# Supplementary material
Source: PubMed Central journal article supplement (PMC3945317)
Supplement: supp_M113.517904_jbc.M113.517904-9.pdf [file supp_M113.517904_jbc.M113.517904-9.pdf]

# MASCOT Search Results

## Peptide View

MS/MS Fragmentation of **DSTLIMQLLR**

Found in **1433B\_HUMAN**, 14-3-3 protein beta/alpha OS=Homo sapiens GN=YWHAB PE=1 SV=3

Match to Query 29889: 1499.841948 from(750.928250,2+) rtinseconds(2952) index(53690)

Title: Locus:1.1.1.3073.6 File:"2013-07-02 CLN FXIII 60 min 3rd F 4.wiff"

Data file C:\Program Files (x86)\Matrix Science\Mascot Daemon\mgf6 FXIII 60 min 3rd\mascot\_daemon\_merge.mgf

Click mouse within plot area to zoom in by factor of two about that point

Or, Plot from  to  Da

Label all possible matches  Label matches used for scoring

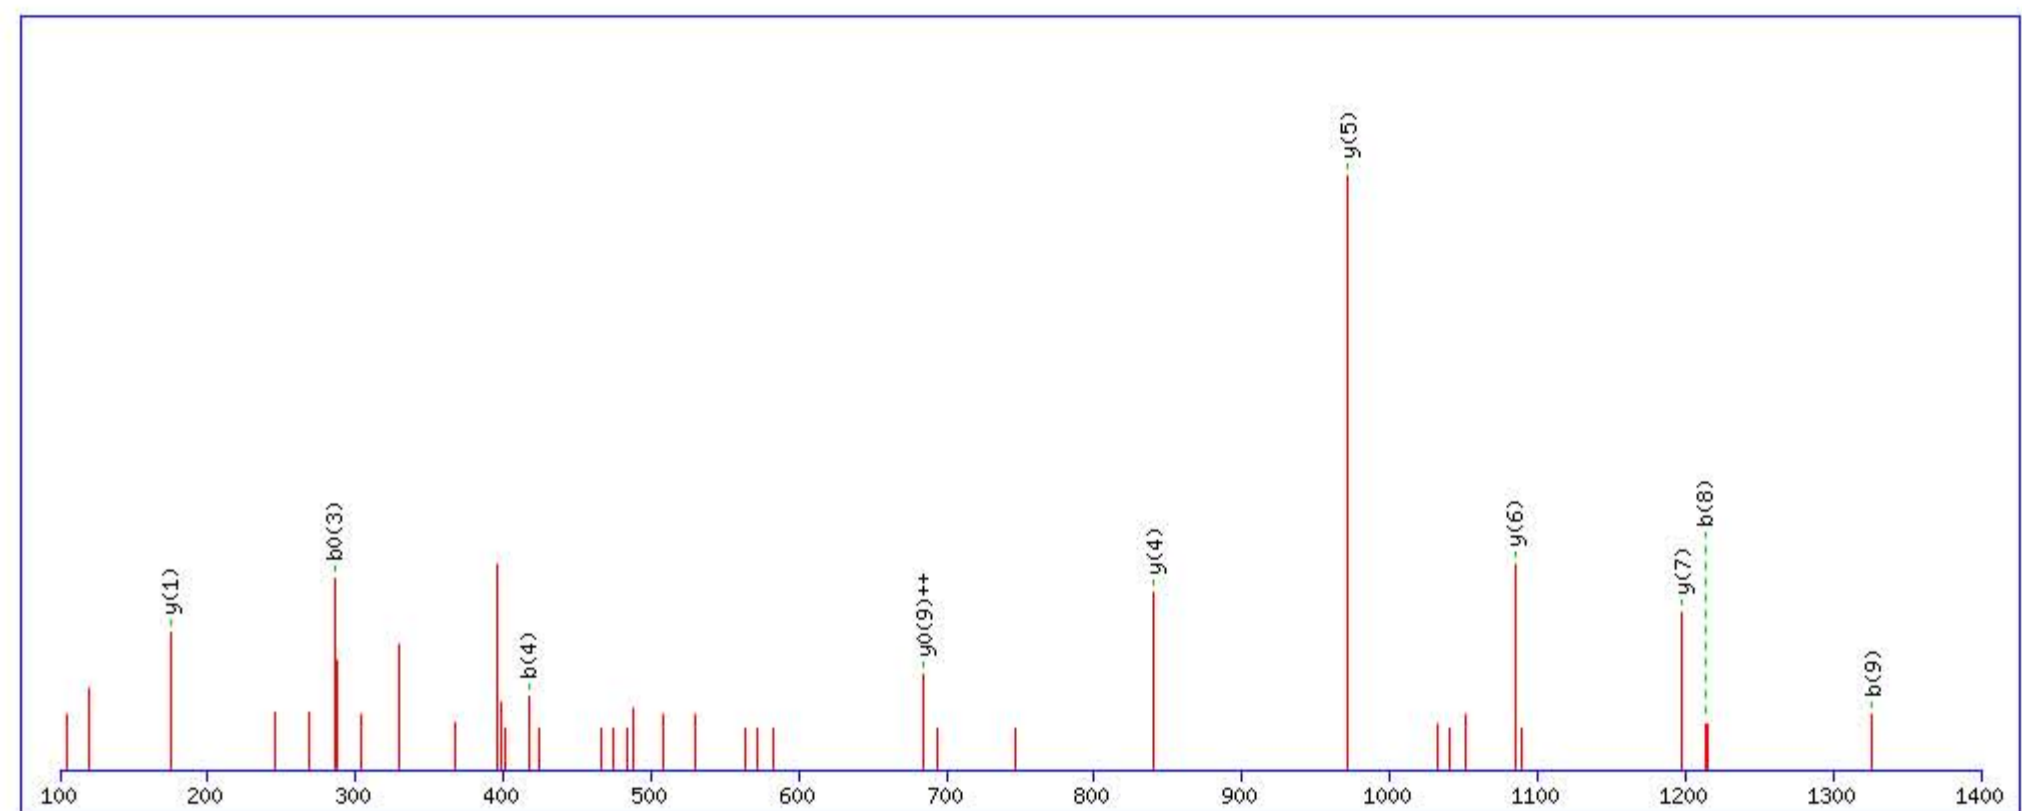

Monoisotopic mass of neutral peptide Mr(calc): 1499.820374

Fixed modifications: Carbamidomethyl (C) (apply to specified residues or termini only)

Variable modifications:

Q7 : Biotin:Thermo-21345 (Q)

Ions Score: 36 Expect: 0.004

Matches : 10/82 fragment ions using 13 most intense peaks [\(help\)](#)

| #  | b           | b <sup>++</sup> | b <sup>+</sup> | b <sup>+++</sup> | b <sup>0</sup> | b <sup>0++</sup> | Seq. | y           | y <sup>++</sup> | y <sup>+</sup> | y <sup>+++</sup> | y <sup>0</sup> | y <sup>0++</sup> | #  |
|----|-------------|-----------------|----------------|------------------|----------------|------------------|------|-------------|-----------------|----------------|------------------|----------------|------------------|----|
| 1  | 116.034219  | 58.520748       |                |                  | 98.023654      | 49.515465        | D    |             |                 |                |                  |                |                  | 10 |
| 2  | 203.066247  | 102.036761      |                |                  | 185.055682     | 93.031479        | S    | 1385.800726 | 693.404001      | 1368.774177    | 684.890726       | 1367.790161    | 684.398718       | 9  |
| 3  | 304.113926  | 152.560601      |                |                  | 286.103361     | 143.555319       | T    | 1298.768698 | 649.887987      | 1281.742149    | 641.374712       | 1280.758133    | 640.882704       | 8  |
| 4  | 417.197990  | 209.102633      |                |                  | 399.187425     | 200.097351       | L    | 1197.721019 | 599.364147      | 1180.694470    | 590.850873       |                |                  | 7  |
| 5  | 530.282054  | 265.644665      |                |                  | 512.271489     | 256.639383       | I    | 1084.636955 | 542.822115      | 1067.610406    | 534.308841       |                |                  | 6  |
| 6  | 661.322539  | 331.164908      |                |                  | 643.311974     | 322.159625       | M    | 971.552891  | 486.280083      | 954.526342     | 477.766809       |                |                  | 5  |
| 7  | 1100.547865 | 550.777571      | 1083.521316    | 542.264296       | 1082.537300    | 541.772288       | Q    | 840.512406  | 420.759841      | 823.485857     | 412.246566       |                |                  | 4  |
| 8  | 1213.631929 | 607.319602      | 1196.605380    | 598.806328       | 1195.621364    | 598.314320       | L    | 401.287080  | 201.147178      | 384.260531     | 192.633903       |                |                  | 3  |
| 9  | 1326.715993 | 663.861634      | 1309.689444    | 655.348360       | 1308.705428    | 654.856352       | L    | 288.203016  | 144.605146      | 271.176467     | 136.091871       |                |                  | 2  |
| 10 |             |                 |                |                  |                |                  | R    | 175.118952  | 88.063114       | 158.092403     | 79.549839        |                |                  | 1  |

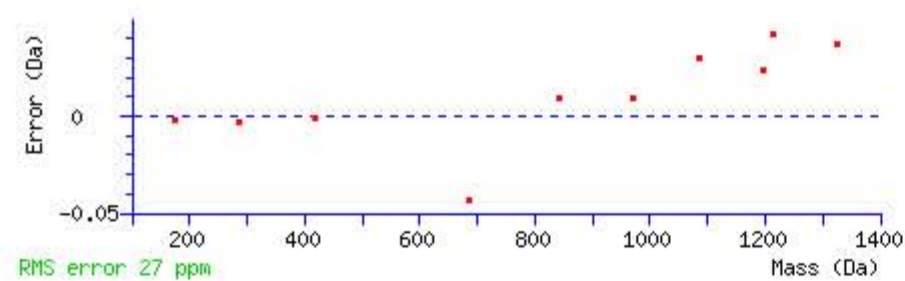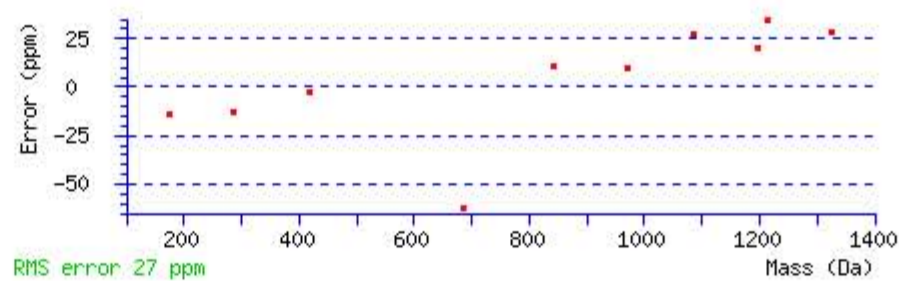

NCBI BLAST search of **DSTLIMQLLR**

(Parameters: blastp, nr protein database, expect=20000, no filter, PAM30)

Other BLAST [web gateways](#)

## All matches to this query

| Score | Mr(calc):   | Delta     | Sequence                        |
|-------|-------------|-----------|---------------------------------|
| 35.6  | 1499.820374 | 0.021574  | <a href="#">DSTLIMQLLR</a>      |
| 19.0  | 1499.830719 | 0.011229  | <a href="#">EEIVDKTRLIER</a>    |
| 15.5  | 1499.860596 | -0.018648 | <a href="#">MTVGKKPVLNKR</a>    |
| 12.2  | 1499.819489 | 0.022459  | <a href="#">SLSLVDNEIELLR</a>   |
| 8.9   | 1499.824203 | 0.017745  | <a href="#">MNKLGTRLVPAER</a>   |
| 8.1   | 1499.830719 | 0.011229  | <a href="#">IEALSSKVQQLER</a>   |
| 7.8   | 1499.830704 | 0.011244  | <a href="#">ALSSLQEELNKLKLR</a> |
| 7.8   | 1499.849350 | -0.007402 | <a href="#">LRLMNLLIDDIR</a>    |
| 7.3   | 1499.845978 | -0.004030 | <a href="#">REPPSLLGYLSLR</a>   |
| 7.2   | 1499.830704 | 0.011244  | <a href="#">AQSENLELLSLKLR</a>  |

# MASCOT Search Results

## Peptide View

MS/MS Fragmentation of **HQGVMVGMGQK**

Found in **ACTA\_HUMAN**, Actin, aortic smooth muscle OS=Homo sapiens GN=ACTA2 PE=1 SV=1

Match to Query 13460: 1497.722622 from(500.248150,3+) rtinseconds(1407) index(29670)

Title: Locus:1.1.1.3038.9 File:"2013-07-02 CLN FXIII 60 min 3rd F 3.wiff"

Data file C:\Program Files (x86)\Matrix Science\Mascot Daemon\mgf\6 FXIII 60 min 3rd\mascot\_daemon\_merge.mgf

Click mouse within plot area to zoom in by factor of two about that point

Or, Plot from  to  Da

Label all possible matches  Label matches used for scoring

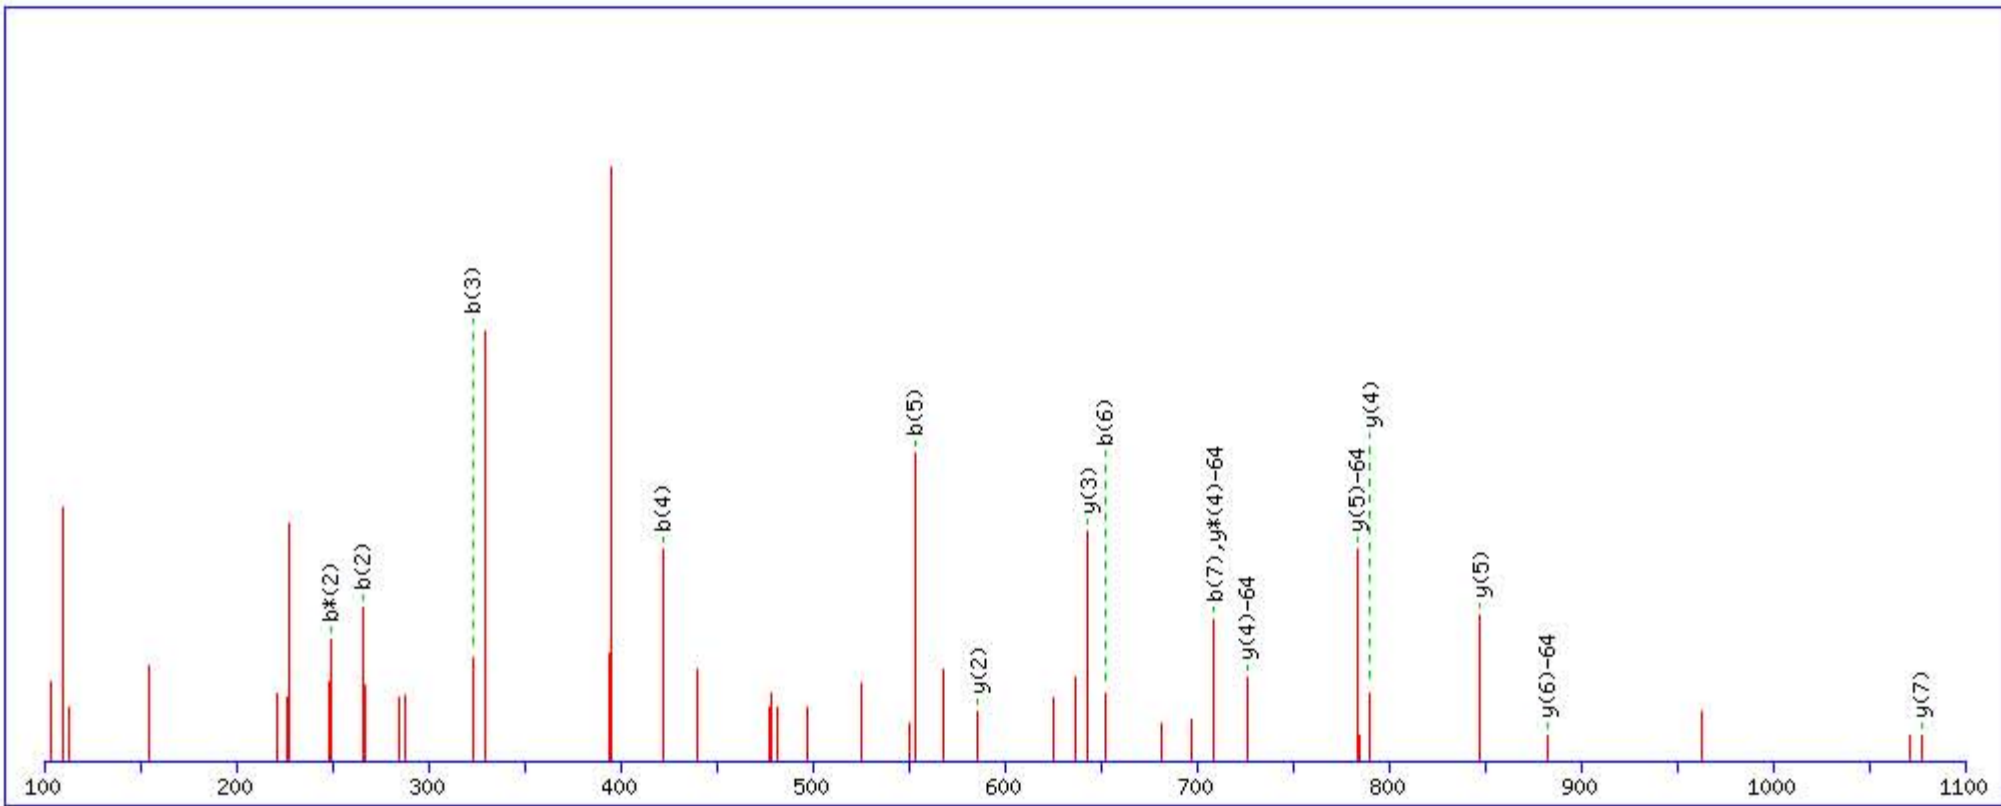

Monoisotopic mass of neutral peptide  $M_r(\text{calc})$ : 1497.725464

Fixed modifications: Carbamidomethyl (C) (apply to specified residues or termini only)

Variable modifications:

M8 : Oxidation (M), with neutral losses 0.000000 (shown in table), 63.998285

Q10 : Biotin:Thermo-21345 (Q)

Ions Score: 29 Expect: 0.053

Matches : 16/118 fragment ions using 33 most intense peaks [\(help\)](#)

| #  | b                 | b <sup>++</sup> | b <sup>*</sup>    | b <sup>***</sup> | Seq. | y                  | y <sup>++</sup> | y <sup>*</sup> | y <sup>***</sup> | #  |
|----|-------------------|-----------------|-------------------|------------------|------|--------------------|-----------------|----------------|------------------|----|
| 1  | 138.066188        | 69.536732       |                   |                  | H    |                    |                 |                |                  | 11 |
| 2  | <b>266.124766</b> | 133.566021      | <b>249.098217</b> | 125.052746       | Q    | 1361.673813        | 681.340545      | 1344.647264    | 672.827270       | 10 |
| 3  | <b>323.146230</b> | 162.076753      | 306.119681        | 153.563478       | G    | 1233.615235        | 617.311256      | 1216.588686    | 608.797981       | 9  |
| 4  | <b>422.214644</b> | 211.610960      | 405.188095        | 203.097685       | V    | 1176.593771        | 588.800524      | 1159.567222    | 580.287249       | 8  |
| 5  | <b>553.255129</b> | 277.131203      | 536.228580        | 268.617928       | M    | <b>1077.525357</b> | 539.266317      | 1060.498808    | 530.753042       | 7  |
| 6  | <b>652.323543</b> | 326.665410      | 635.296994        | 318.152135       | V    | 946.484872         | 473.746074      | 929.458323     | 465.232800       | 6  |
| 7  | <b>709.345007</b> | 355.176142      | 692.318458        | 346.662867       | G    | <b>847.416458</b>  | 424.211867      | 830.389909     | 415.698593       | 5  |
| 8  | 856.380407        | 428.693842      | 839.353858        | 420.180567       | M    | <b>790.394994</b>  | 395.701135      | 773.368445     | 387.187861       | 4  |
| 9  | 913.401871        | 457.204574      | 896.375322        | 448.691299       | G    | <b>643.359594</b>  | 322.183435      | 626.333045     | 313.670161       | 3  |
| 10 | 1352.627197       | 676.817237      | 1335.600648       | 668.303962       | Q    | <b>586.338130</b>  | 293.672703      | 569.311581     | 285.159429       | 2  |
| 11 |                   |                 |                   |                  | K    | 147.112804         | 74.060040       | 130.086255     | 65.546765        | 1  |

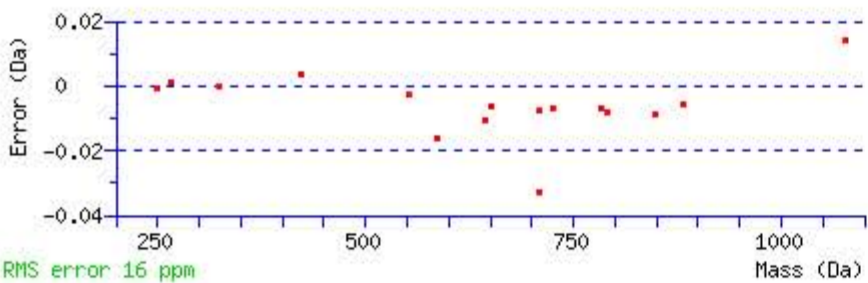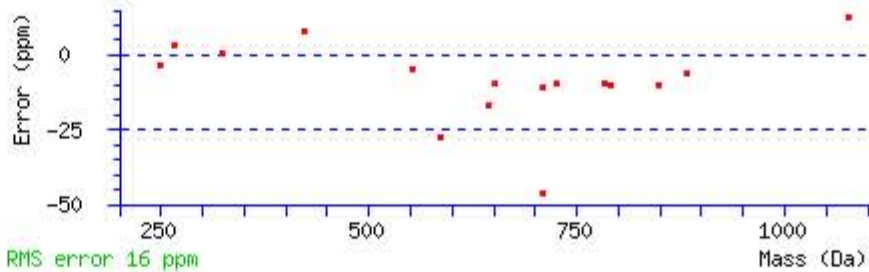

NCBI BLAST search of **HQGVMVGMGQK**

(Parameters: blastp, nr protein database, expect=20000, no filter, PAM30)

Other BLAST [web gateways](#)

### All matches to this query

| Score | $M_r(\text{calc})$ : | Delta     | Sequence                    |
|-------|----------------------|-----------|-----------------------------|
| 28.9  | 1497.725464          | -0.002842 | <a href="#">HQGVMVGMGQK</a> |
| 1.5   | 1497.725464          | -0.002842 | <a href="#">HQGVMVGMGQK</a> |

# MASCOT Search Results

## Peptide View

MS/MS Fragmentation of **HQGVMVGMGQK**

Found in **ACTA\_HUMAN**, Actin, aortic smooth muscle OS=Homo sapiens GN=ACTA2 PE=1 SV=1

Match to Query 29848: 1497.727632 from(500.249820,3+) rtinseconds(1494) index(30242)

Title: Locus:1.1.1.3069.12 File:"2013-07-02 CLN FXIII 60 min 3rd F 3.wiff"

Data file C:\Program Files (x86)\Matrix Science\Mascot Daemon\mgf\6 FXIII 60 min 3rd\mascot\_daemon\_merge.mgf

Click mouse within plot area to zoom in by factor of two about that point

Or, Plot from  to  Da

Label all possible matches  Label matches used for scoring

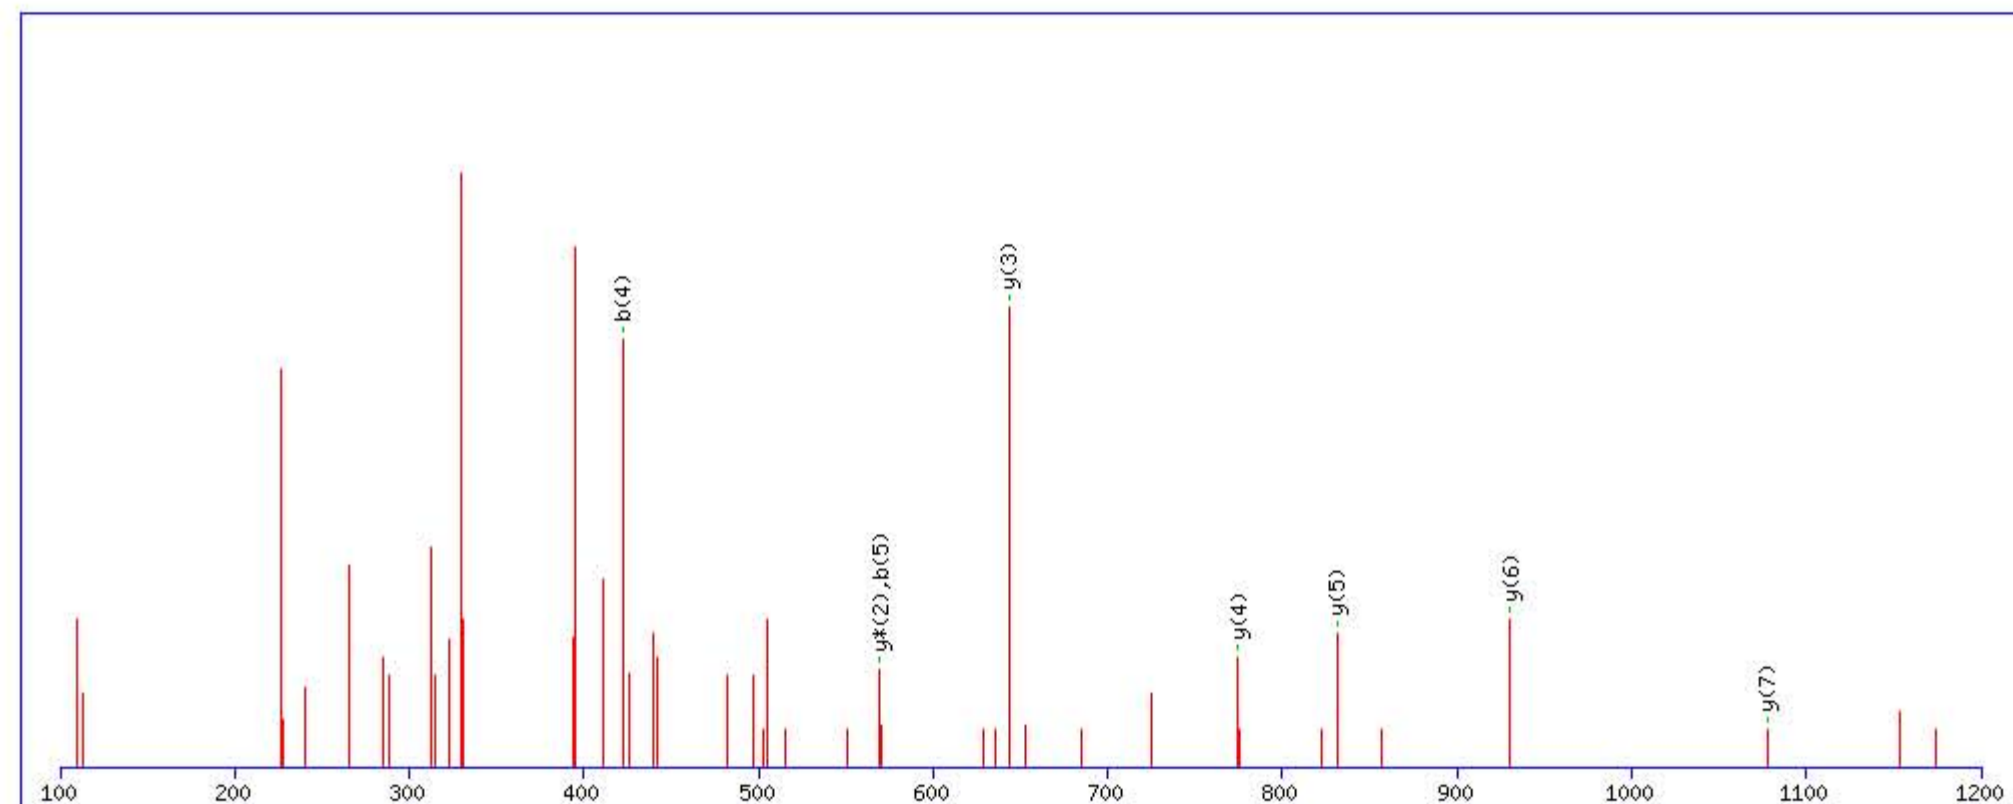

Monoisotopic mass of neutral peptide  $M_r(\text{calc})$ : 1497.725464

Fixed modifications: Carbamidomethyl (C) (apply to specified residues or termini only)

Variable modifications:

M5 : Oxidation (M), with neutral losses 0.000000 (shown in table), 63.998285

Q10 : Biotin:Thermo-21345 (Q)

Ions Score: 29 Expect: 0.019

Matches : 8/118 fragment ions using 11 most intense peaks ([help](#))

| #  | b                 | b <sup>++</sup> | b <sup>*</sup> | b <sup>***</sup> | Seq.     | y                  | y <sup>++</sup> | y <sup>*</sup>    | y <sup>***</sup> | #         |
|----|-------------------|-----------------|----------------|------------------|----------|--------------------|-----------------|-------------------|------------------|-----------|
| 1  | 138.066188        | 69.536732       |                |                  | <b>H</b> |                    |                 |                   |                  | <b>11</b> |
| 2  | 266.124766        | 133.566021      | 249.098217     | 125.052746       | <b>Q</b> | 1361.673813        | 681.340545      | 1344.647264       | 672.827270       | <b>10</b> |
| 3  | 323.146230        | 162.076753      | 306.119681     | 153.563478       | <b>G</b> | 1233.615235        | 617.311256      | 1216.588686       | 608.797981       | <b>9</b>  |
| 4  | <b>422.214644</b> | 211.610960      | 405.188095     | 203.097685       | <b>V</b> | 1176.593771        | 588.800524      | 1159.567222       | 580.287249       | <b>8</b>  |
| 5  | <b>569.250044</b> | 285.128660      | 552.223495     | 276.615386       | <b>M</b> | <b>1077.525357</b> | 539.266317      | 1060.498808       | 530.753042       | <b>7</b>  |
| 6  | 668.318458        | 334.662867      | 651.291909     | 326.149592       | <b>V</b> | <b>930.489957</b>  | 465.748617      | 913.463408        | 457.235342       | <b>6</b>  |
| 7  | 725.339922        | 363.173599      | 708.313373     | 354.660325       | <b>G</b> | <b>831.421543</b>  | 416.214410      | 814.394994        | 407.701135       | <b>5</b>  |
| 8  | 856.380407        | 428.693842      | 839.353858     | 420.180567       | <b>M</b> | <b>774.400079</b>  | 387.703678      | 757.373530        | 379.190403       | <b>4</b>  |
| 9  | 913.401871        | 457.204574      | 896.375322     | 448.691299       | <b>G</b> | <b>643.359594</b>  | 322.183435      | 626.333045        | 313.670161       | <b>3</b>  |
| 10 | 1352.627197       | 676.817237      | 1335.600648    | 668.303962       | <b>Q</b> | 586.338130         | 293.672703      | <b>569.311581</b> | 285.159429       | <b>2</b>  |
| 11 |                   |                 |                |                  | <b>K</b> | 147.112804         | 74.060040       | 130.086255        | 65.546765        | <b>1</b>  |

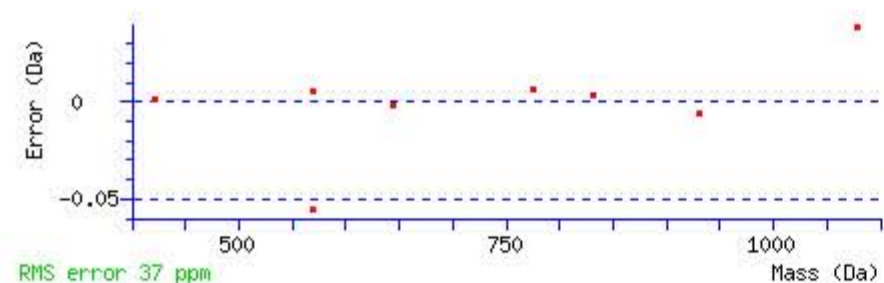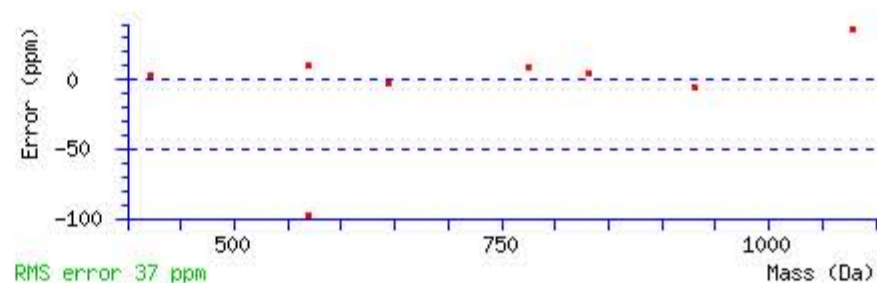

NCBI BLAST search of **HQGVMVGMGQK**

(Parameters: blastp, nr protein database, expect=20000, no filter, PAM30)

Other BLAST [web gateways](#)

## All matches to this query

| Score | $M_r(\text{calc})$ : | Delta    | Sequence                    |
|-------|----------------------|----------|-----------------------------|
| 28.9  | 1497.725464          | 0.002168 | <a href="#">HQGVMVGMGQK</a> |
| 0.6   | 1497.725464          | 0.002168 | <a href="#">HQGVMVGMGQK</a> |

Mascot: <http://www.matrixscience.com/>

# MASCOT SEARCH RESULTS

## Peptide View

MS/MS Fragmentation of **DSYVGDEAQSK**

Found in **ACTA\_HUMAN**, Actin, aortic smooth muscle OS=Homo sapiens GN=ACTA2 PE=1 SV=1

Match to Query 30200: 1508.677668 from(755.346110,2+) rtinseconds(1578) index(30725)

Title: Locus:1.1.1.3098.17 File:"2013-07-02 CLN FXIII 60 min 3rd F 3.wiff"

Data file C:\Program Files (x86)\Matrix Science\Mascot Daemon\mgf\6 FXIII 60 min 3rd\mascot\_daemon\_merge.mgf

Click mouse within plot area to zoom in by factor of two about that point

Or, Plot from  to  Da

Label all possible matches  Label matches used for scoring

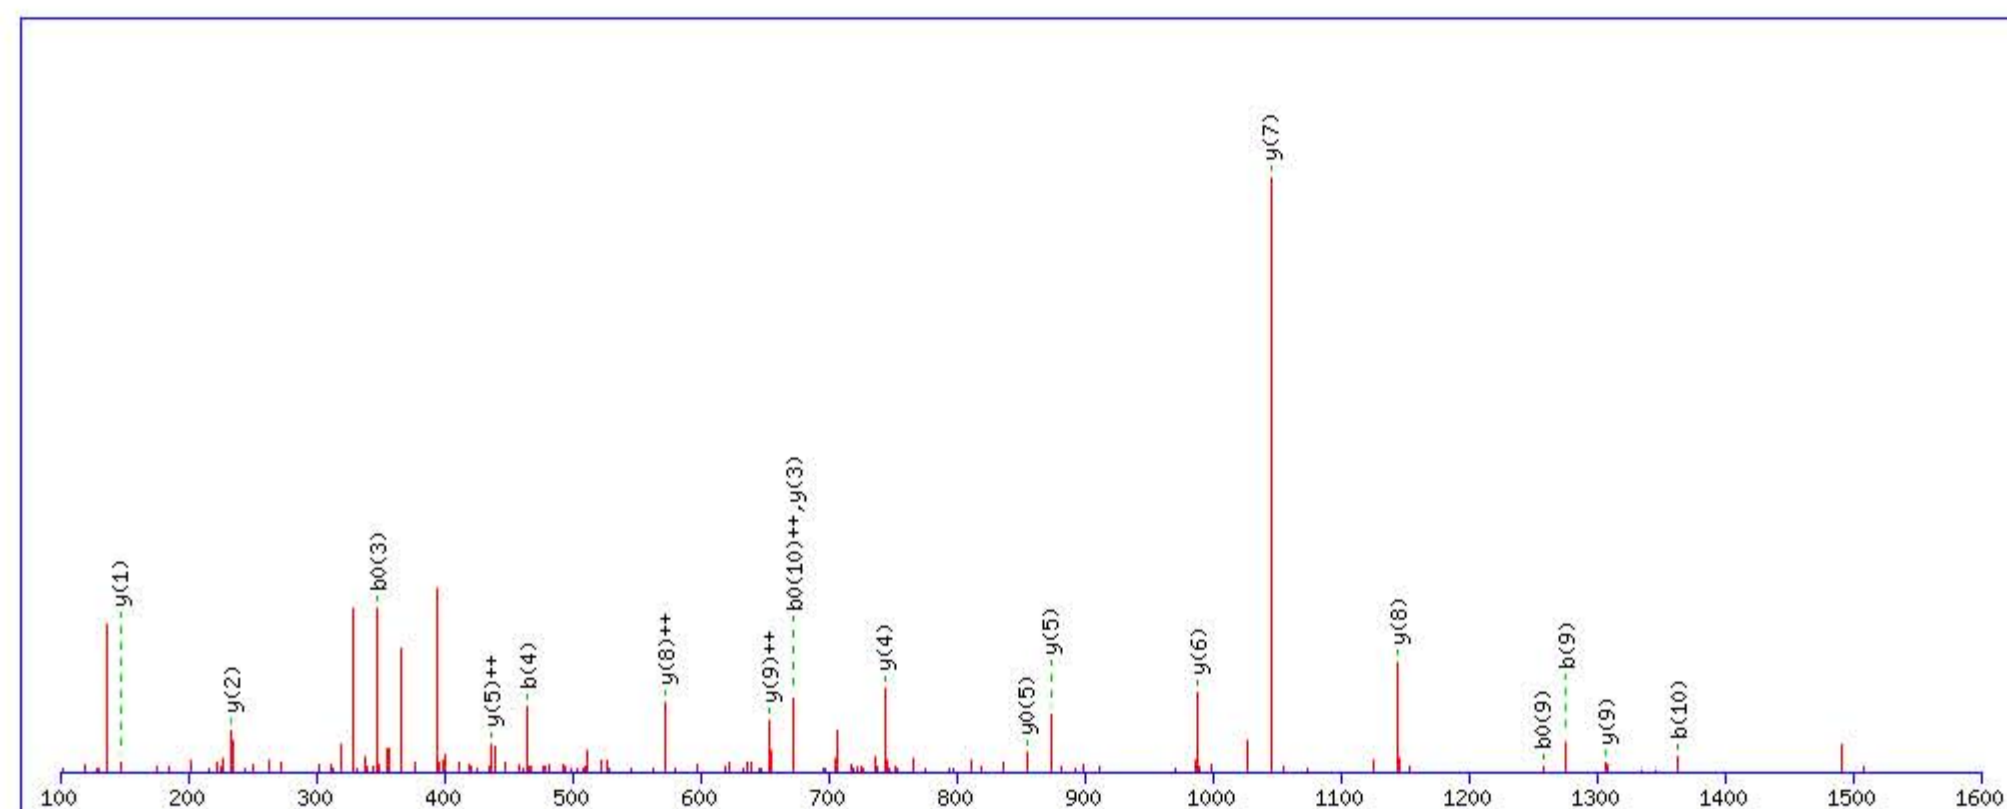

Monoisotopic mass of neutral peptide Mr(calc): 1508.681702

Fixed modifications: Carbamidomethyl (C) (apply to specified residues or termini only)

Variable modifications:

Q9 : Biotin:Thermo-21345 (Q)

Ions Score: 71 Expect: 8.8e-007

Matches : 19/102 fragment ions using 27 most intense peaks [\(help\)](#)

| #  | b           | b <sup>++</sup> | b <sup>*</sup> | b <sup>+++</sup> | b <sup>0</sup> | b <sup>0++</sup> | Seq. | y           | y <sup>++</sup> | y <sup>*</sup> | y <sup>+++</sup> | y <sup>0</sup> | y <sup>0++</sup> | #  |
|----|-------------|-----------------|----------------|------------------|----------------|------------------|------|-------------|-----------------|----------------|------------------|----------------|------------------|----|
| 1  | 116.034219  | 58.520748       |                |                  | 98.023654      | 49.515465        | D    |             |                 |                |                  |                |                  | 11 |
| 2  | 203.066247  | 102.036761      |                |                  | 185.055682     | 93.031479        | S    | 1394.662043 | 697.834660      | 1377.635494    | 689.321385       | 1376.651478    | 688.829377       | 10 |
| 3  | 366.129576  | 183.568426      |                |                  | 348.119011     | 174.563144       | Y    | 1307.630015 | 654.318646      | 1290.603466    | 645.805371       | 1289.619450    | 645.313363       | 9  |
| 4  | 465.197990  | 233.102633      |                |                  | 447.187425     | 224.097351       | V    | 1144.566686 | 572.786981      | 1127.540137    | 564.273707       | 1126.556121    | 563.781699       | 8  |
| 5  | 522.219454  | 261.613365      |                |                  | 504.208889     | 252.608083       | G    | 1045.498272 | 523.252774      | 1028.471723    | 514.739500       | 1027.487707    | 514.247492       | 7  |
| 6  | 637.246397  | 319.126837      |                |                  | 619.235832     | 310.121554       | D    | 988.476808  | 494.742042      | 971.450259     | 486.228768       | 970.466243     | 485.736760       | 6  |
| 7  | 766.288990  | 383.648133      |                |                  | 748.278425     | 374.642851       | E    | 873.449865  | 437.228571      | 856.423316     | 428.715296       | 855.439300     | 428.223288       | 5  |
| 8  | 837.326104  | 419.166690      |                |                  | 819.315539     | 410.161408       | A    | 744.407272  | 372.707274      | 727.380723     | 364.194000       | 726.396707     | 363.701992       | 4  |
| 9  | 1276.551430 | 638.779353      | 1259.524881    | 630.266079       | 1258.540865    | 629.774070       | Q    | 673.370158  | 337.188717      | 656.343609     | 328.675443       | 655.359593     | 328.183435       | 3  |
| 10 | 1363.583458 | 682.295367      | 1346.556909    | 673.782093       | 1345.572893    | 673.290085       | S    | 234.144832  | 117.576054      | 217.118283     | 109.062780       | 216.134267     | 108.570772       | 2  |
| 11 |             |                 |                |                  |                |                  | K    | 147.112804  | 74.060040       | 130.086255     | 65.546765        |                |                  | 1  |

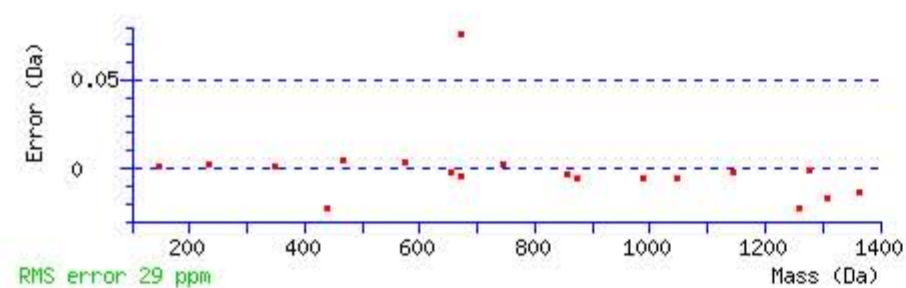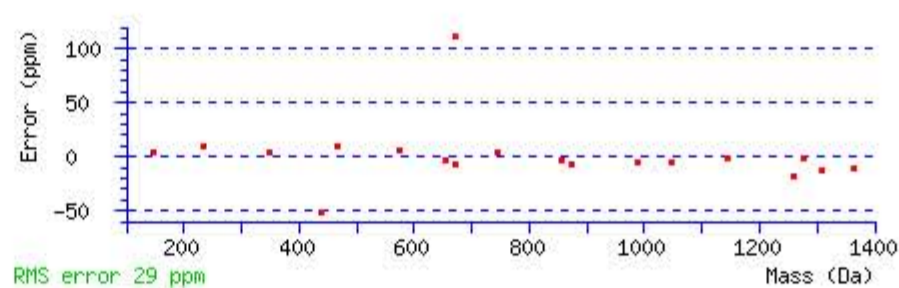

NCBI BLAST search of **DSYVGDEAQSK**

(Parameters: blastp, nr protein database, expect=20000, no filter, PAM30)

Other BLAST [web gateways](#)

All matches to this query

| Score | Mr(calc):   | Delta     | Sequence                         |
|-------|-------------|-----------|----------------------------------|
| 70.5  | 1508.681702 | -0.004034 | <a href="#">DSYVGDEAQSK</a>      |
| 9.4   | 1508.690277 | -0.012609 | <a href="#">GGRGGMGGSDRGGFNK</a> |
| 3.0   | 1508.659912 | 0.017756  | <a href="#">QQAMPSTGMAEQSK</a>   |

Mascot: <http://www.matrixscience.com/>

# MASCOT Search Results

## Peptide View

MS/MS Fragmentation of **VNCLQTR**

Found in **AFAM\_HUMAN**, Afamin OS=Homo sapiens GN=AFM PE=1 SV=1

Match to Query 20350: 1200.609548 from(601.312050,2+) rtinseconds(1535) index(2293)

Title: Locus:1.1.1.3086.9 File:"2013-07-02 CLN FXIII 60 min 3rd F 1.wiff"

Data file C:\Program Files (x86)\Matrix Science\Mascot Daemon\mgf\6 FXIII 60 min 3rd\mascot\_daemon\_merge.mgf

Click mouse within plot area to zoom in by factor of two about that point

Or, Plot from  to  Da

Label all possible matches  Label matches used for scoring

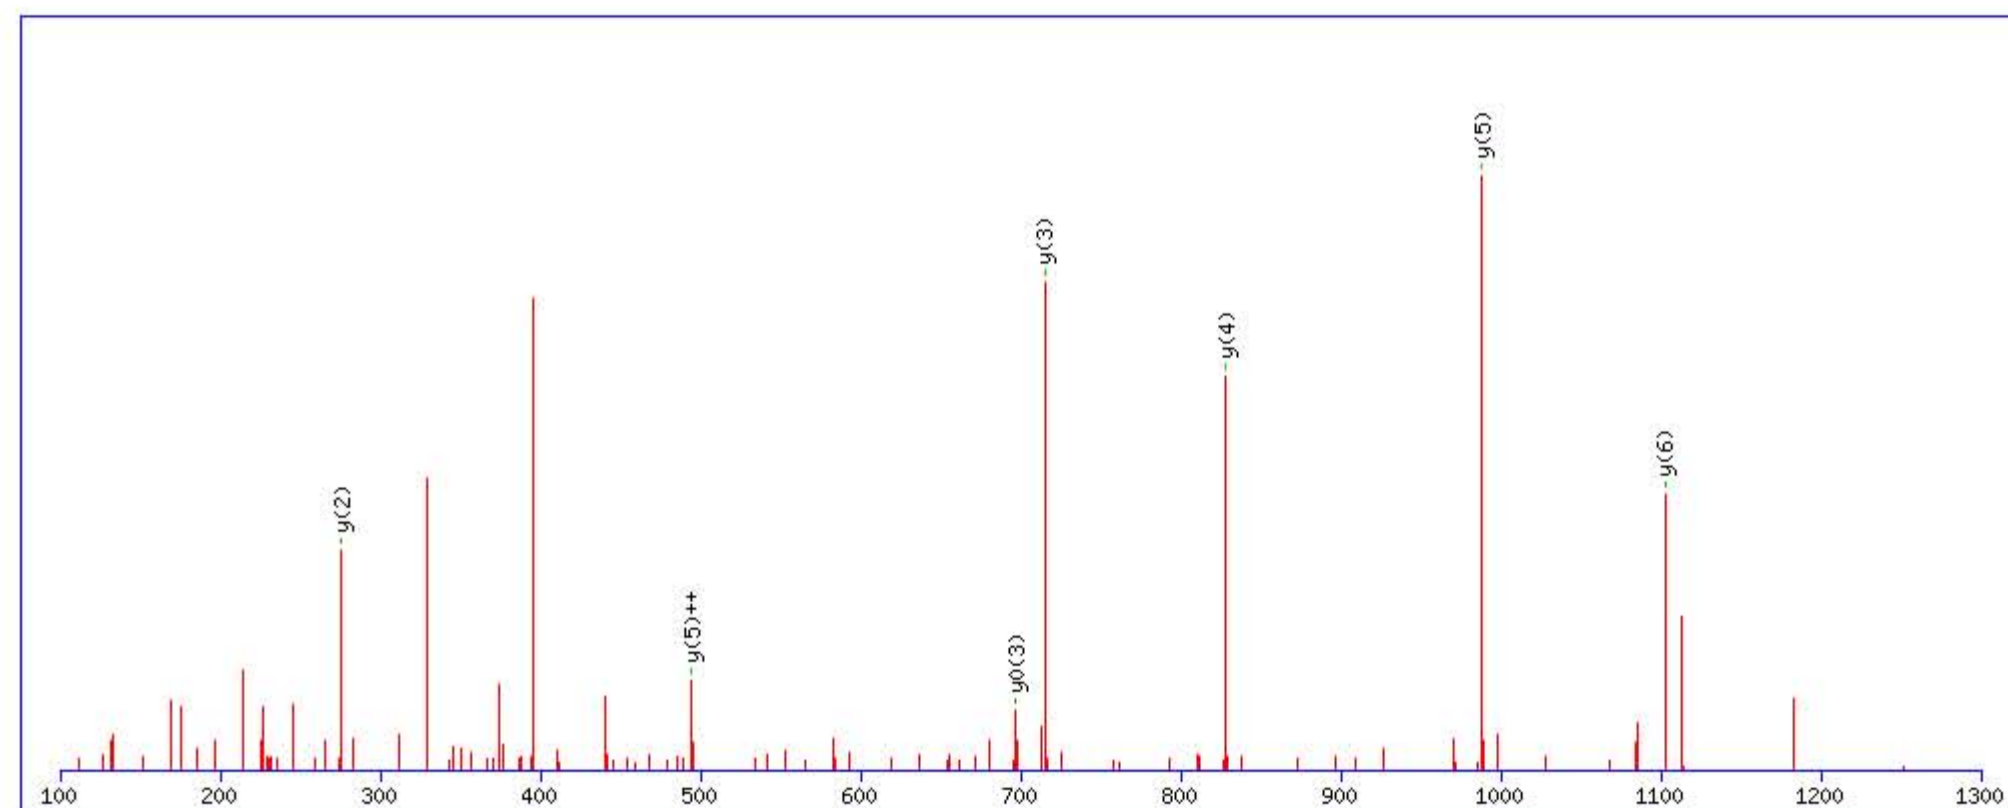

Monoisotopic mass of neutral peptide Mr(calc): 1200.610733

Fixed modifications: Carbamidomethyl (C) (apply to specified residues or termini only)

Variable modifications:

Q5 : Biotin:Thermo-21345 (Q)

Ions Score: 34 Expect: 0.003

Matches : 7/58 fragment ions using 11 most intense peaks [\(help\)](#)

| # | b           | b <sup>++</sup> | b <sup>+</sup> | b <sup>*++</sup> | b <sup>0</sup> | b <sup>0++</sup> | Seq. | y                  | y <sup>++</sup>   | y <sup>+</sup> | y <sup>*++</sup> | y <sup>0</sup>    | y <sup>0++</sup> | # |
|---|-------------|-----------------|----------------|------------------|----------------|------------------|------|--------------------|-------------------|----------------|------------------|-------------------|------------------|---|
| 1 | 100.075690  | 50.541483       |                |                  |                |                  | V    |                    |                   |                |                  |                   |                  | 7 |
| 2 | 214.118617  | 107.562947      | 197.092068     | 99.049672        |                |                  | N    | <b>1102.549597</b> | 551.778437        | 1085.523048    | 543.265162       | 1084.539032       | 542.773154       | 6 |
| 3 | 374.149266  | 187.578271      | 357.122717     | 179.064997       |                |                  | C    | <b>988.506670</b>  | <b>494.756973</b> | 971.480121     | 486.243698       | 970.496105        | 485.751691       | 5 |
| 4 | 487.233330  | 244.120303      | 470.206781     | 235.607029       |                |                  | L    | <b>828.476021</b>  | 414.741649        | 811.449472     | 406.228374       | 810.465456        | 405.736366       | 4 |
| 5 | 926.458656  | 463.732966      | 909.432107     | 455.219692       |                |                  | Q    | <b>715.391957</b>  | 358.199617        | 698.365408     | 349.686342       | <b>697.381392</b> | 349.194334       | 3 |
| 6 | 1027.506335 | 514.256806      | 1010.479786    | 505.743531       | 1009.495770    | 505.251523       | T    | <b>276.166631</b>  | 138.586953        | 259.140082     | 130.073679       | 258.156066        | 129.581671       | 2 |
| 7 |             |                 |                |                  |                |                  | R    | 175.118952         | 88.063114         | 158.092403     | 79.549839        |                   |                  | 1 |

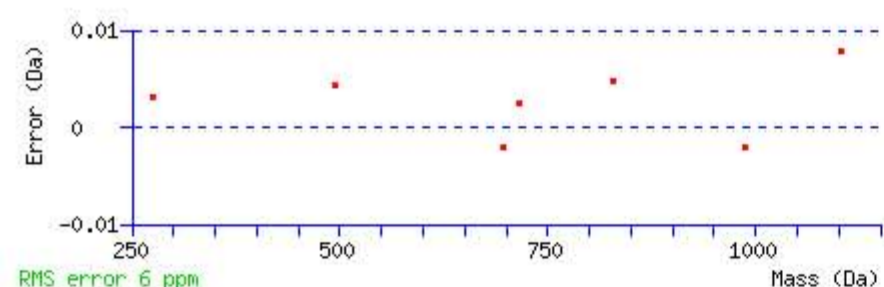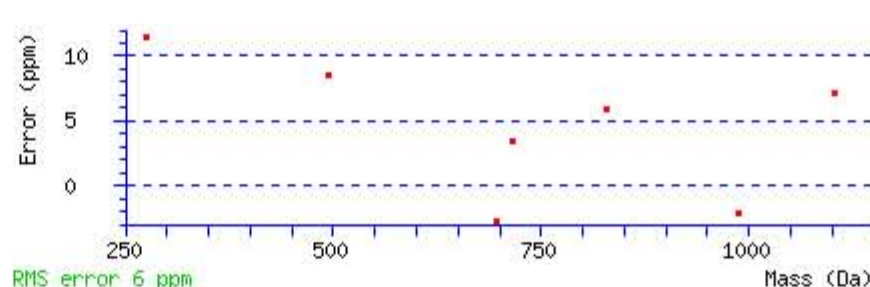

NCBI BLAST search of **VNCLQTR**

(Parameters: blastp, nr protein database, expect=20000, no filter, PAM30)

Other BLAST [web gateways](#)

## All matches to this query

| Score | Mr(calc):   | Delta     | Sequence                    |
|-------|-------------|-----------|-----------------------------|
| 34.2  | 1200.610733 | -0.001185 | <a href="#">VNCLQTR</a>     |
| 6.9   | 1200.621094 | -0.011546 | <a href="#">ESRPVQQTTR</a>  |
| 5.4   | 1200.603333 | 0.006215  | <a href="#">GRIAEPSVCGR</a> |
| 1.7   | 1200.592087 | 0.017461  | <a href="#">SATEQQAR</a>    |
| 1.3   | 1200.611191 | -0.001643 | <a href="#">HDSHLAKHTR</a>  |
| 0.3   | 1200.621948 | -0.012400 | <a href="#">VNMLKHCKR</a>   |

Mascot: <http://www.matrixscience.com/>

# MASCOT Search Results

## Peptide View

MS/MS Fragmentation of **GQCIINSNK**

Found in **AFAM\_HUMAN**, Afamin OS=Homo sapiens GN=AFM PE=1 SV=1

Match to Query 23867: 1343.667108 from(672.840830,2+) rtinseconds(1621) index(2863)

Title: Locus:1.1.1.3116.19 File:"2013-07-02 CLN FXIII 60 min 3rd F 1.wiff"

Data file C:\Program Files (x86)\Matrix Science\Mascot Daemon\mgf6 FXIII 60 min 3rd\mascot\_daemon\_merge.mgf

Click mouse within plot area to zoom in by factor of two about that point

Or, Plot from  to  Da

Label all possible matches  Label matches used for scoring

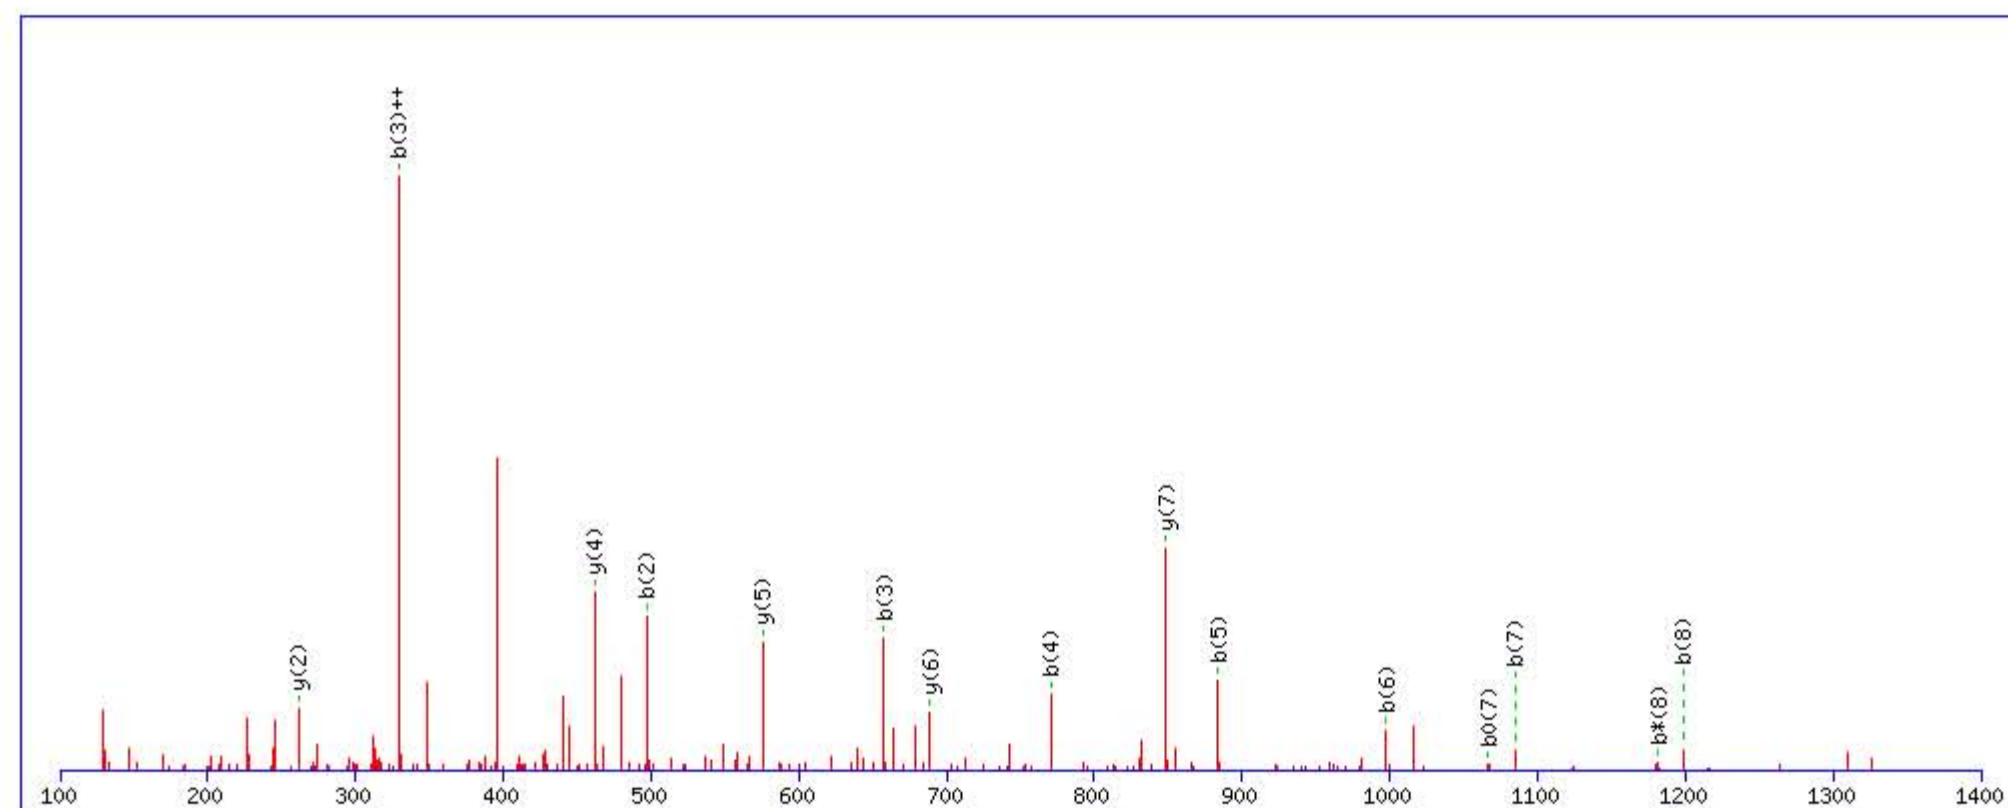

Monoisotopic mass of neutral peptide Mr(calc): 1343.668961

Fixed modifications: Carbamidomethyl (C) (apply to specified residues or termini only)

Variable modifications:

Q2 : Biotin:Thermo-21345 (Q)

Ions Score: 49 Expect: 0.00026

Matches : 15/78 fragment ions using 24 most intense peaks [\(help\)](#)

| # | b                  | b <sup>++</sup>   | b <sup>*</sup>     | b <sup>*++</sup> | b <sup>0</sup>     | b <sup>0++</sup> | Seq. | y                 | y <sup>++</sup> | y <sup>*</sup> | y <sup>*++</sup> | y <sup>0</sup> | y <sup>0++</sup> | # |
|---|--------------------|-------------------|--------------------|------------------|--------------------|------------------|------|-------------------|-----------------|----------------|------------------|----------------|------------------|---|
| 1 | 58.028740          | 29.518008         |                    |                  |                    |                  | G    |                   |                 |                |                  |                |                  | 9 |
| 2 | <b>497.254066</b>  | 249.130671        | 480.227517         | 240.617397       |                    |                  | Q    | 1287.654789       | 644.331033      | 1270.628240    | 635.817758       | 1269.644224    | 635.325750       | 8 |
| 3 | <b>657.284715</b>  | <b>329.145996</b> | 640.258166         | 320.632721       |                    |                  | C    | <b>848.429463</b> | 424.718370      | 831.402914     | 416.205095       | 830.418898     | 415.713087       | 7 |
| 4 | <b>770.368779</b>  | 385.688028        | 753.342230         | 377.174753       |                    |                  | I    | <b>688.398814</b> | 344.703045      | 671.372265     | 336.189771       | 670.388249     | 335.697763       | 6 |
| 5 | <b>883.452843</b>  | 442.230060        | 866.426294         | 433.716785       |                    |                  | I    | <b>575.314750</b> | 288.161013      | 558.288201     | 279.647739       | 557.304185     | 279.155731       | 5 |
| 6 | <b>997.495770</b>  | 499.251523        | 980.469221         | 490.738249       |                    |                  | N    | <b>462.230686</b> | 231.618981      | 445.204137     | 223.105706       | 444.220121     | 222.613698       | 4 |
| 7 | <b>1084.527798</b> | 542.767537        | 1067.501249        | 534.254263       | <b>1066.517233</b> | 533.762255       | S    | 348.187759        | 174.597517      | 331.161210     | 166.084243       | 330.177194     | 165.592235       | 3 |
| 8 | <b>1198.570725</b> | 599.789001        | <b>1181.544176</b> | 591.275726       | 1180.560160        | 590.783718       | N    | <b>261.155731</b> | 131.081503      | 244.129182     | 122.568229       |                |                  | 2 |
| 9 |                    |                   |                    |                  |                    |                  | K    | 147.112804        | 74.060040       | 130.086255     | 65.546765        |                |                  | 1 |

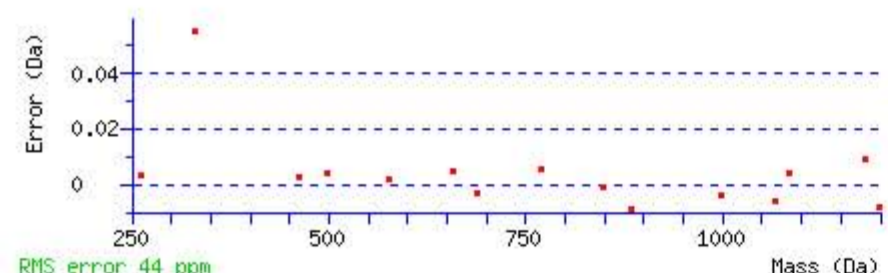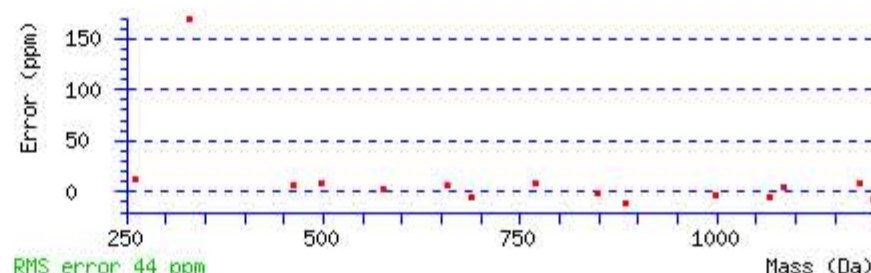

NCBI BLAST search of **GQCIINSNK**

(Parameters: blastp, nr protein database, expect=20000, no filter, PAM30)

Other BLAST [web gateways](#)

## All matches to this query

| Score | Mr(calc):   | Delta     | Sequence                      |
|-------|-------------|-----------|-------------------------------|
| 48.6  | 1343.668961 | -0.001853 | <a href="#">GQCIINSNK</a>     |
| 9.8   | 1343.654358 | 0.012750  | <a href="#">QSLNQFMAVYK</a>   |
| 8.5   | 1343.661591 | 0.005517  | <a href="#">GIGTGHTSMNKGK</a> |
| 7.3   | 1343.661575 | 0.005533  | <a href="#">KISSKGHCQGDK</a>  |
| 6.1   | 1343.686707 | -0.019599 | <a href="#">QPSSAKSSNK</a>    |
| 4.4   | 1343.657745 | 0.009363  | <a href="#">QGGEPVSTMK</a>    |
| 3.4   | 1343.679306 | -0.012198 | <a href="#">QAQSRAQEALDK</a>  |
| 2.0   | 1343.675476 | -0.008368 | <a href="#">DKAEQLDSK</a>     |
| 1.2   | 1343.650314 | 0.016794  | <a href="#">EKLQEHMTSNK</a>   |
| 1.2   | 1343.656876 | 0.010232  | <a href="#">TNLDES DVQPVK</a> |

# Mascot Search Results

## Peptide View

MS/MS Fragmentation of **LPNNVLQEK**

Found in **AFAM\_HUMAN**, Afamin OS=Homo sapiens GN=AFM PE=1 SV=1

Match to Query 25235: 1364.749182 from(455.923670,3+) rtinseconds(1867) index(4068)

Title: Locus:1.1.1.3202.10 File:"2013-07-02 CLN FXIII 60 min 3rd F 1.wiff"

Data file C:\Program Files (x86)\Matrix Science\Mascot Daemon\mgf\6 FXIII 60 min 3rd\mascot\_daemon\_merge.mgf

Click mouse within plot area to zoom in by factor of two about that point

Or, Plot from  to  Da

Label all possible matches  Label matches used for scoring

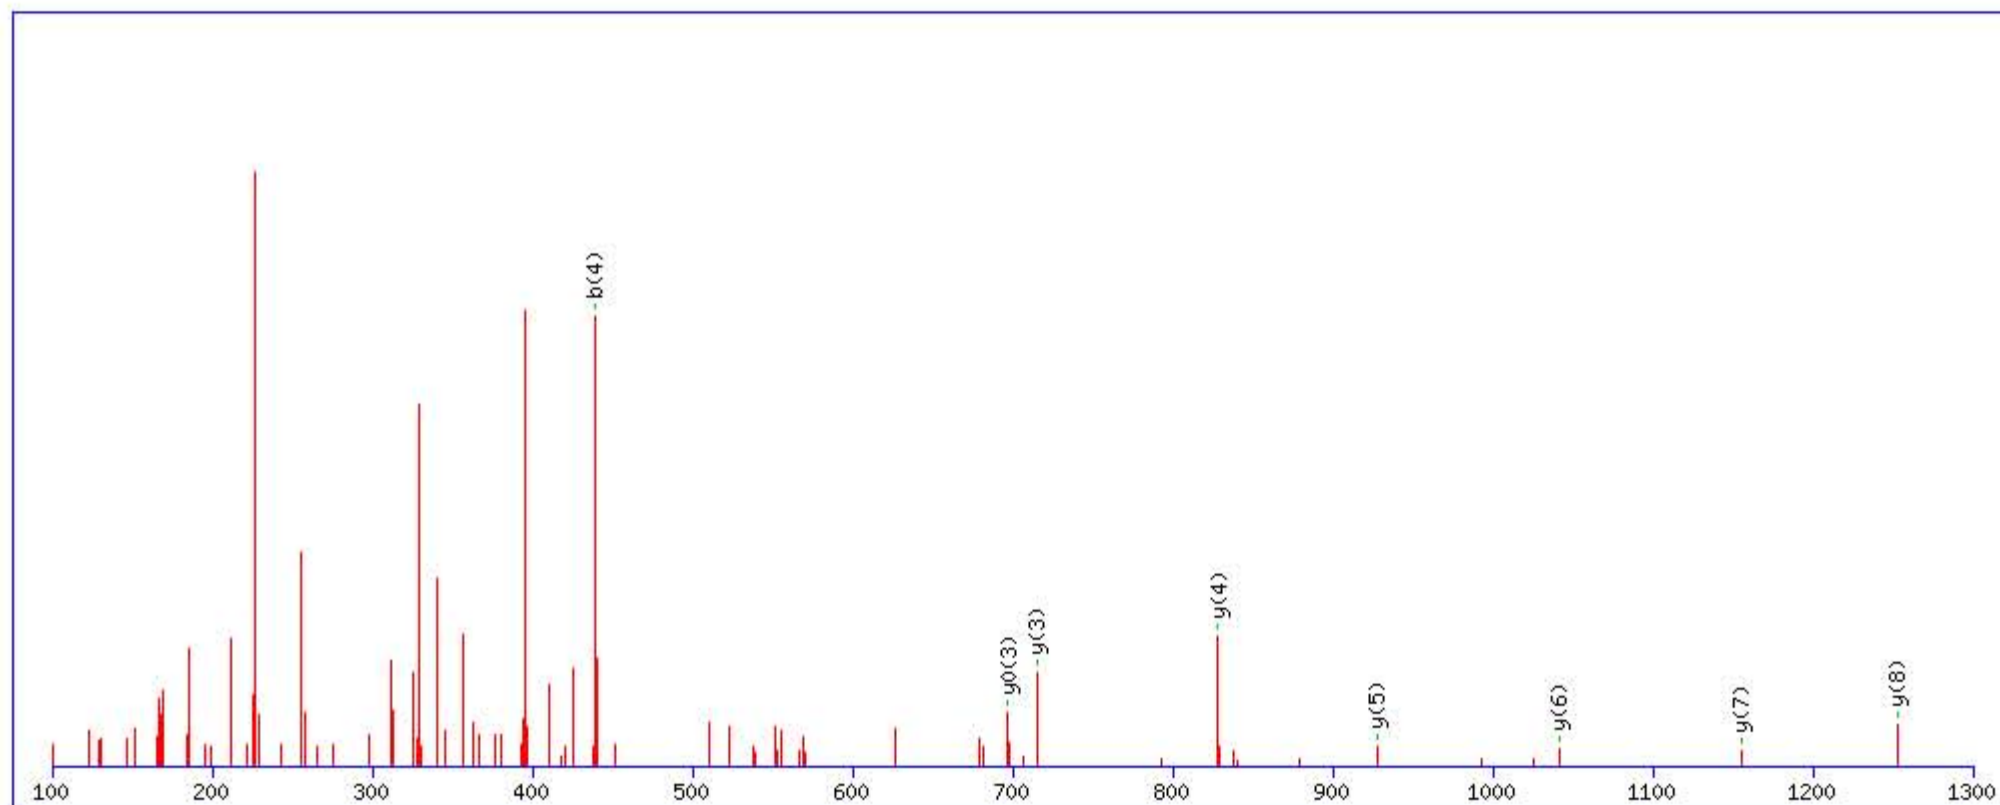

Monoisotopic mass of neutral peptide Mr(calc): 1364.748581

Fixed modifications: Carbamidomethyl (C) (apply to specified residues or termini only)

Variable modifications:

Q7 : Biotin:Thermo-21345 (Q)

Ions Score: 39 Expect: 0.0024

Matches : 8/76 fragment ions using 12 most intense peaks [\(help\)](#)

| # | b           | b <sup>++</sup> | b <sup>*</sup> | b <sup>*++</sup> | b <sup>0</sup> | b <sup>0++</sup> | Seq. | y           | y <sup>++</sup> | y <sup>*</sup> | y <sup>*++</sup> | y <sup>0</sup> | y <sup>0++</sup> | # |
|---|-------------|-----------------|----------------|------------------|----------------|------------------|------|-------------|-----------------|----------------|------------------|----------------|------------------|---|
| 1 | 114.091340  | 57.549308       |                |                  |                |                  | L    |             |                 |                |                  |                |                  | 9 |
| 2 | 211.144104  | 106.075690      |                |                  |                |                  | P    | 1252.671819 | 626.839548      | 1235.645270    | 618.326273       | 1234.661254    | 617.834265       | 8 |
| 3 | 325.187031  | 163.097153      | 308.160482     | 154.583879       |                |                  | N    | 1155.619055 | 578.313166      | 1138.592506    | 569.799891       | 1137.608490    | 569.307883       | 7 |
| 4 | 439.229958  | 220.118617      | 422.203409     | 211.605343       |                |                  | N    | 1041.576128 | 521.291702      | 1024.549579    | 512.778428       | 1023.565563    | 512.286420       | 6 |
| 5 | 538.298372  | 269.652824      | 521.271823     | 261.139550       |                |                  | V    | 927.533201  | 464.270239      | 910.506652     | 455.756964       | 909.522636     | 455.264956       | 5 |
| 6 | 651.382436  | 326.194856      | 634.355887     | 317.681582       |                |                  | L    | 828.464787  | 414.736032      | 811.438238     | 406.222757       | 810.454222     | 405.730749       | 4 |
| 7 | 1090.607762 | 545.807519      | 1073.581213    | 537.294245       |                |                  | Q    | 715.380723  | 358.194000      | 698.354174     | 349.680725       | 697.370158     | 349.188717       | 3 |
| 8 | 1219.650355 | 610.328816      | 1202.623806    | 601.815541       | 1201.639790    | 601.323533       | E    | 276.155397  | 138.581336      | 259.128848     | 130.068062       | 258.144832     | 129.576054       | 2 |
| 9 |             |                 |                |                  |                |                  | K    | 147.112804  | 74.060040       | 130.086255     | 65.546765        |                |                  | 1 |

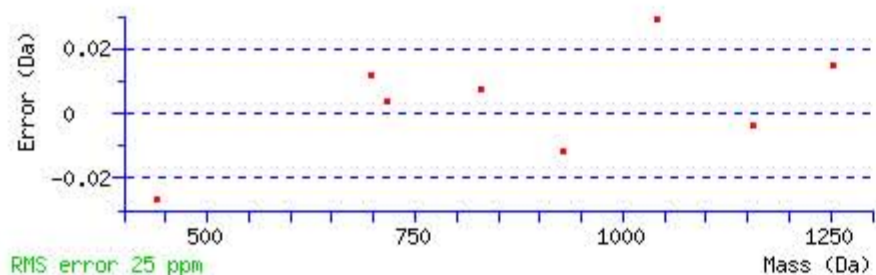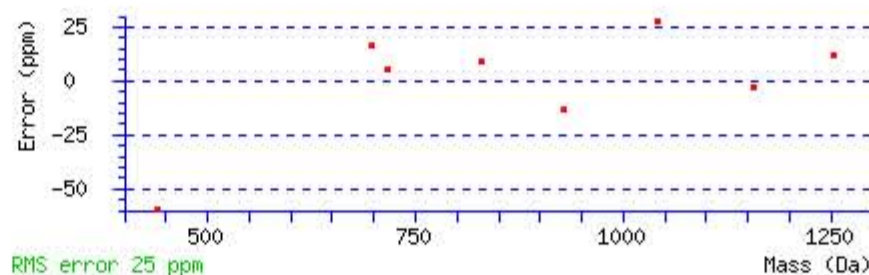

NCBI BLAST search of [LPNNVLQEK](#)

(Parameters: blastp, nr protein database, expect=20000, no filter, PAM30)

Other BLAST [web gateways](#)

## All matches to this query

| Score | Mr(calc):   | Delta    | Sequence                  |
|-------|-------------|----------|---------------------------|
| 38.8  | 1364.748581 | 0.000601 | <a href="#">LPNNVLQEK</a> |

Mascot: <http://www.matrixscience.com/>

# MASCOT SCIENCE Mascot Search Results

## Peptide View

MS/MS Fragmentation of **FTDSENVQER**

Found in **AFAM\_HUMAN**, Afamin OS=Homo sapiens GN=AFM PE=1 SV=1

Match to Query 36308: 1694.735408 from(848.374980,2+) rtinseconds(1602) index(2695)

Title: Locus:1.1.1.3109.26 File:"2013-07-02 CLN FXIII 60 min 3rd F 1.wiff"

Data file C:\Program Files (x86)\Matrix Science\Mascot Daemon\mgf6 FXIII 60 min 3rd\mascot\_daemon\_merge.mgf

Click mouse within plot area to zoom in by factor of two about that point

Or, Plot from  to  Da

Label all possible matches  Label matches used for scoring

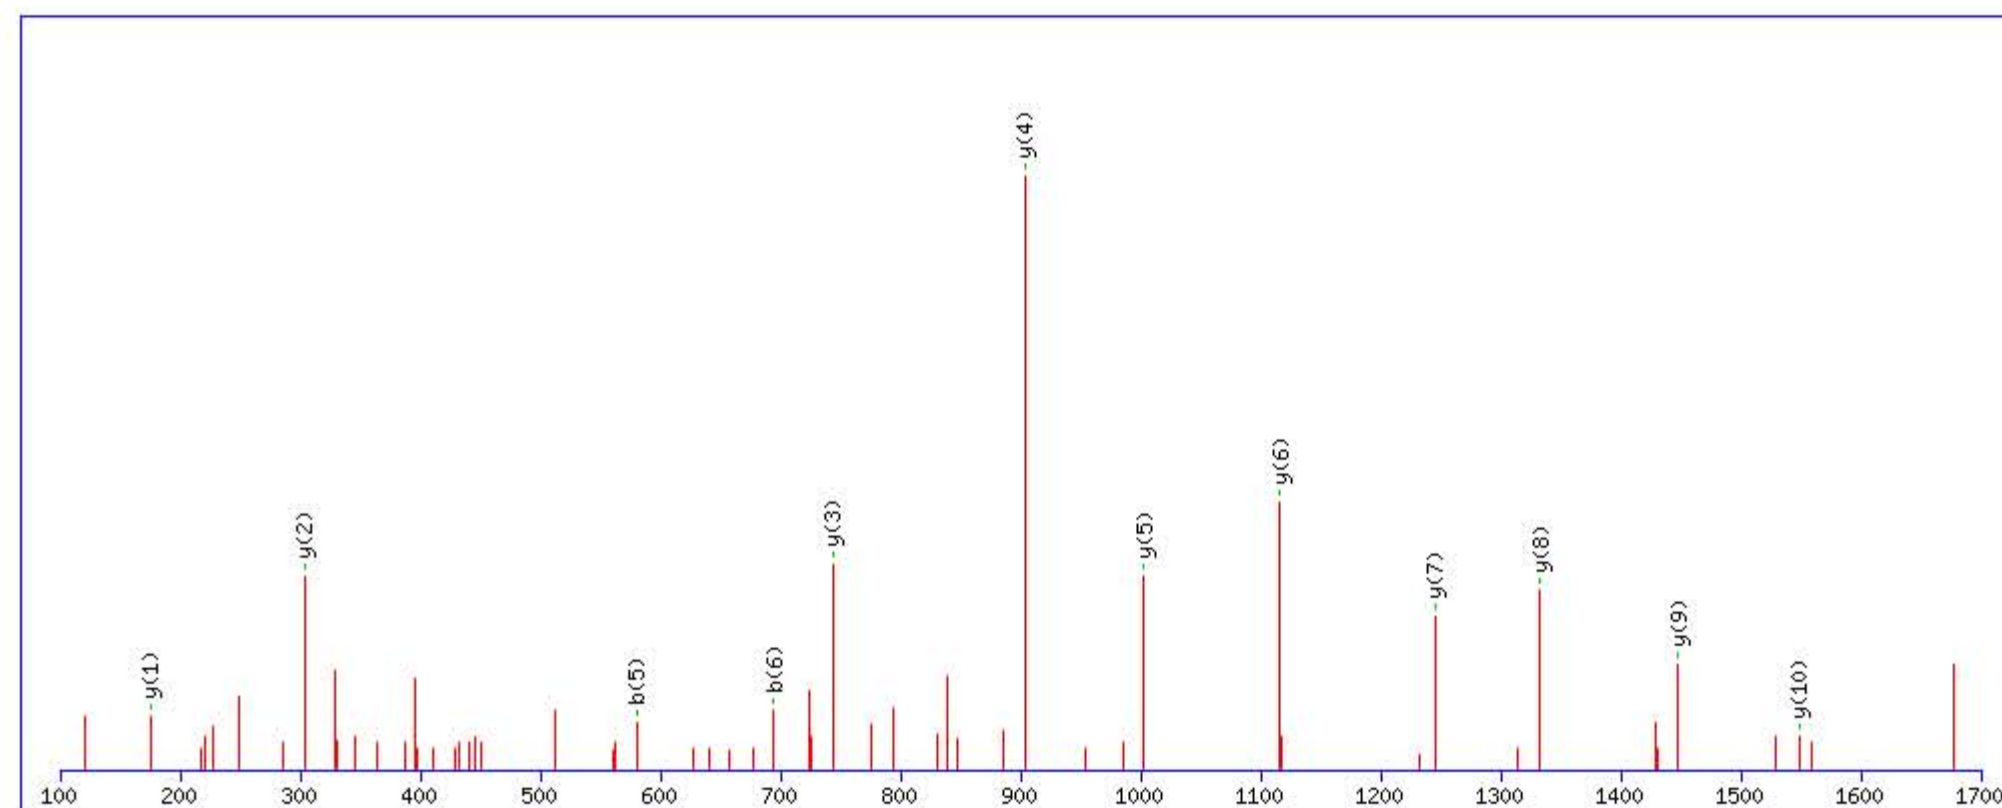

Monoisotopic mass of neutral peptide  $M_r(\text{calc})$ : 1694.739243

Fixed modifications: Carbamidomethyl (C) (apply to specified residues or termini only)

Variable modifications:

Q9 : Biotin:Thermo-21345 (Q)

Ions Score: 97 Expect: 9.7e-010

Matches : 12/106 fragment ions using 15 most intense peaks [\(help\)](#)

| #  | b                 | b <sup>++</sup> | b <sup>+</sup> | b <sup>*++</sup> | b <sup>0</sup> | b <sup>0++</sup> | Seq. | y                  | y <sup>++</sup> | y <sup>+</sup> | y <sup>*++</sup> | y <sup>0</sup> | y <sup>0++</sup> | #  |
|----|-------------------|-----------------|----------------|------------------|----------------|------------------|------|--------------------|-----------------|----------------|------------------|----------------|------------------|----|
| 1  | 148.075690        | 74.541483       |                |                  |                |                  | F    |                    |                 |                |                  |                |                  | 11 |
| 2  | 249.123369        | 125.065322      |                |                  | 231.112804     | 116.060040       | T    | <b>1548.678104</b> | 774.842690      | 1531.651555    | 766.329416       | 1530.667539    | 765.837408       | 10 |
| 3  | 364.150312        | 182.578794      |                |                  | 346.139747     | 173.573512       | D    | <b>1447.630425</b> | 724.318851      | 1430.603876    | 715.805576       | 1429.619860    | 715.313568       | 9  |
| 4  | 451.182340        | 226.094808      |                |                  | 433.171775     | 217.089526       | S    | <b>1332.603482</b> | 666.805379      | 1315.576933    | 658.292105       | 1314.592917    | 657.800097       | 8  |
| 5  | <b>580.224933</b> | 290.616105      |                |                  | 562.214368     | 281.610822       | E    | <b>1245.571454</b> | 623.289365      | 1228.544905    | 614.776091       | 1227.560889    | 614.284083       | 7  |
| 6  | <b>694.267860</b> | 347.637568      | 677.241311     | 339.124294       | 676.257295     | 338.632286       | N    | <b>1116.528861</b> | 558.768069      | 1099.502312    | 550.254794       | 1098.518296    | 549.762786       | 6  |
| 7  | 793.336274        | 397.171775      | 776.309725     | 388.658501       | 775.325709     | 388.166493       | V    | <b>1002.485934</b> | 501.746605      | 985.459385     | 493.233331       | 984.475369     | 492.741323       | 5  |
| 8  | 953.366923        | 477.187100      | 936.340374     | 468.673825       | 935.356358     | 468.181817       | C    | <b>903.417520</b>  | 452.212398      | 886.390971     | 443.699124       | 885.406955     | 443.207116       | 4  |
| 9  | 1392.592249       | 696.799763      | 1375.565700    | 688.286488       | 1374.581684    | 687.794480       | Q    | <b>743.386871</b>  | 372.197074      | 726.360322     | 363.683799       | 725.376306     | 363.191791       | 3  |
| 10 | 1521.634842       | 761.321059      | 1504.608293    | 752.807785       | 1503.624277    | 752.315777       | E    | <b>304.161545</b>  | 152.584411      | 287.134996     | 144.071136       | 286.150980     | 143.579128       | 2  |
| 11 |                   |                 |                |                  |                |                  | R    | <b>175.118952</b>  | 88.063114       | 158.092403     | 79.549839        |                |                  | 1  |

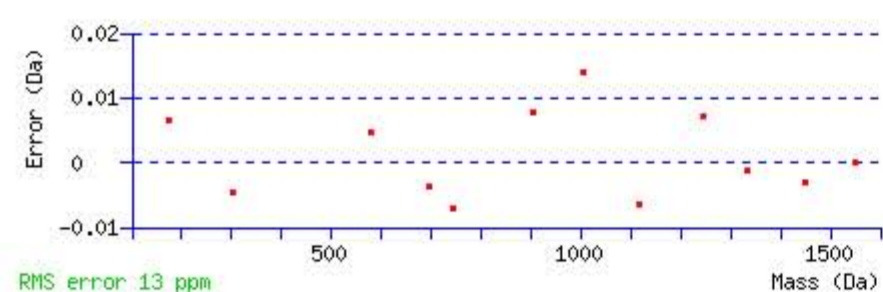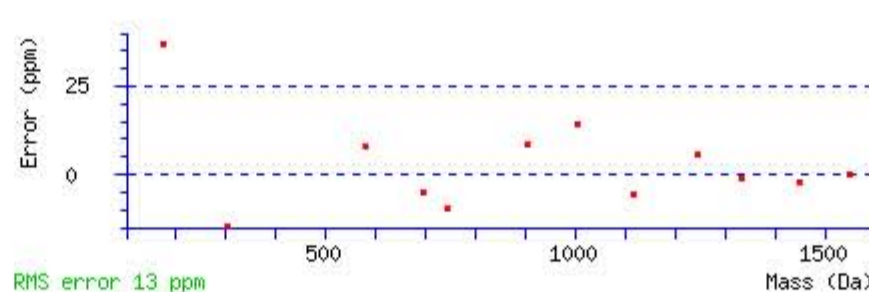

NCBI BLAST search of **FTDSENVQER**

(Parameters: blastp, nr protein database, expect=20000, no filter, PAM30)

Other BLAST [web gateways](#)

All matches to this query

| Score | $M_r(\text{calc})$ : | Delta     | Sequence                      |
|-------|----------------------|-----------|-------------------------------|
| 96.7  | 1694.739243          | -0.003835 | <a href="#">FTDSENVQER</a>    |
| 0.3   | 1694.710068          | 0.025340  | <a href="#">RCVMDDDNEVRDR</a> |

Mascot: <http://www.matrixscience.com/>



# MASCOT Search Results

## Peptide View

MS/MS Fragmentation of **SCCEEQNKVNCLQTR**

Found in **AFAM\_HUMAN**, Afamin OS=Homo sapiens GN=AFM PE=1 SV=1

Match to Query 46660: 2235.981552 from(746.334460,3+) rtinseconds(1482) index(1903)

Title: Locus:1.1.1.3067.26 File:"2013-07-02 CLN FXIII 60 min 3rd F 1.wiff"

Data file C:\Program Files (x86)\Matrix Science\Mascot Daemon\mgf\6 FXIII 60 min 3rd\mascot\_daemon\_merge.mgf

Click mouse within plot area to zoom in by factor of two about that point

Or, Plot from  to  Da

Label all possible matches  Label matches used for scoring

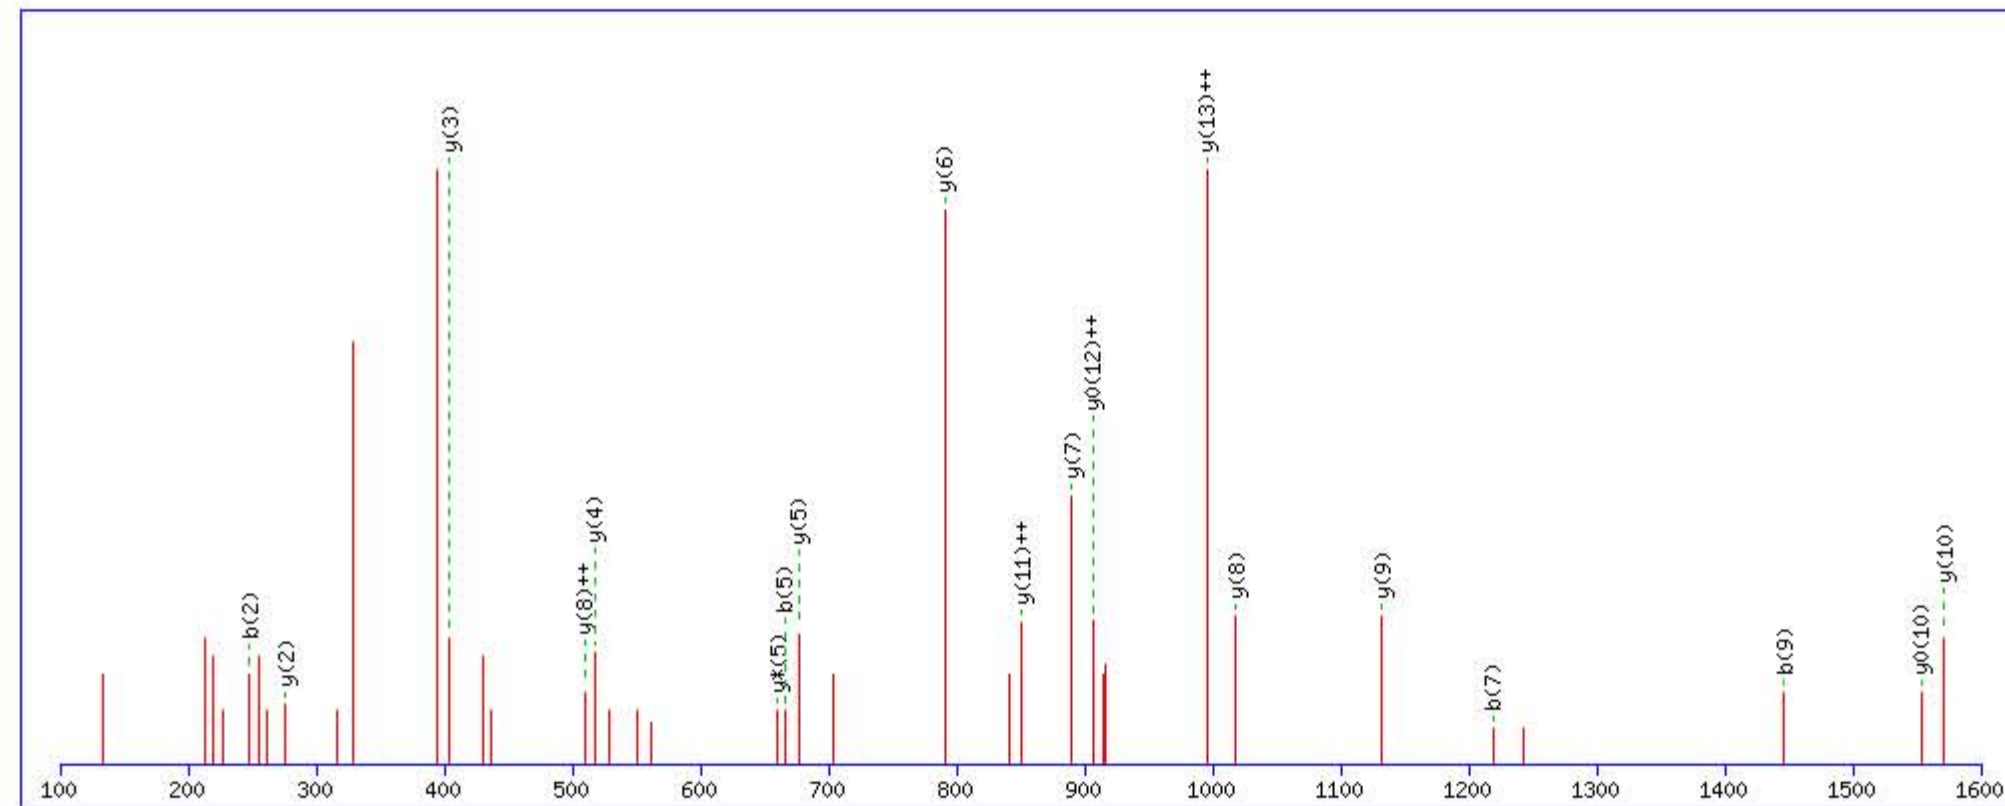

Monoisotopic mass of neutral peptide  $M_r(\text{calc})$ : 2235.985703

Fixed modifications: Carbamidomethyl (C) (apply to specified residues or termini only)

Variable modifications:

Q6 : Biotin:Thermo-21345 (Q)

Ions Score: 48 Expect: 8.9e-005

Matches : 19/156 fragment ions using 35 most intense peaks [\(help\)](#)

| #  | b                  | b <sup>++</sup> | b <sup>*</sup> | b <sup>+++</sup> | b <sup>0</sup> | b <sup>0++</sup> | Seq. | y                  | y <sup>++</sup>   | y <sup>*</sup>    | y <sup>+++</sup> | y <sup>0</sup>     | y <sup>0++</sup>  | #  |
|----|--------------------|-----------------|----------------|------------------|----------------|------------------|------|--------------------|-------------------|-------------------|------------------|--------------------|-------------------|----|
| 1  | 88.039304          | 44.523290       |                |                  | 70.028739      | 35.518008        | S    |                    |                   |                   |                  |                    |                   | 15 |
| 2  | <b>248.069953</b>  | 124.538614      |                |                  | 230.059388     | 115.533332       | C    | 2149.960963        | 1075.484119       | 2132.934414       | 1066.970845      | 2131.950398        | 1066.478837       | 14 |
| 3  | 408.100602         | 204.553939      |                |                  | 390.090037     | 195.548657       | C    | 1989.930314        | <b>995.468795</b> | 1972.903765       | 986.955521       | 1971.919749        | 986.463512        | 13 |
| 4  | 537.143195         | 269.075236      |                |                  | 519.132630     | 260.069953       | E    | 1829.899665        | 915.453470        | 1812.873116       | 906.940196       | 1811.889100        | <b>906.448188</b> | 12 |
| 5  | <b>666.185788</b>  | 333.596532      |                |                  | 648.175223     | 324.591250       | E    | 1700.857072        | <b>850.932174</b> | 1683.830523       | 842.418899       | 1682.846507        | 841.926891        | 11 |
| 6  | 1105.411114        | 553.209195      | 1088.384565    | 544.695921       | 1087.400549    | 544.203913       | Q    | <b>1571.814479</b> | 786.410877        | 1554.787930       | 777.897603       | <b>1553.803914</b> | 777.405595        | 10 |
| 7  | <b>1219.454041</b> | 610.230659      | 1202.427492    | 601.717384       | 1201.443476    | 601.225376       | N    | <b>1132.589153</b> | 566.798214        | 1115.562604       | 558.284940       | 1114.578588        | 557.792932        | 9  |
| 8  | 1347.549004        | 674.278140      | 1330.522455    | 665.764866       | 1329.538439    | 665.272858       | K    | <b>1018.546226</b> | <b>509.776751</b> | 1001.519677       | 501.263476       | 1000.535661        | 500.771468        | 8  |
| 9  | <b>1446.617418</b> | 723.812347      | 1429.590869    | 715.299073       | 1428.606853    | 714.807065       | V    | <b>890.451263</b>  | 445.729269        | 873.424714        | 437.215995       | 872.440698         | 436.723987        | 7  |
| 10 | 1560.660345        | 780.833811      | 1543.633796    | 772.320536       | 1542.649780    | 771.828528       | N    | <b>791.382849</b>  | 396.195062        | 774.356300        | 387.681788       | 773.372284         | 387.189780        | 6  |
| 11 | 1720.690994        | 860.849135      | 1703.664445    | 852.335861       | 1702.680429    | 851.843853       | C    | <b>677.339922</b>  | 339.173599        | <b>660.313373</b> | 330.660324       | 659.329357         | 330.168316        | 5  |
| 12 | 1833.775058        | 917.391167      | 1816.748509    | 908.877893       | 1815.764493    | 908.385885       | L    | <b>517.309273</b>  | 259.158274        | 500.282724        | 250.645000       | 499.298708         | 250.152992        | 4  |
| 13 | 1961.833636        | 981.420456      | 1944.807087    | 972.907182       | 1943.823071    | 972.415174       | Q    | <b>404.225209</b>  | 202.616242        | 387.198660        | 194.102968       | 386.214644         | 193.610960        | 3  |
| 14 | 2062.881315        | 1031.944295     | 2045.854766    | 1023.431021      | 2044.870750    | 1022.939013      | T    | <b>276.166631</b>  | 138.586953        | 259.140082        | 130.073679       | 258.156066         | 129.581671        | 2  |
| 15 |                    |                 |                |                  |                |                  | R    | 175.118952         | 88.063114         | 158.092403        | 79.549839        |                    |                   | 1  |

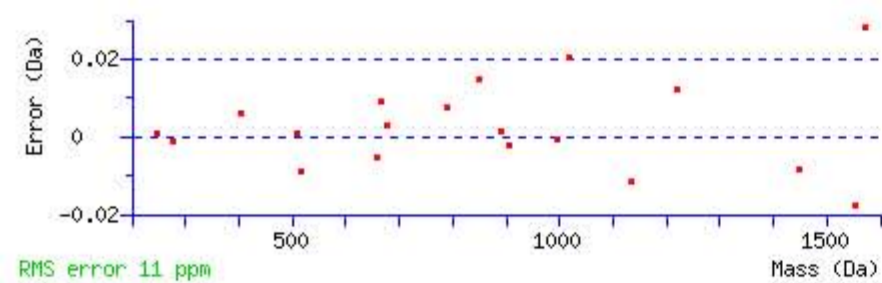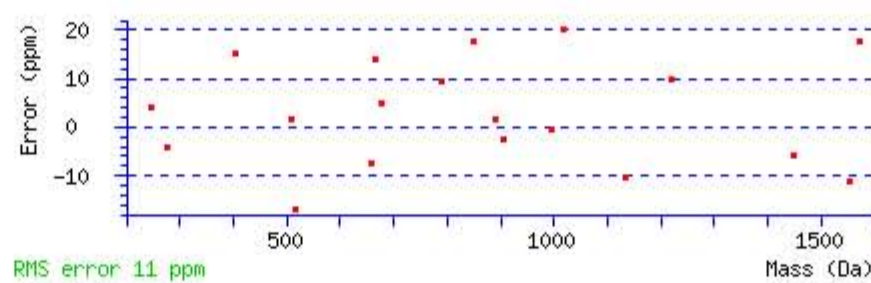

NCBI BLAST search of **SCCEEQNKVNCLQTR**

(Parameters: blastp, nr protein database, expect=20000, no filter, PAM30)

Other BLAST [web gateways](#)

All matches to this query

| Score | $M_r(\text{calc})$ | Delta     | Sequence                        |
|-------|--------------------|-----------|---------------------------------|
| 47.8  | 2235.985703        | -0.004151 | <a href="#">SCCEEQNKVNCLQTR</a> |
| 0.1   | 2235.985703        | -0.004151 | <a href="#">SCCEEQNKVNCLQTR</a> |

# MASCOT Search Results

## Peptide View

MS/MS Fragmentation of **EQQDSPGNK**

Found in **A2AP\_HUMAN**, Alpha-2-antiplasmin OS=Homo sapiens GN=SERPINF2 PE=1 SV=3

Match to Query 23266: 1312.611928 from(657.313240,2+) rtinseconds(1191) index(601)

Title: Locus:1.1.1.2966.10 File:"2013-07-02 CLN FXIII 60 min 3rd F 1.wiff"

Data file C:\Program Files (x86)\Matrix Science\Mascot Daemon\mgf\6 FXIII 60 min 3rd\mascot\_daemon\_merge.mgf

Click mouse within plot area to zoom in by factor of two about that point

Or, Plot from  to  Da

Label all possible matches  Label matches used for scoring

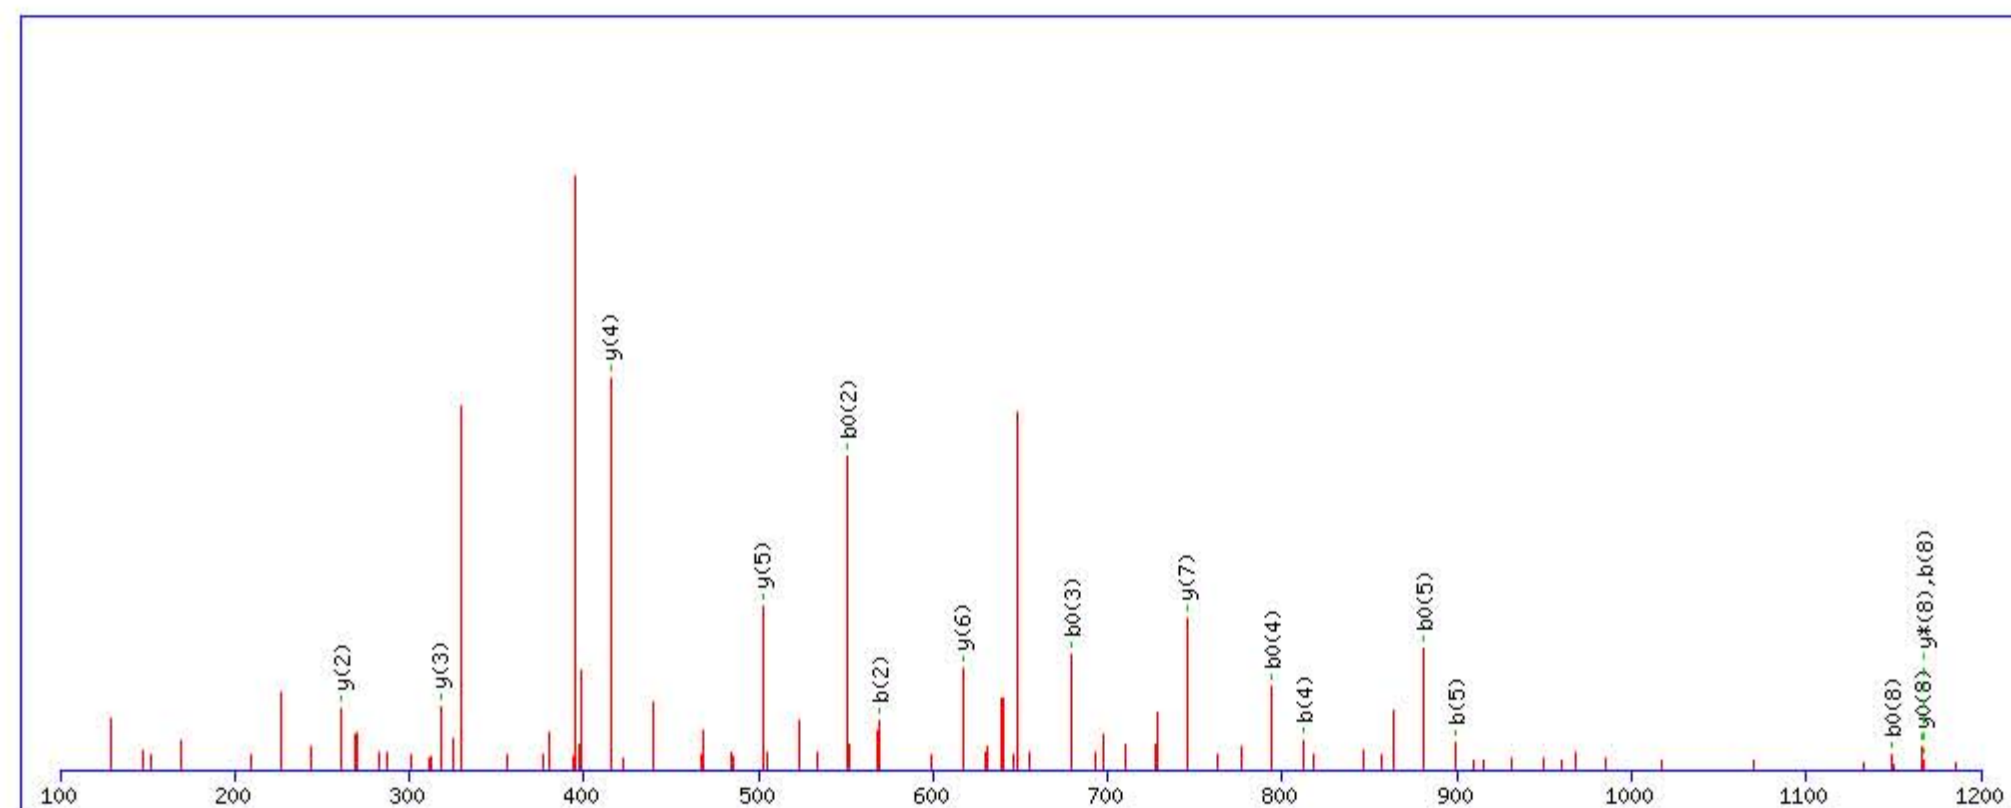

Monoisotopic mass of neutral peptide Mr(calc): 1312.608139

Fixed modifications: Carbamidomethyl (C) (apply to specified residues or termini only)

Variable modifications:

Q2 : Biotin:Thermo-21345 (Q)

Ions Score: 33 Expect: 0.0028

Matches : 17/86 fragment ions using 31 most intense peaks [\(help\)](#)

| # | b                  | b <sup>++</sup> | b <sup>*</sup> | b <sup>*++</sup> | b <sup>0</sup>     | b <sup>0++</sup> | Seq. | y                 | y <sup>++</sup> | y <sup>*</sup>     | y <sup>*++</sup> | y <sup>0</sup>     | y <sup>0++</sup> | # |
|---|--------------------|-----------------|----------------|------------------|--------------------|------------------|------|-------------------|-----------------|--------------------|------------------|--------------------|------------------|---|
| 1 | 130.049869         | 65.528572       |                |                  | 112.039304         | 56.523290        | E    |                   |                 |                    |                  |                    |                  | 9 |
| 2 | <b>569.275195</b>  | 285.141236      | 552.248646     | 276.627961       | <b>551.264630</b>  | 276.135953       | Q    | 1184.572834       | 592.790055      | <b>1167.546285</b> | 584.276780       | <b>1166.562269</b> | 583.784772       | 8 |
| 3 | 697.333773         | 349.170525      | 680.307224     | 340.657250       | <b>679.323208</b>  | 340.165242       | Q    | <b>745.347508</b> | 373.177392      | 728.320959         | 364.664117       | 727.336943         | 364.172109       | 7 |
| 4 | <b>812.360716</b>  | 406.683996      | 795.334167     | 398.170722       | <b>794.350151</b>  | 397.678714       | D    | <b>617.288930</b> | 309.148103      | 600.262381         | 300.634828       | 599.278365         | 300.142820       | 6 |
| 5 | <b>899.392744</b>  | 450.200010      | 882.366195     | 441.686736       | <b>881.382179</b>  | 441.194728       | S    | <b>502.261987</b> | 251.634631      | 485.235438         | 243.121357       | 484.251422         | 242.629349       | 5 |
| 6 | 996.445508         | 498.726392      | 979.418959     | 490.213118       | 978.434943         | 489.721110       | P    | <b>415.229959</b> | 208.118617      | 398.203410         | 199.605343       |                    |                  | 4 |
| 7 | 1053.466972        | 527.237124      | 1036.440423    | 518.723850       | 1035.456407        | 518.231841       | G    | <b>318.177195</b> | 159.592235      | 301.150646         | 151.078961       |                    |                  | 3 |
| 8 | <b>1167.509899</b> | 584.258587      | 1150.483350    | 575.745313       | <b>1149.499334</b> | 575.253305       | N    | <b>261.155731</b> | 131.081503      | 244.129182         | 122.568229       |                    |                  | 2 |
| 9 |                    |                 |                |                  |                    |                  | K    | 147.112804        | 74.060040       | 130.086255         | 65.546765        |                    |                  | 1 |

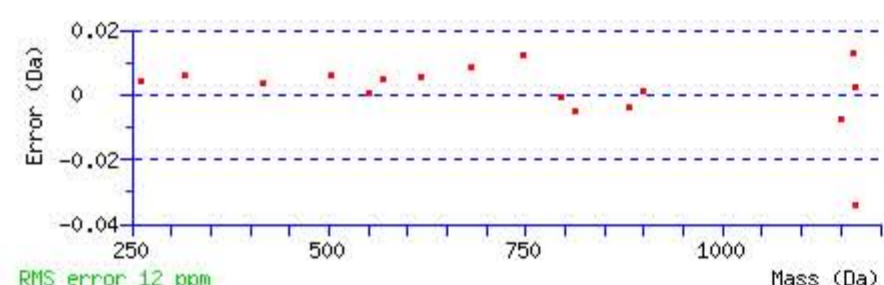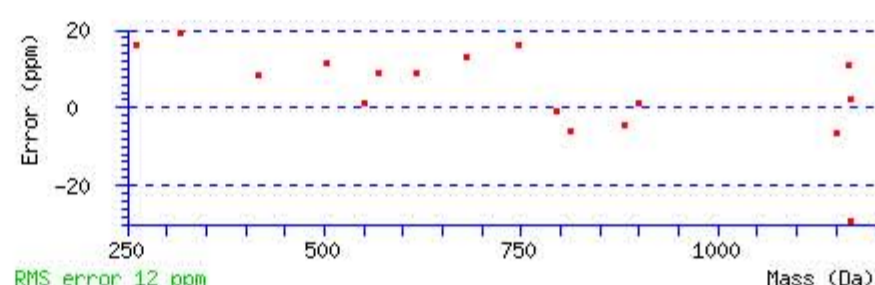

NCBI BLAST search of [EQQDSPGNK](#)

(Parameters: blastp, nr protein database, expect=20000, no filter, PAM30)

Other BLAST [web gateways](#)

## All matches to this query

| Score | Mr(calc):   | Delta     | Sequence                     |
|-------|-------------|-----------|------------------------------|
| 33.2  | 1312.608139 | 0.003789  | <a href="#">EQQDSPGNK</a>    |
| 20.0  | 1312.608139 | 0.003789  | <a href="#">EQQDSPGNK</a>    |
| 5.7   | 1312.625900 | -0.013972 | <a href="#">QEAVHTDSLEGK</a> |
| 4.9   | 1312.596878 | 0.015050  | <a href="#">KYMEENDQLK</a>   |
| 4.4   | 1312.626770 | -0.014842 | <a href="#">QQASPSCP</a>     |
| 3.9   | 1312.608124 | 0.003804  | <a href="#">KDMNETFREK</a>   |
| 3.7   | 1312.626770 | -0.014842 | <a href="#">QQASPSCP</a>     |
| 2.3   | 1312.596878 | 0.015050  | <a href="#">YMEENDQLKK</a>   |
| 1.2   | 1312.596909 | 0.015019  | <a href="#">EPQEPEVCPTK</a>  |
| 0.4   | 1312.601624 | 0.010304  | <a href="#">CGECGKAFTRK</a>  |

# MASCOT Search Results

## Peptide View

MS/MS Fragmentation of **LGNQEPGGQTALK**

Found in **A2AP\_HUMAN**, Alpha-2-antiplasmin OS=Homo sapiens GN=SERPINF2 PE=1 SV=3

Match to Query 34261: 1622.846108 from(812.430330,2+) rtinseconds(1624) index(60585)

Title: Locus:1.1.1.3191.19 File:"2013-07-02 CLN FXIII 60 min 3rd FT.wiff"

Data file C:\Program Files (x86)\Matrix Science\Mascot Daemon\mgf6 FXIII 60 min 3rd\mascot\_daemon\_merge.mgf

Click mouse within plot area to zoom in by factor of two about that point

Or, Plot from  to  Da

Label all possible matches  Label matches used for scoring

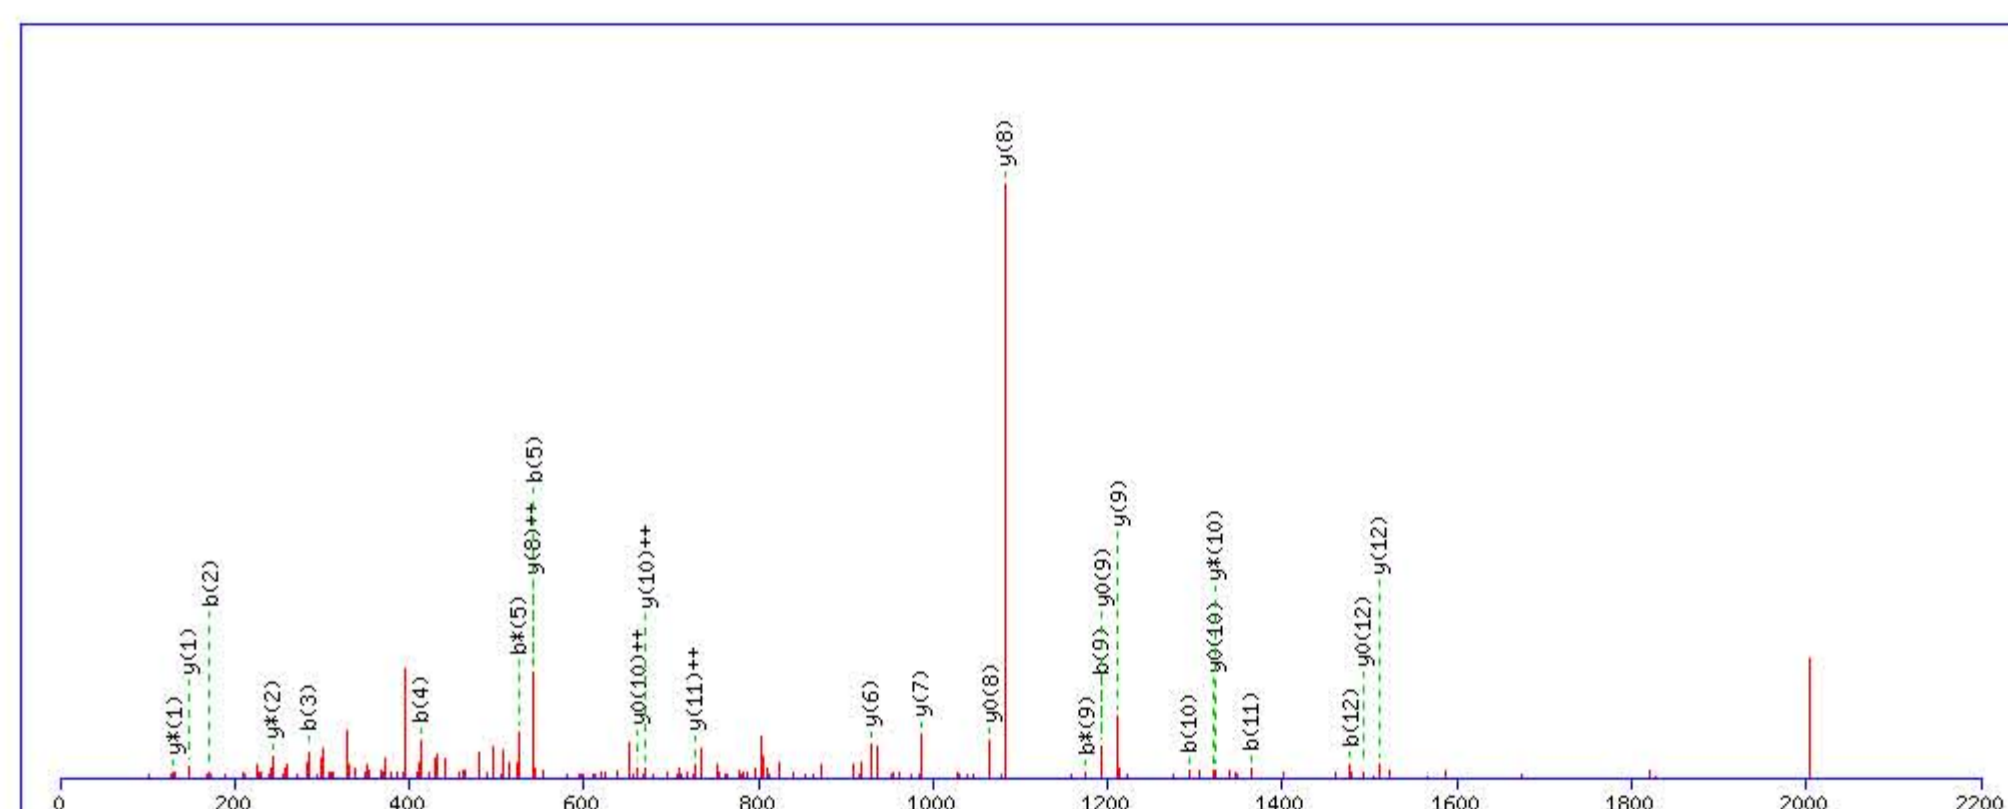

Monoisotopic mass of neutral peptide Mr(calc): 1622.845016

Fixed modifications: Carbamidomethyl (C) (apply to specified residues or termini only)

Variable modifications:

Q9 : Biotin:Thermo-21345 (Q)

Ions Score: 57 Expect: 4.3e-005

Matches : 27/126 fragment ions using 45 most intense peaks [\(help\)](#)

| #  | b                  | b <sup>++</sup> | b <sup>*</sup>     | b <sup>*++</sup> | b <sup>0</sup> | b <sup>0++</sup> | Seq. | y                  | y <sup>++</sup>   | y <sup>*</sup>     | y <sup>*++</sup> | y <sup>0</sup>     | y <sup>0++</sup>  | #  |
|----|--------------------|-----------------|--------------------|------------------|----------------|------------------|------|--------------------|-------------------|--------------------|------------------|--------------------|-------------------|----|
| 1  | 114.091340         | 57.549308       |                    |                  |                |                  | L    |                    |                   |                    |                  |                    |                   | 13 |
| 2  | <b>171.112804</b>  | 86.060040       |                    |                  |                |                  | G    | <b>1510.768241</b> | 755.887759        | 1493.741692        | 747.374484       | <b>1492.757676</b> | 746.882476        | 12 |
| 3  | <b>285.155731</b>  | 143.081504      | 268.129182         | 134.568229       |                |                  | N    | 1453.746777        | <b>727.377027</b> | 1436.720228        | 718.863752       | 1435.736212        | 718.371744        | 11 |
| 4  | <b>413.214309</b>  | 207.110793      | 396.187760         | 198.597518       |                |                  | Q    | 1339.703850        | <b>670.355563</b> | <b>1322.677301</b> | 661.842289       | <b>1321.693285</b> | <b>661.350281</b> | 10 |
| 5  | <b>542.256902</b>  | 271.632089      | <b>525.230353</b>  | 263.118815       | 524.246337     | 262.626807       | E    | <b>1211.645272</b> | 606.326274        | 1194.618723        | 597.813000       | <b>1193.634707</b> | 597.320991        | 9  |
| 6  | 639.309666         | 320.158471      | 622.283117         | 311.645197       | 621.299101     | 311.153189       | P    | <b>1082.602679</b> | <b>541.804978</b> | 1065.576130        | 533.291703       | <b>1064.592114</b> | 532.799695        | 8  |
| 7  | 696.331130         | 348.669203      | 679.304581         | 340.155929       | 678.320565     | 339.663921       | G    | <b>985.549915</b>  | 493.278596        | 968.523366         | 484.765321       | 967.539350         | 484.273313        | 7  |
| 8  | 753.352594         | 377.179935      | 736.326045         | 368.666661       | 735.342029     | 368.174653       | G    | <b>928.528451</b>  | 464.767864        | 911.501902         | 456.254589       | 910.517886         | 455.762581        | 6  |
| 9  | <b>1192.577920</b> | 596.792598      | <b>1175.551371</b> | 588.279324       | 1174.567355    | 587.787316       | Q    | 871.506987         | 436.257132        | 854.480438         | 427.743857       | 853.496422         | 427.251849        | 5  |
| 10 | <b>1293.625599</b> | 647.316438      | 1276.599050        | 638.803163       | 1275.615034    | 638.311155       | T    | 432.281661         | 216.644468        | 415.255112         | 208.131194       | 414.271096         | 207.639186        | 4  |
| 11 | <b>1364.662713</b> | 682.834995      | 1347.636164        | 674.321720       | 1346.652148    | 673.829712       | A    | 331.233982         | 166.120629        | 314.207433         | 157.607354       |                    |                   | 3  |
| 12 | <b>1477.746777</b> | 739.377027      | 1460.720228        | 730.863752       | 1459.736212    | 730.371744       | L    | 260.196868         | 130.602072        | <b>243.170319</b>  | 122.088797       |                    |                   | 2  |
| 13 |                    |                 |                    |                  |                |                  | K    | <b>147.112804</b>  | 74.060040         | <b>130.086255</b>  | 65.546765        |                    |                   | 1  |

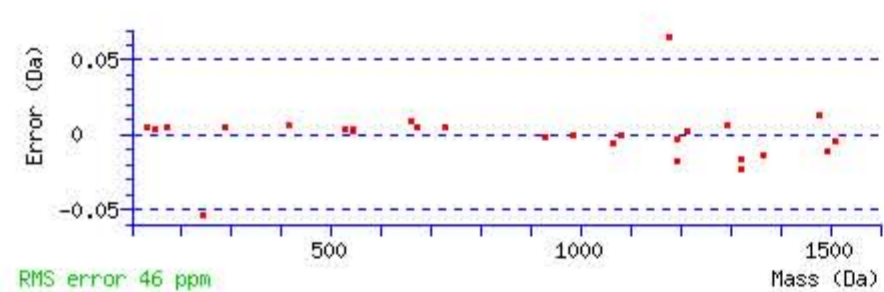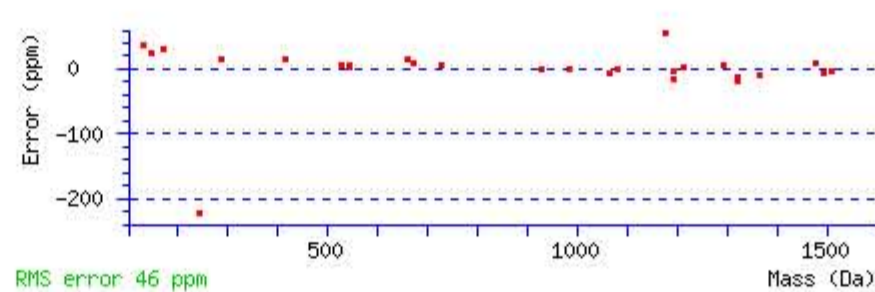

NCBI BLAST search of **LGNQEPGGQTALK**

(Parameters: blastp, nr protein database, expect=20000, no filter, PAM30)

Other BLAST [web gateways](#)

All matches to this query

| Score | Mr(calc):   | Delta     | Sequence                       |
|-------|-------------|-----------|--------------------------------|
| 56.7  | 1622.845016 | 0.001092  | <a href="#">LGNQEPGGQTALK</a>  |
| 29.0  | 1622.845016 | 0.001092  | <a href="#">LGNQEPGGQTALK</a>  |
| 9.5   | 1622.858917 | -0.012809 | <a href="#">SVLLMELEVNYGLK</a> |
| 7.7   | 1622.849045 | -0.002937 | <a href="#">IPMPDFDLHLKGP</a>  |
| 7.5   | 1622.831085 | 0.015023  | <a href="#">GLNPNPSHQMTKRK</a> |
| 7.5   | 1622.833771 | 0.012337  | <a href="#">LDLAGRDLTDYLMK</a> |
| 3.5   | 1622.852890 | -0.006782 | <a href="#">QFEFVGSAPTRRTK</a> |
| 2.7   | 1622.863632 | -0.017524 | <a href="#">KRMILSTISWMGGK</a> |
| 2.2   | 1622.837601 | 0.008507  | <a href="#">SQSEKQTYLEVRR</a>  |
| 2.0   | 1622.864105 | -0.017997 | <a href="#">IWIPHSSGSSRLQR</a> |

# MASCOT Search Results

## Peptide View

MS/MS Fragmentation of **LGNQEPGGQTALK**

Found in **A2AP\_HUMAN**, Alpha-2-antiplasmin OS=Homo sapiens GN=SERPINF2 PE=1 SV=3

Match to Query 40833: 1934.008828 from(968.011690,2+) rtinseconds(1984) index(4871)

Title: Locus:1.1.1.3242.17 File:"2013-07-02 CLN FXIII 60 min 3rd F 1.wiff"

Data file C:\Program Files (x86)\Matrix Science\Mascot Daemon\mgf\6 FXIII 60 min 3rd\mascot\_daemon\_merge.mgf

Click mouse within plot area to zoom in by factor of two about that point

Or, Plot from  to  Da

Label all possible matches  Label matches used for scoring

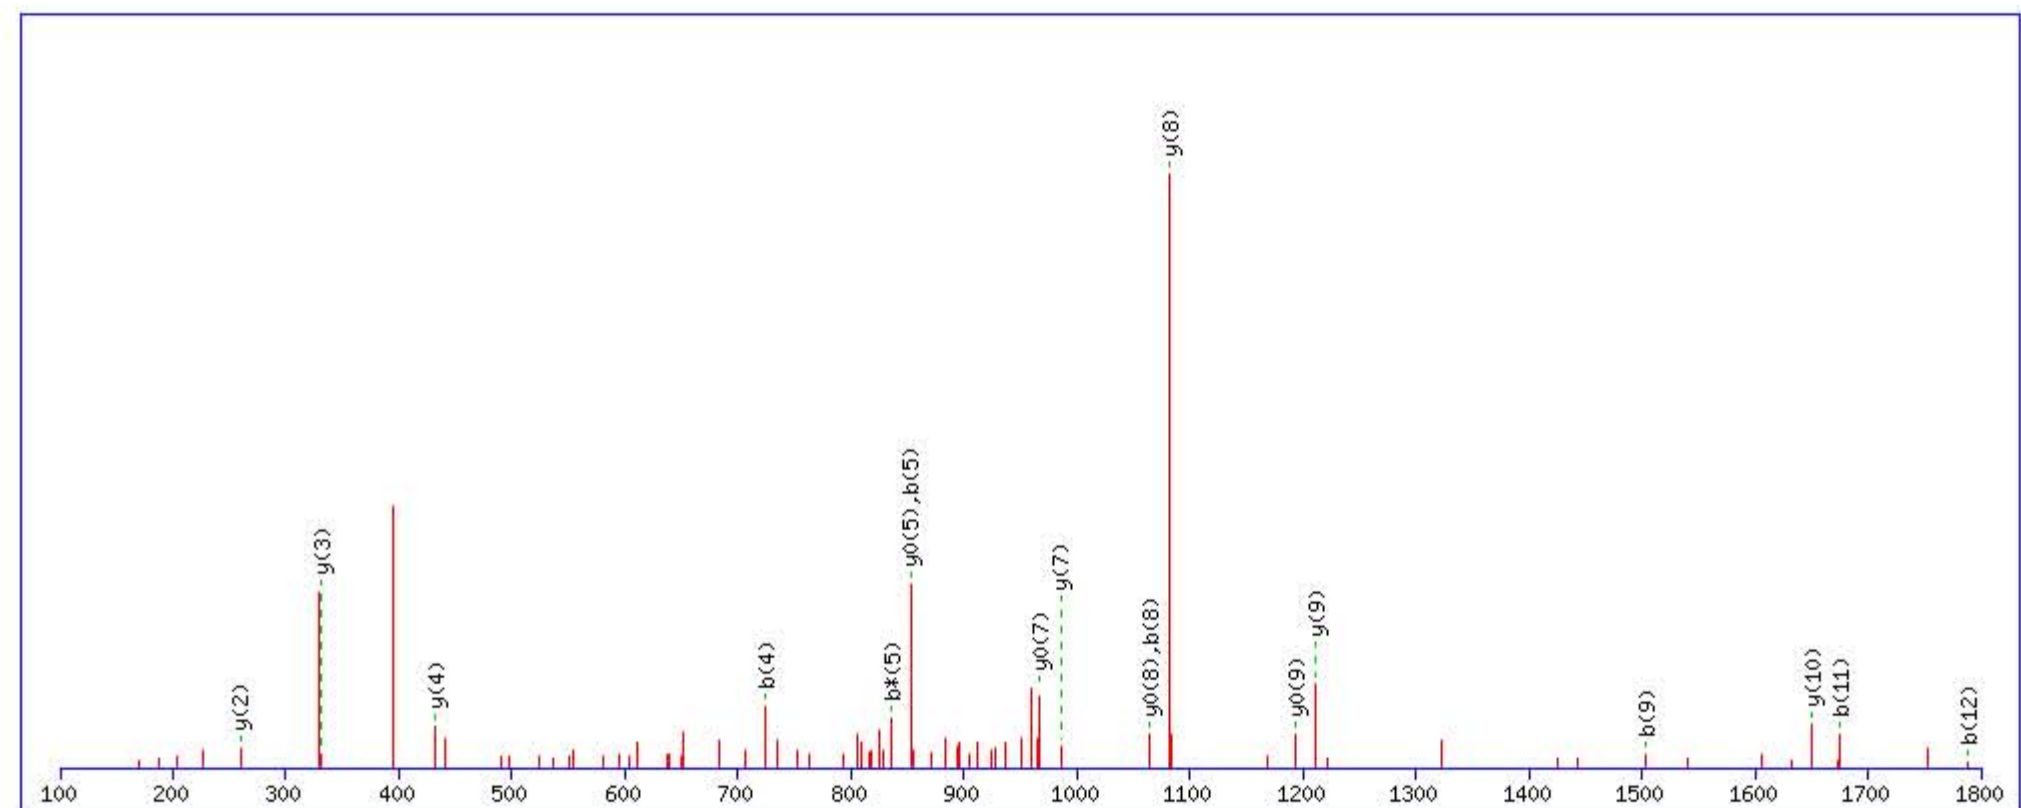

Monoisotopic mass of neutral peptide Mr(calc): 1934.011765

Fixed modifications: Carbamidomethyl (C) (apply to specified residues or termini only)

Variable modifications:

Q4 : Biotin:Thermo-21345 (Q)

Q9 : Biotin:Thermo-21345 (Q)

Ions Score: 39 Expect: 0.0059

Matches : 18/126 fragment ions using 32 most intense peaks [\(help\)](#)

| #  | b                  | b <sup>++</sup> | b <sup>*</sup>    | b <sup>*++</sup> | b <sup>0</sup> | b <sup>0++</sup> | Seq. | y                  | y <sup>++</sup> | y <sup>*</sup> | y <sup>*++</sup> | y <sup>0</sup>     | y <sup>0++</sup> | #  |
|----|--------------------|-----------------|-------------------|------------------|----------------|------------------|------|--------------------|-----------------|----------------|------------------|--------------------|------------------|----|
| 1  | 114.091340         | 57.549308       |                   |                  |                |                  | L    |                    |                 |                |                  |                    |                  | 13 |
| 2  | 171.112804         | 86.060040       |                   |                  |                |                  | G    | 1821.934989        | 911.471133      | 1804.908440    | 902.957858       | 1803.924424        | 902.465850       | 12 |
| 3  | 285.155731         | 143.081504      | 268.129182        | 134.568229       |                |                  | N    | 1764.913525        | 882.960400      | 1747.886976    | 874.447126       | 1746.902960        | 873.955118       | 11 |
| 4  | <b>724.381057</b>  | 362.694167      | 707.354508        | 354.180892       |                |                  | Q    | <b>1650.870598</b> | 825.938937      | 1633.844049    | 817.425663       | 1632.860033        | 816.933654       | 10 |
| 5  | <b>853.423650</b>  | 427.215463      | <b>836.397101</b> | 418.702189       | 835.413085     | 418.210181       | E    | <b>1211.645272</b> | 606.326274      | 1194.618723    | 597.813000       | <b>1193.634707</b> | 597.320991       | 9  |
| 6  | 950.476414         | 475.741845      | 933.449865        | 467.228571       | 932.465849     | 466.736563       | P    | <b>1082.602679</b> | 541.804977      | 1065.576130    | 533.291703       | <b>1064.592114</b> | 532.799695       | 8  |
| 7  | 1007.497878        | 504.252577      | 990.471329        | 495.739303       | 989.487313     | 495.247295       | G    | <b>985.549915</b>  | 493.278595      | 968.523366     | 484.765321       | <b>967.539350</b>  | 484.273313       | 7  |
| 8  | <b>1064.519342</b> | 532.763309      | 1047.492793       | 524.250035       | 1046.508777    | 523.758027       | G    | 928.528451         | 464.767863      | 911.501902     | 456.254589       | 910.517886         | 455.762581       | 6  |
| 9  | <b>1503.744668</b> | 752.375972      | 1486.718119       | 743.862698       | 1485.734103    | 743.370690       | Q    | 871.506987         | 436.257132      | 854.480438     | 427.743857       | <b>853.496422</b>  | 427.251849       | 5  |
| 10 | 1604.792347        | 802.899812      | 1587.765798       | 794.386537       | 1586.781782    | 793.894529       | T    | <b>432.281661</b>  | 216.644468      | 415.255112     | 208.131194       | 414.271096         | 207.639186       | 4  |
| 11 | <b>1675.829461</b> | 838.418369      | 1658.802912       | 829.905094       | 1657.818896    | 829.413086       | A    | <b>331.233982</b>  | 166.120629      | 314.207433     | 157.607354       |                    |                  | 3  |
| 12 | <b>1788.913525</b> | 894.960400      | 1771.886976       | 886.447126       | 1770.902960    | 885.955118       | L    | <b>260.196868</b>  | 130.602072      | 243.170319     | 122.088797       |                    |                  | 2  |
| 13 |                    |                 |                   |                  |                |                  | K    | 147.112804         | 74.060040       | 130.086255     | 65.546765        |                    |                  | 1  |

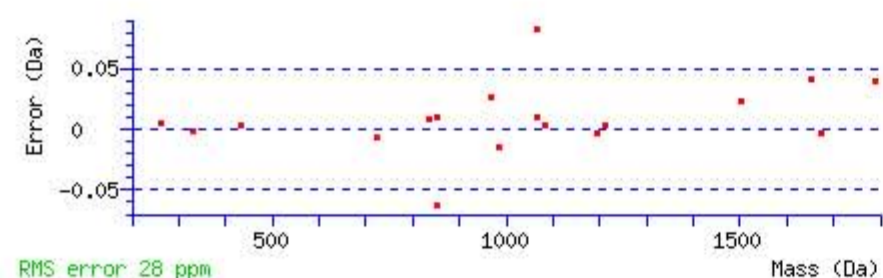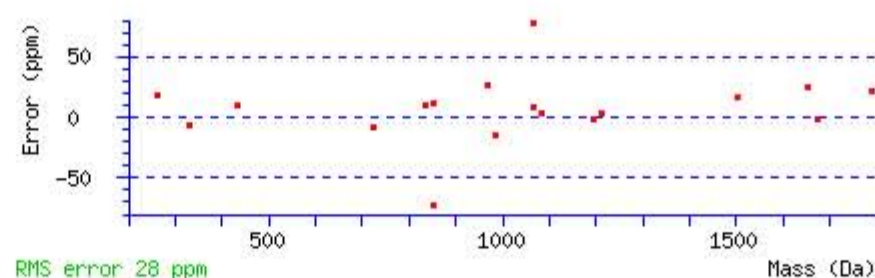

NCBI BLAST search of **LGNQEPGGQTALK**

(Parameters: blastp, nr protein database, expect=20000, no filter, PAM30)

Other BLAST [web gateways](#)

All matches to this query

| Score | Mr(calc):   | Delta     | Sequence                          |
|-------|-------------|-----------|-----------------------------------|
| 38.7  | 1934.011765 | -0.002937 | <a href="#">LGNQEPGGQTALK</a>     |
| 9.3   | 1934.032867 | -0.024039 | <a href="#">KSRPLTGLMDLAKEMTK</a> |
| 9.2   | 1933.982758 | 0.026070  | <a href="#">TVSKLNQEIWMMK</a>     |
| 9.2   | 1933.982758 | 0.026070  | <a href="#">TVSKLNQEIWMMK</a>     |
| 5.5   | 1934.015594 | -0.006766 | <a href="#">RCRTTYSASQLHTLIK</a>  |
| 1.3   | 1934.027008 | -0.018180 | <a href="#">VSFRLHITEPKMMFAK</a>  |
| 0.7   | 1934.037369 | -0.028541 | <a href="#">NYLEGIYNVPVAAVTR</a>  |
| 0.2   | 1934.032867 | -0.024039 | <a href="#">KSRPLTGLMDLAKEMTK</a> |

# MASCOT SCIENCE Mascot Search Results

## Peptide View

MS/MS Fragmentation of **EQQDSPGNKDFLQSLK**

Found in **A2AP\_HUMAN**, Alpha-2-antiplasmin OS=Homo sapiens GN=SERPINF2 PE=1 SV=3

Match to Query 45066: 2144.061102 from(715.694310,3+) rtinseconds(2034) index(5130)

Title: Locus:1.1.1.3260.13 File:"2013-07-02 CLN FXIII 60 min 3rd F 1.wiff"

Data file C:\Program Files (x86)\Matrix Science\Mascot Daemon\mgf\6 FXIII 60 min 3rd\mascot\_daemon\_merge.mgf

Click mouse within plot area to zoom in by factor of two about that point

Or, Plot from  to  Da

Label all possible matches  Label matches used for scoring

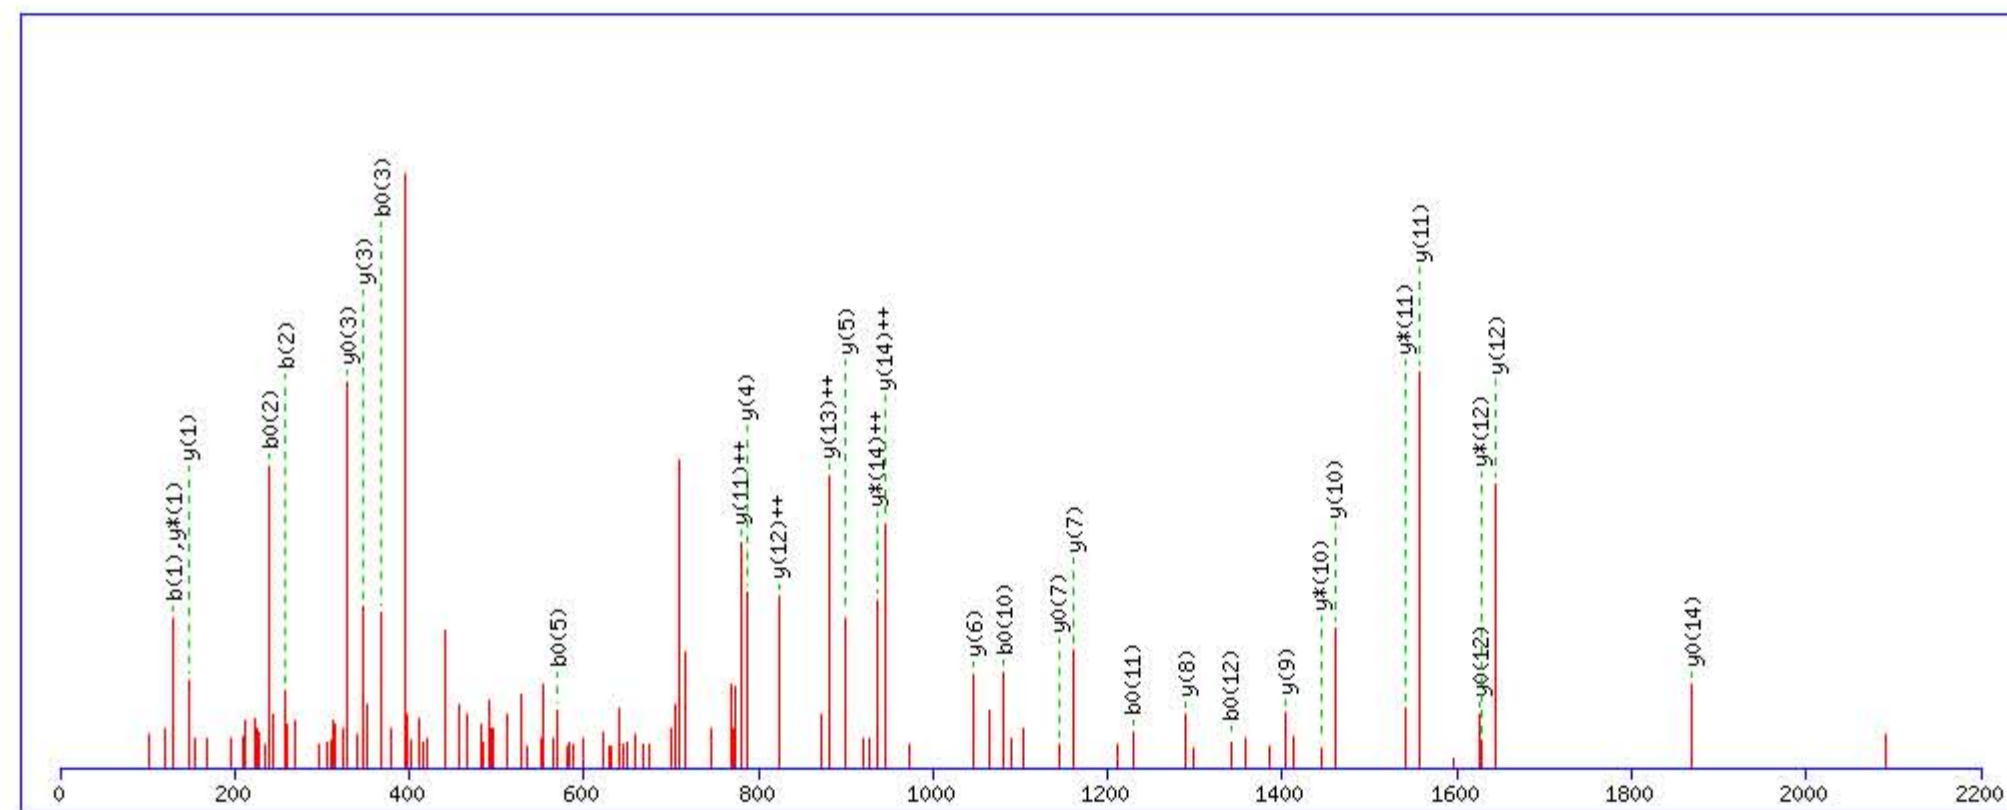

Monoisotopic mass of neutral peptide Mr(calc): 2144.057190

Fixed modifications: Carbamidomethyl (C) (apply to specified residues or termini only)

Variable modifications:

Q13 : Biotin:Thermo-21345 (Q)

Ions Score: 56 Expect: 6.6e-005

Matches : 32/174 fragment ions using 62 most intense peaks [\(help\)](#)

| #  | b           | b <sup>++</sup> | b <sup>+</sup> | b <sup>+++</sup> | b <sup>0</sup> | b <sup>0++</sup> | Seq. | y           | y <sup>++</sup> | y <sup>+</sup> | y <sup>+++</sup> | y <sup>0</sup> | y <sup>0++</sup> | #  |
|----|-------------|-----------------|----------------|------------------|----------------|------------------|------|-------------|-----------------|----------------|------------------|----------------|------------------|----|
| 1  | 130.049869  | 65.528572       |                |                  | 112.039304     | 56.523290        | E    |             |                 |                |                  |                |                  | 16 |
| 2  | 258.108447  | 129.557862      | 241.081898     | 121.044587       | 240.097882     | 120.552579       | Q    | 2016.021888 | 1008.514582     | 1998.995339    | 1000.001308      | 1998.011323    | 999.509300       | 15 |
| 3  | 386.167025  | 193.587151      | 369.140476     | 185.073876       | 368.156460     | 184.581868       | Q    | 1887.963310 | 944.485293      | 1870.936761    | 935.972019       | 1869.952745    | 935.480011       | 14 |
| 4  | 501.193968  | 251.100622      | 484.167419     | 242.587348       | 483.183403     | 242.095340       | D    | 1759.904732 | 880.456004      | 1742.878183    | 871.942730       | 1741.894167    | 871.450722       | 13 |
| 5  | 588.225996  | 294.616636      | 571.199447     | 286.103362       | 570.215431     | 285.611354       | S    | 1644.877789 | 822.942533      | 1627.851240    | 814.429258       | 1626.867224    | 813.937250       | 12 |
| 6  | 685.278760  | 343.143018      | 668.252211     | 334.629744       | 667.268195     | 334.137736       | P    | 1557.845761 | 779.426519      | 1540.819212    | 770.913244       | 1539.835196    | 770.421236       | 11 |
| 7  | 742.300224  | 371.653750      | 725.273675     | 363.140476       | 724.289659     | 362.648468       | G    | 1460.792997 | 730.900137      | 1443.766448    | 722.386862       | 1442.782432    | 721.894854       | 10 |
| 8  | 856.343151  | 428.675214      | 839.316602     | 420.161939       | 838.332586     | 419.669931       | N    | 1403.771533 | 702.389405      | 1386.744984    | 693.876130       | 1385.760968    | 693.384122       | 9  |
| 9  | 984.438114  | 492.722695      | 967.411565     | 484.209421       | 966.427549     | 483.717413       | K    | 1289.728606 | 645.367941      | 1272.702057    | 636.854667       | 1271.718041    | 636.362659       | 8  |
| 10 | 1099.465057 | 550.236167      | 1082.438508    | 541.722892       | 1081.454492    | 541.230884       | D    | 1161.633643 | 581.320460      | 1144.607094    | 572.807185       | 1143.623078    | 572.315177       | 7  |
| 11 | 1246.533471 | 623.770374      | 1229.506922    | 615.257099       | 1228.522906    | 614.765091       | F    | 1046.606700 | 523.806988      | 1029.580151    | 515.293714       | 1028.596135    | 514.801706       | 6  |
| 12 | 1359.617535 | 680.312406      | 1342.590986    | 671.799131       | 1341.606970    | 671.307123       | L    | 899.538286  | 450.272781      | 882.511737     | 441.759507       | 881.527721     | 441.267499       | 5  |
| 13 | 1798.842861 | 899.925069      | 1781.816312    | 891.411794       | 1780.832296    | 890.919786       | Q    | 786.454222  | 393.730749      | 769.427673     | 385.217475       | 768.443657     | 384.725467       | 4  |
| 14 | 1885.874889 | 943.441083      | 1868.848340    | 934.927808       | 1867.864324    | 934.435800       | S    | 347.228896  | 174.118086      | 330.202347     | 165.604812       | 329.218331     | 165.112804       | 3  |
| 15 | 1998.958953 | 999.983115      | 1981.932404    | 991.469840       | 1980.948388    | 990.977832       | L    | 260.196868  | 130.602072      | 243.170319     | 122.088798       |                |                  | 2  |
| 16 |             |                 |                |                  |                |                  | K    | 147.112804  | 74.060040       | 130.086255     | 65.546766        |                |                  | 1  |

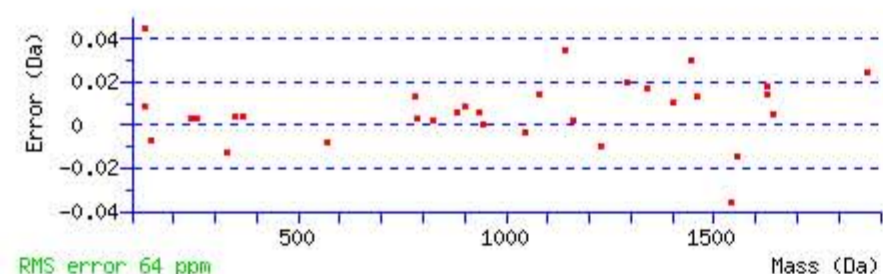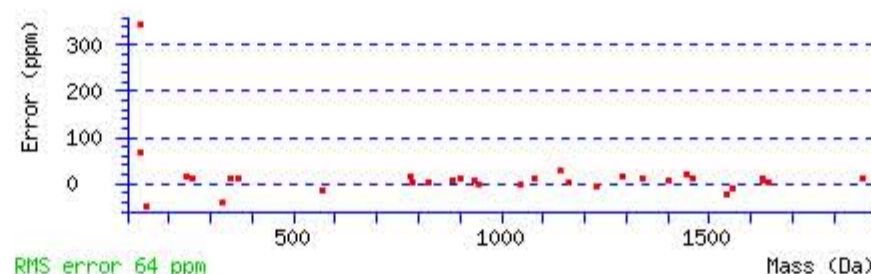

NCBI BLAST search of **EQQDSPGNKDFLQSLK**

(Parameters: blastp, nr protein database, expect=20000, no filter, PAM30)

Other BLAST [web gateways](#)

## All matches to this query

| Score | Mr(calc):   | Delta    | Sequence                         |
|-------|-------------|----------|----------------------------------|
| 55.8  | 2144.057190 | 0.003912 | <a href="#">EQQDSPGNKDFLQSLK</a> |

Mascot: <http://www.matrixscience.com/>

# Mascot Search Results

## Peptide View

MS/MS Fragmentation of **QLTSGPNQEQVSPLTLK**

Found in **A2AP\_HUMAN**, Alpha-2-antiplasmin OS=Homo sapiens GN=SERPINF2 PE=1 SV=3

Match to Query 47154: 2263.236792 from(755.419540,3+) rtinseconds(2530) index(7730)

Title: Locus:1.1.1.3433.10 File:"2013-07-02 CLN FXIII 60 min 3rd F 1.wiff"

Data file C:\Program Files (x86)\Matrix Science\Mascot Daemon\mgf6 FXIII 60 min 3rd\mascot\_daemon\_merge.mgf

Click mouse within plot area to zoom in by factor of two about that point

Or, Plot from  to  Da

Label all possible matches  Label matches used for scoring

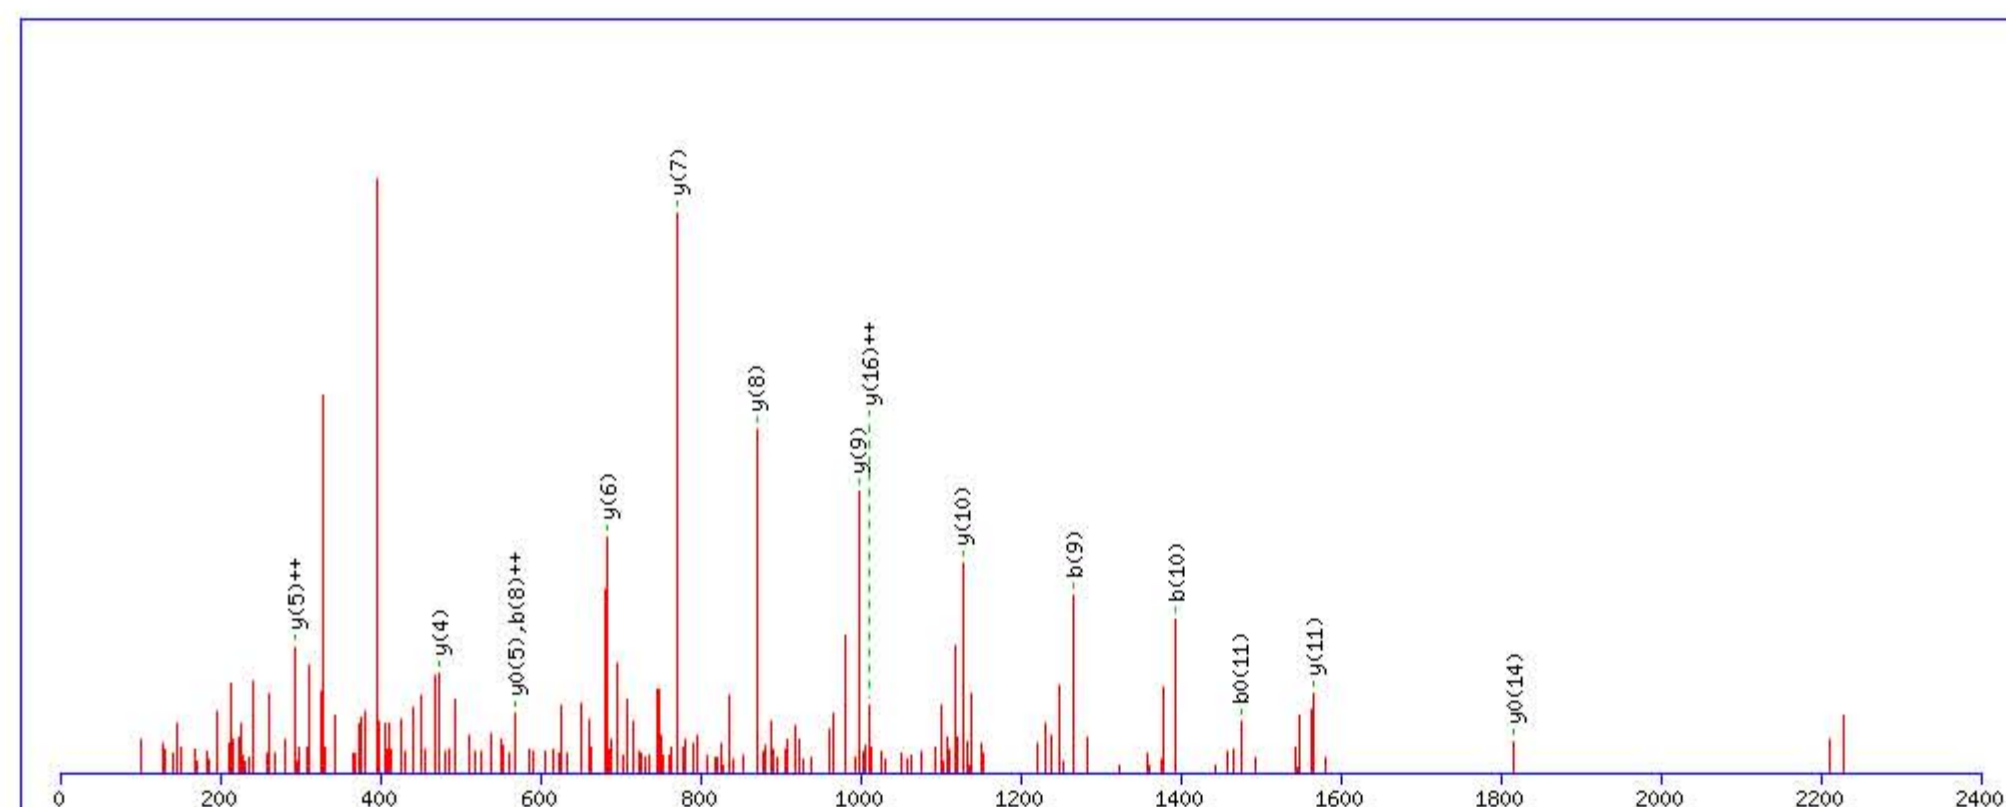

Monoisotopic mass of neutral peptide Mr(calc): 2263.224594

Fixed modifications: Carbamidomethyl (C) (apply to specified residues or termini only)

Variable modifications:

Q8 : Biotin:Thermo-21345 (Q)

Ions Score: 53 Expect: 9.2e-005

Matches : 15/194 fragment ions using 17 most intense peaks [\(help\)](#)

| #  | b           | b <sup>++</sup> | b <sup>*</sup> | b <sup>*++</sup> | b <sup>0</sup> | b <sup>0++</sup> | Seq. | y           | y <sup>++</sup> | y <sup>*</sup> | y <sup>*++</sup> | y <sup>0</sup> | y <sup>0++</sup> | #  |
|----|-------------|-----------------|----------------|------------------|----------------|------------------|------|-------------|-----------------|----------------|------------------|----------------|------------------|----|
| 1  | 129.065854  | 65.036565       | 112.039305     | 56.523291        |                |                  | Q    |             |                 |                |                  |                |                  | 18 |
| 2  | 242.149918  | 121.578597      | 225.123369     | 113.065323       |                |                  | L    | 2136.173304 | 1068.590290     | 2119.146755    | 1060.077015      | 2118.162739    | 1059.585007      | 17 |
| 3  | 343.197597  | 172.102437      | 326.171048     | 163.589162       | 325.187032     | 163.097154       | T    | 2023.089240 | 1012.048258     | 2006.062691    | 1003.534984      | 2005.078675    | 1003.042976      | 16 |
| 4  | 430.229625  | 215.618450      | 413.203076     | 207.105176       | 412.219060     | 206.613168       | S    | 1922.041561 | 961.524419      | 1905.015012    | 953.011144       | 1904.030996    | 952.519136       | 15 |
| 5  | 487.251089  | 244.129182      | 470.224540     | 235.615908       | 469.240524     | 235.123900       | G    | 1835.009533 | 918.008405      | 1817.982984    | 909.495130       | 1816.998968    | 909.003122       | 14 |
| 6  | 584.303853  | 292.655565      | 567.277304     | 284.142290       | 566.293288     | 283.650282       | P    | 1777.988069 | 889.497673      | 1760.961520    | 880.984398       | 1759.977504    | 880.492390       | 13 |
| 7  | 698.346780  | 349.677028      | 681.320231     | 341.163753       | 680.336215     | 340.671745       | N    | 1680.935305 | 840.971291      | 1663.908756    | 832.458016       | 1662.924740    | 831.966008       | 12 |
| 8  | 1137.572106 | 569.289691      | 1120.545557    | 560.776416       | 1119.561541    | 560.284408       | Q    | 1566.892378 | 783.949827      | 1549.865829    | 775.436553       | 1548.881813    | 774.944545       | 11 |
| 9  | 1266.614699 | 633.810988      | 1249.588150    | 625.297713       | 1248.604134    | 624.805705       | E    | 1127.667052 | 564.337164      | 1110.640503    | 555.823890       | 1109.656487    | 555.331882       | 10 |
| 10 | 1394.673277 | 697.840277      | 1377.646728    | 689.327002       | 1376.662712    | 688.834994       | Q    | 998.624459  | 499.815868      | 981.597910     | 491.302593       | 980.613894     | 490.810585       | 9  |
| 11 | 1493.741691 | 747.374484      | 1476.715142    | 738.861209       | 1475.731126    | 738.369201       | V    | 870.565881  | 435.786579      | 853.539332     | 427.273304       | 852.555316     | 426.781296       | 8  |
| 12 | 1580.773719 | 790.890498      | 1563.747170    | 782.377223       | 1562.763154    | 781.885215       | S    | 771.497467  | 386.252372      | 754.470918     | 377.739097       | 753.486902     | 377.247089       | 7  |
| 13 | 1677.826483 | 839.416880      | 1660.799934    | 830.903605       | 1659.815918    | 830.411597       | P    | 684.465439  | 342.736358      | 667.438890     | 334.223083       | 666.454874     | 333.731075       | 6  |
| 14 | 1790.910547 | 895.958912      | 1773.883998    | 887.445637       | 1772.899982    | 886.953629       | L    | 587.412675  | 294.209976      | 570.386126     | 285.696701       | 569.402110     | 285.204693       | 5  |
| 15 | 1891.958226 | 946.482751      | 1874.931677    | 937.969477       | 1873.947661    | 937.477469       | T    | 474.328611  | 237.667944      | 457.302062     | 229.154669       | 456.318046     | 228.662661       | 4  |
| 16 | 2005.042290 | 1003.024783     | 1988.015741    | 994.511509       | 1987.031725    | 994.019501       | L    | 373.280932  | 187.144104      | 356.254383     | 178.630830       |                |                  | 3  |
| 17 | 2118.126354 | 1059.566815     | 2101.099805    | 1051.053540      | 2100.115789    | 1050.561532      | L    | 260.196868  | 130.602072      | 243.170319     | 122.088798       |                |                  | 2  |
| 18 |             |                 |                |                  |                |                  | K    | 147.112804  | 74.060040       | 130.086255     | 65.546765        |                |                  | 1  |

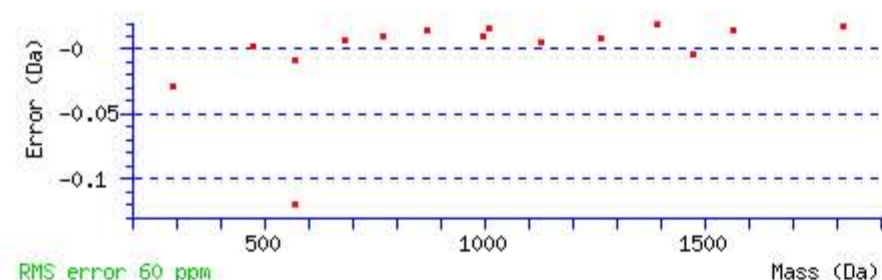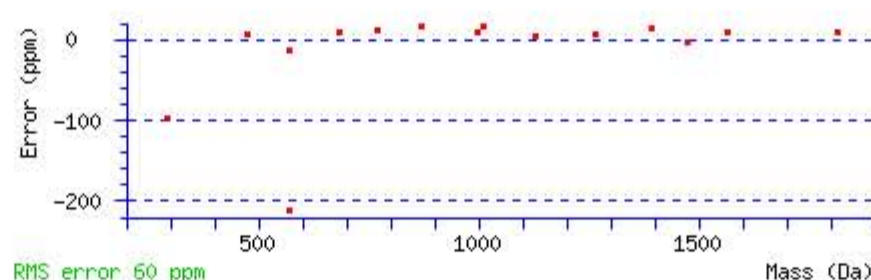

NCBI BLAST search of **QLTSGPNQEQVSPLTLK**

(Parameters: blastp, nr protein database, expect=20000, no filter, PAM30)

Other BLAST [web gateways](#)

All matches to this query

| Score | Mr(calc):   | Delta    | Sequence                             |
|-------|-------------|----------|--------------------------------------|
| 52.6  | 2263.224594 | 0.012198 | <a href="#">QLTSGPNQEQVSPLTLK</a>    |
| 31.4  | 2263.224594 | 0.012198 | <a href="#">QLTSGPNQEQVSPLTLK</a>    |
| 22.2  | 2263.224594 | 0.012198 | <a href="#">QLTSGPNQEQVSPLTLK</a>    |
| 10.7  | 2263.224594 | 0.012198 | <a href="#">GLALSSNKVKSVMVVFENEK</a> |

# Mascot Search Results

## Peptide View

MS/MS Fragmentation of **LQQVLHAGSGPCLPHLLSR**

Found in **A2AP\_HUMAN**, Alpha-2-antiplasmin OS=Homo sapiens GN=SERPINF2 PE=1 SV=3

Match to Query 48962: 2393.286016 from(599.328780,4+) rtinseconds(2140) index(5722)

Title: Locus:1.1.1.3297.15 File:"2013-07-02 CLN FXIII 60 min 3rd F 1.wiff"

Data file C:\Program Files (x86)\Matrix Science\Mascot Daemon\mgf6 FXIII 60 min 3rd\mascot\_daemon\_merge.mgf

Click mouse within plot area to zoom in by factor of two about that point

Or, Plot from  to  Da

Label all possible matches  Label matches used for scoring

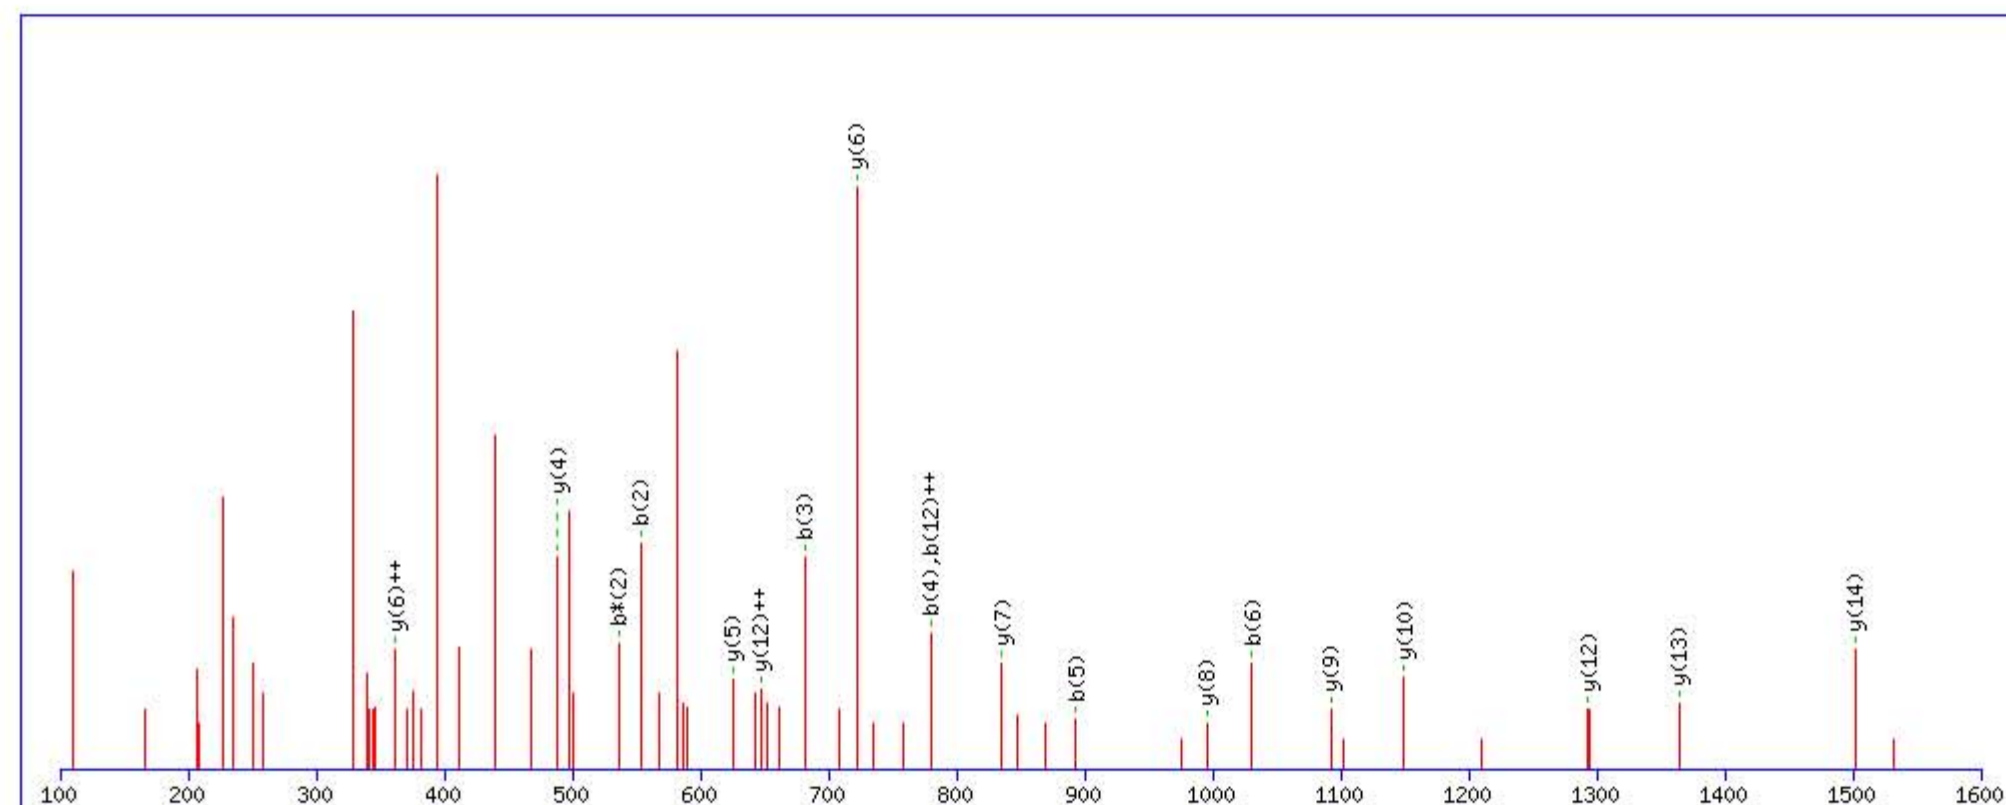

Monoisotopic mass of neutral peptide Mr(calc): 2393.282410

Fixed modifications: Carbamidomethyl (C) (apply to specified residues or termini only)

Variable modifications:

Q2 : Biotin:Thermo-21345 (Q)

Ions Score: 50 Expect: 0.00019

Matches : 19/196 fragment ions using 36 most intense peaks [\(help\)](#)

| #  | b                  | b <sup>++</sup>   | b <sup>*</sup>    | b <sup>*++</sup> | b <sup>0</sup> | b <sup>0++</sup> | Seq. | y                  | y <sup>++</sup>   | y <sup>*</sup> | y <sup>*++</sup> | y <sup>0</sup> | y <sup>0++</sup> | #  |
|----|--------------------|-------------------|-------------------|------------------|----------------|------------------|------|--------------------|-------------------|----------------|------------------|----------------|------------------|----|
| 1  | 114.091340         | 57.549308         |                   |                  |                |                  | L    |                    |                   |                |                  |                |                  | 19 |
| 2  | <b>553.316666</b>  | 277.161971        | <b>536.290117</b> | 268.648697       |                |                  | Q    | 2281.205625        | 1141.106450       | 2264.179076    | 1132.593176      | 2263.195060    | 1132.101168      | 18 |
| 3  | <b>681.375244</b>  | 341.191260        | 664.348695        | 332.677986       |                |                  | Q    | 1841.980299        | 921.493788        | 1824.953750    | 912.980513       | 1823.969734    | 912.488505       | 17 |
| 4  | <b>780.443658</b>  | 390.725467        | 763.417109        | 382.212193       |                |                  | V    | 1713.921721        | 857.464498        | 1696.895172    | 848.951224       | 1695.911156    | 848.459216       | 16 |
| 5  | <b>893.527722</b>  | 447.267499        | 876.501173        | 438.754225       |                |                  | L    | 1614.853307        | 807.930292        | 1597.826758    | 799.417017       | 1596.842742    | 798.925009       | 15 |
| 6  | <b>1030.586634</b> | 515.796955        | 1013.560085       | 507.283681       |                |                  | H    | <b>1501.769243</b> | 751.388260        | 1484.742694    | 742.874985       | 1483.758678    | 742.382977       | 14 |
| 7  | 1101.623748        | 551.315512        | 1084.597199       | 542.802238       |                |                  | A    | <b>1364.710331</b> | 682.858804        | 1347.683782    | 674.345529       | 1346.699766    | 673.853521       | 13 |
| 8  | 1158.645212        | 579.826244        | 1141.618663       | 571.312970       |                |                  | G    | <b>1293.673217</b> | <b>647.340247</b> | 1276.646668    | 638.826972       | 1275.662652    | 638.334964       | 12 |
| 9  | 1245.677240        | 623.342258        | 1228.650691       | 614.828984       | 1227.666675    | 614.336975       | S    | 1236.651753        | 618.829515        | 1219.625204    | 610.316240       | 1218.641188    | 609.824232       | 11 |
| 10 | 1302.698704        | 651.852990        | 1285.672155       | 643.339716       | 1284.688139    | 642.847707       | G    | <b>1149.619725</b> | 575.313501        | 1132.593176    | 566.800226       | 1131.609160    | 566.308218       | 10 |
| 11 | 1399.751468        | 700.379372        | 1382.724919       | 691.866098       | 1381.740903    | 691.374089       | P    | <b>1092.598261</b> | 546.802769        | 1075.571712    | 538.289494       | 1074.587696    | 537.797486       | 9  |
| 12 | 1559.782117        | <b>780.394697</b> | 1542.755568       | 771.881422       | 1541.771552    | 771.389414       | C    | <b>995.545497</b>  | 498.276387        | 978.518948     | 489.763112       | 977.534932     | 489.271104       | 8  |
| 13 | 1672.866181        | 836.936728        | 1655.839632       | 828.423454       | 1654.855616    | 827.931446       | L    | <b>835.514848</b>  | 418.261062        | 818.488299     | 409.747788       | 817.504283     | 409.255780       | 7  |
| 14 | 1769.918945        | 885.463110        | 1752.892396       | 876.949836       | 1751.908380    | 876.457828       | P    | <b>722.430784</b>  | <b>361.719030</b> | 705.404235     | 353.205756       | 704.420219     | 352.713748       | 6  |
| 15 | 1906.977857        | 953.992566        | 1889.951308       | 945.479292       | 1888.967292    | 944.987284       | H    | <b>625.378020</b>  | 313.192648        | 608.351471     | 304.679374       | 607.367455     | 304.187366       | 5  |
| 16 | 2020.061921        | 1010.534598       | 2003.035372       | 1002.021324      | 2002.051356    | 1001.529316      | L    | <b>488.319108</b>  | 244.663192        | 471.292559     | 236.149918       | 470.308543     | 235.657910       | 4  |
| 17 | 2133.145985        | 1067.076630       | 2116.119436       | 1058.563356      | 2115.135420    | 1058.071348      | L    | 375.235044         | 188.121160        | 358.208495     | 179.607886       | 357.224479     | 179.115878       | 3  |
| 18 | 2220.178013        | 1110.592644       | 2203.151464       | 1102.079370      | 2202.167448    | 1101.587362      | S    | 262.150980         | 131.579128        | 245.124431     | 123.065854       | 244.140415     | 122.573846       | 2  |
| 19 |                    |                   |                   |                  |                |                  | R    | 175.118952         | 88.063114         | 158.092403     | 79.549839        |                |                  | 1  |

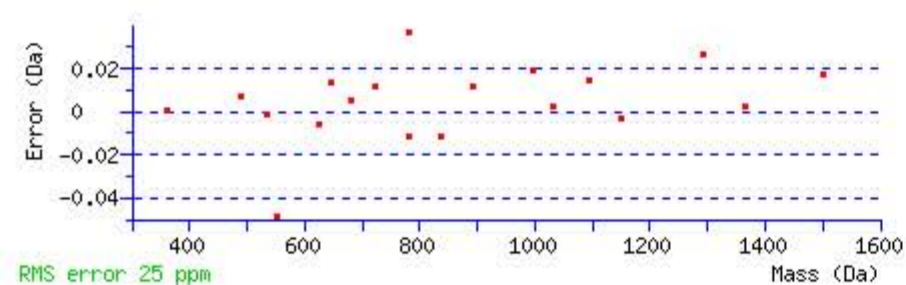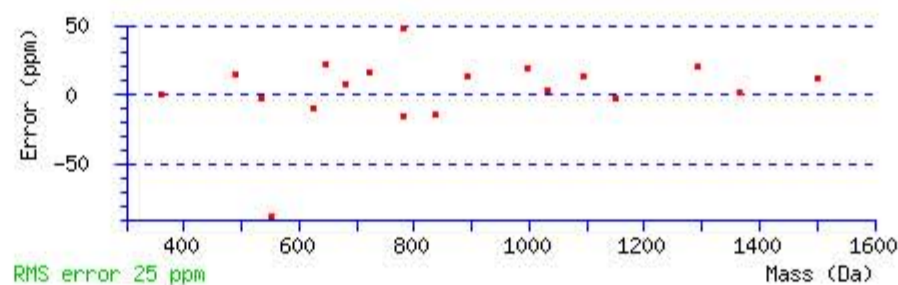

NCBI BLAST search of [LQQVLHAGSGPCLPHLLSR](#)

(Parameters: blastp, nr protein database, expect=20000, no filter, PAM30)

Other BLAST [web gateways](#)

All matches to this query

| Score | Mr(calc):   | Delta    | Sequence                            |
|-------|-------------|----------|-------------------------------------|
| 50.4  | 2393.282410 | 0.003606 | <a href="#">LQQVLHAGSGPCLPHLLSR</a> |
| 46.4  | 2393.282410 | 0.003606 | <a href="#">LQQVLHAGSGPCLPHLLSR</a> |

Mascot: <http://www.matrixscience.com/>

# Mascot Search Results

## Peptide View

MS/MS Fragmentation of **QLTSGPNQEQVSPLTLK**

Found in **A2AP\_HUMAN**, Alpha-2-antiplasmin OS=Homo sapiens GN=SERPINF2 PE=1 SV=3

Match to Query 51875: 2574.402012 from(859.141280,3+) rtinseconds(2717) index(8927)

Title: Locus:1.1.1.3497.23 File:"2013-07-02 CLN FXIII 60 min 3rd F 1.wiff"

Data file C:\Program Files (x86)\Matrix Science\Mascot Daemon\mgf\6 FXIII 60 min 3rd\mascot\_daemon\_merge.mgf

Click mouse within plot area to zoom in by factor of two about that point

Or, Plot from  to  Da

Label all possible matches  Label matches used for scoring

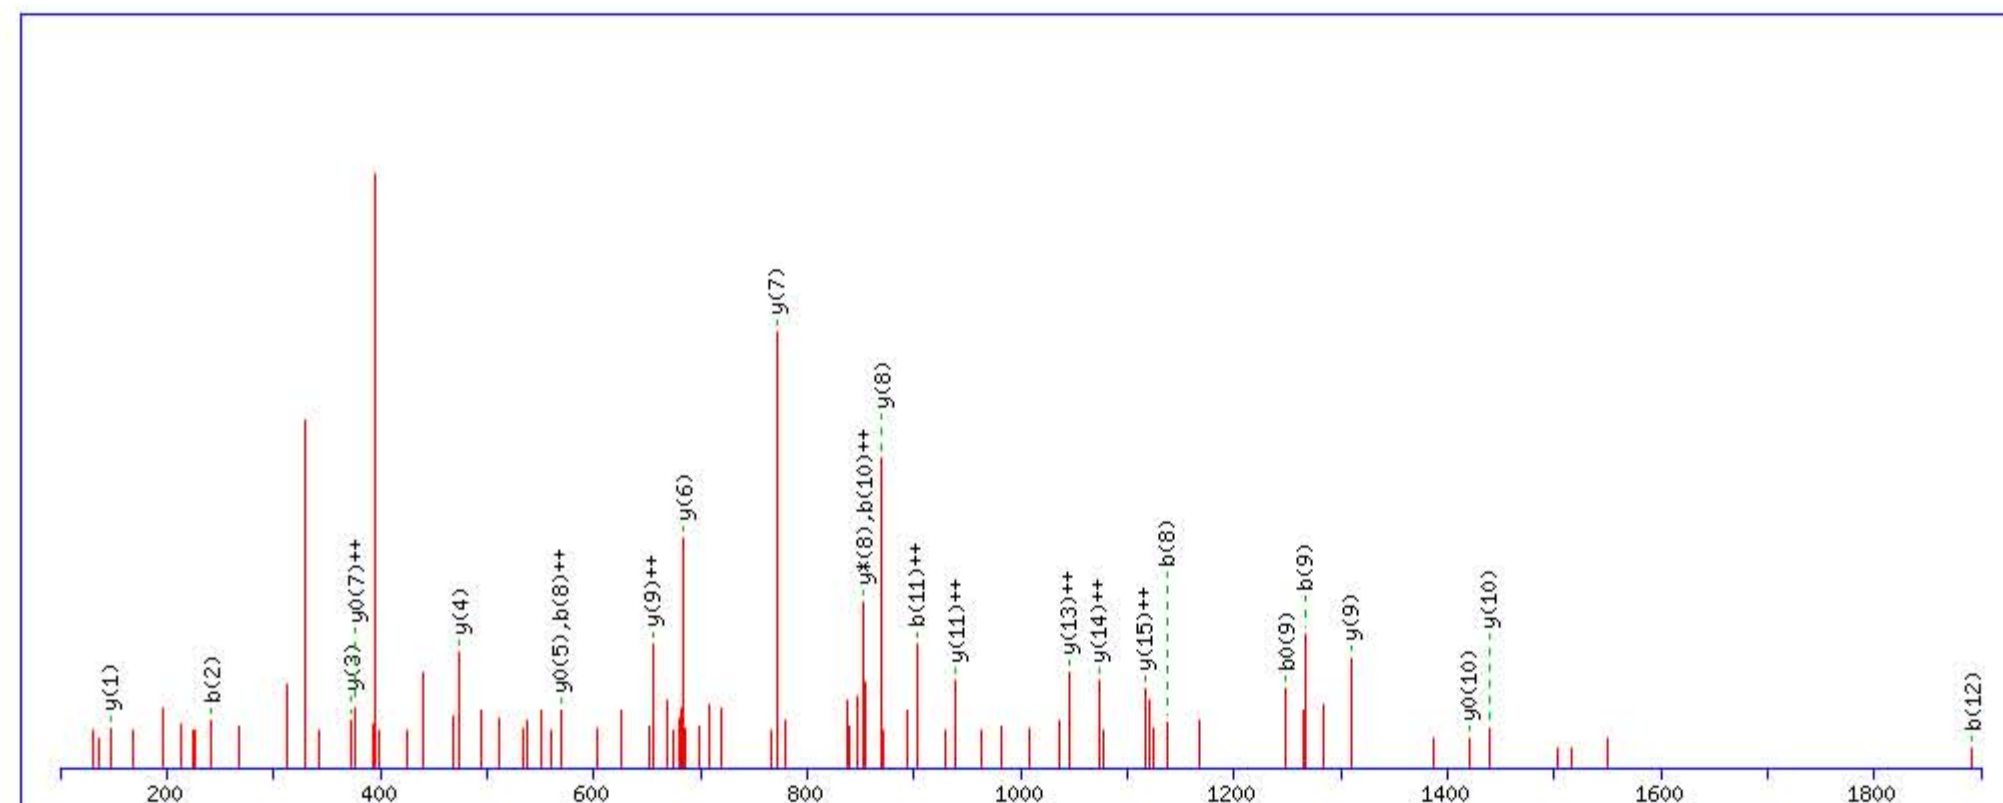

Monoisotopic mass of neutral peptide Mr(calc): 2574.391342

Fixed modifications: Carbamidomethyl (C) (apply to specified residues or termini only)

Variable modifications:

Q8 : Biotin:Thermo-21345 (Q)

Q10 : Biotin:Thermo-21345 (Q)

Ions Score: 40 Expect: 0.0014

Matches : 25/194 fragment ions using 42 most intense peaks [\(help\)](#)

| #  | b                  | b <sup>++</sup>   | b <sup>*</sup> | b <sup>+++</sup> | b <sup>0</sup>     | b <sup>0++</sup> | Seq. | y                  | y <sup>++</sup>    | y <sup>*</sup>    | y <sup>+++</sup> | y <sup>0</sup>     | y <sup>0++</sup>  | #  |
|----|--------------------|-------------------|----------------|------------------|--------------------|------------------|------|--------------------|--------------------|-------------------|------------------|--------------------|-------------------|----|
| 1  | 129.065854         | 65.036565         | 112.039305     | 56.523291        |                    |                  | Q    |                    |                    |                   |                  |                    |                   | 18 |
| 2  | <b>242.149918</b>  | 121.578597        | 225.123369     | 113.065323       |                    |                  | L    | 2447.340052        | 1224.173664        | 2430.313503       | 1215.660389      | 2429.329487        | 1215.168381       | 17 |
| 3  | 343.197597         | 172.102437        | 326.171048     | 163.589162       | 325.187032         | 163.097154       | T    | 2334.255988        | 1167.631632        | 2317.229439       | 1159.118357      | 2316.245423        | 1158.626349       | 16 |
| 4  | 430.229625         | 215.618450        | 413.203076     | 207.105176       | 412.219060         | 206.613168       | S    | 2233.208309        | <b>1117.107792</b> | 2216.181760       | 1108.594518      | 2215.197744        | 1108.102510       | 15 |
| 5  | 487.251089         | 244.129182        | 470.224540     | 235.615908       | 469.240524         | 235.123900       | G    | 2146.176281        | <b>1073.591778</b> | 2129.149732       | 1065.078504      | 2128.165716        | 1064.586496       | 14 |
| 6  | 584.303853         | 292.655565        | 567.277304     | 284.142290       | 566.293288         | 283.650282       | P    | 2089.154817        | <b>1045.081046</b> | 2072.128268       | 1036.567772      | 2071.144252        | 1036.075764       | 13 |
| 7  | 698.346780         | 349.677028        | 681.320231     | 341.163753       | 680.336215         | 340.671745       | N    | 1992.102053        | 996.554665         | 1975.075504       | 988.041390       | 1974.091488        | 987.549382        | 12 |
| 8  | <b>1137.572106</b> | <b>569.289691</b> | 1120.545557    | 560.776416       | 1119.561541        | 560.284408       | Q    | 1878.059126        | <b>939.533201</b>  | 1861.032577       | 931.019927       | 1860.048561        | 930.527919        | 11 |
| 9  | <b>1266.614699</b> | 633.810988        | 1249.588150    | 625.297713       | <b>1248.604134</b> | 624.805705       | E    | <b>1438.833800</b> | 719.920538         | 1421.807251       | 711.407264       | <b>1420.823235</b> | 710.915256        | 10 |
| 10 | 1705.840025        | <b>853.423651</b> | 1688.813476    | 844.910376       | 1687.829460        | 844.418368       | Q    | <b>1309.791207</b> | <b>655.399242</b>  | 1292.764658       | 646.885967       | 1291.780642        | 646.393959        | 9  |
| 11 | 1804.908439        | <b>902.957858</b> | 1787.881890    | 894.444583       | 1786.897874        | 893.952575       | V    | <b>870.565881</b>  | 435.786579         | <b>853.539332</b> | 427.273304       | 852.555316         | 426.781296        | 8  |
| 12 | <b>1891.940467</b> | 946.473872        | 1874.913918    | 937.960597       | 1873.929902        | 937.468589       | S    | <b>771.497467</b>  | 386.252372         | 754.470918        | 377.739097       | 753.486902         | <b>377.247089</b> | 7  |
| 13 | 1988.993231        | 995.000254        | 1971.966682    | 986.486979       | 1970.982666        | 985.994971       | P    | <b>684.465439</b>  | 342.736358         | 667.438890        | 334.223083       | 666.454874         | 333.731075        | 6  |
| 14 | 2102.077295        | 1051.542285       | 2085.050746    | 1043.029011      | 2084.066730        | 1042.537003      | L    | 587.412675         | 294.209976         | 570.386126        | 285.696701       | <b>569.402110</b>  | 285.204693        | 5  |
| 15 | 2203.124974        | 1102.066125       | 2186.098425    | 1093.552850      | 2185.114409        | 1093.060842      | T    | <b>474.328611</b>  | 237.667944         | 457.302062        | 229.154669       | 456.318046         | 228.662661        | 4  |
| 16 | 2316.209038        | 1158.608157       | 2299.182489    | 1150.094882      | 2298.198473        | 1149.602874      | L    | <b>373.280932</b>  | 187.144104         | 356.254383        | 178.630830       |                    |                   | 3  |
| 17 | 2429.293102        | 1215.150189       | 2412.266553    | 1206.636914      | 2411.282537        | 1206.144906      | L    | 260.196868         | 130.602072         | 243.170319        | 122.088798       |                    |                   | 2  |
| 18 |                    |                   |                |                  |                    |                  | K    | <b>147.112804</b>  | 74.060040          | 130.086255        | 65.546765        |                    |                   | 1  |

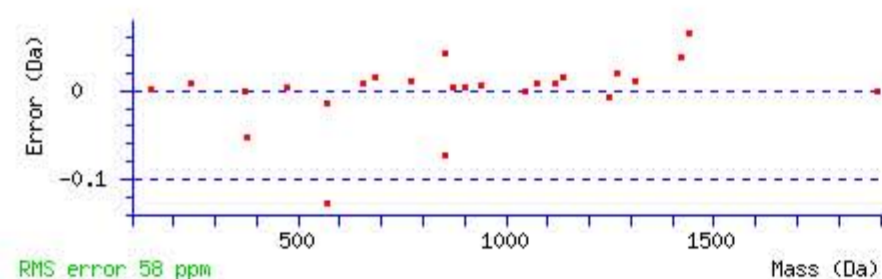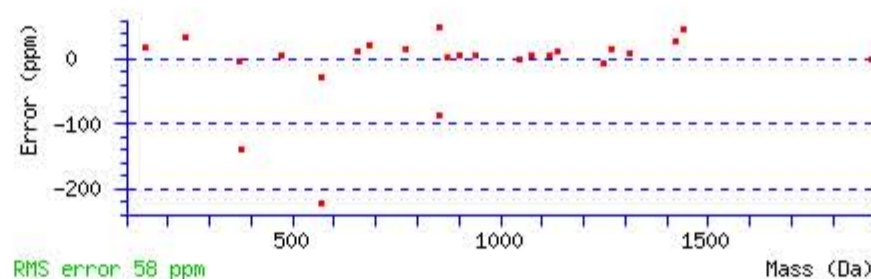

NCBI BLAST search of [QLTSGPNQEQVSPLTLK](#)

(Parameters: blastp, nr protein database, expect=20000, no filter, PAM30)

Other BLAST [web gateways](#)

All matches to this query

| Score | Mr(calc):   | Delta    | Sequence                          |
|-------|-------------|----------|-----------------------------------|
| 40.4  | 2574.391342 | 0.010670 | <a href="#">QLTSGPNQEQVSPLTLK</a> |
| 29.9  | 2574.391342 | 0.010670 | <a href="#">QLTSGPNQEQVSPLTLK</a> |
| 12.2  | 2574.391342 | 0.010670 | <a href="#">QLTSGPNQEQVSPLTLK</a> |

Mascot: <http://www.matrixscience.com/>



# MASCOT Search Results

## Peptide View

MS/MS Fragmentation of **QLTSGPNQEQVSPLTLK**

Found in **A2AP\_HUMAN**, Alpha-2-antiplasmin OS=Homo sapiens GN=SERPINF2 PE=1 SV=3

Match to Query 51877: 2574.406062 from(859.142630,3+) rtinseconds(2664) index(8478)

Title: Locus:1.1.1.3479.22 File:"2013-07-02 CLN FXIII 60 min 3rd F 1.wiff"

Data file C:\Program Files (x86)\Matrix Science\Mascot Daemon\mgf6 FXIII 60 min 3rd\mascot\_daemon\_merge.mgf

Click mouse within plot area to zoom in by factor of two about that point

Or, Plot from  to  Da

Label all possible matches  Label matches used for scoring

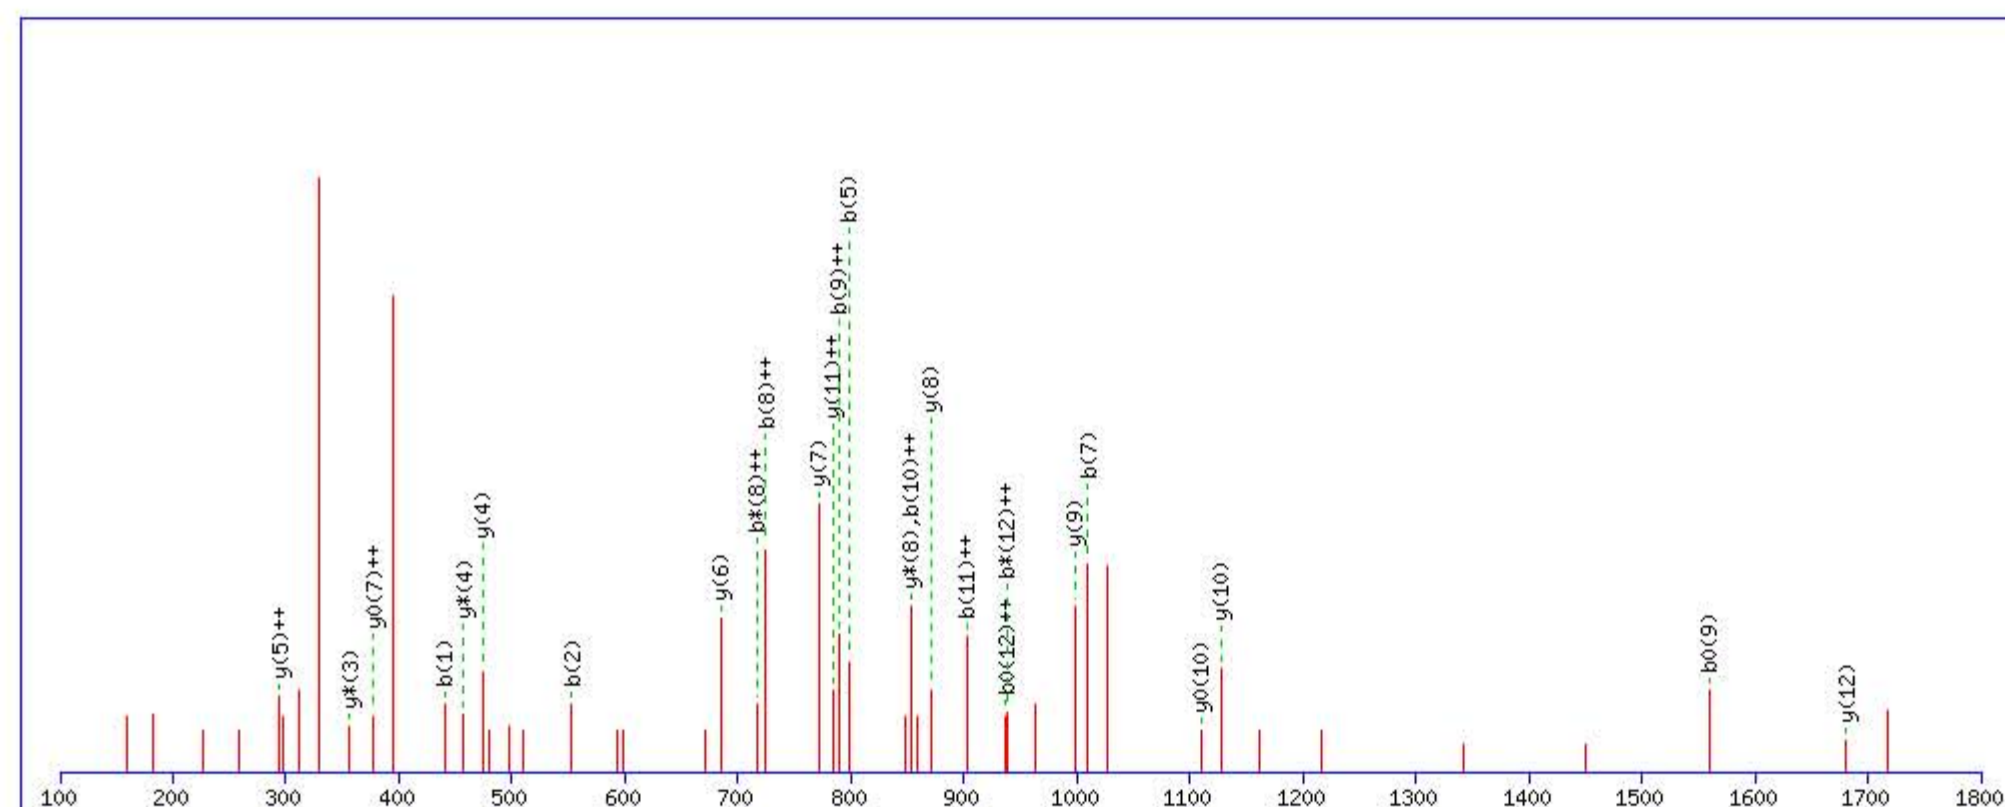

Monoisotopic mass of neutral peptide Mr(calc): 2574.391342

Fixed modifications: Carbamidomethyl (C) (apply to specified residues or termini only)

Variable modifications:

Q1 : Biotin:Thermo-21345 (Q)

Q8 : Biotin:Thermo-21345 (Q)

Ions Score: 32 Expect: 0.0092

Matches : 26/194 fragment ions using 47 most intense peaks [\(help\)](#)

| #  | b                  | b <sup>++</sup>   | b <sup>*</sup> | b <sup>*++</sup>  | b <sup>0</sup>     | b <sup>0++</sup>  | Seq. | y                  | y <sup>++</sup>   | y <sup>*</sup>    | y <sup>*++</sup> | y <sup>0</sup>     | y <sup>0++</sup>  | #  |
|----|--------------------|-------------------|----------------|-------------------|--------------------|-------------------|------|--------------------|-------------------|-------------------|------------------|--------------------|-------------------|----|
| 1  | <b>440.232602</b>  | 220.619939        | 423.206053     | 212.106664        |                    |                   | Q    |                    |                   |                   |                  |                    |                   | 18 |
| 2  | <b>553.316666</b>  | 277.161971        | 536.290117     | 268.648697        |                    |                   | L    | 2136.173304        | 1068.590290       | 2119.146755       | 1060.077015      | 2118.162739        | 1059.585007       | 17 |
| 3  | 654.364345         | 327.685811        | 637.337796     | 319.172536        | 636.353780         | 318.680528        | T    | 2023.089240        | 1012.048258       | 2006.062691       | 1003.534984      | 2005.078675        | 1003.042976       | 16 |
| 4  | 741.396373         | 371.201825        | 724.369824     | 362.688550        | 723.385808         | 362.196542        | S    | 1922.041561        | 961.524419        | 1905.015012       | 953.011144       | 1904.030996        | 952.519136        | 15 |
| 5  | <b>798.417837</b>  | 399.712557        | 781.391288     | 391.199282        | 780.407272         | 390.707274        | G    | 1835.009533        | 918.008405        | 1817.982984       | 909.495130       | 1816.998968        | 909.003122        | 14 |
| 6  | 895.470601         | 448.238939        | 878.444052     | 439.725664        | 877.460036         | 439.233656        | P    | 1777.988069        | 889.497673        | 1760.961520       | 880.984398       | 1759.977504        | 880.492390        | 13 |
| 7  | <b>1009.513528</b> | 505.260402        | 992.486979     | 496.747128        | 991.502963         | 496.255120        | N    | <b>1680.935305</b> | 840.971291        | 1663.908756       | 832.458016       | 1662.924740        | 831.966008        | 12 |
| 8  | 1448.738854        | <b>724.873065</b> | 1431.712305    | <b>716.359791</b> | 1430.728289        | 715.867782        | Q    | 1566.892378        | <b>783.949827</b> | 1549.865829       | 775.436553       | 1548.881813        | 774.944545        | 11 |
| 9  | 1577.781447        | <b>789.394362</b> | 1560.754898    | 780.881087        | <b>1559.770882</b> | 780.389079        | E    | <b>1127.667052</b> | 564.337164        | 1110.640503       | 555.823890       | <b>1109.656487</b> | 555.331882        | 10 |
| 10 | 1705.840025        | <b>853.423651</b> | 1688.813476    | 844.910376        | 1687.829460        | 844.418368        | Q    | <b>998.624459</b>  | 499.815868        | 981.597910        | 491.302593       | 980.613894         | 490.810585        | 9  |
| 11 | 1804.908439        | <b>902.957858</b> | 1787.881890    | 894.444583        | 1786.897874        | 893.952575        | V    | <b>870.565881</b>  | 435.786579        | <b>853.539332</b> | 427.273304       | 852.555316         | 426.781296        | 8  |
| 12 | 1891.940467        | 946.473872        | 1874.913918    | <b>937.960597</b> | 1873.929902        | <b>937.468589</b> | S    | <b>771.497467</b>  | 386.252372        | 754.470918        | 377.739097       | 753.486902         | <b>377.247089</b> | 7  |
| 13 | 1988.993231        | 995.000254        | 1971.966682    | 986.486979        | 1970.982666        | 985.994971        | P    | <b>684.465439</b>  | 342.736358        | 667.438890        | 334.223083       | 666.454874         | 333.731075        | 6  |
| 14 | 2102.077295        | 1051.542285       | 2085.050746    | 1043.029011       | 2084.066730        | 1042.537003       | L    | 587.412675         | <b>294.209976</b> | 570.386126        | 285.696701       | 569.402110         | 285.204693        | 5  |
| 15 | 2203.124974        | 1102.066125       | 2186.098425    | 1093.552850       | 2185.114409        | 1093.060842       | T    | <b>474.328611</b>  | 237.667944        | <b>457.302062</b> | 229.154669       | 456.318046         | 228.662661        | 4  |
| 16 | 2316.209038        | 1158.608157       | 2299.182489    | 1150.094882       | 2298.198473        | 1149.602874       | L    | 373.280932         | 187.144104        | <b>356.254383</b> | 178.630830       |                    |                   | 3  |
| 17 | 2429.293102        | 1215.150189       | 2412.266553    | 1206.636914       | 2411.282537        | 1206.144906       | L    | 260.196868         | 130.602072        | 243.170319        | 122.088798       |                    |                   | 2  |
| 18 |                    |                   |                |                   |                    |                   | K    | 147.112804         | 74.060040         | 130.086255        | 65.546765        |                    |                   | 1  |

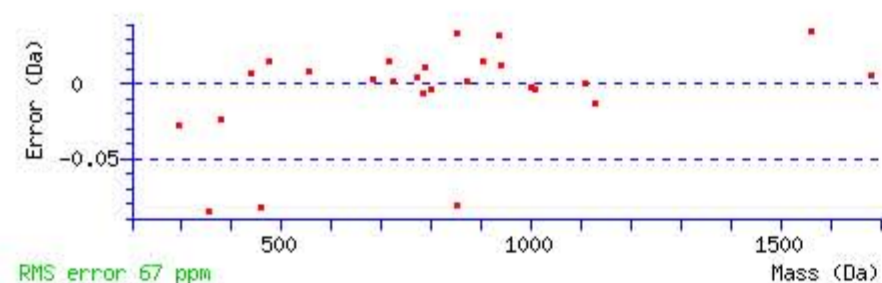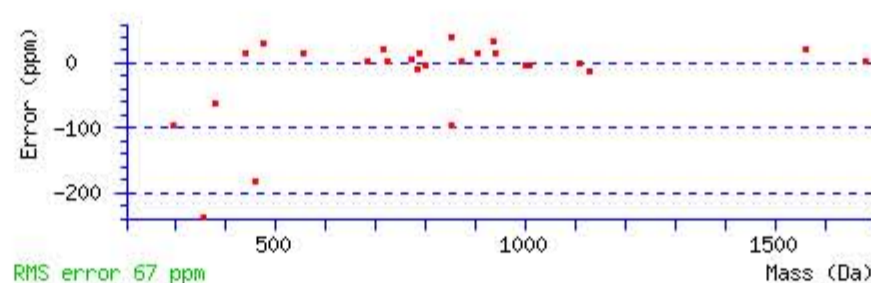

NCBI BLAST search of [QLTSGPNQEQVSPLTLK](#)

(Parameters: blastp, nr protein database, expect=20000, no filter, PAM30)

Other BLAST [web gateways](#)

## All matches to this query

| Score | Mr(calc):   | Delta    | Sequence                          |
|-------|-------------|----------|-----------------------------------|
| 31.8  | 2574.391342 | 0.014720 | <a href="#">QLTSGPNQEQVSPLTLK</a> |
| 14.6  | 2574.391342 | 0.014720 | <a href="#">QLTSGPNQEQVSPLTLK</a> |
| 0.9   | 2574.391342 | 0.014720 | <a href="#">QLTSGPNQEQVSPLTLK</a> |

# MASCOT Search Results

## Peptide View

MS/MS Fragmentation of **GFPIKEDFLEQSEQLFGAKPVSLTGK**  
 Found in **A2AP\_HUMAN**, Alpha-2-antiplasmin OS=Homo sapiens GN=SERPINF2 PE=1 SV=3

Match to Query 57440: 3175.681656 from(794.927690,4+) rtinseconds(2775) index(9342)  
 Title: Locus:1.1.1.3517.20 File:"2013-07-02 CLN FXIII 60 min 3rd F 1.wiff"  
 Data file C:\Program Files (x86)\Matrix Science\Mascot Daemon\mgf6 FXIII 60 min 3rd\mascot\_daemon\_merge.mgf

Click mouse within plot area to zoom in by factor of two about that point  
 Or, Plot from  to  Da   
 Label all possible matches  Label matches used for scoring

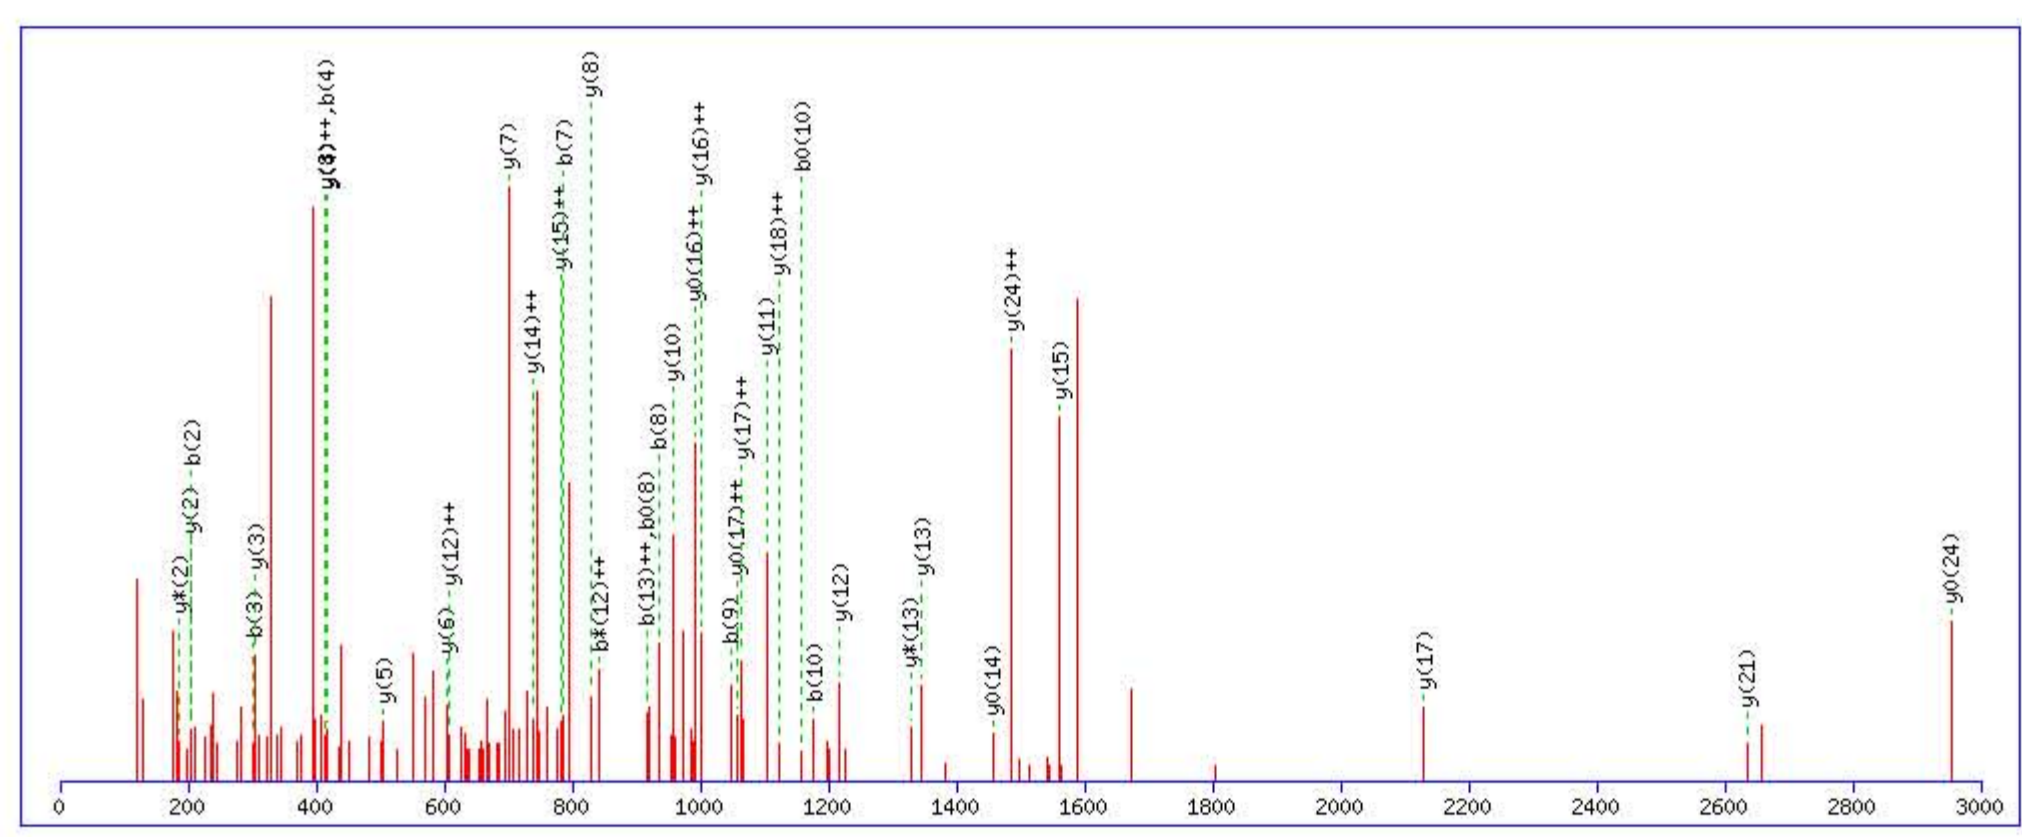

Monoisotopic mass of neutral peptide Mr(calc): 3175.662750  
 Fixed modifications: Carbamidomethyl (C) (apply to specified residues or termini only)  
 Variable modifications:  
 Q11 : Biotin:Thermo-21345 (Q)  
 Ions Score: 52 Expect: 0.00014  
 Matches : 39/278 fragment ions using 107 most intense peaks ([help](#))

| #  | b                  | b <sup>++</sup>   | b <sup>*</sup> | b <sup>+++</sup>  | b <sup>0</sup>     | b <sup>0++</sup> | Seq. | y                  | y <sup>++</sup>    | y <sup>*</sup>     | y <sup>+++</sup> | y <sup>0</sup>     | y <sup>0++</sup>   | #  |
|----|--------------------|-------------------|----------------|-------------------|--------------------|------------------|------|--------------------|--------------------|--------------------|------------------|--------------------|--------------------|----|
| 1  | 58.028740          | 29.518008         |                |                   |                    |                  | G    |                    |                    |                    |                  |                    |                    | 26 |
| 2  | <b>205.097154</b>  | 103.052215        |                |                   |                    |                  | F    | 3119.648573        | 1560.327924        | 3102.622024        | 1551.814650      | 3101.638008        | 1551.322642        | 25 |
| 3  | <b>302.149918</b>  | 151.578597        |                |                   |                    |                  | P    | 2972.580159        | <b>1486.793717</b> | 2955.553610        | 1478.280443      | <b>2954.569594</b> | 1477.788435        | 24 |
| 4  | <b>415.233982</b>  | 208.120629        |                |                   |                    |                  | I    | 2875.527395        | 1438.267335        | 2858.500846        | 1429.754061      | 2857.516830        | 1429.262053        | 23 |
| 5  | 543.328945         | 272.168111        | 526.302396     | 263.654836        |                    |                  | K    | 2762.443331        | 1381.725303        | 2745.416782        | 1373.212029      | 2744.432766        | 1372.720021        | 22 |
| 6  | 672.371538         | 336.689407        | 655.344989     | 328.176133        | 654.360973         | 327.684125       | E    | <b>2634.348368</b> | 1317.677822        | 2617.321819        | 1309.164547      | 2616.337803        | 1308.672539        | 21 |
| 7  | <b>787.398481</b>  | 394.202879        | 770.371932     | 385.689604        | 769.387916         | 385.197596       | D    | 2505.305775        | 1253.156525        | 2488.279226        | 1244.643251      | 2487.295210        | 1244.151243        | 20 |
| 8  | <b>934.466895</b>  | 467.737086        | 917.440346     | 459.223811        | <b>916.456330</b>  | 458.731803       | F    | 2390.278832        | 1195.643054        | 2373.252283        | 1187.129779      | 2372.268267        | 1186.637771        | 19 |
| 9  | <b>1047.550959</b> | 524.279117        | 1030.524410    | 515.765843        | 1029.540394        | 515.273835       | L    | 2243.210418        | <b>1122.108847</b> | 2226.183869        | 1113.595572      | 2225.199853        | 1113.103564        | 18 |
| 10 | <b>1176.593552</b> | 588.800414        | 1159.567003    | 580.287140        | <b>1158.582987</b> | 579.795132       | E    | <b>2130.126354</b> | <b>1065.566815</b> | 2113.099805        | 1057.053540      | 2112.115789        | <b>1056.561532</b> | 17 |
| 11 | 1615.818878        | 808.413077        | 1598.792329    | 799.899803        | 1597.808313        | 799.407795       | Q    | 2001.083761        | <b>1001.045519</b> | 1984.057212        | 992.532244       | 1983.073196        | <b>992.040236</b>  | 16 |
| 12 | 1702.850906        | 851.929091        | 1685.824357    | <b>843.415817</b> | 1684.840341        | 842.923809       | S    | <b>1561.858435</b> | <b>781.432856</b>  | 1544.831886        | 772.919581       | 1543.847870        | 772.427573         | 15 |
| 13 | 1831.893499        | <b>916.450388</b> | 1814.866950    | 907.937113        | 1813.882934        | 907.445105       | E    | 1474.826407        | <b>737.916842</b>  | 1457.799858        | 729.403567       | <b>1456.815842</b> | 728.911559         | 14 |
| 14 | 1959.952077        | 980.479677        | 1942.925528    | 971.966402        | 1941.941512        | 971.474394       | Q    | <b>1345.783814</b> | 673.395545         | <b>1328.757265</b> | 664.882271       | 1327.773249        | 664.390263         | 13 |
| 15 | 2073.036141        | 1037.021709       | 2056.009592    | 1028.508434       | 2055.025576        | 1028.016426      | L    | <b>1217.725236</b> | <b>609.366256</b>  | 1200.698687        | 600.852982       | 1199.714671        | 600.360974         | 12 |
| 16 | 2220.104555        | 1110.555916       | 2203.078006    | 1102.042641       | 2202.093990        | 1101.550633      | F    | <b>1104.641172</b> | 552.824224         | 1087.614623        | 544.310949       | 1086.630607        | 543.818941         | 11 |
| 17 | 2277.126019        | 1139.066648       | 2260.099470    | 1130.553373       | 2259.115454        | 1130.061365      | G    | <b>957.572758</b>  | 479.290017         | 940.546209         | 470.776743       | 939.562193         | 470.284735         | 10 |
| 18 | 2348.163133        | 1174.585205       | 2331.136584    | 1166.071930       | 2330.152568        | 1165.579922      | A    | 900.551294         | 450.779285         | 883.524745         | 442.266011       | 882.540729         | 441.774003         | 9  |
| 19 | 2476.258096        | 1238.632686       | 2459.231547    | 1230.119412       | 2458.247531        | 1229.627404      | K    | <b>829.514180</b>  | <b>415.260728</b>  | 812.487631         | 406.747453       | 811.503615         | 406.255445         | 8  |
| 20 | 2573.310860        | 1287.159068       | 2556.284311    | 1278.645794       | 2555.300295        | 1278.153786      | P    | <b>701.419217</b>  | 351.213246         | 684.392668         | 342.699972       | 683.408652         | 342.207964         | 7  |
| 21 | 2672.379274        | 1336.693275       | 2655.352725    | 1328.180001       | 2654.368709        | 1327.687993      | V    | <b>604.366453</b>  | 302.686864         | 587.339904         | 294.173590       | 586.355888         | 293.681582         | 6  |
| 22 | 2759.411302        | 1380.209289       | 2742.384753    | 1371.696015       | 2741.400737        | 1371.204007      | S    | <b>505.298039</b>  | 253.152657         | 488.271490         | 244.639383       | 487.287474         | 244.147375         | 5  |
| 23 | 2872.495366        | 1436.751321       | 2855.468817    | 1428.238047       | 2854.484801        | 1427.746039      | L    | <b>418.266011</b>  | 209.636643         | 401.239462         | 201.123369       | 400.255446         | 200.631361         | 4  |
| 24 | 2973.543045        | 1487.275161       | 2956.516496    | 1478.761886       | 2955.532480        | 1478.269878      | T    | <b>305.181947</b>  | 153.094611         | 288.155398         | 144.581337       | 287.171382         | 144.089329         | 3  |
| 25 | 3030.564509        | 1515.785893       | 3013.537960    | 1507.272618       | 3012.553944        | 1506.780610      | G    | <b>204.134268</b>  | 102.570772         | <b>187.107719</b>  | 94.057497        |                    |                    | 2  |
| 26 |                    |                   |                |                   |                    |                  | K    | 147.112804         | 74.060040          | 130.086255         | 65.546765        |                    |                    | 1  |

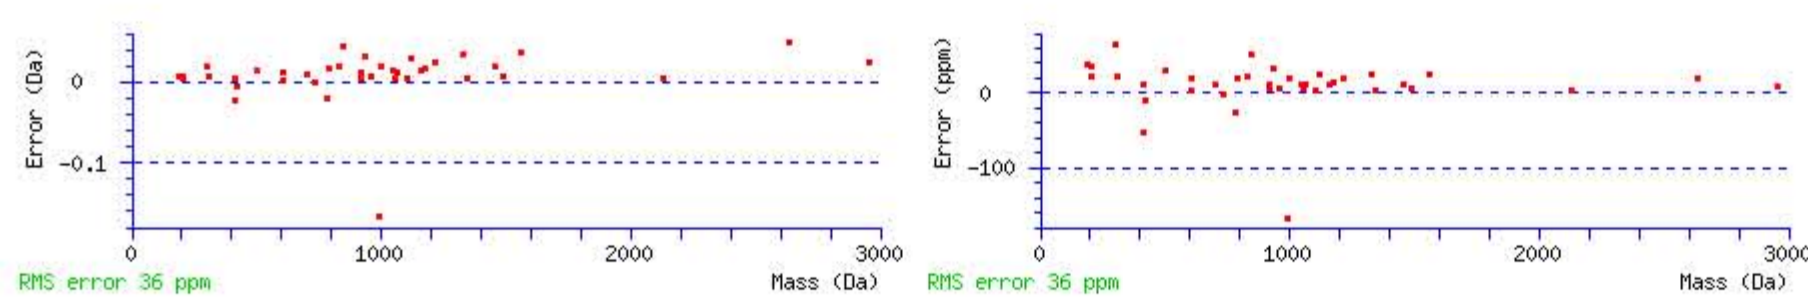

NCBI BLAST search of **GFPIKEDFLEQSEQLFGAKPVSLTGK**  
 (Parameters: blastp, nr protein database, expect=20000, no filter, PAM30)  
 Other BLAST [web gateways](#)

### All matches to this query

| Score | Mr(calc):   | Delta    | Sequence                                   |
|-------|-------------|----------|--------------------------------------------|
| 51.6  | 3175.662750 | 0.018906 | <a href="#">GFPIKEDFLEQSEQLFGAKPVSLTGK</a> |
| 34.3  | 3175.662750 | 0.018906 | <a href="#">GFPIKEDFLEQSEQLFGAKPVSLTGK</a> |

# MASCOT SCIENCE Mascot Search Results

## Peptide View

MS/MS Fragmentation of **EHAVEGDCDFQLLK**

Found in **FETUA\_HUMAN**, Alpha-2-HS-glycoprotein OS=Homo sapiens GN=AHSG PE=1 SV=1

Match to Query 41549: 1970.921592 from(657.981140,3+) rtinseconds(2103) index(5485)

Title: Locus:1.1.1.3284.22 File:"2013-07-02 CLN FXIII 60 min 3rd F 1.wiff"

Data file C:\Program Files (x86)\Matrix Science\Mascot Daemon\mgf6 FXIII 60 min 3rd\mascot\_daemon\_merge.mgf

Click mouse within plot area to zoom in by factor of two about that point

Or, Plot from  to  Da

Label all possible matches  Label matches used for scoring

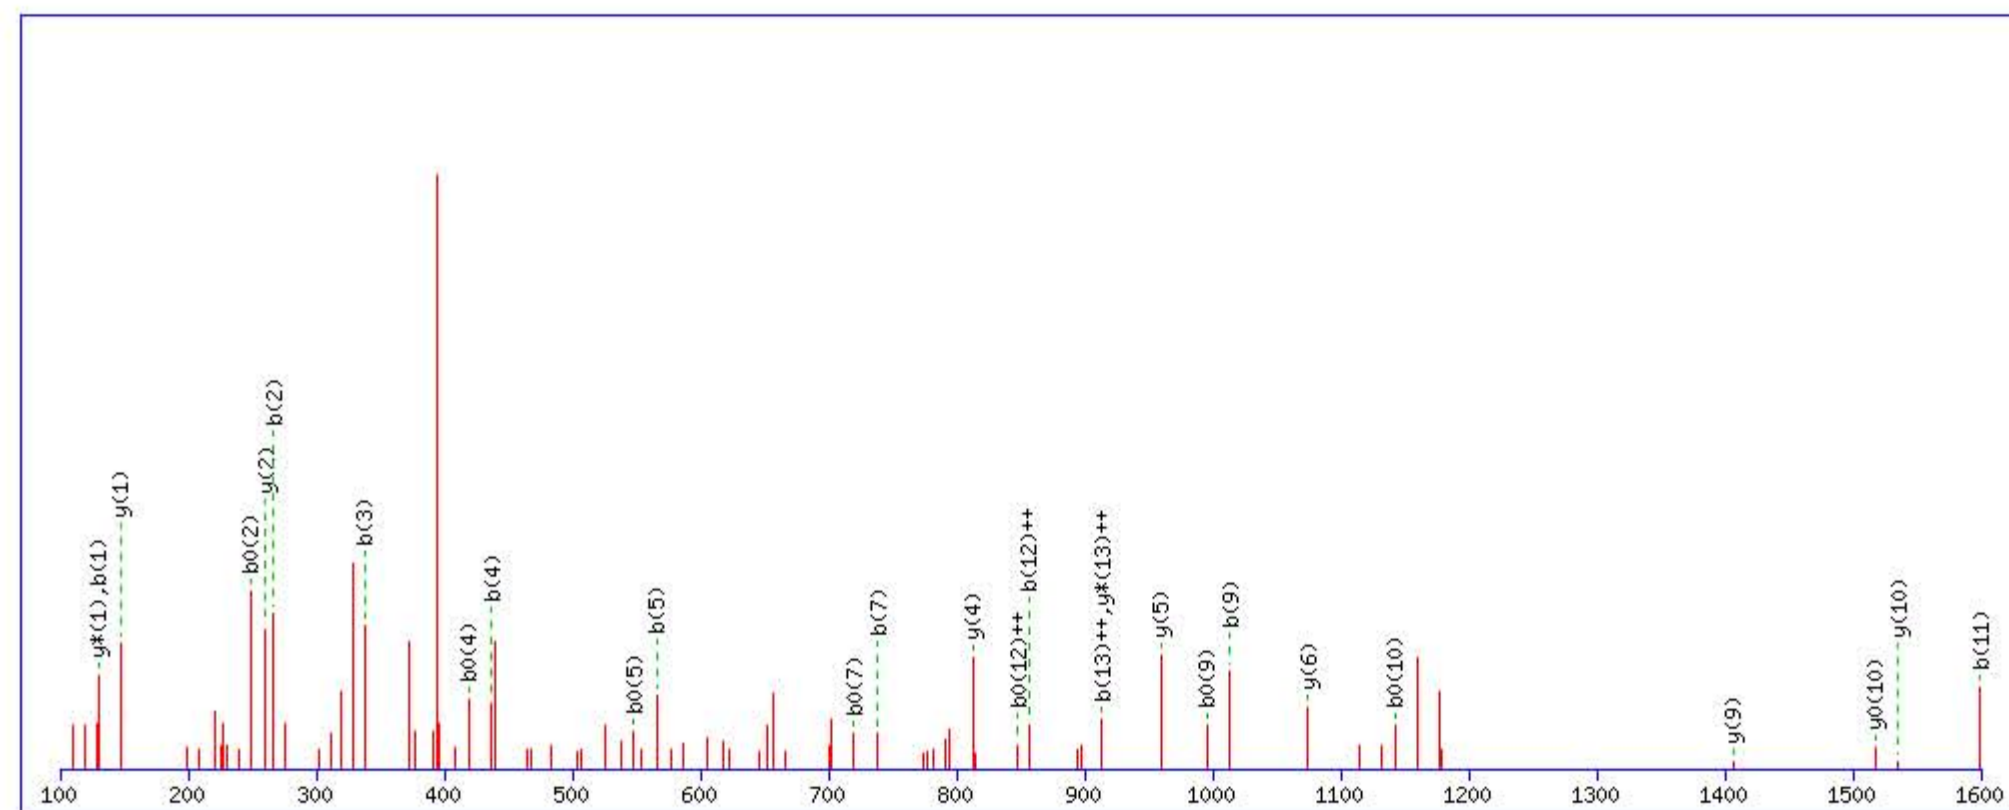

Monoisotopic mass of neutral peptide Mr(calc): 1970.923019

Fixed modifications: Carbamidomethyl (C) (apply to specified residues or termini only)

Variable modifications:

Q11 : Biotin:Thermo-21345 (Q)

Ions Score: 63 Expect: 2.7e-006

Matches : 27/126 fragment ions using 36 most intense peaks [\(help\)](#)

| #  | b                  | b <sup>++</sup>   | b <sup>*</sup> | b <sup>*++</sup> | b <sup>0</sup>     | b <sup>0++</sup>  | Seq. | y                  | y <sup>++</sup> | y <sup>*</sup>    | y <sup>*++</sup>  | y <sup>0</sup>     | y <sup>0++</sup> | #  |
|----|--------------------|-------------------|----------------|------------------|--------------------|-------------------|------|--------------------|-----------------|-------------------|-------------------|--------------------|------------------|----|
| 1  | <b>130.049869</b>  | 65.528572         |                |                  | 112.039304         | 56.523290         | E    |                    |                 |                   |                   |                    |                  | 14 |
| 2  | <b>267.108781</b>  | 134.058028        |                |                  | <b>249.098216</b>  | 125.052746        | H    | 1842.887704        | 921.947490      | 1825.861155       | <b>913.434216</b> | 1824.877139        | 912.942207       | 13 |
| 3  | <b>338.145895</b>  | 169.576585        |                |                  | 320.135330         | 160.571303        | A    | 1705.828792        | 853.418034      | 1688.802243       | 844.904760        | 1687.818227        | 844.412752       | 12 |
| 4  | <b>437.214309</b>  | 219.110792        |                |                  | <b>419.203744</b>  | 210.105510        | V    | 1634.791678        | 817.899477      | 1617.765129       | 809.386203        | 1616.781113        | 808.894195       | 11 |
| 5  | <b>566.256902</b>  | 283.632089        |                |                  | <b>548.246337</b>  | 274.626807        | E    | <b>1535.723264</b> | 768.365270      | 1518.696715       | 759.851996        | <b>1517.712699</b> | 759.359988       | 10 |
| 6  | 623.278366         | 312.142821        |                |                  | 605.267801         | 303.137539        | G    | <b>1406.680671</b> | 703.843974      | 1389.654122       | 695.330699        | 1388.670106        | 694.838691       | 9  |
| 7  | <b>738.305309</b>  | 369.656293        |                |                  | <b>720.294744</b>  | 360.651010        | D    | 1349.659207        | 675.333241      | 1332.632658       | 666.819967        | 1331.648642        | 666.327959       | 8  |
| 8  | 898.335958         | 449.671617        |                |                  | 880.325393         | 440.666335        | C    | 1234.632264        | 617.819770      | 1217.605715       | 609.306496        | 1216.621699        | 608.814488       | 7  |
| 9  | <b>1013.362901</b> | 507.185089        |                |                  | <b>995.352336</b>  | 498.179806        | D    | <b>1074.601615</b> | 537.804446      | 1057.575066       | 529.291171        | 1056.591050        | 528.799163       | 6  |
| 10 | 1160.431315        | 580.719296        |                |                  | <b>1142.420750</b> | 571.714013        | F    | <b>959.574672</b>  | 480.290974      | 942.548123        | 471.777700        |                    |                  | 5  |
| 11 | <b>1599.656641</b> | 800.331959        | 1582.630092    | 791.818684       | 1581.646076        | 791.326676        | Q    | <b>812.506258</b>  | 406.756767      | 795.479709        | 398.243493        |                    |                  | 4  |
| 12 | 1712.740705        | <b>856.873991</b> | 1695.714156    | 848.360716       | 1694.730140        | <b>847.868708</b> | L    | 373.280932         | 187.144104      | 356.254383        | 178.630829        |                    |                  | 3  |
| 13 | 1825.824769        | <b>913.416023</b> | 1808.798220    | 904.902748       | 1807.814204        | 904.410740        | L    | <b>260.196868</b>  | 130.602072      | 243.170319        | 122.088797        |                    |                  | 2  |
| 14 |                    |                   |                |                  |                    |                   | K    | <b>147.112804</b>  | 74.060040       | <b>130.086255</b> | 65.546765         |                    |                  | 1  |

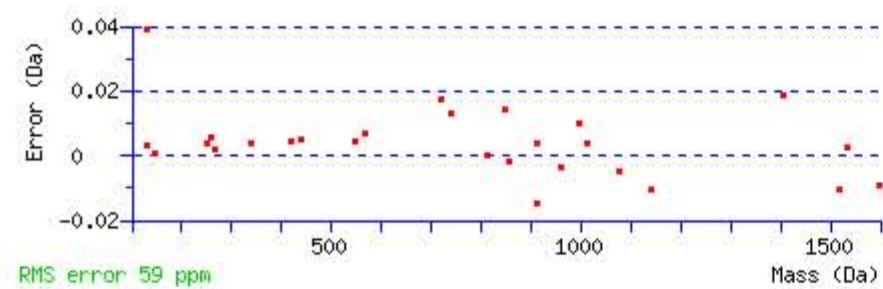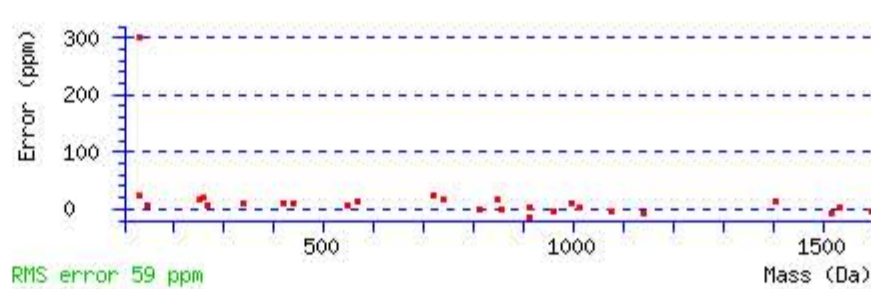

NCBI BLAST search of **EHAVEGDCDFQLLK**

(Parameters: blastp, nr protein database, expect=20000, no filter, PAM30)

Other BLAST [web gateways](#)

All matches to this query

| Score | Mr(calc):   | Delta     | Sequence                        |
|-------|-------------|-----------|---------------------------------|
| 63.5  | 1970.923019 | -0.001427 | <a href="#">EHAVEGDCDFQLLK</a>  |
| 4.1   | 1970.905258 | 0.016334  | <a href="#">LDFNMTNHSFMCLIK</a> |

Mascot: <http://www.matrixscience.com/>

# MASCOT Search Results

## Peptide View

MS/MS Fragmentation of **VTAAPQSVCALR**

Found in **A2MG\_HUMAN**, Alpha-2-macroglobulin OS=Homo sapiens GN=A2M PE=1 SV=3

Match to Query 32362: 1582.843188 from(792.428870,2+) rtinseconds(1850) index(32147)

Title: Locus:1.1.1.3193.14 File:"2013-07-02 CLN FXIII 60 min 3rd F 3.wiff"

Data file C:\Program Files (x86)\Matrix Science\Mascot Daemon\mgf6 FXIII 60 min 3rd\mascot\_daemon\_merge.mgf

Click mouse within plot area to zoom in by factor of two about that point

Or, Plot from  to  Da

Label all possible matches  Label matches used for scoring

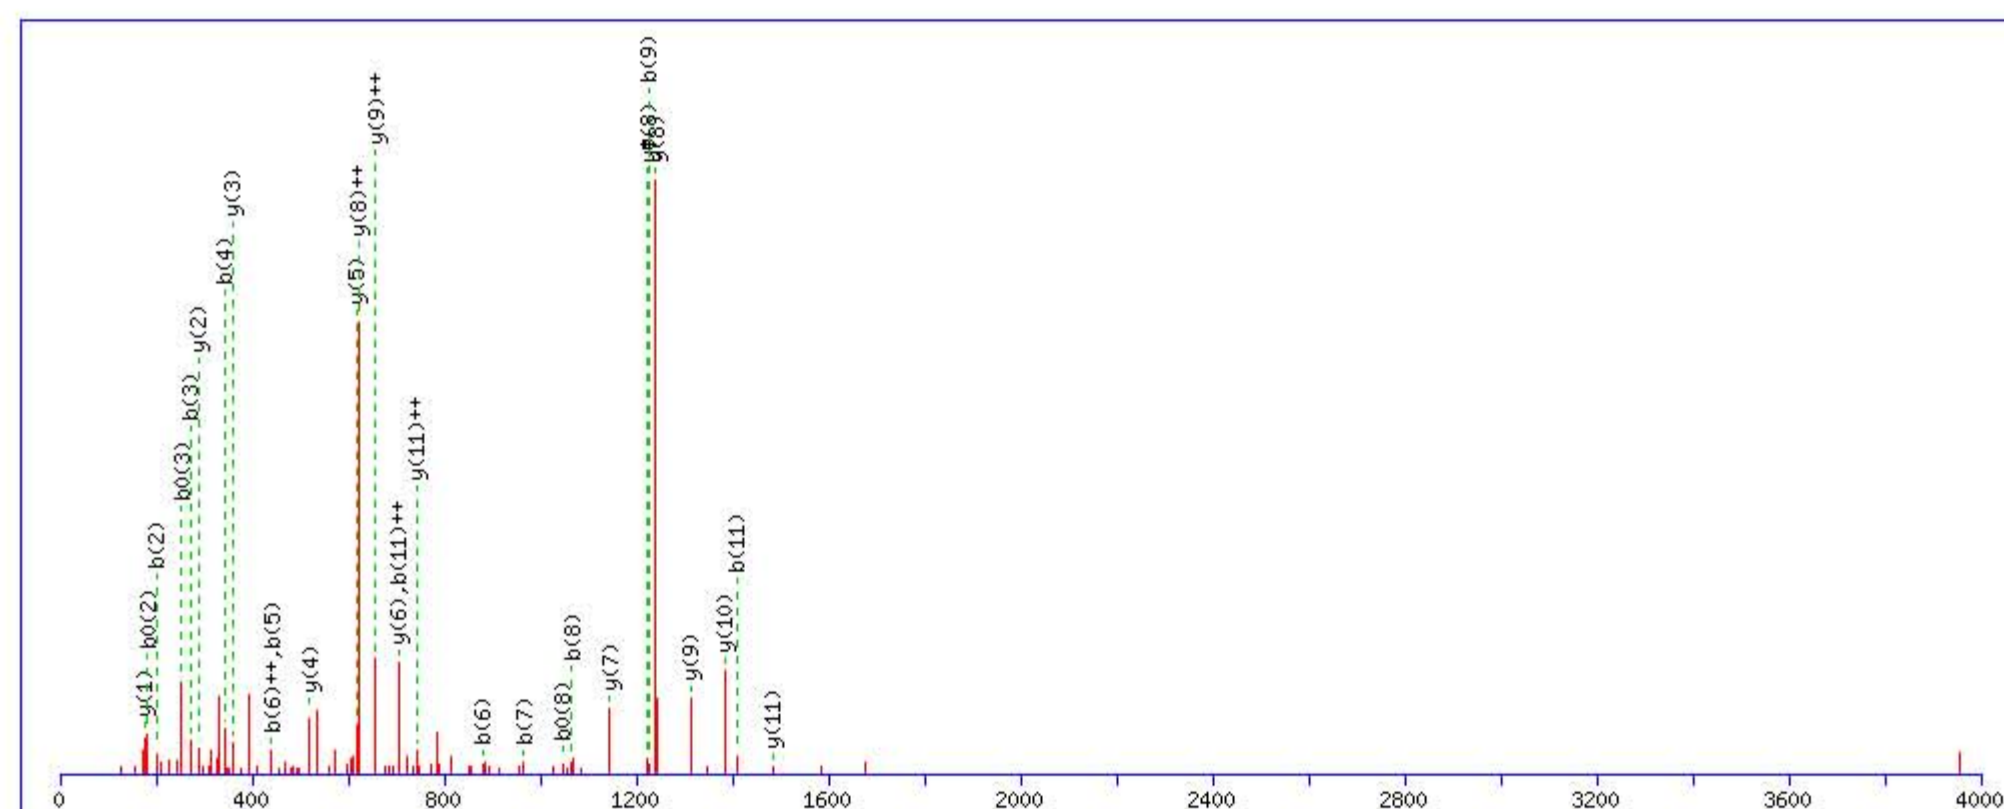

Monoisotopic mass of neutral peptide Mr(calc): 1582.832352

Fixed modifications: Carbamidomethyl (C) (apply to specified residues or termini only)

Variable modifications:

Q6 : Biotin:Thermo-21345 (Q)

Ions Score: 77 Expect: 5.5e-007

Matches : 30/110 fragment ions using 50 most intense peaks [\(help\)](#)

| #  | b                  | b <sup>++</sup>   | b <sup>*</sup> | b <sup>+++</sup> | b <sup>0</sup>     | b <sup>0++</sup> | Seq. | y                  | y <sup>++</sup>   | y <sup>*</sup>     | y <sup>+++</sup> | y <sup>0</sup>     | y <sup>0++</sup> | #  |
|----|--------------------|-------------------|----------------|------------------|--------------------|------------------|------|--------------------|-------------------|--------------------|------------------|--------------------|------------------|----|
| 1  | 100.075690         | 50.541483         |                |                  |                    |                  | V    |                    |                   |                    |                  |                    |                  | 12 |
| 2  | <b>201.123369</b>  | 101.065322        |                |                  | 183.112804         | 92.060040        | T    | <b>1484.771218</b> | <b>742.889247</b> | 1467.744669        | 734.375972       | 1466.760653        | 733.883964       | 11 |
| 3  | <b>272.160483</b>  | 136.583879        |                |                  | <b>254.149918</b>  | 127.578597       | A    | <b>1383.723539</b> | 692.365407        | 1366.696990        | 683.852133       | 1365.712974        | 683.360125       | 10 |
| 4  | <b>343.197597</b>  | 172.102437        |                |                  | 325.187032         | 163.097154       | A    | <b>1312.686425</b> | <b>656.846850</b> | 1295.659876        | 648.333576       | 1294.675860        | 647.841568       | 9  |
| 5  | <b>440.250361</b>  | 220.628819        |                |                  | 422.239796         | 211.623536       | P    | <b>1241.649311</b> | <b>621.328293</b> | <b>1224.622762</b> | 612.815019       | <b>1223.638746</b> | 612.323011       | 8  |
| 6  | <b>879.475687</b>  | <b>440.241482</b> | 862.449138     | 431.728207       | 861.465122         | 431.236199       | Q    | <b>1144.596547</b> | 572.801911        | 1127.569998        | 564.288637       | 1126.585982        | 563.796629       | 7  |
| 7  | <b>966.507715</b>  | 483.757496        | 949.481166     | 475.244221       | 948.497150         | 474.752213       | S    | <b>705.371221</b>  | 353.189248        | 688.344672         | 344.675974       | 687.360656         | 344.183966       | 6  |
| 8  | <b>1065.576129</b> | 533.291703        | 1048.549580    | 524.778428       | <b>1047.565564</b> | 524.286420       | V    | <b>618.339193</b>  | 309.673234        | 601.312644         | 301.159960       |                    |                  | 5  |
| 9  | <b>1225.606778</b> | 613.307027        | 1208.580229    | 604.793753       | 1207.596213        | 604.301745       | C    | <b>519.270779</b>  | 260.139028        | 502.244230         | 251.625753       |                    |                  | 4  |
| 10 | 1296.643892        | 648.825584        | 1279.617343    | 640.312310       | 1278.633327        | 639.820302       | A    | <b>359.240130</b>  | 180.123703        | 342.213581         | 171.610428       |                    |                  | 3  |
| 11 | <b>1409.727956</b> | <b>705.367616</b> | 1392.701407    | 696.854342       | 1391.717391        | 696.362333       | L    | <b>288.203016</b>  | 144.605146        | 271.176467         | 136.091871       |                    |                  | 2  |
| 12 |                    |                   |                |                  |                    |                  | R    | <b>175.118952</b>  | 88.063114         | 158.092403         | 79.549839        |                    |                  | 1  |

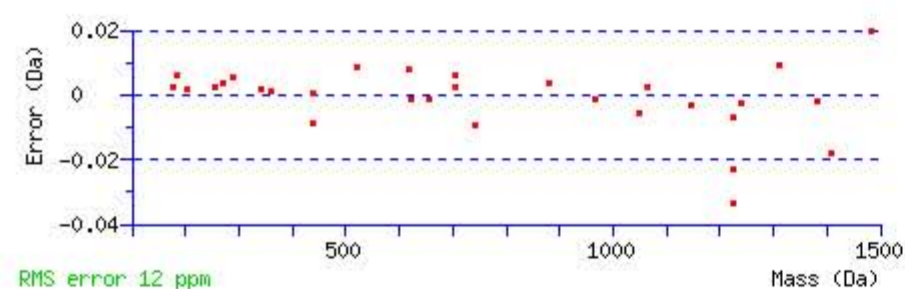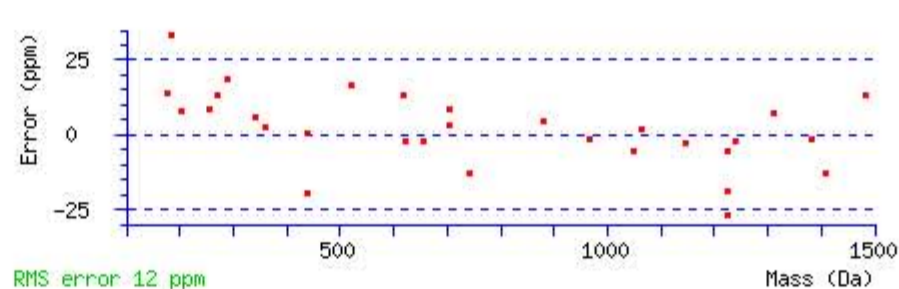

NCBI BLAST search of **VTAAPQSVCALR**

(Parameters: blastp, nr protein database, expect=20000, no filter, PAM30)

Other BLAST [web gateways](#)

All matches to this query

| Score | Mr(calc):   | Delta     | Sequence                         |
|-------|-------------|-----------|----------------------------------|
| 77.0  | 1582.832352 | 0.010836  | <a href="#">VTAAPQSVCALR</a>     |
| 11.4  | 1582.844040 | -0.000852 | <a href="#">APRHGPARDPGLPSR</a>  |
| 8.7   | 1582.865356 | -0.022168 | <a href="#">QPAPGPVEKPPR</a>     |
| 3.3   | 1582.821564 | 0.021624  | <a href="#">LSKAVATWHANTER</a>   |
| 2.9   | 1582.850067 | -0.006879 | <a href="#">AEQEASLQKLR</a>      |
| 1.0   | 1582.821579 | 0.021609  | <a href="#">IGGHGPTLKAYQEGR</a>  |
| 0.6   | 1582.850098 | -0.006910 | <a href="#">VRSSPDKDQIK</a>      |
| 0.6   | 1582.857956 | -0.014768 | <a href="#">LEDVKSQWVRPAR</a>    |
| 0.2   | 1582.831482 | 0.011706  | <a href="#">GIATNDVGIQKDGAPK</a> |

**Peptide View**

MS/MS Fragmentation of **FSGQLNSHGCFYQQVK**

Found in **A2MG\_HUMAN**, Alpha-2-macroglobulin OS=Homo sapiens GN=A2M PE=1 SV=3

Match to Query 46121: 2210.045172 from(737.689000,3+) rtinseconds(1900) index(4225)

Title: Locus:1.1.1.3213.15 File:"2013-07-02 CLN FXIII 60 min 3rd F 1.wiff"

Data file C:\Program Files (x86)\Matrix Science\Mascot Daemon\mgf\6 FXIII 60 min 3rd\mascot\_daemon\_merge.mgf

Click mouse within plot area to zoom in by factor of two about that point

Or, Plot from  to  Da

Label all possible matches  Label matches used for scoring

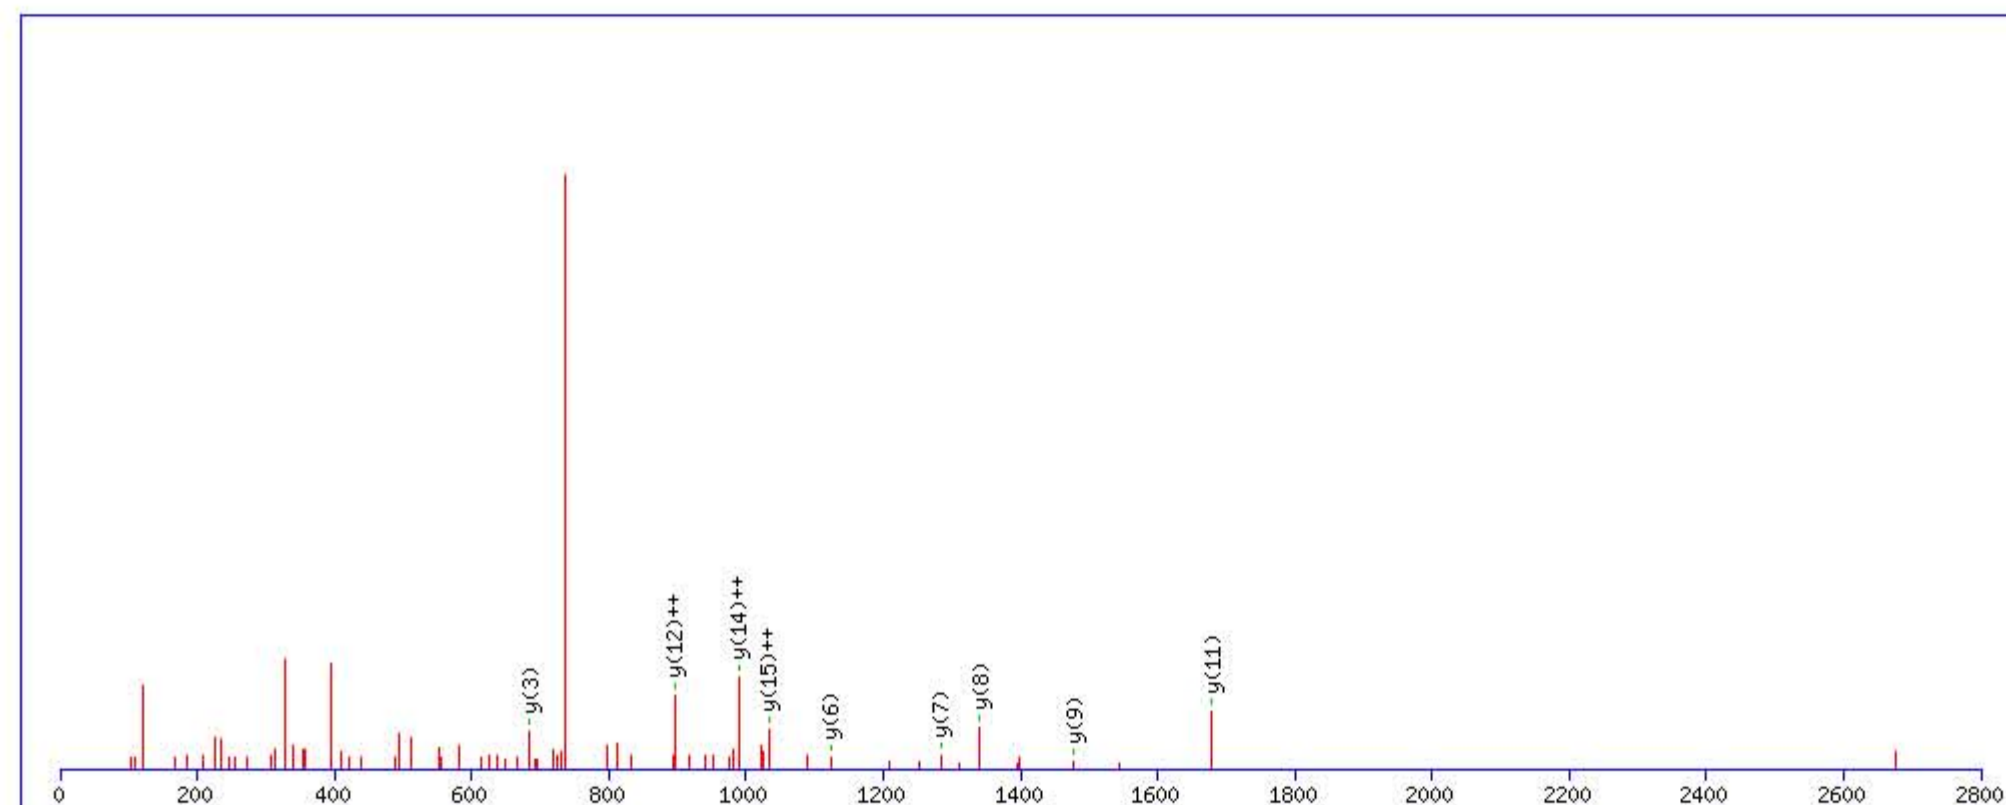

Monoisotopic mass of neutral peptide Mr(calc): 2210.040131

Fixed modifications: Carbamidomethyl (C) (apply to specified residues or termini only)

Variable modifications:

Q14 : Biotin:Thermo-21345 (Q)

Ions Score: 30 Expect: 0.0025

Matches : 9/154 fragment ions using 16 most intense peaks [\(help\)](#)

| #  | b           | b <sup>++</sup> | b <sup>*</sup> | b <sup>*++</sup> | b <sup>0</sup> | b <sup>0++</sup> | Seq. | y           | y <sup>++</sup> | y <sup>*</sup> | y <sup>*++</sup> | y <sup>0</sup> | y <sup>0++</sup> | #  |
|----|-------------|-----------------|----------------|------------------|----------------|------------------|------|-------------|-----------------|----------------|------------------|----------------|------------------|----|
| 1  | 148.075690  | 74.541483       |                |                  |                |                  | F    |             |                 |                |                  |                |                  | 16 |
| 2  | 235.107718  | 118.057497      |                |                  | 217.097153     | 109.052214       | S    | 2063.978979 | 1032.493127     | 2046.952430    | 1023.979853      | 2045.968414    | 1023.487845      | 15 |
| 3  | 292.129182  | 146.568229      |                |                  | 274.118617     | 137.562946       | G    | 1976.946951 | 988.977114      | 1959.920402    | 980.463839       | 1958.936386    | 979.971831       | 14 |
| 4  | 420.187760  | 210.597518      | 403.161211     | 202.084243       | 402.177195     | 201.592235       | Q    | 1919.925487 | 960.466382      | 1902.898938    | 951.953107       | 1901.914922    | 951.461099       | 13 |
| 5  | 533.271824  | 267.139550      | 516.245275     | 258.626276       | 515.261259     | 258.134268       | L    | 1791.866909 | 896.437093      | 1774.840360    | 887.923818       | 1773.856344    | 887.431810       | 12 |
| 6  | 647.314751  | 324.161014      | 630.288202     | 315.647739       | 629.304186     | 315.155731       | N    | 1678.782845 | 839.895061      | 1661.756296    | 831.381786       | 1660.772280    | 830.889778       | 11 |
| 7  | 734.346779  | 367.677028      | 717.320230     | 359.163753       | 716.336214     | 358.671745       | S    | 1564.739918 | 782.873597      | 1547.713369    | 774.360323       | 1546.729353    | 773.868315       | 10 |
| 8  | 871.405691  | 436.206483      | 854.379142     | 427.693209       | 853.395126     | 427.201201       | H    | 1477.707890 | 739.357583      | 1460.681341    | 730.844309       |                |                  | 9  |
| 9  | 928.427155  | 464.717216      | 911.400606     | 456.203941       | 910.416590     | 455.711933       | G    | 1340.648978 | 670.828127      | 1323.622429    | 662.314853       |                |                  | 8  |
| 10 | 1088.457804 | 544.732540      | 1071.431255    | 536.219266       | 1070.447239    | 535.727257       | C    | 1283.627514 | 642.317395      | 1266.600965    | 633.804121       |                |                  | 7  |
| 11 | 1235.526218 | 618.266747      | 1218.499669    | 609.753473       | 1217.515653    | 609.261464       | F    | 1123.596865 | 562.302071      | 1106.570316    | 553.788796       |                |                  | 6  |
| 12 | 1398.589547 | 699.798412      | 1381.562998    | 691.285137       | 1380.578982    | 690.793129       | Y    | 976.528451  | 488.767864      | 959.501902     | 480.254589       |                |                  | 5  |
| 13 | 1526.648125 | 763.827700      | 1509.621576    | 755.314426       | 1508.637560    | 754.822418       | Q    | 813.465122  | 407.236199      | 796.438573     | 398.722925       |                |                  | 4  |
| 14 | 1965.873451 | 983.440364      | 1948.846902    | 974.927089       | 1947.862886    | 974.435081       | Q    | 685.406544  | 343.206910      | 668.379995     | 334.693636       |                |                  | 3  |
| 15 | 2064.941865 | 1032.974570     | 2047.915316    | 1024.461296      | 2046.931300    | 1023.969288      | V    | 246.181218  | 123.594247      | 229.154669     | 115.080972       |                |                  | 2  |
| 16 |             |                 |                |                  |                |                  | K    | 147.112804  | 74.060040       | 130.086255     | 65.546765        |                |                  | 1  |

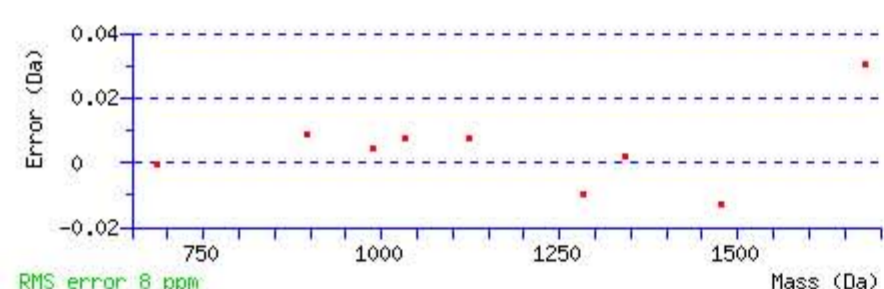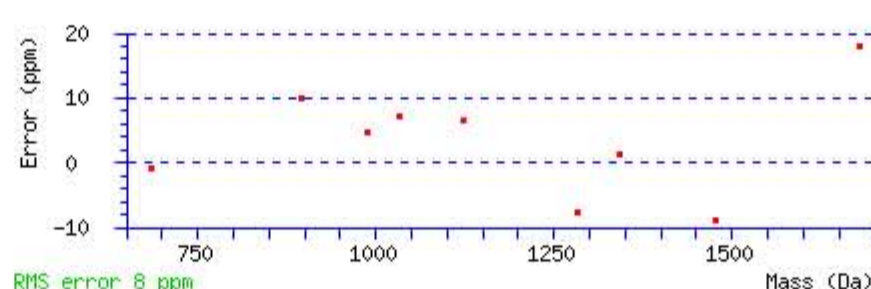

NCBI BLAST search of **FSGQLNSHGCFYQQVK**  
 (Parameters: blastp, nr protein database, expect=20000, no filter, PAM30)  
 Other BLAST [web gateways](#)

**All matches to this query**

| Score | Mr(calc):   | Delta     | Sequence                                |
|-------|-------------|-----------|-----------------------------------------|
| 30.2  | 2210.040131 | 0.005041  | <a href="#">FSGQLNSHGCFYQQVK</a>        |
| 22.2  | 2210.040131 | 0.005041  | <a href="#">FSGQLNSHGCFYQQVK</a>        |
| 2.4   | 2210.045486 | -0.000314 | <a href="#">MSMKEVDEQMLAIQSK</a>        |
| 2.4   | 2210.045486 | -0.000314 | <a href="#">MSMKEVDEQMLAIQSK</a>        |
| 1.7   | 2210.045990 | -0.000818 | <a href="#">GKMISAGLPGEMGSPGEPGPPGR</a> |

# Mascot Search Results

## Peptide View

MS/MS Fragmentation of **LLLQQVSLPELPGEYSMK**

Found in **A2MG\_HUMAN**, Alpha-2-macroglobulin OS=Homo sapiens GN=A2M PE=1 SV=3

Match to Query 48579: 2355.290232 from(786.104020,3+) rtinseconds(2869) index(23911)

Title: Locus:1.1.1.3598.14 File:"2013-07-02 CLN FXIII 60 min 3rd F 2.wiff"

Data file C:\Program Files (x86)\Matrix Science\Mascot Daemon\mgf6 FXIII 60 min 3rd\mascot\_daemon\_merge.mgf

Click mouse within plot area to zoom in by factor of two about that point

Or, Plot from  to  Da

Label all possible matches  Label matches used for scoring

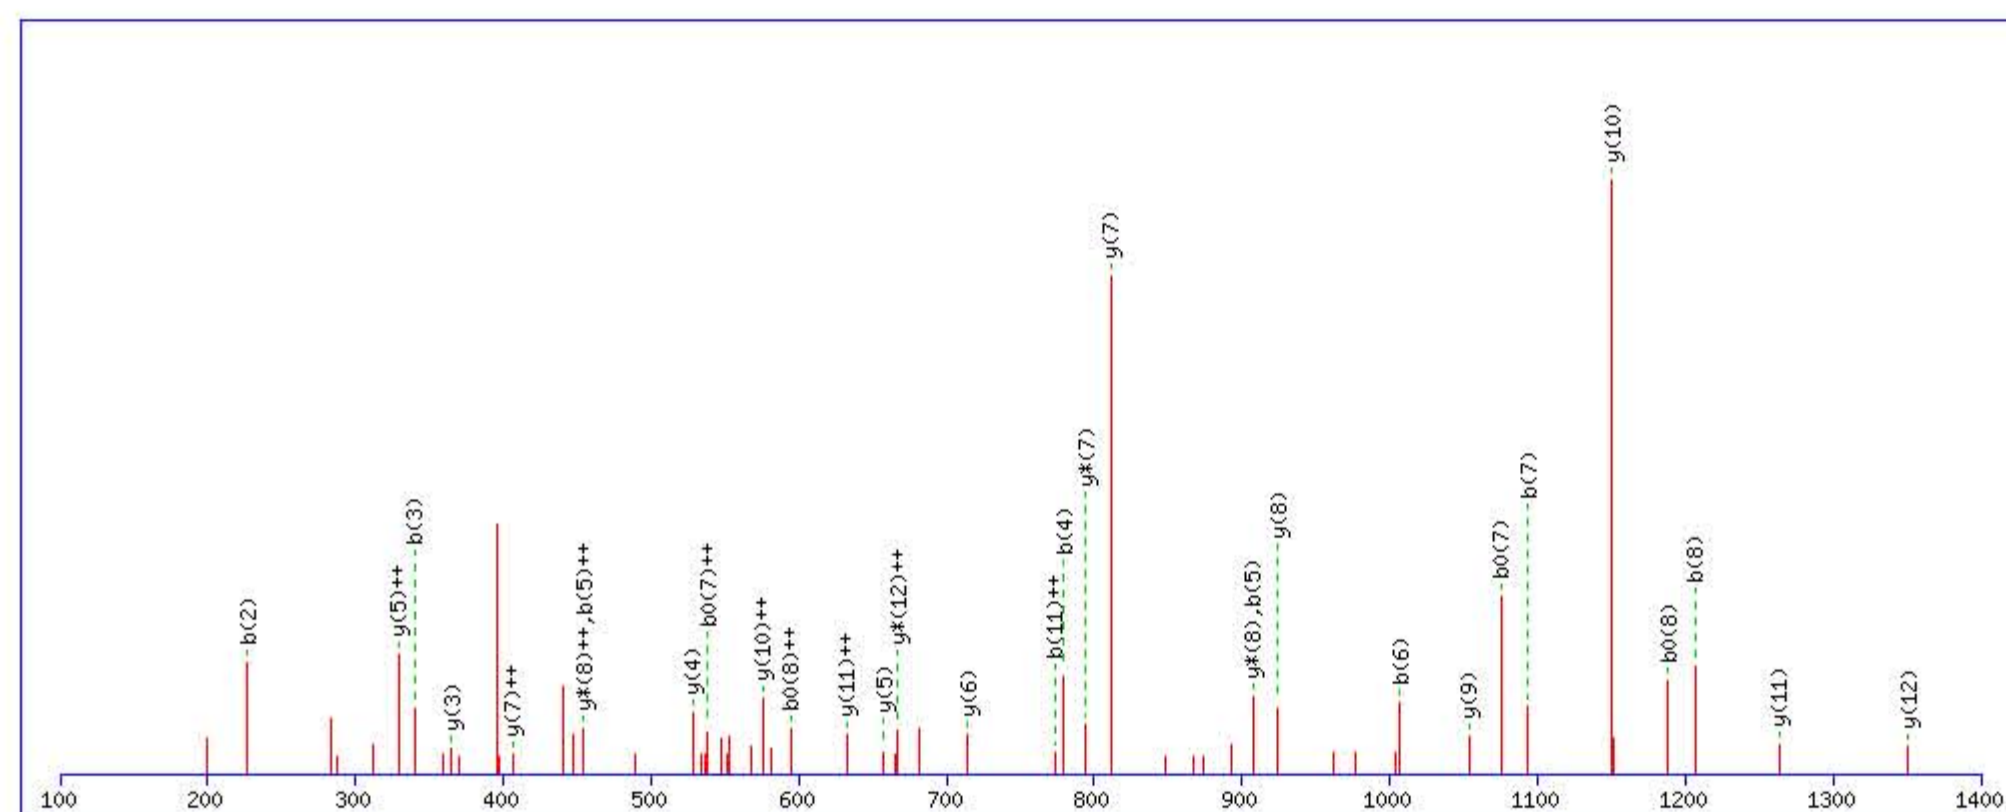

Monoisotopic mass of neutral peptide Mr(calc): 2355.258179

Fixed modifications: Carbamidomethyl (C) (apply to specified residues or termini only)

Variable modifications:

Q4 : Biotin:Thermo-21345 (Q)

Ions Score: 65 Expect: 2e-006

Matches : 31/182 fragment ions using 48 most intense peaks [\(help\)](#)

| #  | b                  | b <sup>++</sup>   | b <sup>*</sup> | b <sup>*++</sup> | b <sup>0</sup>     | b <sup>0++</sup>  | Seq. | y                  | y <sup>++</sup>   | y <sup>*</sup>    | y <sup>*++</sup>  | y <sup>0</sup> | y <sup>0++</sup> | #  |
|----|--------------------|-------------------|----------------|------------------|--------------------|-------------------|------|--------------------|-------------------|-------------------|-------------------|----------------|------------------|----|
| 1  | 114.091340         | 57.549308         |                |                  |                    |                   | L    |                    |                   |                   |                   |                |                  | 18 |
| 2  | <b>227.175404</b>  | 114.091340        |                |                  |                    |                   | L    | 2243.181426        | 1122.094351       | 2226.154877       | 1113.581076       | 2225.170861    | 1113.089068      | 17 |
| 3  | <b>340.259468</b>  | 170.633372        |                |                  |                    |                   | L    | 2130.097362        | 1065.552319       | 2113.070813       | 1057.039044       | 2112.086797    | 1056.547036      | 16 |
| 4  | <b>779.484794</b>  | 390.246035        | 762.458245     | 381.732760       |                    |                   | Q    | 2017.013298        | 1009.010287       | 1999.986749       | 1000.497013       | 1999.002733    | 1000.005005      | 15 |
| 5  | <b>907.543372</b>  | <b>454.275324</b> | 890.516823     | 445.762049       |                    |                   | Q    | 1577.787972        | 789.397624        | 1560.761423       | 780.884350        | 1559.777407    | 780.392342       | 14 |
| 6  | <b>1006.611786</b> | 503.809531        | 989.585237     | 495.296256       |                    |                   | V    | 1449.729394        | 725.368335        | 1432.702845       | 716.855061        | 1431.718829    | 716.363053       | 13 |
| 7  | <b>1093.643814</b> | 547.325545        | 1076.617265    | 538.812271       | <b>1075.633249</b> | <b>538.320263</b> | S    | <b>1350.660980</b> | 675.834128        | 1333.634431       | <b>667.320854</b> | 1332.650415    | 666.828846       | 12 |
| 8  | <b>1206.727878</b> | 603.867577        | 1189.701329    | 595.354303       | <b>1188.717313</b> | <b>594.862294</b> | L    | <b>1263.628952</b> | <b>632.318114</b> | 1246.602403       | 623.804840        | 1245.618387    | 623.312832       | 11 |
| 9  | 1303.780642        | 652.393959        | 1286.754093    | 643.880685       | 1285.770077        | 643.388676        | P    | <b>1150.544888</b> | <b>575.776082</b> | 1133.518339       | 567.262808        | 1132.534323    | 566.770800       | 10 |
| 10 | 1432.823235        | 716.915256        | 1415.796686    | 708.401981       | 1414.812670        | 707.909973        | E    | <b>1053.492124</b> | 527.249700        | 1036.465575       | 518.736426        | 1035.481559    | 518.244418       | 9  |
| 11 | 1545.907299        | <b>773.457288</b> | 1528.880750    | 764.944013       | 1527.896734        | 764.452005        | L    | <b>924.449531</b>  | 462.728404        | <b>907.422982</b> | <b>454.215129</b> | 906.438966     | 453.723121       | 8  |
| 12 | 1642.960063        | 821.983670        | 1625.933514    | 813.470395       | 1624.949498        | 812.978387        | P    | <b>811.365467</b>  | <b>406.186372</b> | <b>794.338918</b> | 397.673097        | 793.354902     | 397.181089       | 7  |
| 13 | 1699.981527        | 850.494401        | 1682.954978    | 841.981127       | 1681.970962        | 841.489119        | G    | <b>714.312703</b>  | 357.659990        | 697.286154        | 349.146715        | 696.302138     | 348.654707       | 6  |
| 14 | 1829.024120        | 915.015698        | 1811.997571    | 906.502423       | 1811.013555        | 906.010415        | E    | <b>657.291239</b>  | <b>329.149258</b> | 640.264690        | 320.635983        | 639.280674     | 320.143975       | 5  |
| 15 | 1992.087449        | 996.547362        | 1975.060900    | 988.034088       | 1974.076884        | 987.542080        | Y    | <b>528.248646</b>  | 264.627961        | 511.222097        | 256.114687        | 510.238081     | 255.622679       | 4  |
| 16 | 2079.119477        | 1040.063376       | 2062.092928    | 1031.550102      | 2061.108912        | 1031.058094       | S    | <b>365.185317</b>  | 183.096297        | 348.158768        | 174.583022        | 347.174752     | 174.091014       | 3  |
| 17 | 2210.159962        | 1105.583619       | 2193.133413    | 1097.070344      | 2192.149397        | 1096.578336       | M    | 278.153289         | 139.580282        | 261.126740        | 131.067008        |                |                  | 2  |
| 18 |                    |                   |                |                  |                    |                   | K    | 147.112804         | 74.060040         | 130.086255        | 65.546765         |                |                  | 1  |

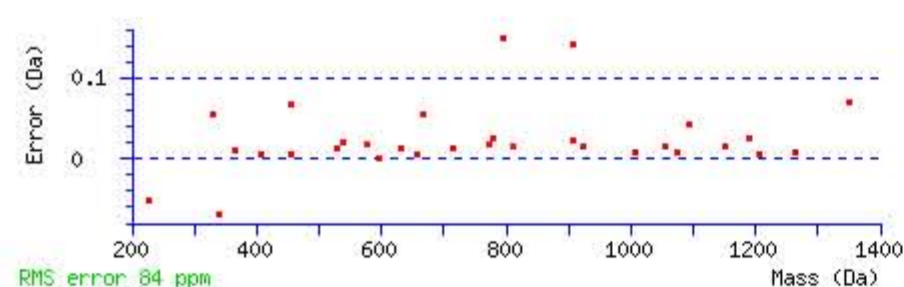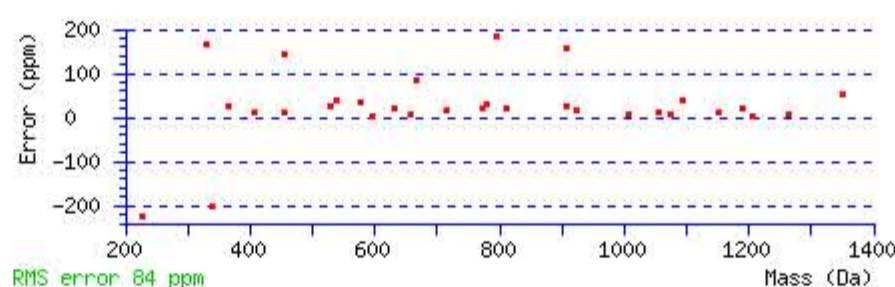

NCBI BLAST search of [LLLQQVSLPELPGEYSMK](#)

(Parameters: blastp, nr protein database, expect=20000, no filter, PAM30)

Other BLAST [web gateways](#)

## All matches to this query

| Score | Mr(calc):   | Delta    | Sequence                             |
|-------|-------------|----------|--------------------------------------|
| 64.5  | 2355.258179 | 0.032053 | <a href="#">LLLQQVSLPELPGEYSMK</a>   |
| 56.4  | 2355.258179 | 0.032053 | <a href="#">LLLQQVSLPELPGEYSMK</a>   |
| 3.6   | 2355.288498 | 0.001734 | <a href="#">LIQQRALLNFTEWKR</a>      |
| 3.6   | 2355.288498 | 0.001734 | <a href="#">LIQQRALLNFTEWKR</a>      |
| 2.5   | 2355.273926 | 0.016306 | <a href="#">LGLYTFVNLANFVKSWTNLR</a> |
| 0.1   | 2355.259354 | 0.030878 | <a href="#">SQPRASGPPRSIQPVSPR</a>   |

# MASCOT Search Results

## Peptide View

MS/MS Fragmentation of **MCPQLQQYEMHGPEGLR**

Found in **A2MG\_HUMAN**, Alpha-2-macroglobulin OS=Homo sapiens GN=A2M PE=1 SV=3

Match to Query 48826: 2384.091942 from(795.704590,3+) rtinseconds(2071) index(33549)

Title: Locus:1.1.1.3270.8 File:"2013-07-02 CLN FXIII 60 min 3rd F 3.wiff"

Data file C:\Program Files (x86)\Matrix Science\Mascot Daemon\mgf\6 FXIII 60 min 3rd\mascot\_daemon\_merge.mgf

Click mouse within plot area to zoom in by factor of two about that point

Or, Plot from  to  Da

Label all possible matches  Label matches used for scoring

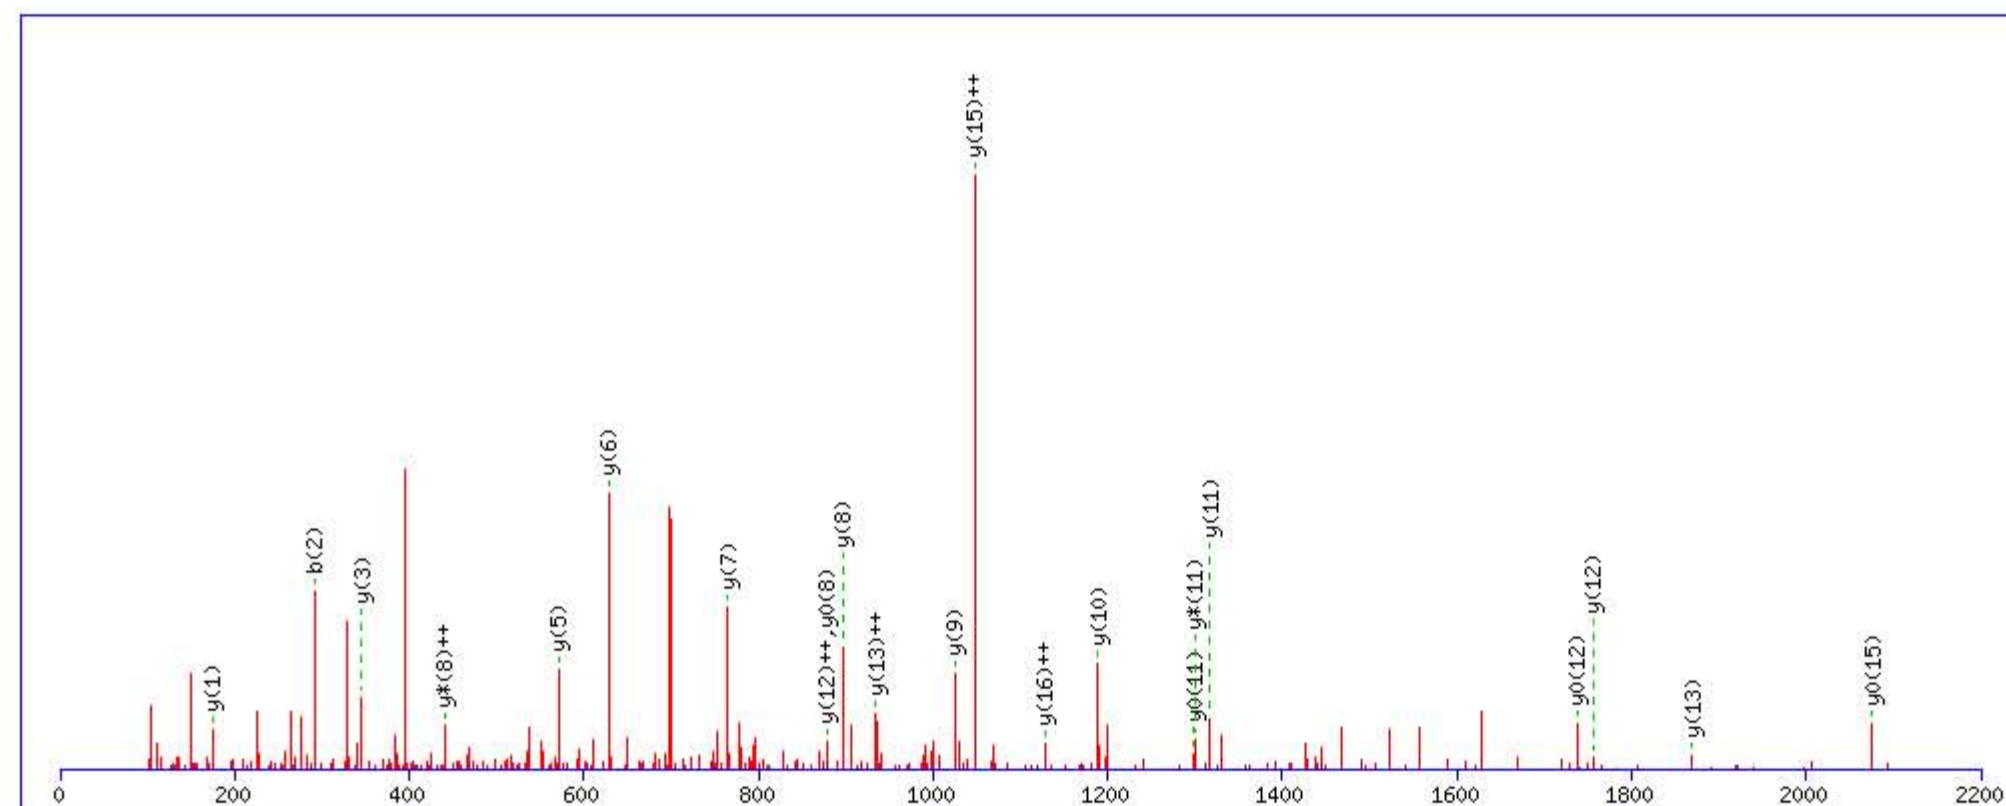

Monoisotopic mass of neutral peptide Mr(calc): 2384.089767

Fixed modifications: Carbamidomethyl (C) (apply to specified residues or termini only)

Variable modifications:

Q6 : Biotin:Thermo-21345 (Q)

Ions Score: 38 Expect: 0.0018

Matches : 22/164 fragment ions using 60 most intense peaks [\(help\)](#)

| #  | b                 | b <sup>++</sup> | b <sup>+</sup> | b <sup>+++</sup> | b <sup>0</sup> | b <sup>0++</sup> | Seq. | y                  | y <sup>++</sup>    | y <sup>+</sup>     | y <sup>+++</sup>  | y <sup>0</sup>     | y <sup>0++</sup> | #  |
|----|-------------------|-----------------|----------------|------------------|----------------|------------------|------|--------------------|--------------------|--------------------|-------------------|--------------------|------------------|----|
| 1  | 132.047761        | 66.527518       |                |                  |                |                  | M    |                    |                    |                    |                   |                    |                  | 17 |
| 2  | <b>292.078410</b> | 146.542843      |                |                  |                |                  | C    | 2254.056579        | <b>1127.531927</b> | 2237.030030        | 1119.018653       | 2236.046014        | 1118.526645      | 16 |
| 3  | 389.131174        | 195.069225      |                |                  |                |                  | P    | 2094.025930        | <b>1047.516603</b> | 2076.999381        | 1039.003328       | <b>2076.015365</b> | 1038.511320      | 15 |
| 4  | 517.189752        | 259.098514      | 500.163203     | 250.585240       |                |                  | Q    | 1996.973166        | 998.990221         | 1979.946617        | 990.476947        | 1978.962601        | 989.984939       | 14 |
| 5  | 630.273816        | 315.640546      | 613.247267     | 307.127272       |                |                  | L    | <b>1868.914588</b> | <b>934.960932</b>  | 1851.888039        | 926.447658        | 1850.904023        | 925.955650       | 13 |
| 6  | 1069.499142       | 535.253209      | 1052.472593    | 526.739935       |                |                  | Q    | <b>1755.830524</b> | <b>878.418900</b>  | 1738.803975        | 869.905626        | <b>1737.819959</b> | 869.413618       | 12 |
| 7  | 1197.557720       | 599.282498      | 1180.531171    | 590.769224       |                |                  | Q    | <b>1316.605198</b> | 658.806237         | <b>1299.578649</b> | 650.292963        | <b>1298.594633</b> | 649.800955       | 11 |
| 8  | 1360.621049       | 680.814163      | 1343.594500    | 672.300888       |                |                  | Y    | <b>1188.546620</b> | 594.776948         | 1171.520071        | 586.263674        | 1170.536055        | 585.771666       | 10 |
| 9  | 1489.663642       | 745.335459      | 1472.637093    | 736.822185       | 1471.653077    | 736.330177       | E    | <b>1025.483291</b> | 513.245284         | 1008.456742        | 504.732009        | 1007.472726        | 504.240001       | 9  |
| 10 | 1620.704127       | 810.855702      | 1603.677578    | 802.342427       | 1602.693562    | 801.850419       | M    | <b>896.440698</b>  | 448.723987         | 879.414149         | <b>440.210713</b> | <b>878.430133</b>  | 439.718705       | 8  |
| 11 | 1757.763039       | 879.385158      | 1740.736490    | 870.871883       | 1739.752474    | 870.379875       | H    | <b>765.400213</b>  | 383.203745         | 748.373664         | 374.690470        | 747.389648         | 374.198462       | 7  |
| 12 | 1814.784503       | 907.895890      | 1797.757954    | 899.382615       | 1796.773938    | 898.890607       | G    | <b>628.341301</b>  | 314.674289         | 611.314752         | 306.161014        | 610.330736         | 305.669006       | 6  |
| 13 | 1911.837267       | 956.422272      | 1894.810718    | 947.908997       | 1893.826702    | 947.416989       | P    | <b>571.319837</b>  | 286.163557         | 554.293288         | 277.650282        | 553.309272         | 277.158274       | 5  |
| 14 | 2040.879860       | 1020.943568     | 2023.853311    | 1012.430294      | 2022.869295    | 1011.938286      | E    | 474.267073         | 237.637175         | 457.240524         | 229.123900        | 456.256508         | 228.631892       | 4  |
| 15 | 2097.901324       | 1049.454300     | 2080.874775    | 1040.941025      | 2079.890759    | 1040.449017      | G    | <b>345.224480</b>  | 173.115878         | 328.197931         | 164.602603        |                    |                  | 3  |
| 16 | 2210.985388       | 1105.996332     | 2193.958839    | 1097.483057      | 2192.974823    | 1096.991049      | L    | 288.203016         | 144.605146         | 271.176467         | 136.091872        |                    |                  | 2  |
| 17 |                   |                 |                |                  |                |                  | R    | <b>175.118952</b>  | 88.063114          | 158.092403         | 79.549839         |                    |                  | 1  |

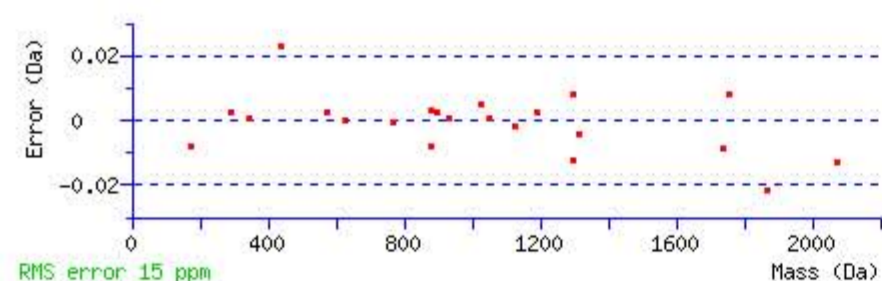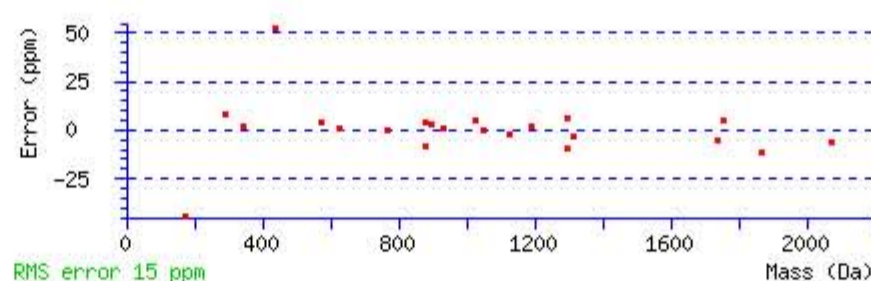

NCBI BLAST search of [MCPQLQQYEMHGPEGLR](#)

(Parameters: blastp, nr protein database, expect=20000, no filter, PAM30)

Other BLAST [web gateways](#)

## All matches to this query

| Score | Mr(calc):   | Delta    | Sequence                          |
|-------|-------------|----------|-----------------------------------|
| 38.0  | 2384.089767 | 0.002175 | <a href="#">MCPQLQQYEMHGPEGLR</a> |
| 36.7  | 2384.089767 | 0.002175 | <a href="#">MCPQLQQYEMHGPEGLR</a> |
| 36.5  | 2384.089767 | 0.002175 | <a href="#">MCPQLQQYEMHGPEGLR</a> |

# MASCOT Search Results

## Peptide View

MS/MS Fragmentation of **MCPQLQQYEMHGPEGLR**

Found in **A2MG\_HUMAN**, Alpha-2-macroglobulin OS=Homo sapiens GN=A2M PE=1 SV=3

Match to Query 49080: 2400.086532 from(801.036120,3+) rtinseconds(1978) index(4842)

Title: Locus:1.1.1.3240.18 File:"2013-07-02 CLN FXIII 60 min 3rd F 1.wiff"

Data file C:\Program Files (x86)\Matrix Science\Mascot Daemon\mgf\6 FXIII 60 min 3rd\mascot\_daemon\_merge.mgf

Click mouse within plot area to zoom in by factor of two about that point

Or, Plot from  to  Da

Label all possible matches  Label matches used for scoring

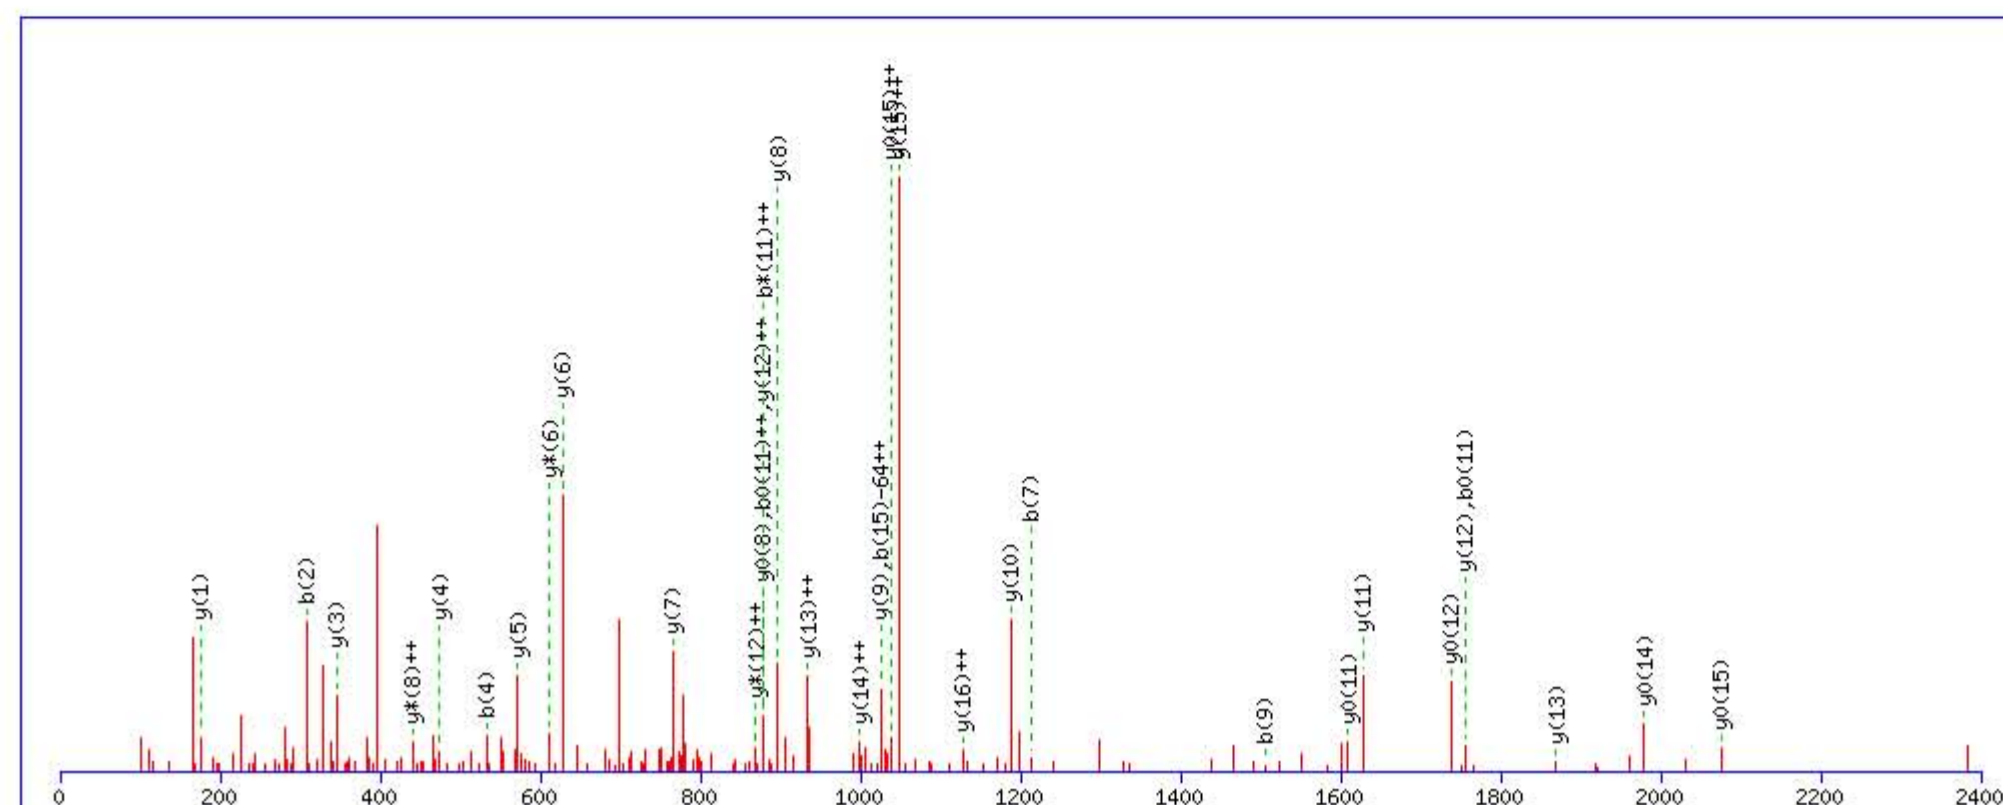

Monoisotopic mass of neutral peptide Mr(calc): 2400.084686

Fixed modifications: Carbamidomethyl (C) (apply to specified residues or termini only)

Variable modifications:

M1 : Oxidation (M), with neutral losses 0.000000 (shown in table), 63.998285

Q7 : Biotin:Thermo-21345 (Q)

Ions Score: 53 Expect: 5.3e-005

Matches : 34/238 fragment ions using 71 most intense peaks [\(help\)](#)

| #  | b                  | b <sup>++</sup> | b <sup>+</sup> | b <sup>+++</sup>  | b <sup>0</sup>     | b <sup>0++</sup>  | Seq. | y                  | y <sup>++</sup>    | y <sup>+</sup>    | y <sup>+++</sup>  | y <sup>0</sup>     | y <sup>0++</sup>   | #  |
|----|--------------------|-----------------|----------------|-------------------|--------------------|-------------------|------|--------------------|--------------------|-------------------|-------------------|--------------------|--------------------|----|
| 1  | 148.042676         | 74.524976       |                |                   |                    |                   | M    |                    |                    |                   |                   |                    |                    | 17 |
| 2  | <b>308.073325</b>  | 154.540301      |                |                   |                    |                   | C    | 2254.056579        | <b>1127.531927</b> | 2237.030030       | 1119.018653       | 2236.046014        | 1118.526645        | 16 |
| 3  | 405.126089         | 203.066683      |                |                   |                    |                   | P    | 2094.025930        | <b>1047.516603</b> | 2076.999381       | 1039.003328       | <b>2076.015365</b> | <b>1038.511320</b> | 15 |
| 4  | <b>533.184667</b>  | 267.095972      | 516.158118     | 258.582697        |                    |                   | Q    | 1996.973166        | <b>998.990221</b>  | 1979.946617       | 990.476947        | <b>1978.962601</b> | 989.984939         | 14 |
| 5  | 646.268731         | 323.638004      | 629.242182     | 315.124729        |                    |                   | L    | <b>1868.914588</b> | <b>934.960932</b>  | 1851.888039       | 926.447658        | 1850.904023        | 925.955650         | 13 |
| 6  | 774.327309         | 387.667293      | 757.300760     | 379.154018        |                    |                   | Q    | <b>1755.830524</b> | <b>878.418900</b>  | 1738.803975       | <b>869.905626</b> | <b>1737.819959</b> | 869.413618         | 12 |
| 7  | <b>1213.552635</b> | 607.279956      | 1196.526086    | 598.766681        |                    |                   | Q    | <b>1627.771946</b> | 814.389611         | 1610.745397       | 805.876337        | <b>1609.761381</b> | 805.384329         | 11 |
| 8  | 1376.615964        | 688.811620      | 1359.589415    | 680.298346        |                    |                   | Y    | <b>1188.546620</b> | 594.776948         | 1171.520071       | 586.263674        | 1170.536055        | 585.771666         | 10 |
| 9  | <b>1505.658557</b> | 753.332917      | 1488.632008    | 744.819642        | 1487.647992        | 744.327634        | E    | <b>1025.483291</b> | 513.245284         | 1008.456742       | 504.732009        | 1007.472726        | 504.240001         | 9  |
| 10 | 1636.699042        | 818.853159      | 1619.672493    | 810.339885        | 1618.688477        | 809.847877        | M    | <b>896.440698</b>  | 448.723987         | 879.414149        | <b>440.210713</b> | <b>878.430133</b>  | 439.718705         | 8  |
| 11 | 1773.757954        | 887.382615      | 1756.731405    | <b>878.869341</b> | <b>1755.747389</b> | <b>878.377333</b> | H    | <b>765.400213</b>  | 383.203745         | 748.373664        | 374.690470        | 747.389648         | 374.198462         | 7  |
| 12 | 1830.779418        | 915.893347      | 1813.752869    | 907.380073        | 1812.768853        | 906.888065        | G    | <b>628.341301</b>  | 314.674289         | <b>611.314752</b> | 306.161014        | 610.330736         | 305.669006         | 6  |
| 13 | 1927.832182        | 964.419729      | 1910.805633    | 955.906455        | 1909.821617        | 955.414447        | P    | <b>571.319837</b>  | 286.163557         | 554.293288        | 277.650282        | 553.309272         | 277.158274         | 5  |
| 14 | 2056.874775        | 1028.941026     | 2039.848226    | 1020.427751       | 2038.864210        | 1019.935743       | E    | <b>474.267073</b>  | 237.637175         | 457.240524        | 229.123900        | 456.256508         | 228.631892         | 4  |
| 15 | 2113.896239        | 1057.451758     | 2096.869690    | 1048.938483       | 2095.885674        | 1048.446475       | G    | <b>345.224480</b>  | 173.115878         | 328.197931        | 164.602603        |                    |                    | 3  |
| 16 | 2226.980303        | 1113.993790     | 2209.953754    | 1105.480515       | 2208.969738        | 1104.988507       | L    | 288.203016         | 144.605146         | 271.176467        | 136.091872        |                    |                    | 2  |
| 17 |                    |                 |                |                   |                    |                   | R    | <b>175.118952</b>  | 88.063114          | 158.092403        | 79.549839         |                    |                    | 1  |

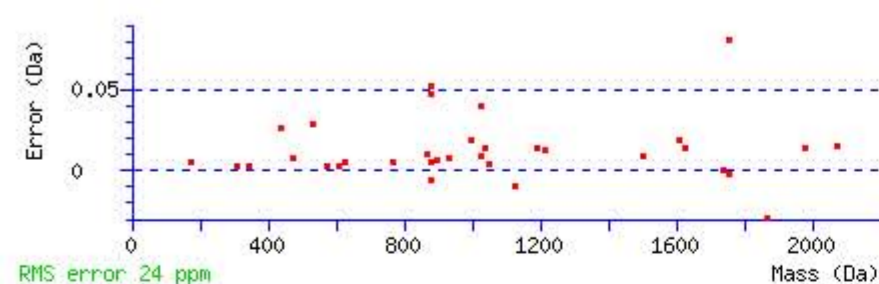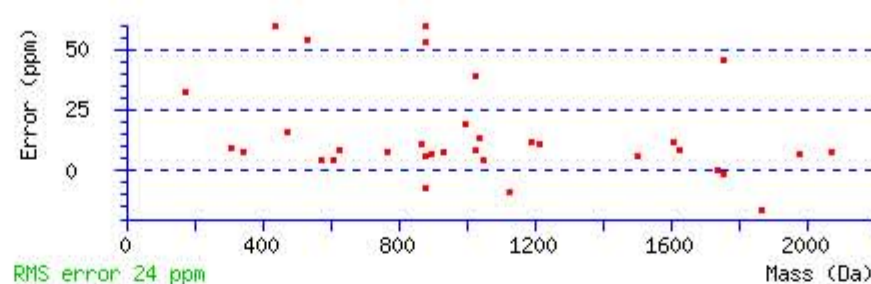

NCBI BLAST search of **MCPQLQQYEMHGPEGLR**

(Parameters: blastp, nr protein database, expect=20000, no filter, PAM30)

Other BLAST [web gateways](#)

## All matches to this query

| Score | Mr(calc):   | Delta    | Sequence                          |
|-------|-------------|----------|-----------------------------------|
| 52.6  | 2400.084686 | 0.001846 | <a href="#">MCPQLQQYEMHGPEGLR</a> |
| 43.5  | 2400.084686 | 0.001846 | <a href="#">MCPQLQQYEMHGPEGLR</a> |
| 24.7  | 2400.084686 | 0.001846 | <a href="#">MCPQLQQYEMHGPEGLR</a> |



# MASCOT Search Results

## Peptide View

MS/MS Fragmentation of **YSDASDCHGEDSQAFCEK**

Found in **A2MG\_HUMAN**, Alpha-2-macroglobulin OS=Homo sapiens GN=A2M PE=1 SV=3

Match to Query 49365: 2415.952152 from(806.324660,3+) rtinseconds(1561) index(16285)

Title: Locus:1.1.1.3144.10 File:"2013-07-02 CLN FXIII 60 min 3rd F 2.wiff"

Data file C:\Program Files (x86)\Matrix Science\Mascot Daemon\mgf\6 FXIII 60 min 3rd\mascot\_daemon\_merge.mgf

Click mouse within plot area to zoom in by factor of two about that point

Or, Plot from  to  Da

Label all possible matches  Label matches used for scoring

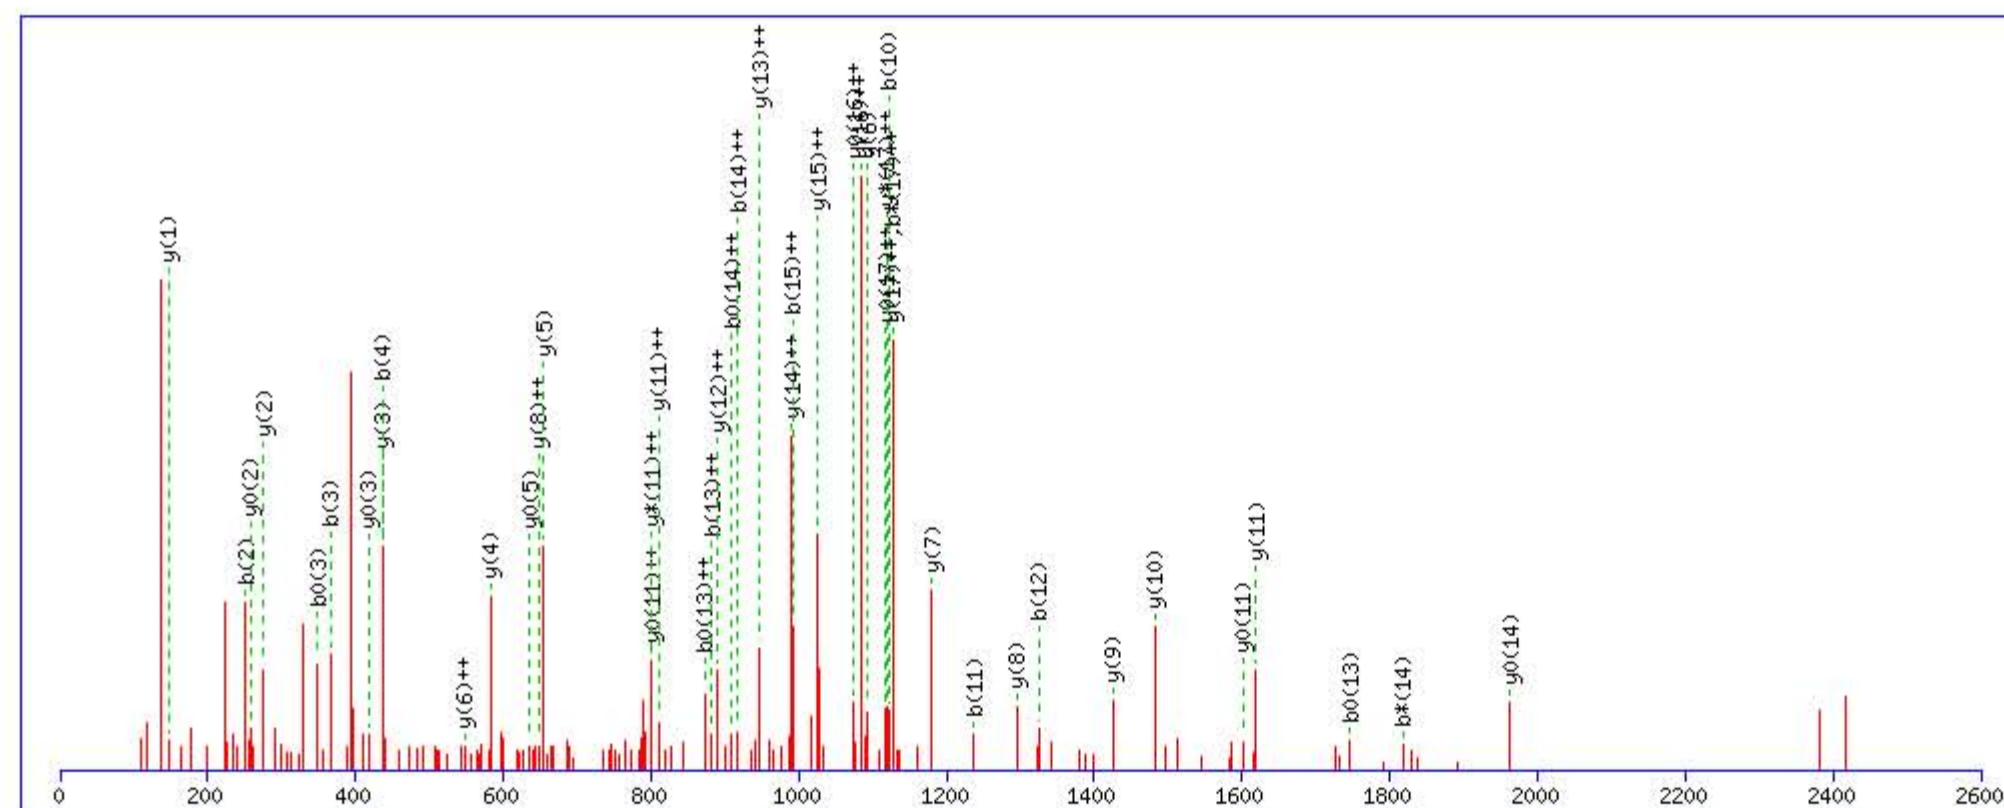

Monoisotopic mass of neutral peptide Mr(calc): 2415.940598

Fixed modifications: Carbamidomethyl (C) (apply to specified residues or termini only)

Variable modifications:

Q13 : Biotin:Thermo-21345 (Q)

Ions Score: 60 Expect: 9.4e-007

Matches : 45/176 fragment ions using 95 most intense peaks [\(help\)](#)

| #  | b                  | b <sup>++</sup>   | b <sup>*</sup>     | b <sup>***</sup>   | b <sup>0</sup>     | b <sup>0++</sup>  | Seq. | y                  | y <sup>++</sup>    | y <sup>*</sup> | y <sup>***</sup>   | y <sup>0</sup>     | y <sup>0++</sup>   | #  |
|----|--------------------|-------------------|--------------------|--------------------|--------------------|-------------------|------|--------------------|--------------------|----------------|--------------------|--------------------|--------------------|----|
| 1  | 164.070605         | 82.538940         |                    |                    |                    |                   | Y    |                    |                    |                |                    |                    |                    | 18 |
| 2  | <b>251.102633</b>  | 126.054954        |                    |                    | 233.092068         | 117.049672        | S    | 2253.884545        | <b>1127.445910</b> | 2236.857996    | <b>1118.932636</b> | 2235.873980        | <b>1118.440628</b> | 17 |
| 3  | <b>366.129576</b>  | 183.568426        |                    |                    | <b>348.119011</b>  | 174.563144        | D    | 2166.852517        | <b>1083.929896</b> | 2149.825968    | 1075.416622        | 2148.841952        | <b>1074.924614</b> | 16 |
| 4  | <b>437.166690</b>  | 219.086983        |                    |                    | 419.156125         | 210.081700        | A    | 2051.825574        | <b>1026.416425</b> | 2034.799025    | 1017.903150        | 2033.815009        | 1017.411142        | 15 |
| 5  | 524.198718         | 262.602997        |                    |                    | 506.188153         | 253.597715        | S    | 1980.788460        | <b>990.897868</b>  | 1963.761911    | 982.384594         | <b>1962.777895</b> | 981.892586         | 14 |
| 6  | 639.225661         | 320.116469        |                    |                    | 621.215096         | 311.111186        | D    | 1893.756432        | <b>947.381854</b>  | 1876.729883    | 938.868580         | 1875.745867        | 938.376572         | 13 |
| 7  | 799.256310         | 400.131793        |                    |                    | 781.245745         | 391.126510        | C    | 1778.729489        | <b>889.868383</b>  | 1761.702940    | 881.355108         | 1760.718924        | 880.863100         | 12 |
| 8  | 936.315222         | 468.661249        |                    |                    | 918.304657         | 459.655966        | H    | <b>1618.698840</b> | <b>809.853058</b>  | 1601.672291    | <b>801.339784</b>  | <b>1600.688275</b> | <b>800.847776</b>  | 11 |
| 9  | 993.336686         | 497.171981        |                    |                    | 975.326121         | 488.166699        | G    | <b>1481.639928</b> | 741.323602         | 1464.613379    | 732.810328         | 1463.629363        | 732.318320         | 10 |
| 10 | <b>1122.379279</b> | 561.693278        |                    |                    | 1104.368714        | 552.687995        | E    | <b>1424.618464</b> | 712.812870         | 1407.591915    | 704.299596         | 1406.607899        | 703.807588         | 9  |
| 11 | <b>1237.406222</b> | 619.206749        |                    |                    | 1219.395657        | 610.201467        | D    | <b>1295.575871</b> | <b>648.291574</b>  | 1278.549322    | 639.778299         | 1277.565306        | 639.286291         | 8  |
| 12 | <b>1324.438250</b> | 662.722763        |                    |                    | 1306.427685        | 653.717481        | S    | <b>1180.548928</b> | 590.778102         | 1163.522379    | 582.264828         | 1162.538363        | 581.772820         | 7  |
| 13 | 1763.663576        | <b>882.335426</b> | 1746.637027        | 873.822152         | <b>1745.653011</b> | <b>873.330144</b> | Q    | <b>1093.516900</b> | <b>547.262088</b>  | 1076.490351    | 538.748814         | 1075.506335        | 538.256806         | 6  |
| 14 | 1834.700690        | <b>917.853983</b> | <b>1817.674141</b> | 909.340709         | 1816.690125        | <b>908.848701</b> | A    | <b>654.291574</b>  | 327.649425         | 637.265025     | 319.136151         | <b>636.281009</b>  | 318.644143         | 5  |
| 15 | 1981.769104        | <b>991.388190</b> | 1964.742555        | 982.874916         | 1963.758539        | 982.382908        | F    | <b>583.254460</b>  | 292.130868         | 566.227911     | 283.617594         | 565.243895         | 283.125586         | 4  |
| 16 | 2141.799753        | 1071.403514       | 2124.773204        | 1062.890240        | 2123.789188        | 1062.398232       | C    | <b>436.186046</b>  | 218.596661         | 419.159497     | 210.083386         | <b>418.175481</b>  | 209.591378         | 3  |
| 17 | 2270.842346        | 1135.924811       | 2253.815797        | <b>1127.411536</b> | 2252.831781        | 1126.919528       | E    | <b>276.155397</b>  | 138.581337         | 259.128848     | 130.068062         | <b>258.144832</b>  | 129.576054         | 2  |
| 18 |                    |                   |                    |                    |                    |                   | K    | <b>147.112804</b>  | 74.060040          | 130.086255     | 65.546765          |                    |                    | 1  |

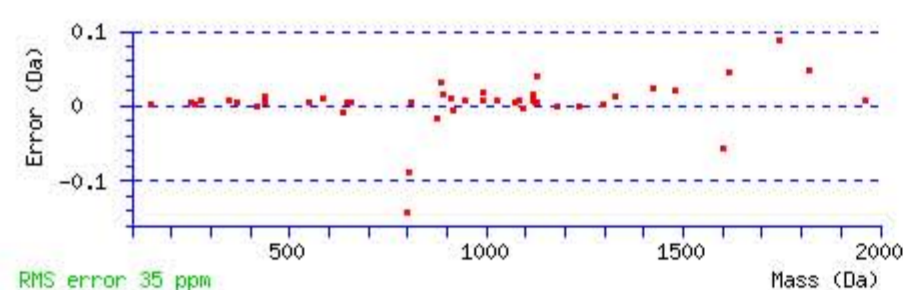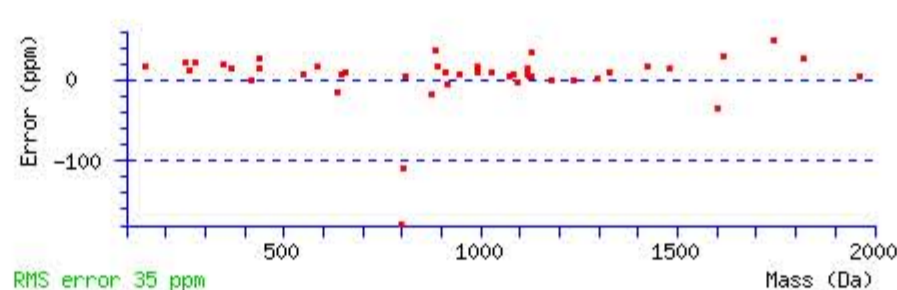

NCBI BLAST search of [YSDASDCHGEDSQAFCEK](#)

(Parameters: blastp, nr protein database, expect=20000, no filter, PAM30)

Other BLAST [web gateways](#)

All matches to this query

| Score | Mr(calc):   | Delta    | Sequence                           |
|-------|-------------|----------|------------------------------------|
| 60.3  | 2415.940598 | 0.011554 | <a href="#">YSDASDCHGEDSQAFCEK</a> |

Mascot: <http://www.matrixscience.com/>

# Mascot Search Results

## Peptide View

MS/MS Fragmentation of **MCPQLQQYEMHGPEGLR**

Found in **A2MG\_HUMAN**, Alpha-2-macroglobulin OS=Homo sapiens GN=A2M PE=1 SV=3

Match to Query 52700: 2695.263762 from(899.428530,3+) rtinseconds(2229) index(34458)

Title: Locus:1.1.1.3325.26 File:"2013-07-02 CLN FXIII 60 min 3rd F 3.wiff"

Data file C:\Program Files (x86)\Matrix Science\Mascot Daemon\mgf6 FXIII 60 min 3rd\mascot\_daemon\_merge.mgf

Click mouse within plot area to zoom in by factor of two about that point

Or, Plot from  to  Da

Label all possible matches  Label matches used for scoring

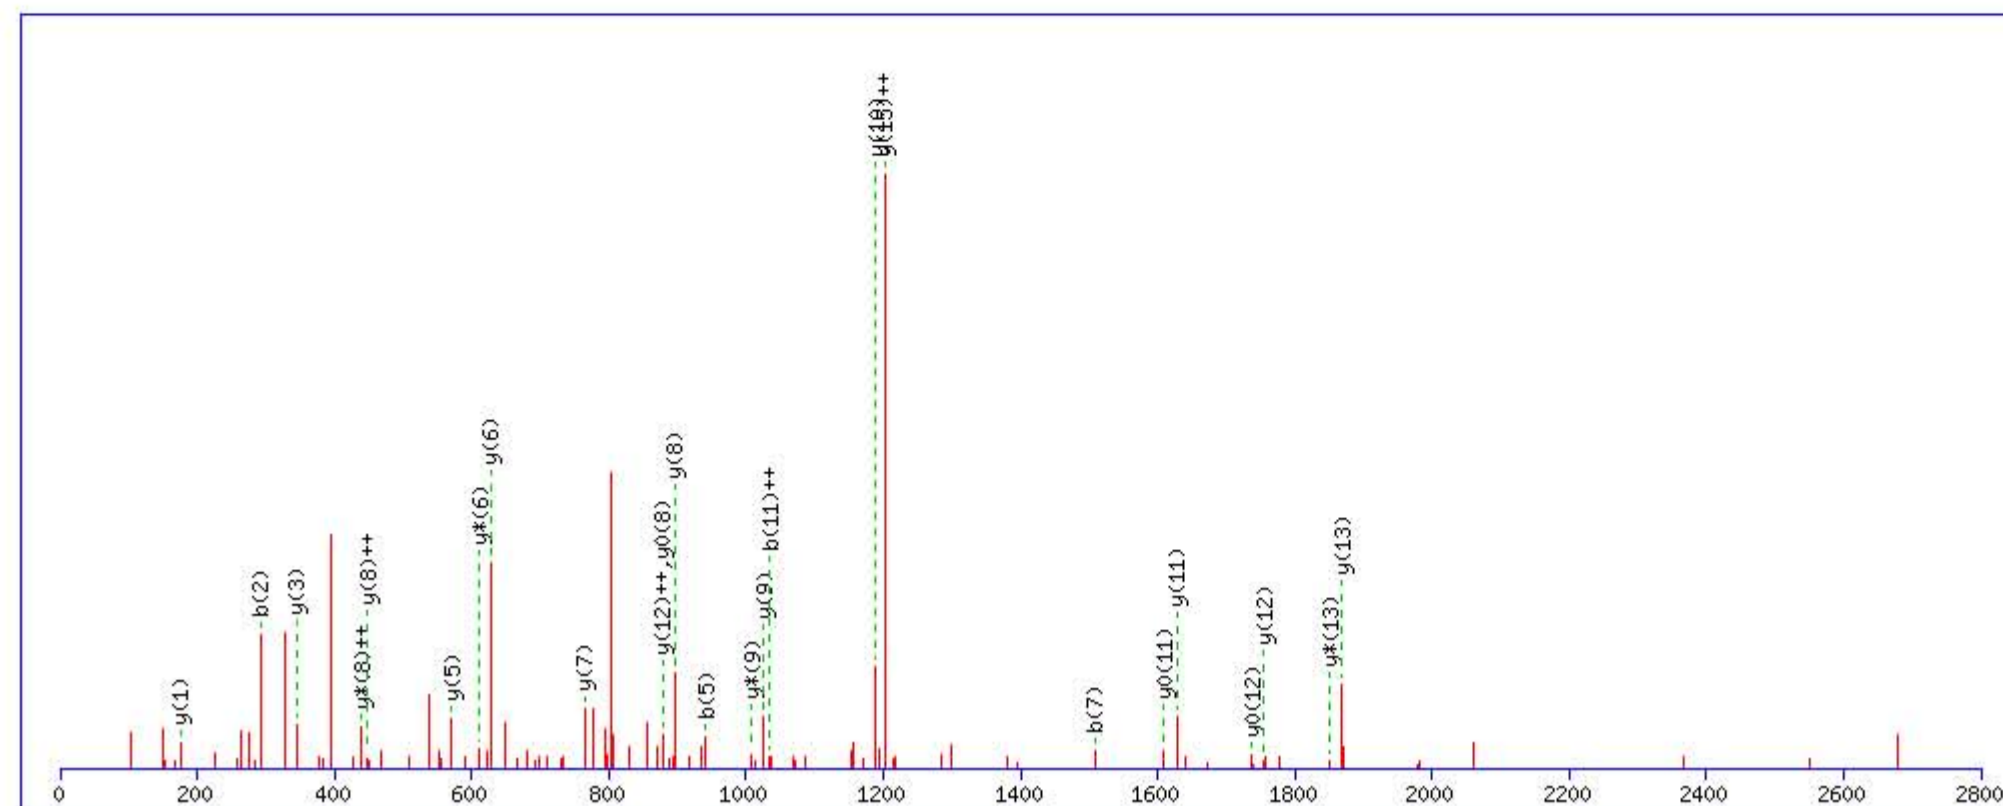

Monoisotopic mass of neutral peptide Mr(calc): 2695.256516

Fixed modifications: Carbamidomethyl (C) (apply to specified residues or termini only)

Variable modifications:

Q4 : Biotin:Thermo-21345 (Q)

Q7 : Biotin:Thermo-21345 (Q)

Ions Score: 33 Expect: 0.009

Matches : 25/164 fragment ions using 70 most intense peaks [\(help\)](#)

| #  | b                  | b <sup>++</sup>    | b <sup>+</sup> | b <sup>+++</sup> | b <sup>0</sup> | b <sup>0++</sup> | Seq. | y                  | y <sup>++</sup>    | y <sup>+</sup>     | y <sup>+++</sup>  | y <sup>0</sup>     | y <sup>0++</sup> | #  |
|----|--------------------|--------------------|----------------|------------------|----------------|------------------|------|--------------------|--------------------|--------------------|-------------------|--------------------|------------------|----|
| 1  | 132.047761         | 66.527518          |                |                  |                |                  | M    |                    |                    |                    |                   |                    |                  | 17 |
| 2  | <b>292.078410</b>  | 146.542843         |                |                  |                |                  | C    | 2565.223327        | 1283.115301        | 2548.196778        | 1274.602027       | 2547.212762        | 1274.110019      | 16 |
| 3  | 389.131174         | 195.069225         |                |                  |                |                  | P    | 2405.192678        | <b>1203.099977</b> | 2388.166129        | 1194.586702       | 2387.182113        | 1194.094694      | 15 |
| 4  | 828.356500         | 414.681888         | 811.329951     | 406.168614       |                |                  | Q    | 2308.139914        | 1154.573595        | 2291.113365        | 1146.060320       | 2290.129349        | 1145.568312      | 14 |
| 5  | <b>941.440564</b>  | 471.223920         | 924.414015     | 462.710646       |                |                  | L    | <b>1868.914588</b> | 934.960932         | <b>1851.888039</b> | 926.447658        | 1850.904023        | 925.955650       | 13 |
| 6  | 1069.499142        | 535.253209         | 1052.472593    | 526.739935       |                |                  | Q    | <b>1755.830524</b> | <b>878.418900</b>  | 1738.803975        | 869.905626        | <b>1737.819959</b> | 869.413618       | 12 |
| 7  | <b>1508.724468</b> | 754.865872         | 1491.697919    | 746.352598       |                |                  | Q    | <b>1627.771946</b> | 814.389611         | 1610.745397        | 805.876337        | <b>1609.761381</b> | 805.384329       | 11 |
| 8  | 1671.787797        | 836.397537         | 1654.761248    | 827.884262       |                |                  | Y    | <b>1188.546620</b> | 594.776948         | 1171.520071        | 586.263674        | 1170.536055        | 585.771666       | 10 |
| 9  | 1800.830390        | 900.918833         | 1783.803841    | 892.405559       | 1782.819825    | 891.913551       | E    | <b>1025.483291</b> | 513.245284         | <b>1008.456742</b> | 504.732009        | 1007.472726        | 504.240001       | 9  |
| 10 | 1931.870875        | 966.439076         | 1914.844326    | 957.925801       | 1913.860310    | 957.433793       | M    | <b>896.440698</b>  | <b>448.723987</b>  | 879.414149         | <b>440.210713</b> | <b>878.430133</b>  | 439.718705       | 8  |
| 11 | 2068.929787        | <b>1034.968531</b> | 2051.903238    | 1026.455257      | 2050.919222    | 1025.963249      | H    | <b>765.400213</b>  | 383.203745         | 748.373664         | 374.690470        | 747.389648         | 374.198462       | 7  |
| 12 | 2125.951251        | 1063.479263        | 2108.924702    | 1054.965989      | 2107.940686    | 1054.473981      | G    | <b>628.341301</b>  | 314.674289         | <b>611.314752</b>  | 306.161014        | 610.330736         | 305.669006       | 6  |
| 13 | 2223.004015        | 1112.005645        | 2205.977466    | 1103.492371      | 2204.993450    | 1103.000363      | P    | <b>571.319837</b>  | 286.163557         | 554.293288         | 277.650282        | 553.309272         | 277.158274       | 5  |
| 14 | 2352.046608        | 1176.526942        | 2335.020059    | 1168.013667      | 2334.036043    | 1167.521659      | E    | 474.267073         | 237.637175         | 457.240524         | 229.123900        | 456.256508         | 228.631892       | 4  |
| 15 | 2409.068072        | 1205.037674        | 2392.041523    | 1196.524399      | 2391.057507    | 1196.032391      | G    | <b>345.224480</b>  | 173.115878         | 328.197931         | 164.602603        |                    |                  | 3  |
| 16 | 2522.152136        | 1261.579706        | 2505.125587    | 1253.066431      | 2504.141571    | 1252.574424      | L    | 288.203016         | 144.605146         | 271.176467         | 136.091872        |                    |                  | 2  |
| 17 |                    |                    |                |                  |                |                  | R    | <b>175.118952</b>  | 88.063114          | 158.092403         | 79.549839         |                    |                  | 1  |

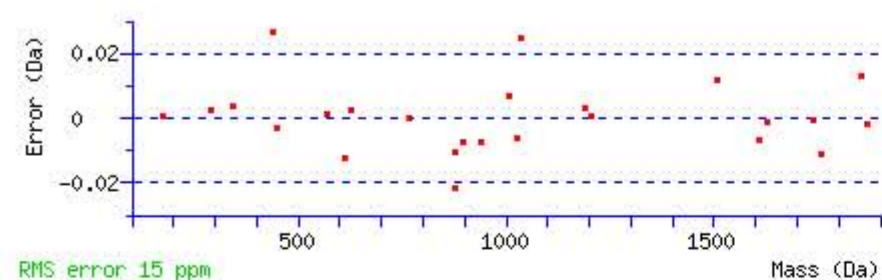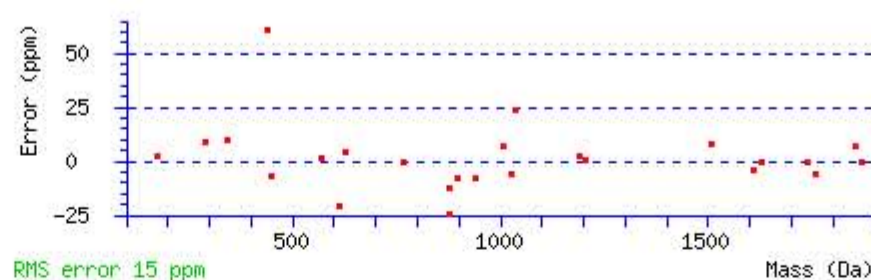

NCBI BLAST search of [MCPQLQQYEMHGPEGLR](#)

(Parameters: blastp, nr protein database, expect=20000, no filter, PAM30)

Other BLAST [web gateways](#)

## All matches to this query

| Score | Mr(calc):   | Delta    | Sequence                          |
|-------|-------------|----------|-----------------------------------|
| 32.8  | 2695.256516 | 0.007246 | <a href="#">MCPQLQQYEMHGPEGLR</a> |
| 26.7  | 2695.256516 | 0.007246 | <a href="#">MCPQLQQYEMHGPEGLR</a> |
| 16.4  | 2695.256516 | 0.007246 | <a href="#">MCPQLQQYEMHGPEGLR</a> |

# Mascot Search Results

## Peptide View

MS/MS Fragmentation of **MCPQLQQYEMHGPEGLR**

Found in **A2MG\_HUMAN**, Alpha-2-macroglobulin OS=Homo sapiens GN=A2M PE=1 SV=3

Match to Query 52706: 2695.264496 from(674.823400,4+) rtinseconds(2214) index(34323)

Title: Locus:1.1.1.3320.16 File:"2013-07-02 CLN FXIII 60 min 3rd F 3.wiff"

Data file C:\Program Files (x86)\Matrix Science\Mascot Daemon\mgf6 FXIII 60 min 3rd\mascot\_daemon\_merge.mgf

Click mouse within plot area to zoom in by factor of two about that point

Or, Plot from  to  Da

Label all possible matches  Label matches used for scoring

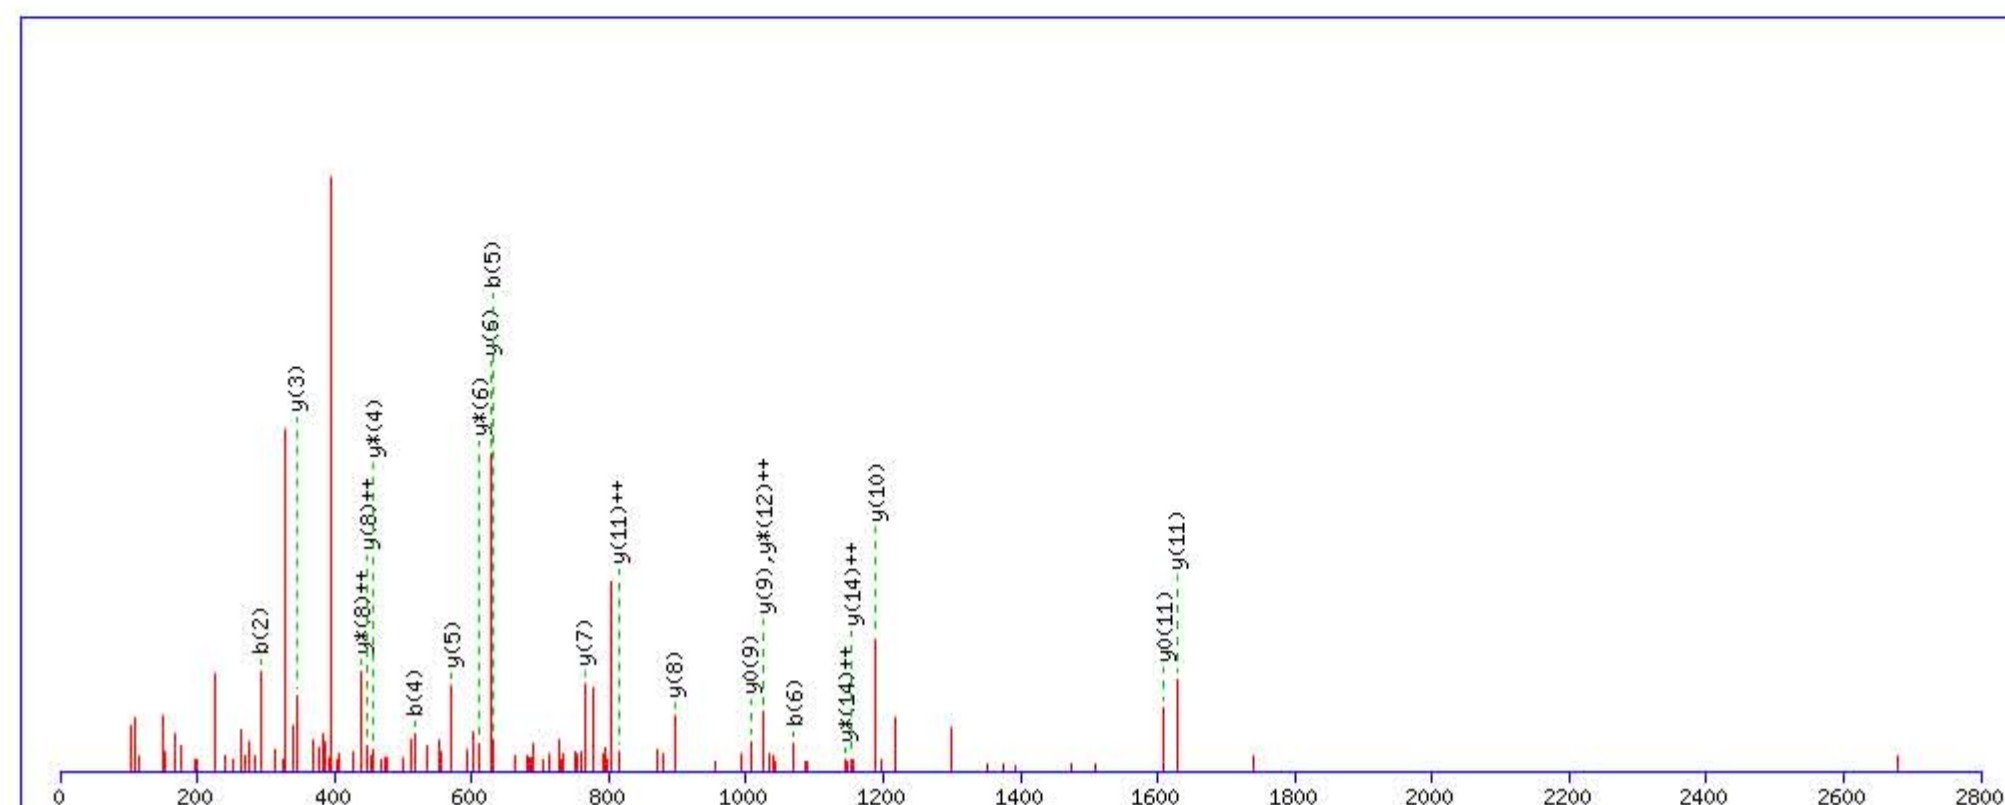

Monoisotopic mass of neutral peptide Mr(calc): 2695.256516

Fixed modifications: Carbamidomethyl (C) (apply to specified residues or termini only)

Variable modifications:

Q6 : Biotin:Thermo-21345 (Q)

Q7 : Biotin:Thermo-21345 (Q)

Ions Score: 30 Expect: 0.019

Matches : 22/164 fragment ions using 45 most intense peaks [\(help\)](#)

| #  | b                  | b <sup>++</sup> | b <sup>*</sup> | b <sup>*++</sup> | b <sup>0</sup> | b <sup>0++</sup> | Seq. | y                  | y <sup>++</sup>    | y <sup>*</sup>    | y <sup>*++</sup>   | y <sup>0</sup>     | y <sup>0++</sup> | #  |
|----|--------------------|-----------------|----------------|------------------|----------------|------------------|------|--------------------|--------------------|-------------------|--------------------|--------------------|------------------|----|
| 1  | 132.047761         | 66.527518       |                |                  |                |                  | M    |                    |                    |                   |                    |                    |                  | 17 |
| 2  | <b>292.078410</b>  | 146.542843      |                |                  |                |                  | C    | 2565.223327        | 1283.115301        | 2548.196778       | 1274.602027        | 2547.212762        | 1274.110019      | 16 |
| 3  | 389.131174         | 195.069225      |                |                  |                |                  | P    | 2405.192678        | 1203.099977        | 2388.166129       | 1194.586702        | 2387.182113        | 1194.094694      | 15 |
| 4  | <b>517.189752</b>  | 259.098514      | 500.163203     | 250.585240       |                |                  | Q    | 2308.139914        | <b>1154.573595</b> | 2291.113365       | <b>1146.060320</b> | 2290.129349        | 1145.568312      | 14 |
| 5  | <b>630.273816</b>  | 315.640546      | 613.247267     | 307.127272       |                |                  | L    | 2180.081336        | 1090.544306        | 2163.054787       | 1082.031031        | 2162.070771        | 1081.539023      | 13 |
| 6  | <b>1069.499142</b> | 535.253209      | 1052.472593    | 526.739935       |                |                  | Q    | 2066.997272        | 1034.002274        | 2049.970723       | <b>1025.488999</b> | 2048.986707        | 1024.996991      | 12 |
| 7  | 1508.724468        | 754.865872      | 1491.697919    | 746.352598       |                |                  | Q    | <b>1627.771946</b> | <b>814.389611</b>  | 1610.745397       | 805.876337         | <b>1609.761381</b> | 805.384329       | 11 |
| 8  | 1671.787797        | 836.397537      | 1654.761248    | 827.884262       |                |                  | Y    | <b>1188.546620</b> | 594.776948         | 1171.520071       | 586.263674         | 1170.536055        | 585.771666       | 10 |
| 9  | 1800.830390        | 900.918833      | 1783.803841    | 892.405559       | 1782.819825    | 891.913551       | E    | <b>1025.483291</b> | 513.245284         | 1008.456742       | 504.732009         | <b>1007.472726</b> | 504.240001       | 9  |
| 10 | 1931.870875        | 966.439076      | 1914.844326    | 957.925801       | 1913.860310    | 957.433793       | M    | <b>896.440698</b>  | <b>448.723987</b>  | 879.414149        | <b>440.210713</b>  | 878.430133         | 439.718705       | 8  |
| 11 | 2068.929787        | 1034.968531     | 2051.903238    | 1026.455257      | 2050.919222    | 1025.963249      | H    | <b>765.400213</b>  | 383.203745         | 748.373664        | 374.690470         | 747.389648         | 374.198462       | 7  |
| 12 | 2125.951251        | 1063.479263     | 2108.924702    | 1054.965989      | 2107.940686    | 1054.473981      | G    | <b>628.341301</b>  | 314.674289         | <b>611.314752</b> | 306.161014         | 610.330736         | 305.669006       | 6  |
| 13 | 2223.004015        | 1112.005645     | 2205.977466    | 1103.492371      | 2204.993450    | 1103.000363      | P    | <b>571.319837</b>  | 286.163557         | 554.293288        | 277.650282         | 553.309272         | 277.158274       | 5  |
| 14 | 2352.046608        | 1176.526942     | 2335.020059    | 1168.013667      | 2334.036043    | 1167.521659      | E    | 474.267073         | 237.637175         | <b>457.240524</b> | 229.123900         | 456.256508         | 228.631892       | 4  |
| 15 | 2409.068072        | 1205.037674     | 2392.041523    | 1196.524399      | 2391.057507    | 1196.032391      | G    | <b>345.224480</b>  | 173.115878         | 328.197931        | 164.602603         |                    |                  | 3  |
| 16 | 2522.152136        | 1261.579706     | 2505.125587    | 1253.066431      | 2504.141571    | 1252.574424      | L    | 288.203016         | 144.605146         | 271.176467        | 136.091872         |                    |                  | 2  |
| 17 |                    |                 |                |                  |                |                  | R    | 175.118952         | 88.063114          | 158.092403        | 79.549839          |                    |                  | 1  |

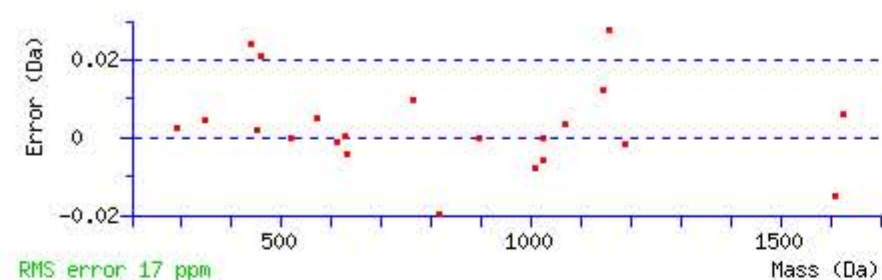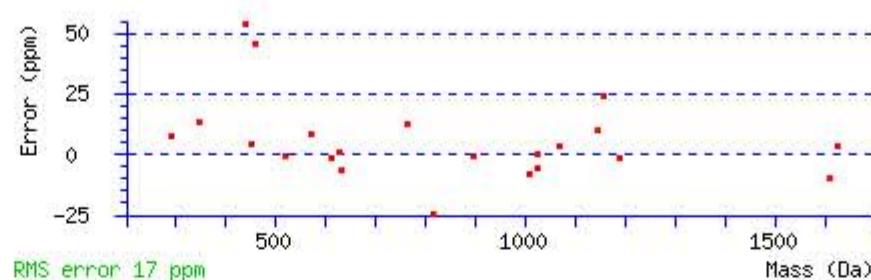

NCBI BLAST search of [MCPQLQQYEMHGPEGLR](#)

(Parameters: blastp, nr protein database, expect=20000, no filter, PAM30)

Other BLAST [web gateways](#)

## All matches to this query

| Score | Mr(calc):   | Delta    | Sequence                          |
|-------|-------------|----------|-----------------------------------|
| 29.6  | 2695.256516 | 0.007980 | <a href="#">MCPQLQQYEMHGPEGLR</a> |
| 28.3  | 2695.256516 | 0.007980 | <a href="#">MCPQLQQYEMHGPEGLR</a> |
| 17.6  | 2695.256516 | 0.007980 | <a href="#">MCPQLQQYEMHGPEGLR</a> |

**Peptide View**

MS/MS Fragmentation of **MCPQLQQYEMHGPEGLR**

Found in **A2MG\_HUMAN**, Alpha-2-macroglobulin OS=Homo sapiens GN=A2M PE=1 SV=3

Match to Query 52862: 2711.274736 from(678.825960,4+) rtinseconds(2153) index(19961)

Title: Locus:1.1.1.3350.12 File:"2013-07-02 CLN FXIII 60 min 3rd F 2.wiff"

Data file C:\Program Files (x86)\Matrix Science\Mascot Daemon\mgf\6 FXIII 60 min 3rd\mascot\_daemon\_merge.mgf

Click mouse within plot area to zoom in by factor of two about that point

Or, Plot from  to  Da

Label all possible matches  Label matches used for scoring

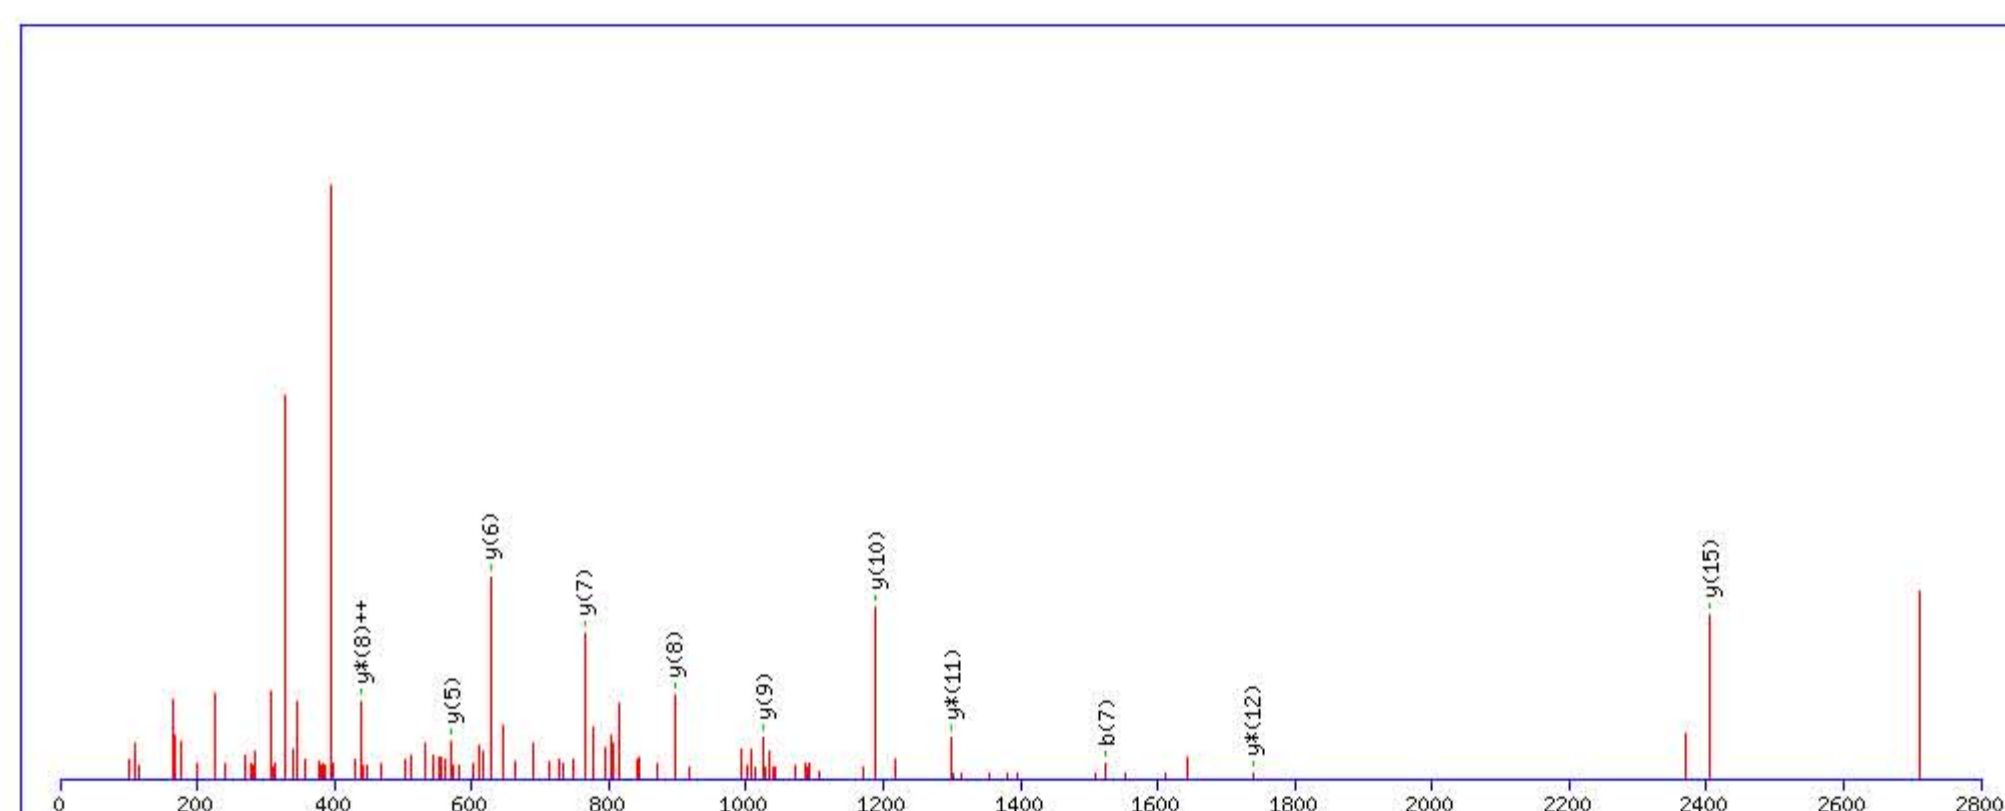

Monoisotopic mass of neutral peptide Mr(calc): 2711.251434

Fixed modifications: Carbamidomethyl (C) (apply to specified residues or termini only)

Variable modifications:

M1 : Oxidation (M), with neutral losses 0.000000 (shown in table), 63.998285

Q4 : Biotin:Thermo-21345 (Q)

Q6 : Biotin:Thermo-21345 (Q)

Ions Score: 33 Expect: 0.0087

Matches : 11/238 fragment ions using 18 most intense peaks [\(help\)](#)

| #  | b                  | b <sup>++</sup> | b <sup>*</sup> | b <sup>*++</sup> | b <sup>0</sup> | b <sup>0++</sup> | Seq. | y                  | y <sup>++</sup> | y <sup>*</sup>     | y <sup>*++</sup>  | y <sup>0</sup> | y <sup>0++</sup> | #  |
|----|--------------------|-----------------|----------------|------------------|----------------|------------------|------|--------------------|-----------------|--------------------|-------------------|----------------|------------------|----|
| 1  | 148.042676         | 74.524976       |                |                  |                |                  | M    |                    |                 |                    |                   |                |                  | 17 |
| 2  | 308.073325         | 154.540301      |                |                  |                |                  | C    | 2565.223327        | 1283.115302     | 2548.196778        | 1274.602027       | 2547.212762    | 1274.110019      | 16 |
| 3  | 405.126089         | 203.066683      |                |                  |                |                  | P    | <b>2405.192678</b> | 1203.099977     | 2388.166129        | 1194.586702       | 2387.182113    | 1194.094694      | 15 |
| 4  | 844.351415         | 422.679346      | 827.324866     | 414.166071       |                |                  | Q    | 2308.139914        | 1154.573595     | 2291.113365        | 1146.060320       | 2290.129349    | 1145.568312      | 14 |
| 5  | 957.435479         | 479.221378      | 940.408930     | 470.708103       |                |                  | L    | 1868.914588        | 934.960932      | 1851.888039        | 926.447658        | 1850.904023    | 925.955650       | 13 |
| 6  | 1396.660805        | 698.834041      | 1379.634256    | 690.320766       |                |                  | Q    | 1755.830524        | 878.418900      | <b>1738.803975</b> | 869.905626        | 1737.819959    | 869.413618       | 12 |
| 7  | <b>1524.719383</b> | 762.863330      | 1507.692834    | 754.350055       |                |                  | Q    | 1316.605198        | 658.806237      | <b>1299.578649</b> | 650.292963        | 1298.594633    | 649.800955       | 11 |
| 8  | 1687.782712        | 844.394994      | 1670.756163    | 835.881720       |                |                  | Y    | <b>1188.546620</b> | 594.776948      | 1171.520071        | 586.263674        | 1170.536055    | 585.771666       | 10 |
| 9  | 1816.825305        | 908.916291      | 1799.798756    | 900.403016       | 1798.814740    | 899.911008       | E    | <b>1025.483291</b> | 513.245284      | 1008.456742        | 504.732009        | 1007.472726    | 504.240001       | 9  |
| 10 | 1947.865790        | 974.436533      | 1930.839241    | 965.923259       | 1929.855225    | 965.431251       | M    | <b>896.440698</b>  | 448.723987      | 879.414149         | <b>440.210713</b> | 878.430133     | 439.718705       | 8  |
| 11 | 2084.924702        | 1042.965989     | 2067.898153    | 1034.452715      | 2066.914137    | 1033.960707      | H    | <b>765.400213</b>  | 383.203745      | 748.373664         | 374.690470        | 747.389648     | 374.198462       | 7  |
| 12 | 2141.946166        | 1071.476721     | 2124.919617    | 1062.963446      | 2123.935601    | 1062.471439      | G    | <b>628.341301</b>  | 314.674289      | 611.314752         | 306.161014        | 610.330736     | 305.669006       | 6  |
| 13 | 2238.998930        | 1120.003103     | 2221.972381    | 1111.489828      | 2220.988365    | 1110.997821      | P    | <b>571.319837</b>  | 286.163557      | 554.293288         | 277.650282        | 553.309272     | 277.158274       | 5  |
| 14 | 2368.041523        | 1184.524400     | 2351.014974    | 1176.011125      | 2350.030958    | 1175.519117      | E    | 474.267073         | 237.637175      | 457.240524         | 229.123900        | 456.256508     | 228.631892       | 4  |
| 15 | 2425.062987        | 1213.035132     | 2408.036438    | 1204.521857      | 2407.052422    | 1204.029849      | G    | 345.224480         | 173.115878      | 328.197931         | 164.602603        |                |                  | 3  |
| 16 | 2538.147051        | 1269.577164     | 2521.120502    | 1261.063889      | 2520.136486    | 1260.571881      | L    | 288.203016         | 144.605146      | 271.176467         | 136.091872        |                |                  | 2  |
| 17 |                    |                 |                |                  |                |                  | R    | 175.118952         | 88.063114       | 158.092403         | 79.549839         |                |                  | 1  |

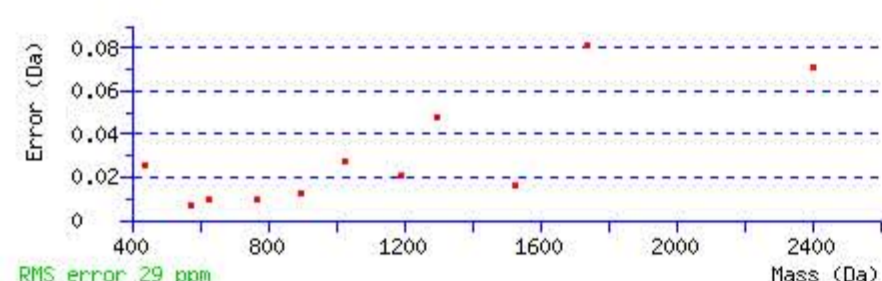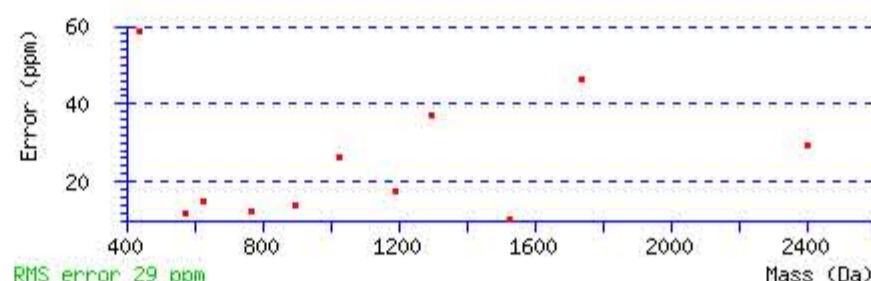

NCBI BLAST search of [MCPQLQQYEMHGPEGLR](#)

(Parameters: blastp, nr protein database, expect=20000, no filter, PAM30)

Other BLAST [web gateways](#)

**All matches to this query**

| Score | Mr(calc):   | Delta    | Sequence                          |
|-------|-------------|----------|-----------------------------------|
| 33.1  | 2711.251434 | 0.023302 | <a href="#">MCPQLQQYEMHGPEGLR</a> |
| 30.6  | 2711.251434 | 0.023302 | <a href="#">MCPQLQQYEMHGPEGLR</a> |
| 28.3  | 2711.251434 | 0.023302 | <a href="#">MCPQLQQYEMHGPEGLR</a> |
| 0.2   | 2711.251434 | 0.023302 | <a href="#">MCPQLQQYEMHGPEGLR</a> |
| 0.2   | 2711.251434 | 0.023302 | <a href="#">MCPQLQQYEMHGPEGLR</a> |

# MASCOT Search Results

## Peptide View

MS/MS Fragmentation of **MCPQLQQYEMHGPEGLR**

Found in **A2MG\_HUMAN**, Alpha-2-macroglobulin OS=Homo sapiens GN=A2M PE=1 SV=3

Match to Query 56142: 3006.459656 from(752.622190,4+) rtinseconds(2345) index(20963)

Title: Locus:1.1.1.3417.10 File:"2013-07-02 CLN FXIII 60 min 3rd F 2.wiff"

Data file C:\Program Files (x86)\Matrix Science\Mascot Daemon\mgf\6 FXIII 60 min 3rd\mascot\_daemon\_merge.mgf

Click mouse within plot area to zoom in by factor of two about that point

Or, Plot from  to  Da

Label all possible matches  Label matches used for scoring

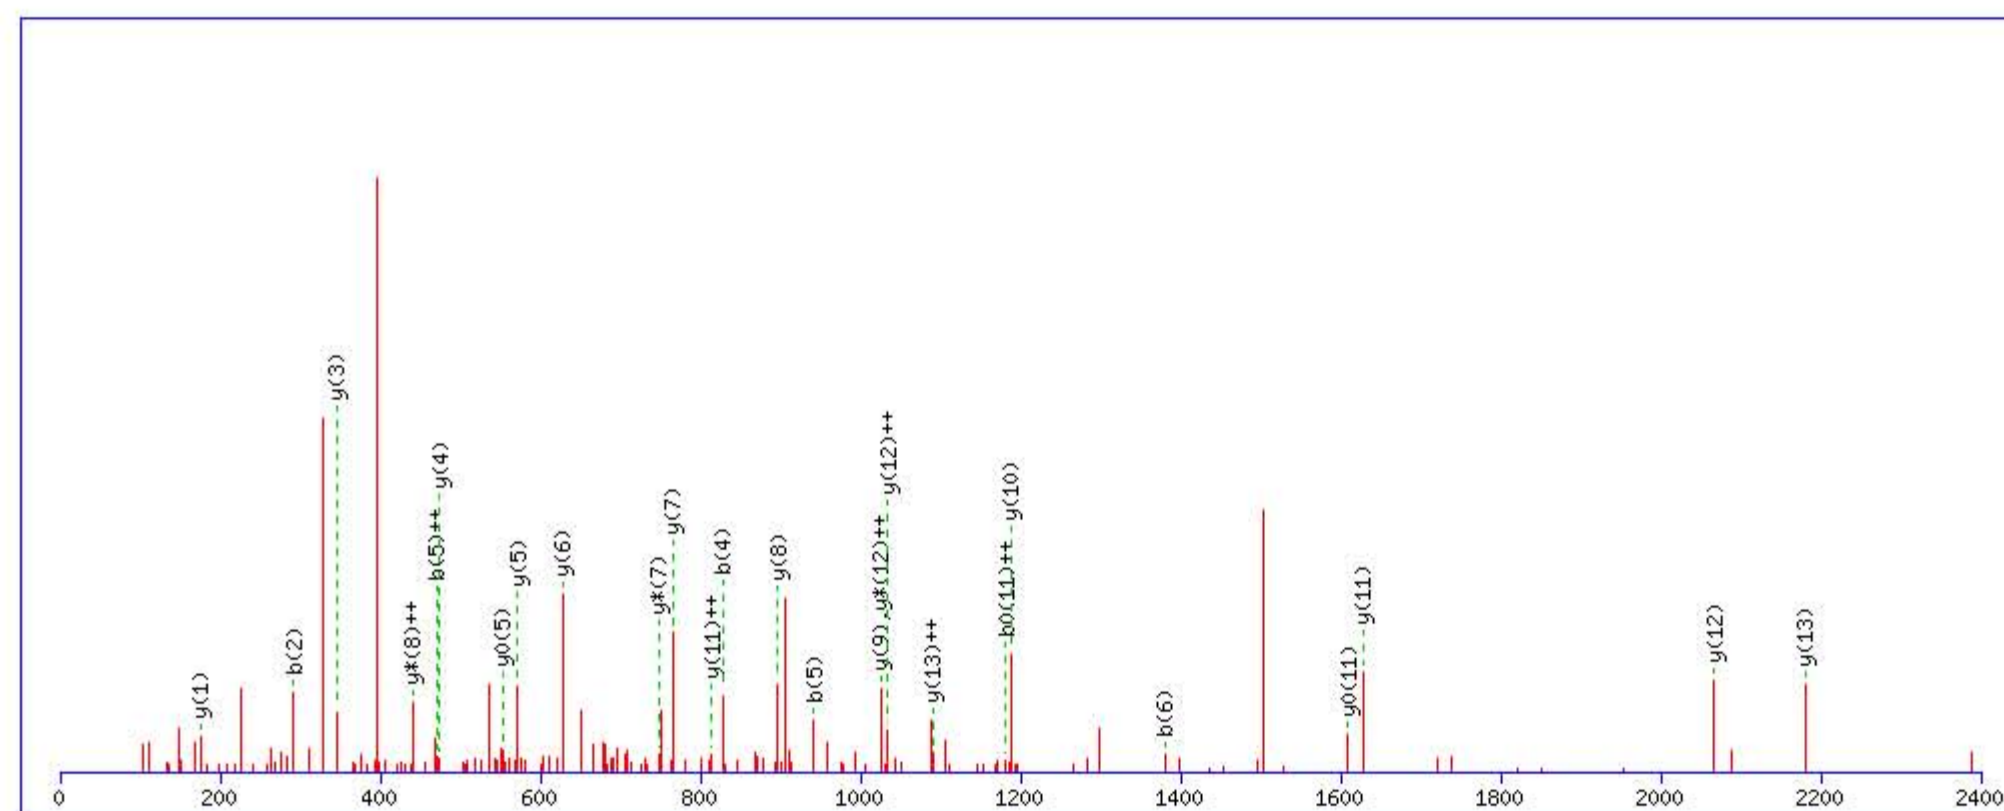

Monoisotopic mass of neutral peptide Mr(calc): 3006.423264

Fixed modifications: Carbamidomethyl (C) (apply to specified residues or termini only)

Variable modifications:

Q4 : Biotin:Thermo-21345 (Q)

Q6 : Biotin:Thermo-21345 (Q)

Q7 : Biotin:Thermo-21345 (Q)

Ions Score: 41 Expect: 0.0021

Matches : 26/164 fragment ions using 68 most intense peaks [\(help\)](#)

| #  | b                  | b <sup>++</sup>   | b <sup>*</sup> | b <sup>*++</sup> | b <sup>0</sup> | b <sup>0++</sup>   | Seq. | y                  | y <sup>++</sup>    | y <sup>*</sup>    | y <sup>*++</sup>   | y <sup>0</sup>     | y <sup>0++</sup> | #  |
|----|--------------------|-------------------|----------------|------------------|----------------|--------------------|------|--------------------|--------------------|-------------------|--------------------|--------------------|------------------|----|
| 1  | 132.047761         | 66.527518         |                |                  |                |                    | M    |                    |                    |                   |                    |                    |                  | 17 |
| 2  | <b>292.078410</b>  | 146.542843        |                |                  |                |                    | C    | 2876.390075        | 1438.698675        | 2859.363526       | 1430.185401        | 2858.379510        | 1429.693393      | 16 |
| 3  | 389.131174         | 195.069225        |                |                  |                |                    | P    | 2716.359426        | 1358.683351        | 2699.332877       | 1350.170076        | 2698.348861        | 1349.678068      | 15 |
| 4  | <b>828.356500</b>  | 414.681888        | 811.329951     | 406.168614       |                |                    | Q    | 2619.306662        | 1310.156969        | 2602.280113       | 1301.643694        | 2601.296097        | 1301.151686      | 14 |
| 5  | <b>941.440564</b>  | <b>471.223920</b> | 924.414015     | 462.710646       |                |                    | L    | <b>2180.081336</b> | <b>1090.544306</b> | 2163.054787       | 1082.031031        | 2162.070771        | 1081.539023      | 13 |
| 6  | <b>1380.665890</b> | 690.836583        | 1363.639341    | 682.323309       |                |                    | Q    | <b>2066.997272</b> | <b>1034.002274</b> | 2049.970723       | <b>1025.488999</b> | 2048.986707        | 1024.996991      | 12 |
| 7  | 1819.891216        | 910.449246        | 1802.864667    | 901.935972       |                |                    | Q    | <b>1627.771946</b> | <b>814.389611</b>  | 1610.745397       | 805.876337         | <b>1609.761381</b> | 805.384329       | 11 |
| 8  | 1982.954545        | 991.980911        | 1965.927996    | 983.467636       |                |                    | Y    | <b>1188.546620</b> | 594.776948         | 1171.520071       | 586.263674         | 1170.536055        | 585.771666       | 10 |
| 9  | 2111.997138        | 1056.502207       | 2094.970589    | 1047.988932      | 2093.986573    | 1047.496925        | E    | <b>1025.483291</b> | 513.245284         | 1008.456742       | 504.732009         | 1007.472726        | 504.240001       | 9  |
| 10 | 2243.037623        | 1122.022450       | 2226.011074    | 1113.509175      | 2225.027058    | 1113.017167        | M    | <b>896.440698</b>  | 448.723987         | 879.414149        | <b>440.210713</b>  | 878.430133         | 439.718705       | 8  |
| 11 | 2380.096535        | 1190.551906       | 2363.069986    | 1182.038631      | 2362.085970    | <b>1181.546623</b> | H    | <b>765.400213</b>  | 383.203745         | <b>748.373664</b> | 374.690470         | 747.389648         | 374.198462       | 7  |
| 12 | 2437.117999        | 1219.062637       | 2420.091450    | 1210.549363      | 2419.107434    | 1210.057355        | G    | <b>628.341301</b>  | 314.674289         | 611.314752        | 306.161014         | 610.330736         | 305.669006       | 6  |
| 13 | 2534.170763        | 1267.589019       | 2517.144214    | 1259.075745      | 2516.160198    | 1258.583737        | P    | <b>571.319837</b>  | 286.163557         | 554.293288        | 277.650282         | <b>553.309272</b>  | 277.158274       | 5  |
| 14 | 2663.213356        | 1332.110316       | 2646.186807    | 1323.597041      | 2645.202791    | 1323.105034        | E    | <b>474.267073</b>  | 237.637175         | 457.240524        | 229.123900         | 456.256508         | 228.631892       | 4  |
| 15 | 2720.234820        | 1360.621048       | 2703.208271    | 1352.107773      | 2702.224255    | 1351.615766        | G    | <b>345.224480</b>  | 173.115878         | 328.197931        | 164.602603         |                    |                  | 3  |
| 16 | 2833.318884        | 1417.163080       | 2816.292335    | 1408.649806      | 2815.308319    | 1408.157798        | L    | 288.203016         | 144.605146         | 271.176467        | 136.091872         |                    |                  | 2  |
| 17 |                    |                   |                |                  |                |                    | R    | <b>175.118952</b>  | 88.063114          | 158.092403        | 79.549839          |                    |                  | 1  |

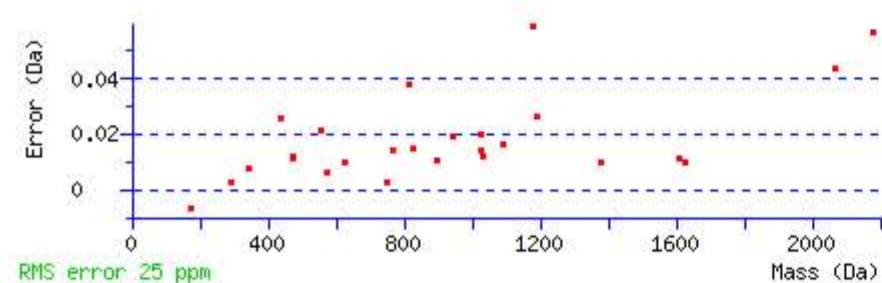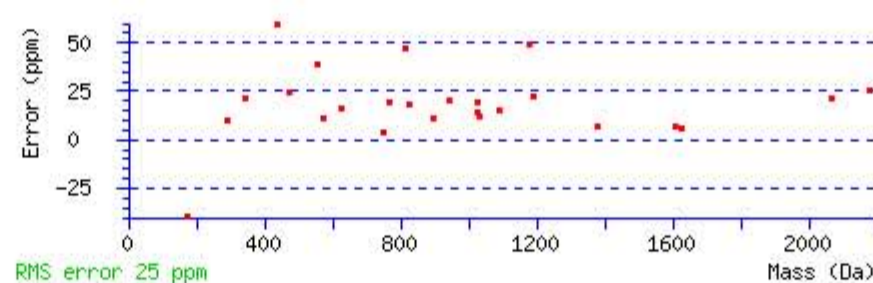

NCBI BLAST search of [MCPQLQQYEMHGPEGLR](#)

(Parameters: blastp, nr protein database, expect=20000, no filter, PAM30)

Other BLAST [web gateways](#)

All matches to this query

| Score | Mr(calc):   | Delta    | Sequence                          |
|-------|-------------|----------|-----------------------------------|
| 41.1  | 3006.423264 | 0.036392 | <a href="#">MCPQLQQYEMHGPEGLR</a> |

Mascot: <http://www.matrixscience.com/>

# MASCOT Search Results

## Peptide View

MS/MS Fragmentation of **AVDQSVLLMKPDAELSASSVYNLLPEK**  
 Found in **A2MG\_HUMAN**, Alpha-2-macroglobulin OS=Homo sapiens GN=A2M PE=1 SV=3

Match to Query 58592: 3227.692452 from(1076.904760,3+) rtinseconds(2776) index(37480)  
 Title: Locus:1.1.1.3514.26 File:"2013-07-02 CLN FXIII 60 min 3rd F 3.wiff"  
 Data file C:\Program Files (x86)\Matrix Science\Mascot Daemon\mgf\6 FXIII 60 min 3rd\mascot\_daemon\_merge.mgf

Click mouse within plot area to zoom in by factor of two about that point  
 Or, Plot from  to  Da   
 Label all possible matches  Label matches used for scoring

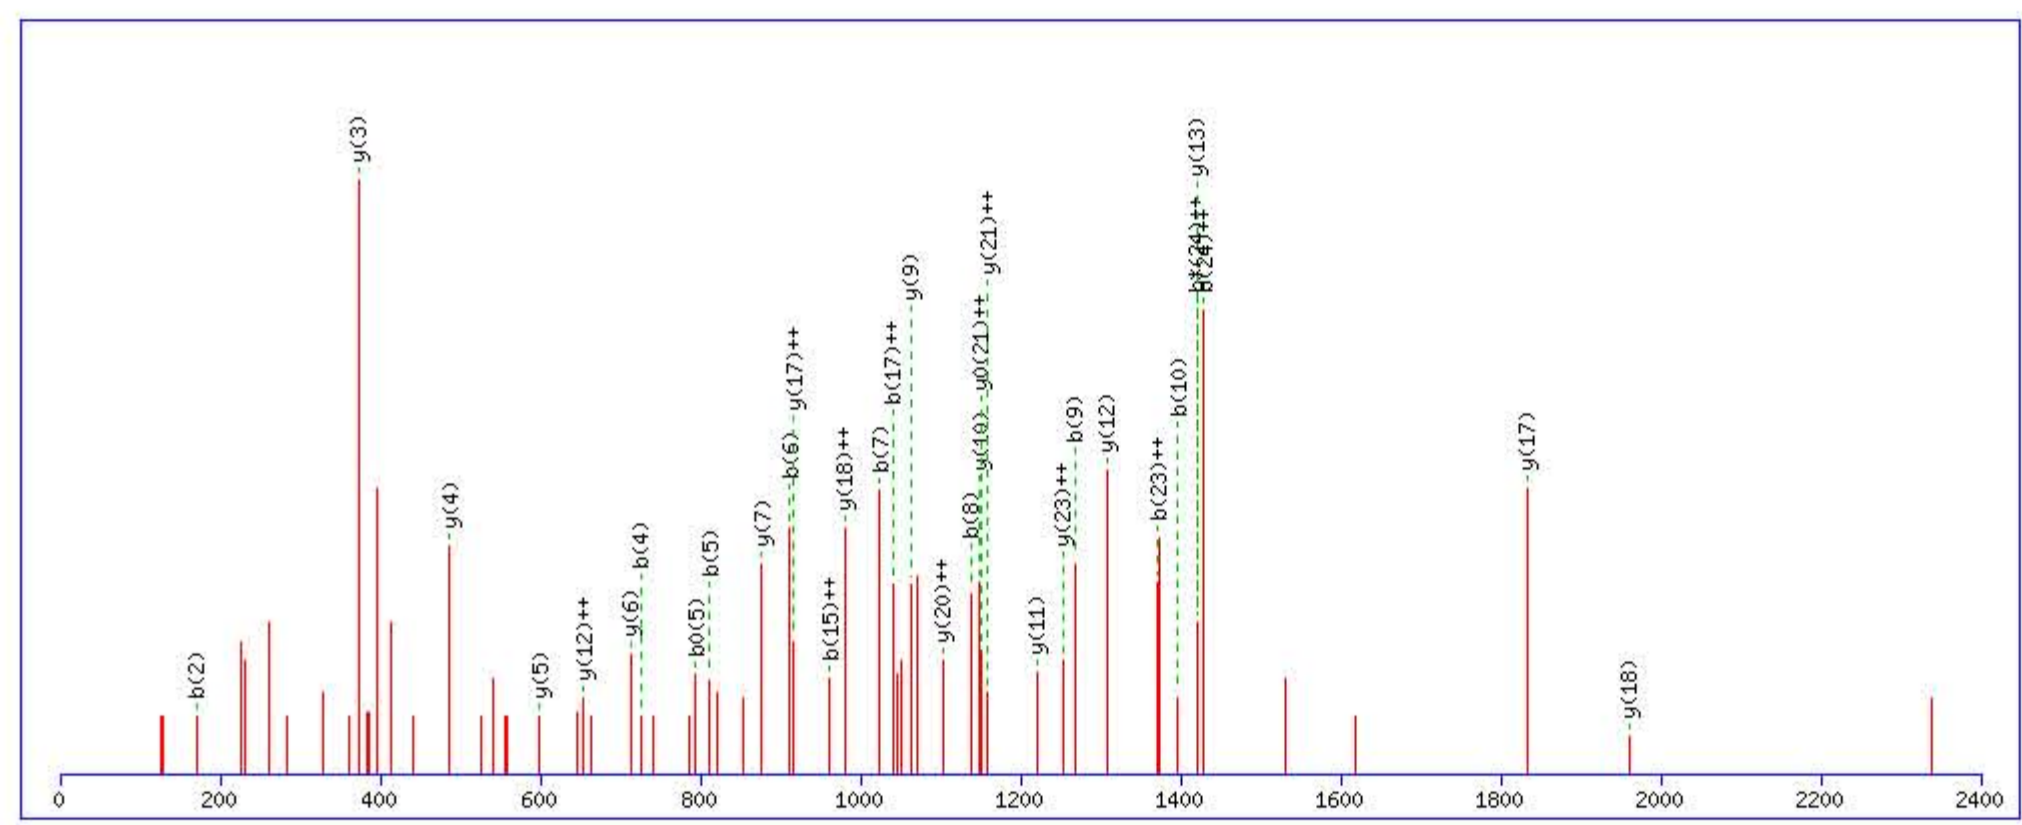

Monoisotopic mass of neutral peptide Mr(calc): 3227.682129  
 Fixed modifications: Carbamidomethyl (C) (apply to specified residues or termini only)  
 Variable modifications:  
 Q4 : Biotin:Thermo-21345 (Q)  
 Ions Score: 63 Expect: 3.1e-006  
 Matches : 33/300 fragment ions using 66 most intense peaks ([help](#))

| #  | b                  | b <sup>++</sup>    | b <sup>*</sup> | b <sup>+++</sup>   | b <sup>0</sup>    | b <sup>0++</sup> | Seq. | y                  | y <sup>++</sup>    | y <sup>*</sup> | y <sup>+++</sup> | y <sup>0</sup> | y <sup>0++</sup>   | #  |
|----|--------------------|--------------------|----------------|--------------------|-------------------|------------------|------|--------------------|--------------------|----------------|------------------|----------------|--------------------|----|
| 1  | 72.044390          | 36.525833          |                |                    |                   |                  | A    |                    |                    |                |                  |                |                    | 27 |
| 2  | <b>171.112804</b>  | 86.060040          |                |                    |                   |                  | V    | 3157.652336        | 1579.329806        | 3140.625787    | 1570.816531      | 3139.641771    | 1570.324523        | 26 |
| 3  | 286.139747         | 143.573512         |                |                    | 268.129182        | 134.568229       | D    | 3058.583922        | 1529.795599        | 3041.557373    | 1521.282324      | 3040.573357    | 1520.790316        | 25 |
| 4  | <b>725.365073</b>  | 363.186175         | 708.338524     | 354.672900         | 707.354508        | 354.180892       | Q    | 2943.556979        | 1472.282127        | 2926.530430    | 1463.768853      | 2925.546414    | 1463.276845        | 24 |
| 5  | <b>812.397101</b>  | 406.702189         | 795.370552     | 398.188914         | <b>794.386536</b> | 397.696906       | S    | 2504.331653        | <b>1252.669464</b> | 2487.305104    | 1244.156190      | 2486.321088    | 1243.664182        | 23 |
| 6  | <b>911.465515</b>  | 456.236396         | 894.438966     | 447.723121         | 893.454950        | 447.231113       | V    | 2417.299625        | 1209.153451        | 2400.273076    | 1200.640176      | 2399.289060    | 1200.148168        | 22 |
| 7  | <b>1024.549579</b> | 512.778427         | 1007.523030    | 504.265153         | 1006.539014       | 503.773145       | L    | 2318.231211        | <b>1159.619243</b> | 2301.204662    | 1151.105969      | 2300.220646    | <b>1150.613961</b> | 21 |
| 8  | <b>1137.633643</b> | 569.320459         | 1120.607094    | 560.807185         | 1119.623078       | 560.315177       | L    | 2205.147147        | <b>1103.077212</b> | 2188.120598    | 1094.563937      | 2187.136582    | 1094.071929        | 20 |
| 9  | <b>1268.674128</b> | 634.840702         | 1251.647579    | 626.327428         | 1250.663563       | 625.835419       | M    | 2092.063083        | 1046.535179        | 2075.036534    | 1038.021905      | 2074.052518    | 1037.529897        | 19 |
| 10 | <b>1396.769091</b> | 698.888183         | 1379.742542    | 690.374909         | 1378.758526       | 689.882901       | K    | <b>1961.022598</b> | <b>981.014937</b>  | 1943.996049    | 972.501663       | 1943.012033    | 972.009655         | 18 |
| 11 | 1493.821855        | 747.414565         | 1476.795306    | 738.901291         | 1475.811290       | 738.409283       | P    | <b>1832.927635</b> | <b>916.967456</b>  | 1815.901086    | 908.454181       | 1814.917070    | 907.962173         | 17 |
| 12 | 1608.848798        | 804.928037         | 1591.822249    | 796.414763         | 1590.838233       | 795.922755       | D    | 1735.874871        | 868.441074         | 1718.848322    | 859.927799       | 1717.864306    | 859.435791         | 16 |
| 13 | 1679.885912        | 840.446594         | 1662.859363    | 831.933320         | 1661.875347       | 831.441311       | A    | 1620.847928        | 810.927602         | 1603.821379    | 802.414328       | 1602.837363    | 801.922320         | 15 |
| 14 | 1808.928505        | 904.967891         | 1791.901956    | 896.454616         | 1790.917940       | 895.962608       | E    | 1549.810814        | 775.409045         | 1532.784265    | 766.895771       | 1531.800249    | 766.403763         | 14 |
| 15 | 1922.012569        | <b>961.509923</b>  | 1904.986020    | 952.996648         | 1904.002004       | 952.504640       | L    | <b>1420.768221</b> | 710.887749         | 1403.741672    | 702.374474       | 1402.757656    | 701.882466         | 13 |
| 16 | 2009.044597        | 1005.025937        | 1992.018048    | 996.512662         | 1991.034032       | 996.020654       | S    | <b>1307.684157</b> | <b>654.345717</b>  | 1290.657608    | 645.832442       | 1289.673592    | 645.340434         | 12 |
| 17 | 2080.081711        | <b>1040.544493</b> | 2063.055162    | 1032.031219        | 2062.071146       | 1031.539211      | A    | <b>1220.652129</b> | 610.829703         | 1203.625580    | 602.316428       | 1202.641564    | 601.824420         | 11 |
| 18 | 2167.113739        | 1084.060507        | 2150.087190    | 1075.547233        | 2149.103174       | 1075.055225      | S    | <b>1149.615015</b> | 575.311146         | 1132.588466    | 566.797871       | 1131.604450    | 566.305863         | 10 |
| 19 | 2254.145767        | 1127.576521        | 2237.119218    | 1119.063247        | 2236.135202       | 1118.571239      | S    | <b>1062.582987</b> | 531.795132         | 1045.556438    | 523.281857       | 1044.572422    | 522.789849         | 9  |
| 20 | 2353.214181        | 1177.110728        | 2336.187632    | 1168.597454        | 2335.203616       | 1168.105446      | V    | 975.550959         | 488.279118         | 958.524410     | 479.765843       | 957.540394     | 479.273835         | 8  |
| 21 | 2516.277510        | 1258.642393        | 2499.250961    | 1250.129118        | 2498.266945       | 1249.637110      | Y    | <b>876.482545</b>  | 438.744911         | 859.455996     | 430.231636       | 858.471980     | 429.739628         | 7  |
| 22 | 2630.320437        | 1315.663856        | 2613.293888    | 1307.150582        | 2612.309872       | 1306.658574      | N    | <b>713.419216</b>  | 357.213246         | 696.392667     | 348.699972       | 695.408651     | 348.207964         | 6  |
| 23 | 2743.404501        | <b>1372.205888</b> | 2726.377952    | 1363.692614        | 2725.393936       | 1363.200606      | L    | <b>599.376289</b>  | 300.191783         | 582.349740     | 291.678508       | 581.365724     | 291.186500         | 5  |
| 24 | 2856.488565        | <b>1428.747921</b> | 2839.462016    | <b>1420.234646</b> | 2838.478000       | 1419.742638      | L    | <b>486.292225</b>  | 243.649751         | 469.265676     | 235.136476       | 468.281660     | 234.644468         | 4  |
| 25 | 2953.541329        | 1477.274303        | 2936.514780    | 1468.761028        | 2935.530764       | 1468.269020      | P    | <b>373.208161</b>  | 187.107719         | 356.181612     | 178.594444       | 355.197596     | 178.102436         | 3  |
| 26 | 3082.583922        | 1541.795599        | 3065.557373    | 1533.282325        | 3064.573357       | 1532.790317      | E    | 276.155397         | 138.581337         | 259.128848     | 130.068062       | 258.144832     | 129.576054         | 2  |
| 27 |                    |                    |                |                    |                   |                  | K    | 147.112804         | 74.060040          | 130.086255     | 65.546765        |                |                    | 1  |

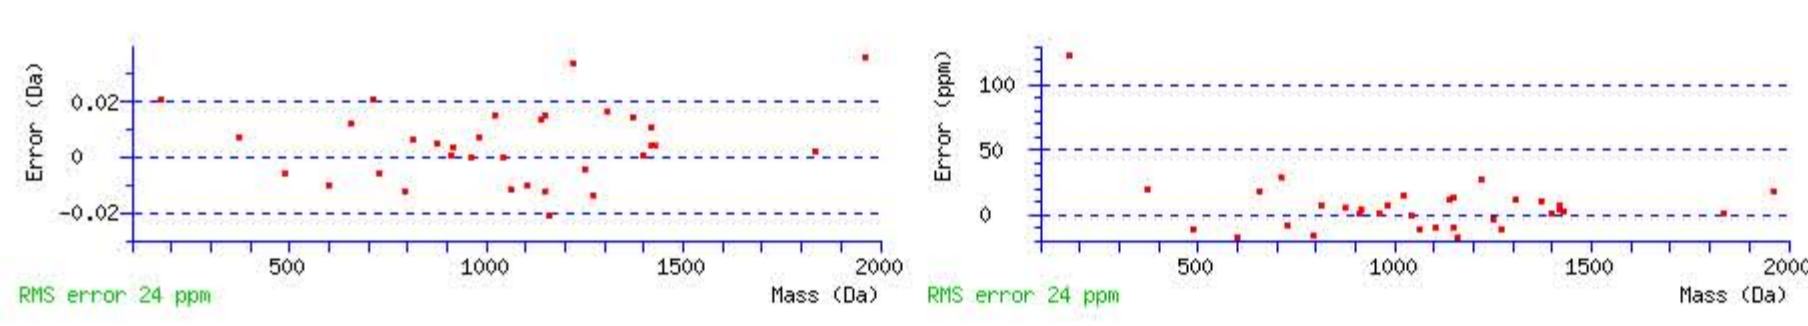

NCBI BLAST search of **AVDQSVLLMKPDAELSASSVYNLLPEK**  
 (Parameters: blastp, nr protein database, expect=20000, no filter, PAM30)  
 Other BLAST [web gateways](#)

### All matches to this query

| Score | Mr(calc):   | Delta    | Sequence                                       |
|-------|-------------|----------|------------------------------------------------|
| 63.1  | 3227.682129 | 0.010323 | <a href="#">AVDQSVLLMKPDAELSASSVYNLLPEK</a>    |
| 4.4   | 3227.668900 | 0.023552 | <a href="#">SQGRGKYDFYIGLGLAMSSSIFIGGSFILK</a> |

# Mascot Search Results

## Peptide View

MS/MS Fragmentation of **ENAEQSR**

Found in **ANT3\_HUMAN**, Antithrombin-III OS=Homo sapiens GN=SERPINC1 PE=1 SV=1

Match to Query 18634: 1143.532728 from(572.773640,2+) rtinseconds(1171) index(28680)

Title: Locus:1.1.1.2956.12 File:"2013-07-02 CLN FXIII 60 min 3rd F 3.wiff"

Data file C:\Program Files (x86)\Matrix Science\Mascot Daemon\mgf\6 FXIII 60 min 3rd\mascot\_daemon\_merge.mgf

Click mouse within plot area to zoom in by factor of two about that point

Or, Plot from  to  Da

Label all possible matches  Label matches used for scoring

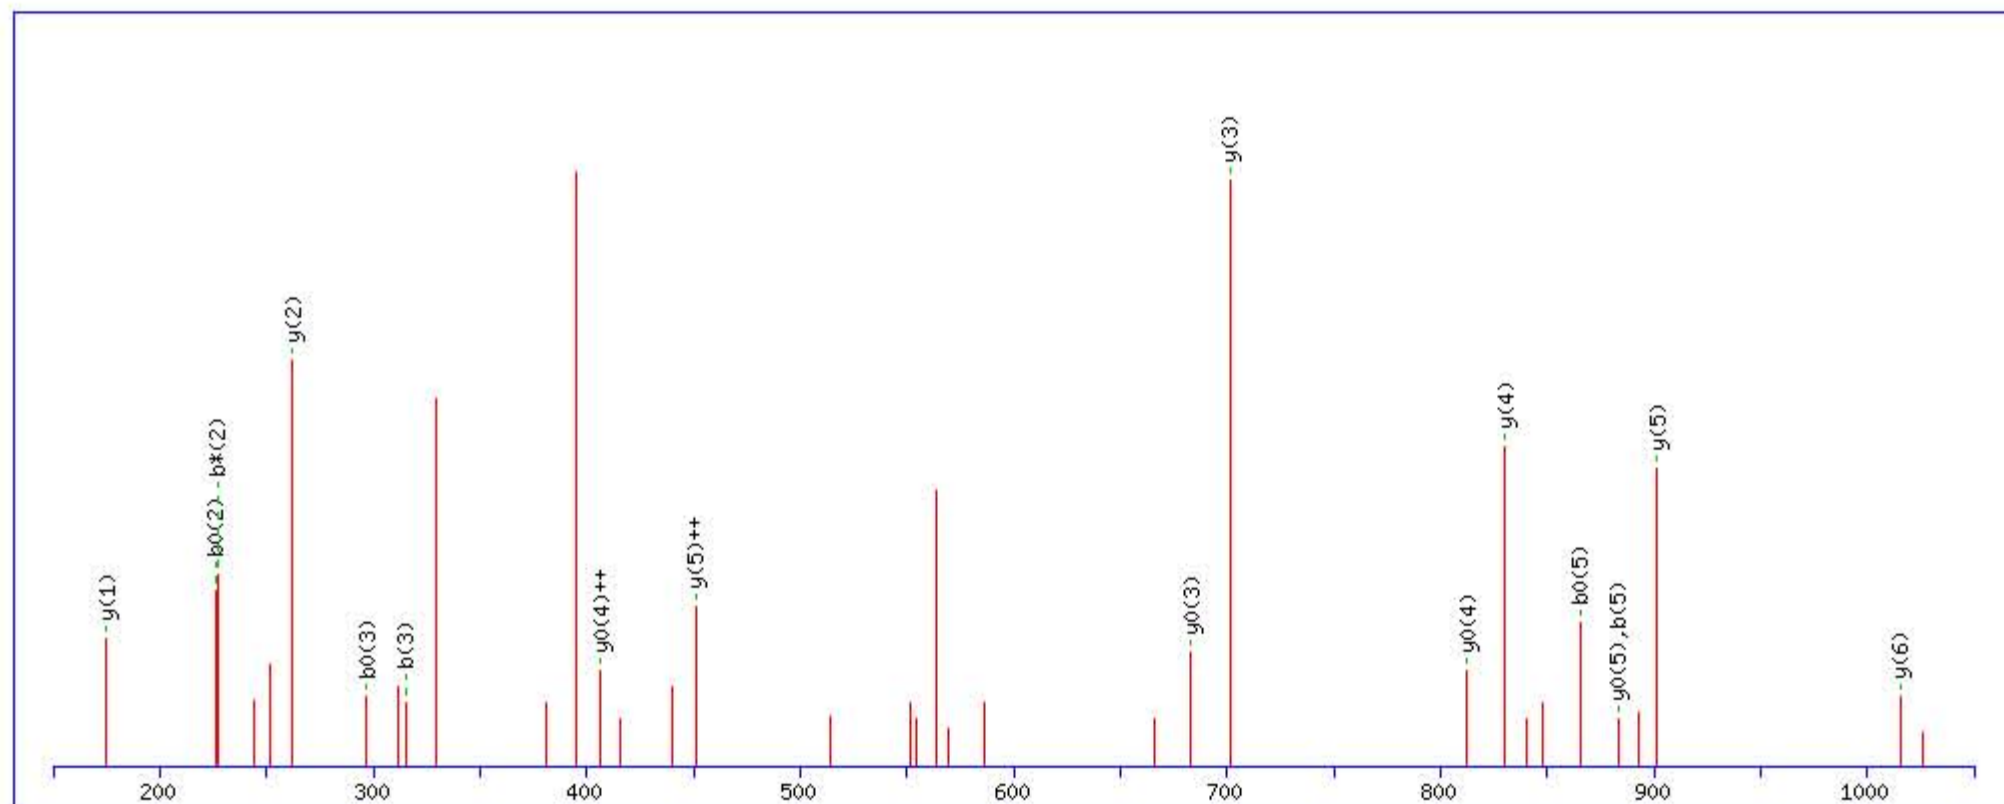

Monoisotopic mass of neutral peptide Mr(calc): 1143.534225

Fixed modifications: Carbamidomethyl (C) (apply to specified residues or termini only)

Variable modifications:

Q5 : Biotin:Thermo-21345 (Q)

Ions Score: 37 Expect: 0.0022

Matches : 17/68 fragment ions using 29 most intense peaks [\(help\)](#)

| # | b          | b <sup>++</sup> | b <sup>*</sup> | b <sup>*++</sup> | b <sup>0</sup> | b <sup>0++</sup> | Seq. | y           | y <sup>++</sup> | y <sup>*</sup> | y <sup>*++</sup> | y <sup>0</sup> | y <sup>0++</sup> | # |
|---|------------|-----------------|----------------|------------------|----------------|------------------|------|-------------|-----------------|----------------|------------------|----------------|------------------|---|
| 1 | 130.049869 | 65.528572       |                |                  | 112.039304     | 56.523290        | E    |             |                 |                |                  |                |                  | 7 |
| 2 | 244.092796 | 122.550036      | 227.066247     | 114.036762       | 226.082231     | 113.544754       | N    | 1015.498940 | 508.253108      | 998.472391     | 499.739834       | 997.488375     | 499.247826       | 6 |
| 3 | 315.129910 | 158.068593      | 298.103361     | 149.555319       | 297.119345     | 149.063311       | A    | 901.456013  | 451.231645      | 884.429464     | 442.718370       | 883.445448     | 442.226362       | 5 |
| 4 | 444.172503 | 222.589890      | 427.145954     | 214.076615       | 426.161938     | 213.584607       | E    | 830.418899  | 415.713088      | 813.392350     | 407.199813       | 812.408334     | 406.707805       | 4 |
| 5 | 883.397829 | 442.202553      | 866.371280     | 433.689278       | 865.387264     | 433.197270       | Q    | 701.376306  | 351.191791      | 684.349757     | 342.678517       | 683.365741     | 342.186509       | 3 |
| 6 | 970.429857 | 485.718567      | 953.403308     | 477.205292       | 952.419292     | 476.713284       | S    | 262.150980  | 131.579128      | 245.124431     | 123.065853       | 244.140415     | 122.573845       | 2 |
| 7 |            |                 |                |                  |                |                  | R    | 175.118952  | 88.063114       | 158.092403     | 79.549839        |                |                  | 1 |

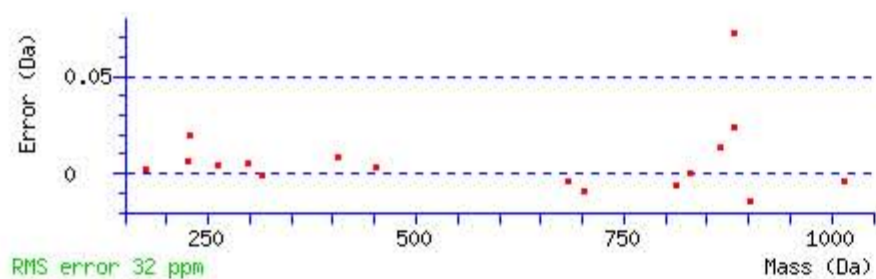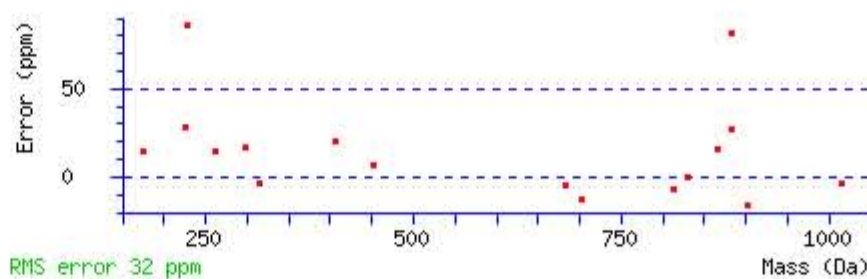

NCBI BLAST search of **ENAEQSR**

(Parameters: blastp, nr protein database, expect=20000, no filter, PAM30)

Other BLAST [web gateways](#)

All matches to this query

| Score | Mr(calc):   | Delta     | Sequence                  |
|-------|-------------|-----------|---------------------------|
| 36.7  | 1143.534225 | -0.001497 | <a href="#">ENAEQSR</a>   |
| 13.2  | 1143.549500 | -0.016772 | <a href="#">WQEQSR</a>    |
| 0.0   | 1143.549500 | -0.016772 | <a href="#">KWESGHCLK</a> |

# MASCOT SEARCH RESULTS

## Peptide View

MS/MS Fragmentation of **ATEDEGSEQK**

Found in **ANT3\_HUMAN**, Antithrombin-III OS=Homo sapiens GN=SERPINC1 PE=1 SV=1

Match to Query 27018: 1403.634828 from(702.824690,2+) rtinseconds(1209) index(14378)

Title: Locus:1.1.1.3021.9 File:"2013-07-02 CLN FXIII 60 min 3rd F 2.wiff"

Data file C:\Program Files (x86)\Matrix Science\Mascot Daemon\mgf\6 FXIII 60 min 3rd\mascot\_daemon\_merge.mgf

Click mouse within plot area to zoom in by factor of two about that point

Or, Plot from  to  Da

Label all possible matches  Label matches used for scoring

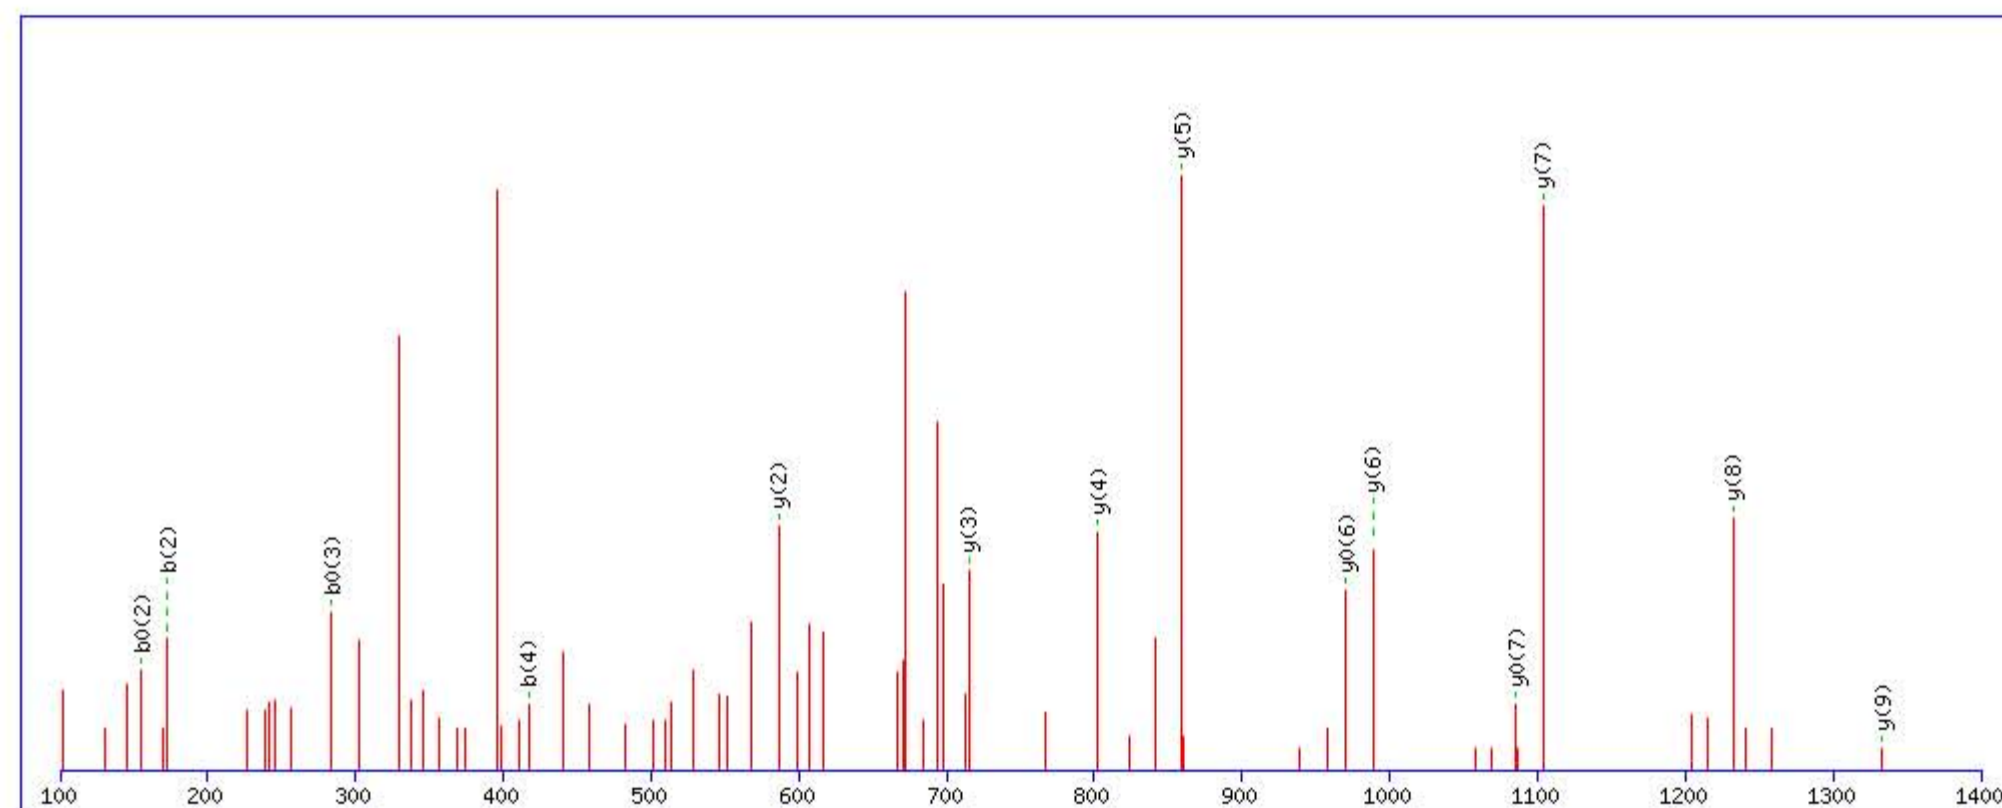

Monoisotopic mass of neutral peptide Mr(calc): 1403.623840

Fixed modifications: Carbamidomethyl (C) (apply to specified residues or termini only)

Variable modifications:

Q9 : Biotin:Thermo-21345 (Q)

Ions Score: 56 Expect: 1.8e-005

Matches : 14/86 fragment ions using 24 most intense peaks [\(help\)](#)

| #  | b                 | b <sup>++</sup> | b <sup>+</sup> | b <sup>*++</sup> | b <sup>0</sup>    | b <sup>0++</sup> | Seq. | y                  | y <sup>++</sup> | y <sup>+</sup> | y <sup>*++</sup> | y <sup>0</sup>     | y <sup>0++</sup> | #  |
|----|-------------------|-----------------|----------------|------------------|-------------------|------------------|------|--------------------|-----------------|----------------|------------------|--------------------|------------------|----|
| 1  | 72.044390         | 36.525833       |                |                  |                   |                  | A    |                    |                 |                |                  |                    |                  | 10 |
| 2  | <b>173.092069</b> | 87.049672       |                |                  | <b>155.081504</b> | 78.044390        | T    | <b>1333.594023</b> | 667.300650      | 1316.567474    | 658.787375       | 1315.583458        | 658.295367       | 9  |
| 3  | 302.134662        | 151.570969      |                |                  | <b>284.124097</b> | 142.565687       | E    | <b>1232.546344</b> | 616.776810      | 1215.519795    | 608.263536       | 1214.535779        | 607.771528       | 8  |
| 4  | <b>417.161605</b> | 209.084441      |                |                  | 399.151040        | 200.079158       | D    | <b>1103.503751</b> | 552.255514      | 1086.477202    | 543.742239       | <b>1085.493186</b> | 543.250231       | 7  |
| 5  | 546.204198        | 273.605737      |                |                  | 528.193633        | 264.600455       | E    | <b>988.476808</b>  | 494.742042      | 971.450259     | 486.228768       | <b>970.466243</b>  | 485.736760       | 6  |
| 6  | 603.225662        | 302.116469      |                |                  | 585.215097        | 293.111187       | G    | <b>859.434215</b>  | 430.220746      | 842.407666     | 421.707471       | 841.423650         | 421.215463       | 5  |
| 7  | 690.257690        | 345.632483      |                |                  | 672.247125        | 336.627201       | S    | <b>802.412751</b>  | 401.710014      | 785.386202     | 393.196739       | 784.402186         | 392.704731       | 4  |
| 8  | 819.300283        | 410.153780      |                |                  | 801.289718        | 401.148497       | E    | <b>715.380723</b>  | 358.194000      | 698.354174     | 349.680725       | 697.370158         | 349.188717       | 3  |
| 9  | 1258.525609       | 629.766443      | 1241.499060    | 621.253168       | 1240.515044       | 620.761160       | Q    | <b>586.338130</b>  | 293.672703      | 569.311581     | 285.159428       |                    |                  | 2  |
| 10 |                   |                 |                |                  |                   |                  | K    | 147.112804         | 74.060040       | 130.086255     | 65.546765        |                    |                  | 1  |

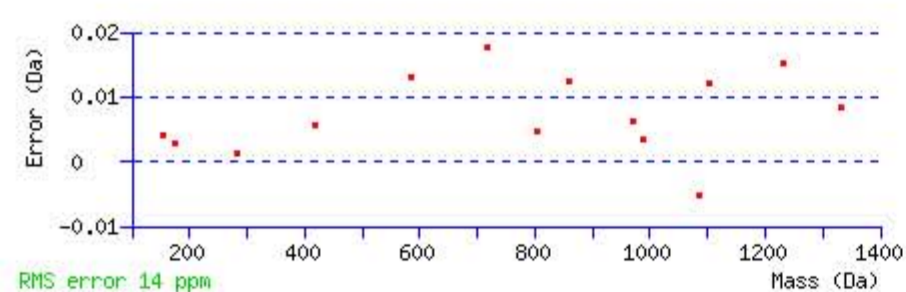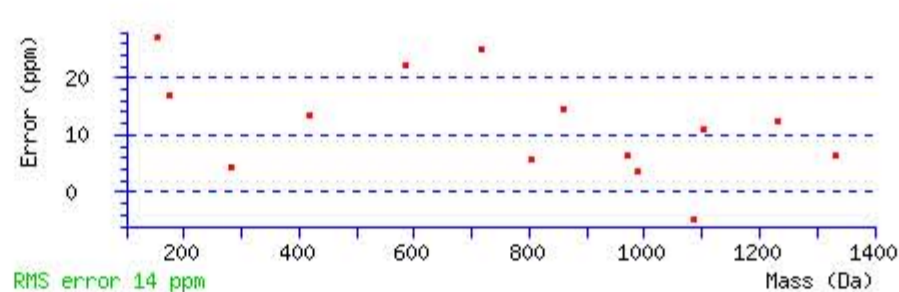

NCBI BLAST search of [ATEDEGSEQK](#)

(Parameters: blastp, nr protein database, expect=20000, no filter, PAM30)

Other BLAST [web gateways](#)

All matches to this query

| Score | Mr(calc):   | Delta     | Sequence                      |
|-------|-------------|-----------|-------------------------------|
| 56.3  | 1403.623840 | 0.010988  | <a href="#">ATEDEGSEQK</a>    |
| 14.2  | 1403.642929 | -0.008101 | <a href="#">EAESWSQIGNQR</a>  |
| 4.7   | 1403.652832 | -0.018004 | <a href="#">LTSDEEGEPSGKR</a> |



# MASCOT Search Results

## Peptide View

MS/MS Fragmentation of **TSDQIHFFFAK**

Found in **ANT3\_HUMAN**, Antithrombin-III OS=Homo sapiens GN=SERPINC1 PE=1 SV=1

Match to Query 35452: 1650.842382 from(551.288070,3+) rtinseconds(2353) index(20998)

Title: Locus:1.1.1.3420.3 File:"2013-07-02 CLN FXIII 60 min 3rd F 2.wiff"

Data file C:\Program Files (x86)\Matrix Science\Mascot Daemon\mgf\6 FXIII 60 min 3rd\mascot\_daemon\_merge.mgf

Click mouse within plot area to zoom in by factor of two about that point

Or, Plot from  to  Da

Label all possible matches  Label matches used for scoring

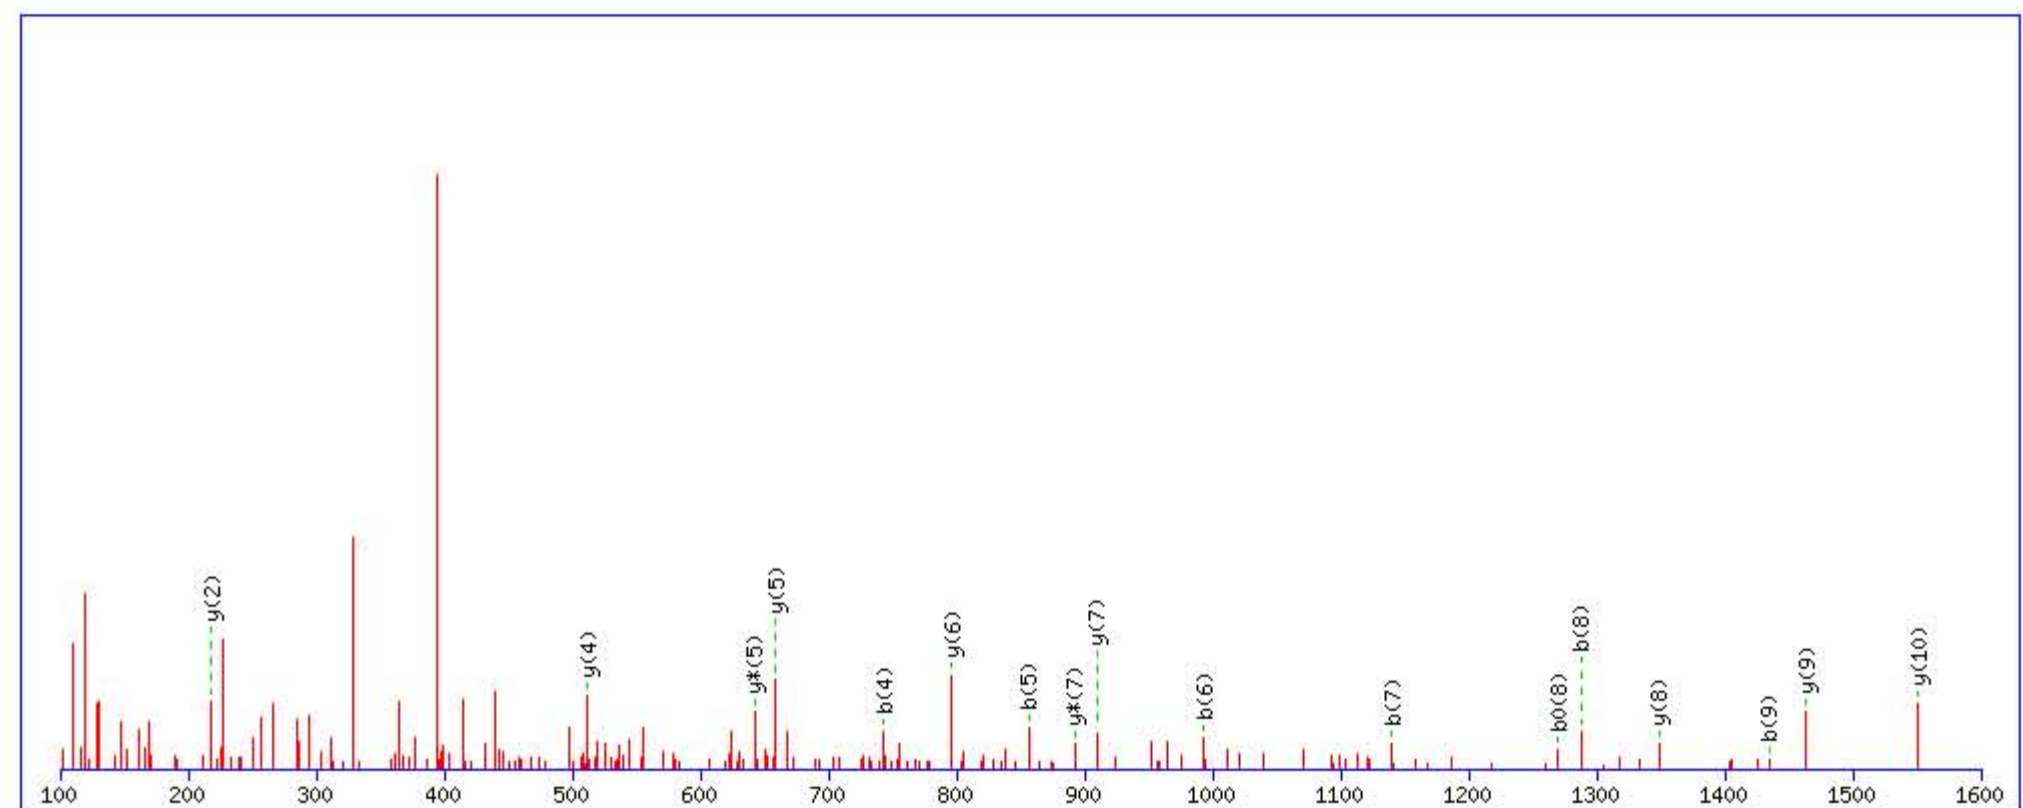

Monoisotopic mass of neutral peptide Mr(calc): 1650.822845

Fixed modifications: Carbamidomethyl (C) (apply to specified residues or termini only)

Variable modifications:

Q4 : Biotin:Thermo-21345 (Q)

Ions Score: 46 Expect: 0.00062

Matches : 17/98 fragment ions using 29 most intense peaks [\(help\)](#)

| #  | b           | b <sup>++</sup> | b <sup>*</sup> | b <sup>*++</sup> | b <sup>0</sup> | b <sup>0++</sup> | Seq. | y           | y <sup>++</sup> | y <sup>*</sup> | y <sup>*++</sup> | y <sup>0</sup> | y <sup>0++</sup> | #  |
|----|-------------|-----------------|----------------|------------------|----------------|------------------|------|-------------|-----------------|----------------|------------------|----------------|------------------|----|
| 1  | 102.054955  | 51.531116       |                |                  | 84.044390      | 42.525833        | T    |             |                 |                |                  |                |                  | 11 |
| 2  | 189.086983  | 95.047129       |                |                  | 171.076418     | 86.041847        | S    | 1550.782433 | 775.894855      | 1533.755884    | 767.381580       | 1532.771868    | 766.889572       | 10 |
| 3  | 304.113926  | 152.560601      |                |                  | 286.103361     | 143.555319       | D    | 1463.750405 | 732.378841      | 1446.723856    | 723.865566       | 1445.739840    | 723.373558       | 9  |
| 4  | 743.339252  | 372.173264      | 726.312703     | 363.659989       | 725.328687     | 363.167982       | Q    | 1348.723462 | 674.865369      | 1331.696913    | 666.352095       |                |                  | 8  |
| 5  | 856.423316  | 428.715296      | 839.396767     | 420.202022       | 838.412751     | 419.710014       | I    | 909.498136  | 455.252706      | 892.471587     | 446.739432       |                |                  | 7  |
| 6  | 993.482228  | 497.244752      | 976.455679     | 488.731477       | 975.471663     | 488.239469       | H    | 796.414072  | 398.710674      | 779.387523     | 390.197400       |                |                  | 6  |
| 7  | 1140.550642 | 570.778959      | 1123.524093    | 562.265685       | 1122.540077    | 561.773676       | F    | 659.355160  | 330.181218      | 642.328611     | 321.667944       |                |                  | 5  |
| 8  | 1287.619056 | 644.313166      | 1270.592507    | 635.799892       | 1269.608491    | 635.307884       | F    | 512.286746  | 256.647011      | 495.260197     | 248.133737       |                |                  | 4  |
| 9  | 1434.687470 | 717.847373      | 1417.660921    | 709.334099       | 1416.676905    | 708.842091       | F    | 365.218332  | 183.112804      | 348.191783     | 174.599530       |                |                  | 3  |
| 10 | 1505.724584 | 753.365930      | 1488.698035    | 744.852656       | 1487.714019    | 744.360648       | A    | 218.149918  | 109.578597      | 201.123369     | 101.065322       |                |                  | 2  |
| 11 |             |                 |                |                  |                |                  | K    | 147.112804  | 74.060040       | 130.086255     | 65.546765        |                |                  | 1  |

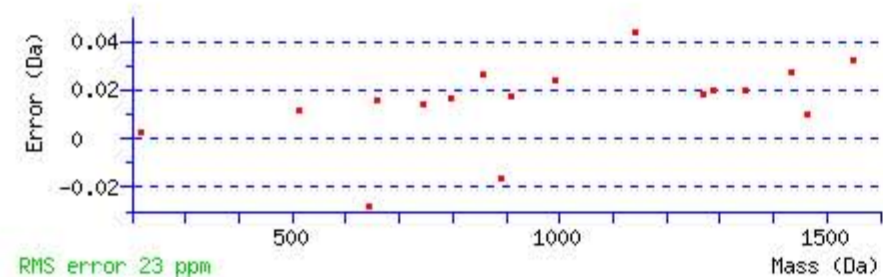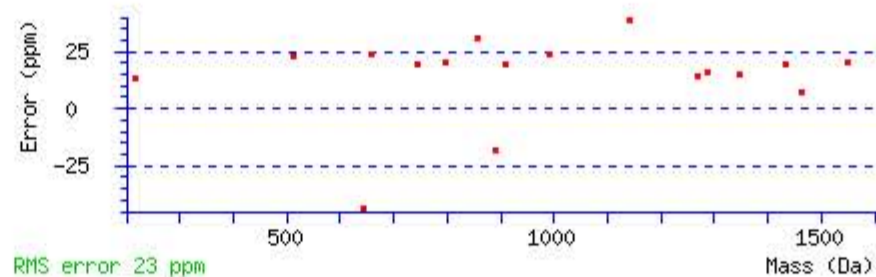

NCBI BLAST search of [TSDQIHFFFAK](#)

(Parameters: blastp, nr protein database, expect=20000, no filter, PAM30)

Other BLAST [web gateways](#)

All matches to this query

| Score | Mr(calc):   | Delta    | Sequence                    |
|-------|-------------|----------|-----------------------------|
| 45.7  | 1650.822845 | 0.019537 | <a href="#">TSDQIHFFFAK</a> |

Mascot: <http://www.matrixscience.com/>

# MASCOT SCIENCE Mascot Search Results

## Peptide View

MS/MS Fragmentation of **VAEGTQVLELPEFK**

Found in **ANT3\_HUMAN**, Antithrombin-III OS=Homo sapiens GN=SERPINC1 PE=1 SV=1

Match to Query 37221: 1740.974248 from(871.494400,2+) rtinseconds(2552) index(21961)

Title: Locus:1.1.1.3489.7 File:"2013-07-02 CLN FXIII 60 min 3rd F 2.wiff"

Data file C:\Program Files (x86)\Matrix Science\Mascot Daemon\mgf\6 FXIII 60 min 3rd\mascot\_daemon\_merge.mgf

Click mouse within plot area to zoom in by factor of two about that point

Or, Plot from  to  Da

Label all possible matches  Label matches used for scoring

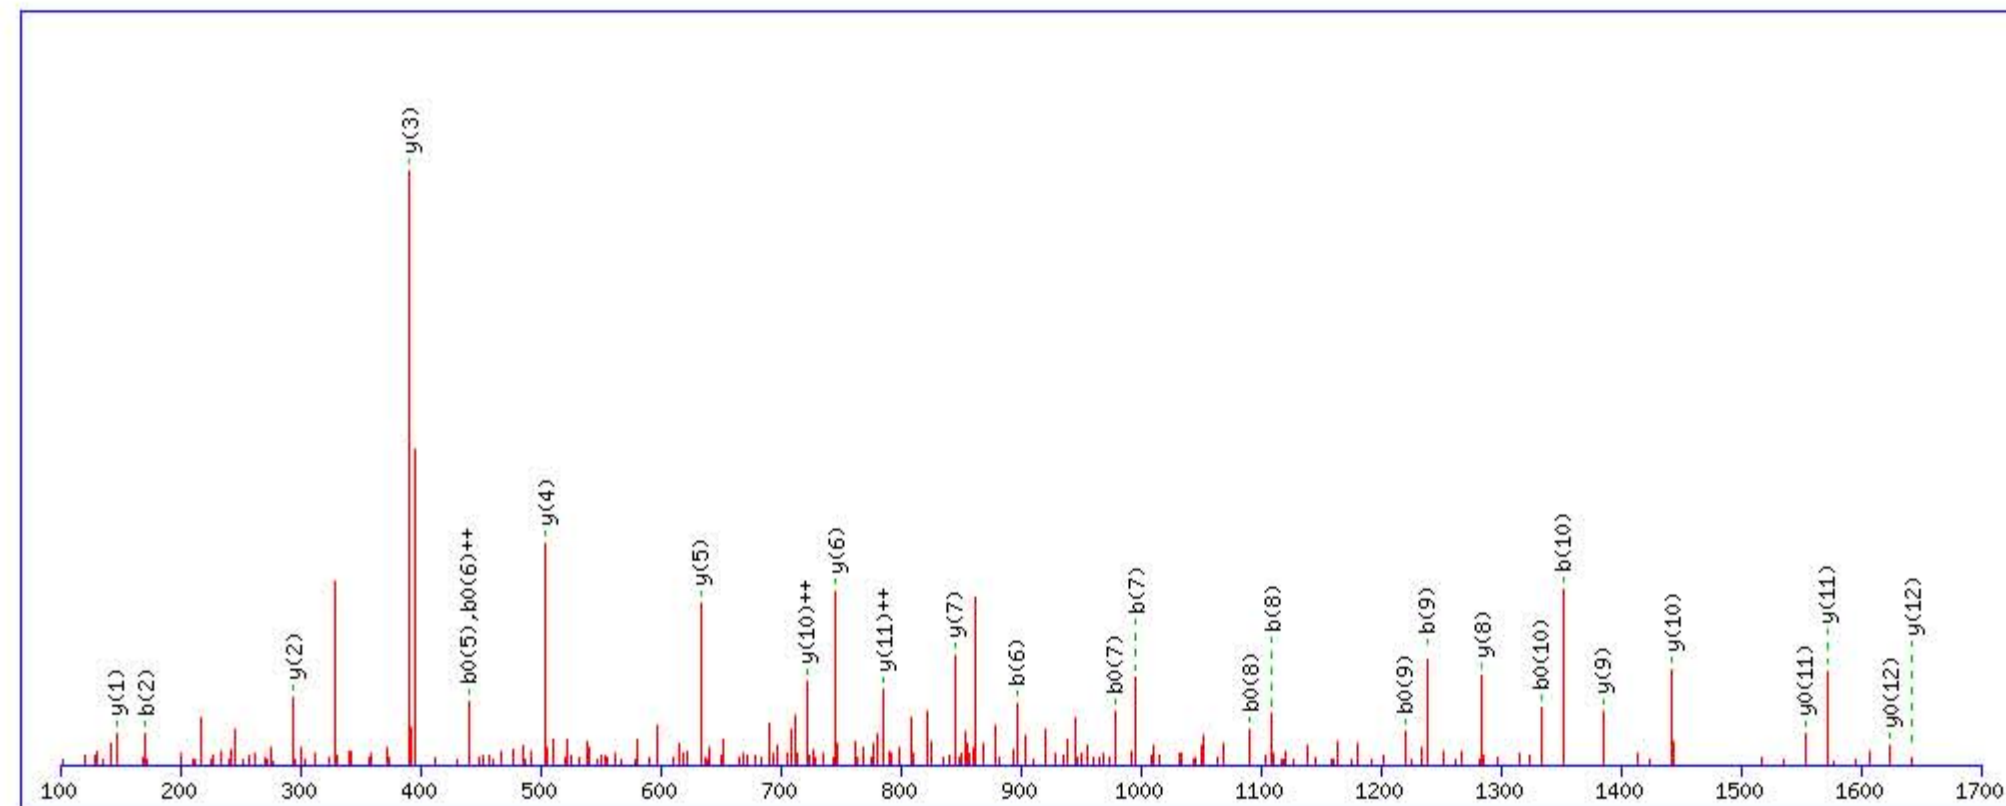

Monoisotopic mass of neutral peptide Mr(calc): 1740.948425

Fixed modifications: Carbamidomethyl (C) (apply to specified residues or termini only)

Variable modifications:

Q6 : Biotin:Thermo-21345 (Q)

Ions Score: 84 Expect: 5.1e-008

Matches : 28/122 fragment ions using 48 most intense peaks [\(help\)](#)

| #  | b                  | b <sup>++</sup> | b <sup>+</sup> | b <sup>+++</sup> | b <sup>0</sup>     | b <sup>0++</sup>  | Seq. | y                  | y <sup>++</sup>   | y <sup>+</sup> | y <sup>+++</sup> | y <sup>0</sup>     | y <sup>0++</sup> | #  |
|----|--------------------|-----------------|----------------|------------------|--------------------|-------------------|------|--------------------|-------------------|----------------|------------------|--------------------|------------------|----|
| 1  | 100.075690         | 50.541483       |                |                  |                    |                   | V    |                    |                   |                |                  |                    |                  | 13 |
| 2  | <b>171.112804</b>  | 86.060040       |                |                  |                    |                   | A    | <b>1642.887293</b> | 821.947284        | 1625.860744    | 813.434010       | <b>1624.876728</b> | 812.942002       | 12 |
| 3  | 300.155397         | 150.581336      |                |                  | 282.144832         | 141.576054        | E    | <b>1571.850179</b> | <b>786.428727</b> | 1554.823630    | 777.915453       | <b>1553.839614</b> | 777.423445       | 11 |
| 4  | 357.176861         | 179.092068      |                |                  | 339.166296         | 170.086786        | G    | <b>1442.807586</b> | <b>721.907431</b> | 1425.781037    | 713.394157       | 1424.797021        | 712.902148       | 10 |
| 5  | 458.224540         | 229.615908      |                |                  | <b>440.213975</b>  | 220.610626        | T    | <b>1385.786122</b> | 693.396699        | 1368.759573    | 684.883424       | 1367.775557        | 684.391416       | 9  |
| 6  | <b>897.449866</b>  | 449.228571      | 880.423317     | 440.715297       | 879.439301         | <b>440.223289</b> | Q    | <b>1284.738443</b> | 642.872860        | 1267.711894    | 634.359585       | 1266.727878        | 633.867577       | 8  |
| 7  | <b>996.518280</b>  | 498.762778      | 979.491731     | 490.249504       | <b>978.507715</b>  | 489.757496        | V    | <b>845.513117</b>  | 423.260196        | 828.486568     | 414.746922       | 827.502552         | 414.254914       | 7  |
| 8  | <b>1109.602344</b> | 555.304810      | 1092.575795    | 546.791536       | <b>1091.591779</b> | 546.299527        | L    | <b>746.444703</b>  | 373.725989        | 729.418154     | 365.212715       | 728.434138         | 364.720707       | 6  |
| 9  | <b>1238.644937</b> | 619.826106      | 1221.618388    | 611.312832       | <b>1220.634372</b> | 610.820824        | E    | <b>633.360639</b>  | 317.183958        | 616.334090     | 308.670683       | 615.350074         | 308.178675       | 5  |
| 10 | <b>1351.729001</b> | 676.368138      | 1334.702452    | 667.854864       | <b>1333.718436</b> | 667.362856        | L    | <b>504.318046</b>  | 252.662661        | 487.291497     | 244.149386       |                    |                  | 4  |
| 11 | 1448.781765        | 724.894520      | 1431.755216    | 716.381246       | 1430.771200        | 715.889238        | P    | <b>391.233982</b>  | 196.120629        | 374.207433     | 187.607355       |                    |                  | 3  |
| 12 | 1595.850179        | 798.428727      | 1578.823630    | 789.915453       | 1577.839614        | 789.423445        | F    | <b>294.181218</b>  | 147.594247        | 277.154669     | 139.080973       |                    |                  | 2  |
| 13 |                    |                 |                |                  |                    |                   | K    | <b>147.112804</b>  | 74.060040         | 130.086255     | 65.546765        |                    |                  | 1  |

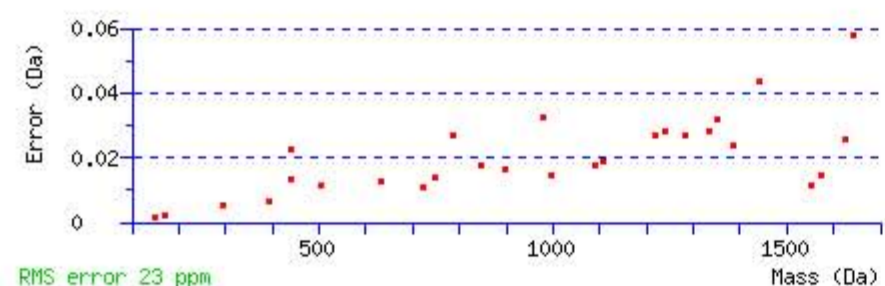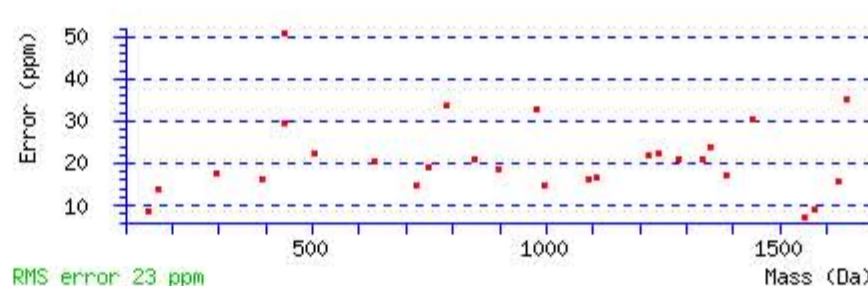

NCBI BLAST search of **VAEGTQVLELPEFK**

(Parameters: blastp, nr protein database, expect=20000, no filter, PAM30)

Other BLAST [web gateways](#)

All matches to this query

| Score | Mr(calc):   | Delta     | Sequence                       |
|-------|-------------|-----------|--------------------------------|
| 84.2  | 1740.948425 | 0.025823  | <a href="#">VAEGTQVLELPEFK</a> |
| 9.8   | 1740.962982 | 0.011266  | <a href="#">ISRQLAEEILMK</a>   |
| 4.5   | 1740.980759 | -0.006511 | <a href="#">TKIDQLKQELSK</a>   |

# MASCOT SEARCH RESULTS

## Peptide View

MS/MS Fragmentation of **AELQEGAR**

Found in **APOA1\_HUMAN**, Apolipoprotein A-I OS=Homo sapiens GN=APOA1 PE=1 SV=1

Match to Query 19964: 1183.602488 from(592.808520,2+) rtinseconds(1484) index(30177)

Title: Locus:1.1.1.3065.20 File:"2013-07-02 CLN FXIII 60 min 3rd F 3.wiff"

Data file C:\Program Files (x86)\Matrix Science\Mascot Daemon\mgf6 FXIII 60 min 3rd\mascot\_daemon\_merge.mgf

Click mouse within plot area to zoom in by factor of two about that point

Or, Plot from  to  Da

Label all possible matches  Label matches used for scoring

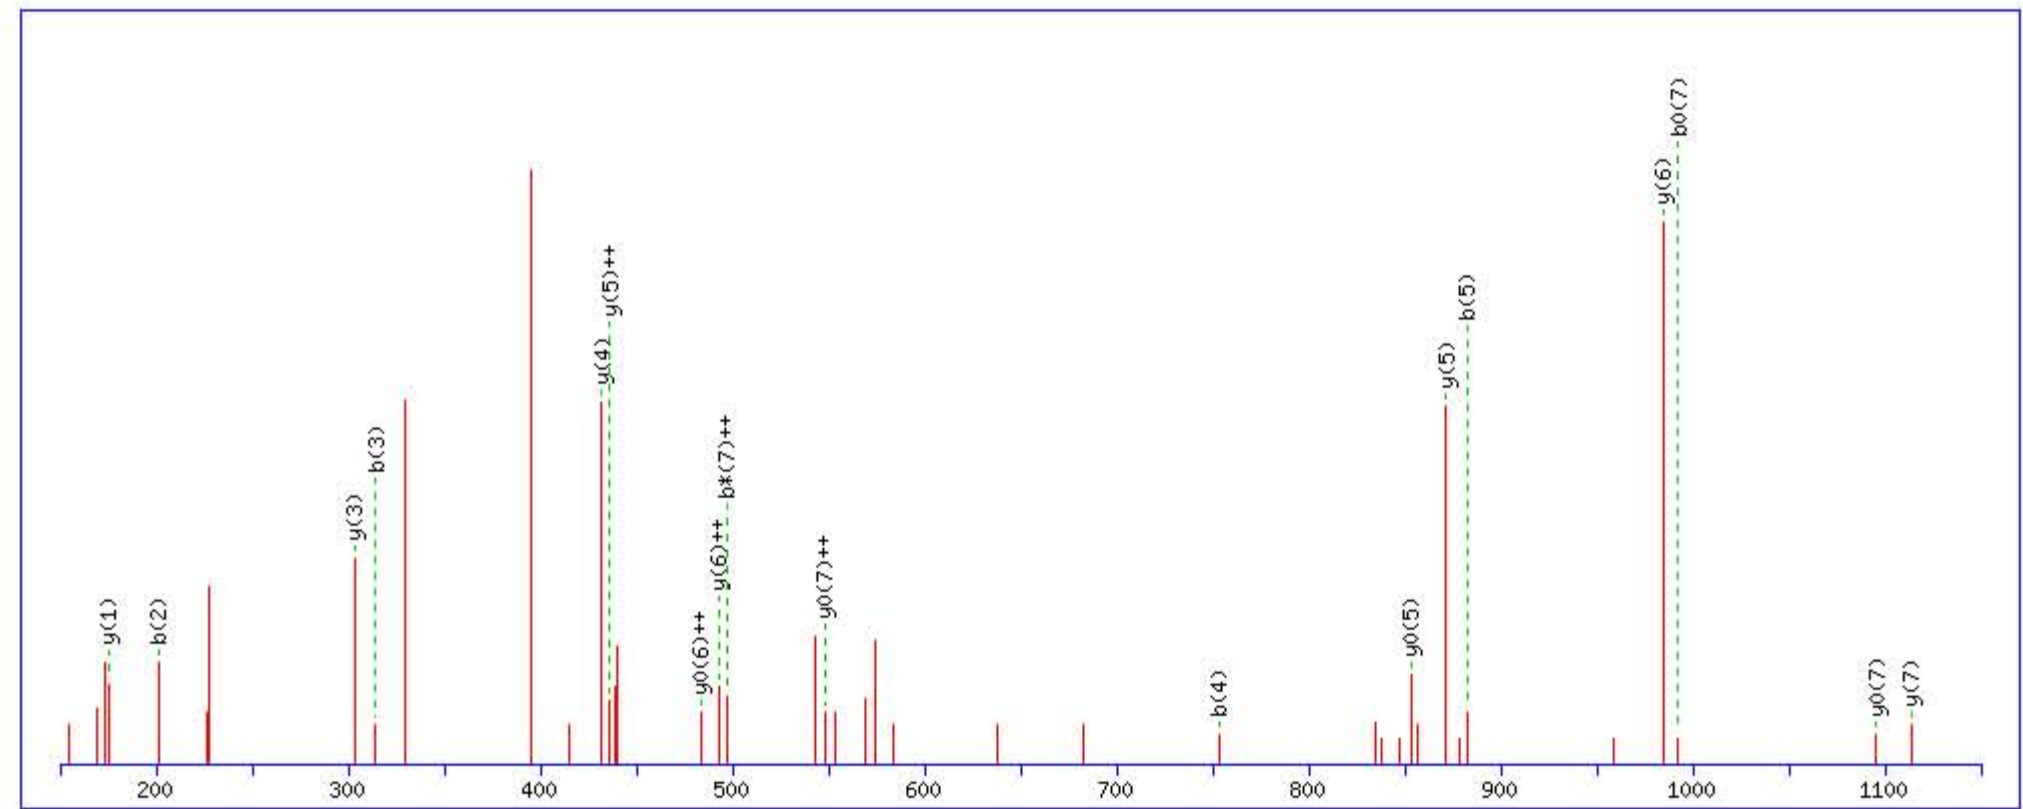

Monoisotopic mass of neutral peptide Mr(calc): 1183.601913

Fixed modifications: Carbamidomethyl (C) (apply to specified residues or termini only)

Variable modifications:

Q4 : Biotin:Thermo-21345 (Q)

Ions Score: 32 Expect: 0.011

Matches : 18/70 fragment ions using 37 most intense peaks [\(help\)](#)

| # | b                 | b <sup>++</sup> | b <sup>*</sup> | b <sup>*++</sup>  | b <sup>0</sup>    | b <sup>0++</sup> | Seq. | y                  | y <sup>++</sup>   | y <sup>*</sup> | y <sup>*++</sup> | y <sup>0</sup>     | y <sup>0++</sup>  | # |
|---|-------------------|-----------------|----------------|-------------------|-------------------|------------------|------|--------------------|-------------------|----------------|------------------|--------------------|-------------------|---|
| 1 | 72.044390         | 36.525833       |                |                   |                   |                  | A    |                    |                   |                |                  |                    |                   | 8 |
| 2 | <b>201.086983</b> | 101.047130      |                |                   | 183.076418        | 92.041847        | E    | <b>1113.572106</b> | 557.289691        | 1096.545557    | 548.776417       | <b>1095.561541</b> | <b>548.284409</b> | 7 |
| 3 | <b>314.171047</b> | 157.589161      |                |                   | 296.160482        | 148.583879       | L    | <b>984.529513</b>  | <b>492.768395</b> | 967.502964     | 484.255120       | 966.518948         | <b>483.763112</b> | 6 |
| 4 | <b>753.396373</b> | 377.201825      | 736.369824     | 368.688550        | 735.385808        | 368.196542       | Q    | <b>871.445449</b>  | <b>436.226363</b> | 854.418900     | 427.713088       | <b>853.434884</b>  | 427.221080        | 5 |
| 5 | <b>882.438966</b> | 441.723121      | 865.412417     | 433.209847        | 864.428401        | 432.717839       | E    | <b>432.220123</b>  | 216.613699        | 415.193574     | 208.100425       | 414.209558         | 207.608417        | 4 |
| 6 | 939.460430        | 470.233853      | 922.433881     | 461.720579        | 921.449865        | 461.228571       | G    | <b>303.177530</b>  | 152.092403        | 286.150981     | 143.579128       |                    |                   | 3 |
| 7 | 1010.497544       | 505.752410      | 993.470995     | <b>497.239136</b> | <b>992.486979</b> | 496.747128       | A    | 246.156066         | 123.581671        | 229.129517     | 115.068396       |                    |                   | 2 |
| 8 |                   |                 |                |                   |                   |                  | R    | <b>175.118952</b>  | 88.063114         | 158.092403     | 79.549839        |                    |                   | 1 |

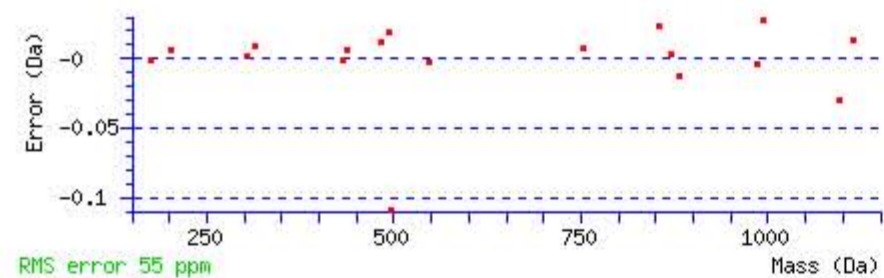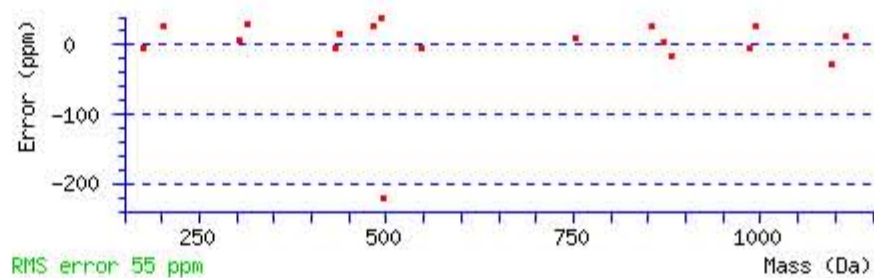

NCBI BLAST search of **AELQEGAR**

(Parameters: blastp, nr protein database, expect=20000, no filter, PAM30)

Other BLAST [web gateways](#)

All matches to this query

| Score | Mr(calc):   | Delta     | Sequence                      |
|-------|-------------|-----------|-------------------------------|
| 31.9  | 1183.601913 | 0.000575  | <a href="#">AELQEGAR</a>      |
| 11.4  | 1183.601913 | 0.000575  | <a href="#">EALEQQR</a>       |
| 4.8   | 1183.587997 | 0.014491  | <a href="#">EAKLDHCRR</a>     |
| 4.7   | 1183.601913 | 0.000575  | <a href="#">EALEQQR</a>       |
| 4.1   | 1183.601913 | 0.000575  | <a href="#">ELQAEAGR</a>      |
| 3.4   | 1183.619690 | -0.017202 | <a href="#">TDPRPDAATIK</a>   |
| 2.4   | 1183.595413 | 0.007075  | <a href="#">AFCRMVTRK</a>     |
| 2.3   | 1183.601913 | 0.000575  | <a href="#">LEAEQQR</a>       |
| 1.6   | 1183.619675 | -0.017187 | <a href="#">AAAASVPNADGLK</a> |

Mascot: <http://www.matrixscience.com/>

# MASCOT Search Results

## Peptide View

MS/MS Fragmentation of **QGLLPVLESFK**

Found in **APOA1\_HUMAN**, Apolipoprotein A-I OS=Homo sapiens GN=APOA1 PE=1 SV=1

Match to Query 31029: 1540.874188 from(771.444370,2+) rtinseconds(2838) index(9661)

Title: Locus:1.1.1.3539.18 File:"2013-07-02 CLN FXIII 60 min 3rd F 1.wiff"

Data file C:\Program Files (x86)\Matrix Science\Mascot Daemon\mgf\6 FXIII 60 min 3rd\mascot\_daemon\_merge.mgf

Click mouse within plot area to zoom in by factor of two about that point

Or, Plot from  to  Da

Label all possible matches  Label matches used for scoring

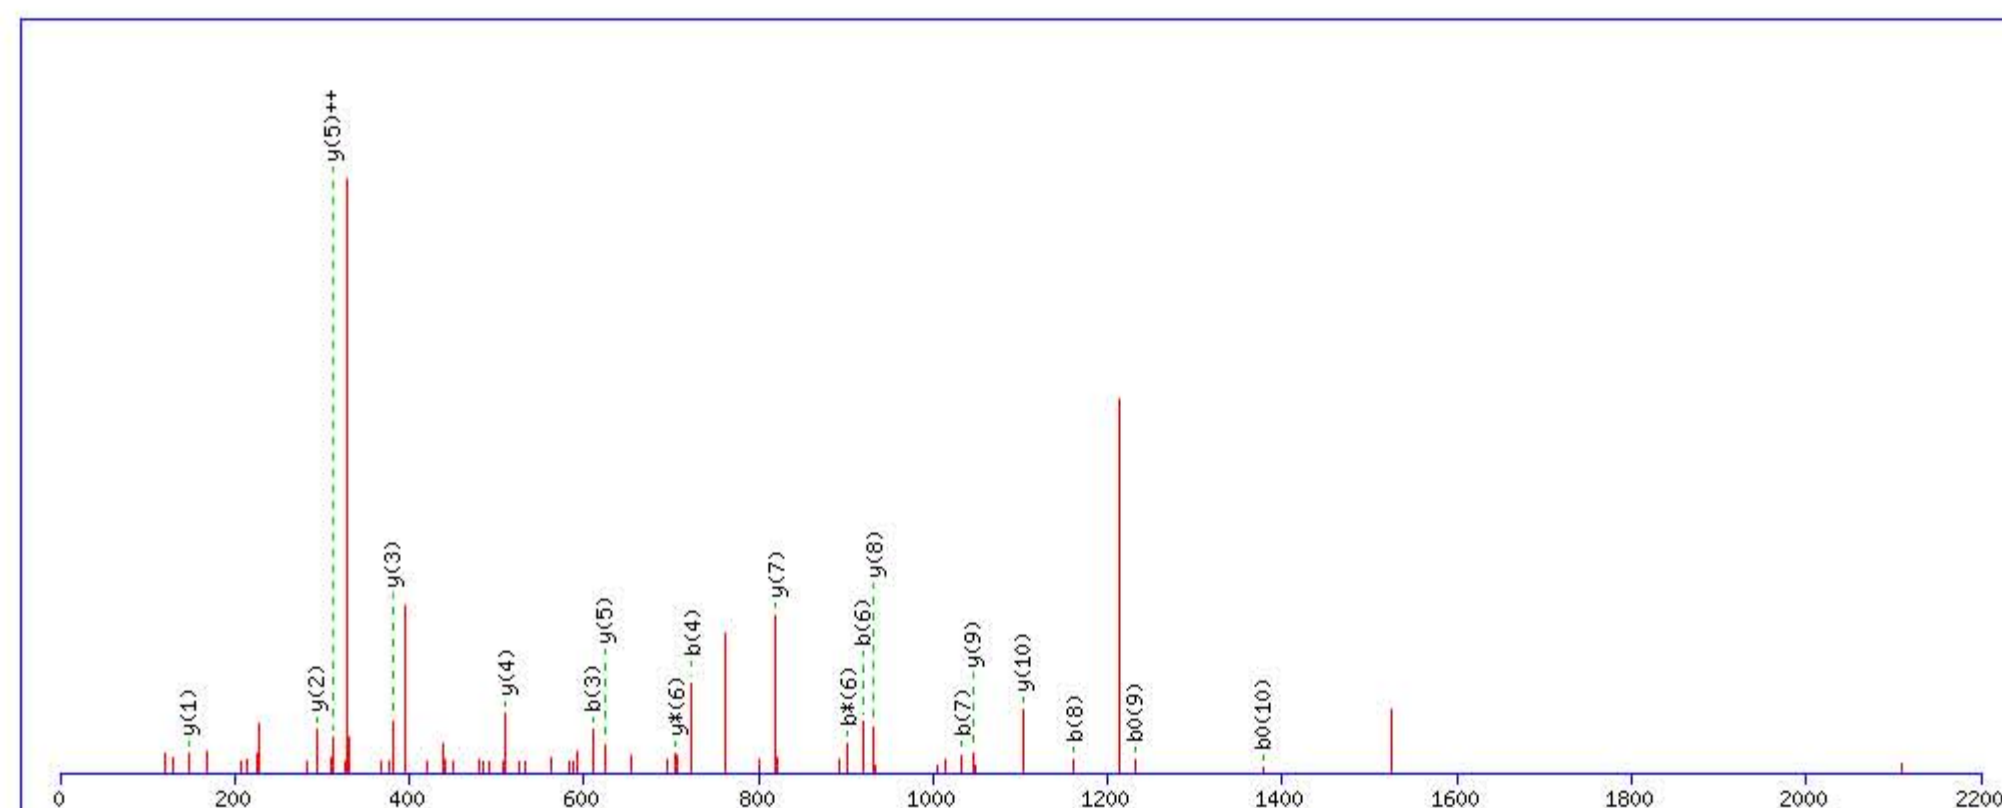

Monoisotopic mass of neutral peptide Mr(calc): 1540.868713

Fixed modifications: Carbamidomethyl (C) (apply to specified residues or termini only)

Variable modifications:

Q1 : Biotin:Thermo-21345 (Q)

Ions Score: 57 Expect: 2.6e-005

Matches : 19/102 fragment ions using 35 most intense peaks [\(help\)](#)

| #  | b           | b <sup>++</sup> | b <sup>+</sup> | b <sup>*++</sup> | b <sup>0</sup> | b <sup>0++</sup> | Seq. | y           | y <sup>++</sup> | y <sup>+</sup> | y <sup>*++</sup> | y <sup>0</sup> | y <sup>0++</sup> | #  |
|----|-------------|-----------------|----------------|------------------|----------------|------------------|------|-------------|-----------------|----------------|------------------|----------------|------------------|----|
| 1  | 440.232602  | 220.619939      | 423.206053     | 212.106664       |                |                  | Q    |             |                 |                |                  |                |                  | 11 |
| 2  | 497.254066  | 249.130671      | 480.227517     | 240.617396       |                |                  | G    | 1102.650673 | 551.828975      | 1085.624124    | 543.315700       | 1084.640108    | 542.823692       | 10 |
| 3  | 610.338130  | 305.672703      | 593.311581     | 297.159428       |                |                  | L    | 1045.629209 | 523.318243      | 1028.602660    | 514.804968       | 1027.618644    | 514.312960       | 9  |
| 4  | 723.422194  | 362.214735      | 706.395645     | 353.701461       |                |                  | L    | 932.545145  | 466.776211      | 915.518596     | 458.262936       | 914.534580     | 457.770928       | 8  |
| 5  | 820.474958  | 410.741117      | 803.448409     | 402.227843       |                |                  | P    | 819.461081  | 410.234179      | 802.434532     | 401.720904       | 801.450516     | 401.228896       | 7  |
| 6  | 919.543372  | 460.275324      | 902.516823     | 451.762049       |                |                  | V    | 722.408317  | 361.707797      | 705.381768     | 353.194522       | 704.397752     | 352.702514       | 6  |
| 7  | 1032.627436 | 516.817356      | 1015.600887    | 508.304082       |                |                  | L    | 623.339903  | 312.173590      | 606.313354     | 303.660315       | 605.329338     | 303.168307       | 5  |
| 8  | 1161.670029 | 581.338653      | 1144.643480    | 572.825378       | 1143.659464    | 572.333370       | E    | 510.255839  | 255.631558      | 493.229290     | 247.118283       | 492.245274     | 246.626275       | 4  |
| 9  | 1248.702057 | 624.854667      | 1231.675508    | 616.341392       | 1230.691492    | 615.849384       | S    | 381.213246  | 191.110261      | 364.186697     | 182.596987       | 363.202681     | 182.104979       | 3  |
| 10 | 1395.770471 | 698.388874      | 1378.743922    | 689.875599       | 1377.759906    | 689.383591       | F    | 294.181218  | 147.594247      | 277.154669     | 139.080973       |                |                  | 2  |
| 11 |             |                 |                |                  |                |                  | K    | 147.112804  | 74.060040       | 130.086255     | 65.546765        |                |                  | 1  |

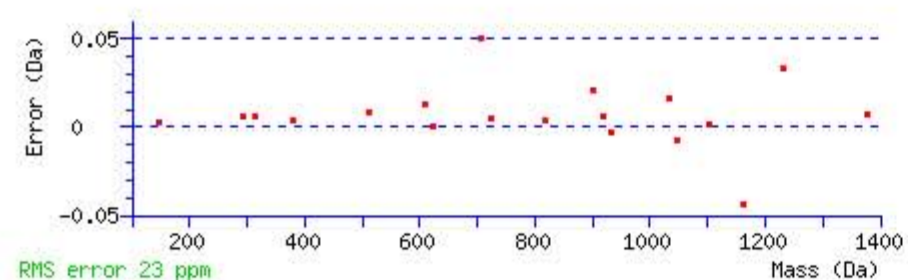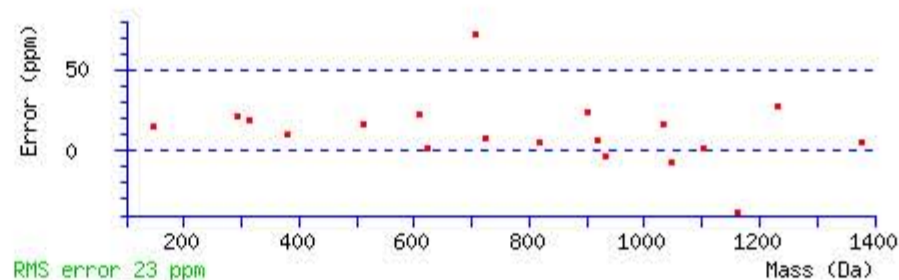

NCBI BLAST search of **QGLLPVLESFK**

(Parameters: blastp, nr protein database, expect=20000, no filter, PAM30)

Other BLAST [web gateways](#)

All matches to this query

| Score | Mr(calc):   | Delta     | Sequence                    |
|-------|-------------|-----------|-----------------------------|
| 57.2  | 1540.868713 | 0.005475  | <a href="#">QGLLPVLESFK</a> |
| 10.0  | 1540.894531 | -0.020343 | <a href="#">QAVLSMVRKAK</a> |

Mascot: <http://www.matrixscience.com/>

# MASCOT Search Results

## Peptide View

MS/MS Fragmentation of **VQPYLDDFQK**

Found in **APOA1\_HUMAN**, Apolipoprotein A-I OS=Homo sapiens GN=APOA1 PE=1 SV=1

Match to Query 31534: 1562.785362 from(521.935730,3+) rtinseconds(2190) index(34172)

Title: Locus:1.1.1.3312.3 File:"2013-07-02 CLN FXIII 60 min 3rd F 3.wiff"

Data file C:\Program Files (x86)\Matrix Science\Mascot Daemon\mgf\6 FXIII 60 min 3rd\mascot\_daemon\_merge.mgf

Click mouse within plot area to zoom in by factor of two about that point

Or, Plot from  to  Da

Label all possible matches  Label matches used for scoring

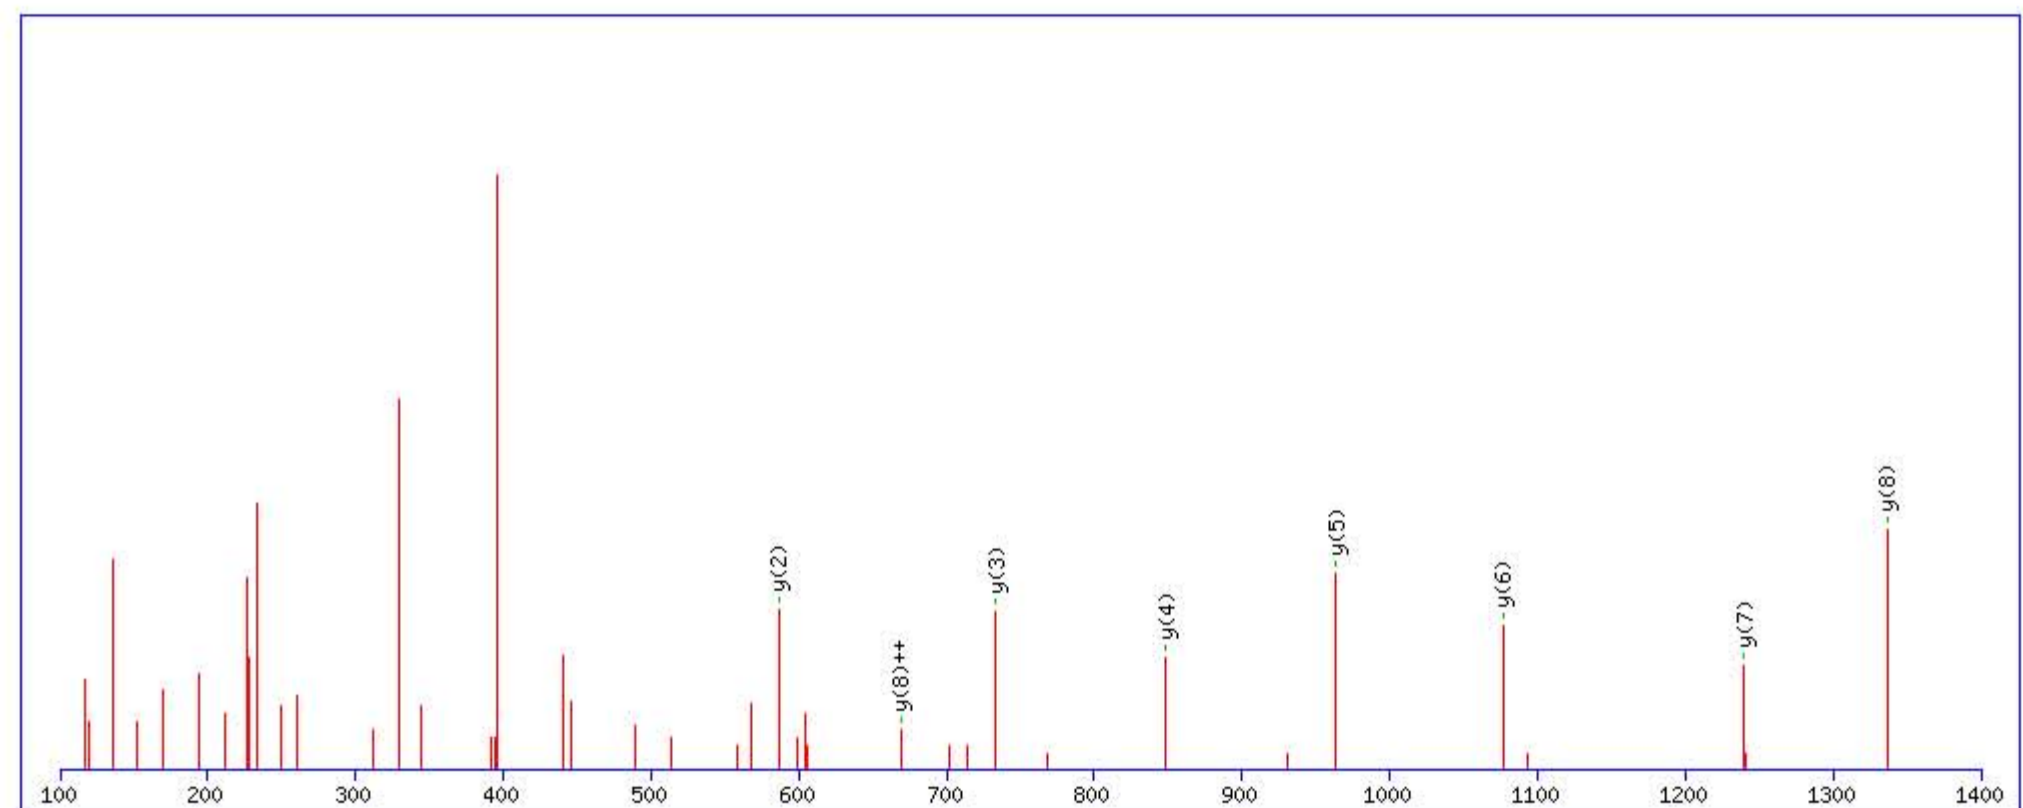

Monoisotopic mass of neutral peptide  $M_r(\text{calc})$ : 1562.780304

Fixed modifications: Carbamidomethyl (C) (apply to specified residues or termini only)

Variable modifications:

Q9 : Biotin:Thermo-21345 (Q)

Ions Score: 49 Expect: 4.6e-005

Matches : 8/90 fragment ions using 12 most intense peaks [\(help\)](#)

| #  | b           | b <sup>++</sup> | b <sup>*</sup> | b <sup>*++</sup> | b <sup>0</sup> | b <sup>0++</sup> | Seq. | y                  | y <sup>++</sup>   | y <sup>*</sup> | y <sup>*++</sup> | y <sup>0</sup> | y <sup>0++</sup> | #  |
|----|-------------|-----------------|----------------|------------------|----------------|------------------|------|--------------------|-------------------|----------------|------------------|----------------|------------------|----|
| 1  | 100.075690  | 50.541483       |                |                  |                |                  | V    |                    |                   |                |                  |                |                  | 10 |
| 2  | 228.134268  | 114.570772      | 211.107719     | 106.057498       |                |                  | Q    | 1464.719165        | 732.863221        | 1447.692616    | 724.349946       | 1446.708600    | 723.857938       | 9  |
| 3  | 325.187032  | 163.097154      | 308.160483     | 154.583879       |                |                  | P    | <b>1336.660587</b> | <b>668.833932</b> | 1319.634038    | 660.320657       | 1318.650022    | 659.828649       | 8  |
| 4  | 488.250361  | 244.628818      | 471.223812     | 236.115544       |                |                  | Y    | <b>1239.607823</b> | 620.307550        | 1222.581274    | 611.794275       | 1221.597258    | 611.302267       | 7  |
| 5  | 601.334425  | 301.170851      | 584.307876     | 292.657576       |                |                  | L    | <b>1076.544494</b> | 538.775885        | 1059.517945    | 530.262611       | 1058.533929    | 529.770603       | 6  |
| 6  | 716.361368  | 358.684322      | 699.334819     | 350.171047       | 698.350803     | 349.679039       | D    | <b>963.460430</b>  | 482.233853        | 946.433881     | 473.720579       | 945.449865     | 473.228571       | 5  |
| 7  | 831.388311  | 416.197793      | 814.361762     | 407.684519       | 813.377746     | 407.192511       | D    | <b>848.433487</b>  | 424.720382        | 831.406938     | 416.207107       | 830.422922     | 415.715099       | 4  |
| 8  | 978.456725  | 489.732000      | 961.430176     | 481.218726       | 960.446160     | 480.726718       | F    | <b>733.406544</b>  | 367.206910        | 716.379995     | 358.693636       |                |                  | 3  |
| 9  | 1417.682051 | 709.344664      | 1400.655502    | 700.831389       | 1399.671486    | 700.339381       | Q    | <b>586.338130</b>  | 293.672703        | 569.311581     | 285.159429       |                |                  | 2  |
| 10 |             |                 |                |                  |                |                  | K    | 147.112804         | 74.060040         | 130.086255     | 65.546765        |                |                  | 1  |

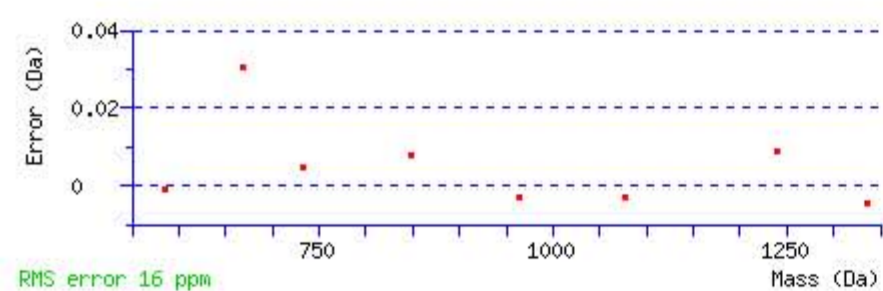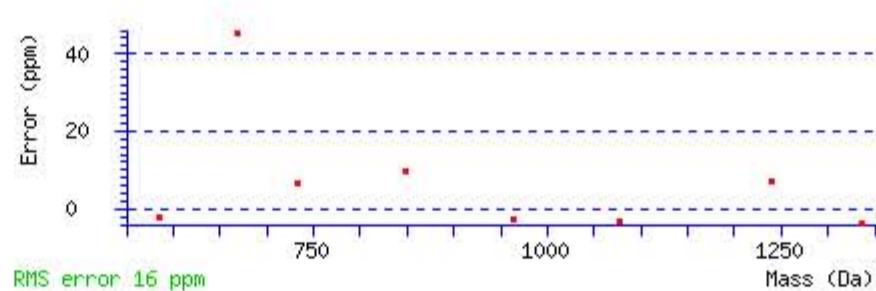

NCBI BLAST search of **VQPYLDDFQK**

(Parameters: blastp, nr protein database, expect=20000, no filter, PAM30)

Other BLAST [web gateways](#)

All matches to this query

| Score | $M_r(\text{calc})$ : | Delta     | Sequence                       |
|-------|----------------------|-----------|--------------------------------|
| 49.3  | 1562.780304          | 0.005058  | <a href="#">VQPYLDDFQK</a>     |
| 3.0   | 1562.808624          | -0.023262 | <a href="#">LNSPTTTSQIMARK</a> |

# MASCOT SCIENCE Mascot Search Results

## Peptide View

MS/MS Fragmentation of **SPELQAEAK**

Found in **APOA2\_HUMAN**, Apolipoprotein A-II OS=Homo sapiens GN=APOA2 PE=1 SV=1

Match to Query 22614: 1282.649828 from(642.332190,2+) rtinseconds(1587) index(2584)

Title: Locus:1.1.1.3104.17 File:"2013-07-02 CLN FXIII 60 min 3rd F 1.wiff"

Data file C:\Program Files (x86)\Matrix Science\Mascot Daemon\mgf\6 FXIII 60 min 3rd\mascot\_daemon\_merge.mgf

Click mouse within plot area to zoom in by factor of two about that point

Or, Plot from  to  Da

Label all possible matches  Label matches used for scoring

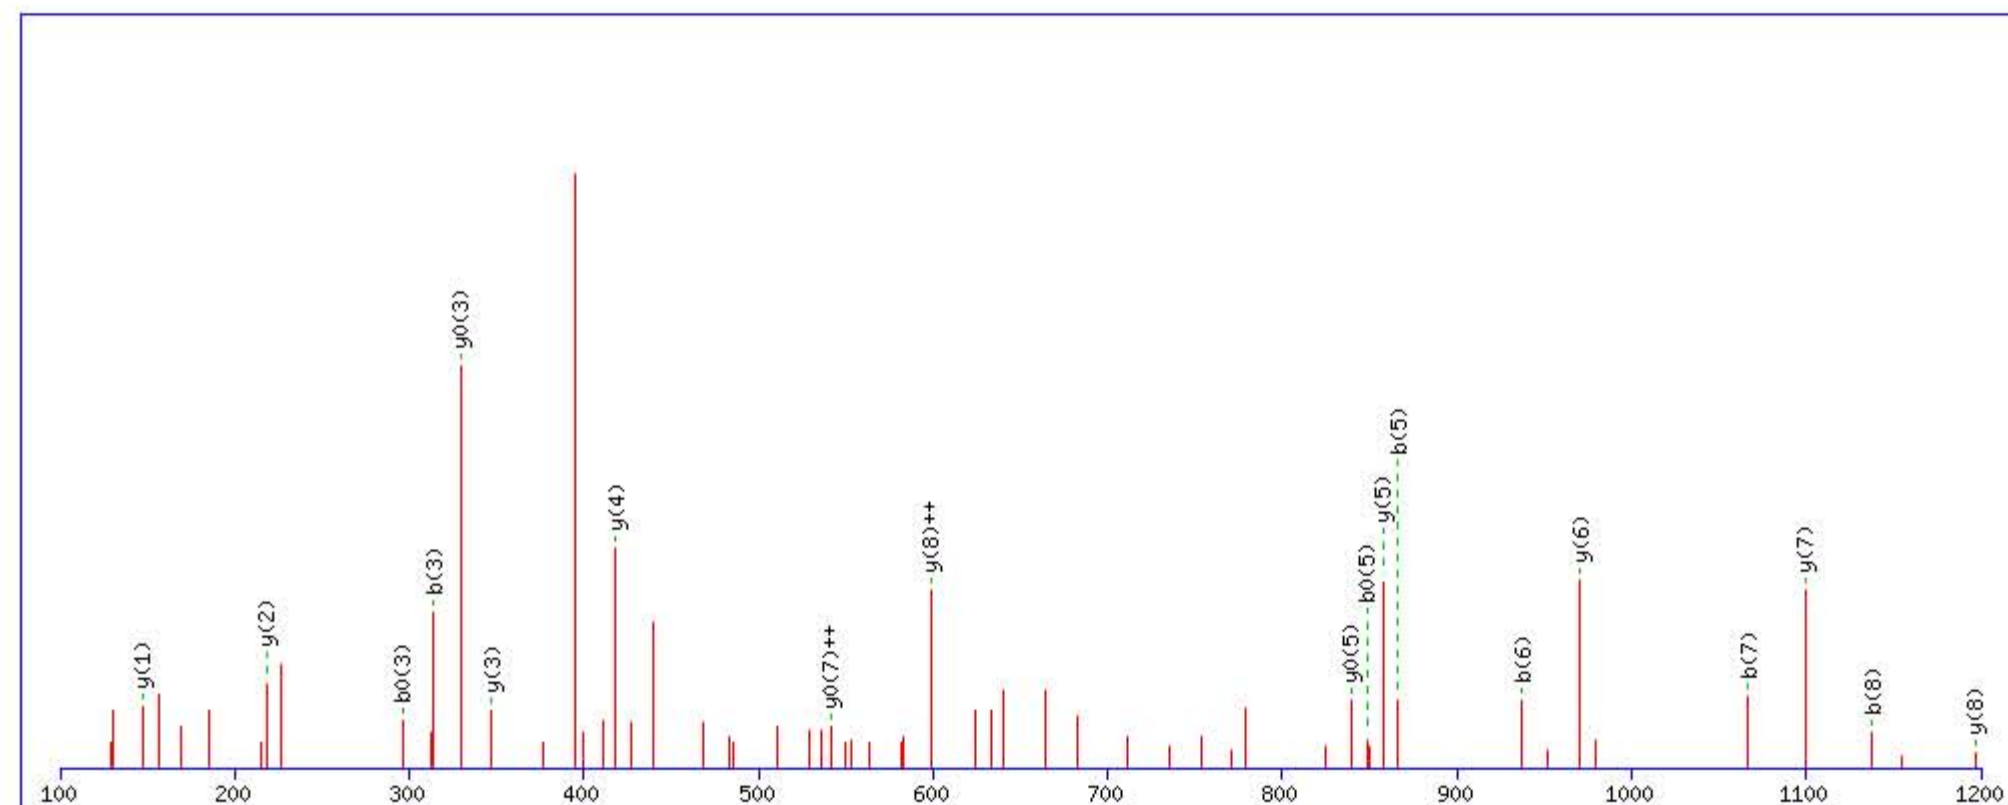

Monoisotopic mass of neutral peptide Mr(calc): 1282.659088

Fixed modifications: Carbamidomethyl (C) (apply to specified residues or termini only)

Variable modifications:

Q5 : Biotin:Thermo-21345 (Q)

Ions Score: 46 Expect: 0.00011

Matches : 19/84 fragment ions using 40 most intense peaks [\(help\)](#)

| # | b           | b <sup>++</sup> | b <sup>*</sup> | b <sup>*++</sup> | b <sup>0</sup> | b <sup>0++</sup> | Seq. | y           | y <sup>++</sup> | y <sup>*</sup> | y <sup>*++</sup> | y <sup>0</sup> | y <sup>0++</sup> | # |
|---|-------------|-----------------|----------------|------------------|----------------|------------------|------|-------------|-----------------|----------------|------------------|----------------|------------------|---|
| 1 | 88.039304   | 44.523290       |                |                  | 70.028739      | 35.518008        | S    |             |                 |                |                  |                |                  | 9 |
| 2 | 185.092068  | 93.049672       |                |                  | 167.081503     | 84.044389        | P    | 1196.634372 | 598.820824      | 1179.607823    | 590.307550       | 1178.623807    | 589.815541       | 8 |
| 3 | 314.134661  | 157.570968      |                |                  | 296.124096     | 148.565686       | E    | 1099.581608 | 550.294442      | 1082.555059    | 541.781168       | 1081.571043    | 541.289160       | 7 |
| 4 | 427.218725  | 214.113001      |                |                  | 409.208160     | 205.107718       | L    | 970.539015  | 485.773146      | 953.512466     | 477.259871       | 952.528450     | 476.767863       | 6 |
| 5 | 866.444051  | 433.725664      | 849.417502     | 425.212389       | 848.433486     | 424.720381       | Q    | 857.454951  | 429.231114      | 840.428402     | 420.717839       | 839.444386     | 420.225831       | 5 |
| 6 | 937.481165  | 469.244221      | 920.454616     | 460.730946       | 919.470600     | 460.238938       | A    | 418.229625  | 209.618450      | 401.203076     | 201.105176       | 400.219060     | 200.613168       | 4 |
| 7 | 1066.523758 | 533.765517      | 1049.497209    | 525.252243       | 1048.513193    | 524.760235       | E    | 347.192511  | 174.099893      | 330.165962     | 165.586619       | 329.181946     | 165.094611       | 3 |
| 8 | 1137.560872 | 569.284074      | 1120.534323    | 560.770800       | 1119.550307    | 560.278792       | A    | 218.149918  | 109.578597      | 201.123369     | 101.065322       |                |                  | 2 |
| 9 |             |                 |                |                  |                |                  | K    | 147.112804  | 74.060040       | 130.086255     | 65.546765        |                |                  | 1 |

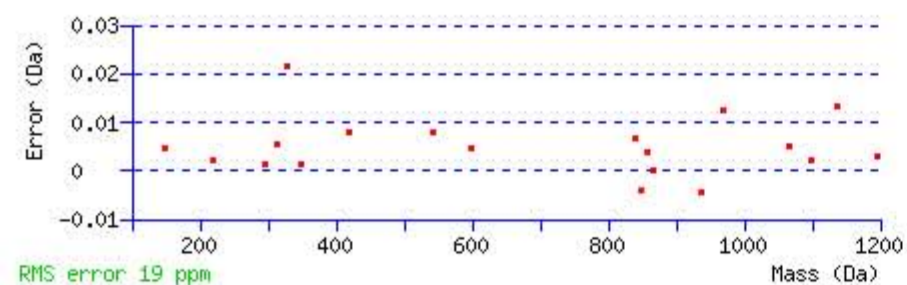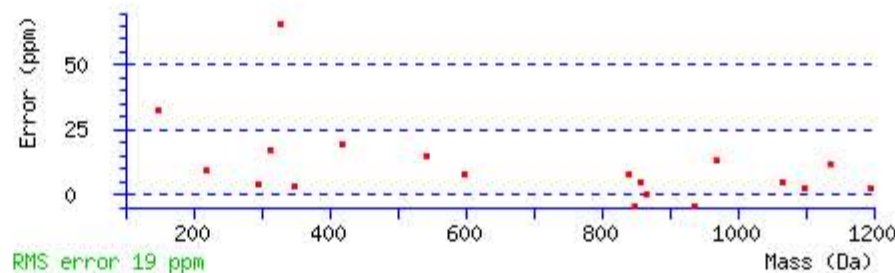

NCBI BLAST search of **SPELQAEAK**

(Parameters: blastp, nr protein database, expect=20000, no filter, PAM30)

Other BLAST [web gateways](#)

All matches to this query

| Score | Mr(calc):   | Delta     | Sequence                     |
|-------|-------------|-----------|------------------------------|
| 46.3  | 1282.659088 | -0.009260 | <a href="#">SPELQAEAK</a>    |
| 3.7   | 1282.662949 | -0.013121 | <a href="#">DLSDTQRHLAK</a>  |
| 3.1   | 1282.641830 | 0.007998  | <a href="#">SYPGHVQPATAR</a> |
| 1.8   | 1282.655716 | -0.005888 | <a href="#">ALEAEKYGFQK</a>  |
| 1.0   | 1282.641815 | 0.008013  | <a href="#">EIRFQPN DHK</a>  |

Mascot: <http://www.matrixscience.com/>

# Mascot Search Results

## Peptide View

MS/MS Fragmentation of **EPCVESLVSQYFQTVTDYGK**

Found in **APOA2\_HUMAN**, Apolipoprotein A-II OS=Homo sapiens GN=APOA2 PE=1 SV=1

Match to Query 52452: 2660.260392 from(887.760740,3+) rtinseconds(3196) index(40147)

Title: Locus:1.1.1.3657.12 File:"2013-07-02 CLN FXIII 60 min 3rd F 3.wiff"

Data file C:\Program Files (x86)\Matrix Science\Mascot Daemon\mgf6 FXIII 60 min 3rd\mascot\_daemon\_merge.mgf

Click mouse within plot area to zoom in by factor of two about that point

Or, Plot from  to  Da

Label all possible matches  Label matches used for scoring

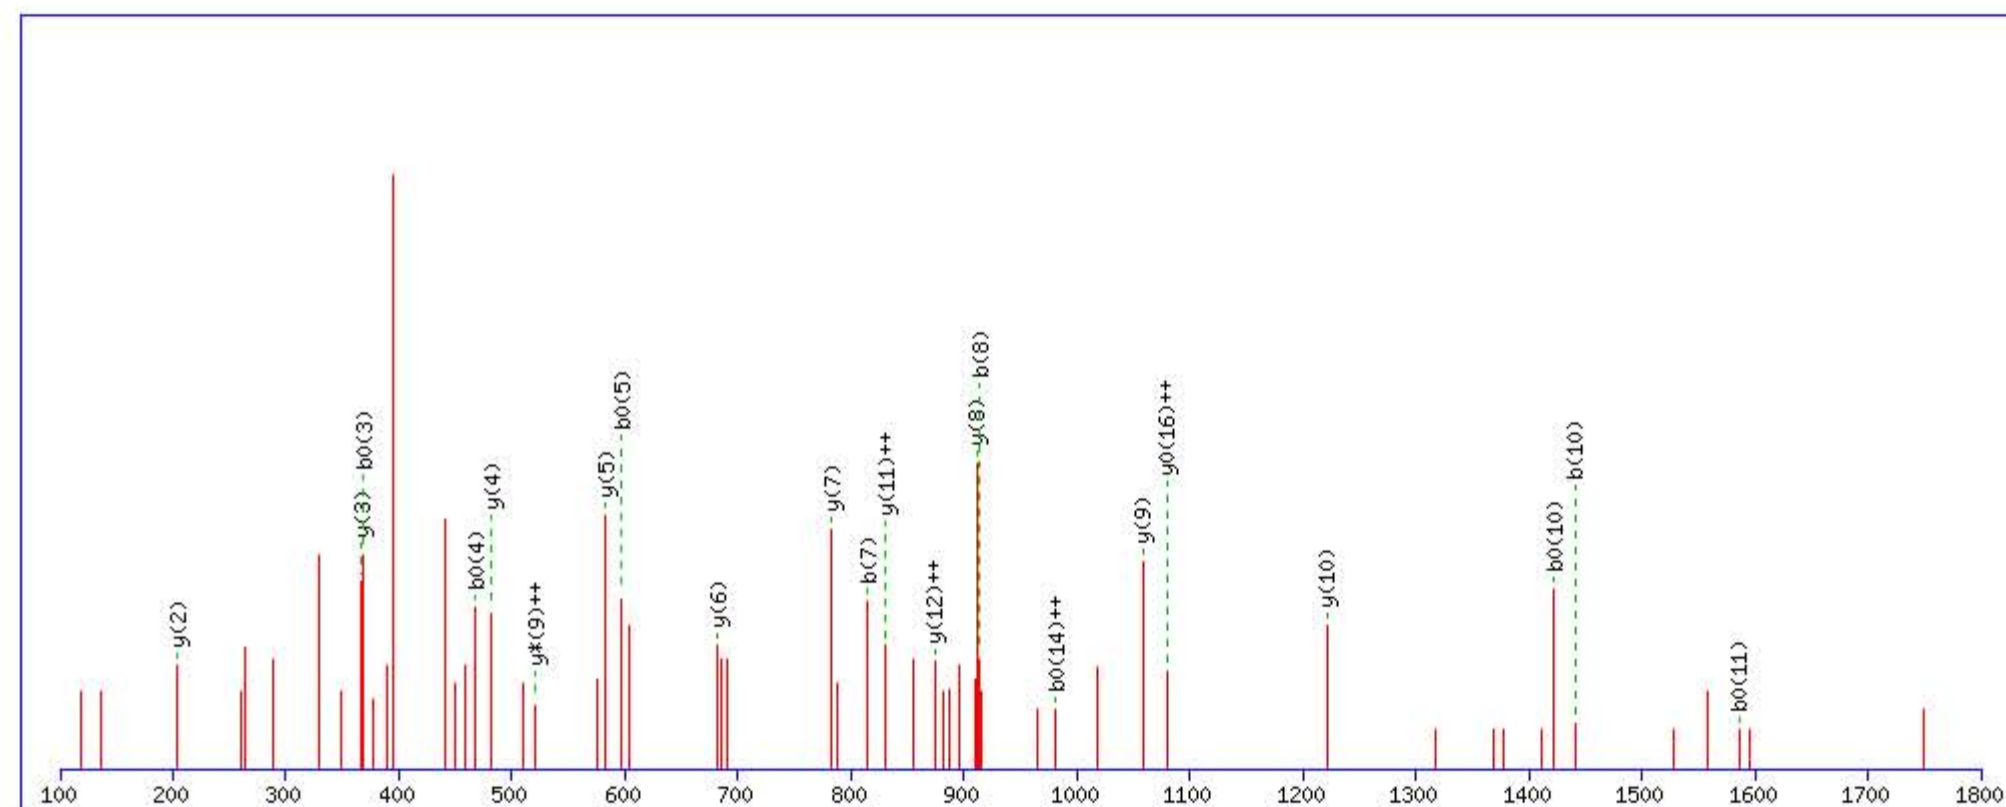

Monoisotopic mass of neutral peptide Mr(calc): 2660.250244

Fixed modifications: Carbamidomethyl (C) (apply to specified residues or termini only)

Variable modifications:

Q10 : Biotin:Thermo-21345 (Q)

Ions Score: 34 Expect: 0.0078

Matches : 22/204 fragment ions using 49 most intense peaks [\(help\)](#)

| #  | b           | b <sup>++</sup> | b <sup>*</sup> | b <sup>*++</sup> | b <sup>0</sup> | b <sup>0++</sup> | Seq. | y           | y <sup>++</sup> | y <sup>*</sup> | y <sup>*++</sup> | y <sup>0</sup> | y <sup>0++</sup> | #  |
|----|-------------|-----------------|----------------|------------------|----------------|------------------|------|-------------|-----------------|----------------|------------------|----------------|------------------|----|
| 1  | 130.049869  | 65.528572       |                |                  | 112.039304     | 56.523290        | E    |             |                 |                |                  |                |                  | 20 |
| 2  | 227.102633  | 114.054954      |                |                  | 209.092068     | 105.049672       | P    | 2532.214913 | 1266.611094     | 2515.188364    | 1258.097820      | 2514.204348    | 1257.605812      | 19 |
| 3  | 387.133282  | 194.070279      |                |                  | 369.122717     | 185.064997       | C    | 2435.162149 | 1218.084712     | 2418.135600    | 1209.571438      | 2417.151584    | 1209.079430      | 18 |
| 4  | 486.201696  | 243.604486      |                |                  | 468.191131     | 234.599204       | V    | 2275.131500 | 1138.069388     | 2258.104951    | 1129.556113      | 2257.120935    | 1129.064105      | 17 |
| 5  | 615.244289  | 308.125783      |                |                  | 597.233724     | 299.120500       | E    | 2176.063086 | 1088.535181     | 2159.036537    | 1080.021906      | 2158.052521    | 1079.529898      | 16 |
| 6  | 702.276317  | 351.641797      |                |                  | 684.265752     | 342.636514       | S    | 2047.020493 | 1024.013884     | 2029.993944    | 1015.500610      | 2029.009928    | 1015.008602      | 15 |
| 7  | 815.360381  | 408.183829      |                |                  | 797.349816     | 399.178546       | L    | 1959.988465 | 980.497870      | 1942.961916    | 971.984596       | 1941.977900    | 971.492588       | 14 |
| 8  | 914.428795  | 457.718036      |                |                  | 896.418230     | 448.712753       | V    | 1846.904401 | 923.955838      | 1829.877852    | 915.442564       | 1828.893836    | 914.950556       | 13 |
| 9  | 1001.460823 | 501.234050      |                |                  | 983.450258     | 492.228767       | S    | 1747.835987 | 874.421631      | 1730.809438    | 865.908357       | 1729.825422    | 865.416349       | 12 |
| 10 | 1440.686149 | 720.846712      | 1423.659600    | 712.333438       | 1422.675584    | 711.841430       | Q    | 1660.803959 | 830.905617      | 1643.777410    | 822.392343       | 1642.793394    | 821.900335       | 11 |
| 11 | 1603.749478 | 802.378377      | 1586.722929    | 793.865103       | 1585.738913    | 793.373094       | Y    | 1221.578633 | 611.292954      | 1204.552084    | 602.779680       | 1203.568068    | 602.287672       | 10 |
| 12 | 1750.817892 | 875.912584      | 1733.791343    | 867.399310       | 1732.807327    | 866.907302       | F    | 1058.515304 | 529.761290      | 1041.488755    | 521.248015       | 1040.504739    | 520.756007       | 9  |
| 13 | 1878.876470 | 939.941873      | 1861.849921    | 931.428599       | 1860.865905    | 930.936590       | Q    | 911.446890  | 456.227083      | 894.420341     | 447.713808       | 893.436325     | 447.221800       | 8  |
| 14 | 1979.924149 | 990.465713      | 1962.897600    | 981.952438       | 1961.913584    | 981.460430       | T    | 783.388312  | 392.197794      | 766.361763     | 383.684519       | 765.377747     | 383.192511       | 7  |
| 15 | 2078.992563 | 1039.999919     | 2061.966014    | 1031.486645      | 2060.981998    | 1030.994637      | V    | 682.340633  | 341.673954      | 665.314084     | 333.160680       | 664.330068     | 332.668672       | 6  |
| 16 | 2180.040242 | 1090.523759     | 2163.013693    | 1082.010484      | 2162.029677    | 1081.518476      | T    | 583.272219  | 292.139747      | 566.245670     | 283.626473       | 565.261654     | 283.134465       | 5  |
| 17 | 2295.067185 | 1148.037230     | 2278.040636    | 1139.523956      | 2277.056620    | 1139.031948      | D    | 482.224540  | 241.615908      | 465.197991     | 233.102633       | 464.213975     | 232.610625       | 4  |
| 18 | 2458.130514 | 1229.568895     | 2441.103965    | 1221.055620      | 2440.119949    | 1220.563612      | Y    | 367.197597  | 184.102436      | 350.171048     | 175.589162       |                |                  | 3  |
| 19 | 2515.151978 | 1258.079627     | 2498.125429    | 1249.566352      | 2497.141413    | 1249.074344      | G    | 204.134268  | 102.570772      | 187.107719     | 94.057497        |                |                  | 2  |
| 20 |             |                 |                |                  |                |                  | K    | 147.112804  | 74.060040       | 130.086255     | 65.546765        |                |                  | 1  |

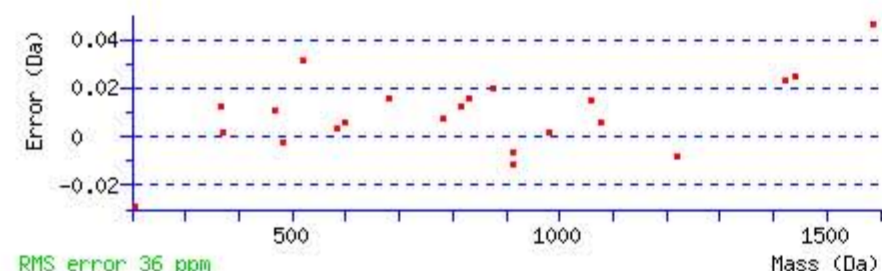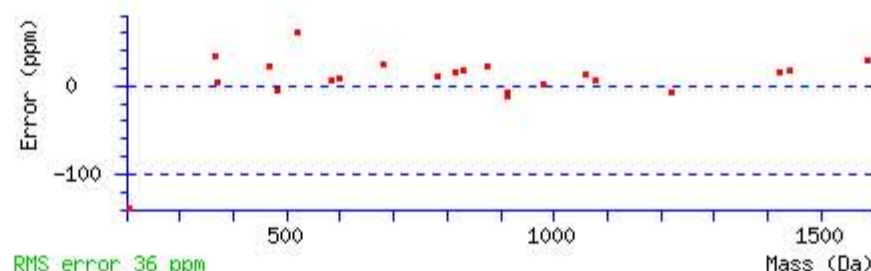

NCBI BLAST search of **EPCVESLVSQYFQTVTDYGK**

(Parameters: blastp, nr protein database, expect=20000, no filter, PAM30)

Other BLAST [web gateways](#)

All matches to this query

| Score | Mr(calc):   | Delta    | Sequence                             |
|-------|-------------|----------|--------------------------------------|
| 34.5  | 2660.250244 | 0.010148 | <a href="#">EPCVESLVSQYFQTVTDYGK</a> |
| 19.5  | 2660.250244 | 0.010148 | <a href="#">EPCVESLVSQYFQTVTDYGK</a> |

# MASCOT Search Results

## Peptide View

MS/MS Fragmentation of **EPCVESLVSQYFQTVTDYGK**

Found in **APOA2\_HUMAN**, Apolipoprotein A-II OS=Homo sapiens GN=APOA2 PE=1 SV=1

Match to Query 52456: 2660.261352 from(887.761060,3+) rtinseconds(3148) index(39931)  
 Title: Locus:1.1.1.3641.21 File:"2013-07-02 CLN FXIII 60 min 3rd F 3.wiff"  
 Data file C:\Program Files (x86)\Matrix Science\Mascot Daemon\mgf\6 FXIII 60 min 3rd\mascot\_daemon\_merge.mgf

Click mouse within plot area to zoom in by factor of two about that point  
 Or, Plot from  to  Da   
 Label all possible matches  Label matches used for scoring

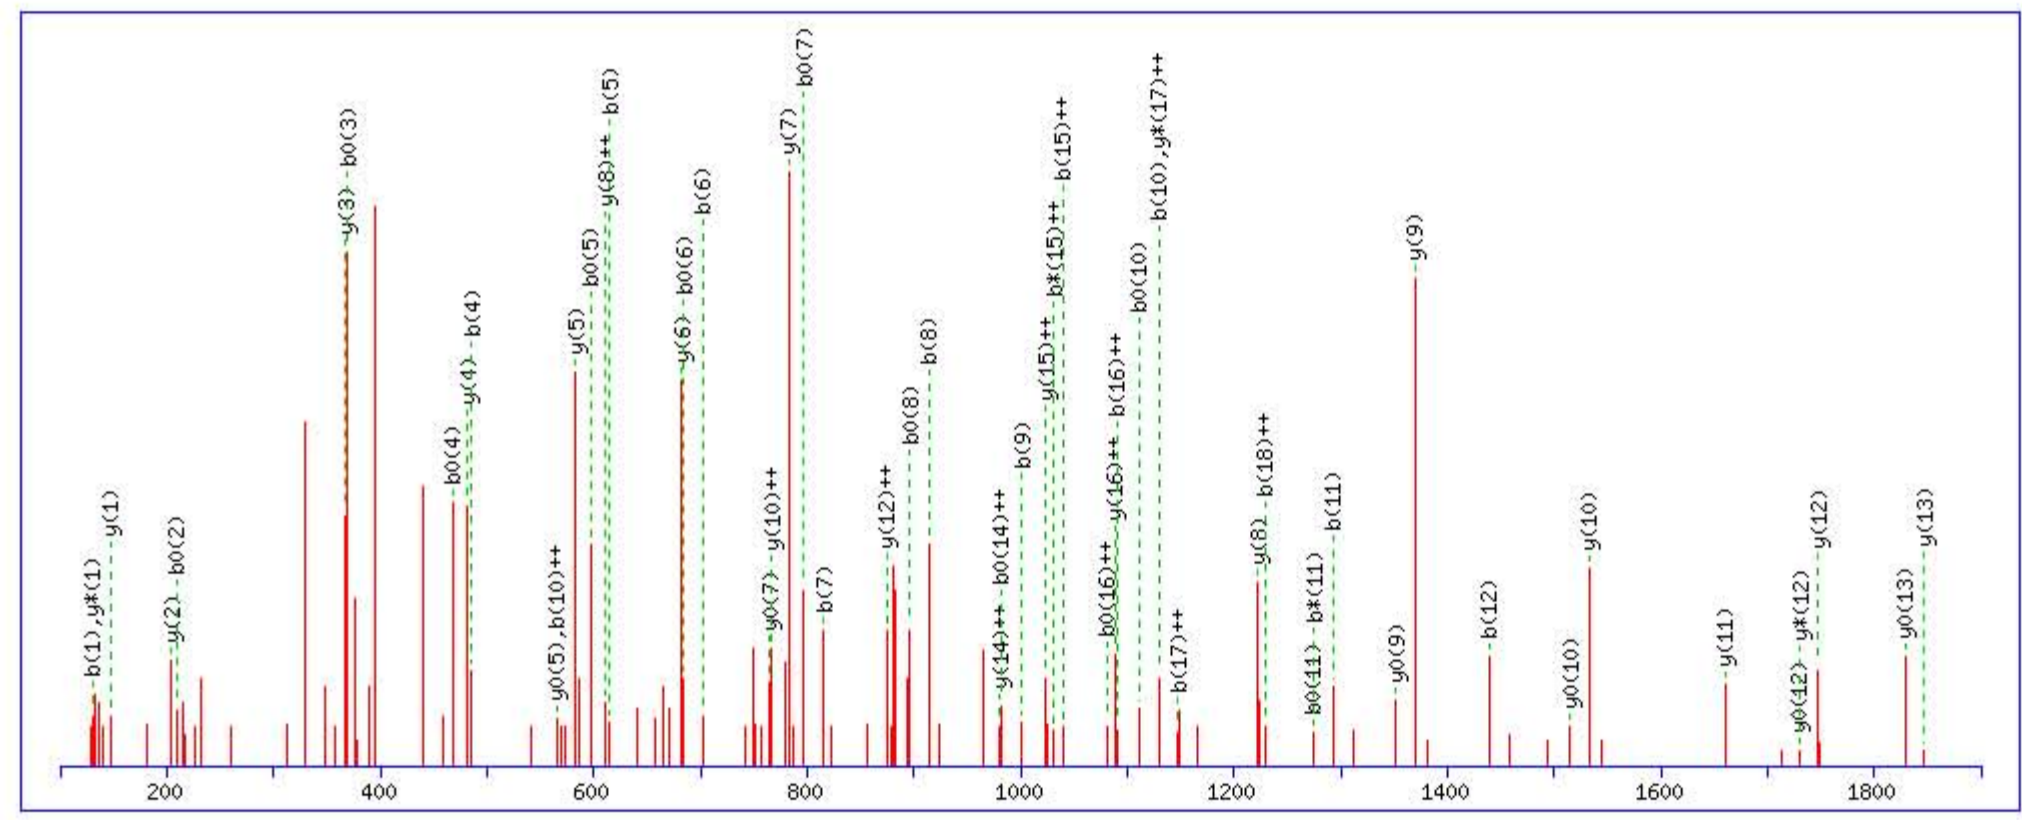

Monoisotopic mass of neutral peptide Mr(calc): 2660.250244  
 Fixed modifications: Carbamidomethyl (C) (apply to specified residues or termini only)  
 Variable modifications:  
 Q13 : Biotin:Thermo-21345 (Q)  
 Ions Score: 73 Expect: 9.8e-007  
 Matches : 56/204 fragment ions using 92 most intense peaks [\(help\)](#)

| #  | b           | b <sup>++</sup> | b <sup>*</sup> | b <sup>*++</sup> | b <sup>0</sup> | b <sup>0++</sup> | Seq. | y           | y <sup>++</sup> | y <sup>*</sup> | y <sup>*++</sup> | y <sup>0</sup> | y <sup>0++</sup> | #  |
|----|-------------|-----------------|----------------|------------------|----------------|------------------|------|-------------|-----------------|----------------|------------------|----------------|------------------|----|
| 1  | 130.049869  | 65.528572       |                |                  | 112.039304     | 56.523290        | E    |             |                 |                |                  |                |                  | 20 |
| 2  | 227.102633  | 114.054954      |                |                  | 209.092068     | 105.049672       | P    | 2532.214913 | 1266.611094     | 2515.188364    | 1258.097820      | 2514.204348    | 1257.605812      | 19 |
| 3  | 387.133282  | 194.070279      |                |                  | 369.122717     | 185.064997       | C    | 2435.162149 | 1218.084712     | 2418.135600    | 1209.571438      | 2417.151584    | 1209.079430      | 18 |
| 4  | 486.201696  | 243.604486      |                |                  | 468.191131     | 234.599204       | V    | 2275.131500 | 1138.069388     | 2258.104951    | 1129.556113      | 2257.120935    | 1129.064105      | 17 |
| 5  | 615.244289  | 308.125783      |                |                  | 597.233724     | 299.120500       | E    | 2176.063086 | 1088.535181     | 2159.036537    | 1080.021906      | 2158.052521    | 1079.529898      | 16 |
| 6  | 702.276317  | 351.641797      |                |                  | 684.265752     | 342.636514       | S    | 2047.020493 | 1024.013885     | 2029.993944    | 1015.500610      | 2029.009928    | 1015.008602      | 15 |
| 7  | 815.360381  | 408.183829      |                |                  | 797.349816     | 399.178546       | L    | 1959.988465 | 980.497871      | 1942.961916    | 971.984596       | 1941.977900    | 971.492588       | 14 |
| 8  | 914.428795  | 457.718036      |                |                  | 896.418230     | 448.712753       | V    | 1846.904401 | 923.955839      | 1829.877852    | 915.442564       | 1828.893836    | 914.950556       | 13 |
| 9  | 1001.460823 | 501.234050      |                |                  | 983.450258     | 492.228767       | S    | 1747.835987 | 874.421632      | 1730.809438    | 865.908357       | 1729.825422    | 865.416349       | 12 |
| 10 | 1129.519401 | 565.263339      | 1112.492852    | 556.750064       | 1111.508836    | 556.258056       | Q    | 1660.803959 | 830.905618      | 1643.777410    | 822.392343       | 1642.793394    | 821.900335       | 11 |
| 11 | 1292.582730 | 646.795003      | 1275.556181    | 638.281729       | 1274.572165    | 637.789721       | Y    | 1532.745381 | 766.876329      | 1515.718832    | 758.363054       | 1514.734816    | 757.871046       | 10 |
| 12 | 1439.651144 | 720.329210      | 1422.624595    | 711.815936       | 1421.640579    | 711.323928       | F    | 1369.682052 | 685.344664      | 1352.655503    | 676.831390       | 1351.671487    | 676.339382       | 9  |
| 13 | 1878.876470 | 939.941873      | 1861.849921    | 931.428599       | 1860.865905    | 930.936591       | Q    | 1222.613638 | 611.810457      | 1205.587089    | 603.297183       | 1204.603073    | 602.805175       | 8  |
| 14 | 1979.924149 | 990.465713      | 1962.897600    | 981.952438       | 1961.913584    | 981.460430       | T    | 783.388312  | 392.197794      | 766.361763     | 383.684519       | 765.377747     | 383.192511       | 7  |
| 15 | 2078.992563 | 1039.999920     | 2061.966014    | 1031.486645      | 2060.981998    | 1030.994637      | V    | 682.340633  | 341.673954      | 665.314084     | 333.160680       | 664.330068     | 332.668672       | 6  |
| 16 | 2180.040242 | 1090.523759     | 2163.013693    | 1082.010484      | 2162.029677    | 1081.518476      | T    | 583.272219  | 292.139747      | 566.245670     | 283.626473       | 565.261654     | 283.134465       | 5  |
| 17 | 2295.067185 | 1148.037230     | 2278.040636    | 1139.523956      | 2277.056620    | 1139.031948      | D    | 482.224540  | 241.615908      | 465.197991     | 233.102633       | 464.213975     | 232.610625       | 4  |
| 18 | 2458.130514 | 1229.568895     | 2441.103965    | 1221.055620      | 2440.119949    | 1220.563612      | Y    | 367.197597  | 184.102436      | 350.171048     | 175.589162       |                |                  | 3  |
| 19 | 2515.151978 | 1258.079627     | 2498.125429    | 1249.566352      | 2497.141413    | 1249.074344      | G    | 204.134268  | 102.570772      | 187.107719     | 94.057497        |                |                  | 2  |
| 20 |             |                 |                |                  |                |                  | K    | 147.112804  | 74.060040       | 130.086255     | 65.546765        |                |                  | 1  |

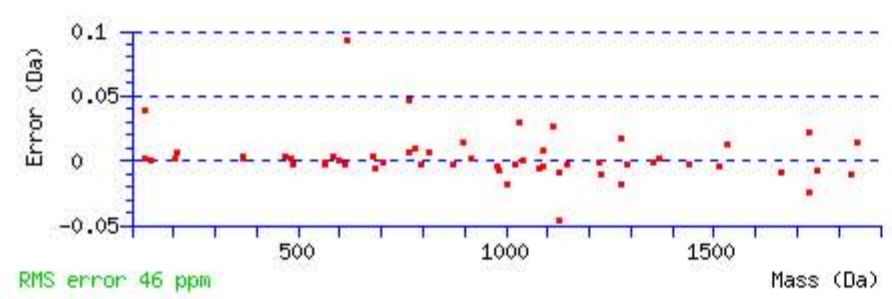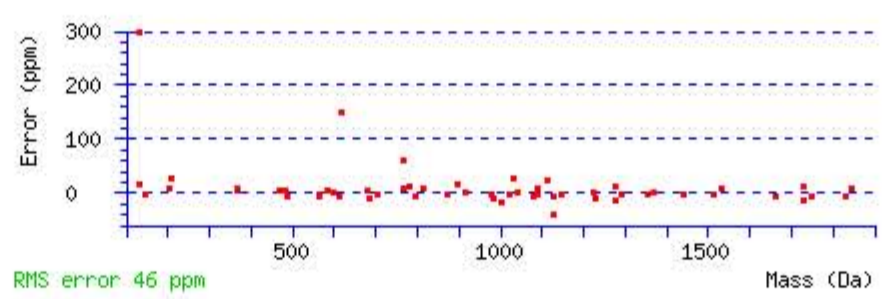

NCBI BLAST search of [EPCVESLVSQYFQTVTDYGK](#)  
 (Parameters: blastp, nr protein database, expect=20000, no filter, PAM30)  
 Other BLAST [web gateways](#)

### All matches to this query

| Score | Mr(calc):   | Delta    | Sequence                             |
|-------|-------------|----------|--------------------------------------|
| 73.5  | 2660.250244 | 0.011108 | <a href="#">EPCVESLVSQYFQTVTDYGK</a> |
| 39.9  | 2660.250244 | 0.011108 | <a href="#">EPCVESLVSQYFQTVTDYGK</a> |



# Mascot Search Results

## Peptide View

MS/MS Fragmentation of **GNTEGLQK**

Found in **APOA4\_HUMAN**, Apolipoprotein A-IV OS=Homo sapiens GN=APOA4 PE=1 SV=3

Match to Query 18992: 1156.589608 from(579.302080,2+) rtinseconds(1443) index(59431)

Title: Locus:1.1.1.3128.16 File:"2013-07-02 CLN FXIII 60 min 3rd FT.wiff"

Data file C:\Program Files (x86)\Matrix Science\Mascot Daemon\mgf\6 FXIII 60 min 3rd\mascot\_daemon\_merge.mgf

Click mouse within plot area to zoom in by factor of two about that point

Or, Plot from  to  Da

Label all possible matches  Label matches used for scoring

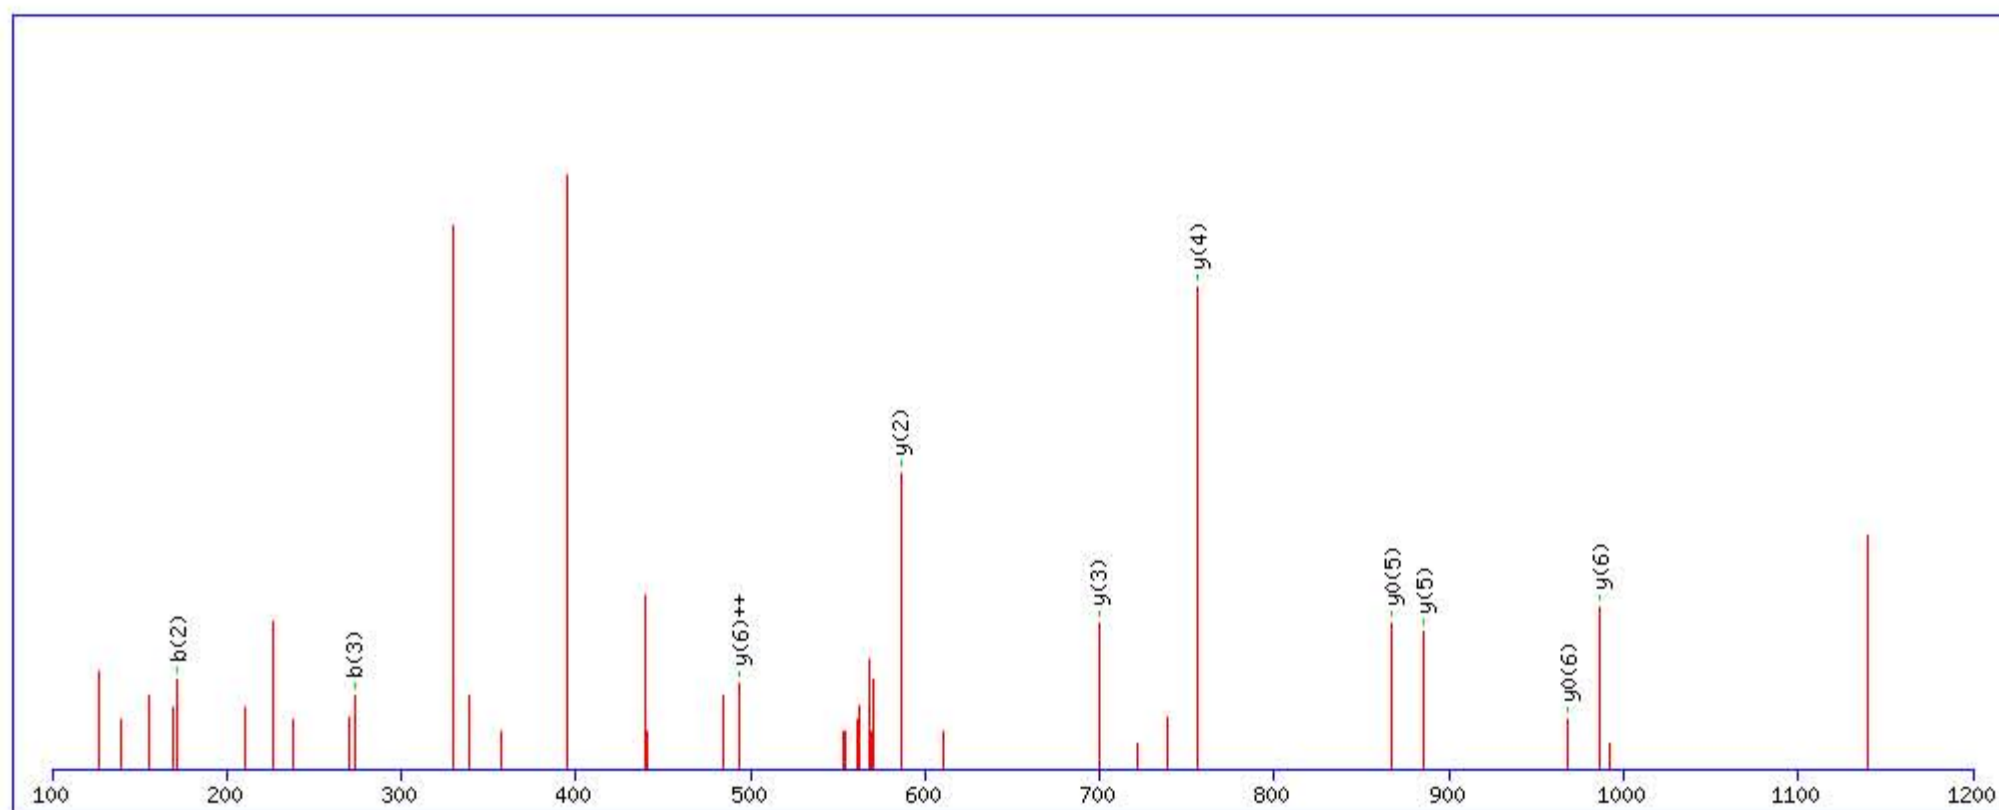

Monoisotopic mass of neutral peptide Mr(calc): 1156.591034

Fixed modifications: Carbamidomethyl (C) (apply to specified residues or termini only)

Variable modifications:

Q7 : Biotin:Thermo-21345 (Q)

Ions Score: 27 Expect: 0.042

Matches : 10/70 fragment ions using 19 most intense peaks [\(help\)](#)

| # | b                 | b <sup>++</sup> | b <sup>*</sup> | b <sup>+++</sup> | b <sup>0</sup> | b <sup>0++</sup> | Seq.     | y                 | y <sup>++</sup>   | y <sup>*</sup> | y <sup>+++</sup> | y <sup>0</sup>    | y <sup>0++</sup> | #        |
|---|-------------------|-----------------|----------------|------------------|----------------|------------------|----------|-------------------|-------------------|----------------|------------------|-------------------|------------------|----------|
| 1 | 58.028740         | 29.518008       |                |                  |                |                  | <b>G</b> |                   |                   |                |                  |                   |                  | <b>8</b> |
| 2 | <b>172.071667</b> | 86.539471       | 155.045118     | 78.026197        |                |                  | <b>N</b> | 1100.576857       | 550.792067        | 1083.550308    | 542.278792       | 1082.566292       | 541.786784       | <b>7</b> |
| 3 | <b>273.119346</b> | 137.063311      | 256.092797     | 128.550037       | 255.108781     | 128.058029       | <b>T</b> | <b>986.533930</b> | <b>493.770603</b> | 969.507381     | 485.257329       | <b>968.523365</b> | 484.765321       | <b>6</b> |
| 4 | 402.161939        | 201.584608      | 385.135390     | 193.071333       | 384.151374     | 192.579325       | <b>E</b> | <b>885.486251</b> | 443.246764        | 868.459702     | 434.733489       | <b>867.475686</b> | 434.241481       | <b>5</b> |
| 5 | 459.183403        | 230.095339      | 442.156854     | 221.582065       | 441.172838     | 221.090057       | <b>G</b> | <b>756.443658</b> | 378.725467        | 739.417109     | 370.212193       |                   |                  | <b>4</b> |
| 6 | 572.267467        | 286.637372      | 555.240918     | 278.124097       | 554.256902     | 277.632089       | <b>L</b> | <b>699.422194</b> | 350.214735        | 682.395645     | 341.701461       |                   |                  | <b>3</b> |
| 7 | 1011.492793       | 506.250035      | 994.466244     | 497.736760       | 993.482228     | 497.244752       | <b>Q</b> | <b>586.338130</b> | 293.672703        | 569.311581     | 285.159429       |                   |                  | <b>2</b> |
| 8 |                   |                 |                |                  |                |                  | <b>K</b> | 147.112804        | 74.060040         | 130.086255     | 65.546766        |                   |                  | <b>1</b> |

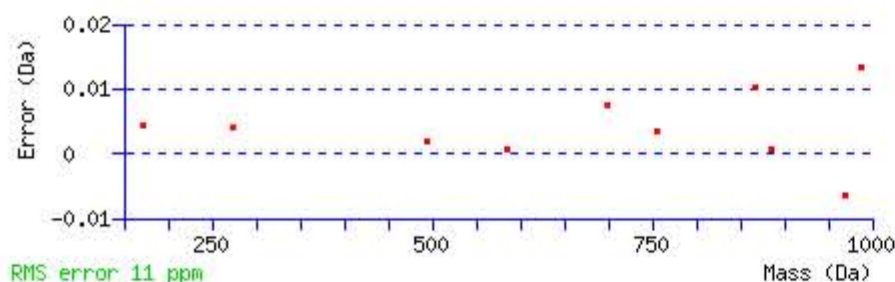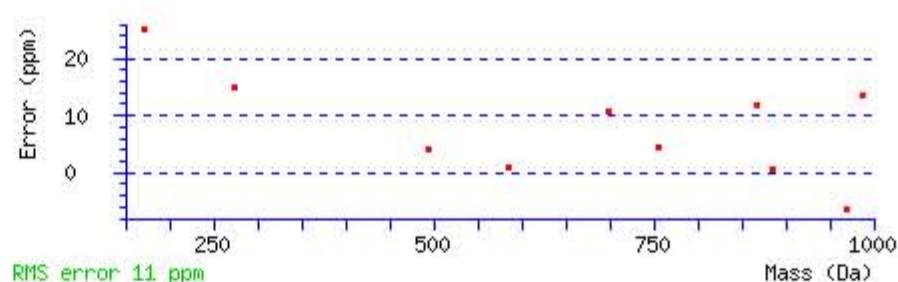

NCBI BLAST search of **GNTEGLQK**

(Parameters: blastp, nr protein database, expect=20000, no filter, PAM30)

Other BLAST [web gateways](#)

All matches to this query

| Score | Mr(calc):   | Delta     | Sequence                 |
|-------|-------------|-----------|--------------------------|
| 26.6  | 1156.591034 | -0.001426 | <a href="#">GNTEGLQK</a> |

Mascot: <http://www.matrixscience.com/>

# MASCOT Search Results

## Peptide View

MS/MS Fragmentation of **IDQNVEELK**

Found in **APOA4\_HUMAN**, Apolipoprotein A-IV OS=Homo sapiens GN=APOA4 PE=1 SV=3

Match to Query 26290: 1397.725428 from(699.869990,2+) rtinseconds(1861) index(61658)

Title: Locus:1.1.1.3274.7 File:"2013-07-02 CLN FXIII 60 min 3rd FT.wiff"

Data file C:\Program Files (x86)\Matrix Science\Mascot Daemon\mgf6 FXIII 60 min 3rd\mascot\_daemon\_merge.mgf

Click mouse within plot area to zoom in by factor of two about that point

Or, Plot from  to  Da

Label all possible matches  Label matches used for scoring

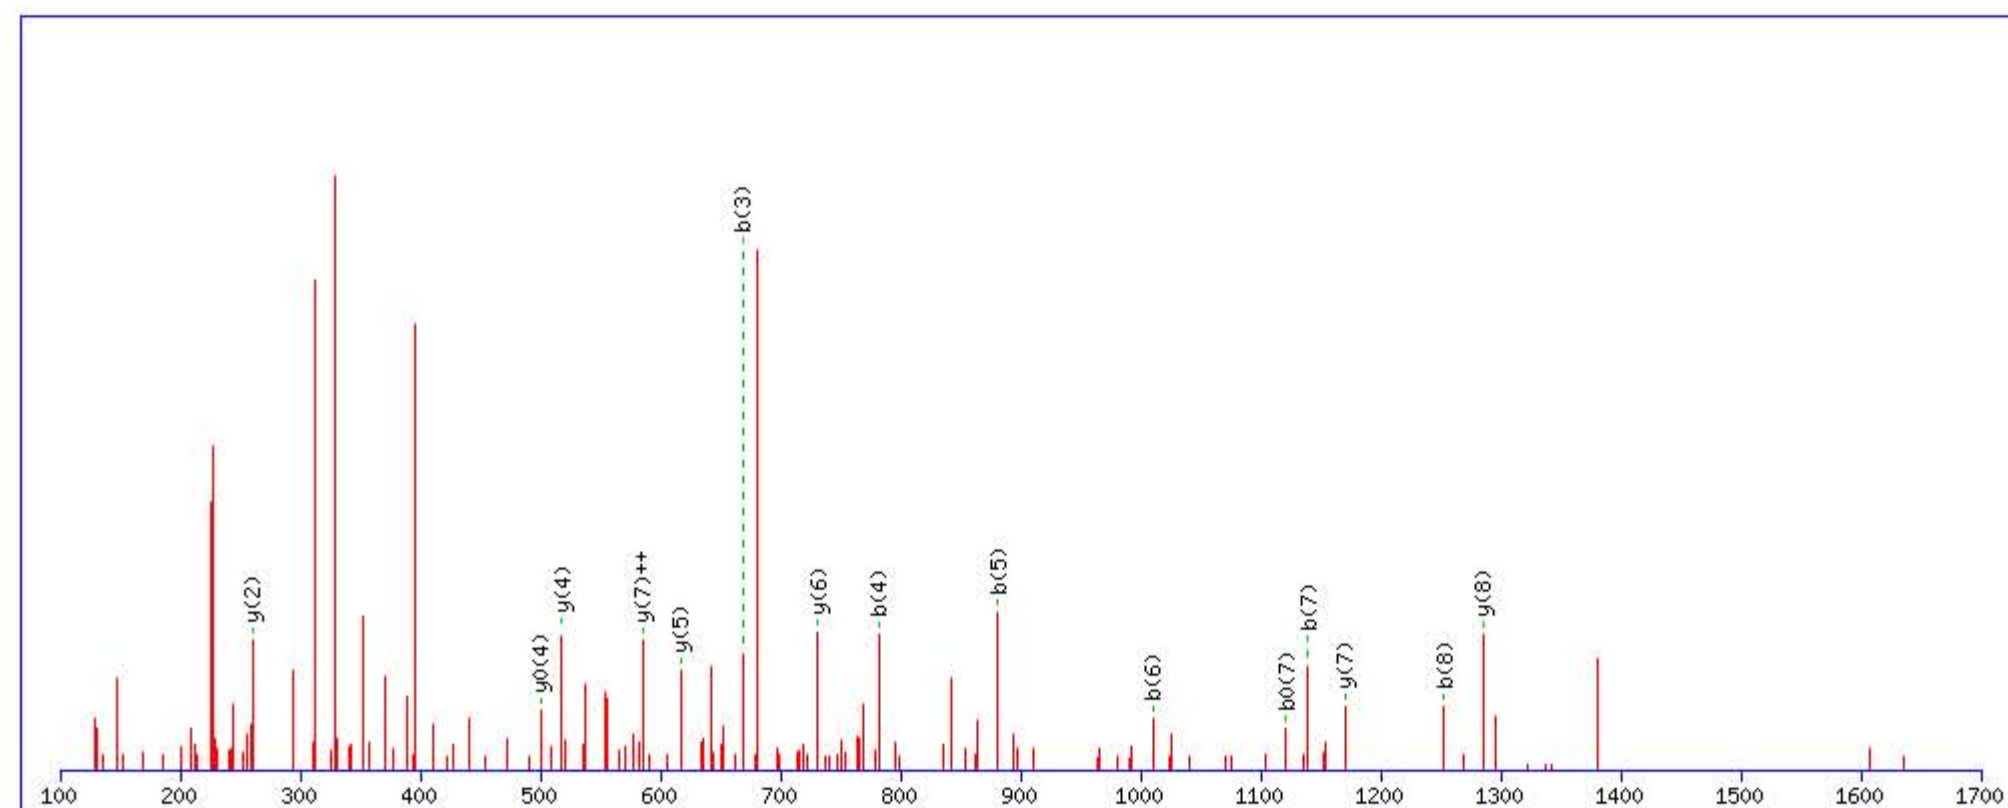

Monoisotopic mass of neutral peptide  $M_r(\text{calc})$ : 1397.722427

Fixed modifications: Carbamidomethyl (C) (apply to specified residues or termini only)

Variable modifications:

Q3 : Biotin:Thermo-21345 (Q)

Ions Score: 39 Expect: 0.0022

Matches : 15/86 fragment ions using 26 most intense peaks [\(help\)](#)

| # | b                  | b <sup>++</sup> | b <sup>*</sup> | b <sup>*++</sup> | b <sup>0</sup>     | b <sup>0++</sup> | Seq. | y                  | y <sup>++</sup>   | y <sup>*</sup> | y <sup>*++</sup> | y <sup>0</sup>    | y <sup>0++</sup> | # |
|---|--------------------|-----------------|----------------|------------------|--------------------|------------------|------|--------------------|-------------------|----------------|------------------|-------------------|------------------|---|
| 1 | 114.091340         | 57.549308       |                |                  |                    |                  | I    |                    |                   |                |                  |                   |                  | 9 |
| 2 | 229.118283         | 115.062779      |                |                  | 211.107718         | 106.057497       | D    | <b>1285.645664</b> | 643.326470        | 1268.619115    | 634.813196       | 1267.635099       | 634.321187       | 8 |
| 3 | <b>668.343609</b>  | 334.675443      | 651.317060     | 326.162168       | 650.333044         | 325.670160       | Q    | <b>1170.618721</b> | <b>585.812998</b> | 1153.592172    | 577.299724       | 1152.608156       | 576.807716       | 7 |
| 4 | <b>782.386536</b>  | 391.696906      | 765.359987     | 383.183631       | 764.375971         | 382.691623       | N    | <b>731.393395</b>  | 366.200335        | 714.366846     | 357.687061       | 713.382830        | 357.195053       | 6 |
| 5 | <b>881.454950</b>  | 441.231113      | 864.428401     | 432.717838       | 863.444385         | 432.225830       | V    | <b>617.350468</b>  | 309.178872        | 600.323919     | 300.665597       | 599.339903        | 300.173589       | 5 |
| 6 | <b>1010.497543</b> | 505.752410      | 993.470994     | 497.239135       | 992.486978         | 496.747127       | E    | <b>518.282054</b>  | 259.644665        | 501.255505     | 251.131390       | <b>500.271489</b> | 250.639382       | 4 |
| 7 | <b>1139.540136</b> | 570.273706      | 1122.513587    | 561.760431       | <b>1121.529571</b> | 561.268423       | E    | 389.239461         | 195.123368        | 372.212912     | 186.610094       | 371.228896        | 186.118086       | 3 |
| 8 | <b>1252.624200</b> | 626.815738      | 1235.597651    | 618.302463       | 1234.613635        | 617.810455       | L    | <b>260.196868</b>  | 130.602072        | 243.170319     | 122.088797       |                   |                  | 2 |
| 9 |                    |                 |                |                  |                    |                  | K    | 147.112804         | 74.060040         | 130.086255     | 65.546765        |                   |                  | 1 |

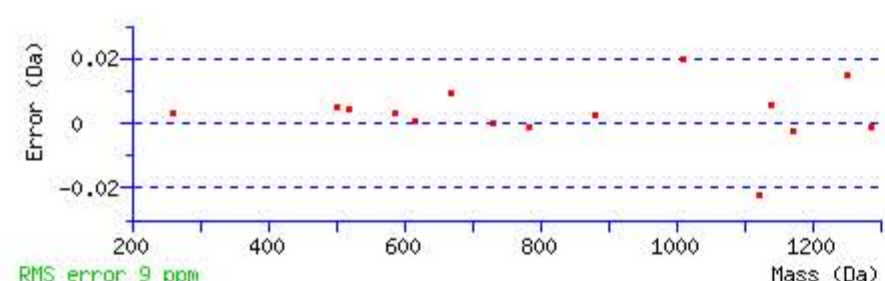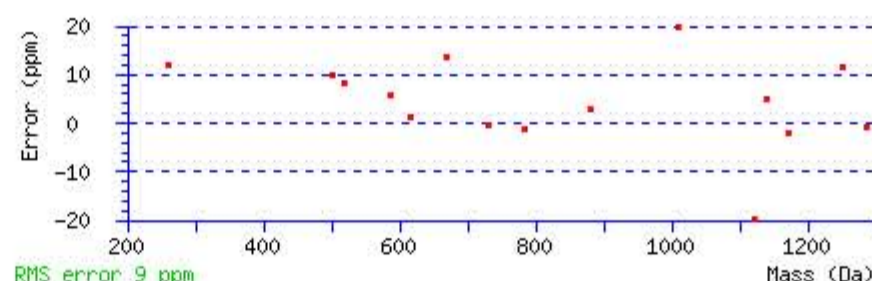

NCBI BLAST search of **IDQNVEELK**

(Parameters: blastp, nr protein database, expect=20000, no filter, PAM30)

Other BLAST [web gateways](#)

All matches to this query

| Score | $M_r(\text{calc})$ : | Delta     | Sequence                      |
|-------|----------------------|-----------|-------------------------------|
| 38.6  | 1397.722427          | 0.003001  | <a href="#">IDQNVEELK</a>     |
| 9.6   | 1397.744873          | -0.019445 | <a href="#">MLEKARHQELK</a>   |
| 8.8   | 1397.744873          | -0.019445 | <a href="#">QRREEELK</a>      |
| 3.1   | 1397.740204          | -0.014776 | <a href="#">VEGDLKGPEVDIK</a> |
| 3.1   | 1397.740204          | -0.014776 | <a href="#">VEGDLKGPEVDLK</a> |
| 2.5   | 1397.744873          | -0.019445 | <a href="#">QEERRELK</a>      |
| 2.5   | 1397.744904          | -0.019476 | <a href="#">SSGPQRAGSLK</a>   |
| 2.4   | 1397.737686          | -0.012258 | <a href="#">MYLNFLVSLGNK</a>  |
| 2.0   | 1397.723785          | 0.001643  | <a href="#">LFVSHMIDKHR</a>   |
| 1.3   | 1397.708023          | 0.017405  | <a href="#">KMALNSLMSLMK</a>  |

# MASCOT Search Results

## Peptide View

MS/MS Fragmentation of **IDQTVEELR**

Found in **APOA4\_HUMAN**, Apolipoprotein A-IV OS=Homo sapiens GN=APOA4 PE=1 SV=3

Match to Query 27240: 1412.734208 from(707.374380,2+) rtinseconds(1918) index(61920)

Title: Locus:1.1.1.3294.18 File:"2013-07-02 CLN FXIII 60 min 3rd FT.wiff"

Data file C:\Program Files (x86)\Matrix Science\Mascot Daemon\mgf6 FXIII 60 min 3rd\mascot\_daemon\_merge.mgf

Click mouse within plot area to zoom in by factor of two about that point

Or, Plot from  to  Da

Label all possible matches  Label matches used for scoring

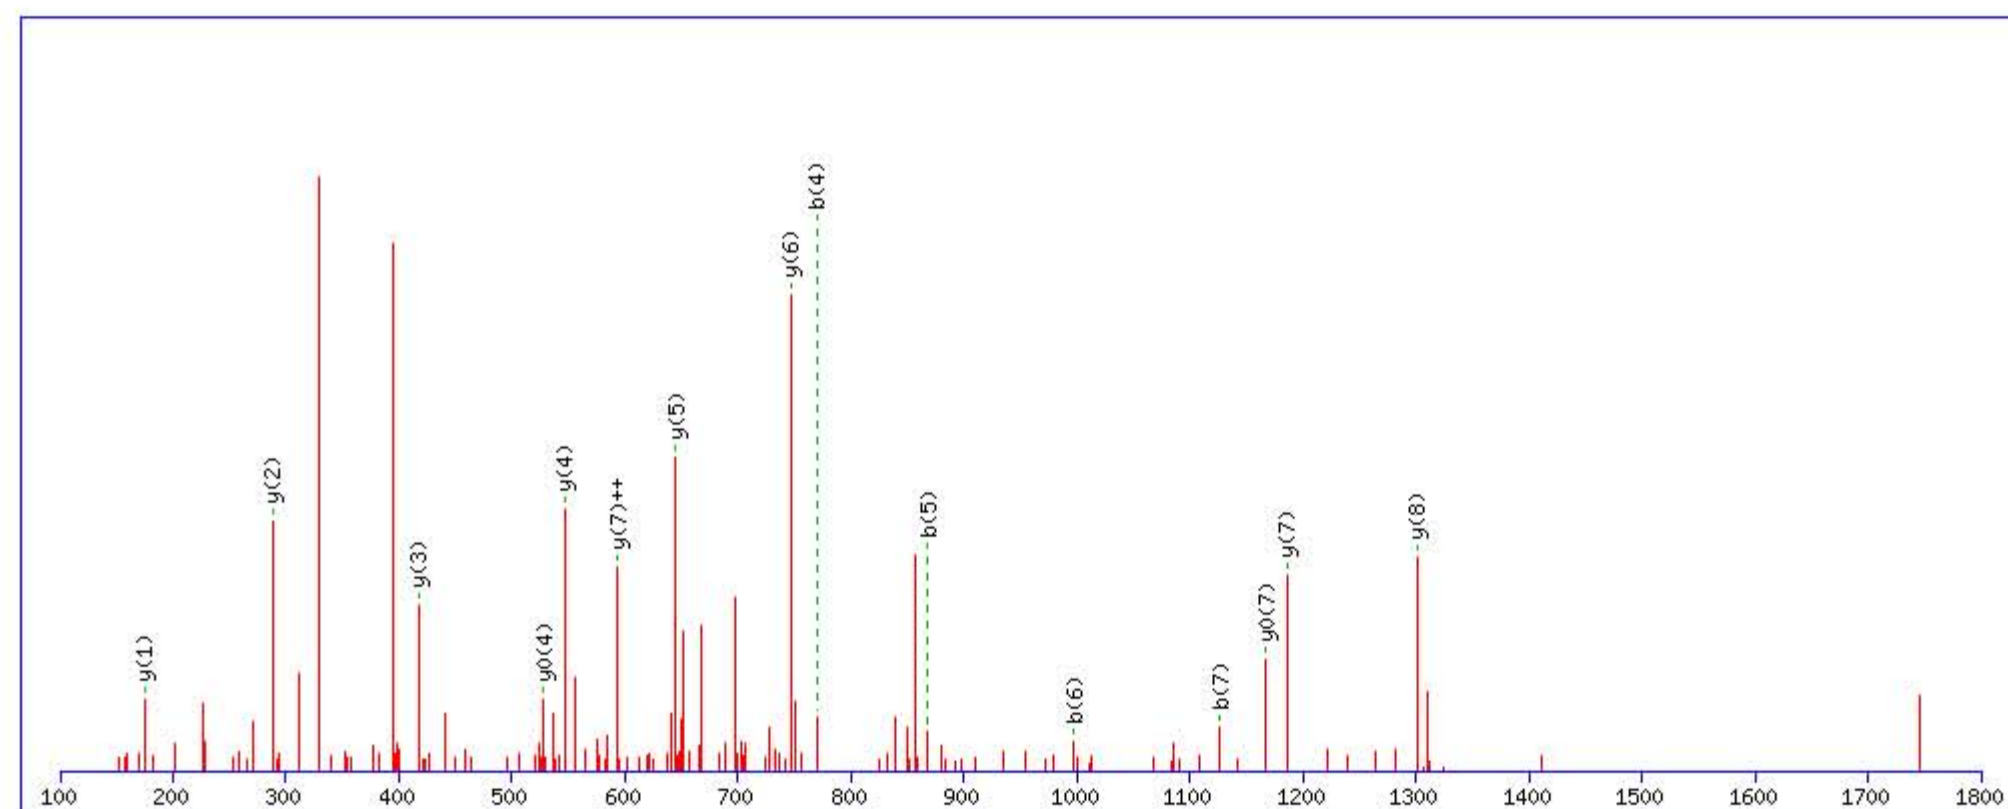

Monoisotopic mass of neutral peptide Mr(calc): 1412.733337

Fixed modifications: Carbamidomethyl (C) (apply to specified residues or termini only)

Variable modifications:

Q3 : Biotin:Thermo-21345 (Q)

Ions Score: 55 Expect: 6.6e-005

Matches : 15/86 fragment ions using 25 most intense peaks [\(help\)](#)

| # | b           | b <sup>++</sup> | b <sup>*</sup> | b <sup>+++</sup> | b <sup>0</sup> | b <sup>0++</sup> | Seq. | y           | y <sup>++</sup> | y <sup>*</sup> | y <sup>+++</sup> | y <sup>0</sup> | y <sup>0++</sup> | # |
|---|-------------|-----------------|----------------|------------------|----------------|------------------|------|-------------|-----------------|----------------|------------------|----------------|------------------|---|
| 1 | 114.091340  | 57.549308       |                |                  |                |                  | I    |             |                 |                |                  |                |                  | 9 |
| 2 | 229.118283  | 115.062779      |                |                  | 211.107718     | 106.057497       | D    | 1300.656564 | 650.831920      | 1283.630015    | 642.318646       | 1282.645999    | 641.826638       | 8 |
| 3 | 668.343609  | 334.675443      | 651.317060     | 326.162168       | 650.333044     | 325.670160       | Q    | 1185.629621 | 593.318449      | 1168.603072    | 584.805174       | 1167.619056    | 584.313166       | 7 |
| 4 | 769.391288  | 385.199282      | 752.364739     | 376.686008       | 751.380723     | 376.194000       | T    | 746.404295  | 373.705786      | 729.377746     | 365.192511       | 728.393730     | 364.700503       | 6 |
| 5 | 868.459702  | 434.733489      | 851.433153     | 426.220215       | 850.449137     | 425.728207       | V    | 645.356616  | 323.181946      | 628.330067     | 314.668672       | 627.346051     | 314.176664       | 5 |
| 6 | 997.502295  | 499.254786      | 980.475746     | 490.741511       | 979.491730     | 490.249503       | E    | 546.288202  | 273.647739      | 529.261653     | 265.134465       | 528.277637     | 264.642457       | 4 |
| 7 | 1126.544888 | 563.776082      | 1109.518339    | 555.262808       | 1108.534323    | 554.770800       | E    | 417.245609  | 209.126442      | 400.219060     | 200.613168       | 399.235044     | 200.121160       | 3 |
| 8 | 1239.628952 | 620.318114      | 1222.602403    | 611.804840       | 1221.618387    | 611.312832       | L    | 288.203016  | 144.605146      | 271.176467     | 136.091871       |                |                  | 2 |
| 9 |             |                 |                |                  |                |                  | R    | 175.118952  | 88.063114       | 158.092403     | 79.549839        |                |                  | 1 |

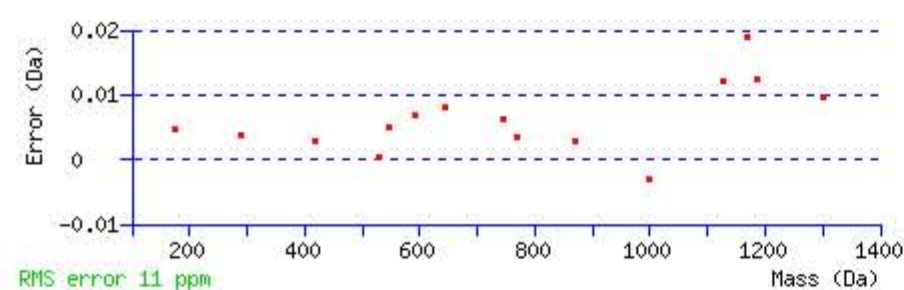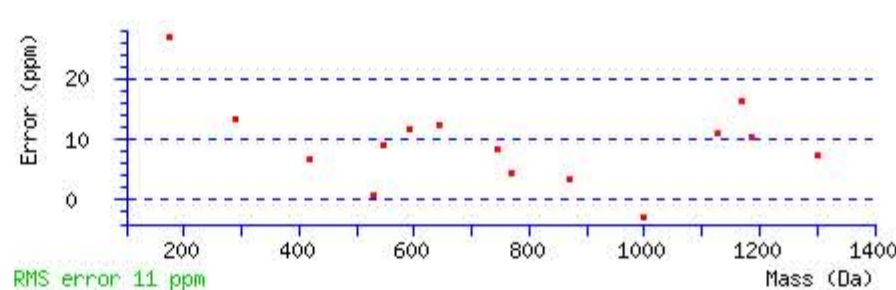

NCBI BLAST search of **IDQTVEELR**

(Parameters: blastp, nr protein database, expect=20000, no filter, PAM30)

Other BLAST [web gateways](#)

## All matches to this query

| Score | Mr(calc):   | Delta     | Sequence                      |
|-------|-------------|-----------|-------------------------------|
| 54.7  | 1412.733337 | 0.000871  | <a href="#">IDQTVEELR</a>     |
| 9.6   | 1412.744537 | -0.010329 | <a href="#">IPPEKMRELER</a>   |
| 8.1   | 1412.734665 | -0.000457 | <a href="#">MPADWRQQLR</a>    |
| 7.2   | 1412.741211 | -0.007003 | <a href="#">KVTIYSFTGNQR</a>  |
| 5.1   | 1412.737167 | -0.002959 | <a href="#">ARPEDVISEGRGK</a> |
| 4.7   | 1412.730621 | 0.003587  | <a href="#">ARMEHSRELLR</a>   |
| 4.1   | 1412.733322 | 0.000886  | <a href="#">LSEEIDQLR</a>     |
| 3.1   | 1412.751938 | -0.017730 | <a href="#">EAELQMLLR</a>     |
| 2.1   | 1412.734665 | -0.000457 | <a href="#">QRYSRMDFLR</a>    |

# MASCOT Search Results

## Peptide View

MS/MS Fragmentation of **LEPYADQLR**

Found in **APOA4\_HUMAN**, Apolipoprotein A-IV OS=Homo sapiens GN=APOA4 PE=1 SV=3

Match to Query 27260: 1414.726728 from(708.370640,2+) rtinseconds(1983) index(4866)

Title: Locus:1.1.1.3242.12 File:"2013-07-02 CLN FXIII 60 min 3rd F 1.wiff"

Data file C:\Program Files (x86)\Matrix Science\Mascot Daemon\mgf6 FXIII 60 min 3rd\mascot\_daemon\_merge.mgf

Click mouse within plot area to zoom in by factor of two about that point

Or, Plot from  to  Da

Label all possible matches  Label matches used for scoring

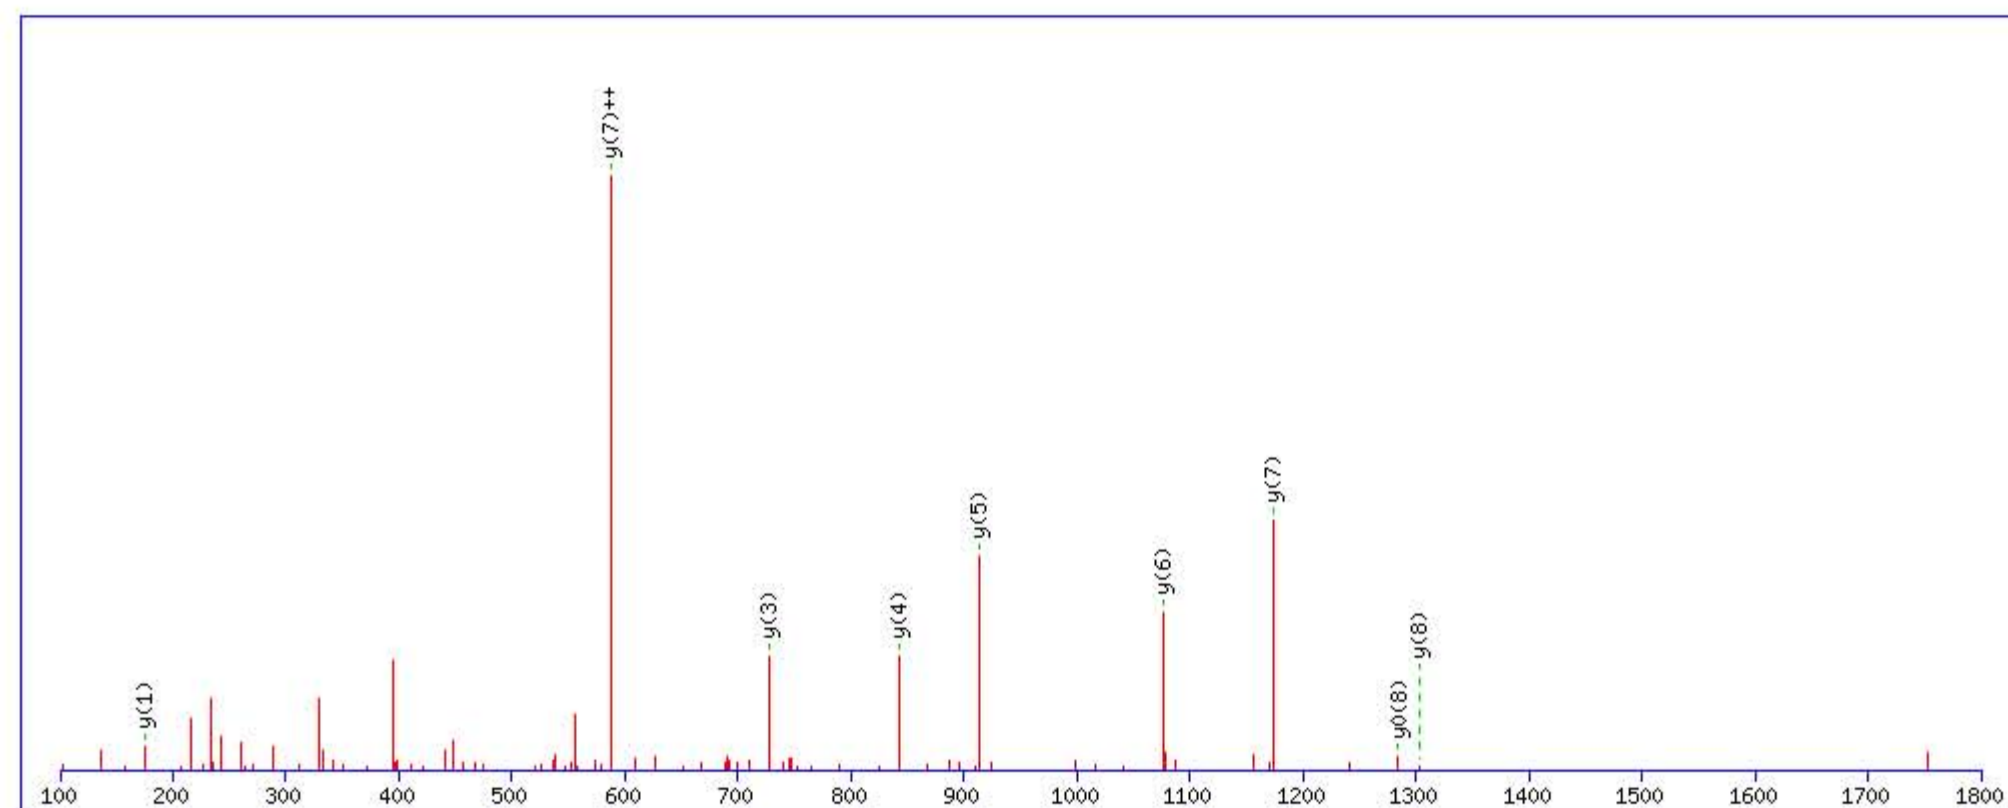

Monoisotopic mass of neutral peptide Mr(calc): 1414.727844

Fixed modifications: Carbamidomethyl (C) (apply to specified residues or termini only)

Variable modifications:

Q7 : Biotin:Thermo-21345 (Q)

Ions Score: 56 Expect: 4.5e-005

Matches : 9/76 fragment ions using 13 most intense peaks [\(help\)](#)

| # | b           | b <sup>++</sup> | b <sup>*</sup> | b <sup>*++</sup> | b <sup>0</sup> | b <sup>0++</sup> | Seq. | y                  | y <sup>++</sup>   | y <sup>*</sup> | y <sup>*++</sup> | y <sup>0</sup>     | y <sup>0++</sup> | # |
|---|-------------|-----------------|----------------|------------------|----------------|------------------|------|--------------------|-------------------|----------------|------------------|--------------------|------------------|---|
| 1 | 114.091340  | 57.549308       |                |                  |                |                  | L    |                    |                   |                |                  |                    |                  | 9 |
| 2 | 243.133933  | 122.070605      |                |                  | 225.123368     | 113.065322       | E    | <b>1302.651085</b> | 651.829181        | 1285.624536    | 643.315906       | <b>1284.640520</b> | 642.823898       | 8 |
| 3 | 340.186697  | 170.596987      |                |                  | 322.176132     | 161.591704       | P    | <b>1173.608492</b> | <b>587.307884</b> | 1156.581943    | 578.794610       | 1155.597927        | 578.302602       | 7 |
| 4 | 503.250026  | 252.128651      |                |                  | 485.239461     | 243.123369       | Y    | <b>1076.555728</b> | 538.781502        | 1059.529179    | 530.268228       | 1058.545163        | 529.776220       | 6 |
| 5 | 574.287140  | 287.647208      |                |                  | 556.276575     | 278.641926       | A    | <b>913.492399</b>  | 457.249838        | 896.465850     | 448.736563       | 895.481834         | 448.244555       | 5 |
| 6 | 689.314083  | 345.160680      |                |                  | 671.303518     | 336.155397       | D    | <b>842.455285</b>  | 421.731281        | 825.428736     | 413.218006       | 824.444720         | 412.725998       | 4 |
| 7 | 1128.539409 | 564.773343      | 1111.512860    | 556.260068       | 1110.528844    | 555.768060       | Q    | <b>727.428342</b>  | 364.217809        | 710.401793     | 355.704535       |                    |                  | 3 |
| 8 | 1241.623473 | 621.315375      | 1224.596924    | 612.802100       | 1223.612908    | 612.310092       | L    | 288.203016         | 144.605146        | 271.176467     | 136.091871       |                    |                  | 2 |
| 9 |             |                 |                |                  |                |                  | R    | <b>175.118952</b>  | 88.063114         | 158.092403     | 79.549839        |                    |                  | 1 |

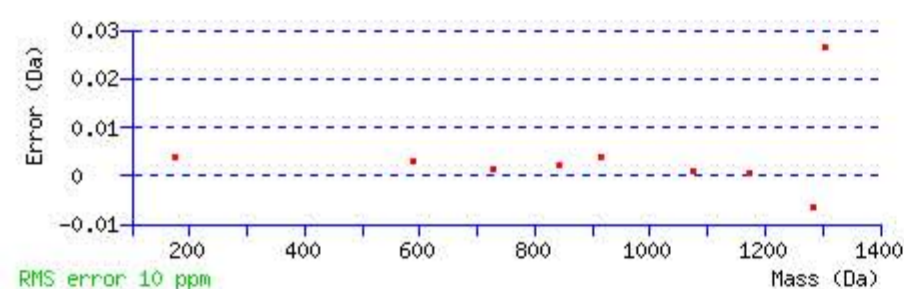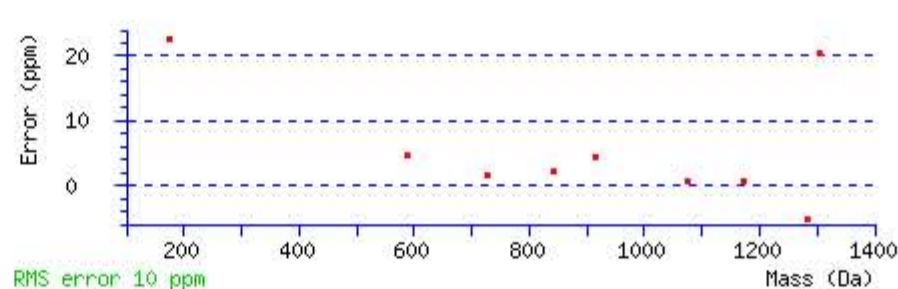

NCBI BLAST search of [LEPYADQLR](#)

(Parameters: blastp, nr protein database, expect=20000, no filter, PAM30)

Other BLAST [web gateways](#)

## All matches to this query

| Score | Mr(calc):   | Delta     | Sequence                       |
|-------|-------------|-----------|--------------------------------|
| 55.8  | 1414.727844 | -0.001116 | <a href="#">LEPYADQLR</a>      |
| 8.8   | 1414.716400 | 0.010328  | <a href="#">LEEDARLEERR</a>    |
| 7.9   | 1414.712585 | 0.014143  | <a href="#">EISTEEQLR</a>      |
| 4.7   | 1414.731689 | -0.004961 | <a href="#">NKAEFHQSVISR</a>   |
| 2.9   | 1414.735062 | -0.008334 | <a href="#">IQLMQEVDQR</a>     |
| 2.5   | 1414.713943 | 0.012785  | <a href="#">KLQCIADQFHR</a>    |
| 1.9   | 1414.741547 | -0.014819 | <a href="#">LEKENLEERQK</a>    |
| 1.2   | 1414.735077 | -0.008349 | <a href="#">SSMSGHLHLVKQGR</a> |
| 0.6   | 1414.741577 | -0.014849 | <a href="#">LETVQADNIREK</a>   |
| 0.4   | 1414.741577 | -0.014849 | <a href="#">ELDVEVSRLEAR</a>   |

# MASCOT Search Results

## Peptide View

MS/MS Fragmentation of **ALVQQMEQLR**

Found in **APOA4\_HUMAN**, Apolipoprotein A-IV OS=Homo sapiens GN=APOA4 PE=1 SV=3

Match to Query 30736: 1525.807708 from(763.911130,2+) rtinseconds(2134) index(63333)

Title: Locus:1.1.1.3369.18 File:"2013-07-02 CLN FXIII 60 min 3rd FT.wiff"

Data file C:\Program Files (x86)\Matrix Science\Mascot Daemon\mgf6 FXIII 60 min 3rd\mascot\_daemon\_merge.mgf

Click mouse within plot area to zoom in by factor of two about that point

Or, Plot from  to  Da

Label all possible matches  Label matches used for scoring

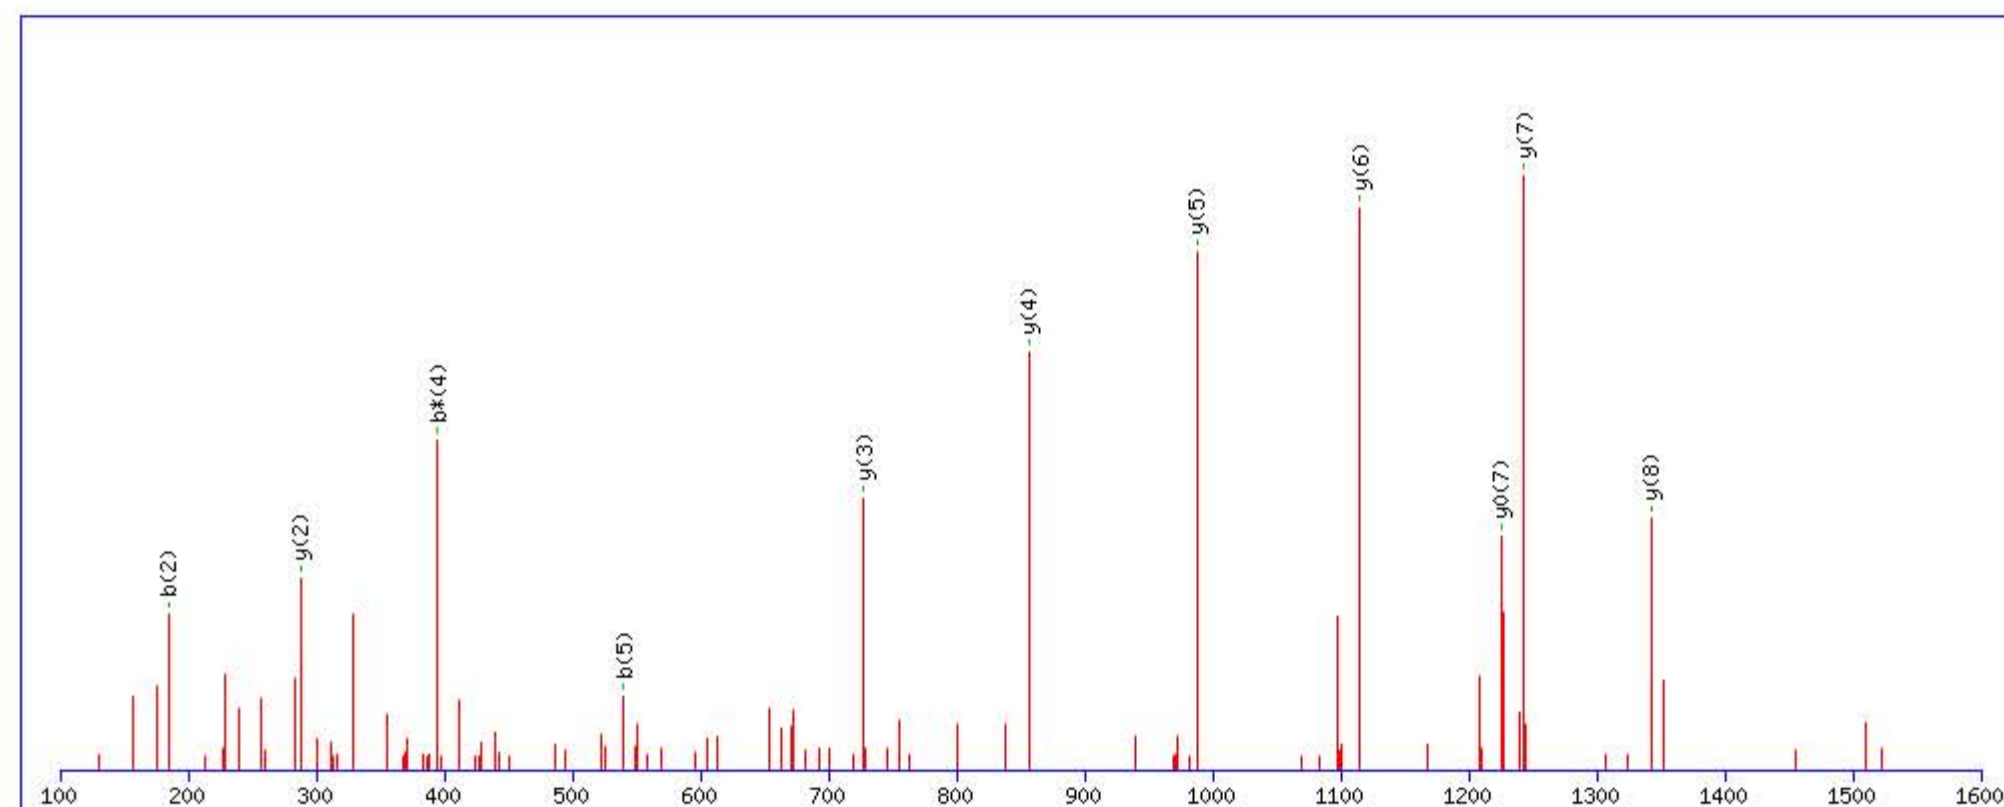

Monoisotopic mass of neutral peptide Mr(calc): 1525.810867

Fixed modifications: Carbamidomethyl (C) (apply to specified residues or termini only)

Variable modifications:

Q8 : Biotin:Thermo-21345 (Q)

Ions Score: 66 Expect: 1.2e-005

Matches : 11/84 fragment ions using 14 most intense peaks [\(help\)](#)

| #  | b                 | b <sup>++</sup> | b <sup>+</sup>    | b <sup>+++</sup> | b <sup>0</sup> | b <sup>0++</sup> | Seq. | y                  | y <sup>++</sup> | y <sup>+</sup> | y <sup>+++</sup> | y <sup>0</sup>     | y <sup>0++</sup> | #  |
|----|-------------------|-----------------|-------------------|------------------|----------------|------------------|------|--------------------|-----------------|----------------|------------------|--------------------|------------------|----|
| 1  | 72.044390         | 36.525833       |                   |                  |                |                  | A    |                    |                 |                |                  |                    |                  | 10 |
| 2  | <b>185.128454</b> | 93.067865       |                   |                  |                |                  | L    | 1455.781054        | 728.394165      | 1438.754505    | 719.880890       | 1437.770489        | 719.388882       | 9  |
| 3  | 284.196868        | 142.602072      |                   |                  |                |                  | V    | <b>1342.696990</b> | 671.852133      | 1325.670441    | 663.338858       | 1324.686425        | 662.846850       | 8  |
| 4  | 412.255446        | 206.631361      | <b>395.228897</b> | 198.118087       |                |                  | Q    | <b>1243.628576</b> | 622.317926      | 1226.602027    | 613.804651       | <b>1225.618011</b> | 613.312643       | 7  |
| 5  | <b>540.314024</b> | 270.660650      | 523.287475        | 262.147376       |                |                  | Q    | <b>1115.569998</b> | 558.288637      | 1098.543449    | 549.775362       | 1097.559433        | 549.283354       | 6  |
| 6  | 671.354509        | 336.180893      | 654.327960        | 327.667618       |                |                  | M    | <b>987.511420</b>  | 494.259348      | 970.484871     | 485.746073       | 969.500855         | 485.254065       | 5  |
| 7  | 800.397102        | 400.702189      | 783.370553        | 392.188915       | 782.386537     | 391.696907       | E    | <b>856.470935</b>  | 428.739105      | 839.444386     | 420.225831       | 838.460370         | 419.733823       | 4  |
| 8  | 1239.622428       | 620.314852      | 1222.595879       | 611.801578       | 1221.611863    | 611.309569       | Q    | <b>727.428342</b>  | 364.217809      | 710.401793     | 355.704534       |                    |                  | 3  |
| 9  | 1352.706492       | 676.856884      | 1335.679943       | 668.343609       | 1334.695927    | 667.851601       | L    | <b>288.203016</b>  | 144.605146      | 271.176467     | 136.091871       |                    |                  | 2  |
| 10 |                   |                 |                   |                  |                |                  | R    | 175.118952         | 88.063114       | 158.092403     | 79.549839        |                    |                  | 1  |

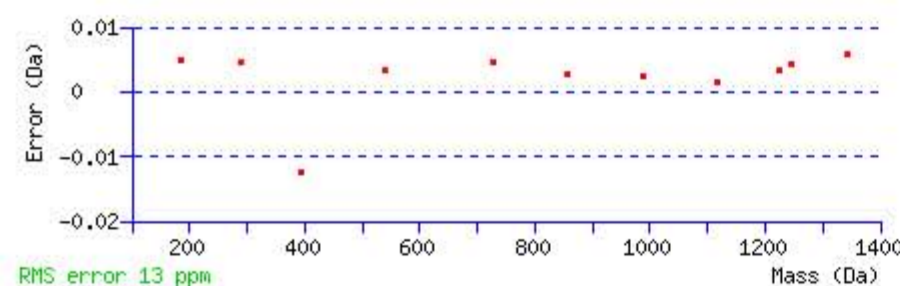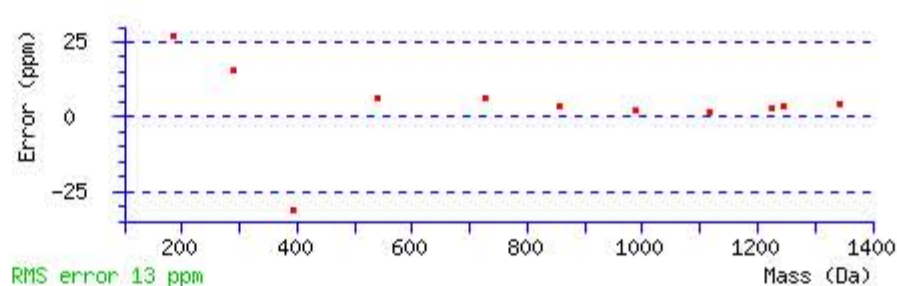

NCBI BLAST search of **ALVQQMEQLR**

(Parameters: blastp, nr protein database, expect=20000, no filter, PAM30)

Other BLAST [web gateways](#)

## All matches to this query

| Score | Mr(calc):   | Delta     | Sequence                      |
|-------|-------------|-----------|-------------------------------|
| 66.1  | 1525.810867 | -0.003159 | <a href="#">ALVQQMEQLR</a>    |
| 23.4  | 1525.810867 | -0.003159 | <a href="#">ALVQQMEQLR</a>    |
| 17.1  | 1525.792236 | 0.015472  | <a href="#">ALTEQQEQLR</a>    |
| 11.9  | 1525.810867 | -0.003159 | <a href="#">ALVQQMEQLR</a>    |
| 11.1  | 1525.798752 | 0.008956  | <a href="#">SPVKEEEKPQEVK</a> |
| 9.7   | 1525.800064 | 0.007644  | <a href="#">ARALQSYEAKAR</a>  |
| 8.2   | 1525.807495 | 0.000213  | <a href="#">WPPQQLMLSAALR</a> |
| 4.3   | 1525.784836 | 0.022872  | <a href="#">LAQVATEEPERQR</a> |
| 4.3   | 1525.814697 | -0.006989 | <a href="#">ERQRTEQLR</a>     |
| 4.1   | 1525.803482 | 0.004226  | <a href="#">VNTPAGSSQKAR</a>  |

# MASCOT SCIENCE Mascot Search Results

## Peptide View

MS/MS Fragmentation of **LLPHANEVSQK**

Found in **APOA4\_HUMAN**, Apolipoprotein A-IV OS=Homo sapiens GN=APOA4 PE=1 SV=3

Match to Query 31104: 1545.831312 from(516.284380,3+) rtinseconds(1557) index(60148)

Title: Locus:1.1.1.3168.7 File:"2013-07-02 CLN FXIII 60 min 3rd FT.wiff"

Data file C:\Program Files (x86)\Matrix Science\Mascot Daemon\mgf6 FXIII 60 min 3rd\mascot\_daemon\_merge.mgf

Click mouse within plot area to zoom in by factor of two about that point

Or, Plot from  to  Da

Label all possible matches  Label matches used for scoring

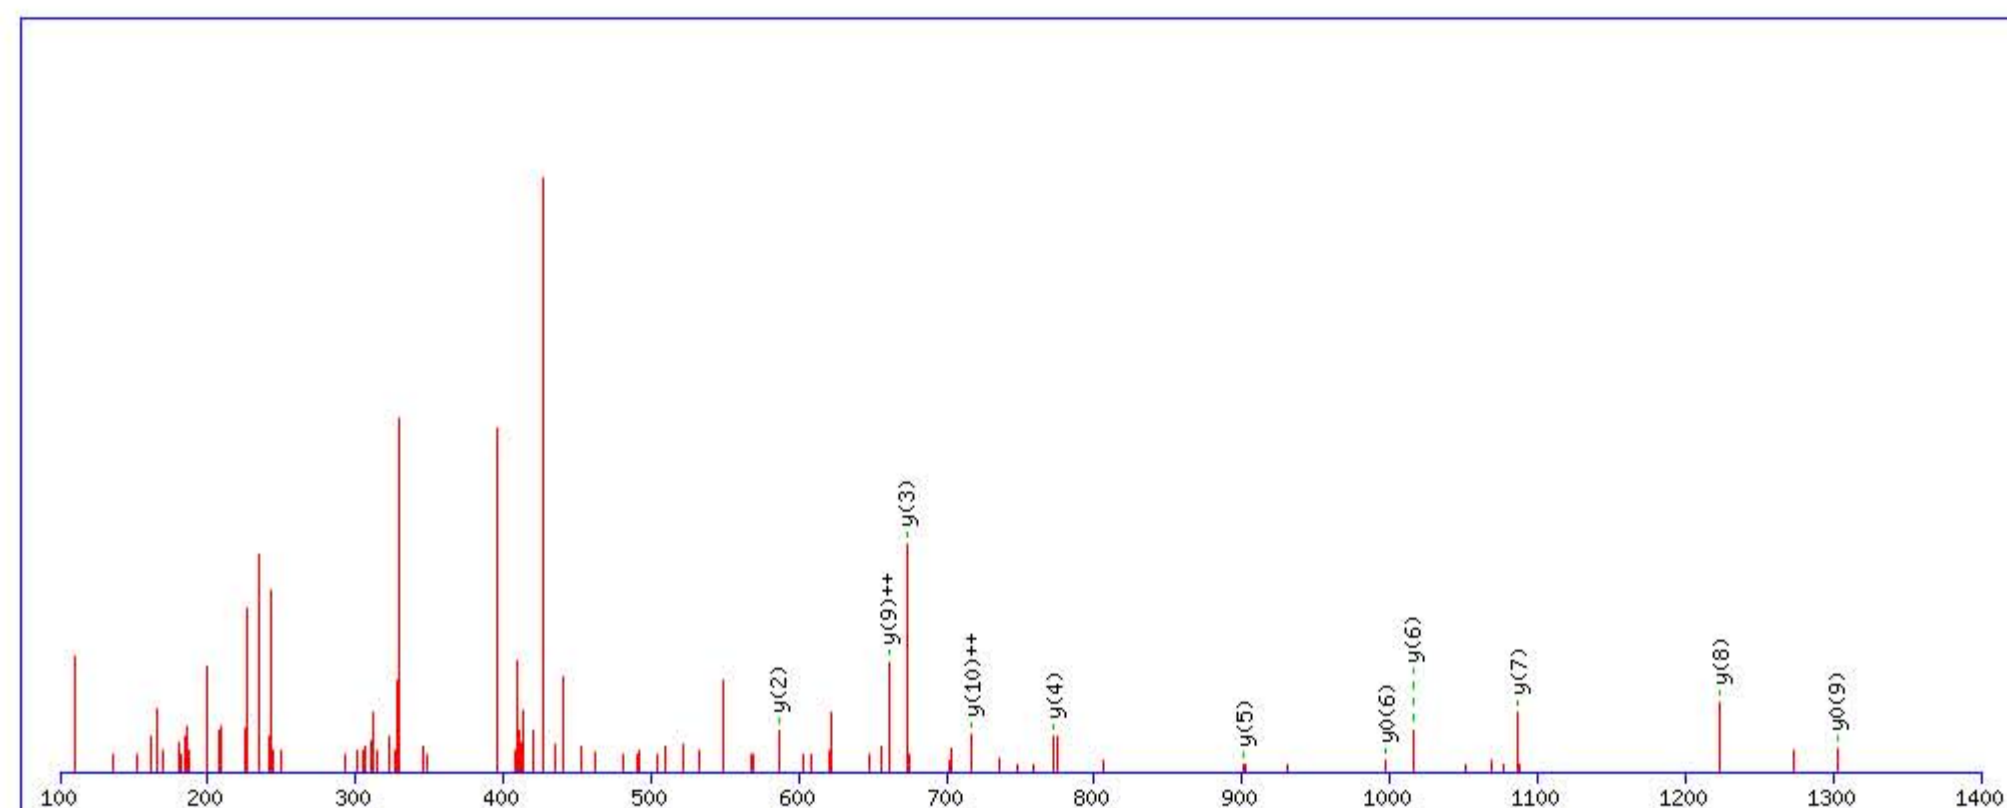

Monoisotopic mass of neutral peptide Mr(calc): 1545.833710

Fixed modifications: Carbamidomethyl (C) (apply to specified residues or termini only)

Variable modifications:

Q10 : Biotin:Thermo-21345 (Q)

Ions Score: 35 Expect: 0.0074

Matches : 11/94 fragment ions using 22 most intense peaks [\(help\)](#)

| #  | b           | b <sup>++</sup> | b <sup>*</sup> | b <sup>*++</sup> | b <sup>0</sup> | b <sup>0++</sup> | Seq. | y           | y <sup>++</sup> | y <sup>*</sup> | y <sup>*++</sup> | y <sup>0</sup> | y <sup>0++</sup> | #  |
|----|-------------|-----------------|----------------|------------------|----------------|------------------|------|-------------|-----------------|----------------|------------------|----------------|------------------|----|
| 1  | 114.091340  | 57.549308       |                |                  |                |                  | L    |             |                 |                |                  |                |                  | 11 |
| 2  | 227.175404  | 114.091340      |                |                  |                |                  | L    | 1433.756946 | 717.382111      | 1416.730397    | 708.868837       | 1415.746381    | 708.376828       | 10 |
| 3  | 324.228168  | 162.617722      |                |                  |                |                  | P    | 1320.672882 | 660.840079      | 1303.646333    | 652.326804       | 1302.662317    | 651.834796       | 9  |
| 4  | 461.287080  | 231.147178      |                |                  |                |                  | H    | 1223.620118 | 612.313697      | 1206.593569    | 603.800422       | 1205.609553    | 603.308414       | 8  |
| 5  | 532.324194  | 266.665735      |                |                  |                |                  | A    | 1086.561206 | 543.784241      | 1069.534657    | 535.270966       | 1068.550641    | 534.778958       | 7  |
| 6  | 646.367121  | 323.687199      | 629.340572     | 315.173924       |                |                  | N    | 1015.524092 | 508.265684      | 998.497543     | 499.752409       | 997.513527     | 499.260401       | 6  |
| 7  | 775.409714  | 388.208495      | 758.383165     | 379.695221       | 757.399149     | 379.203213       | E    | 901.481165  | 451.244220      | 884.454616     | 442.730946       | 883.470600     | 442.238938       | 5  |
| 8  | 874.478128  | 437.742702      | 857.451579     | 429.229427       | 856.467563     | 428.737419       | V    | 772.438572  | 386.722924      | 755.412023     | 378.209649       | 754.428007     | 377.717641       | 4  |
| 9  | 961.510156  | 481.258716      | 944.483607     | 472.745441       | 943.499591     | 472.253433       | S    | 673.370158  | 337.188717      | 656.343609     | 328.675442       | 655.359593     | 328.183434       | 3  |
| 10 | 1400.735482 | 700.871379      | 1383.708933    | 692.358104       | 1382.724917    | 691.866096       | Q    | 586.338130  | 293.672703      | 569.311581     | 285.159428       |                |                  | 2  |
| 11 |             |                 |                |                  |                |                  | K    | 147.112804  | 74.060040       | 130.086255     | 65.546765        |                |                  | 1  |

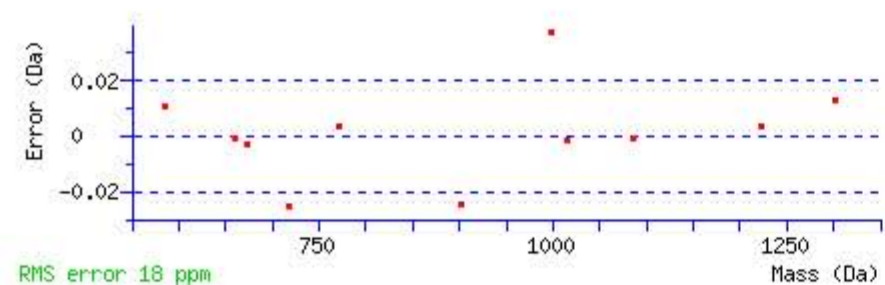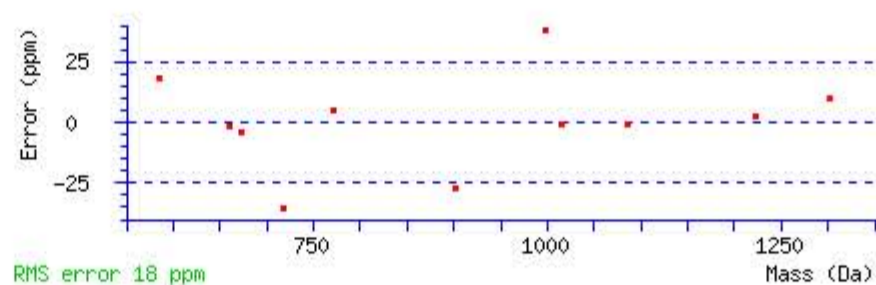

NCBI BLAST search of [LLPHANEVSQK](#)

(Parameters: blastp, nr protein database, expect=20000, no filter, PAM30)

Other BLAST [web gateways](#)

All matches to this query

| Score | Mr(calc):   | Delta     | Sequence                    |
|-------|-------------|-----------|-----------------------------|
| 34.7  | 1545.833710 | -0.002398 | <a href="#">LLPHANEVSQK</a> |

Mascot: <http://www.matrixscience.com/>

# MASCOT SEARCH RESULTS

## Peptide View

MS/MS Fragmentation of **TQVNTQAEQLR**

Found in **APOA4\_HUMAN**, Apolipoprotein A-IV OS=Homo sapiens GN=APOA4 PE=1 SV=3

Match to Query 33221: 1597.822302 from(533.614710,3+) rtinseconds(1609) index(60490)

Title: Locus:1.1.1.3186.17 File:"2013-07-02 CLN FXIII 60 min 3rd FT.wiff"

Data file C:\Program Files (x86)\Matrix Science\Mascot Daemon\mgf\6 FXIII 60 min 3rd\mascot\_daemon\_merge.mgf

Click mouse within plot area to zoom in by factor of two about that point

Or, Plot from  to  Da

Label all possible matches  Label matches used for scoring

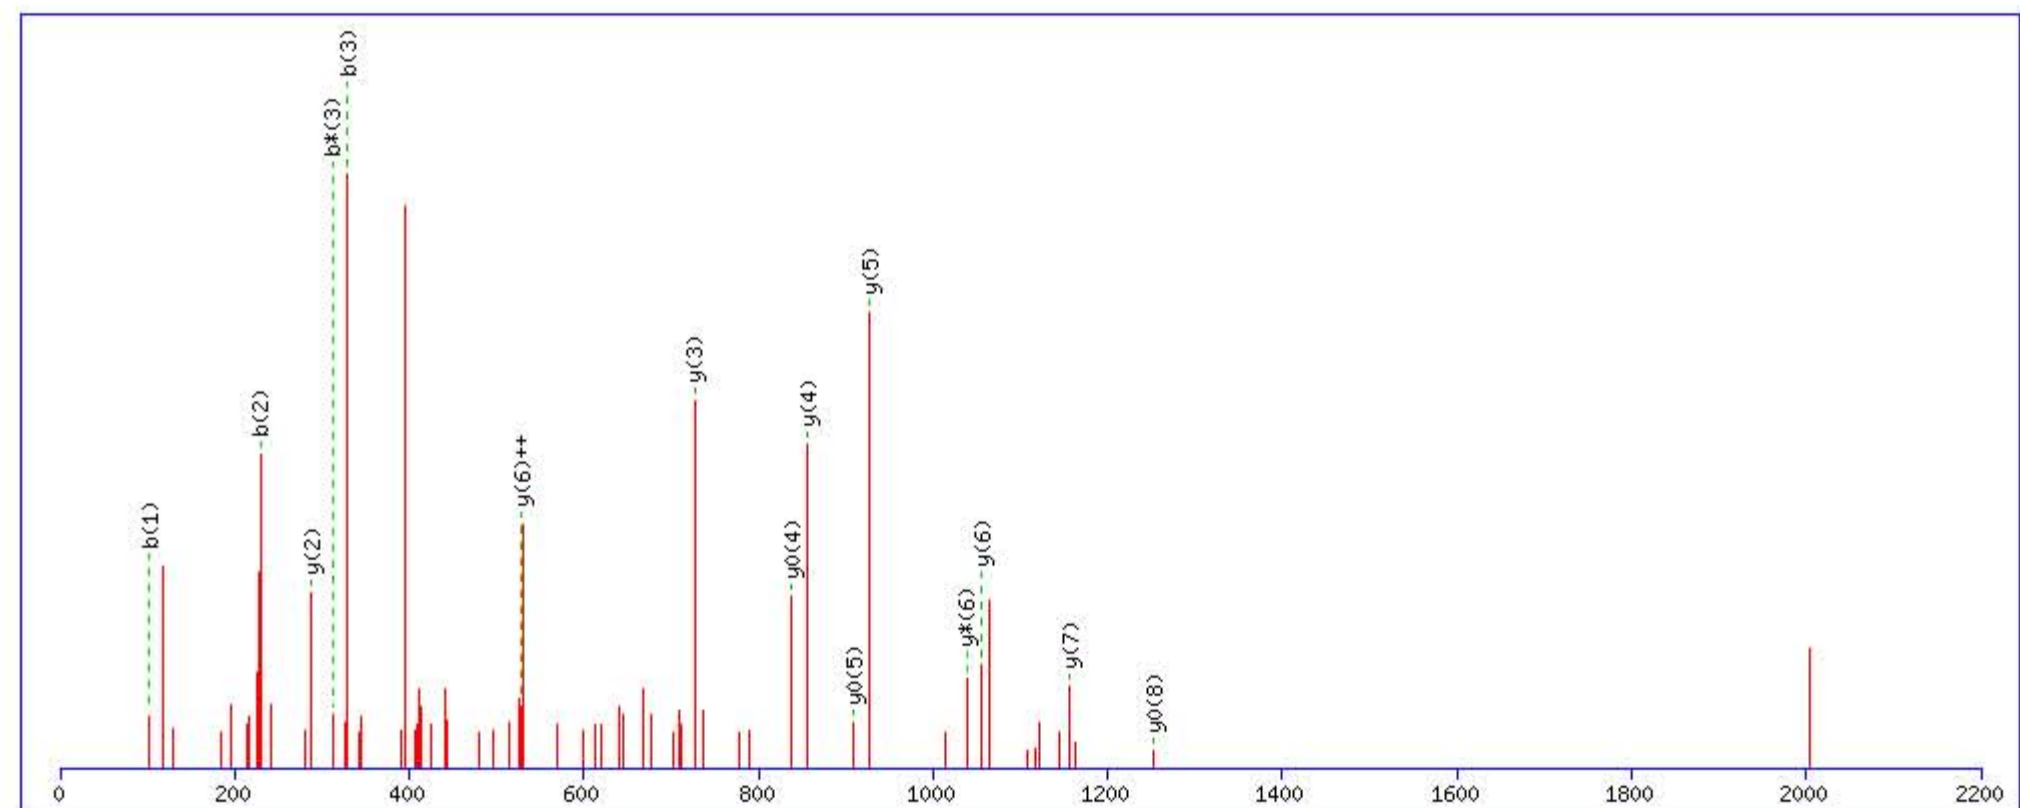

Monoisotopic mass of neutral peptide Mr(calc): 1597.824615

Fixed modifications: Carbamidomethyl (C) (apply to specified residues or termini only)

Variable modifications:

Q9 : Biotin:Thermo-21345 (Q)

Ions Score: 27 Expect: 0.0044

Matches : 15/112 fragment ions using 33 most intense peaks [\(help\)](#)

| #  | b                 | b <sup>++</sup> | b <sup>*</sup>    | b <sup>+++</sup> | b <sup>0</sup> | b <sup>0++</sup> | Seq. | y                  | y <sup>++</sup>   | y <sup>*</sup>     | y <sup>+++</sup> | y <sup>0</sup>     | y <sup>0++</sup> | #  |
|----|-------------------|-----------------|-------------------|------------------|----------------|------------------|------|--------------------|-------------------|--------------------|------------------|--------------------|------------------|----|
| 1  | <b>102.054955</b> | 51.531116       |                   |                  | 84.044390      | 42.525833        | T    |                    |                   |                    |                  |                    |                  | 11 |
| 2  | <b>230.113533</b> | 115.560405      | 213.086984        | 107.047130       | 212.102968     | 106.555122       | Q    | 1497.784225        | 749.395751        | 1480.757676        | 740.882476       | 1479.773660        | 740.390468       | 10 |
| 3  | <b>329.181947</b> | 165.094612      | <b>312.155398</b> | 156.581337       | 311.171382     | 156.089329       | V    | 1369.725647        | 685.366462        | 1352.699098        | 676.853187       | 1351.715082        | 676.361179       | 9  |
| 4  | 443.224874        | 222.116075      | 426.198325        | 213.602801       | 425.214309     | 213.110793       | N    | 1270.657233        | 635.832255        | 1253.630684        | 627.318980       | <b>1252.646668</b> | 626.826972       | 8  |
| 5  | 544.272553        | 272.639915      | 527.246004        | 264.126640       | 526.261988     | 263.634632       | T    | <b>1156.614306</b> | 578.810791        | 1139.587757        | 570.297517       | 1138.603741        | 569.805509       | 7  |
| 6  | 672.331131        | 336.669204      | 655.304582        | 328.155929       | 654.320566     | 327.663921       | Q    | <b>1055.566627</b> | <b>528.286951</b> | <b>1038.540078</b> | 519.773677       | 1037.556062        | 519.281669       | 6  |
| 7  | 743.368245        | 372.187761      | 726.341696        | 363.674486       | 725.357680     | 363.182478       | A    | <b>927.508049</b>  | 464.257663        | 910.481500         | 455.744388       | <b>909.497484</b>  | 455.252380       | 5  |
| 8  | 872.410838        | 436.709057      | 855.384289        | 428.195783       | 854.400273     | 427.703775       | E    | <b>856.470935</b>  | 428.739106        | 839.444386         | 420.225831       | <b>838.460370</b>  | 419.733823       | 4  |
| 9  | 1311.636164       | 656.321720      | 1294.609615       | 647.808446       | 1293.625599    | 647.316438       | Q    | <b>727.428342</b>  | 364.217809        | 710.401793         | 355.704535       |                    |                  | 3  |
| 10 | 1424.720228       | 712.863752      | 1407.693679       | 704.350478       | 1406.709663    | 703.858470       | L    | <b>288.203016</b>  | 144.605146        | 271.176467         | 136.091871       |                    |                  | 2  |
| 11 |                   |                 |                   |                  |                |                  | R    | 175.118952         | 88.063114         | 158.092403         | 79.549839        |                    |                  | 1  |

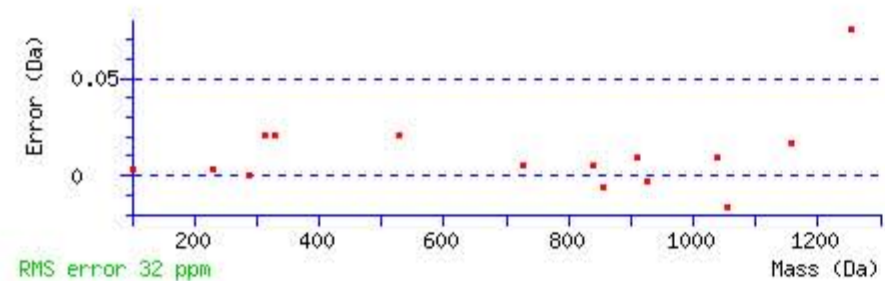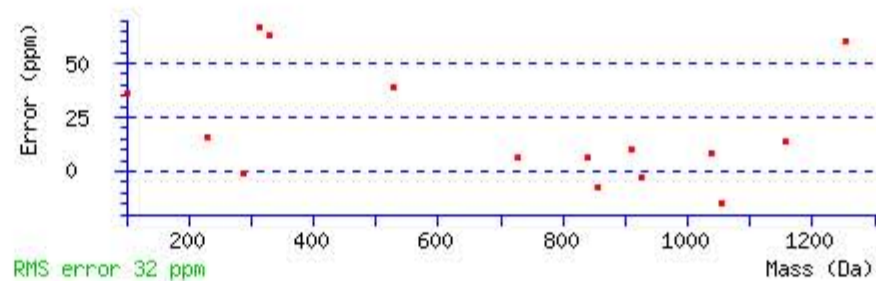

NCBI BLAST search of **TQVNTQAEQLR**

(Parameters: blastp, nr protein database, expect=20000, no filter, PAM30)

Other BLAST [web gateways](#)

All matches to this query

| Score | Mr(calc):   | Delta     | Sequence                       |
|-------|-------------|-----------|--------------------------------|
| 26.8  | 1597.824615 | -0.002313 | <a href="#">TQVNTQAEQLR</a>    |
| 6.1   | 1597.824615 | -0.002313 | <a href="#">TQVNTQAEQLR</a>    |
| 1.7   | 1597.835846 | -0.013544 | <a href="#">TKAAATAGGQGAAR</a> |

Mascot: <http://www.matrixscience.com/>

# MASCOT SEARCH RESULTS

## Peptide View

MS/MS Fragmentation of **SLAPYAQDTQEK**

Found in **APOA4\_HUMAN**, Apolipoprotein A-IV OS=Homo sapiens GN=APOA4 PE=1 SV=3

Match to Query 35636: 1660.815088 from(831.414820,2+) rtinseconds(1733) index(31564)

Title: Locus:1.1.1.3152.13 File:"2013-07-02 CLN FXIII 60 min 3rd F 3.wiff"

Data file C:\Program Files (x86)\Matrix Science\Mascot Daemon\mgf6 FXIII 60 min 3rd\mascot\_daemon\_merge.mgf

Click mouse within plot area to zoom in by factor of two about that point

Or, Plot from  to  Da

Label all possible matches  Label matches used for scoring

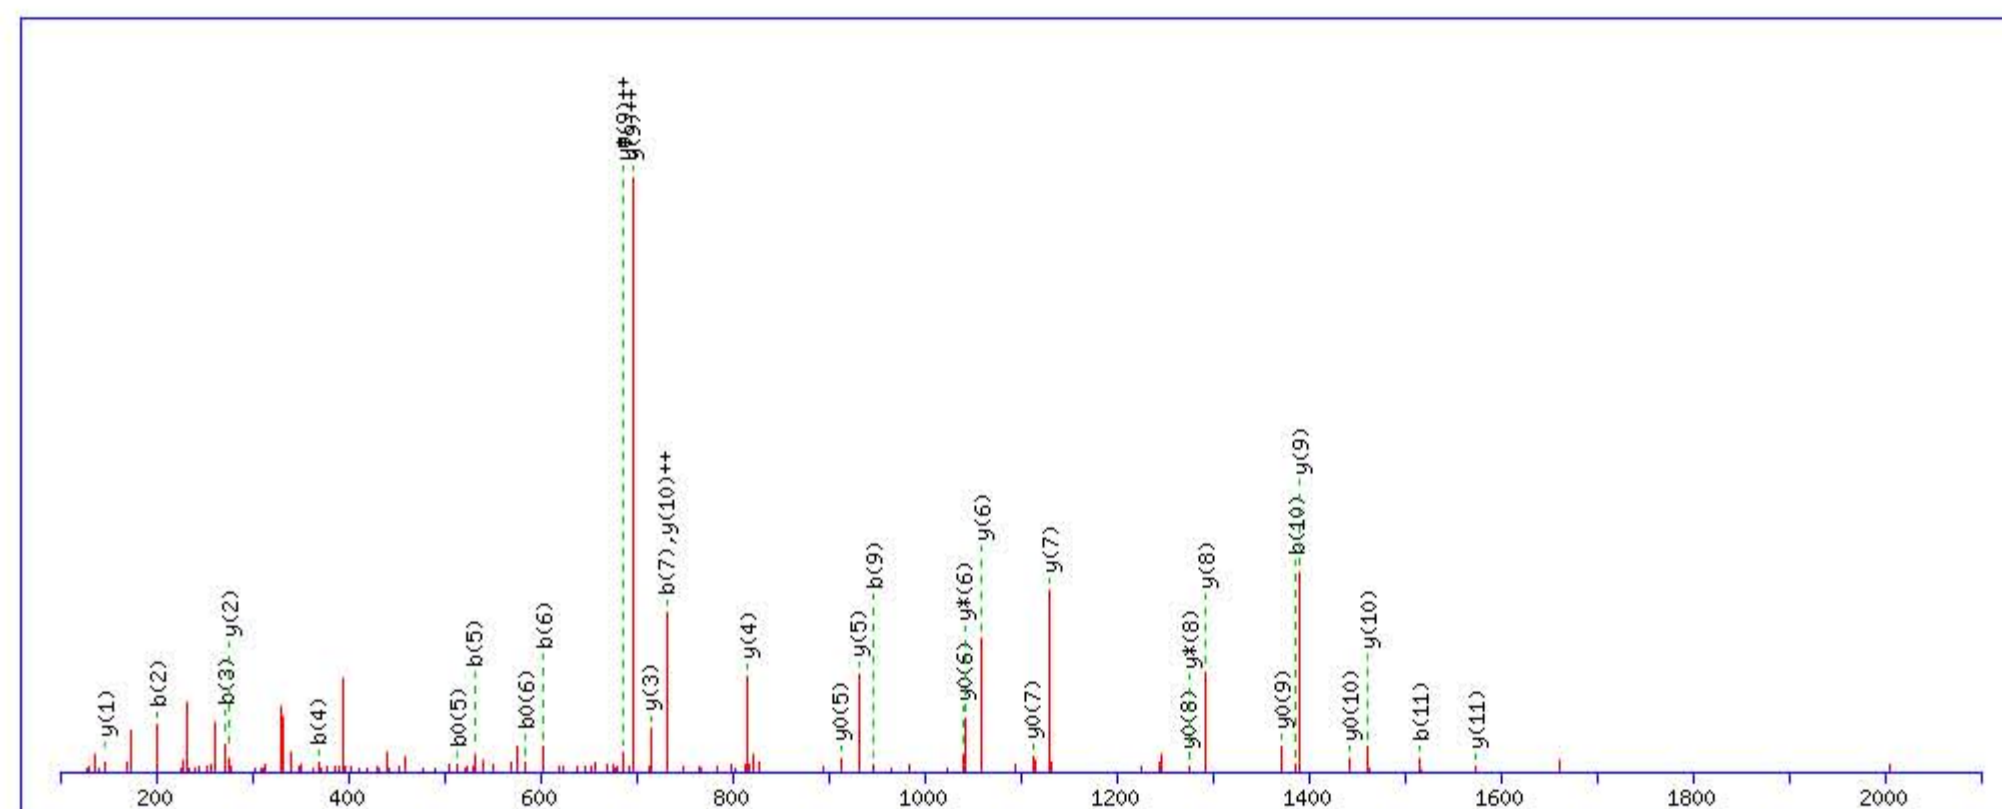

Monoisotopic mass of neutral peptide Mr(calc): 1660.813034

Fixed modifications: Carbamidomethyl (C) (apply to specified residues or termini only)

Variable modifications:

Q10 : Biotin:Thermo-21345 (Q)

Ions Score: 65 Expect: 6.4e-006

Matches : 34/118 fragment ions using 66 most intense peaks [\(help\)](#)

| #  | b                  | b <sup>++</sup> | b <sup>*</sup> | b <sup>*++</sup> | b <sup>0</sup>    | b <sup>0++</sup> | Seq. | y                  | y <sup>++</sup>   | y <sup>*</sup>     | y <sup>*++</sup>  | y <sup>0</sup>     | y <sup>0++</sup>  | #  |
|----|--------------------|-----------------|----------------|------------------|-------------------|------------------|------|--------------------|-------------------|--------------------|-------------------|--------------------|-------------------|----|
| 1  | 88.039304          | 44.523290       |                |                  | 70.028739         | 35.518008        | S    |                    |                   |                    |                   |                    |                   | 12 |
| 2  | <b>201.123368</b>  | 101.065322      |                |                  | 183.112803        | 92.060039        | L    | <b>1574.788308</b> | 787.897792        | 1557.761759        | 779.384518        | 1556.777743        | 778.892510        | 11 |
| 3  | <b>272.160482</b>  | 136.583879      |                |                  | 254.149917        | 127.578596       | A    | <b>1461.704244</b> | <b>731.355760</b> | 1444.677695        | 722.842486        | <b>1443.693679</b> | 722.350478        | 10 |
| 4  | <b>369.213246</b>  | 185.110261      |                |                  | 351.202681        | 176.104978       | P    | <b>1390.667130</b> | <b>695.837203</b> | 1373.640581        | <b>687.323929</b> | <b>1372.656565</b> | <b>686.831921</b> | 9  |
| 5  | <b>532.276575</b>  | 266.641926      |                |                  | <b>514.266010</b> | 257.636643       | Y    | <b>1293.614366</b> | 647.310821        | <b>1276.587817</b> | 638.797547        | <b>1275.603801</b> | 638.305539        | 8  |
| 6  | <b>603.313689</b>  | 302.160483      |                |                  | <b>585.303124</b> | 293.155200       | A    | <b>1130.551037</b> | 565.779157        | 1113.524488        | 557.265882        | <b>1112.540472</b> | 556.773874        | 7  |
| 7  | <b>731.372267</b>  | 366.189772      | 714.345718     | 357.676497       | 713.361702        | 357.184489       | Q    | <b>1059.513923</b> | 530.260600        | <b>1042.487374</b> | 521.747325        | <b>1041.503358</b> | 521.255317        | 6  |
| 8  | 846.399210         | 423.703243      | 829.372661     | 415.189969       | 828.388645        | 414.697961       | D    | <b>931.455345</b>  | 466.231311        | 914.428796         | 457.718036        | <b>913.444780</b>  | 457.226028        | 5  |
| 9  | <b>947.446889</b>  | 474.227083      | 930.420340     | 465.713808       | 929.436324        | 465.221800       | T    | <b>816.428402</b>  | 408.717839        | 799.401853         | 400.204565        | 798.417837         | 399.712557        | 4  |
| 10 | <b>1386.672215</b> | 693.839746      | 1369.645666    | 685.326471       | 1368.661650       | 684.834463       | Q    | <b>715.380723</b>  | 358.194000        | 698.354174         | 349.680725        | 697.370158         | 349.188717        | 3  |
| 11 | <b>1515.714808</b> | 758.361042      | 1498.688259    | 749.847768       | 1497.704243       | 749.355760       | E    | <b>276.155397</b>  | 138.581337        | 259.128848         | 130.068062        | 258.144832         | 129.576054        | 2  |
| 12 |                    |                 |                |                  |                   |                  | K    | <b>147.112804</b>  | 74.060040         | 130.086255         | 65.546765         |                    |                   | 1  |

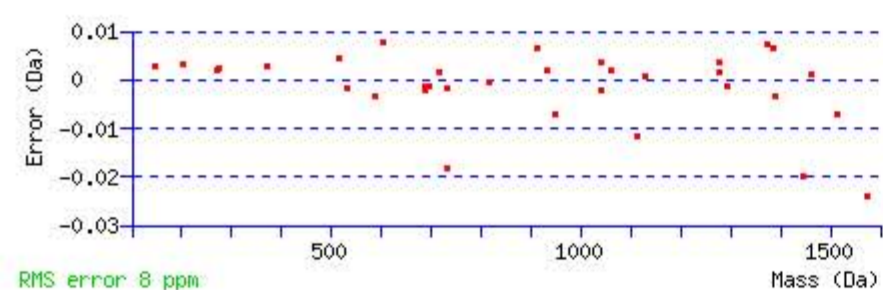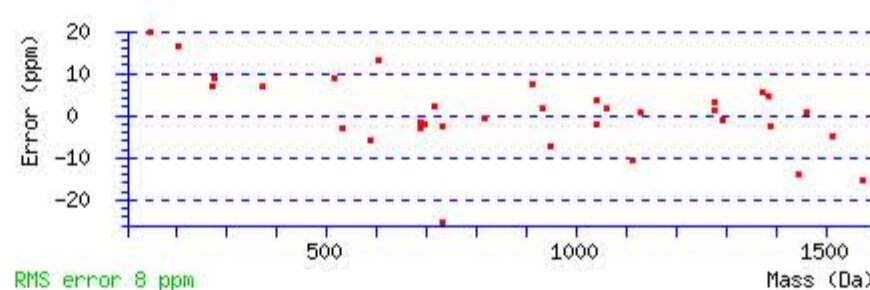

NCBI BLAST search of [SLAPYAQDTQEK](#)

(Parameters: blastp, nr protein database, expect=20000, no filter, PAM30)

Other BLAST [web gateways](#)

## All matches to this query

| Score | Mr(calc):   | Delta     | Sequence                        |
|-------|-------------|-----------|---------------------------------|
| 65.5  | 1660.813034 | 0.002054  | <a href="#">SLAPYAQDTQEK</a>    |
| 34.7  | 1660.813034 | 0.002054  | <a href="#">SLAPYAQDTQEK</a>    |
| 10.4  | 1660.820908 | -0.005820 | <a href="#">SLARAGFYITGVNDK</a> |
| 6.8   | 1660.826782 | -0.011694 | <a href="#">EAATQAQQLGSTIDK</a> |
| 1.8   | 1660.813019 | 0.002069  | <a href="#">EAALMAEFDNPNIK</a>  |



# MASCOT Search Results

## Peptide View

MS/MS Fragmentation of **LGEVNTYAGDLQK**

Found in **APOA4\_HUMAN**, Apolipoprotein A-IV OS=Homo sapiens GN=APOA4 PE=1 SV=3

Match to Query 36791: 1717.875368 from(859.944960,2+) rtinseconds(2011) index(5017)

Title: Locus:1.1.1.3252.11 File:"2013-07-02 CLN FXIII 60 min 3rd F 1.wiff"

Data file C:\Program Files (x86)\Matrix Science\Mascot Daemon\mgf6 FXIII 60 min 3rd\mascot\_daemon\_merge.mgf

Click mouse within plot area to zoom in by factor of two about that point

Or, Plot from  to  Da

Label all possible matches  Label matches used for scoring

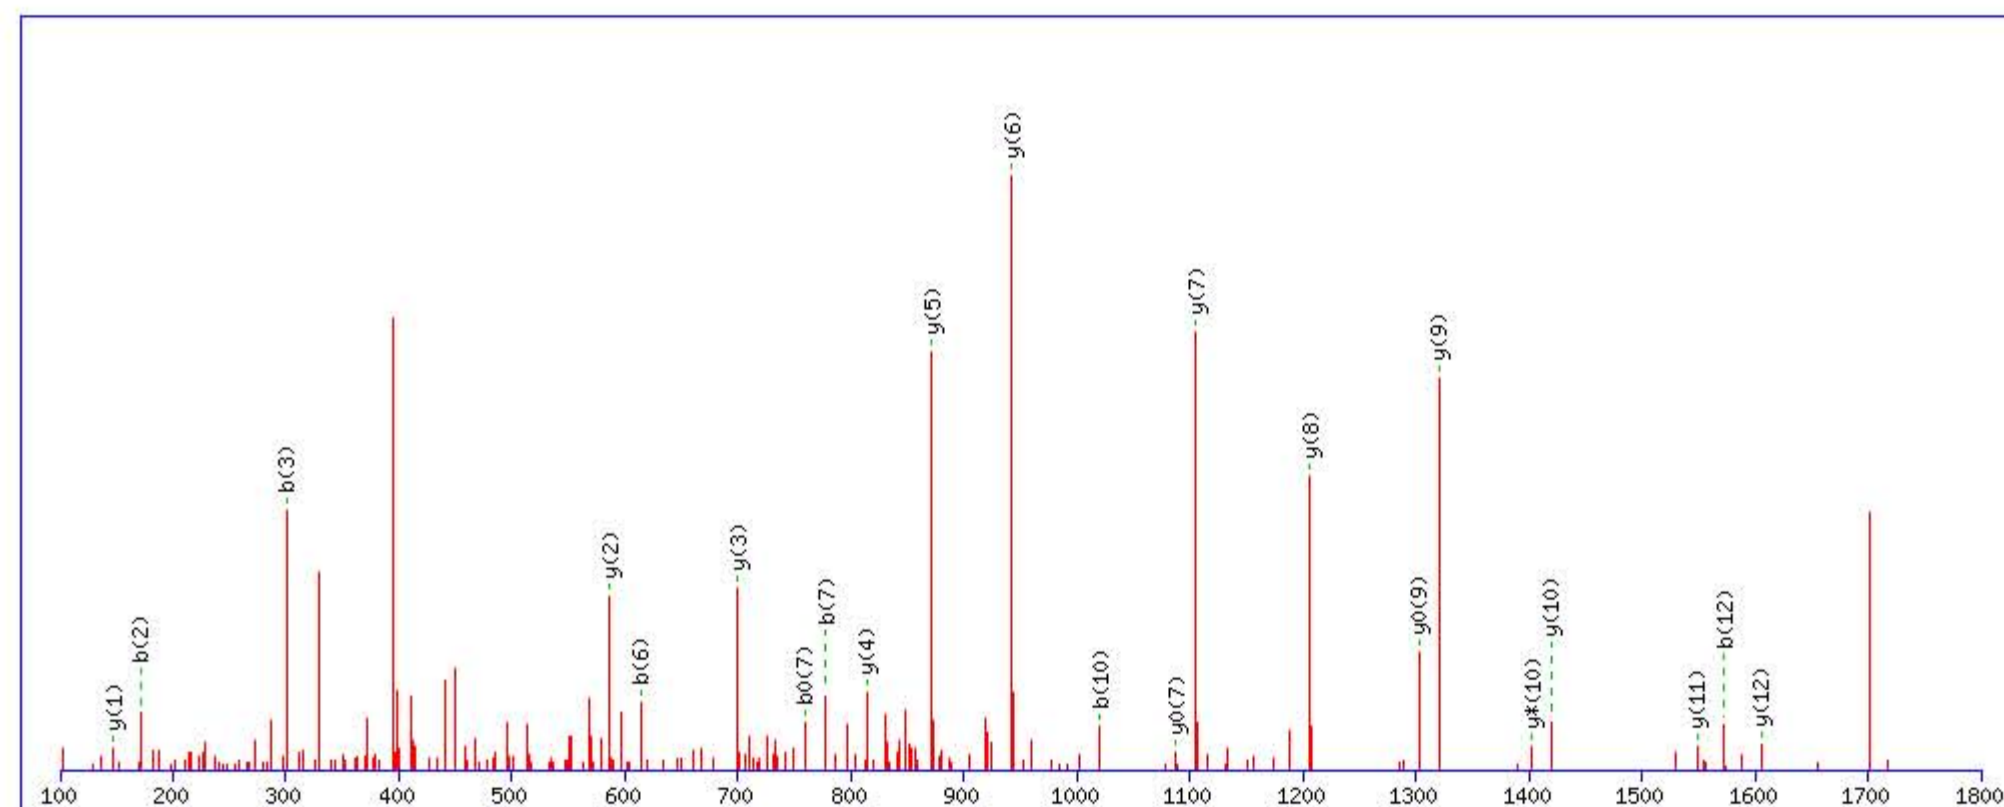

Monoisotopic mass of neutral peptide  $M_r(\text{calc})$ : 1717.870895

Fixed modifications: Carbamidomethyl (C) (apply to specified residues or termini only)

Variable modifications:

Q12 : Biotin:Thermo-21345 (Q)

Ions Score: 103 Expect: 1.5e-009

Matches : 22/126 fragment ions using 32 most intense peaks [\(help\)](#)

| #  | b                  | b <sup>++</sup> | b <sup>+</sup> | b <sup>+++</sup> | b <sup>0</sup>    | b <sup>0++</sup> | Seq. | y                  | y <sup>++</sup> | y <sup>+</sup>     | y <sup>+++</sup> | y <sup>0</sup>     | y <sup>0++</sup> | #  |
|----|--------------------|-----------------|----------------|------------------|-------------------|------------------|------|--------------------|-----------------|--------------------|------------------|--------------------|------------------|----|
| 1  | 114.091340         | 57.549308       |                |                  |                   |                  | L    |                    |                 |                    |                  |                    |                  | 13 |
| 2  | <b>171.112804</b>  | 86.060040       |                |                  |                   |                  | G    | <b>1605.794121</b> | 803.400699      | 1588.767572        | 794.887424       | 1587.783556        | 794.395416       | 12 |
| 3  | <b>300.155397</b>  | 150.581336      |                |                  | 282.144832        | 141.576054       | E    | <b>1548.772657</b> | 774.889967      | 1531.746108        | 766.376692       | 1530.762092        | 765.884684       | 11 |
| 4  | 399.223811         | 200.115544      |                |                  | 381.213246        | 191.110261       | V    | <b>1419.730064</b> | 710.368670      | <b>1402.703515</b> | 701.855396       | 1401.719499        | 701.363388       | 10 |
| 5  | 513.266738         | 257.137007      | 496.240189     | 248.623733       | 495.256173        | 248.131725       | N    | <b>1320.661650</b> | 660.834463      | 1303.635101        | 652.321189       | <b>1302.651085</b> | 651.829181       | 9  |
| 6  | <b>614.314417</b>  | 307.660847      | 597.287868     | 299.147572       | 596.303852        | 298.655564       | T    | <b>1206.618723</b> | 603.813000      | 1189.592174        | 595.299725       | 1188.608158        | 594.807717       | 8  |
| 7  | <b>777.377746</b>  | 389.192511      | 760.351197     | 380.679237       | <b>759.367181</b> | 380.187229       | Y    | <b>1105.571044</b> | 553.289160      | 1088.544495        | 544.775886       | <b>1087.560479</b> | 544.283878       | 7  |
| 8  | 848.414860         | 424.711068      | 831.388311     | 416.197794       | 830.404295        | 415.705786       | A    | <b>942.507715</b>  | 471.757496      | 925.481166         | 463.244221       | 924.497150         | 462.752213       | 6  |
| 9  | 905.436324         | 453.221800      | 888.409775     | 444.708526       | 887.425759        | 444.216518       | G    | <b>871.470601</b>  | 436.238939      | 854.444052         | 427.725664       | 853.460036         | 427.233656       | 5  |
| 10 | <b>1020.463267</b> | 510.735272      | 1003.436718    | 502.221997       | 1002.452702       | 501.729989       | D    | <b>814.449137</b>  | 407.728207      | 797.422588         | 399.214932       | 796.438572         | 398.722924       | 4  |
| 11 | 1133.547331        | 567.277304      | 1116.520782    | 558.764029       | 1115.536766       | 558.272021       | L    | <b>699.422194</b>  | 350.214735      | 682.395645         | 341.701461       |                    |                  | 3  |
| 12 | <b>1572.772657</b> | 786.889967      | 1555.746108    | 778.376692       | 1554.762092       | 777.884684       | Q    | <b>586.338130</b>  | 293.672703      | 569.311581         | 285.159429       |                    |                  | 2  |
| 13 |                    |                 |                |                  |                   |                  | K    | <b>147.112804</b>  | 74.060040       | 130.086255         | 65.546765        |                    |                  | 1  |

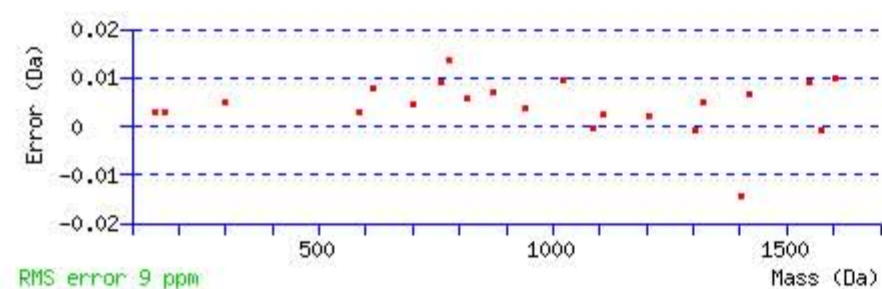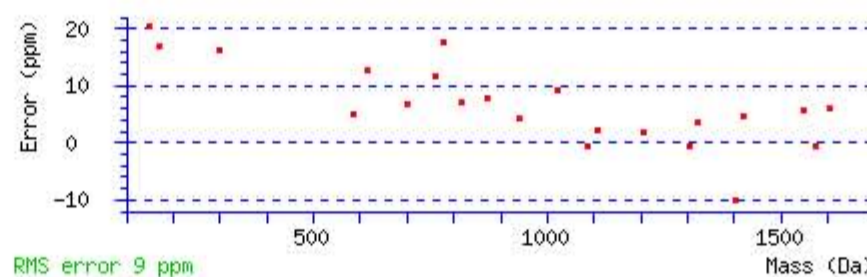

NCBI BLAST search of **LGEVNTYAGDLQK**

(Parameters: blastp, nr protein database, expect=20000, no filter, PAM30)

Other BLAST [web gateways](#)

## All matches to this query

| Score | $M_r(\text{calc})$ : | Delta     | Sequence                         |
|-------|----------------------|-----------|----------------------------------|
| 102.5 | 1717.870895          | 0.004473  | <a href="#">LGEVNTYAGDLQK</a>    |
| 10.8  | 1717.866867          | 0.008501  | <a href="#">IDAVNAETIREVCTK</a>  |
| 5.1   | 1717.878067          | -0.002699 | <a href="#">RATEKEINNMGNTLK</a>  |
| 2.5   | 1717.878754          | -0.003386 | <a href="#">IDAVAWNTTPYQLAR</a>  |
| 1.1   | 1717.882126          | -0.006758 | <a href="#">NNKNFSTVDIQK</a>     |
| 0.5   | 1717.856476          | 0.018892  | <a href="#">GNMEQAILEMCK</a>     |
| 0.3   | 1717.892014          | -0.016646 | <a href="#">LSTAVNIGKMDSPIEK</a> |

# MASCOT Search Results

## Peptide View

MS/MS Fragmentation of **SLAELGGHLDQQVEEFR**  
 Found in **APOA4\_HUMAN**, Apolipoprotein A-IV OS=Homo sapiens GN=APOA4 PE=1 SV=3

Match to Query 46685: 2238.118182 from(747.046670,3+) rtinseconds(2284) index(64176)  
 Title: Locus:1.1.1.3421.10 File:"2013-07-02 CLN FXIII 60 min 3rd FT.wiff"  
 Data file C:\Program Files (x86)\Matrix Science\Mascot Daemon\mgf6 FXIII 60 min 3rd\mascot\_daemon\_merge.mgf

Click mouse within plot area to zoom in by factor of two about that point

Or, Plot from  to  Da

Label all possible matches  Label matches used for scoring

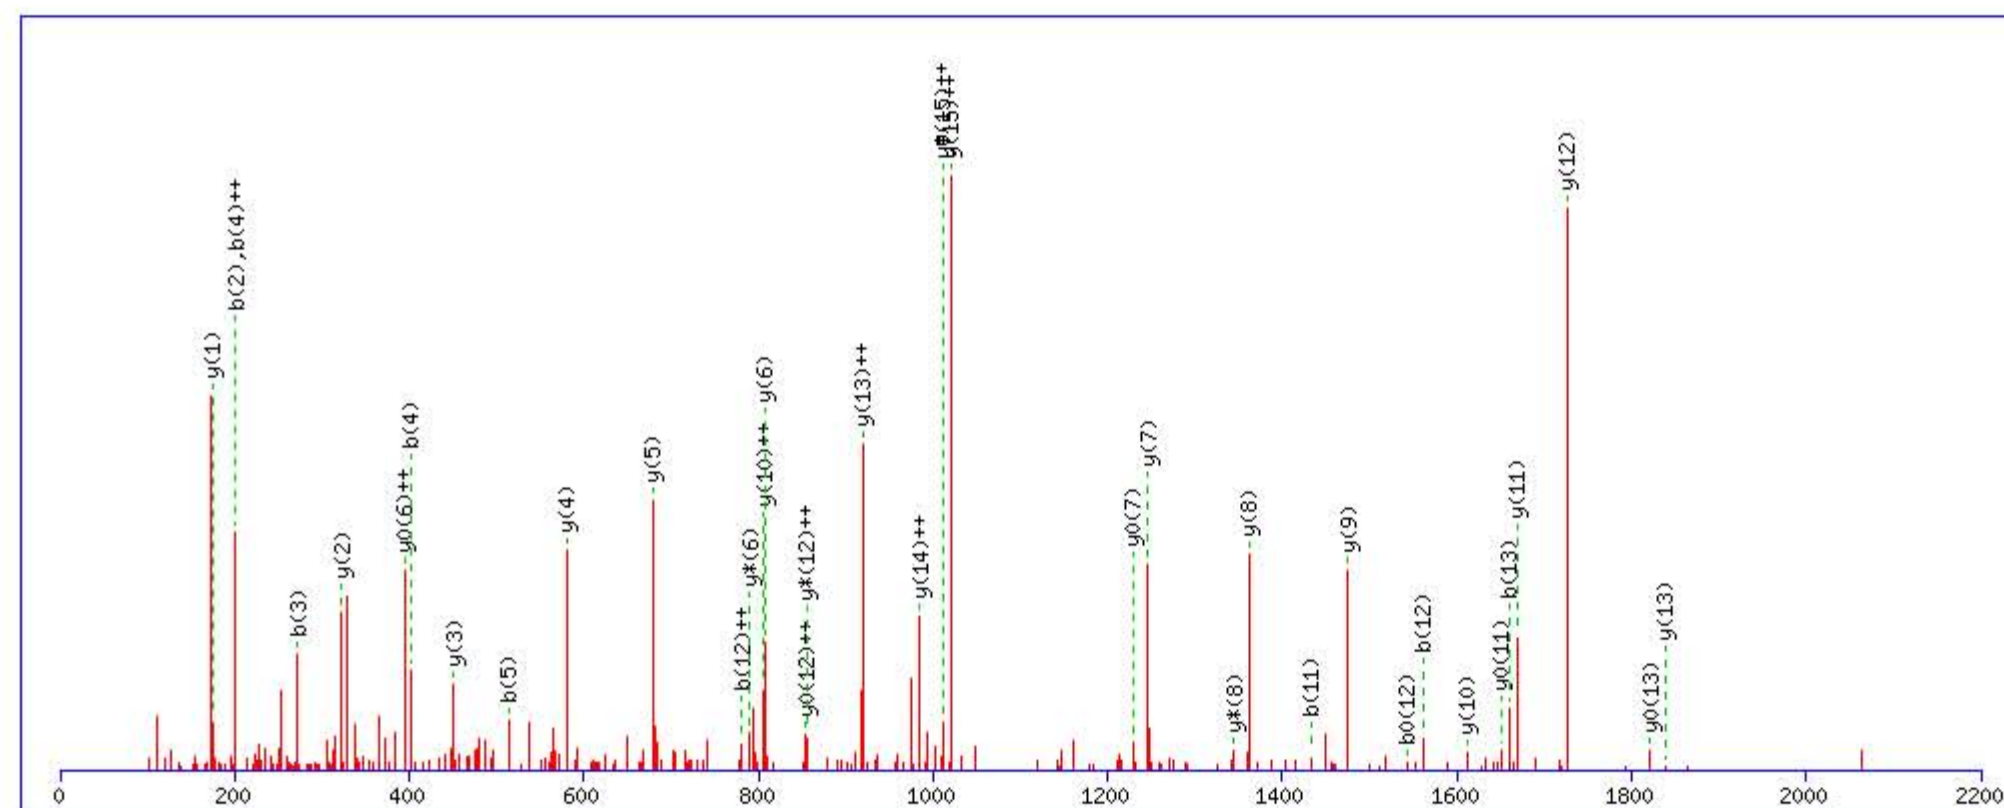

Monoisotopic mass of neutral peptide Mr(calc): 2238.110291  
 Fixed modifications: Carbamidomethyl (C) (apply to specified residues or termini only)  
 Variable modifications:  
 Q11 : Biotin:Thermo-21345 (Q)  
 Ions Score: 69 Expect: 3.3e-006  
 Matches : 37/168 fragment ions using 72 most intense peaks [\(help\)](#)

| #  | b                  | b <sup>++</sup>   | b <sup>*</sup> | b <sup>*++</sup> | b <sup>0</sup>     | b <sup>0++</sup> | Seq. | y                  | y <sup>++</sup>    | y <sup>*</sup>     | y <sup>*++</sup>   | y <sup>0</sup>     | y <sup>0++</sup>   | #  |
|----|--------------------|-------------------|----------------|------------------|--------------------|------------------|------|--------------------|--------------------|--------------------|--------------------|--------------------|--------------------|----|
| 1  | 88.039304          | 44.523290         |                |                  | 70.028739          | 35.518008        | S    |                    |                    |                    |                    |                    |                    | 17 |
| 2  | <b>201.123368</b>  | 101.065322        |                |                  | 183.112803         | 92.060039        | L    | 2152.085552        | 1076.546414        | 2135.059003        | 1068.033139        | 2134.074987        | 1067.541131        | 16 |
| 3  | <b>272.160482</b>  | 136.583879        |                |                  | 254.149917         | 127.578596       | A    | 2039.001488        | <b>1020.004382</b> | 2021.974939        | <b>1011.491108</b> | 2020.990923        | <b>1010.999100</b> | 15 |
| 4  | <b>401.203075</b>  | <b>201.105175</b> |                |                  | 383.192510         | 192.099893       | E    | 1967.964374        | <b>984.485825</b>  | 1950.937825        | 975.972551         | 1949.953809        | 975.480543         | 14 |
| 5  | <b>514.287139</b>  | 257.647208        |                |                  | 496.276574         | 248.641925       | L    | <b>1838.921781</b> | <b>919.964529</b>  | 1821.895232        | 911.451254         | <b>1820.911216</b> | 910.959246         | 13 |
| 6  | 571.308603         | 286.157940        |                |                  | 553.298038         | 277.152657       | G    | <b>1725.837717</b> | 863.422497         | 1708.811168        | <b>854.909222</b>  | 1707.827152        | <b>854.417214</b>  | 12 |
| 7  | 628.330067         | 314.668672        |                |                  | 610.319502         | 305.663389       | G    | <b>1668.816253</b> | 834.911765         | 1651.789704        | 826.398490         | <b>1650.805688</b> | 825.906482         | 11 |
| 8  | 765.388979         | 383.198128        |                |                  | 747.378414         | 374.192845       | H    | <b>1611.794789</b> | <b>806.401033</b>  | 1594.768240        | 797.887758         | 1593.784224        | 797.395750         | 10 |
| 9  | 878.473043         | 439.740160        |                |                  | 860.462478         | 430.734877       | L    | <b>1474.735877</b> | 737.871577         | 1457.709328        | 729.358302         | 1456.725312        | 728.866294         | 9  |
| 10 | 993.499986         | 497.253631        |                |                  | 975.489421         | 488.248349       | D    | <b>1361.651813</b> | 681.329545         | <b>1344.625264</b> | 672.816270         | 1343.641248        | 672.324262         | 8  |
| 11 | <b>1432.725312</b> | 716.866294        | 1415.698763    | 708.353020       | 1414.714747        | 707.861012       | Q    | <b>1246.624870</b> | 623.816073         | 1229.598321        | 615.302799         | <b>1228.614305</b> | 614.810791         | 7  |
| 12 | <b>1560.783890</b> | <b>780.895583</b> | 1543.757341    | 772.382309       | <b>1542.773325</b> | 771.890301       | Q    | <b>807.399544</b>  | 404.203410         | <b>790.372995</b>  | 395.690136         | 789.388979         | <b>395.198128</b>  | 6  |
| 13 | <b>1659.852304</b> | 830.429790        | 1642.825755    | 821.916516       | 1641.841739        | 821.424508       | V    | <b>679.340966</b>  | 340.174121         | 662.314417         | 331.660846         | 661.330401         | 331.168838         | 5  |
| 14 | 1788.894897        | 894.951087        | 1771.868348    | 886.437812       | 1770.884332        | 885.945804       | E    | <b>580.272552</b>  | 290.639914         | 563.246003         | 282.126639         | 562.261987         | 281.634631         | 4  |
| 15 | 1917.937490        | 959.472383        | 1900.910941    | 950.959109       | 1899.926925        | 950.467101       | E    | <b>451.229959</b>  | 226.118617         | 434.203410         | 217.605343         | 433.219394         | 217.113335         | 3  |
| 16 | 2065.005904        | 1033.006590       | 2047.979355    | 1024.493316      | 2046.995339        | 1024.001307      | F    | <b>322.187366</b>  | 161.597321         | 305.160817         | 153.084046         |                    |                    | 2  |
| 17 |                    |                   |                |                  |                    |                  | R    | <b>175.118952</b>  | 88.063114          | 158.092403         | 79.549839          |                    |                    | 1  |

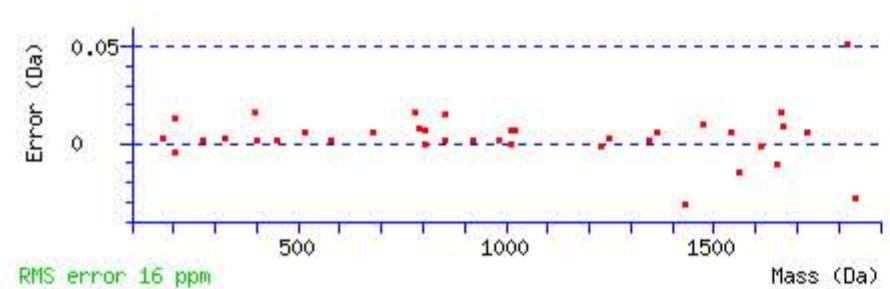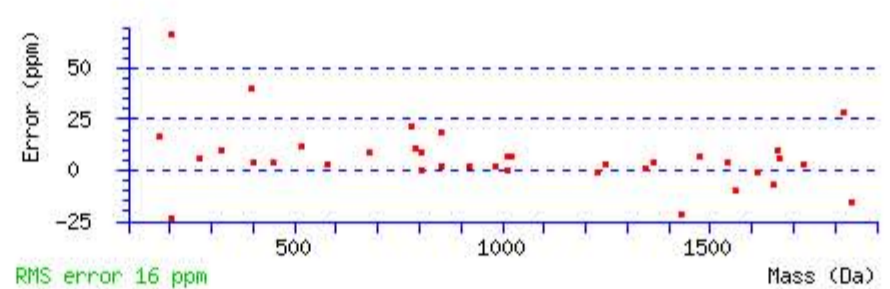

NCBI BLAST search of **SLAELGGHLDQQVEEFR**  
 (Parameters: blastp, nr protein database, expect=20000, no filter, PAM30)  
 Other BLAST [web gateways](#)

### All matches to this query

| Score | Mr(calc):   | Delta    | Sequence                          |
|-------|-------------|----------|-----------------------------------|
| 69.2  | 2238.110291 | 0.007891 | <a href="#">SLAELGGHLDQQVEEFR</a> |
| 65.0  | 2238.110291 | 0.007891 | <a href="#">SLAELGGHLDQQVEEFR</a> |

# MASCOT Search Results

## Peptide View

MS/MS Fragmentation of **ENADSLQASLRPHADELK**

Found in **APOA4\_HUMAN**, Apolipoprotein A-IV OS=Homo sapiens GN=APOA4 PE=1 SV=3

Match to Query 47870: 2304.162072 from(769.061300,3+) rtinseconds(1916) index(61902)

Title: Locus:1.1.1.3293.15 File:"2013-07-02 CLN FXIII 60 min 3rd FT.wiff"

Data file C:\Program Files (x86)\Matrix Science\Mascot Daemon\mgf\6 FXIII 60 min 3rd\mascot\_daemon\_merge.mgf

Click mouse within plot area to zoom in by factor of two about that point

Or, Plot from  to  Da

Label all possible matches  Label matches used for scoring

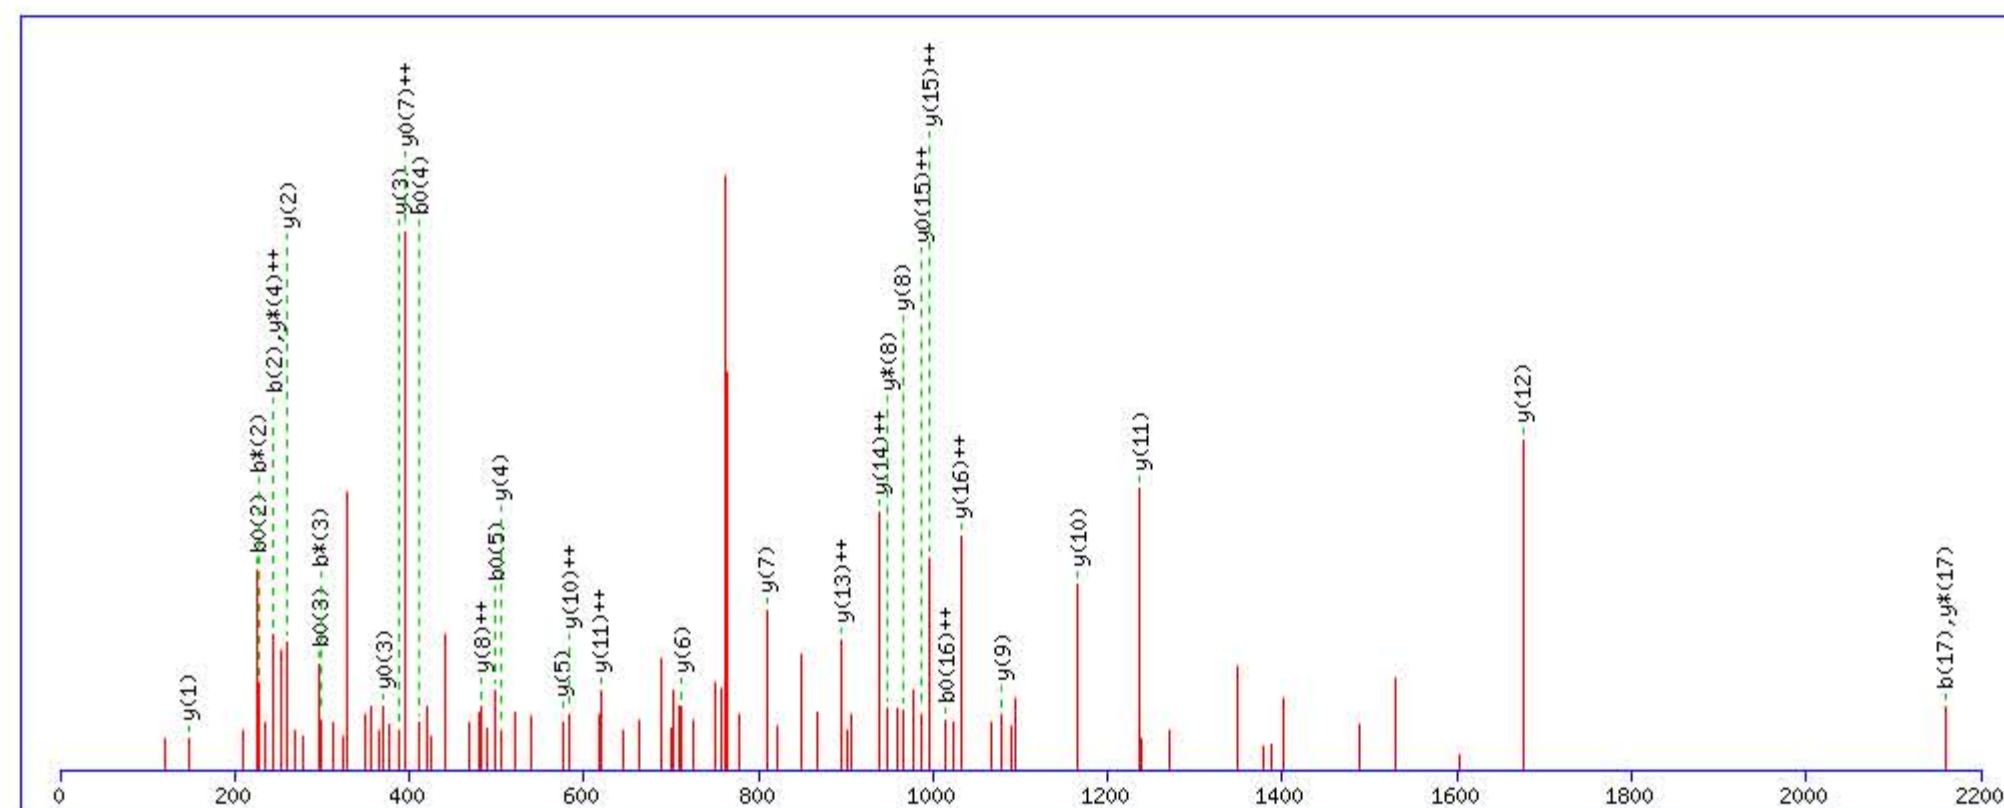

Monoisotopic mass of neutral peptide Mr(calc): 2304.153183

Fixed modifications: Carbamidomethyl (C) (apply to specified residues or termini only)

Variable modifications:

Q7 : Biotin:Thermo-21345 (Q)

Ions Score: 44 Expect: 0.0011

Matches : 34/198 fragment ions using 94 most intense peaks [\(help\)](#)

| #  | b                  | b <sup>++</sup> | b <sup>*</sup>    | b <sup>***</sup> | b <sup>0</sup>    | b <sup>0++</sup> | Seq. | y                  | y <sup>++</sup>    | y <sup>*</sup>     | y <sup>***</sup>  | y <sup>0</sup>    | y <sup>0++</sup>  | #  |
|----|--------------------|-----------------|-------------------|------------------|-------------------|------------------|------|--------------------|--------------------|--------------------|-------------------|-------------------|-------------------|----|
| 1  | 130.049869         | 65.528572       |                   |                  | 112.039304        | 56.523290        | E    |                    |                    |                    |                   |                   |                   | 18 |
| 2  | <b>244.092796</b>  | 122.550036      | <b>227.066247</b> | 114.036762       | <b>226.082231</b> | 113.544754       | N    | 2176.117913        | 1088.562594        | <b>2159.091364</b> | 1080.049320       | 2158.107348       | 1079.557312       | 17 |
| 3  | 315.129910         | 158.068593      | <b>298.103361</b> | 149.555319       | <b>297.119345</b> | 149.063311       | A    | 2062.074986        | <b>1031.541131</b> | 2045.048437        | 1023.027856       | 2044.064421       | 1022.535848       | 16 |
| 4  | 430.156853         | 215.582065      | 413.130304        | 207.068790       | <b>412.146288</b> | 206.576782       | D    | 1991.037872        | <b>996.022574</b>  | 1974.011323        | 987.509300        | 1973.027307       | <b>987.017292</b> | 15 |
| 5  | 517.188881         | 259.098079      | 500.162332        | 250.584804       | <b>499.178316</b> | 250.092796       | S    | 1876.010929        | <b>938.509103</b>  | 1858.984380        | 929.995828        | 1858.000364       | 929.503820        | 14 |
| 6  | 630.272945         | 315.640111      | 613.246396        | 307.126836       | 612.262380        | 306.634828       | L    | 1788.978901        | <b>894.993089</b>  | 1771.952352        | 886.479814        | 1770.968336       | 885.987806        | 13 |
| 7  | 1069.498271        | 535.252774      | 1052.471722       | 526.739499       | 1051.487706       | 526.247491       | Q    | <b>1675.894837</b> | 838.451057         | 1658.868288        | 829.937782        | 1657.884272       | 829.445774        | 12 |
| 8  | 1140.535385        | 570.771331      | 1123.508836       | 562.258056       | 1122.524820       | 561.766048       | A    | <b>1236.669511</b> | <b>618.838394</b>  | 1219.642962        | 610.325119        | 1218.658946       | 609.833111        | 11 |
| 9  | 1227.567413        | 614.287345      | 1210.540864       | 605.774070       | 1209.556848       | 605.282062       | S    | <b>1165.632397</b> | <b>583.319837</b>  | 1148.605848        | 574.806562        | 1147.621832       | 574.314554        | 10 |
| 10 | 1340.651477        | 670.829377      | 1323.624928       | 662.316102       | 1322.640912       | 661.824094       | L    | <b>1078.600369</b> | 539.803823         | 1061.573820        | 531.290548        | 1060.589804       | 530.798540        | 9  |
| 11 | 1496.752588        | 748.879932      | 1479.726039       | 740.366658       | 1478.742023       | 739.874650       | R    | <b>965.516305</b>  | <b>483.261791</b>  | <b>948.489756</b>  | 474.748516        | 947.505740        | 474.256508        | 8  |
| 12 | 1593.805352        | 797.406314      | 1576.778803       | 788.893040       | 1575.794787       | 788.401032       | P    | <b>809.415194</b>  | 405.211235         | 792.388645         | 396.697961        | 791.404629        | <b>396.205953</b> | 7  |
| 13 | 1730.864264        | 865.935770      | 1713.837715       | 857.422496       | 1712.853699       | 856.930488       | H    | <b>712.362430</b>  | 356.684853         | 695.335881         | 348.171579        | 694.351865        | 347.679571        | 6  |
| 14 | 1801.901378        | 901.454327      | 1784.874829       | 892.941053       | 1783.890813       | 892.449045       | A    | <b>575.303518</b>  | 288.155397         | 558.276969         | 279.642123        | 557.292953        | 279.150115        | 5  |
| 15 | 1916.928321        | 958.967799      | 1899.901772       | 950.454524       | 1898.917756       | 949.962516       | D    | <b>504.266404</b>  | 252.636840         | 487.239855         | <b>244.123566</b> | 486.255839        | 243.631558        | 4  |
| 16 | 2045.970914        | 1023.489095     | 2028.944365       | 1014.975821      | 2027.960349       | 1014.483813      | E    | <b>389.239461</b>  | 195.123369         | 372.212912         | 186.610094        | <b>371.228896</b> | 186.118086        | 3  |
| 17 | <b>2159.054978</b> | 1080.031127     | 2142.028429       | 1071.517852      | 2141.044413       | 1071.025844      | L    | <b>260.196868</b>  | 130.602072         | 243.170319         | 122.088798        |                   |                   | 2  |
| 18 |                    |                 |                   |                  |                   |                  | K    | <b>147.112804</b>  | 74.060040          | 130.086255         | 65.546765         |                   |                   | 1  |

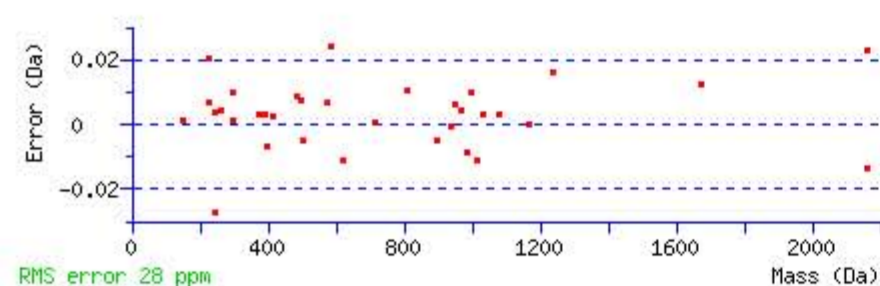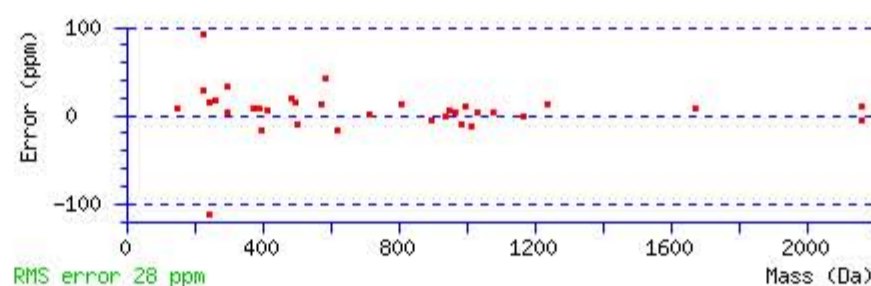

NCBI BLAST search of [ENADSLQASLRPHADELK](#)

(Parameters: blastp, nr protein database, expect=20000, no filter, PAM30)

Other BLAST [web gateways](#)

All matches to this query

| Score | Mr(calc):   | Delta    | Sequence                           |
|-------|-------------|----------|------------------------------------|
| 44.1  | 2304.153183 | 0.008889 | <a href="#">ENADSLQASLRPHADELK</a> |

# MASCOT Search Results

## Peptide View

MS/MS Fragmentation of **STAAMSTYTGIFTDQVLSVLK**

Found in **APOC2\_HUMAN**, Apolipoprotein C-II OS=Homo sapiens GN=APOC2 PE=1 SV=1

Match to Query 51650: 2543.308392 from(848.776740,3+) rtinseconds(3247) index(40266)

Title: Locus:1.1.1.3674.11 File:"2013-07-02 CLN FXIII 60 min 3rd F 3.wiff"

Data file C:\Program Files (x86)\Matrix Science\Mascot Daemon\mgf6 FXIII 60 min 3rd\mascot\_daemon\_merge.mgf

Click mouse within plot area to zoom in by factor of two about that point

Or, Plot from  to  Da

Label all possible matches  Label matches used for scoring

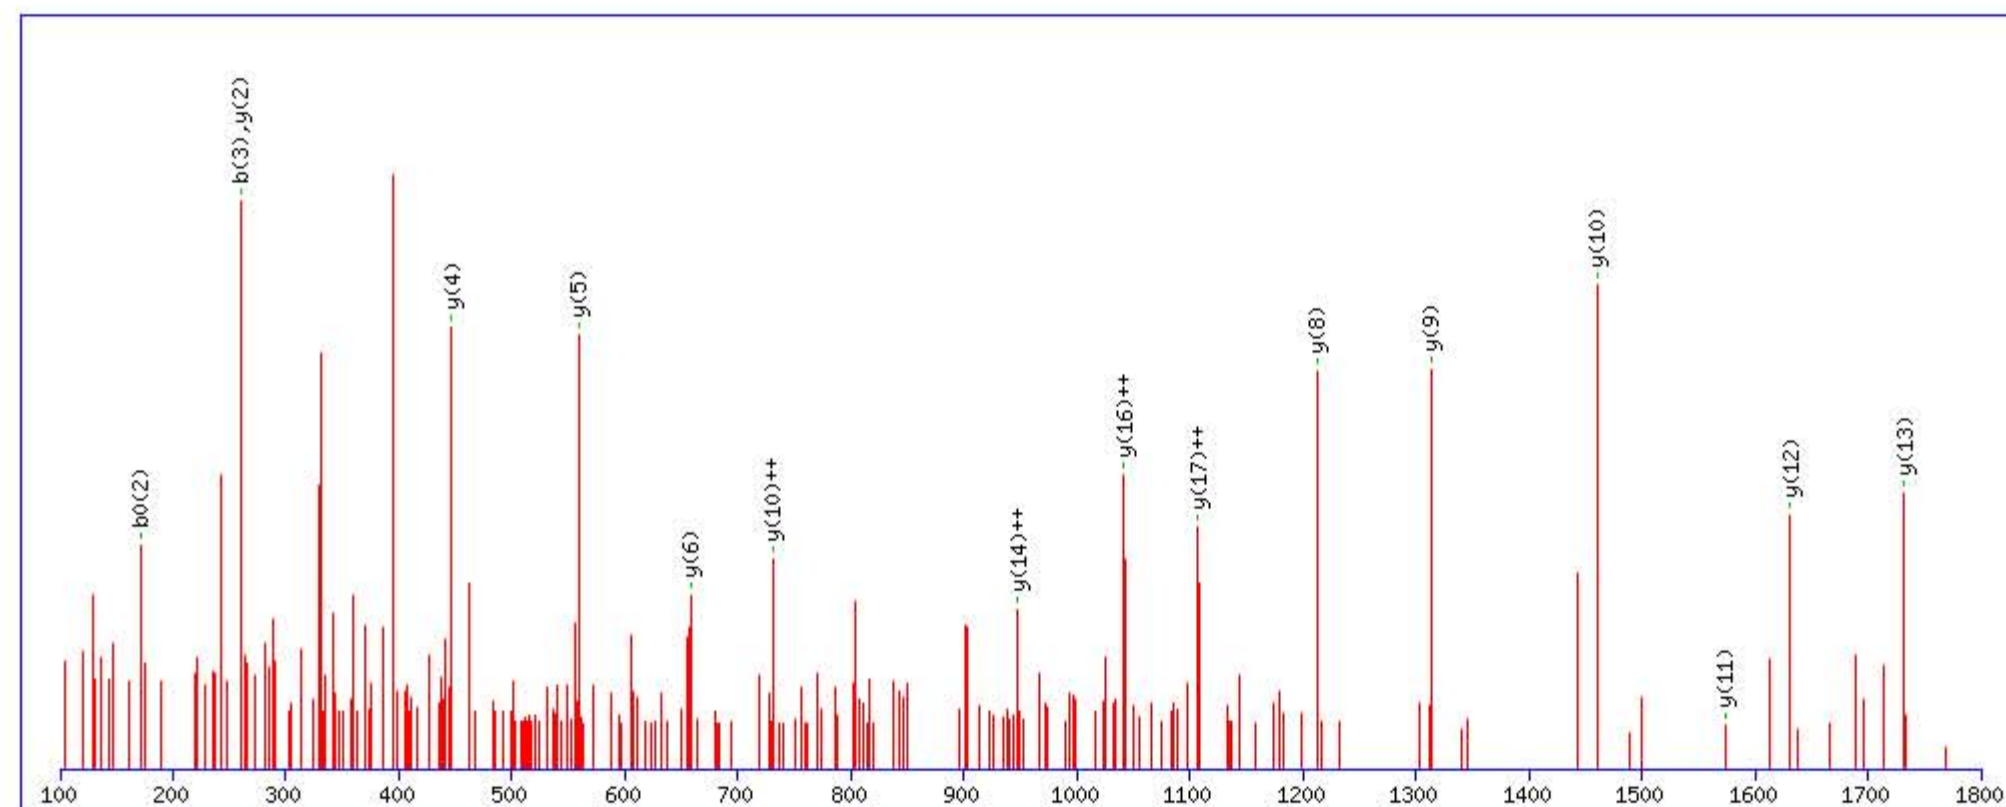

Monoisotopic mass of neutral peptide Mr(calc): 2543.301544

Fixed modifications: Carbamidomethyl (C) (apply to specified residues or termini only)

Variable modifications:

Q15 : Biotin:Thermo-21345 (Q)

Ions Score: 80 Expect: 3.1e-007

Matches : 16/206 fragment ions using 17 most intense peaks [\(help\)](#)

| #  | b           | b <sup>++</sup> | b <sup>*</sup> | b <sup>*++</sup> | b <sup>0</sup> | b <sup>0++</sup> | Seq. | y           | y <sup>++</sup> | y <sup>*</sup> | y <sup>*++</sup> | y <sup>0</sup> | y <sup>0++</sup> | #  |
|----|-------------|-----------------|----------------|------------------|----------------|------------------|------|-------------|-----------------|----------------|------------------|----------------|------------------|----|
| 1  | 88.039304   | 44.523290       |                |                  | 70.028739      | 35.518008        | S    |             |                 |                |                  |                |                  | 21 |
| 2  | 189.086983  | 95.047129       |                |                  | 171.076418     | 86.041847        | T    | 2457.276785 | 1229.142030     | 2440.250236    | 1220.628756      | 2439.266220    | 1220.136748      | 20 |
| 3  | 260.124097  | 130.565686      |                |                  | 242.113532     | 121.560404       | A    | 2356.229106 | 1178.618191     | 2339.202557    | 1170.104916      | 2338.218541    | 1169.612908      | 19 |
| 4  | 331.161211  | 166.084243      |                |                  | 313.150646     | 157.078961       | A    | 2285.191992 | 1143.099634     | 2268.165443    | 1134.586359      | 2267.181427    | 1134.094351      | 18 |
| 5  | 462.201696  | 231.604486      |                |                  | 444.191131     | 222.599203       | M    | 2214.154878 | 1107.581077     | 2197.128329    | 1099.067802      | 2196.144313    | 1098.575794      | 17 |
| 6  | 549.233724  | 275.120500      |                |                  | 531.223159     | 266.115217       | S    | 2083.114393 | 1042.060834     | 2066.087844    | 1033.547560      | 2065.103828    | 1033.055552      | 16 |
| 7  | 650.281403  | 325.644340      |                |                  | 632.270838     | 316.639057       | T    | 1996.082365 | 998.544821      | 1979.055816    | 990.031546       | 1978.071800    | 989.539538       | 15 |
| 8  | 813.344732  | 407.176004      |                |                  | 795.334167     | 398.170722       | Y    | 1895.034686 | 948.020981      | 1878.008137    | 939.507707       | 1877.024121    | 939.015699       | 14 |
| 9  | 914.392411  | 457.699844      |                |                  | 896.381846     | 448.694561       | T    | 1731.971357 | 866.489317      | 1714.944808    | 857.976042       | 1713.960792    | 857.484034       | 13 |
| 10 | 971.413875  | 486.210576      |                |                  | 953.403310     | 477.205293       | G    | 1630.923678 | 815.965477      | 1613.897129    | 807.452203       | 1612.913113    | 806.960195       | 12 |
| 11 | 1084.497939 | 542.752608      |                |                  | 1066.487374    | 533.747325       | I    | 1573.902214 | 787.454745      | 1556.875665    | 778.941471       | 1555.891649    | 778.449463       | 11 |
| 12 | 1231.566353 | 616.286815      |                |                  | 1213.555788    | 607.281532       | F    | 1460.818150 | 730.912713      | 1443.791601    | 722.399439       | 1442.807585    | 721.907431       | 10 |
| 13 | 1332.614032 | 666.810654      |                |                  | 1314.603467    | 657.805372       | T    | 1313.749736 | 657.378506      | 1296.723187    | 648.865232       | 1295.739171    | 648.373224       | 9  |
| 14 | 1447.640975 | 724.324126      |                |                  | 1429.630410    | 715.318843       | D    | 1212.702057 | 606.854667      | 1195.675508    | 598.341392       | 1194.691492    | 597.849384       | 8  |
| 15 | 1886.866301 | 943.936789      | 1869.839752    | 935.423514       | 1868.855736    | 934.931506       | Q    | 1097.675114 | 549.341195      | 1080.648565    | 540.827921       | 1079.664549    | 540.335913       | 7  |
| 16 | 1985.934715 | 993.470996      | 1968.908166    | 984.957721       | 1967.924150    | 984.465713       | V    | 658.449788  | 329.728532      | 641.423239     | 321.215258       | 640.439223     | 320.723250       | 6  |
| 17 | 2099.018779 | 1050.013027     | 2081.992230    | 1041.499753      | 2081.008214    | 1041.007745      | L    | 559.381374  | 280.194325      | 542.354825     | 271.681051       | 541.370809     | 271.189043       | 5  |
| 18 | 2186.050807 | 1093.529041     | 2169.024258    | 1085.015767      | 2168.040242    | 1084.523759      | S    | 446.297310  | 223.652293      | 429.270761     | 215.139019       | 428.286745     | 214.647011       | 4  |
| 19 | 2285.119221 | 1143.063248     | 2268.092672    | 1134.549974      | 2267.108656    | 1134.057966      | V    | 359.265282  | 180.136279      | 342.238733     | 171.623004       |                |                  | 3  |
| 20 | 2398.203285 | 1199.605280     | 2381.176736    | 1191.092006      | 2380.192720    | 1190.599998      | L    | 260.196868  | 130.602072      | 243.170319     | 122.088798       |                |                  | 2  |
| 21 |             |                 |                |                  |                |                  | K    | 147.112804  | 74.060040       | 130.086255     | 65.546765        |                |                  | 1  |

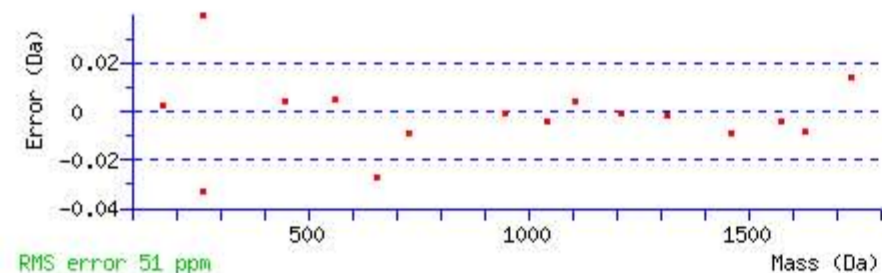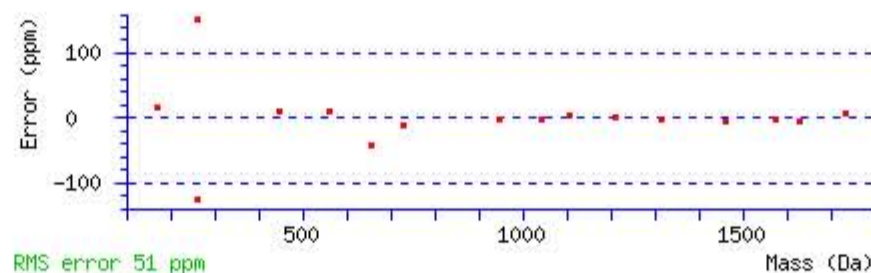

NCBI BLAST search of [STAAMSTYTGIFTDQVLSVLK](#)

(Parameters: blastp, nr protein database, expect=20000, no filter, PAM30)

Other BLAST [web gateways](#)

All matches to this query

| Score | Mr(calc):   | Delta    | Sequence                              |
|-------|-------------|----------|---------------------------------------|
| 79.7  | 2543.301544 | 0.006848 | <a href="#">STAAMSTYTGIFTDQVLSVLK</a> |

Mascot: <http://www.matrixscience.com/>

# MASCOT Search Results

## Peptide View

MS/MS Fragmentation of **DALSSVQESQVAQQAR**

Found in **APOC3\_HUMAN**, Apolipoprotein C-III OS=Homo sapiens GN=APOC3 PE=1 SV=1

Match to Query 43136: 2027.012412 from(676.678080,3+) rtinseconds(1942) index(32758)

Title: Locus:1.1.1.3225.15 File:"2013-07-02 CLN FXIII 60 min 3rd F 3.wiff"

Data file C:\Program Files (x86)\Matrix Science\Mascot Daemon\mgf6 FXIII 60 min 3rd\mascot\_daemon\_merge.mgf

Click mouse within plot area to zoom in by factor of two about that point

Or, Plot from  to  Da

Label all possible matches  Label matches used for scoring

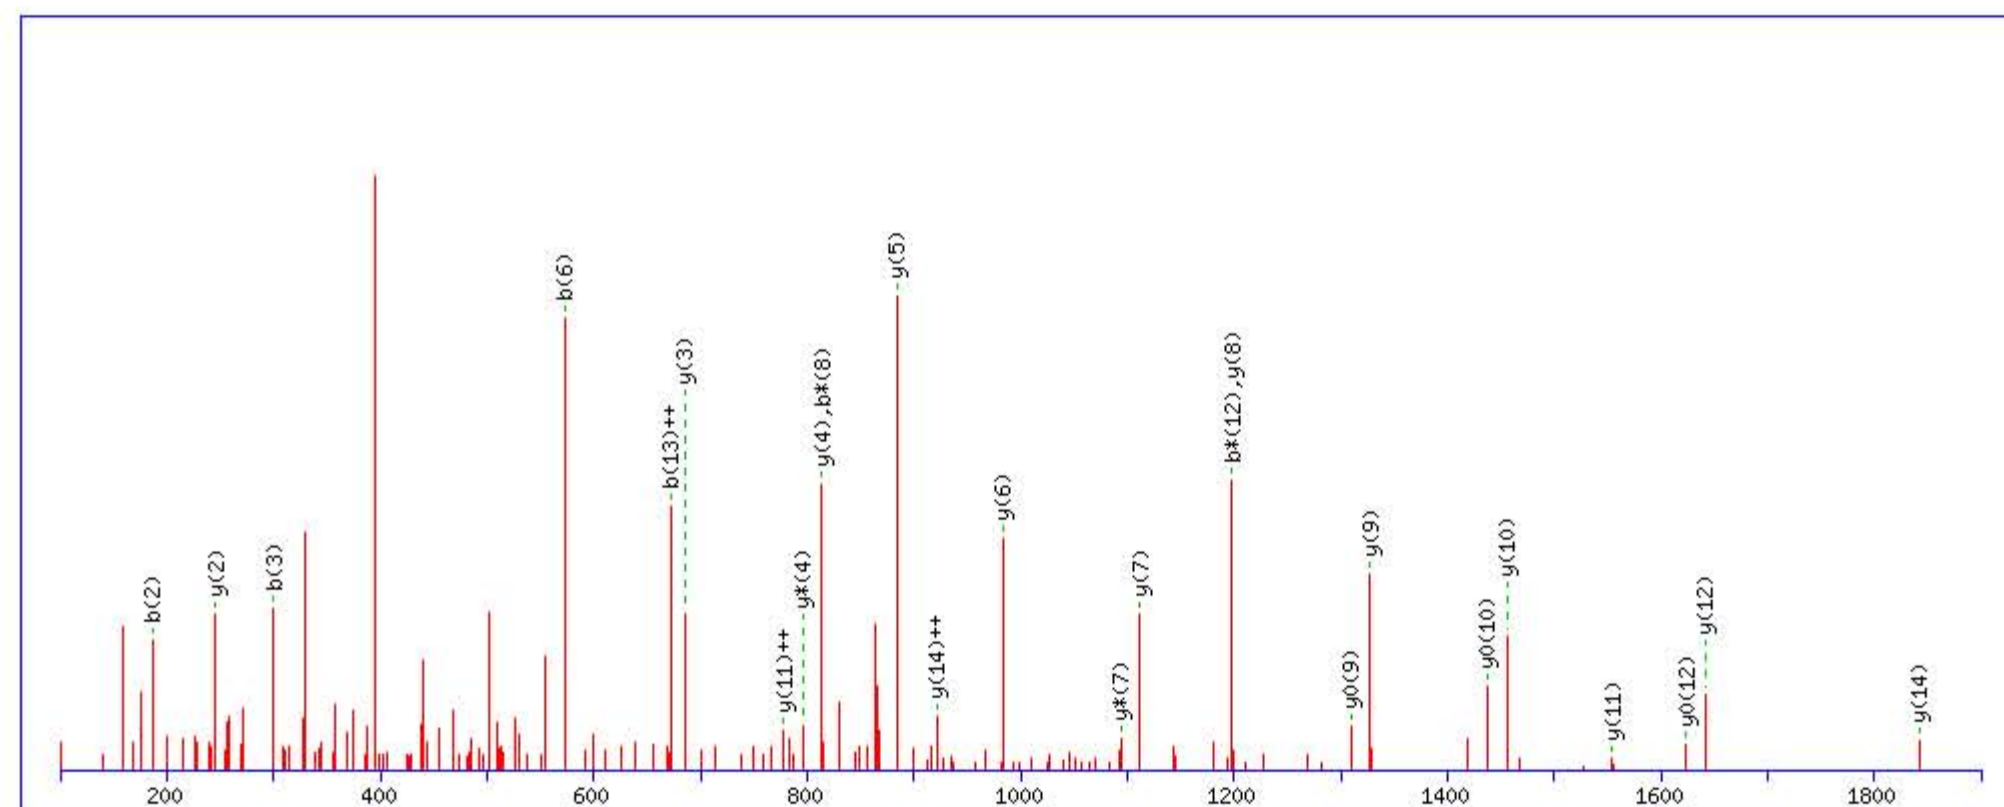

Monoisotopic mass of neutral peptide Mr(calc): 2027.010574

Fixed modifications: Carbamidomethyl (C) (apply to specified residues or termini only)

Variable modifications:

Q14 : Biotin:Thermo-21345 (Q)

Ions Score: 90 Expect: 2.3e-008

Matches : 25/154 fragment ions using 33 most intense peaks [\(help\)](#)

| #  | b                 | b <sup>++</sup>   | b <sup>+</sup>     | b <sup>+++</sup> | b <sup>0</sup> | b <sup>0++</sup> | Seq. | y                  | y <sup>++</sup>   | y <sup>+</sup>     | y <sup>+++</sup> | y <sup>0</sup>     | y <sup>0++</sup> | #  |
|----|-------------------|-------------------|--------------------|------------------|----------------|------------------|------|--------------------|-------------------|--------------------|------------------|--------------------|------------------|----|
| 1  | 116.034219        | 58.520748         |                    |                  | 98.023654      | 49.515465        | D    |                    |                   |                    |                  |                    |                  | 16 |
| 2  | <b>187.071333</b> | 94.039304         |                    |                  | 169.060768     | 85.034022        | A    | 1912.990923        | 956.999100        | 1895.964374        | 948.485825       | 1894.980358        | 947.993817       | 15 |
| 3  | <b>300.155397</b> | 150.581336        |                    |                  | 282.144832     | 141.576054       | L    | <b>1841.953809</b> | <b>921.480543</b> | 1824.927260        | 912.967268       | 1823.943244        | 912.475260       | 14 |
| 4  | 387.187425        | 194.097351        |                    |                  | 369.176860     | 185.092068       | S    | 1728.869745        | 864.938511        | 1711.843196        | 856.425236       | 1710.859180        | 855.933228       | 13 |
| 5  | 474.219453        | 237.613364        |                    |                  | 456.208888     | 228.608082       | S    | <b>1641.837717</b> | 821.422497        | 1624.811168        | 812.909222       | <b>1623.827152</b> | 812.417214       | 12 |
| 6  | <b>573.287867</b> | 287.147572        |                    |                  | 555.277302     | 278.142289       | V    | <b>1554.805689</b> | <b>777.906483</b> | 1537.779140        | 769.393208       | 1536.795124        | 768.901200       | 11 |
| 7  | 701.346445        | 351.176861        | 684.319896         | 342.663586       | 683.335880     | 342.171578       | Q    | <b>1455.737275</b> | 728.372276        | 1438.710726        | 719.859001       | <b>1437.726710</b> | 719.366993       | 10 |
| 8  | 830.389038        | 415.698157        | <b>813.362489</b>  | 407.184883       | 812.378473     | 406.692875       | E    | <b>1327.678697</b> | 664.342987        | 1310.652148        | 655.829712       | <b>1309.668132</b> | 655.337704       | 9  |
| 9  | 917.421066        | 459.214171        | 900.394517         | 450.700897       | 899.410501     | 450.208889       | S    | <b>1198.636104</b> | 599.821690        | 1181.609555        | 591.308416       | 1180.625539        | 590.816408       | 8  |
| 10 | 1045.479644       | 523.243460        | 1028.453095        | 514.730186       | 1027.469079    | 514.238178       | Q    | <b>1111.604076</b> | 556.305676        | <b>1094.577527</b> | 547.792402       |                    |                  | 7  |
| 11 | 1144.548058       | 572.777667        | 1127.521509        | 564.264393       | 1126.537493    | 563.772385       | V    | <b>983.545498</b>  | 492.276387        | 966.518949         | 483.763113       |                    |                  | 6  |
| 12 | 1215.585172       | 608.296224        | <b>1198.558623</b> | 599.782950       | 1197.574607    | 599.290942       | A    | <b>884.477084</b>  | 442.742180        | 867.450535         | 434.228906       |                    |                  | 5  |
| 13 | 1343.643750       | <b>672.325513</b> | 1326.617201        | 663.812239       | 1325.633185    | 663.320230       | Q    | <b>813.439970</b>  | 407.223623        | <b>796.413421</b>  | 398.710349       |                    |                  | 4  |
| 14 | 1782.869076       | 891.938176        | 1765.842527        | 883.424902       | 1764.858511    | 882.932894       | Q    | <b>685.381392</b>  | 343.194334        | 668.354843         | 334.681060       |                    |                  | 3  |
| 15 | 1853.906190       | 927.456733        | 1836.879641        | 918.943459       | 1835.895625    | 918.451451       | A    | <b>246.156066</b>  | 123.581671        | 229.129517         | 115.068396       |                    |                  | 2  |
| 16 |                   |                   |                    |                  |                |                  | R    | 175.118952         | 88.063114         | 158.092403         | 79.549839        |                    |                  | 1  |

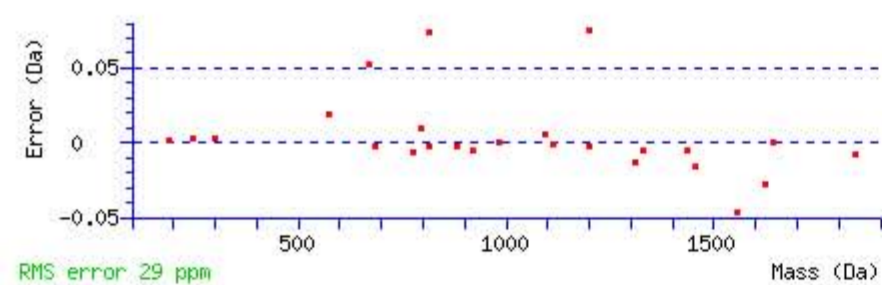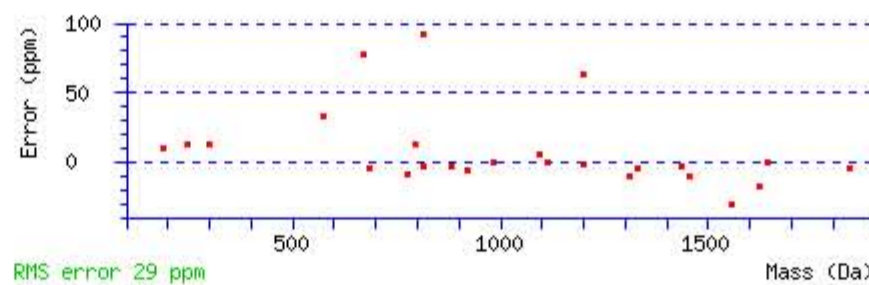

NCBI BLAST search of **DALSSVQESQVAQQAR**

(Parameters: blastp, nr protein database, expect=20000, no filter, PAM30)

Other BLAST [web gateways](#)

All matches to this query

| Score | Mr(calc):   | Delta    | Sequence                         |
|-------|-------------|----------|----------------------------------|
| 90.4  | 2027.010574 | 0.001838 | <a href="#">DALSSVQESQVAQQAR</a> |
| 80.0  | 2027.010574 | 0.001838 | <a href="#">DALSSVQESQVAQQAR</a> |
| 75.0  | 2027.010574 | 0.001838 | <a href="#">DALSSVQESQVAQQAR</a> |
| 37.4  | 2027.010574 | 0.001838 | <a href="#">DALSSVQESQVAQQAR</a> |

# MASCOT SEARCH RESULTS

## Peptide View

MS/MS Fragmentation of **DALSSVQESQVAQQAR**

Found in **APOC3\_HUMAN**, Apolipoprotein C-III OS=Homo sapiens GN=APOC3 PE=1 SV=1

Match to Query 43138: 2027.012742 from(676.678190,3+) rtinseconds(1974) index(33013)

Title: Locus:1.1.1.3236.19 File:"2013-07-02 CLN FXIII 60 min 3rd F 3.wiff"

Data file C:\Program Files (x86)\Matrix Science\Mascot Daemon\mgf\6 FXIII 60 min 3rd\mascot\_daemon\_merge.mgf

Click mouse within plot area to zoom in by factor of two about that point

Or, Plot from 100 to 2100 Da Full range

Label all possible matches  Label matches used for scoring

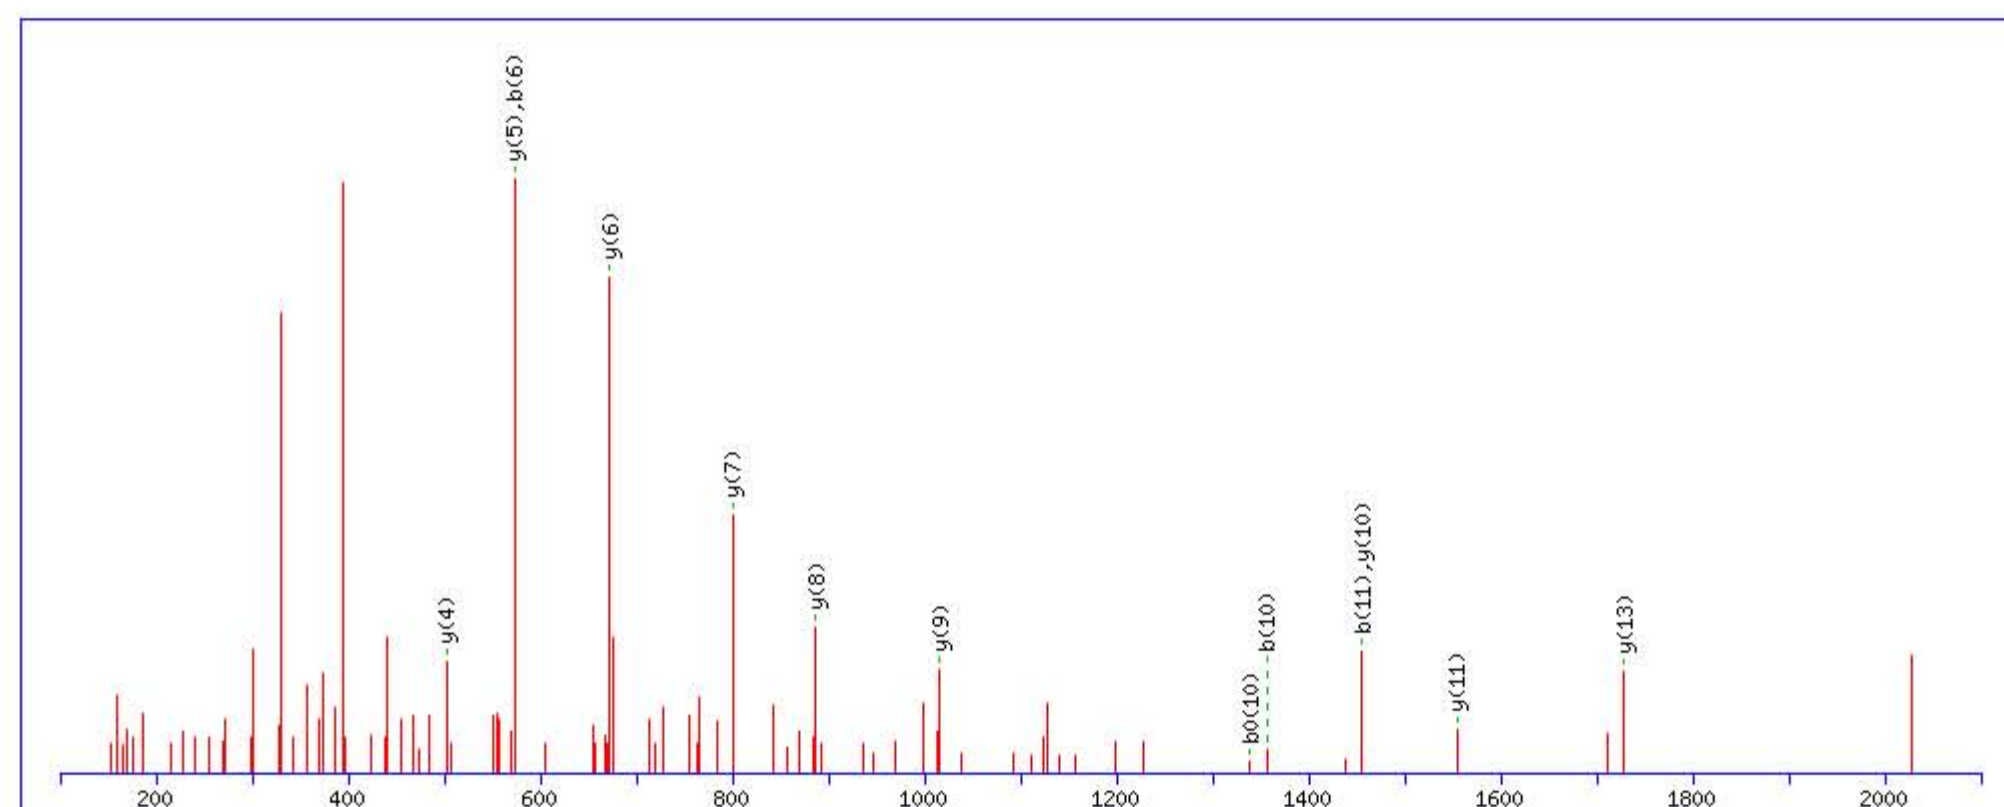

Monoisotopic mass of neutral peptide Mr(calc): 2027.010574

Fixed modifications: Carbamidomethyl (C) (apply to specified residues or termini only)

Variable modifications:

Q7 : Biotin:Thermo-21345 (Q)

Ions Score: 66 Expect: 3.6e-006

Matches : 13/154 fragment ions using 16 most intense peaks [\(help\)](#)

| #  | b                  | b <sup>++</sup> | b <sup>*</sup> | b <sup>+++</sup> | b <sup>0</sup>     | b <sup>0++</sup> | Seq. | y                  | y <sup>++</sup> | y <sup>*</sup> | y <sup>+++</sup> | y <sup>0</sup> | y <sup>0++</sup> | #  |
|----|--------------------|-----------------|----------------|------------------|--------------------|------------------|------|--------------------|-----------------|----------------|------------------|----------------|------------------|----|
| 1  | 116.034219         | 58.520748       |                |                  | 98.023654          | 49.515465        | D    |                    |                 |                |                  |                |                  | 16 |
| 2  | 187.071333         | 94.039304       |                |                  | 169.060768         | 85.034022        | A    | 1912.990923        | 956.999100      | 1895.964374    | 948.485825       | 1894.980358    | 947.993817       | 15 |
| 3  | 300.155397         | 150.581336      |                |                  | 282.144832         | 141.576054       | L    | 1841.953809        | 921.480543      | 1824.927260    | 912.967268       | 1823.943244    | 912.475260       | 14 |
| 4  | 387.187425         | 194.097351      |                |                  | 369.176860         | 185.092068       | S    | <b>1728.869745</b> | 864.938511      | 1711.843196    | 856.425236       | 1710.859180    | 855.933228       | 13 |
| 5  | 474.219453         | 237.613364      |                |                  | 456.208888         | 228.608082       | S    | 1641.837717        | 821.422497      | 1624.811168    | 812.909222       | 1623.827152    | 812.417214       | 12 |
| 6  | <b>573.287867</b>  | 287.147572      |                |                  | 555.277302         | 278.142289       | V    | <b>1554.805689</b> | 777.906483      | 1537.779140    | 769.393208       | 1536.795124    | 768.901200       | 11 |
| 7  | 1012.513193        | 506.760235      | 995.486644     | 498.246960       | 994.502628         | 497.754952       | Q    | <b>1455.737275</b> | 728.372276      | 1438.710726    | 719.859001       | 1437.726710    | 719.366993       | 10 |
| 8  | 1141.555786        | 571.281531      | 1124.529237    | 562.768257       | 1123.545221        | 562.276249       | E    | <b>1016.511949</b> | 508.759613      | 999.485400     | 500.246338       | 998.501384     | 499.754330       | 9  |
| 9  | 1228.587814        | 614.797545      | 1211.561265    | 606.284271       | 1210.577249        | 605.792263       | S    | <b>887.469356</b>  | 444.238316      | 870.442807     | 435.725042       | 869.458791     | 435.233034       | 8  |
| 10 | <b>1356.646392</b> | 678.826834      | 1339.619843    | 670.313560       | <b>1338.635827</b> | 669.821552       | Q    | <b>800.437328</b>  | 400.722302      | 783.410779     | 392.209028       |                |                  | 7  |
| 11 | <b>1455.714806</b> | 728.361041      | 1438.688257    | 719.847767       | 1437.704241        | 719.355759       | V    | <b>672.378750</b>  | 336.693013      | 655.352201     | 328.179739       |                |                  | 6  |
| 12 | 1526.751920        | 763.879598      | 1509.725371    | 755.366324       | 1508.741355        | 754.874316       | A    | <b>573.310336</b>  | 287.158806      | 556.283787     | 278.645532       |                |                  | 5  |
| 13 | 1654.810498        | 827.908887      | 1637.783949    | 819.395613       | 1636.799933        | 818.903605       | Q    | <b>502.273222</b>  | 251.640249      | 485.246673     | 243.126975       |                |                  | 4  |
| 14 | 1782.869076        | 891.938176      | 1765.842527    | 883.424902       | 1764.858511        | 882.932894       | Q    | 374.214644         | 187.610960      | 357.188095     | 179.097686       |                |                  | 3  |
| 15 | 1853.906190        | 927.456733      | 1836.879641    | 918.943459       | 1835.895625        | 918.451451       | A    | 246.156066         | 123.581671      | 229.129517     | 115.068396       |                |                  | 2  |
| 16 |                    |                 |                |                  |                    |                  | R    | 175.118952         | 88.063114       | 158.092403     | 79.549839        |                |                  | 1  |

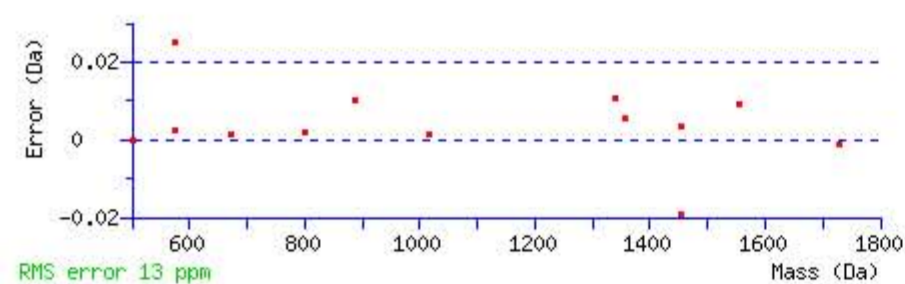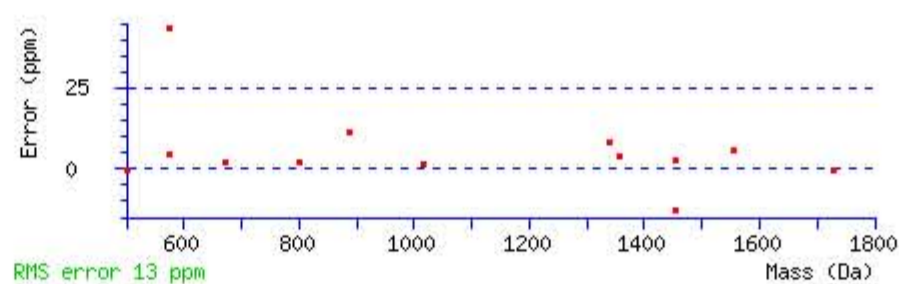

NCBI BLAST search of **DALSSVQESQVAQQAR**

(Parameters: blastp, nr protein database, expect=20000, no filter, PAM30)

Other BLAST [web gateways](#)

### All matches to this query

| Score | Mr(calc):   | Delta    | Sequence                          |
|-------|-------------|----------|-----------------------------------|
| 65.6  | 2027.010574 | 0.002168 | <a href="#">DALSSVQESQVAQQAR</a>  |
| 38.1  | 2027.010574 | 0.002168 | <a href="#">DALSSVQESQVAQQAR</a>  |
| 15.8  | 2027.010574 | 0.002168 | <a href="#">DALSSVQESQVAQQAR</a>  |
| 13.9  | 2027.010574 | 0.002168 | <a href="#">DALSSVQESQVAQQAR</a>  |
| 7.1   | 2027.010559 | 0.002183 | <a href="#">LTGRGAEDSLADQAANK</a> |
| 0.7   | 2027.000870 | 0.011872 | <a href="#">QMSEPNIPFPQGFK</a>    |

# Mascot Search Results

## Peptide View

MS/MS Fragmentation of **DALSSVQESQVAQQAR**  
 Found in **APOC3\_HUMAN**, Apolipoprotein C-III OS=Homo sapiens GN=APOC3 PE=1 SV=1

Match to Query 43141: 2027.014062 from(676.678630,3+) rtinseconds(1887) index(32320)  
 Title: Locus:1.1.1.3206.13 File:"2013-07-02 CLN FXIII 60 min 3rd F 3.wiff"  
 Data file C:\Program Files (x86)\Matrix Science\Mascot Daemon\mgf6 FXIII 60 min 3rd\mascot\_daemon\_merge.mgf

Click mouse within plot area to zoom in by factor of two about that point  
 Or, Plot from  to  Da   
 Label all possible matches  Label matches used for scoring

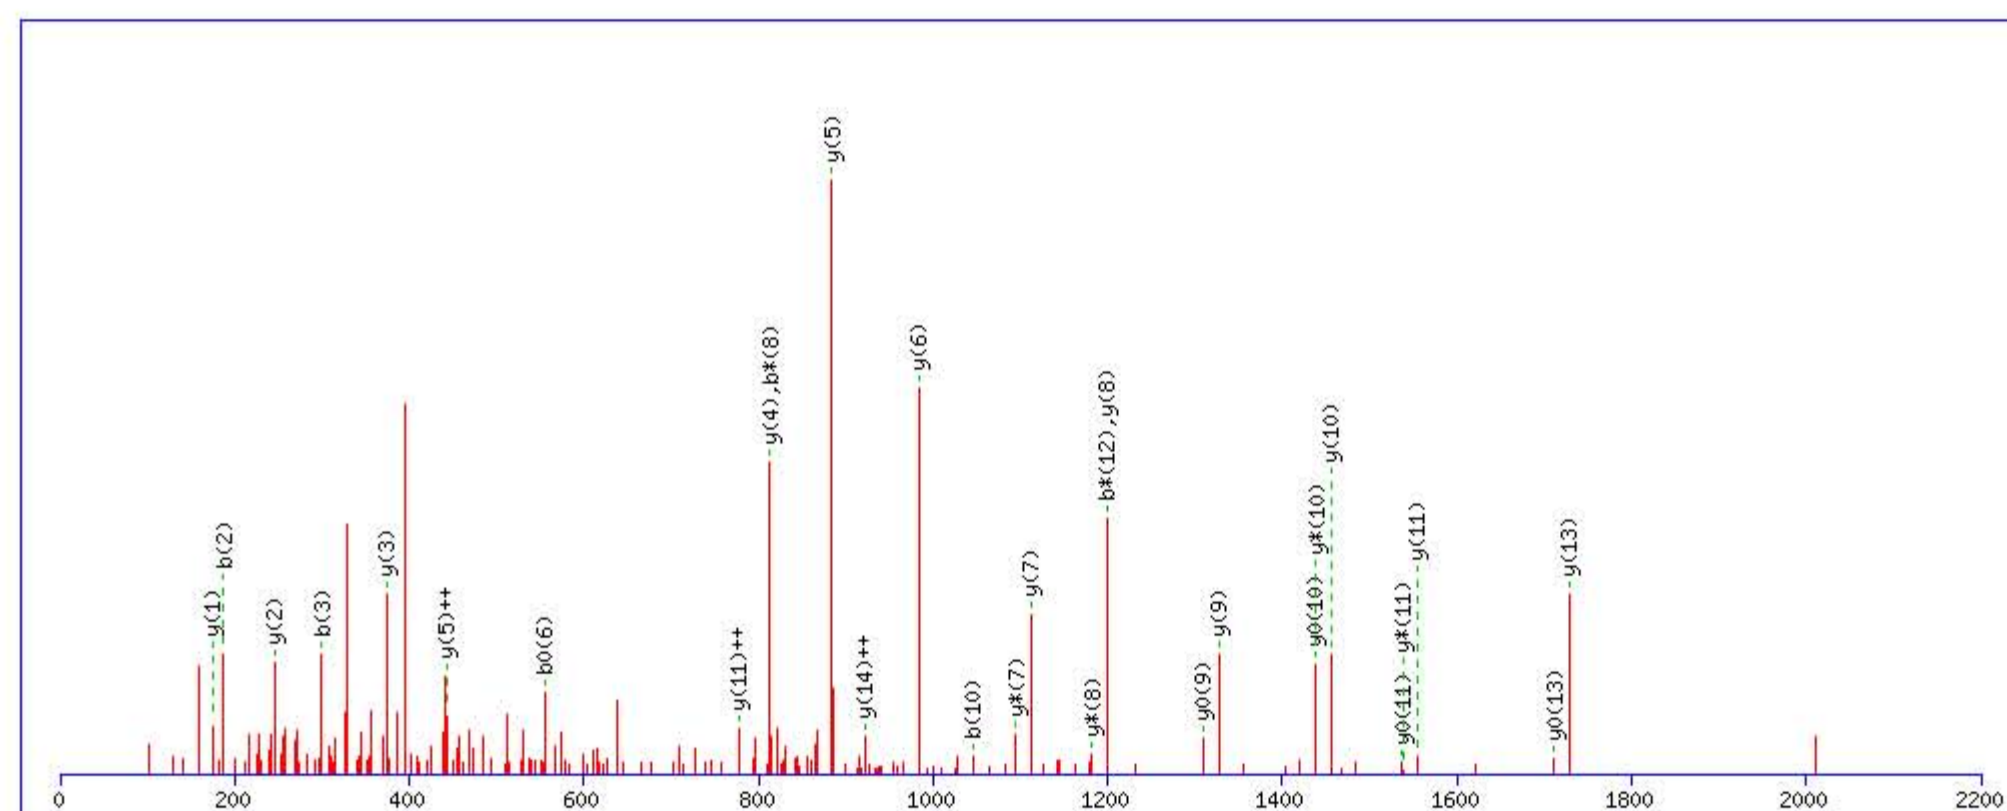

Monoisotopic mass of neutral peptide Mr(calc): 2027.010574  
 Fixed modifications: Carbamidomethyl (C) (apply to specified residues or termini only)  
 Variable modifications:  
 Q13 : Biotin:Thermo-21345 (Q)  
 Ions Score: 79 Expect: 3.3e-007  
 Matches : 29/154 fragment ions using 47 most intense peaks [\(help\)](#)

| #  | b                  | b <sup>++</sup> | b <sup>+</sup>     | b <sup>+++</sup> | b <sup>0</sup>    | b <sup>0++</sup> | Seq. | y                  | y <sup>++</sup>   | y <sup>+</sup>     | y <sup>+++</sup> | y <sup>0</sup>     | y <sup>0++</sup> | #  |
|----|--------------------|-----------------|--------------------|------------------|-------------------|------------------|------|--------------------|-------------------|--------------------|------------------|--------------------|------------------|----|
| 1  | 116.034219         | 58.520748       |                    |                  | 98.023654         | 49.515465        | D    |                    |                   |                    |                  |                    |                  | 16 |
| 2  | <b>187.071333</b>  | 94.039304       |                    |                  | 169.060768        | 85.034022        | A    | 1912.990923        | 956.999100        | 1895.964374        | 948.485825       | 1894.980358        | 947.993817       | 15 |
| 3  | <b>300.155397</b>  | 150.581336      |                    |                  | 282.144832        | 141.576054       | L    | 1841.953809        | <b>921.480543</b> | 1824.927260        | 912.967268       | 1823.943244        | 912.475260       | 14 |
| 4  | 387.187425         | 194.097351      |                    |                  | 369.176860        | 185.092068       | S    | <b>1728.869745</b> | 864.938511        | 1711.843196        | 856.425236       | <b>1710.859180</b> | 855.933228       | 13 |
| 5  | 474.219453         | 237.613364      |                    |                  | 456.208888        | 228.608082       | S    | 1641.837717        | 821.422497        | 1624.811168        | 812.909222       | 1623.827152        | 812.417214       | 12 |
| 6  | 573.287867         | 287.147572      |                    |                  | <b>555.277302</b> | 278.142289       | V    | <b>1554.805689</b> | <b>777.906483</b> | <b>1537.779140</b> | 769.393208       | <b>1536.795124</b> | 768.901200       | 11 |
| 7  | 701.346445         | 351.176861      | 684.319896         | 342.663586       | 683.335880        | 342.171578       | Q    | <b>1455.737275</b> | 728.372276        | <b>1438.710726</b> | 719.859001       | <b>1437.726710</b> | 719.366993       | 10 |
| 8  | 830.389038         | 415.698157      | <b>813.362489</b>  | 407.184883       | 812.378473        | 406.692875       | E    | <b>1327.678697</b> | 664.342987        | 1310.652148        | 655.829712       | <b>1309.668132</b> | 655.337704       | 9  |
| 9  | 917.421066         | 459.214171      | 900.394517         | 450.700897       | 899.410501        | 450.208889       | S    | <b>1198.636104</b> | 599.821690        | <b>1181.609555</b> | 591.308416       | 1180.625539        | 590.816408       | 8  |
| 10 | <b>1045.479644</b> | 523.243460      | 1028.453095        | 514.730186       | 1027.469079       | 514.238178       | Q    | <b>1111.604076</b> | 556.305676        | <b>1094.577527</b> | 547.792402       |                    |                  | 7  |
| 11 | 1144.548058        | 572.777667      | 1127.521509        | 564.264393       | 1126.537493       | 563.772385       | V    | <b>983.545498</b>  | 492.276387        | 966.518949         | 483.763113       |                    |                  | 6  |
| 12 | 1215.585172        | 608.296224      | <b>1198.558623</b> | 599.782950       | 1197.574607       | 599.290942       | A    | <b>884.477084</b>  | <b>442.742180</b> | 867.450535         | 434.228906       |                    |                  | 5  |
| 13 | 1654.810498        | 827.908887      | 1637.783949        | 819.395613       | 1636.799933       | 818.903605       | Q    | <b>813.439970</b>  | 407.223623        | 796.413421         | 398.710349       |                    |                  | 4  |
| 14 | 1782.869076        | 891.938176      | 1765.842527        | 883.424902       | 1764.858511       | 882.932894       | Q    | <b>374.214644</b>  | 187.610960        | 357.188095         | 179.097686       |                    |                  | 3  |
| 15 | 1853.906190        | 927.456733      | 1836.879641        | 918.943459       | 1835.895625       | 918.451451       | A    | <b>246.156066</b>  | 123.581671        | 229.129517         | 115.068396       |                    |                  | 2  |
| 16 |                    |                 |                    |                  |                   |                  | R    | <b>175.118952</b>  | 88.063114         | 158.092403         | 79.549839        |                    |                  | 1  |

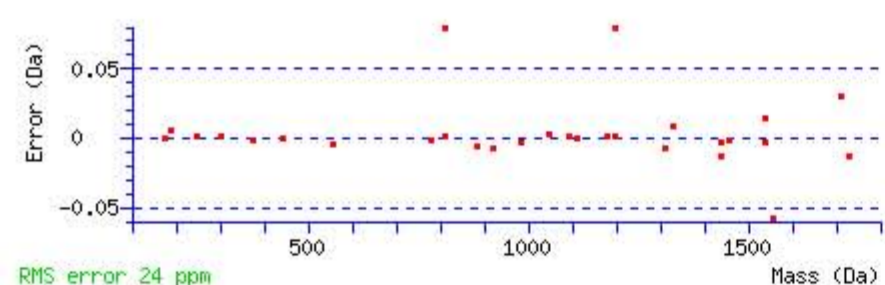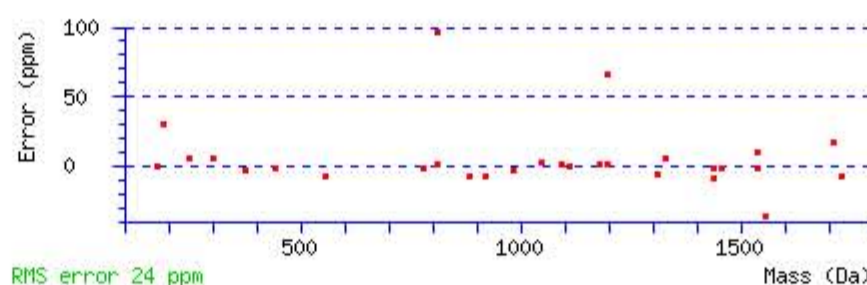

NCBI BLAST search of **DALSSVQESQVAQQAR**  
 (Parameters: blastp, nr protein database, expect=20000, no filter, PAM30)  
 Other BLAST [web gateways](#)

### All matches to this query

| Score | Mr(calc):   | Delta    | Sequence                         |
|-------|-------------|----------|----------------------------------|
| 78.8  | 2027.010574 | 0.003488 | <a href="#">DALSSVQESQVAQQAR</a> |
| 66.4  | 2027.010574 | 0.003488 | <a href="#">DALSSVQESQVAQQAR</a> |
| 43.1  | 2027.010574 | 0.003488 | <a href="#">DALSSVQESQVAQQAR</a> |
| 14.0  | 2027.010574 | 0.003488 | <a href="#">DALSSVQESQVAQQAR</a> |

# MASCOT Search Results

## Peptide View

MS/MS Fragmentation of **DALSSVQESQVAQQAR**

Found in **APOC3\_HUMAN**, Apolipoprotein C-III OS=Homo sapiens GN=APOC3 PE=1 SV=1

Match to Query 43146: 2027.022042 from(676.681290,3+) rtinseconds(1952) index(47087)

Title: Locus:1.1.1.2728.15 File:"2013-07-02 CLN FXIII 60 min 3rd F 4.wiff"

Data file C:\Program Files (x86)\Matrix Science\Mascot Daemon\mgf\6 FXIII 60 min 3rd\mascot\_daemon\_merge.mgf

Click mouse within plot area to zoom in by factor of two about that point

Or, Plot from  to  Da

Label all possible matches  Label matches used for scoring

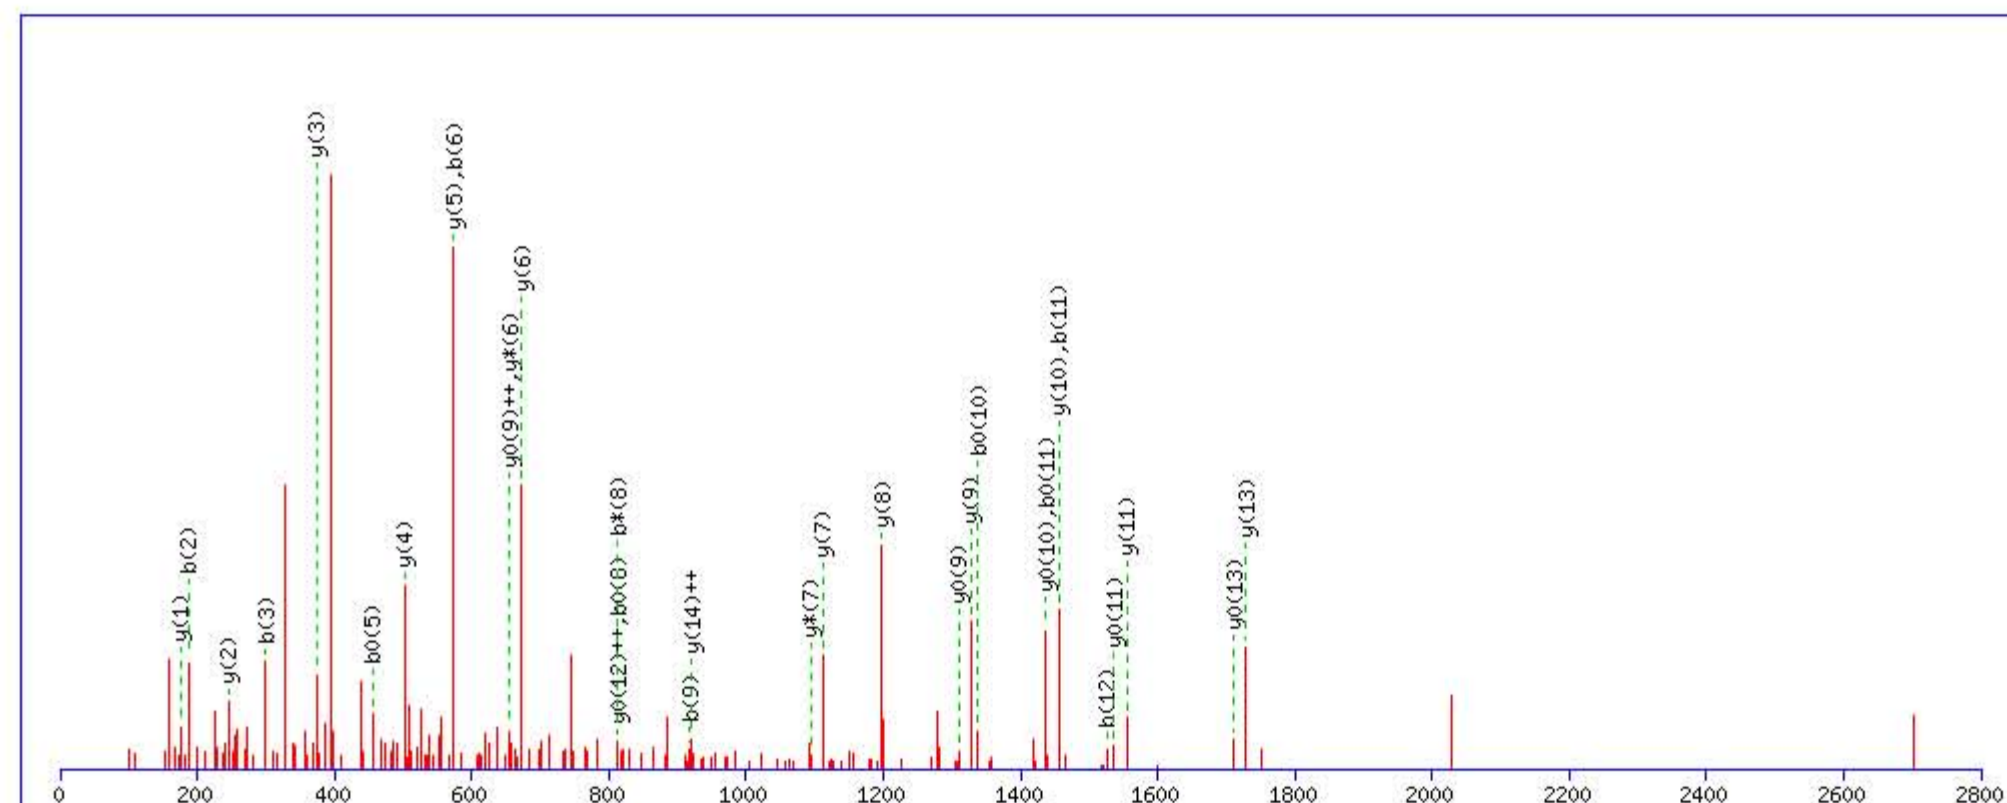

Monoisotopic mass of neutral peptide Mr(calc): 2027.010574

Fixed modifications: Carbamidomethyl (C) (apply to specified residues or termini only)

Variable modifications:

Q10 : Biotin:Thermo-21345 (Q)

Ions Score: 73 Expect: 2.4e-007

Matches : 32/154 fragment ions using 48 most intense peaks [\(help\)](#)

| #  | b                  | b <sup>++</sup> | b <sup>*</sup>    | b <sup>*++</sup> | b <sup>0</sup>     | b <sup>0++</sup> | Seq. | y                  | y <sup>++</sup>   | y <sup>*</sup>     | y <sup>*++</sup> | y <sup>0</sup>     | y <sup>0++</sup>  | #  |
|----|--------------------|-----------------|-------------------|------------------|--------------------|------------------|------|--------------------|-------------------|--------------------|------------------|--------------------|-------------------|----|
| 1  | 116.034219         | 58.520748       |                   |                  | 98.023654          | 49.515465        | D    |                    |                   |                    |                  |                    |                   | 16 |
| 2  | <b>187.071333</b>  | 94.039304       |                   |                  | 169.060768         | 85.034022        | A    | 1912.990923        | 956.999100        | 1895.964374        | 948.485825       | 1894.980358        | 947.993817        | 15 |
| 3  | <b>300.155397</b>  | 150.581336      |                   |                  | 282.144832         | 141.576054       | L    | 1841.953809        | <b>921.480543</b> | 1824.927260        | 912.967268       | 1823.943244        | 912.475260        | 14 |
| 4  | 387.187425         | 194.097351      |                   |                  | 369.176860         | 185.092068       | S    | <b>1728.869745</b> | 864.938511        | 1711.843196        | 856.425236       | <b>1710.859180</b> | 855.933228        | 13 |
| 5  | 474.219453         | 237.613364      |                   |                  | <b>456.208888</b>  | 228.608082       | S    | 1641.837717        | 821.422497        | 1624.811168        | 812.909222       | 1623.827152        | <b>812.417214</b> | 12 |
| 6  | <b>573.287867</b>  | 287.147572      |                   |                  | 555.277302         | 278.142289       | V    | <b>1554.805689</b> | 777.906483        | 1537.779140        | 769.393208       | <b>1536.795124</b> | 768.901200        | 11 |
| 7  | 701.346445         | 351.176861      | 684.319896        | 342.663586       | 683.335880         | 342.171578       | Q    | <b>1455.737275</b> | 728.372276        | 1438.710726        | 719.859001       | <b>1437.726710</b> | 719.366993        | 10 |
| 8  | 830.389038         | 415.698157      | <b>813.362489</b> | 407.184883       | <b>812.378473</b>  | 406.692875       | E    | <b>1327.678697</b> | 664.342987        | 1310.652148        | 655.829712       | <b>1309.668132</b> | <b>655.337704</b> | 9  |
| 9  | <b>917.421066</b>  | 459.214171      | 900.394517        | 450.700897       | 899.410501         | 450.208889       | S    | <b>1198.636104</b> | 599.821690        | 1181.609555        | 591.308416       | 1180.625539        | 590.816408        | 8  |
| 10 | 1356.646392        | 678.826834      | 1339.619843       | 670.313560       | <b>1338.635827</b> | 669.821551       | Q    | <b>1111.604076</b> | 556.305676        | <b>1094.577527</b> | 547.792402       |                    |                   | 7  |
| 11 | <b>1455.714806</b> | 728.361041      | 1438.688257       | 719.847767       | <b>1437.704241</b> | 719.355758       | V    | <b>672.378750</b>  | 336.693013        | <b>655.352201</b>  | 328.179739       |                    |                   | 6  |
| 12 | <b>1526.751920</b> | 763.879598      | 1509.725371       | 755.366324       | 1508.741355        | 754.874315       | A    | <b>573.310336</b>  | 287.158806        | 556.283787         | 278.645532       |                    |                   | 5  |
| 13 | 1654.810498        | 827.908887      | 1637.783949       | 819.395613       | 1636.799933        | 818.903605       | Q    | <b>502.273222</b>  | 251.640249        | 485.246673         | 243.126975       |                    |                   | 4  |
| 14 | 1782.869076        | 891.938176      | 1765.842527       | 883.424902       | 1764.858511        | 882.932894       | Q    | <b>374.214644</b>  | 187.610960        | 357.188095         | 179.097686       |                    |                   | 3  |
| 15 | 1853.906190        | 927.456733      | 1836.879641       | 918.943459       | 1835.895625        | 918.451451       | A    | <b>246.156066</b>  | 123.581671        | 229.129517         | 115.068396       |                    |                   | 2  |
| 16 |                    |                 |                   |                  |                    |                  | R    | <b>175.118952</b>  | 88.063114         | 158.092403         | 79.549839        |                    |                   | 1  |

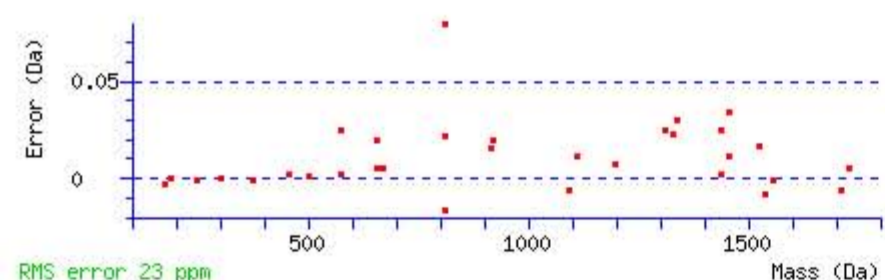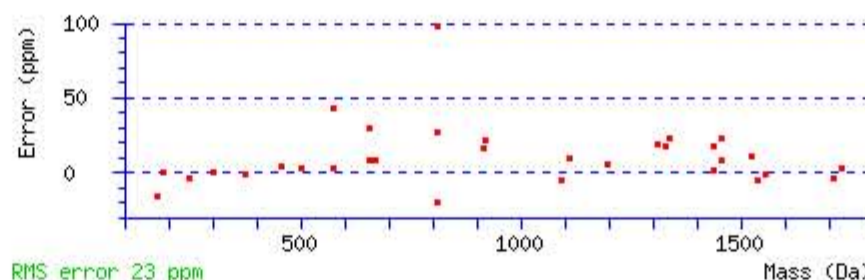

NCBI BLAST search of **DALSSVQESQVAQQAR**

(Parameters: blastp, nr protein database, expect=20000, no filter, PAM30)

Other BLAST [web gateways](#)

## All matches to this query

| Score | Mr(calc):   | Delta    | Sequence                          |
|-------|-------------|----------|-----------------------------------|
| 73.2  | 2027.010574 | 0.011468 | <a href="#">DALSSVQESQVAQQAR</a>  |
| 68.8  | 2027.010574 | 0.011468 | <a href="#">DALSSVQESQVAQQAR</a>  |
| 57.8  | 2027.010574 | 0.011468 | <a href="#">DALSSVQESQVAQQAR</a>  |
| 35.9  | 2027.010574 | 0.011468 | <a href="#">DALSSVQESQVAQQAR</a>  |
| 2.6   | 2027.021805 | 0.000237 | <a href="#">VASVESQGQEISGNRR</a>  |
| 2.0   | 2027.017960 | 0.004082 | <a href="#">MFELTLRGMSEALVDKR</a> |



# **MASCOT** Mascot Search Results

## Peptide View

MS/MS Fragmentation of **ELQAAQAR**

Found in **APOE\_HUMAN**, Apolipoprotein E OS=Homo sapiens GN=APOE PE=1 SV=1

Match to Query 20281: 1196.630508 from(599.322530,2+) rtinseconds(1472) index(44045)

Title: Locus:1.1.1.2561.8 File:"2013-07-02 CLN FXIII 60 min 3rd F 4.wiff"

Data file C:\Program Files (x86)\Matrix Science\Mascot Daemon\mgf6 FXIII 60 min 3rd\mascot\_daemon\_merge.mgf

Click mouse within plot area to zoom in by factor of two about that point

Or, Plot from  to  Da

Label all possible matches  Label matches used for scoring

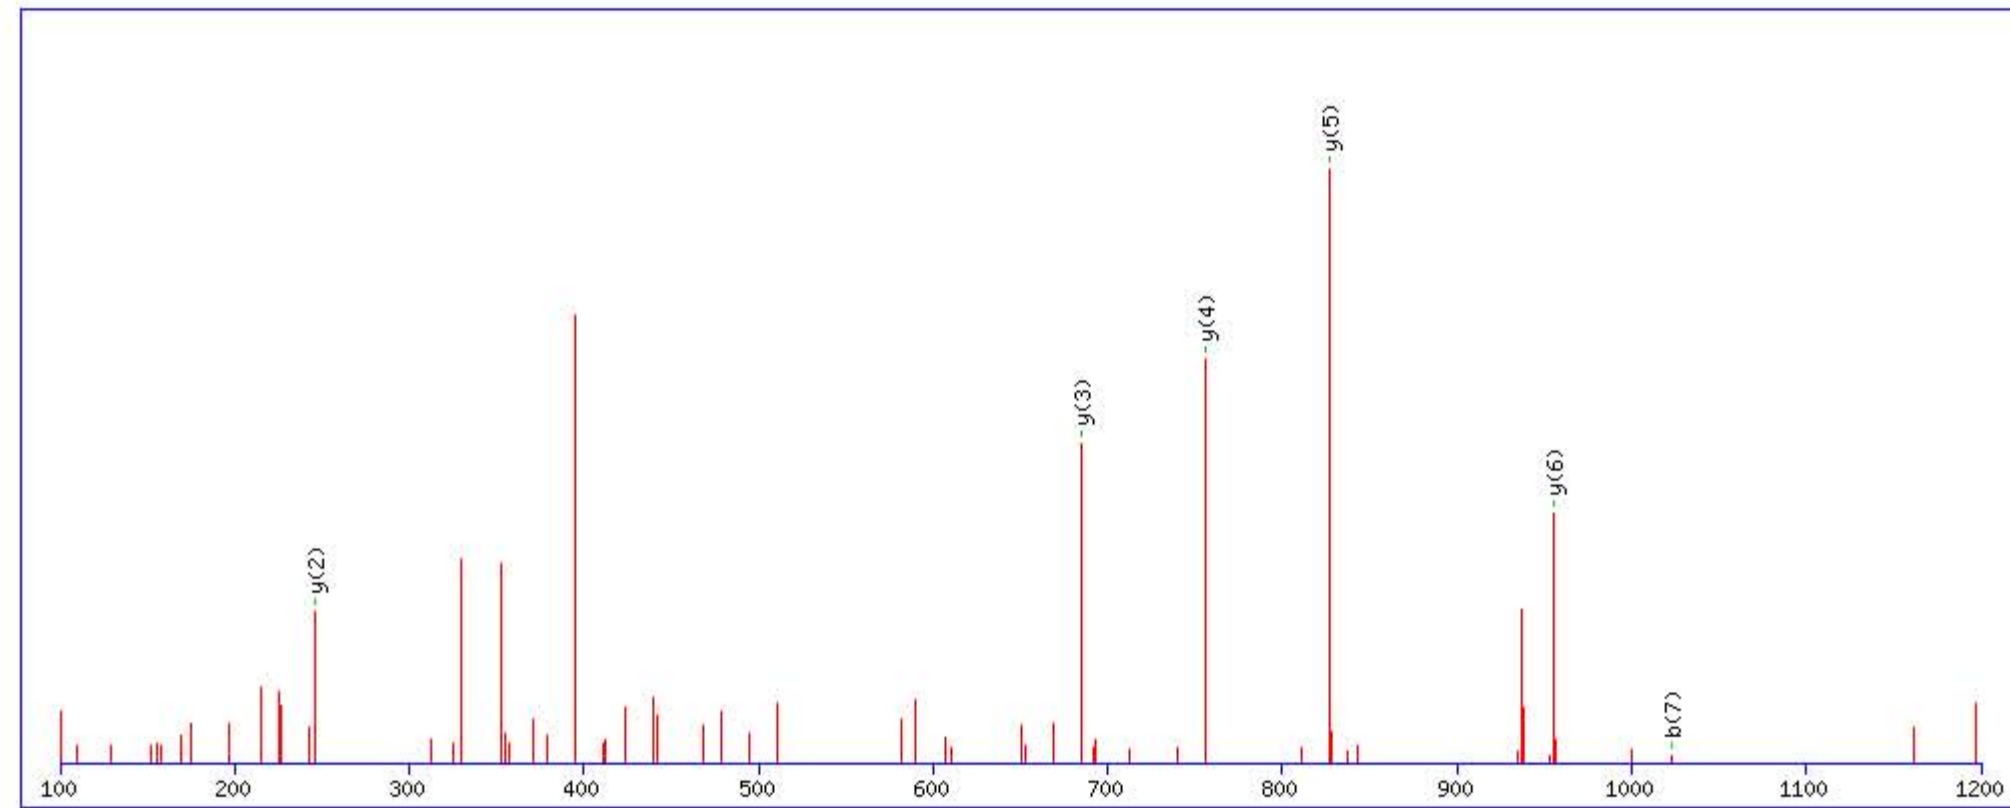

Monoisotopic mass of neutral peptide Mr(calc): 1196.633545

Fixed modifications: Carbamidomethyl (C) (apply to specified residues or termini only)

Variable modifications:

Q6 : Biotin:Thermo-21345 (Q)

Ions Score: 37 Expect: 0.0032

Matches : 6/66 fragment ions using 11 most intense peaks ([help](#))

| # | b                  | b <sup>++</sup> | b <sup>*</sup> | b <sup>+++</sup> | b <sup>0</sup> | b <sup>0++</sup> | Seq. | y                 | y <sup>++</sup> | y <sup>*</sup> | y <sup>+++</sup> | # |
|---|--------------------|-----------------|----------------|------------------|----------------|------------------|------|-------------------|-----------------|----------------|------------------|---|
| 1 | 130.049869         | 65.528572       |                |                  | 112.039304     | 56.523290        | E    |                   |                 |                |                  | 8 |
| 2 | 243.133933         | 122.070605      |                |                  | 225.123368     | 113.065322       | L    | 1068.598262       | 534.802769      | 1051.571713    | 526.289495       | 7 |
| 3 | 371.192511         | 186.099894      | 354.165962     | 177.586619       | 353.181946     | 177.094611       | Q    | <b>955.514198</b> | 478.260737      | 938.487649     | 469.747463       | 6 |
| 4 | 442.229625         | 221.618450      | 425.203076     | 213.105176       | 424.219060     | 212.613168       | A    | <b>827.455620</b> | 414.231448      | 810.429071     | 405.718174       | 5 |
| 5 | 513.266739         | 257.137008      | 496.240190     | 248.623733       | 495.256174     | 248.131725       | A    | <b>756.418506</b> | 378.712891      | 739.391957     | 370.199617       | 4 |
| 6 | 952.492065         | 476.749671      | 935.465516     | 468.236396       | 934.481500     | 467.744388       | Q    | <b>685.381392</b> | 343.194334      | 668.354843     | 334.681060       | 3 |
| 7 | <b>1023.529179</b> | 512.268227      | 1006.502630    | 503.754953       | 1005.518614    | 503.262945       | A    | <b>246.156066</b> | 123.581671      | 229.129517     | 115.068397       | 2 |
| 8 |                    |                 |                |                  |                |                  | R    | 175.118952        | 88.063114       | 158.092403     | 79.549840        | 1 |

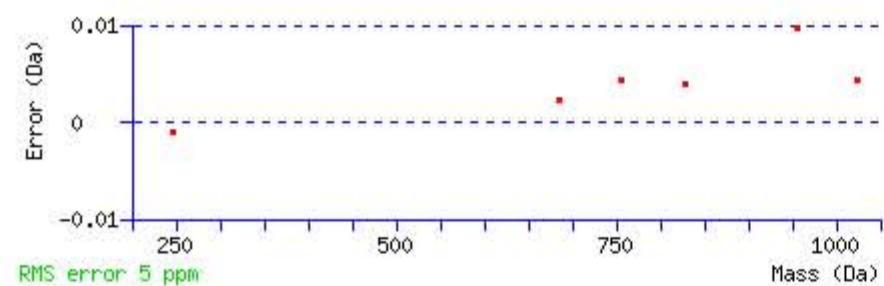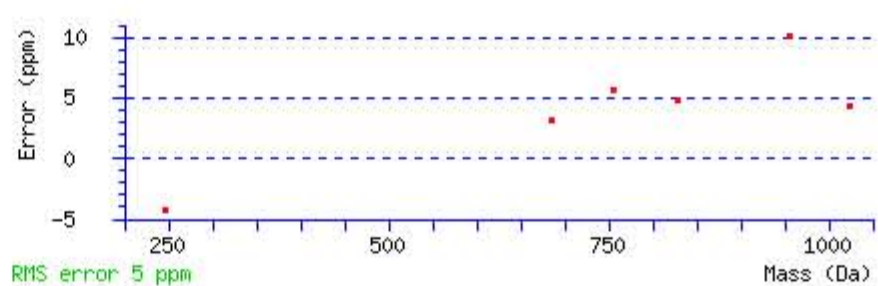

NCBI BLAST search of [ELQAAQAR](#)

(Parameters: blastp, nr protein database, expect=20000, no filter, PAM30)

Other BLAST [web gateways](#)

### All matches to this query

| Score | Mr(calc):   | Delta     | Sequence                     |
|-------|-------------|-----------|------------------------------|
| 37.0  | 1196.633545 | -0.003037 | <a href="#">ELQAAQAR</a>     |
| 10.1  | 1196.614944 | 0.015564  | <a href="#">EAIGPGGEVVNR</a> |
| 7.5   | 1196.633575 | -0.003067 | <a href="#">QASTQVPR</a>     |
| 4.8   | 1196.614914 | 0.015594  | <a href="#">ELQQAELPNR</a>   |
| 3.9   | 1196.641434 | -0.010926 | <a href="#">STRPQAWVPR</a>   |
| 2.6   | 1196.644775 | -0.014267 | <a href="#">KLDHEIMR</a>     |
| 2.5   | 1196.627029 | 0.003479  | <a href="#">AGMPRQAR</a>     |
| 2.5   | 1196.637390 | -0.006882 | <a href="#">TLRQAGAPNNR</a>  |
| 2.4   | 1196.633560 | -0.003052 | <a href="#">GLAEVQNR</a>     |
| 1.6   | 1196.641418 | -0.010910 | <a href="#">EAKKAGPGFHR</a>  |

# MASCOT Search Results

## Peptide View

MS/MS Fragmentation of **LGPLVEQGR**

Found in **APOE\_HUMAN**, Apolipoprotein E OS=Homo sapiens GN=APOE PE=1 SV=1

Match to Query 22385: 1278.713588 from(640.364070,2+) rtinseconds(1973) index(33010)

Title: Locus:1.1.1.3236.16 File:"2013-07-02 CLN FXIII 60 min 3rd F 3.wiff"

Data file C:\Program Files (x86)\Matrix Science\Mascot Daemon\mgf\6 FXIII 60 min 3rd\mascot\_daemon\_merge.mgf

Click mouse within plot area to zoom in by factor of two about that point

Or, Plot from  to  Da

Label all possible matches  Label matches used for scoring

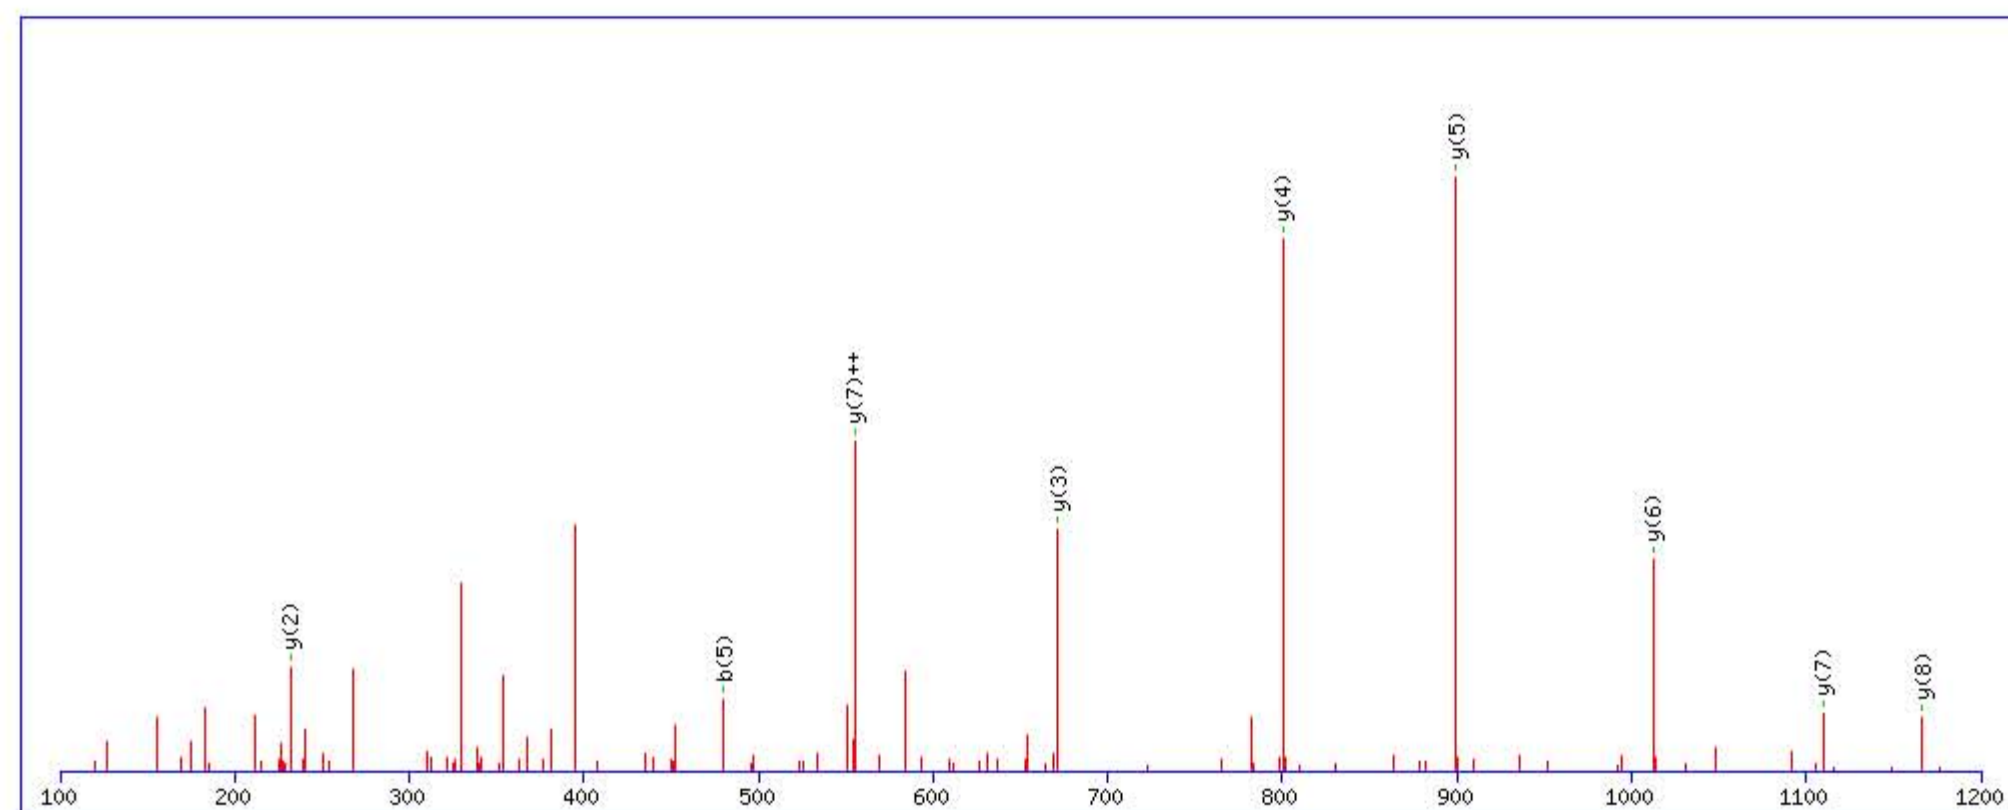

Monoisotopic mass of neutral peptide Mr(calc): 1278.711823

Fixed modifications: Carbamidomethyl (C) (apply to specified residues or termini only)

Variable modifications:

Q7 : Biotin:Thermo-21345 (Q)

Ions Score: 64 Expect: 1.6e-006

Matches : 9/68 fragment ions using 11 most intense peaks ([help](#))

| # | b                 | b <sup>++</sup> | b <sup>*</sup> | b <sup>+++</sup> | b <sup>0</sup> | b <sup>0++</sup> | Seq. | y                  | y <sup>++</sup>   | y <sup>*</sup> | y <sup>+++</sup> | y <sup>0</sup> | y <sup>0++</sup> | # |
|---|-------------------|-----------------|----------------|------------------|----------------|------------------|------|--------------------|-------------------|----------------|------------------|----------------|------------------|---|
| 1 | 114.091340        | 57.549308       |                |                  |                |                  | L    |                    |                   |                |                  |                |                  | 9 |
| 2 | 171.112804        | 86.060040       |                |                  |                |                  | G    | <b>1166.635041</b> | 583.821159        | 1149.608492    | 575.307884       | 1148.624476    | 574.815876       | 8 |
| 3 | 268.165568        | 134.586422      |                |                  |                |                  | P    | <b>1109.613577</b> | <b>555.310426</b> | 1092.587028    | 546.797152       | 1091.603012    | 546.305144       | 7 |
| 4 | 381.249632        | 191.128454      |                |                  |                |                  | L    | <b>1012.560813</b> | 506.784044        | 995.534264     | 498.270770       | 994.550248     | 497.778762       | 6 |
| 5 | <b>480.318046</b> | 240.662661      |                |                  |                |                  | V    | <b>899.476749</b>  | 450.242012        | 882.450200     | 441.728738       | 881.466184     | 441.236730       | 5 |
| 6 | 609.360639        | 305.183958      |                |                  | 591.350074     | 296.178675       | E    | <b>800.408335</b>  | 400.707805        | 783.381786     | 392.194531       | 782.397770     | 391.702523       | 4 |
| 7 | 1048.585965       | 524.796621      | 1031.559416    | 516.283346       | 1030.575400    | 515.791338       | Q    | <b>671.365742</b>  | 336.186509        | 654.339193     | 327.673234       |                |                  | 3 |
| 8 | 1105.607429       | 553.307352      | 1088.580880    | 544.794078       | 1087.596864    | 544.302070       | G    | <b>232.140416</b>  | 116.573846        | 215.113867     | 108.060571       |                |                  | 2 |
| 9 |                   |                 |                |                  |                |                  | R    | 175.118952         | 88.063114         | 158.092403     | 79.549839        |                |                  | 1 |

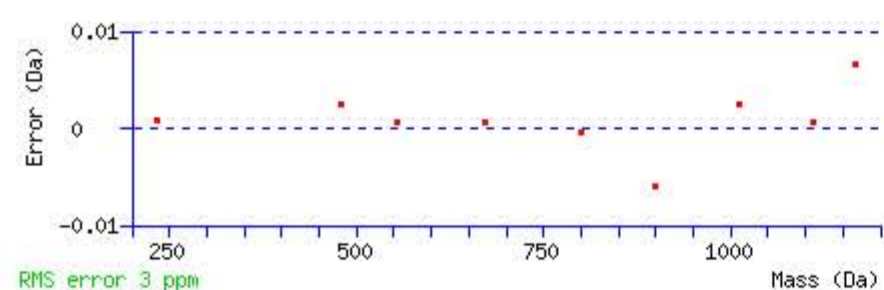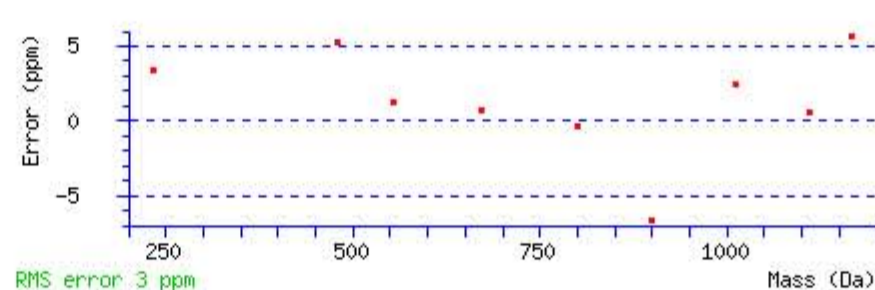

NCBI BLAST search of **LGPLVEQGR**

(Parameters: blastp, nr protein database, expect=20000, no filter, PAM30)

Other BLAST [web gateways](#)

All matches to this query

| Score | Mr(calc):   | Delta     | Sequence                     |
|-------|-------------|-----------|------------------------------|
| 63.8  | 1278.711823 | 0.001765  | <a href="#">LGPLVEQGR</a>    |
| 2.0   | 1278.729584 | -0.015996 | <a href="#">IVIVPSLNPDGR</a> |

Mascot: <http://www.matrixscience.com/>

# MASCOT SEARCH RESULTS

## Peptide View

MS/MS Fragmentation of **LQAEAFQAR**

Found in **APOE\_HUMAN**, Apolipoprotein E OS=Homo sapiens GN=APOE PE=1 SV=1

Match to Query 23881: 1343.708328 from(672.861440,2+) rtinseconds(1830) index(32053)

Title: Locus:1.1.1.3186.9 File:"2013-07-02 CLN FXIII 60 min 3rd F 3.wiff"

Data file C:\Program Files (x86)\Matrix Science\Mascot Daemon\mgf6 FXIII 60 min 3rd\mascot\_daemon\_merge.mgf

Click mouse within plot area to zoom in by factor of two about that point

Or, Plot from  to  Da

Label all possible matches  Label matches used for scoring

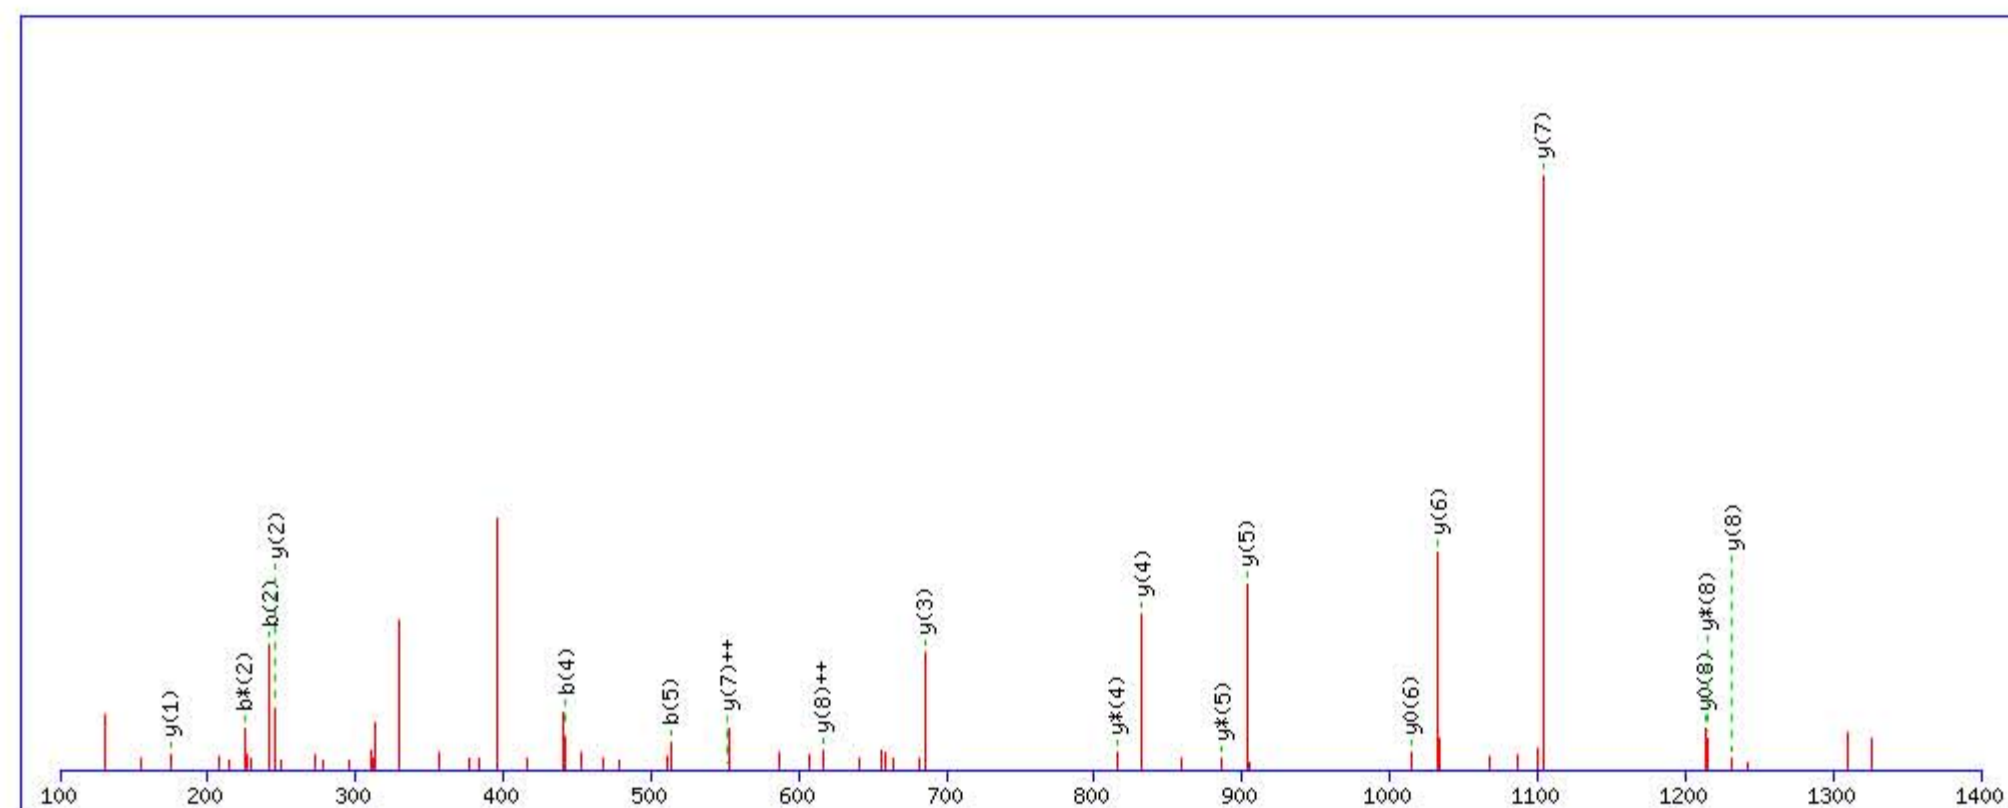

Monoisotopic mass of neutral peptide Mr(calc): 1343.701965

Fixed modifications: Carbamidomethyl (C) (apply to specified residues or termini only)

Variable modifications:

Q7 : Biotin:Thermo-21345 (Q)

Ions Score: 60 Expect: 2.2e-005

Matches : 19/78 fragment ions using 31 most intense peaks [\(help\)](#)

| # | b                 | b <sup>++</sup> | b <sup>*</sup>    | b <sup>*++</sup> | b <sup>0</sup> | b <sup>0++</sup> | Seq. | y                  | y <sup>++</sup>   | y <sup>*</sup>     | y <sup>*++</sup> | y <sup>0</sup>     | y <sup>0++</sup> | # |
|---|-------------------|-----------------|-------------------|------------------|----------------|------------------|------|--------------------|-------------------|--------------------|------------------|--------------------|------------------|---|
| 1 | 114.091340        | 57.549308       |                   |                  |                |                  | L    |                    |                   |                    |                  |                    |                  | 9 |
| 2 | <b>242.149918</b> | 121.578597      | <b>225.123369</b> | 113.065323       |                |                  | Q    | <b>1231.625205</b> | 616.316241        | <b>1214.598656</b> | 607.802966       | <b>1213.614640</b> | 607.310958       | 8 |
| 3 | 313.187032        | 157.097154      | 296.160483        | 148.583879       |                |                  | A    | <b>1103.566627</b> | <b>552.286951</b> | 1086.540078        | 543.773677       | 1085.556062        | 543.281669       | 7 |
| 4 | <b>442.229625</b> | 221.618450      | 425.203076        | 213.105176       | 424.219060     | 212.613168       | E    | <b>1032.529513</b> | 516.768395        | 1015.502964        | 508.255120       | <b>1014.518948</b> | 507.763112       | 6 |
| 5 | <b>513.266739</b> | 257.137008      | 496.240190        | 248.623733       | 495.256174     | 248.131725       | A    | <b>903.486920</b>  | 452.247098        | <b>886.460371</b>  | 443.733823       |                    |                  | 5 |
| 6 | 660.335153        | 330.671215      | 643.308604        | 322.157940       | 642.324588     | 321.665932       | F    | <b>832.449806</b>  | 416.728541        | <b>815.423257</b>  | 408.215266       |                    |                  | 4 |
| 7 | 1099.560479       | 550.283878      | 1082.533930       | 541.770603       | 1081.549914    | 541.278595       | Q    | <b>685.381392</b>  | 343.194334        | 668.354843         | 334.681060       |                    |                  | 3 |
| 8 | 1170.597593       | 585.802435      | 1153.571044       | 577.289160       | 1152.587028    | 576.797152       | A    | <b>246.156066</b>  | 123.581671        | 229.129517         | 115.068396       |                    |                  | 2 |
| 9 |                   |                 |                   |                  |                |                  | R    | <b>175.118952</b>  | 88.063114         | 158.092403         | 79.549839        |                    |                  | 1 |

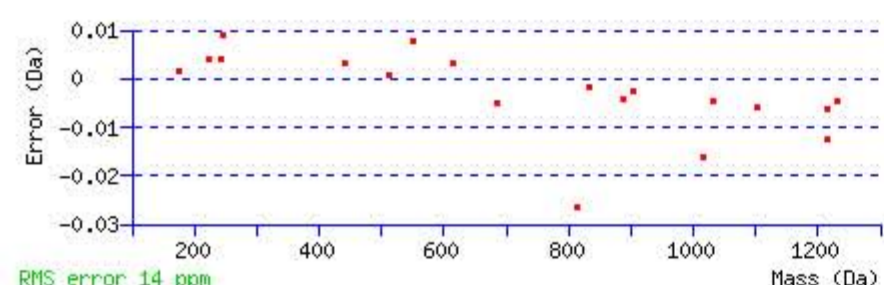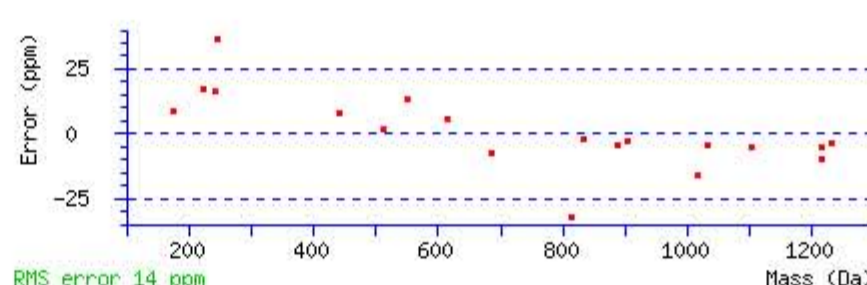

NCBI BLAST search of **LQAEAFQAR**

(Parameters: blastp, nr protein database, expect=20000, no filter, PAM30)

Other BLAST [web gateways](#)

All matches to this query

| Score | Mr(calc):   | Delta     | Sequence                      |
|-------|-------------|-----------|-------------------------------|
| 60.4  | 1343.701965 | 0.006363  | <a href="#">LQAEAFQAR</a>     |
| 17.2  | 1343.715683 | -0.007355 | <a href="#">LKDSEAE LQRR</a>  |
| 11.7  | 1343.694107 | 0.014221  | <a href="#">IQAMSEVQK</a>     |
| 8.7   | 1343.704453 | 0.003875  | <a href="#">IKGEELSEANVR</a>  |
| 8.0   | 1343.704453 | 0.003875  | <a href="#">IQEKKDEDIAR</a>   |
| 5.7   | 1343.716583 | -0.008255 | <a href="#">LQQVMSRR</a>      |
| 5.7   | 1343.693237 | 0.015091  | <a href="#">LQDLELDLETR</a>   |
| 5.5   | 1343.726929 | -0.018601 | <a href="#">LLNGDASTNRKR</a>  |
| 5.2   | 1343.704453 | 0.003875  | <a href="#">LQAANAEDIKSGK</a> |
| 3.6   | 1343.697952 | 0.010376  | <a href="#">AMGTVREAAGLPR</a> |

# MASCOT SEARCH RESULTS

## Peptide View

MS/MS Fragmentation of **LEEQAQQIR**

Found in **APOE\_HUMAN**, Apolipoprotein E OS=Homo sapiens GN=APOE PE=1 SV=1

Match to Query 27826: 1424.734388 from(713.374470,2+) rtinseconds(1575) index(44684)

Title: Locus:1.1.1.2597.10 File:"2013-07-02 CLN FXIII 60 min 3rd F 4.wiff"

Data file C:\Program Files (x86)\Matrix Science\Mascot Daemon\mgf6 FXIII 60 min 3rd\mascot\_daemon\_merge.mgf

Click mouse within plot area to zoom in by factor of two about that point

Or, Plot from  to  Da

Label all possible matches  Label matches used for scoring

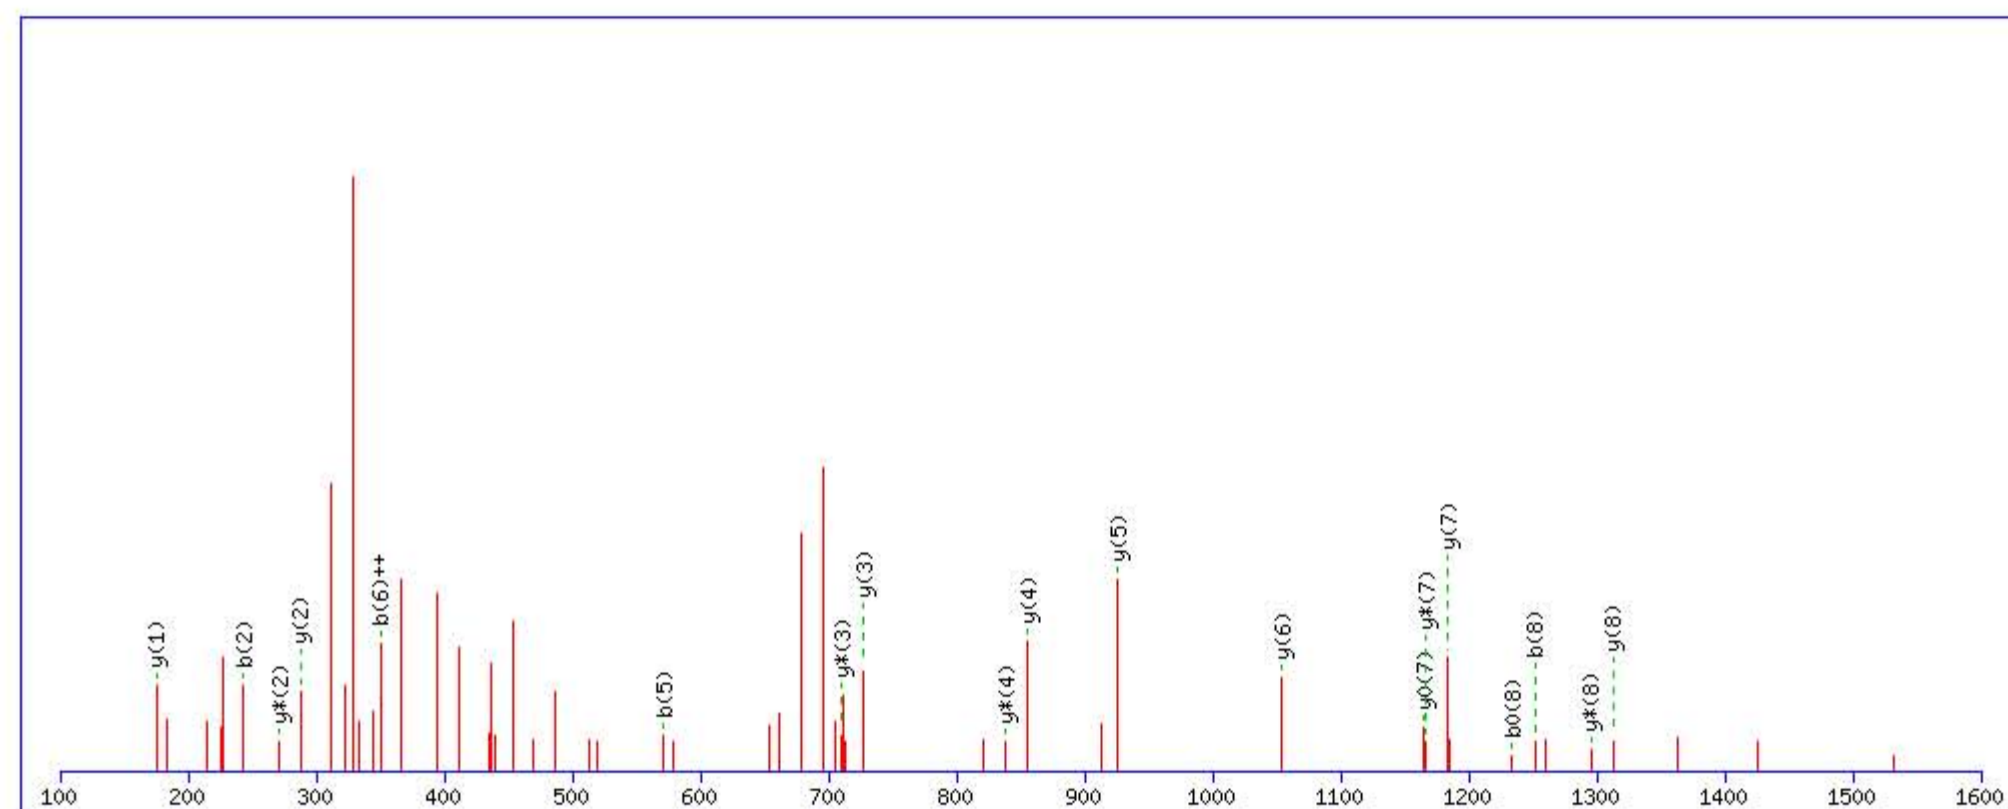

Monoisotopic mass of neutral peptide Mr(calc): 1424.744553

Fixed modifications: Carbamidomethyl (C) (apply to specified residues or termini only)

Variable modifications:

Q7 : Biotin:Thermo-21345 (Q)

Ions Score: 33 Expect: 0.0045

Matches : 19/76 fragment ions using 52 most intense peaks [\(help\)](#)

| # | b                  | b <sup>++</sup>   | b <sup>*</sup> | b <sup>+++</sup> | b <sup>0</sup>     | b <sup>0++</sup> | Seq. | y                  | y <sup>++</sup> | y <sup>*</sup>     | y <sup>+++</sup> | y <sup>0</sup>     | y <sup>0++</sup> | # |
|---|--------------------|-------------------|----------------|------------------|--------------------|------------------|------|--------------------|-----------------|--------------------|------------------|--------------------|------------------|---|
| 1 | 114.091340         | 57.549308         |                |                  |                    |                  | L    |                    |                 |                    |                  |                    |                  | 9 |
| 2 | <b>243.133933</b>  | 122.070605        |                |                  | 225.123368         | 113.065322       | E    | <b>1312.667798</b> | 656.837537      | <b>1295.641249</b> | 648.324263       | 1294.657233        | 647.832255       | 8 |
| 3 | 372.176526         | 186.591901        |                |                  | 354.165961         | 177.586619       | E    | <b>1183.625205</b> | 592.316241      | <b>1166.598656</b> | 583.802966       | <b>1165.614640</b> | 583.310958       | 7 |
| 4 | 500.235104         | 250.621190        | 483.208555     | 242.107916       | 482.224539         | 241.615908       | Q    | <b>1054.582612</b> | 527.794944      | 1037.556063        | 519.281670       |                    |                  | 6 |
| 5 | <b>571.272218</b>  | 286.139747        | 554.245669     | 277.626473       | 553.261653         | 277.134465       | A    | <b>926.524034</b>  | 463.765655      | 909.497485         | 455.252381       |                    |                  | 5 |
| 6 | 699.330796         | <b>350.169036</b> | 682.304247     | 341.655762       | 681.320231         | 341.163754       | Q    | <b>855.486920</b>  | 428.247098      | <b>838.460371</b>  | 419.733824       |                    |                  | 4 |
| 7 | 1138.556122        | 569.781699        | 1121.529573    | 561.268425       | 1120.545557        | 560.776417       | Q    | <b>727.428342</b>  | 364.217809      | <b>710.401793</b>  | 355.704535       |                    |                  | 3 |
| 8 | <b>1251.640186</b> | 626.323731        | 1234.613637    | 617.810457       | <b>1233.629621</b> | 617.318449       | I    | <b>288.203016</b>  | 144.605146      | <b>271.176467</b>  | 136.091871       |                    |                  | 2 |
| 9 |                    |                   |                |                  |                    |                  | R    | <b>175.118952</b>  | 88.063114       | 158.092403         | 79.549839        |                    |                  | 1 |

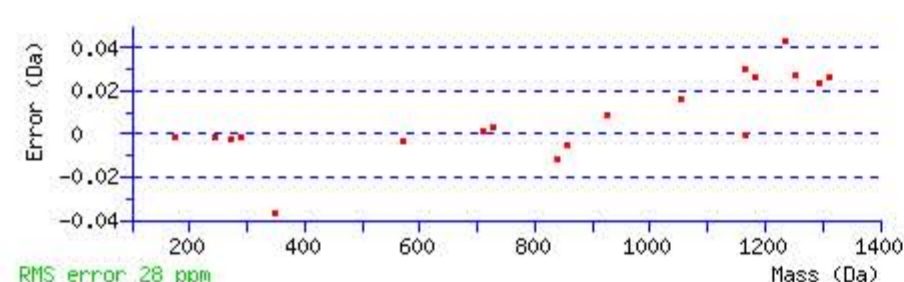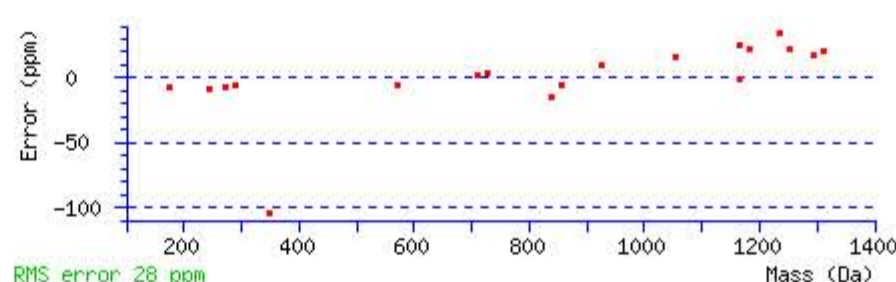

NCBI BLAST search of **LEEQAQQIR**

(Parameters: blastp, nr protein database, expect=20000, no filter, PAM30)

Other BLAST [web gateways](#)

All matches to this query

| Score | Mr(calc):   | Delta     | Sequence                      |
|-------|-------------|-----------|-------------------------------|
| 32.7  | 1424.744553 | -0.010165 | <a href="#">LEEQAQQIR</a>     |
| 23.4  | 1424.744553 | -0.010165 | <a href="#">LEEQAQQIR</a>     |
| 7.2   | 1424.730667 | 0.003721  | <a href="#">QPGCAVPQSGRLR</a> |
| 6.6   | 1424.744553 | -0.010165 | <a href="#">LEEQAQQIR</a>     |
| 5.4   | 1424.745224 | -0.010836 | <a href="#">IITDKHFYFNK</a>   |
| 4.1   | 1424.744583 | -0.010195 | <a href="#">QLSGDQPTIR</a>    |
| 2.8   | 1424.733322 | 0.001066  | <a href="#">LEQETEPLR</a>     |
| 2.1   | 1424.726807 | 0.007581  | <a href="#">QMNLQQQPK</a>     |
| 0.4   | 1424.734680 | -0.000292 | <a href="#">WVLTAHCLAQR</a>   |

# MASCOT SEARCH RESULTS

## Peptide View

MS/MS Fragmentation of **QQTEWQSGQR**

Found in **APOE\_HUMAN**, Apolipoprotein E OS=Homo sapiens GN=APOE PE=1 SV=1

Match to Query 31310: 1557.731892 from(520.251240,3+) rtinseconds(1584) index(44746)

Title: Locus:1.1.1.2600.12 File:"2013-07-02 CLN FXIII 60 min 3rd F 4.wiff"

Data file C:\Program Files (x86)\Matrix Science\Mascot Daemon\mgf\6 FXIII 60 min 3rd\mascot\_daemon\_merge.mgf

Click mouse within plot area to zoom in by factor of two about that point

Or, Plot from  to  Da

Label all possible matches  Label matches used for scoring

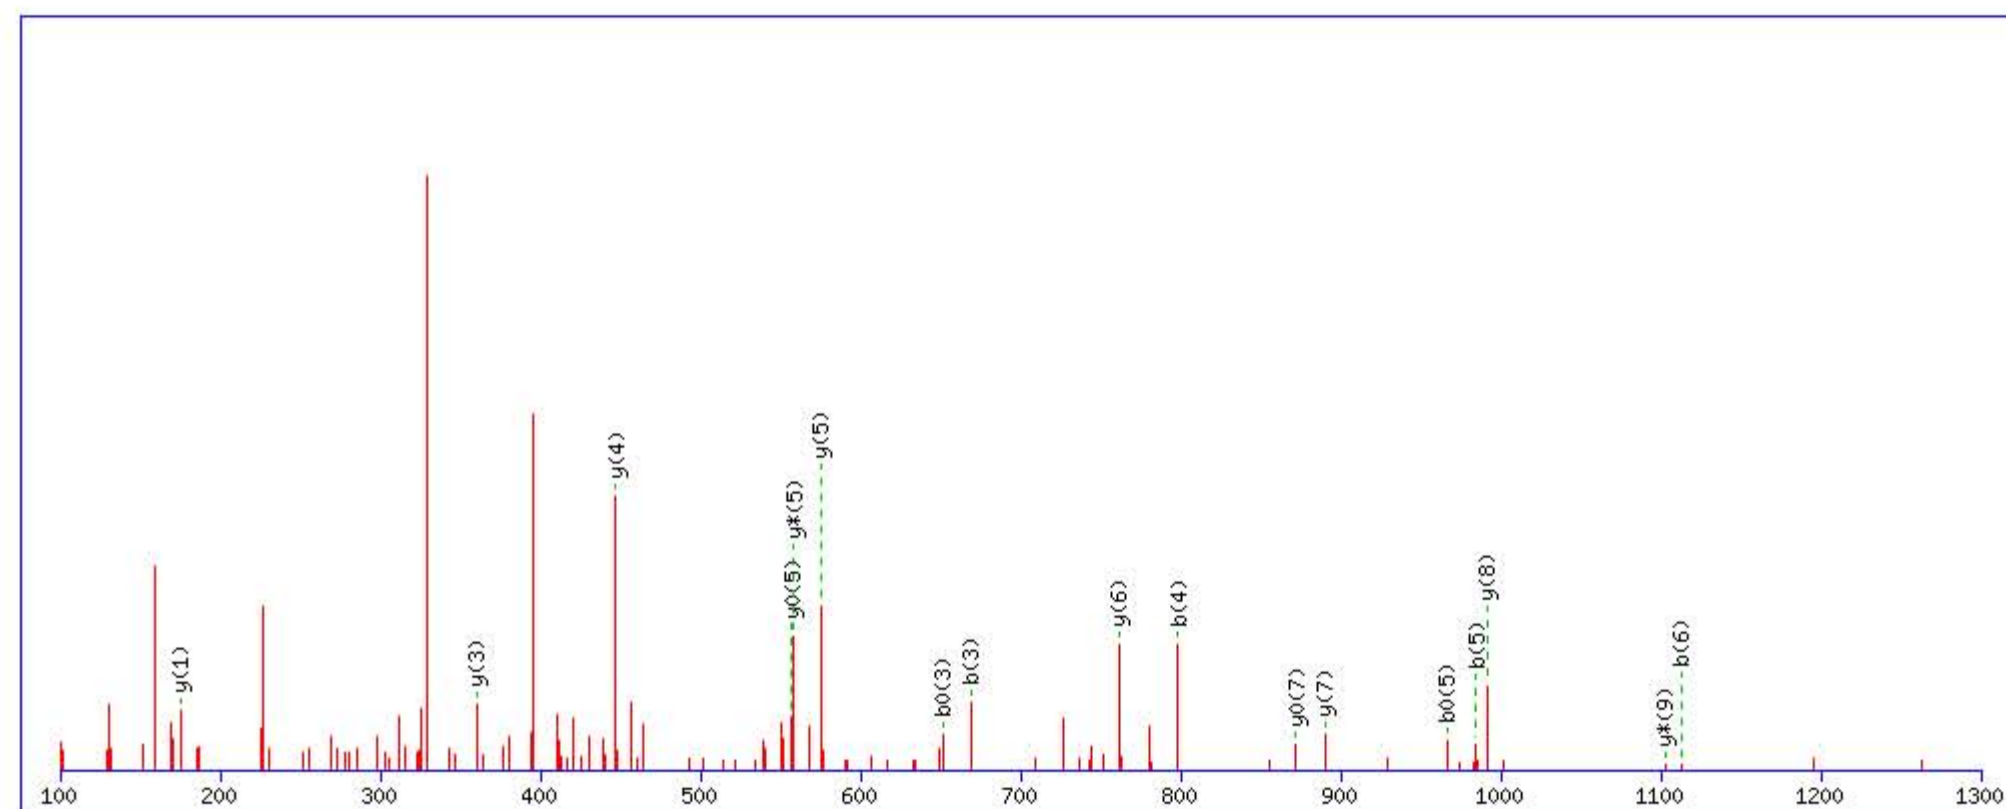

Monoisotopic mass of neutral peptide Mr(calc): 1557.735809

Fixed modifications: Carbamidomethyl (C) (apply to specified residues or termini only)

Variable modifications:

Q1 : Biotin:Thermo-21345 (Q)

Ions Score: 34 Expect: 0.0019

Matches : 17/98 fragment ions using 32 most intense peaks [\(help\)](#)

| #  | b           | b <sup>++</sup> | b <sup>+</sup> | b <sup>+++</sup> | b <sup>0</sup> | b <sup>0++</sup> | Seq. | y           | y <sup>++</sup> | y <sup>+</sup> | y <sup>+++</sup> | y <sup>0</sup> | y <sup>0++</sup> | #  |
|----|-------------|-----------------|----------------|------------------|----------------|------------------|------|-------------|-----------------|----------------|------------------|----------------|------------------|----|
| 1  | 440.232602  | 220.619939      | 423.206053     | 212.106664       |                |                  | Q    |             |                 |                |                  |                |                  | 10 |
| 2  | 568.291180  | 284.649228      | 551.264631     | 276.135954       |                |                  | Q    | 1119.517763 | 560.262520      | 1102.491214    | 551.749245       | 1101.507198    | 551.257237       | 9  |
| 3  | 669.338859  | 335.173068      | 652.312310     | 326.659793       | 651.328294     | 326.167785       | T    | 991.459185  | 496.233231      | 974.432636     | 487.719956       | 973.448620     | 487.227948       | 8  |
| 4  | 798.381452  | 399.694364      | 781.354903     | 391.181090       | 780.370887     | 390.689082       | E    | 890.411506  | 445.709391      | 873.384957     | 437.196117       | 872.400941     | 436.704109       | 7  |
| 5  | 984.460765  | 492.734021      | 967.434216     | 484.220746       | 966.450200     | 483.728738       | W    | 761.368913  | 381.188095      | 744.342364     | 372.674820       | 743.358348     | 372.182812       | 6  |
| 6  | 1112.519343 | 556.763310      | 1095.492794    | 548.250035       | 1094.508778    | 547.758027       | Q    | 575.289600  | 288.148438      | 558.263051     | 279.635164       | 557.279035     | 279.143156       | 5  |
| 7  | 1199.551371 | 600.279324      | 1182.524822    | 591.766049       | 1181.540806    | 591.274041       | S    | 447.231022  | 224.119149      | 430.204473     | 215.605875       | 429.220457     | 215.113867       | 4  |
| 8  | 1256.572835 | 628.790056      | 1239.546286    | 620.276781       | 1238.562270    | 619.784773       | G    | 360.198994  | 180.603135      | 343.172445     | 172.089860       |                |                  | 3  |
| 9  | 1384.631413 | 692.819345      | 1367.604864    | 684.306070       | 1366.620848    | 683.814062       | Q    | 303.177530  | 152.092403      | 286.150981     | 143.579129       |                |                  | 2  |
| 10 |             |                 |                |                  |                |                  | R    | 175.118952  | 88.063114       | 158.092403     | 79.549839        |                |                  | 1  |

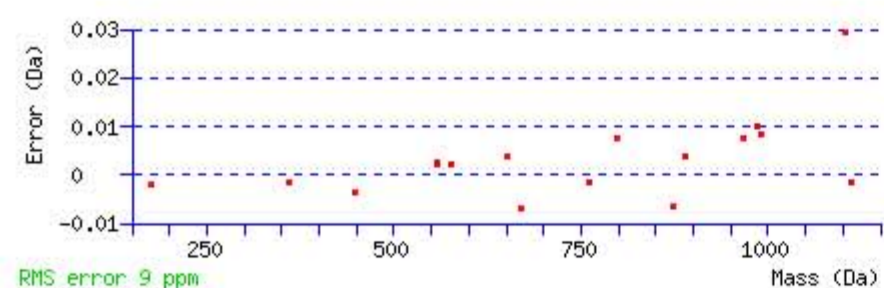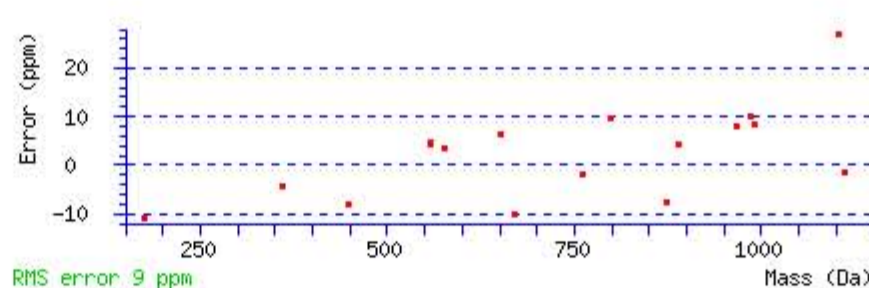

NCBI BLAST search of **QQTEWQSGQR**

(Parameters: blastp, nr protein database, expect=20000, no filter, PAM30)

Other BLAST [web gateways](#)

All matches to this query

| Score | Mr(calc):   | Delta     | Sequence                       |
|-------|-------------|-----------|--------------------------------|
| 34.5  | 1557.735809 | -0.003917 | <a href="#">QQTEWQSGQR</a>     |
| 33.0  | 1557.735809 | -0.003917 | <a href="#">QQTEWQSGQR</a>     |
| 5.5   | 1557.745697 | -0.013805 | <a href="#">GSSLFMDTEKSGKR</a> |

Mascot: <http://www.matrixscience.com/>

# MASCOT Search Results

## Peptide View

MS/MS Fragmentation of **AATVGS LAGQPLQER**

Found in **APOE\_HUMAN**, Apolipoprotein E OS=Homo sapiens GN=APOE PE=1 SV=1

Match to Query 38620: 1807.960122 from(603.660650,3+) rtinseconds(1962) index(4734)

Title: Locus:1.1.1.3235.16 File:"2013-07-02 CLN FXIII 60 min 3rd F 1.wiff"

Data file C:\Program Files (x86)\Matrix Science\Mascot Daemon\mgf\6 FXIII 60 min 3rd\mascot\_daemon\_merge.mgf

Click mouse within plot area to zoom in by factor of two about that point

Or, Plot from  to  Da

Label all possible matches  Label matches used for scoring

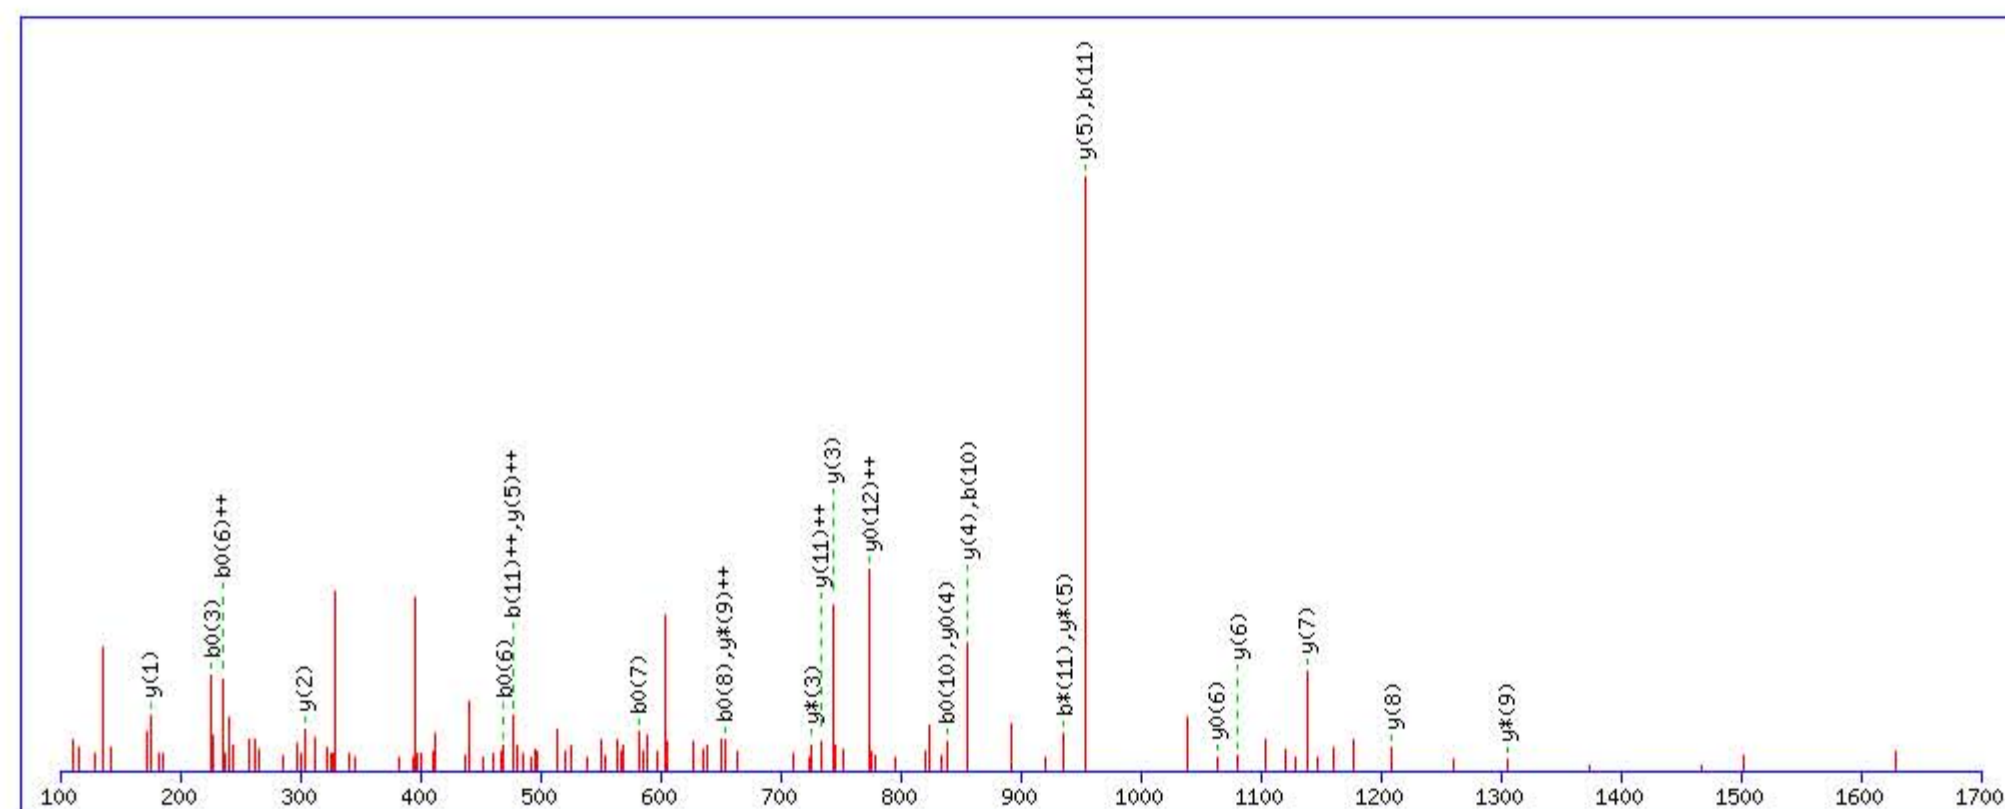

Monoisotopic mass of neutral peptide Mr(calc): 1807.961441

Fixed modifications: Carbamidomethyl (C) (apply to specified residues or termini only)

Variable modifications:

Q13 : Biotin:Thermo-21345 (Q)

Ions Score: 31 Expect: 0.01

Matches : 27/144 fragment ions using 50 most intense peaks [\(help\)](#)

| #  | b           | b <sup>++</sup> | b <sup>*</sup> | b <sup>*++</sup> | b <sup>0</sup> | b <sup>0++</sup> | Seq. | y           | y <sup>++</sup> | y <sup>*</sup> | y <sup>*++</sup> | y <sup>0</sup> | y <sup>0++</sup> | #  |
|----|-------------|-----------------|----------------|------------------|----------------|------------------|------|-------------|-----------------|----------------|------------------|----------------|------------------|----|
| 1  | 72.044390   | 36.525833       |                |                  |                |                  | A    |             |                 |                |                  |                |                  | 15 |
| 2  | 143.081504  | 72.044390       |                |                  |                |                  | A    | 1737.931618 | 869.469447      | 1720.905069    | 860.956173       | 1719.921053    | 860.464165       | 14 |
| 3  | 244.129183  | 122.568230      |                |                  | 226.118618     | 113.562947       | T    | 1666.894504 | 833.950890      | 1649.867955    | 825.437616       | 1648.883939    | 824.945608       | 13 |
| 4  | 343.197597  | 172.102437      |                |                  | 325.187032     | 163.097154       | V    | 1565.846825 | 783.427051      | 1548.820276    | 774.913776       | 1547.836260    | 774.421768       | 12 |
| 5  | 400.219061  | 200.613169      |                |                  | 382.208496     | 191.607886       | G    | 1466.778411 | 733.892844      | 1449.751862    | 725.379569       | 1448.767846    | 724.887561       | 11 |
| 6  | 487.251089  | 244.129183      |                |                  | 469.240524     | 235.123900       | S    | 1409.756947 | 705.382112      | 1392.730398    | 696.868837       | 1391.746382    | 696.376829       | 10 |
| 7  | 600.335153  | 300.671215      |                |                  | 582.324588     | 291.665932       | L    | 1322.724919 | 661.866098      | 1305.698370    | 653.352823       | 1304.714354    | 652.860815       | 9  |
| 8  | 671.372267  | 336.189772      |                |                  | 653.361702     | 327.184489       | A    | 1209.640855 | 605.324066      | 1192.614306    | 596.810791       | 1191.630290    | 596.318783       | 8  |
| 9  | 728.393731  | 364.700504      |                |                  | 710.383166     | 355.695221       | G    | 1138.603741 | 569.805509      | 1121.577192    | 561.292234       | 1120.593176    | 560.800226       | 7  |
| 10 | 856.452309  | 428.729793      | 839.425760     | 420.216518       | 838.441744     | 419.724510       | Q    | 1081.582277 | 541.294777      | 1064.555728    | 532.781502       | 1063.571712    | 532.289494       | 6  |
| 11 | 953.505073  | 477.256175      | 936.478524     | 468.742900       | 935.494508     | 468.250892       | P    | 953.523699  | 477.265488      | 936.497150     | 468.752213       | 935.513134     | 468.260205       | 5  |
| 12 | 1066.589137 | 533.798207      | 1049.562588    | 525.284932       | 1048.578572    | 524.792924       | L    | 856.470935  | 428.739106      | 839.444386     | 420.225831       | 838.460370     | 419.733823       | 4  |
| 13 | 1505.814463 | 753.410870      | 1488.787914    | 744.897595       | 1487.803898    | 744.405587       | Q    | 743.386871  | 372.197074      | 726.360322     | 363.683799       | 725.376306     | 363.191791       | 3  |
| 14 | 1634.857056 | 817.932166      | 1617.830507    | 809.418892       | 1616.846491    | 808.926884       | E    | 304.161545  | 152.584411      | 287.134996     | 144.071136       | 286.150980     | 143.579128       | 2  |
| 15 |             |                 |                |                  |                |                  | R    | 175.118952  | 88.063114       | 158.092403     | 79.549839        |                |                  | 1  |

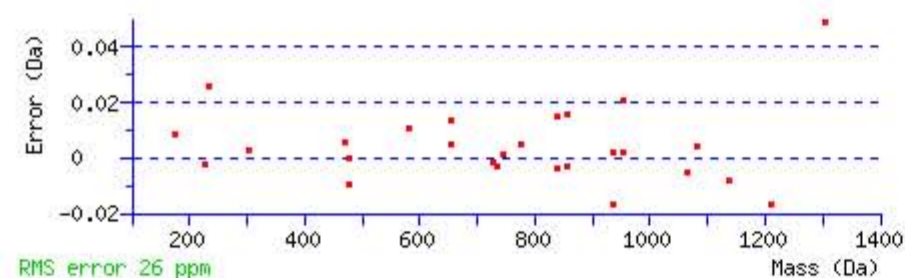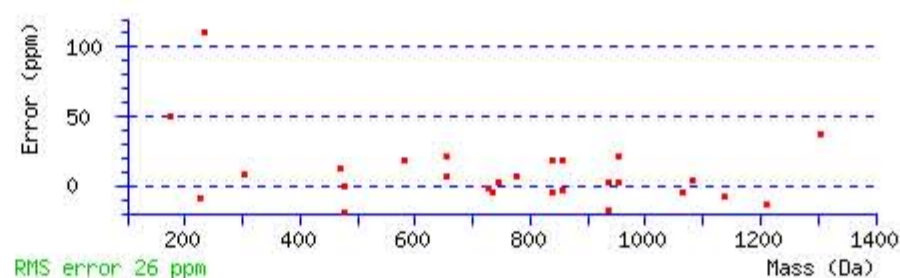

NCBI BLAST search of **AATVGS LAGQPLQER**

(Parameters: blastp, nr protein database, expect=20000, no filter, PAM30)

Other BLAST [web gateways](#)

All matches to this query

| Score | Mr(calc):   | Delta     | Sequence                          |
|-------|-------------|-----------|-----------------------------------|
| 31.2  | 1807.961441 | -0.001319 | <a href="#">AATVGS LAGQPLQER</a>  |
| 9.8   | 1807.947510 | 0.012612  | <a href="#">VGLAQIAAMDISRGNHR</a> |
| 2.7   | 1807.961441 | -0.001319 | <a href="#">AATVGS LAGQPLQER</a>  |

Mascot: <http://www.matrixscience.com/>

# MASCOT SCIENCE Mascot Search Results

## Peptide View

MS/MS Fragmentation of **SWFEPLVEDMQR**

Found in **APOE\_HUMAN**, Apolipoprotein E OS=Homo sapiens GN=APOE PE=1 SV=1

Match to Query 39310: 1846.885692 from(616.635840,3+) rtinseconds(2827) index(37903)

Title: Locus:1.1.1.3532.4 File:"2013-07-02 CLN FXIII 60 min 3rd F 3.wiff"

Data file C:\Program Files (x86)\Matrix Science\Mascot Daemon\mgf\6 FXIII 60 min 3rd\mascot\_daemon\_merge.mgf

Click mouse within plot area to zoom in by factor of two about that point

Or, Plot from  to  Da

Label all possible matches  Label matches used for scoring

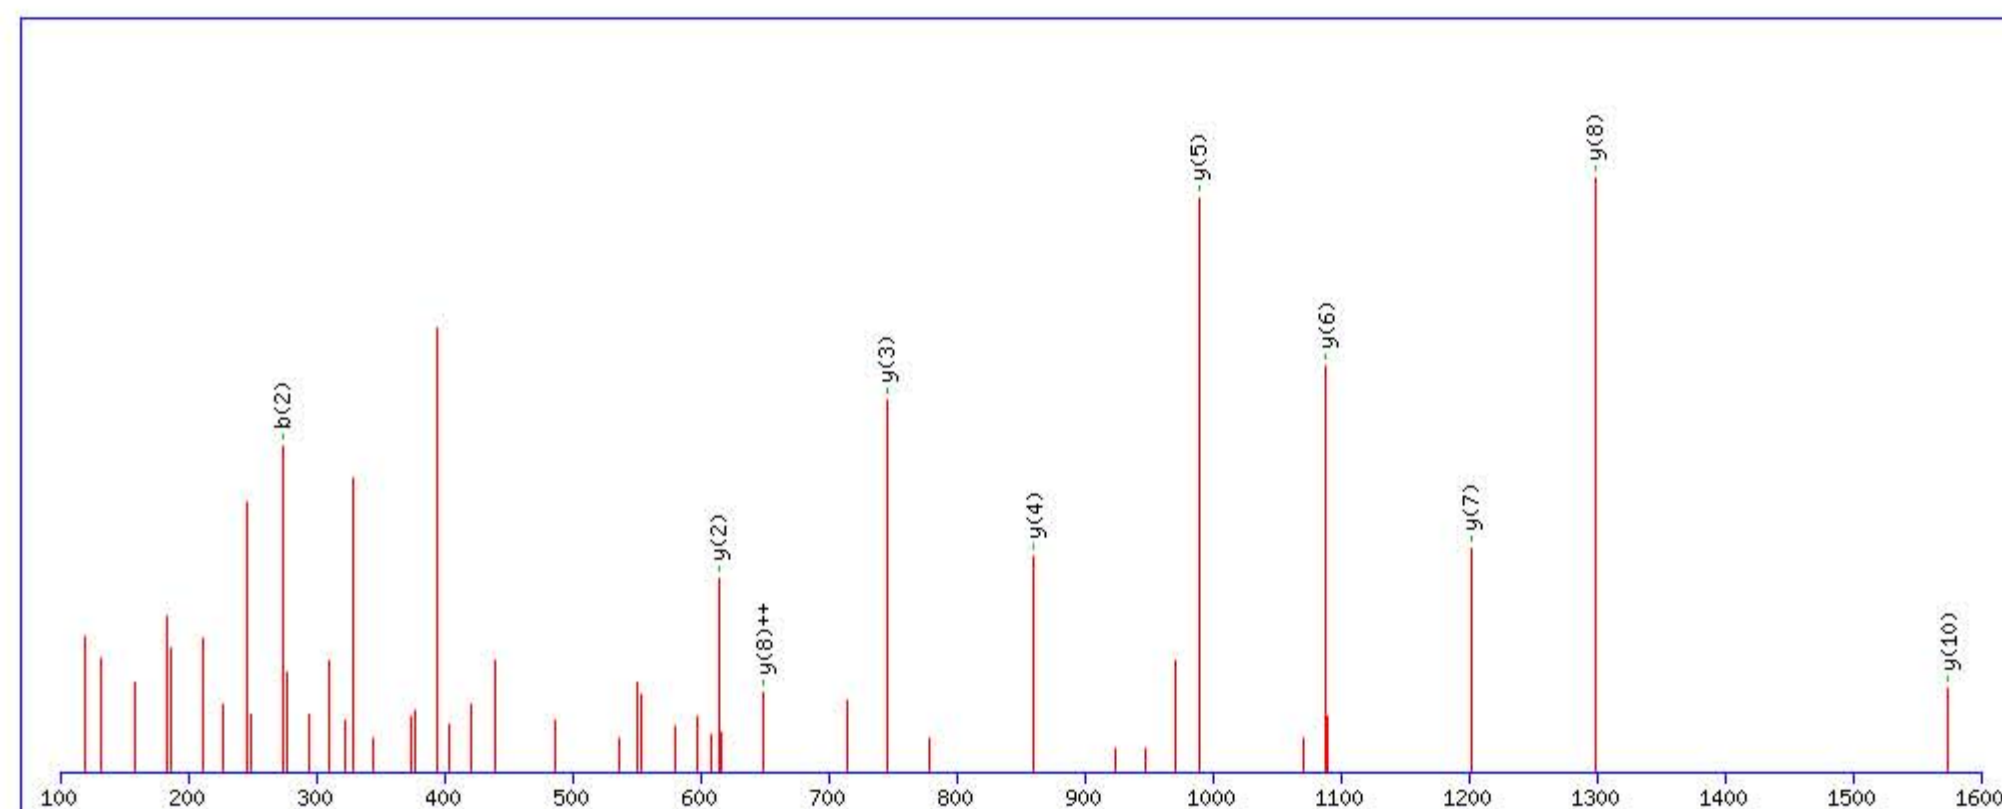

Monoisotopic mass of neutral peptide Mr(calc): 1846.874603

Fixed modifications: Carbamidomethyl (C) (apply to specified residues or termini only)

Variable modifications:

Q11 : Biotin:Thermo-21345 (Q)

Ions Score: 65 Expect: 1.1e-006

Matches : 10/106 fragment ions using 13 most intense peaks [\(help\)](#)

| #  | b                 | b <sup>++</sup> | b <sup>*</sup> | b <sup>+++</sup> | b <sup>0</sup> | b <sup>0++</sup> | Seq. | y                  | y <sup>++</sup>   | y <sup>*</sup> | y <sup>+++</sup> | y <sup>0</sup> | y <sup>0++</sup> | #  |
|----|-------------------|-----------------|----------------|------------------|----------------|------------------|------|--------------------|-------------------|----------------|------------------|----------------|------------------|----|
| 1  | 88.039304         | 44.523290       |                |                  | 70.028739      | 35.518008        | S    |                    |                   |                |                  |                |                  | 12 |
| 2  | <b>274.118617</b> | 137.562947      |                |                  | 256.108052     | 128.557664       | W    | 1760.849861        | 880.928568        | 1743.823312    | 872.415294       | 1742.839296    | 871.923286       | 11 |
| 3  | 421.187031        | 211.097153      |                |                  | 403.176466     | 202.091871       | F    | <b>1574.770548</b> | 787.888912        | 1557.743999    | 779.375638       | 1556.759983    | 778.883629       | 10 |
| 4  | 550.229624        | 275.618450      |                |                  | 532.219059     | 266.613168       | E    | 1427.702134        | 714.354705        | 1410.675585    | 705.841431       | 1409.691569    | 705.349422       | 9  |
| 5  | 647.282388        | 324.144832      |                |                  | 629.271823     | 315.139550       | P    | <b>1298.659541</b> | <b>649.833409</b> | 1281.632992    | 641.320134       | 1280.648976    | 640.828126       | 8  |
| 6  | 760.366452        | 380.686864      |                |                  | 742.355887     | 371.681582       | L    | <b>1201.606777</b> | 601.307027        | 1184.580228    | 592.793752       | 1183.596212    | 592.301744       | 7  |
| 7  | 859.434866        | 430.221071      |                |                  | 841.424301     | 421.215789       | V    | <b>1088.522713</b> | 544.764995        | 1071.496164    | 536.251720       | 1070.512148    | 535.759712       | 6  |
| 8  | 988.477459        | 494.742368      |                |                  | 970.466894     | 485.737085       | E    | <b>989.454299</b>  | 495.230788        | 972.427750     | 486.717513       | 971.443734     | 486.225505       | 5  |
| 9  | 1103.504402       | 552.255839      |                |                  | 1085.493837    | 543.250557       | D    | <b>860.411706</b>  | 430.709491        | 843.385157     | 422.196216       | 842.401141     | 421.704208       | 4  |
| 10 | 1234.544887       | 617.776082      |                |                  | 1216.534322    | 608.770799       | M    | <b>745.384763</b>  | 373.196020        | 728.358214     | 364.682745       |                |                  | 3  |
| 11 | 1673.770213       | 837.388745      | 1656.743664    | 828.875470       | 1655.759648    | 828.383462       | Q    | <b>614.344278</b>  | 307.675777        | 597.317729     | 299.162503       |                |                  | 2  |
| 12 |                   |                 |                |                  |                |                  | R    | 175.118952         | 88.063114         | 158.092403     | 79.549839        |                |                  | 1  |

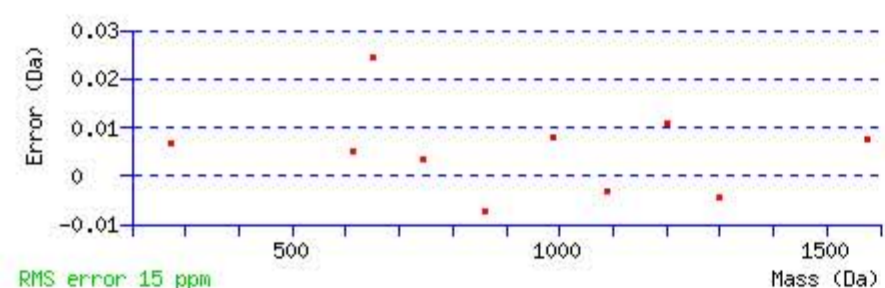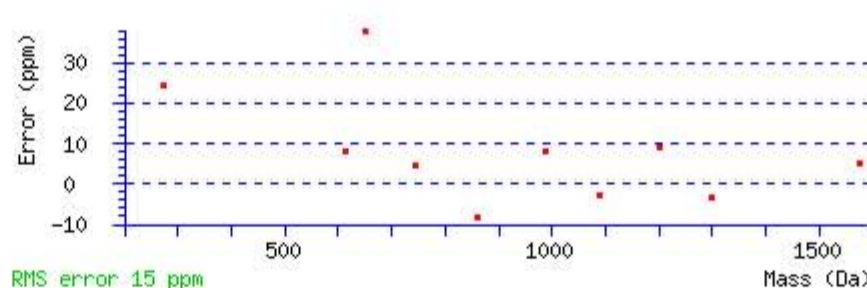

NCBI BLAST search of **SWFEPLVEDMQR**

(Parameters: blastp, nr protein database, expect=20000, no filter, PAM30)

Other BLAST [web gateways](#)

All matches to this query

| Score | Mr(calc):   | Delta     | Sequence                      |
|-------|-------------|-----------|-------------------------------|
| 64.8  | 1846.874603 | 0.011089  | <a href="#">SWFEPLVEDMQR</a>  |
| 1.1   | 1846.895721 | -0.010029 | <a href="#">LQLEETMPSPYGR</a> |

Mascot: <http://www.matrixscience.com/>

# MASCOT Search Results

## Peptide View

MS/MS Fragmentation of **SGVQQLIQYYQDQK**

Found in **APOF\_HUMAN**, Apolipoprotein F OS=Homo sapiens GN=APOF PE=1 SV=2

Match to Query 42848: 2008.018272 from(670.346700,3+) rtinseconds(2478) index(35609)

Title: Locus:1.1.1.3412.15 File:"2013-07-02 CLN FXIII 60 min 3rd F 3.wiff"

Data file C:\Program Files (x86)\Matrix Science\Mascot Daemon\mgf\6 FXIII 60 min 3rd\mascot\_daemon\_merge.mgf

Click mouse within plot area to zoom in by factor of two about that point

Or, Plot from  to  Da

Label all possible matches  Label matches used for scoring

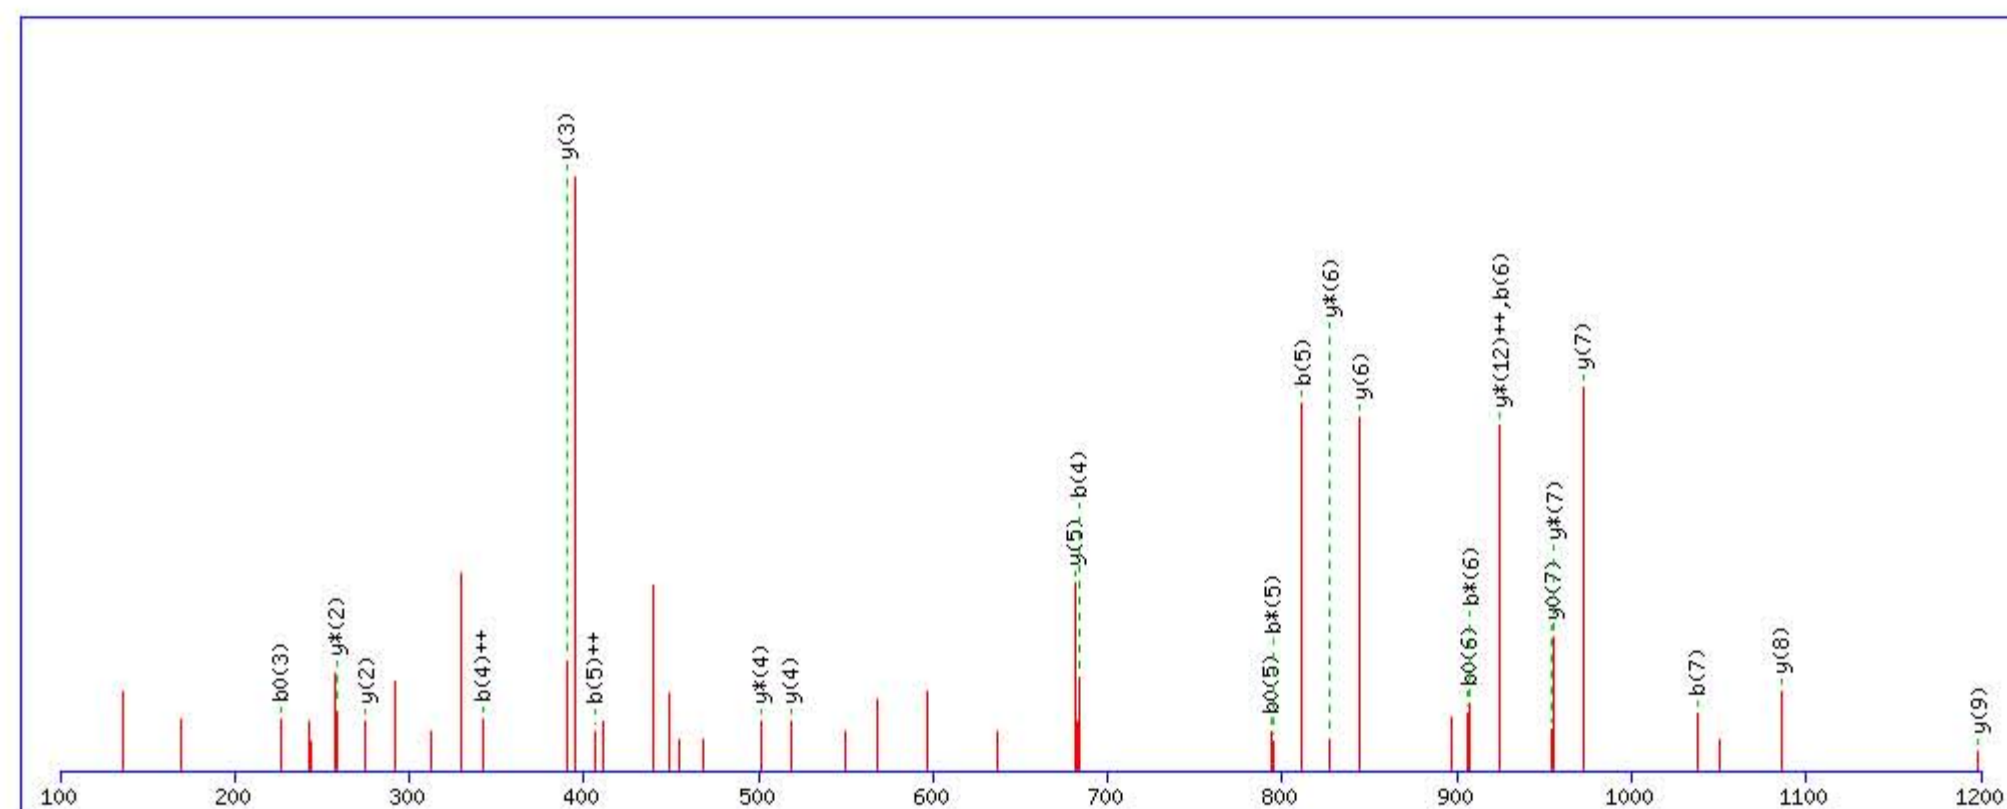

Monoisotopic mass of neutral peptide Mr(calc): 2008.008789

Fixed modifications: Carbamidomethyl (C) (apply to specified residues or termini only)

Variable modifications:

Q4 : Biotin:Thermo-21345 (Q)

Ions Score: 39 Expect: 0.0012

Matches : 25/146 fragment ions using 44 most intense peaks [\(help\)](#)

| #  | b           | b <sup>++</sup> | b <sup>*</sup> | b <sup>*++</sup> | b <sup>0</sup> | b <sup>0++</sup> | Seq. | y           | y <sup>++</sup> | y <sup>*</sup> | y <sup>*++</sup> | y <sup>0</sup> | y <sup>0++</sup> | #  |
|----|-------------|-----------------|----------------|------------------|----------------|------------------|------|-------------|-----------------|----------------|------------------|----------------|------------------|----|
| 1  | 88.039304   | 44.523290       |                |                  | 70.028739      | 35.518008        | S    |             |                 |                |                  |                |                  | 14 |
| 2  | 145.060768  | 73.034022       |                |                  | 127.050203     | 64.028740        | G    | 1921.984049 | 961.495663      | 1904.957500    | 952.982388       | 1903.973484    | 952.490380       | 13 |
| 3  | 244.129182  | 122.568229      |                |                  | 226.118617     | 113.562947       | V    | 1864.962585 | 932.984931      | 1847.936036    | 924.471656       | 1846.952020    | 923.979648       | 12 |
| 4  | 683.354508  | 342.180892      | 666.327959     | 333.667618       | 665.343943     | 333.175610       | Q    | 1765.894171 | 883.450724      | 1748.867622    | 874.937449       | 1747.883606    | 874.445441       | 11 |
| 5  | 811.413086  | 406.210181      | 794.386537     | 397.696907       | 793.402521     | 397.204899       | Q    | 1326.668845 | 663.838061      | 1309.642296    | 655.324786       | 1308.658280    | 654.832778       | 10 |
| 6  | 924.497150  | 462.752213      | 907.470601     | 454.238939       | 906.486585     | 453.746931       | L    | 1198.610267 | 599.808772      | 1181.583718    | 591.295497       | 1180.599702    | 590.803489       | 9  |
| 7  | 1037.581214 | 519.294245      | 1020.554665    | 510.780971       | 1019.570649    | 510.288963       | I    | 1085.526203 | 543.266740      | 1068.499654    | 534.753465       | 1067.515638    | 534.261457       | 8  |
| 8  | 1165.639792 | 583.323534      | 1148.613243    | 574.810260       | 1147.629227    | 574.318252       | Q    | 972.442139  | 486.724708      | 955.415590     | 478.211433       | 954.431574     | 477.719425       | 7  |
| 9  | 1328.703121 | 664.855199      | 1311.676572    | 656.341924       | 1310.692556    | 655.849916       | Y    | 844.383561  | 422.695419      | 827.357012     | 414.182144       | 826.372996     | 413.690136       | 6  |
| 10 | 1491.766450 | 746.386863      | 1474.739901    | 737.873589       | 1473.755885    | 737.381581       | Y    | 681.320232  | 341.163754      | 664.293683     | 332.650480       | 663.309667     | 332.158472       | 5  |
| 11 | 1619.825028 | 810.416152      | 1602.798479    | 801.902878       | 1601.814463    | 801.410870       | Q    | 518.256903  | 259.632090      | 501.230354     | 251.118815       | 500.246338     | 250.626807       | 4  |
| 12 | 1734.851971 | 867.929624      | 1717.825422    | 859.416349       | 1716.841406    | 858.924341       | D    | 390.198325  | 195.602800      | 373.171776     | 187.089526       | 372.187760     | 186.597518       | 3  |
| 13 | 1862.910549 | 931.958913      | 1845.884000    | 923.445638       | 1844.899984    | 922.953630       | Q    | 275.171382  | 138.089329      | 258.144833     | 129.576054       |                |                  | 2  |
| 14 |             |                 |                |                  |                |                  | K    | 147.112804  | 74.060040       | 130.086255     | 65.546765        |                |                  | 1  |

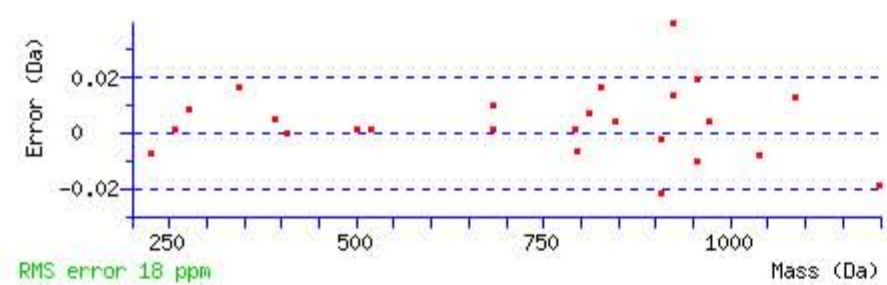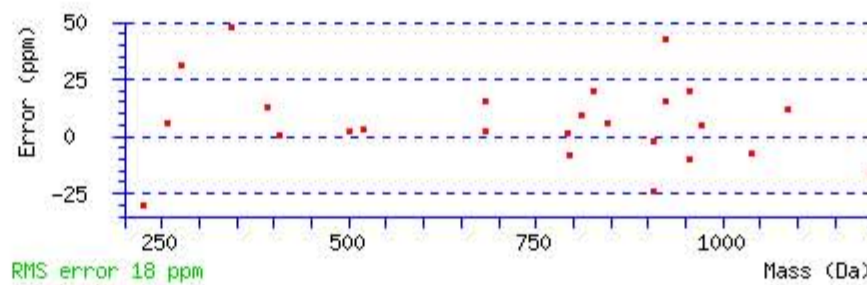

NCBI BLAST search of **SGVQQLIQYYQDQK**

(Parameters: blastp, nr protein database, expect=20000, no filter, PAM30)

Other BLAST [web gateways](#)

All matches to this query

| Score | Mr(calc):   | Delta     | Sequence                           |
|-------|-------------|-----------|------------------------------------|
| 38.8  | 2008.008789 | 0.009483  | <a href="#">SGVQQLIQYYQDQK</a>     |
| 34.9  | 2008.008789 | 0.009483  | <a href="#">SGVQQLIQYYQDQK</a>     |
| 7.2   | 2008.037308 | -0.019036 | <a href="#">VVPVSLSELVLLQCNMK</a>  |
| 2.3   | 2008.026535 | -0.008263 | <a href="#">HYSNTLKALGISDEFVSK</a> |
| 1.4   | 2008.008789 | 0.009483  | <a href="#">SGVQQLIQYYQDQK</a>     |



# MASCOT Search Results

## Peptide View

MS/MS Fragmentation of **VTEPISAESGEQVER**

Found in **APOLI\_HUMAN**, Apolipoprotein L1 OS=Homo sapiens GN=APOL1 PE=1 SV=5

Match to Query 40937: 1940.950812 from(647.990880,3+) rtinseconds(1730) index(31548)

Title: Locus:1.1.1.3151.11 File:"2013-07-02 CLN FXIII 60 min 3rd F 3.wiff"

Data file C:\Program Files (x86)\Matrix Science\Mascot Daemon\mgf\6 FXIII 60 min 3rd\mascot\_daemon\_merge.mgf

Click mouse within plot area to zoom in by factor of two about that point

Or, Plot from  to  Da

Label all possible matches  Label matches used for scoring

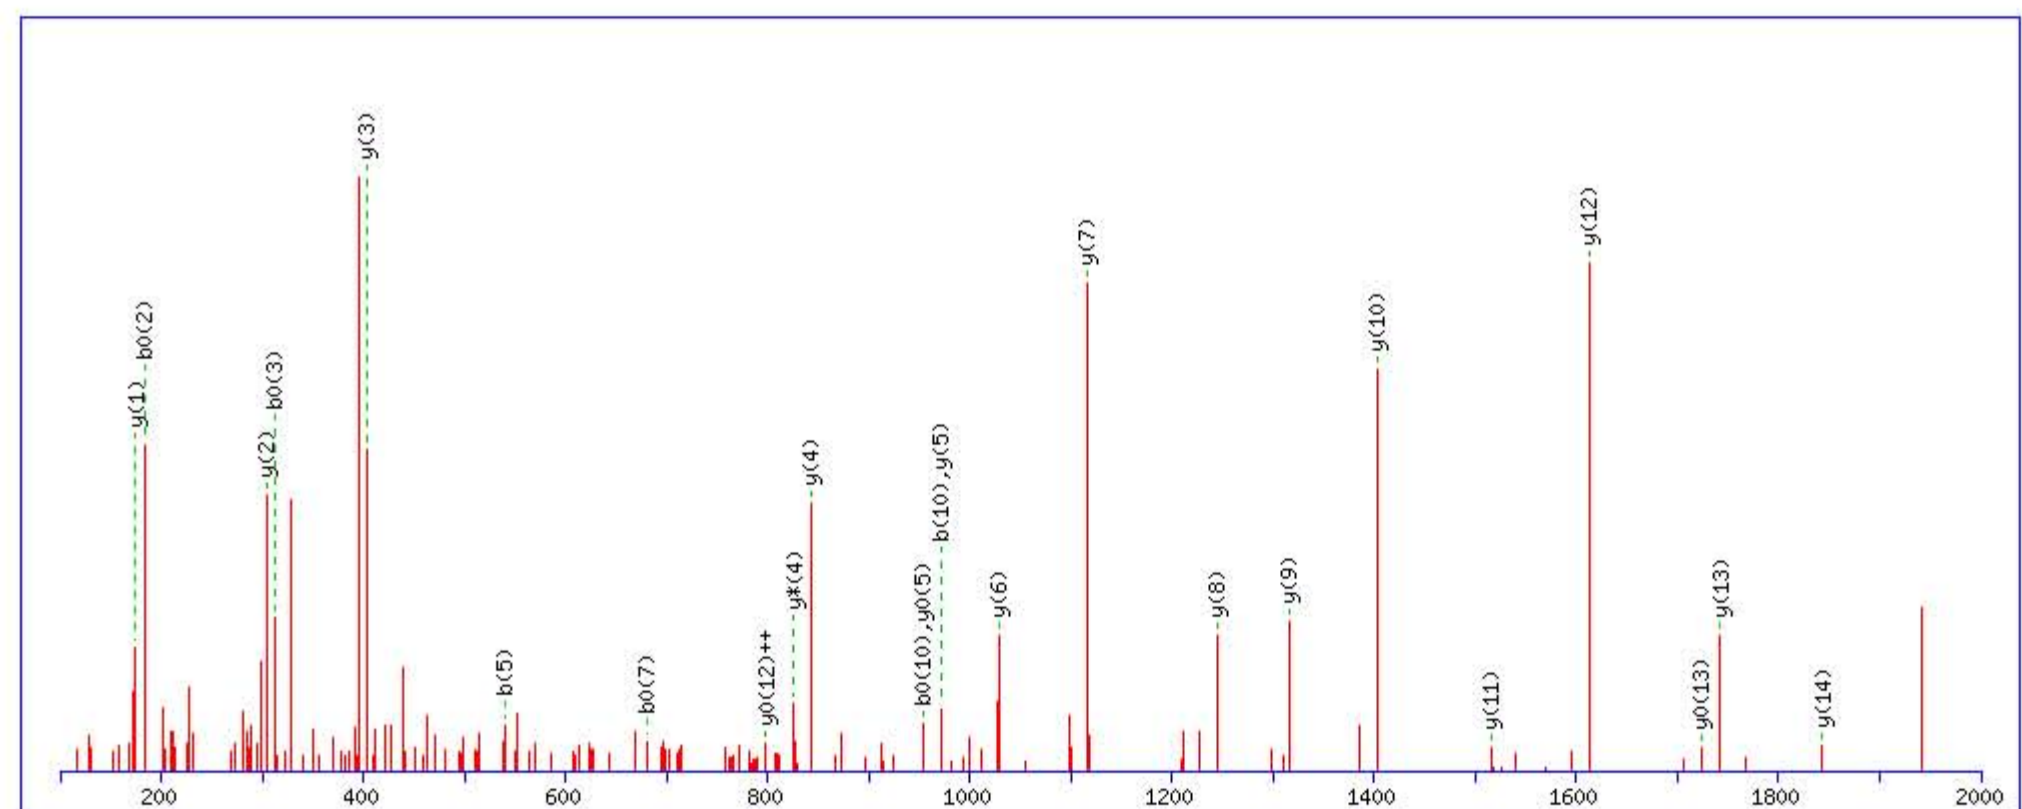

Monoisotopic mass of neutral peptide Mr(calc): 1940.951324

Fixed modifications: Carbamidomethyl (C) (apply to specified residues or termini only)

Variable modifications:

Q12 : Biotin:Thermo-21345 (Q)

Ions Score: 118 Expect: 2.3e-011

Matches : 24/142 fragment ions using 33 most intense peaks [\(help\)](#)

| #  | b           | b <sup>++</sup> | b <sup>*</sup> | b <sup>*++</sup> | b <sup>0</sup> | b <sup>0++</sup> | Seq. | y           | y <sup>++</sup> | y <sup>*</sup> | y <sup>*++</sup> | y <sup>0</sup> | y <sup>0++</sup> | #  |
|----|-------------|-----------------|----------------|------------------|----------------|------------------|------|-------------|-----------------|----------------|------------------|----------------|------------------|----|
| 1  | 100.075690  | 50.541483       |                |                  |                |                  | V    |             |                 |                |                  |                |                  | 15 |
| 2  | 201.123369  | 101.065322      |                |                  | 183.112804     | 92.060040        | T    | 1842.890205 | 921.948741      | 1825.863656    | 913.435466       | 1824.879640    | 912.943458       | 14 |
| 3  | 330.165962  | 165.586619      |                |                  | 312.155397     | 156.581336       | E    | 1741.842526 | 871.424901      | 1724.815977    | 862.911627       | 1723.831961    | 862.419619       | 13 |
| 4  | 427.218726  | 214.113001      |                |                  | 409.208161     | 205.107719       | P    | 1612.799933 | 806.903605      | 1595.773384    | 798.390330       | 1594.789368    | 797.898322       | 12 |
| 5  | 540.302790  | 270.655033      |                |                  | 522.292225     | 261.649751       | I    | 1515.747169 | 758.377223      | 1498.720620    | 749.863948       | 1497.736604    | 749.371940       | 11 |
| 6  | 627.334818  | 314.171047      |                |                  | 609.324253     | 305.165765       | S    | 1402.663105 | 701.835191      | 1385.636556    | 693.321916       | 1384.652540    | 692.829908       | 10 |
| 7  | 698.371932  | 349.689604      |                |                  | 680.361367     | 340.684322       | A    | 1315.631077 | 658.319177      | 1298.604528    | 649.805902       | 1297.620512    | 649.313894       | 9  |
| 8  | 827.414525  | 414.210901      |                |                  | 809.403960     | 405.205618       | E    | 1244.593963 | 622.800620      | 1227.567414    | 614.287345       | 1226.583398    | 613.795337       | 8  |
| 9  | 914.446553  | 457.726915      |                |                  | 896.435988     | 448.721632       | S    | 1115.551370 | 558.279323      | 1098.524821    | 549.766049       | 1097.540805    | 549.274041       | 7  |
| 10 | 971.468017  | 486.237647      |                |                  | 953.457452     | 477.232364       | G    | 1028.519342 | 514.763309      | 1011.492793    | 506.250035       | 1010.508777    | 505.758027       | 6  |
| 11 | 1100.510610 | 550.758943      |                |                  | 1082.500045    | 541.753661       | E    | 971.497878  | 486.252577      | 954.471329     | 477.739303       | 953.487313     | 477.247295       | 5  |
| 12 | 1539.735936 | 770.371606      | 1522.709387    | 761.858332       | 1521.725371    | 761.366324       | Q    | 842.455285  | 421.731281      | 825.428736     | 413.218006       | 824.444720     | 412.725998       | 4  |
| 13 | 1638.804350 | 819.905813      | 1621.777801    | 811.392539       | 1620.793785    | 810.900531       | V    | 403.229959  | 202.118617      | 386.203410     | 193.605343       | 385.219394     | 193.113335       | 3  |
| 14 | 1767.846943 | 884.427110      | 1750.820394    | 875.913835       | 1749.836378    | 875.421827       | E    | 304.161545  | 152.584410      | 287.134996     | 144.071136       | 286.150980     | 143.579128       | 2  |
| 15 |             |                 |                |                  |                |                  | R    | 175.118952  | 88.063114       | 158.092403     | 79.549839        |                |                  | 1  |

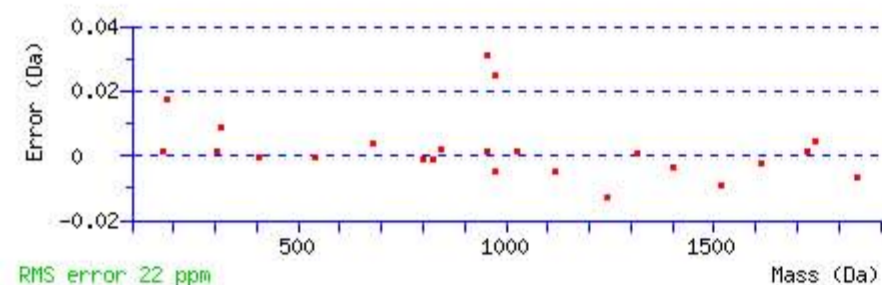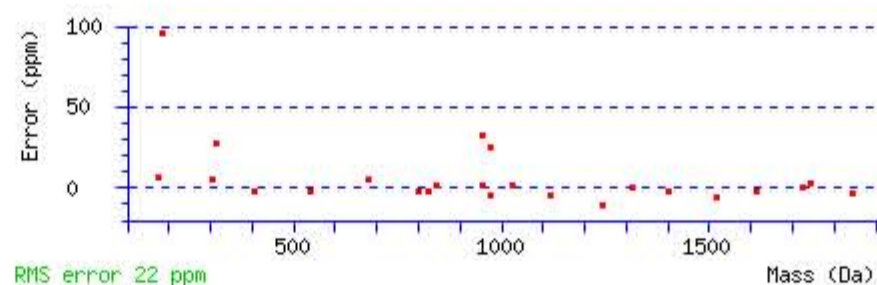

NCBI BLAST search of **VTEPISAESGEQVER**

(Parameters: blastp, nr protein database, expect=20000, no filter, PAM30)

Other BLAST [web gateways](#)

All matches to this query

| Score | Mr(calc):   | Delta     | Sequence                         |
|-------|-------------|-----------|----------------------------------|
| 117.8 | 1940.951324 | -0.000512 | <a href="#">VTEPISAESGEQVER</a>  |
| 4.3   | 1940.937378 | 0.013434  | <a href="#">SNNLEREQEQLDR</a>    |
| 2.8   | 1940.952698 | -0.001886 | <a href="#">IQSQITVGQGSDAHFR</a> |

# MASCOT Search Results

## Peptide View

MS/MS Fragmentation of **NQEACELSNN**

Found in **APOM\_HUMAN**, Apolipoprotein M OS=Homo sapiens GN=APOM PE=1 SV=2

Match to Query 29663: 1488.639008 from(745.326780,2+) rtinseconds(1650) index(31154)

Title: Locus:1.1.1.3123.15 File:"2013-07-02 CLN FXIII 60 min 3rd F 3.wiff"

Data file C:\Program Files (x86)\Matrix Science\Mascot Daemon\mgf\6 FXIII 60 min 3rd\mascot\_daemon\_merge.mgf

Click mouse within plot area to zoom in by factor of two about that point

Or, Plot from  to  Da

Label all possible matches  Label matches used for scoring

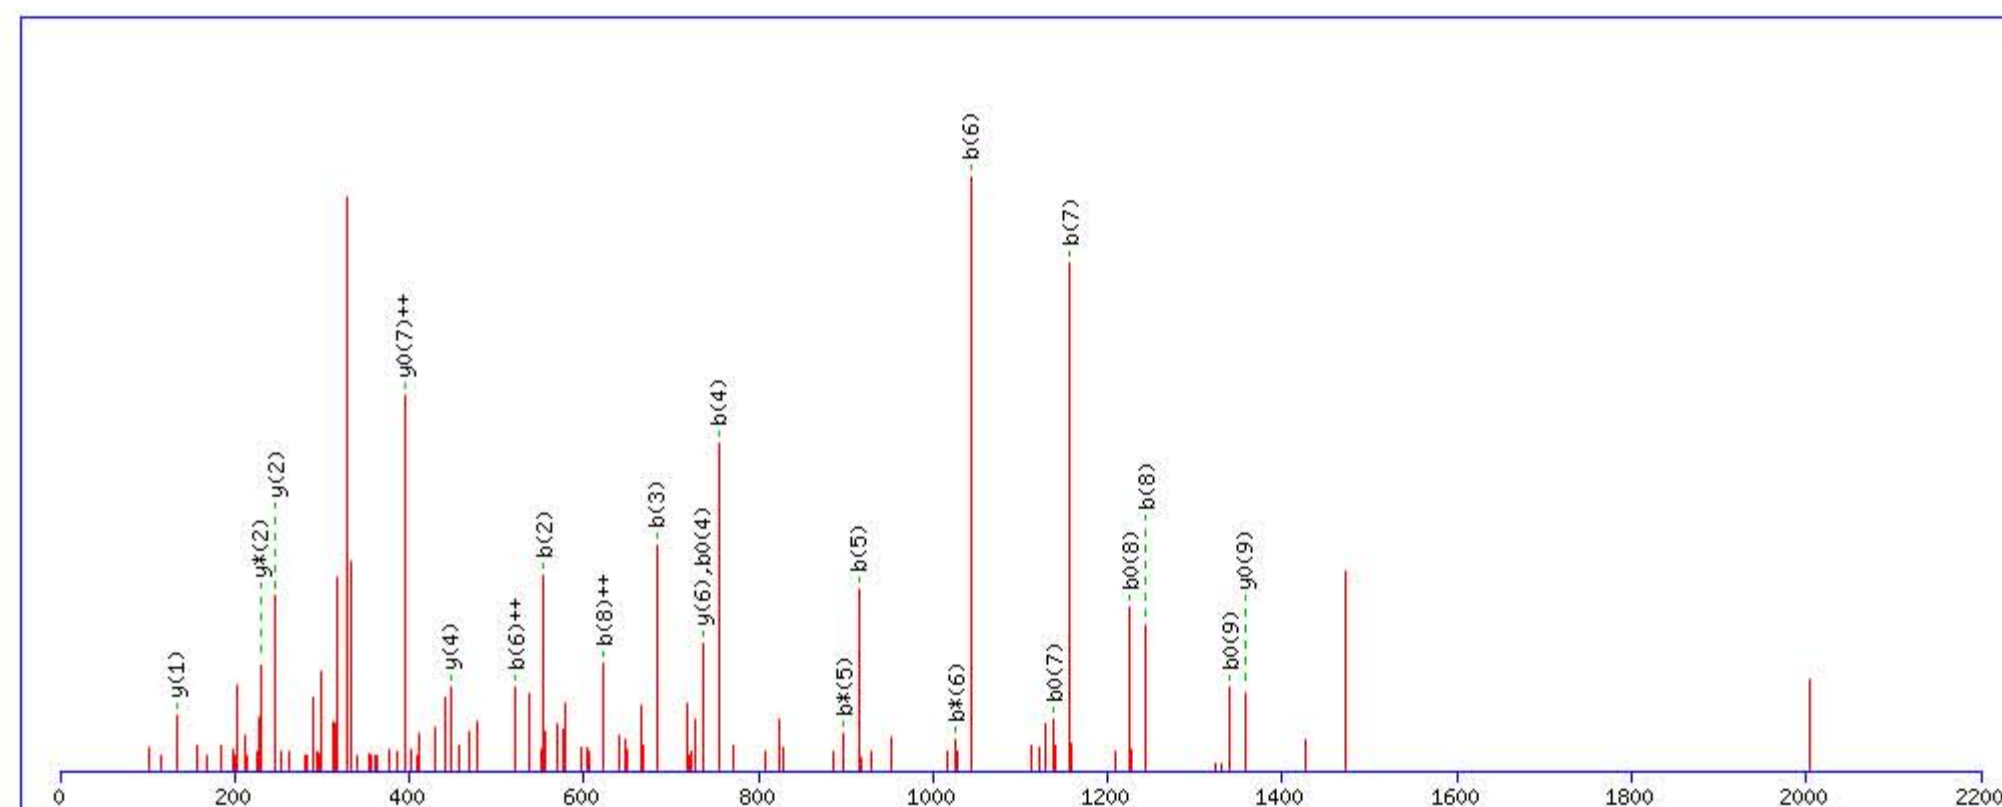

Monoisotopic mass of neutral peptide Mr(calc): 1488.633682

Fixed modifications: Carbamidomethyl (C) (apply to specified residues or termini only)

Variable modifications:

Q2 : Biotin:Thermo-21345 (Q)

Ions Score: 64 Expect: 1.7e-006

Matches : 23/100 fragment ions using 28 most intense peaks [\(help\)](#)

| #  | b                  | b <sup>++</sup>   | b <sup>*</sup>     | b <sup>+++</sup> | b <sup>0</sup>     | b <sup>0++</sup> | Seq. | y                 | y <sup>++</sup> | y <sup>*</sup>    | y <sup>+++</sup> | y <sup>0</sup>     | y <sup>0++</sup>  | #  |
|----|--------------------|-------------------|--------------------|------------------|--------------------|------------------|------|-------------------|-----------------|-------------------|------------------|--------------------|-------------------|----|
| 1  | 115.050203         | 58.028740         | 98.023654          | 49.515465        |                    |                  | N    |                   |                 |                   |                  |                    |                   | 10 |
| 2  | <b>554.275529</b>  | 277.641403        | 537.248980         | 269.128128       |                    |                  | Q    | 1375.598062       | 688.302669      | 1358.571513       | 679.789395       | <b>1357.587497</b> | 679.297387        | 9  |
| 3  | <b>683.318122</b>  | 342.162699        | 666.291573         | 333.649425       | 665.307557         | 333.157417       | E    | 936.372736        | 468.690006      | 919.346187        | 460.176732       | 918.362171         | 459.684724        | 8  |
| 4  | <b>754.355236</b>  | 377.681256        | 737.328687         | 369.167982       | <b>736.344671</b>  | 368.675974       | A    | 807.330143        | 404.168710      | 790.303594        | 395.655435       | 789.319578         | <b>395.163427</b> | 7  |
| 5  | <b>914.385885</b>  | 457.696581        | <b>897.359336</b>  | 449.183306       | 896.375320         | 448.691298       | C    | <b>736.293029</b> | 368.650153      | 719.266480        | 360.136878       | 718.282464         | 359.644870        | 6  |
| 6  | <b>1043.428478</b> | <b>522.217877</b> | <b>1026.401929</b> | 513.704603       | 1025.417913        | 513.212595       | E    | 576.262380        | 288.634828      | 559.235831        | 280.121554       | 558.251815         | 279.629546        | 5  |
| 7  | <b>1156.512542</b> | 578.759909        | 1139.485993        | 570.246635       | <b>1138.501977</b> | 569.754626       | L    | <b>447.219787</b> | 224.113531      | 430.193238        | 215.600257       | 429.209222         | 215.108249        | 4  |
| 8  | <b>1243.544570</b> | <b>622.275923</b> | 1226.518021        | 613.762649       | <b>1225.534005</b> | 613.270641       | S    | 334.135723        | 167.571499      | 317.109174        | 159.058225       | 316.125158         | 158.566217        | 3  |
| 9  | <b>1357.587497</b> | 679.297387        | 1340.560948        | 670.784112       | <b>1339.576932</b> | 670.292104       | N    | <b>247.103695</b> | 124.055485      | <b>230.077146</b> | 115.542211       |                    |                   | 2  |
| 10 |                    |                   |                    |                  |                    |                  | N    | <b>133.060768</b> | 67.034022       | 116.034219        | 58.520747        |                    |                   | 1  |

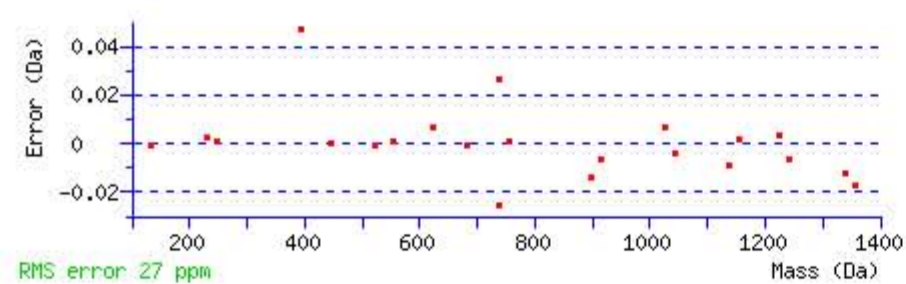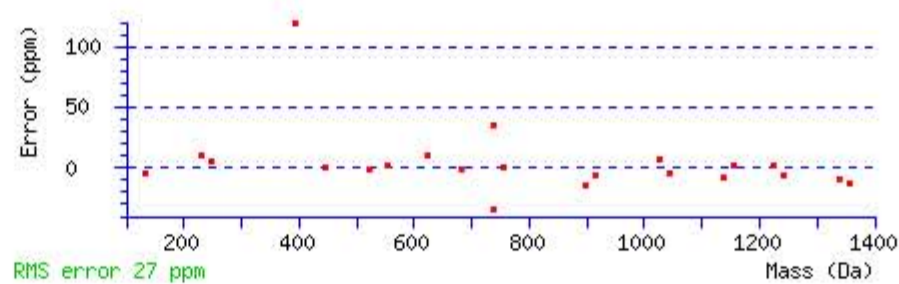

NCBI BLAST search of **NQEACELSNN**

(Parameters: blastp, nr protein database, expect=20000, no filter, PAM30)

Other BLAST [web gateways](#)

All matches to this query

| Score | Mr(calc):   | Delta    | Sequence                   |
|-------|-------------|----------|----------------------------|
| 63.8  | 1488.633682 | 0.005326 | <a href="#">NQEACELSNN</a> |

Mascot: <http://www.matrixscience.com/>



# MASCOT Search Results

## Peptide View

MS/MS Fragmentation of **SCALDQNCQWEPR**

Found in **ATRN\_HUMAN**, Attractin OS=Homo sapiens GN=ATRN PE=1 SV=2

Match to Query 41584: 1973.857572 from(658.959800,3+) rtinseconds(2006) index(4986)  
 Title: Locus:1.1.1.3250.11 File:"2013-07-02 CLN FXIII 60 min 3rd F 1.wiff"

Data file C:\Program Files (x86)\Matrix Science\Mascot Daemon\mgf6 FXIII 60 min 3rd\mascot\_daemon\_merge.mgf

Click mouse within plot area to zoom in by factor of two about that point

Or, Plot from  to  Da

Label all possible matches  Label matches used for scoring

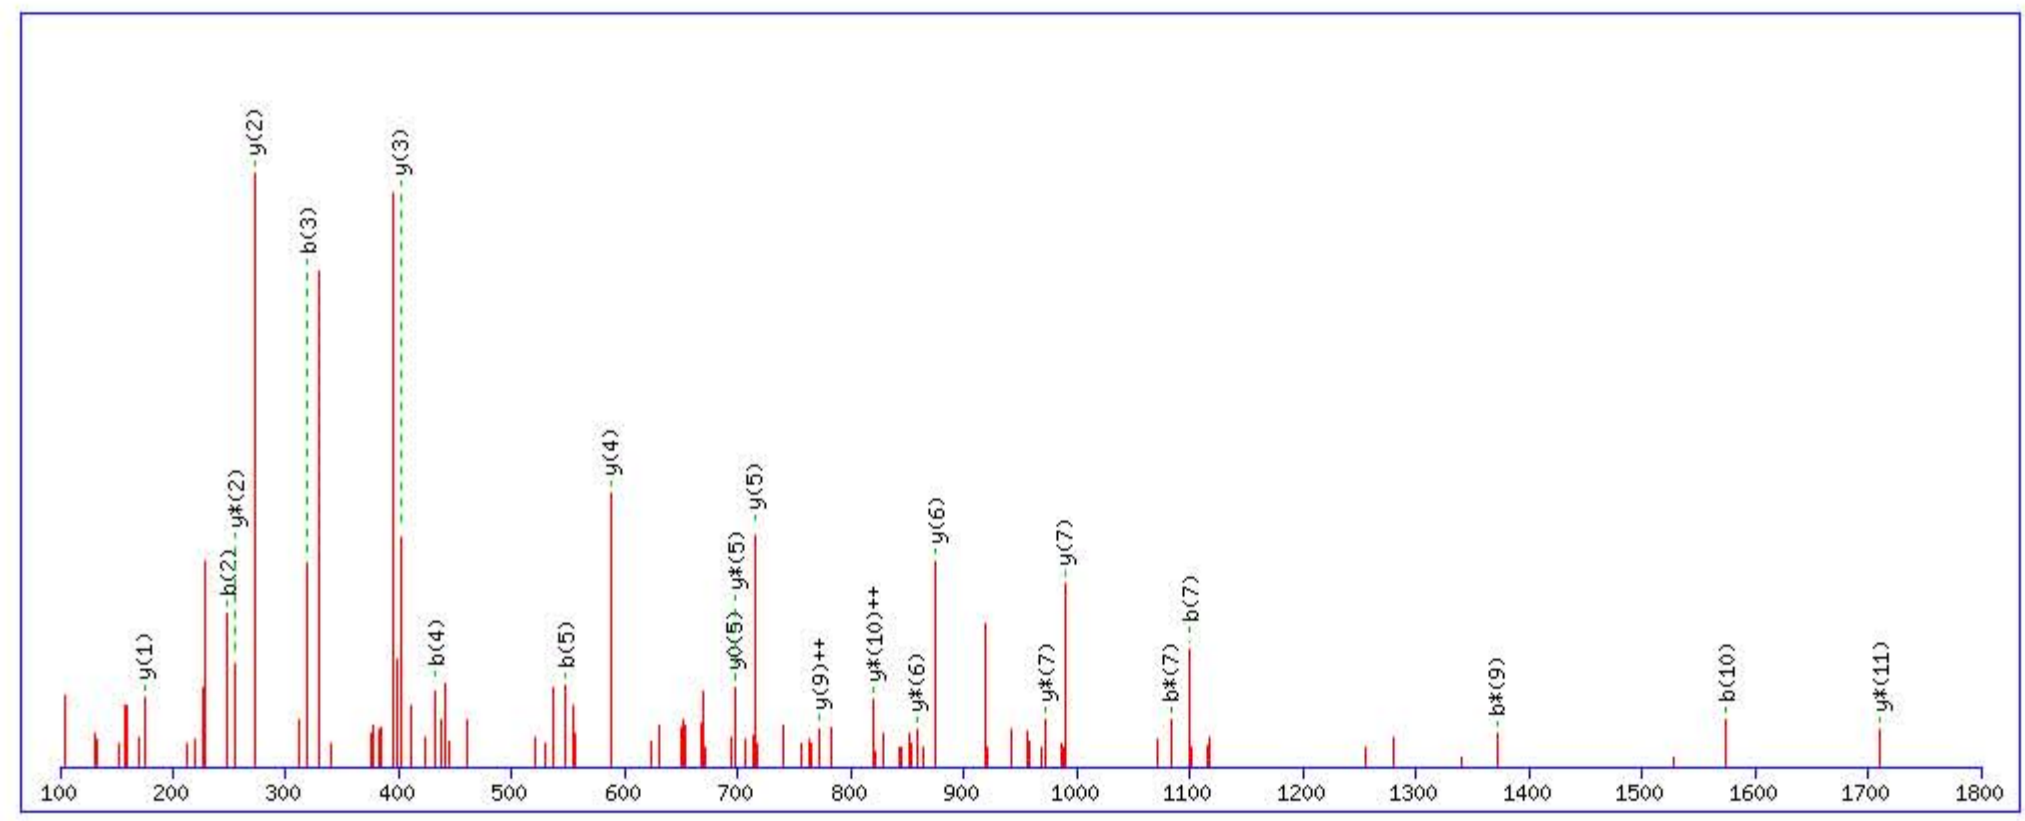

Monoisotopic mass of neutral peptide Mr(calc): 1973.854614

Fixed modifications: Carbamidomethyl (C) (apply to specified residues or termini only)

Variable modifications:

Q6 : Biotin:Thermo-21345 (Q)

Ions Score: 35 Expect: 0.0014

Matches : 23/130 fragment ions using 49 most intense peaks [\(help\)](#)

| #  | b                  | b <sup>++</sup> | b <sup>*</sup>     | b <sup>*++</sup> | b <sup>0</sup> | b <sup>0++</sup> | Seq. | y                 | y <sup>++</sup>   | y <sup>*</sup>     | y <sup>*++</sup>  | y <sup>0</sup>    | y <sup>0++</sup> | #  |
|----|--------------------|-----------------|--------------------|------------------|----------------|------------------|------|-------------------|-------------------|--------------------|-------------------|-------------------|------------------|----|
| 1  | 88.039304          | 44.523290       |                    |                  | 70.028739      | 35.518008        | S    |                   |                   |                    |                   |                   |                  | 13 |
| 2  | <b>248.069953</b>  | 124.538614      |                    |                  | 230.059388     | 115.533332       | C    | 1887.829872       | 944.418574        | 1870.803323        | 935.905300        | 1869.819307       | 935.413292       | 12 |
| 3  | <b>319.107067</b>  | 160.057171      |                    |                  | 301.096502     | 151.051889       | A    | 1727.799223       | 864.403250        | <b>1710.772674</b> | 855.889975        | 1709.788658       | 855.397967       | 11 |
| 4  | <b>432.191131</b>  | 216.599203      |                    |                  | 414.180566     | 207.593921       | L    | 1656.762109       | 828.884693        | 1639.735560        | <b>820.371418</b> | 1638.751544       | 819.879410       | 10 |
| 5  | <b>547.218074</b>  | 274.112675      |                    |                  | 529.207509     | 265.107393       | D    | 1543.678045       | <b>772.342661</b> | 1526.651496        | 763.829386        | 1525.667480       | 763.337378       | 9  |
| 6  | 986.443400         | 493.725338      | 969.416851         | 485.212064       | 968.432835     | 484.720056       | Q    | 1428.651102       | 714.829189        | 1411.624553        | 706.315915        | 1410.640537       | 705.823907       | 8  |
| 7  | <b>1100.486327</b> | 550.746802      | <b>1083.459778</b> | 542.233527       | 1082.475762    | 541.741519       | N    | <b>989.425776</b> | 495.216526        | <b>972.399227</b>  | 486.703252        | 971.415211        | 486.211244       | 7  |
| 8  | 1260.516976        | 630.762126      | 1243.490427        | 622.248852       | 1242.506411    | 621.756844       | C    | <b>875.382849</b> | 438.195063        | <b>858.356300</b>  | 429.681788        | 857.372284        | 429.189780       | 6  |
| 9  | 1388.575554        | 694.791415      | <b>1371.549005</b> | 686.278141       | 1370.564989    | 685.786133       | Q    | <b>715.352200</b> | 358.179738        | <b>698.325651</b>  | 349.666464        | <b>697.341635</b> | 349.174456       | 5  |
| 10 | <b>1574.654867</b> | 787.831072      | 1557.628318        | 779.317797       | 1556.644302    | 778.825789       | W    | <b>587.293622</b> | 294.150449        | 570.267073         | 285.637174        | 569.283057        | 285.145166       | 4  |
| 11 | 1703.697460        | 852.352368      | 1686.670911        | 843.839094       | 1685.686895    | 843.347086       | E    | <b>401.214309</b> | 201.110792        | 384.187760         | 192.597518        | 383.203744        | 192.105510       | 3  |
| 12 | 1800.750224        | 900.878750      | 1783.723675        | 892.365476       | 1782.739659    | 891.873468       | P    | <b>272.171716</b> | 136.589496        | <b>255.145167</b>  | 128.076221        |                   |                  | 2  |
| 13 |                    |                 |                    |                  |                |                  | R    | <b>175.118952</b> | 88.063114         | 158.092403         | 79.549839         |                   |                  | 1  |

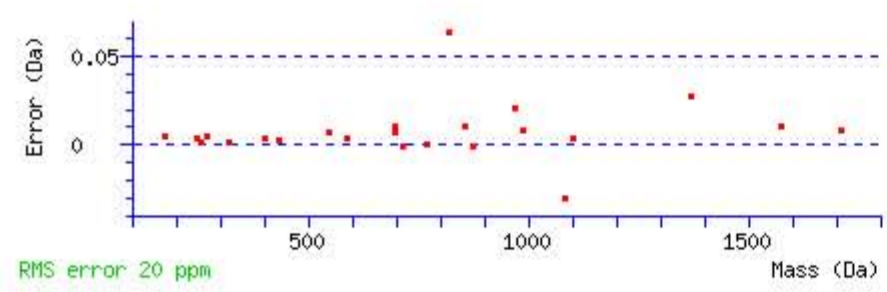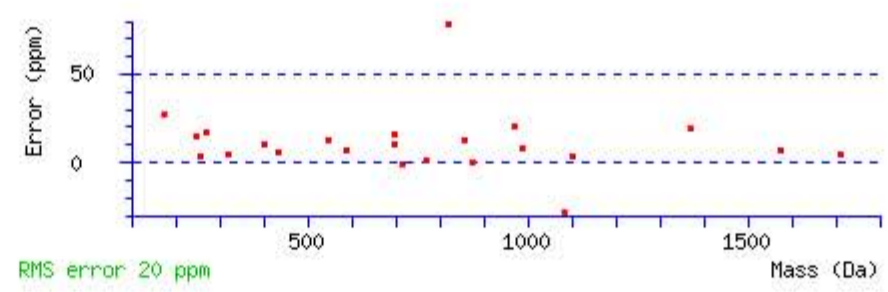

NCBI BLAST search of **SCALDQNCQWEPR**

(Parameters: blastp, nr protein database, expect=20000, no filter, PAM30)

Other BLAST [web gateways](#)

All matches to this query

| Score | Mr(calc):   | Delta    | Sequence                      |
|-------|-------------|----------|-------------------------------|
| 35.3  | 1973.854614 | 0.002958 | <a href="#">SCALDQNCQWEPR</a> |
| 13.2  | 1973.854614 | 0.002958 | <a href="#">SCALDQNCQWEPR</a> |

# MASCOT SCIENCE Mascot Search Results

## Peptide View

MS/MS Fragmentation of **KCSYTEDAQCIDGTIEVPK**  
 Found in **APOH\_HUMAN**, Beta-2-glycoprotein 1 OS=Homo sapiens GN=APOH PE=1 SV=3

Match to Query 51475: 2524.171872 from(842.397900,3+) rtinseconds(2003) index(62602)  
 Title: Locus:1.1.1.3323.26 File:"2013-07-02 CLN FXIII 60 min 3rd FT.wiff"  
 Data file C:\Program Files (x86)\Matrix Science\Mascot Daemon\mgf6 FXIII 60 min 3rd\mascot\_daemon\_merge.mgf

Click mouse within plot area to zoom in by factor of two about that point  
 Or, Plot from  to  Da   
 Label all possible matches  Label matches used for scoring

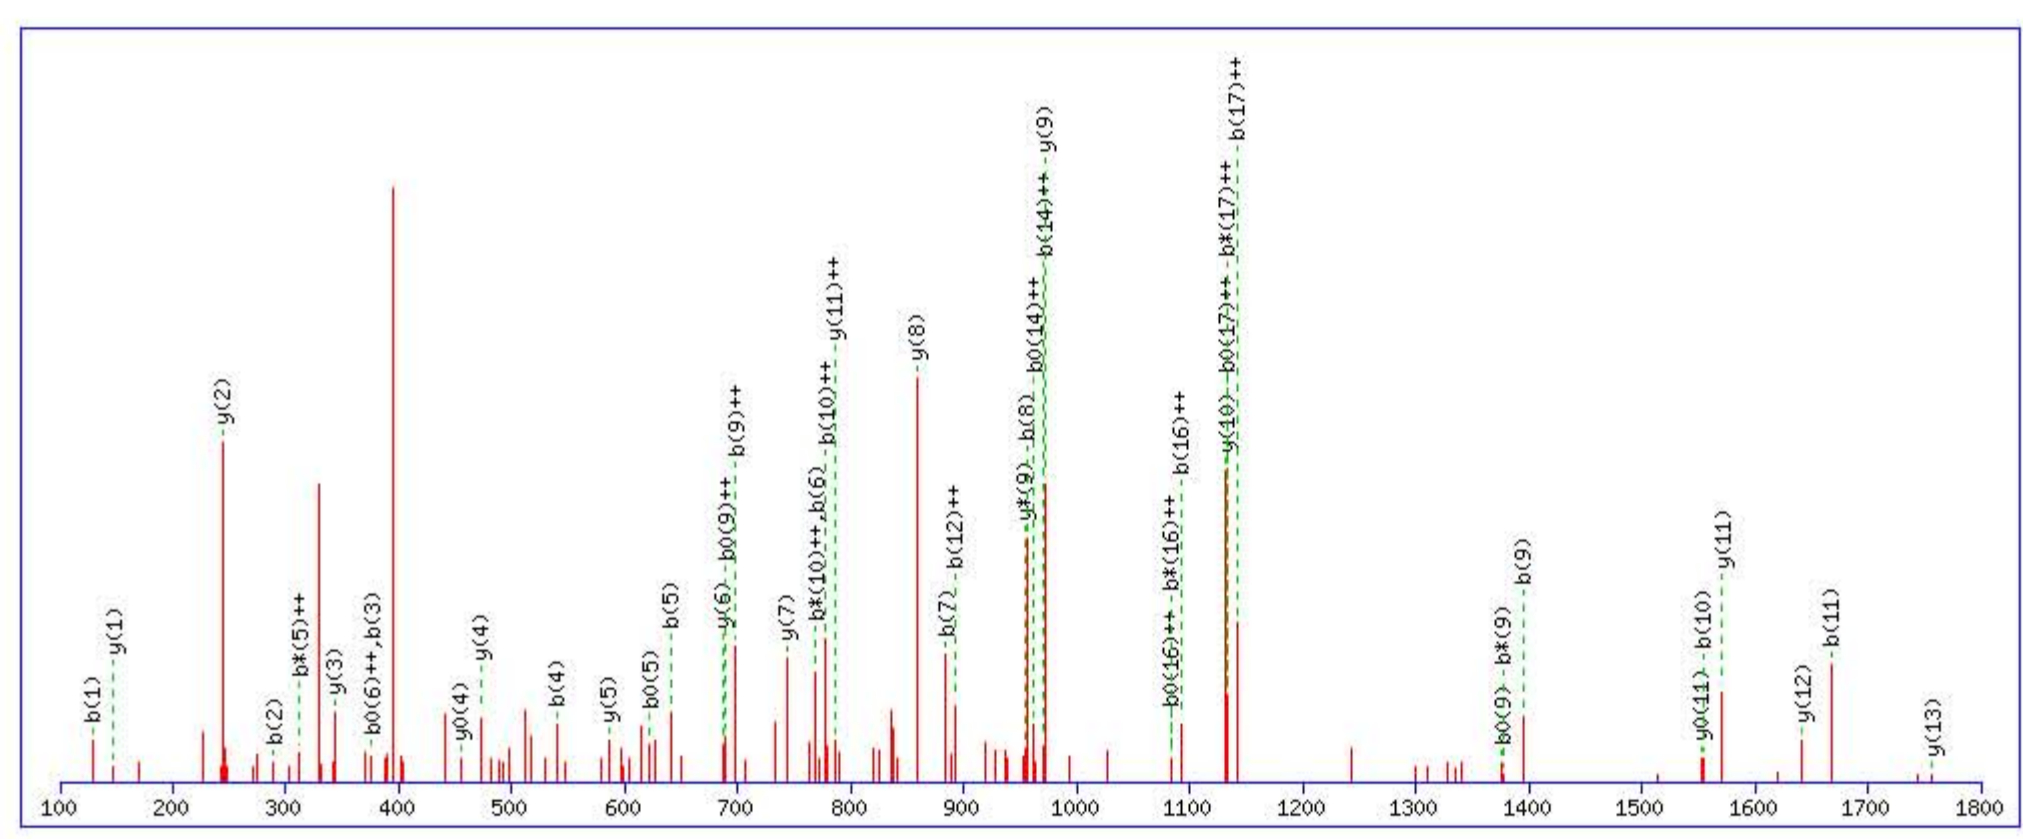

Monoisotopic mass of neutral peptide Mr(calc): 2524.164780  
 Fixed modifications: Carbamidomethyl (C) (apply to specified residues or termini only)  
 Variable modifications:  
 Q9 : Biotin:Thermo-21345 (Q)  
 Ions Score: 81 Expect: 1e-007  
 Matches : 46/206 fragment ions using 80 most intense peaks [\(help\)](#)

| #  | b                  | b <sup>++</sup>    | b <sup>*</sup>     | b <sup>*++</sup>   | b <sup>0</sup>     | b <sup>0++</sup>   | Seq.     | y                  | y <sup>++</sup>   | y <sup>*</sup>    | y <sup>*++</sup> | y <sup>0</sup>     | y <sup>0++</sup> | #         |
|----|--------------------|--------------------|--------------------|--------------------|--------------------|--------------------|----------|--------------------|-------------------|-------------------|------------------|--------------------|------------------|-----------|
| 1  | <b>129.102239</b>  | 65.054757          | 112.075690         | 56.541483          |                    |                    | <b>K</b> |                    |                   |                   |                  |                    |                  | <b>19</b> |
| 2  | <b>289.132888</b>  | 145.070082         | 272.106339         | 136.556808         |                    |                    | <b>C</b> | 2397.077099        | 1199.042187       | 2380.050550       | 1190.528913      | 2379.066534        | 1190.036905      | <b>18</b> |
| 3  | <b>376.164916</b>  | 188.586096         | 359.138367         | 180.072822         | 358.154351         | 179.580814         | <b>S</b> | 2237.046450        | 1119.026863       | 2220.019901       | 1110.513588      | 2219.035885        | 1110.021580      | <b>17</b> |
| 4  | <b>539.228245</b>  | 270.117761         | 522.201696         | 261.604486         | 521.217680         | 261.112478         | <b>Y</b> | 2150.014422        | 1075.510849       | 2132.987873       | 1066.997574      | 2132.003857        | 1066.505566      | <b>16</b> |
| 5  | <b>640.275924</b>  | 320.641600         | 623.249375         | <b>312.128326</b>  | <b>622.265359</b>  | 311.636318         | <b>T</b> | 1986.951093        | 993.979185        | 1969.924544       | 985.465910       | 1968.940528        | 984.973902       | <b>15</b> |
| 6  | <b>769.318517</b>  | 385.162897         | 752.291968         | 376.649622         | 751.307952         | <b>376.157614</b>  | <b>E</b> | 1885.903414        | 943.455345        | 1868.876865       | 934.942071       | 1867.892849        | 934.450063       | <b>14</b> |
| 7  | <b>884.345460</b>  | 442.676368         | 867.318911         | 434.163094         | 866.334895         | 433.671086         | <b>D</b> | <b>1756.860821</b> | 878.934049        | 1739.834272       | 870.420774       | 1738.850256        | 869.928766       | <b>13</b> |
| 8  | <b>955.382574</b>  | 478.194925         | 938.356025         | 469.681650         | 937.372009         | 469.189642         | <b>A</b> | <b>1641.833878</b> | 821.420577        | 1624.807329       | 812.907303       | 1623.823313        | 812.415295       | <b>12</b> |
| 9  | <b>1394.607900</b> | <b>697.807588</b>  | <b>1377.581351</b> | 689.294314         | <b>1376.597335</b> | <b>688.802306</b>  | <b>Q</b> | <b>1570.796764</b> | <b>785.902020</b> | 1553.770215       | 777.388746       | <b>1552.786199</b> | 776.896738       | <b>11</b> |
| 10 | <b>1554.638549</b> | <b>777.822913</b>  | 1537.612000        | <b>769.309638</b>  | 1536.627984        | 768.817630         | <b>C</b> | <b>1131.571438</b> | 566.289357        | 1114.544889       | 557.776083       | 1113.560873        | 557.284075       | <b>10</b> |
| 11 | <b>1667.722613</b> | 834.364945         | 1650.696064        | 825.851670         | 1649.712048        | 825.359662         | <b>I</b> | <b>971.540789</b>  | 486.274033        | <b>954.514240</b> | 477.760758       | 953.530224         | 477.268750       | <b>9</b>  |
| 12 | 1782.749556        | <b>891.878416</b>  | 1765.723007        | 883.365142         | 1764.738991        | 882.873134         | <b>D</b> | <b>858.456725</b>  | 429.732001        | 841.430176        | 421.218726       | 840.446160         | 420.726718       | <b>8</b>  |
| 13 | 1839.771020        | 920.389148         | 1822.744471        | 911.875874         | 1821.760455        | 911.383866         | <b>G</b> | <b>743.429782</b>  | 372.218529        | 726.403233        | 363.705255       | 725.419217         | 363.213247       | <b>7</b>  |
| 14 | 1940.818699        | <b>970.912988</b>  | 1923.792150        | 962.399713         | 1922.808134        | <b>961.907705</b>  | <b>T</b> | <b>686.408318</b>  | 343.707797        | 669.381769        | 335.194523       | 668.397753         | 334.702515       | <b>6</b>  |
| 15 | 2053.902763        | 1027.455019        | 2036.876214        | 1018.941745        | 2035.892198        | 1018.449737        | <b>I</b> | <b>585.360639</b>  | 293.183958        | 568.334090        | 284.670683       | 567.350074         | 284.178675       | <b>5</b>  |
| 16 | 2182.945356        | <b>1091.976316</b> | 2165.918807        | <b>1083.463041</b> | 2164.934791        | <b>1082.971034</b> | <b>E</b> | <b>472.276575</b>  | 236.641925        | 455.250026        | 228.128651       | <b>454.266010</b>  | 227.636643       | <b>4</b>  |
| 17 | 2282.013770        | <b>1141.510523</b> | 2264.987221        | <b>1132.997248</b> | 2264.003205        | <b>1132.505240</b> | <b>V</b> | <b>343.233982</b>  | 172.120629        | 326.207433        | 163.607354       |                    |                  | <b>3</b>  |
| 18 | 2379.066534        | 1190.036905        | 2362.039985        | 1181.523630        | 2361.055969        | 1181.031622        | <b>P</b> | <b>244.165568</b>  | 122.586422        | 227.139019        | 114.073148       |                    |                  | <b>2</b>  |
| 19 |                    |                    |                    |                    |                    |                    | <b>K</b> | <b>147.112804</b>  | 74.060040         | 130.086255        | 65.546765        |                    |                  | <b>1</b>  |

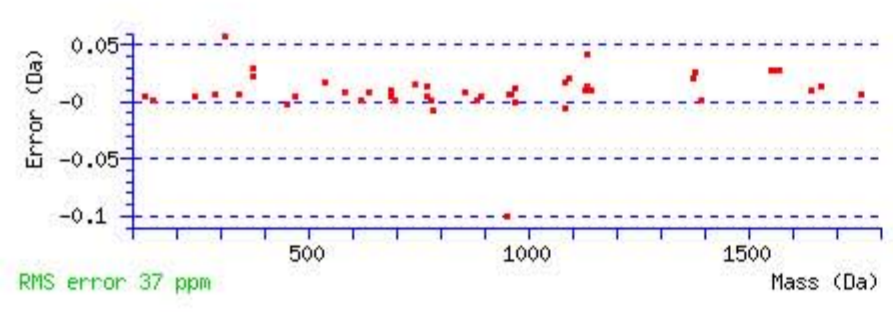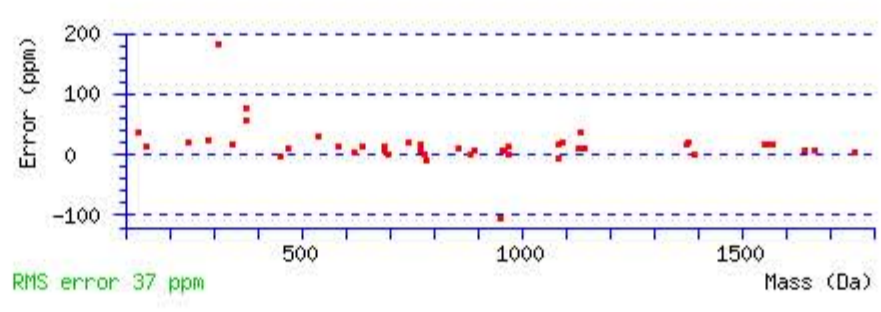

NCBI BLAST search of [KCSYTEDAQCIDGTIEVPK](#)  
 (Parameters: blastp, nr protein database, expect=20000, no filter, PAM30)  
 Other BLAST [web gateways](#)

### All matches to this query

| Score | Mr(calc):   | Delta    | Sequence                            |
|-------|-------------|----------|-------------------------------------|
| 81.3  | 2524.164780 | 0.007092 | <a href="#">KCSYTEDAQCIDGTIEVPK</a> |

**MASCOT** **SCIENCE** Mascot Search Results

Peptide View

MS/MS Fragmentation of **GYILVGQAK**

Found in **C4BPA\_HUMAN**, C4b-binding protein alpha chain OS=Homo sapiens GN=C4BPA PE=1 SV=2

Match to Query 21824: 1258.712348 from(630.363450,2+) rtinseconds(2065) index(33526)

Title: Locus:1.1.1.3268.13 File:"2013-07-02 CLN FXIII 60 min 3rd F 3.wiff"

Data file C:\Program Files (x86)\Matrix Science\Mascot Daemon\mgf\6 FXIII 60 min 3rd\mascot\_daemon\_merge.mgf

Click mouse within plot area to zoom in by factor of two about that point

Or, Plot from  to  Da

Label all possible matches  Label matches used for scoring

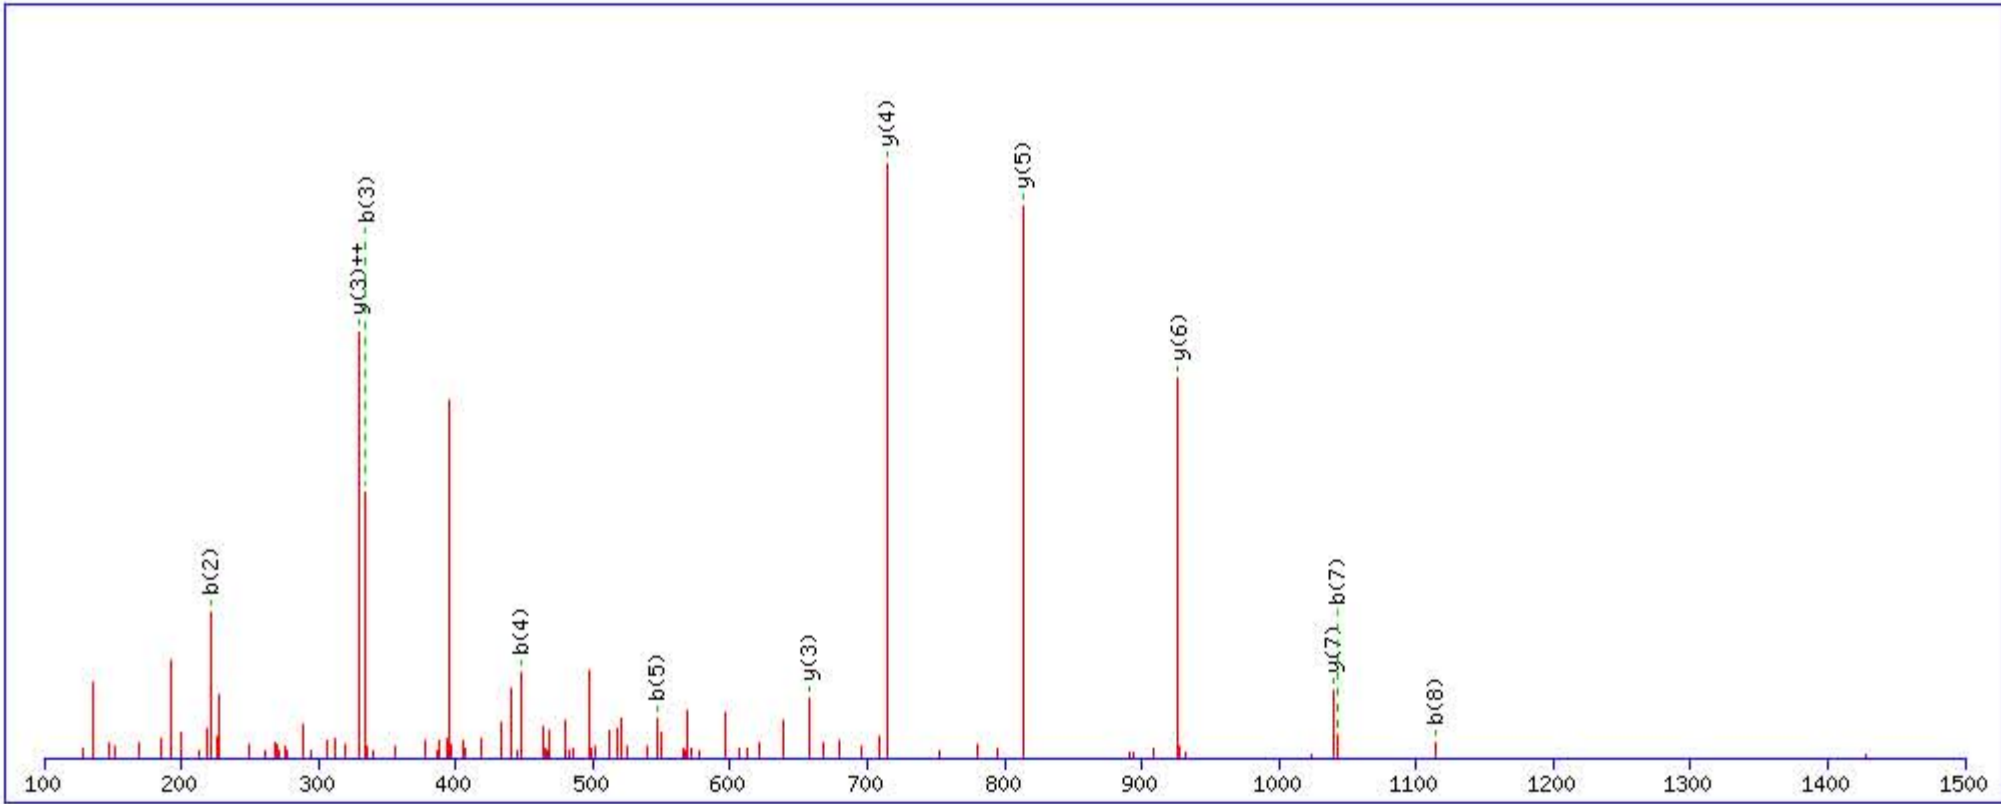

Monoisotopic mass of neutral peptide Mr(calc): 1258.710754

Fixed modifications: Carbamidomethyl (C) (apply to specified residues or termini only)

Variable modifications:

Q7 : Biotin:Thermo-21345 (Q)

Ions Score: 28 Expect: 0.018

Matches : 12/52 fragment ions using 29 most intense peaks [\(help\)](#)

| # | b                  | b <sup>++</sup> | b <sup>*</sup> | b <sup>*++</sup> | Seq. | y                  | y <sup>++</sup>   | y <sup>*</sup> | y <sup>*++</sup> | # |
|---|--------------------|-----------------|----------------|------------------|------|--------------------|-------------------|----------------|------------------|---|
| 1 | 58.028740          | 29.518008       |                |                  | G    |                    |                   |                |                  | 9 |
| 2 | <b>221.092069</b>  | 111.049673      |                |                  | Y    | 1202.696579        | 601.851928        | 1185.670030    | 593.338653       | 8 |
| 3 | <b>334.176133</b>  | 167.591704      |                |                  | I    | <b>1039.633250</b> | 520.320263        | 1022.606701    | 511.806989       | 7 |
| 4 | <b>447.260197</b>  | 224.133737      |                |                  | L    | <b>926.549186</b>  | 463.778231        | 909.522637     | 455.264957       | 6 |
| 5 | <b>546.328611</b>  | 273.667944      |                |                  | V    | <b>813.465122</b>  | 407.236199        | 796.438573     | 398.722925       | 5 |
| 6 | 603.350075         | 302.178676      |                |                  | G    | <b>714.396708</b>  | 357.701992        | 697.370159     | 349.188718       | 4 |
| 7 | <b>1042.575401</b> | 521.791339      | 1025.548852    | 513.278064       | Q    | <b>657.375244</b>  | <b>329.191260</b> | 640.348695     | 320.677986       | 3 |
| 8 | <b>1113.612515</b> | 557.309896      | 1096.585966    | 548.796621       | A    | 218.149918         | 109.578597        | 201.123369     | 101.065322       | 2 |
| 9 |                    |                 |                |                  | K    | 147.112804         | 74.060040         | 130.086255     | 65.546765        | 1 |

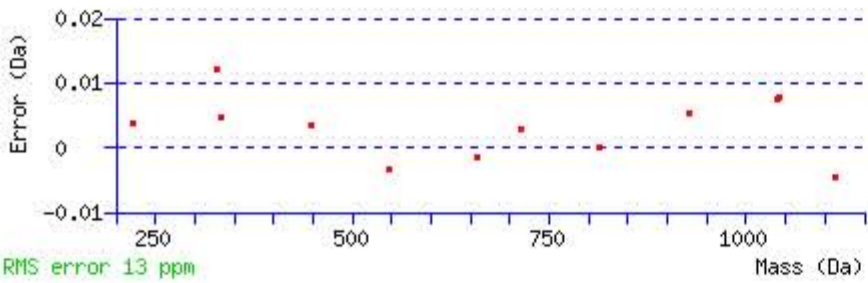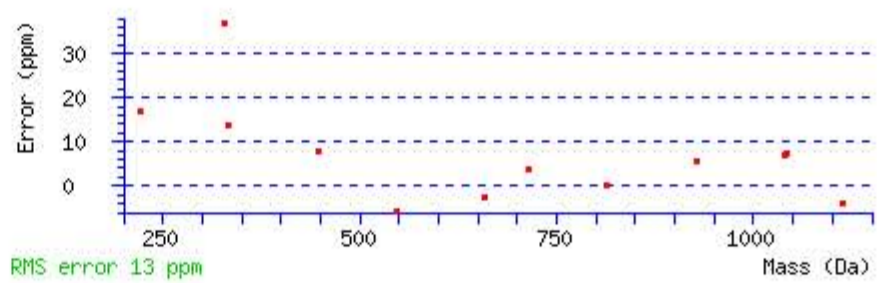

NCBI BLAST search of [GYILVGQAK](#)

(Parameters: blastp, nr protein database, expect=20000, no filter, PAM30)

Other BLAST [web gateways](#)

All matches to this query

| Score | Mr(calc):   | Delta     | Sequence                   |
|-------|-------------|-----------|----------------------------|
| 27.8  | 1258.710754 | 0.001594  | <a href="#">GYILVGQAK</a>  |
| 9.1   | 1258.721970 | -0.009622 | <a href="#">GYILQAKR</a>   |
| 8.9   | 1258.717941 | -0.005593 | <a href="#">RILAKVQEMR</a> |

Mascot: <http://www.matrixscience.com/>

# MASCOT Search Results

## Peptide View

MS/MS Fragmentation of **QSSYSFFK**

Found in **C4BPA\_HUMAN**, C4b-binding protein alpha chain OS=Homo sapiens GN=C4BPA PE=1 SV=2

Match to Query 25948: 1390.663768 from(696.339160,2+) rtinseconds(2137) index(33923)

Title: Locus:1.1.1.3293.11 File:"2013-07-02 CLN FXIII 60 min 3rd F 3.wiff"

Data file C:\Program Files (x86)\Matrix Science\Mascot Daemon\mgf6 FXIII 60 min 3rd\mascot\_daemon\_merge.mgf

Click mouse within plot area to zoom in by factor of two about that point

Or, Plot from  to  Da

Label all possible matches  Label matches used for scoring

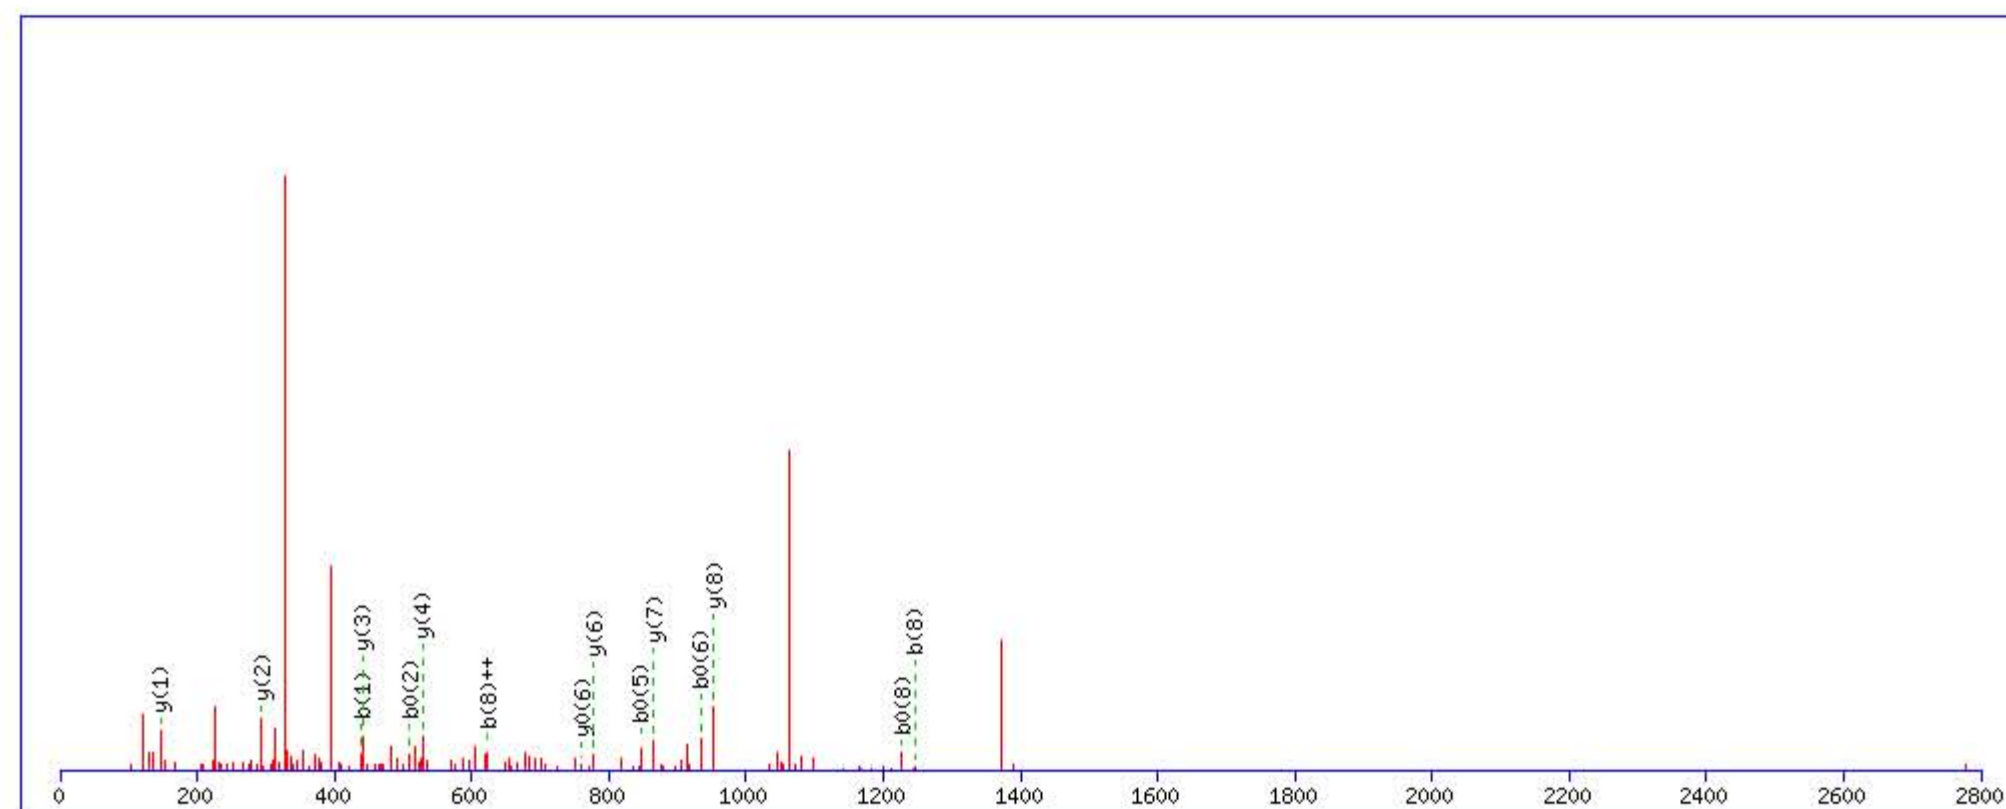

Monoisotopic mass of neutral peptide  $M_r(\text{calc})$ : 1390.659119

Fixed modifications: Carbamidomethyl (C) (apply to specified residues or termini only)

Variable modifications:

Q1 : Biotin:Thermo-21345 (Q)

Ions Score: 29 Expect: 0.0032

Matches : 15/88 fragment ions using 37 most intense peaks [\(help\)](#)

| # | b                  | b <sup>++</sup>   | b <sup>+</sup> | b <sup>+++</sup> | b <sup>0</sup>     | b <sup>0++</sup> | Seq. | y                 | y <sup>++</sup> | y <sup>+</sup> | y <sup>+++</sup> | y <sup>0</sup>    | y <sup>0++</sup> | # |
|---|--------------------|-------------------|----------------|------------------|--------------------|------------------|------|-------------------|-----------------|----------------|------------------|-------------------|------------------|---|
| 1 | <b>440.232602</b>  | 220.619939        | 423.206053     | 212.106664       |                    |                  | Q    |                   |                 |                |                  |                   |                  | 9 |
| 2 | 527.264630         | 264.135953        | 510.238081     | 255.622679       | <b>509.254065</b>  | 255.130671       | S    | <b>952.441073</b> | 476.724175      | 935.414524     | 468.210900       | 934.430508        | 467.718892       | 8 |
| 3 | 614.296658         | 307.651967        | 597.270109     | 299.138692       | 596.286093         | 298.646684       | S    | <b>865.409045</b> | 433.208161      | 848.382496     | 424.694886       | 847.398480        | 424.202878       | 7 |
| 4 | 701.328686         | 351.167981        | 684.302137     | 342.654706       | 683.318121         | 342.162698       | S    | <b>778.377017</b> | 389.692147      | 761.350468     | 381.178872       | <b>760.366452</b> | 380.686864       | 6 |
| 5 | 864.392015         | 432.699645        | 847.365466     | 424.186371       | <b>846.381450</b>  | 423.694363       | Y    | 691.344989        | 346.176133      | 674.318440     | 337.662858       | 673.334424        | 337.170850       | 5 |
| 6 | 951.424043         | 476.215659        | 934.397494     | 467.702385       | <b>933.413478</b>  | 467.210377       | S    | <b>528.281660</b> | 264.644468      | 511.255111     | 256.131194       | 510.271095        | 255.639186       | 4 |
| 7 | 1098.492457        | 549.749866        | 1081.465908    | 541.236592       | 1080.481892        | 540.744584       | F    | <b>441.249632</b> | 221.128454      | 424.223083     | 212.615180       |                   |                  | 3 |
| 8 | <b>1245.560871</b> | <b>623.284073</b> | 1228.534322    | 614.770799       | <b>1227.550306</b> | 614.278791       | F    | <b>294.181218</b> | 147.594247      | 277.154669     | 139.080973       |                   |                  | 2 |
| 9 |                    |                   |                |                  |                    |                  | K    | <b>147.112804</b> | 74.060040       | 130.086255     | 65.546765        |                   |                  | 1 |

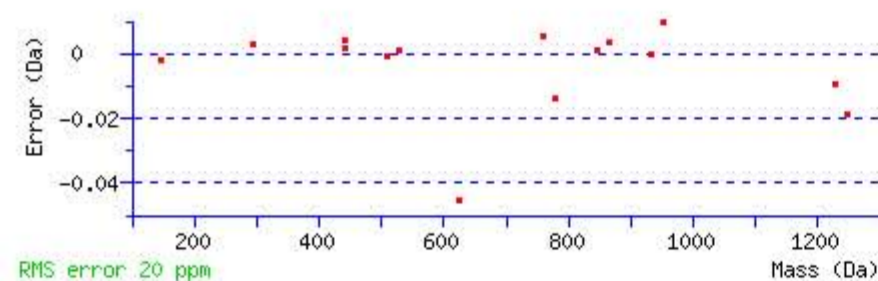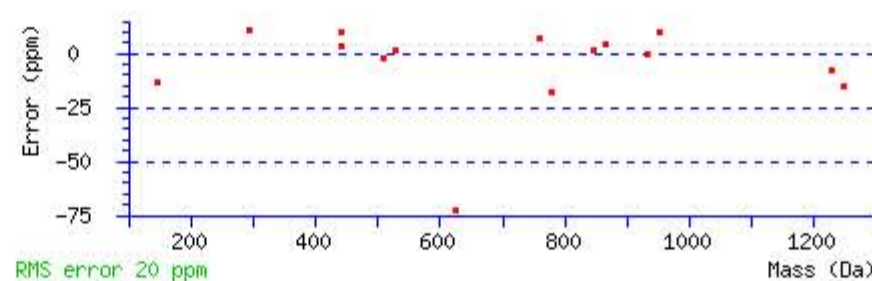

NCBI BLAST search of **QSSYSFFK**

(Parameters: blastp, nr protein database, expect=20000, no filter, PAM30)

Other BLAST [web gateways](#)

All matches to this query

| Score | $M_r(\text{calc})$ : | Delta     | Sequence                     |
|-------|----------------------|-----------|------------------------------|
| 28.9  | 1390.659119          | 0.004649  | <a href="#">QSSYSFFK</a>     |
| 2.1   | 1390.676208          | -0.012440 | <a href="#">AEKSSSTDQK</a>   |
| 1.6   | 1390.669678          | -0.005910 | <a href="#">CAPASIRLMDNK</a> |
| 0.5   | 1390.673721          | -0.009953 | <a href="#">QPNCSSLFK</a>    |

Mascot: <http://www.matrixscience.com/>

# MASCOT Search Results

## Peptide View

MS/MS Fragmentation of **FSAICQGDGTWSPR**

Found in **C4BPA\_HUMAN**, C4b-binding protein alpha chain OS=Homo sapiens GN=C4BPA PE=1 SV=2

Match to Query 40090: 1891.884942 from(631.635590,3+) rtinseconds(2148) index(33971)

Title: Locus:1.1.1.3297.7 File:"2013-07-02 CLN FXIII 60 min 3rd F 3.wiff"

Data file C:\Program Files (x86)\Matrix Science\Mascot Daemon\mgf6 FXIII 60 min 3rd\mascot\_daemon\_merge.mgf

Click mouse within plot area to zoom in by factor of two about that point

Or, Plot from  to  Da

Label all possible matches  Label matches used for scoring

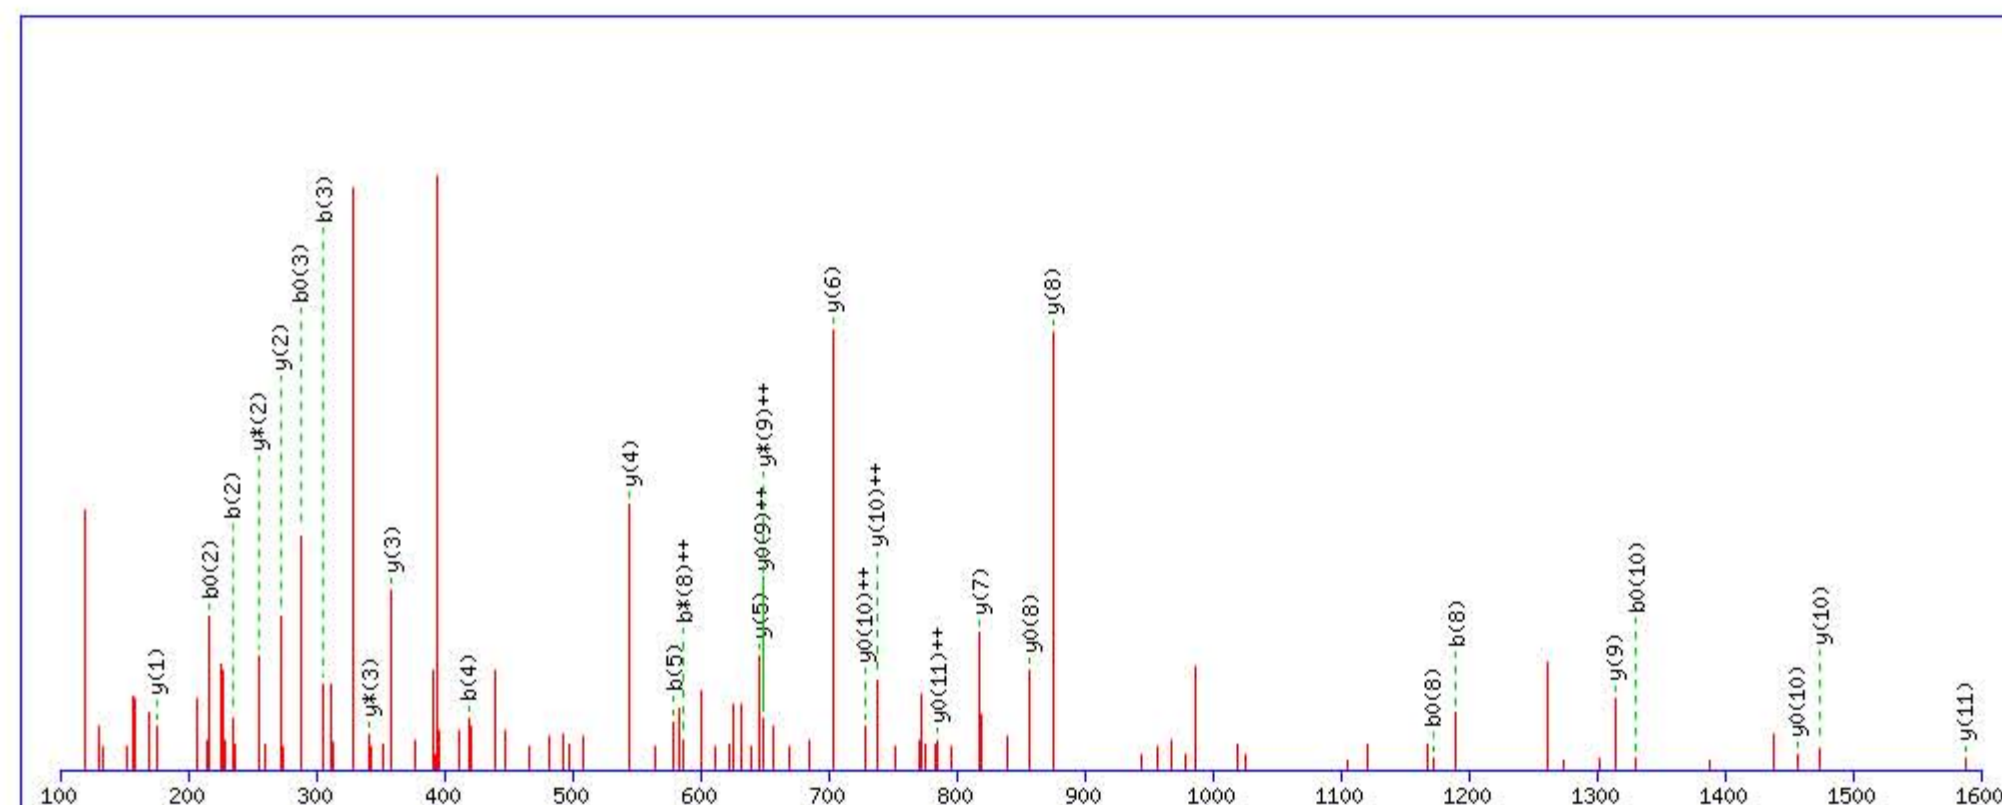

Monoisotopic mass of neutral peptide Mr(calc): 1891.870941

Fixed modifications: Carbamidomethyl (C) (apply to specified residues or termini only)

Variable modifications:

Q6 : Biotin:Thermo-21345 (Q)

Ions Score: 42 Expect: 0.001

Matches : 30/140 fragment ions using 81 most intense peaks [\(help\)](#)

| #  | b                  | b <sup>++</sup> | b <sup>*</sup> | b <sup>*++</sup>  | b <sup>0</sup>     | b <sup>0++</sup> | Seq. | y                  | y <sup>++</sup>   | y <sup>*</sup>    | y <sup>*++</sup>  | y <sup>0</sup>     | y <sup>0++</sup>  | #  |
|----|--------------------|-----------------|----------------|-------------------|--------------------|------------------|------|--------------------|-------------------|-------------------|-------------------|--------------------|-------------------|----|
| 1  | 148.075690         | 74.541483       |                |                   |                    |                  | F    |                    |                   |                   |                   |                    |                   | 14 |
| 2  | <b>235.107718</b>  | 118.057497      |                |                   | 217.097153         | 109.052214       | S    | 1745.809788        | 873.408532        | 1728.783239       | 864.895258        | 1727.799223        | 864.403250        | 13 |
| 3  | <b>306.144832</b>  | 153.576054      |                |                   | 288.134267         | 144.570772       | A    | 1658.777760        | 829.892518        | 1641.751211       | 821.379244        | 1640.767195        | 820.887236        | 12 |
| 4  | <b>419.228896</b>  | 210.118086      |                |                   | 401.218331         | 201.112804       | I    | <b>1587.740646</b> | 794.373961        | 1570.714097       | 785.860687        | 1569.730081        | <b>785.368678</b> | 11 |
| 5  | <b>579.259545</b>  | 290.133411      |                |                   | 561.248980         | 281.128128       | C    | <b>1474.656582</b> | <b>737.831929</b> | 1457.630033       | 729.318655        | <b>1456.646017</b> | <b>728.826647</b> | 10 |
| 6  | 1018.484871        | 509.746074      | 1001.458322    | 501.232799        | 1000.474306        | 500.740791       | Q    | <b>1314.625933</b> | 657.816605        | 1297.599384       | <b>649.303330</b> | 1296.615368        | <b>648.811322</b> | 9  |
| 7  | 1075.506335        | 538.256806      | 1058.479786    | 529.743531        | 1057.495770        | 529.251523       | G    | <b>875.400607</b>  | 438.203942        | 858.374058        | 429.690667        | <b>857.390042</b>  | 429.198659        | 8  |
| 8  | <b>1190.533278</b> | 595.770277      | 1173.506729    | <b>587.257003</b> | <b>1172.522713</b> | 586.764995       | D    | <b>818.379143</b>  | 409.693210        | 801.352594        | 401.179935        | 800.368578         | 400.687927        | 7  |
| 9  | 1247.554742        | 624.281009      | 1230.528193    | 615.767735        | 1229.544177        | 615.275727       | G    | <b>703.352200</b>  | 352.179738        | 686.325651        | 343.666464        | 685.341635         | 343.174456        | 6  |
| 10 | 1348.602421        | 674.804849      | 1331.575872    | 666.291574        | <b>1330.591856</b> | 665.799566       | T    | <b>646.330736</b>  | 323.669006        | 629.304187        | 315.155732        | 628.320171         | 314.663724        | 5  |
| 11 | 1534.681734        | 767.844505      | 1517.655185    | 759.331231        | 1516.671169        | 758.839223       | W    | <b>545.283057</b>  | 273.145167        | 528.256508        | 264.631892        | 527.272492         | 264.139884        | 4  |
| 12 | 1621.713762        | 811.360519      | 1604.687213    | 802.847245        | 1603.703197        | 802.355237       | S    | <b>359.203744</b>  | 180.105510        | <b>342.177195</b> | 171.592236        | 341.193179         | 171.100228        | 3  |
| 13 | 1718.766526        | 859.886901      | 1701.739977    | 851.373627        | 1700.755961        | 850.881619       | P    | <b>272.171716</b>  | 136.589496        | <b>255.145167</b> | 128.076221        |                    |                   | 2  |
| 14 |                    |                 |                |                   |                    |                  | R    | <b>175.118952</b>  | 88.063114         | 158.092403        | 79.549839         |                    |                   | 1  |

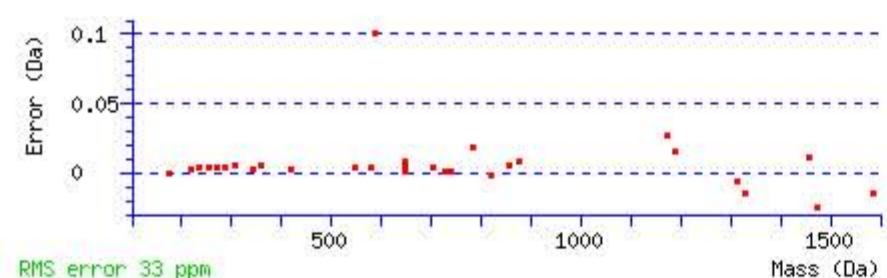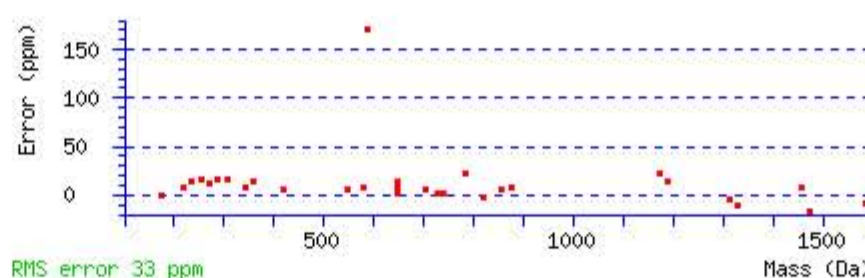

NCBI BLAST search of **FSAICQGDGTWSPR**

(Parameters: blastp, nr protein database, expect=20000, no filter, PAM30)

Other BLAST [web gateways](#)

All matches to this query

| Score | Mr(calc):   | Delta    | Sequence                       |
|-------|-------------|----------|--------------------------------|
| 41.5  | 1891.870941 | 0.014001 | <a href="#">FSAICQGDGTWSPR</a> |

Mascot: <http://www.matrixscience.com/>



# MASCOT Search Results

## Peptide View

MS/MS Fragmentation of **GVGWSHPLPQCEIVK**

Found in **C4BPA\_HUMAN**, C4b-binding protein alpha chain OS=Homo sapiens GN=C4BPA PE=1 SV=2

Match to Query 42980: 2017.032432 from(673.351420,3+) rtinseconds(2088) index(33630)

Title: Locus:1.1.1.3276.14 File:"2013-07-02 CLN FXIII 60 min 3rd F 3.wiff"

Data file C:\Program Files (x86)\Matrix Science\Mascot Daemon\mgf\6 FXIII 60 min 3rd\mascot\_daemon\_merge.mgf

Click mouse within plot area to zoom in by factor of two about that point

Or, Plot from  to  Da

Label all possible matches  Label matches used for scoring

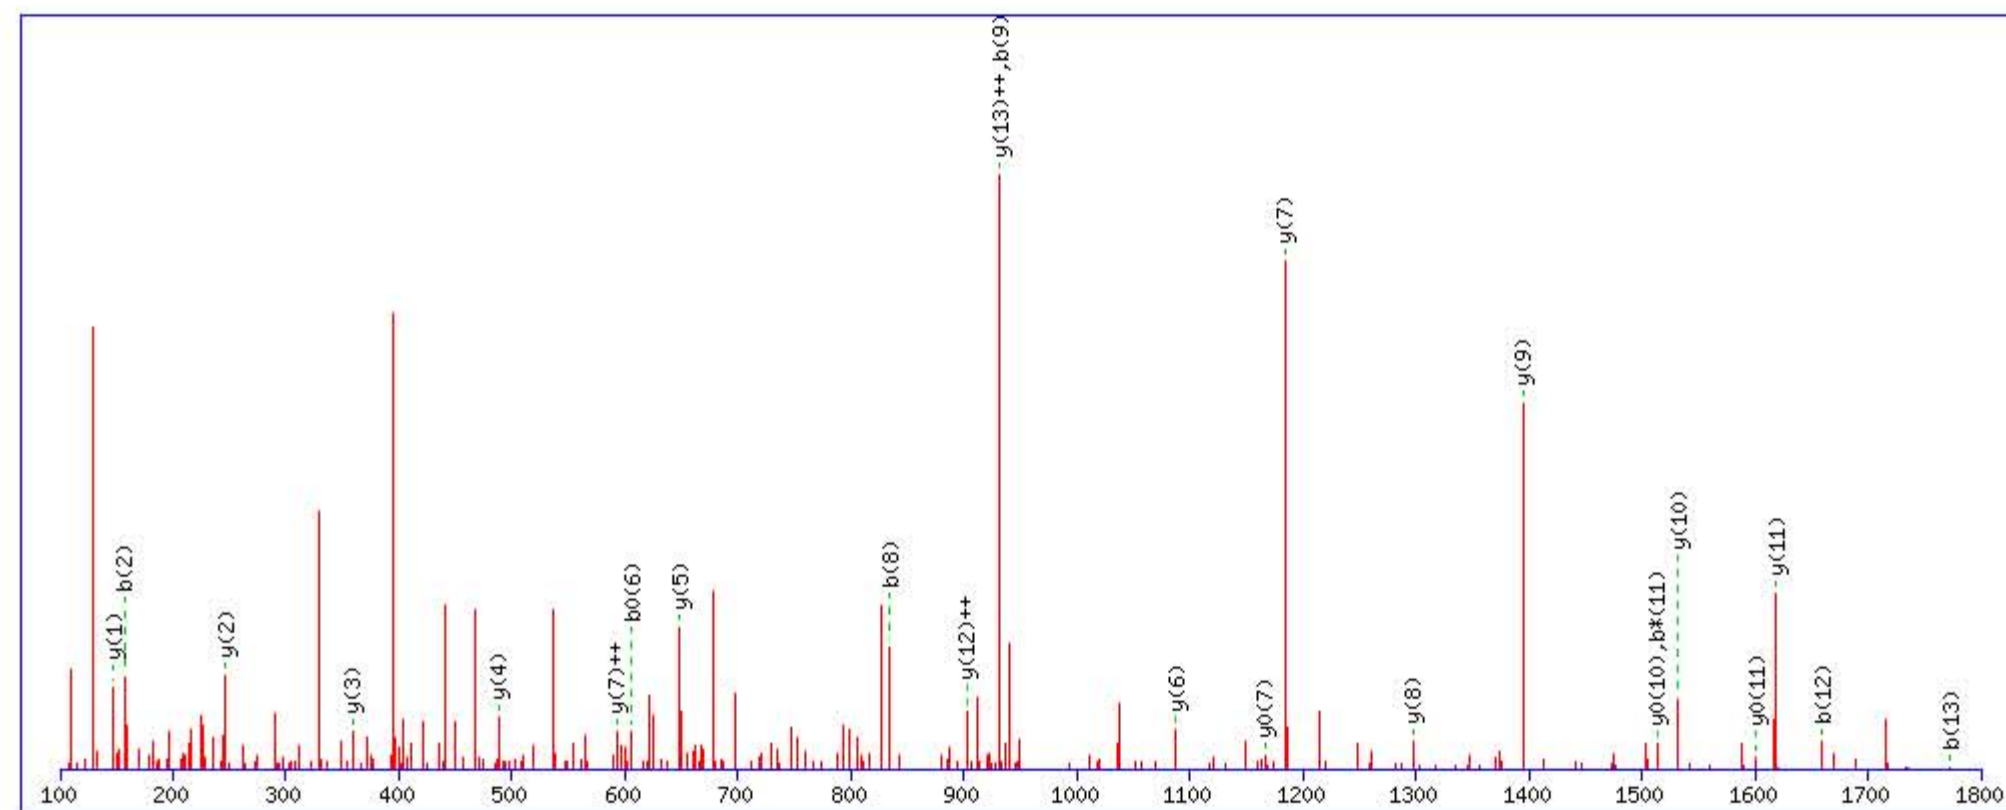

Monoisotopic mass of neutral peptide Mr(calc): 2017.027771

Fixed modifications: Carbamidomethyl (C) (apply to specified residues or termini only)

Variable modifications:

Q10 : Biotin:Thermo-21345 (Q)

Ions Score: 38 Expect: 0.0043

Matches : 24/136 fragment ions using 68 most intense peaks [\(help\)](#)

| #  | b                  | b <sup>++</sup> | b <sup>+</sup>     | b <sup>+++</sup> | b <sup>0</sup>    | b <sup>0++</sup> | Seq. | y                  | y <sup>++</sup>   | y <sup>+</sup> | y <sup>+++</sup> | y <sup>0</sup>     | y <sup>0++</sup> | #  |
|----|--------------------|-----------------|--------------------|------------------|-------------------|------------------|------|--------------------|-------------------|----------------|------------------|--------------------|------------------|----|
| 1  | 58.028740          | 29.518008       |                    |                  |                   |                  | G    |                    |                   |                |                  |                    |                  | 15 |
| 2  | <b>157.097154</b>  | 79.052215       |                    |                  |                   |                  | V    | 1961.013573        | 981.010425        | 1943.987024    | 972.497150       | 1943.003008        | 972.005142       | 14 |
| 3  | 214.118618         | 107.562947      |                    |                  |                   |                  | G    | 1861.945159        | <b>931.476217</b> | 1844.918610    | 922.962943       | 1843.934594        | 922.470935       | 13 |
| 4  | 400.197931         | 200.602603      |                    |                  |                   |                  | W    | 1804.923695        | <b>902.965486</b> | 1787.897146    | 894.452211       | 1786.913130        | 893.960203       | 12 |
| 5  | 487.229959         | 244.118617      |                    |                  | 469.219394        | 235.113335       | S    | <b>1618.844382</b> | 809.925829        | 1601.817833    | 801.412555       | <b>1600.833817</b> | 800.920547       | 11 |
| 6  | 624.288871         | 312.648074      |                    |                  | <b>606.278306</b> | 303.642791       | H    | <b>1531.812354</b> | 766.409815        | 1514.785805    | 757.896541       | <b>1513.801789</b> | 757.404532       | 10 |
| 7  | 721.341635         | 361.174456      |                    |                  | 703.331070        | 352.169173       | P    | <b>1394.753442</b> | 697.880359        | 1377.726893    | 689.367085       | 1376.742877        | 688.875076       | 9  |
| 8  | <b>834.425699</b>  | 417.716488      |                    |                  | 816.415134        | 408.711205       | L    | <b>1297.700678</b> | 649.353977        | 1280.674129    | 640.840703       | 1279.690113        | 640.348694       | 8  |
| 9  | <b>931.478463</b>  | 466.242870      |                    |                  | 913.467898        | 457.237587       | P    | <b>1184.616614</b> | <b>592.811945</b> | 1167.590065    | 584.298670       | <b>1166.606049</b> | 583.806662       | 7  |
| 10 | 1370.703789        | 685.855532      | 1353.677240        | 677.342258       | 1352.693224       | 676.850250       | Q    | <b>1087.563850</b> | 544.285563        | 1070.537301    | 535.772288       | 1069.553285        | 535.280280       | 6  |
| 11 | 1530.734438        | 765.870857      | <b>1513.707889</b> | 757.357583       | 1512.723873       | 756.865574       | C    | <b>648.338524</b>  | 324.672900        | 631.311975     | 316.159626       | 630.327959         | 315.667618       | 5  |
| 12 | <b>1659.777031</b> | 830.392153      | 1642.750482        | 821.878879       | 1641.766466       | 821.386871       | E    | <b>488.307875</b>  | 244.657575        | 471.281326     | 236.144301       | 470.297310         | 235.652293       | 4  |
| 13 | <b>1772.861095</b> | 886.934185      | 1755.834546        | 878.420911       | 1754.850530       | 877.928903       | I    | <b>359.265282</b>  | 180.136279        | 342.238733     | 171.623004       |                    |                  | 3  |
| 14 | 1871.929509        | 936.468392      | 1854.902960        | 927.955118       | 1853.918944       | 927.463110       | V    | <b>246.181218</b>  | 123.594247        | 229.154669     | 115.080973       |                    |                  | 2  |
| 15 |                    |                 |                    |                  |                   |                  | K    | <b>147.112804</b>  | 74.060040         | 130.086255     | 65.546765        |                    |                  | 1  |

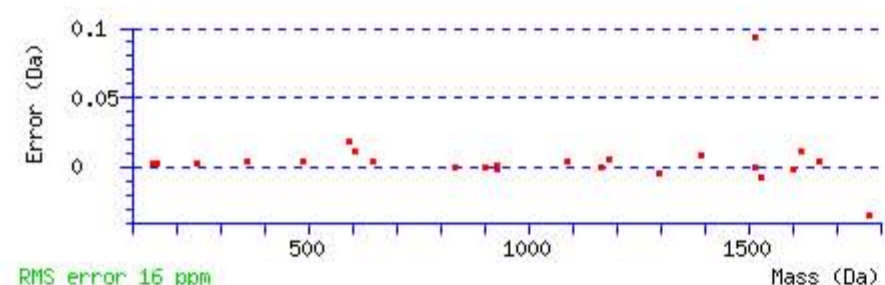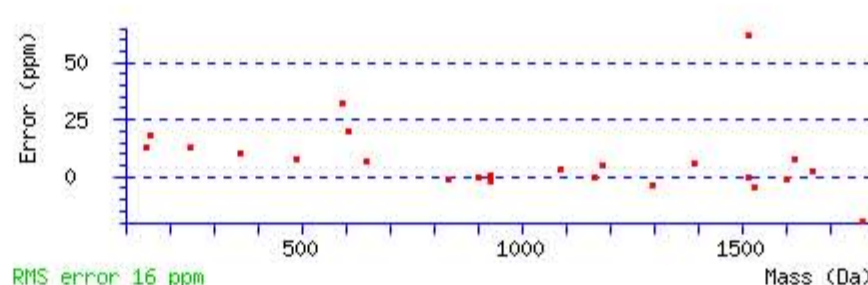

NCBI BLAST search of **GVGWSHPLPQCEIVK**

(Parameters: blastp, nr protein database, expect=20000, no filter, PAM30)

Other BLAST [web gateways](#)

All matches to this query

| Score | Mr(calc):   | Delta    | Sequence                        |
|-------|-------------|----------|---------------------------------|
| 38.5  | 2017.027771 | 0.004661 | <a href="#">GVGWSHPLPQCEIVK</a> |

Mascot: <http://www.matrixscience.com/>

# MASCOT SEARCH RESULTS

## Peptide View

MS/MS Fragmentation of **LSCSYSHWSAPAPQCK**

Found in **C4BPA\_HUMAN**, C4b-binding protein alpha chain OS=Homo sapiens GN=C4BPA PE=1 SV=2

Match to Query 45864: 2188.989162 from(730.670330,3+) rtinseconds(1776) index(31813)

Title: Locus:1.1.1.3167.16 File:"2013-07-02 CLN FXIII 60 min 3rd F 3.wiff"

Data file C:\Program Files (x86)\Matrix Science\Mascot Daemon\mgf\6 FXIII 60 min 3rd\mascot\_daemon\_merge.mgf

Click mouse within plot area to zoom in by factor of two about that point

Or, Plot from  to  Da

Label all possible matches  Label matches used for scoring

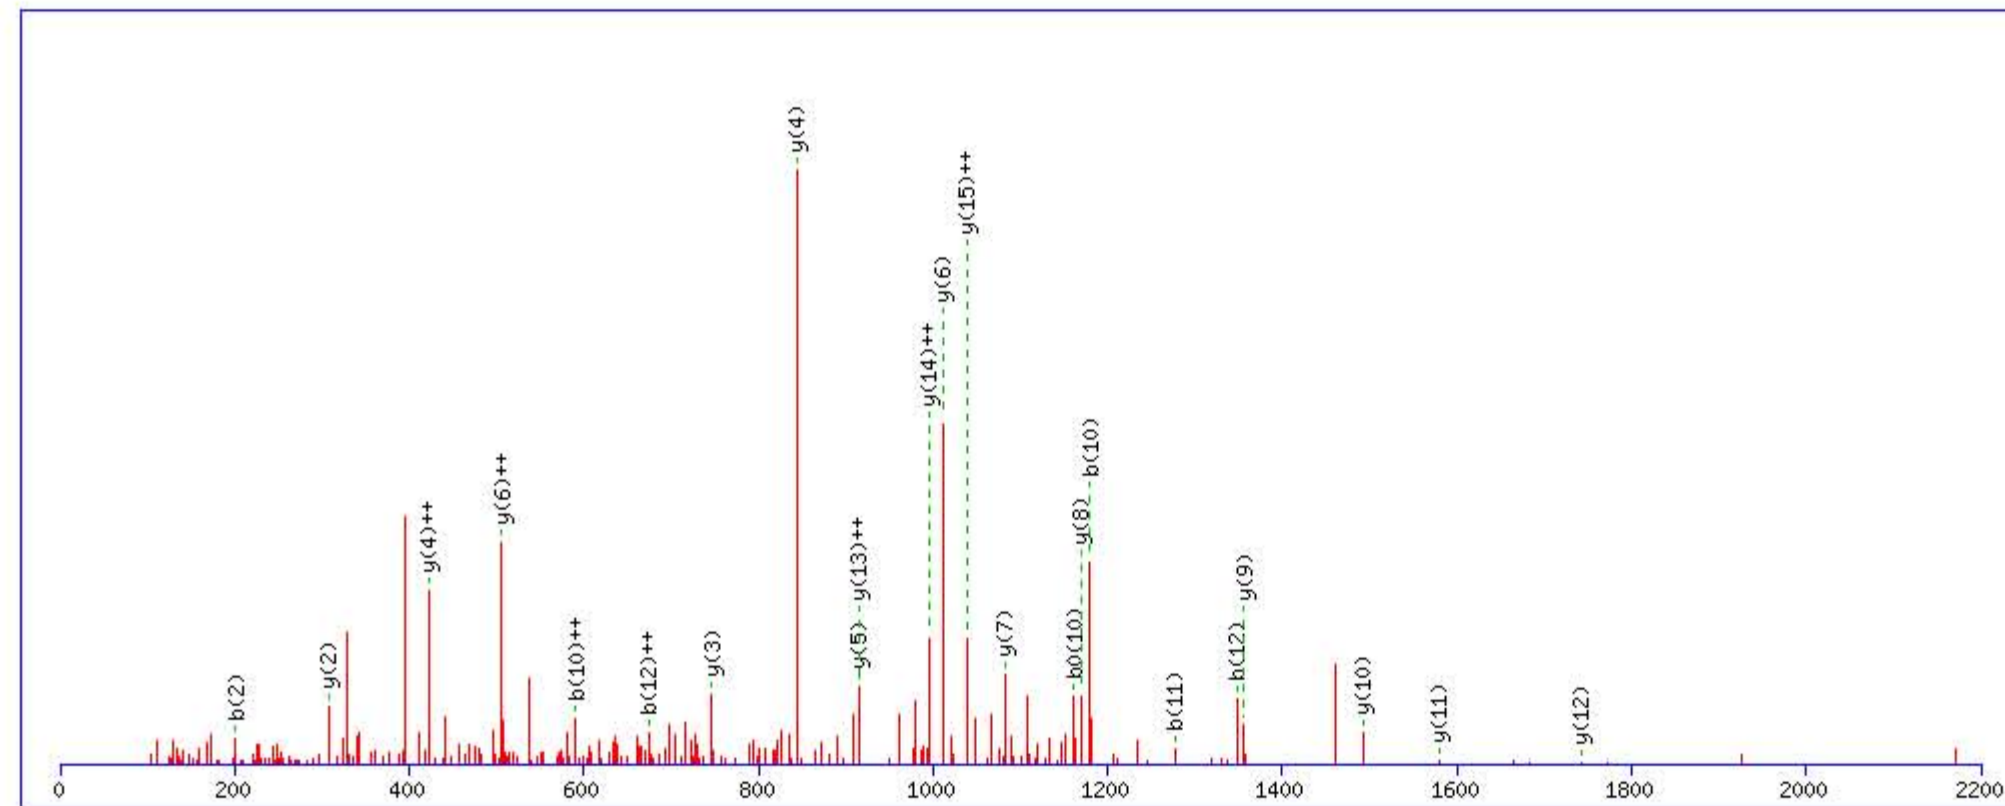

Monoisotopic mass of neutral peptide Mr(calc): 2188.985626

Fixed modifications: Carbamidomethyl (C) (apply to specified residues or termini only)

Variable modifications:

Q14 : Biotin:Thermo-21345 (Q)

Ions Score: 56 Expect: 2.3e-005

Matches : 23/138 fragment ions using 50 most intense peaks [\(help\)](#)

| #  | b                  | b <sup>++</sup>   | b <sup>*</sup> | b <sup>+++</sup> | b <sup>0</sup>     | b <sup>0++</sup> | Seq. | y                  | y <sup>++</sup>    | y <sup>*</sup> | y <sup>+++</sup> | y <sup>0</sup> | y <sup>0++</sup> | #  |
|----|--------------------|-------------------|----------------|------------------|--------------------|------------------|------|--------------------|--------------------|----------------|------------------|----------------|------------------|----|
| 1  | 114.091340         | 57.549308         |                |                  |                    |                  | L    |                    |                    |                |                  |                |                  | 16 |
| 2  | <b>201.123368</b>  | 101.065322        |                |                  | 183.112803         | 92.060039        | S    | 2076.908850        | <b>1038.958063</b> | 2059.882301    | 1030.444788      | 2058.898285    | 1029.952780      | 15 |
| 3  | 361.154017         | 181.080647        |                |                  | 343.143452         | 172.075364       | C    | 1989.876822        | <b>995.442049</b>  | 1972.850273    | 986.928775       | 1971.866257    | 986.436767       | 14 |
| 4  | 448.186045         | 224.596660        |                |                  | 430.175480         | 215.591378       | S    | 1829.846173        | <b>915.426725</b>  | 1812.819624    | 906.913450       | 1811.835608    | 906.421442       | 13 |
| 5  | 611.249374         | 306.128325        |                |                  | 593.238809         | 297.123043       | Y    | <b>1742.814145</b> | 871.910711         | 1725.787596    | 863.397436       | 1724.803580    | 862.905428       | 12 |
| 6  | 698.281402         | 349.644339        |                |                  | 680.270837         | 340.639056       | S    | <b>1579.750816</b> | 790.379046         | 1562.724267    | 781.865772       | 1561.740251    | 781.373764       | 11 |
| 7  | 835.340314         | 418.173795        |                |                  | 817.329749         | 409.168512       | H    | <b>1492.718788</b> | 746.863032         | 1475.692239    | 738.349758       | 1474.708223    | 737.857750       | 10 |
| 8  | 1021.419627        | 511.213452        |                |                  | 1003.409062        | 502.208169       | W    | <b>1355.659876</b> | 678.333576         | 1338.633327    | 669.820302       | 1337.649311    | 669.328294       | 9  |
| 9  | 1108.451655        | 554.729466        |                |                  | 1090.441090        | 545.724183       | S    | <b>1169.580563</b> | 585.293920         | 1152.554014    | 576.780645       | 1151.569998    | 576.288637       | 8  |
| 10 | <b>1179.488769</b> | <b>590.248023</b> |                |                  | <b>1161.478204</b> | 581.242740       | A    | <b>1082.548535</b> | 541.777906         | 1065.521986    | 533.264631       |                |                  | 7  |
| 11 | <b>1276.541533</b> | 638.774405        |                |                  | 1258.530968        | 629.769122       | P    | <b>1011.511421</b> | <b>506.259349</b>  | 994.484872     | 497.746074       |                |                  | 6  |
| 12 | <b>1347.578647</b> | <b>674.292962</b> |                |                  | 1329.568082        | 665.287679       | A    | <b>914.458657</b>  | 457.732967         | 897.432108     | 449.219692       |                |                  | 5  |
| 13 | 1444.631411        | 722.819344        |                |                  | 1426.620846        | 713.814061       | P    | <b>843.421543</b>  | <b>422.214410</b>  | 826.394994     | 413.701135       |                |                  | 4  |
| 14 | 1883.856737        | 942.432007        | 1866.830188    | 933.918732       | 1865.846172        | 933.426724       | Q    | <b>746.368779</b>  | 373.688028         | 729.342230     | 365.174753       |                |                  | 3  |
| 15 | 2043.887386        | 1022.447331       | 2026.860837    | 1013.934057      | 2025.876821        | 1013.442049      | C    | <b>307.143453</b>  | 154.075365         | 290.116904     | 145.562090       |                |                  | 2  |
| 16 |                    |                   |                |                  |                    |                  | K    | 147.112804         | 74.060040          | 130.086255     | 65.546766        |                |                  | 1  |

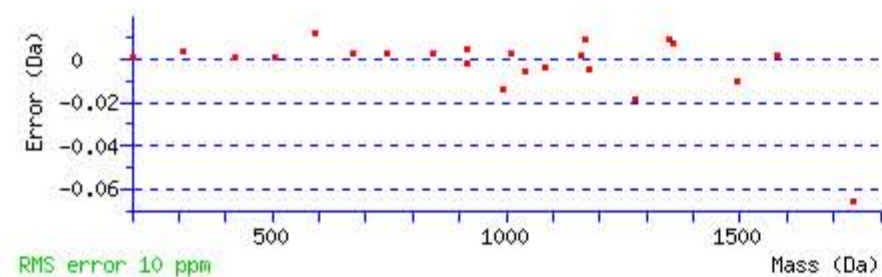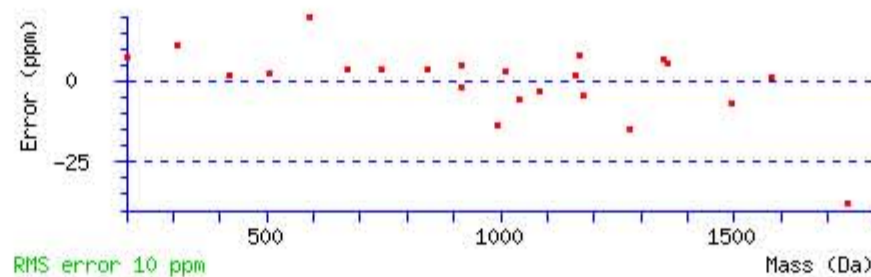

NCBI BLAST search of **LSCSYSHWSAPAPQCK**

(Parameters: blastp, nr protein database, expect=20000, no filter, PAM30)

Other BLAST [web gateways](#)

All matches to this query

| Score | Mr(calc):   | Delta    | Sequence                         |
|-------|-------------|----------|----------------------------------|
| 56.5  | 2188.985626 | 0.003536 | <a href="#">LSCSYSHWSAPAPQCK</a> |

Mascot: <http://www.matrixscience.com/>

# MASCOT Search Results

## Peptide View

MS/MS Fragmentation of **WTPYQGCEALCCPEPK**

Found in **C4BPA\_HUMAN**, C4b-binding protein alpha chain OS=Homo sapiens GN=C4BPA PE=1 SV=2

Match to Query 47904: 2306.007282 from(769.676370,3+) rtinseconds(2120) index(33830)

Title: Locus:1.1.1.3287.16 File:"2013-07-02 CLN FXIII 60 min 3rd F 3.wiff"

Data file C:\Program Files (x86)\Matrix Science\Mascot Daemon\mgf\6 FXIII 60 min 3rd\mascot\_daemon\_merge.mgf

Click mouse within plot area to zoom in by factor of two about that point

Or, Plot from  to  Da

Label all possible matches  Label matches used for scoring

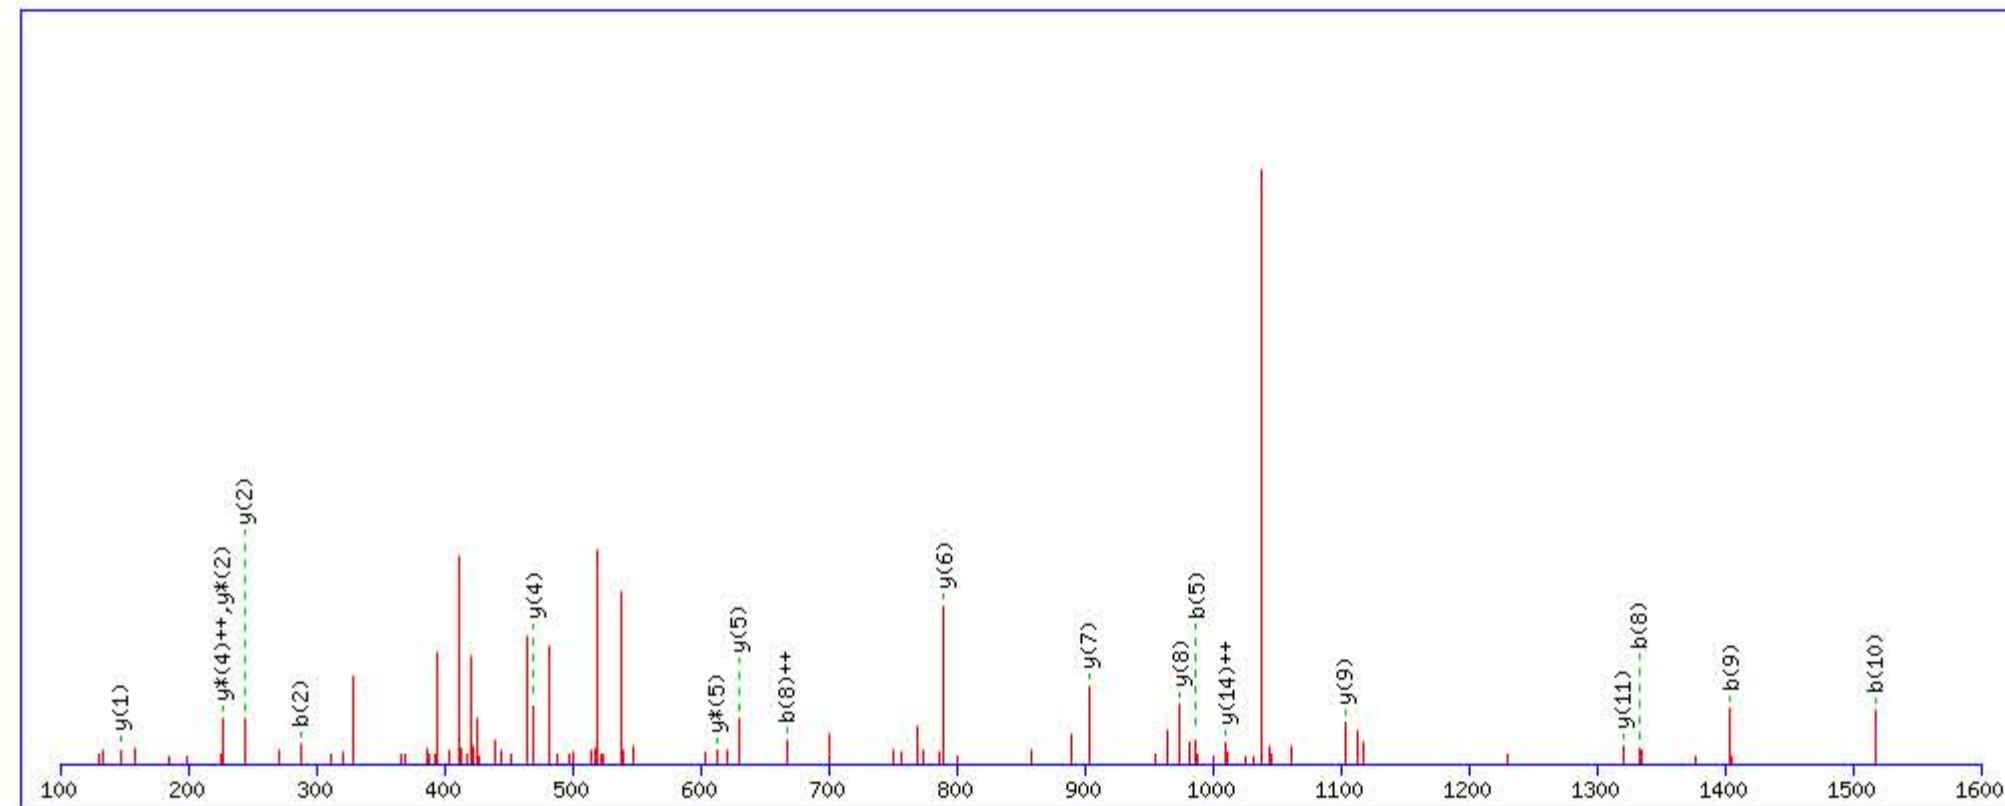

Monoisotopic mass of neutral peptide Mr(calc): 2305.999237

Fixed modifications: Carbamidomethyl (C) (apply to specified residues or termini only)

Variable modifications:

Q5 : Biotin:Thermo-21345 (Q)

Ions Score: 28 Expect: 0.0074

Matches : 19/166 fragment ions using 46 most intense peaks [\(help\)](#)

| #  | b                  | b <sup>++</sup>   | b <sup>*</sup> | b <sup>+++</sup> | b <sup>0</sup> | b <sup>0++</sup> | Seq. | y                  | y <sup>++</sup>    | y <sup>*</sup>    | y <sup>+++</sup>  | y <sup>0</sup> | y <sup>0++</sup> | #  |
|----|--------------------|-------------------|----------------|------------------|----------------|------------------|------|--------------------|--------------------|-------------------|-------------------|----------------|------------------|----|
| 1  | 187.086589         | 94.046932         |                |                  |                |                  | W    |                    |                    |                   |                   |                |                  | 16 |
| 2  | <b>288.134268</b>  | 144.570772        |                |                  | 270.123703     | 135.565490       | T    | 2120.927205        | 1060.967240        | 2103.900656       | 1052.453966       | 2102.916640    | 1051.961958      | 15 |
| 3  | 385.187032         | 193.097154        |                |                  | 367.176467     | 184.091872       | P    | 2019.879526        | <b>1010.443401</b> | 2002.852977       | 1001.930127       | 2001.868961    | 1001.438119      | 14 |
| 4  | 548.250361         | 274.628819        |                |                  | 530.239796     | 265.623536       | Y    | 1922.826762        | 961.917019         | 1905.800213       | 953.403745        | 1904.816197    | 952.911737       | 13 |
| 5  | <b>987.475687</b>  | 494.241482        | 970.449138     | 485.728207       | 969.465122     | 485.236199       | Q    | 1759.763433        | 880.385355         | 1742.736884       | 871.872080        | 1741.752868    | 871.380072       | 12 |
| 6  | 1044.497151        | 522.752214        | 1027.470602    | 514.238939       | 1026.486586    | 513.746931       | G    | <b>1320.538107</b> | 660.772692         | 1303.511558       | 652.259417        | 1302.527542    | 651.767409       | 11 |
| 7  | 1204.527800        | 602.767538        | 1187.501251    | 594.254264       | 1186.517235    | 593.762256       | C    | 1263.516643        | 632.261960         | 1246.490094       | 623.748685        | 1245.506078    | 623.256677       | 10 |
| 8  | <b>1333.570393</b> | <b>667.288835</b> | 1316.543844    | 658.775560       | 1315.559828    | 658.283552       | E    | <b>1103.485994</b> | 552.246635         | 1086.459445       | 543.733361        | 1085.475429    | 543.241353       | 9  |
| 9  | <b>1404.607507</b> | 702.807392        | 1387.580958    | 694.294117       | 1386.596942    | 693.802109       | A    | <b>974.443401</b>  | 487.725339         | 957.416852        | 479.212064        | 956.432836     | 478.720056       | 8  |
| 10 | <b>1517.691571</b> | 759.349424        | 1500.665022    | 750.836149       | 1499.681006    | 750.344141       | L    | <b>903.406287</b>  | 452.206782         | 886.379738        | 443.693507        | 885.395722     | 443.201499       | 7  |
| 11 | 1677.722220        | 839.364748        | 1660.695671    | 830.851474       | 1659.711655    | 830.359466       | C    | <b>790.322223</b>  | 395.664750         | 773.295674        | 387.151475        | 772.311658     | 386.659467       | 6  |
| 12 | 1837.752869        | 919.380073        | 1820.726320    | 910.866798       | 1819.742304    | 910.374790       | C    | <b>630.291574</b>  | 315.649425         | <b>613.265025</b> | 307.136151        | 612.281009     | 306.644143       | 5  |
| 13 | 1934.805633        | 967.906455        | 1917.779084    | 959.393180       | 1916.795068    | 958.901172       | P    | <b>470.260925</b>  | 235.634101         | 453.234376        | <b>227.120826</b> | 452.250360     | 226.628818       | 4  |
| 14 | 2063.848226        | 1032.427751       | 2046.821677    | 1023.914477      | 2045.837661    | 1023.422469      | E    | 373.208161         | 187.107719         | 356.181612        | 178.594444        | 355.197596     | 178.102436       | 3  |
| 15 | 2160.900990        | 1080.954133       | 2143.874441    | 1072.440858      | 2142.890425    | 1071.948850      | P    | <b>244.165568</b>  | 122.586422         | <b>227.139019</b> | 114.073148        |                |                  | 2  |
| 16 |                    |                   |                |                  |                |                  | K    | <b>147.112804</b>  | 74.060040          | 130.086255        | 65.546765         |                |                  | 1  |

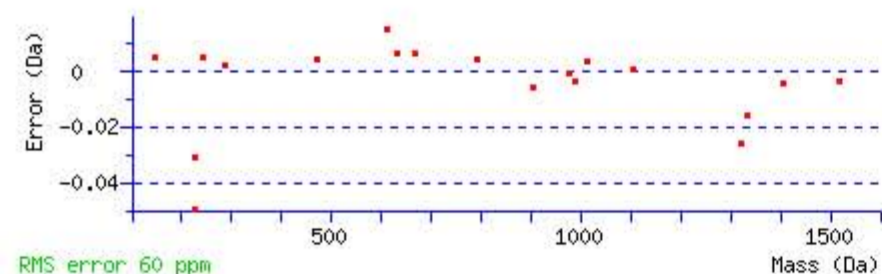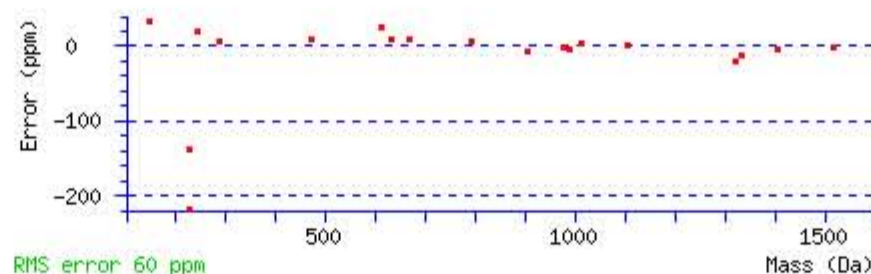

NCBI BLAST search of [WTPYQGCEALCCPEPK](#)

(Parameters: blastp, nr protein database, expect=20000, no filter, PAM30)

Other BLAST [web gateways](#)

## All matches to this query

| Score | Mr(calc):   | Delta    | Sequence                         |
|-------|-------------|----------|----------------------------------|
| 28.4  | 2305.999237 | 0.008045 | <a href="#">WTPYQGCEALCCPEPK</a> |

Mascot: <http://www.matrixscience.com/>

# MASCOT Search Results

## Peptide View

MS/MS Fragmentation of **CHPGYKPTTDEPTTVICQK**

Found in **C4BPA\_HUMAN**, C4b-binding protein alpha chain OS=Homo sapiens GN=C4BPA PE=1 SV=2

Match to Query 51637: 2542.206336 from(636.558860,4+) rtinseconds(1596) index(30863)

Title: Locus:1.1.1.3104.12 File:"2013-07-02 CLN FXIII 60 min 3rd F 3.wiff"

Data file C:\Program Files (x86)\Matrix Science\Mascot Daemon\mgf\6 FXIII 60 min 3rd\mascot\_daemon\_merge.mgf

Click mouse within plot area to zoom in by factor of two about that point

Or, Plot from  to  Da

Label all possible matches  Label matches used for scoring

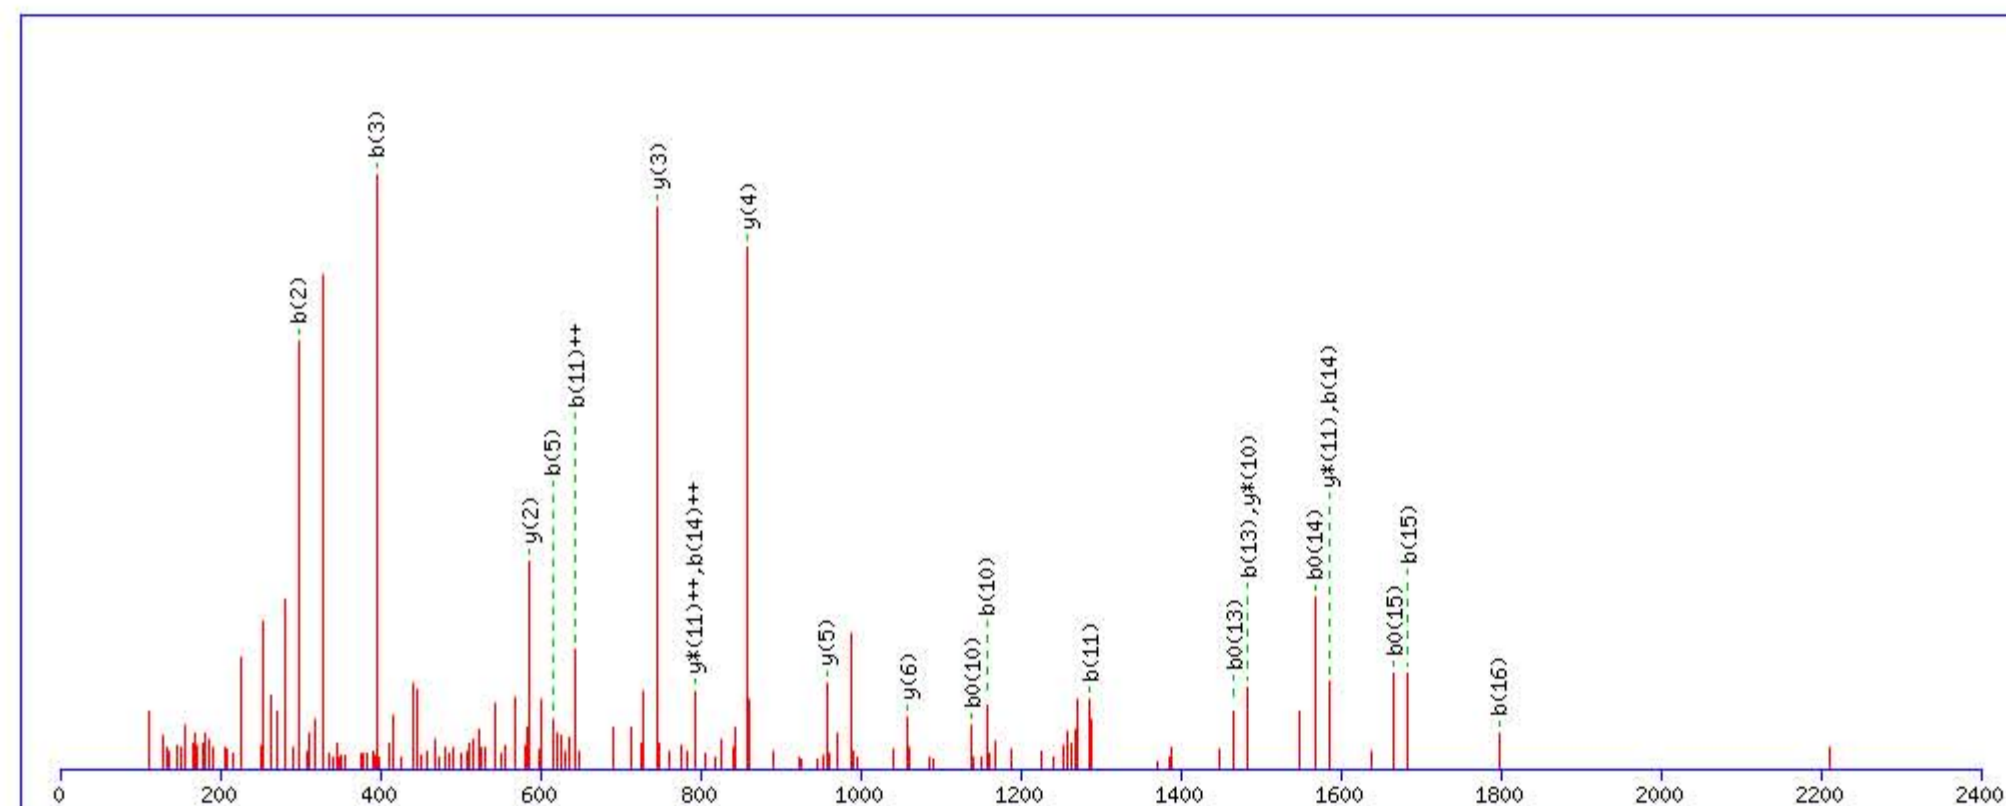

Monoisotopic mass of neutral peptide Mr(calc): 2542.201859

Fixed modifications: Carbamidomethyl (C) (apply to specified residues or termini only)

Variable modifications:

Q18 : Biotin:Thermo-21345 (Q)

Ions Score: 48 Expect: 0.00026

Matches : 23/182 fragment ions using 34 most intense peaks [\(help\)](#)

| #  | b                  | b <sup>++</sup>   | b <sup>+</sup> | b <sup>+++</sup> | b <sup>0</sup>     | b <sup>0++</sup> | Seq. | y                  | y <sup>++</sup> | y <sup>+</sup>     | y <sup>+++</sup>  | y <sup>0</sup> | y <sup>0++</sup> | #  |
|----|--------------------|-------------------|----------------|------------------|--------------------|------------------|------|--------------------|-----------------|--------------------|-------------------|----------------|------------------|----|
| 1  | 161.037925         | 81.022600         |                |                  |                    |                  | C    |                    |                 |                    |                   |                |                  | 19 |
| 2  | <b>298.096837</b>  | 149.552056        |                |                  |                    |                  | H    | 2383.178469        | 1192.092872     | 2366.151920        | 1183.579598       | 2365.167904    | 1183.087590      | 18 |
| 3  | <b>395.149601</b>  | 198.078439        |                |                  |                    |                  | P    | 2246.119557        | 1123.563416     | 2229.093008        | 1115.050142       | 2228.108992    | 1114.558134      | 17 |
| 4  | 452.171065         | 226.589170        |                |                  |                    |                  | G    | 2149.066793        | 1075.037034     | 2132.040244        | 1066.523760       | 2131.056228    | 1066.031752      | 16 |
| 5  | <b>615.234394</b>  | 308.120835        |                |                  |                    |                  | Y    | 2092.045329        | 1046.526302     | 2075.018780        | 1038.013028       | 2074.034764    | 1037.521020      | 15 |
| 6  | 743.329357         | 372.168317        | 726.302808     | 363.655042       |                    |                  | K    | 1928.982000        | 964.994638      | 1911.955451        | 956.481364        | 1910.971435    | 955.989356       | 14 |
| 7  | 840.382121         | 420.694699        | 823.355572     | 412.181424       |                    |                  | P    | 1800.887037        | 900.947157      | 1783.860488        | 892.433882        | 1782.876472    | 891.941874       | 13 |
| 8  | 941.429800         | 471.218538        | 924.403251     | 462.705264       | 923.419235         | 462.213256       | T    | 1703.834273        | 852.420775      | 1686.807724        | 843.907500        | 1685.823708    | 843.415492       | 12 |
| 9  | 1042.477479        | 521.742378        | 1025.450930    | 513.229103       | 1024.466914        | 512.737095       | T    | 1602.786594        | 801.896935      | <b>1585.760045</b> | <b>793.383661</b> | 1584.776029    | 792.891653       | 11 |
| 10 | <b>1157.504422</b> | 579.255849        | 1140.477873    | 570.742575       | <b>1139.493857</b> | 570.250567       | D    | 1501.738915        | 751.373096      | <b>1484.712366</b> | 742.859821        | 1483.728350    | 742.367813       | 10 |
| 11 | <b>1286.547015</b> | <b>643.777146</b> | 1269.520466    | 635.263871       | 1268.536450        | 634.771863       | E    | 1386.711972        | 693.859624      | 1369.685423        | 685.346350        | 1368.701407    | 684.854342       | 9  |
| 12 | 1383.599779        | 692.303528        | 1366.573230    | 683.790253       | 1365.589214        | 683.298245       | P    | 1257.669379        | 629.338328      | 1240.642830        | 620.825053        | 1239.658814    | 620.333045       | 8  |
| 13 | <b>1484.647458</b> | 742.827367        | 1467.620909    | 734.314093       | <b>1466.636893</b> | 733.822085       | T    | 1160.616615        | 580.811946      | 1143.590066        | 572.298671        | 1142.606050    | 571.806663       | 7  |
| 14 | <b>1585.695137</b> | <b>793.351207</b> | 1568.668588    | 784.837932       | <b>1567.684572</b> | 784.345924       | T    | <b>1059.568936</b> | 530.288106      | 1042.542387        | 521.774832        | 1041.558371    | 521.282824       | 6  |
| 15 | <b>1684.763551</b> | 842.885414        | 1667.737002    | 834.372139       | <b>1666.752986</b> | 833.880131       | V    | <b>958.521257</b>  | 479.764267      | 941.494708         | 471.250992        |                |                  | 5  |
| 16 | <b>1797.847615</b> | 899.427446        | 1780.821066    | 890.914171       | 1779.837050        | 890.422163       | I    | <b>859.452843</b>  | 430.230060      | 842.426294         | 421.716785        |                |                  | 4  |
| 17 | 1957.878264        | 979.442770        | 1940.851715    | 970.929496       | 1939.867699        | 970.437488       | C    | <b>746.368779</b>  | 373.688028      | 729.342230         | 365.174753        |                |                  | 3  |
| 18 | 2397.103590        | 1199.055433       | 2380.077041    | 1190.542158      | 2379.093025        | 1190.050151      | Q    | <b>586.338130</b>  | 293.672703      | 569.311581         | 285.159429        |                |                  | 2  |
| 19 |                    |                   |                |                  |                    |                  | K    | 147.112804         | 74.060040       | 130.086255         | 65.546765         |                |                  | 1  |

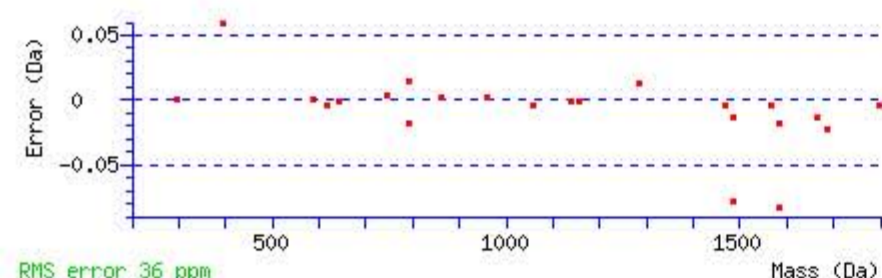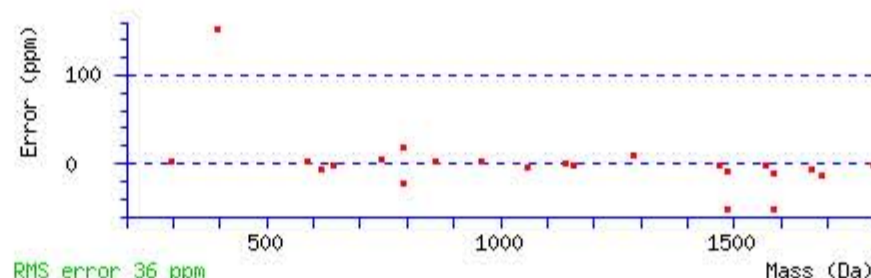

NCBI BLAST search of **CHPGYKPTTDEPTTVICQK**

(Parameters: blastp, nr protein database, expect=20000, no filter, PAM30)

Other BLAST [web gateways](#)

All matches to this query

| Score | Mr(calc):   | Delta    | Sequence                   |
|-------|-------------|----------|----------------------------|
| 48.4  | 2542.201859 | 0.004477 | <b>CHPGYKPTTDEPTTVICQK</b> |

Mascot: <http://www.matrixscience.com/>

# MASCOT Search Results

## Peptide View

MS/MS Fragmentation of **EVEGQILGTYVCIK**

Found in **C4BPB\_HUMAN**, C4b-binding protein beta chain OS=Homo sapiens GN=C4BPB PE=1 SV=1

Match to Query 40555: 1919.000868 from(960.507710,2+) rtinseconds(2482) index(35644)

Title: Locus:1.1.1.3413.25 File:"2013-07-02 CLN FXIII 60 min 3rd F 3.wiff"

Data file C:\Program Files (x86)\Matrix Science\Mascot Daemon\mgf6 FXIII 60 min 3rd\mascot\_daemon\_merge.mgf

Click mouse within plot area to zoom in by factor of two about that point

Or, Plot from  to  Da

Label all possible matches  Label matches used for scoring

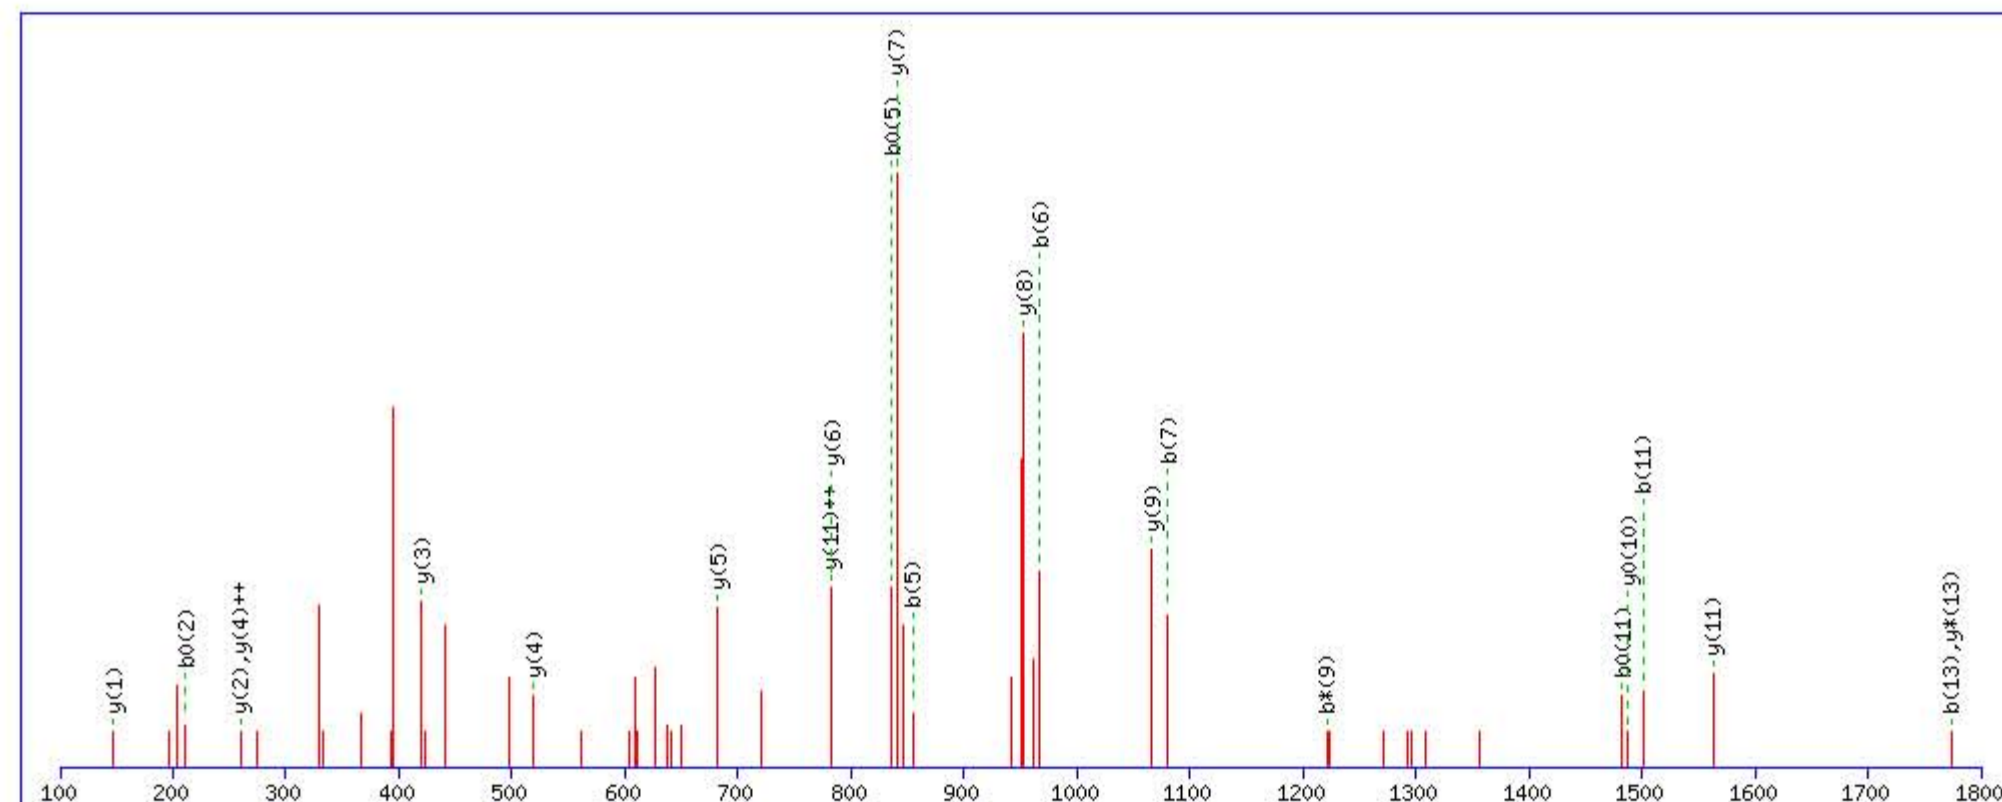

Monoisotopic mass of neutral peptide Mr(calc): 1918.989639

Fixed modifications: Carbamidomethyl (C) (apply to specified residues or termini only)

Variable modifications:

Q5 : Biotin:Thermo-21345 (Q)

Ions Score: 55 Expect: 7.4e-005

Matches : 23/138 fragment ions using 45 most intense peaks [\(help\)](#)

| #  | b           | b <sup>++</sup> | b <sup>*</sup> | b <sup>*++</sup> | b <sup>0</sup> | b <sup>0++</sup> | Seq. | y           | y <sup>++</sup> | y <sup>*</sup> | y <sup>*++</sup> | y <sup>0</sup> | y <sup>0++</sup> | #  |
|----|-------------|-----------------|----------------|------------------|----------------|------------------|------|-------------|-----------------|----------------|------------------|----------------|------------------|----|
| 1  | 130.049869  | 65.528572       |                |                  | 112.039304     | 56.523290        | E    |             |                 |                |                  |                |                  | 14 |
| 2  | 229.118283  | 115.062780      |                |                  | 211.107718     | 106.057497       | V    | 1790.954328 | 895.980802      | 1773.927779    | 887.467528       | 1772.943763    | 886.975520       | 13 |
| 3  | 358.160876  | 179.584076      |                |                  | 340.150311     | 170.578794       | E    | 1691.885914 | 846.446595      | 1674.859365    | 837.933321       | 1673.875349    | 837.441313       | 12 |
| 4  | 415.182340  | 208.094808      |                |                  | 397.171775     | 199.089526       | G    | 1562.843321 | 781.925299      | 1545.816772    | 773.412024       | 1544.832756    | 772.920016       | 11 |
| 5  | 854.407666  | 427.707471      | 837.381117     | 419.194197       | 836.397101     | 418.702189       | Q    | 1505.821857 | 753.414567      | 1488.795308    | 744.901292       | 1487.811292    | 744.409284       | 10 |
| 6  | 967.491730  | 484.249503      | 950.465181     | 475.736229       | 949.481165     | 475.244221       | I    | 1066.596531 | 533.801904      | 1049.569982    | 525.288629       | 1048.585966    | 524.796621       | 9  |
| 7  | 1080.575794 | 540.791535      | 1063.549245    | 532.278261       | 1062.565229    | 531.786253       | L    | 953.512467  | 477.259872      | 936.485918     | 468.746597       | 935.501902     | 468.254589       | 8  |
| 8  | 1137.597258 | 569.302267      | 1120.570709    | 560.788993       | 1119.586693    | 560.296985       | G    | 840.428403  | 420.717840      | 823.401854     | 412.204565       | 822.417838     | 411.712557       | 7  |
| 9  | 1238.644937 | 619.826107      | 1221.618388    | 611.312832       | 1220.634372    | 610.820824       | T    | 783.406939  | 392.207108      | 766.380390     | 383.693833       | 765.396374     | 383.201825       | 6  |
| 10 | 1401.708266 | 701.357771      | 1384.681717    | 692.844497       | 1383.697701    | 692.352489       | Y    | 682.359260  | 341.683268      | 665.332711     | 333.169994       |                |                  | 5  |
| 11 | 1500.776680 | 750.891978      | 1483.750131    | 742.378704       | 1482.766115    | 741.886696       | V    | 519.295931  | 260.151604      | 502.269382     | 251.638329       |                |                  | 4  |
| 12 | 1660.807329 | 830.907303      | 1643.780780    | 822.394028       | 1642.796764    | 821.902020       | C    | 420.227517  | 210.617396      | 403.200968     | 202.104122       |                |                  | 3  |
| 13 | 1773.891393 | 887.449335      | 1756.864844    | 878.936060       | 1755.880828    | 878.444052       | I    | 260.196868  | 130.602072      | 243.170319     | 122.088797       |                |                  | 2  |
| 14 |             |                 |                |                  |                |                  | K    | 147.112804  | 74.060040       | 130.086255     | 65.546765        |                |                  | 1  |

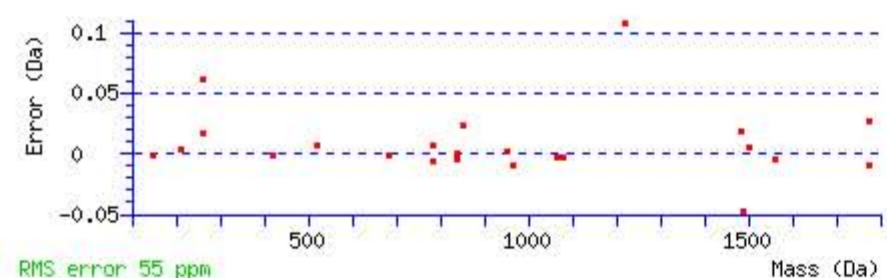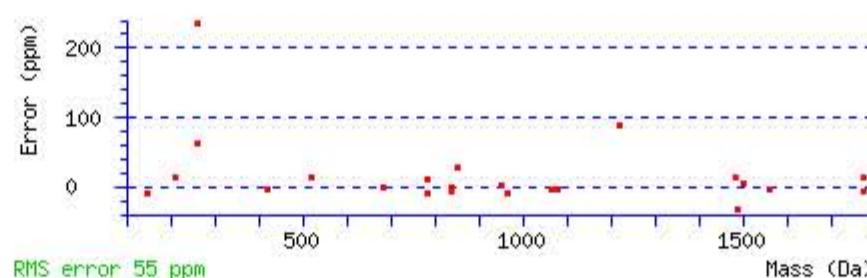

NCBI BLAST search of **EVEGQILGTYVCIK**

(Parameters: blastp, nr protein database, expect=20000, no filter, PAM30)

Other BLAST [web gateways](#)

All matches to this query

| Score | Mr(calc):   | Delta    | Sequence                       |
|-------|-------------|----------|--------------------------------|
| 55.3  | 1918.989639 | 0.011229 | <a href="#">EVEGQILGTYVCIK</a> |

Mascot: <http://www.matrixscience.com/>

# MASCOT Search Results

## Peptide View

MS/MS Fragmentation of **DHLGFQVTWPDESK**

Found in **CPN2\_HUMAN**, Carboxypeptidase N subunit 2 OS=Homo sapiens GN=CPN2 PE=1 SV=3

Match to Query 41514: 1968.963488 from(985.489020,2+) rtinseconds(2315) index(34901)

Title: Locus:1.1.1.3355.15 File:"2013-07-02 CLN FXIII 60 min 3rd F 3.wiff"

Data file C:\Program Files (x86)\Matrix Science\Mascot Daemon\mgf6 FXIII 60 min 3rd\mascot\_daemon\_merge.mgf

Click mouse within plot area to zoom in by factor of two about that point

Or, Plot from  to  Da

Label all possible matches  Label matches used for scoring

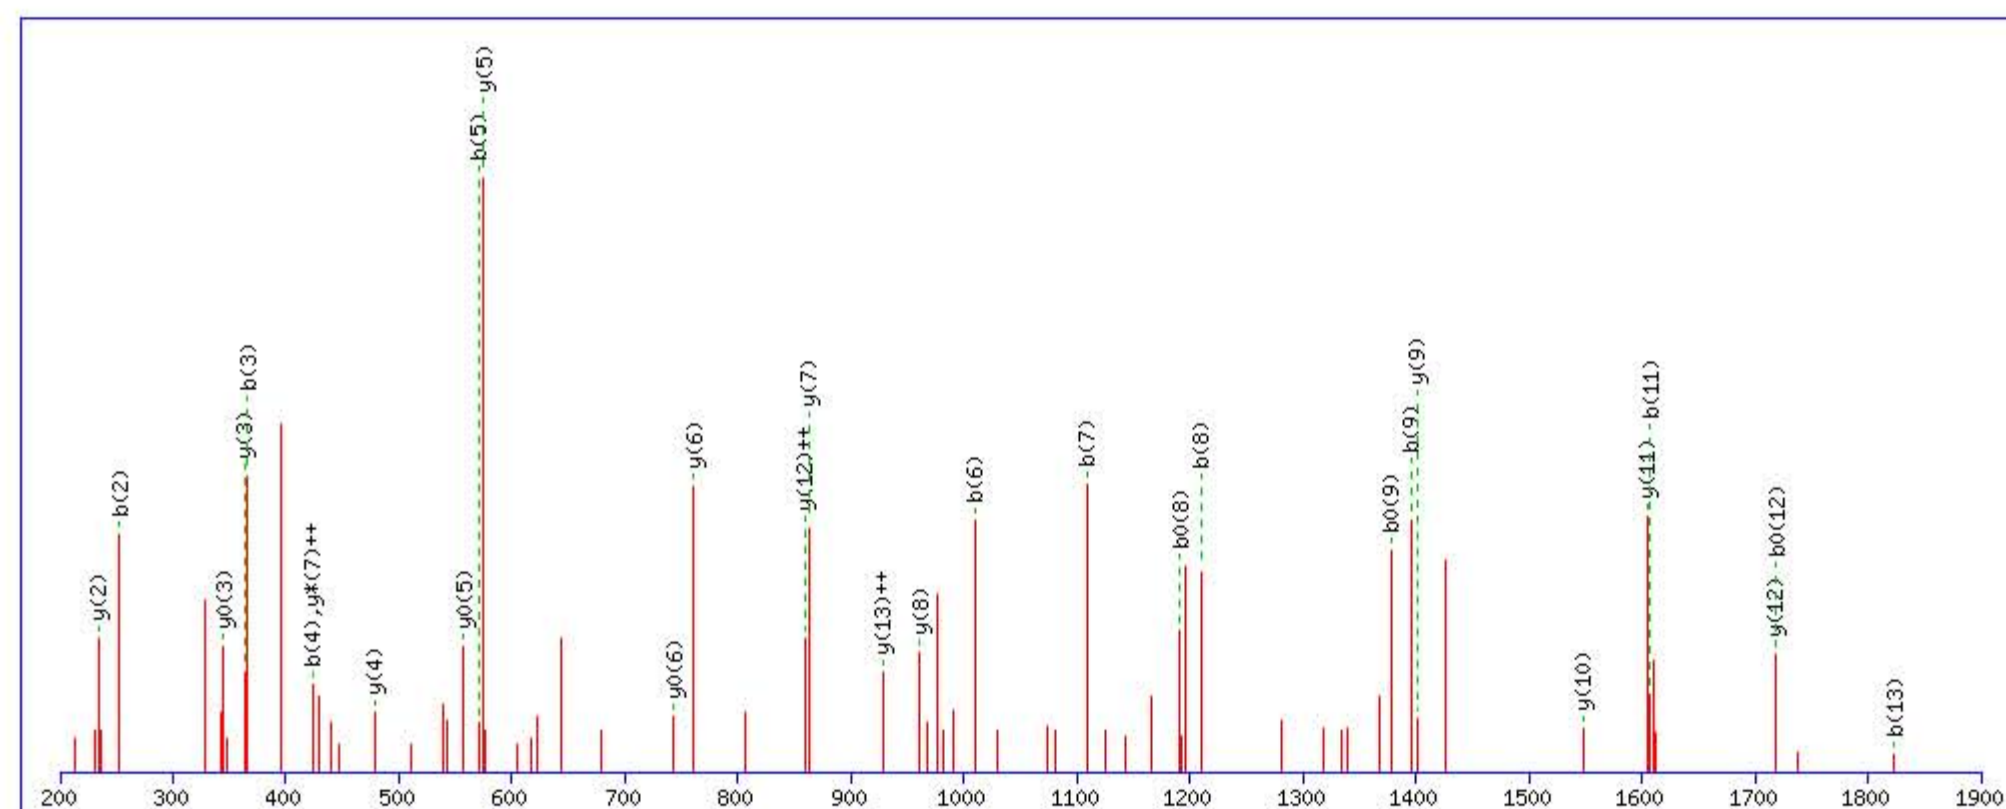

Monoisotopic mass of neutral peptide Mr(calc): 1968.940399

Fixed modifications: Carbamidomethyl (C) (apply to specified residues or termini only)

Variable modifications:

Q6 : Biotin:Thermo-21345 (Q)

Ions Score: 59 Expect: 1.2e-005

Matches : 30/144 fragment ions using 62 most intense peaks [\(help\)](#)

| #  | b                  | b <sup>++</sup> | b <sup>+</sup> | b <sup>+++</sup> | b <sup>0</sup>     | b <sup>0++</sup> | Seq. | y                  | y <sup>++</sup>   | y <sup>+</sup> | y <sup>+++</sup>  | y <sup>0</sup>    | y <sup>0++</sup> | #  |
|----|--------------------|-----------------|----------------|------------------|--------------------|------------------|------|--------------------|-------------------|----------------|-------------------|-------------------|------------------|----|
| 1  | 116.034219         | 58.520748       |                |                  | 98.023654          | 49.515465        | D    |                    |                   |                |                   |                   |                  | 14 |
| 2  | <b>253.093131</b>  | 127.050203      |                |                  | 235.082566         | 118.044921       | H    | 1854.920718        | <b>927.963997</b> | 1837.894169    | 919.450723        | 1836.910153       | 918.958715       | 13 |
| 3  | <b>366.177195</b>  | 183.592235      |                |                  | 348.166630         | 174.586953       | L    | <b>1717.861806</b> | <b>859.434541</b> | 1700.835257    | 850.921267        | 1699.851241       | 850.429259       | 12 |
| 4  | <b>423.198659</b>  | 212.102967      |                |                  | 405.188094         | 203.097685       | G    | <b>1604.777742</b> | 802.892509        | 1587.751193    | 794.379235        | 1586.767177       | 793.887227       | 11 |
| 5  | <b>570.267073</b>  | 285.637175      |                |                  | 552.256508         | 276.631892       | F    | <b>1547.756278</b> | 774.381777        | 1530.729729    | 765.868503        | 1529.745713       | 765.376495       | 10 |
| 6  | <b>1009.492399</b> | 505.249838      | 992.465850     | 496.736563       | 991.481834         | 496.244555       | Q    | <b>1400.687864</b> | 700.847570        | 1383.661315    | 692.334296        | 1382.677299       | 691.842288       | 9  |
| 7  | <b>1108.560813</b> | 554.784045      | 1091.534264    | 546.270770       | 1090.550248        | 545.778762       | V    | <b>961.462538</b>  | 481.234907        | 944.435989     | 472.721633        | 943.451973        | 472.229625       | 8  |
| 8  | <b>1209.608492</b> | 605.307884      | 1192.581943    | 596.794610       | <b>1191.597927</b> | 596.302602       | T    | <b>862.394124</b>  | 431.700700        | 845.367575     | <b>423.187426</b> | 844.383559        | 422.695418       | 7  |
| 9  | <b>1395.687805</b> | 698.347541      | 1378.661256    | 689.834266       | <b>1377.677240</b> | 689.342258       | W    | <b>761.346445</b>  | 381.176861        | 744.319896     | 372.663586        | <b>743.335880</b> | 372.171578       | 6  |
| 10 | 1492.740569        | 746.873923      | 1475.714020    | 738.360648       | 1474.730004        | 737.868640       | P    | <b>575.267132</b>  | 288.137204        | 558.240583     | 279.623930        | <b>557.256567</b> | 279.131922       | 5  |
| 11 | <b>1607.767512</b> | 804.387394      | 1590.740963    | 795.874120       | 1589.756947        | 795.382112       | D    | <b>478.214368</b>  | 239.610822        | 461.187819     | 231.097548        | 460.203803        | 230.605540       | 4  |
| 12 | 1736.810105        | 868.908691      | 1719.783556    | 860.395416       | <b>1718.799540</b> | 859.903408       | E    | <b>363.187425</b>  | 182.097351        | 346.160876     | 173.584076        | <b>345.176860</b> | 173.092068       | 3  |
| 13 | <b>1823.842133</b> | 912.424705      | 1806.815584    | 903.911430       | 1805.831568        | 903.419422       | S    | <b>234.144832</b>  | 117.576054        | 217.118283     | 109.062780        | 216.134267        | 108.570772       | 2  |
| 14 |                    |                 |                |                  |                    |                  | K    | 147.112804         | 74.060040         | 130.086255     | 65.546765         |                   |                  | 1  |

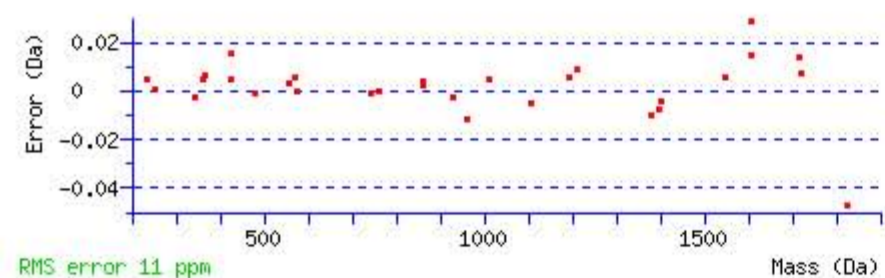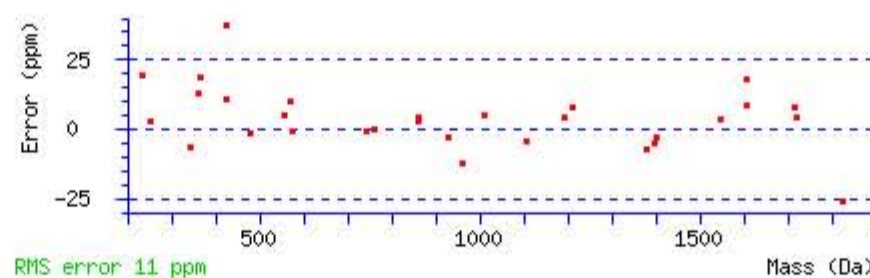

NCBI BLAST search of **DHLGFQVTWPDESK**

(Parameters: blastp, nr protein database, expect=20000, no filter, PAM30)

Other BLAST [web gateways](#)

All matches to this query

| Score | Mr(calc):   | Delta    | Sequence                           |
|-------|-------------|----------|------------------------------------|
| 58.8  | 1968.940399 | 0.023089 | <a href="#">DHLGFQVTWPDESK</a>     |
| 6.0   | 1968.949585 | 0.013903 | <a href="#">EGQMESVEAAMSSKTLKK</a> |
| 2.0   | 1968.957458 | 0.006030 | <a href="#">KFMAASVASTNRDEALDK</a> |

Mascot: <http://www.matrixscience.com/>



# MASCOT Search Results

## Peptide View

MS/MS Fragmentation of **SSTGPGEQLR**

Found in **COMP\_HUMAN**, Cartilage oligomeric matrix protein OS=Homo sapiens GN=COMP PE=1 SV=2

Match to Query 23845: 1341.673168 from(671.843860,2+) rtinseconds(1575) index(44683)

Title: Locus:1.1.1.2597.9 File:"2013-07-02 CLN FXIII 60 min 3rd F 4.wiff"

Data file C:\Program Files (x86)\Matrix Science\Mascot Daemon\mgf\6 FXIII 60 min 3rd\mascot\_daemon\_merge.mgf

Click mouse within plot area to zoom in by factor of two about that point

Or, Plot from  to  Da

Label all possible matches  Label matches used for scoring

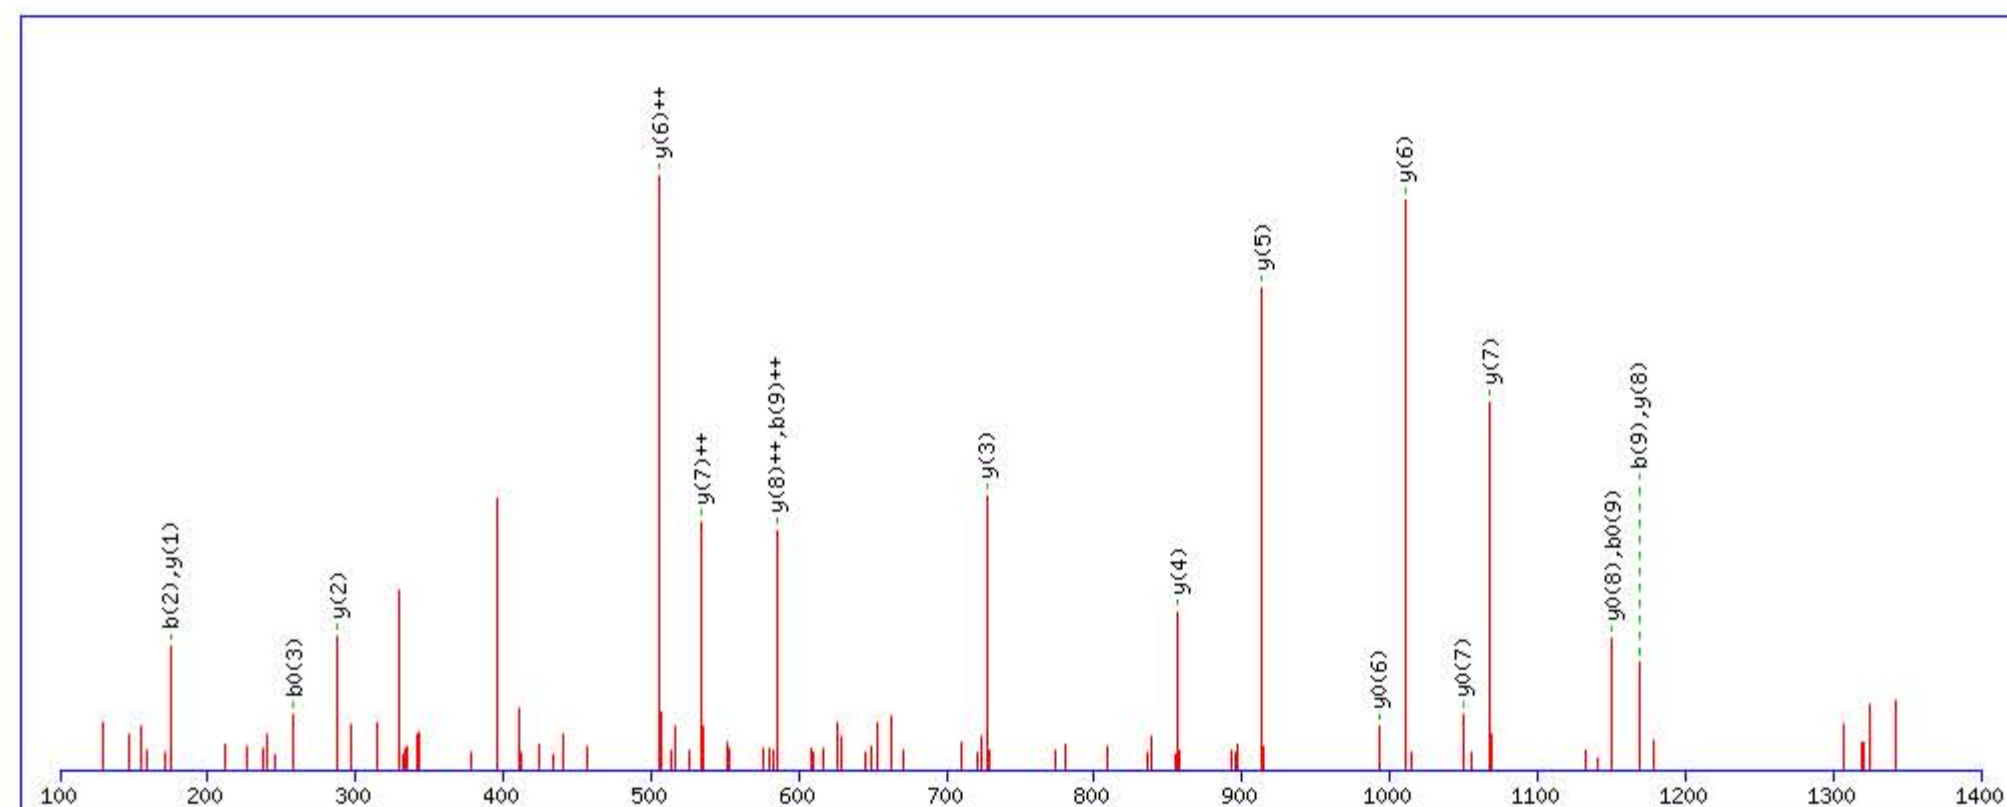

Monoisotopic mass of neutral peptide Mr(calc): 1341.671082

Fixed modifications: Carbamidomethyl (C) (apply to specified residues or termini only)

Variable modifications:

Q8 : Biotin:Thermo-21345 (Q)

Ions Score: 66 Expect: 5.5e-006

Matches : 19/88 fragment ions using 24 most intense peaks [\(help\)](#)

| #  | b                  | b <sup>++</sup>   | b <sup>+</sup> | b <sup>+++</sup> | b <sup>0</sup>     | b <sup>0++</sup> | Seq. | y                  | y <sup>++</sup>   | y <sup>+</sup> | y <sup>+++</sup> | y <sup>0</sup>     | y <sup>0++</sup> | #  |
|----|--------------------|-------------------|----------------|------------------|--------------------|------------------|------|--------------------|-------------------|----------------|------------------|--------------------|------------------|----|
| 1  | 88.039304          | 44.523290         |                |                  | 70.028739          | 35.518008        | S    |                    |                   |                |                  |                    |                  | 10 |
| 2  | <b>175.071332</b>  | 88.039304         |                |                  | 157.060767         | 79.034021        | S    | 1255.646334        | 628.326805        | 1238.619785    | 619.813530       | 1237.635769        | 619.321522       | 9  |
| 3  | 276.119011         | 138.563144        |                |                  | <b>258.108446</b>  | 129.557861       | T    | <b>1168.614306</b> | <b>584.810791</b> | 1151.587757    | 576.297517       | <b>1150.603741</b> | 575.805508       | 8  |
| 4  | 333.140475         | 167.073875        |                |                  | 315.129910         | 158.068593       | G    | <b>1067.566627</b> | <b>534.286951</b> | 1050.540078    | 525.773677       | <b>1049.556062</b> | 525.281669       | 7  |
| 5  | 430.193239         | 215.600258        |                |                  | 412.182674         | 206.594975       | P    | <b>1010.545163</b> | <b>505.776219</b> | 993.518614     | 497.262945       | <b>992.534598</b>  | 496.770937       | 6  |
| 6  | 487.214703         | 244.110989        |                |                  | 469.204138         | 235.105707       | G    | <b>913.492399</b>  | 457.249837        | 896.465850     | 448.736563       | 895.481834         | 448.244555       | 5  |
| 7  | 616.257296         | 308.632286        |                |                  | 598.246731         | 299.627004       | E    | <b>856.470935</b>  | 428.739105        | 839.444386     | 420.225831       | 838.460370         | 419.733823       | 4  |
| 8  | 1055.482622        | 528.244949        | 1038.456073    | 519.731675       | 1037.472057        | 519.239667       | Q    | <b>727.428342</b>  | 364.217809        | 710.401793     | 355.704534       |                    |                  | 3  |
| 9  | <b>1168.566686</b> | <b>584.786981</b> | 1151.540137    | 576.273707       | <b>1150.556121</b> | 575.781698       | L    | <b>288.203016</b>  | 144.605146        | 271.176467     | 136.091871       |                    |                  | 2  |
| 10 |                    |                   |                |                  |                    |                  | R    | <b>175.118952</b>  | 88.063114         | 158.092403     | 79.549839        |                    |                  | 1  |

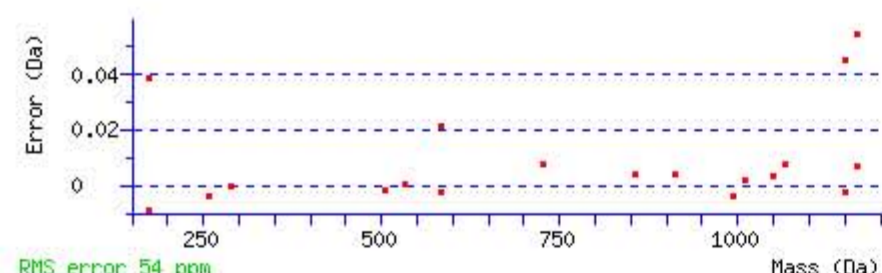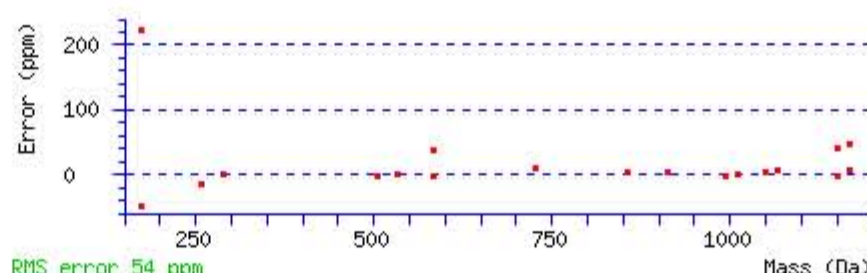

NCBI BLAST search of **SSTGPGEQLR**

(Parameters: blastp, nr protein database, expect=20000, no filter, PAM30)

Other BLAST [web gateways](#)

## All matches to this query

| Score | Mr(calc):   | Delta     | Sequence                      |
|-------|-------------|-----------|-------------------------------|
| 65.5  | 1341.671082 | 0.002086  | <a href="#">SSTGPGEQLR</a>    |
| 13.9  | 1341.674911 | -0.001743 | <a href="#">TSPERREPGTGR</a>  |
| 8.2   | 1341.671036 | 0.002132  | <a href="#">KEAEQEAAR</a>     |
| 6.7   | 1341.663651 | 0.009517  | <a href="#">ESARDPKPEASR</a>  |
| 5.3   | 1341.653778 | 0.019390  | <a href="#">QHRPSNAEFTR</a>   |
| 5.0   | 1341.686127 | -0.012959 | <a href="#">QDDAGRIAARNR</a>  |
| 4.9   | 1341.688828 | -0.015660 | <a href="#">DDAQLSGLPSALR</a> |
| 4.7   | 1341.680267 | -0.007099 | <a href="#">KFHEKHHSR</a>     |
| 2.9   | 1341.671082 | 0.002086  | <a href="#">TSLPQDNTR</a>     |
| 2.6   | 1341.653793 | 0.019375  | <a href="#">GFAEHGKQQGR</a>   |



# MASCOT SEARCH RESULTS

## Peptide View

MS/MS Fragmentation of **NALWHTGDTESQVR**

Found in **COMP\_HUMAN**, Cartilage oligomeric matrix protein OS=Homo sapiens GN=COMP PE=1 SV=2

Match to Query 40652: 1923.934452 from(642.318760,3+) rtinseconds(1759) index(45843)

Title: Locus:1.1.1.2661.13 File:"2013-07-02 CLN FXIII 60 min 3rd F 4.wiff"

Data file C:\Program Files (x86)\Matrix Science\Mascot Daemon\mgf\6 FXIII 60 min 3rd\mascot\_daemon\_merge.mgf

Click mouse within plot area to zoom in by factor of two about that point

Or, Plot from  to  Da

Label all possible matches  Label matches used for scoring

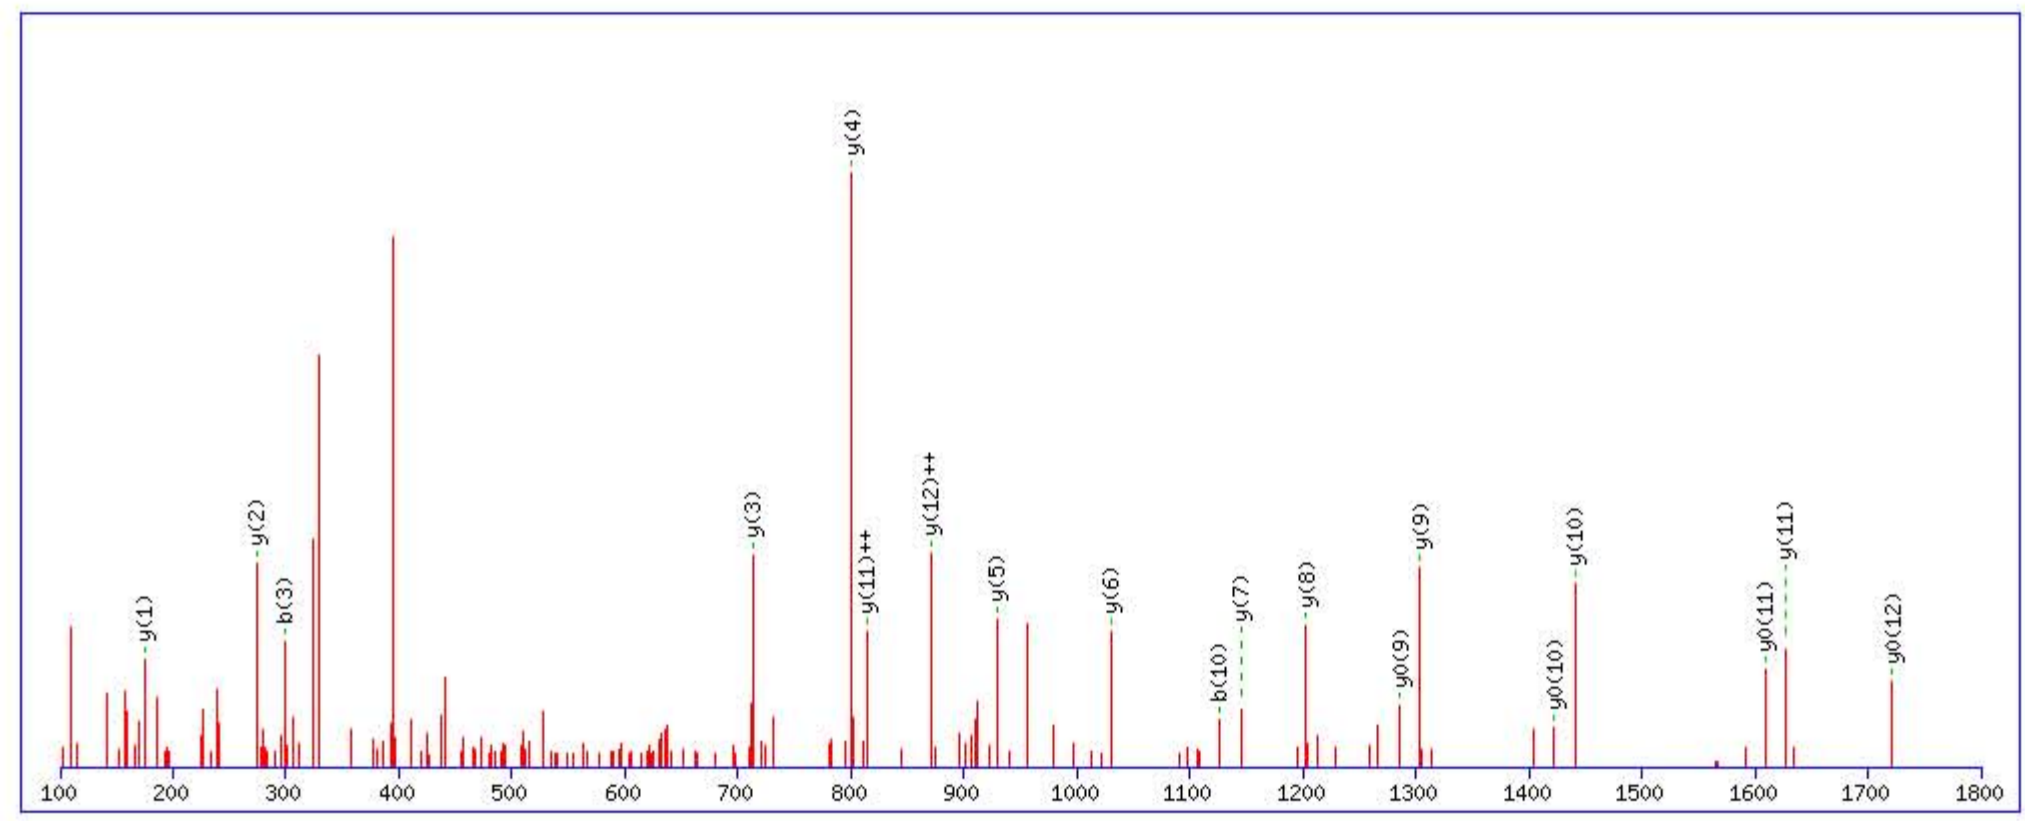

Monoisotopic mass of neutral peptide Mr(calc): 1923.926132

Fixed modifications: Carbamidomethyl (C) (apply to specified residues or termini only)

Variable modifications:

Q12 : Biotin:Thermo-21345 (Q)

Ions Score: 73 Expect: 1.1e-006

Matches : 19/140 fragment ions using 33 most intense peaks [\(help\)](#)

| #  | b                  | b <sup>++</sup> | b <sup>*</sup> | b <sup>*++</sup> | b <sup>0</sup> | b <sup>0++</sup> | Seq. | y                  | y <sup>++</sup>   | y <sup>*</sup> | y <sup>*++</sup> | y <sup>0</sup>     | y <sup>0++</sup> | #  |
|----|--------------------|-----------------|----------------|------------------|----------------|------------------|------|--------------------|-------------------|----------------|------------------|--------------------|------------------|----|
| 1  | 115.050203         | 58.028740       | 98.023654      | 49.515465        |                |                  | N    |                    |                   |                |                  |                    |                  | 14 |
| 2  | 186.087317         | 93.547296       | 169.060768     | 85.034022        |                |                  | A    | 1810.890481        | 905.948879        | 1793.863932    | 897.435604       | 1792.879916        | 896.943596       | 13 |
| 3  | <b>299.171381</b>  | 150.089328      | 282.144832     | 141.576054       |                |                  | L    | 1739.853367        | <b>870.430322</b> | 1722.826818    | 861.917047       | <b>1721.842802</b> | 861.425039       | 12 |
| 4  | 485.250694         | 243.128985      | 468.224145     | 234.615711       |                |                  | W    | <b>1626.769303</b> | <b>813.888290</b> | 1609.742754    | 805.375015       | <b>1608.758738</b> | 804.883007       | 11 |
| 5  | 622.309606         | 311.658441      | 605.283057     | 303.145167       |                |                  | H    | <b>1440.689990</b> | 720.848633        | 1423.663441    | 712.335359       | <b>1422.679425</b> | 711.843351       | 10 |
| 6  | 723.357285         | 362.182281      | 706.330736     | 353.669006       | 705.346720     | 353.176998       | T    | <b>1303.631078</b> | 652.319177        | 1286.604529    | 643.805903       | <b>1285.620513</b> | 643.313895       | 9  |
| 7  | 780.378749         | 390.693013      | 763.352200     | 382.179738       | 762.368184     | 381.687730       | G    | <b>1202.583399</b> | 601.795338        | 1185.556850    | 593.282063       | 1184.572834        | 592.790055       | 8  |
| 8  | 895.405692         | 448.206484      | 878.379143     | 439.693210       | 877.395127     | 439.201202       | D    | <b>1145.561935</b> | 573.284606        | 1128.535386    | 564.771331       | 1127.551370        | 564.279323       | 7  |
| 9  | 996.453371         | 498.730324      | 979.426822     | 490.217049       | 978.442806     | 489.725041       | T    | <b>1030.534992</b> | 515.771134        | 1013.508443    | 507.257860       | 1012.524427        | 506.765852       | 6  |
| 10 | <b>1125.495964</b> | 563.251620      | 1108.469415    | 554.738346       | 1107.485399    | 554.246337       | E    | <b>929.487313</b>  | 465.247295        | 912.460764     | 456.734020       | 911.476748         | 456.242012       | 5  |
| 11 | 1212.527992        | 606.767634      | 1195.501443    | 598.254360       | 1194.517427    | 597.762352       | S    | <b>800.444720</b>  | 400.725998        | 783.418171     | 392.212724       | 782.434155         | 391.720716       | 4  |
| 12 | 1651.753318        | 826.380297      | 1634.726769    | 817.867023       | 1633.742753    | 817.375015       | Q    | <b>713.412692</b>  | 357.209984        | 696.386143     | 348.696710       |                    |                  | 3  |
| 13 | 1750.821732        | 875.914504      | 1733.795183    | 867.401230       | 1732.811167    | 866.909222       | V    | <b>274.187366</b>  | 137.597321        | 257.160817     | 129.084047       |                    |                  | 2  |
| 14 |                    |                 |                |                  |                |                  | R    | <b>175.118952</b>  | 88.063114         | 158.092403     | 79.549839        |                    |                  | 1  |

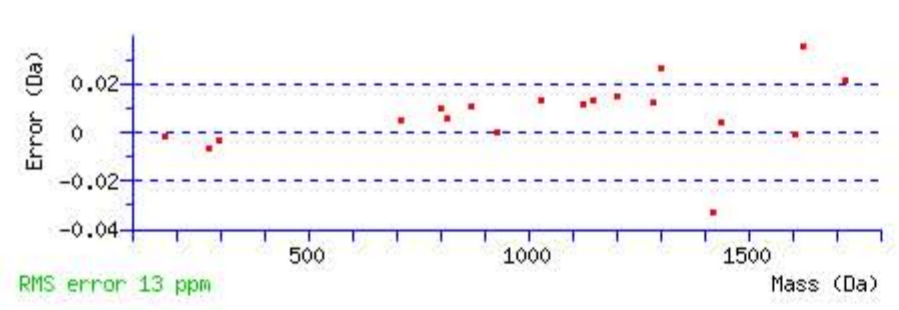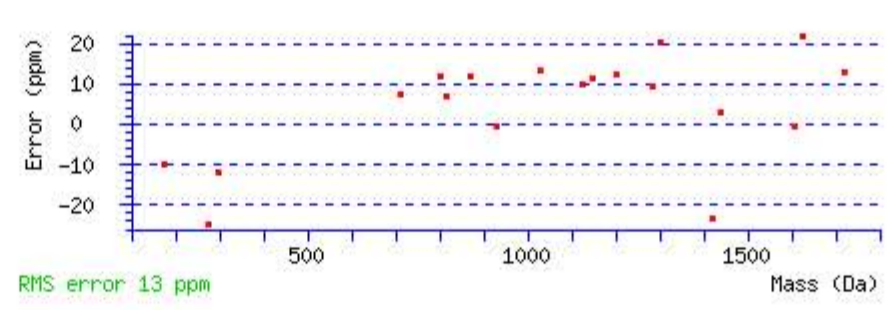

NCBI BLAST search of [NALWHTGDTESQVR](#)

(Parameters: blastp, nr protein database, expect=20000, no filter, PAM30)

Other BLAST [web gateways](#)

All matches to this query

| Score | Mr(calc):   | Delta    | Sequence                       |
|-------|-------------|----------|--------------------------------|
| 73.0  | 1923.926132 | 0.008320 | <a href="#">NALWHTGDTESQVR</a> |

Mascot: <http://www.matrixscience.com/>

**Peptide View**

MS/MS Fragmentation of **GVWGSVCDDNWGEKEDQVVCK**  
 Found in **CD5L\_HUMAN**, CD5 antigen-like OS=Homo sapiens GN=CD5L PE=1 SV=1

Match to Query 53517: 2777.240592 from(926.754140,3+) rtinseconds(2132) index(33897)  
 Title: Locus:1.1.1.3291.19 File:"2013-07-02 CLN FXIII 60 min 3rd F 3.wiff"  
 Data file C:\Program Files (x86)\Matrix Science\Mascot Daemon\mgf\6 FXIII 60 min 3rd\mascot\_daemon\_merge.mgf

Click mouse within plot area to zoom in by factor of two about that point

Or, Plot from  to  Da   
 Label all possible matches  Label matches used for scoring

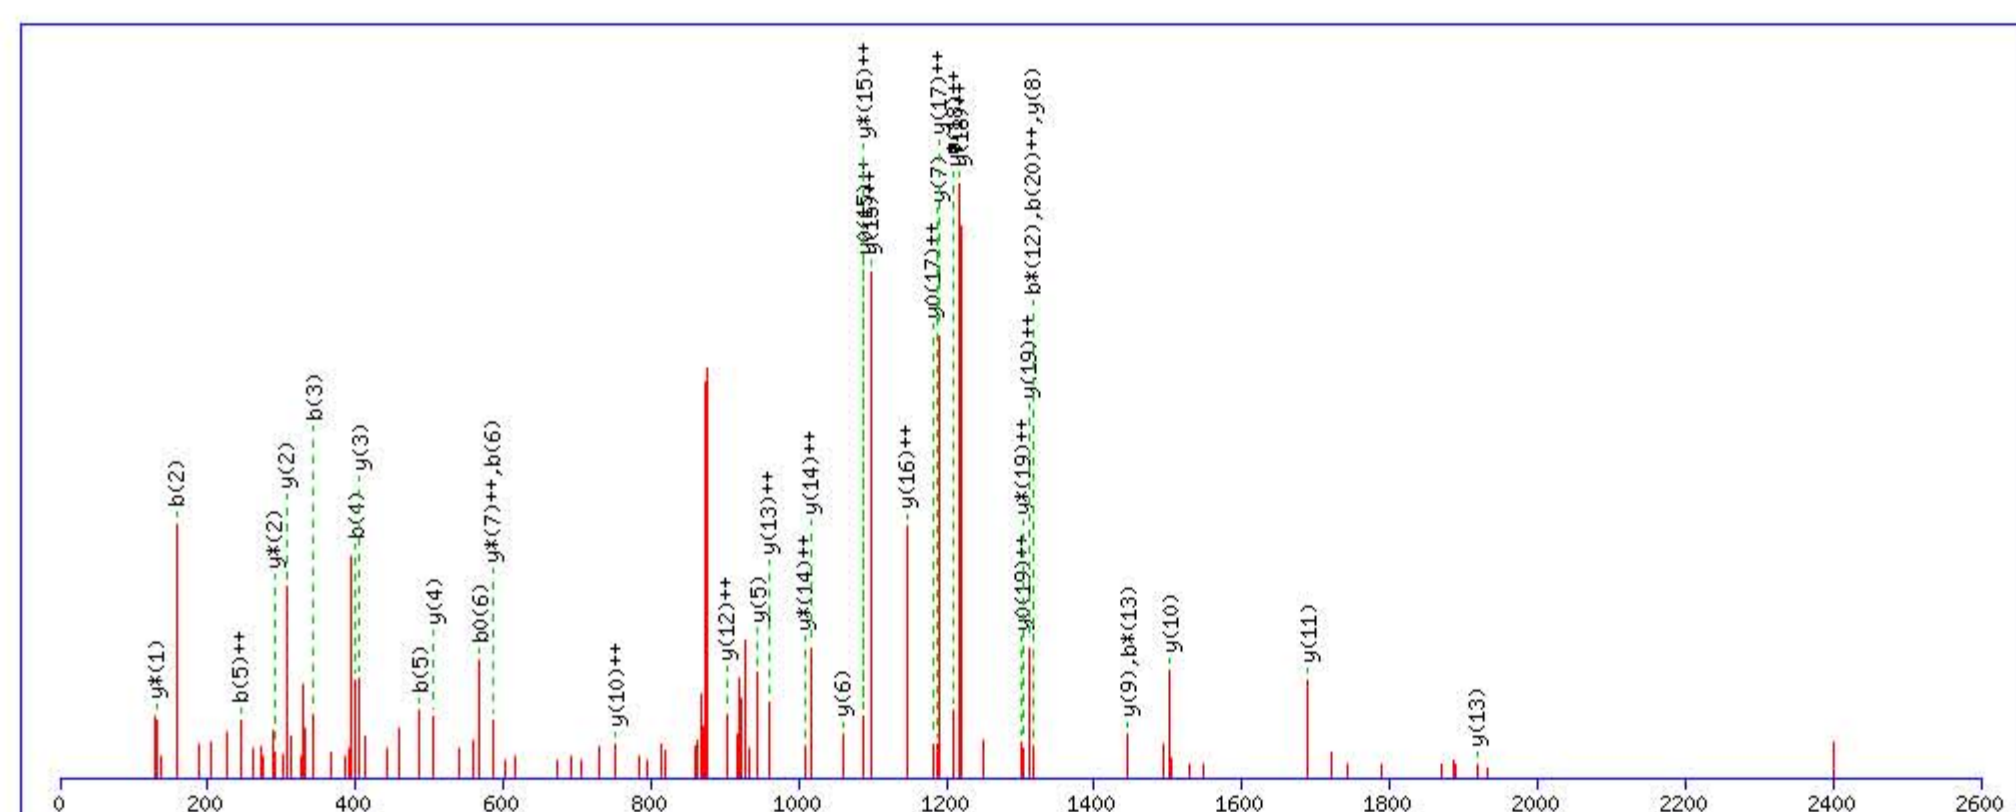

Monoisotopic mass of neutral peptide Mr(calc): 2777.224792  
 Fixed modifications: Carbamidomethyl (C) (apply to specified residues or termini only)  
 Variable modifications:  
 Q17 : Biotin:Thermo-21345 (Q)  
 Ions Score: 41 Expect: 0.00053  
 Matches : 41/204 fragment ions using 105 most intense peaks [\(help\)](#)

| #  | b                 | b <sup>++</sup>    | b <sup>*</sup>     | b <sup>*++</sup> | b <sup>0</sup>    | b <sup>0++</sup> | Seq. | y                  | y <sup>++</sup>    | y <sup>*</sup>    | y <sup>*++</sup>   | y <sup>0</sup> | y <sup>0++</sup>   | #  |
|----|-------------------|--------------------|--------------------|------------------|-------------------|------------------|------|--------------------|--------------------|-------------------|--------------------|----------------|--------------------|----|
| 1  | 58.028740         | 29.518008          |                    |                  |                   |                  | G    |                    |                    |                   |                    |                |                    | 21 |
| 2  | <b>157.097154</b> | 79.052215          |                    |                  |                   |                  | V    | 2721.210571        | 1361.108923        | 2704.184022       | 1352.595649        | 2703.200006    | 1352.103641        | 20 |
| 3  | <b>343.176467</b> | 172.091872         |                    |                  |                   |                  | W    | 2622.142157        | <b>1311.574716</b> | 2605.115608       | <b>1303.061442</b> | 2604.131592    | <b>1302.569434</b> | 19 |
| 4  | <b>400.197931</b> | 200.602603         |                    |                  |                   |                  | G    | 2436.062844        | <b>1218.535060</b> | 2419.036295       | <b>1210.021785</b> | 2418.052279    | <b>1209.529777</b> | 18 |
| 5  | <b>487.229959</b> | <b>244.118617</b>  |                    |                  | 469.219394        | 235.113335       | S    | 2379.041380        | <b>1190.024328</b> | 2362.014831       | 1181.511053        | 2361.030815    | <b>1181.019045</b> | 17 |
| 6  | <b>586.298373</b> | 293.652825         |                    |                  | <b>568.287808</b> | 284.647542       | V    | 2292.009352        | <b>1146.508314</b> | 2274.982803       | 1137.995039        | 2273.998787    | 1137.503031        | 16 |
| 7  | 746.329022        | 373.668149         |                    |                  | 728.318457        | 364.662867       | C    | 2192.940938        | <b>1096.974107</b> | 2175.914389       | <b>1088.460832</b> | 2174.930373    | <b>1087.968824</b> | 15 |
| 8  | 861.355965        | 431.181621         |                    |                  | 843.345400        | 422.176338       | D    | 2032.910289        | <b>1016.958782</b> | 2015.883740       | <b>1008.445508</b> | 2014.899724    | 1007.953500        | 14 |
| 9  | 976.382908        | 488.695092         |                    |                  | 958.372343        | 479.689809       | D    | <b>1917.883346</b> | <b>959.445311</b>  | 1900.856797       | 950.932036         | 1899.872781    | 950.440028         | 13 |
| 10 | 1090.425835       | 545.716556         | 1073.399286        | 537.203281       | 1072.415270       | 536.711273       | N    | 1802.856403        | <b>901.931840</b>  | 1785.829854       | 893.418565         | 1784.845838    | 892.926557         | 12 |
| 11 | 1276.505148       | 638.756212         | 1259.478599        | 630.242938       | 1258.494583       | 629.750929       | W    | <b>1688.813476</b> | 844.910376         | 1671.786927       | 836.397101         | 1670.802911    | 835.905093         | 11 |
| 12 | 1333.526612       | 667.266944         | <b>1316.500063</b> | 658.753670       | 1315.516047       | 658.261661       | G    | <b>1502.734163</b> | <b>751.870719</b>  | 1485.707614       | 743.357445         | 1484.723598    | 742.865437         | 10 |
| 13 | 1462.569205       | 731.788241         | <b>1445.542656</b> | 723.274966       | 1444.558640       | 722.782958       | E    | <b>1445.712699</b> | 723.359987         | 1428.686150       | 714.846713         | 1427.702134    | 714.354705         | 9  |
| 14 | 1590.664168       | 795.835722         | 1573.637619        | 787.322448       | 1572.653603       | 786.830440       | K    | <b>1316.670106</b> | 658.838691         | 1299.643557       | 650.325416         | 1298.659541    | 649.833408         | 8  |
| 15 | 1719.706761       | 860.357019         | 1702.680212        | 851.843744       | 1701.696196       | 851.351736       | E    | <b>1188.575143</b> | 594.791209         | 1171.548594       | <b>586.277935</b>  | 1170.564578    | 585.785927         | 7  |
| 16 | 1834.733704       | 917.870490         | 1817.707155        | 909.357216       | 1816.723139       | 908.865208       | D    | <b>1059.532550</b> | 530.269913         | 1042.506001       | 521.756638         | 1041.521985    | 521.264630         | 6  |
| 17 | 2273.959030       | 1137.483153        | 2256.932481        | 1128.969878      | 2255.948465       | 1128.477870      | Q    | <b>944.505607</b>  | 472.756441         | 927.479058        | 464.243167         |                |                    | 5  |
| 18 | 2373.027444       | 1187.017360        | 2356.000895        | 1178.504085      | 2355.016879       | 1178.012077      | V    | <b>505.280281</b>  | 253.143778         | 488.253732        | 244.630504         |                |                    | 4  |
| 19 | 2472.095858       | 1236.551567        | 2455.069309        | 1228.038292      | 2454.085293       | 1227.546284      | V    | <b>406.211867</b>  | 203.609571         | 389.185318        | 195.096297         |                |                    | 3  |
| 20 | 2632.126507       | <b>1316.566891</b> | 2615.099958        | 1308.053617      | 2614.115942       | 1307.561609      | C    | <b>307.143453</b>  | 154.075364         | <b>290.116904</b> | 145.562090         |                |                    | 2  |
| 21 |                   |                    |                    |                  |                   |                  | K    | 147.112804         | 74.060040          | <b>130.086255</b> | 65.546765          |                |                    | 1  |

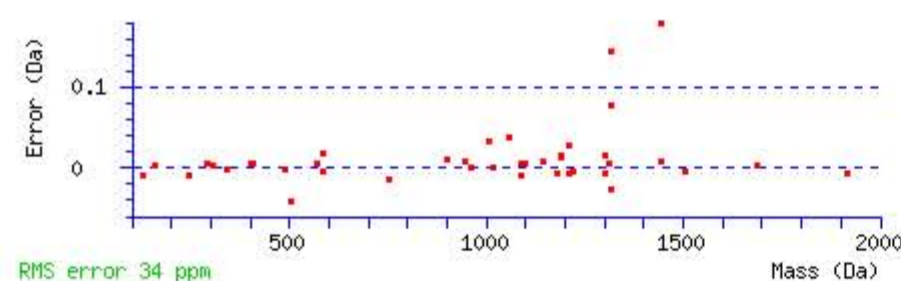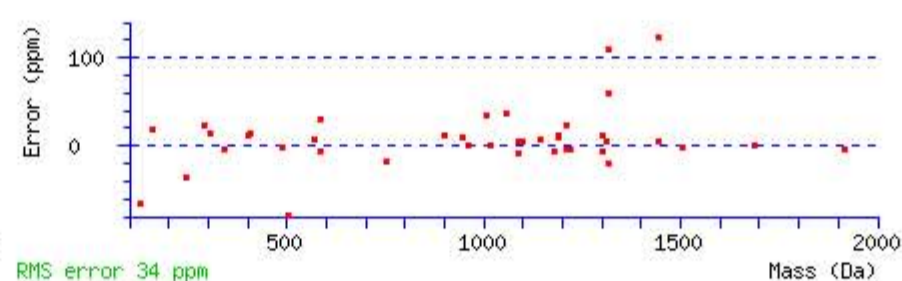

NCBI BLAST search of **GVWGSVCDDNWGEKEDQVVCK**  
 (Parameters: blastp, nr protein database, expect=20000, no filter, PAM30)  
 Other BLAST [web gateways](#)

**All matches to this query**

| Score | Mr(calc):   | Delta    | Sequence                              |
|-------|-------------|----------|---------------------------------------|
| 41.2  | 2777.224792 | 0.015800 | <a href="#">GVWGSVCDDNWGEKEDQVVCK</a> |



# MASCOT Search Results

## Peptide View

MS/MS Fragmentation of **ELDESLQVAER**

Found in **CLUS\_HUMAN**, Clusterin OS=Homo sapiens GN=CLU PE=1 SV=1

Match to Query 33254: 1598.796828 from(800.405690,2+) rtinseconds(1966) index(4768)

Title: Locus:1.1.1.3236.25 File:"2013-07-02 CLN FXIII 60 min 3rd F 1.wiff"

Data file C:\Program Files (x86)\Matrix Science\Mascot Daemon\mgf6 FXIII 60 min 3rd\mascot\_daemon\_merge.mgf

Click mouse within plot area to zoom in by factor of two about that point

Or, Plot from  to  Da

Label all possible matches  Label matches used for scoring

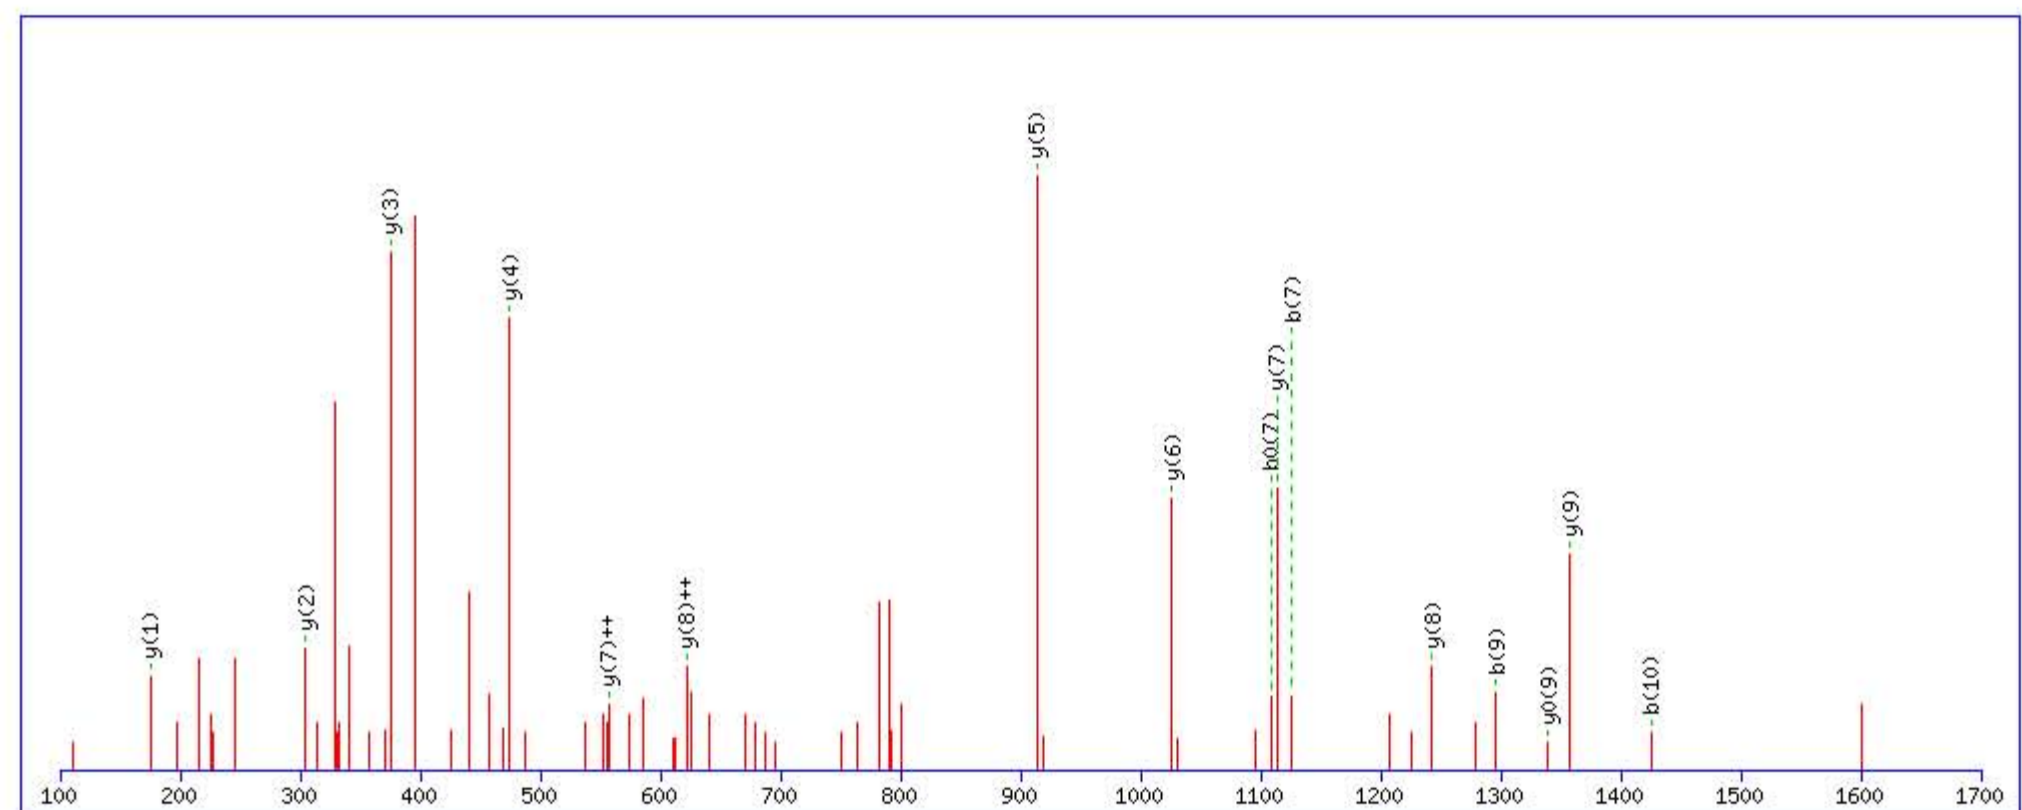

Monoisotopic mass of neutral peptide Mr(calc): 1598.797379

Fixed modifications: Carbamidomethyl (C) (apply to specified residues or termini only)

Variable modifications:

Q7 : Biotin:Thermo-21345 (Q)

Ions Score: 71 Expect: 1.9e-006

Matches : 16/106 fragment ions using 25 most intense peaks [\(help\)](#)

| #  | b                  | b <sup>++</sup> | b <sup>*</sup> | b <sup>+++</sup> | b <sup>0</sup>     | b <sup>0++</sup> | Seq. | y                  | y <sup>++</sup>   | y <sup>*</sup> | y <sup>+++</sup> | y <sup>0</sup>     | y <sup>0++</sup> | #  |
|----|--------------------|-----------------|----------------|------------------|--------------------|------------------|------|--------------------|-------------------|----------------|------------------|--------------------|------------------|----|
| 1  | 130.049869         | 65.528572       |                |                  | 112.039304         | 56.523290        | E    |                    |                   |                |                  |                    |                  | 11 |
| 2  | 243.133933         | 122.070605      |                |                  | 225.123368         | 113.065322       | L    | 1470.762091        | 735.884684        | 1453.735542    | 727.371409       | 1452.751526        | 726.879401       | 10 |
| 3  | 358.160876         | 179.584076      |                |                  | 340.150311         | 170.578794       | D    | <b>1357.678027</b> | 679.342652        | 1340.651478    | 670.829377       | <b>1339.667462</b> | 670.337369       | 9  |
| 4  | 487.203469         | 244.105373      |                |                  | 469.192904         | 235.100090       | E    | <b>1242.651084</b> | <b>621.829180</b> | 1225.624535    | 613.315906       | 1224.640519        | 612.823898       | 8  |
| 5  | 574.235497         | 287.621387      |                |                  | 556.224932         | 278.616104       | S    | <b>1113.608491</b> | <b>557.307884</b> | 1096.581942    | 548.794609       | 1095.597926        | 548.302601       | 7  |
| 6  | 687.319561         | 344.163419      |                |                  | 669.308996         | 335.158136       | L    | <b>1026.576463</b> | 513.791870        | 1009.549914    | 505.278595       | 1008.565898        | 504.786587       | 6  |
| 7  | <b>1126.544887</b> | 563.776082      | 1109.518338    | 555.262807       | <b>1108.534322</b> | 554.770799       | Q    | <b>913.492399</b>  | 457.249838        | 896.465850     | 448.736563       | 895.481834         | 448.244555       | 5  |
| 8  | 1225.613301        | 613.310289      | 1208.586752    | 604.797014       | 1207.602736        | 604.305006       | V    | <b>474.267073</b>  | 237.637175        | 457.240524     | 229.123900       | 456.256508         | 228.631892       | 4  |
| 9  | <b>1296.650415</b> | 648.828846      | 1279.623866    | 640.315571       | 1278.639850        | 639.823563       | A    | <b>375.198659</b>  | 188.102968        | 358.172110     | 179.589693       | 357.188094         | 179.097685       | 3  |
| 10 | <b>1425.693008</b> | 713.350142      | 1408.666459    | 704.836868       | 1407.682443        | 704.344860       | E    | <b>304.161545</b>  | 152.584411        | 287.134996     | 144.071136       | 286.150980         | 143.579128       | 2  |
| 11 |                    |                 |                |                  |                    |                  | R    | <b>175.118952</b>  | 88.063114         | 158.092403     | 79.549839        |                    |                  | 1  |

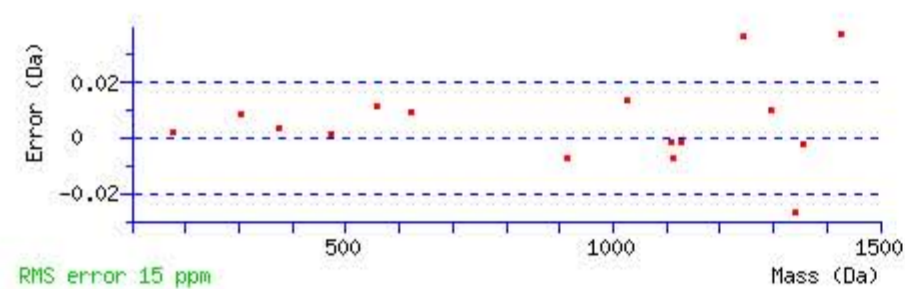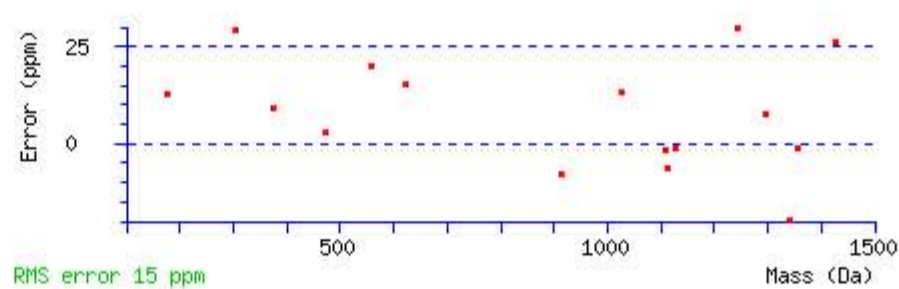

NCBI BLAST search of [ELDESLQVAER](#)

(Parameters: blastp, nr protein database, expect=20000, no filter, PAM30)

Other BLAST [web gateways](#)

All matches to this query

| Score | Mr(calc):   | Delta     | Sequence                       |
|-------|-------------|-----------|--------------------------------|
| 70.7  | 1598.797379 | -0.000551 | <a href="#">ELDESLQVAER</a>    |
| 13.4  | 1598.787506 | 0.009322  | <a href="#">AGGSWDLAVQER</a>   |
| 7.8   | 1598.783478 | 0.013350  | <a href="#">EDSVQRSTPNR</a>    |
| 7.4   | 1598.817352 | -0.020524 | <a href="#">DRAALCQLWR</a>     |
| 5.4   | 1598.797409 | -0.000581 | <a href="#">EDVDDLVSQLR</a>    |
| 4.8   | 1598.802109 | -0.005281 | <a href="#">CQNALQQVTAR</a>    |
| 4.5   | 1598.797379 | -0.000551 | <a href="#">LEESDVLQEAR</a>    |
| 3.9   | 1598.802094 | -0.005266 | <a href="#">ELVSRGEMLHIR</a>   |
| 3.8   | 1598.794708 | 0.002120  | <a href="#">GGRSRVDQEER</a>    |
| 3.1   | 1598.812637 | -0.015809 | <a href="#">FINVGEKAYSCALK</a> |

# MASCOT SEARCH RESULTS

## Peptide View

MS/MS Fragmentation of **ASSIIDELFQDR**

Found in **CLUS\_HUMAN**, Clusterin OS=Homo sapiens GN=CLU PE=1 SV=1

Match to Query 36535: 1703.860542 from(568.960790,3+) rtinseconds(2812) index(37781)

Title: Locus:1.1.1.3527.2 File:"2013-07-02 CLN FXIII 60 min 3rd F 3.wiff"

Data file C:\Program Files (x86)\Matrix Science\Mascot Daemon\mgf\6 FXIII 60 min 3rd\mascot\_daemon\_merge.mgf

Click mouse within plot area to zoom in by factor of two about that point

Or, Plot from  to  Da

Label all possible matches  Label matches used for scoring

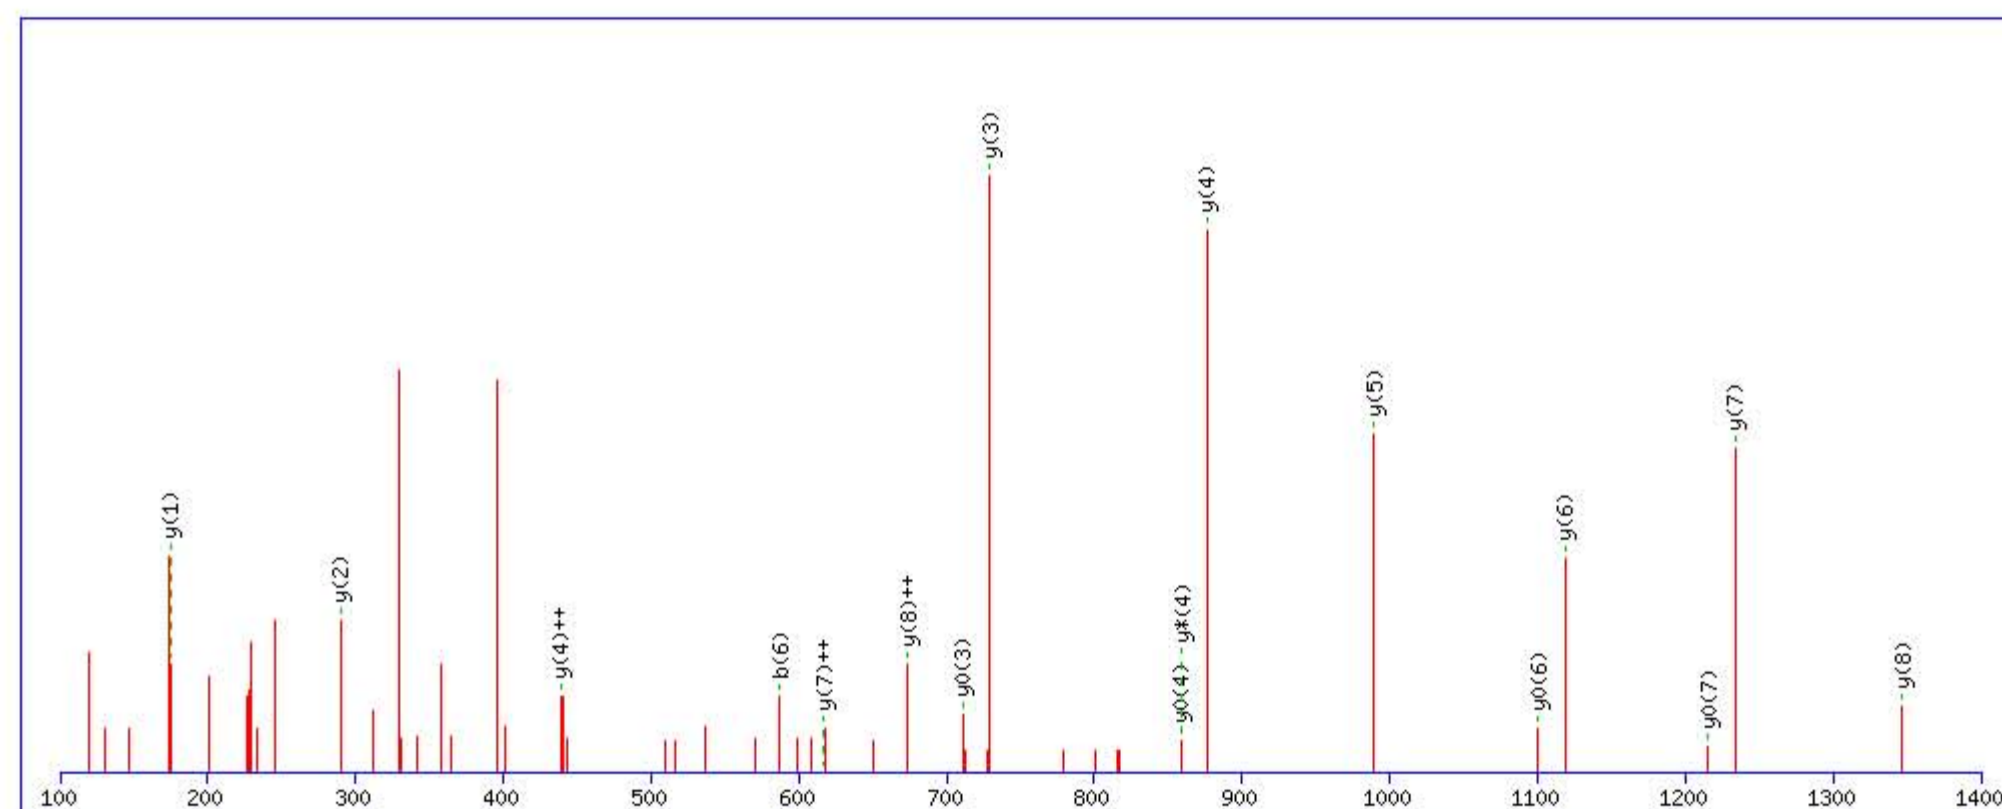

Monoisotopic mass of neutral peptide Mr(calc): 1703.855240

Fixed modifications: Carbamidomethyl (C) (apply to specified residues or termini only)

Variable modifications:

Q10 : Biotin:Thermo-21345 (Q)

Ions Score: 45 Expect: 5.7e-005

Matches : 17/110 fragment ions using 30 most intense peaks [\(help\)](#)

| #  | b                 | b <sup>++</sup> | b <sup>*</sup> | b <sup>+++</sup> | b <sup>0</sup> | b <sup>0++</sup> | Seq. | y                  | y <sup>++</sup>   | y <sup>*</sup>    | y <sup>+++</sup> | y <sup>0</sup>     | y <sup>0++</sup> | #  |
|----|-------------------|-----------------|----------------|------------------|----------------|------------------|------|--------------------|-------------------|-------------------|------------------|--------------------|------------------|----|
| 1  | 72.044390         | 36.525833       |                |                  |                |                  | A    |                    |                   |                   |                  |                    |                  | 12 |
| 2  | 159.076418        | 80.041847       |                |                  | 141.065853     | 71.036564        | S    | 1633.825419        | 817.416348        | 1616.798870       | 808.903073       | 1615.814854        | 808.411065       | 11 |
| 3  | 246.108446        | 123.557861      |                |                  | 228.097881     | 114.552578       | S    | 1546.793391        | 773.900333        | 1529.766842       | 765.387059       | 1528.782826        | 764.895051       | 10 |
| 4  | 359.192510        | 180.099893      |                |                  | 341.181945     | 171.094610       | I    | 1459.761363        | 730.384320        | 1442.734814       | 721.871045       | 1441.750798        | 721.379037       | 9  |
| 5  | 472.276574        | 236.641925      |                |                  | 454.266009     | 227.636642       | I    | <b>1346.677299</b> | <b>673.842288</b> | 1329.650750       | 665.329013       | 1328.666734        | 664.837005       | 8  |
| 6  | <b>587.303517</b> | 294.155397      |                |                  | 569.292952     | 285.150114       | D    | <b>1233.593235</b> | <b>617.300256</b> | 1216.566686       | 608.786981       | <b>1215.582670</b> | 608.294973       | 7  |
| 7  | 716.346110        | 358.676693      |                |                  | 698.335545     | 349.671411       | E    | <b>1118.566292</b> | 559.786784        | 1101.539743       | 551.273510       | <b>1100.555727</b> | 550.781501       | 6  |
| 8  | 829.430174        | 415.218725      |                |                  | 811.419609     | 406.213443       | L    | <b>989.523699</b>  | 495.265488        | 972.497150        | 486.752213       | 971.513134         | 486.260205       | 5  |
| 9  | 976.498588        | 488.752932      |                |                  | 958.488023     | 479.747650       | F    | <b>876.439635</b>  | <b>438.723456</b> | <b>859.413086</b> | 430.210181       | <b>858.429070</b>  | 429.718173       | 4  |
| 10 | 1415.723914       | 708.365595      | 1398.697365    | 699.852321       | 1397.713349    | 699.360312       | Q    | <b>729.371221</b>  | 365.189249        | 712.344672        | 356.675974       | <b>711.360656</b>  | 356.183966       | 3  |
| 11 | 1530.750857       | 765.879067      | 1513.724308    | 757.365792       | 1512.740292    | 756.873784       | D    | <b>290.145895</b>  | 145.576585        | 273.119346        | 137.063311       | 272.135330         | 136.571303       | 2  |
| 12 |                   |                 |                |                  |                |                  | R    | <b>175.118952</b>  | 88.063114         | 158.092403        | 79.549839        |                    |                  | 1  |

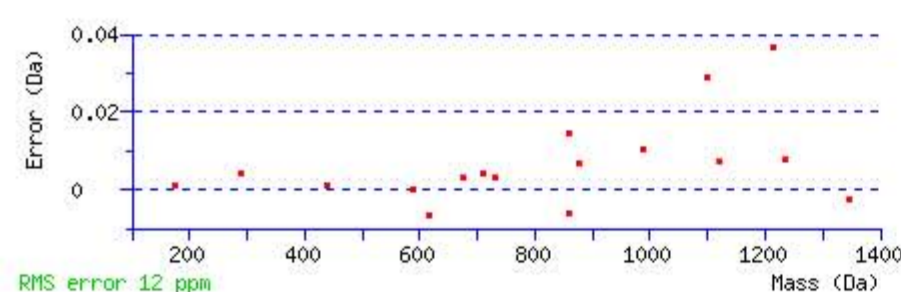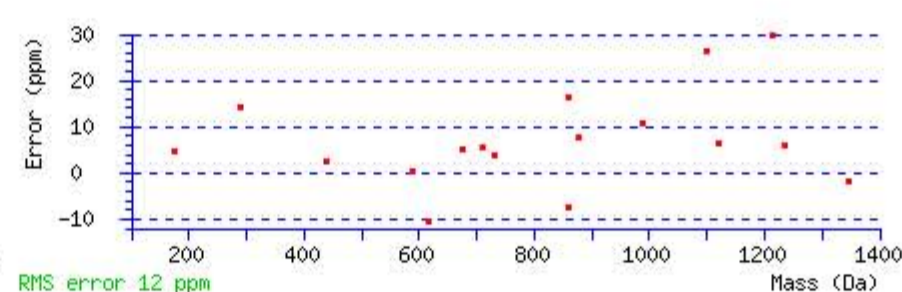

NCBI BLAST search of [ASSIIDELFQDR](#)

(Parameters: blastp, nr protein database, expect=20000, no filter, PAM30)

Other BLAST [web gateways](#)

All matches to this query

| Score | Mr(calc):   | Delta    | Sequence                       |
|-------|-------------|----------|--------------------------------|
| 45.5  | 1703.855240 | 0.005302 | <a href="#">ASSIIDELFQDR</a>   |
| 0.2   | 1703.859070 | 0.001472 | <a href="#">RWDELETTTQAKAR</a> |

Mascot: <http://www.matrixscience.com/>

# MASCOT Search Results

## Peptide View

MS/MS Fragmentation of **EILSVDCSTNNPSQAK**

Found in **CLUS\_HUMAN**, Clusterin OS=Homo sapiens GN=CLU PE=1 SV=1

Match to Query 44082: 2072.993468 from(1037.504010,2+) rtinseconds(1813) index(31993)

Title: Locus:1.1.1.3180.15 File:"2013-07-02 CLN FXIII 60 min 3rd F 3.wiff"

Data file C:\Program Files (x86)\Matrix Science\Mascot Daemon\mgf6 FXIII 60 min 3rd\mascot\_daemon\_merge.mgf

Click mouse within plot area to zoom in by factor of two about that point

Or, Plot from 100 to 2100 Da Full range

Label all possible matches  Label matches used for scoring

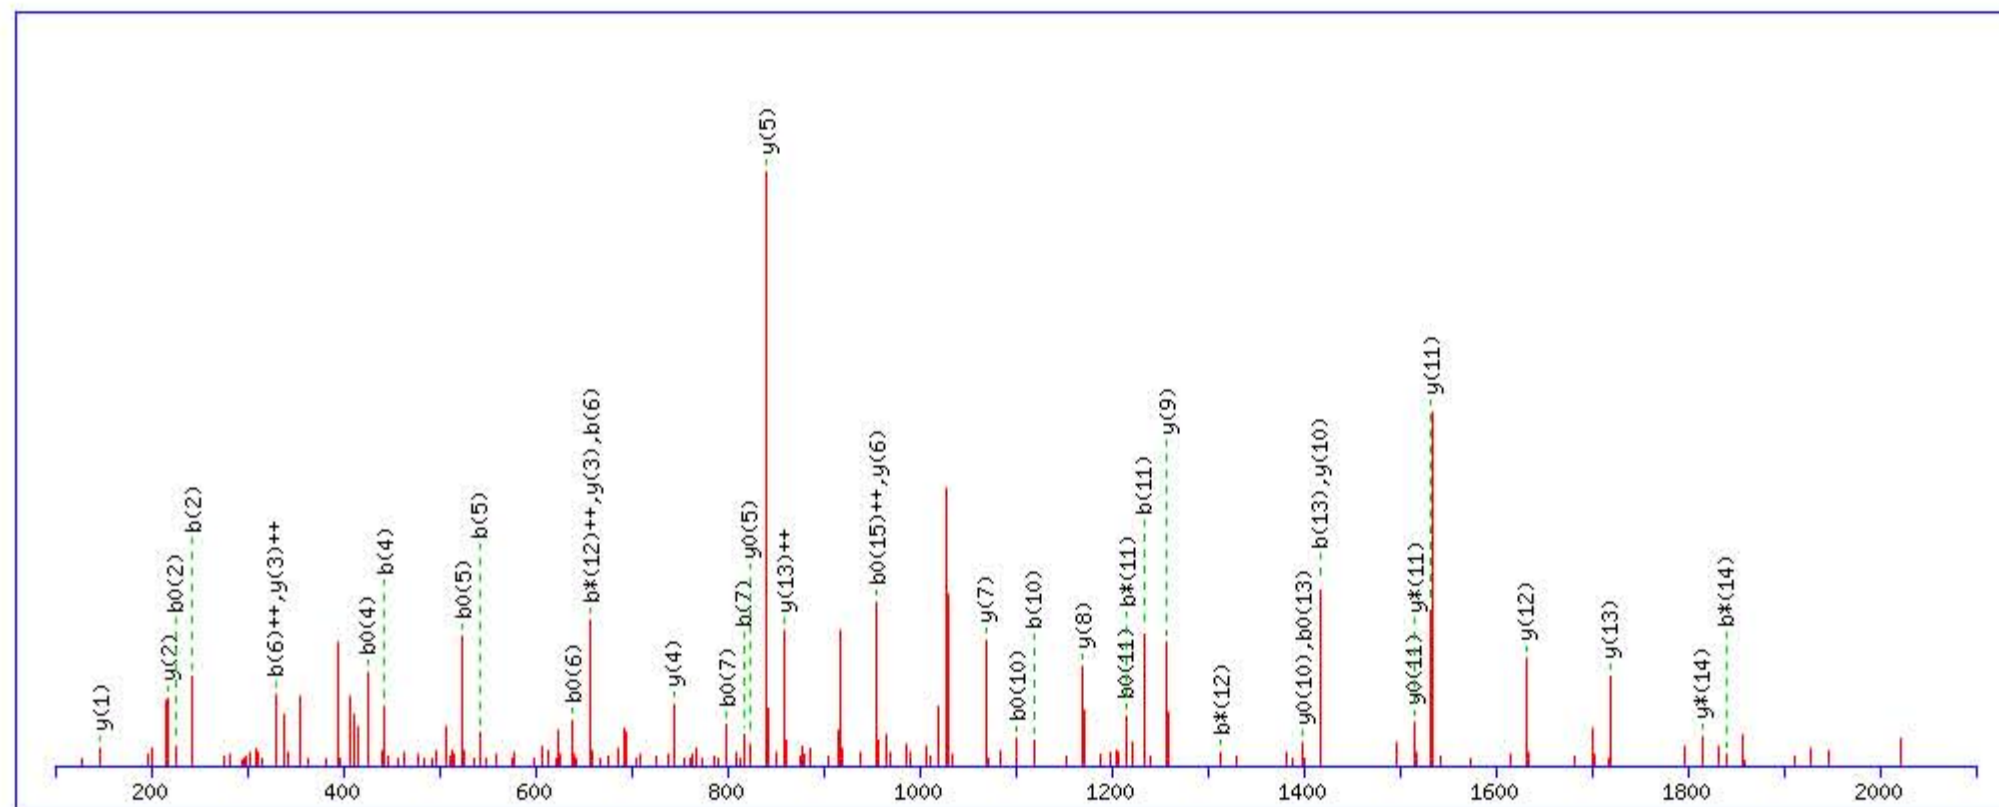

Monoisotopic mass of neutral peptide Mr(calc): 2072.987061

Fixed modifications: Carbamidomethyl (C) (apply to specified residues or termini only)

Variable modifications:

Q14 : Biotin:Thermo-21345 (Q)

Ions Score: 75 Expect: 1.2e-007

Matches : 42/156 fragment ions using 72 most intense peaks [\(help\)](#)

| #  | b                  | b <sup>++</sup>   | b <sup>+</sup>     | b <sup>+++</sup>  | b <sup>0</sup>     | b <sup>0++</sup> | Seq. | y                  | y <sup>++</sup>   | y <sup>+</sup>     | y <sup>+++</sup> | y <sup>0</sup>     | y <sup>0++</sup> | #  |
|----|--------------------|-------------------|--------------------|-------------------|--------------------|------------------|------|--------------------|-------------------|--------------------|------------------|--------------------|------------------|----|
| 1  | 130.049869         | 65.528572         |                    |                   | 112.039304         | 56.523290        | E    |                    |                   |                    |                  |                    |                  | 16 |
| 2  | <b>243.133933</b>  | 122.070605        |                    |                   | <b>225.123368</b>  | 113.065322       | I    | 1944.951759        | 972.979517        | 1927.925210        | 964.466243       | 1926.941194        | 963.974235       | 15 |
| 3  | 356.217997         | 178.612637        |                    |                   | 338.207432         | 169.607354       | L    | 1831.867695        | 916.437485        | <b>1814.841146</b> | 907.924211       | 1813.857130        | 907.432203       | 14 |
| 4  | <b>443.250025</b>  | 222.128650        |                    |                   | <b>425.239460</b>  | 213.123368       | S    | <b>1718.783631</b> | <b>859.895454</b> | 1701.757082        | 851.382179       | 1700.773066        | 850.890171       | 13 |
| 5  | <b>542.318439</b>  | 271.662858        |                    |                   | <b>524.307874</b>  | 262.657575       | V    | <b>1631.751603</b> | 816.379439        | 1614.725054        | 807.866165       | 1613.741038        | 807.374157       | 12 |
| 6  | <b>657.345382</b>  | <b>329.176329</b> |                    |                   | <b>639.334817</b>  | 320.171046       | D    | <b>1532.683189</b> | 766.845233        | <b>1515.656640</b> | 758.331958       | <b>1514.672624</b> | 757.839950       | 11 |
| 7  | <b>817.376031</b>  | 409.191654        |                    |                   | <b>799.365466</b>  | 400.186371       | C    | <b>1417.656246</b> | 709.331761        | 1400.629697        | 700.818487       | <b>1399.645681</b> | 700.326479       | 10 |
| 8  | 904.408059         | 452.707668        |                    |                   | 886.397494         | 443.702385       | S    | <b>1257.625597</b> | 629.316437        | 1240.599048        | 620.803162       | 1239.615032        | 620.311154       | 9  |
| 9  | 1005.455738        | 503.231507        |                    |                   | 987.445173         | 494.226225       | T    | <b>1170.593569</b> | 585.800422        | 1153.567020        | 577.287148       | 1152.583004        | 576.795140       | 8  |
| 10 | <b>1119.498665</b> | 560.252971        | 1102.472116        | 551.739696        | <b>1101.488100</b> | 551.247688       | N    | <b>1069.545890</b> | 535.276583        | 1052.519341        | 526.763309       | 1051.535325        | 526.271301       | 7  |
| 11 | <b>1233.541592</b> | 617.274434        | <b>1216.515043</b> | 608.761160        | <b>1215.531027</b> | 608.269152       | N    | <b>955.502963</b>  | 478.255119        | 938.476414         | 469.741845       | 937.492398         | 469.249837       | 6  |
| 12 | 1330.594356        | 665.800816        | <b>1313.567807</b> | <b>657.287542</b> | 1312.583791        | 656.795534       | P    | <b>841.460036</b>  | 421.233656        | 824.433487         | 412.720381       | <b>823.449471</b>  | 412.228373       | 5  |
| 13 | <b>1417.626384</b> | 709.316830        | 1400.599835        | 700.803556        | <b>1399.615819</b> | 700.311548       | S    | <b>744.407272</b>  | 372.707274        | 727.380723         | 364.193999       | 726.396707         | 363.701991       | 4  |
| 14 | 1856.851710        | 928.929493        | <b>1839.825161</b> | 920.416219        | 1838.841145        | 919.924211       | Q    | <b>657.375244</b>  | <b>329.191260</b> | 640.348695         | 320.677985       |                    |                  | 3  |
| 15 | 1927.888824        | 964.448050        | 1910.862275        | 955.934776        | 1909.878259        | 955.442768       | A    | <b>218.149918</b>  | 109.578597        | 201.123369         | 101.065322       |                    |                  | 2  |
| 16 |                    |                   |                    |                   |                    |                  | K    | <b>147.112804</b>  | 74.060040         | 130.086255         | 65.546765        |                    |                  | 1  |

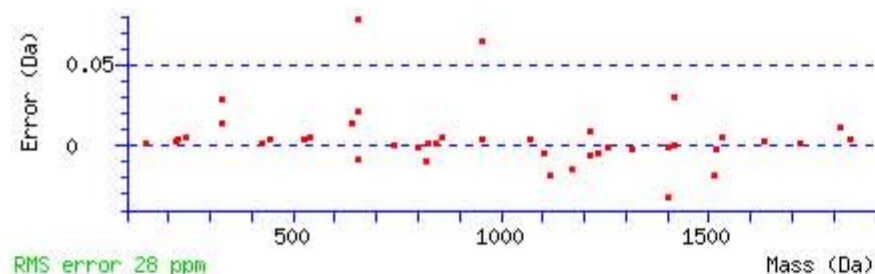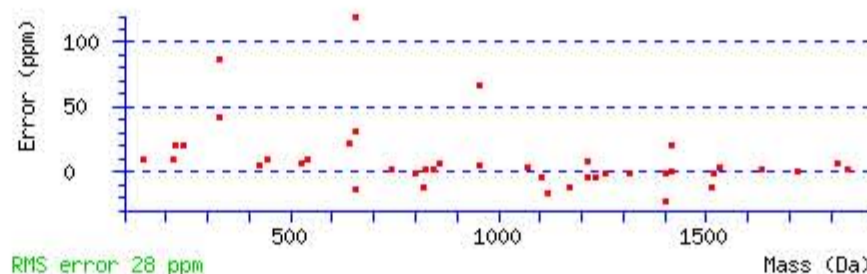

NCBI BLAST search of [EILSVDCSTNNPSQAK](#)

(Parameters: blastp, nr protein database, expect=20000, no filter, PAM30)

Other BLAST [web gateways](#)

All matches to this query

| Score | Mr(calc):   | Delta     | Sequence                             |
|-------|-------------|-----------|--------------------------------------|
| 75.2  | 2072.987061 | 0.006407  | <a href="#">EILSVDCSTNNPSQAK</a>     |
| 1.5   | 2072.994904 | -0.001436 | <a href="#">MQDPNADTEWNDILRKK</a>    |
| 1.2   | 2072.985199 | 0.008269  | <a href="#">KWVYPSEQMFWNAMLK</a>     |
| 0.1   | 2073.023911 | -0.030443 | <a href="#">EAAAVFQETLRGGSQPDAAR</a> |

# MASCOT SCIENCE Mascot Search Results

## Peptide View

MS/MS Fragmentation of **QQTHMLDVMQDHF**SR

Found in **CLUS\_HUMAN**, Clusterin OS=Homo sapiens GN=CLU PE=1 SV=1

Match to Query 45730: 2183.011016 from(546.760030,4+) rtinseconds(2029) index(47598)

Title: Locus:1.1.1.2755.6 File:"2013-07-02 CLN FXIII 60 min 3rd F 4.wiff"

Data file C:\Program Files (x86)\Matrix Science\Mascot Daemon\mgf\6 FXIII 60 min 3rd\mascot\_daemon\_merge.mgf

Click mouse within plot area to zoom in by factor of two about that point

Or, Plot from  to  Da

Label all possible matches  Label matches used for scoring

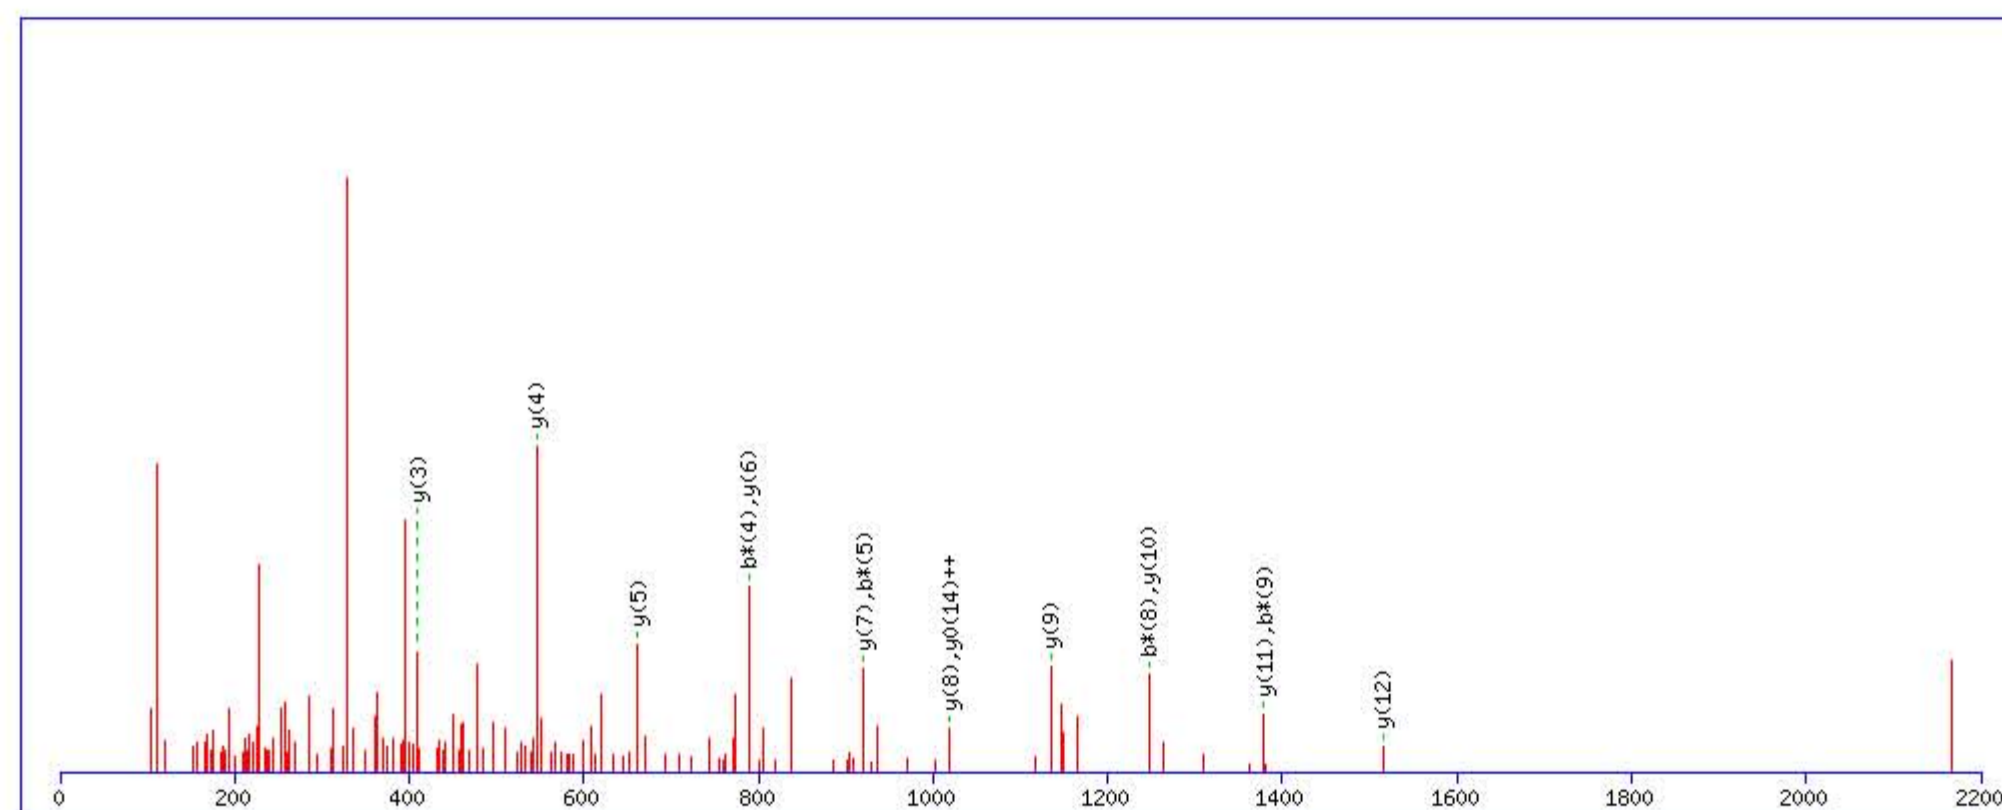

Monoisotopic mass of neutral peptide Mr(calc): 2183.007446

Fixed modifications: Carbamidomethyl (C) (apply to specified residues or termini only)

Variable modifications:

Q2 : Biotin:Thermo-21345 (Q)

Ions Score: 78 Expect: 2.3e-007

Matches : 15/162 fragment ions using 15 most intense peaks ([help](#))

| #  | b           | b <sup>++</sup> | b <sup>*</sup> | b <sup>+++</sup> | b <sup>0</sup> | b <sup>0++</sup> | Seq. | y           | y <sup>++</sup> | y <sup>*</sup> | y <sup>+++</sup> | y <sup>0</sup> | y <sup>0++</sup> | #  |
|----|-------------|-----------------|----------------|------------------|----------------|------------------|------|-------------|-----------------|----------------|------------------|----------------|------------------|----|
| 1  | 129.065854  | 65.036565       | 112.039305     | 56.523291        |                |                  | Q    |             |                 |                |                  |                |                  | 15 |
| 2  | 568.291180  | 284.649228      | 551.264631     | 276.135954       |                |                  | Q    | 2055.956135 | 1028.481705     | 2038.929586    | 1019.968431      | 2037.945570    | 1019.476423      | 14 |
| 3  | 669.338859  | 335.173068      | 652.312310     | 326.659793       | 651.328294     | 326.167785       | T    | 1616.730809 | 808.869043      | 1599.704260    | 800.355768       | 1598.720244    | 799.863760       | 13 |
| 4  | 806.397771  | 403.702524      | 789.371222     | 395.189249       | 788.387206     | 394.697241       | H    | 1515.683130 | 758.345203      | 1498.656581    | 749.831929       | 1497.672565    | 749.339921       | 12 |
| 5  | 937.438256  | 469.222766      | 920.411707     | 460.709492       | 919.427691     | 460.217484       | M    | 1378.624218 | 689.815747      | 1361.597669    | 681.302473       | 1360.613653    | 680.810465       | 11 |
| 6  | 1050.522320 | 525.764798      | 1033.495771    | 517.251524       | 1032.511755    | 516.759516       | L    | 1247.583733 | 624.295505      | 1230.557184    | 615.782230       | 1229.573168    | 615.290222       | 10 |
| 7  | 1165.549263 | 583.278270      | 1148.522714    | 574.764995       | 1147.538698    | 574.272987       | D    | 1134.499669 | 567.753473      | 1117.473120    | 559.240198       | 1116.489104    | 558.748190       | 9  |
| 8  | 1264.617677 | 632.812477      | 1247.591128    | 624.299202       | 1246.607112    | 623.807194       | V    | 1019.472726 | 510.240001      | 1002.446177    | 501.726727       | 1001.462161    | 501.234719       | 8  |
| 9  | 1395.658162 | 698.332719      | 1378.631613    | 689.819445       | 1377.647597    | 689.327437       | M    | 920.404312  | 460.705794      | 903.377763     | 452.192520       | 902.393747     | 451.700512       | 7  |
| 10 | 1523.716740 | 762.362008      | 1506.690191    | 753.848734       | 1505.706175    | 753.356726       | Q    | 789.363827  | 395.185552      | 772.337278     | 386.672277       | 771.353262     | 386.180269       | 6  |
| 11 | 1638.743683 | 819.875480      | 1621.717134    | 811.362205       | 1620.733118    | 810.870197       | D    | 661.305249  | 331.156263      | 644.278700     | 322.642988       | 643.294684     | 322.150980       | 5  |
| 12 | 1775.802595 | 888.404936      | 1758.776046    | 879.891661       | 1757.792030    | 879.399653       | H    | 546.278306  | 273.642791      | 529.251757     | 265.129517       | 528.267741     | 264.637509       | 4  |
| 13 | 1922.871009 | 961.939143      | 1905.844460    | 953.425868       | 1904.860444    | 952.933860       | F    | 409.219394  | 205.113335      | 392.192845     | 196.600061       | 391.208829     | 196.108053       | 3  |
| 14 | 2009.903037 | 1005.455157     | 1992.876488    | 996.941882       | 1991.892472    | 996.449874       | S    | 262.150980  | 131.579128      | 245.124431     | 123.065854       | 244.140415     | 122.573846       | 2  |
| 15 |             |                 |                |                  |                |                  | R    | 175.118952  | 88.063114       | 158.092403     | 79.549839        |                |                  | 1  |

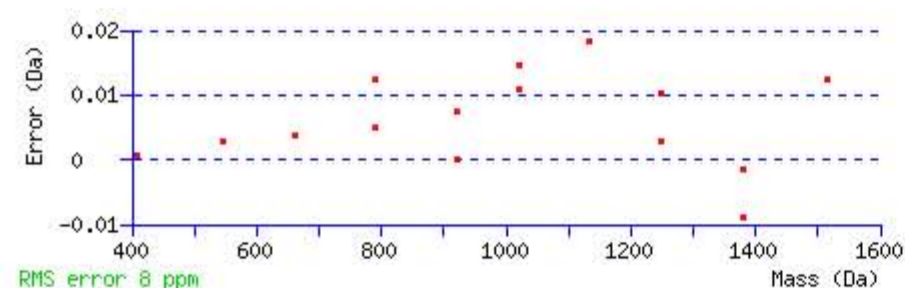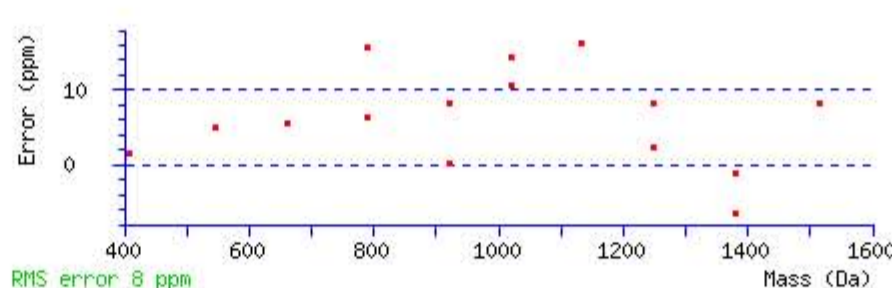

NCBI BLAST search of **QQTHMLDVMQDHF**SR

(Parameters: blastp, nr protein database, expect=20000, no filter, PAM30)

Other BLAST [web gateways](#)

All matches to this query

| Score | Mr(calc):   | Delta    | Sequence                         |
|-------|-------------|----------|----------------------------------|
| 77.6  | 2183.007446 | 0.003570 | <a href="#">QQTHMLDVMQDHF</a> SR |
| 77.6  | 2183.007446 | 0.003570 | <a href="#">QQTHMLDVMQDHF</a> SR |

# MASCOT Search Results

## Peptide View

MS/MS Fragmentation of **QQTHMLDVMQDHF<sup>R</sup>**  
Found in **CLUS\_HUMAN**, Clusterin OS=Homo sapiens GN=CLU PE=1 SV=1

Match to Query 45735: 2183.016792 from(728.679540,3+) rtinseconds(2009) index(19131)  
Title: Locus:1.1.1.3300.8 File:"2013-07-02 CLN FXIII 60 min 3rd F 2.wiff"  
Data file C:\Program Files (x86)\Matrix Science\Mascot Daemon\mgf\6 FXIII 60 min 3rd\mascot\_daemon\_merge.mgf

Click mouse within plot area to zoom in by factor of two about that point

Or, Plot from 0 to 2200 Da Full range

Label all possible matches  Label matches used for scoring

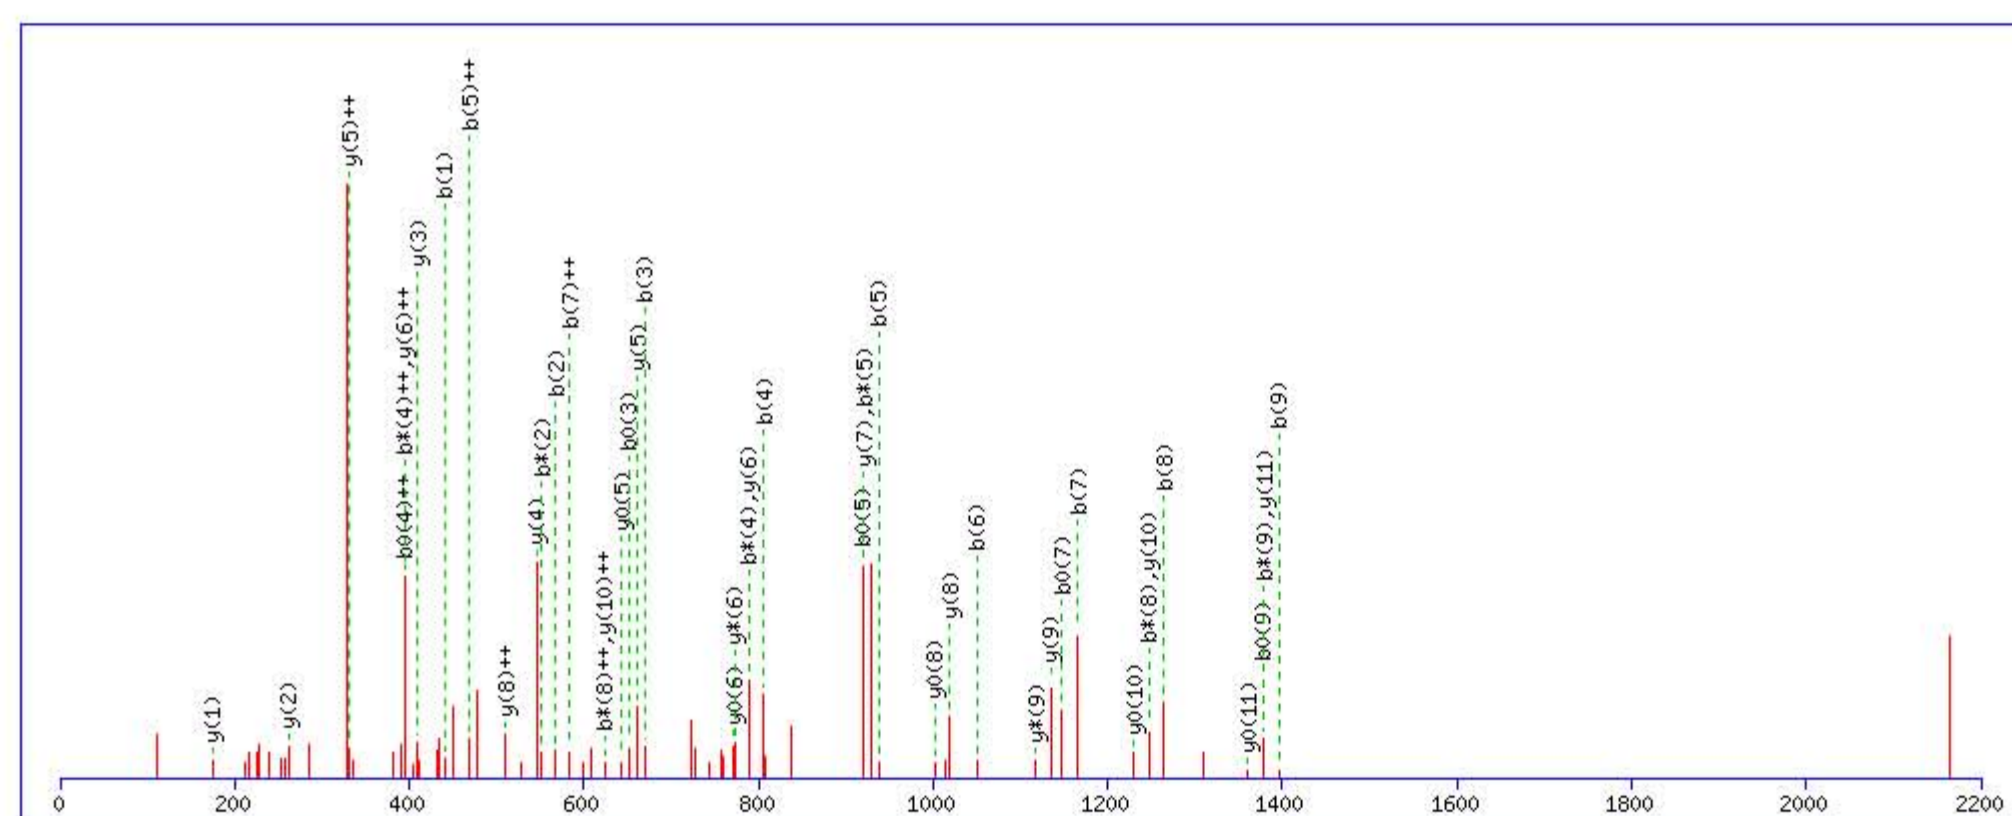

Monoisotopic mass of neutral peptide  $M_r(\text{calc})$ : 2183.007446  
Fixed modifications: Carbamidomethyl (C) (apply to specified residues or termini only)

Variable modifications:  
Q1 : Biotin:Thermo-21345 (Q)

Ions Score: 73 Expect: 1.7e-007

Matches : 45/162 fragment ions using 60 most intense peaks [\(help\)](#)

| #  | b           | b <sup>++</sup> | b <sup>*</sup> | b <sup>*++</sup> | b <sup>0</sup> | b <sup>0++</sup> | Seq. | y           | y <sup>++</sup> | y <sup>*</sup> | y <sup>*++</sup> | y <sup>0</sup> | y <sup>0++</sup> | #  |
|----|-------------|-----------------|----------------|------------------|----------------|------------------|------|-------------|-----------------|----------------|------------------|----------------|------------------|----|
| 1  | 440.232602  | 220.619939      | 423.206053     | 212.106664       |                |                  | Q    |             |                 |                |                  |                |                  | 15 |
| 2  | 568.291180  | 284.649228      | 551.264631     | 276.135954       |                |                  | Q    | 1744.789387 | 872.898332      | 1727.762838    | 864.385057       | 1726.778822    | 863.893049       | 14 |
| 3  | 669.338859  | 335.173068      | 652.312310     | 326.659793       | 651.328294     | 326.167785       | T    | 1616.730809 | 808.869043      | 1599.704260    | 800.355768       | 1598.720244    | 799.863760       | 13 |
| 4  | 806.397771  | 403.702524      | 789.371222     | 395.189249       | 788.387206     | 394.697241       | H    | 1515.683130 | 758.345203      | 1498.656581    | 749.831929       | 1497.672565    | 749.339921       | 12 |
| 5  | 937.438256  | 469.222766      | 920.411707     | 460.709492       | 919.427691     | 460.217484       | M    | 1378.624218 | 689.815747      | 1361.597669    | 681.302473       | 1360.613653    | 680.810465       | 11 |
| 6  | 1050.522320 | 525.764798      | 1033.495771    | 517.251524       | 1032.511755    | 516.759516       | L    | 1247.583733 | 624.295505      | 1230.557184    | 615.782230       | 1229.573168    | 615.290222       | 10 |
| 7  | 1165.549263 | 583.278270      | 1148.522714    | 574.764995       | 1147.538698    | 574.272987       | D    | 1134.499669 | 567.753473      | 1117.473120    | 559.240198       | 1116.489104    | 558.748190       | 9  |
| 8  | 1264.617677 | 632.812477      | 1247.591128    | 624.299202       | 1246.607112    | 623.807194       | V    | 1019.472726 | 510.240001      | 1002.446177    | 501.726727       | 1001.462161    | 501.234719       | 8  |
| 9  | 1395.658162 | 698.332719      | 1378.631613    | 689.819445       | 1377.647597    | 689.327437       | M    | 920.404312  | 460.705794      | 903.377763     | 452.192520       | 902.393747     | 451.700512       | 7  |
| 10 | 1523.716740 | 762.362008      | 1506.690191    | 753.848734       | 1505.706175    | 753.356726       | Q    | 789.363827  | 395.185552      | 772.337278     | 386.672277       | 771.353262     | 386.180269       | 6  |
| 11 | 1638.743683 | 819.875480      | 1621.717134    | 811.362205       | 1620.733118    | 810.870197       | D    | 661.305249  | 331.156263      | 644.278700     | 322.642988       | 643.294684     | 322.150980       | 5  |
| 12 | 1775.802595 | 888.404936      | 1758.776046    | 879.891661       | 1757.792030    | 879.399653       | H    | 546.278306  | 273.642791      | 529.251757     | 265.129517       | 528.267741     | 264.637509       | 4  |
| 13 | 1922.871009 | 961.939143      | 1905.844460    | 953.425868       | 1904.860444    | 952.933860       | F    | 409.219394  | 205.113335      | 392.192845     | 196.600061       | 391.208829     | 196.108053       | 3  |
| 14 | 2009.903037 | 1005.455157     | 1992.876488    | 996.941882       | 1991.892472    | 996.449874       | S    | 262.150980  | 131.579128      | 245.124431     | 123.065854       | 244.140415     | 122.573846       | 2  |
| 15 |             |                 |                |                  |                |                  | R    | 175.118952  | 88.063114       | 158.092403     | 79.549839        |                |                  | 1  |

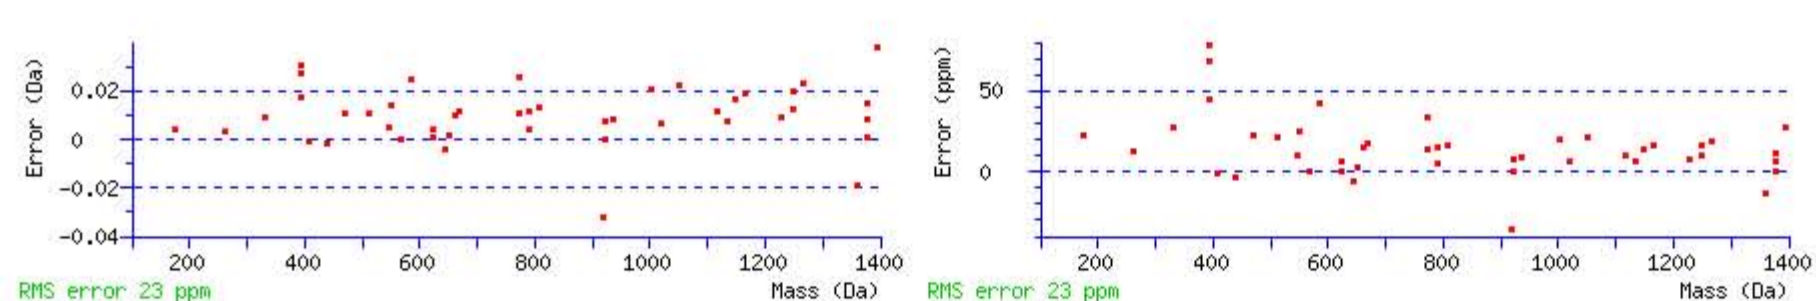

NCBI BLAST search of **QQTHMLDVMQDHF<sup>R</sup>**  
(Parameters: blastp, nr protein database, expect=20000, no filter, PAM30)  
Other BLAST [web gateways](#)

## All matches to this query

| Score | $M_r(\text{calc})$ | Delta     | Sequence                                  |
|-------|--------------------|-----------|-------------------------------------------|
| 73.3  | 2183.007446        | 0.009346  | <a href="#">QQTHMLDVMQDHF<sup>R</sup></a> |
| 69.5  | 2183.007446        | 0.009346  | <a href="#">QQTHMLDVMQDHF<sup>R</sup></a> |
| 1.1   | 2183.042465        | -0.025673 | <a href="#">EVYQKASVNMDQAMVK</a>          |
| 0.4   | 2183.021149        | -0.004357 | <a href="#">GLAGEIVGEVRCHMEENQR</a>       |



# MASCOT Search Results

## Peptide View

MS/MS Fragmentation of **VSVSQTSK**

Found in **FA9\_HUMAN**, Coagulation factor IX OS=Homo sapiens GN=F9 PE=1 SV=2

Match to Query 18684: 1145.611008 from(573.812780,2+) rtinseconds(1435) index(43767)

Title: Locus:1.1.1.2548.10 File:"2013-07-02 CLN FXIII 60 min 3rd F 4.wiff"

Data file C:\Program Files (x86)\Matrix Science\Mascot Daemon\mgf6 FXIII 60 min 3rd\mascot\_daemon\_merge.mgf

Click mouse within plot area to zoom in by factor of two about that point

Or, Plot from  to  Da

Label all possible matches  Label matches used for scoring

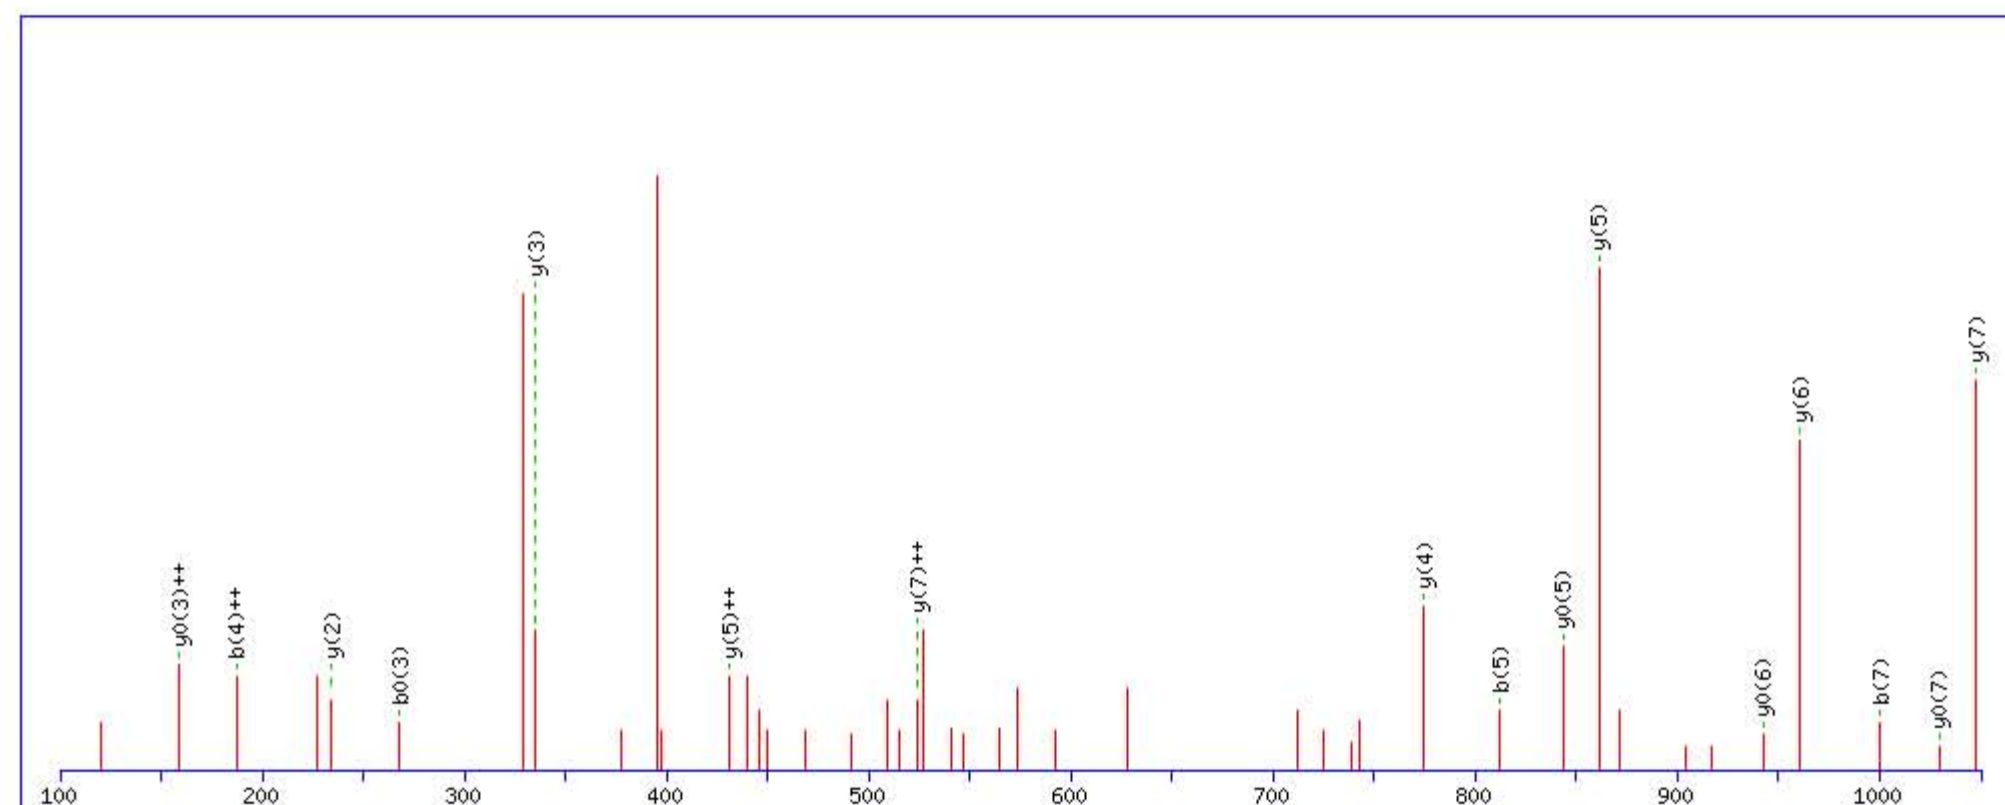

Monoisotopic mass of neutral peptide Mr(calc): 1145.611450

Fixed modifications: Carbamidomethyl (C) (apply to specified residues or termini only)

Variable modifications:

Q5 : Biotin:Thermo-21345 (Q)

Ions Score: 35 Expect: 0.00088

Matches : 17/72 fragment ions using 28 most intense peaks [\(help\)](#)

| # | b                  | b <sup>++</sup>   | b <sup>*</sup> | b <sup>*++</sup> | b <sup>0</sup>    | b <sup>0++</sup> | Seq. | y                  | y <sup>++</sup>   | y <sup>*</sup> | y <sup>*++</sup> | y <sup>0</sup>     | y <sup>0++</sup>  | # |
|---|--------------------|-------------------|----------------|------------------|-------------------|------------------|------|--------------------|-------------------|----------------|------------------|--------------------|-------------------|---|
| 1 | 100.075690         | 50.541483         |                |                  |                   |                  | V    |                    |                   |                |                  |                    |                   | 8 |
| 2 | <b>187.107718</b>  | 94.057497         |                |                  | 169.097153        | 85.052214        | S    | <b>1047.550307</b> | <b>524.278792</b> | 1030.523758    | 515.765517       | <b>1029.539742</b> | 515.273509        | 7 |
| 3 | 286.176132         | 143.591704        |                |                  | <b>268.165567</b> | 134.586422       | V    | <b>960.518279</b>  | 480.762778        | 943.491730     | 472.249503       | <b>942.507714</b>  | 471.757495        | 6 |
| 4 | 373.208160         | <b>187.107718</b> |                |                  | 355.197595        | 178.102435       | S    | <b>861.449865</b>  | <b>431.228571</b> | 844.423316     | 422.715296       | <b>843.439300</b>  | 422.223288        | 5 |
| 5 | <b>812.433486</b>  | 406.720381        | 795.406937     | 398.207107       | 794.422921        | 397.715099       | Q    | <b>774.417837</b>  | 387.712557        | 757.391288     | 379.199282       | 756.407272         | 378.707274        | 4 |
| 6 | 913.481165         | 457.244221        | 896.454616     | 448.730946       | 895.470600        | 448.238938       | T    | <b>335.192511</b>  | 168.099893        | 318.165962     | 159.586619       | 317.181946         | <b>159.094611</b> | 3 |
| 7 | <b>1000.513193</b> | 500.760235        | 983.486644     | 492.246960       | 982.502628        | 491.754952       | S    | <b>234.144832</b>  | 117.576054        | 217.118283     | 109.062779       | 216.134267         | 108.570771        | 2 |
| 8 |                    |                   |                |                  |                   |                  | K    | 147.112804         | 74.060040         | 130.086255     | 65.546765        |                    |                   | 1 |

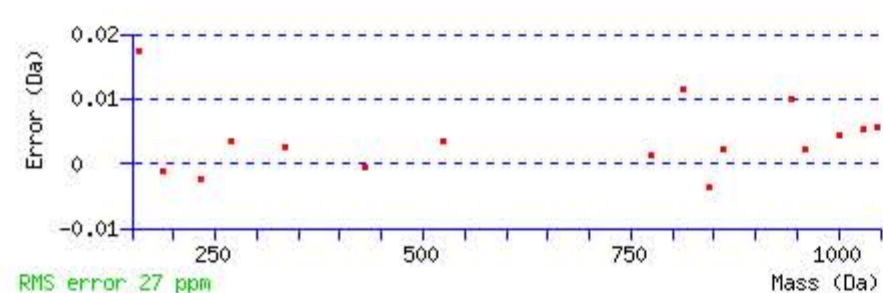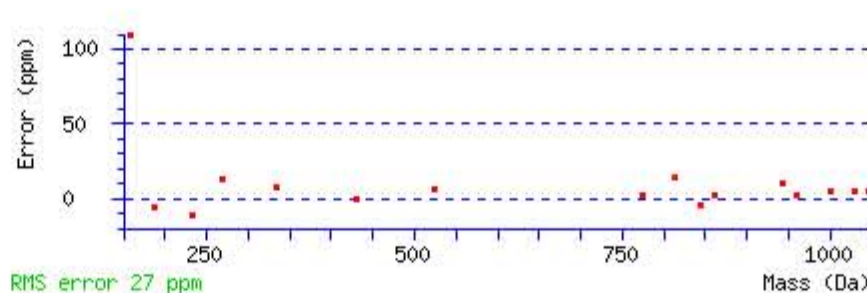

NCBI BLAST search of **VSVSQTSK**

(Parameters: blastp, nr protein database, expect=20000, no filter, PAM30)

Other BLAST [web gateways](#)

All matches to this query

| Score | Mr(calc):   | Delta     | Sequence                   |
|-------|-------------|-----------|----------------------------|
| 35.3  | 1145.611450 | -0.000442 | <a href="#">VSVSQTSK</a>   |
| 2.5   | 1145.622650 | -0.011642 | <a href="#">VKEALRDGMK</a> |
| 2.4   | 1145.623337 | -0.012329 | <a href="#">WVDGGKPLFK</a> |
| 1.7   | 1145.619278 | -0.008270 | <a href="#">WELQRSLSK</a>  |
| 1.1   | 1145.622650 | -0.011642 | <a href="#">VSMDLRANLK</a> |
| 0.5   | 1145.611420 | -0.000412 | <a href="#">KSIMVQSPEK</a> |
| 0.2   | 1145.622650 | -0.011642 | <a href="#">VDNAMSRLK</a>  |

**Peptide View**

MS/MS Fragmentation of **ITVVAGEHNIEETEHTEQK**

Found in **FA9\_HUMAN**, Coagulation factor IX OS=Homo sapiens GN=F9 PE=1 SV=2

Match to Query 50435: 2474.224122 from(825.748650,3+) rtinseconds(1608) index(44915)

Title: Locus:1.1.1.2608.17 File:"2013-07-02 CLN FXIII 60 min 3rd F 4.wiff"

Data file C:\Program Files (x86)\Matrix Science\Mascot Daemon\mgf\6 FXIII 60 min 3rd\mascot\_daemon\_merge.mgf

Click mouse within plot area to zoom in by factor of two about that point

Or, Plot from  to  Da

Label all possible matches  Label matches used for scoring

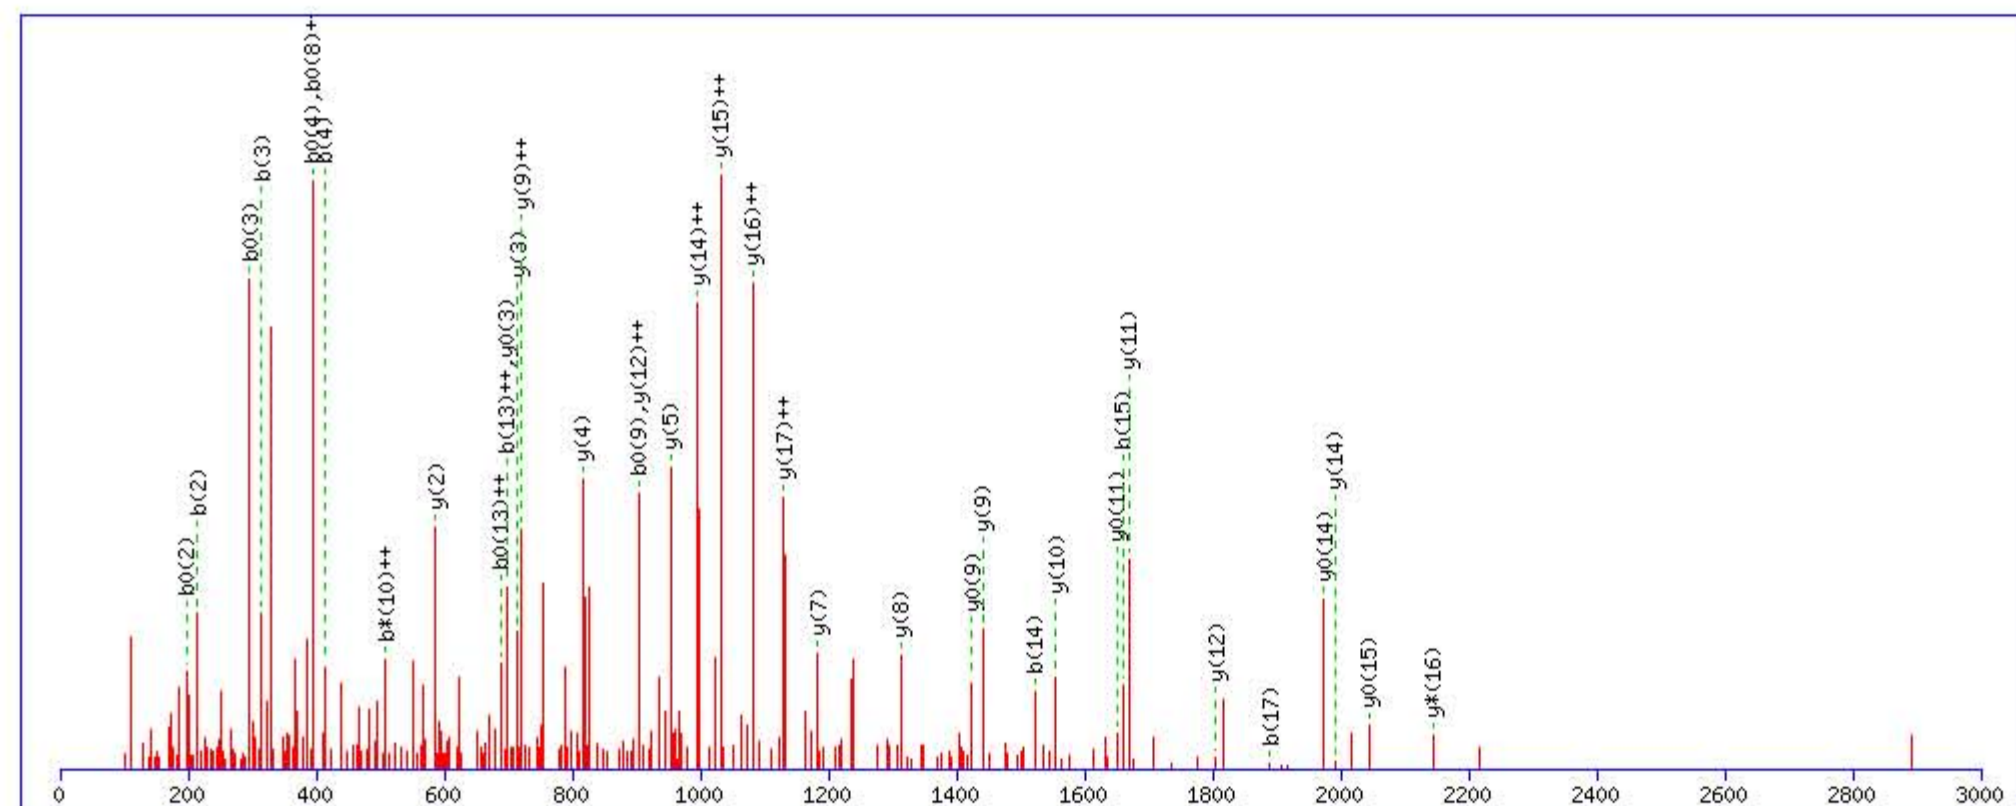

Monoisotopic mass of neutral peptide Mr(calc): 2474.211121  
 Fixed modifications: Carbamidomethyl (C) (apply to specified residues or termini only)  
 Variable modifications:  
 Q18 : Biotin:Thermo-21345 (Q)  
 Ions Score: 55 Expect: 8.1e-005  
 Matches : 37/194 fragment ions using 61 most intense peaks [\(help\)](#)

| #  | b           | b <sup>++</sup> | b <sup>+</sup> | b <sup>+++</sup> | b <sup>0</sup> | b <sup>0++</sup> | Seq. | y           | y <sup>++</sup> | y <sup>+</sup> | y <sup>+++</sup> | y <sup>0</sup> | y <sup>0++</sup> | #  |
|----|-------------|-----------------|----------------|------------------|----------------|------------------|------|-------------|-----------------|----------------|------------------|----------------|------------------|----|
| 1  | 114.091340  | 57.549308       |                |                  |                |                  | I    |             |                 |                |                  |                |                  | 19 |
| 2  | 215.139019  | 108.073147      |                |                  | 197.128454     | 99.067865        | T    | 2362.134353 | 1181.570814     | 2345.107804    | 1173.057540      | 2344.123788    | 1172.565532      | 18 |
| 3  | 314.207433  | 157.607354      |                |                  | 296.196868     | 148.602072       | V    | 2261.086674 | 1131.046975     | 2244.060125    | 1122.533700      | 2243.076109    | 1122.041692      | 17 |
| 4  | 413.275847  | 207.141561      |                |                  | 395.265282     | 198.136279       | V    | 2162.018260 | 1081.512768     | 2144.991711    | 1072.999493      | 2144.007695    | 1072.507485      | 16 |
| 5  | 484.312961  | 242.660119      |                |                  | 466.302396     | 233.654836       | A    | 2062.949846 | 1031.978561     | 2045.923297    | 1023.465286      | 2044.939281    | 1022.973278      | 15 |
| 6  | 541.334425  | 271.170851      |                |                  | 523.323860     | 262.165568       | G    | 1991.912732 | 996.460004      | 1974.886183    | 987.946730       | 1973.902167    | 987.454722       | 14 |
| 7  | 670.377018  | 335.692147      |                |                  | 652.366453     | 326.686865       | E    | 1934.891268 | 967.949272      | 1917.864719    | 959.435998       | 1916.880703    | 958.943990       | 13 |
| 8  | 807.435930  | 404.221603      |                |                  | 789.425365     | 395.216321       | H    | 1805.848675 | 903.427976      | 1788.822126    | 894.914701       | 1787.838110    | 894.422693       | 12 |
| 9  | 921.478857  | 461.243067      | 904.452308     | 452.729792       | 903.468292     | 452.237784       | N    | 1668.789763 | 834.898520      | 1651.763214    | 826.385245       | 1650.779198    | 825.893237       | 11 |
| 10 | 1034.562921 | 517.785099      | 1017.536372    | 509.271824       | 1016.552356    | 508.779816       | I    | 1554.746836 | 777.877056      | 1537.720287    | 769.363782       | 1536.736271    | 768.871774       | 10 |
| 11 | 1163.605514 | 582.306395      | 1146.578965    | 573.793121       | 1145.594949    | 573.301113       | E    | 1441.662772 | 721.335024      | 1424.636223    | 712.821750       | 1423.652207    | 712.329742       | 9  |
| 12 | 1292.648107 | 646.827692      | 1275.621558    | 638.314417       | 1274.637542    | 637.822409       | E    | 1312.620179 | 656.813728      | 1295.593630    | 648.300453       | 1294.609614    | 647.808445       | 8  |
| 13 | 1393.695786 | 697.351531      | 1376.669237    | 688.838257       | 1375.685221    | 688.346249       | T    | 1183.577586 | 592.292431      | 1166.551037    | 583.779157       | 1165.567021    | 583.287149       | 7  |
| 14 | 1522.738379 | 761.872828      | 1505.711830    | 753.359553       | 1504.727814    | 752.867545       | E    | 1082.529907 | 541.768592      | 1065.503358    | 533.255317       | 1064.519342    | 532.763309       | 6  |
| 15 | 1659.797291 | 830.402284      | 1642.770742    | 821.889009       | 1641.786726    | 821.397001       | H    | 953.487314  | 477.247295      | 936.460765     | 468.734021       | 935.476749     | 468.242013       | 5  |
| 16 | 1760.844970 | 880.926123      | 1743.818421    | 872.412849       | 1742.834405    | 871.920841       | T    | 816.428402  | 408.717839      | 799.401853     | 400.204565       | 798.417837     | 399.712557       | 4  |
| 17 | 1889.887563 | 945.447420      | 1872.861014    | 936.934145       | 1871.876998    | 936.442137       | E    | 715.380723  | 358.194000      | 698.354174     | 349.680725       | 697.370158     | 349.188717       | 3  |
| 18 | 2329.112889 | 1165.060082     | 2312.086340    | 1156.546808      | 2311.102324    | 1156.054800      | Q    | 586.338130  | 293.672703      | 569.311581     | 285.159429       |                |                  | 2  |
| 19 |             |                 |                |                  |                |                  | K    | 147.112804  | 74.060040       | 130.086255     | 65.546765        |                |                  | 1  |

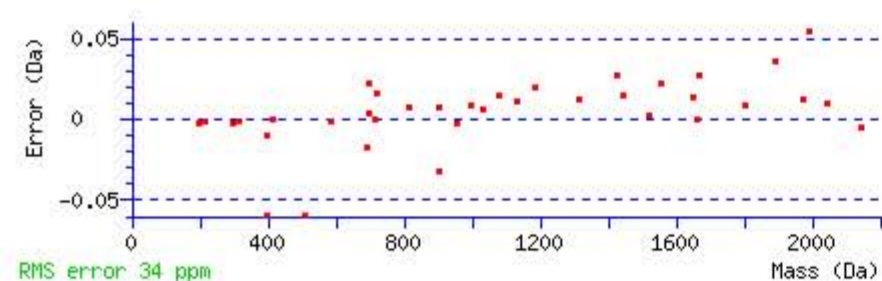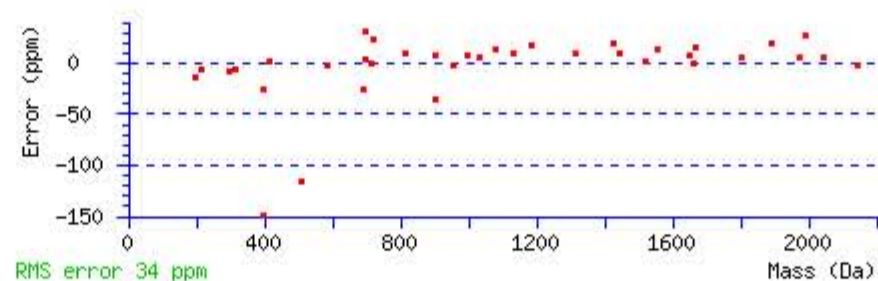

NCBI BLAST search of [ITVVAGEHNIEETEHTEQK](#)  
 (Parameters: blastp, nr protein database, expect=20000, no filter, PAM30)  
 Other BLAST [web gateways](#)

**All matches to this query**

| Score | Mr(calc):   | Delta    | Sequence                            |
|-------|-------------|----------|-------------------------------------|
| 55.1  | 2474.211121 | 0.013001 | <a href="#">ITVVAGEHNIEETEHTEQK</a> |

# MASCOT Search Results

## Peptide View

MS/MS Fragmentation of **SQHLDNFSNQIGK**

Found in **FA5\_HUMAN**, Coagulation factor V OS=Homo sapiens GN=F5 PE=1 SV=4

Match to Query 38451: 1797.890802 from(600.304210,3+) rtinseconds(1764) index(45869)

Title: Locus:1.1.1.2663.4 File:"2013-07-02 CLN FXIII 60 min 3rd F 4.wiff"

Data file C:\Program Files (x86)\Matrix Science\Mascot Daemon\mgf\6 FXIII 60 min 3rd\mascot\_daemon\_merge.mgf

Click mouse within plot area to zoom in by factor of two about that point

Or, Plot from  to  Da

Label all possible matches  Label matches used for scoring

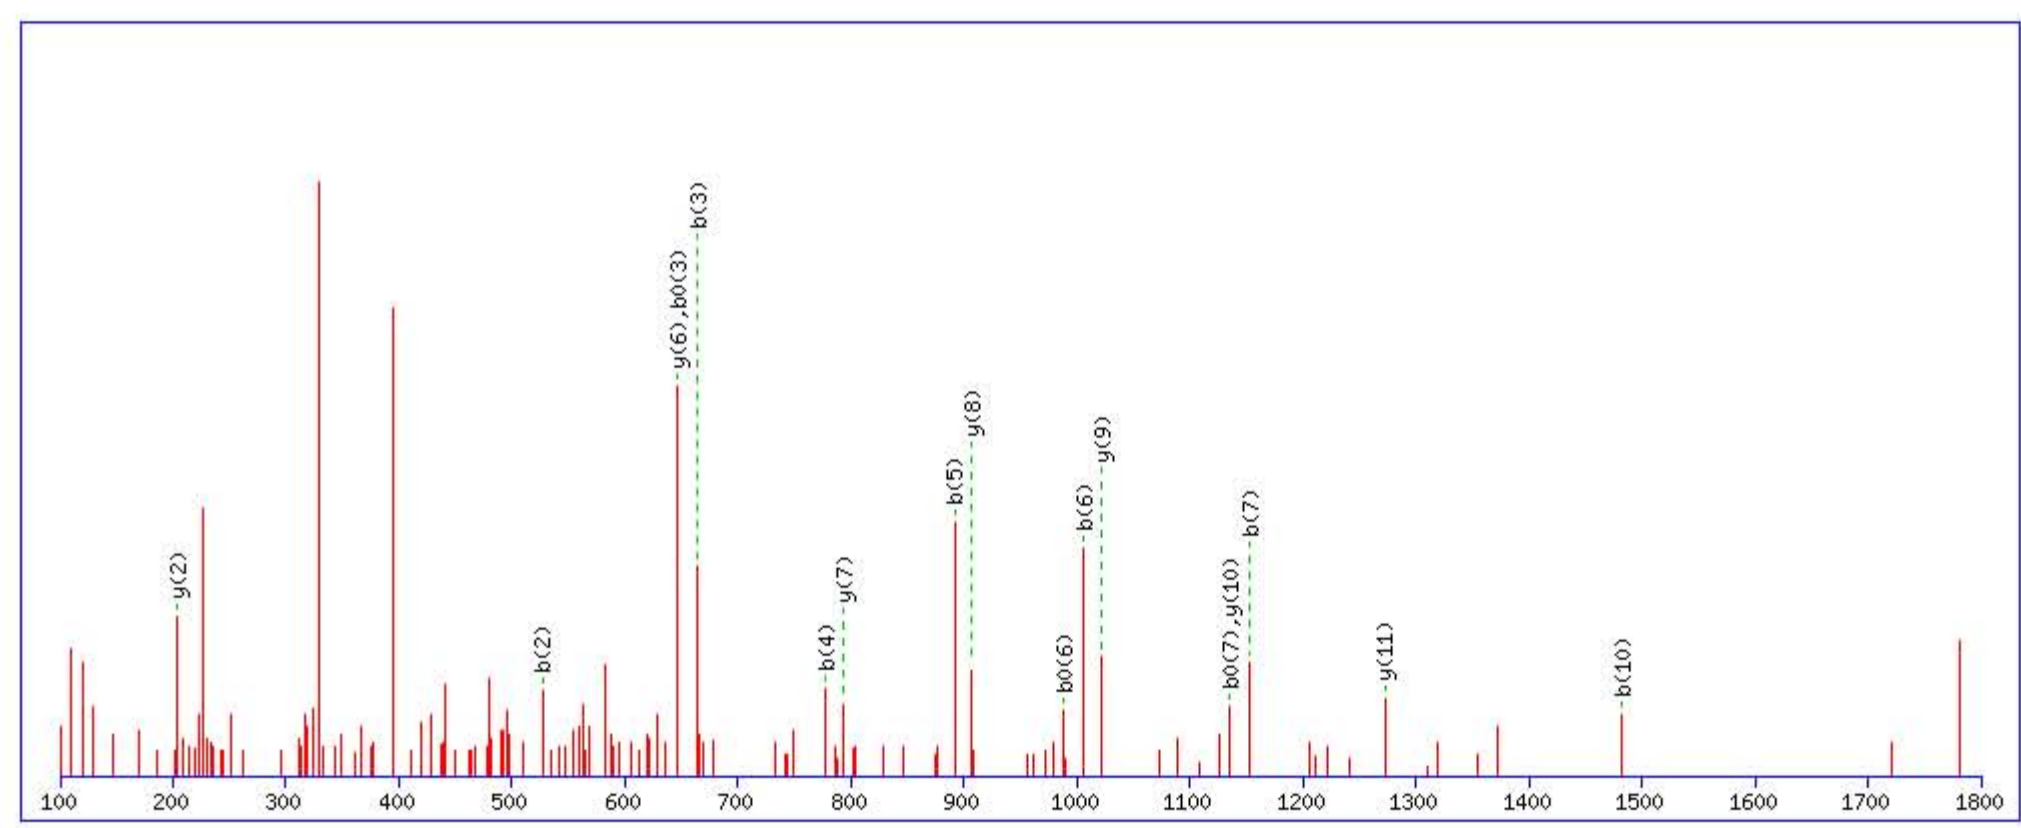

Monoisotopic mass of neutral peptide Mr(calc): 1797.883194

Fixed modifications: Carbamidomethyl (C) (apply to specified residues or termini only)

Variable modifications:

Q2 : Biotin:Thermo-21345 (Q)

Ions Score: 39 Expect: 0.0027

Matches : 17/132 fragment ions using 29 most intense peaks [\(help\)](#)

| #  | b                  | b <sup>++</sup> | b <sup>*</sup> | b <sup>*++</sup> | b <sup>0</sup>     | b <sup>0++</sup> | Seq. | y                  | y <sup>++</sup> | y <sup>*</sup> | y <sup>*++</sup> | y <sup>0</sup> | y <sup>0++</sup> | #  |
|----|--------------------|-----------------|----------------|------------------|--------------------|------------------|------|--------------------|-----------------|----------------|------------------|----------------|------------------|----|
| 1  | 88.039304          | 44.523290       |                |                  | 70.028739          | 35.518008        | S    |                    |                 |                |                  |                |                  | 13 |
| 2  | <b>527.264630</b>  | 264.135953      | 510.238081     | 255.622679       | 509.254065         | 255.130671       | Q    | 1711.858451        | 856.432863      | 1694.831902    | 847.919589       | 1693.847886    | 847.427581       | 12 |
| 3  | <b>664.323542</b>  | 332.665409      | 647.296993     | 324.152134       | <b>646.312977</b>  | 323.660126       | H    | <b>1272.633125</b> | 636.820200      | 1255.606576    | 628.306926       | 1254.622560    | 627.814918       | 11 |
| 4  | <b>777.407606</b>  | 389.207441      | 760.381057     | 380.694166       | 759.397041         | 380.202159       | L    | <b>1135.574213</b> | 568.290744      | 1118.547664    | 559.777470       | 1117.563648    | 559.285462       | 10 |
| 5  | <b>892.434549</b>  | 446.720913      | 875.408000     | 438.207638       | 874.423984         | 437.715630       | D    | <b>1022.490149</b> | 511.748712      | 1005.463600    | 503.235438       | 1004.479584    | 502.743430       | 9  |
| 6  | <b>1006.477476</b> | 503.742376      | 989.450927     | 495.229101       | <b>988.466911</b>  | 494.737093       | N    | <b>907.463206</b>  | 454.235241      | 890.436657     | 445.721966       | 889.452641     | 445.229958       | 8  |
| 7  | <b>1153.545890</b> | 577.276583      | 1136.519341    | 568.763308       | <b>1135.535325</b> | 568.271300       | F    | <b>793.420279</b>  | 397.213777      | 776.393730     | 388.700503       | 775.409714     | 388.208495       | 7  |
| 8  | 1240.577918        | 620.792597      | 1223.551369    | 612.279323       | 1222.567353        | 611.787314       | S    | <b>646.351865</b>  | 323.679570      | 629.325316     | 315.166296       | 628.341300     | 314.674288       | 6  |
| 9  | 1354.620845        | 677.814060      | 1337.594296    | 669.300786       | 1336.610280        | 668.808778       | N    | 559.319837         | 280.163556      | 542.293288     | 271.650282       |                |                  | 5  |
| 10 | <b>1482.679423</b> | 741.843349      | 1465.652874    | 733.330075       | 1464.668858        | 732.838067       | Q    | 445.276910         | 223.142093      | 428.250361     | 214.628818       |                |                  | 4  |
| 11 | 1595.763487        | 798.385381      | 1578.736938    | 789.872107       | 1577.752922        | 789.380099       | I    | 317.218332         | 159.112804      | 300.191783     | 150.599529       |                |                  | 3  |
| 12 | 1652.784951        | 826.896113      | 1635.758402    | 818.382839       | 1634.774386        | 817.890831       | G    | <b>204.134268</b>  | 102.570772      | 187.107719     | 94.057497        |                |                  | 2  |
| 13 |                    |                 |                |                  |                    |                  | K    | 147.112804         | 74.060040       | 130.086255     | 65.546765        |                |                  | 1  |

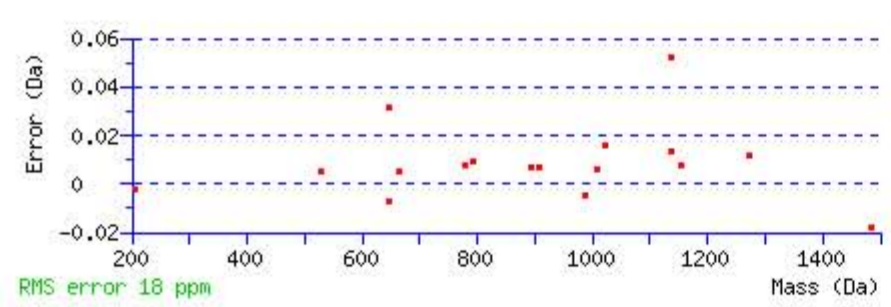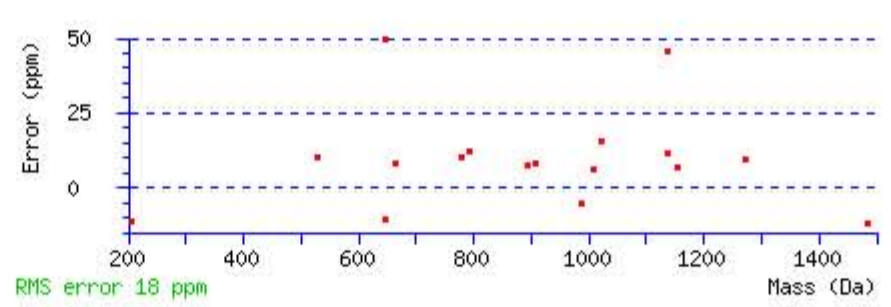

NCBI BLAST search of **SQHLDNFSNQIGK**

(Parameters: blastp, nr protein database, expect=20000, no filter, PAM30)

Other BLAST [web gateways](#)

### All matches to this query

| Score | Mr(calc):   | Delta    | Sequence                      |
|-------|-------------|----------|-------------------------------|
| 39.4  | 1797.883194 | 0.007608 | <a href="#">SQHLDNFSNQIGK</a> |

# MASCOT Search Results

## Peptide View

MS/MS Fragmentation of **MPMGLSTGIISDSQIK**

Found in **FA5\_HUMAN**, Coagulation factor V OS=Homo sapiens GN=F5 PE=1 SV=4

Match to Query 41786: 1988.031192 from(663.684340,3+) rtinseconds(2469) index(50083)

Title: Locus:1.1.1.2908.7 File:"2013-07-02 CLN FXIII 60 min 3rd F 4.wiff"

Data file C:\Program Files (x86)\Matrix Science\Mascot Daemon\mgf6 FXIII 60 min 3rd\mascot\_daemon\_merge.mgf

Click mouse within plot area to zoom in by factor of two about that point

Or, Plot from  to  Da

Label all possible matches  Label matches used for scoring

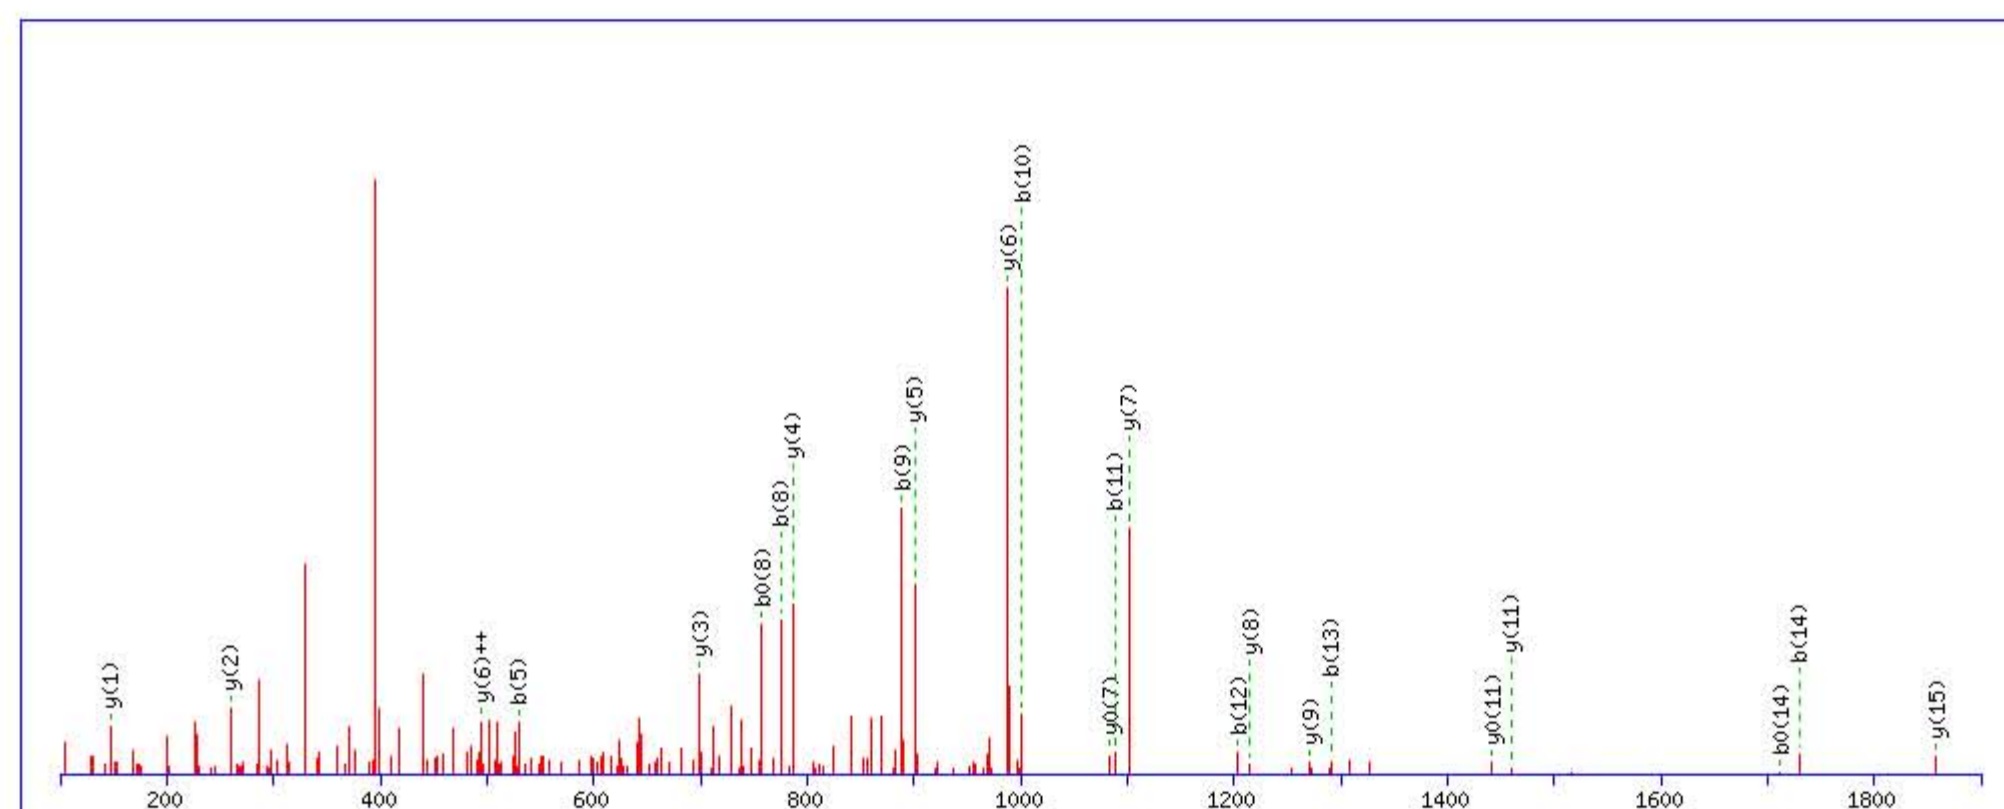

Monoisotopic mass of neutral peptide Mr(calc): 1988.014465

Fixed modifications: Carbamidomethyl (C) (apply to specified residues or termini only)

Variable modifications:

Q14 : Biotin:Thermo-21345 (Q)

Ions Score: 66 Expect: 4.5e-006

Matches : 24/138 fragment ions using 43 most intense peaks [\(help\)](#)

| #  | b           | b <sup>++</sup> | b <sup>*</sup> | b <sup>+++</sup> | b <sup>0</sup> | b <sup>0++</sup> | Seq. | y           | y <sup>++</sup> | y <sup>*</sup> | y <sup>+++</sup> | y <sup>0</sup> | y <sup>0++</sup> | #  |
|----|-------------|-----------------|----------------|------------------|----------------|------------------|------|-------------|-----------------|----------------|------------------|----------------|------------------|----|
| 1  | 132.047761  | 66.527518       |                |                  |                |                  | M    |             |                 |                |                  |                |                  | 16 |
| 2  | 229.100525  | 115.053900      |                |                  |                |                  | P    | 1857.981269 | 929.494273      | 1840.954720    | 920.980998       | 1839.970704    | 920.488990       | 15 |
| 3  | 360.141010  | 180.574143      |                |                  |                |                  | M    | 1760.928505 | 880.967891      | 1743.901956    | 872.454616       | 1742.917940    | 871.962608       | 14 |
| 4  | 417.162474  | 209.084875      |                |                  |                |                  | G    | 1629.888020 | 815.447648      | 1612.861471    | 806.934374       | 1611.877455    | 806.442366       | 13 |
| 5  | 530.246538  | 265.626907      |                |                  |                |                  | L    | 1572.866556 | 786.936916      | 1555.840007    | 778.423642       | 1554.855991    | 777.931634       | 12 |
| 6  | 617.278566  | 309.142921      |                |                  | 599.268001     | 300.137638       | S    | 1459.782492 | 730.394884      | 1442.755943    | 721.881610       | 1441.771927    | 721.389602       | 11 |
| 7  | 718.326245  | 359.666761      |                |                  | 700.315680     | 350.661478       | T    | 1372.750464 | 686.878870      | 1355.723915    | 678.365596       | 1354.739899    | 677.873588       | 10 |
| 8  | 775.347709  | 388.177493      |                |                  | 757.337144     | 379.172210       | G    | 1271.702785 | 636.355031      | 1254.676236    | 627.841756       | 1253.692220    | 627.349748       | 9  |
| 9  | 888.431773  | 444.719525      |                |                  | 870.421208     | 435.714242       | I    | 1214.681321 | 607.844299      | 1197.654772    | 599.331024       | 1196.670756    | 598.839016       | 8  |
| 10 | 1001.515837 | 501.261557      |                |                  | 983.505272     | 492.256274       | I    | 1101.597257 | 551.302267      | 1084.570708    | 542.788992       | 1083.586692    | 542.296984       | 7  |
| 11 | 1088.547865 | 544.777571      |                |                  | 1070.537300    | 535.772288       | S    | 988.513193  | 494.760235      | 971.486644     | 486.246960       | 970.502628     | 485.754952       | 6  |
| 12 | 1203.574808 | 602.291042      |                |                  | 1185.564243    | 593.285760       | D    | 901.481165  | 451.244221      | 884.454616     | 442.730946       | 883.470600     | 442.238938       | 5  |
| 13 | 1290.606836 | 645.807056      |                |                  | 1272.596271    | 636.801774       | S    | 786.454222  | 393.730749      | 769.427673     | 385.217475       | 768.443657     | 384.725467       | 4  |
| 14 | 1729.832162 | 865.419719      | 1712.805613    | 856.906445       | 1711.821597    | 856.414437       | Q    | 699.422194  | 350.214735      | 682.395645     | 341.701461       |                |                  | 3  |
| 15 | 1842.916226 | 921.961751      | 1825.889677    | 913.448477       | 1824.905661    | 912.956469       | I    | 260.196868  | 130.602072      | 243.170319     | 122.088797       |                |                  | 2  |
| 16 |             |                 |                |                  |                |                  | K    | 147.112804  | 74.060040       | 130.086255     | 65.546765        |                |                  | 1  |

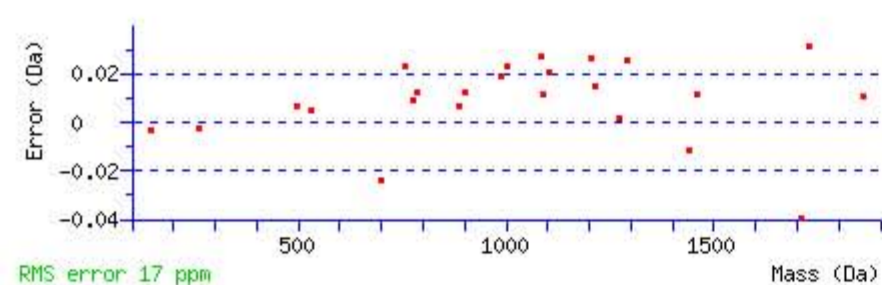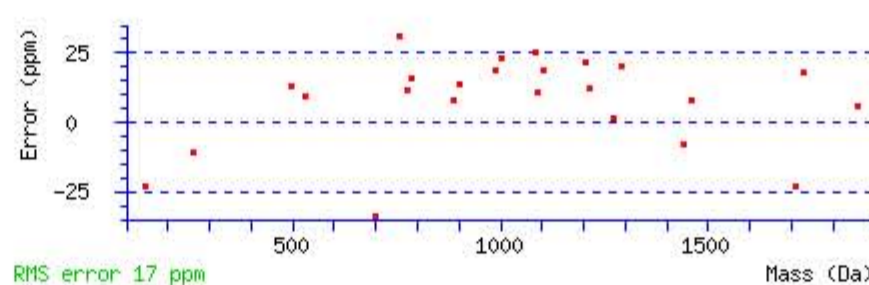

NCBI BLAST search of **MPMGLSTGIISDSQIK**

(Parameters: blastp, nr protein database, expect=20000, no filter, PAM30)

Other BLAST [web gateways](#)

## All matches to this query

| Score | Mr(calc):   | Delta     | Sequence                          |
|-------|-------------|-----------|-----------------------------------|
| 65.8  | 1988.014465 | 0.016727  | <a href="#">MPMGLSTGIISDSQIK</a>  |
| 8.2   | 1988.054688 | -0.023496 | <a href="#">EVGKILCTDCATRPKLK</a> |
| 1.8   | 1988.047485 | -0.016293 | <a href="#">YDVSSQVISQLK</a>      |
| 1.2   | 1988.051331 | -0.020139 | <a href="#">MTHKLVFLEDGTSQVRK</a> |
| 0.3   | 1988.055359 | -0.024167 | <a href="#">VVDYAQLVQPRFDK</a>    |

**MASCOT** Mascot Search Results

Peptide View

MS/MS Fragmentation of **AADIEQQAVFAVFDENK**

Found in **FA5\_HUMAN**, Coagulation factor V OS=Homo sapiens GN=F5 PE=1 SV=4

Match to Query 46071: 2205.103602 from(736.041810,3+) rtinseconds(2757) index(52064)

Title: Locus:1.1.1.3007.11 File:"2013-07-02 CLN FXIII 60 min 3rd F 4.wiff"

Data file C:\Program Files (x86)\Matrix Science\Mascot Daemon\mgf\6 FXIII 60 min 3rd\mascot\_daemon\_merge.mgf

Click mouse within plot area to zoom in by factor of two about that point

Or, Plot from 100 to 1700 Da Full range

Label all possible matches  Label matches used for scoring

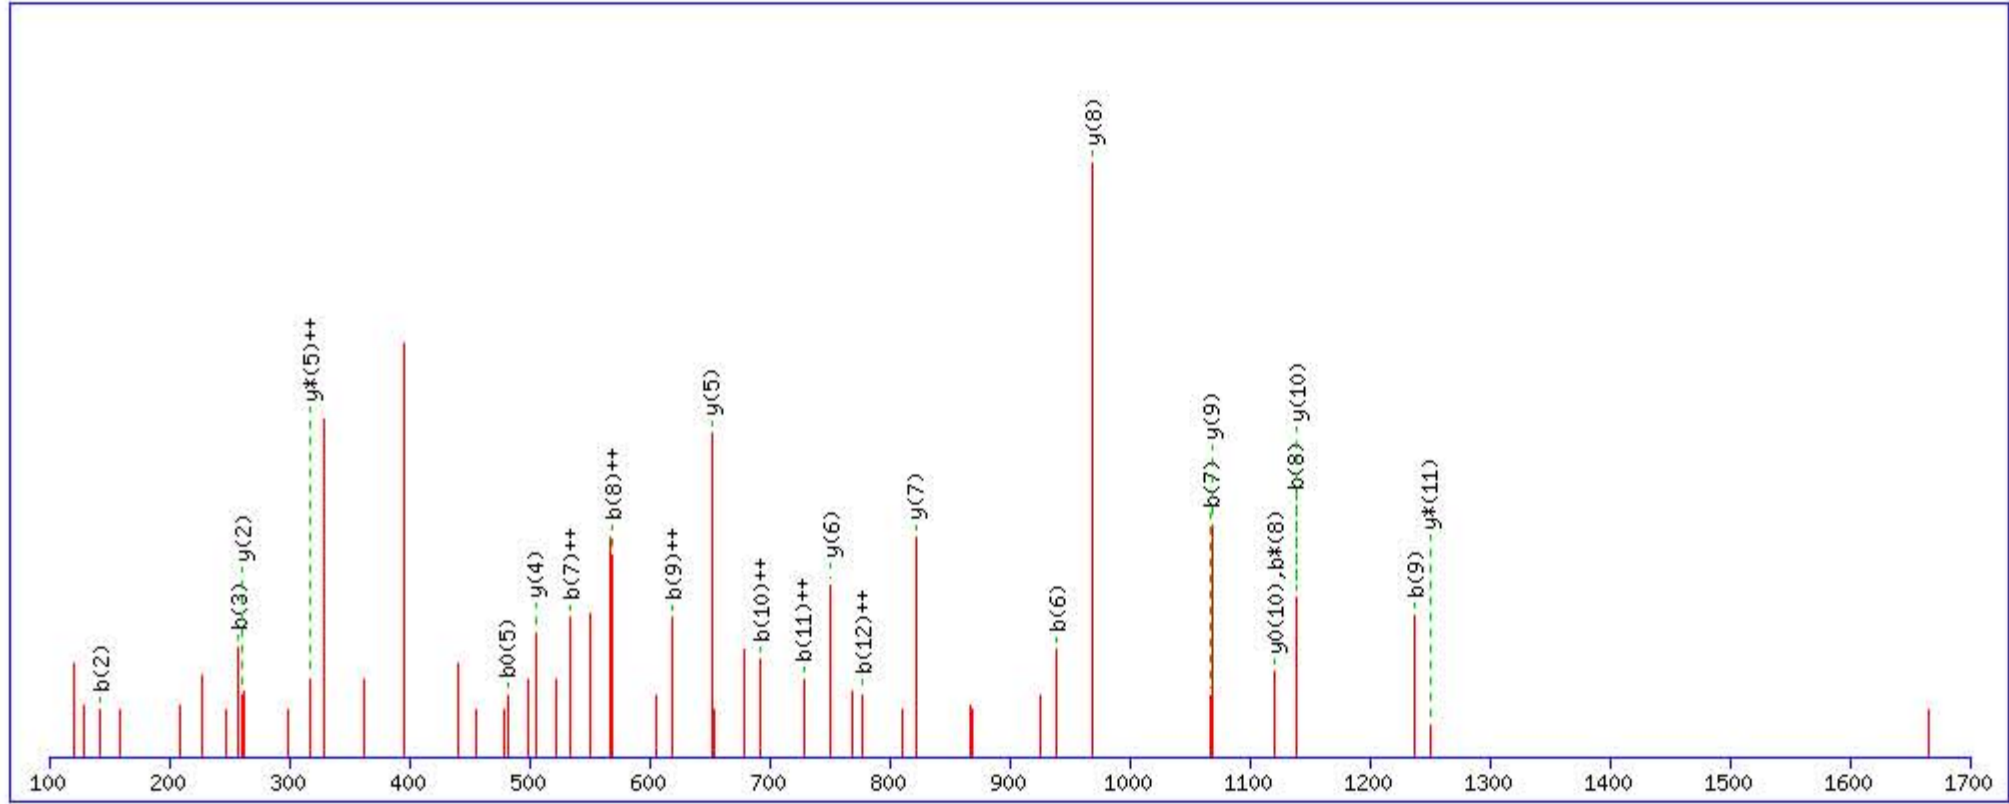

Monoisotopic mass of neutral peptide  $M_r(\text{calc})$ : 2205.077591  
 Fixed modifications: Carbamidomethyl (C) (apply to specified residues or termini only)  
 Variable modifications: Q6 : Biotin:Thermo-21345 (Q)  
 Ions Score: 42 Expect: 0.00017  
 Matches : 25/174 fragment ions using 46 most intense peaks [\(help\)](#)

| #  | b                  | b <sup>++</sup>   | b <sup>+</sup>     | b <sup>+++</sup> | b <sup>0</sup>    | b <sup>0++</sup> | Seq. | y                  | y <sup>++</sup> | y <sup>+</sup>     | y <sup>+++</sup>  | y <sup>0</sup>     | y <sup>0++</sup> | #  |
|----|--------------------|-------------------|--------------------|------------------|-------------------|------------------|------|--------------------|-----------------|--------------------|-------------------|--------------------|------------------|----|
| 1  | 72.044390          | 36.525833         |                    |                  |                   |                  | A    |                    |                 |                    |                   |                    |                  | 17 |
| 2  | <b>143.081504</b>  | 72.044390         |                    |                  |                   |                  | A    | 2135.047769        | 1068.027522     | 2118.021220        | 1059.514248       | 2117.037204        | 1059.022240      | 16 |
| 3  | <b>258.108447</b>  | 129.557862        |                    |                  | 240.097882        | 120.552579       | D    | 2064.010655        | 1032.508965     | 2046.984106        | 1023.995691       | 2046.000090        | 1023.503683      | 15 |
| 4  | 371.192511         | 186.099894        |                    |                  | 353.181946        | 177.094611       | I    | 1948.983712        | 974.995494      | 1931.957163        | 966.482220        | 1930.973147        | 965.990212       | 14 |
| 5  | 500.235104         | 250.621190        |                    |                  | <b>482.224539</b> | 241.615908       | E    | 1835.899648        | 918.453462      | 1818.873099        | 909.940188        | 1817.889083        | 909.448180       | 13 |
| 6  | <b>939.460430</b>  | 470.233853        | 922.433881         | 461.720579       | 921.449865        | 461.228571       | Q    | 1706.857055        | 853.932166      | 1689.830506        | 845.418891        | 1688.846490        | 844.926883       | 12 |
| 7  | <b>1067.519008</b> | <b>534.263142</b> | 1050.492459        | 525.749868       | 1049.508443       | 525.257860       | Q    | 1267.631729        | 634.319503      | <b>1250.605180</b> | 625.806228        | 1249.621164        | 625.314220       | 11 |
| 8  | <b>1138.556122</b> | <b>569.781699</b> | <b>1121.529573</b> | 561.268425       | 1120.545557       | 560.776416       | A    | <b>1139.573151</b> | 570.290214      | 1122.546602        | 561.776939        | <b>1121.562586</b> | 561.284931       | 10 |
| 9  | <b>1237.624536</b> | <b>619.315906</b> | 1220.597987        | 610.802632       | 1219.613971       | 610.310624       | V    | <b>1068.536037</b> | 534.771657      | 1051.509488        | 526.258382        | 1050.525472        | 525.766374       | 9  |
| 10 | 1384.692950        | <b>692.850113</b> | 1367.666401        | 684.336839       | 1366.682385       | 683.844831       | F    | <b>969.467623</b>  | 485.237450      | 952.441074         | 476.724175        | 951.457058         | 476.232167       | 8  |
| 11 | 1455.730064        | <b>728.368670</b> | 1438.703515        | 719.855396       | 1437.719499       | 719.363388       | A    | <b>822.399209</b>  | 411.703243      | 805.372660         | 403.189968        | 804.388644         | 402.697960       | 7  |
| 12 | 1554.798478        | <b>777.902877</b> | 1537.771929        | 769.389603       | 1536.787913       | 768.897595       | V    | <b>751.362095</b>  | 376.184686      | 734.335546         | 367.671411        | 733.351530         | 367.179403       | 6  |
| 13 | 1701.866892        | 851.437084        | 1684.840343        | 842.923810       | 1683.856327       | 842.431802       | F    | <b>652.293681</b>  | 326.650479      | 635.267132         | <b>318.137204</b> | 634.283116         | 317.645196       | 5  |
| 14 | 1816.893835        | 908.950556        | 1799.867286        | 900.437281       | 1798.883270       | 899.945273       | D    | <b>505.225267</b>  | 253.116271      | 488.198718         | 244.602997        | 487.214702         | 244.110989       | 4  |
| 15 | 1945.936428        | 973.471852        | 1928.909879        | 964.958578       | 1927.925863       | 964.466570       | E    | 390.198324         | 195.602800      | 373.171775         | 187.089525        | 372.187759         | 186.597517       | 3  |
| 16 | 2059.979355        | 1030.493315       | 2042.952806        | 1021.980041      | 2041.968790       | 1021.488033      | N    | <b>261.155731</b>  | 131.081503      | 244.129182         | 122.568229        |                    |                  | 2  |
| 17 |                    |                   |                    |                  |                   |                  | K    | 147.112804         | 74.060040       | 130.086255         | 65.546765         |                    |                  | 1  |

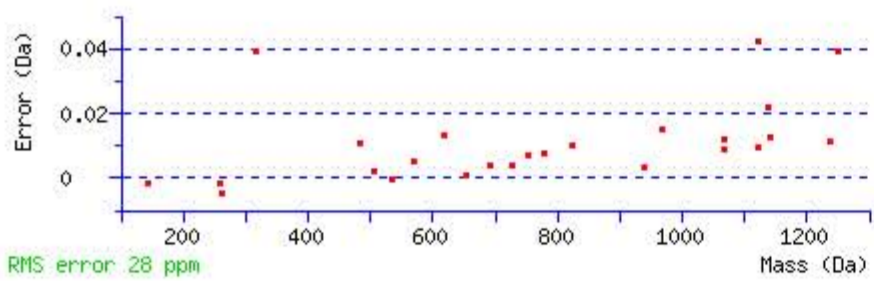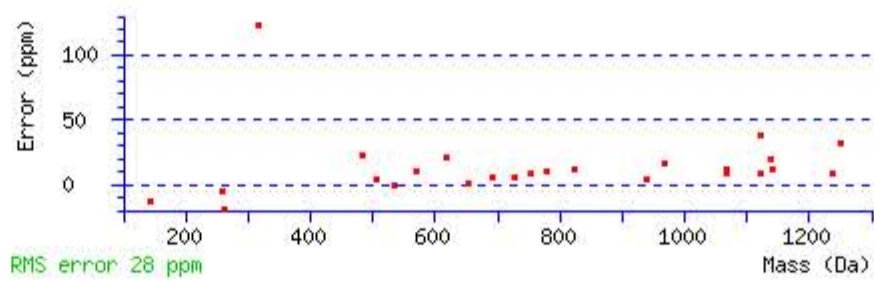

NCBI BLAST search of [AADIEQQAVFAVFDENK](#)  
 (Parameters: blastp, nr protein database, expect=20000, no filter, PAM30)  
 Other BLAST [web gateways](#)

All matches to this query

| Score | $M_r(\text{calc})$ | Delta     | Sequence                            |
|-------|--------------------|-----------|-------------------------------------|
| 41.6  | 2205.077591        | 0.026011  | <a href="#">AADIEQQAVFAVFDENK</a>   |
| 36.8  | 2205.077591        | 0.026011  | <a href="#">AADIEQQAVFAVFDENK</a>   |
| 1.4   | 2205.080063        | 0.023539  | <a href="#">EKENDELDIQLKVF DENK</a> |
| 1.0   | 2205.129929        | -0.026327 | <a href="#">YPGRNGAQMMVHIVFKVAR</a> |



# MASCOT SCIENCE Mascot Search Results

## Peptide View

MS/MS Fragmentation of **IVGGQECK**

Found in **FA10\_HUMAN**, Coagulation factor X OS=Homo sapiens GN=F10 PE=1 SV=2

Match to Query 20349: 1200.599808 from(601.307180,2+) rtinseconds(1430) index(43745)

Title: Locus:1.1.1.2546.18 File:"2013-07-02 CLN FXIII 60 min 3rd F 4.wiff"

Data file C:\Program Files (x86)\Matrix Science\Mascot Daemon\mgf\6 FXIII 60 min 3rd\mascot\_daemon\_merge.mgf

Click mouse within plot area to zoom in by factor of two about that point

Or, Plot from  to  Da

Label all possible matches  Label matches used for scoring

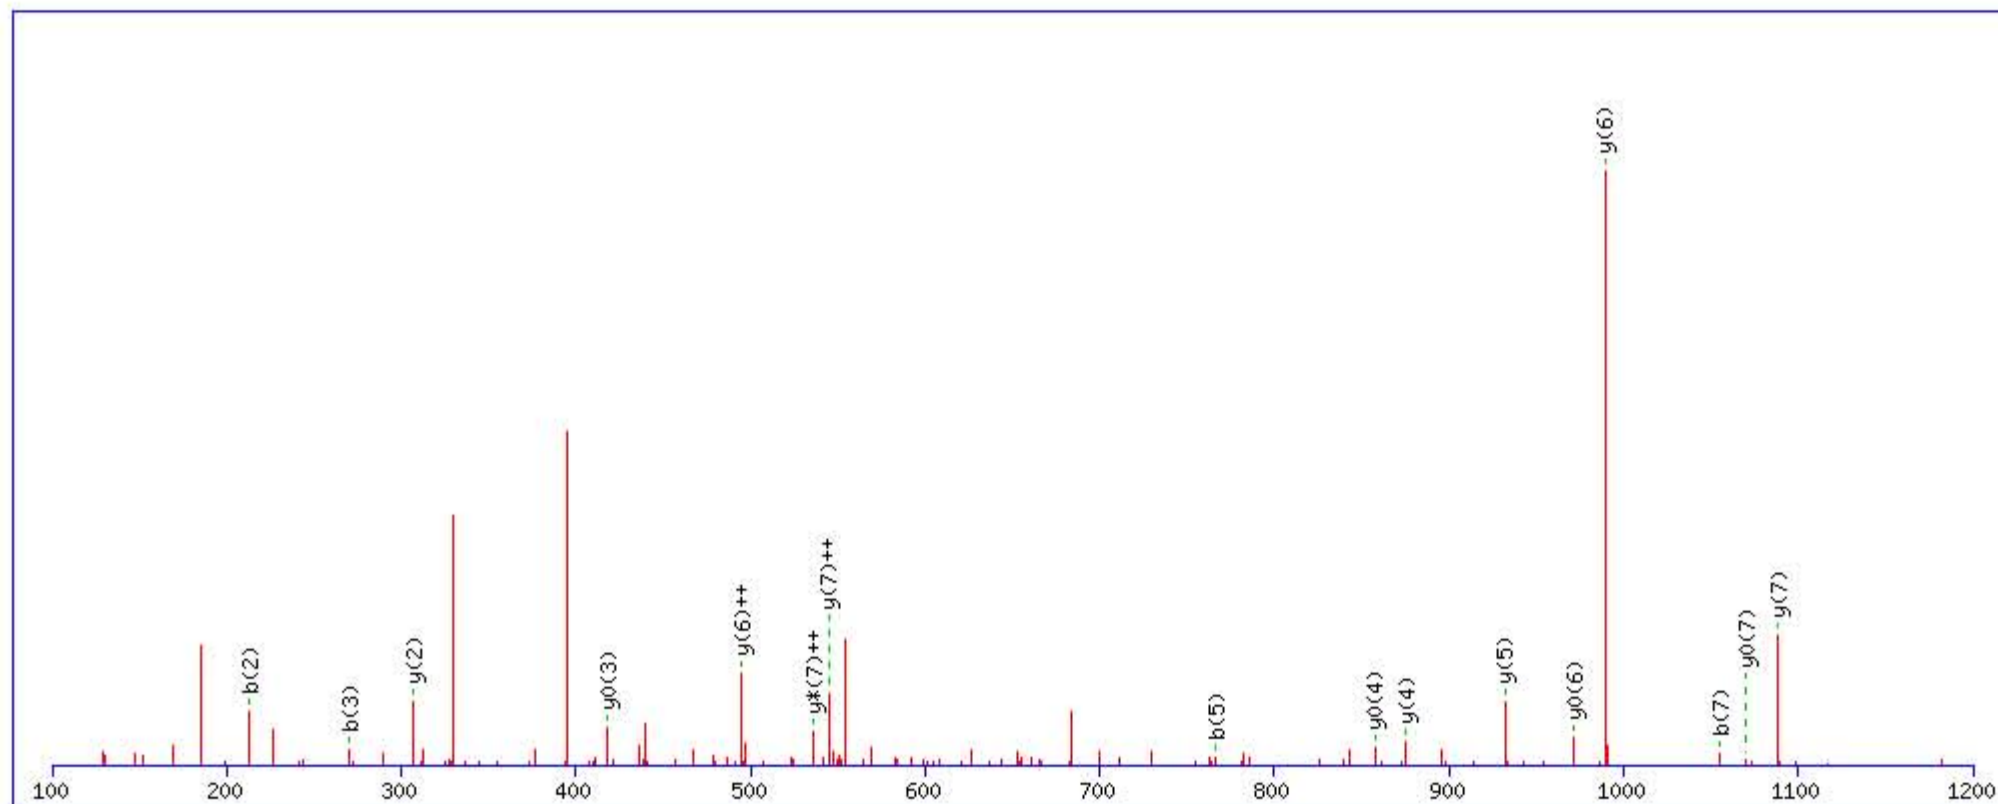

Monoisotopic mass of neutral peptide Mr(calc): 1200.599503

Fixed modifications: Carbamidomethyl (C) (apply to specified residues or termini only)

Variable modifications:

Q5 : Biotin:Thermo-21345 (Q)

Ions Score: 28 Expect: 0.0047

Matches : 16/62 fragment ions using 31 most intense peaks [\(help\)](#)

| # | b                  | b <sup>++</sup> | b <sup>*</sup> | b <sup>*++</sup> | b <sup>0</sup> | b <sup>0++</sup> | Seq. | y                  | y <sup>++</sup>   | y <sup>*</sup> | y <sup>*++</sup>  | y <sup>0</sup>     | y <sup>0++</sup> | # |
|---|--------------------|-----------------|----------------|------------------|----------------|------------------|------|--------------------|-------------------|----------------|-------------------|--------------------|------------------|---|
| 1 | 114.091340         | 57.549308       |                |                  |                |                  | I    |                    |                   |                |                   |                    |                  | 8 |
| 2 | <b>213.159754</b>  | 107.083515      |                |                  |                |                  | V    | <b>1088.522714</b> | <b>544.764995</b> | 1071.496165    | <b>536.251721</b> | <b>1070.512149</b> | 535.759713       | 7 |
| 3 | <b>270.181218</b>  | 135.594247      |                |                  |                |                  | G    | <b>989.454300</b>  | <b>495.230788</b> | 972.427751     | 486.717514        | <b>971.443735</b>  | 486.225506       | 6 |
| 4 | 327.202682         | 164.104979      |                |                  |                |                  | G    | <b>932.432836</b>  | 466.720056        | 915.406287     | 458.206782        | 914.422271         | 457.714774       | 5 |
| 5 | <b>766.428008</b>  | 383.717642      | 749.401459     | 375.204368       |                |                  | Q    | <b>875.411372</b>  | 438.209324        | 858.384823     | 429.696050        | <b>857.400807</b>  | 429.204042       | 4 |
| 6 | 895.470601         | 448.238939      | 878.444052     | 439.725664       | 877.460036     | 439.233656       | E    | 436.186046         | 218.596661        | 419.159497     | 210.083386        | <b>418.175481</b>  | 209.591378       | 3 |
| 7 | <b>1055.501250</b> | 528.254263      | 1038.474701    | 519.740989       | 1037.490685    | 519.248981       | C    | <b>307.143453</b>  | 154.075364        | 290.116904     | 145.562090        |                    |                  | 2 |
| 8 |                    |                 |                |                  |                |                  | K    | 147.112804         | 74.060040         | 130.086255     | 65.546765         |                    |                  | 1 |

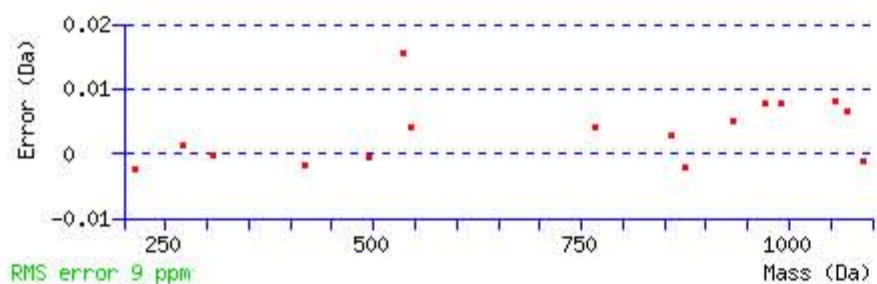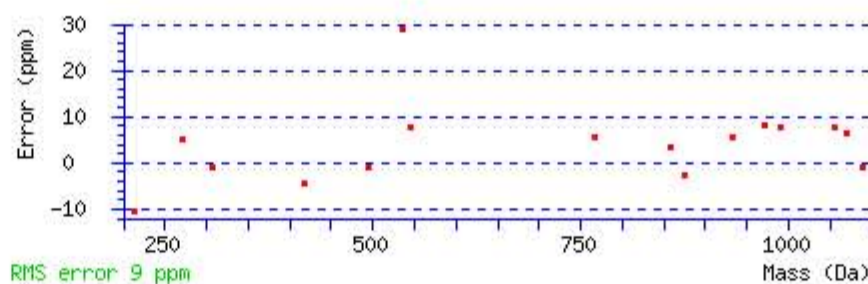

NCBI BLAST search of **IVGGQECK**

(Parameters: blastp, nr protein database, expect=20000, no filter, PAM30)

Other BLAST [web gateways](#)

## All matches to this query

| Score | Mr(calc):   | Delta    | Sequence                  |
|-------|-------------|----------|---------------------------|
| 27.7  | 1200.599503 | 0.000305 | <a href="#">IVGGQECK</a>  |
| 2.7   | 1200.598587 | 0.001221 | <a href="#">ILADLEENR</a> |
| 0.4   | 1200.596100 | 0.003708 | <a href="#">LVKMYDNR</a>  |
| 0.3   | 1200.599503 | 0.000305 | <a href="#">LIQGDGCK</a>  |

**MATRIX SCIENCE Mascot Search Results**

**Peptide View**

MS/MS Fragmentation of **QEDACQGDSSGGPHVTR**

Found in **FA10\_HUMAN**, Coagulation factor X OS=Homo sapiens GN=F10 PE=1 SV=2

Match to Query 43078: 2023.886742 from(675.636190,3+) rtinseconds(1310) index(43089)

Title: Locus:1.1.1.2504.22 File:"2013-07-02 CLN FXIII 60 min 3rd F 4.wiff"

Data file C:\Program Files (x86)\Matrix Science\Mascot Daemon\mgf\6 FXIII 60 min 3rd\mascot\_daemon\_merge.mgf

Click mouse within plot area to zoom in by factor of two about that point

Or, Plot from  to  Da

Label all possible matches  Label matches used for scoring

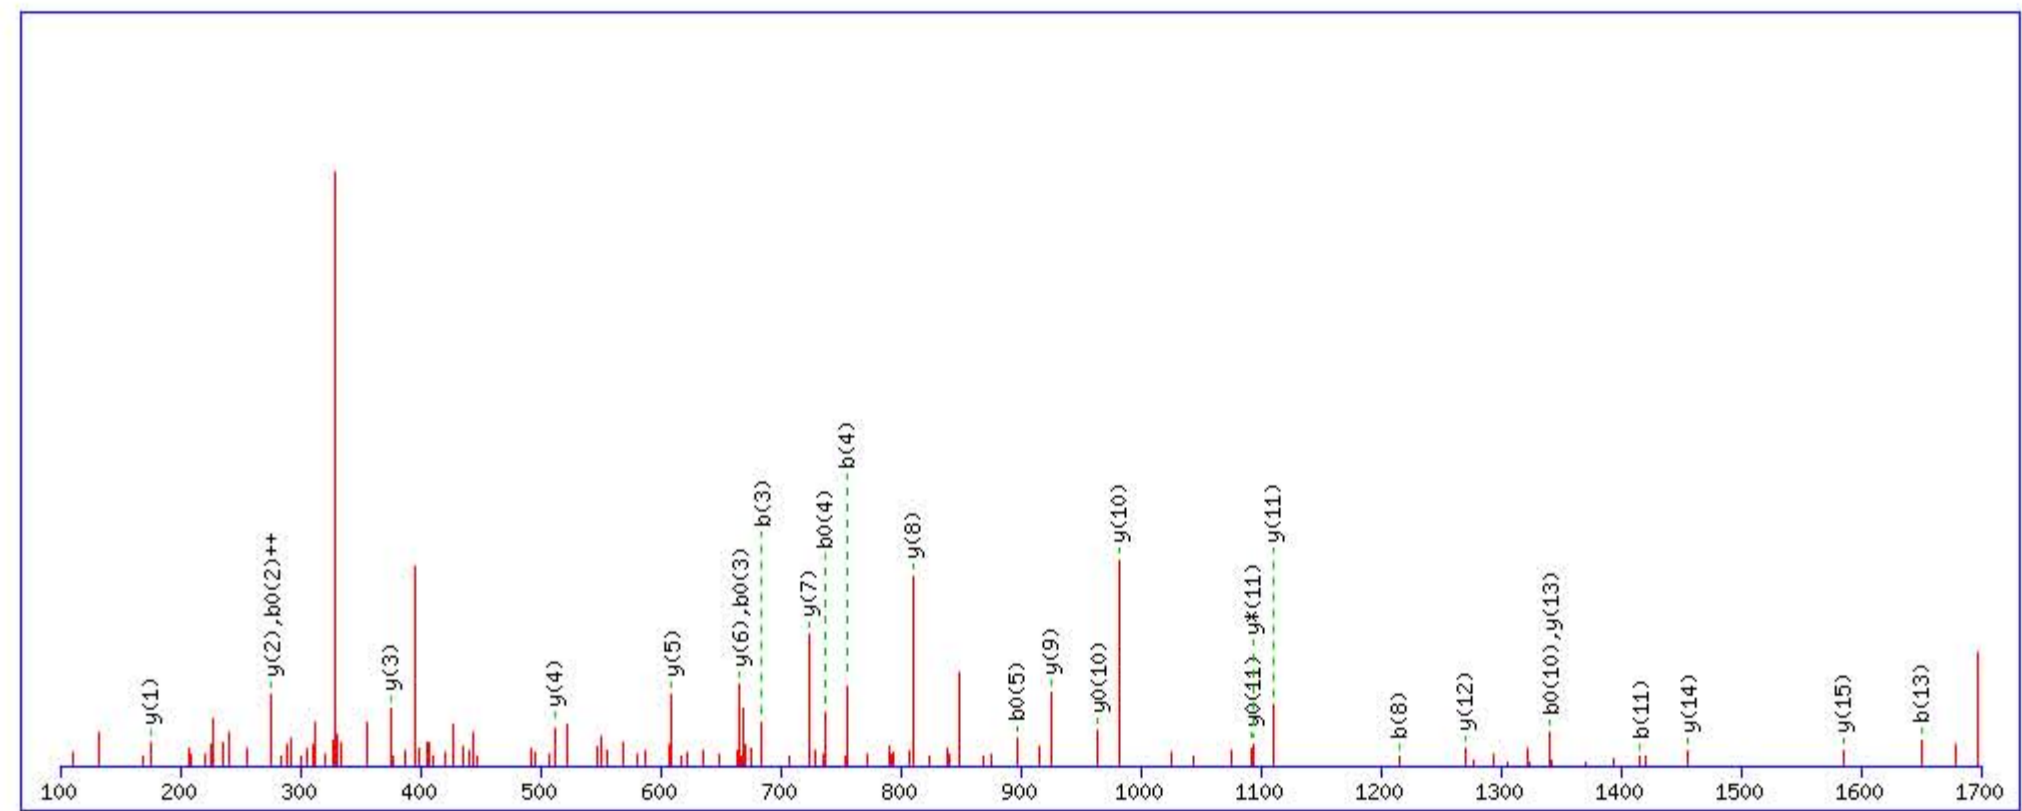

Monoisotopic mass of neutral peptide Mr(calc): 2023.884033

Fixed modifications: Carbamidomethyl (C) (apply to specified residues or termini only)

Variable modifications:

Q1 : Biotin:Thermo-21345 (Q)

Ions Score: 111 Expect: 4.4e-011

Matches : 28/176 fragment ions using 44 most intense peaks [\(help\)](#)

| #  | b           | b <sup>++</sup> | b <sup>*</sup> | b <sup>*++</sup> | b <sup>0</sup> | b <sup>0++</sup> | Seq. | y           | y <sup>++</sup> | y <sup>*</sup> | y <sup>*++</sup> | y <sup>0</sup> | y <sup>0++</sup> | #  |
|----|-------------|-----------------|----------------|------------------|----------------|------------------|------|-------------|-----------------|----------------|------------------|----------------|------------------|----|
| 1  | 440.232602  | 220.619939      | 423.206053     | 212.106664       |                |                  | Q    |             |                 |                |                  |                |                  | 16 |
| 2  | 569.275195  | 285.141236      | 552.248646     | 276.627961       | 551.264630     | 276.135953       | E    | 1585.665961 | 793.336618      | 1568.639412    | 784.823344       | 1567.655396    | 784.331336       | 15 |
| 3  | 684.302138  | 342.654707      | 667.275589     | 334.141433       | 666.291573     | 333.649425       | D    | 1456.623368 | 728.815322      | 1439.596819    | 720.302047       | 1438.612803    | 719.810039       | 14 |
| 4  | 755.339252  | 378.173264      | 738.312703     | 369.659989       | 737.328687     | 369.167982       | A    | 1341.596425 | 671.301851      | 1324.569876    | 662.788576       | 1323.585860    | 662.296568       | 13 |
| 5  | 915.369901  | 458.188589      | 898.343352     | 449.675314       | 897.359336     | 449.183306       | C    | 1270.559311 | 635.783294      | 1253.532762    | 627.270019       | 1252.548746    | 626.778011       | 12 |
| 6  | 1043.428479 | 522.217877      | 1026.401930    | 513.704603       | 1025.417914    | 513.212595       | Q    | 1110.528662 | 555.767969      | 1093.502113    | 547.254695       | 1092.518097    | 546.762686       | 11 |
| 7  | 1100.449943 | 550.728609      | 1083.423394    | 542.215335       | 1082.439378    | 541.723327       | G    | 982.470084  | 491.738680      | 965.443535     | 483.225406       | 964.459519     | 482.733398       | 10 |
| 8  | 1215.476886 | 608.242081      | 1198.450337    | 599.728807       | 1197.466321    | 599.236798       | D    | 925.448620  | 463.227948      | 908.422071     | 454.714674       | 907.438055     | 454.222666       | 9  |
| 9  | 1302.508914 | 651.758095      | 1285.482365    | 643.244821       | 1284.498349    | 642.752813       | S    | 810.421677  | 405.714477      | 793.395128     | 397.201202       | 792.411112     | 396.709194       | 8  |
| 10 | 1359.530378 | 680.268827      | 1342.503829    | 671.755553       | 1341.519813    | 671.263544       | G    | 723.389649  | 362.198463      | 706.363100     | 353.685188       | 705.379084     | 353.193180       | 7  |
| 11 | 1416.551842 | 708.779559      | 1399.525293    | 700.266284       | 1398.541277    | 699.774276       | G    | 666.368185  | 333.687731      | 649.341636     | 325.174456       | 648.357620     | 324.682448       | 6  |
| 12 | 1513.604606 | 757.305941      | 1496.578057    | 748.792667       | 1495.594041    | 748.300658       | P    | 609.346721  | 305.176999      | 592.320172     | 296.663724       | 591.336156     | 296.171716       | 5  |
| 13 | 1650.663518 | 825.835397      | 1633.636969    | 817.322122       | 1632.652953    | 816.830114       | H    | 512.293957  | 256.650617      | 495.267408     | 248.137342       | 494.283392     | 247.645334       | 4  |
| 14 | 1749.731932 | 875.369604      | 1732.705383    | 866.856330       | 1731.721367    | 866.364321       | V    | 375.235045  | 188.121161      | 358.208496     | 179.607886       | 357.224480     | 179.115878       | 3  |
| 15 | 1850.779611 | 925.893443      | 1833.753062    | 917.380169       | 1832.769046    | 916.888161       | T    | 276.166631  | 138.586953      | 259.140082     | 130.073679       | 258.156066     | 129.581671       | 2  |
| 16 |             |                 |                |                  |                |                  | R    | 175.118952  | 88.063114       | 158.092403     | 79.549839        |                |                  | 1  |

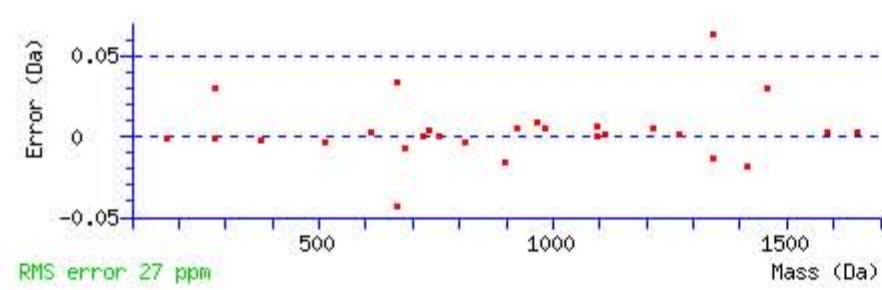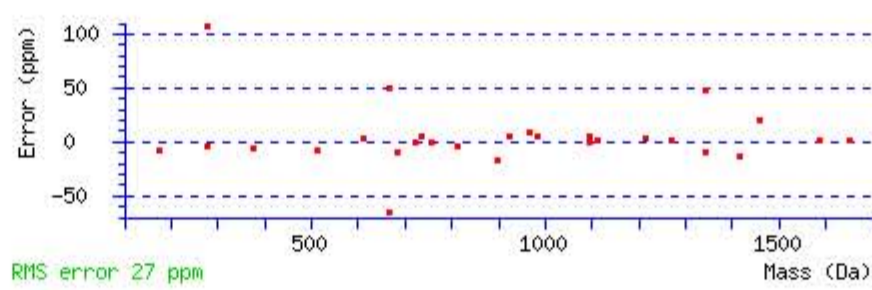

NCBI BLAST search of **QEDACQGDSSGGPHVTR**

(Parameters: blastp, nr protein database, expect=20000, no filter, PAM30)

Other BLAST [web gateways](#)

**All matches to this query**

| Score | Mr(calc):   | Delta    | Sequence                          |
|-------|-------------|----------|-----------------------------------|
| 110.9 | 2023.884033 | 0.002709 | <a href="#">QEDACQGDSSGGPHVTR</a> |
| 54.5  | 2023.884033 | 0.002709 | <a href="#">QEDACQGDSSGGPHVTR</a> |
| 2.1   | 2023.864899 | 0.021843 | <a href="#">QEGETAICSEMTADR</a>   |

Mascot: <http://www.matrixscience.com/>



# MASCOT SEARCH RESULTS

## Peptide View

MS/MS Fragmentation of **DGDQCETSPCQNQGK**

Found in **FA10\_HUMAN**, Coagulation factor X OS=Homo sapiens GN=F10 PE=1 SV=2

Match to Query 43279: 2033.831288 from(1017.922920,2+) rtinseconds(1341) index(43215)

Title: Locus:1.1.1.2515.13 File:"2013-07-02 CLN FXIII 60 min 3rd F 4.wiff"

Data file C:\Program Files (x86)\Matrix Science\Mascot Daemon\mgf6 FXIII 60 min 3rd\mascot\_daemon\_merge.mgf

Click mouse within plot area to zoom in by factor of two about that point

Or, Plot from  to  Da

Label all possible matches  Label matches used for scoring

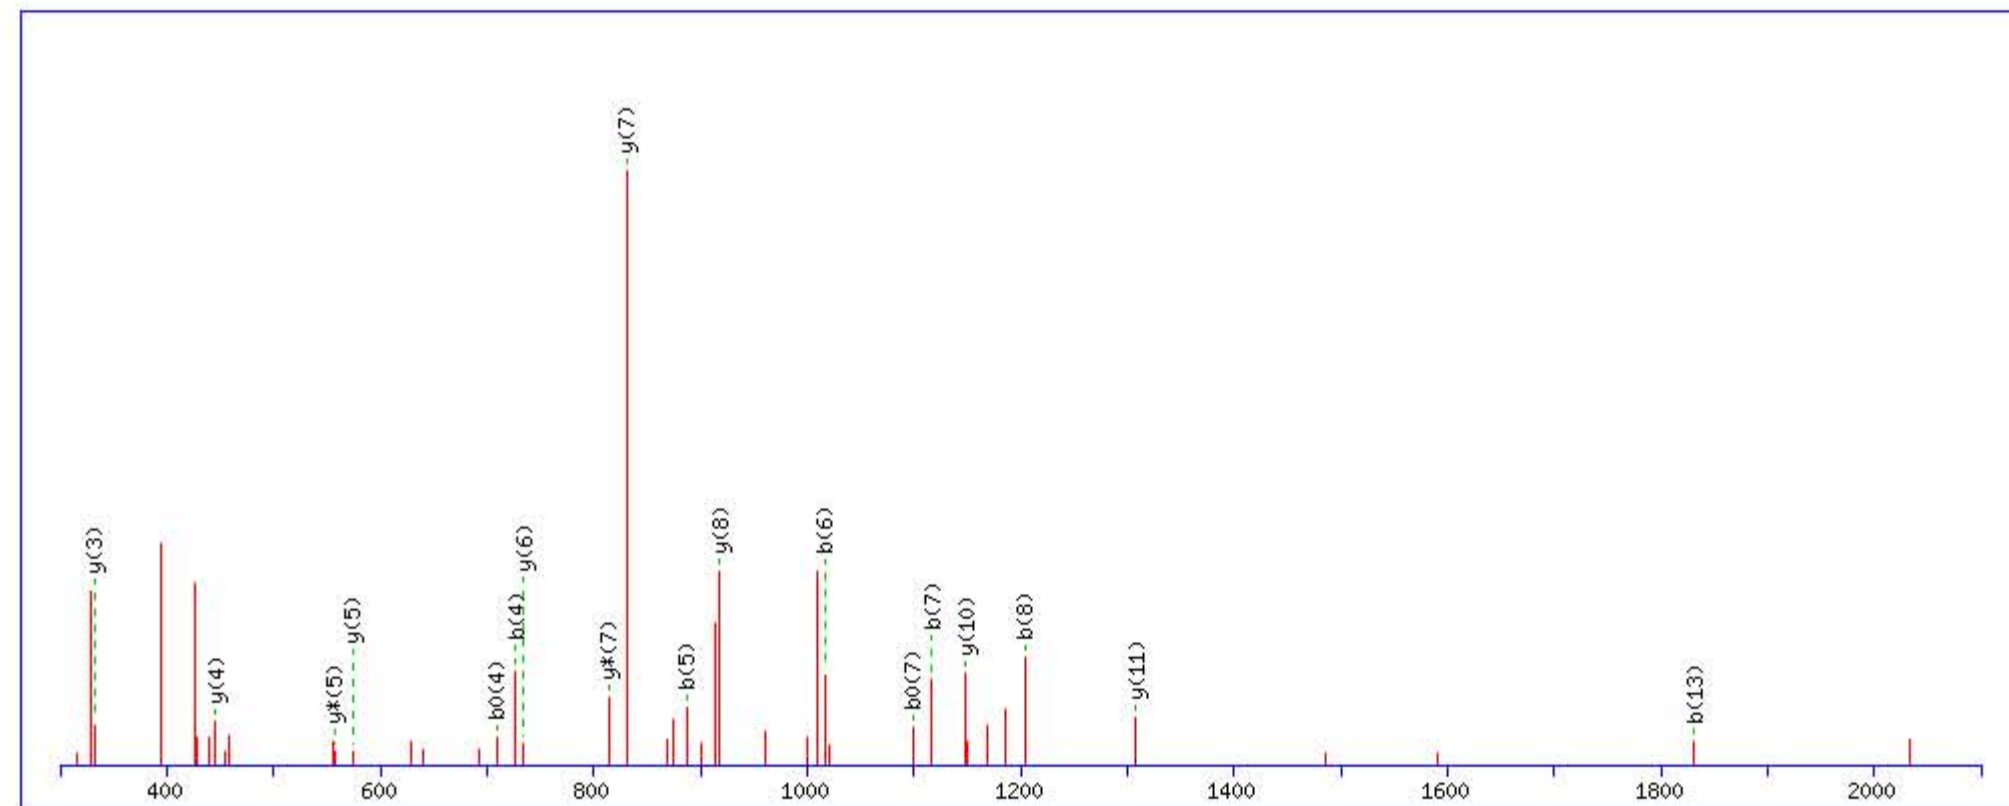

Monoisotopic mass of neutral peptide Mr(calc): 2033.824127

Fixed modifications: Carbamidomethyl (C) (apply to specified residues or termini only)

Variable modifications:

Q4 : Biotin:Thermo-21345 (Q)

Ions Score: 50 Expect: 1.5e-005

Matches : 18/148 fragment ions using 32 most intense peaks [\(help\)](#)

| #  | b                  | b <sup>++</sup> | b <sup>*</sup> | b <sup>*++</sup> | b <sup>0</sup>     | b <sup>0++</sup> | Seq. | y                  | y <sup>++</sup> | y <sup>*</sup>    | y <sup>*++</sup> | y <sup>0</sup> | y <sup>0++</sup> | #  |
|----|--------------------|-----------------|----------------|------------------|--------------------|------------------|------|--------------------|-----------------|-------------------|------------------|----------------|------------------|----|
| 1  | 116.034219         | 58.520748       |                |                  | 98.023654          | 49.515465        | D    |                    |                 |                   |                  |                |                  | 15 |
| 2  | 173.055683         | 87.031479       |                |                  | 155.045118         | 78.026197        | G    | 1919.804446        | 960.405861      | 1902.777897       | 951.892587       | 1901.793881    | 951.400579       | 14 |
| 3  | 288.082626         | 144.544951      |                |                  | 270.072061         | 135.539669       | D    | 1862.782982        | 931.895129      | 1845.756433       | 923.381855       | 1844.772417    | 922.889847       | 13 |
| 4  | <b>727.307952</b>  | 364.157614      | 710.281403     | 355.644340       | <b>709.297387</b>  | 355.152332       | Q    | 1747.756039        | 874.381658      | 1730.729490       | 865.868383       | 1729.745474    | 865.376375       | 12 |
| 5  | <b>887.338601</b>  | 444.172939      | 870.312052     | 435.659664       | 869.328036         | 435.167656       | C    | <b>1308.530713</b> | 654.768995      | 1291.504164       | 646.255720       | 1290.520148    | 645.763712       | 11 |
| 6  | <b>1016.381194</b> | 508.694235      | 999.354645     | 500.180961       | 998.370629         | 499.688953       | E    | <b>1148.500064</b> | 574.753670      | 1131.473515       | 566.240396       | 1130.489499    | 565.748388       | 10 |
| 7  | <b>1117.428873</b> | 559.218075      | 1100.402324    | 550.704800       | <b>1099.418308</b> | 550.212792       | T    | 1019.457471        | 510.232374      | 1002.430922       | 501.719099       | 1001.446906    | 501.227091       | 9  |
| 8  | <b>1204.460901</b> | 602.734089      | 1187.434352    | 594.220814       | 1186.450336        | 593.728806       | S    | <b>918.409792</b>  | 459.708534      | 901.383243        | 451.195260       | 900.399227     | 450.703252       | 8  |
| 9  | 1301.513665        | 651.260471      | 1284.487116    | 642.747196       | 1283.503100        | 642.255188       | P    | <b>831.377764</b>  | 416.192520      | <b>814.351215</b> | 407.679246       |                |                  | 7  |
| 10 | 1461.544314        | 731.275795      | 1444.517765    | 722.762521       | 1443.533749        | 722.270513       | C    | <b>734.325000</b>  | 367.666138      | 717.298451        | 359.152864       |                |                  | 6  |
| 11 | 1589.602892        | 795.305084      | 1572.576343    | 786.791810       | 1571.592327        | 786.299802       | Q    | <b>574.294351</b>  | 287.650814      | <b>557.267802</b> | 279.137539       |                |                  | 5  |
| 12 | 1703.645819        | 852.326548      | 1686.619270    | 843.813273       | 1685.635254        | 843.321265       | N    | <b>446.235773</b>  | 223.621524      | 429.209224        | 215.108250       |                |                  | 4  |
| 13 | <b>1831.704397</b> | 916.355837      | 1814.677848    | 907.842562       | 1813.693832        | 907.350554       | Q    | <b>332.192846</b>  | 166.600061      | 315.166297        | 158.086787       |                |                  | 3  |
| 14 | 1888.725861        | 944.866569      | 1871.699312    | 936.353294       | 1870.715296        | 935.861286       | G    | 204.134268         | 102.570772      | 187.107719        | 94.057497        |                |                  | 2  |
| 15 |                    |                 |                |                  |                    |                  | K    | 147.112804         | 74.060040       | 130.086255        | 65.546765        |                |                  | 1  |

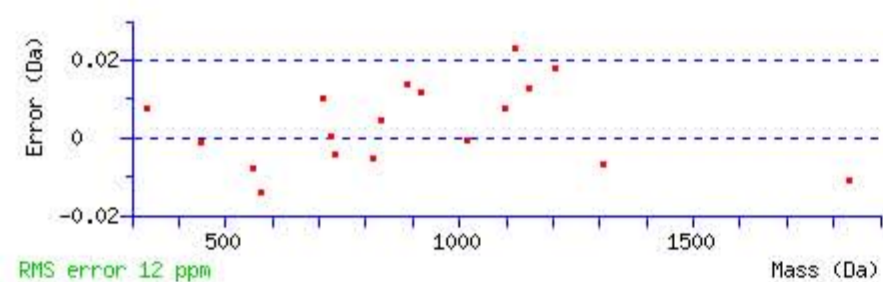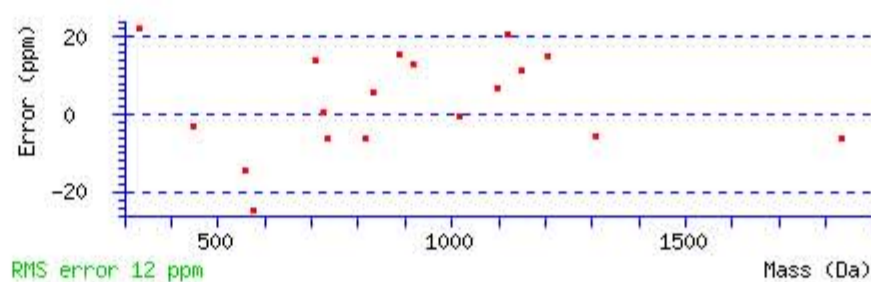

NCBI BLAST search of **DGDQCETSPCQNQGK**

(Parameters: blastp, nr protein database, expect=20000, no filter, PAM30)

Other BLAST [web gateways](#)

All matches to this query

| Score | Mr(calc):   | Delta    | Sequence                        |
|-------|-------------|----------|---------------------------------|
| 50.1  | 2033.824127 | 0.007161 | <a href="#">DGDQCETSPCQNQGK</a> |

Mascot: <http://www.matrixscience.com/>

# Mascot Search Results

## Peptide View

MS/MS Fragmentation of **MNVAPACLPERDWAESTLMTQK**

Found in **FA10\_HUMAN**, Coagulation factor X OS=Homo sapiens GN=F10 PE=1 SV=2

Match to Query 54748: 2858.399502 from(953.807110,3+) rtinseconds(2390) index(49728)

Title: Locus:1.1.1.2880.10 File:"2013-07-02 CLN FXIII 60 min 3rd F 4.wiff"

Data file C:\Program Files (x86)\Matrix Science\Mascot Daemon\mgf6 FXIII 60 min 3rd\mascot\_daemon\_merge.mgf

Click mouse within plot area to zoom in by factor of two about that point

Or, Plot from  to  Da

Label all possible matches  Label matches used for scoring

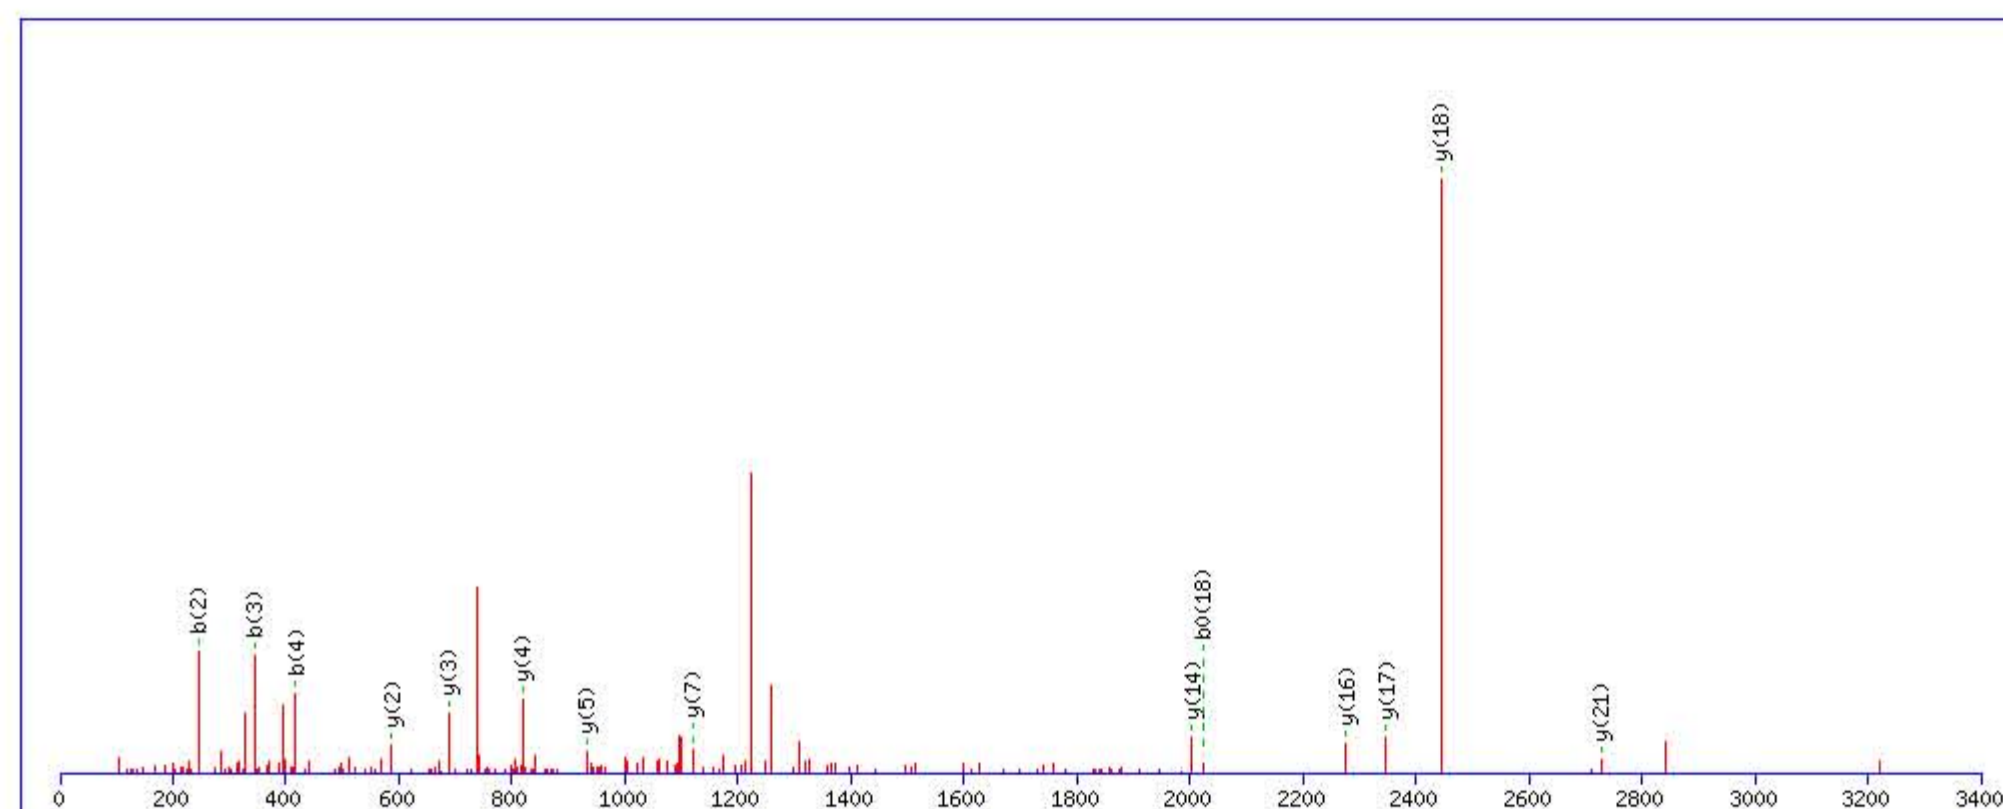

Monoisotopic mass of neutral peptide Mr(calc): 2858.358719

Fixed modifications: Carbamidomethyl (C) (apply to specified residues or termini only)

Variable modifications:

Q21 : Biotin:Thermo-21345 (Q)

Ions Score: 59 Expect: 3.5e-005

Matches : 14/228 fragment ions using 25 most intense peaks [\(help\)](#)

| #  | b                 | b <sup>++</sup> | b <sup>*</sup> | b <sup>*++</sup> | b <sup>0</sup>     | b <sup>0++</sup> | Seq. | y                  | y <sup>++</sup> | y <sup>*</sup> | y <sup>*++</sup> | y <sup>0</sup> | y <sup>0++</sup> | #  |
|----|-------------------|-----------------|----------------|------------------|--------------------|------------------|------|--------------------|-----------------|----------------|------------------|----------------|------------------|----|
| 1  | 132.047761        | 66.527518       |                |                  |                    |                  | M    |                    |                 |                |                  |                |                  | 22 |
| 2  | <b>246.090688</b> | 123.548982      | 229.064139     | 115.035708       |                    |                  | N    | <b>2728.325542</b> | 1364.666409     | 2711.298993    | 1356.153134      | 2710.314977    | 1355.661126      | 21 |
| 3  | <b>345.159102</b> | 173.083189      | 328.132553     | 164.569915       |                    |                  | V    | 2614.282615        | 1307.644945     | 2597.256066    | 1299.131671      | 2596.272050    | 1298.639663      | 20 |
| 4  | <b>416.196216</b> | 208.601746      | 399.169667     | 200.088472       |                    |                  | A    | 2515.214201        | 1258.110738     | 2498.187652    | 1249.597464      | 2497.203636    | 1249.105456      | 19 |
| 5  | 513.248980        | 257.128128      | 496.222431     | 248.614854       |                    |                  | P    | <b>2444.177087</b> | 1222.592181     | 2427.150538    | 1214.078907      | 2426.166522    | 1213.586899      | 18 |
| 6  | 584.286094        | 292.646685      | 567.259545     | 284.133411       |                    |                  | A    | <b>2347.124323</b> | 1174.065799     | 2330.097774    | 1165.552525      | 2329.113758    | 1165.060517      | 17 |
| 7  | 744.316743        | 372.662010      | 727.290194     | 364.148735       |                    |                  | C    | <b>2276.087209</b> | 1138.547242     | 2259.060660    | 1130.033968      | 2258.076644    | 1129.541960      | 16 |
| 8  | 857.400807        | 429.204042      | 840.374258     | 420.690767       |                    |                  | L    | 2116.056560        | 1058.531918     | 2099.030011    | 1050.018643      | 2098.045995    | 1049.526635      | 15 |
| 9  | 954.453571        | 477.730424      | 937.427022     | 469.217149       |                    |                  | P    | <b>2002.972496</b> | 1001.989886     | 1985.945947    | 993.476612       | 1984.961931    | 992.984604       | 14 |
| 10 | 1083.496164       | 542.251720      | 1066.469615    | 533.738446       | 1065.485599        | 533.246438       | E    | 1905.919732        | 953.463504      | 1888.893183    | 944.950230       | 1887.909167    | 944.458222       | 13 |
| 11 | 1239.597275       | 620.302276      | 1222.570726    | 611.789001       | 1221.586710        | 611.296993       | R    | 1776.877139        | 888.942208      | 1759.850590    | 880.428933       | 1758.866574    | 879.936925       | 12 |
| 12 | 1354.624218       | 677.815747      | 1337.597669    | 669.302473       | 1336.613653        | 668.810465       | D    | 1620.776028        | 810.891652      | 1603.749479    | 802.378378       | 1602.765463    | 801.886370       | 11 |
| 13 | 1540.703531       | 770.855404      | 1523.676982    | 762.342129       | 1522.692966        | 761.850121       | W    | 1505.749085        | 753.378181      | 1488.722536    | 744.864906       | 1487.738520    | 744.372898       | 10 |
| 14 | 1611.740645       | 806.373961      | 1594.714096    | 797.860686       | 1593.730080        | 797.368678       | A    | 1319.669772        | 660.338524      | 1302.643223    | 651.825250       | 1301.659207    | 651.333242       | 9  |
| 15 | 1740.783238       | 870.895257      | 1723.756689    | 862.381983       | 1722.772673        | 861.889975       | E    | 1248.632658        | 624.819967      | 1231.606109    | 616.306693       | 1230.622093    | 615.814685       | 8  |
| 16 | 1827.815266       | 914.411271      | 1810.788717    | 905.897997       | 1809.804701        | 905.405989       | S    | <b>1119.590065</b> | 560.298671      | 1102.563516    | 551.785396       | 1101.579500    | 551.293388       | 7  |
| 17 | 1928.862945       | 964.935111      | 1911.836396    | 956.421836       | 1910.852380        | 955.929828       | T    | 1032.558037        | 516.782657      | 1015.531488    | 508.269382       | 1014.547472    | 507.777374       | 6  |
| 18 | 2041.947009       | 1021.477143     | 2024.920460    | 1012.963868      | <b>2023.936444</b> | 1012.471860      | L    | <b>931.510358</b>  | 466.258817      | 914.483809     | 457.745543       | 913.499793     | 457.253535       | 5  |
| 19 | 2172.987494       | 1086.997385     | 2155.960945    | 1078.484110      | 2154.976929        | 1077.992102      | M    | <b>818.426294</b>  | 409.716785      | 801.399745     | 401.203511       | 800.415729     | 400.711503       | 4  |
| 20 | 2274.035173       | 1137.521224     | 2257.008624    | 1129.007950      | 2256.024608        | 1128.515942      | T    | <b>687.385809</b>  | 344.196543      | 670.359260     | 335.683268       | 669.375244     | 335.191260       | 3  |
| 21 | 2713.260499       | 1357.133887     | 2696.233950    | 1348.620613      | 2695.249934        | 1348.128605      | Q    | <b>586.338130</b>  | 293.672703      | 569.311581     | 285.159429       |                |                  | 2  |
| 22 |                   |                 |                |                  |                    |                  | K    | 147.112804         | 74.060040       | 130.086255     | 65.546765        |                |                  | 1  |

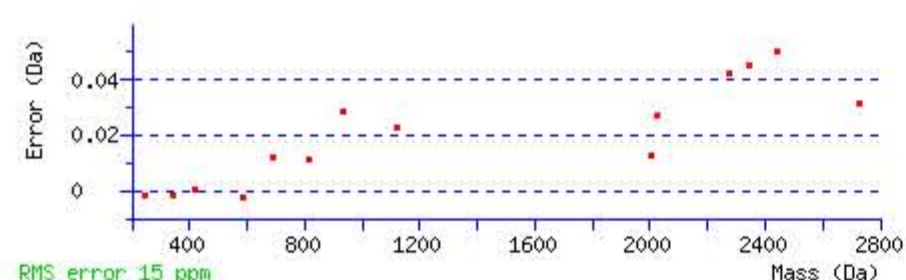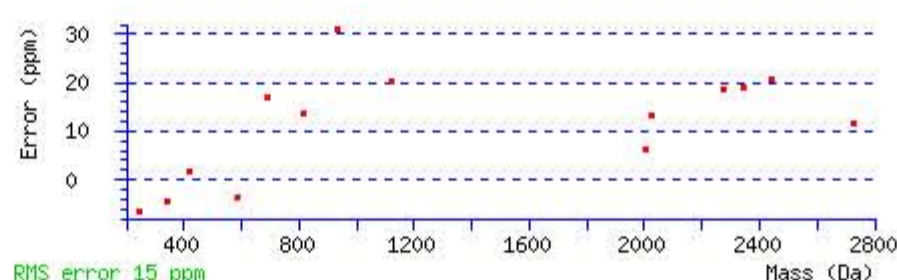

NCBI BLAST search of **MNVAPACLPERDWAESTLMTQK**

(Parameters: blastp, nr protein database, expect=20000, no filter, PAM30)

Other BLAST [web gateways](#)

All matches to this query

| Score | Mr(calc):   | Delta    | Sequence                               |
|-------|-------------|----------|----------------------------------------|
| 59.1  | 2858.358719 | 0.040783 | <a href="#">MNVAPACLPERDWAESTLMTQK</a> |

Mascot: <http://www.matrixscience.com/>

# Mascot Search Results

## Peptide View

MS/MS Fragmentation of **LASQACR**

Found in **FA12\_HUMAN**, Coagulation factor XII OS=Homo sapiens GN=F12 PE=1 SV=3

Match to Query 17079: 1115.554708 from(558.784630,2+) rtinseconds(1363) index(29411)

Title: Locus:1.1.1.3023.11 File:"2013-07-02 CLN FXIII 60 min 3rd F 3.wiff"

Data file C:\Program Files (x86)\Matrix Science\Mascot Daemon\mgf\6 FXIII 60 min 3rd\mascot\_daemon\_merge.mgf

Click mouse within plot area to zoom in by factor of two about that point

Or, Plot from  to  Da

Label all possible matches  Label matches used for scoring

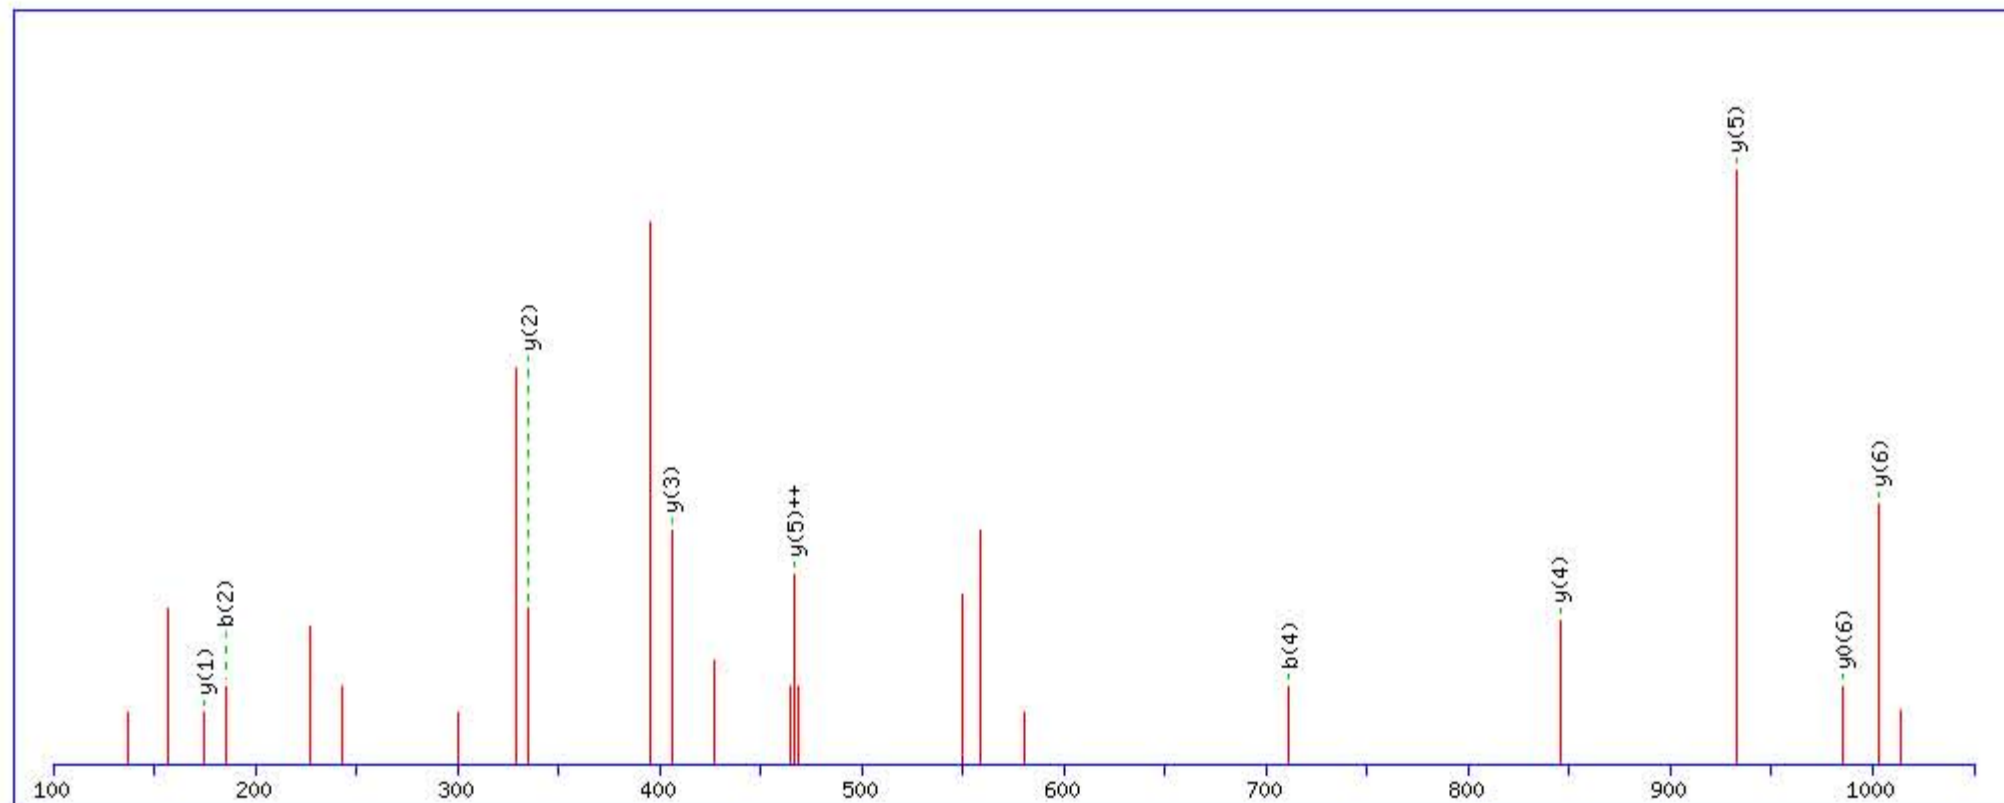

Monoisotopic mass of neutral peptide Mr(calc): 1115.557953

Fixed modifications: Carbamidomethyl (C) (apply to specified residues or termini only)

Variable modifications:

Q4 : Biotin:Thermo-21345 (Q)

Ions Score: 30 Expect: 0.0035

Matches : 10/54 fragment ions using 24 most intense peaks ([help](#))

| # | b                 | b <sup>++</sup> | b <sup>*</sup> | b <sup>*++</sup> | b <sup>0</sup> | b <sup>0++</sup> | Seq. | y                  | y <sup>++</sup>   | y <sup>*</sup> | y <sup>*++</sup> | y <sup>0</sup>    | y <sup>0++</sup> | # |
|---|-------------------|-----------------|----------------|------------------|----------------|------------------|------|--------------------|-------------------|----------------|------------------|-------------------|------------------|---|
| 1 | 114.091340        | 57.549308       |                |                  |                |                  | L    |                    |                   |                |                  |                   |                  | 7 |
| 2 | <b>185.128454</b> | 93.067865       |                |                  |                |                  | A    | <b>1003.481183</b> | 502.244230        | 986.454634     | 493.730955       | <b>985.470618</b> | 493.238947       | 6 |
| 3 | 272.160482        | 136.583879      |                |                  | 254.149917     | 127.578596       | S    | <b>932.444069</b>  | <b>466.725673</b> | 915.417520     | 458.212398       | 914.433504        | 457.720390       | 5 |
| 4 | <b>711.385808</b> | 356.196542      | 694.359259     | 347.683268       | 693.375243     | 347.191260       | Q    | <b>845.412041</b>  | 423.209659        | 828.385492     | 414.696384       |                   |                  | 4 |
| 5 | 782.422922        | 391.715099      | 765.396373     | 383.201824       | 764.412357     | 382.709816       | A    | <b>406.186715</b>  | 203.596995        | 389.160166     | 195.083721       |                   |                  | 3 |
| 6 | 942.453571        | 471.730424      | 925.427022     | 463.217149       | 924.443006     | 462.725141       | C    | <b>335.149601</b>  | 168.078438        | 318.123052     | 159.565164       |                   |                  | 2 |
| 7 |                   |                 |                |                  |                |                  | R    | <b>175.118952</b>  | 88.063114         | 158.092403     | 79.549839        |                   |                  | 1 |

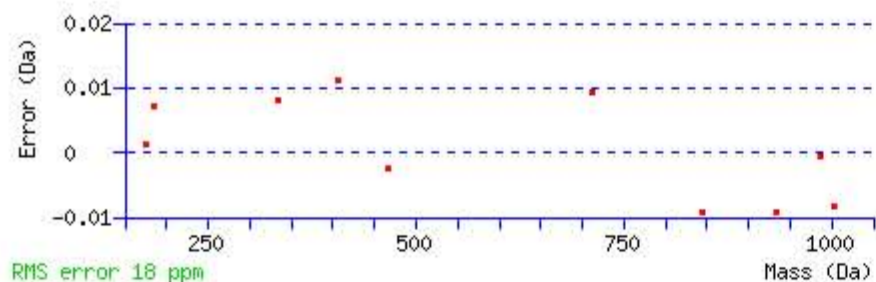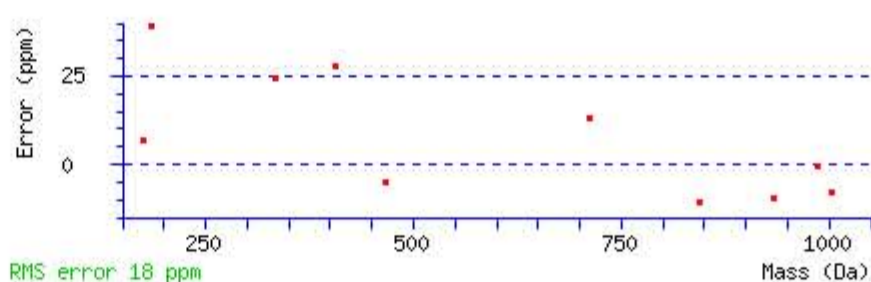

NCBI BLAST search of [LASQACR](#)

(Parameters: blastp, nr protein database, expect=20000, no filter, PAM30)

Other BLAST [web gateways](#)

All matches to this query

| Score | Mr(calc):   | Delta     | Sequence                   |
|-------|-------------|-----------|----------------------------|
| 30.3  | 1115.557953 | -0.003245 | <a href="#">LASQACR</a>    |
| 4.0   | 1115.543350 | 0.011358  | <a href="#">LEYKFCTR</a>   |
| 2.3   | 1115.550552 | 0.004156  | <a href="#">LAAGSRCPER</a> |
| 1.1   | 1115.546722 | 0.007986  | <a href="#">LAQDACK</a>    |

# MASCOT SEARCH RESULTS

## Peptide View

MS/MS Fragmentation of **TEQAAVAR**

Found in **FA12\_HUMAN**, Coagulation factor XII OS=Homo sapiens GN=F12 PE=1 SV=3

Match to Query 18975: 1155.606988 from(578.810770,2+) rtinseconds(1409) index(59236)

Title: Locus:1.1.1.3116.14 File:"2013-07-02 CLN FXIII 60 min 3rd FT.wiff"

Data file C:\Program Files (x86)\Matrix Science\Mascot Daemon\mgf6 FXIII 60 min 3rd\mascot\_daemon\_merge.mgf

Click mouse within plot area to zoom in by factor of two about that point

Or, Plot from  to  Da

Label all possible matches  Label matches used for scoring

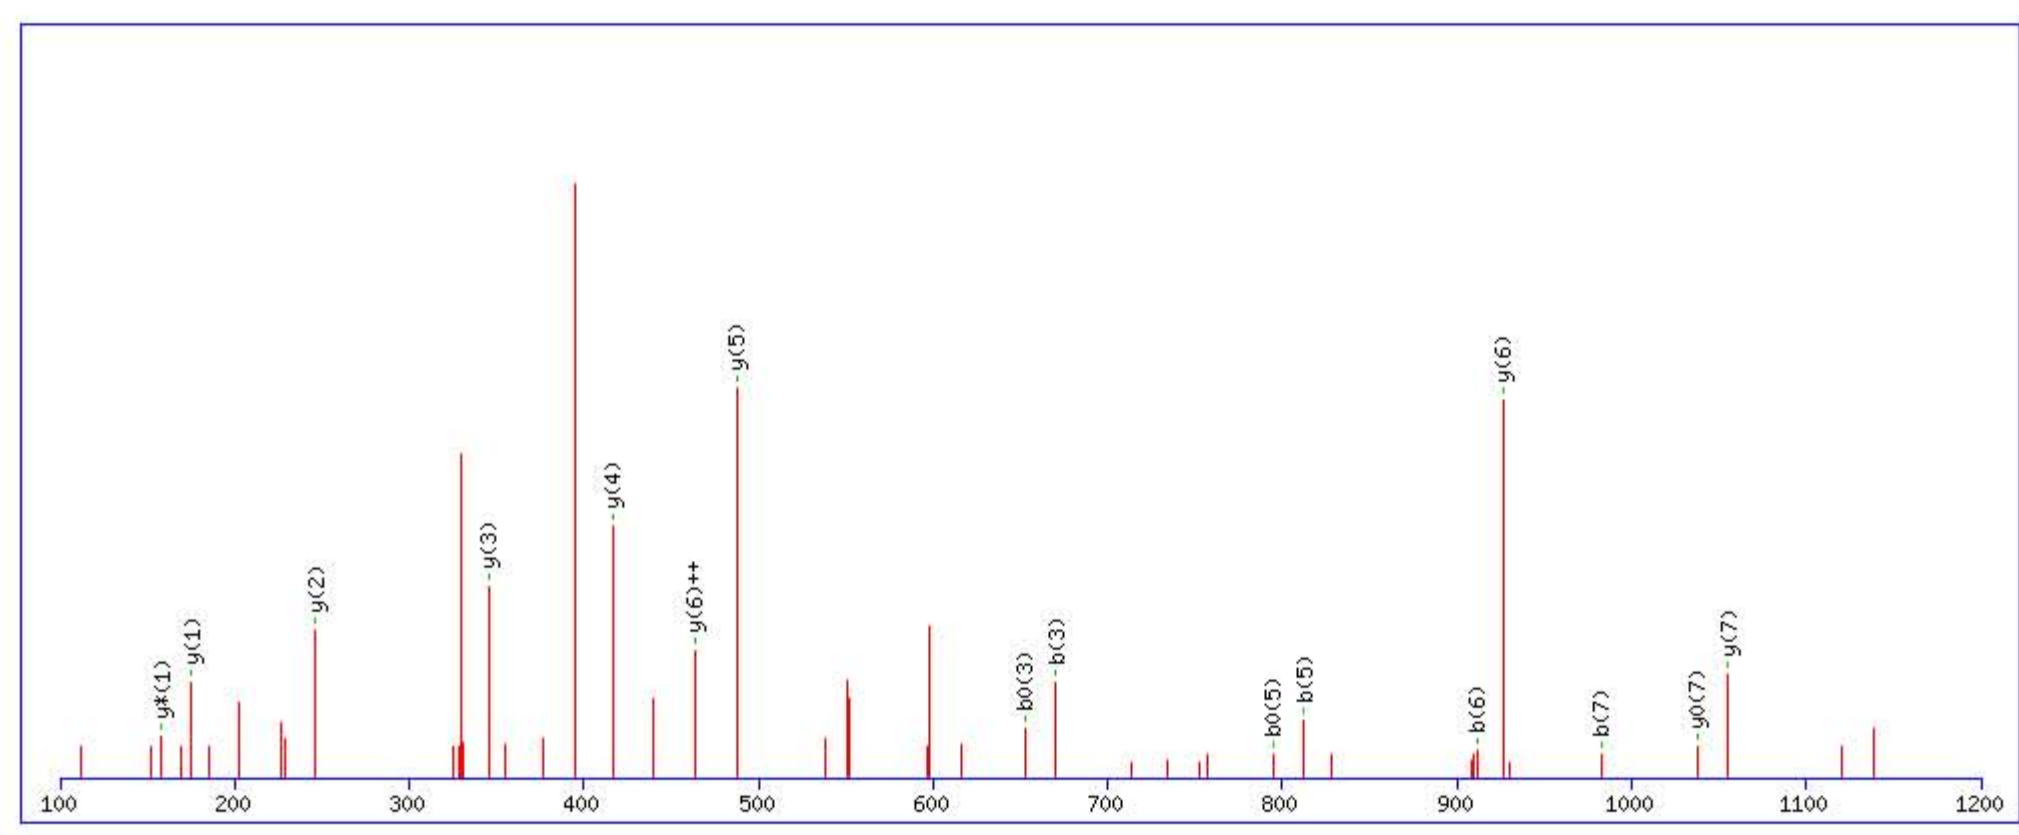

Monoisotopic mass of neutral peptide Mr(calc): 1155.607010

Fixed modifications: Carbamidomethyl (C) (apply to specified residues or termini only)

Variable modifications:

Q3 : Biotin:Thermo-21345 (Q)

Ions Score: 43 Expect: 0.001

Matches : 16/68 fragment ions using 31 most intense peaks [\(help\)](#)

| # | b          | b <sup>++</sup> | b <sup>*</sup> | b <sup>*++</sup> | b <sup>0</sup> | b <sup>0++</sup> | Seq. | y           | y <sup>++</sup> | y <sup>*</sup> | y <sup>*++</sup> | y <sup>0</sup> | y <sup>0++</sup> | # |
|---|------------|-----------------|----------------|------------------|----------------|------------------|------|-------------|-----------------|----------------|------------------|----------------|------------------|---|
| 1 | 102.054955 | 51.531116       |                |                  | 84.044390      | 42.525833        | T    |             |                 |                |                  |                |                  | 8 |
| 2 | 231.097548 | 116.052412      |                |                  | 213.086983     | 107.047130       | E    | 1055.566627 | 528.286951      | 1038.540078    | 519.773677       | 1037.556062    | 519.281669       | 7 |
| 3 | 670.322874 | 335.665075      | 653.296325     | 327.151801       | 652.312309     | 326.659793       | Q    | 926.524034  | 463.765655      | 909.497485     | 455.252380       |                |                  | 6 |
| 4 | 741.359988 | 371.183632      | 724.333439     | 362.670358       | 723.349423     | 362.178350       | A    | 487.298708  | 244.152992      | 470.272159     | 235.639717       |                |                  | 5 |
| 5 | 812.397102 | 406.702189      | 795.370553     | 398.188915       | 794.386537     | 397.696907       | A    | 416.261594  | 208.634435      | 399.235045     | 200.121160       |                |                  | 4 |
| 6 | 911.465516 | 456.236396      | 894.438967     | 447.723121       | 893.454951     | 447.231113       | V    | 345.224480  | 173.115878      | 328.197931     | 164.602603       |                |                  | 3 |
| 7 | 982.502630 | 491.754953      | 965.476081     | 483.241678       | 964.492065     | 482.749670       | A    | 246.156066  | 123.581671      | 229.129517     | 115.068396       |                |                  | 2 |
| 8 |            |                 |                |                  |                |                  | R    | 175.118952  | 88.063114       | 158.092403     | 79.549839        |                |                  | 1 |

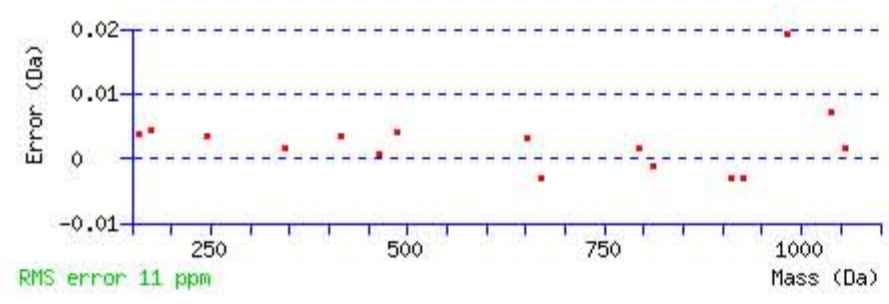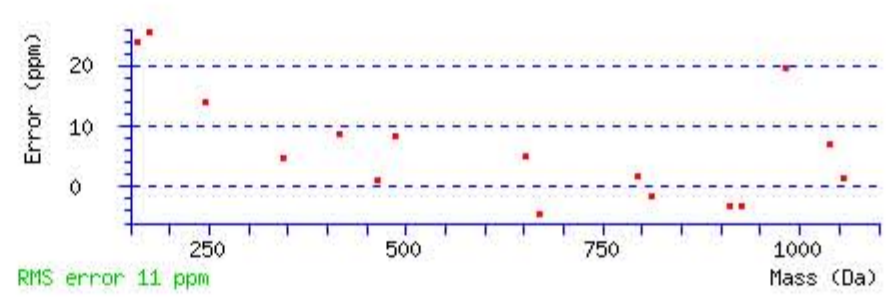

NCBI BLAST search of **TEQAAVAR**

(Parameters: blastp, nr protein database, expect=20000, no filter, PAM30)

Other BLAST [web gateways](#)

### All matches to this query

| Score | Mr(calc):   | Delta     | Sequence                      |
|-------|-------------|-----------|-------------------------------|
| 43.4  | 1155.607010 | -0.000022 | <a href="#">TEQAAVAR</a>      |
| 10.8  | 1155.589706 | 0.017282  | <a href="#">EQWPERRR</a>      |
| 8.3   | 1155.607025 | -0.000037 | <a href="#">VQDSAVAR</a>      |
| 7.8   | 1155.610855 | -0.003867 | <a href="#">GAGAGLSRPGSAR</a> |
| 7.2   | 1155.607025 | -0.000037 | <a href="#">AMAAVPQDVVR</a>   |
| 4.0   | 1155.599594 | 0.007394  | <a href="#">TKESKHEAAR</a>    |
| 2.8   | 1155.614883 | -0.007895 | <a href="#">RSGDWLLPGR</a>    |
| 1.7   | 1155.607010 | -0.000022 | <a href="#">QQLETAR</a>       |
| 1.5   | 1155.592422 | 0.014566  | <a href="#">YTEFLTGLGR</a>    |
| 1.2   | 1155.607040 | -0.000052 | <a href="#">TPACVPVSIQR</a>   |

# MASCOT SCIENCE Mascot Search Results

## Peptide View

MS/MS Fragmentation of **CFEPQLLR**

Found in **FA12\_HUMAN**, Coagulation factor XII OS=Homo sapiens GN=F12 PE=1 SV=3

Match to Query 25472: 1372.701348 from(687.357950,2+) rtinseconds(2217) index(63769)

Title: Locus:1.1.1.3398.19 File:"2013-07-02 CLN FXIII 60 min 3rd FT.wiff"

Data file C:\Program Files (x86)\Matrix Science\Mascot Daemon\mgf\6 FXIII 60 min 3rd\mascot\_daemon\_merge.mgf

Click mouse within plot area to zoom in by factor of two about that point

Or, Plot from  to  Da

Label all possible matches  Label matches used for scoring

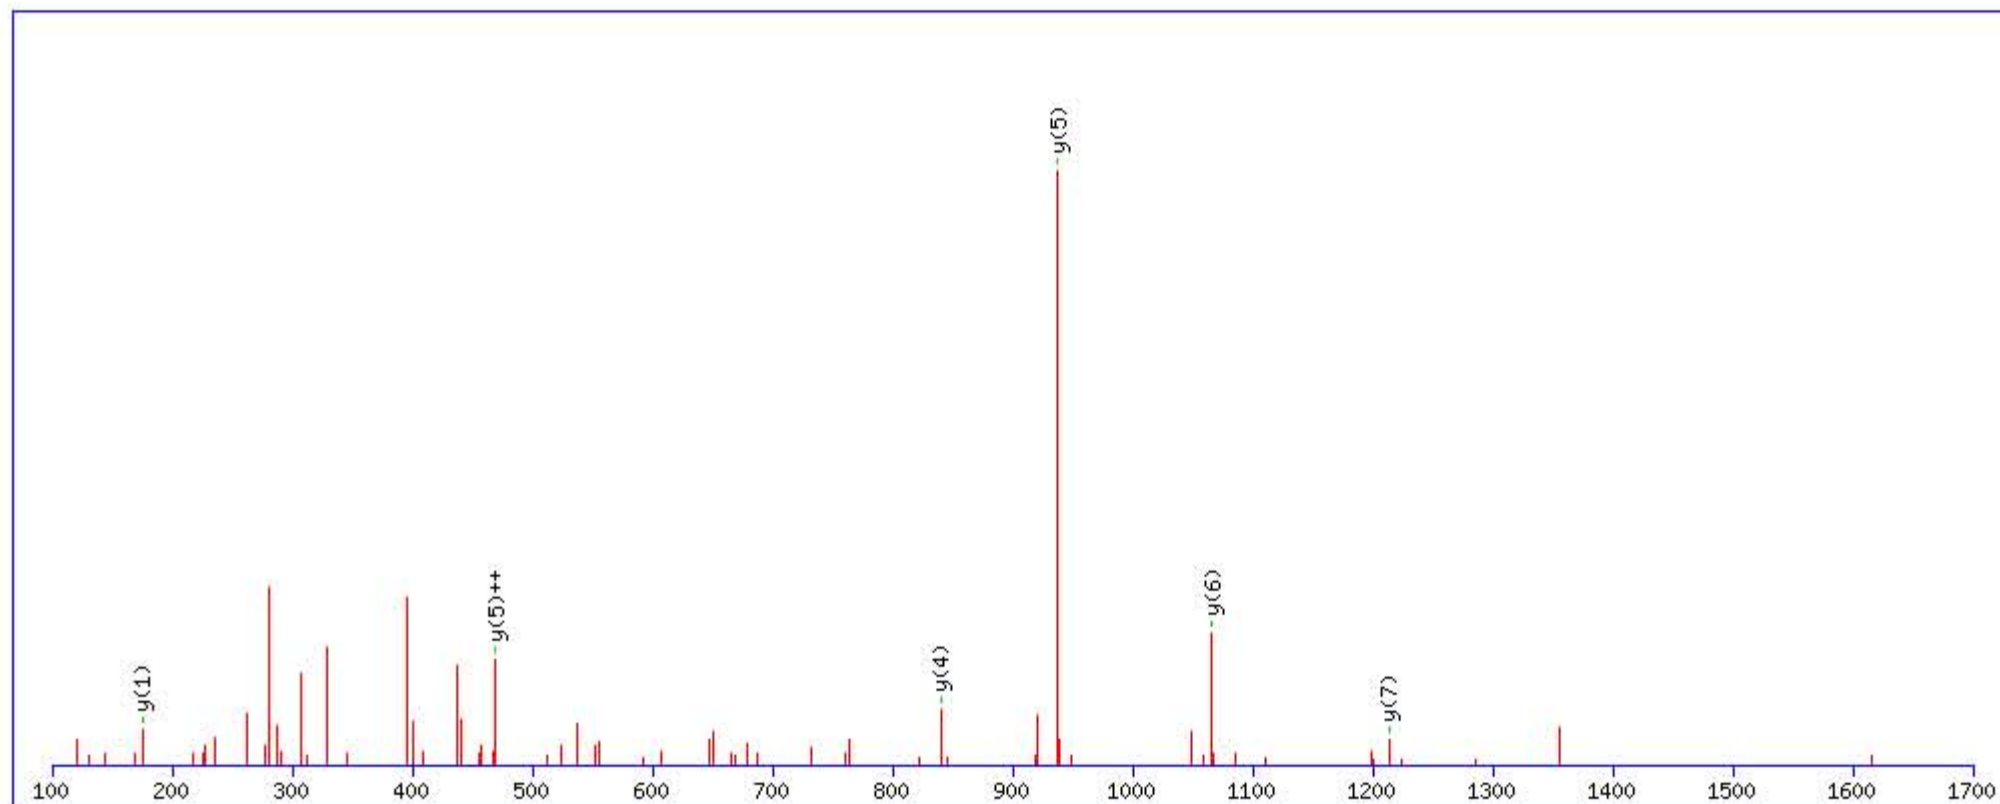

Monoisotopic mass of neutral peptide Mr(calc): 1372.699539

Fixed modifications: Carbamidomethyl (C) (apply to specified residues or termini only)

Variable modifications:

Q5 : Biotin:Thermo-21345 (Q)

Ions Score: 28 Expect: 0.012

Matches : 6/62 fragment ions using 13 most intense peaks [\(help\)](#)

| # | b           | b <sup>++</sup> | b <sup>*</sup> | b <sup>*++</sup> | b <sup>0</sup> | b <sup>0++</sup> | Seq. | y           | y <sup>++</sup> | y <sup>*</sup> | y <sup>*++</sup> | y <sup>0</sup> | y <sup>0++</sup> | # |
|---|-------------|-----------------|----------------|------------------|----------------|------------------|------|-------------|-----------------|----------------|------------------|----------------|------------------|---|
| 1 | 161.037925  | 81.022600       |                |                  |                |                  | C    |             |                 |                |                  |                |                  | 8 |
| 2 | 308.106339  | 154.556807      |                |                  |                |                  | F    | 1213.676177 | 607.341726      | 1196.649628    | 598.828452       | 1195.665612    | 598.336444       | 7 |
| 3 | 437.148932  | 219.078104      |                |                  | 419.138367     | 210.072822       | E    | 1066.607763 | 533.807519      | 1049.581214    | 525.294245       | 1048.597198    | 524.802237       | 6 |
| 4 | 534.201696  | 267.604486      |                |                  | 516.191131     | 258.599204       | P    | 937.565170  | 469.286223      | 920.538621     | 460.772948       |                |                  | 5 |
| 5 | 973.427022  | 487.217149      | 956.400473     | 478.703875       | 955.416457     | 478.211867       | Q    | 840.512406  | 420.759841      | 823.485857     | 412.246566       |                |                  | 4 |
| 6 | 1086.511086 | 543.759181      | 1069.484537    | 535.245907       | 1068.500521    | 534.753898       | L    | 401.287080  | 201.147178      | 384.260531     | 192.633903       |                |                  | 3 |
| 7 | 1199.595150 | 600.301213      | 1182.568601    | 591.787939       | 1181.584585    | 591.295930       | L    | 288.203016  | 144.605146      | 271.176467     | 136.091871       |                |                  | 2 |
| 8 |             |                 |                |                  |                |                  | R    | 175.118952  | 88.063114       | 158.092403     | 79.549839        |                |                  | 1 |

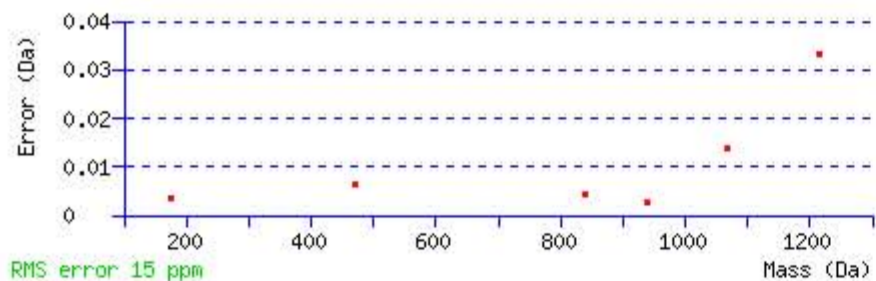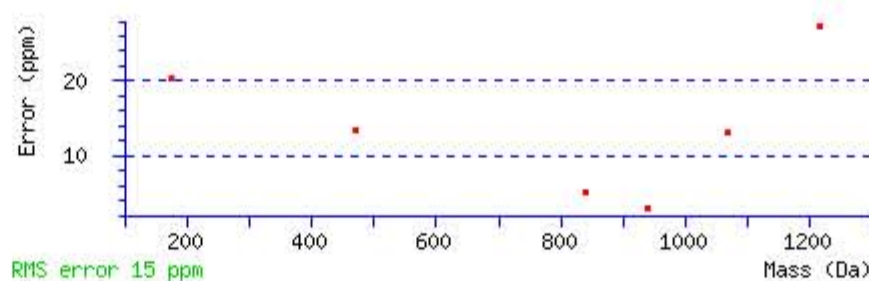

NCBI BLAST search of **CFEPQLLR**

(Parameters: blastp, nr protein database, expect=20000, no filter, PAM30)

Other BLAST [web gateways](#)

## All matches to this query

| Score | Mr(calc):   | Delta     | Sequence                     |
|-------|-------------|-----------|------------------------------|
| 27.6  | 1372.699539 | 0.001809  | <a href="#">CFEPQLLR</a>     |
| 6.7   | 1372.710770 | -0.009422 | <a href="#">QPRMLDFR</a>     |
| 1.1   | 1372.717331 | -0.015983 | <a href="#">QGLPVVMPVFDR</a> |
| 0.8   | 1372.703369 | -0.002021 | <a href="#">NPPKQEGHR</a>    |

# Mascot Search Results

## Peptide View

MS/MS Fragmentation of **AEHTVVLTVTGEPCHFPPQYHR**

Found in **FA12\_HUMAN**, Coagulation factor XII OS=Homo sapiens GN=F12 PE=1 SV=3

Match to Query 56487: 3064.478496 from(767.126900,4+) rtinseconds(2163) index(5852)

Title: Locus:1.1.1.3305.17 File:"2013-07-02 CLN FXIII 60 min 3rd F 1.wiff"

Data file C:\Program Files (x86)\Matrix Science\Mascot Daemon\mgf6 FXIII 60 min 3rd\mascot\_daemon\_merge.mgf

Click mouse within plot area to zoom in by factor of two about that point

Or, Plot from  to  Da

Label all possible matches  Label matches used for scoring

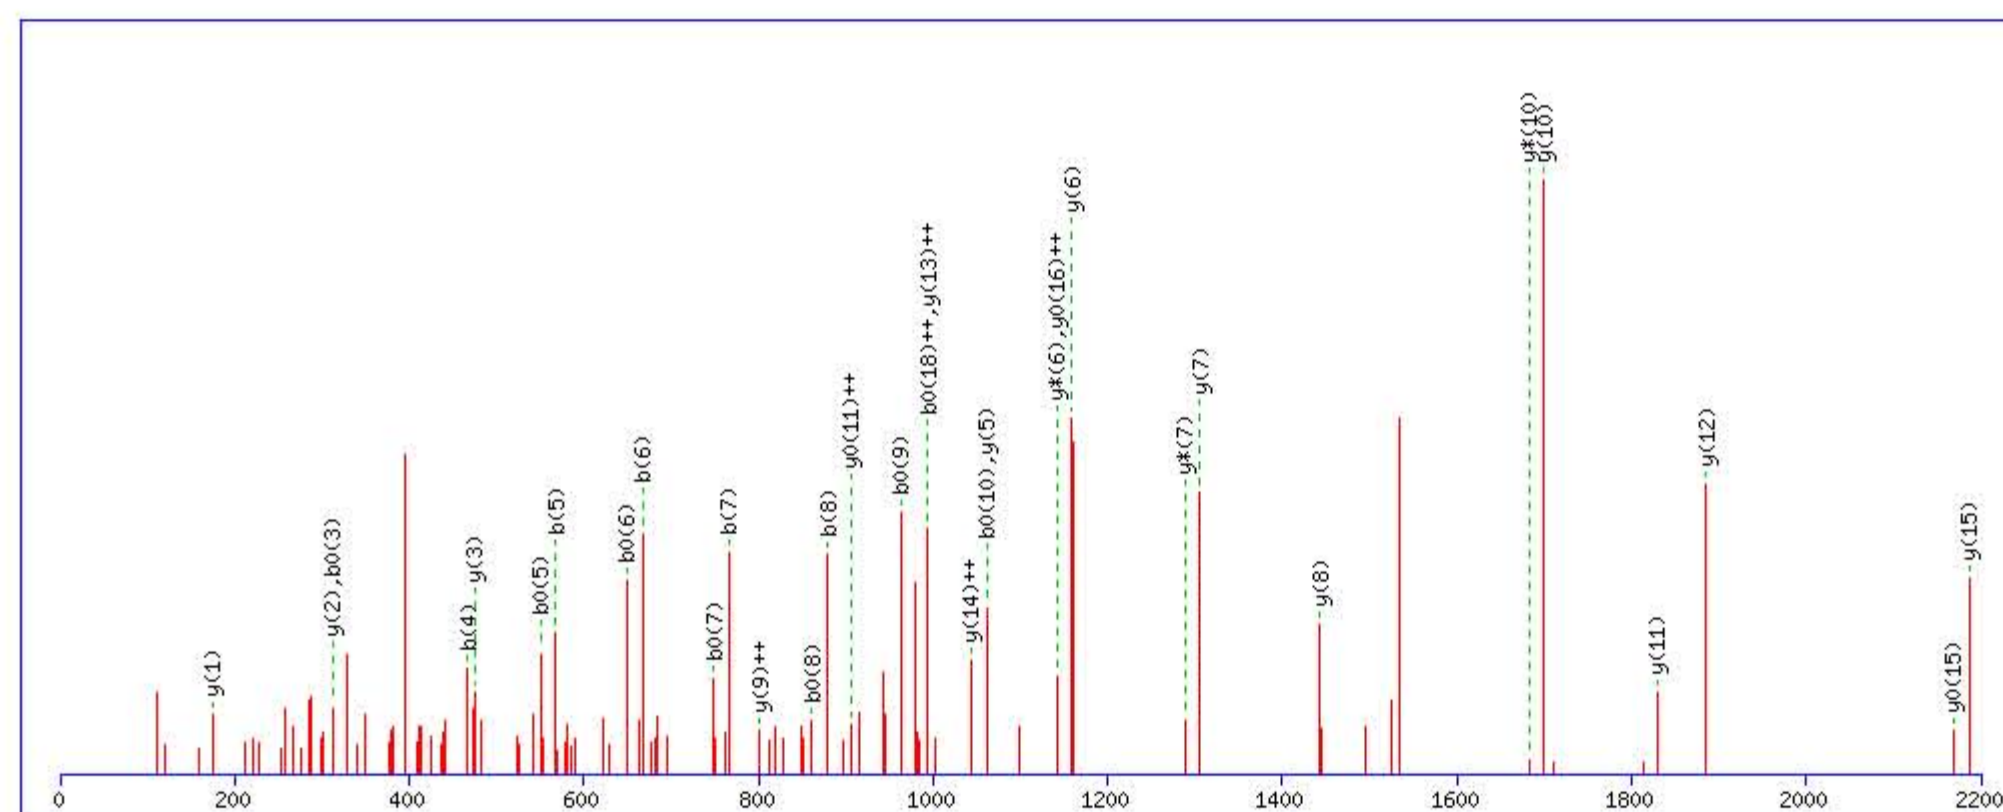

Monoisotopic mass of neutral peptide Mr(calc): 3064.468796

Fixed modifications: Carbamidomethyl (C) (apply to specified residues or termini only)

Variable modifications:

Q20 : Biotin:Thermo-21345 (Q)

Ions Score: 61 Expect: 2.1e-005

Matches : 33/204 fragment ions using 49 most intense peaks [\(help\)](#)

| #  | b           | b <sup>++</sup> | b <sup>*</sup> | b <sup>*++</sup> | b <sup>0</sup> | b <sup>0++</sup> | Seq. | y           | y <sup>++</sup> | y <sup>*</sup> | y <sup>*++</sup> | y <sup>0</sup> | y <sup>0++</sup> | #  |
|----|-------------|-----------------|----------------|------------------|----------------|------------------|------|-------------|-----------------|----------------|------------------|----------------|------------------|----|
| 1  | 72.044390   | 36.525833       |                |                  |                |                  | A    |             |                 |                |                  |                |                  | 23 |
| 2  | 201.086983  | 101.047130      |                |                  | 183.076418     | 92.041847        | E    | 2994.438934 | 1497.723105     | 2977.412385    | 1489.209830      | 2976.428369    | 1488.717822      | 22 |
| 3  | 330.129576  | 165.568426      |                |                  | 312.119011     | 156.563144       | E    | 2865.396341 | 1433.201808     | 2848.369792    | 1424.688534      | 2847.385776    | 1424.196526      | 21 |
| 4  | 467.188488  | 234.097882      |                |                  | 449.177923     | 225.092599       | H    | 2736.353748 | 1368.680512     | 2719.327199    | 1360.167237      | 2718.343183    | 1359.675229      | 20 |
| 5  | 568.236167  | 284.621722      |                |                  | 550.225602     | 275.616439       | T    | 2599.294836 | 1300.151056     | 2582.268287    | 1291.637781      | 2581.284271    | 1291.145773      | 19 |
| 6  | 667.304581  | 334.155929      |                |                  | 649.294016     | 325.150646       | V    | 2498.247157 | 1249.627216     | 2481.220608    | 1241.113942      | 2480.236592    | 1240.621934      | 18 |
| 7  | 766.372995  | 383.690136      |                |                  | 748.362430     | 374.684853       | V    | 2399.178743 | 1200.093009     | 2382.152194    | 1191.579735      | 2381.168178    | 1191.087727      | 17 |
| 8  | 879.457059  | 440.232168      |                |                  | 861.446494     | 431.226885       | L    | 2300.110329 | 1150.558802     | 2283.083780    | 1142.045528      | 2282.099764    | 1141.553520      | 16 |
| 9  | 980.504738  | 490.756007      |                |                  | 962.494173     | 481.750724       | T    | 2187.026265 | 1094.016770     | 2169.999716    | 1085.503496      | 2169.015700    | 1085.011488      | 15 |
| 10 | 1079.573152 | 540.290214      |                |                  | 1061.562587    | 531.284931       | V    | 2085.978586 | 1043.492931     | 2068.952037    | 1034.979656      | 2067.968021    | 1034.487648      | 14 |
| 11 | 1180.620831 | 590.814054      |                |                  | 1162.610266    | 581.808771       | T    | 1986.910172 | 993.958724      | 1969.883623    | 985.445450       | 1968.899607    | 984.953442       | 13 |
| 12 | 1237.642295 | 619.324785      |                |                  | 1219.631730    | 610.319503       | G    | 1885.862493 | 943.434885      | 1868.835944    | 934.921610       | 1867.851928    | 934.429602       | 12 |
| 13 | 1366.684888 | 683.846082      |                |                  | 1348.674323    | 674.840800       | E    | 1828.841029 | 914.924153      | 1811.814480    | 906.410878       | 1810.830464    | 905.918870       | 11 |
| 14 | 1463.737652 | 732.372464      |                |                  | 1445.727087    | 723.367182       | P    | 1699.798436 | 850.402856      | 1682.771887    | 841.889582       |                |                  | 10 |
| 15 | 1623.768301 | 812.387789      |                |                  | 1605.757736    | 803.382506       | C    | 1602.745672 | 801.876474      | 1585.719123    | 793.363200       |                |                  | 9  |
| 16 | 1760.827213 | 880.917245      |                |                  | 1742.816648    | 871.911962       | H    | 1442.715023 | 721.861150      | 1425.688474    | 713.347875       |                |                  | 8  |
| 17 | 1907.895627 | 954.451452      |                |                  | 1889.885062    | 945.446169       | F    | 1305.656111 | 653.331694      | 1288.629562    | 644.818419       |                |                  | 7  |
| 18 | 2004.948391 | 1002.977834     |                |                  | 1986.937826    | 993.972551       | P    | 1158.587697 | 579.797487      | 1141.561148    | 571.284212       |                |                  | 6  |
| 19 | 2152.016805 | 1076.512040     |                |                  | 2134.006240    | 1067.506758      | F    | 1061.534933 | 531.271105      | 1044.508384    | 522.757830       |                |                  | 5  |
| 20 | 2591.242131 | 1296.124703     | 2574.215582    | 1287.611429      | 2573.231566    | 1287.119421      | Q    | 914.466519  | 457.736898      | 897.439970     | 449.223623       |                |                  | 4  |
| 21 | 2754.305460 | 1377.656368     | 2737.278911    | 1369.143093      | 2736.294895    | 1368.651085      | Y    | 475.241193  | 238.124234      | 458.214644     | 229.610960       |                |                  | 3  |
| 22 | 2891.364372 | 1446.185824     | 2874.337823    | 1437.672549      | 2873.353807    | 1437.180541      | H    | 312.177864  | 156.592570      | 295.151315     | 148.079295       |                |                  | 2  |
| 23 |             |                 |                |                  |                |                  | R    | 175.118952  | 88.063114       | 158.092403     | 79.549839        |                |                  | 1  |

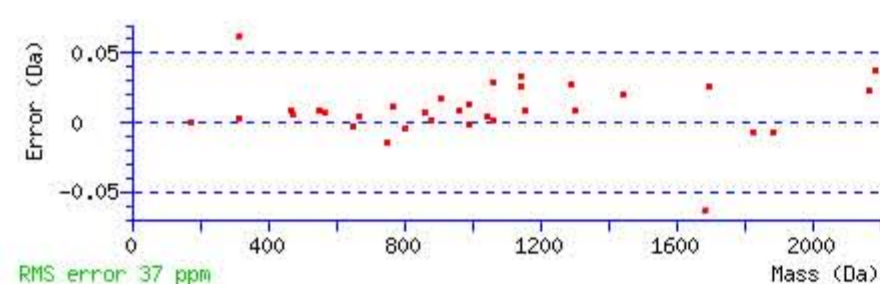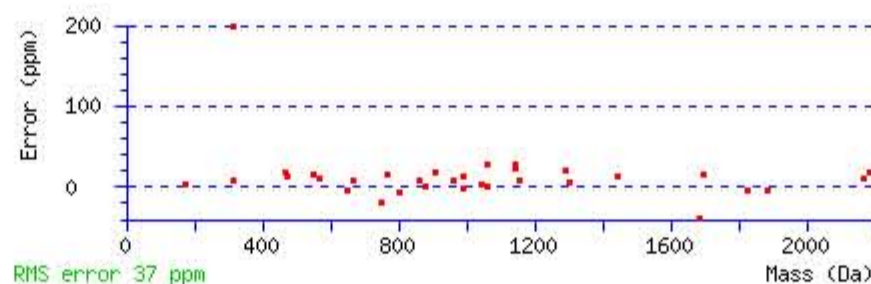

NCBI BLAST search of [AEHTVVLTVTGEPCHFPPQYHR](#)  
(Parameters: blastp, nr protein database, expect=20000, no filter, PAM30)

Other BLAST [web gateways](#)

All matches to this query

| Score | Mr(calc):   | Delta    | Sequence                               |
|-------|-------------|----------|----------------------------------------|
| 60.5  | 3064.468796 | 0.009700 | <a href="#">AEHTVVLTVTGEPCHFPPQYHR</a> |

# MASCOT Search Results

## Peptide View

MS/MS Fragmentation of **AQMDLSGR**

Found in **F13A\_HUMAN**, Coagulation factor XIII A chain OS=Homo sapiens GN=F13A1 PE=1 SV=4

Match to Query 20057: 1187.578728 from(594.796640,2+) rtinseconds(1749) index(3533)

Title: Locus:1.1.1.3161.11 File:"2013-07-02 CLN FXIII 60 min 3rd F 1.wiff"

Data file C:\Program Files (x86)\Matrix Science\Mascot Daemon\mgf6 FXIII 60 min 3rd\mascot\_daemon\_merge.mgf

Click mouse within plot area to zoom in by factor of two about that point

Or, Plot from  to  Da

Label all possible matches  Label matches used for scoring

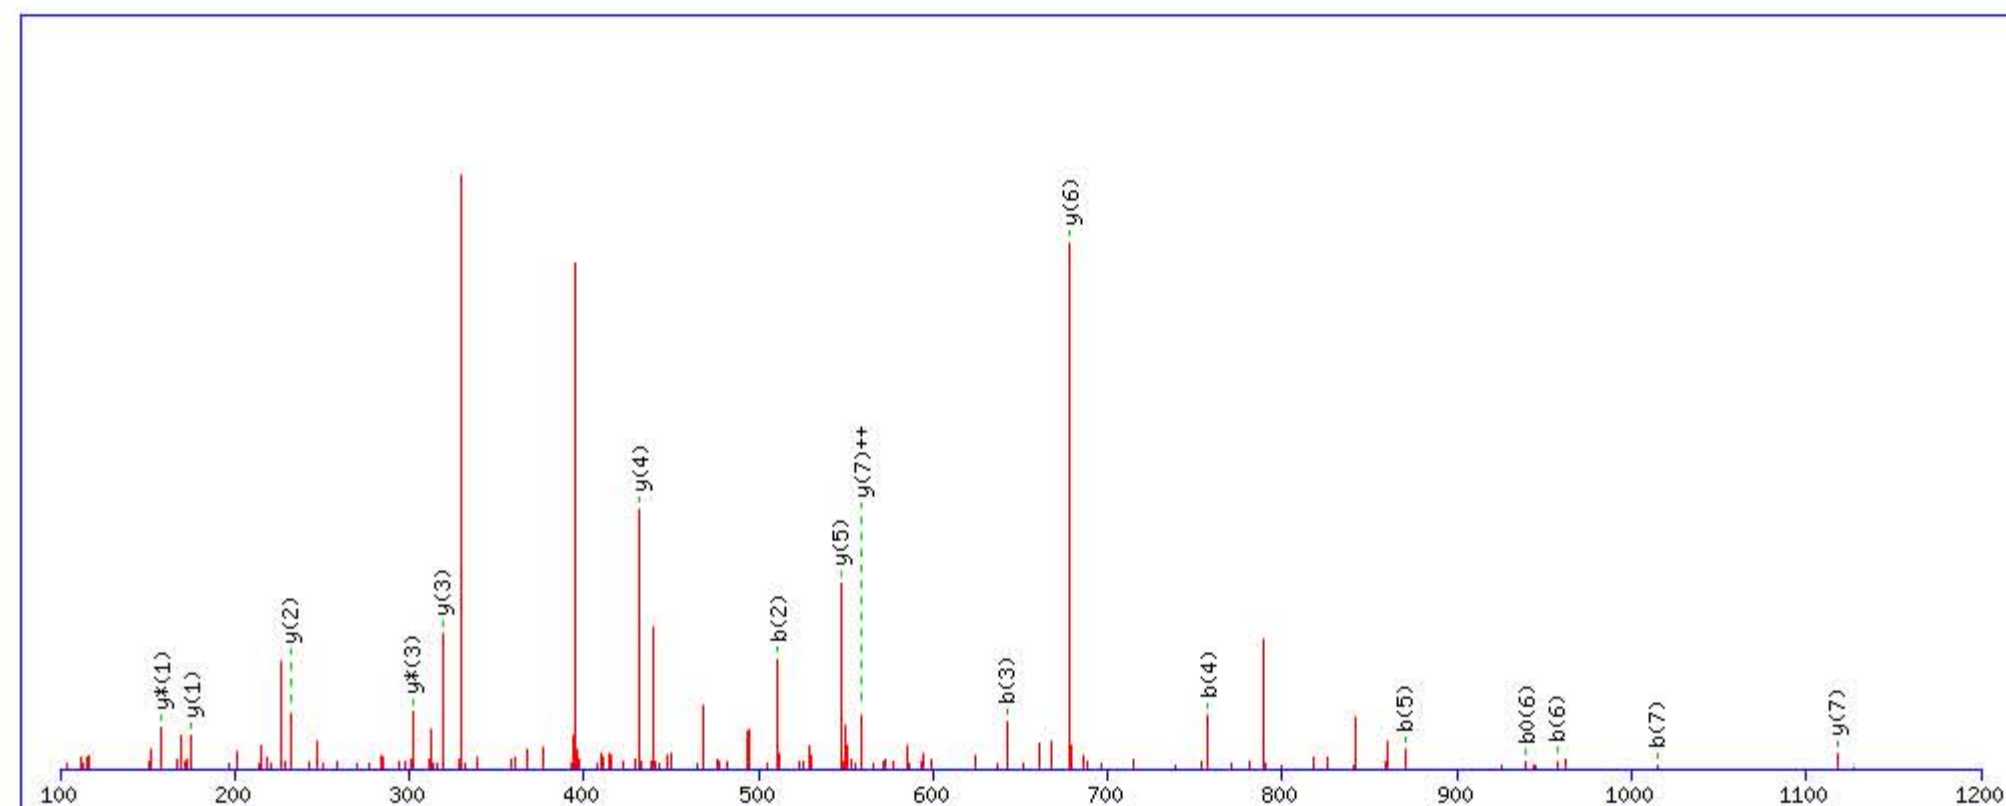

Monoisotopic mass of neutral peptide Mr(calc): 1187.579086

Fixed modifications: Carbamidomethyl (C) (apply to specified residues or termini only)

Variable modifications:

Q2 : Biotin:Thermo-21345 (Q)

Ions Score: 42 Expect: 0.001

Matches : 17/72 fragment ions using 30 most intense peaks [\(help\)](#)

| # | b                  | b <sup>++</sup> | b <sup>*</sup> | b <sup>+++</sup> | b <sup>0</sup>    | b <sup>0++</sup> | Seq. | y                  | y <sup>++</sup>   | y <sup>*</sup>    | y <sup>+++</sup> | y <sup>0</sup> | y <sup>0++</sup> | # |
|---|--------------------|-----------------|----------------|------------------|-------------------|------------------|------|--------------------|-------------------|-------------------|------------------|----------------|------------------|---|
| 1 | 72.044390          | 36.525833       |                |                  |                   |                  | A    |                    |                   |                   |                  |                |                  | 8 |
| 2 | <b>511.269716</b>  | 256.138496      | 494.243167     | 247.625221       |                   |                  | Q    | <b>1117.549262</b> | <b>559.278269</b> | 1100.522713       | 550.764995       | 1099.538697    | 550.272987       | 7 |
| 3 | <b>642.310201</b>  | 321.658739      | 625.283652     | 313.145464       |                   |                  | M    | <b>678.323936</b>  | 339.665606        | 661.297387        | 331.152332       | 660.313371     | 330.660324       | 6 |
| 4 | <b>757.337144</b>  | 379.172210      | 740.310595     | 370.658935       | 739.326579        | 370.166927       | D    | <b>547.283451</b>  | 274.145364        | 530.256902        | 265.632089       | 529.272886     | 265.140081       | 5 |
| 5 | <b>870.421208</b>  | 435.714242      | 853.394659     | 427.200967       | 852.410643        | 426.708959       | L    | <b>432.256508</b>  | 216.631892        | 415.229959        | 208.118617       | 414.245943     | 207.626609       | 4 |
| 6 | <b>957.453236</b>  | 479.230256      | 940.426687     | 470.716981       | <b>939.442671</b> | 470.224973       | S    | <b>319.172444</b>  | 160.089860        | <b>302.145895</b> | 151.576585       | 301.161879     | 151.084577       | 3 |
| 7 | <b>1014.474700</b> | 507.740988      | 997.448151     | 499.227713       | 996.464135        | 498.735705       | G    | <b>232.140416</b>  | 116.573846        | 215.113867        | 108.060571       |                |                  | 2 |
| 8 |                    |                 |                |                  |                   |                  | R    | <b>175.118952</b>  | 88.063114         | <b>158.092403</b> | 79.549839        |                |                  | 1 |

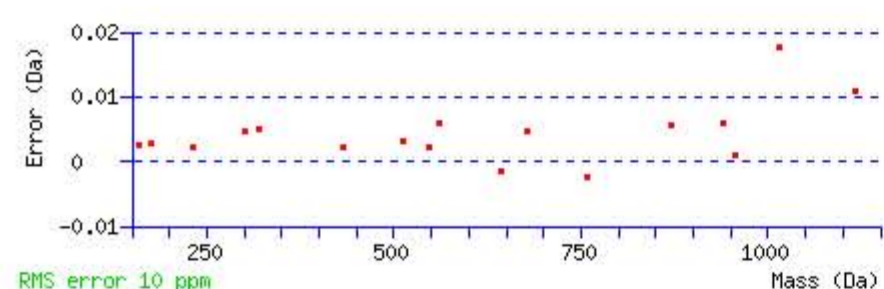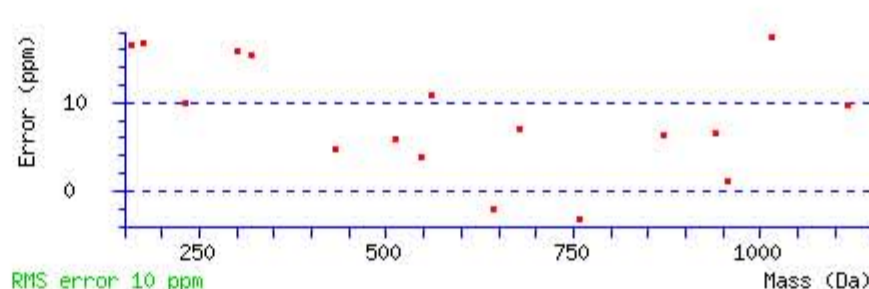

NCBI BLAST search of **AQMDLSGR**

(Parameters: blastp, nr protein database, expect=20000, no filter, PAM30)

Other BLAST [web gateways](#)

## All matches to this query

| Score | Mr(calc):   | Delta     | Sequence                    |
|-------|-------------|-----------|-----------------------------|
| 41.8  | 1187.579086 | -0.000358 | <a href="#">AQMDLSGR</a>    |
| 9.6   | 1187.568314 | 0.010414  | <a href="#">QREDIWEGR</a>   |
| 9.1   | 1187.568344 | 0.010384  | <a href="#">DHGFKVSADGR</a> |
| 8.6   | 1187.578201 | 0.000527  | <a href="#">SSLENEPSLGR</a> |
| 7.0   | 1187.579086 | -0.000358 | <a href="#">QAAEVMGR</a>    |
| 6.0   | 1187.575714 | 0.003014  | <a href="#">YQDAAGPR</a>    |
| 2.0   | 1187.593475 | -0.014747 | <a href="#">AESFPNTPLGR</a> |
| 0.9   | 1187.568314 | 0.010414  | <a href="#">QYLEQHASGR</a>  |

# MASCOT SEARCH RESULTS

## Peptide View

MS/MS Fragmentation of **FQEGQEEER**

Found in **F13A\_HUMAN**, Coagulation factor XIII A chain OS=Homo sapiens GN=F13A1 PE=1 SV=4

Match to Query 28894: 1461.655248 from(731.834900,2+) rtinseconds(1473) index(30088)

Title: Locus:1.1.1.3061.22 File:"2013-07-02 CLN FXIII 60 min 3rd F 3.wiff"

Data file C:\Program Files (x86)\Matrix Science\Mascot Daemon\mgf\6 FXIII 60 min 3rd\mascot\_daemon\_merge.mgf

Click mouse within plot area to zoom in by factor of two about that point

Or, Plot from  to  Da

Label all possible matches  Label matches used for scoring

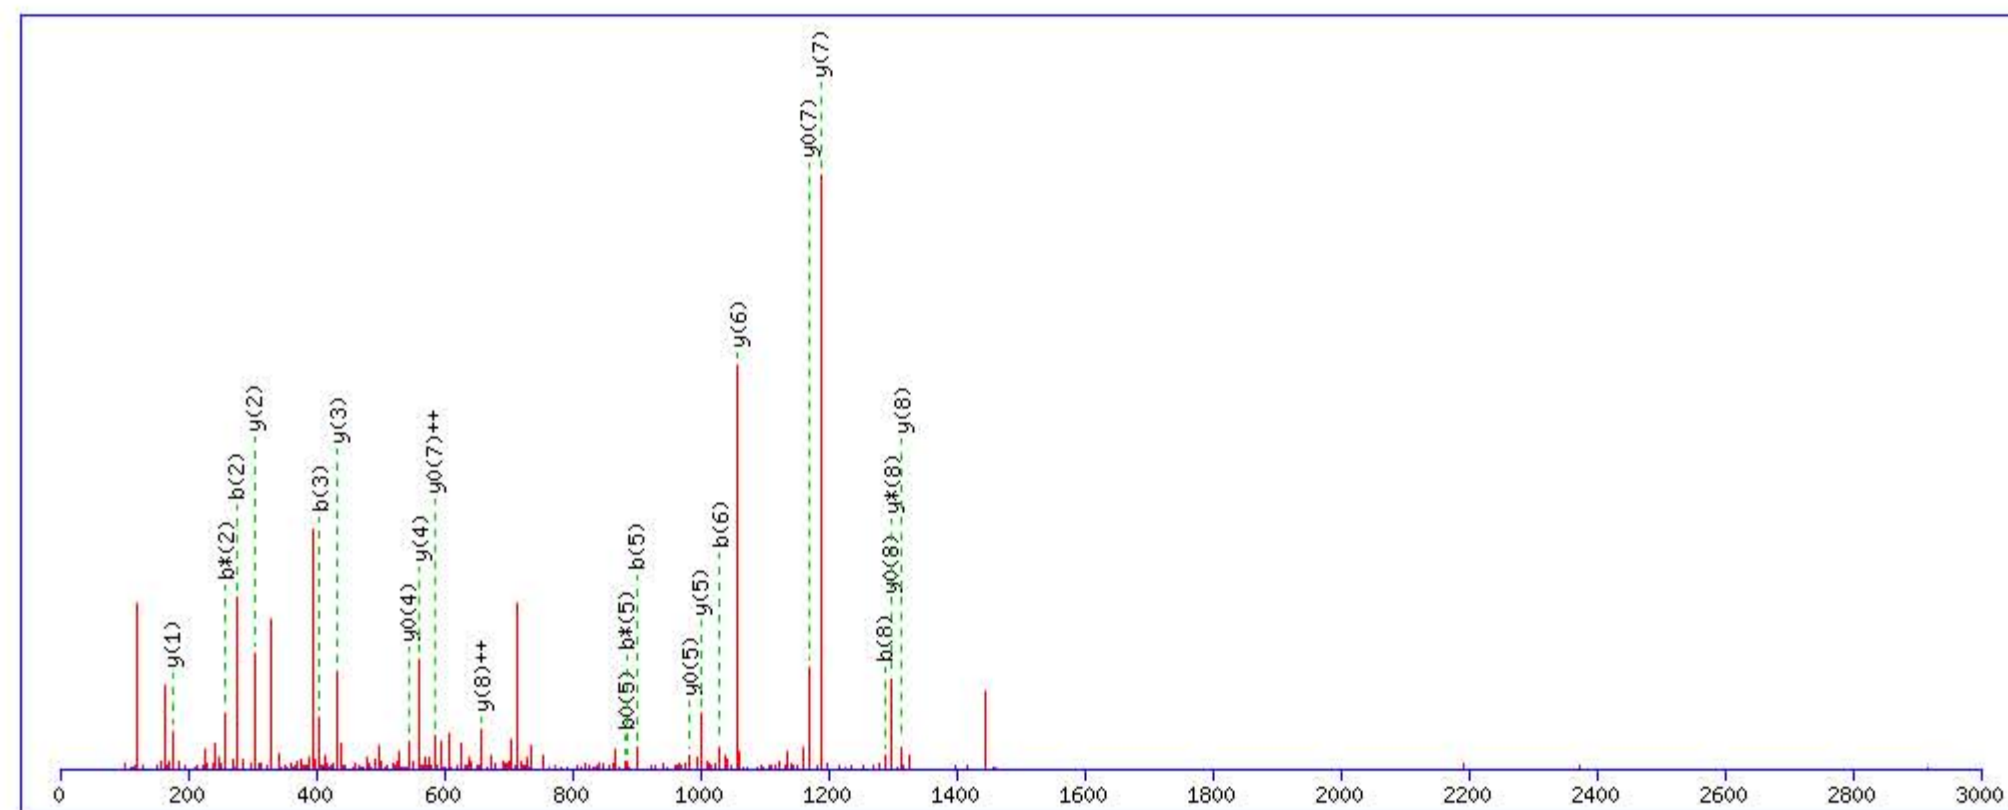

Monoisotopic mass of neutral peptide Mr(calc): 1461.655807

Fixed modifications: Carbamidomethyl (C) (apply to specified residues or termini only)

Variable modifications:

Q5 : Biotin:Thermo-21345 (Q)

Ions Score: 47 Expect: 0.00015

Matches : 23/88 fragment ions using 42 most intense peaks [\(help\)](#)

| # | b                  | b <sup>++</sup> | b <sup>+</sup>    | b <sup>+++</sup> | b <sup>0</sup>    | b <sup>0++</sup> | Seq. | y                  | y <sup>++</sup> | y <sup>+</sup>     | y <sup>+++</sup> | y <sup>0</sup>     | y <sup>0++</sup>  | # |
|---|--------------------|-----------------|-------------------|------------------|-------------------|------------------|------|--------------------|-----------------|--------------------|------------------|--------------------|-------------------|---|
| 1 | 148.075690         | 74.541483       |                   |                  |                   |                  | F    |                    |                 |                    |                  |                    |                   | 9 |
| 2 | <b>276.134268</b>  | 138.570772      | <b>259.107719</b> | 130.057497       |                   |                  | Q    | <b>1315.594692</b> | 658.300984      | <b>1298.568143</b> | 649.787710       | <b>1297.584127</b> | 649.295702        | 8 |
| 3 | <b>405.176861</b>  | 203.092068      | 388.150312        | 194.578794       | 387.166296        | 194.086786       | E    | <b>1187.536114</b> | 594.271695      | 1170.509565        | 585.758421       | <b>1169.525549</b> | <b>585.266413</b> | 7 |
| 4 | 462.198325         | 231.602800      | 445.171776        | 223.089526       | 444.187760        | 222.597518       | G    | <b>1058.493521</b> | 529.750399      | 1041.466972        | 521.237124       | 1040.482956        | 520.745116        | 6 |
| 5 | <b>901.423651</b>  | 451.215464      | <b>884.397102</b> | 442.702189       | <b>883.413086</b> | 442.210181       | Q    | <b>1001.472057</b> | 501.239667      | 984.445508         | 492.726392       | <b>983.461492</b>  | 492.234384        | 5 |
| 6 | <b>1030.466244</b> | 515.736760      | 1013.439695       | 507.223485       | 1012.455679       | 506.731477       | E    | <b>562.246731</b>  | 281.627004      | 545.220182         | 273.113729       | <b>544.236166</b>  | 272.621721        | 4 |
| 7 | 1159.508837        | 580.258057      | 1142.482288       | 571.744782       | 1141.498272       | 571.252774       | E    | <b>433.204138</b>  | 217.105707      | 416.177589         | 208.592433       | 415.193573         | 208.100425        | 3 |
| 8 | <b>1288.551430</b> | 644.779353      | 1271.524881       | 636.266079       | 1270.540865       | 635.774071       | E    | <b>304.161545</b>  | 152.584411      | 287.134996         | 144.071136       | 286.150980         | 143.579128        | 2 |
| 9 |                    |                 |                   |                  |                   |                  | R    | <b>175.118952</b>  | 88.063114       | 158.092403         | 79.549839        |                    |                   | 1 |

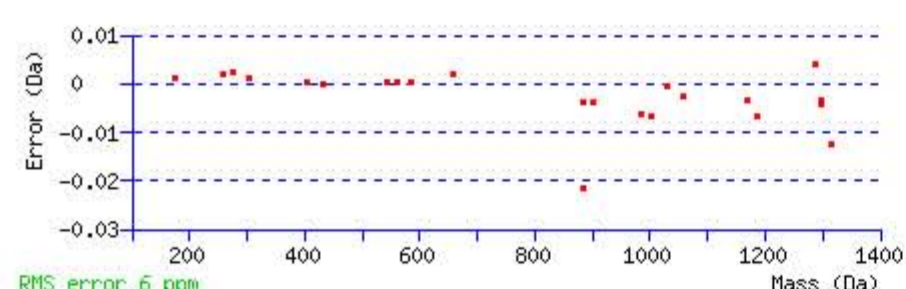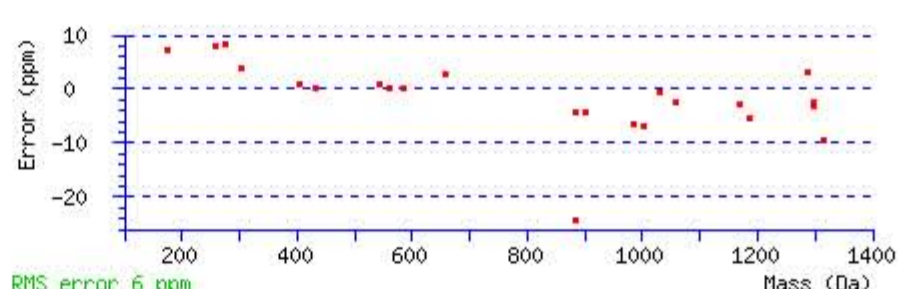

NCBI BLAST search of **FQEGQEEER**

(Parameters: blastp, nr protein database, expect=20000, no filter, PAM30)

Other BLAST [web gateways](#)

All matches to this query

| Score | Mr(calc):   | Delta     | Sequence                       |
|-------|-------------|-----------|--------------------------------|
| 47.0  | 1461.655807 | -0.000559 | <a href="#">FQEGQEEER</a>      |
| 12.2  | 1461.640564 | 0.014684  | <a href="#">NSGTQSDGEEK</a>    |
| 10.3  | 1461.655807 | -0.000559 | <a href="#">FQEGQEEER</a>      |
| 8.8   | 1461.640564 | 0.014684  | <a href="#">VMIDVAGNPEEER</a>  |
| 5.6   | 1461.648392 | 0.006856  | <a href="#">HREELSDYEER</a>    |
| 4.2   | 1461.637161 | 0.018087  | <a href="#">ESELQWQEEER</a>    |
| 1.4   | 1461.676956 | -0.021708 | <a href="#">MSGQVGDLSPSQEK</a> |

Mascot: <http://www.matrixscience.com/>



# MASCOT SCIENCE Mascot Search Results

## Peptide View

MS/MS Fragmentation of **HVYGELDVQIQR**

Found in **F13A\_HUMAN**, Coagulation factor XIII A chain OS=Homo sapiens GN=F13A1 PE=1 SV=4

Match to Query 37843: 1766.913582 from(589.978470,3+) rtinseconds(1951) index(4633)

Title: Locus:1.1.1.3231.15 File:"2013-07-02 CLN FXIII 60 min 3rd F 1.wiff"

Data file C:\Program Files (x86)\Matrix Science\Mascot Daemon\mgf\6 FXIII 60 min 3rd\mascot\_daemon\_merge.mgf

Click mouse within plot area to zoom in by factor of two about that point

Or, Plot from  to  Da

Label all possible matches  Label matches used for scoring

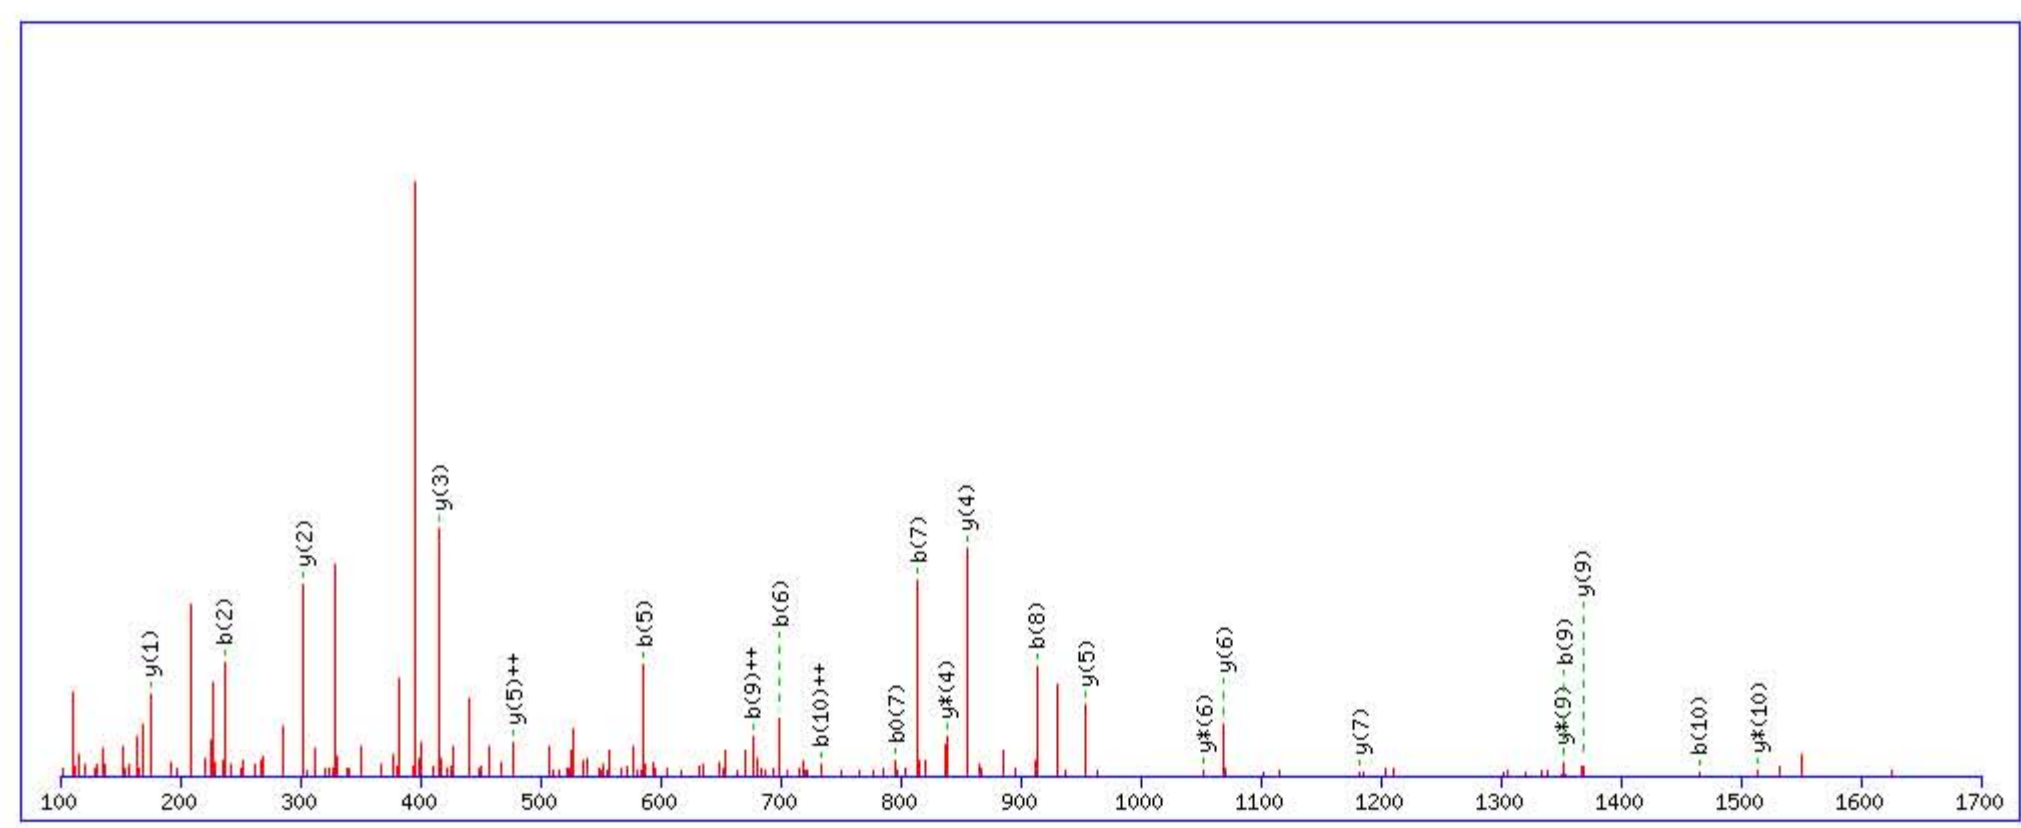

Monoisotopic mass of neutral peptide Mr(calc): 1766.913773

Fixed modifications: Carbamidomethyl (C) (apply to specified residues or termini only)

Variable modifications:

Q9 : Biotin:Thermo-21345 (Q)

Ions Score: 39 Expect: 0.003

Matches : 23/98 fragment ions using 43 most intense peaks [\(help\)](#)

| #  | b                  | b <sup>++</sup>   | b <sup>*</sup> | b <sup>*++</sup> | b <sup>0</sup>    | b <sup>0++</sup> | Seq. | y                  | y <sup>++</sup>   | y <sup>*</sup>     | y <sup>*++</sup> | y <sup>0</sup> | y <sup>0++</sup> | #  |
|----|--------------------|-------------------|----------------|------------------|-------------------|------------------|------|--------------------|-------------------|--------------------|------------------|----------------|------------------|----|
| 1  | 138.066188         | 69.536732         |                |                  |                   |                  | H    |                    |                   |                    |                  |                |                  | 12 |
| 2  | <b>237.134602</b>  | 119.070939        |                |                  |                   |                  | V    | 1630.862141        | 815.934708        | 1613.835592        | 807.421434       | 1612.851576    | 806.929426       | 11 |
| 3  | 400.197931         | 200.602603        |                |                  |                   |                  | Y    | 1531.793727        | 766.400501        | <b>1514.767178</b> | 757.887227       | 1513.783162    | 757.395219       | 10 |
| 4  | 457.219395         | 229.113335        |                |                  |                   |                  | G    | <b>1368.730398</b> | 684.868837        | <b>1351.703849</b> | 676.355563       | 1350.719833    | 675.863554       | 9  |
| 5  | <b>586.261988</b>  | 293.634632        |                |                  | 568.251423        | 284.629349       | E    | 1311.708934        | 656.358105        | 1294.682385        | 647.844830       | 1293.698369    | 647.352822       | 8  |
| 6  | <b>699.346052</b>  | 350.176664        |                |                  | 681.335487        | 341.171382       | L    | <b>1182.666341</b> | 591.836808        | 1165.639792        | 583.323534       | 1164.655776    | 582.831526       | 7  |
| 7  | <b>814.372995</b>  | 407.690136        |                |                  | <b>796.362430</b> | 398.684853       | D    | <b>1069.582277</b> | 535.294776        | <b>1052.555728</b> | 526.781502       | 1051.571712    | 526.289494       | 6  |
| 8  | <b>913.441409</b>  | 457.224342        |                |                  | 895.430844        | 448.219060       | V    | <b>954.555334</b>  | <b>477.781305</b> | 937.528785         | 469.268030       |                |                  | 5  |
| 9  | <b>1352.666735</b> | <b>676.837006</b> | 1335.640186    | 668.323731       | 1334.656170       | 667.831723       | Q    | <b>855.486920</b>  | 428.247098        | <b>838.460371</b>  | 419.733823       |                |                  | 4  |
| 10 | <b>1465.750799</b> | <b>733.379037</b> | 1448.724250    | 724.865763       | 1447.740234       | 724.373755       | I    | <b>416.261594</b>  | 208.634435        | 399.235045         | 200.121160       |                |                  | 3  |
| 11 | 1593.809377        | 797.408326        | 1576.782828    | 788.895052       | 1575.798812       | 788.403044       | Q    | <b>303.177530</b>  | 152.092403        | 286.150981         | 143.579128       |                |                  | 2  |
| 12 |                    |                   |                |                  |                   |                  | R    | <b>175.118952</b>  | 88.063114         | 158.092403         | 79.549839        |                |                  | 1  |

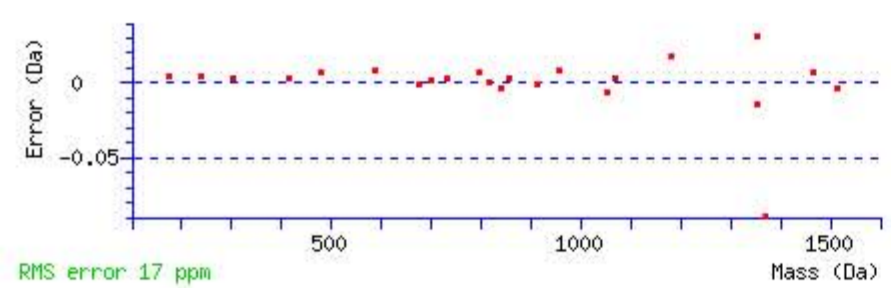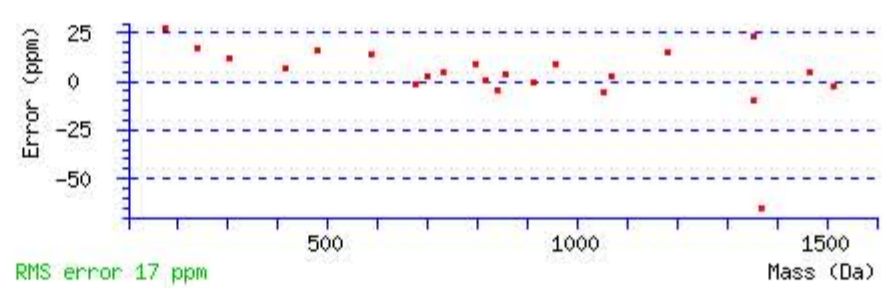

NCBI BLAST search of **HVYGELDVQIQR**

(Parameters: blastp, nr protein database, expect=20000, no filter, PAM30)

Other BLAST [web gateways](#)

All matches to this query

| Score | Mr(calc):   | Delta     | Sequence                     |
|-------|-------------|-----------|------------------------------|
| 39.3  | 1766.913773 | -0.000191 | <a href="#">HVYGELDVQIQR</a> |
| 16.7  | 1766.913773 | -0.000191 | <a href="#">HVYGELDVQIQR</a> |

# MASCOT Search Results

## Peptide View

MS/MS Fragmentation of **FQEGQEEER**

Found in **F13A\_HUMAN**, Coagulation factor XIII A chain OS=Homo sapiens GN=F13A1 PE=1 SV=4

Match to Query 38009: 1772.815528 from(887.415040,2+) rtinseconds(1853) index(32159)

Title: Locus:1.1.1.3194.10 File:"2013-07-02 CLN FXIII 60 min 3rd F 3.wiff"

Data file C:\Program Files (x86)\Matrix Science\Mascot Daemon\mgf6 FXIII 60 min 3rd\mascot\_daemon\_merge.mgf

Click mouse within plot area to zoom in by factor of two about that point

Or, Plot from  to  Da

Label all possible matches  Label matches used for scoring

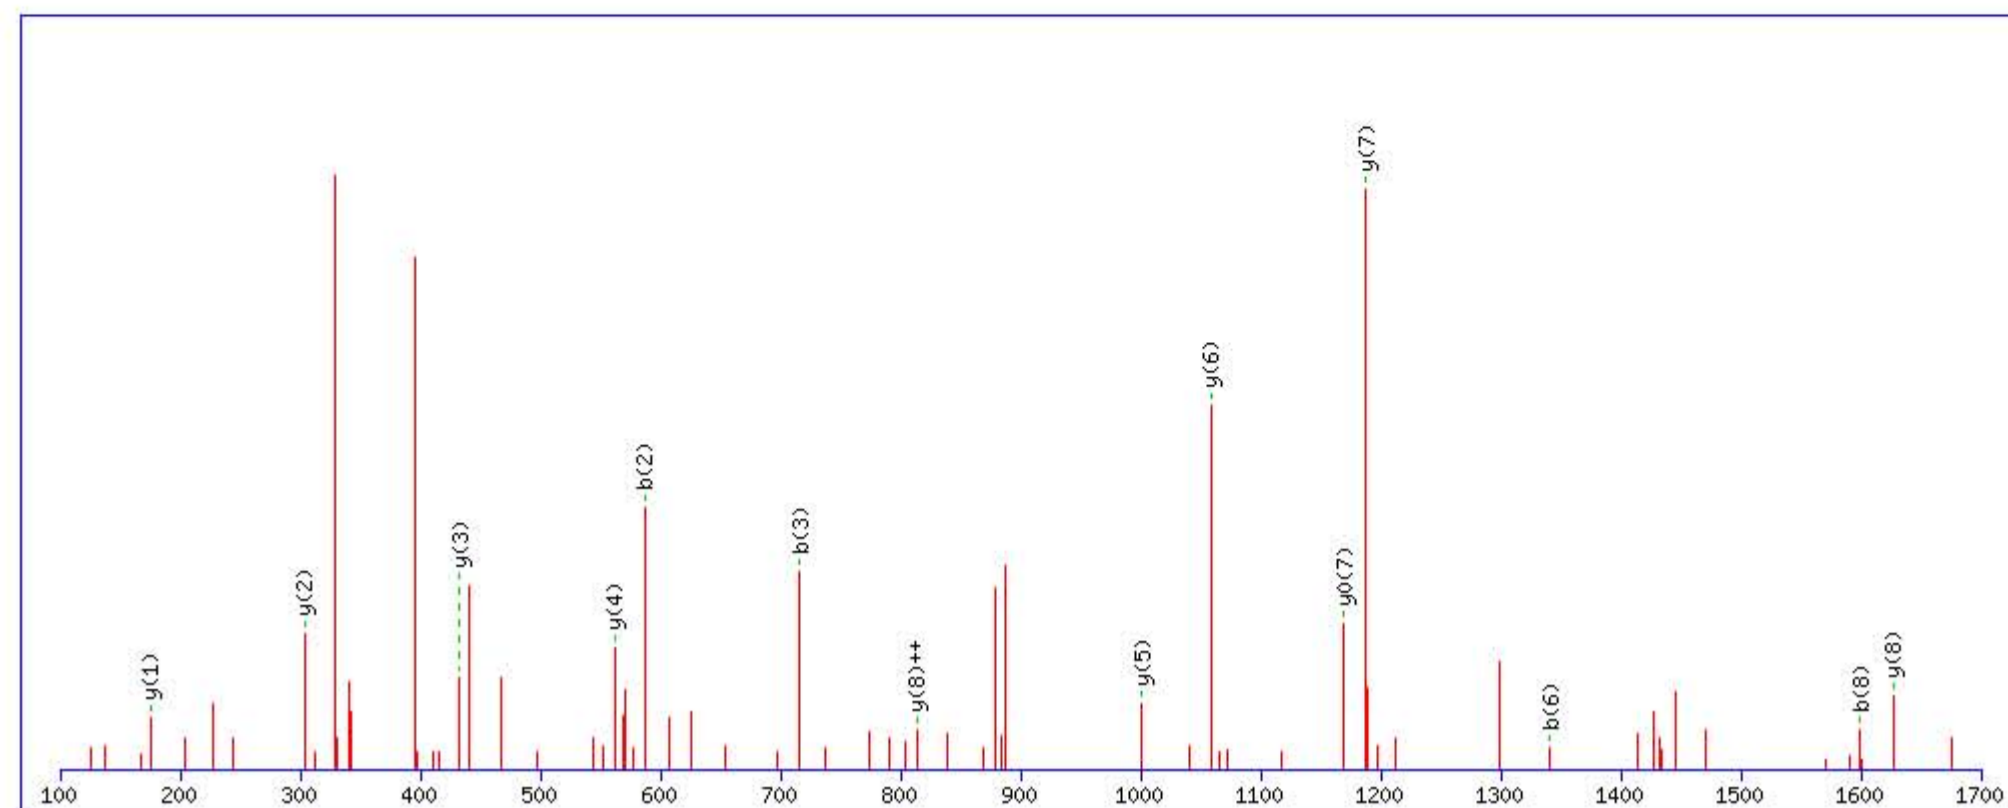

Monoisotopic mass of neutral peptide Mr(calc): 1772.822556

Fixed modifications: Carbamidomethyl (C) (apply to specified residues or termini only)

Variable modifications:

Q2 : Biotin:Thermo-21345 (Q)

Q5 : Biotin:Thermo-21345 (Q)

Ions Score: 39 Expect: 0.0013

Matches : 14/88 fragment ions using 31 most intense peaks [\(help\)](#)

| # | b                  | b <sup>++</sup> | b <sup>*</sup> | b <sup>+++</sup> | b <sup>0</sup> | b <sup>0++</sup> | Seq. | y                  | y <sup>++</sup>   | y <sup>*</sup> | y <sup>+++</sup> | y <sup>0</sup>     | y <sup>0++</sup> | # |
|---|--------------------|-----------------|----------------|------------------|----------------|------------------|------|--------------------|-------------------|----------------|------------------|--------------------|------------------|---|
| 1 | 148.075690         | 74.541483       |                |                  |                |                  | F    |                    |                   |                |                  |                    |                  | 9 |
| 2 | <b>587.301016</b>  | 294.154146      | 570.274467     | 285.640872       |                |                  | Q    | <b>1626.761440</b> | <b>813.884358</b> | 1609.734891    | 805.371084       | 1608.750875        | 804.879076       | 8 |
| 3 | <b>716.343609</b>  | 358.675443      | 699.317060     | 350.162168       | 698.333044     | 349.670160       | E    | <b>1187.536114</b> | 594.271695        | 1170.509565    | 585.758421       | <b>1169.525549</b> | 585.266413       | 7 |
| 4 | 773.365073         | 387.186175      | 756.338524     | 378.672900       | 755.354508     | 378.180892       | G    | <b>1058.493521</b> | 529.750399        | 1041.466972    | 521.237124       | 1040.482956        | 520.745116       | 6 |
| 5 | 1212.590399        | 606.798837      | 1195.563850    | 598.285563       | 1194.579834    | 597.793555       | Q    | <b>1001.472057</b> | 501.239667        | 984.445508     | 492.726392       | 983.461492         | 492.234384       | 5 |
| 6 | <b>1341.632992</b> | 671.320134      | 1324.606443    | 662.806860       | 1323.622427    | 662.314852       | E    | <b>562.246731</b>  | 281.627004        | 545.220182     | 273.113729       | 544.236166         | 272.621721       | 4 |
| 7 | 1470.675585        | 735.841431      | 1453.649036    | 727.328156       | 1452.665020    | 726.836148       | E    | <b>433.204138</b>  | 217.105707        | 416.177589     | 208.592433       | 415.193573         | 208.100425       | 3 |
| 8 | <b>1599.718178</b> | 800.362727      | 1582.691629    | 791.849453       | 1581.707613    | 791.357445       | E    | <b>304.161545</b>  | 152.584411        | 287.134996     | 144.071136       | 286.150980         | 143.579128       | 2 |
| 9 |                    |                 |                |                  |                |                  | R    | <b>175.118952</b>  | 88.063114         | 158.092403     | 79.549839        |                    |                  | 1 |

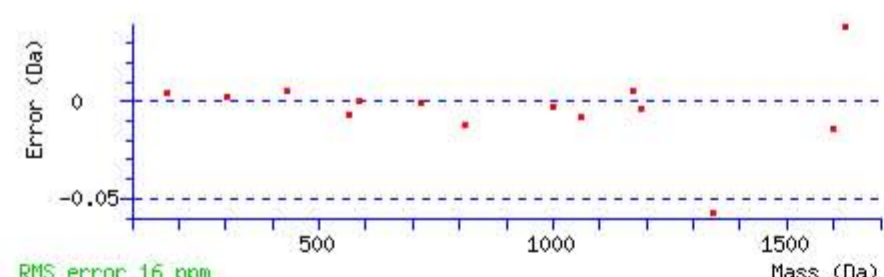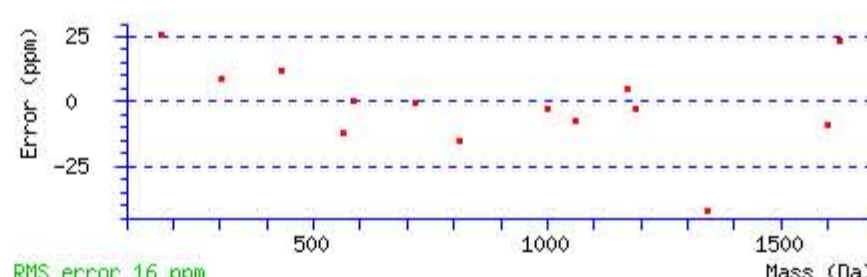

NCBI BLAST search of **FQEGQEEER**

(Parameters: blastp, nr protein database, expect=20000, no filter, PAM30)

Other BLAST [web gateways](#)

All matches to this query

| Score | Mr(calc):   | Delta     | Sequence                            |
|-------|-------------|-----------|-------------------------------------|
| 39.5  | 1772.822556 | -0.007028 | <a href="#">FQEGQEEER</a>           |
| 22.7  | 1772.803909 | 0.011619  | <a href="#">ESELQWQEEER</a>         |
| 6.1   | 1772.829727 | -0.014199 | <a href="#">QEEEEAMRRER</a>         |
| 4.3   | 1772.798752 | 0.016776  | <a href="#">HISSCMRWPGHYSR</a>      |
| 3.8   | 1772.803909 | 0.011619  | <a href="#">ESELQWQEEER</a>         |
| 3.7   | 1772.828873 | -0.013345 | <a href="#">QAEQEATVAREEQER</a>     |
| 3.7   | 1772.836288 | -0.020760 | <a href="#">ADGSLTGGGLEAAAMAPER</a> |
| 1.1   | 1772.811798 | 0.003730  | <a href="#">YQTPPHQNFEDLER</a>      |

Mascot: <http://www.matrixscience.com/>

# MASCOT Search Results

## Peptide View

MS/MS Fragmentation of **GTYPVPIVSELQSGK**

Found in **F13A\_HUMAN**, Coagulation factor XIII A chain OS=Homo sapiens GN=F13A1 PE=1 SV=4

Match to Query 41987: 1998.094992 from(667.038940,3+) rtinseconds(2770) index(66806)

Title: Locus:1.1.1.3590.9 File:"2013-07-02 CLN FXIII 60 min 3rd FT.wiff"

Data file C:\Program Files (x86)\Matrix Science\Mascot Daemon\mgf\6 FXIII 60 min 3rd\mascot\_daemon\_merge.mgf

Click mouse within plot area to zoom in by factor of two about that point

Or, Plot from  to  Da

Label all possible matches  Label matches used for scoring

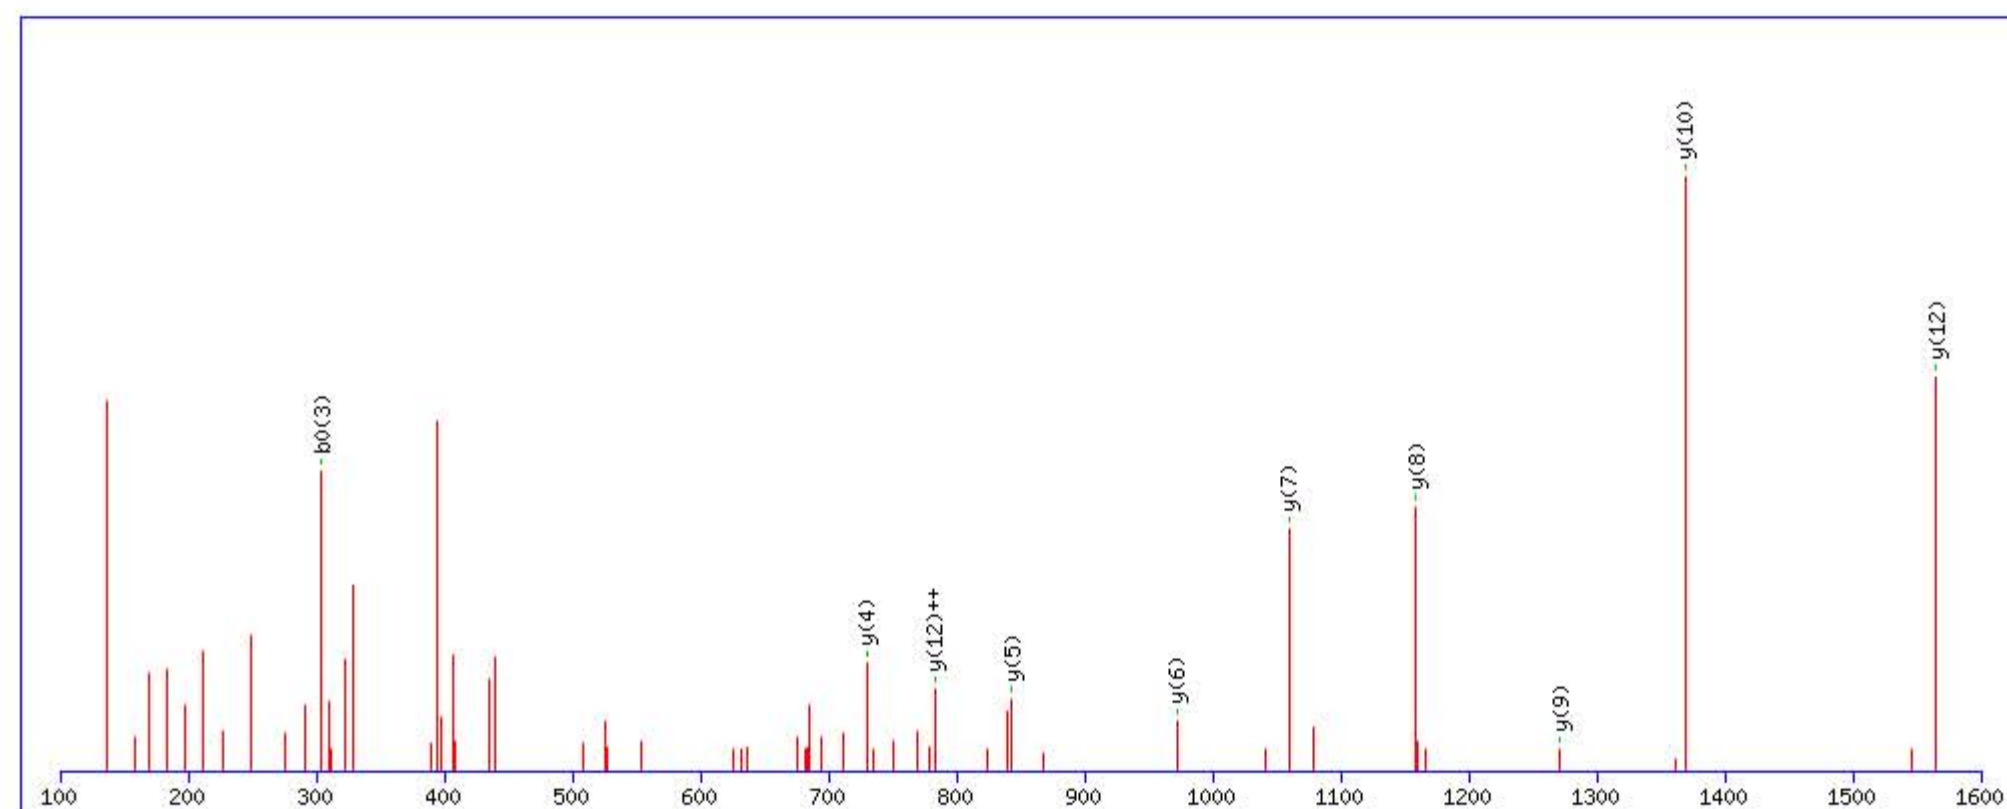

Monoisotopic mass of neutral peptide Mr(calc): 1998.085983

Fixed modifications: Carbamidomethyl (C) (apply to specified residues or termini only)

Variable modifications:

Q13 : Biotin:Thermo-21345 (Q)

Ions Score: 55 Expect: 1e-005

Matches : 10/150 fragment ions using 14 most intense peaks [\(help\)](#)

| #  | b           | b <sup>++</sup> | b <sup>*</sup> | b <sup>*++</sup> | b <sup>0</sup>    | b <sup>0++</sup> | Seq.     | y                  | y <sup>++</sup>   | y <sup>*</sup> | y <sup>*++</sup> | y <sup>0</sup> | y <sup>0++</sup> | #  |
|----|-------------|-----------------|----------------|------------------|-------------------|------------------|----------|--------------------|-------------------|----------------|------------------|----------------|------------------|----|
| 1  | 58.028740   | 29.518008       |                |                  |                   |                  | <b>G</b> |                    |                   |                |                  |                |                  | 16 |
| 2  | 159.076419  | 80.041847       |                |                  | 141.065854        | 71.036565        | <b>T</b> | 1942.071799        | 971.539538        | 1925.045250    | 963.026263       | 1924.061234    | 962.534255       | 15 |
| 3  | 322.139748  | 161.573512      |                |                  | <b>304.129183</b> | 152.568230       | <b>Y</b> | 1841.024120        | 921.015698        | 1823.997571    | 912.502424       | 1823.013555    | 912.010416       | 14 |
| 4  | 435.223812  | 218.115544      |                |                  | 417.213247        | 209.110262       | <b>I</b> | 1677.960791        | 839.484034        | 1660.934242    | 830.970759       | 1659.950226    | 830.478751       | 13 |
| 5  | 532.276576  | 266.641926      |                |                  | 514.266011        | 257.636644       | <b>P</b> | <b>1564.876727</b> | <b>782.942002</b> | 1547.850178    | 774.428727       | 1546.866162    | 773.936719       | 12 |
| 6  | 631.344990  | 316.176133      |                |                  | 613.334425        | 307.170851       | <b>V</b> | 1467.823963        | 734.415620        | 1450.797414    | 725.902345       | 1449.813398    | 725.410337       | 11 |
| 7  | 728.397754  | 364.702515      |                |                  | 710.387189        | 355.697233       | <b>P</b> | <b>1368.755549</b> | 684.881413        | 1351.729000    | 676.368138       | 1350.744984    | 675.876130       | 10 |
| 8  | 841.481818  | 421.244547      |                |                  | 823.471253        | 412.239265       | <b>I</b> | <b>1271.702785</b> | 636.355031        | 1254.676236    | 627.841756       | 1253.692220    | 627.349748       | 9  |
| 9  | 940.550232  | 470.778754      |                |                  | 922.539667        | 461.773472       | <b>V</b> | <b>1158.618721</b> | 579.812999        | 1141.592172    | 571.299724       | 1140.608156    | 570.807716       | 8  |
| 10 | 1027.582260 | 514.294768      |                |                  | 1009.571695       | 505.289486       | <b>S</b> | <b>1059.550307</b> | 530.278792        | 1042.523758    | 521.765517       | 1041.539742    | 521.273509       | 7  |
| 11 | 1156.624853 | 578.816065      |                |                  | 1138.614288       | 569.810782       | <b>E</b> | <b>972.518279</b>  | 486.762777        | 955.491730     | 478.249503       | 954.507714     | 477.757495       | 6  |
| 12 | 1269.708917 | 635.358096      |                |                  | 1251.698352       | 626.352814       | <b>L</b> | <b>843.475686</b>  | 422.241481        | 826.449137     | 413.728207       | 825.465121     | 413.236199       | 5  |
| 13 | 1708.934243 | 854.970759      | 1691.907694    | 846.457485       | 1690.923678       | 845.965477       | <b>Q</b> | <b>730.391622</b>  | 365.699449        | 713.365073     | 357.186175       | 712.381057     | 356.694167       | 4  |
| 14 | 1795.966271 | 898.486774      | 1778.939722    | 889.973499       | 1777.955706       | 889.481491       | <b>S</b> | 291.166296         | 146.086786        | 274.139747     | 137.573512       | 273.155731     | 137.081504       | 3  |
| 15 | 1852.987735 | 926.997505      | 1835.961186    | 918.484231       | 1834.977170       | 917.992223       | <b>G</b> | 204.134268         | 102.570772        | 187.107719     | 94.057497        |                |                  | 2  |
| 16 |             |                 |                |                  |                   |                  | <b>K</b> | 147.112804         | 74.060040         | 130.086255     | 65.546765        |                |                  | 1  |

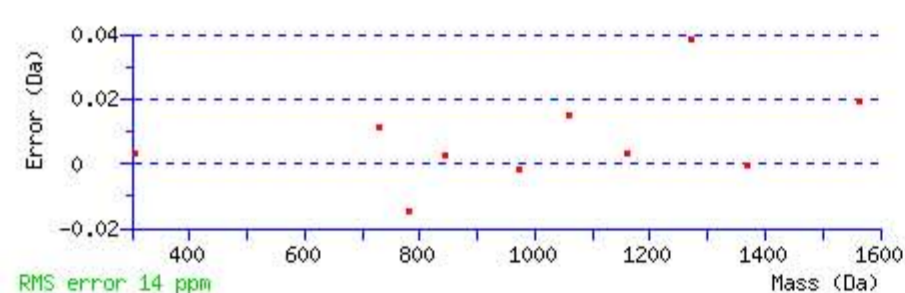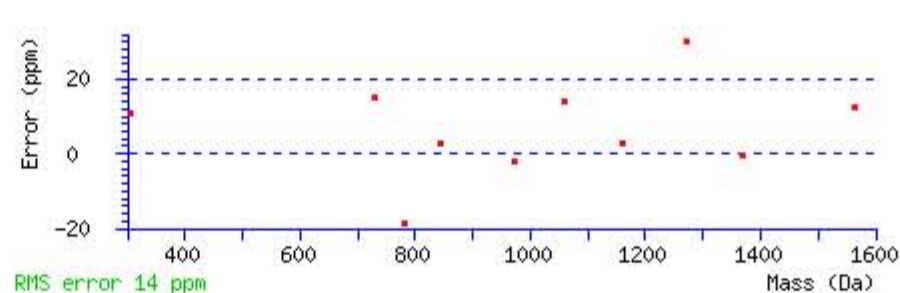

NCBI BLAST search of **GTYPVPIVSELQSGK**

(Parameters: blastp, nr protein database, expect=20000, no filter, PAM30)

Other BLAST [web gateways](#)

All matches to this query

| Score | Mr(calc):   | Delta     | Sequence                            |
|-------|-------------|-----------|-------------------------------------|
| 54.9  | 1998.085983 | 0.009009  | <a href="#">GTYPVPIVSELQSGK</a>     |
| 1.6   | 1998.099731 | -0.004739 | <a href="#">GDEVVVELVENGKKVTVGK</a> |

Mascot: <http://www.matrixscience.com/>

# MASCOT Search Results

## Peptide View

MS/MS Fragmentation of **GVNLQEFLNVTSVHLFK**  
 Found in **F13A\_HUMAN**, Coagulation factor XIII A chain OS=Homo sapiens GN=F13A1 PE=1 SV=4

Match to Query 46948: 2255.223132 from(752.748320,3+) rtinseconds(3018) index(39162)  
 Title: Locus:1.1.1.3597.7 File:"2013-07-02 CLN FXIII 60 min 3rd F 3.wiff"  
 Data file C:\Program Files (x86)\Matrix Science\Mascot Daemon\mgf\6 FXIII 60 min 3rd\mascot\_daemon\_merge.mgf

Click mouse within plot area to zoom in by factor of two about that point  
 Or, Plot from  to  Da   
 Label all possible matches  Label matches used for scoring

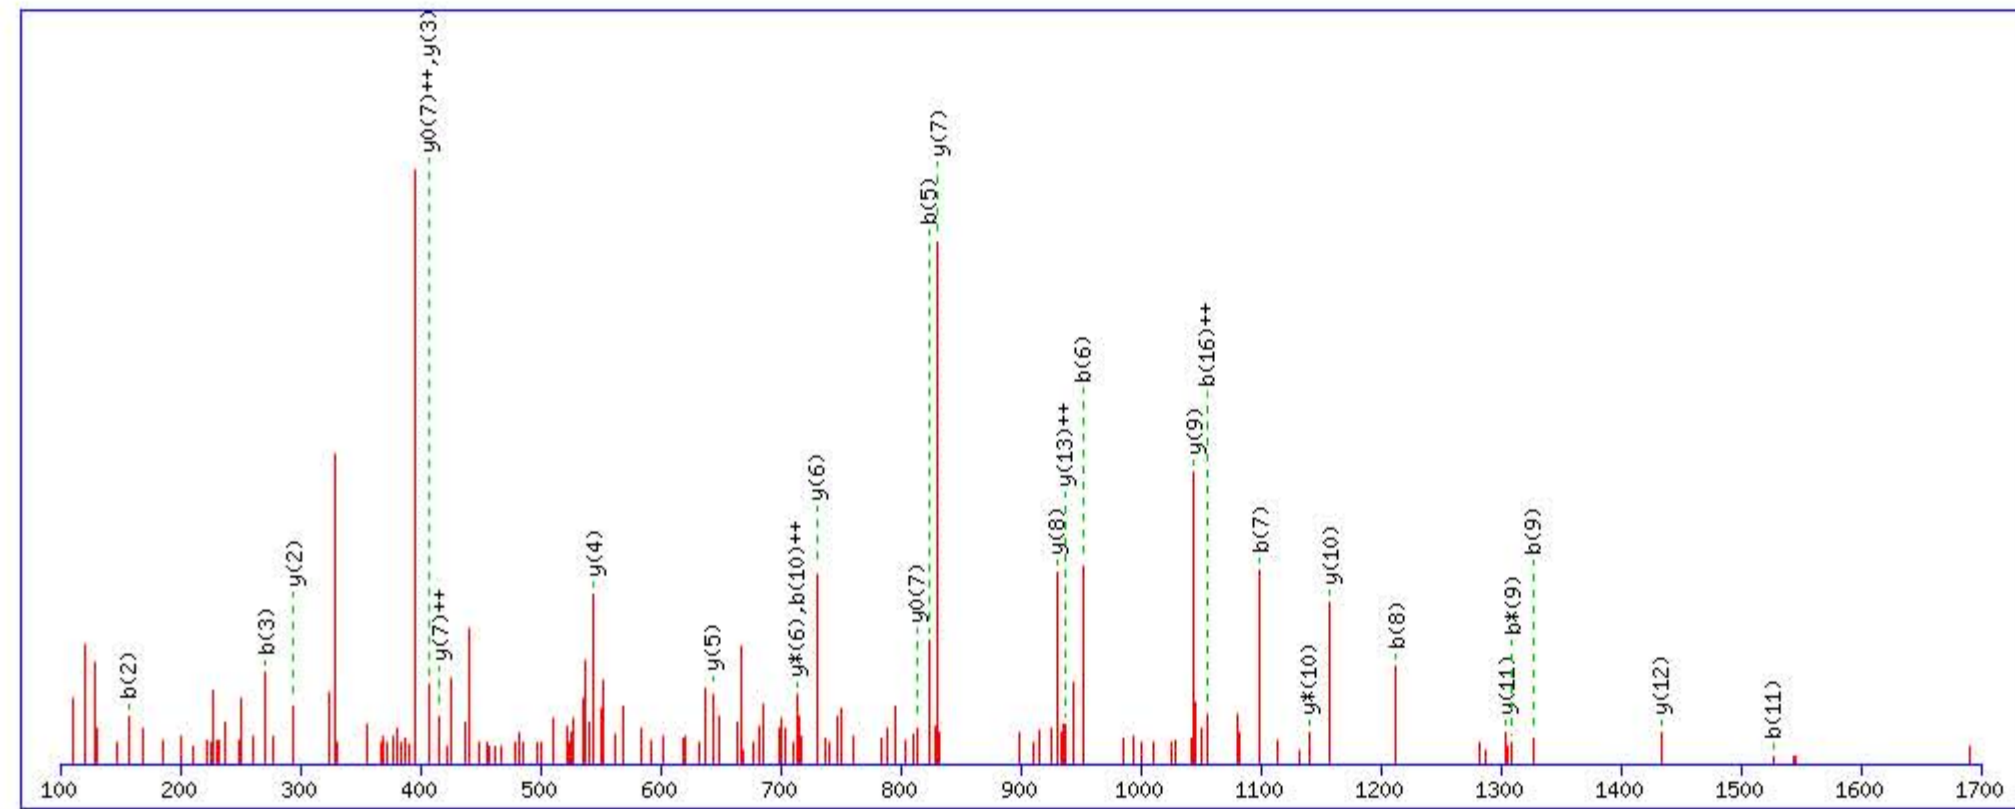

Monoisotopic mass of neutral peptide  $M_r(\text{calc})$ : 2255.213654  
 Fixed modifications: Carbamidomethyl (C) (apply to specified residues or termini only)  
 Variable modifications:  
 Q5 : Biotin:Thermo-21345 (Q)  
 Ions Score: 52 Expect: 0.00011  
 Matches : 28/168 fragment ions using 55 most intense peaks [\(help\)](#)

| #  | b           | b <sup>++</sup> | b <sup>*</sup> | b <sup>+++</sup> | b <sup>0</sup> | b <sup>0++</sup> | Seq. | y           | y <sup>++</sup> | y <sup>*</sup> | y <sup>+++</sup> | y <sup>0</sup> | y <sup>0++</sup> | #  |
|----|-------------|-----------------|----------------|------------------|----------------|------------------|------|-------------|-----------------|----------------|------------------|----------------|------------------|----|
| 1  | 58.028740   | 29.518008       |                |                  |                |                  | G    |             |                 |                |                  |                |                  | 17 |
| 2  | 157.097154  | 79.052215       |                |                  |                |                  | V    | 2199.199458 | 1100.103367     | 2182.172909    | 1091.590092      | 2181.188893    | 1091.098084      | 16 |
| 3  | 271.140081  | 136.073679      | 254.113532     | 127.560404       |                |                  | N    | 2100.131044 | 1050.569160     | 2083.104495    | 1042.055885      | 2082.120479    | 1041.563877      | 15 |
| 4  | 384.224145  | 192.615711      | 367.197596     | 184.102436       |                |                  | L    | 1986.088117 | 993.547697      | 1969.061568    | 985.034422       | 1968.077552    | 984.542414       | 14 |
| 5  | 823.449471  | 412.228374      | 806.422922     | 403.715099       |                |                  | Q    | 1873.004053 | 937.005665      | 1855.977504    | 928.492390       | 1854.993488    | 928.000382       | 13 |
| 6  | 952.492064  | 476.749670      | 935.465515     | 468.236396       | 934.481499     | 467.744388       | E    | 1433.778727 | 717.393002      | 1416.752178    | 708.879727       | 1415.768162    | 708.387719       | 12 |
| 7  | 1099.560478 | 550.283877      | 1082.533929    | 541.770603       | 1081.549913    | 541.278595       | F    | 1304.736134 | 652.871705      | 1287.709585    | 644.358431       | 1286.725569    | 643.866423       | 11 |
| 8  | 1212.644542 | 606.825909      | 1195.617993    | 598.312635       | 1194.633977    | 597.820627       | L    | 1157.667720 | 579.337498      | 1140.641171    | 570.824224       | 1139.657155    | 570.332216       | 10 |
| 9  | 1326.687469 | 663.847373      | 1309.660920    | 655.334098       | 1308.676904    | 654.842090       | N    | 1044.583656 | 522.795466      | 1027.557107    | 514.282192       | 1026.573091    | 513.790184       | 9  |
| 10 | 1425.755883 | 713.381580      | 1408.729334    | 704.868305       | 1407.745318    | 704.376297       | V    | 930.540729  | 465.774003      | 913.514180     | 457.260728       | 912.530164     | 456.768720       | 8  |
| 11 | 1526.803562 | 763.905419      | 1509.777013    | 755.392145       | 1508.792997    | 754.900137       | T    | 831.472315  | 416.239796      | 814.445766     | 407.726521       | 813.461750     | 407.234513       | 7  |
| 12 | 1613.835590 | 807.421433      | 1596.809041    | 798.908159       | 1595.825025    | 798.416151       | S    | 730.424636  | 365.715956      | 713.398087     | 357.202682       | 712.414071     | 356.710674       | 6  |
| 13 | 1712.904004 | 856.955640      | 1695.877455    | 848.442366       | 1694.893439    | 847.950358       | V    | 643.392608  | 322.199942      | 626.366059     | 313.686668       |                |                  | 5  |
| 14 | 1849.962916 | 925.485096      | 1832.936367    | 916.971822       | 1831.952351    | 916.479814       | H    | 544.324194  | 272.665735      | 527.297645     | 264.152461       |                |                  | 4  |
| 15 | 1963.046980 | 982.027128      | 1946.020431    | 973.513854       | 1945.036415    | 973.021846       | L    | 407.265282  | 204.136279      | 390.238733     | 195.623004       |                |                  | 3  |
| 16 | 2110.115394 | 1055.561335     | 2093.088845    | 1047.048060      | 2092.104829    | 1046.556052      | F    | 294.181218  | 147.594247      | 277.154669     | 139.080973       |                |                  | 2  |
| 17 |             |                 |                |                  |                |                  | K    | 147.112804  | 74.060040       | 130.086255     | 65.546765        |                |                  | 1  |

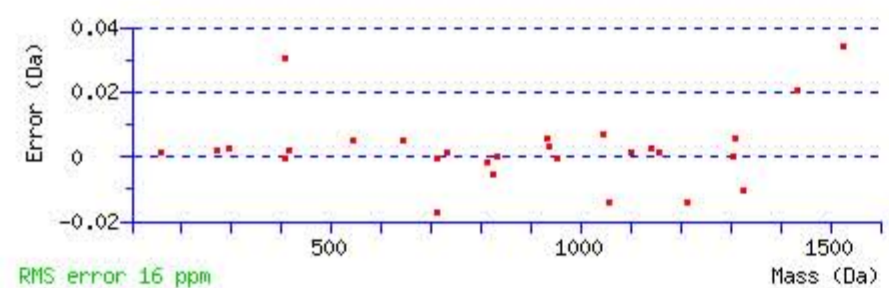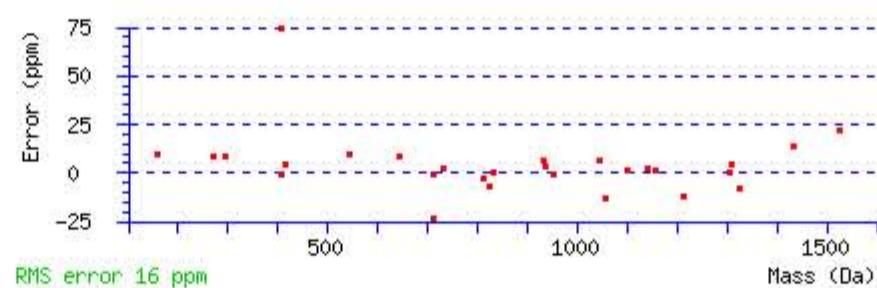

NCBI BLAST search of [GVNLQEFLNVTSVHLFK](#)  
 (Parameters: blastp, nr protein database, expect=20000, no filter, PAM30)  
 Other BLAST [web gateways](#)

### All matches to this query

| Score | $M_r(\text{calc})$ : | Delta    | Sequence                          |
|-------|----------------------|----------|-----------------------------------|
| 52.1  | 2255.213654          | 0.009478 | <a href="#">GVNLQEFLNVTSVHLFK</a> |



# MASCOT SEARCH RESULTS

## Peptide View

MS/MS Fragmentation of **SNALDIIFQDTLTGQK**

Found in **C1S\_HUMAN**, Complement C1s subcomponent OS=Homo sapiens GN=C1S PE=1 SV=1

Match to Query 44112: 2074.100982 from(692.374270,3+) rtinseconds(2878) index(53069)

Title: Locus:1.1.1.3048.10 File:"2013-07-02 CLN FXIII 60 min 3rd F 4.wiff"

Data file C:\Program Files (x86)\Matrix Science\Mascot Daemon\mgf\6 FXIII 60 min 3rd\mascot\_daemon\_merge.mgf

Click mouse within plot area to zoom in by factor of two about that point

Or, Plot from  to  Da

Label all possible matches  Label matches used for scoring

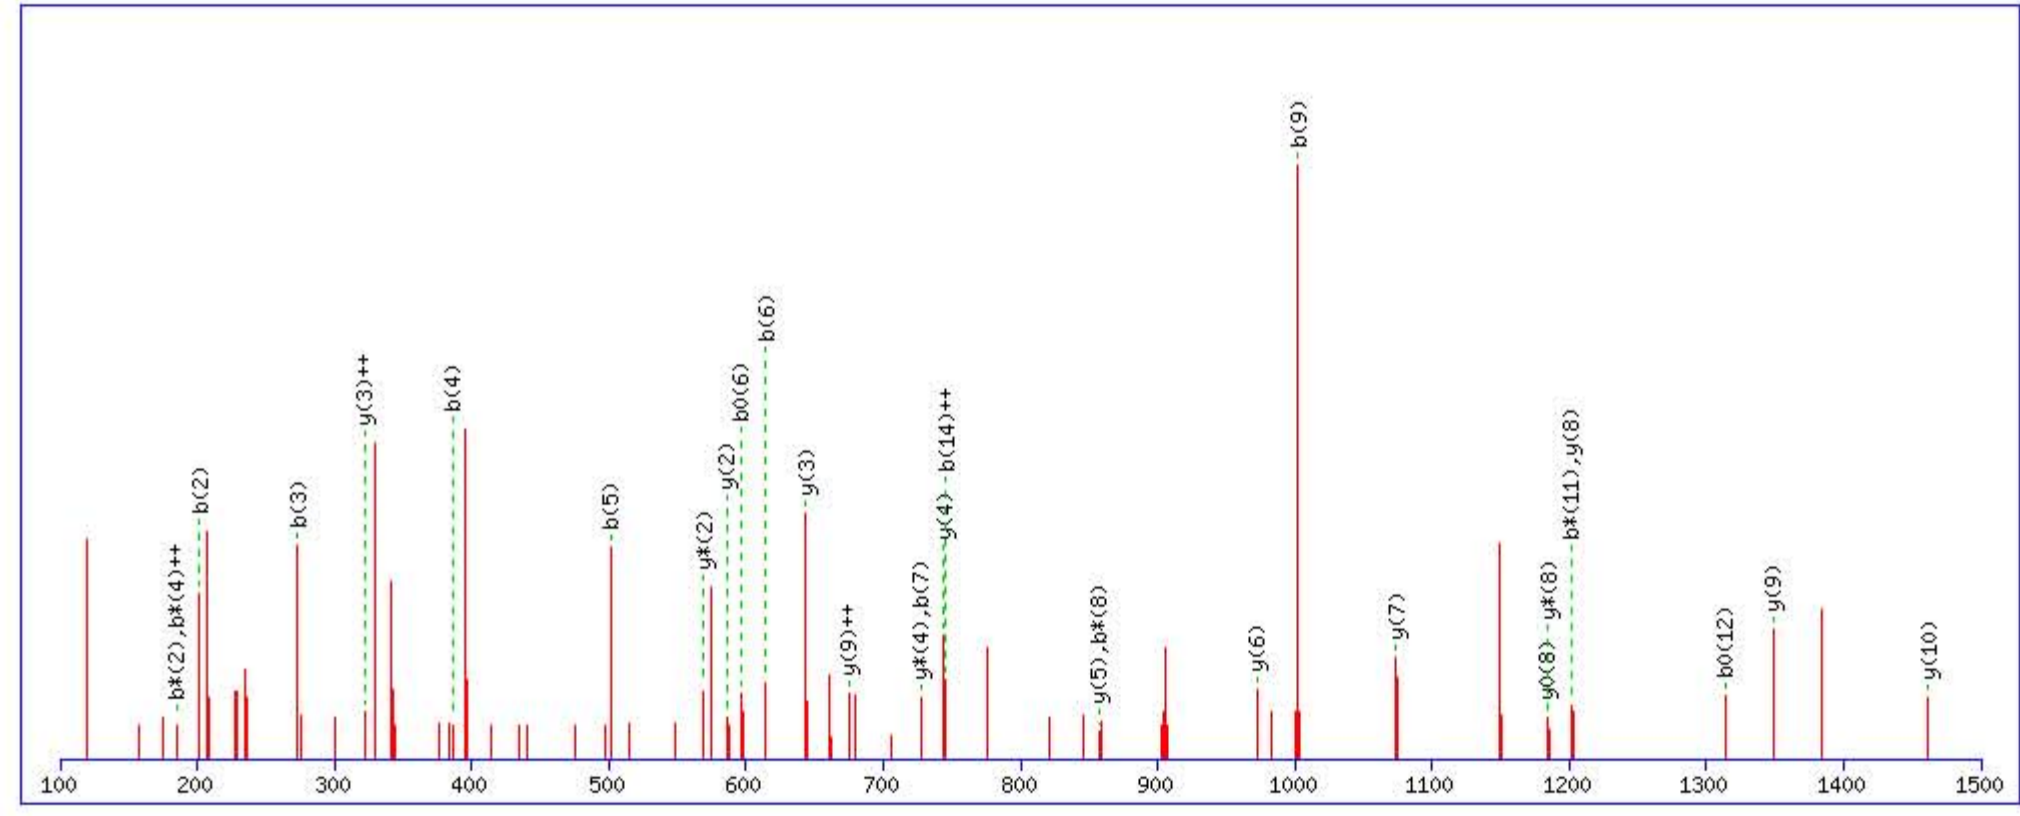

Monoisotopic mass of neutral peptide Mr(calc): 2074.076874

Fixed modifications: Carbamidomethyl (C) (apply to specified residues or termini only)

Variable modifications:

Q15 : Biotin:Thermo-21345 (Q)

Ions Score: 28 Expect: 0.042

Matches : 29/172 fragment ions using 84 most intense peaks [\(help\)](#)

| #  | b                  | b <sup>++</sup>   | b <sup>*</sup>     | b <sup>*++</sup>  | b <sup>0</sup>     | b <sup>0++</sup> | Seq. | y                  | y <sup>++</sup>   | y <sup>*</sup>     | y <sup>*++</sup> | y <sup>0</sup>     | y <sup>0++</sup> | #  |
|----|--------------------|-------------------|--------------------|-------------------|--------------------|------------------|------|--------------------|-------------------|--------------------|------------------|--------------------|------------------|----|
| 1  | 88.039304          | 44.523290         |                    |                   | 70.028739          | 35.518008        | S    |                    |                   |                    |                  |                    |                  | 16 |
| 2  | <b>202.082231</b>  | 101.544753        | <b>185.055682</b>  | 93.031479         | 184.071666         | 92.539471        | N    | 1988.052127        | 994.529702        | 1971.025578        | 986.016427       | 1970.041562        | 985.524419       | 15 |
| 3  | <b>273.119345</b>  | 137.063311        | 256.092796         | 128.550036        | 255.108780         | 128.058028       | A    | 1874.009200        | 937.508238        | 1856.982651        | 928.994964       | 1855.998635        | 928.502956       | 14 |
| 4  | <b>386.203409</b>  | 193.605343        | 369.176860         | <b>185.092068</b> | 368.192844         | 184.600060       | L    | 1802.972086        | 901.989681        | 1785.945537        | 893.476407       | 1784.961521        | 892.984399       | 13 |
| 5  | <b>501.230352</b>  | 251.118814        | 484.203803         | 242.605540        | 483.219787         | 242.113532       | D    | 1689.888022        | 845.447649        | 1672.861473        | 836.934375       | 1671.877457        | 836.442367       | 12 |
| 6  | <b>614.314416</b>  | 307.660846        | 597.287867         | 299.147572        | <b>596.303851</b>  | 298.655564       | I    | 1574.861079        | 787.934178        | 1557.834530        | 779.420903       | 1556.850514        | 778.928895       | 11 |
| 7  | <b>727.398480</b>  | 364.202878        | 710.371931         | 355.689604        | 709.387915         | 355.197596       | I    | <b>1461.777015</b> | 731.392146        | 1444.750466        | 722.878871       | 1443.766450        | 722.386863       | 10 |
| 8  | 874.466894         | 437.737085        | <b>857.440345</b>  | 429.223811        | 856.456329         | 428.731803       | F    | <b>1348.692951</b> | <b>674.850114</b> | 1331.666402        | 666.336839       | 1330.682386        | 665.844831       | 9  |
| 9  | <b>1002.525472</b> | 501.766374        | 985.498923         | 493.253100        | 984.514907         | 492.761092       | Q    | <b>1201.624537</b> | 601.315907        | <b>1184.597988</b> | 592.802632       | <b>1183.613972</b> | 592.310624       | 8  |
| 10 | 1103.573151        | 552.290214        | 1086.546602        | 543.776939        | 1085.562586        | 543.284931       | T    | <b>1073.565959</b> | 537.286618        | 1056.539410        | 528.773343       | 1055.555394        | 528.281335       | 7  |
| 11 | 1218.600094        | 609.803685        | <b>1201.573545</b> | 601.290411        | 1200.589529        | 600.798403       | D    | <b>972.518280</b>  | 486.762778        | 955.491731         | 478.249504       | 954.507715         | 477.757496       | 6  |
| 12 | 1331.684158        | 666.345717        | 1314.657609        | 657.832443        | <b>1313.673593</b> | 657.340435       | L    | <b>857.491337</b>  | 429.249307        | 840.464788         | 420.736032       | 839.480772         | 420.244024       | 5  |
| 13 | 1432.731837        | 716.869557        | 1415.705288        | 708.356282        | 1414.721272        | 707.864274       | T    | <b>744.407273</b>  | 372.707275        | <b>727.380724</b>  | 364.194000       | 726.396708         | 363.701992       | 4  |
| 14 | 1489.753301        | <b>745.380289</b> | 1472.726752        | 736.867014        | 1471.742736        | 736.375006       | G    | <b>643.359594</b>  | <b>322.183435</b> | 626.333045         | 313.670161       |                    |                  | 3  |
| 15 | 1928.978627        | 964.992952        | 1911.952078        | 956.479677        | 1910.968062        | 955.987669       | Q    | <b>586.338130</b>  | 293.672703        | <b>569.311581</b>  | 285.159429       |                    |                  | 2  |
| 16 |                    |                   |                    |                   |                    |                  | K    | 147.112804         | 74.060040         | 130.086255         | 65.546765        |                    |                  | 1  |

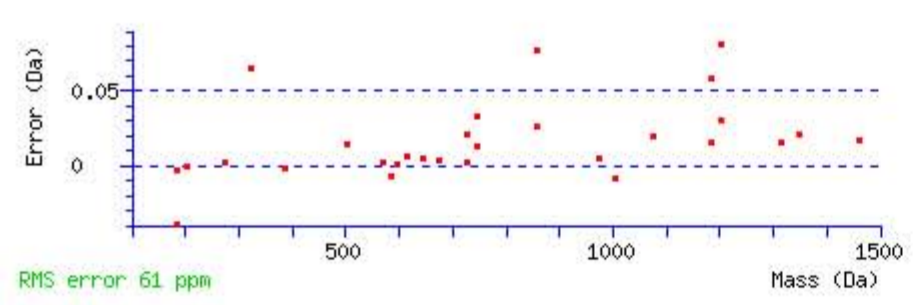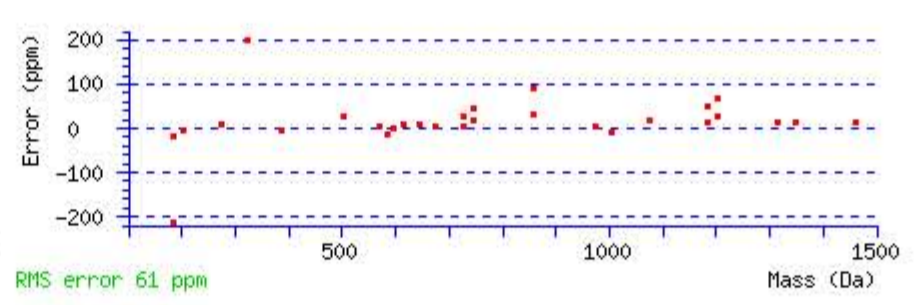

NCBI BLAST search of [SNALDIIFQDTLTGQK](#)  
 (Parameters: blastp, nr protein database, expect=20000, no filter, PAM30)  
 Other BLAST [web gateways](#)

### All matches to this query

| Score | Mr(calc):   | Delta    | Sequence                         |
|-------|-------------|----------|----------------------------------|
| 27.7  | 2074.076874 | 0.024108 | <a href="#">SNALDIIFQDTLTGQK</a> |
| 10.7  | 2074.076874 | 0.024108 | <a href="#">SNALDIIFQDTLTGQK</a> |

# MASCOT Search Results

## Peptide View

MS/MS Fragmentation of **SSGQWQTPGATR**

Found in **CO2\_HUMAN**, Complement C2 OS=Homo sapiens GN=C2 PE=1 SV=2

Match to Query 32617: 1585.766608 from(793.890580,2+) rtinseconds(1747) index(61085)

Title: Locus:1.1.1.3234.9 File:"2013-07-02 CLN FXIII 60 min 3rd FT.wiff"

Data file C:\Program Files (x86)\Matrix Science\Mascot Daemon\mgf\6 FXIII 60 min 3rd\mascot\_daemon\_merge.mgf

Click mouse within plot area to zoom in by factor of two about that point

Or, Plot from  to  Da

Label all possible matches  Label matches used for scoring

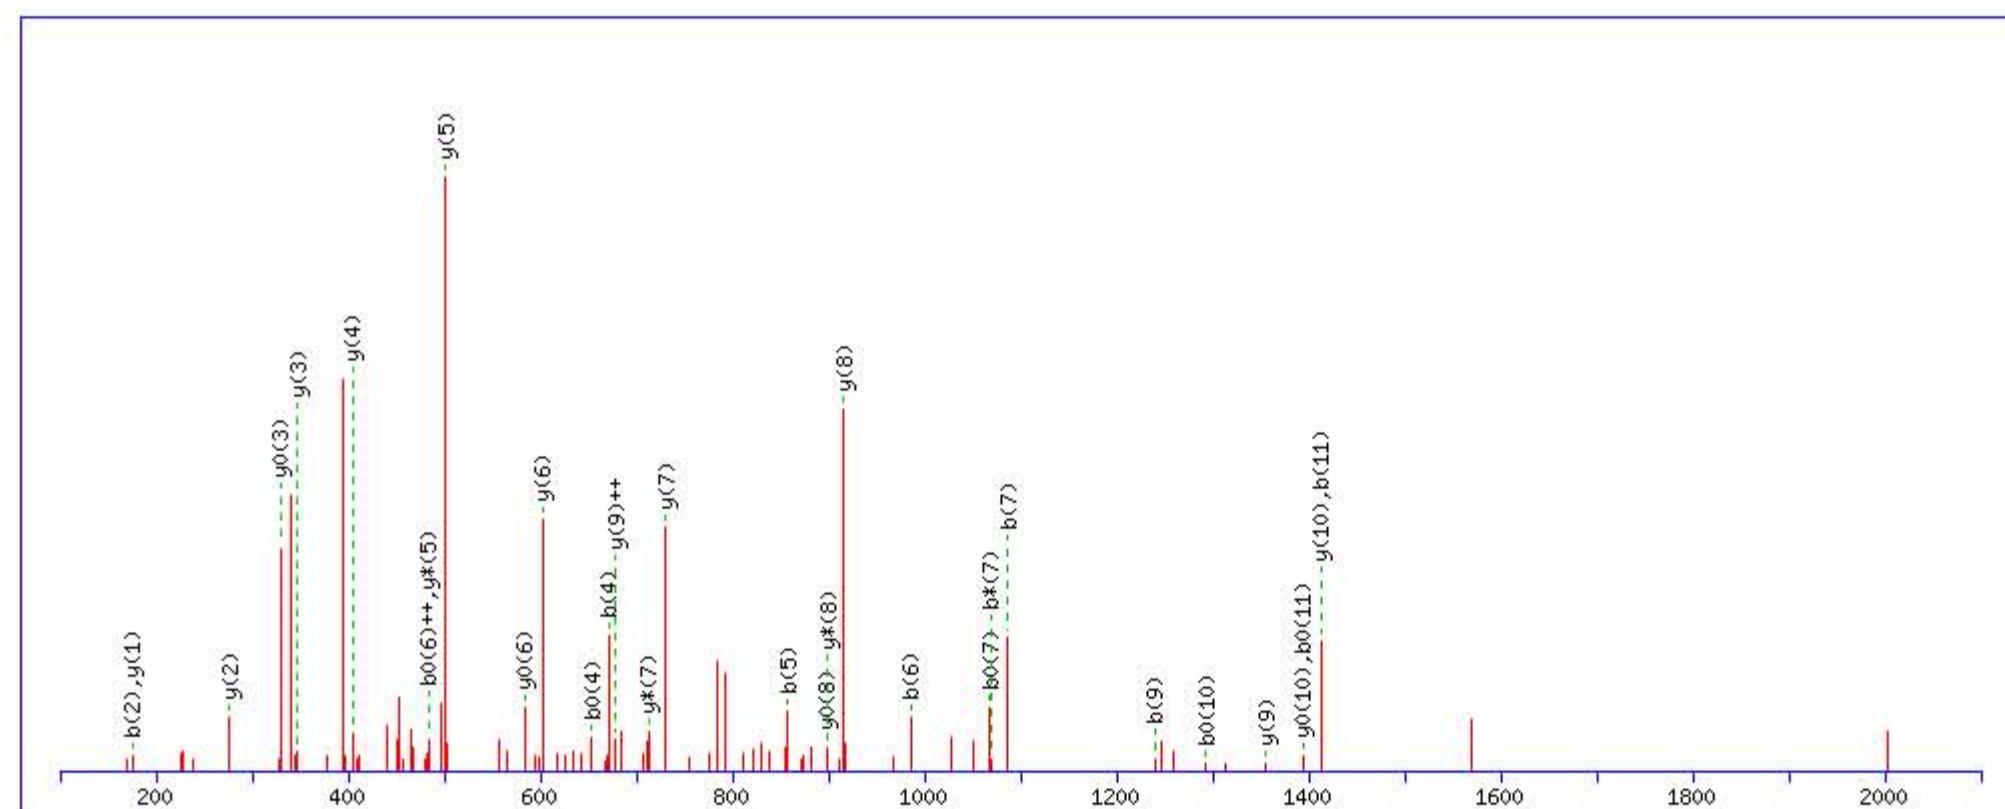

Monoisotopic mass of neutral peptide  $M_r(\text{calc})$ : 1585.767120

Fixed modifications: Carbamidomethyl (C) (apply to specified residues or termini only)

Variable modifications:

Q4 : Biotin:Thermo-21345 (Q)

Ions Score: 55 Expect: 3e-005

Matches : 31/124 fragment ions using 57 most intense peaks [\(help\)](#)

| #  | b                  | b <sup>++</sup> | b <sup>*</sup>     | b <sup>*++</sup> | b <sup>0</sup>     | b <sup>0++</sup>  | Seq. | y                  | y <sup>++</sup>   | y <sup>*</sup>    | y <sup>*++</sup> | y <sup>0</sup>     | y <sup>0++</sup> | #  |
|----|--------------------|-----------------|--------------------|------------------|--------------------|-------------------|------|--------------------|-------------------|-------------------|------------------|--------------------|------------------|----|
| 1  | 88.039304          | 44.523290       |                    |                  | 70.028739          | 35.518008         | S    |                    |                   |                   |                  |                    |                  | 12 |
| 2  | <b>175.071332</b>  | 88.039304       |                    |                  | 157.060767         | 79.034021         | S    | 1499.742361        | 750.374818        | 1482.715812       | 741.861544       | 1481.731796        | 741.369536       | 11 |
| 3  | 232.092796         | 116.550036      |                    |                  | 214.082231         | 107.544753        | G    | <b>1412.710333</b> | 706.858805        | 1395.683784       | 698.345530       | <b>1394.699768</b> | 697.853522       | 10 |
| 4  | <b>671.318122</b>  | 336.162699      | 654.291573         | 327.649425       | <b>653.307557</b>  | 327.157417        | Q    | <b>1355.688869</b> | <b>678.348072</b> | 1338.662320       | 669.834798       | 1337.678304        | 669.342790       | 9  |
| 5  | <b>857.397435</b>  | 429.202356      | 840.370886         | 420.689081       | 839.386870         | 420.197073        | W    | <b>916.463543</b>  | 458.735410        | <b>899.436994</b> | 450.222135       | <b>898.452978</b>  | 449.730127       | 8  |
| 6  | <b>985.456013</b>  | 493.231645      | 968.429464         | 484.718370       | 967.445448         | <b>484.226362</b> | Q    | <b>730.384230</b>  | 365.695753        | <b>713.357681</b> | 357.182478       | 712.373665         | 356.690470       | 7  |
| 7  | <b>1086.503692</b> | 543.755484      | <b>1069.477143</b> | 535.242210       | <b>1068.493127</b> | 534.750202        | T    | <b>602.325652</b>  | 301.666464        | 585.299103        | 293.153189       | <b>584.315087</b>  | 292.661181       | 6  |
| 8  | 1183.556456        | 592.281866      | 1166.529907        | 583.768592       | 1165.545891        | 583.276584        | P    | <b>501.277973</b>  | 251.142624        | <b>484.251424</b> | 242.629350       | 483.267408         | 242.137342       | 5  |
| 9  | <b>1240.577920</b> | 620.792598      | 1223.551371        | 612.279324       | 1222.567355        | 611.787315        | G    | <b>404.225209</b>  | 202.616242        | 387.198660        | 194.102968       | 386.214644         | 193.610960       | 4  |
| 10 | 1311.615034        | 656.311155      | 1294.588485        | 647.797881       | <b>1293.604469</b> | 647.305872        | A    | <b>347.203745</b>  | 174.105510        | 330.177196        | 165.592236       | <b>329.193180</b>  | 165.100228       | 3  |
| 11 | <b>1412.662713</b> | 706.834994      | 1395.636164        | 698.321720       | <b>1394.652148</b> | 697.829712        | T    | <b>276.166631</b>  | 138.586953        | 259.140082        | 130.073679       | 258.156066         | 129.581671       | 2  |
| 12 |                    |                 |                    |                  |                    |                   | R    | <b>175.118952</b>  | 88.063114         | 158.092403        | 79.549839        |                    |                  | 1  |

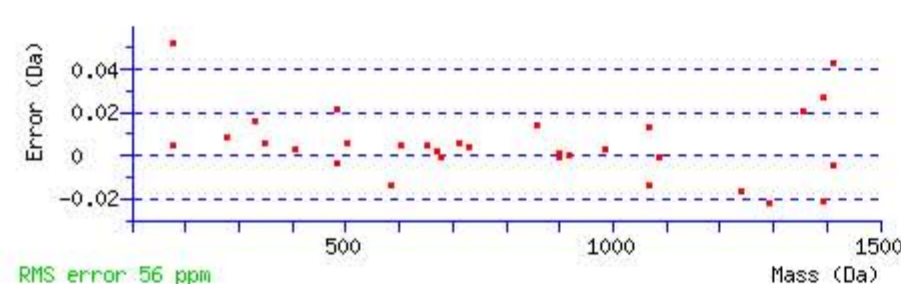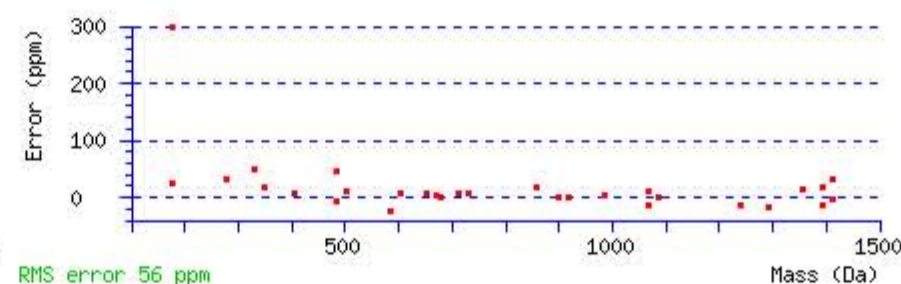

NCBI BLAST search of **SSGQWQTPGATR**

(Parameters: blastp, nr protein database, expect=20000, no filter, PAM30)

Other BLAST [web gateways](#)

## All matches to this query

| Score | $M_r(\text{calc})$ : | Delta     | Sequence                          |
|-------|----------------------|-----------|-----------------------------------|
| 55.4  | 1585.767120          | -0.000512 | <a href="#">SSGQWQTPGATR</a>      |
| 27.6  | 1585.767120          | -0.000512 | <a href="#">SSGQWQTPGATR</a>      |
| 6.8   | 1585.767075          | -0.000467 | <a href="#">AWENLGEQMKGKAPR</a>   |
| 6.2   | 1585.769592          | -0.002984 | <a href="#">ETDHSKSLSSSPDKR</a>   |
| 4.4   | 1585.751846          | 0.014762  | <a href="#">LMDEPALRSPGGGDR</a>   |
| 2.0   | 1585.766922          | -0.000314 | <a href="#">RTSNERPGSGQGQGR</a>   |
| 1.1   | 1585.769653          | -0.003045 | <a href="#">GDVGTAGSVGGTGEPLR</a> |

# MASCOT SEARCH RESULTS

## Peptide View

MS/MS Fragmentation of **SVQLTEK**

Found in **CO3\_HUMAN**, Complement C3 OS=Homo sapiens GN=C3 PE=1 SV=2

Match to Query 17067: 1114.602688 from(558.308620,2+) rtinseconds(1529) index(30442)

Title: Locus:1.1.1.3081.17 File:"2013-07-02 CLN FXIII 60 min 3rd F 3.wiff"

Data file C:\Program Files (x86)\Matrix Science\Mascot Daemon\mgf\6 FXIII 60 min 3rd\mascot\_daemon\_merge.mgf

Click mouse within plot area to zoom in by factor of two about that point

Or, Plot from  to  Da

Label all possible matches  Label matches used for scoring

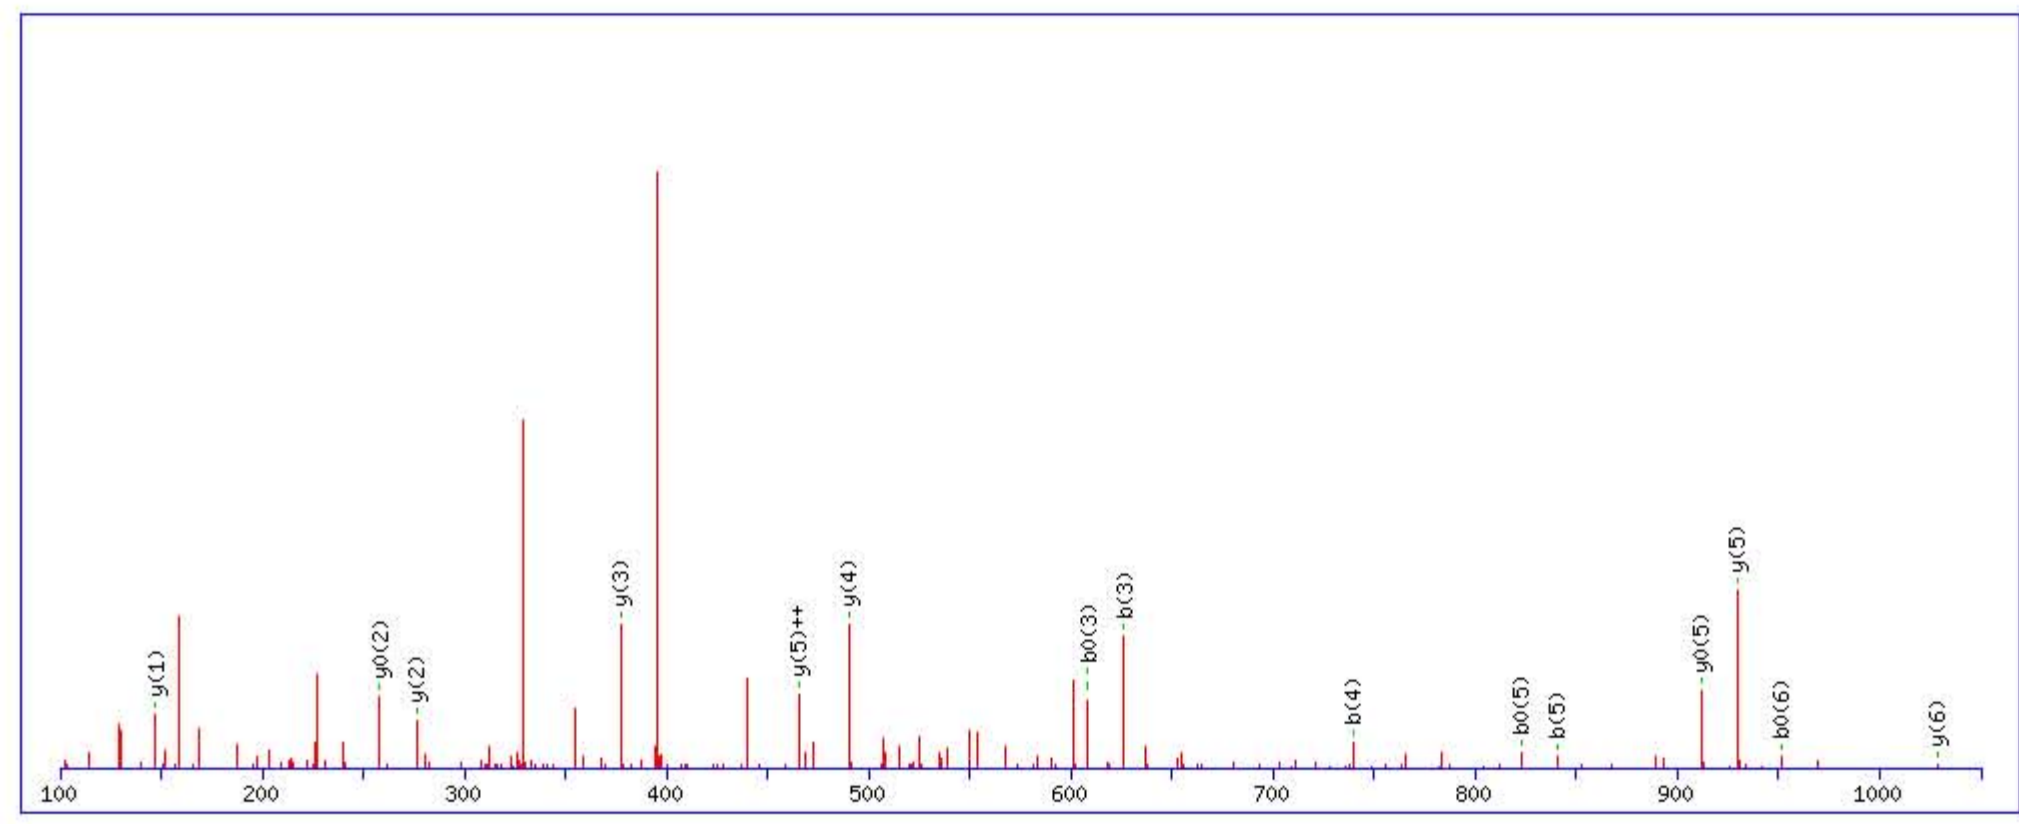

Monoisotopic mass of neutral peptide Mr(calc): 1114.605621

Fixed modifications: Carbamidomethyl (C) (apply to specified residues or termini only)

Variable modifications:

Q3 : Biotin:Thermo-21345 (Q)

Ions Score: 32 Expect: 0.015

Matches : 15/66 fragment ions using 28 most intense peaks [\(help\)](#)

| # | b          | b <sup>++</sup> | b <sup>*</sup> | b <sup>*++</sup> | b <sup>0</sup> | b <sup>0++</sup> | Seq. | y           | y <sup>++</sup> | y <sup>*</sup> | y <sup>*++</sup> | y <sup>0</sup> | y <sup>0++</sup> | # |
|---|------------|-----------------|----------------|------------------|----------------|------------------|------|-------------|-----------------|----------------|------------------|----------------|------------------|---|
| 1 | 88.039304  | 44.523290       |                |                  | 70.028739      | 35.518008        | S    |             |                 |                |                  |                |                  | 7 |
| 2 | 187.107718 | 94.057497       |                |                  | 169.097153     | 85.052214        | V    | 1028.580880 | 514.794078      | 1011.554331    | 506.280804       | 1010.570315    | 505.788796       | 6 |
| 3 | 626.333044 | 313.670160      | 609.306495     | 305.156885       | 608.322479     | 304.664877       | Q    | 929.512466  | 465.259871      | 912.485917     | 456.746597       | 911.501901     | 456.254589       | 5 |
| 4 | 739.417108 | 370.212192      | 722.390559     | 361.698917       | 721.406543     | 361.206909       | L    | 490.287140  | 245.647208      | 473.260591     | 237.133934       | 472.276575     | 236.641926       | 4 |
| 5 | 840.464787 | 420.736032      | 823.438238     | 412.222757       | 822.454222     | 411.730749       | T    | 377.203076  | 189.105176      | 360.176527     | 180.591902       | 359.192511     | 180.099894       | 3 |
| 6 | 969.507380 | 485.257328      | 952.480831     | 476.744054       | 951.496815     | 476.252046       | E    | 276.155397  | 138.581336      | 259.128848     | 130.068062       | 258.144832     | 129.576054       | 2 |
| 7 |            |                 |                |                  |                |                  | K    | 147.112804  | 74.060040       | 130.086255     | 65.546765        |                |                  | 1 |

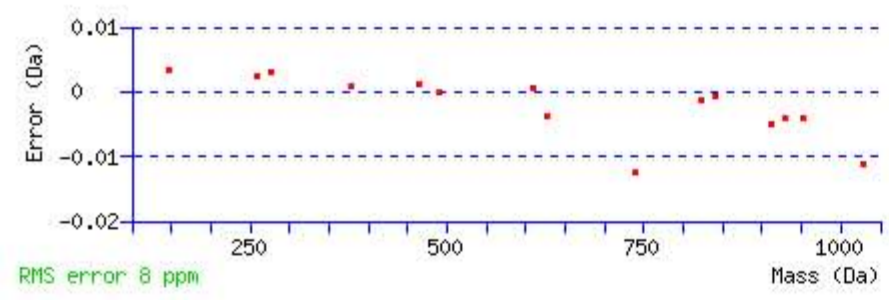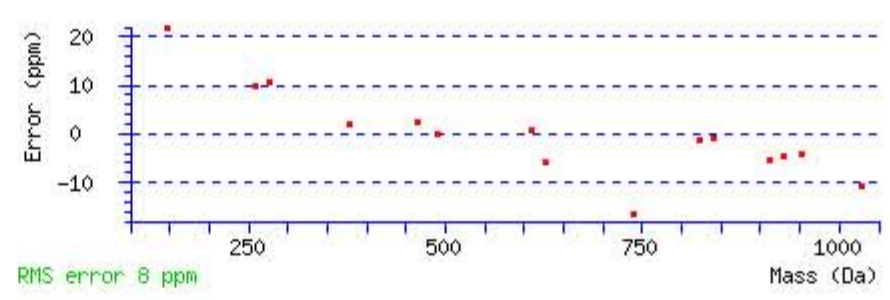

NCBI BLAST search of **SVQLTEK**

(Parameters: blastp, nr protein database, expect=20000, no filter, PAM30)

Other BLAST [web gateways](#)

All matches to this query

| Score | Mr(calc):   | Delta     | Sequence                    |
|-------|-------------|-----------|-----------------------------|
| 32.0  | 1114.605621 | -0.002933 | <a href="#">SVQLTEK</a>     |
| 14.8  | 1114.613480 | -0.010792 | <a href="#">SVFAKHGLEK</a>  |
| 5.1   | 1114.591690 | 0.010998  | <a href="#">ASVHSMISRK</a>  |
| 4.6   | 1114.598236 | 0.004452  | <a href="#">SAVITSLDPGR</a> |
| 4.3   | 1114.609451 | -0.006763 | <a href="#">SVARLSPETR</a>  |
| 3.3   | 1114.609436 | -0.006748 | <a href="#">EGIKRQQEK</a>   |
| 3.1   | 1114.588318 | 0.014370  | <a href="#">YIVNRGEHK</a>   |
| 2.5   | 1114.609451 | -0.006763 | <a href="#">LLQSALGGNSR</a> |
| 2.3   | 1114.605621 | -0.002933 | <a href="#">LQTSVEK</a>     |
| 1.5   | 1114.616837 | -0.014149 | <a href="#">SPRLLCIEK</a>   |



# MASCOT Search Results

## Peptide View

MS/MS Fragmentation of **NEQVEIR**

Found in **CO3\_HUMAN**, Complement C3 OS=Homo sapiens GN=C3 PE=1 SV=2

Match to Query 20294: 1197.616848 from(599.815700,2+) rtinseconds(1624) index(31042)

Title: Locus:1.1.1.3114.20 File:"2013-07-02 CLN FXIII 60 min 3rd F 3.wiff"

Data file C:\Program Files (x86)\Matrix Science\Mascot Daemon\mgf6 FXIII 60 min 3rd\mascot\_daemon\_merge.mgf

Click mouse within plot area to zoom in by factor of two about that point

Or, Plot from  to  Da

Label all possible matches  Label matches used for scoring

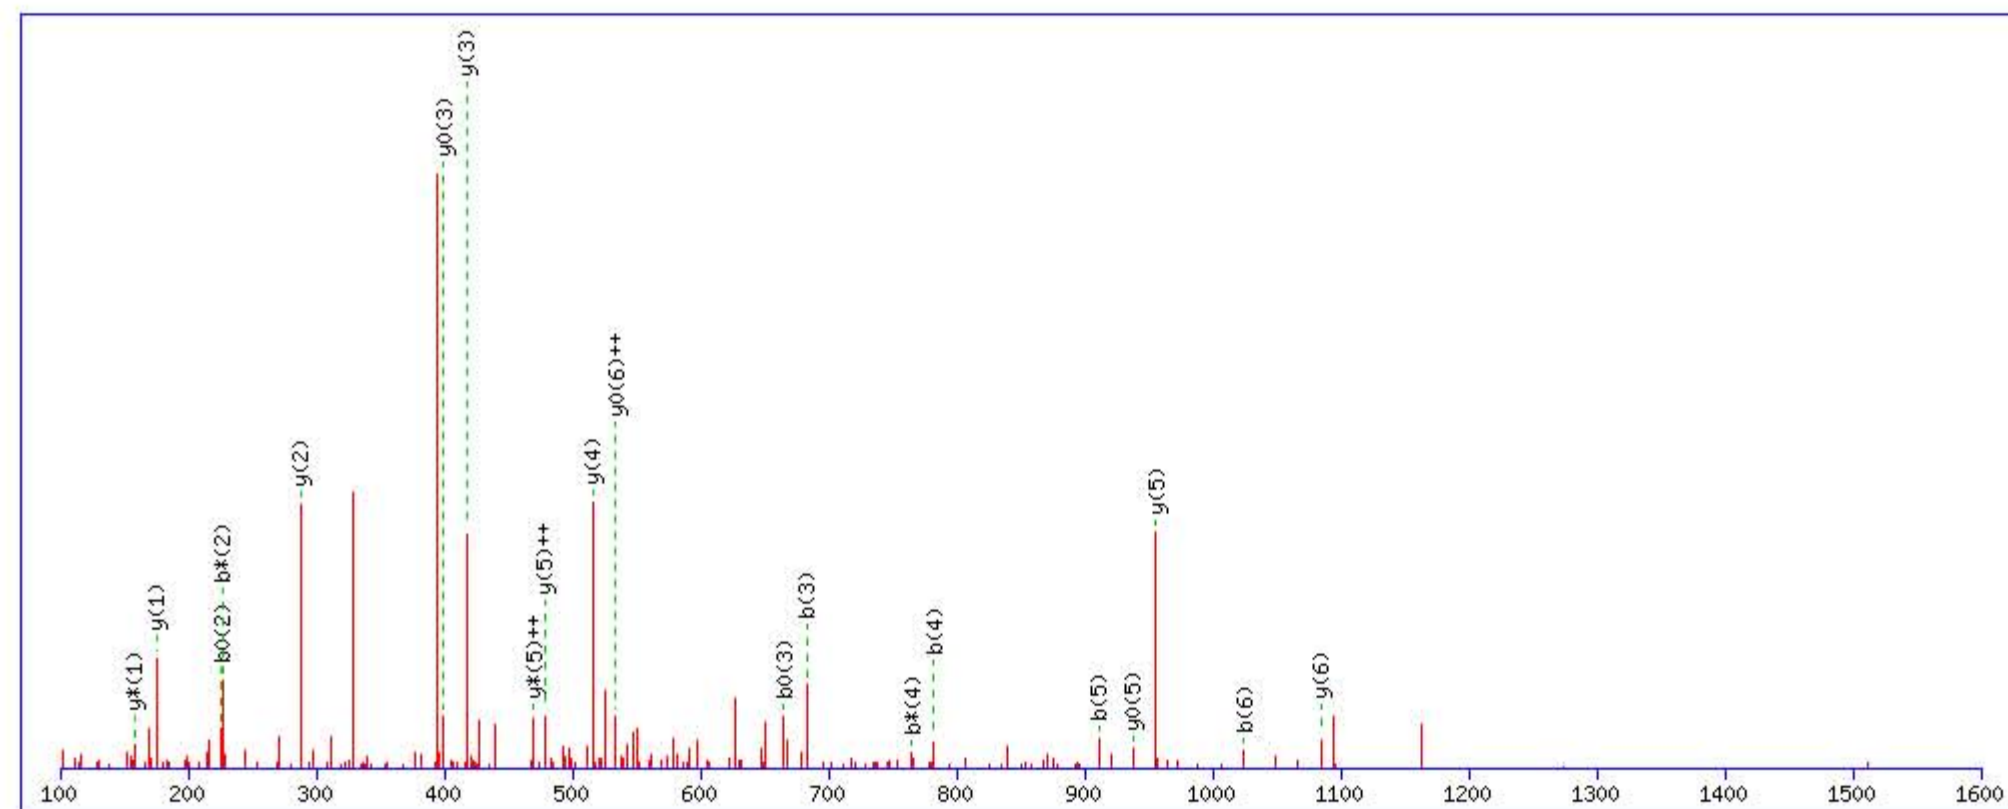

Monoisotopic mass of neutral peptide Mr(calc): 1197.617569

Fixed modifications: Carbamidomethyl (C) (apply to specified residues or termini only)

Variable modifications:

Q3 : Biotin:Thermo-21345 (Q)

Ions Score: 37 Expect: 0.0037

Matches : 20/66 fragment ions using 31 most intense peaks [\(help\)](#)

| # | b           | b <sup>++</sup> | b <sup>*</sup> | b <sup>+++</sup> | b <sup>0</sup> | b <sup>0++</sup> | Seq. | y           | y <sup>++</sup> | y <sup>*</sup> | y <sup>+++</sup> | y <sup>0</sup> | y <sup>0++</sup> | # |
|---|-------------|-----------------|----------------|------------------|----------------|------------------|------|-------------|-----------------|----------------|------------------|----------------|------------------|---|
| 1 | 115.050203  | 58.028740       | 98.023654      | 49.515465        |                |                  | N    |             |                 |                |                  |                |                  | 7 |
| 2 | 244.092796  | 122.550036      | 227.066247     | 114.036762       | 226.082231     | 113.544754       | E    | 1084.581942 | 542.794609      | 1067.555393    | 534.281335       | 1066.571377    | 533.789327       | 6 |
| 3 | 683.318122  | 342.162699      | 666.291573     | 333.649425       | 665.307557     | 333.157417       | Q    | 955.539349  | 478.273313      | 938.512800     | 469.760038       | 937.528784     | 469.268030       | 5 |
| 4 | 782.386536  | 391.696906      | 765.359987     | 383.183632       | 764.375971     | 382.691624       | V    | 516.314023  | 258.660650      | 499.287474     | 250.147375       | 498.303458     | 249.655367       | 4 |
| 5 | 911.429129  | 456.218203      | 894.402580     | 447.704928       | 893.418564     | 447.212920       | E    | 417.245609  | 209.126443      | 400.219060     | 200.613168       | 399.235044     | 200.121160       | 3 |
| 6 | 1024.513193 | 512.760235      | 1007.486644    | 504.246960       | 1006.502628    | 503.754952       | I    | 288.203016  | 144.605146      | 271.176467     | 136.091872       |                |                  | 2 |
| 7 |             |                 |                |                  |                |                  | R    | 175.118952  | 88.063114       | 158.092403     | 79.549840        |                |                  | 1 |

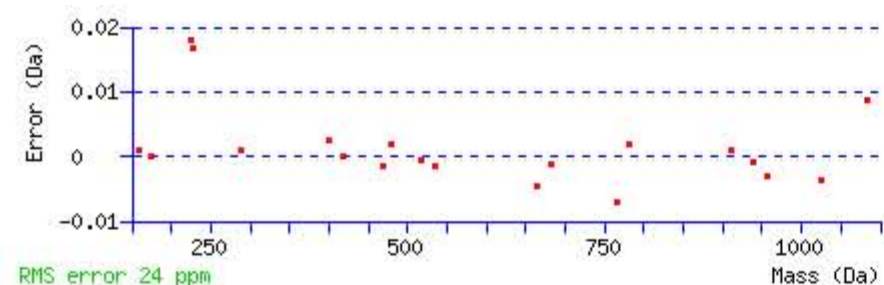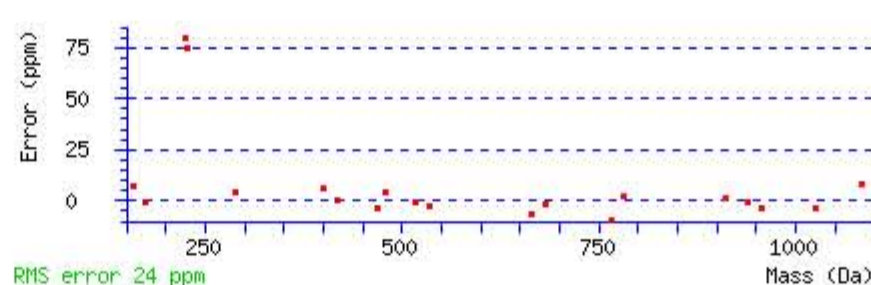

NCBI BLAST search of **NEQVEIR**

(Parameters: blastp, nr protein database, expect=20000, no filter, PAM30)

Other BLAST [web gateways](#)

All matches to this query

| Score | Mr(calc):   | Delta     | Sequence                     |
|-------|-------------|-----------|------------------------------|
| 37.2  | 1197.617569 | -0.000721 | <a href="#">NEQVEIR</a>      |
| 11.3  | 1197.617569 | -0.000721 | <a href="#">NQEDLLR</a>      |
| 10.8  | 1197.598938 | 0.017910  | <a href="#">AAQEGDLPELR</a>  |
| 9.5   | 1197.617569 | -0.000721 | <a href="#">QEVNELR</a>      |
| 8.6   | 1197.598953 | 0.017895  | <a href="#">QDNLDPDIEVR</a>  |
| 8.2   | 1197.617569 | -0.000721 | <a href="#">LQDNELR</a>      |
| 7.9   | 1197.598953 | 0.017895  | <a href="#">EISPGSGPGEIR</a> |
| 6.3   | 1197.628815 | -0.011967 | <a href="#">QLSMQVHALR</a>   |
| 6.2   | 1197.621399 | -0.004551 | <a href="#">EKHSTQAKNR</a>   |
| 4.4   | 1197.598953 | 0.017895  | <a href="#">VDNQPEELVR</a>   |

Mascot: <http://www.matrixscience.com/>

# MASCOT Search Results

## Peptide View

MS/MS Fragmentation of **TGLQEVEVK**

Found in **CO3\_HUMAN**, Complement C3 OS=Homo sapiens GN=C3 PE=1 SV=2

Match to Query 23275: 1312.707728 from(657.361140,2+) rtinseconds(1838) index(32088)

Title: Locus:1.1.1.3189.6 File:"2013-07-02 CLN FXIII 60 min 3rd F 3.wiff"

Data file C:\Program Files (x86)\Matrix Science\Mascot Daemon\mgf6 FXIII 60 min 3rd\mascot\_daemon\_merge.mgf

Click mouse within plot area to zoom in by factor of two about that point

Or, Plot from  to  Da

Label all possible matches  Label matches used for scoring

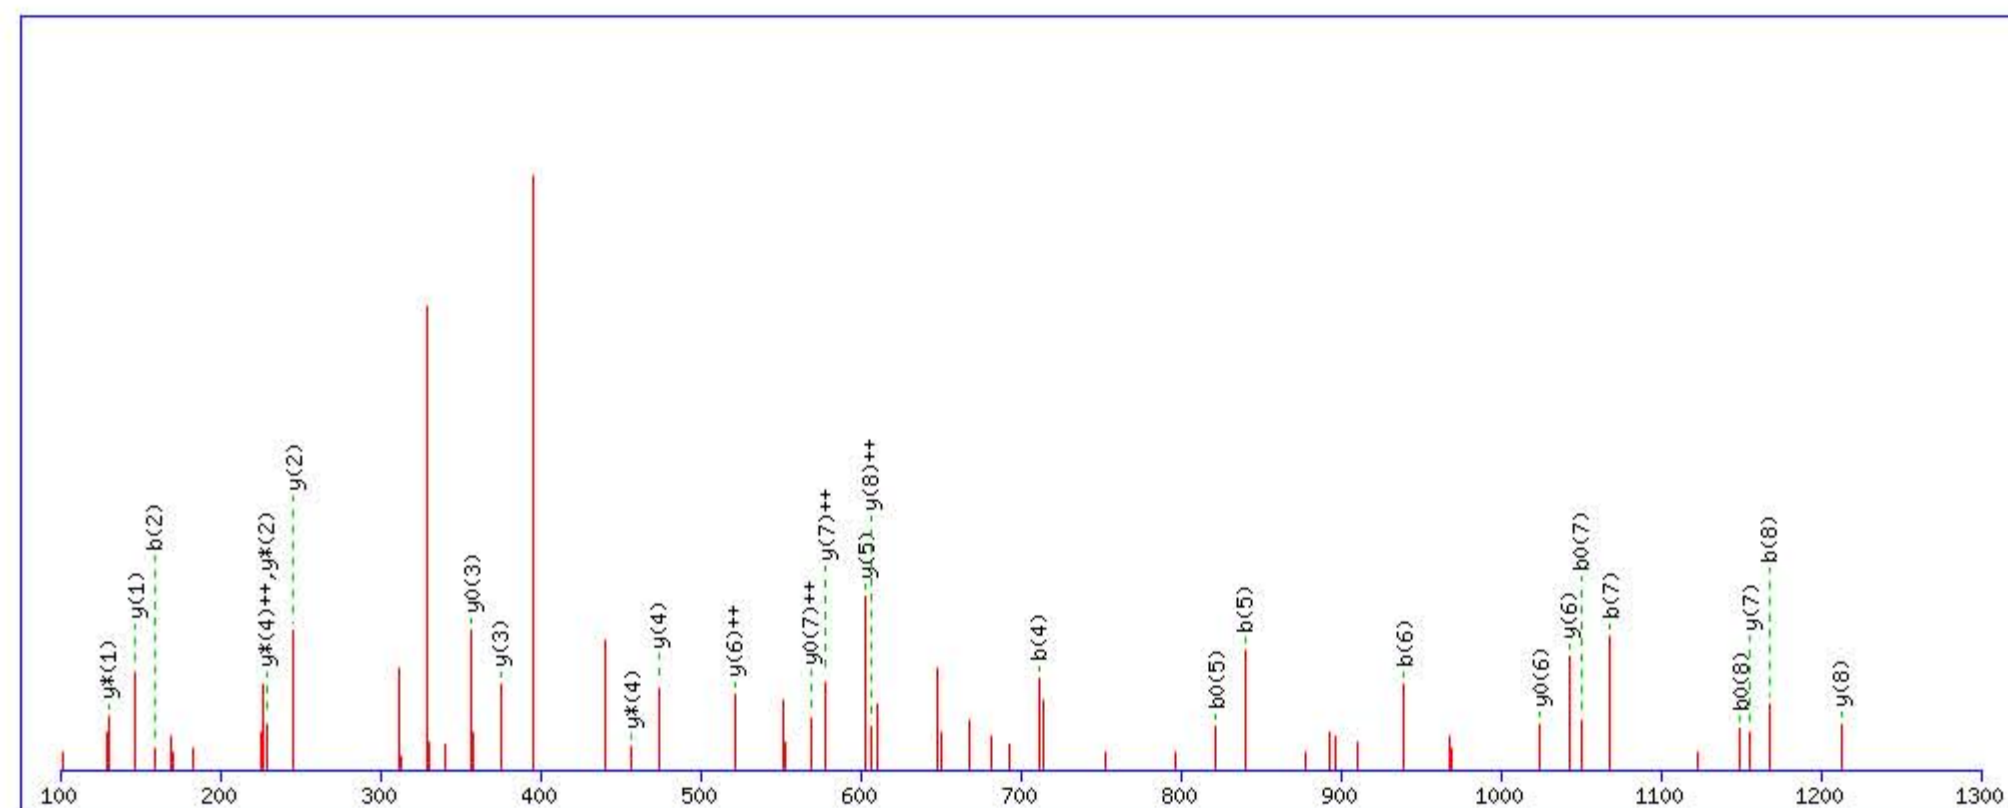

Monoisotopic mass of neutral peptide Mr(calc): 1312.706070

Fixed modifications: Carbamidomethyl (C) (apply to specified residues or termini only)

Variable modifications:

Q4 : Biotin:Thermo-21345 (Q)

Ions Score: 46 Expect: 0.00056

Matches : 27/86 fragment ions using 49 most intense peaks [\(help\)](#)

| # | b                  | b <sup>++</sup> | b <sup>*</sup> | b <sup>*++</sup> | b <sup>0</sup>     | b <sup>0++</sup> | Seq. | y                  | y <sup>++</sup>   | y <sup>*</sup>    | y <sup>*++</sup>  | y <sup>0</sup>     | y <sup>0++</sup>  | # |
|---|--------------------|-----------------|----------------|------------------|--------------------|------------------|------|--------------------|-------------------|-------------------|-------------------|--------------------|-------------------|---|
| 1 | 102.054955         | 51.531116       |                |                  | 84.044390          | 42.525833        | T    |                    |                   |                   |                   |                    |                   | 9 |
| 2 | <b>159.076419</b>  | 80.041847       |                |                  | 141.065854         | 71.036565        | G    | <b>1212.665672</b> | <b>606.836474</b> | 1195.639123       | 598.323200        | 1194.655107        | 597.831192        | 8 |
| 3 | 272.160483         | 136.583879      |                |                  | 254.149918         | 127.578597       | L    | <b>1155.644208</b> | <b>578.325742</b> | 1138.617659       | 569.812468        | 1137.633643        | <b>569.320460</b> | 7 |
| 4 | <b>711.385809</b>  | 356.196543      | 694.359260     | 347.683268       | 693.375244         | 347.191260       | Q    | <b>1042.560144</b> | <b>521.783710</b> | 1025.533595       | 513.270436        | <b>1024.549579</b> | 512.778428        | 6 |
| 5 | <b>840.428402</b>  | 420.717839      | 823.401853     | 412.204565       | <b>822.417837</b>  | 411.712557       | E    | <b>603.334818</b>  | 302.171047        | 586.308269        | 293.657773        | 585.324253         | 293.165765        | 5 |
| 6 | <b>939.496816</b>  | 470.252046      | 922.470267     | 461.738772       | 921.486251         | 461.246764       | V    | <b>474.292225</b>  | 237.649751        | <b>457.265676</b> | <b>229.136476</b> | 456.281660         | 228.644468        | 4 |
| 7 | <b>1068.539409</b> | 534.773343      | 1051.512860    | 526.260068       | <b>1050.528844</b> | 525.768060       | E    | <b>375.223811</b>  | 188.115544        | 358.197262        | 179.602269        | <b>357.213246</b>  | 179.110261        | 3 |
| 8 | <b>1167.607823</b> | 584.307550      | 1150.581274    | 575.794275       | <b>1149.597258</b> | 575.302267       | V    | <b>246.181218</b>  | 123.594247        | <b>229.154669</b> | 115.080973        |                    |                   | 2 |
| 9 |                    |                 |                |                  |                    |                  | K    | <b>147.112804</b>  | 74.060040         | <b>130.086255</b> | 65.546765         |                    |                   | 1 |

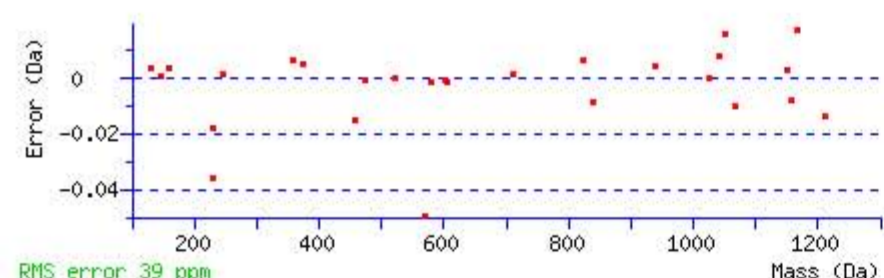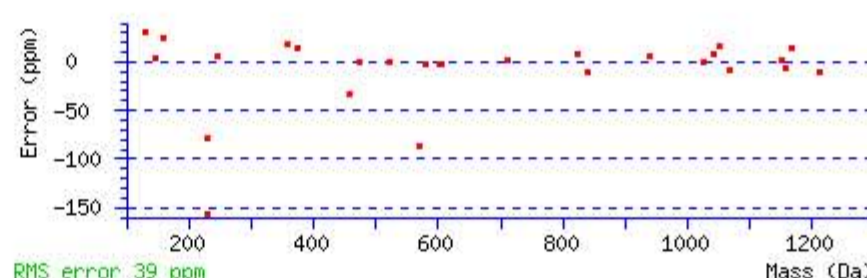

NCBI BLAST search of **TGLQEVEVK**

(Parameters: blastp, nr protein database, expect=20000, no filter, PAM30)

Other BLAST [web gateways](#)

## All matches to this query

| Score | Mr(calc):   | Delta     | Sequence                    |
|-------|-------------|-----------|-----------------------------|
| 46.4  | 1312.706070 | 0.001658  | <a href="#">TGLQEVEVK</a>   |
| 13.8  | 1312.699524 | 0.008204  | <a href="#">TIMHLMINNVK</a> |
| 8.8   | 1312.721115 | -0.013387 | <a href="#">KKPQRDSQAQK</a> |
| 5.6   | 1312.706055 | 0.001673  | <a href="#">QSAEEVIVK</a>   |
| 5.3   | 1312.691422 | 0.016306  | <a href="#">YKELYLEEVK</a>  |
| 3.6   | 1312.702682 | 0.005046  | <a href="#">IQYSLGKYDVK</a> |
| 3.2   | 1312.692139 | 0.015589  | <a href="#">DRQSQIQK</a>    |
| 3.0   | 1312.713913 | -0.006185 | <a href="#">KVFEKYTTAAR</a> |
| 1.7   | 1312.688766 | 0.018962  | <a href="#">HKVHTGEKSYK</a> |
| 1.5   | 1312.692139 | 0.015589  | <a href="#">EMLTHRNLVK</a>  |

# MASCOT Search Results

## Peptide View

MS/MS Fragmentation of **HQQTVTIPPK**

Found in **CO3\_HUMAN**, Complement C3 OS=Homo sapiens GN=C3 PE=1 SV=2

Match to Query 28844: 1458.798522 from(487.273450,3+) rtinseconds(1574) index(30697)

Title: Locus:1.1.1.3097.7 File:"2013-07-02 CLN FXIII 60 min 3rd F 3.wiff"

Data file C:\Program Files (x86)\Matrix Science\Mascot Daemon\mgf\6 FXIII 60 min 3rd\mascot\_daemon\_merge.mgf

Click mouse within plot area to zoom in by factor of two about that point

Or, Plot from  to  Da

Label all possible matches  Label matches used for scoring

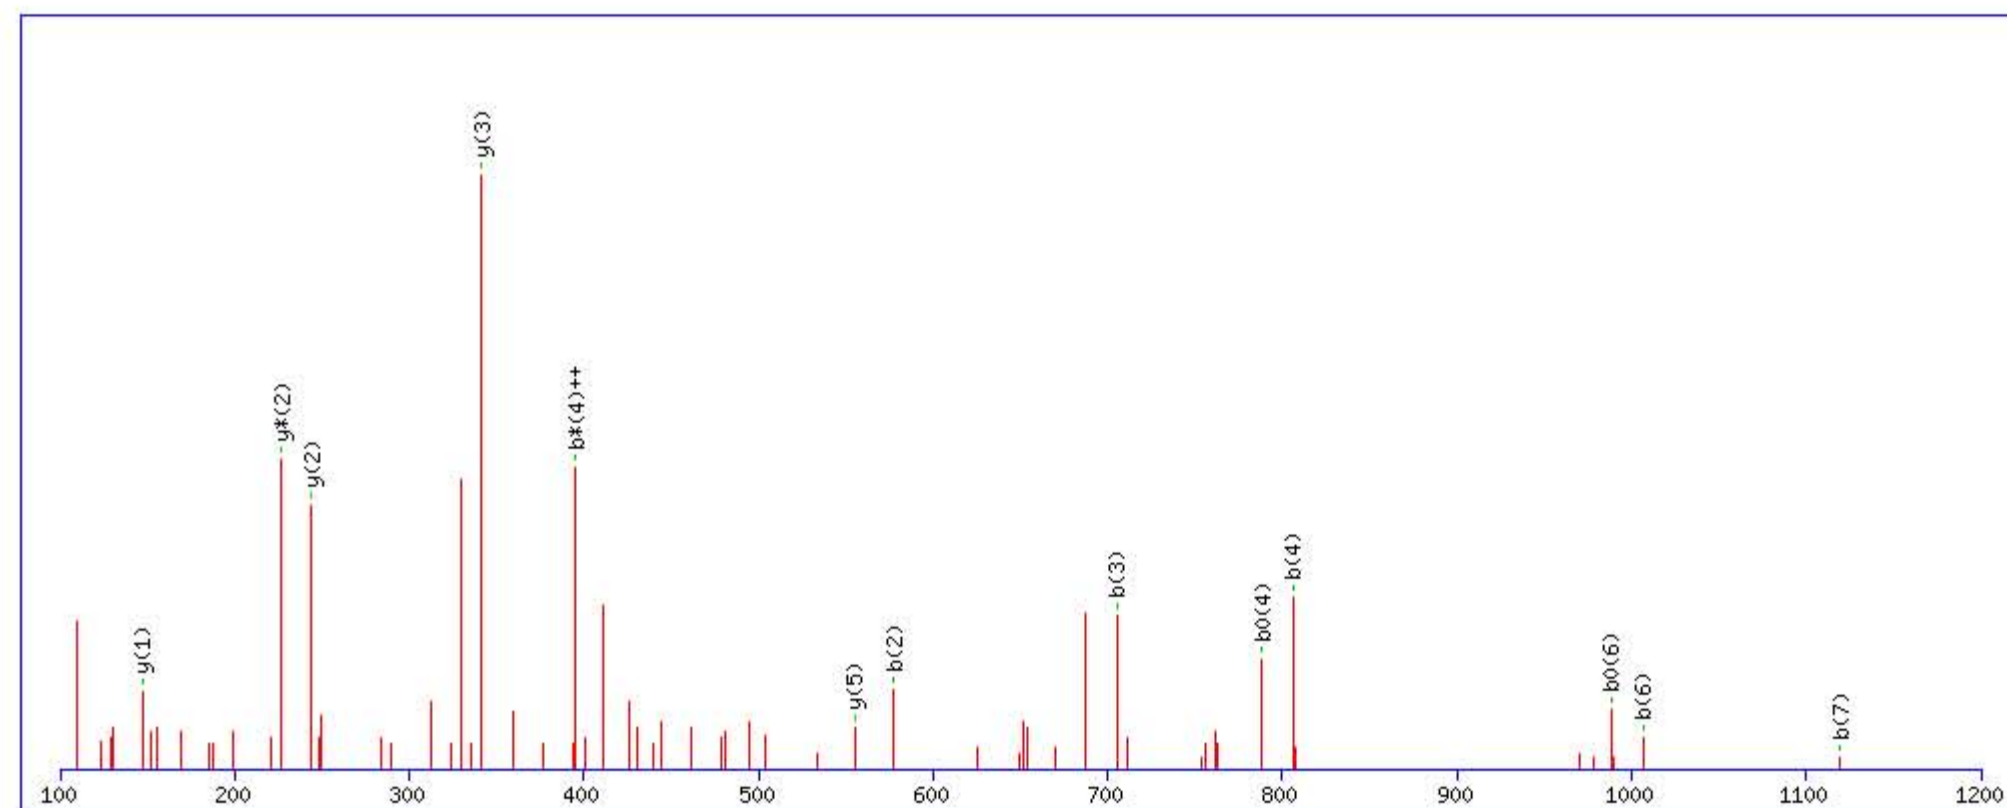

Monoisotopic mass of neutral peptide  $M_r(\text{calc})$ : 1458.801712

Fixed modifications: Carbamidomethyl (C) (apply to specified residues or termini only)

Variable modifications:

Q2 : Biotin:Thermo-21345 (Q)

Ions Score: 44 Expect: 0.00089

Matches : 13/92 fragment ions using 17 most intense peaks [\(help\)](#)

| #  | b                  | b <sup>++</sup> | b <sup>*</sup> | b <sup>*++</sup>  | b <sup>0</sup>    | b <sup>0++</sup> | Seq. | y                 | y <sup>++</sup> | y <sup>*</sup>    | y <sup>*++</sup> | y <sup>0</sup> | y <sup>0++</sup> | #  |
|----|--------------------|-----------------|----------------|-------------------|-------------------|------------------|------|-------------------|-----------------|-------------------|------------------|----------------|------------------|----|
| 1  | 138.066188         | 69.536732       |                |                   |                   |                  | H    |                   |                 |                   |                  |                |                  | 10 |
| 2  | <b>577.291514</b>  | 289.149395      | 560.264965     | 280.636121        |                   |                  | Q    | 1322.750072       | 661.878674      | 1305.723523       | 653.365400       | 1304.739507    | 652.873392       | 9  |
| 3  | <b>705.350092</b>  | 353.178684      | 688.323543     | 344.665410        |                   |                  | Q    | 883.524746        | 442.266011      | 866.498197        | 433.752737       | 865.514181     | 433.260729       | 8  |
| 4  | <b>806.397771</b>  | 403.702524      | 789.371222     | <b>395.189249</b> | <b>788.387206</b> | 394.697241       | T    | 755.466168        | 378.236722      | 738.439619        | 369.723448       | 737.455603     | 369.231440       | 7  |
| 5  | 905.466185         | 453.236731      | 888.439636     | 444.723456        | 887.455620        | 444.231448       | V    | 654.418489        | 327.712883      | 637.391940        | 319.199608       | 636.407924     | 318.707600       | 6  |
| 6  | <b>1006.513864</b> | 503.760570      | 989.487315     | 495.247296        | <b>988.503299</b> | 494.755288       | T    | <b>555.350075</b> | 278.178676      | 538.323526        | 269.665401       | 537.339510     | 269.173393       | 5  |
| 7  | <b>1119.597928</b> | 560.302602      | 1102.571379    | 551.789328        | 1101.587363       | 551.297319       | I    | 454.302396        | 227.654836      | 437.275847        | 219.141561       |                |                  | 4  |
| 8  | 1216.650692        | 608.828984      | 1199.624143    | 600.315710        | 1198.640127       | 599.823701       | P    | <b>341.218332</b> | 171.112804      | 324.191783        | 162.599530       |                |                  | 3  |
| 9  | 1313.703456        | 657.355366      | 1296.676907    | 648.842092        | 1295.692891       | 648.350083       | P    | <b>244.165568</b> | 122.586422      | <b>227.139019</b> | 114.073148       |                |                  | 2  |
| 10 |                    |                 |                |                   |                   |                  | K    | <b>147.112804</b> | 74.060040       | 130.086255        | 65.546765        |                |                  | 1  |

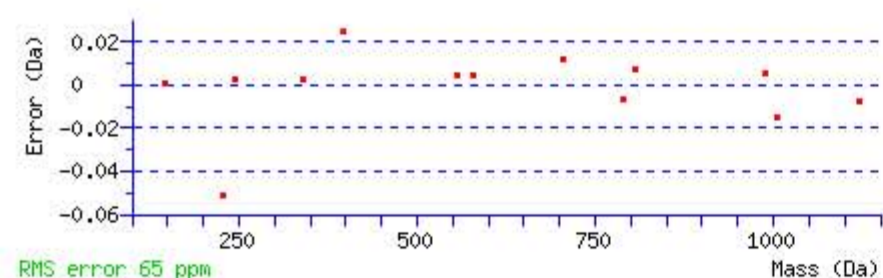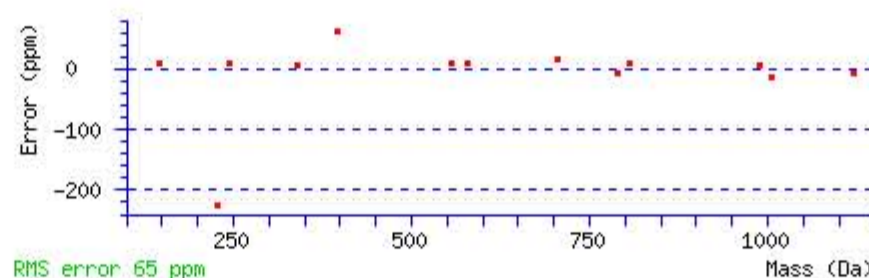

NCBI BLAST search of [HQQTVTIPPK](#)

(Parameters: blastp, nr protein database, expect=20000, no filter, PAM30)

Other BLAST [web gateways](#)

### All matches to this query

| Score | $M_r(\text{calc})$ : | Delta     | Sequence                   |
|-------|----------------------|-----------|----------------------------|
| 43.8  | 1458.801712          | -0.003190 | <a href="#">HQQTVTIPPK</a> |
| 33.8  | 1458.801712          | -0.003190 | <a href="#">HQQTVTIPPK</a> |

**Peptide View**

MS/MS Fragmentation of **KVEGTAFVIFGIQDGEQR**  
 Found in **CO3\_HUMAN**, Complement C3 OS=Homo sapiens GN=C3 PE=1 SV=2

Match to Query 30938: 2304.200052 from(769.073960,3+) rtinseconds(2473) index(35579)  
 Title: Locus:1.1.1.3410.23 File:"2013-07-02 CLN FXIII 60 min 3rd F 3.wiff"  
 Data file C:\Program Files (x86)\Matrix Science\Mascot Daemon\mgf6 FXIII 60 min 3rd\mascot\_daemon\_merge.mgf

Click mouse within plot area to zoom in by factor of two about that point  
 Or, Plot from  to  Da   
 Label all possible matches  Label matches used for scoring

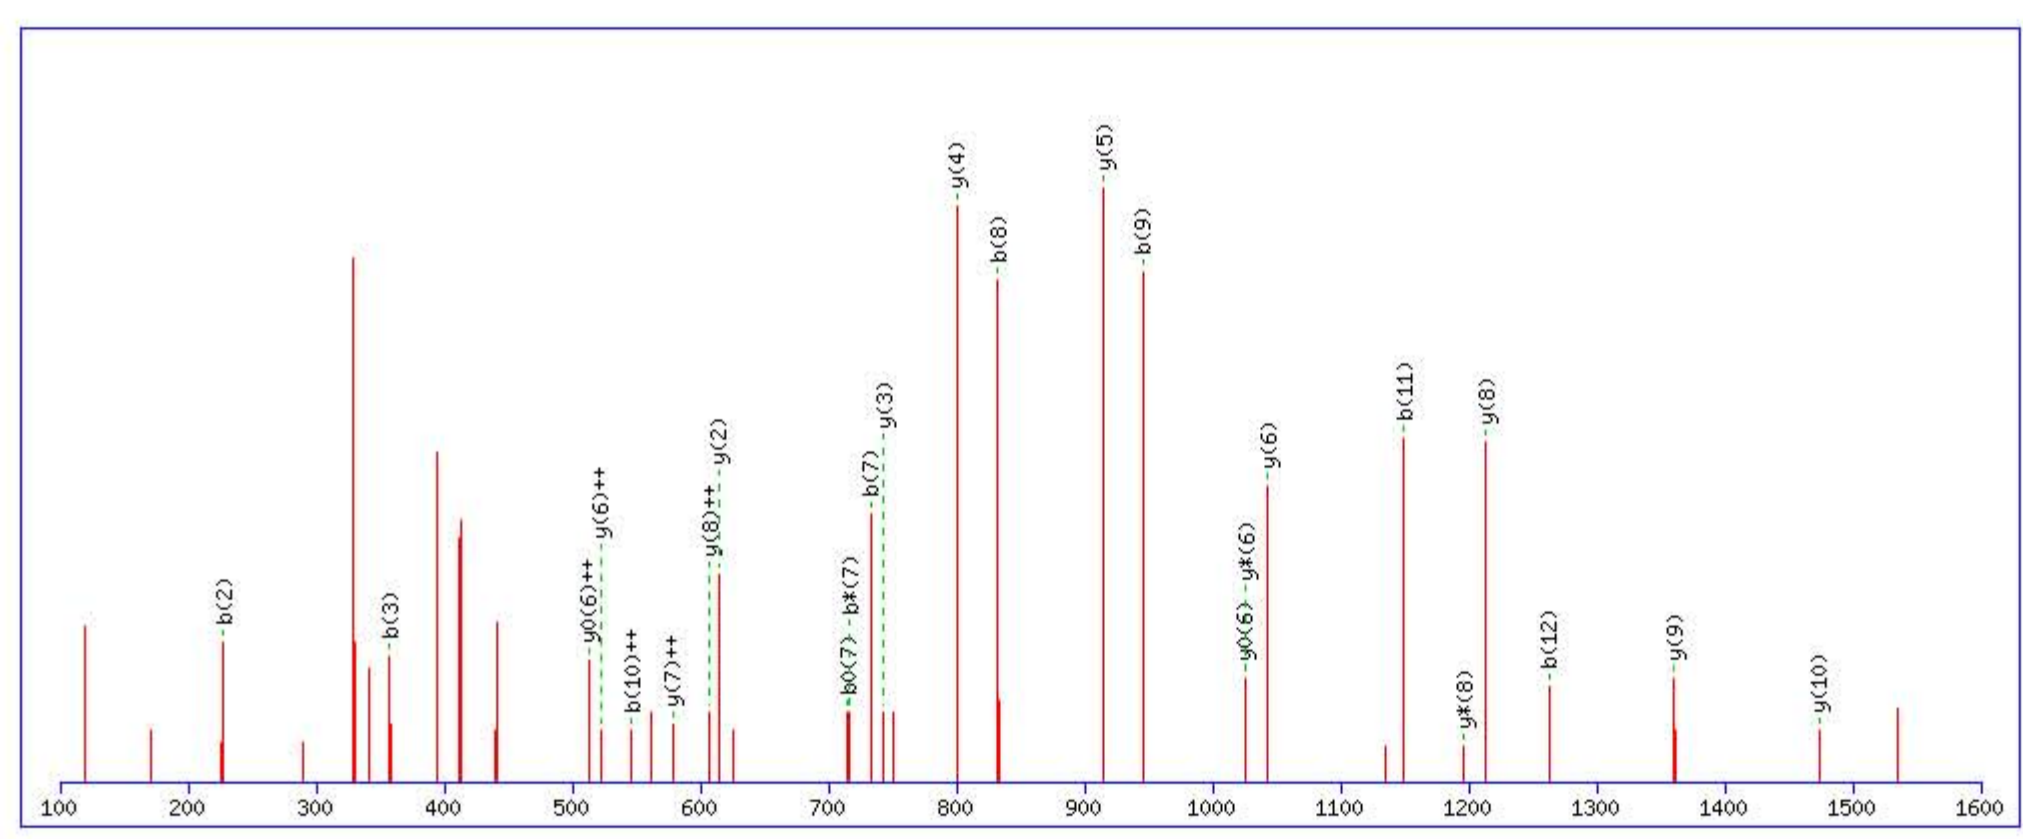

Monoisotopic mass of neutral peptide Mr(calc): 2304.193649  
 Fixed modifications: Carbamidomethyl (C) (apply to specified residues or termini only)  
 Variable modifications:  
 Q17 : Biotin:Thermo-21345 (Q)  
 Ions Score: 49 Expect: 0.0003  
 Matches : 25/196 fragment ions using 45 most intense peaks [\(help\)](#)

| #  | b                  | b <sup>++</sup>   | b <sup>*</sup>    | b <sup>*++</sup> | b <sup>0</sup>    | b <sup>0++</sup> | Seq.     | y                  | y <sup>++</sup>   | y <sup>*</sup>     | y <sup>*++</sup> | y <sup>0</sup>     | y <sup>0++</sup>  | #  |
|----|--------------------|-------------------|-------------------|------------------|-------------------|------------------|----------|--------------------|-------------------|--------------------|------------------|--------------------|-------------------|----|
| 1  | 129.102239         | 65.054757         | 112.075690        | 56.541483        |                   |                  | <b>K</b> |                    |                   |                    |                  |                    |                   | 18 |
| 2  | <b>228.170653</b>  | 114.588965        | 211.144104        | 106.075690       |                   |                  | <b>V</b> | 2177.105954        | 1089.056615       | 2160.079405        | 1080.543340      | 2159.095389        | 1080.051332       | 17 |
| 3  | <b>357.213246</b>  | 179.110261        | 340.186697        | 170.596987       | 339.202681        | 170.104979       | <b>E</b> | 2078.037540        | 1039.522408       | 2061.010991        | 1031.009133      | 2060.026975        | 1030.517125       | 16 |
| 4  | 414.234710         | 207.620993        | 397.208161        | 199.107719       | 396.224145        | 198.615711       | <b>G</b> | 1948.994947        | 975.001111        | 1931.968398        | 966.487837       | 1930.984382        | 965.995829        | 15 |
| 5  | 515.282389         | 258.144833        | 498.255840        | 249.631558       | 497.271824        | 249.139550       | <b>T</b> | 1891.973483        | 946.490380        | 1874.946934        | 937.977105       | 1873.962918        | 937.485097        | 14 |
| 6  | 586.319503         | 293.663390        | 569.292954        | 285.150115       | 568.308938        | 284.658107       | <b>A</b> | 1790.925804        | 895.966540        | 1773.899255        | 887.453265       | 1772.915239        | 886.961257        | 13 |
| 7  | <b>733.387917</b>  | 367.197597        | <b>716.361368</b> | 358.684322       | <b>715.377352</b> | 358.192314       | <b>F</b> | 1719.888690        | 860.447983        | 1702.862141        | 851.934709       | 1701.878125        | 851.442701        | 12 |
| 8  | <b>832.456331</b>  | 416.731804        | 815.429782        | 408.218529       | 814.445766        | 407.726521       | <b>V</b> | 1572.820276        | 786.913776        | 1555.793727        | 778.400502       | 1554.809711        | 777.908493        | 11 |
| 9  | <b>945.540395</b>  | 473.273836        | 928.513846        | 464.760561       | 927.529830        | 464.268553       | <b>I</b> | <b>1473.751862</b> | 737.379569        | 1456.725313        | 728.866294       | 1455.741297        | 728.374286        | 10 |
| 10 | 1092.608809        | <b>546.808043</b> | 1075.582260       | 538.294768       | 1074.598244       | 537.802760       | <b>F</b> | <b>1360.667798</b> | 680.837537        | 1343.641249        | 672.324263       | 1342.657233        | 671.832254        | 9  |
| 11 | <b>1149.630273</b> | 575.318775        | 1132.603724       | 566.805500       | 1131.619708       | 566.313492       | <b>G</b> | <b>1213.599384</b> | <b>607.303330</b> | <b>1196.572835</b> | 598.790055       | 1195.588819        | 598.298047        | 8  |
| 12 | <b>1262.714337</b> | 631.860806        | 1245.687788       | 623.347532       | 1244.703772       | 622.855524       | <b>I</b> | 1156.577920        | <b>578.792598</b> | 1139.551371        | 570.279324       | 1138.567355        | 569.787315        | 7  |
| 13 | 1390.772915        | 695.890095        | 1373.746366       | 687.376821       | 1372.762350       | 686.884813       | <b>Q</b> | <b>1043.493856</b> | <b>522.250566</b> | <b>1026.467307</b> | 513.737292       | <b>1025.483291</b> | <b>513.245284</b> | 6  |
| 14 | 1505.799858        | 753.403567        | 1488.773309       | 744.890292       | 1487.789293       | 744.398284       | <b>D</b> | <b>915.435278</b>  | 458.221277        | 898.408729         | 449.708003       | 897.424713         | 449.215995        | 5  |
| 15 | 1562.821322        | 781.914299        | 1545.794773       | 773.401024       | 1544.810757       | 772.909016       | <b>G</b> | <b>800.408335</b>  | 400.707806        | 783.381786         | 392.194531       | 782.397770         | 391.702523        | 4  |
| 16 | 1691.863915        | 846.435595        | 1674.837366       | 837.922321       | 1673.853350       | 837.430313       | <b>E</b> | <b>743.386871</b>  | 372.197074        | 726.360322         | 363.683799       | 725.376306         | 363.191791        | 3  |
| 17 | 2131.089241        | 1066.048258       | 2114.062692       | 1057.534984      | 2113.078676       | 1057.042976      | <b>Q</b> | <b>614.344278</b>  | 307.675777        | 597.317729         | 299.162503       |                    |                   | 2  |
| 18 |                    |                   |                   |                  |                   |                  | <b>R</b> | 175.118952         | 88.063114         | 158.092403         | 79.549839        |                    |                   | 1  |

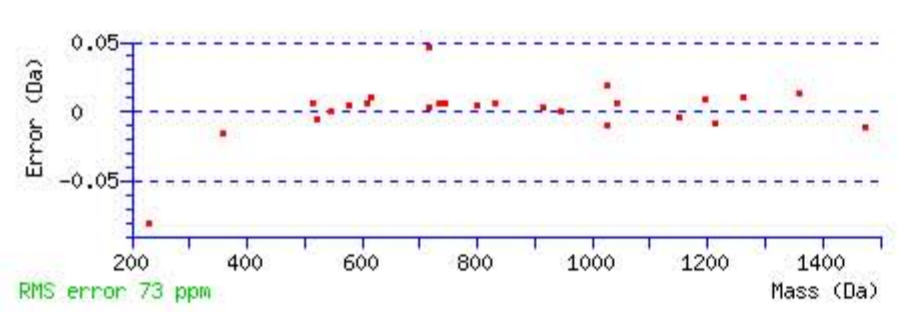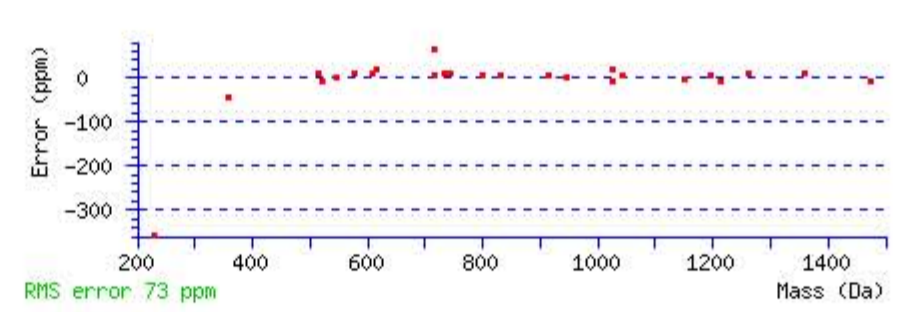

NCBI BLAST search of [KVEGTAFVIFGIQDGEQR](#)  
 (Parameters: blastp, nr protein database, expect=20000, no filter, PAM30)  
 Other BLAST [web gateways](#)

**All matches to this query**

| Score | Mr(calc):   | Delta    | Sequence                           |
|-------|-------------|----------|------------------------------------|
| 49.3  | 2304.193649 | 0.006403 | <a href="#">KVEGTAFVIFGIQDGEQR</a> |
| 25.2  | 2304.193649 | 0.006403 | <a href="#">KVEGTAFVIFGIQDGEQR</a> |

# MASCOT Search Results

## Peptide View

MS/MS Fragmentation of **SGSDEVQVGQQR**

Found in **CO3\_HUMAN**, Complement C3 OS=Homo sapiens GN=C3 PE=1 SV=2

Match to Query 33271: 1599.763308 from(800.888930,2+) rtinseconds(1556) index(30586)

Title: Locus:1.1.1.3090.13 File:"2013-07-02 CLN FXIII 60 min 3rd F 3.wiff"

Data file C:\Program Files (x86)\Matrix Science\Mascot Daemon\mgf\6 FXIII 60 min 3rd\mascot\_daemon\_merge.mgf

Click mouse within plot area to zoom in by factor of two about that point

Or, Plot from  to  Da

Label all possible matches  Label matches used for scoring

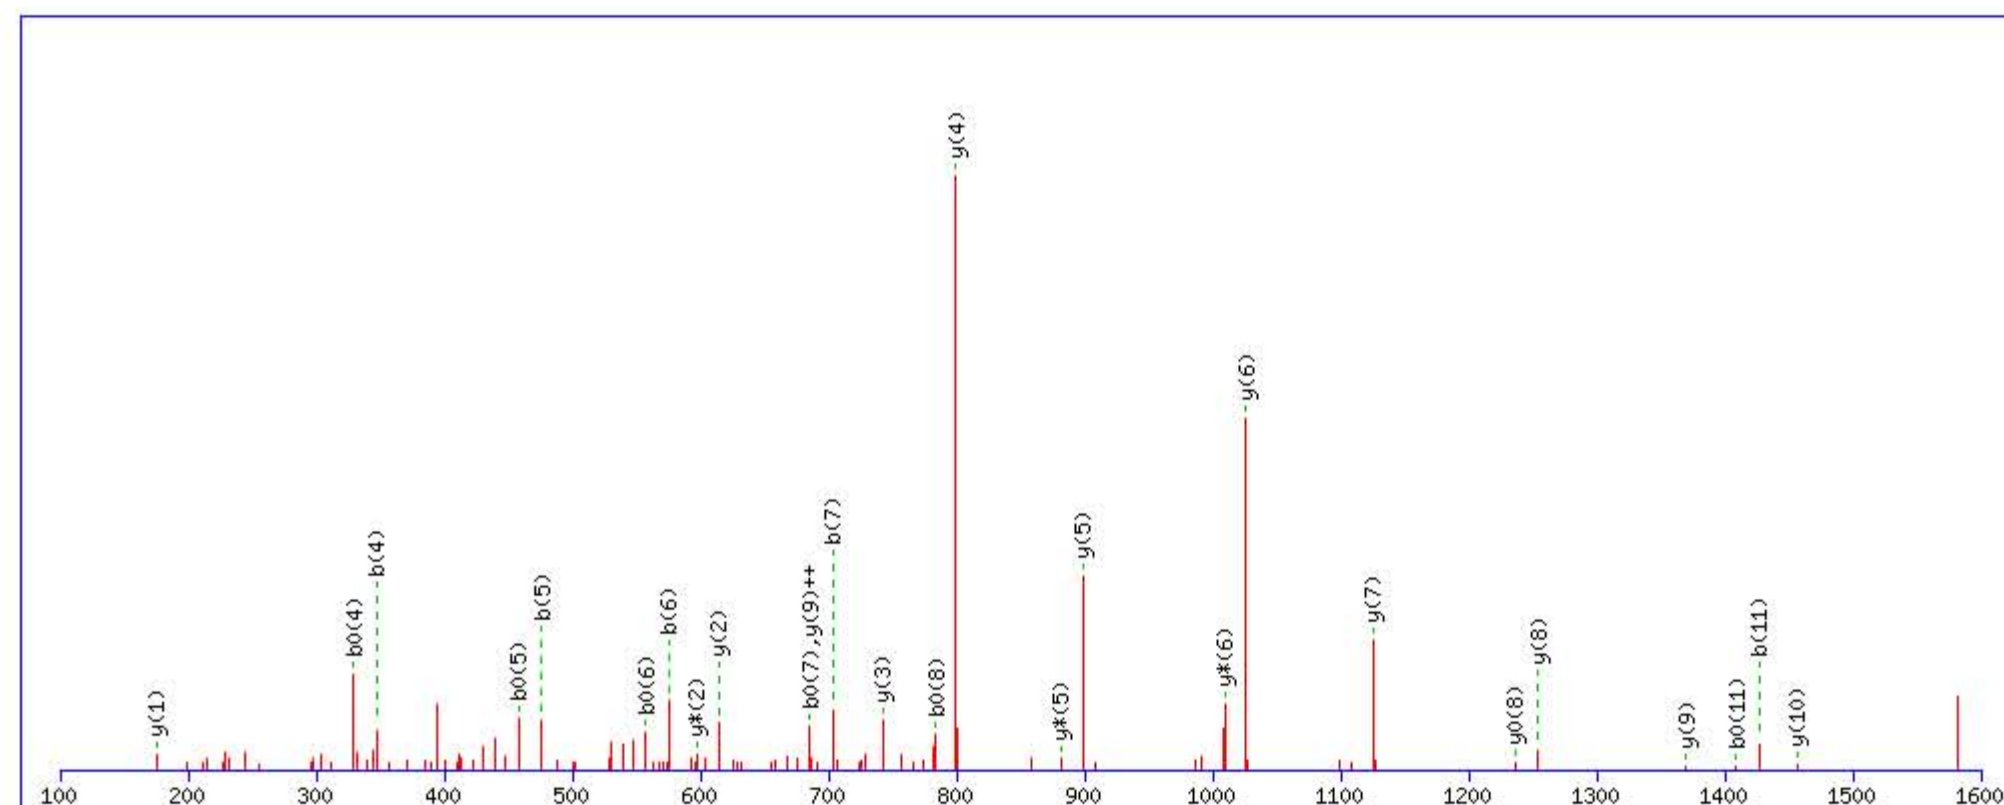

Monoisotopic mass of neutral peptide Mr(calc): 1599.767517

Fixed modifications: Carbamidomethyl (C) (apply to specified residues or termini only)

Variable modifications:

Q11 : Biotin:Thermo-21345 (Q)

Ions Score: 78 Expect: 2.4e-007

Matches : 26/106 fragment ions using 37 most intense peaks [\(help\)](#)

| #  | b                  | b <sup>++</sup> | b <sup>*</sup> | b <sup>+++</sup> | b <sup>0</sup>     | b <sup>0++</sup> | Seq. | y                  | y <sup>++</sup>   | y <sup>*</sup>     | y <sup>+++</sup> | y <sup>0</sup>     | y <sup>0++</sup> | #  |
|----|--------------------|-----------------|----------------|------------------|--------------------|------------------|------|--------------------|-------------------|--------------------|------------------|--------------------|------------------|----|
| 1  | 88.039304          | 44.523290       |                |                  | 70.028739          | 35.518008        | S    |                    |                   |                    |                  |                    |                  | 12 |
| 2  | 145.060768         | 73.034022       |                |                  | 127.050203         | 64.028740        | G    | 1513.742754        | 757.375015        | 1496.716205        | 748.861741       | 1495.732189        | 748.369733       | 11 |
| 3  | 232.092796         | 116.550036      |                |                  | 214.082231         | 107.544753       | S    | <b>1456.721290</b> | 728.864283        | 1439.694741        | 720.351009       | 1438.710725        | 719.859001       | 10 |
| 4  | <b>347.119739</b>  | 174.063507      |                |                  | <b>329.109174</b>  | 165.058225       | D    | <b>1369.689262</b> | <b>685.348269</b> | 1352.662713        | 676.834995       | 1351.678697        | 676.342987       | 9  |
| 5  | <b>476.162332</b>  | 238.584804      |                |                  | <b>458.151767</b>  | 229.579522       | E    | <b>1254.662319</b> | 627.834798        | 1237.635770        | 619.321523       | <b>1236.651754</b> | 618.829515       | 8  |
| 6  | <b>575.230746</b>  | 288.119011      |                |                  | <b>557.220181</b>  | 279.113729       | V    | <b>1125.619726</b> | 563.313501        | 1108.593177        | 554.800227       |                    |                  | 7  |
| 7  | <b>703.289324</b>  | 352.148300      | 686.262775     | 343.635026       | <b>685.278759</b>  | 343.143018       | Q    | <b>1026.551312</b> | 513.779294        | <b>1009.524763</b> | 505.266020       |                    |                  | 6  |
| 8  | 802.357738         | 401.682507      | 785.331189     | 393.169233       | <b>784.347173</b>  | 392.677225       | V    | <b>898.492734</b>  | 449.750005        | <b>881.466185</b>  | 441.236731       |                    |                  | 5  |
| 9  | 859.379202         | 430.193239      | 842.352653     | 421.679965       | 841.368637         | 421.187957       | G    | <b>799.424320</b>  | 400.215798        | 782.397771         | 391.702524       |                    |                  | 4  |
| 10 | 987.437780         | 494.222528      | 970.411231     | 485.709254       | 969.427215         | 485.217246       | Q    | <b>742.402856</b>  | 371.705066        | 725.376307         | 363.191792       |                    |                  | 3  |
| 11 | <b>1426.663106</b> | 713.835191      | 1409.636557    | 705.321917       | <b>1408.652541</b> | 704.829909       | Q    | <b>614.344278</b>  | 307.675777        | <b>597.317729</b>  | 299.162503       |                    |                  | 2  |
| 12 |                    |                 |                |                  |                    |                  | R    | <b>175.118952</b>  | 88.063114         | 158.092403         | 79.549839        |                    |                  | 1  |

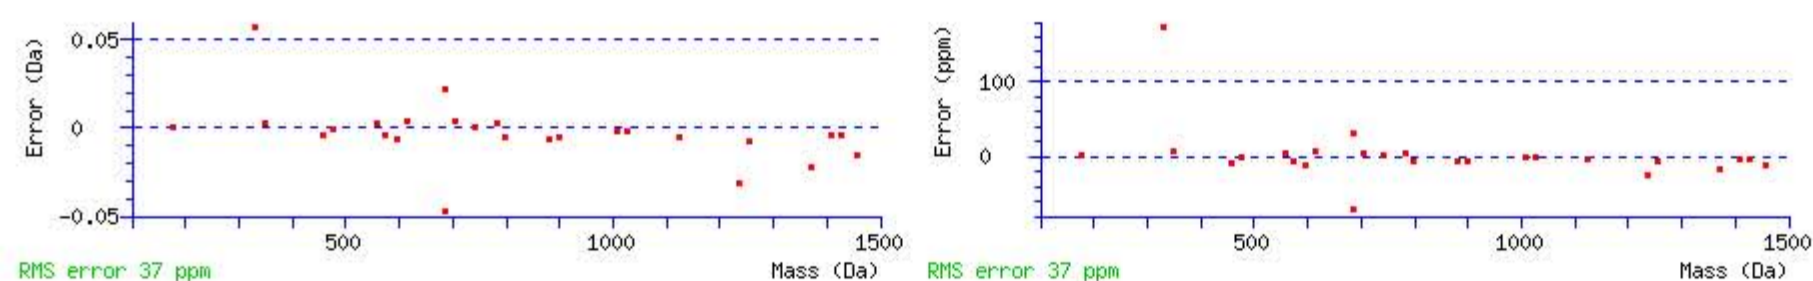

NCBI BLAST search of **SGSDEVQVGQQR**

(Parameters: blastp, nr protein database, expect=20000, no filter, PAM30)

Other BLAST [web gateways](#)

All matches to this query

| Score | Mr(calc):   | Delta     | Sequence                        |
|-------|-------------|-----------|---------------------------------|
| 77.7  | 1599.767517 | -0.004209 | <a href="#">SGSDEVQVGQQR</a>    |
| 62.4  | 1599.767517 | -0.004209 | <a href="#">SGSDEVQVGQQR</a>    |
| 34.3  | 1599.767517 | -0.004209 | <a href="#">SGSDEVQVGQQR</a>    |
| 9.9   | 1599.767471 | -0.004163 | <a href="#">AMNAANLNIPPSDTR</a> |
| 6.4   | 1599.779388 | -0.016080 | <a href="#">RFPDFSYITQNGR</a>   |
| 3.5   | 1599.742325 | 0.020983  | <a href="#">REGDQEERDR</a>      |
| 1.8   | 1599.767502 | -0.004194 | <a href="#">EVCSEKTGHAEVVR</a>  |
| 1.8   | 1599.753769 | 0.009539  | <a href="#">ASTFSCIMQKWGGK</a>  |
| 1.6   | 1599.767502 | -0.004194 | <a href="#">LHMLSSVDLNGQDR</a>  |

# MASCOT Search Results

## Peptide View

MS/MS Fragmentation of **SGSDEVQVGQQR**

Found in **CO3\_HUMAN**, Complement C3 OS=Homo sapiens GN=C3 PE=1 SV=2

Match to Query 33272: 1599.763572 from(534.261800,3+) rtinseconds(1538) index(30490)

Title: Locus:1.1.1.3084.14 File:"2013-07-02 CLN FXIII 60 min 3rd F 3.wiff"

Data file C:\Program Files (x86)\Matrix Science\Mascot Daemon\mgf\6 FXIII 60 min 3rd\mascot\_daemon\_merge.mgf

Click mouse within plot area to zoom in by factor of two about that point

Or, Plot from  to  Da

Label all possible matches  Label matches used for scoring

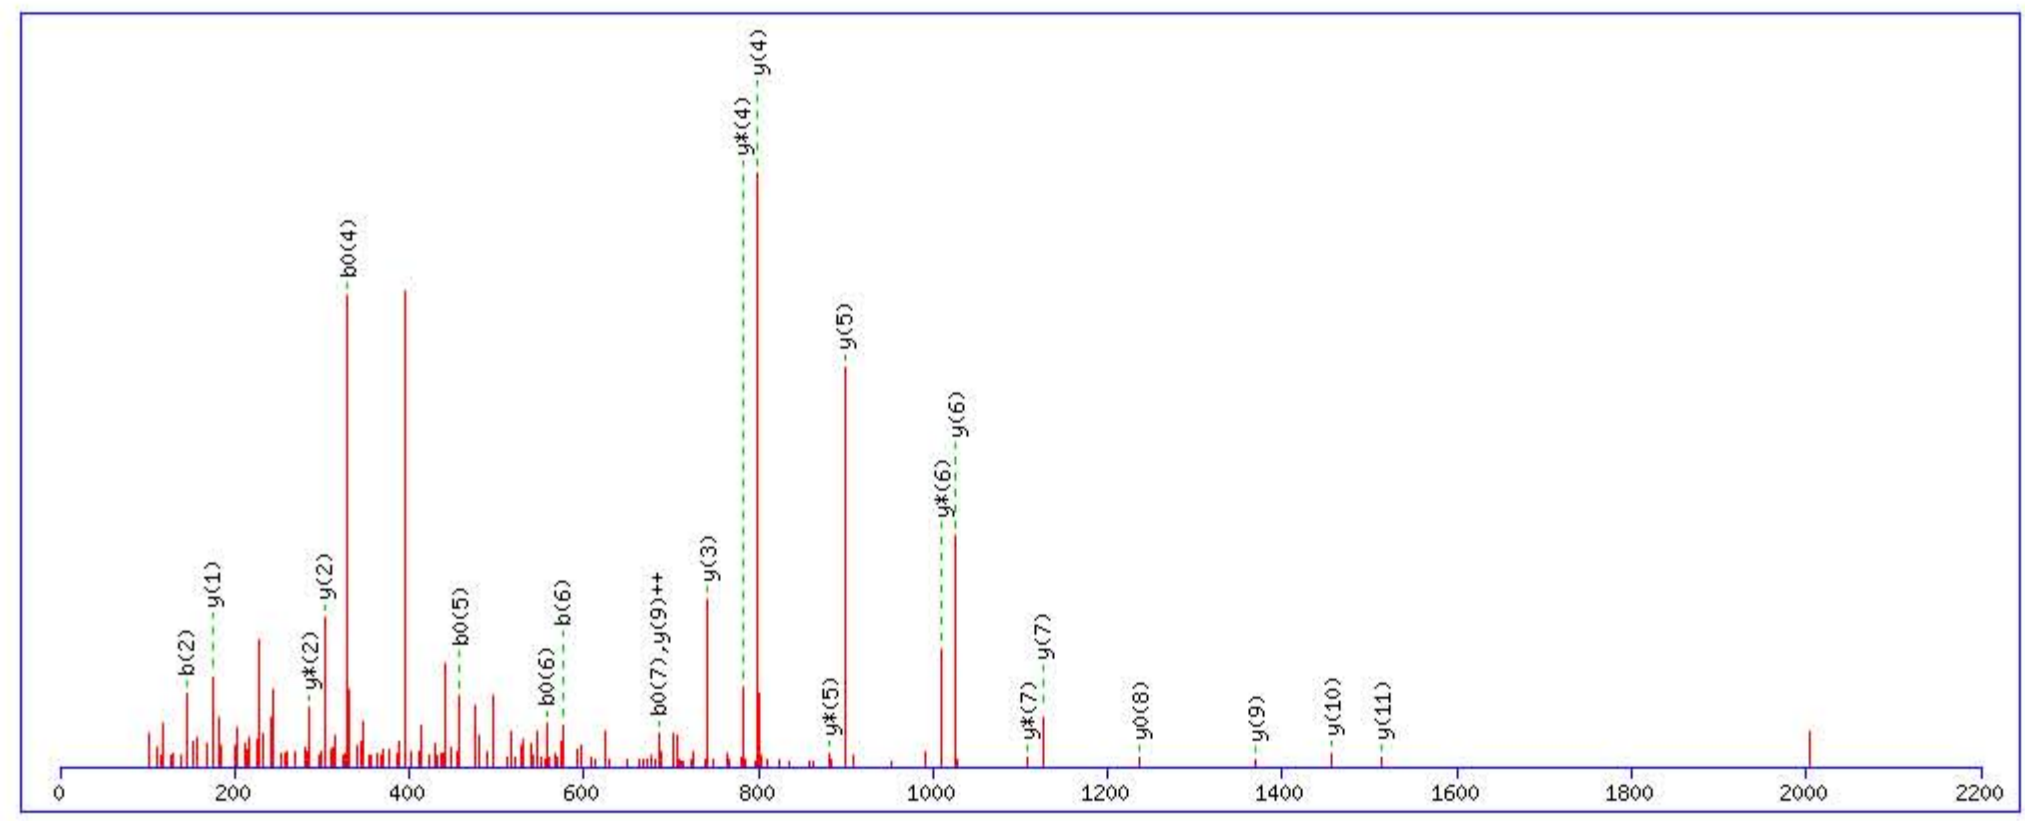

Monoisotopic mass of neutral peptide Mr(calc): 1599.767517

Fixed modifications: Carbamidomethyl (C) (apply to specified residues or termini only)

Variable modifications:

Q10 : Biotin:Thermo-21345 (Q)

Ions Score: 70 Expect: 1.4e-006

Matches : 23/106 fragment ions using 36 most intense peaks [\(help\)](#)

| #  | b                 | b <sup>++</sup> | b <sup>*</sup> | b <sup>*++</sup> | b <sup>0</sup>    | b <sup>0++</sup> | Seq. | y                  | y <sup>++</sup>   | y <sup>*</sup>     | y <sup>*++</sup> | y <sup>0</sup>     | y <sup>0++</sup> | #  |
|----|-------------------|-----------------|----------------|------------------|-------------------|------------------|------|--------------------|-------------------|--------------------|------------------|--------------------|------------------|----|
| 1  | 88.039304         | 44.523290       |                |                  | 70.028739         | 35.518008        | S    |                    |                   |                    |                  |                    |                  | 12 |
| 2  | <b>145.060768</b> | 73.034022       |                |                  | 127.050203        | 64.028740        | G    | <b>1513.742754</b> | 757.375015        | 1496.716205        | 748.861741       | 1495.732189        | 748.369733       | 11 |
| 3  | 232.092796        | 116.550036      |                |                  | 214.082231        | 107.544753       | S    | <b>1456.721290</b> | 728.864283        | 1439.694741        | 720.351009       | 1438.710725        | 719.859001       | 10 |
| 4  | 347.119739        | 174.063507      |                |                  | <b>329.109174</b> | 165.058225       | D    | <b>1369.689262</b> | <b>685.348269</b> | 1352.662713        | 676.834995       | 1351.678697        | 676.342987       | 9  |
| 5  | 476.162332        | 238.584804      |                |                  | <b>458.151767</b> | 229.579522       | E    | 1254.662319        | 627.834798        | 1237.635770        | 619.321523       | <b>1236.651754</b> | 618.829515       | 8  |
| 6  | <b>575.230746</b> | 288.119011      |                |                  | <b>557.220181</b> | 279.113729       | V    | <b>1125.619726</b> | 563.313501        | <b>1108.593177</b> | 554.800227       |                    |                  | 7  |
| 7  | 703.289324        | 352.148300      | 686.262775     | 343.635026       | <b>685.278759</b> | 343.143018       | Q    | <b>1026.551312</b> | 513.779294        | <b>1009.524763</b> | 505.266020       |                    |                  | 6  |
| 8  | 802.357738        | 401.682507      | 785.331189     | 393.169233       | 784.347173        | 392.677225       | V    | <b>898.492734</b>  | 449.750005        | <b>881.466185</b>  | 441.236731       |                    |                  | 5  |
| 9  | 859.379202        | 430.193239      | 842.352653     | 421.679965       | 841.368637        | 421.187957       | G    | <b>799.424320</b>  | 400.215798        | <b>782.397771</b>  | 391.702524       |                    |                  | 4  |
| 10 | 1298.604528       | 649.805902      | 1281.577979    | 641.292628       | 1280.593963       | 640.800620       | Q    | <b>742.402856</b>  | 371.705066        | 725.376307         | 363.191792       |                    |                  | 3  |
| 11 | 1426.663106       | 713.835191      | 1409.636557    | 705.321917       | 1408.652541       | 704.829909       | Q    | <b>303.177530</b>  | 152.092403        | <b>286.150981</b>  | 143.579129       |                    |                  | 2  |
| 12 |                   |                 |                |                  |                   |                  | R    | <b>175.118952</b>  | 88.063114         | 158.092403         | 79.549839        |                    |                  | 1  |

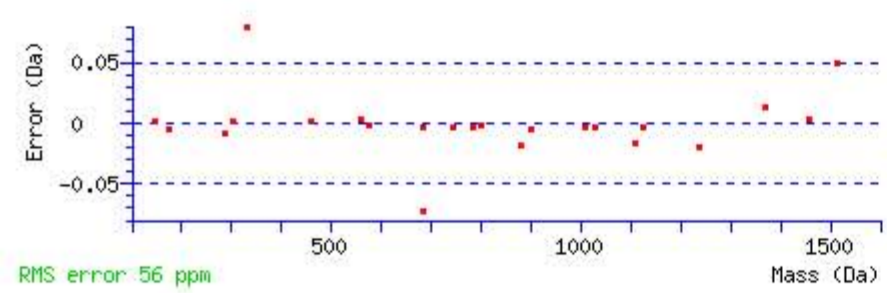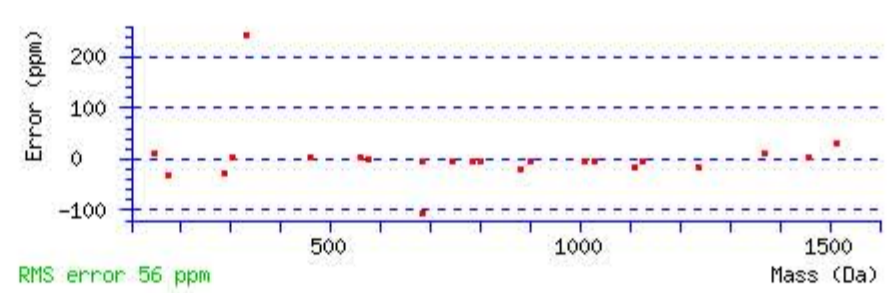

NCBI BLAST search of **SGSDEVQVGQQR**

(Parameters: blastp, nr protein database, expect=20000, no filter, PAM30)

Other BLAST [web gateways](#)

### All matches to this query

| Score | Mr(calc):   | Delta     | Sequence                     |
|-------|-------------|-----------|------------------------------|
| 70.0  | 1599.767517 | -0.003945 | <a href="#">SGSDEVQVGQQR</a> |
| 62.7  | 1599.767517 | -0.003945 | <a href="#">SGSDEVQVGQQR</a> |
| 28.6  | 1599.767517 | -0.003945 | <a href="#">SGSDEVQVGQQR</a> |

# MASCOT SEARCH RESULTS

## Peptide View

MS/MS Fragmentation of **KQELSEAEQATR**

Found in **CO3\_HUMAN**, Complement C3 OS=Homo sapiens GN=C3 PE=1 SV=2

Match to Query 36417: 1699.852752 from(567.624860,3+) rtinseconds(1412) index(29685)

Title: Locus:1.1.1.3040.9 File:"2013-07-02 CLN FXIII 60 min 3rd F 3.wiff"

Data file C:\Program Files (x86)\Matrix Science\Mascot Daemon\mgf\6 FXIII 60 min 3rd\mascot\_daemon\_merge.mgf

Click mouse within plot area to zoom in by factor of two about that point

Or, Plot from  to  Da

Label all possible matches  Label matches used for scoring

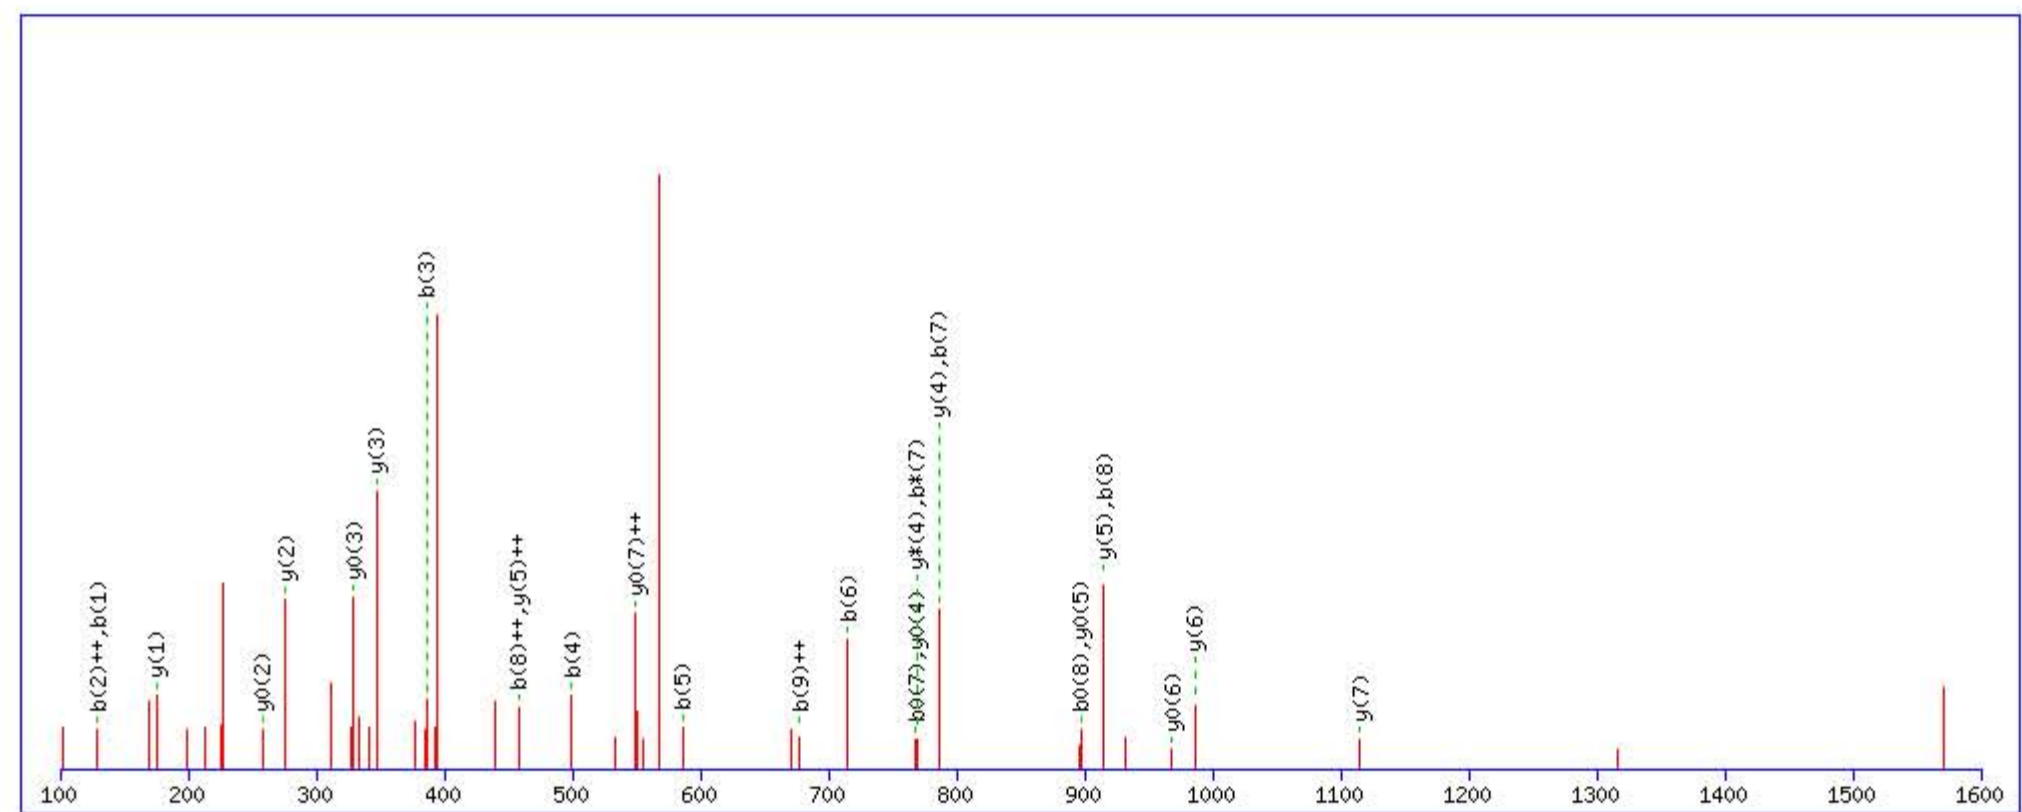

Monoisotopic mass of neutral peptide Mr(calc): 1699.856277

Fixed modifications: Carbamidomethyl (C) (apply to specified residues or termini only)

Variable modifications:

Q9 : Biotin:Thermo-21345 (Q)

Ions Score: 41 Expect: 0.0025

Matches : 28/126 fragment ions using 39 most intense peaks [\(help\)](#)

| #  | b                 | b <sup>++</sup>   | b <sup>*</sup>    | b <sup>+++</sup> | b <sup>0</sup>    | b <sup>0++</sup> | Seq.     | y                  | y <sup>++</sup>   | y <sup>*</sup>    | y <sup>+++</sup> | y <sup>0</sup>    | y <sup>0++</sup>  | #         |
|----|-------------------|-------------------|-------------------|------------------|-------------------|------------------|----------|--------------------|-------------------|-------------------|------------------|-------------------|-------------------|-----------|
| 1  | <b>129.102239</b> | 65.054757         | 112.075690        | 56.541483        |                   |                  | <b>K</b> |                    |                   |                   |                  |                   |                   | <b>12</b> |
| 2  | 257.160817        | <b>129.084047</b> | 240.134268        | 120.570772       |                   |                  | <b>Q</b> | 1572.768634        | 786.887955        | 1555.742085       | 778.374681       | 1554.758069       | 777.882673        | <b>11</b> |
| 3  | <b>386.203410</b> | 193.605343        | 369.176861        | 185.092069       | 368.192845        | 184.600061       | <b>E</b> | 1444.710056        | 722.858666        | 1427.683507       | 714.345392       | 1426.699491       | 713.853384        | <b>10</b> |
| 4  | <b>499.287474</b> | 250.147375        | 482.260925        | 241.634101       | 481.276909        | 241.142093       | <b>L</b> | 1315.667463        | 658.337370        | 1298.640914       | 649.824095       | 1297.656898       | 649.332087        | <b>9</b>  |
| 5  | <b>586.319502</b> | 293.663389        | 569.292953        | 285.150115       | 568.308937        | 284.658107       | <b>S</b> | 1202.583399        | 601.795338        | 1185.556850       | 593.282063       | 1184.572834       | 592.790055        | <b>8</b>  |
| 6  | <b>715.362095</b> | 358.184686        | 698.335546        | 349.671411       | 697.351530        | 349.179403       | <b>E</b> | <b>1115.551371</b> | 558.279324        | 1098.524822       | 549.766049       | 1097.540806       | <b>549.274041</b> | <b>7</b>  |
| 7  | <b>786.399209</b> | 393.703243        | <b>769.372660</b> | 385.189968       | <b>768.388644</b> | 384.697960       | <b>A</b> | <b>986.508778</b>  | 493.758027        | 969.482229        | 485.244753       | <b>968.498213</b> | 484.752745        | <b>6</b>  |
| 8  | <b>915.441802</b> | <b>458.224539</b> | 898.415253        | 449.711265       | <b>897.431237</b> | 449.219257       | <b>E</b> | <b>915.471664</b>  | <b>458.239470</b> | 898.445115        | 449.726196       | <b>897.461099</b> | 449.234188        | <b>5</b>  |
| 9  | 1354.667128       | <b>677.837202</b> | 1337.640579       | 669.323928       | 1336.656563       | 668.831920       | <b>Q</b> | <b>786.429071</b>  | 393.718174        | <b>769.402522</b> | 385.204899       | <b>768.418506</b> | 384.712891        | <b>4</b>  |
| 10 | 1425.704242       | 713.355759        | 1408.677693       | 704.842485       | 1407.693677       | 704.350477       | <b>A</b> | <b>347.203745</b>  | 174.105510        | 330.177196        | 165.592236       | <b>329.193180</b> | 165.100228        | <b>3</b>  |
| 11 | 1526.751921       | 763.879599        | 1509.725372       | 755.366324       | 1508.741356       | 754.874316       | <b>T</b> | <b>276.166631</b>  | 138.586953        | 259.140082        | 130.073679       | <b>258.156066</b> | 129.581671        | <b>2</b>  |
| 12 |                   |                   |                   |                  |                   |                  | <b>R</b> | <b>175.118952</b>  | 88.063114         | 158.092403        | 79.549839        |                   |                   | <b>1</b>  |

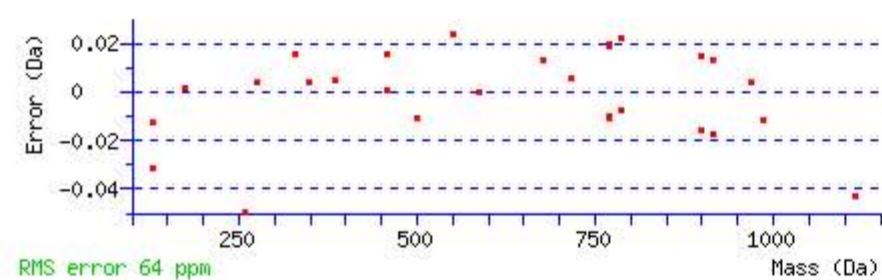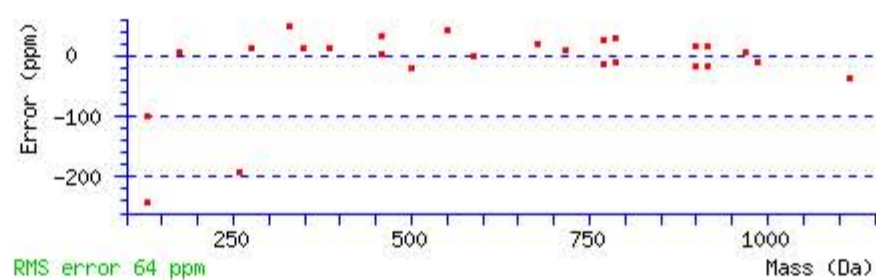

NCBI BLAST search of **KQELSEAEQATR**

(Parameters: blastp, nr protein database, expect=20000, no filter, PAM30)

Other BLAST [web gateways](#)

All matches to this query

| Score | Mr(calc):   | Delta     | Sequence                        |
|-------|-------------|-----------|---------------------------------|
| 40.5  | 1699.856277 | -0.003525 | <a href="#">KQELSEAEQATR</a>    |
| 14.0  | 1699.874039 | -0.021287 | <a href="#">KEISVNDLNESSIPR</a> |
| 7.7   | 1699.843063 | 0.009689  | <a href="#">GKVSEGIDFVHHYGR</a> |
| 7.2   | 1699.856277 | -0.003525 | <a href="#">KQELSEAEQATR</a>    |
| 5.7   | 1699.874924 | -0.022172 | <a href="#">SQGMLALSISPNR</a>   |
| 5.7   | 1699.841705 | 0.011047  | <a href="#">EKIDFADTVTKYDR</a>  |
| 5.1   | 1699.845932 | 0.006820  | <a href="#">QAMQEQLSK</a>       |
| 4.4   | 1699.845932 | 0.006820  | <a href="#">QAMQEQLSK</a>       |
| 4.4   | 1699.838562 | 0.014190  | <a href="#">EAPTQGLACVSTR</a>   |
| 4.1   | 1699.848907 | 0.003845  | <a href="#">TQATERVNSQPVNEK</a> |

# MASCOT SEARCH RESULTS

## Peptide View

MS/MS Fragmentation of **HQQTVTIPPK**

Found in **CO3\_HUMAN**, Complement C3 OS=Homo sapiens GN=C3 PE=1 SV=2

Match to Query 37956: 1769.969532 from(590.997120,3+) rtinseconds(1893) index(32360)

Title: Locus:1.1.1.3208.19 File:"2013-07-02 CLN FXIII 60 min 3rd F 3.wiff"

Data file C:\Program Files (x86)\Matrix Science\Mascot Daemon\mgf6 FXIII 60 min 3rd\mascot\_daemon\_merge.mgf

Click mouse within plot area to zoom in by factor of two about that point

Or, Plot from  to  Da

Label all possible matches  Label matches used for scoring

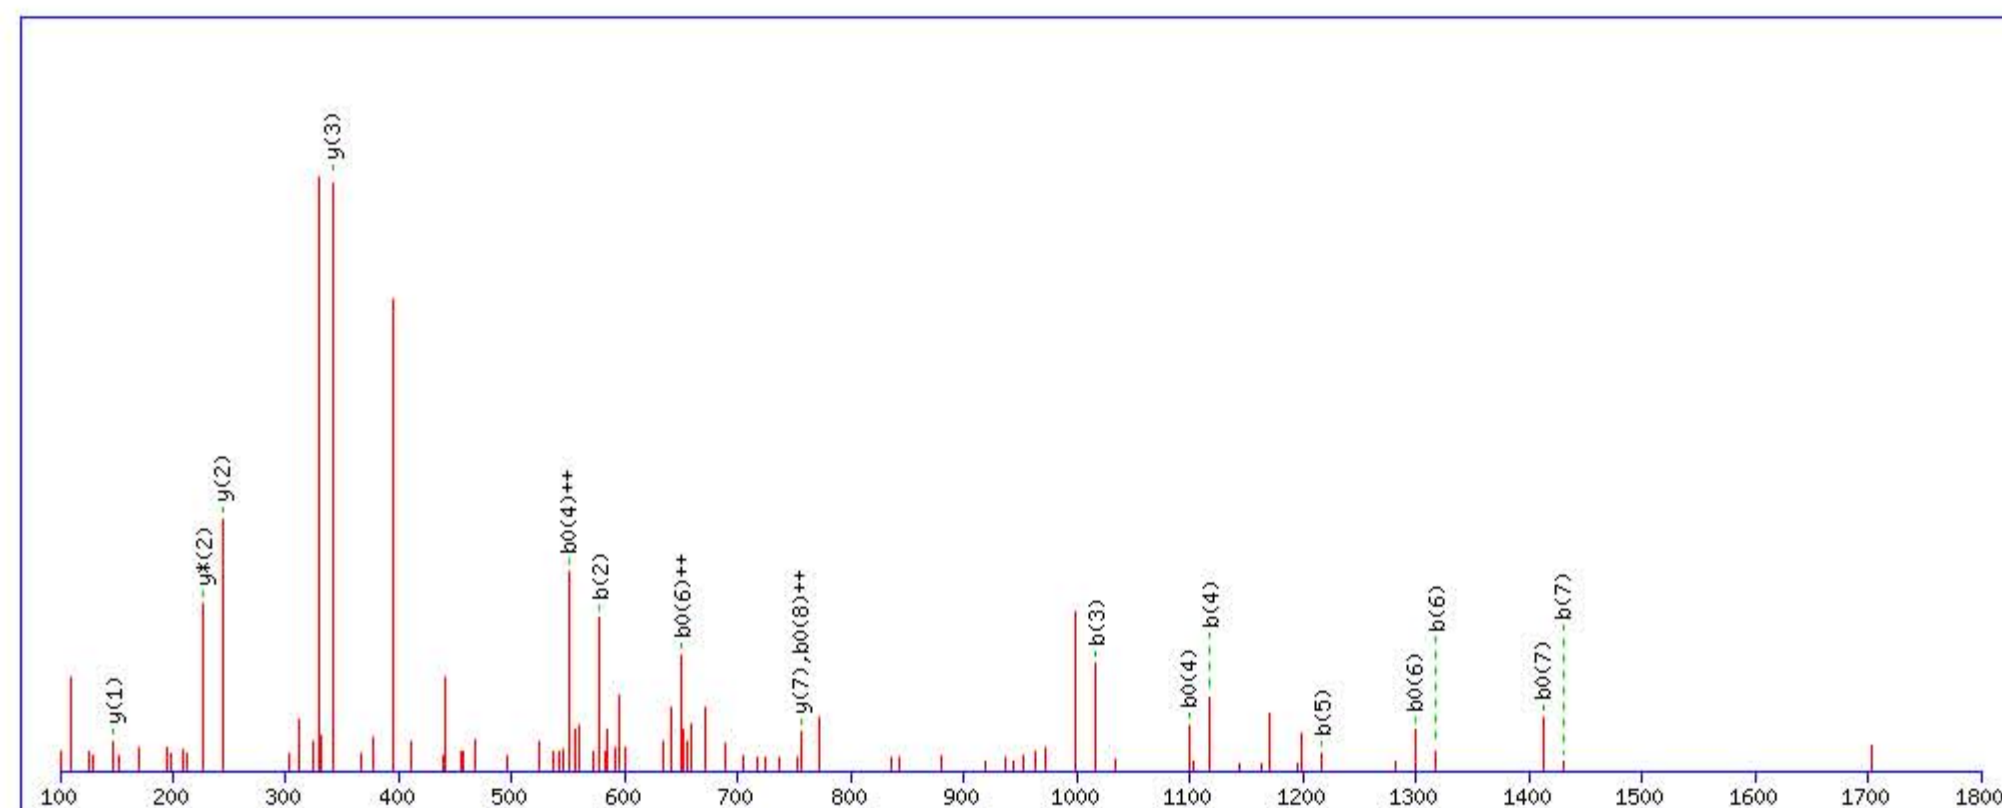

Monoisotopic mass of neutral peptide Mr(calc): 1769.968460

Fixed modifications: Carbamidomethyl (C) (apply to specified residues or termini only)

Variable modifications:

Q2 : Biotin:Thermo-21345 (Q)

Q3 : Biotin:Thermo-21345 (Q)

Ions Score: 31 Expect: 0.0045

Matches : 17/92 fragment ions using 28 most intense peaks [\(help\)](#)

| #  | b                  | b <sup>++</sup> | b <sup>*</sup> | b <sup>*++</sup> | b <sup>0</sup>     | b <sup>0++</sup>  | Seq. | y                 | y <sup>++</sup> | y <sup>*</sup>    | y <sup>*++</sup> | y <sup>0</sup> | y <sup>0++</sup> | #  |
|----|--------------------|-----------------|----------------|------------------|--------------------|-------------------|------|-------------------|-----------------|-------------------|------------------|----------------|------------------|----|
| 1  | 138.066188         | 69.536732       |                |                  |                    |                   | H    |                   |                 |                   |                  |                |                  | 10 |
| 2  | <b>577.291514</b>  | 289.149395      | 560.264965     | 280.636121       |                    |                   | Q    | 1633.916820       | 817.462048      | 1616.890271       | 808.948774       | 1615.906255    | 808.456766       | 9  |
| 3  | <b>1016.516840</b> | 508.762058      | 999.490291     | 500.248784       |                    |                   | Q    | 1194.691494       | 597.849385      | 1177.664945       | 589.336111       | 1176.680929    | 588.844103       | 8  |
| 4  | <b>1117.564519</b> | 559.285898      | 1100.537970    | 550.772623       | <b>1099.553954</b> | <b>550.280615</b> | T    | <b>755.466168</b> | 378.236722      | 738.439619        | 369.723448       | 737.455603     | 369.231440       | 7  |
| 5  | <b>1216.632933</b> | 608.820105      | 1199.606384    | 600.306830       | 1198.622368        | 599.814822        | V    | 654.418489        | 327.712883      | 637.391940        | 319.199608       | 636.407924     | 318.707600       | 6  |
| 6  | <b>1317.680612</b> | 659.343944      | 1300.654063    | 650.830670       | <b>1299.670047</b> | <b>650.338662</b> | T    | 555.350075        | 278.178676      | 538.323526        | 269.665401       | 537.339510     | 269.173393       | 5  |
| 7  | <b>1430.764676</b> | 715.885976      | 1413.738127    | 707.372702       | <b>1412.754111</b> | 706.880694        | I    | 454.302396        | 227.654836      | 437.275847        | 219.141561       |                |                  | 4  |
| 8  | 1527.817440        | 764.412358      | 1510.790891    | 755.899084       | 1509.806875        | <b>755.407076</b> | P    | <b>341.218332</b> | 171.112804      | 324.191783        | 162.599530       |                |                  | 3  |
| 9  | 1624.870204        | 812.938740      | 1607.843655    | 804.425466       | 1606.859639        | 803.933458        | P    | <b>244.165568</b> | 122.586422      | <b>227.139019</b> | 114.073148       |                |                  | 2  |
| 10 |                    |                 |                |                  |                    |                   | K    | <b>147.112804</b> | 74.060040       | 130.086255        | 65.546765        |                |                  | 1  |

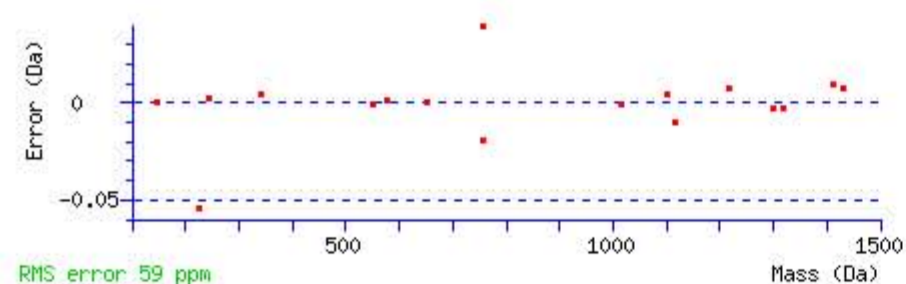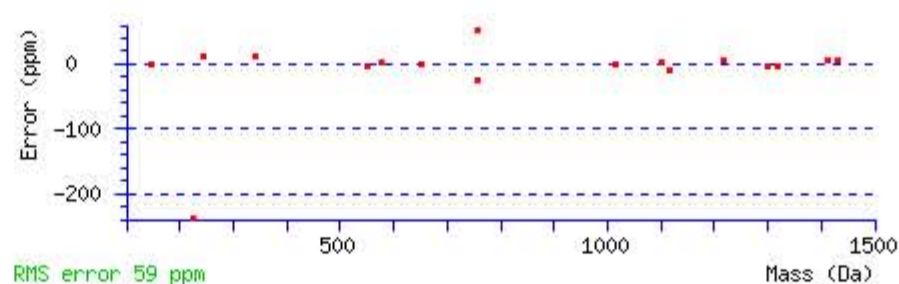

NCBI BLAST search of [HQQTVTIPPK](#)

(Parameters: blastp, nr protein database, expect=20000, no filter, PAM30)

Other BLAST [web gateways](#)

All matches to this query

| Score | Mr(calc):   | Delta     | Sequence                         |
|-------|-------------|-----------|----------------------------------|
| 31.4  | 1769.968460 | 0.001072  | <a href="#">HQQTVTIPPK</a>       |
| 6.0   | 1769.961029 | 0.008503  | <a href="#">WMLSRDRASTLPLPK</a>  |
| 1.3   | 1769.978836 | -0.009304 | <a href="#">TPVRGEEPVFVVTGRK</a> |

Mascot: <http://www.matrixscience.com/>



# MASCOT Search Results

## Peptide View

MS/MS Fragmentation of **GQGILSVVTMYHAK**

Found in **CO3\_HUMAN**, Complement C3 OS=Homo sapiens GN=C3 PE=1 SV=2

Match to Query 38886: 1817.919222 from(606.980350,3+) rtinseconds(1827) index(32042)

Title: Locus:1.1.1.3185.8 File:"2013-07-02 CLN FXIII 60 min 3rd F 3.wiff"

Data file C:\Program Files (x86)\Matrix Science\Mascot Daemon\mgf6 FXIII 60 min 3rd\mascot\_daemon\_merge.mgf

Click mouse within plot area to zoom in by factor of two about that point

Or, Plot from  to  Da

Label all possible matches  Label matches used for scoring

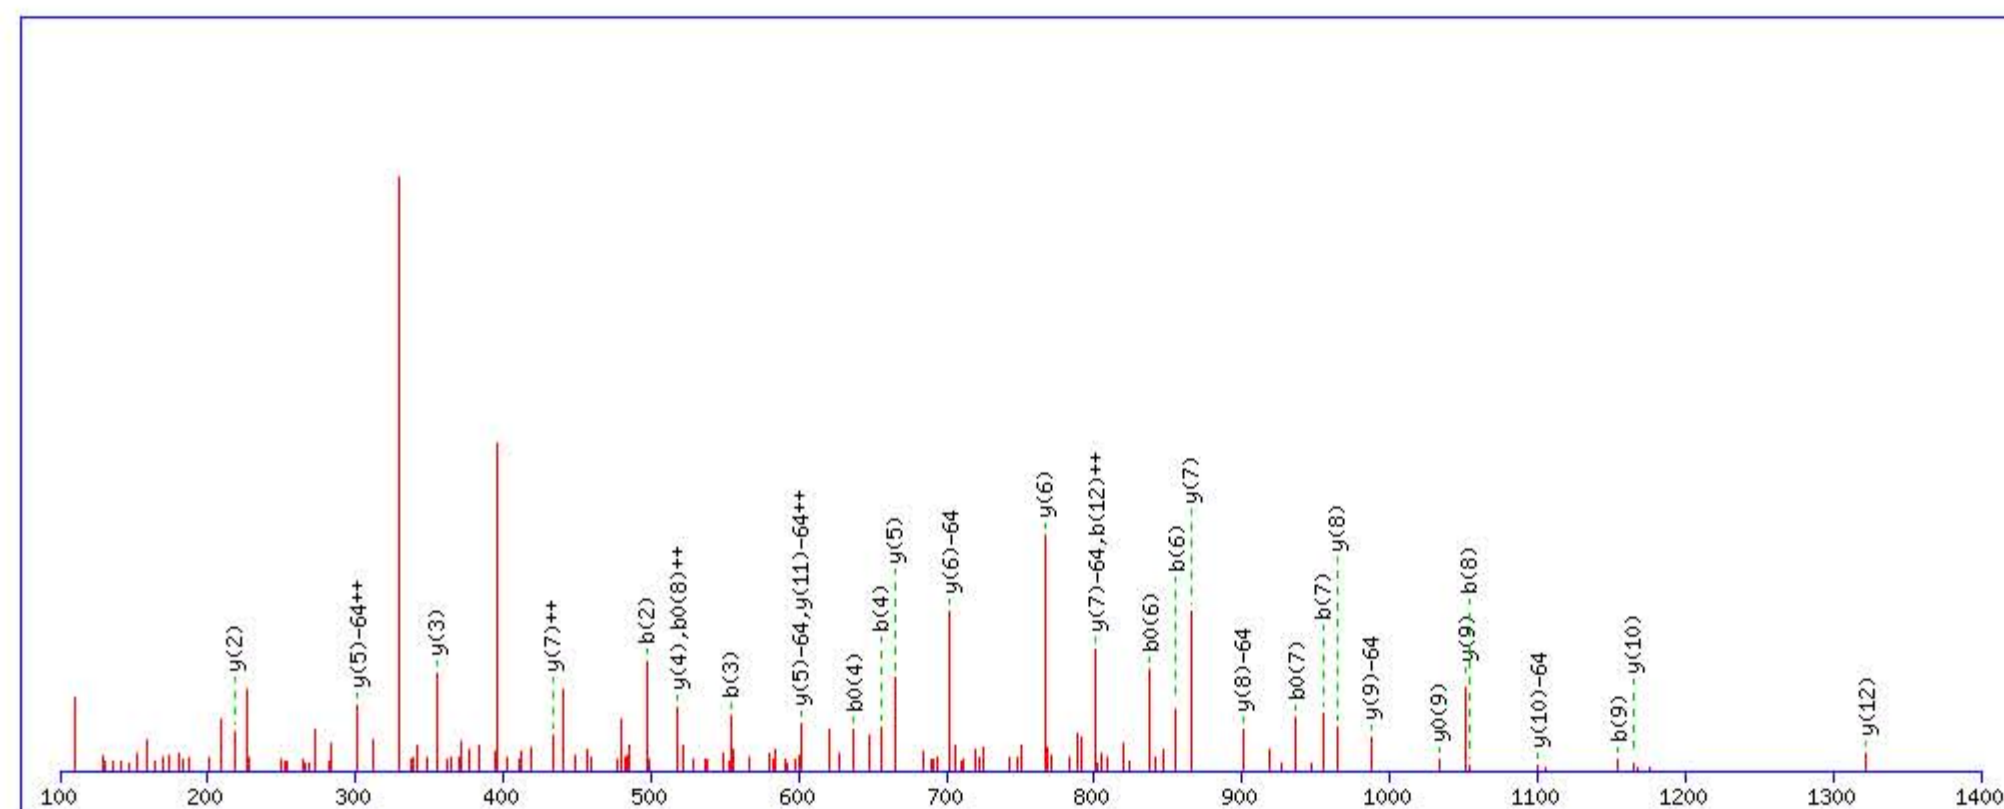

Monoisotopic mass of neutral peptide Mr(calc): 1817.916824

Fixed modifications: Carbamidomethyl (C) (apply to specified residues or termini only)

Variable modifications:

Q2 : Biotin:Thermo-21345 (Q)

M10 : Oxidation (M), with neutral losses 0.000000 (shown in table), 63.998285

Ions Score: 63 Expect: 1.7e-006

Matches : 32/214 fragment ions using 45 most intense peaks [\(help\)](#)

| #  | b                  | b <sup>++</sup>   | b <sup>+</sup> | b <sup>+++</sup> | b <sup>0</sup>    | b <sup>0++</sup>  | Seq.     | y                  | y <sup>++</sup>   | y <sup>+</sup> | y <sup>+++</sup> | y <sup>0</sup>     | y <sup>0++</sup> | #  |
|----|--------------------|-------------------|----------------|------------------|-------------------|-------------------|----------|--------------------|-------------------|----------------|------------------|--------------------|------------------|----|
| 1  | 58.028740          | 29.518008         |                |                  |                   |                   | <b>G</b> |                    |                   |                |                  |                    |                  | 14 |
| 2  | <b>497.254066</b>  | 249.130671        | 480.227517     | 240.617397       |                   |                   | <b>Q</b> | 1761.902627        | 881.454952        | 1744.876078    | 872.941677       | 1743.892062        | 872.449669       | 13 |
| 3  | <b>554.275530</b>  | 277.641403        | 537.248981     | 269.128129       |                   |                   | <b>G</b> | <b>1322.677301</b> | 661.842289        | 1305.650752    | 653.329014       | 1304.666736        | 652.837006       | 12 |
| 4  | <b>655.323209</b>  | 328.165243        | 638.296660     | 319.651968       | <b>637.312644</b> | 319.159960        | <b>T</b> | 1265.655837        | 633.331557        | 1248.629288    | 624.818282       | 1247.645272        | 624.326274       | 11 |
| 5  | 768.407273         | 384.707275        | 751.380724     | 376.194000       | 750.396708        | 375.701992        | <b>L</b> | <b>1164.608158</b> | 582.807717        | 1147.581609    | 574.294443       | 1146.597593        | 573.802435       | 10 |
| 6  | <b>855.439301</b>  | 428.223289        | 838.412752     | 419.710014       | <b>837.428736</b> | 419.218006        | <b>S</b> | <b>1051.524094</b> | 526.265685        | 1034.497545    | 517.752411       | <b>1033.513529</b> | 517.260403       | 9  |
| 7  | <b>954.507715</b>  | 477.757496        | 937.481166     | 469.244221       | <b>936.497150</b> | 468.752213        | <b>V</b> | <b>964.492066</b>  | 482.749671        | 947.465517     | 474.236397       | 946.481501         | 473.744389       | 8  |
| 8  | <b>1053.576129</b> | 527.291703        | 1036.549580    | 518.778428       | 1035.565564       | <b>518.286420</b> | <b>V</b> | <b>865.423652</b>  | <b>433.215464</b> | 848.397103     | 424.702190       | 847.413087         | 424.210182       | 7  |
| 9  | <b>1154.623808</b> | 577.815542        | 1137.597259    | 569.302268       | 1136.613243       | 568.810260        | <b>T</b> | <b>766.355238</b>  | 383.681257        | 749.328689     | 375.167983       | 748.344673         | 374.675975       | 6  |
| 10 | 1301.659208        | 651.333242        | 1284.632659    | 642.819968       | 1283.648643       | 642.327960        | <b>M</b> | <b>665.307559</b>  | 333.157418        | 648.281010     | 324.644143       |                    |                  | 5  |
| 11 | 1464.722537        | 732.864907        | 1447.695988    | 724.351632       | 1446.711972       | 723.859624        | <b>Y</b> | <b>518.272159</b>  | 259.639718        | 501.245610     | 251.126443       |                    |                  | 4  |
| 12 | 1601.781449        | <b>801.394363</b> | 1584.754900    | 792.881088       | 1583.770884       | 792.389080        | <b>H</b> | <b>355.208830</b>  | 178.108053        | 338.182281     | 169.594778       |                    |                  | 3  |
| 13 | 1672.818563        | 836.912920        | 1655.792014    | 828.399645       | 1654.807998       | 827.907637        | <b>A</b> | <b>218.149918</b>  | 109.578597        | 201.123369     | 101.065322       |                    |                  | 2  |
| 14 |                    |                   |                |                  |                   |                   | <b>K</b> | 147.112804         | 74.060040         | 130.086255     | 65.546765        |                    |                  | 1  |

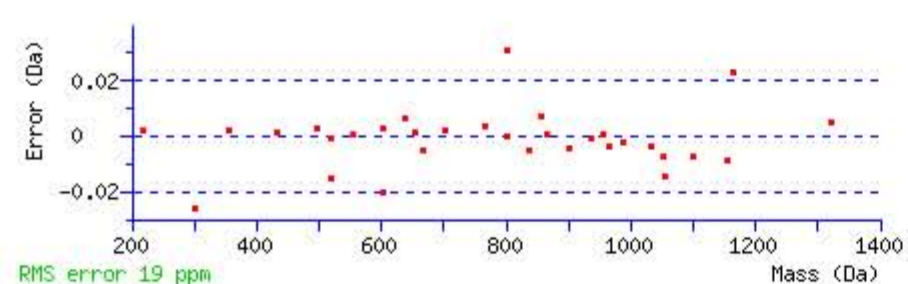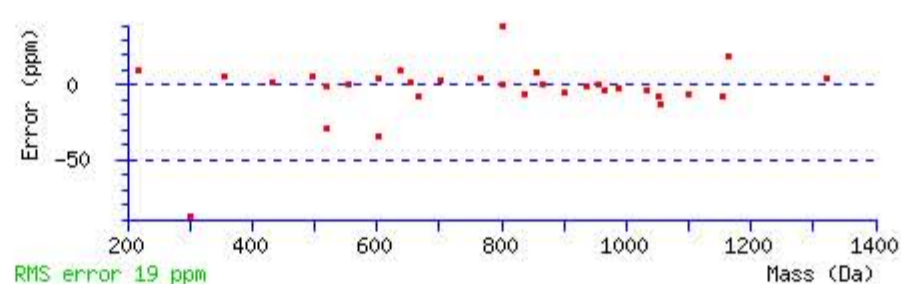

NCBI BLAST search of **GQGILSVVTMYHAK**

(Parameters: blastp, nr protein database, expect=20000, no filter, PAM30)

Other BLAST [web gateways](#)

All matches to this query

| Score | Mr(calc):   | Delta     | Sequence                       |
|-------|-------------|-----------|--------------------------------|
| 63.2  | 1817.916824 | 0.002398  | <a href="#">GQGILSVVTMYHAK</a> |
| 1.8   | 1817.920181 | -0.000959 | <a href="#">QGGITAEVMMGILR</a> |

Mascot: <http://www.matrixscience.com/>

# MASCOT Search Results

## Peptide View

MS/MS Fragmentation of **SGSDEVQVGQQR**

Found in **CO3\_HUMAN**, Complement C3 OS=Homo sapiens GN=C3 PE=1 SV=2

Match to Query 40432: 1910.938332 from(637.986720,3+) rtinseconds(1913) index(32514)

Title: Locus:1.1.1.3215.21 File:"2013-07-02 CLN FXIII 60 min 3rd F 3.wiff"

Data file C:\Program Files (x86)\Matrix Science\Mascot Daemon\mgf\6 FXIII 60 min 3rd\mascot\_daemon\_merge.mgf

Click mouse within plot area to zoom in by factor of two about that point

Or, Plot from  to  Da

Label all possible matches  Label matches used for scoring

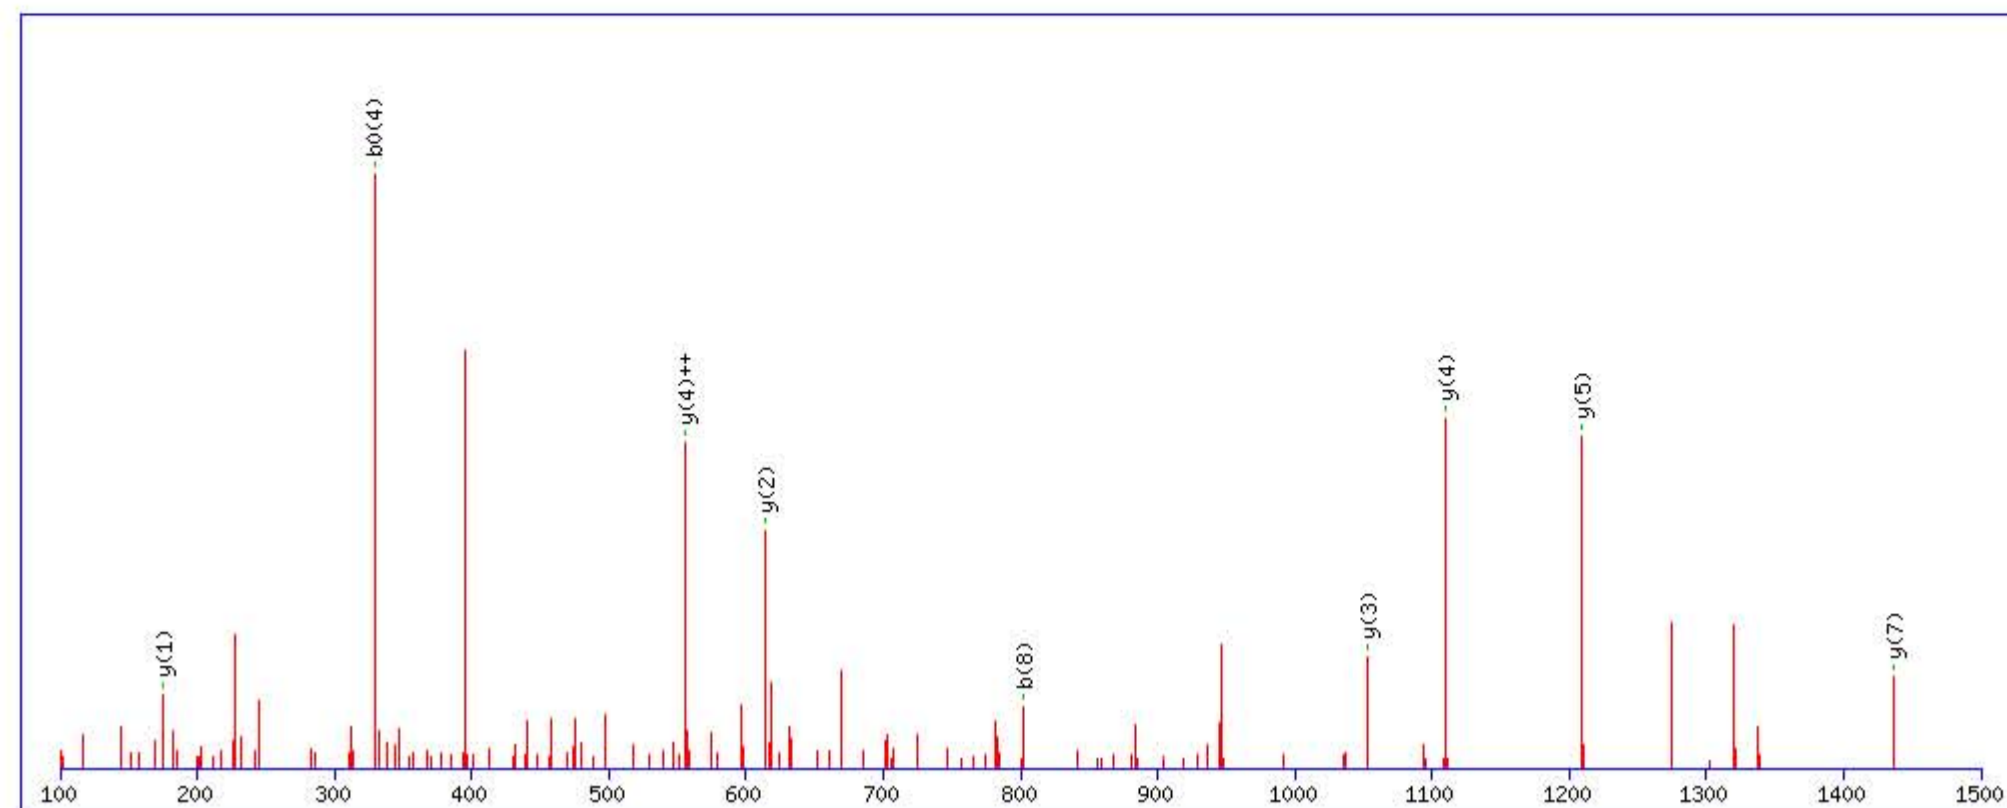

Monoisotopic mass of neutral peptide Mr(calc): 1910.934265

Fixed modifications: Carbamidomethyl (C) (apply to specified residues or termini only)

Variable modifications:

Q10 : Biotin:Thermo-21345 (Q)

Q11 : Biotin:Thermo-21345 (Q)

Ions Score: 36 Expect: 0.0015

Matches : 9/106 fragment ions using 14 most intense peaks [\(help\)](#)

| #  | b           | b <sup>++</sup> | b <sup>*</sup> | b <sup>*++</sup> | b <sup>0</sup> | b <sup>0++</sup> | Seq. | y           | y <sup>++</sup> | y <sup>*</sup> | y <sup>*++</sup> | y <sup>0</sup> | y <sup>0++</sup> | #  |
|----|-------------|-----------------|----------------|------------------|----------------|------------------|------|-------------|-----------------|----------------|------------------|----------------|------------------|----|
| 1  | 88.039304   | 44.523290       |                |                  | 70.028739      | 35.518008        | S    |             |                 |                |                  |                |                  | 12 |
| 2  | 145.060768  | 73.034022       |                |                  | 127.050203     | 64.028740        | G    | 1824.909502 | 912.958389      | 1807.882953    | 904.445115       | 1806.898937    | 903.953107       | 11 |
| 3  | 232.092796  | 116.550036      |                |                  | 214.082231     | 107.544753       | S    | 1767.888038 | 884.447657      | 1750.861489    | 875.934383       | 1749.877473    | 875.442375       | 10 |
| 4  | 347.119739  | 174.063507      |                |                  | 329.109174     | 165.058225       | D    | 1680.856010 | 840.931643      | 1663.829461    | 832.418369       | 1662.845445    | 831.926361       | 9  |
| 5  | 476.162332  | 238.584804      |                |                  | 458.151767     | 229.579522       | E    | 1565.829067 | 783.418172      | 1548.802518    | 774.904897       | 1547.818502    | 774.412889       | 8  |
| 6  | 575.230746  | 288.119011      |                |                  | 557.220181     | 279.113729       | V    | 1436.786474 | 718.896875      | 1419.759925    | 710.383601       |                |                  | 7  |
| 7  | 703.289324  | 352.148300      | 686.262775     | 343.635026       | 685.278759     | 343.143018       | Q    | 1337.718060 | 669.362668      | 1320.691511    | 660.849394       |                |                  | 6  |
| 8  | 802.357738  | 401.682507      | 785.331189     | 393.169233       | 784.347173     | 392.677225       | V    | 1209.659482 | 605.333379      | 1192.632933    | 596.820105       |                |                  | 5  |
| 9  | 859.379202  | 430.193239      | 842.352653     | 421.679965       | 841.368637     | 421.187957       | G    | 1110.591068 | 555.799172      | 1093.564519    | 547.285898       |                |                  | 4  |
| 10 | 1298.604528 | 649.805902      | 1281.577979    | 641.292628       | 1280.593963    | 640.800620       | Q    | 1053.569604 | 527.288440      | 1036.543055    | 518.775166       |                |                  | 3  |
| 11 | 1737.829854 | 869.418565      | 1720.803305    | 860.905291       | 1719.819289    | 860.413283       | Q    | 614.344278  | 307.675777      | 597.317729     | 299.162503       |                |                  | 2  |
| 12 |             |                 |                |                  |                |                  | R    | 175.118952  | 88.063114       | 158.092403     | 79.549839        |                |                  | 1  |

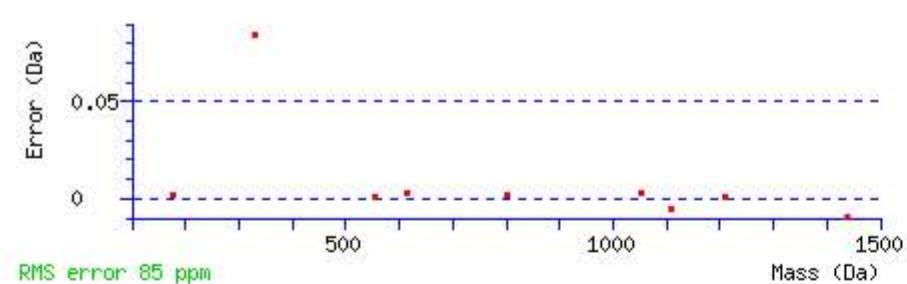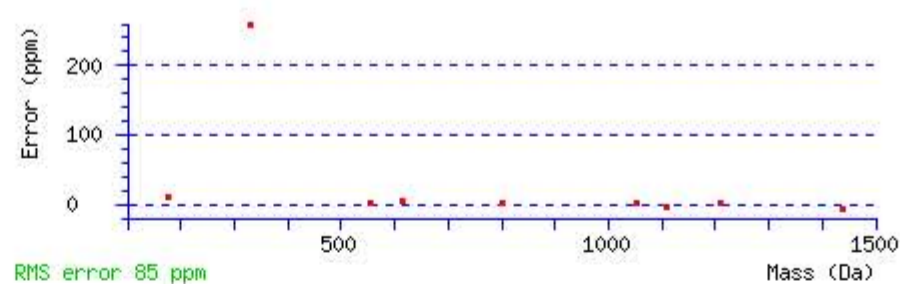

NCBI BLAST search of **SGSDEVQVGQQR**

(Parameters: blastp, nr protein database, expect=20000, no filter, PAM30)

Other BLAST [web gateways](#)

All matches to this query

| Score | Mr(calc):   | Delta     | Sequence                             |
|-------|-------------|-----------|--------------------------------------|
| 36.2  | 1910.934265 | 0.004067  | <a href="#">SGSDEVQVGQQR</a>         |
| 9.2   | 1910.934265 | 0.004067  | <a href="#">SGSDEVQVGQQR</a>         |
| 5.8   | 1910.958542 | -0.020210 | <a href="#">TDDYGRDLSSVQILLTK</a>    |
| 5.2   | 1910.934265 | 0.004067  | <a href="#">SGSDEVQVGQQR</a>         |
| 2.9   | 1910.960709 | -0.022377 | <a href="#">VGAPAWREAAQAMAR</a>      |
| 0.8   | 1910.915619 | 0.022713  | <a href="#">EDSGSGMKAELPPGPGAVGR</a> |

# MASCOT SCIENCE Mascot Search Results

## Peptide View

MS/MS Fragmentation of **SGIPIVTSPYQIHFTK**

Found in **CO3\_HUMAN**, Complement C3 OS=Homo sapiens GN=C3 PE=1 SV=2

Match to Query 44435: 2098.137942 from(700.386590,3+) rtinseconds(2354) index(35027)

Title: Locus:1.1.1.3369.7 File:"2013-07-02 CLN FXIII 60 min 3rd F 3.wiff"

Data file C:\Program Files (x86)\Matrix Science\Mascot Daemon\mgf\6 FXIII 60 min 3rd\mascot\_daemon\_merge.mgf

Click mouse within plot area to zoom in by factor of two about that point

Or, Plot from  to  Da

Label all possible matches  Label matches used for scoring

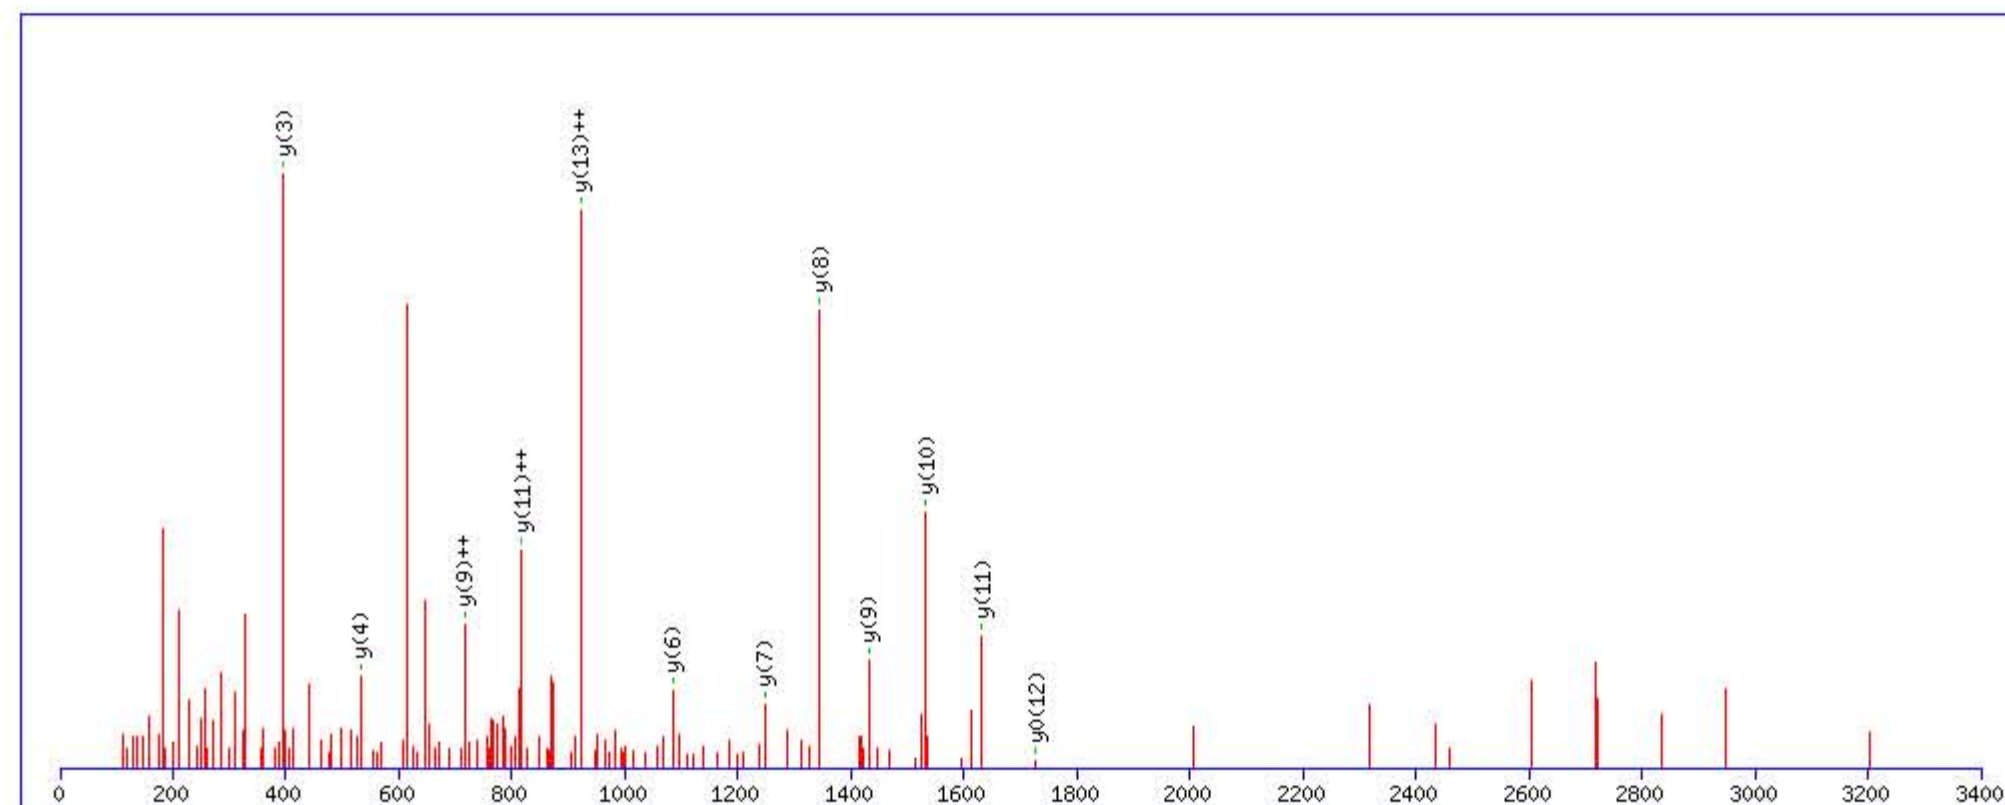

Monoisotopic mass of neutral peptide Mr(calc): 2098.128525

Fixed modifications: Carbamidomethyl (C) (apply to specified residues or termini only)

Variable modifications:

Q11 : Biotin:Thermo-21345 (Q)

Ions Score: 53 Expect: 9.8e-005

Matches : 12/158 fragment ions using 18 most intense peaks [\(help\)](#)

| #  | b           | b <sup>++</sup> | b <sup>+</sup> | b <sup>+++</sup> | b <sup>0</sup> | b <sup>0++</sup> | Seq. | y           | y <sup>++</sup> | y <sup>+</sup> | y <sup>+++</sup> | y <sup>0</sup> | y <sup>0++</sup> | #  |
|----|-------------|-----------------|----------------|------------------|----------------|------------------|------|-------------|-----------------|----------------|------------------|----------------|------------------|----|
| 1  | 88.039304   | 44.523290       |                |                  | 70.028739      | 35.518008        | S    |             |                 |                |                  |                |                  | 16 |
| 2  | 145.060768  | 73.034022       |                |                  | 127.050203     | 64.028740        | G    | 2012.103769 | 1006.555523     | 1995.077220    | 998.042248       | 1994.093204    | 997.550240       | 15 |
| 3  | 258.144832  | 129.576054      |                |                  | 240.134267     | 120.570772       | I    | 1955.082305 | 978.044791      | 1938.055756    | 969.531516       | 1937.071740    | 969.039508       | 14 |
| 4  | 355.197596  | 178.102436      |                |                  | 337.187031     | 169.097154       | P    | 1841.998241 | 921.502759      | 1824.971692    | 912.989484       | 1823.987676    | 912.497476       | 13 |
| 5  | 468.281660  | 234.644468      |                |                  | 450.271095     | 225.639186       | I    | 1744.945477 | 872.976377      | 1727.918928    | 864.463102       | 1726.934912    | 863.971094       | 12 |
| 6  | 567.350074  | 284.178675      |                |                  | 549.339509     | 275.173393       | V    | 1631.861413 | 816.434345      | 1614.834864    | 807.921070       | 1613.850848    | 807.429062       | 11 |
| 7  | 668.397753  | 334.702515      |                |                  | 650.387188     | 325.697232       | T    | 1532.792999 | 766.900138      | 1515.766450    | 758.386863       | 1514.782434    | 757.894855       | 10 |
| 8  | 755.429781  | 378.218529      |                |                  | 737.419216     | 369.213246       | S    | 1431.745320 | 716.376298      | 1414.718771    | 707.863024       | 1413.734755    | 707.371016       | 9  |
| 9  | 852.482545  | 426.744911      |                |                  | 834.471980     | 417.739628       | P    | 1344.713292 | 672.860284      | 1327.686743    | 664.347010       | 1326.702727    | 663.855002       | 8  |
| 10 | 1015.545874 | 508.276575      |                |                  | 997.535309     | 499.271293       | Y    | 1247.660528 | 624.333902      | 1230.633979    | 615.820628       | 1229.649963    | 615.328620       | 7  |
| 11 | 1454.771200 | 727.889238      | 1437.744651    | 719.375964       | 1436.760635    | 718.883956       | Q    | 1084.597199 | 542.802238      | 1067.570650    | 534.288963       | 1066.586634    | 533.796955       | 6  |
| 12 | 1567.855264 | 784.431270      | 1550.828715    | 775.917996       | 1549.844699    | 775.425988       | I    | 645.371873  | 323.189574      | 628.345324     | 314.676300       | 627.361308     | 314.184292       | 5  |
| 13 | 1704.914176 | 852.960726      | 1687.887627    | 844.447452       | 1686.903611    | 843.955444       | H    | 532.287809  | 266.647542      | 515.261260     | 258.134268       | 514.277244     | 257.642260       | 4  |
| 14 | 1851.982590 | 926.494933      | 1834.956041    | 917.981659       | 1833.972025    | 917.489651       | F    | 395.228897  | 198.118086      | 378.202348     | 189.604812       | 377.218332     | 189.112804       | 3  |
| 15 | 1953.030269 | 977.018773      | 1936.003720    | 968.505498       | 1935.019704    | 968.013490       | T    | 248.160483  | 124.583879      | 231.133934     | 116.070605       | 230.149918     | 115.578597       | 2  |
| 16 |             |                 |                |                  |                |                  | K    | 147.112804  | 74.060040       | 130.086255     | 65.546765        |                |                  | 1  |

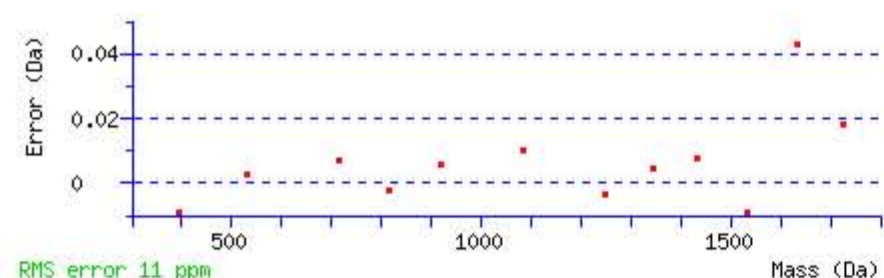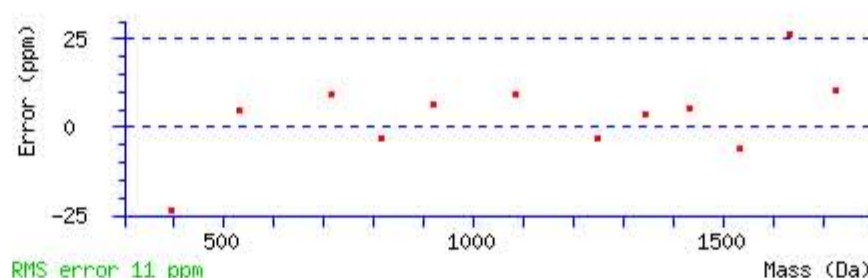

NCBI BLAST search of [SGIPIVTSPYQIHFTK](#)

(Parameters: blastp, nr protein database, expect=20000, no filter, PAM30)

Other BLAST [web gateways](#)

All matches to this query

| Score | Mr(calc):   | Delta    | Sequence                         |
|-------|-------------|----------|----------------------------------|
| 53.0  | 2098.128525 | 0.009417 | <a href="#">SGIPIVTSPYQIHFTK</a> |

Mascot: <http://www.matrixscience.com/>

**Peptide View**

MS/MS Fragmentation of **LSINTHPSQKPLSITVR**

Found in **CO3\_HUMAN**, Complement C3 OS=Homo sapiens GN=C3 PE=1 SV=2

Match to Query 46022: 2201.238942 from(734.753590,3+) rtinseconds(1893) index(32366)

Title: Locus:1.1.1.3208.25 File:"2013-07-02 CLN FXIII 60 min 3rd F 3.wiff"

Data file C:\Program Files (x86)\Matrix Science\Mascot Daemon\mgf\6 FXIII 60 min 3rd\mascot\_daemon\_merge.mgf

Click mouse within plot area to zoom in by factor of two about that point

Or, Plot from  to  Da

Label all possible matches  Label matches used for scoring

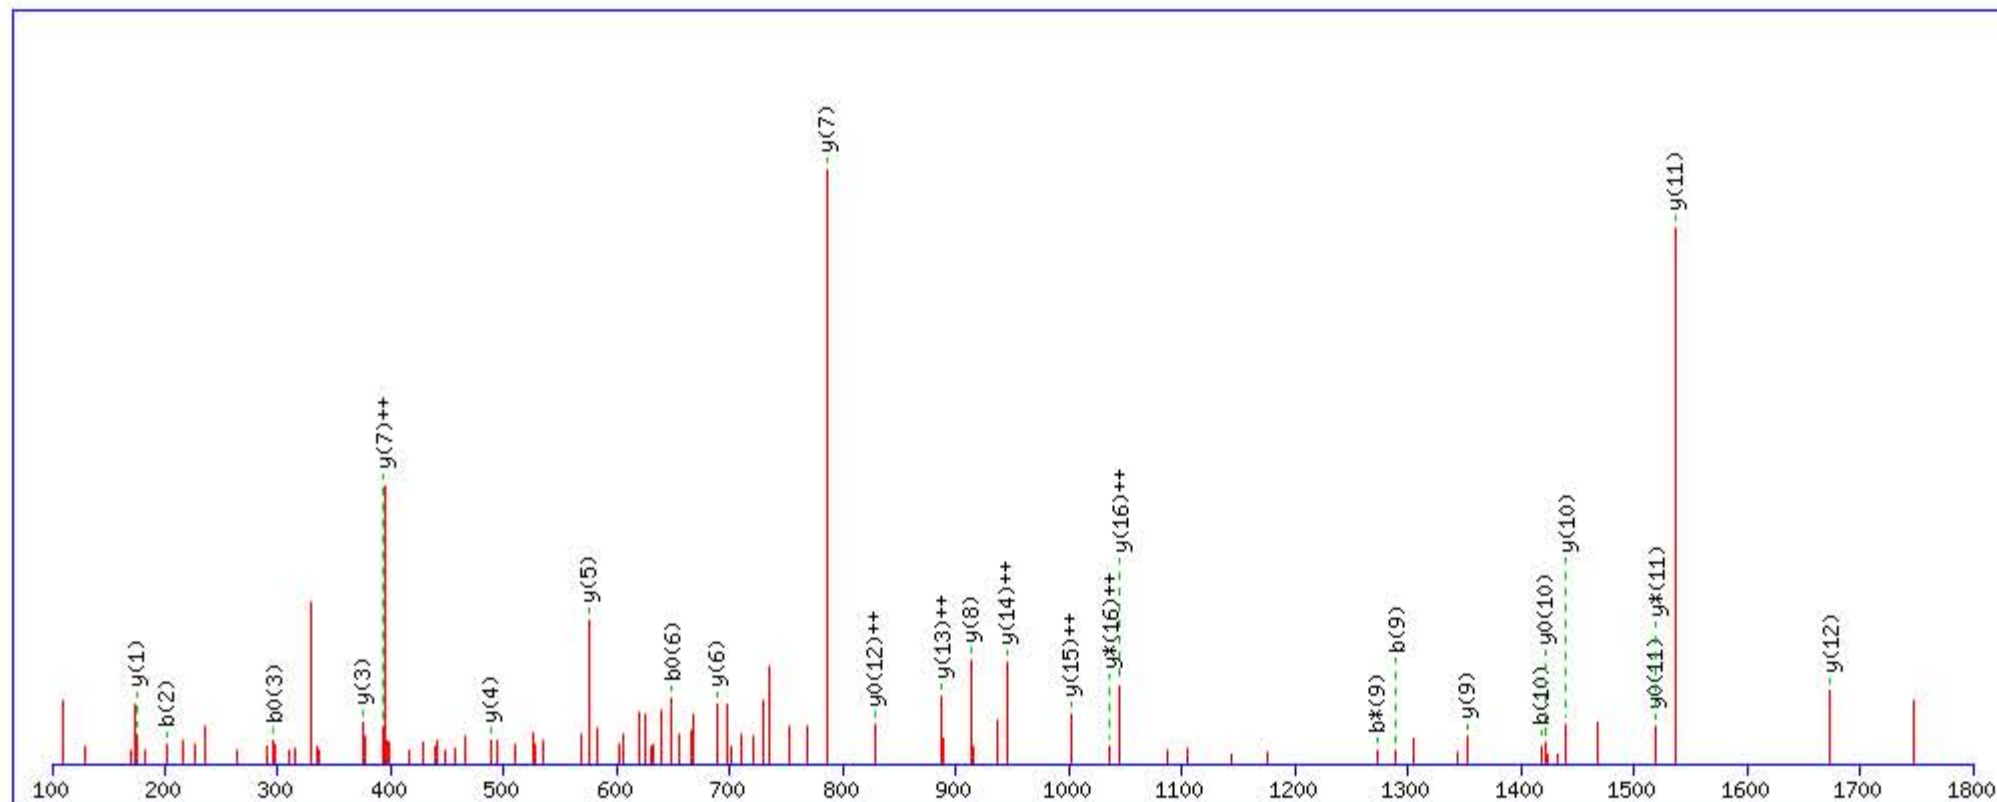

Monoisotopic mass of neutral peptide  $M_r(\text{calc})$ : 2201.235428

Fixed modifications: Carbamidomethyl (C) (apply to specified residues or termini only)

Variable modifications:

Q9 : Biotin:Thermo-21345 (Q)

Ions Score: 57 Expect: 1.7e-005

Matches : 27/180 fragment ions using 56 most intense peaks ([help](#))

| #  | b                  | b <sup>++</sup> | b <sup>*</sup>     | b <sup>+++</sup> | b <sup>0</sup>    | b <sup>0++</sup> | Seq. | y                  | y <sup>++</sup>    | y <sup>*</sup>     | y <sup>+++</sup>   | y <sup>0</sup>     | y <sup>0++</sup>  | #  |
|----|--------------------|-----------------|--------------------|------------------|-------------------|------------------|------|--------------------|--------------------|--------------------|--------------------|--------------------|-------------------|----|
| 1  | 114.091340         | 57.549308       |                    |                  |                   |                  | L    |                    |                    |                    |                    |                    |                   | 17 |
| 2  | <b>201.123368</b>  | 101.065322      |                    |                  | 183.112803        | 92.060039        | S    | 2089.158656        | <b>1045.082966</b> | 2072.132107        | <b>1036.569691</b> | 2071.148091        | 1036.077683       | 16 |
| 3  | 314.207432         | 157.607354      |                    |                  | <b>296.196867</b> | 148.602071       | I    | 2002.126628        | <b>1001.566952</b> | 1985.100079        | 993.053678         | 1984.116063        | 992.561669        | 15 |
| 4  | 428.250359         | 214.628818      | 411.223810         | 206.115543       | 410.239794        | 205.623535       | N    | 1889.042564        | <b>945.024920</b>  | 1872.016015        | 936.511646         | 1871.031999        | 936.019638        | 14 |
| 5  | 529.298038         | 265.152657      | 512.271489         | 256.639383       | 511.287473        | 256.147375       | T    | 1774.999637        | <b>888.003456</b>  | 1757.973088        | 879.490182         | 1756.989072        | 878.998174        | 13 |
| 6  | 666.356950         | 333.682113      | 649.330401         | 325.168838       | <b>648.346385</b> | 324.676830       | H    | <b>1673.951958</b> | 837.479617         | 1656.925409        | 828.966343         | 1655.941393        | <b>828.474334</b> | 12 |
| 7  | 763.409714         | 382.208495      | 746.383165         | 373.695221       | 745.399149        | 373.203213       | P    | <b>1536.893046</b> | 768.950161         | <b>1519.866497</b> | 760.436887         | <b>1518.882481</b> | 759.944878        | 11 |
| 8  | 850.441742         | 425.724509      | 833.415193         | 417.211234       | 832.431177        | 416.719226       | S    | <b>1439.840282</b> | 720.423779         | 1422.813733        | 711.910505         | <b>1421.829717</b> | 711.418496        | 10 |
| 9  | <b>1289.667068</b> | 645.337172      | <b>1272.640519</b> | 636.823898       | 1271.656503       | 636.331889       | Q    | <b>1352.808254</b> | 676.907765         | 1335.781705        | 668.394491         | 1334.797689        | 667.902483        | 9  |
| 10 | <b>1417.762031</b> | 709.384654      | 1400.735482        | 700.871379       | 1399.751466       | 700.379371       | K    | <b>913.582928</b>  | 457.295102         | 896.556379         | 448.781828         | 895.572363         | 448.289820        | 8  |
| 11 | 1514.814795        | 757.911036      | 1497.788246        | 749.397761       | 1496.804230       | 748.905753       | P    | <b>785.487965</b>  | <b>393.247621</b>  | 768.461416         | 384.734346         | 767.477400         | 384.242338        | 7  |
| 12 | 1627.898859        | 814.453067      | 1610.872310        | 805.939793       | 1609.888294       | 805.447785       | L    | <b>688.435201</b>  | 344.721239         | 671.408652         | 336.207964         | 670.424636         | 335.715956        | 6  |
| 13 | 1714.930887        | 857.969082      | 1697.904338        | 849.455807       | 1696.920322       | 848.963799       | S    | <b>575.351137</b>  | 288.179207         | 558.324588         | 279.665932         | 557.340572         | 279.173924        | 5  |
| 14 | 1828.014951        | 914.511113      | 1810.988402        | 905.997839       | 1810.004386       | 905.505831       | I    | <b>488.319109</b>  | 244.663192         | 471.292560         | 236.149918         | 470.308544         | 235.657910        | 4  |
| 15 | 1929.062630        | 965.034953      | 1912.036081        | 956.521679       | 1911.052065       | 956.029670       | T    | <b>375.235045</b>  | 188.121161         | 358.208496         | 179.607886         | 357.224480         | 179.115878        | 3  |
| 16 | 2028.131044        | 1014.569160     | 2011.104495        | 1006.055886      | 2010.120479       | 1005.563878      | V    | 274.187366         | 137.597321         | 257.160817         | 129.084047         |                    |                   | 2  |
| 17 |                    |                 |                    |                  |                   |                  | R    | <b>175.118952</b>  | 88.063114          | 158.092403         | 79.549839          |                    |                   | 1  |

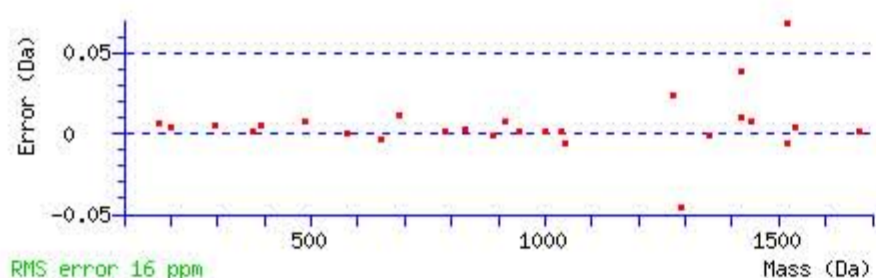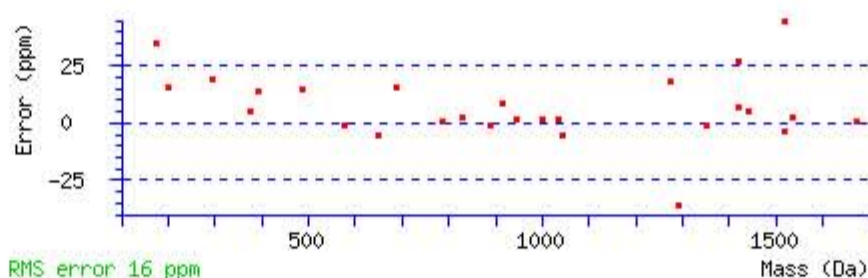

NCBI BLAST search of [LSINTHPSQKPLSITVR](#)

(Parameters: blastp, nr protein database, expect=20000, no filter, PAM30)

Other BLAST [web gateways](#)

**All matches to this query**

| Score | $M_r(\text{calc})$ : | Delta    | Sequence                          |
|-------|----------------------|----------|-----------------------------------|
| 57.0  | 2201.235428          | 0.003514 | <a href="#">LSINTHPSQKPLSITVR</a> |

# *MATRIX SCIENCE* Mascot Search Results

## Peptide View

MS/MS Fragmentation of **DAPDHQELNLDVSLQLPSR**

Found in **CO3\_HUMAN**, Complement C3 OS=Homo sapiens GN=C3 PE=1 SV=2

Match to Query 50048: 2457.244122 from(820.088650,3+) rtinseconds(2553) index(36060)

Title: Locus:1.1.1.3438.10 File:"2013-07-02 CLN FXIII 60 min 3rd F 3.wiff"

Data file C:\Program Files (x86)\Matrix Science\Mascot Daemon\mgf6 FXIII 60 min 3rd\mascot\_daemon\_merge.mgf

Click mouse within plot area to zoom in by factor of two about that point

Or, Plot from  to  Da

Label all possible matches  Label matches used for scoring

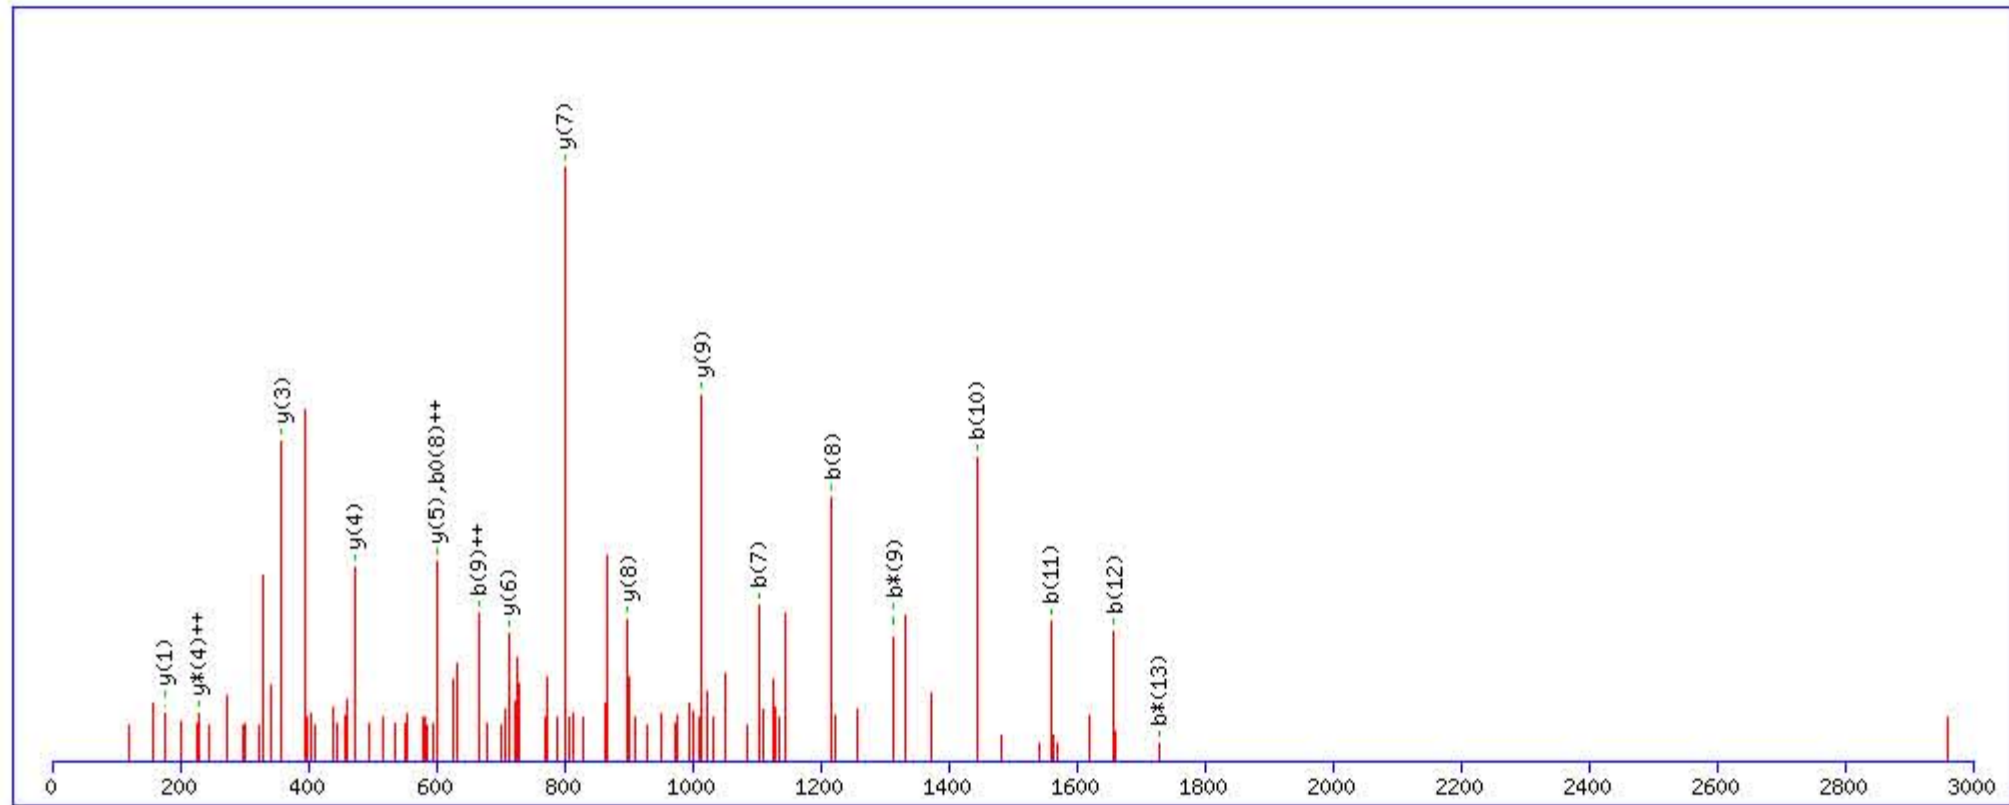

Monoisotopic mass of neutral peptide Mr(calc): 2457.232193

Fixed modifications: Carbamidomethyl (C) (apply to specified residues or termini only)

Variable modifications:

Q6 : Biotin:Thermo-21345 (Q)

Ions Score: 35 Expect: 0.0047

Matches : 18/204 fragment ions using 33 most intense peaks [\(help\)](#)

| #  | b                  | b <sup>++</sup>   | b <sup>*</sup>     | b <sup>*++</sup> | b <sup>0</sup> | b <sup>0++</sup>  | Seq. | y                  | y <sup>++</sup> | y <sup>*</sup> | y <sup>*++</sup>  | y <sup>0</sup> | y <sup>0++</sup> | #  |
|----|--------------------|-------------------|--------------------|------------------|----------------|-------------------|------|--------------------|-----------------|----------------|-------------------|----------------|------------------|----|
| 1  | 116.034219         | 58.520748         |                    |                  | 98.023654      | 49.515465         | D    |                    |                 |                |                   |                |                  | 19 |
| 2  | 187.071333         | 94.039304         |                    |                  | 169.060768     | 85.034022         | A    | 2343.212542        | 1172.109909     | 2326.185993    | 1163.596634       | 2325.201977    | 1163.104626      | 18 |
| 3  | 284.124097         | 142.565686        |                    |                  | 266.113532     | 133.560404        | P    | 2272.175428        | 1136.591352     | 2255.148879    | 1128.078077       | 2254.164863    | 1127.586069      | 17 |
| 4  | 399.151040         | 200.079158        |                    |                  | 381.140475     | 191.073875        | D    | 2175.122664        | 1088.064970     | 2158.096115    | 1079.551695       | 2157.112099    | 1079.059687      | 16 |
| 5  | 536.209952         | 268.608614        |                    |                  | 518.199387     | 259.603332        | H    | 2060.095721        | 1030.551498     | 2043.069172    | 1022.038224       | 2042.085156    | 1021.546216      | 15 |
| 6  | 975.435278         | 488.221277        | 958.408729         | 479.708003       | 957.424713     | 479.215995        | Q    | 1923.036809        | 962.022043      | 1906.010260    | 953.508768        | 1905.026244    | 953.016760       | 14 |
| 7  | <b>1104.477871</b> | 552.742574        | 1087.451322        | 544.229299       | 1086.467306    | 543.737291        | E    | 1483.811483        | 742.409380      | 1466.784934    | 733.896105        | 1465.800918    | 733.404097       | 13 |
| 8  | <b>1217.561935</b> | 609.284606        | 1200.535386        | 600.771331       | 1199.551370    | <b>600.279323</b> | L    | 1354.768890        | 677.888083      | 1337.742341    | 669.374809        | 1336.758325    | 668.882801       | 12 |
| 9  | 1331.604862        | <b>666.306069</b> | <b>1314.578313</b> | 657.792795       | 1313.594297    | 657.300786        | N    | 1241.684826        | 621.346051      | 1224.658277    | 612.832777        | 1223.674261    | 612.340769       | 11 |
| 10 | <b>1444.688926</b> | 722.848101        | 1427.662377        | 714.334826       | 1426.678361    | 713.842818        | L    | 1127.641899        | 564.324588      | 1110.615350    | 555.811313        | 1109.631334    | 555.319305       | 10 |
| 11 | <b>1559.715869</b> | 780.361572        | 1542.689320        | 771.848298       | 1541.705304    | 771.356290        | D    | <b>1014.557835</b> | 507.782556      | 997.531286     | 499.269281        | 996.547270     | 498.777273       | 9  |
| 12 | <b>1658.784283</b> | 829.895780        | 1641.757734        | 821.382505       | 1640.773718    | 820.890497        | V    | <b>899.530892</b>  | 450.269084      | 882.504343     | 441.755810        | 881.520327     | 441.263802       | 8  |
| 13 | 1745.816311        | 873.411794        | <b>1728.789762</b> | 864.898519       | 1727.805746    | 864.406511        | S    | <b>800.462478</b>  | 400.734877      | 783.435929     | 392.221603        | 782.451913     | 391.729595       | 7  |
| 14 | 1858.900375        | 929.953825        | 1841.873826        | 921.440551       | 1840.889810    | 920.948543        | L    | <b>713.430450</b>  | 357.218863      | 696.403901     | 348.705589        | 695.419885     | 348.213581       | 6  |
| 15 | 1986.958953        | 993.983115        | 1969.932404        | 985.469840       | 1968.948388    | 984.977832        | Q    | <b>600.346386</b>  | 300.676831      | 583.319837     | 292.163557        | 582.335821     | 291.671549       | 5  |
| 16 | 2100.043017        | 1050.525146       | 2083.016468        | 1042.011872      | 2082.032452    | 1041.519864       | L    | <b>472.287808</b>  | 236.647542      | 455.261259     | <b>228.134268</b> | 454.277243     | 227.642260       | 4  |
| 17 | 2197.095781        | 1099.051528       | 2180.069232        | 1090.538254      | 2179.085216    | 1090.046246       | P    | <b>359.203744</b>  | 180.105510      | 342.177195     | 171.592236        | 341.193179     | 171.100228       | 3  |
| 18 | 2284.127809        | 1142.567542       | 2267.101260        | 1134.054268      | 2266.117244    | 1133.562260       | S    | 262.150980         | 131.579128      | 245.124431     | 123.065854        | 244.140415     | 122.573846       | 2  |
| 19 |                    |                   |                    |                  |                |                   | R    | <b>175.118952</b>  | 88.063114       | 158.092403     | 79.549839         |                |                  | 1  |

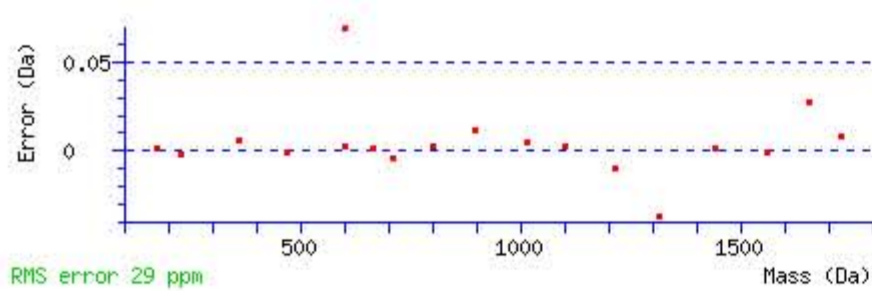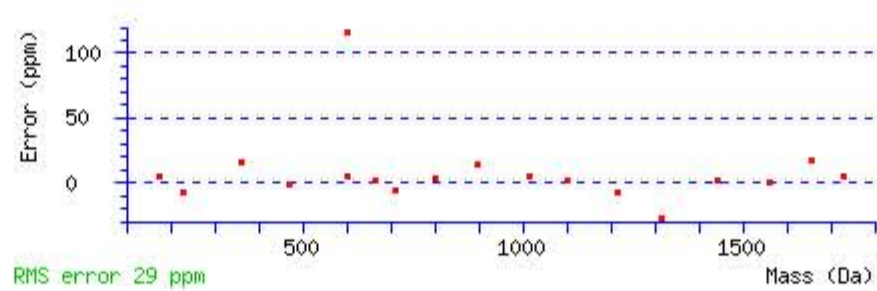

NCBI BLAST search of [DAPDHQELNLDVSLQLPSR](#)

(Parameters: blastp, nr protein database, expect=20000, no filter, PAM30)

Other BLAST [web gateways](#)

All matches to this query

| Score | Mr(calc):   | Delta     | Sequence                                 |
|-------|-------------|-----------|------------------------------------------|
| 34.7  | 2457.232193 | 0.011929  | <a href="#">DAPDHQELNLDVSLQLPSR</a>      |
| 9.4   | 2457.243423 | 0.000699  | <a href="#">TGLSDAFMILNPSDPVPSRRR</a>    |
| 4.5   | 2457.278442 | -0.034320 | <a href="#">EPVSNSVTAEAGMEALTKILAELR</a> |
| 0.5   | 2457.244080 | 0.000042  | <a href="#">AKFHQTEGDHLTLAVYNSWK</a>     |

Mascot: <http://www.matrixscience.com/>

# MASCOT Search Results

## Peptide View

MS/MS Fragmentation of **ILLQGTPVAQMTEDAVDAER**  
 Found in **CO3\_HUMAN**, Complement C3 OS=Homo sapiens GN=C3 PE=1 SV=2

Match to Query 50261: 2467.253922 from(823.425250,3+) rtinseconds(2676) index(36685)  
 Title: Locus:1.1.1.3480.10 File:"2013-07-02 CLN FXIII 60 min 3rd F 3.wiff"  
 Data file C:\Program Files (x86)\Matrix Science\Mascot Daemon\mgf\6 FXIII 60 min 3rd\mascot\_daemon\_merge.mgf

Click mouse within plot area to zoom in by factor of two about that point

Or, Plot from 100 to 1900 Da  Full range

Label all possible matches  Label matches used for scoring

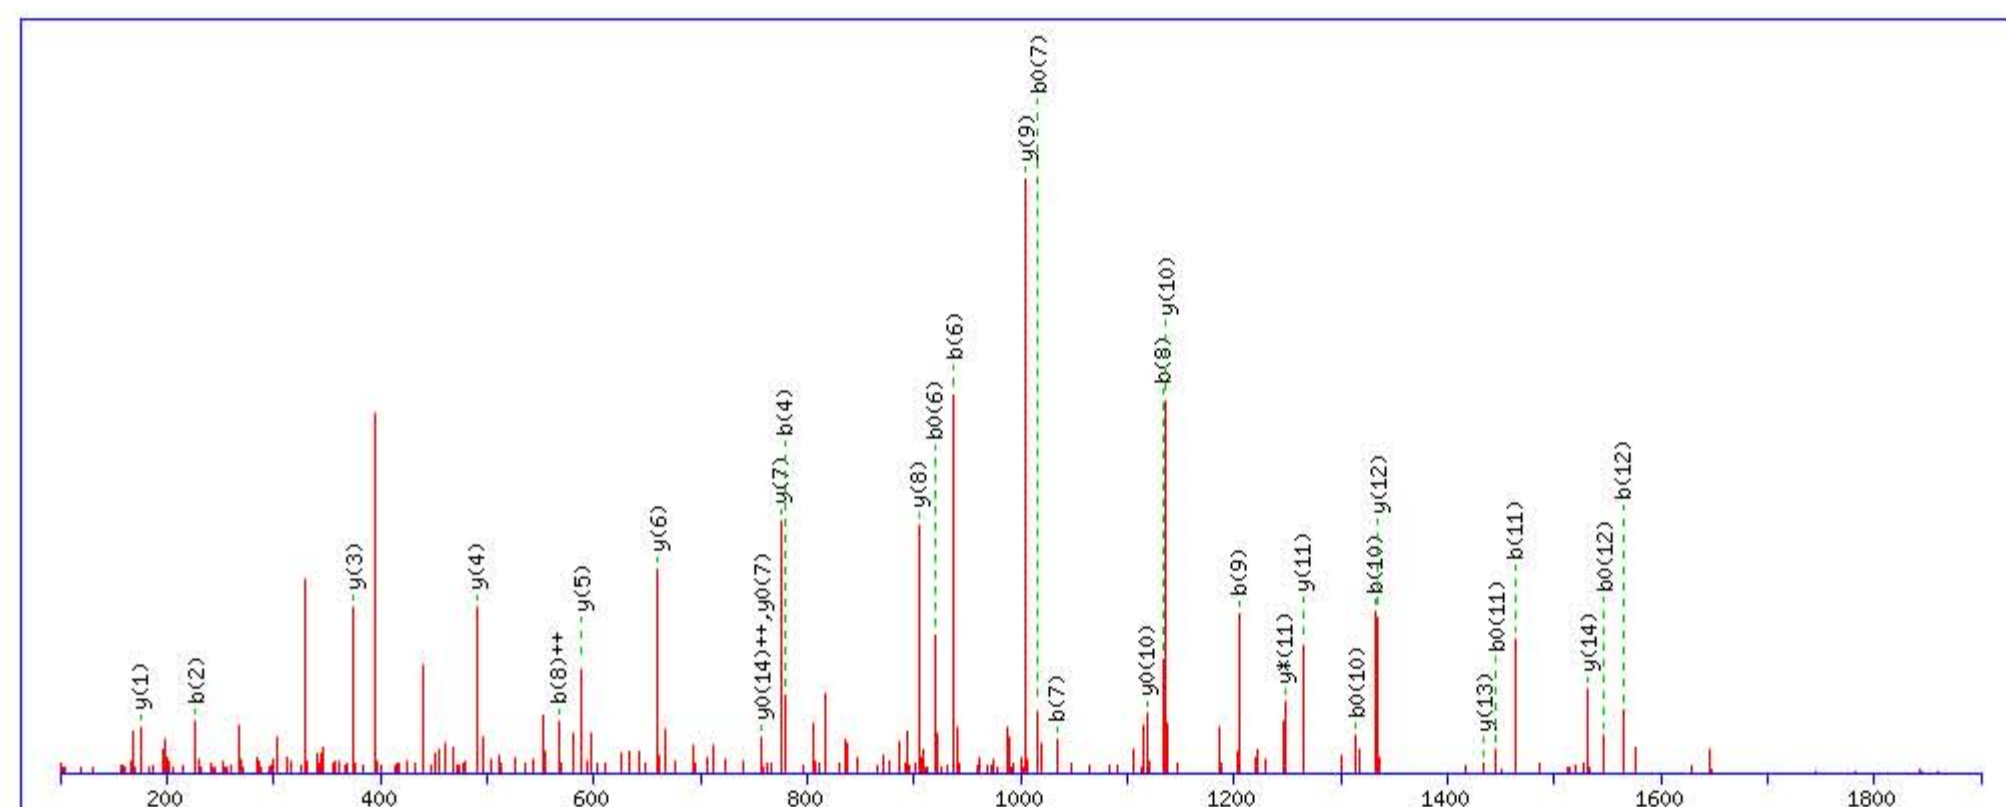

Monoisotopic mass of neutral peptide  $M_r(\text{calc})$ : 2467.245071  
 Fixed modifications: Carbamidomethyl (C) (apply to specified residues or termini only)  
 Variable modifications:  
 Q4 : Biotin:Thermo-21345 (Q)  
 Ions Score: 78 Expect: 4.8e-007  
 Matches : 32/210 fragment ions using 53 most intense peaks ([help](#))

| #  | b                  | b <sup>++</sup>   | b <sup>*</sup> | b <sup>*++</sup> | b <sup>0</sup>     | b <sup>0++</sup> | Seq. | y                  | y <sup>++</sup> | y <sup>*</sup>     | y <sup>*++</sup> | y <sup>0</sup>     | y <sup>0++</sup>  | #  |
|----|--------------------|-------------------|----------------|------------------|--------------------|------------------|------|--------------------|-----------------|--------------------|------------------|--------------------|-------------------|----|
| 1  | 114.091340         | 57.549308         |                |                  |                    |                  | I    |                    |                 |                    |                  |                    |                   | 20 |
| 2  | <b>227.175404</b>  | 114.091340        |                |                  |                    |                  | L    | 2355.168297        | 1178.087786     | 2338.141748        | 1169.574512      | 2337.157732        | 1169.082504       | 19 |
| 3  | 340.259468         | 170.633372        |                |                  |                    |                  | L    | 2242.084233        | 1121.545754     | 2225.057684        | 1113.032480      | 2224.073668        | 1112.540472       | 18 |
| 4  | <b>779.484794</b>  | 390.246035        | 762.458245     | 381.732760       |                    |                  | Q    | 2129.000169        | 1065.003722     | 2111.973620        | 1056.490448      | 2110.989604        | 1055.998440       | 17 |
| 5  | 836.506258         | 418.756767        | 819.479709     | 410.243493       |                    |                  | G    | 1689.774843        | 845.391060      | 1672.748294        | 836.877785       | 1671.764278        | 836.385777        | 16 |
| 6  | <b>937.553937</b>  | 469.280607        | 920.527388     | 460.767332       | <b>919.543372</b>  | 460.275324       | T    | 1632.753379        | 816.880328      | 1615.726830        | 808.367053       | 1614.742814        | 807.875045        | 15 |
| 7  | <b>1034.606701</b> | 517.806988        | 1017.580152    | 509.293714       | <b>1016.596136</b> | 508.801706       | P    | <b>1531.705700</b> | 766.356488      | 1514.679151        | 757.843214       | 1513.695135        | <b>757.351206</b> | 14 |
| 8  | <b>1133.675115</b> | <b>567.341196</b> | 1116.648566    | 558.827921       | 1115.664550        | 558.335913       | V    | <b>1434.652936</b> | 717.830106      | 1417.626387        | 709.316832       | 1416.642371        | 708.824824        | 13 |
| 9  | <b>1204.712229</b> | 602.859753        | 1187.685680    | 594.346478       | 1186.701664        | 593.854470       | A    | <b>1335.584522</b> | 668.295899      | 1318.557973        | 659.782625       | 1317.573957        | 659.290617        | 12 |
| 10 | <b>1332.770807</b> | 666.889042        | 1315.744258    | 658.375767       | <b>1314.760242</b> | 657.883759       | Q    | <b>1264.547408</b> | 632.777342      | <b>1247.520859</b> | 624.264068       | 1246.536843        | 623.772060        | 11 |
| 11 | <b>1463.811292</b> | 732.409284        | 1446.784743    | 723.896010       | <b>1445.800727</b> | 723.404002       | M    | <b>1136.488830</b> | 568.748053      | 1119.462281        | 560.234779       | <b>1118.478265</b> | 559.742771        | 10 |
| 12 | <b>1564.858971</b> | 782.933124        | 1547.832422    | 774.419849       | <b>1546.848406</b> | 773.927841       | T    | <b>1005.448345</b> | 503.227811      | 988.421796         | 494.714536       | 987.437780         | 494.222528        | 9  |
| 13 | 1693.901564        | 847.454420        | 1676.875015    | 838.941146       | 1675.890999        | 838.449138       | E    | <b>904.400666</b>  | 452.703971      | 887.374117         | 444.190697       | 886.390101         | 443.698689        | 8  |
| 14 | 1808.928507        | 904.967892        | 1791.901958    | 896.454617       | 1790.917942        | 895.962609       | D    | <b>775.358073</b>  | 388.182675      | 758.331524         | 379.669400       | <b>757.347508</b>  | 379.177392        | 7  |
| 15 | 1879.965621        | 940.486449        | 1862.939072    | 931.973174       | 1861.955056        | 931.481166       | A    | <b>660.331130</b>  | 330.669203      | 643.304581         | 322.155929       | 642.320565         | 321.663921        | 6  |
| 16 | 1979.034035        | 990.020656        | 1962.007486    | 981.507381       | 1961.023470        | 981.015373       | V    | <b>589.294016</b>  | 295.150646      | 572.267467         | 286.637372       | 571.283451         | 286.145364        | 5  |
| 17 | 2094.060978        | 1047.534127       | 2077.034429    | 1039.020852      | 2076.050413        | 1038.528844      | D    | <b>490.225602</b>  | 245.616439      | 473.199053         | 237.103165       | 472.215037         | 236.611157        | 4  |
| 18 | 2165.098092        | 1083.052684       | 2148.071543    | 1074.539409      | 2147.087527        | 1074.047402      | A    | <b>375.198659</b>  | 188.102968      | 358.172110         | 179.589693       | 357.188094         | 179.097685        | 3  |
| 19 | 2294.140685        | 1147.573981       | 2277.114136    | 1139.060706      | 2276.130120        | 1138.568698      | E    | 304.161545         | 152.584411      | 287.134996         | 144.071136       | 286.150980         | 143.579128        | 2  |
| 20 |                    |                   |                |                  |                    |                  | R    | <b>175.118952</b>  | 88.063114       | 158.092403         | 79.549839        |                    |                   | 1  |

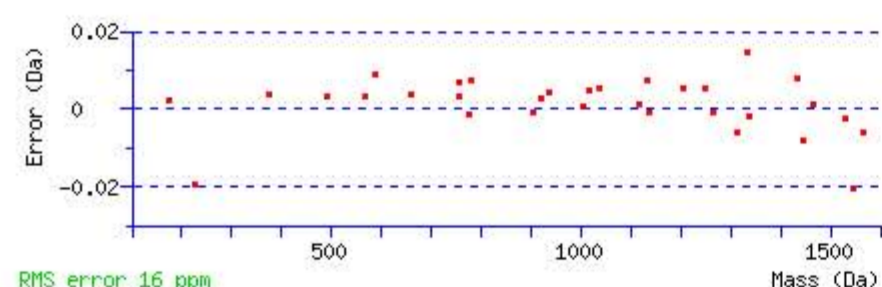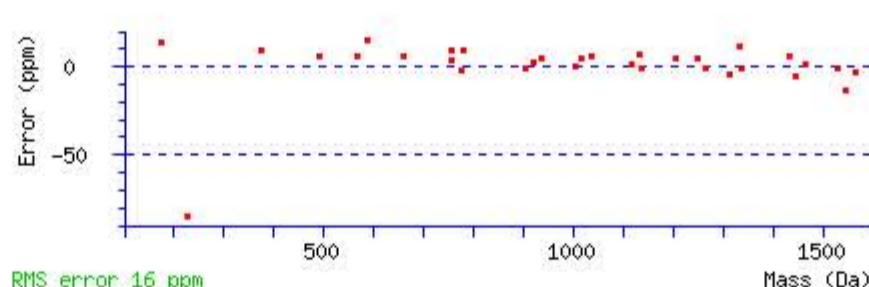

NCBI BLAST search of **ILLQGTPVAQMTEDAVDAER**  
 (Parameters: blastp, nr protein database, expect=20000, no filter, PAM30)  
 Other BLAST [web gateways](#)

### All matches to this query

| Score | $M_r(\text{calc})$ : | Delta    | Sequence                             |
|-------|----------------------|----------|--------------------------------------|
| 78.0  | 2467.245071          | 0.008851 | <a href="#">ILLQGTPVAQMTEDAVDAER</a> |
| 72.5  | 2467.245071          | 0.008851 | <a href="#">ILLQGTPVAQMTEDAVDAER</a> |

## Peptide View

MS/MS Fragmentation of **ILLQGTPVAQMTEDAVDAER**  
Found in **CO3\_HUMAN**, Complement C3 OS=Homo sapiens GN=C3 PE=1 SV=2

Match to Query 50662: 2483.248182 from(828.756670,3+) rtinseconds(2249) index(34600)  
Title: Locus:1.1.1.3332.12 File:"2013-07-02 CLN FXIII 60 min 3rd F 3.wiff"  
Data file C:\Program Files (x86)\Matrix Science\Mascot Daemon\mgf6 FXIII 60 min 3rd\mascot\_daemon\_merge.mgf

Click mouse within plot area to zoom in by factor of two about that point  
Or, Plot from  to  Da   
Label all possible matches  Label matches used for scoring

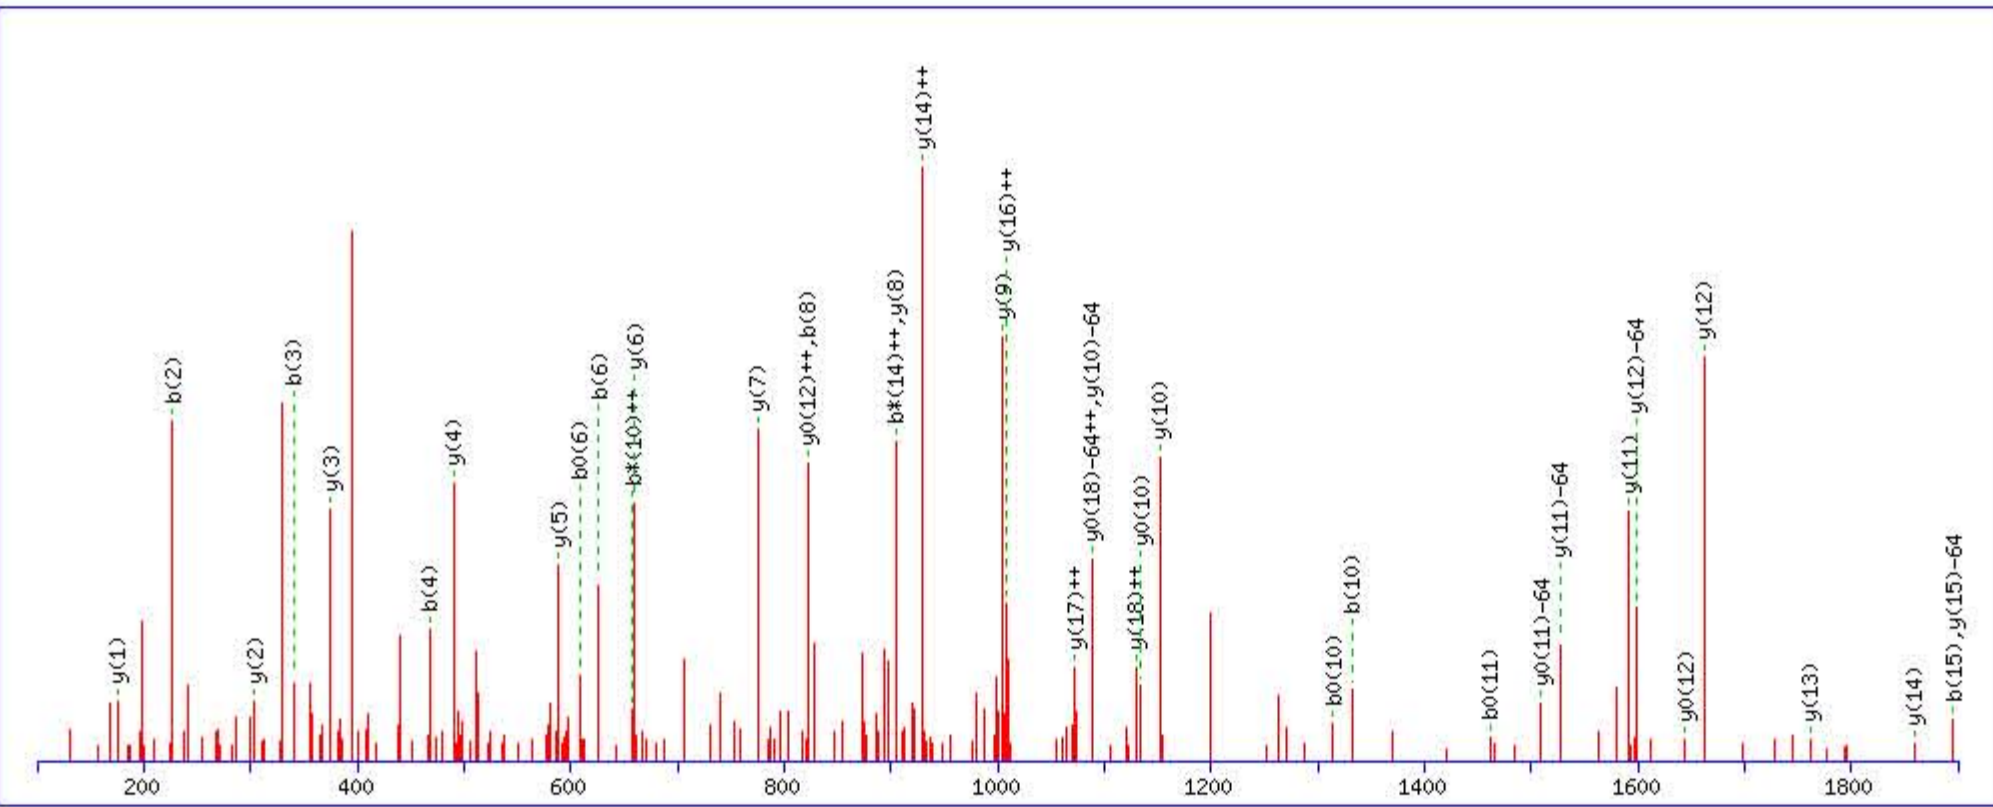

Monoisotopic mass of neutral peptide Mr(calc): 2483.239990  
Fixed modifications: Carbamidomethyl (C) (apply to specified residues or termini only)  
Variable modifications:  
Q10 : Biotin:Thermo-21345 (Q)  
M11 : Oxidation (M), with neutral losses 0.000000 (shown in table), 63.998285  
Ions Score: 95 Expect: 9e-009  
Matches : 39/324 fragment ions using 53 most intense peaks [\(help\)](#)

| #  | b           | b <sup>++</sup> | b*          | b <sup>+++</sup> | b <sup>0</sup> | b <sup>0++</sup> | Seq. | y           | y <sup>++</sup> | y*          | y <sup>+++</sup> | y <sup>0</sup> | y <sup>0++</sup> | #  |
|----|-------------|-----------------|-------------|------------------|----------------|------------------|------|-------------|-----------------|-------------|------------------|----------------|------------------|----|
| 1  | 114.091340  | 57.549308       |             |                  |                |                  | I    |             |                 |             |                  |                |                  | 20 |
| 2  | 227.175404  | 114.091340      |             |                  |                |                  | L    | 2371.163212 | 1186.085244     | 2354.136663 | 1177.571969      | 2353.152647    | 1177.079961      | 19 |
| 3  | 340.259468  | 170.633372      |             |                  |                |                  | L    | 2258.079148 | 1129.543212     | 2241.052599 | 1121.029938      | 2240.068583    | 1120.537930      | 18 |
| 4  | 468.318046  | 234.662661      | 451.291497  | 226.149386       |                |                  | Q    | 2144.995084 | 1073.001180     | 2127.968535 | 1064.487905      | 2126.984519    | 1063.995898      | 17 |
| 5  | 525.339510  | 263.173393      | 508.312961  | 254.660119       |                |                  | G    | 2016.936506 | 1008.971891     | 1999.909957 | 1000.458617      | 1998.925941    | 999.966609       | 16 |
| 6  | 626.387189  | 313.697233      | 609.360640  | 305.183958       | 608.376624     | 304.691950       | T    | 1959.915042 | 980.461159      | 1942.888493 | 971.947885       | 1941.904477    | 971.455877       | 15 |
| 7  | 723.439953  | 362.223615      | 706.413404  | 353.710340       | 705.429388     | 353.218332       | P    | 1858.867363 | 929.937320      | 1841.840814 | 921.424045       | 1840.856798    | 920.932037       | 14 |
| 8  | 822.508367  | 411.757822      | 805.481818  | 403.244547       | 804.497802     | 402.752539       | V    | 1761.814599 | 881.410938      | 1744.788050 | 872.897663       | 1743.804034    | 872.405655       | 13 |
| 9  | 893.545481  | 447.276379      | 876.518932  | 438.763104       | 875.534916     | 438.271096       | A    | 1662.746185 | 831.876731      | 1645.719636 | 823.363456       | 1644.735620    | 822.871448       | 12 |
| 10 | 1332.770807 | 666.889042      | 1315.744258 | 658.375767       | 1314.760242    | 657.883759       | Q    | 1591.709071 | 796.358174      | 1574.682522 | 787.844899       | 1573.698506    | 787.352891       | 11 |
| 11 | 1479.806207 | 740.406742      | 1462.779658 | 731.893467       | 1461.795642    | 731.401459       | M    | 1152.483745 | 576.745511      | 1135.457196 | 568.232236       | 1134.473180    | 567.740228       | 10 |
| 12 | 1580.853886 | 790.930581      | 1563.827337 | 782.417307       | 1562.843321    | 781.925299       | T    | 1005.448345 | 503.227811      | 988.421796  | 494.714536       | 987.437780     | 494.222528       | 9  |
| 13 | 1709.896479 | 855.451878      | 1692.869930 | 846.938603       | 1691.885914    | 846.446595       | E    | 904.400666  | 452.703971      | 887.374117  | 444.190697       | 886.390101     | 443.698689       | 8  |
| 14 | 1824.923422 | 912.965349      | 1807.896873 | 904.452075       | 1806.912857    | 903.960067       | D    | 775.358073  | 388.182675      | 758.331524  | 379.669400       | 757.347508     | 379.177392       | 7  |
| 15 | 1895.960536 | 948.483906      | 1878.933987 | 939.970632       | 1877.949971    | 939.478624       | A    | 660.331130  | 330.669203      | 643.304581  | 322.155929       | 642.320565     | 321.663921       | 6  |
| 16 | 1995.028950 | 998.018113      | 1978.002401 | 989.504839       | 1977.018385    | 989.012831       | V    | 589.294016  | 295.150646      | 572.267467  | 286.637372       | 571.283451     | 286.145364       | 5  |
| 17 | 2110.055893 | 1055.531585     | 2093.029344 | 1047.018310      | 2092.045328    | 1046.526302      | D    | 490.225602  | 245.616439      | 473.199053  | 237.103165       | 472.215037     | 236.611157       | 4  |
| 18 | 2181.093007 | 1091.050142     | 2164.066458 | 1082.536867      | 2163.082442    | 1082.044859      | A    | 375.198659  | 188.102968      | 358.172110  | 179.589693       | 357.188094     | 179.097685       | 3  |
| 19 | 2310.135600 | 1155.571438     | 2293.109051 | 1147.058164      | 2292.125035    | 1146.566156      | E    | 304.161545  | 152.584411      | 287.134996  | 144.071136       | 286.150980     | 143.579128       | 2  |
| 20 |             |                 |             |                  |                |                  | R    | 175.118952  | 88.063114       | 158.092403  | 79.549839        |                |                  | 1  |

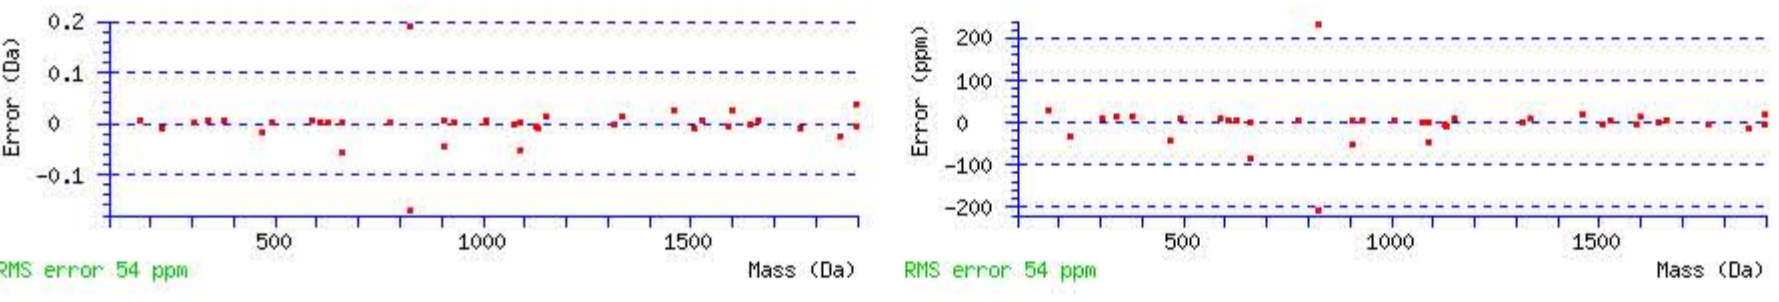

NCBI BLAST search of **ILLQGTPVAQMTEDAVDAER**  
(Parameters: blastp, nr protein database, expect=20000, no filter, PAM30)  
Other BLAST [web gateways](#)

## All matches to this query

| Score | Mr(calc):   | Delta    | Sequence                             |
|-------|-------------|----------|--------------------------------------|
| 95.2  | 2483.239990 | 0.008192 | <a href="#">ILLQGTPVAQMTEDAVDAER</a> |
| 37.4  | 2483.239990 | 0.008192 | <a href="#">ILLQGTPVAQMTEDAVDAER</a> |

**MASCOT** Mascot Search Results

Peptide View

MS/MS Fragmentation of **VPVAVQGEDTVQSLTQGDGVAK**  
Found in **CO3\_HUMAN**, Complement C3 OS=Homo sapiens GN=C3 PE=1 SV=2

Match to Query 51297: 2508.298212 from(837.106680,3+) rtinseconds(2241) index(34556)  
Title: Locus:1.1.1.3329.24 File:"2013-07-02 CLN FXIII 60 min 3rd F 3.wiff"  
Data file C:\Program Files (x86)\Matrix Science\Mascot Daemon\mgf6 FXIII 60 min 3rd\mascot\_daemon\_merge.mgf

Click mouse within plot area to zoom in by factor of two about that point  
Or, Plot from  to  Da   
Label all possible matches  Label matches used for scoring

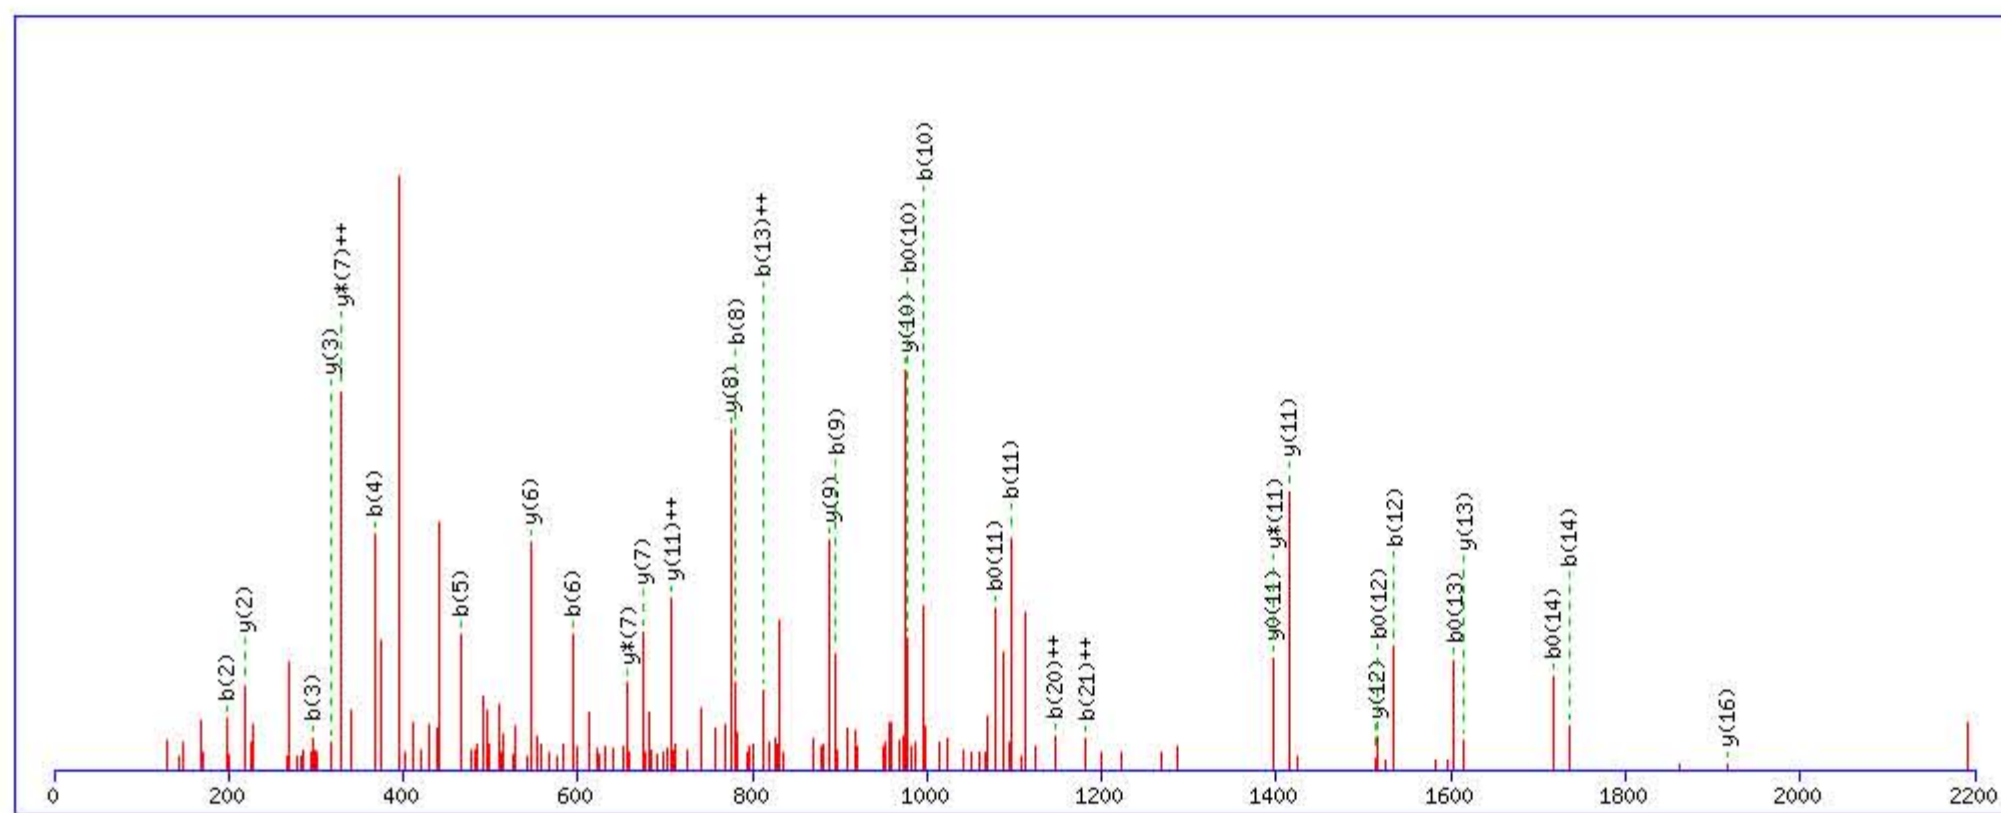

Monoisotopic mass of neutral peptide **Mr(calc)**: 2508.289429  
Fixed modifications: Carbamidomethyl (C) (apply to specified residues or termini only)  
Variable modifications:  
Q12 : Biotin:Thermo-21345 (Q)  
Ions Score: 93 Expect: 1.5e-008  
Matches : 35/220 fragment ions using 49 most intense peaks [\(help\)](#)

| #  | b                  | b <sup>++</sup>    | b <sup>*</sup> | b <sup>*++</sup> | b <sup>0</sup>     | b <sup>0++</sup> | Seq. | y                  | y <sup>++</sup>   | y <sup>*</sup>     | y <sup>*++</sup>  | y <sup>0</sup>     | y <sup>0++</sup> | #  |
|----|--------------------|--------------------|----------------|------------------|--------------------|------------------|------|--------------------|-------------------|--------------------|-------------------|--------------------|------------------|----|
| 1  | 100.075690         | 50.541483          |                |                  |                    |                  | V    |                    |                   |                    |                   |                    |                  | 22 |
| 2  | <b>197.128454</b>  | 99.067865          |                |                  |                    |                  | P    | 2410.228255        | 1205.617765       | 2393.201706        | 1197.104491       | 2392.217690        | 1196.612483      | 21 |
| 3  | <b>296.196868</b>  | 148.602072         |                |                  |                    |                  | V    | 2313.175491        | 1157.091383       | 2296.148942        | 1148.578109       | 2295.164926        | 1148.086101      | 20 |
| 4  | <b>367.233982</b>  | 184.120629         |                |                  |                    |                  | A    | 2214.107077        | 1107.557176       | 2197.080528        | 1099.043902       | 2196.096512        | 1098.551894      | 19 |
| 5  | <b>466.302396</b>  | 233.654836         |                |                  |                    |                  | V    | 2143.069963        | 1072.038619       | 2126.043414        | 1063.525345       | 2125.059398        | 1063.033337      | 18 |
| 6  | <b>594.360974</b>  | 297.684125         | 577.334425     | 289.170851       |                    |                  | Q    | 2044.001549        | 1022.504413       | 2026.975000        | 1013.991138       | 2025.990984        | 1013.499130      | 17 |
| 7  | 651.382438         | 326.194857         | 634.355889     | 317.681583       |                    |                  | G    | <b>1915.942971</b> | 958.475124        | 1898.916422        | 949.961849        | 1897.932406        | 949.469841       | 16 |
| 8  | <b>780.425031</b>  | 390.716154         | 763.398482     | 382.202879       | 762.414466         | 381.710871       | E    | 1858.921507        | 929.964391        | 1841.894958        | 921.451117        | 1840.910942        | 920.959109       | 15 |
| 9  | <b>895.451974</b>  | 448.229625         | 878.425425     | 439.716351       | 877.441409         | 439.224343       | D    | 1729.878914        | 865.443095        | 1712.852365        | 856.929821        | 1711.868349        | 856.437812       | 14 |
| 10 | <b>996.499653</b>  | 498.753465         | 979.473104     | 490.240190       | <b>978.489088</b>  | 489.748182       | T    | <b>1614.851971</b> | 807.929623        | 1597.825422        | 799.416349        | 1596.841406        | 798.924341       | 13 |
| 11 | <b>1095.568067</b> | 548.287672         | 1078.541518    | 539.774397       | <b>1077.557502</b> | 539.282389       | V    | <b>1513.804292</b> | 757.405784        | 1496.777743        | 748.892510        | 1495.793727        | 748.400502       | 12 |
| 12 | <b>1534.793393</b> | 767.900335         | 1517.766844    | 759.387060       | <b>1516.782828</b> | 758.895052       | Q    | <b>1414.735878</b> | <b>707.871577</b> | <b>1397.709329</b> | 699.358303        | <b>1396.725313</b> | 698.866294       | 11 |
| 13 | 1621.825421        | <b>811.416349</b>  | 1604.798872    | 802.903074       | <b>1603.814856</b> | 802.411066       | S    | <b>975.510552</b>  | 488.258914        | 958.484003         | 479.745639        | 957.499987         | 479.253631       | 10 |
| 14 | <b>1734.909485</b> | 867.958381         | 1717.882936    | 859.445106       | <b>1716.898920</b> | 858.953098       | L    | <b>888.478524</b>  | 444.742900        | 871.451975         | 436.229625        | 870.467959         | 435.737617       | 9  |
| 15 | 1835.957164        | 918.482220         | 1818.930615    | 909.968946       | 1817.946599        | 909.476938       | T    | <b>775.394460</b>  | 388.200868        | 758.367911         | 379.687593        | 757.383895         | 379.195585       | 8  |
| 16 | 1964.015742        | 982.511509         | 1946.989193    | 973.998235       | 1946.005177        | 973.506227       | Q    | <b>674.346781</b>  | 337.677029        | <b>657.320232</b>  | <b>329.163754</b> | 656.336216         | 328.671746       | 7  |
| 17 | 2021.037206        | 1011.022241        | 2004.010657    | 1002.508967      | 2003.026641        | 1002.016959      | G    | <b>546.288203</b>  | 273.647739        | 529.261654         | 265.134465        | 528.277638         | 264.642457       | 6  |
| 18 | 2136.064149        | 1068.535712        | 2119.037600    | 1060.022438      | 2118.053584        | 1059.530430      | D    | 489.266739         | 245.137007        | 472.240190         | 236.623733        | 471.256174         | 236.131725       | 5  |
| 19 | 2193.085613        | 1097.046444        | 2176.059064    | 1088.533170      | 2175.075048        | 1088.041162      | G    | 374.239796         | 187.623536        | 357.213247         | 179.110261        |                    |                  | 4  |
| 20 | 2292.154027        | <b>1146.580651</b> | 2275.127478    | 1138.067377      | 2274.143462        | 1137.575369      | V    | <b>317.218332</b>  | 159.112804        | 300.191783         | 150.599530        |                    |                  | 3  |
| 21 | 2363.191141        | <b>1182.099208</b> | 2346.164592    | 1173.585934      | 2345.180576        | 1173.093926      | A    | <b>218.149918</b>  | 109.578597        | 201.123369         | 101.065323        |                    |                  | 2  |
| 22 |                    |                    |                |                  |                    |                  | K    | 147.112804         | 74.060040         | 130.086255         | 65.546765         |                    |                  | 1  |

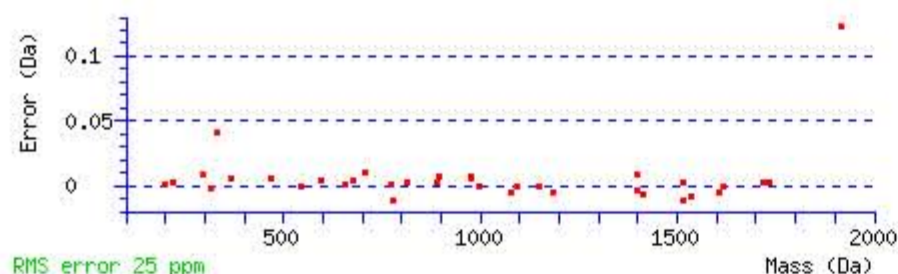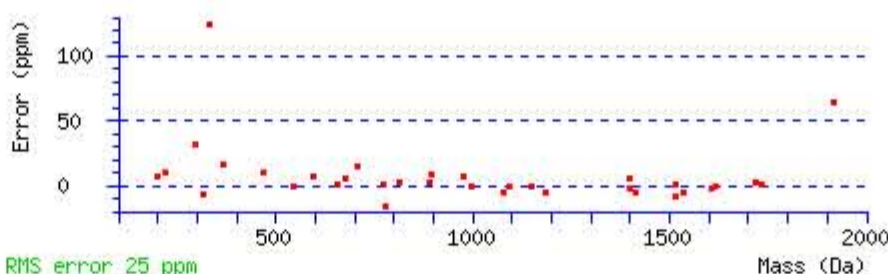

NCBI BLAST search of **VPVAVQGEDTVQSLTQGDGVAK**  
(Parameters: blastp, nr protein database, expect=20000, no filter, PAM30)  
Other BLAST [web gateways](#)

All matches to this query

| Score | Mr(calc):   | Delta    | Sequence                               |
|-------|-------------|----------|----------------------------------------|
| 92.5  | 2508.289429 | 0.008783 | <a href="#">VPVAVQGEDTVQSLTQGDGVAK</a> |
| 76.1  | 2508.289429 | 0.008783 | <a href="#">VPVAVQGEDTVQSLTQGDGVAK</a> |
| 29.6  | 2508.289429 | 0.008783 | <a href="#">VPVAVQGEDTVQSLTQGDGVAK</a> |



# MASCOT Search Results

## Peptide View

MS/MS Fragmentation of **EDIPPADLSDQVPDTESETR**

Found in **CO3\_HUMAN**, Complement C3 OS=Homo sapiens GN=C3 PE=1 SV=2

Match to Query 51476: 2524.172172 from(842.398000,3+) rtinseconds(2120) index(33831)

Title: Locus:1.1.1.3287.17 File:"2013-07-02 CLN FXIII 60 min 3rd F 3.wiff"

Data file C:\Program Files (x86)\Matrix Science\Mascot Daemon\mgf6 FXIII 60 min 3rd\mascot\_daemon\_merge.mgf

Click mouse within plot area to zoom in by factor of two about that point

Or, Plot from  to  Da

Label all possible matches  Label matches used for scoring

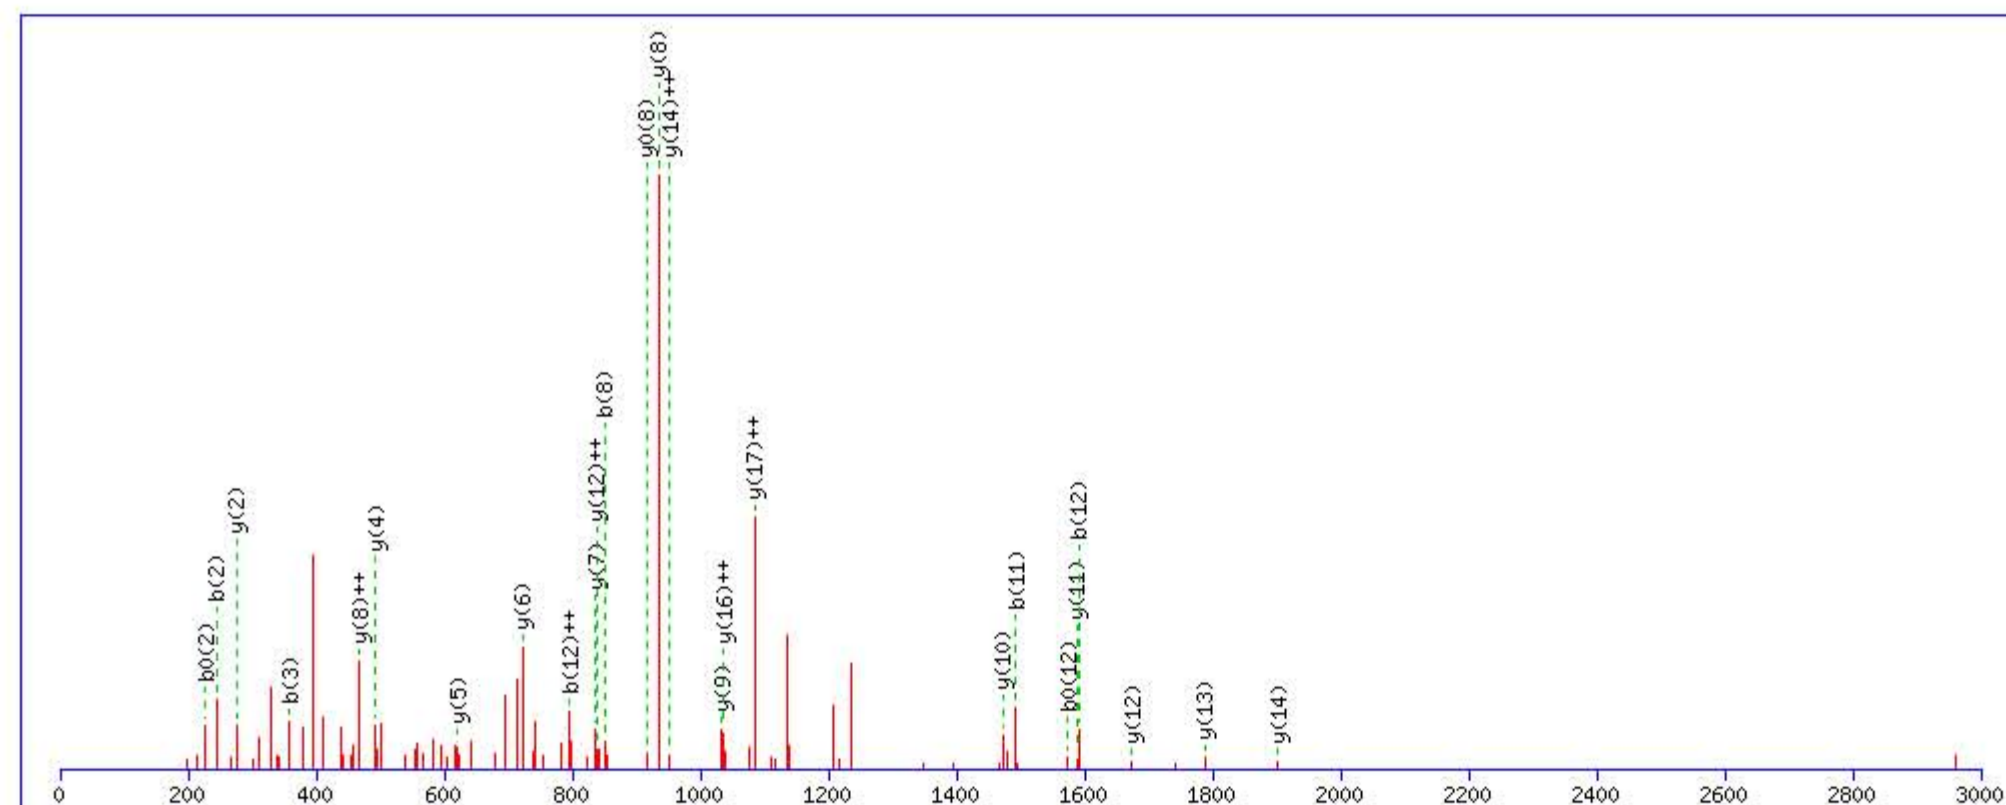

Monoisotopic mass of neutral peptide Mr(calc): 2524.163910

Fixed modifications: Carbamidomethyl (C) (apply to specified residues or termini only)

Variable modifications:

Q11 : Biotin:Thermo-21345 (Q)

Ions Score: 54 Expect: 4.9e-005

Matches : 26/206 fragment ions using 58 most intense peaks [\(help\)](#)

| #  | b                  | b <sup>++</sup>   | b <sup>*</sup> | b <sup>*++</sup> | b <sup>0</sup>     | b <sup>0++</sup> | Seq. | y                  | y <sup>++</sup>    | y <sup>*</sup> | y <sup>*++</sup> | y <sup>0</sup>    | y <sup>0++</sup> | #  |
|----|--------------------|-------------------|----------------|------------------|--------------------|------------------|------|--------------------|--------------------|----------------|------------------|-------------------|------------------|----|
| 1  | 130.049869         | 65.528572         |                |                  | 112.039304         | 56.523290        | E    |                    |                    |                |                  |                   |                  | 20 |
| 2  | <b>245.076812</b>  | 123.042044        |                |                  | <b>227.066247</b>  | 114.036762       | D    | 2396.128598        | 1198.567937        | 2379.102049    | 1190.054662      | 2378.118033       | 1189.562654      | 19 |
| 3  | <b>358.160876</b>  | 179.584076        |                |                  | 340.150311         | 170.578794       | I    | 2281.101655        | 1141.054465        | 2264.075106    | 1132.541191      | 2263.091090       | 1132.049183      | 18 |
| 4  | 455.213640         | 228.110458        |                |                  | 437.203075         | 219.105176       | P    | 2168.017591        | <b>1084.512433</b> | 2150.991042    | 1075.999159      | 2150.007026       | 1075.507151      | 17 |
| 5  | 552.266404         | 276.636840        |                |                  | 534.255839         | 267.631558       | P    | 2070.964827        | <b>1035.986051</b> | 2053.938278    | 1027.472777      | 2052.954262       | 1026.980769      | 16 |
| 6  | 623.303518         | 312.155397        |                |                  | 605.292953         | 303.150115       | A    | 1973.912063        | 987.459670         | 1956.885514    | 978.946395       | 1955.901498       | 978.454387       | 15 |
| 7  | 738.330461         | 369.668869        |                |                  | 720.319896         | 360.663586       | D    | <b>1902.874949</b> | <b>951.941113</b>  | 1885.848400    | 943.427838       | 1884.864384       | 942.935830       | 14 |
| 8  | <b>851.414525</b>  | 426.210901        |                |                  | 833.403960         | 417.205618       | L    | <b>1787.848006</b> | 894.427641         | 1770.821457    | 885.914367       | 1769.837441       | 885.422359       | 13 |
| 9  | 938.446553         | 469.726915        |                |                  | 920.435988         | 460.721632       | S    | <b>1674.763942</b> | <b>837.885609</b>  | 1657.737393    | 829.372335       | 1656.753377       | 828.880327       | 12 |
| 10 | 1053.473496        | 527.240386        |                |                  | 1035.462931        | 518.235104       | D    | <b>1587.731914</b> | 794.369595         | 1570.705365    | 785.856321       | 1569.721349       | 785.364313       | 11 |
| 11 | <b>1492.698822</b> | 746.853049        | 1475.672273    | 738.339775       | 1474.688257        | 737.847767       | Q    | <b>1472.704971</b> | 736.856124         | 1455.678422    | 728.342849       | 1454.694406       | 727.850841       | 10 |
| 12 | <b>1591.767236</b> | <b>796.387256</b> | 1574.740687    | 787.873982       | <b>1573.756671</b> | 787.381974       | V    | <b>1033.479645</b> | 517.243461         | 1016.453096    | 508.730186       | 1015.469080       | 508.238178       | 9  |
| 13 | 1688.820000        | 844.913638        | 1671.793451    | 836.400364       | 1670.809435        | 835.908356       | P    | <b>934.411231</b>  | <b>467.709254</b>  | 917.384682     | 459.195979       | <b>916.400666</b> | 458.703971       | 8  |
| 14 | 1803.846943        | 902.427110        | 1786.820394    | 893.913835       | 1785.836378        | 893.421827       | D    | <b>837.358467</b>  | 419.182872         | 820.331918     | 410.669597       | 819.347902        | 410.177589       | 7  |
| 15 | 1904.894622        | 952.950949        | 1887.868073    | 944.437675       | 1886.884057        | 943.945667       | T    | <b>722.331524</b>  | 361.669400         | 705.304975     | 353.156125       | 704.320959        | 352.664117       | 6  |
| 16 | 2033.937215        | 1017.472246       | 2016.910666    | 1008.958971      | 2015.926650        | 1008.466963      | E    | <b>621.283845</b>  | 311.145560         | 604.257296     | 302.632286       | 603.273280        | 302.140278       | 5  |
| 17 | 2120.969243        | 1060.988259       | 2103.942694    | 1052.474985      | 2102.958678        | 1051.982977      | S    | <b>492.241252</b>  | 246.624264         | 475.214703     | 238.110989       | 474.230687        | 237.618981       | 4  |
| 18 | 2250.011836        | 1125.509556       | 2232.985287    | 1116.996281      | 2232.001271        | 1116.504274      | E    | 405.209224         | 203.108250         | 388.182675     | 194.594975       | 387.198659        | 194.102967       | 3  |
| 19 | 2351.059515        | 1176.033395       | 2334.032966    | 1167.520121      | 2333.048950        | 1167.028113      | T    | <b>276.166631</b>  | 138.586953         | 259.140082     | 130.073679       | 258.156066        | 129.581671       | 2  |
| 20 |                    |                   |                |                  |                    |                  | R    | 175.118952         | 88.063114          | 158.092403     | 79.549839        |                   |                  | 1  |

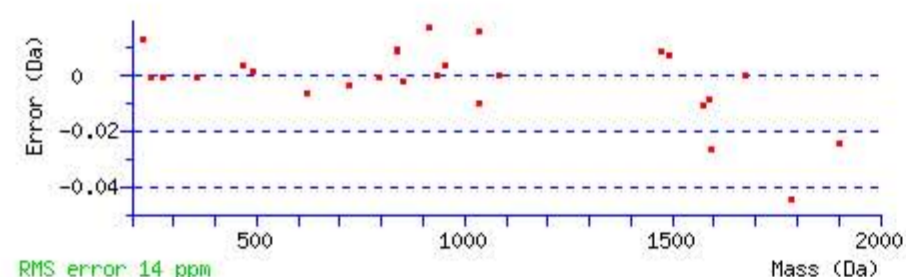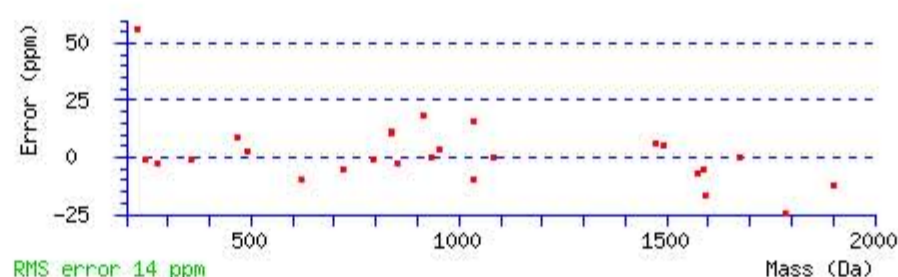

NCBI BLAST search of [EDIPPADLSDQVPDTESETR](#)

(Parameters: blastp, nr protein database, expect=20000, no filter, PAM30)

Other BLAST [web gateways](#)

All matches to this query

| Score | Mr(calc):   | Delta    | Sequence                             |
|-------|-------------|----------|--------------------------------------|
| 54.4  | 2524.163910 | 0.008262 | <a href="#">EDIPPADLSDQVPDTESETR</a> |

Mascot: <http://www.matrixscience.com/>

Peptide View

MS/MS Fragmentation of VQLSNDFDEYIMAIEQTIK

Found in CO3\_HUMAN, Complement C3 OS=Homo sapiens GN=C3 PE=1 SV=2

Match to Query 51790: 2567.270292 from(856.764040,3+) rtinseconds(3270) index(40352)

Title: Locus:1.1.1.3682.17 File:"2013-07-02 CLN FXIII 60 min 3rd F 3.wiff"

Data file C:\Program Files (x86)\Matrix Science\Mascot Daemon\mgf\6 FXIII 60 min 3rd\mascot\_daemon\_merge.mgf

Click mouse within plot area to zoom in by factor of two about that point

Or, Plot from 0 to 2600 Da Full range

Label all possible matches Label matches used for scoring

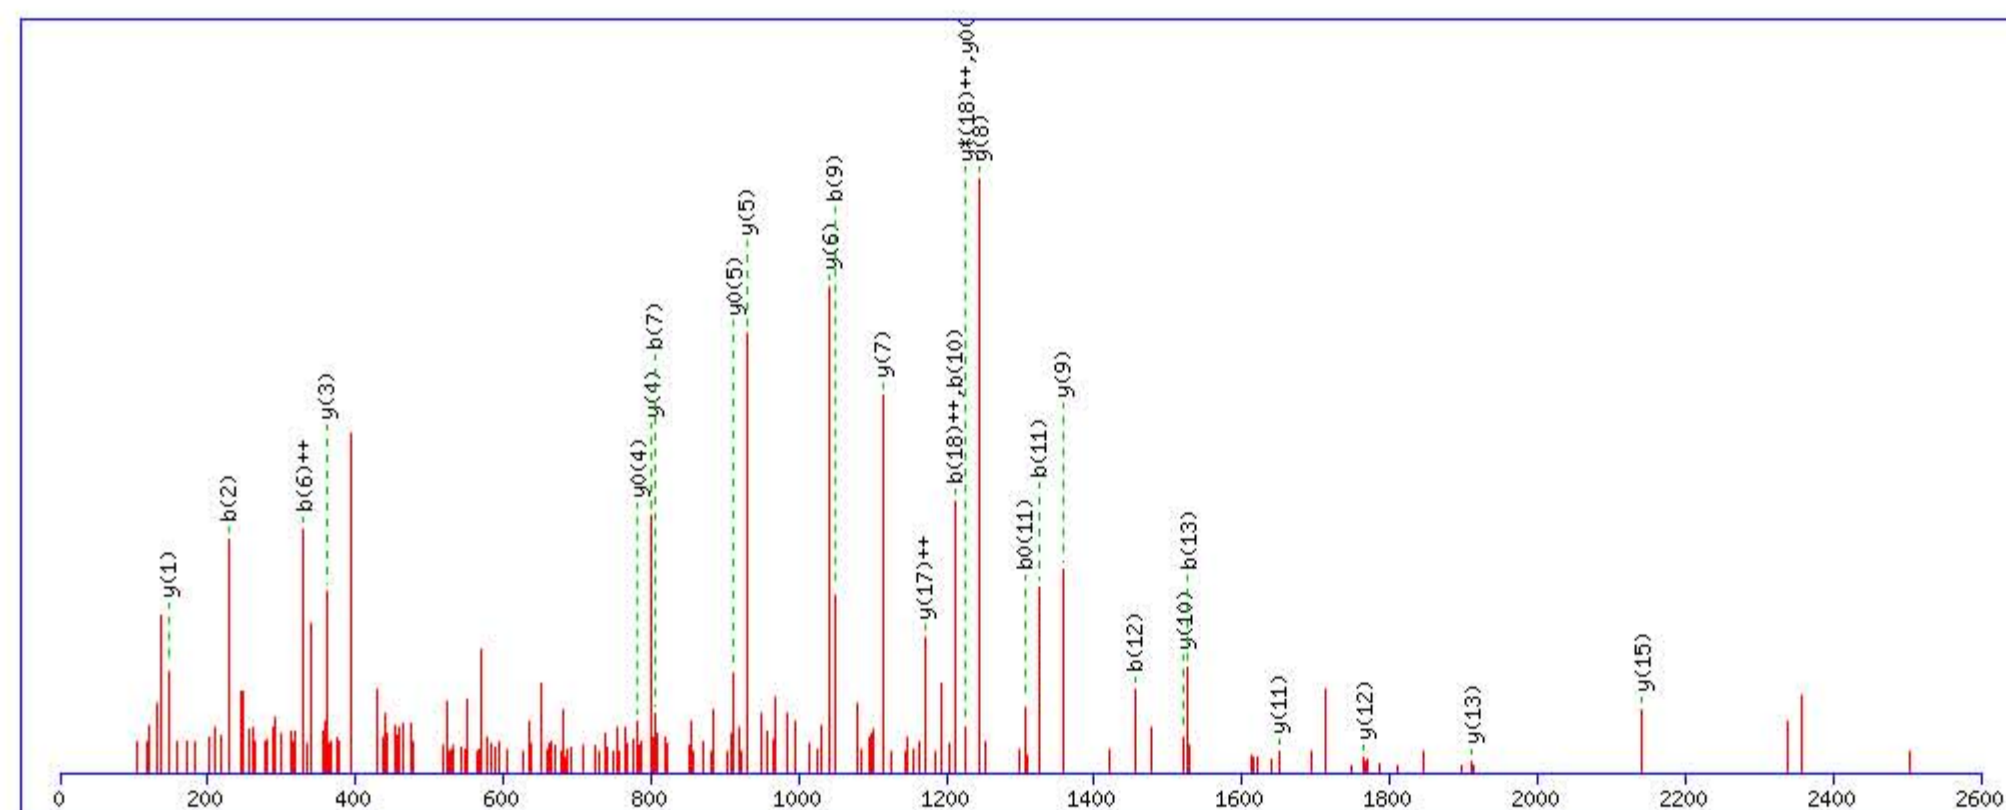

Monoisotopic mass of neutral peptide Mr(calc): 2567.265121

Fixed modifications: Carbamidomethyl (C) (apply to specified residues or termini only)

Variable modifications:

Q16 : Biotin:Thermo-21345 (Q)

Ions Score: 59 Expect: 3.1e-005

Matches : 28/204 fragment ions using 60 most intense peaks (help)

Table with columns: #, b, b++, b+, b\*+, b0, b0++, Seq., y, y++, y+, y\*+, y0, y0++, #. Contains 19 rows of peptide fragmentation data.

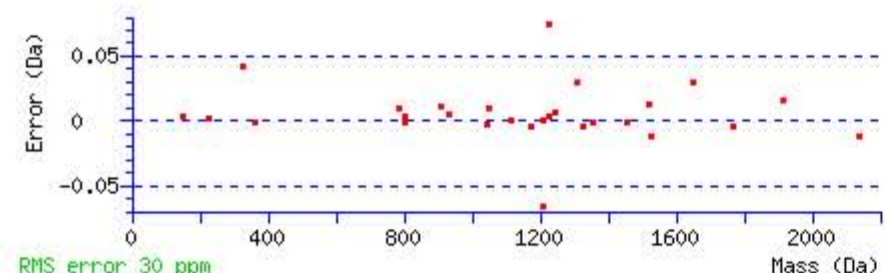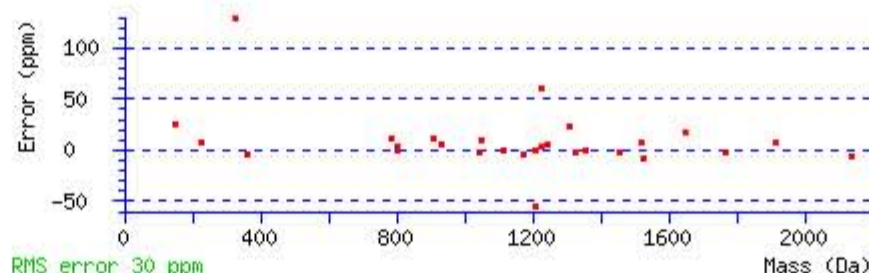

NCBI BLAST search of VQLSNDFDEYIMAIEQTIK

(Parameters: blastp, nr protein database, expect=20000, no filter, PAM30)

Other BLAST web gateways

All matches to this query

Table with columns: Score, Mr(calc), Delta, Sequence. Shows a single match with score 59.4 and sequence VQLSNDFDEYIMAIEQTIK.

Peptide View

MS/MS Fragmentation of ILLQGTPVAQMTEDAVDAER
Found in CO3\_HUMAN, Complement C3 OS=Homo sapiens GN=C3 PE=1 SV=2

Match to Query 53528: 2778.426912 from(927.149580,3+) rtinseconds(2787) index(37575)
Title: Locus:1.1.1.3518.21 File:"2013-07-02 CLN FXIII 60 min 3rd F 3.wiff"
Data file C:\Program Files (x86)\Matrix Science\Mascot Daemon\mgf\6 FXIII 60 min 3rd\mascot\_daemon\_merge.mgf

Click mouse within plot area to zoom in by factor of two about that point
Or, Plot from 100 to 1900 Da Full range
Label all possible matches Label matches used for scoring

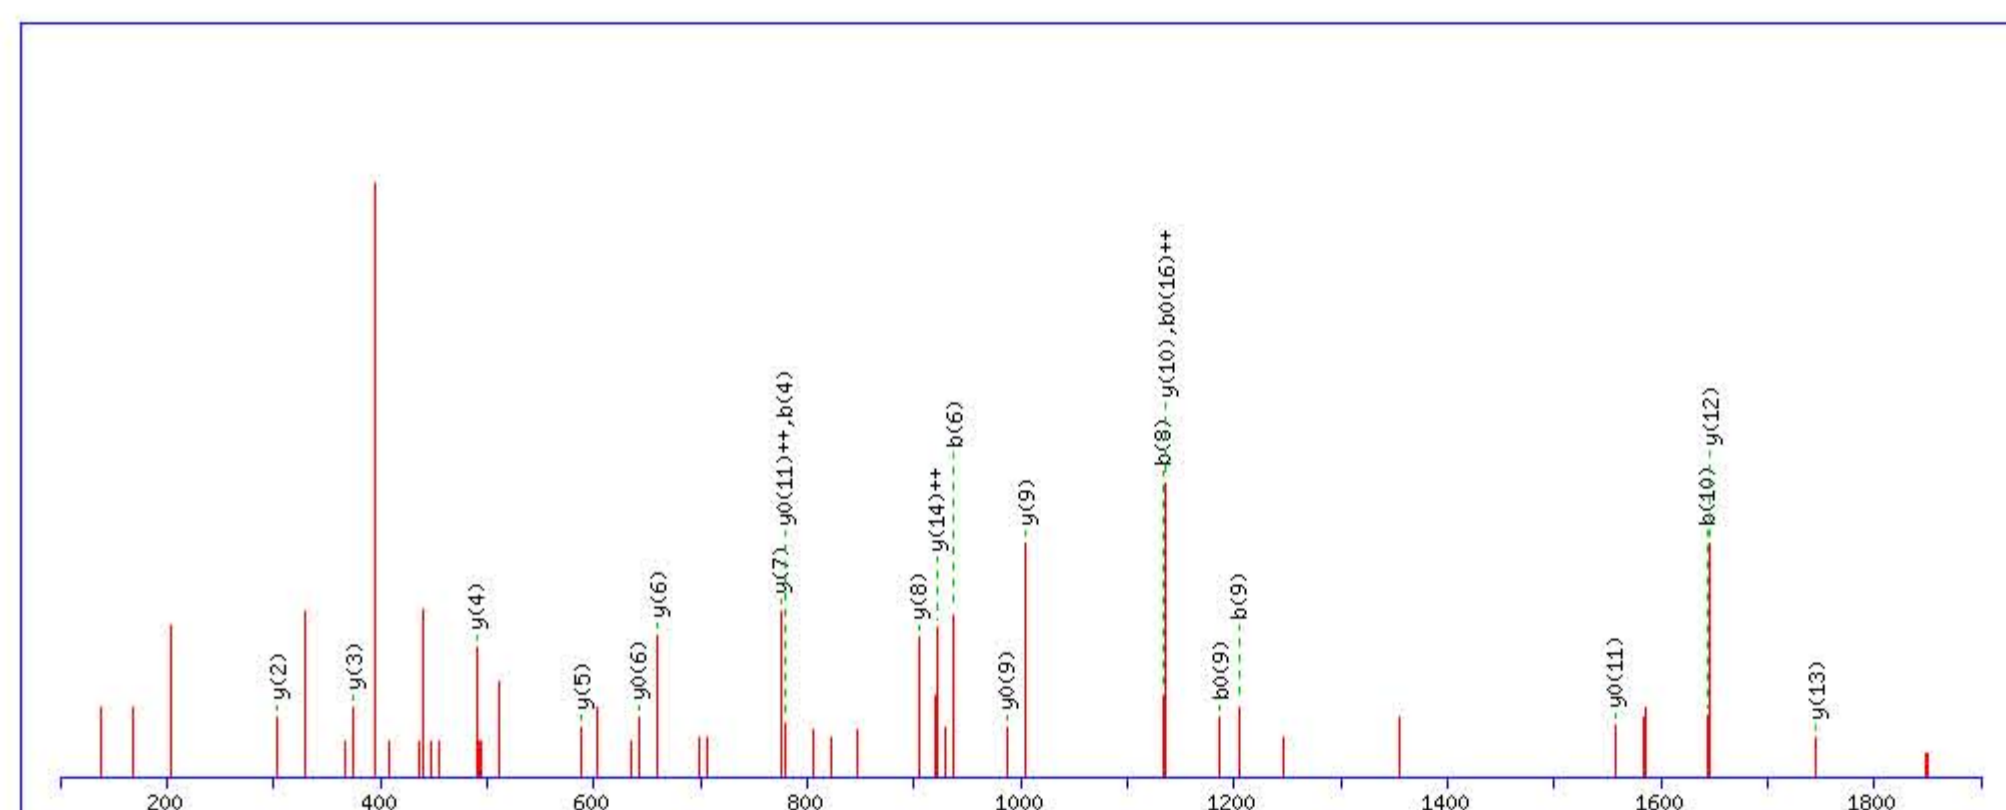

Monoisotopic mass of neutral peptide Mr(calc): 2778.411819
Fixed modifications: Carbamidomethyl (C) (apply to specified residues or termini only)
Variable modifications:
Q4 : Biotin:Thermo-21345 (Q)
Q10 : Biotin:Thermo-21345 (Q)
Ions Score: 56 Expect: 5.5e-006
Matches : 23/210 fragment ions using 39 most intense peaks

Table with columns: #, b, b++, b\*, b\*+, b0, b0++, Seq., y, y++, y\*, y\*+, y0, y0++, #. It lists peptide fragments and their corresponding masses and sequence identifiers.

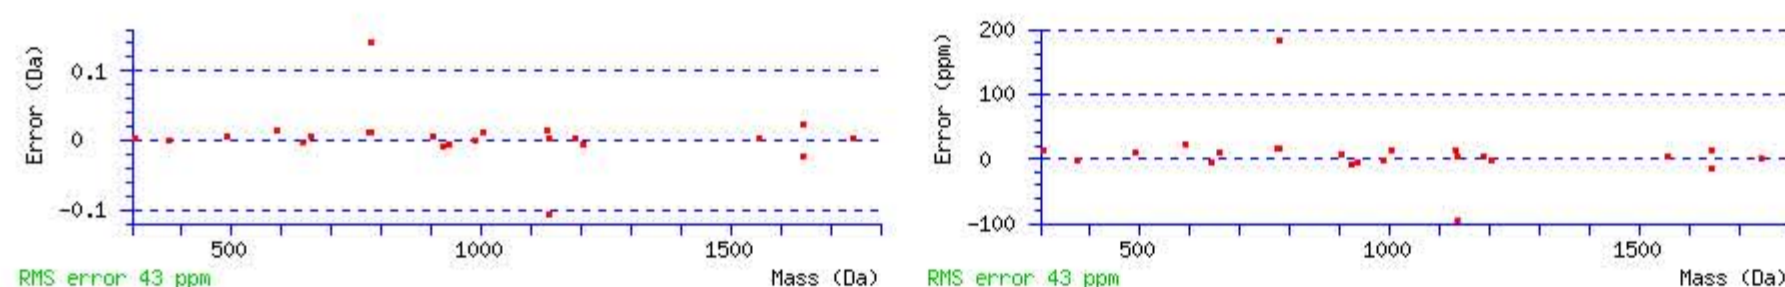

NCBI BLAST search of ILLQGTPVAQMTEDAVDAER
(Parameters: blastp, nr protein database, expect=20000, no filter, PAM30)
Other BLAST web gateways

All matches to this query

Table with columns: Score, Mr(calc):, Delta, Sequence. It lists search results with scores and sequences.

# Mascot Search Results

## Peptide View

MS/MS Fragmentation of **QKPDGVFQEDAPVIHQEMIGGLR**

Found in **CO3\_HUMAN**, Complement C3 OS=Homo sapiens GN=C3 PE=1 SV=2

Match to Query 55022: 2874.461456 from(719.622640,4+) rtinseconds(2243) index(34571)

Title: Locus:1.1.1.3330.14 File:"2013-07-02 CLN FXIII 60 min 3rd F 3.wiff"

Data file C:\Program Files (x86)\Matrix Science\Mascot Daemon\mgf6 FXIII 60 min 3rd\mascot\_daemon\_merge.mgf

Click mouse within plot area to zoom in by factor of two about that point

Or, Plot from  to  Da

Label all possible matches  Label matches used for scoring

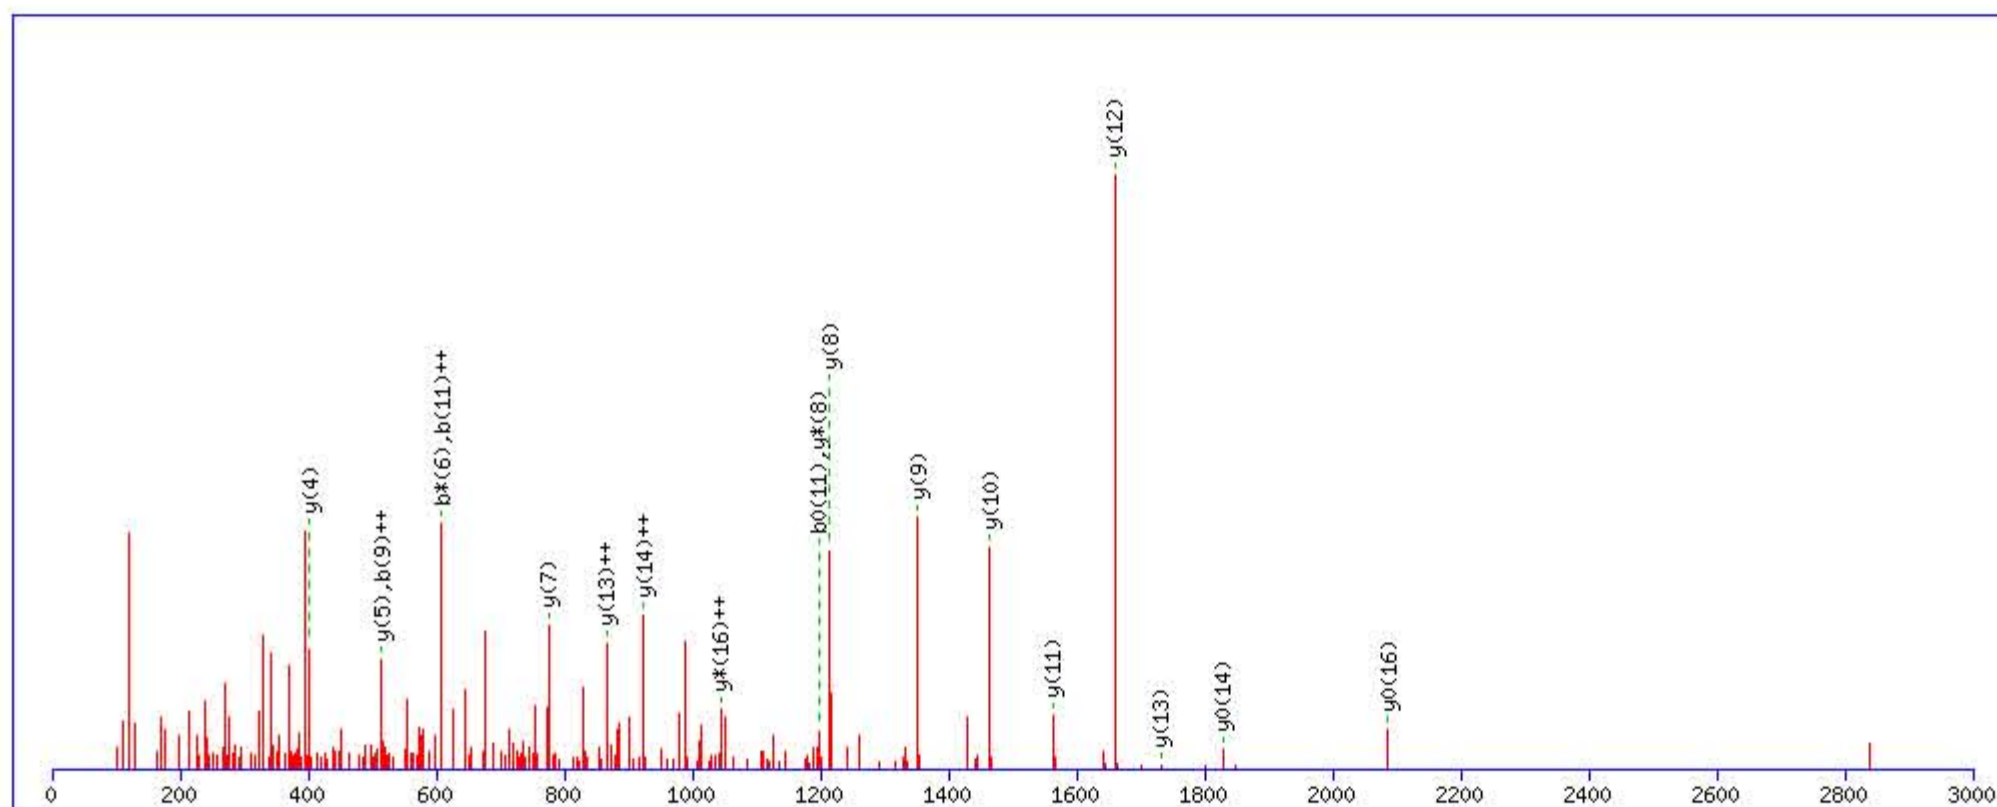

Monoisotopic mass of neutral peptide Mr(calc): 2874.452057

Fixed modifications: Carbamidomethyl (C) (apply to specified residues or termini only)

Variable modifications:

Q16 : Biotin:Thermo-21345 (Q)

Ions Score: 64 Expect: 1.2e-005

Matches : 19/246 fragment ions using 20 most intense peaks [\(help\)](#)

| #  | b           | b <sup>++</sup>   | b <sup>*</sup>    | b <sup>*++</sup> | b <sup>0</sup>     | b <sup>0++</sup> | Seq.     | y                  | y <sup>++</sup>   | y <sup>*</sup>     | y <sup>*++</sup>   | y <sup>0</sup>     | y <sup>0++</sup> | #         |
|----|-------------|-------------------|-------------------|------------------|--------------------|------------------|----------|--------------------|-------------------|--------------------|--------------------|--------------------|------------------|-----------|
| 1  | 129.065854  | 65.036565         | 112.039305        | 56.523291        |                    |                  | <b>Q</b> |                    |                   |                    |                    |                    |                  | <b>23</b> |
| 2  | 257.160817  | 129.084047        | 240.134268        | 120.570772       |                    |                  | <b>K</b> | 2747.400756        | 1374.204016       | 2730.374207        | 1365.690741        | 2729.390191        | 1365.198733      | <b>22</b> |
| 3  | 354.213581  | 177.610429        | 337.187032        | 169.097154       |                    |                  | <b>P</b> | 2619.305793        | 1310.156534       | 2602.279244        | 1301.643260        | 2601.295228        | 1301.151252      | <b>21</b> |
| 4  | 469.240524  | 235.123900        | 452.213975        | 226.610626       | 451.229959         | 226.118618       | <b>D</b> | 2522.253029        | 1261.630152       | 2505.226480        | 1253.116878        | 2504.242464        | 1252.624870      | <b>20</b> |
| 5  | 526.261988  | 263.634632        | 509.235439        | 255.121358       | 508.251423         | 254.629350       | <b>G</b> | 2407.226086        | 1204.116681       | 2390.199537        | 1195.603406        | 2389.215521        | 1195.111398      | <b>19</b> |
| 6  | 625.330402  | 313.168839        | <b>608.303853</b> | 304.655565       | 607.319837         | 304.163557       | <b>V</b> | 2350.204622        | 1175.605949       | 2333.178073        | 1167.092674        | 2332.194057        | 1166.600666      | <b>18</b> |
| 7  | 772.398816  | 386.703046        | 755.372267        | 378.189772       | 754.388251         | 377.697764       | <b>F</b> | 2251.136208        | 1126.071742       | 2234.109659        | 1117.558467        | 2233.125643        | 1117.066459      | <b>17</b> |
| 8  | 900.457394  | 450.732335        | 883.430845        | 442.219061       | 882.446829         | 441.727053       | <b>Q</b> | 2104.067794        | 1052.537535       | 2087.041245        | <b>1044.024260</b> | <b>2086.057229</b> | 1043.532252      | <b>16</b> |
| 9  | 1029.499987 | <b>515.253631</b> | 1012.473438       | 506.740357       | 1011.489422        | 506.248349       | <b>E</b> | 1976.009216        | 988.508246        | 1958.982667        | 979.994972         | 1957.998651        | 979.502964       | <b>15</b> |
| 10 | 1144.526930 | 572.767103        | 1127.500381       | 564.253829       | 1126.516365        | 563.761821       | <b>D</b> | 1846.966623        | <b>923.986950</b> | 1829.940074        | 915.473675         | <b>1828.956058</b> | 914.981667       | <b>14</b> |
| 11 | 1215.564044 | <b>608.285660</b> | 1198.537495       | 599.772386       | <b>1197.553479</b> | 599.280377       | <b>A</b> | <b>1731.939680</b> | <b>866.473478</b> | 1714.913131        | 857.960204         | 1713.929115        | 857.468196       | <b>13</b> |
| 12 | 1312.616808 | 656.812042        | 1295.590259       | 648.298768       | 1294.606243        | 647.806760       | <b>P</b> | <b>1660.902566</b> | 830.954921        | 1643.876017        | 822.441647         | 1642.892001        | 821.949639       | <b>12</b> |
| 13 | 1411.685222 | 706.346249        | 1394.658673       | 697.832975       | 1393.674657        | 697.340967       | <b>V</b> | <b>1563.849802</b> | 782.428539        | 1546.823253        | 773.915265         | 1545.839237        | 773.423257       | <b>11</b> |
| 14 | 1524.769286 | 762.888281        | 1507.742737       | 754.375007       | 1506.758721        | 753.882998       | <b>I</b> | <b>1464.781388</b> | 732.894332        | 1447.754839        | 724.381058         | 1446.770823        | 723.889050       | <b>10</b> |
| 15 | 1661.828198 | 831.417737        | 1644.801649       | 822.904463       | 1643.817633        | 822.412454       | <b>H</b> | <b>1351.697324</b> | 676.352300        | 1334.670775        | 667.839026         | 1333.686759        | 667.347018       | <b>9</b>  |
| 16 | 2101.053524 | 1051.030400       | 2084.026975       | 1042.517125      | 2083.042959        | 1042.025117      | <b>Q</b> | <b>1214.638412</b> | 607.822844        | <b>1197.611863</b> | 599.309570         | 1196.627847        | 598.817562       | <b>8</b>  |
| 17 | 2230.096117 | 1115.551696       | 2213.069568       | 1107.038422      | 2212.085552        | 1106.546414      | <b>E</b> | <b>775.413086</b>  | 388.210181        | 758.386537         | 379.696907         | 757.402521         | 379.204899       | <b>7</b>  |
| 18 | 2361.136602 | 1181.071939       | 2344.110053       | 1172.558664      | 2343.126037        | 1172.066656      | <b>M</b> | 646.370493         | 323.688885        | 629.343944         | 315.175610         |                    |                  | <b>6</b>  |
| 19 | 2474.220666 | 1237.613971       | 2457.194117       | 1229.100696      | 2456.210101        | 1228.608689      | <b>I</b> | <b>515.330008</b>  | 258.168642        | 498.303459         | 249.655368         |                    |                  | <b>5</b>  |
| 20 | 2531.242130 | 1266.124703       | 2514.215581       | 1257.611428      | 2513.231565        | 1257.119420      | <b>G</b> | <b>402.245944</b>  | 201.626610        | 385.219395         | 193.113335         |                    |                  | <b>4</b>  |
| 21 | 2588.263594 | 1294.635435       | 2571.237045       | 1286.122160      | 2570.253029        | 1285.630152      | <b>G</b> | 345.224480         | 173.115878        | 328.197931         | 164.602603         |                    |                  | <b>3</b>  |
| 22 | 2701.347658 | 1351.177467       | 2684.321109       | 1342.664192      | 2683.337093        | 1342.172185      | <b>L</b> | 288.203016         | 144.605146        | 271.176467         | 136.091872         |                    |                  | <b>2</b>  |
| 23 |             |                   |                   |                  |                    |                  | <b>R</b> | 175.118952         | 88.063114         | 158.092403         | 79.549839          |                    |                  | <b>1</b>  |

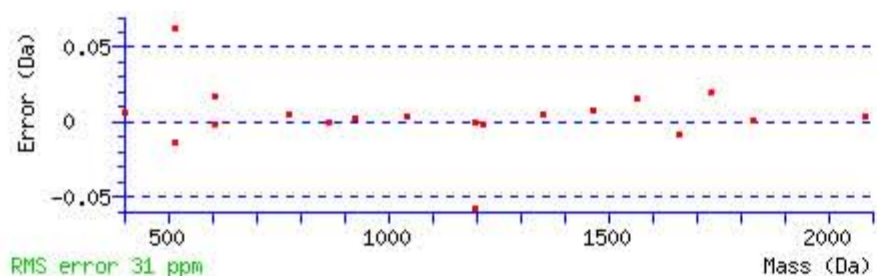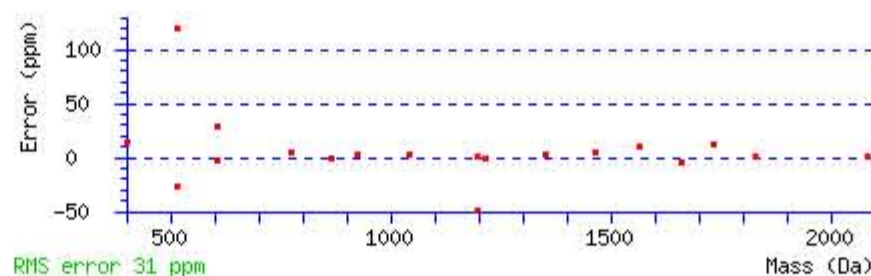

NCBI BLAST search of **QKPDGVFQEDAPVIHQEMIGGLR**  
(Parameters: blastp, nr protein database, expect=20000, no filter, PAM30)

Other BLAST [web gateways](#)

### All matches to this query

| Score | Mr(calc):   | Delta    | Sequence                       |
|-------|-------------|----------|--------------------------------|
| 64.0  | 2874.452057 | 0.009399 | <b>QKPDGVFQEDAPVIHQEMIGGLR</b> |

MATRIX SCIENCE Mascot Search Results

Peptide View

MS/MS Fragmentation of **DTWVEHWPEEDECQDEENQK**  
 Found in **CO3\_HUMAN**, Complement C3 OS=Homo sapiens GN=C3 PE=1 SV=2

Match to Query 55332: 2913.194022 from(972.071950,3+) rtinseconds(2120) index(33832)  
 Title: Locus:1.1.1.3287.18 File:"2013-07-02 CLN FXIII 60 min 3rd F 3.wiff"  
 Data file C:\Program Files (x86)\Matrix Science\Mascot Daemon\mgf6 FXIII 60 min 3rd\mascot\_daemon\_merge.mgf

Click mouse within plot area to zoom in by factor of two about that point  
 Or, Plot from  to  Da   
 Label all possible matches  Label matches used for scoring

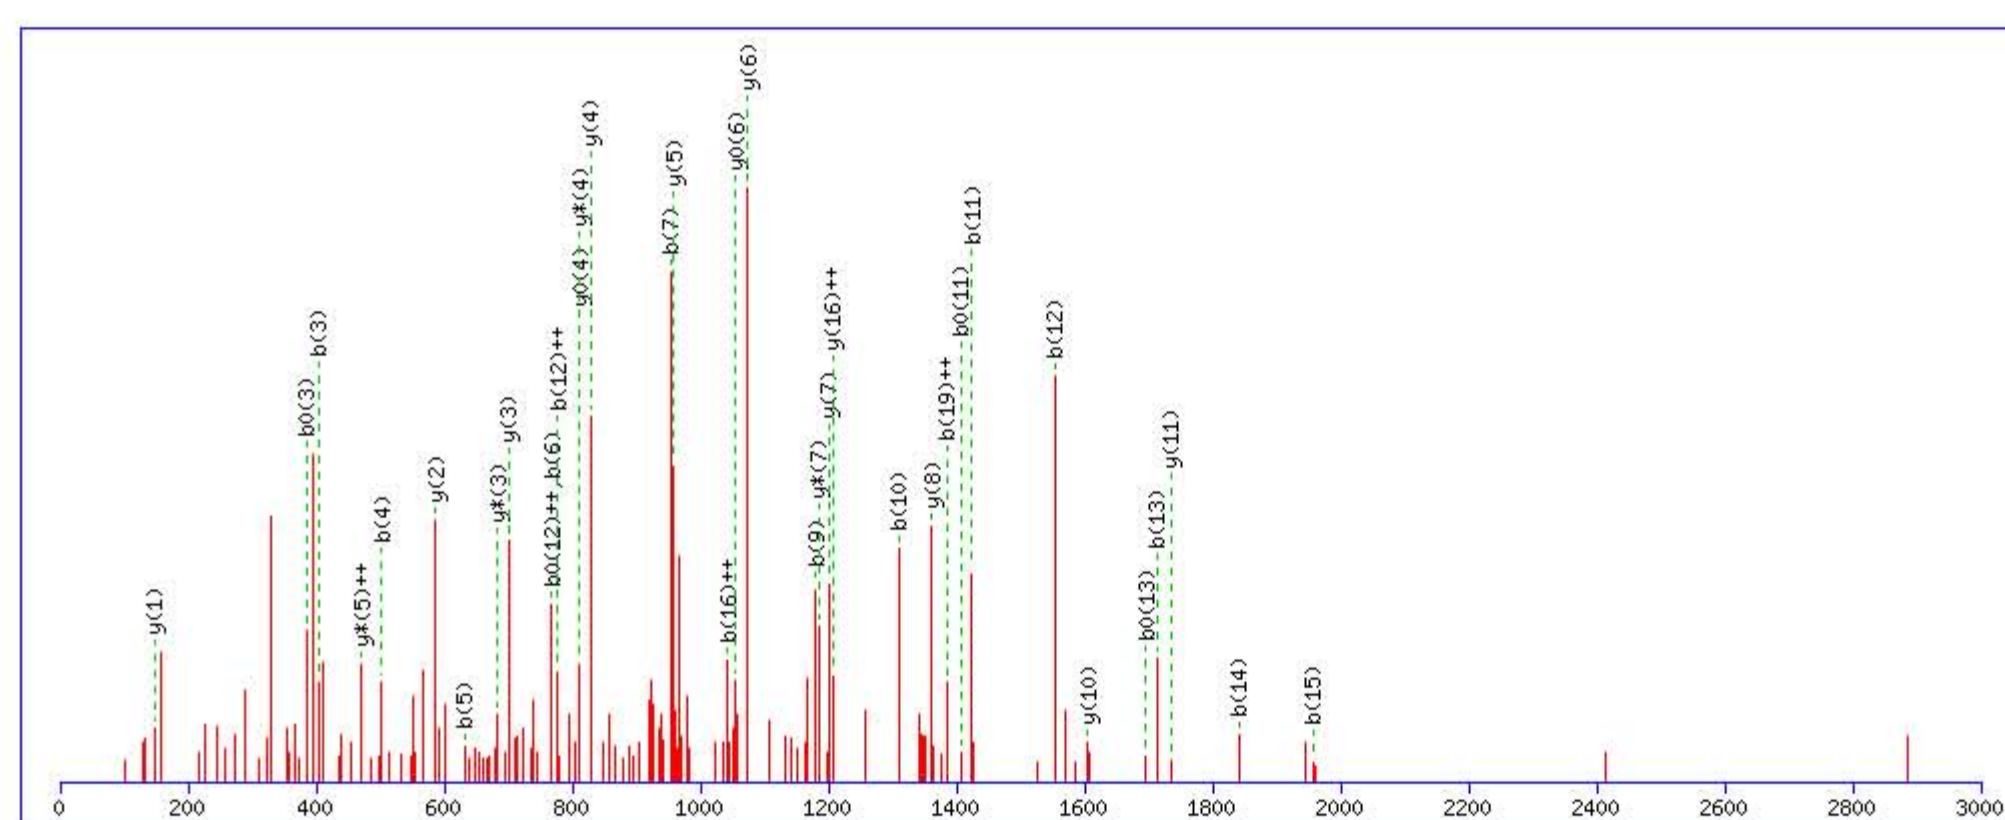

Monoisotopic mass of neutral peptide  $M_r(\text{calc})$ : 2913.185776  
 Fixed modifications: Carbamidomethyl (C) (apply to specified residues or termini only)  
 Variable modifications:  
 Q19 : Biotin:Thermo-21345 (Q)  
 Ions Score: 73 Expect: 6.2e-008  
 Matches : 36/196 fragment ions using 58 most intense peaks (help)

| #  | b           | b <sup>++</sup> | b*          | b <sup>+++</sup> | b <sup>0</sup> | b <sup>0++</sup> | Seq. | y           | y <sup>++</sup> | y*          | y <sup>+++</sup> | y <sup>0</sup> | y <sup>0++</sup> | #  |
|----|-------------|-----------------|-------------|------------------|----------------|------------------|------|-------------|-----------------|-------------|------------------|----------------|------------------|----|
| 1  | 116.034219  | 58.520748       |             |                  | 98.023654      | 49.515465        | D    |             |                 |             |                  |                |                  | 20 |
| 2  | 217.081898  | 109.044587      |             |                  | 199.071333     | 100.039304       | T    | 2799.166123 | 1400.086699     | 2782.139574 | 1391.573425      | 2781.155558    | 1391.081417      | 19 |
| 3  | 403.161211  | 202.084244      |             |                  | 385.150646     | 193.078961       | W    | 2698.118444 | 1349.562860     | 2681.091895 | 1341.049585      | 2680.107879    | 1340.557577      | 18 |
| 4  | 502.229625  | 251.618451      |             |                  | 484.219060     | 242.613168       | V    | 2512.039131 | 1256.523203     | 2495.012582 | 1248.009929      | 2494.028566    | 1247.517921      | 17 |
| 5  | 631.272218  | 316.139747      |             |                  | 613.261653     | 307.134465       | E    | 2412.970717 | 1206.988996     | 2395.944168 | 1198.475722      | 2394.960152    | 1197.983714      | 16 |
| 6  | 768.331130  | 384.669203      |             |                  | 750.320565     | 375.663921       | H    | 2283.928124 | 1142.467700     | 2266.901575 | 1133.954425      | 2265.917559    | 1133.462417      | 15 |
| 7  | 954.410443  | 477.708860      |             |                  | 936.399878     | 468.703577       | W    | 2146.869212 | 1073.938244     | 2129.842663 | 1065.424969      | 2128.858647    | 1064.932961      | 14 |
| 8  | 1051.463207 | 526.235242      |             |                  | 1033.452642    | 517.229959       | P    | 1960.789899 | 980.898588      | 1943.763350 | 972.385313       | 1942.779334    | 971.893305       | 13 |
| 9  | 1180.505800 | 590.756538      |             |                  | 1162.495235    | 581.751256       | E    | 1863.737135 | 932.372206      | 1846.710586 | 923.858931       | 1845.726570    | 923.366923       | 12 |
| 10 | 1309.548393 | 655.277835      |             |                  | 1291.537828    | 646.272552       | E    | 1734.694542 | 867.850909      | 1717.667993 | 859.337635       | 1716.683977    | 858.845627       | 11 |
| 11 | 1424.575336 | 712.791306      |             |                  | 1406.564771    | 703.786024       | D    | 1605.651949 | 803.329613      | 1588.625400 | 794.816338       | 1587.641384    | 794.324330       | 10 |
| 12 | 1553.617929 | 777.312603      |             |                  | 1535.607364    | 768.307320       | E    | 1490.625006 | 745.816141      | 1473.598457 | 737.302867       | 1472.614441    | 736.810859       | 9  |
| 13 | 1713.648578 | 857.327927      |             |                  | 1695.638013    | 848.322645       | C    | 1361.582413 | 681.294845      | 1344.555864 | 672.781570       | 1343.571848    | 672.289562       | 8  |
| 14 | 1841.707156 | 921.357216      | 1824.680607 | 912.843942       | 1823.696591    | 912.351934       | Q    | 1201.551764 | 601.279520      | 1184.525215 | 592.766246       | 1183.541199    | 592.274238       | 7  |
| 15 | 1956.734099 | 978.870688      | 1939.707550 | 970.357413       | 1938.723534    | 969.865405       | D    | 1073.493186 | 537.250231      | 1056.466637 | 528.736957       | 1055.482621    | 528.244949       | 6  |
| 16 | 2085.776692 | 1043.391984     | 2068.750143 | 1034.878709      | 2067.766127    | 1034.386701      | E    | 958.466243  | 479.736760      | 941.439694  | 471.223485       | 940.455678     | 470.731477       | 5  |
| 17 | 2214.819285 | 1107.913280     | 2197.792736 | 1099.400006      | 2196.808720    | 1098.907998      | E    | 829.423650  | 415.215463      | 812.397101  | 406.702189       | 811.413085     | 406.210181       | 4  |
| 18 | 2328.862212 | 1164.934744     | 2311.835663 | 1156.421469      | 2310.851647    | 1155.929461      | N    | 700.381057  | 350.694167      | 683.354508  | 342.180892       |                |                  | 3  |
| 19 | 2768.087538 | 1384.547407     | 2751.060989 | 1376.034132      | 2750.076973    | 1375.542125      | Q    | 586.338130  | 293.672703      | 569.311581  | 285.159429       |                |                  | 2  |
| 20 |             |                 |             |                  |                |                  | K    | 147.112804  | 74.060040       | 130.086255  | 65.546765        |                |                  | 1  |

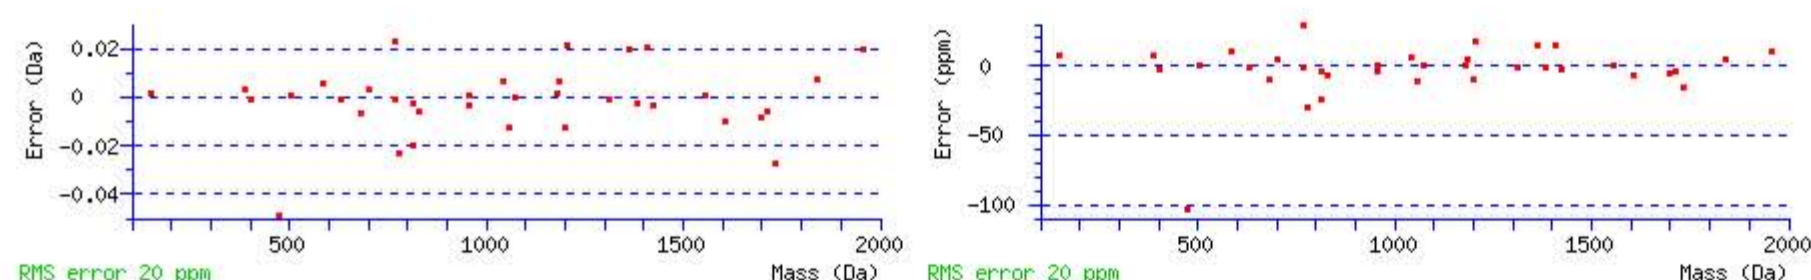

NCBI BLAST search of **DTWVEHWPEEDECQDEENQK**  
 (Parameters: blastp, nr protein database, expect=20000, no filter, PAM30)  
 Other BLAST [web gateways](#)

All matches to this query

| Score | $M_r(\text{calc})$ : | Delta    | Sequence                             |
|-------|----------------------|----------|--------------------------------------|
| 73.0  | 2913.185776          | 0.008246 | <a href="#">DTWVEHWPEEDECQDEENQK</a> |
| 35.1  | 2913.185776          | 0.008246 | <a href="#">DTWVEHWPEEDECQDEENQK</a> |

# MASCOT SCIENCE Mascot Search Results

## Peptide View

MS/MS Fragmentation of **GLESQTK**

Found in **CO4A\_HUMAN**, Complement C4-A OS=Homo sapiens GN=C4A PE=1 SV=2

Match to Query 15590: 1072.557228 from(537.285890,2+) rtinseconds(1461) index(43956)

Title: Locus:1.1.1.2557.11 File:"2013-07-02 CLN FXIII 60 min 3rd F 4.wiff"

Data file C:\Program Files (x86)\Matrix Science\Mascot Daemon\mgf\6 FXIII 60 min 3rd\mascot\_daemon\_merge.mgf

Click mouse within plot area to zoom in by factor of two about that point

Or, Plot from  to  Da

Label all possible matches  Label matches used for scoring

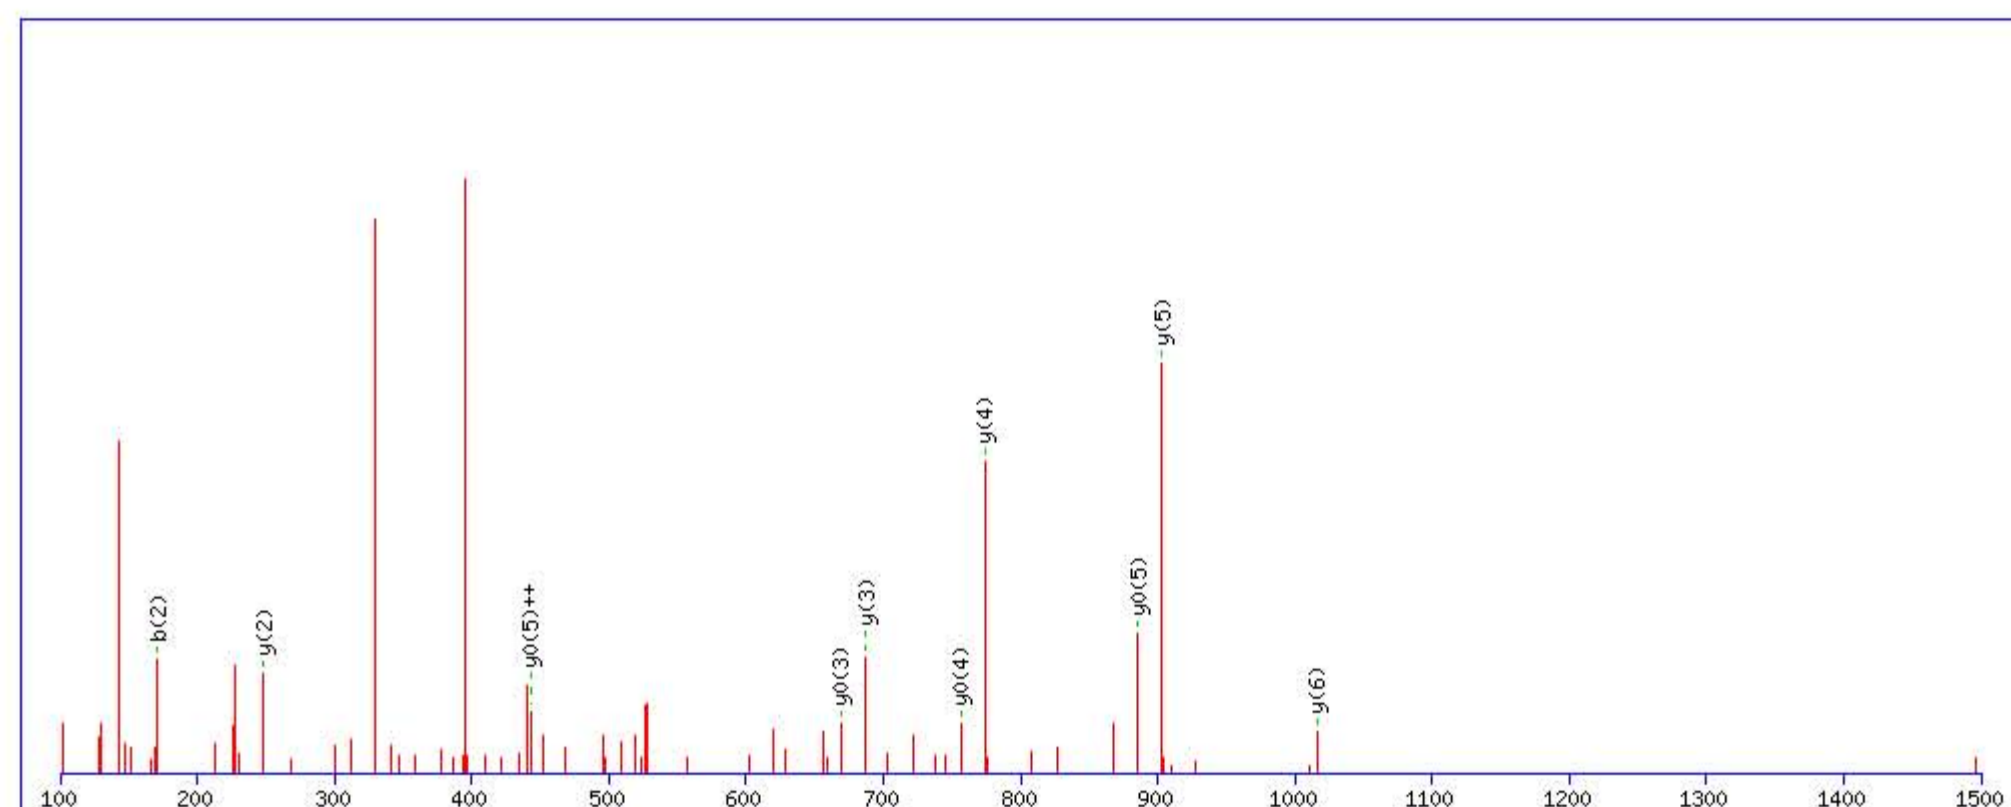

Monoisotopic mass of neutral peptide Mr(calc): 1072.558670

Fixed modifications: Carbamidomethyl (C) (apply to specified residues or termini only)

Variable modifications:

Q5 : Biotin:Thermo-21345 (Q)

Ions Score: 26 Expect: 0.06

Matches : 10/58 fragment ions using 20 most intense peaks ([help](#))

| # | b                 | b <sup>++</sup> | b <sup>+</sup> | b <sup>*++</sup> | b <sup>0</sup> | b <sup>0++</sup> | Seq.     | y                  | y <sup>++</sup> | y <sup>+</sup> | y <sup>*++</sup> | y <sup>0</sup>    | y <sup>0++</sup>  | # |
|---|-------------------|-----------------|----------------|------------------|----------------|------------------|----------|--------------------|-----------------|----------------|------------------|-------------------|-------------------|---|
| 1 | 58.028740         | 29.518008       |                |                  |                |                  | <b>G</b> |                    |                 |                |                  |                   |                   | 7 |
| 2 | <b>171.112804</b> | 86.060040       |                |                  |                |                  | <b>L</b> | <b>1016.544494</b> | 508.775885      | 999.517945     | 500.262611       | 998.533929        | 499.770603        | 6 |
| 3 | 300.155397        | 150.581336      |                |                  | 282.144832     | 141.576054       | <b>E</b> | <b>903.460430</b>  | 452.233853      | 886.433881     | 443.720579       | <b>885.449865</b> | <b>443.228571</b> | 5 |
| 4 | 387.187425        | 194.097351      |                |                  | 369.176860     | 185.092068       | <b>S</b> | <b>774.417837</b>  | 387.712557      | 757.391288     | 379.199282       | <b>756.407272</b> | 378.707274        | 4 |
| 5 | 826.412751        | 413.710014      | 809.386202     | 405.196739       | 808.402186     | 404.704731       | <b>Q</b> | <b>687.385809</b>  | 344.196543      | 670.359260     | 335.683268       | <b>669.375244</b> | 335.191260        | 3 |
| 6 | 927.460430        | 464.233853      | 910.433881     | 455.720579       | 909.449865     | 455.228571       | <b>T</b> | <b>248.160483</b>  | 124.583879      | 231.133934     | 116.070605       | 230.149918        | 115.578597        | 2 |
| 7 |                   |                 |                |                  |                |                  | <b>K</b> | 147.112804         | 74.060040       | 130.086255     | 65.546765        |                   |                   | 1 |

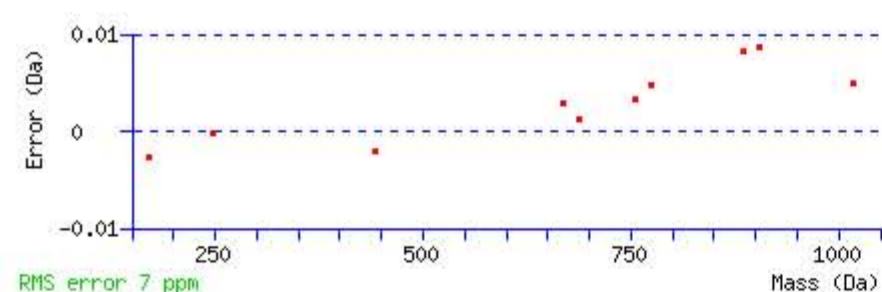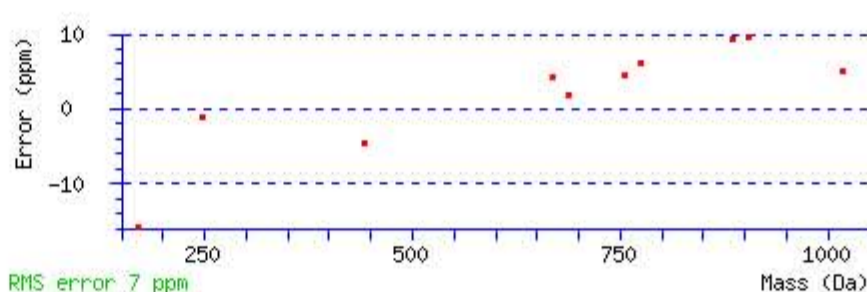

NCBI BLAST search of [GLESQTK](#)

(Parameters: blastp, nr protein database, expect=20000, no filter, PAM30)

Other BLAST [web gateways](#)

All matches to this query

| Score | Mr(calc):   | Delta     | Sequence                   |
|-------|-------------|-----------|----------------------------|
| 25.6  | 1072.558670 | -0.001442 | <a href="#">GLESQTK</a>    |
| 11.8  | 1072.558670 | -0.001442 | <a href="#">LGECPAVLSK</a> |
| 7.5   | 1072.558670 | -0.001442 | <a href="#">QSEGLTK</a>    |
| 7.2   | 1072.551254 | 0.005974  | <a href="#">KEAPRDETK</a>  |
| 1.9   | 1072.551285 | 0.005943  | <a href="#">GPRITEPSTK</a> |
| 0.9   | 1072.566544 | -0.009316 | <a href="#">NHSLAFVGTK</a> |

Mascot: <http://www.matrixscience.com/>

# MASCOT Search Results

## Peptide View

MS/MS Fragmentation of **VQQPDCR**

Found in **CO4A\_HUMAN**, Complement C4-A OS=Homo sapiens GN=C4A PE=1 SV=2

Match to Query 20591: 1212.574308 from(607.294430,2+) rtinseconds(1290) index(42994)

Title: Locus:1.1.1.2497.15 File:"2013-07-02 CLN FXIII 60 min 3rd F 4.wiff"

Data file C:\Program Files (x86)\Matrix Science\Mascot Daemon\mgf\6 FXIII 60 min 3rd\mascot\_daemon\_merge.mgf

Click mouse within plot area to zoom in by factor of two about that point

Or, Plot from  to  Da

Label all possible matches  Label matches used for scoring

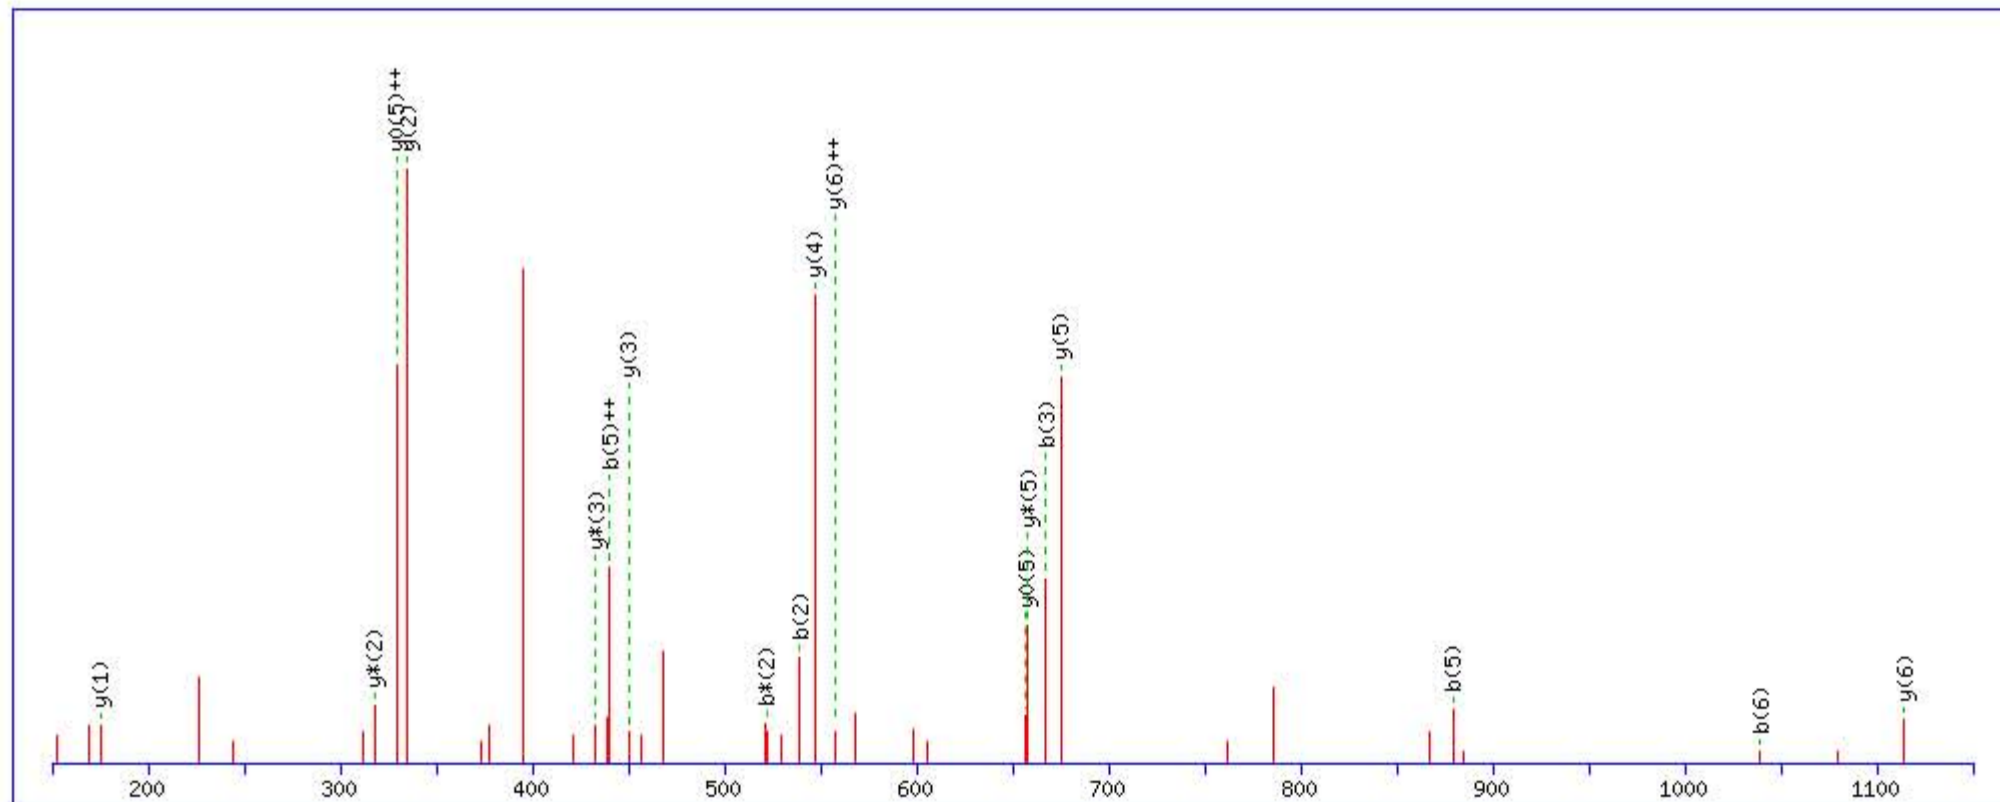

Monoisotopic mass of neutral peptide Mr(calc): 1212.574356

Fixed modifications: Carbamidomethyl (C) (apply to specified residues or termini only)

Variable modifications:

Q2 : Biotin:Thermo-21345 (Q)

Ions Score: 28 Expect: 0.0053

Matches : 18/58 fragment ions using 39 most intense peaks ([help](#))

| # | b                  | b <sup>++</sup>   | b <sup>*</sup>    | b <sup>***</sup> | b <sup>0</sup> | b <sup>0++</sup> | Seq. | y                  | y <sup>++</sup>   | y <sup>*</sup>    | y <sup>***</sup> | y <sup>0</sup>    | y <sup>0++</sup>  | # |
|---|--------------------|-------------------|-------------------|------------------|----------------|------------------|------|--------------------|-------------------|-------------------|------------------|-------------------|-------------------|---|
| 1 | 100.075690         | 50.541483         |                   |                  |                |                  | V    |                    |                   |                   |                  |                   |                   | 7 |
| 2 | <b>539.301016</b>  | 270.154146        | <b>522.274467</b> | 261.640872       |                |                  | Q    | <b>1114.513212</b> | <b>557.760244</b> | 1097.486663       | 549.246970       | 1096.502647       | 548.754962        | 6 |
| 3 | <b>667.359594</b>  | 334.183435        | 650.333045        | 325.670161       |                |                  | Q    | <b>675.287886</b>  | 338.147581        | <b>658.261337</b> | 329.634307       | <b>657.277321</b> | <b>329.142299</b> | 5 |
| 4 | 764.412358         | 382.709817        | 747.385809        | 374.196543       |                |                  | P    | <b>547.229308</b>  | 274.118292        | 530.202759        | 265.605018       | 529.218743        | 265.113010        | 4 |
| 5 | <b>879.439301</b>  | <b>440.223289</b> | 862.412752        | 431.710014       | 861.428736     | 431.218006       | D    | <b>450.176544</b>  | 225.591910        | <b>433.149995</b> | 217.078635       | 432.165979        | 216.586627        | 3 |
| 6 | <b>1039.469950</b> | 520.238613        | 1022.443401       | 511.725339       | 1021.459385    | 511.233331       | C    | <b>335.149601</b>  | 168.078438        | <b>318.123052</b> | 159.565164       |                   |                   | 2 |
| 7 |                    |                   |                   |                  |                |                  | R    | <b>175.118952</b>  | 88.063114         | 158.092403        | 79.549839        |                   |                   | 1 |

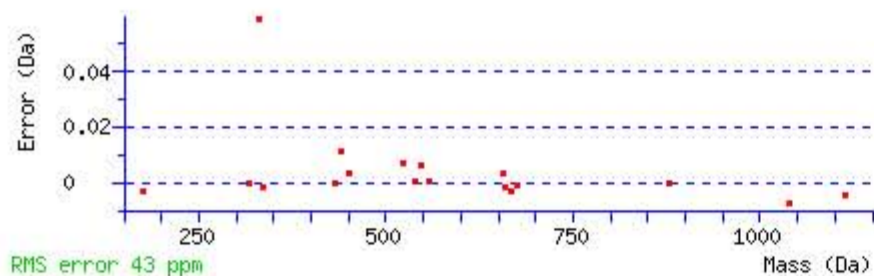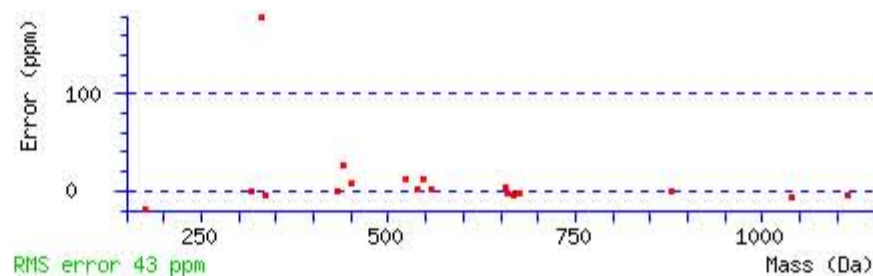

NCBI BLAST search of **VQQPDCR**

(Parameters: blastp, nr protein database, expect=20000, no filter, PAM30)

Other BLAST [web gateways](#)

### All matches to this query

| Score | Mr(calc):   | Delta     | Sequence                   |
|-------|-------------|-----------|----------------------------|
| 28.1  | 1212.574356 | -0.000048 | <a href="#">VQQPDCR</a>    |
| 13.1  | 1212.574356 | -0.000048 | <a href="#">VQQPDCR</a>    |
| 3.8   | 1212.592102 | -0.017794 | <a href="#">VQEDQQR</a>    |
| 3.3   | 1212.582199 | -0.007891 | <a href="#">GRMPPSEFHR</a> |

# MASCOT SEARCH RESULTS

## Peptide View

MS/MS Fragmentation of **VEYGFQVK**

Found in **CO4A\_HUMAN**, Complement C4-A OS=Homo sapiens GN=C4A PE=1 SV=2

Match to Query 22437: 1279.669668 from(640.842110,2+) rtinseconds(1986) index(47365)

Title: Locus:1.1.1.2740.6 File:"2013-07-02 CLN FXIII 60 min 3rd F 4.wiff"

Data file C:\Program Files (x86)\Matrix Science\Mascot Daemon\mgf6 FXIII 60 min 3rd\mascot\_daemon\_merge.mgf

Click mouse within plot area to zoom in by factor of two about that point

Or, Plot from  to  Da

Label all possible matches  Label matches used for scoring

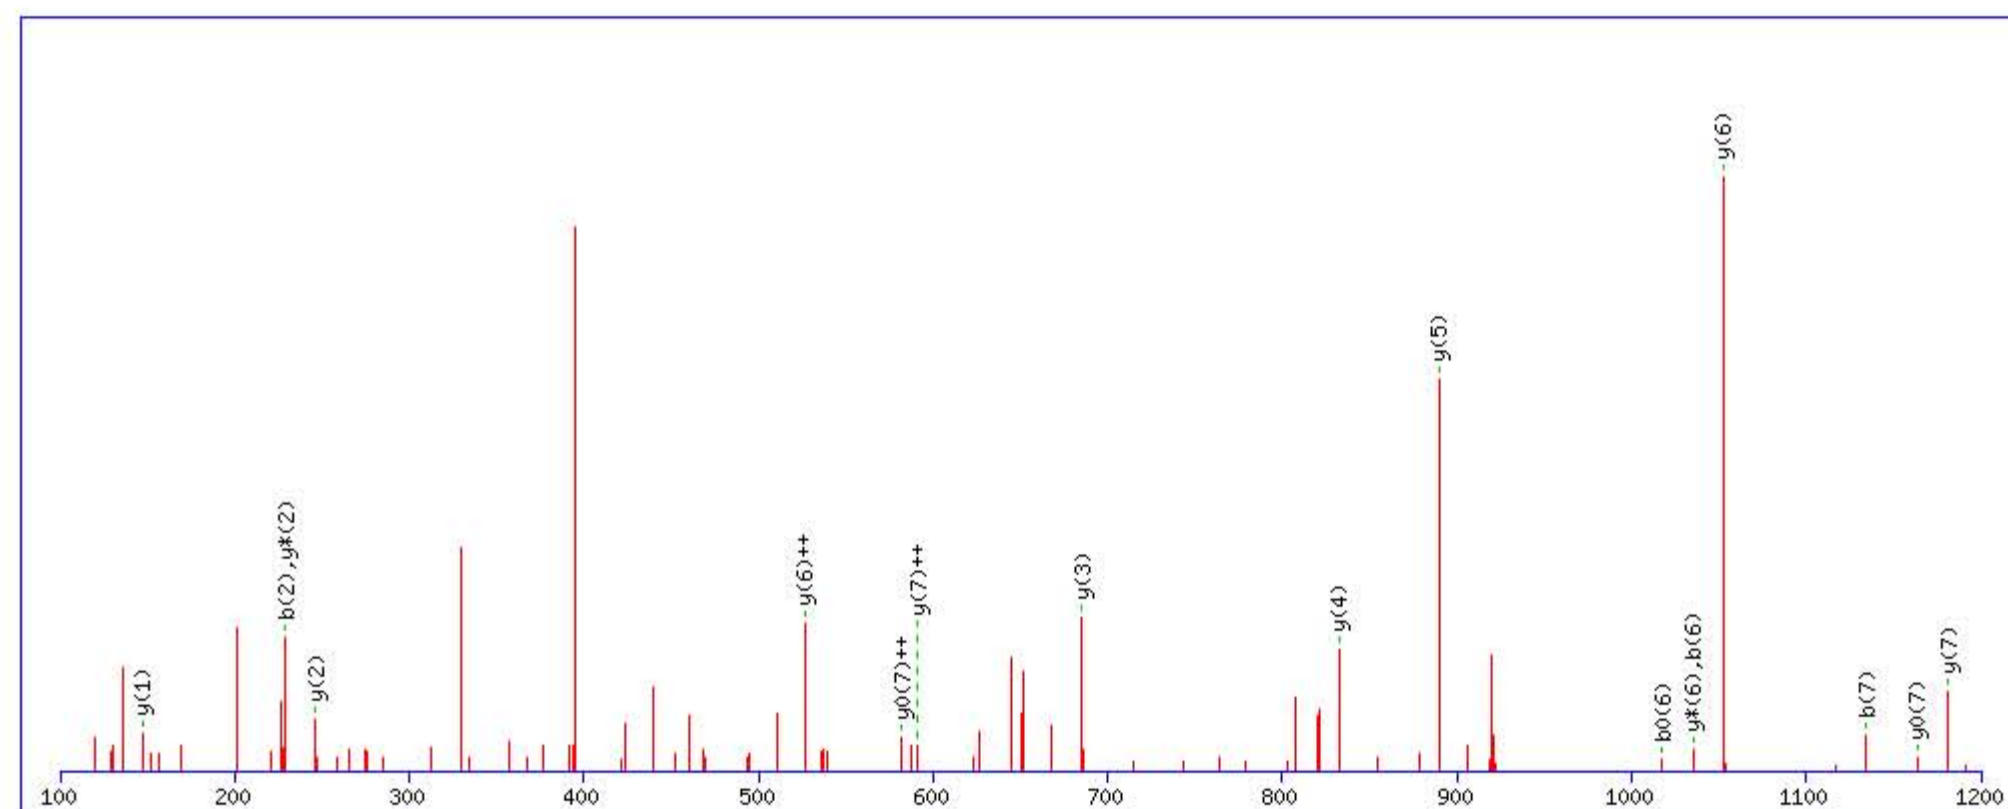

Monoisotopic mass of neutral peptide Mr(calc): 1279.663483

Fixed modifications: Carbamidomethyl (C) (apply to specified residues or termini only)

Variable modifications:

Q6 : Biotin:Thermo-21345 (Q)

Ions Score: 35 Expect: 0.005

Matches : 17/60 fragment ions using 33 most intense peaks [\(help\)](#)

| # | b                  | b <sup>++</sup> | b <sup>*</sup> | b <sup>+++</sup> | b <sup>0</sup>     | b <sup>0++</sup> | Seq. | y                  | y <sup>++</sup>   | y <sup>*</sup>     | y <sup>+++</sup> | y <sup>0</sup>     | y <sup>0++</sup>  | # |
|---|--------------------|-----------------|----------------|------------------|--------------------|------------------|------|--------------------|-------------------|--------------------|------------------|--------------------|-------------------|---|
| 1 | 100.075690         | 50.541483       |                |                  |                    |                  | V    |                    |                   |                    |                  |                    |                   | 8 |
| 2 | <b>229.118283</b>  | 115.062780      |                |                  | 211.107718         | 106.057497       | E    | <b>1181.602344</b> | <b>591.304810</b> | 1164.575795        | 582.791536       | <b>1163.591779</b> | <b>582.299528</b> | 7 |
| 3 | 392.181612         | 196.594444      |                |                  | 374.171047         | 187.589162       | Y    | <b>1052.559751</b> | <b>526.783514</b> | <b>1035.533202</b> | 518.270239       |                    |                   | 6 |
| 4 | 449.203076         | 225.105176      |                |                  | 431.192511         | 216.099894       | G    | <b>889.496422</b>  | 445.251849        | 872.469873         | 436.738575       |                    |                   | 5 |
| 5 | 596.271490         | 298.639383      |                |                  | 578.260925         | 289.634101       | F    | <b>832.474958</b>  | 416.741117        | 815.448409         | 408.227843       |                    |                   | 4 |
| 6 | <b>1035.496816</b> | 518.252046      | 1018.470267    | 509.738772       | <b>1017.486251</b> | 509.246764       | Q    | <b>685.406544</b>  | 343.206910        | 668.379995         | 334.693636       |                    |                   | 3 |
| 7 | <b>1134.565230</b> | 567.786253      | 1117.538681    | 559.272979       | 1116.554665        | 558.780971       | V    | <b>246.181218</b>  | 123.594247        | <b>229.154669</b>  | 115.080973       |                    |                   | 2 |
| 8 |                    |                 |                |                  |                    |                  | K    | <b>147.112804</b>  | 74.060040         | 130.086255         | 65.546765        |                    |                   | 1 |

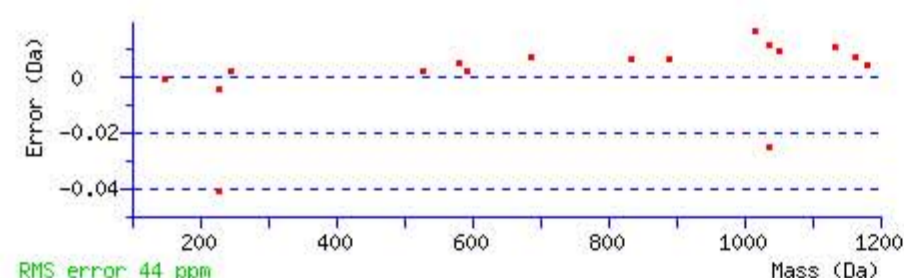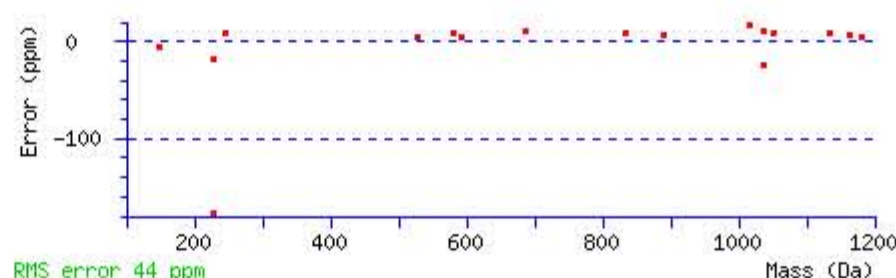

NCBI BLAST search of **VEYGFQVK**

(Parameters: blastp, nr protein database, expect=20000, no filter, PAM30)

Other BLAST [web gateways](#)

All matches to this query

| Score | Mr(calc):   | Delta     | Sequence                     |
|-------|-------------|-----------|------------------------------|
| 35.4  | 1279.663483 | 0.006185  | <a href="#">VEYGFQVK</a>     |
| 10.2  | 1279.684601 | -0.014933 | <a href="#">MSASAVFILDVK</a> |
| 6.0   | 1279.677216 | -0.007548 | <a href="#">VFKTEDTQGKK</a>  |
| 5.1   | 1279.666824 | 0.002844  | <a href="#">VKEWSLMIMK</a>   |
| 5.1   | 1279.666824 | 0.002844  | <a href="#">VKEWSLMIMK</a>   |
| 4.2   | 1279.681229 | -0.011561 | <a href="#">EVTVKEWYVK</a>   |
| 3.3   | 1279.687958 | -0.018290 | <a href="#">LIKSMESVMVK</a>  |
| 3.0   | 1279.665955 | 0.003713  | <a href="#">LDKYDSVEAIK</a>  |
| 2.4   | 1279.670670 | -0.001002 | <a href="#">VEHKSNOQK</a>    |
| 2.2   | 1279.663483 | 0.006185  | <a href="#">QFVGYLDK</a>     |



# MASCOT Search Results

## Peptide View

MS/MS Fragmentation of **DKGQAGLQR**

Found in **CO4A\_HUMAN**, Complement C4-A OS=Homo sapiens GN=C4A PE=1 SV=2

Match to Query 22621: 1282.684548 from(642.349550,2+) rtinseconds(1334) index(43190)

Title: Locus:1.1.1.2513.7 File:"2013-07-02 CLN FXIII 60 min 3rd F 4.wiff"

Data file C:\Program Files (x86)\Matrix Science\Mascot Daemon\mgf6 FXIII 60 min 3rd\mascot\_daemon\_merge.mgf

Click mouse within plot area to zoom in by factor of two about that point

Or, Plot from  to  Da

Label all possible matches  Label matches used for scoring

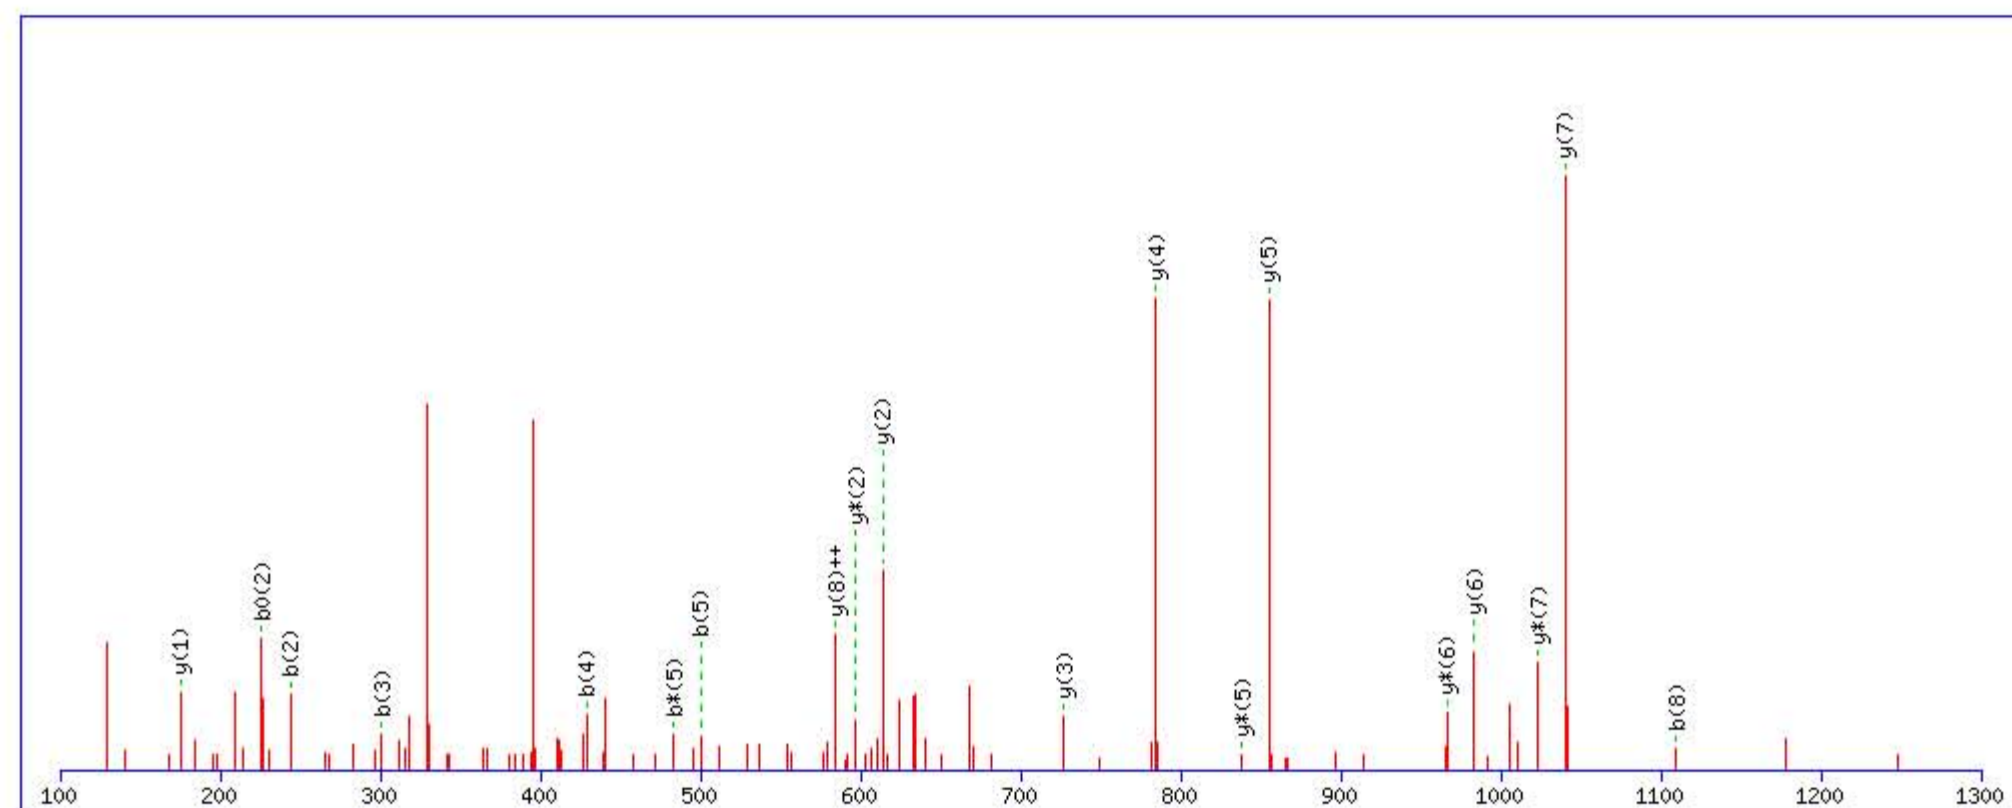

Monoisotopic mass of neutral peptide Mr(calc): 1282.681580

Fixed modifications: Carbamidomethyl (C) (apply to specified residues or termini only)

Variable modifications:

Q8 : Biotin:Thermo-21345 (Q)

Ions Score: 39 Expect: 0.0028

Matches : 19/78 fragment ions using 41 most intense peaks [\(help\)](#)

| # | b                  | b <sup>++</sup> | b <sup>*</sup>    | b <sup>*++</sup> | b <sup>0</sup>    | b <sup>0++</sup> | Seq. | y                  | y <sup>++</sup>   | y <sup>*</sup>     | y <sup>*++</sup> | # |
|---|--------------------|-----------------|-------------------|------------------|-------------------|------------------|------|--------------------|-------------------|--------------------|------------------|---|
| 1 | 116.034219         | 58.520748       |                   |                  | 98.023654         | 49.515465        | D    |                    |                   |                    |                  | 9 |
| 2 | <b>244.129182</b>  | 122.568229      | 227.102633        | 114.054955       | <b>226.118617</b> | 113.562947       | K    | 1168.661925        | <b>584.834600</b> | 1151.635376        | 576.321326       | 8 |
| 3 | <b>301.150646</b>  | 151.078961      | 284.124097        | 142.565687       | 283.140081        | 142.073679       | G    | <b>1040.566962</b> | 520.787119        | <b>1023.540413</b> | 512.273844       | 7 |
| 4 | <b>429.209224</b>  | 215.108250      | 412.182675        | 206.594976       | 411.198659        | 206.102968       | Q    | <b>983.545498</b>  | 492.276387        | <b>966.518949</b>  | 483.763112       | 6 |
| 5 | <b>500.246338</b>  | 250.626807      | <b>483.219789</b> | 242.113532       | 482.235773        | 241.621524       | A    | <b>855.486920</b>  | 428.247098        | <b>838.460371</b>  | 419.733823       | 5 |
| 6 | 557.267802         | 279.137539      | 540.241253        | 270.624265       | 539.257237        | 270.132257       | G    | <b>784.449806</b>  | 392.728541        | 767.423257         | 384.215266       | 4 |
| 7 | 670.351866         | 335.679571      | 653.325317        | 327.166297       | 652.341301        | 326.674289       | L    | <b>727.428342</b>  | 364.217809        | 710.401793         | 355.704534       | 3 |
| 8 | <b>1109.577192</b> | 555.292234      | 1092.550643       | 546.778960       | 1091.566627       | 546.286951       | Q    | <b>614.344278</b>  | 307.675777        | <b>597.317729</b>  | 299.162502       | 2 |
| 9 |                    |                 |                   |                  |                   |                  | R    | <b>175.118952</b>  | 88.063114         | 158.092403         | 79.549839        | 1 |

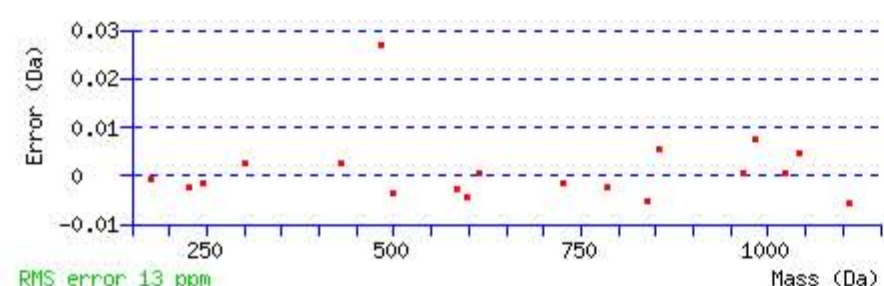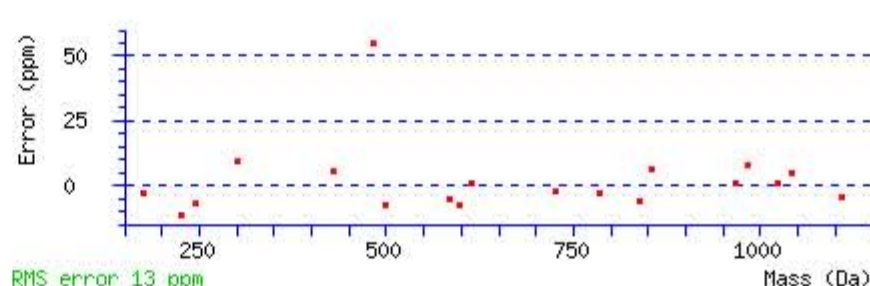

NCBI BLAST search of **DKGQAGLQR**

(Parameters: blastp, nr protein database, expect=20000, no filter, PAM30)

Other BLAST [web gateways](#)

## All matches to this query

| Score | Mr(calc):   | Delta     | Sequence                     |
|-------|-------------|-----------|------------------------------|
| 38.6  | 1282.681580 | 0.002968  | <a href="#">DKGQAGLQR</a>    |
| 11.8  | 1282.670334 | 0.014214  | <a href="#">ELEGQIQR</a>     |
| 8.0   | 1282.674194 | 0.010354  | <a href="#">QGEGQSRLVPGR</a> |
| 5.5   | 1282.674164 | 0.010384  | <a href="#">NEGKLGPNPKNR</a> |
| 4.7   | 1282.681580 | 0.002968  | <a href="#">DKGQAGLQR</a>    |
| 4.3   | 1282.670349 | 0.014199  | <a href="#">QIDLDVNR</a>     |
| 4.0   | 1282.685623 | -0.001075 | <a href="#">VWVDGIQR</a>     |
| 3.9   | 1282.670334 | 0.014214  | <a href="#">QDLEAQIR</a>     |
| 3.7   | 1282.688095 | -0.003547 | <a href="#">KPTKPESQSPGK</a> |
| 3.4   | 1282.692108 | -0.007560 | <a href="#">LEWVEIIEPR</a>   |

# Mascot Search Results

## Peptide View

MS/MS Fragmentation of **VVEEQESR**

Found in **CO4A\_HUMAN**, Complement C4-A OS=Homo sapiens GN=C4A PE=1 SV=2

Match to Query 22733: 1285.636228 from(643.825390,2+) rtinseconds(1361) index(43302)

Title: Locus:1.1.1.2522.17 File:"2013-07-02 CLN FXIII 60 min 3rd F 4.wiff"

Data file C:\Program Files (x86)\Matrix Science\Mascot Daemon\mgf\6 FXIII 60 min 3rd\mascot\_daemon\_merge.mgf

Click mouse within plot area to zoom in by factor of two about that point

Or, Plot from  to  Da

Label all possible matches  Label matches used for scoring

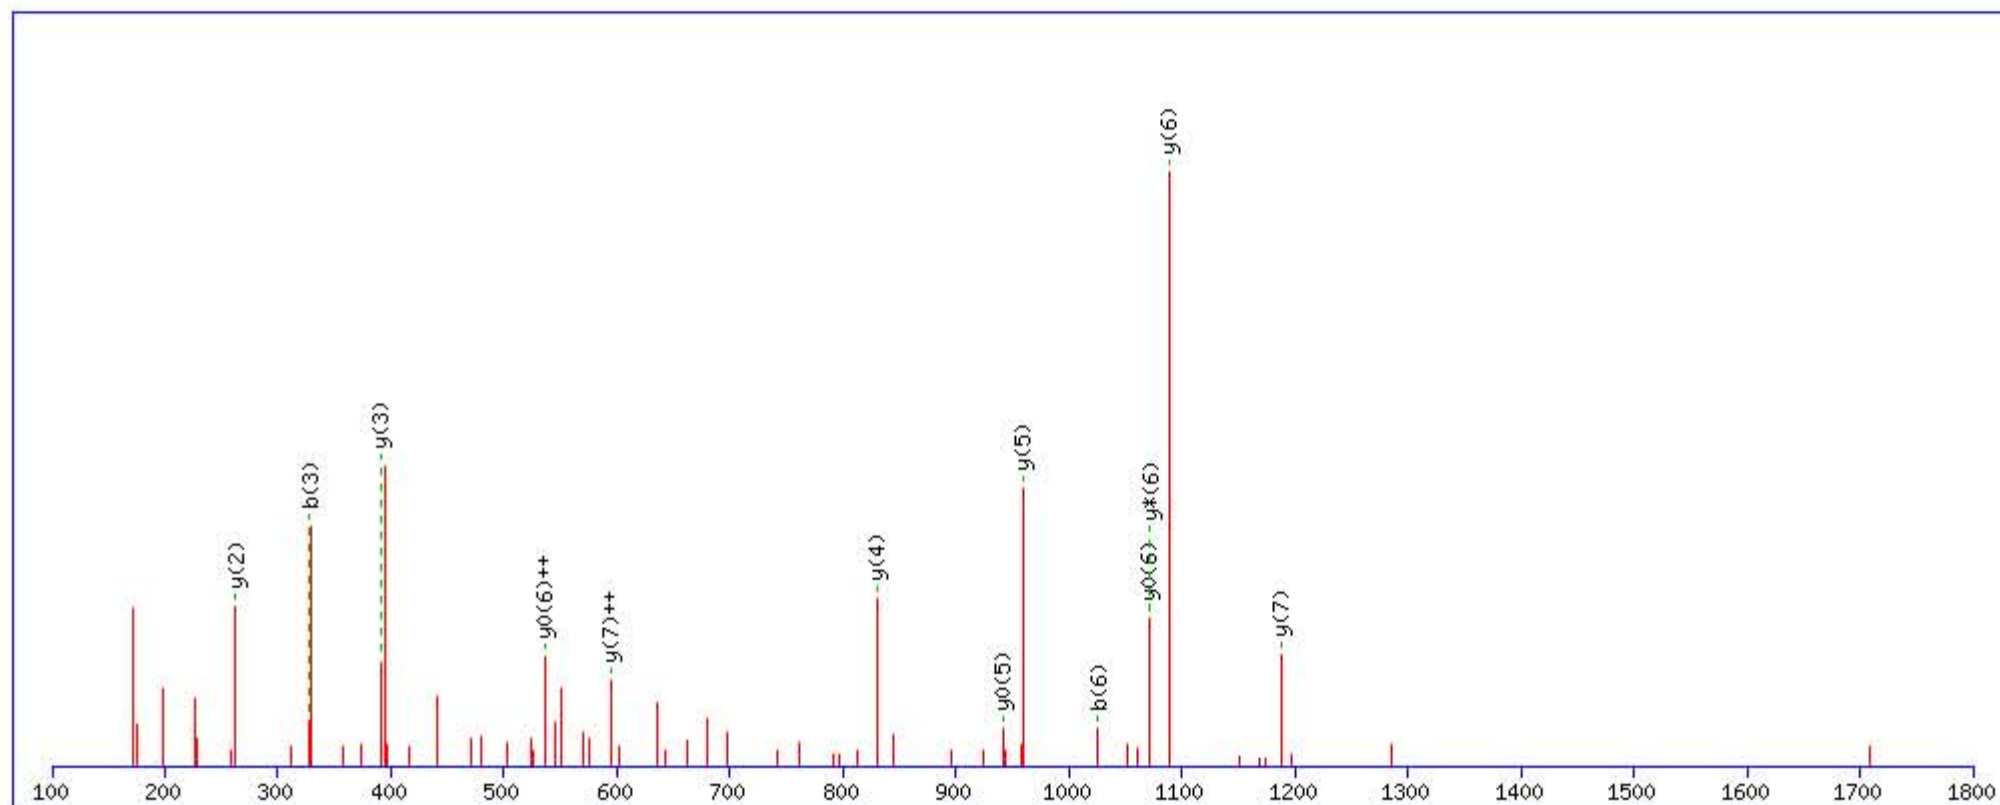

Monoisotopic mass of neutral peptide Mr(calc): 1285.633621

Fixed modifications: Carbamidomethyl (C) (apply to specified residues or termini only)

Variable modifications:

Q5 : Biotin:Thermo-21345 (Q)

Ions Score: 36 Expect: 0.00056

Matches : 13/70 fragment ions using 23 most intense peaks [\(help\)](#)

| # | b           | b <sup>++</sup> | b <sup>*</sup> | b <sup>*++</sup> | b <sup>0</sup> | b <sup>0++</sup> | Seq. | y           | y <sup>++</sup> | y <sup>*</sup> | y <sup>*++</sup> | y <sup>0</sup> | y <sup>0++</sup> | # |
|---|-------------|-----------------|----------------|------------------|----------------|------------------|------|-------------|-----------------|----------------|------------------|----------------|------------------|---|
| 1 | 100.075690  | 50.541483       |                |                  |                |                  | V    |             |                 |                |                  |                |                  | 8 |
| 2 | 199.144104  | 100.075690      |                |                  |                |                  | V    | 1187.572499 | 594.289888      | 1170.545950    | 585.776613       | 1169.561934    | 585.284605       | 7 |
| 3 | 328.186697  | 164.596987      |                |                  | 310.176132     | 155.591704       | E    | 1088.504085 | 544.755681      | 1071.477536    | 536.242406       | 1070.493520    | 535.750398       | 6 |
| 4 | 457.229290  | 229.118283      |                |                  | 439.218725     | 220.113001       | E    | 959.461492  | 480.234384      | 942.434943     | 471.721110       | 941.450927     | 471.229102       | 5 |
| 5 | 896.454616  | 448.730946      | 879.428067     | 440.217672       | 878.444051     | 439.725664       | Q    | 830.418899  | 415.713088      | 813.392350     | 407.199813       | 812.408334     | 406.707805       | 4 |
| 6 | 1025.497209 | 513.252243      | 1008.470660    | 504.738968       | 1007.486644    | 504.246960       | E    | 391.193573  | 196.100425      | 374.167024     | 187.587150       | 373.183008     | 187.095142       | 3 |
| 7 | 1112.529237 | 556.768257      | 1095.502688    | 548.254982       | 1094.518672    | 547.762974       | S    | 262.150980  | 131.579128      | 245.124431     | 123.065854       | 244.140415     | 122.573846       | 2 |
| 8 |             |                 |                |                  |                |                  | R    | 175.118952  | 88.063114       | 158.092403     | 79.549839        |                |                  | 1 |

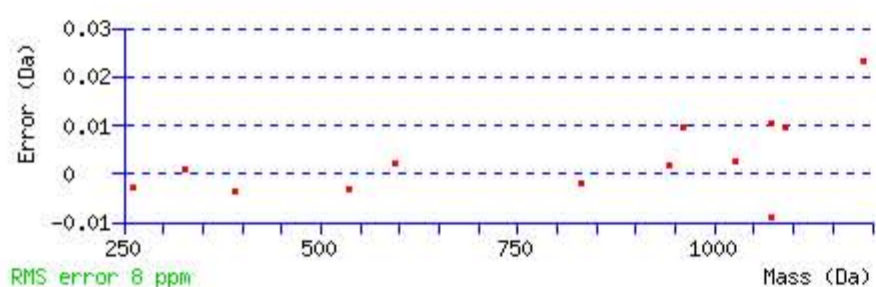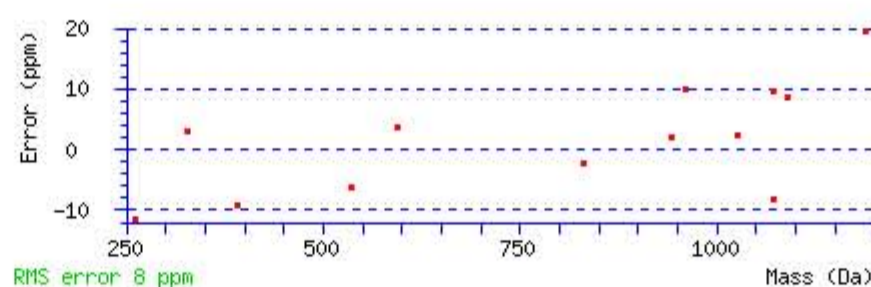

NCBI BLAST search of **VVEEQESR**

(Parameters: blastp, nr protein database, expect=20000, no filter, PAM30)

Other BLAST [web gateways](#)

All matches to this query

| Score | Mr(calc):   | Delta    | Sequence                     |
|-------|-------------|----------|------------------------------|
| 35.7  | 1285.633621 | 0.002607 | <a href="#">VVEEQESR</a>     |
| 1.0   | 1285.626236 | 0.009992 | <a href="#">VETQEVNPGASR</a> |

# MASCOT Search Results

## Peptide View

MS/MS Fragmentation of **CCQDGVTR**

Found in **CO4A\_HUMAN**, Complement C4-A OS=Homo sapiens GN=C4A PE=1 SV=2

Match to Query 23136: 1305.570468 from(653.792510,2+) rtinseconds(1387) index(43448)

Title: Locus:1.1.1.2531.11 File:"2013-07-02 CLN FXIII 60 min 3rd F 4.wiff"

Data file C:\Program Files (x86)\Matrix Science\Mascot Daemon\mgf\6 FXIII 60 min 3rd\mascot\_daemon\_merge.mgf

Click mouse within plot area to zoom in by factor of two about that point

Or, Plot from  to  Da

Label all possible matches  Label matches used for scoring

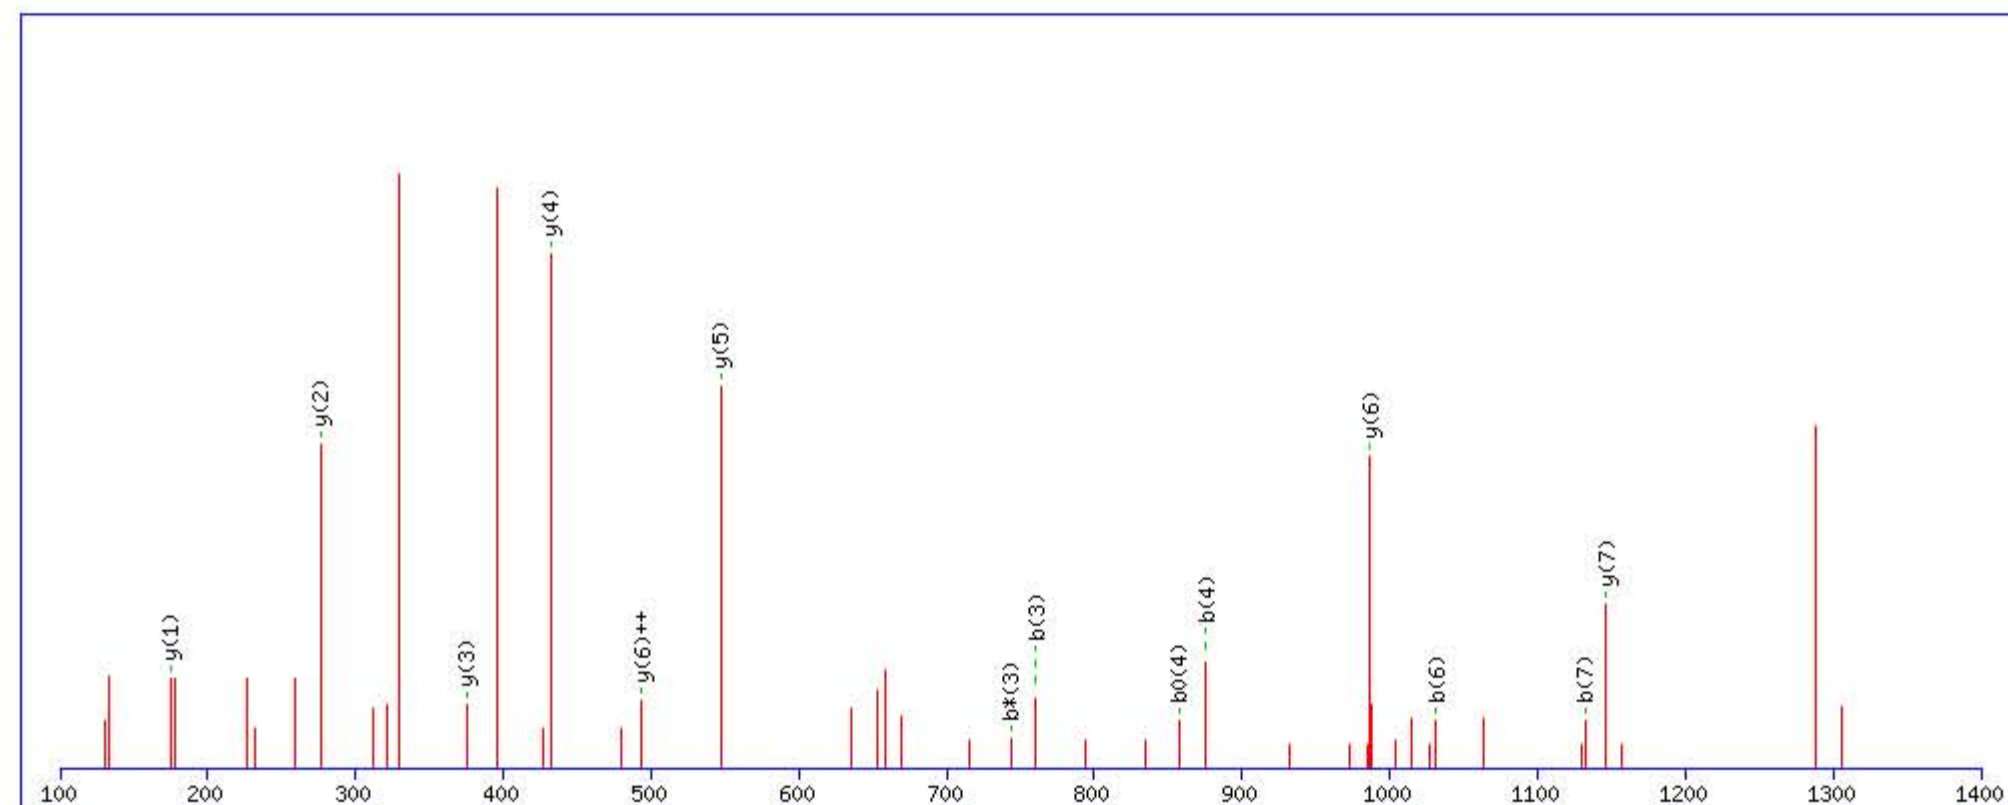

Monoisotopic mass of neutral peptide Mr(calc): 1305.562820

Fixed modifications: Carbamidomethyl (C) (apply to specified residues or termini only)

Variable modifications:

Q3 : Biotin:Thermo-21345 (Q)

Ions Score: 49 Expect: 5.7e-005

Matches : 14/72 fragment ions using 22 most intense peaks [\(help\)](#)

| # | b           | b <sup>++</sup> | b <sup>*</sup> | b <sup>*++</sup> | b <sup>0</sup> | b <sup>0++</sup> | Seq. | y           | y <sup>++</sup> | y <sup>*</sup> | y <sup>*++</sup> | y <sup>0</sup> | y <sup>0++</sup> | # |
|---|-------------|-----------------|----------------|------------------|----------------|------------------|------|-------------|-----------------|----------------|------------------|----------------|------------------|---|
| 1 | 161.037925  | 81.022600       |                |                  |                |                  | C    |             |                 |                |                  |                |                  | 8 |
| 2 | 321.068574  | 161.037925      |                |                  |                |                  | C    | 1146.539427 | 573.773352      | 1129.512878    | 565.260077       | 1128.528862    | 564.768069       | 7 |
| 3 | 760.293900  | 380.650588      | 743.267351     | 372.137314       |                |                  | Q    | 986.508778  | 493.758027      | 969.482229     | 485.244753       | 968.498213     | 484.752745       | 6 |
| 4 | 875.320843  | 438.164060      | 858.294294     | 429.650785       | 857.310278     | 429.158777       | D    | 547.283452  | 274.145364      | 530.256903     | 265.632090       | 529.272887     | 265.140082       | 5 |
| 5 | 932.342307  | 466.674792      | 915.315758     | 458.161517       | 914.331742     | 457.669509       | G    | 432.256509  | 216.631893      | 415.229960     | 208.118618       | 414.245944     | 207.626610       | 4 |
| 6 | 1031.410721 | 516.208999      | 1014.384172    | 507.695724       | 1013.400156    | 507.203716       | V    | 375.235045  | 188.121161      | 358.208496     | 179.607886       | 357.224480     | 179.115878       | 3 |
| 7 | 1132.458400 | 566.732838      | 1115.431851    | 558.219564       | 1114.447835    | 557.727556       | T    | 276.166631  | 138.586953      | 259.140082     | 130.073679       | 258.156066     | 129.581671       | 2 |
| 8 |             |                 |                |                  |                |                  | R    | 175.118952  | 88.063114       | 158.092403     | 79.549839        |                |                  | 1 |

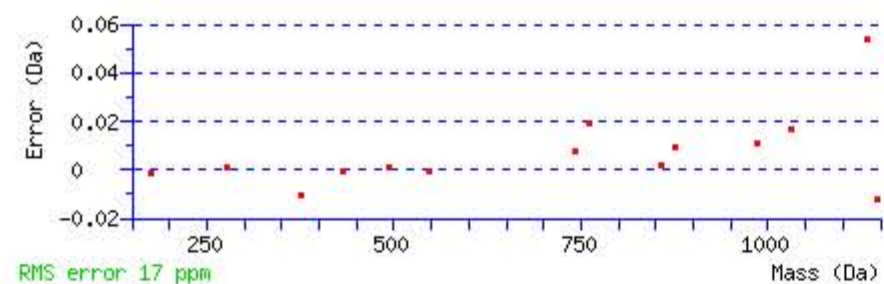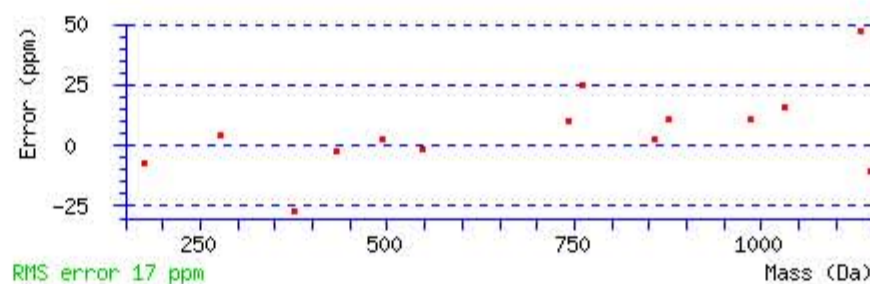

NCBI BLAST search of **CCQDGVTR**

(Parameters: blastp, nr protein database, expect=20000, no filter, PAM30)

Other BLAST [web gateways](#)

All matches to this query

| Score | Mr(calc):   | Delta     | Sequence                     |
|-------|-------------|-----------|------------------------------|
| 49.4  | 1305.562820 | 0.007648  | <a href="#">CCQDGVTR</a>     |
| 14.1  | 1305.588409 | -0.017941 | <a href="#">CRSSTPADAWR</a>  |
| 5.2   | 1305.577194 | -0.006726 | <a href="#">CDAGWLADGSVR</a> |
| 2.1   | 1305.569778 | 0.000690  | <a href="#">SSWQGENQSQR</a>  |
| 1.0   | 1305.583679 | -0.013211 | <a href="#">EQEPDFEEKR</a>   |
| 0.6   | 1305.577148 | -0.006680 | <a href="#">MGQHYEEEKR</a>   |

Mascot: <http://www.matrixscience.com/>

# MASCOT Search Results

## Peptide View

MS/MS Fragmentation of **LGQYASPTAK**

Found in **CO4A\_HUMAN**, Complement C4-A OS=Homo sapiens GN=C4A PE=1 SV=2

Match to Query 23941: 1345.710648 from(673.862600,2+) rtinseconds(1604) index(44889)

Title: Locus:1.1.1.2607.9 File:"2013-07-02 CLN FXIII 60 min 3rd F 4.wiff"

Data file C:\Program Files (x86)\Matrix Science\Mascot Daemon\mgf\6 FXIII 60 min 3rd\mascot\_daemon\_merge.mgf

Click mouse within plot area to zoom in by factor of two about that point

Or, Plot from  to  Da

Label all possible matches  Label matches used for scoring

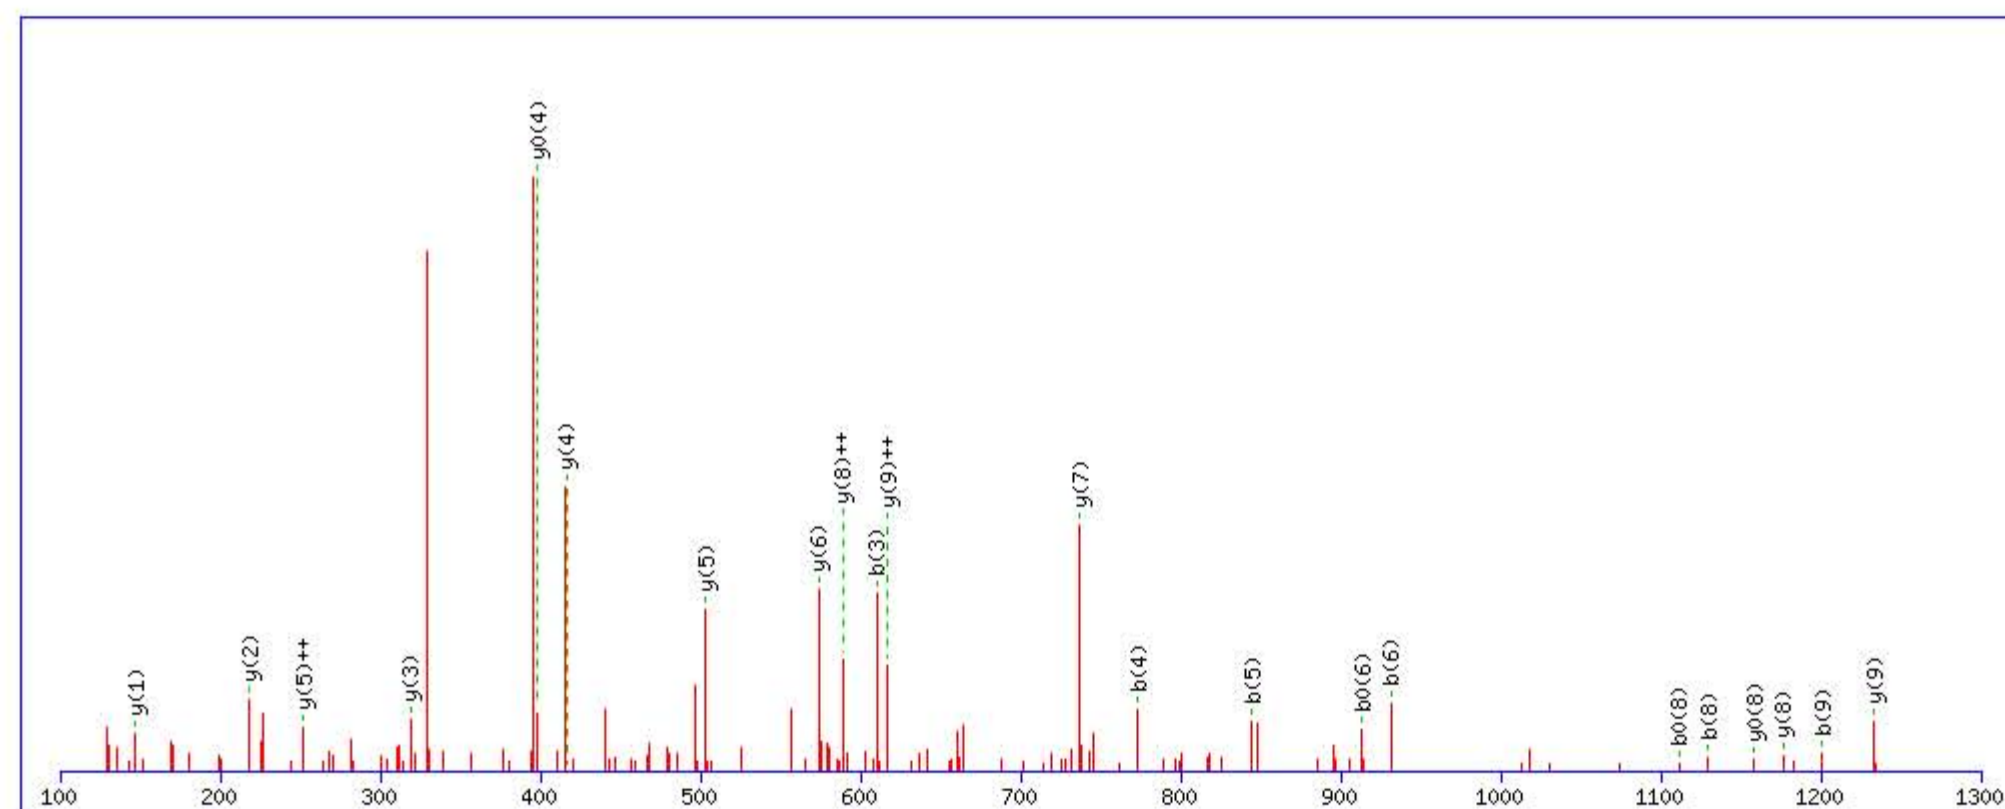

Monoisotopic mass of neutral peptide Mr(calc): 1345.706390

Fixed modifications: Carbamidomethyl (C) (apply to specified residues or termini only)

Variable modifications:

Q3 : Biotin:Thermo-21345 (Q)

Ions Score: 53 Expect: 0.0001

Matches : 22/90 fragment ions using 45 most intense peaks [\(help\)](#)

| #  | b           | b <sup>++</sup> | b <sup>*</sup> | b <sup>*++</sup> | b <sup>0</sup> | b <sup>0++</sup> | Seq. | y           | y <sup>++</sup> | y <sup>*</sup> | y <sup>*++</sup> | y <sup>0</sup> | y <sup>0++</sup> | #  |
|----|-------------|-----------------|----------------|------------------|----------------|------------------|------|-------------|-----------------|----------------|------------------|----------------|------------------|----|
| 1  | 114.091340  | 57.549308       |                |                  |                |                  | L    |             |                 |                |                  |                |                  | 10 |
| 2  | 171.112804  | 86.060040       |                |                  |                |                  | G    | 1233.629622 | 617.318449      | 1216.603073    | 608.805175       | 1215.619057    | 608.313167       | 9  |
| 3  | 610.338130  | 305.672703      | 593.311581     | 297.159429       |                |                  | Q    | 1176.608158 | 588.807717      | 1159.581609    | 580.294443       | 1158.597593    | 579.802435       | 8  |
| 4  | 773.401459  | 387.204368      | 756.374910     | 378.691093       |                |                  | Y    | 737.382832  | 369.195054      | 720.356283     | 360.681780       | 719.372267     | 360.189772       | 7  |
| 5  | 844.438573  | 422.722925      | 827.412024     | 414.209650       |                |                  | A    | 574.319503  | 287.663389      | 557.292954     | 279.150115       | 556.308938     | 278.658107       | 6  |
| 6  | 931.470601  | 466.238939      | 914.444052     | 457.725664       | 913.460036     | 457.233656       | S    | 503.282389  | 252.144832      | 486.255840     | 243.631558       | 485.271824     | 243.139550       | 5  |
| 7  | 1028.523365 | 514.765321      | 1011.496816    | 506.252046       | 1010.512800    | 505.760038       | P    | 416.250361  | 208.628818      | 399.223812     | 200.115544       | 398.239796     | 199.623536       | 4  |
| 8  | 1129.571044 | 565.289160      | 1112.544495    | 556.775886       | 1111.560479    | 556.283878       | T    | 319.197597  | 160.102436      | 302.171048     | 151.589162       | 301.187032     | 151.097154       | 3  |
| 9  | 1200.608158 | 600.807717      | 1183.581609    | 592.294443       | 1182.597593    | 591.802435       | A    | 218.149918  | 109.578597      | 201.123369     | 101.065322       |                |                  | 2  |
| 10 |             |                 |                |                  |                |                  | K    | 147.112804  | 74.060040       | 130.086255     | 65.546765        |                |                  | 1  |

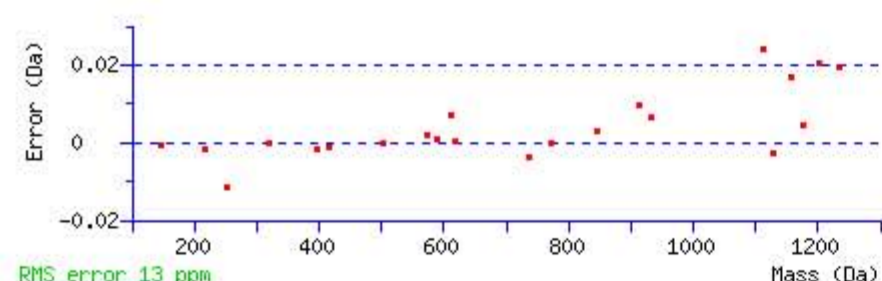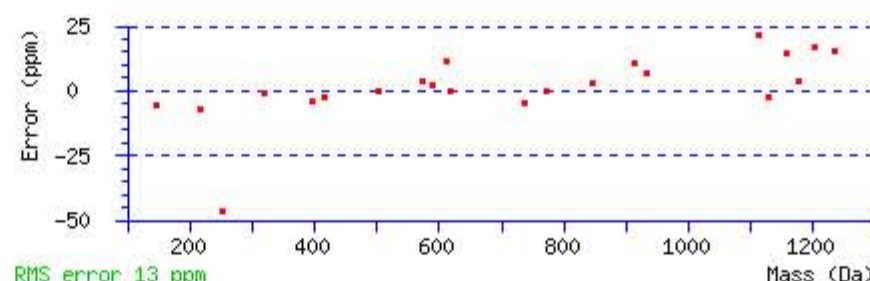

NCBI BLAST search of **LGQYASPTAK**

(Parameters: blastp, nr protein database, expect=20000, no filter, PAM30)

Other BLAST [web gateways](#)

## All matches to this query

| Score | Mr(calc):   | Delta     | Sequence                       |
|-------|-------------|-----------|--------------------------------|
| 52.7  | 1345.706390 | 0.004258  | <a href="#">LGQYASPTAK</a>     |
| 9.4   | 1345.727509 | -0.016861 | <a href="#">LGLMDNEIKVAK</a>   |
| 9.2   | 1345.692474 | 0.018174  | <a href="#">VASCRYPALGPR</a>   |
| 8.2   | 1345.706390 | 0.004258  | <a href="#">LGQYDQALK</a>      |
| 7.6   | 1345.724182 | -0.013534 | <a href="#">LGAVPATSGPTTFK</a> |
| 7.1   | 1345.706406 | 0.004242  | <a href="#">QGLYTPQTK</a>      |
| 0.4   | 1345.713608 | -0.002960 | <a href="#">NGMLLTGGGKDRK</a>  |
| 0.3   | 1345.724152 | -0.013504 | <a href="#">QPLQTDIYGLAK</a>   |

# MASCOT Search Results

## Peptide View

MS/MS Fragmentation of **TEQWSTLPPETK**

Found in **CO4A\_HUMAN**, Complement C4-A OS=Homo sapiens GN=C4A PE=1 SV=2

Match to Query 36950: 1726.873848 from(864.444200,2+) rtinseconds(2028) index(47589)

Title: Locus:1.1.1.2754.9 File:"2013-07-02 CLN FXIII 60 min 3rd F 4.wiff"

Data file C:\Program Files (x86)\Matrix Science\Mascot Daemon\mgf\6 FXIII 60 min 3rd\mascot\_daemon\_merge.mgf

Click mouse within plot area to zoom in by factor of two about that point

Or, Plot from  to  Da

Label all possible matches  Label matches used for scoring

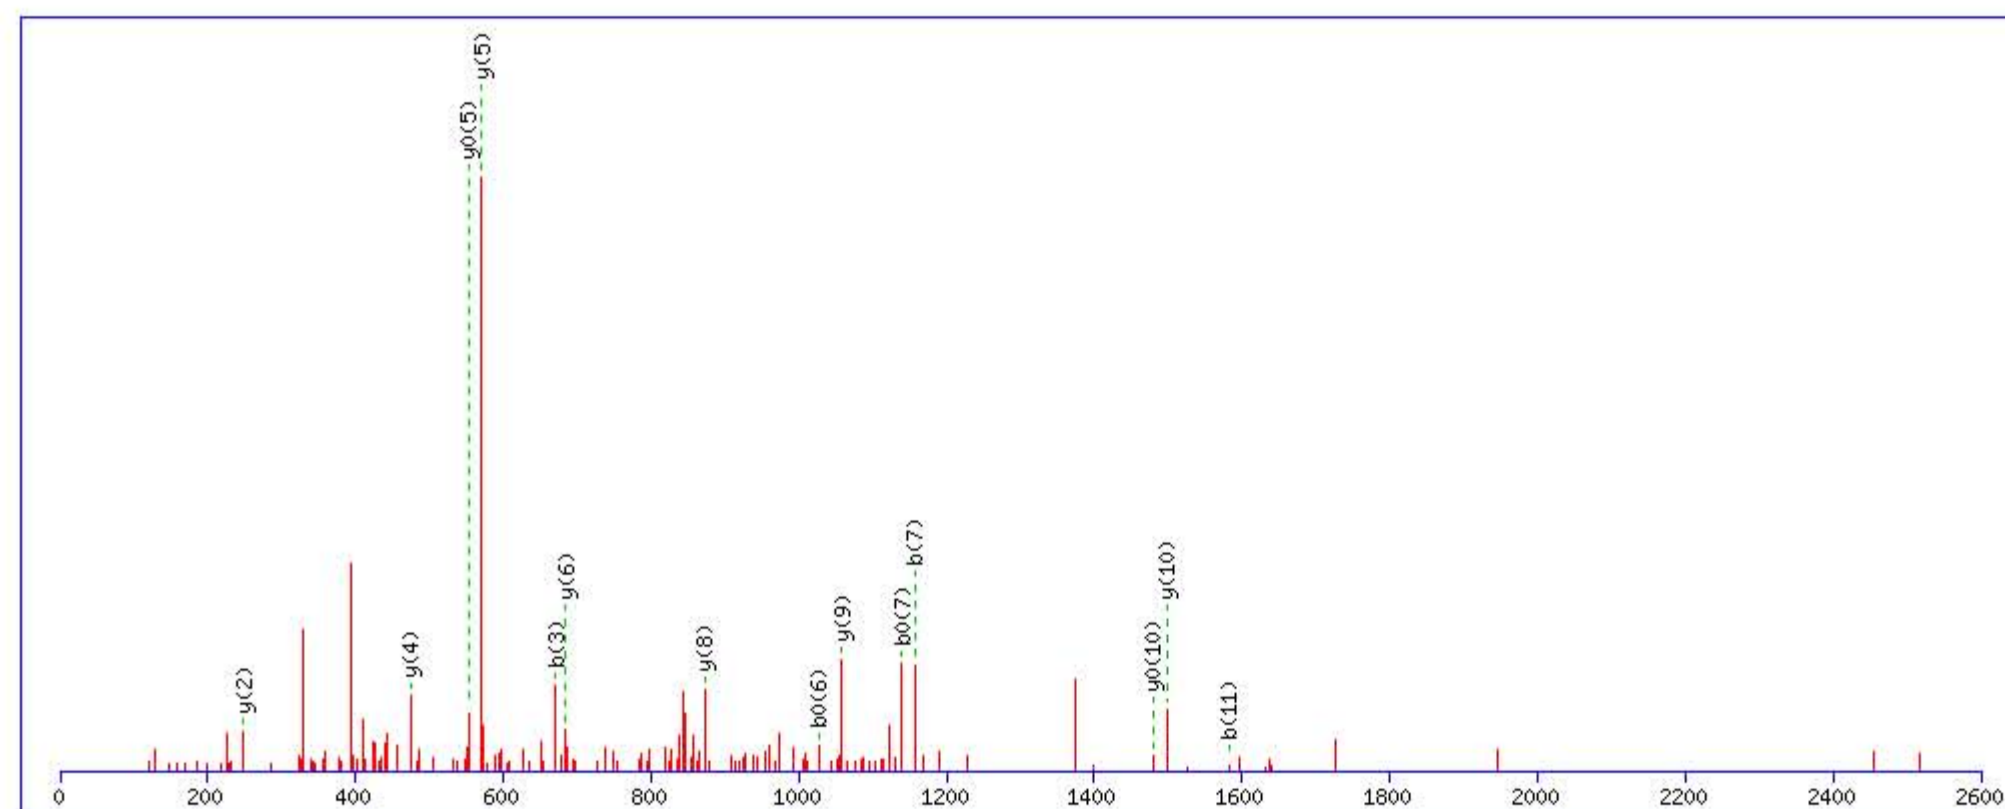

Monoisotopic mass of neutral peptide Mr(calc): 1726.860001

Fixed modifications: Carbamidomethyl (C) (apply to specified residues or termini only)

Variable modifications:

Q3 : Biotin:Thermo-21345 (Q)

Ions Score: 30 Expect: 0.011

Matches : 14/126 fragment ions using 32 most intense peaks [\(help\)](#)

| #  | b                  | b <sup>++</sup> | b <sup>*</sup> | b <sup>*++</sup> | b <sup>0</sup>     | b <sup>0++</sup> | Seq. | y                  | y <sup>++</sup> | y <sup>*</sup> | y <sup>*++</sup> | y <sup>0</sup>     | y <sup>0++</sup> | #  |
|----|--------------------|-----------------|----------------|------------------|--------------------|------------------|------|--------------------|-----------------|----------------|------------------|--------------------|------------------|----|
| 1  | 102.054955         | 51.531116       |                |                  | 84.044390          | 42.525833        | T    |                    |                 |                |                  |                    |                  | 12 |
| 2  | 231.097548         | 116.052412      |                |                  | 213.086983         | 107.047130       | E    | 1626.819607        | 813.913442      | 1609.793058    | 805.400167       | 1608.809042        | 804.908159       | 11 |
| 3  | <b>670.322874</b>  | 335.665075      | 653.296325     | 327.151801       | 652.312309         | 326.659793       | Q    | <b>1497.777014</b> | 749.392145      | 1480.750465    | 740.878871       | <b>1479.766449</b> | 740.386863       | 10 |
| 4  | 856.402187         | 428.704732      | 839.375638     | 420.191457       | 838.391622         | 419.699449       | W    | <b>1058.551688</b> | 529.779482      | 1041.525139    | 521.266208       | 1040.541123        | 520.774200       | 9  |
| 5  | 943.434215         | 472.220746      | 926.407666     | 463.707471       | 925.423650         | 463.215463       | S    | <b>872.472375</b>  | 436.739826      | 855.445826     | 428.226551       | 854.461810         | 427.734543       | 8  |
| 6  | 1044.481894        | 522.744585      | 1027.455345    | 514.231311       | <b>1026.471329</b> | 513.739303       | T    | 785.440347         | 393.223812      | 768.413798     | 384.710537       | 767.429782         | 384.218529       | 7  |
| 7  | <b>1157.565958</b> | 579.286617      | 1140.539409    | 570.773343       | <b>1139.555393</b> | 570.281334       | L    | <b>684.392668</b>  | 342.699972      | 667.366119     | 334.186698       | 666.382103         | 333.694690       | 6  |
| 8  | 1254.618722        | 627.812999      | 1237.592173    | 619.299725       | 1236.608157        | 618.807716       | P    | <b>571.308604</b>  | 286.157940      | 554.282055     | 277.644666       | <b>553.298039</b>  | 277.152658       | 5  |
| 9  | 1351.671486        | 676.339381      | 1334.644937    | 667.826107       | 1333.660921        | 667.334098       | P    | <b>474.255840</b>  | 237.631558      | 457.229291     | 229.118284       | 456.245275         | 228.626276       | 4  |
| 10 | 1480.714079        | 740.860678      | 1463.687530    | 732.347403       | 1462.703514        | 731.855395       | E    | 377.203076         | 189.105176      | 360.176527     | 180.591902       | 359.192511         | 180.099894       | 3  |
| 11 | <b>1581.761758</b> | 791.384517      | 1564.735209    | 782.871243       | 1563.751193        | 782.379235       | T    | <b>248.160483</b>  | 124.583879      | 231.133934     | 116.070605       | 230.149918         | 115.578597       | 2  |
| 12 |                    |                 |                |                  |                    |                  | K    | 147.112804         | 74.060040       | 130.086255     | 65.546765        |                    |                  | 1  |

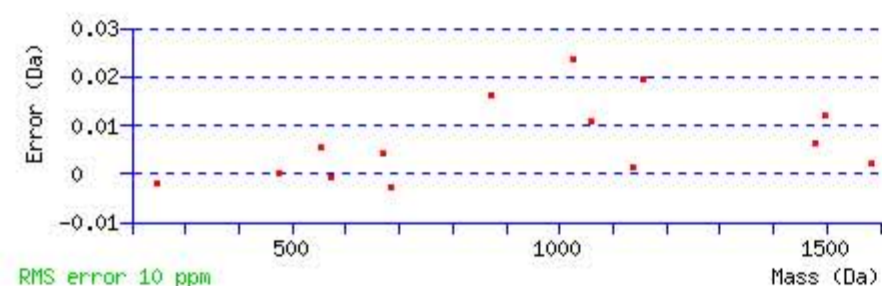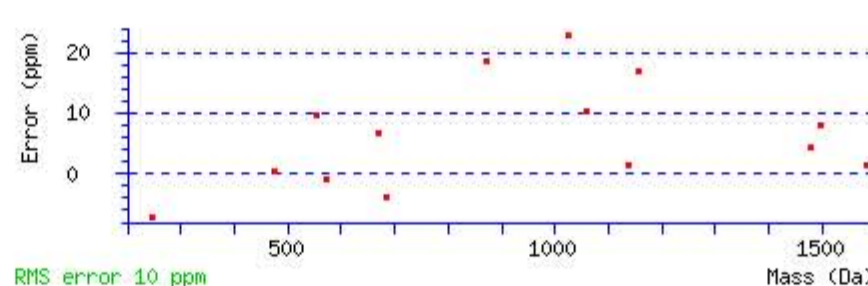

NCBI BLAST search of **TEQWSTLPPETK**

(Parameters: blastp, nr protein database, expect=20000, no filter, PAM30)

Other BLAST [web gateways](#)

### All matches to this query

| Score | Mr(calc):   | Delta     | Sequence                          |
|-------|-------------|-----------|-----------------------------------|
| 30.1  | 1726.860001 | 0.013847  | <a href="#">TEQWSTLPPETK</a>      |
| 8.5   | 1726.871216 | 0.002632  | <a href="#">NLNTKLQMYFQSPK</a>    |
| 6.4   | 1726.867188 | 0.006660  | <a href="#">KDHAEMQAVIDAKQK</a>   |
| 2.2   | 1726.849960 | 0.023888  | <a href="#">TERFGQGAGPVGGQGPR</a> |
| 1.2   | 1726.874573 | -0.000725 | <a href="#">VTKNQEMMSQIKYK</a>    |
| 0.4   | 1726.853485 | 0.020363  | <a href="#">MASGHAFQPDLVK</a>     |

# MASCOT Search Results

## Peptide View

MS/MS Fragmentation of **GLEEELQFSLGSK**

Found in **CO4A\_HUMAN**, Complement C4-A OS=Homo sapiens GN=C4A PE=1 SV=2

Match to Query 37441: 1746.905928 from(874.460240,2+) rtinseconds(2557) index(50641)

Title: Locus:1.1.1.2938.6 File:"2013-07-02 CLN FXIII 60 min 3rd F 4.wiff"

Data file C:\Program Files (x86)\Matrix Science\Mascot Daemon\mgf\6 FXIII 60 min 3rd\mascot\_daemon\_merge.mgf

Click mouse within plot area to zoom in by factor of two about that point

Or, Plot from  to  Da

Label all possible matches  Label matches used for scoring

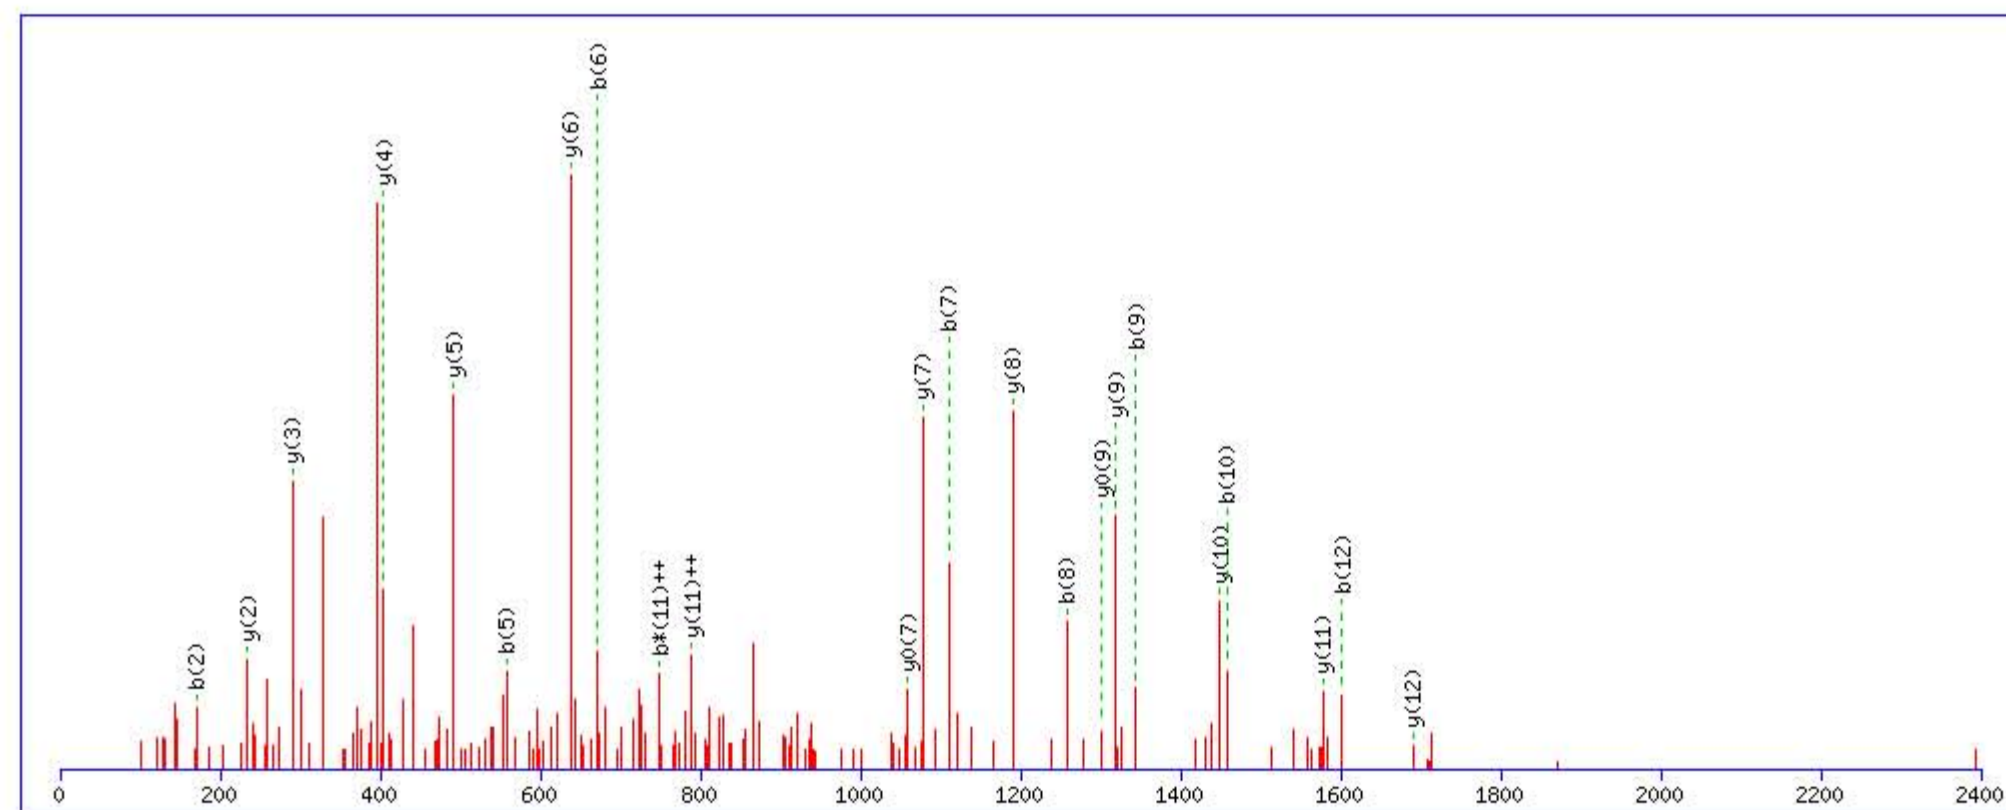

Monoisotopic mass of neutral peptide Mr(calc): 1746.886200

Fixed modifications: Carbamidomethyl (C) (apply to specified residues or termini only)

Variable modifications:

Q7 : Biotin:Thermo-21345 (Q)

Ions Score: 89 Expect: 8.7e-009

Matches : 23/126 fragment ions using 33 most intense peaks [\(help\)](#)

| #  | b                  | b <sup>++</sup> | b <sup>+</sup> | b <sup>+++</sup>  | b <sup>0</sup> | b <sup>0++</sup> | Seq. | y                  | y <sup>++</sup>   | y <sup>+</sup> | y <sup>+++</sup> | y <sup>0</sup>     | y <sup>0++</sup> | #  |
|----|--------------------|-----------------|----------------|-------------------|----------------|------------------|------|--------------------|-------------------|----------------|------------------|--------------------|------------------|----|
| 1  | 58.028740          | 29.518008       |                |                   |                |                  | G    |                    |                   |                |                  |                    |                  | 13 |
| 2  | <b>171.112804</b>  | 86.060040       |                |                   |                |                  | L    | <b>1690.872035</b> | 845.939656        | 1673.845486    | 837.426381       | 1672.861470        | 836.934373       | 12 |
| 3  | 300.155397         | 150.581336      |                |                   | 282.144832     | 141.576054       | E    | <b>1577.787971</b> | <b>789.397624</b> | 1560.761422    | 780.884349       | 1559.777406        | 780.392341       | 11 |
| 4  | 429.197990         | 215.102633      |                |                   | 411.187425     | 206.097351       | E    | <b>1448.745378</b> | 724.876327        | 1431.718829    | 716.363053       | 1430.734813        | 715.871045       | 10 |
| 5  | <b>558.240583</b>  | 279.623930      |                |                   | 540.230018     | 270.618647       | E    | <b>1319.702785</b> | 660.355031        | 1302.676236    | 651.841756       | <b>1301.692220</b> | 651.349748       | 9  |
| 6  | <b>671.324647</b>  | 336.165962      |                |                   | 653.314082     | 327.160679       | L    | <b>1190.660192</b> | 595.833734        | 1173.633643    | 587.320460       | 1172.649627        | 586.828452       | 8  |
| 7  | <b>1110.549973</b> | 555.778624      | 1093.523424    | 547.265350        | 1092.539408    | 546.773342       | Q    | <b>1077.576128</b> | 539.291702        | 1060.549579    | 530.778428       | <b>1059.565563</b> | 530.286419       | 7  |
| 8  | <b>1257.618387</b> | 629.312832      | 1240.591838    | 620.799557        | 1239.607822    | 620.307549       | F    | <b>638.350802</b>  | 319.679039        | 621.324253     | 311.165765       | 620.340237         | 310.673757       | 6  |
| 9  | <b>1344.650415</b> | 672.828846      | 1327.623866    | 664.315571        | 1326.639850    | 663.823563       | S    | <b>491.282388</b>  | 246.144832        | 474.255839     | 237.631557       | 473.271823         | 237.139549       | 5  |
| 10 | <b>1457.734479</b> | 729.370878      | 1440.707930    | 720.857603        | 1439.723914    | 720.365595       | L    | <b>404.250360</b>  | 202.628818        | 387.223811     | 194.115543       | 386.239795         | 193.623535       | 4  |
| 11 | 1514.755943        | 757.881609      | 1497.729394    | <b>749.368335</b> | 1496.745378    | 748.876327       | G    | <b>291.166296</b>  | 146.086786        | 274.139747     | 137.573512       | 273.155731         | 137.081504       | 3  |
| 12 | <b>1601.787971</b> | 801.397624      | 1584.761422    | 792.884349        | 1583.777406    | 792.392341       | S    | <b>234.144832</b>  | 117.576054        | 217.118283     | 109.062780       | 216.134267         | 108.570772       | 2  |
| 13 |                    |                 |                |                   |                |                  | K    | 147.112804         | 74.060040         | 130.086255     | 65.546765        |                    |                  | 1  |

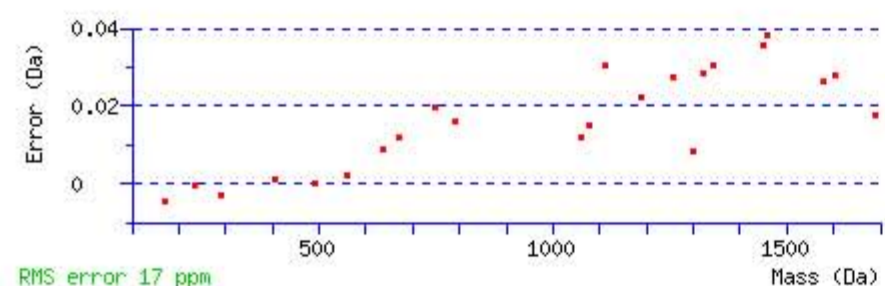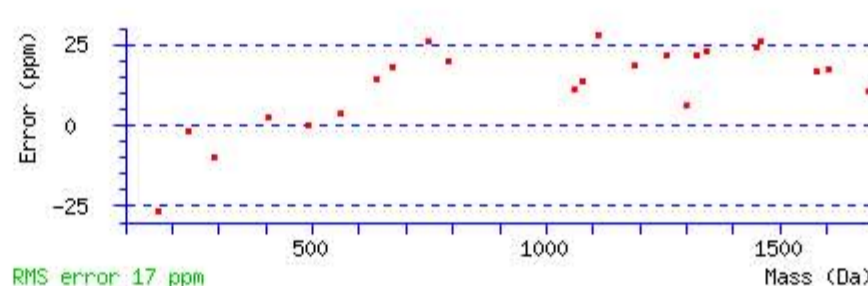

NCBI BLAST search of [GLEEELQFSLGSK](#)

(Parameters: blastp, nr protein database, expect=20000, no filter, PAM30)

Other BLAST [web gateways](#)

All matches to this query

| Score | Mr(calc):   | Delta     | Sequence                          |
|-------|-------------|-----------|-----------------------------------|
| 89.4  | 1746.886200 | 0.019728  | <a href="#">GLEEELQFSLGSK</a>     |
| 3.4   | 1746.887558 | 0.018370  | <a href="#">AVQSKAFCAGGLAPGWK</a> |
| 1.4   | 1746.918533 | -0.012605 | <a href="#">AKLQMTEAALALSEQK</a>  |

Mascot: <http://www.matrixscience.com/>

# MASCOT Search Results

## Peptide View

MS/MS Fragmentation of **VLSLAQEQVGG SPEK**

Found in **CO4A\_HUMAN**, Complement C4-A OS=Homo sapiens GN=C4A PE=1 SV=2

Match to Query 39377: 1851.983712 from(618.335180,3+) rtinseconds(1978) index(47293)

Title: Locus:1.1.1.2737.9 File:"2013-07-02 CLN FXIII 60 min 3rd F 4.wiff"

Data file C:\Program Files (x86)\Matrix Science\Mascot Daemon\mgf\6 FXIII 60 min 3rd\mascot\_daemon\_merge.mgf

Click mouse within plot area to zoom in by factor of two about that point

Or, Plot from  to  Da

Label all possible matches  Label matches used for scoring

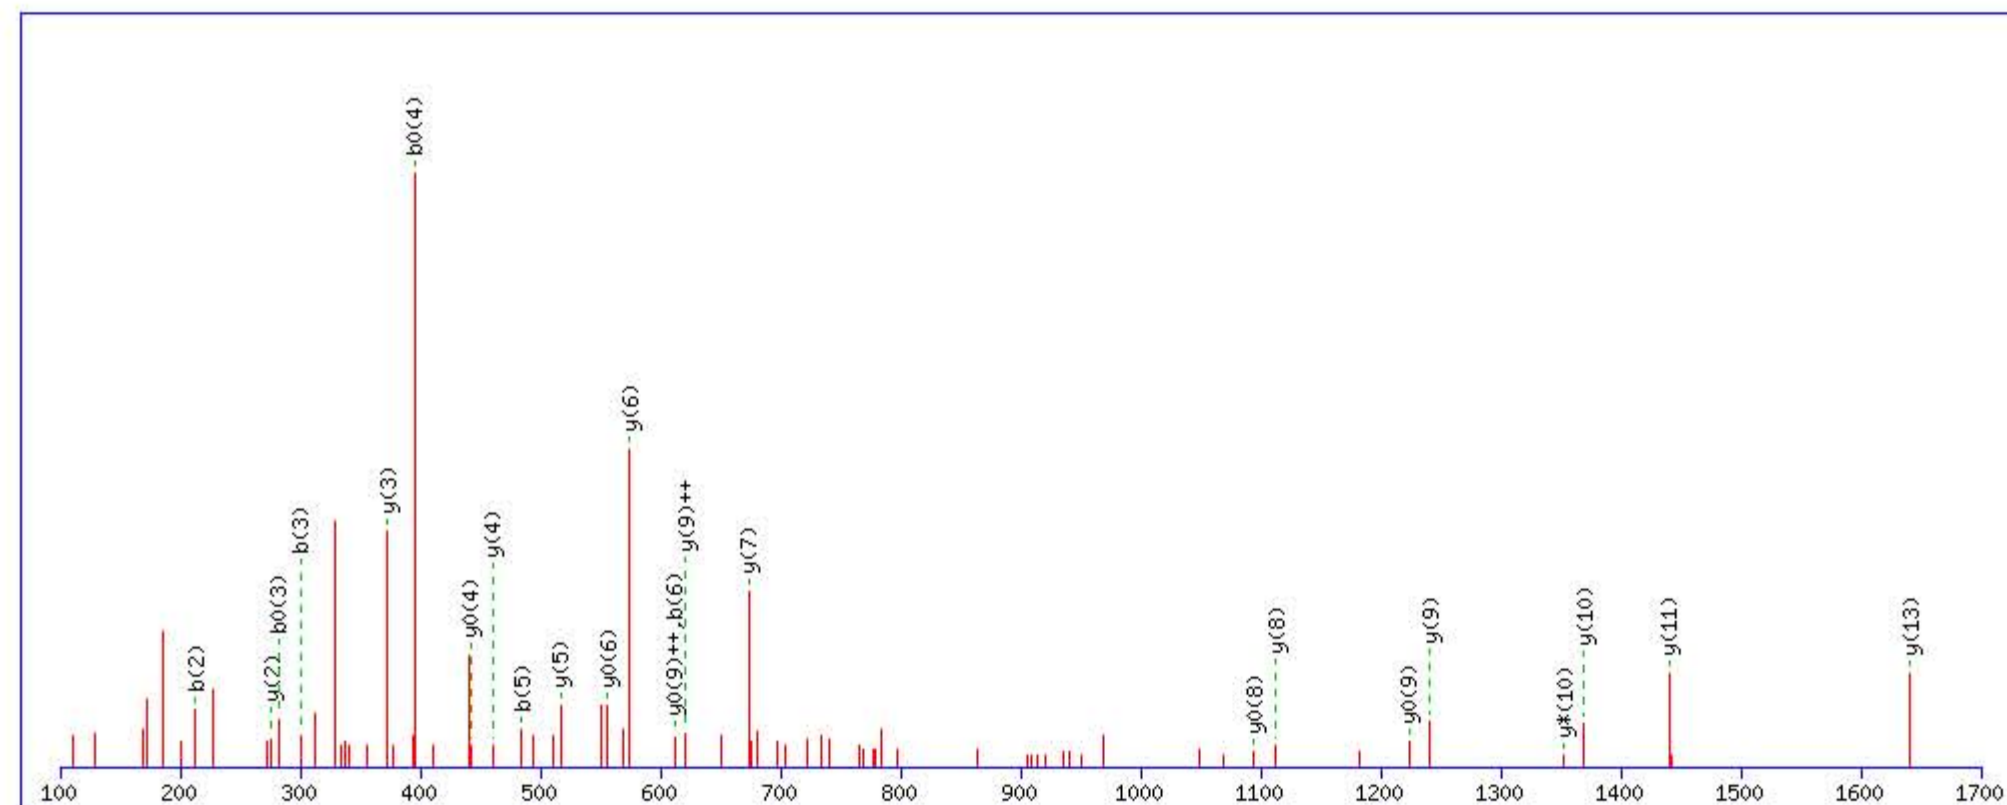

Monoisotopic mass of neutral peptide Mr(calc): 1851.976425

Fixed modifications: Carbamidomethyl (C) (apply to specified residues or termini only)

Variable modifications:

Q8 : Biotin:Thermo-21345 (Q)

Ions Score: 53 Expect: 1.4e-005

Matches : 24/152 fragment ions using 56 most intense peaks [\(help\)](#)

| #  | b                 | b <sup>++</sup> | b <sup>*</sup> | b <sup>*++</sup> | b <sup>0</sup>    | b <sup>0++</sup> | Seq. | y                  | y <sup>++</sup>   | y <sup>*</sup>     | y <sup>*++</sup> | y <sup>0</sup>     | y <sup>0++</sup>  | #  |
|----|-------------------|-----------------|----------------|------------------|-------------------|------------------|------|--------------------|-------------------|--------------------|------------------|--------------------|-------------------|----|
| 1  | 100.075690        | 50.541483       |                |                  |                   |                  | V    |                    |                   |                    |                  |                    |                   | 15 |
| 2  | <b>213.159754</b> | 107.083515      |                |                  |                   |                  | L    | 1753.915298        | 877.461287        | 1736.888749        | 868.948013       | 1735.904733        | 868.456004        | 14 |
| 3  | <b>300.191782</b> | 150.599529      |                |                  | <b>282.181217</b> | 141.594247       | S    | <b>1640.831234</b> | 820.919255        | 1623.804685        | 812.405981       | 1622.820669        | 811.913973        | 13 |
| 4  | 413.275846        | 207.141561      |                |                  | <b>395.265281</b> | 198.136279       | L    | 1553.799206        | 777.403241        | 1536.772657        | 768.889967       | 1535.788641        | 768.397958        | 12 |
| 5  | <b>484.312960</b> | 242.660118      |                |                  | 466.302395        | 233.654836       | A    | <b>1440.715142</b> | 720.861209        | 1423.688593        | 712.347935       | 1422.704577        | 711.855927        | 11 |
| 6  | <b>612.371538</b> | 306.689407      | 595.344989     | 298.176133       | 594.360973        | 297.684125       | Q    | <b>1369.678028</b> | 685.342652        | <b>1352.651479</b> | 676.829378       | 1351.667463        | 676.337370        | 10 |
| 7  | 741.414131        | 371.210704      | 724.387582     | 362.697429       | 723.403566        | 362.205421       | E    | <b>1241.619450</b> | <b>621.313363</b> | 1224.592901        | 612.800089       | <b>1223.608885</b> | <b>612.308080</b> | 9  |
| 8  | 1180.639457       | 590.823367      | 1163.612908    | 582.310092       | 1162.628892       | 581.818084       | Q    | <b>1112.576857</b> | 556.792066        | 1095.550308        | 548.278792       | <b>1094.566292</b> | 547.786784        | 8  |
| 9  | 1279.707871       | 640.357574      | 1262.681322    | 631.844299       | 1261.697306       | 631.352291       | V    | <b>673.351531</b>  | 337.179404        | 656.324982         | 328.666129       | 655.340966         | 328.174121        | 7  |
| 10 | 1336.729335       | 668.868306      | 1319.702786    | 660.355031       | 1318.718770       | 659.863023       | G    | <b>574.283117</b>  | 287.645197        | 557.256568         | 279.131922       | <b>556.272552</b>  | 278.639914        | 6  |
| 11 | 1393.750799       | 697.379037      | 1376.724250    | 688.865763       | 1375.740234       | 688.373755       | G    | <b>517.261653</b>  | 259.134465        | 500.235104         | 250.621190       | 499.251088         | 250.129182        | 5  |
| 12 | 1480.782827       | 740.895052      | 1463.756278    | 732.381777       | 1462.772262       | 731.889769       | S    | <b>460.240189</b>  | 230.623732        | 443.213640         | 222.110458       | <b>442.229624</b>  | 221.618450        | 4  |
| 13 | 1577.835591       | 789.421434      | 1560.809042    | 780.908159       | 1559.825026       | 780.416151       | P    | <b>373.208161</b>  | 187.107718        | 356.181612         | 178.594444       | 355.197596         | 178.102436        | 3  |
| 14 | 1706.878184       | 853.942730      | 1689.851635    | 845.429456       | 1688.867619       | 844.937447       | E    | <b>276.155397</b>  | 138.581336        | 259.128848         | 130.068062       | 258.144832         | 129.576054        | 2  |
| 15 |                   |                 |                |                  |                   |                  | K    | 147.112804         | 74.060040         | 130.086255         | 65.546765        |                    |                   | 1  |

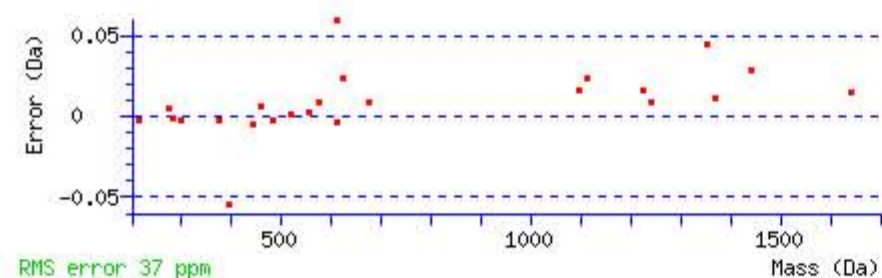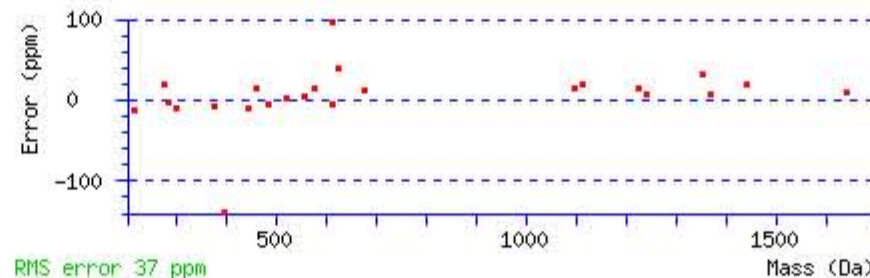

NCBI BLAST search of **VLSLAQEQVGG SPEK**

(Parameters: blastp, nr protein database, expect=20000, no filter, PAM30)

Other BLAST [web gateways](#)

All matches to this query

| Score | Mr(calc):   | Delta     | Sequence                          |
|-------|-------------|-----------|-----------------------------------|
| 53.1  | 1851.976425 | 0.007287  | <a href="#">VLSLAQEQVGG SPEK</a>  |
| 34.0  | 1851.976425 | 0.007287  | <a href="#">VLSLAQEQVGG SPEK</a>  |
| 1.4   | 1852.005402 | -0.021690 | <a href="#">LQLEQQVATGPALDNKK</a> |

Mascot: <http://www.matrixscience.com/>

# MASCOT Search Results

## Peptide View

MS/MS Fragmentation of **GPEVQLVAHSPWLK**

Found in **CO4A\_HUMAN**, Complement C4-A OS=Homo sapiens GN=C4A PE=1 SV=2

Match to Query 39870: 1871.022912 from(624.681580,3+) rtinseconds(2231) index(48816)

Title: Locus:1.1.1.2825.12 File:"2013-07-02 CLN FXIII 60 min 3rd F 4.wiff"

Data file C:\Program Files (x86)\Matrix Science\Mascot Daemon\mgf\6 FXIII 60 min 3rd\mascot\_daemon\_merge.mgf

Click mouse within plot area to zoom in by factor of two about that point

Or, Plot from  to  Da

Label all possible matches  Label matches used for scoring

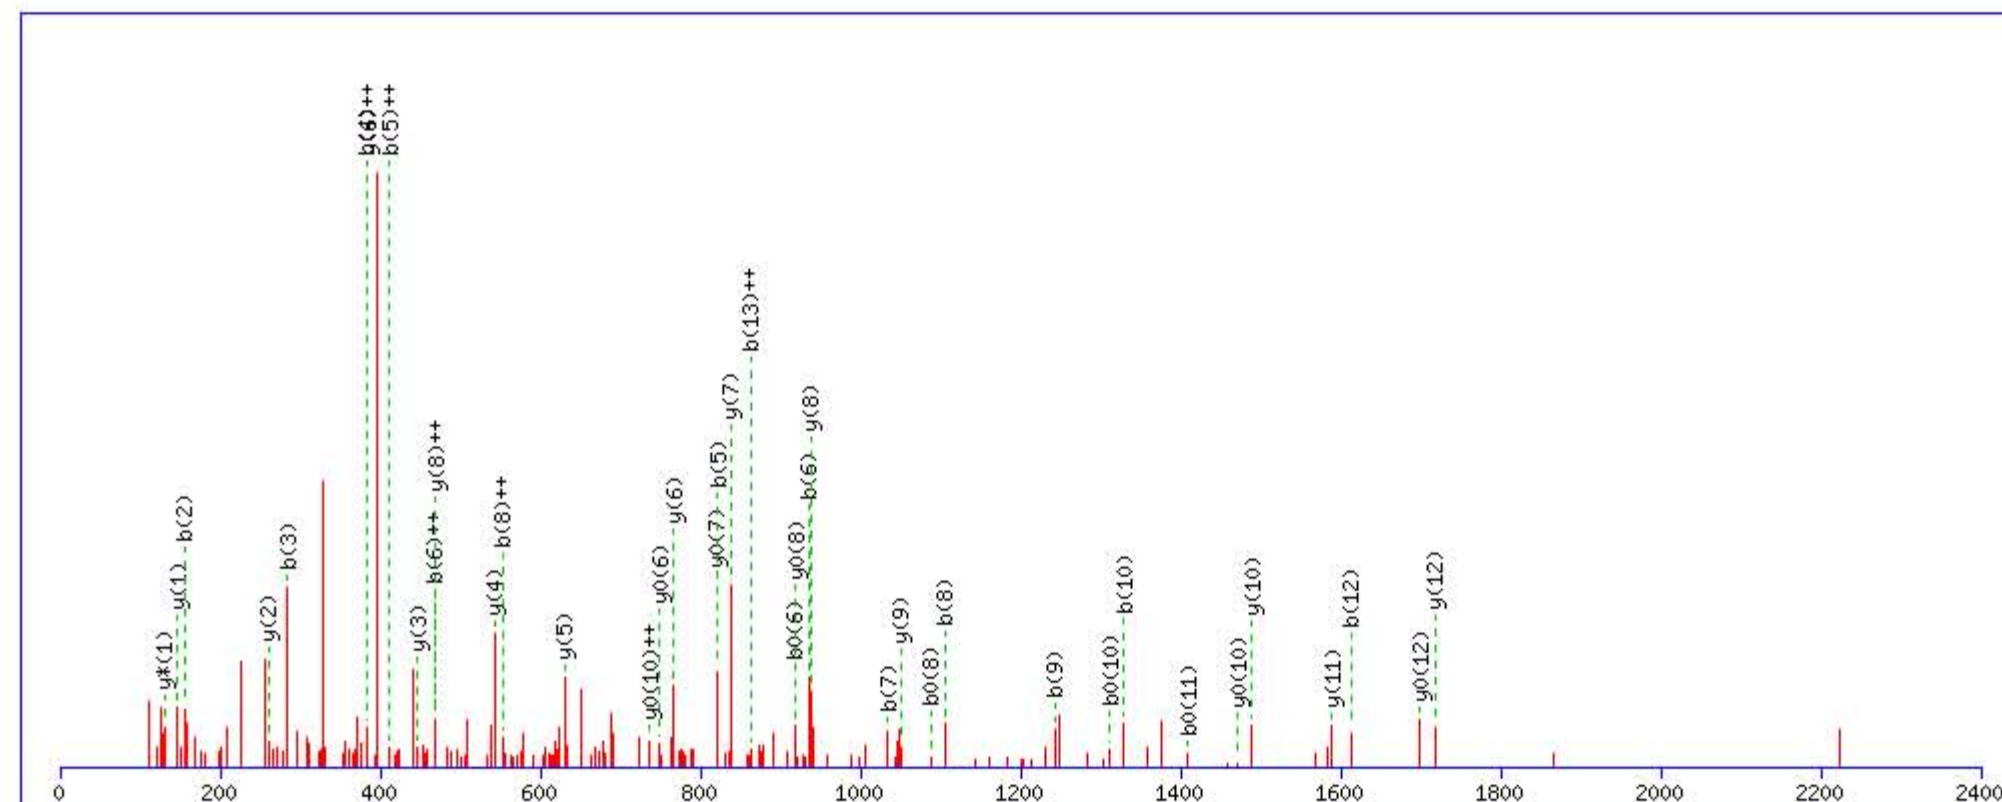

Monoisotopic mass of neutral peptide Mr(calc): 1871.012756

Fixed modifications: Carbamidomethyl (C) (apply to specified residues or termini only)

Variable modifications:

Q5 : Biotin:Thermo-21345 (Q)

Ions Score: 47 Expect: 0.00038

Matches : 39/136 fragment ions using 106 most intense peaks [\(help\)](#)

| #  | b           | b <sup>++</sup> | b <sup>*</sup> | b <sup>*++</sup> | b <sup>0</sup> | b <sup>0++</sup> | Seq. | y           | y <sup>++</sup> | y <sup>*</sup> | y <sup>*++</sup> | y <sup>0</sup> | y <sup>0++</sup> | #  |
|----|-------------|-----------------|----------------|------------------|----------------|------------------|------|-------------|-----------------|----------------|------------------|----------------|------------------|----|
| 1  | 58.028740   | 29.518008       |                |                  |                |                  | G    |             |                 |                |                  |                |                  | 14 |
| 2  | 155.081504  | 78.044390       |                |                  |                |                  | P    | 1814.998574 | 908.002925      | 1797.972025    | 899.489651       | 1796.988009    | 898.997643       | 13 |
| 3  | 284.124097  | 142.565687      |                |                  | 266.113532     | 133.560404       | E    | 1717.945810 | 859.476543      | 1700.919261    | 850.963269       | 1699.935245    | 850.471261       | 12 |
| 4  | 383.192511  | 192.099894      |                |                  | 365.181946     | 183.094611       | V    | 1588.903217 | 794.955247      | 1571.876668    | 786.441972       | 1570.892652    | 785.949964       | 11 |
| 5  | 822.417837  | 411.712557      | 805.391288     | 403.199282       | 804.407272     | 402.707274       | Q    | 1489.834803 | 745.421040      | 1472.808254    | 736.907765       | 1471.824238    | 736.415757       | 10 |
| 6  | 935.501901  | 468.254589      | 918.475352     | 459.741314       | 917.491336     | 459.249306       | L    | 1050.609477 | 525.808377      | 1033.582928    | 517.295102       | 1032.598912    | 516.803094       | 9  |
| 7  | 1034.570315 | 517.788796      | 1017.543766    | 509.275521       | 1016.559750    | 508.783513       | V    | 937.525413  | 469.266345      | 920.498864     | 460.753070       | 919.514848     | 460.261062       | 8  |
| 8  | 1105.607429 | 553.307353      | 1088.580880    | 544.794078       | 1087.596864    | 544.302070       | A    | 838.456999  | 419.732138      | 821.430450     | 411.218863       | 820.446434     | 410.726855       | 7  |
| 9  | 1242.666341 | 621.836809      | 1225.639792    | 613.323534       | 1224.655776    | 612.831526       | H    | 767.419885  | 384.213581      | 750.393336     | 375.700306       | 749.409320     | 375.208298       | 6  |
| 10 | 1329.698369 | 665.352823      | 1312.671820    | 656.839548       | 1311.687804    | 656.347540       | S    | 630.360973  | 315.684125      | 613.334424     | 307.170850       | 612.350408     | 306.678842       | 5  |
| 11 | 1426.751133 | 713.879205      | 1409.724584    | 705.365930       | 1408.740568    | 704.873922       | P    | 543.328945  | 272.168111      | 526.302396     | 263.654836       |                |                  | 4  |
| 12 | 1612.830446 | 806.918861      | 1595.803897    | 798.405587       | 1594.819881    | 797.913579       | W    | 446.276181  | 223.641728      | 429.249632     | 215.128454       |                |                  | 3  |
| 13 | 1725.914510 | 863.460893      | 1708.887961    | 854.947619       | 1707.903945    | 854.455611       | L    | 260.196868  | 130.602072      | 243.170319     | 122.088797       |                |                  | 2  |
| 14 |             |                 |                |                  |                |                  | K    | 147.112804  | 74.060040       | 130.086255     | 65.546765        |                |                  | 1  |

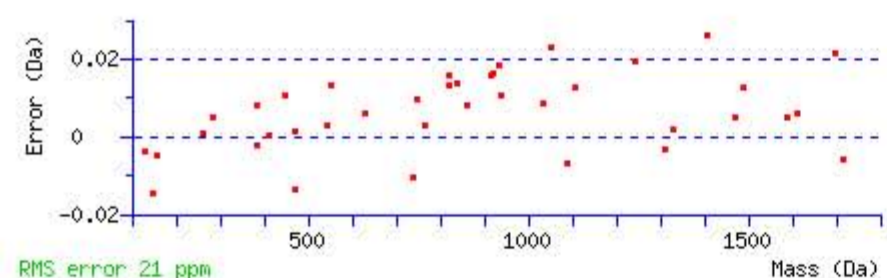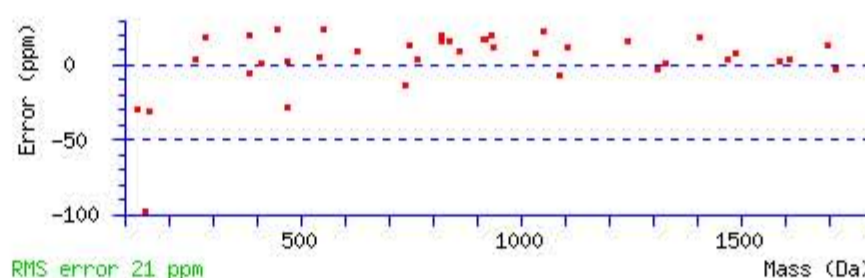

NCBI BLAST search of [GPEVQLVAHSPWLK](#)

(Parameters: blastp, nr protein database, expect=20000, no filter, PAM30)

Other BLAST [web gateways](#)

## All matches to this query

| Score | Mr(calc):   | Delta    | Sequence                       |
|-------|-------------|----------|--------------------------------|
| 47.2  | 1871.012756 | 0.010156 | <a href="#">GPEVQLVAHSPWLK</a> |

Mascot: <http://www.matrixscience.com/>



# MASCOT SCIENCE Mascot Search Results

## Peptide View

MS/MS Fragmentation of **HLVPGAPFLLQALVR**

Found in **CO4A\_HUMAN**, Complement C4-A OS=Homo sapiens GN=C4A PE=1 SV=2

Match to Query 40950: 1941.156402 from(648.059410,3+) rtinseconds(2868) index(52987)

Title: Locus:1.1.1.3045.3 File:"2013-07-02 CLN FXIII 60 min 3rd F 4.wiff"

Data file C:\Program Files (x86)\Matrix Science\Mascot Daemon\mgf6 FXIII 60 min 3rd\mascot\_daemon\_merge.mgf

Click mouse within plot area to zoom in by factor of two about that point

Or, Plot from  to  Da

Label all possible matches  Label matches used for scoring

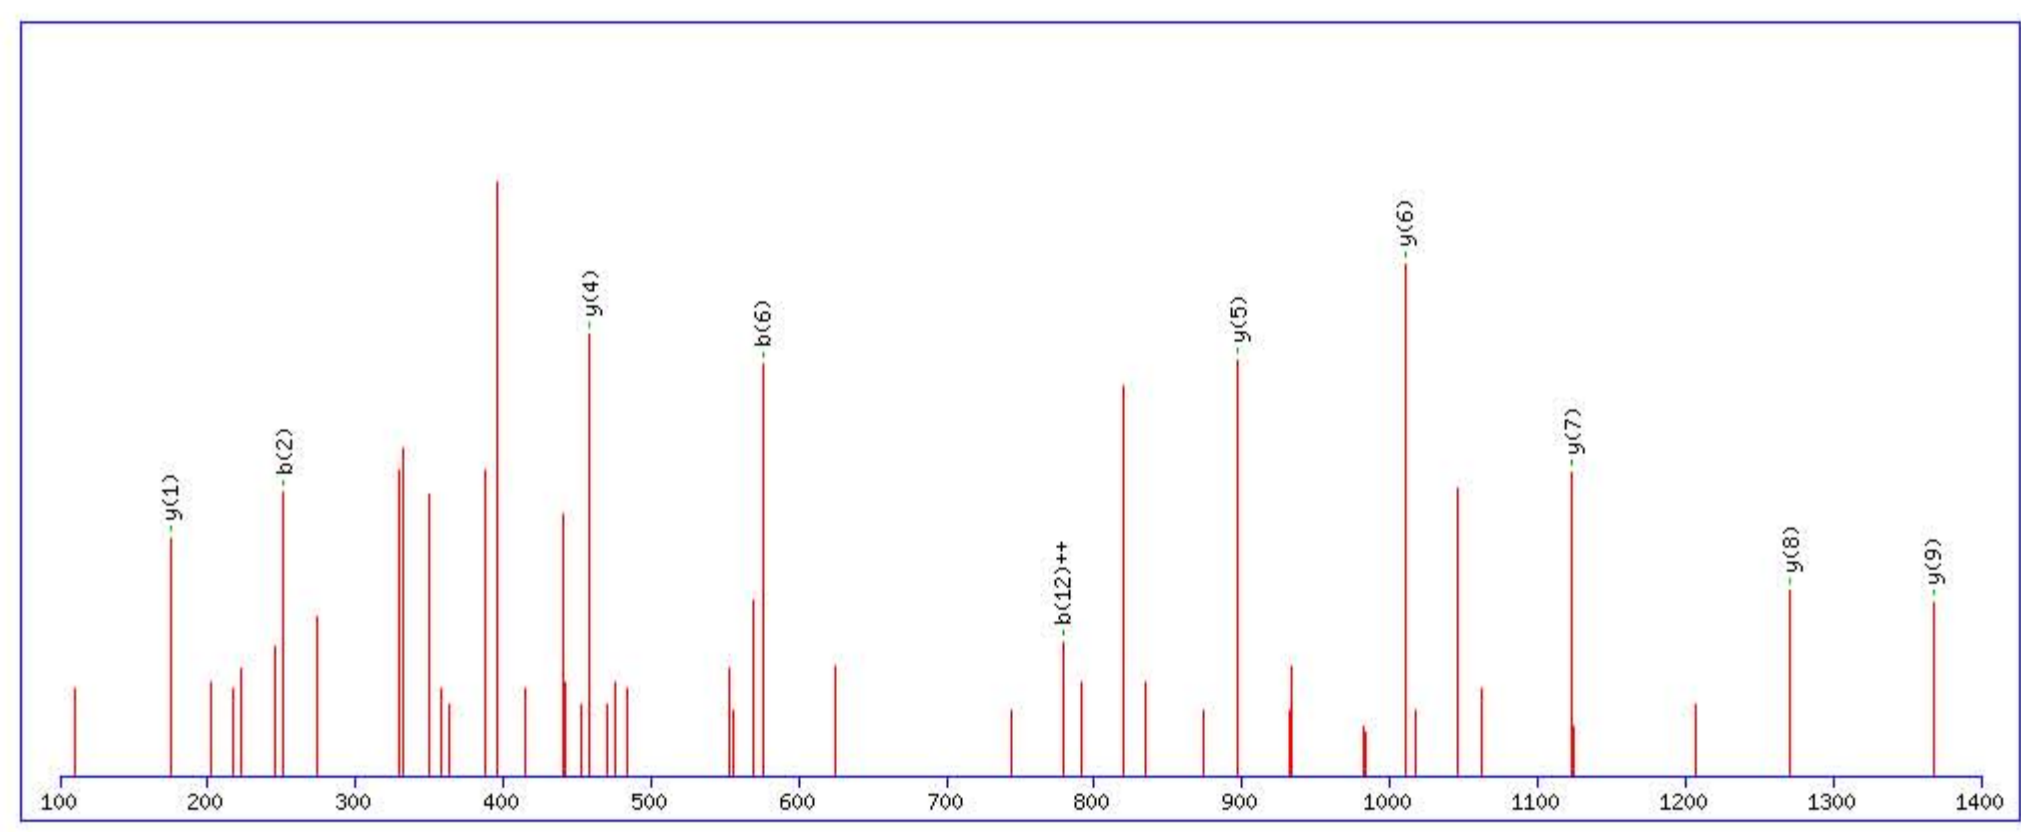

Monoisotopic mass of neutral peptide Mr(calc): 1941.138626

Fixed modifications: Carbamidomethyl (C) (apply to specified residues or termini only)

Variable modifications:

Q11 : Biotin:Thermo-21345 (Q)

Ions Score: 52 Expect: 1.2e-005

Matches : 10/92 fragment ions using 13 most intense peaks [\(help\)](#)

| #  | b                 | b <sup>++</sup>   | b <sup>*</sup> | b <sup>*++</sup> | Seq. | y                  | y <sup>++</sup> | y <sup>*</sup> | y <sup>*++</sup> | #  |
|----|-------------------|-------------------|----------------|------------------|------|--------------------|-----------------|----------------|------------------|----|
| 1  | 138.066188        | 69.536732         |                |                  | H    |                    |                 |                |                  | 15 |
| 2  | <b>251.150252</b> | 126.078764        |                |                  | L    | 1805.086996        | 903.047136      | 1788.060447    | 894.533862       | 14 |
| 3  | 350.218666        | 175.612971        |                |                  | V    | 1692.002932        | 846.505104      | 1674.976383    | 837.991830       | 13 |
| 4  | 447.271430        | 224.139353        |                |                  | P    | 1592.934518        | 796.970897      | 1575.907969    | 788.457623       | 12 |
| 5  | 504.292894        | 252.650085        |                |                  | G    | 1495.881754        | 748.444515      | 1478.855205    | 739.931241       | 11 |
| 6  | <b>575.330008</b> | 288.168642        |                |                  | A    | 1438.860290        | 719.933783      | 1421.833741    | 711.420509       | 10 |
| 7  | 672.382772        | 336.695024        |                |                  | P    | <b>1367.823176</b> | 684.415226      | 1350.796627    | 675.901952       | 9  |
| 8  | 819.451186        | 410.229231        |                |                  | F    | <b>1270.770412</b> | 635.888844      | 1253.743863    | 627.375570       | 8  |
| 9  | 932.535250        | 466.771263        |                |                  | L    | <b>1123.701998</b> | 562.354637      | 1106.675449    | 553.841363       | 7  |
| 10 | 1045.619314       | 523.313295        |                |                  | L    | <b>1010.617934</b> | 505.812605      | 993.591385     | 497.299331       | 6  |
| 11 | 1484.844640       | 742.925958        | 1467.818091    | 734.412684       | Q    | <b>897.533870</b>  | 449.270573      | 880.507321     | 440.757298       | 5  |
| 12 | 1555.881754       | <b>778.444515</b> | 1538.855205    | 769.931241       | A    | <b>458.308544</b>  | 229.657910      | 441.281995     | 221.144635       | 4  |
| 13 | 1668.965818       | 834.986547        | 1651.939269    | 826.473273       | L    | 387.271430         | 194.139353      | 370.244881     | 185.626078       | 3  |
| 14 | 1768.034232       | 884.520754        | 1751.007683    | 876.007480       | V    | 274.187366         | 137.597321      | 257.160817     | 129.084047       | 2  |
| 15 |                   |                   |                |                  | R    | <b>175.118952</b>  | 88.063114       | 158.092403     | 79.549839        | 1  |

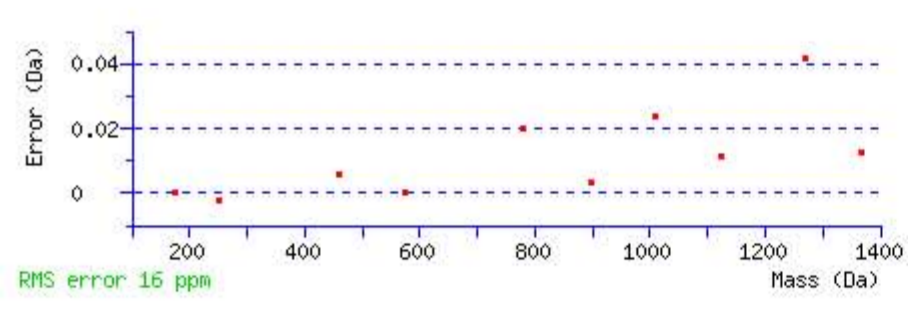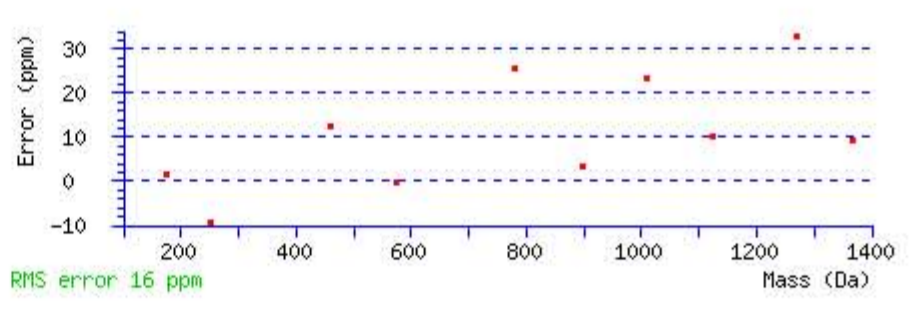

NCBI BLAST search of [HLVPGAPFLLQALVR](#)

(Parameters: blastp, nr protein database, expect=20000, no filter, PAM30)

Other BLAST [web gateways](#)

### All matches to this query

| Score | Mr(calc):   | Delta    | Sequence                        |
|-------|-------------|----------|---------------------------------|
| 51.6  | 1941.138626 | 0.017776 | <a href="#">HLVPGAPFLLQALVR</a> |

# MASCOT SCIENCE Mascot Search Results

## Peptide View

MS/MS Fragmentation of **EPFLSCCQFAESLR**

Found in **CO4A\_HUMAN**, Complement C4-A OS=Homo sapiens GN=C4A PE=1 SV=2

Match to Query 43769: 2053.964232 from(685.662020,3+) rtinseconds(2492) index(50229)

Title: Locus:1.1.1.2916.14 File:"2013-07-02 CLN FXIII 60 min 3rd F 4.wiff"

Data file C:\Program Files (x86)\Matrix Science\Mascot Daemon\mgf\6 FXIII 60 min 3rd\mascot\_daemon\_merge.mgf

Click mouse within plot area to zoom in by factor of two about that point

Or, Plot from 0 to 2600 Da Full range

Label all possible matches  Label matches used for scoring

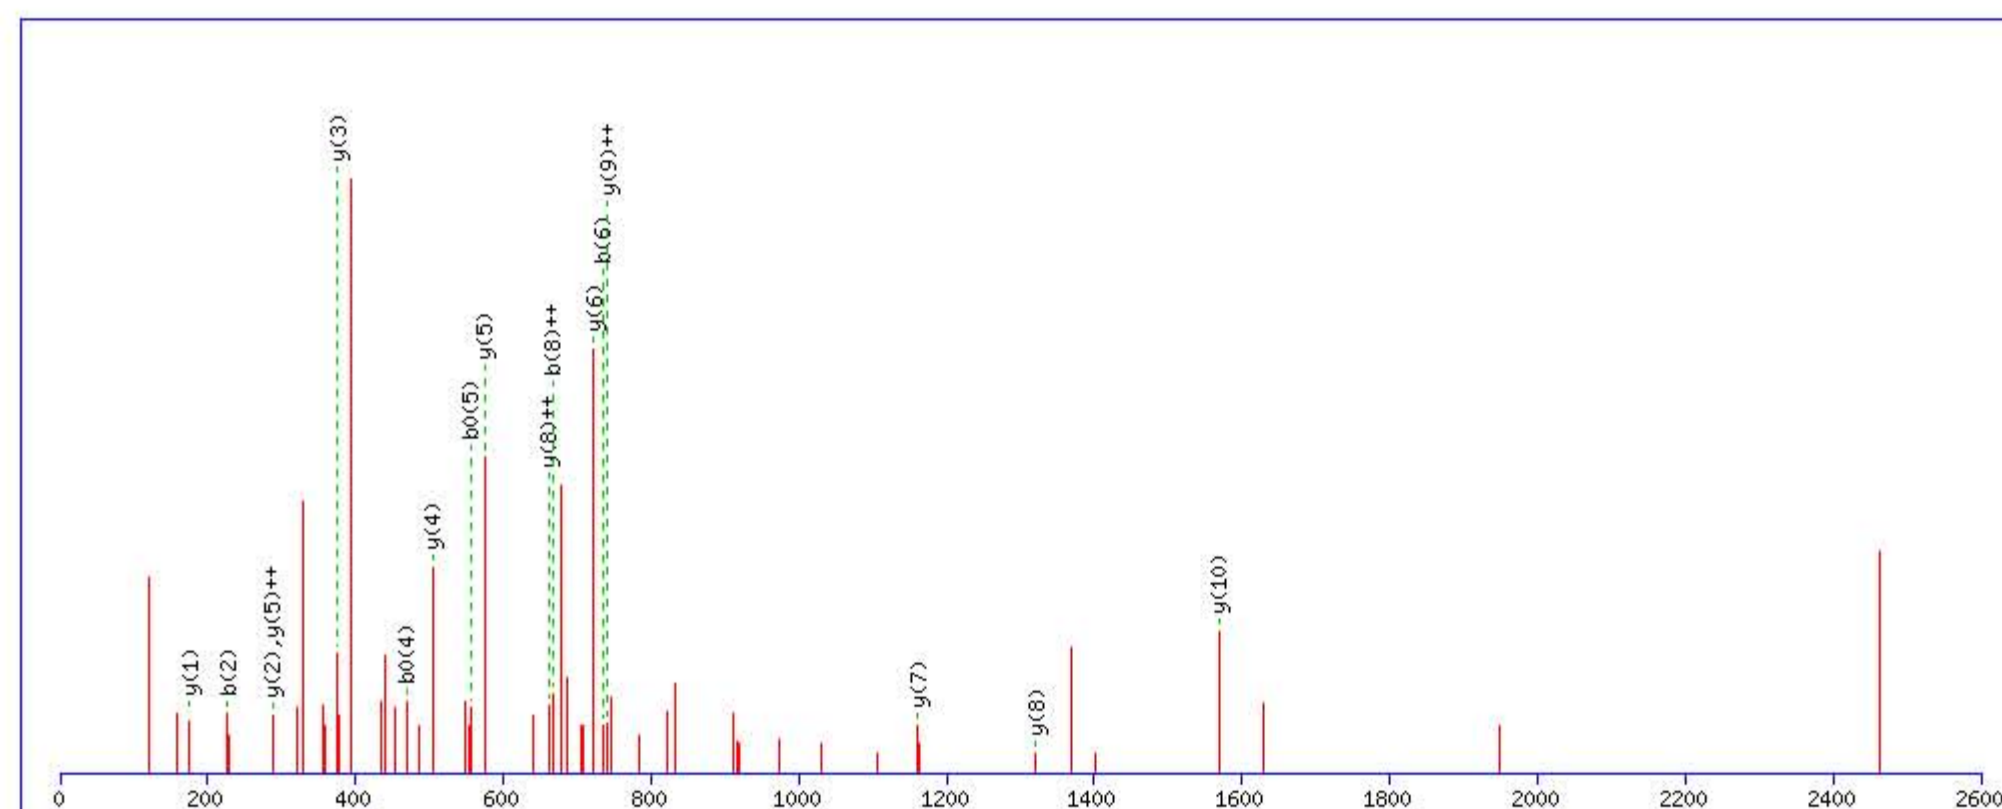

Monoisotopic mass of neutral peptide Mr(calc): 2053.942368

Fixed modifications: Carbamidomethyl (C) (apply to specified residues or termini only)

Variable modifications:

Q8 : Biotin:Thermo-21345 (Q)

Ions Score: 34 Expect: 0.00081

Matches : 17/138 fragment ions using 42 most intense peaks ([help](#))

| #  | b                 | b <sup>++</sup>   | b <sup>+</sup> | b <sup>++</sup> | b <sup>0</sup>    | b <sup>0++</sup> | Seq. | y                  | y <sup>++</sup>   | y <sup>+</sup> | y <sup>++</sup> | y <sup>0</sup> | y <sup>0++</sup> | #  |
|----|-------------------|-------------------|----------------|-----------------|-------------------|------------------|------|--------------------|-------------------|----------------|-----------------|----------------|------------------|----|
| 1  | 130.049869        | 65.528572         |                |                 | 112.039304        | 56.523290        | E    |                    |                   |                |                 |                |                  | 14 |
| 2  | <b>227.102633</b> | 114.054954        |                |                 | 209.092068        | 105.049672       | P    | 1925.907059        | 963.457168        | 1908.880510    | 954.943893      | 1907.896494    | 954.451885       | 13 |
| 3  | 374.171047        | 187.589161        |                |                 | 356.160482        | 178.583879       | F    | 1828.854295        | 914.930786        | 1811.827746    | 906.417511      | 1810.843730    | 905.925503       | 12 |
| 4  | 487.255111        | 244.131193        |                |                 | <b>469.244546</b> | 235.125911       | L    | 1681.785881        | 841.396579        | 1664.759332    | 832.883304      | 1663.775316    | 832.391296       | 11 |
| 5  | 574.287139        | 287.647208        |                |                 | <b>556.276574</b> | 278.641925       | S    | <b>1568.701817</b> | 784.854547        | 1551.675268    | 776.341272      | 1550.691252    | 775.849264       | 10 |
| 6  | <b>734.317788</b> | 367.662532        |                |                 | 716.307223        | 358.657250       | C    | 1481.669789        | <b>741.338533</b> | 1464.643240    | 732.825258      | 1463.659224    | 732.333250       | 9  |
| 7  | 894.348437        | 447.677857        |                |                 | 876.337872        | 438.672574       | C    | <b>1321.639140</b> | <b>661.323208</b> | 1304.612591    | 652.809934      | 1303.628575    | 652.317926       | 8  |
| 8  | 1333.573763       | <b>667.290520</b> | 1316.547214    | 658.777245      | 1315.563198       | 658.285237       | Q    | <b>1161.608491</b> | 581.307884        | 1144.581942    | 572.794609      | 1143.597926    | 572.302601       | 7  |
| 9  | 1480.642177       | 740.824727        | 1463.615628    | 732.311452      | 1462.631612       | 731.819444       | F    | <b>722.383165</b>  | 361.695221        | 705.356616     | 353.181946      | 704.372600     | 352.689938       | 6  |
| 10 | 1551.679291       | 776.343284        | 1534.652742    | 767.830009      | 1533.668726       | 767.338001       | A    | <b>575.314751</b>  | <b>288.161014</b> | 558.288202     | 279.647739      | 557.304186     | 279.155731       | 5  |
| 11 | 1680.721884       | 840.864580        | 1663.695335    | 832.351306      | 1662.711319       | 831.859298       | E    | <b>504.277637</b>  | 252.642457        | 487.251088     | 244.129182      | 486.267072     | 243.637174       | 4  |
| 12 | 1767.753912       | 884.380594        | 1750.727363    | 875.867320      | 1749.743347       | 875.375312       | S    | <b>375.235044</b>  | 188.121160        | 358.208495     | 179.607885      | 357.224479     | 179.115877       | 3  |
| 13 | 1880.837976       | 940.922626        | 1863.811427    | 932.409352      | 1862.827411       | 931.917344       | L    | <b>288.203016</b>  | 144.605146        | 271.176467     | 136.091871      |                |                  | 2  |
| 14 |                   |                   |                |                 |                   |                  | R    | <b>175.118952</b>  | 88.063114         | 158.092403     | 79.549839       |                |                  | 1  |

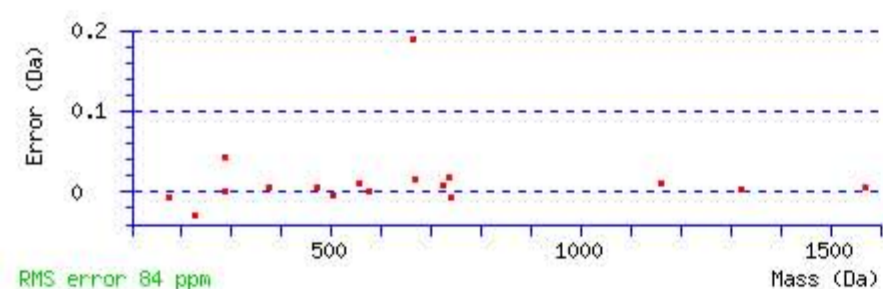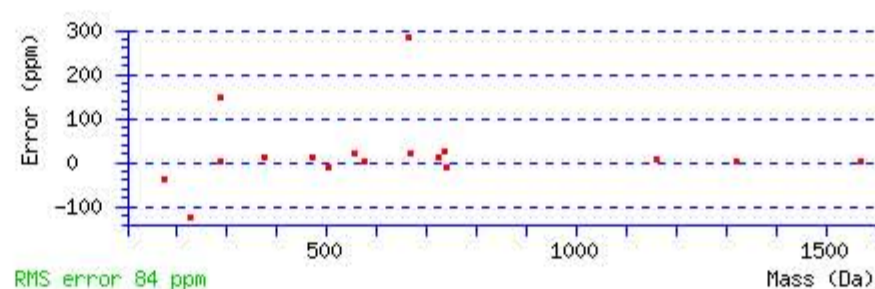

NCBI BLAST search of **EPFLSCCQFAESLR**

(Parameters: blastp, nr protein database, expect=20000, no filter, PAM30)

Other BLAST [web gateways](#)

All matches to this query

| Score | Mr(calc):   | Delta    | Sequence                           |
|-------|-------------|----------|------------------------------------|
| 33.8  | 2053.942368 | 0.021864 | <a href="#">EPFLSCCQFAESLR</a>     |
| 0.9   | 2053.948227 | 0.016005 | <a href="#">EKSTCSMGSELLPMISPR</a> |

Mascot: <http://www.matrixscience.com/>

**MASCOT SCIENCE** Mascot Search Results

Peptide View

MS/MS Fragmentation of **LLATLCSAEVCQCAEGK**

Found in **CO4A\_HUMAN**, Complement C4-A OS=Homo sapiens GN=C4A PE=1 SV=2

Match to Query 46405: 2220.049032 from(741.023620,3+) rtinseconds(2140) index(63359)

Title: Locus:1.1.1.3371.11 File:"2013-07-02 CLN FXIII 60 min 3rd FT.wiff"

Data file C:\Program Files (x86)\Matrix Science\Mascot Daemon\mgf\6 FXIII 60 min 3rd\mascot\_daemon\_merge.mgf

Click mouse within plot area to zoom in by factor of two about that point

Or, Plot from  to  Da

Label all possible matches  Label matches used for scoring

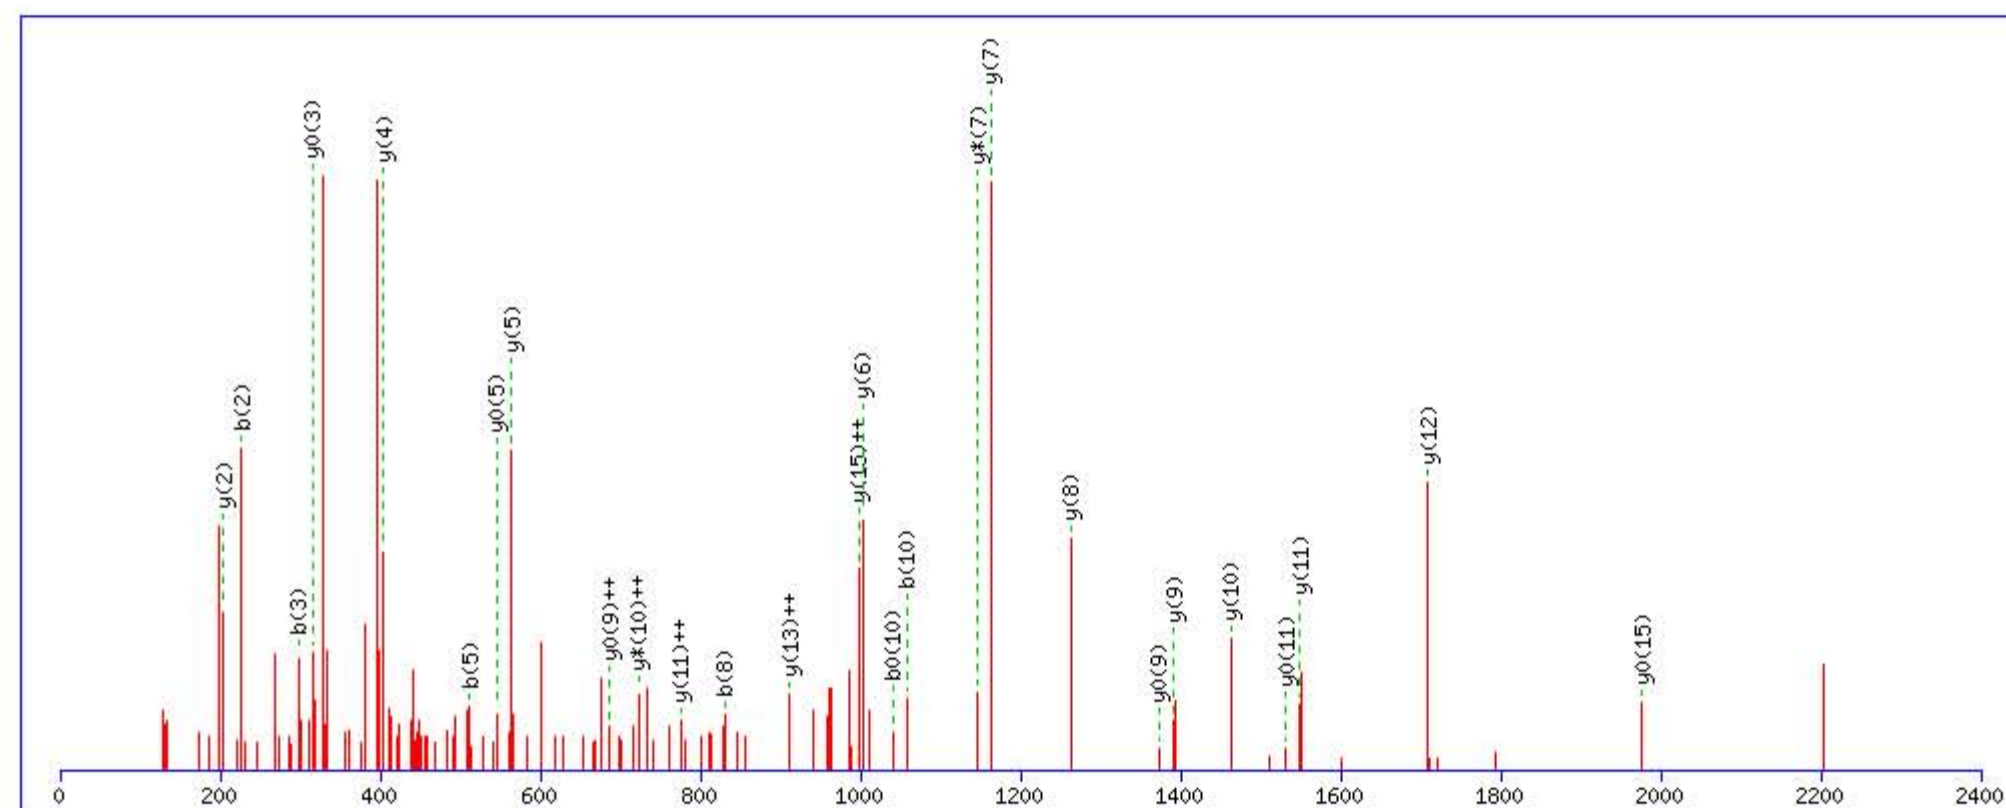

Monoisotopic mass of neutral peptide Mr(calc): 2220.041092

Fixed modifications: Carbamidomethyl (C) (apply to specified residues or termini only)

Variable modifications:

Q12 : Biotin:Thermo-21345 (Q)

Ions Score: 51 Expect: 2.7e-005

Matches : 27/160 fragment ions using 50 most intense peaks [\(help\)](#)

| #  | b                  | b <sup>++</sup> | b <sup>*</sup> | b <sup>*++</sup> | b <sup>0</sup>     | b <sup>0++</sup> | Seq. | y                  | y <sup>++</sup>   | y <sup>*</sup>     | y <sup>*++</sup>  | y <sup>0</sup>     | y <sup>0++</sup>  | #  |
|----|--------------------|-----------------|----------------|------------------|--------------------|------------------|------|--------------------|-------------------|--------------------|-------------------|--------------------|-------------------|----|
| 1  | 114.091340         | 57.549308       |                |                  |                    |                  | L    |                    |                   |                    |                   |                    |                   | 17 |
| 2  | <b>227.175404</b>  | 114.091340      |                |                  |                    |                  | L    | 2107.964318        | 1054.485797       | 2090.937769        | 1045.972522       | 2089.953753        | 1045.480514       | 16 |
| 3  | <b>298.212518</b>  | 149.609897      |                |                  |                    |                  | A    | 1994.880254        | <b>997.943765</b> | 1977.853705        | 989.430491        | <b>1976.869689</b> | 988.938483        | 15 |
| 4  | 399.260197         | 200.133737      |                |                  | 381.249632         | 191.128454       | T    | 1923.843140        | 962.425208        | 1906.816591        | 953.911934        | 1905.832575        | 953.419926        | 14 |
| 5  | <b>512.344261</b>  | 256.675769      |                |                  | 494.333696         | 247.670486       | L    | 1822.795461        | <b>911.901369</b> | 1805.768912        | 903.388094        | 1804.784896        | 902.896086        | 13 |
| 6  | 672.374910         | 336.691093      |                |                  | 654.364345         | 327.685811       | C    | <b>1709.711397</b> | 855.359337        | 1692.684848        | 846.846062        | 1691.700832        | 846.354054        | 12 |
| 7  | 759.406938         | 380.207107      |                |                  | 741.396373         | 371.201825       | S    | <b>1549.680748</b> | <b>775.344012</b> | 1532.654199        | 766.830738        | <b>1531.670183</b> | 766.338730        | 11 |
| 8  | <b>830.444052</b>  | 415.725664      |                |                  | 812.433487         | 406.720382       | A    | <b>1462.648720</b> | 731.827998        | 1445.622171        | <b>723.314724</b> | 1444.638155        | 722.822716        | 10 |
| 9  | 959.486645         | 480.246961      |                |                  | 941.476080         | 471.241678       | E    | <b>1391.611606</b> | 696.309441        | 1374.585057        | 687.796167        | <b>1373.601041</b> | <b>687.304159</b> | 9  |
| 10 | <b>1058.555059</b> | 529.781168      |                |                  | <b>1040.544494</b> | 520.775885       | V    | <b>1262.569013</b> | 631.788145        | 1245.542464        | 623.274870        | 1244.558448        | 622.782862        | 8  |
| 11 | 1218.585708        | 609.796492      |                |                  | 1200.575143        | 600.791210       | C    | <b>1163.500599</b> | 582.253938        | <b>1146.474050</b> | 573.740663        | 1145.490034        | 573.248655        | 7  |
| 12 | 1657.811034        | 829.409155      | 1640.784485    | 820.895881       | 1639.800469        | 820.403873       | Q    | <b>1003.469950</b> | 502.238613        | 986.443401         | 493.725339        | 985.459385         | 493.233331        | 6  |
| 13 | 1817.841683        | 909.424480      | 1800.815134    | 900.911205       | 1799.831118        | 900.419197       | C    | <b>564.244624</b>  | 282.625950        | 547.218075         | 274.112676        | <b>546.234059</b>  | 273.620668        | 5  |
| 14 | 1888.878797        | 944.943037      | 1871.852248    | 936.429762       | 1870.868232        | 935.937754       | A    | <b>404.213975</b>  | 202.610626        | 387.187426         | 194.097351        | 386.203410         | 193.605343        | 4  |
| 15 | 2017.921390        | 1009.464333     | 2000.894841    | 1000.951059      | 1999.910825        | 1000.459051      | E    | 333.176861         | 167.092069        | 316.150312         | 158.578794        | <b>315.166296</b>  | 158.086786        | 3  |
| 16 | 2074.942854        | 1037.975065     | 2057.916305    | 1029.461790      | 2056.932289        | 1028.969782      | G    | <b>204.134268</b>  | 102.570772        | 187.107719         | 94.057497         |                    |                   | 2  |
| 17 |                    |                 |                |                  |                    |                  | K    | 147.112804         | 74.060040         | 130.086255         | 65.546765         |                    |                   | 1  |

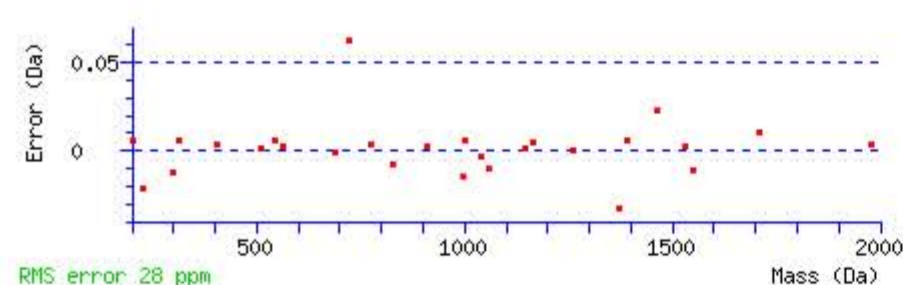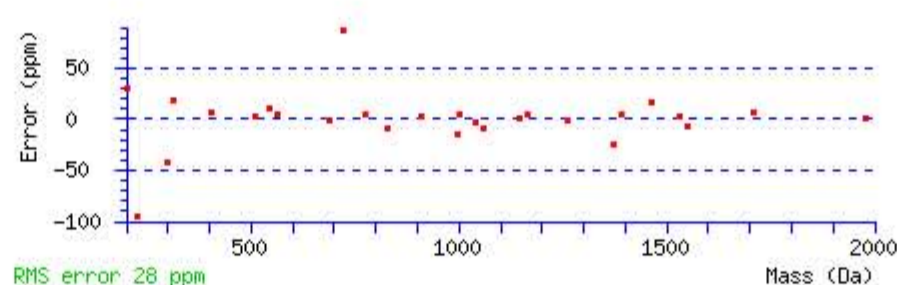

NCBI BLAST search of [LLATLCSAEVCQCAEGK](#)

(Parameters: blastp, nr protein database, expect=20000, no filter, PAM30)

Other BLAST [web gateways](#)

All matches to this query

| Score | Mr(calc):   | Delta    | Sequence                          |
|-------|-------------|----------|-----------------------------------|
| 51.3  | 2220.041092 | 0.007940 | <a href="#">LLATLCSAEVCQCAEGK</a> |
| 2.5   | 2220.048080 | 0.000952 | <a href="#">EPQEGALPEATGTTSHR</a> |

## Peptide View

MS/MS Fragmentation of **GCGEQTMILAPTLAASR**

Found in **CO4A\_HUMAN**, Complement C4-A OS=Homo sapiens GN=C4A PE=1 SV=2

Match to Query 46845: 2249.129682 from(750.717170,3+) rtinseconds(2504) index(50330)

Title: Locus:1.1.1.2920.15 File:"2013-07-02 CLN FXIII 60 min 3rd F 4.wiff"

Data file C:\Program Files (x86)\Matrix Science\Mascot Daemon\mgf\6 FXIII 60 min 3rd\mascot\_daemon\_merge.mgf

Click mouse within plot area to zoom in by factor of two about that point

Or, Plot from  to  Da

Label all possible matches  Label matches used for scoring

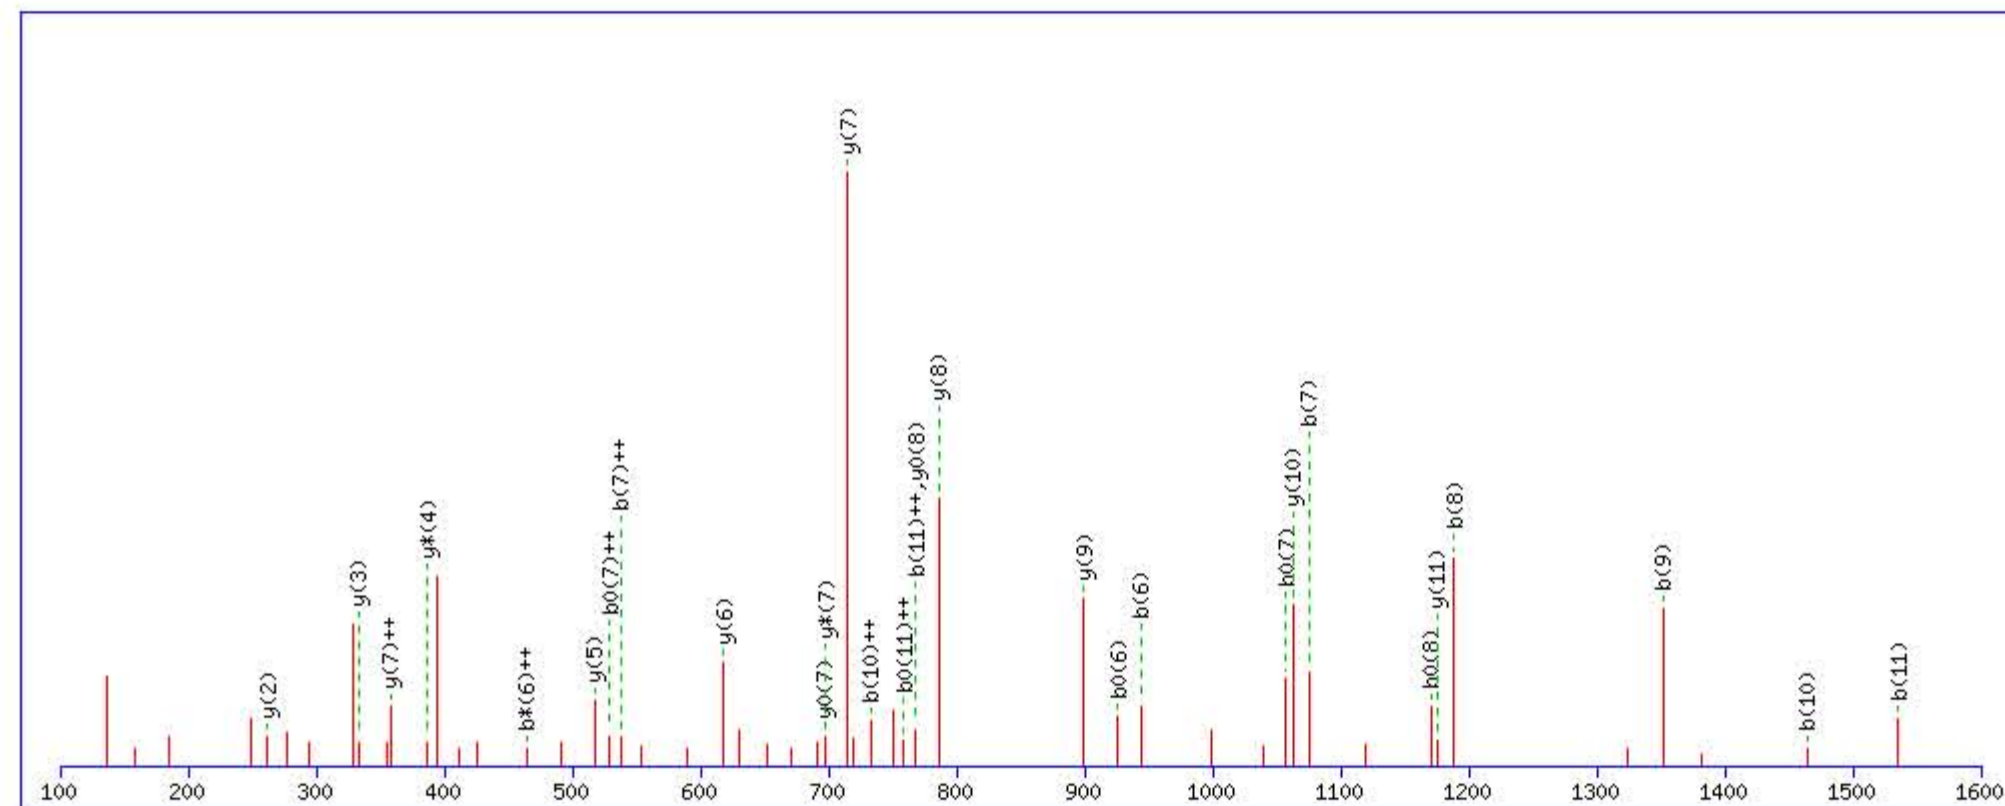

Monoisotopic mass of neutral peptide Mr(calc): 2249.100647

Fixed modifications: Carbamidomethyl (C) (apply to specified residues or termini only)

Variable modifications:

Q5 : Biotin:Thermo-21345 (Q)

Ions Score: 41 Expect: 0.00079

Matches : 29/188 fragment ions using 53 most intense peaks ([help](#))

| #  | b                  | b <sup>++</sup>   | b <sup>*</sup> | b <sup>*++</sup>  | b <sup>0</sup>     | b <sup>0++</sup>  | Seq. | y                  | y <sup>++</sup>   | y <sup>*</sup>    | y <sup>*++</sup> | y <sup>0</sup>    | y <sup>0++</sup> | #  |
|----|--------------------|-------------------|----------------|-------------------|--------------------|-------------------|------|--------------------|-------------------|-------------------|------------------|-------------------|------------------|----|
| 1  | 58.028740          | 29.518008         |                |                   |                    |                   | G    |                    |                   |                   |                  |                   |                  | 18 |
| 2  | 218.059389         | 109.533333        |                |                   |                    |                   | C    | 2193.086482        | 1097.046879       | 2176.059933       | 1088.533604      | 2175.075917       | 1088.041596      | 17 |
| 3  | 275.080853         | 138.044064        |                |                   |                    |                   | G    | 2033.055833        | 1017.031555       | 2016.029284       | 1008.518280      | 2015.045268       | 1008.026272      | 16 |
| 4  | 404.123446         | 202.565361        |                |                   | 386.112881         | 193.560079        | E    | 1976.034369        | 988.520822        | 1959.007820       | 980.007548       | 1958.023804       | 979.515540       | 15 |
| 5  | 843.348772         | 422.178024        | 826.322223     | 413.664750        | 825.338207         | 413.172742        | Q    | 1846.991776        | 923.999526        | 1829.965227       | 915.486251       | 1828.981211       | 914.994243       | 14 |
| 6  | <b>944.396451</b>  | 472.701864        | 927.369902     | <b>464.188589</b> | <b>926.385886</b>  | 463.696581        | T    | 1407.766450        | 704.386863        | 1390.739901       | 695.873588       | 1389.755885       | 695.381580       | 13 |
| 7  | <b>1075.436936</b> | <b>538.222106</b> | 1058.410387    | 529.708832        | <b>1057.426371</b> | <b>529.216824</b> | M    | 1306.718771        | 653.863023        | 1289.692222       | 645.349749       | 1288.708206       | 644.857741       | 12 |
| 8  | <b>1188.521000</b> | 594.764138        | 1171.494451    | 586.250864        | <b>1170.510435</b> | 585.758855        | I    | <b>1175.678286</b> | 588.342781        | 1158.651737       | 579.829506       | 1157.667721       | 579.337498       | 11 |
| 9  | <b>1351.584329</b> | 676.295803        | 1334.557780    | 667.782528        | 1333.573764        | 667.290520        | Y    | <b>1062.594222</b> | 531.800749        | 1045.567673       | 523.287475       | 1044.583657       | 522.795466       | 10 |
| 10 | <b>1464.668393</b> | <b>732.837834</b> | 1447.641844    | 724.324560        | 1446.657828        | 723.832552        | L    | <b>899.530893</b>  | 450.269084        | 882.504344        | 441.755810       | 881.520328        | 441.263802       | 9  |
| 11 | <b>1535.705507</b> | <b>768.356391</b> | 1518.678958    | 759.843117        | 1517.694942        | <b>759.351109</b> | A    | <b>786.446829</b>  | 393.727053        | 769.420280        | 385.213778       | <b>768.436264</b> | 384.721770       | 8  |
| 12 | 1632.758271        | 816.882773        | 1615.731722    | 808.369499        | 1614.747706        | 807.877491        | P    | <b>715.409715</b>  | <b>358.208496</b> | <b>698.383166</b> | 349.695221       | <b>697.399150</b> | 349.203213       | 7  |
| 13 | 1733.805950        | 867.406613        | 1716.779401    | 858.893339        | 1715.795385        | 858.401330        | T    | <b>618.356951</b>  | 309.682114        | 601.330402        | 301.168839       | 600.346386        | 300.676831       | 6  |
| 14 | 1846.890014        | 923.948645        | 1829.863465    | 915.435370        | 1828.879449        | 914.943362        | L    | <b>517.309272</b>  | 259.158274        | 500.282723        | 250.644999       | 499.298707        | 250.152991       | 5  |
| 15 | 1917.927128        | 959.467202        | 1900.900579    | 950.953927        | 1899.916563        | 950.461919        | A    | 404.225208         | 202.616242        | <b>387.198659</b> | 194.102967       | 386.214643        | 193.610959       | 4  |
| 16 | 1988.964242        | 994.985759        | 1971.937693    | 986.472484        | 1970.953677        | 985.980476        | A    | <b>333.188094</b>  | 167.097685        | 316.161545        | 158.584410       | 315.177529        | 158.092402       | 3  |
| 17 | 2075.996270        | 1038.501773       | 2058.969721    | 1029.988498       | 2057.985705        | 1029.496490       | S    | <b>262.150980</b>  | 131.579128        | 245.124431        | 123.065854       | 244.140415        | 122.573846       | 2  |
| 18 |                    |                   |                |                   |                    |                   | R    | 175.118952         | 88.063114         | 158.092403        | 79.549839        |                   |                  | 1  |

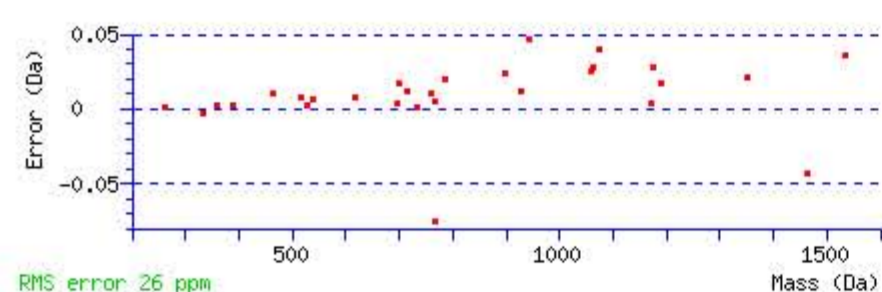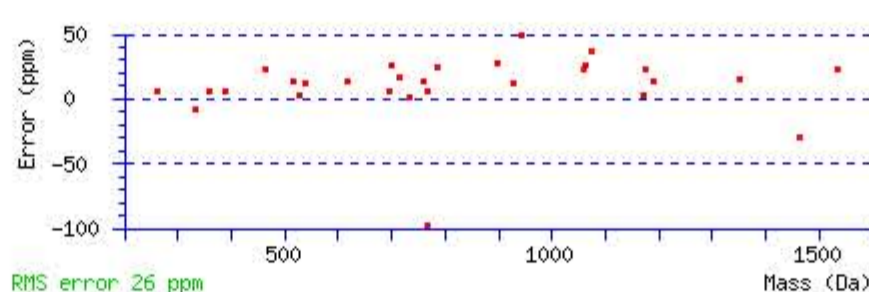

NCBI BLAST search of **GCGEQTMILAPTLAASR**

(Parameters: blastp, nr protein database, expect=20000, no filter, PAM30)

Other BLAST [web gateways](#)

### All matches to this query

| Score | Mr(calc):   | Delta     | Sequence                              |
|-------|-------------|-----------|---------------------------------------|
| 41.4  | 2249.100647 | 0.029035  | <a href="#">GCGEQTMILAPTLAASR</a>     |
| 7.8   | 2249.115051 | 0.014631  | <a href="#">YSTSLYASPSMVHEGVAVVPR</a> |
| 1.3   | 2249.143570 | -0.013888 | <a href="#">TPPPQPPLISSMDSISQK</a>    |
| 1.3   | 2249.104492 | 0.025190  | <a href="#">AQLQQHNLEMVGEGR</a>       |
| 0.3   | 2249.137527 | -0.007845 | <a href="#">QKFERPICVSWSTDVKGGR</a>   |

# **Mascot Search Results**

## Peptide View

MS/MS Fragmentation of **DDPDAPLQPVTPLQLFEGR**  
 Found in **CO4A\_HUMAN**, Complement C4-A OS=Homo sapiens GN=C4A PE=1 SV=2

Match to Query 49443: 2418.255432 from(807.092420,3+) rtinseconds(3006) index(54069)  
 Title: Locus:1.1.1.3091.18 File:"2013-07-02 CLN FXIII 60 min 3rd F 4.wiff"  
 Data file C:\Program Files (x86)\Matrix Science\Mascot Daemon\mgf6 FXIII 60 min 3rd\mascot\_daemon\_merge.mgf

Click mouse within plot area to zoom in by factor of two about that point

Or, Plot from  to  Da

Label all possible matches  Label matches used for scoring

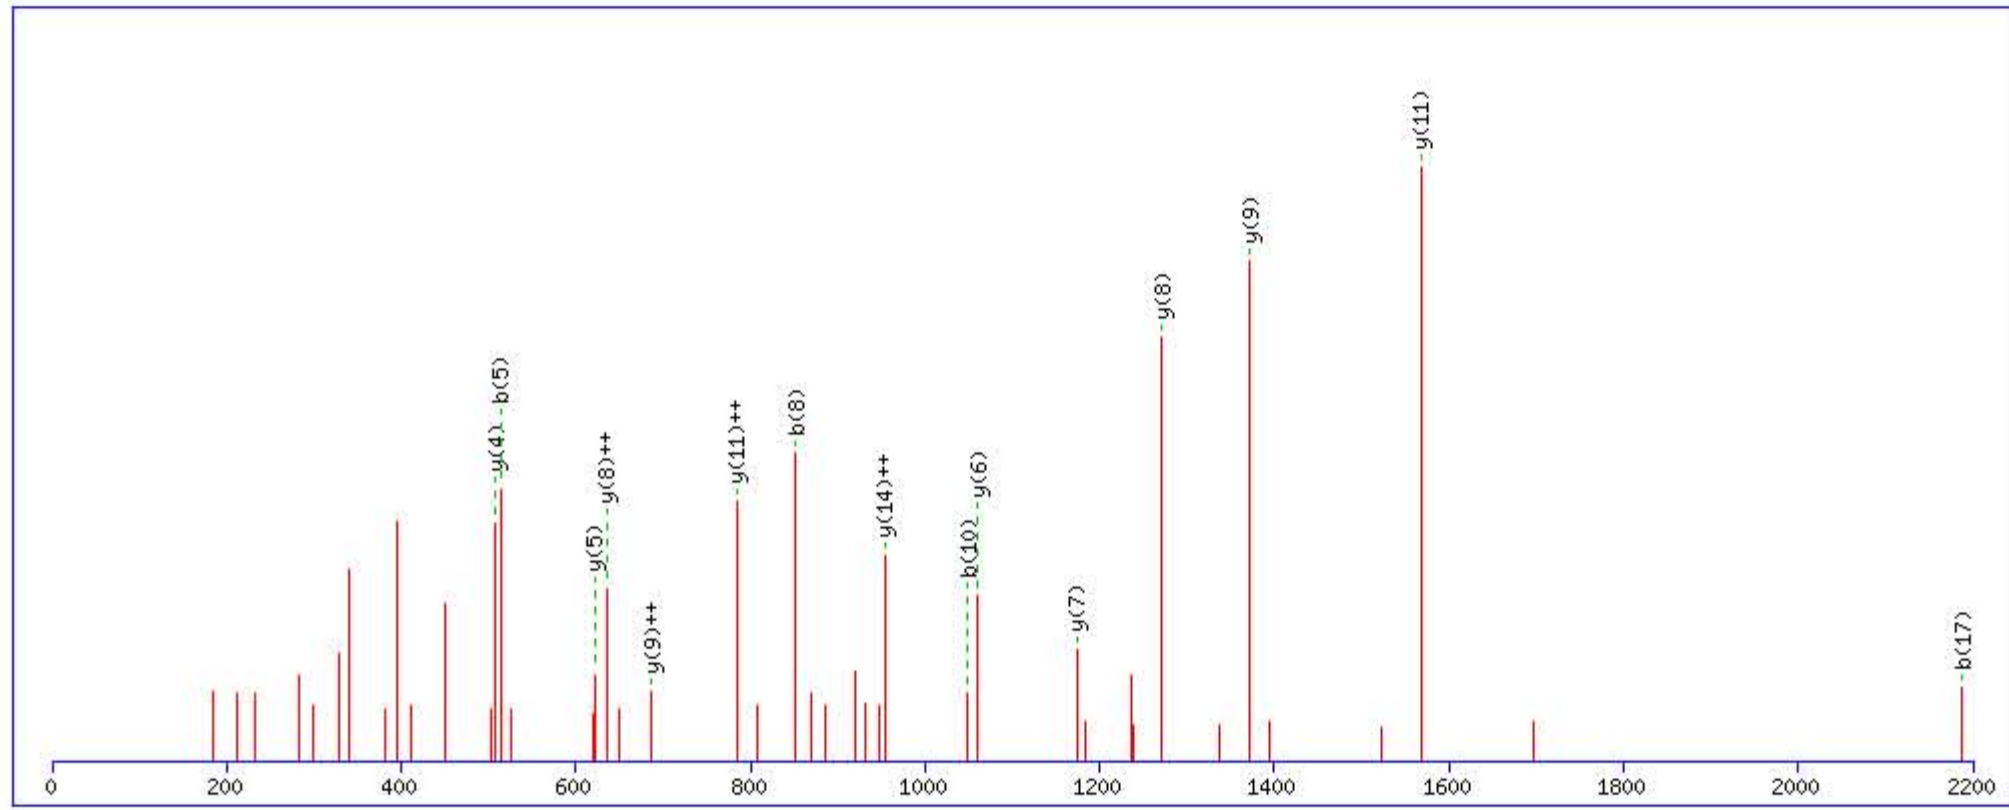

Monoisotopic mass of neutral peptide Mr(calc): 2418.225342  
 Fixed modifications: Carbamidomethyl (C) (apply to specified residues or termini only)  
 Variable modifications:  
 Q14 : Biotin:Thermo-21345 (Q)  
 Ions Score: 32 Expect: 0.0011  
 Matches : 15/198 fragment ions using 29 most intense peaks [\(help\)](#)

| #  | b                  | b <sup>++</sup> | b <sup>*</sup> | b <sup>*++</sup> | b <sup>0</sup> | b <sup>0++</sup> | Seq. | y                  | y <sup>++</sup>   | y <sup>*</sup> | y <sup>*++</sup> | y <sup>0</sup> | y <sup>0++</sup> | #  |
|----|--------------------|-----------------|----------------|------------------|----------------|------------------|------|--------------------|-------------------|----------------|------------------|----------------|------------------|----|
| 1  | 116.034219         | 58.520748       |                |                  | 98.023654      | 49.515465        | D    |                    |                   |                |                  |                |                  | 19 |
| 2  | 231.061162         | 116.034219      |                |                  | 213.050597     | 107.028936       | D    | 2304.205668        | 1152.606472       | 2287.179119    | 1144.093197      | 2286.195103    | 1143.601189      | 18 |
| 3  | 328.113926         | 164.560601      |                |                  | 310.103361     | 155.555319       | P    | 2189.178725        | 1095.093000       | 2172.152176    | 1086.579726      | 2171.168160    | 1086.087718      | 17 |
| 4  | 443.140869         | 222.074073      |                |                  | 425.130304     | 213.068790       | D    | 2092.125961        | 1046.566618       | 2075.099412    | 1038.053344      | 2074.115396    | 1037.561336      | 16 |
| 5  | <b>514.177983</b>  | 257.592630      |                |                  | 496.167418     | 248.587347       | A    | 1977.099018        | 989.053147        | 1960.072469    | 980.539873       | 1959.088453    | 980.047865       | 15 |
| 6  | 611.230747         | 306.119012      |                |                  | 593.220182     | 297.113729       | P    | 1906.061904        | <b>953.534590</b> | 1889.035355    | 945.021316       | 1888.051339    | 944.529308       | 14 |
| 7  | 724.314811         | 362.661044      |                |                  | 706.304246     | 353.655761       | L    | 1809.009140        | 905.008208        | 1791.982591    | 896.494934       | 1790.998575    | 896.002926       | 13 |
| 8  | <b>852.373389</b>  | 426.690333      | 835.346840     | 418.177058       | 834.362824     | 417.685050       | Q    | 1695.925076        | 848.466176        | 1678.898527    | 839.952902       | 1677.914511    | 839.460894       | 12 |
| 9  | 949.426153         | 475.216715      | 932.399604     | 466.703440       | 931.415588     | 466.211432       | P    | <b>1567.866498</b> | <b>784.436887</b> | 1550.839949    | 775.923613       | 1549.855933    | 775.431605       | 11 |
| 10 | <b>1048.494567</b> | 524.750922      | 1031.468018    | 516.237647       | 1030.484002    | 515.745639       | V    | 1470.813734        | 735.910505        | 1453.787185    | 727.397231       | 1452.803169    | 726.905223       | 10 |
| 11 | 1149.542246        | 575.274761      | 1132.515697    | 566.761487       | 1131.531681    | 566.269479       | T    | <b>1371.745320</b> | <b>686.376298</b> | 1354.718771    | 677.863024       | 1353.734755    | 677.371016       | 9  |
| 12 | 1246.595010        | 623.801143      | 1229.568461    | 615.287869       | 1228.584445    | 614.795861       | P    | <b>1270.697641</b> | <b>635.852459</b> | 1253.671092    | 627.339184       | 1252.687076    | 626.847176       | 8  |
| 13 | 1359.679074        | 680.343175      | 1342.652525    | 671.829901       | 1341.668509    | 671.337893       | L    | <b>1173.644877</b> | 587.326077        | 1156.618328    | 578.812802       | 1155.634312    | 578.320794       | 7  |
| 14 | 1798.904400        | 899.955838      | 1781.877851    | 891.442564       | 1780.893835    | 890.950556       | Q    | <b>1060.560813</b> | 530.784045        | 1043.534264    | 522.270770       | 1042.550248    | 521.778762       | 6  |
| 15 | 1911.988464        | 956.497870      | 1894.961915    | 947.984596       | 1893.977899    | 947.492588       | L    | <b>621.335487</b>  | 311.171382        | 604.308938     | 302.658107       | 603.324922     | 302.166099       | 5  |
| 16 | 2059.056878        | 1030.032077     | 2042.030329    | 1021.518803      | 2041.046313    | 1021.026794      | F    | <b>508.251423</b>  | 254.629350        | 491.224874     | 246.116075       | 490.240858     | 245.624067       | 4  |
| 17 | <b>2188.099471</b> | 1094.553373     | 2171.072922    | 1086.040099      | 2170.088906    | 1085.548091      | E    | 361.183009         | 181.095142        | 344.156460     | 172.581868       | 343.172444     | 172.089860       | 3  |
| 18 | 2245.120935        | 1123.064105     | 2228.094386    | 1114.550831      | 2227.110370    | 1114.058823      | G    | 232.140416         | 116.573846        | 215.113867     | 108.060571       |                |                  | 2  |
| 19 |                    |                 |                |                  |                |                  | R    | 175.118952         | 88.063114         | 158.092403     | 79.549839        |                |                  | 1  |

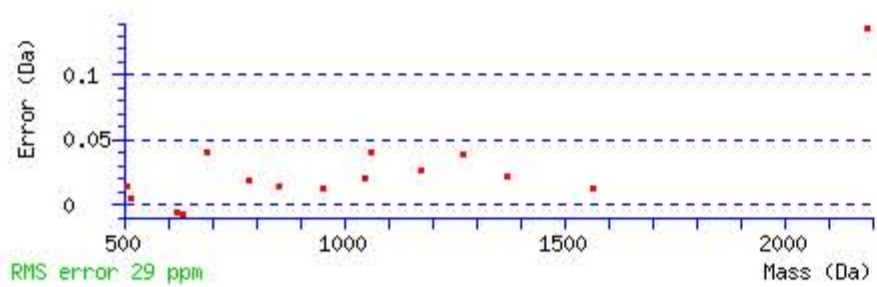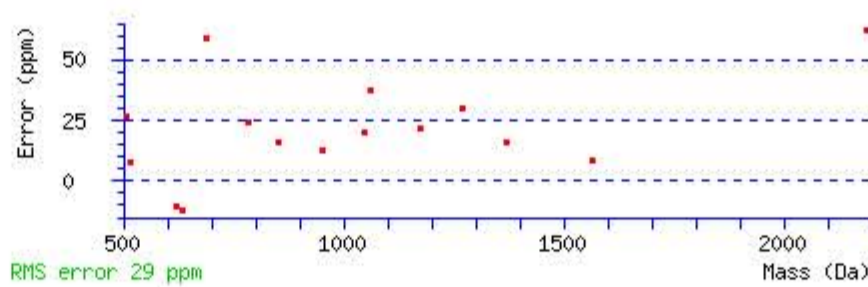

NCBI BLAST search of [DDPDAPLQPVTPLQLFEGR](#)  
 (Parameters: blastp, nr protein database, expect=20000, no filter, PAM30)  
 Other BLAST [web gateways](#)

### All matches to this query

| Score | Mr(calc):   | Delta     | Sequence                             |
|-------|-------------|-----------|--------------------------------------|
| 32.4  | 2418.225342 | 0.030090  | <a href="#">DDPDAPLQPVTPLQLFEGR</a>  |
| 0.8   | 2418.259033 | -0.003601 | <a href="#">QQQRALLGPWLSGPGQGTDR</a> |
| 0.8   | 2418.259033 | -0.003601 | <a href="#">QQQRALLGPWLSGPGQGTDR</a> |
| 0.8   | 2418.259033 | -0.003601 | <a href="#">QQQRALLGPWLSGPGQGTDR</a> |

**MASCOT** Mascot Search Results

**Peptide View**

MS/MS Fragmentation of **AACAQLNDFLQEYGTQGCQV**  
 Found in **CO4A\_HUMAN**, Complement C4-A OS=Homo sapiens GN=C4A PE=1 SV=2

Match to Query 51933: 2583.191832 from(862.071220,3+) rtinseconds(2732) index(51870)  
 Title: Locus:1.1.1.2998.21 File:"2013-07-02 CLN FXIII 60 min 3rd F 4.wiff"  
 Data file C:\Program Files (x86)\Matrix Science\Mascot Daemon\mgf6 FXIII 60 min 3rd\mascot\_daemon\_merge.mgf

Click mouse within plot area to zoom in by factor of two about that point  
 Or, Plot from 100 to 1900 Da Full range  
 Label all possible matches  Label matches used for scoring

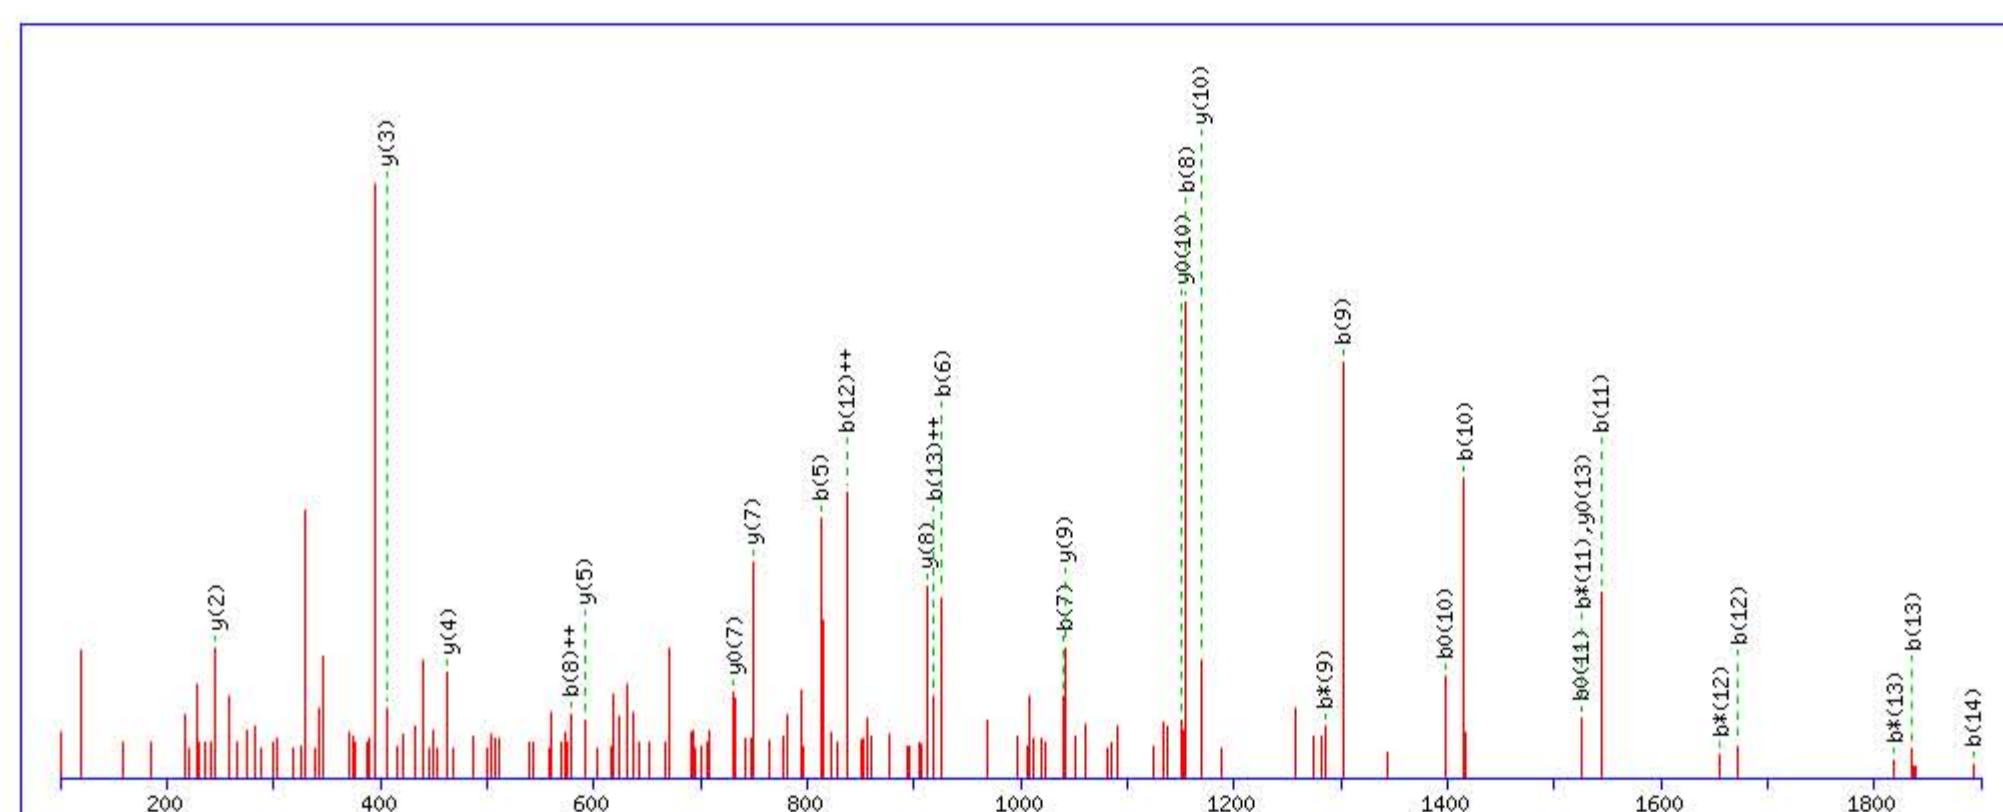

Monoisotopic mass of neutral peptide  $M_r(\text{calc})$ : 2583.155624  
 Fixed modifications: Carbamidomethyl (C) (apply to specified residues or termini only)  
 Variable modifications:  
 Q5 : Biotin:Thermo-21345 (Q)  
 Ions Score: 62 Expect: 7.5e-006  
 Matches : 30/194 fragment ions using 49 most intense peaks ([help](#))

| #  | b                  | b <sup>++</sup>   | b <sup>*</sup>     | b <sup>*++</sup> | b <sup>0</sup>     | b <sup>0++</sup> | Seq. | y                  | y <sup>++</sup> | y <sup>*</sup> | y <sup>*++</sup> | y <sup>0</sup>     | y <sup>0++</sup> | #  |
|----|--------------------|-------------------|--------------------|------------------|--------------------|------------------|------|--------------------|-----------------|----------------|------------------|--------------------|------------------|----|
| 1  | 72.044390          | 36.525833         |                    |                  |                    |                  | A    |                    |                 |                |                  |                    |                  | 20 |
| 2  | 143.081504         | 72.044390         |                    |                  |                    |                  | A    | 2513.125782        | 1257.066529     | 2496.099233    | 1248.553254      | 2495.115217        | 1248.061246      | 19 |
| 3  | 303.112153         | 152.059714        |                    |                  |                    |                  | C    | 2442.088668        | 1221.547972     | 2425.062119    | 1213.034697      | 2424.078103        | 1212.542689      | 18 |
| 4  | 374.149267         | 187.578271        |                    |                  |                    |                  | A    | 2282.058019        | 1141.532647     | 2265.031470    | 1133.019373      | 2264.047454        | 1132.527365      | 17 |
| 5  | <b>813.374593</b>  | 407.190935        | 796.348044         | 398.677660       |                    |                  | Q    | 2211.020905        | 1106.014090     | 2193.994356    | 1097.500816      | 2193.010340        | 1097.008808      | 16 |
| 6  | <b>926.458657</b>  | 463.732967        | 909.432108         | 455.219692       |                    |                  | L    | 1771.795579        | 886.401428      | 1754.769030    | 877.888153       | 1753.785014        | 877.396145       | 15 |
| 7  | <b>1040.501584</b> | 520.754430        | 1023.475035        | 512.241155       |                    |                  | N    | 1658.711515        | 829.859396      | 1641.684966    | 821.346121       | 1640.700950        | 820.854113       | 14 |
| 8  | <b>1155.528527</b> | <b>578.267902</b> | 1138.501978        | 569.754627       | 1137.517962        | 569.262619       | D    | 1544.668588        | 772.837932      | 1527.642039    | 764.324658       | <b>1526.658023</b> | 763.832650       | 13 |
| 9  | <b>1302.596941</b> | 651.802109        | <b>1285.570392</b> | 643.288834       | 1284.586376        | 642.796826       | F    | 1429.641645        | 715.324460      | 1412.615096    | 706.811186       | 1411.631080        | 706.319178       | 12 |
| 10 | <b>1415.681005</b> | 708.344141        | 1398.654456        | 699.830866       | <b>1397.670440</b> | 699.338858       | L    | 1282.573231        | 641.790253      | 1265.546682    | 633.276979       | 1264.562666        | 632.784971       | 11 |
| 11 | <b>1543.739583</b> | 772.373430        | <b>1526.713034</b> | 763.860155       | <b>1525.729018</b> | 763.368147       | Q    | <b>1169.489167</b> | 585.248222      | 1152.462618    | 576.734947       | <b>1151.478602</b> | 576.242939       | 10 |
| 12 | <b>1672.782176</b> | <b>836.894726</b> | <b>1655.755627</b> | 828.381452       | 1654.771611        | 827.889444       | E    | <b>1041.430589</b> | 521.218932      | 1024.404040    | 512.705658       | 1023.420024        | 512.213650       | 9  |
| 13 | <b>1835.845505</b> | <b>918.426391</b> | <b>1818.818956</b> | 909.913116       | 1817.834940        | 909.421108       | Y    | <b>912.387996</b>  | 456.697636      | 895.361447     | 448.184361       | 894.377431         | 447.692353       | 8  |
| 14 | <b>1892.866969</b> | 946.937123        | 1875.840420        | 938.423848       | 1874.856404        | 937.931840       | G    | <b>749.324667</b>  | 375.165971      | 732.298118     | 366.652697       | <b>731.314102</b>  | 366.160689       | 7  |
| 15 | 1993.914648        | 997.460962        | 1976.888099        | 988.947688       | 1975.904083        | 988.455680       | T    | 692.303203         | 346.655239      | 675.276654     | 338.141965       | 674.292638         | 337.649957       | 6  |
| 16 | 2121.973226        | 1061.490251       | 2104.946677        | 1052.976976      | 2103.962661        | 1052.484968      | Q    | <b>591.255524</b>  | 296.131400      | 574.228975     | 287.618125       |                    |                  | 5  |
| 17 | 2178.994690        | 1090.000983       | 2161.968141        | 1081.487708      | 2160.984125        | 1080.995700      | G    | <b>463.196946</b>  | 232.102111      | 446.170397     | 223.588836       |                    |                  | 4  |
| 18 | 2339.025339        | 1170.016307       | 2321.998790        | 1161.503033      | 2321.014774        | 1161.011025      | C    | <b>406.175482</b>  | 203.591379      | 389.148933     | 195.078104       |                    |                  | 3  |
| 19 | 2467.083917        | 1234.045596       | 2450.057368        | 1225.532322      | 2449.073352        | 1225.040314      | Q    | <b>246.144833</b>  | 123.576054      | 229.118284     | 115.062780       |                    |                  | 2  |
| 20 |                    |                   |                    |                  |                    |                  | V    | 118.086255         | 59.546765       |                |                  |                    |                  | 1  |

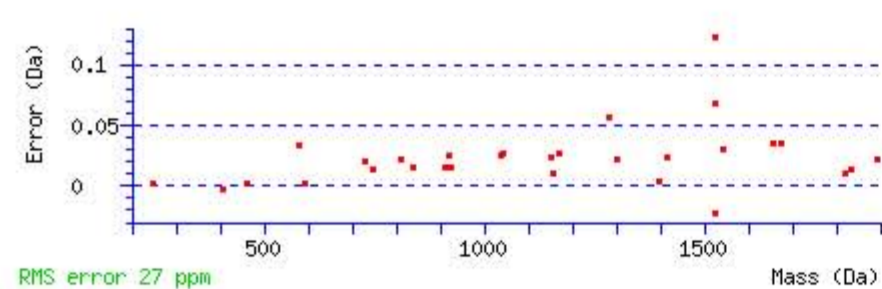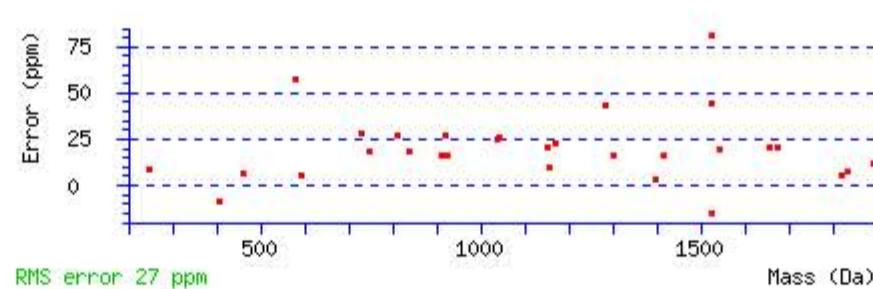

NCBI BLAST search of [AACAQLNDFLQEYGTQGCQV](#)  
 (Parameters: blastp, nr protein database, expect=20000, no filter, PAM30)  
 Other BLAST [web gateways](#)

**All matches to this query**

| Score | $M_r(\text{calc})$ : | Delta    | Sequence                             |
|-------|----------------------|----------|--------------------------------------|
| 62.5  | 2583.155624          | 0.036208 | <a href="#">AACAQLNDFLQEYGTQGCQV</a> |
| 15.1  | 2583.155624          | 0.036208 | <a href="#">AACAQLNDFLQEYGTQGCQV</a> |

# MASCOT Search Results

## Peptide View

MS/MS Fragmentation of **GLESQTK**

Found in **CO4A\_HUMAN**, Complement C4-A OS=Homo sapiens GN=C4A PE=1 SV=2

Match to Query 15590: 1072.557228 from(537.285890,2+) rtinseconds(1461) index(43956)

Title: Locus:1.1.1.2557.11 File:"2013-07-02 CLN FXIII 60 min 3rd F 4.wiff"

Data file C:\Program Files (x86)\Matrix Science\Mascot Daemon\mgf\6 FXIII 60 min 3rd\mascot\_daemon\_merge.mgf

Click mouse within plot area to zoom in by factor of two about that point

Or, Plot from  to  Da

Label all possible matches  Label matches used for scoring

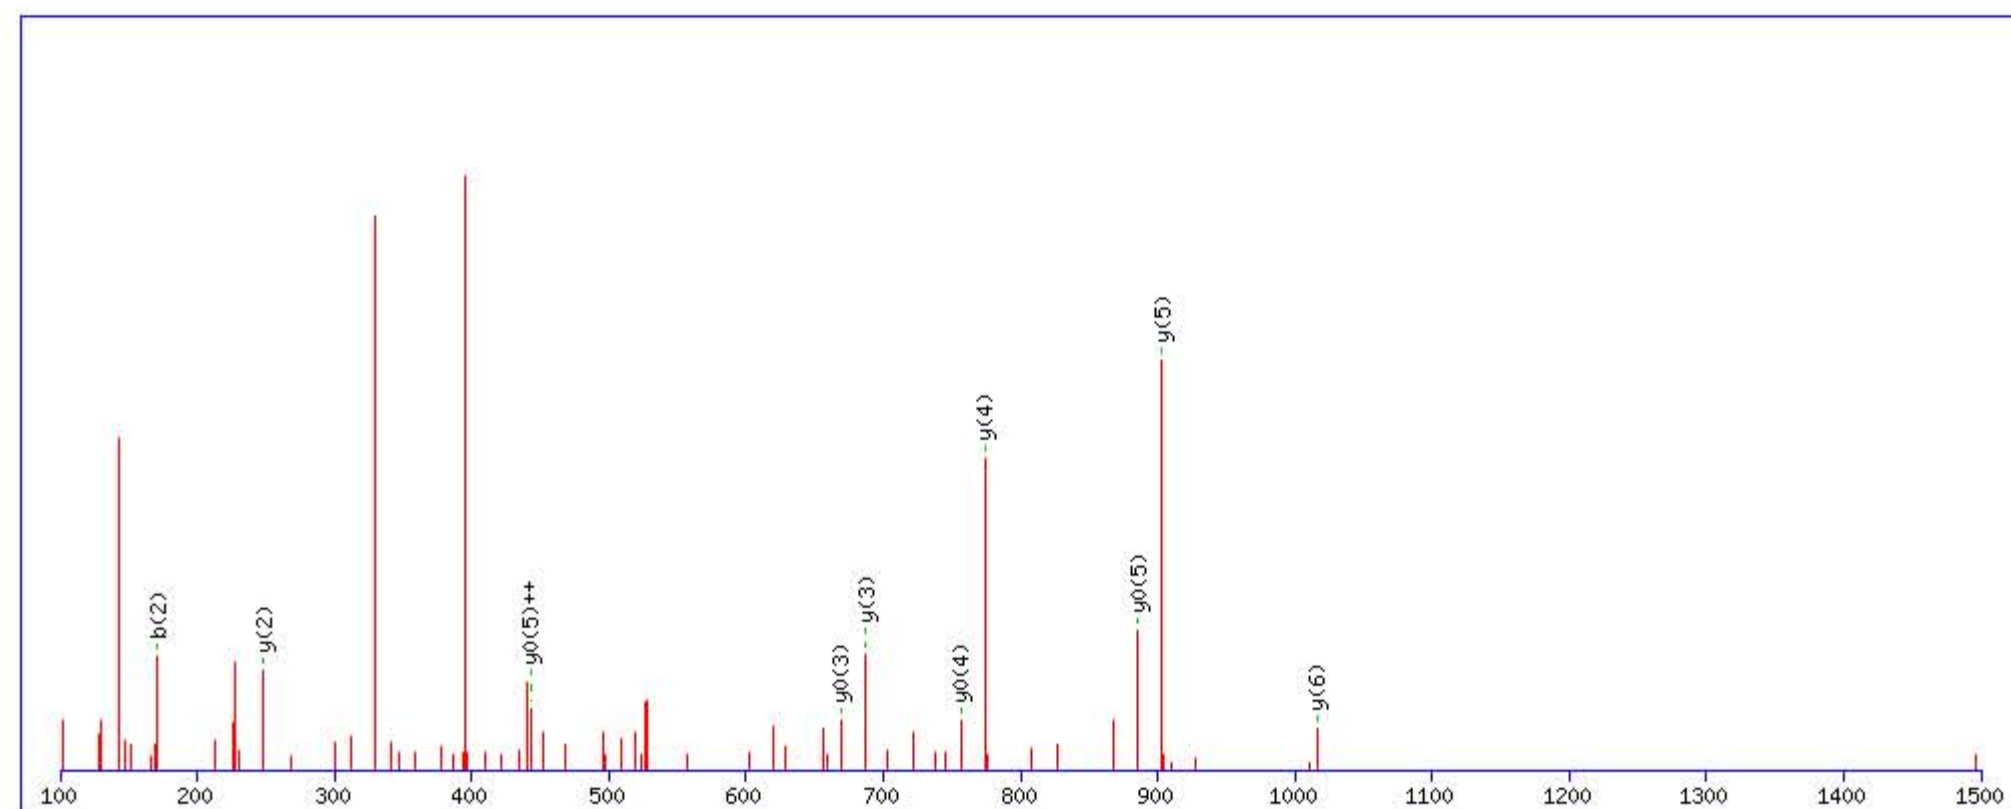

Monoisotopic mass of neutral peptide Mr(calc): 1072.558670

Fixed modifications: Carbamidomethyl (C) (apply to specified residues or termini only)

Variable modifications:

Q5 : Biotin:Thermo-21345 (Q)

Ions Score: 26 Expect: 0.06

Matches : 10/58 fragment ions using 20 most intense peaks ([help](#))

| # | b                 | b <sup>++</sup> | b <sup>+</sup> | b <sup>*++</sup> | b <sup>0</sup> | b <sup>0++</sup> | Seq.     | y                  | y <sup>++</sup> | y <sup>+</sup> | y <sup>*++</sup> | y <sup>0</sup>    | y <sup>0++</sup>  | # |
|---|-------------------|-----------------|----------------|------------------|----------------|------------------|----------|--------------------|-----------------|----------------|------------------|-------------------|-------------------|---|
| 1 | 58.028740         | 29.518008       |                |                  |                |                  | <b>G</b> |                    |                 |                |                  |                   |                   | 7 |
| 2 | <b>171.112804</b> | 86.060040       |                |                  |                |                  | <b>L</b> | <b>1016.544494</b> | 508.775885      | 999.517945     | 500.262611       | 998.533929        | 499.770603        | 6 |
| 3 | 300.155397        | 150.581336      |                |                  | 282.144832     | 141.576054       | <b>E</b> | <b>903.460430</b>  | 452.233853      | 886.433881     | 443.720579       | <b>885.449865</b> | <b>443.228571</b> | 5 |
| 4 | 387.187425        | 194.097351      |                |                  | 369.176860     | 185.092068       | <b>S</b> | <b>774.417837</b>  | 387.712557      | 757.391288     | 379.199282       | <b>756.407272</b> | 378.707274        | 4 |
| 5 | 826.412751        | 413.710014      | 809.386202     | 405.196739       | 808.402186     | 404.704731       | <b>Q</b> | <b>687.385809</b>  | 344.196543      | 670.359260     | 335.683268       | <b>669.375244</b> | 335.191260        | 3 |
| 6 | 927.460430        | 464.233853      | 910.433881     | 455.720579       | 909.449865     | 455.228571       | <b>T</b> | <b>248.160483</b>  | 124.583879      | 231.133934     | 116.070605       | 230.149918        | 115.578597        | 2 |
| 7 |                   |                 |                |                  |                |                  | <b>K</b> | 147.112804         | 74.060040       | 130.086255     | 65.546765        |                   |                   | 1 |



NCBI BLAST search of [GLESQTK](#)

(Parameters: blastp, nr protein database, expect=20000, no filter, PAM30)

Other BLAST [web gateways](#)

All matches to this query

| Score | Mr(calc):   | Delta     | Sequence                    |
|-------|-------------|-----------|-----------------------------|
| 25.6  | 1072.558670 | -0.001442 | <a href="#">GLESQTK</a>     |
| 11.8  | 1072.558670 | -0.001442 | <a href="#">LGECPAVLSK</a>  |
| 7.5   | 1072.558670 | -0.001442 | <a href="#">QSEGLTK</a>     |
| 7.2   | 1072.551254 | 0.005974  | <a href="#">KEAPRDETK</a>   |
| 1.9   | 1072.551285 | 0.005943  | <a href="#">GPRITTEPSTK</a> |
| 0.9   | 1072.566544 | -0.009316 | <a href="#">NHSLAFVGTK</a>  |

Mascot: <http://www.matrixscience.com/>

# MASCOT Search Results

## Peptide View

MS/MS Fragmentation of **VQQPDCR**

Found in **CO4A\_HUMAN**, Complement C4-A OS=Homo sapiens GN=C4A PE=1 SV=2

Match to Query 20591: 1212.574308 from(607.294430,2+) rtinseconds(1290) index(42994)

Title: Locus:1.1.1.2497.15 File:"2013-07-02 CLN FXIII 60 min 3rd F 4.wiff"

Data file C:\Program Files (x86)\Matrix Science\Mascot Daemon\mgf\6 FXIII 60 min 3rd\mascot\_daemon\_merge.mgf

Click mouse within plot area to zoom in by factor of two about that point

Or, Plot from  to  Da

Label all possible matches  Label matches used for scoring



Monoisotopic mass of neutral peptide Mr(calc): 1212.574356

Fixed modifications: Carbamidomethyl (C) (apply to specified residues or termini only)

Variable modifications:

Q2 : Biotin:Thermo-21345 (Q)

Ions Score: 28 Expect: 0.0053

Matches : 18/58 fragment ions using 39 most intense peaks ([help](#))

| # | b                  | b <sup>++</sup>   | b <sup>*</sup>    | b <sup>***</sup> | b <sup>0</sup> | b <sup>0++</sup> | Seq. | y                  | y <sup>++</sup>   | y <sup>*</sup>    | y <sup>***</sup> | y <sup>0</sup>    | y <sup>0++</sup>  | # |
|---|--------------------|-------------------|-------------------|------------------|----------------|------------------|------|--------------------|-------------------|-------------------|------------------|-------------------|-------------------|---|
| 1 | 100.075690         | 50.541483         |                   |                  |                |                  | V    |                    |                   |                   |                  |                   |                   | 7 |
| 2 | <b>539.301016</b>  | 270.154146        | <b>522.274467</b> | 261.640872       |                |                  | Q    | <b>1114.513212</b> | <b>557.760244</b> | 1097.486663       | 549.246970       | 1096.502647       | 548.754962        | 6 |
| 3 | <b>667.359594</b>  | 334.183435        | 650.333045        | 325.670161       |                |                  | Q    | <b>675.287886</b>  | 338.147581        | <b>658.261337</b> | 329.634307       | <b>657.277321</b> | <b>329.142299</b> | 5 |
| 4 | 764.412358         | 382.709817        | 747.385809        | 374.196543       |                |                  | P    | <b>547.229308</b>  | 274.118292        | 530.202759        | 265.605018       | 529.218743        | 265.113010        | 4 |
| 5 | <b>879.439301</b>  | <b>440.223289</b> | 862.412752        | 431.710014       | 861.428736     | 431.218006       | D    | <b>450.176544</b>  | 225.591910        | <b>433.149995</b> | 217.078635       | 432.165979        | 216.586627        | 3 |
| 6 | <b>1039.469950</b> | 520.238613        | 1022.443401       | 511.725339       | 1021.459385    | 511.233331       | C    | <b>335.149601</b>  | 168.078438        | <b>318.123052</b> | 159.565164       |                   |                   | 2 |
| 7 |                    |                   |                   |                  |                |                  | R    | <b>175.118952</b>  | 88.063114         | 158.092403        | 79.549839        |                   |                   | 1 |



NCBI BLAST search of [VQQPDCR](#)

(Parameters: blastp, nr protein database, expect=20000, no filter, PAM30)

Other BLAST [web gateways](#)

### All matches to this query

| Score | Mr(calc):   | Delta     | Sequence                   |
|-------|-------------|-----------|----------------------------|
| 28.1  | 1212.574356 | -0.000048 | <a href="#">VQQPDCR</a>    |
| 13.1  | 1212.574356 | -0.000048 | <a href="#">VQQPDCR</a>    |
| 3.8   | 1212.592102 | -0.017794 | <a href="#">VQEDQQR</a>    |
| 3.3   | 1212.582199 | -0.007891 | <a href="#">GRMPPSEFHR</a> |



# MASCOT SEARCH RESULTS

## Peptide View

MS/MS Fragmentation of **VEYGFQVK**

Found in **CO4A\_HUMAN**, Complement C4-A OS=Homo sapiens GN=C4A PE=1 SV=2

Match to Query 22437: 1279.669668 from(640.842110,2+) rtinseconds(1986) index(47365)

Title: Locus:1.1.1.2740.6 File:"2013-07-02 CLN FXIII 60 min 3rd F 4.wiff"

Data file C:\Program Files (x86)\Matrix Science\Mascot Daemon\mgf6 FXIII 60 min 3rd\mascot\_daemon\_merge.mgf

Click mouse within plot area to zoom in by factor of two about that point

Or, Plot from  to  Da

Label all possible matches  Label matches used for scoring



Monoisotopic mass of neutral peptide Mr(calc): 1279.663483

Fixed modifications: Carbamidomethyl (C) (apply to specified residues or termini only)

Variable modifications:

Q6 : Biotin:Thermo-21345 (Q)

Ions Score: 35 Expect: 0.005

Matches : 17/60 fragment ions using 33 most intense peaks [\(help\)](#)

| # | b                  | b <sup>++</sup> | b <sup>*</sup> | b <sup>***</sup> | b <sup>0</sup>     | b <sup>0++</sup> | Seq. | y                  | y <sup>++</sup>   | y <sup>*</sup>     | y <sup>***</sup> | y <sup>0</sup>     | y <sup>0++</sup>  | # |
|---|--------------------|-----------------|----------------|------------------|--------------------|------------------|------|--------------------|-------------------|--------------------|------------------|--------------------|-------------------|---|
| 1 | 100.075690         | 50.541483       |                |                  |                    |                  | V    |                    |                   |                    |                  |                    |                   | 8 |
| 2 | <b>229.118283</b>  | 115.062780      |                |                  | 211.107718         | 106.057497       | E    | <b>1181.602344</b> | <b>591.304810</b> | 1164.575795        | 582.791536       | <b>1163.591779</b> | <b>582.299528</b> | 7 |
| 3 | 392.181612         | 196.594444      |                |                  | 374.171047         | 187.589162       | Y    | <b>1052.559751</b> | <b>526.783514</b> | <b>1035.533202</b> | 518.270239       |                    |                   | 6 |
| 4 | 449.203076         | 225.105176      |                |                  | 431.192511         | 216.099894       | G    | <b>889.496422</b>  | 445.251849        | 872.469873         | 436.738575       |                    |                   | 5 |
| 5 | 596.271490         | 298.639383      |                |                  | 578.260925         | 289.634101       | F    | <b>832.474958</b>  | 416.741117        | 815.448409         | 408.227843       |                    |                   | 4 |
| 6 | <b>1035.496816</b> | 518.252046      | 1018.470267    | 509.738772       | <b>1017.486251</b> | 509.246764       | Q    | <b>685.406544</b>  | 343.206910        | 668.379995         | 334.693636       |                    |                   | 3 |
| 7 | <b>1134.565230</b> | 567.786253      | 1117.538681    | 559.272979       | 1116.554665        | 558.780971       | V    | <b>246.181218</b>  | 123.594247        | <b>229.154669</b>  | 115.080973       |                    |                   | 2 |
| 8 |                    |                 |                |                  |                    |                  | K    | <b>147.112804</b>  | 74.060040         | 130.086255         | 65.546765        |                    |                   | 1 |

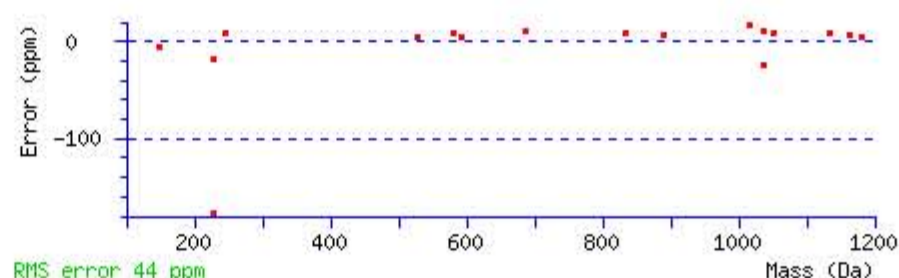

NCBI BLAST search of **VEYGFQVK**

(Parameters: blastp, nr protein database, expect=20000, no filter, PAM30)

Other BLAST [web gateways](#)

All matches to this query

| Score | Mr(calc):   | Delta     | Sequence                     |
|-------|-------------|-----------|------------------------------|
| 35.4  | 1279.663483 | 0.006185  | <a href="#">VEYGFQVK</a>     |
| 10.2  | 1279.684601 | -0.014933 | <a href="#">MSASAVFILDVK</a> |
| 6.0   | 1279.677216 | -0.007548 | <a href="#">VFKTEDTQGKK</a>  |
| 5.1   | 1279.666824 | 0.002844  | <a href="#">VKEWSLMIMK</a>   |
| 5.1   | 1279.666824 | 0.002844  | <a href="#">VKEWSLMIMK</a>   |
| 4.2   | 1279.681229 | -0.011561 | <a href="#">EVTVKEWYVK</a>   |
| 3.3   | 1279.687958 | -0.018290 | <a href="#">LIKSMESVMVK</a>  |
| 3.0   | 1279.665955 | 0.003713  | <a href="#">LDKYDSVEAIK</a>  |
| 2.4   | 1279.670670 | -0.001002 | <a href="#">VEHKSNOQK</a>    |
| 2.2   | 1279.663483 | 0.006185  | <a href="#">QFVGYLDK</a>     |

# MASCOT Search Results

## Peptide View

MS/MS Fragmentation of **DKGQAGLQR**

Found in **CO4A\_HUMAN**, Complement C4-A OS=Homo sapiens GN=C4A PE=1 SV=2

Match to Query 22621: 1282.684548 from(642.349550,2+) rtinseconds(1334) index(43190)

Title: Locus:1.1.1.2513.7 File:"2013-07-02 CLN FXIII 60 min 3rd F 4.wiff"

Data file C:\Program Files (x86)\Matrix Science\Mascot Daemon\mgf6 FXIII 60 min 3rd\mascot\_daemon\_merge.mgf

Click mouse within plot area to zoom in by factor of two about that point

Or, Plot from  to  Da

Label all possible matches  Label matches used for scoring



Monoisotopic mass of neutral peptide Mr(calc): 1282.681580

Fixed modifications: Carbamidomethyl (C) (apply to specified residues or termini only)

Variable modifications:

Q8 : Biotin:Thermo-21345 (Q)

Ions Score: 39 Expect: 0.0028

Matches : 19/78 fragment ions using 41 most intense peaks [\(help\)](#)

| # | b                  | b <sup>++</sup> | b <sup>*</sup>    | b <sup>***</sup> | b <sup>0</sup>    | b <sup>0++</sup> | Seq. | y                  | y <sup>++</sup>   | y <sup>*</sup>     | y <sup>***</sup> | # |
|---|--------------------|-----------------|-------------------|------------------|-------------------|------------------|------|--------------------|-------------------|--------------------|------------------|---|
| 1 | 116.034219         | 58.520748       |                   |                  | 98.023654         | 49.515465        | D    |                    |                   |                    |                  | 9 |
| 2 | <b>244.129182</b>  | 122.568229      | 227.102633        | 114.054955       | <b>226.118617</b> | 113.562947       | K    | 1168.661925        | <b>584.834600</b> | 1151.635376        | 576.321326       | 8 |
| 3 | <b>301.150646</b>  | 151.078961      | 284.124097        | 142.565687       | 283.140081        | 142.073679       | G    | <b>1040.566962</b> | 520.787119        | <b>1023.540413</b> | 512.273844       | 7 |
| 4 | <b>429.209224</b>  | 215.108250      | 412.182675        | 206.594976       | 411.198659        | 206.102968       | Q    | <b>983.545498</b>  | 492.276387        | <b>966.518949</b>  | 483.763112       | 6 |
| 5 | <b>500.246338</b>  | 250.626807      | <b>483.219789</b> | 242.113532       | 482.235773        | 241.621524       | A    | <b>855.486920</b>  | 428.247098        | <b>838.460371</b>  | 419.733823       | 5 |
| 6 | 557.267802         | 279.137539      | 540.241253        | 270.624265       | 539.257237        | 270.132257       | G    | <b>784.449806</b>  | 392.728541        | 767.423257         | 384.215266       | 4 |
| 7 | 670.351866         | 335.679571      | 653.325317        | 327.166297       | 652.341301        | 326.674289       | L    | <b>727.428342</b>  | 364.217809        | 710.401793         | 355.704534       | 3 |
| 8 | <b>1109.577192</b> | 555.292234      | 1092.550643       | 546.778960       | 1091.566627       | 546.286951       | Q    | <b>614.344278</b>  | 307.675777        | <b>597.317729</b>  | 299.162502       | 2 |
| 9 |                    |                 |                   |                  |                   |                  | R    | <b>175.118952</b>  | 88.063114         | 158.092403         | 79.549839        | 1 |

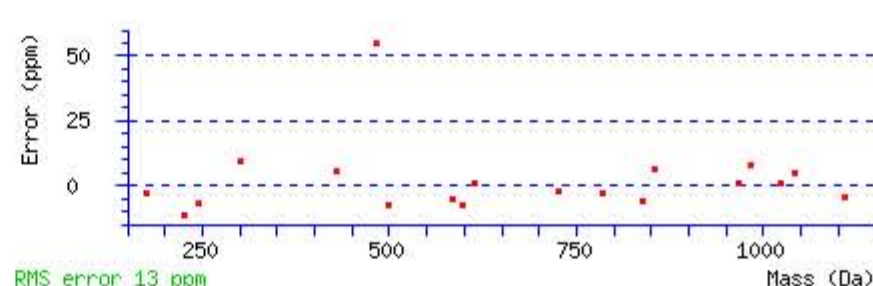

NCBI BLAST search of **DKGQAGLQR**

(Parameters: blastp, nr protein database, expect=20000, no filter, PAM30)

Other BLAST [web gateways](#)

## All matches to this query

| Score | Mr(calc):   | Delta     | Sequence                     |
|-------|-------------|-----------|------------------------------|
| 38.6  | 1282.681580 | 0.002968  | <a href="#">DKGQAGLQR</a>    |
| 11.8  | 1282.670334 | 0.014214  | <a href="#">ELEGQIQR</a>     |
| 8.0   | 1282.674194 | 0.010354  | <a href="#">QGEGQSRLVPGR</a> |
| 5.5   | 1282.674164 | 0.010384  | <a href="#">NEGKLGPNPKNR</a> |
| 4.7   | 1282.681580 | 0.002968  | <a href="#">DKGQAGLQR</a>    |
| 4.3   | 1282.670349 | 0.014199  | <a href="#">QIDLDVNR</a>     |
| 4.0   | 1282.685623 | -0.001075 | <a href="#">VWVDGIQR</a>     |
| 3.9   | 1282.670334 | 0.014214  | <a href="#">QDLEAQIR</a>     |
| 3.7   | 1282.688095 | -0.003547 | <a href="#">KPTKPESQSPGK</a> |
| 3.4   | 1282.692108 | -0.007560 | <a href="#">LEWVEIIEPR</a>   |

# Mascot Search Results

## Peptide View

MS/MS Fragmentation of **VVEEQESR**

Found in **CO4A\_HUMAN**, Complement C4-A OS=Homo sapiens GN=C4A PE=1 SV=2

Match to Query 22733: 1285.636228 from(643.825390,2+) rtinseconds(1361) index(43302)

Title: Locus:1.1.1.2522.17 File:"2013-07-02 CLN FXIII 60 min 3rd F 4.wiff"

Data file C:\Program Files (x86)\Matrix Science\Mascot Daemon\mgf\6 FXIII 60 min 3rd\mascot\_daemon\_merge.mgf

Click mouse within plot area to zoom in by factor of two about that point

Or, Plot from  to  Da

Label all possible matches  Label matches used for scoring



Monoisotopic mass of neutral peptide Mr(calc): 1285.633621

Fixed modifications: Carbamidomethyl (C) (apply to specified residues or termini only)

Variable modifications:

Q5 : Biotin:Thermo-21345 (Q)

Ions Score: 36 Expect: 0.00056

Matches : 13/70 fragment ions using 23 most intense peaks [\(help\)](#)

| # | b           | b <sup>++</sup> | b <sup>*</sup> | b <sup>*++</sup> | b <sup>0</sup> | b <sup>0++</sup> | Seq. | y           | y <sup>++</sup> | y <sup>*</sup> | y <sup>*++</sup> | y <sup>0</sup> | y <sup>0++</sup> | # |
|---|-------------|-----------------|----------------|------------------|----------------|------------------|------|-------------|-----------------|----------------|------------------|----------------|------------------|---|
| 1 | 100.075690  | 50.541483       |                |                  |                |                  | V    |             |                 |                |                  |                |                  | 8 |
| 2 | 199.144104  | 100.075690      |                |                  |                |                  | V    | 1187.572499 | 594.289888      | 1170.545950    | 585.776613       | 1169.561934    | 585.284605       | 7 |
| 3 | 328.186697  | 164.596987      |                |                  | 310.176132     | 155.591704       | E    | 1088.504085 | 544.755681      | 1071.477536    | 536.242406       | 1070.493520    | 535.750398       | 6 |
| 4 | 457.229290  | 229.118283      |                |                  | 439.218725     | 220.113001       | E    | 959.461492  | 480.234384      | 942.434943     | 471.721110       | 941.450927     | 471.229102       | 5 |
| 5 | 896.454616  | 448.730946      | 879.428067     | 440.217672       | 878.444051     | 439.725664       | Q    | 830.418899  | 415.713088      | 813.392350     | 407.199813       | 812.408334     | 406.707805       | 4 |
| 6 | 1025.497209 | 513.252243      | 1008.470660    | 504.738968       | 1007.486644    | 504.246960       | E    | 391.193573  | 196.100425      | 374.167024     | 187.587150       | 373.183008     | 187.095142       | 3 |
| 7 | 1112.529237 | 556.768257      | 1095.502688    | 548.254982       | 1094.518672    | 547.762974       | S    | 262.150980  | 131.579128      | 245.124431     | 123.065854       | 244.140415     | 122.573846       | 2 |
| 8 |             |                 |                |                  |                |                  | R    | 175.118952  | 88.063114       | 158.092403     | 79.549839        |                |                  | 1 |



NCBI BLAST search of **VVEEQESR**

(Parameters: blastp, nr protein database, expect=20000, no filter, PAM30)

Other BLAST [web gateways](#)

All matches to this query

| Score | Mr(calc):   | Delta    | Sequence                     |
|-------|-------------|----------|------------------------------|
| 35.7  | 1285.633621 | 0.002607 | <a href="#">VVEEQESR</a>     |
| 1.0   | 1285.626236 | 0.009992 | <a href="#">VETQEVNPGASR</a> |

# MASCOT SCIENCE Mascot Search Results

## Peptide View

MS/MS Fragmentation of **CCQDGVTR**

Found in **CO4A\_HUMAN**, Complement C4-A OS=Homo sapiens GN=C4A PE=1 SV=2

Match to Query 23136: 1305.570468 from(653.792510,2+) rtinseconds(1387) index(43448)

Title: Locus:1.1.1.2531.11 File:"2013-07-02 CLN FXIII 60 min 3rd F 4.wiff"

Data file C:\Program Files (x86)\Matrix Science\Mascot Daemon\mgf\6 FXIII 60 min 3rd\mascot\_daemon\_merge.mgf

Click mouse within plot area to zoom in by factor of two about that point

Or, Plot from  to  Da

Label all possible matches  Label matches used for scoring



Monoisotopic mass of neutral peptide Mr(calc): 1305.562820

Fixed modifications: Carbamidomethyl (C) (apply to specified residues or termini only)

Variable modifications:

Q3 : Biotin:Thermo-21345 (Q)

Ions Score: 49 Expect: 5.7e-005

Matches : 14/72 fragment ions using 22 most intense peaks [\(help\)](#)

| # | b           | b <sup>++</sup> | b <sup>*</sup> | b <sup>*++</sup> | b <sup>0</sup> | b <sup>0++</sup> | Seq. | y           | y <sup>++</sup> | y <sup>*</sup> | y <sup>*++</sup> | y <sup>0</sup> | y <sup>0++</sup> | # |
|---|-------------|-----------------|----------------|------------------|----------------|------------------|------|-------------|-----------------|----------------|------------------|----------------|------------------|---|
| 1 | 161.037925  | 81.022600       |                |                  |                |                  | C    |             |                 |                |                  |                |                  | 8 |
| 2 | 321.068574  | 161.037925      |                |                  |                |                  | C    | 1146.539427 | 573.773352      | 1129.512878    | 565.260077       | 1128.528862    | 564.768069       | 7 |
| 3 | 760.293900  | 380.650588      | 743.267351     | 372.137314       |                |                  | Q    | 986.508778  | 493.758027      | 969.482229     | 485.244753       | 968.498213     | 484.752745       | 6 |
| 4 | 875.320843  | 438.164060      | 858.294294     | 429.650785       | 857.310278     | 429.158777       | D    | 547.283452  | 274.145364      | 530.256903     | 265.632090       | 529.272887     | 265.140082       | 5 |
| 5 | 932.342307  | 466.674792      | 915.315758     | 458.161517       | 914.331742     | 457.669509       | G    | 432.256509  | 216.631893      | 415.229960     | 208.118618       | 414.245944     | 207.626610       | 4 |
| 6 | 1031.410721 | 516.208999      | 1014.384172    | 507.695724       | 1013.400156    | 507.203716       | V    | 375.235045  | 188.121161      | 358.208496     | 179.607886       | 357.224480     | 179.115878       | 3 |
| 7 | 1132.458400 | 566.732838      | 1115.431851    | 558.219564       | 1114.447835    | 557.727556       | T    | 276.166631  | 138.586953      | 259.140082     | 130.073679       | 258.156066     | 129.581671       | 2 |
| 8 |             |                 |                |                  |                |                  | R    | 175.118952  | 88.063114       | 158.092403     | 79.549839        |                |                  | 1 |



NCBI BLAST search of **CCQDGVTR**

(Parameters: blastp, nr protein database, expect=20000, no filter, PAM30)

Other BLAST [web gateways](#)

All matches to this query

| Score | Mr(calc):   | Delta     | Sequence                     |
|-------|-------------|-----------|------------------------------|
| 49.4  | 1305.562820 | 0.007648  | <a href="#">CCQDGVTR</a>     |
| 14.1  | 1305.588409 | -0.017941 | <a href="#">CRSSTPADAWR</a>  |
| 5.2   | 1305.577194 | -0.006726 | <a href="#">CDAGWLADGSVR</a> |
| 2.1   | 1305.569778 | 0.000690  | <a href="#">SSWQGENQSQR</a>  |
| 1.0   | 1305.583679 | -0.013211 | <a href="#">EQEPDFEEKR</a>   |
| 0.6   | 1305.577148 | -0.006680 | <a href="#">MGQHYEEEKR</a>   |

Mascot: <http://www.matrixscience.com/>

# MASCOT Search Results

## Peptide View

MS/MS Fragmentation of **LGQYASPTAK**

Found in **CO4A\_HUMAN**, Complement C4-A OS=Homo sapiens GN=C4A PE=1 SV=2

Match to Query 23941: 1345.710648 from(673.862600,2+) rtinseconds(1604) index(44889)

Title: Locus:1.1.1.2607.9 File:"2013-07-02 CLN FXIII 60 min 3rd F 4.wiff"

Data file C:\Program Files (x86)\Matrix Science\Mascot Daemon\mgf\6 FXIII 60 min 3rd\mascot\_daemon\_merge.mgf

Click mouse within plot area to zoom in by factor of two about that point

Or, Plot from  to  Da

Label all possible matches  Label matches used for scoring

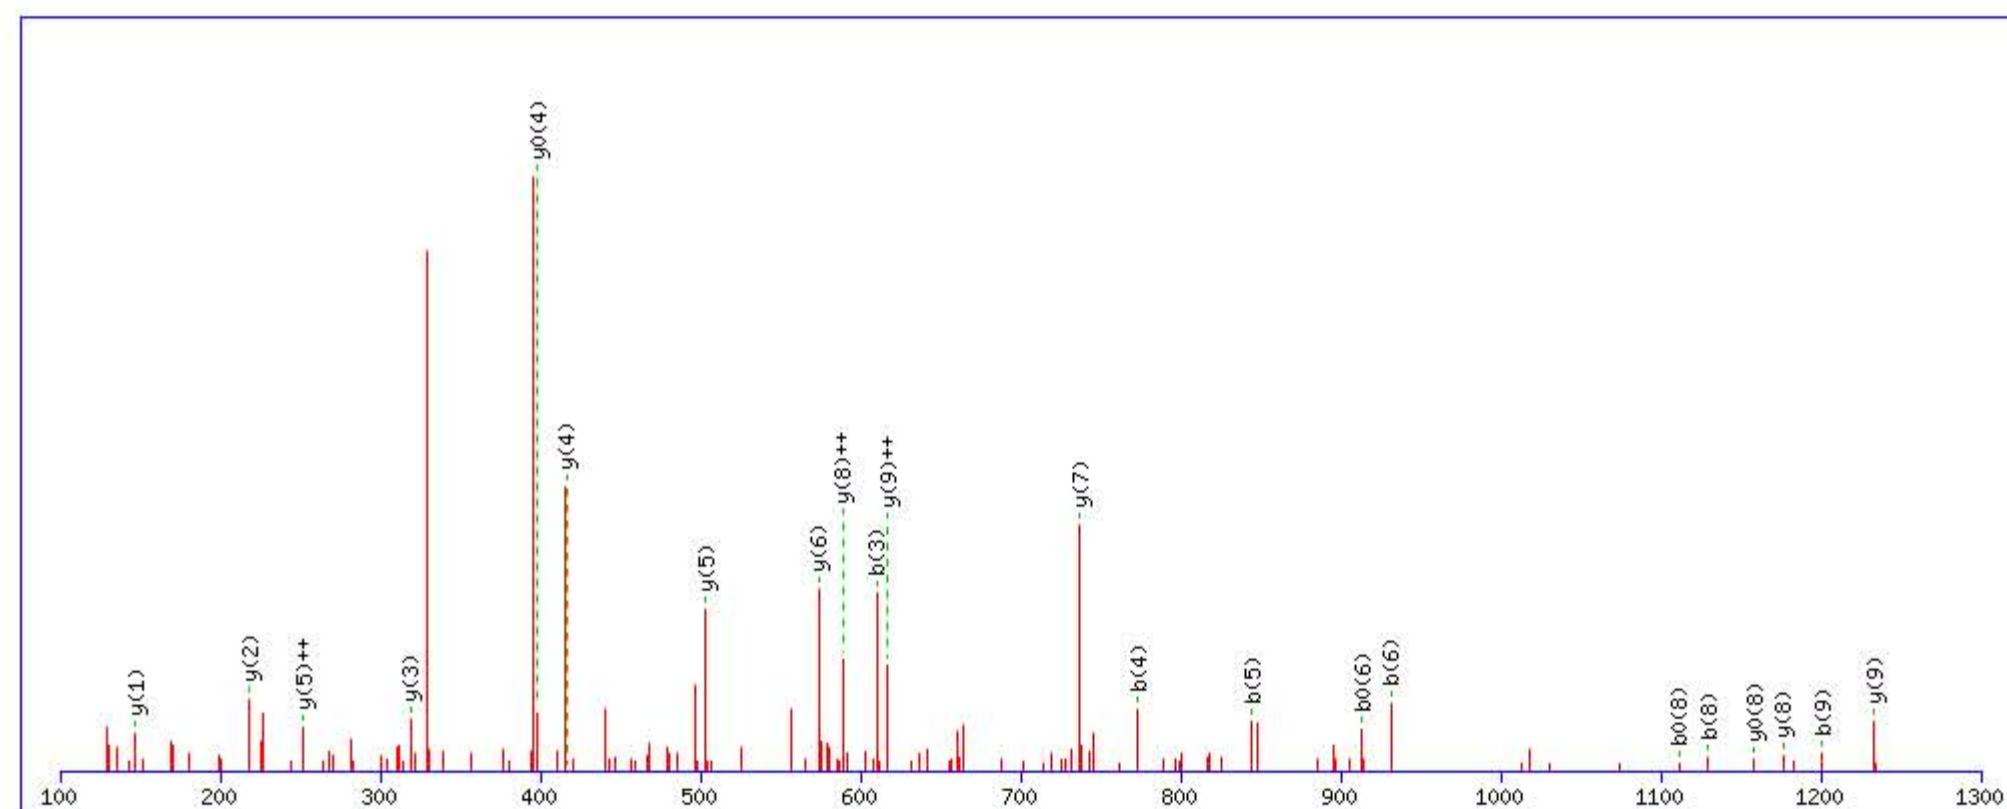

Monoisotopic mass of neutral peptide Mr(calc): 1345.706390

Fixed modifications: Carbamidomethyl (C) (apply to specified residues or termini only)

Variable modifications:

Q3 : Biotin:Thermo-21345 (Q)

Ions Score: 53 Expect: 0.0001

Matches : 22/90 fragment ions using 45 most intense peaks [\(help\)](#)

| #  | b           | b <sup>++</sup> | b <sup>*</sup> | b <sup>*+</sup> | b <sup>0</sup> | b <sup>0+</sup> | Seq. | y           | y <sup>++</sup> | y <sup>*</sup> | y <sup>*+</sup> | y <sup>0</sup> | y <sup>0+</sup> | #  |
|----|-------------|-----------------|----------------|-----------------|----------------|-----------------|------|-------------|-----------------|----------------|-----------------|----------------|-----------------|----|
| 1  | 114.091340  | 57.549308       |                |                 |                |                 | L    |             |                 |                |                 |                |                 | 10 |
| 2  | 171.112804  | 86.060040       |                |                 |                |                 | G    | 1233.629622 | 617.318449      | 1216.603073    | 608.805175      | 1215.619057    | 608.313167      | 9  |
| 3  | 610.338130  | 305.672703      | 593.311581     | 297.159429      |                |                 | Q    | 1176.608158 | 588.807717      | 1159.581609    | 580.294443      | 1158.597593    | 579.802435      | 8  |
| 4  | 773.401459  | 387.204368      | 756.374910     | 378.691093      |                |                 | Y    | 737.382832  | 369.195054      | 720.356283     | 360.681780      | 719.372267     | 360.189772      | 7  |
| 5  | 844.438573  | 422.722925      | 827.412024     | 414.209650      |                |                 | A    | 574.319503  | 287.663389      | 557.292954     | 279.150115      | 556.308938     | 278.658107      | 6  |
| 6  | 931.470601  | 466.238939      | 914.444052     | 457.725664      | 913.460036     | 457.233656      | S    | 503.282389  | 252.144832      | 486.255840     | 243.631558      | 485.271824     | 243.139550      | 5  |
| 7  | 1028.523365 | 514.765321      | 1011.496816    | 506.252046      | 1010.512800    | 505.760038      | P    | 416.250361  | 208.628818      | 399.223812     | 200.115544      | 398.239796     | 199.623536      | 4  |
| 8  | 1129.571044 | 565.289160      | 1112.544495    | 556.775886      | 1111.560479    | 556.283878      | T    | 319.197597  | 160.102436      | 302.171048     | 151.589162      | 301.187032     | 151.097154      | 3  |
| 9  | 1200.608158 | 600.807717      | 1183.581609    | 592.294443      | 1182.597593    | 591.802435      | A    | 218.149918  | 109.578597      | 201.123369     | 101.065322      |                |                 | 2  |
| 10 |             |                 |                |                 |                |                 | K    | 147.112804  | 74.060040       | 130.086255     | 65.546765       |                |                 | 1  |



NCBI BLAST search of **LGQYASPTAK**

(Parameters: blastp, nr protein database, expect=20000, no filter, PAM30)

Other BLAST [web gateways](#)

## All matches to this query

| Score | Mr(calc):   | Delta     | Sequence                       |
|-------|-------------|-----------|--------------------------------|
| 52.7  | 1345.706390 | 0.004258  | <a href="#">LGQYASPTAK</a>     |
| 9.4   | 1345.727509 | -0.016861 | <a href="#">LGLMDNEIKVAK</a>   |
| 9.2   | 1345.692474 | 0.018174  | <a href="#">VASCrypALGPR</a>   |
| 8.2   | 1345.706390 | 0.004258  | <a href="#">LGQYDQALK</a>      |
| 7.6   | 1345.724182 | -0.013534 | <a href="#">LGAVPATSGPTTFK</a> |
| 7.1   | 1345.706406 | 0.004242  | <a href="#">QGLYTPQTK</a>      |
| 0.4   | 1345.713608 | -0.002960 | <a href="#">NGMLLTGGGKDRK</a>  |
| 0.3   | 1345.724152 | -0.013504 | <a href="#">QPLQTDIYGLAK</a>   |

Mascot: <http://www.matrixscience.com/>

# MASCOT SEARCH RESULTS

## Peptide View

MS/MS Fragmentation of **TEQWSTLPPETK**

Found in **CO4A\_HUMAN**, Complement C4-A OS=Homo sapiens GN=C4A PE=1 SV=2

Match to Query 36950: 1726.873848 from(864.444200,2+) rtinseconds(2028) index(47589)

Title: Locus:1.1.1.2754.9 File:"2013-07-02 CLN FXIII 60 min 3rd F 4.wiff"

Data file C:\Program Files (x86)\Matrix Science\Mascot Daemon\mgf\6 FXIII 60 min 3rd\mascot\_daemon\_merge.mgf

Click mouse within plot area to zoom in by factor of two about that point

Or, Plot from 0 to 2600 Da Full range

Label all possible matches  Label matches used for scoring

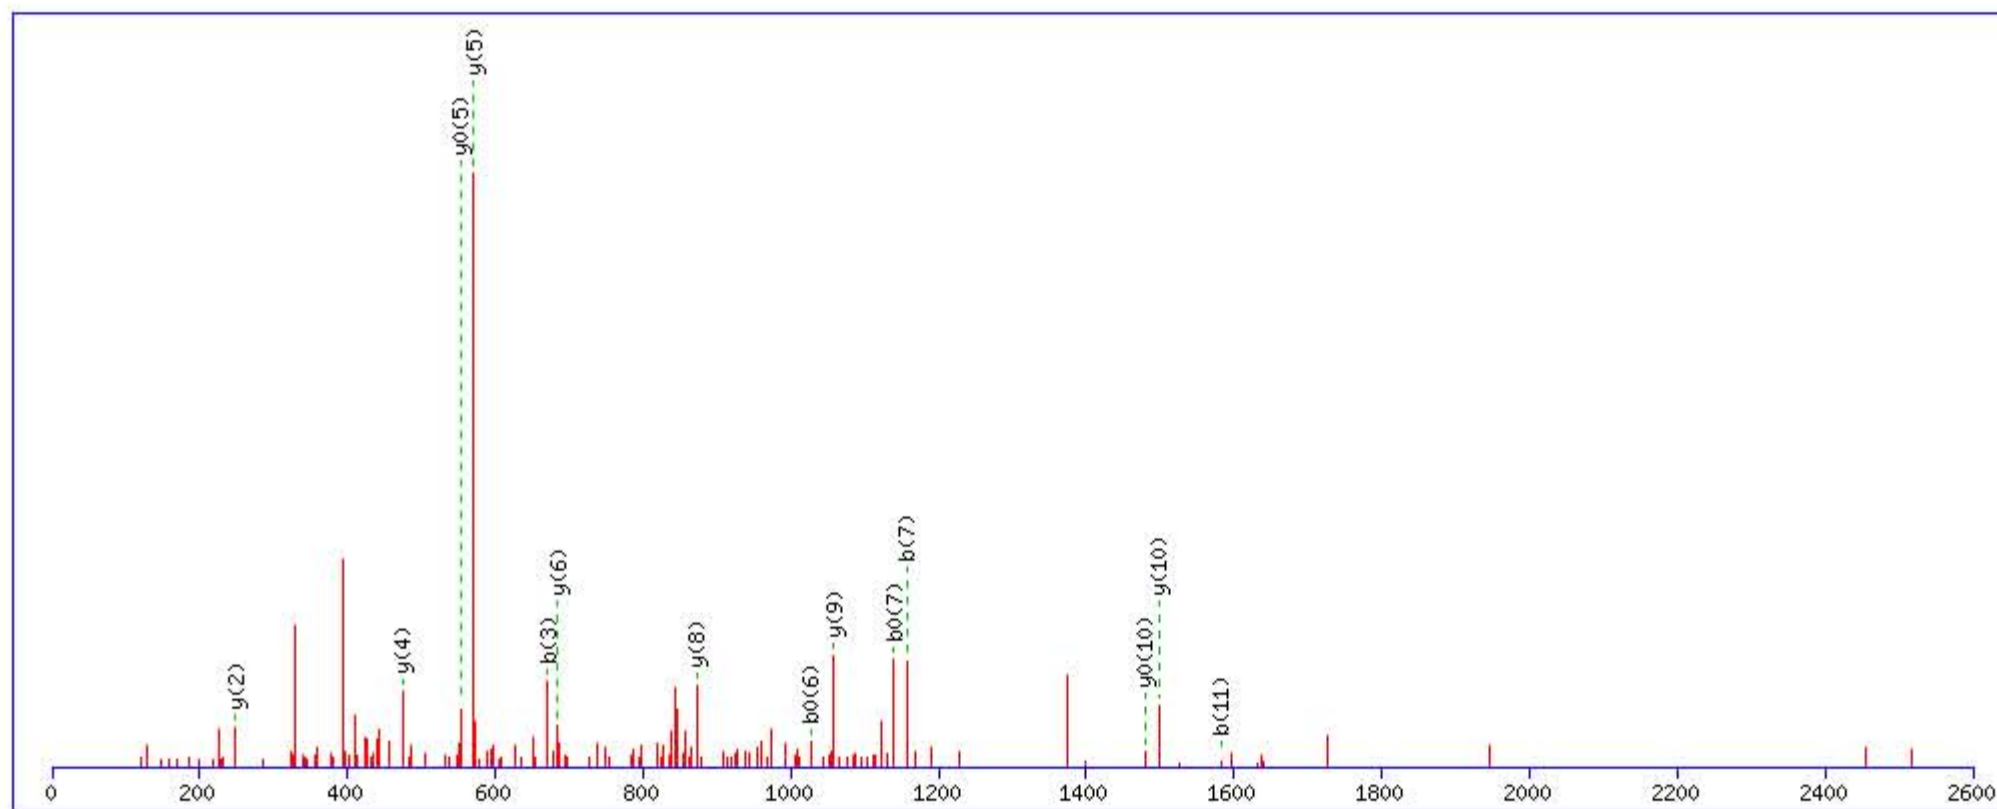

Monoisotopic mass of neutral peptide  $M_r(\text{calc})$ : 1726.860001

Fixed modifications: Carbamidomethyl (C) (apply to specified residues or termini only)

Variable modifications:

Q3 : Biotin:Thermo-21345 (Q)

Ions Score: 30 Expect: 0.011

Matches : 14/126 fragment ions using 32 most intense peaks [\(help\)](#)

| #  | b                  | b <sup>++</sup> | b <sup>*</sup> | b <sup>*++</sup> | b <sup>0</sup>     | b <sup>0++</sup> | Seq.     | y                  | y <sup>++</sup> | y <sup>*</sup> | y <sup>*++</sup> | y <sup>0</sup>     | y <sup>0++</sup> | #  |
|----|--------------------|-----------------|----------------|------------------|--------------------|------------------|----------|--------------------|-----------------|----------------|------------------|--------------------|------------------|----|
| 1  | 102.054955         | 51.531116       |                |                  | 84.044390          | 42.525833        | T        |                    |                 |                |                  |                    |                  | 12 |
| 2  | 231.097548         | 116.052412      |                |                  | 213.086983         | 107.047130       | E        | 1626.819607        | 813.913442      | 1609.793058    | 805.400167       | 1608.809042        | 804.908159       | 11 |
| 3  | <b>670.322874</b>  | 335.665075      | 653.296325     | 327.151801       | 652.312309         | 326.659793       | <b>Q</b> | <b>1497.777014</b> | 749.392145      | 1480.750465    | 740.878871       | <b>1479.766449</b> | 740.386863       | 10 |
| 4  | 856.402187         | 428.704732      | 839.375638     | 420.191457       | 838.391622         | 419.699449       | <b>W</b> | <b>1058.551688</b> | 529.779482      | 1041.525139    | 521.266208       | 1040.541123        | 520.774200       | 9  |
| 5  | 943.434215         | 472.220746      | 926.407666     | 463.707471       | 925.423650         | 463.215463       | <b>S</b> | <b>872.472375</b>  | 436.739826      | 855.445826     | 428.226551       | 854.461810         | 427.734543       | 8  |
| 6  | 1044.481894        | 522.744585      | 1027.455345    | 514.231311       | <b>1026.471329</b> | 513.739303       | <b>T</b> | 785.440347         | 393.223812      | 768.413798     | 384.710537       | 767.429782         | 384.218529       | 7  |
| 7  | <b>1157.565958</b> | 579.286617      | 1140.539409    | 570.773343       | <b>1139.555393</b> | 570.281334       | <b>L</b> | <b>684.392668</b>  | 342.699972      | 667.366119     | 334.186698       | 666.382103         | 333.694690       | 6  |
| 8  | 1254.618722        | 627.812999      | 1237.592173    | 619.299725       | 1236.608157        | 618.807716       | <b>P</b> | <b>571.308604</b>  | 286.157940      | 554.282055     | 277.644666       | <b>553.298039</b>  | 277.152658       | 5  |
| 9  | 1351.671486        | 676.339381      | 1334.644937    | 667.826107       | 1333.660921        | 667.334098       | <b>P</b> | <b>474.255840</b>  | 237.631558      | 457.229291     | 229.118284       | 456.245275         | 228.626276       | 4  |
| 10 | 1480.714079        | 740.860678      | 1463.687530    | 732.347403       | 1462.703514        | 731.855395       | <b>E</b> | 377.203076         | 189.105176      | 360.176527     | 180.591902       | 359.192511         | 180.099894       | 3  |
| 11 | <b>1581.761758</b> | 791.384517      | 1564.735209    | 782.871243       | 1563.751193        | 782.379235       | <b>T</b> | <b>248.160483</b>  | 124.583879      | 231.133934     | 116.070605       | 230.149918         | 115.578597       | 2  |
| 12 |                    |                 |                |                  |                    |                  | <b>K</b> | 147.112804         | 74.060040       | 130.086255     | 65.546765        |                    |                  | 1  |

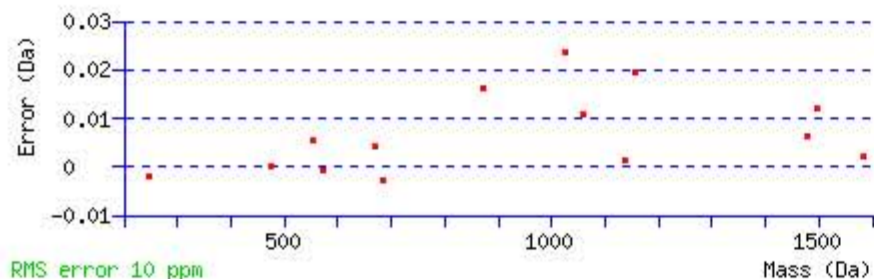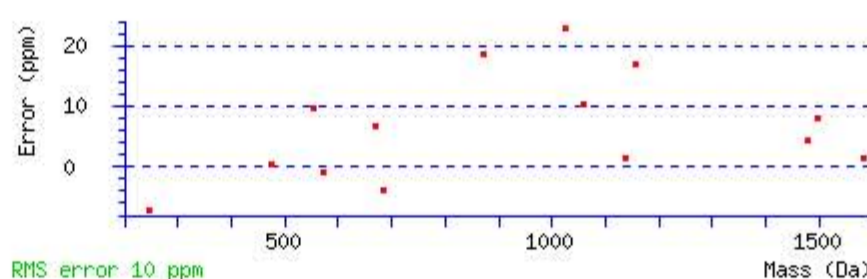

NCBI BLAST search of [TEQWSTLPPETK](#)

(Parameters: blastp, nr protein database, expect=20000, no filter, PAM30)

Other BLAST [web gateways](#)

### All matches to this query

| Score | $M_r(\text{calc})$ | Delta     | Sequence                          |
|-------|--------------------|-----------|-----------------------------------|
| 30.1  | 1726.860001        | 0.013847  | <a href="#">TEQWSTLPPETK</a>      |
| 8.5   | 1726.871216        | 0.002632  | <a href="#">NLNTKLQMYFQSPK</a>    |
| 6.4   | 1726.867188        | 0.006660  | <a href="#">KDHAEMQAVIDAKQK</a>   |
| 2.2   | 1726.849960        | 0.023888  | <a href="#">TERFGQGAGPVGGQGPR</a> |
| 1.2   | 1726.874573        | -0.000725 | <a href="#">VTKNQEMMSQIKYK</a>    |
| 0.4   | 1726.853485        | 0.020363  | <a href="#">MASGHAFQPDLVK</a>     |

# MASCOT Search Results

## Peptide View

MS/MS Fragmentation of **GLEEELQFSLGSK**

Found in **CO4A\_HUMAN**, Complement C4-A OS=Homo sapiens GN=C4A PE=1 SV=2

Match to Query 37441: 1746.905928 from(874.460240,2+) rtinseconds(2557) index(50641)

Title: Locus:1.1.1.2938.6 File:"2013-07-02 CLN FXIII 60 min 3rd F 4.wiff"

Data file C:\Program Files (x86)\Matrix Science\Mascot Daemon\mgf\6 FXIII 60 min 3rd\mascot\_daemon\_merge.mgf

Click mouse within plot area to zoom in by factor of two about that point

Or, Plot from  to  Da

Label all possible matches  Label matches used for scoring

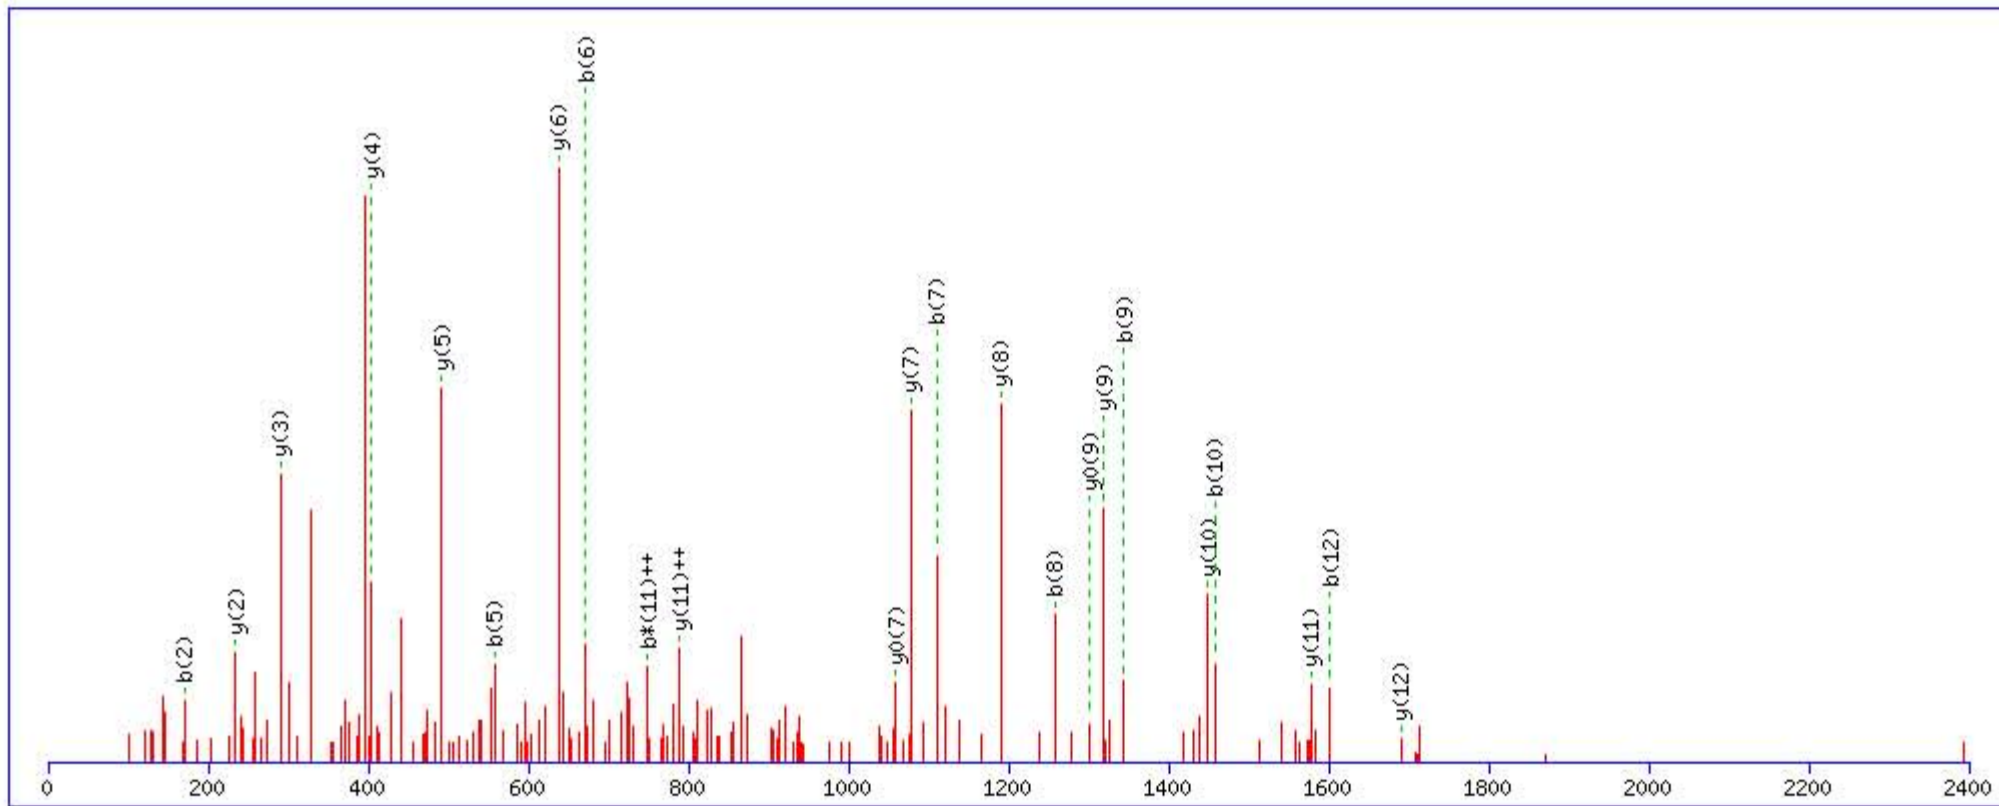

Monoisotopic mass of neutral peptide Mr(calc): 1746.886200

Fixed modifications: Carbamidomethyl (C) (apply to specified residues or termini only)

Variable modifications:

Q7 : Biotin:Thermo-21345 (Q)

Ions Score: 89 Expect: 8.7e-009

Matches : 23/126 fragment ions using 33 most intense peaks [\(help\)](#)

| #  | b                  | b <sup>++</sup> | b <sup>+</sup> | b <sup>+++</sup>  | b <sup>0</sup> | b <sup>0++</sup> | Seq. | y                  | y <sup>++</sup>   | y <sup>+</sup> | y <sup>+++</sup> | y <sup>0</sup>     | y <sup>0++</sup> | #  |
|----|--------------------|-----------------|----------------|-------------------|----------------|------------------|------|--------------------|-------------------|----------------|------------------|--------------------|------------------|----|
| 1  | 58.028740          | 29.518008       |                |                   |                |                  | G    |                    |                   |                |                  |                    |                  | 13 |
| 2  | <b>171.112804</b>  | 86.060040       |                |                   |                |                  | L    | <b>1690.872035</b> | 845.939656        | 1673.845486    | 837.426381       | 1672.861470        | 836.934373       | 12 |
| 3  | 300.155397         | 150.581336      |                |                   | 282.144832     | 141.576054       | E    | <b>1577.787971</b> | <b>789.397624</b> | 1560.761422    | 780.884349       | 1559.777406        | 780.392341       | 11 |
| 4  | 429.197990         | 215.102633      |                |                   | 411.187425     | 206.097351       | E    | <b>1448.745378</b> | 724.876327        | 1431.718829    | 716.363053       | 1430.734813        | 715.871045       | 10 |
| 5  | <b>558.240583</b>  | 279.623930      |                |                   | 540.230018     | 270.618647       | E    | <b>1319.702785</b> | 660.355031        | 1302.676236    | 651.841756       | <b>1301.692220</b> | 651.349748       | 9  |
| 6  | <b>671.324647</b>  | 336.165962      |                |                   | 653.314082     | 327.160679       | L    | <b>1190.660192</b> | 595.833734        | 1173.633643    | 587.320460       | 1172.649627        | 586.828452       | 8  |
| 7  | <b>1110.549973</b> | 555.778624      | 1093.523424    | 547.265350        | 1092.539408    | 546.773342       | Q    | <b>1077.576128</b> | 539.291702        | 1060.549579    | 530.778428       | <b>1059.565563</b> | 530.286419       | 7  |
| 8  | <b>1257.618387</b> | 629.312832      | 1240.591838    | 620.799557        | 1239.607822    | 620.307549       | F    | <b>638.350802</b>  | 319.679039        | 621.324253     | 311.165765       | 620.340237         | 310.673757       | 6  |
| 9  | <b>1344.650415</b> | 672.828846      | 1327.623866    | 664.315571        | 1326.639850    | 663.823563       | S    | <b>491.282388</b>  | 246.144832        | 474.255839     | 237.631557       | 473.271823         | 237.139549       | 5  |
| 10 | <b>1457.734479</b> | 729.370878      | 1440.707930    | 720.857603        | 1439.723914    | 720.365595       | L    | <b>404.250360</b>  | 202.628818        | 387.223811     | 194.115543       | 386.239795         | 193.623535       | 4  |
| 11 | 1514.755943        | 757.881609      | 1497.729394    | <b>749.368335</b> | 1496.745378    | 748.876327       | G    | <b>291.166296</b>  | 146.086786        | 274.139747     | 137.573512       | 273.155731         | 137.081504       | 3  |
| 12 | <b>1601.787971</b> | 801.397624      | 1584.761422    | 792.884349        | 1583.777406    | 792.392341       | S    | <b>234.144832</b>  | 117.576054        | 217.118283     | 109.062780       | 216.134267         | 108.570772       | 2  |
| 13 |                    |                 |                |                   |                |                  | K    | 147.112804         | 74.060040         | 130.086255     | 65.546765        |                    |                  | 1  |

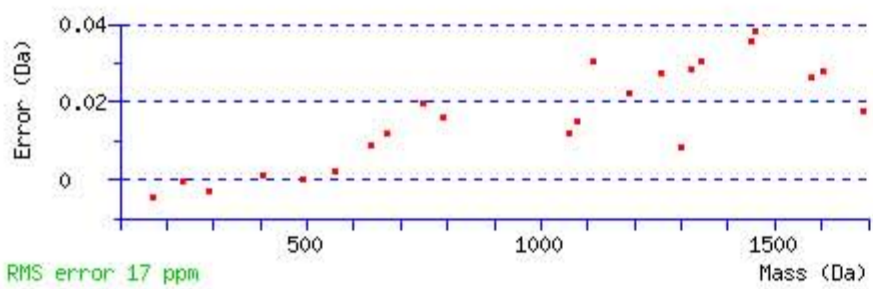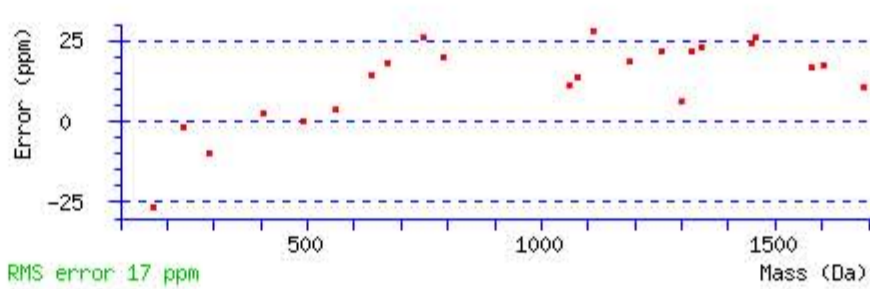

NCBI BLAST search of [GLEEELQFSLGSK](#)

(Parameters: blastp, nr protein database, expect=20000, no filter, PAM30)

Other BLAST [web gateways](#)

All matches to this query

| Score | Mr(calc):   | Delta     | Sequence                          |
|-------|-------------|-----------|-----------------------------------|
| 89.4  | 1746.886200 | 0.019728  | <a href="#">GLEEELQFSLGSK</a>     |
| 3.4   | 1746.887558 | 0.018370  | <a href="#">AVQSKAFCAGGLAPGWK</a> |
| 1.4   | 1746.918533 | -0.012605 | <a href="#">AKLQMTEAALALSEQK</a>  |

# MASCOT SEARCH RESULTS

## Peptide View

MS/MS Fragmentation of **VLSLAQEQVGGSP**EK

Found in **CO4A\_HUMAN**, Complement C4-A OS=Homo sapiens GN=C4A PE=1 SV=2

Match to Query 39377: 1851.983712 from(618.335180,3+) rtinseconds(1978) index(47293)

Title: Locus:1.1.1.2737.9 File:"2013-07-02 CLN FXIII 60 min 3rd F 4.wiff"

Data file C:\Program Files (x86)\Matrix Science\Mascot Daemon\mgf\6 FXIII 60 min 3rd\mascot\_daemon\_merge.mgf

Click mouse within plot area to zoom in by factor of two about that point

Or, Plot from  to  Da

Label all possible matches  Label matches used for scoring

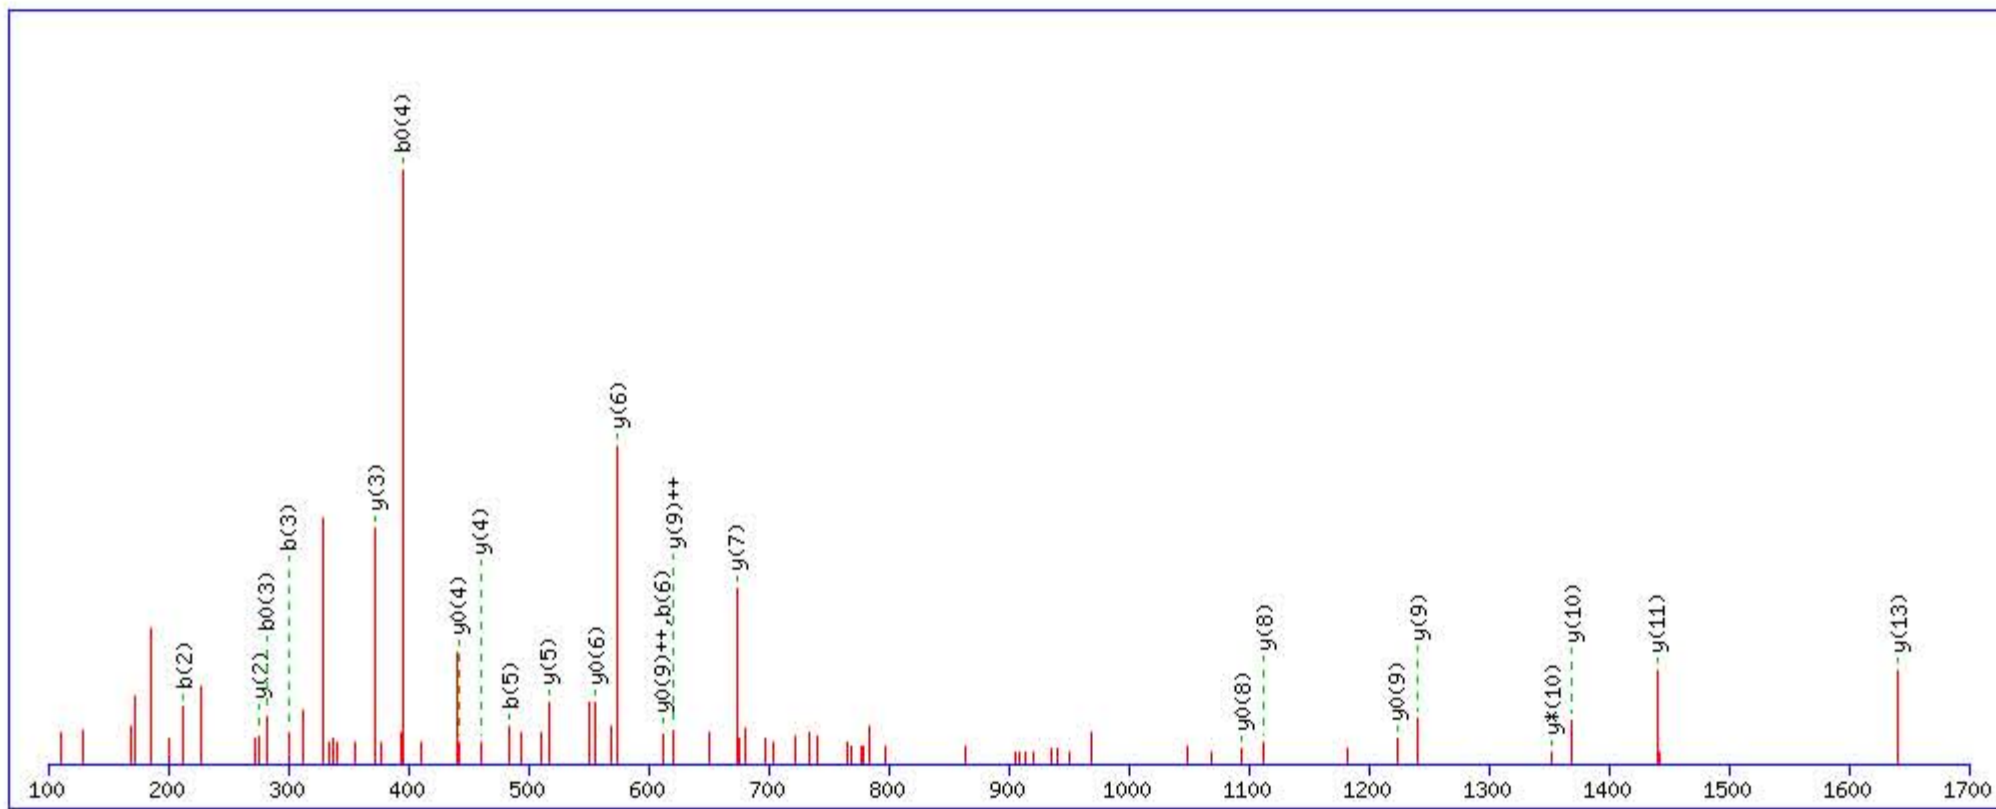

Monoisotopic mass of neutral peptide Mr(calc): 1851.976425

Fixed modifications: Carbamidomethyl (C) (apply to specified residues or termini only)

Variable modifications:

Q8 : Biotin:Thermo-21345 (Q)

Ions Score: 53 Expect: 1.4e-005

Matches : 24/152 fragment ions using 56 most intense peaks [\(help\)](#)

| #  | b                 | b <sup>++</sup> | b <sup>*</sup> | b <sup>*++</sup> | b <sup>0</sup>    | b <sup>0++</sup> | Seq. | y                  | y <sup>++</sup>   | y <sup>*</sup>     | y <sup>*++</sup> | y <sup>0</sup>     | y <sup>0++</sup>  | #  |
|----|-------------------|-----------------|----------------|------------------|-------------------|------------------|------|--------------------|-------------------|--------------------|------------------|--------------------|-------------------|----|
| 1  | 100.075690        | 50.541483       |                |                  |                   |                  | V    |                    |                   |                    |                  |                    |                   | 15 |
| 2  | <b>213.159754</b> | 107.083515      |                |                  |                   |                  | L    | 1753.915298        | 877.461287        | 1736.888749        | 868.948013       | 1735.904733        | 868.456004        | 14 |
| 3  | <b>300.191782</b> | 150.599529      |                |                  | <b>282.181217</b> | 141.594247       | S    | <b>1640.831234</b> | 820.919255        | 1623.804685        | 812.405981       | 1622.820669        | 811.913973        | 13 |
| 4  | 413.275846        | 207.141561      |                |                  | <b>395.265281</b> | 198.136279       | L    | 1553.799206        | 777.403241        | 1536.772657        | 768.889967       | 1535.788641        | 768.397958        | 12 |
| 5  | <b>484.312960</b> | 242.660118      |                |                  | 466.302395        | 233.654836       | A    | <b>1440.715142</b> | 720.861209        | 1423.688593        | 712.347935       | 1422.704577        | 711.855927        | 11 |
| 6  | <b>612.371538</b> | 306.689407      | 595.344989     | 298.176133       | 594.360973        | 297.684125       | Q    | <b>1369.678028</b> | 685.342652        | <b>1352.651479</b> | 676.829378       | 1351.667463        | 676.337370        | 10 |
| 7  | 741.414131        | 371.210704      | 724.387582     | 362.697429       | 723.403566        | 362.205421       | E    | <b>1241.619450</b> | <b>621.313363</b> | 1224.592901        | 612.800089       | <b>1223.608885</b> | <b>612.308080</b> | 9  |
| 8  | 1180.639457       | 590.823367      | 1163.612908    | 582.310092       | 1162.628892       | 581.818084       | Q    | <b>1112.576857</b> | 556.792066        | 1095.550308        | 548.278792       | <b>1094.566292</b> | 547.786784        | 8  |
| 9  | 1279.707871       | 640.357574      | 1262.681322    | 631.844299       | 1261.697306       | 631.352291       | V    | <b>673.351531</b>  | 337.179404        | 656.324982         | 328.666129       | 655.340966         | 328.174121        | 7  |
| 10 | 1336.729335       | 668.868306      | 1319.702786    | 660.355031       | 1318.718770       | 659.863023       | G    | <b>574.283117</b>  | 287.645197        | 557.256568         | 279.131922       | <b>556.272552</b>  | 278.639914        | 6  |
| 11 | 1393.750799       | 697.379037      | 1376.724250    | 688.865763       | 1375.740234       | 688.373755       | G    | <b>517.261653</b>  | 259.134465        | 500.235104         | 250.621190       | 499.251088         | 250.129182        | 5  |
| 12 | 1480.782827       | 740.895052      | 1463.756278    | 732.381777       | 1462.772262       | 731.889769       | S    | <b>460.240189</b>  | 230.623732        | 443.213640         | 222.110458       | <b>442.229624</b>  | 221.618450        | 4  |
| 13 | 1577.835591       | 789.421434      | 1560.809042    | 780.908159       | 1559.825026       | 780.416151       | P    | <b>373.208161</b>  | 187.107718        | 356.181612         | 178.594444       | 355.197596         | 178.102436        | 3  |
| 14 | 1706.878184       | 853.942730      | 1689.851635    | 845.429456       | 1688.867619       | 844.937447       | E    | <b>276.155397</b>  | 138.581336        | 259.128848         | 130.068062       | 258.144832         | 129.576054        | 2  |
| 15 |                   |                 |                |                  |                   |                  | K    | 147.112804         | 74.060040         | 130.086255         | 65.546765        |                    |                   | 1  |

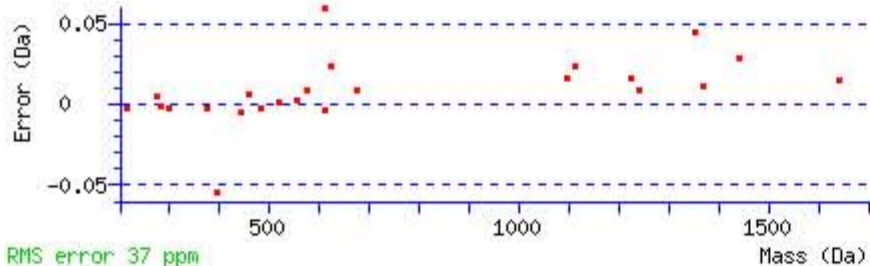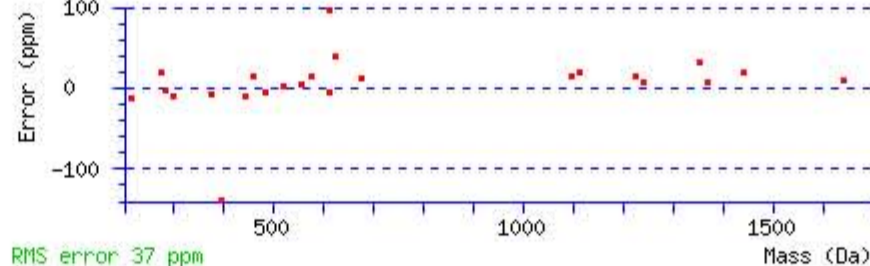

NCBI BLAST search of **VLSLAQEQVGGSP**EK

(Parameters: blastp, nr protein database, expect=20000, no filter, PAM30)

Other BLAST [web gateways](#)

All matches to this query

| Score | Mr(calc):   | Delta     | Sequence                                                        |
|-------|-------------|-----------|-----------------------------------------------------------------|
| 53.1  | 1851.976425 | 0.007287  | <a href="#">VLSLAQEQVGGSP</a> EK                                |
| 34.0  | 1851.976425 | 0.007287  | <a href="#">VLSLAQEQVGGSP</a> EK                                |
| 1.4   | 1852.005402 | -0.021690 | <a href="#">L</a> QL <del>EQ</del> <a href="#">VATG</a> PALDNKK |

Mascot: <http://www.matrixscience.com/>



# MATRIX SCIENCE Mascot Search Results

## Peptide View

MS/MS Fragmentation of **GPEVQLVAHSPWLK**

Found in **CO4A\_HUMAN**, Complement C4-A OS=Homo sapiens GN=C4A PE=1 SV=2

Match to Query 39870: 1871.022912 from(624.681580,3+) rtinseconds(2231) index(48816)

Title: Locus:1.1.1.2825.12 File:"2013-07-02 CLN FXIII 60 min 3rd F 4.wiff"

Data file C:\Program Files (x86)\Matrix Science\Mascot Daemon\mgf\6 FXIII 60 min 3rd\mascot\_daemon\_merge.mgf

Click mouse within plot area to zoom in by factor of two about that point

Or, Plot from  to  Da

Label all possible matches  Label matches used for scoring



Monoisotopic mass of neutral peptide Mr(calc): 1871.012756

Fixed modifications: Carbamidomethyl (C) (apply to specified residues or termini only)

Variable modifications:

Q5 : Biotin:Thermo-21345 (Q)

Ions Score: 47 Expect: 0.00038

Matches : 39/136 fragment ions using 106 most intense peaks ([help](#))

| #  | b           | b <sup>++</sup> | b <sup>*</sup> | b <sup>*++</sup> | b <sup>0</sup> | b <sup>0++</sup> | Seq. | y           | y <sup>++</sup> | y <sup>*</sup> | y <sup>*++</sup> | y <sup>0</sup> | y <sup>0++</sup> | #  |
|----|-------------|-----------------|----------------|------------------|----------------|------------------|------|-------------|-----------------|----------------|------------------|----------------|------------------|----|
| 1  | 58.028740   | 29.518008       |                |                  |                |                  | G    |             |                 |                |                  |                |                  | 14 |
| 2  | 155.081504  | 78.044390       |                |                  |                |                  | P    | 1814.998574 | 908.002925      | 1797.972025    | 899.489651       | 1796.988009    | 898.997643       | 13 |
| 3  | 284.124097  | 142.565687      |                |                  | 266.113532     | 133.560404       | E    | 1717.945810 | 859.476543      | 1700.919261    | 850.963269       | 1699.935245    | 850.471261       | 12 |
| 4  | 383.192511  | 192.099894      |                |                  | 365.181946     | 183.094611       | V    | 1588.903217 | 794.955247      | 1571.876668    | 786.441972       | 1570.892652    | 785.949964       | 11 |
| 5  | 822.417837  | 411.712557      | 805.391288     | 403.199282       | 804.407272     | 402.707274       | Q    | 1489.834803 | 745.421040      | 1472.808254    | 736.907765       | 1471.824238    | 736.415757       | 10 |
| 6  | 935.501901  | 468.254589      | 918.475352     | 459.741314       | 917.491336     | 459.249306       | L    | 1050.609477 | 525.808377      | 1033.582928    | 517.295102       | 1032.598912    | 516.803094       | 9  |
| 7  | 1034.570315 | 517.788796      | 1017.543766    | 509.275521       | 1016.559750    | 508.783513       | V    | 937.525413  | 469.266345      | 920.498864     | 460.753070       | 919.514848     | 460.261062       | 8  |
| 8  | 1105.607429 | 553.307353      | 1088.580880    | 544.794078       | 1087.596864    | 544.302070       | A    | 838.456999  | 419.732138      | 821.430450     | 411.218863       | 820.446434     | 410.726855       | 7  |
| 9  | 1242.666341 | 621.836809      | 1225.639792    | 613.323534       | 1224.655776    | 612.831526       | H    | 767.419885  | 384.213581      | 750.393336     | 375.700306       | 749.409320     | 375.208298       | 6  |
| 10 | 1329.698369 | 665.352823      | 1312.671820    | 656.839548       | 1311.687804    | 656.347540       | S    | 630.360973  | 315.684125      | 613.334424     | 307.170850       | 612.350408     | 306.678842       | 5  |
| 11 | 1426.751133 | 713.879205      | 1409.724584    | 705.365930       | 1408.740568    | 704.873922       | P    | 543.328945  | 272.168111      | 526.302396     | 263.654836       |                |                  | 4  |
| 12 | 1612.830446 | 806.918861      | 1595.803897    | 798.405587       | 1594.819881    | 797.913579       | W    | 446.276181  | 223.641728      | 429.249632     | 215.128454       |                |                  | 3  |
| 13 | 1725.914510 | 863.460893      | 1708.887961    | 854.947619       | 1707.903945    | 854.455611       | L    | 260.196868  | 130.602072      | 243.170319     | 122.088797       |                |                  | 2  |
| 14 |             |                 |                |                  |                |                  | K    | 147.112804  | 74.060040       | 130.086255     | 65.546765        |                |                  | 1  |

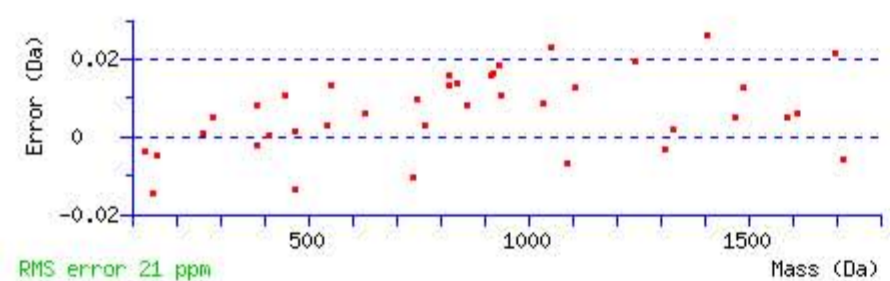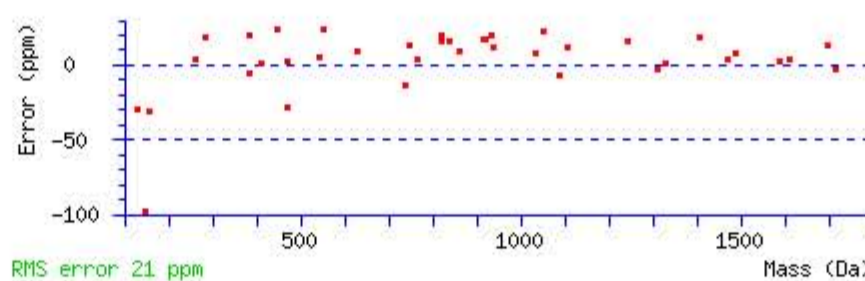

NCBI BLAST search of [GPEVQLVAHSPWLK](#)

(Parameters: blastp, nr protein database, expect=20000, no filter, PAM30)

Other BLAST [web gateways](#)

### All matches to this query

| Score | Mr(calc):   | Delta    | Sequence                       |
|-------|-------------|----------|--------------------------------|
| 47.2  | 1871.012756 | 0.010156 | <a href="#">GPEVQLVAHSPWLK</a> |

Mascot: <http://www.matrixscience.com/>

# MASCOT SCIENCE Mascot Search Results

## Peptide View

MS/MS Fragmentation of **HLVPGAPFLLQALVR**

Found in **CO4A\_HUMAN**, Complement C4-A OS=Homo sapiens GN=C4A PE=1 SV=2

Match to Query 40950: 1941.156402 from(648.059410,3+) rtinseconds(2868) index(52987)

Title: Locus:1.1.1.3045.3 File:"2013-07-02 CLN FXIII 60 min 3rd F 4.wiff"

Data file C:\Program Files (x86)\Matrix Science\Mascot Daemon\mgf6 FXIII 60 min 3rd\mascot\_daemon\_merge.mgf

Click mouse within plot area to zoom in by factor of two about that point

Or, Plot from  to  Da

Label all possible matches  Label matches used for scoring

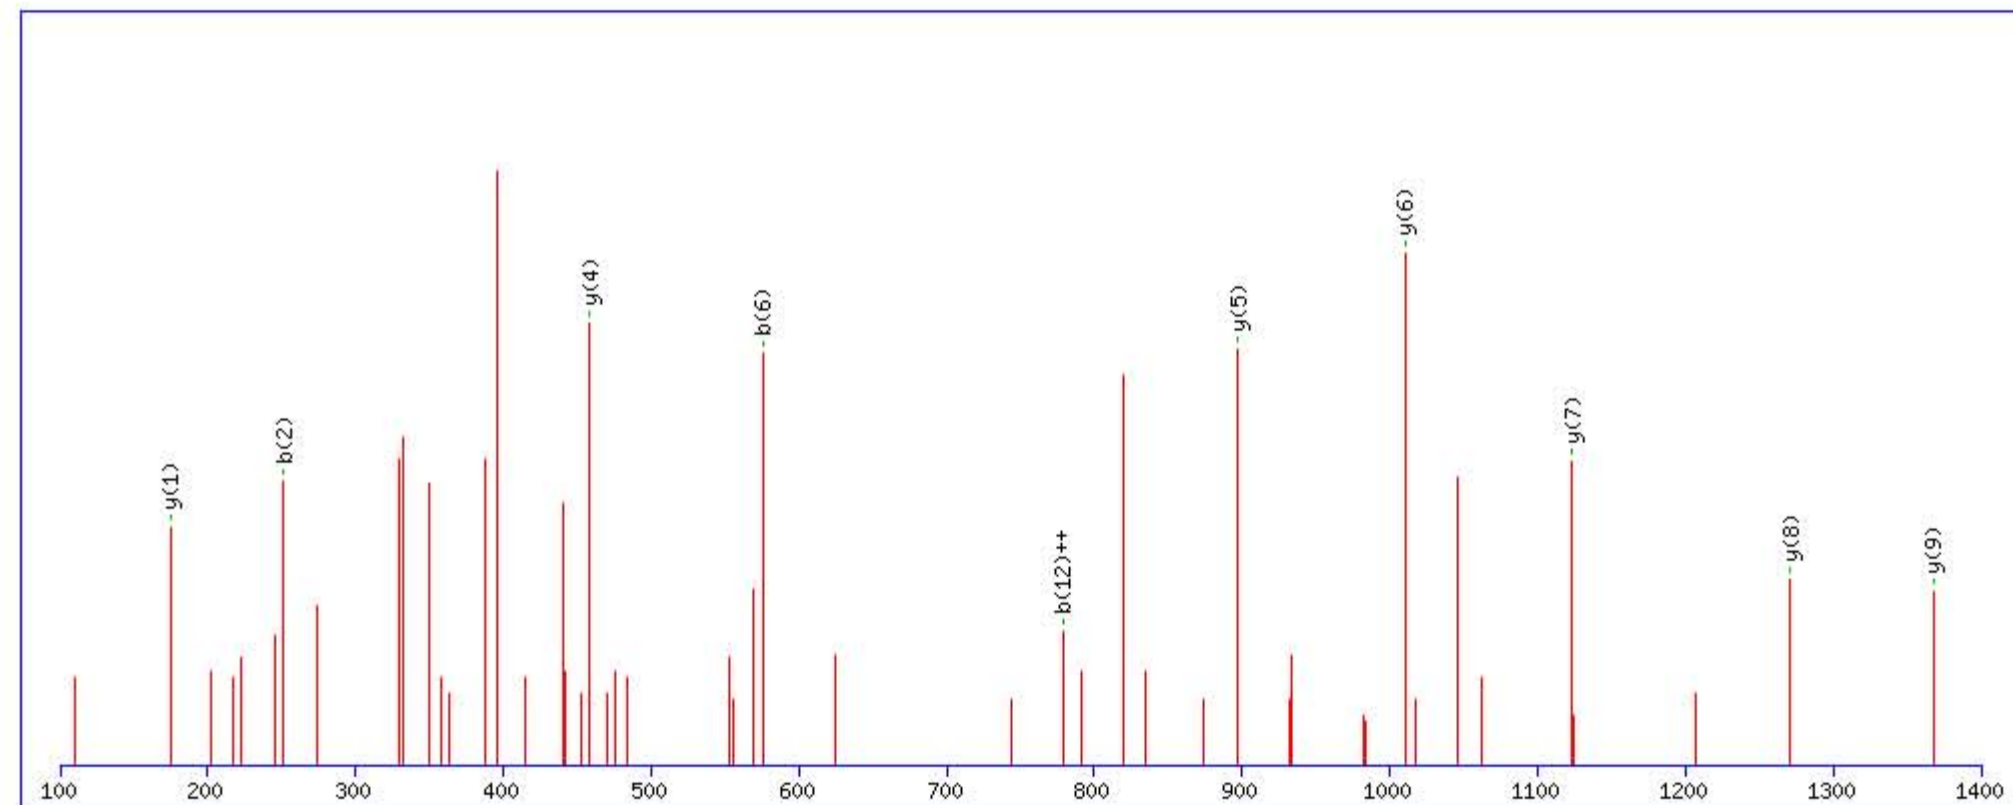

Monoisotopic mass of neutral peptide Mr(calc): 1941.138626

Fixed modifications: Carbamidomethyl (C) (apply to specified residues or termini only)

Variable modifications:

Q11 : Biotin:Thermo-21345 (Q)

Ions Score: 52 Expect: 1.2e-005

Matches : 10/92 fragment ions using 13 most intense peaks [\(help\)](#)

| #  | b                 | b <sup>++</sup>   | b <sup>*</sup> | b <sup>*++</sup> | Seq. | y                  | y <sup>++</sup> | y <sup>*</sup> | y <sup>*++</sup> | #  |
|----|-------------------|-------------------|----------------|------------------|------|--------------------|-----------------|----------------|------------------|----|
| 1  | 138.066188        | 69.536732         |                |                  | H    |                    |                 |                |                  | 15 |
| 2  | <b>251.150252</b> | 126.078764        |                |                  | L    | 1805.086996        | 903.047136      | 1788.060447    | 894.533862       | 14 |
| 3  | 350.218666        | 175.612971        |                |                  | V    | 1692.002932        | 846.505104      | 1674.976383    | 837.991830       | 13 |
| 4  | 447.271430        | 224.139353        |                |                  | P    | 1592.934518        | 796.970897      | 1575.907969    | 788.457623       | 12 |
| 5  | 504.292894        | 252.650085        |                |                  | G    | 1495.881754        | 748.444515      | 1478.855205    | 739.931241       | 11 |
| 6  | <b>575.330008</b> | 288.168642        |                |                  | A    | 1438.860290        | 719.933783      | 1421.833741    | 711.420509       | 10 |
| 7  | 672.382772        | 336.695024        |                |                  | P    | <b>1367.823176</b> | 684.415226      | 1350.796627    | 675.901952       | 9  |
| 8  | 819.451186        | 410.229231        |                |                  | F    | <b>1270.770412</b> | 635.888844      | 1253.743863    | 627.375570       | 8  |
| 9  | 932.535250        | 466.771263        |                |                  | L    | <b>1123.701998</b> | 562.354637      | 1106.675449    | 553.841363       | 7  |
| 10 | 1045.619314       | 523.313295        |                |                  | L    | <b>1010.617934</b> | 505.812605      | 993.591385     | 497.299331       | 6  |
| 11 | 1484.844640       | 742.925958        | 1467.818091    | 734.412684       | Q    | <b>897.533870</b>  | 449.270573      | 880.507321     | 440.757298       | 5  |
| 12 | 1555.881754       | <b>778.444515</b> | 1538.855205    | 769.931241       | A    | <b>458.308544</b>  | 229.657910      | 441.281995     | 221.144635       | 4  |
| 13 | 1668.965818       | 834.986547        | 1651.939269    | 826.473273       | L    | 387.271430         | 194.139353      | 370.244881     | 185.626078       | 3  |
| 14 | 1768.034232       | 884.520754        | 1751.007683    | 876.007480       | V    | 274.187366         | 137.597321      | 257.160817     | 129.084047       | 2  |
| 15 |                   |                   |                |                  | R    | <b>175.118952</b>  | 88.063114       | 158.092403     | 79.549839        | 1  |

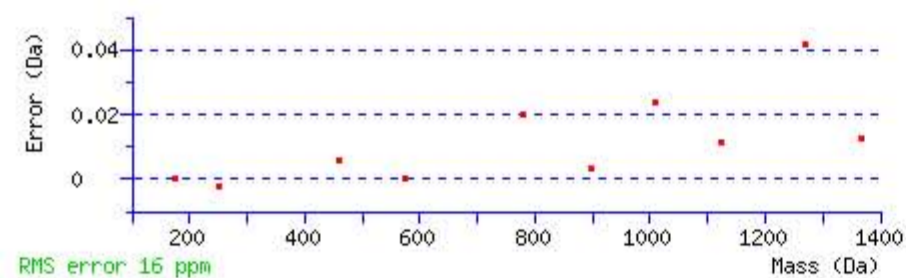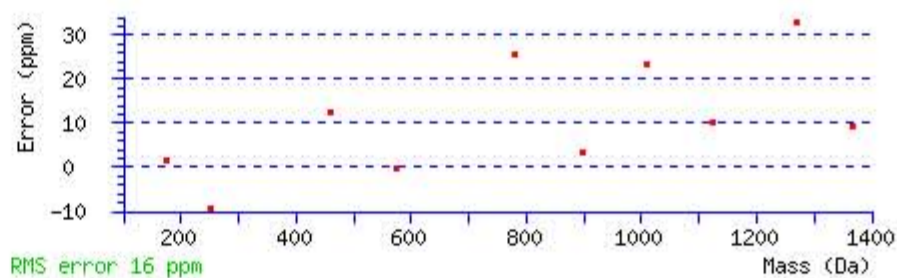

NCBI BLAST search of [HLVPGAPFLLQALVR](#)

(Parameters: blastp, nr protein database, expect=20000, no filter, PAM30)

Other BLAST [web gateways](#)

All matches to this query

| Score | Mr(calc):   | Delta    | Sequence                        |
|-------|-------------|----------|---------------------------------|
| 51.6  | 1941.138626 | 0.017776 | <a href="#">HLVPGAPFLLQALVR</a> |

Mascot: <http://www.matrixscience.com/>

# MATRIX SCIENCE Mascot Search Results

## Peptide View

MS/MS Fragmentation of **EPFLSCCQFAESLR**

Found in **CO4A\_HUMAN**, Complement C4-A OS=Homo sapiens GN=C4A PE=1 SV=2

Match to Query 43769: 2053.964232 from(685.662020,3+) rtinseconds(2492) index(50229)

Title: Locus:1.1.1.2916.14 File:"2013-07-02 CLN FXIII 60 min 3rd F 4.wiff"

Data file C:\Program Files (x86)\Matrix Science\Mascot Daemon\mgf\6 FXIII 60 min 3rd\mascot\_daemon\_merge.mgf

Click mouse within plot area to zoom in by factor of two about that point

Or, Plot from  to  Da

Label all possible matches  Label matches used for scoring

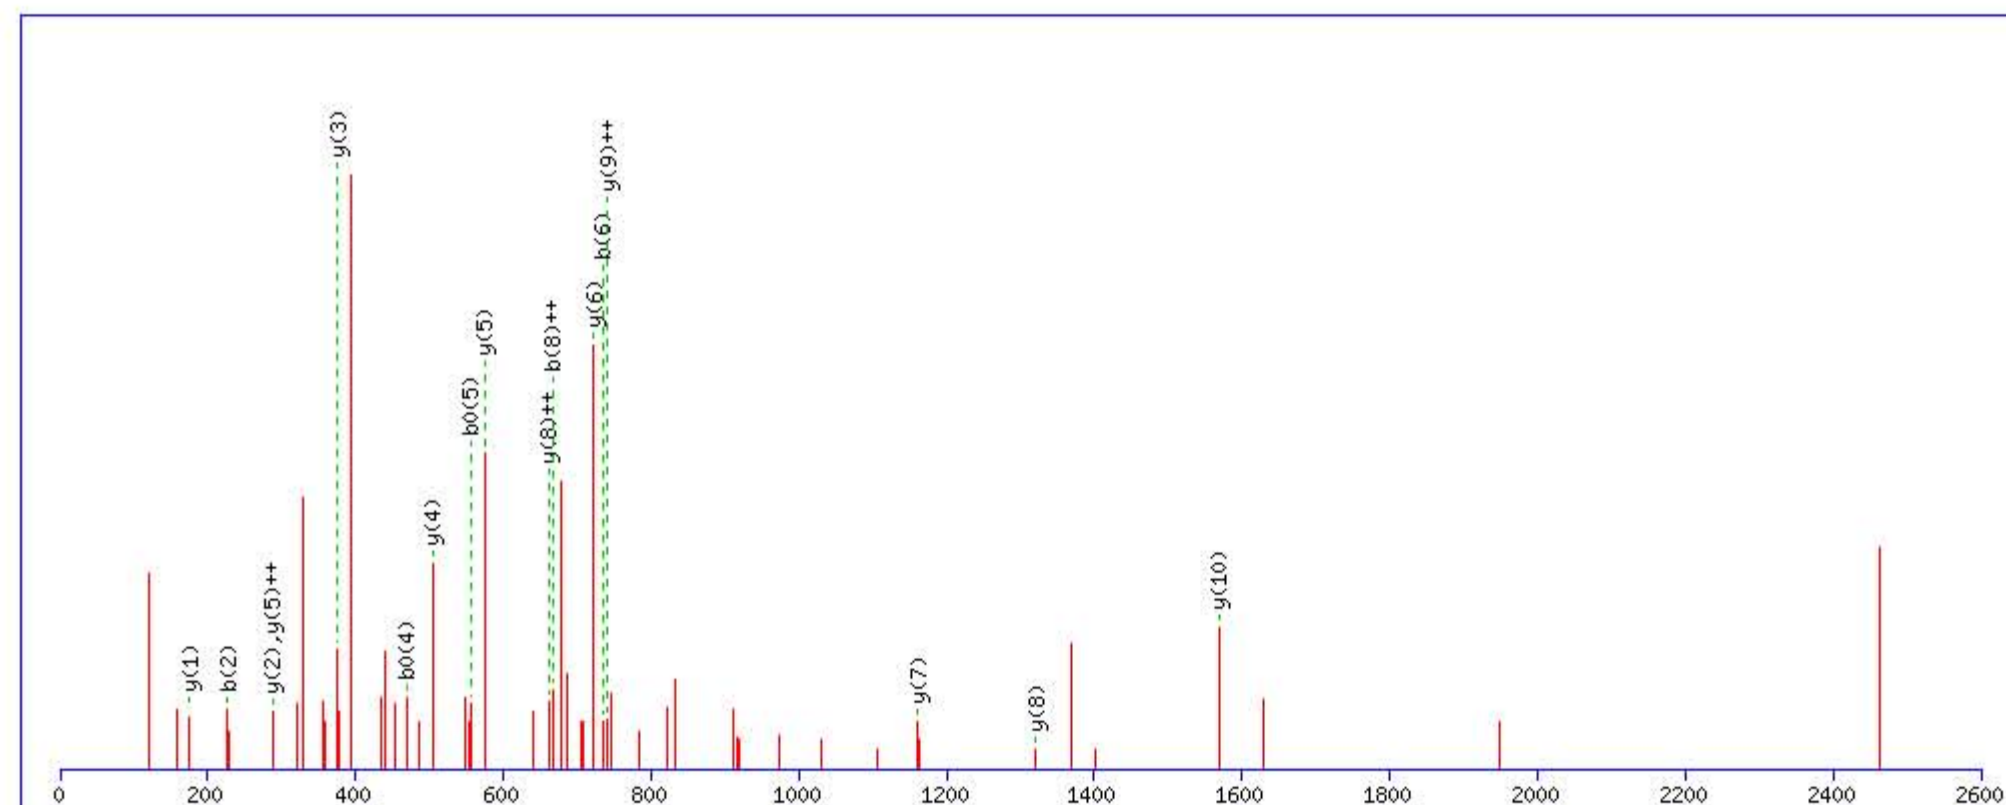

Monoisotopic mass of neutral peptide Mr(calc): 2053.942368

Fixed modifications: Carbamidomethyl (C) (apply to specified residues or termini only)

Variable modifications:

Q8 : Biotin:Thermo-21345 (Q)

Ions Score: 34 Expect: 0.00081

Matches : 17/138 fragment ions using 42 most intense peaks ([help](#))

| #  | b                 | b <sup>++</sup>   | b <sup>+</sup> | b <sup>+++</sup> | b <sup>0</sup>    | b <sup>0++</sup> | Seq. | y                  | y <sup>++</sup>   | y <sup>+</sup> | y <sup>+++</sup> | y <sup>0</sup> | y <sup>0++</sup> | #  |
|----|-------------------|-------------------|----------------|------------------|-------------------|------------------|------|--------------------|-------------------|----------------|------------------|----------------|------------------|----|
| 1  | 130.049869        | 65.528572         |                |                  | 112.039304        | 56.523290        | E    |                    |                   |                |                  |                |                  | 14 |
| 2  | <b>227.102633</b> | 114.054954        |                |                  | 209.092068        | 105.049672       | P    | 1925.907059        | 963.457168        | 1908.880510    | 954.943893       | 1907.896494    | 954.451885       | 13 |
| 3  | 374.171047        | 187.589161        |                |                  | 356.160482        | 178.583879       | F    | 1828.854295        | 914.930786        | 1811.827746    | 906.417511       | 1810.843730    | 905.925503       | 12 |
| 4  | 487.255111        | 244.131193        |                |                  | <b>469.244546</b> | 235.125911       | L    | 1681.785881        | 841.396579        | 1664.759332    | 832.883304       | 1663.775316    | 832.391296       | 11 |
| 5  | 574.287139        | 287.647208        |                |                  | <b>556.276574</b> | 278.641925       | S    | <b>1568.701817</b> | 784.854547        | 1551.675268    | 776.341272       | 1550.691252    | 775.849264       | 10 |
| 6  | <b>734.317788</b> | 367.662532        |                |                  | 716.307223        | 358.657250       | C    | 1481.669789        | <b>741.338533</b> | 1464.643240    | 732.825258       | 1463.659224    | 732.333250       | 9  |
| 7  | 894.348437        | 447.677857        |                |                  | 876.337872        | 438.672574       | C    | <b>1321.639140</b> | <b>661.323208</b> | 1304.612591    | 652.809934       | 1303.628575    | 652.317926       | 8  |
| 8  | 1333.573763       | <b>667.290520</b> | 1316.547214    | 658.777245       | 1315.563198       | 658.285237       | Q    | <b>1161.608491</b> | 581.307884        | 1144.581942    | 572.794609       | 1143.597926    | 572.302601       | 7  |
| 9  | 1480.642177       | 740.824727        | 1463.615628    | 732.311452       | 1462.631612       | 731.819444       | F    | <b>722.383165</b>  | 361.695221        | 705.356616     | 353.181946       | 704.372600     | 352.689938       | 6  |
| 10 | 1551.679291       | 776.343284        | 1534.652742    | 767.830009       | 1533.668726       | 767.338001       | A    | <b>575.314751</b>  | <b>288.161014</b> | 558.288202     | 279.647739       | 557.304186     | 279.155731       | 5  |
| 11 | 1680.721884       | 840.864580        | 1663.695335    | 832.351306       | 1662.711319       | 831.859298       | E    | <b>504.277637</b>  | 252.642457        | 487.251088     | 244.129182       | 486.267072     | 243.637174       | 4  |
| 12 | 1767.753912       | 884.380594        | 1750.727363    | 875.867320       | 1749.743347       | 875.375312       | S    | <b>375.235044</b>  | 188.121160        | 358.208495     | 179.607885       | 357.224479     | 179.115877       | 3  |
| 13 | 1880.837976       | 940.922626        | 1863.811427    | 932.409352       | 1862.827411       | 931.917344       | L    | <b>288.203016</b>  | 144.605146        | 271.176467     | 136.091871       |                |                  | 2  |
| 14 |                   |                   |                |                  |                   |                  | R    | <b>175.118952</b>  | 88.063114         | 158.092403     | 79.549839        |                |                  | 1  |

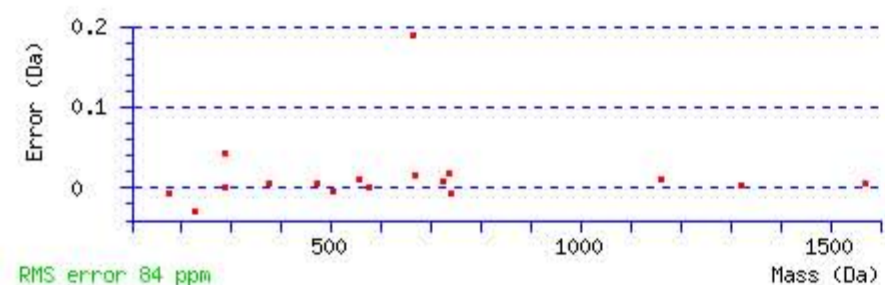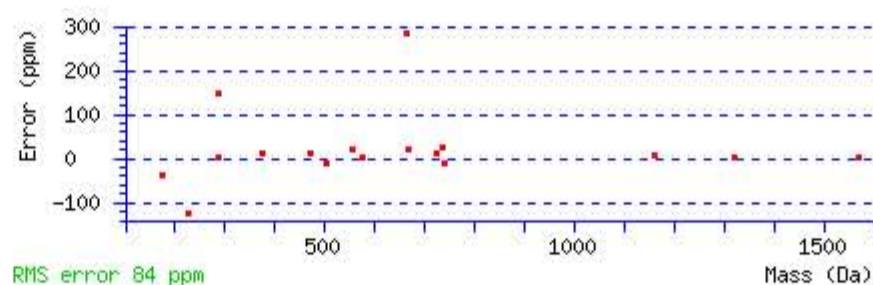

NCBI BLAST search of **EPFLSCCQFAESLR**

(Parameters: blastp, nr protein database, expect=20000, no filter, PAM30)

Other BLAST [web gateways](#)

## All matches to this query

| Score | Mr(calc):   | Delta    | Sequence                           |
|-------|-------------|----------|------------------------------------|
| 33.8  | 2053.942368 | 0.021864 | <a href="#">EPFLSCCQFAESLR</a>     |
| 0.9   | 2053.948227 | 0.016005 | <a href="#">EKSTCSMGSELLPMISPR</a> |

Mascot: <http://www.matrixscience.com/>

**MASCOT** Mascot Search Results

**Peptide View**

MS/MS Fragmentation of **LLATLCSAEVCQCAEGK**

Found in **CO4A\_HUMAN**, Complement C4-A OS=Homo sapiens GN=C4A PE=1 SV=2

Match to Query 46405: 2220.049032 from(741.023620,3+) rtinseconds(2140) index(63359)

Title: Locus:1.1.1.3371.11 File:"2013-07-02 CLN FXIII 60 min 3rd FT.wiff"

Data file C:\Program Files (x86)\Matrix Science\Mascot Daemon\mgf\6 FXIII 60 min 3rd\mascot\_daemon\_merge.mgf

Click mouse within plot area to zoom in by factor of two about that point

Or, Plot from  to  Da

Label all possible matches  Label matches used for scoring

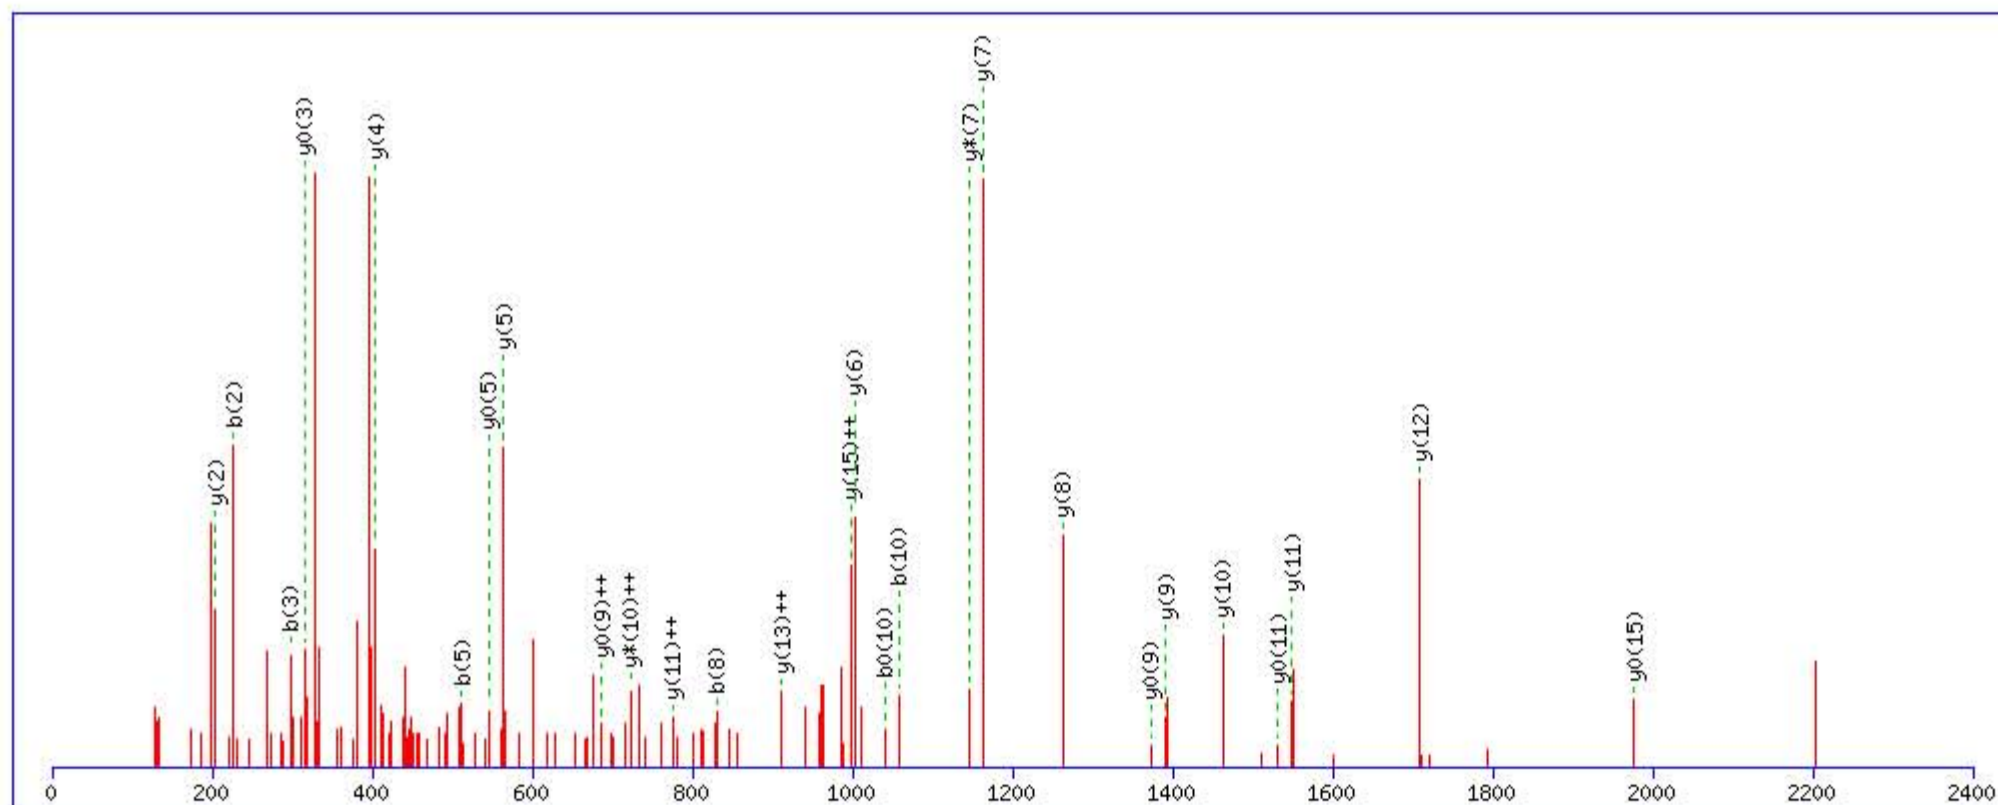

Monoisotopic mass of neutral peptide  $M_r(\text{calc})$ : 2220.041092  
 Fixed modifications: Carbamidomethyl (C) (apply to specified residues or termini only)  
 Variable modifications:  
 Q12 : Biotin:Thermo-21345 (Q)  
 Ions Score: 51 Expect: 2.7e-005  
 Matches : 27/160 fragment ions using 50 most intense peaks [\(help\)](#)

| #  | b           | b <sup>++</sup> | b <sup>*</sup> | b <sup>***</sup> | b <sup>0</sup> | b <sup>0++</sup> | Seq. | y           | y <sup>++</sup> | y <sup>*</sup> | y <sup>***</sup> | y <sup>0</sup> | y <sup>0++</sup> | #  |
|----|-------------|-----------------|----------------|------------------|----------------|------------------|------|-------------|-----------------|----------------|------------------|----------------|------------------|----|
| 1  | 114.091340  | 57.549308       |                |                  |                |                  | L    |             |                 |                |                  |                |                  | 17 |
| 2  | 227.175404  | 114.091340      |                |                  |                |                  | L    | 2107.964318 | 1054.485797     | 2090.937769    | 1045.972522      | 2089.953753    | 1045.480514      | 16 |
| 3  | 298.212518  | 149.609897      |                |                  |                |                  | A    | 1994.880254 | 997.943765      | 1977.853705    | 989.430491       | 1976.869689    | 988.938483       | 15 |
| 4  | 399.260197  | 200.133737      |                |                  | 381.249632     | 191.128454       | T    | 1923.843140 | 962.425208      | 1906.816591    | 953.911934       | 1905.832575    | 953.419926       | 14 |
| 5  | 512.344261  | 256.675769      |                |                  | 494.333696     | 247.670486       | L    | 1822.795461 | 911.901369      | 1805.768912    | 903.388094       | 1804.784896    | 902.896086       | 13 |
| 6  | 672.374910  | 336.691093      |                |                  | 654.364345     | 327.685811       | C    | 1709.711397 | 855.359337      | 1692.684848    | 846.846062       | 1691.700832    | 846.354054       | 12 |
| 7  | 759.406938  | 380.207107      |                |                  | 741.396373     | 371.201825       | S    | 1549.680748 | 775.344012      | 1532.654199    | 766.830738       | 1531.670183    | 766.338730       | 11 |
| 8  | 830.444052  | 415.725664      |                |                  | 812.433487     | 406.720382       | A    | 1462.648720 | 731.827998      | 1445.622171    | 723.314724       | 1444.638155    | 722.822716       | 10 |
| 9  | 959.486645  | 480.246961      |                |                  | 941.476080     | 471.241678       | E    | 1391.611606 | 696.309441      | 1374.585057    | 687.796167       | 1373.601041    | 687.304159       | 9  |
| 10 | 1058.555059 | 529.781168      |                |                  | 1040.544494    | 520.775885       | V    | 1262.569013 | 631.788145      | 1245.542464    | 623.274870       | 1244.558448    | 622.782862       | 8  |
| 11 | 1218.585708 | 609.796492      |                |                  | 1200.575143    | 600.791210       | C    | 1163.500599 | 582.253938      | 1146.474050    | 573.740663       | 1145.490034    | 573.248655       | 7  |
| 12 | 1657.811034 | 829.409155      | 1640.784485    | 820.895881       | 1639.800469    | 820.403873       | Q    | 1003.469950 | 502.238613      | 986.443401     | 493.725339       | 985.459385     | 493.233331       | 6  |
| 13 | 1817.841683 | 909.424480      | 1800.815134    | 900.911205       | 1799.831118    | 900.419197       | C    | 564.244624  | 282.625950      | 547.218075     | 274.112676       | 546.234059     | 273.620668       | 5  |
| 14 | 1888.878797 | 944.943037      | 1871.852248    | 936.429762       | 1870.868232    | 935.937754       | A    | 404.213975  | 202.610626      | 387.187426     | 194.097351       | 386.203410     | 193.605343       | 4  |
| 15 | 2017.921390 | 1009.464333     | 2000.894841    | 1000.951059      | 1999.910825    | 1000.459051      | E    | 333.176861  | 167.092069      | 316.150312     | 158.578794       | 315.166296     | 158.086786       | 3  |
| 16 | 2074.942854 | 1037.975065     | 2057.916305    | 1029.461790      | 2056.932289    | 1028.969782      | G    | 204.134268  | 102.570772      | 187.107719     | 94.057497        |                |                  | 2  |
| 17 |             |                 |                |                  |                |                  | K    | 147.112804  | 74.060040       | 130.086255     | 65.546765        |                |                  | 1  |

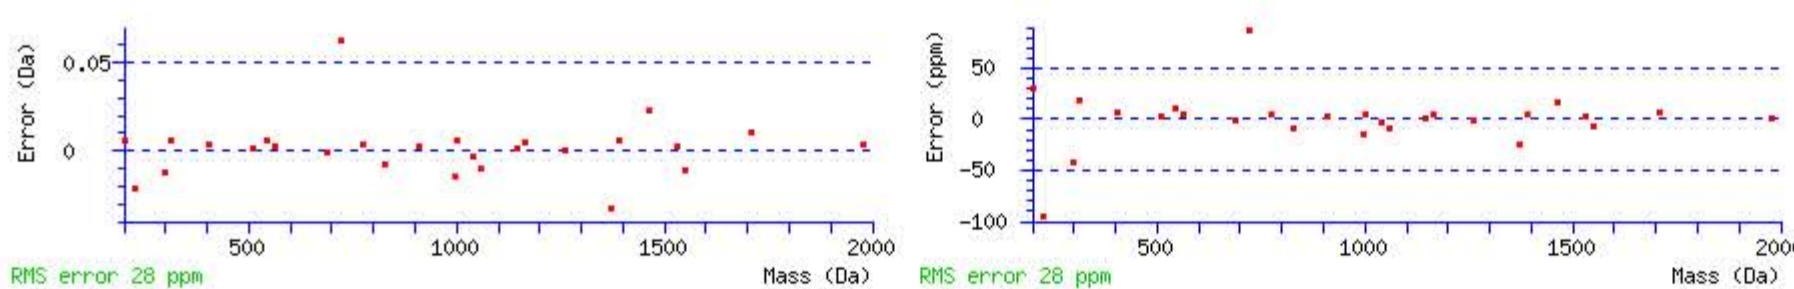

NCBI BLAST search of **LLATLCSAEVCQCAEGK**  
 (Parameters: blastp, nr protein database, expect=20000, no filter, PAM30)  
 Other BLAST [web gateways](#)

**All matches to this query**

| Score | Mr(calc):   | Delta    | Sequence                          |
|-------|-------------|----------|-----------------------------------|
| 51.3  | 2220.041092 | 0.007940 | <a href="#">LLATLCSAEVCQCAEGK</a> |
| 2.5   | 2220.048080 | 0.000952 | <a href="#">EPQEGALPEATGTTSHR</a> |



# Mascot Search Results

## Peptide View

MS/MS Fragmentation of **DDPDAPLQPVTPLQLFEGR**

Found in **CO4A\_HUMAN**, Complement C4-A OS=Homo sapiens GN=C4A PE=1 SV=2

Match to Query 49443: 2418.255432 from(807.092420,3+) rtinseconds(3006) index(54069)  
Title: Locus:1.1.1.3091.18 File:"2013-07-02 CLN FXIII 60 min 3rd F 4.wiff"  
Data file C:\Program Files (x86)\Matrix Science\Mascot Daemon\mgf6 FXIII 60 min 3rd\mascot\_daemon\_merge.mgf

Click mouse within plot area to zoom in by factor of two about that point  
Or, Plot from  to  Da   
Label all possible matches  Label matches used for scoring

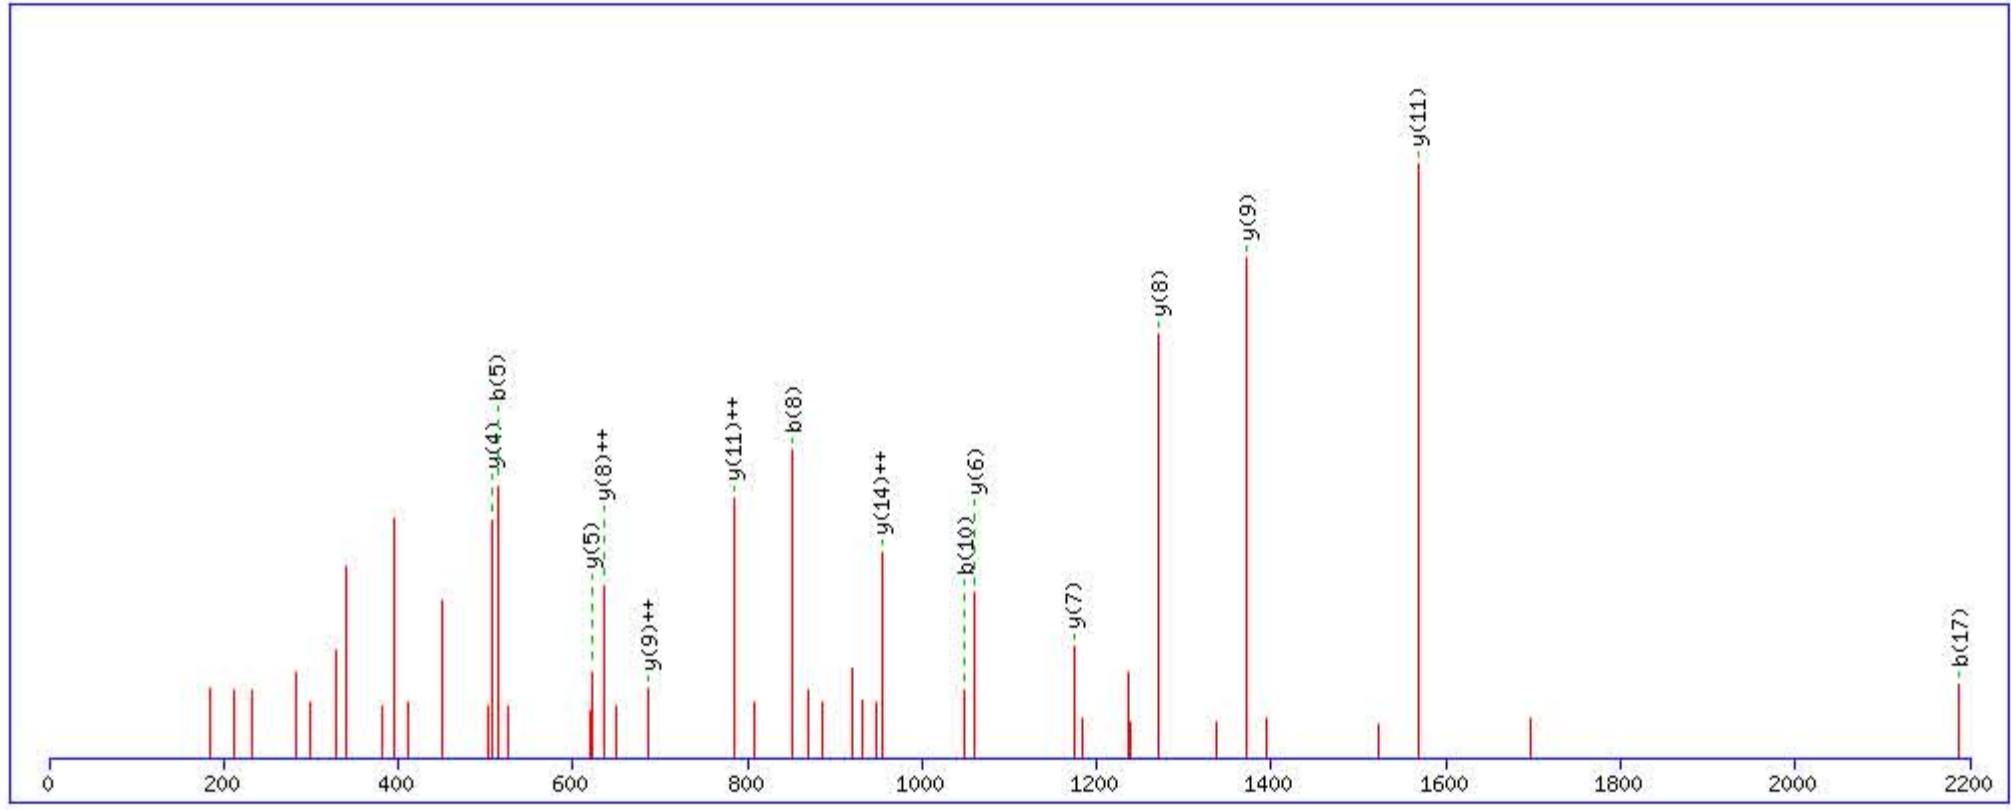

Monoisotopic mass of neutral peptide  $M_r(\text{calc})$ : 2418.225342  
Fixed modifications: Carbamidomethyl (C) (apply to specified residues or termini only)  
Variable modifications:  
Q14 : Biotin:Thermo-21345 (Q)  
Ions Score: 32 Expect: 0.0011  
Matches : 15/198 fragment ions using 29 most intense peaks [\(help\)](#)

| #  | b                  | b <sup>++</sup> | b*          | b <sup>+++</sup> | b <sup>0</sup> | b <sup>0++</sup> | Seq. | y                  | y <sup>++</sup>   | y*          | y <sup>+++</sup> | y <sup>0</sup> | y <sup>0++</sup> | #  |
|----|--------------------|-----------------|-------------|------------------|----------------|------------------|------|--------------------|-------------------|-------------|------------------|----------------|------------------|----|
| 1  | 116.034219         | 58.520748       |             |                  | 98.023654      | 49.515465        | D    |                    |                   |             |                  |                |                  | 19 |
| 2  | 231.061162         | 116.034219      |             |                  | 213.050597     | 107.028936       | D    | 2304.205668        | 1152.606472       | 2287.179119 | 1144.093197      | 2286.195103    | 1143.601189      | 18 |
| 3  | 328.113926         | 164.560601      |             |                  | 310.103361     | 155.555319       | P    | 2189.178725        | 1095.093000       | 2172.152176 | 1086.579726      | 2171.168160    | 1086.087718      | 17 |
| 4  | 443.140869         | 222.074073      |             |                  | 425.130304     | 213.068790       | D    | 2092.125961        | 1046.566618       | 2075.099412 | 1038.053344      | 2074.115396    | 1037.561336      | 16 |
| 5  | <b>514.177983</b>  | 257.592630      |             |                  | 496.167418     | 248.587347       | A    | 1977.099018        | 989.053147        | 1960.072469 | 980.539873       | 1959.088453    | 980.047865       | 15 |
| 6  | 611.230747         | 306.119012      |             |                  | 593.220182     | 297.113729       | P    | 1906.061904        | <b>953.534590</b> | 1889.035355 | 945.021316       | 1888.051339    | 944.529308       | 14 |
| 7  | 724.314811         | 362.661044      |             |                  | 706.304246     | 353.655761       | L    | 1809.009140        | 905.008208        | 1791.982591 | 896.494934       | 1790.998575    | 896.002926       | 13 |
| 8  | <b>852.373389</b>  | 426.690333      | 835.346840  | 418.177058       | 834.362824     | 417.685050       | Q    | 1695.925076        | 848.466176        | 1678.898527 | 839.952902       | 1677.914511    | 839.460894       | 12 |
| 9  | 949.426153         | 475.216715      | 932.399604  | 466.703440       | 931.415588     | 466.211432       | P    | <b>1567.866498</b> | <b>784.436887</b> | 1550.839949 | 775.923613       | 1549.855933    | 775.431605       | 11 |
| 10 | <b>1048.494567</b> | 524.750922      | 1031.468018 | 516.237647       | 1030.484002    | 515.745639       | V    | 1470.813734        | 735.910505        | 1453.787185 | 727.397231       | 1452.803169    | 726.905223       | 10 |
| 11 | 1149.542246        | 575.274761      | 1132.515697 | 566.761487       | 1131.531681    | 566.269479       | T    | <b>1371.745320</b> | <b>686.376298</b> | 1354.718771 | 677.863024       | 1353.734755    | 677.371016       | 9  |
| 12 | 1246.595010        | 623.801143      | 1229.568461 | 615.287869       | 1228.584445    | 614.795861       | P    | <b>1270.697641</b> | <b>635.852459</b> | 1253.671092 | 627.339184       | 1252.687076    | 626.847176       | 8  |
| 13 | 1359.679074        | 680.343175      | 1342.652525 | 671.829901       | 1341.668509    | 671.337893       | L    | <b>1173.644877</b> | 587.326077        | 1156.618328 | 578.812802       | 1155.634312    | 578.320794       | 7  |
| 14 | 1798.904400        | 899.955838      | 1781.877851 | 891.442564       | 1780.893835    | 890.950556       | Q    | <b>1060.560813</b> | 530.784045        | 1043.534264 | 522.270770       | 1042.550248    | 521.778762       | 6  |
| 15 | 1911.988464        | 956.497870      | 1894.961915 | 947.984596       | 1893.977899    | 947.492588       | L    | <b>621.335487</b>  | 311.171382        | 604.308938  | 302.658107       | 603.324922     | 302.166099       | 5  |
| 16 | 2059.056878        | 1030.032077     | 2042.030329 | 1021.518803      | 2041.046313    | 1021.026794      | F    | <b>508.251423</b>  | 254.629350        | 491.224874  | 246.116075       | 490.240858     | 245.624067       | 4  |
| 17 | <b>2188.099471</b> | 1094.553373     | 2171.072922 | 1086.040099      | 2170.088906    | 1085.548091      | E    | 361.183009         | 181.095142        | 344.156460  | 172.581868       | 343.172444     | 172.089860       | 3  |
| 18 | 2245.120935        | 1123.064105     | 2228.094386 | 1114.550831      | 2227.110370    | 1114.058823      | G    | 232.140416         | 116.573846        | 215.113867  | 108.060571       |                |                  | 2  |
| 19 |                    |                 |             |                  |                |                  | R    | 175.118952         | 88.063114         | 158.092403  | 79.549839        |                |                  | 1  |

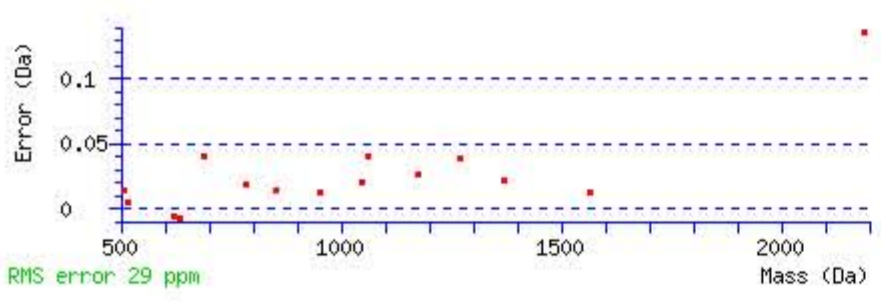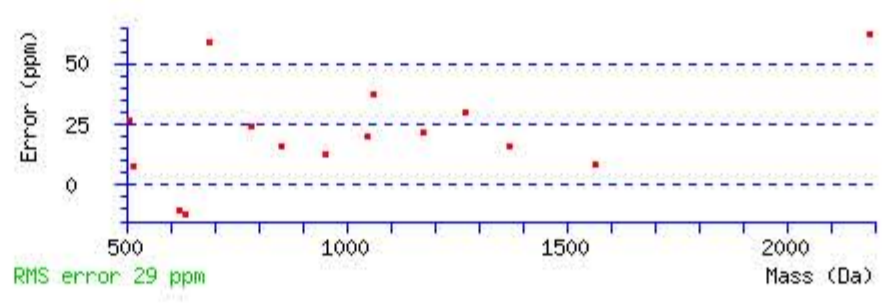

NCBI BLAST search of [DDPDAPLQPVTPLQLFEGR](#)  
(Parameters: blastp, nr protein database, expect=20000, no filter, PAM30)  
Other BLAST [web gateways](#)

### All matches to this query

| Score | $M_r(\text{calc})$ : | Delta     | Sequence                            |
|-------|----------------------|-----------|-------------------------------------|
| 32.4  | 2418.225342          | 0.030090  | <a href="#">DDPDAPLQPVTPLQLFEGR</a> |
| 0.8   | 2418.259033          | -0.003601 | <a href="#">QQQRALLGPWLSGPQGTDR</a> |
| 0.8   | 2418.259033          | -0.003601 | <a href="#">QQQRALLGPWLSGPQGTDR</a> |
| 0.8   | 2418.259033          | -0.003601 | <a href="#">QQQRALLGPWLSGPQGTDR</a> |



# MASCOT SCIENCE Mascot Search Results

## Peptide View

MS/MS Fragmentation of **GEQIQLK**

Found in **COS\_HUMAN**, Complement C5 OS=Homo sapiens GN=C5 PE=1 SV=4

Match to Query 17403: 1125.622228 from(563.818390,2+) rtinseconds(1752) index(31676)

Title: Locus:1.1.1.3159.13 File:"2013-07-02 CLN FXIII 60 min 3rd F 3.wiff"

Data file C:\Program Files (x86)\Matrix Science\Mascot Daemon\mgf\6 FXIII 60 min 3rd\mascot\_daemon\_merge.mgf

Click mouse within plot area to zoom in by factor of two about that point

Or, Plot from  to  Da

Label all possible matches  Label matches used for scoring

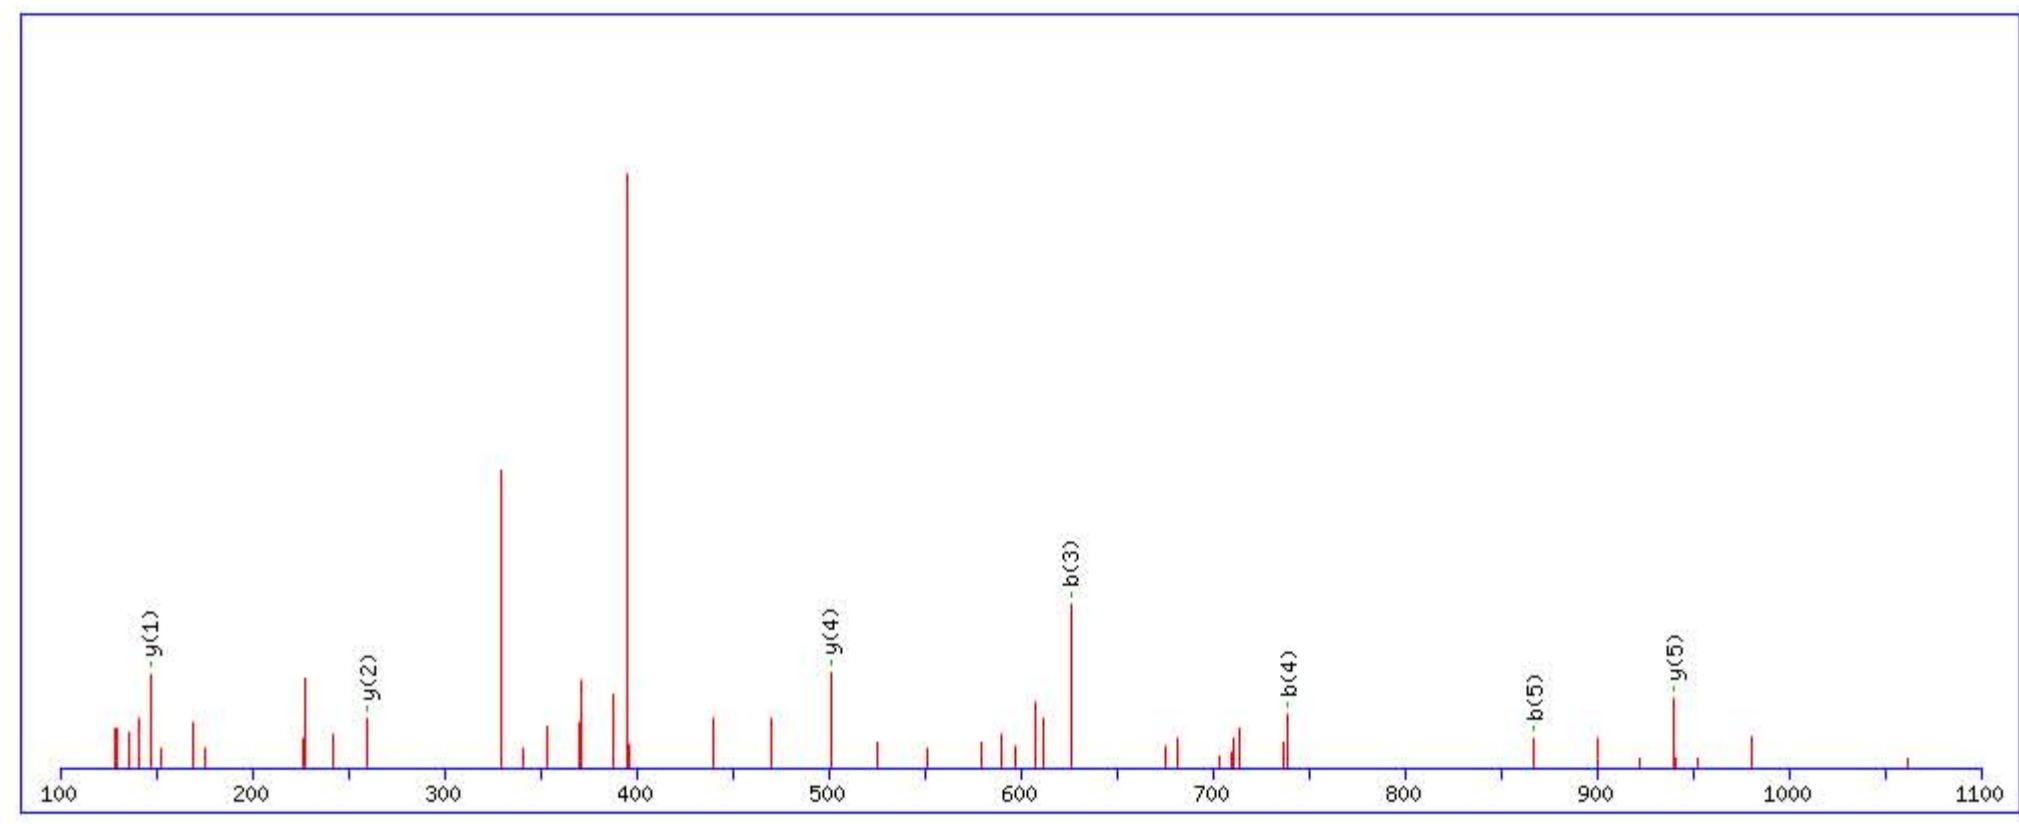

Monoisotopic mass of neutral peptide Mr(calc): 1125.621597

Fixed modifications: Carbamidomethyl (C) (apply to specified residues or termini only)

Variable modifications:

Q3 : Biotin:Thermo-21345 (Q)

Ions Score: 25 Expect: 0.039

Matches : 7/56 fragment ions using 10 most intense peaks [\(help\)](#)

| # | b                 | b <sup>++</sup> | b <sup>*</sup> | b <sup>*++</sup> | b <sup>0</sup> | b <sup>0++</sup> | Seq. | y                 | y <sup>++</sup> | y <sup>*</sup> | y <sup>*++</sup> | y <sup>0</sup> | y <sup>0++</sup> | # |
|---|-------------------|-----------------|----------------|------------------|----------------|------------------|------|-------------------|-----------------|----------------|------------------|----------------|------------------|---|
| 1 | 58.028740         | 29.518008       |                |                  |                |                  | G    |                   |                 |                |                  |                |                  | 7 |
| 2 | 187.071333        | 94.039305       |                |                  | 169.060768     | 85.034022        | E    | 1069.607429       | 535.307353      | 1052.580880    | 526.794078       | 1051.596864    | 526.302070       | 6 |
| 3 | <b>626.296659</b> | 313.651968      | 609.270110     | 305.138693       | 608.286094     | 304.646685       | Q    | <b>940.564836</b> | 470.786056      | 923.538287     | 462.272782       |                |                  | 5 |
| 4 | <b>739.380723</b> | 370.194000      | 722.354174     | 361.680725       | 721.370158     | 361.188717       | I    | <b>501.339510</b> | 251.173393      | 484.312961     | 242.660119       |                |                  | 4 |
| 5 | <b>867.439301</b> | 434.223289      | 850.412752     | 425.710014       | 849.428736     | 425.218006       | Q    | 388.255446        | 194.631361      | 371.228897     | 186.118087       |                |                  | 3 |
| 6 | 980.523365        | 490.765321      | 963.496816     | 482.252046       | 962.512800     | 481.760038       | L    | <b>260.196868</b> | 130.602072      | 243.170319     | 122.088798       |                |                  | 2 |
| 7 |                   |                 |                |                  |                |                  | K    | <b>147.112804</b> | 74.060040       | 130.086255     | 65.546766        |                |                  | 1 |

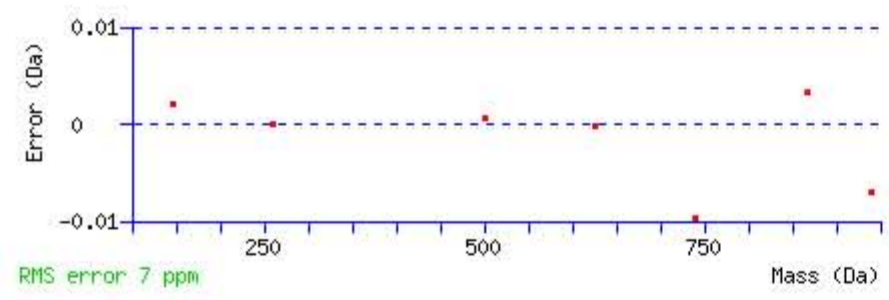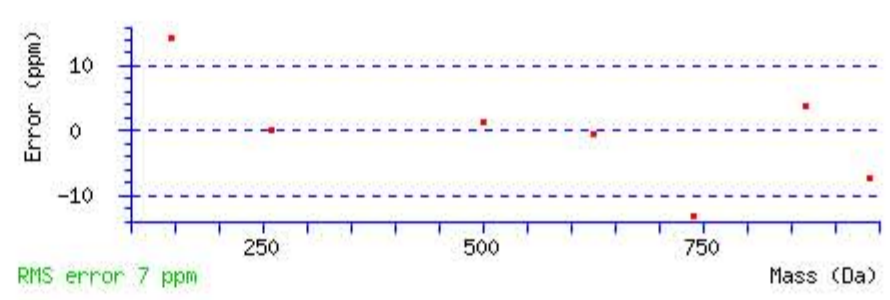

NCBI BLAST search of [GEQIQLK](#)

(Parameters: blastp, nr protein database, expect=20000, no filter, PAM30)

Other BLAST [web gateways](#)

All matches to this query

| Score | Mr(calc):   | Delta     | Sequence                    |
|-------|-------------|-----------|-----------------------------|
| 25.2  | 1125.621597 | 0.000631  | <a href="#">GEQIQLK</a>     |
| 9.5   | 1125.632828 | -0.010600 | <a href="#">KLCLSHLQK</a>   |
| 8.9   | 1125.607666 | 0.014562  | <a href="#">QMDRHAKIK</a>   |
| 7.2   | 1125.636856 | -0.014628 | <a href="#">WAAQVIK</a>     |
| 6.8   | 1125.633499 | -0.011271 | <a href="#">VSHFLPWIK</a>   |
| 6.0   | 1125.629486 | -0.007258 | <a href="#">RVDGWVPVGLK</a> |
| 4.9   | 1125.606979 | 0.015249  | <a href="#">LKEAFDYIK</a>   |
| 4.8   | 1125.621597 | 0.000631  | <a href="#">GEQIQLK</a>     |
| 3.7   | 1125.621597 | 0.000631  | <a href="#">GQELIQK</a>     |
| 3.2   | 1125.622940 | -0.000712 | <a href="#">WQLGRR</a>      |



# MASCOT SEARCH RESULTS

## Peptide View

MS/MS Fragmentation of **AFTECCVVASQLR**

Found in **COS\_HUMAN**, Complement C5 OS=Homo sapiens GN=C5 PE=1 SV=4

Match to Query 39370: 1850.894082 from(617.971970,3+) rtinseconds(2188) index(34165)

Title: Locus:1.1.1.3311.7 File:"2013-07-02 CLN FXIII 60 min 3rd F 3.wiff"

Data file C:\Program Files (x86)\Matrix Science\Mascot Daemon\mgf6 FXIII 60 min 3rd\mascot\_daemon\_merge.mgf

Click mouse within plot area to zoom in by factor of two about that point

Or, Plot from  to  Da

Label all possible matches  Label matches used for scoring

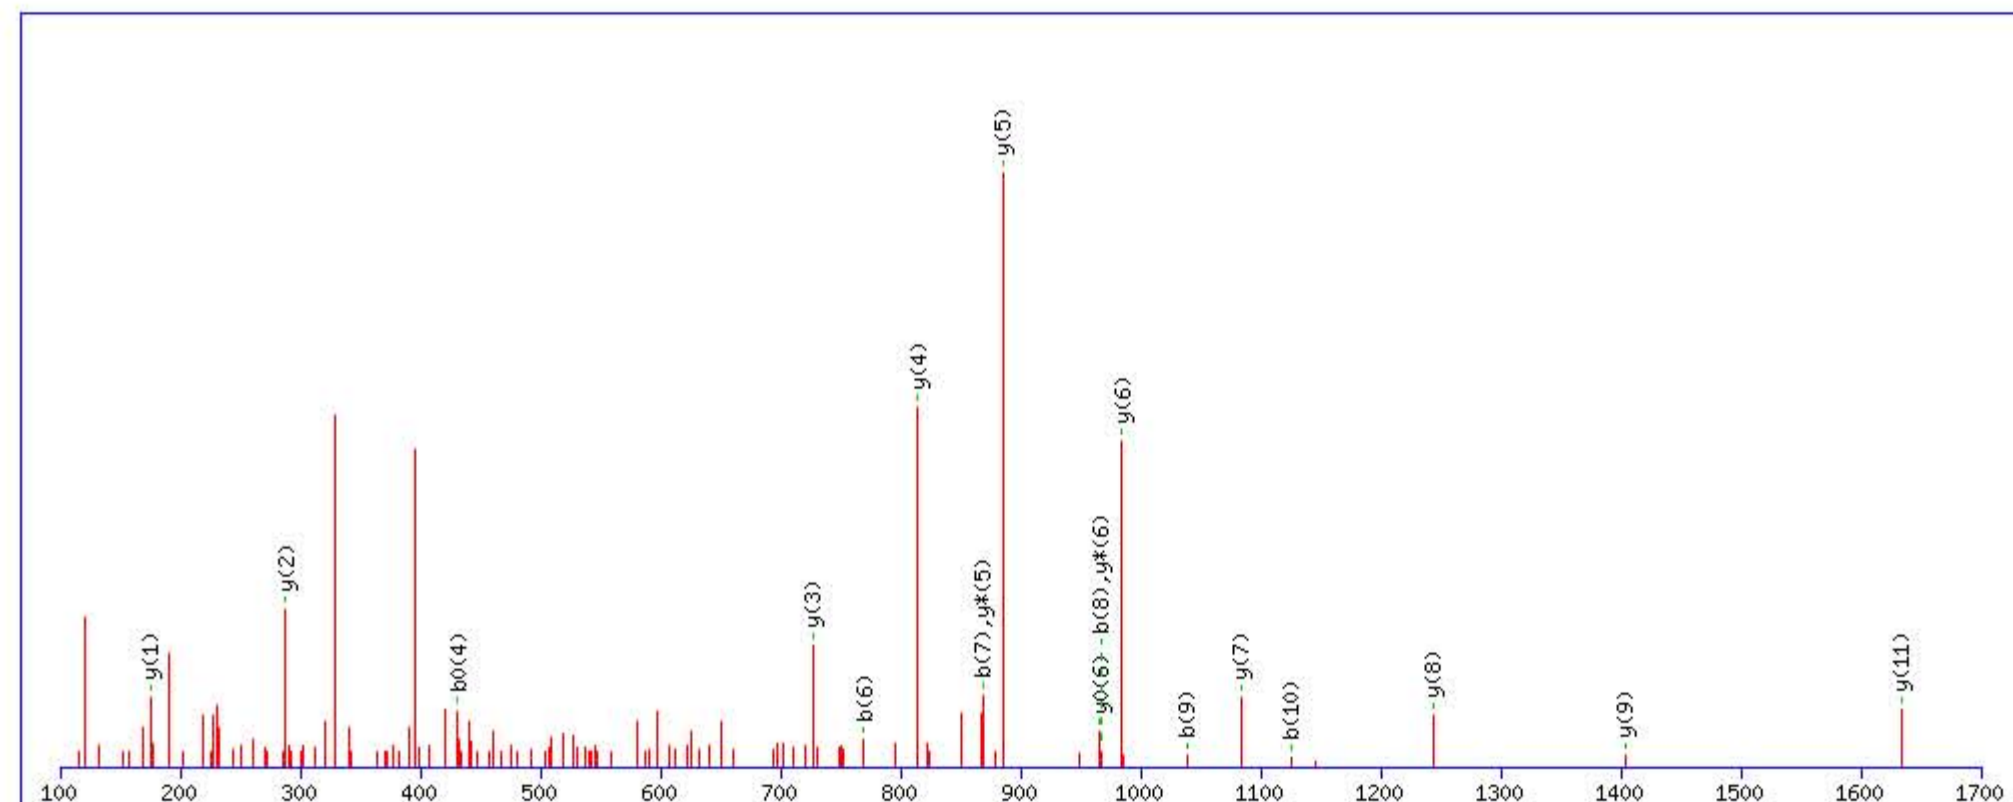

Monoisotopic mass of neutral peptide Mr(calc): 1850.884140

Fixed modifications: Carbamidomethyl (C) (apply to specified residues or termini only)

Variable modifications:

Q11 : Biotin:Thermo-21345 (Q)

Ions Score: 57 Expect: 8.8e-006

Matches : 19/114 fragment ions using 35 most intense peaks [\(help\)](#)

| #  | b                  | b <sup>++</sup> | b <sup>*</sup> | b <sup>*++</sup> | b <sup>0</sup>    | b <sup>0++</sup> | Seq. | y                  | y <sup>++</sup> | y <sup>*</sup>    | y <sup>*++</sup> | y <sup>0</sup>    | y <sup>0++</sup> | #  |
|----|--------------------|-----------------|----------------|------------------|-------------------|------------------|------|--------------------|-----------------|-------------------|------------------|-------------------|------------------|----|
| 1  | 72.044390          | 36.525833       |                |                  |                   |                  | A    |                    |                 |                   |                  |                   |                  | 13 |
| 2  | 219.112804         | 110.060040      |                |                  |                   |                  | F    | 1780.854296        | 890.930786      | 1763.827747       | 882.417512       | 1762.843731       | 881.925504       | 12 |
| 3  | 320.160483         | 160.583879      |                |                  | 302.149918        | 151.578597       | T    | <b>1633.785882</b> | 817.396579      | 1616.759333       | 808.883305       | 1615.775317       | 808.391297       | 11 |
| 4  | 449.203076         | 225.105176      |                |                  | <b>431.192511</b> | 216.099894       | E    | 1532.738203        | 766.872740      | 1515.711654       | 758.359465       | 1514.727638       | 757.867457       | 10 |
| 5  | 609.233725         | 305.120501      |                |                  | 591.223160        | 296.115218       | C    | <b>1403.695610</b> | 702.351443      | 1386.669061       | 693.838169       | 1385.685045       | 693.346161       | 9  |
| 6  | <b>769.264374</b>  | 385.135825      |                |                  | 751.253809        | 376.130543       | C    | <b>1243.664961</b> | 622.336119      | 1226.638412       | 613.822844       | 1225.654396       | 613.330836       | 8  |
| 7  | <b>868.332788</b>  | 434.670032      |                |                  | 850.322223        | 425.664750       | V    | <b>1083.634312</b> | 542.320794      | 1066.607763       | 533.807520       | 1065.623747       | 533.315512       | 7  |
| 8  | <b>967.401202</b>  | 484.204239      |                |                  | 949.390637        | 475.198957       | V    | <b>984.565898</b>  | 492.786587      | <b>967.539349</b> | 484.273313       | <b>966.555333</b> | 483.781305       | 6  |
| 9  | <b>1038.438316</b> | 519.722796      |                |                  | 1020.427751       | 510.717514       | A    | <b>885.497484</b>  | 443.252380      | <b>868.470935</b> | 434.739106       | 867.486919        | 434.247098       | 5  |
| 10 | <b>1125.470344</b> | 563.238810      |                |                  | 1107.459779       | 554.233528       | S    | <b>814.460370</b>  | 407.733823      | 797.433821        | 399.220549       | 796.449805        | 398.728541       | 4  |
| 11 | 1564.695670        | 782.851473      | 1547.669121    | 774.338199       | 1546.685105       | 773.846191       | Q    | <b>727.428342</b>  | 364.217809      | 710.401793        | 355.704535       |                   |                  | 3  |
| 12 | 1677.779734        | 839.393505      | 1660.753185    | 830.880231       | 1659.769169       | 830.388223       | L    | <b>288.203016</b>  | 144.605146      | 271.176467        | 136.091871       |                   |                  | 2  |
| 13 |                    |                 |                |                  |                   |                  | R    | <b>175.118952</b>  | 88.063114       | 158.092403        | 79.549839        |                   |                  | 1  |

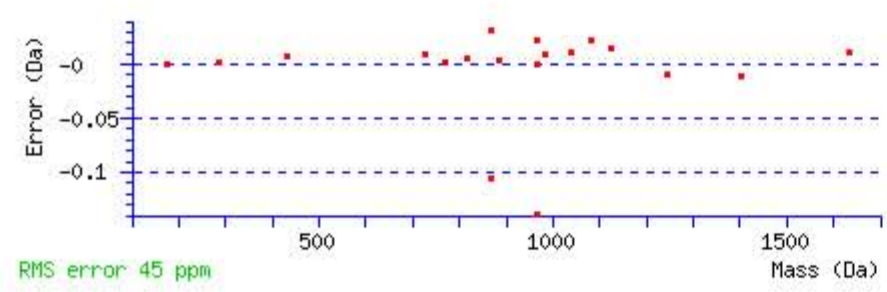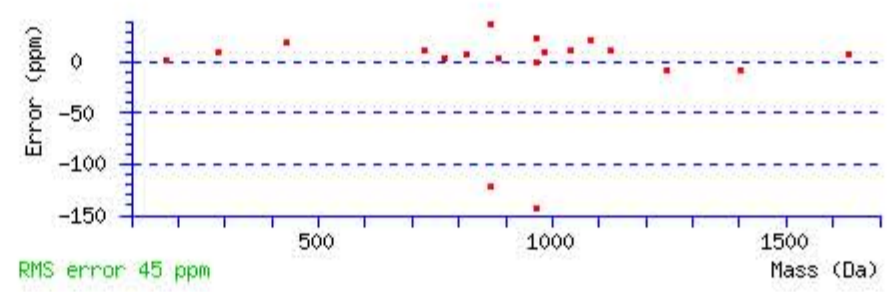

NCBI BLAST search of **AFTECCVVASQLR**

(Parameters: blastp, nr protein database, expect=20000, no filter, PAM30)

Other BLAST [web gateways](#)

All matches to this query

| Score | Mr(calc):   | Delta    | Sequence                            |
|-------|-------------|----------|-------------------------------------|
| 57.1  | 1850.884140 | 0.009942 | <a href="#">AFTECCVVASQLR</a>       |
| 3.2   | 1850.893127 | 0.000955 | <a href="#">AMESTATAAVAAELVSADK</a> |

**Peptide View**

MS/MS Fragmentation of **MSAVEGICTSESPVIDHQGTK**  
 Found in **CO5\_HUMAN**, Complement C5 OS=Homo sapiens GN=C5 PE=1 SV=4

Match to Query 51717: 2556.200082 from(853.073970,3+) rtinseconds(1957) index(32868)  
 Title: Locus:1.1.1.3230.24 File:"2013-07-02 CLN FXIII 60 min 3rd F 3.wiff"  
 Data file C:\Program Files (x86)\Matrix Science\Mascot Daemon\mgf6 FXIII 60 min 3rd\mascot\_daemon\_merge.mgf

Click mouse within plot area to zoom in by factor of two about that point  
 Or, Plot from  to  Da   
 Label all possible matches  Label matches used for scoring

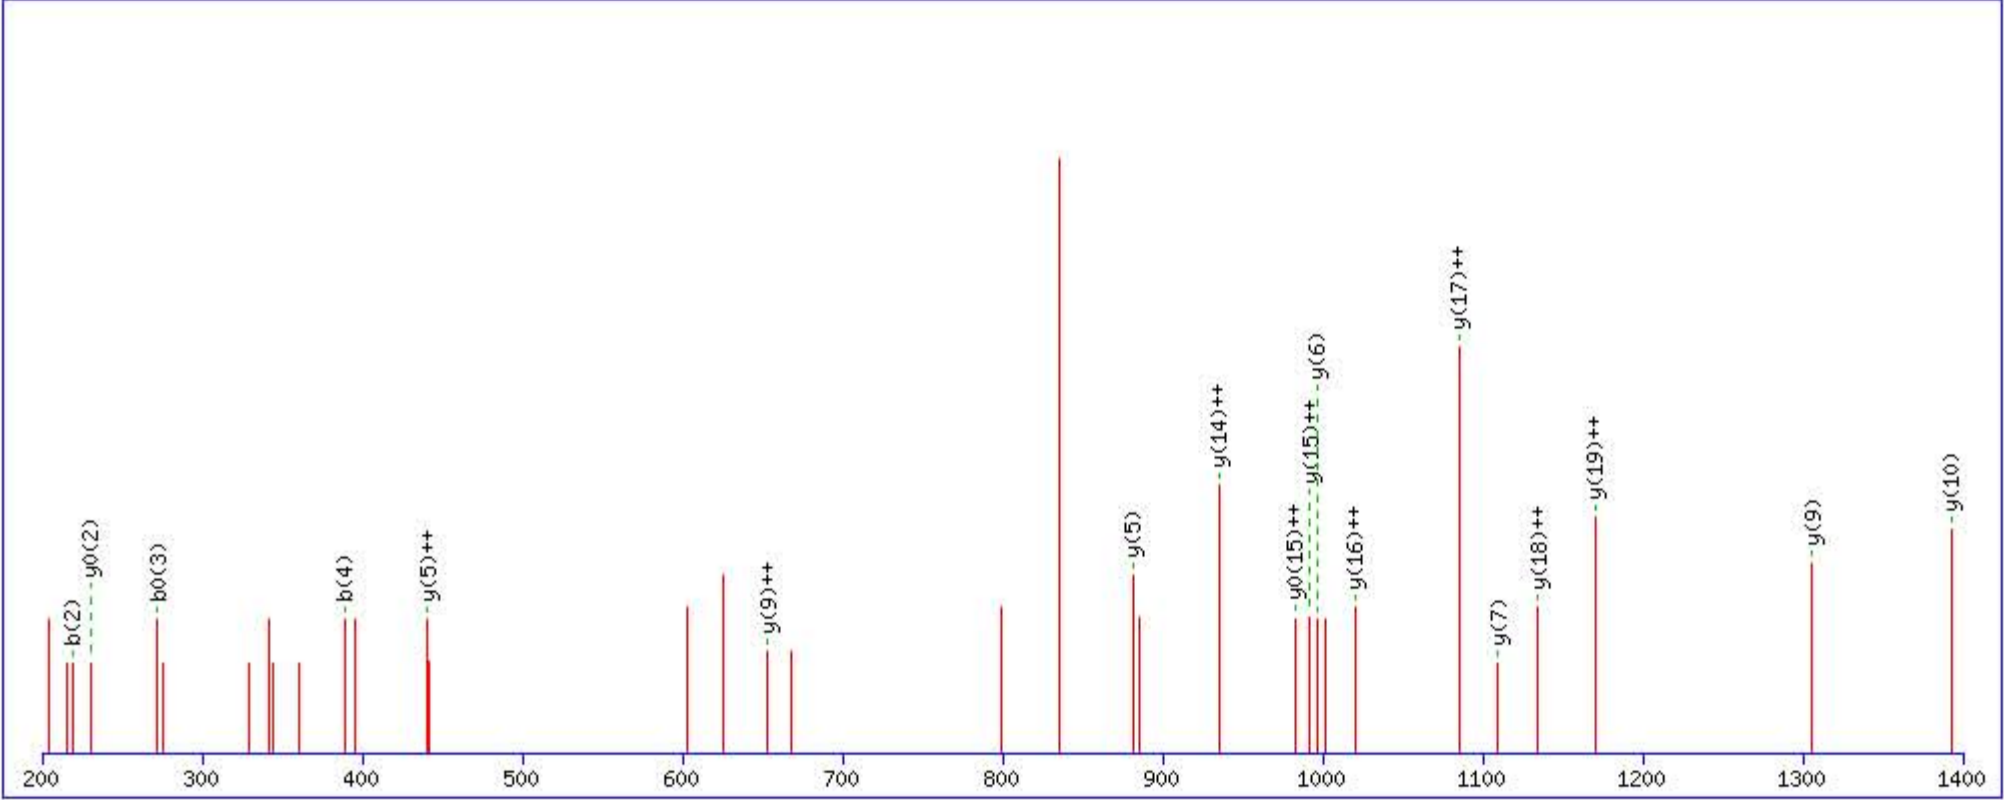

Monoisotopic mass of neutral peptide Mr(calc): 2556.202240  
 Fixed modifications: Carbamidomethyl (C) (apply to specified residues or termini only)  
 Variable modifications:  
 Q18 : Biotin:Thermo-21345 (Q)  
 Ions Score: 39 Expect: 0.0025  
 Matches : 18/202 fragment ions using 35 most intense peaks [\(help\)](#)

| #  | b           | b <sup>++</sup> | b <sup>*</sup> | b <sup>*++</sup> | b <sup>0</sup> | b <sup>0++</sup> | Seq. | y           | y <sup>++</sup> | y <sup>*</sup> | y <sup>*++</sup> | y <sup>0</sup> | y <sup>0++</sup> | #  |
|----|-------------|-----------------|----------------|------------------|----------------|------------------|------|-------------|-----------------|----------------|------------------|----------------|------------------|----|
| 1  | 132.047761  | 66.527518       |                |                  |                |                  | M    |             |                 |                |                  |                |                  | 21 |
| 2  | 219.079789  | 110.043532      |                |                  | 201.069224     | 101.038250       | S    | 2426.169024 | 1213.588150     | 2409.142475    | 1205.074875      | 2408.158459    | 1204.582867      | 20 |
| 3  | 290.116903  | 145.562089      |                |                  | 272.106338     | 136.556807       | A    | 2339.136996 | 1170.072136     | 2322.110447    | 1161.558861      | 2321.126431    | 1161.066853      | 19 |
| 4  | 389.185317  | 195.096296      |                |                  | 371.174752     | 186.091014       | V    | 2268.099882 | 1134.553579     | 2251.073333    | 1126.040304      | 2250.089317    | 1125.548296      | 18 |
| 5  | 518.227910  | 259.617593      |                |                  | 500.217345     | 250.612311       | E    | 2169.031468 | 1085.019372     | 2152.004919    | 1076.506097      | 2151.020903    | 1076.014089      | 17 |
| 6  | 575.249374  | 288.128325      |                |                  | 557.238809     | 279.123043       | G    | 2039.988875 | 1020.498076     | 2022.962326    | 1011.984801      | 2021.978310    | 1011.492793      | 16 |
| 7  | 688.333438  | 344.670357      |                |                  | 670.322873     | 335.665075       | I    | 1982.967411 | 991.987343      | 1965.940862    | 983.474069       | 1964.956846    | 982.982061       | 15 |
| 8  | 848.364087  | 424.685682      |                |                  | 830.353522     | 415.680399       | C    | 1869.883347 | 935.445312      | 1852.856798    | 926.932037       | 1851.872782    | 926.440029       | 14 |
| 9  | 949.411766  | 475.209521      |                |                  | 931.401201     | 466.204239       | T    | 1709.852698 | 855.429987      | 1692.826149    | 846.916713       | 1691.842133    | 846.424704       | 13 |
| 10 | 1036.443794 | 518.725535      |                |                  | 1018.433229    | 509.720253       | S    | 1608.805019 | 804.906147      | 1591.778470    | 796.392873       | 1590.794454    | 795.900865       | 12 |
| 11 | 1165.486387 | 583.246832      |                |                  | 1147.475822    | 574.241549       | E    | 1521.772991 | 761.390133      | 1504.746442    | 752.876859       | 1503.762426    | 752.384851       | 11 |
| 12 | 1252.518415 | 626.762846      |                |                  | 1234.507850    | 617.757563       | S    | 1392.730398 | 696.868837      | 1375.703849    | 688.355563       | 1374.719833    | 687.863554       | 10 |
| 13 | 1349.571179 | 675.289228      |                |                  | 1331.560614    | 666.283945       | P    | 1305.698370 | 653.352823      | 1288.671821    | 644.839548       | 1287.687805    | 644.347540       | 9  |
| 14 | 1448.639593 | 724.823435      |                |                  | 1430.629028    | 715.818152       | V    | 1208.645606 | 604.826441      | 1191.619057    | 596.313166       | 1190.635041    | 595.821158       | 8  |
| 15 | 1561.723657 | 781.365467      |                |                  | 1543.713092    | 772.360184       | I    | 1109.577192 | 555.292234      | 1092.550643    | 546.778959       | 1091.566627    | 546.286951       | 7  |
| 16 | 1676.750600 | 838.878938      |                |                  | 1658.740035    | 829.873656       | D    | 996.493128  | 498.750202      | 979.466579     | 490.236927       | 978.482563     | 489.744919       | 6  |
| 17 | 1813.809512 | 907.408394      |                |                  | 1795.798947    | 898.403112       | H    | 881.466185  | 441.236730      | 864.439636     | 432.723456       | 863.455620     | 432.231448       | 5  |
| 18 | 2253.034838 | 1127.021057     | 2236.008289    | 1118.507782      | 2235.024273    | 1118.015774      | Q    | 744.407273  | 372.707274      | 727.380724     | 364.194000       | 726.396708     | 363.701992       | 4  |
| 19 | 2310.056302 | 1155.531789     | 2293.029753    | 1147.018514      | 2292.045737    | 1146.526506      | G    | 305.181947  | 153.094611      | 288.155398     | 144.581337       | 287.171382     | 144.089329       | 3  |
| 20 | 2411.103981 | 1206.055628     | 2394.077432    | 1197.542354      | 2393.093416    | 1197.050346      | T    | 248.160483  | 124.583879      | 231.133934     | 116.070605       | 230.149918     | 115.578597       | 2  |
| 21 |             |                 |                |                  |                |                  | K    | 147.112804  | 74.060040       | 130.086255     | 65.546765        |                |                  | 1  |

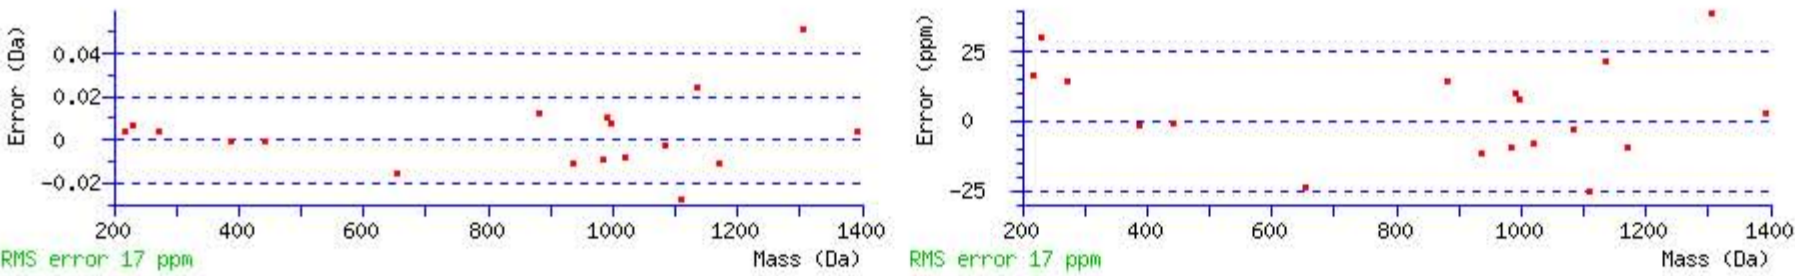

NCBI BLAST search of **MSAVEGICTSESPVIDHQGTK**  
 (Parameters: blastp, nr protein database, expect=20000, no filter, PAM30)  
 Other BLAST [web gateways](#)

**All matches to this query**

| Score | Mr(calc):   | Delta     | Sequence                              |
|-------|-------------|-----------|---------------------------------------|
| 38.7  | 2556.202240 | -0.002158 | <a href="#">MSAVEGICTSESPVIDHQGTK</a> |

# MASCOT SCIENCE Mascot Search Results

## Peptide View

MS/MS Fragmentation of **QGDVECQR**

Found in **CO6\_HUMAN**, Complement component C6 OS=Homo sapiens GN=C6 PE=1 SV=3

Match to Query 23073: 1301.596568 from(651.805560,2+) rtinseconds(1363) index(14952)

Title: Locus:1.1.1.3075.15 File:"2013-07-02 CLN FXIII 60 min 3rd F 2.wiff"

Data file C:\Program Files (x86)\Matrix Science\Mascot Daemon\mgf\6 FXIII 60 min 3rd\mascot\_daemon\_merge.mgf

Click mouse within plot area to zoom in by factor of two about that point

Or, Plot from  to  Da

Label all possible matches  Label matches used for scoring

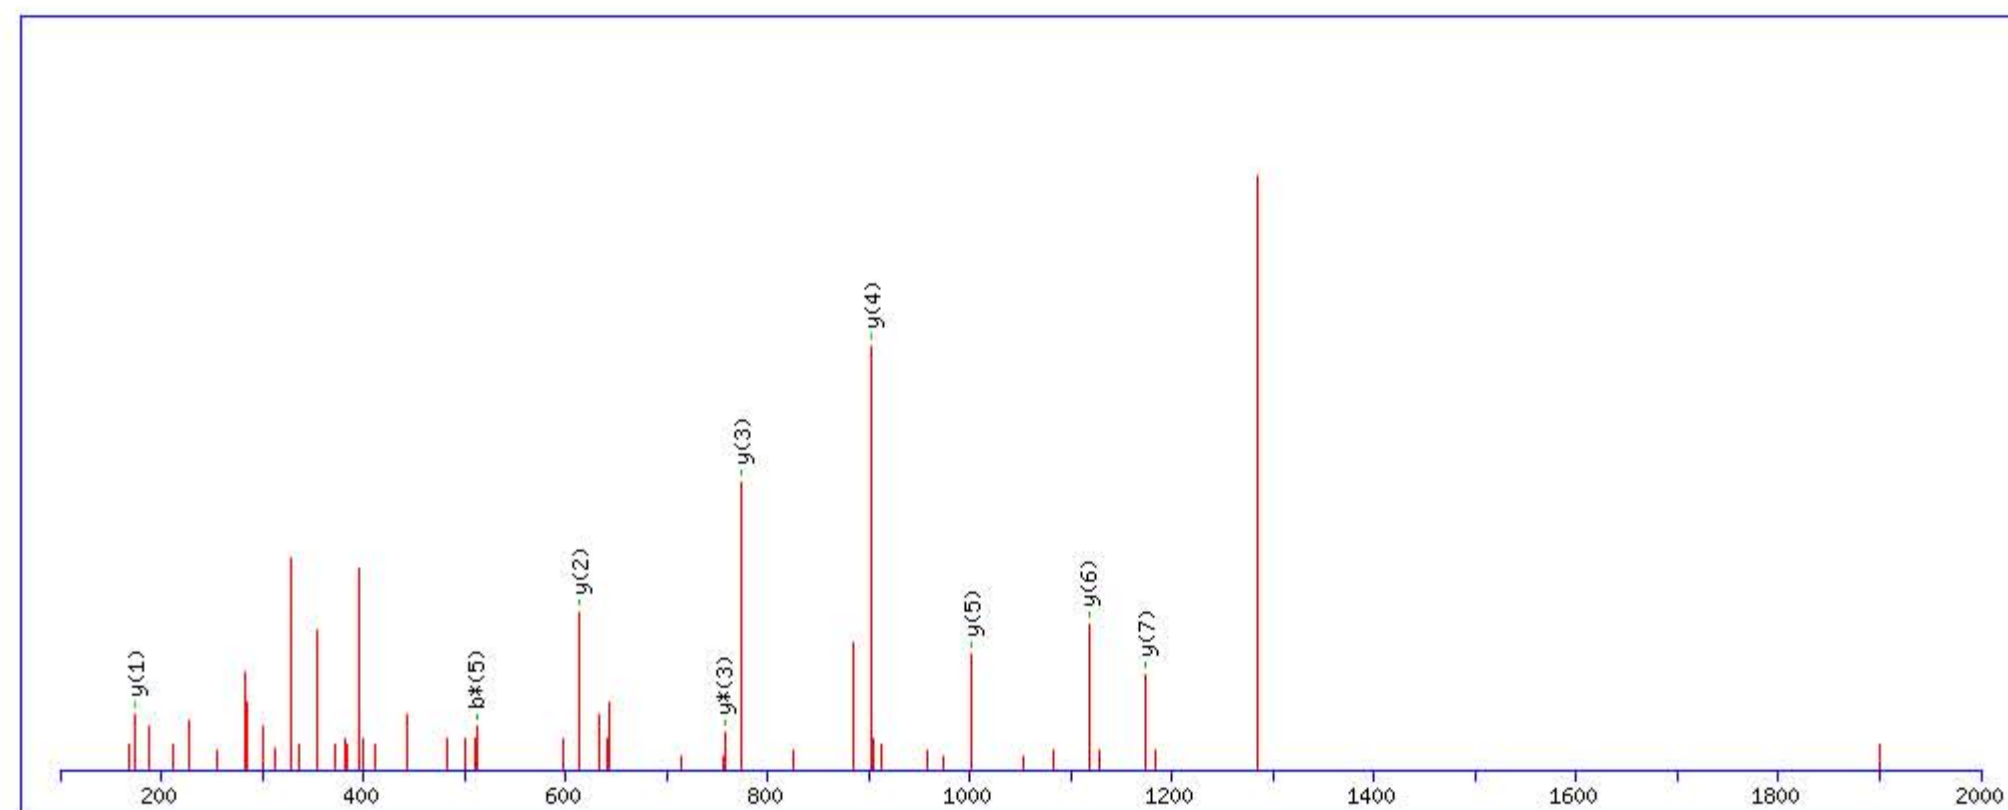

Monoisotopic mass of neutral peptide Mr(calc): 1301.585648

Fixed modifications: Carbamidomethyl (C) (apply to specified residues or termini only)

Variable modifications:

Q7 : Biotin:Thermo-21345 (Q)

Ions Score: 60 Expect: 7.8e-006

Matches : 9/74 fragment ions using 12 most intense peaks [\(help\)](#)

| # | b           | b <sup>++</sup> | b <sup>*</sup>    | b <sup>*++</sup> | b <sup>0</sup> | b <sup>0++</sup> | Seq. | y                  | y <sup>++</sup> | y <sup>*</sup>    | y <sup>*++</sup> | y <sup>0</sup> | y <sup>0++</sup> | # |
|---|-------------|-----------------|-------------------|------------------|----------------|------------------|------|--------------------|-----------------|-------------------|------------------|----------------|------------------|---|
| 1 | 129.065854  | 65.036565       | 112.039305        | 56.523291        |                |                  | Q    |                    |                 |                   |                  |                |                  | 8 |
| 2 | 186.087318  | 93.547297       | 169.060769        | 85.034023        |                |                  | G    | <b>1174.534341</b> | 587.770809      | 1157.507792       | 579.257534       | 1156.523776    | 578.765526       | 7 |
| 3 | 301.114261  | 151.060768      | 284.087712        | 142.547494       | 283.103696     | 142.055486       | D    | <b>1117.512877</b> | 559.260077      | 1100.486328       | 550.746802       | 1099.502312    | 550.254794       | 6 |
| 4 | 400.182675  | 200.594976      | 383.156126        | 192.081701       | 382.172110     | 191.589693       | V    | <b>1002.485934</b> | 501.746605      | 985.459385        | 493.233331       | 984.475369     | 492.741323       | 5 |
| 5 | 529.225268  | 265.116272      | <b>512.198719</b> | 256.602998       | 511.214703     | 256.110990       | E    | <b>903.417520</b>  | 452.212398      | 886.390971        | 443.699124       | 885.406955     | 443.207116       | 4 |
| 6 | 689.255917  | 345.131597      | 672.229368        | 336.618322       | 671.245352     | 336.126314       | C    | <b>774.374927</b>  | 387.691102      | <b>757.348378</b> | 379.177827       |                |                  | 3 |
| 7 | 1128.481243 | 564.744260      | 1111.454694       | 556.230985       | 1110.470678    | 555.738977       | Q    | <b>614.344278</b>  | 307.675777      | 597.317729        | 299.162503       |                |                  | 2 |
| 8 |             |                 |                   |                  |                |                  | R    | <b>175.118952</b>  | 88.063114       | 158.092403        | 79.549839        |                |                  | 1 |

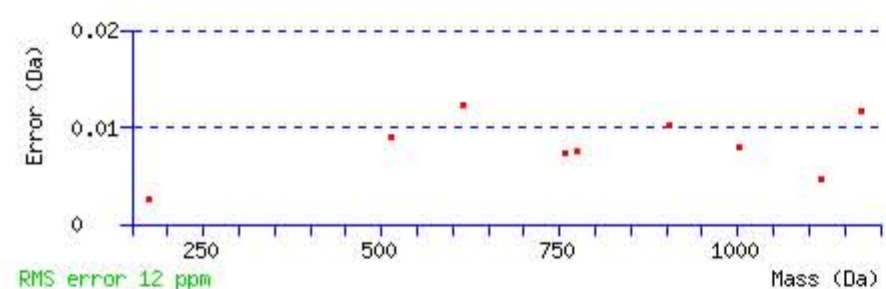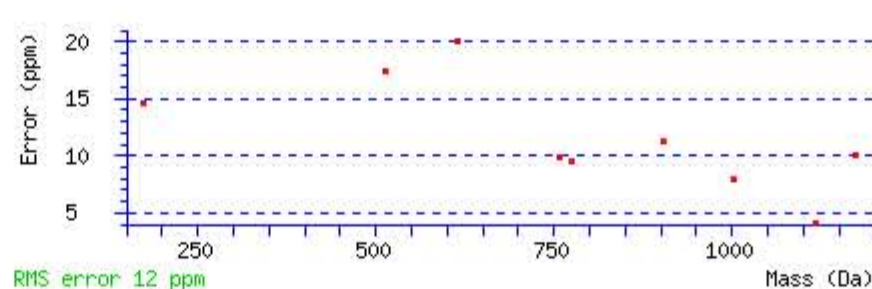

NCBI BLAST search of **QGDVECQR**

(Parameters: blastp, nr protein database, expect=20000, no filter, PAM30)

Other BLAST [web gateways](#)

All matches to this query

| Score | Mr(calc):   | Delta     | Sequence                      |
|-------|-------------|-----------|-------------------------------|
| 59.9  | 1301.585648 | 0.010920  | <a href="#">QGDVECQR</a>      |
| 15.3  | 1301.584763 | 0.011805  | <a href="#">KATEDAEGGDGPR</a> |
| 11.1  | 1301.584747 | 0.011821  | <a href="#">QESPSQENIDR</a>   |
| 10.1  | 1301.604263 | -0.007695 | <a href="#">CPAAMTVMHLR</a>   |
| 6.4   | 1301.604263 | -0.007695 | <a href="#">CPAAMTVMHLR</a>   |
| 4.1   | 1301.584747 | 0.011821  | <a href="#">ESENLASGDQPR</a>  |
| 3.0   | 1301.614609 | -0.018041 | <a href="#">LGNPEEGQRMK</a>   |

# MASCOT SEARCH RESULTS

## Peptide View

MS/MS Fragmentation of **YYQENFCEQICKS**

Found in **CO6\_HUMAN**, Complement component C6 OS=Homo sapiens GN=C6 PE=1 SV=3

Match to Query 44169: 2078.907882 from(693.976570,3+) rtinseconds(2047) index(19351)

Title: Locus:1.1.1.3313.13 File:"2013-07-02 CLN FXIII 60 min 3rd F 2.wiff"

Data file C:\Program Files (x86)\Matrix Science\Mascot Daemon\mgf6 FXIII 60 min 3rd\mascot\_daemon\_merge.mgf

Click mouse within plot area to zoom in by factor of two about that point

Or, Plot from 0 to 2600 Da Full range

Label all possible matches  Label matches used for scoring

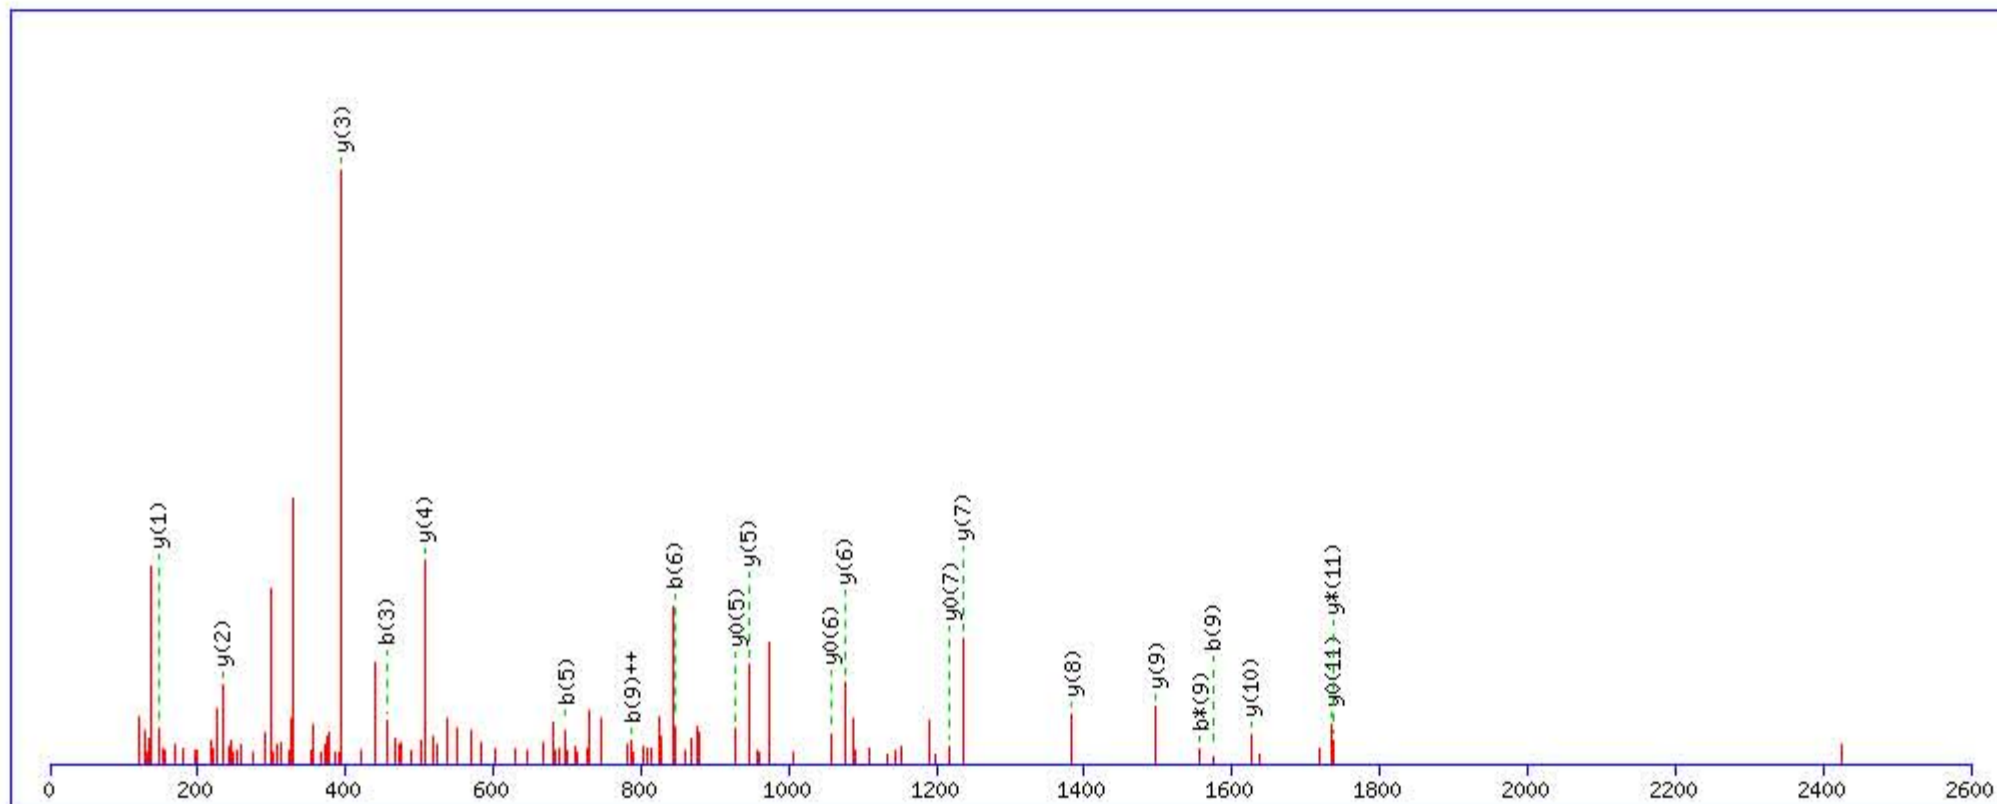

Monoisotopic mass of neutral peptide Mr(calc): 2078.889984

Fixed modifications: Carbamidomethyl (C) (apply to specified residues or termini only)

Variable modifications:

Q9 : Biotin:Thermo-21345 (Q)

Ions Score: 48 Expect: 8.9e-005

Matches : 21/132 fragment ions using 43 most intense peaks (help)

| #  | b                  | b <sup>++</sup>   | b <sup>*</sup>     | b <sup>*++</sup> | b <sup>0</sup> | b <sup>0++</sup> | Seq. | y                  | y <sup>++</sup> | y <sup>*</sup>     | y <sup>*++</sup> | y <sup>0</sup>     | y <sup>0++</sup> | #  |
|----|--------------------|-------------------|--------------------|------------------|----------------|------------------|------|--------------------|-----------------|--------------------|------------------|--------------------|------------------|----|
| 1  | 164.070605         | 82.538940         |                    |                  |                |                  | Y    |                    |                 |                    |                  |                    |                  | 13 |
| 2  | 327.133934         | 164.070605        |                    |                  |                |                  | Y    | 1916.833954        | 958.920615      | 1899.807405        | 950.407341       | 1898.823389        | 949.915333       | 12 |
| 3  | <b>455.192512</b>  | 228.099894        | 438.165963         | 219.586620       |                |                  | Q    | 1753.770625        | 877.388951      | <b>1736.744076</b> | 868.875676       | <b>1735.760060</b> | 868.383668       | 11 |
| 4  | 584.235105         | 292.621191        | 567.208556         | 284.107916       | 566.224540     | 283.615908       | E    | <b>1625.712047</b> | 813.359662      | 1608.685498        | 804.846387       | 1607.701482        | 804.354379       | 10 |
| 5  | <b>698.278032</b>  | 349.642654        | 681.251483         | 341.129380       | 680.267467     | 340.637372       | N    | <b>1496.669454</b> | 748.838365      | 1479.642905        | 740.325091       | 1478.658889        | 739.833083       | 9  |
| 6  | <b>845.346446</b>  | 423.176861        | 828.319897         | 414.663587       | 827.335881     | 414.171579       | F    | <b>1382.626527</b> | 691.816902      | 1365.599978        | 683.303627       | 1364.615962        | 682.811619       | 8  |
| 7  | 1005.377095        | 503.192186        | 988.350546         | 494.678911       | 987.366530     | 494.186903       | C    | <b>1235.558113</b> | 618.282695      | 1218.531564        | 609.769420       | <b>1217.547548</b> | 609.277412       | 7  |
| 8  | 1134.419688        | 567.713482        | 1117.393139        | 559.200208       | 1116.409123    | 558.708200       | E    | <b>1075.527464</b> | 538.267370      | 1058.500915        | 529.754096       | <b>1057.516899</b> | 529.262088       | 6  |
| 9  | <b>1573.645014</b> | <b>787.326145</b> | <b>1556.618465</b> | 778.812871       | 1555.634449    | 778.320863       | Q    | <b>946.484871</b>  | 473.746074      | 929.458322         | 465.232799       | <b>928.474306</b>  | 464.740791       | 5  |
| 10 | 1686.729078        | 843.868177        | 1669.702529        | 835.354903       | 1668.718513    | 834.862895       | I    | <b>507.259545</b>  | 254.133411      | 490.232996         | 245.620136       | 489.248980         | 245.128128       | 4  |
| 11 | 1846.759727        | 923.883502        | 1829.733178        | 915.370227       | 1828.749162    | 914.878219       | C    | <b>394.175481</b>  | 197.591379      | 377.148932         | 189.078104       | 376.164916         | 188.586096       | 3  |
| 12 | 1933.791755        | 967.399516        | 1916.765206        | 958.886241       | 1915.781190    | 958.394233       | S    | <b>234.144832</b>  | 117.576054      | 217.118283         | 109.062780       | 216.134267         | 108.570772       | 2  |
| 13 |                    |                   |                    |                  |                |                  | K    | <b>147.112804</b>  | 74.060040       | 130.086255         | 65.546765        |                    |                  | 1  |

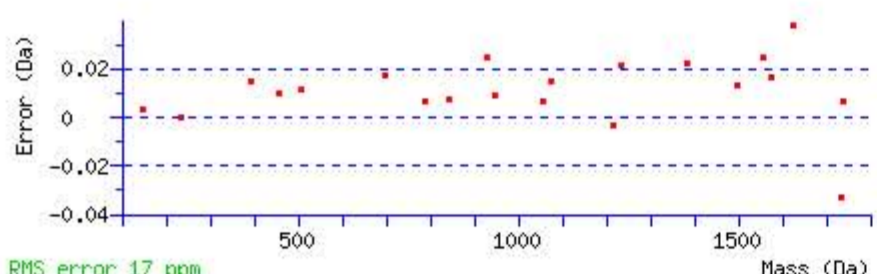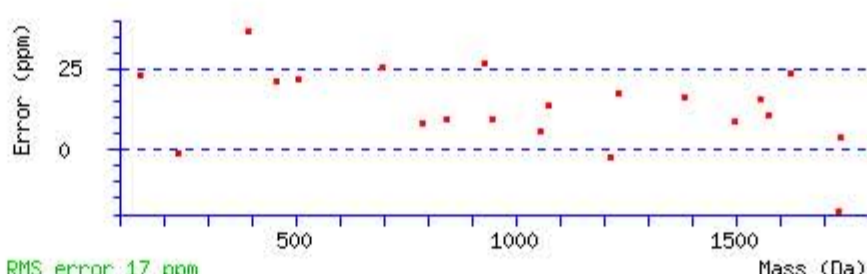

NCBI BLAST search of **YYQENFCEQICKS**

(Parameters: blastp, nr protein database, expect=20000, no filter, PAM30)

Other BLAST [web gateways](#)

All matches to this query

| Score | Mr(calc):   | Delta    | Sequence                      |
|-------|-------------|----------|-------------------------------|
| 48.0  | 2078.889984 | 0.017898 | <a href="#">YYQENFCEQICKS</a> |

Mascot: <http://www.matrixscience.com/>

# MASCOT SCIENCE Mascot Search Results

## Peptide View

MS/MS Fragmentation of **SFGGQCR**

Found in **CO7\_HUMAN**, Complement component C7 OS=Homo sapiens GN=C7 PE=1 SV=2

Match to Query 17316: 1121.508208 from(561.761380,2+) rtinseconds(1564) index(2446)

Title: Locus:1.1.1.3096.12 File:"2013-07-02 CLN FXIII 60 min 3rd F 1.wiff"

Data file C:\Program Files (x86)\Matrix Science\Mascot Daemon\mgf6 FXIII 60 min 3rd\mascot\_daemon\_merge.mgf

Click mouse within plot area to zoom in by factor of two about that point

Or, Plot from  to  Da

Label all possible matches  Label matches used for scoring

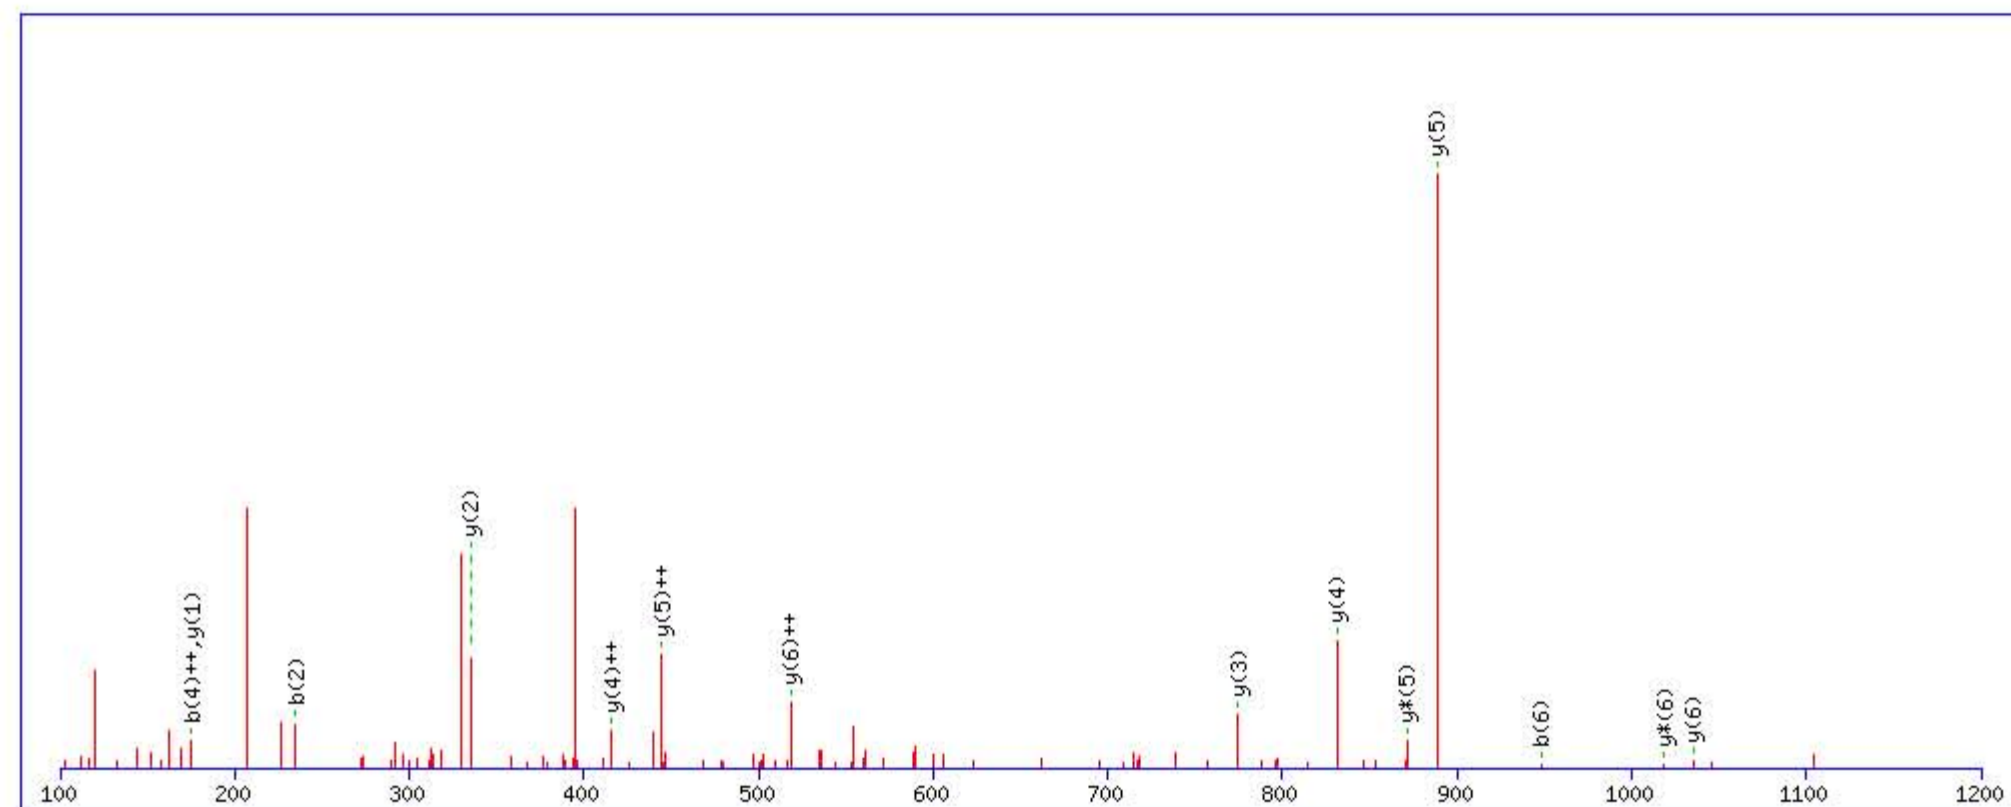

Monoisotopic mass of neutral peptide Mr(calc): 1121.511032

Fixed modifications: Carbamidomethyl (C) (apply to specified residues or termini only)

Variable modifications:

Q5 : Biotin:Thermo-21345 (Q)

Ions Score: 31 Expect: 0.0038

Matches : 14/52 fragment ions using 29 most intense peaks [\(help\)](#)

| # | b                 | b <sup>++</sup>   | b <sup>*</sup> | b <sup>*++</sup> | b <sup>0</sup> | b <sup>0++</sup> | Seq. | y                  | y <sup>++</sup>   | y <sup>*</sup>     | y <sup>*++</sup> | # |
|---|-------------------|-------------------|----------------|------------------|----------------|------------------|------|--------------------|-------------------|--------------------|------------------|---|
| 1 | 88.039304         | 44.523290         |                |                  | 70.028739      | 35.518008        | S    |                    |                   |                    |                  | 7 |
| 2 | <b>235.107718</b> | 118.057497        |                |                  | 217.097153     | 109.052214       | F    | <b>1035.486269</b> | <b>518.246773</b> | <b>1018.459720</b> | 509.733498       | 6 |
| 3 | 292.129182        | 146.568229        |                |                  | 274.118617     | 137.562946       | G    | <b>888.417855</b>  | <b>444.712566</b> | <b>871.391306</b>  | 436.199291       | 5 |
| 4 | 349.150646        | <b>175.078961</b> |                |                  | 331.140081     | 166.073678       | G    | <b>831.396391</b>  | <b>416.201834</b> | 814.369842         | 407.688559       | 4 |
| 5 | 788.375972        | 394.691624        | 771.349423     | 386.178350       | 770.365407     | 385.686342       | Q    | <b>774.374927</b>  | 387.691102        | 757.348378         | 379.177827       | 3 |
| 6 | <b>948.406621</b> | 474.706949        | 931.380072     | 466.193674       | 930.396056     | 465.701666       | C    | <b>335.149601</b>  | 168.078438        | 318.123052         | 159.565164       | 2 |
| 7 |                   |                   |                |                  |                |                  | R    | <b>175.118952</b>  | 88.063114         | 158.092403         | 79.549839        | 1 |

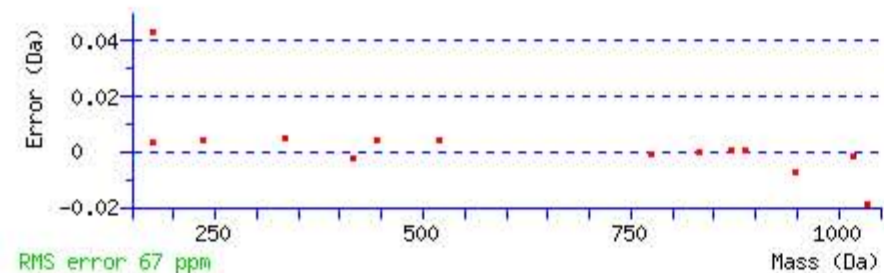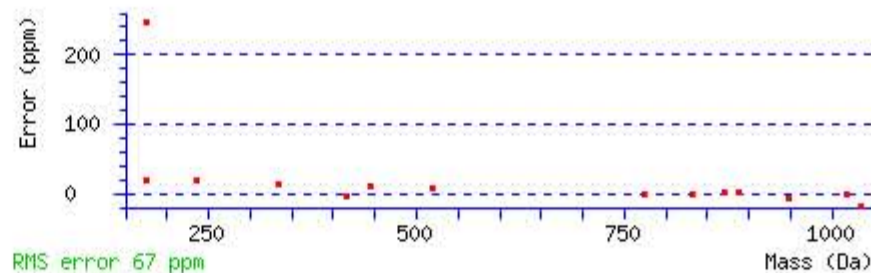

NCBI BLAST search of **SFGGQCR**

(Parameters: blastp, nr protein database, expect=20000, no filter, PAM30)

Other BLAST [web gateways](#)

## All matches to this query

| Score | Mr(calc):   | Delta     | Sequence                     |
|-------|-------------|-----------|------------------------------|
| 30.7  | 1121.511032 | -0.002824 | <a href="#">SFGGQCR</a>      |
| 4.8   | 1121.500259 | 0.007949  | <a href="#">HPGFHQEDR</a>    |
| 4.7   | 1121.513535 | -0.005327 | <a href="#">MGSGGDSLLGGR</a> |
| 1.8   | 1121.502274 | 0.005934  | <a href="#">MSVEEQIDR</a>    |

Mascot: <http://www.matrixscience.com/>

# MASCOT Search Results

## Peptide View

MS/MS Fragmentation of **CFSGQCISK**

Found in **CO7\_HUMAN**, Complement component C7 OS=Homo sapiens GN=C7 PE=1 SV=2

Match to Query 26264: 1396.629708 from(699.322130,2+) rtinseconds(1656) index(3072)

Title: Locus:1.1.1.3128.11 File:"2013-07-02 CLN FXIII 60 min 3rd F 1.wiff"

Data file C:\Program Files (x86)\Matrix Science\Mascot Daemon\mgf\6 FXIII 60 min 3rd\mascot\_daemon\_merge.mgf

Click mouse within plot area to zoom in by factor of two about that point

Or, Plot from  to  Da

Label all possible matches  Label matches used for scoring

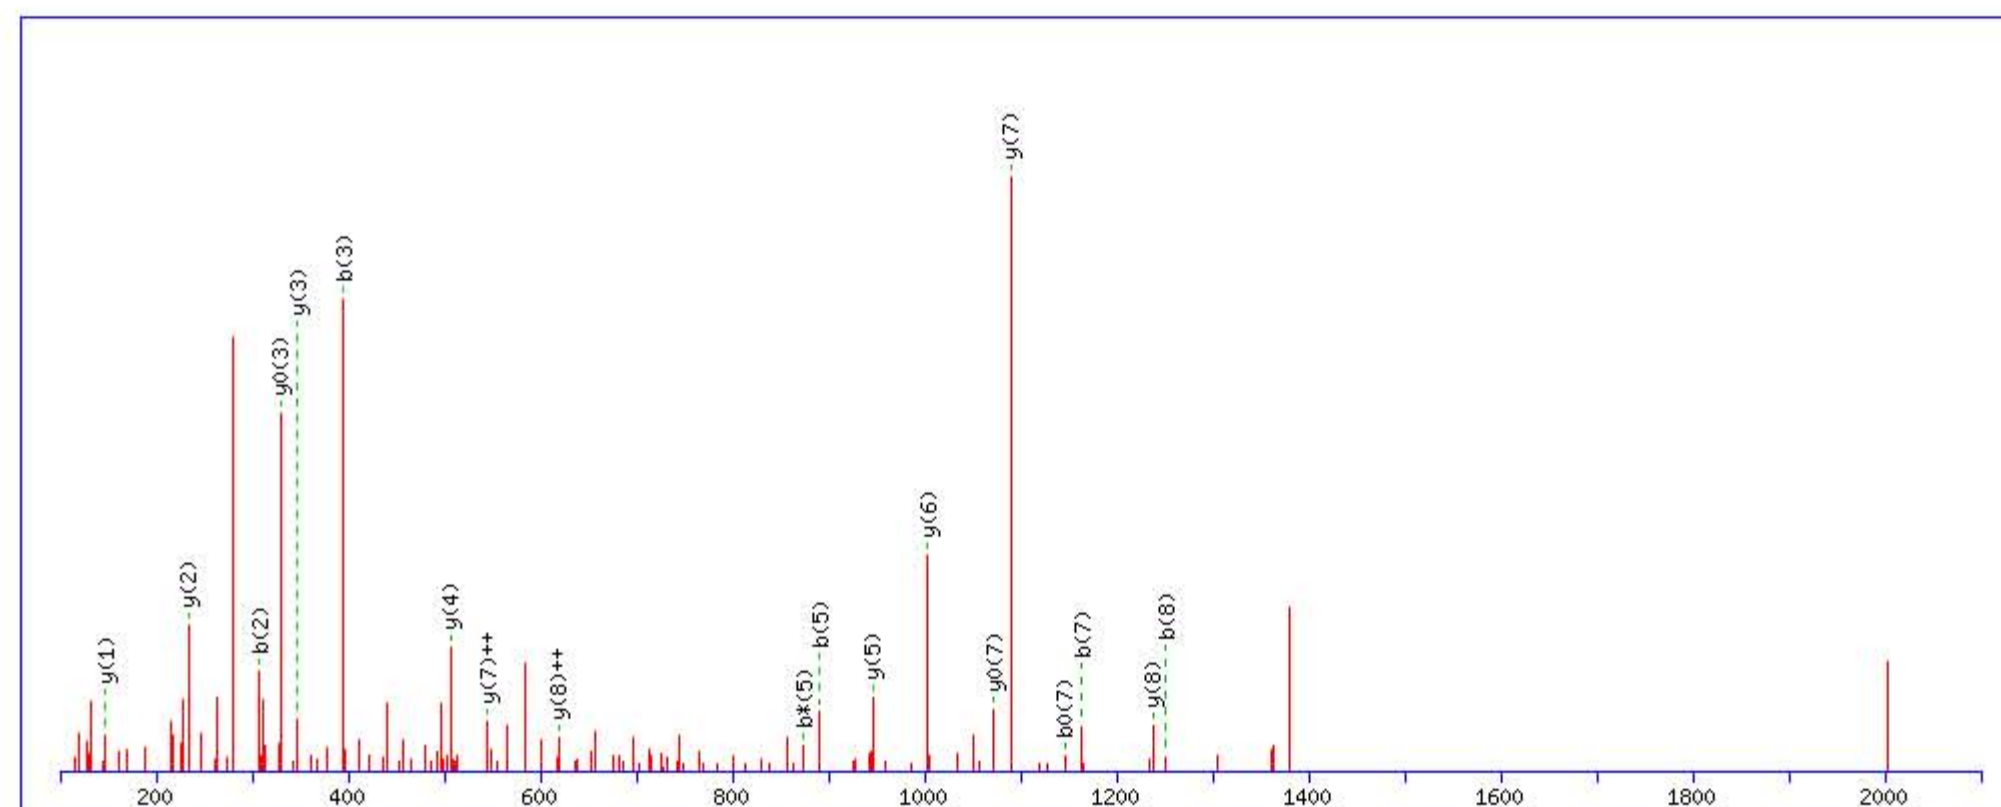

Monoisotopic mass of neutral peptide Mr(calc): 1396.630157

Fixed modifications: Carbamidomethyl (C) (apply to specified residues or termini only)

Variable modifications:

Q5 : Biotin:Thermo-21345 (Q)

Ions Score: 48 Expect: 0.00012

Matches : 19/82 fragment ions using 39 most intense peaks ([help](#))

| # | b                  | b <sup>++</sup> | b <sup>*</sup>    | b <sup>+++</sup> | b <sup>0</sup>     | b <sup>0++</sup> | Seq. | y                  | y <sup>++</sup>   | y <sup>*</sup> | y <sup>+++</sup> | y <sup>0</sup>     | y <sup>0++</sup> | # |
|---|--------------------|-----------------|-------------------|------------------|--------------------|------------------|------|--------------------|-------------------|----------------|------------------|--------------------|------------------|---|
| 1 | 161.037925         | 81.022600       |                   |                  |                    |                  | C    |                    |                   |                |                  |                    |                  | 9 |
| 2 | <b>308.106339</b>  | 154.556807      |                   |                  |                    |                  | F    | <b>1237.606777</b> | <b>619.307027</b> | 1220.580228    | 610.793752       | 1219.596212        | 610.301744       | 8 |
| 3 | <b>395.138367</b>  | 198.072821      |                   |                  | 377.127802         | 189.067539       | S    | <b>1090.538363</b> | <b>545.772819</b> | 1073.511814    | 537.259545       | <b>1072.527798</b> | 536.767537       | 7 |
| 4 | 452.159831         | 226.583553      |                   |                  | 434.149266         | 217.578271       | G    | <b>1003.506335</b> | 502.256806        | 986.479786     | 493.743531       | 985.495770         | 493.251523       | 6 |
| 5 | <b>891.385157</b>  | 446.196217      | <b>874.358608</b> | 437.682942       | 873.374592         | 437.190934       | Q    | <b>946.484871</b>  | 473.746074        | 929.458322     | 465.232799       | 928.474306         | 464.740791       | 5 |
| 6 | 1051.415806        | 526.211541      | 1034.389257       | 517.698267       | 1033.405241        | 517.206258       | C    | <b>507.259545</b>  | 254.133410        | 490.232996     | 245.620136       | 489.248980         | 245.128128       | 4 |
| 7 | <b>1164.499870</b> | 582.753573      | 1147.473321       | 574.240298       | <b>1146.489305</b> | 573.748290       | I    | <b>347.228896</b>  | 174.118086        | 330.202347     | 165.604811       | <b>329.218331</b>  | 165.112803       | 3 |
| 8 | <b>1251.531898</b> | 626.269587      | 1234.505349       | 617.756313       | 1233.521333        | 617.264304       | S    | <b>234.144832</b>  | 117.576054        | 217.118283     | 109.062780       | 216.134267         | 108.570772       | 2 |
| 9 |                    |                 |                   |                  |                    |                  | K    | <b>147.112804</b>  | 74.060040         | 130.086255     | 65.546765        |                    |                  | 1 |

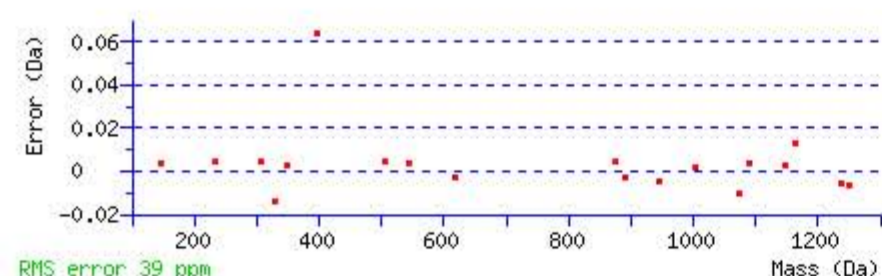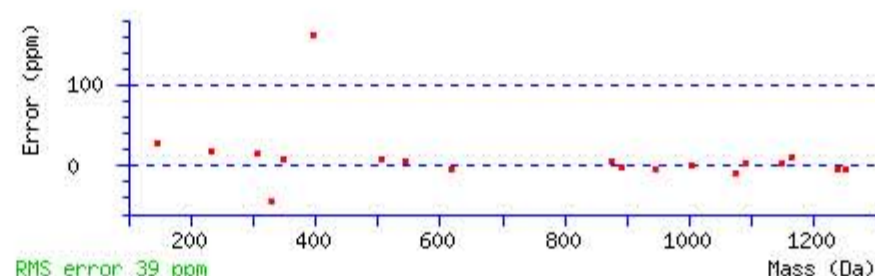

NCBI BLAST search of **CFSGQCISK**

(Parameters: blastp, nr protein database, expect=20000, no filter, PAM30)

Other BLAST [web gateways](#)

All matches to this query

| Score | Mr(calc):   | Delta     | Sequence                     |
|-------|-------------|-----------|------------------------------|
| 48.5  | 1396.630157 | -0.000449 | <a href="#">CFSGQCISK</a>    |
| 16.0  | 1396.629272 | 0.000436  | <a href="#">QLSQAEATDFCK</a> |

Mascot: <http://www.matrixscience.com/>

# MASCOT Search Results

## Peptide View

MS/MS Fragmentation of **AASGTQNNVLR**

Found in **CO7\_HUMAN**, Complement component C7 OS=Homo sapiens GN=C7 PE=1 SV=2

Match to Query 28370: 1440.759128 from(721.386840,2+) rtinseconds(1593) index(16535)

Title: Locus:1.1.1.3155.18 File:"2013-07-02 CLN FXIII 60 min 3rd F 2.wiff"

Data file C:\Program Files (x86)\Matrix Science\Mascot Daemon\mgf\6 FXIII 60 min 3rd\mascot\_daemon\_merge.mgf

Click mouse within plot area to zoom in by factor of two about that point

Or, Plot from  to  Da

Label all possible matches  Label matches used for scoring

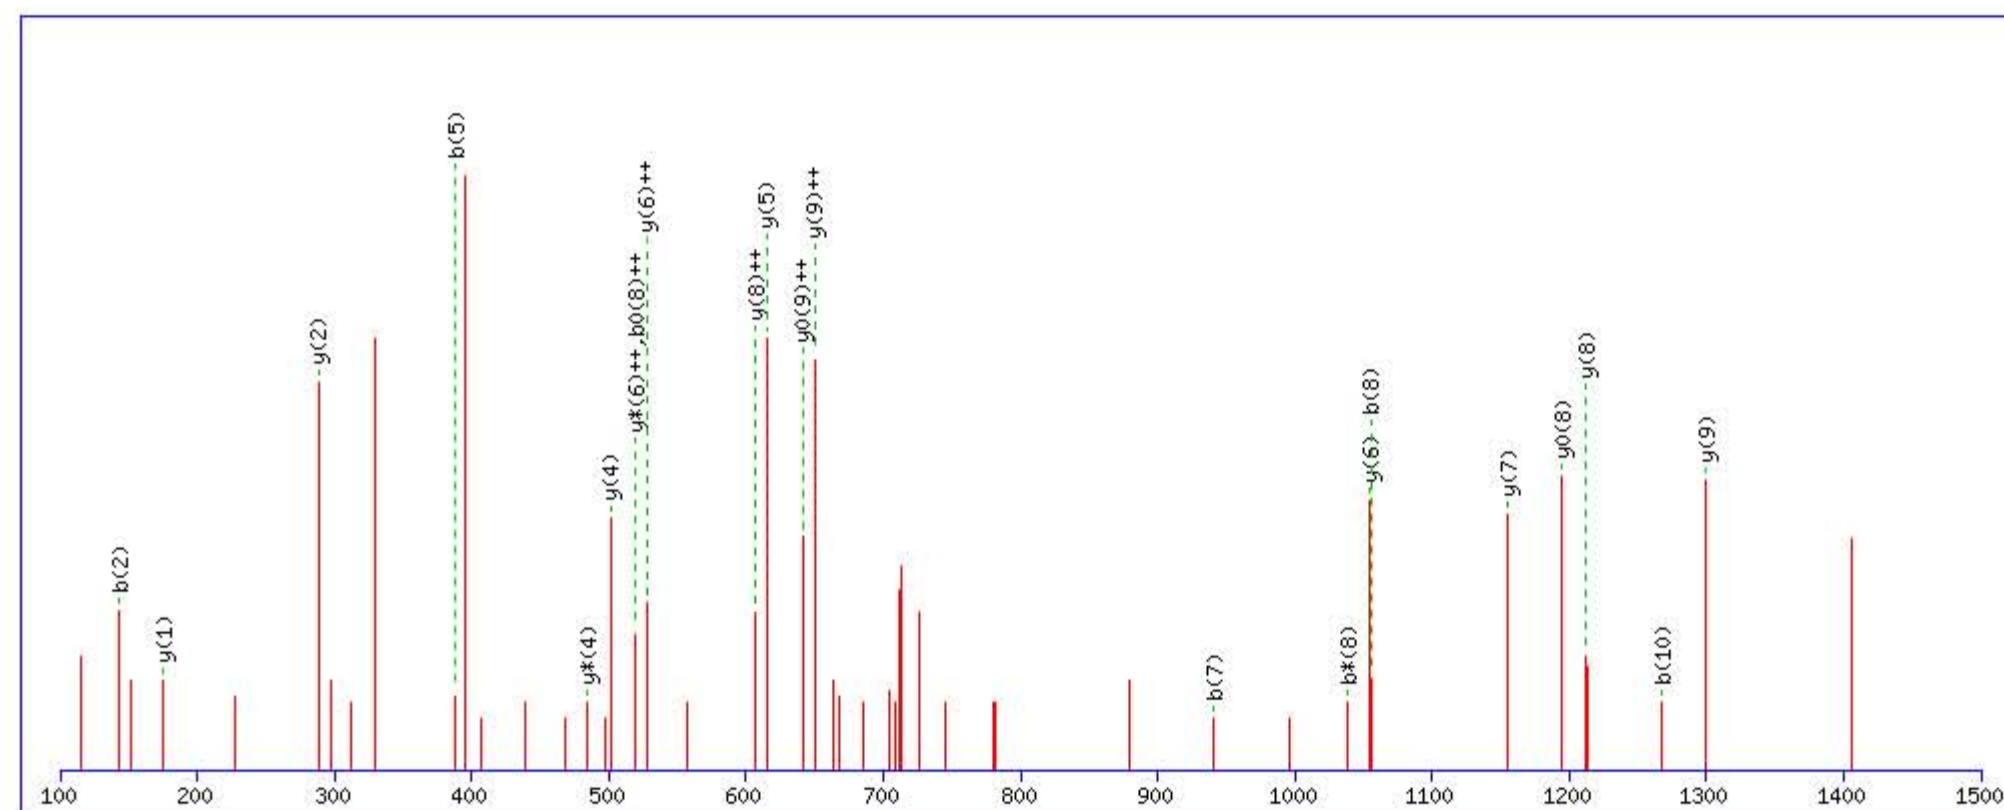

Monoisotopic mass of neutral peptide Mr(calc): 1440.750717

Fixed modifications: Carbamidomethyl (C) (apply to specified residues or termini only)

Variable modifications:

Q6 : Biotin:Thermo-21345 (Q)

Ions Score: 48 Expect: 0.00022

Matches : 22/94 fragment ions using 41 most intense peaks [\(help\)](#)

| #  | b                  | b <sup>++</sup> | b <sup>*</sup>     | b <sup>+++</sup> | b <sup>0</sup> | b <sup>0++</sup>  | Seq. | y                  | y <sup>++</sup>   | y <sup>*</sup>    | y <sup>+++</sup>  | y <sup>0</sup>     | y <sup>0++</sup>  | #  |
|----|--------------------|-----------------|--------------------|------------------|----------------|-------------------|------|--------------------|-------------------|-------------------|-------------------|--------------------|-------------------|----|
| 1  | 72.044390          | 36.525833       |                    |                  |                |                   | A    |                    |                   |                   |                   |                    |                   | 11 |
| 2  | <b>143.081504</b>  | 72.044390       |                    |                  |                |                   | A    | 1370.720895        | 685.864086        | 1353.694346       | 677.350811        | 1352.710330        | 676.858803        | 10 |
| 3  | 230.113532         | 115.560404      |                    |                  | 212.102967     | 106.555121        | S    | <b>1299.683781</b> | <b>650.345529</b> | 1282.657232       | 641.832254        | 1281.673216        | <b>641.340246</b> | 9  |
| 4  | 287.134996         | 144.071136      |                    |                  | 269.124431     | 135.065854        | G    | <b>1212.651753</b> | <b>606.829515</b> | 1195.625204       | 598.316240        | <b>1194.641188</b> | 597.824232        | 8  |
| 5  | <b>388.182675</b>  | 194.594976      |                    |                  | 370.172110     | 185.589693        | T    | <b>1155.630289</b> | 578.318783        | 1138.603740       | 569.805508        | 1137.619724        | 569.313500        | 7  |
| 6  | 827.408001         | 414.207639      | 810.381452         | 405.694364       | 809.397436     | 405.202356        | Q    | <b>1054.582610</b> | <b>527.794943</b> | 1037.556061       | <b>519.281669</b> |                    |                   | 6  |
| 7  | <b>941.450928</b>  | 471.229102      | 924.424379         | 462.715828       | 923.440363     | 462.223820        | N    | <b>615.357284</b>  | 308.182280        | 598.330735        | 299.669006        |                    |                   | 5  |
| 8  | <b>1055.493855</b> | 528.250566      | <b>1038.467306</b> | 519.737291       | 1037.483290    | <b>519.245283</b> | N    | <b>501.314357</b>  | 251.160816        | <b>484.287808</b> | 242.647542        |                    |                   | 4  |
| 9  | 1154.562269        | 577.784773      | 1137.535720        | 569.271498       | 1136.551704    | 568.779490        | V    | 387.271430         | 194.139353        | 370.244881        | 185.626078        |                    |                   | 3  |
| 10 | <b>1267.646333</b> | 634.326805      | 1250.619784        | 625.813530       | 1249.635768    | 625.321522        | L    | <b>288.203016</b>  | 144.605146        | 271.176467        | 136.091871        |                    |                   | 2  |
| 11 |                    |                 |                    |                  |                |                   | R    | <b>175.118952</b>  | 88.063114         | 158.092403        | 79.549839         |                    |                   | 1  |

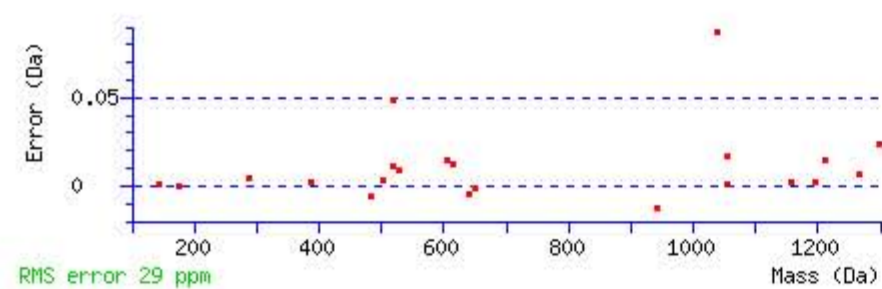

RMS error 29 ppm

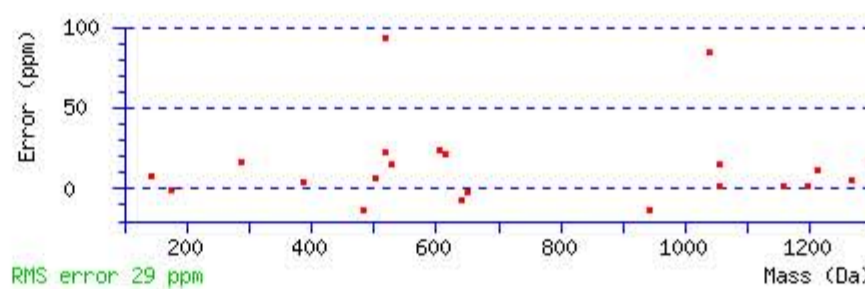

RMS error 29 ppm

NCBI BLAST search of [AASGTQNNVLR](#)

(Parameters: blastp, nr protein database, expect=20000, no filter, PAM30)

Other BLAST [web gateways](#)

All matches to this query

| Score | Mr(calc):   | Delta     | Sequence                       |
|-------|-------------|-----------|--------------------------------|
| 48.3  | 1440.750717 | 0.008411  | <a href="#">AASGTQNNVLR</a>    |
| 8.7   | 1440.765961 | -0.006833 | <a href="#">VMHANNPKYVLR</a>   |
| 4.6   | 1440.739471 | 0.019657  | <a href="#">EEKCPLGTAPALR</a>  |
| 3.8   | 1440.750717 | 0.008411  | <a href="#">LDQLDASRGR</a>     |
| 3.6   | 1440.769318 | -0.010190 | <a href="#">RMQEMLHKIQK</a>    |
| 3.0   | 1440.757217 | 0.001911  | <a href="#">NNLLEIEVNDLR</a>   |
| 2.5   | 1440.754715 | 0.004413  | <a href="#">MAAWSPAAAAPLLR</a> |
| 1.9   | 1440.757202 | 0.001926  | <a href="#">NNLLQAELEELR</a>   |
| 1.0   | 1440.761963 | -0.002835 | <a href="#">THTVRLAMGNLR</a>   |
| 0.1   | 1440.739487 | 0.019641  | <a href="#">AAVTGQDEAIR</a>    |

# MASCOT SEARCH RESULTS

## Peptide View

MS/MS Fragmentation of **LSGNVLSYTFQVK**

Found in **CO7\_HUMAN**, Complement component C7 OS=Homo sapiens GN=C7 PE=1 SV=2

Match to Query 37805: 1765.950672 from(589.657500,3+) rtinseconds(2495) index(7487)

Title: Locus:1.1.1.3421.12 File:"2013-07-02 CLN FXIII 60 min 3rd F 1.wiff"

Data file C:\Program Files (x86)\Matrix Science\Mascot Daemon\mgf\6 FXIII 60 min 3rd\mascot\_daemon\_merge.mgf

Click mouse within plot area to zoom in by factor of two about that point

Or, Plot from  to  Da

Label all possible matches  Label matches used for scoring

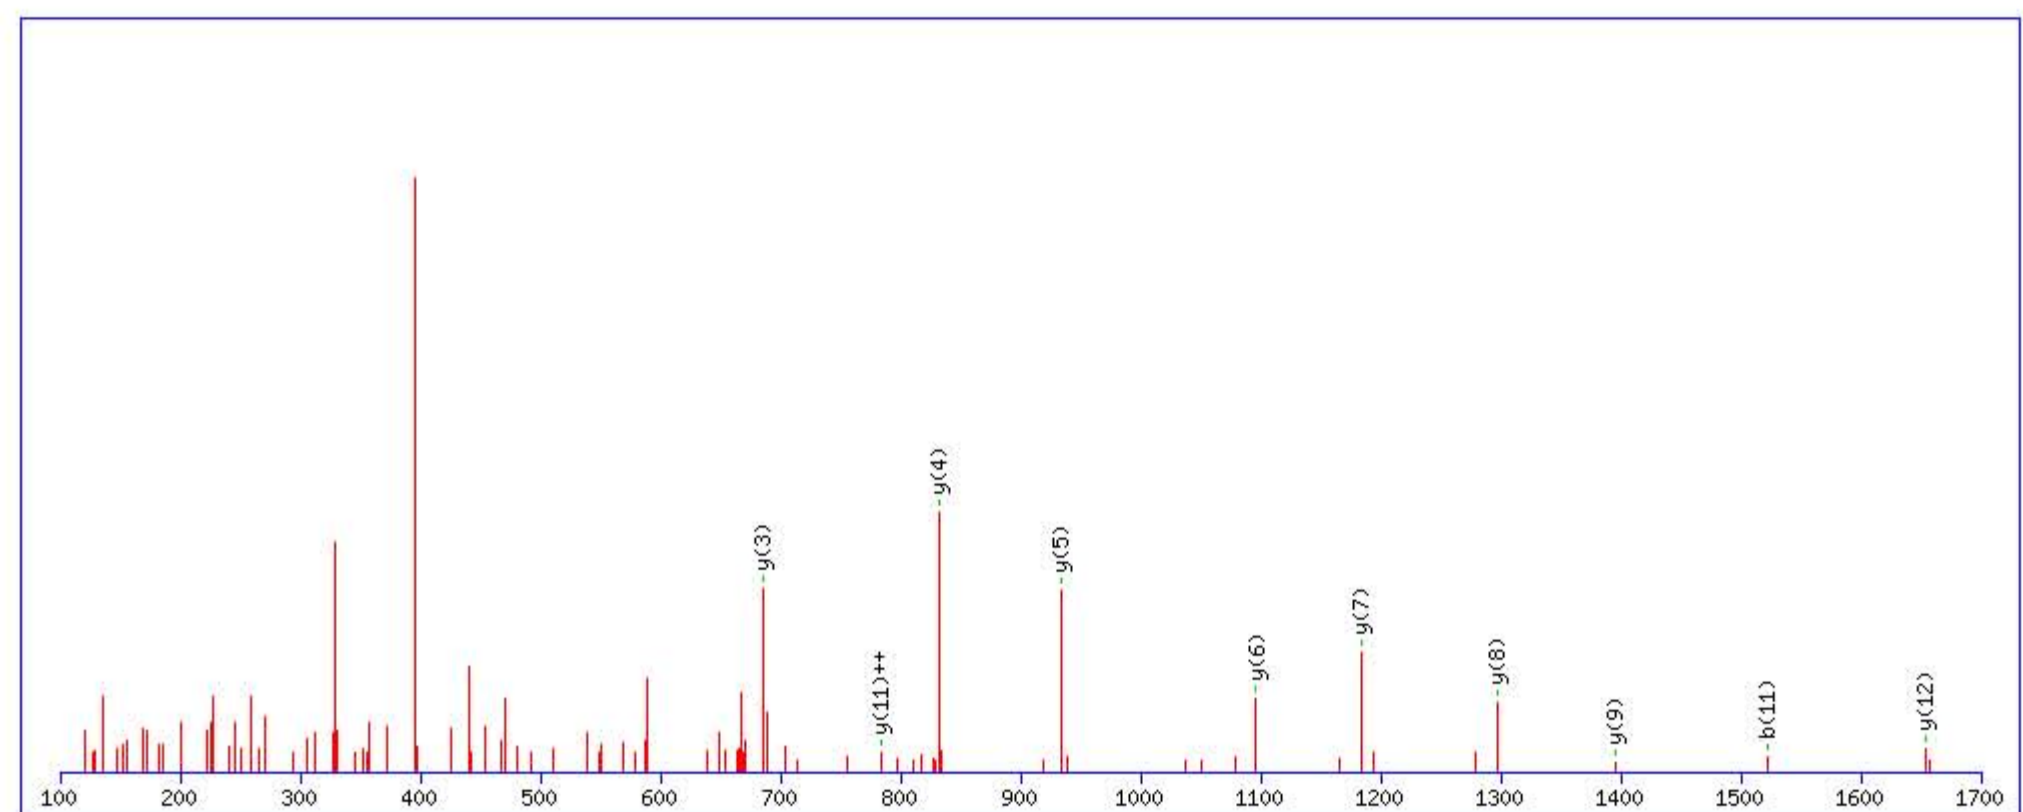

Monoisotopic mass of neutral peptide Mr(calc): 1765.943680

Fixed modifications: Carbamidomethyl (C) (apply to specified residues or termini only)

Variable modifications:

Q11 : Biotin:Thermo-21345 (Q)

Ions Score: 50 Expect: 0.00025

Matches : 10/128 fragment ions using 15 most intense peaks [\(help\)](#)

| #  | b                  | b <sup>++</sup> | b <sup>*</sup> | b <sup>*++</sup> | b <sup>0</sup> | b <sup>0++</sup> | Seq. | y                  | y <sup>++</sup>   | y <sup>*</sup> | y <sup>*++</sup> | y <sup>0</sup> | y <sup>0++</sup> | #  |
|----|--------------------|-----------------|----------------|------------------|----------------|------------------|------|--------------------|-------------------|----------------|------------------|----------------|------------------|----|
| 1  | 114.091340         | 57.549308       |                |                  |                |                  | L    |                    |                   |                |                  |                |                  | 13 |
| 2  | 201.123368         | 101.065322      |                |                  | 183.112803     | 92.060039        | S    | <b>1653.866891</b> | 827.437084        | 1636.840342    | 818.923809       | 1635.856326    | 818.431801       | 12 |
| 3  | 258.144832         | 129.576054      |                |                  | 240.134267     | 120.570771       | G    | 1566.834863        | <b>783.921070</b> | 1549.808314    | 775.407795       | 1548.824298    | 774.915787       | 11 |
| 4  | 372.187759         | 186.597517      | 355.161210     | 178.084243       | 354.177194     | 177.592235       | N    | 1509.813399        | 755.410338        | 1492.786850    | 746.897063       | 1491.802834    | 746.405055       | 10 |
| 5  | 471.256173         | 236.131724      | 454.229624     | 227.618450       | 453.245608     | 227.126442       | V    | <b>1395.770472</b> | 698.388874        | 1378.743923    | 689.875600       | 1377.759907    | 689.383592       | 9  |
| 6  | 584.340237         | 292.673757      | 567.313688     | 284.160482       | 566.329672     | 283.668474       | L    | <b>1296.702058</b> | 648.854667        | 1279.675509    | 640.341393       | 1278.691493    | 639.849385       | 8  |
| 7  | 671.372265         | 336.189771      | 654.345716     | 327.676496       | 653.361700     | 327.184488       | S    | <b>1183.617994</b> | 592.312635        | 1166.591445    | 583.799361       | 1165.607429    | 583.307353       | 7  |
| 8  | 834.435594         | 417.721435      | 817.409045     | 409.208161       | 816.425029     | 408.716153       | Y    | <b>1096.585966</b> | 548.796621        | 1079.559417    | 540.283347       | 1078.575401    | 539.791339       | 6  |
| 9  | 935.483273         | 468.245275      | 918.456724     | 459.732000       | 917.472708     | 459.239992       | T    | <b>933.522637</b>  | 467.264957        | 916.496088     | 458.751682       | 915.512072     | 458.259674       | 5  |
| 10 | 1082.551687        | 541.779482      | 1065.525138    | 533.266207       | 1064.541122    | 532.774199       | F    | <b>832.474958</b>  | 416.741117        | 815.448409     | 408.227843       |                |                  | 4  |
| 11 | <b>1521.777013</b> | 761.392145      | 1504.750464    | 752.878870       | 1503.766448    | 752.386862       | Q    | <b>685.406544</b>  | 343.206910        | 668.379995     | 334.693636       |                |                  | 3  |
| 12 | 1620.845427        | 810.926352      | 1603.818878    | 802.413077       | 1602.834862    | 801.921069       | V    | 246.181218         | 123.594247        | 229.154669     | 115.080973       |                |                  | 2  |
| 13 |                    |                 |                |                  |                |                  | K    | 147.112804         | 74.060040         | 130.086255     | 65.546765        |                |                  | 1  |

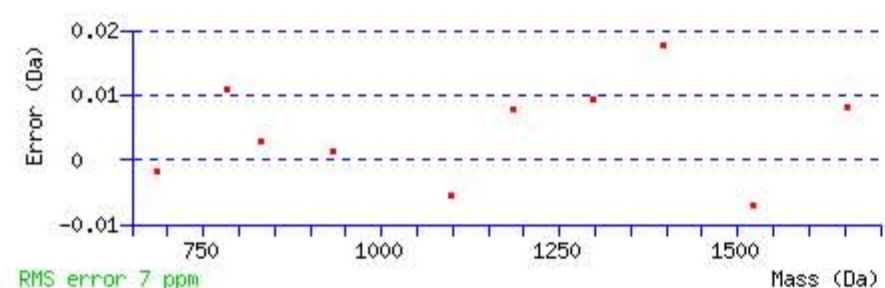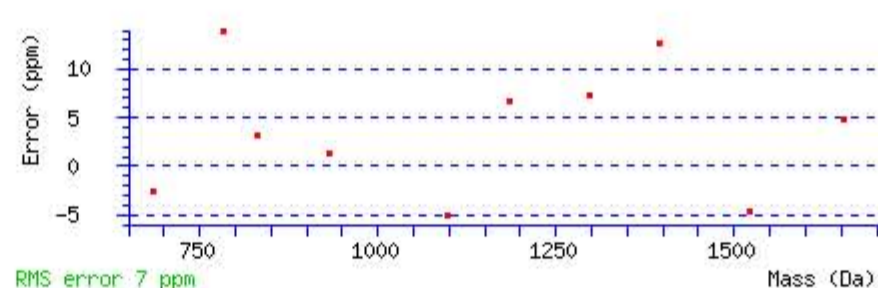

NCBI BLAST search of **LSGNVLSYTFQVK**

(Parameters: blastp, nr protein database, expect=20000, no filter, PAM30)

Other BLAST [web gateways](#)

## All matches to this query

| Score | Mr(calc):   | Delta    | Sequence             |
|-------|-------------|----------|----------------------|
| 49.6  | 1765.943680 | 0.006992 | <b>LSGNVLSYTFQVK</b> |

Mascot: <http://www.matrixscience.com/>



# MASCOT SEARCH RESULTS

## Peptide View

MS/MS Fragmentation of **EQTMSECEAGALR**

Found in **CO7\_HUMAN**, Complement component C7 OS=Homo sapiens GN=C7 PE=1 SV=2

Match to Query 38354: 1791.796692 from(598.272840,3+) rtinseconds(1767) index(3625)

Title: Locus:1.1.1.3167.13 File:"2013-07-02 CLN FXIII 60 min 3rd F 1.wiff"

Data file C:\Program Files (x86)\Matrix Science\Mascot Daemon\mgf6 FXIII 60 min 3rd\mascot\_daemon\_merge.mgf

Click mouse within plot area to zoom in by factor of two about that point

Or, Plot from  to  Da

Label all possible matches  Label matches used for scoring

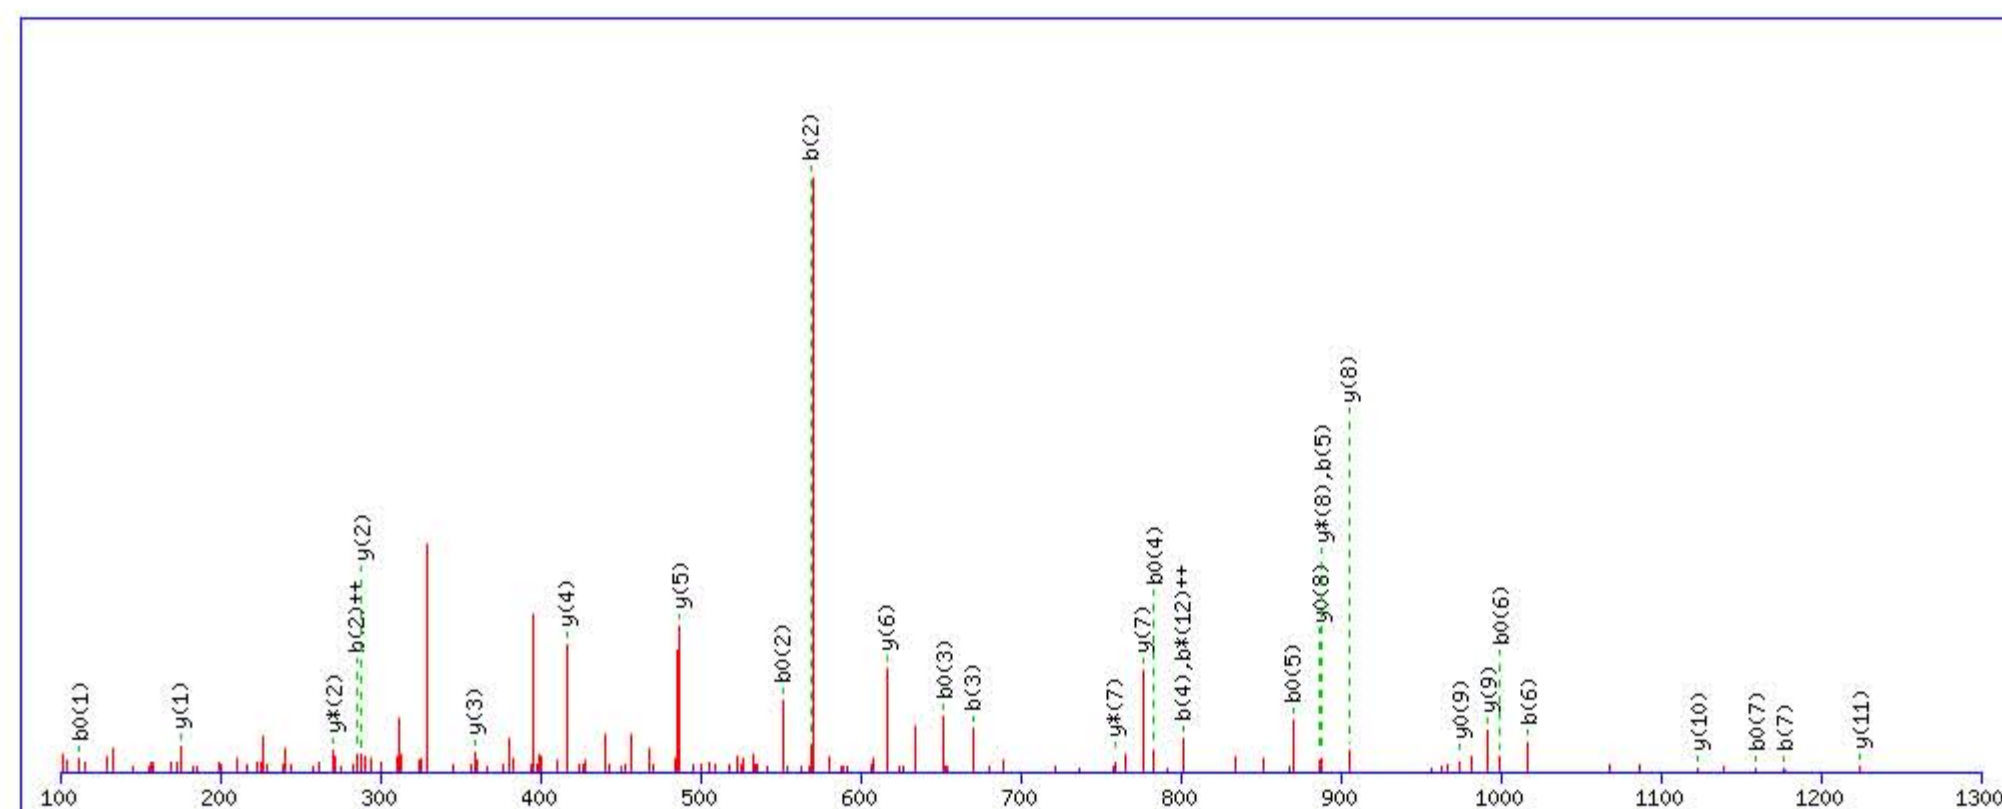

Monoisotopic mass of neutral peptide Mr(calc): 1791.795349

Fixed modifications: Carbamidomethyl (C) (apply to specified residues or termini only)

Variable modifications:

Q2 : Biotin:Thermo-21345 (Q)

Ions Score: 62 Expect: 5.1e-006

Matches : 31/132 fragment ions using 54 most intense peaks [\(help\)](#)

| #  | b           | b <sup>++</sup> | b <sup>*</sup> | b <sup>*++</sup> | b <sup>0</sup> | b <sup>0++</sup> | Seq. | y           | y <sup>++</sup> | y <sup>*</sup> | y <sup>*++</sup> | y <sup>0</sup> | y <sup>0++</sup> | #  |
|----|-------------|-----------------|----------------|------------------|----------------|------------------|------|-------------|-----------------|----------------|------------------|----------------|------------------|----|
| 1  | 130.049869  | 65.528572       |                |                  | 112.039304     | 56.523290        | E    |             |                 |                |                  |                |                  | 13 |
| 2  | 569.275195  | 285.141236      | 552.248646     | 276.627961       | 551.264630     | 276.135953       | Q    | 1663.760061 | 832.383668      | 1646.733512    | 823.870394       | 1645.749496    | 823.378386       | 12 |
| 3  | 670.322874  | 335.665075      | 653.296325     | 327.151801       | 652.312309     | 326.659793       | T    | 1224.534735 | 612.771005      | 1207.508186    | 604.257731       | 1206.524170    | 603.765723       | 11 |
| 4  | 801.363359  | 401.185318      | 784.336810     | 392.672043       | 783.352794     | 392.180035       | M    | 1123.487056 | 562.247166      | 1106.460507    | 553.733891       | 1105.476491    | 553.241883       | 10 |
| 5  | 888.395387  | 444.701332      | 871.368838     | 436.188057       | 870.384822     | 435.696049       | S    | 992.446571  | 496.726923      | 975.420022     | 488.213649       | 974.436006     | 487.721641       | 9  |
| 6  | 1017.437980 | 509.222628      | 1000.411431    | 500.709354       | 999.427415     | 500.217346       | E    | 905.414543  | 453.210909      | 888.387994     | 444.697635       | 887.403978     | 444.205627       | 8  |
| 7  | 1177.468629 | 589.237953      | 1160.442080    | 580.724678       | 1159.458064    | 580.232670       | C    | 776.371950  | 388.689613      | 759.345401     | 380.176338       | 758.361385     | 379.684330       | 7  |
| 8  | 1306.511222 | 653.759249      | 1289.484673    | 645.245974       | 1288.500657    | 644.753966       | E    | 616.341301  | 308.674288      | 599.314752     | 300.161014       | 598.330736     | 299.669006       | 6  |
| 9  | 1377.548336 | 689.277806      | 1360.521787    | 680.764531       | 1359.537771    | 680.272523       | A    | 487.298708  | 244.152992      | 470.272159     | 235.639717       |                |                  | 5  |
| 10 | 1434.569800 | 717.788538      | 1417.543251    | 709.275263       | 1416.559235    | 708.783255       | G    | 416.261594  | 208.634435      | 399.235045     | 200.121160       |                |                  | 4  |
| 11 | 1505.606914 | 753.307095      | 1488.580365    | 744.793820       | 1487.596349    | 744.301812       | A    | 359.240130  | 180.123703      | 342.213581     | 171.610428       |                |                  | 3  |
| 12 | 1618.690978 | 809.849127      | 1601.664429    | 801.335852       | 1600.680413    | 800.843844       | L    | 288.203016  | 144.605146      | 271.176467     | 136.091871       |                |                  | 2  |
| 13 |             |                 |                |                  |                |                  | R    | 175.118952  | 88.063114       | 158.092403     | 79.549839        |                |                  | 1  |

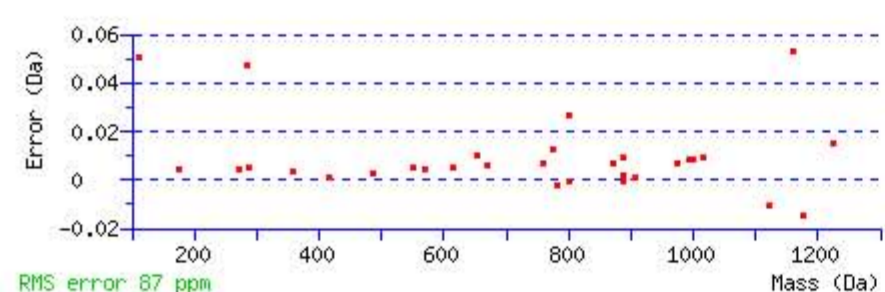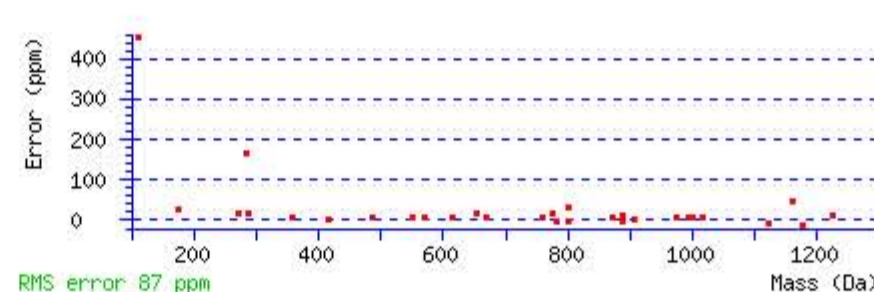

NCBI BLAST search of [EQTMSECEAGALR](#)

(Parameters: blastp, nr protein database, expect=20000, no filter, PAM30)

Other BLAST [web gateways](#)

All matches to this query

| Score | Mr(calc):   | Delta    | Sequence                      |
|-------|-------------|----------|-------------------------------|
| 61.9  | 1791.795349 | 0.001343 | <a href="#">EQTMSECEAGALR</a> |

Mascot: <http://www.matrixscience.com/>



# MASCOT Search Results

## Peptide View

MS/MS Fragmentation of **AGIQER**

Found in **CO8A\_HUMAN**, Complement component C8 alpha chain OS=Homo sapiens GN=C8A PE=1 SV=2

Match to Query 13203: 983.519968 from(492.767260,2+) rtinseconds(1426) index(43710)

Title: Locus:1.1.1.2545.8 File:"2013-07-02 CLN FXIII 60 min 3rd F 4.wiff"

Data file C:\Program Files (x86)\Matrix Science\Mascot Daemon\mgf\6 FXIII 60 min 3rd\mascot\_daemon\_merge.mgf

Click mouse within plot area to zoom in by factor of two about that point

Or, Plot from  to  Da

Label all possible matches  Label matches used for scoring

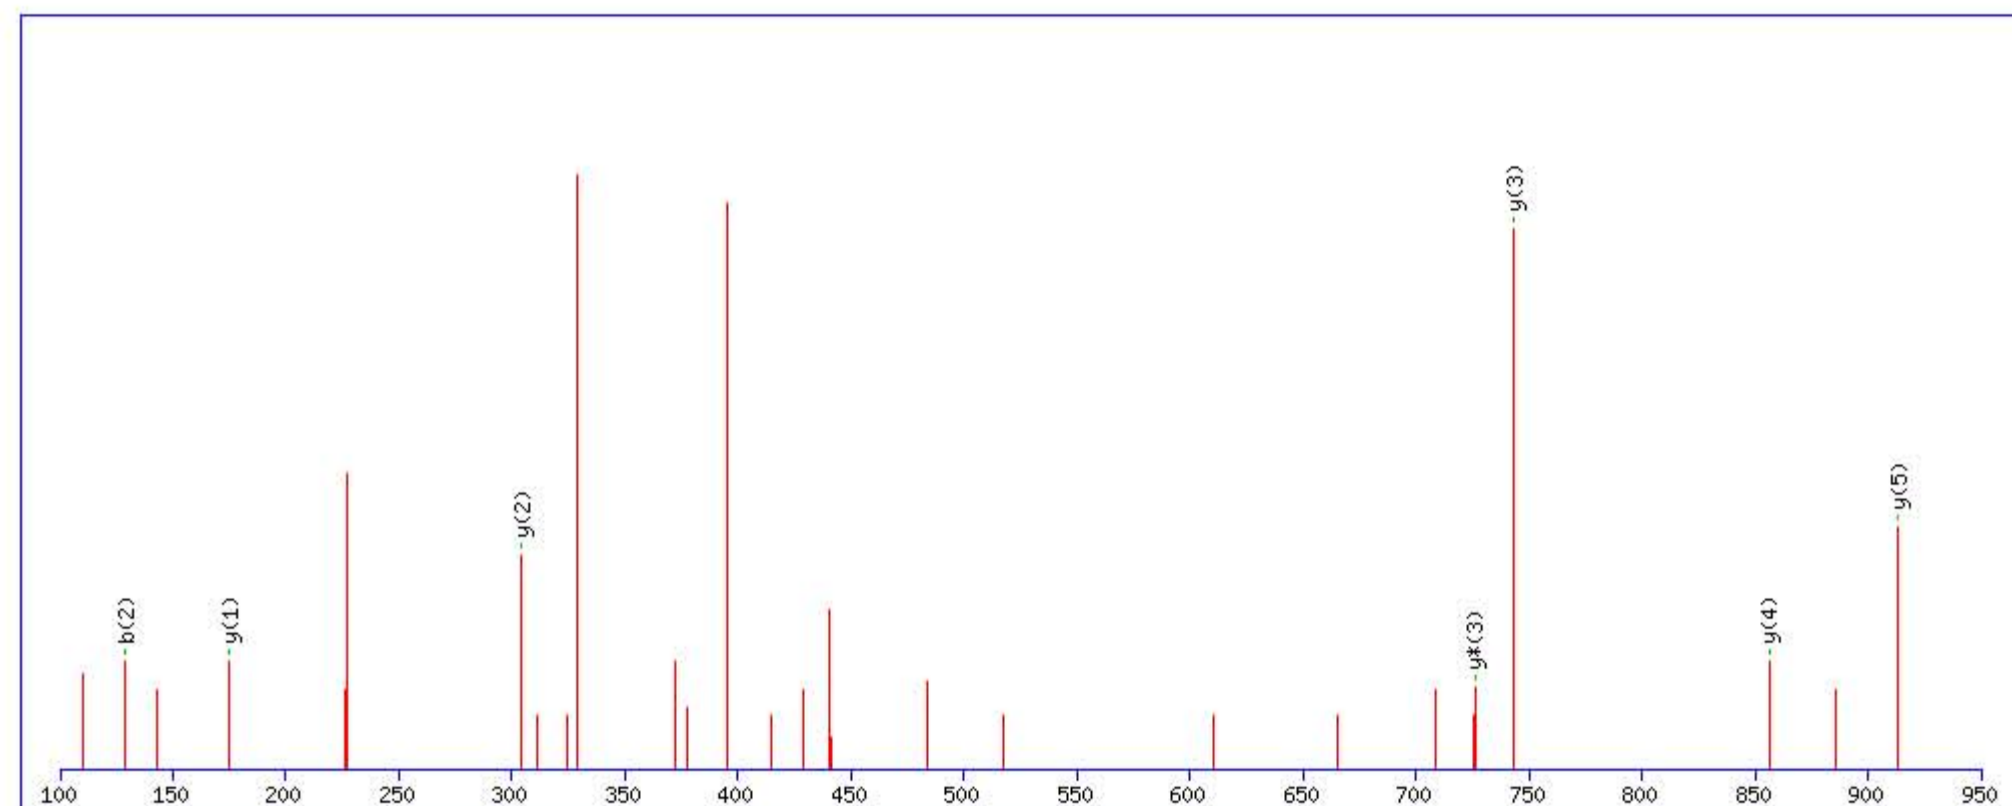

Monoisotopic mass of neutral peptide Mr(calc): 983.522217

Fixed modifications: Carbamidomethyl (C) (apply to specified residues or termini only)

Variable modifications:

Q4 : Biotin:Thermo-21345 (Q)

Ions Score: 27 Expect: 0.044

Matches : 7/44 fragment ions using 16 most intense peaks [\(help\)](#)

| # | b          | b <sup>++</sup> | b <sup>*</sup> | b <sup>+++</sup> | b <sup>0</sup> | b <sup>0++</sup> | Seq. | y          | y <sup>++</sup> | y <sup>*</sup> | y <sup>+++</sup> | y <sup>0</sup> | y <sup>0++</sup> | # |
|---|------------|-----------------|----------------|------------------|----------------|------------------|------|------------|-----------------|----------------|------------------|----------------|------------------|---|
| 1 | 72.044390  | 36.525833       |                |                  |                |                  | A    |            |                 |                |                  |                |                  | 6 |
| 2 | 129.065854 | 65.036565       |                |                  |                |                  | G    | 913.492399 | 457.249838      | 896.465850     | 448.736563       | 895.481834     | 448.244555       | 5 |
| 3 | 242.149918 | 121.578597      |                |                  |                |                  | I    | 856.470935 | 428.739106      | 839.444386     | 420.225831       | 838.460370     | 419.733823       | 4 |
| 4 | 681.375244 | 341.191260      | 664.348695     | 332.677986       |                |                  | Q    | 743.386871 | 372.197074      | 726.360322     | 363.683799       | 725.376306     | 363.191791       | 3 |
| 5 | 810.417837 | 405.712557      | 793.391288     | 397.199282       | 792.407272     | 396.707274       | E    | 304.161545 | 152.584411      | 287.134996     | 144.071136       | 286.150980     | 143.579128       | 2 |
| 6 |            |                 |                |                  |                |                  | R    | 175.118952 | 88.063114       | 158.092403     | 79.549840        |                |                  | 1 |

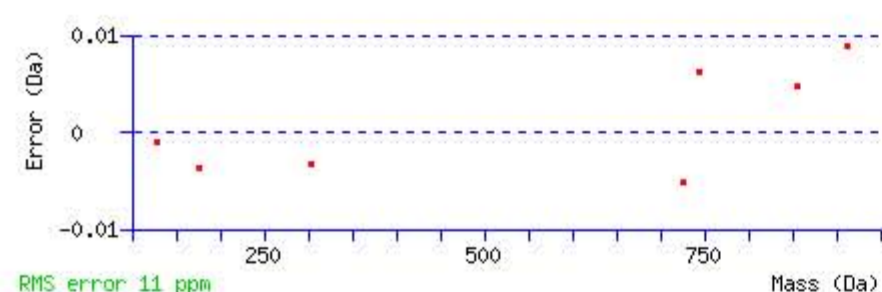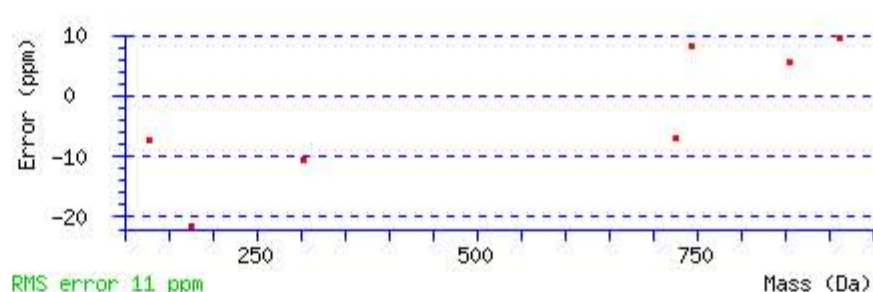

NCBI BLAST search of **AGIQER**

(Parameters: blastp, nr protein database, expect=20000, no filter, PAM30)

Other BLAST [web gateways](#)

All matches to this query

| Score | Mr(calc):  | Delta     | Sequence                 |
|-------|------------|-----------|--------------------------|
| 26.6  | 983.522217 | -0.002249 | <a href="#">AGIQER</a>   |
| 15.5  | 983.522217 | -0.002249 | <a href="#">AGLEQR</a>   |
| 15.4  | 983.522217 | -0.002249 | <a href="#">QIQER</a>    |
| 15.4  | 983.522217 | -0.002249 | <a href="#">QLQER</a>    |
| 9.2   | 983.514816 | 0.005152  | <a href="#">QPVREAER</a> |
| 7.0   | 983.522202 | -0.002234 | <a href="#">KLMENPPR</a> |
| 7.0   | 983.522217 | -0.002249 | <a href="#">QLEQR</a>    |
| 6.4   | 983.522217 | -0.002249 | <a href="#">IQQER</a>    |
| 6.4   | 983.522217 | -0.002249 | <a href="#">LQQER</a>    |
| 5.2   | 983.530090 | -0.010122 | <a href="#">QLLNHFGR</a> |

Mascot: <http://www.matrixscience.com/>

# MASCOT SCIENCE Mascot Search Results

## Peptide View

MS/MS Fragmentation of **QAQCGQDFQCK**

Found in **CO8A\_HUMAN**, Complement component C8 alpha chain OS=Homo sapiens GN=C8A PE=1 SV=2

Match to Query 36039: 1679.732888 from(840.873720,2+) rtinseconds(1535) index(16123)

Title: Locus:1.1.1.3135.12 File:"2013-07-02 CLN FXIII 60 min 3rd F 2.wiff"

Data file C:\Program Files (x86)\Matrix Science\Mascot Daemon\mgf\6 FXIII 60 min 3rd\mascot\_daemon\_merge.mgf

Click mouse within plot area to zoom in by factor of two about that point

Or, Plot from  to  Da

Label all possible matches  Label matches used for scoring

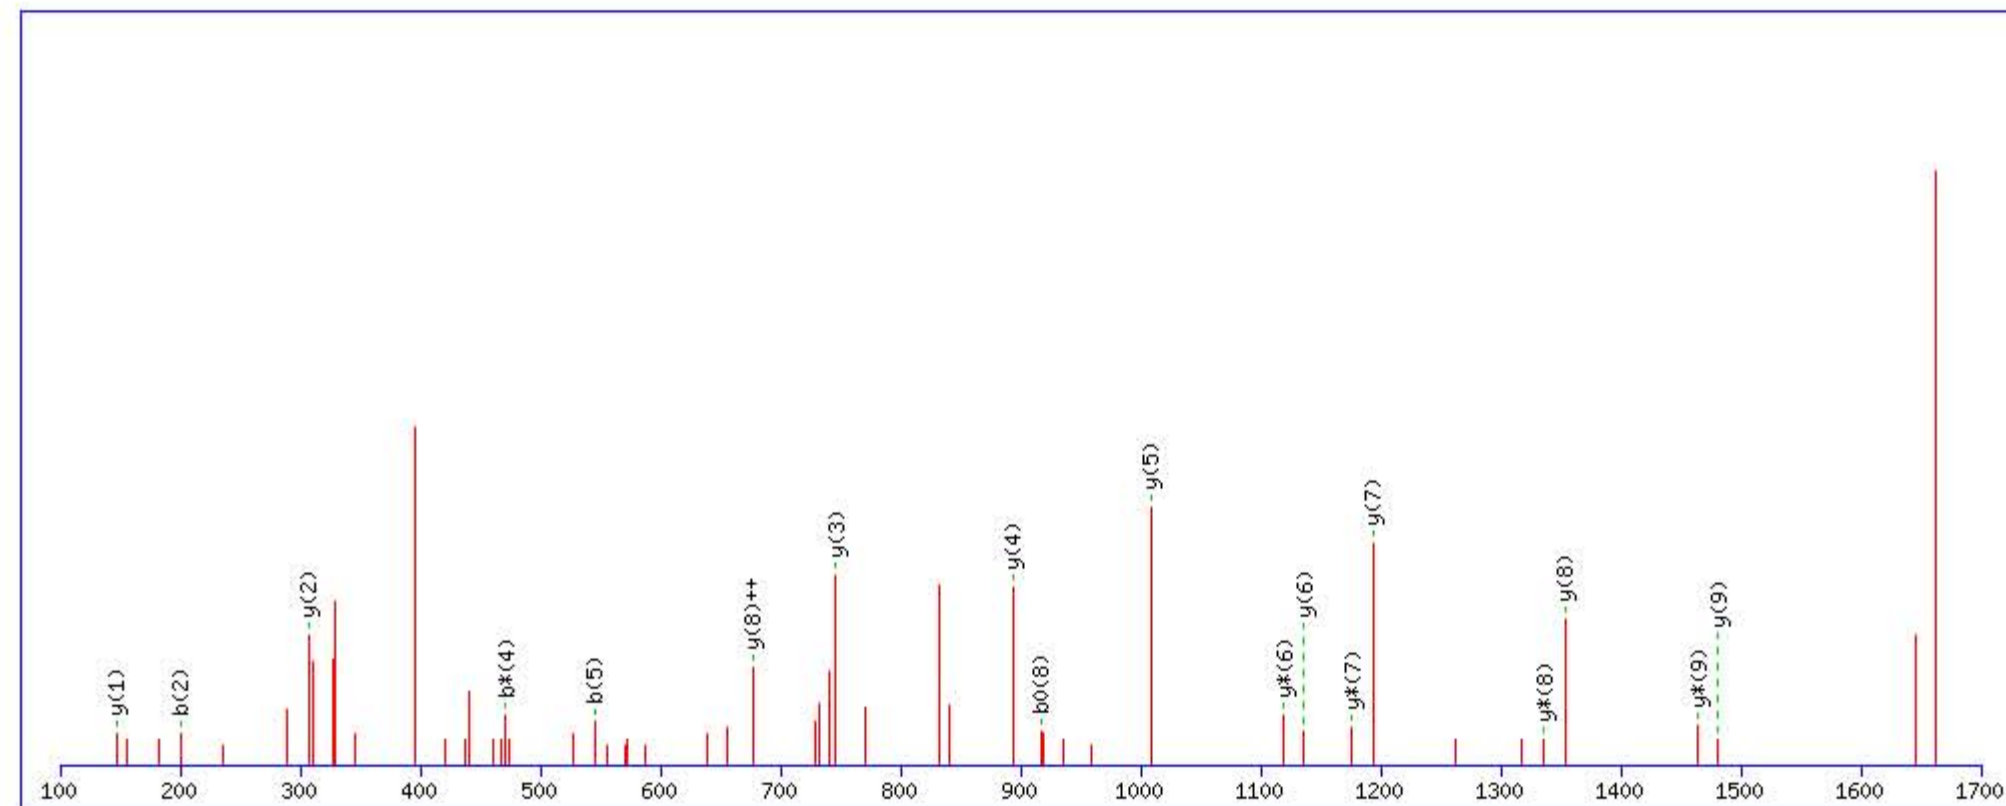

Monoisotopic mass of neutral peptide Mr(calc): 1679.721832

Fixed modifications: Carbamidomethyl (C) (apply to specified residues or termini only)

Variable modifications:

Q9 : Biotin:Thermo-21345 (Q)

Ions Score: 68 Expect: 8.2e-007

Matches : 18/100 fragment ions using 29 most intense peaks [\(help\)](#)

| #  | b                 | b <sup>++</sup> | b <sup>*</sup>    | b <sup>*++</sup> | b <sup>0</sup>    | b <sup>0++</sup> | Seq. | y                  | y <sup>++</sup>   | y <sup>*</sup>     | y <sup>*++</sup> | y <sup>0</sup> | y <sup>0++</sup> | #  |
|----|-------------------|-----------------|-------------------|------------------|-------------------|------------------|------|--------------------|-------------------|--------------------|------------------|----------------|------------------|----|
| 1  | 129.065854        | 65.036565       | 112.039305        | 56.523291        |                   |                  | Q    |                    |                   |                    |                  |                |                  | 11 |
| 2  | <b>200.102968</b> | 100.555122      | 183.076419        | 92.041848        |                   |                  | A    | 1552.670519        | 776.838898        | 1535.643970        | 768.325623       | 1534.659954    | 767.833615       | 10 |
| 3  | 328.161546        | 164.584411      | 311.134997        | 156.071136       |                   |                  | Q    | <b>1481.633405</b> | 741.320341        | <b>1464.606856</b> | 732.807066       | 1463.622840    | 732.315058       | 9  |
| 4  | 488.192195        | 244.599736      | <b>471.165646</b> | 236.086461       |                   |                  | C    | <b>1353.574827</b> | <b>677.291052</b> | <b>1336.548278</b> | 668.777777       | 1335.564262    | 668.285769       | 8  |
| 5  | <b>545.213659</b> | 273.110468      | 528.187110        | 264.597193       |                   |                  | G    | <b>1193.544178</b> | 597.275727        | <b>1176.517629</b> | 588.762453       | 1175.533613    | 588.270445       | 7  |
| 6  | 673.272237        | 337.139757      | 656.245688        | 328.626482       |                   |                  | Q    | <b>1136.522714</b> | 568.764995        | <b>1119.496165</b> | 560.251721       | 1118.512149    | 559.759713       | 6  |
| 7  | 788.299180        | 394.653228      | 771.272631        | 386.139954       | 770.288615        | 385.647946       | D    | <b>1008.464136</b> | 504.735706        | 991.437587         | 496.222432       | 990.453571     | 495.730424       | 5  |
| 8  | 935.367594        | 468.187435      | 918.341045        | 459.674161       | <b>917.357029</b> | 459.182153       | F    | <b>893.437193</b>  | 447.222235        | 876.410644         | 438.708960       |                |                  | 4  |
| 9  | 1374.592920       | 687.800098      | 1357.566371       | 679.286824       | 1356.582355       | 678.794816       | Q    | <b>746.368779</b>  | 373.688028        | 729.342230         | 365.174753       |                |                  | 3  |
| 10 | 1534.623569       | 767.815423      | 1517.597020       | 759.302148       | 1516.613004       | 758.810140       | C    | <b>307.143453</b>  | 154.075365        | 290.116904         | 145.562090       |                |                  | 2  |
| 11 |                   |                 |                   |                  |                   |                  | K    | <b>147.112804</b>  | 74.060040         | 130.086255         | 65.546765        |                |                  | 1  |

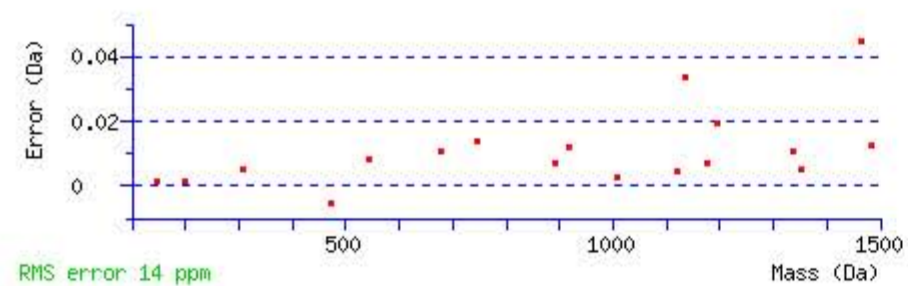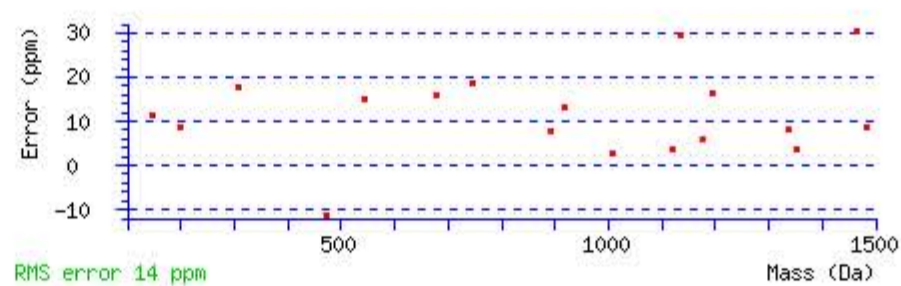

NCBI BLAST search of **QAQCGQDFQCK**

(Parameters: blastp, nr protein database, expect=20000, no filter, PAM30)

Other BLAST [web gateways](#)

All matches to this query

| Score | Mr(calc):   | Delta     | Sequence                       |
|-------|-------------|-----------|--------------------------------|
| 68.1  | 1679.721832 | 0.011056  | <a href="#">QAQCGQDFQCK</a>    |
| 29.9  | 1679.721832 | 0.011056  | <a href="#">QAQCGQDFQCK</a>    |
| 7.2   | 1679.713074 | 0.019814  | <a href="#">QSASMTSDNADDK</a>  |
| 6.2   | 1679.733063 | -0.000175 | <a href="#">HMIMHTGDGPHKCK</a> |
| 0.3   | 1679.721832 | 0.011056  | <a href="#">QAQCGQDFQCK</a>    |

# MASCOT SEARCH RESULTS

## Peptide View

MS/MS Fragmentation of **ALDQYLMEFNACR**

Found in **CO8A\_HUMAN**, Complement component C8 alpha chain OS=Homo sapiens GN=C8A PE=1 SV=2

Match to Query 40932: 1940.903832 from(647.975220,3+) rtinseconds(2561) index(36081)

Title: Locus:1.1.1.3441.6 File:"2013-07-02 CLN FXIII 60 min 3rd F 3.wiff"

Data file C:\Program Files (x86)\Matrix Science\Mascot Daemon\mgf\6 FXIII 60 min 3rd\mascot\_daemon\_merge.mgf

Click mouse within plot area to zoom in by factor of two about that point

Or, Plot from  to  Da

Label all possible matches  Label matches used for scoring

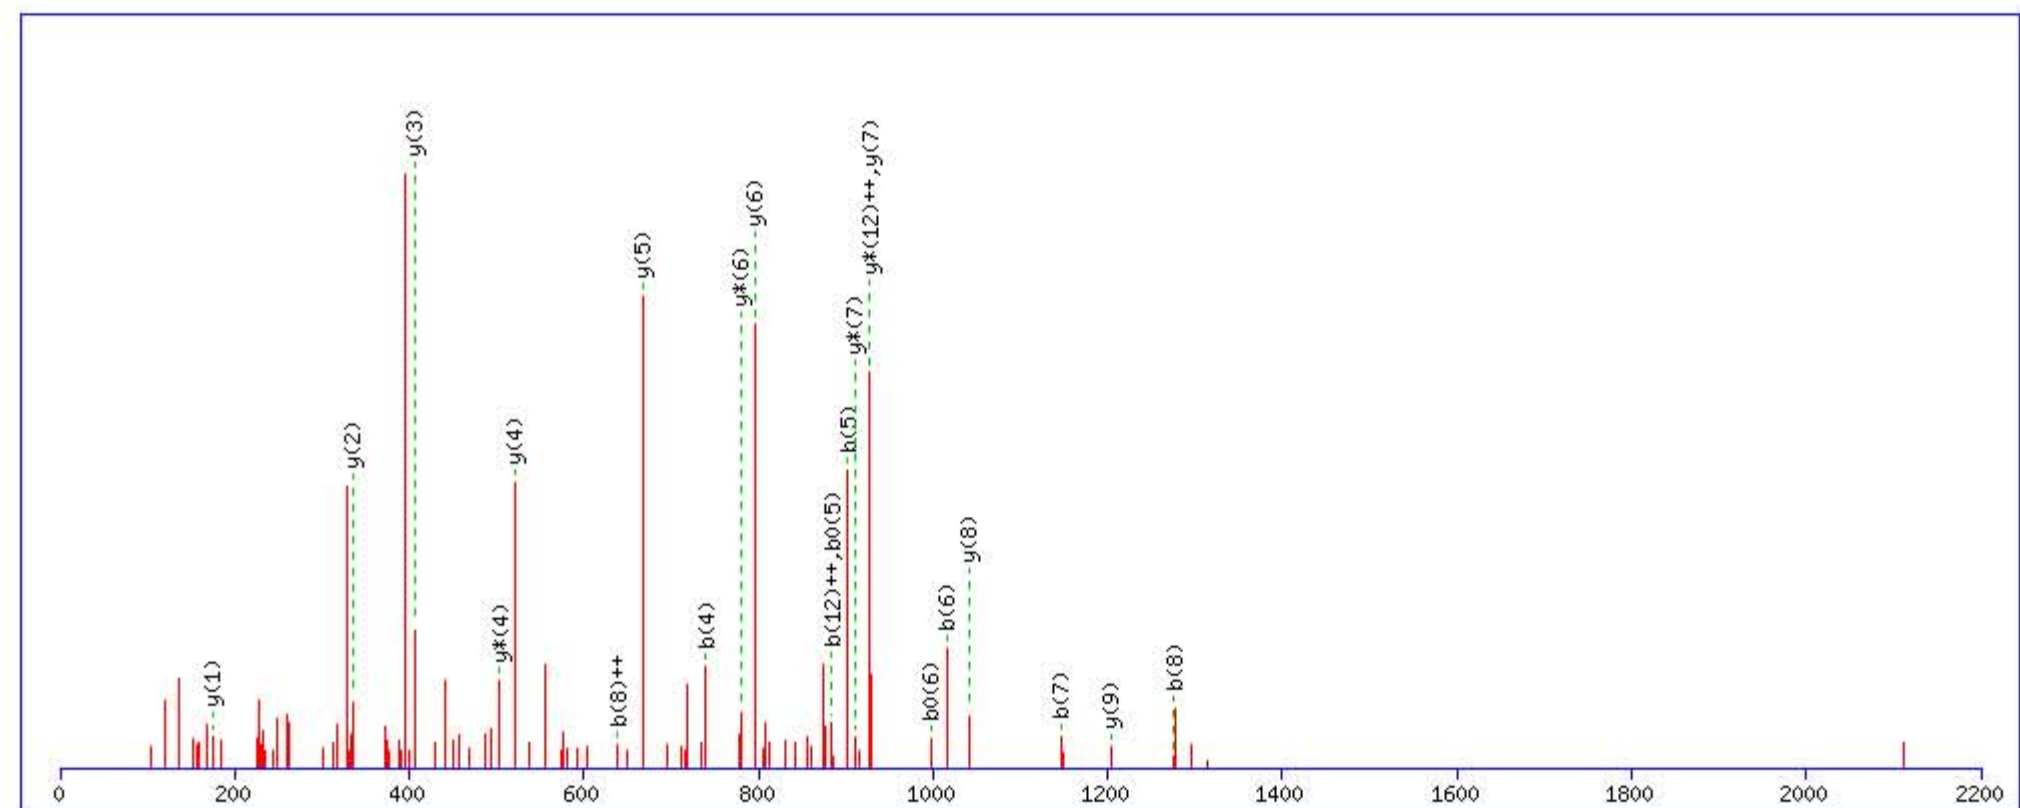

Monoisotopic mass of neutral peptide Mr(calc): 1940.894669

Fixed modifications: Carbamidomethyl (C) (apply to specified residues or termini only)

Variable modifications:

Q4 : Biotin:Thermo-21345 (Q)

Ions Score: 39 Expect: 0.0016

Matches : 22/124 fragment ions using 47 most intense peaks [\(help\)](#)

| #  | b           | b <sup>++</sup> | b <sup>*</sup> | b <sup>*++</sup> | b <sup>0</sup> | b <sup>0++</sup> | Seq. | y           | y <sup>++</sup> | y <sup>*</sup> | y <sup>*++</sup> | y <sup>0</sup> | y <sup>0++</sup> | #  |
|----|-------------|-----------------|----------------|------------------|----------------|------------------|------|-------------|-----------------|----------------|------------------|----------------|------------------|----|
| 1  | 72.044390   | 36.525833       |                |                  |                |                  | A    |             |                 |                |                  |                |                  | 13 |
| 2  | 185.128454  | 93.067865       |                |                  |                |                  | L    | 1870.864860 | 935.936068      | 1853.838311    | 927.422794       | 1852.854295    | 926.930786       | 12 |
| 3  | 300.155397  | 150.581336      |                |                  | 282.144832     | 141.576054       | D    | 1757.780796 | 879.394036      | 1740.754247    | 870.880762       | 1739.770231    | 870.388754       | 11 |
| 4  | 739.380723  | 370.194000      | 722.354174     | 361.680725       | 721.370158     | 361.188717       | Q    | 1642.753853 | 821.880565      | 1625.727304    | 813.367290       | 1624.743288    | 812.875282       | 10 |
| 5  | 902.444052  | 451.725664      | 885.417503     | 443.212390       | 884.433487     | 442.720382       | Y    | 1203.528527 | 602.267902      | 1186.501978    | 593.754627       | 1185.517962    | 593.262619       | 9  |
| 6  | 1015.528116 | 508.267696      | 998.501567     | 499.754422       | 997.517551     | 499.262414       | L    | 1040.465198 | 520.736237      | 1023.438649    | 512.222963       | 1022.454633    | 511.730955       | 8  |
| 7  | 1146.568601 | 573.787939      | 1129.542052    | 565.274664       | 1128.558036    | 564.782656       | M    | 927.381134  | 464.194205      | 910.354585     | 455.680931       | 909.370569     | 455.188923       | 7  |
| 8  | 1275.611194 | 638.309235      | 1258.584645    | 629.795961       | 1257.600629    | 629.303953       | E    | 796.340649  | 398.673963      | 779.314100     | 390.160688       | 778.330084     | 389.668680       | 6  |
| 9  | 1422.679608 | 711.843442      | 1405.653059    | 703.330168       | 1404.669043    | 702.838160       | F    | 667.298056  | 334.152666      | 650.271507     | 325.639392       |                |                  | 5  |
| 10 | 1536.722535 | 768.864906      | 1519.695986    | 760.351631       | 1518.711970    | 759.859623       | N    | 520.229642  | 260.618459      | 503.203093     | 252.105185       |                |                  | 4  |
| 11 | 1607.759649 | 804.383463      | 1590.733100    | 795.870188       | 1589.749084    | 795.378180       | A    | 406.186715  | 203.596995      | 389.160166     | 195.083721       |                |                  | 3  |
| 12 | 1767.790298 | 884.398787      | 1750.763749    | 875.885513       | 1749.779733    | 875.393505       | C    | 335.149601  | 168.078438      | 318.123052     | 159.565164       |                |                  | 2  |
| 13 |             |                 |                |                  |                |                  | R    | 175.118952  | 88.063114       | 158.092403     | 79.549839        |                |                  | 1  |

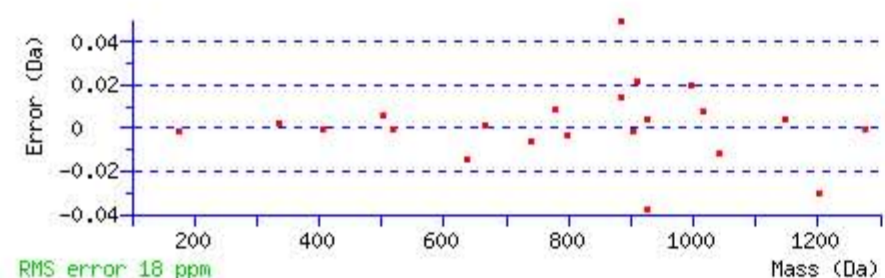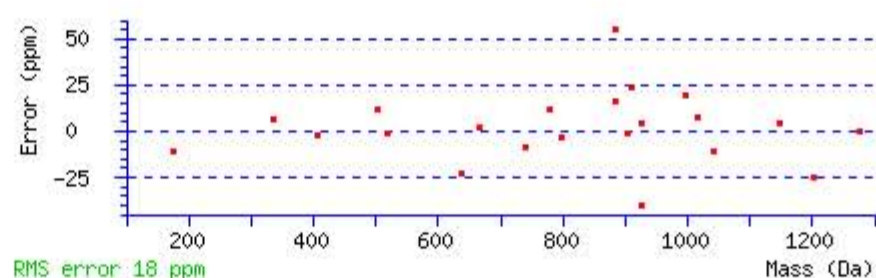

NCBI BLAST search of [ALDQYLMEFNACR](#)

(Parameters: blastp, nr protein database, expect=20000, no filter, PAM30)

Other BLAST [web gateways](#)

All matches to this query

| Score | Mr(calc):   | Delta    | Sequence                      |
|-------|-------------|----------|-------------------------------|
| 39.0  | 1940.894669 | 0.009163 | <a href="#">ALDQYLMEFNACR</a> |

Mascot: <http://www.matrixscience.com/>

# MASCOT SEARCH RESULTS

## Peptide View

MS/MS Fragmentation of **LGSLGAACEQTQTEGAK**

Found in **CO8A\_HUMAN**, Complement component C8 alpha chain OS=Homo sapiens GN=C8A PE=1 SV=2

Match to Query 43237: 2030.974008 from(1016.494280,2+) rtinseconds(1724) index(31513)

Title: Locus:1.1.1.3149.15 File:"2013-07-02 CLN FXIII 60 min 3rd F 3.wiff"

Data file C:\Program Files (x86)\Matrix Science\Mascot Daemon\mgf\6 FXIII 60 min 3rd\mascot\_daemon\_merge.mgf

Click mouse within plot area to zoom in by factor of two about that point

Or,  Plot from  0 to  3600 Da  Full range

Label all possible matches  Label matches used for scoring

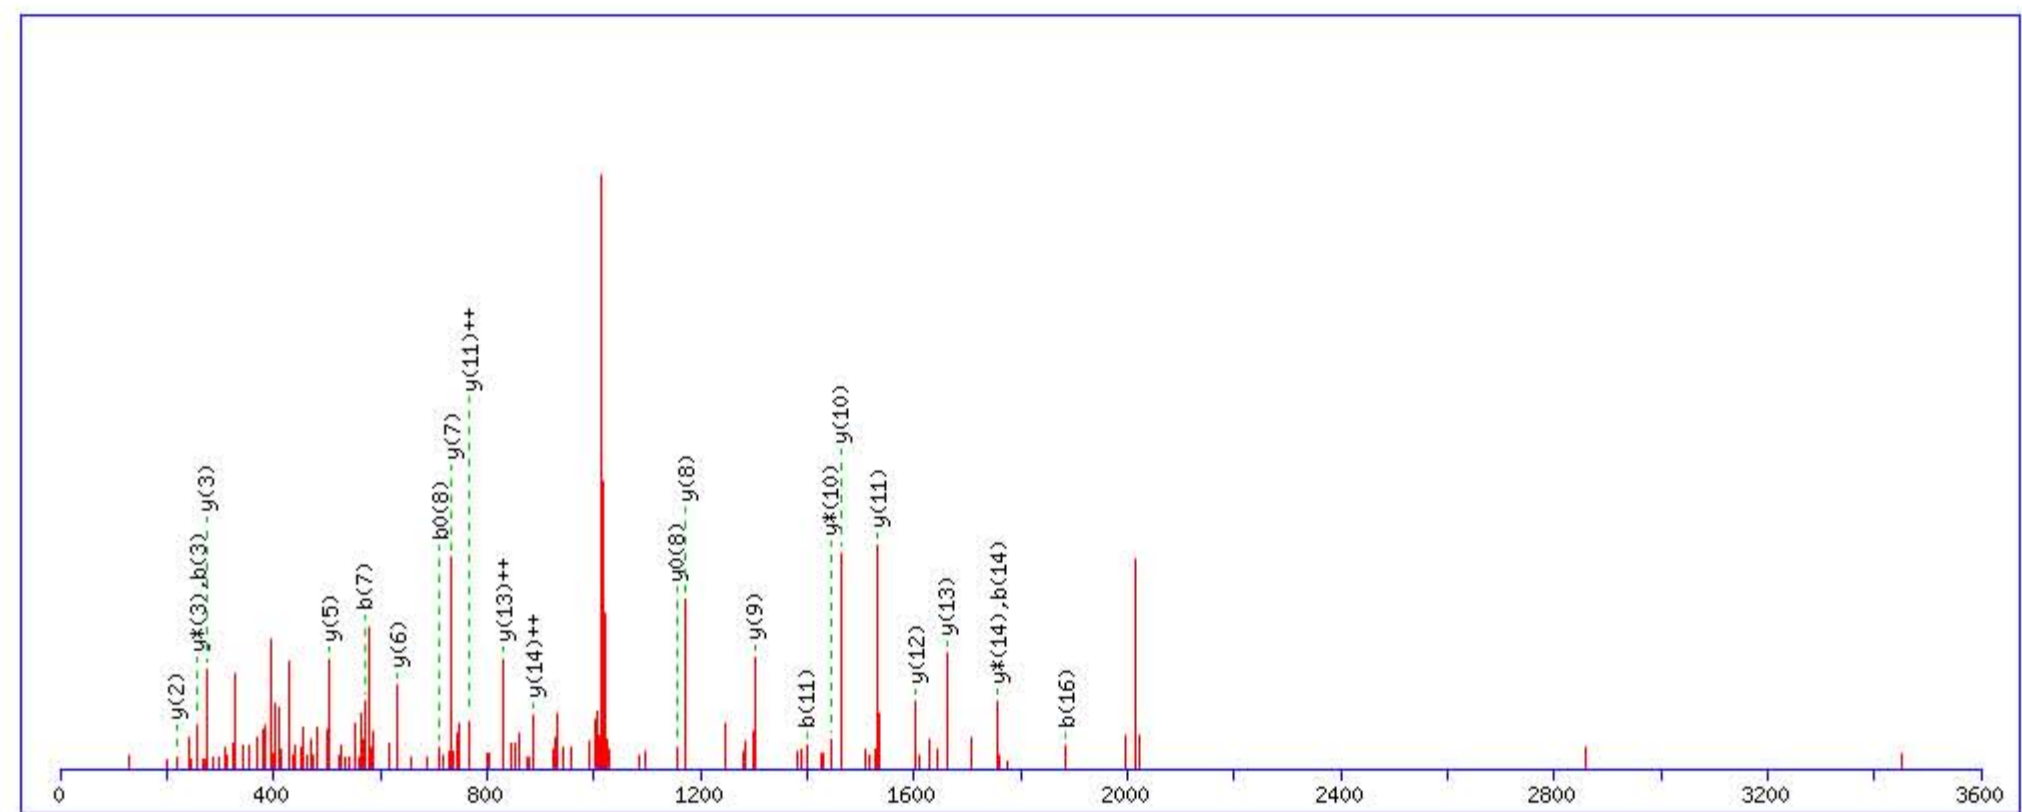

Monoisotopic mass of neutral peptide Mr(calc): 2030.976501

Fixed modifications: Carbamidomethyl (C) (apply to specified residues or termini only)

Variable modifications:

Q10 : Biotin:Thermo-21345 (Q)

Ions Score: 75 Expect: 2.7e-007

Matches : 24/164 fragment ions using 37 most intense peaks [\(help\)](#)

| #  | b                  | b <sup>++</sup> | b <sup>*</sup> | b <sup>*++</sup> | b <sup>0</sup>    | b <sup>0++</sup> | Seq.     | y                  | y <sup>++</sup>   | y <sup>*</sup>     | y <sup>*++</sup> | y <sup>0</sup>     | y <sup>0++</sup> | #  |
|----|--------------------|-----------------|----------------|------------------|-------------------|------------------|----------|--------------------|-------------------|--------------------|------------------|--------------------|------------------|----|
| 1  | 114.091340         | 57.549308       |                |                  |                   |                  | <b>L</b> |                    |                   |                    |                  |                    |                  | 17 |
| 2  | 171.112804         | 86.060040       |                |                  |                   |                  | <b>G</b> | 1918.899727        | 959.953502        | 1901.873178        | 951.440227       | 1900.889162        | 950.948219       | 16 |
| 3  | <b>258.144832</b>  | 129.576054      |                |                  | 240.134267        | 120.570772       | <b>S</b> | 1861.878263        | 931.442770        | 1844.851714        | 922.929495       | 1843.867698        | 922.437487       | 15 |
| 4  | 371.228896         | 186.118086      |                |                  | 353.218331        | 177.112804       | <b>L</b> | 1774.846235        | <b>887.926756</b> | <b>1757.819686</b> | 879.413481       | 1756.835670        | 878.921473       | 14 |
| 5  | 428.250360         | 214.628818      |                |                  | 410.239795        | 205.623536       | <b>G</b> | <b>1661.762171</b> | <b>831.384724</b> | 1644.735622        | 822.871449       | 1643.751606        | 822.379441       | 13 |
| 6  | 499.287474         | 250.147375      |                |                  | 481.276909        | 241.142093       | <b>A</b> | <b>1604.740707</b> | 802.873992        | 1587.714158        | 794.360717       | 1586.730142        | 793.868709       | 12 |
| 7  | <b>570.324588</b>  | 285.665932      |                |                  | 552.314023        | 276.660650       | <b>A</b> | <b>1533.703593</b> | <b>767.355435</b> | 1516.677044        | 758.842160       | 1515.693028        | 758.350152       | 11 |
| 8  | 730.355237         | 365.681257      |                |                  | <b>712.344672</b> | 356.675974       | <b>C</b> | <b>1462.666479</b> | 731.836878        | <b>1445.639930</b> | 723.323603       | 1444.655914        | 722.831595       | 10 |
| 9  | 859.397830         | 430.202553      |                |                  | 841.387265        | 421.197271       | <b>E</b> | <b>1302.635830</b> | 651.821553        | 1285.609281        | 643.308279       | 1284.625265        | 642.816270       | 9  |
| 10 | 1298.623156        | 649.815216      | 1281.596607    | 641.301942       | 1280.612591       | 640.809934       | <b>Q</b> | <b>1173.593237</b> | 587.300257        | 1156.566688        | 578.786982       | <b>1155.582672</b> | 578.294974       | 8  |
| 11 | <b>1399.670835</b> | 700.339056      | 1382.644286    | 691.825781       | 1381.660270       | 691.333773       | <b>T</b> | <b>734.367911</b>  | 367.687594        | 717.341362         | 359.174319       | 716.357346         | 358.682311       | 7  |
| 12 | 1527.729413        | 764.368345      | 1510.702864    | 755.855070       | 1509.718848       | 755.363062       | <b>Q</b> | <b>633.320232</b>  | 317.163754        | 616.293683         | 308.650480       | 615.309667         | 308.158472       | 6  |
| 13 | 1628.777092        | 814.892184      | 1611.750543    | 806.378910       | 1610.766527       | 805.886902       | <b>T</b> | <b>505.261654</b>  | 253.134465        | 488.235105         | 244.621190       | 487.251089         | 244.129182       | 5  |
| 14 | <b>1757.819685</b> | 879.413481      | 1740.793136    | 870.900206       | 1739.809120       | 870.408198       | <b>E</b> | 404.213975         | 202.610625        | 387.187426         | 194.097351       | 386.203410         | 193.605343       | 4  |
| 15 | 1814.841149        | 907.924213      | 1797.814600    | 899.410938       | 1796.830584       | 898.918930       | <b>G</b> | <b>275.171382</b>  | 138.089329        | <b>258.144833</b>  | 129.576054       |                    |                  | 3  |
| 16 | <b>1885.878263</b> | 943.442770      | 1868.851714    | 934.929495       | 1867.867698       | 934.437487       | <b>A</b> | <b>218.149918</b>  | 109.578597        | 201.123369         | 101.065322       |                    |                  | 2  |
| 17 |                    |                 |                |                  |                   |                  | <b>K</b> | 147.112804         | 74.060040         | 130.086255         | 65.546765        |                    |                  | 1  |

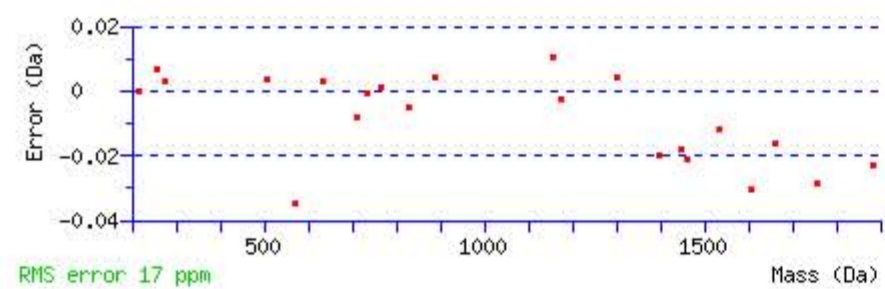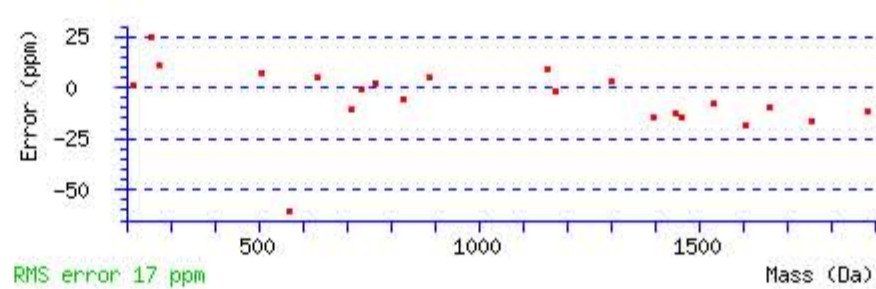

NCBI BLAST search of **LGSLGAACEQTQTEGAK**

(Parameters: blastp, nr protein database, expect=20000, no filter, PAM30)

Other BLAST [web gateways](#)

## All matches to this query

| Score | Mr(calc):   | Delta     | Sequence                           |
|-------|-------------|-----------|------------------------------------|
| 74.7  | 2030.976501 | -0.002493 | <a href="#">LGSLGAACEQTQTEGAK</a>  |
| 48.2  | 2030.976501 | -0.002493 | <a href="#">LGSLGAACEQTQTEGAK</a>  |
| 4.4   | 2031.000748 | -0.026740 | <a href="#">LEQQVEDLESSLEQKK</a>   |
| 1.7   | 2030.958710 | 0.015298  | <a href="#">QPMNAASGAAMSLAGAEK</a> |
| 0.3   | 2030.973099 | 0.000909  | <a href="#">QFEEAEQQANTNLAK</a>    |

**MASCOT** Mascot Search Results

Peptide View

MS/MS Fragmentation of **AIDEDCSQYEPIPGSQK**

Found in **CO8A\_HUMAN**, Complement component C8 alpha chain OS=Homo sapiens GN=C8A PE=1 SV=2

Match to Query 46819: 2247.023622 from(750.015150,3+) rtinseconds(1896) index(32391)

Title: Locus:1.1.1.3209.25 File:"2013-07-02 CLN FXIII 60 min 3rd F 3.wiff"

Data file C:\Program Files (x86)\Matrix Science\Mascot Daemon\mgf\6 FXIII 60 min 3rd\mascot\_daemon\_merge.mgf

Click mouse within plot area to zoom in by factor of two about that point

Or, Plot from 100 to 1500 Da Full range

Label all possible matches  Label matches used for scoring

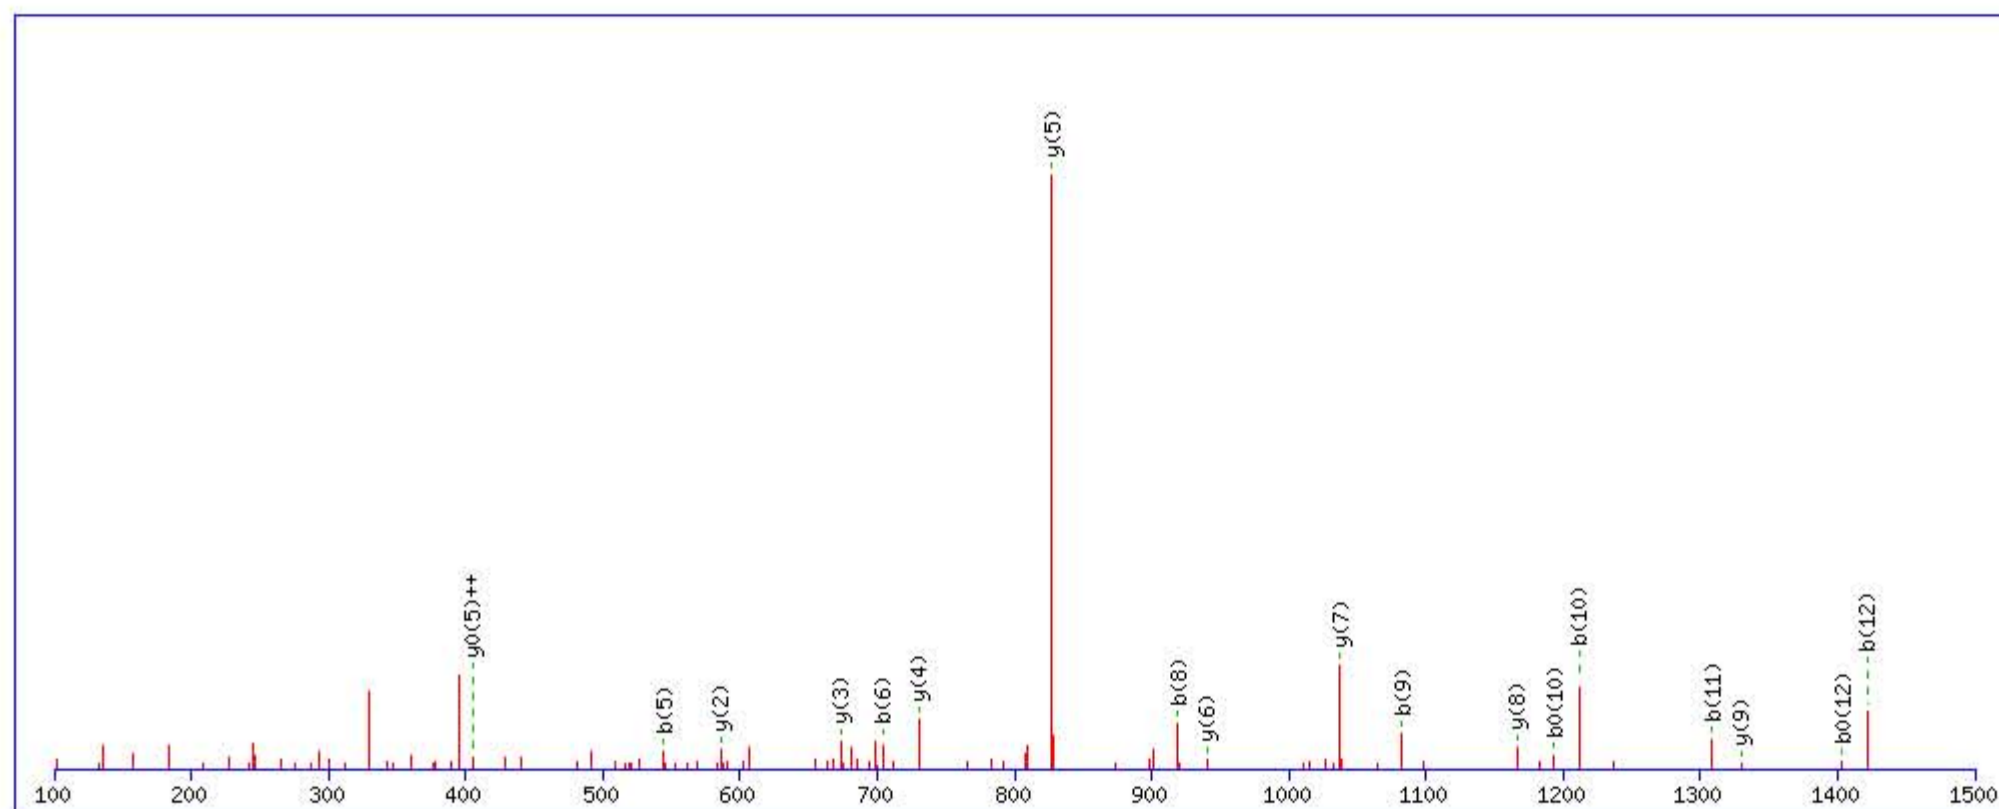

Monoisotopic mass of neutral peptide Mr(calc): 2247.018753

Fixed modifications: Carbamidomethyl (C) (apply to specified residues or termini only)

Variable modifications:

Q16 : Biotin:Thermo-21345 (Q)

Ions Score: 54 Expect: 9.4e-006

Matches : 18/170 fragment ions using 28 most intense peaks (help)

| #  | b                  | b <sup>++</sup> | b <sup>*</sup> | b <sup>+++</sup> | b <sup>0</sup>     | b <sup>0++</sup> | Seq. | y                  | y <sup>++</sup> | y <sup>*</sup> | y <sup>+++</sup> | y <sup>0</sup> | y <sup>0++</sup>  | #  |
|----|--------------------|-----------------|----------------|------------------|--------------------|------------------|------|--------------------|-----------------|----------------|------------------|----------------|-------------------|----|
| 1  | 72.044390          | 36.525833       |                |                  |                    |                  | A    |                    |                 |                |                  |                |                   | 17 |
| 2  | 185.128454         | 93.067865       |                |                  |                    |                  | I    | 2176.988934        | 1088.998105     | 2159.962385    | 1080.484830      | 2158.978369    | 1079.992822       | 16 |
| 3  | 300.155397         | 150.581336      |                |                  | 282.144832         | 141.576054       | D    | 2063.904870        | 1032.456073     | 2046.878321    | 1023.942798      | 2045.894305    | 1023.450790       | 15 |
| 4  | 429.197990         | 215.102633      |                |                  | 411.187425         | 206.097351       | E    | 1948.877927        | 974.942602      | 1931.851378    | 966.429327       | 1930.867362    | 965.937319        | 14 |
| 5  | <b>544.224933</b>  | 272.616105      |                |                  | 526.214368         | 263.610822       | D    | 1819.835334        | 910.421305      | 1802.808785    | 901.908031       | 1801.824769    | 901.416022        | 13 |
| 6  | <b>704.255582</b>  | 352.631429      |                |                  | 686.245017         | 343.626147       | C    | 1704.808391        | 852.907833      | 1687.781842    | 844.394559       | 1686.797826    | 843.902551        | 12 |
| 7  | 791.287610         | 396.147443      |                |                  | 773.277045         | 387.142161       | S    | 1544.777742        | 772.892509      | 1527.751193    | 764.379235       | 1526.767177    | 763.887227        | 11 |
| 8  | <b>919.346188</b>  | 460.176732      | 902.319639     | 451.663458       | 901.335623         | 451.171450       | Q    | 1457.745714        | 729.376495      | 1440.719165    | 720.863221       | 1439.735149    | 720.371212        | 10 |
| 9  | <b>1082.409517</b> | 541.708397      | 1065.382968    | 533.195122       | 1064.398952        | 532.703114       | Y    | <b>1329.687136</b> | 665.347206      | 1312.660587    | 656.833931       | 1311.676571    | 656.341923        | 9  |
| 10 | <b>1211.452110</b> | 606.229693      | 1194.425561    | 597.716419       | <b>1193.441545</b> | 597.224410       | E    | <b>1166.623807</b> | 583.815541      | 1149.597258    | 575.302267       | 1148.613242    | 574.810259        | 8  |
| 11 | <b>1308.504874</b> | 654.756075      | 1291.478325    | 646.242801       | 1290.494309        | 645.750792       | P    | <b>1037.581214</b> | 519.294245      | 1020.554665    | 510.780971       | 1019.570649    | 510.288963        | 7  |
| 12 | <b>1421.588938</b> | 711.298107      | 1404.562389    | 702.784832       | <b>1403.578373</b> | 702.292824       | I    | <b>940.528450</b>  | 470.767863      | 923.501901     | 462.254589       | 922.517885     | 461.762581        | 6  |
| 13 | 1518.641702        | 759.824489      | 1501.615153    | 751.311215       | 1500.631137        | 750.819206       | P    | <b>827.444386</b>  | 414.225831      | 810.417837     | 405.712557       | 809.433821     | <b>405.220549</b> | 5  |
| 14 | 1575.663166        | 788.335221      | 1558.636617    | 779.821946       | 1557.652601        | 779.329938       | G    | <b>730.391622</b>  | 365.699449      | 713.365073     | 357.186175       | 712.381057     | 356.694167        | 4  |
| 15 | 1662.695194        | 831.851235      | 1645.668645    | 823.337961       | 1644.684629        | 822.845952       | S    | <b>673.370158</b>  | 337.188717      | 656.343609     | 328.675443       | 655.359593     | 328.183435        | 3  |
| 16 | 2101.920520        | 1051.463898     | 2084.893971    | 1042.950623      | 2083.909955        | 1042.458615      | Q    | <b>586.338130</b>  | 293.672703      | 569.311581     | 285.159429       |                |                   | 2  |
| 17 |                    |                 |                |                  |                    |                  | K    | 147.112804         | 74.060040       | 130.086255     | 65.546765        |                |                   | 1  |

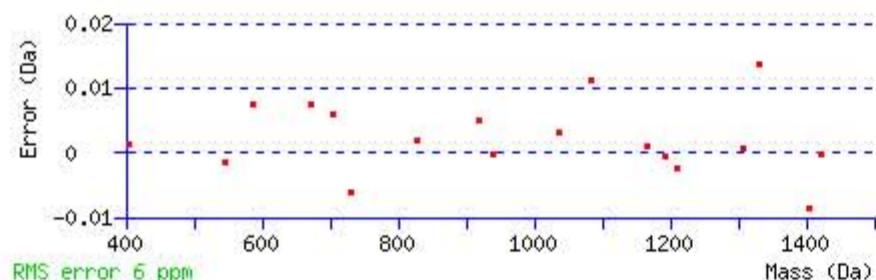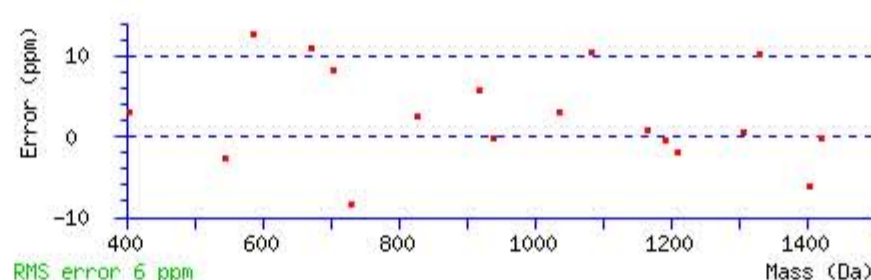

NCBI BLAST search of **AIDEDCSQYEPIPGSQK**

(Parameters: blastp, nr protein database, expect=20000, no filter, PAM30)

Other BLAST [web gateways](#)

All matches to this query

| Score | Mr(calc):   | Delta     | Sequence                            |
|-------|-------------|-----------|-------------------------------------|
| 54.1  | 2247.018753 | 0.004869  | <a href="#">AIDEDCSQYEPIPGSQK</a>   |
| 0.5   | 2247.048630 | -0.025008 | <a href="#">LVDQDKTMFICKSSWSMR</a>  |
| 0.3   | 2247.047760 | -0.024138 | <a href="#">NGSDDPSYNGAIIVSGDQK</a> |
| 0.2   | 2247.048615 | -0.024993 | <a href="#">NPGYPQSEGLLGECMIR</a>   |





# MATRIX SCIENCE Mascot Search Results

## Peptide View

MS/MS Fragmentation of **CEGFVCAQTGR**

Found in **CO8B\_HUMAN**, Complement component C8 beta chain OS=Homo sapiens GN=C8B PE=1 SV=3

Match to Query 32996: 1594.713188 from(798.363870,2+) rtinseconds(1788) index(17666)

Title: Locus:1.1.1.3223.18 File:"2013-07-02 CLN FXIII 60 min 3rd F 2.wiff"

Data file C:\Program Files (x86)\Matrix Science\Mascot Daemon\mgf\6 FXIII 60 min 3rd\mascot\_daemon\_merge.mgf

Click mouse within plot area to zoom in by factor of two about that point

Or, Plot from  to  Da

Label all possible matches  Label matches used for scoring

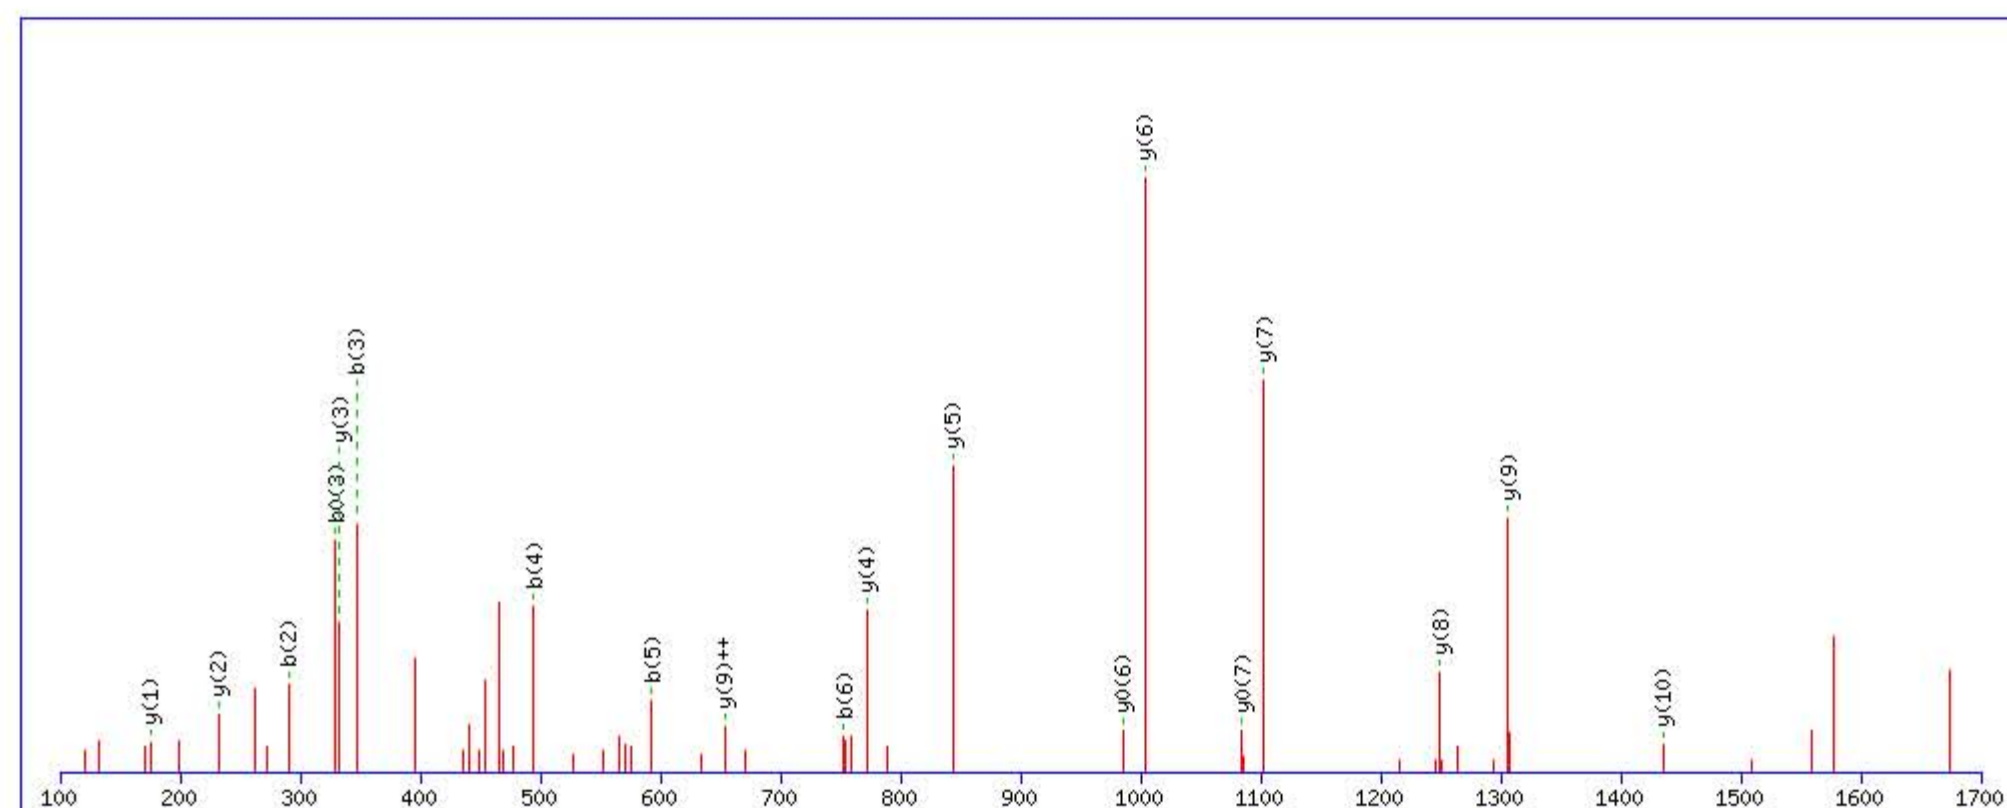

Monoisotopic mass of neutral peptide  $M_r(\text{calc})$ : 1594.705460

Fixed modifications: Carbamidomethyl (C) (apply to specified residues or termini only)

Variable modifications:

Q8 : Biotin:Thermo-21345 (Q)

Ions Score: 68 Expect: 1.3e-006

Matches : 19/100 fragment ions using 36 most intense peaks [\(help\)](#)

| #  | b                 | b <sup>++</sup> | b <sup>*</sup> | b <sup>*++</sup> | b <sup>0</sup>    | b <sup>0++</sup> | Seq. | y                  | y <sup>++</sup>   | y <sup>*</sup> | y <sup>*++</sup> | y <sup>0</sup>     | y <sup>0++</sup> | #  |
|----|-------------------|-----------------|----------------|------------------|-------------------|------------------|------|--------------------|-------------------|----------------|------------------|--------------------|------------------|----|
| 1  | 161.037925        | 81.022600       |                |                  |                   |                  | C    |                    |                   |                |                  |                    |                  | 11 |
| 2  | <b>290.080518</b> | 145.543897      |                |                  | 272.069953        | 136.538615       | E    | <b>1435.682069</b> | 718.344673        | 1418.655520    | 709.831398       | 1417.671504        | 709.339390       | 10 |
| 3  | <b>347.101982</b> | 174.054629      |                |                  | <b>329.091417</b> | 165.049347       | G    | <b>1306.639476</b> | <b>653.823376</b> | 1289.612927    | 645.310102       | 1288.628911        | 644.818094       | 9  |
| 4  | <b>494.170396</b> | 247.588836      |                |                  | 476.159831        | 238.583554       | F    | <b>1249.618012</b> | 625.312644        | 1232.591463    | 616.799370       | 1231.607447        | 616.307361       | 8  |
| 5  | <b>593.238810</b> | 297.123043      |                |                  | 575.228245        | 288.117761       | V    | <b>1102.549598</b> | 551.778437        | 1085.523049    | 543.265162       | <b>1084.539033</b> | 542.773154       | 7  |
| 6  | <b>753.269459</b> | 377.138368      |                |                  | 735.258894        | 368.133085       | C    | <b>1003.481184</b> | 502.244230        | 986.454635     | 493.730955       | <b>985.470619</b>  | 493.238947       | 6  |
| 7  | 824.306573        | 412.656925      |                |                  | 806.296008        | 403.651642       | A    | <b>843.450535</b>  | 422.228906        | 826.423986     | 413.715631       | 825.439970         | 413.223623       | 5  |
| 8  | 1263.531899       | 632.269588      | 1246.505350    | 623.756313       | 1245.521334       | 623.264305       | Q    | <b>772.413421</b>  | 386.710349        | 755.386872     | 378.197074       | 754.402856         | 377.705066       | 4  |
| 9  | 1364.579578       | 682.793427      | 1347.553029    | 674.280153       | 1346.569013       | 673.788145       | T    | <b>333.188095</b>  | 167.097685        | 316.161546     | 158.584411       | 315.177530         | 158.092403       | 3  |
| 10 | 1421.601042       | 711.304159      | 1404.574493    | 702.790885       | 1403.590477       | 702.298877       | G    | <b>232.140416</b>  | 116.573846        | 215.113867     | 108.060571       |                    |                  | 2  |
| 11 |                   |                 |                |                  |                   |                  | R    | <b>175.118952</b>  | 88.063114         | 158.092403     | 79.549839        |                    |                  | 1  |

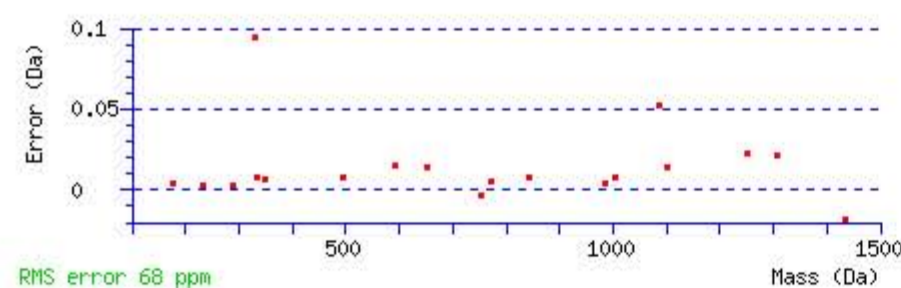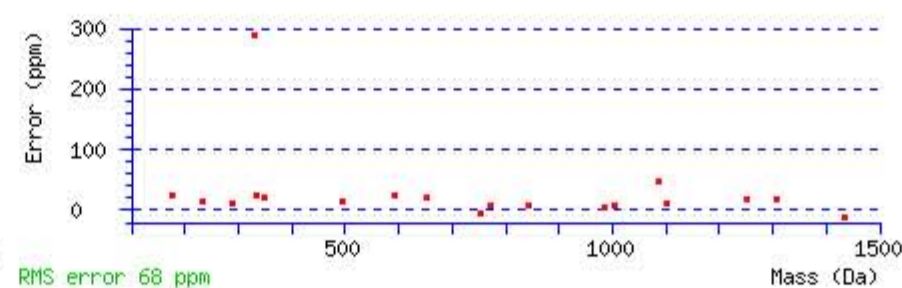

NCBI BLAST search of [CEGFVCAQTGR](#)

(Parameters: blastp, nr protein database, expect=20000, no filter, PAM30)

Other BLAST [web gateways](#)

All matches to this query

| Score | $M_r(\text{calc})$ : | Delta    | Sequence                    |
|-------|----------------------|----------|-----------------------------|
| 67.6  | 1594.705460          | 0.007728 | <a href="#">CEGFVCAQTGR</a> |

Mascot: <http://www.matrixscience.com/>

# MASCOT SCIENCE Mascot Search Results

## Peptide View

MS/MS Fragmentation of **KPYNVESYTPQTQ GK**

Found in **CO8B\_HUMAN**, Complement component C8 beta chain OS=Homo sapiens GN=C8B PE=1 SV=3

Match to Query 43705: 2050.030032 from(684.350620,3+) rtinseconds(1604) index(16605)

Title: Locus:1.1.1.3159.15 File:"2013-07-02 CLN FXIII 60 min 3rd F 2.wiff"

Data file C:\Program Files (x86)\Matrix Science\Mascot Daemon\mgf\6 FXIII 60 min 3rd\mascot\_daemon\_merge.mgf

Click mouse within plot area to zoom in by factor of two about that point

Or, Plot from 100 to 1600 Da Full range

Label all possible matches  Label matches used for scoring

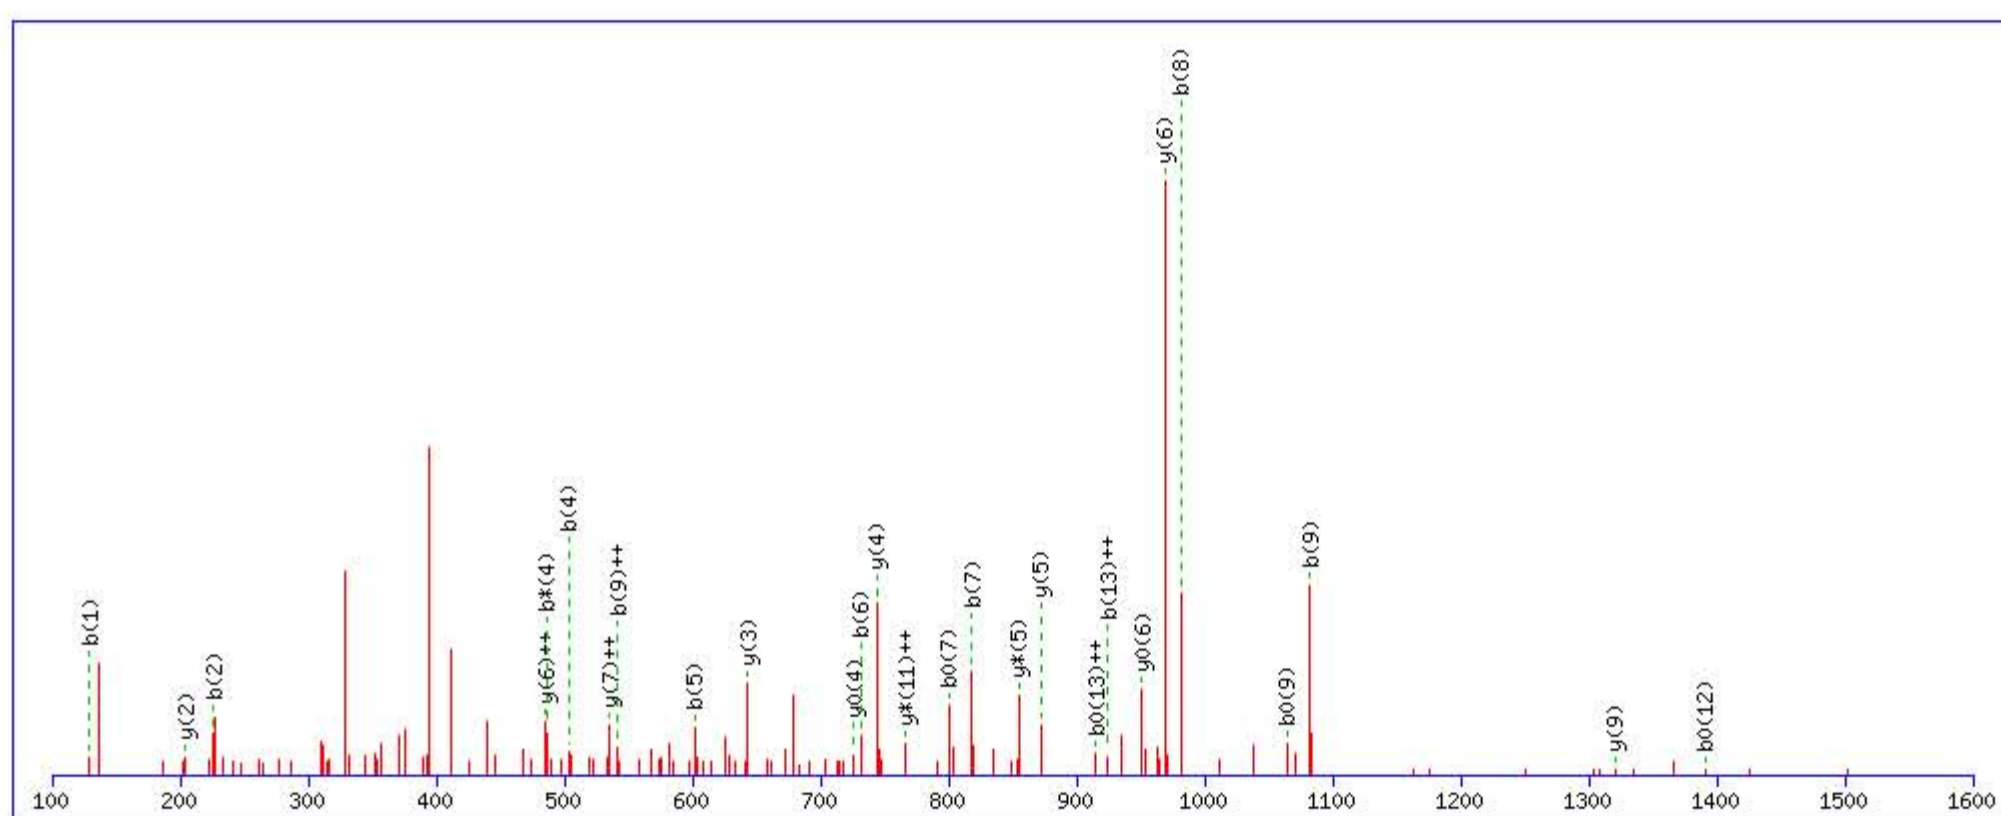

Monoisotopic mass of neutral peptide Mr(calc): 2050.019348

Fixed modifications: Carbamidomethyl (C) (apply to specified residues or termini only)

Variable modifications:

Q13 : Biotin:Thermo-21345 (Q)

Ions Score: 37 Expect: 0.00054

Matches : 27/152 fragment ions using 61 most intense peaks [\(help\)](#)

| #  | b                  | b <sup>++</sup>   | b <sup>*</sup>    | b <sup>*++</sup> | b <sup>0</sup>     | b <sup>0++</sup>  | Seq.     | y                  | y <sup>++</sup>   | y <sup>*</sup>    | y <sup>*++</sup>  | y <sup>0</sup>    | y <sup>0++</sup> | #         |
|----|--------------------|-------------------|-------------------|------------------|--------------------|-------------------|----------|--------------------|-------------------|-------------------|-------------------|-------------------|------------------|-----------|
| 1  | <b>129.102239</b>  | 65.054757         | 112.075690        | 56.541483        |                    |                   | <b>K</b> |                    |                   |                   |                   |                   |                  | <b>15</b> |
| 2  | <b>226.155003</b>  | 113.581139        | 209.128454        | 105.067865       |                    |                   | <b>P</b> | 1922.931678        | 961.969477        | 1905.905129       | 953.456203        | 1904.921113       | 952.964195       | <b>14</b> |
| 3  | 389.218332         | 195.112804        | 372.191783        | 186.599529       |                    |                   | <b>Y</b> | 1825.878914        | 913.443095        | 1808.852365       | 904.929821        | 1807.868349       | 904.437813       | <b>13</b> |
| 4  | <b>503.261259</b>  | 252.134267        | <b>486.234710</b> | 243.620993       |                    |                   | <b>N</b> | 1662.815585        | 831.911431        | 1645.789036       | 823.398156        | 1644.805020       | 822.906148       | <b>12</b> |
| 5  | <b>602.329673</b>  | 301.668475        | 585.303124        | 293.155200       |                    |                   | <b>V</b> | 1548.772658        | 774.889967        | 1531.746109       | <b>766.376693</b> | 1530.762093       | 765.884685       | <b>11</b> |
| 6  | <b>731.372266</b>  | 366.189771        | 714.345717        | 357.676497       | 713.361701         | 357.184489        | <b>E</b> | 1449.704244        | 725.355760        | 1432.677695       | 716.842486        | 1431.693679       | 716.350478       | <b>10</b> |
| 7  | <b>818.404294</b>  | 409.705785        | 801.377745        | 401.192511       | <b>800.393729</b>  | 400.700503        | <b>S</b> | <b>1320.661651</b> | 660.834464        | 1303.635102       | 652.321189        | 1302.651086       | 651.829181       | <b>9</b>  |
| 8  | <b>981.467623</b>  | 491.237450        | 964.441074        | 482.724175       | 963.457058         | 482.232167        | <b>Y</b> | 1233.629623        | 617.318450        | 1216.603074       | 608.805175        | 1215.619058       | 608.313167       | <b>8</b>  |
| 9  | <b>1082.515302</b> | <b>541.761289</b> | 1065.488753       | 533.248015       | <b>1064.504737</b> | 532.756007        | <b>T</b> | 1070.566294        | <b>535.786785</b> | 1053.539745       | 527.273511        | 1052.555729       | 526.781503       | <b>7</b>  |
| 10 | 1179.568066        | 590.287671        | 1162.541517       | 581.774397       | 1161.557501        | 581.282389        | <b>P</b> | <b>969.518615</b>  | <b>485.262946</b> | 952.492066        | 476.749671        | <b>951.508050</b> | 476.257663       | <b>6</b>  |
| 11 | 1307.626644        | 654.316960        | 1290.600095       | 645.803686       | 1289.616079        | 645.311678        | <b>Q</b> | <b>872.465851</b>  | 436.736564        | <b>855.439302</b> | 428.223289        | 854.455286        | 427.731281       | <b>5</b>  |
| 12 | 1408.674323        | 704.840800        | 1391.647774       | 696.327525       | <b>1390.663758</b> | 695.835517        | <b>T</b> | <b>744.407273</b>  | 372.707275        | 727.380724        | 364.194000        | <b>726.396708</b> | 363.701992       | <b>4</b>  |
| 13 | 1847.899649        | <b>924.453463</b> | 1830.873100       | 915.940188       | 1829.889084        | <b>915.448180</b> | <b>Q</b> | <b>643.359594</b>  | 322.183435        | 626.333045        | 313.670161        |                   |                  | <b>3</b>  |
| 14 | 1904.921113        | 952.964195        | 1887.894564       | 944.450920       | 1886.910548        | 943.958912        | <b>G</b> | <b>204.134268</b>  | 102.570772        | 187.107719        | 94.057497         |                   |                  | <b>2</b>  |
| 15 |                    |                   |                   |                  |                    |                   | <b>K</b> | 147.112804         | 74.060040         | 130.086255        | 65.546765         |                   |                  | <b>1</b>  |

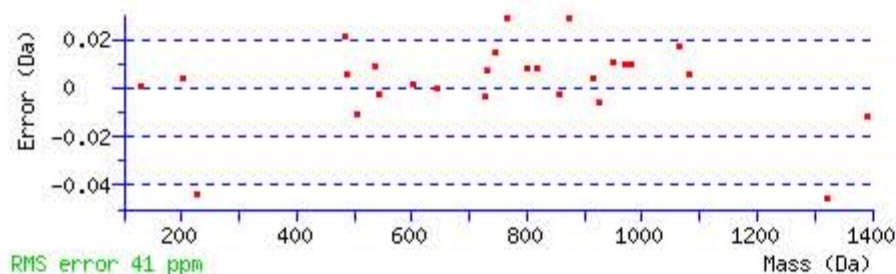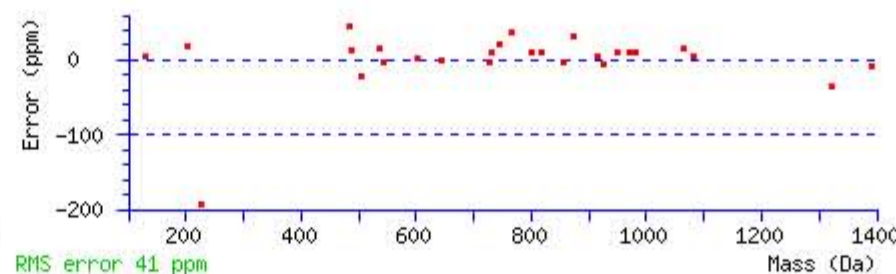

NCBI BLAST search of **KPYNVESYTPQTQ GK**

(Parameters: blastp, nr protein database, expect=20000, no filter, PAM30)

Other BLAST [web gateways](#)

All matches to this query

| Score | Mr(calc):   | Delta    | Sequence                          |
|-------|-------------|----------|-----------------------------------|
| 37.0  | 2050.019348 | 0.010684 | <a href="#">KPYNVESYTPQTQ GK</a>  |
| 24.4  | 2050.019348 | 0.010684 | <a href="#">KPYNVESYTPQTQ GK</a>  |
| 2.2   | 2050.026566 | 0.003466 | <a href="#">LFVGM LNKQSEDDVRR</a> |

**Mascot Search Results**

**Peptide View**

MS/MS Fragmentation of **CDCICPVGSQGLACEVSYR**

Found in **CO8B\_HUMAN**, Complement component C8 beta chain OS=Homo sapiens GN=C8B PE=1 SV=3

Match to Query 51628: 2541.124332 from(848.048720,3+) rtinseconds(2168) index(20066)  
 Title: Locus:1.1.1.3355.16 File:"2013-07-02 CLN FXIII 60 min 3rd F 2.wiff"  
 Data file C:\Program Files (x86)\Matrix Science\Mascot Daemon\mgf6 FXIII 60 min 3rd\mascot\_daemon\_merge.mgf

Click mouse within plot area to zoom in by factor of two about that point  
 Or, Plot from  to  Da   
 Label all possible matches  Label matches used for scoring

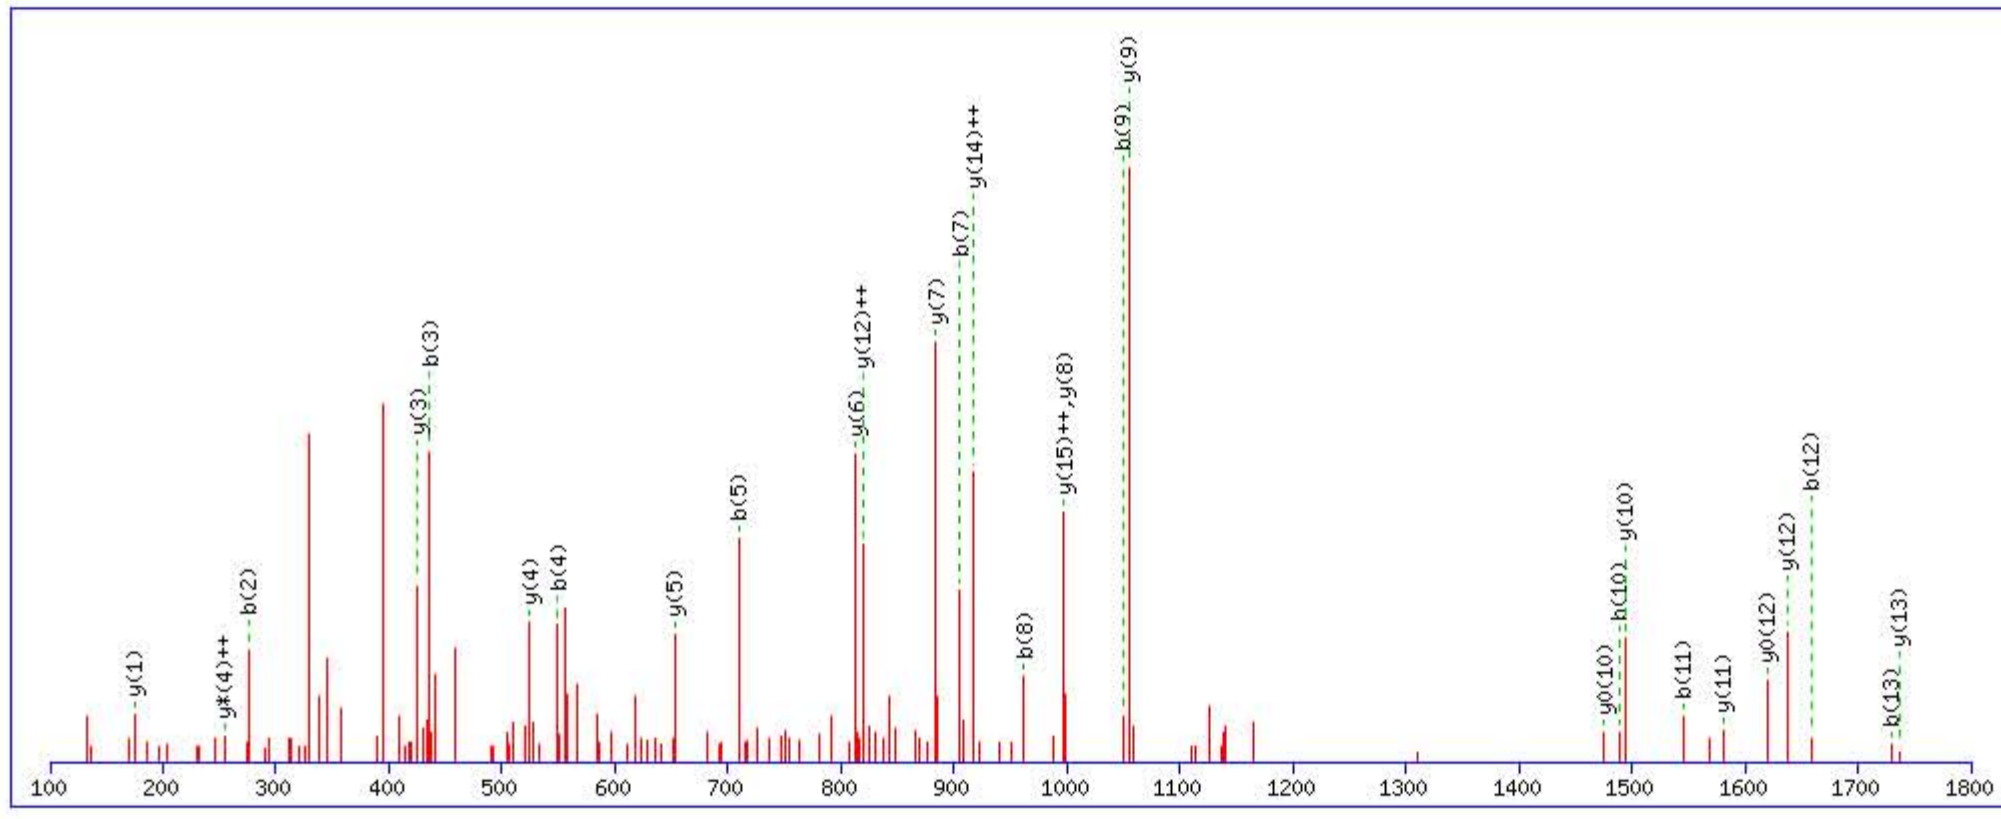

Monoisotopic mass of neutral peptide Mr(calc): 2541.094299  
 Fixed modifications: Carbamidomethyl (C) (apply to specified residues or termini only)  
 Variable modifications:  
 Q10 : Biotin:Thermo-21345 (Q)  
 Ions Score: 92 Expect: 4e-009  
 Matches : 29/192 fragment ions using 44 most intense peaks [\(help\)](#)

| #  | b                  | b <sup>++</sup> | b <sup>*</sup> | b <sup>*++</sup> | b <sup>0</sup> | b <sup>0++</sup> | Seq.     | y                  | y <sup>++</sup>   | y <sup>*</sup> | y <sup>*++</sup>  | y <sup>0</sup>     | y <sup>0++</sup> | #  |
|----|--------------------|-----------------|----------------|------------------|----------------|------------------|----------|--------------------|-------------------|----------------|-------------------|--------------------|------------------|----|
| 1  | 161.037925         | 81.022600       |                |                  |                |                  | <b>C</b> |                    |                   |                |                   |                    |                  | 19 |
| 2  | <b>276.064868</b>  | 138.536072      |                |                  | 258.054303     | 129.530790       | <b>D</b> | 2382.070908        | 1191.539092       | 2365.044359    | 1183.025817       | 2364.060343        | 1182.533809      | 18 |
| 3  | <b>436.095517</b>  | 218.551397      |                |                  | 418.084952     | 209.546114       | <b>C</b> | 2267.043965        | 1134.025620       | 2250.017416    | 1125.512346       | 2249.033400        | 1125.020338      | 17 |
| 4  | <b>549.179581</b>  | 275.093429      |                |                  | 531.169016     | 266.088146       | <b>I</b> | 2107.013316        | 1054.010296       | 2089.986767    | 1045.497021       | 2089.002751        | 1045.005013      | 16 |
| 5  | <b>709.210230</b>  | 355.108753      |                |                  | 691.199665     | 346.103471       | <b>C</b> | 1993.929252        | <b>997.468264</b> | 1976.902703    | 988.954990        | 1975.918687        | 988.462982       | 15 |
| 6  | 806.262994         | 403.635135      |                |                  | 788.252429     | 394.629853       | <b>P</b> | 1833.898603        | <b>917.452940</b> | 1816.872054    | 908.939665        | 1815.888038        | 908.447657       | 14 |
| 7  | <b>905.331408</b>  | 453.169342      |                |                  | 887.320843     | 444.164060       | <b>V</b> | <b>1736.845839</b> | 868.926558        | 1719.819290    | 860.413283        | 1718.835274        | 859.921275       | 13 |
| 8  | <b>962.352872</b>  | 481.680074      |                |                  | 944.342307     | 472.674792       | <b>G</b> | <b>1637.777425</b> | <b>819.392351</b> | 1620.750876    | 810.879076        | <b>1619.766860</b> | 810.387068       | 12 |
| 9  | <b>1049.384900</b> | 525.196088      |                |                  | 1031.374335    | 516.190806       | <b>S</b> | <b>1580.755961</b> | 790.881619        | 1563.729412    | 782.368344        | 1562.745396        | 781.876336       | 11 |
| 10 | <b>1488.610226</b> | 744.808751      | 1471.583677    | 736.295477       | 1470.599661    | 735.803469       | <b>Q</b> | <b>1493.723933</b> | 747.365605        | 1476.697384    | 738.852330        | <b>1475.713368</b> | 738.360322       | 10 |
| 11 | <b>1545.631690</b> | 773.319483      | 1528.605141    | 764.806209       | 1527.621125    | 764.314201       | <b>G</b> | <b>1054.498607</b> | 527.752941        | 1037.472058    | 519.239667        | 1036.488042        | 518.747659       | 9  |
| 12 | <b>1658.715754</b> | 829.861515      | 1641.689205    | 821.348241       | 1640.705189    | 820.856233       | <b>L</b> | <b>997.477143</b>  | 499.242209        | 980.450594     | 490.728935        | 979.466578         | 490.236927       | 8  |
| 13 | <b>1729.752868</b> | 865.380072      | 1712.726319    | 856.866798       | 1711.742303    | 856.374790       | <b>A</b> | <b>884.393079</b>  | 442.700178        | 867.366530     | 434.186903        | 866.382514         | 433.694895       | 7  |
| 14 | 1889.783517        | 945.395397      | 1872.756968    | 936.882122       | 1871.772952    | 936.390114       | <b>C</b> | <b>813.355965</b>  | 407.181621        | 796.329416     | 398.668346        | 795.345400         | 398.176338       | 6  |
| 15 | 2018.826110        | 1009.916693     | 2001.799561    | 1001.403419      | 2000.815545    | 1000.911411      | <b>E</b> | <b>653.325316</b>  | 327.166296        | 636.298767     | 318.653021        | 635.314751         | 318.161013       | 5  |
| 16 | 2117.894524        | 1059.450900     | 2100.867975    | 1050.937625      | 2099.883959    | 1050.445617      | <b>V</b> | <b>524.282723</b>  | 262.645000        | 507.256174     | <b>254.131725</b> | 506.272158         | 253.639717       | 4  |
| 17 | 2204.926552        | 1102.966914     | 2187.900003    | 1094.453639      | 2186.915987    | 1093.961631      | <b>S</b> | <b>425.214309</b>  | 213.110793        | 408.187760     | 204.597518        | 407.203744         | 204.105510       | 3  |
| 18 | 2367.989881        | 1184.498578     | 2350.963332    | 1175.985304      | 2349.979316    | 1175.493296      | <b>Y</b> | 338.182281         | 169.594778        | 321.155732     | 161.081504        |                    |                  | 2  |
| 19 |                    |                 |                |                  |                |                  | <b>R</b> | <b>175.118952</b>  | 88.063114         | 158.092403     | 79.549839         |                    |                  | 1  |

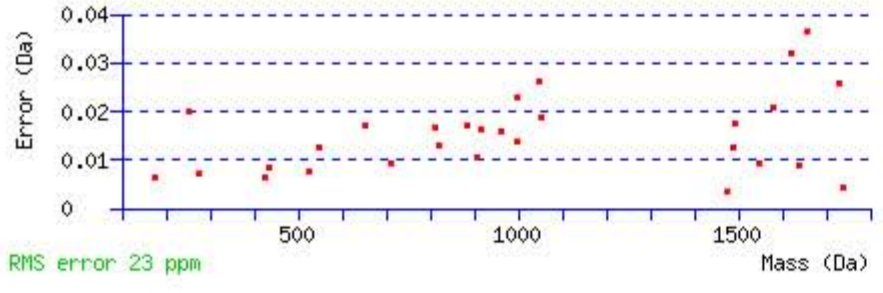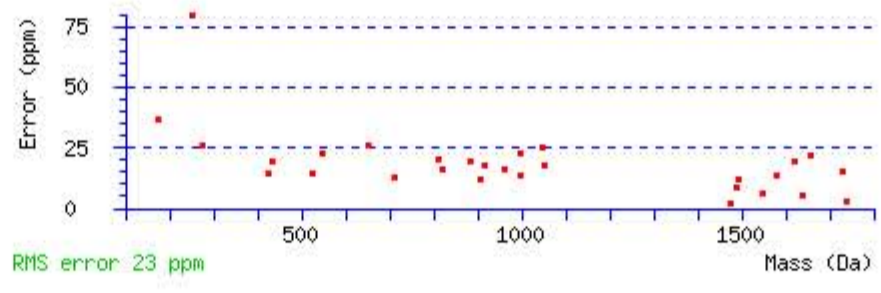

NCBI BLAST search of **CDCICPVGSQGLACEVSYR**  
 (Parameters: blastp, nr protein database, expect=20000, no filter, PAM30)  
 Other BLAST [web gateways](#)

**All matches to this query**

| Score | Mr(calc):   | Delta    | Sequence                            |
|-------|-------------|----------|-------------------------------------|
| 92.4  | 2541.094299 | 0.030033 | <a href="#">CDCICPVGSQGLACEVSYR</a> |

# MASCOT Search Results

## Peptide View

MS/MS Fragmentation of **AGQLSVK**

Found in **CO8G\_HUMAN**, Complement component C8 gamma chain OS=Homo sapiens GN=C8G PE=1 SV=3

Match to Query 13746: 1012.573548 from(507.294050,2+) rtinseconds(1592) index(30838)

Title: Locus:1.1.1.3103.12 File:"2013-07-02 CLN FXIII 60 min 3rd F 3.wiff"

Data file C:\Program Files (x86)\Matrix Science\Mascot Daemon\mgf\6 FXIII 60 min 3rd\mascot\_daemon\_merge.mgf

Click mouse within plot area to zoom in by factor of two about that point

Or, Plot from  to  Da

Label all possible matches  Label matches used for scoring

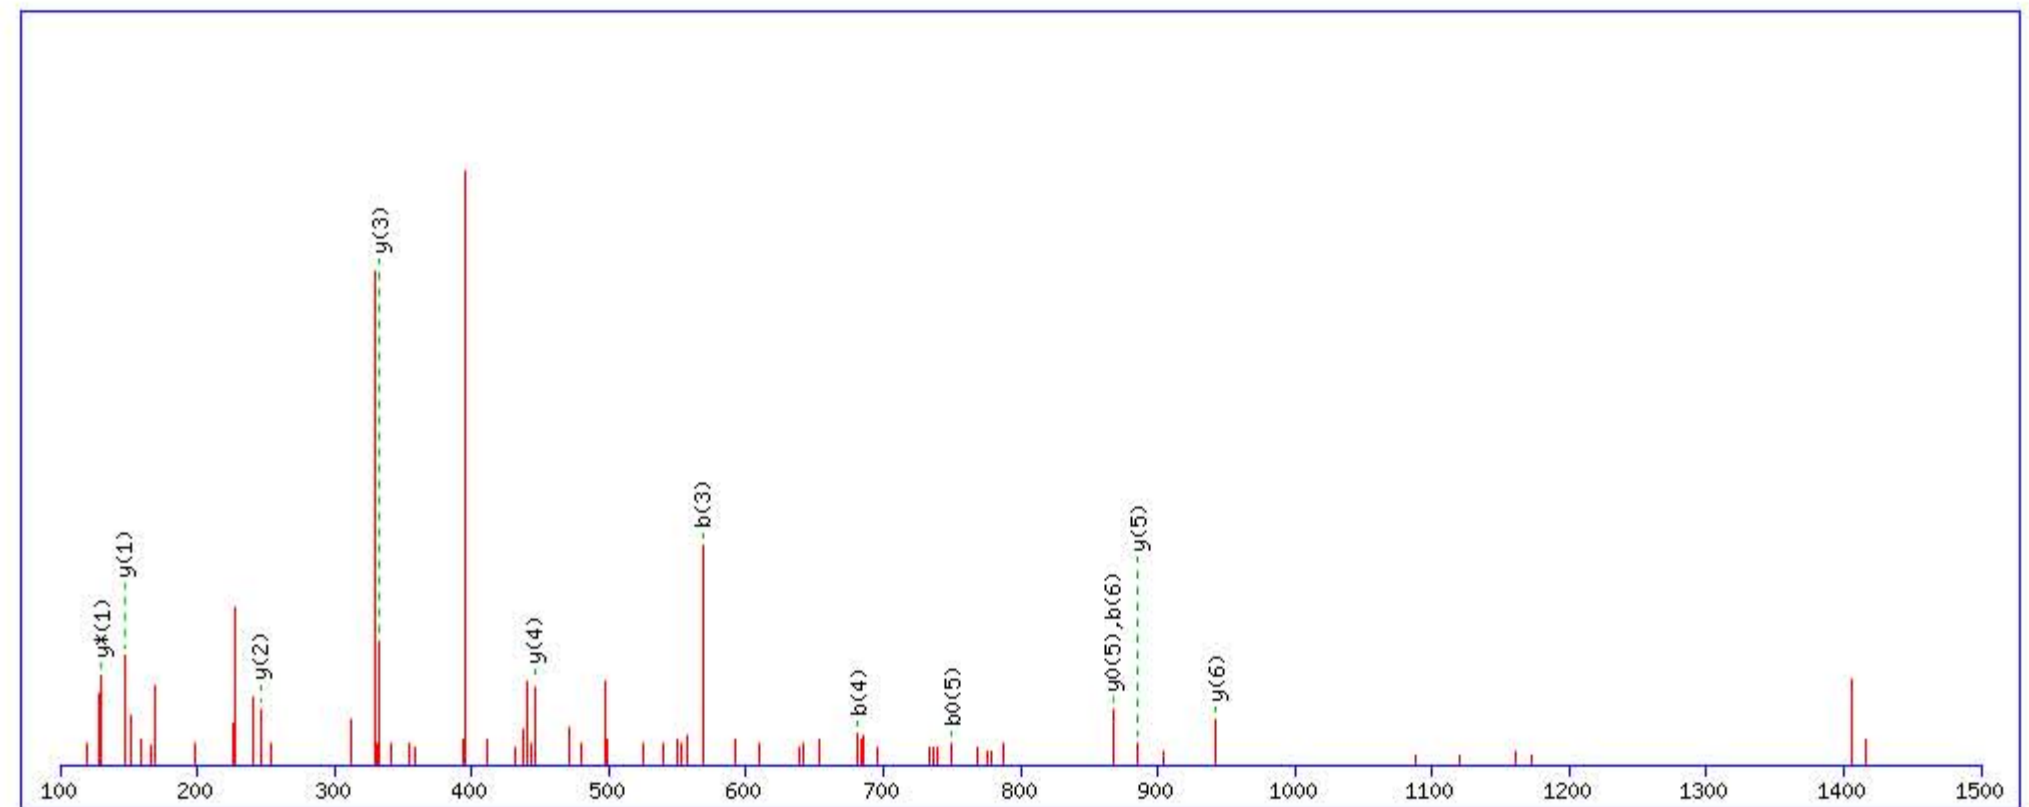

Monoisotopic mass of neutral peptide Mr(calc): 1012.573929

Fixed modifications: Carbamidomethyl (C) (apply to specified residues or termini only)

Variable modifications:

Q3 : Biotin:Thermo-21345 (Q)

Ions Score: 29 Expect: 0.025

Matches : 12/56 fragment ions using 25 most intense peaks [\(help\)](#)

| # | b                 | b <sup>++</sup> | b*         | b <sup>+++</sup> | b <sup>0</sup>    | b <sup>0++</sup> | Seq. | y                 | y <sup>++</sup> | y*                | y <sup>+++</sup> | y <sup>0</sup>    | y <sup>0++</sup> | # |
|---|-------------------|-----------------|------------|------------------|-------------------|------------------|------|-------------------|-----------------|-------------------|------------------|-------------------|------------------|---|
| 1 | 72.044390         | 36.525833       |            |                  |                   |                  | A    |                   |                 |                   |                  |                   |                  | 7 |
| 2 | 129.065854        | 65.036565       |            |                  |                   |                  | G    | <b>942.544100</b> | 471.775688      | 925.517551        | 463.262414       | 924.533535        | 462.770406       | 6 |
| 3 | <b>568.291180</b> | 284.649228      | 551.264631 | 276.135954       |                   |                  | Q    | <b>885.522636</b> | 443.264956      | 868.496087        | 434.751682       | <b>867.512071</b> | 434.259674       | 5 |
| 4 | <b>681.375244</b> | 341.191260      | 664.348695 | 332.677986       |                   |                  | L    | <b>446.297310</b> | 223.652293      | 429.270761        | 215.139018       | 428.286745        | 214.647010       | 4 |
| 5 | 768.407272        | 384.707274      | 751.380723 | 376.194000       | <b>750.396707</b> | 375.701992       | S    | <b>333.213246</b> | 167.110261      | 316.186697        | 158.596986       | 315.202681        | 158.104978       | 3 |
| 6 | <b>867.475686</b> | 434.241481      | 850.449137 | 425.728207       | 849.465121        | 425.236199       | V    | <b>246.181218</b> | 123.594247      | 229.154669        | 115.080972       |                   |                  | 2 |
| 7 |                   |                 |            |                  |                   |                  | K    | <b>147.112804</b> | 74.060040       | <b>130.086255</b> | 65.546765        |                   |                  | 1 |

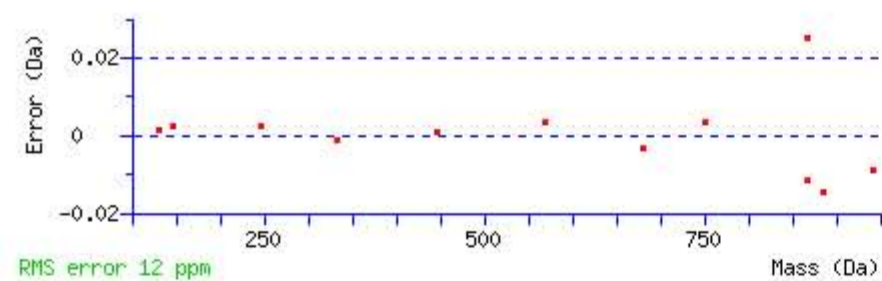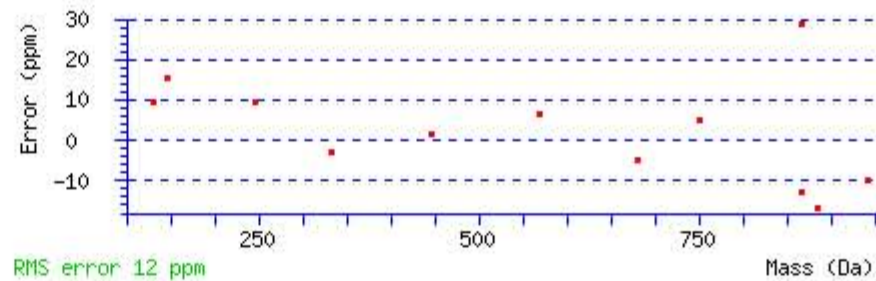

NCBI BLAST search of **AGQLSVK**

(Parameters: blastp, nr protein database, expect=20000, no filter, PAM30)

Other BLAST [web gateways](#)

All matches to this query

| Score | Mr(calc):   | Delta     | Sequence                |
|-------|-------------|-----------|-------------------------|
| 29.3  | 1012.573929 | -0.000381 | <a href="#">AGQLSVK</a> |
| 19.3  | 1012.573929 | -0.000381 | <a href="#">QAGLVSK</a> |
| 19.3  | 1012.573914 | -0.000366 | <a href="#">QKLEGK</a>  |
| 11.2  | 1012.573914 | -0.000366 | <a href="#">KEAQVK</a>  |
| 8.3   | 1012.573914 | -0.000366 | <a href="#">QKADIK</a>  |
| 8.3   | 1012.573914 | -0.000366 | <a href="#">QKADLK</a>  |
| 8.3   | 1012.573914 | -0.000366 | <a href="#">QKEGIK</a>  |
| 8.3   | 1012.585144 | -0.011596 | <a href="#">QKNGKK</a>  |
| 6.9   | 1012.573914 | -0.000366 | <a href="#">KQDLAK</a>  |
| 6.3   | 1012.573914 | -0.000366 | <a href="#">AKEVQK</a>  |

# MASCOT Search Results

## Peptide View

MS/MS Fragmentation of **KLDGICWQVR**

Found in **CO8G\_HUMAN**, Complement component C8 gamma chain OS=Homo sapiens GN=C8G PE=1 SV=3

Match to Query 32590: 1584.841748 from(793.428150,2+) rtinseconds(2073) index(19475)

Title: Locus:1.1.1.3322.9 File:"2013-07-02 CLN FXIII 60 min 3rd F 2.wiff"

Data file C:\Program Files (x86)\Matrix Science\Mascot Daemon\mgf6 FXIII 60 min 3rd\mascot\_daemon\_merge.mgf

Click mouse within plot area to zoom in by factor of two about that point

Or, Plot from 0 to 2600 Da Full range

Label all possible matches  Label matches used for scoring

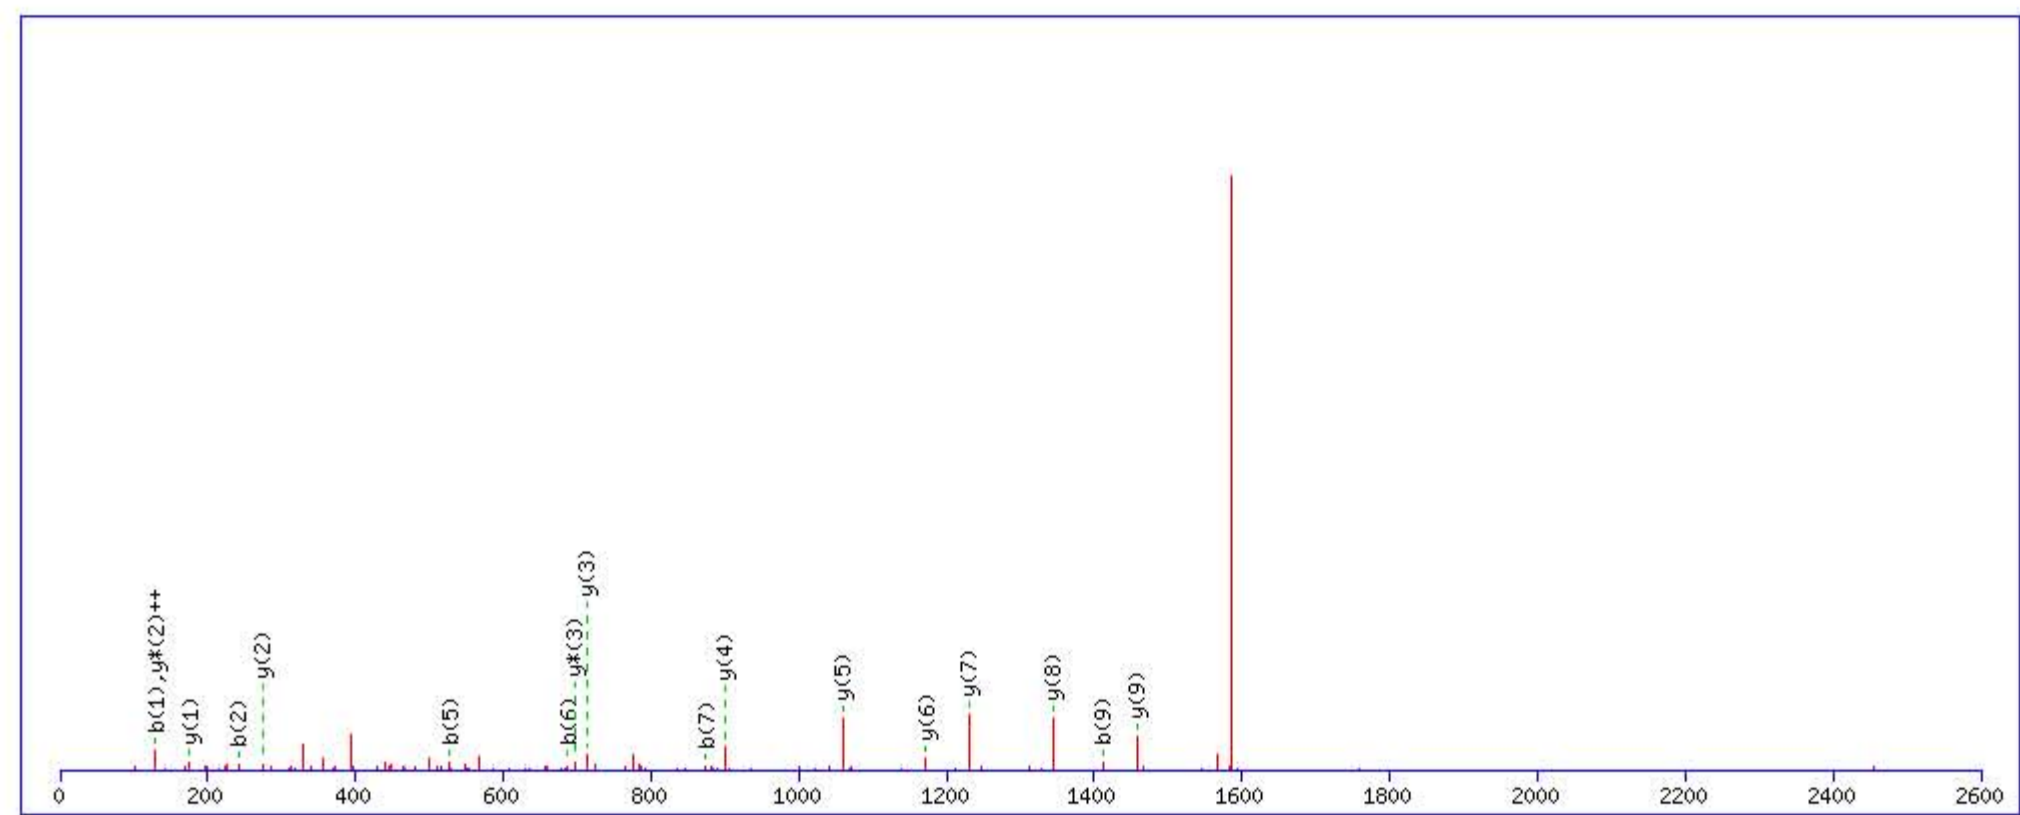

Monoisotopic mass of neutral peptide Mr(calc): 1584.826874

Fixed modifications: Carbamidomethyl (C) (apply to specified residues or termini only)

Variable modifications:

Q8 : Biotin:Thermo-21345 (Q)

Ions Score: 61 Expect: 2.2e-005

Matches : 17/90 fragment ions using 30 most intense peaks ([help](#))

| #  | b           | b <sup>++</sup> | b <sup>*</sup> | b <sup>*++</sup> | b <sup>0</sup> | b <sup>0++</sup> | Seq. | y           | y <sup>++</sup> | y <sup>*</sup> | y <sup>*++</sup> | y <sup>0</sup> | y <sup>0++</sup> | #  |
|----|-------------|-----------------|----------------|------------------|----------------|------------------|------|-------------|-----------------|----------------|------------------|----------------|------------------|----|
| 1  | 129.102239  | 65.054757       | 112.075690     | 56.541483        |                |                  | K    |             |                 |                |                  |                |                  | 10 |
| 2  | 242.186303  | 121.596790      | 225.159754     | 113.083515       |                |                  | L    | 1457.739189 | 729.373233      | 1440.712640    | 720.859958       | 1439.728624    | 720.367950       | 9  |
| 3  | 357.213246  | 179.110261      | 340.186697     | 170.596987       | 339.202681     | 170.104979       | D    | 1344.655125 | 672.831201      | 1327.628576    | 664.317926       | 1326.644560    | 663.825918       | 8  |
| 4  | 414.234710  | 207.620993      | 397.208161     | 199.107719       | 396.224145     | 198.615711       | G    | 1229.628182 | 615.317729      | 1212.601633    | 606.804455       |                |                  | 7  |
| 5  | 527.318774  | 264.163025      | 510.292225     | 255.649751       | 509.308209     | 255.157743       | I    | 1172.606718 | 586.806997      | 1155.580169    | 578.293723       |                |                  | 6  |
| 6  | 687.349423  | 344.178350      | 670.322874     | 335.665075       | 669.338858     | 335.173067       | C    | 1059.522654 | 530.264965      | 1042.496105    | 521.751691       |                |                  | 5  |
| 7  | 873.428736  | 437.218006      | 856.402187     | 428.704732       | 855.418171     | 428.212724       | W    | 899.492005  | 450.249641      | 882.465456     | 441.736366       |                |                  | 4  |
| 8  | 1312.654062 | 656.830669      | 1295.627513    | 648.317395       | 1294.643497    | 647.825387       | Q    | 713.412692  | 357.209984      | 696.386143     | 348.696710       |                |                  | 3  |
| 9  | 1411.722476 | 706.364876      | 1394.695927    | 697.851602       | 1393.711911    | 697.359594       | V    | 274.187366  | 137.597321      | 257.160817     | 129.084047       |                |                  | 2  |
| 10 |             |                 |                |                  |                |                  | R    | 175.118952  | 88.063114       | 158.092403     | 79.549839        |                |                  | 1  |

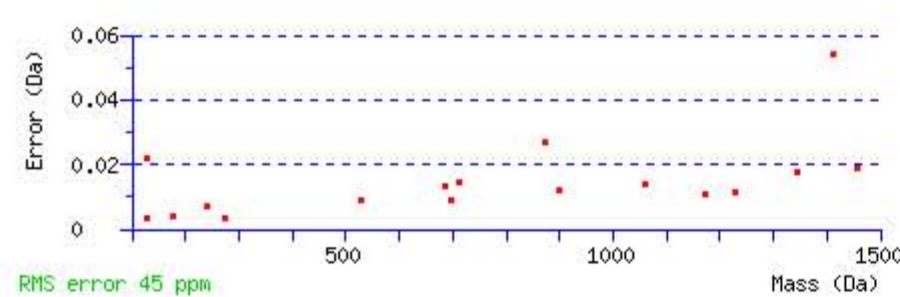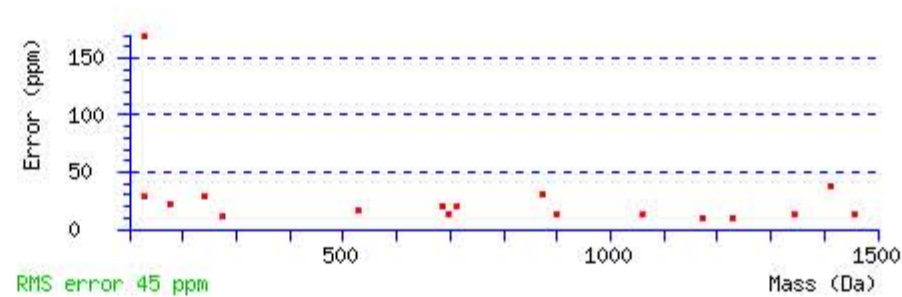

NCBI BLAST search of [KLDGICWQVR](#)

(Parameters: blastp, nr protein database, expect=20000, no filter, PAM30)

Other BLAST [web gateways](#)

## All matches to this query

| Score | Mr(calc):   | Delta     | Sequence                         |
|-------|-------------|-----------|----------------------------------|
| 61.0  | 1584.826874 | 0.014874  | <a href="#">KLDGICWQVR</a>       |
| 20.7  | 1584.858353 | -0.016605 | <a href="#">QLDGLAGLKGEGSRGK</a> |
| 11.5  | 1584.858337 | -0.016589 | <a href="#">LKSNDGEERLAVVR</a>   |
| 7.4   | 1584.822830 | 0.018918  | <a href="#">QLDQKCKQAR</a>       |
| 7.3   | 1584.822830 | 0.018918  | <a href="#">QLDQKCKQAR</a>       |
| 6.7   | 1584.859222 | -0.017474 | <a href="#">KLSDVCQLRR</a>       |
| 6.3   | 1584.819458 | 0.022290  | <a href="#">QITRSWQEAR</a>       |
| 6.3   | 1584.841278 | 0.000470  | <a href="#">QLAWVGDGVWVSIR</a>   |
| 4.1   | 1584.818100 | 0.023648  | <a href="#">KQQTLEAEEAK</a>      |
| 3.0   | 1584.851791 | -0.010043 | <a href="#">KQLRAQEIAMQNR</a>    |

**MASCOT** **SCIENCE** Mascot Search Results

Peptide View

MS/MS Fragmentation of **SLPVSDSVLSGFQR**

Found in **CO8G\_HUMAN**, Complement component C8 gamma chain OS=Homo sapiens GN=C8G PE=1 SV=3

Match to Query 40743: 1930.992072 from(644.671300,3+) rtinseconds(2512) index(35904)

Title: Locus:1.1.1.3424.10 File:"2013-07-02 CLN FXIII 60 min 3rd F 3.wiff"

Data file C:\Program Files (x86)\Matrix Science\Mascot Daemon\mgf6 FXIII 60 min 3rd\mascot\_daemon\_merge.mgf

Click mouse within plot area to zoom in by factor of two about that point

Or, Plot from 0 to 2800 Da Full range

Label all possible matches  Label matches used for scoring

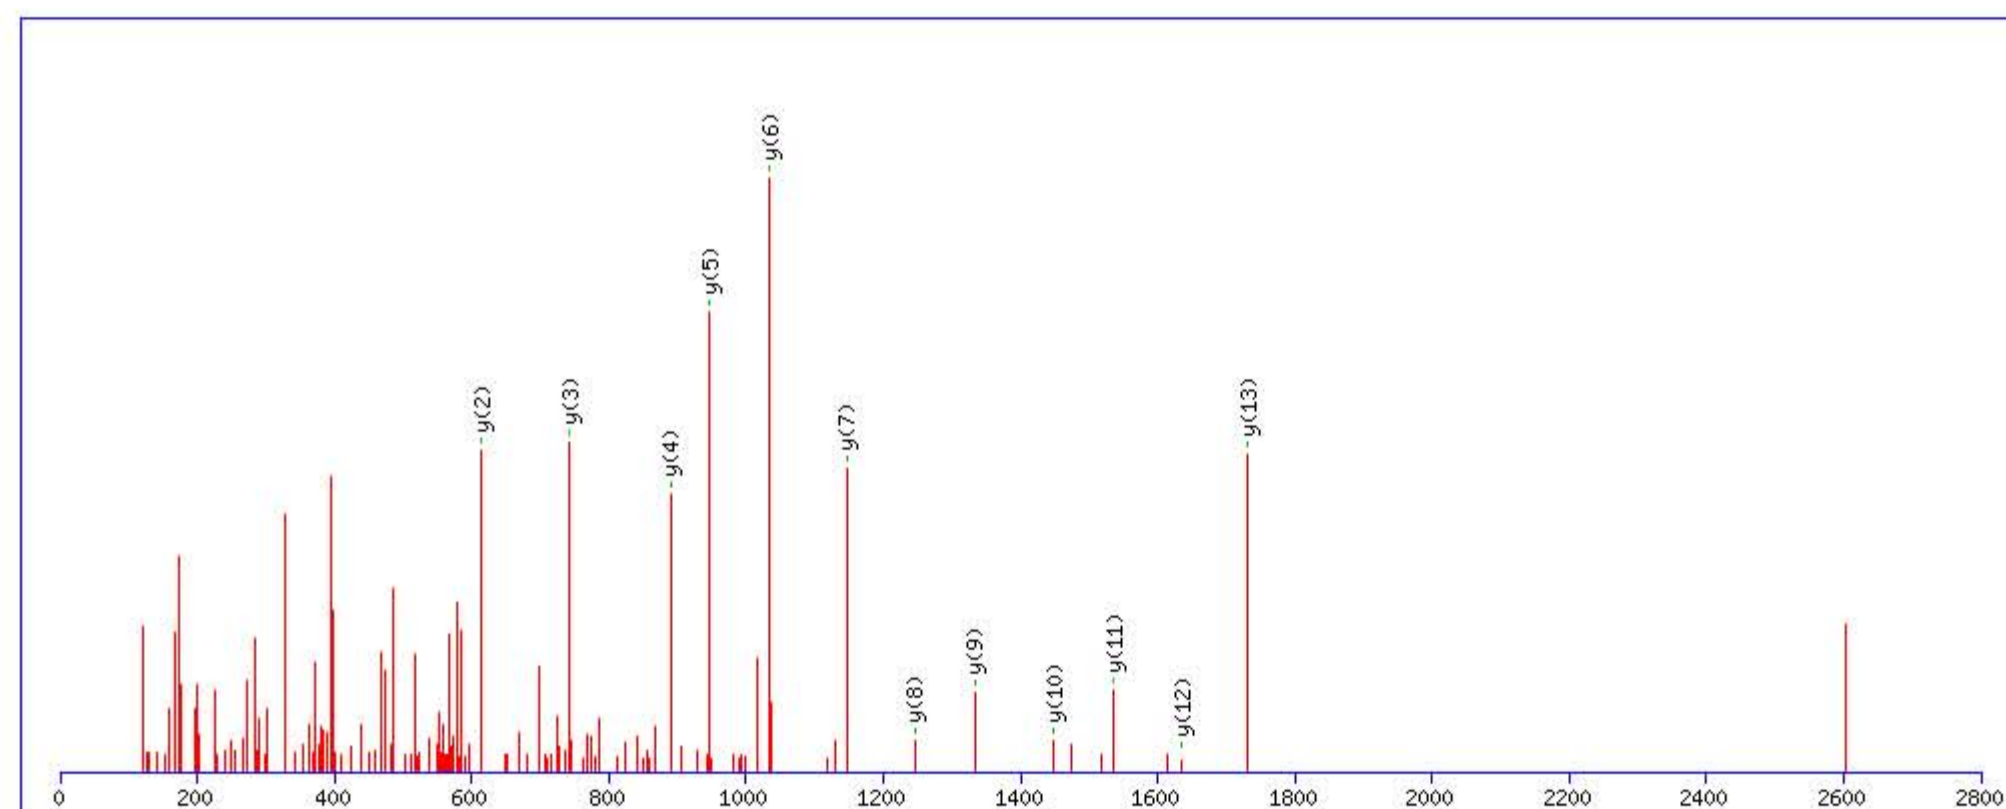

Monoisotopic mass of neutral peptide Mr(calc): 1930.982254

Fixed modifications: Carbamidomethyl (C) (apply to specified residues or termini only)

Variable modifications:

Q14 : Biotin:Thermo-21345 (Q)

Ions Score: 104 Expect: 2.4e-010

Matches : 12/138 fragment ions using 17 most intense peaks ([help](#))

| #  | b           | b <sup>++</sup> | b <sup>+</sup> | b <sup>+++</sup> | b <sup>0</sup> | b <sup>0++</sup> | Seq. | y                  | y <sup>++</sup> | y <sup>+</sup> | y <sup>+++</sup> | y <sup>0</sup> | y <sup>0++</sup> | #  |
|----|-------------|-----------------|----------------|------------------|----------------|------------------|------|--------------------|-----------------|----------------|------------------|----------------|------------------|----|
| 1  | 88.039304   | 44.523290       |                |                  | 70.028739      | 35.518008        | S    |                    |                 |                |                  |                |                  | 15 |
| 2  | 201.123368  | 101.065322      |                |                  | 183.112803     | 92.060039        | L    | 1844.957496        | 922.982386      | 1827.930947    | 914.469112       | 1826.946931    | 913.977104       | 14 |
| 3  | 298.176132  | 149.591704      |                |                  | 280.165567     | 140.586422       | P    | <b>1731.873432</b> | 866.440354      | 1714.846883    | 857.927080       | 1713.862867    | 857.435072       | 13 |
| 4  | 397.244546  | 199.125911      |                |                  | 379.233981     | 190.120629       | V    | <b>1634.820668</b> | 817.913972      | 1617.794119    | 809.400698       | 1616.810103    | 808.908690       | 12 |
| 5  | 484.276574  | 242.641925      |                |                  | 466.266009     | 233.636643       | S    | <b>1535.752254</b> | 768.379765      | 1518.725705    | 759.866491       | 1517.741689    | 759.374483       | 11 |
| 6  | 599.303517  | 300.155397      |                |                  | 581.292952     | 291.150114       | D    | <b>1448.720226</b> | 724.863751      | 1431.693677    | 716.350477       | 1430.709661    | 715.858469       | 10 |
| 7  | 686.335545  | 343.671411      |                |                  | 668.324980     | 334.666128       | S    | <b>1333.693283</b> | 667.350280      | 1316.666734    | 658.837005       | 1315.682718    | 658.344997       | 9  |
| 8  | 785.403959  | 393.205618      |                |                  | 767.393394     | 384.200335       | V    | <b>1246.661255</b> | 623.834266      | 1229.634706    | 615.320991       | 1228.650690    | 614.828983       | 8  |
| 9  | 898.488023  | 449.747650      |                |                  | 880.477458     | 440.742367       | L    | <b>1147.592841</b> | 574.300059      | 1130.566292    | 565.786784       | 1129.582276    | 565.294776       | 7  |
| 10 | 985.520051  | 493.263664      |                |                  | 967.509486     | 484.258381       | S    | <b>1034.508777</b> | 517.758027      | 1017.482228    | 509.244752       | 1016.498212    | 508.752744       | 6  |
| 11 | 1042.541515 | 521.774395      |                |                  | 1024.530950    | 512.769113       | G    | <b>947.476749</b>  | 474.242013      | 930.450200     | 465.728738       | 929.466184     | 465.236730       | 5  |
| 12 | 1189.609929 | 595.308603      |                |                  | 1171.599364    | 586.303320       | F    | <b>890.455285</b>  | 445.731281      | 873.428736     | 437.218006       | 872.444720     | 436.725998       | 4  |
| 13 | 1318.652522 | 659.829899      |                |                  | 1300.641957    | 650.824617       | E    | <b>743.386871</b>  | 372.197074      | 726.360322     | 363.683799       | 725.376306     | 363.191791       | 3  |
| 14 | 1757.877848 | 879.442562      | 1740.851299    | 870.929288       | 1739.867283    | 870.437280       | Q    | <b>614.344278</b>  | 307.675777      | 597.317729     | 299.162503       |                |                  | 2  |
| 15 |             |                 |                |                  |                |                  | R    | 175.118952         | 88.063114       | 158.092403     | 79.549839        |                |                  | 1  |

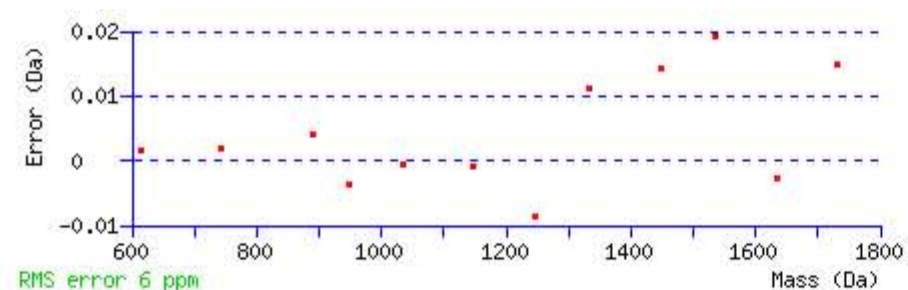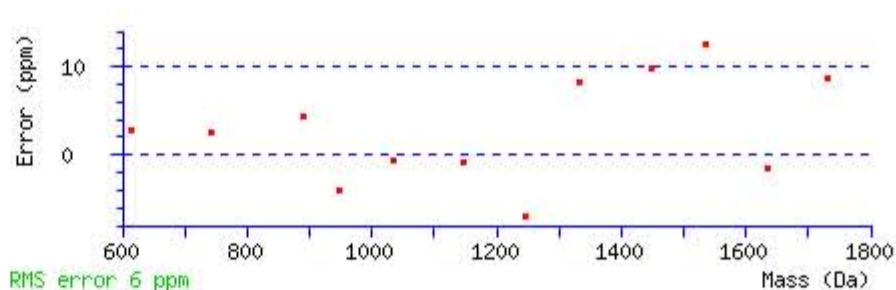

NCBI BLAST search of [SLPVSDSVLSGFQR](#)

(Parameters: blastp, nr protein database, expect=20000, no filter, PAM30)

Other BLAST [web gateways](#)

All matches to this query

| Score | Mr(calc):   | Delta     | Sequence                        |
|-------|-------------|-----------|---------------------------------|
| 103.6 | 1930.982254 | 0.009818  | <a href="#">SLPVSDSVLSGFQR</a>  |
| 0.9   | 1931.000885 | -0.008813 | <a href="#">LSPVTACAGQTLQFK</a> |

Mascot: <http://www.matrixscience.com/>

# MASCOT Search Results

## Peptide View

MS/MS Fragmentation of **VQEAHLTEDQIFYFPK**  
 Found in **CO8G\_HUMAN**, Complement component C8 gamma chain OS=Homo sapiens GN=C8G PE=1 SV=3

Match to Query 47378: 2275.150872 from(759.390900,3+) rtinseconds(2400) index(35257)  
 Title: Locus:1.1.1.3385.12 File:"2013-07-02 CLN FXIII 60 min 3rd F 3.wiff"  
 Data file C:\Program Files (x86)\Matrix Science\Mascot Daemon\mgf 6 FXIII 60 min 3rd\mascot\_daemon\_merge.mgf

Click mouse within plot area to zoom in by factor of two about that point  
 Or, Plot from  to  Da Full range  
 Label all possible matches  Label matches used for scoring

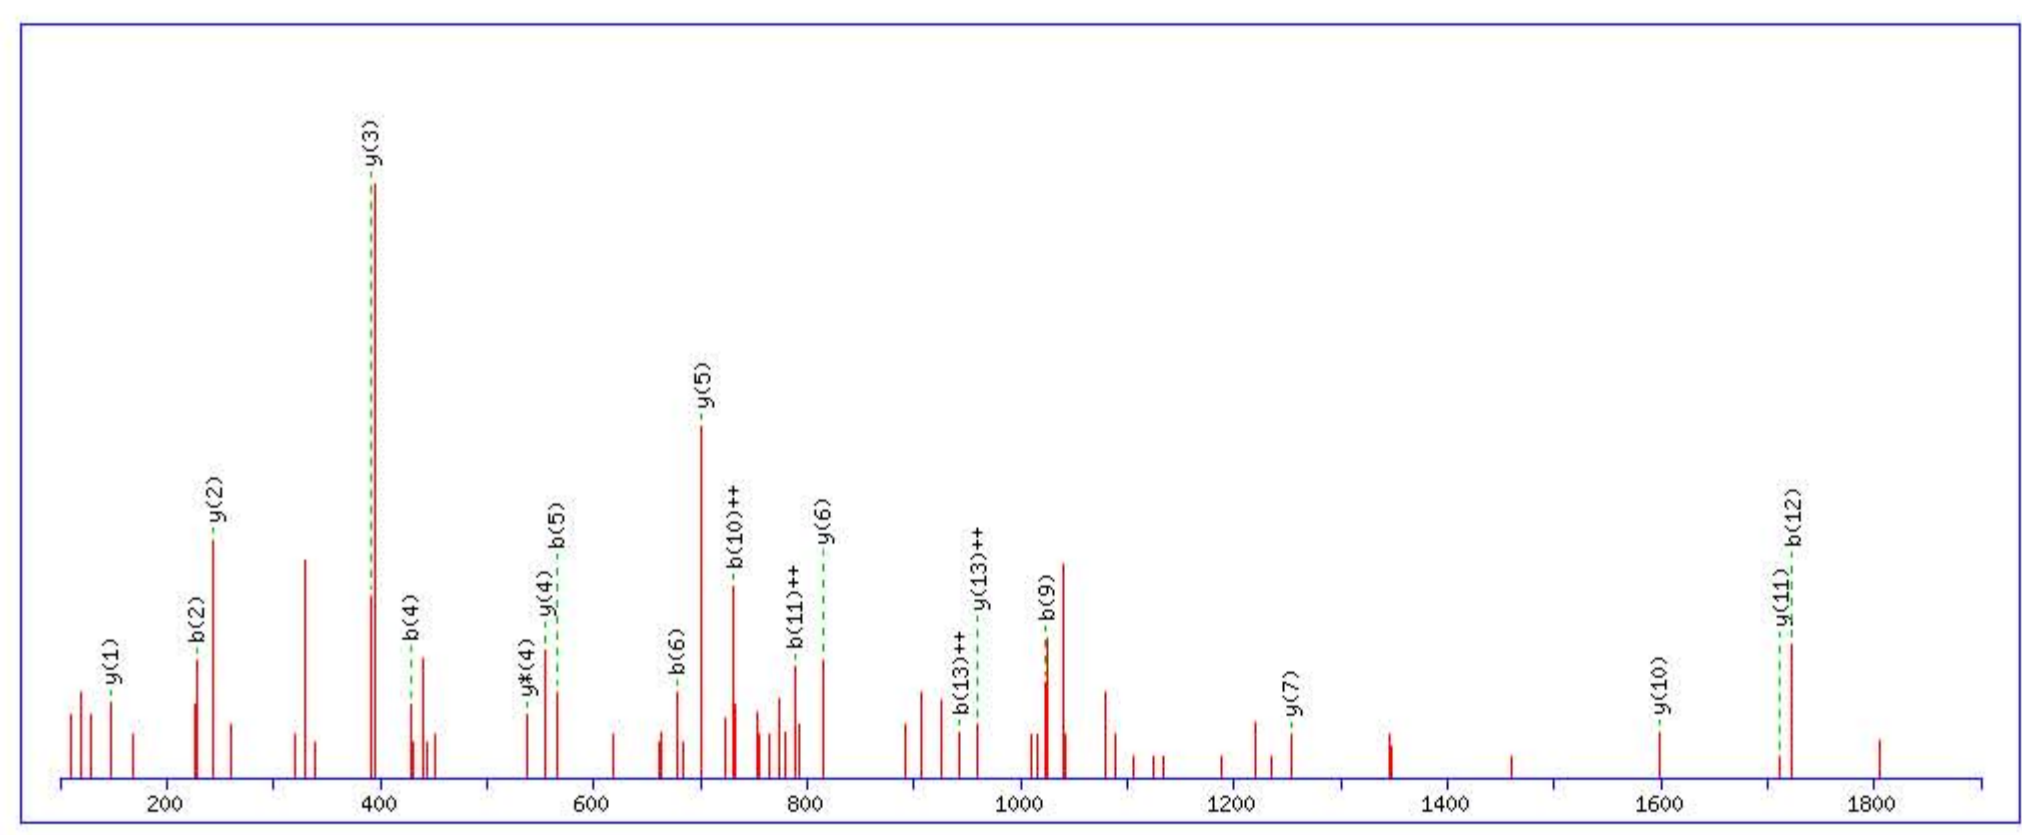

Monoisotopic mass of neutral peptide Mr(calc): 2275.134720  
 Fixed modifications: Carbamidomethyl (C) (apply to specified residues or termini only)  
 Variable modifications:  
 Q10 : Biotin:Thermo-21345 (Q)  
 Ions Score: 38 Expect: 0.0049  
 Matches : 20/160 fragment ions using 43 most intense peaks ([help](#))

| #  | b                  | b <sup>++</sup>   | b <sup>*</sup> | b <sup>*++</sup> | b <sup>0</sup> | b <sup>0++</sup> | Seq. | y                  | y <sup>++</sup>   | y <sup>*</sup>    | y <sup>*++</sup> | y <sup>0</sup> | y <sup>0++</sup> | #  |
|----|--------------------|-------------------|----------------|------------------|----------------|------------------|------|--------------------|-------------------|-------------------|------------------|----------------|------------------|----|
| 1  | 100.075690         | 50.541483         |                |                  |                |                  | V    |                    |                   |                   |                  |                |                  | 16 |
| 2  | <b>228.134268</b>  | 114.570772        | 211.107719     | 106.057498       |                |                  | Q    | 2177.073591        | 1089.040433       | 2160.047042       | 1080.527159      | 2159.063026    | 1080.035151      | 15 |
| 3  | 357.176861         | 179.092069        | 340.150312     | 170.578794       | 339.166296     | 170.086786       | E    | 2049.015013        | 1025.011144       | 2031.988464       | 1016.497870      | 2031.004448    | 1016.005862      | 14 |
| 4  | <b>428.213975</b>  | 214.610626        | 411.187426     | 206.097351       | 410.203410     | 205.605343       | A    | 1919.972420        | <b>960.489848</b> | 1902.945871       | 951.976573       | 1901.961855    | 951.484565       | 13 |
| 5  | <b>565.272887</b>  | 283.140082        | 548.246338     | 274.626807       | 547.262322     | 274.134799       | H    | 1848.935306        | 924.971291        | 1831.908757       | 916.458016       | 1830.924741    | 915.966008       | 12 |
| 6  | <b>678.356951</b>  | 339.682114        | 661.330402     | 331.168839       | 660.346386     | 330.676831       | L    | <b>1711.876394</b> | 856.441835        | 1694.849845       | 847.928561       | 1693.865829    | 847.436552       | 11 |
| 7  | 779.404630         | 390.205953        | 762.378081     | 381.692679       | 761.394065     | 381.200671       | T    | <b>1598.792330</b> | 799.899803        | 1581.765781       | 791.386529       | 1580.781765    | 790.894521       | 10 |
| 8  | 908.447223         | 454.727250        | 891.420674     | 446.213975       | 890.436658     | 445.721967       | E    | 1497.744651        | 749.375963        | 1480.718102       | 740.862689       | 1479.734086    | 740.370681       | 9  |
| 9  | <b>1023.474166</b> | 512.240721        | 1006.447617    | 503.727447       | 1005.463601    | 503.235439       | D    | 1368.702058        | 684.854667        | 1351.675509       | 676.341392       | 1350.691493    | 675.849384       | 8  |
| 10 | 1462.699492        | <b>731.853384</b> | 1445.672943    | 723.340110       | 1444.688927    | 722.848101       | Q    | <b>1253.675115</b> | 627.341195        | 1236.648566       | 618.827921       |                |                  | 7  |
| 11 | 1575.783556        | <b>788.395416</b> | 1558.757007    | 779.882141       | 1557.772991    | 779.390133       | I    | <b>814.449789</b>  | 407.728533        | 797.423240        | 399.215258       |                |                  | 6  |
| 12 | <b>1722.851970</b> | 861.929623        | 1705.825421    | 853.416349       | 1704.841405    | 852.924340       | F    | <b>701.365725</b>  | 351.186501        | 684.339176        | 342.673226       |                |                  | 5  |
| 13 | 1885.915299        | <b>943.461288</b> | 1868.888750    | 934.948013       | 1867.904734    | 934.456005       | Y    | <b>554.297311</b>  | 277.652294        | <b>537.270762</b> | 269.139019       |                |                  | 4  |
| 14 | 2032.983713        | 1016.995495       | 2015.957164    | 1008.482220      | 2014.973148    | 1007.990212      | F    | <b>391.233982</b>  | 196.120629        | 374.207433        | 187.607354       |                |                  | 3  |
| 15 | 2130.036477        | 1065.521876       | 2113.009928    | 1057.008602      | 2112.025912    | 1056.516594      | P    | <b>244.165568</b>  | 122.586422        | 227.139019        | 114.073147       |                |                  | 2  |
| 16 |                    |                   |                |                  |                |                  | K    | <b>147.112804</b>  | 74.060040         | 130.086255        | 65.546765        |                |                  | 1  |

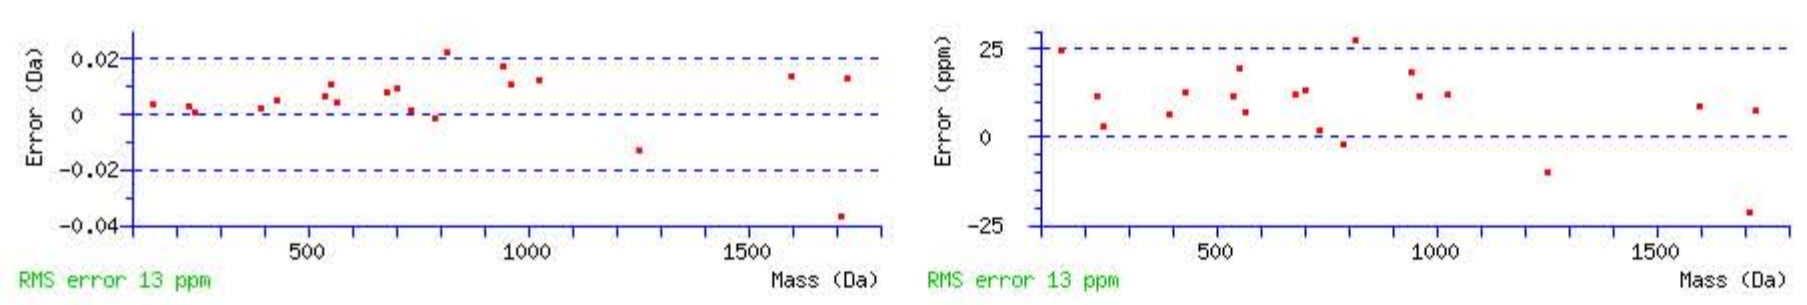

NCBI BLAST search of **VQEAHLTEDQIFYFPK**  
 (Parameters: blastp, nr protein database, expect=20000, no filter, PAM30)  
 Other BLAST [web gateways](#)

### All matches to this query

| Score | Mr(calc):   | Delta    | Sequence                         |
|-------|-------------|----------|----------------------------------|
| 38.0  | 2275.134720 | 0.016152 | <a href="#">VQEAHLTEDQIFYFPK</a> |
| 12.8  | 2275.134720 | 0.016152 | <a href="#">VQEAHLTEDQIFYFPK</a> |

# MASCOT Search Results

## Peptide View

MS/MS Fragmentation of **YGFCEAADQFHVLDEVR**

Found in **CO8G\_HUMAN**, Complement component C8 gamma chain OS=Homo sapiens GN=C8G PE=1 SV=3

Match to Query 48672: 2366.096022 from(789.705950,3+) rtinseconds(2582) index(36186)

Title: Locus:1.1.1.3448.15 File:"2013-07-02 CLN FXIII 60 min 3rd F 3.wiff"

Data file C:\Program Files (x86)\Matrix Science\Mascot Daemon\mgf\6 FXIII 60 min 3rd\mascot\_daemon\_merge.mgf

Click mouse within plot area to zoom in by factor of two about that point

Or, Plot from  to  Da

Label all possible matches  Label matches used for scoring

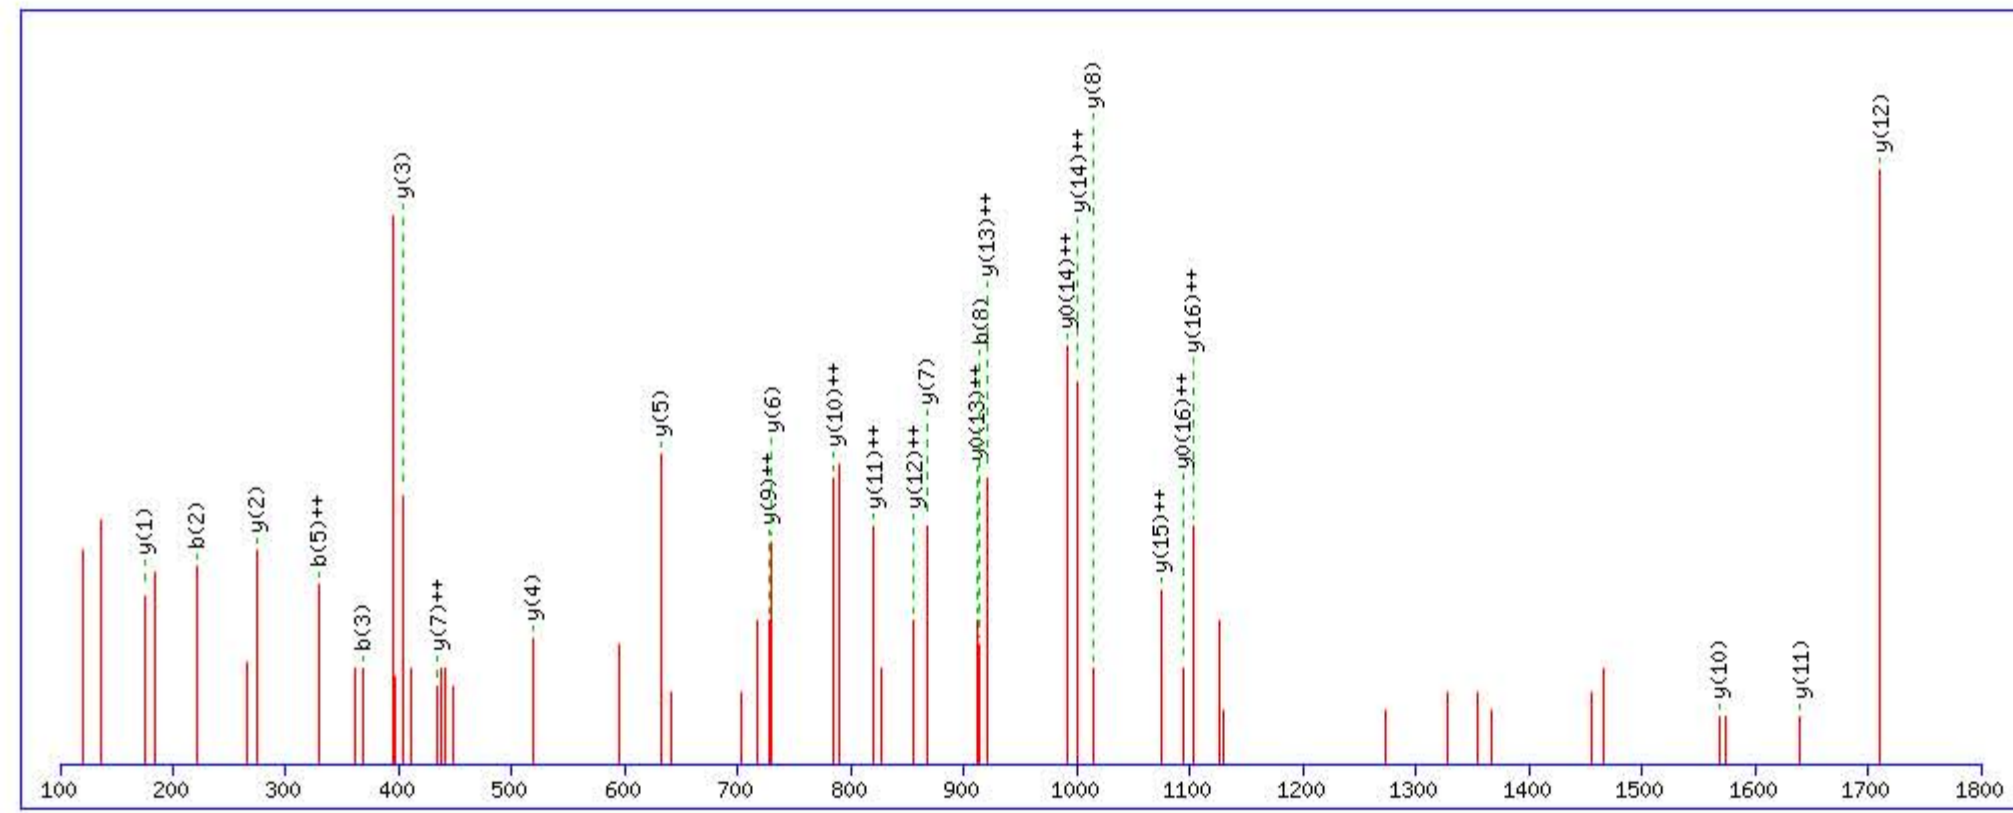

Monoisotopic mass of neutral peptide Mr(calc): 2366.082382

Fixed modifications: Carbamidomethyl (C) (apply to specified residues or termini only)

Variable modifications:

Q9 : Biotin:Thermo-21345 (Q)

Ions Score: 64 Expect: 5.5e-006

Matches : 27/164 fragment ions using 57 most intense peaks [\(help\)](#)

| #  | b                 | b <sup>++</sup>   | b <sup>*</sup> | b <sup>+++</sup> | b <sup>0</sup> | b <sup>0++</sup> | Seq. | y                  | y <sup>++</sup>    | y <sup>*</sup> | y <sup>+++</sup> | y <sup>0</sup> | y <sup>0++</sup>   | #  |
|----|-------------------|-------------------|----------------|------------------|----------------|------------------|------|--------------------|--------------------|----------------|------------------|----------------|--------------------|----|
| 1  | 164.070605        | 82.538940         |                |                  |                |                  | Y    |                    |                    |                |                  |                |                    | 17 |
| 2  | <b>221.092069</b> | 111.049673        |                |                  |                |                  | G    | 2204.026323        | <b>1102.516799</b> | 2186.999774    | 1094.003525      | 2186.015758    | <b>1093.511517</b> | 16 |
| 3  | <b>368.160483</b> | 184.583879        |                |                  |                |                  | F    | 2147.004859        | <b>1074.006067</b> | 2129.978310    | 1065.492793      | 2128.994294    | 1065.000785        | 15 |
| 4  | 528.191132        | 264.599204        |                |                  |                |                  | C    | 1999.936445        | <b>1000.471860</b> | 1982.909896    | 991.958586       | 1981.925880    | <b>991.466578</b>  | 14 |
| 5  | 657.233725        | <b>329.120501</b> |                |                  | 639.223160     | 320.115218       | E    | 1839.905796        | <b>920.456536</b>  | 1822.879247    | 911.943261       | 1821.895231    | <b>911.451253</b>  | 13 |
| 6  | 728.270839        | 364.639058        |                |                  | 710.260274     | 355.633775       | A    | <b>1710.863203</b> | <b>855.935239</b>  | 1693.836654    | 847.421965       | 1692.852638    | 846.929957         | 12 |
| 7  | 799.307953        | 400.157615        |                |                  | 781.297388     | 391.152332       | A    | <b>1639.826089</b> | <b>820.416682</b>  | 1622.799540    | 811.903408       | 1621.815524    | 811.411400         | 11 |
| 8  | <b>914.334896</b> | 457.671086        |                |                  | 896.324331     | 448.665803       | D    | <b>1568.788975</b> | <b>784.898125</b>  | 1551.762426    | 776.384851       | 1550.778410    | 775.892843         | 10 |
| 9  | 1353.560222       | 677.283749        | 1336.533673    | 668.770474       | 1335.549657    | 668.278466       | Q    | 1453.762032        | <b>727.384654</b>  | 1436.735483    | 718.871379       | 1435.751467    | 718.379371         | 9  |
| 10 | 1500.628636       | 750.817956        | 1483.602087    | 742.304682       | 1482.618071    | 741.812673       | F    | <b>1014.536706</b> | 507.771991         | 997.510157     | 499.258717       | 996.526141     | 498.766709         | 8  |
| 11 | 1637.687548       | 819.347412        | 1620.660999    | 810.834138       | 1619.676983    | 810.342129       | H    | <b>867.468292</b>  | <b>434.237784</b>  | 850.441743     | 425.724510       | 849.457727     | 425.232502         | 7  |
| 12 | 1736.755962       | 868.881619        | 1719.729413    | 860.368345       | 1718.745397    | 859.876336       | V    | <b>730.409380</b>  | 365.708328         | 713.382831     | 357.195054       | 712.398815     | 356.703046         | 6  |
| 13 | 1849.840026       | 925.423651        | 1832.813477    | 916.910376       | 1831.829461    | 916.418368       | L    | <b>631.340966</b>  | 316.174121         | 614.314417     | 307.660846       | 613.330401     | 307.168838         | 5  |
| 14 | 1964.866969       | 982.937122        | 1947.840420    | 974.423848       | 1946.856404    | 973.931840       | D    | <b>518.256902</b>  | 259.632089         | 501.230353     | 251.118815       | 500.246337     | 250.626807         | 4  |
| 15 | 2093.909562       | 1047.458419       | 2076.883013    | 1038.945144      | 2075.898997    | 1038.453136      | E    | <b>403.229959</b>  | 202.118617         | 386.203410     | 193.605343       | 385.219394     | 193.113335         | 3  |
| 16 | 2192.977976       | 1096.992626       | 2175.951427    | 1088.479351      | 2174.967411    | 1087.987343      | V    | <b>274.187366</b>  | 137.597321         | 257.160817     | 129.084046       |                |                    | 2  |
| 17 |                   |                   |                |                  |                |                  | R    | <b>175.118952</b>  | 88.063114          | 158.092403     | 79.549839        |                |                    | 1  |

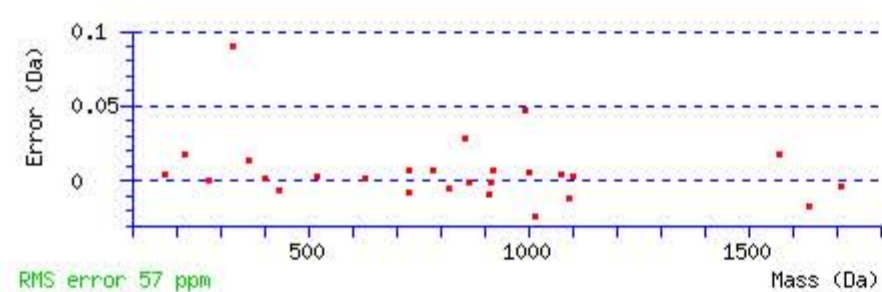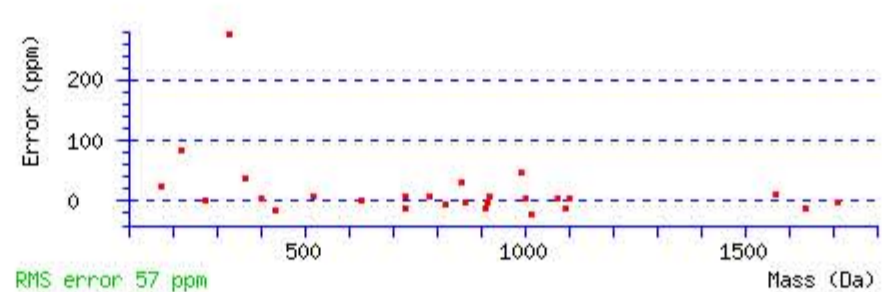

NCBI BLAST search of [YGFCEAADQFHVLDEVR](#)

(Parameters: blastp, nr protein database, expect=20000, no filter, PAM30)

Other BLAST [web gateways](#)

All matches to this query

| Score | Mr(calc):   | Delta    | Sequence                          |
|-------|-------------|----------|-----------------------------------|
| 64.5  | 2366.082382 | 0.013640 | <a href="#">YGFCEAADQFHVLDEVR</a> |

Mascot: <http://www.matrixscience.com/>



# MASCOT SEARCH RESULTS

## Peptide View

MS/MS Fragmentation of **TEHYEEQIEAFK**

Found in **CO9\_HUMAN**, Complement component C9 OS=Homo sapiens GN=C9 PE=1 SV=2

Match to Query 39107: 1833.866742 from(612.296190,3+) rtinseconds(1986) index(33117)

Title: Locus:1.1.1.3240.23 File:"2013-07-02 CLN FXIII 60 min 3rd F 3.wiff"

Data file C:\Program Files (x86)\Matrix Science\Mascot Daemon\mgf6 FXIII 60 min 3rd\mascot\_daemon\_merge.mgf

Click mouse within plot area to zoom in by factor of two about that point

Or, Plot from  to  Da

Label all possible matches  Label matches used for scoring

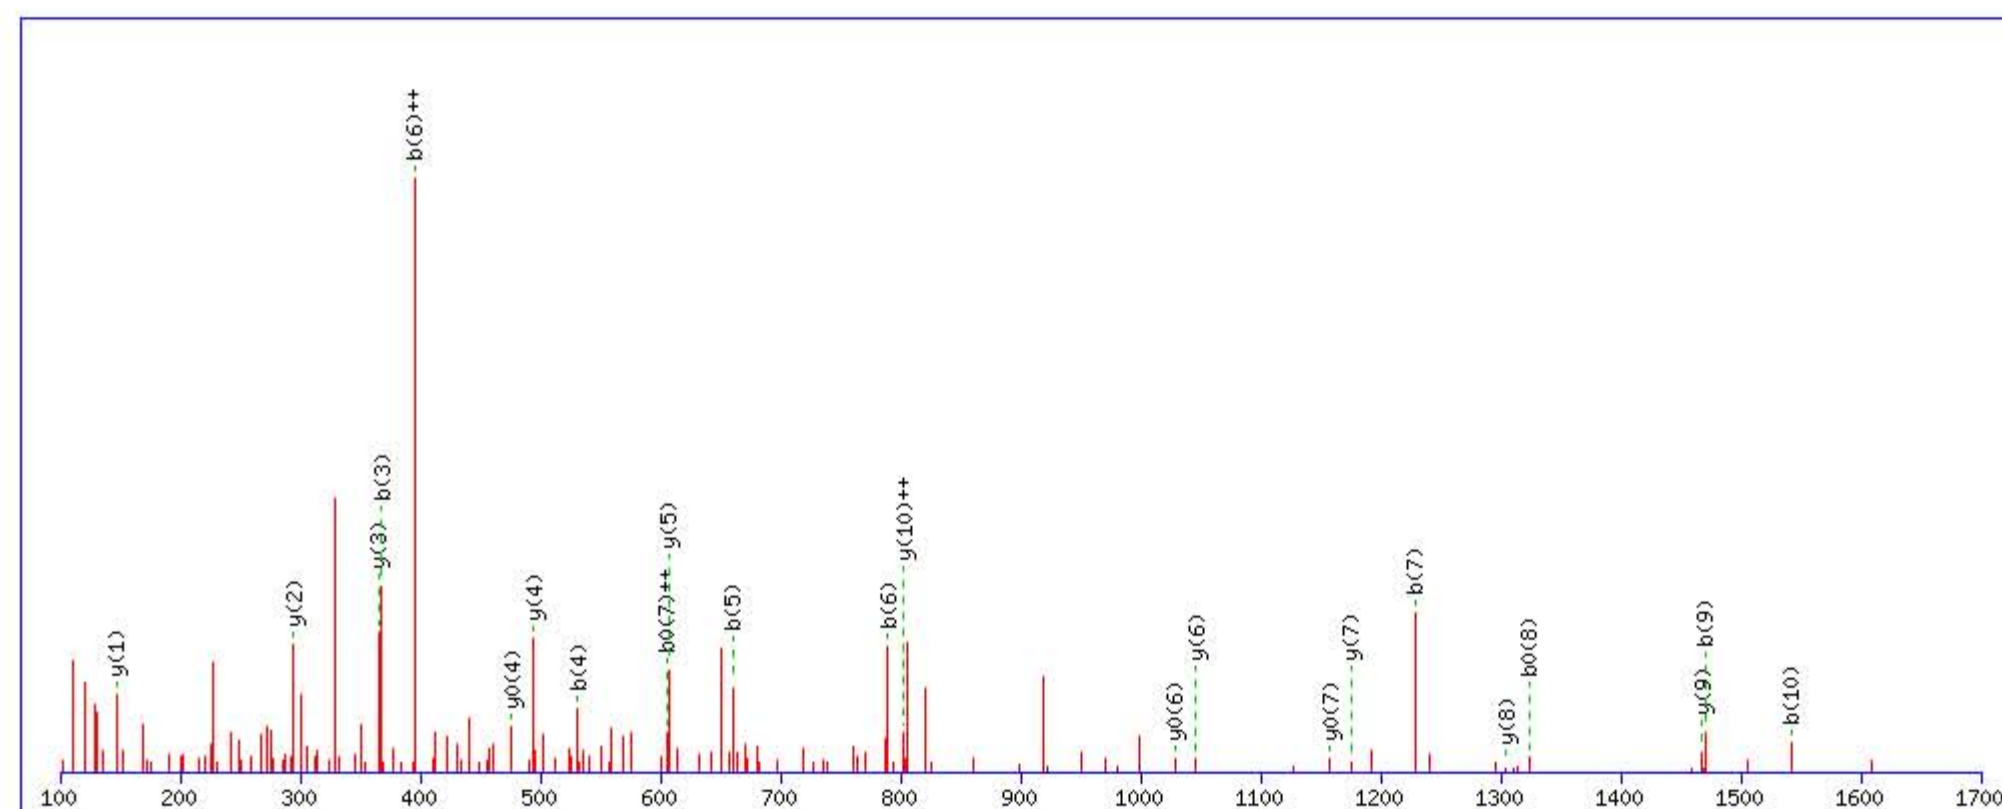

Monoisotopic mass of neutral peptide Mr(calc): 1833.860703

Fixed modifications: Carbamidomethyl (C) (apply to specified residues or termini only)

Variable modifications:

Q7 : Biotin:Thermo-21345 (Q)

Ions Score: 34 Expect: 0.0018

Matches : 23/114 fragment ions using 56 most intense peaks [\(help\)](#)

| #  | b                  | b <sup>++</sup>   | b <sup>*</sup> | b <sup>*++</sup> | b <sup>0</sup>     | b <sup>0++</sup>  | Seq. | y                  | y <sup>++</sup>   | y <sup>*</sup> | y <sup>*++</sup> | y <sup>0</sup>     | y <sup>0++</sup> | #  |
|----|--------------------|-------------------|----------------|------------------|--------------------|-------------------|------|--------------------|-------------------|----------------|------------------|--------------------|------------------|----|
| 1  | 102.054955         | 51.531116         |                |                  | 84.044390          | 42.525833         | T    |                    |                   |                |                  |                    |                  | 12 |
| 2  | 231.097548         | 116.052412        |                |                  | 213.086983         | 107.047130        | E    | 1733.820335        | 867.413805        | 1716.793786    | 858.900531       | 1715.809770        | 858.408523       | 11 |
| 3  | <b>368.156460</b>  | 184.581868        |                |                  | 350.145895         | 175.576585        | H    | 1604.777742        | <b>802.892509</b> | 1587.751193    | 794.379235       | 1586.767177        | 793.887227       | 10 |
| 4  | <b>531.219789</b>  | 266.113533        |                |                  | 513.209224         | 257.108250        | Y    | <b>1467.718830</b> | 734.363053        | 1450.692281    | 725.849779       | 1449.708265        | 725.357771       | 9  |
| 5  | <b>660.262382</b>  | 330.634829        |                |                  | 642.251817         | 321.629547        | E    | <b>1304.655501</b> | 652.831389        | 1287.628952    | 644.318114       | 1286.644936        | 643.826106       | 8  |
| 6  | <b>789.304975</b>  | <b>395.156126</b> |                |                  | 771.294410         | 386.150843        | E    | <b>1175.612908</b> | 588.310092        | 1158.586359    | 579.796817       | <b>1157.602343</b> | 579.304809       | 7  |
| 7  | <b>1228.530301</b> | 614.768789        | 1211.503752    | 606.255514       | 1210.519736        | <b>605.763506</b> | Q    | <b>1046.570315</b> | 523.788795        | 1029.543766    | 515.275521       | <b>1028.559750</b> | 514.783513       | 6  |
| 8  | 1341.614365        | 671.310820        | 1324.587816    | 662.797546       | <b>1323.603800</b> | 662.305538        | I    | <b>607.344989</b>  | 304.176132        | 590.318440     | 295.662858       | 589.334424         | 295.170850       | 5  |
| 9  | <b>1470.656958</b> | 735.832117        | 1453.630409    | 727.318842       | 1452.646393        | 726.826834        | E    | <b>494.260925</b>  | 247.634100        | 477.234376     | 239.120826       | <b>476.250360</b>  | 238.628818       | 4  |
| 10 | <b>1541.694072</b> | 771.350674        | 1524.667523    | 762.837399       | 1523.683507        | 762.345391        | A    | <b>365.218332</b>  | 183.112804        | 348.191783     | 174.599530       |                    |                  | 3  |
| 11 | 1688.762486        | 844.884881        | 1671.735937    | 836.371606       | 1670.751921        | 835.879598        | F    | <b>294.181218</b>  | 147.594247        | 277.154669     | 139.080973       |                    |                  | 2  |
| 12 |                    |                   |                |                  |                    |                   | K    | <b>147.112804</b>  | 74.060040         | 130.086255     | 65.546765        |                    |                  | 1  |

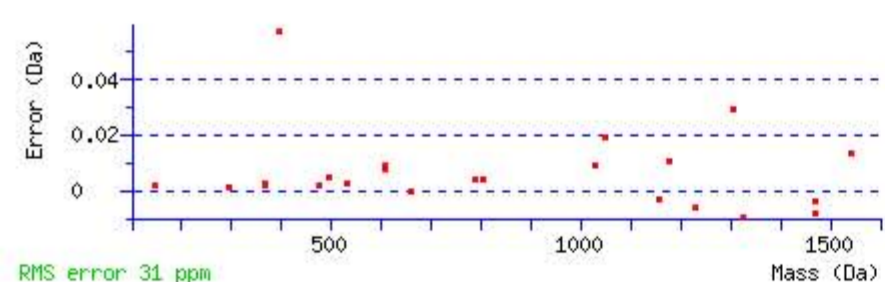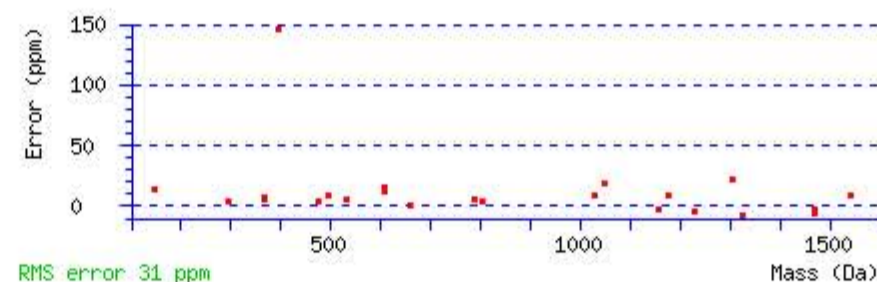

NCBI BLAST search of [TEHYEEQIEAFK](#)

(Parameters: blastp, nr protein database, expect=20000, no filter, PAM30)

Other BLAST [web gateways](#)

All matches to this query

| Score | Mr(calc):   | Delta    | Sequence                        |
|-------|-------------|----------|---------------------------------|
| 34.4  | 1833.860703 | 0.006039 | <a href="#">TEHYEEQIEAFK</a>    |
| 5.2   | 1833.860031 | 0.006711 | <a href="#">KMAALECEDPERELK</a> |

Mascot: <http://www.matrixscience.com/>

# MASCOT Search Results

## Peptide View

MS/MS Fragmentation of **AEQCCEETASSISLHGK**

Found in **CO9\_HUMAN**, Complement component C9 OS=Homo sapiens GN=C9 PE=1 SV=2

Match to Query 46325: 2216.980812 from(740.000880,3+) rtinseconds(1584) index(30777)

Title: Locus:1.1.1.3100.26 File:"2013-07-02 CLN FXIII 60 min 3rd F 3.wiff"

Data file C:\Program Files (x86)\Matrix Science\Mascot Daemon\mgf\6 FXIII 60 min 3rd\mascot\_daemon\_merge.mgf

Click mouse within plot area to zoom in by factor of two about that point

Or, Plot from  to  Da

Label all possible matches  Label matches used for scoring

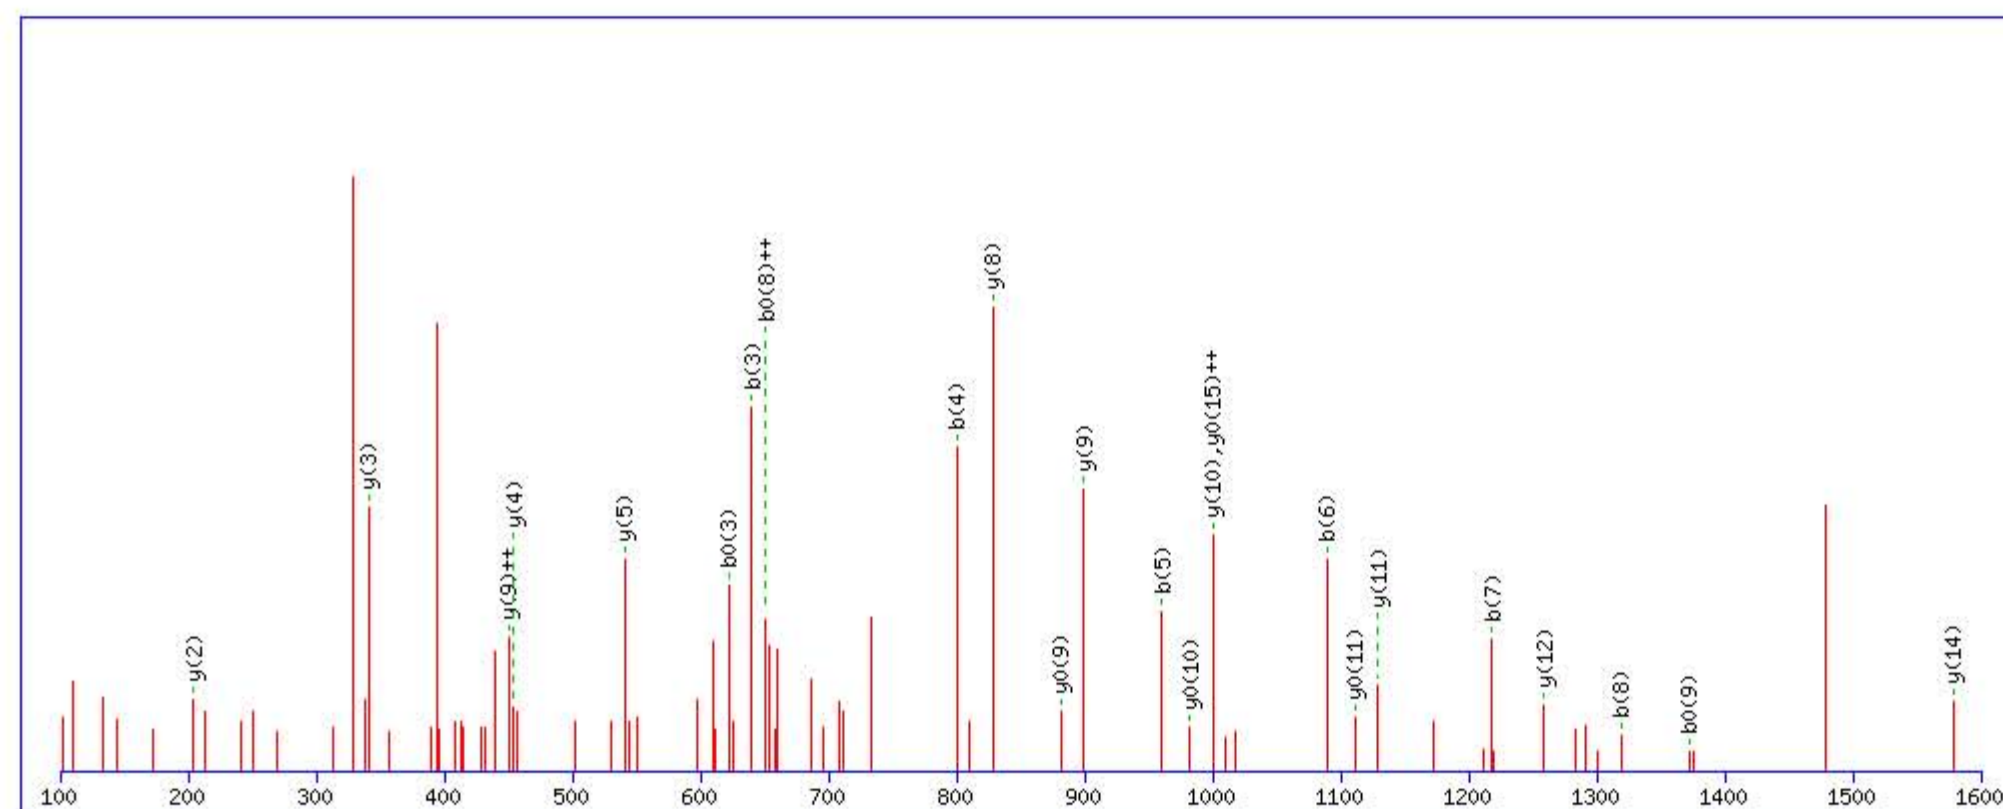

Monoisotopic mass of neutral peptide  $M_r(\text{calc})$ : 2216.986404

Fixed modifications: Carbamidomethyl (C) (apply to specified residues or termini only)

Variable modifications:

Q3 : Biotin:Thermo-21345 (Q)

Ions Score: 55 Expect: 2.6e-005

Matches : 24/178 fragment ions using 41 most intense peaks ([help](#))

| #  | b                  | b <sup>++</sup> | b <sup>*</sup> | b <sup>*++</sup> | b <sup>0</sup>     | b <sup>0++</sup>  | Seq. | y                  | y <sup>++</sup>   | y <sup>*</sup> | y <sup>*++</sup> | y <sup>0</sup>     | y <sup>0++</sup>   | #  |
|----|--------------------|-----------------|----------------|------------------|--------------------|-------------------|------|--------------------|-------------------|----------------|------------------|--------------------|--------------------|----|
| 1  | 72.044390          | 36.525833       |                |                  |                    |                   | A    |                    |                   |                |                  |                    |                    | 17 |
| 2  | 201.086983         | 101.047130      |                |                  | 183.076418         | 92.041847         | E    | 2146.956588        | 1073.981932       | 2129.930039    | 1065.468657      | 2128.946023        | 1064.976649        | 16 |
| 3  | <b>640.312309</b>  | 320.659793      | 623.285760     | 312.146518       | <b>622.301744</b>  | 311.654510        | Q    | 2017.913995        | 1009.460636       | 2000.887446    | 1000.947361      | 1999.903430        | <b>1000.455353</b> | 15 |
| 4  | <b>800.342958</b>  | 400.675117      | 783.316409     | 392.161843       | 782.332393         | 391.669835        | C    | <b>1578.688669</b> | 789.847972        | 1561.662120    | 781.334698       | 1560.678104        | 780.842690         | 14 |
| 5  | <b>960.373607</b>  | 480.690442      | 943.347058     | 472.177167       | 942.363042         | 471.685159        | C    | 1418.658020        | 709.832648        | 1401.631471    | 701.319374       | 1400.647455        | 700.827366         | 13 |
| 6  | <b>1089.416200</b> | 545.211738      | 1072.389651    | 536.698464       | 1071.405635        | 536.206456        | E    | <b>1258.627371</b> | 629.817323        | 1241.600822    | 621.304049       | 1240.616806        | 620.812041         | 12 |
| 7  | <b>1218.458793</b> | 609.733035      | 1201.432244    | 601.219760       | 1200.448228        | 600.727752        | E    | <b>1129.584778</b> | 565.296027        | 1112.558229    | 556.782753       | <b>1111.574213</b> | 556.290744         | 11 |
| 8  | <b>1319.506472</b> | 660.256874      | 1302.479923    | 651.743600       | 1301.495907        | <b>651.251592</b> | T    | <b>1000.542185</b> | 500.774731        | 983.515636     | 492.261456       | <b>982.531620</b>  | 491.769448         | 10 |
| 9  | 1390.543586        | 695.775431      | 1373.517037    | 687.262157       | <b>1372.533021</b> | 686.770149        | A    | <b>899.494506</b>  | <b>450.250891</b> | 882.467957     | 441.737617       | <b>881.483941</b>  | 441.245609         | 9  |
| 10 | 1477.575614        | 739.291445      | 1460.549065    | 730.778171       | 1459.565049        | 730.286163        | S    | <b>828.457392</b>  | 414.732334        | 811.430843     | 406.219060       | 810.446827         | 405.727052         | 8  |
| 11 | 1564.607642        | 782.807459      | 1547.581093    | 774.294185       | 1546.597077        | 773.802177        | S    | 741.425364         | 371.216320        | 724.398815     | 362.703045       | 723.414799         | 362.211037         | 7  |
| 12 | 1677.691706        | 839.349491      | 1660.665157    | 830.836217       | 1659.681141        | 830.344209        | I    | 654.393336         | 327.700306        | 637.366787     | 319.187031       | 636.382771         | 318.695023         | 6  |
| 13 | 1764.723734        | 882.865505      | 1747.697185    | 874.352231       | 1746.713169        | 873.860223        | S    | <b>541.309272</b>  | 271.158274        | 524.282723     | 262.644999       | 523.298707         | 262.152991         | 5  |
| 14 | 1877.807798        | 939.407537      | 1860.781249    | 930.894263       | 1859.797233        | 930.402255        | L    | <b>454.277244</b>  | 227.642260        | 437.250695     | 219.128985       |                    |                    | 4  |
| 15 | 2014.866710        | 1007.936993     | 1997.840161    | 999.423719       | 1996.856145        | 998.931711        | H    | <b>341.193180</b>  | 171.100228        | 324.166631     | 162.586953       |                    |                    | 3  |
| 16 | 2071.888174        | 1036.447725     | 2054.861625    | 1027.934450      | 2053.877609        | 1027.442442       | G    | <b>204.134268</b>  | 102.570772        | 187.107719     | 94.057497        |                    |                    | 2  |
| 17 |                    |                 |                |                  |                    |                   | K    | 147.112804         | 74.060040         | 130.086255     | 65.546765        |                    |                    | 1  |

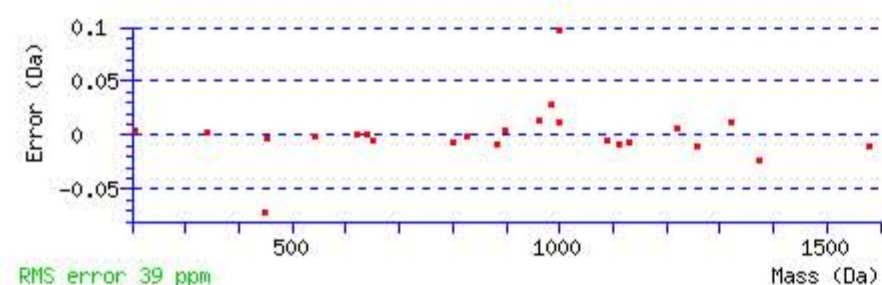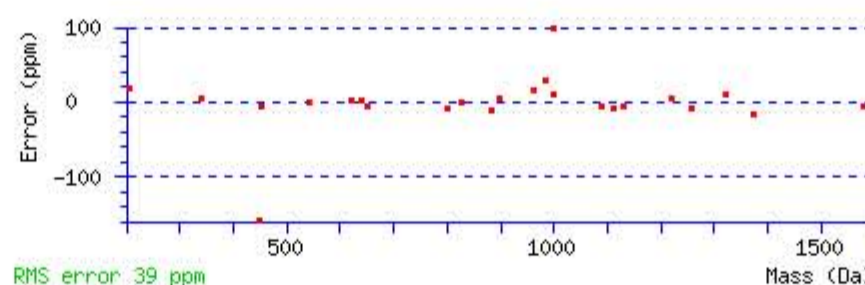

NCBI BLAST search of **AEQCCEETASSISLHGK**

(Parameters: blastp, nr protein database, expect=20000, no filter, PAM30)

Other BLAST [web gateways](#)

All matches to this query

| Score | $M_r(\text{calc})$ : | Delta     | Sequence                          |
|-------|----------------------|-----------|-----------------------------------|
| 54.6  | 2216.986404          | -0.005592 | <a href="#">AEQCCEETASSISLHGK</a> |

Mascot: <http://www.matrixscience.com/>

# MASCOT SCIENCE Mascot Search Results

## Peptide View

MS/MS Fragmentation of **VGSQYR**

Found in **CFAB\_HUMAN**, Complement factor B OS=Homo sapiens GN=CFB PE=1 SV=2

Match to Query 14161: 1019.525848 from(510.770200,2+) rtinseconds(1412) index(15266)

Title: Locus:1.1.1.3092.17 File:"2013-07-02 CLN FXIII 60 min 3rd F 2.wiff"

Data file C:\Program Files (x86)\Matrix Science\Mascot Daemon\mgf\6 FXIII 60 min 3rd\mascot\_daemon\_merge.mgf

Click mouse within plot area to zoom in by factor of two about that point

Or, Plot from  to  Da

Label all possible matches  Label matches used for scoring

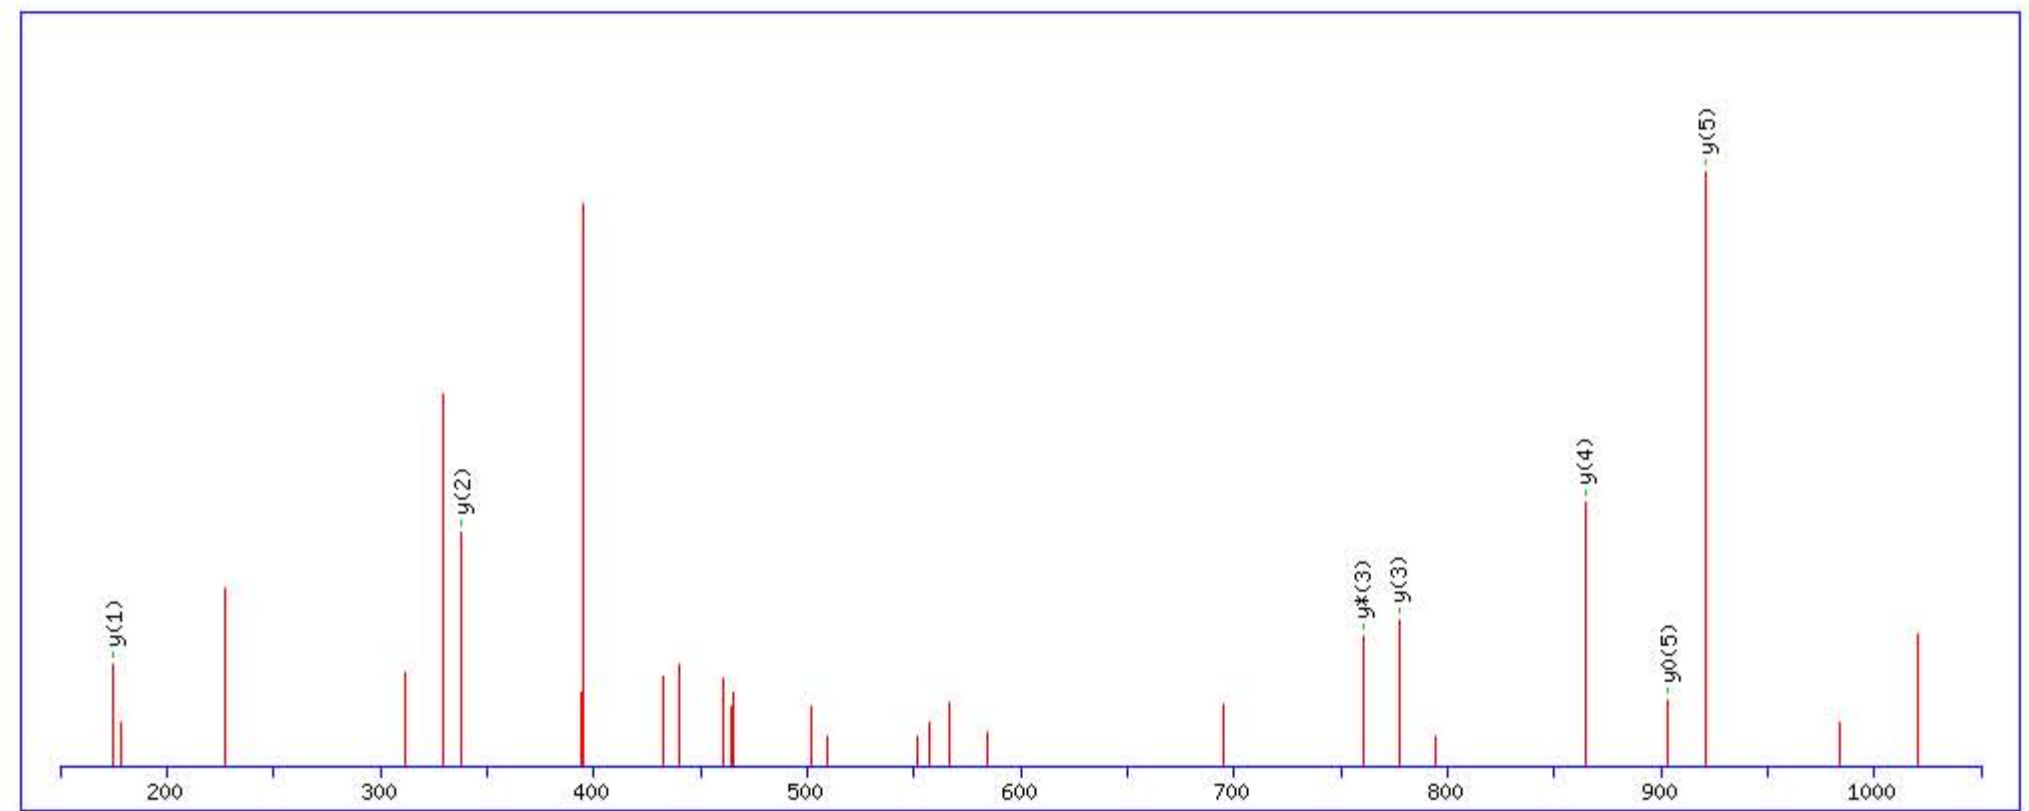

Monoisotopic mass of neutral peptide Mr(calc): 1019.522232

Fixed modifications: Carbamidomethyl (C) (apply to specified residues or termini only)

Variable modifications:

Q4 : Biotin:Thermo-21345 (Q)

Ions Score: 28 Expect: 0.054

Matches : 7/44 fragment ions using 16 most intense peaks [\(help\)](#)

| # | b          | b <sup>++</sup> | b <sup>*</sup> | b <sup>+++</sup> | b <sup>0</sup> | b <sup>0++</sup> | Seq. | y                 | y <sup>++</sup> | y <sup>*</sup>    | y <sup>+++</sup> | y <sup>0</sup>    | y <sup>0++</sup> | # |
|---|------------|-----------------|----------------|------------------|----------------|------------------|------|-------------------|-----------------|-------------------|------------------|-------------------|------------------|---|
| 1 | 100.075690 | 50.541483       |                |                  |                |                  | V    |                   |                 |                   |                  |                   |                  | 6 |
| 2 | 157.097154 | 79.052215       |                |                  |                |                  | G    | <b>921.461099</b> | 461.234188      | 904.434550        | 452.720913       | <b>903.450534</b> | 452.228905       | 5 |
| 3 | 244.129182 | 122.568229      |                |                  | 226.118617     | 113.562946       | S    | <b>864.439635</b> | 432.723456      | 847.413086        | 424.210181       | 846.429070        | 423.718173       | 4 |
| 4 | 683.354508 | 342.180892      | 666.327959     | 333.667618       | 665.343943     | 333.175610       | Q    | <b>777.407607</b> | 389.207442      | <b>760.381058</b> | 380.694167       |                   |                  | 3 |
| 5 | 846.417837 | 423.712557      | 829.391288     | 415.199282       | 828.407272     | 414.707274       | Y    | <b>338.182281</b> | 169.594778      | 321.155732        | 161.081504       |                   |                  | 2 |
| 6 |            |                 |                |                  |                |                  | R    | <b>175.118952</b> | 88.063114       | 158.092403        | 79.549839        |                   |                  | 1 |

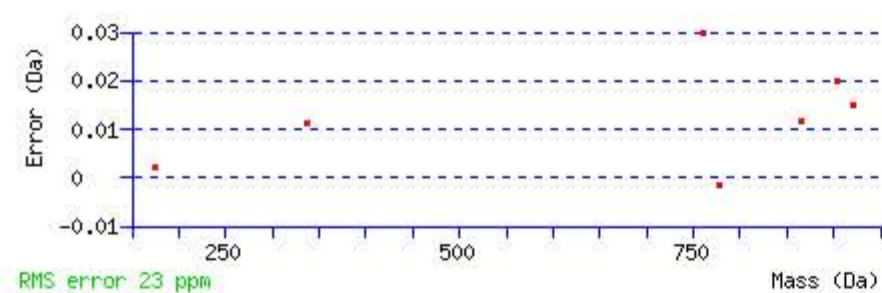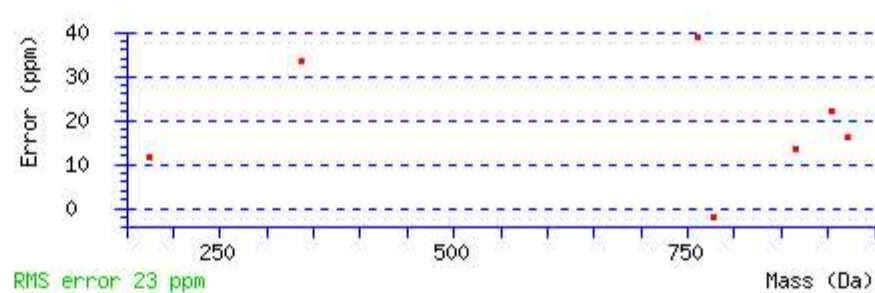

NCBI BLAST search of **VGSQYR**

(Parameters: blastp, nr protein database, expect=20000, no filter, PAM30)

Other BLAST [web gateways](#)

## All matches to this query

| Score | Mr(calc):   | Delta     | Sequence                    |
|-------|-------------|-----------|-----------------------------|
| 28.4  | 1019.522232 | 0.003616  | <a href="#">VGSQYR</a>      |
| 13.9  | 1019.533447 | -0.007599 | <a href="#">RSQYR</a>       |
| 12.3  | 1019.539993 | -0.014145 | <a href="#">VGEAFALTGR</a>  |
| 7.2   | 1019.510818 | 0.015030  | <a href="#">RSSVSSGGAGR</a> |
| 6.5   | 1019.539993 | -0.014145 | <a href="#">VDLAAFQTR</a>   |
| 4.9   | 1019.512146 | 0.013702  | <a href="#">RSRGHHDR</a>    |
| 4.7   | 1019.526047 | -0.000199 | <a href="#">SRERGPYR</a>    |
| 4.3   | 1019.539978 | -0.014130 | <a href="#">DGLLLYNGR</a>   |
| 1.6   | 1019.533463 | -0.007615 | <a href="#">VSLMWRGR</a>    |
| 0.1   | 1019.530090 | -0.004242 | <a href="#">SPLPWQHR</a>    |

Mascot: <http://www.matrixscience.com/>

# MASCOT SEARCH RESULTS

## Peptide View

MS/MS Fragmentation of **LPPTTTCQQQK**

Found in **CFAB\_HUMAN**, Complement factor B OS=Homo sapiens GN=CFB PE=1 SV=2

Match to Query 33775: 1611.811152 from(538.277660,3+) rtinseconds(1463) index(1773)

Title: Locus:1.1.1.3061.9 File:"2013-07-02 CLN FXIII 60 min 3rd F 1.wiff"

Data file C:\Program Files (x86)\Matrix Science\Mascot Daemon\mgf\6 FXIII 60 min 3rd\mascot\_daemon\_merge.mgf

Click mouse within plot area to zoom in by factor of two about that point

Or, Plot from  to  Da

Label all possible matches  Label matches used for scoring

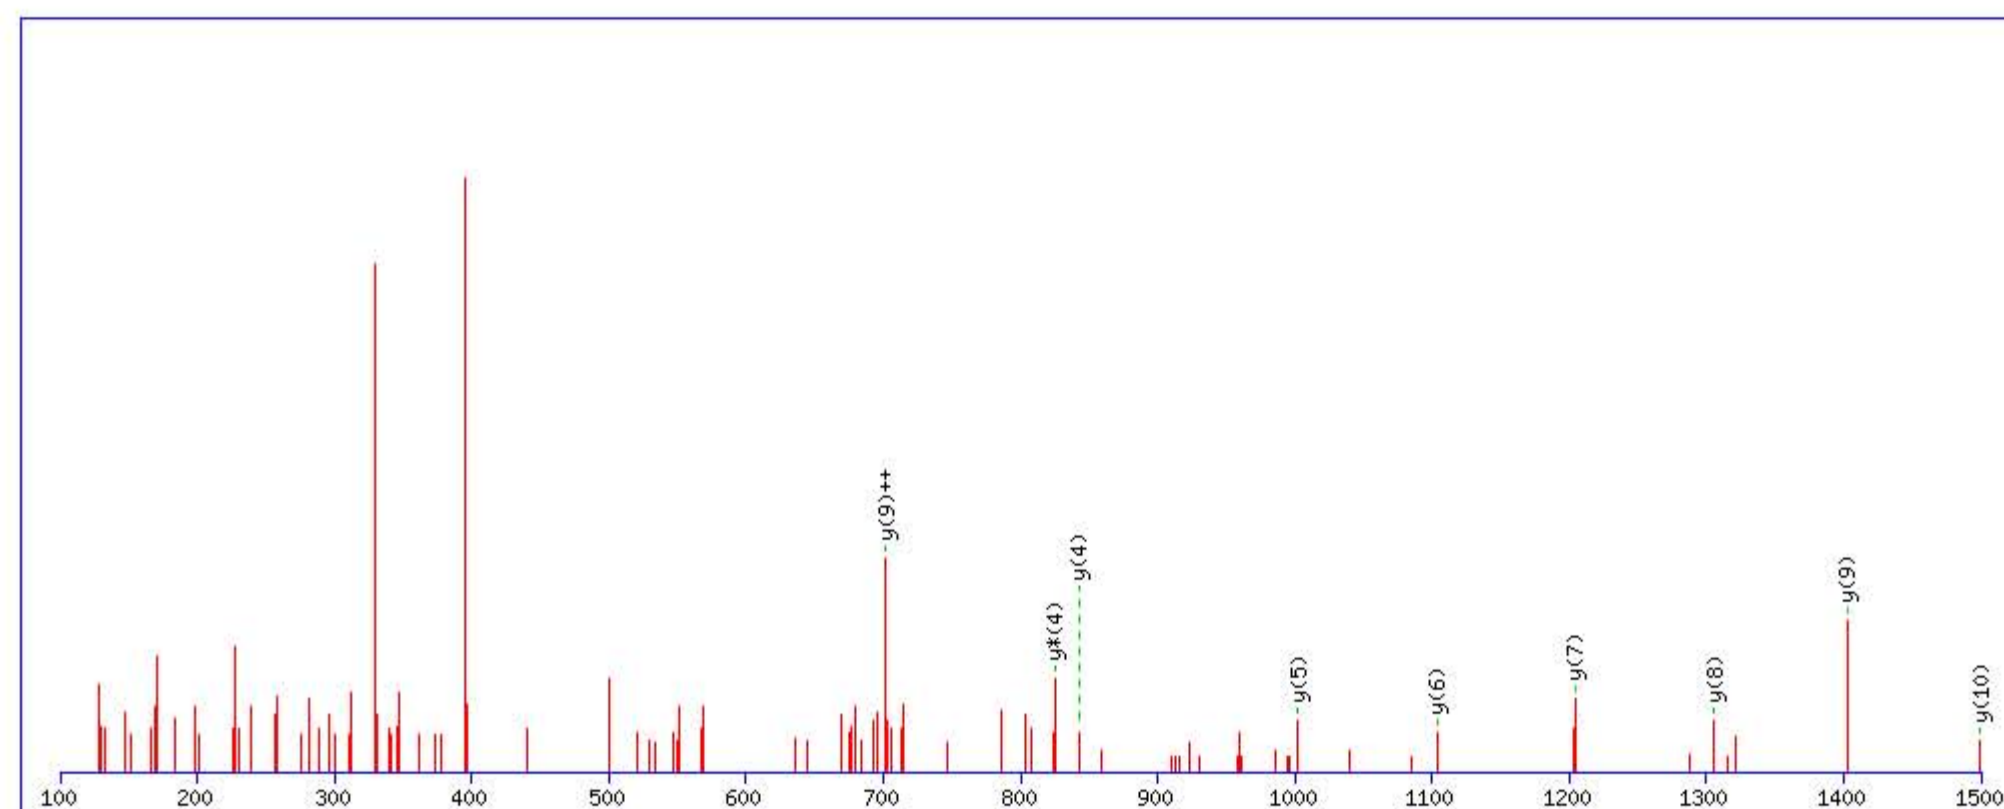

Monoisotopic mass of neutral peptide Mr(calc): 1611.811295

Fixed modifications: Carbamidomethyl (C) (apply to specified residues or termini only)

Variable modifications:

Q10 : Biotin:Thermo-21345 (Q)

Ions Score: 44 Expect: 0.00041

Matches : 9/90 fragment ions using 14 most intense peaks [\(help\)](#)

| #  | b           | b <sup>++</sup> | b <sup>*</sup> | b <sup>*++</sup> | b <sup>0</sup> | b <sup>0++</sup> | Seq. | y           | y <sup>++</sup> | y <sup>*</sup> | y <sup>*++</sup> | y <sup>0</sup> | y <sup>0++</sup> | #  |
|----|-------------|-----------------|----------------|------------------|----------------|------------------|------|-------------|-----------------|----------------|------------------|----------------|------------------|----|
| 1  | 114.091340  | 57.549308       |                |                  |                |                  | L    |             |                 |                |                  |                |                  | 11 |
| 2  | 211.144104  | 106.075690      |                |                  |                |                  | P    | 1499.734500 | 750.370888      | 1482.707951    | 741.857614       | 1481.723935    | 741.365606       | 10 |
| 3  | 308.196868  | 154.602072      |                |                  |                |                  | P    | 1402.681736 | 701.844506      | 1385.655187    | 693.331232       | 1384.671171    | 692.839224       | 9  |
| 4  | 409.244547  | 205.125911      |                |                  | 391.233982     | 196.120629       | T    | 1305.628972 | 653.318124      | 1288.602423    | 644.804850       | 1287.618407    | 644.312842       | 8  |
| 5  | 510.292226  | 255.649751      |                |                  | 492.281661     | 246.644468       | T    | 1204.581293 | 602.794285      | 1187.554744    | 594.281010       | 1186.570728    | 593.789002       | 7  |
| 6  | 611.339905  | 306.173591      |                |                  | 593.329340     | 297.168308       | T    | 1103.533614 | 552.270445      | 1086.507065    | 543.757171       | 1085.523049    | 543.265163       | 6  |
| 7  | 771.370554  | 386.188915      |                |                  | 753.359989     | 377.183633       | C    | 1002.485935 | 501.746606      | 985.459386     | 493.233331       |                |                  | 5  |
| 8  | 899.429132  | 450.218204      | 882.402583     | 441.704930       | 881.418567     | 441.212922       | Q    | 842.455286  | 421.731281      | 825.428737     | 413.218007       |                |                  | 4  |
| 9  | 1027.487710 | 514.247493      | 1010.461161    | 505.734219       | 1009.477145    | 505.242211       | Q    | 714.396708  | 357.701992      | 697.370159     | 349.188718       |                |                  | 3  |
| 10 | 1466.713036 | 733.860156      | 1449.686487    | 725.346882       | 1448.702471    | 724.854874       | Q    | 586.338130  | 293.672703      | 569.311581     | 285.159429       |                |                  | 2  |
| 11 |             |                 |                |                  |                |                  | K    | 147.112804  | 74.060040       | 130.086255     | 65.546765        |                |                  | 1  |

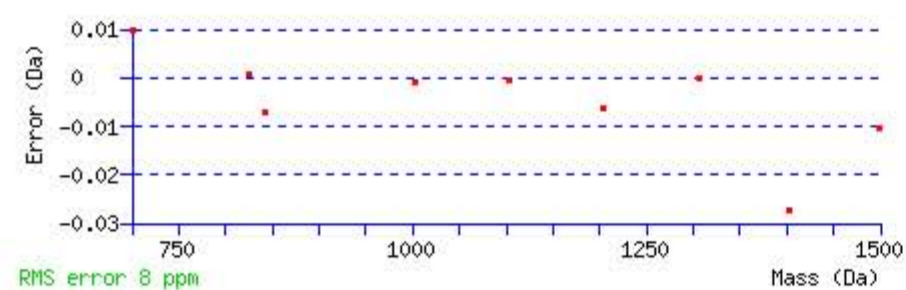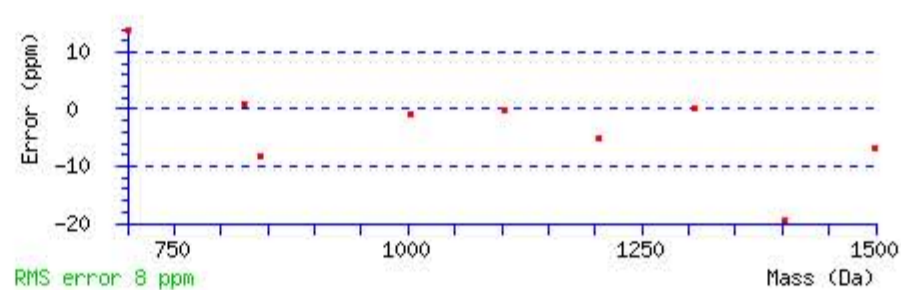

NCBI BLAST search of **LPPTTTCQQQK**

(Parameters: blastp, nr protein database, expect=20000, no filter, PAM30)

Other BLAST [web gateways](#)

All matches to this query

| Score | Mr(calc):   | Delta     | Sequence                        |
|-------|-------------|-----------|---------------------------------|
| 44.3  | 1611.811295 | -0.000143 | <a href="#">LPPTTTCQQQK</a>     |
| 44.3  | 1611.811295 | -0.000143 | <a href="#">LPPTTTCQQQK</a>     |
| 44.3  | 1611.811295 | -0.000143 | <a href="#">LPPTTTCQQQK</a>     |
| 7.7   | 1611.815094 | -0.003942 | <a href="#">NDVEGAKMHLRQAK</a>  |
| 2.0   | 1611.803406 | 0.007746  | <a href="#">TPIKMGISASTMTMK</a> |
| 0.1   | 1611.803864 | 0.007288  | <a href="#">HQEMEDVIRLAQK</a>   |

Mascot: <http://www.matrixscience.com/>

# MASCOT Search Results

## Peptide View

MS/MS Fragmentation of **YGQTI RPICLPCTEGTTR**

Found in **CFAB\_HUMAN**, Complement factor B OS=Homo sapiens GN=CFB PE=1 SV=2

Match to Query 49672: 2433.198162 from(812.073330,3+) rtinseconds(2089) index(5389)

Title: Locus:1.1.1.3279.16 File:"2013-07-02 CLN FXIII 60 min 3rd F 1.wiff"

Data file C:\Program Files (x86)\Matrix Science\Mascot Daemon\mgf\6 FXIII 60 min 3rd\mascot\_daemon\_merge.mgf

Click mouse within plot area to zoom in by factor of two about that point

Or, Plot from  to  Da

Label all possible matches  Label matches used for scoring

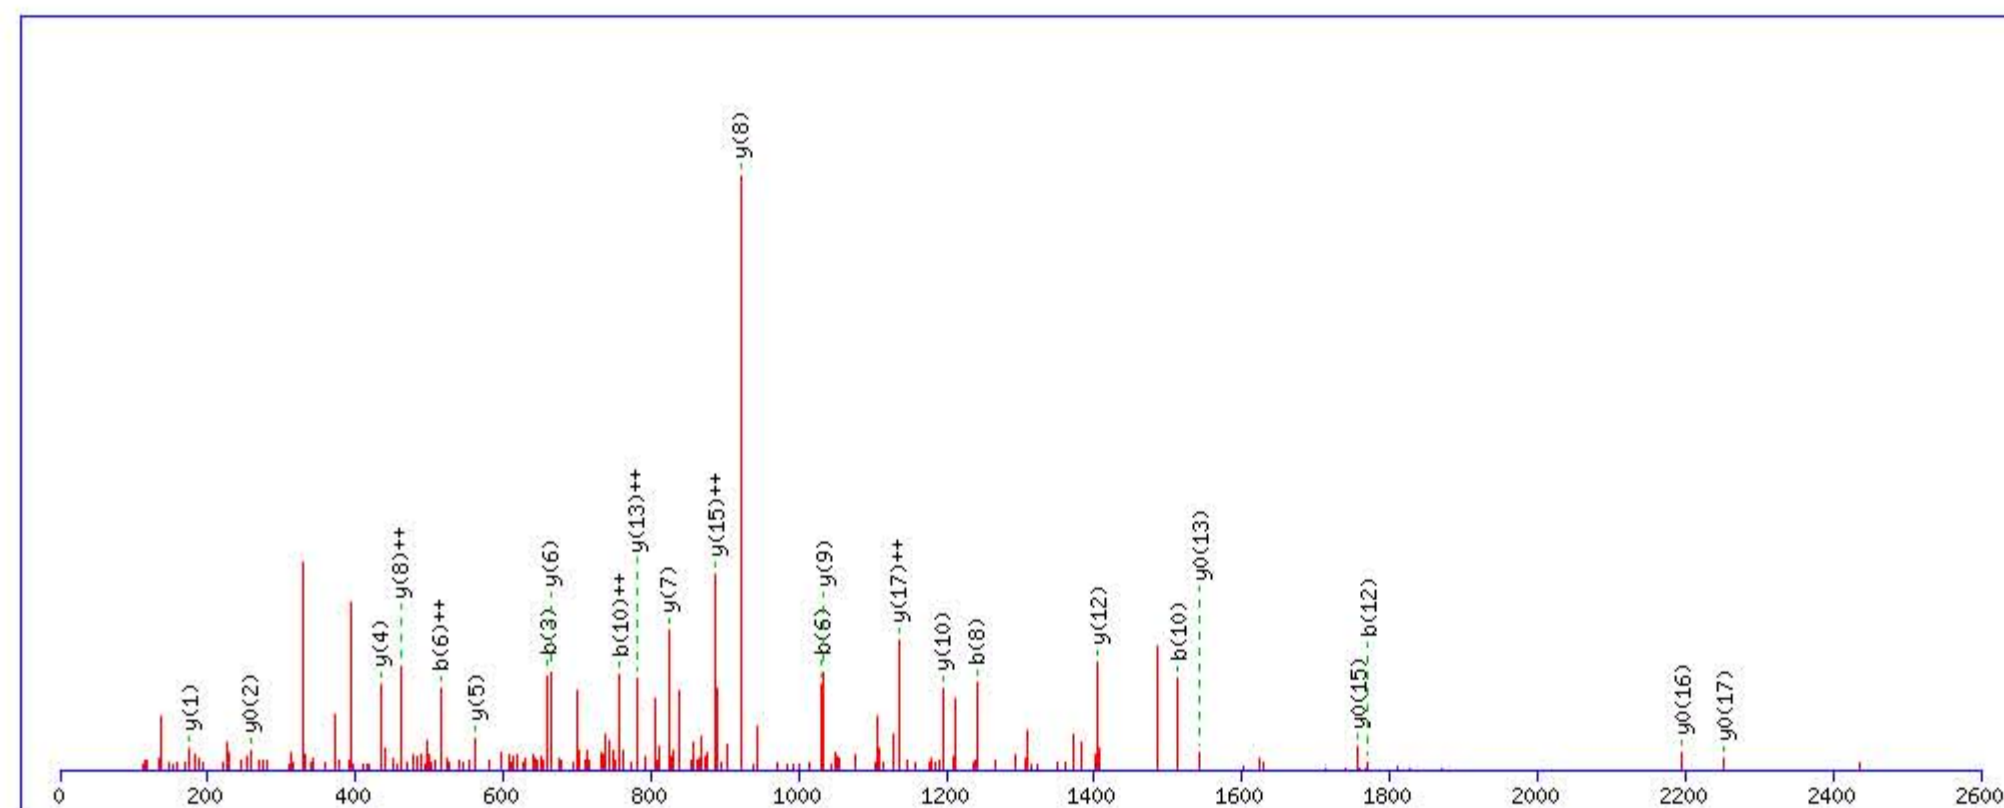

Monoisotopic mass of neutral peptide Mr(calc): 2433.196701

Fixed modifications: Carbamidomethyl (C) (apply to specified residues or termini only)

Variable modifications:

Q3 : Biotin:Thermo-21345 (Q)

Ions Score: 52 Expect: 0.00015

Matches : 25/192 fragment ions using 38 most intense peaks [\(help\)](#)

| #  | b                  | b <sup>++</sup>   | b <sup>*</sup> | b <sup>*++</sup> | b <sup>0</sup> | b <sup>0++</sup> | Seq. | y                  | y <sup>++</sup>   | y <sup>*</sup> | y <sup>*++</sup> | y <sup>0</sup>     | y <sup>0++</sup> | #  |
|----|--------------------|-------------------|----------------|------------------|----------------|------------------|------|--------------------|-------------------|----------------|------------------|--------------------|------------------|----|
| 1  | 164.070605         | 82.538940         |                |                  |                |                  | Y    |                    |                   |                |                  |                    |                  | 18 |
| 2  | 221.092069         | 111.049673        |                |                  |                |                  | G    | 2271.140644        | 1136.073960       | 2254.114095    | 1127.560685      | 2253.130079        | 1127.068677      | 17 |
| 3  | <b>660.317395</b>  | 330.662336        | 643.290846     | 322.149061       |                |                  | Q    | 2214.119180        | 1107.563228       | 2197.092631    | 1099.049953      | <b>2196.108615</b> | 1098.557945      | 16 |
| 4  | 761.365074         | 381.186175        | 744.338525     | 372.672901       | 743.354509     | 372.180893       | T    | 1774.893854        | <b>887.950565</b> | 1757.867305    | 879.437290       | <b>1756.883289</b> | 878.945282       | 15 |
| 5  | 874.449138         | 437.728207        | 857.422589     | 429.214933       | 856.438573     | 428.722925       | I    | 1673.846175        | 837.426725        | 1656.819626    | 828.913451       | 1655.835610        | 828.421443       | 14 |
| 6  | <b>1030.550249</b> | <b>515.778763</b> | 1013.523700    | 507.265488       | 1012.539684    | 506.773480       | R    | 1560.762111        | <b>780.884693</b> | 1543.735562    | 772.371419       | <b>1542.751546</b> | 771.879411       | 13 |
| 7  | 1127.603013        | 564.305145        | 1110.576464    | 555.791870       | 1109.592448    | 555.299862       | P    | <b>1404.661000</b> | 702.834138        | 1387.634451    | 694.320863       | 1386.650435        | 693.828855       | 12 |
| 8  | <b>1240.687077</b> | 620.847177        | 1223.660528    | 612.333902       | 1222.676512    | 611.841894       | I    | 1307.608236        | 654.307756        | 1290.581687    | 645.794481       | 1289.597671        | 645.302473       | 11 |
| 9  | 1400.717726        | 700.862501        | 1383.691177    | 692.349227       | 1382.707161    | 691.857219       | C    | <b>1194.524172</b> | 597.765724        | 1177.497623    | 589.252449       | 1176.513607        | 588.760441       | 10 |
| 10 | <b>1513.801790</b> | <b>757.404533</b> | 1496.775241    | 748.891259       | 1495.791225    | 748.399250       | L    | <b>1034.493523</b> | 517.750399        | 1017.466974    | 509.237125       | 1016.482958        | 508.745117       | 9  |
| 11 | 1610.854554        | 805.930915        | 1593.828005    | 797.417641       | 1592.843989    | 796.925633       | P    | <b>921.409459</b>  | <b>461.208367</b> | 904.382910     | 452.695093       | 903.398894         | 452.203085       | 8  |
| 12 | <b>1770.885203</b> | 885.946240        | 1753.858654    | 877.432965       | 1752.874638    | 876.940957       | C    | <b>824.356695</b>  | 412.681985        | 807.330146     | 404.168711       | 806.346130         | 403.676703       | 7  |
| 13 | 1871.932882        | 936.470079        | 1854.906333    | 927.956805       | 1853.922317    | 927.464797       | T    | <b>664.326046</b>  | 332.666661        | 647.299497     | 324.153386       | 646.315481         | 323.661378       | 6  |
| 14 | 2000.975475        | 1000.991376       | 1983.948926    | 992.478101       | 1982.964910    | 991.986093       | E    | <b>563.278367</b>  | 282.142821        | 546.251818     | 273.629547       | 545.267802         | 273.137539       | 5  |
| 15 | 2057.996939        | 1029.502107       | 2040.970390    | 1020.988833      | 2039.986374    | 1020.496825      | G    | <b>434.235774</b>  | 217.621525        | 417.209225     | 209.108250       | 416.225209         | 208.616242       | 4  |
| 16 | 2159.044618        | 1080.025947       | 2142.018069    | 1071.512672      | 2141.034053    | 1071.020664      | T    | 377.214310         | 189.110793        | 360.187761     | 180.597518       | 359.203745         | 180.105510       | 3  |
| 17 | 2260.092297        | 1130.549786       | 2243.065748    | 1122.036512      | 2242.081732    | 1121.544504      | T    | 276.166631         | 138.586953        | 259.140082     | 130.073679       | <b>258.156066</b>  | 129.581671       | 2  |
| 18 |                    |                   |                |                  |                |                  | R    | <b>175.118952</b>  | 88.063114         | 158.092403     | 79.549839        |                    |                  | 1  |

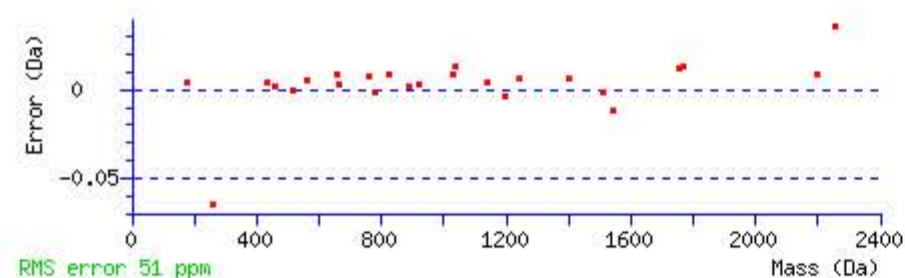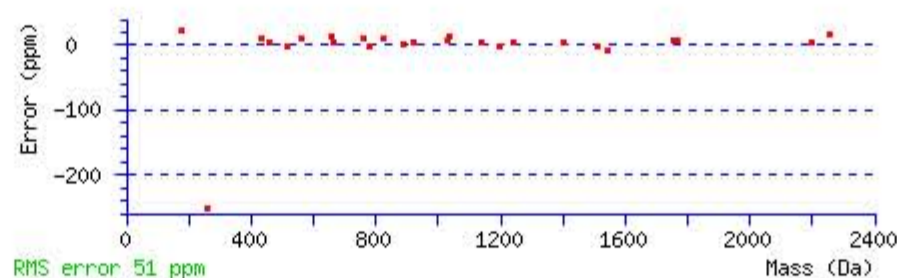

NCBI BLAST search of **YGQTI RPICLPCTEGTTR**

(Parameters: blastp, nr protein database, expect=20000, no filter, PAM30)

Other BLAST [web gateways](#)

All matches to this query

| Score | Mr(calc):   | Delta    | Sequence                            |
|-------|-------------|----------|-------------------------------------|
| 52.2  | 2433.196701 | 0.001461 | <a href="#">YGQTI RPICLPCTEGTTR</a> |

Mascot: <http://www.matrixscience.com/>

# MASCOT SEARCH RESULTS

## Peptide View

MS/MS Fragmentation of **WSSPPQCEGLPCK**

Found in **CFAH\_HUMAN**, Complement factor H OS=Homo sapiens GN=CFH PE=1 SV=4

Match to Query 39626: 1855.855482 from(619.625770,3+) rtinseconds(1919) index(18483)

Title: Locus:1.1.1.3269.9 File:"2013-07-02 CLN FXIII 60 min 3rd F 2.wiff"

Data file C:\Program Files (x86)\Matrix Science\Mascot Daemon\mgf\6 FXIII 60 min 3rd\mascot\_daemon\_merge.mgf

Click mouse within plot area to zoom in by factor of two about that point

Or, Plot from  to  Da

Label all possible matches  Label matches used for scoring

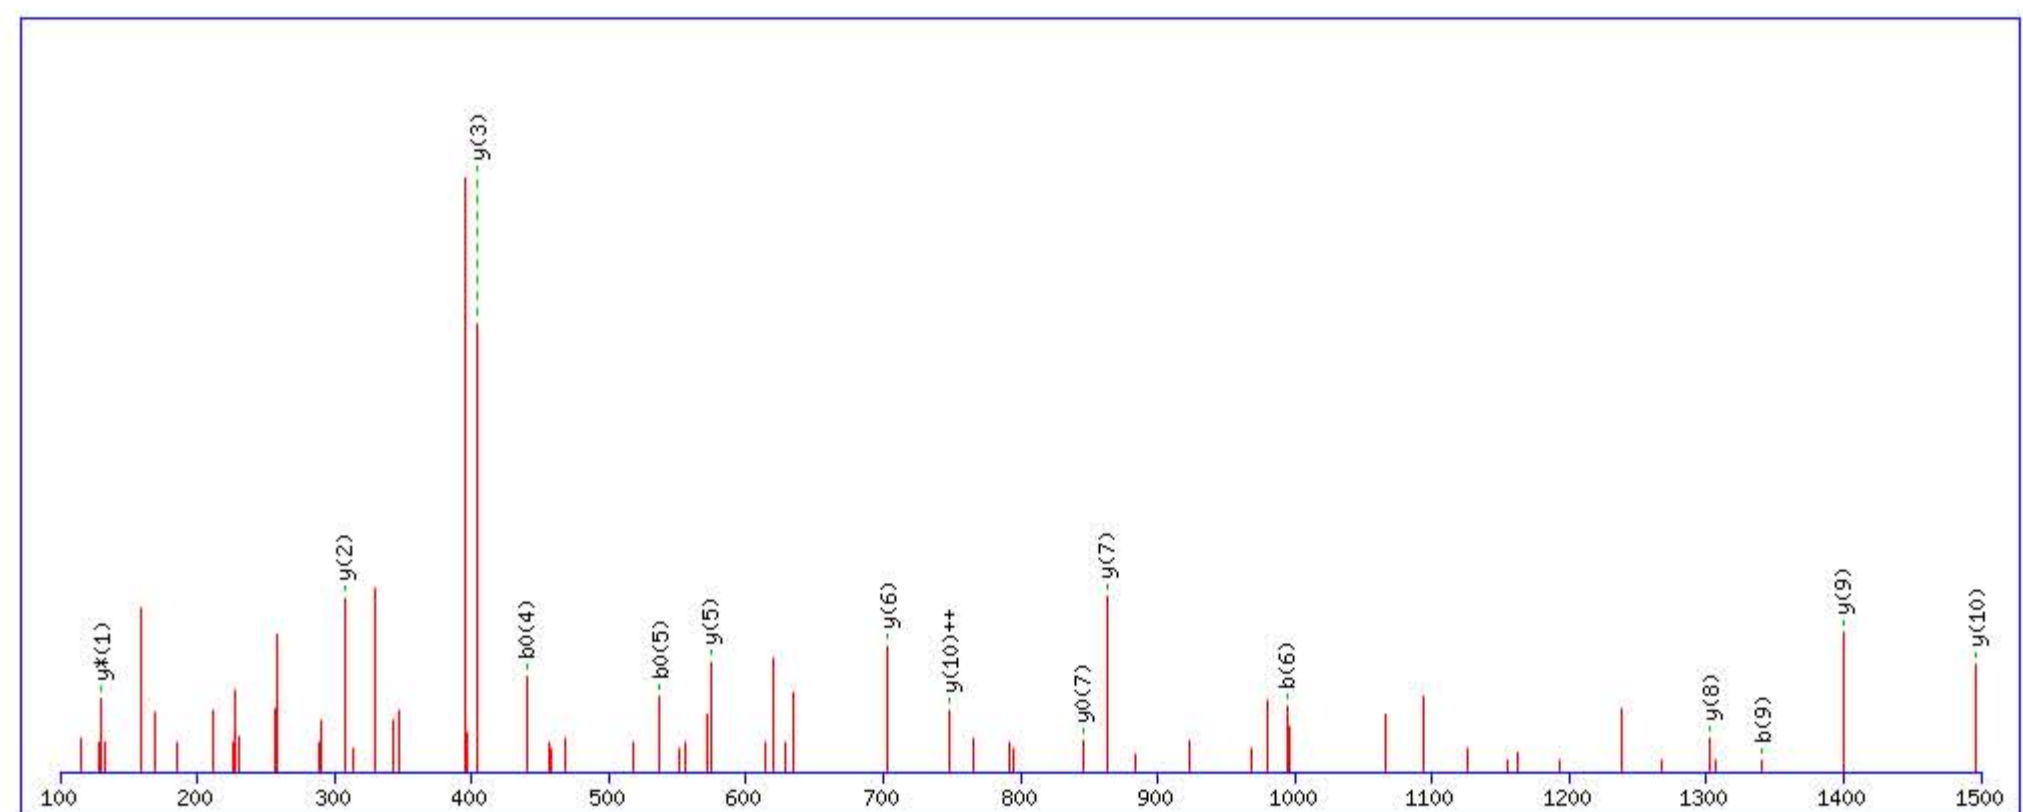

Monoisotopic mass of neutral peptide Mr(calc): 1855.841934

Fixed modifications: Carbamidomethyl (C) (apply to specified residues or termini only)

Variable modifications:

Q6 : Biotin:Thermo-21345 (Q)

Ions Score: 43 Expect: 0.00056

Matches : 15/122 fragment ions using 27 most intense peaks [\(help\)](#)

| #  | b           | b <sup>++</sup> | b <sup>*</sup> | b <sup>+++</sup> | b <sup>0</sup> | b <sup>0++</sup> | Seq. | y           | y <sup>++</sup> | y <sup>*</sup> | y <sup>+++</sup> | y <sup>0</sup> | y <sup>0++</sup> | #  |
|----|-------------|-----------------|----------------|------------------|----------------|------------------|------|-------------|-----------------|----------------|------------------|----------------|------------------|----|
| 1  | 187.086589  | 94.046932       |                |                  |                |                  | W    |             |                 |                |                  |                |                  | 13 |
| 2  | 274.118617  | 137.562947      |                |                  | 256.108052     | 128.557664       | S    | 1670.769897 | 835.888587      | 1653.743348    | 827.375312       | 1652.759332    | 826.883304       | 12 |
| 3  | 361.150645  | 181.078960      |                |                  | 343.140080     | 172.073678       | S    | 1583.737869 | 792.372573      | 1566.711320    | 783.859298       | 1565.727304    | 783.367290       | 11 |
| 4  | 458.203409  | 229.605343      |                |                  | 440.192844     | 220.600060       | P    | 1496.705841 | 748.856559      | 1479.679292    | 740.343284       | 1478.695276    | 739.851276       | 10 |
| 5  | 555.256173  | 278.131725      |                |                  | 537.245608     | 269.126442       | P    | 1399.653077 | 700.330177      | 1382.626528    | 691.816902       | 1381.642512    | 691.324894       | 9  |
| 6  | 994.481499  | 497.744388      | 977.454950     | 489.231113       | 976.470934     | 488.739105       | Q    | 1302.600313 | 651.803795      | 1285.573764    | 643.290520       | 1284.589748    | 642.798512       | 8  |
| 7  | 1154.512148 | 577.759712      | 1137.485599    | 569.246438       | 1136.501583    | 568.754430       | C    | 863.374987  | 432.191132      | 846.348438     | 423.677857       | 845.364422     | 423.185849       | 7  |
| 8  | 1283.554741 | 642.281009      | 1266.528192    | 633.767734       | 1265.544176    | 633.275726       | E    | 703.344338  | 352.175807      | 686.317789     | 343.662533       | 685.333773     | 343.170525       | 6  |
| 9  | 1340.576205 | 670.791741      | 1323.549656    | 662.278466       | 1322.565640    | 661.786458       | G    | 574.301745  | 287.654511      | 557.275196     | 279.141236       |                |                  | 5  |
| 10 | 1453.660269 | 727.333773      | 1436.633720    | 718.820498       | 1435.649704    | 718.328490       | L    | 517.280281  | 259.143779      | 500.253732     | 250.630504       |                |                  | 4  |
| 11 | 1550.713033 | 775.860155      | 1533.686484    | 767.346880       | 1532.702468    | 766.854872       | P    | 404.196217  | 202.601747      | 387.169668     | 194.088472       |                |                  | 3  |
| 12 | 1710.743682 | 855.875479      | 1693.717133    | 847.362205       | 1692.733117    | 846.870197       | C    | 307.143453  | 154.075365      | 290.116904     | 145.562090       |                |                  | 2  |
| 13 |             |                 |                |                  |                |                  | K    | 147.112804  | 74.060040       | 130.086255     | 65.546765        |                |                  | 1  |

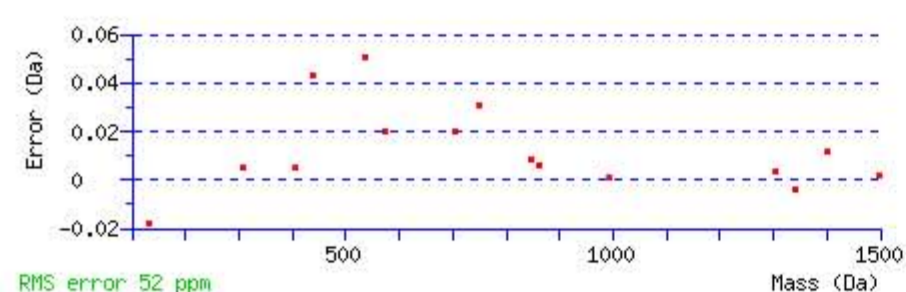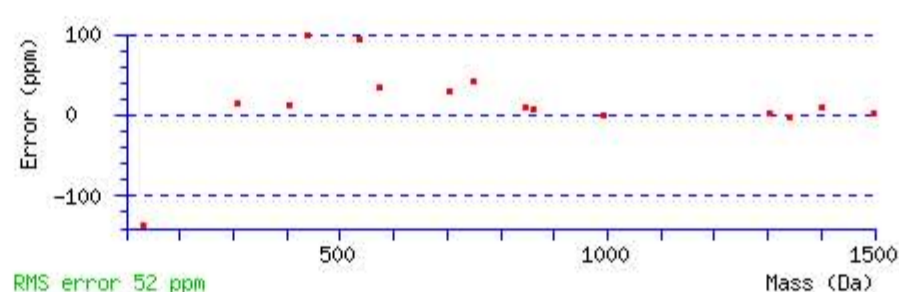

NCBI BLAST search of **WSSPPQCEGLPCK**

(Parameters: blastp, nr protein database, expect=20000, no filter, PAM30)

Other BLAST [web gateways](#)

All matches to this query

| Score | Mr(calc):   | Delta    | Sequence                      |
|-------|-------------|----------|-------------------------------|
| 43.2  | 1855.841934 | 0.013548 | <a href="#">WSSPPQCEGLPCK</a> |

Mascot: <http://www.matrixscience.com/>

# MASCOT SEARCH RESULTS

## Peptide View

MS/MS Fragmentation of **AGEQVITYTCATYYK**

Found in **CFAH\_HUMAN**, Complement factor H OS=Homo sapiens GN=CFH PE=1 SV=4

Match to Query 41410: 1964.907402 from(655.976410,3+) rtinseconds(1881) index(32285)  
 Title: Locus:1.1.1.3204.8 File:"2013-07-02 CLN FXIII 60 min 3rd F 3.wiff"

Data file C:\Program Files (x86)\Matrix Science\Mascot Daemon\mgf\6 FXIII 60 min 3rd\mascot\_daemon\_merge.mgf

Click mouse within plot area to zoom in by factor of two about that point

Or, Plot from  to  Da

Label all possible matches  Label matches used for scoring

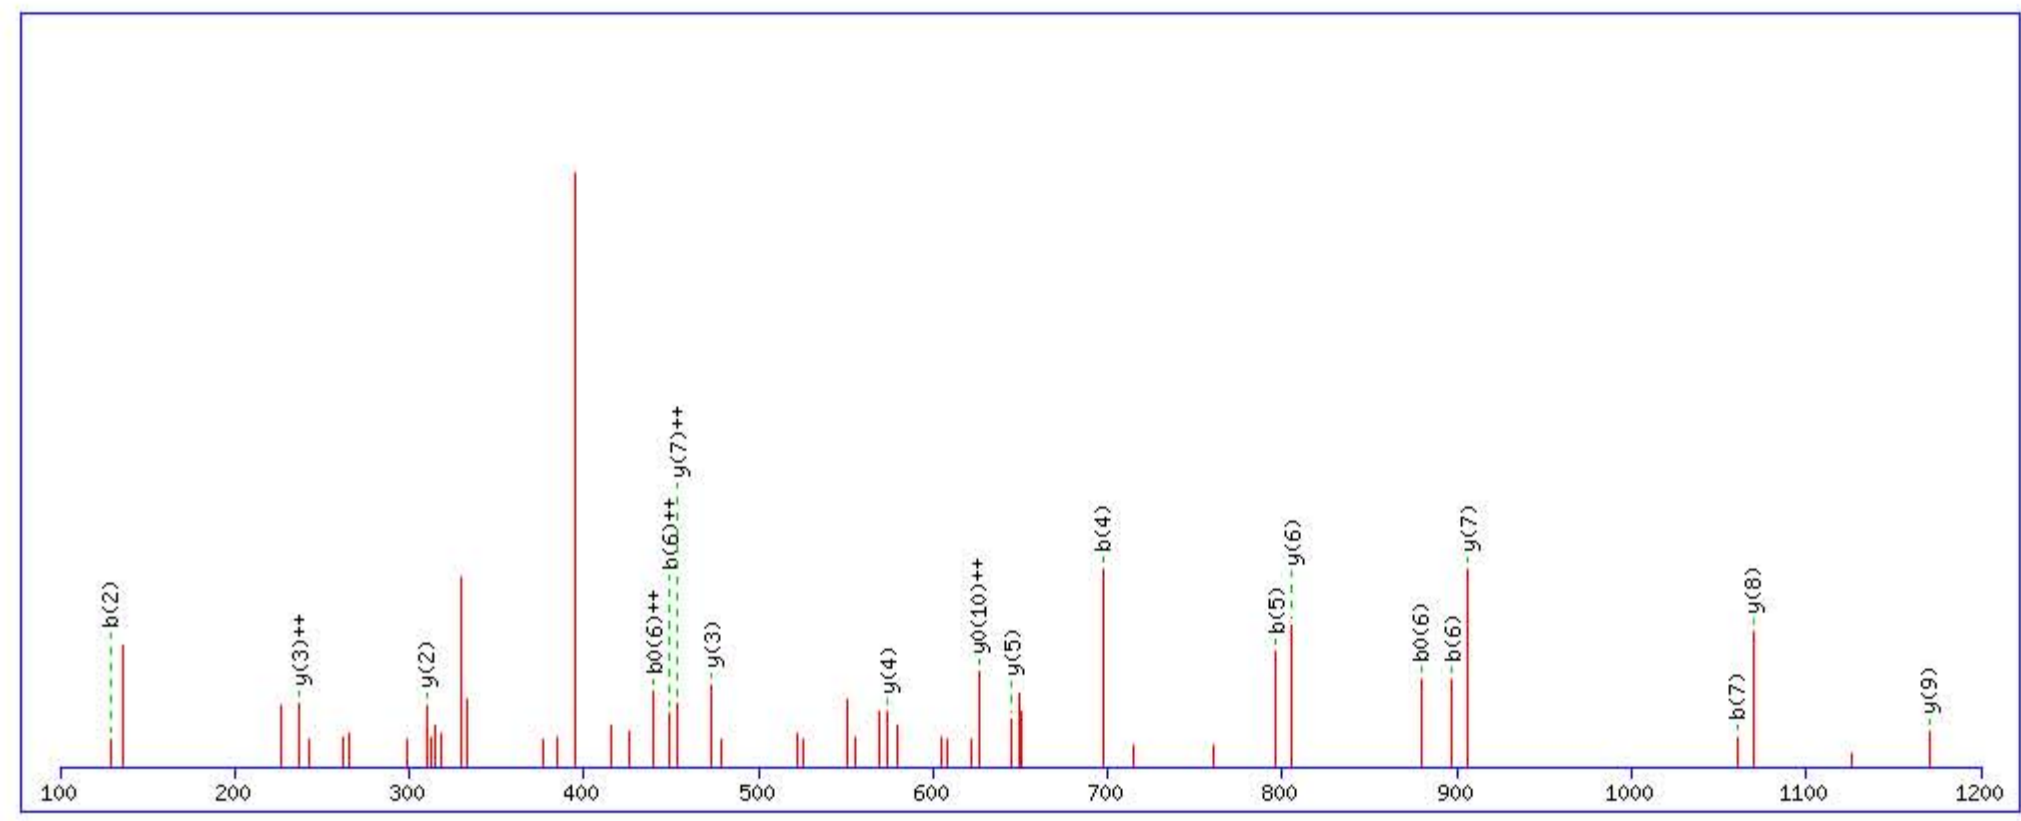

Monoisotopic mass of neutral peptide Mr(calc): 1964.901215

Fixed modifications: Carbamidomethyl (C) (apply to specified residues or termini only)

Variable modifications:

Q4 : Biotin:Thermo-21345 (Q)

Ions Score: 42 Expect: 0.00072

Matches : 19/140 fragment ions using 33 most intense peaks [\(help\)](#)

| #  | b                  | b <sup>++</sup>   | b <sup>*</sup> | b <sup>***</sup> | b <sup>0</sup>    | b <sup>0++</sup>  | Seq. | y                  | y <sup>++</sup>   | y <sup>*</sup> | y <sup>***</sup> | y <sup>0</sup> | y <sup>0++</sup>  | #  |
|----|--------------------|-------------------|----------------|------------------|-------------------|-------------------|------|--------------------|-------------------|----------------|------------------|----------------|-------------------|----|
| 1  | 72.044390          | 36.525833         |                |                  |                   |                   | A    |                    |                   |                |                  |                |                   | 14 |
| 2  | <b>129.065854</b>  | 65.036565         |                |                  |                   |                   | G    | 1894.871388        | 947.939332        | 1877.844839    | 939.426058       | 1876.860823    | 938.934050        | 13 |
| 3  | 258.108447         | 129.557862        |                |                  | 240.097882        | 120.552579        | E    | 1837.849924        | 919.428600        | 1820.823375    | 910.915326       | 1819.839359    | 910.423318        | 12 |
| 4  | <b>697.333773</b>  | 349.170525        | 680.307224     | 340.657250       | 679.323208        | 340.165242        | Q    | 1708.807331        | 854.907304        | 1691.780782    | 846.394029       | 1690.796766    | 845.902021        | 11 |
| 5  | <b>796.402187</b>  | 398.704732        | 779.375638     | 390.191457       | 778.391622        | 389.699449        | V    | 1269.582005        | 635.294641        | 1252.555456    | 626.781366       | 1251.571440    | <b>626.289358</b> | 10 |
| 6  | <b>897.449866</b>  | <b>449.228571</b> | 880.423317     | 440.715297       | <b>879.439301</b> | <b>440.223289</b> | T    | <b>1170.513591</b> | 585.760434        | 1153.487042    | 577.247159       | 1152.503026    | 576.755151        | 9  |
| 7  | <b>1060.513195</b> | 530.760236        | 1043.486646    | 522.246961       | 1042.502630       | 521.754953        | Y    | <b>1069.465912</b> | 535.236594        | 1052.439363    | 526.723320       | 1051.455347    | 526.231312        | 8  |
| 8  | 1161.560874        | 581.284075        | 1144.534325    | 572.770801       | 1143.550309       | 572.278793        | T    | <b>906.402583</b>  | <b>453.704930</b> | 889.376034     | 445.191655       | 888.392018     | 444.699647        | 7  |
| 9  | 1321.591523        | 661.299400        | 1304.564974    | 652.786125       | 1303.580958       | 652.294117        | C    | <b>805.354904</b>  | 403.181090        | 788.328355     | 394.667816       | 787.344339     | 394.175808        | 6  |
| 10 | 1392.628637        | 696.817957        | 1375.602088    | 688.304682       | 1374.618072       | 687.812674        | A    | <b>645.324255</b>  | 323.165766        | 628.297706     | 314.652491       | 627.313690     | 314.160483        | 5  |
| 11 | 1493.676316        | 747.341796        | 1476.649767    | 738.828522       | 1475.665751       | 738.336514        | T    | <b>574.287141</b>  | 287.647209        | 557.260592     | 279.133934       | 556.276576     | 278.641926        | 4  |
| 12 | 1656.739645        | 828.873461        | 1639.713096    | 820.360186       | 1638.729080       | 819.868178        | Y    | <b>473.239462</b>  | <b>237.123369</b> | 456.212913     | 228.610095       |                |                   | 3  |
| 13 | 1819.802974        | 910.405125        | 1802.776425    | 901.891851       | 1801.792409       | 901.399843        | Y    | <b>310.176133</b>  | 155.591705        | 293.149584     | 147.078430       |                |                   | 2  |
| 14 |                    |                   |                |                  |                   |                   | K    | 147.112804         | 74.060040         | 130.086255     | 65.546765        |                |                   | 1  |

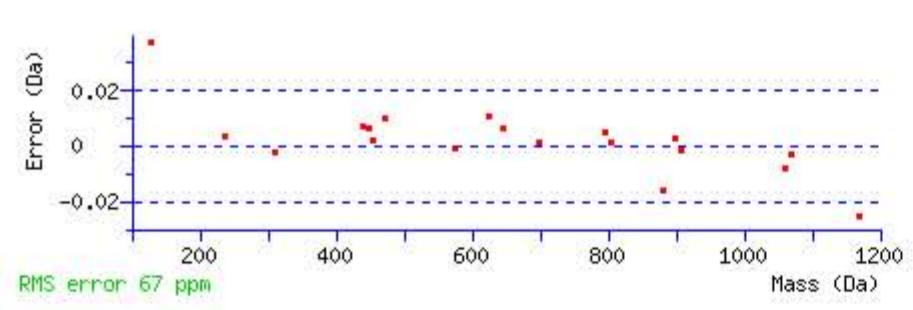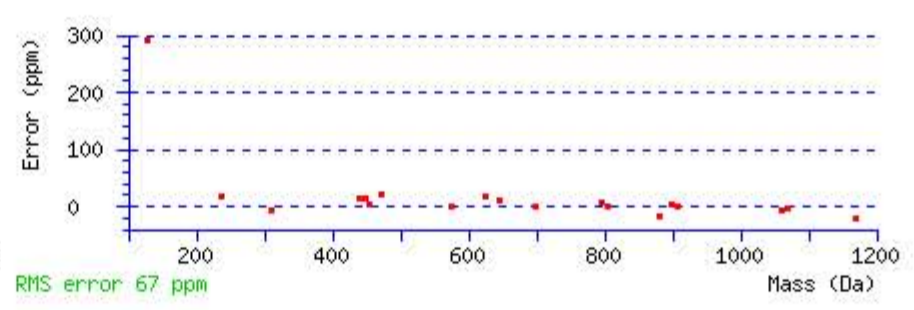

NCBI BLAST search of **AGEQVITYTCATYYK**

(Parameters: blastp, nr protein database, expect=20000, no filter, PAM30)

Other BLAST [web gateways](#)

### All matches to this query

| Score | Mr(calc):   | Delta    | Sequence                        |
|-------|-------------|----------|---------------------------------|
| 42.5  | 1964.901215 | 0.006187 | <a href="#">AGEQVITYTCATYYK</a> |

# MASCOT Search Results

## Peptide View

MS/MS Fragmentation of **IVSSAMEPDREYHFGQAVR**

Found in **CFAH\_HUMAN**, Complement factor H OS=Homo sapiens GN=CFH PE=1 SV=4

Match to Query 51182: 2502.233136 from(626.565560,4+) rtinseconds(1864) index(18073)

Title: Locus:1.1.1.3250.7 File:"2013-07-02 CLN FXIII 60 min 3rd F 2.wiff"

Data file C:\Program Files (x86)\Matrix Science\Mascot Daemon\mgf\6 FXIII 60 min 3rd\mascot\_daemon\_merge.mgf

Click mouse within plot area to zoom in by factor of two about that point

Or, Plot from  to  Da

Label all possible matches  Label matches used for scoring

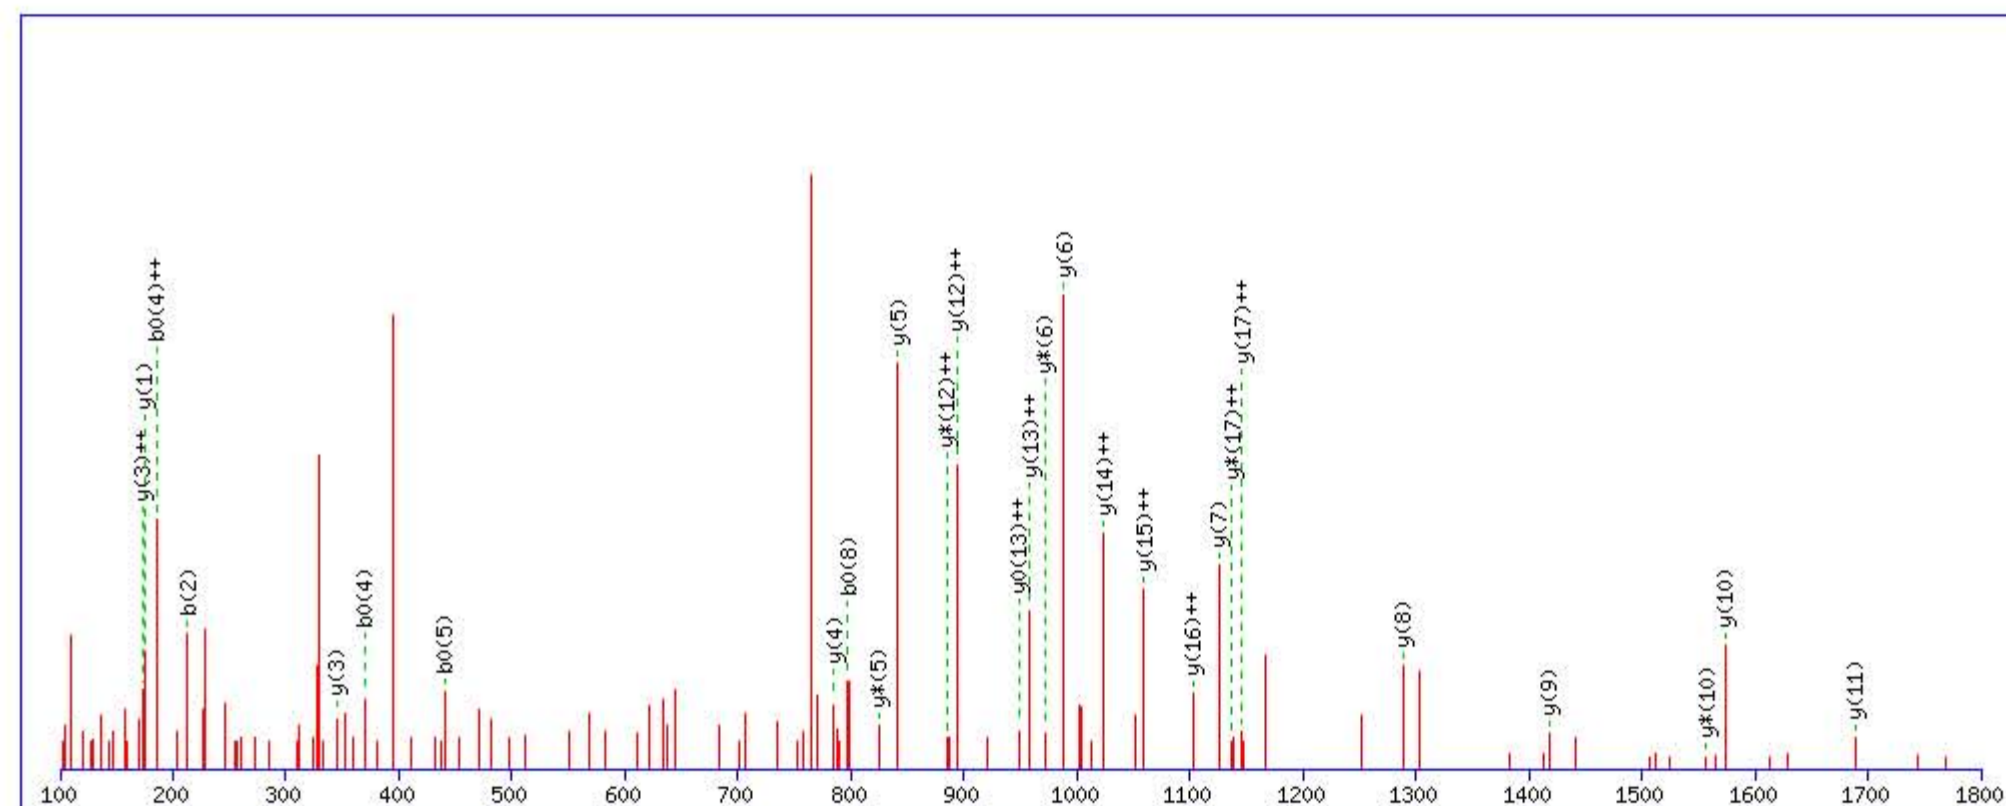

Monoisotopic mass of neutral peptide Mr(calc): 2502.214767

Fixed modifications: Carbamidomethyl (C) (apply to specified residues or termini only)

Variable modifications:

Q16 : Biotin:Thermo-21345 (Q)

Ions Score: 30 Expect: 0.027

Matches : 28/178 fragment ions using 93 most intense peaks [\(help\)](#)

| #  | b                 | b <sup>++</sup> | b <sup>+</sup> | b <sup>+++</sup> | b <sup>0</sup>    | b <sup>0++</sup>  | Seq. | y                  | y <sup>++</sup>    | y <sup>+</sup>     | y <sup>+++</sup>   | y <sup>0</sup> | y <sup>0++</sup>  | #  |
|----|-------------------|-----------------|----------------|------------------|-------------------|-------------------|------|--------------------|--------------------|--------------------|--------------------|----------------|-------------------|----|
| 1  | 114.091340        | 57.549308       |                |                  |                   |                   | I    |                    |                    |                    |                    |                |                   | 19 |
| 2  | <b>213.159754</b> | 107.083515      |                |                  |                   |                   | V    | 2390.137998        | 1195.572637        | 2373.111449        | 1187.059362        | 2372.127433    | 1186.567354       | 18 |
| 3  | 300.191782        | 150.599529      |                |                  | 282.181217        | 141.594247        | S    | 2291.069584        | <b>1146.038430</b> | 2274.043035        | <b>1137.525155</b> | 2273.059019    | 1137.033147       | 17 |
| 4  | 387.223810        | 194.115543      |                |                  | <b>369.213245</b> | <b>185.110261</b> | S    | 2204.037556        | <b>1102.522416</b> | 2187.011007        | 1094.009141        | 2186.026991    | 1093.517133       | 16 |
| 5  | 458.260924        | 229.634100      |                |                  | <b>440.250359</b> | 220.628818        | A    | 2117.005528        | <b>1059.006402</b> | 2099.978979        | 1050.493127        | 2098.994963    | 1050.001119       | 15 |
| 6  | 589.301409        | 295.154343      |                |                  | 571.290844        | 286.149060        | M    | 2045.968414        | <b>1023.487845</b> | 2028.941865        | 1014.974571        | 2027.957849    | 1014.482563       | 14 |
| 7  | 718.344002        | 359.675639      |                |                  | 700.333437        | 350.670357        | E    | 1914.927929        | <b>957.967603</b>  | 1897.901380        | 949.454328         | 1896.917364    | <b>948.962320</b> | 13 |
| 8  | 815.396766        | 408.202021      |                |                  | <b>797.386201</b> | 399.196739        | P    | 1785.885336        | <b>893.446306</b>  | 1768.858787        | <b>884.933032</b>  | 1767.874771    | 884.441024        | 12 |
| 9  | 930.423709        | 465.715493      |                |                  | 912.413144        | 456.710210        | D    | <b>1688.832572</b> | 844.919924         | 1671.806023        | 836.406650         | 1670.822007    | 835.914642        | 11 |
| 10 | 1086.524820       | 543.766048      | 1069.498271    | 535.252774       | 1068.514255       | 534.760766        | R    | <b>1573.805629</b> | 787.406453         | <b>1556.779080</b> | 778.893178         | 1555.795064    | 778.401170        | 10 |
| 11 | 1215.567413       | 608.287345      | 1198.540864    | 599.774070       | 1197.556848       | 599.282062        | E    | <b>1417.704518</b> | 709.355897         | 1400.677969        | 700.842623         | 1399.693953    | 700.350615        | 9  |
| 12 | 1378.630742       | 689.819009      | 1361.604193    | 681.305735       | 1360.620177       | 680.813727        | Y    | <b>1288.661925</b> | 644.834601         | 1271.635376        | 636.321326         |                |                   | 8  |
| 13 | 1515.689654       | 758.348465      | 1498.663105    | 749.835191       | 1497.679089       | 749.343183        | H    | <b>1125.598596</b> | 563.302936         | 1108.572047        | 554.789662         |                |                   | 7  |
| 14 | 1662.758068       | 831.882672      | 1645.731519    | 823.369398       | 1644.747503       | 822.877390        | F    | <b>988.539684</b>  | 494.773480         | <b>971.513135</b>  | 486.260206         |                |                   | 6  |
| 15 | 1719.779532       | 860.393404      | 1702.752983    | 851.880130       | 1701.768967       | 851.388122        | G    | <b>841.471270</b>  | 421.239273         | <b>824.444721</b>  | 412.725999         |                |                   | 5  |
| 16 | 2159.004858       | 1080.006067     | 2141.978309    | 1071.492792      | 2140.994293       | 1071.000784       | Q    | <b>784.449806</b>  | 392.728541         | 767.423257         | 384.215267         |                |                   | 4  |
| 17 | 2230.041972       | 1115.524624     | 2213.015423    | 1107.011349      | 2212.031407       | 1106.519341       | A    | <b>345.224480</b>  | <b>173.115878</b>  | 328.197931         | 164.602603         |                |                   | 3  |
| 18 | 2329.110386       | 1165.058831     | 2312.083837    | 1156.545556      | 2311.099821       | 1156.053548       | V    | 274.187366         | 137.597321         | 257.160817         | 129.084046         |                |                   | 2  |
| 19 |                   |                 |                |                  |                   |                   | R    | <b>175.118952</b>  | 88.063114          | 158.092403         | 79.549839          |                |                   | 1  |

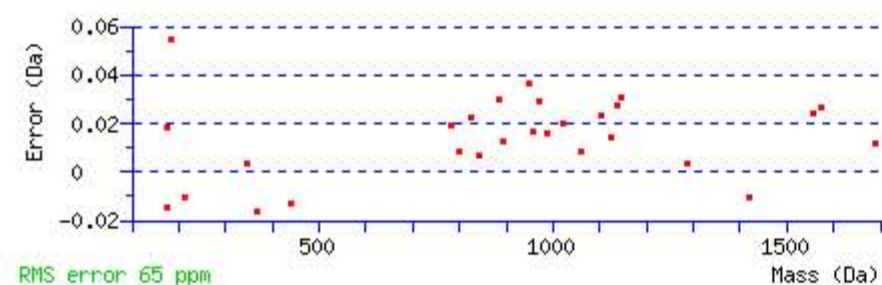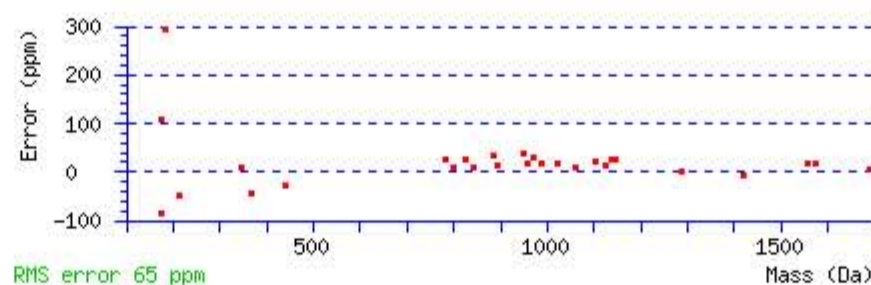

NCBI BLAST search of [IVSSAMEPDREYHFGQAVR](#)

(Parameters: blastp, nr protein database, expect=20000, no filter, PAM30)

Other BLAST [web gateways](#)

All matches to this query

| Score | Mr(calc):   | Delta    | Sequence                            |
|-------|-------------|----------|-------------------------------------|
| 29.7  | 2502.214767 | 0.018369 | <a href="#">IVSSAMEPDREYHFGQAVR</a> |

Mascot: <http://www.matrixscience.com/>



**MASCOT** **SCIENCE** Mascot Search Results

Peptide View

MS/MS Fragmentation of **VFCQPWQR**

Found in **CFAL\_HUMAN**, Complement factor I OS=Homo sapiens GN=CFI PE=1 SV=2

Match to Query 28048: 1430.696708 from(716.355630,2+) rtinseconds(2074) index(62953)

Title: Locus:1.1.1.3348.10 File:"2013-07-02 CLN FXIII 60 min 3rd FT.wiff"

Data file C:\Program Files (x86)\Matrix Science\Mascot Daemon\mgf\6 FXIII 60 min 3rd\mascot\_daemon\_merge.mgf

Click mouse within plot area to zoom in by factor of two about that point

Or, Plot from  to  Da

Label all possible matches  Label matches used for scoring

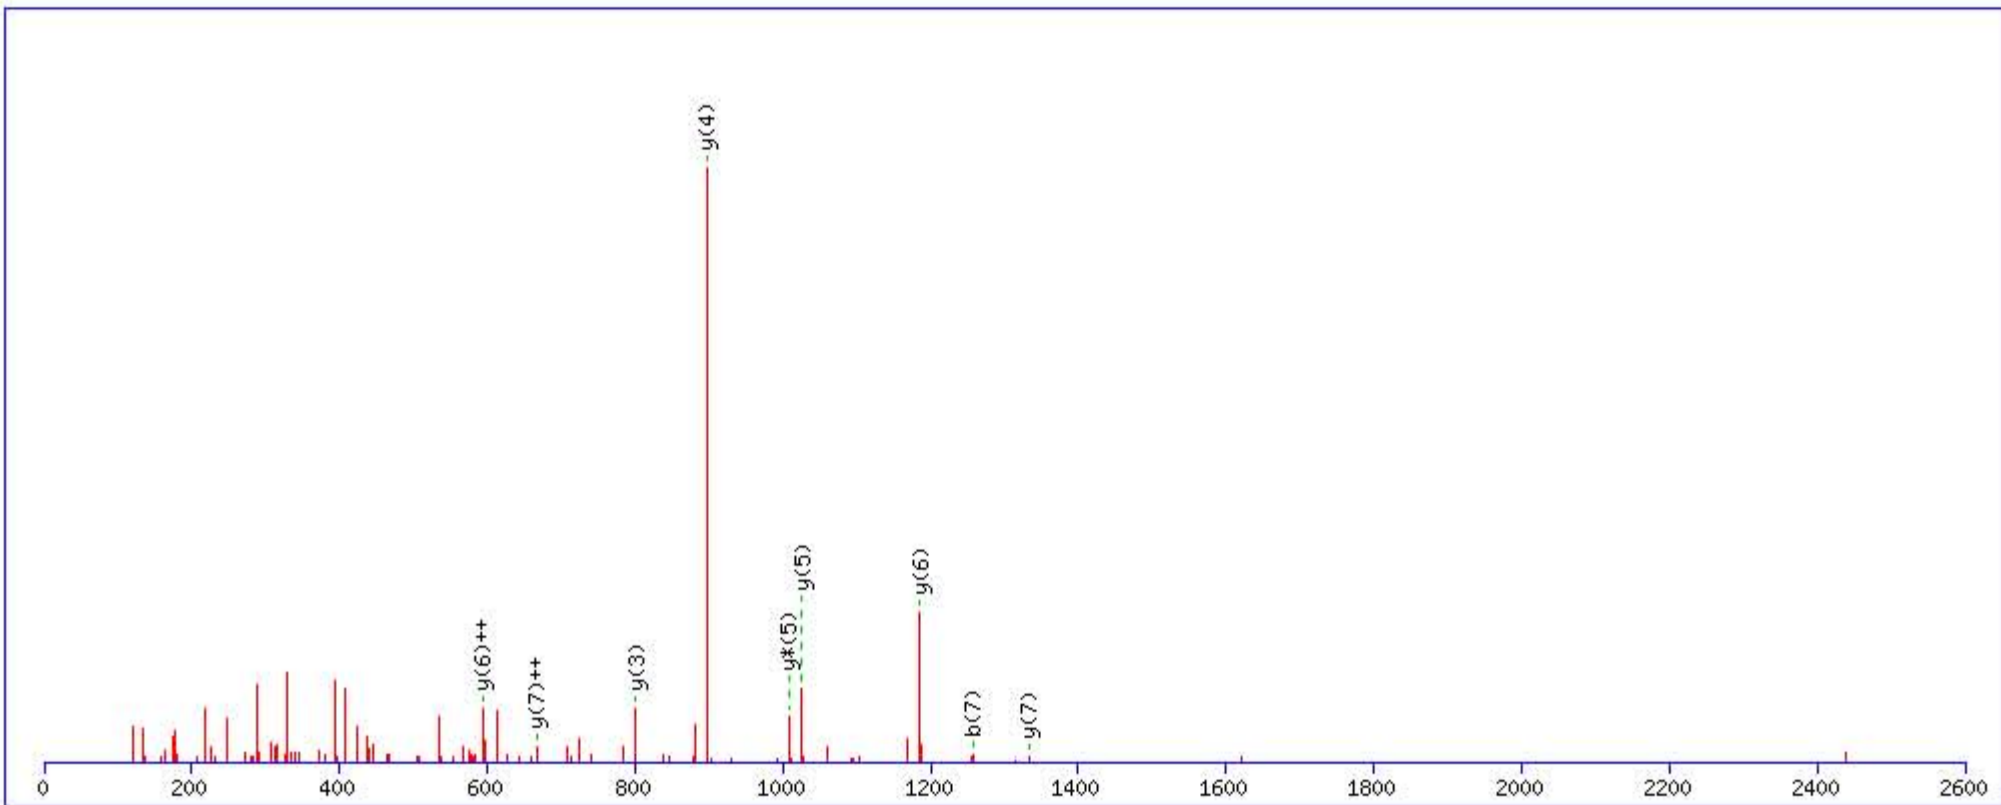

Monoisotopic mass of neutral peptide Mr(calc): 1430.695145

Fixed modifications: Carbamidomethyl (C) (apply to specified residues or termini only)

Variable modifications:

Q7 : Biotin:Thermo-21345 (Q)

Ions Score: 33 Expect: 0.00095

Matches : 9/50 fragment ions using 13 most intense peaks [\(help\)](#)

| # | b           | b <sup>++</sup> | b <sup>+</sup> | b <sup>+++</sup> | Seq. | y           | y <sup>++</sup> | y <sup>+</sup> | y <sup>+++</sup> | # |
|---|-------------|-----------------|----------------|------------------|------|-------------|-----------------|----------------|------------------|---|
| 1 | 100.075690  | 50.541483       |                |                  | V    |             |                 |                |                  | 8 |
| 2 | 247.144104  | 124.075690      |                |                  | F    | 1332.633996 | 666.820636      | 1315.607447    | 658.307362       | 7 |
| 3 | 407.174753  | 204.091014      |                |                  | C    | 1185.565582 | 593.286429      | 1168.539033    | 584.773155       | 6 |
| 4 | 535.233331  | 268.120304      | 518.206782     | 259.607029       | Q    | 1025.534933 | 513.271105      | 1008.508384    | 504.757830       | 5 |
| 5 | 632.286095  | 316.646686      | 615.259546     | 308.133411       | P    | 897.476355  | 449.241816      | 880.449806     | 440.728541       | 4 |
| 6 | 818.365408  | 409.686342      | 801.338859     | 401.173068       | W    | 800.423591  | 400.715434      | 783.397042     | 392.202159       | 3 |
| 7 | 1257.590734 | 629.299005      | 1240.564185    | 620.785731       | Q    | 614.344278  | 307.675777      | 597.317729     | 299.162503       | 2 |
| 8 |             |                 |                |                  | R    | 175.118952  | 88.063114       | 158.092403     | 79.549839        | 1 |

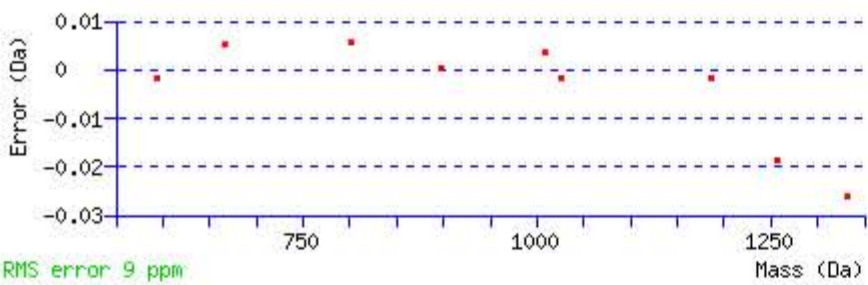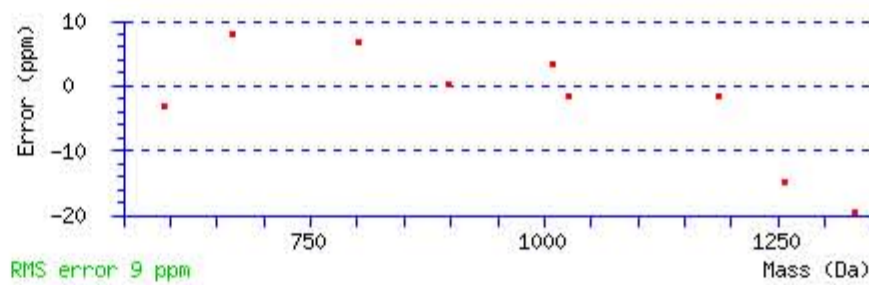

NCBI BLAST search of **VFCQPWQR**

(Parameters: blastp, nr protein database, expect=20000, no filter, PAM30)

Other BLAST [web gateways](#)

All matches to this query

| Score | Mr(calc):   | Delta     | Sequence                      |
|-------|-------------|-----------|-------------------------------|
| 32.9  | 1430.695145 | 0.001563  | <a href="#">VFCQPWQR</a>      |
| 7.5   | 1430.695145 | 0.001563  | <a href="#">VFCQPWQR</a>      |
| 0.6   | 1430.693619 | 0.003089  | <a href="#">QLQTLSPGGGGNR</a> |
| 0.6   | 1430.700989 | -0.004281 | <a href="#">NMPQADAMVLVAR</a> |
| 0.1   | 1430.711319 | -0.014611 | <a href="#">RAKAEDENETLR</a>  |

# MASCOT SCIENCE Mascot Search Results

## Peptide View

MS/MS Fragmentation of **SFPTYCQQK**

Found in **CFAI\_HUMAN**, Complement factor I OS=Homo sapiens GN=CFI PE=1 SV=2

Match to Query 29122: 1468.685288 from(735.349920,2+) rtinseconds(1859) index(61652)

Title: Locus:1.1.1.3273.11 File:"2013-07-02 CLN FXIII 60 min 3rd FT.wiff"

Data file C:\Program Files (x86)\Matrix Science\Mascot Daemon\mgf\6 FXIII 60 min 3rd\mascot\_daemon\_merge.mgf

Click mouse within plot area to zoom in by factor of two about that point

Or, Plot from  to  Da

Label all possible matches  Label matches used for scoring

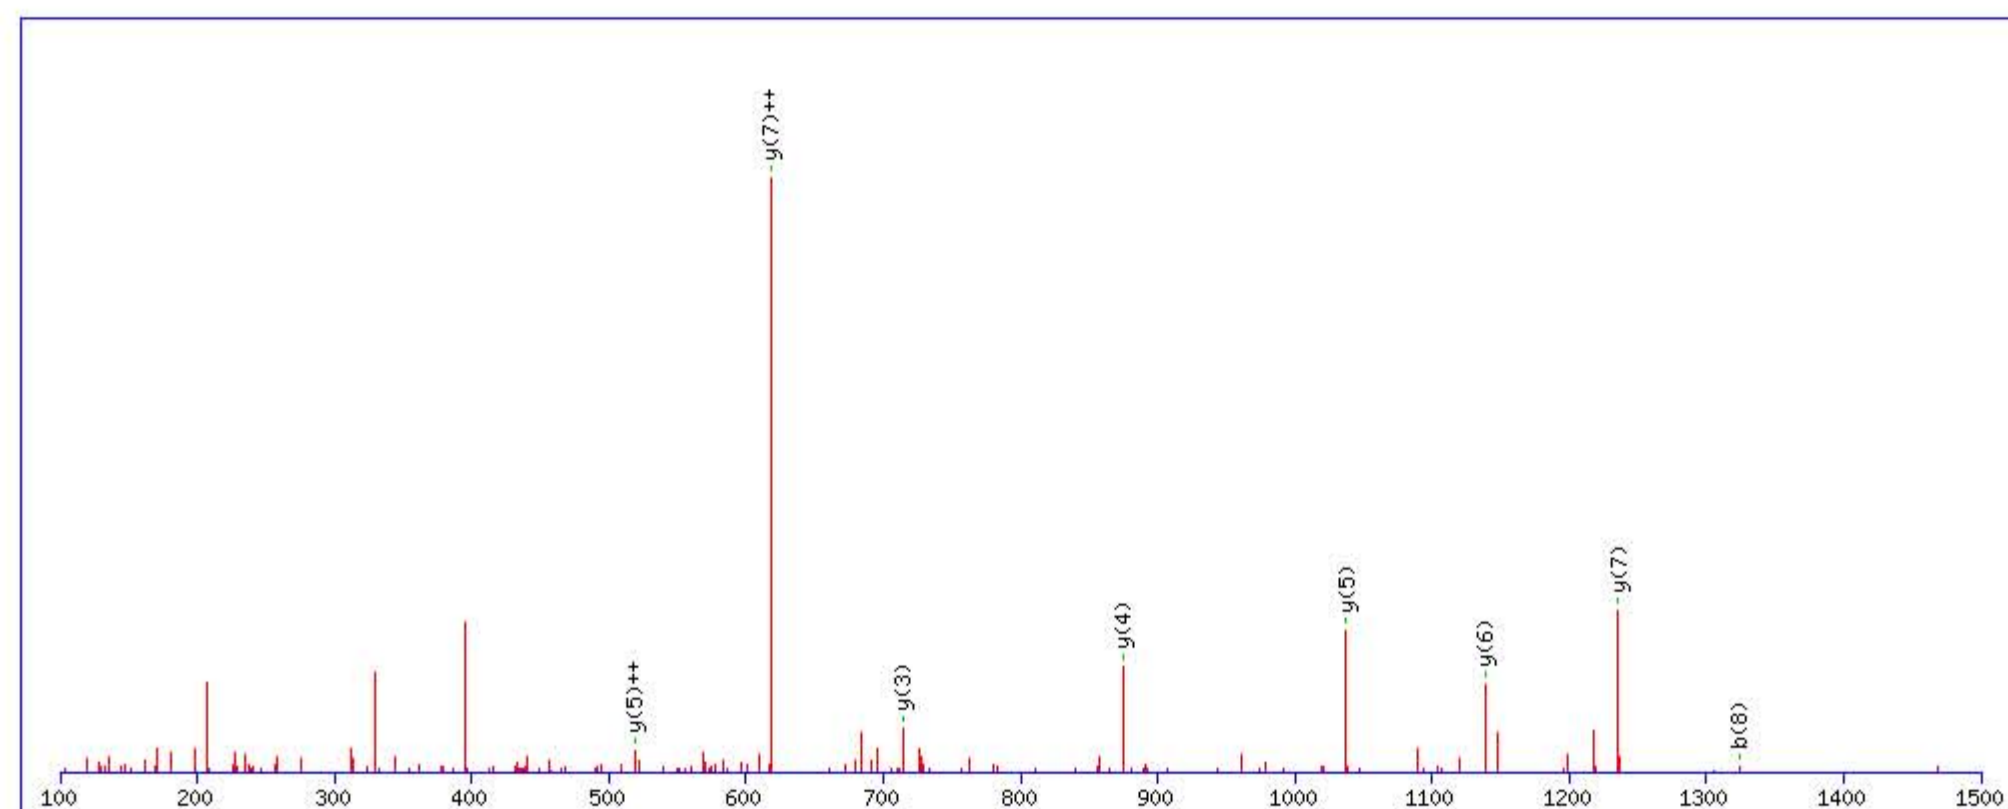

Monoisotopic mass of neutral peptide Mr(calc): 1468.684296

Fixed modifications: Carbamidomethyl (C) (apply to specified residues or termini only)

Variable modifications:

Q8 : Biotin:Thermo-21345 (Q)

Ions Score: 30 Expect: 0.0055

Matches : 8/74 fragment ions using 13 most intense peaks ([help](#))

| # | b                  | b <sup>++</sup> | b <sup>*</sup> | b <sup>*++</sup> | b <sup>0</sup> | b <sup>0++</sup> | Seq. | y                  | y <sup>++</sup>   | y <sup>*</sup> | y <sup>*++</sup> | y <sup>0</sup> | y <sup>0++</sup> | # |
|---|--------------------|-----------------|----------------|------------------|----------------|------------------|------|--------------------|-------------------|----------------|------------------|----------------|------------------|---|
| 1 | 88.039304          | 44.523290       |                |                  | 70.028739      | 35.518008        | S    |                    |                   |                |                  |                |                  | 9 |
| 2 | 235.107718         | 118.057497      |                |                  | 217.097153     | 109.052214       | F    | 1382.659543        | 691.833410        | 1365.632994    | 683.320135       | 1364.648978    | 682.828127       | 8 |
| 3 | 332.160482         | 166.583879      |                |                  | 314.149917     | 157.578596       | P    | <b>1235.591129</b> | <b>618.299203</b> | 1218.564580    | 609.785928       | 1217.580564    | 609.293920       | 7 |
| 4 | 433.208161         | 217.107718      |                |                  | 415.197596     | 208.102436       | T    | <b>1138.538365</b> | 569.772821        | 1121.511816    | 561.259546       | 1120.527800    | 560.767538       | 6 |
| 5 | 596.271490         | 298.639383      |                |                  | 578.260925     | 289.634101       | Y    | <b>1037.490686</b> | <b>519.248981</b> | 1020.464137    | 510.735707       |                |                  | 5 |
| 6 | 756.302139         | 378.654708      |                |                  | 738.291574     | 369.649425       | C    | <b>874.427357</b>  | 437.717317        | 857.400808     | 429.204042       |                |                  | 4 |
| 7 | 884.360717         | 442.683997      | 867.334168     | 434.170722       | 866.350152     | 433.678714       | Q    | <b>714.396708</b>  | 357.701992        | 697.370159     | 349.188718       |                |                  | 3 |
| 8 | <b>1323.586043</b> | 662.296660      | 1306.559494    | 653.783385       | 1305.575478    | 653.291377       | Q    | 586.338130         | 293.672703        | 569.311581     | 285.159428       |                |                  | 2 |
| 9 |                    |                 |                |                  |                |                  | K    | 147.112804         | 74.060040         | 130.086255     | 65.546765        |                |                  | 1 |

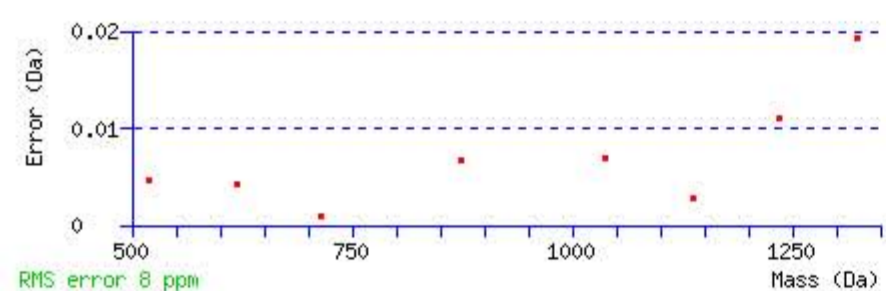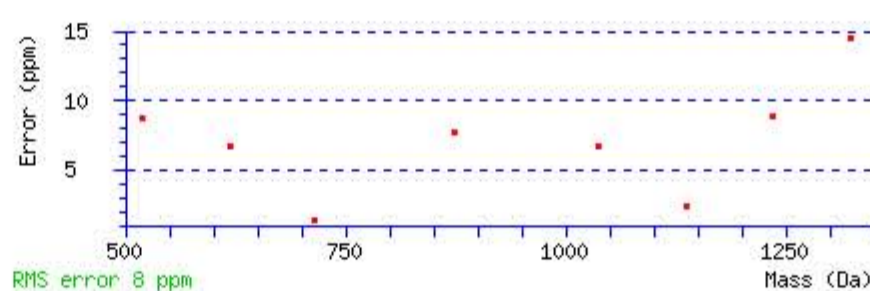

NCBI BLAST search of **SFPTYCQQK**

(Parameters: blastp, nr protein database, expect=20000, no filter, PAM30)

Other BLAST [web gateways](#)

All matches to this query

| Score | Mr(calc):   | Delta     | Sequence                       |
|-------|-------------|-----------|--------------------------------|
| 30.1  | 1468.684296 | 0.000992  | <a href="#">SFPTYCQQK</a>      |
| 30.1  | 1468.684296 | 0.000992  | <a href="#">SFPTYCQQK</a>      |
| 5.6   | 1468.671524 | 0.013764  | <a href="#">MEAETGSSVETGKK</a> |
| 0.9   | 1468.688126 | -0.002838 | <a href="#">FSIPSMTEHHAGR</a>  |
| 0.2   | 1468.680252 | 0.005036  | <a href="#">YAKGNDCALLCK</a>   |

Mascot: <http://www.matrixscience.com/>

# MASCOT Search Results

## Peptide View

MS/MS Fragmentation of **VTYTSQEDLVEK**

Found in **CFAI\_HUMAN**, Complement factor I OS=Homo sapiens GN=CFI PE=1 SV=2

Match to Query 36856: 1721.841028 from(861.927790,2+) rtinseconds(1910) index(61868)

Title: Locus:1.1.1.3291.12 File:"2013-07-02 CLN FXIII 60 min 3rd FT.wiff"

Data file C:\Program Files (x86)\Matrix Science\Mascot Daemon\mgf\6 FXIII 60 min 3rd\mascot\_daemon\_merge.mgf

Click mouse within plot area to zoom in by factor of two about that point

Or, Plot from  to  Da

Label all possible matches  Label matches used for scoring

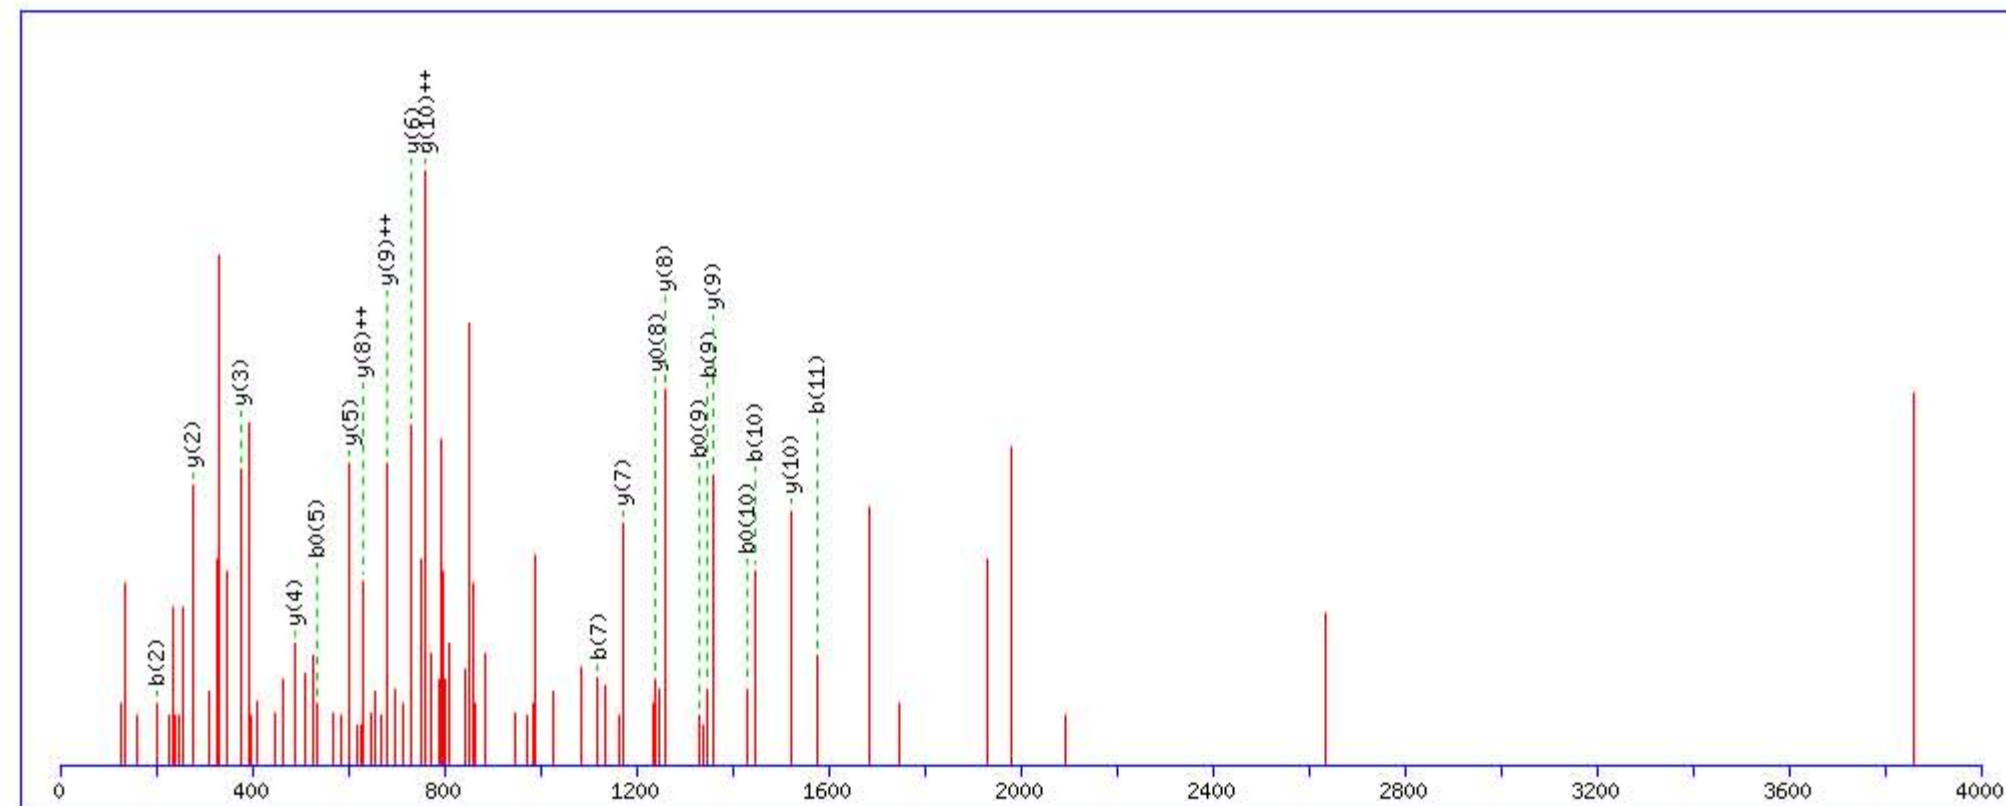

Monoisotopic mass of neutral peptide Mr(calc): 1721.854584

Fixed modifications: Carbamidomethyl (C) (apply to specified residues or termini only)

Variable modifications:

Q6 : Biotin:Thermo-21345 (Q)

Ions Score: 48 Expect: 6.4e-005

Matches : 21/118 fragment ions using 43 most intense peaks [\(help\)](#)

| #  | b                  | b <sup>++</sup> | b <sup>+</sup> | b <sup>+++</sup> | b <sup>0</sup>     | b <sup>0++</sup> | Seq. | y                  | y <sup>++</sup>   | y <sup>+</sup> | y <sup>+++</sup> | y <sup>0</sup>     | y <sup>0++</sup> | #  |
|----|--------------------|-----------------|----------------|------------------|--------------------|------------------|------|--------------------|-------------------|----------------|------------------|--------------------|------------------|----|
| 1  | 100.075690         | 50.541483       |                |                  |                    |                  | V    |                    |                   |                |                  |                    |                  | 12 |
| 2  | <b>201.123369</b>  | 101.065322      |                |                  | 183.112804         | 92.060040        | T    | 1623.793452        | 812.400364        | 1606.766903    | 803.887090       | 1605.782887        | 803.395081       | 11 |
| 3  | 364.186698         | 182.596987      |                |                  | 346.176133         | 173.591705       | Y    | <b>1522.745773</b> | <b>761.876524</b> | 1505.719224    | 753.363250       | 1504.735208        | 752.871242       | 10 |
| 4  | 465.234377         | 233.120827      |                |                  | 447.223812         | 224.115544       | T    | <b>1359.682444</b> | <b>680.344860</b> | 1342.655895    | 671.831585       | 1341.671879        | 671.339577       | 9  |
| 5  | 552.266405         | 276.636841      |                |                  | <b>534.255840</b>  | 267.631558       | S    | <b>1258.634765</b> | <b>629.821021</b> | 1241.608216    | 621.307746       | <b>1240.624200</b> | 620.815738       | 8  |
| 6  | 991.491731         | 496.249504      | 974.465182     | 487.736229       | 973.481166         | 487.244221       | Q    | <b>1171.602737</b> | 586.305006        | 1154.576188    | 577.791732       | 1153.592172        | 577.299724       | 7  |
| 7  | <b>1120.534324</b> | 560.770800      | 1103.507775    | 552.257526       | 1102.523759        | 551.765517       | E    | <b>732.377411</b>  | 366.692343        | 715.350862     | 358.179069       | 714.366846         | 357.687061       | 6  |
| 8  | 1235.561267        | 618.284272      | 1218.534718    | 609.770997       | 1217.550702        | 609.278989       | D    | <b>603.334818</b>  | 302.171047        | 586.308269     | 293.657773       | 585.324253         | 293.165765       | 5  |
| 9  | <b>1348.645331</b> | 674.826303      | 1331.618782    | 666.313029       | <b>1330.634766</b> | 665.821021       | L    | <b>488.307875</b>  | 244.657575        | 471.281326     | 236.144301       | 470.297310         | 235.652293       | 4  |
| 10 | <b>1447.713745</b> | 724.360511      | 1430.687196    | 715.847236       | <b>1429.703180</b> | 715.355228       | V    | <b>375.223811</b>  | 188.115543        | 358.197262     | 179.602269       | 357.213246         | 179.110261       | 3  |
| 11 | <b>1576.756338</b> | 788.881807      | 1559.729789    | 780.368533       | 1558.745773        | 779.876524       | E    | <b>276.155397</b>  | 138.581336        | 259.128848     | 130.068062       | 258.144832         | 129.576054       | 2  |
| 12 |                    |                 |                |                  |                    |                  | K    | 147.112804         | 74.060040         | 130.086255     | 65.546765        |                    |                  | 1  |

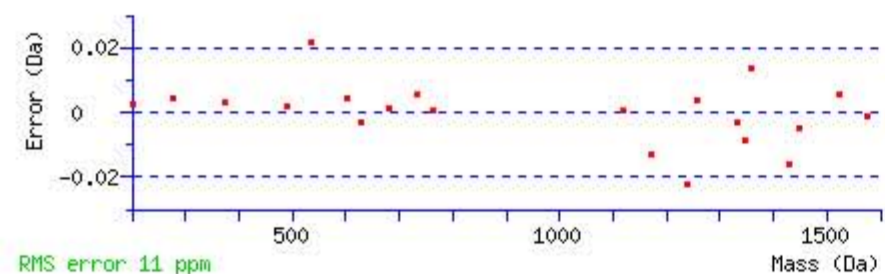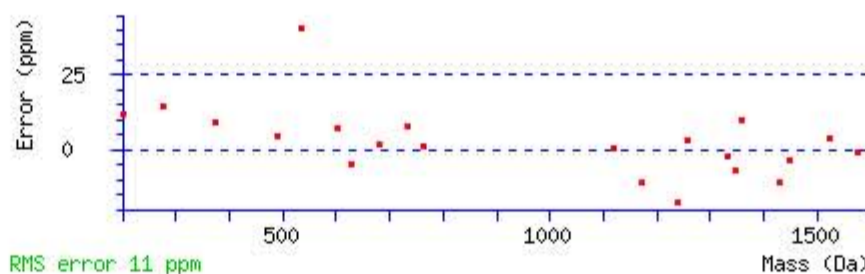

NCBI BLAST search of **VTYTSQEDLVEK**

(Parameters: blastp, nr protein database, expect=20000, no filter, PAM30)

Other BLAST [web gateways](#)

All matches to this query

| Score | Mr(calc):   | Delta     | Sequence                       |
|-------|-------------|-----------|--------------------------------|
| 48.2  | 1721.854584 | -0.013556 | <a href="#">VTYTSQEDLVEK</a>   |
| 3.2   | 1721.858414 | -0.017386 | <a href="#">DRVYQVTEQQISEK</a> |
| 3.2   | 1721.830292 | 0.010736  | <a href="#">MQNICNFLVEK</a>    |
| 0.7   | 1721.847122 | -0.006094 | <a href="#">EAYDQKIAEEAKAK</a> |

## Peptide View

MS/MS Fragmentation of **EANVACLDLGFQQGADTQR**Found in **CFAI\_HUMAN**, Complement factor I OS=Homo sapiens GN=CFI PE=1 SV=2

Match to Query 49180: 2403.139392 from(802.053740,3+) rtinseconds(2297) index(64243)

Title: Locus:1.1.1.3426.10 File:"2013-07-02 CLN FXIII 60 min 3rd FT.wiff"

Data file C:\Program Files (x86)\Matrix Science\Mascot Daemon\mgf6 FXIII 60 min 3rd\mascot\_daemon\_merge.mgf

Click mouse within plot area to zoom in by factor of two about that point

Or, Plot from 0 to 2400 Da Full range

Label all possible matches  Label matches used for scoring 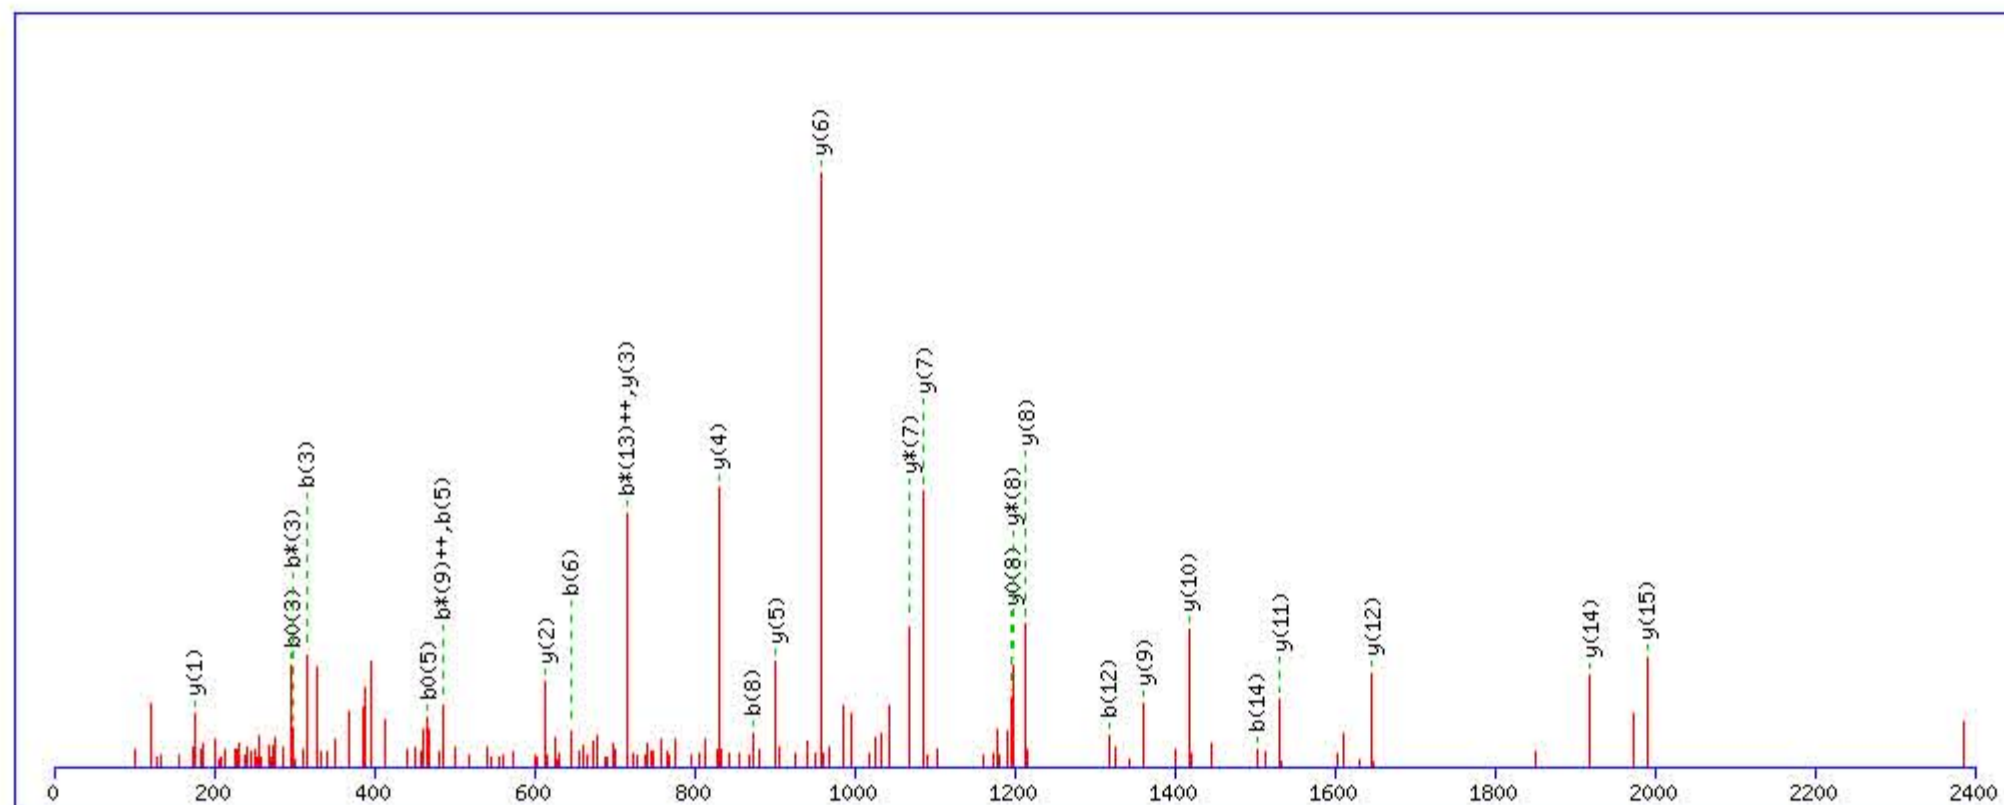

Monoisotopic mass of neutral peptide Mr(calc): 2403.131119

Fixed modifications: Carbamidomethyl (C) (apply to specified residues or termini only)

Variable modifications:

Q18 : Biotin:Thermo-21345 (Q)

Ions Score: 116 Expect: 5.2e-011

Matches : 28/208 fragment ions using 36 most intense peaks ([help](#))

| #  | b                  | b <sup>++</sup> | b <sup>*</sup>    | b <sup>*++</sup>  | b <sup>0</sup>    | b <sup>0++</sup> | Seq. | y                  | y <sup>++</sup> | y <sup>*</sup>     | y <sup>*++</sup> | y <sup>0</sup>     | y <sup>0++</sup> | #  |
|----|--------------------|-----------------|-------------------|-------------------|-------------------|------------------|------|--------------------|-----------------|--------------------|------------------|--------------------|------------------|----|
| 1  | 130.049869         | 65.528572       |                   |                   | 112.039304        | 56.523290        | E    |                    |                 |                    |                  |                    |                  | 19 |
| 2  | 201.086983         | 101.047130      |                   |                   | 183.076418        | 92.041847        | A    | 2275.095801        | 1138.051538     | 2258.069252        | 1129.538264      | 2257.085236        | 1129.046256      | 18 |
| 3  | <b>315.129910</b>  | 158.068593      | <b>298.103361</b> | 149.555319        | <b>297.119345</b> | 149.063311       | N    | 2204.058687        | 1102.532981     | 2187.032138        | 1094.019707      | 2186.048122        | 1093.527699      | 17 |
| 4  | 414.198324         | 207.602800      | 397.171775        | 199.089526        | 396.187759        | 198.597518       | V    | 2090.015760        | 1045.511518     | 2072.989211        | 1036.998243      | 2072.005195        | 1036.506235      | 16 |
| 5  | <b>485.235438</b>  | 243.121357      | 468.208889        | 234.608082        | <b>467.224873</b> | 234.116075       | A    | <b>1990.947346</b> | 995.977311      | 1973.920797        | 987.464037       | 1972.936781        | 986.972029       | 15 |
| 6  | <b>645.266087</b>  | 323.136682      | 628.239538        | 314.623407        | 627.255522        | 314.131399       | C    | <b>1919.910232</b> | 960.458754      | 1902.883683        | 951.945480       | 1901.899667        | 951.453472       | 14 |
| 7  | 758.350151         | 379.678714      | 741.323602        | 371.165439        | 740.339586        | 370.673431       | L    | 1759.879583        | 880.443430      | 1742.853034        | 871.930155       | 1741.869018        | 871.438147       | 13 |
| 8  | <b>873.377094</b>  | 437.192185      | 856.350545        | 428.678911        | 855.366529        | 428.186903       | D    | <b>1646.795519</b> | 823.901398      | 1629.768970        | 815.388123       | 1628.784954        | 814.896115       | 12 |
| 9  | 986.461158         | 493.734217      | 969.434609        | <b>485.220943</b> | 968.450593        | 484.728935       | L    | <b>1531.768576</b> | 766.387926      | 1514.742027        | 757.874652       | 1513.758011        | 757.382644       | 11 |
| 10 | 1043.482622        | 522.244949      | 1026.456073       | 513.731675        | 1025.472057       | 513.239667       | G    | <b>1418.684512</b> | 709.845894      | 1401.657963        | 701.332620       | 1400.673947        | 700.840612       | 10 |
| 11 | 1190.551036        | 595.779156      | 1173.524487       | 587.265882        | 1172.540471       | 586.773874       | F    | <b>1361.663048</b> | 681.335162      | 1344.636499        | 672.821888       | 1343.652483        | 672.329880       | 9  |
| 12 | <b>1318.609614</b> | 659.808445      | 1301.583065       | 651.295171        | 1300.599049       | 650.803163       | Q    | <b>1214.594634</b> | 607.800955      | <b>1197.568085</b> | 599.287681       | <b>1196.584069</b> | 598.795673       | 8  |
| 13 | 1446.668192        | 723.837734      | 1429.641643       | <b>715.324460</b> | 1428.657627       | 714.832452       | Q    | <b>1086.536056</b> | 543.771666      | <b>1069.509507</b> | 535.258392       | 1068.525491        | 534.766384       | 7  |
| 14 | <b>1503.689656</b> | 752.348466      | 1486.663107       | 743.835192        | 1485.679091       | 743.343184       | G    | <b>958.477478</b>  | 479.742377      | 941.450929         | 471.229103       | 940.466913         | 470.737095       | 6  |
| 15 | 1574.726770        | 787.867023      | 1557.700221       | 779.353749        | 1556.716205       | 778.861741       | A    | <b>901.456014</b>  | 451.231645      | 884.429465         | 442.718371       | 883.445449         | 442.226363       | 5  |
| 16 | 1689.753713        | 845.380495      | 1672.727164       | 836.867220        | 1671.743148       | 836.375212       | D    | <b>830.418900</b>  | 415.713088      | 813.392351         | 407.199814       | 812.408335         | 406.707806       | 4  |
| 17 | 1790.801392        | 895.904334      | 1773.774843       | 887.391060        | 1772.790827       | 886.899052       | T    | <b>715.391957</b>  | 358.199617      | 698.365408         | 349.686342       | 697.381392         | 349.194334       | 3  |
| 18 | 2230.026718        | 1115.516997     | 2213.000169       | 1107.003722       | 2212.016153       | 1106.511714      | Q    | <b>614.344278</b>  | 307.675777      | 597.317729         | 299.162503       |                    |                  | 2  |
| 19 |                    |                 |                   |                   |                   |                  | R    | <b>175.118952</b>  | 88.063114       | 158.092403         | 79.549839        |                    |                  | 1  |

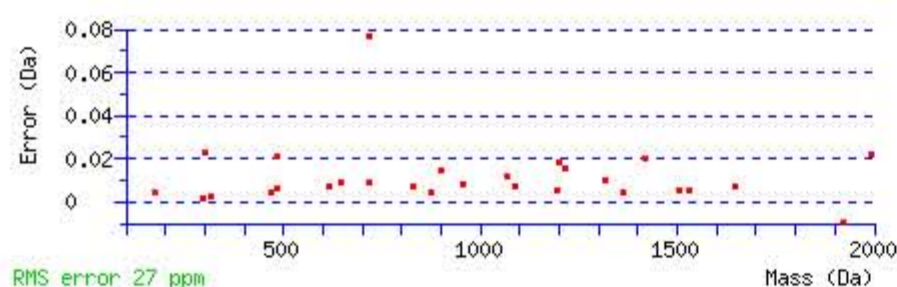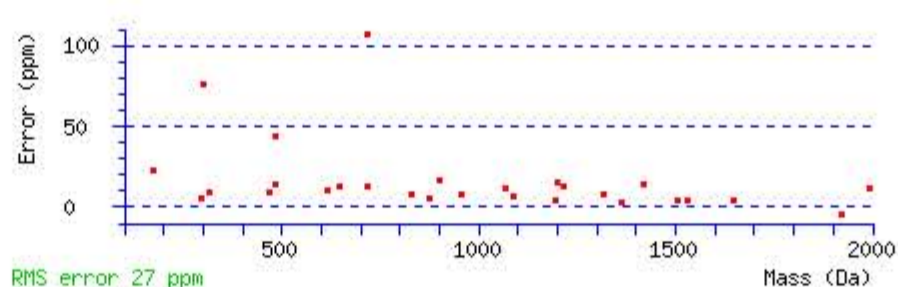NCBI BLAST search of [EANVACLDLGFQQGADTQR](#)

(Parameters: blastp, nr protein database, expect=20000, no filter, PAM30)

Other BLAST [web gateways](#)

All matches to this query

| Score | Mr(calc):   | Delta     | Sequence                            |
|-------|-------------|-----------|-------------------------------------|
| 115.8 | 2403.131119 | 0.008273  | <a href="#">EANVACLDLGFQQGADTQR</a> |
| 48.4  | 2403.131119 | 0.008273  | <a href="#">EANVACLDLGFQQGADTQR</a> |
| 35.5  | 2403.131119 | 0.008273  | <a href="#">EANVACLDLGFQQGADTQR</a> |
| 7.5   | 2403.171967 | -0.032575 | <a href="#">HAGEEVFTSKEEANFFIHR</a> |
| 4.8   | 2403.157135 | -0.017743 | <a href="#">QAMMKTDFFPDLGSQR</a>    |
| 0.6   | 2403.104553 | 0.034839  | <a href="#">ESSMEPKAAEEEEAGSEQR</a> |

# MASCOT SCIENCE Mascot Search Results

## Peptide View

MS/MS Fragmentation of **HLQEALGLPAGR**

Found in **CLC11\_HUMAN**, C-type lectin domain family 11 member A OS=Homo sapiens GN=CLEC11A PE=1 SV=1

Match to Query 31864: 1571.864862 from(524.962230,3+) rtinseconds(1937) index(46954)

Title: Locus:1.1.1.2723.7 File:"2013-07-02 CLN FXIII 60 min 3rd F 4.wiff"

Data file C:\Program Files (x86)\Matrix Science\Mascot Daemon\mgf\6 FXIII 60 min 3rd\mascot\_daemon\_merge.mgf

Click mouse within plot area to zoom in by factor of two about that point

Or, Plot from  to  Da

Label all possible matches  Label matches used for scoring

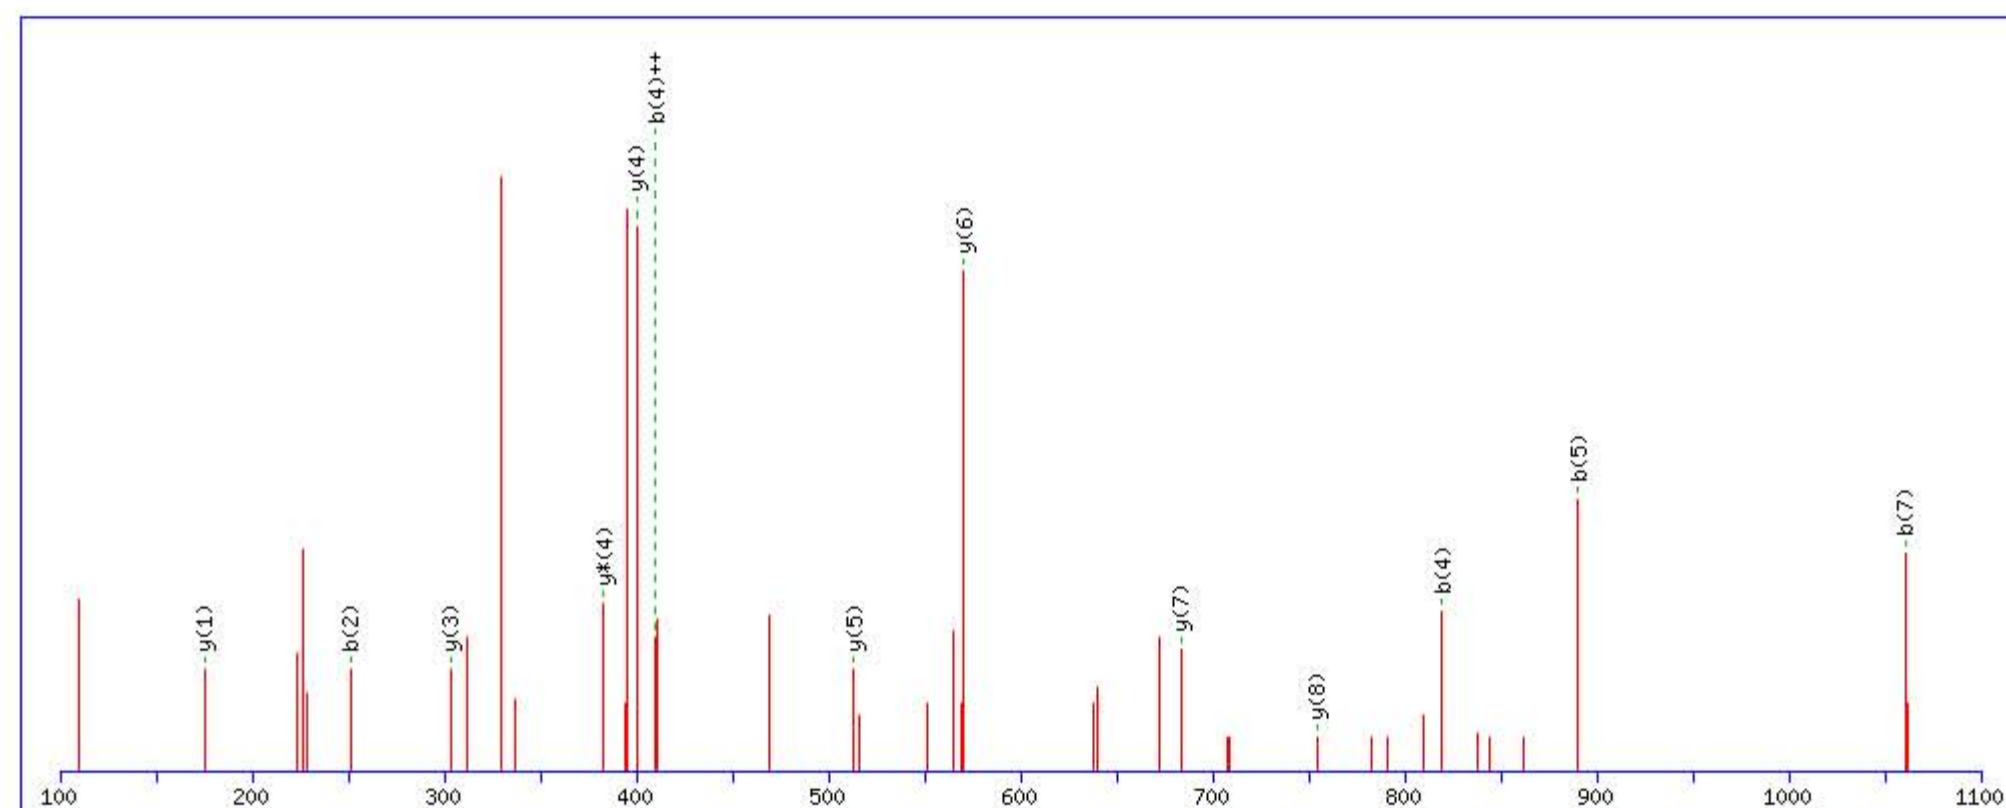

Monoisotopic mass of neutral peptide Mr(calc): 1571.860596

Fixed modifications: Carbamidomethyl (C) (apply to specified residues or termini only)

Variable modifications:

Q3 : Biotin:Thermo-21345 (Q)

Ions Score: 30 Expect: 0.0055

Matches : 13/106 fragment ions using 30 most intense peaks [\(help\)](#)

| #  | b                  | b <sup>++</sup>   | b <sup>+</sup> | b <sup>+++</sup> | b <sup>0</sup> | b <sup>0++</sup> | Seq. | y                 | y <sup>++</sup> | y <sup>+</sup>    | y <sup>+++</sup> | y <sup>0</sup> | y <sup>0++</sup> | #  |
|----|--------------------|-------------------|----------------|------------------|----------------|------------------|------|-------------------|-----------------|-------------------|------------------|----------------|------------------|----|
| 1  | 138.066188         | 69.536732         |                |                  |                |                  | H    |                   |                 |                   |                  |                |                  | 12 |
| 2  | <b>251.150252</b>  | 126.078764        |                |                  |                |                  | L    | 1435.808983       | 718.408129      | 1418.782434       | 709.894855       | 1417.798418    | 709.402847       | 11 |
| 3  | 690.375578         | 345.691427        | 673.349029     | 337.178153       |                |                  | Q    | 1322.724919       | 661.866098      | 1305.698370       | 653.352823       | 1304.714354    | 652.860815       | 10 |
| 4  | <b>819.418171</b>  | <b>410.212724</b> | 802.391622     | 401.699449       | 801.407606     | 401.207441       | E    | 883.499593        | 442.253434      | 866.473044        | 433.740160       | 865.489028     | 433.248152       | 9  |
| 5  | <b>890.455285</b>  | 445.731281        | 873.428736     | 437.218006       | 872.444720     | 436.725998       | A    | <b>754.457000</b> | 377.732138      | 737.430451        | 369.218863       |                |                  | 8  |
| 6  | 1003.539349        | 502.273313        | 986.512800     | 493.760038       | 985.528784     | 493.268030       | L    | <b>683.419886</b> | 342.213581      | 666.393337        | 333.700306       |                |                  | 7  |
| 7  | <b>1060.560813</b> | 530.784045        | 1043.534264    | 522.270770       | 1042.550248    | 521.778762       | G    | <b>570.335822</b> | 285.671549      | 553.309273        | 277.158274       |                |                  | 6  |
| 8  | 1173.644877        | 587.326077        | 1156.618328    | 578.812802       | 1155.634312    | 578.320794       | L    | <b>513.314358</b> | 257.160817      | 496.287809        | 248.647542       |                |                  | 5  |
| 9  | 1270.697641        | 635.852459        | 1253.671092    | 627.339184       | 1252.687076    | 626.847176       | P    | <b>400.230294</b> | 200.618785      | <b>383.203745</b> | 192.105510       |                |                  | 4  |
| 10 | 1341.734755        | 671.371016        | 1324.708206    | 662.857741       | 1323.724190    | 662.365733       | A    | <b>303.177530</b> | 152.092403      | 286.150981        | 143.579128       |                |                  | 3  |
| 11 | 1398.756219        | 699.881747        | 1381.729670    | 691.368473       | 1380.745654    | 690.876465       | G    | 232.140416        | 116.573846      | 215.113867        | 108.060571       |                |                  | 2  |
| 12 |                    |                   |                |                  |                |                  | R    | <b>175.118952</b> | 88.063114       | 158.092403        | 79.549839        |                |                  | 1  |

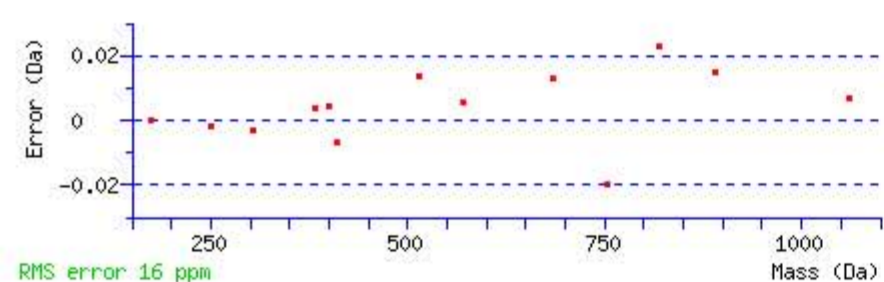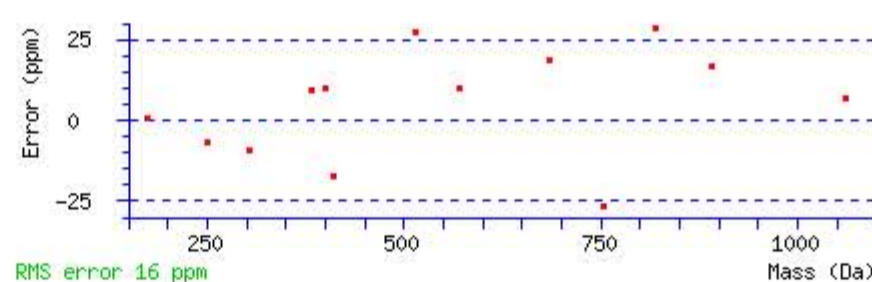

NCBI BLAST search of **HLQEALGLPAGR**

(Parameters: blastp, nr protein database, expect=20000, no filter, PAM30)

Other BLAST [web gateways](#)

All matches to this query

| Score | Mr(calc):   | Delta     | Sequence                        |
|-------|-------------|-----------|---------------------------------|
| 30.3  | 1571.860596 | 0.004266  | <a href="#">HLQEALGLPAGR</a>    |
| 5.8   | 1571.856567 | 0.008295  | <a href="#">QVRELQMRLDIR</a>    |
| 0.7   | 1571.857224 | 0.007638  | <a href="#">VNWLGSKEGLRWK</a>   |
| 0.7   | 1571.878372 | -0.013510 | <a href="#">LTGRVLALSFDAPGR</a> |
| 0.3   | 1571.857239 | 0.007623  | <a href="#">GRSPLAFIPFSAGPR</a> |

Mascot: <http://www.matrixscience.com/>

# MASCOT Search Results

## Peptide View

MS/MS Fragmentation of **NEQESAVHPR**

Found in **DBNL\_HUMAN**, Drebrin-like protein OS=Homo sapiens GN=DBNL PE=1 SV=1

Match to Query 29345: 1476.713172 from(493.245000,3+) rtinseconds(1289) index(42988)

Title: Locus:1.1.1.2497.9 File:"2013-07-02 CLN FXIII 60 min 3rd F 4.wiff"

Data file C:\Program Files (x86)\Matrix Science\Mascot Daemon\mgf\6 FXIII 60 min 3rd\mascot\_daemon\_merge.mgf

Click mouse within plot area to zoom in by factor of two about that point

Or, Plot from  to  Da

Label all possible matches  Label matches used for scoring

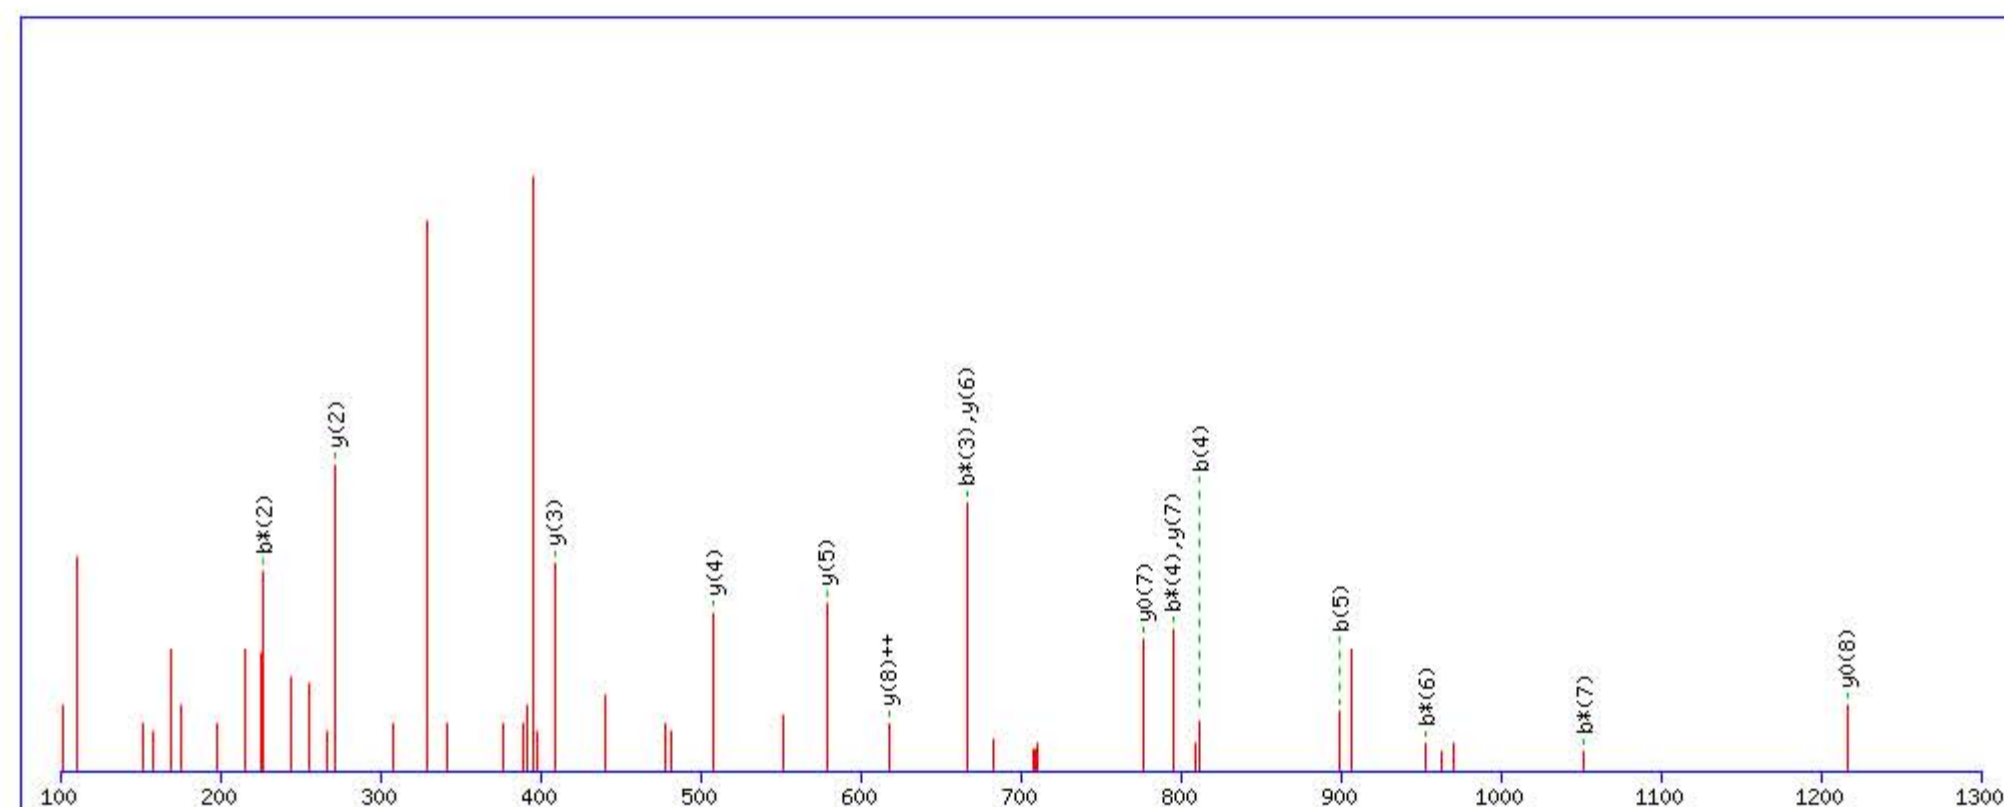

Monoisotopic mass of neutral peptide Mr(calc): 1476.714325

Fixed modifications: Carbamidomethyl (C) (apply to specified residues or termini only)

Variable modifications:

Q3 : Biotin:Thermo-21345 (Q)

Ions Score: 37 Expect: 0.0042

Matches : 16/96 fragment ions using 20 most intense peaks [\(help\)](#)

| #  | b           | b <sup>++</sup> | b <sup>*</sup> | b <sup>*++</sup> | b <sup>0</sup> | b <sup>0++</sup> | Seq. | y           | y <sup>++</sup> | y <sup>*</sup> | y <sup>*++</sup> | y <sup>0</sup> | y <sup>0++</sup> | #  |
|----|-------------|-----------------|----------------|------------------|----------------|------------------|------|-------------|-----------------|----------------|------------------|----------------|------------------|----|
| 1  | 115.050203  | 58.028740       | 98.023654      | 49.515465        |                |                  | N    |             |                 |                |                  |                |                  | 10 |
| 2  | 244.092796  | 122.550036      | 227.066247     | 114.036762       | 226.082231     | 113.544754       | E    | 1363.678696 | 682.342986      | 1346.652147    | 673.829712       | 1345.668131    | 673.337704       | 9  |
| 3  | 683.318122  | 342.162699      | 666.291573     | 333.649425       | 665.307557     | 333.157417       | Q    | 1234.636103 | 617.821690      | 1217.609554    | 609.308415       | 1216.625538    | 608.816407       | 8  |
| 4  | 812.360715  | 406.683996      | 795.334166     | 398.170721       | 794.350150     | 397.678713       | E    | 795.410777  | 398.209027      | 778.384228     | 389.695752       | 777.400212     | 389.203744       | 7  |
| 5  | 899.392743  | 450.200010      | 882.366194     | 441.686735       | 881.382178     | 441.194727       | S    | 666.368184  | 333.687730      | 649.341635     | 325.174456       | 648.357619     | 324.682448       | 6  |
| 6  | 970.429857  | 485.718567      | 953.403308     | 477.205292       | 952.419292     | 476.713284       | A    | 579.336156  | 290.171716      | 562.309607     | 281.658442       |                |                  | 5  |
| 7  | 1069.498271 | 535.252774      | 1052.471722    | 526.739499       | 1051.487706    | 526.247491       | V    | 508.299042  | 254.653159      | 491.272493     | 246.139884       |                |                  | 4  |
| 8  | 1206.557183 | 603.782230      | 1189.530634    | 595.268955       | 1188.546618    | 594.776947       | H    | 409.230628  | 205.118952      | 392.204079     | 196.605677       |                |                  | 3  |
| 9  | 1303.609947 | 652.308612      | 1286.583398    | 643.795337       | 1285.599382    | 643.303329       | P    | 272.171716  | 136.589496      | 255.145167     | 128.076221       |                |                  | 2  |
| 10 |             |                 |                |                  |                |                  | R    | 175.118952  | 88.063114       | 158.092403     | 79.549839        |                |                  | 1  |

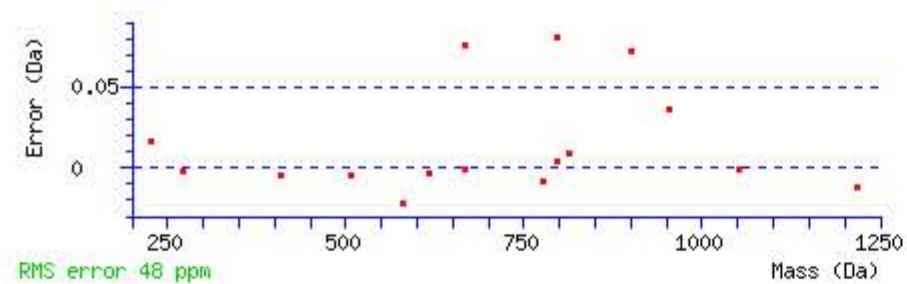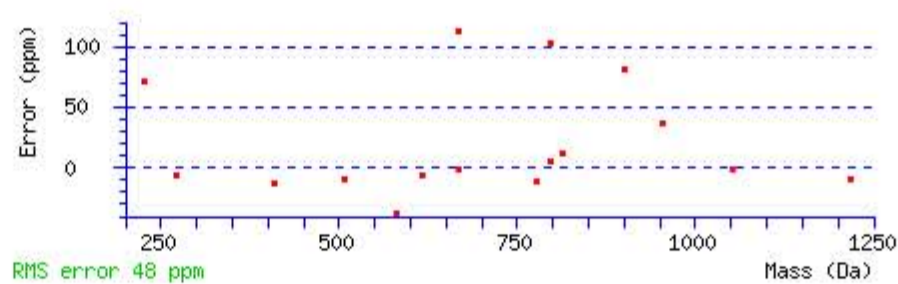

NCBI BLAST search of **NEQESAVHPR**

(Parameters: blastp, nr protein database, expect=20000, no filter, PAM30)

Other BLAST [web gateways](#)

All matches to this query

| Score | Mr(calc):   | Delta     | Sequence                   |
|-------|-------------|-----------|----------------------------|
| 36.8  | 1476.714325 | -0.001153 | <a href="#">NEQESAVHPR</a> |

Mascot: <http://www.matrixscience.com/>

# MASCOT Search Results

## Peptide View

MS/MS Fragmentation of **ADQVCINLR**

Found in **FBLN3\_HUMAN**, EGF-containing fibulin-like extracellular matrix protein 1 OS=Homo sapiens GN=EFEMP1 PE=1 SV=2

Match to Query 26314: 1398.726068 from(700.370310,2+) rtinseconds(2028) index(33335)

Title: Locus:1.1.1.3255.10 File:"2013-07-02 CLN FXIII 60 min 3rd F 3.wiff"

Data file C:\Program Files (x86)\Matrix Science\Mascot Daemon\mgf\6 FXIII 60 min 3rd\mascot\_daemon\_merge.mgf

Click mouse within plot area to zoom in by factor of two about that point

Or, Plot from  to  Da

Label all possible matches  Label matches used for scoring

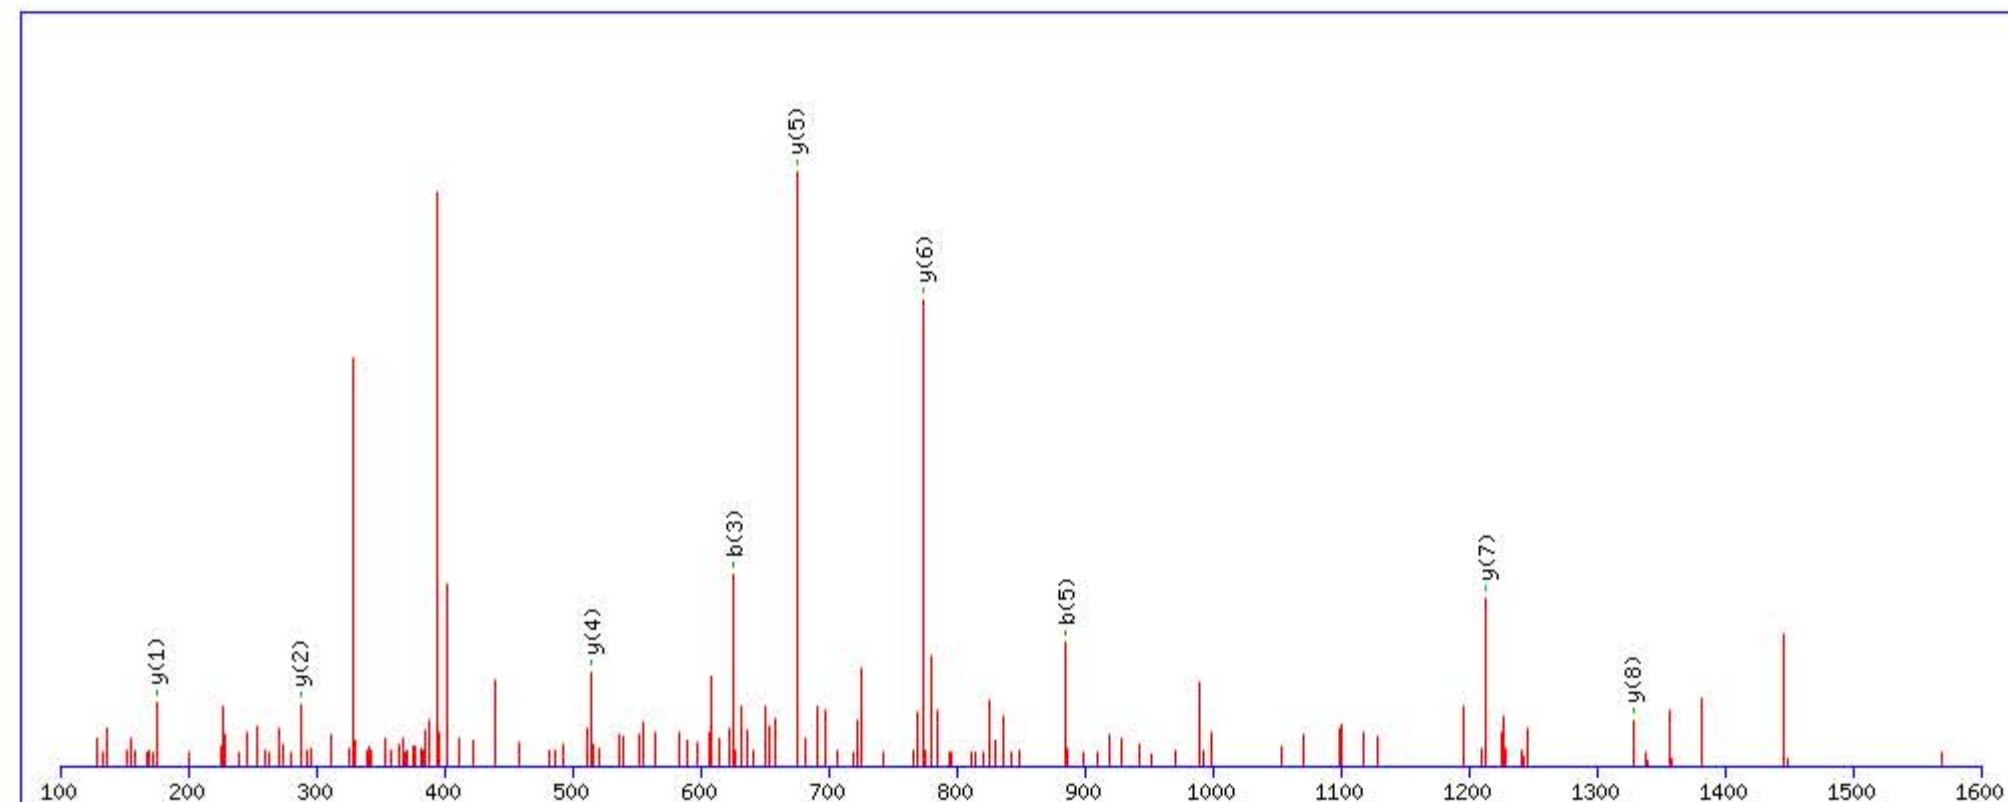

Monoisotopic mass of neutral peptide Mr(calc): 1398.711166

Fixed modifications: Carbamidomethyl (C) (apply to specified residues or termini only)

Variable modifications:

Q3 : Biotin:Thermo-21345 (Q)

Ions Score: 57 Expect: 7.5e-006

Matches : 9/76 fragment ions using 13 most intense peaks ([help](#))

| # | b                 | b <sup>++</sup> | b <sup>*</sup> | b <sup>*++</sup> | b <sup>0</sup> | b <sup>0++</sup> | Seq. | y                  | y <sup>++</sup> | y <sup>*</sup> | y <sup>*++</sup> | y <sup>0</sup> | y <sup>0++</sup> | # |
|---|-------------------|-----------------|----------------|------------------|----------------|------------------|------|--------------------|-----------------|----------------|------------------|----------------|------------------|---|
| 1 | 72.044390         | 36.525833       |                |                  |                |                  | A    |                    |                 |                |                  |                |                  | 9 |
| 2 | 187.071333        | 94.039304       |                |                  | 169.060768     | 85.034022        | D    | <b>1328.681339</b> | 664.844308      | 1311.654790    | 656.331033       | 1310.670774    | 655.839025       | 8 |
| 3 | <b>626.296659</b> | 313.651968      | 609.270110     | 305.138693       | 608.286094     | 304.646685       | Q    | <b>1213.654396</b> | 607.330836      | 1196.627847    | 598.817562       |                |                  | 7 |
| 4 | 725.365073        | 363.186175      | 708.338524     | 354.672900       | 707.354508     | 354.180892       | V    | <b>774.429070</b>  | 387.718173      | 757.402521     | 379.204898       |                |                  | 6 |
| 5 | <b>885.395722</b> | 443.201499      | 868.369173     | 434.688225       | 867.385157     | 434.196217       | C    | <b>675.360656</b>  | 338.183966      | 658.334107     | 329.670691       |                |                  | 5 |
| 6 | 998.479786        | 499.743531      | 981.453237     | 491.230257       | 980.469221     | 490.738249       | I    | <b>515.330007</b>  | 258.168641      | 498.303458     | 249.655367       |                |                  | 4 |
| 7 | 1112.522713       | 556.764995      | 1095.496164    | 548.251720       | 1094.512148    | 547.759712       | N    | 402.245943         | 201.626609      | 385.219394     | 193.113335       |                |                  | 3 |
| 8 | 1225.606777       | 613.307027      | 1208.580228    | 604.793752       | 1207.596212    | 604.301744       | L    | <b>288.203016</b>  | 144.605146      | 271.176467     | 136.091871       |                |                  | 2 |
| 9 |                   |                 |                |                  |                |                  | R    | <b>175.118952</b>  | 88.063114       | 158.092403     | 79.549839        |                |                  | 1 |

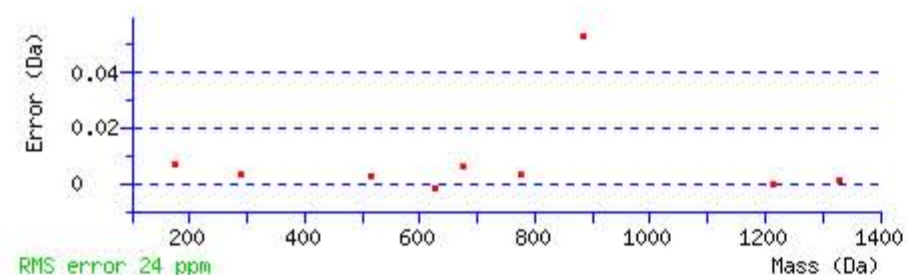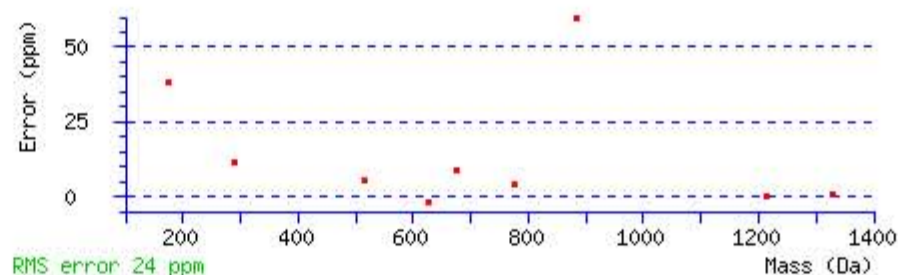

NCBI BLAST search of [ADQVCINLR](#)

(Parameters: blastp, nr protein database, expect=20000, no filter, PAM30)

Other BLAST [web gateways](#)

## All matches to this query

| Score | Mr(calc):   | Delta     | Sequence                       |
|-------|-------------|-----------|--------------------------------|
| 56.5  | 1398.711166 | 0.014902  | <a href="#">ADQVCINLR</a>      |
| 1.8   | 1398.729584 | -0.003516 | <a href="#">WLAPDGLIFPDR</a>   |
| 1.6   | 1398.746643 | -0.020575 | <a href="#">EEIEREVNILR</a>    |
| 1.3   | 1398.746674 | -0.020606 | <a href="#">APTASLAPTSQSLR</a> |

Mascot: <http://www.matrixscience.com/>





# Mascot Search Results

## Peptide View

MS/MS Fragmentation of **IQCAAGYEQSEHNCQDIDECTAGTHNCR**

Found in **FBLN3\_HUMAN**, EGF-containing fibulin-like extracellular matrix protein 1 OS=Homo sapiens GN=EFEMP1 PE=1 SV=2

Match to Query 62779: 3733.546616 from(934.393930,4+) rtinseconds(1748) index(31647)

Title: Locus:1.1.1.3157.19 File:"2013-07-02 CLN FXIII 60 min 3rd F 3.wiff"

Data file C:\Program Files (x86)\Matrix Science\Mascot Daemon\mgf6 FXIII 60 min 3rdmascot\_daemon\_merge.mgf

Click mouse within plot area to zoom in by factor of two about that point

Or, Plot from  to  Da

Label all possible matches  Label matches used for scoring

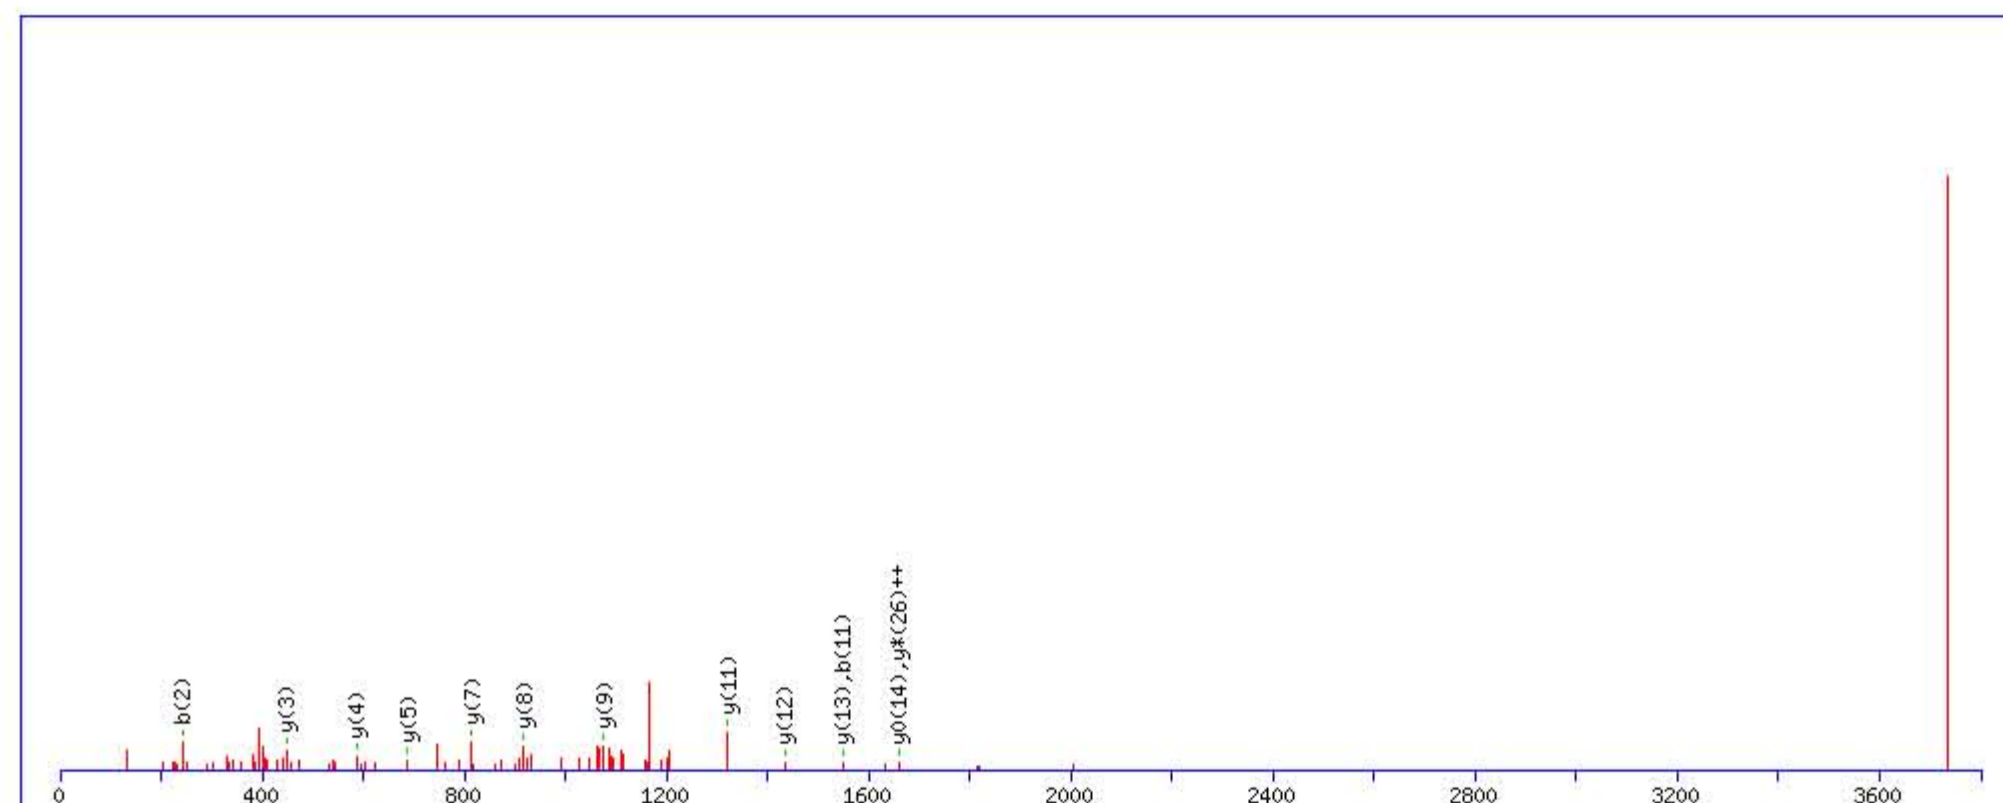

Monoisotopic mass of neutral peptide Mr(calc): 3733.543625

Fixed modifications: Carbamidomethyl (C) (apply to specified residues or termini only)

Variable modifications:

Q9 : Biotin:Thermo-21345 (Q)

Ions Score: 49 Expect: 1.9e-005

Matches : 13/312 fragment ions using 17 most intense peaks [\(help\)](#)

| #  | b                  | b <sup>++</sup> | b*          | b <sup>+++</sup> | b <sup>0</sup> | b <sup>0++</sup> | Seq. | y                  | y <sup>++</sup> | y*          | y <sup>+++</sup>   | y <sup>0</sup>     | y <sup>0++</sup> | #  |
|----|--------------------|-----------------|-------------|------------------|----------------|------------------|------|--------------------|-----------------|-------------|--------------------|--------------------|------------------|----|
| 1  | 114.091340         | 57.549308       |             |                  |                |                  | I    |                    |                 |             |                    |                    |                  | 29 |
| 2  | <b>242.149918</b>  | 121.578597      | 225.123369  | 113.065323       |                |                  | Q    | 3621.466836        | 1811.237056     | 3604.440287 | 1802.723781        | 3603.456271        | 1802.231773      | 28 |
| 3  | 402.180567         | 201.593922      | 385.154018  | 193.080647       |                |                  | C    | 3493.408258        | 1747.207767     | 3476.381709 | 1738.694492        | 3475.397693        | 1738.202484      | 27 |
| 4  | 473.217681         | 237.112479      | 456.191132  | 228.599204       |                |                  | A    | 3333.377609        | 1667.192442     | 3316.351060 | <b>1658.679168</b> | 3315.367044        | 1658.187160      | 26 |
| 5  | 544.254795         | 272.631036      | 527.228246  | 264.117761       |                |                  | A    | 3262.340495        | 1631.673885     | 3245.313946 | 1623.160611        | 3244.329930        | 1622.668603      | 25 |
| 6  | 601.276259         | 301.141768      | 584.249710  | 292.628493       |                |                  | G    | 3191.303381        | 1596.155328     | 3174.276832 | 1587.642054        | 3173.292816        | 1587.150046      | 24 |
| 7  | 764.339588         | 382.673432      | 747.313039  | 374.160158       |                |                  | Y    | 3134.281917        | 1567.644596     | 3117.255368 | 1559.131322        | 3116.271352        | 1558.639314      | 23 |
| 8  | 893.382181         | 447.194729      | 876.355632  | 438.681454       | 875.371616     | 438.189446       | E    | 2971.218588        | 1486.112932     | 2954.192039 | 1477.599657        | 2953.208023        | 1477.107649      | 22 |
| 9  | 1332.607507        | 666.807391      | 1315.580958 | 658.294117       | 1314.596942    | 657.802109       | Q    | 2842.175995        | 1421.591635     | 2825.149446 | 1413.078361        | 2824.165430        | 1412.586353      | 21 |
| 10 | 1419.639535        | 710.323406      | 1402.612986 | 701.810131       | 1401.628970    | 701.318123       | S    | 2402.950669        | 1201.978972     | 2385.924120 | 1193.465698        | 2384.940104        | 1192.973690      | 20 |
| 11 | <b>1548.682128</b> | 774.844702      | 1531.655579 | 766.331428       | 1530.671563    | 765.839420       | E    | 2315.918641        | 1158.462958     | 2298.892092 | 1149.949684        | 2297.908076        | 1149.457676      | 19 |
| 12 | 1685.741040        | 843.374158      | 1668.714491 | 834.860884       | 1667.730475    | 834.368876       | H    | 2186.876048        | 1093.941662     | 2169.849499 | 1085.428387        | 2168.865483        | 1084.936379      | 18 |
| 13 | 1799.783967        | 900.395622      | 1782.757418 | 891.882347       | 1781.773402    | 891.390339       | N    | 2049.817136        | 1025.412206     | 2032.790587 | 1016.898931        | 2031.806571        | 1016.406923      | 17 |
| 14 | 1898.852381        | 949.929829      | 1881.825832 | 941.416554       | 1880.841816    | 940.924546       | V    | 1935.774209        | 968.390742      | 1918.747660 | 959.877468         | 1917.763644        | 959.385460       | 16 |
| 15 | 2058.883030        | 1029.945153     | 2041.856481 | 1021.431879      | 2040.872465    | 1020.939871      | C    | 1836.705795        | 918.856535      | 1819.679246 | 910.343261         | 1818.695230        | 909.851253       | 15 |
| 16 | 2186.941608        | 1093.974442     | 2169.915059 | 1085.461167      | 2168.931043    | 1084.969159      | Q    | 1676.675146        | 838.841211      | 1659.648597 | 830.327936         | <b>1658.664581</b> | 829.835928       | 14 |
| 17 | 2301.968551        | 1151.487913     | 2284.942002 | 1142.974639      | 2283.957986    | 1142.482631      | D    | <b>1548.616568</b> | 774.811922      | 1531.590019 | 766.298647         | 1530.606003        | 765.806639       | 13 |
| 18 | 2415.052615        | 1208.029945     | 2398.026066 | 1199.516671      | 2397.042050    | 1199.024663      | I    | <b>1433.589625</b> | 717.298450      | 1416.563076 | 708.785176         | 1415.579060        | 708.293168       | 12 |
| 19 | 2530.079558        | 1265.543417     | 2513.053009 | 1257.030142      | 2512.068993    | 1256.538134      | D    | <b>1320.505561</b> | 660.756418      | 1303.479012 | 652.243144         | 1302.494996        | 651.751136       | 11 |
| 20 | 2659.122151        | 1330.064713     | 2642.095602 | 1321.551439      | 2641.111586    | 1321.059431      | E    | 1205.478618        | 603.242947      | 1188.452069 | 594.729672         | 1187.468053        | 594.237664       | 10 |
| 21 | 2819.152800        | 1410.080038     | 2802.126251 | 1401.566763      | 2801.142235    | 1401.074755      | C    | <b>1076.436025</b> | 538.721650      | 1059.409476 | 530.208376         | 1058.425460        | 529.716368       | 9  |
| 22 | 2920.200479        | 1460.603877     | 2903.173930 | 1452.090603      | 2902.189914    | 1451.598595      | T    | <b>916.405376</b>  | 458.706326      | 899.378827  | 450.193051         | 898.394811         | 449.701043       | 8  |
| 23 | 2991.237593        | 1496.122434     | 2974.211044 | 1487.609160      | 2973.227028    | 1487.117152      | A    | <b>815.357697</b>  | 408.182486      | 798.331148  | 399.669212         | 797.347132         | 399.177204       | 7  |
| 24 | 3048.259057        | 1524.633166     | 3031.232508 | 1516.119892      | 3030.248492    | 1515.627884      | G    | 744.320583         | 372.663929      | 727.294034  | 364.150655         | 726.310018         | 363.658647       | 6  |
| 25 | 3149.306736        | 1575.157006     | 3132.280187 | 1566.643731      | 3131.296171    | 1566.151723      | T    | <b>687.299119</b>  | 344.153197      | 670.272570  | 335.639923         | 669.288554         | 335.147915       | 5  |
| 26 | 3286.365648        | 1643.686462     | 3269.339099 | 1635.173187      | 3268.355083    | 1634.681179      | H    | <b>586.251440</b>  | 293.629358      | 569.224891  | 285.116083         |                    |                  | 4  |
| 27 | 3400.408575        | 1700.707925     | 3383.382026 | 1692.194651      | 3382.398010    | 1691.702643      | N    | <b>449.192528</b>  | 225.099902      | 432.165979  | 216.586627         |                    |                  | 3  |
| 28 | 3560.439224        | 1780.723250     | 3543.412675 | 1772.209975      | 3542.428659    | 1771.717967      | C    | 335.149601         | 168.078438      | 318.123052  | 159.565164         |                    |                  | 2  |
| 29 |                    |                 |             |                  |                |                  | R    | 175.118952         | 88.063114       | 158.092403  | 79.549839          |                    |                  | 1  |

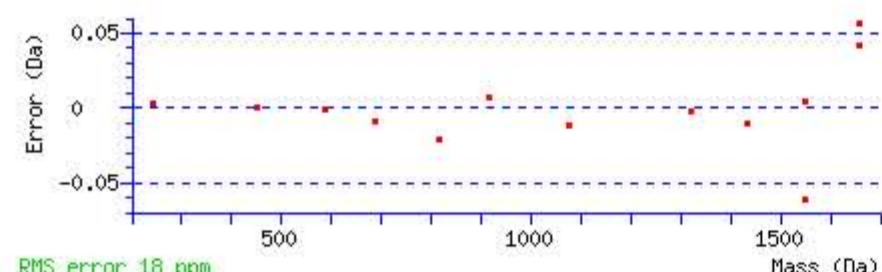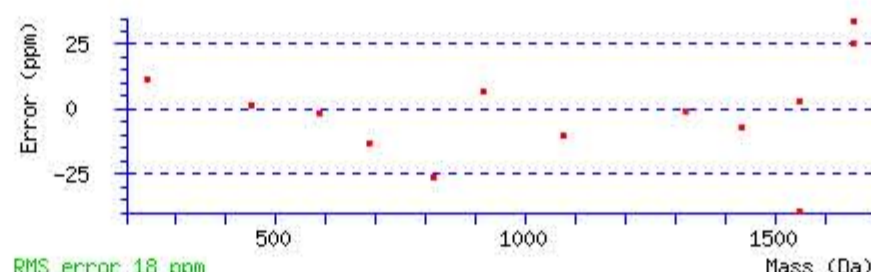

NCBI BLAST search of **IQCAAGYEQSEHNCQDIDECTAGTHNCR**

(Parameters: blastp, nr protein database, expect=20000, no filter, PAM30)

Other BLAST [web gateways](#)

### All matches to this query

| Score | Mr(calc):   | Delta    | Sequence                                     |
|-------|-------------|----------|----------------------------------------------|
| 49.0  | 3733.543625 | 0.002991 | <a href="#">IQCAAGYEQSEHNCQDIDECTAGTHNCR</a> |
| 45.9  | 3733.543625 | 0.002991 | <a href="#">IQCAAGYEQSEHNCQDIDECTAGTHNCR</a> |
| 45.3  | 3733.543625 | 0.002991 | <a href="#">IQCAAGYEQSEHNCQDIDECTAGTHNCR</a> |

Mascot: <http://www.matrixscience.com/>

# MASCOT SCIENCE Mascot Search Results

## Peptide View

MS/MS Fragmentation of **NLPATDPLQR**

Found in **ECM1\_HUMAN**, Extracellular matrix protein 1 OS=Homo sapiens GN=ECM1 PE=1 SV=2

Match to Query 28239: 1434.776588 from(718.395570,2+) rtinseconds(1989) index(4910)

Title: Locus:1.1.1.3244.23 File:"2013-07-02 CLN FXIII 60 min 3rd F 1.wiff"

Data file C:\Program Files (x86)\Matrix Science\Mascot Daemon\mgf6 FXIII 60 min 3rd\mascot\_daemon\_merge.mgf

Click mouse within plot area to zoom in by factor of two about that point

Or, Plot from  to  Da

Label all possible matches  Label matches used for scoring

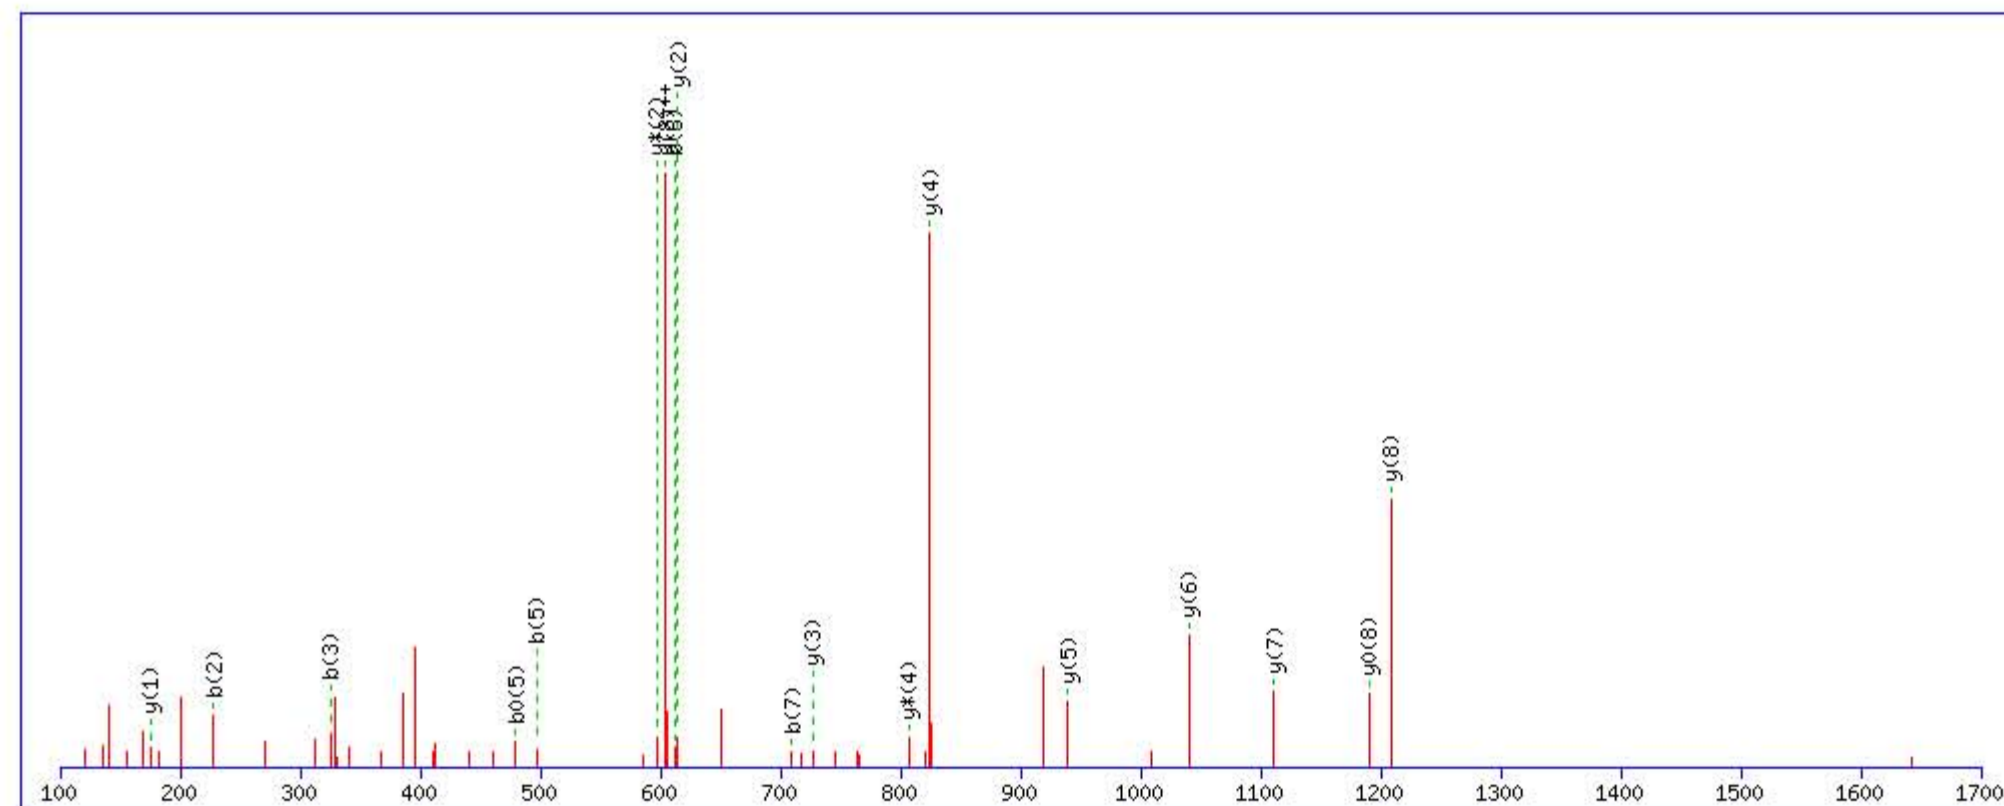

Monoisotopic mass of neutral peptide Mr(calc): 1434.765305

Fixed modifications: Carbamidomethyl (C) (apply to specified residues or termini only)

Variable modifications:

Q9 : Biotin:Thermo-21345 (Q)

Ions Score: 42 Expect: 0.00048

Matches : 18/92 fragment ions using 41 most intense peaks [\(help\)](#)

| #  | b                 | b <sup>++</sup> | b <sup>*</sup> | b <sup>*++</sup> | b <sup>0</sup>    | b <sup>0++</sup> | Seq. | y                  | y <sup>++</sup>   | y <sup>*</sup>    | y <sup>*++</sup> | y <sup>0</sup>     | y <sup>0++</sup> | #  |
|----|-------------------|-----------------|----------------|------------------|-------------------|------------------|------|--------------------|-------------------|-------------------|------------------|--------------------|------------------|----|
| 1  | 115.050203        | 58.028740       | 98.023654      | 49.515465        |                   |                  | N    |                    |                   |                   |                  |                    |                  | 10 |
| 2  | <b>228.134267</b> | 114.570771      | 211.107718     | 106.057497       |                   |                  | L    | 1321.729670        | 661.368473        | 1304.703121       | 652.855199       | 1303.719105        | 652.363190       | 9  |
| 3  | <b>325.187031</b> | 163.097153      | 308.160482     | 154.583879       |                   |                  | P    | <b>1208.645606</b> | <b>604.826441</b> | 1191.619057       | 596.313166       | <b>1190.635041</b> | 595.821158       | 8  |
| 4  | 396.224145        | 198.615710      | 379.197596     | 190.102436       |                   |                  | A    | <b>1111.592842</b> | 556.300059        | 1094.566293       | 547.786784       | 1093.582277        | 547.294776       | 7  |
| 5  | <b>497.271824</b> | 249.139550      | 480.245275     | 240.626275       | <b>479.261259</b> | 240.134267       | T    | <b>1040.555728</b> | 520.781502        | 1023.529179       | 512.268227       | 1022.545163        | 511.776220       | 6  |
| 6  | <b>612.298767</b> | 306.653022      | 595.272218     | 298.139747       | 594.288202        | 297.647739       | D    | <b>939.508049</b>  | 470.257662        | 922.481500        | 461.744388       | 921.497484         | 461.252380       | 5  |
| 7  | <b>709.351531</b> | 355.179404      | 692.324982     | 346.666129       | 691.340966        | 346.174121       | P    | <b>824.481106</b>  | 412.744191        | <b>807.454557</b> | 404.230916       |                    |                  | 4  |
| 8  | 822.435595        | 411.721436      | 805.409046     | 403.208161       | 804.425030        | 402.716153       | L    | <b>727.428342</b>  | 364.217809        | 710.401793        | 355.704534       |                    |                  | 3  |
| 9  | 1261.660921       | 631.334098      | 1244.634372    | 622.820824       | 1243.650356       | 622.328816       | Q    | <b>614.344278</b>  | 307.675777        | <b>597.317729</b> | 299.162502       |                    |                  | 2  |
| 10 |                   |                 |                |                  |                   |                  | R    | <b>175.118952</b>  | 88.063114         | 158.092403        | 79.549839        |                    |                  | 1  |

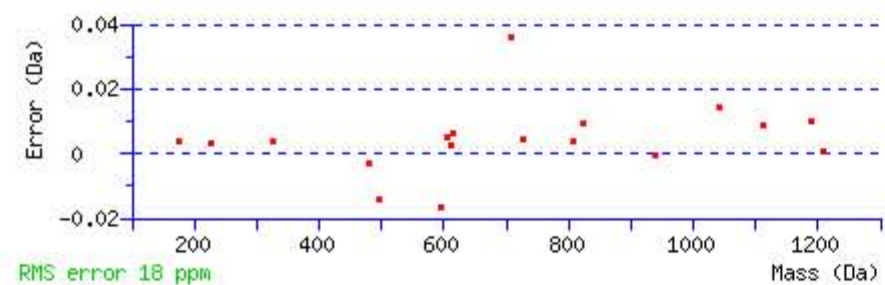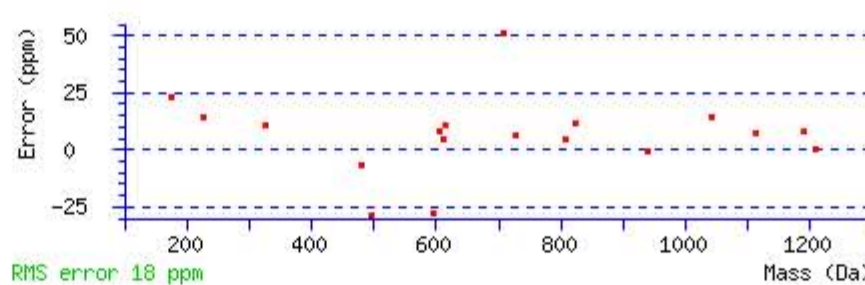

NCBI BLAST search of **NLPATDPLQR**

(Parameters: blastp, nr protein database, expect=20000, no filter, PAM30)

Other BLAST [web gateways](#)

## All matches to this query

| Score | Mr(calc):   | Delta    | Sequence                      |
|-------|-------------|----------|-------------------------------|
| 41.8  | 1434.765305 | 0.011283 | <a href="#">NLPATDPLQR</a>    |
| 6.0   | 1434.757889 | 0.018699 | <a href="#">NLIRQISSGEYR</a>  |
| 2.6   | 1434.761932 | 0.014656 | <a href="#">NLDYFPFGNVLRK</a> |
| 1.0   | 1434.761932 | 0.014656 | <a href="#">NIFPSNLVSAAFR</a> |
| 0.1   | 1434.757919 | 0.018669 | <a href="#">VQQAELHTGSLPR</a> |

Mascot: <http://www.matrixscience.com/>

# MASCOT Search Results

## Peptide View

MS/MS Fragmentation of **ELLALIQLER**

Found in **ECM1\_HUMAN**, Extracellular matrix protein 1 OS=Homo sapiens GN=ECM1 PE=1 SV=2

Match to Query 30177: 1507.899788 from(754.957170,2+) rtinseconds(2762) index(23323)

Title: Locus:1.1.1.3561.17 File:"2013-07-02 CLN FXIII 60 min 3rd F 2.wiff"

Data file C:\Program Files (x86)\Matrix Science\Mascot Daemon\mgf\6 FXIII 60 min 3rd\mascot\_daemon\_merge.mgf

Click mouse within plot area to zoom in by factor of two about that point

Or, Plot from  to  Da

Label all possible matches  Label matches used for scoring

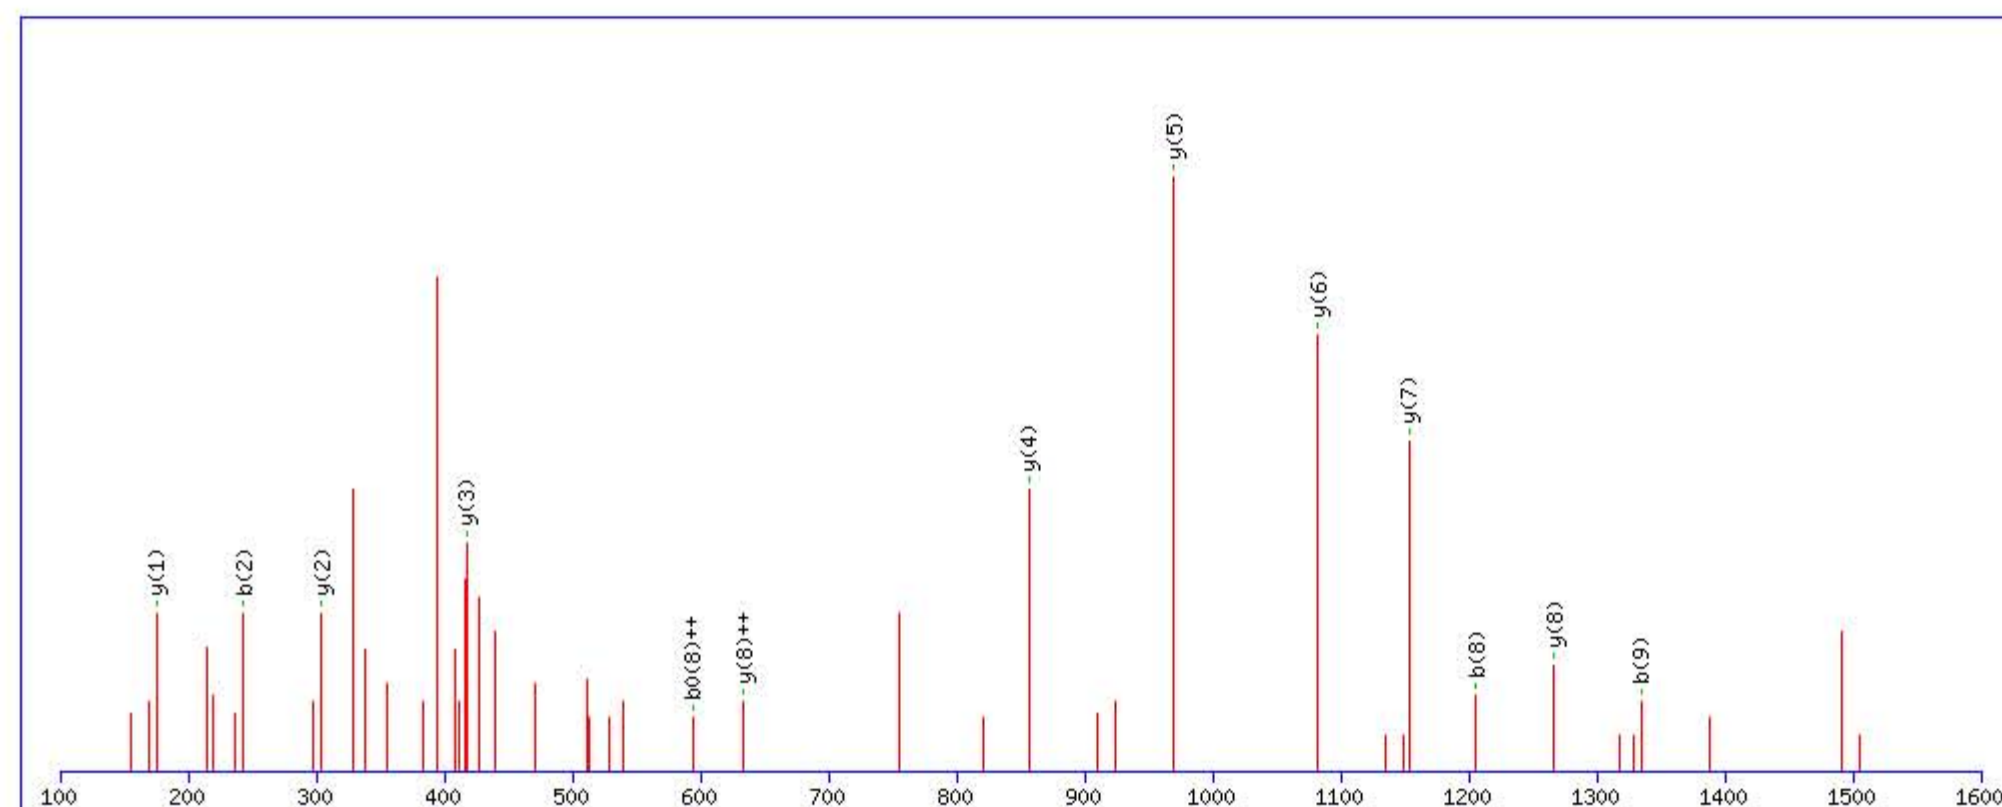

Monoisotopic mass of neutral peptide Mr(calc): 1507.879578

Fixed modifications: Carbamidomethyl (C) (apply to specified residues or termini only)

Variable modifications:

Q7 : Biotin:Thermo-21345 (Q)

Ions Score: 53 Expect: 2.2e-005

Matches : 13/94 fragment ions using 23 most intense peaks [\(help\)](#)

| #  | b                  | b <sup>++</sup> | b <sup>*</sup> | b <sup>*++</sup> | b <sup>0</sup> | b <sup>0++</sup>  | Seq. | y                  | y <sup>++</sup>   | y <sup>*</sup> | y <sup>*++</sup> | y <sup>0</sup> | y <sup>0++</sup> | #  |
|----|--------------------|-----------------|----------------|------------------|----------------|-------------------|------|--------------------|-------------------|----------------|------------------|----------------|------------------|----|
| 1  | 130.049869         | 65.528572       |                |                  | 112.039304     | 56.523290         | E    |                    |                   |                |                  |                |                  | 10 |
| 2  | <b>243.133933</b>  | 122.070605      |                |                  | 225.123368     | 113.065322        | L    | 1379.844305        | 690.425790        | 1362.817756    | 681.912516       | 1361.833740    | 681.420508       | 9  |
| 3  | 356.217997         | 178.612637      |                |                  | 338.207432     | 169.607354        | L    | <b>1266.760241</b> | <b>633.883759</b> | 1249.733692    | 625.370484       | 1248.749676    | 624.878476       | 8  |
| 4  | 427.255111         | 214.131193      |                |                  | 409.244546     | 205.125911        | A    | <b>1153.676177</b> | 577.341727        | 1136.649628    | 568.828452       | 1135.665612    | 568.336444       | 7  |
| 5  | 540.339175         | 270.673226      |                |                  | 522.328610     | 261.667943        | L    | <b>1082.639063</b> | 541.823169        | 1065.612514    | 533.309895       | 1064.628498    | 532.817887       | 6  |
| 6  | 653.423239         | 327.215258      |                |                  | 635.412674     | 318.209975        | I    | <b>969.554999</b>  | 485.281138        | 952.528450     | 476.767863       | 951.544434     | 476.275855       | 5  |
| 7  | 1092.648565        | 546.827921      | 1075.622016    | 538.314646       | 1074.638000    | 537.822638        | Q    | <b>856.470935</b>  | 428.739105        | 839.444386     | 420.225831       | 838.460370     | 419.733823       | 4  |
| 8  | <b>1205.732629</b> | 603.369953      | 1188.706080    | 594.856678       | 1187.722064    | <b>594.364670</b> | L    | <b>417.245609</b>  | 209.126442        | 400.219060     | 200.613168       | 399.235044     | 200.121160       | 3  |
| 9  | <b>1334.775222</b> | 667.891249      | 1317.748673    | 659.377975       | 1316.764657    | 658.885966        | E    | <b>304.161545</b>  | 152.584410        | 287.134996     | 144.071136       | 286.150980     | 143.579128       | 2  |
| 10 |                    |                 |                |                  |                |                   | R    | <b>175.118952</b>  | 88.063114         | 158.092403     | 79.549839        |                |                  | 1  |

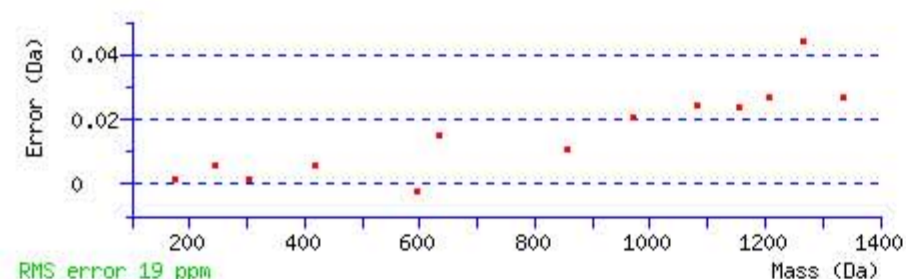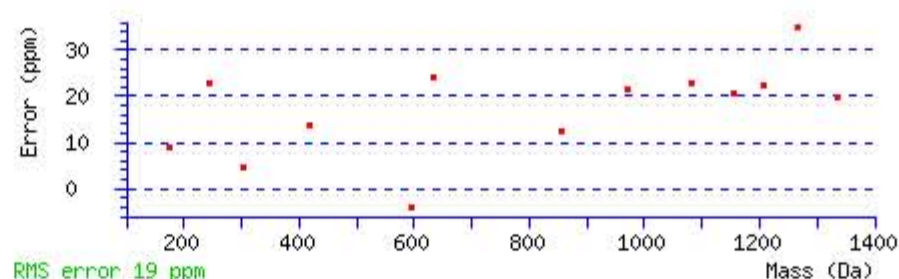

NCBI BLAST search of [ELLALIQLER](#)

(Parameters: blastp, nr protein database, expect=20000, no filter, PAM30)

Other BLAST [web gateways](#)

All matches to this query

| Score | Mr(calc):   | Delta    | Sequence                   |
|-------|-------------|----------|----------------------------|
| 52.6  | 1507.879578 | 0.020210 | <a href="#">ELLALIQLER</a> |

Mascot: <http://www.matrixscience.com/>

# MASCOT Search Results

## Peptide View

MS/MS Fragmentation of **VTPNLMGHLCGNQR**

Found in **ECM1\_HUMAN**, Extracellular matrix protein 1 OS=Homo sapiens GN=ECM1 PE=1 SV=2

Match to Query 40327: 1906.932462 from(636.651430,3+) rtinseconds(1919) index(4361)

Title: Locus:1.1.1.3220.18 File:"2013-07-02 CLN FXIII 60 min 3rd F 1.wiff"

Data file C:\Program Files (x86)\Matrix Science\Mascot Daemon\mgf6 FXIII 60 min 3rd\mascot\_daemon\_merge.mgf

Click mouse within plot area to zoom in by factor of two about that point

Or, Plot from  to  Da

Label all possible matches  Label matches used for scoring

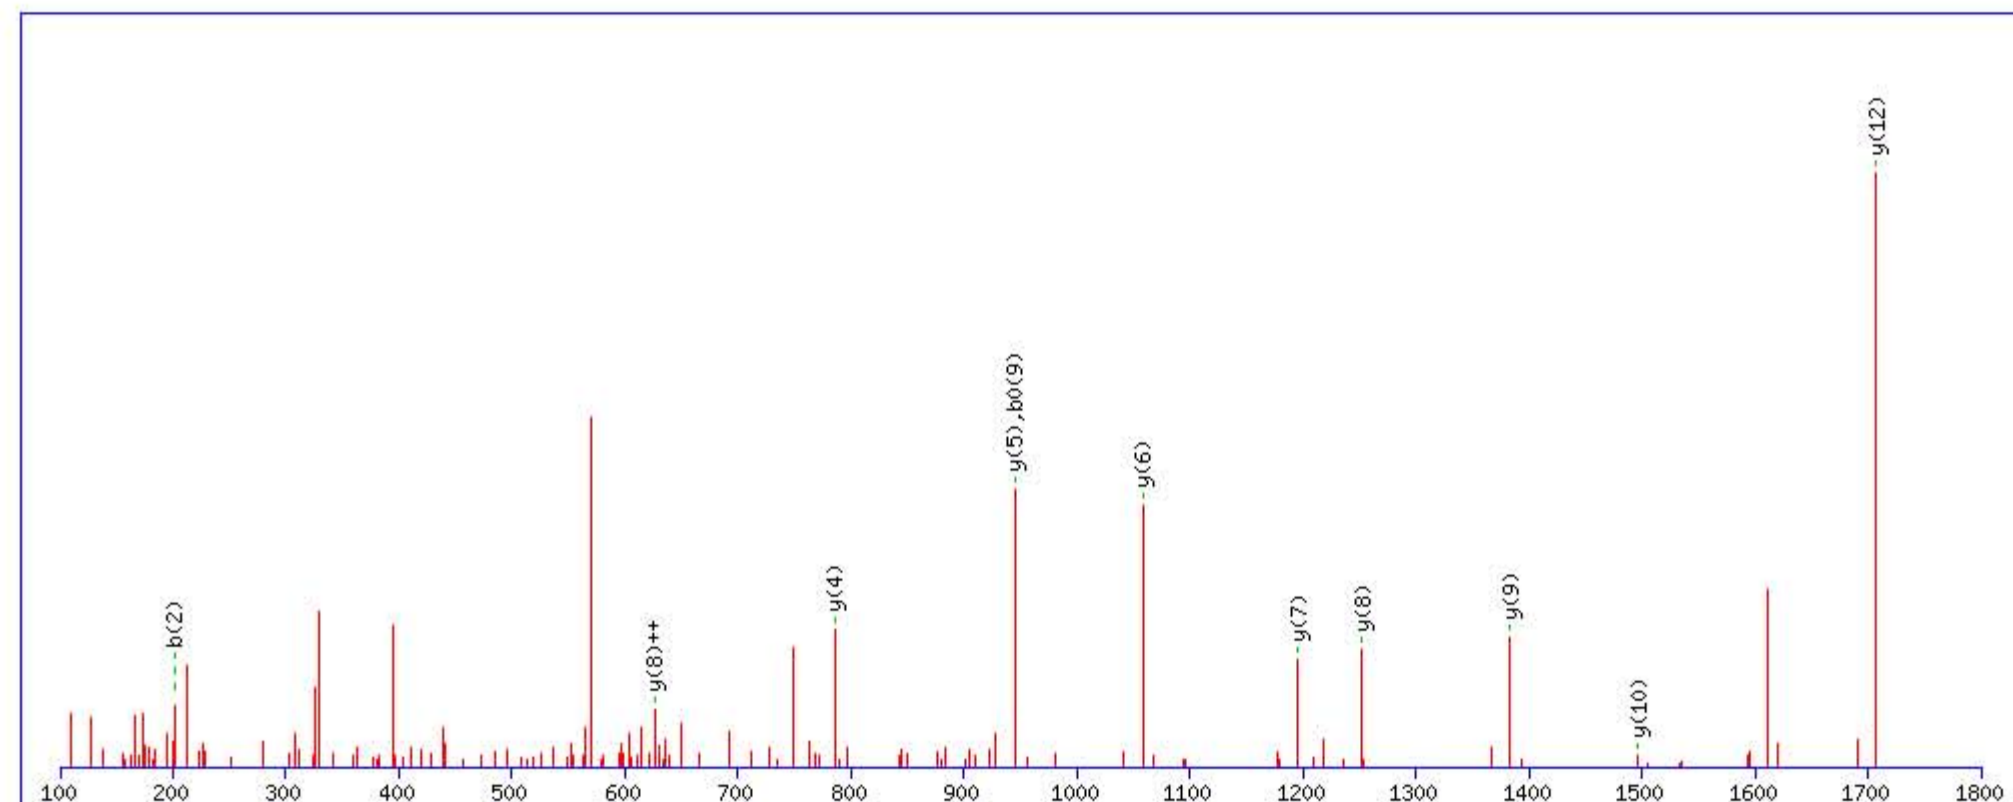

Monoisotopic mass of neutral peptide Mr(calc): 1906.932816

Fixed modifications: Carbamidomethyl (C) (apply to specified residues or termini only)

Variable modifications:

Q13 : Biotin:Thermo-21345 (Q)

Ions Score: 47 Expect: 0.00044

Matches : 11/124 fragment ions using 16 most intense peaks [\(help\)](#)

| #  | b           | b <sup>++</sup> | b <sup>*</sup> | b <sup>*++</sup> | b <sup>0</sup> | b <sup>0++</sup> | Seq. | y           | y <sup>++</sup> | y <sup>*</sup> | y <sup>*++</sup> | y <sup>0</sup> | y <sup>0++</sup> | #  |
|----|-------------|-----------------|----------------|------------------|----------------|------------------|------|-------------|-----------------|----------------|------------------|----------------|------------------|----|
| 1  | 100.075690  | 50.541483       |                |                  |                |                  | V    |             |                 |                |                  |                |                  | 14 |
| 2  | 201.123369  | 101.065322      |                |                  | 183.112804     | 92.060040        | T    | 1808.871677 | 904.939477      | 1791.845128    | 896.426202       | 1790.861112    | 895.934194       | 13 |
| 3  | 298.176133  | 149.591704      |                |                  | 280.165568     | 140.586422       | P    | 1707.823998 | 854.415637      | 1690.797449    | 845.902363       |                |                  | 12 |
| 4  | 412.219060  | 206.613168      | 395.192511     | 198.099894       | 394.208495     | 197.607886       | N    | 1610.771234 | 805.889255      | 1593.744685    | 797.375981       |                |                  | 11 |
| 5  | 525.303124  | 263.155200      | 508.276575     | 254.641926       | 507.292559     | 254.149918       | L    | 1496.728307 | 748.867792      | 1479.701758    | 740.354517       |                |                  | 10 |
| 6  | 656.343609  | 328.675443      | 639.317060     | 320.162168       | 638.333044     | 319.670160       | M    | 1383.644243 | 692.325760      | 1366.617694    | 683.812485       |                |                  | 9  |
| 7  | 713.365073  | 357.186175      | 696.338524     | 348.672900       | 695.354508     | 348.180892       | G    | 1252.603758 | 626.805517      | 1235.577209    | 618.292243       |                |                  | 8  |
| 8  | 850.423985  | 425.715631      | 833.397436     | 417.202356       | 832.413420     | 416.710348       | H    | 1195.582294 | 598.294785      | 1178.555745    | 589.781511       |                |                  | 7  |
| 9  | 963.508049  | 482.257663      | 946.481500     | 473.744388       | 945.497484     | 473.252380       | L    | 1058.523382 | 529.765329      | 1041.496833    | 521.252055       |                |                  | 6  |
| 10 | 1123.538698 | 562.272987      | 1106.512149    | 553.759713       | 1105.528133    | 553.267705       | C    | 945.439318  | 473.223297      | 928.412769     | 464.710023       |                |                  | 5  |
| 11 | 1180.560162 | 590.783719      | 1163.533613    | 582.270445       | 1162.549597    | 581.778437       | G    | 785.408669  | 393.207973      | 768.382120     | 384.694698       |                |                  | 4  |
| 12 | 1294.603089 | 647.805183      | 1277.576540    | 639.291908       | 1276.592524    | 638.799900       | N    | 728.387205  | 364.697241      | 711.360656     | 356.183966       |                |                  | 3  |
| 13 | 1733.828415 | 867.417846      | 1716.801866    | 858.904571       | 1715.817850    | 858.412563       | Q    | 614.344278  | 307.675777      | 597.317729     | 299.162503       |                |                  | 2  |
| 14 |             |                 |                |                  |                |                  | R    | 175.118952  | 88.063114       | 158.092403     | 79.549839        |                |                  | 1  |

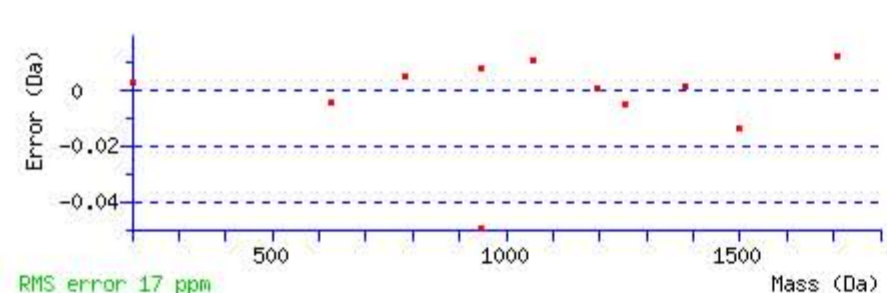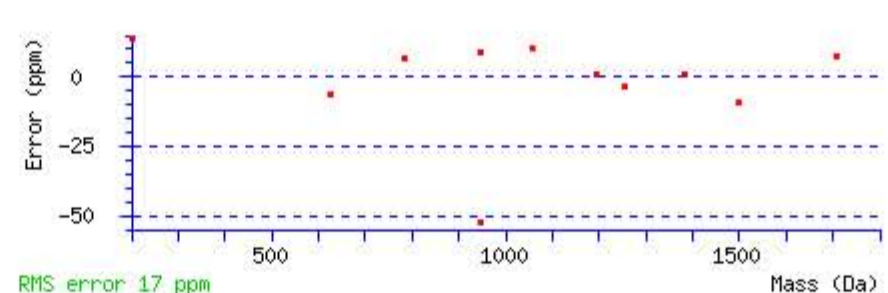

NCBI BLAST search of **VTPNLMGHLCGNQR**

(Parameters: blastp, nr protein database, expect=20000, no filter, PAM30)

Other BLAST [web gateways](#)

### All matches to this query

| Score | Mr(calc):   | Delta     | Sequence                       |
|-------|-------------|-----------|--------------------------------|
| 47.0  | 1906.932816 | -0.000354 | <a href="#">VTPNLMGHLCGNQR</a> |

# MASCOT Search Results

## Peptide View

MS/MS Fragmentation of **EVGPPLPQEAVPLQK**

Found in **ECM1\_HUMAN**, Extracellular matrix protein 1 OS=Homo sapiens GN=ECM1 PE=1 SV=2

Match to Query 40484: 1912.053042 from(638.358290,3+) rtinseconds(2241) index(6302)

Title: Locus:1.1.1.3332.18 File:"2013-07-02 CLN FXIII 60 min 3rd F 1.wiff"

Data file C:\Program Files (x86)\Matrix Science\Mascot Daemon\mgf\6 FXIII 60 min 3rd\mascot\_daemon\_merge.mgf

Click mouse within plot area to zoom in by factor of two about that point

Or, Plot from  to  Da

Label all possible matches  Label matches used for scoring

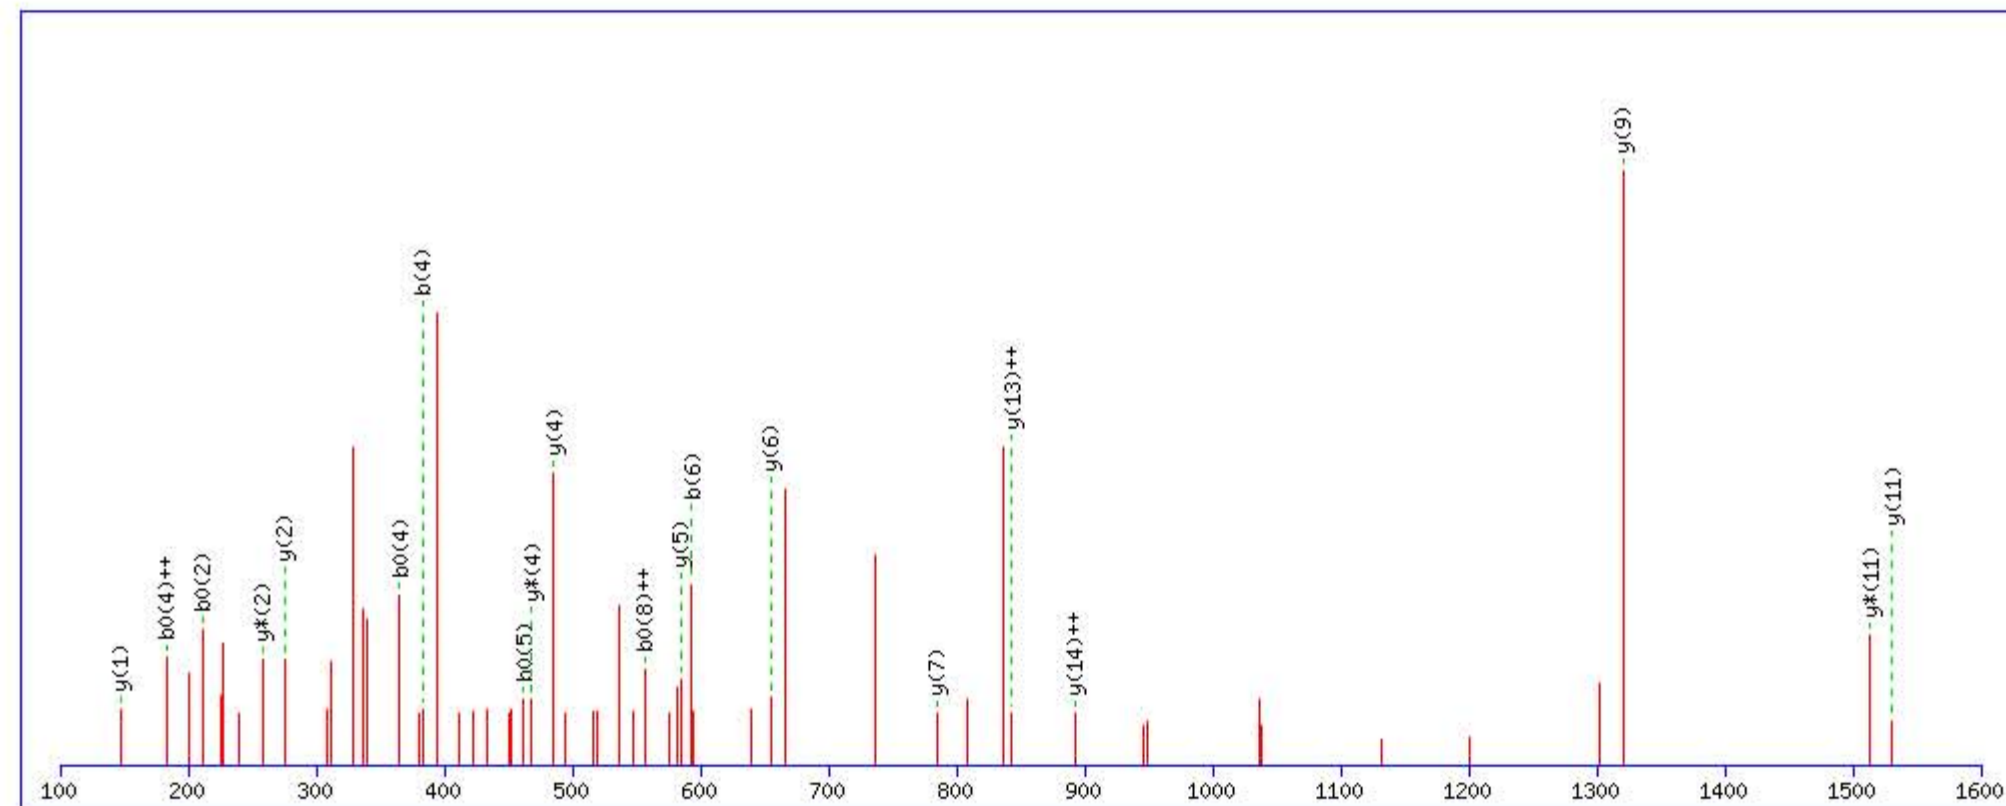

Monoisotopic mass of neutral peptide Mr(calc): 1912.049194

Fixed modifications: Carbamidomethyl (C) (apply to specified residues or termini only)

Variable modifications:

Q8 : Biotin:Thermo-21345 (Q)

Ions Score: 31 Expect: 0.012

Matches : 20/142 fragment ions using 48 most intense peaks [\(help\)](#)

| #  | b           | b <sup>++</sup> | b <sup>+</sup> | b <sup>+++</sup> | b <sup>0</sup> | b <sup>0++</sup> | Seq. | y           | y <sup>++</sup> | y <sup>+</sup> | y <sup>+++</sup> | y <sup>0</sup> | y <sup>0++</sup> | #  |
|----|-------------|-----------------|----------------|------------------|----------------|------------------|------|-------------|-----------------|----------------|------------------|----------------|------------------|----|
| 1  | 130.049869  | 65.528572       |                |                  | 112.039304     | 56.523290        | E    |             |                 |                |                  |                |                  | 15 |
| 2  | 229.118283  | 115.062780      |                |                  | 211.107718     | 106.057497       | V    | 1784.013891 | 892.510583      | 1766.987342    | 883.997309       | 1766.003326    | 883.505301       | 14 |
| 3  | 286.139747  | 143.573512      |                |                  | 268.129182     | 134.568229       | G    | 1684.945477 | 842.976377      | 1667.918928    | 834.463102       | 1666.934912    | 833.971094       | 13 |
| 4  | 383.192511  | 192.099894      |                |                  | 365.181946     | 183.094611       | P    | 1627.924013 | 814.465645      | 1610.897464    | 805.952370       | 1609.913448    | 805.460362       | 12 |
| 5  | 480.245275  | 240.626276      |                |                  | 462.234710     | 231.620993       | P    | 1530.871249 | 765.939263      | 1513.844700    | 757.425988       | 1512.860684    | 756.933980       | 11 |
| 6  | 593.329339  | 297.168308      |                |                  | 575.318774     | 288.163025       | L    | 1433.818485 | 717.412881      | 1416.791936    | 708.899606       | 1415.807920    | 708.407598       | 10 |
| 7  | 690.382103  | 345.694690      |                |                  | 672.371538     | 336.689407       | P    | 1320.734421 | 660.870848      | 1303.707872    | 652.357574       | 1302.723856    | 651.865566       | 9  |
| 8  | 1129.607429 | 565.307353      | 1112.580880    | 556.794078       | 1111.596864    | 556.302070       | Q    | 1223.681657 | 612.344466      | 1206.655108    | 603.831192       | 1205.671092    | 603.339184       | 8  |
| 9  | 1258.650022 | 629.828649      | 1241.623473    | 621.315375       | 1240.639457    | 620.823367       | E    | 784.456331  | 392.731803      | 767.429782     | 384.218529       | 766.445766     | 383.726521       | 7  |
| 10 | 1329.687136 | 665.347206      | 1312.660587    | 656.833932       | 1311.676571    | 656.341924       | A    | 655.413738  | 328.210507      | 638.387189     | 319.697232       |                |                  | 6  |
| 11 | 1428.755550 | 714.881413      | 1411.729001    | 706.368139       | 1410.744985    | 705.876131       | V    | 584.376624  | 292.691950      | 567.350075     | 284.178676       |                |                  | 5  |
| 12 | 1525.808314 | 763.407795      | 1508.781765    | 754.894521       | 1507.797749    | 754.402513       | P    | 485.308210  | 243.157743      | 468.281661     | 234.644468       |                |                  | 4  |
| 13 | 1638.892378 | 819.949827      | 1621.865829    | 811.436553       | 1620.881813    | 810.944545       | L    | 388.255446  | 194.631361      | 371.228897     | 186.118086       |                |                  | 3  |
| 14 | 1766.950956 | 883.979116      | 1749.924407    | 875.465842       | 1748.940391    | 874.973833       | Q    | 275.171382  | 138.089329      | 258.144833     | 129.576054       |                |                  | 2  |
| 15 |             |                 |                |                  |                |                  | K    | 147.112804  | 74.060040       | 130.086255     | 65.546765        |                |                  | 1  |

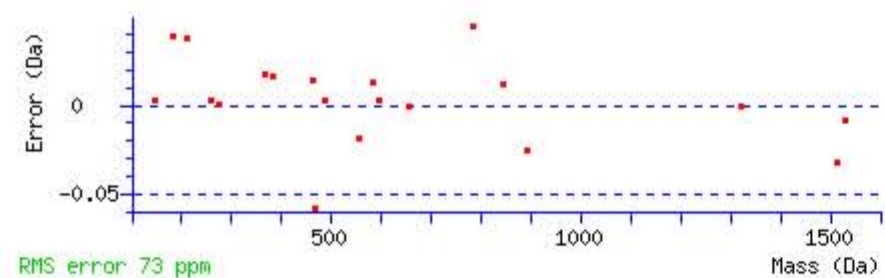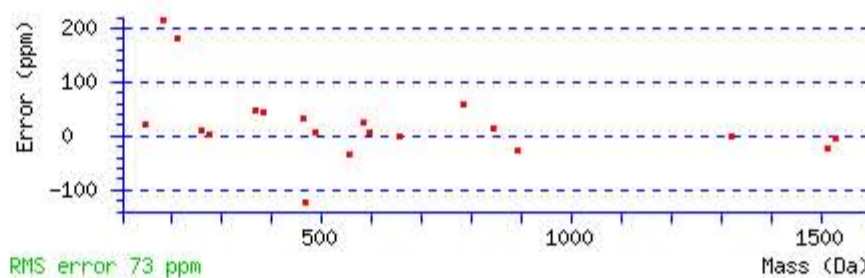

NCBI BLAST search of **EVGPPLPQEAVPLQK**

(Parameters: blastp, nr protein database, expect=20000, no filter, PAM30)

Other BLAST [web gateways](#)

All matches to this query

| Score | Mr(calc):   | Delta    | Sequence                        |
|-------|-------------|----------|---------------------------------|
| 31.4  | 1912.049194 | 0.003848 | <a href="#">EVGPPLPQEAVPLQK</a> |

Mascot: <http://www.matrixscience.com/>

# MASCOT Search Results

## Peptide View

MS/MS Fragmentation of **EVGPPLPQEAVPLQK**

Found in **ECM1\_HUMAN**, Extracellular matrix protein 1 OS=Homo sapiens GN=ECM1 PE=1 SV=2

Match to Query 46456: 2223.245592 from(742.089140,3+) rtinseconds(2449) index(21411)

Title: Locus:1.1.1.3453.11 File:"2013-07-02 CLN FXIII 60 min 3rd F 2.wiff"

Data file C:\Program Files (x86)\Matrix Science\Mascot Daemon\mgf\6 FXIII 60 min 3rd\mascot\_daemon\_merge.mgf

Click mouse within plot area to zoom in by factor of two about that point

Or, Plot from  to  Da

Label all possible matches  Label matches used for scoring

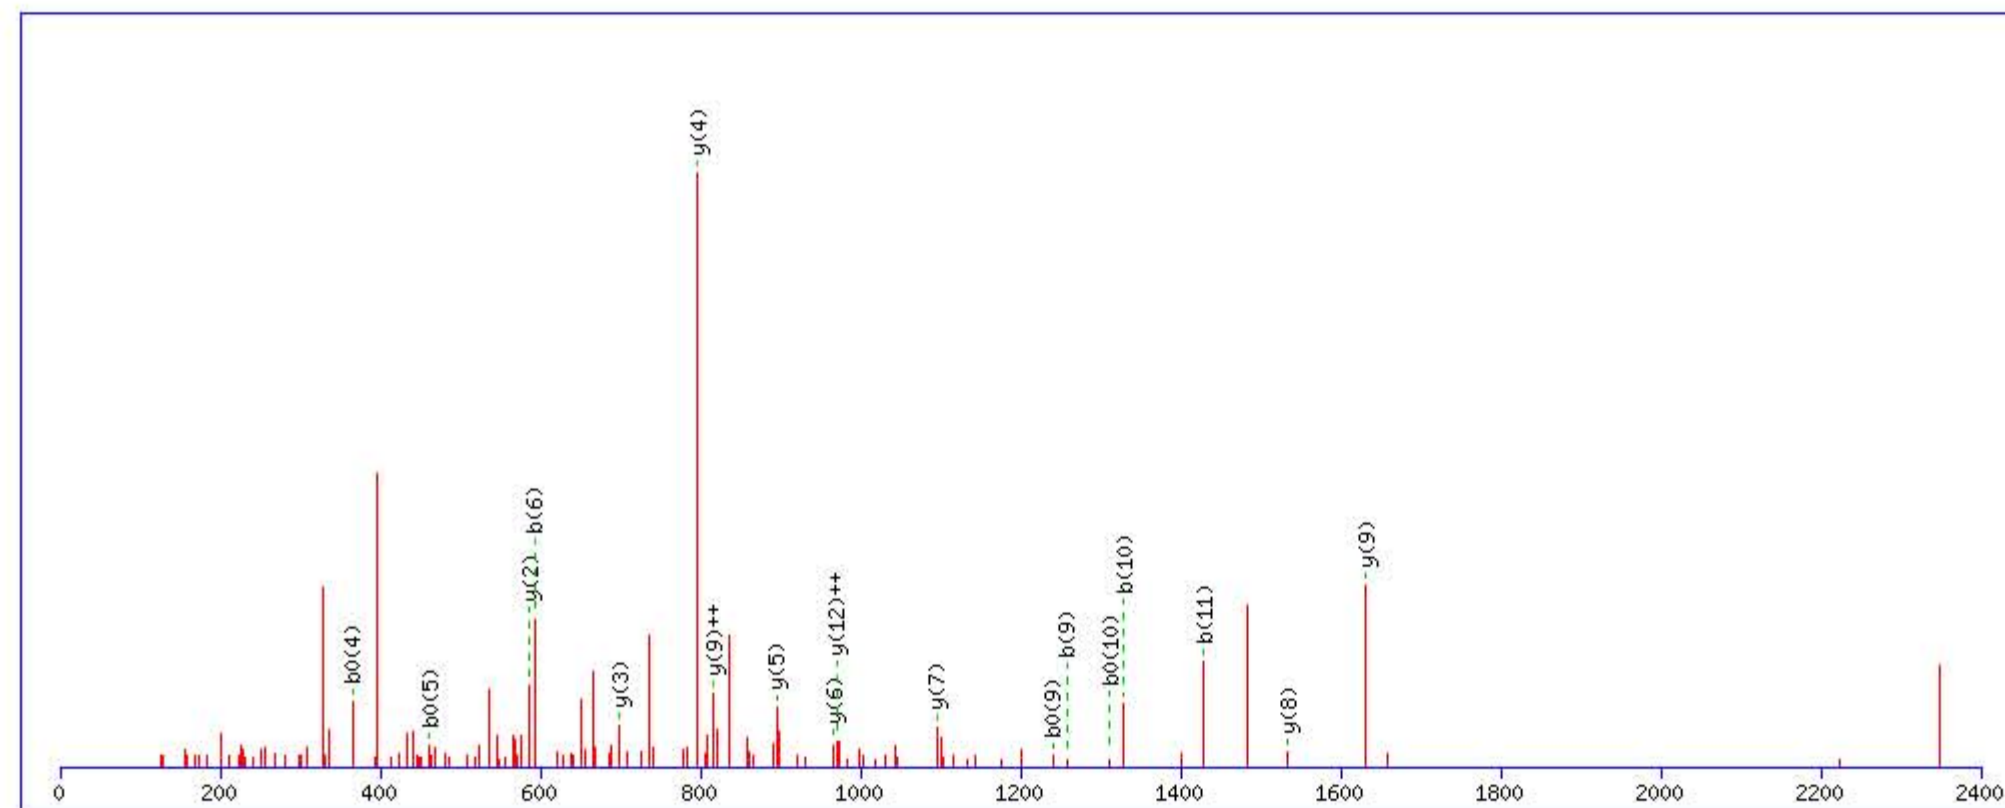

Monoisotopic mass of neutral peptide Mr(calc): 2223.215942

Fixed modifications: Carbamidomethyl (C) (apply to specified residues or termini only)

Variable modifications:

Q8 : Biotin:Thermo-21345 (Q)

Q14 : Biotin:Thermo-21345 (Q)

Ions Score: 28 Expect: 0.016

Matches : 18/142 fragment ions using 44 most intense peaks [\(help\)](#)

| #  | b           | b <sup>++</sup> | b <sup>+</sup> | b <sup>+++</sup> | b <sup>0</sup> | b <sup>0++</sup> | Seq. | y           | y <sup>++</sup> | y <sup>+</sup> | y <sup>+++</sup> | y <sup>0</sup> | y <sup>0++</sup> | #  |
|----|-------------|-----------------|----------------|------------------|----------------|------------------|------|-------------|-----------------|----------------|------------------|----------------|------------------|----|
| 1  | 130.049869  | 65.528572       |                |                  | 112.039304     | 56.523290        | E    |             |                 |                |                  |                |                  | 15 |
| 2  | 229.118283  | 115.062780      |                |                  | 211.107718     | 106.057497       | V    | 2095.180639 | 1048.093957     | 2078.154090    | 1039.580683      | 2077.170074    | 1039.088675      | 14 |
| 3  | 286.139747  | 143.573512      |                |                  | 268.129182     | 134.568229       | G    | 1996.112225 | 998.559751      | 1979.085676    | 990.046476       | 1978.101660    | 989.554468       | 13 |
| 4  | 383.192511  | 192.099894      |                |                  | 365.181946     | 183.094611       | P    | 1939.090761 | 970.049019      | 1922.064212    | 961.535744       | 1921.080196    | 961.043736       | 12 |
| 5  | 480.245275  | 240.626276      |                |                  | 462.234710     | 231.620993       | P    | 1842.037997 | 921.522637      | 1825.011448    | 913.009362       | 1824.027432    | 912.517354       | 11 |
| 6  | 593.329339  | 297.168308      |                |                  | 575.318774     | 288.163025       | L    | 1744.985233 | 872.996255      | 1727.958684    | 864.482980       | 1726.974668    | 863.990972       | 10 |
| 7  | 690.382103  | 345.694690      |                |                  | 672.371538     | 336.689407       | P    | 1631.901169 | 816.454223      | 1614.874620    | 807.940948       | 1613.890604    | 807.448940       | 9  |
| 8  | 1129.607429 | 565.307353      | 1112.580880    | 556.794078       | 1111.596864    | 556.302070       | Q    | 1534.848405 | 767.927841      | 1517.821856    | 759.414566       | 1516.837840    | 758.922558       | 8  |
| 9  | 1258.650022 | 629.828649      | 1241.623473    | 621.315375       | 1240.639457    | 620.823367       | E    | 1095.623079 | 548.315178      | 1078.596530    | 539.801903       | 1077.612514    | 539.309895       | 7  |
| 10 | 1329.687136 | 665.347206      | 1312.660587    | 656.833932       | 1311.676571    | 656.341924       | A    | 966.580486  | 483.793881      | 949.553937     | 475.280607       |                |                  | 6  |
| 11 | 1428.755550 | 714.881413      | 1411.729001    | 706.368139       | 1410.744985    | 705.876131       | V    | 895.543372  | 448.275324      | 878.516823     | 439.762050       |                |                  | 5  |
| 12 | 1525.808314 | 763.407795      | 1508.781765    | 754.894521       | 1507.797749    | 754.402513       | P    | 796.474958  | 398.741117      | 779.448409     | 390.227843       |                |                  | 4  |
| 13 | 1638.892378 | 819.949827      | 1621.865829    | 811.436553       | 1620.881813    | 810.944545       | L    | 699.422194  | 350.214735      | 682.395645     | 341.701461       |                |                  | 3  |
| 14 | 2078.117704 | 1039.562490     | 2061.091155    | 1031.049215      | 2060.107139    | 1030.557207      | Q    | 586.338130  | 293.672703      | 569.311581     | 285.159429       |                |                  | 2  |
| 15 |             |                 |                |                  |                |                  | K    | 147.112804  | 74.060040       | 130.086255     | 65.546765        |                |                  | 1  |

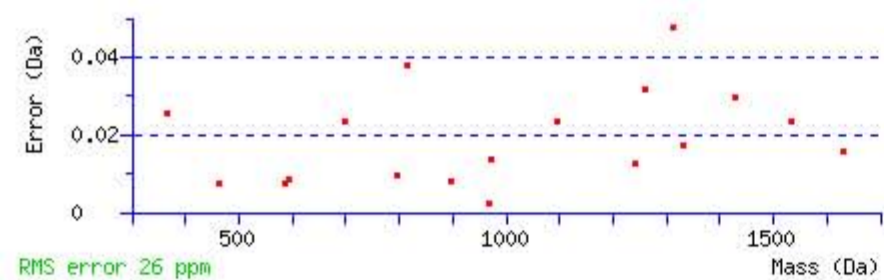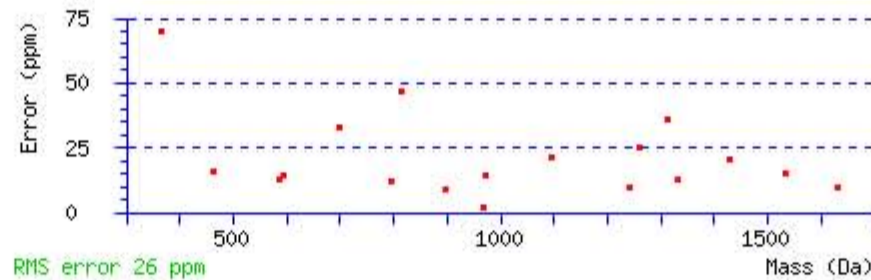

NCBI BLAST search of **EVGPPLPQEAVPLQK**

(Parameters: blastp, nr protein database, expect=20000, no filter, PAM30)

Other BLAST [web gateways](#)

All matches to this query

| Score | Mr(calc):   | Delta    | Sequence                        |
|-------|-------------|----------|---------------------------------|
| 28.1  | 2223.215942 | 0.029650 | <a href="#">EVGPPLPQEAVPLQK</a> |

Mascot: <http://www.matrixscience.com/>

# MASCOT Search Results

## Peptide View

MS/MS Fragmentation of **FSCFQEEAPQPHYQLR**

Found in **ECM1\_HUMAN**, Extracellular matrix protein 1 OS=Homo sapiens GN=ECM1 PE=1 SV=2

Match to Query 48504: 2347.085652 from(783.369160,3+) rtinseconds(1957) index(4693)

Title: Locus:1.1.1.3233.25 File:"2013-07-02 CLN FXIII 60 min 3rd F 1.wiff"

Data file C:\Program Files (x86)\Matrix Science\Mascot Daemon\mgf\6 FXIII 60 min 3rd\mascot\_daemon\_merge.mgf

Click mouse within plot area to zoom in by factor of two about that point

Or, Plot from  to  Da

Label all possible matches  Label matches used for scoring

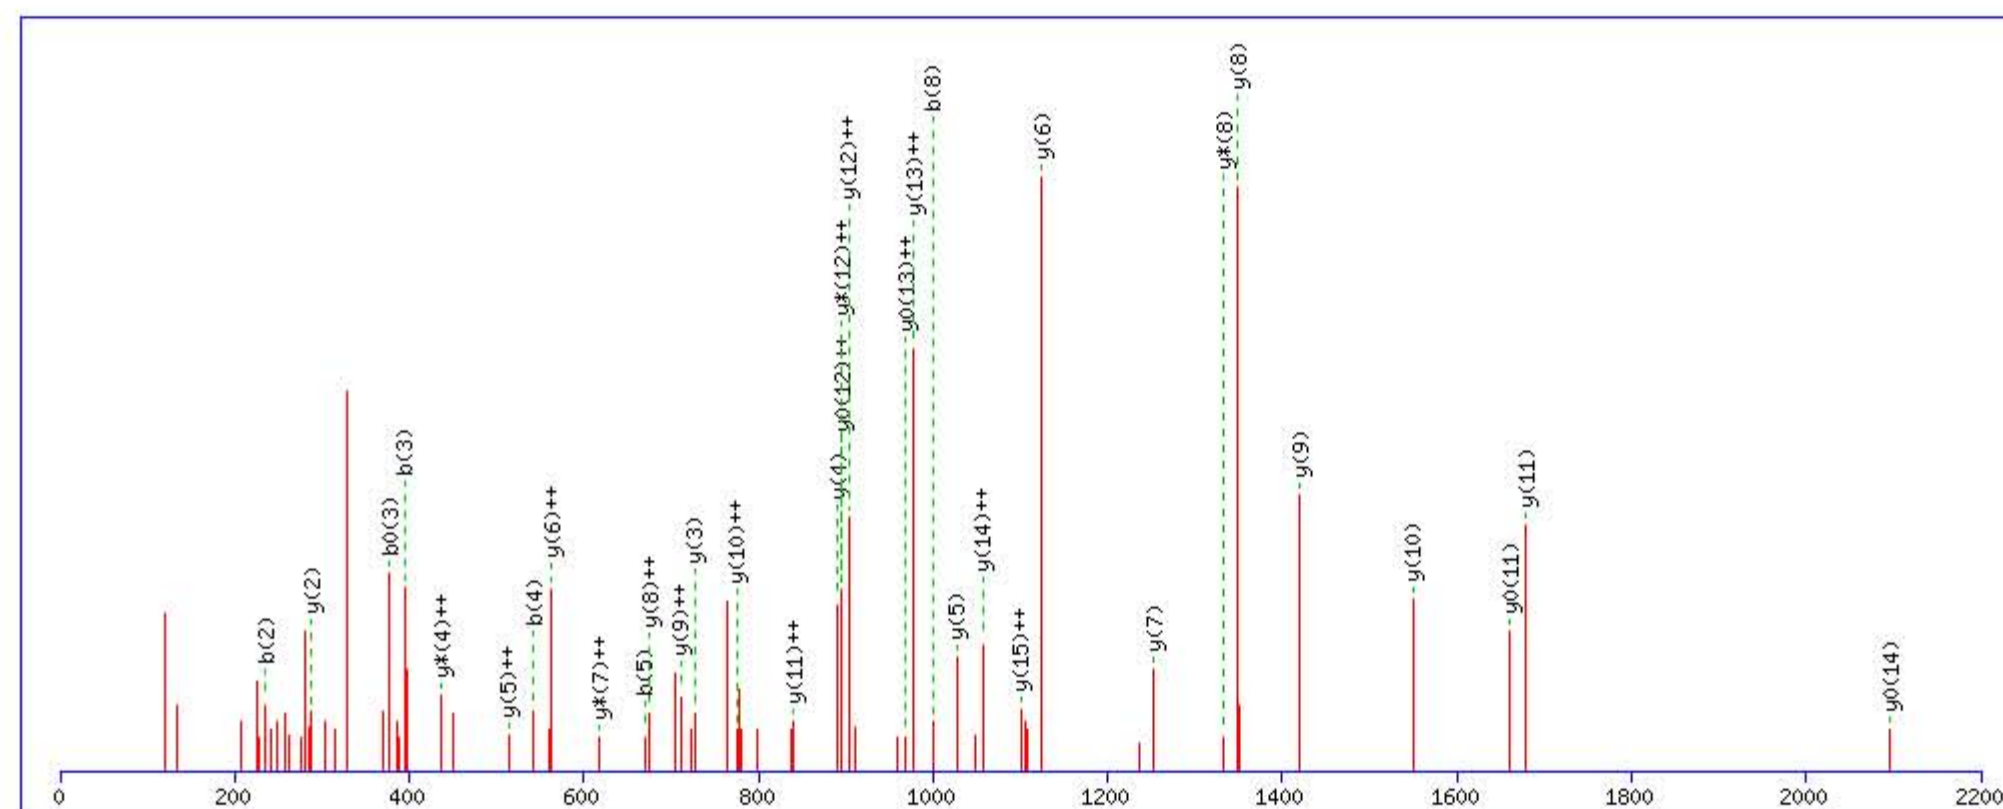

Monoisotopic mass of neutral peptide Mr(calc): 2347.087784

Fixed modifications: Carbamidomethyl (C) (apply to specified residues or termini only)

Variable modifications:

Q14 : Biotin:Thermo-21345 (Q)

Ions Score: 67 Expect: 3.1e-006

Matches : 34/152 fragment ions using 58 most intense peaks ([help](#))

| #  | b                 | b <sup>++</sup> | b <sup>*</sup> | b <sup>+++</sup> | b <sup>0</sup>    | b <sup>0++</sup> | Seq. | y                  | y <sup>++</sup>    | y <sup>*</sup>     | y <sup>+++</sup>  | y <sup>0</sup>     | y <sup>0++</sup>  | #  |
|----|-------------------|-----------------|----------------|------------------|-------------------|------------------|------|--------------------|--------------------|--------------------|-------------------|--------------------|-------------------|----|
| 1  | 148.075690        | 74.541483       |                |                  |                   |                  | F    |                    |                    |                    |                   |                    |                   | 16 |
| 2  | <b>235.107718</b> | 118.057497      |                |                  | 217.097153        | 109.052214       | S    | 2201.026658        | <b>1101.016967</b> | 2184.000109        | 1092.503692       | 2183.016093        | 1092.011684       | 15 |
| 3  | <b>395.138367</b> | 198.072821      |                |                  | <b>377.127802</b> | 189.067539       | C    | 2113.994630        | <b>1057.500953</b> | 2096.968081        | 1048.987678       | <b>2095.984065</b> | 1048.495670       | 14 |
| 4  | <b>542.206781</b> | 271.607029      |                |                  | 524.196216        | 262.601746       | F    | 1953.963981        | <b>977.485629</b>  | 1936.937432        | 968.972354        | 1935.953416        | <b>968.480346</b> | 13 |
| 5  | <b>670.265359</b> | 335.636318      | 653.238810     | 327.123043       | 652.254794        | 326.631035       | Q    | 1806.895567        | <b>903.951422</b>  | 1789.869018        | <b>895.438147</b> | 1788.885002        | <b>894.946139</b> | 12 |
| 6  | 799.307952        | 400.157614      | 782.281403     | 391.644340       | 781.297387        | 391.152332       | E    | <b>1678.836989</b> | <b>839.922133</b>  | 1661.810440        | 831.408858        | <b>1660.826424</b> | 830.916850        | 11 |
| 7  | 928.350545        | 464.678911      | 911.323996     | 456.165636       | 910.339980        | 455.673628       | E    | <b>1549.794396</b> | <b>775.400836</b>  | 1532.767847        | 766.887562        | 1531.783831        | 766.395554        | 10 |
| 8  | <b>999.387659</b> | 500.197468      | 982.361110     | 491.684193       | 981.377094        | 491.192185       | A    | <b>1420.751803</b> | <b>710.879540</b>  | 1403.725254        | 702.366265        |                    |                   | 9  |
| 9  | 1096.440423       | 548.723850      | 1079.413874    | 540.210575       | 1078.429858       | 539.718567       | P    | <b>1349.714689</b> | <b>675.360983</b>  | <b>1332.688140</b> | 666.847708        |                    |                   | 8  |
| 10 | 1224.499001       | 612.753138      | 1207.472452    | 604.239864       | 1206.488436       | 603.747856       | Q    | <b>1252.661925</b> | 626.834601         | 1235.635376        | <b>618.321326</b> |                    |                   | 7  |
| 11 | 1321.551765       | 661.279520      | 1304.525216    | 652.766246       | 1303.541200       | 652.274238       | P    | <b>1124.603347</b> | <b>562.805312</b>  | 1107.576798        | 554.292037        |                    |                   | 6  |
| 12 | 1458.610677       | 729.808976      | 1441.584128    | 721.295702       | 1440.600112       | 720.803694       | H    | <b>1027.550583</b> | <b>514.278930</b>  | 1010.524034        | 505.765655        |                    |                   | 5  |
| 13 | 1621.674006       | 811.340641      | 1604.647457    | 802.827367       | 1603.663441       | 802.335358       | Y    | <b>890.491671</b>  | 445.749474         | 873.465122         | <b>437.236199</b> |                    |                   | 4  |
| 14 | 2060.899332       | 1030.953304     | 2043.872783    | 1022.440030      | 2042.888767       | 1021.948022      | Q    | <b>727.428342</b>  | 364.217809         | 710.401793         | 355.704535        |                    |                   | 3  |
| 15 | 2173.983396       | 1087.495336     | 2156.956847    | 1078.982061      | 2155.972831       | 1078.490053      | L    | <b>288.203016</b>  | 144.605146         | 271.176467         | 136.091872        |                    |                   | 2  |
| 16 |                   |                 |                |                  |                   |                  | R    | 175.118952         | 88.063114          | 158.092403         | 79.549839         |                    |                   | 1  |

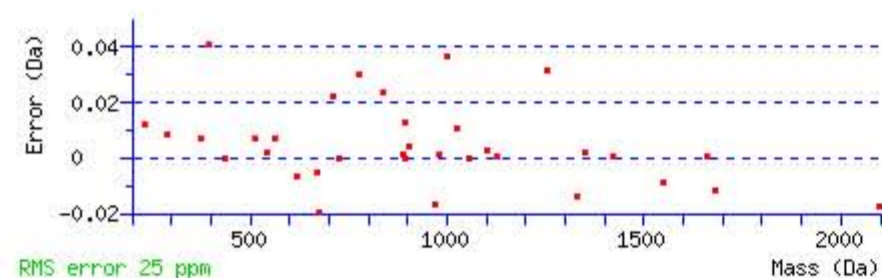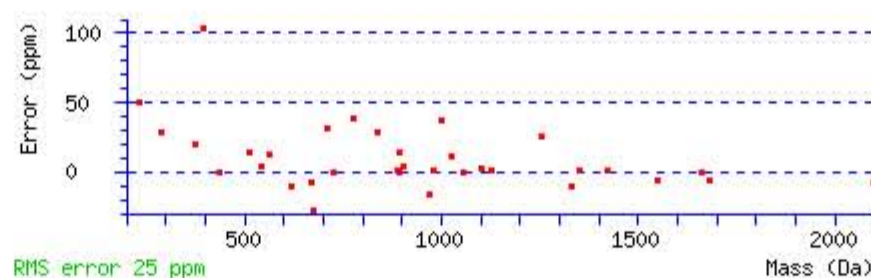

NCBI BLAST search of **FSCFQEEAPQPHYQLR**

(Parameters: blastp, nr protein database, expect=20000, no filter, PAM30)

Other BLAST [web gateways](#)

### All matches to this query

| Score | Mr(calc):   | Delta     | Sequence                         |
|-------|-------------|-----------|----------------------------------|
| 66.7  | 2347.087784 | -0.002132 | <a href="#">FSCFQEEAPQPHYQLR</a> |
| 29.8  | 2347.087784 | -0.002132 | <a href="#">FSCFQEEAPQPHYQLR</a> |

# MASCOT Search Results

## Peptide View

MS/MS Fragmentation of **QLEQVIAK**

Found in **FIBA\_HUMAN**, Fibrinogen alpha chain OS=Homo sapiens GN=FGA PE=1 SV=2

Match to Query 21295: 1238.712648 from(620.363600,2+) rtinseconds(1782) index(45970)

Title: Locus:1.1.1.2669.11 File:"2013-07-02 CLN FXIII 60 min 3rd F 4.wiff"

Data file C:\Program Files (x86)\Matrix Science\Mascot Daemon\mgf6 FXIII 60 min 3rd\mascot\_daemon\_merge.mgf

Click mouse within plot area to zoom in by factor of two about that point

Or, Plot from  to  Da

Label all possible matches  Label matches used for scoring

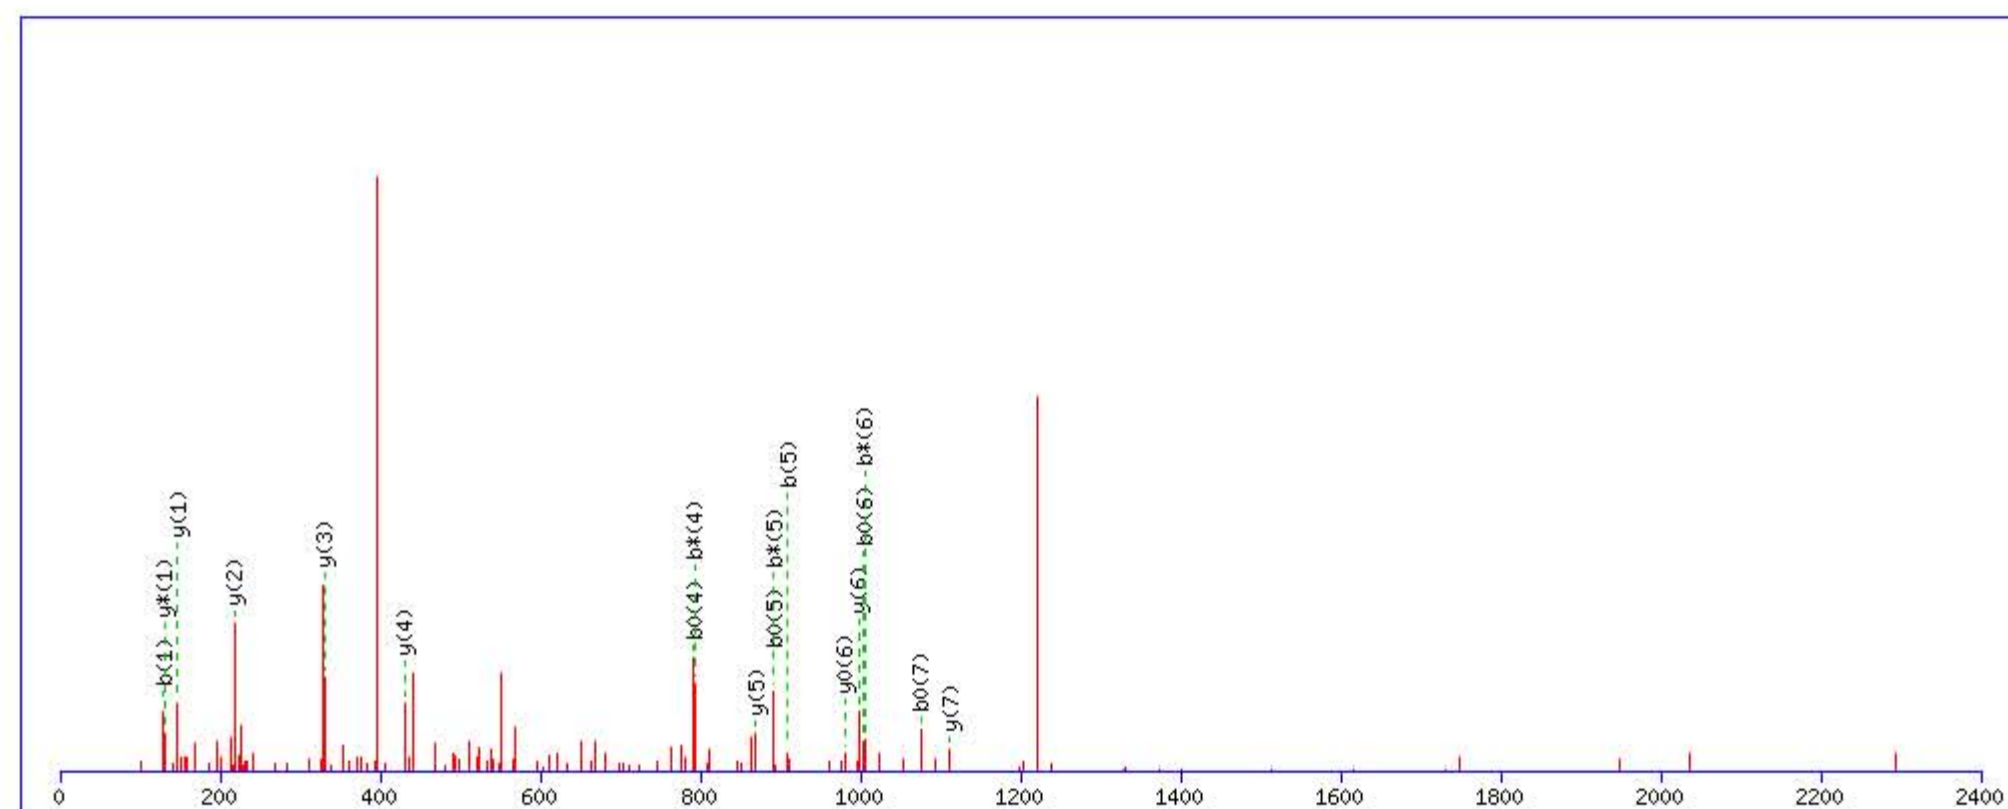

Monoisotopic mass of neutral peptide Mr(calc): 1238.705658

Fixed modifications: Carbamidomethyl (C) (apply to specified residues or termini only)

Variable modifications:

Q4 : Biotin:Thermo-21345 (Q)

Ions Score: 42 Expect: 0.00095

Matches : 18/70 fragment ions using 34 most intense peaks [\(help\)](#)

| # | b           | b <sup>++</sup> | b <sup>*</sup> | b <sup>+++</sup> | b <sup>0</sup> | b <sup>0++</sup> | Seq. | y           | y <sup>++</sup> | y <sup>*</sup> | y <sup>+++</sup> | y <sup>0</sup> | y <sup>0++</sup> | # |
|---|-------------|-----------------|----------------|------------------|----------------|------------------|------|-------------|-----------------|----------------|------------------|----------------|------------------|---|
| 1 | 129.065854  | 65.036565       | 112.039305     | 56.523291        |                |                  | Q    |             |                 |                |                  |                |                  | 8 |
| 2 | 242.149918  | 121.578597      | 225.123369     | 113.065323       |                |                  | L    | 1111.654379 | 556.330828      | 1094.627830    | 547.817553       | 1093.643814    | 547.325545       | 7 |
| 3 | 371.192511  | 186.099894      | 354.165962     | 177.586619       | 353.181946     | 177.094611       | E    | 998.570315  | 499.788796      | 981.543766     | 491.275521       | 980.559750     | 490.783513       | 6 |
| 4 | 810.417837  | 405.712557      | 793.391288     | 397.199282       | 792.407272     | 396.707274       | Q    | 869.527722  | 435.267499      | 852.501173     | 426.754225       |                |                  | 5 |
| 5 | 909.486251  | 455.246764      | 892.459702     | 446.733489       | 891.475686     | 446.241481       | V    | 430.302396  | 215.654836      | 413.275847     | 207.141562       |                |                  | 4 |
| 6 | 1022.570315 | 511.788796      | 1005.543766    | 503.275521       | 1004.559750    | 502.783513       | I    | 331.233982  | 166.120629      | 314.207433     | 157.607355       |                |                  | 3 |
| 7 | 1093.607429 | 547.307353      | 1076.580880    | 538.794078       | 1075.596864    | 538.302070       | A    | 218.149918  | 109.578597      | 201.123369     | 101.065323       |                |                  | 2 |
| 8 |             |                 |                |                  |                |                  | K    | 147.112804  | 74.060040       | 130.086255     | 65.546765        |                |                  | 1 |

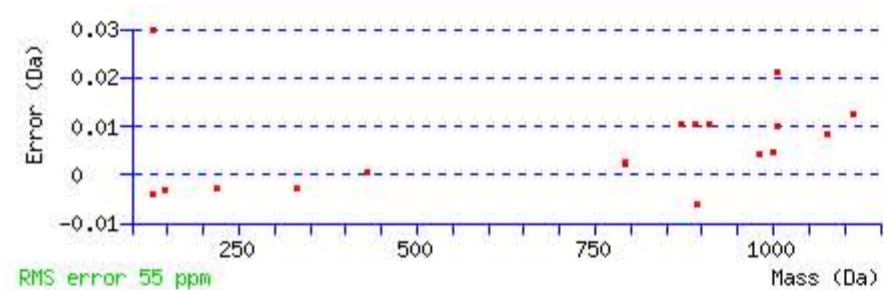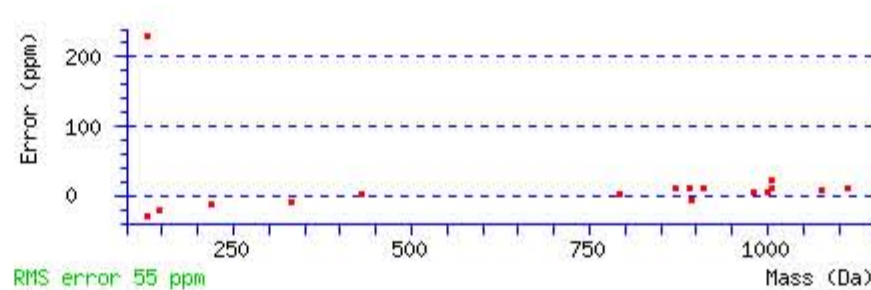

NCBI BLAST search of **QLEQVIAK**

(Parameters: blastp, nr protein database, expect=20000, no filter, PAM30)

Other BLAST [web gateways](#)

All matches to this query

| Score | Mr(calc):   | Delta     | Sequence                     |
|-------|-------------|-----------|------------------------------|
| 41.7  | 1238.705658 | 0.006990  | <a href="#">QLEQVIAK</a>     |
| 18.9  | 1238.705658 | 0.006990  | <a href="#">QLEQVIAK</a>     |
| 11.9  | 1238.698257 | 0.014391  | <a href="#">IHADASSKVLAK</a> |
| 10.0  | 1238.716904 | -0.004256 | <a href="#">DRVQVAIK</a>     |
| 8.0   | 1238.702301 | 0.010347  | <a href="#">DVFKKGFSLAK</a>  |
| 5.9   | 1238.698273 | 0.014375  | <a href="#">GHVTQLKESLK</a>  |
| 5.3   | 1238.728119 | -0.015471 | <a href="#">QEVRRLLK</a>     |
| 5.1   | 1238.705658 | 0.006990  | <a href="#">QIAQEIVK</a>     |
| 3.6   | 1238.709473 | 0.003175  | <a href="#">NDLRPANKLAK</a>  |
| 2.4   | 1238.716888 | -0.004240 | <a href="#">KRILCPLDPK</a>   |



# MASCOT Search Results

## Peptide View

MS/MS Fragmentation of **NSLFYQK**

Found in **FIBA\_HUMAN**, Fibrinogen alpha chain OS=Homo sapiens GN=FGA PE=1 SV=2

Match to Query 23761: 1338.667048 from(670.340800,2+) rtinseconds(2094) index(5418)

Title: Locus:1.1.1.3281.14 File:"2013-07-02 CLN FXIII 60 min 3rd F 1.wiff"

Data file C:\Program Files (x86)\Matrix Science\Mascot Daemon\mgf\6 FXIII 60 min 3rd\mascot\_daemon\_merge.mgf

Click mouse within plot area to zoom in by factor of two about that point

Or, Plot from  to  Da

Label all possible matches  Label matches used for scoring

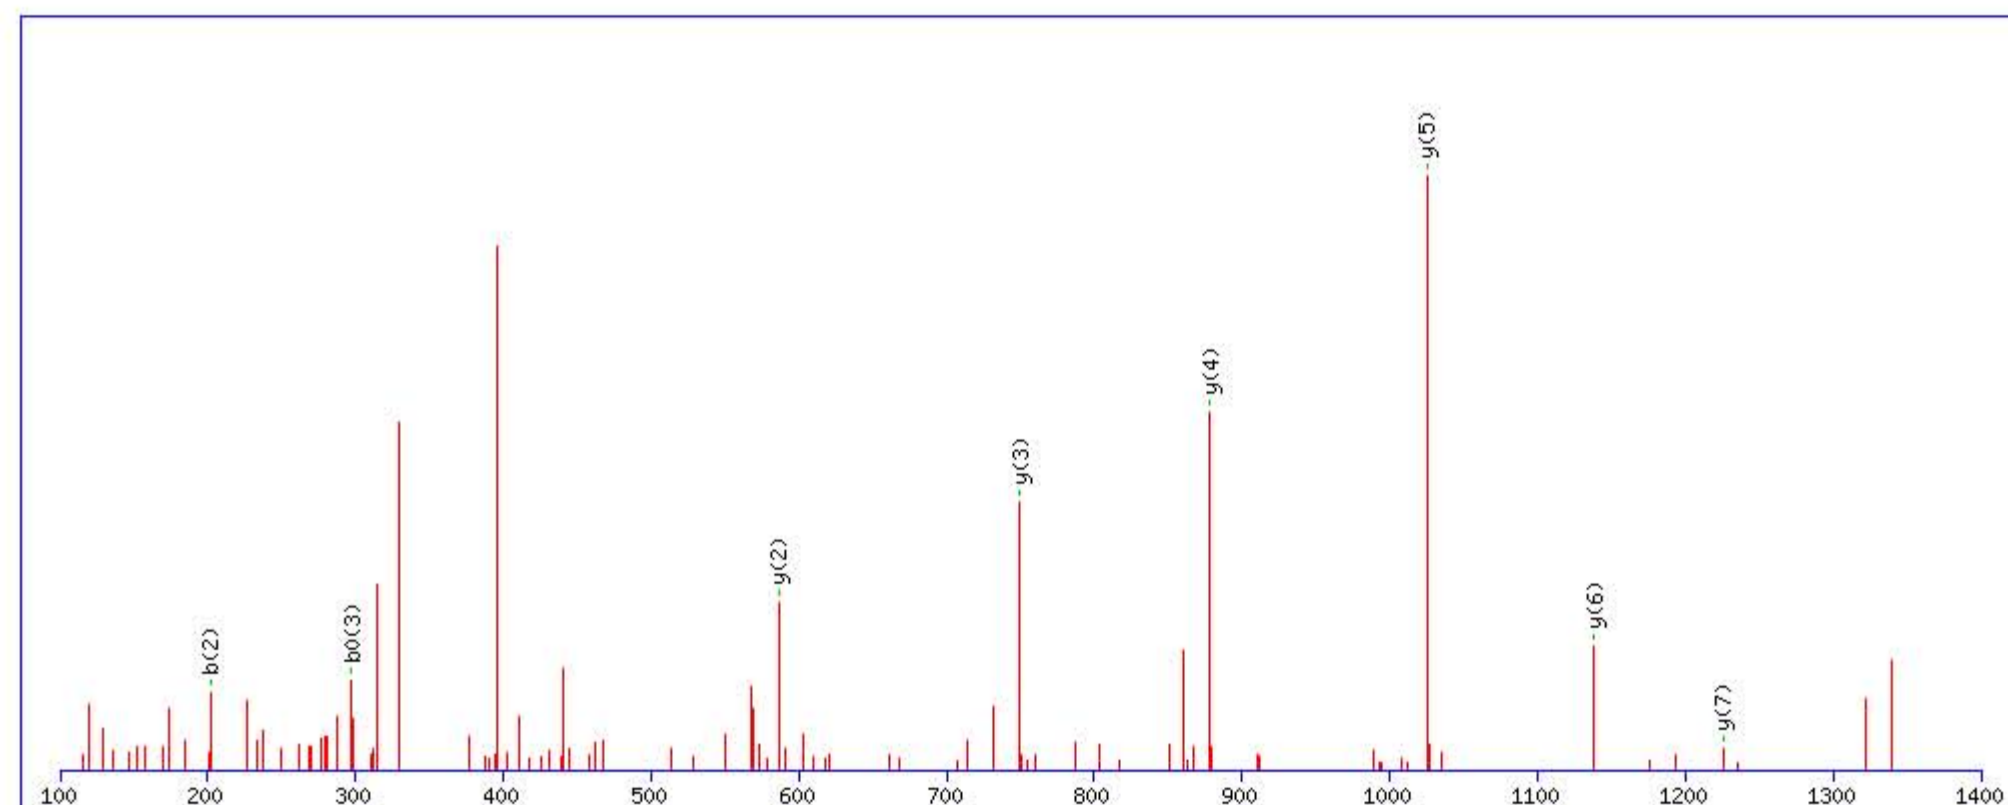

Monoisotopic mass of neutral peptide Mr(calc): 1338.664185

Fixed modifications: Carbamidomethyl (C) (apply to specified residues or termini only)

Variable modifications:

Q7 : Biotin:Thermo-21345 (Q)

Ions Score: 43 Expect: 0.00063

Matches : 8/76 fragment ions using 13 most intense peaks [\(help\)](#)

| # | b                 | b <sup>++</sup> | b <sup>+</sup> | b <sup>*++</sup> | b <sup>0</sup>    | b <sup>0++</sup> | Seq. | y                  | y <sup>++</sup> | y <sup>+</sup> | y <sup>*++</sup> | y <sup>0</sup> | y <sup>0++</sup> | # |
|---|-------------------|-----------------|----------------|------------------|-------------------|------------------|------|--------------------|-----------------|----------------|------------------|----------------|------------------|---|
| 1 | 115.050203        | 58.028740       | 98.023654      | 49.515465        |                   |                  | N    |                    |                 |                |                  |                |                  | 8 |
| 2 | <b>202.082231</b> | 101.544753      | 185.055682     | 93.031479        | 184.071666        | 92.539471        | S    | <b>1225.628558</b> | 613.317917      | 1208.602009    | 604.804643       | 1207.617993    | 604.312635       | 7 |
| 3 | 315.166295        | 158.086785      | 298.139746     | 149.573511       | <b>297.155730</b> | 149.081503       | L    | <b>1138.596530</b> | 569.801903      | 1121.569981    | 561.288629       | 1120.585965    | 560.796621       | 6 |
| 4 | 462.234709        | 231.620993      | 445.208160     | 223.107718       | 444.224144        | 222.615710       | F    | <b>1025.512466</b> | 513.259871      | 1008.485917    | 504.746597       | 1007.501901    | 504.254589       | 5 |
| 5 | 591.277302        | 296.142289      | 574.250753     | 287.629015       | 573.266737        | 287.137007       | E    | <b>878.444052</b>  | 439.725664      | 861.417503     | 431.212390       | 860.433487     | 430.720382       | 4 |
| 6 | 754.340631        | 377.673954      | 737.314082     | 369.160679       | 736.330066        | 368.668671       | Y    | <b>749.401459</b>  | 375.204368      | 732.374910     | 366.691093       |                |                  | 3 |
| 7 | 1193.565957       | 597.286617      | 1176.539408    | 588.773342       | 1175.555392       | 588.281334       | Q    | <b>586.338130</b>  | 293.672703      | 569.311581     | 285.159429       |                |                  | 2 |
| 8 |                   |                 |                |                  |                   |                  | K    | 147.112804         | 74.060040       | 130.086255     | 65.546765        |                |                  | 1 |

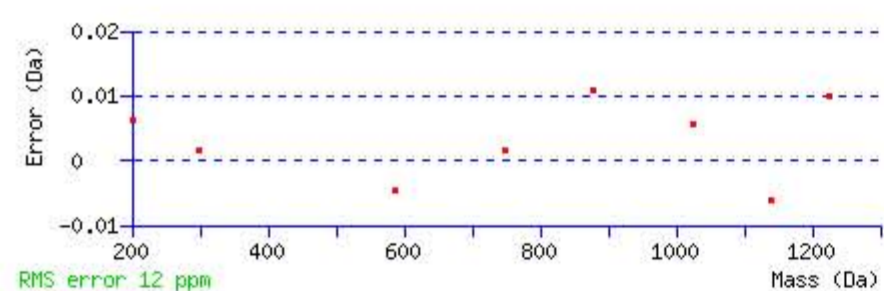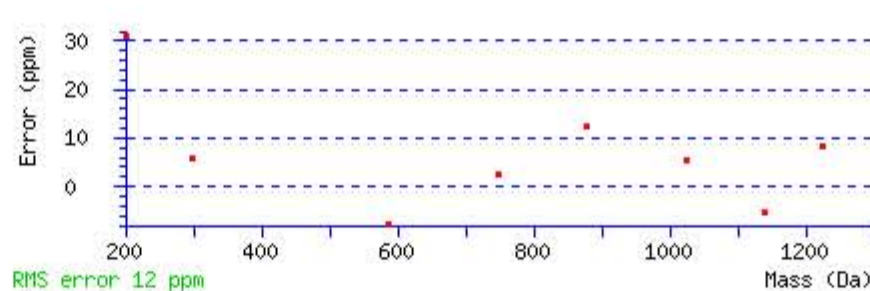

NCBI BLAST search of **NSLFYQK**

(Parameters: blastp, nr protein database, expect=20000, no filter, PAM30)

Other BLAST [web gateways](#)

All matches to this query

| Score | Mr(calc):   | Delta     | Sequence                      |
|-------|-------------|-----------|-------------------------------|
| 42.6  | 1338.664185 | 0.002863  | <a href="#">NSLFYQK</a>       |
| 8.2   | 1338.660172 | 0.006876  | <a href="#">NSMFTAGKGVAEK</a> |
| 6.9   | 1338.660172 | 0.006876  | <a href="#">BTVYLQMBSLR</a>   |
| 5.8   | 1338.666687 | 0.000361  | <a href="#">SKVEEKYVDDK</a>   |
| 4.5   | 1338.682632 | -0.015584 | <a href="#">NLSRMQSRFGK</a>   |

Mascot: <http://www.matrixscience.com/>

# MASCOT Search Results

## Peptide View

MS/MS Fragmentation of **ALTDMPQMR**

Found in **FIBA\_HUMAN**, Fibrinogen alpha chain OS=Homo sapiens GN=FGA PE=1 SV=2

Match to Query 25447: 1372.667868 from(687.341210,2+) rtinseconds(2072) index(5313)

Title: Locus:1.1.1.3273.11 File:"2013-07-02 CLN FXIII 60 min 3rd F 1.wiff"

Data file C:\Program Files (x86)\Matrix Science\Mascot Daemon\mgf\6 FXIII 60 min 3rd\mascot\_daemon\_merge.mgf

Click mouse within plot area to zoom in by factor of two about that point

Or, Plot from  to  Da

Label all possible matches  Label matches used for scoring

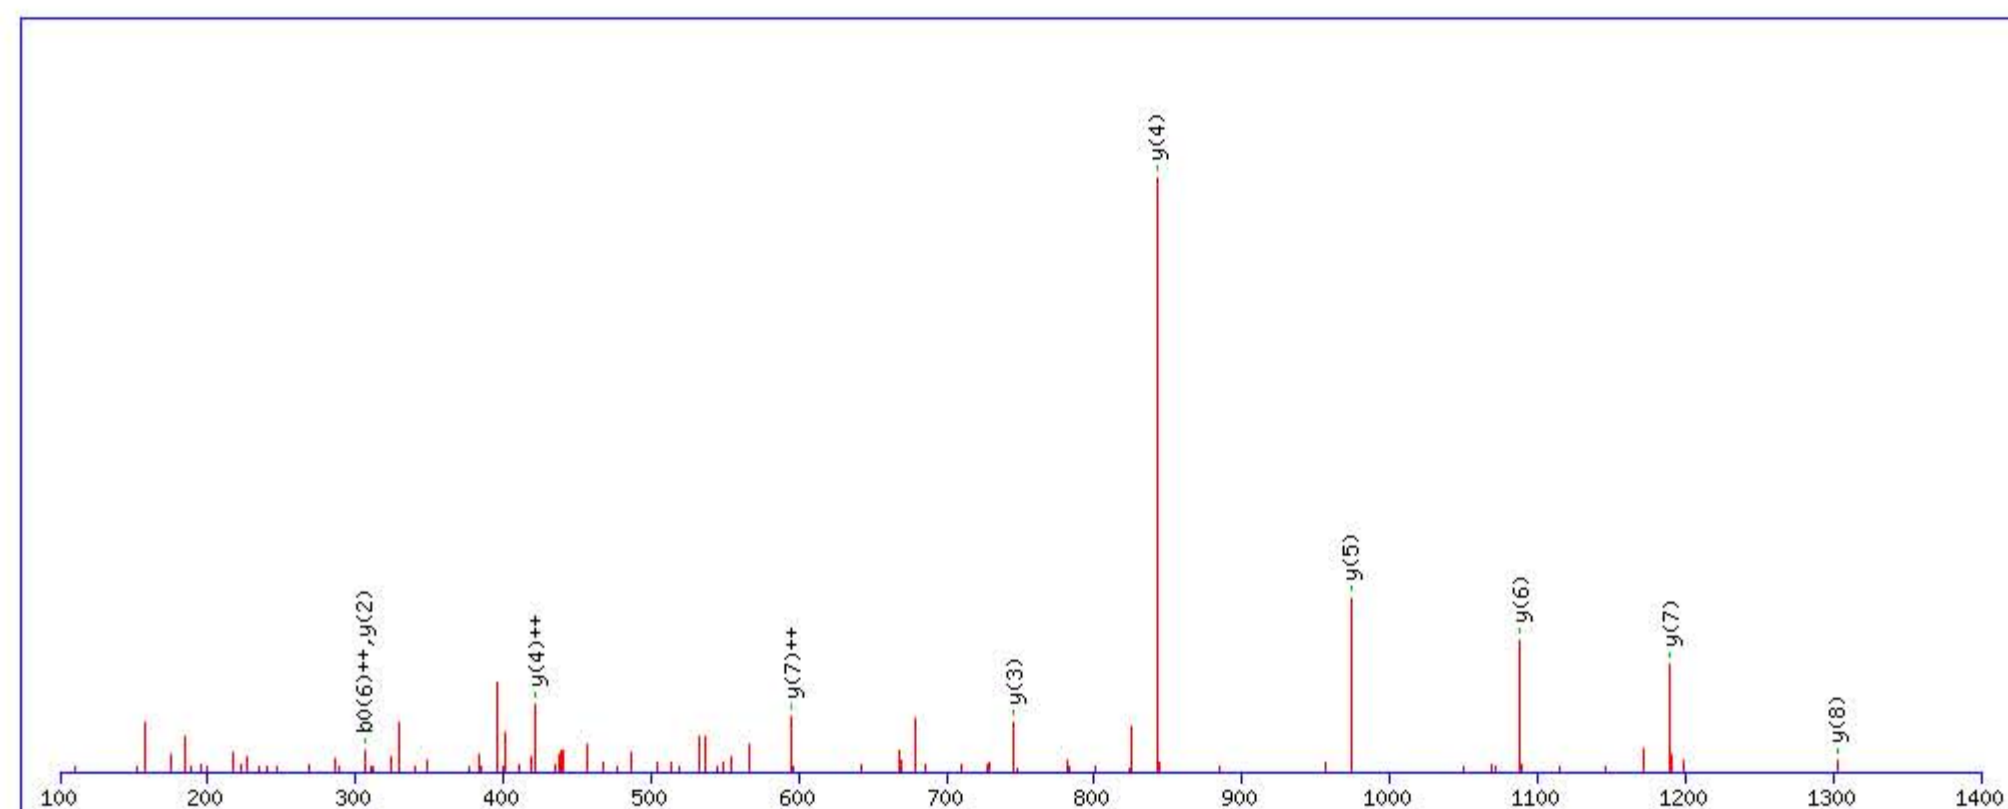

Monoisotopic mass of neutral peptide Mr(calc): 1372.666519

Fixed modifications: Carbamidomethyl (C) (apply to specified residues or termini only)

Variable modifications:

Q7 : Biotin:Thermo-21345 (Q)

Ions Score: 63 Expect: 2.4e-006

Matches : 10/70 fragment ions using 12 most intense peaks ([help](#))

| # | b           | b <sup>++</sup> | b <sup>*</sup> | b <sup>*++</sup> | b <sup>0</sup> | b <sup>0++</sup>  | Seq. | y                  | y <sup>++</sup>   | y <sup>*</sup> | y <sup>*++</sup> | y <sup>0</sup> | y <sup>0++</sup> | # |
|---|-------------|-----------------|----------------|------------------|----------------|-------------------|------|--------------------|-------------------|----------------|------------------|----------------|------------------|---|
| 1 | 72.044390   | 36.525833       |                |                  |                |                   | A    |                    |                   |                |                  |                |                  | 9 |
| 2 | 185.128454  | 93.067865       |                |                  |                |                   | L    | <b>1302.636698</b> | 651.821987        | 1285.610149    | 643.308713       | 1284.626133    | 642.816705       | 8 |
| 3 | 286.176133  | 143.591704      |                |                  | 268.165568     | 134.586422        | T    | <b>1189.552634</b> | <b>595.279955</b> | 1172.526085    | 586.766681       | 1171.542069    | 586.274672       | 7 |
| 4 | 401.203076  | 201.105176      |                |                  | 383.192511     | 192.099894        | D    | <b>1088.504955</b> | 544.756116        | 1071.478406    | 536.242841       | 1070.494390    | 535.750833       | 6 |
| 5 | 532.243561  | 266.625419      |                |                  | 514.232996     | 257.620136        | M    | <b>973.478012</b>  | 487.242644        | 956.451463     | 478.729370       |                |                  | 5 |
| 6 | 629.296325  | 315.151801      |                |                  | 611.285760     | <b>306.146518</b> | P    | <b>842.437527</b>  | <b>421.722402</b> | 825.410978     | 413.209127       |                |                  | 4 |
| 7 | 1068.521651 | 534.764464      | 1051.495102    | 526.251189       | 1050.511086    | 525.759181        | Q    | <b>745.384763</b>  | 373.196020        | 728.358214     | 364.682745       |                |                  | 3 |
| 8 | 1199.562136 | 600.284706      | 1182.535587    | 591.771432       | 1181.551571    | 591.279424        | M    | <b>306.159437</b>  | 153.583356        | 289.132888     | 145.070082       |                |                  | 2 |
| 9 |             |                 |                |                  |                |                   | R    | 175.118952         | 88.063114         | 158.092403     | 79.549839        |                |                  | 1 |

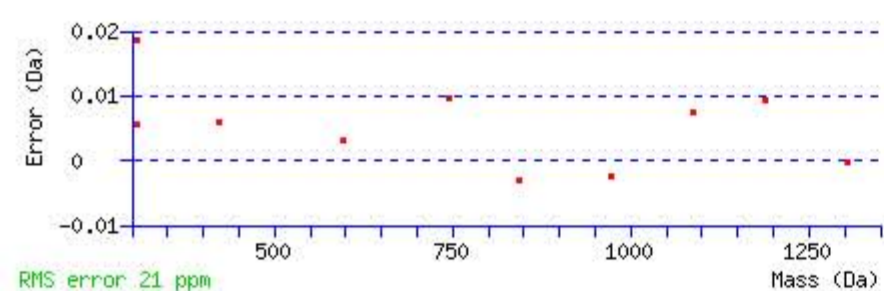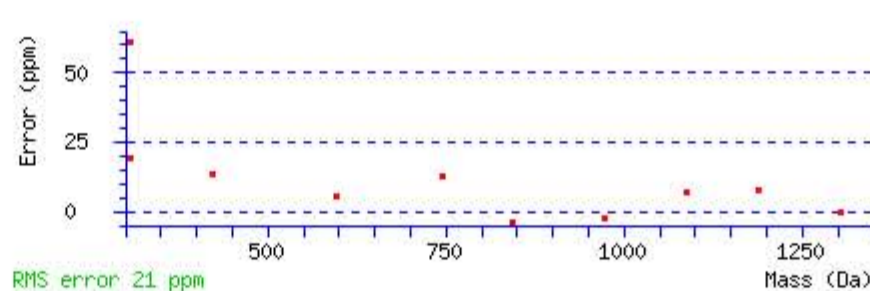

NCBI BLAST search of [ALTDMPQMR](#)

(Parameters: blastp, nr protein database, expect=20000, no filter, PAM30)

Other BLAST [web gateways](#)

## All matches to this query

| Score | Mr(calc):   | Delta     | Sequence                      |
|-------|-------------|-----------|-------------------------------|
| 62.7  | 1372.666519 | 0.001349  | <a href="#">ALTDMPQMR</a>     |
| 2.6   | 1372.663620 | 0.004248  | <a href="#">AGREHFAFGEPR</a>  |
| 0.9   | 1372.665649 | 0.002219  | <a href="#">SEMTASPLVGPER</a> |
| 0.7   | 1372.681610 | -0.013742 | <a href="#">RMGVMTDVHRR</a>   |
| 0.7   | 1372.681610 | -0.013742 | <a href="#">RMGVMTDVHRR</a>   |

# MASCOT Search Results

## Peptide View

MS/MS Fragmentation of **QFTSSTSYNR**

Found in **FIBA\_HUMAN**, Fibrinogen alpha chain OS=Homo sapiens GN=FGA PE=1 SV=2

Match to Query 29894: 1500.701268 from(751.357910,2+) rtinseconds(1599) index(30888)

Title: Locus:1.1.1.3105.25 File:"2013-07-02 CLN FXIII 60 min 3rd F 3.wiff"

Data file C:\Program Files (x86)\Matrix Science\Mascot Daemon\mgf\6 FXIII 60 min 3rd\mascot\_daemon\_merge.mgf

Click mouse within plot area to zoom in by factor of two about that point

Or, Plot from  to  Da

Label all possible matches  Label matches used for scoring

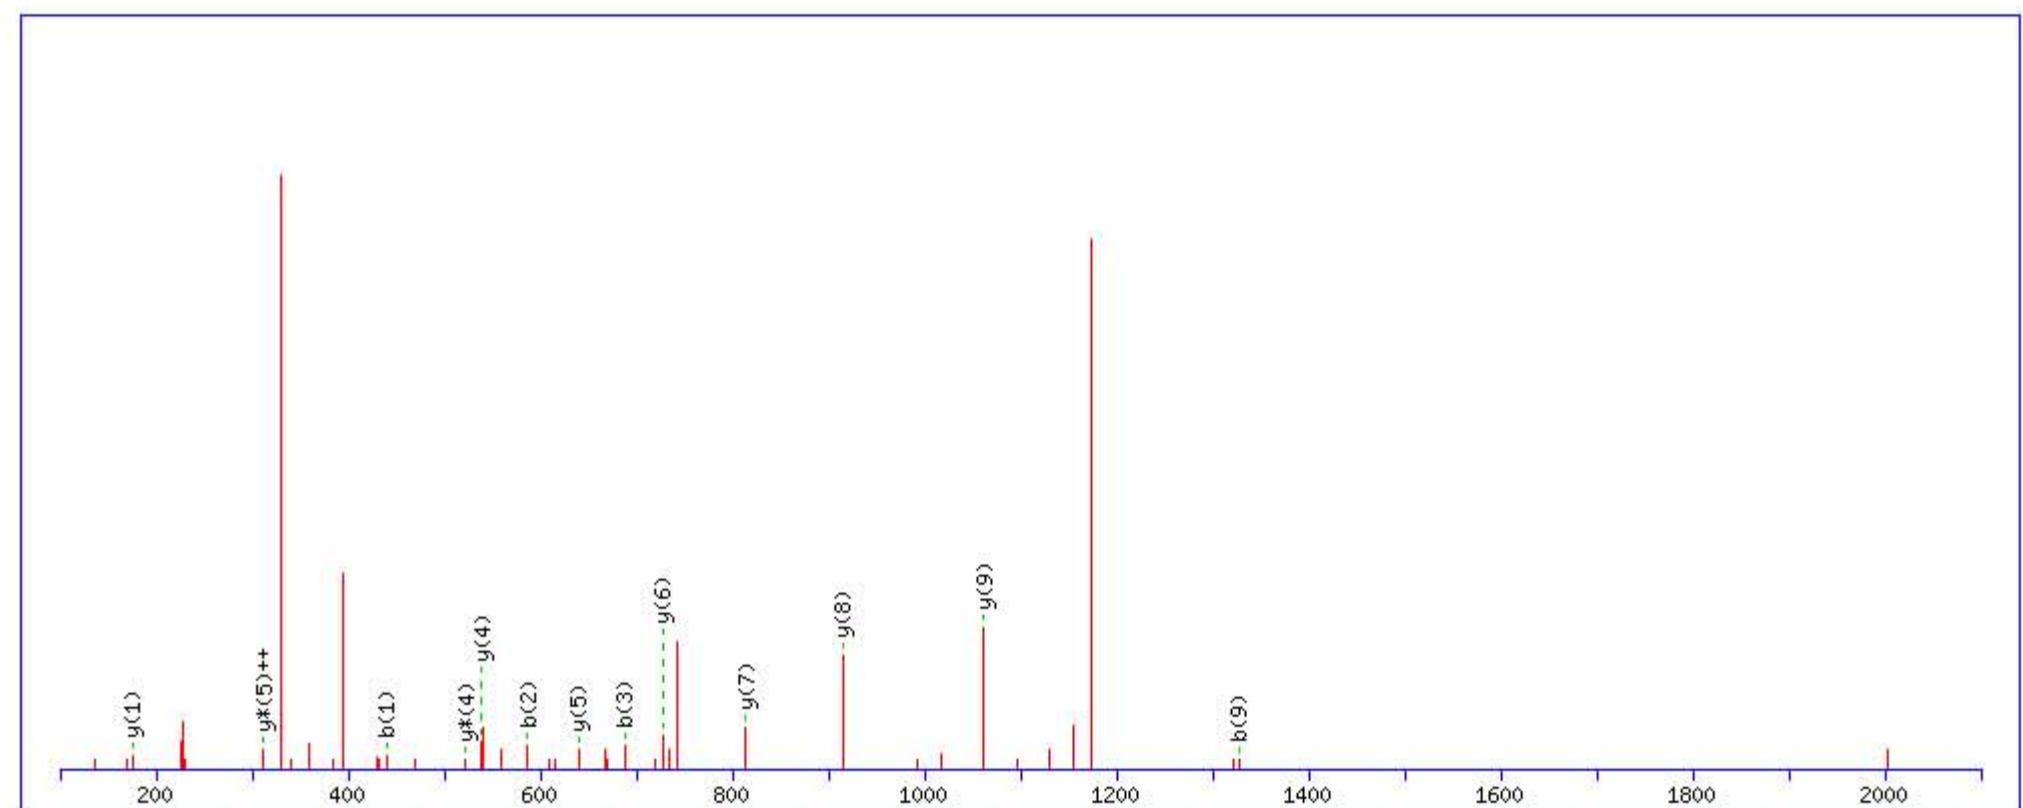

Monoisotopic mass of neutral peptide  $M_r(\text{calc})$ : 1500.703110

Fixed modifications: Carbamidomethyl (C) (apply to specified residues or termini only)

Variable modifications:

Q1 : Biotin:Thermo-21345 (Q)

Ions Score: 27 Expect: 0.0058

Matches : 13/98 fragment ions using 40 most intense peaks [\(help\)](#)

| #  | b                  | b <sup>++</sup> | b <sup>*</sup> | b <sup>*++</sup> | b <sup>0</sup> | b <sup>0++</sup> | Seq. | y                  | y <sup>++</sup> | y <sup>*</sup>    | y <sup>*++</sup>  | y <sup>0</sup> | y <sup>0++</sup> | #  |
|----|--------------------|-----------------|----------------|------------------|----------------|------------------|------|--------------------|-----------------|-------------------|-------------------|----------------|------------------|----|
| 1  | <b>440.232602</b>  | 220.619939      | 423.206053     | 212.106664       |                |                  | Q    |                    |                 |                   |                   |                |                  | 10 |
| 2  | <b>587.301016</b>  | 294.154146      | 570.274467     | 285.640872       |                |                  | F    | <b>1062.485064</b> | 531.746170      | 1045.458515       | 523.232896        | 1044.474499    | 522.740887       | 9  |
| 3  | <b>688.348695</b>  | 344.677986      | 671.322146     | 336.164711       | 670.338130     | 335.672703       | T    | <b>915.416650</b>  | 458.211963      | 898.390101        | 449.698689        | 897.406085     | 449.206681       | 8  |
| 4  | 775.380723         | 388.194000      | 758.354174     | 379.680725       | 757.370158     | 379.188717       | S    | <b>814.368971</b>  | 407.688124      | 797.342422        | 399.174849        | 796.358406     | 398.682841       | 7  |
| 5  | 862.412751         | 431.710014      | 845.386202     | 423.196739       | 844.402186     | 422.704731       | S    | <b>727.336943</b>  | 364.172110      | 710.310394        | 355.658835        | 709.326378     | 355.166827       | 6  |
| 6  | 963.460430         | 482.233853      | 946.433881     | 473.720578       | 945.449865     | 473.228570       | T    | <b>640.304915</b>  | 320.656096      | 623.278366        | <b>312.142821</b> | 622.294350     | 311.650813       | 5  |
| 7  | 1050.492458        | 525.749867      | 1033.465909    | 517.236593       | 1032.481893    | 516.744584       | S    | <b>539.257236</b>  | 270.132256      | <b>522.230687</b> | 261.618982        | 521.246671     | 261.126974       | 4  |
| 8  | 1213.555787        | 607.281532      | 1196.529238    | 598.768257       | 1195.545222    | 598.276249       | Y    | 452.225208         | 226.616242      | 435.198659        | 218.102967        |                |                  | 3  |
| 9  | <b>1327.598714</b> | 664.302995      | 1310.572165    | 655.789721       | 1309.588149    | 655.297712       | N    | 289.161879         | 145.084577      | 272.135330        | 136.571303        |                |                  | 2  |
| 10 |                    |                 |                |                  |                |                  | R    | <b>175.118952</b>  | 88.063114       | 158.092403        | 79.549839         |                |                  | 1  |

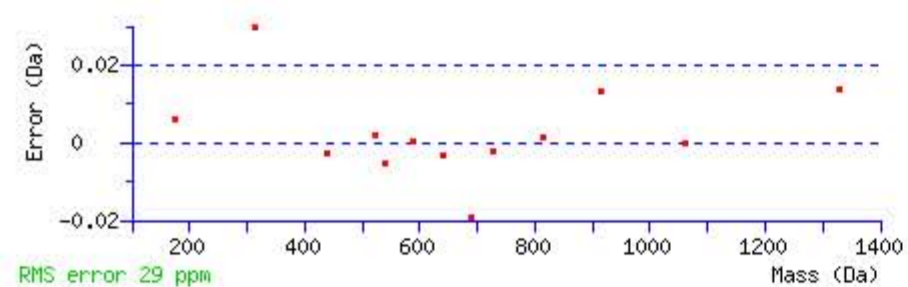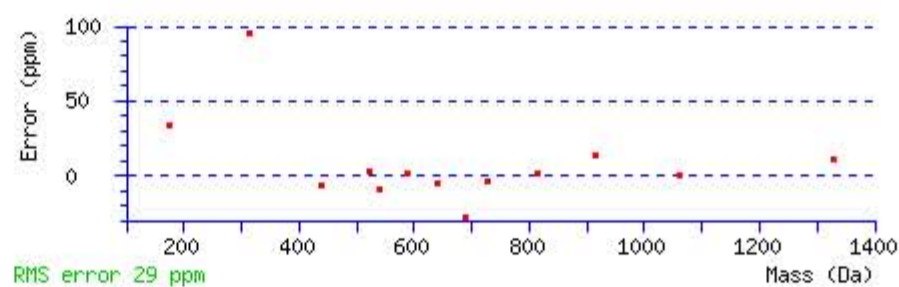

NCBI BLAST search of **QFTSSTSYNR**

(Parameters: blastp, nr protein database, expect=20000, no filter, PAM30)

Other BLAST [web gateways](#)

All matches to this query

| Score | $M_r(\text{calc})$ : | Delta     | Sequence                   |
|-------|----------------------|-----------|----------------------------|
| 26.7  | 1500.703110          | -0.001842 | <a href="#">QFTSSTSYNR</a> |
| 2.9   | 1500.703110          | -0.001842 | <a href="#">DAEGWETVQR</a> |

Mascot: <http://www.matrixscience.com/>





**MASCOT** Mascot Search Results

Peptide View

MS/MS Fragmentation of **HQLYIDETVNSNIPTNLR**

Found in **FIBB\_HUMAN**, Fibrinogen beta chain OS=Homo sapiens GN=FGB PE=1 SV=2

Match to Query 49723: 2437.266372 from(813.429400,3+) rtinseconds(2157) index(48383)

Title: Locus:1.1.1.2799.21 File:"2013-07-02 CLN FXIII 60 min 3rd F 4.wiff"

Data file C:\Program Files (x86)\Matrix Science\Mascot Daemon\mgf\6 FXIII 60 min 3rd\mascot\_daemon\_merge.mgf

Click mouse within plot area to zoom in by factor of two about that point

Or, Plot from 0 to 2600 Da Full range  
Label all possible matches  Label matches used for scoring

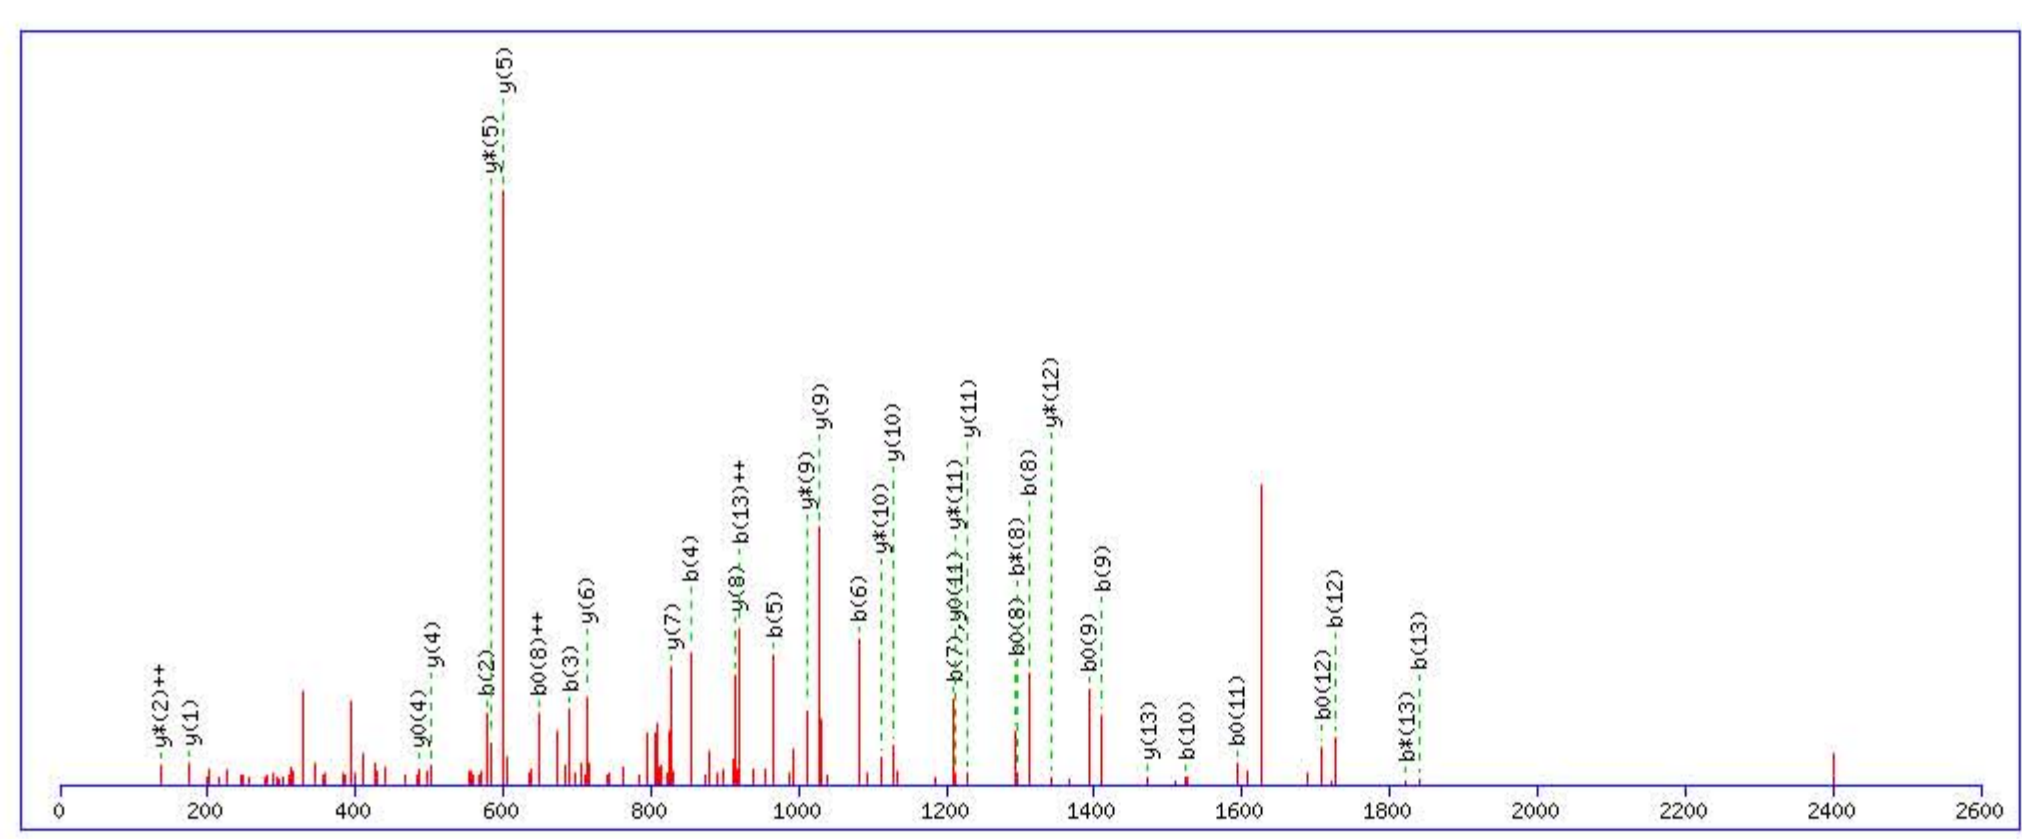

Monoisotopic mass of neutral peptide Mr(calc): 2437.242355

Fixed modifications: Carbamidomethyl (C) (apply to specified residues or termini only)

Variable modifications:

Q2 : Biotin:Thermo-21345 (Q)

Ions Score: 82 Expect: 3.5e-008

Matches : 37/186 fragment ions using 51 most intense peaks ([help](#))

| #  | b                  | b <sup>++</sup>   | b <sup>*</sup>     | b <sup>+++</sup> | b <sup>0</sup>     | b <sup>0++</sup>  | Seq. | y                  | y <sup>++</sup> | y <sup>*</sup>     | y <sup>+++</sup>  | y <sup>0</sup>     | y <sup>0++</sup> | #  |
|----|--------------------|-------------------|--------------------|------------------|--------------------|-------------------|------|--------------------|-----------------|--------------------|-------------------|--------------------|------------------|----|
| 1  | 138.066188         | 69.536732         |                    |                  |                    |                   | H    |                    |                 |                    |                   |                    |                  | 18 |
| 2  | <b>577.291514</b>  | 289.149395        | 560.264965         | 280.636121       |                    |                   | Q    | 2301.190744        | 1151.099010     | 2284.164195        | 1142.585735       | 2283.180179        | 1142.093727      | 17 |
| 3  | <b>690.375578</b>  | 345.691427        | 673.349029         | 337.178153       |                    |                   | L    | 1861.965418        | 931.486347      | 1844.938869        | 922.973073        | 1843.954853        | 922.481065       | 16 |
| 4  | <b>853.438907</b>  | 427.223092        | 836.412358         | 418.709817       |                    |                   | Y    | 1748.881354        | 874.944315      | 1731.854805        | 866.431041        | 1730.870789        | 865.939033       | 15 |
| 5  | <b>966.522971</b>  | 483.765124        | 949.496422         | 475.251849       |                    |                   | I    | 1585.818025        | 793.412651      | 1568.791476        | 784.899376        | 1567.807460        | 784.407368       | 14 |
| 6  | <b>1081.549914</b> | 541.278595        | 1064.523365        | 532.765321       | 1063.539349        | 532.273312        | D    | <b>1472.733961</b> | 736.870619      | 1455.707412        | 728.357344        | 1454.723396        | 727.865336       | 13 |
| 7  | <b>1210.592507</b> | 605.799892        | 1193.565958        | 597.286617       | 1192.581942        | 596.794609        | E    | 1357.707018        | 679.357147      | <b>1340.680469</b> | 670.843873        | 1339.696453        | 670.351865       | 12 |
| 8  | <b>1311.640186</b> | 656.323731        | <b>1294.613637</b> | 647.810457       | <b>1293.629621</b> | <b>647.318449</b> | T    | <b>1228.664425</b> | 614.835851      | <b>1211.637876</b> | 606.322576        | <b>1210.653860</b> | 605.830568       | 11 |
| 9  | <b>1410.708600</b> | 705.857938        | 1393.682051        | 697.344664       | <b>1392.698035</b> | 696.852656        | V    | <b>1127.616746</b> | 564.312011      | <b>1110.590197</b> | 555.798737        | 1109.606181        | 555.306729       | 10 |
| 10 | <b>1524.751527</b> | 762.879402        | 1507.724978        | 754.366127       | 1506.740962        | 753.874119        | N    | <b>1028.548332</b> | 514.777804      | <b>1011.521783</b> | 506.264530        | 1010.537767        | 505.772522       | 9  |
| 11 | 1611.783555        | 806.395416        | 1594.757006        | 797.882141       | <b>1593.772990</b> | 797.390133        | S    | <b>914.505405</b>  | 457.756341      | 897.478856         | 449.243066        | 896.494840         | 448.751058       | 8  |
| 12 | <b>1725.826482</b> | 863.416879        | 1708.799933        | 854.903605       | <b>1707.815917</b> | 854.411597        | N    | <b>827.473377</b>  | 414.240327      | 810.446828         | 405.727052        | 809.462812         | 405.235044       | 7  |
| 13 | <b>1838.910546</b> | <b>919.958911</b> | <b>1821.883997</b> | 911.445637       | 1820.899981        | 910.953629        | I    | <b>713.430450</b>  | 357.218863      | 696.403901         | 348.705589        | 695.419885         | 348.213581       | 6  |
| 14 | 1935.963310        | 968.485293        | 1918.936761        | 959.972019       | 1917.952745        | 959.480011        | P    | <b>600.346386</b>  | 300.676831      | <b>583.319837</b>  | 292.163557        | 582.335821         | 291.671549       | 5  |
| 15 | 2037.010989        | 1019.009133       | 2019.984440        | 1010.495858      | 2019.000424        | 1010.003850       | T    | <b>503.293622</b>  | 252.150449      | 486.267073         | 243.637175        | <b>485.283057</b>  | 243.145167       | 4  |
| 16 | 2151.053916        | 1076.030596       | 2134.027367        | 1067.517321      | 2133.043351        | 1067.025313       | N    | 402.245943         | 201.626610      | 385.219394         | 193.113335        |                    |                  | 3  |
| 17 | 2264.137980        | 1132.572628       | 2247.111431        | 1124.059353      | 2246.127415        | 1123.567345       | L    | 288.203016         | 144.605146      | 271.176467         | <b>136.091872</b> |                    |                  | 2  |
| 18 |                    |                   |                    |                  |                    |                   | R    | <b>175.118952</b>  | 88.063114       | 158.092403         | 79.549839         |                    |                  | 1  |

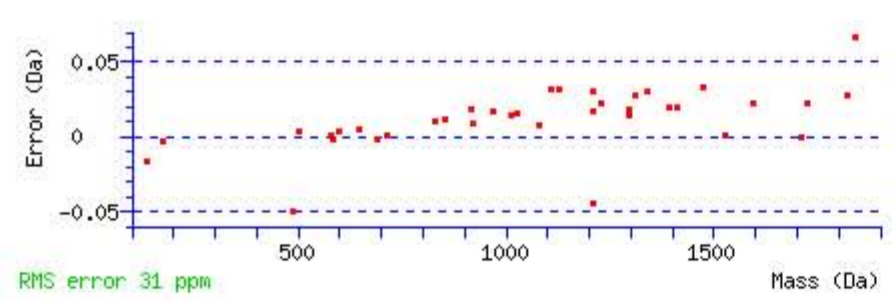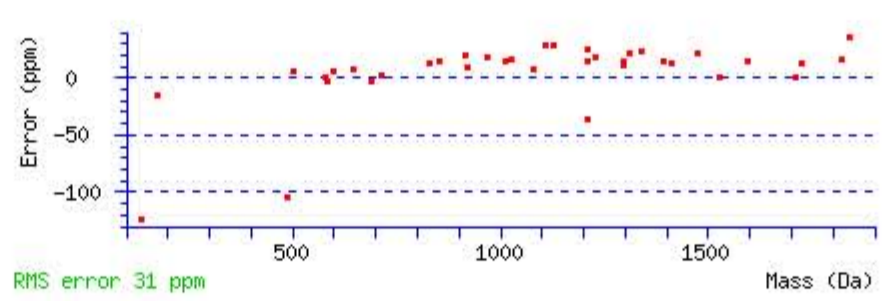

NCBI BLAST search of [HQLYIDETVNSNIPTNLR](#)

(Parameters: blastp, nr protein database, expect=20000, no filter, PAM30)

Other BLAST [web gateways](#)

All matches to this query

| Score | Mr(calc):   | Delta     | Sequence                              |
|-------|-------------|-----------|---------------------------------------|
| 82.4  | 2437.242355 | 0.024017  | <a href="#">HQLYIDETVNSNIPTNLR</a>    |
| 2.7   | 2437.253586 | 0.012786  | <a href="#">DEASGFCYLNDAVLGILRLRR</a> |
| 1.8   | 2437.289520 | -0.023148 | <a href="#">VPEIMGVICAQLSIISQPR</a>   |
| 0.2   | 2437.279617 | -0.013245 | <a href="#">GMLHQDHITFAMLLARIK</a>    |

Mascot: <http://www.matrixscience.com/>

# MASCOT Search Results

## Peptide View

MS/MS Fragmentation of **LTIGEGQQHHLGGAK**

Found in **FIBG\_HUMAN**, Fibrinogen gamma chain OS=Homo sapiens GN=FGG PE=1 SV=3

Match to Query 39637: 1855.969092 from(619.663640,3+) rtinseconds(1547) index(2357)

Title: Locus:1.1.1.3090.16 File:"2013-07-02 CLN FXIII 60 min 3rd F 1.wiff"

Data file C:\Program Files (x86)\Matrix Science\Mascot Daemon\mgf\6 FXIII 60 min 3rd\mascot\_daemon\_merge.mgf

Click mouse within plot area to zoom in by factor of two about that point

Or, Plot from  to  Da

Label all possible matches  Label matches used for scoring

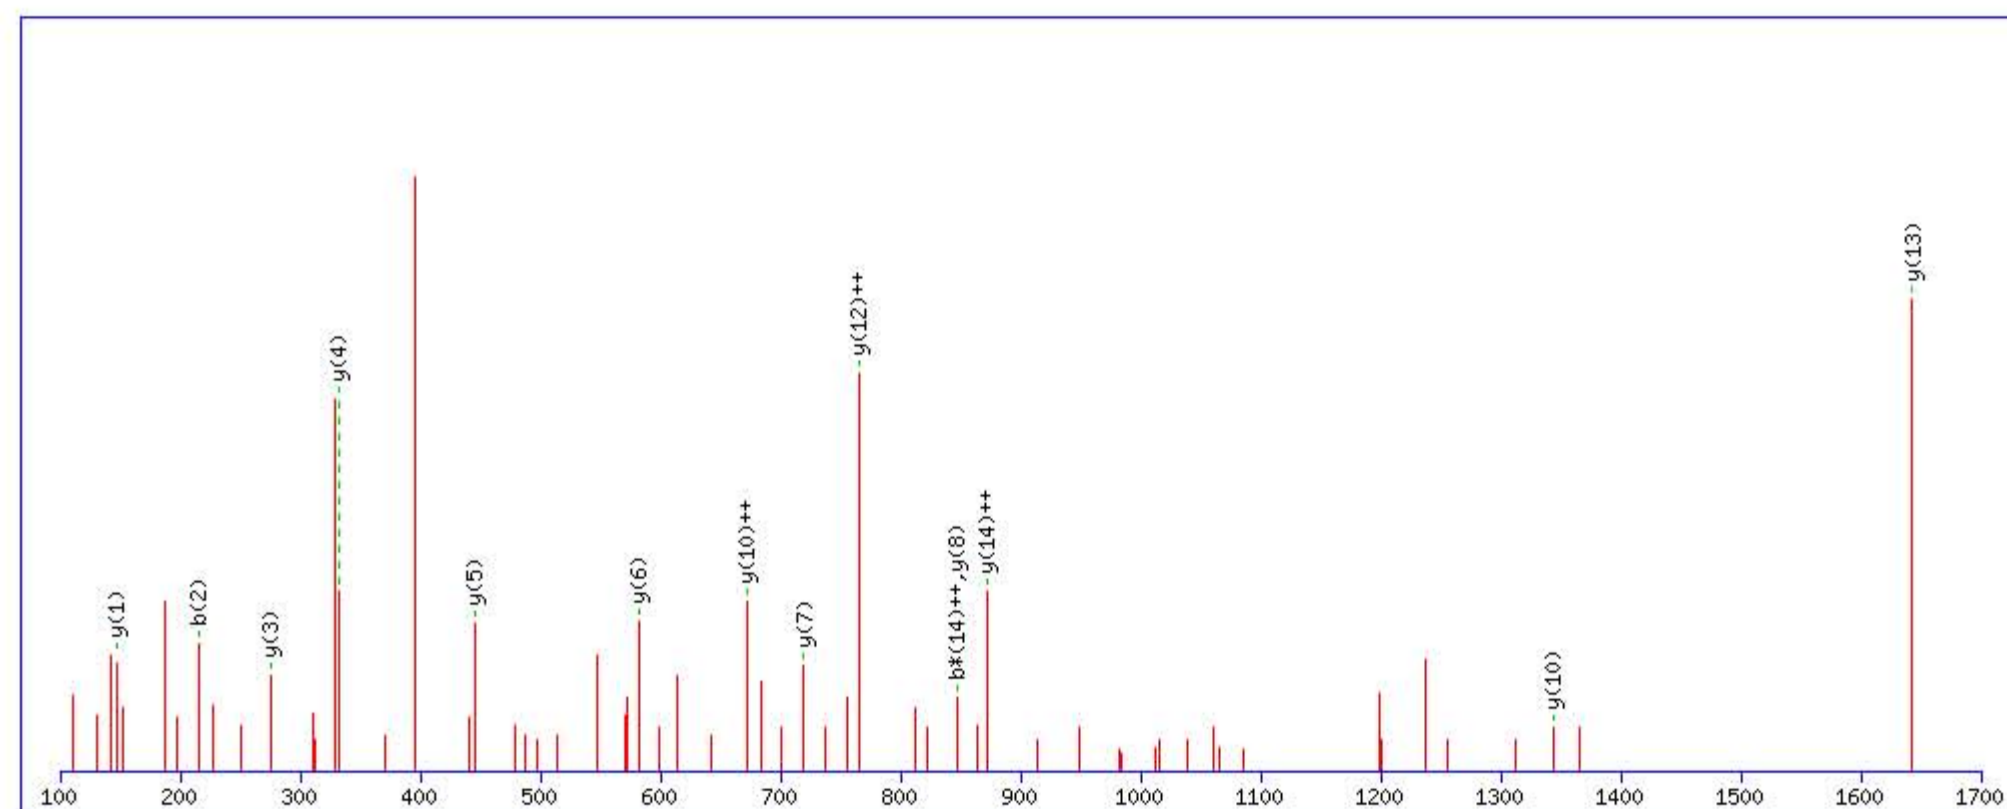

Monoisotopic mass of neutral peptide Mr(calc): 1855.972687

Fixed modifications: Carbamidomethyl (C) (apply to specified residues or termini only)

Variable modifications:

Q7 : Biotin:Thermo-21345 (Q)

Ions Score: 35 Expect: 0.0011

Matches : 14/134 fragment ions using 38 most intense peaks [\(help\)](#)

| #  | b                 | b <sup>++</sup> | b <sup>*</sup> | b <sup>*++</sup>  | b <sup>0</sup> | b <sup>0++</sup> | Seq. | y                  | y <sup>++</sup>   | y <sup>*</sup> | y <sup>*++</sup> | y <sup>0</sup> | y <sup>0++</sup> | #  |
|----|-------------------|-----------------|----------------|-------------------|----------------|------------------|------|--------------------|-------------------|----------------|------------------|----------------|------------------|----|
| 1  | 114.091340        | 57.549308       |                |                   |                |                  | L    |                    |                   |                |                  |                |                  | 15 |
| 2  | <b>215.139019</b> | 108.073147      |                |                   | 197.128454     | 99.067865        | T    | 1743.895902        | <b>872.451589</b> | 1726.869353    | 863.938314       | 1725.885337    | 863.446306       | 14 |
| 3  | 328.223083        | 164.615179      |                |                   | 310.212518     | 155.609897       | I    | <b>1642.848223</b> | 821.927749        | 1625.821674    | 813.414475       | 1624.837658    | 812.922467       | 13 |
| 4  | 385.244547        | 193.125911      |                |                   | 367.233982     | 184.120629       | G    | 1529.764159        | <b>765.385717</b> | 1512.737610    | 756.872443       | 1511.753594    | 756.380435       | 12 |
| 5  | 514.287140        | 257.647208      |                |                   | 496.276575     | 248.641926       | E    | 1472.742695        | 736.874985        | 1455.716146    | 728.361711       | 1454.732130    | 727.869703       | 11 |
| 6  | 571.308604        | 286.157940      |                |                   | 553.298039     | 277.152658       | G    | <b>1343.700102</b> | <b>672.353689</b> | 1326.673553    | 663.840414       |                |                  | 10 |
| 7  | 1010.533930       | 505.770603      | 993.507381     | 497.257329        | 992.523365     | 496.765321       | Q    | 1286.678638        | 643.842957        | 1269.652089    | 635.329682       |                |                  | 9  |
| 8  | 1138.592508       | 569.799892      | 1121.565959    | 561.286618        | 1120.581943    | 560.794609       | Q    | <b>847.453312</b>  | 424.230294        | 830.426763     | 415.717019       |                |                  | 8  |
| 9  | 1275.651420       | 638.329348      | 1258.624871    | 629.816074        | 1257.640855    | 629.324065       | H    | <b>719.394734</b>  | 360.201005        | 702.368185     | 351.687730       |                |                  | 7  |
| 10 | 1412.710332       | 706.858804      | 1395.683783    | 698.345530        | 1394.699767    | 697.853521       | H    | <b>582.335822</b>  | 291.671549        | 565.309273     | 283.158274       |                |                  | 6  |
| 11 | 1525.794396       | 763.400836      | 1508.767847    | 754.887561        | 1507.783831    | 754.395553       | L    | <b>445.276910</b>  | 223.142093        | 428.250361     | 214.628818       |                |                  | 5  |
| 12 | 1582.815860       | 791.911568      | 1565.789311    | 783.398293        | 1564.805295    | 782.906285       | G    | <b>332.192846</b>  | 166.600061        | 315.166297     | 158.086786       |                |                  | 4  |
| 13 | 1639.837324       | 820.422300      | 1622.810775    | 811.909025        | 1621.826759    | 811.417017       | G    | <b>275.171382</b>  | 138.089329        | 258.144833     | 129.576054       |                |                  | 3  |
| 14 | 1710.874438       | 855.940857      | 1693.847889    | <b>847.427582</b> | 1692.863873    | 846.935574       | A    | 218.149918         | 109.578597        | 201.123369     | 101.065322       |                |                  | 2  |
| 15 |                   |                 |                |                   |                |                  | K    | <b>147.112804</b>  | 74.060040         | 130.086255     | 65.546765        |                |                  | 1  |

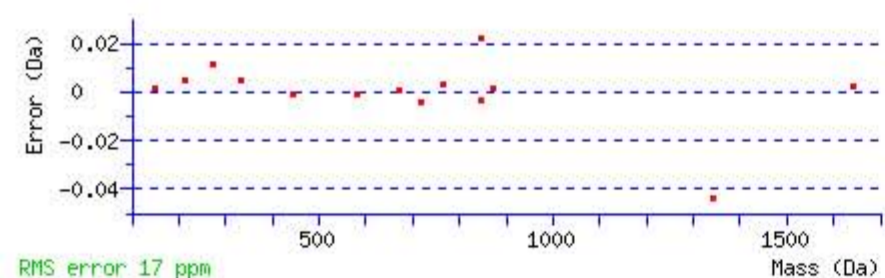

RMS error 17 ppm

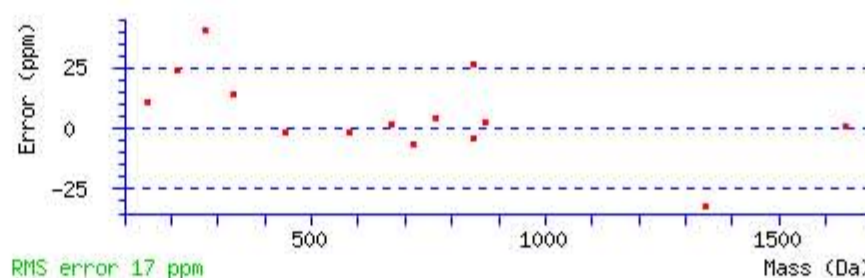

RMS error 17 ppm

NCBI BLAST search of **LTIGEGQQHHLGGAK**

(Parameters: blastp, nr protein database, expect=20000, no filter, PAM30)

Other BLAST [web gateways](#)

All matches to this query

| Score | Mr(calc):   | Delta     | Sequence                          |
|-------|-------------|-----------|-----------------------------------|
| 35.0  | 1855.972687 | -0.003595 | <a href="#">LTIGEGQQHHLGGAK</a>   |
| 28.4  | 1855.972687 | -0.003595 | <a href="#">LTIGEGQQHHLGGAK</a>   |
| 3.3   | 1855.979202 | -0.010110 | <a href="#">ITIVENVGSVEGLAYHR</a> |

Mascot: <http://www.matrixscience.com/>

# MASCOT Search Results

## Peptide View

MS/MS Fragmentation of **LTIGEGQQHHLGGAK**

Found in **FIBG\_HUMAN**, Fibrinogen gamma chain OS=Homo sapiens GN=FGG PE=1 SV=3

Match to Query 39649: 1855.975992 from(619.665940,3+) rtinseconds(1503) index(44212)

Title: Locus:1.1.1.2572.8 File:"2013-07-02 CLN FXIII 60 min 3rd F 4.wiff"

Data file C:\Program Files (x86)\Matrix Science\Mascot Daemon\mgf\6 FXIII 60 min 3rd\mascot\_daemon\_merge.mgf

Click mouse within plot area to zoom in by factor of two about that point

Or, Plot from  to  Da

Label all possible matches  Label matches used for scoring

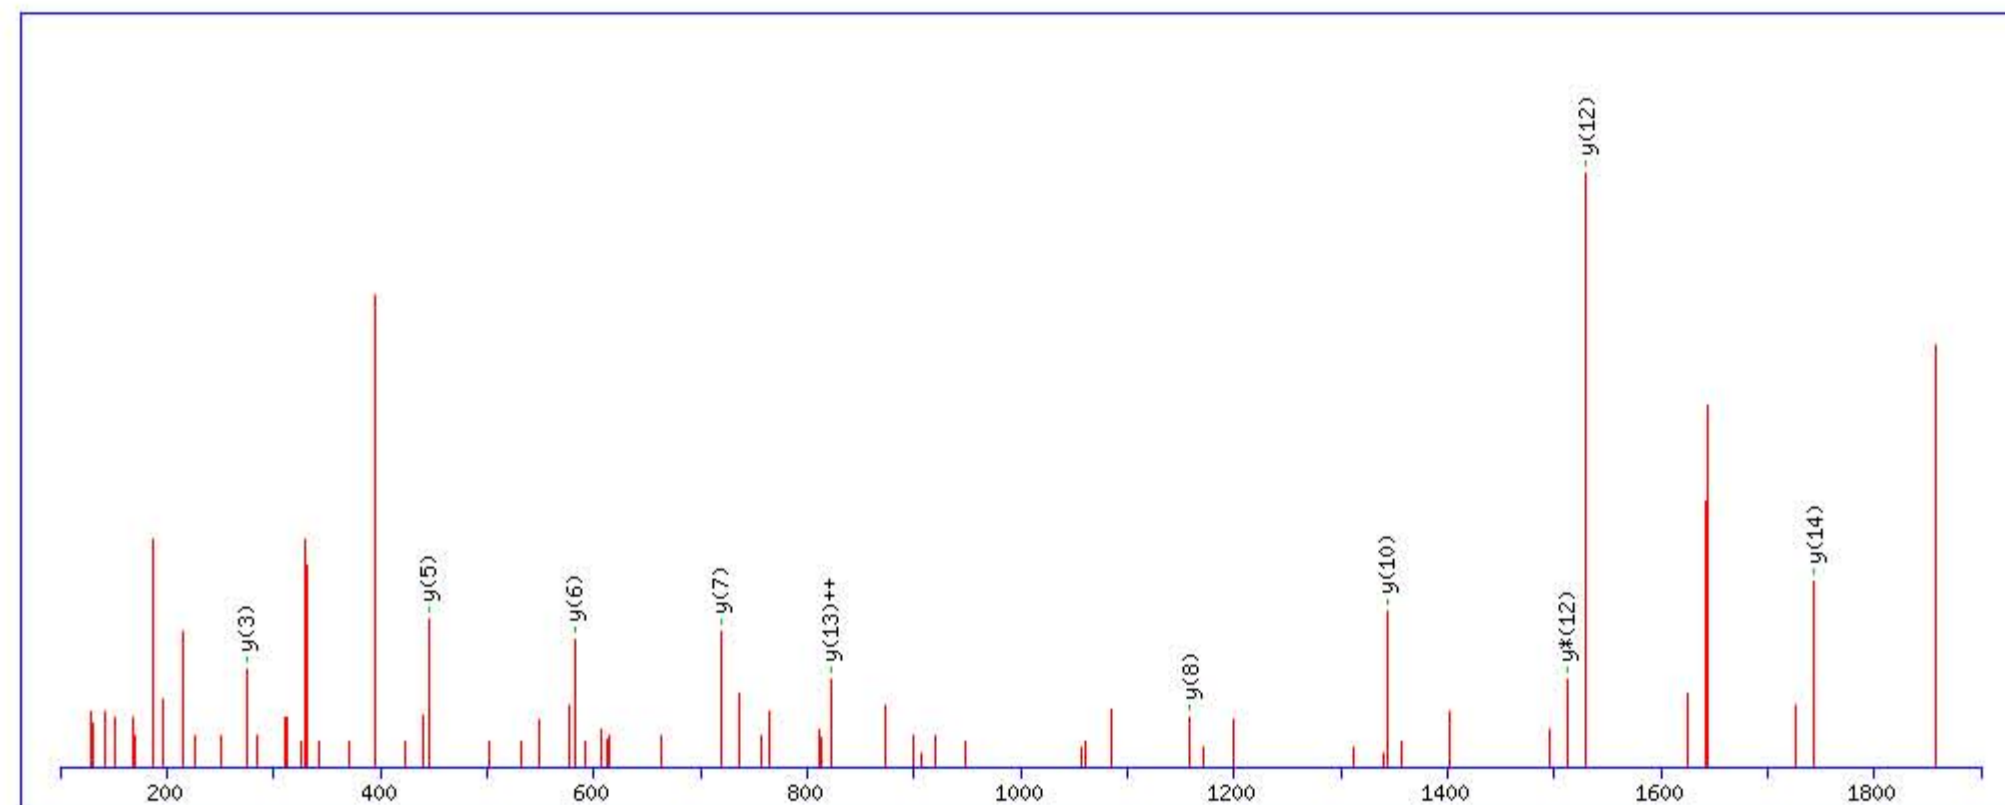

Monoisotopic mass of neutral peptide Mr(calc): 1855.972687

Fixed modifications: Carbamidomethyl (C) (apply to specified residues or termini only)

Variable modifications:

Q8 : Biotin:Thermo-21345 (Q)

Ions Score: 48 Expect: 9.7e-005

Matches : 10/134 fragment ions using 17 most intense peaks [\(help\)](#)

| #  | b           | b <sup>++</sup> | b <sup>*</sup> | b <sup>*++</sup> | b <sup>0</sup> | b <sup>0++</sup> | Seq. | y                  | y <sup>++</sup>   | y <sup>*</sup>     | y <sup>*++</sup> | y <sup>0</sup> | y <sup>0++</sup> | #  |
|----|-------------|-----------------|----------------|------------------|----------------|------------------|------|--------------------|-------------------|--------------------|------------------|----------------|------------------|----|
| 1  | 114.091340  | 57.549308       |                |                  |                |                  | L    |                    |                   |                    |                  |                |                  | 15 |
| 2  | 215.139019  | 108.073147      |                |                  | 197.128454     | 99.067865        | T    | <b>1743.895902</b> | 872.451589        | 1726.869353        | 863.938314       | 1725.885337    | 863.446306       | 14 |
| 3  | 328.223083  | 164.615179      |                |                  | 310.212518     | 155.609897       | I    | 1642.848223        | <b>821.927749</b> | 1625.821674        | 813.414475       | 1624.837658    | 812.922467       | 13 |
| 4  | 385.244547  | 193.125911      |                |                  | 367.233982     | 184.120629       | G    | <b>1529.764159</b> | 765.385717        | <b>1512.737610</b> | 756.872443       | 1511.753594    | 756.380435       | 12 |
| 5  | 514.287140  | 257.647208      |                |                  | 496.276575     | 248.641926       | E    | 1472.742695        | 736.874985        | 1455.716146        | 728.361711       | 1454.732130    | 727.869703       | 11 |
| 6  | 571.308604  | 286.157940      |                |                  | 553.298039     | 277.152658       | G    | <b>1343.700102</b> | 672.353689        | 1326.673553        | 663.840414       |                |                  | 10 |
| 7  | 699.367182  | 350.187229      | 682.340633     | 341.673955       | 681.356617     | 341.181947       | Q    | 1286.678638        | 643.842957        | 1269.652089        | 635.329682       |                |                  | 9  |
| 8  | 1138.592508 | 569.799892      | 1121.565959    | 561.286618       | 1120.581943    | 560.794609       | Q    | <b>1158.620060</b> | 579.813668        | 1141.593511        | 571.300393       |                |                  | 8  |
| 9  | 1275.651420 | 638.329348      | 1258.624871    | 629.816074       | 1257.640855    | 629.324065       | H    | <b>719.394734</b>  | 360.201005        | 702.368185         | 351.687730       |                |                  | 7  |
| 10 | 1412.710332 | 706.858804      | 1395.683783    | 698.345530       | 1394.699767    | 697.853521       | H    | <b>582.335822</b>  | 291.671549        | 565.309273         | 283.158274       |                |                  | 6  |
| 11 | 1525.794396 | 763.400836      | 1508.767847    | 754.887561       | 1507.783831    | 754.395553       | L    | <b>445.276910</b>  | 223.142093        | 428.250361         | 214.628818       |                |                  | 5  |
| 12 | 1582.815860 | 791.911568      | 1565.789311    | 783.398293       | 1564.805295    | 782.906285       | G    | 332.192846         | 166.600061        | 315.166297         | 158.086786       |                |                  | 4  |
| 13 | 1639.837324 | 820.422300      | 1622.810775    | 811.909025       | 1621.826759    | 811.417017       | G    | <b>275.171382</b>  | 138.089329        | 258.144833         | 129.576054       |                |                  | 3  |
| 14 | 1710.874438 | 855.940857      | 1693.847889    | 847.427582       | 1692.863873    | 846.935574       | A    | 218.149918         | 109.578597        | 201.123369         | 101.065322       |                |                  | 2  |
| 15 |             |                 |                |                  |                |                  | K    | 147.112804         | 74.060040         | 130.086255         | 65.546765        |                |                  | 1  |

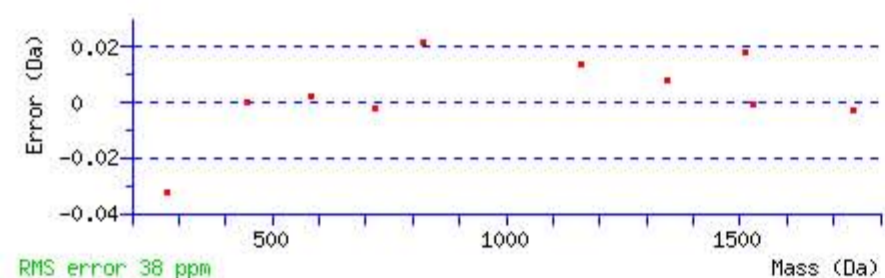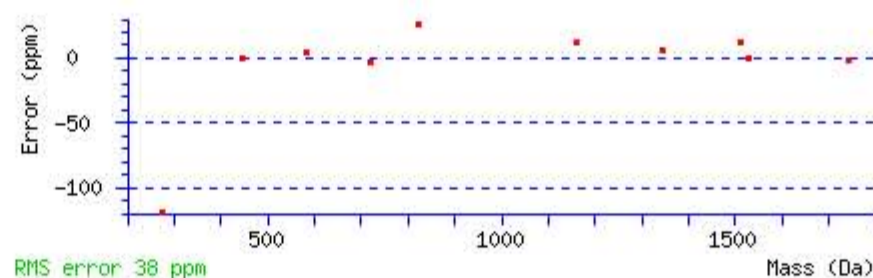

NCBI BLAST search of **LTIGEGQQHHLGGAK**

(Parameters: blastp, nr protein database, expect=20000, no filter, PAM30)

Other BLAST [web gateways](#)

All matches to this query

| Score | Mr(calc):   | Delta     | Sequence                          |
|-------|-------------|-----------|-----------------------------------|
| 48.1  | 1855.972687 | 0.003305  | <a href="#">LTIGEGQQHHLGGAK</a>   |
| 37.9  | 1855.972687 | 0.003305  | <a href="#">LTIGEGQQHHLGGAK</a>   |
| 5.3   | 1855.979202 | -0.003210 | <a href="#">ITIVENVGSVEGLAYHR</a> |

Mascot: <http://www.matrixscience.com/>



# MASCOT Search Results

## Peptide View

MS/MS Fragmentation of **LTIGEGQQHHLGGAK**

Found in **FIBG\_HUMAN**, Fibrinogen gamma chain OS=Homo sapiens GN=FGG PE=1 SV=3

Match to Query 45461: 2167.147008 from(1084.580780,2+) rtinseconds(1805) index(3840)

Title: Locus:1.1.1.3180.15 File:"2013-07-02 CLN FXIII 60 min 3rd F 1.wiff"

Data file C:\Program Files (x86)\Matrix Science\Mascot Daemon\mgf6 FXIII 60 min 3rd\mascot\_daemon\_merge.mgf

Click mouse within plot area to zoom in by factor of two about that point

Or, Plot from  to  Da

Label all possible matches  Label matches used for scoring

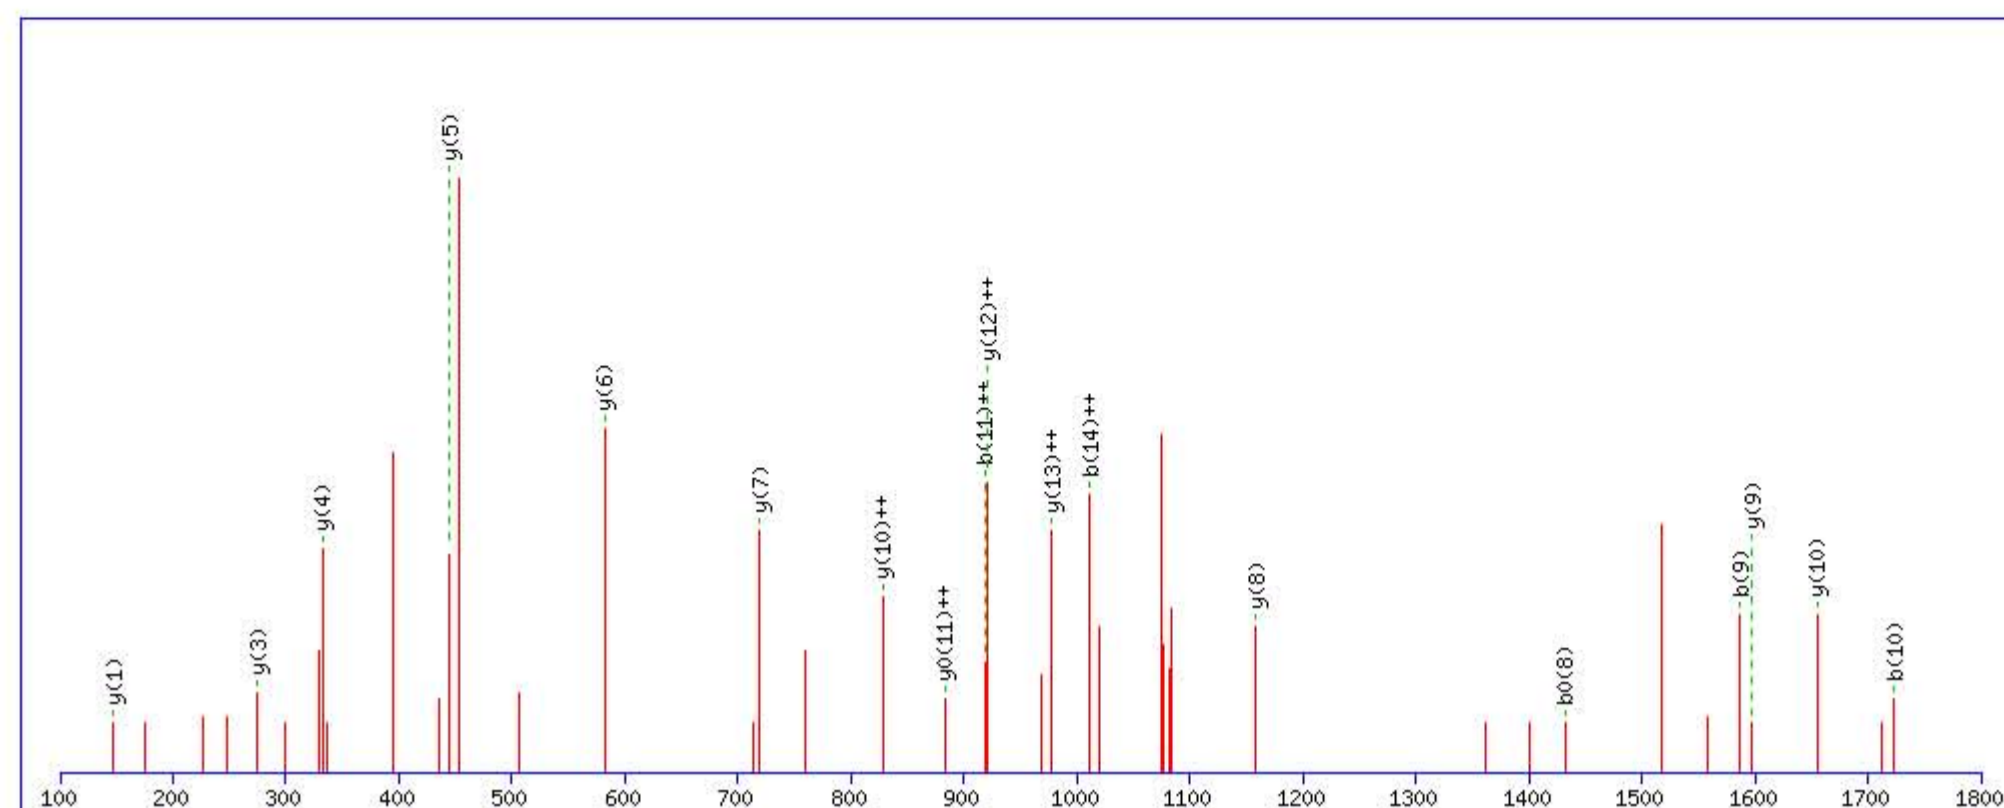

Monoisotopic mass of neutral peptide Mr(calc): 2167.139435

Fixed modifications: Carbamidomethyl (C) (apply to specified residues or termini only)

Variable modifications:

Q7 : Biotin:Thermo-21345 (Q)

Q8 : Biotin:Thermo-21345 (Q)

Ions Score: 49 Expect: 4.7e-005

Matches : 18/134 fragment ions using 36 most intense peaks [\(help\)](#)

| #  | b           | b <sup>++</sup> | b <sup>*</sup> | b <sup>+++</sup> | b <sup>0</sup> | b <sup>0++</sup> | Seq. | y           | y <sup>++</sup> | y <sup>*</sup> | y <sup>+++</sup> | y <sup>0</sup> | y <sup>0++</sup> | #  |
|----|-------------|-----------------|----------------|------------------|----------------|------------------|------|-------------|-----------------|----------------|------------------|----------------|------------------|----|
| 1  | 114.091340  | 57.549308       |                |                  |                |                  | L    |             |                 |                |                  |                |                  | 15 |
| 2  | 215.139019  | 108.073147      |                |                  | 197.128454     | 99.067865        | T    | 2055.062650 | 1028.034963     | 2038.036101    | 1019.521688      | 2037.052085    | 1019.029680      | 14 |
| 3  | 328.223083  | 164.615179      |                |                  | 310.212518     | 155.609897       | I    | 1954.014971 | 977.511123      | 1936.988422    | 968.997849       | 1936.004406    | 968.505841       | 13 |
| 4  | 385.244547  | 193.125911      |                |                  | 367.233982     | 184.120629       | G    | 1840.930907 | 920.969091      | 1823.904358    | 912.455817       | 1822.920342    | 911.963809       | 12 |
| 5  | 514.287140  | 257.647208      |                |                  | 496.276575     | 248.641926       | E    | 1783.909443 | 892.458359      | 1766.882894    | 883.945085       | 1765.898878    | 883.453077       | 11 |
| 6  | 571.308604  | 286.157940      |                |                  | 553.298039     | 277.152658       | G    | 1654.866850 | 827.937063      | 1637.840301    | 819.423788       |                |                  | 10 |
| 7  | 1010.533930 | 505.770603      | 993.507381     | 497.257329       | 992.523365     | 496.765321       | Q    | 1597.845386 | 799.426331      | 1580.818837    | 790.913056       |                |                  | 9  |
| 8  | 1449.759256 | 725.383266      | 1432.732707    | 716.869992       | 1431.748691    | 716.377984       | Q    | 1158.620060 | 579.813668      | 1141.593511    | 571.300393       |                |                  | 8  |
| 9  | 1586.818168 | 793.912722      | 1569.791619    | 785.399448       | 1568.807603    | 784.907440       | H    | 719.394734  | 360.201005      | 702.368185     | 351.687730       |                |                  | 7  |
| 10 | 1723.877080 | 862.442178      | 1706.850531    | 853.928904       | 1705.866515    | 853.436895       | H    | 582.335822  | 291.671549      | 565.309273     | 283.158274       |                |                  | 6  |
| 11 | 1836.961144 | 918.984210      | 1819.934595    | 910.470936       | 1818.950579    | 909.978927       | L    | 445.276910  | 223.142093      | 428.250361     | 214.628818       |                |                  | 5  |
| 12 | 1893.982608 | 947.494942      | 1876.956059    | 938.981667       | 1875.972043    | 938.489659       | G    | 332.192846  | 166.600061      | 315.166297     | 158.086786       |                |                  | 4  |
| 13 | 1951.004072 | 976.005674      | 1933.977523    | 967.492399       | 1932.993507    | 967.000391       | G    | 275.171382  | 138.089329      | 258.144833     | 129.576054       |                |                  | 3  |
| 14 | 2022.041186 | 1011.524231     | 2005.014637    | 1003.010956      | 2004.030621    | 1002.518948      | A    | 218.149918  | 109.578597      | 201.123369     | 101.065322       |                |                  | 2  |
| 15 |             |                 |                |                  |                |                  | K    | 147.112804  | 74.060040       | 130.086255     | 65.546765        |                |                  | 1  |

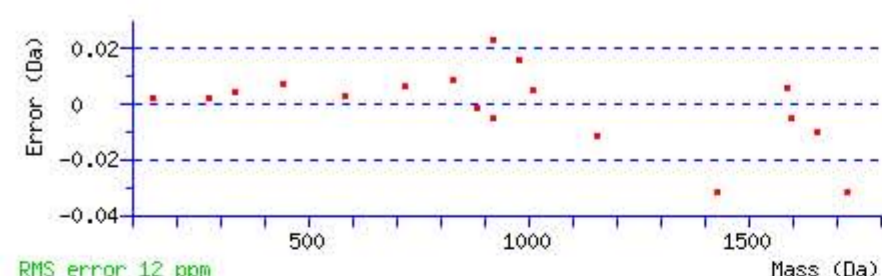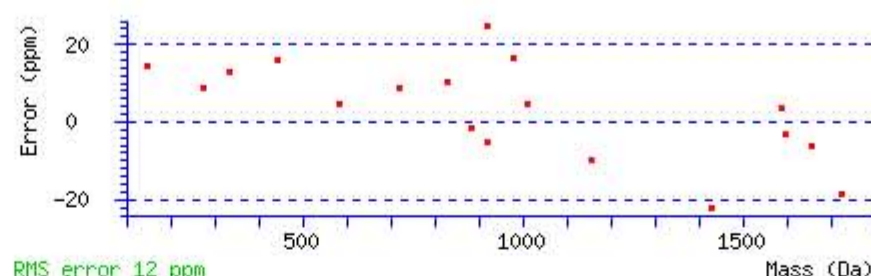

NCBI BLAST search of **LTIGEGQQHHLGGAK**

(Parameters: blastp, nr protein database, expect=20000, no filter, PAM30)

Other BLAST [web gateways](#)

All matches to this query

| Score | Mr(calc):   | Delta     | Sequence                              |
|-------|-------------|-----------|---------------------------------------|
| 49.4  | 2167.139435 | 0.007573  | <a href="#">LTIGEGQQHHLGGAK</a>       |
| 3.1   | 2167.177612 | -0.030604 | <a href="#">EPPPEPVPSPPIIPLPSTAGK</a> |
| 1.3   | 2167.127304 | 0.019704  | <a href="#">LQNTSLYDSKIWTKNQK</a>     |

Mascot: <http://www.matrixscience.com/>

# MASCOT Search Results

## Peptide View

MS/MS Fragmentation of **IGDQWDK**

Found in **FINC\_HUMAN**, Fibronectin OS=Homo sapiens GN=FN1 PE=1 SV=4

Match to Query 19490: 1171.570968 from(586.792760,2+) rtinseconds(1824) index(32029)

Title: Locus:1.1.1.3184.8 File:"2013-07-02 CLN FXIII 60 min 3rd F 3.wiff"

Data file C:\Program Files (x86)\Matrix Science\Mascot Daemon\mgf6 FXIII 60 min 3rd\mascot\_daemon\_merge.mgf

Click mouse within plot area to zoom in by factor of two about that point

Or, Plot from  to  Da

Label all possible matches  Label matches used for scoring

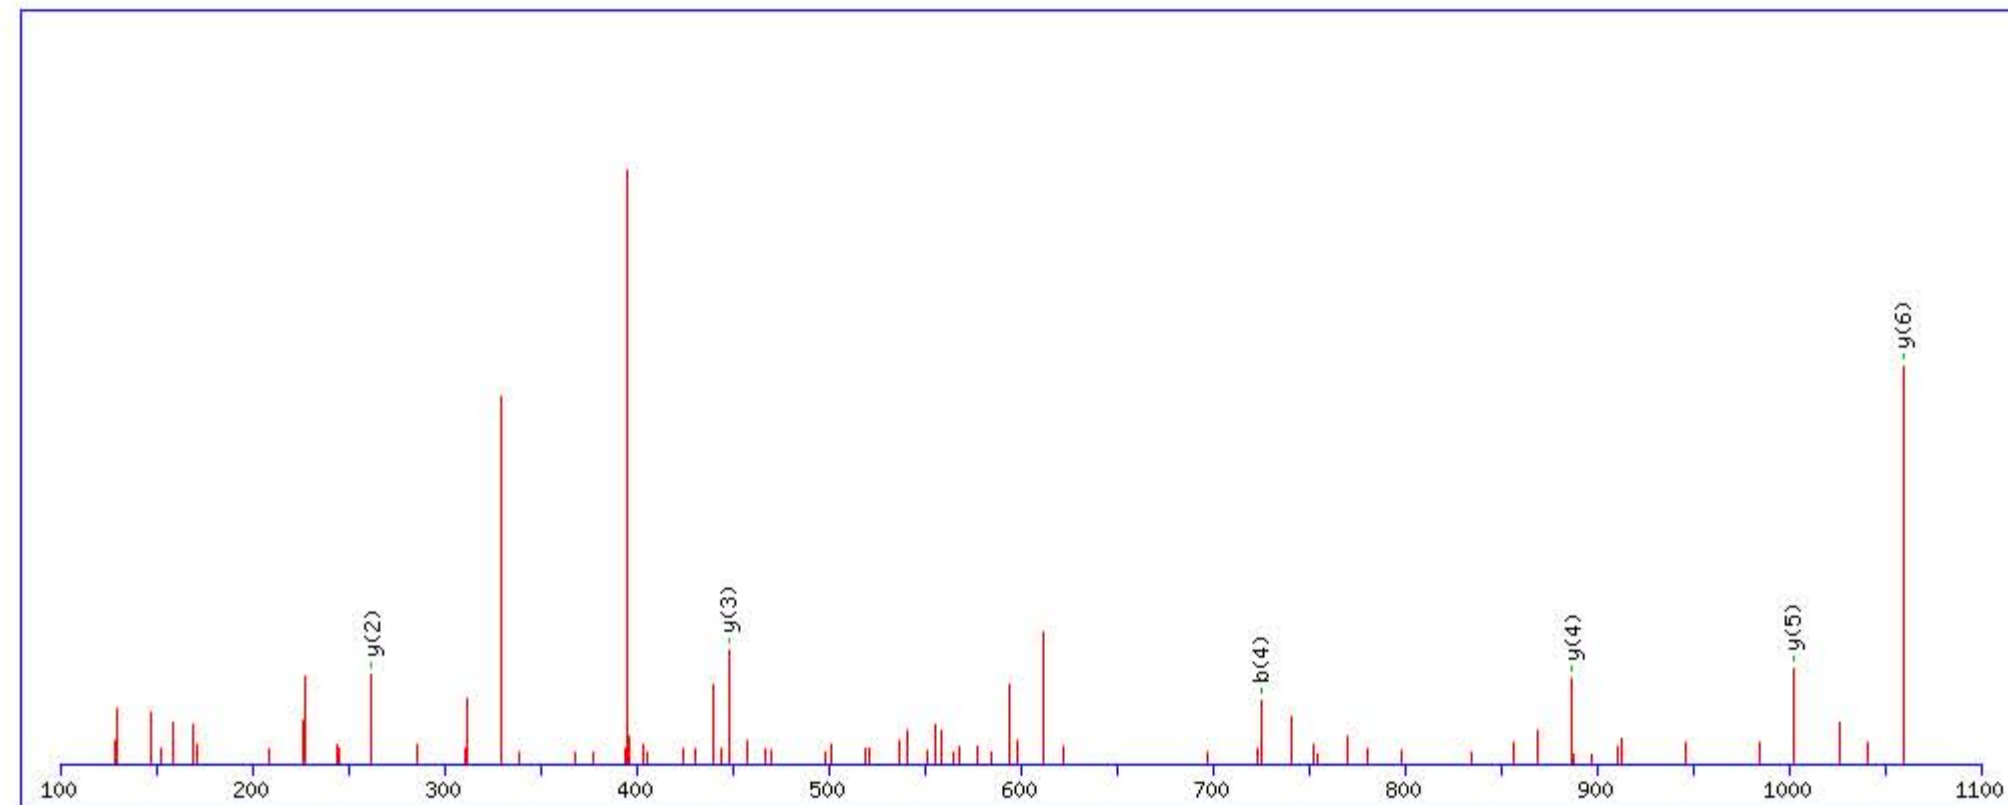

Monoisotopic mass of neutral peptide Mr(calc): 1171.569580

Fixed modifications: Carbamidomethyl (C) (apply to specified residues or termini only)

Variable modifications:

Q4 : Biotin:Thermo-21345 (Q)

Ions Score: 31 Expect: 0.013

Matches : 6/60 fragment ions using 10 most intense peaks [\(help\)](#)

| # | b           | b <sup>++</sup> | b <sup>*</sup> | b <sup>+++</sup> | b <sup>0</sup> | b <sup>0++</sup> | Seq. | y           | y <sup>++</sup> | y <sup>*</sup> | y <sup>+++</sup> | y <sup>0</sup> | y <sup>0++</sup> | # |
|---|-------------|-----------------|----------------|------------------|----------------|------------------|------|-------------|-----------------|----------------|------------------|----------------|------------------|---|
| 1 | 114.091340  | 57.549308       |                |                  |                |                  | I    |             |                 |                |                  |                |                  | 7 |
| 2 | 171.112804  | 86.060040       |                |                  |                |                  | G    | 1059.492793 | 530.250035      | 1042.466244    | 521.736760       | 1041.482228    | 521.244752       | 6 |
| 3 | 286.139747  | 143.573512      |                |                  | 268.129182     | 134.568229       | D    | 1002.471329 | 501.739303      | 985.444780     | 493.226028       | 984.460764     | 492.734020       | 5 |
| 4 | 725.365073  | 363.186175      | 708.338524     | 354.672900       | 707.354508     | 354.180892       | Q    | 887.444386  | 444.225831      | 870.417837     | 435.712557       | 869.433821     | 435.220549       | 4 |
| 5 | 911.444386  | 456.225831      | 894.417837     | 447.712557       | 893.433821     | 447.220549       | W    | 448.219060  | 224.613168      | 431.192511     | 216.099894       | 430.208495     | 215.607886       | 3 |
| 6 | 1026.471329 | 513.739303      | 1009.444780    | 505.226028       | 1008.460764    | 504.734020       | D    | 262.139747  | 131.573512      | 245.113198     | 123.060237       | 244.129182     | 122.568229       | 2 |
| 7 |             |                 |                |                  |                |                  | K    | 147.112804  | 74.060040       | 130.086255     | 65.546765        |                |                  | 1 |

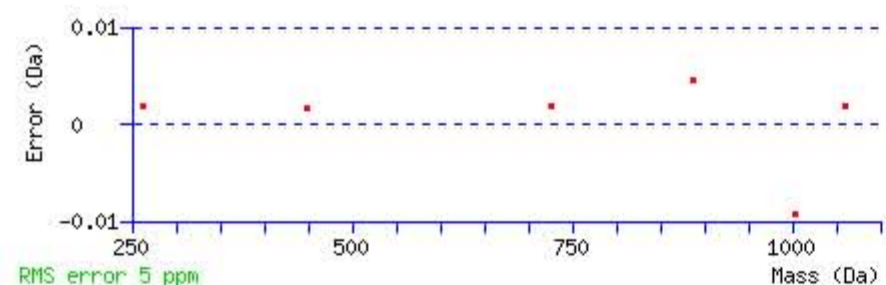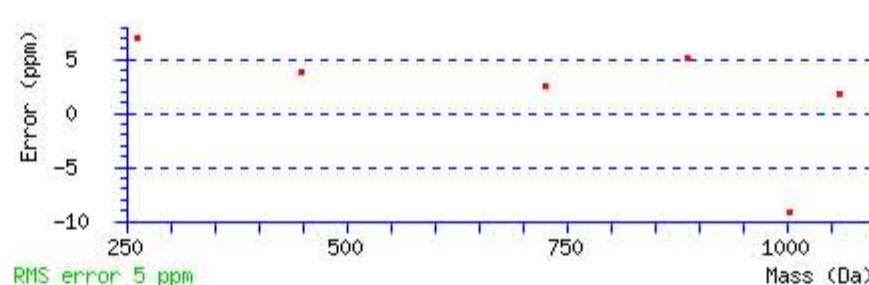

NCBI BLAST search of **IGDQWDK**

(Parameters: blastp, nr protein database, expect=20000, no filter, PAM30)

Other BLAST [web gateways](#)

## All matches to this query

| Score | Mr(calc):   | Delta     | Sequence                     |
|-------|-------------|-----------|------------------------------|
| 31.1  | 1171.569580 | 0.001388  | <a href="#">IGDQWDK</a>      |
| 11.6  | 1171.583328 | -0.012360 | <a href="#">GEVGDPGQKGTK</a> |
| 8.7   | 1171.576096 | -0.005128 | <a href="#">LYFSDATLDK</a>   |
| 5.3   | 1171.554337 | 0.016631  | <a href="#">ALCDTPGVDPK</a>  |
| 3.2   | 1171.573410 | -0.002442 | <a href="#">RAPDPGFQER</a>   |
| 3.1   | 1171.565536 | 0.005432  | <a href="#">VASHINEMQK</a>   |
| 3.0   | 1171.572067 | -0.001099 | <a href="#">LGSGPDGAEIHK</a> |
| 2.5   | 1171.565536 | 0.005432  | <a href="#">MGSGEPNPAGKK</a> |
| 1.5   | 1171.572037 | -0.001069 | <a href="#">ENPEVKAEIK</a>   |
| 0.6   | 1171.565536 | 0.005432  | <a href="#">MNGSLHQELK</a>   |

Mascot: <http://www.matrixscience.com/>

# MASCOT SCIENCE Mascot Search Results

## Peptide View

MS/MS Fragmentation of **WCGTTQNYDADQK**

Found in **FINC\_HUMAN**, Fibronectin OS=Homo sapiens GN=FN1 PE=1 SV=4

Match to Query 40134: 1896.816508 from(949.415530,2+) rtinseconds(1673) index(31247)

Title: Locus:1.1.1.3131.10 File:"2013-07-02 CLN FXIII 60 min 3rd F 3.wiff"

Data file C:\Program Files (x86)\Matrix Science\Mascot Daemon\mgf\6 FXIII 60 min 3rd\mascot\_daemon\_merge.mgf

Click mouse within plot area to zoom in by factor of two about that point

Or, Plot from  to  Da

Label all possible matches  Label matches used for scoring

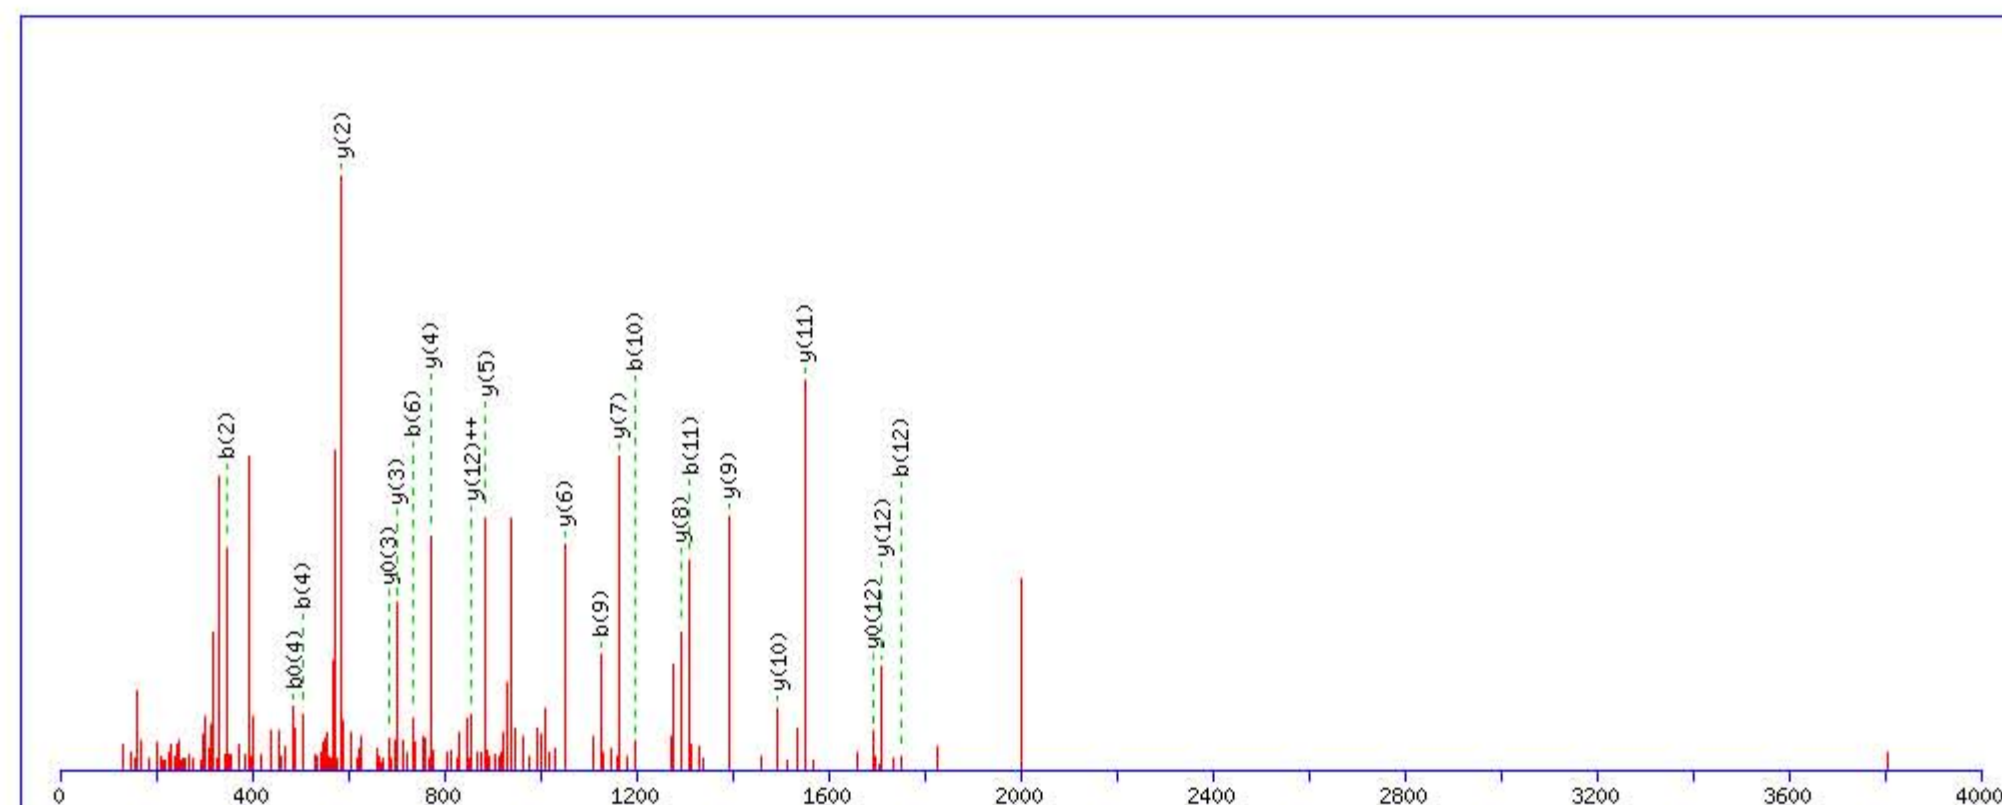

Monoisotopic mass of neutral peptide Mr(calc): 1896.813477

Fixed modifications: Carbamidomethyl (C) (apply to specified residues or termini only)

Variable modifications:

Q12 : Biotin:Thermo-21345 (Q)

Ions Score: 81 Expect: 3.3e-008

Matches : 22/124 fragment ions using 34 most intense peaks [\(help\)](#)

| #  | b                  | b <sup>++</sup> | b <sup>*</sup> | b <sup>*++</sup> | b <sup>0</sup>    | b <sup>0++</sup> | Seq. | y                  | y <sup>++</sup>   | y <sup>*</sup> | y <sup>*++</sup> | y <sup>0</sup>     | y <sup>0++</sup> | #  |
|----|--------------------|-----------------|----------------|------------------|-------------------|------------------|------|--------------------|-------------------|----------------|------------------|--------------------|------------------|----|
| 1  | 187.086589         | 94.046932       |                |                  |                   |                  | W    |                    |                   |                |                  |                    |                  | 13 |
| 2  | <b>347.117238</b>  | 174.062257      |                |                  |                   |                  | C    | <b>1711.741435</b> | <b>856.374356</b> | 1694.714886    | 847.861081       | <b>1693.730870</b> | 847.369073       | 12 |
| 3  | 404.138702         | 202.572989      |                |                  |                   |                  | G    | <b>1551.710786</b> | 776.359031        | 1534.684237    | 767.845757       | 1533.700221        | 767.353749       | 11 |
| 4  | <b>505.186381</b>  | 253.096828      |                |                  | <b>487.175816</b> | 244.091546       | T    | <b>1494.689322</b> | 747.848299        | 1477.662773    | 739.335025       | 1476.678757        | 738.843017       | 10 |
| 5  | 606.234060         | 303.620668      |                |                  | 588.223495        | 294.615386       | T    | <b>1393.641643</b> | 697.324460        | 1376.615094    | 688.811185       | 1375.631078        | 688.319177       | 9  |
| 6  | <b>734.292638</b>  | 367.649957      | 717.266089     | 359.136683       | 716.282073        | 358.644675       | Q    | <b>1292.593964</b> | 646.800620        | 1275.567415    | 638.287346       | 1274.583399        | 637.795338       | 8  |
| 7  | 848.335565         | 424.671421      | 831.309016     | 416.158146       | 830.325000        | 415.666138       | N    | <b>1164.535386</b> | 582.771331        | 1147.508837    | 574.258057       | 1146.524821        | 573.766049       | 7  |
| 8  | 1011.398894        | 506.203085      | 994.372345     | 497.689810       | 993.388329        | 497.197802       | Y    | <b>1050.492459</b> | 525.749868        | 1033.465910    | 517.236593       | 1032.481894        | 516.744585       | 6  |
| 9  | <b>1126.425837</b> | 563.716557      | 1109.399288    | 555.203282       | 1108.415272       | 554.711274       | D    | <b>887.429130</b>  | 444.218203        | 870.402581     | 435.704929       | 869.418565         | 435.212921       | 5  |
| 10 | <b>1197.462951</b> | 599.235114      | 1180.436402    | 590.721839       | 1179.452386       | 590.229831       | A    | <b>772.402187</b>  | 386.704732        | 755.375638     | 378.191457       | 754.391622         | 377.699449       | 4  |
| 11 | <b>1312.489894</b> | 656.748585      | 1295.463345    | 648.235311       | 1294.479329       | 647.743303       | D    | <b>701.365073</b>  | 351.186175        | 684.338524     | 342.672900       | <b>683.354508</b>  | 342.180892       | 3  |
| 12 | <b>1751.715220</b> | 876.361248      | 1734.688671    | 867.847974       | 1733.704655       | 867.355966       | Q    | <b>586.338130</b>  | 293.672703        | 569.311581     | 285.159429       |                    |                  | 2  |
| 13 |                    |                 |                |                  |                   |                  | K    | 147.112804         | 74.060040         | 130.086255     | 65.546765        |                    |                  | 1  |

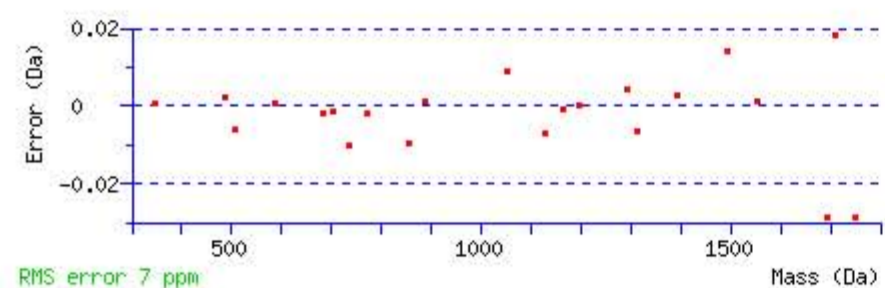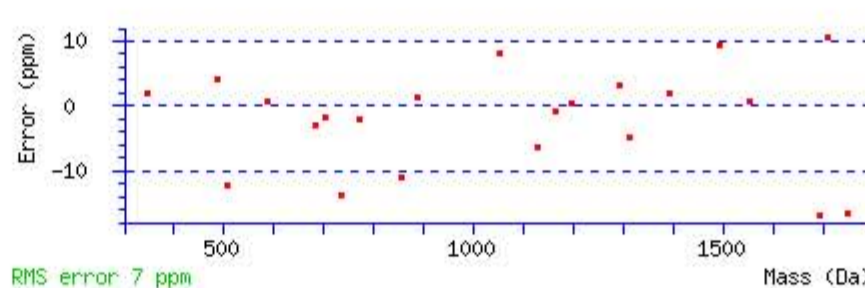

NCBI BLAST search of **WCGTTQNYDADQK**

(Parameters: blastp, nr protein database, expect=20000, no filter, PAM30)

Other BLAST [web gateways](#)

All matches to this query

| Score | Mr(calc):   | Delta    | Sequence                      |
|-------|-------------|----------|-------------------------------|
| 81.3  | 1896.813477 | 0.003031 | <a href="#">WCGTTQNYDADQK</a> |
| 11.4  | 1896.813477 | 0.003031 | <a href="#">WCGTTQNYDADQK</a> |

Mascot: <http://www.matrixscience.com/>

# MASCOT Search Results

## Peptide View

MS/MS Fragmentation of **LLCQCLGFGSGHFR**

Found in **FINC\_HUMAN**, Fibronectin OS=Homo sapiens GN=FN1 PE=1 SV=4

Match to Query 41322: 1961.952702 from(654.991510,3+) rtinseconds(2190) index(34177)

Title: Locus:1.1.1.3312.8 File:"2013-07-02 CLN FXIII 60 min 3rd F 3.wiff"

Data file C:\Program Files (x86)\Matrix Science\Mascot Daemon\mgf\6 FXIII 60 min 3rd\mascot\_daemon\_merge.mgf

Click mouse within plot area to zoom in by factor of two about that point

Or, Plot from  to  Da

Label all possible matches  Label matches used for scoring

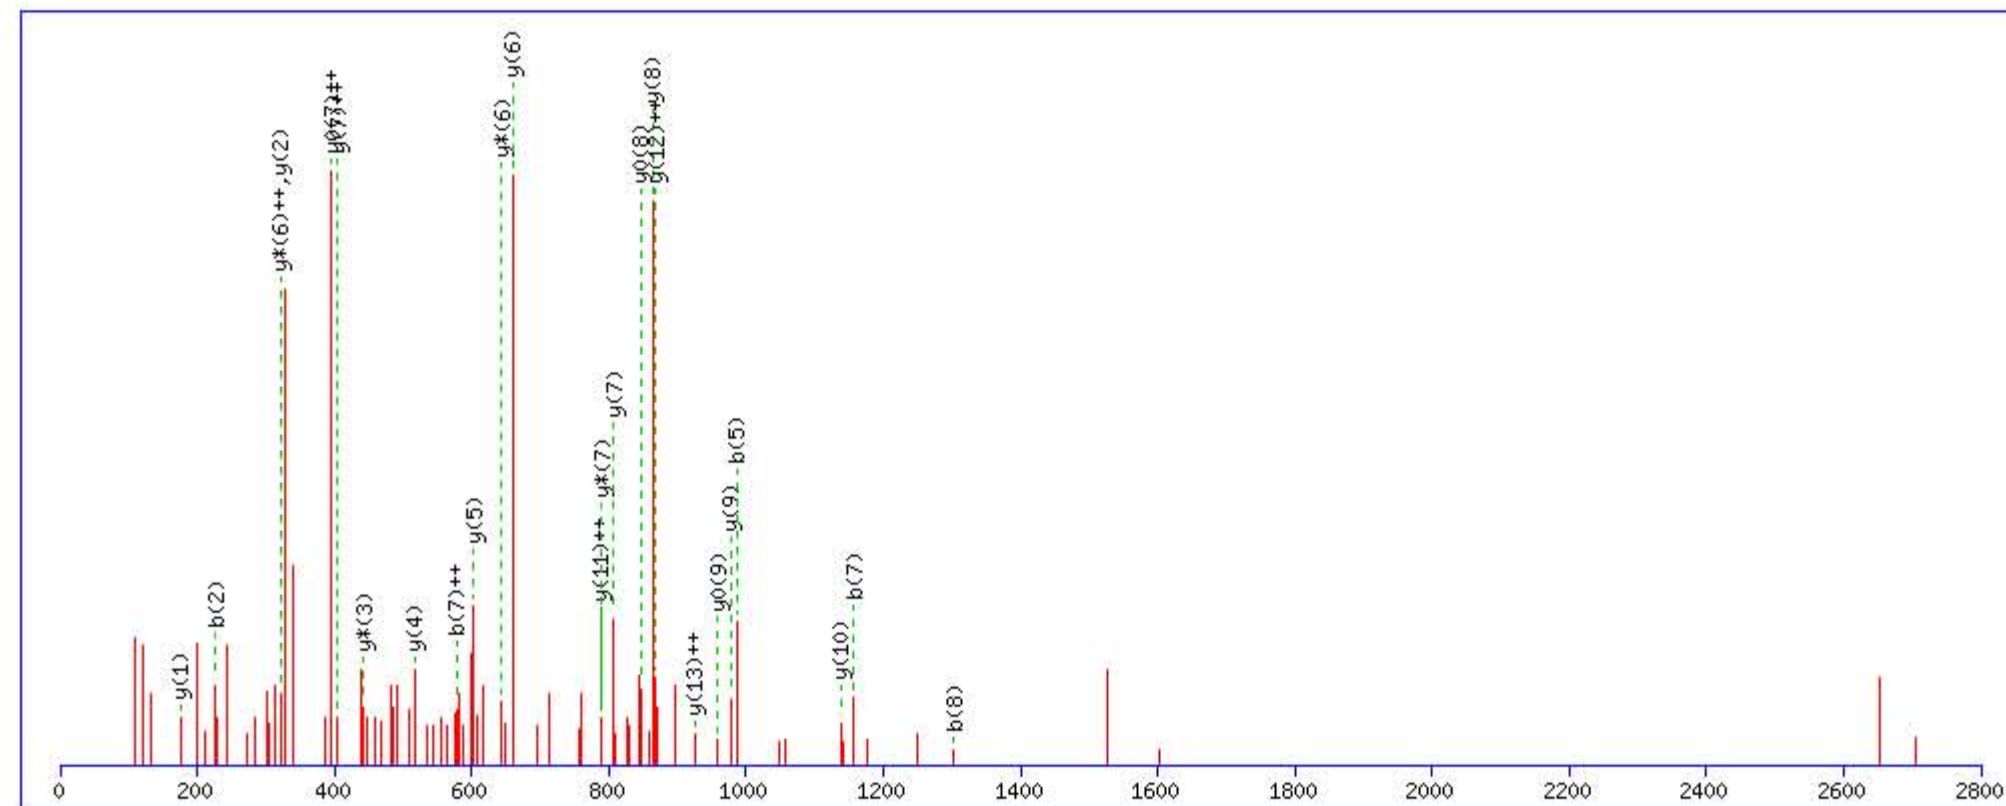

Monoisotopic mass of neutral peptide Mr(calc): 1961.942673

Fixed modifications: Carbamidomethyl (C) (apply to specified residues or termini only)

Variable modifications:

Q4 : Biotin:Thermo-21345 (Q)

Ions Score: 33 Expect: 0.001

Matches : 25/124 fragment ions using 62 most intense peaks [\(help\)](#)

| #  | b                  | b <sup>++</sup>   | b <sup>+</sup> | b <sup>++</sup> | b <sup>0</sup> | b <sup>0++</sup> | Seq. | y                  | y <sup>++</sup>   | y <sup>+</sup>    | y <sup>++</sup>   | y <sup>0</sup>    | y <sup>0++</sup>  | #  |
|----|--------------------|-------------------|----------------|-----------------|----------------|------------------|------|--------------------|-------------------|-------------------|-------------------|-------------------|-------------------|----|
| 1  | 114.091340         | 57.549308         |                |                 |                |                  | L    |                    |                   |                   |                   |                   |                   | 14 |
| 2  | <b>227.175404</b>  | 114.091340        |                |                 |                |                  | L    | 1849.865864        | <b>925.436570</b> | 1832.839315       | 916.923296        | 1831.855299       | 916.431288        | 13 |
| 3  | 387.206053         | 194.106664        |                |                 |                |                  | C    | 1736.781800        | <b>868.894538</b> | 1719.755251       | 860.381264        | 1718.771235       | 859.889255        | 12 |
| 4  | 826.431379         | 413.719328        | 809.404830     | 405.206053      |                |                  | Q    | 1576.751151        | <b>788.879213</b> | 1559.724602       | 780.365939        | 1558.740586       | 779.873931        | 11 |
| 5  | <b>986.462028</b>  | 493.734652        | 969.435479     | 485.221378      |                |                  | C    | <b>1137.525825</b> | 569.266550        | 1120.499276       | 560.753276        | 1119.515260       | 560.261268        | 10 |
| 6  | 1099.546092        | 550.276684        | 1082.519543    | 541.763410      |                |                  | L    | <b>977.495176</b>  | 489.251226        | 960.468627        | 480.737952        | <b>959.484611</b> | 480.245944        | 9  |
| 7  | <b>1156.567556</b> | <b>578.787416</b> | 1139.541007    | 570.274142      |                |                  | G    | <b>864.411112</b>  | 432.709194        | 847.384563        | 424.195920        | <b>846.400547</b> | 423.703912        | 8  |
| 8  | <b>1303.635970</b> | 652.321623        | 1286.609421    | 643.808349      |                |                  | F    | <b>807.389648</b>  | <b>404.198462</b> | <b>790.363099</b> | 395.685188        | 789.379083        | <b>395.193180</b> | 7  |
| 9  | 1360.657434        | 680.832355        | 1343.630885    | 672.319081      |                |                  | G    | <b>660.321234</b>  | 330.664255        | <b>643.294685</b> | <b>322.150981</b> | 642.310669        | 321.658973        | 6  |
| 10 | 1447.689462        | 724.348369        | 1430.662913    | 715.835095      | 1429.678897    | 715.343087       | S    | <b>603.299770</b>  | 302.153523        | 586.273221        | 293.640249        | 585.289205        | 293.148241        | 5  |
| 11 | 1504.710926        | 752.859101        | 1487.684377    | 744.345827      | 1486.700361    | 743.853818       | G    | <b>516.267742</b>  | 258.637509        | 499.241193        | 250.124235        |                   |                   | 4  |
| 12 | 1641.769838        | 821.388557        | 1624.743289    | 812.875283      | 1623.759273    | 812.383274       | H    | 459.246278         | 230.126777        | <b>442.219729</b> | 221.613502        |                   |                   | 3  |
| 13 | 1788.838252        | 894.922764        | 1771.811703    | 886.409490      | 1770.827687    | 885.917482       | F    | <b>322.187366</b>  | 161.597321        | 305.160817        | 153.084047        |                   |                   | 2  |
| 14 |                    |                   |                |                 |                |                  | R    | <b>175.118952</b>  | 88.063114         | 158.092403        | 79.549839         |                   |                   | 1  |

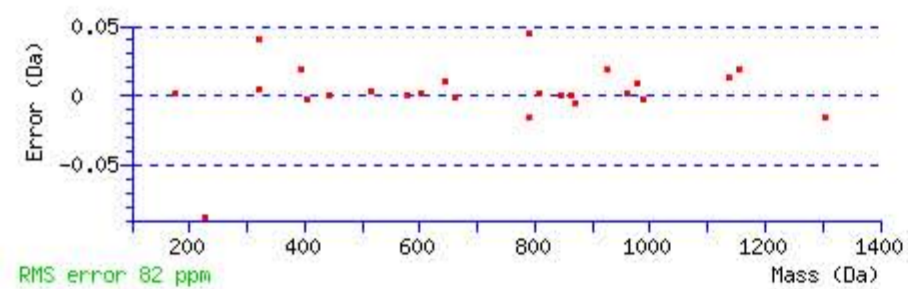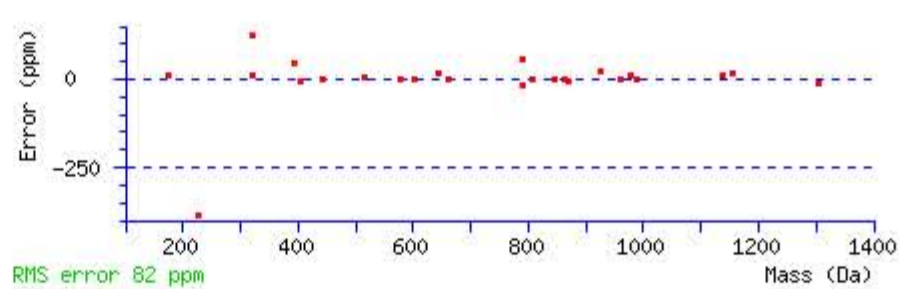

NCBI BLAST search of **LLCQCLGFGSGHFR**

(Parameters: blastp, nr protein database, expect=20000, no filter, PAM30)

Other BLAST [web gateways](#)

All matches to this query

| Score | Mr(calc):   | Delta     | Sequence                           |
|-------|-------------|-----------|------------------------------------|
| 32.8  | 1961.942673 | 0.010029  | <a href="#">LLCQCLGFGSGHFR</a>     |
| 0.8   | 1961.970779 | -0.018077 | <a href="#">DAGREGLRSDVFPGPSFR</a> |

Mascot: <http://www.matrixscience.com/>

# MASCOT SCIENCE Mascot Search Results

## Peptide View

MS/MS Fragmentation of **YSFCTDHTVLVQTR**

Found in **FINC\_HUMAN**, Fibronectin OS=Homo sapiens GN=FN1 PE=1 SV=4

Match to Query 43334: 2036.980708 from(1019.497630,2+) rtinseconds(2023) index(33312)

Title: Locus:1.1.1.3253.18 File:"2013-07-02 CLN FXIII 60 min 3rd F 3.wiff"

Data file C:\Program Files (x86)\Matrix Science\Mascot Daemon\mgf6 FXIII 60 min 3rd\mascot\_daemon\_merge.mgf

Click mouse within plot area to zoom in by factor of two about that point

Or, Plot from  to  Da

Label all possible matches  Label matches used for scoring

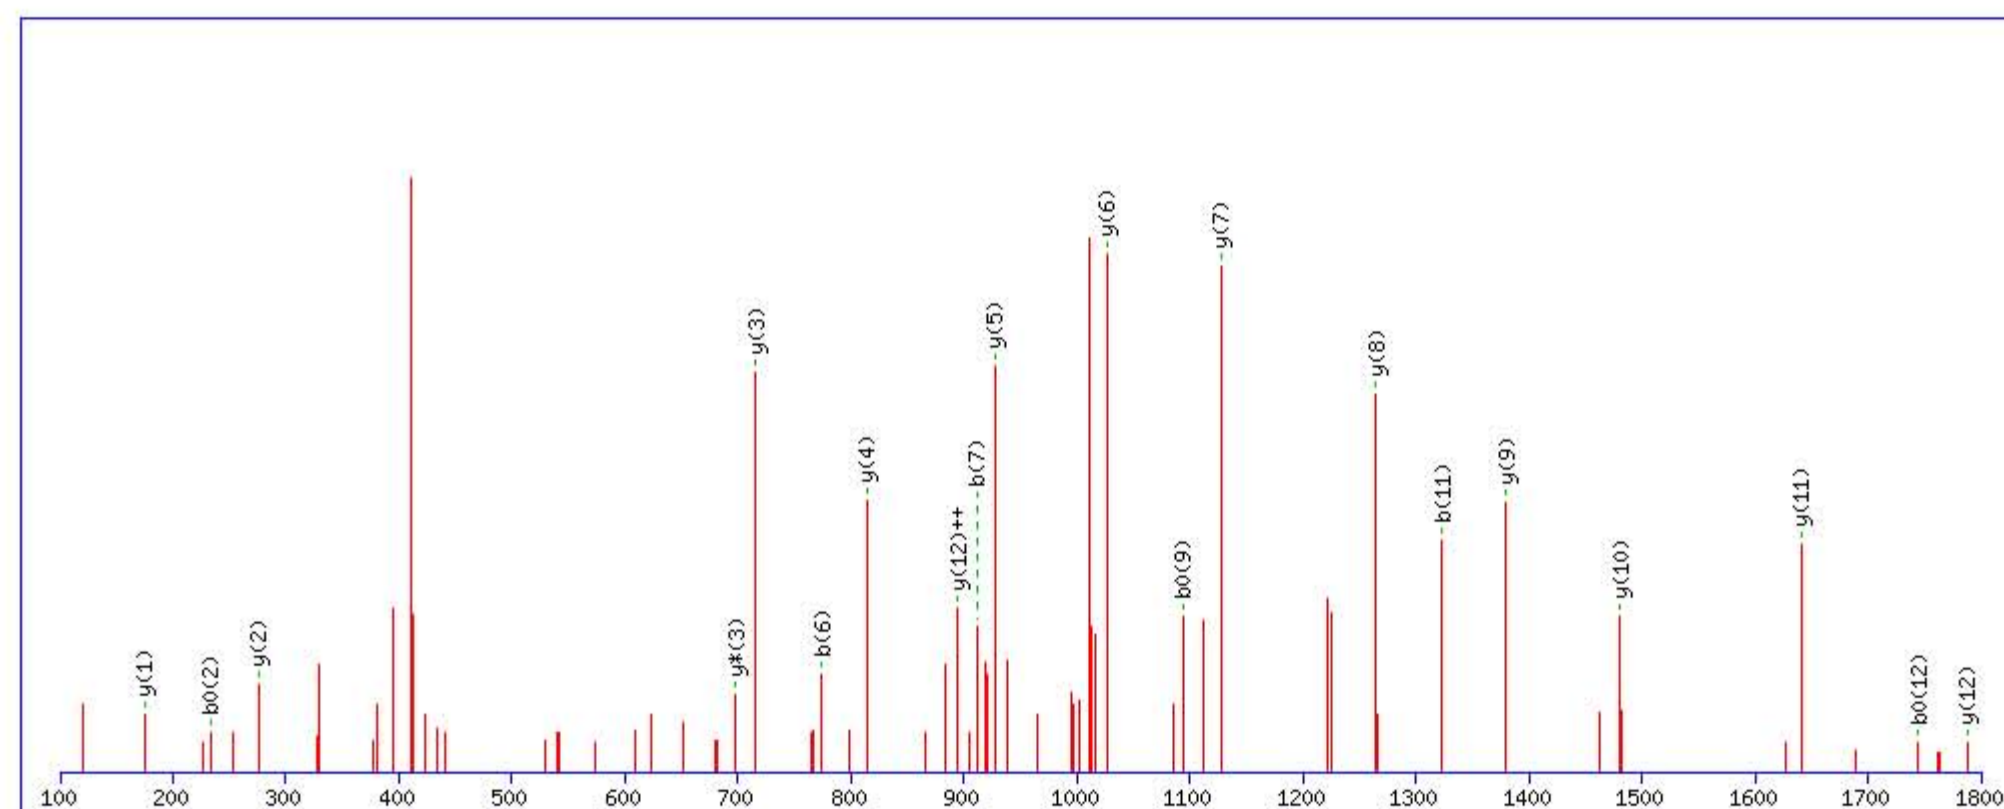

Monoisotopic mass of neutral peptide Mr(calc): 2036.981232

Fixed modifications: Carbamidomethyl (C) (apply to specified residues or termini only)

Variable modifications:

Q12 : Biotin:Thermo-21345 (Q)

Ions Score: 90 Expect: 6.6e-009

Matches : 20/130 fragment ions using 31 most intense peaks [\(help\)](#)

| #  | b           | b <sup>++</sup> | b <sup>*</sup> | b <sup>+++</sup> | b <sup>0</sup> | b <sup>0++</sup> | Seq. | y           | y <sup>++</sup> | y <sup>*</sup> | y <sup>+++</sup> | y <sup>0</sup> | y <sup>0++</sup> | #  |
|----|-------------|-----------------|----------------|------------------|----------------|------------------|------|-------------|-----------------|----------------|------------------|----------------|------------------|----|
| 1  | 164.070605  | 82.538940       |                |                  |                |                  | Y    |             |                 |                |                  |                |                  | 14 |
| 2  | 251.102633  | 126.054954      |                |                  | 233.092068     | 117.049672       | S    | 1874.925153 | 937.966215      | 1857.898604    | 929.452940       | 1856.914588    | 928.960932       | 13 |
| 3  | 398.171047  | 199.589161      |                |                  | 380.160482     | 190.583879       | F    | 1787.893125 | 894.450201      | 1770.866576    | 885.936926       | 1769.882560    | 885.444918       | 12 |
| 4  | 558.201696  | 279.604486      |                |                  | 540.191131     | 270.599204       | C    | 1640.824711 | 820.915994      | 1623.798162    | 812.402719       | 1622.814146    | 811.910711       | 11 |
| 5  | 659.249375  | 330.128326      |                |                  | 641.238810     | 321.123043       | T    | 1480.794062 | 740.900669      | 1463.767513    | 732.387395       | 1462.783497    | 731.895387       | 10 |
| 6  | 774.276318  | 387.641797      |                |                  | 756.265753     | 378.636515       | D    | 1379.746383 | 690.376830      | 1362.719834    | 681.863555       | 1361.735818    | 681.371547       | 9  |
| 7  | 911.335230  | 456.171253      |                |                  | 893.324665     | 447.165971       | H    | 1264.719440 | 632.863358      | 1247.692891    | 624.350084       | 1246.708875    | 623.858076       | 8  |
| 8  | 1012.382909 | 506.695093      |                |                  | 994.372344     | 497.689810       | T    | 1127.660528 | 564.333902      | 1110.633979    | 555.820628       | 1109.649963    | 555.328620       | 7  |
| 9  | 1111.451323 | 556.229300      |                |                  | 1093.440758    | 547.224017       | V    | 1026.612849 | 513.810063      | 1009.586300    | 505.296788       | 1008.602284    | 504.804780       | 6  |
| 10 | 1224.535387 | 612.771331      |                |                  | 1206.524822    | 603.766049       | L    | 927.544435  | 464.275856      | 910.517886     | 455.762581       | 909.533870     | 455.270573       | 5  |
| 11 | 1323.603801 | 662.305539      |                |                  | 1305.593236    | 653.300256       | V    | 814.460371  | 407.733824      | 797.433822     | 399.220549       | 796.449806     | 398.728541       | 4  |
| 12 | 1762.829127 | 881.918202      | 1745.802578    | 873.404927       | 1744.818562    | 872.912919       | Q    | 715.391957  | 358.199617      | 698.365408     | 349.686342       | 697.381392     | 349.194334       | 3  |
| 13 | 1863.876806 | 932.442041      | 1846.850257    | 923.928767       | 1845.866241    | 923.436759       | T    | 276.166631  | 138.586953      | 259.140082     | 130.073679       | 258.156066     | 129.581671       | 2  |
| 14 |             |                 |                |                  |                |                  | R    | 175.118952  | 88.063114       | 158.092403     | 79.549839        |                |                  | 1  |

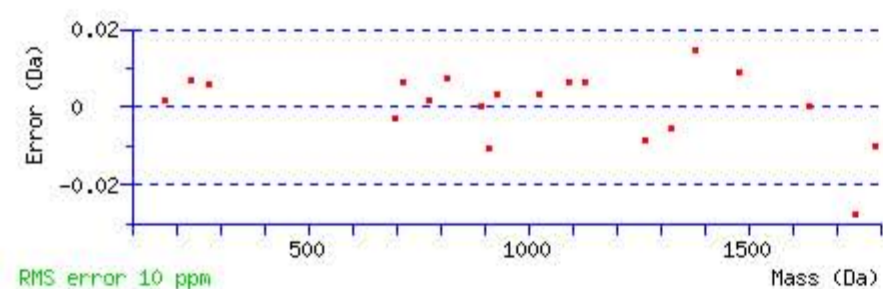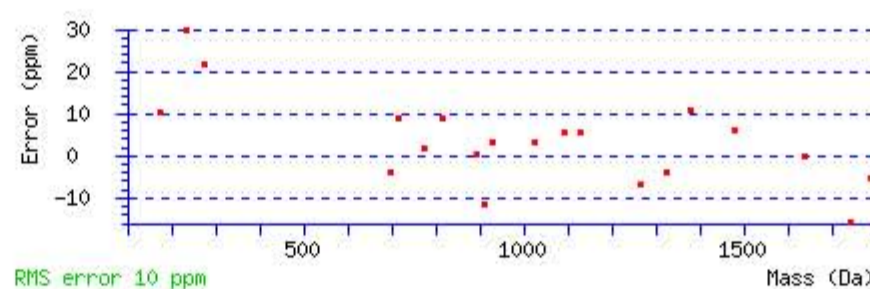

NCBI BLAST search of **YSFCTDHTVLVQTR**

(Parameters: blastp, nr protein database, expect=20000, no filter, PAM30)

Other BLAST [web gateways](#)

All matches to this query

| Score | Mr(calc):   | Delta     | Sequence                              |
|-------|-------------|-----------|---------------------------------------|
| 89.9  | 2036.981232 | -0.000524 | <a href="#">YSFCTDHTVLVQTR</a>        |
| 2.6   | 2037.006180 | -0.025472 | <a href="#">TVSEDRPQAVSSGHTR</a>      |
| 1.1   | 2036.969818 | 0.010890  | <a href="#">GSMGDPGLPGPQGLRGDVGDR</a> |

Mascot: <http://www.matrixscience.com/>

# MASCOT Search Results

## Peptide View

MS/MS Fragmentation of **HTSVQTTSSGSGPFTDVR**

Found in **FINC\_HUMAN**, Fibronectin OS=Homo sapiens GN=FN1 PE=1 SV=4

Match to Query 45595: 2174.042502 from(725.688110,3+) rtinseconds(1667) index(31216)

Title: Locus:1.1.1.3129.14 File:"2013-07-02 CLN FXIII 60 min 3rd F 3.wiff"

Data file C:\Program Files (x86)\Matrix Science\Mascot Daemon\mgf6 FXIII 60 min 3rd\mascot\_daemon\_merge.mgf

Click mouse within plot area to zoom in by factor of two about that point

Or, Plot from  to  Da

Label all possible matches  Label matches used for scoring

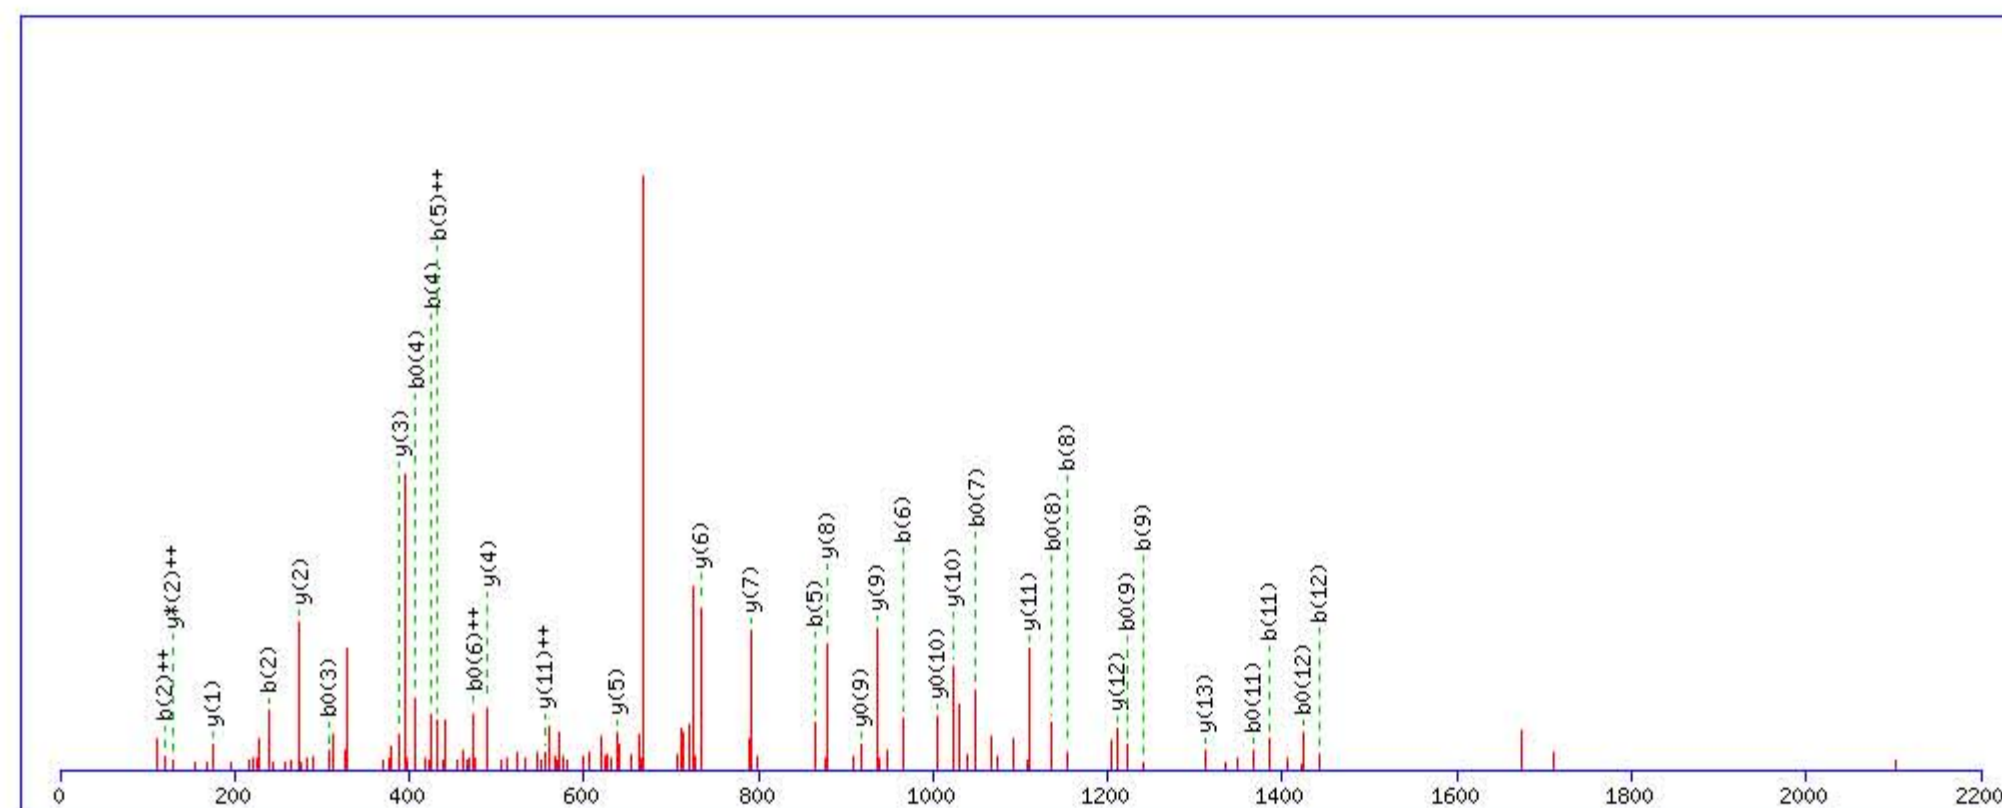

Monoisotopic mass of neutral peptide Mr(calc): 2174.042664

Fixed modifications: Carbamidomethyl (C) (apply to specified residues or termini only)

Variable modifications:

Q5 : Biotin:Thermo-21345 (Q)

Ions Score: 82 Expect: 1.3e-007

Matches : 35/190 fragment ions using 58 most intense peaks [\(help\)](#)

| #  | b                  | b <sup>++</sup>   | b <sup>*</sup> | b <sup>***</sup> | b <sup>0</sup>     | b <sup>0++</sup>  | Seq. | y                  | y <sup>++</sup>   | y <sup>*</sup> | y <sup>***</sup>  | y <sup>0</sup>     | y <sup>0++</sup> | #  |
|----|--------------------|-------------------|----------------|------------------|--------------------|-------------------|------|--------------------|-------------------|----------------|-------------------|--------------------|------------------|----|
| 1  | 138.066188         | 69.536732         |                |                  |                    |                   | H    |                    |                   |                |                   |                    |                  | 18 |
| 2  | <b>239.113867</b>  | <b>120.060571</b> |                |                  | 221.103302         | 111.055289        | T    | 2037.990983        | 1019.499130       | 2020.964434    | 1010.985855       | 2019.980418        | 1010.493847      | 17 |
| 3  | 326.145895         | 163.576585        |                |                  | <b>308.135330</b>  | 154.571303        | S    | 1936.943304        | 968.975290        | 1919.916755    | 960.462016        | 1918.932739        | 959.970008       | 16 |
| 4  | <b>425.214309</b>  | 213.110792        |                |                  | <b>407.203744</b>  | 204.105510        | V    | 1849.911276        | 925.459276        | 1832.884727    | 916.946002        | 1831.900711        | 916.453994       | 15 |
| 5  | <b>864.439635</b>  | <b>432.723456</b> | 847.413086     | 424.210181       | 846.429070         | 423.718173        | Q    | 1750.842862        | 875.925069        | 1733.816313    | 867.411795        | 1732.832297        | 866.919787       | 14 |
| 6  | <b>965.487314</b>  | 483.247295        | 948.460765     | 474.734021       | 947.476749         | <b>474.242013</b> | T    | <b>1311.617536</b> | 656.312406        | 1294.590987    | 647.799132        | 1293.606971        | 647.307124       | 13 |
| 7  | 1066.534993        | 533.771135        | 1049.508444    | 525.257860       | <b>1048.524428</b> | 524.765852        | T    | <b>1210.569857</b> | 605.788567        | 1193.543308    | 597.275292        | 1192.559292        | 596.783284       | 12 |
| 8  | <b>1153.567021</b> | 577.287149        | 1136.540472    | 568.773874       | <b>1135.556456</b> | 568.281866        | S    | <b>1109.522178</b> | <b>555.264727</b> | 1092.495629    | 546.751453        | 1091.511613        | 546.259445       | 11 |
| 9  | <b>1240.599049</b> | 620.803163        | 1223.572500    | 612.289888       | <b>1222.588484</b> | 611.797880        | S    | <b>1022.490150</b> | 511.748713        | 1005.463601    | 503.235439        | <b>1004.479585</b> | 502.743431       | 10 |
| 10 | 1297.620513        | 649.313895        | 1280.593964    | 640.800620       | 1279.609948        | 640.308612        | G    | <b>935.458122</b>  | 468.232699        | 918.431573     | 459.719425        | <b>917.447557</b>  | 459.227417       | 9  |
| 11 | <b>1384.652541</b> | 692.829909        | 1367.625992    | 684.316634       | <b>1366.641976</b> | 683.824626        | S    | <b>878.436658</b>  | 439.721967        | 861.410109     | 431.208693        | 860.426093         | 430.716685       | 8  |
| 12 | <b>1441.674005</b> | 721.340641        | 1424.647456    | 712.827366       | <b>1423.663440</b> | 712.335358        | G    | <b>791.404630</b>  | 396.205953        | 774.378081     | 387.692679        | 773.394065         | 387.200671       | 7  |
| 13 | 1538.726769        | 769.867023        | 1521.700220    | 761.353748       | 1520.716204        | 760.861740        | P    | <b>734.383166</b>  | 367.695221        | 717.356617     | 359.181947        | 716.372601         | 358.689939       | 6  |
| 14 | 1685.795183        | 843.401230        | 1668.768634    | 834.887955       | 1667.784618        | 834.395947        | F    | <b>637.330402</b>  | 319.168839        | 620.303853     | 310.655565        | 619.319837         | 310.163557       | 5  |
| 15 | 1786.842862        | 893.925069        | 1769.816313    | 885.411795       | 1768.832297        | 884.919787        | T    | <b>490.261988</b>  | 245.634632        | 473.235439     | 237.121358        | 472.251423         | 236.629350       | 4  |
| 16 | 1901.869805        | 951.438541        | 1884.843256    | 942.925266       | 1883.859240        | 942.433258        | D    | <b>389.214309</b>  | 195.110793        | 372.187760     | 186.597518        | 371.203744         | 186.105510       | 3  |
| 17 | 2000.938219        | 1000.972748       | 1983.911670    | 992.459473       | 1982.927654        | 991.967465        | V    | <b>274.187366</b>  | 137.597321        | 257.160817     | <b>129.084047</b> |                    |                  | 2  |
| 18 |                    |                   |                |                  |                    |                   | R    | <b>175.118952</b>  | 88.063114         | 158.092403     | 79.549839         |                    |                  | 1  |

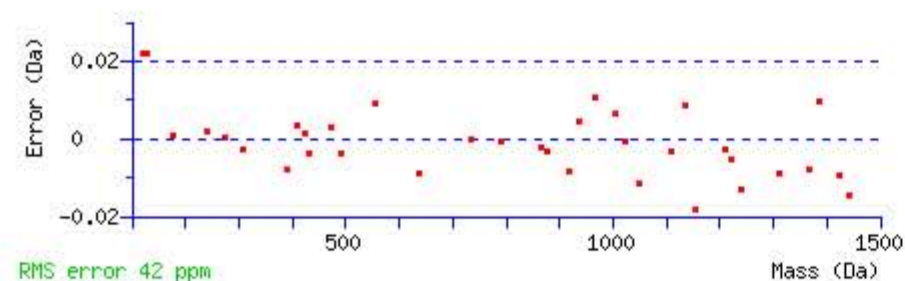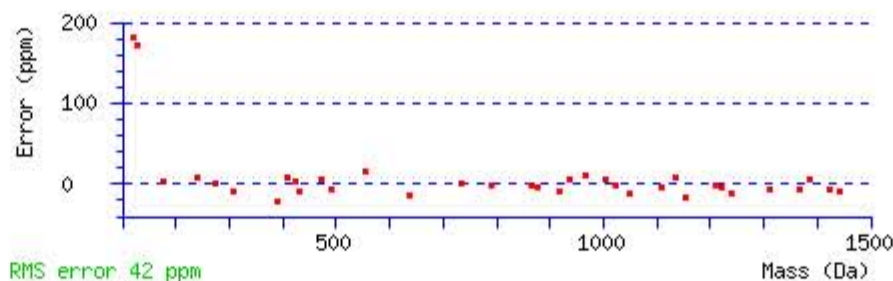

NCBI BLAST search of [HTSVQTTSSGSGPFTDVR](#)

(Parameters: blastp, nr protein database, expect=20000, no filter, PAM30)

Other BLAST [web gateways](#)

All matches to this query

| Score | Mr(calc):   | Delta     | Sequence                           |
|-------|-------------|-----------|------------------------------------|
| 81.8  | 2174.042664 | -0.000162 | <a href="#">HTSVQTTSSGSGPFTDVR</a> |

# MASCOT Search Results

## Peptide View

MS/MS Fragmentation of **RPGGEPSPGTTGQSYNQYSQR**  
 Found in **FINC\_HUMAN**, Fibronectin OS=Homo sapiens GN=FN1 PE=1 SV=4

Match to Query 52767: 2706.234552 from(903.085460,3+) rtinseconds(1533) index(30460)  
 Title: Locus:1.1.1.3082.12 File:"2013-07-02 CLN FXIII 60 min 3rd F 3.wiff"  
 Data file C:\Program Files (x86)\Matrix Science\Mascot Daemon\mgf6 FXIII 60 min 3rd\mascot\_daemon\_merge.mgf

Click mouse within plot area to zoom in by factor of two about that point  
 Or, Plot from  to  Da   
 Label all possible matches  Label matches used for scoring

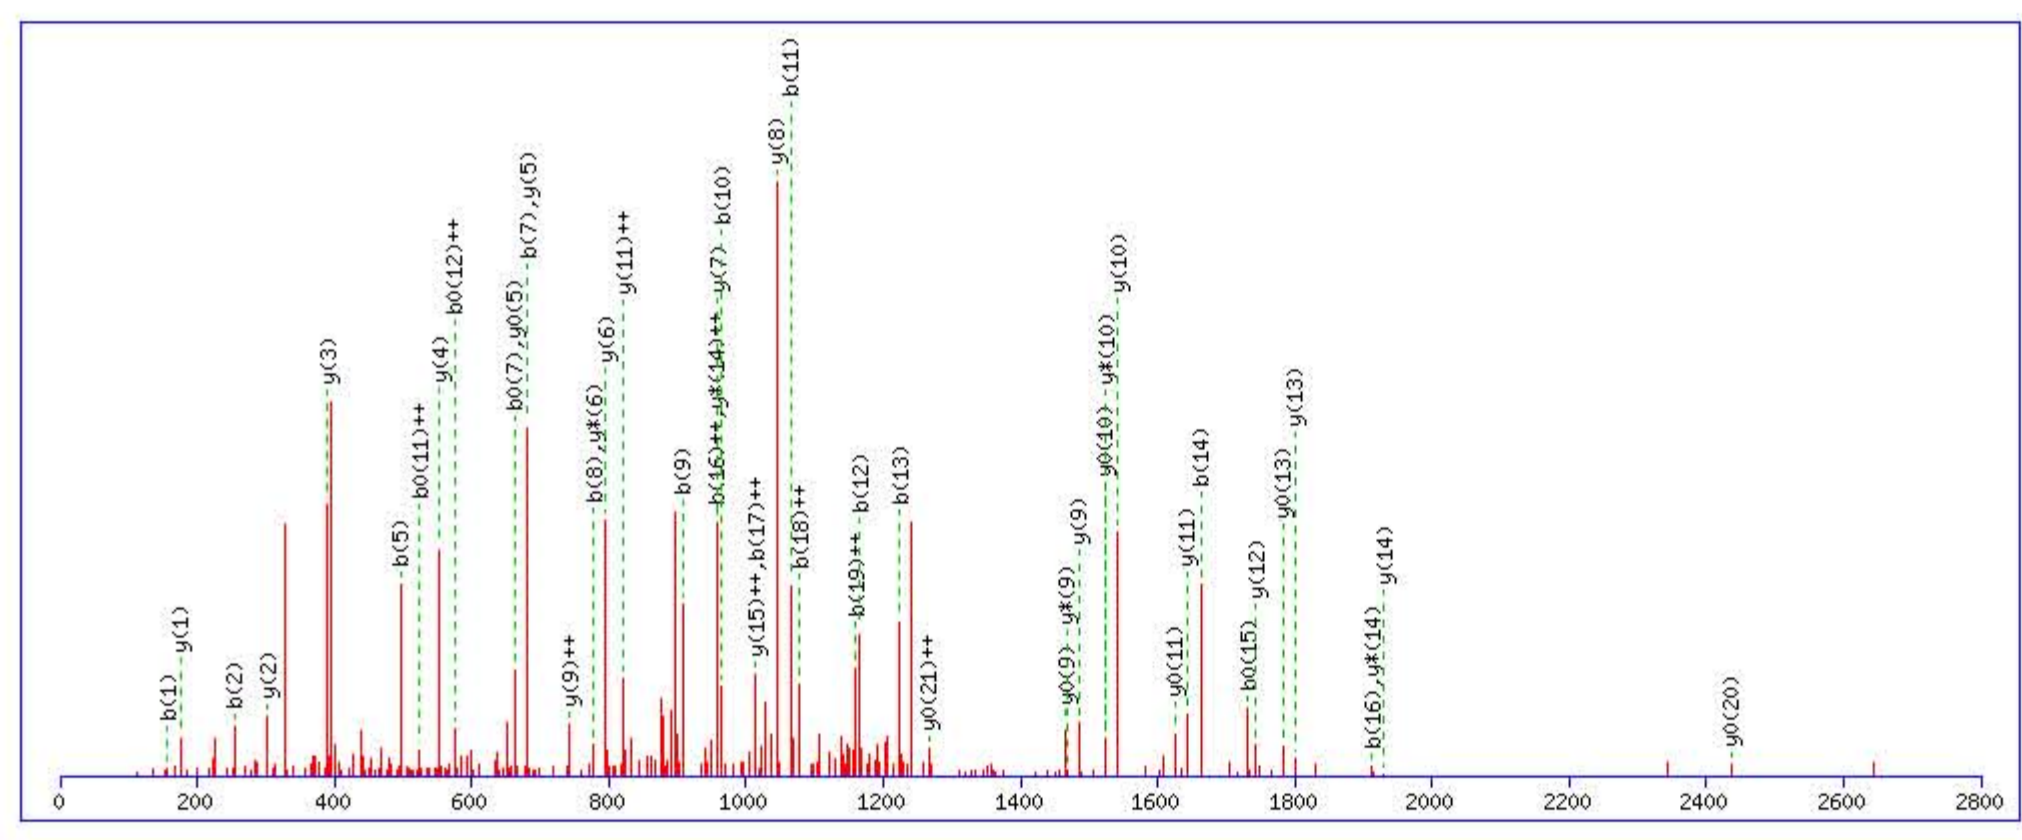

Monoisotopic mass of neutral peptide Mr(calc): 2706.245621  
 Fixed modifications: Carbamidomethyl (C) (apply to specified residues or termini only)  
 Variable modifications:  
 Q14 : Biotin:Thermo-21345 (Q)  
 Ions Score: 83 Expect: 2.2e-008  
 Matches : 50/240 fragment ions using 75 most intense peaks [\(help\)](#)

| #  | b           | b <sup>++</sup> | b <sup>+</sup> | b <sup>+++</sup> | b <sup>0</sup> | b <sup>0++</sup> | Seq. | y           | y <sup>++</sup> | y <sup>+</sup> | y <sup>+++</sup> | y <sup>0</sup> | y <sup>0++</sup> | #  |
|----|-------------|-----------------|----------------|------------------|----------------|------------------|------|-------------|-----------------|----------------|------------------|----------------|------------------|----|
| 1  | 157.108387  | 79.057831       | 140.081838     | 70.544557        |                |                  | R    |             |                 |                |                  |                |                  | 22 |
| 2  | 254.161151  | 127.584213      | 237.134602     | 119.070939       |                |                  | P    | 2551.151795 | 1276.079535     | 2534.125246    | 1267.566261      | 2533.141230    | 1267.074253      | 21 |
| 3  | 311.182615  | 156.094945      | 294.156066     | 147.581671       |                |                  | G    | 2454.099031 | 1227.553153     | 2437.072482    | 1219.039879      | 2436.088466    | 1218.547871      | 20 |
| 4  | 368.204079  | 184.605677      | 351.177530     | 176.092403       |                |                  | G    | 2397.077567 | 1199.042421     | 2380.051018    | 1190.529147      | 2379.067002    | 1190.037139      | 19 |
| 5  | 497.246672  | 249.126974      | 480.220123     | 240.613700       | 479.236107     | 240.121692       | E    | 2340.056103 | 1170.531689     | 2323.029554    | 1162.018415      | 2322.045538    | 1161.526407      | 18 |
| 6  | 594.299436  | 297.653356      | 577.272887     | 289.140082       | 576.288871     | 288.648074       | P    | 2211.013510 | 1106.010393     | 2193.986961    | 1097.497118      | 2193.002945    | 1097.005110      | 17 |
| 7  | 681.331464  | 341.169370      | 664.304915     | 332.656095       | 663.320899     | 332.164087       | S    | 2113.960746 | 1057.484011     | 2096.934197    | 1048.970736      | 2095.950181    | 1048.478728      | 16 |
| 8  | 778.384228  | 389.695752      | 761.357679     | 381.182478       | 760.373663     | 380.690470       | P    | 2026.928718 | 1013.967997     | 2009.902169    | 1005.454723      | 2008.918153    | 1004.962715      | 15 |
| 9  | 907.426821  | 454.217049      | 890.400272     | 445.703774       | 889.416256     | 445.211766       | E    | 1929.875954 | 965.441615      | 1912.849405    | 956.928341       | 1911.865389    | 956.436333       | 14 |
| 10 | 964.448285  | 482.727781      | 947.421736     | 474.214506       | 946.437720     | 473.722498       | G    | 1800.833361 | 900.920319      | 1783.806812    | 892.407044       | 1782.822796    | 891.915036       | 13 |
| 11 | 1065.495964 | 533.251620      | 1048.469415    | 524.738346       | 1047.485399    | 524.246337       | T    | 1743.811897 | 872.409587      | 1726.785348    | 863.896312       | 1725.801332    | 863.404304       | 12 |
| 12 | 1166.543643 | 583.775460      | 1149.517094    | 575.262185       | 1148.533078    | 574.770177       | T    | 1642.764218 | 821.885747      | 1625.737669    | 813.372473       | 1624.753653    | 812.880465       | 11 |
| 13 | 1223.565107 | 612.286191      | 1206.538558    | 603.772917       | 1205.554542    | 603.280909       | G    | 1541.716539 | 771.361908      | 1524.689990    | 762.848633       | 1523.705974    | 762.356625       | 10 |
| 14 | 1662.790433 | 831.898854      | 1645.763884    | 823.385580       | 1644.779868    | 822.893572       | Q    | 1484.695075 | 742.851176      | 1467.668526    | 734.337901       | 1466.684510    | 733.845893       | 9  |
| 15 | 1749.822461 | 875.414869      | 1732.795912    | 866.901594       | 1731.811896    | 866.409586       | S    | 1045.469749 | 523.238513      | 1028.443200    | 514.725238       | 1027.459184    | 514.233230       | 8  |
| 16 | 1912.885790 | 956.946533      | 1895.859241    | 948.433259       | 1894.875225    | 947.941251       | Y    | 958.437721  | 479.722499      | 941.411172     | 471.209224       | 940.427156     | 470.717216       | 7  |
| 17 | 2026.928717 | 1013.967997     | 2009.902168    | 1005.454722      | 2008.918152    | 1004.962714      | N    | 795.374392  | 398.190834      | 778.347843     | 389.677560       | 777.363827     | 389.185552       | 6  |
| 18 | 2154.987295 | 1077.997285     | 2137.960746    | 1069.484011      | 2136.976730    | 1068.992003      | Q    | 681.331465  | 341.169371      | 664.304916     | 332.656096       | 663.320900     | 332.164088       | 5  |
| 19 | 2318.050624 | 1159.528950     | 2301.024075    | 1151.015675      | 2300.040059    | 1150.523667      | Y    | 553.272887  | 277.140082      | 536.246338     | 268.626807       | 535.262322     | 268.134799       | 4  |
| 20 | 2405.082652 | 1203.044964     | 2388.056103    | 1194.531689      | 2387.072087    | 1194.039681      | S    | 390.209558  | 195.608417      | 373.183009     | 187.095143       | 372.198993     | 186.603135       | 3  |
| 21 | 2533.141230 | 1267.074253     | 2516.114681    | 1258.560978      | 2515.130665    | 1258.068971      | Q    | 303.177530  | 152.092403      | 286.150981     | 143.579129       |                |                  | 2  |
| 22 |             |                 |                |                  |                |                  | R    | 175.118952  | 88.063114       | 158.092403     | 79.549839        |                |                  | 1  |

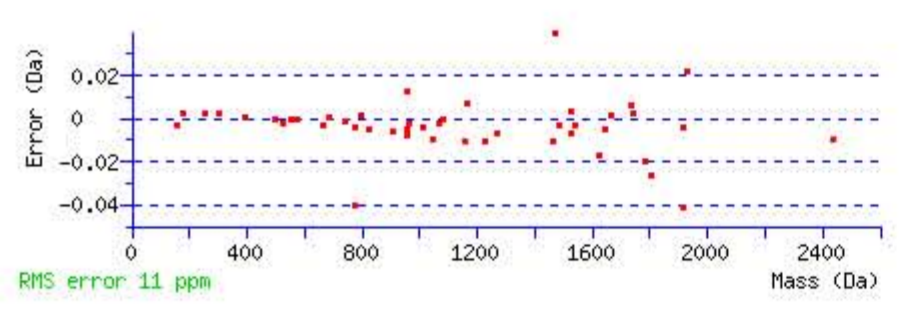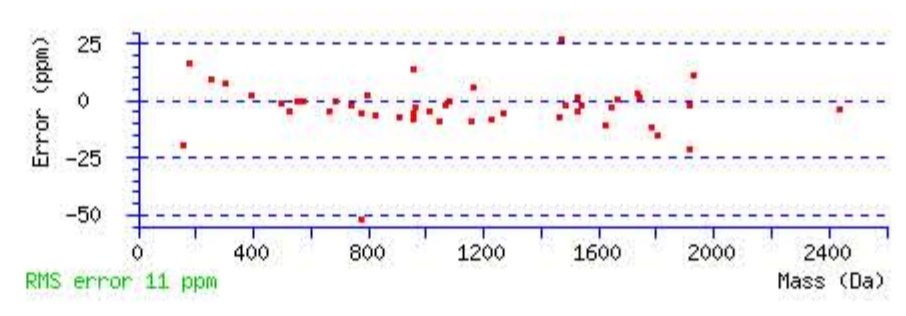

NCBI BLAST search of **RPGGEPSPGTTGQSYNQYSQR**  
 (Parameters: blastp, nr protein database, expect=20000, no filter, PAM30)  
 Other BLAST [web gateways](#)

### All matches to this query

| Score | Mr(calc):   | Delta     | Sequence                              |
|-------|-------------|-----------|---------------------------------------|
| 83.4  | 2706.245621 | -0.011069 | <a href="#">RPGGEPSPGTTGQSYNQYSQR</a> |
| 61.1  | 2706.245621 | -0.011069 | <a href="#">RPGGEPSPGTTGQSYNQYSQR</a> |
| 41.8  | 2706.245621 | -0.011069 | <a href="#">RPGGEPSPGTTGQSYNQYSQR</a> |
| 1.7   | 2706.246658 | -0.012106 | <a href="#">MAQKMSFGFYKYSNMEFVR</a>   |

**MASCOT SEARCH RESULTS**

**Peptide View**

MS/MS Fragmentation of **RPGGEPSPGTTGQSYNQYSQR**

Found in **FINC\_HUMAN**, Fibronectin OS=Homo sapiens GN=FN1 PE=1 SV=4

Match to Query 52768: 2706.237376 from(677.566620,4+) rtinseconds(1515) index(30360)  
 Title: Locus:1.1.1.3076.9 File:"2013-07-02 CLN FXIII 60 min 3rd F 3.wiff"  
 Data file C:\Program Files (x86)\Matrix Science\Mascot Daemon\mgf6 FXIII 60 min 3rd\mascot\_daemon\_merge.mgf

Click mouse within plot area to zoom in by factor of two about that point

Or, Plot from  to  Da

Label all possible matches  Label matches used for scoring

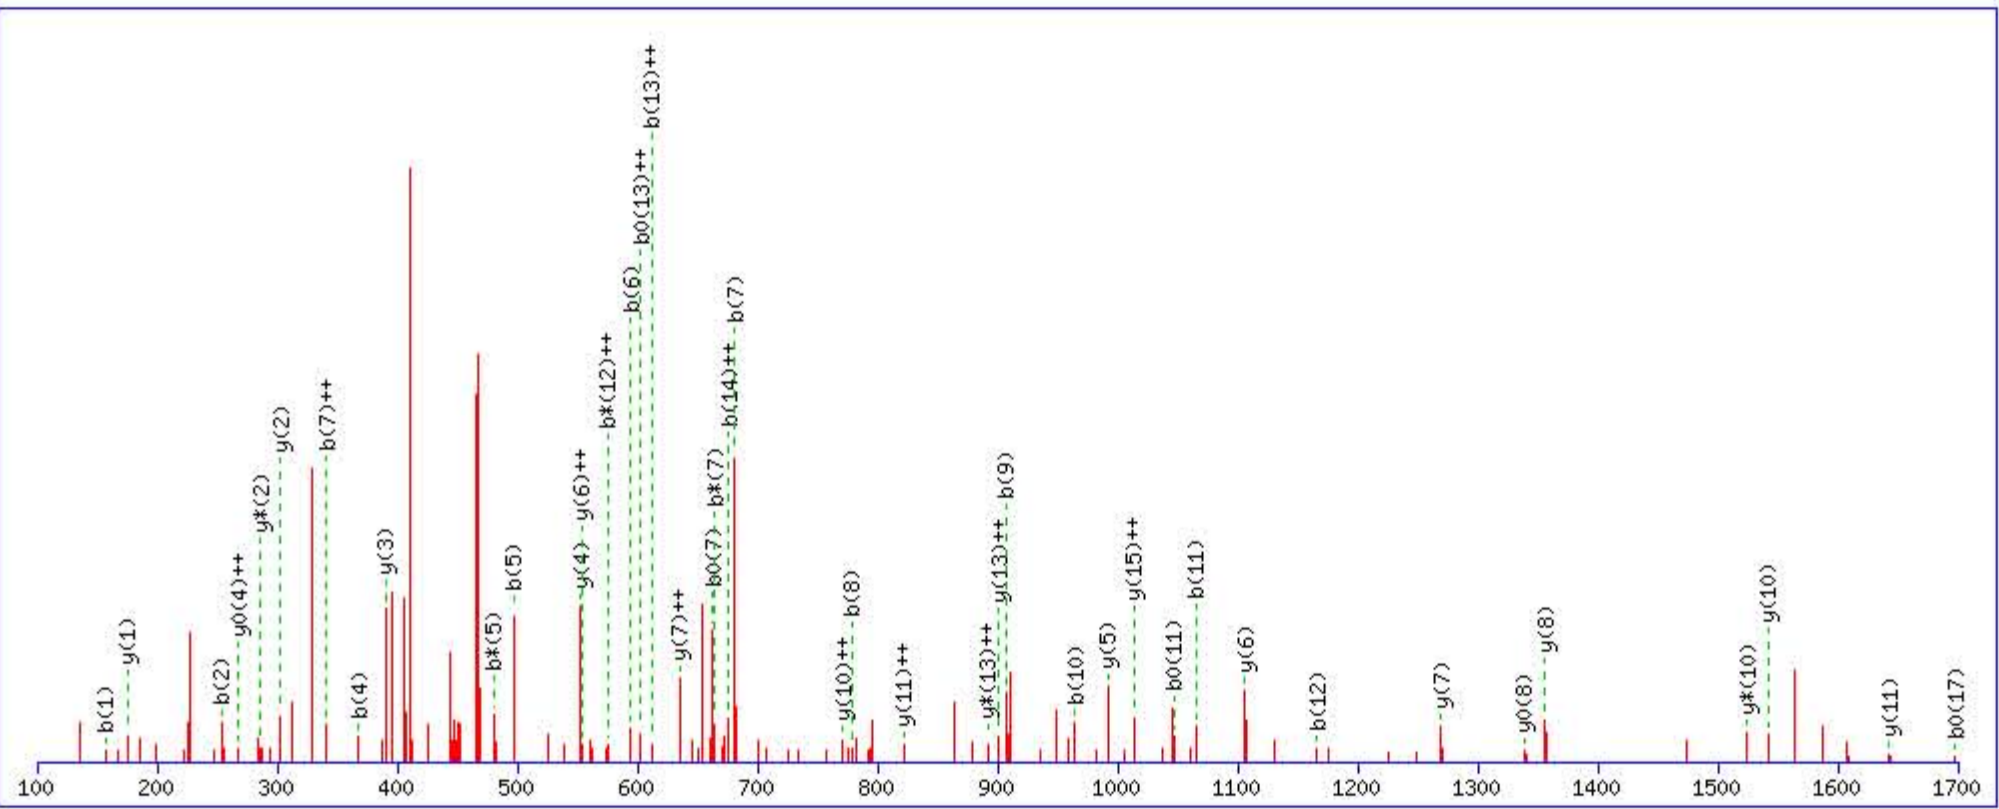

Monoisotopic mass of neutral peptide  $M_r(\text{calc})$ : 2706.245621  
 Fixed modifications: Carbamidomethyl (C) (apply to specified residues or termini only)  
 Variable modifications:  
 Q18 : Biotin:Thermo-21345 (Q)  
 Ions Score: 53 Expect: 6.4e-005  
 Matches : 42/240 fragment ions using 109 most intense peaks [\(help\)](#)

| #  | b                  | b <sup>++</sup>   | b <sup>*</sup>    | b <sup>*++</sup>  | b <sup>0</sup>     | b <sup>0++</sup>  | Seq. | y                  | y <sup>++</sup>    | y <sup>*</sup>     | y <sup>*++</sup>  | y <sup>0</sup>     | y <sup>0++</sup>  | #  |
|----|--------------------|-------------------|-------------------|-------------------|--------------------|-------------------|------|--------------------|--------------------|--------------------|-------------------|--------------------|-------------------|----|
| 1  | <b>157.108387</b>  | 79.057831         | 140.081838        | 70.544557         |                    |                   | R    |                    |                    |                    |                   |                    |                   | 22 |
| 2  | <b>254.161151</b>  | 127.584213        | 237.134602        | 119.070939        |                    |                   | P    | 2551.151795        | 1276.079535        | 2534.125246        | 1267.566261       | 2533.141230        | 1267.074253       | 21 |
| 3  | 311.182615         | 156.094945        | 294.156066        | 147.581671        |                    |                   | G    | 2454.099031        | 1227.553153        | 2437.072482        | 1219.039879       | 2436.088466        | 1218.547871       | 20 |
| 4  | <b>368.204079</b>  | 184.605677        | 351.177530        | 176.092403        |                    |                   | G    | 2397.077567        | 1199.042421        | 2380.051018        | 1190.529147       | 2379.067002        | 1190.037139       | 19 |
| 5  | <b>497.246672</b>  | 249.126974        | <b>480.220123</b> | 240.613700        | 479.236107         | 240.121692        | E    | 2340.056103        | 1170.531689        | 2323.029554        | 1162.018415       | 2322.045538        | 1161.526407       | 18 |
| 6  | <b>594.299436</b>  | 297.653356        | 577.272887        | 289.140082        | 576.288871         | 288.648074        | P    | 2211.013510        | 1106.010393        | 2193.986961        | 1097.497118       | 2193.002945        | 1097.005110       | 17 |
| 7  | <b>681.331464</b>  | <b>341.169370</b> | <b>664.304915</b> | 332.656095        | <b>663.320899</b>  | 332.164087        | S    | 2113.960746        | 1057.484011        | 2096.934197        | 1048.970736       | 2095.950181        | 1048.478728       | 16 |
| 8  | <b>778.384228</b>  | 389.695752        | 761.357679        | 381.182478        | 760.373663         | 380.690470        | P    | 2026.928718        | <b>1013.967997</b> | 2009.902169        | 1005.454723       | 2008.918153        | 1004.962715       | 15 |
| 9  | <b>907.426821</b>  | 454.217049        | 890.400272        | 445.703774        | 889.416256         | 445.211766        | E    | 1929.875954        | 965.441615         | 1912.849405        | 956.928341        | 1911.865389        | 956.436333        | 14 |
| 10 | <b>964.448285</b>  | 482.727781        | 947.421736        | 474.214506        | 946.437720         | 473.722498        | G    | 1800.833361        | <b>900.920319</b>  | 1783.806812        | <b>892.407044</b> | 1782.822796        | 891.915036        | 13 |
| 11 | <b>1065.495964</b> | 533.251620        | 1048.469415       | 524.738346        | <b>1047.485399</b> | 524.246337        | T    | 1743.811897        | 872.409587         | 1726.785348        | 863.896312        | 1725.801332        | 863.404304        | 12 |
| 12 | <b>1166.543643</b> | 583.775460        | 1149.517094       | <b>575.262185</b> | 1148.533078        | 574.770177        | T    | <b>1642.764218</b> | <b>821.885747</b>  | 1625.737669        | 813.372473        | 1624.753653        | 812.880465        | 11 |
| 13 | 1223.565107        | <b>612.286191</b> | 1206.538558       | 603.772917        | 1205.554542        | <b>603.280909</b> | G    | <b>1541.716539</b> | <b>771.361908</b>  | <b>1524.689990</b> | 762.848633        | 1523.705974        | 762.356625        | 10 |
| 14 | 1351.623685        | <b>676.315480</b> | 1334.597136       | 667.802206        | 1333.613120        | 667.310198        | Q    | 1484.695075        | 742.851176         | 1467.668526        | 734.337901        | 1466.684510        | 733.845893        | 9  |
| 15 | 1438.655713        | 719.831494        | 1421.629164       | 711.318220        | 1420.645148        | 710.826212        | S    | <b>1356.636497</b> | 678.821887         | 1339.609948        | 670.308612        | <b>1338.625932</b> | 669.816604        | 8  |
| 16 | 1601.719042        | 801.363159        | 1584.692493       | 792.849885        | 1583.708477        | 792.357876        | Y    | <b>1269.604469</b> | <b>635.305873</b>  | 1252.577920        | 626.792598        | 1251.593904        | 626.300590        | 7  |
| 17 | 1715.761969        | 858.384622        | 1698.735420       | 849.871348        | <b>1697.751404</b> | 849.379340        | N    | <b>1106.541140</b> | <b>553.774208</b>  | 1089.514591        | 545.260934        | 1088.530575        | 544.768926        | 6  |
| 18 | 2154.987295        | 1077.997285       | 2137.960746       | 1069.484011       | 2136.976730        | 1068.992003       | Q    | <b>992.498213</b>  | 496.752745         | 975.471664         | 488.239470        | 974.487648         | 487.747462        | 5  |
| 19 | 2318.050624        | 1159.528950       | 2301.024075       | 1151.015675       | 2300.040059        | 1150.523667       | Y    | <b>553.272887</b>  | 277.140082         | 536.246338         | 268.626807        | 535.262322         | <b>268.134799</b> | 4  |
| 20 | 2405.082652        | 1203.044964       | 2388.056103       | 1194.531689       | 2387.072087        | 1194.039681       | S    | <b>390.209558</b>  | 195.608417         | 373.183009         | 187.095143        | 372.198993         | 186.603135        | 3  |
| 21 | 2533.141230        | 1267.074253       | 2516.114681       | 1258.560978       | 2515.130665        | 1258.068971       | Q    | <b>303.177530</b>  | 152.092403         | <b>286.150981</b>  | 143.579129        |                    |                   | 2  |
| 22 |                    |                   |                   |                   |                    |                   | R    | <b>175.118952</b>  | 88.063114          | 158.092403         | 79.549839         |                    |                   | 1  |

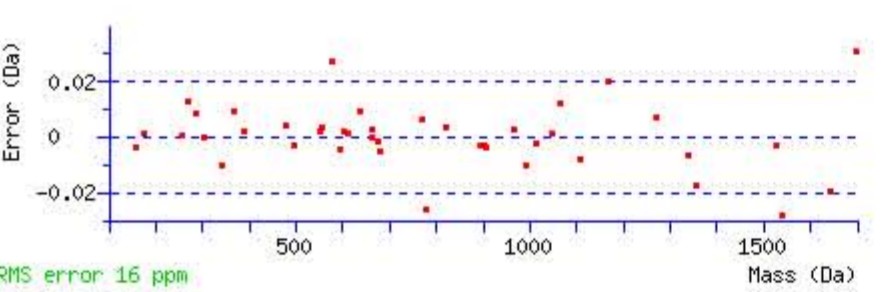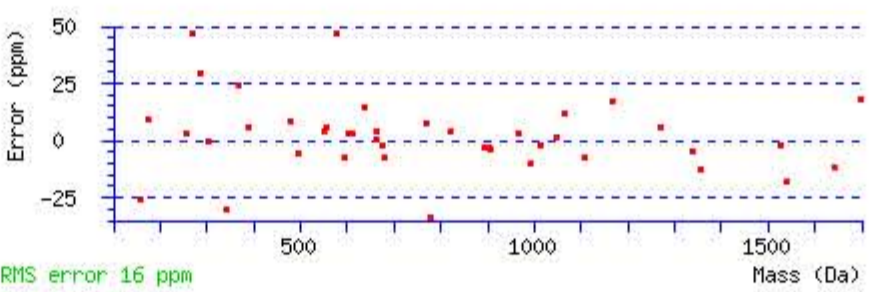

NCBI BLAST search of [RPGGEPSPGTTGQSYNQYSQR](#)  
 (Parameters: blastp, nr protein database, expect=20000, no filter, PAM30)  
 Other BLAST [web gateways](#)

**All matches to this query**

| Score | $M_r(\text{calc})$ : | Delta     | Sequence                              |
|-------|----------------------|-----------|---------------------------------------|
| 52.7  | 2706.245621          | -0.008245 | <a href="#">RPGGEPSPGTTGQSYNQYSQR</a> |
| 38.0  | 2706.245621          | -0.008245 | <a href="#">RPGGEPSPGTTGQSYNQYSQR</a> |
| 32.3  | 2706.245621          | -0.008245 | <a href="#">RPGGEPSPGTTGQSYNQYSQR</a> |



# Mascot Search Results

## Peptide View

MS/MS Fragmentation of **RPGGEPSPGTTGQSYNQYSQR**  
 Found in **FINC\_HUMAN**, Fibronectin OS=Homo sapiens GN=FN1 PE=1 SV=4

Match to Query 56201: 3017.415912 from(1006.812580,3+) rtinseconds(1811) index(31979)  
 Title: Locus:1.1.1.3179.13 File:"2013-07-02 CLN FXIII 60 min 3rd F 3.wiff"  
 Data file C:\Program Files (x86)\Matrix Science\Mascot Daemon\mgf\6 FXIII 60 min 3rd\mascot\_daemon\_merge.mgf

Click mouse within plot area to zoom in by factor of two about that point  
 Or, Plot from  to  Da   
 Label all possible matches  Label matches used for scoring

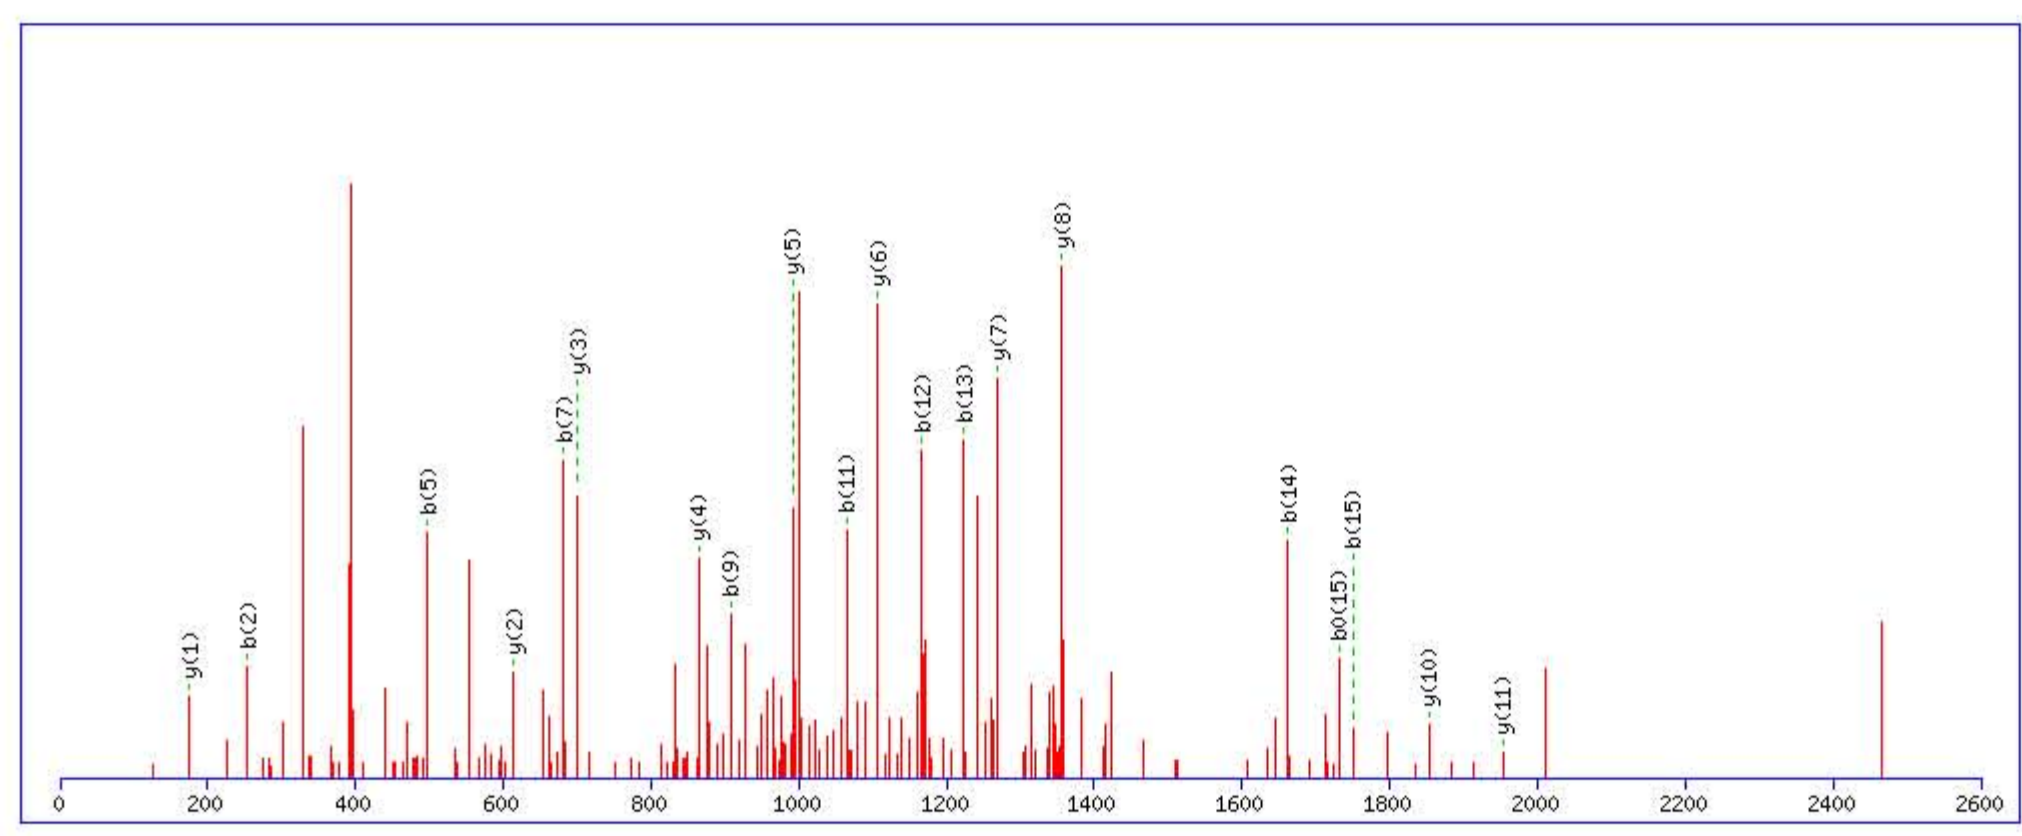

Monoisotopic mass of neutral peptide Mr(calc): 3017.412369  
 Fixed modifications: Carbamidomethyl (C) (apply to specified residues or termini only)  
 Variable modifications:  
 Q14 : Biotin:Thermo-21345 (Q)  
 Q21 : Biotin:Thermo-21345 (Q)  
 Ions Score: 62 Expect: 1e-005  
 Matches : 20/240 fragment ions using 38 most intense peaks [\(help\)](#)

| #  | b                  | b <sup>++</sup> | b <sup>+</sup> | b <sup>*++</sup> | b <sup>0</sup>     | b <sup>0++</sup> | Seq. | y                  | y <sup>++</sup> | y <sup>+</sup> | y <sup>*++</sup> | y <sup>0</sup> | y <sup>0++</sup> | #  |
|----|--------------------|-----------------|----------------|------------------|--------------------|------------------|------|--------------------|-----------------|----------------|------------------|----------------|------------------|----|
| 1  | 157.108387         | 79.057831       | 140.081838     | 70.544557        |                    |                  | R    |                    |                 |                |                  |                |                  | 22 |
| 2  | <b>254.161151</b>  | 127.584213      | 237.134602     | 119.070939       |                    |                  | P    | 2862.318543        | 1431.662909     | 2845.291994    | 1423.149635      | 2844.307978    | 1422.657627      | 21 |
| 3  | 311.182615         | 156.094945      | 294.156066     | 147.581671       |                    |                  | G    | 2765.265779        | 1383.136527     | 2748.239230    | 1374.623253      | 2747.255214    | 1374.131245      | 20 |
| 4  | 368.204079         | 184.605677      | 351.177530     | 176.092403       |                    |                  | G    | 2708.244315        | 1354.625795     | 2691.217766    | 1346.112521      | 2690.233750    | 1345.620513      | 19 |
| 5  | <b>497.246672</b>  | 249.126974      | 480.220123     | 240.613700       | 479.236107         | 240.121692       | E    | 2651.222851        | 1326.115063     | 2634.196302    | 1317.601789      | 2633.212286    | 1317.109781      | 18 |
| 6  | 594.299436         | 297.653356      | 577.272887     | 289.140082       | 576.288871         | 288.648074       | P    | 2522.180258        | 1261.593767     | 2505.153709    | 1253.080492      | 2504.169693    | 1252.588484      | 17 |
| 7  | <b>681.331464</b>  | 341.169370      | 664.304915     | 332.656095       | 663.320899         | 332.164087       | S    | 2425.127494        | 1213.067385     | 2408.100945    | 1204.554110      | 2407.116929    | 1204.062102      | 16 |
| 8  | 778.384228         | 389.695752      | 761.357679     | 381.182478       | 760.373663         | 380.690470       | P    | 2338.095466        | 1169.551371     | 2321.068917    | 1161.038096      | 2320.084901    | 1160.546088      | 15 |
| 9  | <b>907.426821</b>  | 454.217049      | 890.400272     | 445.703774       | 889.416256         | 445.211766       | E    | 2241.042702        | 1121.024989     | 2224.016153    | 1112.511714      | 2223.032137    | 1112.019706      | 14 |
| 10 | 964.448285         | 482.727781      | 947.421736     | 474.214506       | 946.437720         | 473.722498       | G    | 2112.000109        | 1056.503692     | 2094.973560    | 1047.990418      | 2093.989544    | 1047.498410      | 13 |
| 11 | <b>1065.495964</b> | 533.251620      | 1048.469415    | 524.738346       | 1047.485399        | 524.246337       | T    | 2054.978645        | 1027.992960     | 2037.952096    | 1019.479686      | 2036.968080    | 1018.987678      | 12 |
| 12 | <b>1166.543643</b> | 583.775460      | 1149.517094    | 575.262185       | 1148.533078        | 574.770177       | T    | <b>1953.930966</b> | 977.469121      | 1936.904417    | 968.955847       | 1935.920401    | 968.463839       | 11 |
| 13 | <b>1223.565107</b> | 612.286191      | 1206.538558    | 603.772917       | 1205.554542        | 603.280909       | G    | <b>1852.883287</b> | 926.945282      | 1835.856738    | 918.432007       | 1834.872722    | 917.939999       | 10 |
| 14 | <b>1662.790433</b> | 831.898854      | 1645.763884    | 823.385580       | 1644.779868        | 822.893572       | Q    | 1795.861823        | 898.434550      | 1778.835274    | 889.921275       | 1777.851258    | 889.429267       | 9  |
| 15 | <b>1749.822461</b> | 875.414869      | 1732.795912    | 866.901594       | <b>1731.811896</b> | 866.409586       | S    | <b>1356.636497</b> | 678.821887      | 1339.609948    | 670.308612       | 1338.625932    | 669.816604       | 8  |
| 16 | 1912.885790        | 956.946533      | 1895.859241    | 948.433259       | 1894.875225        | 947.941251       | Y    | <b>1269.604469</b> | 635.305873      | 1252.577920    | 626.792598       | 1251.593904    | 626.300590       | 7  |
| 17 | 2026.928717        | 1013.967997     | 2009.902168    | 1005.454722      | 2008.918152        | 1004.962714      | N    | <b>1106.541140</b> | 553.774208      | 1089.514591    | 545.260934       | 1088.530575    | 544.768926       | 6  |
| 18 | 2154.987295        | 1077.997285     | 2137.960746    | 1069.484011      | 2136.976730        | 1068.992003      | Q    | <b>992.498213</b>  | 496.752745      | 975.471664     | 488.239470       | 974.487648     | 487.747462       | 5  |
| 19 | 2318.050624        | 1159.528950     | 2301.024075    | 1151.015675      | 2300.040059        | 1150.523667      | Y    | <b>864.439635</b>  | 432.723456      | 847.413086     | 424.210181       | 846.429070     | 423.718173       | 4  |
| 20 | 2405.082652        | 1203.044964     | 2388.056103    | 1194.531689      | 2387.072087        | 1194.039681      | S    | <b>701.376306</b>  | 351.191791      | 684.349757     | 342.678517       | 683.365741     | 342.186509       | 3  |
| 21 | 2844.307978        | 1422.657627     | 2827.281429    | 1414.144353      | 2826.297413        | 1413.652345      | Q    | <b>614.344278</b>  | 307.675777      | 597.317729     | 299.162503       |                |                  | 2  |
| 22 |                    |                 |                |                  |                    |                  | R    | <b>175.118952</b>  | 88.063114       | 158.092403     | 79.549839        |                |                  | 1  |

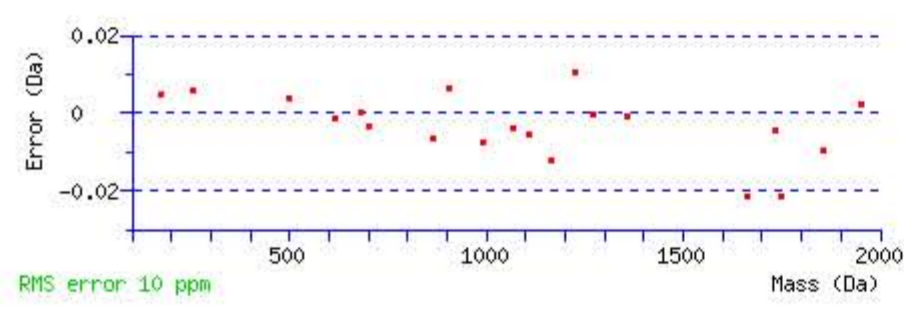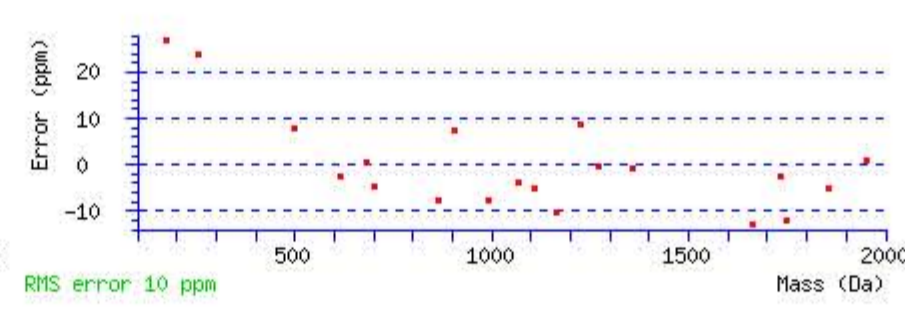

NCBI BLAST search of [RPGGEPSPGTTGQSYNQYSQR](#)  
 (Parameters: blastp, nr protein database, expect=20000, no filter, PAM30)  
 Other BLAST [web gateways](#)

### All matches to this query

| Score | Mr(calc):   | Delta    | Sequence                              |
|-------|-------------|----------|---------------------------------------|
| 62.4  | 3017.412369 | 0.003543 | <a href="#">RPGGEPSPGTTGQSYNQYSQR</a> |
| 60.5  | 3017.412369 | 0.003543 | <a href="#">RPGGEPSPGTTGQSYNQYSQR</a> |
| 27.3  | 3017.412369 | 0.003543 | <a href="#">RPGGEPSPGTTGQSYNQYSQR</a> |

# MASCOT Search Results

## Peptide View

MS/MS Fragmentation of **RPGGEPSPGTTGQSYNQYSQR**

Found in **FINC\_HUMAN**, Fibronectin OS=Homo sapiens GN=FN1 PE=1 SV=4

Match to Query 56203: 3017.419016 from(755.362030,4+) rtinseconds(1810) index(31975)

Title: Locus:1.1.1.3179.9 File:"2013-07-02 CLN FXIII 60 min 3rd F 3.wiff"

Data file C:\Program Files (x86)\Matrix Science\Mascot Daemon\mgf\6 FXIII 60 min 3rd\mascot\_daemon\_merge.mgf

Click mouse within plot area to zoom in by factor of two about that point

Or, Plot from  to  Da

Label all possible matches  Label matches used for scoring

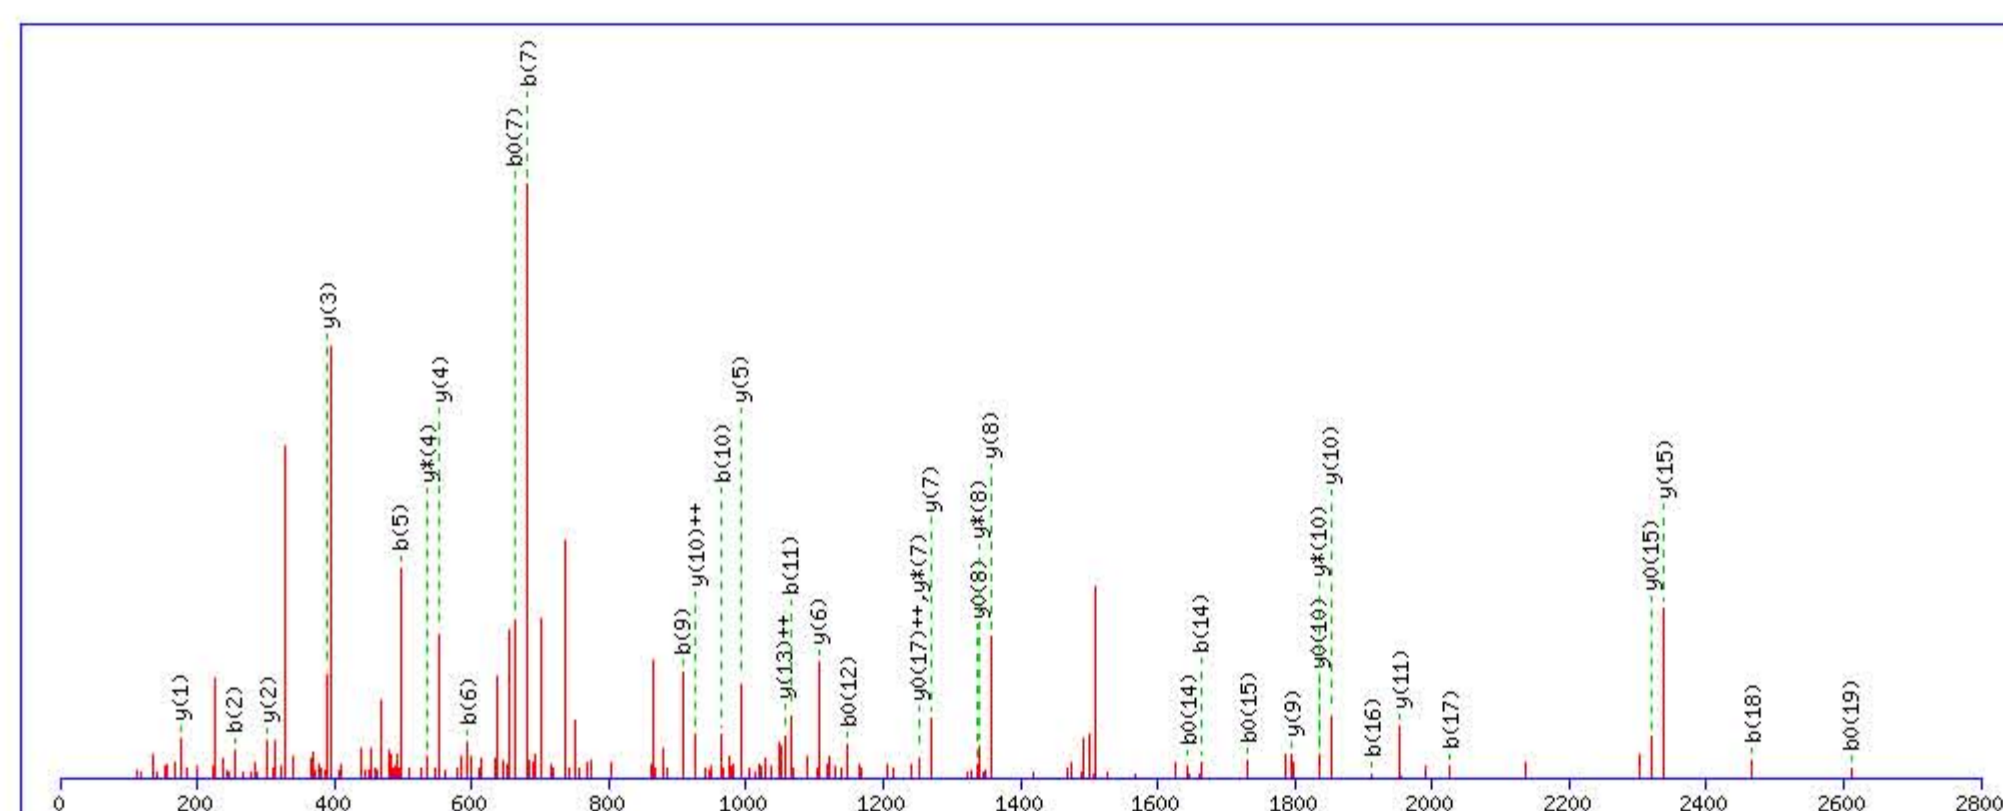

Monoisotopic mass of neutral peptide Mr(calc): 3017.412369

Fixed modifications: Carbamidomethyl (C) (apply to specified residues or termini only)

Variable modifications:

Q14 : Biotin:Thermo-21345 (Q)

Q18 : Biotin:Thermo-21345 (Q)

Ions Score: 81 Expect: 1.4e-007

Matches : 38/240 fragment ions using 63 most intense peaks [\(help\)](#)

| #  | b                  | b <sup>++</sup> | b <sup>+</sup> | b <sup>+++</sup> | b <sup>0</sup>     | b <sup>0++</sup> | Seq. | y                  | y <sup>++</sup>    | y <sup>+</sup>     | y <sup>+++</sup> | y <sup>0</sup>     | y <sup>0++</sup>   | #  |
|----|--------------------|-----------------|----------------|------------------|--------------------|------------------|------|--------------------|--------------------|--------------------|------------------|--------------------|--------------------|----|
| 1  | 157.108387         | 79.057831       | 140.081838     | 70.544557        |                    |                  | R    |                    |                    |                    |                  |                    |                    | 22 |
| 2  | <b>254.161151</b>  | 127.584213      | 237.134602     | 119.070939       |                    |                  | P    | 2862.318543        | 1431.662909        | 2845.291994        | 1423.149635      | 2844.307978        | 1422.657627        | 21 |
| 3  | 311.182615         | 156.094945      | 294.156066     | 147.581671       |                    |                  | G    | 2765.265779        | 1383.136527        | 2748.239230        | 1374.623253      | 2747.255214        | 1374.131245        | 20 |
| 4  | 368.204079         | 184.605677      | 351.177530     | 176.092403       |                    |                  | G    | 2708.244315        | 1354.625795        | 2691.217766        | 1346.112521      | 2690.233750        | 1345.620513        | 19 |
| 5  | <b>497.246672</b>  | 249.126974      | 480.220123     | 240.613700       | 479.236107         | 240.121692       | E    | 2651.222851        | 1326.115063        | 2634.196302        | 1317.601789      | 2633.212286        | 1317.109781        | 18 |
| 6  | <b>594.299436</b>  | 297.653356      | 577.272887     | 289.140082       | 576.288871         | 288.648074       | P    | 2522.180258        | 1261.593767        | 2505.153709        | 1253.080492      | 2504.169693        | <b>1252.588484</b> | 17 |
| 7  | <b>681.331464</b>  | 341.169370      | 664.304915     | 332.656095       | <b>663.320899</b>  | 332.164087       | S    | 2425.127494        | 1213.067385        | 2408.100945        | 1204.554110      | 2407.116929        | 1204.062102        | 16 |
| 8  | 778.384228         | 389.695752      | 761.357679     | 381.182478       | 760.373663         | 380.690470       | P    | <b>2338.095466</b> | 1169.551371        | 2321.068917        | 1161.038096      | <b>2320.084901</b> | 1160.546088        | 15 |
| 9  | <b>907.426821</b>  | 454.217049      | 890.400272     | 445.703774       | 889.416256         | 445.211766       | E    | 2241.042702        | 1121.024989        | 2224.016153        | 1112.511714      | 2223.032137        | 1112.019706        | 14 |
| 10 | <b>964.448285</b>  | 482.727781      | 947.421736     | 474.214506       | 946.437720         | 473.722498       | G    | 2112.000109        | <b>1056.503692</b> | 2094.973560        | 1047.990418      | 2093.989544        | 1047.498410        | 13 |
| 11 | <b>1065.495964</b> | 533.251620      | 1048.469415    | 524.738346       | 1047.485399        | 524.246337       | T    | 2054.978645        | 1027.992960        | 2037.952096        | 1019.479686      | 2036.968080        | 1018.987678        | 12 |
| 12 | 1166.543643        | 583.775460      | 1149.517094    | 575.262185       | <b>1148.533078</b> | 574.770177       | T    | <b>1953.930966</b> | 977.469121         | 1936.904417        | 968.955847       | 1935.920401        | 968.463839         | 11 |
| 13 | 1223.565107        | 612.286191      | 1206.538558    | 603.772917       | 1205.554542        | 603.280909       | G    | <b>1852.883287</b> | <b>926.945282</b>  | <b>1835.856738</b> | 918.432007       | <b>1834.872722</b> | 917.939999         | 10 |
| 14 | <b>1662.790433</b> | 831.898854      | 1645.763884    | 823.385580       | <b>1644.779868</b> | 822.893572       | Q    | <b>1795.861823</b> | 898.434550         | 1778.835274        | 889.921275       | 1777.851258        | 889.429267         | 9  |
| 15 | 1749.822461        | 875.414869      | 1732.795912    | 866.901594       | <b>1731.811896</b> | 866.409586       | S    | <b>1356.636497</b> | 678.821887         | <b>1339.609948</b> | 670.308612       | <b>1338.625932</b> | 669.816604         | 8  |
| 16 | <b>1912.885790</b> | 956.946533      | 1895.859241    | 948.433259       | 1894.875225        | 947.941251       | Y    | <b>1269.604469</b> | 635.305873         | <b>1252.577920</b> | 626.792598       | 1251.593904        | 626.300590         | 7  |
| 17 | <b>2026.928717</b> | 1013.967997     | 2009.902168    | 1005.454722      | 2008.918152        | 1004.962714      | N    | <b>1106.541140</b> | 553.774208         | 1089.514591        | 545.260934       | 1088.530575        | 544.768926         | 6  |
| 18 | <b>2466.154043</b> | 1233.580659     | 2449.127494    | 1225.067385      | 2448.143478        | 1224.575377      | Q    | <b>992.498213</b>  | 496.752745         | 975.471664         | 488.239470       | 974.487648         | 487.747462         | 5  |
| 19 | 2629.217372        | 1315.112324     | 2612.190823    | 1306.599049      | <b>2611.206807</b> | 1306.107041      | Y    | <b>553.272887</b>  | 277.140082         | <b>536.246338</b>  | 268.626807       | 535.262322         | 268.134799         | 4  |
| 20 | 2716.249400        | 1358.628338     | 2699.222851    | 1350.115063      | 2698.238835        | 1349.623056      | S    | <b>390.209558</b>  | 195.608417         | 373.183009         | 187.095143       | 372.198993         | 186.603135         | 3  |
| 21 | 2844.307978        | 1422.657627     | 2827.281429    | 1414.144353      | 2826.297413        | 1413.652345      | Q    | <b>303.177530</b>  | 152.092403         | 286.150981         | 143.579129       |                    |                    | 2  |
| 22 |                    |                 |                |                  |                    |                  | R    | <b>175.118952</b>  | 88.063114          | 158.092403         | 79.549839        |                    |                    | 1  |

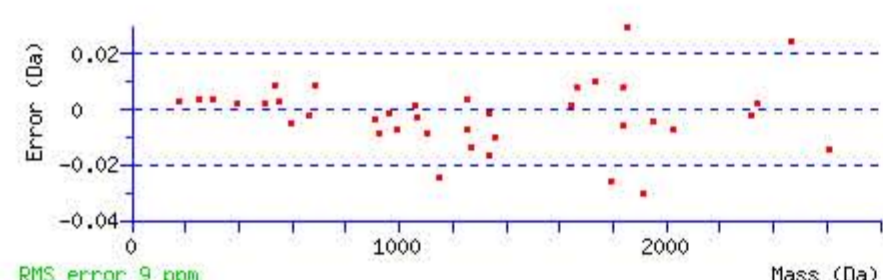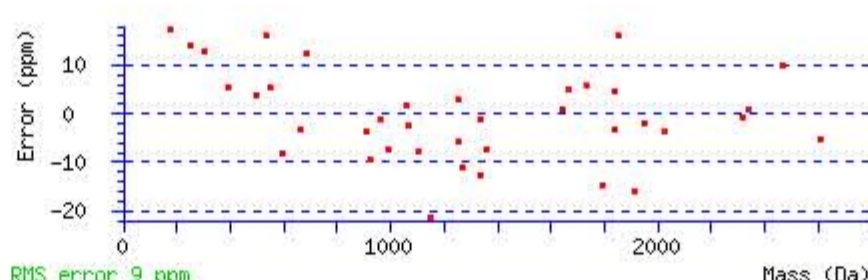

NCBI BLAST search of **RPGGEPSPGTTGQSYNQYSQR**

(Parameters: blastp, nr protein database, expect=20000, no filter, PAM30)

Other BLAST [web gateways](#)

All matches to this query

| Score | Mr(calc):   | Delta    | Sequence                              |
|-------|-------------|----------|---------------------------------------|
| 81.2  | 3017.412369 | 0.006647 | <a href="#">RPGGEPSPGTTGQSYNQYSQR</a> |
| 67.3  | 3017.412369 | 0.006647 | <a href="#">RPGGEPSPGTTGQSYNQYSQR</a> |
| 26.8  | 3017.412369 | 0.006647 | <a href="#">RPGGEPSPGTTGQSYNQYSQR</a> |

# MASCOT Search Results

## Peptide View

MS/MS Fragmentation of **GLKPGVVYEGQLISIQQYGHQEVTR**  
 Found in **FINC\_HUMAN**, Fibronectin OS=Homo sapiens GN=FN1 PE=1 SV=4

Match to Query 56797: 3109.651136 from(778.420060,4+) rtinseconds(2208) index(34278)  
 Title: Locus:1.1.1.3318.18 File:"2013-07-02 CLN FXIII 60 min 3rd F 3.wiff"  
 Data file C:\Program Files (x86)\Matrix Science\Mascot Daemon\mgf\6 FXIII 60 min 3rd\mascot\_daemon\_merge.mgf

Click mouse within plot area to zoom in by factor of two about that point  
 Or, Plot from  to  Da   
 Label all possible matches  Label matches used for scoring

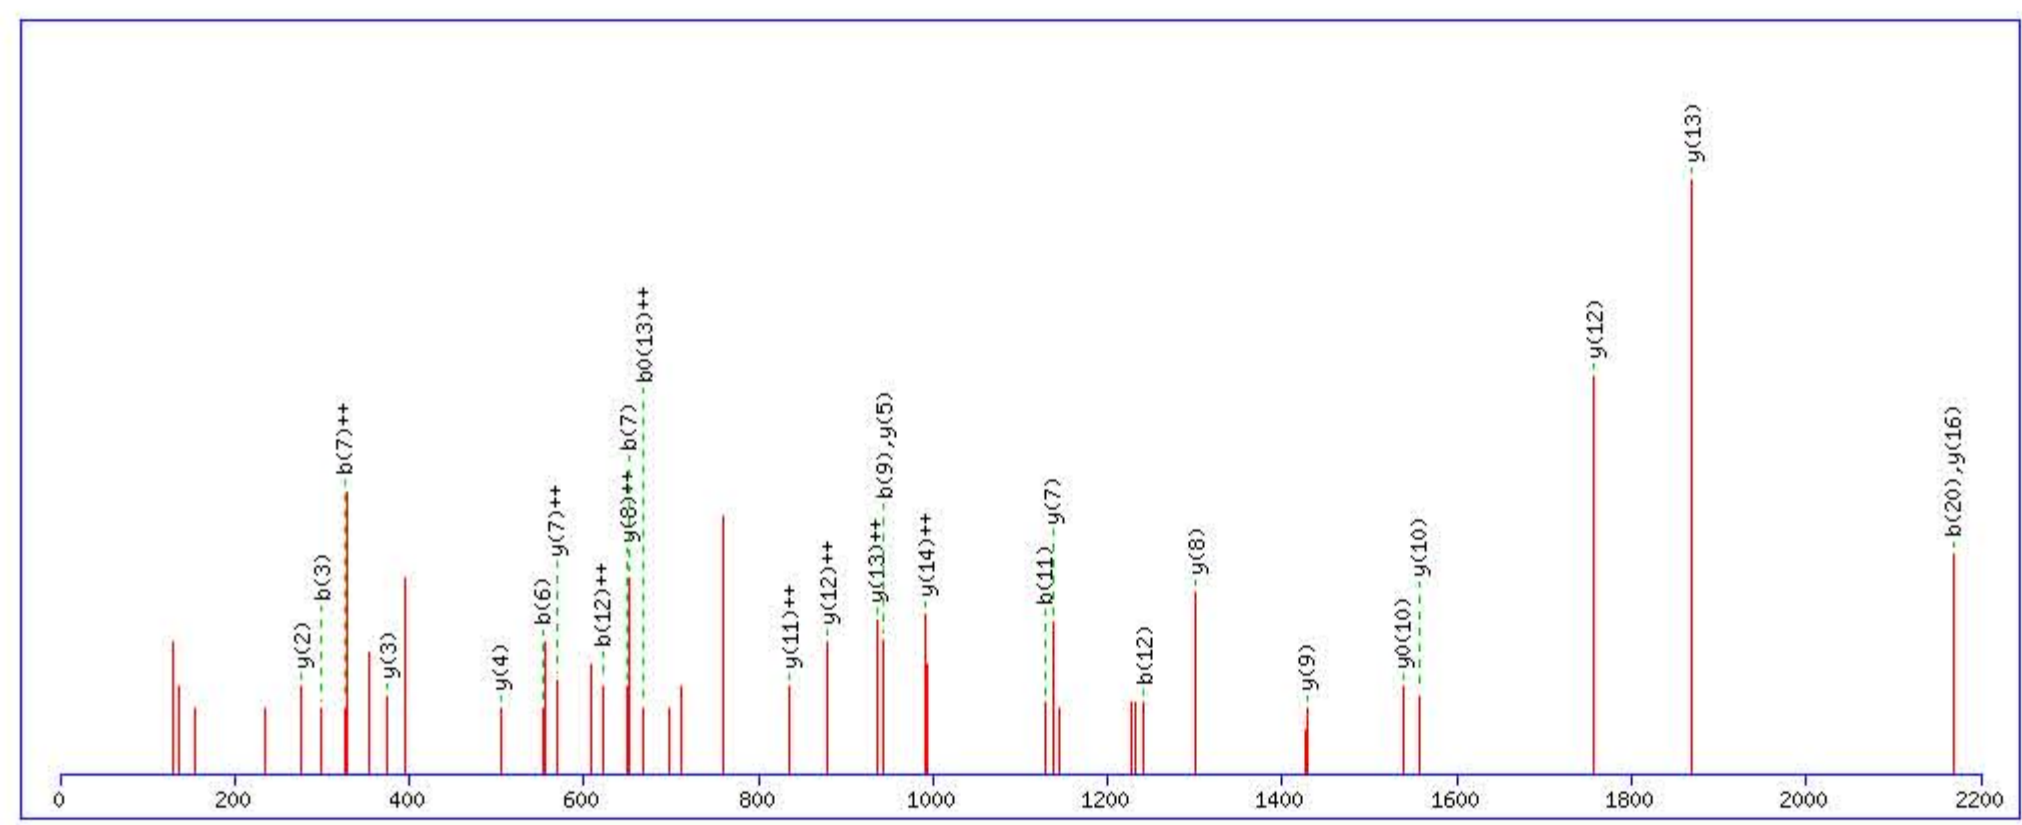

Monoisotopic mass of neutral peptide  $M_r(\text{calc})$ : 3109.638275  
 Fixed modifications: Carbamidomethyl (C) (apply to specified residues or termini only)  
 Variable modifications:  
 Q21 : Biotin:Thermo-21345 (Q)  
 Ions Score: 65 Expect: 5.9e-006  
 Matches : 28/266 fragment ions using 43 most intense peaks ([help](#))

| #  | b                  | b <sup>++</sup>   | b <sup>*</sup> | b <sup>+++</sup> | b <sup>0</sup> | b <sup>0++</sup>  | Seq. | y                  | y <sup>++</sup>   | y <sup>*</sup> | y <sup>+++</sup> | y <sup>0</sup>     | y <sup>0++</sup> | #  |
|----|--------------------|-------------------|----------------|------------------|----------------|-------------------|------|--------------------|-------------------|----------------|------------------|--------------------|------------------|----|
| 1  | 58.028740          | 29.518008         |                |                  |                |                   | G    |                    |                   |                |                  |                    |                  | 25 |
| 2  | 171.112804         | 86.060040         |                |                  |                |                   | L    | 3053.624092        | 1527.315684       | 3036.597543    | 1518.802409      | 3035.613527        | 1518.310401      | 24 |
| 3  | <b>299.207767</b>  | 150.107521        | 282.181218     | 141.594247       |                |                   | K    | 2940.540028        | 1470.773652       | 2923.513479    | 1462.260377      | 2922.529463        | 1461.768369      | 23 |
| 4  | 396.260531         | 198.633903        | 379.233982     | 190.120629       |                |                   | P    | 2812.445065        | 1406.726170       | 2795.418516    | 1398.212896      | 2794.434500        | 1397.720888      | 22 |
| 5  | 453.281995         | 227.144635        | 436.255446     | 218.631361       |                |                   | G    | 2715.392301        | 1358.199788       | 2698.365752    | 1349.686514      | 2697.381736        | 1349.194506      | 21 |
| 6  | <b>552.350409</b>  | 276.678843        | 535.323860     | 268.165568       |                |                   | V    | 2658.370837        | 1329.689056       | 2641.344288    | 1321.175782      | 2640.360272        | 1320.683774      | 20 |
| 7  | <b>651.418823</b>  | <b>326.213050</b> | 634.392274     | 317.699775       |                |                   | V    | 2559.302423        | 1280.154849       | 2542.275874    | 1271.641575      | 2541.291858        | 1271.149567      | 19 |
| 8  | 814.482152         | 407.744714        | 797.455603     | 399.231440       |                |                   | Y    | 2460.234009        | 1230.620642       | 2443.207460    | 1222.107368      | 2442.223444        | 1221.615360      | 18 |
| 9  | <b>943.524745</b>  | 472.266011        | 926.498196     | 463.752736       | 925.514180     | 463.260728        | E    | 2297.170680        | 1149.088978       | 2280.144131    | 1140.575703      | 2279.160115        | 1140.083695      | 17 |
| 10 | 1000.546209        | 500.776743        | 983.519660     | 492.263468       | 982.535644     | 491.771460        | G    | <b>2168.128087</b> | 1084.567681       | 2151.101538    | 1076.054407      | 2150.117522        | 1075.562399      | 16 |
| 11 | <b>1128.604787</b> | 564.806032        | 1111.578238    | 556.292757       | 1110.594222    | 555.800749        | Q    | 2111.106623        | 1056.056949       | 2094.080074    | 1047.543675      | 2093.096058        | 1047.051667      | 15 |
| 12 | <b>1241.688851</b> | <b>621.348063</b> | 1224.662302    | 612.834789       | 1223.678286    | 612.342781        | L    | 1983.048045        | <b>992.027660</b> | 1966.021496    | 983.514386       | 1965.037480        | 983.022378       | 14 |
| 13 | 1354.772915        | 677.890095        | 1337.746366    | 669.376821       | 1336.762350    | <b>668.884813</b> | I    | <b>1869.963981</b> | <b>935.485628</b> | 1852.937432    | 926.972354       | 1851.953416        | 926.480346       | 13 |
| 14 | 1441.804943        | 721.406109        | 1424.778394    | 712.892835       | 1423.794378    | 712.400827        | S    | <b>1756.879917</b> | <b>878.943597</b> | 1739.853368    | 870.430322       | 1738.869352        | 869.938314       | 12 |
| 15 | 1554.889007        | 777.948141        | 1537.862458    | 769.434867       | 1536.878442    | 768.942859        | I    | 1669.847889        | <b>835.427582</b> | 1652.821340    | 826.914308       | 1651.837324        | 826.422300       | 11 |
| 16 | 1682.947585        | 841.977430        | 1665.921036    | 833.464156       | 1664.937020    | 832.972148        | Q    | <b>1556.763825</b> | 778.885551        | 1539.737276    | 770.372276       | <b>1538.753260</b> | 769.880268       | 10 |
| 17 | 1811.006163        | 906.006719        | 1793.979614    | 897.493445       | 1792.995598    | 897.001437        | Q    | <b>1428.705247</b> | 714.856262        | 1411.678698    | 706.342987       | 1410.694682        | 705.850979       | 9  |
| 18 | 1974.069492        | 987.538384        | 1957.042943    | 979.025109       | 1956.058927    | 978.533101        | Y    | <b>1300.646669</b> | <b>650.826973</b> | 1283.620120    | 642.313698       | 1282.636104        | 641.821690       | 8  |
| 19 | 2031.090956        | 1016.049116       | 2014.064407    | 1007.535841      | 2013.080391    | 1007.043833       | G    | <b>1137.583340</b> | <b>569.295308</b> | 1120.556791    | 560.782034       | 1119.572775        | 560.290025       | 7  |
| 20 | <b>2168.149868</b> | 1084.578572       | 2151.123319    | 1076.065297      | 2150.139303    | 1075.573289       | H    | 1080.561876        | 540.784576        | 1063.535327    | 532.271302       | 1062.551311        | 531.779293       | 6  |
| 21 | 2607.375194        | 1304.191235       | 2590.348645    | 1295.677960      | 2589.364629    | 1295.185952       | Q    | <b>943.502964</b>  | 472.255120        | 926.476415     | 463.741846       | 925.492399         | 463.249838       | 5  |
| 22 | 2736.417787        | 1368.712531       | 2719.391238    | 1360.199257      | 2718.407222    | 1359.707249       | E    | <b>504.277638</b>  | 252.642457        | 487.251089     | 244.129182       | 486.267073         | 243.637174       | 4  |
| 23 | 2835.486201        | 1418.246738       | 2818.459652    | 1409.733464      | 2817.475636    | 1409.241456       | V    | <b>375.235045</b>  | 188.121160        | 358.208496     | 179.607886       | 357.224480         | 179.115878       | 3  |
| 24 | 2936.533880        | 1468.770578       | 2919.507331    | 1460.257303      | 2918.523315    | 1459.765295       | T    | <b>276.166631</b>  | 138.586953        | 259.140082     | 130.073679       | 258.156066         | 129.581671       | 2  |
| 25 |                    |                   |                |                  |                |                   | R    | 175.118952         | 88.063114         | 158.092403     | 79.549839        |                    |                  | 1  |

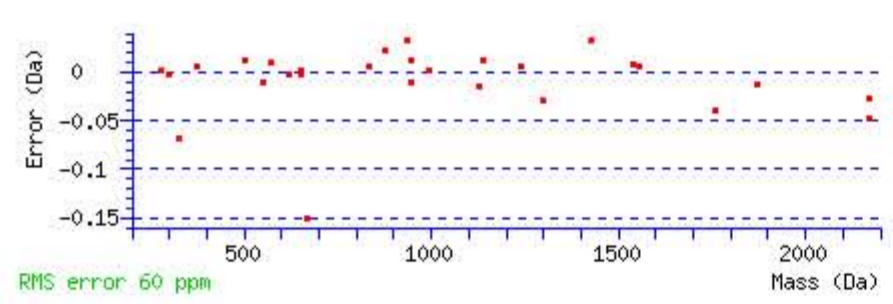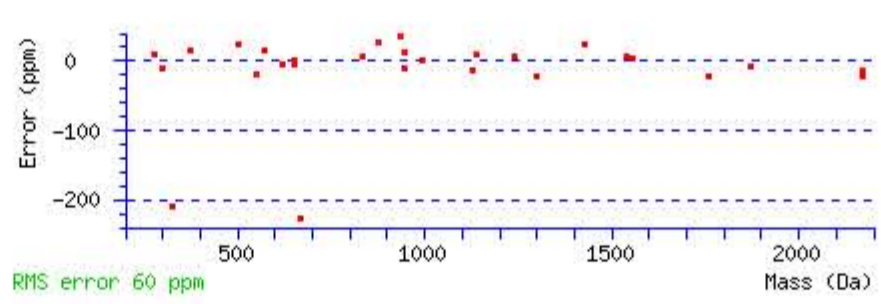

NCBI BLAST search of **GLKPGVVYEGQLISIQQYGHQEVTR**  
 (Parameters: blastp, nr protein database, expect=20000, no filter, PAM30)  
 Other BLAST [web gateways](#)

### All matches to this query

| Score | $M_r(\text{calc})$ : | Delta    | Sequence                                  |
|-------|----------------------|----------|-------------------------------------------|
| 65.2  | 3109.638275          | 0.012861 | <a href="#">GLKPGVVYEGQLISIQQYGHQEVTR</a> |
| 39.5  | 3109.638275          | 0.012861 | <a href="#">GLKPGVVYEGQLISIQQYGHQEVTR</a> |
| 32.9  | 3109.638275          | 0.012861 | <a href="#">GLKPGVVYEGQLISIQQYGHQEVTR</a> |
| 3.7   | 3109.638275          | 0.012861 | <a href="#">GLKPGVVYEGQLISIQQYGHQEVTR</a> |



# MASCOT Search Results

## Peptide View

MS/MS Fragmentation of **SAATLQQEK**

Found in **FBLN1\_HUMAN**, Fibulin-1 OS=Homo sapiens GN=FBLN1 PE=1 SV=4

Match to Query 22736: 1285.668568 from(643.841560,2+) rtinseconds(1498) index(30265)

Title: Locus:1.1.1.3070.10 File:"2013-07-02 CLN FXIII 60 min 3rd F 3.wiff"

Data file C:\Program Files (x86)\Matrix Science\Mascot Daemon\mgf\6 FXIII 60 min 3rd\mascot\_daemon\_merge.mgf

Click mouse within plot area to zoom in by factor of two about that point

Or, Plot from  to  Da

Label all possible matches  Label matches used for scoring

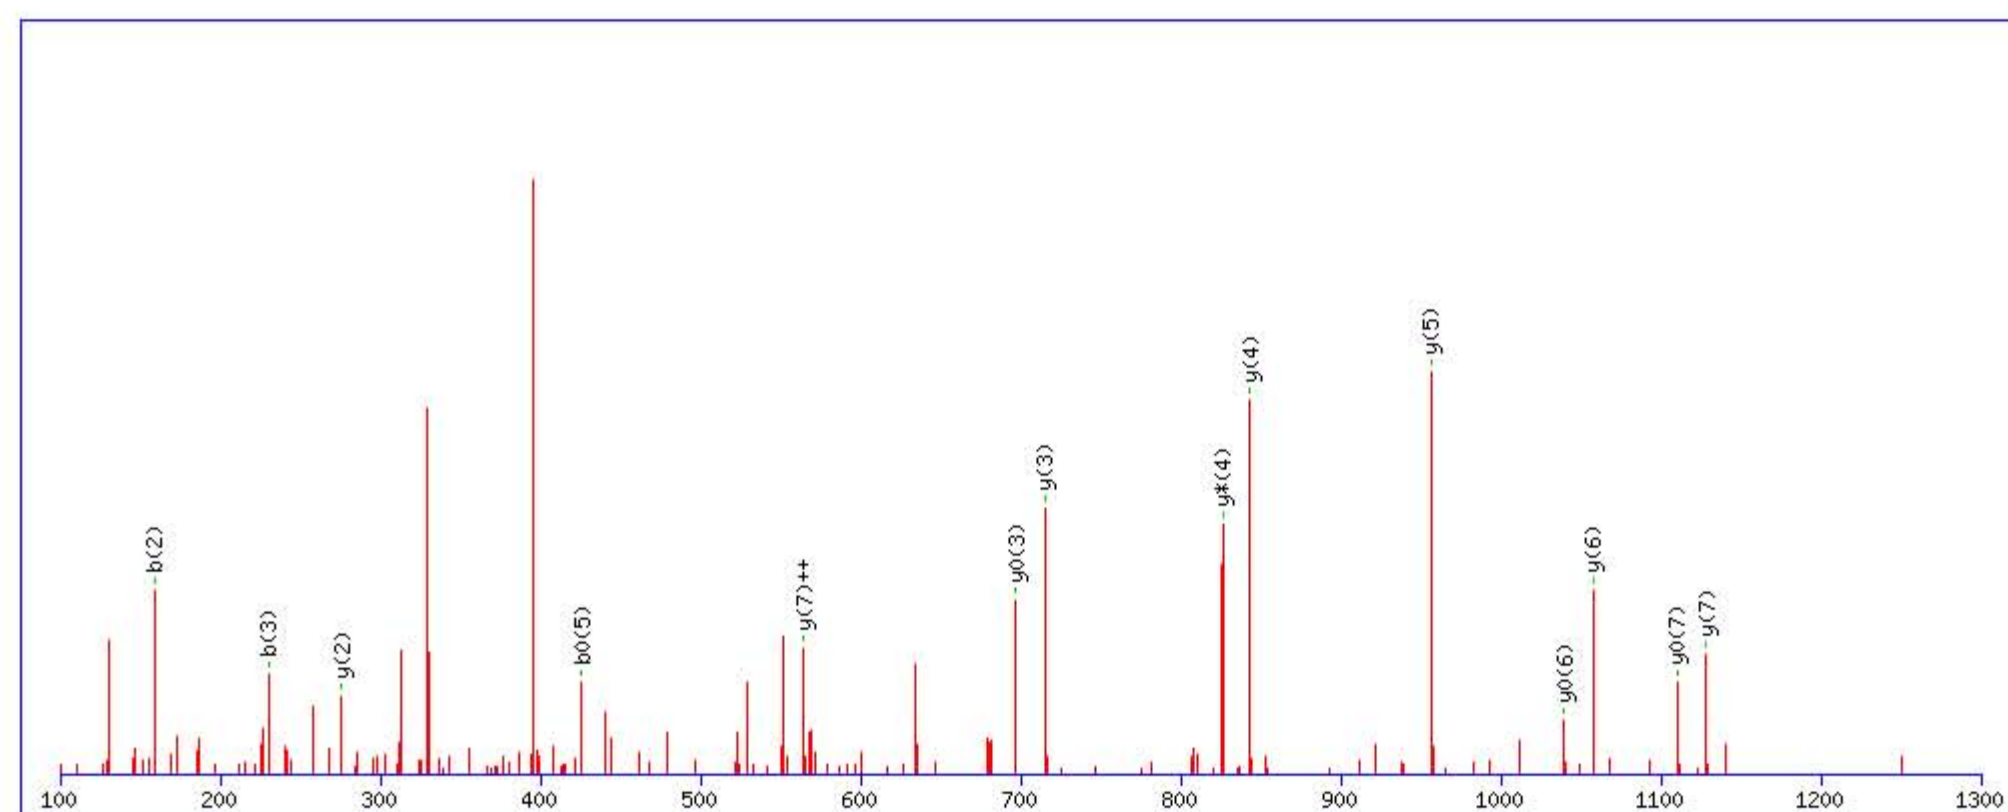

Monoisotopic mass of neutral peptide  $M_r(\text{calc})$ : 1285.669998

Fixed modifications: Carbamidomethyl (C) (apply to specified residues or termini only)

Variable modifications:

Q7 : Biotin:Thermo-21345 (Q)

Ions Score: 39 Expect: 0.0037

Matches : 14/84 fragment ions using 23 most intense peaks [\(help\)](#)

| # | b                 | b <sup>++</sup> | b <sup>*</sup> | b <sup>*++</sup> | b <sup>0</sup>    | b <sup>0++</sup> | Seq. | y                  | y <sup>++</sup>   | y <sup>*</sup>    | y <sup>*++</sup> | y <sup>0</sup>     | y <sup>0++</sup> | # |
|---|-------------------|-----------------|----------------|------------------|-------------------|------------------|------|--------------------|-------------------|-------------------|------------------|--------------------|------------------|---|
| 1 | 88.039304         | 44.523290       |                |                  | 70.028739         | 35.518008        | S    |                    |                   |                   |                  |                    |                  | 9 |
| 2 | <b>159.076418</b> | 80.041847       |                |                  | 141.065853        | 71.036564        | A    | 1199.645272        | 600.326274        | 1182.618723       | 591.813000       | 1181.634707        | 591.320991       | 8 |
| 3 | <b>230.113532</b> | 115.560404      |                |                  | 212.102967        | 106.555121       | A    | <b>1128.608158</b> | <b>564.807717</b> | 1111.581609       | 556.294443       | <b>1110.597593</b> | 555.802435       | 7 |
| 4 | 331.161211        | 166.084243      |                |                  | 313.150646        | 157.078961       | T    | <b>1057.571044</b> | 529.289160        | 1040.544495       | 520.775886       | <b>1039.560479</b> | 520.283878       | 6 |
| 5 | 444.245275        | 222.626275      |                |                  | <b>426.234710</b> | 213.620993       | L    | <b>956.523365</b>  | 478.765321        | 939.496816        | 470.252046       | 938.512800         | 469.760038       | 5 |
| 6 | 572.303853        | 286.655565      | 555.277304     | 278.142290       | 554.293288        | 277.650282       | Q    | <b>843.439301</b>  | 422.223289        | <b>826.412752</b> | 413.710014       | 825.428736         | 413.218006       | 4 |
| 7 | 1011.529179       | 506.268228      | 994.502630     | 497.754953       | 993.518614        | 497.262945       | Q    | <b>715.380723</b>  | 358.194000        | 698.354174        | 349.680725       | <b>697.370158</b>  | 349.188717       | 3 |
| 8 | 1140.571772       | 570.789524      | 1123.545223    | 562.276250       | 1122.561207       | 561.784242       | E    | <b>276.155397</b>  | 138.581336        | 259.128848        | 130.068062       | 258.144832         | 129.576054       | 2 |
| 9 |                   |                 |                |                  |                   |                  | K    | 147.112804         | 74.060040         | 130.086255        | 65.546765        |                    |                  | 1 |

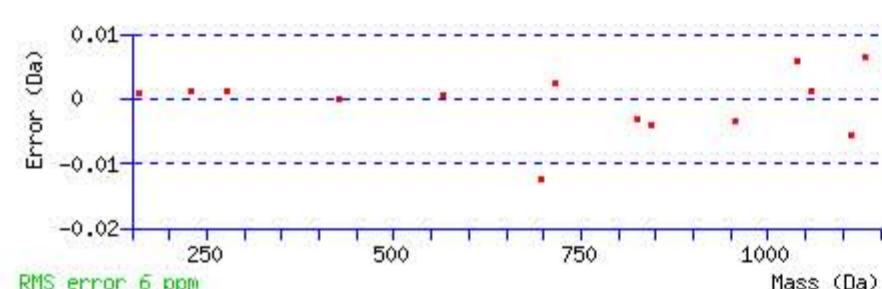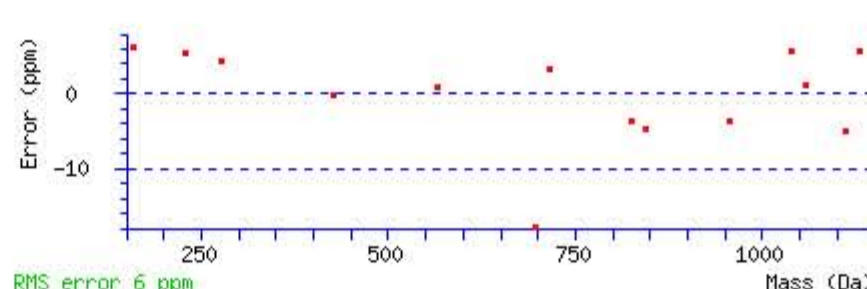

NCBI BLAST search of [SAATLQQEK](#)

(Parameters: blastp, nr protein database, expect=20000, no filter, PAM30)

Other BLAST [web gateways](#)

All matches to this query

| Score | $M_r(\text{calc})$ : | Delta     | Sequence                     |
|-------|----------------------|-----------|------------------------------|
| 38.5  | 1285.669998          | -0.001430 | <a href="#">SAATLQQEK</a>    |
| 29.1  | 1285.669998          | -0.001430 | <a href="#">SAATLQQEK</a>    |
| 11.8  | 1285.651367          | 0.017201  | <a href="#">LLQAVENGDAEK</a> |
| 6.3   | 1285.652237          | 0.016331  | <a href="#">AMQIQEQK</a>     |
| 5.0   | 1285.669998          | -0.001430 | <a href="#">ASLDQGKEK</a>    |
| 4.2   | 1285.649582          | 0.018986  | <a href="#">SVPCRCVRR</a>    |
| 3.4   | 1285.658752          | 0.009816  | <a href="#">IESLEQEK</a>     |
| 3.4   | 1285.658768          | 0.009800  | <a href="#">VTELEQEK</a>     |
| 2.9   | 1285.673859          | -0.005291 | <a href="#">NDVGGQRSLVNK</a> |
| 1.6   | 1285.687759          | -0.019191 | <a href="#">SNQQLVDIIEK</a>  |















# MASCOT SEARCH RESULTS

## Peptide View

MS/MS Fragmentation of **KSQLVYQSR**

Found in **LG3BP\_HUMAN**, Galectin-3-binding protein OS=Homo sapiens GN=LGALS3BP PE=1 SV=1

Match to Query 27371: 1418.776328 from(710.395440,2+) rtinseconds(1504) index(44215)

Title: Locus:1.1.1.2572.11 File:"2013-07-02 CLN FXIII 60 min 3rd F 4.wiff"

Data file C:\Program Files (x86)\Matrix Science\Mascot Daemon\mgf6 FXIII 60 min 3rd\mascot\_daemon\_merge.mgf

Click mouse within plot area to zoom in by factor of two about that point

Or, Plot from  to  Da

Label all possible matches  Label matches used for scoring

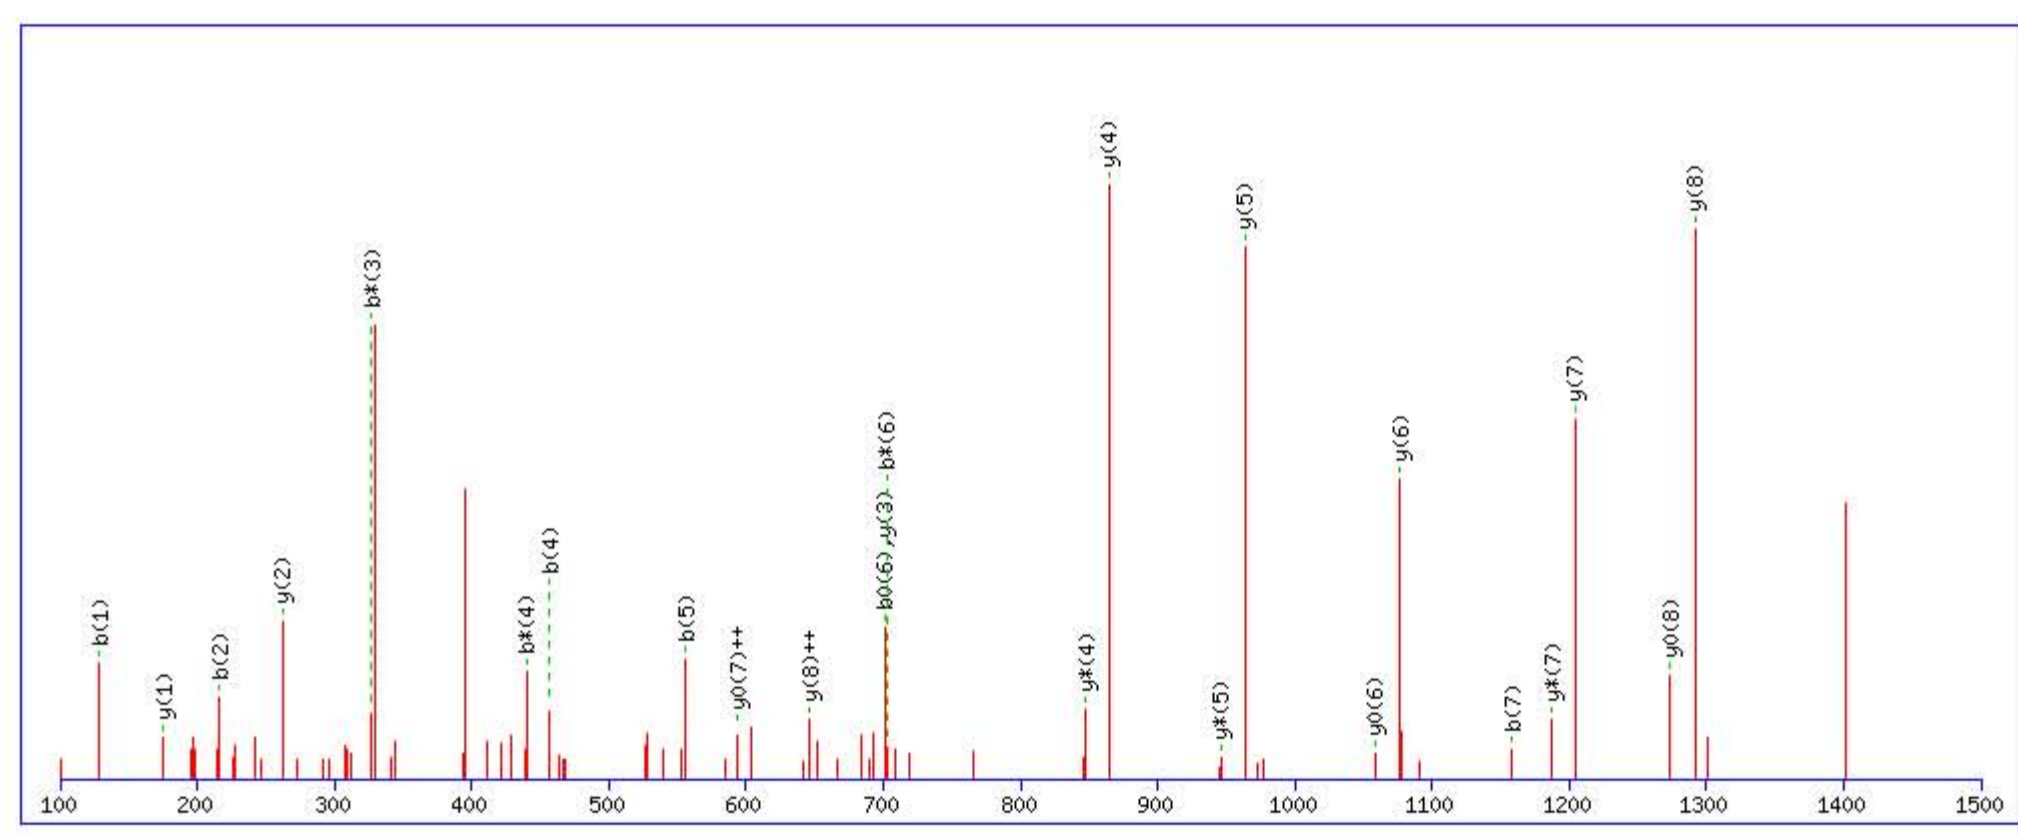

Monoisotopic mass of neutral peptide Mr(calc): 1418.770386  
 Fixed modifications: Carbamidomethyl (C) (apply to specified residues or termini only)

Variable modifications:  
 Q7 : Biotin:Thermo-21345 (Q)

Ions Score: 53 Expect: 4.8e-005

Matches : 24/92 fragment ions using 37 most intense peaks [\(help\)](#)

| # | b           | b <sup>++</sup> | b <sup>*</sup> | b <sup>*++</sup> | b <sup>0</sup> | b <sup>0++</sup> | Seq.     | y           | y <sup>++</sup> | y <sup>*</sup> | y <sup>*++</sup> | y <sup>0</sup> | y <sup>0++</sup> | # |
|---|-------------|-----------------|----------------|------------------|----------------|------------------|----------|-------------|-----------------|----------------|------------------|----------------|------------------|---|
| 1 | 129.102239  | 65.054757       | 112.075690     | 56.541483        |                |                  | <b>K</b> |             |                 |                |                  |                |                  | 9 |
| 2 | 216.134267  | 108.570771      | 199.107718     | 100.057497       | 198.123702     | 99.565489        | <b>S</b> | 1291.682719 | 646.344998      | 1274.656170    | 637.831723       | 1273.672154    | 637.339715       | 8 |
| 3 | 344.192845  | 172.600060      | 327.166296     | 164.086786       | 326.182280     | 163.594778       | <b>Q</b> | 1204.650691 | 602.828984      | 1187.624142    | 594.315709       | 1186.640126    | 593.823701       | 7 |
| 4 | 457.276909  | 229.142092      | 440.250360     | 220.628818       | 439.266344     | 220.136810       | <b>L</b> | 1076.592113 | 538.799695      | 1059.565564    | 530.286420       | 1058.581548    | 529.794412       | 6 |
| 5 | 556.345323  | 278.676300      | 539.318774     | 270.163025       | 538.334758     | 269.671017       | <b>V</b> | 963.508049  | 482.257663      | 946.481500     | 473.744388       | 945.497484     | 473.252380       | 5 |
| 6 | 719.408652  | 360.207964      | 702.382103     | 351.694690       | 701.398087     | 351.202682       | <b>Y</b> | 864.439635  | 432.723456      | 847.413086     | 424.210181       | 846.429070     | 423.718173       | 4 |
| 7 | 1158.633978 | 579.820627      | 1141.607429    | 571.307353       | 1140.623413    | 570.815345       | <b>Q</b> | 701.376306  | 351.191791      | 684.349757     | 342.678517       | 683.365741     | 342.186509       | 3 |
| 8 | 1245.666006 | 623.336641      | 1228.639457    | 614.823367       | 1227.655441    | 614.331359       | <b>S</b> | 262.150980  | 131.579128      | 245.124431     | 123.065854       | 244.140415     | 122.573846       | 2 |
| 9 |             |                 |                |                  |                |                  | <b>R</b> | 175.118952  | 88.063114       | 158.092403     | 79.549839        |                |                  | 1 |

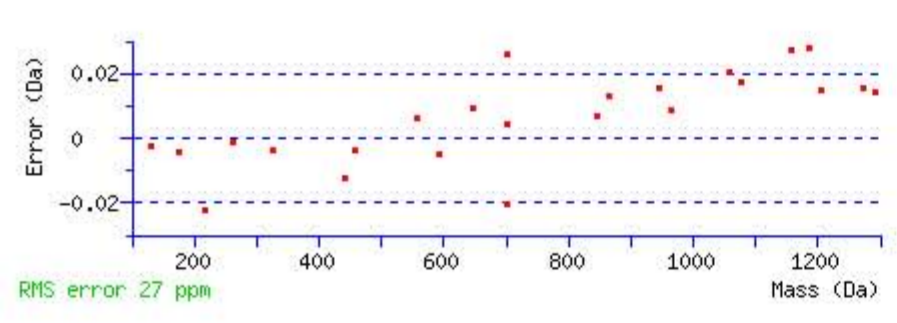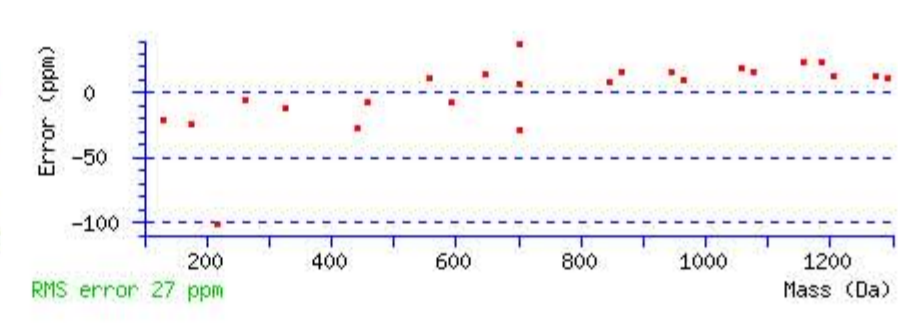

NCBI BLAST search of **KSQLVYQSR**  
 (Parameters: blastp, nr protein database, expect=20000, no filter, PAM30)  
 Other BLAST [web gateways](#)

### All matches to this query

| Score | Mr(calc):   | Delta     | Sequence                       |
|-------|-------------|-----------|--------------------------------|
| 53.1  | 1418.770386 | 0.005942  | <a href="#">KSQLVYQSR</a>      |
| 16.2  | 1418.770386 | 0.005942  | <a href="#">KSQLVYQSR</a>      |
| 6.7   | 1418.780273 | -0.003945 | <a href="#">TNQLMETLKITK</a>   |
| 5.6   | 1418.767044 | 0.009284  | <a href="#">SQGLAGLFAGVFPR</a> |
| 5.2   | 1418.788147 | -0.011819 | <a href="#">QSQVDRLYVALK</a>   |
| 4.2   | 1418.776886 | -0.000558 | <a href="#">EKAKALEDLAGFK</a>  |
| 2.3   | 1418.763000 | 0.013328  | <a href="#">IKGEQGAPGLQGHK</a> |
| 0.8   | 1418.787659 | -0.011331 | <a href="#">KEILLAMLVDK</a>    |
| 0.7   | 1418.778259 | -0.001931 | <a href="#">RVSLPQWPPPSR</a>   |

**Peptide View**

MS/MS Fragmentation of **SQLVYQSR**

Found in **LG3BP\_HUMAN**, Galectin-3-binding protein OS=Homo sapiens GN=LGALS3BP PE=1 SV=1

Match to Query 33324: 1601.849188 from(801.931870,2+) rtinseconds(2076) index(47831)

Title: Locus:1.1.1.2771.9 File:"2013-07-02 CLN FXIII 60 min 3rd F 4.wiff"

Data file C:\Program Files (x86)\Matrix Science\Mascot Daemon\mgf\6 FXIII 60 min 3rd\mascot\_daemon\_merge.mgf

Click mouse within plot area to zoom in by factor of two about that point

Or, Plot from 0 to 2200 Da Full range

Label all possible matches  Label matches used for scoring

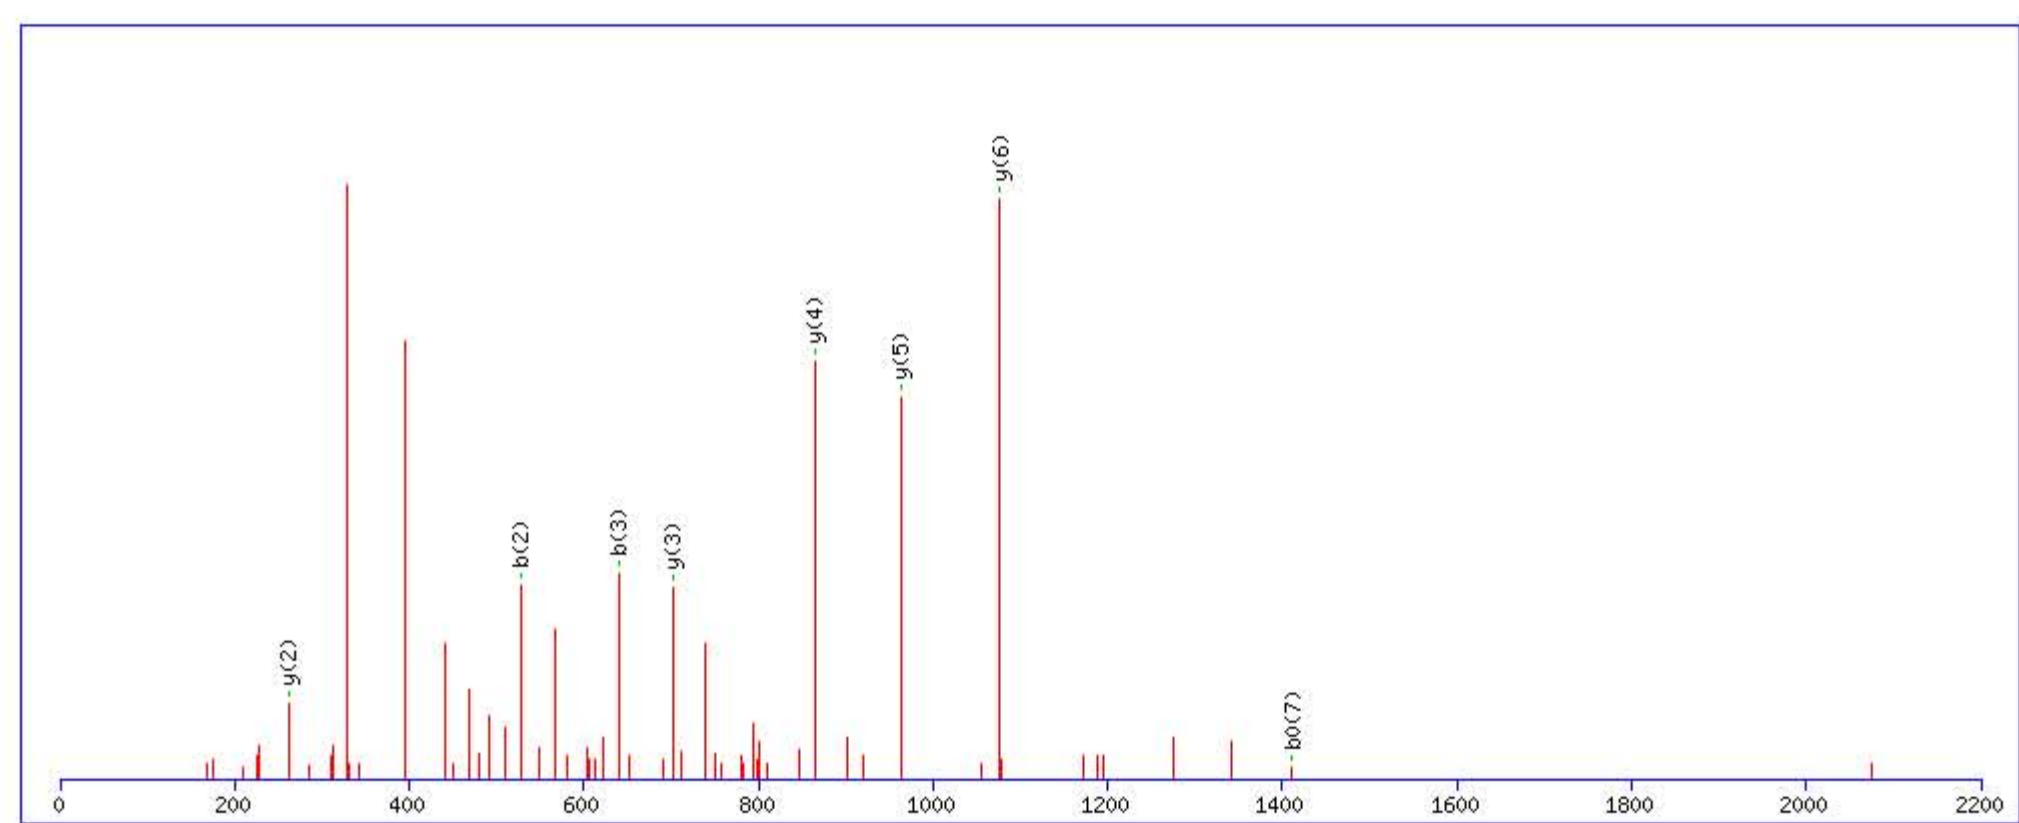

Monoisotopic mass of neutral peptide Mr(calc): 1601.842178

Fixed modifications: Carbamidomethyl (C) (apply to specified residues or termini only)

Variable modifications:

Q2 : Biotin:Thermo-21345 (Q)

Q6 : Biotin:Thermo-21345 (Q)

Ions Score: 29 Expect: 0.01

Matches : 8/80 fragment ions using 13 most intense peaks ([help](#))

| # | b                 | b <sup>++</sup> | b <sup>+</sup> | b <sup>+++</sup> | b <sup>0</sup>     | b <sup>0++</sup> | Seq. | y                  | y <sup>++</sup> | y <sup>+</sup> | y <sup>+++</sup> | y <sup>0</sup> | y <sup>0++</sup> | # |
|---|-------------------|-----------------|----------------|------------------|--------------------|------------------|------|--------------------|-----------------|----------------|------------------|----------------|------------------|---|
| 1 | 88.039304         | 44.523290       |                |                  | 70.028739          | 35.518008        | S    |                    |                 |                |                  |                |                  | 8 |
| 2 | <b>527.264630</b> | 264.135953      | 510.238081     | 255.622679       | 509.254065         | 255.130671       | Q    | 1515.817439        | 758.412358      | 1498.790890    | 749.899083       | 1497.806874    | 749.407075       | 7 |
| 3 | <b>640.348694</b> | 320.677985      | 623.322145     | 312.164711       | 622.338129         | 311.672703       | L    | <b>1076.592113</b> | 538.799695      | 1059.565564    | 530.286420       | 1058.581548    | 529.794412       | 6 |
| 4 | 739.417108        | 370.212192      | 722.390559     | 361.698917       | 721.406543         | 361.206909       | V    | <b>963.508049</b>  | 482.257663      | 946.481500     | 473.744388       | 945.497484     | 473.252380       | 5 |
| 5 | 902.480437        | 451.743856      | 885.453888     | 443.230582       | 884.469872         | 442.738574       | Y    | <b>864.439635</b>  | 432.723456      | 847.413086     | 424.210181       | 846.429070     | 423.718173       | 4 |
| 6 | 1341.705763       | 671.356520      | 1324.679214    | 662.843245       | 1323.695198        | 662.351237       | Q    | <b>701.376306</b>  | 351.191791      | 684.349757     | 342.678517       | 683.365741     | 342.186509       | 3 |
| 7 | 1428.737791       | 714.872534      | 1411.711242    | 706.359259       | <b>1410.727226</b> | 705.867251       | S    | <b>262.150980</b>  | 131.579128      | 245.124431     | 123.065854       | 244.140415     | 122.573846       | 2 |
| 8 |                   |                 |                |                  |                    |                  | R    | 175.118952         | 88.063114       | 158.092403     | 79.549839        |                |                  | 1 |

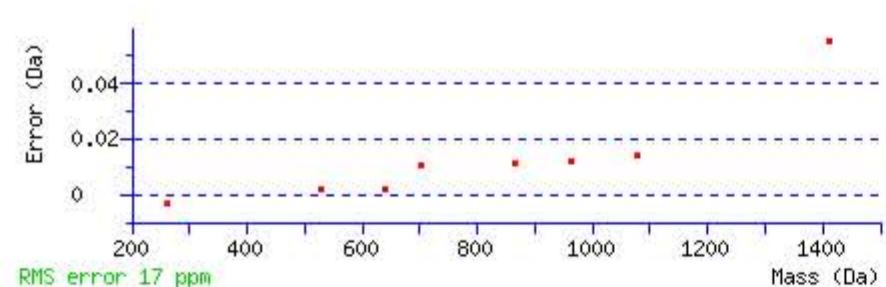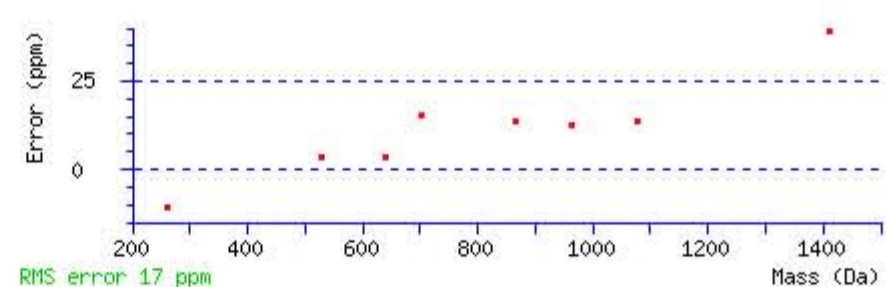

NCBI BLAST search of [SQLVYQSR](#)

(Parameters: blastp, nr protein database, expect=20000, no filter, PAM30)

Other BLAST [web gateways](#)

**All matches to this query**

| Score | Mr(calc):   | Delta     | Sequence                      |
|-------|-------------|-----------|-------------------------------|
| 28.9  | 1601.842178 | 0.007010  | <a href="#">SQLVYQSR</a>      |
| 7.3   | 1601.846024 | 0.003164  | <a href="#">RFVLSCSLLSHQK</a> |
| 2.0   | 1601.834763 | 0.014425  | <a href="#">QMLEALNFLHSKR</a> |
| 1.5   | 1601.855881 | -0.006693 | <a href="#">ELQRLQQAETMKK</a> |
| 1.5   | 1601.852051 | -0.002863 | <a href="#">SQISELNLLMK</a>   |

Peptide View

MS/MS Fragmentation of **ELSEALGQIFDSQR**

Found in **LG3BP\_HUMAN**, Galectin-3-binding protein OS=Homo sapiens GN=LGALS3BP PE=1 SV=1

Match to Query 40239: 1902.963852 from(635.328560,3+) rtinseconds(2698) index(51595)

Title: Locus:1.1.1.2987.10 File:"2013-07-02 CLN FXIII 60 min 3rd F 4.wiff"

Data file C:\Program Files (x86)\Matrix Science\Mascot Daemon\mgf\6 FXIII 60 min 3rd\mascot\_daemon\_merge.mgf

Click mouse within plot area to zoom in by factor of two about that point

Or, Plot from 100 to 1700 Da Full range

Label all possible matches  Label matches used for scoring

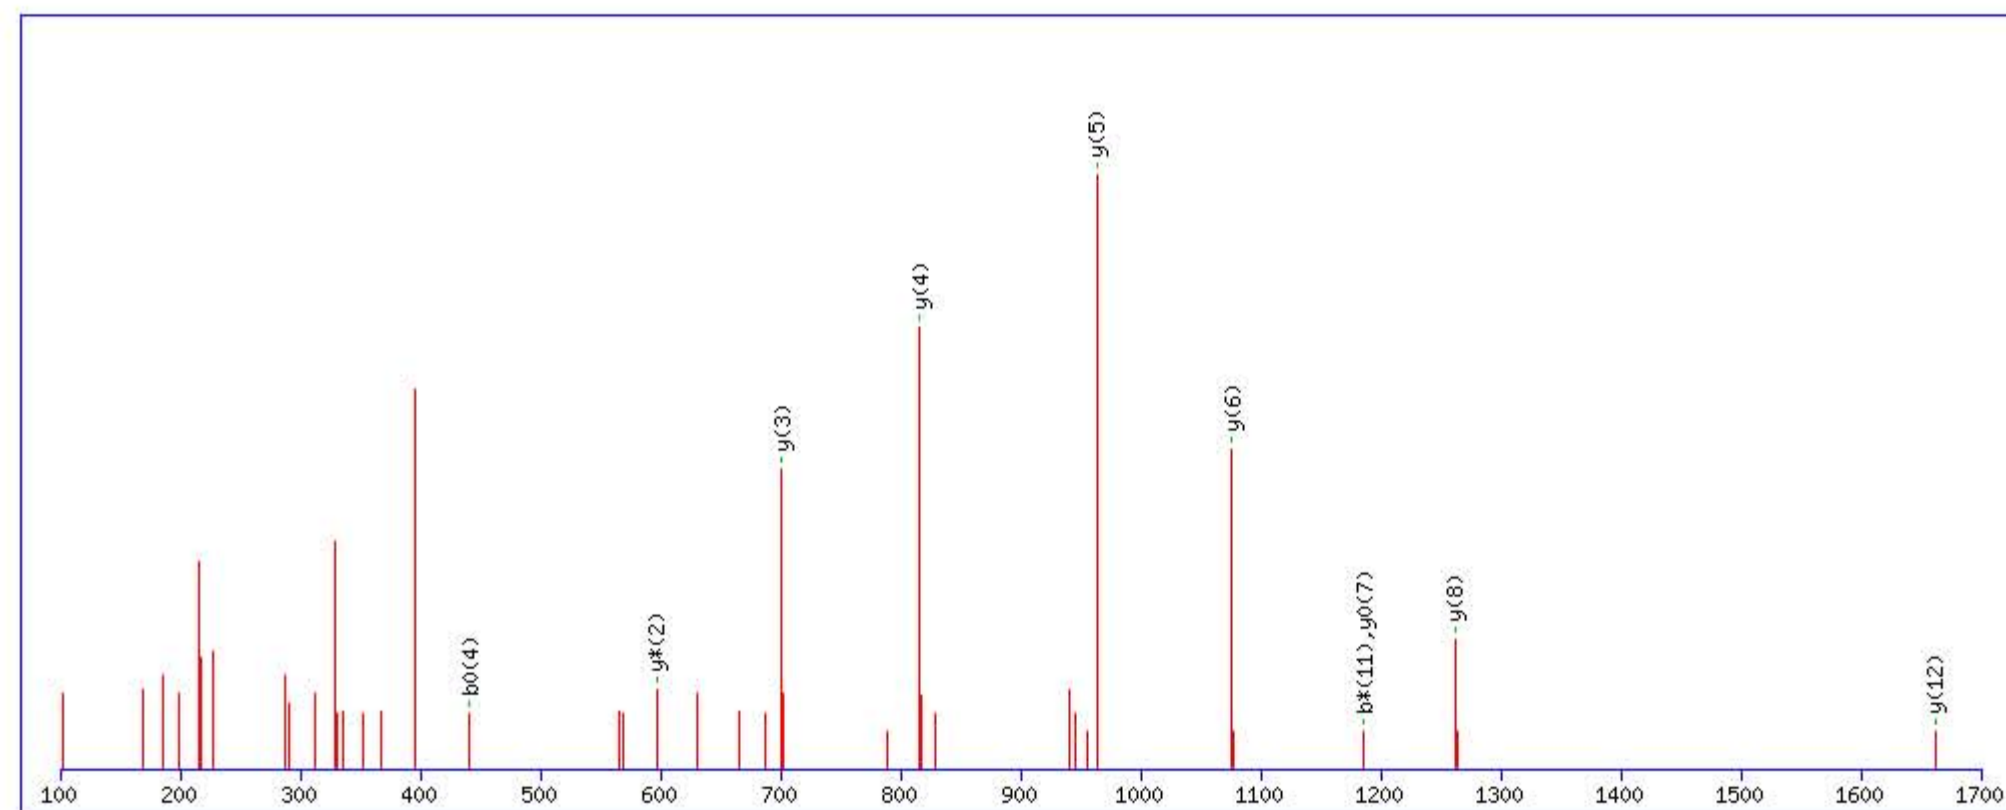

Monoisotopic mass of neutral peptide Mr(calc): 1902.950928

Fixed modifications: Carbamidomethyl (C) (apply to specified residues or termini only)

Variable modifications:

Q13 : Biotin:Thermo-21345 (Q)

Ions Score: 36 Expect: 0.00043

Matches : 10/138 fragment ions using 13 most intense peaks [\(help\)](#)

| #  | b           | b <sup>++</sup> | b <sup>*</sup>     | b <sup>***</sup> | b <sup>0</sup>    | b <sup>0++</sup> | Seq. | y                  | y <sup>++</sup> | y <sup>*</sup>    | y <sup>***</sup> | y <sup>0</sup>     | y <sup>0++</sup> | #  |
|----|-------------|-----------------|--------------------|------------------|-------------------|------------------|------|--------------------|-----------------|-------------------|------------------|--------------------|------------------|----|
| 1  | 130.049869  | 65.528572       |                    |                  | 112.039304        | 56.523290        | E    |                    |                 |                   |                  |                    |                  | 14 |
| 2  | 243.133933  | 122.070605      |                    |                  | 225.123368        | 113.065322       | L    | 1774.915632        | 887.961454      | 1757.889083       | 879.448180       | 1756.905067        | 878.956172       | 13 |
| 3  | 330.165961  | 165.586618      |                    |                  | 312.155396        | 156.581336       | S    | <b>1661.831568</b> | 831.419422      | 1644.805019       | 822.906148       | 1643.821003        | 822.414140       | 12 |
| 4  | 459.208554  | 230.107915      |                    |                  | <b>441.197989</b> | 221.102633       | E    | 1574.799540        | 787.903408      | 1557.772991       | 779.390134       | 1556.788975        | 778.898126       | 11 |
| 5  | 530.245668  | 265.626472      |                    |                  | 512.235103        | 256.621190       | A    | 1445.756947        | 723.382112      | 1428.730398       | 714.868837       | 1427.746382        | 714.376829       | 10 |
| 6  | 643.329732  | 322.168504      |                    |                  | 625.319167        | 313.163222       | L    | 1374.719833        | 687.863555      | 1357.693284       | 679.350280       | 1356.709268        | 678.858272       | 9  |
| 7  | 700.351196  | 350.679236      |                    |                  | 682.340631        | 341.673954       | G    | <b>1261.635769</b> | 631.321523      | 1244.609220       | 622.808248       | 1243.625204        | 622.316240       | 8  |
| 8  | 828.409774  | 414.708525      | 811.383225         | 406.195251       | 810.399209        | 405.703243       | Q    | 1204.614305        | 602.810791      | 1187.587756       | 594.297516       | <b>1186.603740</b> | 593.805508       | 7  |
| 9  | 941.493838  | 471.250557      | 924.467289         | 462.737283       | 923.483273        | 462.245275       | I    | <b>1076.555727</b> | 538.781502      | 1059.529178       | 530.268227       | 1058.545162        | 529.776219       | 6  |
| 10 | 1088.562252 | 544.784764      | 1071.535703        | 536.271490       | 1070.551687       | 535.779482       | F    | <b>963.471663</b>  | 482.239470      | 946.445114        | 473.726195       | 945.461098         | 473.234187       | 5  |
| 11 | 1203.589195 | 602.298236      | <b>1186.562646</b> | 593.784961       | 1185.578630       | 593.292953       | D    | <b>816.403249</b>  | 408.705263      | 799.376700        | 400.191988       | 798.392684         | 399.699980       | 4  |
| 12 | 1290.621223 | 645.814250      | 1273.594674        | 637.300975       | 1272.610658       | 636.808967       | S    | <b>701.376306</b>  | 351.191791      | 684.349757        | 342.678517       | 683.365741         | 342.186509       | 3  |
| 13 | 1729.846549 | 865.426913      | 1712.820000        | 856.913638       | 1711.835984       | 856.421630       | Q    | 614.344278         | 307.675777      | <b>597.317729</b> | 299.162503       |                    |                  | 2  |
| 14 |             |                 |                    |                  |                   |                  | R    | 175.118952         | 88.063114       | 158.092403        | 79.549839        |                    |                  | 1  |

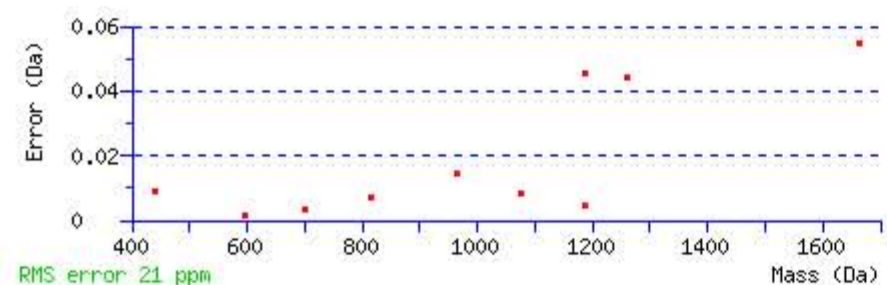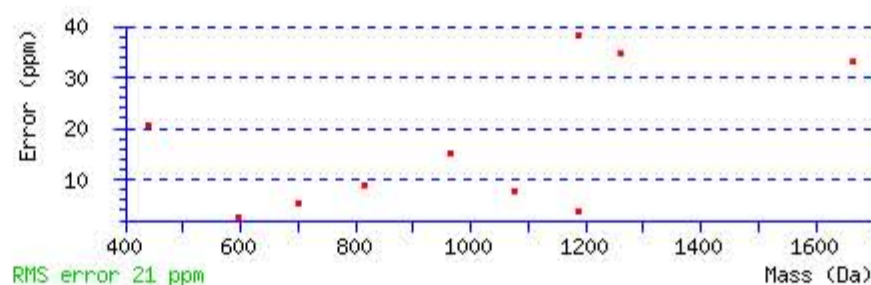

NCBI BLAST search of **ELSEALGQIFDSQR**

(Parameters: blastp, nr protein database, expect=20000, no filter, PAM30)

Other BLAST [web gateways](#)

All matches to this query

| Score | Mr(calc):   | Delta    | Sequence                       |
|-------|-------------|----------|--------------------------------|
| 36.1  | 1902.950928 | 0.012924 | <a href="#">ELSEALGQIFDSQR</a> |
| 0.3   | 1902.947739 | 0.016113 | <a href="#">MKEQLREMNLR</a>    |

# MASCOT SEARCH RESULTS

## Peptide View

MS/MS Fragmentation of **YSSDYFQAPSDYR**

Found in **LG3BP\_HUMAN**, Galectin-3-binding protein OS=Homo sapiens GN=LGALS3BP PE=1 SV=1

Match to Query 40361: 1908.863048 from(955.438800,2+) rtinseconds(2088) index(47915)  
 Title: Locus:1.1.1.2775.19 File:"2013-07-02 CLN FXIII 60 min 3rd F 4.wiff"

Data file C:\Program Files (x86)\Matrix Science\Mascot Daemon\mgf\6 FXIII 60 min 3rd\mascot\_daemon\_merge.mgf

Click mouse within plot area to zoom in by factor of two about that point

Or, Plot from  to  Da

Label all possible matches  Label matches used for scoring

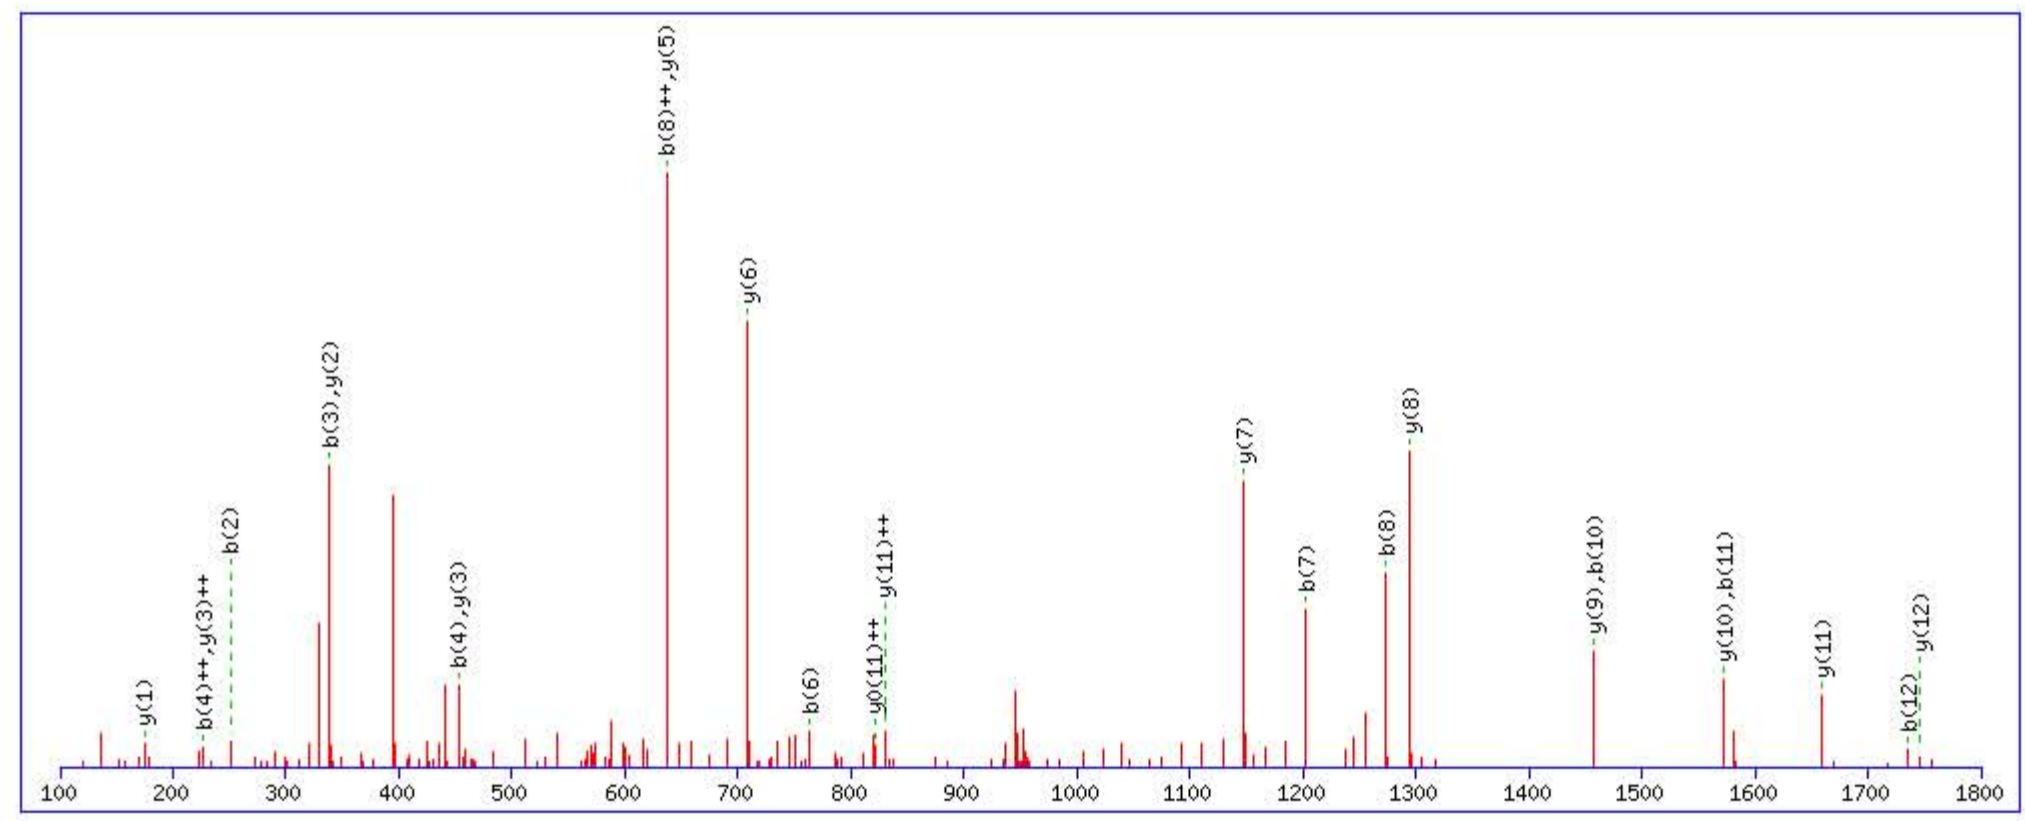

Monoisotopic mass of neutral peptide Mr(calc): 1908.835236  
 Fixed modifications: Carbamidomethyl (C) (apply to specified residues or termini only)  
 Variable modifications:  
 Q7 : Biotin:Thermo-21345 (Q)  
 Ions Score: 81 Expect: 4.3e-008  
 Matches : 25/126 fragment ions using 31 most intense peaks [\(help\)](#)

| #  | b                  | b <sup>++</sup>   | b <sup>*</sup> | b <sup>*++</sup> | b <sup>0</sup> | b <sup>0++</sup> | Seq. | y                  | y <sup>++</sup>   | y <sup>*</sup> | y <sup>*++</sup> | y <sup>0</sup> | y <sup>0++</sup>  | #  |
|----|--------------------|-------------------|----------------|------------------|----------------|------------------|------|--------------------|-------------------|----------------|------------------|----------------|-------------------|----|
| 1  | 164.070605         | 82.538940         |                |                  |                |                  | Y    |                    |                   |                |                  |                |                   | 13 |
| 2  | <b>251.102633</b>  | 126.054954        |                |                  | 233.092068     | 117.049672       | S    | <b>1746.779198</b> | 873.893237        | 1729.752649    | 865.379963       | 1728.768633    | 864.887955        | 12 |
| 3  | <b>338.134661</b>  | 169.570968        |                |                  | 320.124096     | 160.565686       | S    | <b>1659.747170</b> | <b>830.377223</b> | 1642.720621    | 821.863949       | 1641.736605    | <b>821.371941</b> | 11 |
| 4  | <b>453.161604</b>  | <b>227.084440</b> |                |                  | 435.151039     | 218.079158       | D    | <b>1572.715142</b> | 786.861209        | 1555.688593    | 778.347935       | 1554.704577    | 777.855927        | 10 |
| 5  | 616.224933         | 308.616105        |                |                  | 598.214368     | 299.610822       | Y    | <b>1457.688199</b> | 729.347738        | 1440.661650    | 720.834463       | 1439.677634    | 720.342455        | 9  |
| 6  | <b>763.293347</b>  | 382.150312        |                |                  | 745.282782     | 373.145029       | F    | <b>1294.624870</b> | 647.816073        | 1277.598321    | 639.302799       | 1276.614305    | 638.810791        | 8  |
| 7  | <b>1202.518673</b> | 601.762975        | 1185.492124    | 593.249700       | 1184.508108    | 592.757692       | Q    | <b>1147.556456</b> | 574.281866        | 1130.529907    | 565.768592       | 1129.545891    | 565.276584        | 7  |
| 8  | <b>1273.555787</b> | <b>637.281532</b> | 1256.529238    | 628.768257       | 1255.545222    | 628.276249       | A    | <b>708.331130</b>  | 354.669203        | 691.304581     | 346.155929       | 690.320565     | 345.663921        | 6  |
| 9  | 1370.608551        | 685.807914        | 1353.582002    | 677.294639       | 1352.597986    | 676.802631       | P    | <b>637.294016</b>  | 319.150646        | 620.267467     | 310.637372       | 619.283451     | 310.145364        | 5  |
| 10 | <b>1457.640579</b> | 729.323928        | 1440.614030    | 720.810653       | 1439.630014    | 720.318645       | S    | 540.241252         | 270.624264        | 523.214703     | 262.110990       | 522.230687     | 261.618982        | 4  |
| 11 | <b>1572.667522</b> | 786.837399        | 1555.640973    | 778.324125       | 1554.656957    | 777.832117       | D    | <b>453.209224</b>  | <b>227.108250</b> | 436.182675     | 218.594976       | 435.198659     | 218.102968        | 3  |
| 12 | <b>1735.730851</b> | 868.369064        | 1718.704302    | 859.855789       | 1717.720286    | 859.363781       | Y    | <b>338.182281</b>  | 169.594778        | 321.155732     | 161.081504       |                |                   | 2  |
| 13 |                    |                   |                |                  |                |                  | R    | <b>175.118952</b>  | 88.063114         | 158.092403     | 79.549839        |                |                   | 1  |

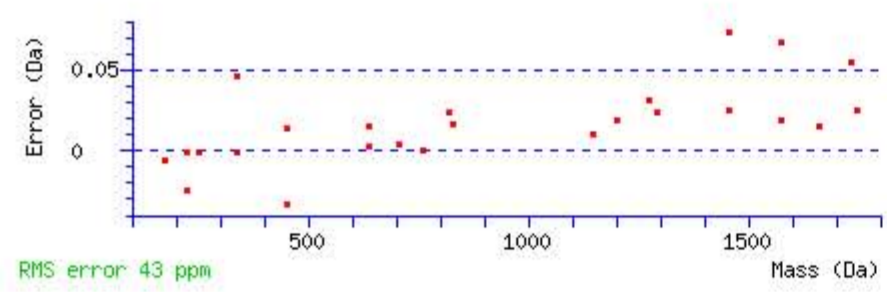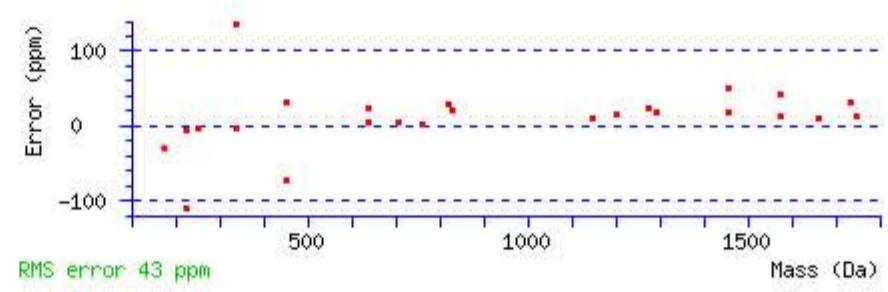

NCBI BLAST search of [YSSDYFQAPSDYR](#)  
 (Parameters: blastp, nr protein database, expect=20000, no filter, PAM30)  
 Other BLAST [web gateways](#)

### All matches to this query

| Score | Mr(calc):   | Delta     | Sequence                      |
|-------|-------------|-----------|-------------------------------|
| 80.9  | 1908.835236 | 0.027812  | <a href="#">YSSDYFQAPSDYR</a> |
| 2.3   | 1908.868927 | -0.005879 | <a href="#">YSSYRSHDHYQR</a>  |

# MASCOT SEARCH RESULTS

## Peptide View

MS/MS Fragmentation of **TGAQELLR**

Found in **GELS\_HUMAN**, Gelsolin OS=Homo sapiens GN=GSN PE=1 SV=1

Match to Query 20300: 1197.656568 from(599.835560,2+) rtinseconds(1916) index(4340)

Title: Locus:1.1.1.3219.22 File:"2013-07-02 CLN FXIII 60 min 3rd F 1.wiff"

Data file C:\Program Files (x86)\Matrix Science\Mascot Daemon\mgf6 FXIII 60 min 3rd\mascot\_daemon\_merge.mgf

Click mouse within plot area to zoom in by factor of two about that point

Or, Plot from  to  Da

Label all possible matches  Label matches used for scoring

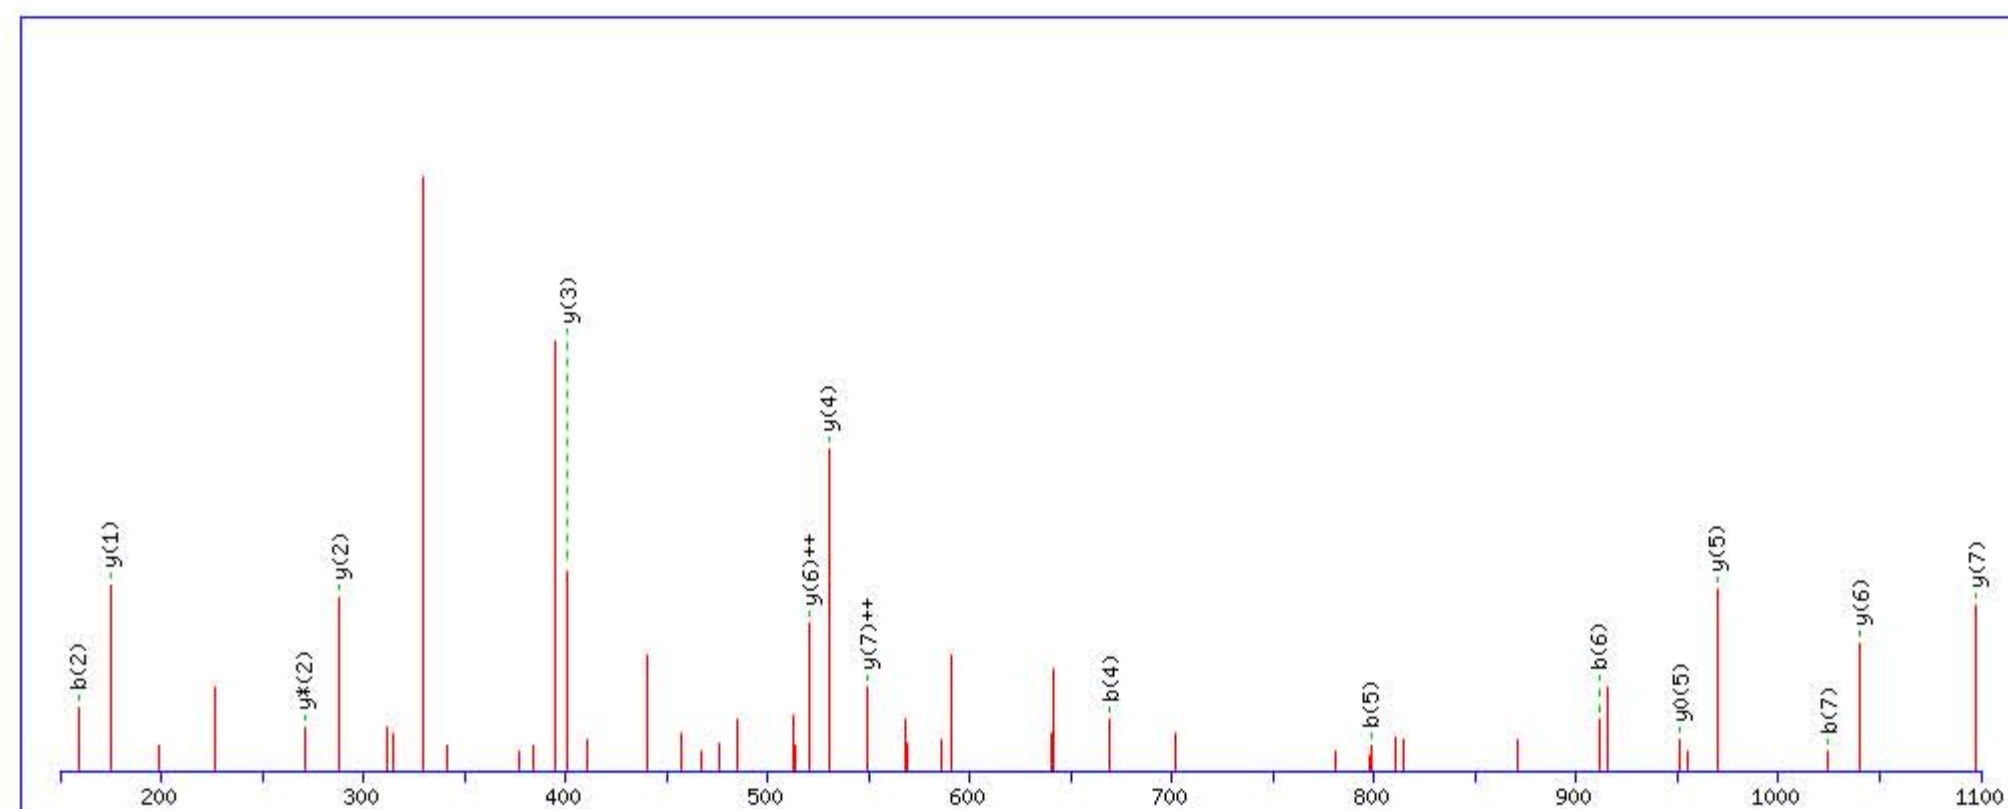

Monoisotopic mass of neutral peptide Mr(calc): 1197.653961

Fixed modifications: Carbamidomethyl (C) (apply to specified residues or termini only)

Variable modifications:

Q4 : Biotin:Thermo-21345 (Q)

Ions Score: 49 Expect: 0.00034

Matches : 16/72 fragment ions using 27 most intense peaks [\(help\)](#)

| # | b           | b <sup>++</sup> | b <sup>*</sup> | b <sup>+++</sup> | b <sup>0</sup> | b <sup>0++</sup> | Seq. | y           | y <sup>++</sup> | y <sup>*</sup> | y <sup>+++</sup> | y <sup>0</sup> | y <sup>0++</sup> | # |
|---|-------------|-----------------|----------------|------------------|----------------|------------------|------|-------------|-----------------|----------------|------------------|----------------|------------------|---|
| 1 | 102.054955  | 51.531116       |                |                  | 84.044390      | 42.525833        | T    |             |                 |                |                  |                |                  | 8 |
| 2 | 159.076419  | 80.041847       |                |                  | 141.065854     | 71.036565        | G    | 1097.613577 | 549.310427      | 1080.587028    | 540.797152       | 1079.603012    | 540.305144       | 7 |
| 3 | 230.113533  | 115.560404      |                |                  | 212.102968     | 106.555122       | A    | 1040.592113 | 520.799695      | 1023.565564    | 512.286420       | 1022.581548    | 511.794412       | 6 |
| 4 | 669.338859  | 335.173068      | 652.312310     | 326.659793       | 651.328294     | 326.167785       | Q    | 969.554999  | 485.281138      | 952.528450     | 476.767863       | 951.544434     | 476.275855       | 5 |
| 5 | 798.381452  | 399.694364      | 781.354903     | 391.181090       | 780.370887     | 390.689082       | E    | 530.329673  | 265.668475      | 513.303124     | 257.155200       | 512.319108     | 256.663192       | 4 |
| 6 | 911.465516  | 456.236396      | 894.438967     | 447.723122       | 893.454951     | 447.231114       | L    | 401.287080  | 201.147178      | 384.260531     | 192.633903       |                |                  | 3 |
| 7 | 1024.549580 | 512.778428      | 1007.523031    | 504.265153       | 1006.539015    | 503.773145       | L    | 288.203016  | 144.605146      | 271.176467     | 136.091871       |                |                  | 2 |
| 8 |             |                 |                |                  |                |                  | R    | 175.118952  | 88.063114       | 158.092403     | 79.549839        |                |                  | 1 |

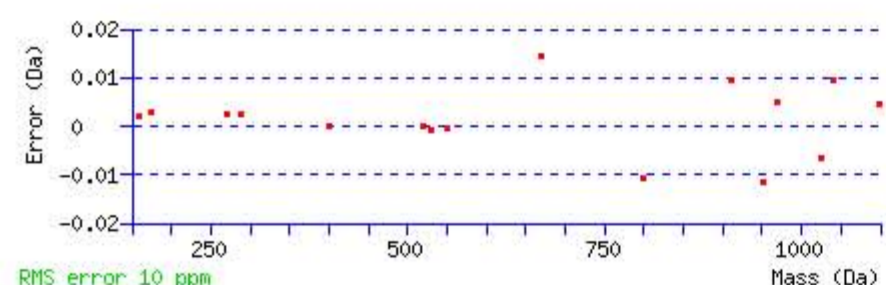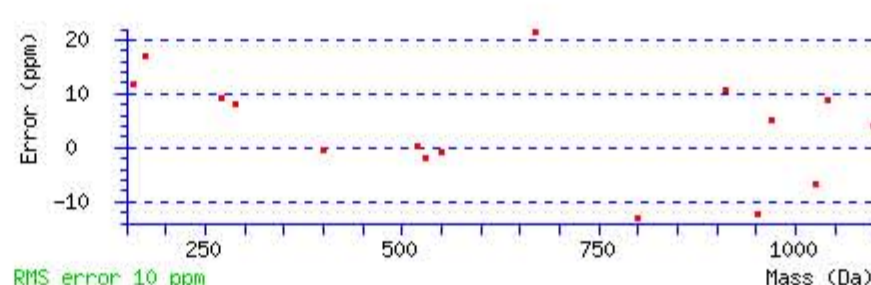

NCBI BLAST search of [TGAQELLR](#)

(Parameters: blastp, nr protein database, expect=20000, no filter, PAM30)

Other BLAST [web gateways](#)

All matches to this query

| Score | Mr(calc):   | Delta     | Sequence                    |
|-------|-------------|-----------|-----------------------------|
| 48.6  | 1197.653961 | 0.002607  | <a href="#">TGAQELLR</a>    |
| 21.8  | 1197.653961 | 0.002607  | <a href="#">QTQEILR</a>     |
| 21.4  | 1197.653961 | 0.002607  | <a href="#">TQQLLR</a>      |
| 20.4  | 1197.653961 | 0.002607  | <a href="#">QTQEILR</a>     |
| 14.0  | 1197.653961 | 0.002607  | <a href="#">QQEITIR</a>     |
| 13.9  | 1197.646545 | 0.010023  | <a href="#">RSPQAEILR</a>   |
| 11.0  | 1197.671692 | -0.015124 | <a href="#">LGLNAAEALIR</a> |
| 10.1  | 1197.653961 | 0.002607  | <a href="#">TQQLLR</a>      |
| 9.9   | 1197.653961 | 0.002607  | <a href="#">QTEQLLR</a>     |
| 9.9   | 1197.653961 | 0.002607  | <a href="#">QTEQLLR</a>     |



# MASCOT SEARCH RESULTS

## Peptide View

MS/MS Fragmentation of **GASQAGAPQGR**

Found in **GELS\_HUMAN**, Gelsolin OS=Homo sapiens GN=GSN PE=1 SV=1

Match to Query 23210: 1309.658022 from(437.559950,3+) rtinseconds(1267) index(826)

Title: Locus:1.1.1.2993.3 File:"2013-07-02 CLN FXIII 60 min 3rd F 1.wiff"

Data file C:\Program Files (x86)\Matrix Science\Mascot Daemon\mgf\6 FXIII 60 min 3rd\mascot\_daemon\_merge.mgf

Click mouse within plot area to zoom in by factor of two about that point

Or, Plot from  to  Da

Label all possible matches  Label matches used for scoring

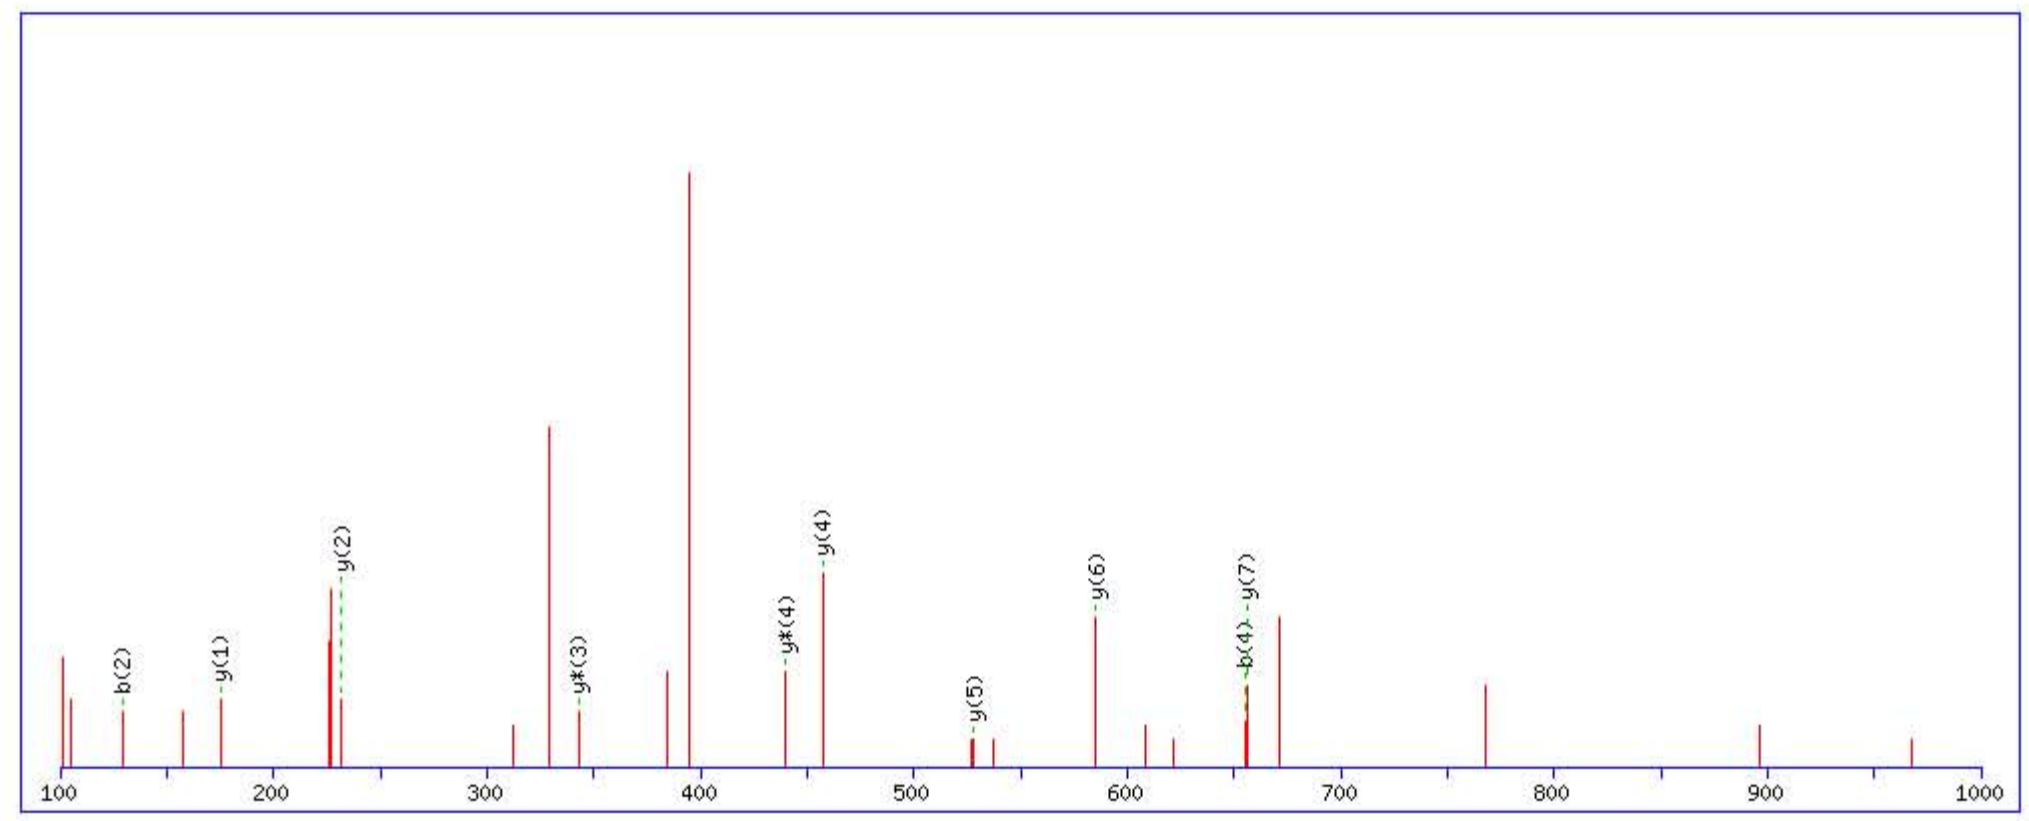

Monoisotopic mass of neutral peptide Mr(calc): 1309.656097

Fixed modifications: Carbamidomethyl (C) (apply to specified residues or termini only)

Variable modifications:

Q4 : Biotin:Thermo-21345 (Q)

Ions Score: 27 Expect: 0.015

Matches : 10/94 fragment ions using 24 most intense peaks [\(help\)](#)

| #  | b                 | b <sup>++</sup> | b <sup>*</sup> | b <sup>*++</sup> | b <sup>0</sup> | b <sup>0++</sup> | Seq. | y                 | y <sup>++</sup> | y <sup>*</sup>    | y <sup>*++</sup> | y <sup>0</sup> | y <sup>0++</sup> | #  |
|----|-------------------|-----------------|----------------|------------------|----------------|------------------|------|-------------------|-----------------|-------------------|------------------|----------------|------------------|----|
| 1  | 58.028740         | 29.518008       |                |                  |                |                  | G    |                   |                 |                   |                  |                |                  | 11 |
| 2  | <b>129.065854</b> | 65.036565       |                |                  |                |                  | A    | 1253.641918       | 627.324597      | 1236.615369       | 618.811323       | 1235.631353    | 618.319315       | 10 |
| 3  | 216.097882        | 108.552579      |                |                  | 198.087317     | 99.547296        | S    | 1182.604804       | 591.806040      | 1165.578255       | 583.292765       | 1164.594239    | 582.800757       | 9  |
| 4  | <b>655.323208</b> | 328.165242      | 638.296659     | 319.651968       | 637.312643     | 319.159960       | Q    | 1095.572776       | 548.290026      | 1078.546227       | 539.776752       |                |                  | 8  |
| 5  | 726.360322        | 363.683799      | 709.333773     | 355.170525       | 708.349757     | 354.678517       | A    | <b>656.347450</b> | 328.677363      | 639.320901        | 320.164088       |                |                  | 7  |
| 6  | 783.381786        | 392.194531      | 766.355237     | 383.681257       | 765.371221     | 383.189249       | G    | <b>585.310336</b> | 293.158806      | 568.283787        | 284.645532       |                |                  | 6  |
| 7  | 854.418900        | 427.713088      | 837.392351     | 419.199814       | 836.408335     | 418.707806       | A    | <b>528.288872</b> | 264.648074      | 511.262323        | 256.134799       |                |                  | 5  |
| 8  | 951.471664        | 476.239470      | 934.445115     | 467.726196       | 933.461099     | 467.234188       | P    | <b>457.251758</b> | 229.129517      | <b>440.225209</b> | 220.616242       |                |                  | 4  |
| 9  | 1079.530242       | 540.268759      | 1062.503693    | 531.755485       | 1061.519677    | 531.263477       | Q    | 360.198994        | 180.603135      | <b>343.172445</b> | 172.089860       |                |                  | 3  |
| 10 | 1136.551706       | 568.779491      | 1119.525157    | 560.266217       | 1118.541141    | 559.774208       | G    | <b>232.140416</b> | 116.573846      | 215.113867        | 108.060571       |                |                  | 2  |
| 11 |                   |                 |                |                  |                |                  | R    | <b>175.118952</b> | 88.063114       | 158.092403        | 79.549839        |                |                  | 1  |

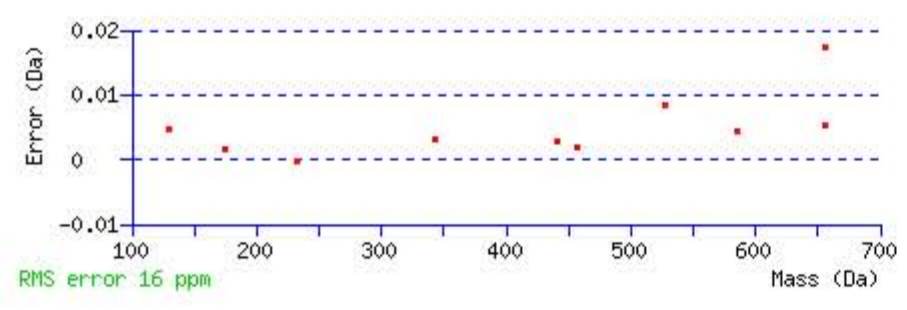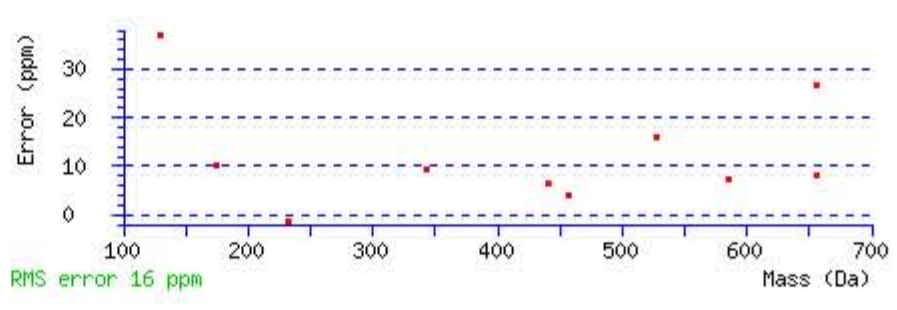

NCBI BLAST search of **GASQAGAPQGR**

(Parameters: blastp, nr protein database, expect=20000, no filter, PAM30)

Other BLAST [web gateways](#)

### All matches to this query

| Score | Mr(calc):   | Delta     | Sequence                    |
|-------|-------------|-----------|-----------------------------|
| 26.7  | 1309.656097 | 0.001925  | <a href="#">GASQAGAPQGR</a> |
| 24.2  | 1309.656097 | 0.001925  | <a href="#">GASQAGAPQGR</a> |
| 7.0   | 1309.669998 | -0.011976 | <a href="#">LIETQMERFK</a>  |
| 0.5   | 1309.648895 | 0.009127  | <a href="#">WDIFQVMISR</a>  |

# MASCOT SEARCH RESULTS

## Peptide View

MS/MS Fragmentation of **GASQAGAPQGR**

Found in **GELS\_HUMAN**, Gelsolin OS=Homo sapiens GN=GSN PE=1 SV=1

Match to Query 23212: 1309.658022 from(437.559950,3+) rtinseconds(1276) index(853)

Title: Locus:1.1.1.2996.2 File:"2013-07-02 CLN FXIII 60 min 3rd F 1.wiff"

Data file C:\Program Files (x86)\Matrix Science\Mascot Daemon\mgf\6 FXIII 60 min 3rd\mascot\_daemon\_merge.mgf

Click mouse within plot area to zoom in by factor of two about that point

Or, Plot from  to  Da

Label all possible matches  Label matches used for scoring

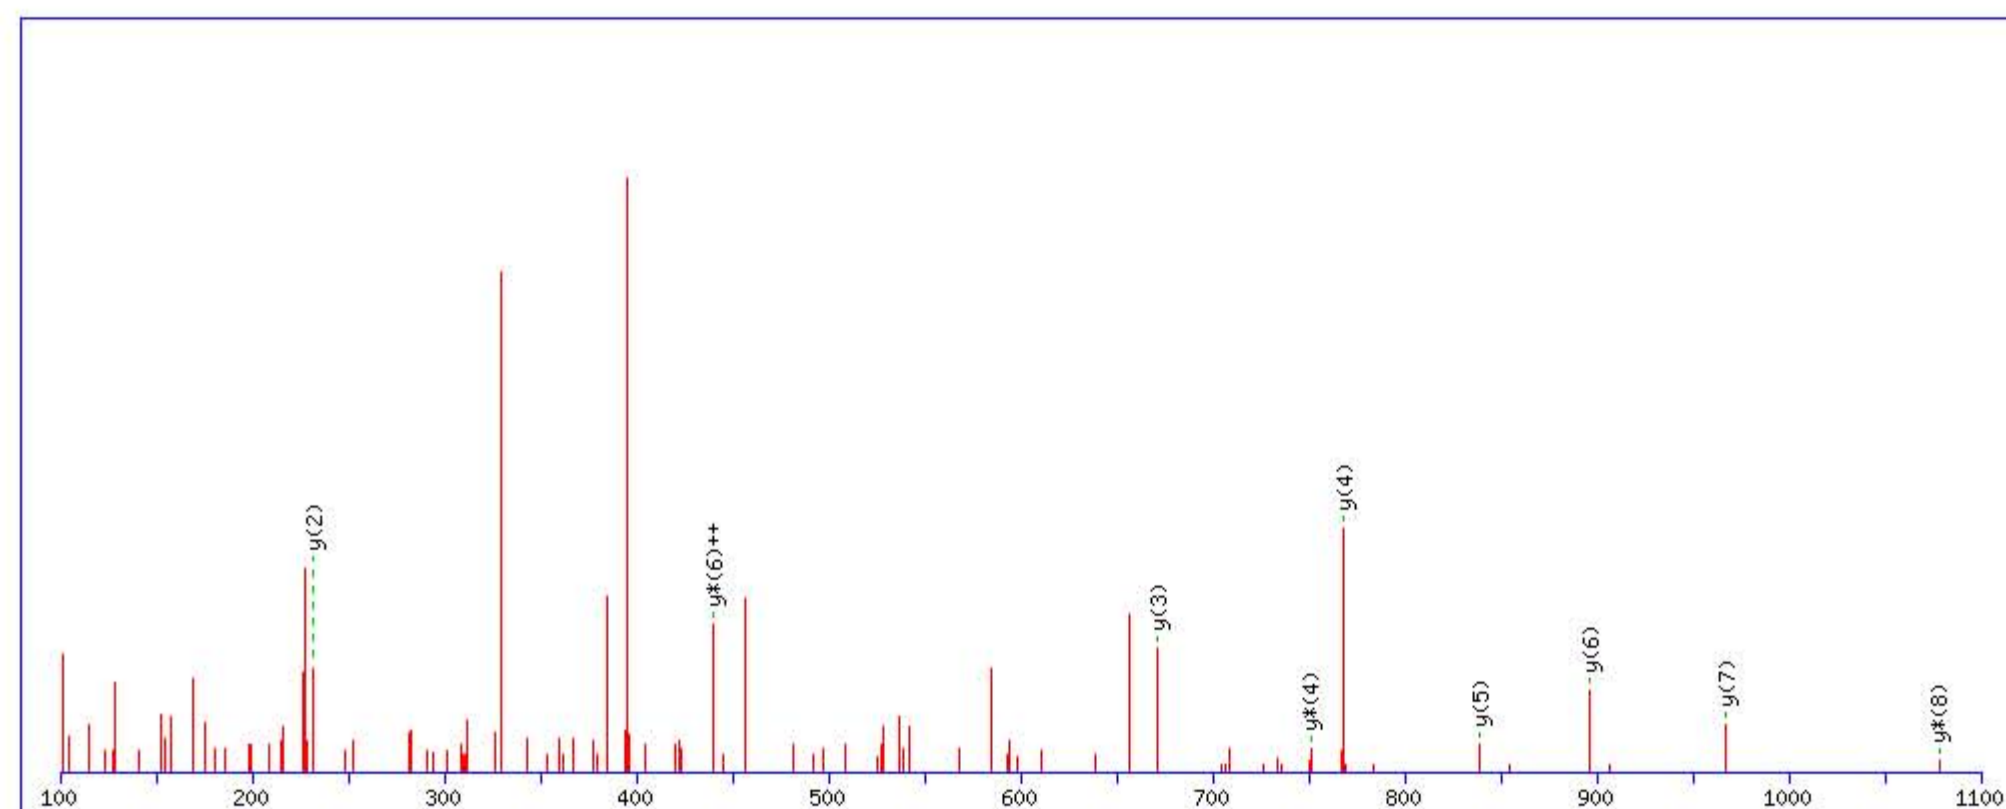

Monoisotopic mass of neutral peptide Mr(calc): 1309.656097

Fixed modifications: Carbamidomethyl (C) (apply to specified residues or termini only)

Variable modifications:

Q9 : Biotin:Thermo-21345 (Q)

Ions Score: 29 Expect: 0.002

Matches : 9/94 fragment ions using 19 most intense peaks [\(help\)](#)

| #  | b           | b <sup>++</sup> | b <sup>*</sup> | b <sup>*++</sup> | b <sup>0</sup> | b <sup>0++</sup> | Seq. | y           | y <sup>++</sup> | y <sup>*</sup> | y <sup>*++</sup> | y <sup>0</sup> | y <sup>0++</sup> | #  |
|----|-------------|-----------------|----------------|------------------|----------------|------------------|------|-------------|-----------------|----------------|------------------|----------------|------------------|----|
| 1  | 58.028740   | 29.518008       |                |                  |                |                  | G    |             |                 |                |                  |                |                  | 11 |
| 2  | 129.065854  | 65.036565       |                |                  |                |                  | A    | 1253.641918 | 627.324597      | 1236.615369    | 618.811323       | 1235.631353    | 618.319315       | 10 |
| 3  | 216.097882  | 108.552579      |                |                  | 198.087317     | 99.547296        | S    | 1182.604804 | 591.806040      | 1165.578255    | 583.292765       | 1164.594239    | 582.800757       | 9  |
| 4  | 344.156460  | 172.581868      | 327.129911     | 164.068593       | 326.145895     | 163.576585       | Q    | 1095.572776 | 548.290026      | 1078.546227    | 539.776752       |                |                  | 8  |
| 5  | 415.193574  | 208.100425      | 398.167025     | 199.587150       | 397.183009     | 199.095142       | A    | 967.514198  | 484.260737      | 950.487649     | 475.747462       |                |                  | 7  |
| 6  | 472.215038  | 236.611157      | 455.188489     | 228.097882       | 454.204473     | 227.605874       | G    | 896.477084  | 448.742180      | 879.450535     | 440.228906       |                |                  | 6  |
| 7  | 543.252152  | 272.129714      | 526.225603     | 263.616440       | 525.241587     | 263.124432       | A    | 839.455620  | 420.231448      | 822.429071     | 411.718173       |                |                  | 5  |
| 8  | 640.304916  | 320.656096      | 623.278367     | 312.142822       | 622.294351     | 311.650814       | P    | 768.418506  | 384.712891      | 751.391957     | 376.199616       |                |                  | 4  |
| 9  | 1079.530242 | 540.268759      | 1062.503693    | 531.755485       | 1061.519677    | 531.263477       | Q    | 671.365742  | 336.186509      | 654.339193     | 327.673234       |                |                  | 3  |
| 10 | 1136.551706 | 568.779491      | 1119.525157    | 560.266217       | 1118.541141    | 559.774208       | G    | 232.140416  | 116.573846      | 215.113867     | 108.060571       |                |                  | 2  |
| 11 |             |                 |                |                  |                |                  | R    | 175.118952  | 88.063114       | 158.092403     | 79.549839        |                |                  | 1  |

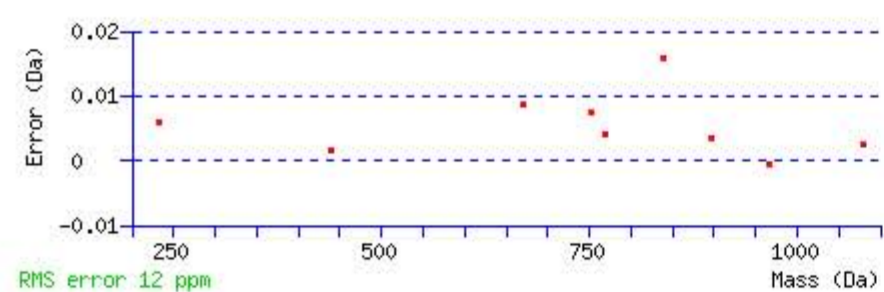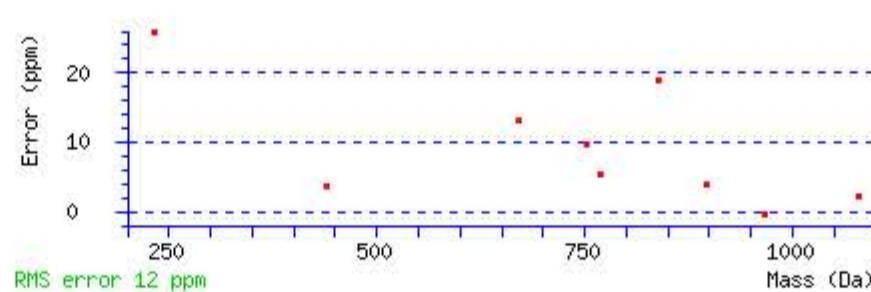

NCBI BLAST search of **GASQAGAPQGR**

(Parameters: blastp, nr protein database, expect=20000, no filter, PAM30)

Other BLAST [web gateways](#)

All matches to this query

| Score | Mr(calc):   | Delta     | Sequence                    |
|-------|-------------|-----------|-----------------------------|
| 29.0  | 1309.656097 | 0.001925  | <a href="#">GASQAGAPQGR</a> |
| 18.6  | 1309.656097 | 0.001925  | <a href="#">GASQAGAPQGR</a> |
| 0.1   | 1309.669998 | -0.011976 | <a href="#">LIETQMERFK</a>  |

Mascot: <http://www.matrixscience.com/>

# MASCOT SCIENCE Mascot Search Results

## Peptide View

MS/MS Fragmentation of **GASQAGAPQGR**

Found in **GELS\_HUMAN**, Gelsolin OS=Homo sapiens GN=GSN PE=1 SV=1

Match to Query 34092: 1620.824142 from(541.281990,3+) rtinseconds(1695) index(3235)

Title: Locus:1.1.1.3142.5 File:"2013-07-02 CLN FXIII 60 min 3rd F 1.wiff"

Data file C:\Program Files (x86)\Matrix Science\Mascot Daemon\mgf\6 FXIII 60 min 3rd\mascot\_daemon\_merge.mgf

Click mouse within plot area to zoom in by factor of two about that point

Or, Plot from  to  Da

Label all possible matches  Label matches used for scoring

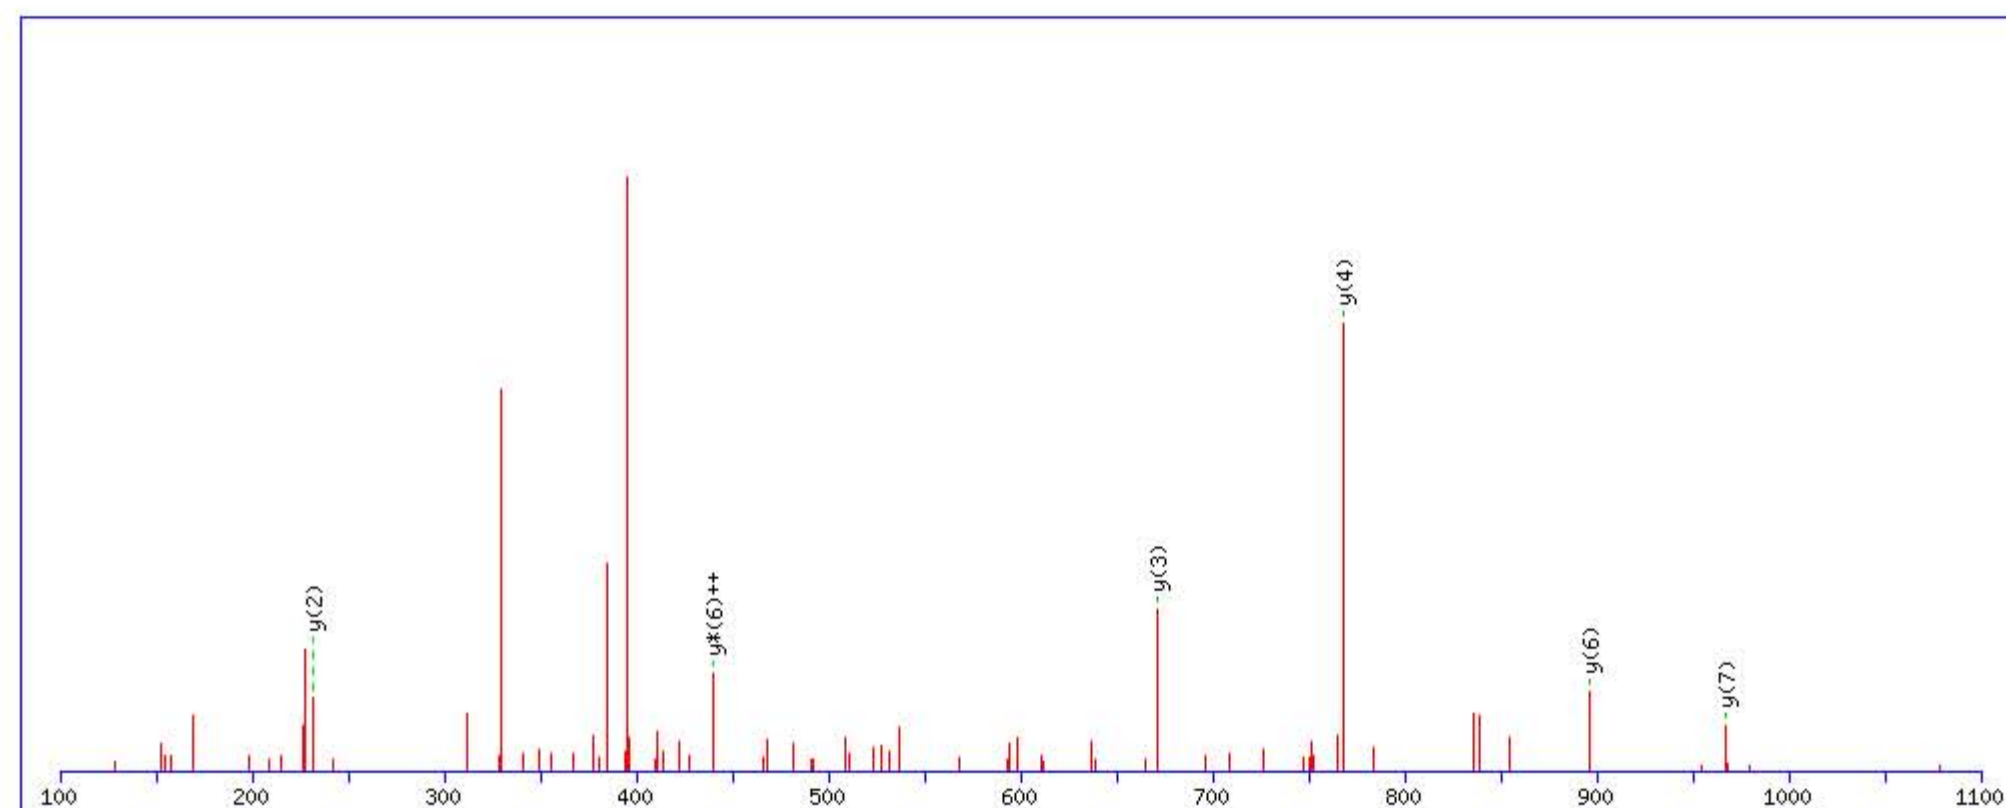

Monoisotopic mass of neutral peptide Mr(calc): 1620.822845

Fixed modifications: Carbamidomethyl (C) (apply to specified residues or termini only)

Variable modifications:

Q4 : Biotin:Thermo-21345 (Q)

Q9 : Biotin:Thermo-21345 (Q)

Ions Score: 28 Expect: 0.0041

Matches : 6/94 fragment ions using 10 most intense peaks [\(help\)](#)

| #  | b           | b <sup>++</sup> | b <sup>*</sup> | b <sup>*++</sup> | b <sup>0</sup> | b <sup>0++</sup> | Seq.     | y                 | y <sup>++</sup> | y <sup>*</sup> | y <sup>*++</sup>  | y <sup>0</sup> | y <sup>0++</sup> | #  |
|----|-------------|-----------------|----------------|------------------|----------------|------------------|----------|-------------------|-----------------|----------------|-------------------|----------------|------------------|----|
| 1  | 58.028740   | 29.518008       |                |                  |                |                  | <b>G</b> |                   |                 |                |                   |                |                  | 11 |
| 2  | 129.065854  | 65.036565       |                |                  |                |                  | <b>A</b> | 1564.808666       | 782.907971      | 1547.782117    | 774.394697        | 1546.798101    | 773.902689       | 10 |
| 3  | 216.097882  | 108.552579      |                |                  | 198.087317     | 99.547296        | <b>S</b> | 1493.771552       | 747.389414      | 1476.745003    | 738.876140        | 1475.760987    | 738.384131       | 9  |
| 4  | 655.323208  | 328.165242      | 638.296659     | 319.651968       | 637.312643     | 319.159960       | <b>Q</b> | 1406.739524       | 703.873400      | 1389.712975    | 695.360126        |                |                  | 8  |
| 5  | 726.360322  | 363.683799      | 709.333773     | 355.170525       | 708.349757     | 354.678517       | <b>A</b> | <b>967.514198</b> | 484.260737      | 950.487649     | 475.747463        |                |                  | 7  |
| 6  | 783.381786  | 392.194531      | 766.355237     | 383.681257       | 765.371221     | 383.189249       | <b>G</b> | <b>896.477084</b> | 448.742180      | 879.450535     | <b>440.228906</b> |                |                  | 6  |
| 7  | 854.418900  | 427.713088      | 837.392351     | 419.199814       | 836.408335     | 418.707806       | <b>A</b> | 839.455620        | 420.231448      | 822.429071     | 411.718174        |                |                  | 5  |
| 8  | 951.471664  | 476.239470      | 934.445115     | 467.726196       | 933.461099     | 467.234188       | <b>P</b> | <b>768.418506</b> | 384.712891      | 751.391957     | 376.199617        |                |                  | 4  |
| 9  | 1390.696990 | 695.852133      | 1373.670441    | 687.338859       | 1372.686425    | 686.846851       | <b>Q</b> | <b>671.365742</b> | 336.186509      | 654.339193     | 327.673235        |                |                  | 3  |
| 10 | 1447.718454 | 724.362865      | 1430.691905    | 715.849591       | 1429.707889    | 715.357583       | <b>G</b> | <b>232.140416</b> | 116.573846      | 215.113867     | 108.060571        |                |                  | 2  |
| 11 |             |                 |                |                  |                |                  | <b>R</b> | 175.118952        | 88.063114       | 158.092403     | 79.549839         |                |                  | 1  |

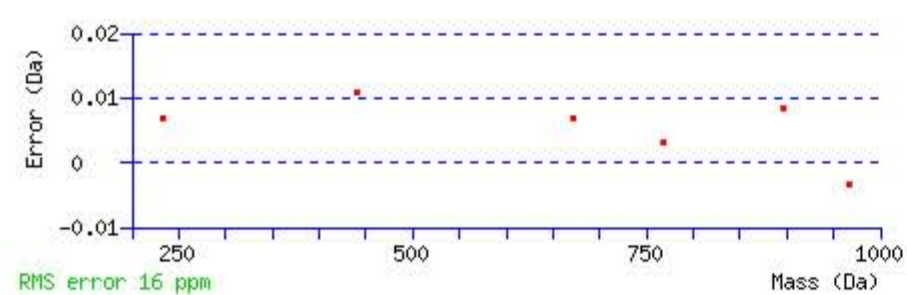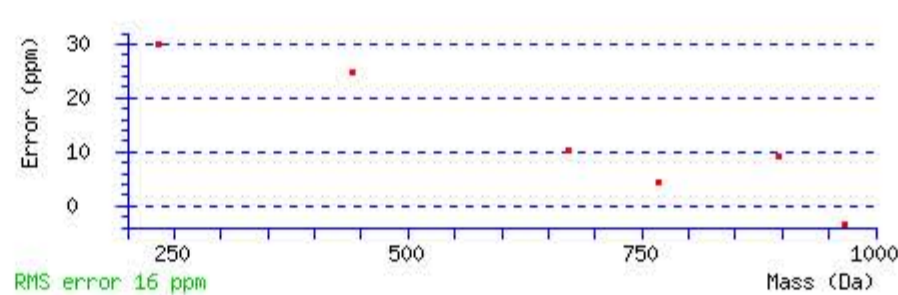

NCBI BLAST search of **GASQAGAPQGR**

(Parameters: blastp, nr protein database, expect=20000, no filter, PAM30)

Other BLAST [web gateways](#)

All matches to this query

| Score | Mr(calc):   | Delta    | Sequence                    |
|-------|-------------|----------|-----------------------------|
| 28.1  | 1620.822845 | 0.001297 | <a href="#">GASQAGAPQGR</a> |
| 2.6   | 1620.815430 | 0.008712 | <a href="#">SLQAQEDARHR</a> |

# MASCOT SEARCH RESULTS

## Peptide View

MS/MS Fragmentation of **QTQVSVLPEGGETPLFK**  
 Found in **GELS\_HUMAN**, Gelsolin OS=Homo sapiens GN=GSN PE=1 SV=1

Match to Query 49930: 2451.299832 from(818.107220,3+) rtinseconds(2614) index(36446)  
 Title: Locus:1.1.1.3459.18 File:"2013-07-02 CLN FXIII 60 min 3rd F 3.wiff"  
 Data file C:\Program Files (x86)\Matrix Science\Mascot Daemon\mgf6 FXIII 60 min 3rd\mascot\_daemon\_merge.mgf

Click mouse within plot area to zoom in by factor of two about that point  
 Or, Plot from  to  Da   
 Label all possible matches  Label matches used for scoring

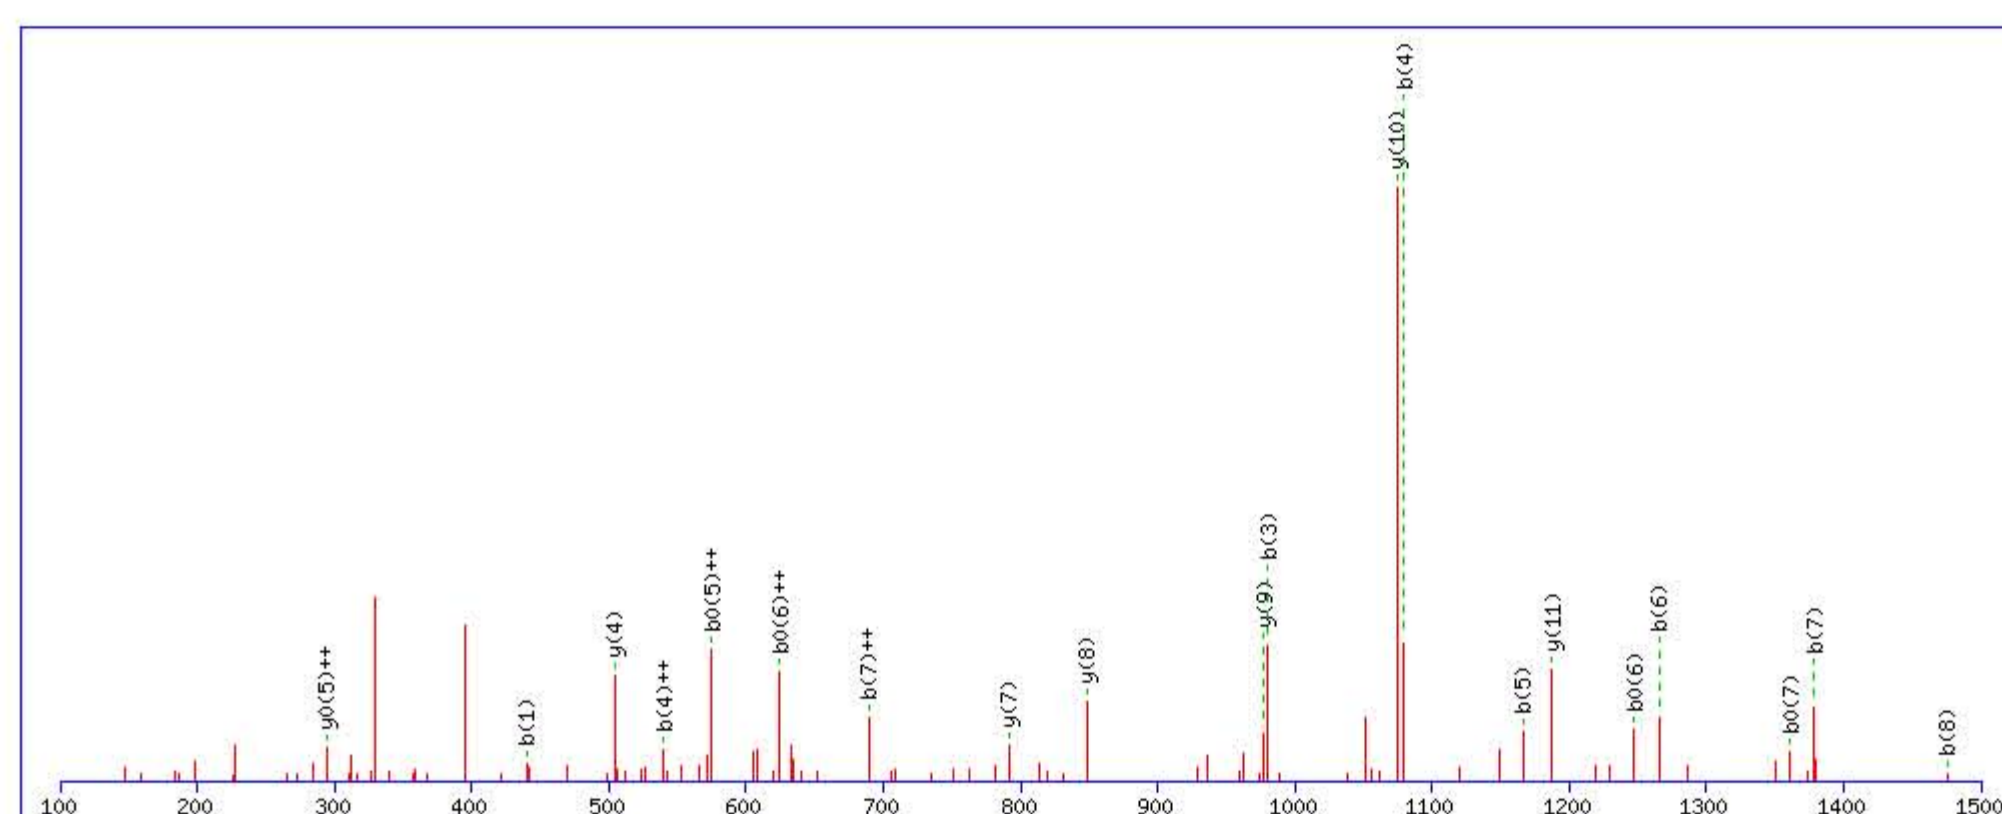

Monoisotopic mass of neutral peptide Mr(calc): 2451.290588  
 Fixed modifications: Carbamidomethyl (C) (apply to specified residues or termini only)  
 Variable modifications:  
 Q1 : Biotin:Thermo-21345 (Q)  
 Q3 : Biotin:Thermo-21345 (Q)  
 Ions Score: 59 Expect: 9.2e-006  
 Matches : 21/182 fragment ions using 27 most intense peaks [\(help\)](#)

| #  | b                  | b <sup>++</sup>   | b <sup>*</sup> | b <sup>*++</sup> | b <sup>0</sup>     | b <sup>0++</sup>  | Seq. | y                  | y <sup>++</sup> | y <sup>*</sup> | y <sup>*++</sup> | y <sup>0</sup> | y <sup>0++</sup>  | #  |
|----|--------------------|-------------------|----------------|------------------|--------------------|-------------------|------|--------------------|-----------------|----------------|------------------|----------------|-------------------|----|
| 1  | <b>440.232602</b>  | 220.619939        | 423.206053     | 212.106664       |                    |                   | Q    |                    |                 |                |                  |                |                   | 17 |
| 2  | 541.280281         | 271.143779        | 524.253732     | 262.630504       | 523.269716         | 262.138496        | T    | 2013.072528        | 1007.039902     | 1996.045979    | 998.526628       | 1995.061963    | 998.034620        | 16 |
| 3  | <b>980.505607</b>  | 490.756442        | 963.479058     | 482.243167       | 962.495042         | 481.751159        | Q    | 1912.024849        | 956.516063      | 1894.998300    | 948.002788       | 1894.014284    | 947.510780        | 15 |
| 4  | <b>1079.574021</b> | <b>540.290649</b> | 1062.547472    | 531.777374       | 1061.563456        | 531.285366        | V    | 1472.799523        | 736.903400      | 1455.772974    | 728.390125       | 1454.788958    | 727.898117        | 14 |
| 5  | <b>1166.606049</b> | 583.806663        | 1149.579500    | 575.293388       | 1148.595484        | <b>574.801380</b> | S    | 1373.731109        | 687.369193      | 1356.704560    | 678.855918       | 1355.720544    | 678.363910        | 13 |
| 6  | <b>1265.674463</b> | 633.340870        | 1248.647914    | 624.827595       | <b>1247.663898</b> | <b>624.335587</b> | V    | 1286.699081        | 643.853179      | 1269.672532    | 635.339904       | 1268.688516    | 634.847896        | 12 |
| 7  | <b>1378.758527</b> | <b>689.882902</b> | 1361.731978    | 681.369627       | <b>1360.747962</b> | 680.877619        | L    | <b>1187.630667</b> | 594.318971      | 1170.604118    | 585.805697       | 1169.620102    | 585.313689        | 11 |
| 8  | <b>1475.811291</b> | 738.409284        | 1458.784742    | 729.896009       | 1457.800726        | 729.404001        | P    | <b>1074.546603</b> | 537.776940      | 1057.520054    | 529.263665       | 1056.536038    | 528.771657        | 10 |
| 9  | 1604.853884        | 802.930580        | 1587.827335    | 794.417306       | 1586.843319        | 793.925298        | E    | <b>977.493839</b>  | 489.250558      | 960.467290     | 480.737283       | 959.483274     | 480.245275        | 9  |
| 10 | 1661.875348        | 831.441312        | 1644.848799    | 822.928038       | 1643.864783        | 822.436030        | G    | <b>848.451246</b>  | 424.729261      | 831.424697     | 416.215986       | 830.440681     | 415.723978        | 8  |
| 11 | 1718.896812        | 859.952044        | 1701.870263    | 851.438770       | 1700.886247        | 850.946762        | G    | <b>791.429782</b>  | 396.218529      | 774.403233     | 387.705254       | 773.419217     | 387.213246        | 7  |
| 12 | 1847.939405        | 924.473341        | 1830.912856    | 915.960066       | 1829.928840        | 915.468058        | E    | 734.408318         | 367.707797      | 717.381769     | 359.194523       | 716.397753     | 358.702515        | 6  |
| 13 | 1948.987084        | 974.997180        | 1931.960535    | 966.483906       | 1930.976519        | 965.991898        | T    | 605.365725         | 303.186500      | 588.339176     | 294.673226       | 587.355160     | <b>294.181218</b> | 5  |
| 14 | 2046.039848        | 1023.523562       | 2029.013299    | 1015.010288      | 2028.029283        | 1014.518280       | P    | <b>504.318046</b>  | 252.662661      | 487.291497     | 244.149386       |                |                   | 4  |
| 15 | 2159.123912        | 1080.065594       | 2142.097363    | 1071.552319      | 2141.113347        | 1071.060311       | L    | 407.265282         | 204.136279      | 390.238733     | 195.623004       |                |                   | 3  |
| 16 | 2306.192326        | 1153.599801       | 2289.165777    | 1145.086526      | 2288.181761        | 1144.594518       | F    | <b>294.181218</b>  | 147.594247      | 277.154669     | 139.080972       |                |                   | 2  |
| 17 |                    |                   |                |                  |                    |                   | K    | 147.112804         | 74.060040       | 130.086255     | 65.546765        |                |                   | 1  |

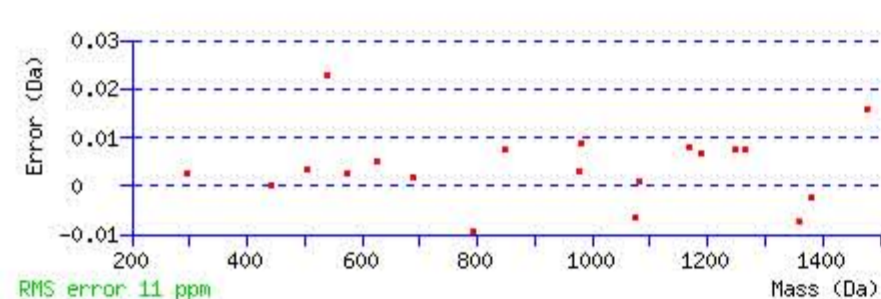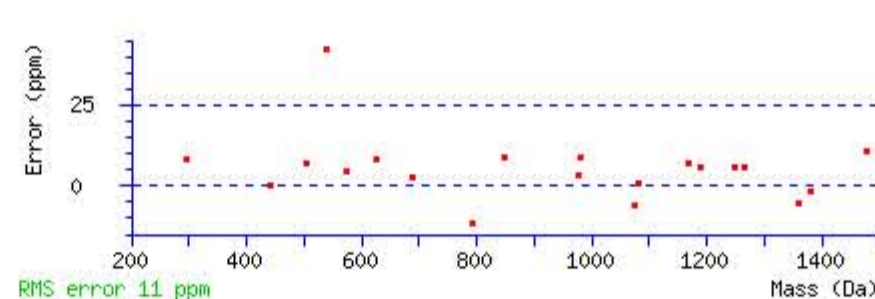

NCBI BLAST search of **QTQVSVLPEGGETPLFK**  
 (Parameters: blastp, nr protein database, expect=20000, no filter, PAM30)  
 Other BLAST [web gateways](#)

## All matches to this query

| Score | Mr(calc):   | Delta     | Sequence                               |
|-------|-------------|-----------|----------------------------------------|
| 59.4  | 2451.290588 | 0.009244  | <a href="#">QTQVSVLPEGGETPLFK</a>      |
| 5.5   | 2451.277130 | 0.022702  | <a href="#">GFPSDTQLLDLRRNHFPSVPR</a>  |
| 3.7   | 2451.330780 | -0.030948 | <a href="#">RQFQSQLADLQQLPDILK</a>     |
| 3.7   | 2451.330780 | -0.030948 | <a href="#">RQFQSQLADLQQLPDILK</a>     |
| 2.0   | 2451.301590 | -0.001758 | <a href="#">ATKRISHMPSRPELSAVATDLR</a> |

**MATRIX SCIENCE Mascot Search Results**

**Peptide View**

MS/MS Fragmentation of **DPDQTDGLGLSYLSSHIANVER**  
 Found in **GELS\_HUMAN**, Gelsolin OS=Homo sapiens GN=GSN PE=1 SV=1

Match to Query 52731: 2697.327612 from(900.116480,3+) rtinseconds(2568) index(36105)  
 Title: Locus:1.1.1.3443.11 File:"2013-07-02 CLN FXIII 60 min 3rd F 3.wiff"  
 Data file C:\Program Files (x86)\Matrix Science\Mascot Daemon\mgf\6 FXIII 60 min 3rd\mascot\_daemon\_merge.mgf

Click mouse within plot area to zoom in by factor of two about that point  
 Or, Plot from  to  Da   
 Label all possible matches  Label matches used for scoring

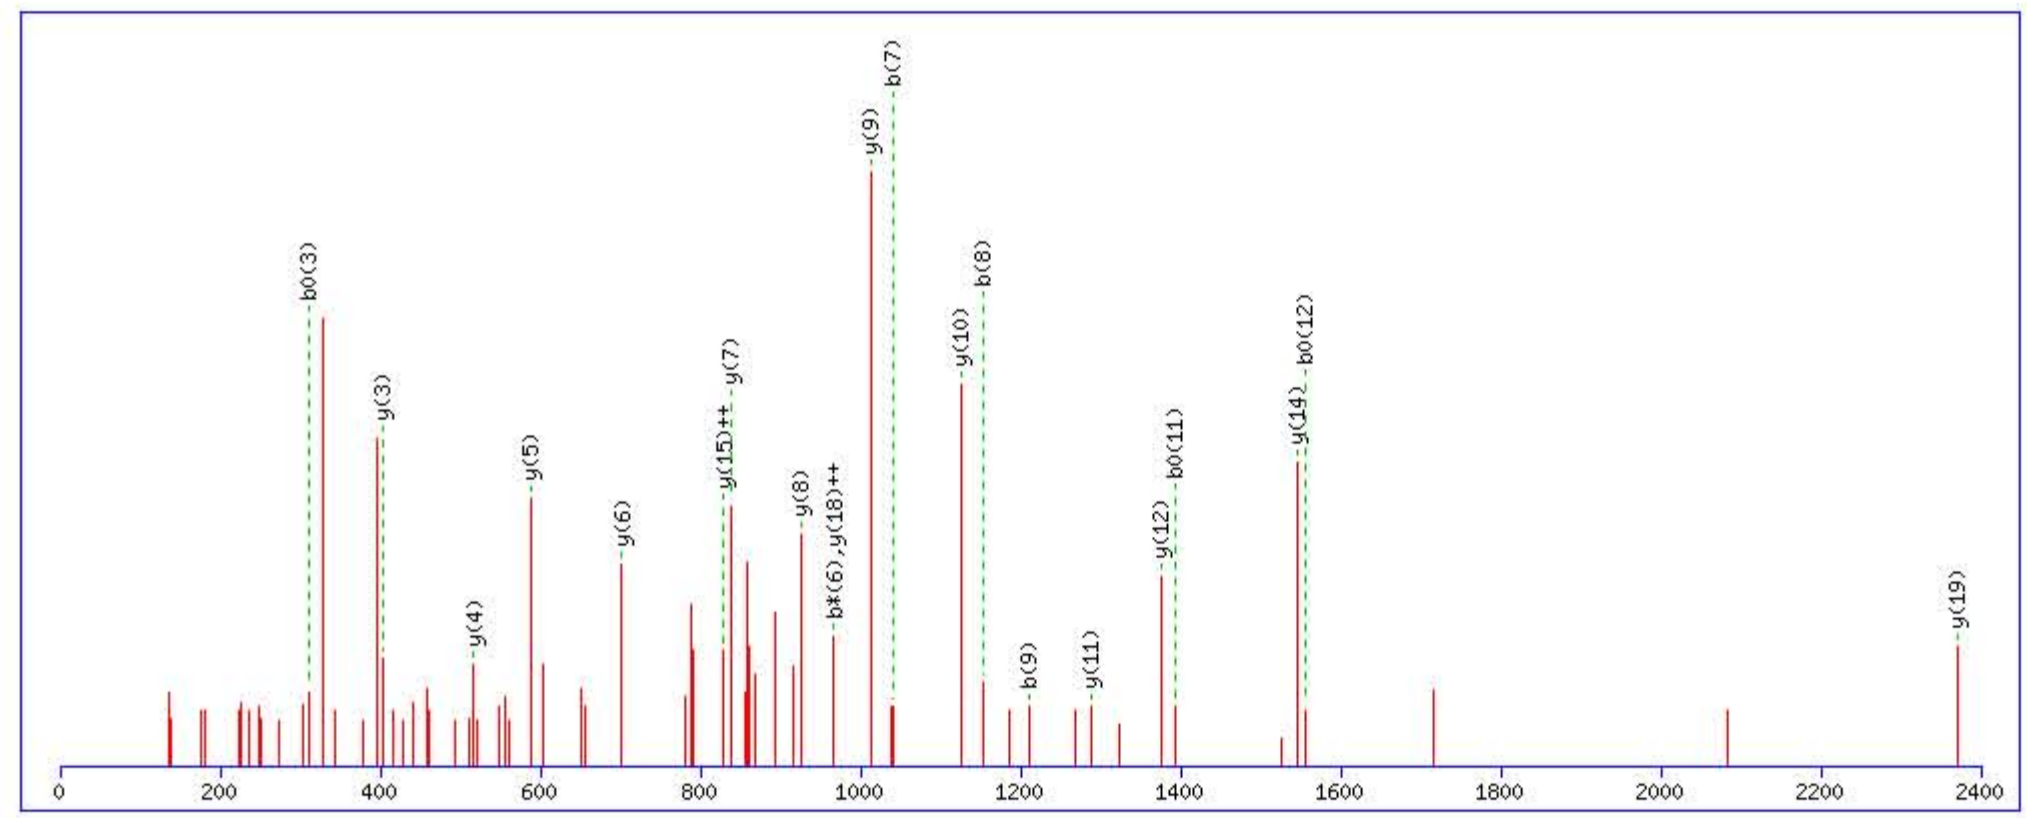

Monoisotopic mass of neutral peptide Mr(calc): 2697.306824  
 Fixed modifications: Carbamidomethyl (C) (apply to specified residues or termini only)  
 Variable modifications:  
 Q4 : Biotin:Thermo-21345 (Q)  
 Ions Score: 78 Expect: 4.2e-007  
 Matches : 21/244 fragment ions using 32 most intense peaks [\(help\)](#)

| #  | b           | b <sup>++</sup> | b*          | b <sup>+++</sup> | b <sup>0</sup> | b <sup>0++</sup> | Seq. | y           | y <sup>++</sup> | y*          | y <sup>+++</sup> | y <sup>0</sup> | y <sup>0++</sup> | #  |
|----|-------------|-----------------|-------------|------------------|----------------|------------------|------|-------------|-----------------|-------------|------------------|----------------|------------------|----|
| 1  | 116.034219  | 58.520748       |             |                  | 98.023654      | 49.515465        | D    |             |                 |             |                  |                |                  | 22 |
| 2  | 213.086983  | 107.047129      |             |                  | 195.076418     | 98.041847        | P    | 2583.287164 | 1292.147220     | 2566.260615 | 1283.633945      | 2565.276599    | 1283.141937      | 21 |
| 3  | 328.113926  | 164.560601      |             |                  | 310.103361     | 155.555319       | D    | 2486.234400 | 1243.620838     | 2469.207851 | 1235.107563      | 2468.223835    | 1234.615555      | 20 |
| 4  | 767.339252  | 384.173264      | 750.312703  | 375.659989       | 749.328687     | 375.167982       | Q    | 2371.207457 | 1186.107366     | 2354.180908 | 1177.594092      | 2353.196892    | 1177.102084      | 19 |
| 5  | 868.386931  | 434.697104      | 851.360382  | 426.183829       | 850.376366     | 425.691821       | T    | 1931.982131 | 966.494704      | 1914.955582 | 957.981429       | 1913.971566    | 957.489421       | 18 |
| 6  | 983.413874  | 492.210575      | 966.387325  | 483.697300       | 965.403309     | 483.205292       | D    | 1830.934452 | 915.970864      | 1813.907903 | 907.457590       | 1812.923887    | 906.965581       | 17 |
| 7  | 1040.435338 | 520.721307      | 1023.408789 | 512.208032       | 1022.424773    | 511.716025       | G    | 1715.907509 | 858.457392      | 1698.880960 | 849.944118       | 1697.896944    | 849.452110       | 16 |
| 8  | 1153.519402 | 577.263339      | 1136.492853 | 568.750065       | 1135.508837    | 568.258056       | L    | 1658.886045 | 829.946661      | 1641.859496 | 821.433386       | 1640.875480    | 820.941378       | 15 |
| 9  | 1210.540866 | 605.774071      | 1193.514317 | 597.260796       | 1192.530301    | 596.768788       | G    | 1545.801981 | 773.404629      | 1528.775432 | 764.891354       | 1527.791416    | 764.399346       | 14 |
| 10 | 1323.624930 | 662.316103      | 1306.598381 | 653.802828       | 1305.614365    | 653.310820       | L    | 1488.780517 | 744.893897      | 1471.753968 | 736.380622       | 1470.769952    | 735.888614       | 13 |
| 11 | 1410.656958 | 705.832117      | 1393.630409 | 697.318842       | 1392.646393    | 696.826834       | S    | 1375.696453 | 688.351865      | 1358.669904 | 679.838590       | 1357.685888    | 679.346582       | 12 |
| 12 | 1573.720287 | 787.363781      | 1556.693738 | 778.850507       | 1555.709722    | 778.358499       | Y    | 1288.664425 | 644.835851      | 1271.637876 | 636.322576       | 1270.653860    | 635.830568       | 11 |
| 13 | 1686.804351 | 843.905813      | 1669.777802 | 835.392539       | 1668.793786    | 834.900531       | L    | 1125.601096 | 563.304186      | 1108.574547 | 554.790912       | 1107.590531    | 554.298904       | 10 |
| 14 | 1773.836379 | 887.421827      | 1756.809830 | 878.908553       | 1755.825814    | 878.416545       | S    | 1012.517032 | 506.762154      | 995.490483  | 498.248880       | 994.506467     | 497.756872       | 9  |
| 15 | 1860.868407 | 930.937841      | 1843.841858 | 922.424567       | 1842.857842    | 921.932559       | S    | 925.485004  | 463.246140      | 908.458455  | 454.732866       | 907.474439     | 454.240858       | 8  |
| 16 | 1997.927319 | 999.467297      | 1980.900770 | 990.954023       | 1979.916754    | 990.462015       | H    | 838.452976  | 419.730126      | 821.426427  | 411.216852       | 820.442411     | 410.724844       | 7  |
| 17 | 2111.011383 | 1056.009329     | 2093.984834 | 1047.496055      | 2093.000818    | 1047.004047      | I    | 701.394064  | 351.200670      | 684.367515  | 342.687396       | 683.383499     | 342.195388       | 6  |
| 18 | 2182.048497 | 1091.527886     | 2165.021948 | 1083.014612      | 2164.037932    | 1082.522604      | A    | 588.310000  | 294.658638      | 571.283451  | 286.145364       | 570.299435     | 285.653356       | 5  |
| 19 | 2296.091424 | 1148.549350     | 2279.064875 | 1140.036075      | 2278.080859    | 1139.544067      | N    | 517.272886  | 259.140081      | 500.246337  | 250.626806       | 499.262321     | 250.134798       | 4  |
| 20 | 2395.159838 | 1198.083557     | 2378.133289 | 1189.570282      | 2377.149273    | 1189.078274      | V    | 403.229959  | 202.118617      | 386.203410  | 193.605343       | 385.219394     | 193.113335       | 3  |
| 21 | 2524.202431 | 1262.604853     | 2507.175882 | 1254.091579      | 2506.191866    | 1253.599571      | E    | 304.161545  | 152.584411      | 287.134996  | 144.071136       | 286.150980     | 143.579128       | 2  |
| 22 |             |                 |             |                  |                |                  | R    | 175.118952  | 88.063114       | 158.092403  | 79.549839        |                |                  | 1  |

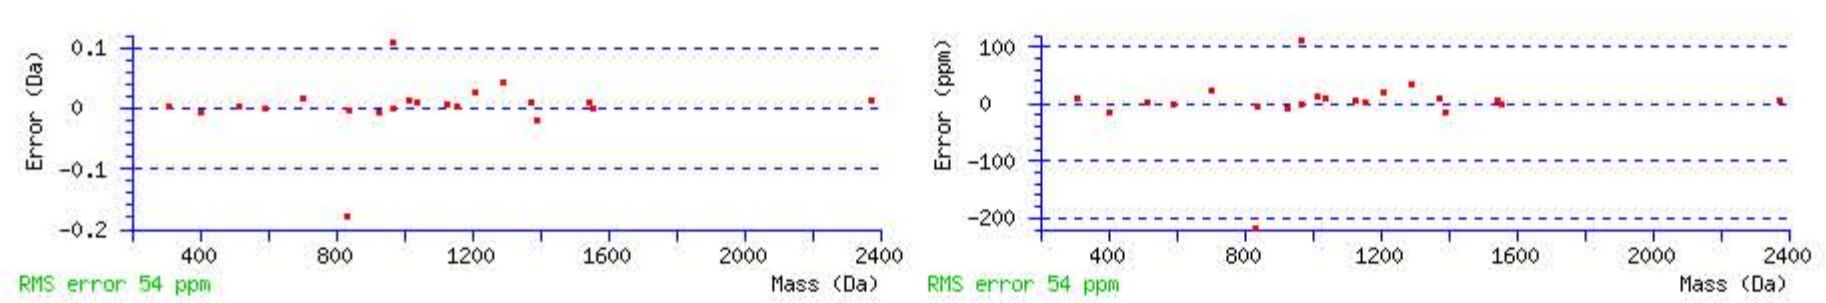

NCBI BLAST search of **DPDQTDGLGLSYLSSHIANVER**  
 (Parameters: blastp, nr protein database, expect=20000, no filter, PAM30)  
 Other BLAST [web gateways](#)

**All matches to this query**

| Score | Mr(calc):   | Delta    | Sequence                               |
|-------|-------------|----------|----------------------------------------|
| 78.2  | 2697.306824 | 0.020788 | <a href="#">DPDQTDGLGLSYLSSHIANVER</a> |



# Mascot Search Results

## Peptide View

MS/MS Fragmentation of **VIHDNFGIVEGLMTTVHAIATQK**  
 Found in **G3P\_HUMAN**, Glyceraldehyde-3-phosphate dehydrogenase OS=Homo sapiens GN=GAPDH PE=1 SV=3

Match to Query 55282: 2905.553696 from(727.395700,4+) rtinseconds(3118) index(54674)  
 Title: Locus:1.1.1.3130.10 File:"2013-07-02 CLN FXIII 60 min 3rd F 4.wiff"  
 Data file C:\Program Files (x86)\Matrix Science\Mascot Daemon\mgf6 FXIII 60 min 3rd\mascot\_daemon\_merge.mgf

Click mouse within plot area to zoom in by factor of two about that point  
 Or, Plot from  to  Da   
 Label all possible matches  Label matches used for scoring

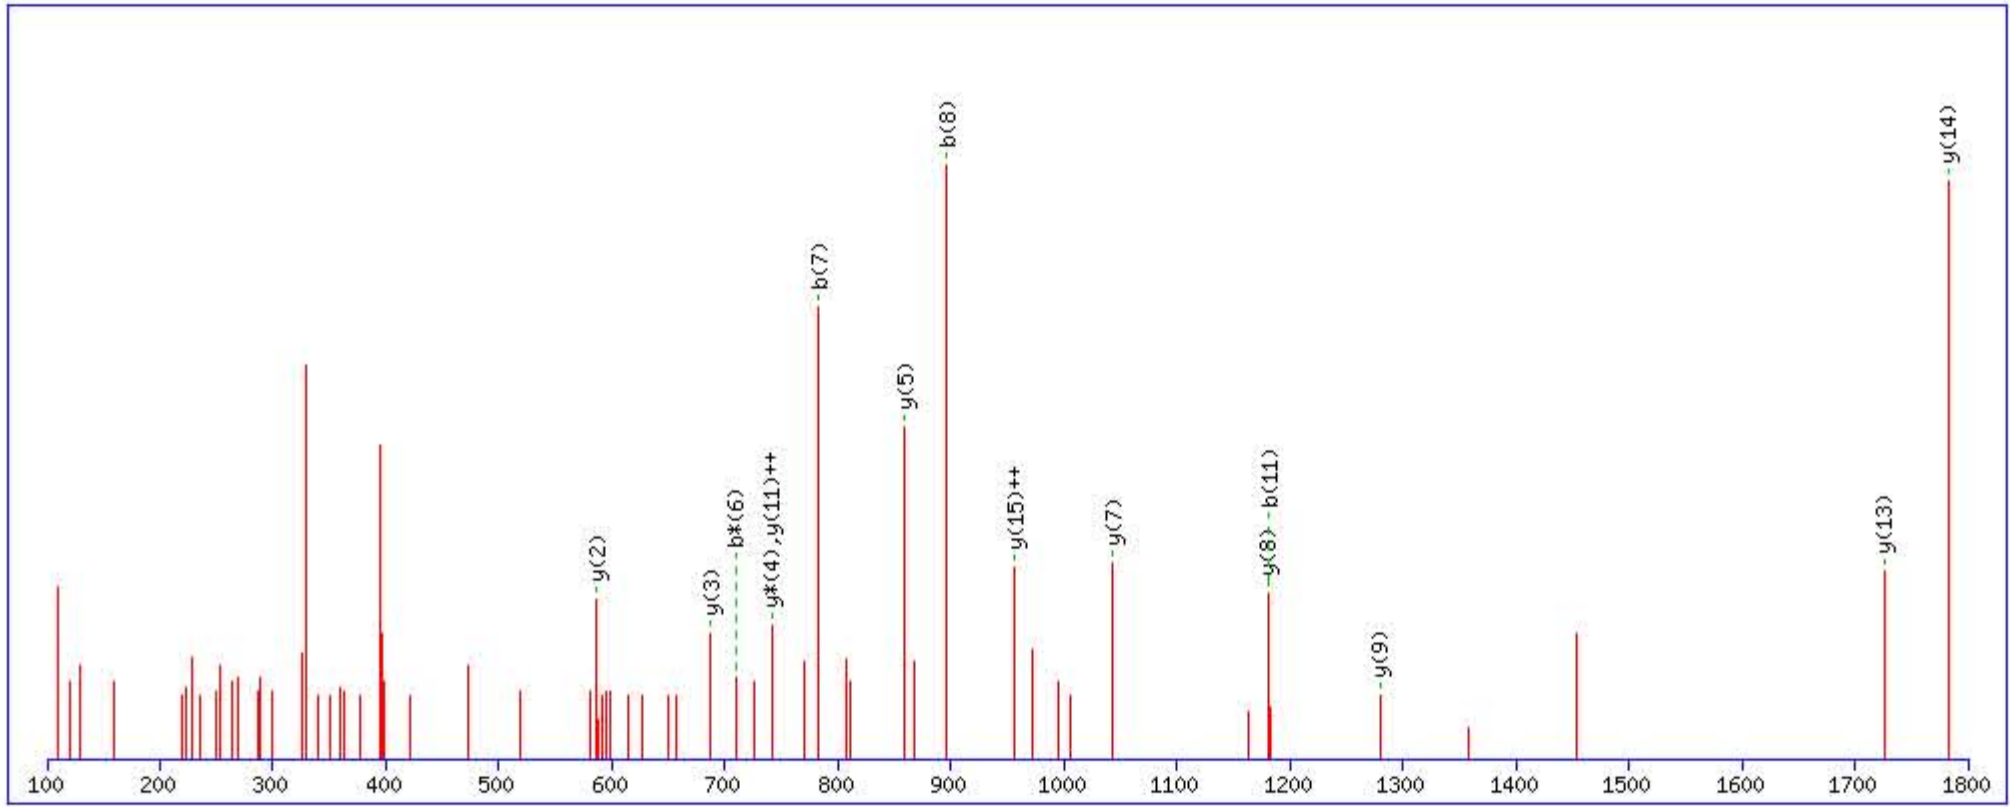

Monoisotopic mass of neutral peptide Mr(calc): 2905.519424  
 Fixed modifications: Carbamidomethyl (C) (apply to specified residues or termini only)  
 Variable modifications:  
 Q23 : Biotin:Thermo-21345 (Q)  
 Ions Score: 38 Expect: 0.0012  
 Matches : 15/258 fragment ions using 26 most intense peaks [\(help\)](#)

| #  | b           | b <sup>++</sup> | b <sup>+</sup> | b <sup>+++</sup> | b <sup>0</sup> | b <sup>0++</sup> | Seq. | y           | y <sup>++</sup> | y <sup>+</sup> | y <sup>+++</sup> | y <sup>0</sup> | y <sup>0++</sup> | #  |
|----|-------------|-----------------|----------------|------------------|----------------|------------------|------|-------------|-----------------|----------------|------------------|----------------|------------------|----|
| 1  | 100.075690  | 50.541483       |                |                  |                |                  | V    |             |                 |                |                  |                |                  | 24 |
| 2  | 213.159754  | 107.083515      |                |                  |                |                  | I    | 2807.458272 | 1404.232774     | 2790.431723    | 1395.719499      | 2789.447707    | 1395.227491      | 23 |
| 3  | 350.218666  | 175.612971      |                |                  |                |                  | H    | 2694.374208 | 1347.690742     | 2677.347659    | 1339.177467      | 2676.363643    | 1338.685459      | 22 |
| 4  | 465.245609  | 233.126443      |                |                  | 447.235044     | 224.121160       | D    | 2557.315296 | 1279.161286     | 2540.288747    | 1270.648011      | 2539.304731    | 1270.156003      | 21 |
| 5  | 579.288536  | 290.147906      | 562.261987     | 281.634632       | 561.277971     | 281.142624       | N    | 2442.288353 | 1221.647814     | 2425.261804    | 1213.134540      | 2424.277788    | 1212.642532      | 20 |
| 6  | 726.356950  | 363.682113      | 709.330401     | 355.168838       | 708.346385     | 354.676830       | F    | 2328.245426 | 1164.626351     | 2311.218877    | 1156.113076      | 2310.234861    | 1155.621068      | 19 |
| 7  | 783.378414  | 392.192845      | 766.351865     | 383.679571       | 765.367849     | 383.187563       | G    | 2181.177012 | 1091.092144     | 2164.150463    | 1082.578869      | 2163.166447    | 1082.086861      | 18 |
| 8  | 896.462478  | 448.734877      | 879.435929     | 440.221603       | 878.451913     | 439.729595       | I    | 2124.155548 | 1062.581412     | 2107.128999    | 1054.068137      | 2106.144983    | 1053.576129      | 17 |
| 9  | 995.530892  | 498.269084      | 978.504343     | 489.755810       | 977.520327     | 489.263802       | V    | 2011.071484 | 1006.039380     | 1994.044935    | 997.526105       | 1993.060919    | 997.034097       | 16 |
| 10 | 1124.573485 | 562.790381      | 1107.546936    | 554.277106       | 1106.562920    | 553.785098       | E    | 1912.003070 | 956.505173      | 1894.976521    | 947.991899       | 1893.992505    | 947.499890       | 15 |
| 11 | 1181.594949 | 591.301113      | 1164.568400    | 582.787838       | 1163.584384    | 582.295830       | G    | 1782.960477 | 891.983876      | 1765.933928    | 883.470602       | 1764.949912    | 882.978594       | 14 |
| 12 | 1294.679013 | 647.843144      | 1277.652464    | 639.329870       | 1276.668448    | 638.837862       | L    | 1725.939013 | 863.473144      | 1708.912464    | 854.959870       | 1707.928448    | 854.467862       | 13 |
| 13 | 1425.719498 | 713.363387      | 1408.692949    | 704.850113       | 1407.708933    | 704.358104       | M    | 1612.854949 | 806.931113      | 1595.828400    | 798.417838       | 1594.844384    | 797.925830       | 12 |
| 14 | 1526.767177 | 763.887227      | 1509.740628    | 755.373952       | 1508.756612    | 754.881944       | T    | 1481.814464 | 741.410870      | 1464.787915    | 732.897596       | 1463.803899    | 732.405588       | 11 |
| 15 | 1627.814856 | 814.411066      | 1610.788307    | 805.897792       | 1609.804291    | 805.405783       | T    | 1380.766785 | 690.887031      | 1363.740236    | 682.373756       | 1362.756220    | 681.881748       | 10 |
| 16 | 1726.883270 | 863.945273      | 1709.856721    | 855.431999       | 1708.872705    | 854.939991       | V    | 1279.719106 | 640.363191      | 1262.692557    | 631.849917       | 1261.708541    | 631.357909       | 9  |
| 17 | 1863.942182 | 932.474729      | 1846.915633    | 923.961455       | 1845.931617    | 923.469447       | H    | 1180.650692 | 590.828984      | 1163.624143    | 582.315710       | 1162.640127    | 581.823701       | 8  |
| 18 | 1934.979296 | 967.993286      | 1917.952747    | 959.480012       | 1916.968731    | 958.988003       | A    | 1043.591780 | 522.299528      | 1026.565231    | 513.786254       | 1025.581215    | 513.294245       | 7  |
| 19 | 2048.063360 | 1024.535318     | 2031.036811    | 1016.022044      | 2030.052795    | 1015.530036      | I    | 972.554666  | 486.780971      | 955.528117     | 478.267697       | 954.544101     | 477.775689       | 6  |
| 20 | 2149.111039 | 1075.059157     | 2132.084490    | 1066.545883      | 2131.100474    | 1066.053875      | T    | 859.470602  | 430.238939      | 842.444053     | 421.725665       | 841.460037     | 421.233657       | 5  |
| 21 | 2220.148153 | 1110.577714     | 2203.121604    | 1102.064440      | 2202.137588    | 1101.572432      | A    | 758.422923  | 379.715100      | 741.396374     | 371.201825       | 740.412358     | 370.709817       | 4  |
| 22 | 2321.195832 | 1161.101554     | 2304.169283    | 1152.588279      | 2303.185267    | 1152.096271      | T    | 687.385809  | 344.196543      | 670.359260     | 335.683268       | 669.375244     | 335.191260       | 3  |
| 23 | 2760.421158 | 1380.714217     | 2743.394609    | 1372.200942      | 2742.410593    | 1371.708934      | Q    | 586.338130  | 293.672703      | 569.311581     | 285.159429       |                |                  | 2  |
| 24 |             |                 |                |                  |                |                  | K    | 147.112804  | 74.060040       | 130.086255     | 65.546765        |                |                  | 1  |

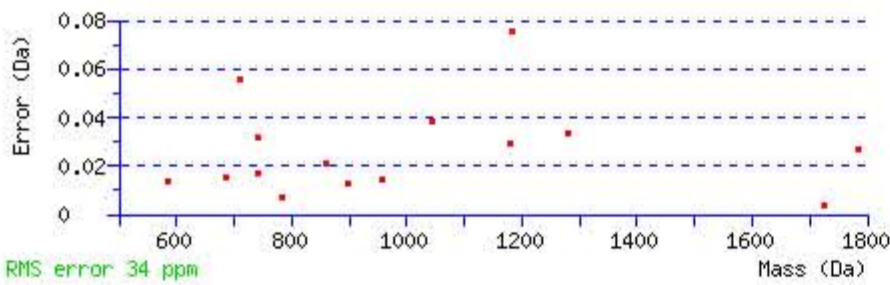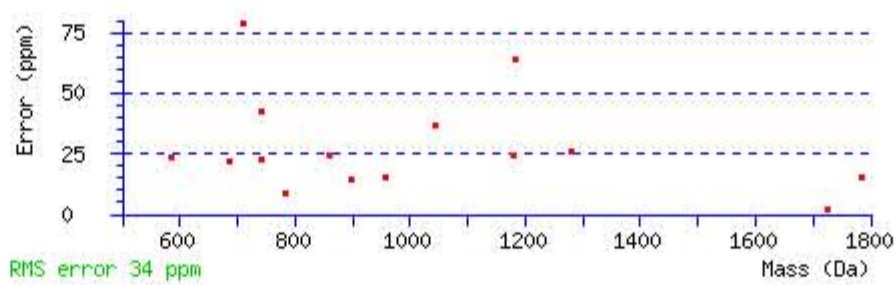

NCBI BLAST search of **VIHDNFGIVEGLMTTVHAIATQK**  
 (Parameters: blastp, nr protein database, expect=20000, no filter, PAM30)  
 Other BLAST [web gateways](#)

### All matches to this query

| Score | Mr(calc):   | Delta    | Sequence                                |
|-------|-------------|----------|-----------------------------------------|
| 37.6  | 2905.519424 | 0.034272 | <a href="#">VIHDNFGIVEGLMTTVHAIATQK</a> |
| 6.5   | 2905.511490 | 0.042206 | <a href="#">TLQEIFQAENTIMLLERSIMAK</a>  |
| 2.4   | 2905.511490 | 0.042206 | <a href="#">TLQEIFQAENTIMLLERSIMAK</a>  |

**Peptide View**

MS/MS Fragmentation of **YVMLPVADQYDCITHYEGSTCPK**

Found in **HPTR\_HUMAN**, Haptoglobin-related protein OS=Homo sapiens GN=HPR PE=1 SV=2

Match to Query 56471: 3057.389382 from(1020.137070,3+) rtinseconds(2456) index(35470)  
 Title: Locus:1.1.1.3404.15 File:"2013-07-02 CLN FXIII 60 min 3rd F 3.wiff"  
 Data file C:\Program Files (x86)\Matrix Science\Mascot Daemon\mgf6 FXIII 60 min 3rd\mascot\_daemon\_merge.mgf

Click mouse within plot area to zoom in by factor of two about that point

Or, Plot from  to  Da

Label all possible matches  Label matches used for scoring

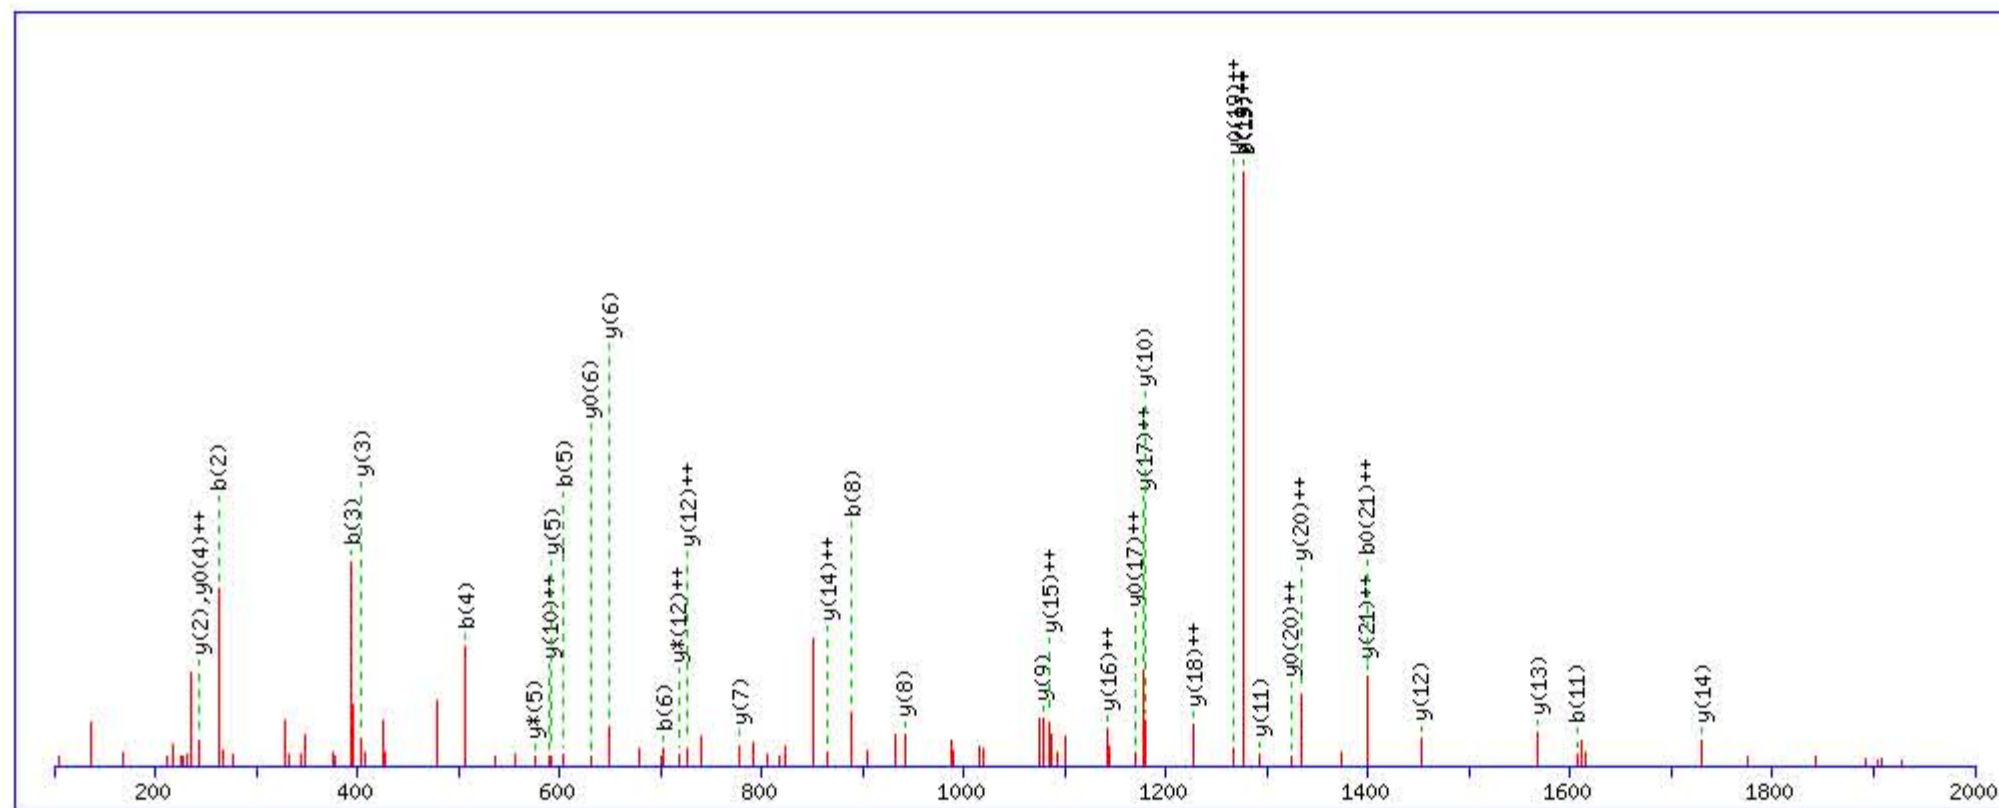

Monoisotopic mass of neutral peptide Mr(calc): 3057.374466  
 Fixed modifications: Carbamidomethyl (C) (apply to specified residues or termini only)  
 Variable modifications:  
 Q9 : Biotin:Thermo-21345 (Q)  
 Ions Score: 54 Expect: 4.5e-005  
 Matches : 38/228 fragment ions using 95 most intense peaks [\(help\)](#)

| #  | b                  | b <sup>++</sup>    | b <sup>*</sup> | b <sup>*++</sup> | b <sup>0</sup> | b <sup>0++</sup>   | Seq. | y                  | y <sup>++</sup>    | y <sup>*</sup>    | y <sup>*++</sup>  | y <sup>0</sup>    | y <sup>0++</sup>   | #  |
|----|--------------------|--------------------|----------------|------------------|----------------|--------------------|------|--------------------|--------------------|-------------------|-------------------|-------------------|--------------------|----|
| 1  | 164.070605         | 82.538940          |                |                  |                |                    | Y    |                    |                    |                   |                   |                   |                    | 23 |
| 2  | <b>263.139019</b>  | 132.073148         |                |                  |                |                    | V    | 2895.318410        | 1448.162843        | 2878.291861       | 1439.649568       | 2877.307845       | 1439.157560        | 22 |
| 3  | <b>394.179504</b>  | 197.593390         |                |                  |                |                    | M    | 2796.249996        | <b>1398.628636</b> | 2779.223447       | 1390.115361       | 2778.239431       | 1389.623353        | 21 |
| 4  | <b>507.263568</b>  | 254.135422         |                |                  |                |                    | L    | 2665.209511        | <b>1333.108393</b> | 2648.182962       | 1324.595119       | 2647.198946       | <b>1324.103111</b> | 20 |
| 5  | <b>604.316332</b>  | 302.661804         |                |                  |                |                    | P    | 2552.125447        | <b>1276.566361</b> | 2535.098898       | 1268.053087       | 2534.114882       | <b>1267.561079</b> | 19 |
| 6  | <b>703.384746</b>  | 352.196011         |                |                  |                |                    | V    | 2455.072683        | <b>1228.039979</b> | 2438.046134       | 1219.526705       | 2437.062118       | 1219.034697        | 18 |
| 7  | 774.421860         | 387.714568         |                |                  |                |                    | A    | 2356.004269        | <b>1178.505772</b> | 2338.977720       | 1169.992498       | 2337.993704       | <b>1169.500490</b> | 17 |
| 8  | <b>889.448803</b>  | 445.228040         |                |                  | 871.438238     | 436.222757         | D    | 2284.967155        | <b>1142.987215</b> | 2267.940606       | 1134.473941       | 2266.956590       | 1133.981933        | 16 |
| 9  | 1328.674129        | 664.840703         | 1311.647580    | 656.327428       | 1310.663564    | 655.835420         | Q    | 2169.940212        | <b>1085.473744</b> | 2152.913663       | 1076.960469       | 2151.929647       | 1076.468461        | 15 |
| 10 | 1491.737458        | 746.372367         | 1474.710909    | 737.859093       | 1473.726893    | 737.367085         | Y    | <b>1730.714886</b> | <b>865.861081</b>  | 1713.688337       | 857.347807        | 1712.704321       | 856.855799         | 14 |
| 11 | <b>1606.764401</b> | 803.885839         | 1589.737852    | 795.372564       | 1588.753836    | 794.880556         | D    | <b>1567.651557</b> | 784.329417         | 1550.625008       | 775.816142        | 1549.640992       | 775.324134         | 13 |
| 12 | 1766.795050        | 883.901163         | 1749.768501    | 875.387889       | 1748.784485    | 874.895881         | C    | <b>1452.624614</b> | <b>726.815945</b>  | 1435.598065       | <b>718.302671</b> | 1434.614049       | 717.810663         | 12 |
| 13 | 1879.879114        | 940.443195         | 1862.852565    | 931.929921       | 1861.868549    | 931.437913         | I    | <b>1292.593965</b> | 646.800621         | 1275.567416       | 638.287346        | 1274.583400       | 637.795338         | 11 |
| 14 | 1980.926793        | 990.967035         | 1963.900244    | 982.453760       | 1962.916228    | 981.961752         | T    | <b>1179.509901</b> | <b>590.258589</b>  | 1162.483352       | 581.745314        | 1161.499336       | 581.253306         | 10 |
| 15 | 2117.985705        | 1059.496490        | 2100.959156    | 1050.983216      | 2099.975140    | 1050.491208        | H    | <b>1078.462222</b> | 539.734749         | 1061.435673       | 531.221475        | 1060.451657       | 530.729467         | 9  |
| 16 | 2281.049034        | 1141.028155        | 2264.022485    | 1132.514880      | 2263.038469    | 1132.022872        | Y    | <b>941.403310</b>  | 471.205293         | 924.376761        | 462.692018        | 923.392745        | 462.200010         | 8  |
| 17 | 2410.091627        | 1205.549452        | 2393.065078    | 1197.036177      | 2392.081062    | 1196.544169        | E    | <b>778.339981</b>  | 389.673628         | 761.313432        | 381.160354        | 760.329416        | 380.668346         | 7  |
| 18 | 2467.113091        | 1234.060184        | 2450.086542    | 1225.546909      | 2449.102526    | 1225.054901        | G    | <b>649.297388</b>  | 325.152332         | 632.270839        | 316.639057        | <b>631.286823</b> | 316.147049         | 6  |
| 19 | 2554.145119        | <b>1277.576198</b> | 2537.118570    | 1269.062923      | 2536.134554    | 1268.570915        | S    | <b>592.275924</b>  | 296.641600         | <b>575.249375</b> | 288.128325        | 574.265359        | 287.636317         | 5  |
| 20 | 2655.192798        | 1328.100037        | 2638.166249    | 1319.586762      | 2637.182233    | 1319.094754        | T    | 505.243896         | 253.125586         | 488.217347        | 244.612311        | 487.233331        | <b>244.120303</b>  | 4  |
| 21 | 2815.223447        | 1408.115361        | 2798.196898    | 1399.602087      | 2797.212882    | <b>1399.110079</b> | C    | <b>404.196217</b>  | 202.601746         | 387.169668        | 194.088472        |                   |                    | 3  |
| 22 | 2912.276211        | 1456.641743        | 2895.249662    | 1448.128469      | 2894.265646    | 1447.636461        | P    | <b>244.165568</b>  | 122.586422         | 227.139019        | 114.073148        |                   |                    | 2  |
| 23 |                    |                    |                |                  |                |                    | K    | 147.112804         | 74.060040          | 130.086255        | 65.546765         |                   |                    | 1  |

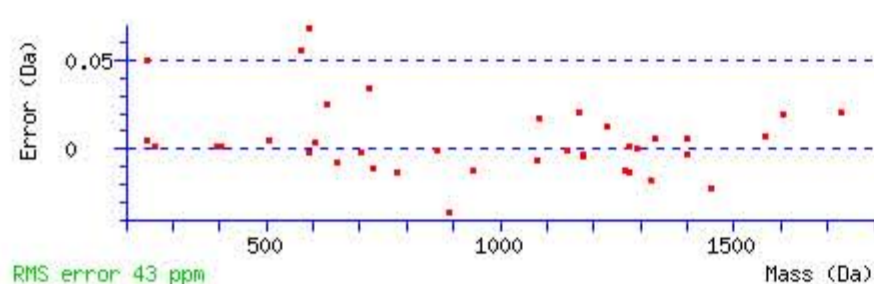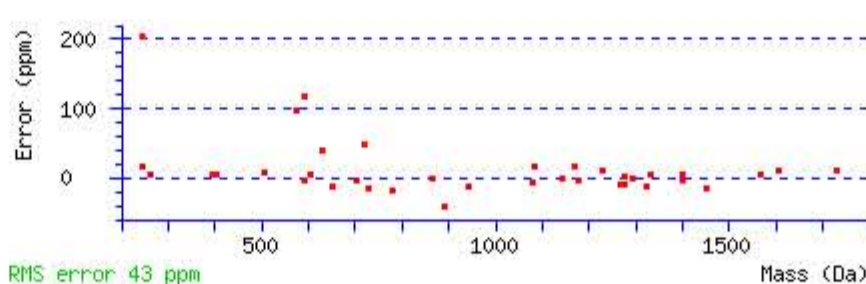

NCBI BLAST search of **YVMLPVADQYDCITHYEGSTCPK**  
 (Parameters: blastp, nr protein database, expect=20000, no filter, PAM30)  
 Other BLAST [web gateways](#)

**All matches to this query**

| Score | Mr(calc):   | Delta    | Sequence                                |
|-------|-------------|----------|-----------------------------------------|
| 53.6  | 3057.374466 | 0.014916 | <a href="#">YVMLPVADQYDCITHYEGSTCPK</a> |



# MASCOT Search Results

## Peptide View

MS/MS Fragmentation of **TYFPHFDSLHGSAQVK**

Found in **HBA\_HUMAN**, Hemoglobin subunit alpha OS=Homo sapiens GN=HBA1 PE=1 SV=2

Match to Query 45062: 2144.051296 from(537.020100,4+) rtinseconds(2097) index(5434)

Title: Locus:1.1.1.3282.13 File:"2013-07-02 CLN FXIII 60 min 3rd F 1.wiff"

Data file C:\Program Files (x86)\Matrix Science\Mascot Daemon\mgf\6 FXIII 60 min 3rd\mascot\_daemon\_merge.mgf

Click mouse within plot area to zoom in by factor of two about that point

Or, Plot from 100 to 1800 Da Full range

Label all possible matches  Label matches used for scoring

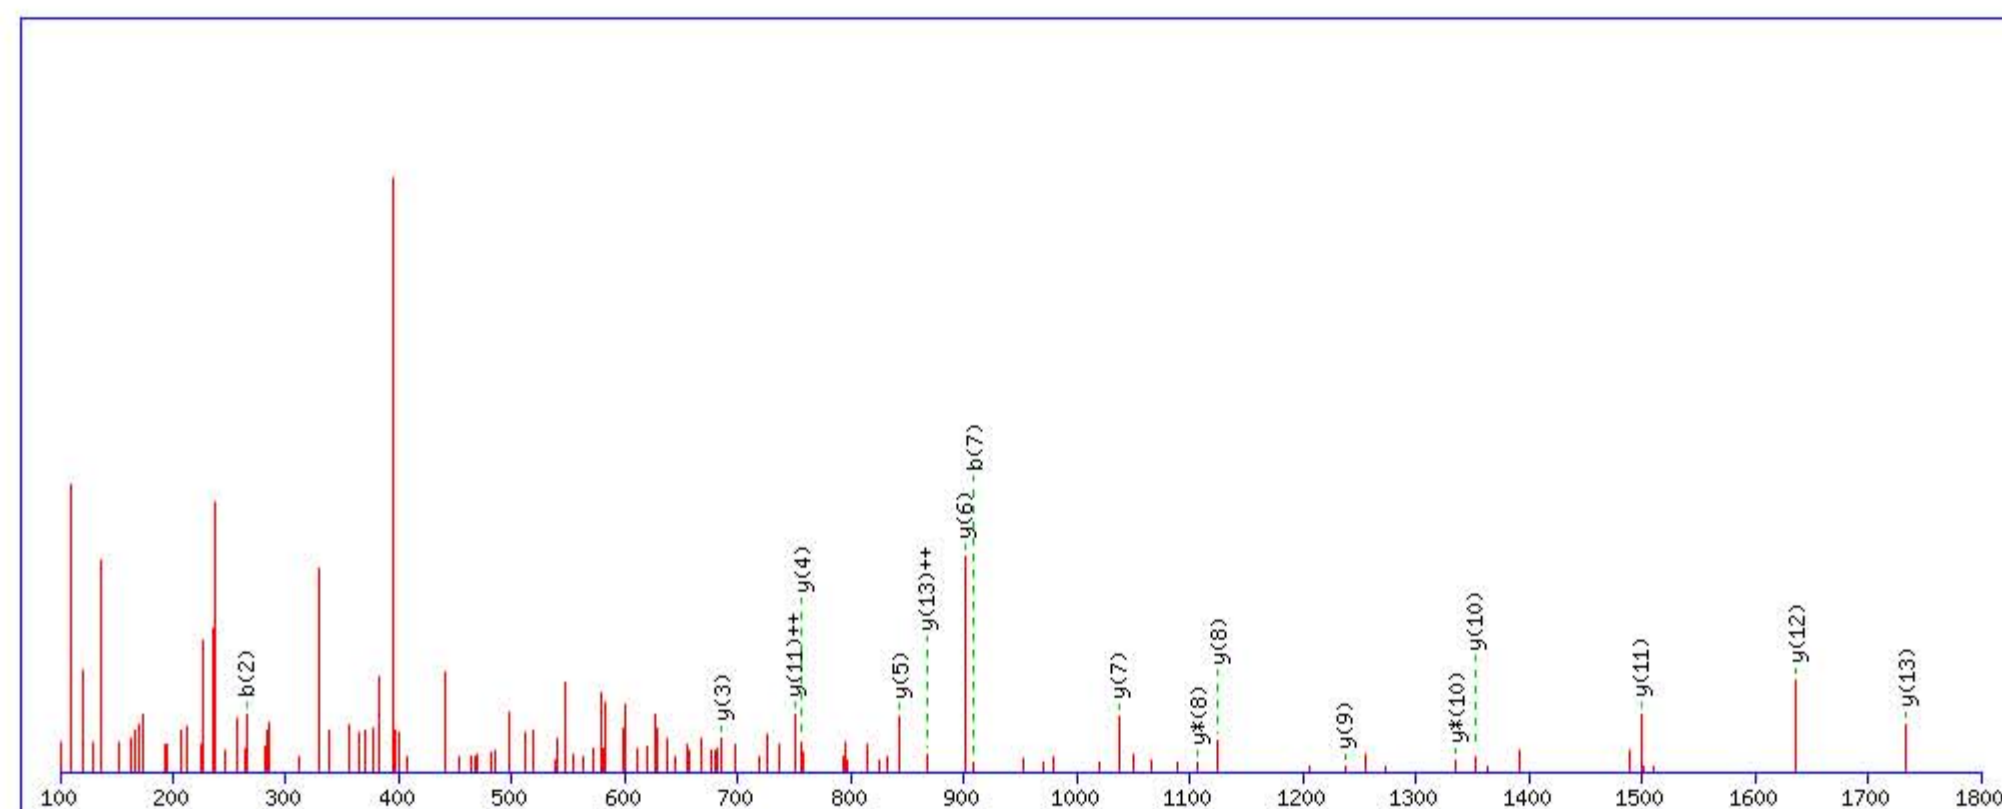

Monoisotopic mass of neutral peptide Mr(calc): 2144.051346

Fixed modifications: Carbamidomethyl (C) (apply to specified residues or termini only)

Variable modifications:

Q14 : Biotin:Thermo-21345 (Q)

Ions Score: 35 Expect: 0.0071

Matches : 17/146 fragment ions using 56 most intense peaks [\(help\)](#)

| #  | b                 | b <sup>++</sup> | b <sup>*</sup> | b <sup>*++</sup> | b <sup>0</sup> | b <sup>0++</sup> | Seq. | y                  | y <sup>++</sup>   | y <sup>*</sup>     | y <sup>*++</sup> | y <sup>0</sup> | y <sup>0++</sup> | #  |
|----|-------------------|-----------------|----------------|------------------|----------------|------------------|------|--------------------|-------------------|--------------------|------------------|----------------|------------------|----|
| 1  | 102.054955        | 51.531116       |                |                  | 84.044390      | 42.525833        | T    |                    |                   |                    |                  |                |                  | 16 |
| 2  | <b>265.118284</b> | 133.062780      |                |                  | 247.107719     | 124.057498       | Y    | 2044.010930        | 1022.509103       | 2026.984381        | 1013.995829      | 2026.000365    | 1013.503821      | 15 |
| 3  | 412.186698        | 206.596987      |                |                  | 394.176133     | 197.591705       | F    | 1880.947601        | 940.977438        | 1863.921052        | 932.464164       | 1862.937036    | 931.972156       | 14 |
| 4  | 509.239462        | 255.123369      |                |                  | 491.228897     | 246.118087       | P    | <b>1733.879187</b> | <b>867.443231</b> | 1716.852638        | 858.929957       | 1715.868622    | 858.437949       | 13 |
| 5  | 646.298374        | 323.652825      |                |                  | 628.287809     | 314.647543       | H    | <b>1636.826423</b> | 818.916849        | 1619.799874        | 810.403575       | 1618.815858    | 809.911567       | 12 |
| 6  | 793.366788        | 397.187032      |                |                  | 775.356223     | 388.181750       | F    | <b>1499.767511</b> | <b>750.387393</b> | 1482.740962        | 741.874119       | 1481.756946    | 741.382111       | 11 |
| 7  | <b>908.393731</b> | 454.700504      |                |                  | 890.383166     | 445.695221       | D    | <b>1352.699097</b> | 676.853186        | <b>1335.672548</b> | 668.339912       | 1334.688532    | 667.847904       | 10 |
| 8  | 1021.477795       | 511.242536      |                |                  | 1003.467230    | 502.237253       | L    | <b>1237.672154</b> | 619.339715        | 1220.645605        | 610.826441       | 1219.661589    | 610.334433       | 9  |
| 9  | 1108.509823       | 554.758550      |                |                  | 1090.499258    | 545.753267       | S    | <b>1124.588090</b> | 562.797683        | <b>1107.561541</b> | 554.284409       | 1106.577525    | 553.792400       | 8  |
| 10 | 1245.568735       | 623.288006      |                |                  | 1227.558170    | 614.282723       | H    | <b>1037.556062</b> | 519.281669        | 1020.529513        | 510.768394       | 1019.545497    | 510.276386       | 7  |
| 11 | 1302.590199       | 651.798738      |                |                  | 1284.579634    | 642.793455       | G    | <b>900.497150</b>  | 450.752213        | 883.470601         | 442.238938       | 882.486585     | 441.746930       | 6  |
| 12 | 1389.622227       | 695.314752      |                |                  | 1371.611662    | 686.309469       | S    | <b>843.475686</b>  | 422.241481        | 826.449137         | 413.728207       | 825.465121     | 413.236199       | 5  |
| 13 | 1460.659341       | 730.833309      |                |                  | 1442.648776    | 721.828026       | A    | <b>756.443658</b>  | 378.725467        | 739.417109         | 370.212192       |                |                  | 4  |
| 14 | 1899.884667       | 950.445972      | 1882.858118    | 941.932697       | 1881.874102    | 941.440689       | Q    | <b>685.406544</b>  | 343.206910        | 668.379995         | 334.693635       |                |                  | 3  |
| 15 | 1998.953081       | 999.980179      | 1981.926532    | 991.466904       | 1980.942516    | 990.974896       | V    | 246.181218         | 123.594247        | 229.154669         | 115.080972       |                |                  | 2  |
| 16 |                   |                 |                |                  |                |                  | K    | 147.112804         | 74.060040         | 130.086255         | 65.546765        |                |                  | 1  |

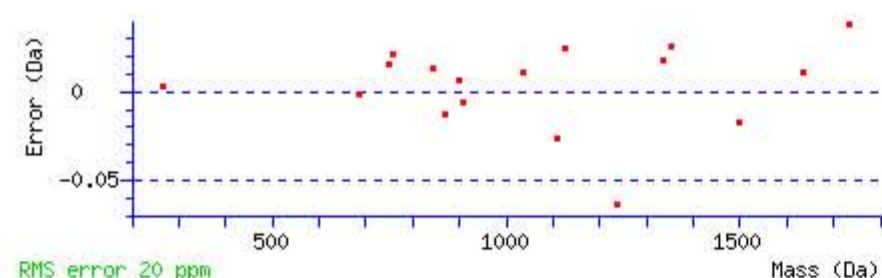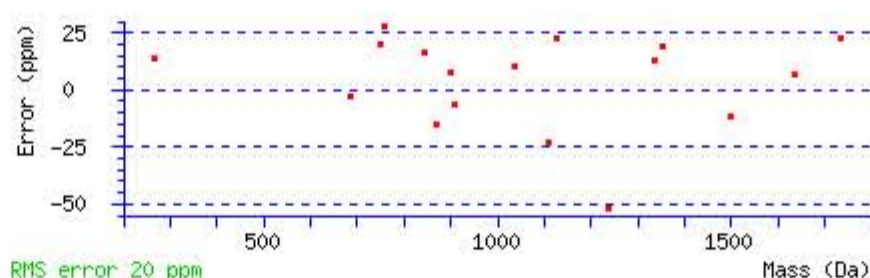

NCBI BLAST search of [TYFPHFDSLHGSAQVK](#)

(Parameters: blastp, nr protein database, expect=20000, no filter, PAM30)

Other BLAST [web gateways](#)

All matches to this query

| Score | Mr(calc):   | Delta     | Sequence                         |
|-------|-------------|-----------|----------------------------------|
| 35.3  | 2144.051346 | -0.000050 | <a href="#">TYFPHFDSLHGSAQVK</a> |

Mascot: <http://www.matrixscience.com/>

# MASCOT Search Results

## Peptide View

MS/MS Fragmentation of **YYCFQGNQFLR**

Found in **HEMO\_HUMAN**, Hemopexin OS=Homo sapiens GN=HPX PE=1 SV=2

Match to Query 38572: 1805.857648 from(903.936100,2+) rtinseconds(2332) index(64392)

Title: Locus:1.1.1.3438.15 File:"2013-07-02 CLN FXIII 60 min 3rd FT.wiff"

Data file C:\Program Files (x86)\Matrix Science\Mascot Daemon\mgf6 FXIII 60 min 3rd\mascot\_daemon\_merge.mgf

Click mouse within plot area to zoom in by factor of two about that point

Or, Plot from  to  Da

Label all possible matches  Label matches used for scoring

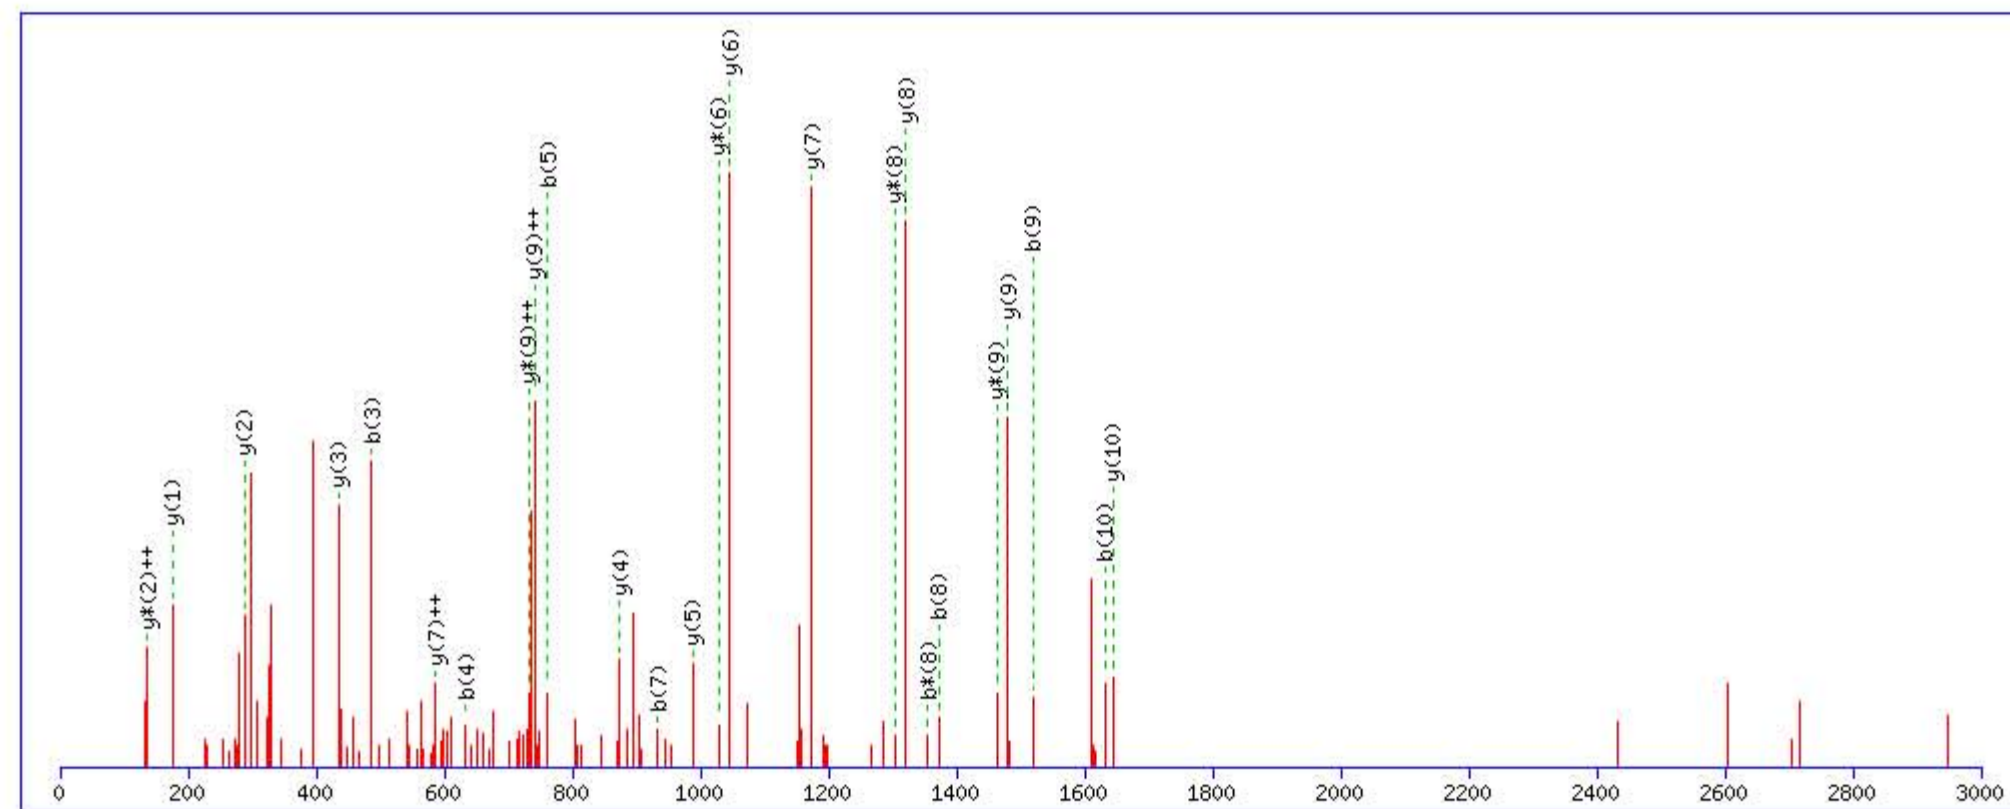

Monoisotopic mass of neutral peptide Mr(calc): 1805.838165

Fixed modifications: Carbamidomethyl (C) (apply to specified residues or termini only)

Variable modifications:

Q8 : Biotin:Thermo-21345 (Q)

Ions Score: 60 Expect: 1.7e-005

Matches : 25/72 fragment ions using 46 most intense peaks [\(help\)](#)

| #  | b           | b <sup>++</sup> | b <sup>*</sup> | b <sup>*++</sup> | Seq. | y           | y <sup>++</sup> | y <sup>*</sup> | y <sup>*++</sup> | #  |
|----|-------------|-----------------|----------------|------------------|------|-------------|-----------------|----------------|------------------|----|
| 1  | 164.070605  | 82.538940       |                |                  | Y    |             |                 |                |                  | 11 |
| 2  | 327.133934  | 164.070605      |                |                  | Y    | 1643.782117 | 822.394697      | 1626.755568    | 813.881422       | 10 |
| 3  | 487.164583  | 244.085930      |                |                  | C    | 1480.718788 | 740.863032      | 1463.692239    | 732.349758       | 9  |
| 4  | 634.232997  | 317.620137      |                |                  | F    | 1320.688139 | 660.847708      | 1303.661590    | 652.334433       | 8  |
| 5  | 762.291575  | 381.649426      | 745.265026     | 373.136151       | Q    | 1173.619725 | 587.313501      | 1156.593176    | 578.800226       | 7  |
| 6  | 819.313039  | 410.160158      | 802.286490     | 401.646883       | G    | 1045.561147 | 523.284212      | 1028.534598    | 514.770937       | 6  |
| 7  | 933.355966  | 467.181621      | 916.329417     | 458.668347       | N    | 988.539683  | 494.773480      | 971.513134     | 486.260205       | 5  |
| 8  | 1372.581292 | 686.794284      | 1355.554743    | 678.281010       | Q    | 874.496756  | 437.752016      | 857.470207     | 429.238742       | 4  |
| 9  | 1519.649706 | 760.328491      | 1502.623157    | 751.815217       | F    | 435.271430  | 218.139353      | 418.244881     | 209.626078       | 3  |
| 10 | 1632.733770 | 816.870523      | 1615.707221    | 808.357249       | L    | 288.203016  | 144.605146      | 271.176467     | 136.091871       | 2  |
| 11 |             |                 |                |                  | R    | 175.118952  | 88.063114       | 158.092403     | 79.549839        | 1  |

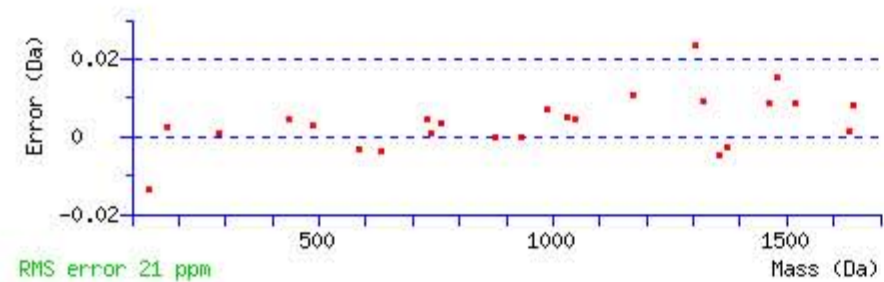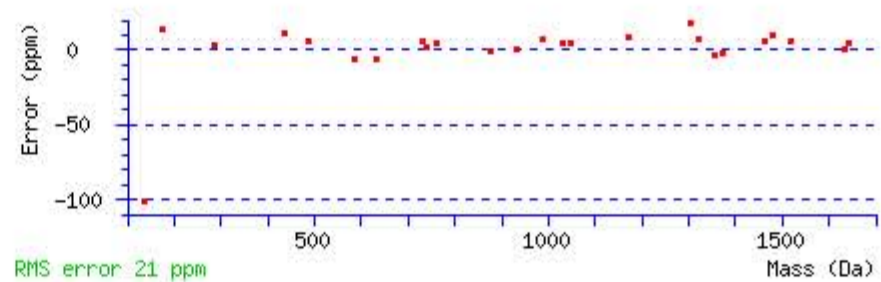

NCBI BLAST search of [YYCFQGNQFLR](#)

(Parameters: blastp, nr protein database, expect=20000, no filter, PAM30)

Other BLAST [web gateways](#)

## All matches to this query

| Score | Mr(calc):   | Delta     | Sequence                          |
|-------|-------------|-----------|-----------------------------------|
| 59.6  | 1805.838165 | 0.019483  | <a href="#">YYCFQGNQFLR</a>       |
| 56.1  | 1805.838165 | 0.019483  | <a href="#">YYCFQGNQFLR</a>       |
| 7.5   | 1805.844055 | 0.013593  | <a href="#">LLQAPFTDCGDGPMRLR</a> |
| 3.9   | 1805.845383 | 0.012265  | <a href="#">WGTRGGFNGQMER</a>     |
| 3.9   | 1805.873886 | -0.016238 | <a href="#">QMFQERSR</a>          |
| 3.9   | 1805.873032 | -0.015384 | <a href="#">VSTGDNWNGIMKDTLR</a>  |
| 2.0   | 1805.866013 | -0.008365 | <a href="#">SMKMQQEVVEMR</a>      |

# MASCOT SEARCH RESULTS

## Peptide View

MS/MS Fragmentation of **GECQAEGVLFFQGDR**

Found in **HEMO\_HUMAN**, Hemopexin OS=Homo sapiens GN=HPX PE=1 SV=2

Match to Query 43064: 2022.944802 from(675.322210,3+) rtinseconds(2423) index(64809)

Title: Locus:1.1.1.3470.10 File:"2013-07-02 CLN FXIII 60 min 3rd FT.wiff"

Data file C:\Program Files (x86)\Matrix Science\Mascot Daemon\mgf6 FXIII 60 min 3rd\mascot\_daemon\_merge.mgf

Click mouse within plot area to zoom in by factor of two about that point

Or, Plot from 100 to 1600 Da Full range

Label all possible matches  Label matches used for scoring

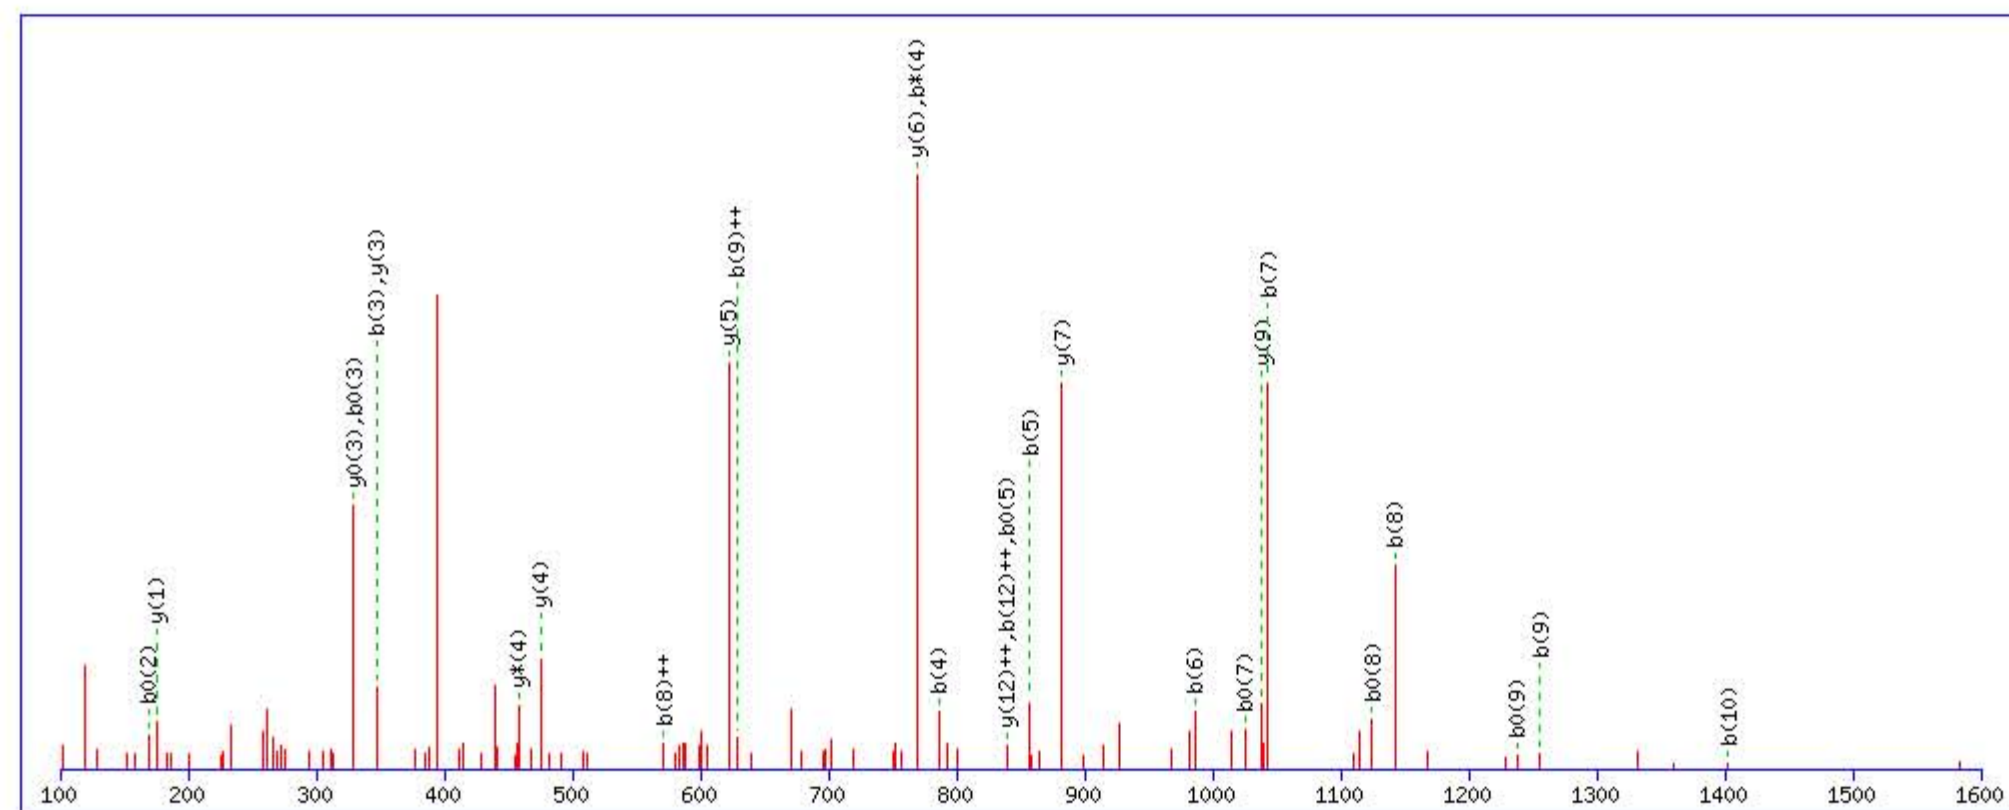

Monoisotopic mass of neutral peptide Mr(calc): 2022.929184

Fixed modifications: Carbamidomethyl (C) (apply to specified residues or termini only)

Variable modifications:

Q4 : Biotin:Thermo-21345 (Q)

Ions Score: 47 Expect: 0.00034

Matches : 28/158 fragment ions using 40 most intense peaks [\(help\)](#)

| #  | b                  | b <sup>++</sup>   | b <sup>*</sup>    | b <sup>*++</sup> | b <sup>0</sup>     | b <sup>0++</sup> | Seq. | y                  | y <sup>++</sup>   | y <sup>*</sup>    | y <sup>*++</sup> | y <sup>0</sup>    | y <sup>0++</sup> | #  |
|----|--------------------|-------------------|-------------------|------------------|--------------------|------------------|------|--------------------|-------------------|-------------------|------------------|-------------------|------------------|----|
| 1  | 58.028740          | 29.518008         |                   |                  |                    |                  | G    |                    |                   |                   |                  |                   |                  | 15 |
| 2  | 187.071333         | 94.039305         |                   |                  | 169.060768         | 85.034022        | E    | 1966.914982        | 983.961129        | 1949.888433       | 975.447855       | 1948.904417       | 974.955847       | 14 |
| 3  | <b>347.101982</b>  | 174.054629        |                   |                  | <b>329.091417</b>  | 165.049347       | C    | 1837.872389        | 919.439833        | 1820.845840       | 910.926558       | 1819.861824       | 910.434550       | 13 |
| 4  | <b>786.327308</b>  | 393.667292        | <b>769.300759</b> | 385.154018       | 768.316743         | 384.662010       | Q    | 1677.841740        | <b>839.424508</b> | 1660.815191       | 830.911234       | 1659.831175       | 830.419226       | 12 |
| 5  | <b>857.364422</b>  | 429.185849        | 840.337873        | 420.672575       | <b>839.353857</b>  | 420.180567       | A    | 1238.616414        | 619.811845        | 1221.589865       | 611.298571       | 1220.605849       | 610.806563       | 11 |
| 6  | <b>986.407015</b>  | 493.707146        | 969.380466        | 485.193871       | 968.396450         | 484.701863       | E    | 1167.579300        | 584.293288        | 1150.552751       | 575.780014       | 1149.568735       | 575.288006       | 10 |
| 7  | <b>1043.428479</b> | 522.217878        | 1026.401930       | 513.704603       | <b>1025.417914</b> | 513.212595       | G    | <b>1038.536707</b> | 519.771992        | 1021.510158       | 511.258717       | 1020.526142       | 510.766709       | 9  |
| 8  | <b>1142.496893</b> | <b>571.752085</b> | 1125.470344       | 563.238810       | <b>1124.486328</b> | 562.746802       | V    | 981.515243         | 491.261260        | 964.488694        | 482.747985       | 963.504678        | 482.255977       | 8  |
| 9  | <b>1255.580957</b> | <b>628.294117</b> | 1238.554408       | 619.780842       | <b>1237.570392</b> | 619.288834       | L    | <b>882.446829</b>  | 441.727053        | 865.420280        | 433.213778       | 864.436264        | 432.721770       | 7  |
| 10 | <b>1402.649371</b> | 701.828324        | 1385.622822       | 693.315049       | 1384.638806        | 692.823041       | F    | <b>769.362765</b>  | 385.185021        | 752.336216        | 376.671746       | 751.352200        | 376.179738       | 6  |
| 11 | 1549.717785        | 775.362531        | 1532.691236       | 766.849256       | 1531.707220        | 766.357248       | F    | <b>622.294351</b>  | 311.650814        | 605.267802        | 303.137539       | 604.283786        | 302.645531       | 5  |
| 12 | 1677.776363        | <b>839.391820</b> | 1660.749814       | 830.878545       | 1659.765798        | 830.386537       | Q    | <b>475.225937</b>  | 238.116606        | <b>458.199388</b> | 229.603332       | 457.215372        | 229.111324       | 4  |
| 13 | 1734.797827        | 867.902552        | 1717.771278       | 859.389277       | 1716.787262        | 858.897269       | G    | <b>347.167359</b>  | 174.087317        | 330.140810        | 165.574043       | <b>329.156794</b> | 165.082035       | 3  |
| 14 | 1849.824770        | 925.416023        | 1832.798221       | 916.902749       | 1831.814205        | 916.410741       | D    | 290.145895         | 145.576585        | 273.119346        | 137.063311       | 272.135330        | 136.571303       | 2  |
| 15 |                    |                   |                   |                  |                    |                  | R    | <b>175.118952</b>  | 88.063114         | 158.092403        | 79.549839        |                   |                  | 1  |

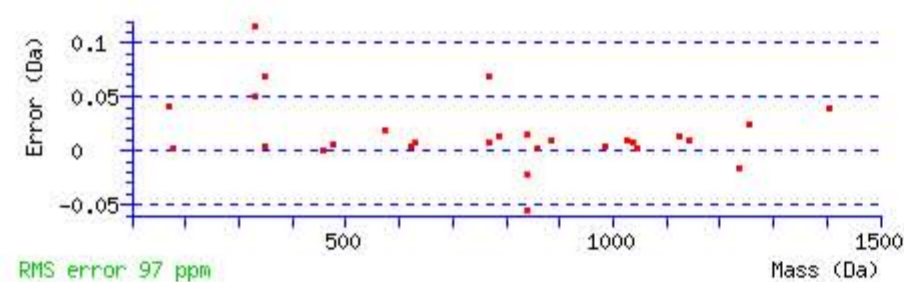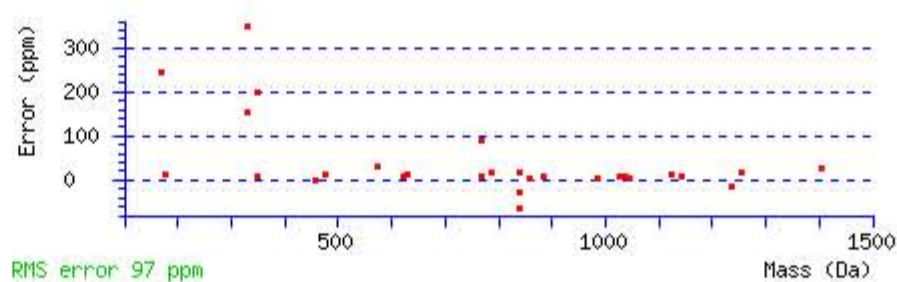

NCBI BLAST search of **GECQAEGVLFFQGDR**

(Parameters: blastp, nr protein database, expect=20000, no filter, PAM30)

Other BLAST [web gateways](#)

All matches to this query

| Score | Mr(calc):   | Delta    | Sequence                        |
|-------|-------------|----------|---------------------------------|
| 46.5  | 2022.929184 | 0.015618 | <a href="#">GECQAEGVLFFQGDR</a> |

Mascot: <http://www.matrixscience.com/>

# Mascot Search Results

## Peptide View

MS/MS Fragmentation of **LLQDEFPGIPSPLDAAVECHR**  
 Found in **HEMO\_HUMAN**, Hemopexin OS=Homo sapiens GN=HPX PE=1 SV=2

Match to Query 52541: 2674.337562 from(892.453130,3+) rtinseconds(2678) index(66101)  
 Title: Locus:1.1.1.3558.10 File:"2013-07-02 CLN FXIII 60 min 3rd FT.wiff"  
 Data file C:\Program Files (x86)\Matrix Science\Mascot Daemon\mgf6 FXIII 60 min 3rd\mascot\_daemon\_merge.mgf

Click mouse within plot area to zoom in by factor of two about that point  
 Or, Plot from  to  Da   
 Label all possible matches  Label matches used for scoring

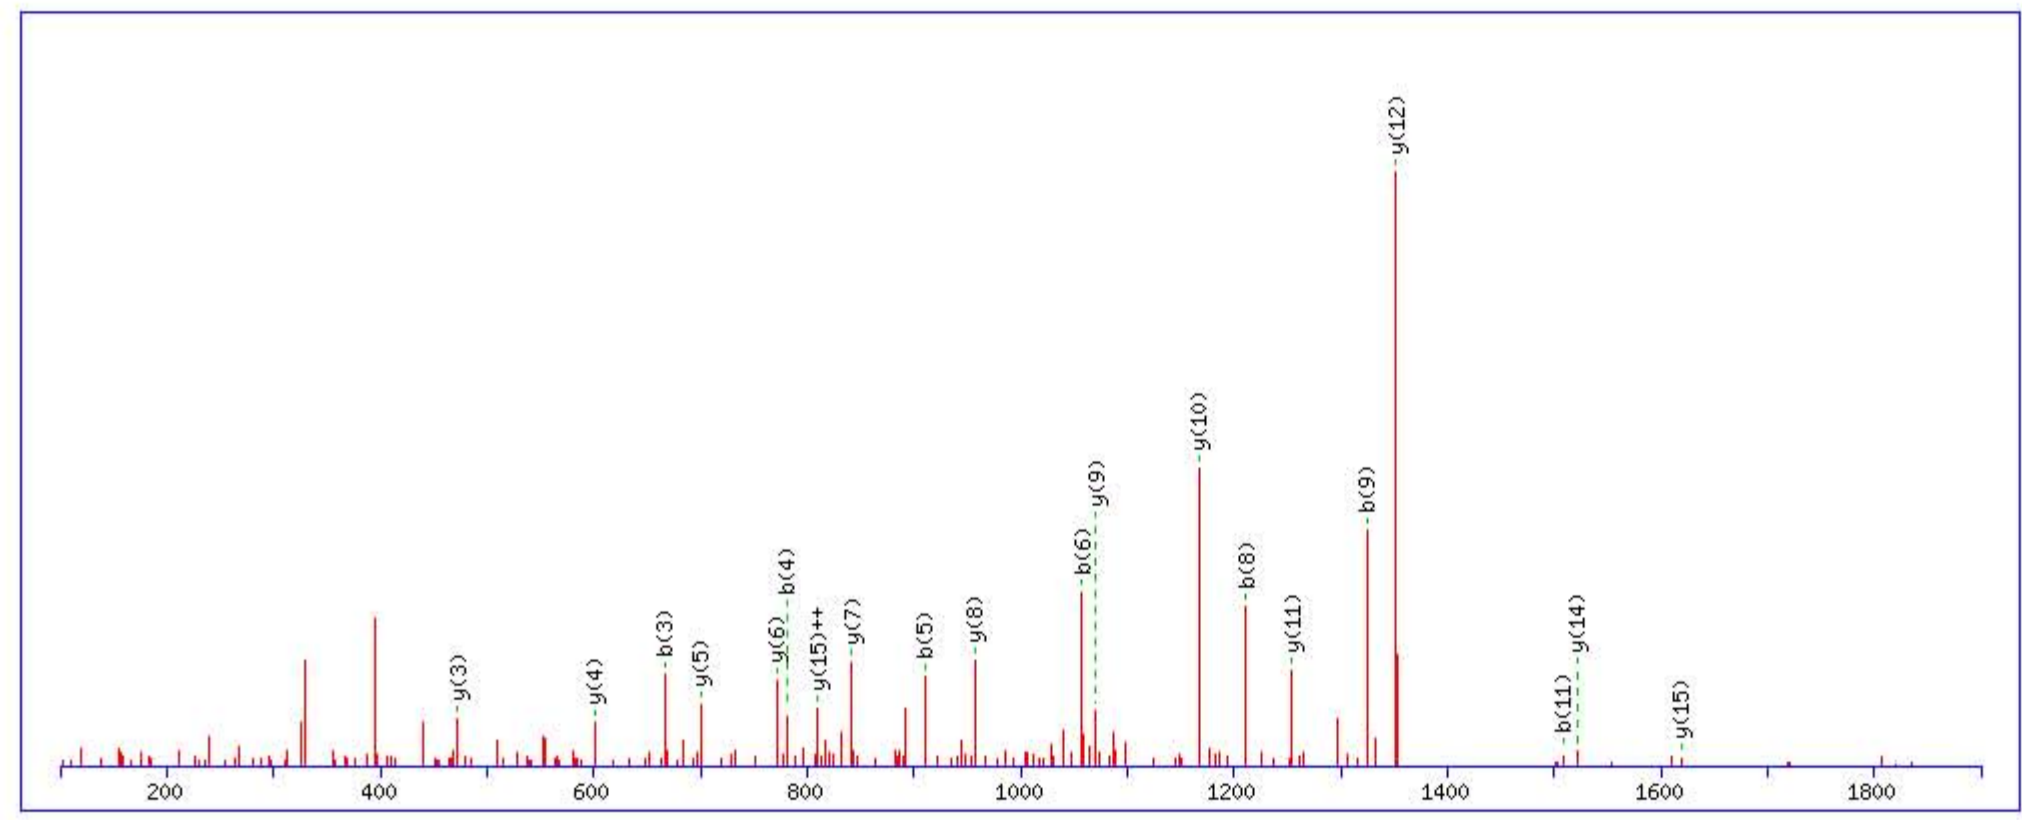

Monoisotopic mass of neutral peptide  $M_r(\text{calc})$ : 2674.324722  
 Fixed modifications: Carbamidomethyl (C) (apply to specified residues or termini only)  
 Variable modifications:  
 Q3 : Biotin:Thermo-21345 (Q)  
 Ions Score: 73 Expect: 1.4e-006  
 Matches : 20/224 fragment ions using 36 most intense peaks [\(help\)](#)

| #  | b                  | b <sup>++</sup> | b <sup>*</sup> | b <sup>+++</sup> | b <sup>0</sup> | b <sup>0++</sup> | Seq. | y                  | y <sup>++</sup>   | y <sup>*</sup> | y <sup>+++</sup> | y <sup>0</sup> | y <sup>0++</sup> | #  |
|----|--------------------|-----------------|----------------|------------------|----------------|------------------|------|--------------------|-------------------|----------------|------------------|----------------|------------------|----|
| 1  | 114.091340         | 57.549308       |                |                  |                |                  | L    |                    |                   |                |                  |                |                  | 21 |
| 2  | 227.175404         | 114.091340      |                |                  |                |                  | L    | 2562.247943        | 1281.627609       | 2545.221394    | 1273.114335      | 2544.237378    | 1272.622327      | 20 |
| 3  | <b>666.400730</b>  | 333.704003      | 649.374181     | 325.190729       |                |                  | Q    | 2449.163879        | 1225.085577       | 2432.137330    | 1216.572303      | 2431.153314    | 1216.080295      | 19 |
| 4  | <b>781.427673</b>  | 391.217475      | 764.401124     | 382.704200       | 763.417108     | 382.212192       | D    | 2009.938553        | 1005.472914       | 1992.912004    | 996.959640       | 1991.927988    | 996.467632       | 18 |
| 5  | <b>910.470266</b>  | 455.738771      | 893.443717     | 447.225497       | 892.459701     | 446.733489       | E    | 1894.911610        | 947.959443        | 1877.885061    | 939.446169       | 1876.901045    | 938.954160       | 17 |
| 6  | <b>1057.538680</b> | 529.272978      | 1040.512131    | 520.759704       | 1039.528115    | 520.267696       | F    | 1765.869017        | 883.438146        | 1748.842468    | 874.924872       | 1747.858452    | 874.432864       | 16 |
| 7  | 1154.591444        | 577.799360      | 1137.564895    | 569.286086       | 1136.580879    | 568.794078       | P    | <b>1618.800603</b> | <b>809.903939</b> | 1601.774054    | 801.390665       | 1600.790038    | 800.898657       | 15 |
| 8  | <b>1211.612908</b> | 606.310092      | 1194.586359    | 597.796818       | 1193.602343    | 597.304810       | G    | <b>1521.747839</b> | 761.377557        | 1504.721290    | 752.864283       | 1503.737274    | 752.372275       | 14 |
| 9  | <b>1324.696972</b> | 662.852124      | 1307.670423    | 654.338850       | 1306.686407    | 653.846841       | I    | 1464.726375        | 732.866825        | 1447.699826    | 724.353551       | 1446.715810    | 723.861543       | 13 |
| 10 | 1421.749736        | 711.378506      | 1404.723187    | 702.865232       | 1403.739171    | 702.373223       | P    | <b>1351.642311</b> | 676.324793        | 1334.615762    | 667.811519       | 1333.631746    | 667.319511       | 12 |
| 11 | <b>1508.781764</b> | 754.894520      | 1491.755215    | 746.381246       | 1490.771199    | 745.889238       | S    | <b>1254.589547</b> | 627.798411        | 1237.562998    | 619.285137       | 1236.578982    | 618.793129       | 11 |
| 12 | 1605.834528        | 803.420902      | 1588.807979    | 794.907628       | 1587.823963    | 794.415620       | P    | <b>1167.557519</b> | 584.282397        | 1150.530970    | 575.769123       | 1149.546954    | 575.277115       | 10 |
| 13 | 1718.918592        | 859.962934      | 1701.892043    | 851.449660       | 1700.908027    | 850.957652       | L    | <b>1070.504755</b> | 535.756015        | 1053.478206    | 527.242741       | 1052.494190    | 526.750733       | 9  |
| 14 | 1833.945535        | 917.476406      | 1816.918986    | 908.963131       | 1815.934970    | 908.471123       | D    | <b>957.420691</b>  | 479.213983        | 940.394142     | 470.700709       | 939.410126     | 470.208701       | 8  |
| 15 | 1904.982649        | 952.994963      | 1887.956100    | 944.481688       | 1886.972084    | 943.989680       | A    | <b>842.393748</b>  | 421.700512        | 825.367199     | 413.187237       | 824.383183     | 412.695229       | 7  |
| 16 | 1976.019763        | 988.513520      | 1958.993214    | 980.000245       | 1958.009198    | 979.508237       | A    | <b>771.356634</b>  | 386.181955        | 754.330085     | 377.668680       | 753.346069     | 377.176672       | 6  |
| 17 | 2075.088177        | 1038.047726     | 2058.061628    | 1029.534452      | 2057.077612    | 1029.042444      | V    | <b>700.319520</b>  | 350.663398        | 683.292971     | 342.150123       | 682.308955     | 341.658115       | 5  |
| 18 | 2204.130770        | 1102.569023     | 2187.104221    | 1094.055748      | 2186.120205    | 1093.563740      | E    | <b>601.251106</b>  | 301.129191        | 584.224557     | 292.615916       | 583.240541     | 292.123908       | 4  |
| 19 | 2364.161419        | 1182.584347     | 2347.134870    | 1174.071073      | 2346.150854    | 1173.579065      | C    | <b>472.208513</b>  | 236.607894        | 455.181964     | 228.094620       |                |                  | 3  |
| 20 | 2501.220331        | 1251.113803     | 2484.193782    | 1242.600529      | 2483.209766    | 1242.108521      | H    | 312.177864         | 156.592570        | 295.151315     | 148.079295       |                |                  | 2  |
| 21 |                    |                 |                |                  |                |                  | R    | 175.118952         | 88.063114         | 158.092403     | 79.549839        |                |                  | 1  |

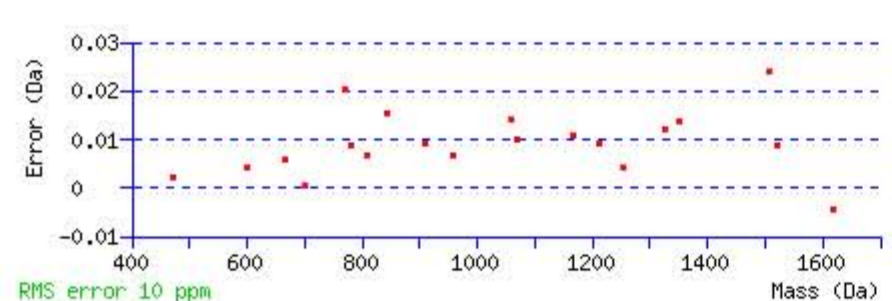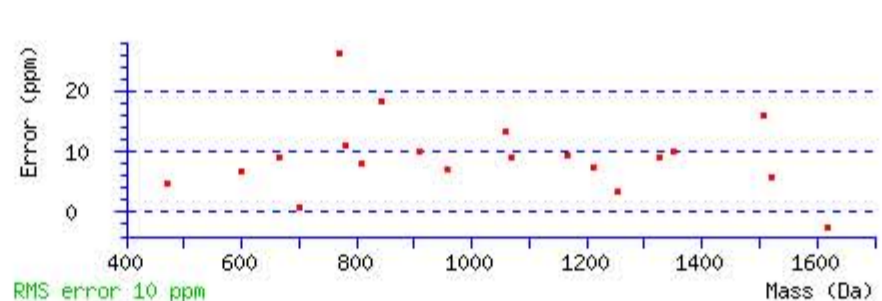

NCBI BLAST search of [LLQDEFPGIPSPLDAAVECHR](#)  
 (Parameters: blastp, nr protein database, expect=20000, no filter, PAM30)  
 Other BLAST [web gateways](#)

## All matches to this query

| Score | $M_r(\text{calc})$ : | Delta    | Sequence                              |
|-------|----------------------|----------|---------------------------------------|
| 72.9  | 2674.324722          | 0.012840 | <a href="#">LLQDEFPGIPSPLDAAVECHR</a> |

# MASCOT Search Results

## Peptide View

MS/MS Fragmentation of **TLEAQLTPR**

Found in **HEP2\_HUMAN**, Heparin cofactor 2 OS=Homo sapiens GN=SERPIND1 PE=1 SV=3

Match to Query 23773: 1338.736928 from(670.375740,2+) rtinseconds(1959) index(32889)

Title: Locus:1.1.1.3231.20 File:"2013-07-02 CLN FXIII 60 min 3rd F 3.wiff"

Data file C:\Program Files (x86)\Matrix Science\Mascot Daemon\mgf\6 FXIII 60 min 3rd\mascot\_daemon\_merge.mgf

Click mouse within plot area to zoom in by factor of two about that point

Or, Plot from  to  Da

Label all possible matches  Label matches used for scoring

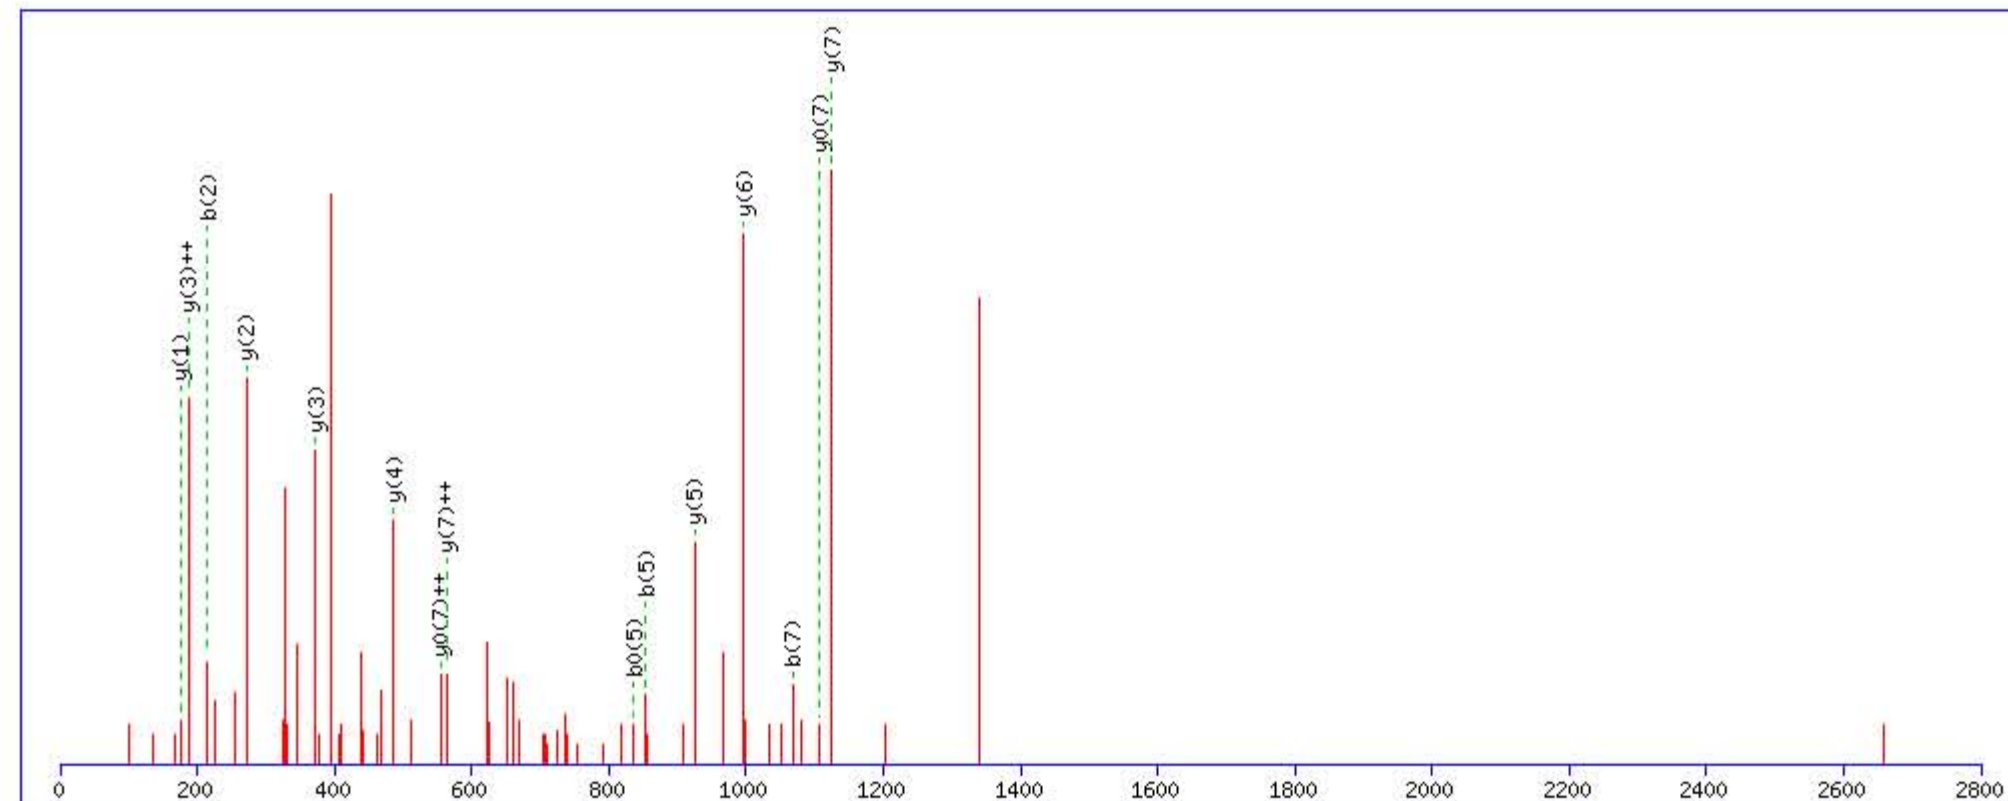

Monoisotopic mass of neutral peptide Mr(calc): 1338.732941

Fixed modifications: Carbamidomethyl (C) (apply to specified residues or termini only)

Variable modifications:

Q5 : Biotin:Thermo-21345 (Q)

Ions Score: 51 Expect: 0.00015

Matches : 15/84 fragment ions using 23 most intense peaks ([help](#))

| # | b                  | b <sup>++</sup> | b <sup>*</sup> | b <sup>*++</sup> | b <sup>0</sup>    | b <sup>0++</sup> | Seq. | y                  | y <sup>++</sup>   | y <sup>*</sup> | y <sup>*++</sup> | y <sup>0</sup>     | y <sup>0++</sup>  | # |
|---|--------------------|-----------------|----------------|------------------|-------------------|------------------|------|--------------------|-------------------|----------------|------------------|--------------------|-------------------|---|
| 1 | 102.054955         | 51.531116       |                |                  | 84.044390         | 42.525833        | T    |                    |                   |                |                  |                    |                   | 9 |
| 2 | <b>215.139019</b>  | 108.073147      |                |                  | 197.128454        | 99.067865        | L    | 1238.692556        | 619.849916        | 1221.666007    | 611.336642       | 1220.681991        | 610.844633        | 8 |
| 3 | 344.181612         | 172.594444      |                |                  | 326.171047        | 163.589162       | E    | <b>1125.608492</b> | <b>563.307884</b> | 1108.581943    | 554.794610       | <b>1107.597927</b> | <b>554.302602</b> | 7 |
| 4 | 415.218726         | 208.113001      |                |                  | 397.208161        | 199.107719       | A    | <b>996.565899</b>  | 498.786588        | 979.539350     | 490.273313       | 978.555334         | 489.781305        | 6 |
| 5 | <b>854.444052</b>  | 427.725664      | 837.417503     | 419.212390       | <b>836.433487</b> | 418.720382       | Q    | <b>925.528785</b>  | 463.268031        | 908.502236     | 454.754756       | 907.518220         | 454.262748        | 5 |
| 6 | 967.528116         | 484.267696      | 950.501567     | 475.754422       | 949.517551        | 475.262414       | L    | <b>486.303459</b>  | 243.655367        | 469.276910     | 235.142093       | 468.292894         | 234.650085        | 4 |
| 7 | <b>1068.575795</b> | 534.791536      | 1051.549246    | 526.278261       | 1050.565230       | 525.786253       | T    | <b>373.219395</b>  | <b>187.113335</b> | 356.192846     | 178.600061       | 355.208830         | 178.108053        | 3 |
| 8 | 1165.628559        | 583.317918      | 1148.602010    | 574.804643       | 1147.617994       | 574.312635       | P    | <b>272.171716</b>  | 136.589496        | 255.145167     | 128.076221       |                    |                   | 2 |
| 9 |                    |                 |                |                  |                   |                  | R    | <b>175.118952</b>  | 88.063114         | 158.092403     | 79.549839        |                    |                   | 1 |

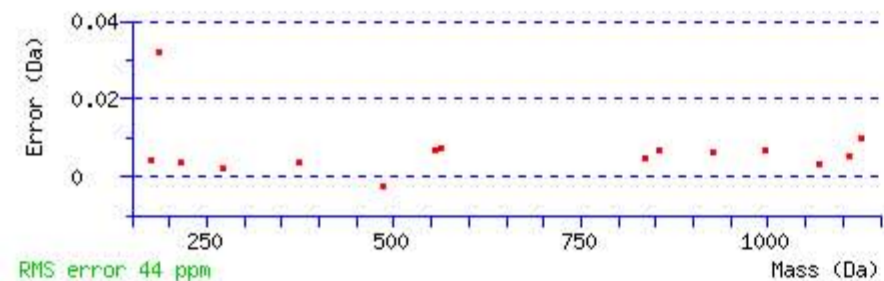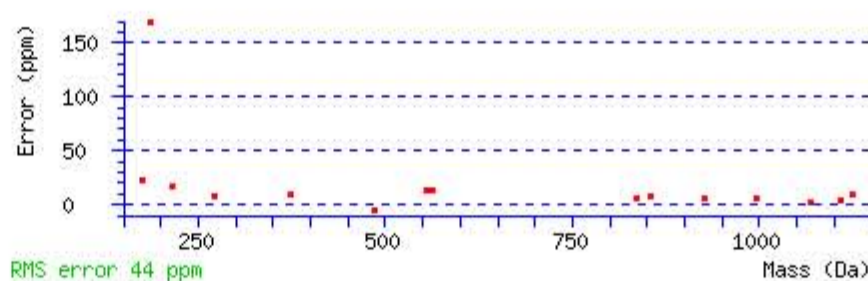

NCBI BLAST search of **TLEAQLTPR**

(Parameters: blastp, nr protein database, expect=20000, no filter, PAM30)

Other BLAST [web gateways](#)

## All matches to this query

| Score | Mr(calc):   | Delta    | Sequence                     |
|-------|-------------|----------|------------------------------|
| 50.8  | 1338.732941 | 0.003987 | <a href="#">TLEAQLTPR</a>    |
| 15.0  | 1338.732956 | 0.003972 | <a href="#">VDLQSLPTR</a>    |
| 5.2   | 1338.725555 | 0.011373 | <a href="#">VDTVAAEHLTRK</a> |
| 1.5   | 1338.726883 | 0.010045 | <a href="#">ASAVRGRSPWPR</a> |
| 1.5   | 1338.725555 | 0.011373 | <a href="#">RSPTVEPSTLPR</a> |

# MASCOT Search Results

## Peptide View

MS/MS Fragmentation of **GGETAQSADPQWEQLNPK**

Found in **HEP2\_HUMAN**, Heparin cofactor 2 OS=Homo sapiens GN=SERPIND1 PE=1 SV=3

Match to Query 47504: 2283.060792 from(762.027540,3+) rtinseconds(1933) index(32684)

Title: Locus:1.1.1.3222.16 File:"2013-07-02 CLN FXIII 60 min 3rd F 3.wiff"

Data file C:\Program Files (x86)\Matrix Science\Mascot Daemon\mgf6 FXIII 60 min 3rd\mascot\_daemon\_merge.mgf

Click mouse within plot area to zoom in by factor of two about that point

Or, Plot from  to  Da

Label all possible matches  Label matches used for scoring

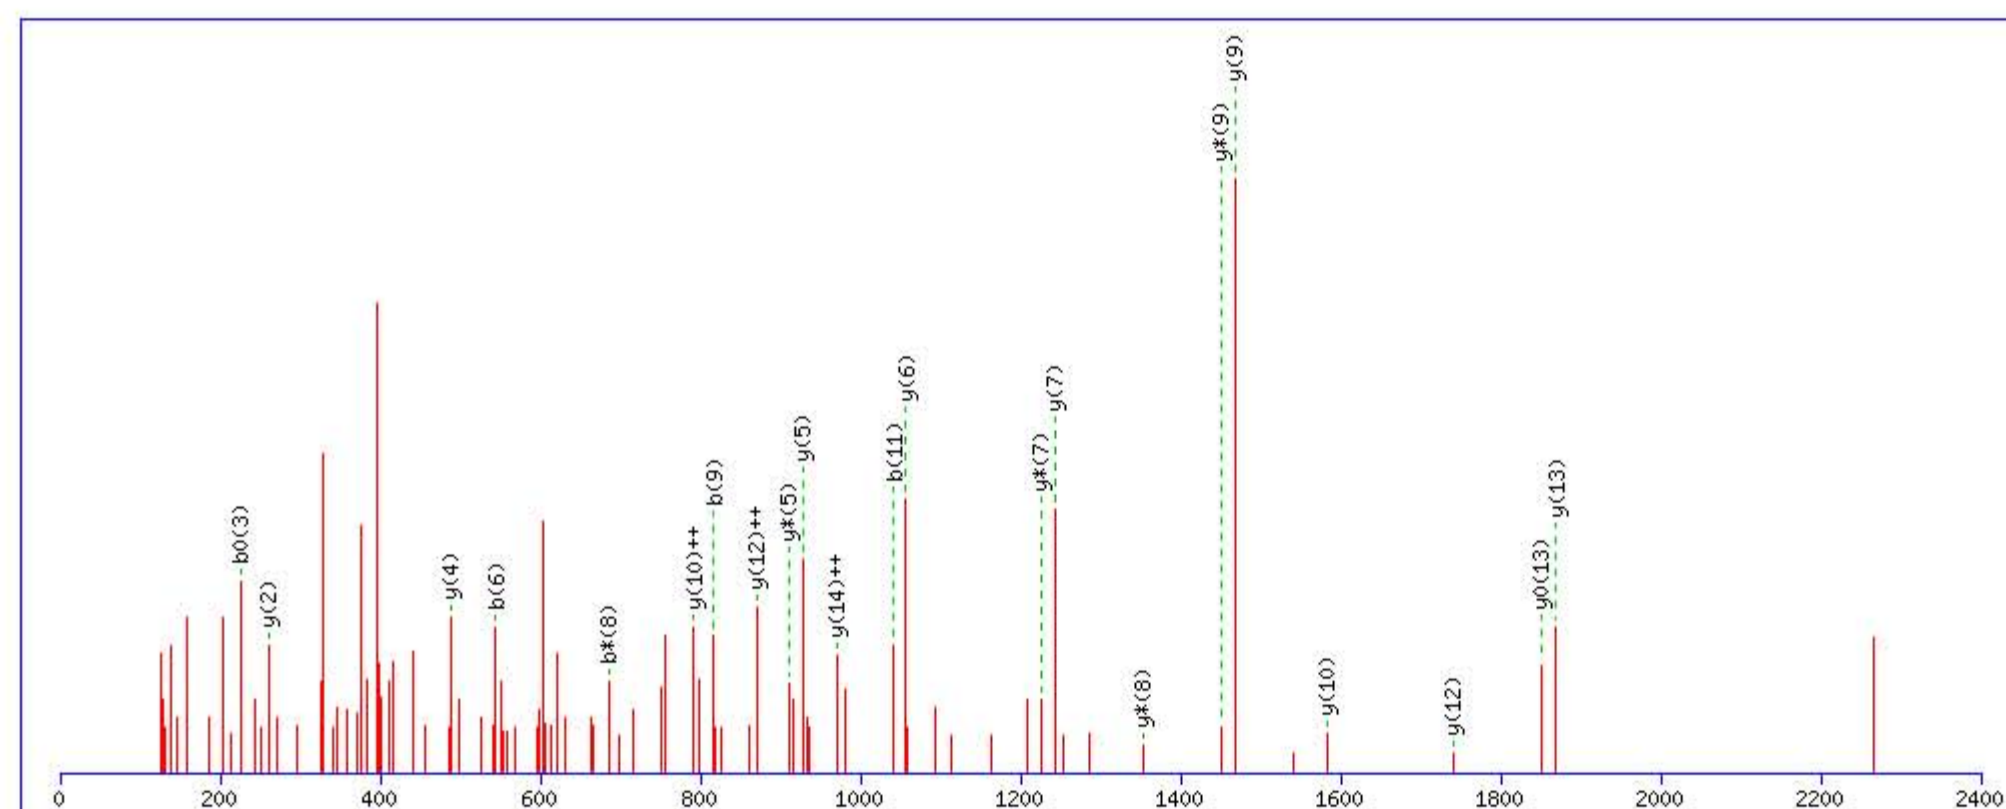

Monoisotopic mass of neutral peptide Mr(calc): 2283.058975

Fixed modifications: Carbamidomethyl (C) (apply to specified residues or termini only)

Variable modifications:

Q14 : Biotin:Thermo-21345 (Q)

Ions Score: 55 Expect: 4.3e-005

Matches : 22/180 fragment ions using 34 most intense peaks [\(help\)](#)

| #  | b           | b <sup>++</sup> | b <sup>*</sup> | b <sup>*++</sup> | b <sup>0</sup> | b <sup>0++</sup> | Seq. | y           | y <sup>++</sup> | y <sup>*</sup> | y <sup>*++</sup> | y <sup>0</sup> | y <sup>0++</sup> | #  |
|----|-------------|-----------------|----------------|------------------|----------------|------------------|------|-------------|-----------------|----------------|------------------|----------------|------------------|----|
| 1  | 58.028740   | 29.518008       |                |                  |                |                  | G    |             |                 |                |                  |                |                  | 18 |
| 2  | 115.050204  | 58.028740       |                |                  |                |                  | G    | 2227.044809 | 1114.026042     | 2210.018260    | 1105.512768      | 2209.034244    | 1105.020760      | 17 |
| 3  | 244.092797  | 122.550037      |                |                  | 226.082232     | 113.544754       | E    | 2170.023345 | 1085.515310     | 2152.996796    | 1077.002036      | 2152.012780    | 1076.510028      | 16 |
| 4  | 345.140476  | 173.073876      |                |                  | 327.129911     | 164.068594       | T    | 2040.980752 | 1020.994014     | 2023.954203    | 1012.480740      | 2022.970187    | 1011.988732      | 15 |
| 5  | 416.177590  | 208.592433      |                |                  | 398.167025     | 199.587151       | A    | 1939.933073 | 970.470175      | 1922.906524    | 961.956900       | 1921.922508    | 961.464892       | 14 |
| 6  | 544.236168  | 272.621722      | 527.209619     | 264.108448       | 526.225603     | 263.616440       | Q    | 1868.895959 | 934.951618      | 1851.869410    | 926.438343       | 1850.885394    | 925.946335       | 13 |
| 7  | 631.268196  | 316.137736      | 614.241647     | 307.624462       | 613.257631     | 307.132454       | S    | 1740.837381 | 870.922329      | 1723.810832    | 862.409054       | 1722.826816    | 861.917046       | 12 |
| 8  | 702.305310  | 351.656293      | 685.278761     | 343.143019       | 684.294745     | 342.651011       | A    | 1653.805353 | 827.406315      | 1636.778804    | 818.893040       | 1635.794788    | 818.401032       | 11 |
| 9  | 817.332253  | 409.169765      | 800.305704     | 400.656490       | 799.321688     | 400.164482       | D    | 1582.768239 | 791.887758      | 1565.741690    | 783.374483       | 1564.757674    | 782.882475       | 10 |
| 10 | 914.385017  | 457.696147      | 897.358468     | 449.182872       | 896.374452     | 448.690864       | P    | 1467.741296 | 734.374286      | 1450.714747    | 725.861012       | 1449.730731    | 725.369004       | 9  |
| 11 | 1042.443595 | 521.725436      | 1025.417046    | 513.212161       | 1024.433030    | 512.720153       | Q    | 1370.688532 | 685.847904      | 1353.661983    | 677.334630       | 1352.677967    | 676.842622       | 8  |
| 12 | 1228.522908 | 614.765092      | 1211.496359    | 606.251818       | 1210.512343    | 605.759809       | W    | 1242.629954 | 621.818615      | 1225.603405    | 613.305341       | 1224.619389    | 612.813333       | 7  |
| 13 | 1357.565501 | 679.286388      | 1340.538952    | 670.773114       | 1339.554936    | 670.281106       | E    | 1056.550641 | 528.778959      | 1039.524092    | 520.265684       | 1038.540076    | 519.773676       | 6  |
| 14 | 1796.790827 | 898.899052      | 1779.764278    | 890.385777       | 1778.780262    | 889.893769       | Q    | 927.508048  | 464.257662      | 910.481499     | 455.744388       |                |                  | 5  |
| 15 | 1909.874891 | 955.441083      | 1892.848342    | 946.927809       | 1891.864326    | 946.435801       | L    | 488.282722  | 244.644999      | 471.256173     | 236.131725       |                |                  | 4  |
| 16 | 2023.917818 | 1012.462547     | 2006.891269    | 1003.949273      | 2005.907253    | 1003.457265      | N    | 375.198658  | 188.102967      | 358.172109     | 179.589693       |                |                  | 3  |
| 17 | 2137.960745 | 1069.484010     | 2120.934196    | 1060.970736      | 2119.950180    | 1060.478728      | N    | 261.155731  | 131.081504      | 244.129182     | 122.568229       |                |                  | 2  |
| 18 |             |                 |                |                  |                |                  | K    | 147.112804  | 74.060040       | 130.086255     | 65.546765        |                |                  | 1  |

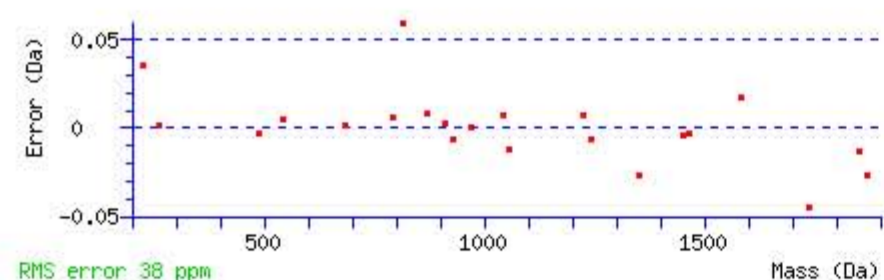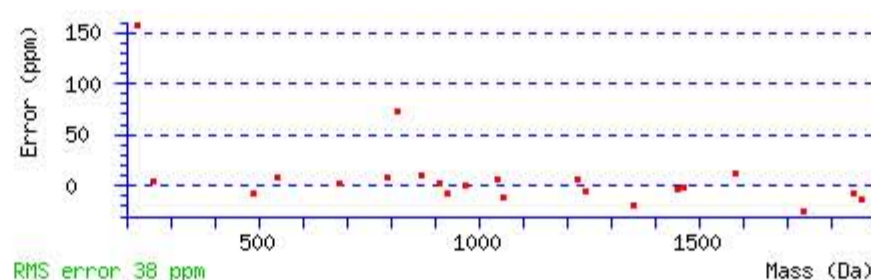

NCBI BLAST search of **GGETAQSADPQWEQLNPK**

(Parameters: blastp, nr protein database, expect=20000, no filter, PAM30)

Other BLAST [web gateways](#)

All matches to this query

| Score | Mr(calc):   | Delta    | Sequence                           |
|-------|-------------|----------|------------------------------------|
| 55.0  | 2283.058975 | 0.001817 | <a href="#">GGETAQSADPQWEQLNPK</a> |
| 27.7  | 2283.058975 | 0.001817 | <a href="#">GGETAQSADPQWEQLNPK</a> |
| 6.1   | 2283.058975 | 0.001817 | <a href="#">GGETAQSADPQWEQLNPK</a> |

# MASCOT Search Results

## Peptide View

MS/MS Fragmentation of **GGETAQSADPQWEQLNKK**  
 Found in **HEP2\_HUMAN**, Heparin cofactor 2 OS=Homo sapiens GN=SERPIND1 PE=1 SV=3

Match to Query 47505: 2283.065142 from(762.028990,3+) rtinseconds(1914) index(32519)  
 Title: Locus:1.1.1.3215.26 File:"2013-07-02 CLN FXIII 60 min 3rd F 3.wiff"  
 Data file C:\Program Files (x86)\Matrix Science\Mascot Daemon\mgf6 FXIII 60 min 3rd\mascot\_daemon\_merge.mgf

Click mouse within plot area to zoom in by factor of two about that point  
 Or, Plot from  to  Da   
 Label all possible matches  Label matches used for scoring

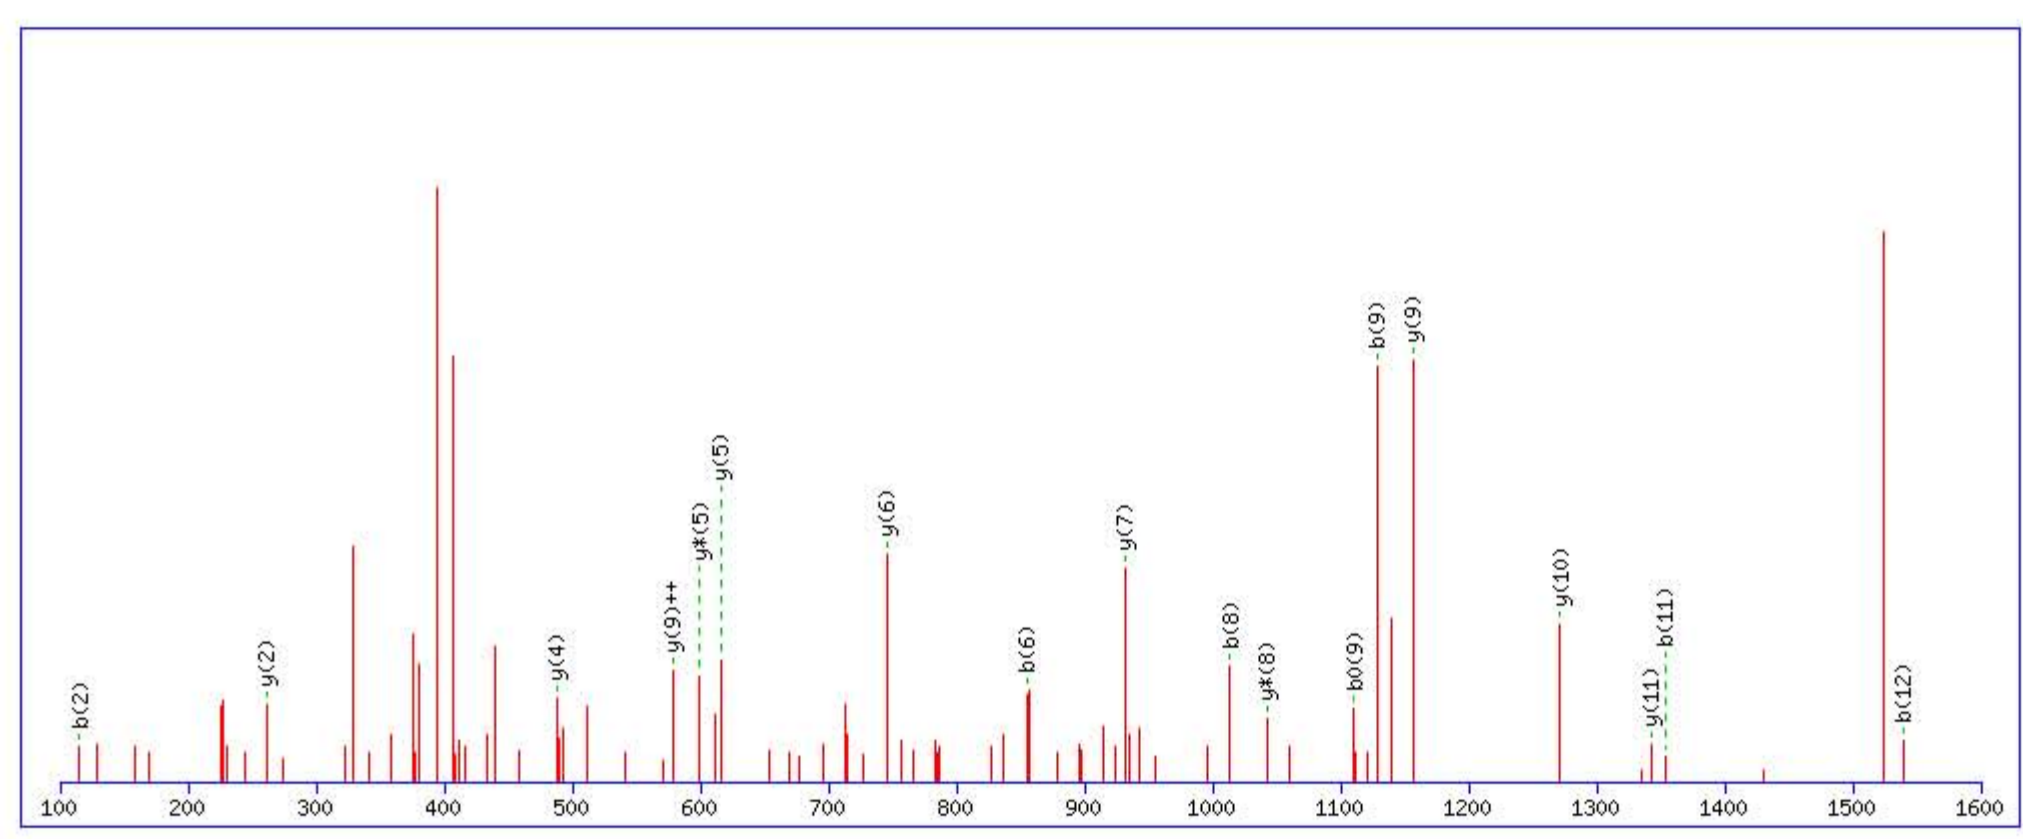

Monoisotopic mass of neutral peptide Mr(calc): 2283.058975  
 Fixed modifications: Carbamidomethyl (C) (apply to specified residues or termini only)  
 Variable modifications:  
 Q6 : Biotin:Thermo-21345 (Q)  
 Ions Score: 47 Expect: 0.00031  
 Matches : 18/180 fragment ions using 28 most intense peaks [\(help\)](#)

| #  | b                  | b <sup>++</sup> | b <sup>*</sup> | b <sup>*++</sup> | b <sup>0</sup>     | b <sup>0++</sup> | Seq.     | y                  | y <sup>++</sup>   | y <sup>*</sup>     | y <sup>*++</sup> | y <sup>0</sup> | y <sup>0++</sup> | #  |
|----|--------------------|-----------------|----------------|------------------|--------------------|------------------|----------|--------------------|-------------------|--------------------|------------------|----------------|------------------|----|
| 1  | 58.028740          | 29.518008       |                |                  |                    |                  | <b>G</b> |                    |                   |                    |                  |                |                  | 18 |
| 2  | <b>115.050204</b>  | 58.028740       |                |                  |                    |                  | <b>G</b> | 2227.044809        | 1114.026042       | 2210.018260        | 1105.512768      | 2209.034244    | 1105.020760      | 17 |
| 3  | 244.092797         | 122.550037      |                |                  | 226.082232         | 113.544754       | <b>E</b> | 2170.023345        | 1085.515310       | 2152.996796        | 1077.002036      | 2152.012780    | 1076.510028      | 16 |
| 4  | 345.140476         | 173.073876      |                |                  | 327.129911         | 164.068594       | <b>T</b> | 2040.980752        | 1020.994014       | 2023.954203        | 1012.480740      | 2022.970187    | 1011.988732      | 15 |
| 5  | 416.177590         | 208.592433      |                |                  | 398.167025         | 199.587151       | <b>A</b> | 1939.933073        | 970.470175        | 1922.906524        | 961.956900       | 1921.922508    | 961.464892       | 14 |
| 6  | <b>855.402916</b>  | 428.205096      | 838.376367     | 419.691822       | 837.392351         | 419.199814       | <b>Q</b> | 1868.895959        | 934.951618        | 1851.869410        | 926.438343       | 1850.885394    | 925.946335       | 13 |
| 7  | 942.434944         | 471.721110      | 925.408395     | 463.207836       | 924.424379         | 462.715828       | <b>S</b> | 1429.670633        | 715.338955        | 1412.644084        | 706.825680       | 1411.660068    | 706.333672       | 12 |
| 8  | <b>1013.472058</b> | 507.239667      | 996.445509     | 498.726393       | 995.461493         | 498.234385       | <b>A</b> | <b>1342.638605</b> | 671.822941        | 1325.612056        | 663.309666       | 1324.628040    | 662.817658       | 11 |
| 9  | <b>1128.499001</b> | 564.753139      | 1111.472452    | 556.239864       | <b>1110.488436</b> | 555.747856       | <b>D</b> | <b>1271.601491</b> | 636.304384        | 1254.574942        | 627.791109       | 1253.590926    | 627.299101       | 10 |
| 10 | 1225.551765        | 613.279521      | 1208.525216    | 604.766246       | 1207.541200        | 604.274238       | <b>P</b> | <b>1156.574548</b> | <b>578.790912</b> | 1139.547999        | 570.277638       | 1138.563983    | 569.785630       | 9  |
| 11 | <b>1353.610343</b> | 677.308810      | 1336.583794    | 668.795535       | 1335.599778        | 668.303527       | <b>Q</b> | 1059.521784        | 530.264530        | <b>1042.495235</b> | 521.751256       | 1041.511219    | 521.259248       | 8  |
| 12 | <b>1539.689656</b> | 770.348466      | 1522.663107    | 761.835192       | 1521.679091        | 761.343184       | <b>W</b> | <b>931.463206</b>  | 466.235241        | 914.436657         | 457.721967       | 913.452641     | 457.229959       | 7  |
| 13 | 1668.732249        | 834.869762      | 1651.705700    | 826.356488       | 1650.721684        | 825.864480       | <b>E</b> | <b>745.383893</b>  | 373.195585        | 728.357344         | 364.682310       | 727.373328     | 364.190302       | 6  |
| 14 | 1796.790827        | 898.899052      | 1779.764278    | 890.385777       | 1778.780262        | 889.893769       | <b>Q</b> | <b>616.341300</b>  | 308.674288        | <b>599.314751</b>  | 300.161014       |                |                  | 5  |
| 15 | 1909.874891        | 955.441083      | 1892.848342    | 946.927809       | 1891.864326        | 946.435801       | <b>L</b> | <b>488.282722</b>  | 244.644999        | 471.256173         | 236.131725       |                |                  | 4  |
| 16 | 2023.917818        | 1012.462547     | 2006.891269    | 1003.949273      | 2005.907253        | 1003.457265      | <b>N</b> | 375.198658         | 188.102967        | 358.172109         | 179.589693       |                |                  | 3  |
| 17 | 2137.960745        | 1069.484010     | 2120.934196    | 1060.970736      | 2119.950180        | 1060.478728      | <b>N</b> | <b>261.155731</b>  | 131.081504        | 244.129182         | 122.568229       |                |                  | 2  |
| 18 |                    |                 |                |                  |                    |                  | <b>K</b> | 147.112804         | 74.060040         | 130.086255         | 65.546765        |                |                  | 1  |

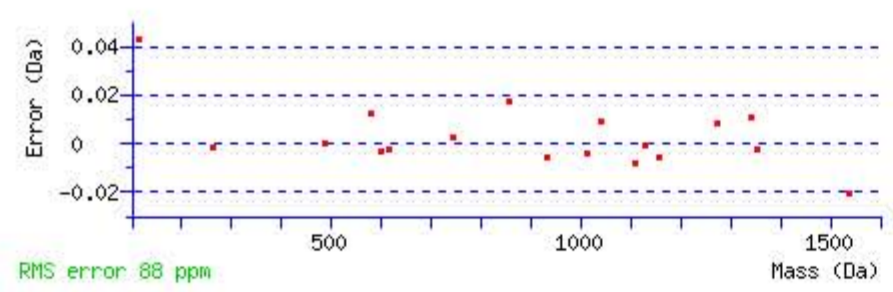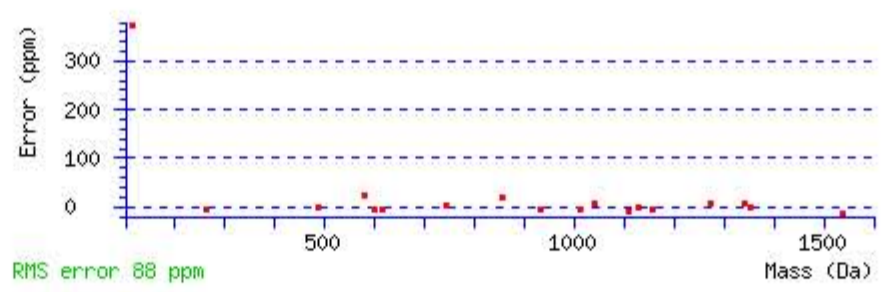

NCBI BLAST search of **GGETAQSADPQWEQLNKK**  
 (Parameters: blastp, nr protein database, expect=20000, no filter, PAM30)  
 Other BLAST [web gateways](#)

### All matches to this query

| Score | Mr(calc):   | Delta    | Sequence                           |
|-------|-------------|----------|------------------------------------|
| 46.7  | 2283.058975 | 0.006167 | <a href="#">GGETAQSADPQWEQLNKK</a> |
| 7.4   | 2283.058975 | 0.006167 | <a href="#">GGETAQSADPQWEQLNKK</a> |

**Peptide View**

MS/MS Fragmentation of **VQLSPDLLATLPEPASPGR**

Found in **HGFA\_HUMAN**, Hepatocyte growth factor activator OS=Homo sapiens GN=HGFA PE=1 SV=1

Match to Query 47286: 2271.242232 from(758.088020,3+) rtinseconds(2684) index(8650)

Title: Locus:1.1.1.3486.21 File:"2013-07-02 CLN FXIII 60 min 3rd F 1.wiff"

Data file C:\Program Files (x86)\Matrix Science\Mascot Daemon\mgf6 FXIII 60 min 3rd\mascot\_daemon\_merge.mgf

Click mouse within plot area to zoom in by factor of two about that point

Or, Plot from  to  Da

Label all possible matches  Label matches used for scoring

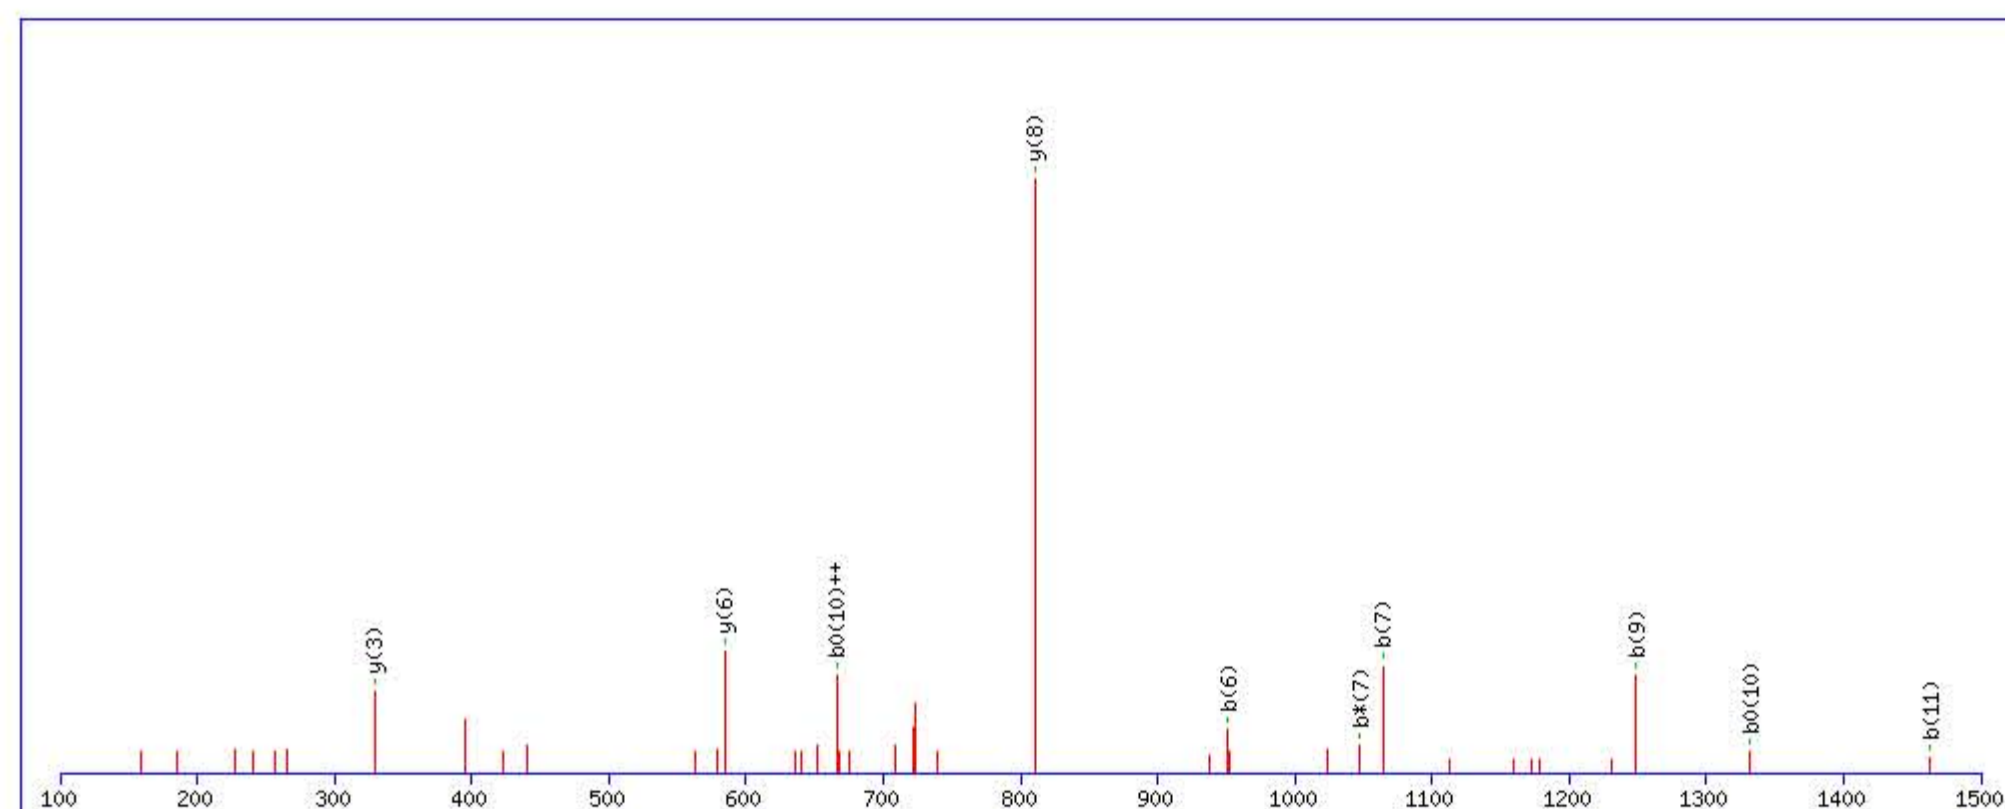

Monoisotopic mass of neutral peptide Mr(calc): 2271.229675

Fixed modifications: Carbamidomethyl (C) (apply to specified residues or termini only)

Variable modifications:

Q2 : Biotin:Thermo-21345 (Q)

Ions Score: 31 Expect: 0.0028

Matches : 10/202 fragment ions using 12 most intense peaks [\(help\)](#)

| #  | b                  | b <sup>++</sup> | b*                 | b <sup>*++</sup> | b <sup>0</sup>     | b <sup>0++</sup>  | Seq. | y                 | y <sup>++</sup> | y*          | y <sup>*++</sup> | y <sup>0</sup> | y <sup>0++</sup> | #  |
|----|--------------------|-----------------|--------------------|------------------|--------------------|-------------------|------|-------------------|-----------------|-------------|------------------|----------------|------------------|----|
| 1  | 100.075690         | 50.541483       |                    |                  |                    |                   | V    |                   |                 |             |                  |                |                  | 19 |
| 2  | 539.301016         | 270.154146      | 522.274467         | 261.640872       |                    |                   | Q    | 2173.168553       | 1087.087914     | 2156.142004 | 1078.574640      | 2155.157988    | 1078.082632      | 18 |
| 3  | 652.385080         | 326.696178      | 635.358531         | 318.182904       |                    |                   | L    | 1733.943227       | 867.475252      | 1716.916678 | 858.961977       | 1715.932662    | 858.469969       | 17 |
| 4  | 739.417108         | 370.212192      | 722.390559         | 361.698918       | 721.406543         | 361.206910        | S    | 1620.859163       | 810.933219      | 1603.832614 | 802.419945       | 1602.848598    | 801.927937       | 16 |
| 5  | 836.469872         | 418.738574      | 819.443323         | 410.225300       | 818.459307         | 409.733292        | P    | 1533.827135       | 767.417206      | 1516.800586 | 758.903931       | 1515.816570    | 758.411923       | 15 |
| 6  | <b>951.496815</b>  | 476.252046      | 934.470266         | 467.738771       | 933.486250         | 467.246763        | D    | 1436.774371       | 718.890824      | 1419.747822 | 710.377549       | 1418.763806    | 709.885541       | 14 |
| 7  | <b>1064.580879</b> | 532.794078      | <b>1047.554330</b> | 524.280803       | 1046.570314        | 523.788795        | L    | 1321.747428       | 661.377352      | 1304.720879 | 652.864078       | 1303.736863    | 652.372069       | 13 |
| 8  | 1177.664943        | 589.336110      | 1160.638394        | 580.822835       | 1159.654378        | 580.330827        | L    | 1208.663364       | 604.835320      | 1191.636815 | 596.322046       | 1190.652799    | 595.830038       | 12 |
| 9  | <b>1248.702057</b> | 624.854667      | 1231.675508        | 616.341392       | 1230.691492        | 615.849384        | A    | 1095.579300       | 548.293288      | 1078.552751 | 539.780014       | 1077.568735    | 539.288006       | 11 |
| 10 | 1349.749736        | 675.378506      | 1332.723187        | 666.865232       | <b>1331.739171</b> | <b>666.373223</b> | T    | 1024.542186       | 512.774731      | 1007.515637 | 504.261456       | 1006.531621    | 503.769448       | 10 |
| 11 | <b>1462.833800</b> | 731.920538      | 1445.807251        | 723.407264       | 1444.823235        | 722.915255        | L    | 923.494507        | 462.250892      | 906.467958  | 453.737617       | 905.483942     | 453.245609       | 9  |
| 12 | 1559.886564        | 780.446920      | 1542.860015        | 771.933646       | 1541.875999        | 771.441637        | P    | <b>810.410443</b> | 405.708860      | 793.383894  | 397.195585       | 792.399878     | 396.703577       | 8  |
| 13 | 1688.929157        | 844.968216      | 1671.902608        | 836.454942       | 1670.918592        | 835.962934        | E    | 713.357679        | 357.182478      | 696.331130  | 348.669203       | 695.347114     | 348.177195       | 7  |
| 14 | 1785.981921        | 893.494598      | 1768.955372        | 884.981324       | 1767.971356        | 884.489316        | P    | <b>584.315086</b> | 292.661181      | 567.288537  | 284.147907       | 566.304521     | 283.655899       | 6  |
| 15 | 1857.019035        | 929.013155      | 1839.992486        | 920.499881       | 1839.008470        | 920.007873        | A    | 487.262322        | 244.134799      | 470.235773  | 235.621525       | 469.251757     | 235.129517       | 5  |
| 16 | 1944.051063        | 972.529169      | 1927.024514        | 964.015895       | 1926.040498        | 963.523887        | S    | 416.225208        | 208.616242      | 399.198659  | 200.102968       | 398.214643     | 199.610960       | 4  |
| 17 | 2041.103827        | 1021.055552     | 2024.077278        | 1012.542277      | 2023.093262        | 1012.050269       | P    | <b>329.193180</b> | 165.100228      | 312.166631  | 156.586954       |                |                  | 3  |
| 18 | 2098.125291        | 1049.566283     | 2081.098742        | 1041.053009      | 2080.114726        | 1040.561001       | G    | 232.140416        | 116.573846      | 215.113867  | 108.060572       |                |                  | 2  |
| 19 |                    |                 |                    |                  |                    |                   | R    | 175.118952        | 88.063114       | 158.092403  | 79.549839        |                |                  | 1  |

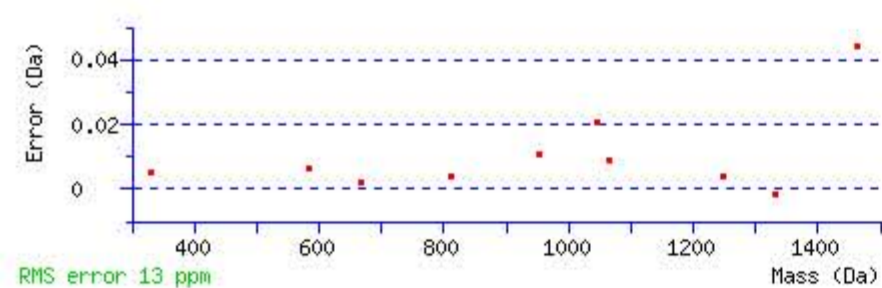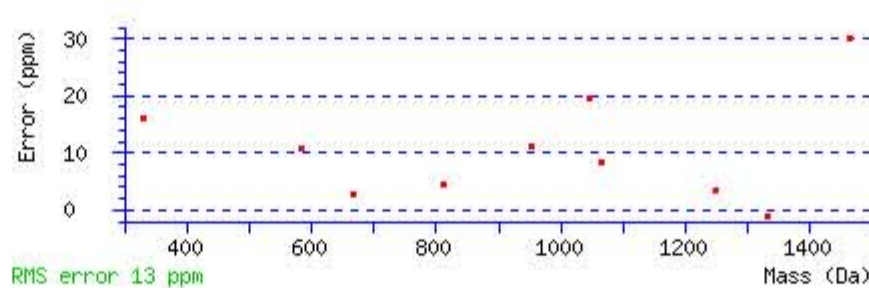

NCBI BLAST search of **VQLSPDLLATLPEPASPGR**

(Parameters: blastp, nr protein database, expect=20000, no filter, PAM30)

Other BLAST [web gateways](#)

**All matches to this query**

| Score | Mr(calc):   | Delta    | Sequence                             |
|-------|-------------|----------|--------------------------------------|
| 31.3  | 2271.229675 | 0.012557 | <a href="#">VQLSPDLLATLPEPASPGR</a>  |
| 4.0   | 2271.230530 | 0.011702 | <a href="#">LAVSQMKQQKYPTK</a>       |
| 4.0   | 2271.230530 | 0.011702 | <a href="#">LAVSQMKQQKYPTK</a>       |
| 2.0   | 2271.226303 | 0.015929 | <a href="#">IAKSDPPTLLTPSKWSVEFR</a> |



# MASCOT Search Results

## Peptide View

MS/MS Fragmentation of **QEATTVSCFR**

Found in **HGFL\_HUMAN**, Hepatocyte growth factor-like protein OS=Homo sapiens GN=MST1 PE=1 SV=2

Match to Query 30210: 1508.711862 from(503.911230,3+) rtinseconds(1778) index(61280)

Title: Locus:1.1.1.3245.15 File:"2013-07-02 CLN FXIII 60 min 3rd FT.wiff"

Data file C:\Program Files (x86)\Matrix Science\Mascot Daemon\mgf\6 FXIII 60 min 3rd\mascot\_daemon\_merge.mgf

Click mouse within plot area to zoom in by factor of two about that point

Or, Plot from  to  Da

Label all possible matches  Label matches used for scoring

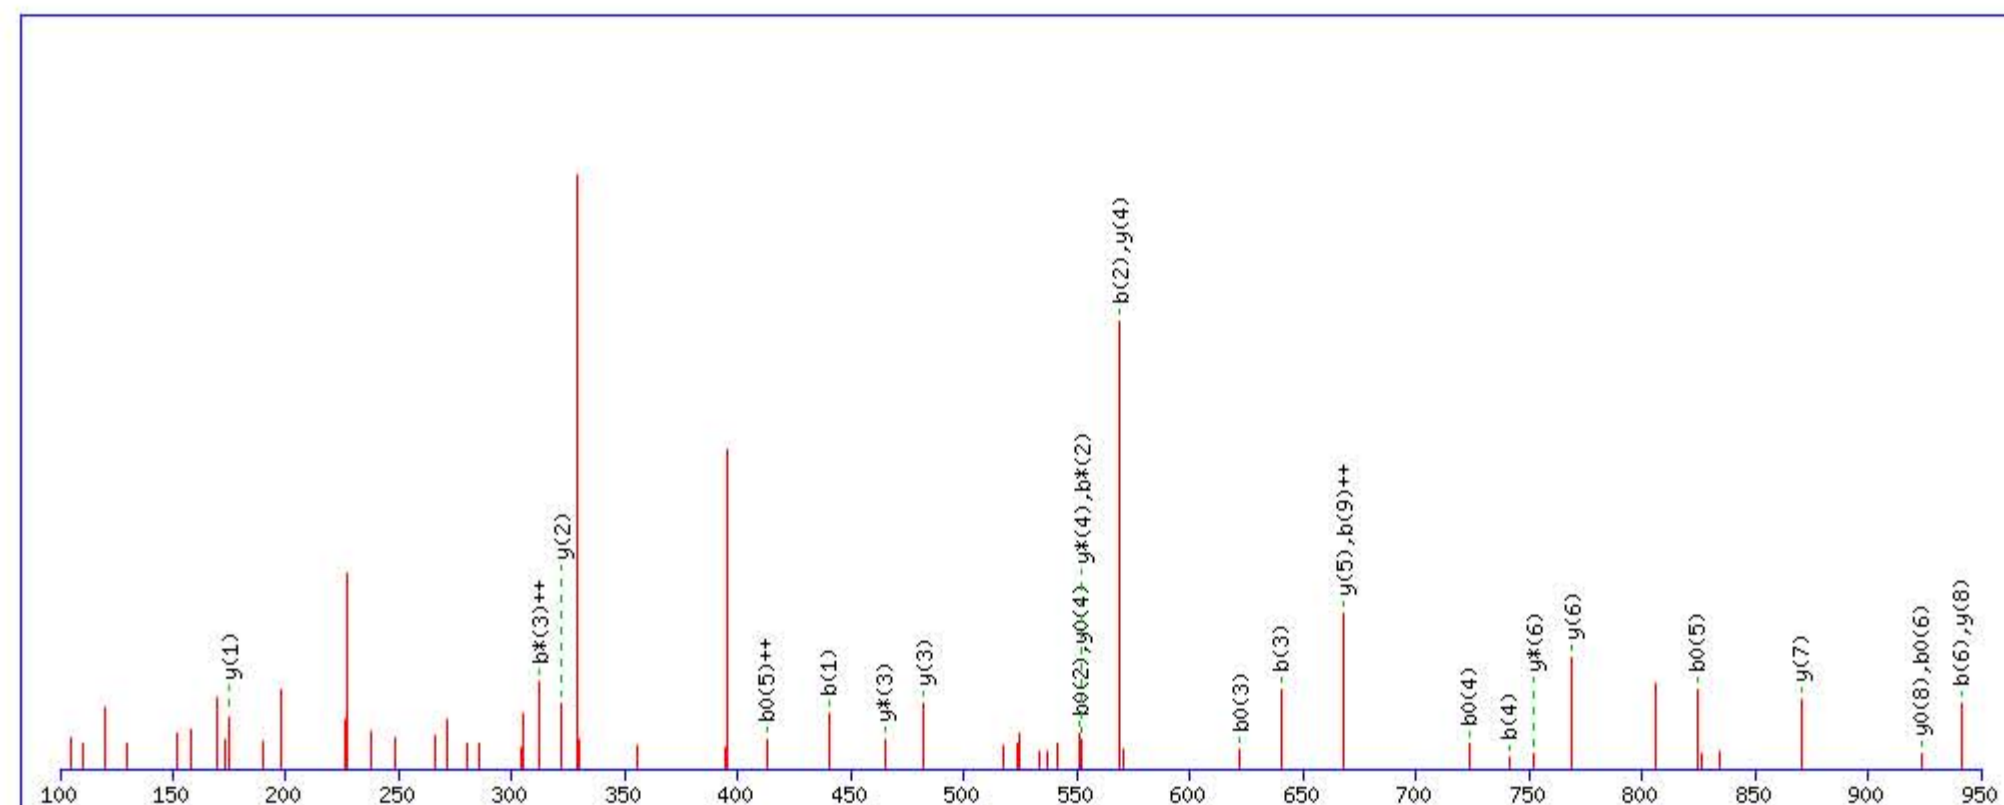

Monoisotopic mass of neutral peptide  $M_r(\text{calc})$ : 1508.711578

Fixed modifications: Carbamidomethyl (C) (apply to specified residues or termini only)

Variable modifications:

Q1 : Biotin:Thermo-21345 (Q)

Ions Score: 52 Expect: 1.4e-005

Matches : 27/100 fragment ions using 33 most intense peaks [\(help\)](#)

| #  | b           | b <sup>++</sup> | b <sup>*</sup> | b <sup>*++</sup> | b <sup>0</sup> | b <sup>0++</sup> | Seq. | y           | y <sup>++</sup> | y <sup>*</sup> | y <sup>*++</sup> | y <sup>0</sup> | y <sup>0++</sup> | #  |
|----|-------------|-----------------|----------------|------------------|----------------|------------------|------|-------------|-----------------|----------------|------------------|----------------|------------------|----|
| 1  | 440.232602  | 220.619939      | 423.206053     | 212.106664       |                |                  | Q    |             |                 |                |                  |                |                  | 10 |
| 2  | 569.275195  | 285.141236      | 552.248646     | 276.627961       | 551.264630     | 276.135953       | E    | 1070.493522 | 535.750399      | 1053.466973    | 527.237125       | 1052.482957    | 526.745117       | 9  |
| 3  | 640.312309  | 320.659793      | 623.285760     | 312.146518       | 622.301744     | 311.654510       | A    | 941.450929  | 471.229103      | 924.424380     | 462.715828       | 923.440364     | 462.223820       | 8  |
| 4  | 741.359988  | 371.183632      | 724.333439     | 362.670358       | 723.349423     | 362.178350       | T    | 870.413815  | 435.710546      | 853.387266     | 427.197271       | 852.403250     | 426.705263       | 7  |
| 5  | 842.407667  | 421.707472      | 825.381118     | 413.194197       | 824.397102     | 412.702189       | T    | 769.366136  | 385.186706      | 752.339587     | 376.673432       | 751.355571     | 376.181424       | 6  |
| 6  | 941.476081  | 471.241679      | 924.449532     | 462.728404       | 923.465516     | 462.236396       | V    | 668.318457  | 334.662867      | 651.291908     | 326.149592       | 650.307892     | 325.657584       | 5  |
| 7  | 1028.508109 | 514.757693      | 1011.481560    | 506.244418       | 1010.497544    | 505.752410       | S    | 569.250043  | 285.128660      | 552.223494     | 276.615385       | 551.239478     | 276.123377       | 4  |
| 8  | 1188.538758 | 594.773017      | 1171.512209    | 586.259743       | 1170.528193    | 585.767735       | C    | 482.218015  | 241.612646      | 465.191466     | 233.099371       |                |                  | 3  |
| 9  | 1335.607172 | 668.307224      | 1318.580623    | 659.793950       | 1317.596607    | 659.301942       | F    | 322.187366  | 161.597321      | 305.160817     | 153.084047       |                |                  | 2  |
| 10 |             |                 |                |                  |                |                  | R    | 175.118952  | 88.063114       | 158.092403     | 79.549839        |                |                  | 1  |

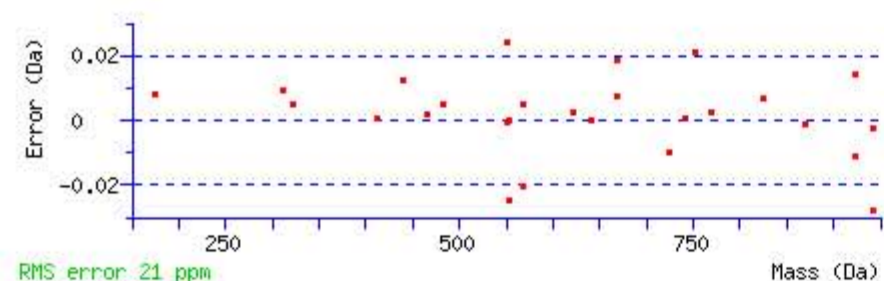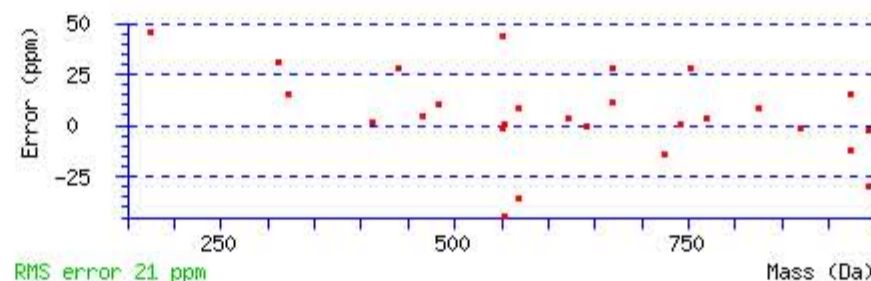

NCBI BLAST search of **QEATTVSCFR**

(Parameters: blastp, nr protein database, expect=20000, no filter, PAM30)

Other BLAST [web gateways](#)

All matches to this query

| Score | $M_r(\text{calc})$ : | Delta    | Sequence                       |
|-------|----------------------|----------|--------------------------------|
| 51.8  | 1508.711578          | 0.000284 | <a href="#">QEATTVSCFR</a>     |
| 0.1   | 1508.711380          | 0.000482 | <a href="#">RTASGGRTEQGMSR</a> |

Mascot: <http://www.matrixscience.com/>

**MASCOT Search Results**

**Peptide View**

MS/MS Fragmentation of **GTELQHLLHAVVPGPWQEDVADAEECAGR**  
 Found in **HGFL\_HUMAN**, Hepatocyte growth factor-like protein OS=Homo sapiens GN=MST1 PE=1 SV=2

Match to Query 61337: 3494.686696 from(874.678950,4+) rtinseconds(2846) index(67443)  
 Title: Locus:1.1.1.3615.21 File:"2013-07-02 CLN FXIII 60 min 3rd FT.wiff"  
 Data file C:\Program Files (x86)\Matrix Science\Mascot Daemon\mgf6 FXIII 60 min 3rdmascot\_daemon\_merge.mgf

Click mouse within plot area to zoom in by factor of two about that point

Or, Plot from  to  Da

Label all possible matches  Label matches used for scoring

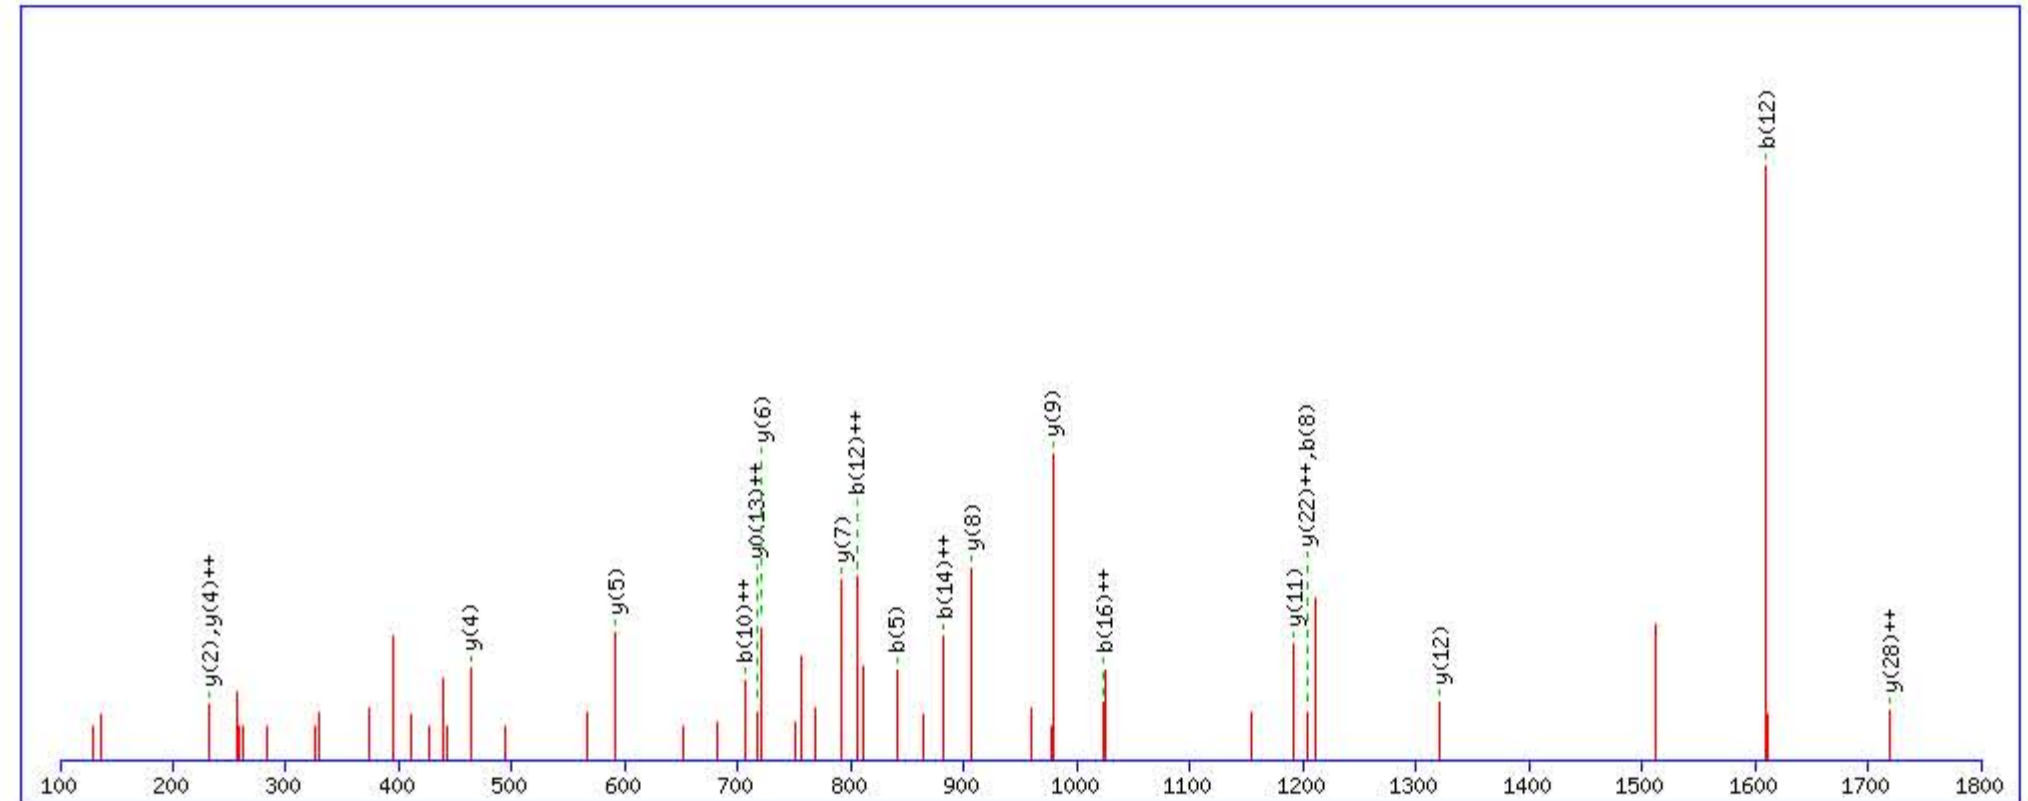

Monoisotopic mass of neutral peptide Mr(calc) : 3494.671112  
 Fixed modifications: Carbamidomethyl (C) (apply to specified residues or termini only)  
 Variable modifications:  
 Q5 : Biotin:Thermo-21345 (Q)  
 Ions Score: 41 Expect: 0.0016  
 Matches : 20/318 fragment ions using 33 most intense peaks [\(help\)](#)

| #  | b                  | b <sup>++</sup>    | b <sup>*</sup> | b <sup>*++</sup> | b <sup>0</sup> | b <sup>0++</sup> | Seq.     | y                  | y <sup>++</sup>    | y <sup>*</sup> | y <sup>*++</sup> | y <sup>0</sup> | y <sup>0++</sup>  | #  |
|----|--------------------|--------------------|----------------|------------------|----------------|------------------|----------|--------------------|--------------------|----------------|------------------|----------------|-------------------|----|
| 1  | 58.028740          | 29.518008          |                |                  |                |                  | <b>G</b> |                    |                    |                |                  |                |                   | 29 |
| 2  | 159.076419         | 80.041847          |                |                  | 141.065854     | 71.036565        | <b>T</b> | 3438.656925        | <b>1719.832100</b> | 3421.630376    | 1711.318826      | 3420.646360    | 1710.826818       | 28 |
| 3  | 288.119012         | 144.563144         |                |                  | 270.108447     | 135.557862       | <b>E</b> | 3337.609246        | 1669.308261        | 3320.582697    | 1660.794986      | 3319.598681    | 1660.302978       | 27 |
| 4  | 401.203076         | 201.105176         |                |                  | 383.192511     | 192.099894       | <b>L</b> | 3208.566653        | 1604.786964        | 3191.540104    | 1596.273690      | 3190.556088    | 1595.781682       | 26 |
| 5  | <b>840.428402</b>  | 420.717839         | 823.401853     | 412.204565       | 822.417837     | 411.712557       | <b>Q</b> | 3095.482589        | 1548.244932        | 3078.456040    | 1539.731658      | 3077.472024    | 1539.239650       | 25 |
| 6  | 977.487314         | 489.247295         | 960.460765     | 480.734021       | 959.476749     | 480.242013       | <b>H</b> | 2656.257263        | 1328.632269        | 2639.230714    | 1320.118995      | 2638.246698    | 1319.626987       | 24 |
| 7  | 1090.571378        | 545.789327         | 1073.544829    | 537.276053       | 1072.560813    | 536.784045       | <b>L</b> | 2519.198351        | 1260.102813        | 2502.171802    | 1251.589539      | 2501.187786    | 1251.097531       | 23 |
| 8  | <b>1203.655442</b> | 602.331359         | 1186.628893    | 593.818085       | 1185.644877    | 593.326077       | <b>L</b> | 2406.114287        | <b>1203.560781</b> | 2389.087738    | 1195.047507      | 2388.103722    | 1194.555499       | 22 |
| 9  | 1340.714354        | 670.860815         | 1323.687805    | 662.347541       | 1322.703789    | 661.855532       | <b>H</b> | 2293.030223        | 1147.018749        | 2276.003674    | 1138.505475      | 2275.019658    | 1138.013467       | 21 |
| 10 | 1411.751468        | <b>706.379372</b>  | 1394.724919    | 697.866098       | 1393.740903    | 697.374089       | <b>A</b> | 2155.971311        | 1078.489293        | 2138.944762    | 1069.976019      | 2137.960746    | 1069.484011       | 20 |
| 11 | 1510.819882        | 755.913579         | 1493.793333    | 747.400305       | 1492.809317    | 746.908297       | <b>V</b> | 2084.934197        | 1042.970736        | 2067.907648    | 1034.457462      | 2066.923632    | 1033.965454       | 19 |
| 12 | <b>1609.888296</b> | <b>805.447786</b>  | 1592.861747    | 796.934512       | 1591.877731    | 796.442504       | <b>V</b> | 1985.865783        | 993.436530         | 1968.839234    | 984.923255       | 1967.855218    | 984.431247        | 18 |
| 13 | 1706.941060        | 853.974168         | 1689.914511    | 845.460894       | 1688.930495    | 844.968886       | <b>P</b> | 1886.797369        | 943.902323         | 1869.770820    | 935.389048       | 1868.786804    | 934.897040        | 17 |
| 14 | 1763.962524        | <b>882.484900</b>  | 1746.935975    | 873.971626       | 1745.951959    | 873.479618       | <b>G</b> | 1789.744605        | 895.375941         | 1772.718056    | 886.862666       | 1771.734040    | 886.370658        | 16 |
| 15 | 1861.015288        | 931.011282         | 1843.988739    | 922.498008       | 1843.004723    | 922.006000       | <b>P</b> | 1732.723141        | 866.865209         | 1715.696592    | 858.351934       | 1714.712576    | 857.859926        | 15 |
| 16 | 2047.094601        | <b>1024.050939</b> | 2030.068052    | 1015.537664      | 2029.084036    | 1015.045656      | <b>W</b> | 1635.670377        | 818.338827         | 1618.643828    | 809.825552       | 1617.659812    | 809.333544        | 14 |
| 17 | 2175.153179        | 1088.080227        | 2158.126630    | 1079.566953      | 2157.142614    | 1079.074945      | <b>Q</b> | 1449.591064        | 725.299170         | 1432.564515    | 716.785896       | 1431.580499    | <b>716.293888</b> | 13 |
| 18 | 2304.195772        | 1152.601524        | 2287.169223    | 1144.088249      | 2286.185207    | 1143.596241      | <b>E</b> | <b>1321.532486</b> | 661.269881         | 1304.505937    | 652.756607       | 1303.521921    | 652.264599        | 12 |
| 19 | 2419.222715        | 1210.114995        | 2402.196166    | 1201.601721      | 2401.212150    | 1201.109713      | <b>D</b> | <b>1192.489893</b> | 596.748585         | 1175.463344    | 588.235310       | 1174.479328    | 587.743302        | 11 |
| 20 | 2518.291129        | 1259.649202        | 2501.264580    | 1251.135928      | 2500.280564    | 1250.643920      | <b>V</b> | 1077.462950        | 539.235113         | 1060.436401    | 530.721839       | 1059.452385    | 530.229831        | 10 |
| 21 | 2589.328243        | 1295.167759        | 2572.301694    | 1286.654485      | 2571.317678    | 1286.162477      | <b>A</b> | <b>978.394536</b>  | 489.700906         | 961.367987     | 481.187632       | 960.383971     | 480.695624        | 9  |
| 22 | 2704.355186        | 1352.681231        | 2687.328637    | 1344.167956      | 2686.344621    | 1343.675948      | <b>D</b> | <b>907.357422</b>  | 454.182349         | 890.330873     | 445.669075       | 889.346857     | 445.177067        | 8  |
| 23 | 2775.392300        | 1388.199788        | 2758.365751    | 1379.686513      | 2757.381735    | 1379.194505      | <b>A</b> | <b>792.330479</b>  | 396.668878         | 775.303930     | 388.155603       | 774.319914     | 387.663595        | 7  |
| 24 | 2904.434893        | 1452.721085        | 2887.408344    | 1444.207810      | 2886.424328    | 1443.715802      | <b>E</b> | <b>721.293365</b>  | 361.150321         | 704.266816     | 352.637046       | 703.282800     | 352.145038        | 6  |
| 25 | 3033.477486        | 1517.242381        | 3016.450937    | 1508.729106      | 3015.466921    | 1508.237099      | <b>E</b> | <b>592.250772</b>  | 296.629024         | 575.224223     | 288.115750       | 574.240207     | 287.623742        | 5  |
| 26 | 3193.508135        | 1597.257705        | 3176.481586    | 1588.744431      | 3175.497570    | 1588.252423      | <b>C</b> | <b>463.208179</b>  | <b>232.107727</b>  | 446.181630     | 223.594453       |                |                   | 4  |
| 27 | 3264.545249        | 1632.776263        | 3247.518700    | 1624.262988      | 3246.534684    | 1623.770980      | <b>A</b> | 303.177530         | 152.092403         | 286.150981     | 143.579129       |                |                   | 3  |
| 28 | 3321.566713        | 1661.286995        | 3304.540164    | 1652.773720      | 3303.556148    | 1652.281712      | <b>G</b> | <b>232.140416</b>  | 116.573846         | 215.113867     | 108.060571       |                |                   | 2  |
| 29 |                    |                    |                |                  |                |                  | <b>R</b> | 175.118952         | 88.063114          | 158.092403     | 79.549839        |                |                   | 1  |

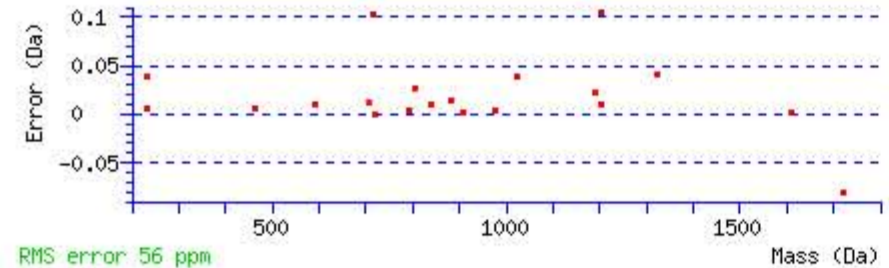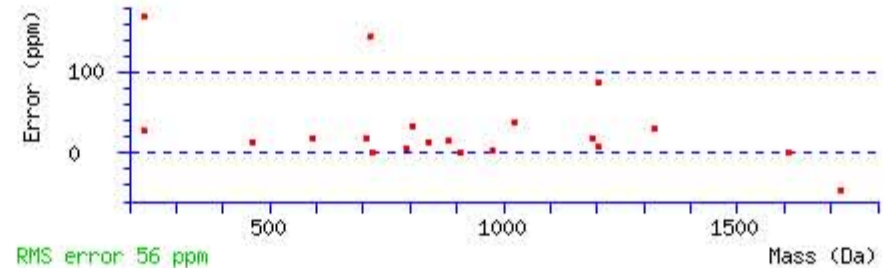

NCBI BLAST search of **GTELQHLLHAVVPGPWQEDVADAEECAGR**  
 (Parameters: blastp, nr protein database, expect=20000, no filter, PAM30)  
 Other BLAST [web gateways](#)

**All matches to this query**

| Score | Mr(calc):   | Delta    | Sequence                                      |
|-------|-------------|----------|-----------------------------------------------|
| 41.2  | 3494.671112 | 0.015584 | <a href="#">GTELQHLLHAVVPGPWQEDVADAEECAGR</a> |
| 34.2  | 3494.671112 | 0.015584 | <a href="#">GTELQHLLHAVVPGPWQEDVADAEECAGR</a> |

# MASCOT Search Results

## Peptide View

MS/MS Fragmentation of **WSAETPHKQPQFTTSEPHAQLEENFCR**

Found in **HGFL\_HUMAN**, Hepatocyte growth factor-like protein OS=Homo sapiens GN=MST1 PE=1 SV=2

Match to Query 62102: 3584.666120 from(717.940500,5+) rtinseconds(2054) index(62851)

Title: Locus:1.1.1.3341.10 File:"2013-07-02 CLN FXIII 60 min 3rd FT.wiff"

Data file C:\Program Files (x86)\Matrix Science\Mascot Daemon\mgf6 FXIII 60 min 3rd\mascot\_daemon\_merge.mgf

Click mouse within plot area to zoom in by factor of two about that point

Or, Plot from  to  Da

Label all possible matches  Label matches used for scoring

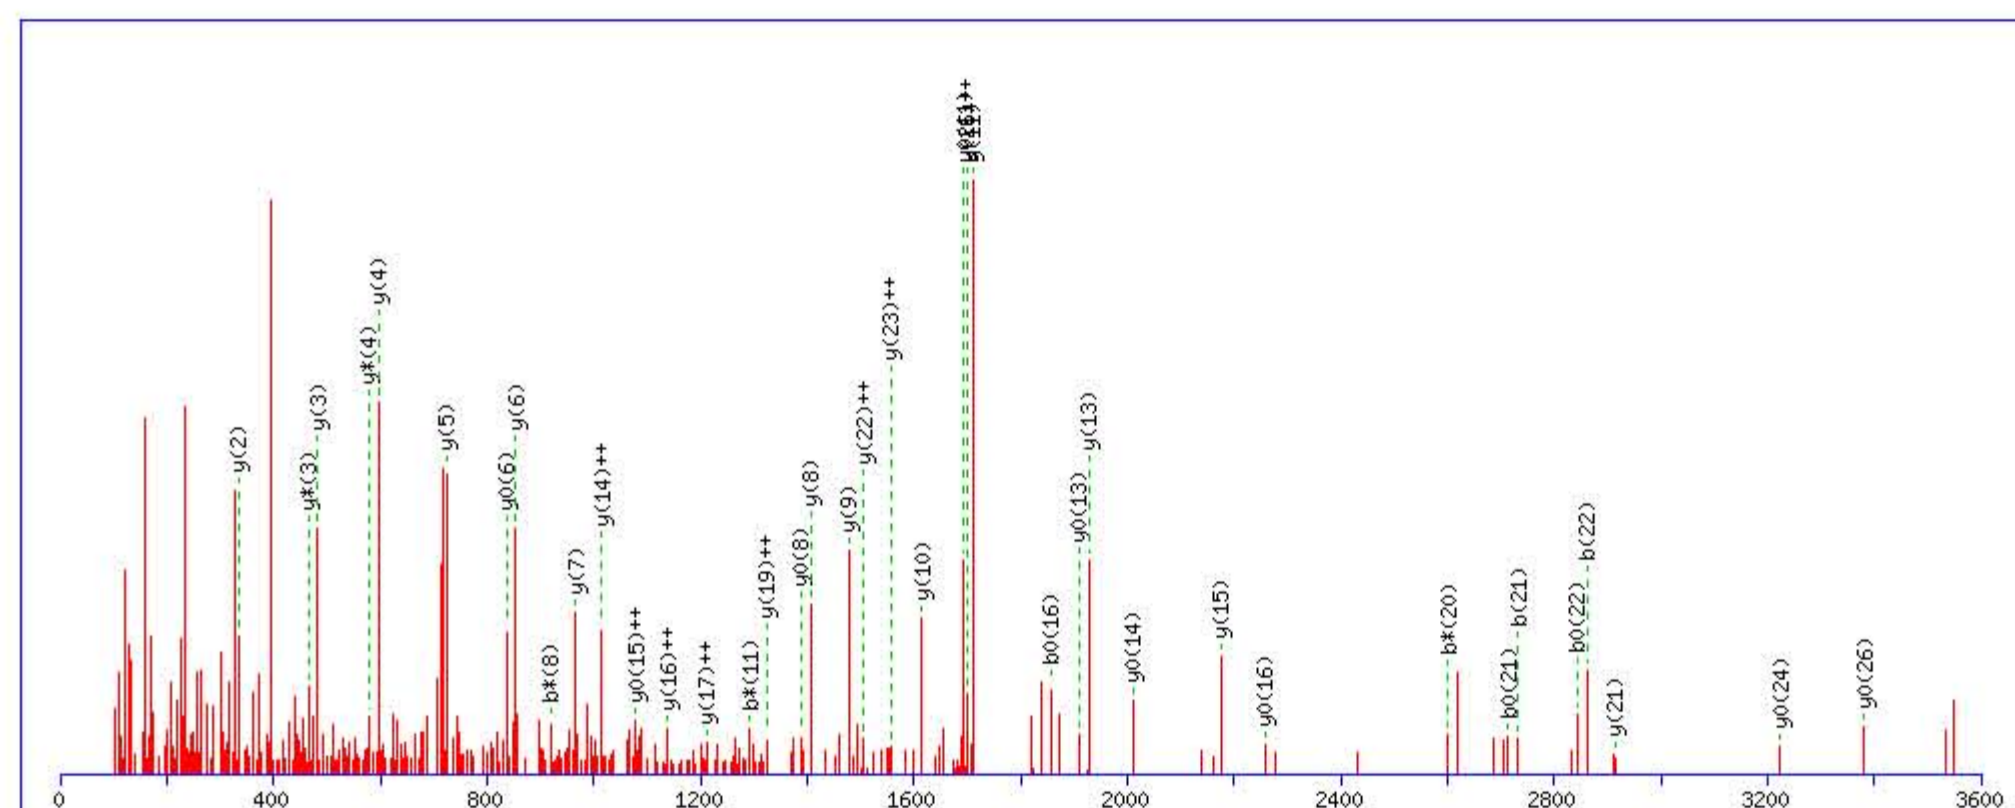

Monoisotopic mass of neutral peptide Mr(calc): 3584.660538

Fixed modifications: Carbamidomethyl (C) (apply to specified residues or termini only)

Variable modifications:

Q20 : Biotin:Thermo-21345 (Q)

Ions Score: 63 Expect: 8.1e-006

Matches : 39/288 fragment ions using 79 most intense peaks [\(help\)](#)

| #  | b           | b <sup>++</sup> | b*          | b <sup>++</sup> * | b <sup>0</sup> | b <sup>0++</sup> | Seq. | y           | y <sup>++</sup> | y*          | y <sup>++</sup> * | y <sup>0</sup> | y <sup>0++</sup> | #  |
|----|-------------|-----------------|-------------|-------------------|----------------|------------------|------|-------------|-----------------|-------------|-------------------|----------------|------------------|----|
| 1  | 187.086589  | 94.046932       |             |                   |                |                  | W    |             |                 |             |                   |                |                  | 27 |
| 2  | 274.118617  | 137.562947      |             |                   | 256.108052     | 128.557664       | S    | 3399.588510 | 1700.297893     | 3382.561961 | 1691.784618       | 3381.577945    | 1691.292610      | 26 |
| 3  | 345.155731  | 173.081504      |             |                   | 327.145166     | 164.076221       | A    | 3312.556482 | 1656.781879     | 3295.529933 | 1648.268605       | 3294.545917    | 1647.776597      | 25 |
| 4  | 474.198324  | 237.602800      |             |                   | 456.187759     | 228.597518       | E    | 3241.519368 | 1621.263322     | 3224.492819 | 1612.750047       | 3223.508803    | 1612.258040      | 24 |
| 5  | 575.246003  | 288.126640      |             |                   | 557.235438     | 279.121357       | T    | 3112.476775 | 1556.742026     | 3095.450226 | 1548.228751       | 3094.466210    | 1547.736743      | 23 |
| 6  | 672.298767  | 336.653022      |             |                   | 654.288202     | 327.647739       | P    | 3011.429096 | 1506.218186     | 2994.402547 | 1497.704912       | 2993.418531    | 1497.212904      | 22 |
| 7  | 809.357679  | 405.182478      |             |                   | 791.347114     | 396.177195       | H    | 2914.376332 | 1457.691804     | 2897.349783 | 1449.178530       | 2896.365767    | 1448.686522      | 21 |
| 8  | 937.452642  | 469.229959      | 920.426093  | 460.716685        | 919.442077     | 460.224677       | K    | 2777.317420 | 1389.162348     | 2760.290871 | 1380.649074       | 2759.306855    | 1380.157066      | 20 |
| 9  | 1034.505406 | 517.756341      | 1017.478857 | 509.243067        | 1016.494841    | 508.751059       | P    | 2649.222457 | 1325.114867     | 2632.195908 | 1316.601592       | 2631.211892    | 1316.109584      | 19 |
| 10 | 1162.563984 | 581.785630      | 1145.537435 | 573.272356        | 1144.553419    | 572.780348       | Q    | 2552.169693 | 1276.588485     | 2535.143144 | 1268.075210       | 2534.159128    | 1267.583202      | 18 |
| 11 | 1309.632398 | 655.319837      | 1292.605849 | 646.806563        | 1291.621833    | 646.314555       | F    | 2424.111115 | 1212.559196     | 2407.084566 | 1204.045921       | 2406.100550    | 1203.553913      | 17 |
| 12 | 1410.680077 | 705.843677      | 1393.653528 | 697.330402        | 1392.669512    | 696.838394       | T    | 2277.042701 | 1139.024988     | 2260.016152 | 1130.511714       | 2259.032136    | 1130.019706      | 16 |
| 13 | 1557.748491 | 779.377884      | 1540.721942 | 770.864609        | 1539.737926    | 770.372601       | F    | 2175.995022 | 1088.501149     | 2158.968473 | 1079.987874       | 2157.984457    | 1079.495866      | 15 |
| 14 | 1658.796170 | 829.901723      | 1641.769621 | 821.388449        | 1640.785605    | 820.896441       | T    | 2028.926608 | 1014.966942     | 2011.900059 | 1006.453668       | 2010.916043    | 1005.961660      | 14 |
| 15 | 1745.828198 | 873.417737      | 1728.801649 | 864.904463        | 1727.817633    | 864.412455       | S    | 1927.878929 | 964.443103      | 1910.852380 | 955.929828        | 1909.868364    | 955.437820       | 13 |
| 16 | 1874.870791 | 937.939034      | 1857.844242 | 929.425759        | 1856.860226    | 928.933751       | E    | 1840.846901 | 920.927089      | 1823.820352 | 912.413814        | 1822.836336    | 911.921806       | 12 |
| 17 | 1971.923555 | 986.465416      | 1954.897006 | 977.952141        | 1953.912990    | 977.460133       | P    | 1711.804308 | 856.405792      | 1694.777759 | 847.892518        | 1693.793743    | 847.400510       | 11 |
| 18 | 2108.982467 | 1054.994872     | 2091.955918 | 1046.481597       | 2090.971902    | 1045.989589      | H    | 1614.751544 | 807.879410      | 1597.724995 | 799.366136        | 1596.740979    | 798.874128       | 10 |
| 19 | 2180.019581 | 1090.513429     | 2162.993032 | 1082.000154       | 2162.009016    | 1081.508146      | A    | 1477.692632 | 739.349954      | 1460.666083 | 730.836680        | 1459.682067    | 730.344672       | 9  |
| 20 | 2619.244907 | 1310.126092     | 2602.218358 | 1301.612817       | 2601.234342    | 1301.120809      | Q    | 1406.655518 | 703.831397      | 1389.628969 | 695.318123        | 1388.644953    | 694.826115       | 8  |
| 21 | 2732.328971 | 1366.668124     | 2715.302422 | 1358.154849       | 2714.318406    | 1357.662841      | L    | 967.430192  | 484.218734      | 950.403643  | 475.705460        | 949.419627     | 475.213452       | 7  |
| 22 | 2861.371564 | 1431.189420     | 2844.345015 | 1422.676146       | 2843.360999    | 1422.184138      | E    | 854.346128  | 427.676702      | 837.319579  | 419.163427        | 836.335563     | 418.671419       | 6  |
| 23 | 2990.414157 | 1495.710717     | 2973.387608 | 1487.197442       | 2972.403592    | 1486.705434      | E    | 725.303535  | 363.155405      | 708.276986  | 354.642131        | 707.292970     | 354.150123       | 5  |
| 24 | 3104.457084 | 1552.732180     | 3087.430535 | 1544.218906       | 3086.446519    | 1543.726898      | N    | 596.260942  | 298.634109      | 579.234393  | 290.120834        |                |                  | 4  |
| 25 | 3251.525498 | 1626.266387     | 3234.498949 | 1617.753113       | 3233.514933    | 1617.261105      | F    | 482.218015  | 241.612645      | 465.191466  | 233.099371        |                |                  | 3  |
| 26 | 3411.556147 | 1706.281712     | 3394.529598 | 1697.768437       | 3393.545582    | 1697.276429      | C    | 335.149601  | 168.078438      | 318.123052  | 159.565164        |                |                  | 2  |
| 27 |             |                 |             |                   |                |                  | R    | 175.118952  | 88.063114       | 158.092403  | 79.549839         |                |                  | 1  |

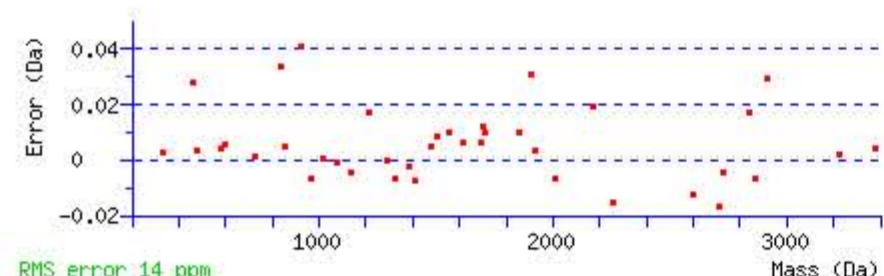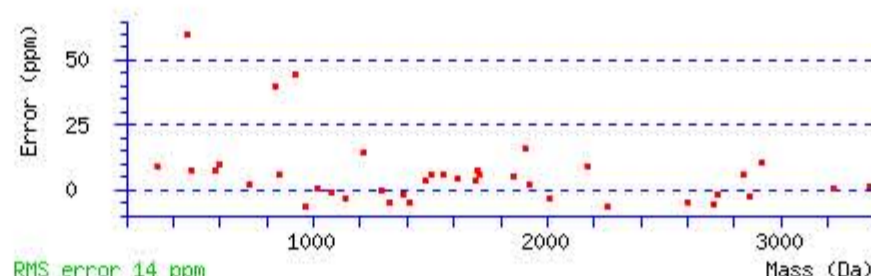

NCBI BLAST search of **WSAETPHKQPQFTTSEPHAQLEENFCR**  
 (Parameters: blastp, nr protein database, expect=20000, no filter, PAM30)  
 Other BLAST [web gateways](#)

All matches to this query

| Score | Mr(calc):   | Delta    | Sequence                                    |
|-------|-------------|----------|---------------------------------------------|
| 62.6  | 3584.660538 | 0.005582 | <a href="#">WSAETPHKQPQFTTSEPHAQLEENFCR</a> |
| 6.9   | 3584.660538 | 0.005582 | <a href="#">WSAETPHKQPQFTTSEPHAQLEENFCR</a> |

# MASCOT Search Results

## Peptide View

MS/MS Fragmentation of **FTCACPDQFK**

Found in **HABP2\_HUMAN**, Hyaluronan-binding protein 2 OS=Homo sapiens GN=HABP2 PE=1 SV=1

Match to Query 32538: 1583.708088 from(792.861320,2+) rtinseconds(1862) index(46383)

Title: Locus:1.1.1.2697.7 File:"2013-07-02 CLN FXIII 60 min 3rd F 4.wiff"

Data file C:\Program Files (x86)\Matrix Science\Mascot Daemon\mgf\6 FXIII 60 min 3rd\mascot\_daemon\_merge.mgf

Click mouse within plot area to zoom in by factor of two about that point

Or, Plot from  to  Da

Label all possible matches  Label matches used for scoring

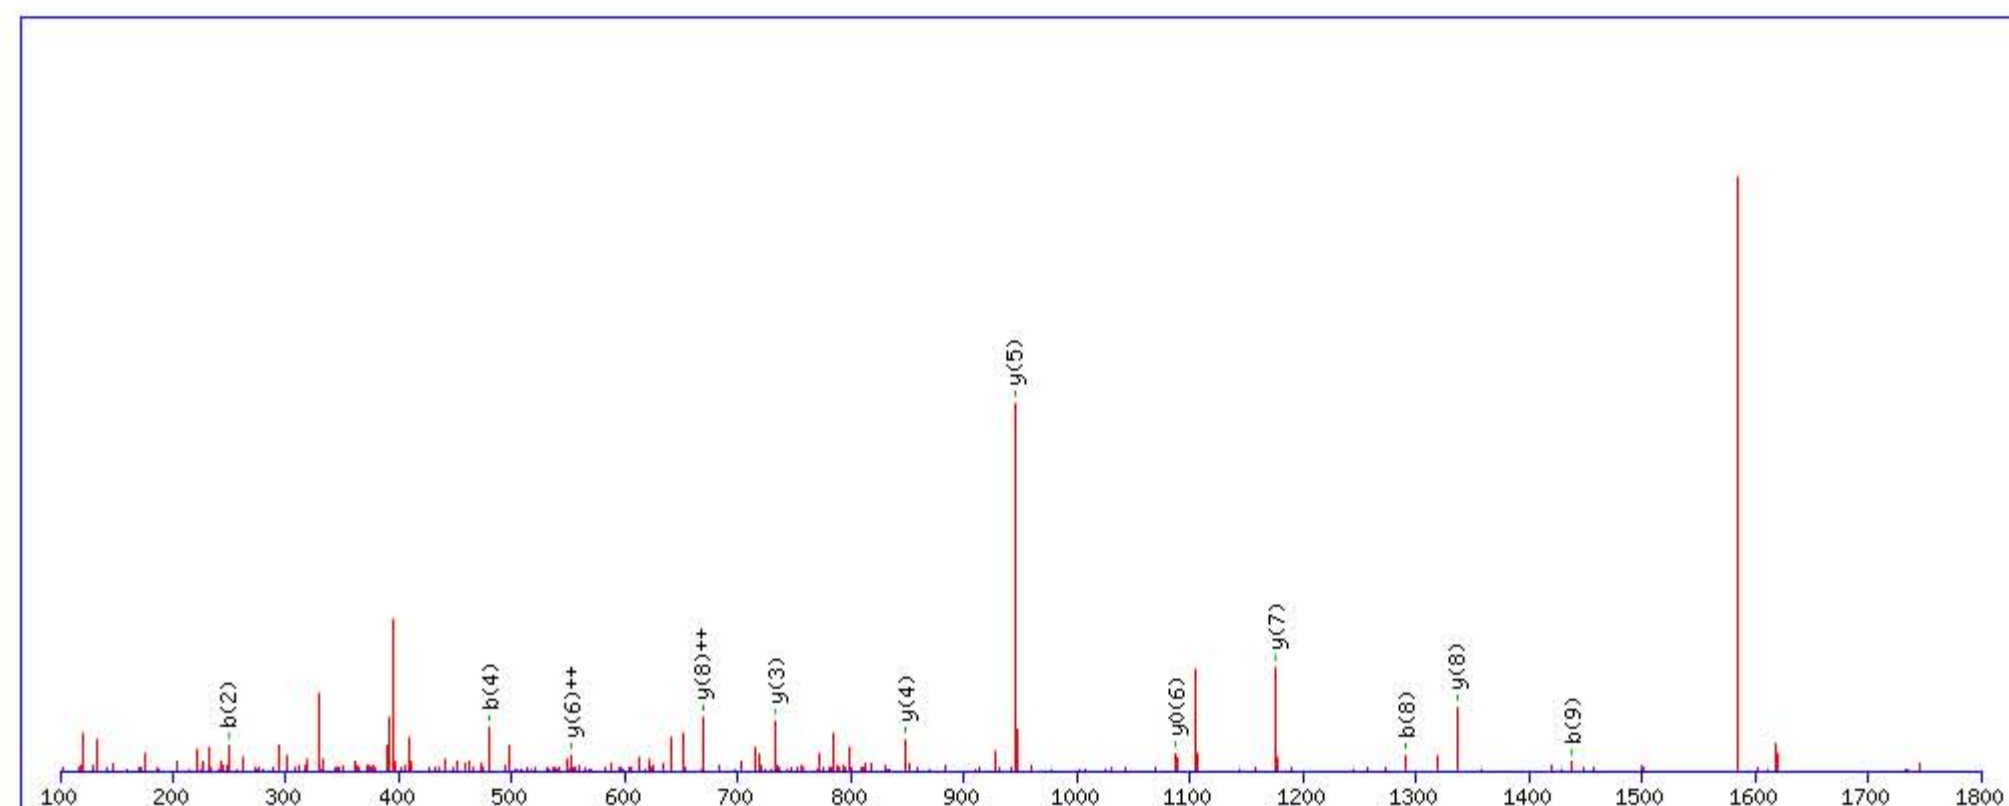

Monoisotopic mass of neutral peptide Mr(calc): 1583.693497

Fixed modifications: Carbamidomethyl (C) (apply to specified residues or termini only)

Variable modifications:

Q8 : Biotin:Thermo-21345 (Q)

Ions Score: 47 Expect: 0.00015

Matches : 12/86 fragment ions using 14 most intense peaks [\(help\)](#)

| #  | b                  | b <sup>++</sup> | b <sup>*</sup> | b <sup>++</sup> | b <sup>0</sup> | b <sup>0++</sup> | Seq. | y                  | y <sup>++</sup>   | y <sup>*</sup> | y <sup>++</sup> | y <sup>0</sup>     | y <sup>0++</sup> | #  |
|----|--------------------|-----------------|----------------|-----------------|----------------|------------------|------|--------------------|-------------------|----------------|-----------------|--------------------|------------------|----|
| 1  | 148.075690         | 74.541483       |                |                 |                |                  | F    |                    |                   |                |                 |                    |                  | 10 |
| 2  | <b>249.123369</b>  | 125.065322      |                |                 | 231.112804     | 116.060040       | T    | 1437.632342        | 719.319809        | 1420.605793    | 710.806535      | 1419.621777        | 710.314527       | 9  |
| 3  | 409.154018         | 205.080647      |                |                 | 391.143453     | 196.075365       | C    | <b>1336.584663</b> | <b>668.795970</b> | 1319.558114    | 660.282695      | 1318.574098        | 659.790687       | 8  |
| 4  | <b>480.191132</b>  | 240.599204      |                |                 | 462.180567     | 231.593921       | A    | <b>1176.554014</b> | 588.780645        | 1159.527465    | 580.267371      | 1158.543449        | 579.775363       | 7  |
| 5  | 640.221781         | 320.614529      |                |                 | 622.211216     | 311.609246       | C    | 1105.516900        | <b>553.262088</b> | 1088.490351    | 544.748814      | <b>1087.506335</b> | 544.256806       | 6  |
| 6  | 737.274545         | 369.140911      |                |                 | 719.263980     | 360.135628       | P    | <b>945.486251</b>  | 473.246764        | 928.459702     | 464.733489      | 927.475686         | 464.241481       | 5  |
| 7  | 852.301488         | 426.654382      |                |                 | 834.290923     | 417.649100       | D    | <b>848.433487</b>  | 424.720382        | 831.406938     | 416.207107      | 830.422922         | 415.715099       | 4  |
| 8  | <b>1291.526814</b> | 646.267045      | 1274.500265    | 637.753771      | 1273.516249    | 637.261763       | Q    | <b>733.406544</b>  | 367.206910        | 716.379995     | 358.693636      |                    |                  | 3  |
| 9  | <b>1438.595228</b> | 719.801252      | 1421.568679    | 711.287978      | 1420.584663    | 710.795970       | F    | 294.181218         | 147.594247        | 277.154669     | 139.080973      |                    |                  | 2  |
| 10 |                    |                 |                |                 |                |                  | K    | 147.112804         | 74.060040         | 130.086255     | 65.546765       |                    |                  | 1  |

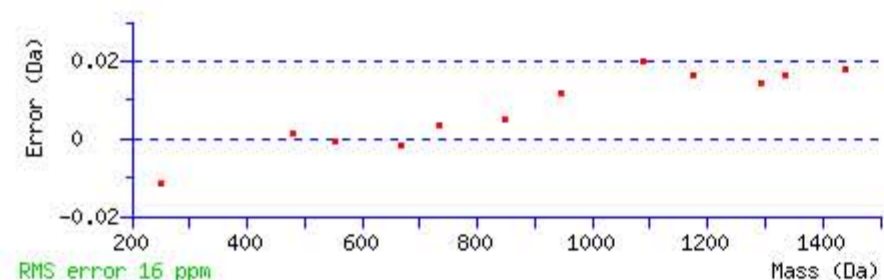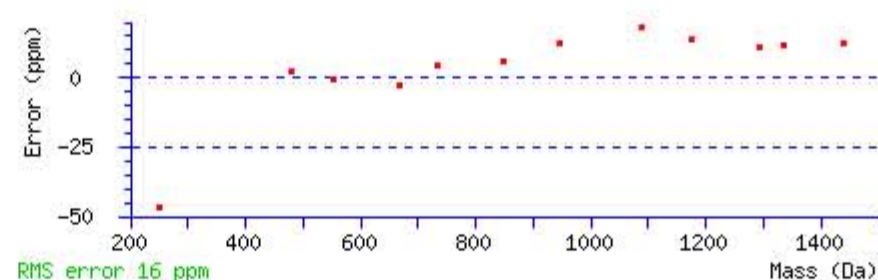

NCBI BLAST search of [FTCACPDQFK](#)

(Parameters: blastp, nr protein database, expect=20000, no filter, PAM30)

Other BLAST [web gateways](#)

All matches to this query

| Score | Mr(calc):   | Delta    | Sequence                   |
|-------|-------------|----------|----------------------------|
| 47.3  | 1583.693497 | 0.014591 | <a href="#">FTCACPDQFK</a> |

Mascot: <http://www.matrixscience.com/>

# MASCOT Search Results

## Peptide View

MS/MS Fragmentation of **GQCLITQSPYYR**  
 Found in **HABP2\_HUMAN**, Hyaluronan-binding protein 2 OS=Homo sapiens GN=HABP2 PE=1 SV=1

Match to Query 40101: 1892.954688 from(947.484620,2+) rtinseconds(2091) index(47936)  
 Title: Locus:1.1.1.2776.16 File:"2013-07-02 CLN FXIII 60 min 3rd F 4.wiff"  
 Data file C:\Program Files (x86)\Matrix Science\Mascot Daemon\mgf6 FXIII 60 min 3rd\mascot\_daemon\_merge.mgf

Click mouse within plot area to zoom in by factor of two about that point  
 Or, Plot from  to  Da   
 Label all possible matches  Label matches used for scoring

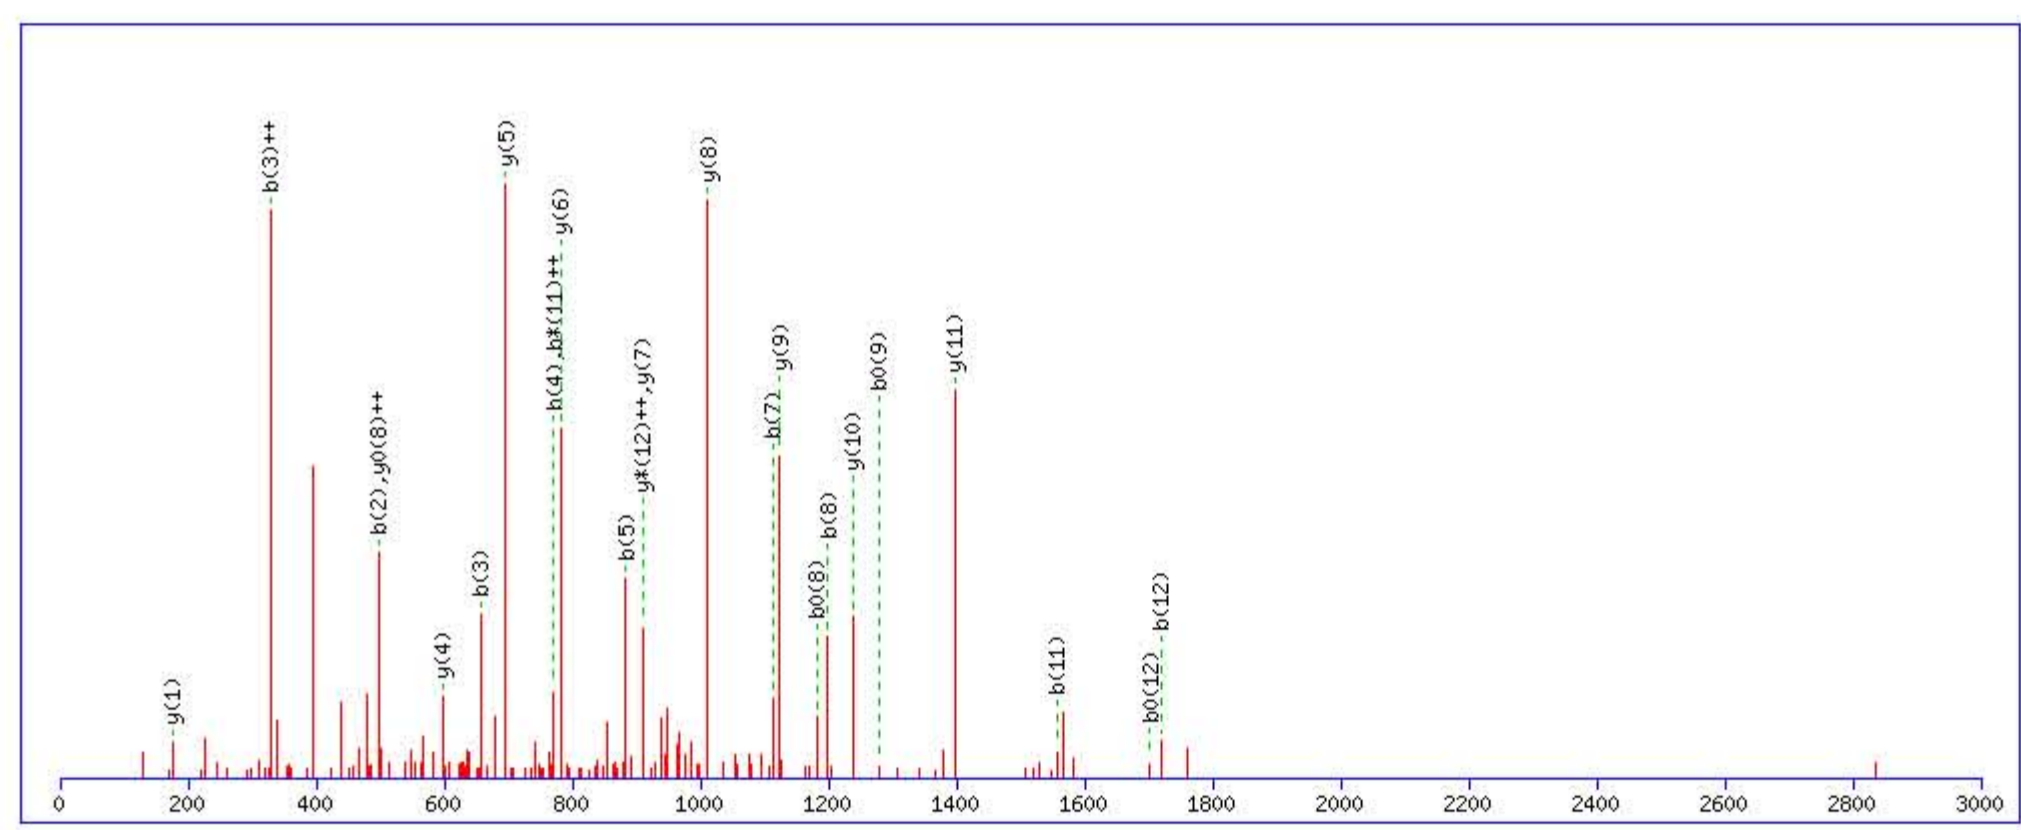

Monoisotopic mass of neutral peptide Mr(calc): 1892.927704  
 Fixed modifications: Carbamidomethyl (C) (apply to specified residues or termini only)  
 Variable modifications:  
 Q2 : Biotin:Thermo-21345 (Q)  
 Ions Score: 59 Expect: 1.2e-005  
 Matches : 24/122 fragment ions using 33 most intense peaks [\(help\)](#)

| #  | b                  | b <sup>++</sup>   | b <sup>*</sup> | b <sup>*++</sup>  | b <sup>0</sup>     | b <sup>0++</sup> | Seq. | y                  | y <sup>++</sup> | y <sup>*</sup> | y <sup>*++</sup>  | y <sup>0</sup> | y <sup>0++</sup>  | #  |
|----|--------------------|-------------------|----------------|-------------------|--------------------|------------------|------|--------------------|-----------------|----------------|-------------------|----------------|-------------------|----|
| 1  | 58.028740          | 29.518008         |                |                   |                    |                  | G    |                    |                 |                |                   |                |                   | 13 |
| 2  | <b>497.254066</b>  | 249.130671        | 480.227517     | 240.617397        |                    |                  | Q    | 1836.913526        | 918.960401      | 1819.886977    | <b>910.447127</b> | 1818.902961    | 909.955119        | 12 |
| 3  | <b>657.284715</b>  | <b>329.145996</b> | 640.258166     | 320.632721        |                    |                  | C    | <b>1397.688200</b> | 699.347738      | 1380.661651    | 690.834464        | 1379.677635    | 690.342456        | 11 |
| 4  | <b>770.368779</b>  | 385.688028        | 753.342230     | 377.174753        |                    |                  | L    | <b>1237.657551</b> | 619.332414      | 1220.631002    | 610.819139        | 1219.646986    | 610.327131        | 10 |
| 5  | <b>883.452843</b>  | 442.230060        | 866.426294     | 433.716785        |                    |                  | I    | <b>1124.573487</b> | 562.790382      | 1107.546938    | 554.277107        | 1106.562922    | 553.785099        | 9  |
| 6  | 984.500522         | 492.753899        | 967.473973     | 484.240625        | 966.489957         | 483.748617       | T    | <b>1011.489423</b> | 506.248350      | 994.462874     | 497.735075        | 993.478858     | <b>497.243067</b> | 8  |
| 7  | <b>1112.559100</b> | 556.783188        | 1095.532551    | 548.269914        | 1094.548535        | 547.777906       | Q    | <b>910.441744</b>  | 455.724510      | 893.415195     | 447.211236        | 892.431179     | 446.719228        | 7  |
| 8  | <b>1199.591128</b> | 600.299202        | 1182.564579    | 591.785928        | <b>1181.580563</b> | 591.293920       | S    | <b>782.383166</b>  | 391.695221      | 765.356617     | 383.181947        | 764.372601     | 382.689939        | 6  |
| 9  | 1296.643892        | 648.825584        | 1279.617343    | 640.312310        | <b>1278.633327</b> | 639.820302       | P    | <b>695.351138</b>  | 348.179207      | 678.324589     | 339.665933        |                |                   | 5  |
| 10 | 1393.696656        | 697.351966        | 1376.670107    | 688.838692        | 1375.686091        | 688.346684       | P    | <b>598.298374</b>  | 299.652825      | 581.271825     | 291.139551        |                |                   | 4  |
| 11 | <b>1556.759985</b> | 778.883631        | 1539.733436    | <b>770.370356</b> | 1538.749420        | 769.878348       | Y    | 501.245610         | 251.126443      | 484.219061     | 242.613169        |                |                   | 3  |
| 12 | <b>1719.823314</b> | 860.415295        | 1702.796765    | 851.902021        | <b>1701.812749</b> | 851.410013       | Y    | 338.182281         | 169.594778      | 321.155732     | 161.081504        |                |                   | 2  |
| 13 |                    |                   |                |                   |                    |                  | R    | <b>175.118952</b>  | 88.063114       | 158.092403     | 79.549839         |                |                   | 1  |

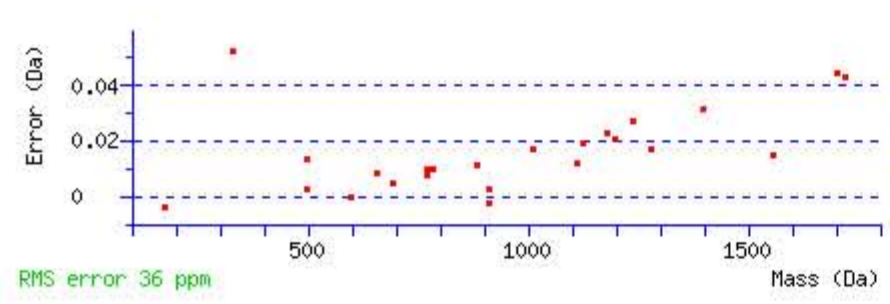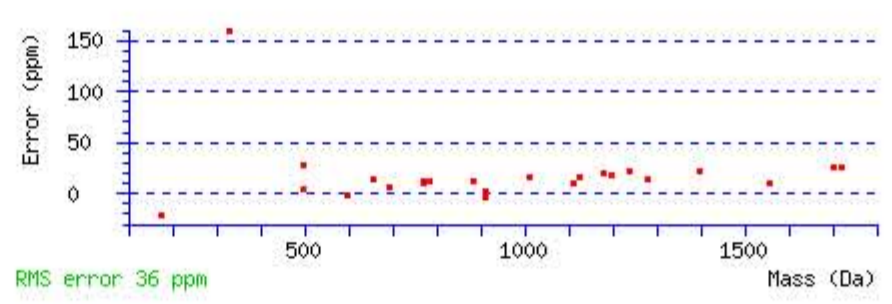

NCBI BLAST search of **GQCLITQSPYYR**  
 (Parameters: blastp, nr protein database, expect=20000, no filter, PAM30)  
 Other BLAST [web gateways](#)

### All matches to this query

| Score | Mr(calc):   | Delta     | Sequence                           |
|-------|-------------|-----------|------------------------------------|
| 58.5  | 1892.927704 | 0.026984  | <a href="#">GQCLITQSPYYR</a>       |
| 11.5  | 1892.927704 | 0.026984  | <a href="#">GQCLITQSPYYR</a>       |
| 5.5   | 1892.974411 | -0.019723 | <a href="#">EALLDESRPLFERYR</a>    |
| 4.0   | 1892.934921 | 0.019767  | <a href="#">QGSQAGPGPQLAQGMR</a>   |
| 2.9   | 1892.977844 | -0.023156 | <a href="#">QVZLVZSGGGAVZPGR</a>   |
| 2.7   | 1892.977844 | -0.023156 | <a href="#">QVZLVZSGGGAVZPGR</a>   |
| 2.5   | 1892.963882 | -0.009194 | <a href="#">RTQQEESNLGKHR</a>      |
| 1.7   | 1892.977844 | -0.023156 | <a href="#">QVZLVZSGGGAVZPGR</a>   |
| 1.7   | 1892.977844 | -0.023156 | <a href="#">QVZLVZSGGGAVZPGR</a>   |
| 0.1   | 1892.938065 | 0.016623  | <a href="#">AQESVGFDPAPAANPGPR</a> |

# MASCOT Search Results

## Peptide View

MS/MS Fragmentation of **KGDTFSCMVGHEALPLAFTQK**

Found in **IGHA1\_HUMAN**, Ig alpha-1 chain C region OS=Homo sapiens GN=IGHA1 PE=1 SV=2

Match to Query 52390: 2647.309856 from(662.834740,4+) rtinseconds(2367) index(6838)

Title: Locus:1.1.1.3376.11 File:"2013-07-02 CLN FXIII 60 min 3rd F 1.wiff"

Data file C:\Program Files (x86)\Matrix Science\Mascot Daemon\mgf\6 FXIII 60 min 3rd\mascot\_daemon\_merge.mgf

Click mouse within plot area to zoom in by factor of two about that point

Or, Plot from 0 to 3000 Da Full range

Label all possible matches  Label matches used for scoring

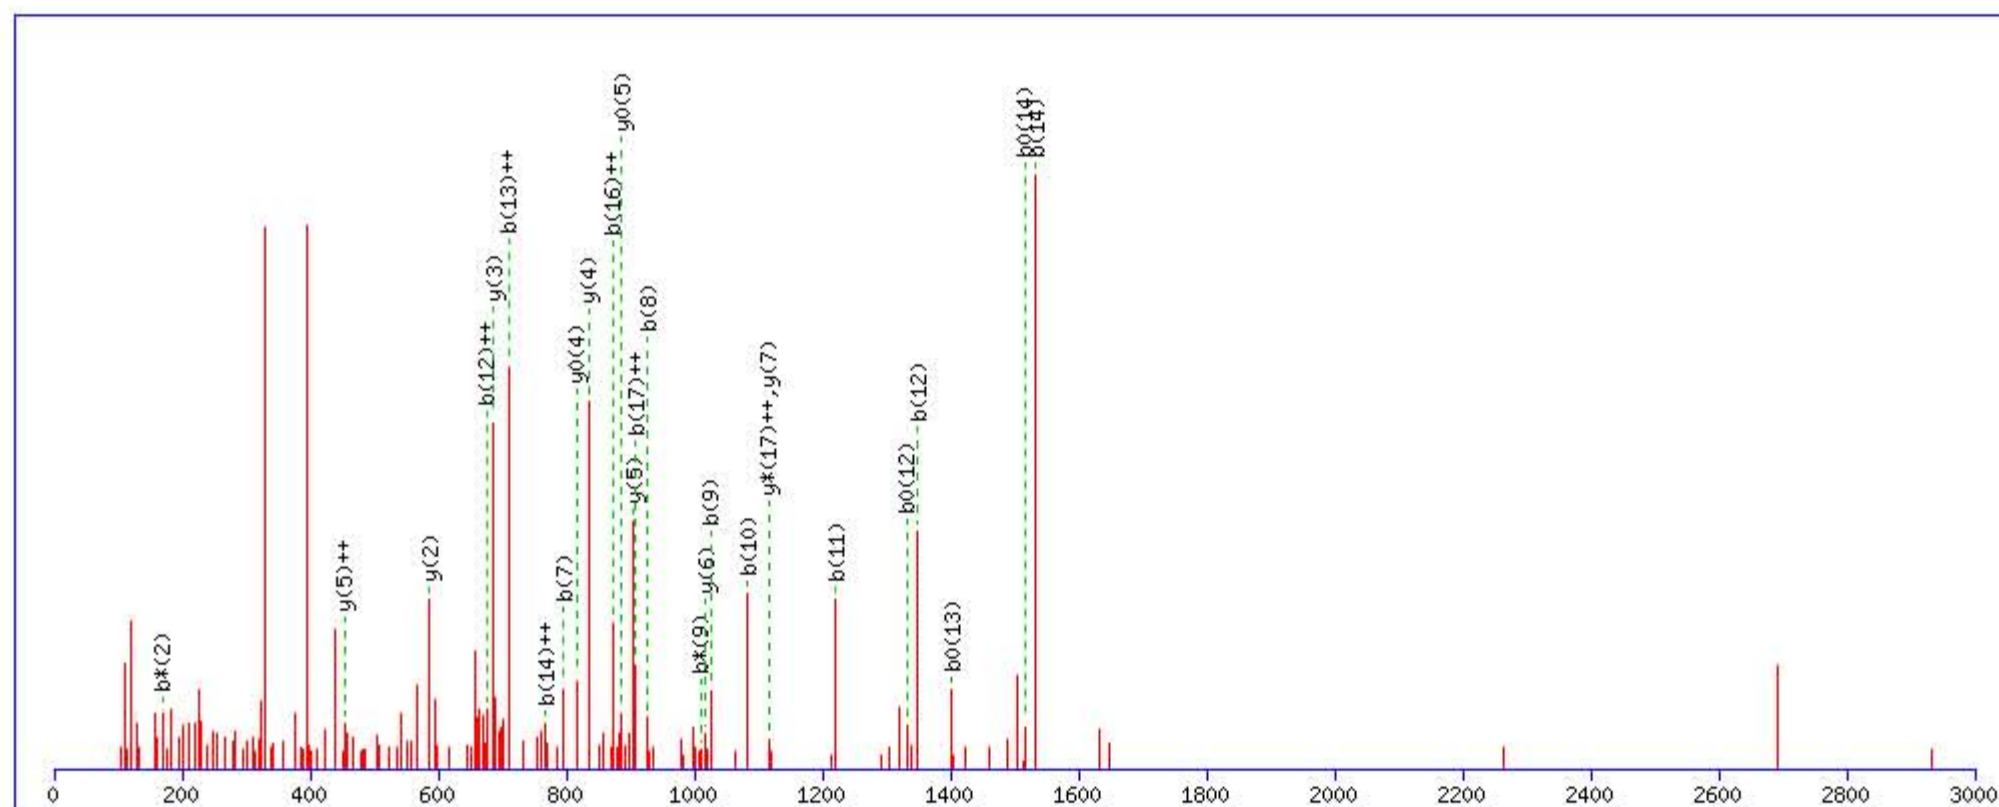

Monoisotopic mass of neutral peptide Mr(calc): 2647.296082

Fixed modifications: Carbamidomethyl (C) (apply to specified residues or termini only)

Variable modifications:

Q20 : Biotin:Thermo-21345 (Q)

Ions Score: 28 Expect: 0.046

Matches : 27/232 fragment ions using 61 most intense peaks (help)

| #  | b           | b <sup>++</sup> | b <sup>*</sup> | b <sup>+++</sup> | b <sup>0</sup> | b <sup>0++</sup> | Seq. | y           | y <sup>++</sup> | y <sup>*</sup> | y <sup>+++</sup> | y <sup>0</sup> | y <sup>0++</sup> | #  |
|----|-------------|-----------------|----------------|------------------|----------------|------------------|------|-------------|-----------------|----------------|------------------|----------------|------------------|----|
| 1  | 129.102239  | 65.054757       | 112.075690     | 56.541483        |                |                  | K    |             |                 |                |                  |                |                  | 21 |
| 2  | 186.123703  | 93.565489       | 169.097154     | 85.052215        |                |                  | G    | 2520.208388 | 1260.607832     | 2503.181839    | 1252.094557      | 2502.197823    | 1251.602549      | 20 |
| 3  | 301.150646  | 151.078961      | 284.124097     | 142.565687       | 283.140081     | 142.073679       | D    | 2463.186924 | 1232.097100     | 2446.160375    | 1223.583825      | 2445.176359    | 1223.091817      | 19 |
| 4  | 402.198325  | 201.602801      | 385.171776     | 193.089526       | 384.187760     | 192.597518       | T    | 2348.159981 | 1174.583628     | 2331.133432    | 1166.070354      | 2330.149416    | 1165.578346      | 18 |
| 5  | 549.266739  | 275.137008      | 532.240190     | 266.623733       | 531.256174     | 266.131725       | F    | 2247.112302 | 1124.059789     | 2230.085753    | 1115.546514      | 2229.101737    | 1115.054506      | 17 |
| 6  | 636.298767  | 318.653022      | 619.272218     | 310.139747       | 618.288202     | 309.647739       | S    | 2100.043888 | 1050.525582     | 2083.017339    | 1042.012307      | 2082.033323    | 1041.520299      | 16 |
| 7  | 796.329416  | 398.668346      | 779.302867     | 390.155072       | 778.318851     | 389.663064       | C    | 2013.011860 | 1007.009568     | 1995.985311    | 998.496294       | 1995.001295    | 998.004286       | 15 |
| 8  | 927.369901  | 464.188589      | 910.343352     | 455.675314       | 909.359336     | 455.183306       | M    | 1852.981211 | 926.994244      | 1835.954662    | 918.480969       | 1834.970646    | 917.988961       | 14 |
| 9  | 1026.438315 | 513.722796      | 1009.411766    | 505.209521       | 1008.427750    | 504.717513       | V    | 1721.940726 | 861.474001      | 1704.914177    | 852.960727       | 1703.930161    | 852.468719       | 13 |
| 10 | 1083.459779 | 542.233528      | 1066.433230    | 533.720253       | 1065.449214    | 533.228245       | G    | 1622.872312 | 811.939794      | 1605.845763    | 803.426520       | 1604.861747    | 802.934512       | 12 |
| 11 | 1220.518691 | 610.762984      | 1203.492142    | 602.249709       | 1202.508126    | 601.757701       | H    | 1565.850848 | 783.429062      | 1548.824299    | 774.915788       | 1547.840283    | 774.423780       | 11 |
| 12 | 1349.561284 | 675.284280      | 1332.534735    | 666.771006       | 1331.550719    | 666.278998       | E    | 1428.791936 | 714.899606      | 1411.765387    | 706.386332       | 1410.781371    | 705.894324       | 10 |
| 13 | 1420.598398 | 710.802837      | 1403.571849    | 702.289563       | 1402.587833    | 701.797555       | A    | 1299.749343 | 650.378310      | 1282.722794    | 641.865035       | 1281.738778    | 641.373027       | 9  |
| 14 | 1533.682462 | 767.344869      | 1516.655913    | 758.831595       | 1515.671897    | 758.339587       | L    | 1228.712229 | 614.859753      | 1211.685680    | 606.346478       | 1210.701664    | 605.854470       | 8  |
| 15 | 1630.735226 | 815.871251      | 1613.708677    | 807.357977       | 1612.724661    | 806.865969       | P    | 1115.628165 | 558.317721      | 1098.601616    | 549.804446       | 1097.617600    | 549.312438       | 7  |
| 16 | 1743.819290 | 872.413283      | 1726.792741    | 863.900009       | 1725.808725    | 863.408000       | L    | 1018.575401 | 509.791339      | 1001.548852    | 501.278064       | 1000.564836    | 500.786056       | 6  |
| 17 | 1814.856404 | 907.931840      | 1797.829855    | 899.418566       | 1796.845839    | 898.926557       | A    | 905.491337  | 453.249307      | 888.464788     | 444.736032       | 887.480772     | 444.244024       | 5  |
| 18 | 1961.924818 | 981.466047      | 1944.898269    | 972.952773       | 1943.914253    | 972.460764       | F    | 834.454223  | 417.730750      | 817.427674     | 409.217475       | 816.443658     | 408.725467       | 4  |
| 19 | 2062.972497 | 1031.989886     | 2045.945948    | 1023.476612      | 2044.961932    | 1022.984604      | T    | 687.385809  | 344.196543      | 670.359260     | 335.683268       | 669.375244     | 335.191260       | 3  |
| 20 | 2502.197823 | 1251.602549     | 2485.171274    | 1243.089275      | 2484.187258    | 1242.597267      | Q    | 586.338130  | 293.672703      | 569.311581     | 285.159429       |                |                  | 2  |
| 21 |             |                 |                |                  |                |                  | K    | 147.112804  | 74.060040       | 130.086255     | 65.546765        |                |                  | 1  |

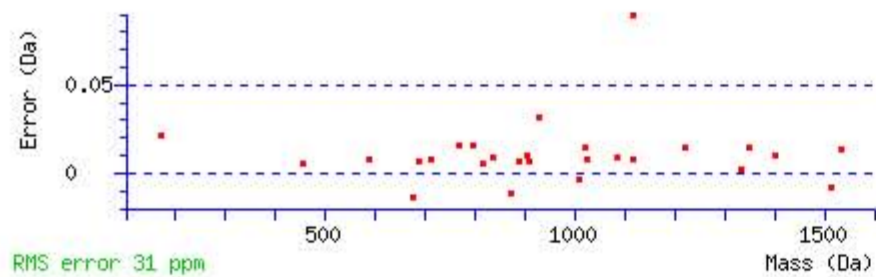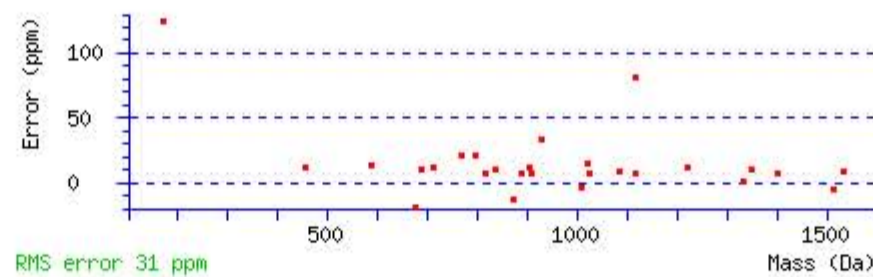

NCBI BLAST search of **KGDTFSCMVGHEALPLAFTQK**

(Parameters: blastp, nr protein database, expect=20000, no filter, PAM30)

Other BLAST [web gateways](#)

All matches to this query

| Score | Mr(calc):   | Delta    | Sequence                              |
|-------|-------------|----------|---------------------------------------|
| 28.0  | 2647.296082 | 0.013774 | <a href="#">KGDTFSCMVGHEALPLAFTQK</a> |

Mascot: <http://www.matrixscience.com/>

**MASCOT** Mascot Search Results

**Peptide View**

MS/MS Fragmentation of **NFPPSQDASGDLYTTSSQLTLPATQCLAGK**  
 Found in **IGHA1\_HUMAN**, Ig alpha-1 chain C region OS=Homo sapiens GN=IGHA1 PE=1 SV=2

Match to Query 61216: 3478.691816 from(870.680230,4+) rtinseconds(2597) index(36303)  
 Title: Locus:1.1.1.3453.25 File:"2013-07-02 CLN FXIII 60 min 3rd F 3.wiff"  
 Data file C:\Program Files (x86)\Matrix Science\Mascot Daemon\mgf\6 FXIII 60 min 3rd\mascot\_daemon\_merge.mgf

Click mouse within plot area to zoom in by factor of two about that point  
 Or, Plot from  0  to  2600  Da  Full range  
 Label all possible matches  Label matches used for scoring

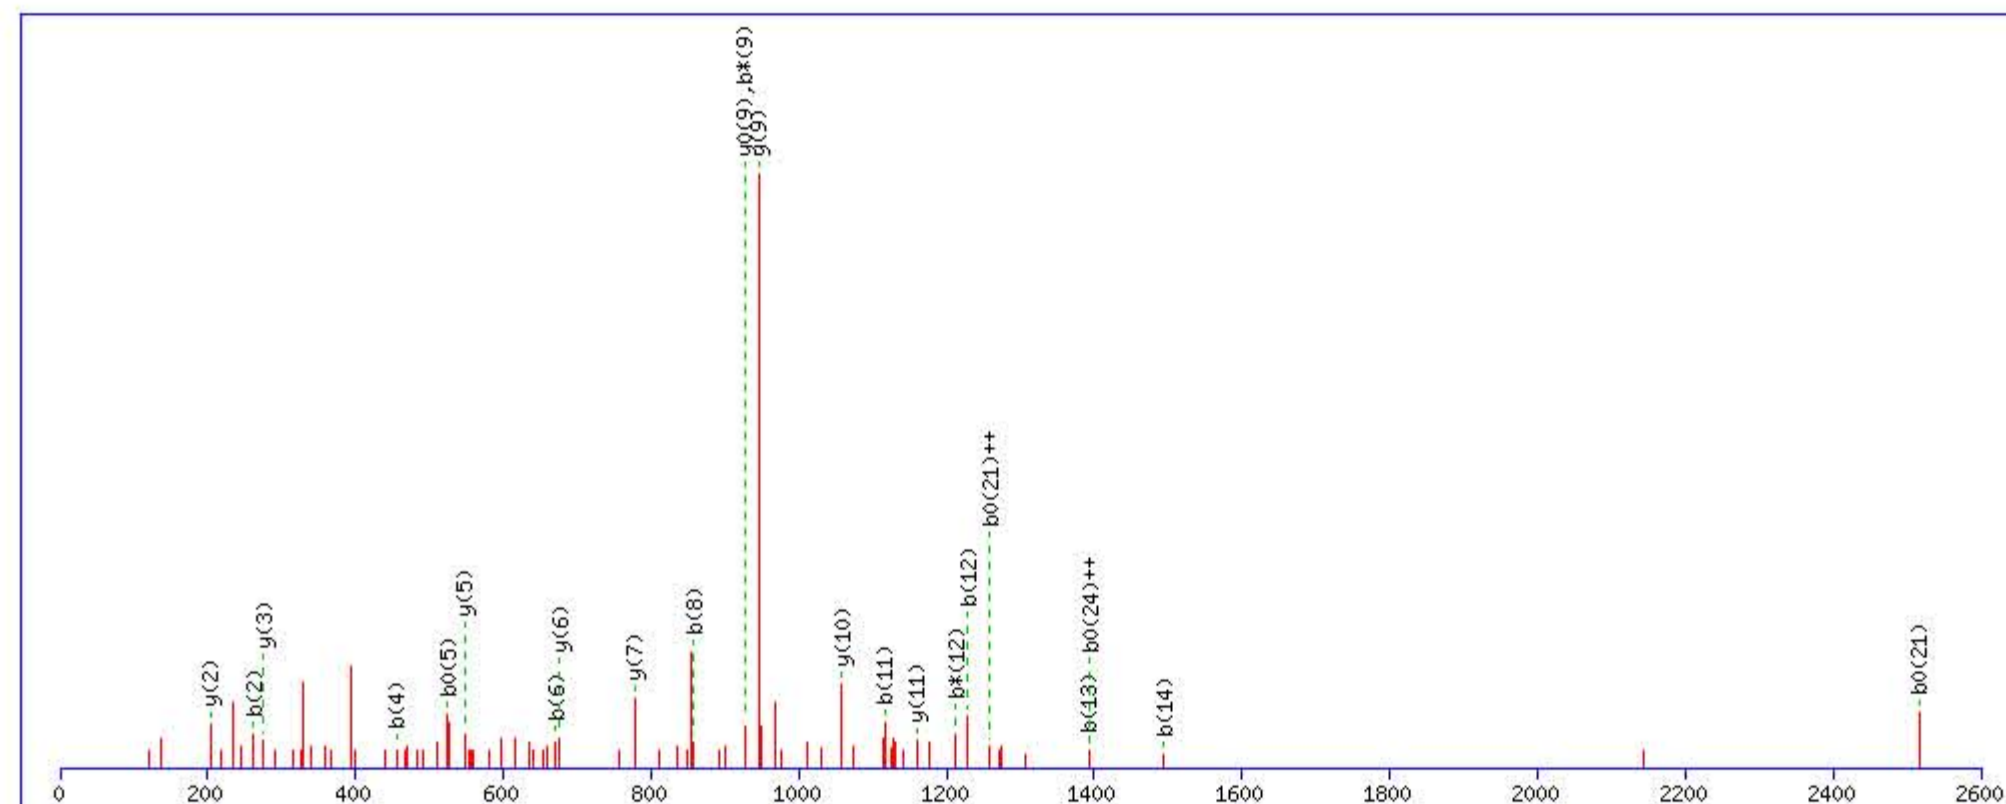

Monoisotopic mass of neutral peptide Mr(calc): 3478.674866  
 Fixed modifications: Carbamidomethyl (C) (apply to specified residues or termini only)  
 Variable modifications:  
 Q18 : Biotin:Thermo-21345 (Q)  
 Ions Score: 54 Expect: 8.3e-005  
 Matches : 23/328 fragment ions using 41 most intense peaks [\(help\)](#)

| #  | b           | b <sup>++</sup> | b <sup>*</sup> | b <sup>***</sup> | b <sup>0</sup> | b <sup>0++</sup> | Seq. | y           | y <sup>++</sup> | y <sup>*</sup> | y <sup>***</sup> | y <sup>0</sup> | y <sup>0++</sup> | #  |
|----|-------------|-----------------|----------------|------------------|----------------|------------------|------|-------------|-----------------|----------------|------------------|----------------|------------------|----|
| 1  | 115.050203  | 58.028740       | 98.023654      | 49.515465        |                |                  | N    |             |                 |                |                  |                |                  | 30 |
| 2  | 262.118617  | 131.562946      | 245.092068     | 123.049672       |                |                  | F    | 3365.639210 | 1683.323243     | 3348.612661    | 1674.809968      | 3347.628645    | 1674.317960      | 29 |
| 3  | 359.171381  | 180.089328      | 342.144832     | 171.576054       |                |                  | P    | 3218.570796 | 1609.789036     | 3201.544247    | 1601.275761      | 3200.560231    | 1600.783753      | 28 |
| 4  | 456.224145  | 228.615710      | 439.197596     | 220.102436       |                |                  | P    | 3121.518032 | 1561.262654     | 3104.491483    | 1552.749379      | 3103.507467    | 1552.257371      | 27 |
| 5  | 543.256173  | 272.131725      | 526.229624     | 263.618450       | 525.245608     | 263.126442       | S    | 3024.465268 | 1512.736272     | 3007.438719    | 1504.222997      | 3006.454703    | 1503.730989      | 26 |
| 6  | 671.314751  | 336.161014      | 654.288202     | 327.647739       | 653.304186     | 327.155731       | Q    | 2937.433240 | 1469.220258     | 2920.406691    | 1460.706983      | 2919.422675    | 1460.214975      | 25 |
| 7  | 786.341694  | 393.674485      | 769.315145     | 385.161210       | 768.331129     | 384.669202       | D    | 2809.374662 | 1405.190969     | 2792.348113    | 1396.677694      | 2791.364097    | 1396.185686      | 24 |
| 8  | 857.378808  | 429.193042      | 840.352259     | 420.679767       | 839.368243     | 420.187759       | A    | 2694.347719 | 1347.677497     | 2677.321170    | 1339.164223      | 2676.337154    | 1338.672215      | 23 |
| 9  | 944.410836  | 472.709056      | 927.384287     | 464.195781       | 926.400271     | 463.703773       | S    | 2623.310605 | 1312.158941     | 2606.284056    | 1303.645666      | 2605.300040    | 1303.153658      | 22 |
| 10 | 1001.432300 | 501.219788      | 984.405751     | 492.706513       | 983.421735     | 492.214505       | G    | 2536.278577 | 1268.642926     | 2519.252028    | 1260.129652      | 2518.268012    | 1259.637644      | 21 |
| 11 | 1116.459243 | 558.733260      | 1099.432694    | 550.219985       | 1098.448678    | 549.727977       | D    | 2479.257113 | 1240.132195     | 2462.230564    | 1231.618920      | 2461.246548    | 1231.126912      | 20 |
| 12 | 1229.543307 | 615.275291      | 1212.516758    | 606.762017       | 1211.532742    | 606.270009       | L    | 2364.230170 | 1182.618723     | 2347.203621    | 1174.105448      | 2346.219605    | 1173.613440      | 19 |
| 13 | 1392.606636 | 696.806956      | 1375.580087    | 688.293682       | 1374.596071    | 687.801673       | Y    | 2251.146106 | 1126.076691     | 2234.119557    | 1117.563416      | 2233.135541    | 1117.071408      | 18 |
| 14 | 1493.654315 | 747.330796      | 1476.627766    | 738.817521       | 1475.643750    | 738.325513       | T    | 2088.082777 | 1044.545026     | 2071.056228    | 1036.031752      | 2070.072212    | 1035.539744      | 17 |
| 15 | 1594.701994 | 797.854635      | 1577.675445    | 789.341361       | 1576.691429    | 788.849353       | T    | 1987.035098 | 994.021187      | 1970.008549    | 985.507913       | 1969.024533    | 985.015905       | 16 |
| 16 | 1681.734022 | 841.370649      | 1664.707473    | 832.857375       | 1663.723457    | 832.365367       | S    | 1885.987419 | 943.497348      | 1868.960870    | 934.984073       | 1867.976854    | 934.492065       | 15 |
| 17 | 1768.766050 | 884.886663      | 1751.739501    | 876.373389       | 1750.755485    | 875.881381       | S    | 1798.955391 | 899.981334      | 1781.928842    | 891.468059       | 1780.944826    | 890.976051       | 14 |
| 18 | 2207.991376 | 1104.499326     | 2190.964827    | 1095.986051      | 2189.980811    | 1095.494043      | Q    | 1711.923363 | 856.465320      | 1694.896814    | 847.952045       | 1693.912798    | 847.460037       | 13 |
| 19 | 2321.075440 | 1161.041358     | 2304.048891    | 1152.528083      | 2303.064875    | 1152.036075      | L    | 1272.698037 | 636.852657      | 1255.671488    | 628.339382       | 1254.687472    | 627.847374       | 12 |
| 20 | 2422.123119 | 1211.565197     | 2405.096570    | 1203.051923      | 2404.112554    | 1202.559915      | T    | 1159.613973 | 580.310625      | 1142.587424    | 571.797350       | 1141.603408    | 571.305342       | 11 |
| 21 | 2535.207183 | 1268.107229     | 2518.180634    | 1259.593955      | 2517.196618    | 1259.101947      | L    | 1058.566294 | 529.786785      | 1041.539745    | 521.273511       | 1040.555729    | 520.781503       | 10 |
| 22 | 2632.259947 | 1316.633611     | 2615.233398    | 1308.120337      | 2614.249382    | 1307.628329      | P    | 945.482230  | 473.244753      | 928.455681     | 464.731479       | 927.471665     | 464.239471       | 9  |
| 23 | 2703.297061 | 1352.152169     | 2686.270512    | 1343.638894      | 2685.286496    | 1343.146886      | A    | 848.429466  | 424.718371      | 831.402917     | 416.205097       | 830.418901     | 415.713089       | 8  |
| 24 | 2804.344740 | 1402.676008     | 2787.318191    | 1394.162733      | 2786.334175    | 1393.670725      | T    | 777.392352  | 389.199814      | 760.365803     | 380.686540       | 759.381787     | 380.194532       | 7  |
| 25 | 2932.403318 | 1466.705297     | 2915.376769    | 1458.192022      | 2914.392753    | 1457.700015      | Q    | 676.344673  | 338.675975      | 659.318124     | 330.162700       |                |                  | 6  |
| 26 | 3092.433967 | 1546.720621     | 3075.407418    | 1538.207347      | 3074.423402    | 1537.715339      | C    | 548.286095  | 274.646686      | 531.259546     | 266.133411       |                |                  | 5  |
| 27 | 3205.518031 | 1603.262653     | 3188.491482    | 1594.749379      | 3187.507466    | 1594.257371      | L    | 388.255446  | 194.631361      | 371.228897     | 186.118087       |                |                  | 4  |
| 28 | 3276.555145 | 1638.781211     | 3259.528596    | 1630.267936      | 3258.544580    | 1629.775928      | A    | 275.171382  | 138.089329      | 258.144833     | 129.576055       |                |                  | 3  |
| 29 | 3333.576609 | 1667.291943     | 3316.550060    | 1658.778668      | 3315.566044    | 1658.286660      | G    | 204.134268  | 102.570772      | 187.107719     | 94.057497        |                |                  | 2  |
| 30 |             |                 |                |                  |                |                  | K    | 147.112804  | 74.060040       | 130.086255     | 65.546765        |                |                  | 1  |

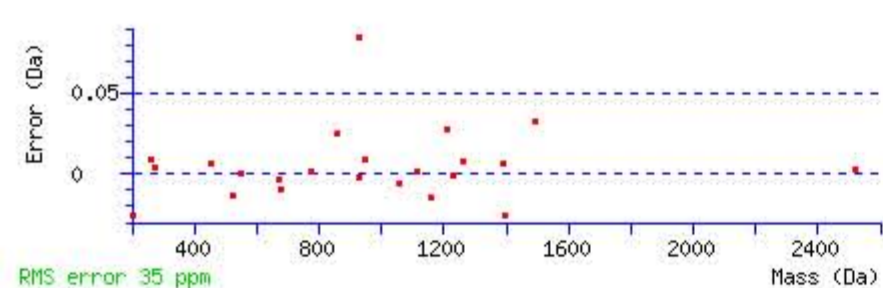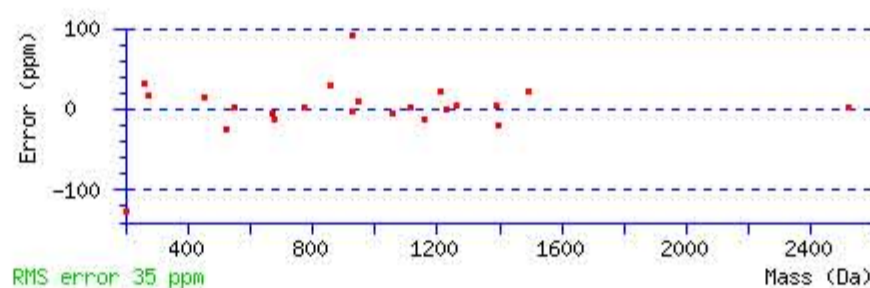

NCBI BLAST search of **NFPPSQDASGDLYTTSSQLTLPATQCLAGK**  
 (Parameters: blastp, nr protein database, expect=20000, no filter, PAM30)  
 Other BLAST [web gateways](#)

**All matches to this query**

| Score | Mr(calc):   | Delta    | Sequence                                       |
|-------|-------------|----------|------------------------------------------------|
| 54.4  | 3478.674866 | 0.016950 | <a href="#">NFPPSQDASGDLYTTSSQLTLPATQCLAGK</a> |
| 21.6  | 3478.674866 | 0.016950 | <a href="#">NFPPSQDASGDLYTTSSQLTLPATQCLAGK</a> |
| 21.5  | 3478.674866 | 0.016950 | <a href="#">NFPPSQDASGDLYTTSSQLTLPATQCLAGK</a> |

# MASCOT Search Results

## Peptide View

MS/MS Fragmentation of **EPAAQAPVK**

Found in **IGHD\_HUMAN**, Ig delta chain C region OS=Homo sapiens GN=IGHD PE=1 SV=2

Match to Query 20767: 1220.657028 from(611.335790,2+) rtinseconds(1449) index(59469)

Title: Locus:1.1.1.3130.17 File:"2013-07-02 CLN FXIII 60 min 3rd FT.wiff"

Data file C:\Program Files (x86)\Matrix Science\Mascot Daemon\mgf6 FXIII 60 min 3rd\mascot\_daemon\_merge.mgf

Click mouse within plot area to zoom in by factor of two about that point

Or, Plot from  to  Da

Label all possible matches  Label matches used for scoring

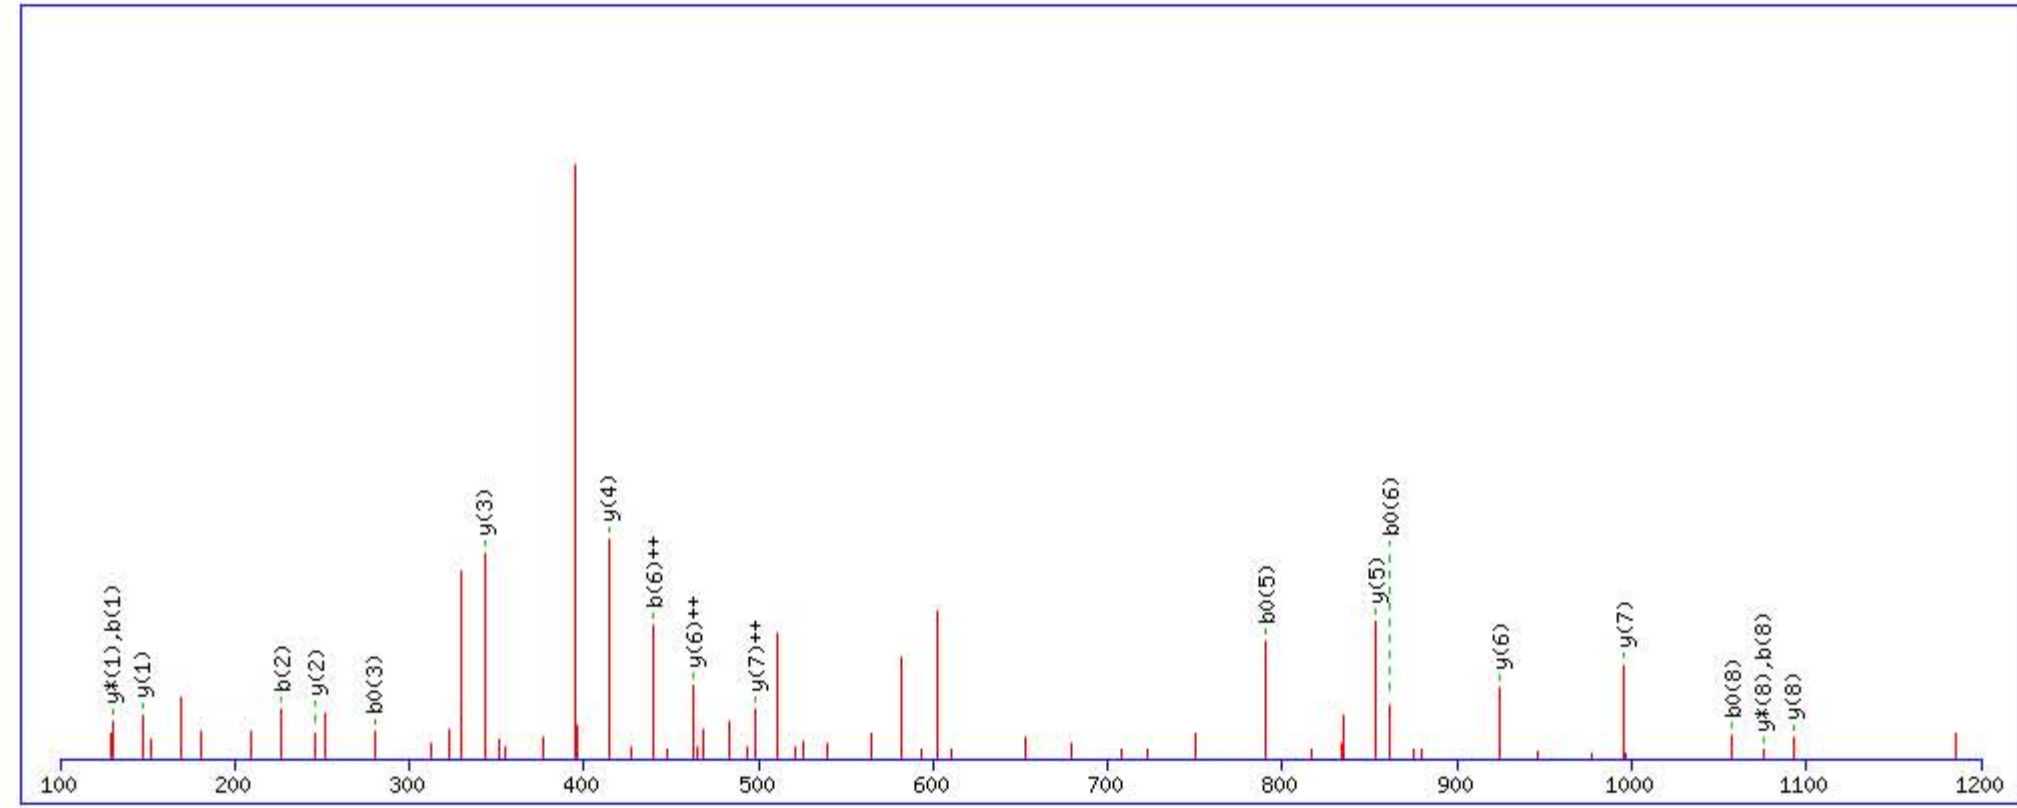

Monoisotopic mass of neutral peptide Mr(calc): 1220.658707

Fixed modifications: Carbamidomethyl (C) (apply to specified residues or termini only)

Variable modifications:

Q5 : Biotin:Thermo-21345 (Q)

Ions Score: 49 Expect: 0.00022

Matches : 20/72 fragment ions using 39 most intense peaks [\(help\)](#)

| # | b           | b <sup>++</sup> | b <sup>*</sup> | b <sup>*++</sup> | b <sup>0</sup> | b <sup>0++</sup> | Seq. | y           | y <sup>++</sup> | y <sup>*</sup> | y <sup>*++</sup> | # |
|---|-------------|-----------------|----------------|------------------|----------------|------------------|------|-------------|-----------------|----------------|------------------|---|
| 1 | 130.049869  | 65.528572       |                |                  | 112.039304     | 56.523290        | E    |             |                 |                |                  | 9 |
| 2 | 227.102633  | 114.054954      |                |                  | 209.092068     | 105.049672       | P    | 1092.623414 | 546.815345      | 1075.596865    | 538.302071       | 8 |
| 3 | 298.139747  | 149.573512      |                |                  | 280.129182     | 140.568229       | A    | 995.570650  | 498.288963      | 978.544101     | 489.775689       | 7 |
| 4 | 369.176861  | 185.092068      |                |                  | 351.166296     | 176.086786       | A    | 924.533536  | 462.770406      | 907.506987     | 454.257132       | 6 |
| 5 | 808.402187  | 404.704732      | 791.375638     | 396.191457       | 790.391622     | 395.699449       | Q    | 853.496422  | 427.251849      | 836.469873     | 418.738575       | 5 |
| 6 | 879.439301  | 440.223289      | 862.412752     | 431.710014       | 861.428736     | 431.218006       | A    | 414.271096  | 207.639186      | 397.244547     | 199.125911       | 4 |
| 7 | 976.492065  | 488.749671      | 959.465516     | 480.236396       | 958.481500     | 479.744388       | P    | 343.233982  | 172.120629      | 326.207433     | 163.607354       | 3 |
| 8 | 1075.560479 | 538.283878      | 1058.533930    | 529.770603       | 1057.549914    | 529.278595       | V    | 246.181218  | 123.594247      | 229.154669     | 115.080972       | 2 |
| 9 |             |                 |                |                  |                |                  | K    | 147.112804  | 74.060040       | 130.086255     | 65.546765        | 1 |

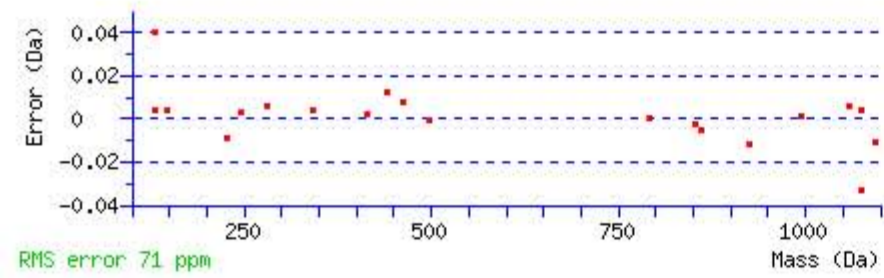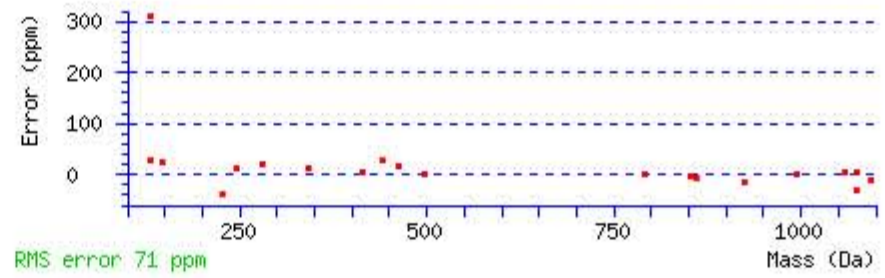

NCBI BLAST search of [EPAAQAPVK](#)

(Parameters: blastp, nr protein database, expect=20000, no filter, PAM30)

Other BLAST [web gateways](#)

### All matches to this query

| Score | Mr(calc):   | Delta     | Sequence                    |
|-------|-------------|-----------|-----------------------------|
| 49.2  | 1220.658707 | -0.001679 | <a href="#">EPAAQAPVK</a>   |
| 16.9  | 1220.658722 | -0.001694 | <a href="#">EQNVVPVK</a>    |
| 2.6   | 1220.654678 | 0.002350  | <a href="#">SVRMLSGSKEK</a> |
| 2.3   | 1220.651321 | 0.005707  | <a href="#">GQVLIASSYGR</a> |
| 2.1   | 1220.651291 | 0.005737  | <a href="#">EYIKQRGAEK</a>  |
| 1.6   | 1220.644806 | 0.012222  | <a href="#">GGHVQREK</a>    |
| 1.6   | 1220.669937 | -0.012909 | <a href="#">IIAHSNQK</a>    |
| 1.6   | 1220.640076 | 0.016952  | <a href="#">LLAEYTGAAQK</a> |
| 1.4   | 1220.647491 | 0.009537  | <a href="#">ETLFSVMPGLK</a> |
| 1.4   | 1220.666580 | -0.009552 | <a href="#">EPAIVRFFSR</a>  |



# MASCOT Search Results

## Peptide View

MS/MS Fragmentation of **NQVSLTCLVK**

Found in **IGHG1\_HUMAN**, Ig gamma-1 chain C region OS=Homo sapiens GN=IGHG1 PE=1 SV=1

Match to Query 29231: 1471.791608 from(736.903080,2+) rtinseconds(2257) index(64048)

Title: Locus:1.1.1.3412.10 File:"2013-07-02 CLN FXIII 60 min 3rd FT.wiff"

Data file C:\Program Files (x86)\Matrix Science\Mascot Daemon\mgf\6 FXIII 60 min 3rd\mascot\_daemon\_merge.mgf

Click mouse within plot area to zoom in by factor of two about that point

Or, Plot from  to  Da

Label all possible matches  Label matches used for scoring

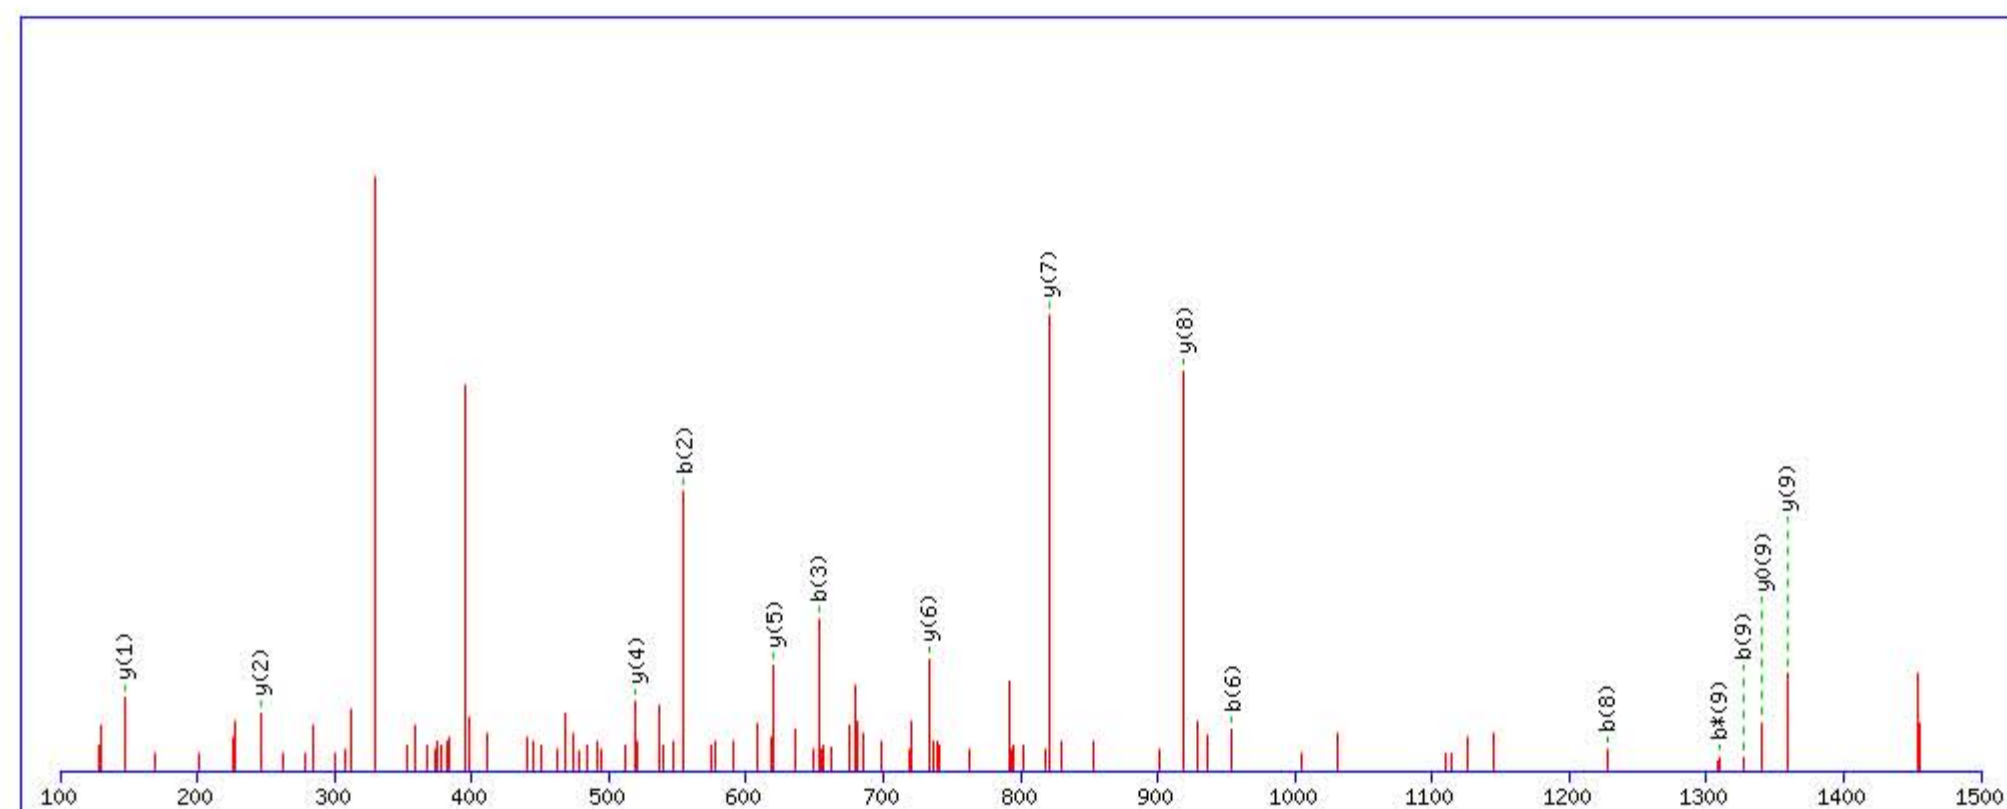

Monoisotopic mass of neutral peptide  $M_r(\text{calc})$ : 1471.789093

Fixed modifications: Carbamidomethyl (C) (apply to specified residues or termini only)

Variable modifications:

Q2 : Biotin:Thermo-21345 (Q)

Ions Score: 52 Expect: 4.7e-005

Matches : 15/94 fragment ions using 28 most intense peaks [\(help\)](#)

| #  | b                  | b <sup>++</sup> | b <sup>*</sup>     | b <sup>*++</sup> | b <sup>0</sup> | b <sup>0++</sup> | Seq. | y                  | y <sup>++</sup> | y <sup>*</sup> | y <sup>*++</sup> | y <sup>0</sup>     | y <sup>0++</sup> | #  |
|----|--------------------|-----------------|--------------------|------------------|----------------|------------------|------|--------------------|-----------------|----------------|------------------|--------------------|------------------|----|
| 1  | 115.050203         | 58.028740       | 98.023654          | 49.515465        |                |                  | N    |                    |                 |                |                  |                    |                  | 10 |
| 2  | <b>554.275529</b>  | 277.641403      | 537.248980         | 269.128128       |                |                  | Q    | <b>1358.753442</b> | 679.880359      | 1341.726893    | 671.367085       | <b>1340.742877</b> | 670.875076       | 9  |
| 3  | <b>653.343943</b>  | 327.175610      | 636.317394         | 318.662335       |                |                  | V    | <b>919.528116</b>  | 460.267696      | 902.501567     | 451.754421       | 901.517551         | 451.262413       | 8  |
| 4  | 740.375971         | 370.691623      | 723.349422         | 362.178349       | 722.365406     | 361.686341       | S    | <b>820.459702</b>  | 410.733489      | 803.433153     | 402.220215       | 802.449137         | 401.728207       | 7  |
| 5  | 853.460035         | 427.233656      | 836.433486         | 418.720381       | 835.449470     | 418.228373       | L    | <b>733.427674</b>  | 367.217475      | 716.401125     | 358.704201       | 715.417109         | 358.212193       | 6  |
| 6  | <b>954.507714</b>  | 477.757495      | 937.481165         | 469.244220       | 936.497149     | 468.752212       | T    | <b>620.343610</b>  | 310.675443      | 603.317061     | 302.162169       | 602.333045         | 301.670161       | 5  |
| 7  | 1114.538363        | 557.772819      | 1097.511814        | 549.259545       | 1096.527798    | 548.767537       | C    | <b>519.295931</b>  | 260.151604      | 502.269382     | 251.638329       |                    |                  | 4  |
| 8  | <b>1227.622427</b> | 614.314851      | 1210.595878        | 605.801577       | 1209.611862    | 605.309569       | L    | 359.265282         | 180.136279      | 342.238733     | 171.623004       |                    |                  | 3  |
| 9  | <b>1326.690841</b> | 663.849058      | <b>1309.664292</b> | 655.335784       | 1308.680276    | 654.843776       | V    | <b>246.181218</b>  | 123.594247      | 229.154669     | 115.080973       |                    |                  | 2  |
| 10 |                    |                 |                    |                  |                |                  | K    | <b>147.112804</b>  | 74.060040       | 130.086255     | 65.546765        |                    |                  | 1  |

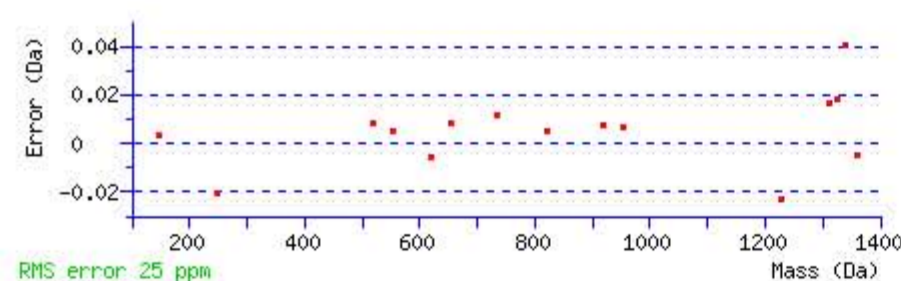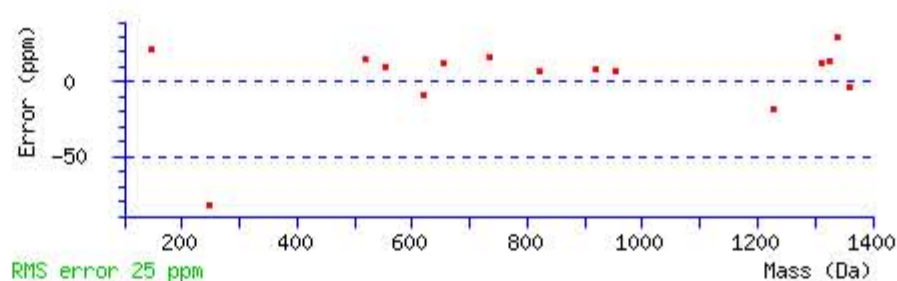

NCBI BLAST search of **NQVSLTCLVK**

(Parameters: blastp, nr protein database, expect=20000, no filter, PAM30)

Other BLAST [web gateways](#)

## All matches to this query

| Score | $M_r(\text{calc})$ : | Delta     | Sequence                        |
|-------|----------------------|-----------|---------------------------------|
| 51.9  | 1471.789093          | 0.002515  | <a href="#">NQVSLTCLVK</a>      |
| 5.4   | 1471.803467          | -0.011859 | <a href="#">EKQGPLLDLFGQK</a>   |
| 5.2   | 1471.806839          | -0.015231 | <a href="#">VANSPTMVNLLL GK</a> |
| 4.8   | 1471.799438          | -0.007830 | <a href="#">EVELDRLRDTVK</a>    |
| 4.1   | 1471.796921          | -0.005313 | <a href="#">YLIAACQHLQKK</a>    |
| 3.6   | 1471.796265          | -0.004657 | <a href="#">ELFEYFVVVSLK</a>    |
| 2.8   | 1471.797592          | -0.005984 | <a href="#">KYFWDR AFLVK</a>    |
| 2.4   | 1471.770447          | 0.021161  | <a href="#">QPTTAEKSATK</a>     |
| 1.1   | 1471.778305          | 0.013303  | <a href="#">NVQKGKGLGW EK</a>   |

# MASCOT Search Results

## Peptide View

MS/MS Fragmentation of **EPQVYTLPPSR**

Found in **IGHG1\_HUMAN**, Ig gamma-1 chain C region OS=Homo sapiens GN=IGHG1 PE=1 SV=1

Match to Query 33190: 1596.828912 from(533.283580,3+) rtinseconds(1996) index(62540)

Title: Locus:1.1.1.3321.14 File:"2013-07-02 CLN FXIII 60 min 3rd FT.wiff"

Data file C:\Program Files (x86)\Matrix Science\Mascot Daemon\mgf\6 FXIII 60 min 3rd\mascot\_daemon\_merge.mgf

Click mouse within plot area to zoom in by factor of two about that point

Or, Plot from  to  Da

Label all possible matches  Label matches used for scoring

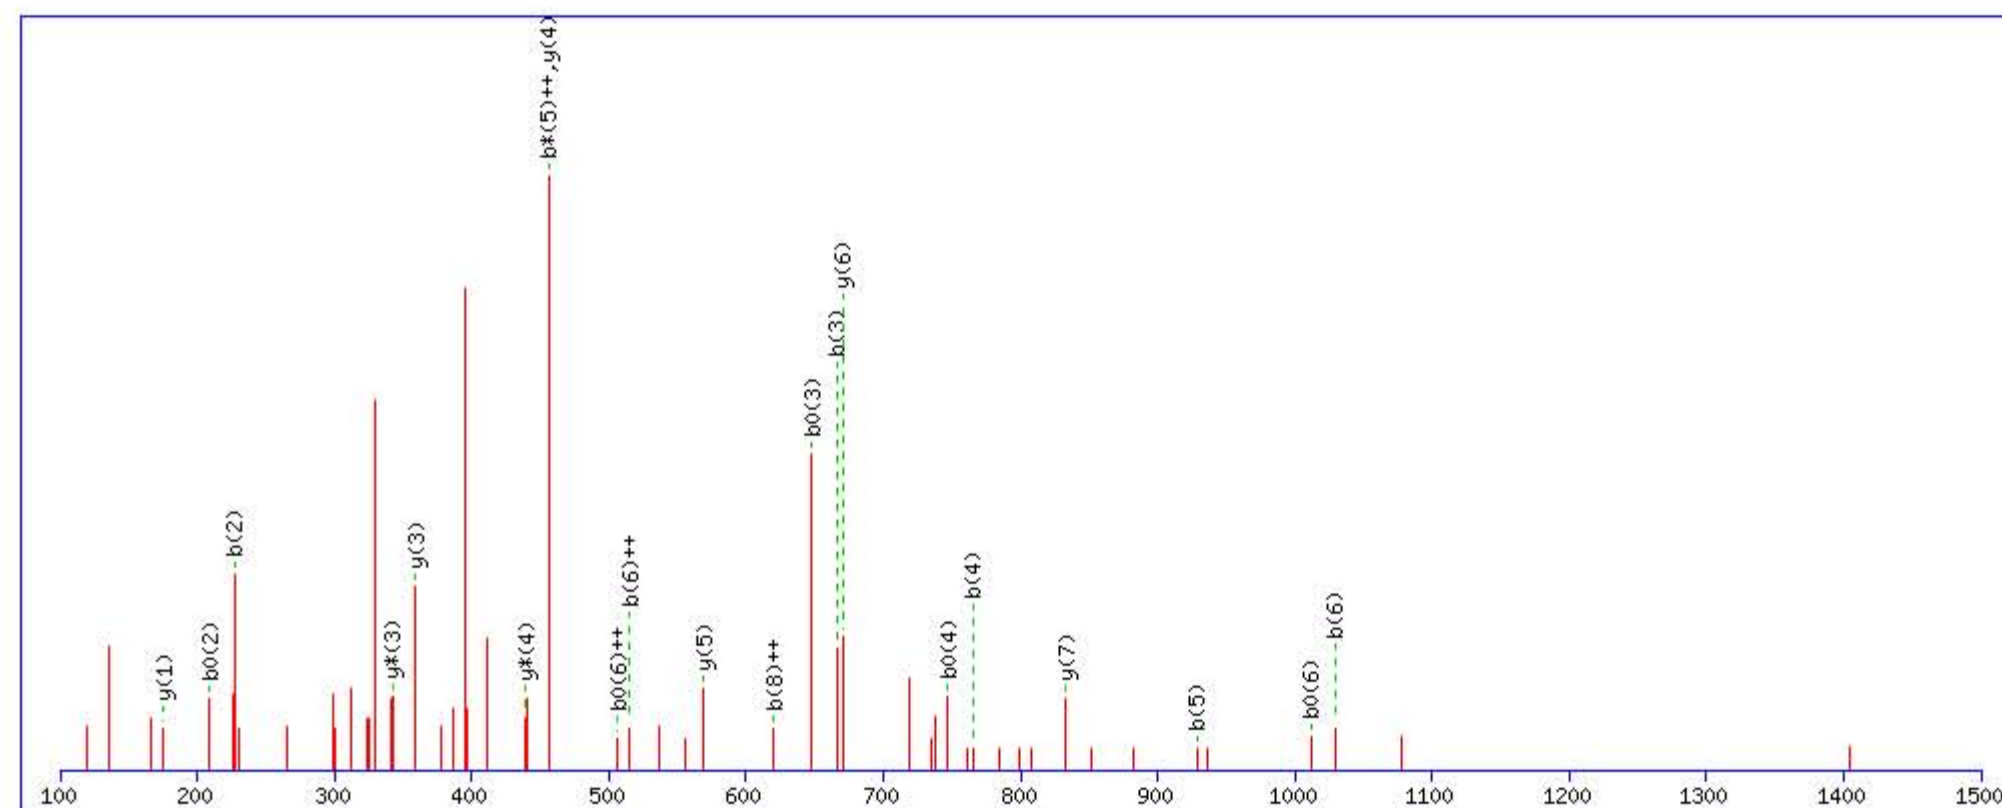

Monoisotopic mass of neutral peptide  $M_r(\text{calc})$ : 1596.833389

Fixed modifications: Carbamidomethyl (C) (apply to specified residues or termini only)

Variable modifications:

Q3 : Biotin:Thermo-21345 (Q)

Ions Score: 27 Expect: 0.0031

Matches : 21/114 fragment ions using 42 most intense peaks [\(help\)](#)

| #  | b                  | b <sup>++</sup>   | b <sup>+</sup> | b <sup>+++</sup>  | b <sup>0</sup>     | b <sup>0++</sup>  | Seq. | y                 | y <sup>++</sup> | y <sup>+</sup>    | y <sup>+++</sup> | y <sup>0</sup> | y <sup>0++</sup> | #  |
|----|--------------------|-------------------|----------------|-------------------|--------------------|-------------------|------|-------------------|-----------------|-------------------|------------------|----------------|------------------|----|
| 1  | 130.049869         | 65.528572         |                |                   | 112.039304         | 56.523290         | E    |                   |                 |                   |                  |                |                  | 11 |
| 2  | <b>227.102633</b>  | 114.054954        |                |                   | <b>209.092068</b>  | 105.049672        | P    | 1468.798084       | 734.902680      | 1451.771535       | 726.389406       | 1450.787519    | 725.897398       | 10 |
| 3  | <b>666.327959</b>  | 333.667618        | 649.301410     | 325.154343        | <b>648.317394</b>  | 324.662335        | Q    | 1371.745320       | 686.376298      | 1354.718771       | 677.863024       | 1353.734755    | 677.371016       | 9  |
| 4  | <b>765.396373</b>  | 383.201825        | 748.369824     | 374.688550        | <b>747.385808</b>  | 374.196542        | V    | 932.519994        | 466.763635      | 915.493445        | 458.250361       | 914.509429     | 457.758353       | 8  |
| 5  | <b>928.459702</b>  | 464.733489        | 911.433153     | <b>456.220215</b> | 910.449137         | 455.728207        | Y    | <b>833.451580</b> | 417.229428      | 816.425031        | 408.716154       | 815.441015     | 408.224146       | 7  |
| 6  | <b>1029.507381</b> | <b>515.257329</b> | 1012.480832    | 506.744054        | <b>1011.496816</b> | <b>506.252046</b> | T    | <b>670.388251</b> | 335.697764      | 653.361702        | 327.184489       | 652.377686     | 326.692481       | 6  |
| 7  | 1142.591445        | 571.799361        | 1125.564896    | 563.286086        | 1124.580880        | 562.794078        | L    | <b>569.340572</b> | 285.173924      | 552.314023        | 276.660650       | 551.330007     | 276.168642       | 5  |
| 8  | 1239.644209        | <b>620.325743</b> | 1222.617660    | 611.812468        | 1221.633644        | 611.320460        | P    | <b>456.256508</b> | 228.631892      | <b>439.229959</b> | 220.118618       | 438.245943     | 219.626610       | 4  |
| 9  | 1336.696973        | 668.852125        | 1319.670424    | 660.338850        | 1318.686408        | 659.846842        | P    | <b>359.203744</b> | 180.105510      | <b>342.177195</b> | 171.592236       | 341.193179     | 171.100228       | 3  |
| 10 | 1423.729001        | 712.368139        | 1406.702452    | 703.854864        | 1405.718436        | 703.362856        | S    | 262.150980        | 131.579128      | 245.124431        | 123.065854       | 244.140415     | 122.573846       | 2  |
| 11 |                    |                   |                |                   |                    |                   | R    | <b>175.118952</b> | 88.063114       | 158.092403        | 79.549839        |                |                  | 1  |

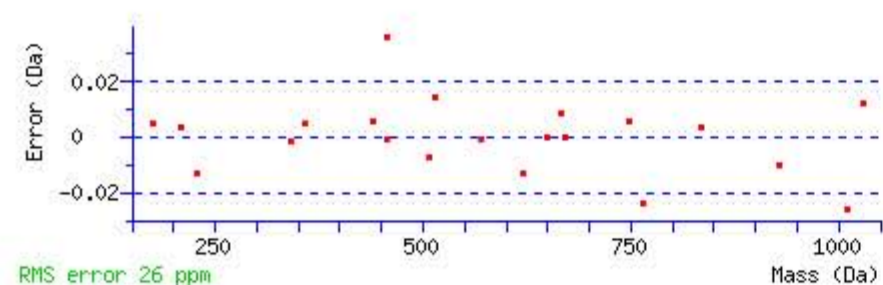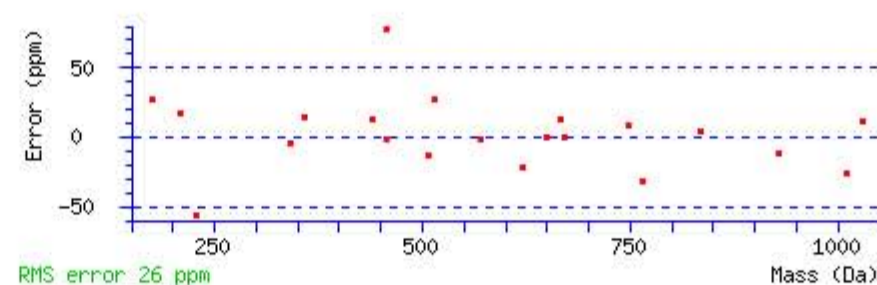

NCBI BLAST search of **EPQVYTLPPSR**

(Parameters: blastp, nr protein database, expect=20000, no filter, PAM30)

Other BLAST [web gateways](#)

All matches to this query

| Score | $M_r(\text{calc})$ : | Delta     | Sequence                          |
|-------|----------------------|-----------|-----------------------------------|
| 27.4  | 1596.833389          | -0.004477 | <a href="#">EPQVYTLPPSR</a>       |
| 0.6   | 1596.847122          | -0.018210 | <a href="#">ATPSSSPGTATALPALR</a> |

# MASCOT Search Results

## Peptide View

MS/MS Fragmentation of **WQQGNVFSCSVMEALHNHYTQK**

Found in **IGHG1\_HUMAN**, Ig gamma-1 chain C region OS=Homo sapiens GN=IGHG1 PE=1 SV=1

Match to Query 56804: 3111.434616 from(778.865930,4+) rtinseconds(2094) index(63044)

Title: Locus:1.1.1.3355.13 File:"2013-07-02 CLN FXIII 60 min 3rd FT.wiff"

Data file C:\Program Files (x86)\Matrix Science\Mascot Daemon\mgf6 FXIII 60 min 3rd\mascot\_daemon\_merge.mgf

Click mouse within plot area to zoom in by factor of two about that point

Or, Plot from  to  Da

Label all possible matches  Label matches used for scoring

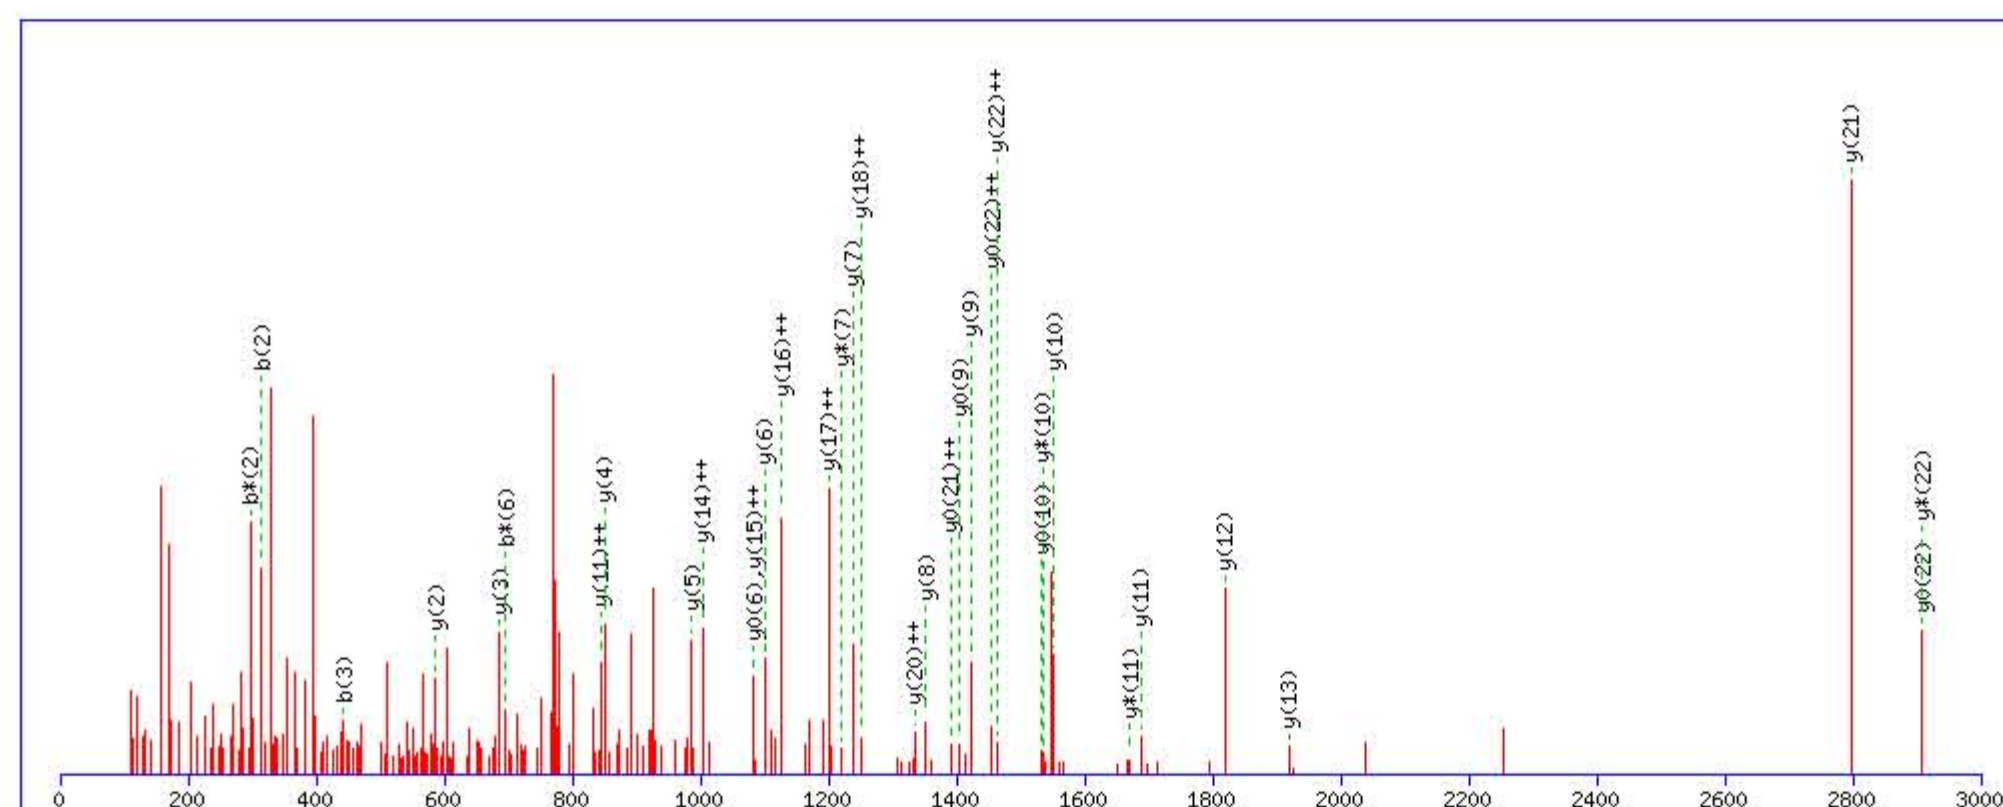

Monoisotopic mass of neutral peptide Mr(calc): 3111.426590

Fixed modifications: Carbamidomethyl (C) (apply to specified residues or termini only)

Variable modifications:

Q22 : Biotin:Thermo-21345 (Q)

Ions Score: 66 Expect: 3.6e-006

Matches : 35/244 fragment ions using 76 most intense peaks [\(help\)](#)

| #  | b                 | b <sup>++</sup> | b <sup>*</sup>    | b <sup>*++</sup> | b <sup>0</sup> | b <sup>0++</sup> | Seq. | y                  | y <sup>++</sup>    | y <sup>*</sup>     | y <sup>*++</sup> | y <sup>0</sup>     | y <sup>0++</sup>   | #  |
|----|-------------------|-----------------|-------------------|------------------|----------------|------------------|------|--------------------|--------------------|--------------------|------------------|--------------------|--------------------|----|
| 1  | 187.086589        | 94.046932       |                   |                  |                |                  | W    |                    |                    |                    |                  |                    |                    | 23 |
| 2  | <b>315.145167</b> | 158.076222      | <b>298.118618</b> | 149.562947       |                |                  | Q    | 2926.354551        | <b>1463.680913</b> | <b>2909.328002</b> | 1455.167639      | <b>2908.343986</b> | <b>1454.675631</b> | 22 |
| 3  | <b>443.203745</b> | 222.105511      | 426.177196        | 213.592236       |                |                  | Q    | <b>2798.295973</b> | 1399.651624        | 2781.269424        | 1391.138350      | 2780.285408        | <b>1390.646342</b> | 21 |
| 4  | 500.225209        | 250.616243      | 483.198660        | 242.102968       |                |                  | G    | 2670.237395        | <b>1335.622335</b> | 2653.210846        | 1327.109061      | 2652.226830        | 1326.617053        | 20 |
| 5  | 614.268136        | 307.637706      | 597.241587        | 299.124432       |                |                  | N    | 2613.215931        | 1307.111603        | 2596.189382        | 1298.598329      | 2595.205366        | 1298.106321        | 19 |
| 6  | 713.336550        | 357.171913      | <b>696.310001</b> | 348.658639       |                |                  | V    | 2499.173004        | <b>1250.090140</b> | 2482.146455        | 1241.576865      | 2481.162439        | 1241.084857        | 18 |
| 7  | 860.404964        | 430.706120      | 843.378415        | 422.192845       |                |                  | F    | 2400.104590        | <b>1200.555933</b> | 2383.078041        | 1192.042658      | 2382.094025        | 1191.550650        | 17 |
| 8  | 947.436992        | 474.222134      | 930.410443        | 465.708859       | 929.426427     | 465.216851       | S    | 2253.036176        | <b>1127.021726</b> | 2236.009627        | 1118.508451      | 2235.025611        | 1118.016443        | 16 |
| 9  | 1107.467641       | 554.237459      | 1090.441092       | 545.724184       | 1089.457076    | 545.232176       | C    | 2166.004148        | <b>1083.505712</b> | 2148.977599        | 1074.992437      | 2147.993583        | 1074.500429        | 15 |
| 10 | 1194.499669       | 597.753473      | 1177.473120       | 589.240198       | 1176.489104    | 588.748190       | S    | 2005.973499        | <b>1003.490388</b> | 1988.946950        | 994.977113       | 1987.962934        | 994.485105         | 14 |
| 11 | 1293.568083       | 647.287680      | 1276.541534       | 638.774405       | 1275.557518    | 638.282397       | V    | <b>1918.941471</b> | 959.974373         | 1901.914922        | 951.461099       | 1900.930906        | 950.969091         | 13 |
| 12 | 1424.608568       | 712.807922      | 1407.582019       | 704.294648       | 1406.598003    | 703.802640       | M    | <b>1819.873057</b> | 910.440166         | 1802.846508        | 901.926892       | 1801.862492        | 901.434884         | 12 |
| 13 | 1561.667480       | 781.337378      | 1544.640931       | 772.824104       | 1543.656915    | 772.332096       | H    | <b>1688.832572</b> | <b>844.919924</b>  | <b>1671.806023</b> | 836.406649       | 1670.822007        | 835.914641         | 11 |
| 14 | 1690.710073       | 845.858675      | 1673.683524       | 837.345400       | 1672.699508    | 836.853392       | E    | <b>1551.773660</b> | 776.390468         | <b>1534.747111</b> | 767.877193       | <b>1533.763095</b> | 767.385185         | 10 |
| 15 | 1761.747187       | 881.377231      | 1744.720638       | 872.863957       | 1743.736622    | 872.371949       | A    | <b>1422.731067</b> | 711.869171         | 1405.704518        | 703.355897       | <b>1404.720502</b> | 702.863889         | 9  |
| 16 | 1874.831251       | 937.919263      | 1857.804702       | 929.405989       | 1856.820686    | 928.913981       | L    | <b>1351.693953</b> | 676.350615         | 1334.667404        | 667.837340       | 1333.683388        | 667.345332         | 8  |
| 17 | 2011.890163       | 1006.448719     | 1994.863614       | 997.935445       | 1993.879598    | 997.443437       | H    | <b>1238.609889</b> | 619.808583         | <b>1221.583340</b> | 611.295308       | 1220.599324        | 610.803300         | 7  |
| 18 | 2125.933090       | 1063.470183     | 2108.906541       | 1054.956908      | 2107.922525    | 1054.464900      | N    | <b>1101.550977</b> | 551.279127         | 1084.524428        | 542.765852       | <b>1083.540412</b> | 542.273844         | 6  |
| 19 | 2262.992002       | 1131.999639     | 2245.965453       | 1123.486364      | 2244.981437    | 1122.994356      | H    | <b>987.508050</b>  | 494.257663         | 970.481501         | 485.744389       | 969.497485         | 485.252381         | 5  |
| 20 | 2426.055331       | 1213.531303     | 2409.028782       | 1205.018029      | 2408.044766    | 1204.526021      | Y    | <b>850.449138</b>  | 425.728207         | 833.422589         | 417.214933       | 832.438573         | 416.722925         | 4  |
| 21 | 2527.103010       | 1264.055143     | 2510.076461       | 1255.541868      | 2509.092445    | 1255.049860      | T    | <b>687.385809</b>  | 344.196543         | 670.359260         | 335.683268       | 669.375244         | 335.191260         | 3  |
| 22 | 2966.328336       | 1483.667806     | 2949.301787       | 1475.154531      | 2948.317771    | 1474.662523      | Q    | <b>586.338130</b>  | 293.672703         | 569.311581         | 285.159429       |                    |                    | 2  |
| 23 |                   |                 |                   |                  |                |                  | K    | 147.112804         | 74.060040          | 130.086255         | 65.546765        |                    |                    | 1  |

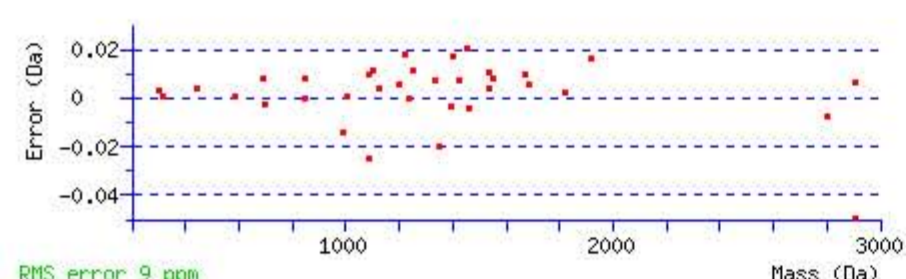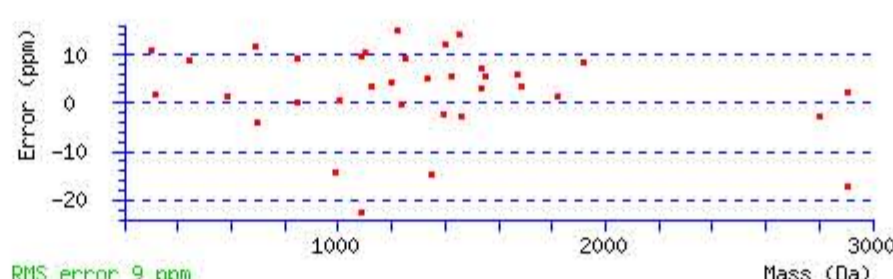

NCBI BLAST search of **WQQGNVFSCSVMEALHNHYTQK**

(Parameters: blastp, nr protein database, expect=20000, no filter, PAM30)

Other BLAST [web gateways](#)

All matches to this query

| Score | Mr(calc):   | Delta    | Sequence                      |
|-------|-------------|----------|-------------------------------|
| 66.0  | 3111.426590 | 0.008026 | <b>WQQGNVFSCSVMEALHNHYTQK</b> |

# MASCOT Search Results

## Peptide View

MS/MS Fragmentation of **NQVSLTCLVK**

Found in **IGHG1\_HUMAN**, Ig gamma-1 chain C region OS=Homo sapiens GN=IGHG1 PE=1 SV=1

Match to Query 29231: 1471.791608 from(736.903080,2+) rtinseconds(2257) index(64048)

Title: Locus:1.1.1.3412.10 File:"2013-07-02 CLN FXIII 60 min 3rd FT.wiff"

Data file C:\Program Files (x86)\Matrix Science\Mascot Daemon\mgf\6 FXIII 60 min 3rd\mascot\_daemon\_merge.mgf

Click mouse within plot area to zoom in by factor of two about that point

Or, Plot from  to  Da

Label all possible matches  Label matches used for scoring



Monoisotopic mass of neutral peptide  $M_r(\text{calc})$ : 1471.789093

Fixed modifications: Carbamidomethyl (C) (apply to specified residues or termini only)

Variable modifications:

Q2 : Biotin:Thermo-21345 (Q)

Ions Score: 52 Expect: 4.7e-005

Matches : 15/94 fragment ions using 28 most intense peaks [\(help\)](#)

| #  | b                  | b <sup>++</sup> | b*                 | b <sup>*++</sup> | b <sup>0</sup> | b <sup>0++</sup> | Seq. | y                  | y <sup>++</sup> | y*          | y <sup>*++</sup> | y <sup>0</sup>     | y <sup>0++</sup> | #  |
|----|--------------------|-----------------|--------------------|------------------|----------------|------------------|------|--------------------|-----------------|-------------|------------------|--------------------|------------------|----|
| 1  | 115.050203         | 58.028740       | 98.023654          | 49.515465        |                |                  | N    |                    |                 |             |                  |                    |                  | 10 |
| 2  | <b>554.275529</b>  | 277.641403      | 537.248980         | 269.128128       |                |                  | Q    | <b>1358.753442</b> | 679.880359      | 1341.726893 | 671.367085       | <b>1340.742877</b> | 670.875076       | 9  |
| 3  | <b>653.343943</b>  | 327.175610      | 636.317394         | 318.662335       |                |                  | V    | <b>919.528116</b>  | 460.267696      | 902.501567  | 451.754421       | 901.517551         | 451.262413       | 8  |
| 4  | 740.375971         | 370.691623      | 723.349422         | 362.178349       | 722.365406     | 361.686341       | S    | <b>820.459702</b>  | 410.733489      | 803.433153  | 402.220215       | 802.449137         | 401.728207       | 7  |
| 5  | 853.460035         | 427.233656      | 836.433486         | 418.720381       | 835.449470     | 418.228373       | L    | <b>733.427674</b>  | 367.217475      | 716.401125  | 358.704201       | 715.417109         | 358.212193       | 6  |
| 6  | <b>954.507714</b>  | 477.757495      | 937.481165         | 469.244220       | 936.497149     | 468.752212       | T    | <b>620.343610</b>  | 310.675443      | 603.317061  | 302.162169       | 602.333045         | 301.670161       | 5  |
| 7  | 1114.538363        | 557.772819      | 1097.511814        | 549.259545       | 1096.527798    | 548.767537       | C    | <b>519.295931</b>  | 260.151604      | 502.269382  | 251.638329       |                    |                  | 4  |
| 8  | <b>1227.622427</b> | 614.314851      | 1210.595878        | 605.801577       | 1209.611862    | 605.309569       | L    | 359.265282         | 180.136279      | 342.238733  | 171.623004       |                    |                  | 3  |
| 9  | <b>1326.690841</b> | 663.849058      | <b>1309.664292</b> | 655.335784       | 1308.680276    | 654.843776       | V    | <b>246.181218</b>  | 123.594247      | 229.154669  | 115.080973       |                    |                  | 2  |
| 10 |                    |                 |                    |                  |                |                  | K    | <b>147.112804</b>  | 74.060040       | 130.086255  | 65.546765        |                    |                  | 1  |



NCBI BLAST search of **NQVSLTCLVK**

(Parameters: blastp, nr protein database, expect=20000, no filter, PAM30)

Other BLAST [web gateways](#)

## All matches to this query

| Score | $M_r(\text{calc})$ : | Delta     | Sequence                        |
|-------|----------------------|-----------|---------------------------------|
| 51.9  | 1471.789093          | 0.002515  | <a href="#">NQVSLTCLVK</a>      |
| 5.4   | 1471.803467          | -0.011859 | <a href="#">EKQGPLLDLFGQK</a>   |
| 5.2   | 1471.806839          | -0.015231 | <a href="#">VANSPTMVNLLL GK</a> |
| 4.8   | 1471.799438          | -0.007830 | <a href="#">EVELDRLRDTVK</a>    |
| 4.1   | 1471.796921          | -0.005313 | <a href="#">YLIAACQHLQKK</a>    |
| 3.6   | 1471.796265          | -0.004657 | <a href="#">ELFEYFVVVSLK</a>    |
| 2.8   | 1471.797592          | -0.005984 | <a href="#">KYFWDR AFLVK</a>    |
| 2.4   | 1471.770447          | 0.021161  | <a href="#">QPTTAEKSATK</a>     |
| 1.1   | 1471.778305          | 0.013303  | <a href="#">NVQKGKGLGW EK</a>   |

# MASCOT Search Results

## Peptide View

MS/MS Fragmentation of **EPQVYTLPPSR**

Found in **IGHG1\_HUMAN**, Ig gamma-1 chain C region OS=Homo sapiens GN=IGHG1 PE=1 SV=1

Match to Query 33190: 1596.828912 from(533.283580,3+) rtinseconds(1996) index(62540)

Title: Locus:1.1.1.3321.14 File:"2013-07-02 CLN FXIII 60 min 3rd FT.wiff"

Data file C:\Program Files (x86)\Matrix Science\Mascot Daemon\mgf\6 FXIII 60 min 3rd\mascot\_daemon\_merge.mgf

Click mouse within plot area to zoom in by factor of two about that point

Or, Plot from  to  Da

Label all possible matches  Label matches used for scoring

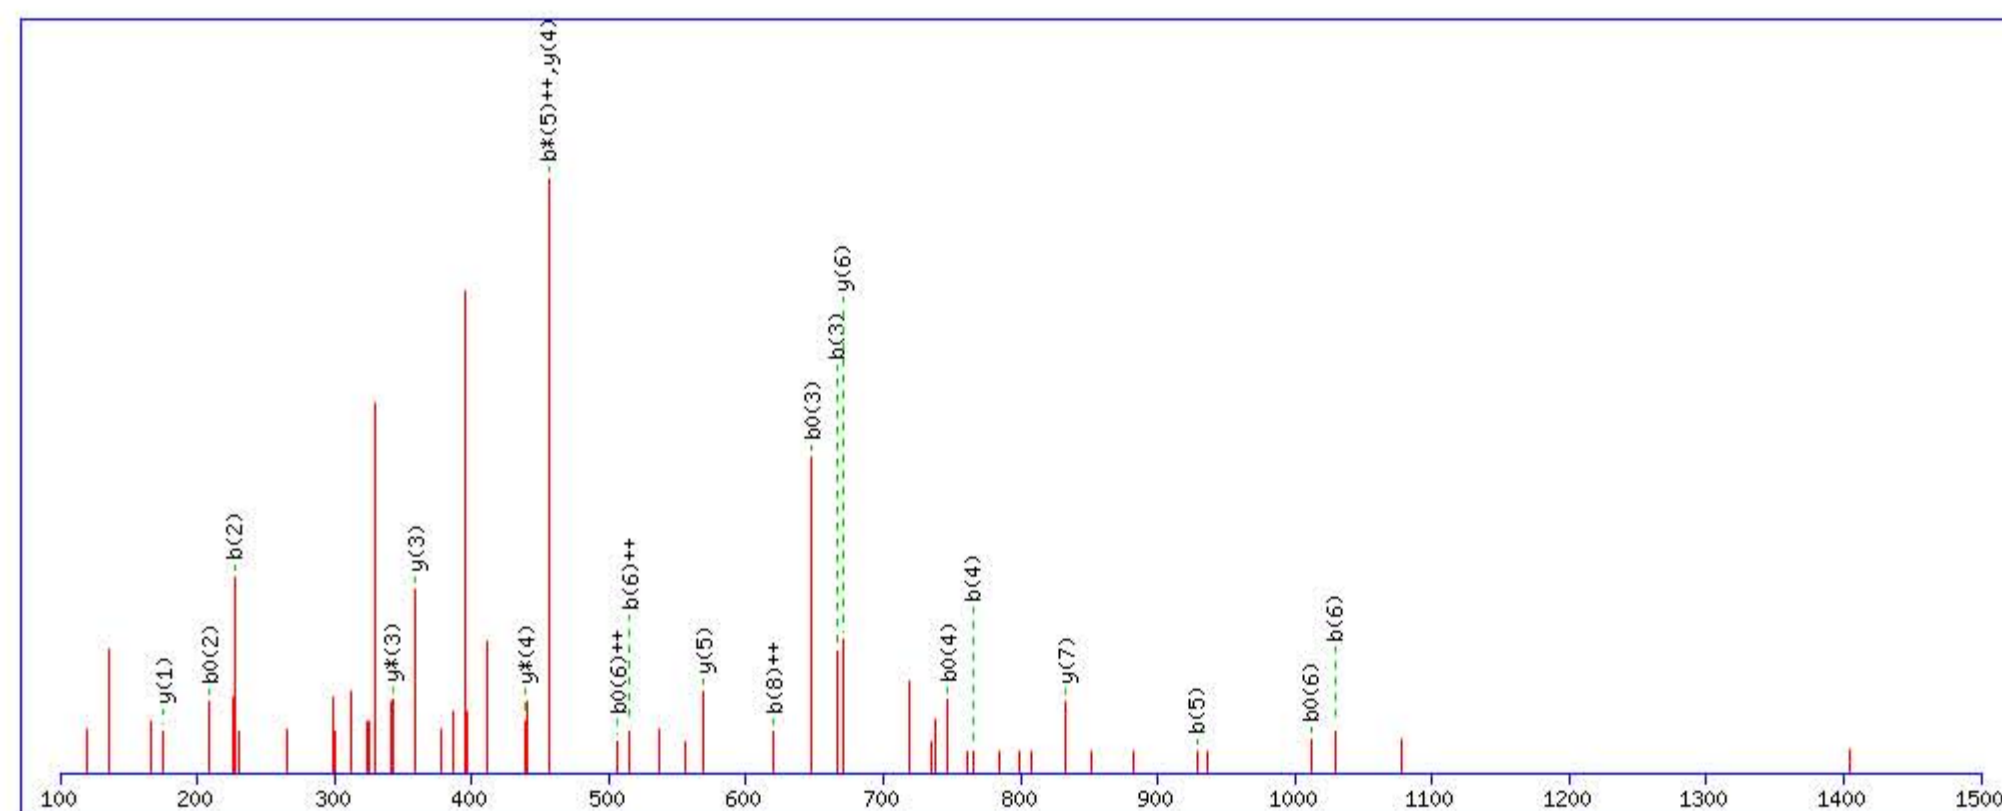

Monoisotopic mass of neutral peptide  $M_r(\text{calc})$ : 1596.833389

Fixed modifications: Carbamidomethyl (C) (apply to specified residues or termini only)

Variable modifications:

Q3 : Biotin:Thermo-21345 (Q)

Ions Score: 27 Expect: 0.0031

Matches : 21/114 fragment ions using 42 most intense peaks [\(help\)](#)

| #  | b                  | b <sup>++</sup>   | b <sup>+</sup> | b <sup>+++</sup>  | b <sup>0</sup>     | b <sup>0++</sup>  | Seq. | y                 | y <sup>++</sup> | y <sup>+</sup>    | y <sup>+++</sup> | y <sup>0</sup> | y <sup>0++</sup> | #  |
|----|--------------------|-------------------|----------------|-------------------|--------------------|-------------------|------|-------------------|-----------------|-------------------|------------------|----------------|------------------|----|
| 1  | 130.049869         | 65.528572         |                |                   | 112.039304         | 56.523290         | E    |                   |                 |                   |                  |                |                  | 11 |
| 2  | <b>227.102633</b>  | 114.054954        |                |                   | <b>209.092068</b>  | 105.049672        | P    | 1468.798084       | 734.902680      | 1451.771535       | 726.389406       | 1450.787519    | 725.897398       | 10 |
| 3  | <b>666.327959</b>  | 333.667618        | 649.301410     | 325.154343        | <b>648.317394</b>  | 324.662335        | Q    | 1371.745320       | 686.376298      | 1354.718771       | 677.863024       | 1353.734755    | 677.371016       | 9  |
| 4  | <b>765.396373</b>  | 383.201825        | 748.369824     | 374.688550        | <b>747.385808</b>  | 374.196542        | V    | 932.519994        | 466.763635      | 915.493445        | 458.250361       | 914.509429     | 457.758353       | 8  |
| 5  | <b>928.459702</b>  | 464.733489        | 911.433153     | <b>456.220215</b> | 910.449137         | 455.728207        | Y    | <b>833.451580</b> | 417.229428      | 816.425031        | 408.716154       | 815.441015     | 408.224146       | 7  |
| 6  | <b>1029.507381</b> | <b>515.257329</b> | 1012.480832    | 506.744054        | <b>1011.496816</b> | <b>506.252046</b> | T    | <b>670.388251</b> | 335.697764      | 653.361702        | 327.184489       | 652.377686     | 326.692481       | 6  |
| 7  | 1142.591445        | 571.799361        | 1125.564896    | 563.286086        | 1124.580880        | 562.794078        | L    | <b>569.340572</b> | 285.173924      | 552.314023        | 276.660650       | 551.330007     | 276.168642       | 5  |
| 8  | 1239.644209        | <b>620.325743</b> | 1222.617660    | 611.812468        | 1221.633644        | 611.320460        | P    | <b>456.256508</b> | 228.631892      | <b>439.229959</b> | 220.118618       | 438.245943     | 219.626610       | 4  |
| 9  | 1336.696973        | 668.852125        | 1319.670424    | 660.338850        | 1318.686408        | 659.846842        | P    | <b>359.203744</b> | 180.105510      | <b>342.177195</b> | 171.592236       | 341.193179     | 171.100228       | 3  |
| 10 | 1423.729001        | 712.368139        | 1406.702452    | 703.854864        | 1405.718436        | 703.362856        | S    | 262.150980        | 131.579128      | 245.124431        | 123.065854       | 244.140415     | 122.573846       | 2  |
| 11 |                    |                   |                |                   |                    |                   | R    | <b>175.118952</b> | 88.063114       | 158.092403        | 79.549839        |                |                  | 1  |



NCBI BLAST search of **EPQVYTLPPSR**

(Parameters: blastp, nr protein database, expect=20000, no filter, PAM30)

Other BLAST [web gateways](#)

All matches to this query

| Score | $M_r(\text{calc})$ : | Delta     | Sequence                          |
|-------|----------------------|-----------|-----------------------------------|
| 27.4  | 1596.833389          | -0.004477 | <a href="#">EPQVYTLPPSR</a>       |
| 0.6   | 1596.847122          | -0.018210 | <a href="#">ATPSSSPGTATALPALR</a> |

Mascot: <http://www.matrixscience.com/>

# MASCOT Search Results

## Peptide View

MS/MS Fragmentation of **WQQGNVFSCSVMEALHNHYTQK**

Found in **IGHG1\_HUMAN**, Ig gamma-1 chain C region OS=Homo sapiens GN=IGHG1 PE=1 SV=1

Match to Query 56804: 3111.434616 from(778.865930,4+) rtinseconds(2094) index(63044)

Title: Locus:1.1.1.3355.13 File:"2013-07-02 CLN FXIII 60 min 3rd FT.wiff"

Data file C:\Program Files (x86)\Matrix Science\Mascot Daemon\mgf6 FXIII 60 min 3rd\mascot\_daemon\_merge.mgf

Click mouse within plot area to zoom in by factor of two about that point

Or, Plot from  to  Da

Label all possible matches  Label matches used for scoring

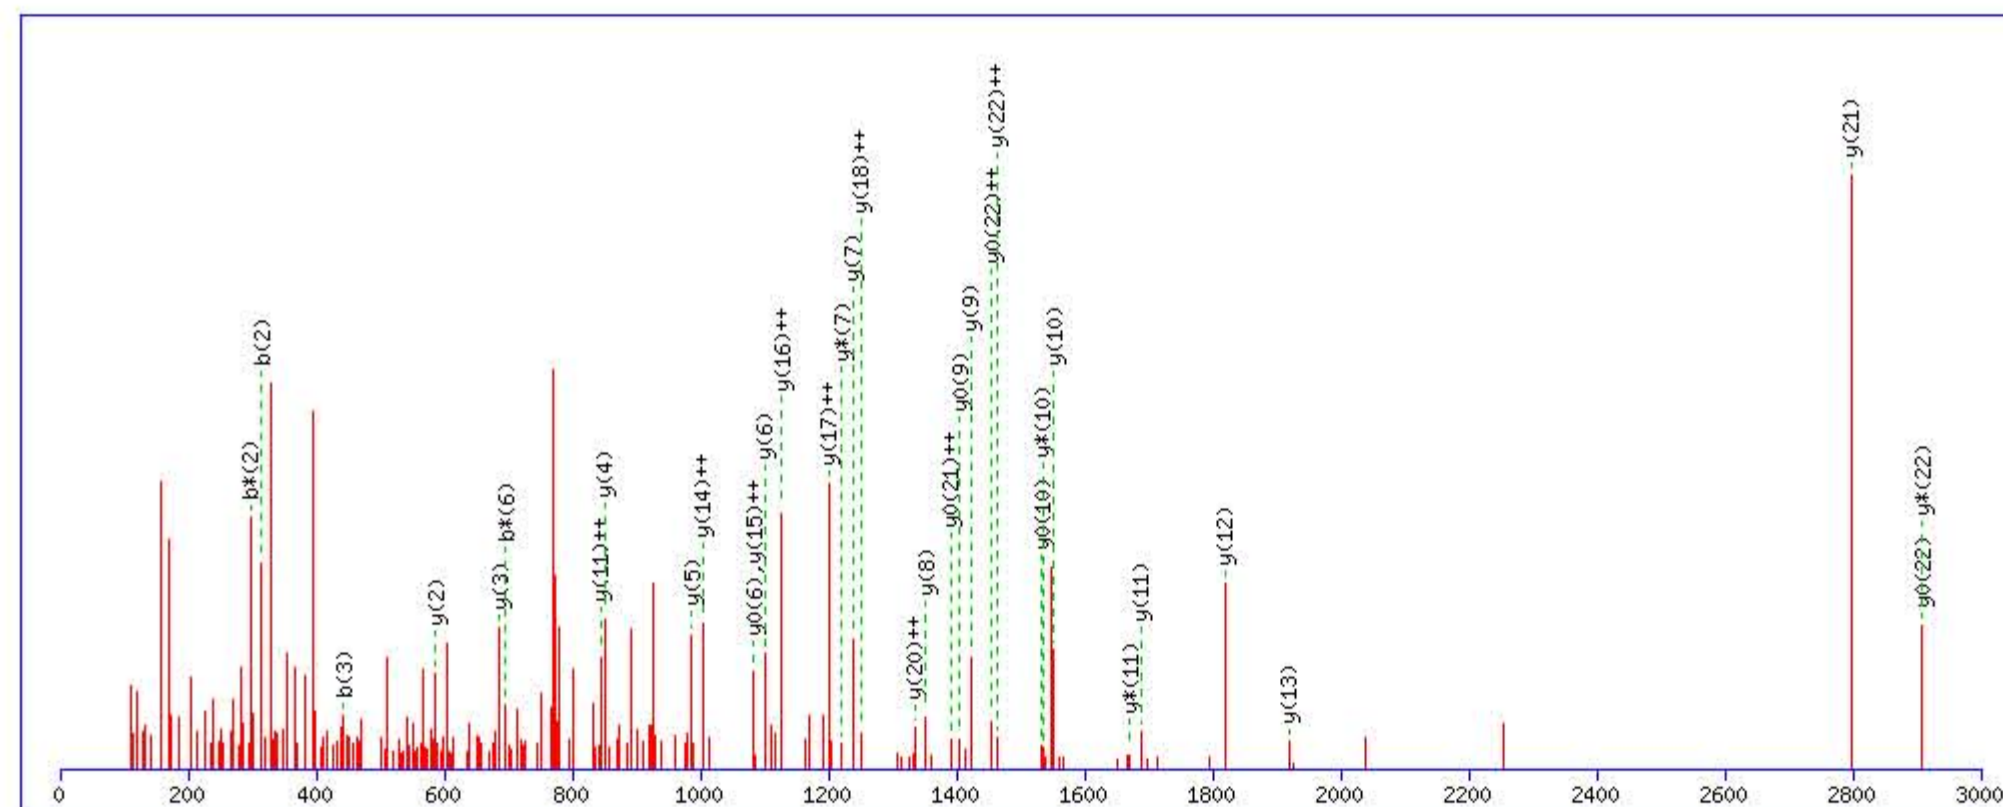

Monoisotopic mass of neutral peptide Mr(calc): 3111.426590

Fixed modifications: Carbamidomethyl (C) (apply to specified residues or termini only)

Variable modifications:

Q22 : Biotin:Thermo-21345 (Q)

Ions Score: 66 Expect: 3.6e-006

Matches : 35/244 fragment ions using 76 most intense peaks [\(help\)](#)

| #  | b                 | b <sup>++</sup> | b <sup>*</sup>    | b <sup>*++</sup> | b <sup>0</sup> | b <sup>0++</sup> | Seq. | y                  | y <sup>++</sup>    | y <sup>*</sup>     | y <sup>*++</sup> | y <sup>0</sup>     | y <sup>0++</sup>   | #  |
|----|-------------------|-----------------|-------------------|------------------|----------------|------------------|------|--------------------|--------------------|--------------------|------------------|--------------------|--------------------|----|
| 1  | 187.086589        | 94.046932       |                   |                  |                |                  | W    |                    |                    |                    |                  |                    |                    | 23 |
| 2  | <b>315.145167</b> | 158.076222      | <b>298.118618</b> | 149.562947       |                |                  | Q    | 2926.354551        | <b>1463.680913</b> | <b>2909.328002</b> | 1455.167639      | <b>2908.343986</b> | <b>1454.675631</b> | 22 |
| 3  | <b>443.203745</b> | 222.105511      | 426.177196        | 213.592236       |                |                  | Q    | <b>2798.295973</b> | 1399.651624        | 2781.269424        | 1391.138350      | 2780.285408        | <b>1390.646342</b> | 21 |
| 4  | 500.225209        | 250.616243      | 483.198660        | 242.102968       |                |                  | G    | 2670.237395        | <b>1335.622335</b> | 2653.210846        | 1327.109061      | 2652.226830        | 1326.617053        | 20 |
| 5  | 614.268136        | 307.637706      | 597.241587        | 299.124432       |                |                  | N    | 2613.215931        | 1307.111603        | 2596.189382        | 1298.598329      | 2595.205366        | 1298.106321        | 19 |
| 6  | 713.336550        | 357.171913      | <b>696.310001</b> | 348.658639       |                |                  | V    | 2499.173004        | <b>1250.090140</b> | 2482.146455        | 1241.576865      | 2481.162439        | 1241.084857        | 18 |
| 7  | 860.404964        | 430.706120      | 843.378415        | 422.192845       |                |                  | F    | 2400.104590        | <b>1200.555933</b> | 2383.078041        | 1192.042658      | 2382.094025        | 1191.550650        | 17 |
| 8  | 947.436992        | 474.222134      | 930.410443        | 465.708859       | 929.426427     | 465.216851       | S    | 2253.036176        | <b>1127.021726</b> | 2236.009627        | 1118.508451      | 2235.025611        | 1118.016443        | 16 |
| 9  | 1107.467641       | 554.237459      | 1090.441092       | 545.724184       | 1089.457076    | 545.232176       | C    | 2166.004148        | <b>1083.505712</b> | 2148.977599        | 1074.992437      | 2147.993583        | 1074.500429        | 15 |
| 10 | 1194.499669       | 597.753473      | 1177.473120       | 589.240198       | 1176.489104    | 588.748190       | S    | 2005.973499        | <b>1003.490388</b> | 1988.946950        | 994.977113       | 1987.962934        | 994.485105         | 14 |
| 11 | 1293.568083       | 647.287680      | 1276.541534       | 638.774405       | 1275.557518    | 638.282397       | V    | <b>1918.941471</b> | 959.974373         | 1901.914922        | 951.461099       | 1900.930906        | 950.969091         | 13 |
| 12 | 1424.608568       | 712.807922      | 1407.582019       | 704.294648       | 1406.598003    | 703.802640       | M    | <b>1819.873057</b> | 910.440166         | 1802.846508        | 901.926892       | 1801.862492        | 901.434884         | 12 |
| 13 | 1561.667480       | 781.337378      | 1544.640931       | 772.824104       | 1543.656915    | 772.332096       | H    | <b>1688.832572</b> | <b>844.919924</b>  | <b>1671.806023</b> | 836.406649       | 1670.822007        | 835.914641         | 11 |
| 14 | 1690.710073       | 845.858675      | 1673.683524       | 837.345400       | 1672.699508    | 836.853392       | E    | <b>1551.773660</b> | 776.390468         | <b>1534.747111</b> | 767.877193       | <b>1533.763095</b> | 767.385185         | 10 |
| 15 | 1761.747187       | 881.377231      | 1744.720638       | 872.863957       | 1743.736622    | 872.371949       | A    | <b>1422.731067</b> | 711.869171         | 1405.704518        | 703.355897       | <b>1404.720502</b> | 702.863889         | 9  |
| 16 | 1874.831251       | 937.919263      | 1857.804702       | 929.405989       | 1856.820686    | 928.913981       | L    | <b>1351.693953</b> | 676.350615         | 1334.667404        | 667.837340       | 1333.683388        | 667.345332         | 8  |
| 17 | 2011.890163       | 1006.448719     | 1994.863614       | 997.935445       | 1993.879598    | 997.443437       | H    | <b>1238.609889</b> | 619.808583         | <b>1221.583340</b> | 611.295308       | 1220.599324        | 610.803300         | 7  |
| 18 | 2125.933090       | 1063.470183     | 2108.906541       | 1054.956908      | 2107.922525    | 1054.464900      | N    | <b>1101.550977</b> | 551.279127         | 1084.524428        | 542.765852       | <b>1083.540412</b> | 542.273844         | 6  |
| 19 | 2262.992002       | 1131.999639     | 2245.965453       | 1123.486364      | 2244.981437    | 1122.994356      | H    | <b>987.508050</b>  | 494.257663         | 970.481501         | 485.744389       | 969.497485         | 485.252381         | 5  |
| 20 | 2426.055331       | 1213.531303     | 2409.028782       | 1205.018029      | 2408.044766    | 1204.526021      | Y    | <b>850.449138</b>  | 425.728207         | 833.422589         | 417.214933       | 832.438573         | 416.722925         | 4  |
| 21 | 2527.103010       | 1264.055143     | 2510.076461       | 1255.541868      | 2509.092445    | 1255.049860      | T    | <b>687.385809</b>  | 344.196543         | 670.359260         | 335.683268       | 669.375244         | 335.191260         | 3  |
| 22 | 2966.328336       | 1483.667806     | 2949.301787       | 1475.154531      | 2948.317771    | 1474.662523      | Q    | <b>586.338130</b>  | 293.672703         | 569.311581         | 285.159429       |                    |                    | 2  |
| 23 |                   |                 |                   |                  |                |                  | K    | 147.112804         | 74.060040          | 130.086255         | 65.546765        |                    |                    | 1  |

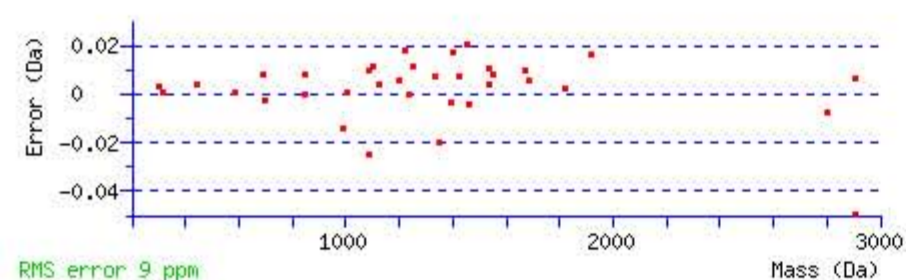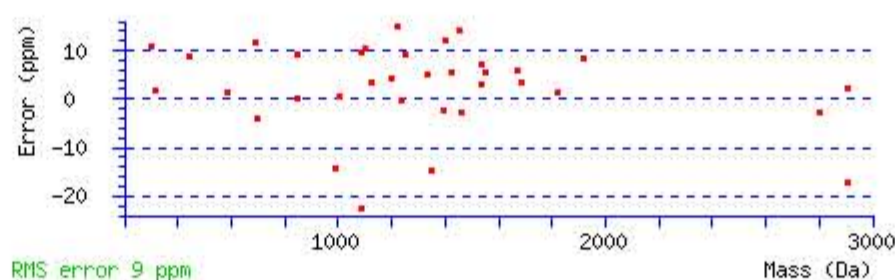

NCBI BLAST search of **WQQGNVFSCSVMEALHNHYTQK**  
 (Parameters: blastp, nr protein database, expect=20000, no filter, PAM30)  
 Other BLAST [web gateways](#)

All matches to this query

| Score | Mr(calc):   | Delta    | Sequence                      |
|-------|-------------|----------|-------------------------------|
| 66.0  | 3111.426590 | 0.008026 | <b>WQQGNVFSCSVMEALHNHYTQK</b> |

# MASCOT Search Results

## Peptide View

MS/MS Fragmentation of **NQVSLTCLVK**

Found in **IGHG1\_HUMAN**, Ig gamma-1 chain C region OS=Homo sapiens GN=IGHG1 PE=1 SV=1

Match to Query 29231: 1471.791608 from(736.903080,2+) rtinseconds(2257) index(64048)

Title: Locus:1.1.1.3412.10 File:"2013-07-02 CLN FXIII 60 min 3rd FT.wiff"

Data file C:\Program Files (x86)\Matrix Science\Mascot Daemon\mgf\6 FXIII 60 min 3rd\mascot\_daemon\_merge.mgf

Click mouse within plot area to zoom in by factor of two about that point

Or, Plot from  to  Da

Label all possible matches  Label matches used for scoring



Monoisotopic mass of neutral peptide  $M_r(\text{calc})$ : 1471.789093

Fixed modifications: Carbamidomethyl (C) (apply to specified residues or termini only)

Variable modifications:

Q2 : Biotin:Thermo-21345 (Q)

Ions Score: 52 Expect: 4.7e-005

Matches : 15/94 fragment ions using 28 most intense peaks [\(help\)](#)

| #  | b                  | b <sup>++</sup> | b <sup>*</sup>     | b <sup>*++</sup> | b <sup>0</sup> | b <sup>0++</sup> | Seq. | y                  | y <sup>++</sup> | y <sup>*</sup> | y <sup>*++</sup> | y <sup>0</sup>     | y <sup>0++</sup> | #  |
|----|--------------------|-----------------|--------------------|------------------|----------------|------------------|------|--------------------|-----------------|----------------|------------------|--------------------|------------------|----|
| 1  | 115.050203         | 58.028740       | 98.023654          | 49.515465        |                |                  | N    |                    |                 |                |                  |                    |                  | 10 |
| 2  | <b>554.275529</b>  | 277.641403      | 537.248980         | 269.128128       |                |                  | Q    | <b>1358.753442</b> | 679.880359      | 1341.726893    | 671.367085       | <b>1340.742877</b> | 670.875076       | 9  |
| 3  | <b>653.343943</b>  | 327.175610      | 636.317394         | 318.662335       |                |                  | V    | <b>919.528116</b>  | 460.267696      | 902.501567     | 451.754421       | 901.517551         | 451.262413       | 8  |
| 4  | 740.375971         | 370.691623      | 723.349422         | 362.178349       | 722.365406     | 361.686341       | S    | <b>820.459702</b>  | 410.733489      | 803.433153     | 402.220215       | 802.449137         | 401.728207       | 7  |
| 5  | 853.460035         | 427.233656      | 836.433486         | 418.720381       | 835.449470     | 418.228373       | L    | <b>733.427674</b>  | 367.217475      | 716.401125     | 358.704201       | 715.417109         | 358.212193       | 6  |
| 6  | <b>954.507714</b>  | 477.757495      | 937.481165         | 469.244220       | 936.497149     | 468.752212       | T    | <b>620.343610</b>  | 310.675443      | 603.317061     | 302.162169       | 602.333045         | 301.670161       | 5  |
| 7  | 1114.538363        | 557.772819      | 1097.511814        | 549.259545       | 1096.527798    | 548.767537       | C    | <b>519.295931</b>  | 260.151604      | 502.269382     | 251.638329       |                    |                  | 4  |
| 8  | <b>1227.622427</b> | 614.314851      | 1210.595878        | 605.801577       | 1209.611862    | 605.309569       | L    | 359.265282         | 180.136279      | 342.238733     | 171.623004       |                    |                  | 3  |
| 9  | <b>1326.690841</b> | 663.849058      | <b>1309.664292</b> | 655.335784       | 1308.680276    | 654.843776       | V    | <b>246.181218</b>  | 123.594247      | 229.154669     | 115.080973       |                    |                  | 2  |
| 10 |                    |                 |                    |                  |                |                  | K    | <b>147.112804</b>  | 74.060040       | 130.086255     | 65.546765        |                    |                  | 1  |



NCBI BLAST search of **NQVSLTCLVK**

(Parameters: blastp, nr protein database, expect=20000, no filter, PAM30)

Other BLAST [web gateways](#)

## All matches to this query

| Score | $M_r(\text{calc})$ : | Delta     | Sequence                        |
|-------|----------------------|-----------|---------------------------------|
| 51.9  | 1471.789093          | 0.002515  | <a href="#">NQVSLTCLVK</a>      |
| 5.4   | 1471.803467          | -0.011859 | <a href="#">EKQGPLLDLFGQK</a>   |
| 5.2   | 1471.806839          | -0.015231 | <a href="#">VANSPTMVNLLL GK</a> |
| 4.8   | 1471.799438          | -0.007830 | <a href="#">EVELDRLRDTVK</a>    |
| 4.1   | 1471.796921          | -0.005313 | <a href="#">YLIAACQHLQKK</a>    |
| 3.6   | 1471.796265          | -0.004657 | <a href="#">ELFEYFVVVSLK</a>    |
| 2.8   | 1471.797592          | -0.005984 | <a href="#">KYFWDR AFLVK</a>    |
| 2.4   | 1471.770447          | 0.021161  | <a href="#">QPTTAEKSATK</a>     |
| 1.1   | 1471.778305          | 0.013303  | <a href="#">NVQKGKGLGW EK</a>   |

# MASCOT Search Results

## Peptide View

MS/MS Fragmentation of **EPQVYTLPPSR**

Found in **IGHG1\_HUMAN**, Ig gamma-1 chain C region OS=Homo sapiens GN=IGHG1 PE=1 SV=1

Match to Query 33190: 1596.828912 from(533.283580,3+) rtinseconds(1996) index(62540)

Title: Locus:1.1.1.3321.14 File:"2013-07-02 CLN FXIII 60 min 3rd FT.wiff"

Data file C:\Program Files (x86)\Matrix Science\Mascot Daemon\mgf\6 FXIII 60 min 3rd\mascot\_daemon\_merge.mgf

Click mouse within plot area to zoom in by factor of two about that point

Or, Plot from  to  Da

Label all possible matches  Label matches used for scoring



Monoisotopic mass of neutral peptide  $M_r(\text{calc})$ : 1596.833389

Fixed modifications: Carbamidomethyl (C) (apply to specified residues or termini only)

Variable modifications:

Q3 : Biotin:Thermo-21345 (Q)

Ions Score: 27 Expect: 0.0031

Matches : 21/114 fragment ions using 42 most intense peaks [\(help\)](#)

| #  | b                  | b <sup>++</sup>   | b <sup>+</sup> | b <sup>+++</sup>  | b <sup>0</sup>     | b <sup>0++</sup>  | Seq. | y                 | y <sup>++</sup> | y <sup>+</sup>    | y <sup>+++</sup> | y <sup>0</sup> | y <sup>0++</sup> | #  |
|----|--------------------|-------------------|----------------|-------------------|--------------------|-------------------|------|-------------------|-----------------|-------------------|------------------|----------------|------------------|----|
| 1  | 130.049869         | 65.528572         |                |                   | 112.039304         | 56.523290         | E    |                   |                 |                   |                  |                |                  | 11 |
| 2  | <b>227.102633</b>  | 114.054954        |                |                   | <b>209.092068</b>  | 105.049672        | P    | 1468.798084       | 734.902680      | 1451.771535       | 726.389406       | 1450.787519    | 725.897398       | 10 |
| 3  | <b>666.327959</b>  | 333.667618        | 649.301410     | 325.154343        | <b>648.317394</b>  | 324.662335        | Q    | 1371.745320       | 686.376298      | 1354.718771       | 677.863024       | 1353.734755    | 677.371016       | 9  |
| 4  | <b>765.396373</b>  | 383.201825        | 748.369824     | 374.688550        | <b>747.385808</b>  | 374.196542        | V    | 932.519994        | 466.763635      | 915.493445        | 458.250361       | 914.509429     | 457.758353       | 8  |
| 5  | <b>928.459702</b>  | 464.733489        | 911.433153     | <b>456.220215</b> | 910.449137         | 455.728207        | Y    | <b>833.451580</b> | 417.229428      | 816.425031        | 408.716154       | 815.441015     | 408.224146       | 7  |
| 6  | <b>1029.507381</b> | <b>515.257329</b> | 1012.480832    | 506.744054        | <b>1011.496816</b> | <b>506.252046</b> | T    | <b>670.388251</b> | 335.697764      | 653.361702        | 327.184489       | 652.377686     | 326.692481       | 6  |
| 7  | 1142.591445        | 571.799361        | 1125.564896    | 563.286086        | 1124.580880        | 562.794078        | L    | <b>569.340572</b> | 285.173924      | 552.314023        | 276.660650       | 551.330007     | 276.168642       | 5  |
| 8  | 1239.644209        | <b>620.325743</b> | 1222.617660    | 611.812468        | 1221.633644        | 611.320460        | P    | <b>456.256508</b> | 228.631892      | <b>439.229959</b> | 220.118618       | 438.245943     | 219.626610       | 4  |
| 9  | 1336.696973        | 668.852125        | 1319.670424    | 660.338850        | 1318.686408        | 659.846842        | P    | <b>359.203744</b> | 180.105510      | <b>342.177195</b> | 171.592236       | 341.193179     | 171.100228       | 3  |
| 10 | 1423.729001        | 712.368139        | 1406.702452    | 703.854864        | 1405.718436        | 703.362856        | S    | 262.150980        | 131.579128      | 245.124431        | 123.065854       | 244.140415     | 122.573846       | 2  |
| 11 |                    |                   |                |                   |                    |                   | R    | <b>175.118952</b> | 88.063114       | 158.092403        | 79.549839        |                |                  | 1  |



NCBI BLAST search of **EPQVYTLPPSR**

(Parameters: blastp, nr protein database, expect=20000, no filter, PAM30)

Other BLAST [web gateways](#)

All matches to this query

| Score | $M_r(\text{calc})$ : | Delta     | Sequence                          |
|-------|----------------------|-----------|-----------------------------------|
| 27.4  | 1596.833389          | -0.004477 | <a href="#">EPQVYTLPPSR</a>       |
| 0.6   | 1596.847122          | -0.018210 | <a href="#">ATPSSSPGTATALPALR</a> |

Mascot: <http://www.matrixscience.com/>



# Mascot Search Results

## Peptide View

MS/MS Fragmentation of **TVAAPSVFIFPPSDEQLK**

Found in **IGKC\_HUMAN**, Ig kappa chain C region OS=Homo sapiens GN=IGKC PE=1 SV=1

Match to Query 46971: 2256.196992 from(753.072940,3+) rtinseconds(2697) index(66221)

Title: Locus:1.1.1.3565.12 File:"2013-07-02 CLN FXIII 60 min 3rd FT.wiff"

Data file C:\Program Files (x86)\Matrix Science\Mascot Daemon\mgf6 FXIII 60 min 3rd\mascot\_daemon\_merge.mgf

Click mouse within plot area to zoom in by factor of two about that point

Or, Plot from  to  Da

Label all possible matches  Label matches used for scoring

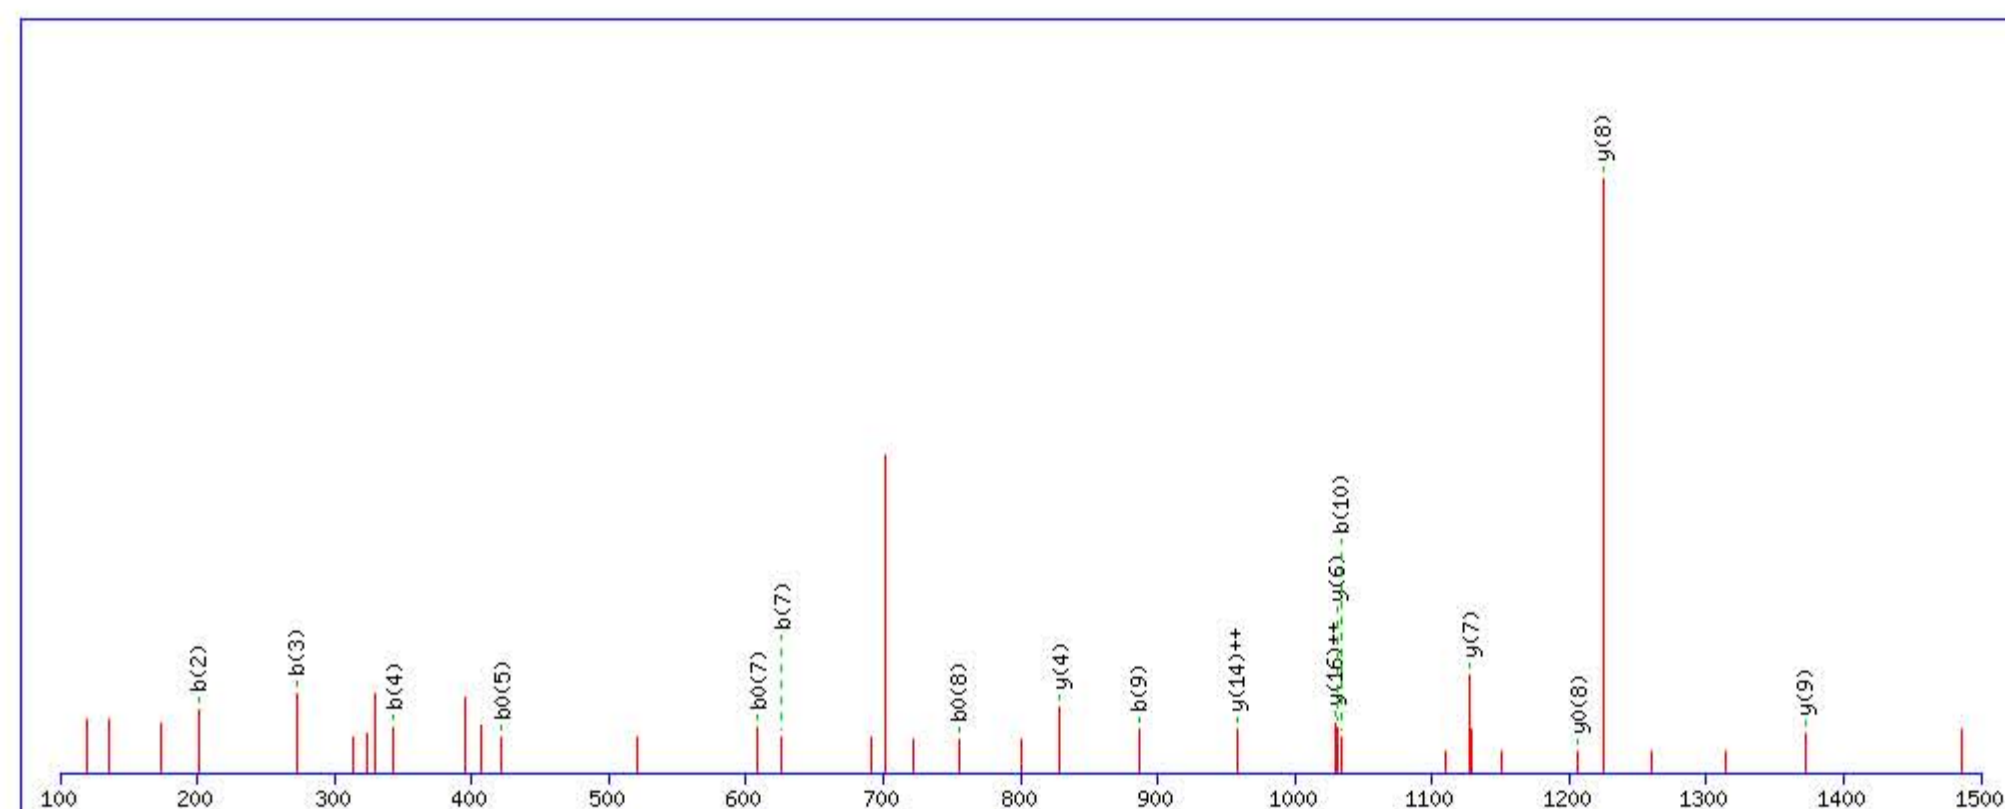

Monoisotopic mass of neutral peptide Mr(calc): 2256.186432

Fixed modifications: Carbamidomethyl (C) (apply to specified residues or termini only)

Variable modifications:

Q16 : Biotin:Thermo-21345 (Q)

Ions Score: 28 Expect: 0.0028

Matches : 17/168 fragment ions using 36 most intense peaks [\(help\)](#)

| #  | b                  | b <sup>++</sup> | b <sup>*</sup> | b <sup>+++</sup> | b <sup>0</sup>    | b <sup>0++</sup> | Seq. | y                  | y <sup>++</sup>    | y <sup>*</sup> | y <sup>+++</sup> | y <sup>0</sup>     | y <sup>0++</sup> | #  |
|----|--------------------|-----------------|----------------|------------------|-------------------|------------------|------|--------------------|--------------------|----------------|------------------|--------------------|------------------|----|
| 1  | 102.054955         | 51.531116       |                |                  | 84.044390         | 42.525833        | T    |                    |                    |                |                  |                    |                  | 18 |
| 2  | <b>201.123369</b>  | 101.065322      |                |                  | 183.112804        | 92.060040        | V    | 2156.146026        | 1078.576651        | 2139.119477    | 1070.063377      | 2138.135461        | 1069.571369      | 17 |
| 3  | <b>272.160483</b>  | 136.583879      |                |                  | 254.149918        | 127.578597       | A    | 2057.077612        | <b>1029.042444</b> | 2040.051063    | 1020.529170      | 2039.067047        | 1020.037162      | 16 |
| 4  | <b>343.197597</b>  | 172.102437      |                |                  | 325.187032        | 163.097154       | A    | 1986.040498        | 993.523887         | 1969.013949    | 985.010613       | 1968.029933        | 984.518605       | 15 |
| 5  | 440.250361         | 220.628819      |                |                  | <b>422.239796</b> | 211.623536       | P    | 1915.003384        | <b>958.005330</b>  | 1897.976835    | 949.492056       | 1896.992819        | 949.000048       | 14 |
| 6  | 527.282389         | 264.144833      |                |                  | 509.271824        | 255.139550       | S    | 1817.950620        | 909.478948         | 1800.924071    | 900.965674       | 1799.940055        | 900.473666       | 13 |
| 7  | <b>626.350803</b>  | 313.679040      |                |                  | <b>608.340238</b> | 304.673757       | V    | 1730.918592        | 865.962934         | 1713.892043    | 857.449660       | 1712.908027        | 856.957652       | 12 |
| 8  | 773.419217         | 387.213247      |                |                  | <b>755.408652</b> | 378.207964       | F    | 1631.850178        | 816.428727         | 1614.823629    | 807.915453       | 1613.839613        | 807.423445       | 11 |
| 9  | <b>886.503281</b>  | 443.755279      |                |                  | 868.492716        | 434.749996       | I    | 1484.781764        | 742.894520         | 1467.755215    | 734.381246       | 1466.771199        | 733.889238       | 10 |
| 10 | <b>1033.571695</b> | 517.289486      |                |                  | 1015.561130       | 508.284203       | F    | <b>1371.697700</b> | 686.352488         | 1354.671151    | 677.839214       | 1353.687135        | 677.347206       | 9  |
| 11 | 1130.624459        | 565.815868      |                |                  | 1112.613894       | 556.810585       | P    | <b>1224.629286</b> | 612.818281         | 1207.602737    | 604.305007       | <b>1206.618721</b> | 603.812999       | 8  |
| 12 | 1227.677223        | 614.342250      |                |                  | 1209.666658       | 605.336967       | P    | <b>1127.576522</b> | 564.291899         | 1110.549973    | 555.778625       | 1109.565957        | 555.286617       | 7  |
| 13 | 1314.709251        | 657.858264      |                |                  | 1296.698686       | 648.852981       | S    | <b>1030.523758</b> | 515.765517         | 1013.497209    | 507.252243       | 1012.513193        | 506.760235       | 6  |
| 14 | 1429.736194        | 715.371735      |                |                  | 1411.725629       | 706.366453       | D    | 943.491730         | 472.249503         | 926.465181     | 463.736229       | 925.481165         | 463.244221       | 5  |
| 15 | 1558.778787        | 779.893032      |                |                  | 1540.768222       | 770.887749       | E    | <b>828.464787</b>  | 414.736032         | 811.438238     | 406.222757       | 810.454222         | 405.730749       | 4  |
| 16 | 1998.004113        | 999.505695      | 1980.977564    | 990.992420       | 1979.993548       | 990.500412       | Q    | 699.422194         | 350.214735         | 682.395645     | 341.701461       |                    |                  | 3  |
| 17 | 2111.088177        | 1056.047727     | 2094.061628    | 1047.534452      | 2093.077612       | 1047.042444      | L    | 260.196868         | 130.602072         | 243.170319     | 122.088798       |                    |                  | 2  |
| 18 |                    |                 |                |                  |                   |                  | K    | 147.112804         | 74.060040          | 130.086255     | 65.546765        |                    |                  | 1  |

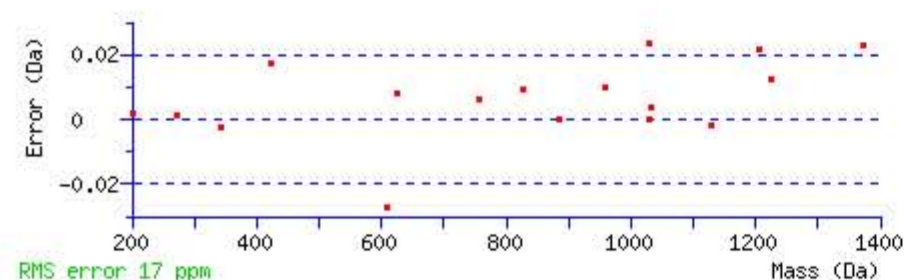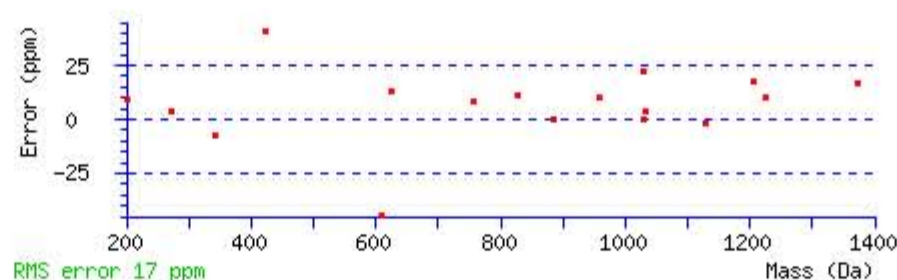

NCBI BLAST search of **TVAAPSVFIFPPSDEQLK**

(Parameters: blastp, nr protein database, expect=20000, no filter, PAM30)

Other BLAST [web gateways](#)

All matches to this query

| Score | Mr(calc):   | Delta     | Sequence                             |
|-------|-------------|-----------|--------------------------------------|
| 27.8  | 2256.186432 | 0.010560  | <a href="#">TVAAPSVFIFPPSDEQLK</a>   |
| 0.6   | 2256.211365 | -0.014373 | <a href="#">ELEQLHLGLYGTSDRLTLAK</a> |
| 0.5   | 2256.179016 | 0.017976  | <a href="#">TFLVPEIKSLDQYDFSRK</a>   |

Mascot: <http://www.matrixscience.com/>

# MASCOT SEARCH RESULTS

## Peptide View

MS/MS Fragmentation of **LICQATGFSPR**

Found in **IGHM\_HUMAN**, Ig mu chain C region OS=Homo sapiens GN=IGHM PE=1 SV=3

Match to Query 31367: 1559.800348 from(780.907450,2+) rtinseconds(1999) index(33195)

Title: Locus:1.1.1.3245.8 File:"2013-07-02 CLN FXIII 60 min 3rd F 3.wiff"

Data file C:\Program Files (x86)\Matrix Science\Mascot Daemon\mgf6 FXIII 60 min 3rd\mascot\_daemon\_merge.mgf

Click mouse within plot area to zoom in by factor of two about that point

Or, Plot from  to  Da

Label all possible matches  Label matches used for scoring

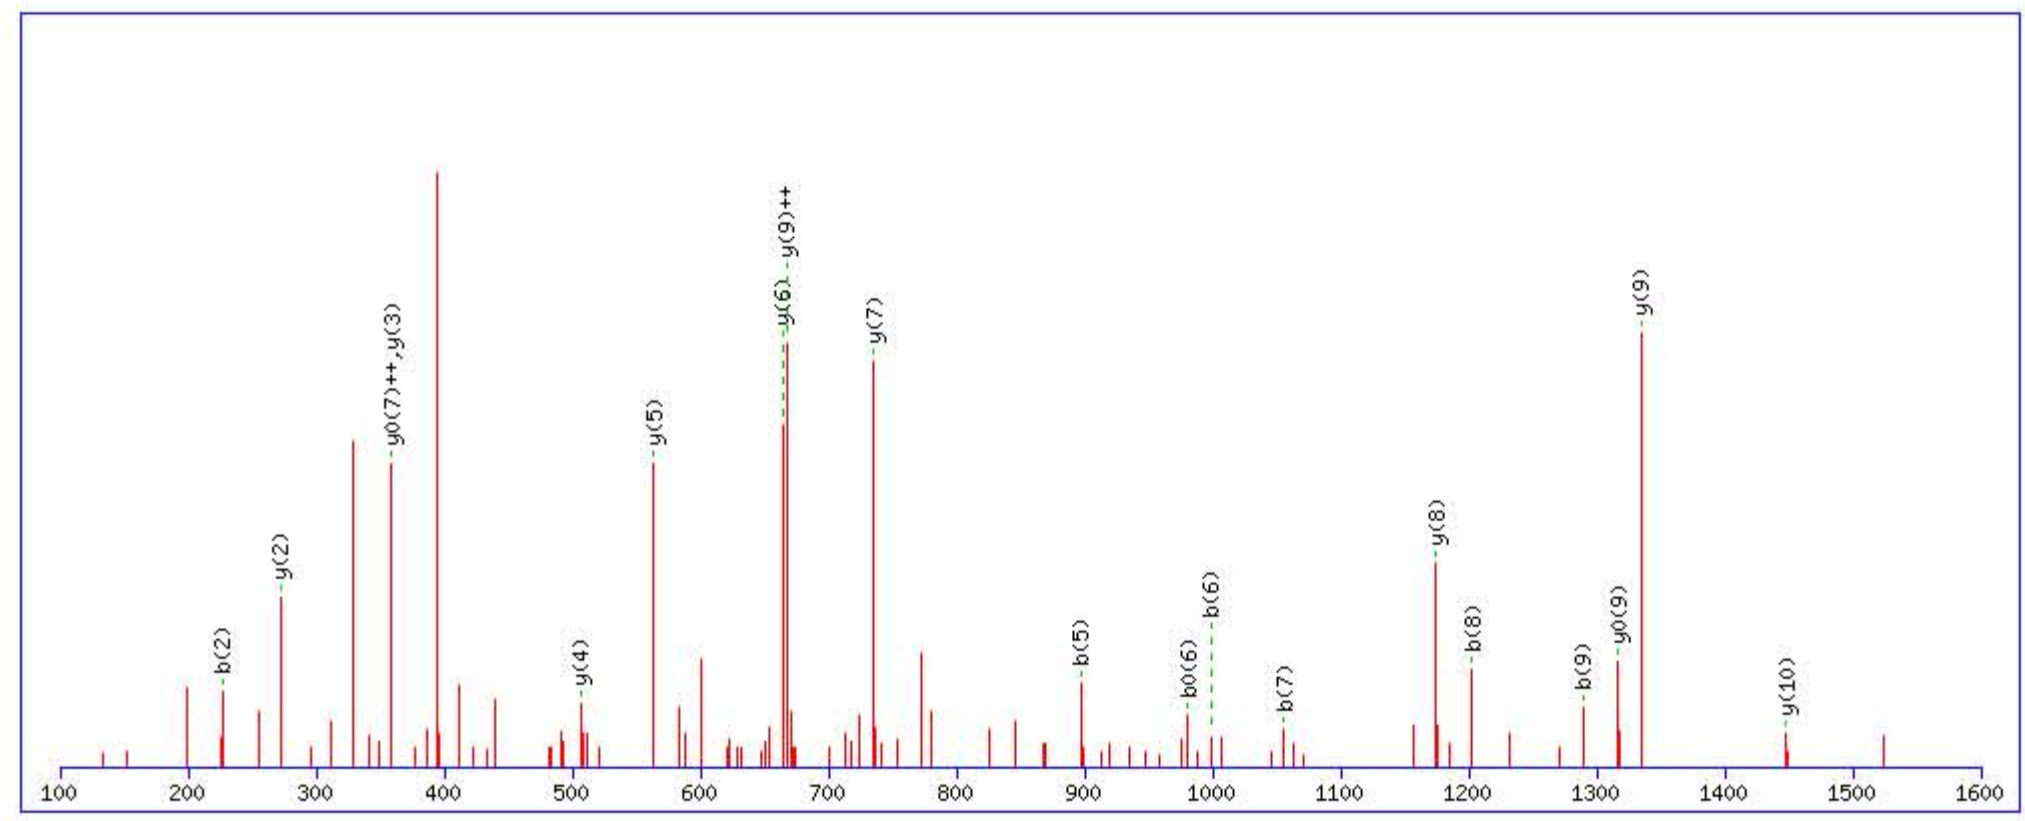

Monoisotopic mass of neutral peptide Mr(calc): 1559.795242

Fixed modifications: Carbamidomethyl (C) (apply to specified residues or termini only)

Variable modifications:

Q4 : Biotin:Thermo-21345 (Q)

Ions Score: 67 Expect: 1.9e-006

Matches : 19/100 fragment ions using 28 most intense peaks [\(help\)](#)

| #  | b                  | b <sup>++</sup> | b <sup>*</sup> | b <sup>*++</sup> | b <sup>0</sup>    | b <sup>0++</sup> | Seq. | y                  | y <sup>++</sup>   | y <sup>*</sup> | y <sup>*++</sup> | y <sup>0</sup>     | y <sup>0++</sup>  | #  |
|----|--------------------|-----------------|----------------|------------------|-------------------|------------------|------|--------------------|-------------------|----------------|------------------|--------------------|-------------------|----|
| 1  | 114.091340         | 57.549308       |                |                  |                   |                  | L    |                    |                   |                |                  |                    |                   | 11 |
| 2  | <b>227.175404</b>  | 114.091340      |                |                  |                   |                  | I    | <b>1447.718454</b> | 724.362865        | 1430.691905    | 715.849591       | 1429.707889        | 715.357583        | 10 |
| 3  | 387.206053         | 194.106664      |                |                  |                   |                  | C    | <b>1334.634390</b> | <b>667.820833</b> | 1317.607841    | 659.307559       | <b>1316.623825</b> | 658.815551        | 9  |
| 4  | 826.431379         | 413.719328      | 809.404830     | 405.206053       |                   |                  | Q    | <b>1174.603741</b> | 587.805509        | 1157.577192    | 579.292234       | 1156.593176        | 578.800226        | 8  |
| 5  | <b>897.468493</b>  | 449.237885      | 880.441944     | 440.724610       |                   |                  | A    | <b>735.378415</b>  | 368.192846        | 718.351866     | 359.679571       | 717.367850         | <b>359.187563</b> | 7  |
| 6  | <b>998.516172</b>  | 499.761724      | 981.489623     | 491.248449       | <b>980.505607</b> | 490.756441       | T    | <b>664.341301</b>  | 332.674289        | 647.314752     | 324.161014       | 646.330736         | 323.669006        | 6  |
| 7  | <b>1055.537636</b> | 528.272456      | 1038.511087    | 519.759182       | 1037.527071       | 519.267174       | G    | <b>563.293622</b>  | 282.150449        | 546.267073     | 273.637175       | 545.283057         | 273.145167        | 5  |
| 8  | <b>1202.606050</b> | 601.806663      | 1185.579501    | 593.293389       | 1184.595485       | 592.801381       | F    | <b>506.272158</b>  | 253.639717        | 489.245609     | 245.126443       | 488.261593         | 244.634435        | 4  |
| 9  | <b>1289.638078</b> | 645.322677      | 1272.611529    | 636.809403       | 1271.627513       | 636.317395       | S    | <b>359.203744</b>  | 180.105510        | 342.177195     | 171.592236       | 341.193179         | 171.100228        | 3  |
| 10 | 1386.690842        | 693.849059      | 1369.664293    | 685.335785       | 1368.680277       | 684.843777       | P    | <b>272.171716</b>  | 136.589496        | 255.145167     | 128.076221       |                    |                   | 2  |
| 11 |                    |                 |                |                  |                   |                  | R    | 175.118952         | 88.063114         | 158.092403     | 79.549839        |                    |                   | 1  |

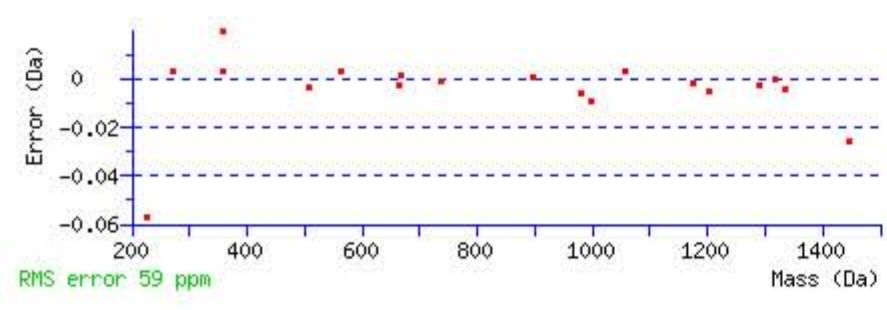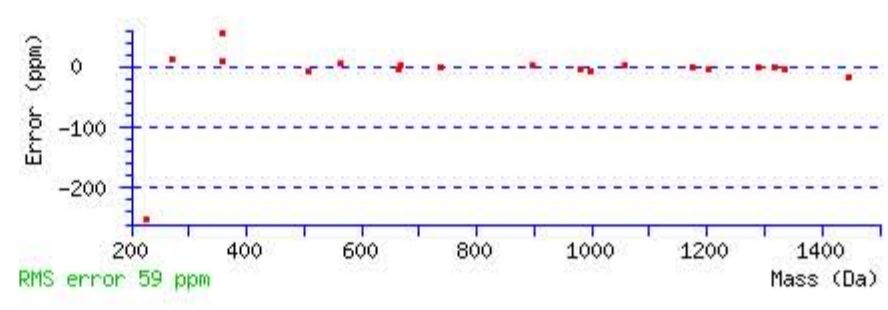

NCBI BLAST search of **LICQATGFSPR**

(Parameters: blastp, nr protein database, expect=20000, no filter, PAM30)

Other BLAST [web gateways](#)

All matches to this query

| Score | Mr(calc):   | Delta     | Sequence                       |
|-------|-------------|-----------|--------------------------------|
| 66.6  | 1559.795242 | 0.005106  | <a href="#">LICQATGFSPR</a>    |
| 5.4   | 1559.820190 | -0.019842 | <a href="#">MTRSATQAAKQVPR</a> |
| 4.3   | 1559.808960 | -0.008612 | <a href="#">LDRLSGLADQMVAR</a> |
| 3.0   | 1559.808975 | -0.008627 | <a href="#">LLDRDACDITVRVK</a> |

Mascot: <http://www.matrixscience.com/>

# MASCOT SEARCH RESULTS

## Peptide View

MS/MS Fragmentation of **YAATSQVLLPSK**

Found in **IGHM\_HUMAN**, Ig mu chain C region OS=Homo sapiens GN=IGHM PE=1 SV=3

Match to Query 32676: 1587.861308 from(794.937930,2+) rtinseconds(2045) index(33415)

Title: Locus:1.1.1.3261.17 File:"2013-07-02 CLN FXIII 60 min 3rd F 3.wiff"

Data file C:\Program Files (x86)\Matrix Science\Mascot Daemon\mgf\6 FXIII 60 min 3rd\mascot\_daemon\_merge.mgf

Click mouse within plot area to zoom in by factor of two about that point

Or, Plot from  to  Da

Label all possible matches  Label matches used for scoring

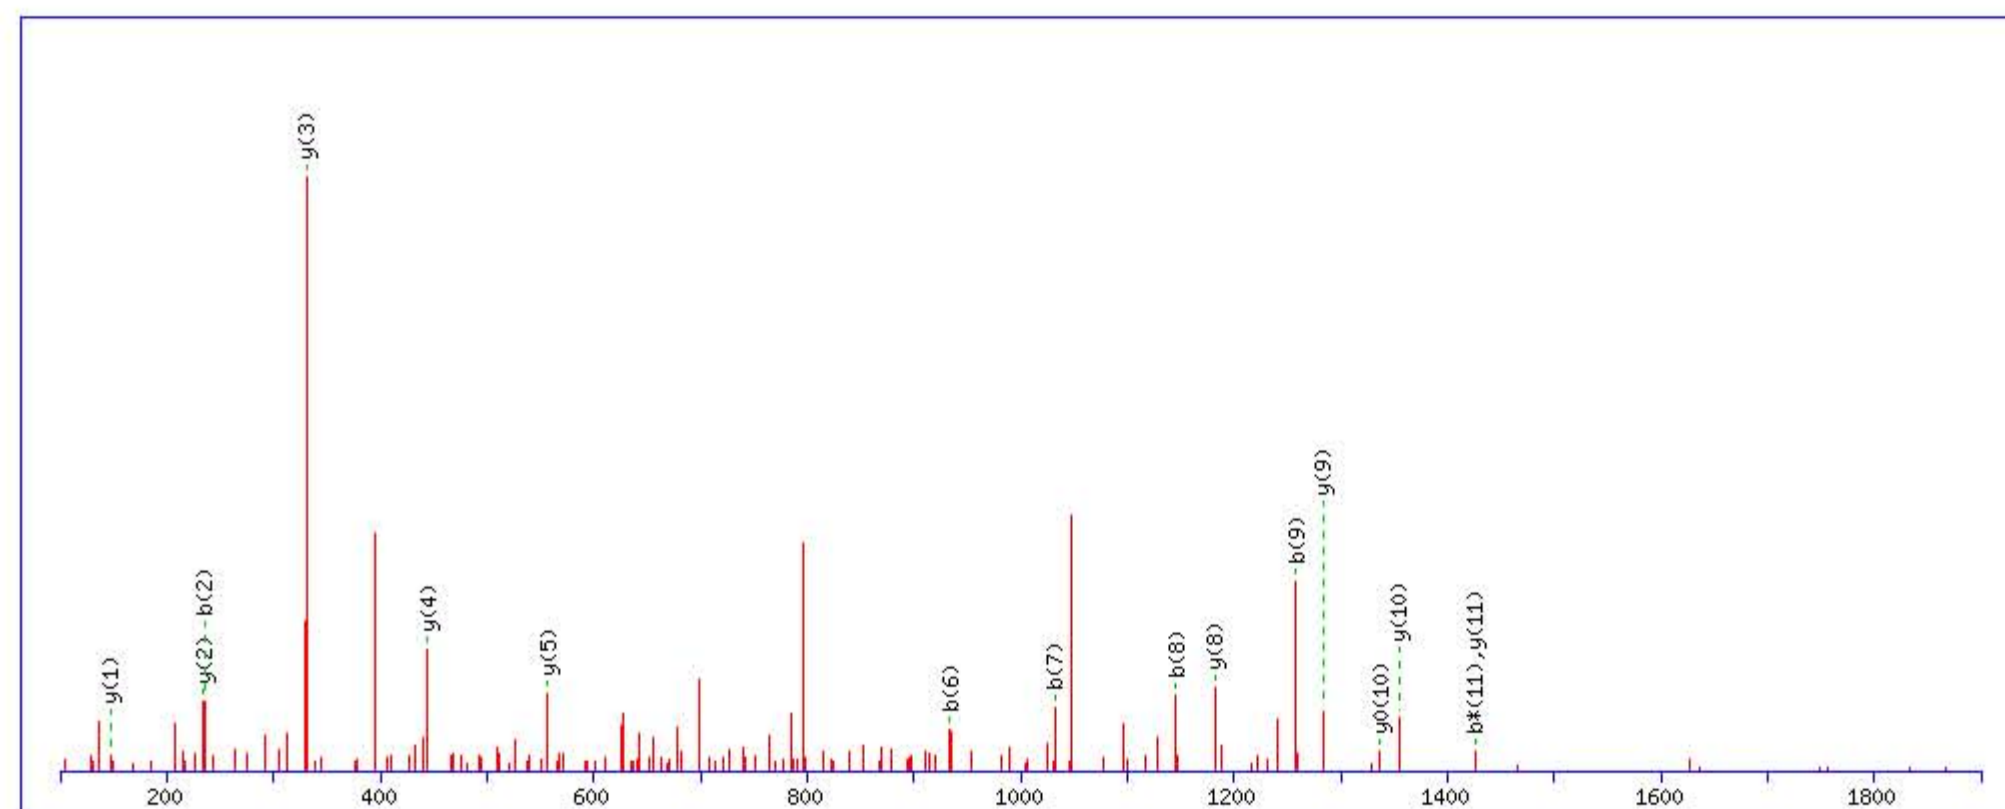

Monoisotopic mass of neutral peptide Mr(calc): 1587.869431

Fixed modifications: Carbamidomethyl (C) (apply to specified residues or termini only)

Variable modifications:

Q6 : Biotin:Thermo-21345 (Q)

Ions Score: 58 Expect: 5.4e-005

Matches : 16/114 fragment ions using 28 most intense peaks [\(help\)](#)

| #  | b                  | b <sup>++</sup> | b <sup>*</sup>     | b <sup>*++</sup> | b <sup>0</sup> | b <sup>0++</sup> | Seq. | y                  | y <sup>++</sup> | y <sup>*</sup> | y <sup>*++</sup> | y <sup>0</sup>     | y <sup>0++</sup> | #  |
|----|--------------------|-----------------|--------------------|------------------|----------------|------------------|------|--------------------|-----------------|----------------|------------------|--------------------|------------------|----|
| 1  | 164.070605         | 82.538940       |                    |                  |                |                  | Y    |                    |                 |                |                  |                    |                  | 12 |
| 2  | <b>235.107719</b>  | 118.057498      |                    |                  |                |                  | A    | <b>1425.813399</b> | 713.410337      | 1408.786850    | 704.897063       | 1407.802834        | 704.405055       | 11 |
| 3  | 306.144833         | 153.576055      |                    |                  |                |                  | A    | <b>1354.776285</b> | 677.891780      | 1337.749736    | 669.378506       | <b>1336.765720</b> | 668.886498       | 10 |
| 4  | 407.192512         | 204.099894      |                    |                  | 389.181947     | 195.094612       | T    | <b>1283.739171</b> | 642.373223      | 1266.712622    | 633.859949       | 1265.728606        | 633.367941       | 9  |
| 5  | 494.224540         | 247.615908      |                    |                  | 476.213975     | 238.610626       | S    | <b>1182.691492</b> | 591.849384      | 1165.664943    | 583.336110       | 1164.680927        | 582.844101       | 8  |
| 6  | <b>933.449866</b>  | 467.228571      | 916.423317         | 458.715297       | 915.439301     | 458.223289       | Q    | 1095.659464        | 548.333370      | 1078.632915    | 539.820096       | 1077.648899        | 539.328088       | 7  |
| 7  | <b>1032.518280</b> | 516.762778      | 1015.491731        | 508.249504       | 1014.507715    | 507.757496       | V    | 656.434138         | 328.720707      | 639.407589     | 320.207432       | 638.423573         | 319.715424       | 6  |
| 8  | <b>1145.602344</b> | 573.304810      | 1128.575795        | 564.791536       | 1127.591779    | 564.299527       | L    | <b>557.365724</b>  | 279.186500      | 540.339175     | 270.673226       | 539.355159         | 270.181218       | 5  |
| 9  | <b>1258.686408</b> | 629.846842      | 1241.659859        | 621.333567       | 1240.675843    | 620.841559       | L    | <b>444.281660</b>  | 222.644468      | 427.255111     | 214.131193       | 426.271095         | 213.639186       | 4  |
| 10 | 1355.739172        | 678.373224      | 1338.712623        | 669.859949       | 1337.728607    | 669.367941       | P    | <b>331.197596</b>  | 166.102436      | 314.171047     | 157.589162       | 313.187031         | 157.097154       | 3  |
| 11 | 1442.771200        | 721.889238      | <b>1425.744651</b> | 713.375964       | 1424.760635    | 712.883955       | S    | <b>234.144832</b>  | 117.576054      | 217.118283     | 109.062780       | 216.134267         | 108.570772       | 2  |
| 12 |                    |                 |                    |                  |                |                  | K    | <b>147.112804</b>  | 74.060040       | 130.086255     | 65.546765        |                    |                  | 1  |

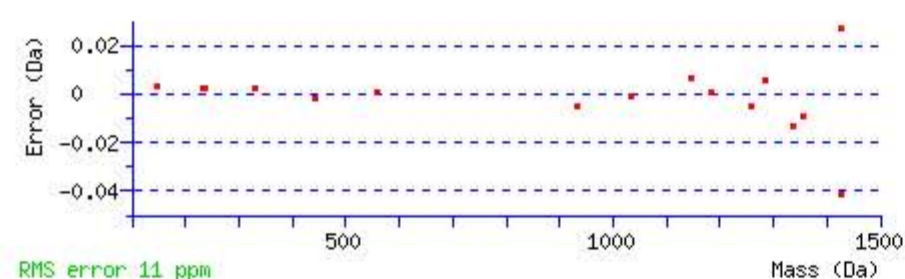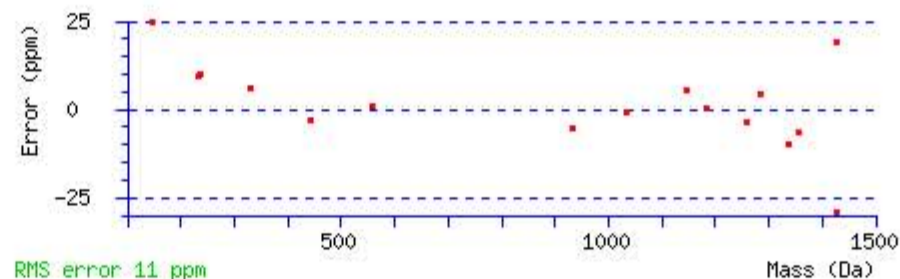

NCBI BLAST search of **YAATSQVLLPSK**

(Parameters: blastp, nr protein database, expect=20000, no filter, PAM30)

Other BLAST [web gateways](#)

### All matches to this query

| Score | Mr(calc):   | Delta     | Sequence                        |
|-------|-------------|-----------|---------------------------------|
| 58.4  | 1587.869431 | -0.008123 | <a href="#">YAATSQVLLPSK</a>    |
| 12.1  | 1587.862045 | -0.000737 | <a href="#">VTGQNQEQLLLAK</a>   |
| 10.5  | 1587.841599 | 0.019709  | <a href="#">QSTHLKDHR</a>       |
| 4.7   | 1587.874603 | -0.013295 | <a href="#">SFAFRSAIQHR</a>     |
| 1.1   | 1587.862045 | -0.000737 | <a href="#">DGASLSPATLFIQIR</a> |
| 0.8   | 1587.840286 | 0.021022  | <a href="#">DATRVLQMVLDGVR</a>  |

# MASCOT SEARCH RESULTS

## Peptide View

MS/MS Fragmentation of **LICQATGFSPR**

Found in **IGHM\_HUMAN**, Ig mu chain C region OS=Homo sapiens GN=IGHM PE=1 SV=3

Match to Query 31367: 1559.800348 from(780.907450,2+) rtinseconds(1999) index(33195)

Title: Locus:1.1.1.3245.8 File:"2013-07-02 CLN FXIII 60 min 3rd F 3.wiff"

Data file C:\Program Files (x86)\Matrix Science\Mascot Daemon\mgf6 FXIII 60 min 3rd\mascot\_daemon\_merge.mgf

Click mouse within plot area to zoom in by factor of two about that point

Or, Plot from  to  Da

Label all possible matches  Label matches used for scoring



Monoisotopic mass of neutral peptide Mr(calc): 1559.795242

Fixed modifications: Carbamidomethyl (C) (apply to specified residues or termini only)

Variable modifications:

Q4 : Biotin:Thermo-21345 (Q)

Ions Score: 67 Expect: 1.9e-006

Matches : 19/100 fragment ions using 28 most intense peaks [\(help\)](#)

| #  | b                  | b <sup>++</sup> | b <sup>*</sup> | b <sup>*++</sup> | b <sup>0</sup>    | b <sup>0++</sup> | Seq. | y                  | y <sup>++</sup>   | y <sup>*</sup> | y <sup>*++</sup> | y <sup>0</sup>     | y <sup>0++</sup>  | #  |
|----|--------------------|-----------------|----------------|------------------|-------------------|------------------|------|--------------------|-------------------|----------------|------------------|--------------------|-------------------|----|
| 1  | 114.091340         | 57.549308       |                |                  |                   |                  | L    |                    |                   |                |                  |                    |                   | 11 |
| 2  | <b>227.175404</b>  | 114.091340      |                |                  |                   |                  | I    | <b>1447.718454</b> | 724.362865        | 1430.691905    | 715.849591       | 1429.707889        | 715.357583        | 10 |
| 3  | 387.206053         | 194.106664      |                |                  |                   |                  | C    | <b>1334.634390</b> | <b>667.820833</b> | 1317.607841    | 659.307559       | <b>1316.623825</b> | 658.815551        | 9  |
| 4  | 826.431379         | 413.719328      | 809.404830     | 405.206053       |                   |                  | Q    | <b>1174.603741</b> | 587.805509        | 1157.577192    | 579.292234       | 1156.593176        | 578.800226        | 8  |
| 5  | <b>897.468493</b>  | 449.237885      | 880.441944     | 440.724610       |                   |                  | A    | <b>735.378415</b>  | 368.192846        | 718.351866     | 359.679571       | 717.367850         | <b>359.187563</b> | 7  |
| 6  | <b>998.516172</b>  | 499.761724      | 981.489623     | 491.248449       | <b>980.505607</b> | 490.756441       | T    | <b>664.341301</b>  | 332.674289        | 647.314752     | 324.161014       | 646.330736         | 323.669006        | 6  |
| 7  | <b>1055.537636</b> | 528.272456      | 1038.511087    | 519.759182       | 1037.527071       | 519.267174       | G    | <b>563.293622</b>  | 282.150449        | 546.267073     | 273.637175       | 545.283057         | 273.145167        | 5  |
| 8  | <b>1202.606050</b> | 601.806663      | 1185.579501    | 593.293389       | 1184.595485       | 592.801381       | F    | <b>506.272158</b>  | 253.639717        | 489.245609     | 245.126443       | 488.261593         | 244.634435        | 4  |
| 9  | <b>1289.638078</b> | 645.322677      | 1272.611529    | 636.809403       | 1271.627513       | 636.317395       | S    | <b>359.203744</b>  | 180.105510        | 342.177195     | 171.592236       | 341.193179         | 171.100228        | 3  |
| 10 | 1386.690842        | 693.849059      | 1369.664293    | 685.335785       | 1368.680277       | 684.843777       | P    | <b>272.171716</b>  | 136.589496        | 255.145167     | 128.076221       |                    |                   | 2  |
| 11 |                    |                 |                |                  |                   |                  | R    | 175.118952         | 88.063114         | 158.092403     | 79.549839        |                    |                   | 1  |

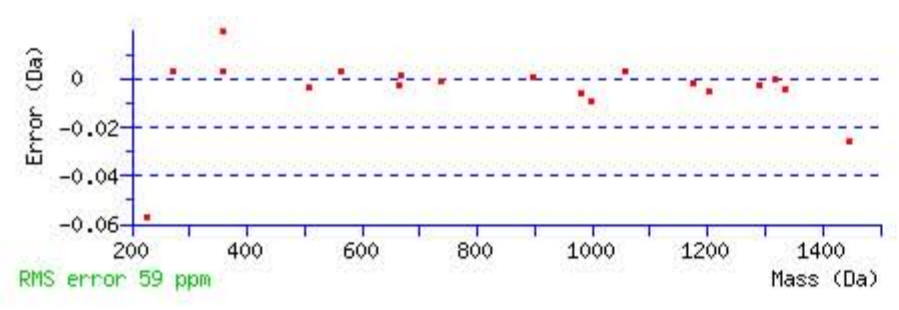

NCBI BLAST search of **LICQATGFSPR**

(Parameters: blastp, nr protein database, expect=20000, no filter, PAM30)

Other BLAST [web gateways](#)

### All matches to this query

| Score | Mr(calc):   | Delta     | Sequence                       |
|-------|-------------|-----------|--------------------------------|
| 66.6  | 1559.795242 | 0.005106  | <a href="#">LICQATGFSPR</a>    |
| 5.4   | 1559.820190 | -0.019842 | <a href="#">MTRSATQAAKQVPR</a> |
| 4.3   | 1559.808960 | -0.008612 | <a href="#">LDRLSGLADQMVAR</a> |
| 3.0   | 1559.808975 | -0.008627 | <a href="#">LLDRDACDITVRVK</a> |

Mascot: <http://www.matrixscience.com/>

# MASCOT Search Results

## Peptide View

MS/MS Fragmentation of **GAQTLYVPNC DHR**

Found in **IBP6\_HUMAN**, Insulin-like growth factor-binding protein 6 OS=Homo sapiens GN=IGFBP6 PE=1 SV=1

Match to Query 39231: 1840.872762 from(614.631530,3+) rtinseconds(1772) index(61231)

Title: Locus:1.1.1.3243.14 File:"2013-07-02 CLN FXIII 60 min 3rd FT.wiff"

Data file C:\Program Files (x86)\Matrix Science\Mascot Daemon\mgf6 FXIII 60 min 3rd\mascot\_daemon\_merge.mgf

Click mouse within plot area to zoom in by factor of two about that point

Or, Plot from  to  Da

Label all possible matches  Label matches used for scoring

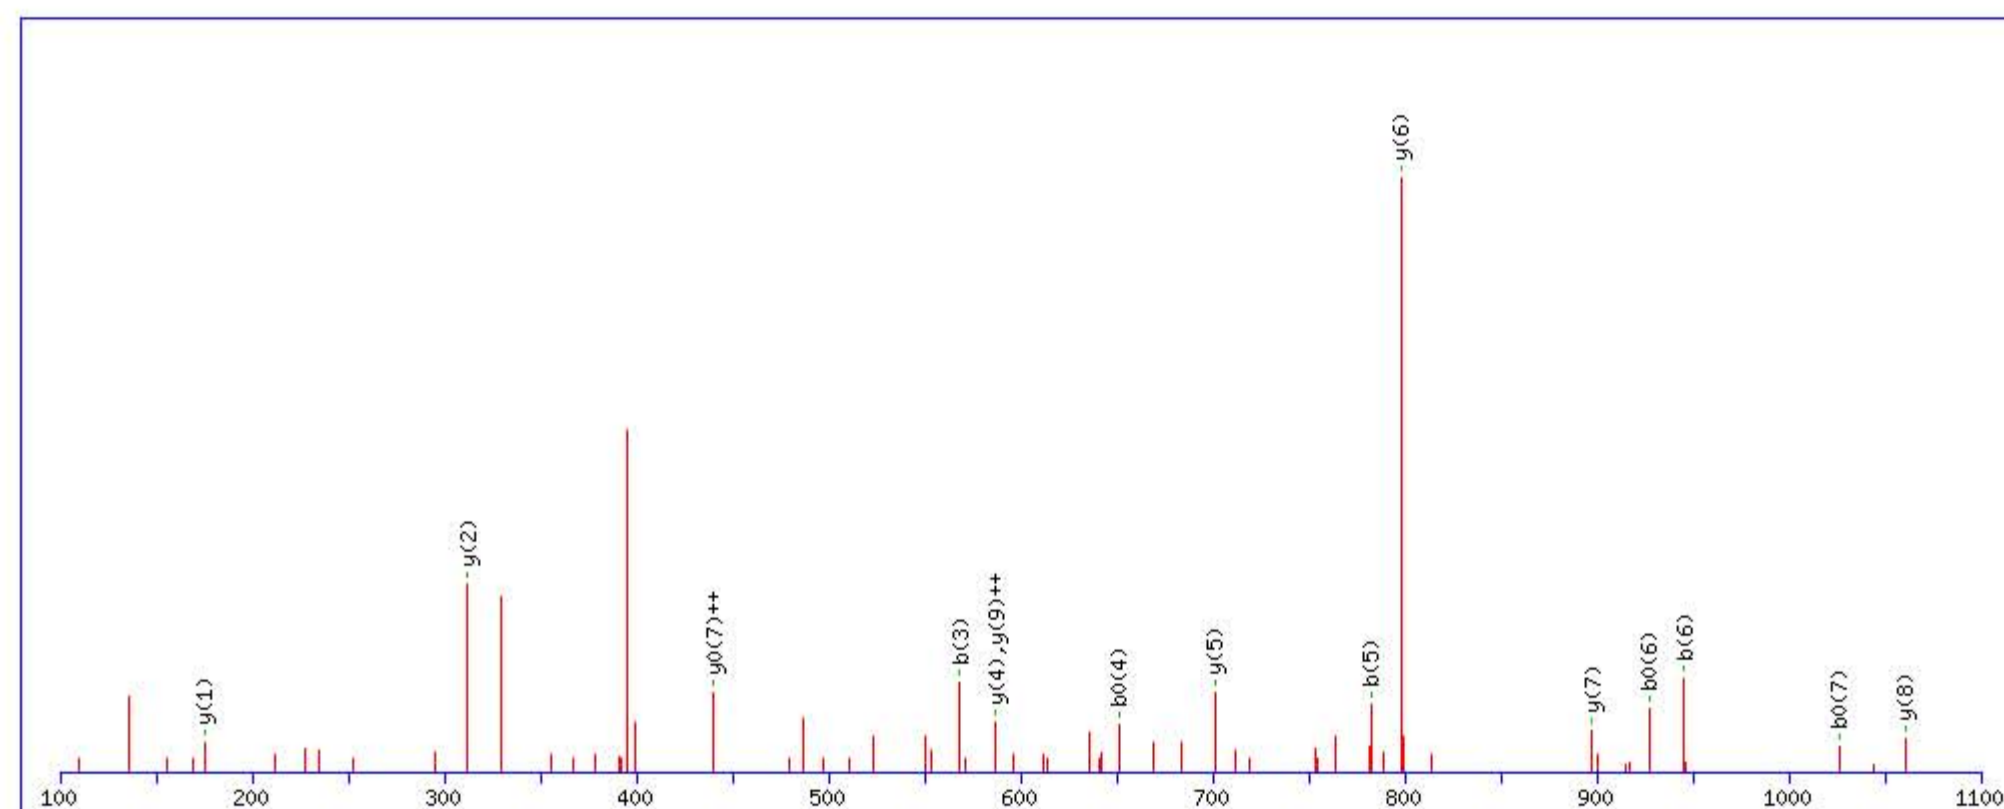

Monoisotopic mass of neutral peptide Mr(calc): 1840.871262

Fixed modifications: Carbamidomethyl (C) (apply to specified residues or termini only)

Variable modifications:

Q3 : Biotin:Thermo-21345 (Q)

Ions Score: 47 Expect: 0.0003

Matches : 15/130 fragment ions using 20 most intense peaks [\(help\)](#)

| #  | b                 | b <sup>++</sup> | b <sup>*</sup> | b <sup>*++</sup> | b <sup>0</sup>     | b <sup>0++</sup> | Seq. | y                  | y <sup>++</sup>   | y <sup>*</sup> | y <sup>*++</sup> | y <sup>0</sup> | y <sup>0++</sup>  | #  |
|----|-------------------|-----------------|----------------|------------------|--------------------|------------------|------|--------------------|-------------------|----------------|------------------|----------------|-------------------|----|
| 1  | 58.028740         | 29.518008       |                |                  |                    |                  | G    |                    |                   |                |                  |                |                   | 13 |
| 2  | 129.065854        | 65.036565       |                |                  |                    |                  | A    | 1784.857073        | 892.932175        | 1767.830524    | 884.418900       | 1766.846508    | 883.926892        | 12 |
| 3  | <b>568.291180</b> | 284.649228      | 551.264631     | 276.135954       |                    |                  | Q    | 1713.819959        | 857.413618        | 1696.793410    | 848.900343       | 1695.809394    | 848.408335        | 11 |
| 4  | 669.338859        | 335.173068      | 652.312310     | 326.659793       | <b>651.328294</b>  | 326.167785       | T    | 1274.594633        | 637.800955        | 1257.568084    | 629.287680       | 1256.584068    | 628.795672        | 10 |
| 5  | <b>782.422923</b> | 391.715100      | 765.396374     | 383.201825       | 764.412358         | 382.709817       | L    | 1173.546954        | <b>587.277115</b> | 1156.520405    | 578.763841       | 1155.536389    | 578.271833        | 9  |
| 6  | <b>945.486252</b> | 473.246764      | 928.459703     | 464.733490       | <b>927.475687</b>  | 464.241482       | Y    | <b>1060.462890</b> | 530.735083        | 1043.436341    | 522.221809       | 1042.452325    | 521.729801        | 8  |
| 7  | 1044.554666       | 522.780971      | 1027.528117    | 514.267697       | <b>1026.544101</b> | 513.775689       | V    | <b>897.399561</b>  | 449.203419        | 880.373012     | 440.690144       | 879.388996     | <b>440.198136</b> | 7  |
| 8  | 1141.607430       | 571.307353      | 1124.580881    | 562.794079       | 1123.596865        | 562.302071       | P    | <b>798.331147</b>  | 399.669212        | 781.304598     | 391.155937       | 780.320582     | 390.663929        | 6  |
| 9  | 1255.650357       | 628.328817      | 1238.623808    | 619.815542       | 1237.639792        | 619.323534       | N    | <b>701.278383</b>  | 351.142830        | 684.251834     | 342.629555       | 683.267818     | 342.137547        | 5  |
| 10 | 1415.681006       | 708.344141      | 1398.654457    | 699.830867       | 1397.670441        | 699.338859       | C    | <b>587.235456</b>  | 294.121366        | 570.208907     | 285.608092       | 569.224891     | 285.116084        | 4  |
| 11 | 1530.707949       | 765.857613      | 1513.681400    | 757.344338       | 1512.697384        | 756.852330       | D    | 427.204807         | 214.106041        | 410.178258     | 205.592767       | 409.194242     | 205.100759        | 3  |
| 12 | 1667.766861       | 834.387069      | 1650.740312    | 825.873794       | 1649.756296        | 825.381786       | H    | <b>312.177864</b>  | 156.592570        | 295.151315     | 148.079295       |                |                   | 2  |
| 13 |                   |                 |                |                  |                    |                  | R    | <b>175.118952</b>  | 88.063114         | 158.092403     | 79.549839        |                |                   | 1  |

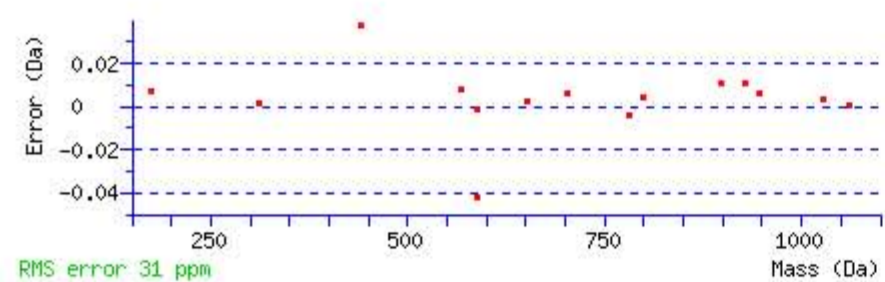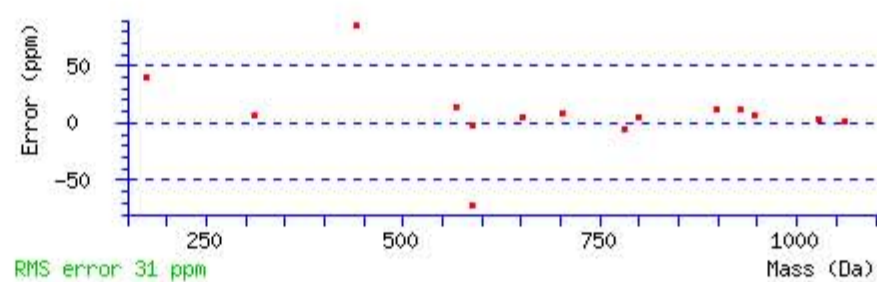

NCBI BLAST search of [GAQTLYVPNC DHR](#)

(Parameters: blastp, nr protein database, expect=20000, no filter, PAM30)

Other BLAST [web gateways](#)

## All matches to this query

| Score | Mr(calc):   | Delta     | Sequence                        |
|-------|-------------|-----------|---------------------------------|
| 47.2  | 1840.871262 | 0.001500  | <a href="#">GAQTLYVPNC DHR</a>  |
| 10.1  | 1840.887650 | -0.014888 | <a href="#">AALSASEGEEVPQDK</a> |
| 1.5   | 1840.873734 | -0.000972 | <a href="#">PEMTENETPTKKQHR</a> |
| 1.2   | 1840.892365 | -0.019603 | <a href="#">NNSPMAANQPTLR</a>   |

Mascot: <http://www.matrixscience.com/>

# MASCOT Search Results

## Peptide View

MS/MS Fragmentation of **HLDSVLQQLQTEVYR**

Found in **IBP6\_HUMAN**, Insulin-like growth factor-binding protein 6 OS=Homo sapiens GN=IGFBP6 PE=1 SV=1

Match to Query 45027: 2139.118782 from(714.046870,3+) rtinseconds(2601) index(65762)

Title: Locus:1.1.1.3532.12 File:"2013-07-02 CLN FXIII 60 min 3rd FT.wiff"

Data file C:\Program Files (x86)\Matrix Science\Mascot Daemon\mgf6 FXIII 60 min 3rd\mascot\_daemon\_merge.mgf

Click mouse within plot area to zoom in by factor of two about that point

Or, Plot from  to  Da

Label all possible matches  Label matches used for scoring

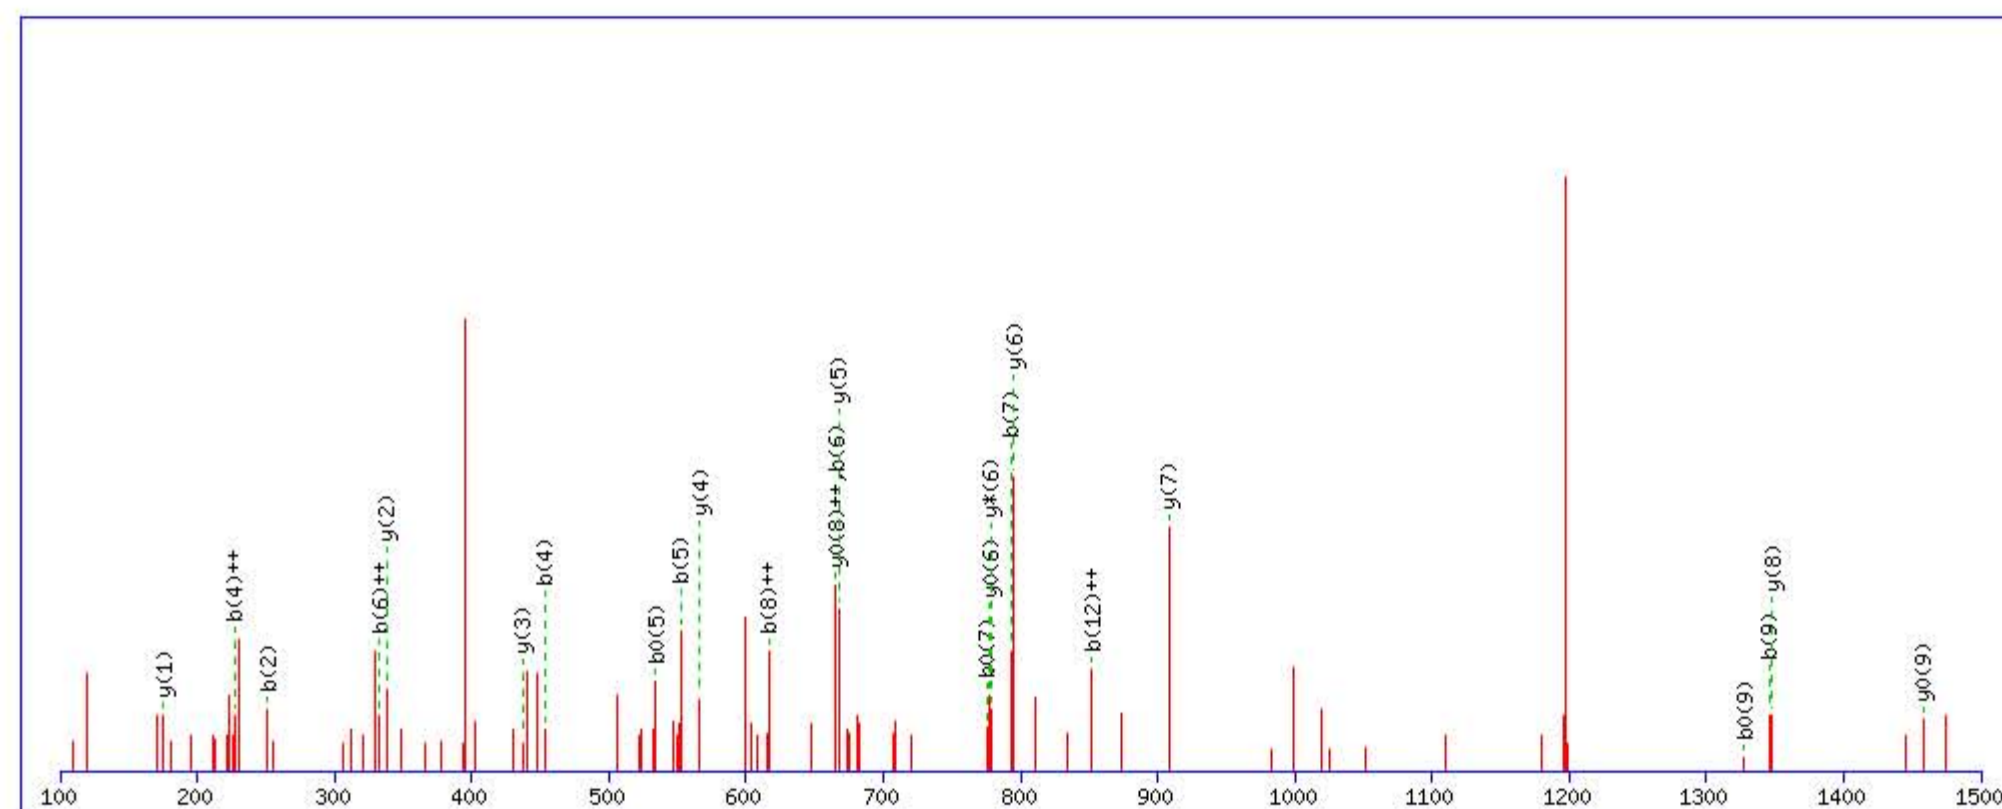

Monoisotopic mass of neutral peptide Mr(calc): 2139.114655

Fixed modifications: Carbamidomethyl (C) (apply to specified residues or termini only)

Variable modifications:

Q8 : Biotin:Thermo-21345 (Q)

Ions Score: 30 Expect: 0.025

Matches : 25/146 fragment ions using 64 most intense peaks [\(help\)](#)

| #  | b                  | b <sup>++</sup>   | b <sup>*</sup> | b <sup>*++</sup> | b <sup>0</sup>     | b <sup>0++</sup> | Seq. | y                  | y <sup>++</sup> | y <sup>*</sup>    | y <sup>*++</sup> | y <sup>0</sup>     | y <sup>0++</sup>  | #  |
|----|--------------------|-------------------|----------------|------------------|--------------------|------------------|------|--------------------|-----------------|-------------------|------------------|--------------------|-------------------|----|
| 1  | 138.066188         | 69.536732         |                |                  |                    |                  | H    |                    |                 |                   |                  |                    |                   | 15 |
| 2  | <b>251.150252</b>  | 126.078764        |                |                  |                    |                  | L    | 2003.063026        | 1002.035151     | 1986.036477       | 993.521877       | 1985.052461        | 993.029869        | 14 |
| 3  | 366.177195         | 183.592235        |                |                  | 348.166630         | 174.586953       | D    | 1889.978962        | 945.493119      | 1872.952413       | 936.979845       | 1871.968397        | 936.487836        | 13 |
| 4  | <b>453.209223</b>  | <b>227.108250</b> |                |                  | 435.198658         | 218.102967       | S    | 1774.952019        | 887.979648      | 1757.925470       | 879.466373       | 1756.941454        | 878.974365        | 12 |
| 5  | <b>552.277637</b>  | 276.642457        |                |                  | <b>534.267072</b>  | 267.637174       | V    | 1687.919991        | 844.463634      | 1670.893442       | 835.950359       | 1669.909426        | 835.458351        | 11 |
| 6  | <b>665.361701</b>  | <b>333.184489</b> |                |                  | 647.351136         | 324.179206       | L    | 1588.851577        | 794.929427      | 1571.825028       | 786.416152       | 1570.841012        | 785.924144        | 10 |
| 7  | <b>793.420279</b>  | 397.213778        | 776.393730     | 388.700503       | <b>775.409714</b>  | 388.208495       | Q    | 1475.767513        | 738.387395      | 1458.740964       | 729.874120       | <b>1457.756948</b> | 729.382112        | 9  |
| 8  | 1232.645605        | <b>616.826440</b> | 1215.619056    | 608.313166       | 1214.635040        | 607.821158       | Q    | <b>1347.708935</b> | 674.358105      | 1330.682386       | 665.844831       | 1329.698370        | <b>665.352823</b> | 8  |
| 9  | <b>1345.729669</b> | 673.368472        | 1328.703120    | 664.855198       | <b>1327.719104</b> | 664.363190       | L    | <b>908.483609</b>  | 454.745443      | 891.457060        | 446.232168       | 890.473044         | 445.740160        | 7  |
| 10 | 1473.788247        | 737.397761        | 1456.761698    | 728.884487       | 1455.777682        | 728.392479       | Q    | <b>795.399545</b>  | 398.203411      | <b>778.372996</b> | 389.690136       | <b>777.388980</b>  | 389.198128        | 6  |
| 11 | 1574.835926        | 787.921601        | 1557.809377    | 779.408326       | 1556.825361        | 778.916318       | T    | <b>667.340967</b>  | 334.174122      | 650.314418        | 325.660847       | 649.330402         | 325.168839        | 5  |
| 12 | 1703.878519        | <b>852.442897</b> | 1686.851970    | 843.929623       | 1685.867954        | 843.437615       | E    | <b>566.293288</b>  | 283.650282      | 549.266739        | 275.137008       | 548.282723         | 274.645000        | 4  |
| 13 | 1802.946933        | 901.977104        | 1785.920384    | 893.463830       | 1784.936368        | 892.971822       | V    | <b>437.250695</b>  | 219.128986      | 420.224146        | 210.615711       |                    |                   | 3  |
| 14 | 1966.010262        | 983.508769        | 1948.983713    | 974.995494       | 1947.999697        | 974.503486       | Y    | <b>338.182281</b>  | 169.594779      | 321.155732        | 161.081504       |                    |                   | 2  |
| 15 |                    |                   |                |                  |                    |                  | R    | <b>175.118952</b>  | 88.063114       | 158.092403        | 79.549840        |                    |                   | 1  |

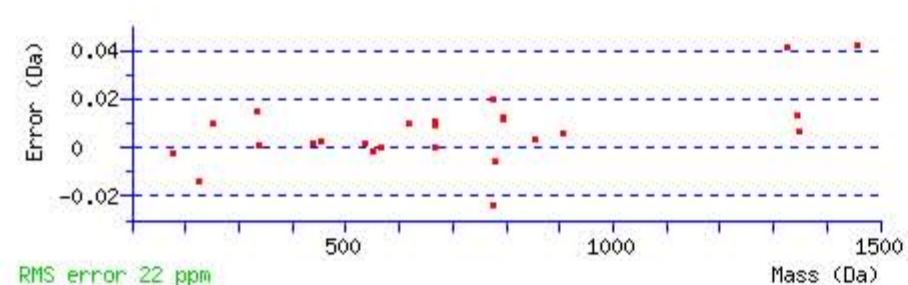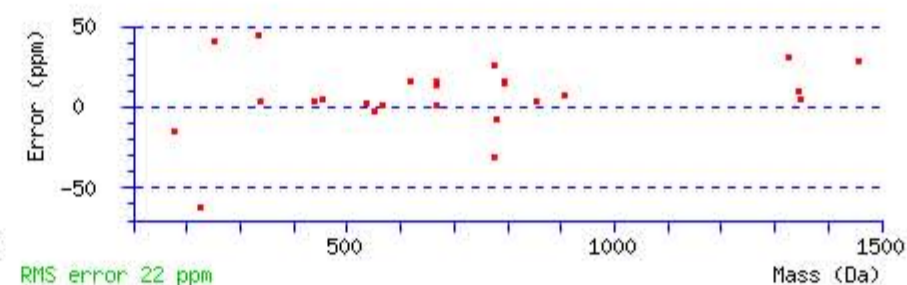

NCBI BLAST search of **HLDSVLQQLQTEVYR**

(Parameters: blastp, nr protein database, expect=20000, no filter, PAM30)

Other BLAST [web gateways](#)

All matches to this query

| Score | Mr(calc):   | Delta    | Sequence                        |
|-------|-------------|----------|---------------------------------|
| 30.1  | 2139.114655 | 0.004127 | <a href="#">HLDSVLQQLQTEVYR</a> |
| 21.8  | 2139.114655 | 0.004127 | <a href="#">HLDSVLQQLQTEVYR</a> |
| 11.9  | 2139.114655 | 0.004127 | <a href="#">HLDSVLQQLQTEVYR</a> |

Mascot: <http://www.matrixscience.com/>

# MASCOT Search Results

## Peptide View

MS/MS Fragmentation of **LAELPADALGPLQR**

Found in **ALS\_HUMAN**, Insulin-like growth factor-binding protein complex acid labile subunit OS=Homo sapiens GN=IGFALS PE=1 SV=1

Match to Query 38064: 1773.990048 from(888.002300,2+) rtinseconds(2466) index(35528)

Title: Locus:1.1.1.3408.15 File:"2013-07-02 CLN FXIII 60 min 3rd F 3.wiff"

Data file C:\Program Files (x86)\Matrix Science\Mascot Daemon\mgf\6 FXIII 60 min 3rd\mascot\_daemon\_merge.mgf

Click mouse within plot area to zoom in by factor of two about that point

Or, Plot from  to  Da

Label all possible matches  Label matches used for scoring

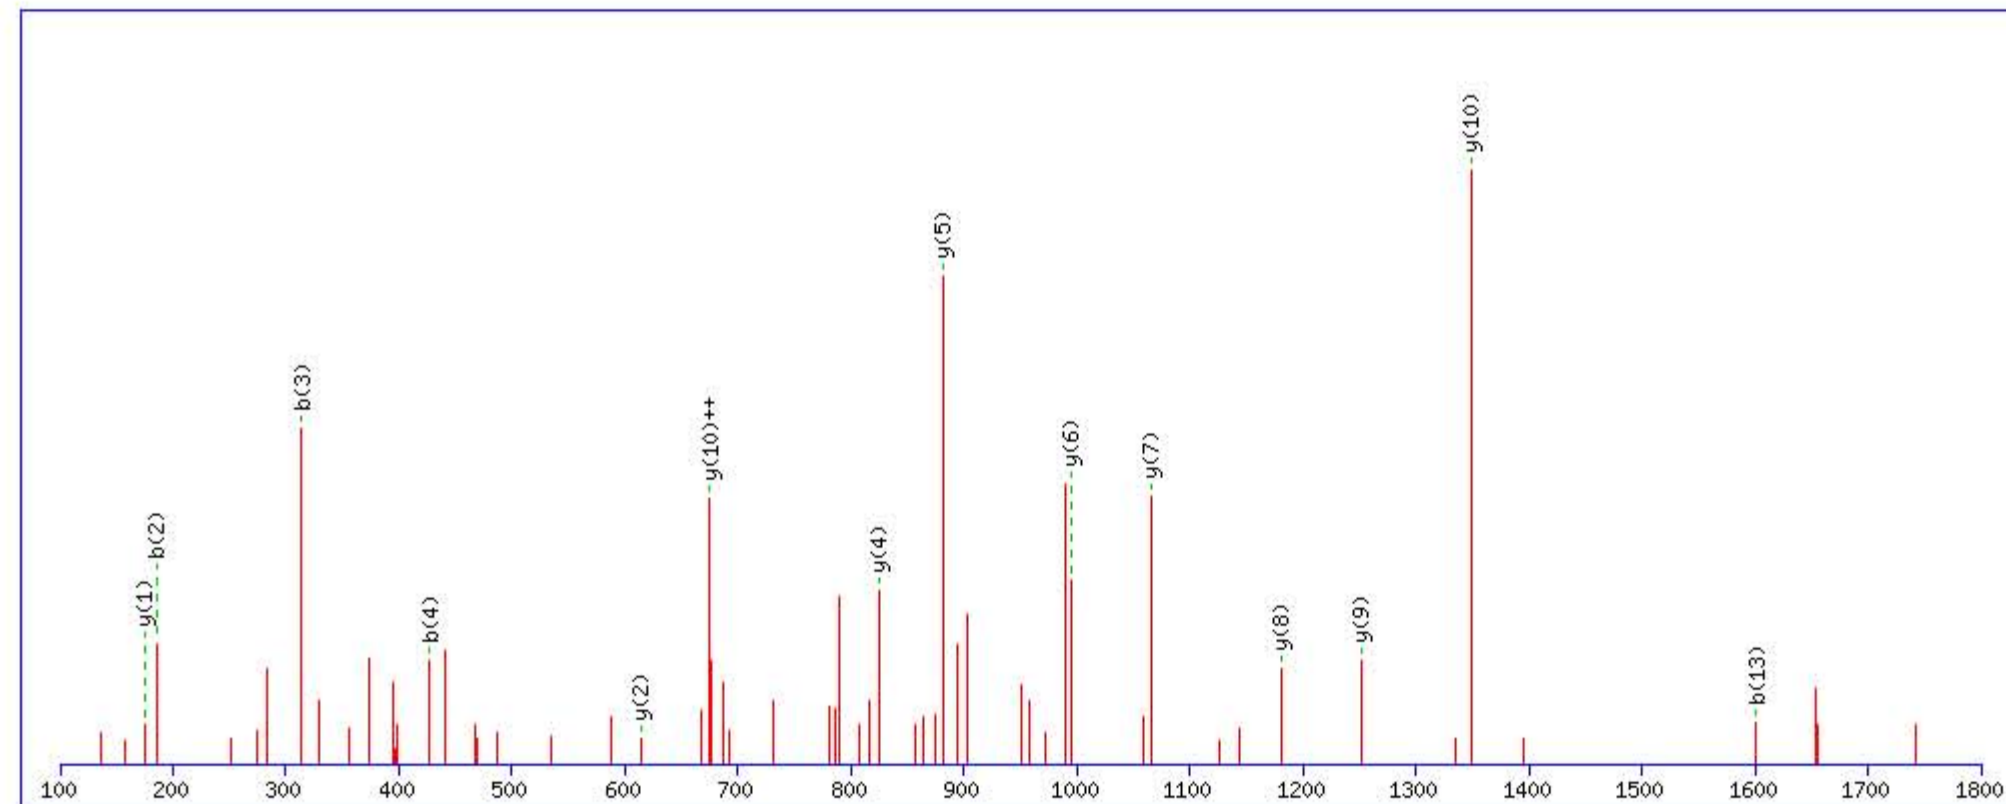

Monoisotopic mass of neutral peptide Mr(calc): 1773.981094

Fixed modifications: Carbamidomethyl (C) (apply to specified residues or termini only)

Variable modifications:

Q13 : Biotin:Thermo-21345 (Q)

Ions Score: 49 Expect: 0.00019

Matches : 14/114 fragment ions using 30 most intense peaks [\(help\)](#)

| #  | b                  | b <sup>++</sup> | b <sup>*</sup> | b <sup>+++</sup> | b <sup>0</sup> | b <sup>0++</sup> | Seq. | y                  | y <sup>++</sup>   | y <sup>*</sup> | y <sup>+++</sup> | y <sup>0</sup> | y <sup>0++</sup> | #  |
|----|--------------------|-----------------|----------------|------------------|----------------|------------------|------|--------------------|-------------------|----------------|------------------|----------------|------------------|----|
| 1  | 114.091340         | 57.549308       |                |                  |                |                  | L    |                    |                   |                |                  |                |                  | 14 |
| 2  | <b>185.128454</b>  | 93.067865       |                |                  |                |                  | A    | 1661.904340        | 831.455808        | 1644.877791    | 822.942534       | 1643.893775    | 822.450526       | 13 |
| 3  | <b>314.171047</b>  | 157.589161      |                |                  | 296.160482     | 148.583879       | E    | 1590.867226        | 795.937251        | 1573.840677    | 787.423977       | 1572.856661    | 786.931969       | 12 |
| 4  | <b>427.255111</b>  | 214.131193      |                |                  | 409.244546     | 205.125911       | L    | 1461.824633        | 731.415955        | 1444.798084    | 722.902680       | 1443.814068    | 722.410672       | 11 |
| 5  | 524.307875         | 262.657576      |                |                  | 506.297310     | 253.652293       | P    | <b>1348.740569</b> | <b>674.873922</b> | 1331.714020    | 666.360648       | 1330.730004    | 665.868640       | 10 |
| 6  | 595.344989         | 298.176133      |                |                  | 577.334424     | 289.170850       | A    | <b>1251.687805</b> | 626.347540        | 1234.661256    | 617.834266       | 1233.677240    | 617.342258       | 9  |
| 7  | 710.371932         | 355.689604      |                |                  | 692.361367     | 346.684322       | D    | <b>1180.650691</b> | 590.828984        | 1163.624142    | 582.315709       | 1162.640126    | 581.823701       | 8  |
| 8  | 781.409046         | 391.208161      |                |                  | 763.398481     | 382.202879       | A    | <b>1065.623748</b> | 533.315512        | 1048.597199    | 524.802238       |                |                  | 7  |
| 9  | 894.493110         | 447.750193      |                |                  | 876.482545     | 438.744911       | L    | <b>994.586634</b>  | 497.796955        | 977.560085     | 489.283681       |                |                  | 6  |
| 10 | 951.514574         | 476.260925      |                |                  | 933.504009     | 467.255643       | G    | <b>881.502570</b>  | 441.254923        | 864.476021     | 432.741649       |                |                  | 5  |
| 11 | 1048.567338        | 524.787307      |                |                  | 1030.556773    | 515.782025       | P    | <b>824.481106</b>  | 412.744191        | 807.454557     | 404.230916       |                |                  | 4  |
| 12 | 1161.651402        | 581.329339      |                |                  | 1143.640837    | 572.324056       | L    | 727.428342         | 364.217809        | 710.401793     | 355.704534       |                |                  | 3  |
| 13 | <b>1600.876728</b> | 800.942002      | 1583.850179    | 792.428728       | 1582.866163    | 791.936719       | Q    | <b>614.344278</b>  | 307.675777        | 597.317729     | 299.162503       |                |                  | 2  |
| 14 |                    |                 |                |                  |                |                  | R    | <b>175.118952</b>  | 88.063114         | 158.092403     | 79.549839        |                |                  | 1  |

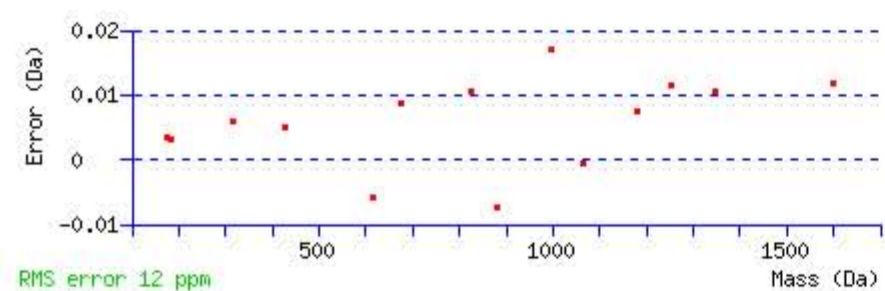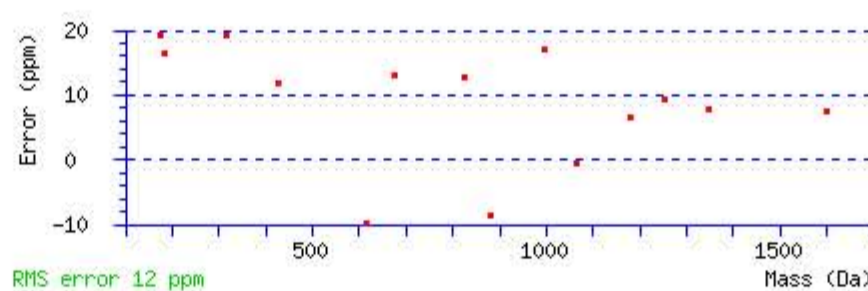

NCBI BLAST search of [LAELPADALGPLQR](#)

(Parameters: blastp, nr protein database, expect=20000, no filter, PAM30)

Other BLAST [web gateways](#)

All matches to this query

| Score | Mr(calc):   | Delta    | Sequence                       |
|-------|-------------|----------|--------------------------------|
| 48.6  | 1773.981094 | 0.008954 | <a href="#">LAELPADALGPLQR</a> |

Mascot: <http://www.matrixscience.com/>

**MATRIX SCIENCE Mascot Search Results**

**Peptide View**

MS/MS Fragmentation of **SFEGLGQLEVLTLTDHNQLQEVK**

Found in **ALS\_HUMAN**, Insulin-like growth factor-binding protein complex acid labile subunit OS=Homo sapiens GN=IGFALS PE=1 SV=1

Match to Query 53865: 2807.467872 from(936.829900,3+) rtinseconds(2722) index(37025)  
 Title: Locus:1.1.1.3496.21 File:"2013-07-02 CLN FXIII 60 min 3rd F 3.wiff"  
 Data file C:\Program Files (x86)\Matrix Science\Mascot Daemon\mgf6 FXIII 60 min 3rd\mascot\_daemon\_merge.mgf

Click mouse within plot area to zoom in by factor of two about that point  
 Or, Plot from  to  Da   
 Label all possible matches  Label matches used for scoring

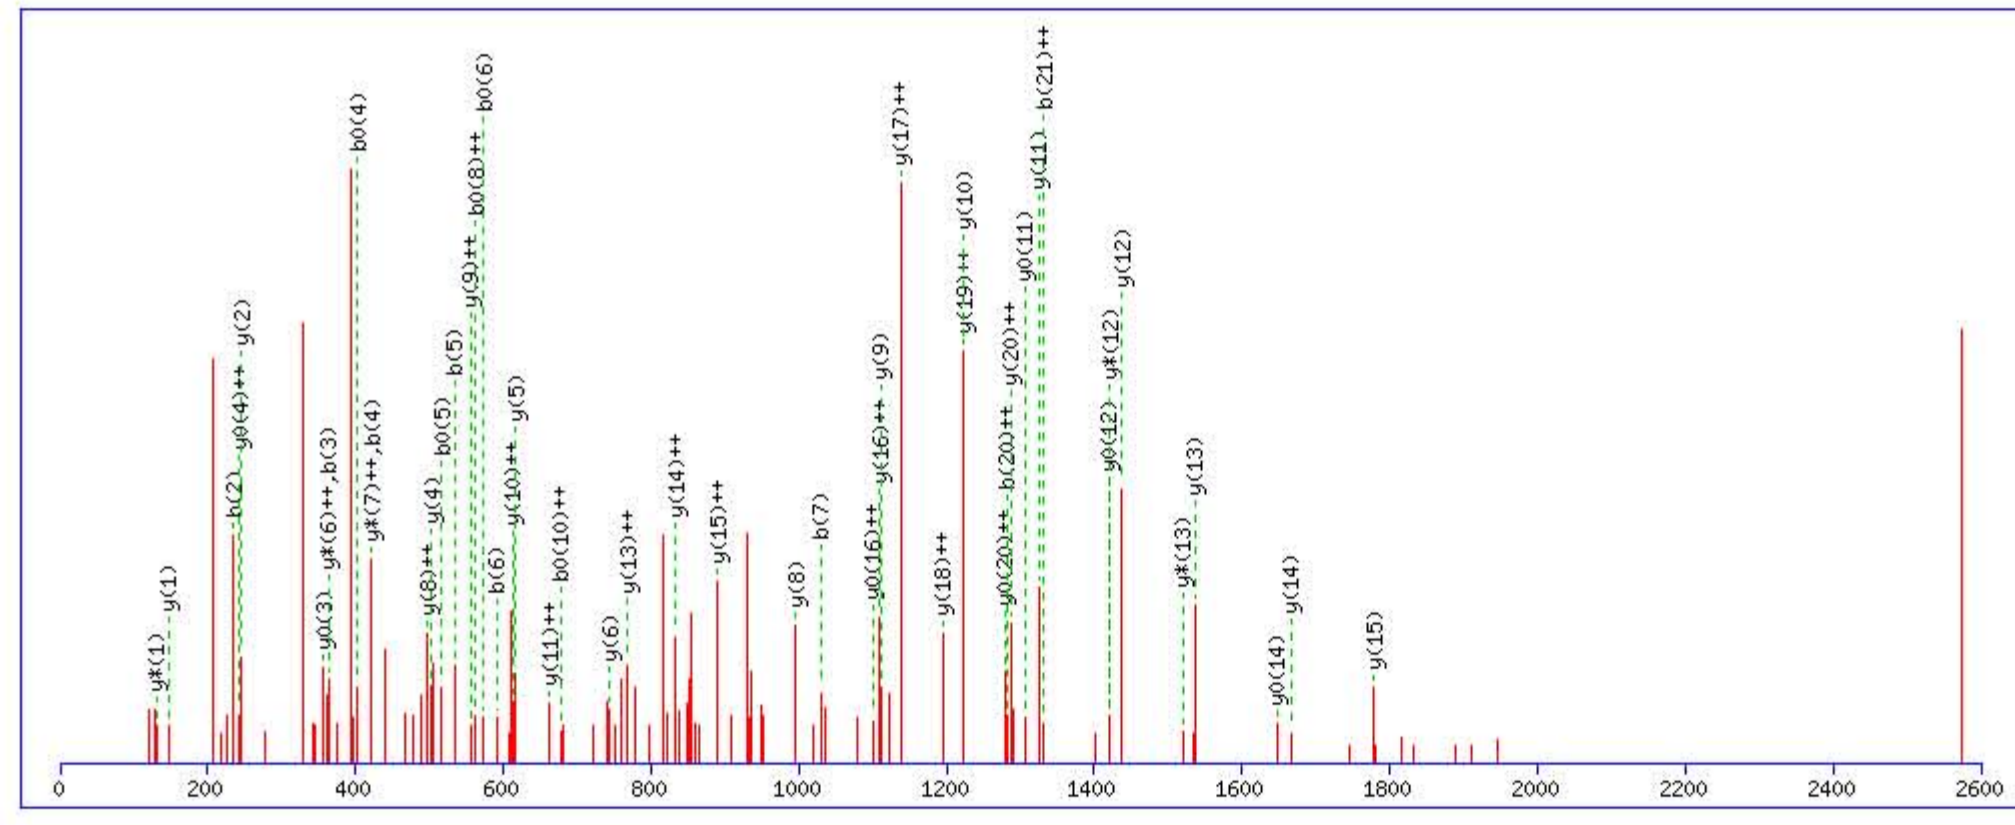

Monoisotopic mass of neutral peptide Mr(calc): 2807.452759  
 Fixed modifications: Carbamidomethyl (C) (apply to specified residues or termini only)  
 Variable modifications:  
 Q7 : Biotin:Thermo-21345 (Q)  
 Ions Score: 64 Expect: 8.9e-006  
 Matches : 50/236 fragment ions using 103 most intense peaks [\(help\)](#)

| #  | b                  | b <sup>++</sup>    | b <sup>*</sup> | b <sup>*++</sup> | b <sup>0</sup>    | b <sup>0++</sup>  | Seq. | y                  | y <sup>++</sup>    | y <sup>*</sup>     | y <sup>*++</sup>  | y <sup>0</sup>     | y <sup>0++</sup>   | #  |
|----|--------------------|--------------------|----------------|------------------|-------------------|-------------------|------|--------------------|--------------------|--------------------|-------------------|--------------------|--------------------|----|
| 1  | 88.039304          | 44.523290          |                |                  | 70.028739         | 35.518008         | S    |                    |                    |                    |                   |                    |                    | 22 |
| 2  | <b>235.107718</b>  | 118.057497         |                |                  | 217.097153        | 109.052214        | F    | 2721.428016        | 1361.217646        | 2704.401467        | 1352.704371       | 2703.417451        | 1352.212363        | 21 |
| 3  | <b>364.150311</b>  | 182.578793         |                |                  | 346.139746        | 173.573511        | E    | 2574.359602        | <b>1287.683439</b> | 2557.333053        | 1279.170164       | 2556.349037        | <b>1278.678156</b> | 20 |
| 4  | <b>421.171775</b>  | 211.089525         |                |                  | <b>403.161210</b> | 202.084243        | G    | 2445.317009        | <b>1223.162142</b> | 2428.290460        | 1214.648868       | 2427.306444        | 1214.156860        | 19 |
| 5  | <b>534.255839</b>  | 267.631558         |                |                  | <b>516.245274</b> | 258.626275        | L    | 2388.295545        | <b>1194.651410</b> | 2371.268996        | 1186.138136       | 2370.284980        | 1185.646128        | 18 |
| 6  | <b>591.277303</b>  | 296.142290         |                |                  | <b>573.266738</b> | 287.137007        | G    | 2275.211481        | <b>1138.109378</b> | 2258.184932        | 1129.596104       | 2257.200916        | 1129.104096        | 17 |
| 7  | <b>1030.502629</b> | 515.754953         | 1013.476080    | 507.241678       | 1012.492064       | 506.749670        | Q    | 2218.190017        | <b>1109.598646</b> | 2201.163468        | 1101.085372       | 2200.179452        | <b>1100.593364</b> | 16 |
| 8  | 1143.586693        | 572.296985         | 1126.560144    | 563.783710       | 1125.576128       | <b>563.291702</b> | L    | <b>1778.964691</b> | <b>889.985984</b>  | 1761.938142        | 881.472709        | 1760.954126        | 880.980701         | 15 |
| 9  | 1272.629286        | 636.818281         | 1255.602737    | 628.305007       | 1254.618721       | 627.812999        | E    | <b>1665.880627</b> | <b>833.443952</b>  | 1648.854078        | 824.930677        | <b>1647.870062</b> | 824.438669         | 14 |
| 10 | 1371.697700        | 686.352488         | 1354.671151    | 677.839214       | 1353.687135       | <b>677.347206</b> | V    | <b>1536.838034</b> | <b>768.922655</b>  | <b>1519.811485</b> | 760.409381        | 1518.827469        | 759.917373         | 13 |
| 11 | 1484.781764        | 742.894520         | 1467.755215    | 734.381246       | 1466.771199       | 733.889238        | L    | <b>1437.769620</b> | 719.388448         | <b>1420.743071</b> | 710.875174        | <b>1419.759055</b> | 710.383166         | 12 |
| 12 | 1585.829443        | 793.418360         | 1568.802894    | 784.905085       | 1567.818878       | 784.413077        | T    | <b>1324.685556</b> | <b>662.846416</b>  | 1307.659007        | 654.333142        | <b>1306.674991</b> | 653.841134         | 11 |
| 13 | 1698.913507        | 849.960392         | 1681.886958    | 841.447117       | 1680.902942       | 840.955109        | L    | <b>1223.637877</b> | <b>612.322577</b>  | 1206.611328        | 603.809302        | 1205.627312        | 603.317294         | 10 |
| 14 | 1813.940450        | 907.473863         | 1796.913901    | 898.960589       | 1795.929885       | 898.468581        | D    | <b>1110.553813</b> | <b>555.780545</b>  | 1093.527264        | 547.267270        | 1092.543248        | 546.775262         | 9  |
| 15 | 1950.999362        | 976.003319         | 1933.972813    | 967.490045       | 1932.988797       | 966.998037        | H    | <b>995.526870</b>  | <b>498.267073</b>  | 978.500321         | 489.753799        | 977.516305         | 489.261791         | 8  |
| 16 | 2065.042289        | 1033.024782        | 2048.015740    | 1024.511508      | 2047.031724       | 1024.019500       | N    | 858.467958         | 429.737617         | 841.441409         | <b>421.224343</b> | 840.457393         | 420.732335         | 7  |
| 17 | 2193.100867        | 1097.054072        | 2176.074318    | 1088.540797      | 2175.090302       | 1088.048789       | Q    | <b>744.425031</b>  | 372.716154         | 727.398482         | <b>364.202879</b> | 726.414466         | 363.710871         | 6  |
| 18 | 2306.184931        | 1153.596104        | 2289.158382    | 1145.082829      | 2288.174366       | 1144.590821       | L    | <b>616.366453</b>  | 308.686865         | 599.339904         | 300.173590        | 598.355888         | 299.681582         | 5  |
| 19 | 2434.243509        | 1217.625393        | 2417.216960    | 1209.112118      | 2416.232944       | 1208.620110       | Q    | <b>503.282389</b>  | 252.144833         | 486.255840         | 243.631558        | 485.271824         | <b>243.139550</b>  | 4  |
| 20 | 2563.286102        | <b>1282.146689</b> | 2546.259553    | 1273.633415      | 2545.275537       | 1273.141407       | E    | 375.223811         | 188.115543         | 358.197262         | 179.602269        | <b>357.213246</b>  | 179.110261         | 3  |
| 21 | 2662.354516        | <b>1331.680896</b> | 2645.327967    | 1323.167622      | 2644.343951       | 1322.675614       | V    | <b>246.181218</b>  | 123.594247         | 229.154669         | 115.080972        |                    |                    | 2  |
| 22 |                    |                    |                |                  |                   |                   | K    | <b>147.112804</b>  | 74.060040          | <b>130.086255</b>  | 65.546765         |                    |                    | 1  |

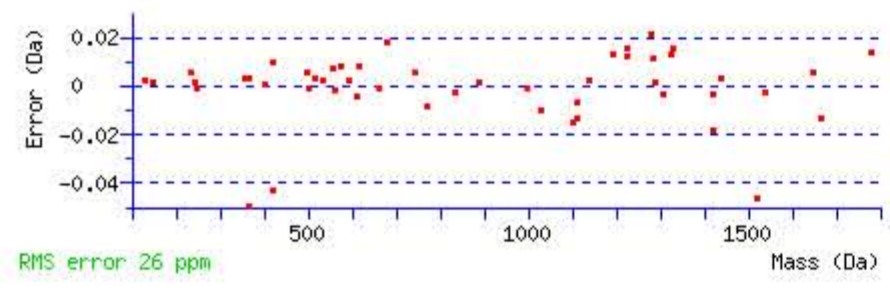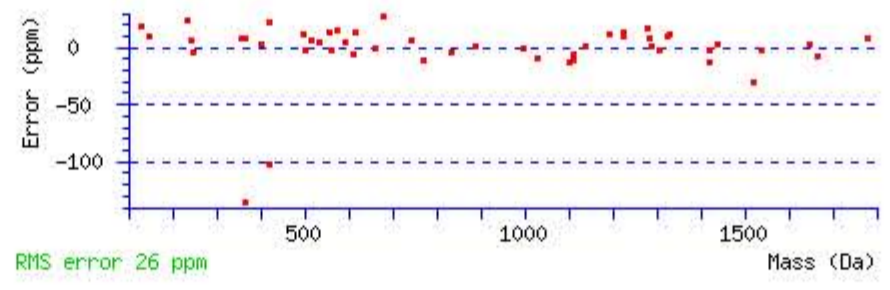

NCBI BLAST search of **SFEGLGQLEVLTLTDHNQLQEVK**  
 (Parameters: blastp, nr protein database, expect=20000, no filter, PAM30)  
 Other BLAST [web gateways](#)

**All matches to this query**

| Score | Mr(calc):   | Delta    | Sequence                                |
|-------|-------------|----------|-----------------------------------------|
| 64.3  | 2807.452759 | 0.015113 | <a href="#">SFEGLGQLEVLTLTDHNQLQEVK</a> |
| 9.0   | 2807.452759 | 0.015113 | <a href="#">SFEGLGQLEVLTLTDHNQLQEVK</a> |



# MASCOT Search Results

## Peptide View

MS/MS Fragmentation of **ELAAQTIK**

Found in **ITIH1\_HUMAN**, Inter-alpha-trypsin inhibitor heavy chain H1 OS=Homo sapiens GN=ITIH1 PE=1 SV=3

Match to Query 19966: 1183.664828 from(592.839690,2+) rtinseconds(1718) index(45556)

Title: Locus:1.1.1.2647.9 File:"2013-07-02 CLN FXIII 60 min 3rd F 4.wiff"

Data file C:\Program Files (x86)\Matrix Science\Mascot Daemon\mgf6 FXIII 60 min 3rd\mascot\_daemon\_merge.mgf

Click mouse within plot area to zoom in by factor of two about that point

Or, Plot from  to  Da

Label all possible matches  Label matches used for scoring

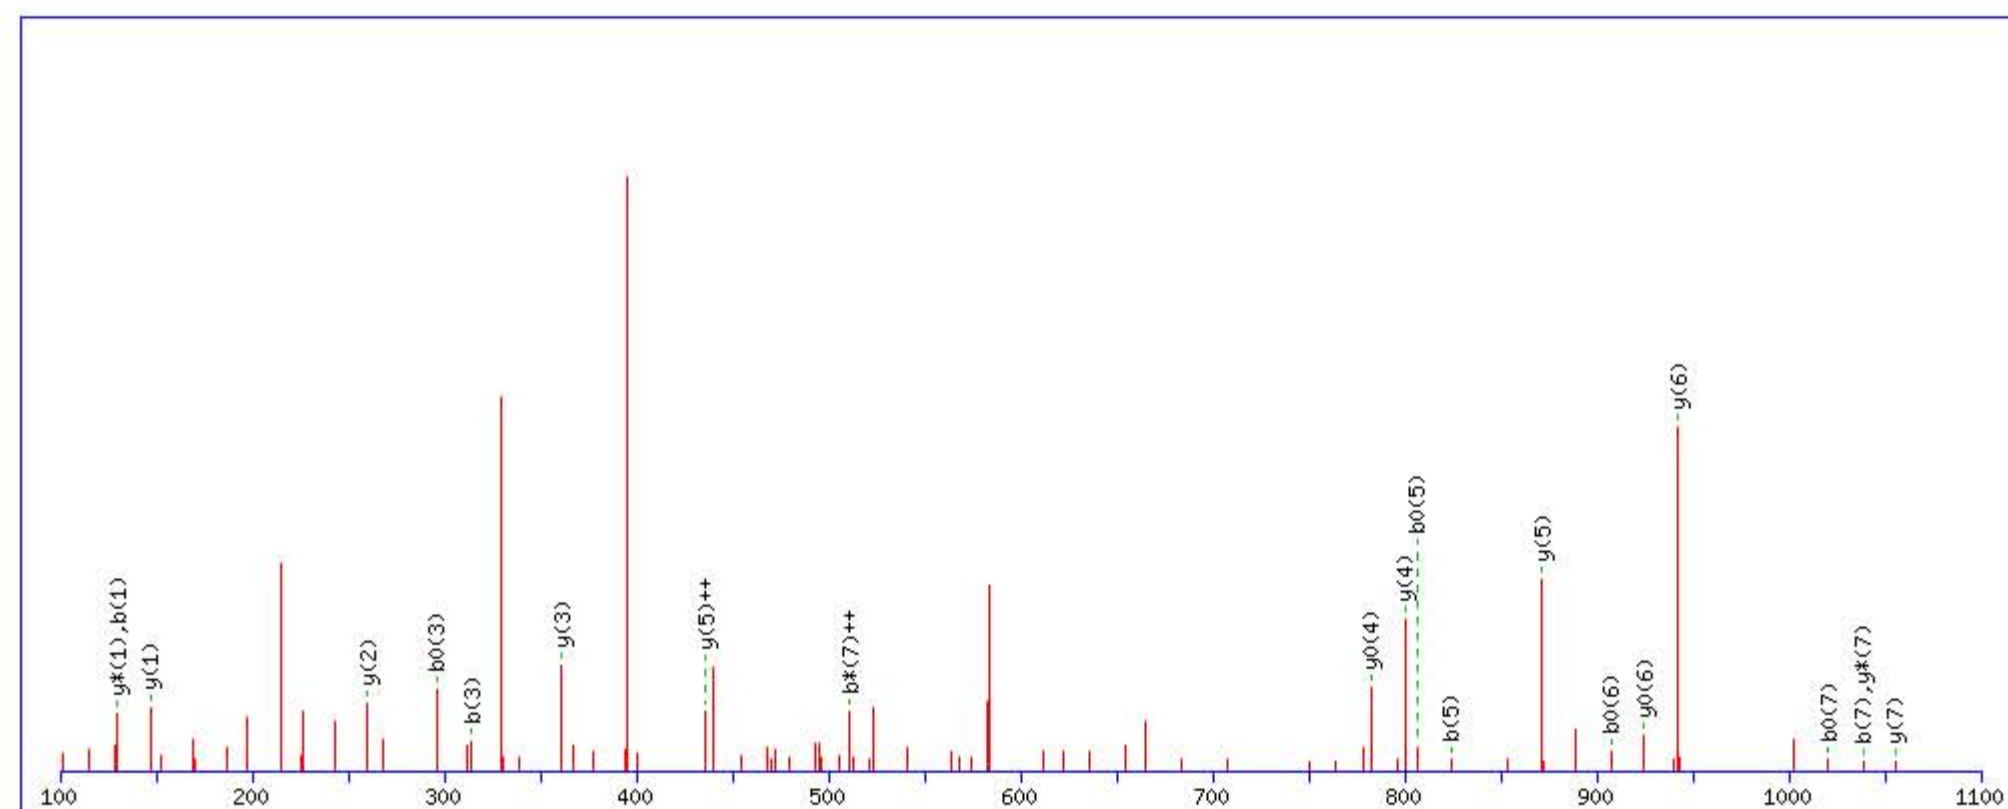

Monoisotopic mass of neutral peptide Mr(calc): 1183.663452

Fixed modifications: Carbamidomethyl (C) (apply to specified residues or termini only)

Variable modifications:

Q5 : Biotin:Thermo-21345 (Q)

Ions Score: 36 Expect: 0.0055

Matches : 21/72 fragment ions using 40 most intense peaks [\(help\)](#)

| # | b           | b <sup>++</sup> | b <sup>*</sup> | b <sup>***</sup> | b <sup>0</sup> | b <sup>0++</sup> | Seq. | y           | y <sup>++</sup> | y <sup>*</sup> | y <sup>***</sup> | y <sup>0</sup> | y <sup>0++</sup> | # |
|---|-------------|-----------------|----------------|------------------|----------------|------------------|------|-------------|-----------------|----------------|------------------|----------------|------------------|---|
| 1 | 130.049869  | 65.528572       |                |                  | 112.039304     | 56.523290        | E    |             |                 |                |                  |                |                  | 8 |
| 2 | 243.133933  | 122.070605      |                |                  | 225.123368     | 113.065322       | L    | 1055.628165 | 528.317720      | 1038.601616    | 519.804446       | 1037.617600    | 519.312438       | 7 |
| 3 | 314.171047  | 157.589161      |                |                  | 296.160482     | 148.583879       | A    | 942.544101  | 471.775689      | 925.517552     | 463.262414       | 924.533536     | 462.770406       | 6 |
| 4 | 385.208161  | 193.107718      |                |                  | 367.197596     | 184.102436       | A    | 871.506987  | 436.257132      | 854.480438     | 427.743857       | 853.496422     | 427.251849       | 5 |
| 5 | 824.433487  | 412.720382      | 807.406938     | 404.207107       | 806.422922     | 403.715099       | Q    | 800.469873  | 400.738575      | 783.443324     | 392.225300       | 782.459308     | 391.733292       | 4 |
| 6 | 925.481166  | 463.244221      | 908.454617     | 454.730947       | 907.470601     | 454.238939       | T    | 361.244547  | 181.125911      | 344.217998     | 172.612637       | 343.233982     | 172.120629       | 3 |
| 7 | 1038.565230 | 519.786253      | 1021.538681    | 511.272978       | 1020.554665    | 510.780970       | I    | 260.196868  | 130.602072      | 243.170319     | 122.088797       |                |                  | 2 |
| 8 |             |                 |                |                  |                |                  | K    | 147.112804  | 74.060040       | 130.086255     | 65.546765        |                |                  | 1 |

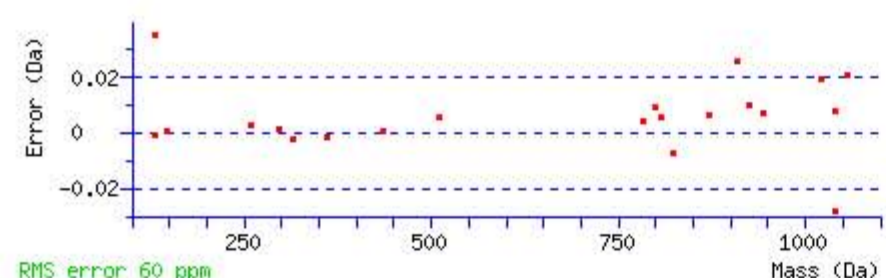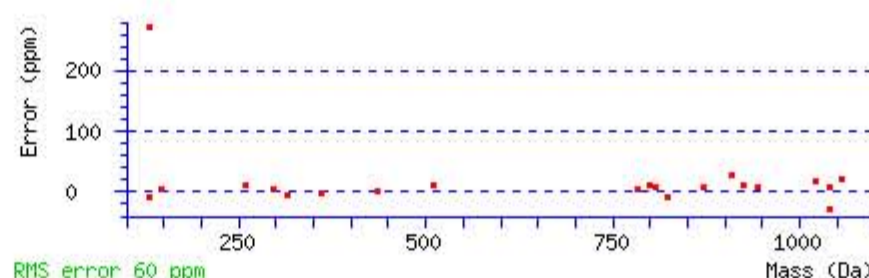

NCBI BLAST search of [ELAAQTIK](#)

(Parameters: blastp, nr protein database, expect=20000, no filter, PAM30)

Other BLAST [web gateways](#)

All matches to this query

| Score | Mr(calc):   | Delta     | Sequence                     |
|-------|-------------|-----------|------------------------------|
| 36.0  | 1183.663452 | 0.001376  | <a href="#">ELAAQTIK</a>     |
| 24.8  | 1183.663452 | 0.001376  | <a href="#">ELAAQITK</a>     |
| 7.8   | 1183.681198 | -0.016370 | <a href="#">LEALLEAAGIGK</a> |
| 7.4   | 1183.663452 | 0.001376  | <a href="#">LEQAATLK</a>     |
| 7.0   | 1183.660080 | 0.004748  | <a href="#">AIEAVAISPWK</a>  |
| 7.0   | 1183.667282 | -0.002454 | <a href="#">GKQASEPALRK</a>  |
| 6.3   | 1183.656937 | 0.007891  | <a href="#">MRPQILK</a>      |
| 5.7   | 1183.667297 | -0.002469 | <a href="#">EPTGRVEIRK</a>   |
| 5.0   | 1183.681229 | -0.016401 | <a href="#">NTLAIPLTDVK</a>  |
| 4.1   | 1183.667282 | -0.002454 | <a href="#">QLLRALLEGR</a>   |

# MASCOT SCIENCE Mascot Search Results

## Peptide View

MS/MS Fragmentation of **LDAQASFLPK**

Found in **ITIH1\_HUMAN**, Inter-alpha-trypsin inhibitor heavy chain H1 OS=Homo sapiens GN=ITIH1 PE=1 SV=3

Match to Query 26332: 1399.764468 from(700.889510,2+) rtinseconds(2219) index(48728)

Title: Locus:1.1.1.2821.10 File:"2013-07-02 CLN FXIII 60 min 3rd F 4.wiff"

Data file C:\Program Files (x86)\Matrix Science\Mascot Daemon\mgf\6 FXIII 60 min 3rd\mascot\_daemon\_merge.mgf

Click mouse within plot area to zoom in by factor of two about that point

Or, Plot from  to  Da

Label all possible matches  Label matches used for scoring

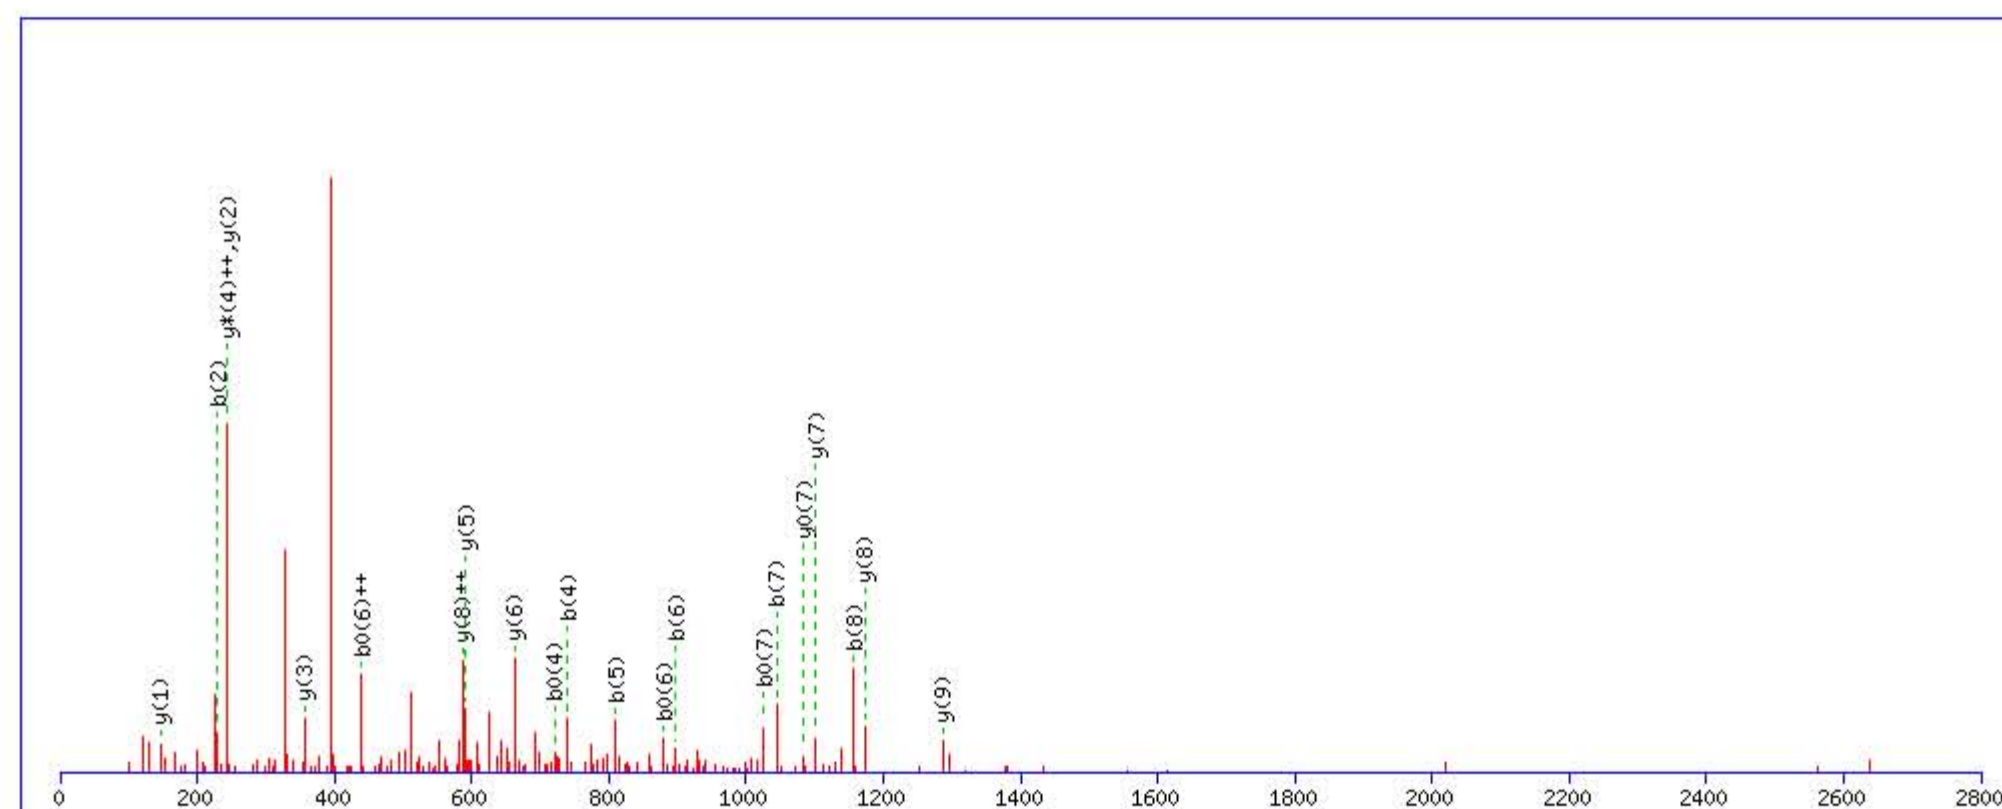

Monoisotopic mass of neutral peptide Mr(calc): 1399.753342

Fixed modifications: Carbamidomethyl (C) (apply to specified residues or termini only)

Variable modifications:

Q4 : Biotin:Thermo-21345 (Q)

Ions Score: 44 Expect: 0.00049

Matches : 21/92 fragment ions using 39 most intense peaks [\(help\)](#)

| #  | b                  | b <sup>++</sup> | b <sup>*</sup> | b <sup>+++</sup> | b <sup>0</sup>     | b <sup>0++</sup>  | Seq. | y                  | y <sup>++</sup>   | y <sup>*</sup> | y <sup>+++</sup>  | y <sup>0</sup>     | y <sup>0++</sup> | #  |
|----|--------------------|-----------------|----------------|------------------|--------------------|-------------------|------|--------------------|-------------------|----------------|-------------------|--------------------|------------------|----|
| 1  | 114.091340         | 57.549308       |                |                  |                    |                   | L    |                    |                   |                |                   |                    |                  | 10 |
| 2  | <b>229.118283</b>  | 115.062779      |                |                  | 211.107718         | 106.057497        | D    | <b>1287.676571</b> | 644.341924        | 1270.650022    | 635.828649        | 1269.666006        | 635.336641       | 9  |
| 3  | 300.155397         | 150.581336      |                |                  | 282.144832         | 141.576054        | A    | <b>1172.649628</b> | <b>586.828452</b> | 1155.623079    | 578.315178        | 1154.639063        | 577.823169       | 8  |
| 4  | <b>739.380723</b>  | 370.194000      | 722.354174     | 361.680725       | <b>721.370158</b>  | 361.188717        | Q    | <b>1101.612514</b> | 551.309895        | 1084.585965    | 542.796621        | <b>1083.601949</b> | 542.304612       | 7  |
| 5  | <b>810.417837</b>  | 405.712557      | 793.391288     | 397.199282       | 792.407272         | 396.707274        | A    | <b>662.387188</b>  | 331.697232        | 645.360639     | 323.183957        | 644.376623         | 322.691949       | 6  |
| 6  | <b>897.449865</b>  | 449.228570      | 880.423316     | 440.715296       | <b>879.439300</b>  | <b>440.223288</b> | S    | <b>591.350074</b>  | 296.178675        | 574.323525     | 287.665400        | 573.339509         | 287.173392       | 5  |
| 7  | <b>1044.518279</b> | 522.762777      | 1027.491730    | 514.249503       | <b>1026.507714</b> | 513.757495        | F    | 504.318046         | 252.662661        | 487.291497     | <b>244.149386</b> |                    |                  | 4  |
| 8  | <b>1157.602343</b> | 579.304809      | 1140.575794    | 570.791535       | 1139.591778        | 570.299527        | L    | <b>357.249632</b>  | 179.128454        | 340.223083     | 170.615179        |                    |                  | 3  |
| 9  | 1254.655107        | 627.831191      | 1237.628558    | 619.317917       | 1236.644542        | 618.825909        | P    | <b>244.165568</b>  | 122.586422        | 227.139019     | 114.073148        |                    |                  | 2  |
| 10 |                    |                 |                |                  |                    |                   | K    | <b>147.112804</b>  | 74.060040         | 130.086255     | 65.546765         |                    |                  | 1  |

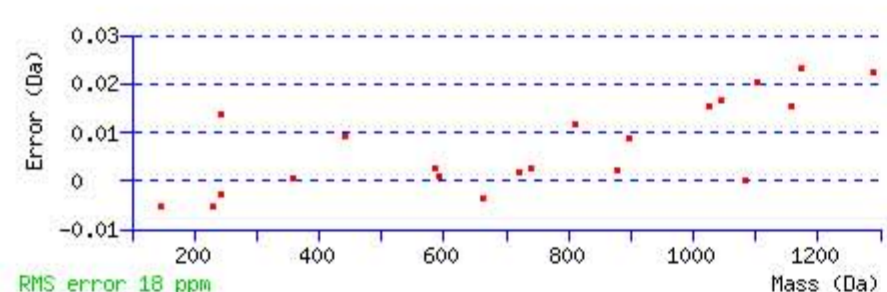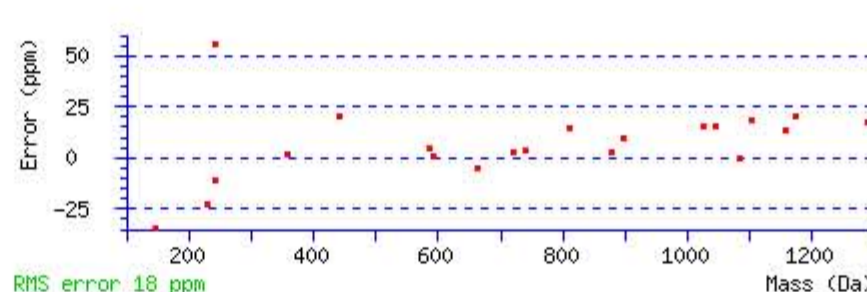

NCBI BLAST search of **LDAQASFLPK**

(Parameters: blastp, nr protein database, expect=20000, no filter, PAM30)

Other BLAST [web gateways](#)

All matches to this query

| Score | Mr(calc):   | Delta     | Sequence                      |
|-------|-------------|-----------|-------------------------------|
| 44.3  | 1399.753342 | 0.011126  | <a href="#">LDAQASFLPK</a>    |
| 8.6   | 1399.745972 | 0.018496  | <a href="#">IDAATGIPVTTWR</a> |
| 3.0   | 1399.778275 | -0.013807 | <a href="#">LSRLQEKEELR</a>   |
| 2.1   | 1399.767059 | -0.002591 | <a href="#">EKAVTDEKPKQK</a>  |

Mascot: <http://www.matrixscience.com/>

# MASCOT Search Results

## Peptide View

MS/MS Fragmentation of **GSLVQASEANLQAAQDFVR**

Found in **ITIH1\_HUMAN**, Inter-alpha-trypsin inhibitor heavy chain H1 OS=Homo sapiens GN=ITIH1 PE=1 SV=3

Match to Query 48008: 2314.204092 from(772.408640,3+) rtinseconds(2550) index(50621)

Title: Locus:1.1.1.2936.8 File:"2013-07-02 CLN FXIII 60 min 3rd F 4.wiff"

Data file C:\Program Files (x86)\Matrix Science\Mascot Daemon\mgf\6 FXIII 60 min 3rd\mascot\_daemon\_merge.mgf

Click mouse within plot area to zoom in by factor of two about that point

Or, Plot from  to  Da

Label all possible matches  Label matches used for scoring

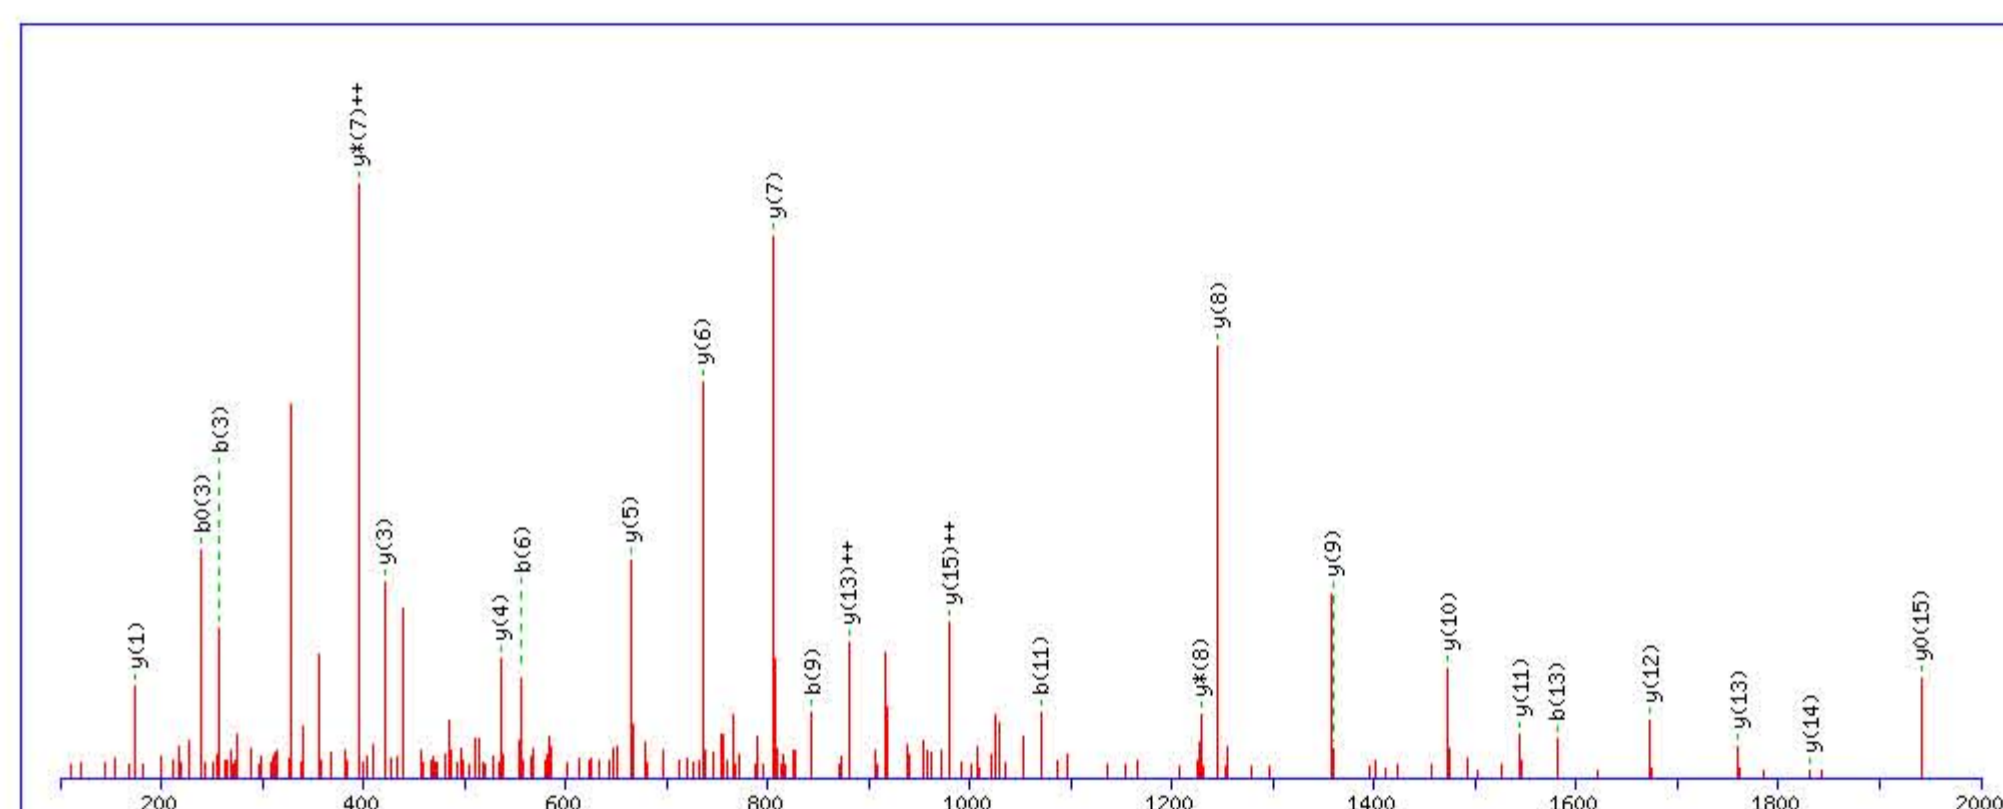

Monoisotopic mass of neutral peptide Mr(calc): 2314.173950

Fixed modifications: Carbamidomethyl (C) (apply to specified residues or termini only)

Variable modifications:

Q12 : Biotin:Thermo-21345 (Q)

Ions Score: 95 Expect: 2e-009

Matches : 24/200 fragment ions using 37 most intense peaks [\(help\)](#)

| #  | b                  | b <sup>++</sup> | b <sup>*</sup> | b <sup>*++</sup> | b <sup>0</sup>    | b <sup>0++</sup> | Seq. | y                  | y <sup>++</sup>   | y <sup>*</sup>     | y <sup>*++</sup>  | y <sup>0</sup>     | y <sup>0++</sup> | #  |
|----|--------------------|-----------------|----------------|------------------|-------------------|------------------|------|--------------------|-------------------|--------------------|-------------------|--------------------|------------------|----|
| 1  | 58.028740          | 29.518008       |                |                  |                   |                  | G    |                    |                   |                    |                   |                    |                  | 19 |
| 2  | 145.060768         | 73.034022       |                |                  | 127.050203        | 64.028740        | S    | 2258.159779        | 1129.583527       | 2241.133230        | 1121.070253       | 2240.149214        | 1120.578245      | 18 |
| 3  | <b>258.144832</b>  | 129.576054      |                |                  | <b>240.134267</b> | 120.570772       | L    | 2171.127751        | 1086.067513       | 2154.101202        | 1077.554239       | 2153.117186        | 1077.062231      | 17 |
| 4  | 357.213246         | 179.110261      |                |                  | 339.202681        | 170.104979       | V    | 2058.043687        | 1029.525481       | 2041.017138        | 1021.012207       | 2040.033122        | 1020.520199      | 16 |
| 5  | 485.271824         | 243.139550      | 468.245275     | 234.626276       | 467.261259        | 234.134268       | Q    | 1958.975273        | <b>979.991275</b> | 1941.948724        | 971.478000        | <b>1940.964708</b> | 970.985992       | 15 |
| 6  | <b>556.308938</b>  | 278.658107      | 539.282389     | 270.144833       | 538.298373        | 269.652825       | A    | <b>1830.916695</b> | 915.961986        | 1813.890146        | 907.448711        | 1812.906130        | 906.956703       | 14 |
| 7  | 643.340966         | 322.174121      | 626.314417     | 313.660847       | 625.330401        | 313.168839       | S    | <b>1759.879581</b> | <b>880.443429</b> | 1742.853032        | 871.930154        | 1741.869016        | 871.438146       | 13 |
| 8  | 772.383559         | 386.695418      | 755.357010     | 378.182143       | 754.372994        | 377.690135       | E    | <b>1672.847553</b> | 836.927415        | 1655.821004        | 828.414140        | 1654.836988        | 827.922132       | 12 |
| 9  | <b>843.420673</b>  | 422.213975      | 826.394124     | 413.700700       | 825.410108        | 413.208692       | A    | <b>1543.804960</b> | 772.406118        | 1526.778411        | 763.892844        | 1525.794395        | 763.400836       | 11 |
| 10 | 957.463600         | 479.235438      | 940.437051     | 470.722164       | 939.453035        | 470.230156       | N    | <b>1472.767846</b> | 736.887561        | 1455.741297        | 728.374287        | 1454.757281        | 727.882279       | 10 |
| 11 | <b>1070.547664</b> | 535.777470      | 1053.521115    | 527.264196       | 1052.537099       | 526.772187       | L    | <b>1358.724919</b> | 679.866098        | 1341.698370        | 671.352823        | 1340.714354        | 670.860815       | 9  |
| 12 | 1509.772990        | 755.390133      | 1492.746441    | 746.876859       | 1491.762425       | 746.384851       | Q    | <b>1245.640855</b> | 623.324066        | <b>1228.614306</b> | 614.810791        | 1227.630290        | 614.318783       | 8  |
| 13 | <b>1580.810104</b> | 790.908690      | 1563.783555    | 782.395416       | 1562.799539       | 781.903408       | A    | <b>806.415529</b>  | 403.711403        | 789.388980         | <b>395.198128</b> | 788.404964         | 394.706120       | 7  |
| 14 | 1651.847218        | 826.427247      | 1634.820669    | 817.913973       | 1633.836653       | 817.421965       | A    | <b>735.378415</b>  | 368.192846        | 718.351866         | 359.679571        | 717.367850         | 359.187563       | 6  |
| 15 | 1779.905796        | 890.456536      | 1762.879247    | 881.943262       | 1761.895231       | 881.451254       | Q    | <b>664.341301</b>  | 332.674289        | 647.314752         | 324.161014        | 646.330736         | 323.669006       | 5  |
| 16 | 1894.932739        | 947.970008      | 1877.906190    | 939.456733       | 1876.922174       | 938.964725       | D    | <b>536.282723</b>  | 268.645000        | 519.256174         | 260.131725        | 518.272158         | 259.639717       | 4  |
| 17 | 2042.001153        | 1021.504215     | 2024.974604    | 1012.990940      | 2023.990588       | 1012.498932      | F    | <b>421.255780</b>  | 211.131528        | 404.229231         | 202.618253        |                    |                  | 3  |
| 18 | 2141.069567        | 1071.038421     | 2124.043018    | 1062.525147      | 2123.059002       | 1062.033139      | V    | 274.187366         | 137.597321        | 257.160817         | 129.084046        |                    |                  | 2  |
| 19 |                    |                 |                |                  |                   |                  | R    | <b>175.118952</b>  | 88.063114         | 158.092403         | 79.549839         |                    |                  | 1  |

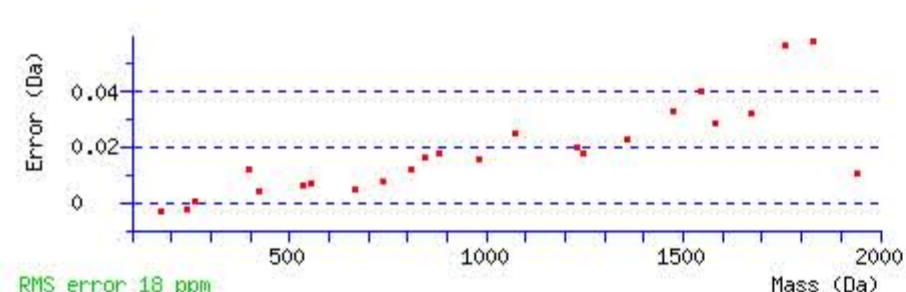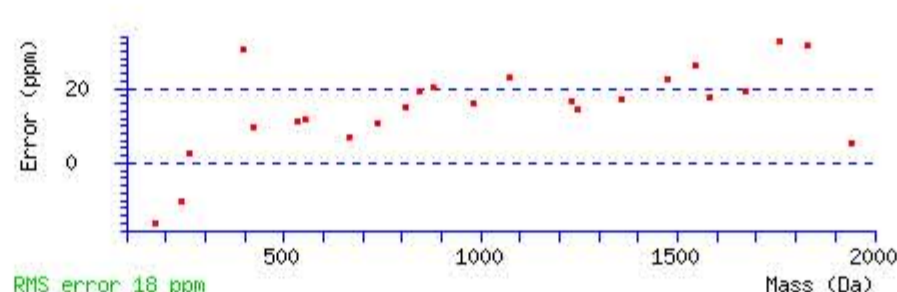

NCBI BLAST search of [GSLVQASEANLQAAQDFVR](#)

(Parameters: blastp, nr protein database, expect=20000, no filter, PAM30)

Other BLAST [web gateways](#)

All matches to this query

| Score | Mr(calc):   | Delta    | Sequence                            |
|-------|-------------|----------|-------------------------------------|
| 95.1  | 2314.173950 | 0.030142 | <a href="#">GSLVQASEANLQAAQDFVR</a> |
| 56.9  | 2314.173950 | 0.030142 | <a href="#">GSLVQASEANLQAAQDFVR</a> |
| 15.6  | 2314.173950 | 0.030142 | <a href="#">GSLVQASEANLQAAQDFVR</a> |
| 2.2   | 2314.178635 | 0.025457 | <a href="#">NKDRPAMQLYQPGARSR</a>   |

# Mascot Search Results

## Peptide View

MS/MS Fragmentation of **GSLVQASEANLQAAQDFVR**

Found in **ITIH1\_HUMAN**, Inter-alpha-trypsin inhibitor heavy chain H1 OS=Homo sapiens GN=ITIH1 PE=1 SV=3

Match to Query 48009: 2314.206282 from(772.409370,3+) rtinseconds(2504) index(50333)  
 Title: Locus:1.1.1.2920.18 File:"2013-07-02 CLN FXIII 60 min 3rd F 4.wiff"  
 Data file C:\Program Files (x86)\Matrix Science\Mascot Daemon\mgf\6 FXIII 60 min 3rd\mascot\_daemon\_merge.mgf

Click mouse within plot area to zoom in by factor of two about that point  
 Or, Plot from  to  Da   
 Label all possible matches  Label matches used for scoring

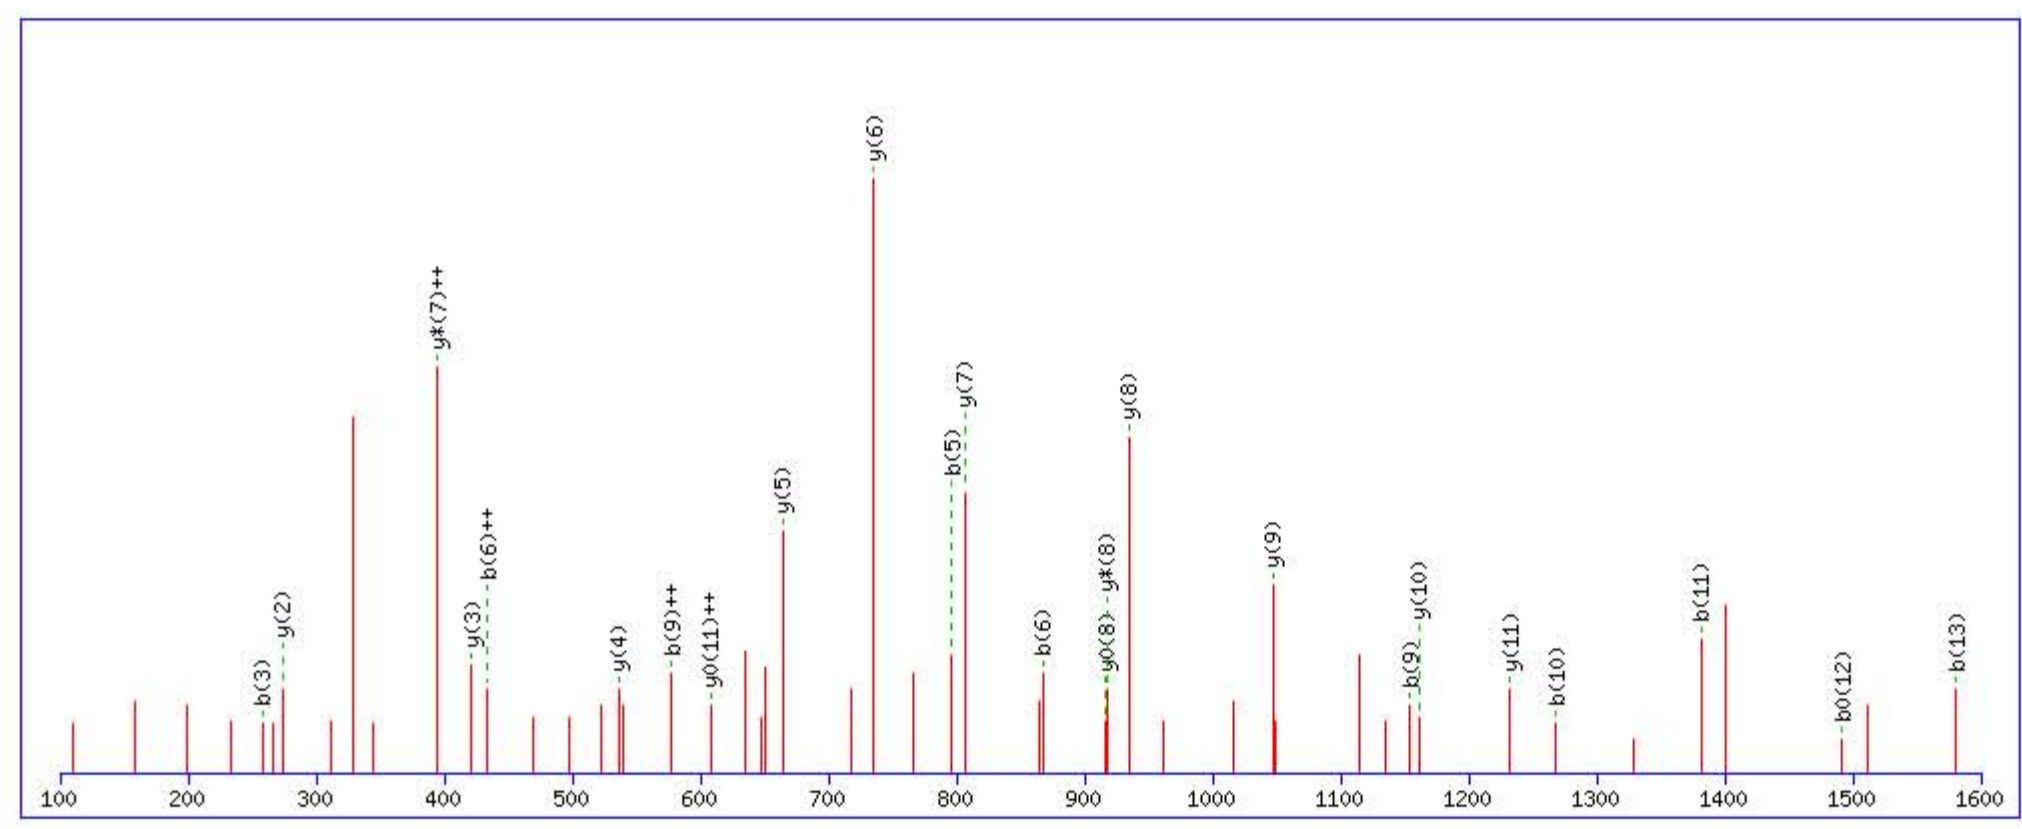

Monoisotopic mass of neutral peptide Mr(calc): 2314.173950  
 Fixed modifications: Carbamidomethyl (C) (apply to specified residues or termini only)  
 Variable modifications:  
 Q5 : Biotin:Thermo-21345 (Q)  
 Ions Score: 64 Expect: 1.2e-005  
 Matches : 24/200 fragment ions using 40 most intense peaks [\(help\)](#)

| #  | b                  | b <sup>++</sup>   | b <sup>*</sup> | b <sup>+++</sup> | b <sup>0</sup>     | b <sup>0++</sup> | Seq.     | y                  | y <sup>++</sup> | y <sup>*</sup>    | y <sup>+++</sup>  | y <sup>0</sup>    | y <sup>0++</sup>  | #  |
|----|--------------------|-------------------|----------------|------------------|--------------------|------------------|----------|--------------------|-----------------|-------------------|-------------------|-------------------|-------------------|----|
| 1  | 58.028740          | 29.518008         |                |                  |                    |                  | <b>G</b> |                    |                 |                   |                   |                   |                   | 19 |
| 2  | 145.060768         | 73.034022         |                |                  | 127.050203         | 64.028740        | <b>S</b> | 2258.159779        | 1129.583527     | 2241.133230       | 1121.070253       | 2240.149214       | 1120.578245       | 18 |
| 3  | <b>258.144832</b>  | 129.576054        |                |                  | 240.134267         | 120.570772       | <b>L</b> | 2171.127751        | 1086.067513     | 2154.101202       | 1077.554239       | 2153.117186       | 1077.062231       | 17 |
| 4  | 357.213246         | 179.110261        |                |                  | 339.202681         | 170.104979       | <b>V</b> | 2058.043687        | 1029.525481     | 2041.017138       | 1021.012207       | 2040.033122       | 1020.520199       | 16 |
| 5  | <b>796.438572</b>  | 398.722924        | 779.412023     | 390.209650       | 778.428007         | 389.717642       | <b>Q</b> | 1958.975273        | 979.991274      | 1941.948724       | 971.478000        | 1940.964708       | 970.985992        | 15 |
| 6  | <b>867.475686</b>  | <b>434.241481</b> | 850.449137     | 425.728207       | 849.465121         | 425.236199       | <b>A</b> | 1519.749947        | 760.378611      | 1502.723398       | 751.865337        | 1501.739382       | 751.373329        | 14 |
| 7  | 954.507714         | 477.757495        | 937.481165     | 469.244220       | 936.497149         | 468.752212       | <b>S</b> | 1448.712833        | 724.860054      | 1431.686284       | 716.346780        | 1430.702268       | 715.854772        | 13 |
| 8  | 1083.550307        | 542.278792        | 1066.523758    | 533.765517       | 1065.539742        | 533.273509       | <b>E</b> | 1361.680805        | 681.344040      | 1344.654256       | 672.830766        | 1343.670240       | 672.338758        | 12 |
| 9  | <b>1154.587421</b> | <b>577.797349</b> | 1137.560872    | 569.284074       | 1136.576856        | 568.792066       | <b>A</b> | <b>1232.638212</b> | 616.822744      | 1215.611663       | 608.309469        | 1214.627647       | <b>607.817461</b> | 11 |
| 10 | <b>1268.630348</b> | 634.818812        | 1251.603799    | 626.305538       | 1250.619783        | 625.813529       | <b>N</b> | <b>1161.601098</b> | 581.304187      | 1144.574549       | 572.790912        | 1143.590533       | 572.298904        | 10 |
| 11 | <b>1381.714412</b> | 691.360844        | 1364.687863    | 682.847569       | 1363.703847        | 682.355561       | <b>L</b> | <b>1047.558171</b> | 524.282723      | 1030.531622       | 515.769449        | 1029.547606       | 515.277441        | 9  |
| 12 | 1509.772990        | 755.390133        | 1492.746441    | 746.876858       | <b>1491.762425</b> | 746.384850       | <b>Q</b> | <b>934.474107</b>  | 467.740692      | <b>917.447558</b> | 459.227417        | <b>916.463542</b> | 458.735409        | 8  |
| 13 | <b>1580.810104</b> | 790.908690        | 1563.783555    | 782.395415       | 1562.799539        | 781.903407       | <b>A</b> | <b>806.415529</b>  | 403.711403      | 789.388980        | <b>395.198128</b> | 788.404964        | 394.706120        | 7  |
| 14 | 1651.847218        | 826.427247        | 1634.820669    | 817.913972       | 1633.836653        | 817.421964       | <b>A</b> | <b>735.378415</b>  | 368.192846      | 718.351866        | 359.679571        | 717.367850        | 359.187563        | 6  |
| 15 | 1779.905796        | 890.456536        | 1762.879247    | 881.943261       | 1761.895231        | 881.451253       | <b>Q</b> | <b>664.341301</b>  | 332.674289      | 647.314752        | 324.161014        | 646.330736        | 323.669006        | 5  |
| 16 | 1894.932739        | 947.970007        | 1877.906190    | 939.456733       | 1876.922174        | 938.964725       | <b>D</b> | <b>536.282723</b>  | 268.645000      | 519.256174        | 260.131725        | 518.272158        | 259.639717        | 4  |
| 17 | 2042.001153        | 1021.504215       | 2024.974604    | 1012.990940      | 2023.990588        | 1012.498932      | <b>F</b> | <b>421.255780</b>  | 211.131528      | 404.229231        | 202.618253        |                   |                   | 3  |
| 18 | 2141.069567        | 1071.038421       | 2124.043018    | 1062.525147      | 2123.059002        | 1062.033139      | <b>V</b> | <b>274.187366</b>  | 137.597321      | 257.160817        | 129.084046        |                   |                   | 2  |
| 19 |                    |                   |                |                  |                    |                  | <b>R</b> | 175.118952         | 88.063114       | 158.092403        | 79.549839         |                   |                   | 1  |

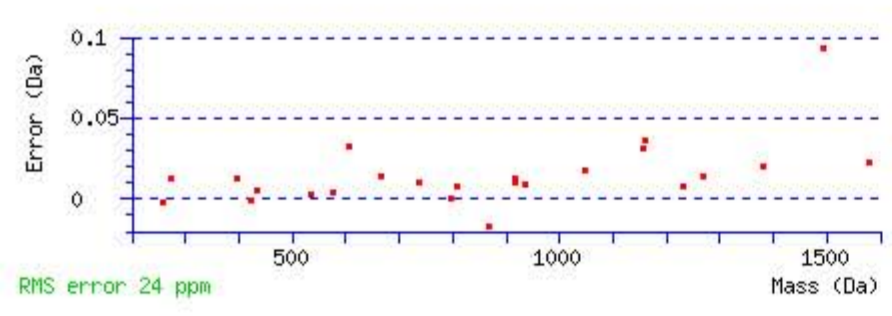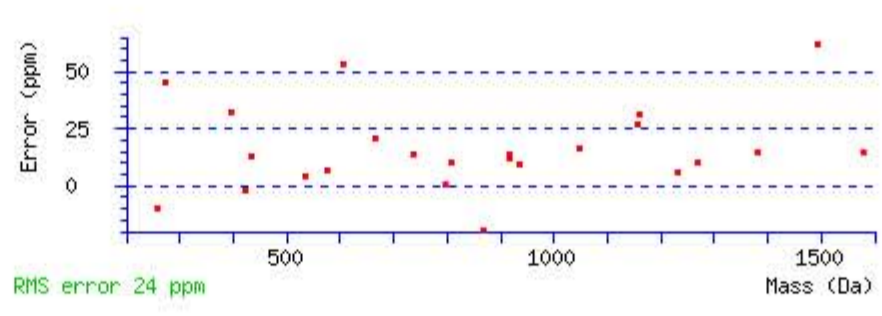

NCBI BLAST search of [GSLVQASEANLQAAQDFVR](#)  
 (Parameters: blastp, nr protein database, expect=20000, no filter, PAM30)  
 Other BLAST [web gateways](#)

### All matches to this query

| Score | Mr(calc):   | Delta    | Sequence                            |
|-------|-------------|----------|-------------------------------------|
| 63.6  | 2314.173950 | 0.032332 | <a href="#">GSLVQASEANLQAAQDFVR</a> |
| 13.4  | 2314.173950 | 0.032332 | <a href="#">GSLVQASEANLQAAQDFVR</a> |

# MASCOT Search Results

## Peptide View

MS/MS Fragmentation of **FAHYVVTSQVVNTANEAR**

Found in **ITIH1\_HUMAN**, Inter-alpha-trypsin inhibitor heavy chain H1 OS=Homo sapiens GN=ITIH1 PE=1 SV=3

Match to Query 48039: 2316.183582 from(773.068470,3+) rtinseconds(1953) index(47093)

Title: Locus:1.1.1.2728.21 File:"2013-07-02 CLN FXIII 60 min 3rd F 4.wiff"

Data file C:\Program Files (x86)\Matrix Science\Mascot Daemon\mgf6 FXIII 60 min 3rd\mascot\_daemon\_merge.mgf

Click mouse within plot area to zoom in by factor of two about that point

Or, Plot from  to  Da

Label all possible matches  Label matches used for scoring

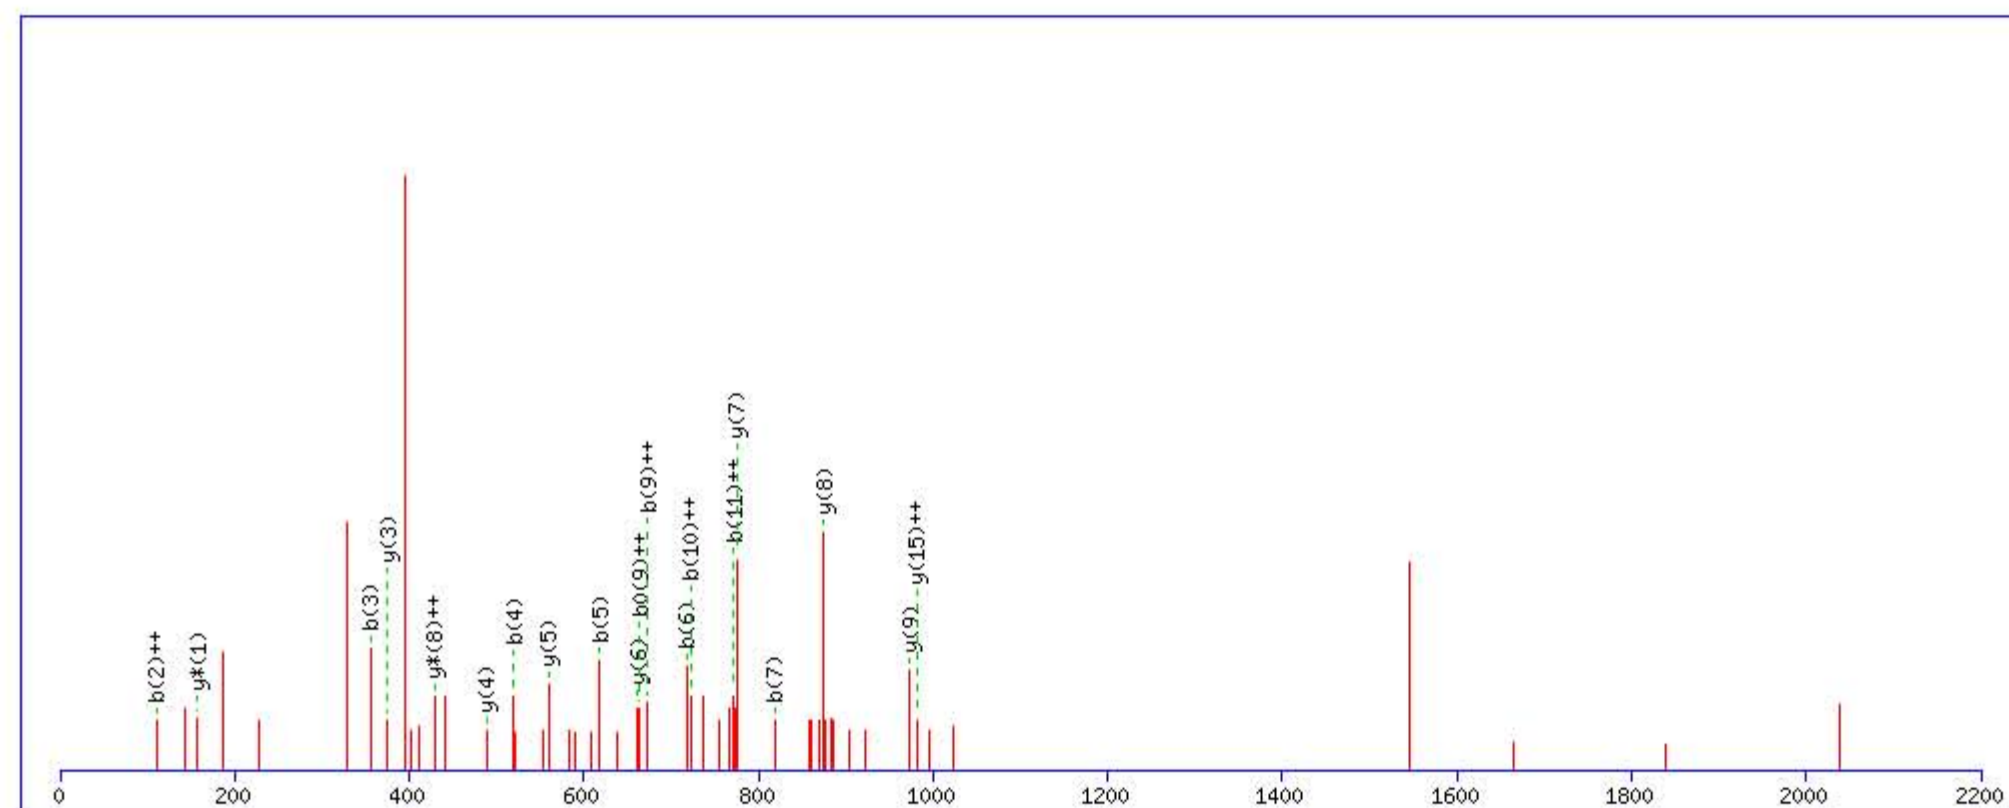

Monoisotopic mass of neutral peptide Mr(calc): 2316.168488

Fixed modifications: Carbamidomethyl (C) (apply to specified residues or termini only)

Variable modifications:

Q9 : Biotin:Thermo-21345 (Q)

Ions Score: 33 Expect: 0.014

Matches : 20/172 fragment ions using 45 most intense peaks [\(help\)](#)

| #  | b                 | b <sup>++</sup>   | b <sup>*</sup> | b <sup>+++</sup> | b <sup>0</sup> | b <sup>0++</sup>  | Seq. | y                 | y <sup>++</sup>   | y <sup>*</sup>    | y <sup>+++</sup>  | y <sup>0</sup> | y <sup>0++</sup> | #  |
|----|-------------------|-------------------|----------------|------------------|----------------|-------------------|------|-------------------|-------------------|-------------------|-------------------|----------------|------------------|----|
| 1  | 148.075690        | 74.541483         |                |                  |                |                   | F    |                   |                   |                   |                   |                |                  | 18 |
| 2  | 219.112804        | <b>110.060040</b> |                |                  |                |                   | A    | 2170.107350       | 1085.557313       | 2153.080801       | 1077.044038       | 2152.096785    | 1076.552030      | 17 |
| 3  | <b>356.171716</b> | 178.589496        |                |                  |                |                   | H    | 2099.070236       | 1050.038756       | 2082.043687       | 1041.525481       | 2081.059671    | 1041.033473      | 16 |
| 4  | <b>519.235045</b> | 260.121161        |                |                  |                |                   | Y    | 1962.011324       | <b>981.509300</b> | 1944.984775       | 972.996026        | 1944.000759    | 972.504018       | 15 |
| 5  | <b>618.303459</b> | 309.655368        |                |                  |                |                   | V    | 1798.947995       | 899.977636        | 1781.921446       | 891.464361        | 1780.937430    | 890.972353       | 14 |
| 6  | <b>717.371873</b> | 359.189575        |                |                  |                |                   | V    | 1699.879581       | 850.443429        | 1682.853032       | 841.930154        | 1681.869016    | 841.438146       | 13 |
| 7  | <b>818.419552</b> | 409.713414        |                |                  | 800.408987     | 400.708132        | T    | 1600.811167       | 800.909222        | 1583.784618       | 792.395947        | 1582.800602    | 791.903939       | 12 |
| 8  | 905.451580        | 453.229428        |                |                  | 887.441015     | 444.224146        | S    | 1499.763488       | 750.385382        | 1482.736939       | 741.872108        | 1481.752923    | 741.380100       | 11 |
| 9  | 1344.676906       | <b>672.842091</b> | 1327.650357    | 664.328817       | 1326.666341    | <b>663.836808</b> | Q    | 1412.731460       | 706.869368        | 1395.704911       | 698.356094        | 1394.720895    | 697.864086       | 10 |
| 10 | 1443.745320       | <b>722.376298</b> | 1426.718771    | 713.863024       | 1425.734755    | 713.371016        | V    | <b>973.506134</b> | 487.256705        | 956.479585        | 478.743431        | 955.495569     | 478.251423       | 9  |
| 11 | 1542.813734       | <b>771.910505</b> | 1525.787185    | 763.397231       | 1524.803169    | 762.905223        | V    | <b>874.437720</b> | 437.722498        | 857.411171        | <b>429.209224</b> | 856.427155     | 428.717216       | 8  |
| 12 | 1656.856661       | 828.931969        | 1639.830112    | 820.418694       | 1638.846096    | 819.926686        | N    | <b>775.369306</b> | 388.188291        | 758.342757        | 379.675017        | 757.358741     | 379.183009       | 7  |
| 13 | 1757.904340       | 879.455808        | 1740.877791    | 870.942534       | 1739.893775    | 870.450526        | T    | <b>661.326379</b> | 331.166828        | 644.299830        | 322.653553        | 643.315814     | 322.161545       | 6  |
| 14 | 1828.941454       | 914.974365        | 1811.914905    | 906.461091       | 1810.930889    | 905.969083        | A    | <b>560.278700</b> | 280.642988        | 543.252151        | 272.129714        | 542.268135     | 271.637706       | 5  |
| 15 | 1942.984381       | 971.995829        | 1925.957832    | 963.482554       | 1924.973816    | 962.990546        | N    | <b>489.241586</b> | 245.124431        | 472.215037        | 236.611157        | 471.231021     | 236.119149       | 4  |
| 16 | 2072.026974       | 1036.517125       | 2055.000425    | 1028.003850      | 2054.016409    | 1027.511842       | E    | <b>375.198659</b> | 188.102968        | 358.172110        | 179.589693        | 357.188094     | 179.097685       | 3  |
| 17 | 2143.064088       | 1072.035682       | 2126.037539    | 1063.522407      | 2125.053523    | 1063.030399       | A    | 246.156066        | 123.581671        | 229.129517        | 115.068397        |                |                  | 2  |
| 18 |                   |                   |                |                  |                |                   | R    | 175.118952        | 88.063114         | <b>158.092403</b> | 79.549839         |                |                  | 1  |

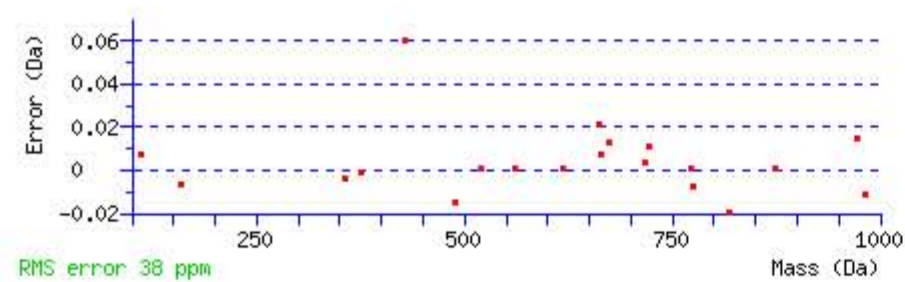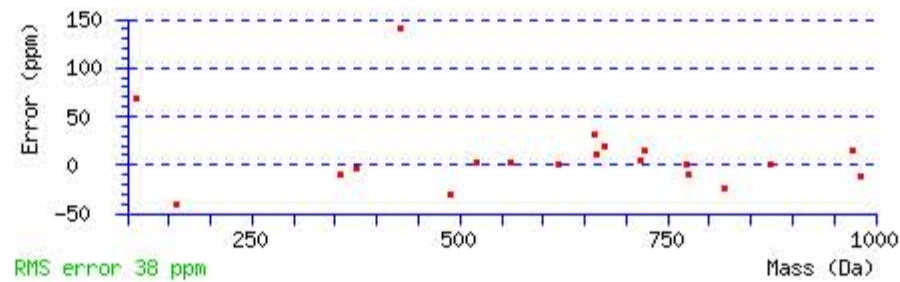

NCBI BLAST search of **FAHYVVTSQVVNTANEAR**

(Parameters: blastp, nr protein database, expect=20000, no filter, PAM30)

Other BLAST [web gateways](#)

All matches to this query

| Score | Mr(calc):   | Delta    | Sequence                           |
|-------|-------------|----------|------------------------------------|
| 32.8  | 2316.168488 | 0.015094 | <a href="#">FAHYVVTSQVVNTANEAR</a> |

Mascot: <http://www.matrixscience.com/>

# MASCOT Search Results

## Peptide View

MS/MS Fragmentation of **GMADQDGLKPTIDKPSEDSPPLEMLGPR**  
Found in **ITIH1\_HUMAN**, Inter-alpha-trypsin inhibitor heavy chain H1 OS=Homo sapiens GN=ITIH1 PE=1 SV=3

Match to Query 60222: 3304.652816 from(827.170480,4+) rtinseconds(2221) index(48741)  
Title: Locus:1.1.1.2821.23 File:"2013-07-02 CLN FXIII 60 min 3rd F 4.wiff"  
Data file C:\Program Files (x86)\Matrix Science\Mascot Daemon\mgf6 FXIII 60 min 3rd\mascot\_daemon\_merge.mgf

Click mouse within plot area to zoom in by factor of two about that point  
Or, Plot from  to  Da   
Label all possible matches  Label matches used for scoring

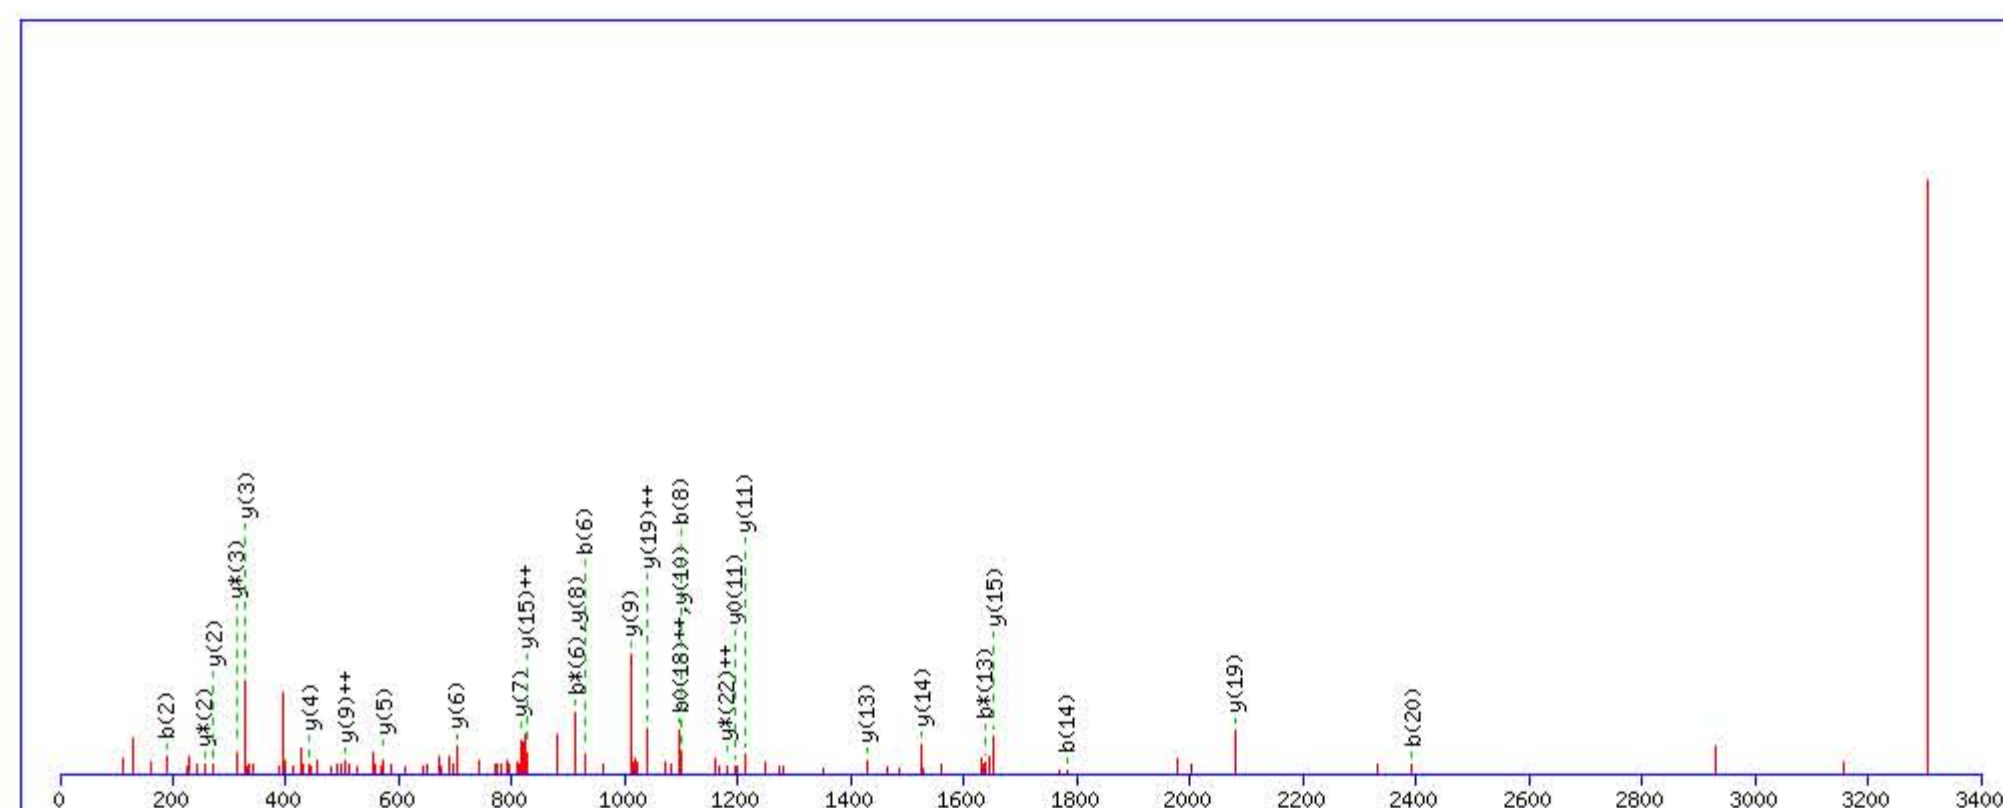

Monoisotopic mass of neutral peptide  $M_r(\text{calc})$ : 3304.614151  
Fixed modifications: Carbamidomethyl (C) (apply to specified residues or termini only)  
Variable modifications:  
Q5 : Biotin:Thermo-21345 (Q)  
Ions Score: 35 Expect: 0.0094  
Matches : 29/300 fragment ions using 107 most intense peaks [\(help\)](#)

| #  | b                  | b <sup>++</sup> | b <sup>*</sup>     | b <sup>*++</sup> | b <sup>0</sup> | b <sup>0++</sup>   | Seq. | y                  | y <sup>++</sup>    | y <sup>*</sup>    | y <sup>*++</sup>   | y <sup>0</sup>     | y <sup>0++</sup> | #  |
|----|--------------------|-----------------|--------------------|------------------|----------------|--------------------|------|--------------------|--------------------|-------------------|--------------------|--------------------|------------------|----|
| 1  | 58.028740          | 29.518008       |                    |                  |                |                    | G    |                    |                    |                   |                    |                    |                  | 28 |
| 2  | <b>189.069225</b>  | 95.038250       |                    |                  |                |                    | M    | 3248.599985        | 1624.803630        | 3231.573436       | 1616.290356        | 3230.589420        | 1615.798348      | 27 |
| 3  | 260.106339         | 130.556807      |                    |                  |                |                    | A    | 3117.559500        | 1559.283388        | 3100.532951       | 1550.770113        | 3099.548935        | 1550.278105      | 26 |
| 4  | 375.133282         | 188.070279      |                    |                  | 357.122717     | 179.064997         | D    | 3046.522386        | 1523.764831        | 3029.495837       | 1515.251556        | 3028.511821        | 1514.759548      | 25 |
| 5  | 814.358608         | 407.682942      | 797.332059         | 399.169668       | 796.348043     | 398.677660         | Q    | 2931.495443        | 1466.251359        | 2914.468894       | 1457.738085        | 2913.484878        | 1457.246077      | 24 |
| 6  | <b>929.385551</b>  | 465.196414      | <b>912.359002</b>  | 456.683139       | 911.374986     | 456.191131         | D    | 2492.270117        | 1246.638696        | 2475.243568       | 1238.125422        | 2474.259552        | 1237.633414      | 23 |
| 7  | 986.407015         | 493.707146      | 969.380466         | 485.193871       | 968.396450     | 484.701863         | G    | 2377.243174        | 1189.125225        | 2360.216625       | <b>1180.611950</b> | 2359.232609        | 1180.119942      | 22 |
| 8  | <b>1099.491079</b> | 550.249177      | 1082.464530        | 541.735903       | 1081.480514    | 541.243895         | L    | 2320.221710        | 1160.614493        | 2303.195161       | 1152.101218        | 2302.211145        | 1151.609210      | 21 |
| 9  | 1227.586042        | 614.296659      | 1210.559493        | 605.783385       | 1209.575477    | 605.291376         | K    | 2207.137646        | 1104.072461        | 2190.111097       | 1095.559186        | 2189.127081        | 1095.067178      | 20 |
| 10 | 1324.638806        | 662.823041      | 1307.612257        | 654.309767       | 1306.628241    | 653.817758         | P    | <b>2079.042683</b> | <b>1040.024980</b> | 2062.016134       | 1031.511705        | 2061.032118        | 1031.019697      | 19 |
| 11 | 1425.686485        | 713.346881      | 1408.659936        | 704.833606       | 1407.675920    | 704.341598         | T    | 1981.989919        | 991.498598         | 1964.963370       | 982.985323         | 1963.979354        | 982.493315       | 18 |
| 12 | 1538.770549        | 769.888912      | 1521.744000        | 761.375638       | 1520.759984    | 760.883630         | I    | 1880.942240        | 940.974758         | 1863.915691       | 932.461484         | 1862.931675        | 931.969476       | 17 |
| 13 | 1653.797492        | 827.402384      | <b>1636.770943</b> | 818.889110       | 1635.786927    | 818.397101         | D    | 1767.858176        | 884.432726         | 1750.831627       | 875.919452         | 1749.847611        | 875.427444       | 16 |
| 14 | <b>1781.892455</b> | 891.449865      | 1764.865906        | 882.936591       | 1763.881890    | 882.444583         | K    | <b>1652.831233</b> | <b>826.919255</b>  | 1635.804684       | 818.405980         | 1634.820668        | 817.913972       | 15 |
| 15 | 1878.945219        | 939.976248      | 1861.918670        | 931.462973       | 1860.934654    | 930.970965         | P    | <b>1524.736270</b> | 762.871773         | 1507.709721       | 754.358499         | 1506.725705        | 753.866491       | 14 |
| 16 | 1965.977247        | 983.492262      | 1948.950698        | 974.978987       | 1947.966682    | 974.486979         | S    | <b>1427.683506</b> | 714.345391         | 1410.656957       | 705.832117         | 1409.672941        | 705.340109       | 13 |
| 17 | 2095.019840        | 1048.013558     | 2077.993291        | 1039.500283      | 2077.009275    | 1039.008275        | E    | 1340.651478        | 670.829377         | 1323.624929       | 662.316103         | 1322.640913        | 661.824095       | 12 |
| 18 | 2210.046783        | 1105.527029     | 2193.020234        | 1097.013755      | 2192.036218    | <b>1096.521747</b> | D    | <b>1211.608885</b> | 606.308081         | 1194.582336       | 597.794806         | <b>1193.598320</b> | 597.302798       | 11 |
| 19 | 2297.078811        | 1149.043043     | 2280.052262        | 1140.529769      | 2279.068246    | 1140.037761        | S    | <b>1096.581942</b> | 548.794609         | 1079.555393       | 540.281335         | 1078.571377        | 539.789327       | 10 |
| 20 | <b>2394.131575</b> | 1197.569425     | 2377.105026        | 1189.056151      | 2376.121010    | 1188.564143        | P    | <b>1009.549914</b> | <b>505.278595</b>  | 992.523365        | 496.765321         | 991.539349         | 496.273313       | 9  |
| 21 | 2491.184339        | 1246.095807     | 2474.157790        | 1237.582533      | 2473.173774    | 1237.090525        | P    | <b>912.497150</b>  | 456.752213         | 895.470601        | 448.238939         | 894.486585         | 447.746931       | 8  |
| 22 | 2604.268403        | 1302.637839     | 2587.241854        | 1294.124565      | 2586.257838    | 1293.632557        | L    | <b>815.444386</b>  | 408.225831         | 798.417837        | 399.712557         | 797.433821         | 399.220549       | 7  |
| 23 | 2733.310996        | 1367.159136     | 2716.284447        | 1358.645861      | 2715.300431    | 1358.153854        | E    | <b>702.360322</b>  | 351.683799         | 685.333773        | 343.170525         | 684.349757         | 342.678517       | 6  |
| 24 | 2864.351481        | 1432.679379     | 2847.324932        | 1424.166104      | 2846.340916    | 1423.674096        | M    | <b>573.317729</b>  | 287.162503         | 556.291180        | 278.649228         |                    |                  | 5  |
| 25 | 2977.435545        | 1489.221411     | 2960.408996        | 1480.708136      | 2959.424980    | 1480.216128        | L    | <b>442.277244</b>  | 221.642260         | 425.250695        | 213.128986         |                    |                  | 4  |
| 26 | 3034.457009        | 1517.732143     | 3017.430460        | 1509.218868      | 3016.446444    | 1508.726860        | G    | <b>329.193180</b>  | 165.100228         | <b>312.166631</b> | 156.586953         |                    |                  | 3  |
| 27 | 3131.509773        | 1566.258525     | 3114.483224        | 1557.745250      | 3113.499208    | 1557.253242        | P    | <b>272.171716</b>  | 136.589496         | <b>255.145167</b> | 128.076221         |                    |                  | 2  |
| 28 |                    |                 |                    |                  |                |                    | R    | 175.118952         | 88.063114          | 158.092403        | 79.549839          |                    |                  | 1  |

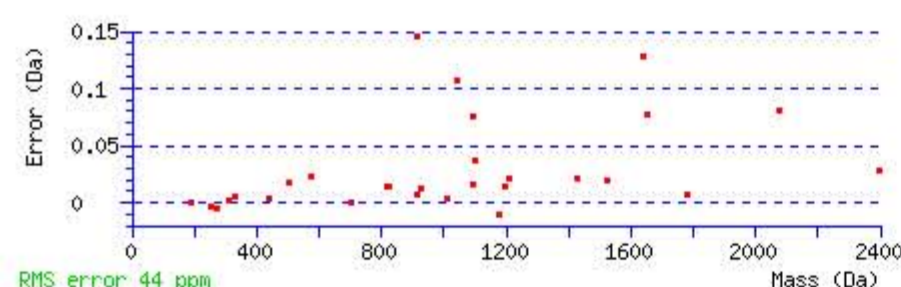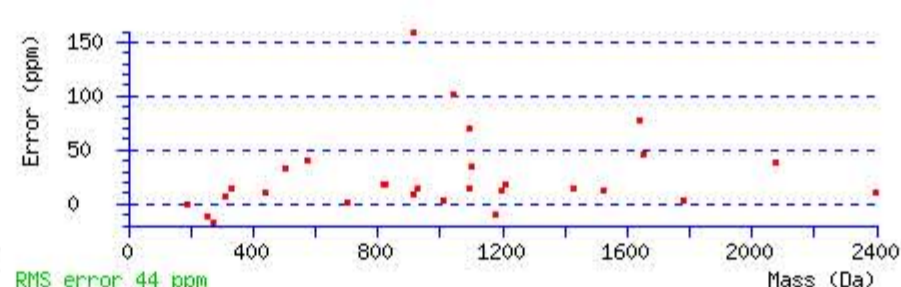

NCBI BLAST search of **GMADQDGLKPTIDKPSEDSPPLEMLGPR**  
(Parameters: blastp, nr protein database, expect=20000, no filter, PAM30)  
Other BLAST [web gateways](#)

## All matches to this query

| Score | $M_r(\text{calc})$ : | Delta    | Sequence                                     |
|-------|----------------------|----------|----------------------------------------------|
| 34.9  | 3304.614151          | 0.038665 | <a href="#">GMADQDGLKPTIDKPSEDSPPLEMLGPR</a> |

# MASCOT Search Results

## Peptide View

### MS/MS Fragmentation of TQVADAK

Found in **ITIH2\_HUMAN**, Inter-alpha-trypsin inhibitor heavy chain H2 OS=Homo sapiens GN=ITIH2 PE=1 SV=2

Match to Query 14872: 1042.545688 from(522.280120,2+) rtinseconds(1300) index(43036)

Title: Locus:1.1.1.2501.11 File:"2013-07-02 CLN FXIII 60 min 3rd F 4.wiff"

Data file C:\Program Files (x86)\Matrix Science\Mascot Daemon\mgf\6 FXIII 60 min 3rd\mascot\_daemon\_merge.mgf

Click mouse within plot area to zoom in by factor of two about that point

Or, Plot from  to  Da

Label all possible matches  Label matches used for scoring

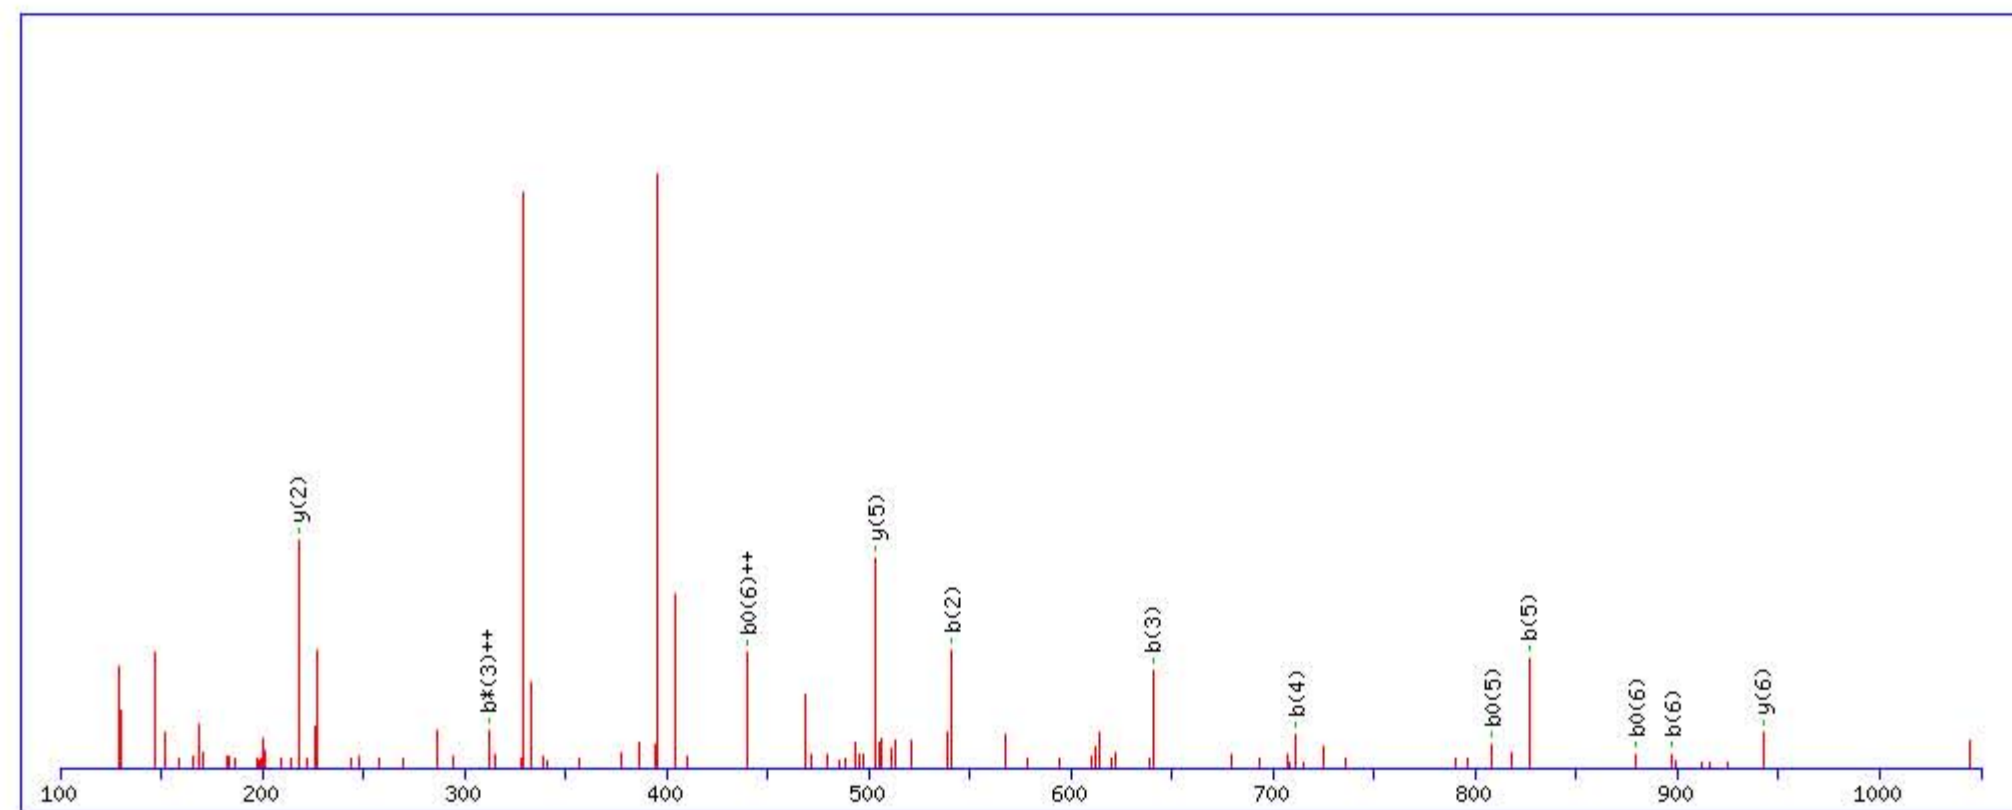

Monoisotopic mass of neutral peptide Mr(calc): 1042.548111

Fixed modifications: Carbamidomethyl (C) (apply to specified residues or termini only)

Variable modifications:

Q2 : Biotin:Thermo-21345 (Q)

Ions Score: 33 Expect: 0.013

Matches : 12/66 fragment ions using 17 most intense peaks [\(help\)](#)

| # | b                 | b <sup>++</sup> | b <sup>*</sup> | b <sup>*++</sup>  | b <sup>0</sup>    | b <sup>0++</sup>  | Seq. | y                 | y <sup>++</sup> | y <sup>*</sup> | y <sup>*++</sup> | y <sup>0</sup> | y <sup>0++</sup> | # |
|---|-------------------|-----------------|----------------|-------------------|-------------------|-------------------|------|-------------------|-----------------|----------------|------------------|----------------|------------------|---|
| 1 | 102.054955        | 51.531116       |                |                   | 84.044390         | 42.525833         | T    |                   |                 |                |                  |                |                  | 7 |
| 2 | <b>541.280281</b> | 271.143779      | 524.253732     | 262.630504        | 523.269716        | 262.138496        | Q    | <b>942.507715</b> | 471.757496      | 925.481166     | 463.244221       | 924.497150     | 462.752213       | 6 |
| 3 | <b>640.348695</b> | 320.677986      | 623.322146     | <b>312.164711</b> | 622.338130        | 311.672703        | V    | <b>503.282389</b> | 252.144832      | 486.255840     | 243.631558       | 485.271824     | 243.139550       | 5 |
| 4 | <b>711.385809</b> | 356.196543      | 694.359260     | 347.683268        | 693.375244        | 347.191260        | A    | 404.213975        | 202.610625      | 387.187426     | 194.097351       | 386.203410     | 193.605343       | 4 |
| 5 | <b>826.412752</b> | 413.710014      | 809.386203     | 405.196739        | <b>808.402187</b> | 404.704731        | D    | 333.176861        | 167.092068      | 316.150312     | 158.578794       | 315.166296     | 158.086786       | 3 |
| 6 | <b>897.449866</b> | 449.228571      | 880.423317     | 440.715296        | <b>879.439301</b> | <b>440.223288</b> | A    | <b>218.149918</b> | 109.578597      | 201.123369     | 101.065322       |                |                  | 2 |
| 7 |                   |                 |                |                   |                   |                   | K    | 147.112804        | 74.060040       | 130.086255     | 65.546765        |                |                  | 1 |

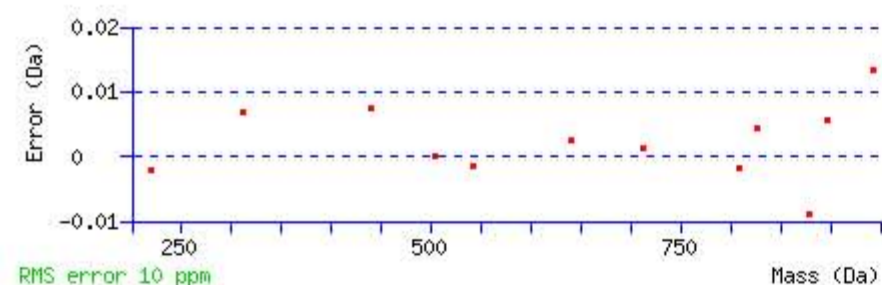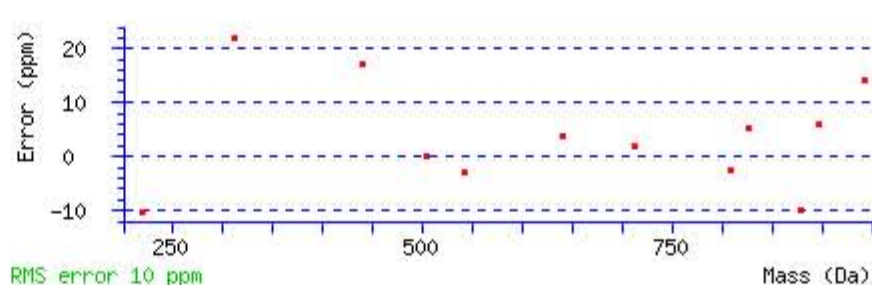

### NCBI BLAST search of TQVADAK

(Parameters: blastp, nr protein database, expect=20000, no filter, PAM30)

Other BLAST [web gateways](#)

### All matches to this query

| Score | Mr(calc):   | Delta     | Sequence                   |
|-------|-------------|-----------|----------------------------|
| 32.9  | 1042.548111 | -0.002423 | <a href="#">TQVADAK</a>    |
| 14.5  | 1042.548096 | -0.002408 | <a href="#">SLQADAK</a>    |
| 10.8  | 1042.534164 | 0.011524  | <a href="#">QEAHKRMK</a>   |
| 8.9   | 1042.540726 | 0.004962  | <a href="#">KPVSEVGDGR</a> |
| 8.0   | 1042.538223 | 0.007465  | <a href="#">SCKHVVWK</a>   |
| 6.0   | 1042.544739 | 0.000949  | <a href="#">GLEWVGSPAK</a> |
| 6.0   | 1042.544724 | 0.000964  | <a href="#">WKGIEPGEK</a>  |
| 5.2   | 1042.548096 | -0.002408 | <a href="#">QEAGLSK</a>    |
| 4.8   | 1042.548080 | -0.002392 | <a href="#">KEQEAQ</a>     |
| 4.7   | 1042.540680 | 0.005008  | <a href="#">EAEKRPADK</a>  |

# **MASCOT** Mascot Search Results

## Peptide View

MS/MS Fragmentation of **ALYAQAR**

Found in **ITIH2\_HUMAN**, Inter-alpha-trypsin inhibitor heavy chain H2 OS=Homo sapiens GN=ITIH2 PE=1 SV=2

Match to Query 16206: 1102.594728 from(552.304640,2+) rtinseconds(1633) index(45054)

Title: Locus:1.1.1.2617.11 File:"2013-07-02 CLN FXIII 60 min 3rd F 4.wiff"

Data file C:\Program Files (x86)\Matrix Science\Mascot Daemon\mgf\6 FXIII 60 min 3rd\mascot\_daemon\_merge.mgf

Click mouse within plot area to zoom in by factor of two about that point

Or, Plot from  to  Da

Label all possible matches  Label matches used for scoring

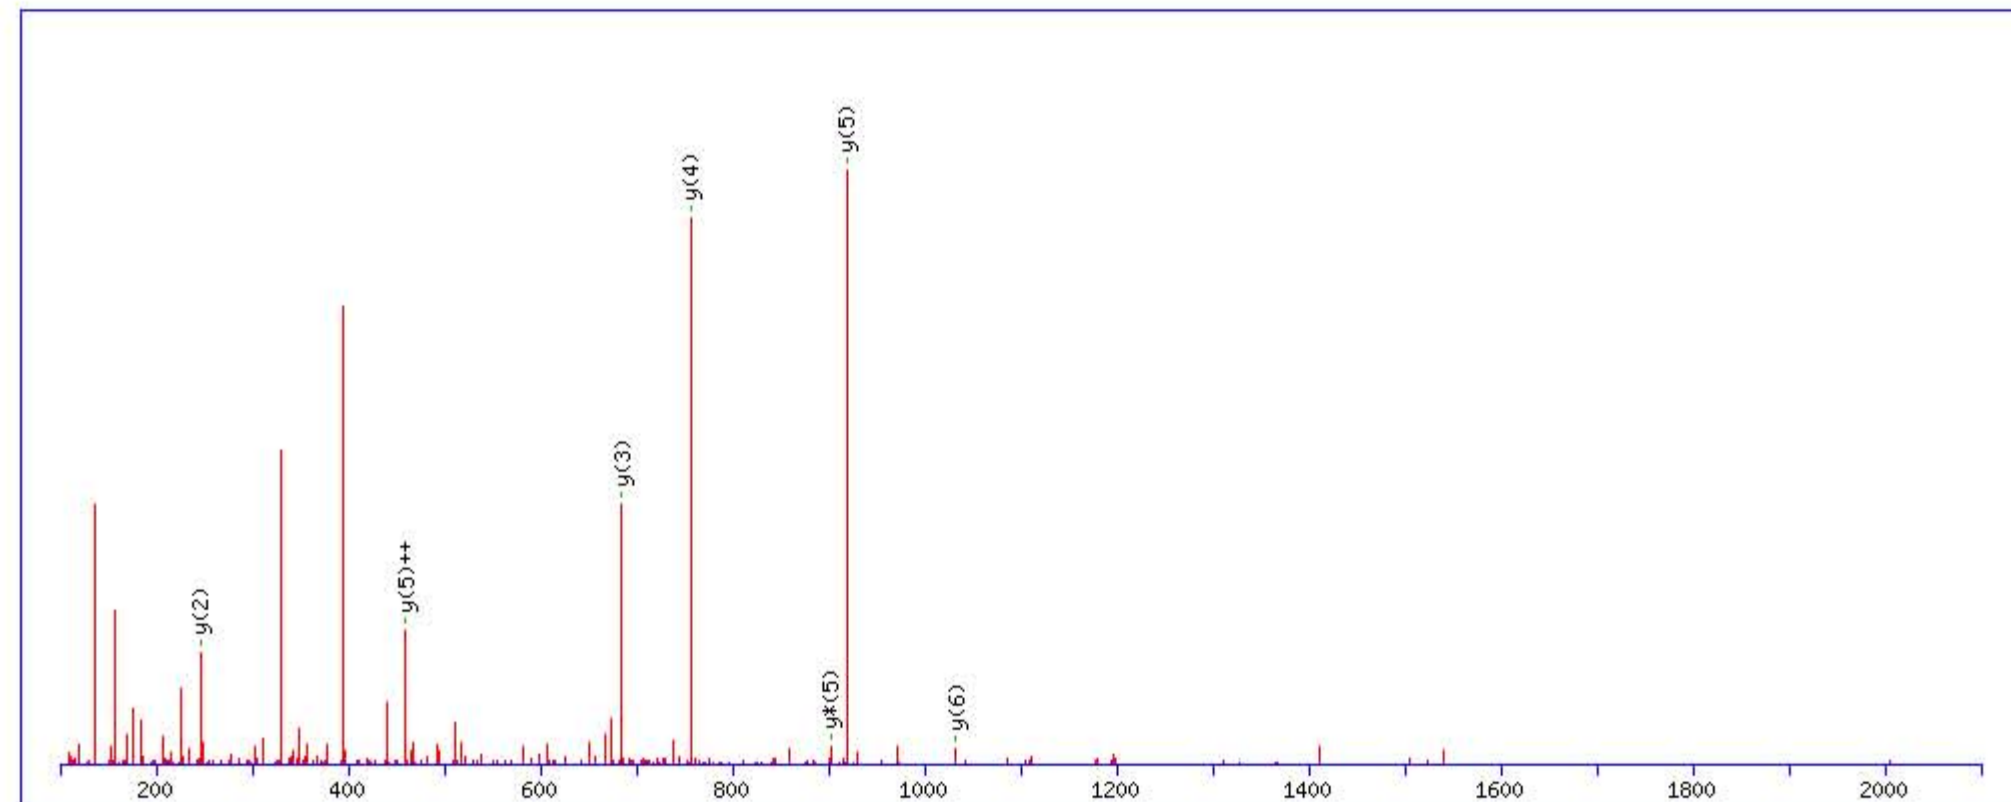

Monoisotopic mass of neutral peptide Mr(calc): 1102.595703

Fixed modifications: Carbamidomethyl (C) (apply to specified residues or termini only)

Variable modifications:

Q5 : Biotin:Thermo-21345 (Q)

Ions Score: 38 Expect: 0.0035

Matches : 7/40 fragment ions using 10 most intense peaks [\(help\)](#)

| # | b          | b <sup>++</sup> | b <sup>*</sup> | b <sup>*++</sup> | Seq. | y                  | y <sup>++</sup>   | y <sup>*</sup>    | y <sup>*++</sup> | # |
|---|------------|-----------------|----------------|------------------|------|--------------------|-------------------|-------------------|------------------|---|
| 1 | 72.044390  | 36.525833       |                |                  | A    |                    |                   |                   |                  | 7 |
| 2 | 185.128454 | 93.067865       |                |                  | L    | <b>1032.565899</b> | 516.786588        | 1015.539350       | 508.273313       | 6 |
| 3 | 348.191783 | 174.599529      |                |                  | Y    | <b>919.481835</b>  | <b>460.244556</b> | <b>902.455286</b> | 451.731281       | 5 |
| 4 | 419.228897 | 210.118087      |                |                  | A    | <b>756.418506</b>  | 378.712891        | 739.391957        | 370.199617       | 4 |
| 5 | 858.454223 | 429.730750      | 841.427674     | 421.217475       | Q    | <b>685.381392</b>  | 343.194334        | 668.354843        | 334.681060       | 3 |
| 6 | 929.491337 | 465.249307      | 912.464788     | 456.736032       | A    | <b>246.156066</b>  | 123.581671        | 229.129517        | 115.068397       | 2 |
| 7 |            |                 |                |                  | R    | 175.118952         | 88.063114         | 158.092403        | 79.549840        | 1 |

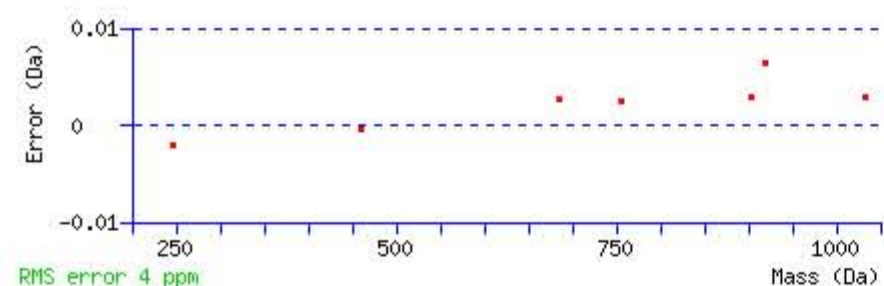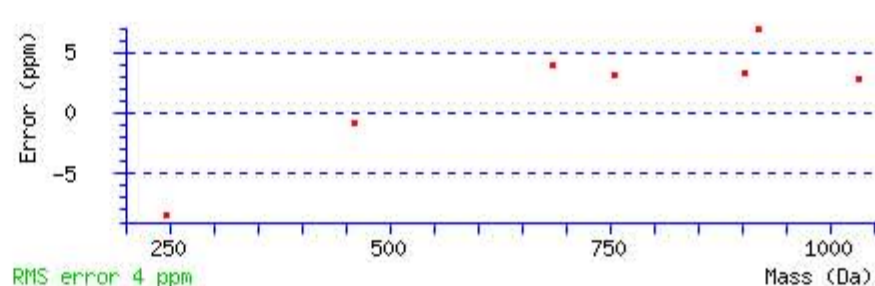

NCBI BLAST search of **ALYAQAR**

(Parameters: blastp, nr protein database, expect=20000, no filter, PAM30)

Other BLAST [web gateways](#)

## All matches to this query

| Score | Mr(calc):   | Delta     | Sequence                    |
|-------|-------------|-----------|-----------------------------|
| 37.7  | 1102.595703 | -0.000975 | <a href="#">ALYAQAR</a>     |
| 10.9  | 1102.602234 | -0.007506 | <a href="#">AIELGYNPVK</a>  |
| 8.5   | 1102.580460 | 0.014268  | <a href="#">AMVENVTIAR</a>  |
| 6.1   | 1102.591660 | 0.003068  | <a href="#">AMKRLEEAR</a>   |
| 5.7   | 1102.598221 | -0.003493 | <a href="#">LAGSLATDLSR</a> |
| 5.5   | 1102.588333 | 0.006395  | <a href="#">SPYGLTPRGR</a>  |
| 3.8   | 1102.591690 | 0.003038  | <a href="#">NMEVSLVRR</a>   |
| 3.6   | 1102.598221 | -0.003493 | <a href="#">DDLKATLTAR</a>  |
| 3.6   | 1102.584305 | 0.010423  | <a href="#">QSSQRGLTAR</a>  |
| 3.0   | 1102.610321 | -0.015593 | <a href="#">ALGMMGLVRR</a>  |



# MASCOT SCIENCE Mascot Search Results

## Peptide View

MS/MS Fragmentation of **VQSTITSR**

Found in **ITIH2\_HUMAN**, Inter-alpha-trypsin inhibitor heavy chain H2 OS=Homo sapiens GN=ITIH2 PE=1 SV=2

Match to Query 20361: 1201.649908 from(601.832230,2+) rtinseconds(1495) index(44169)

Title: Locus:1.1.1.2569.7 File:"2013-07-02 CLN FXIII 60 min 3rd F 4.wiff"

Data file C:\Program Files (x86)\Matrix Science\Mascot Daemon\mgf\6 FXIII 60 min 3rd\mascot\_daemon\_merge.mgf

Click mouse within plot area to zoom in by factor of two about that point

Or, Plot from  to  Da

Label all possible matches  Label matches used for scoring

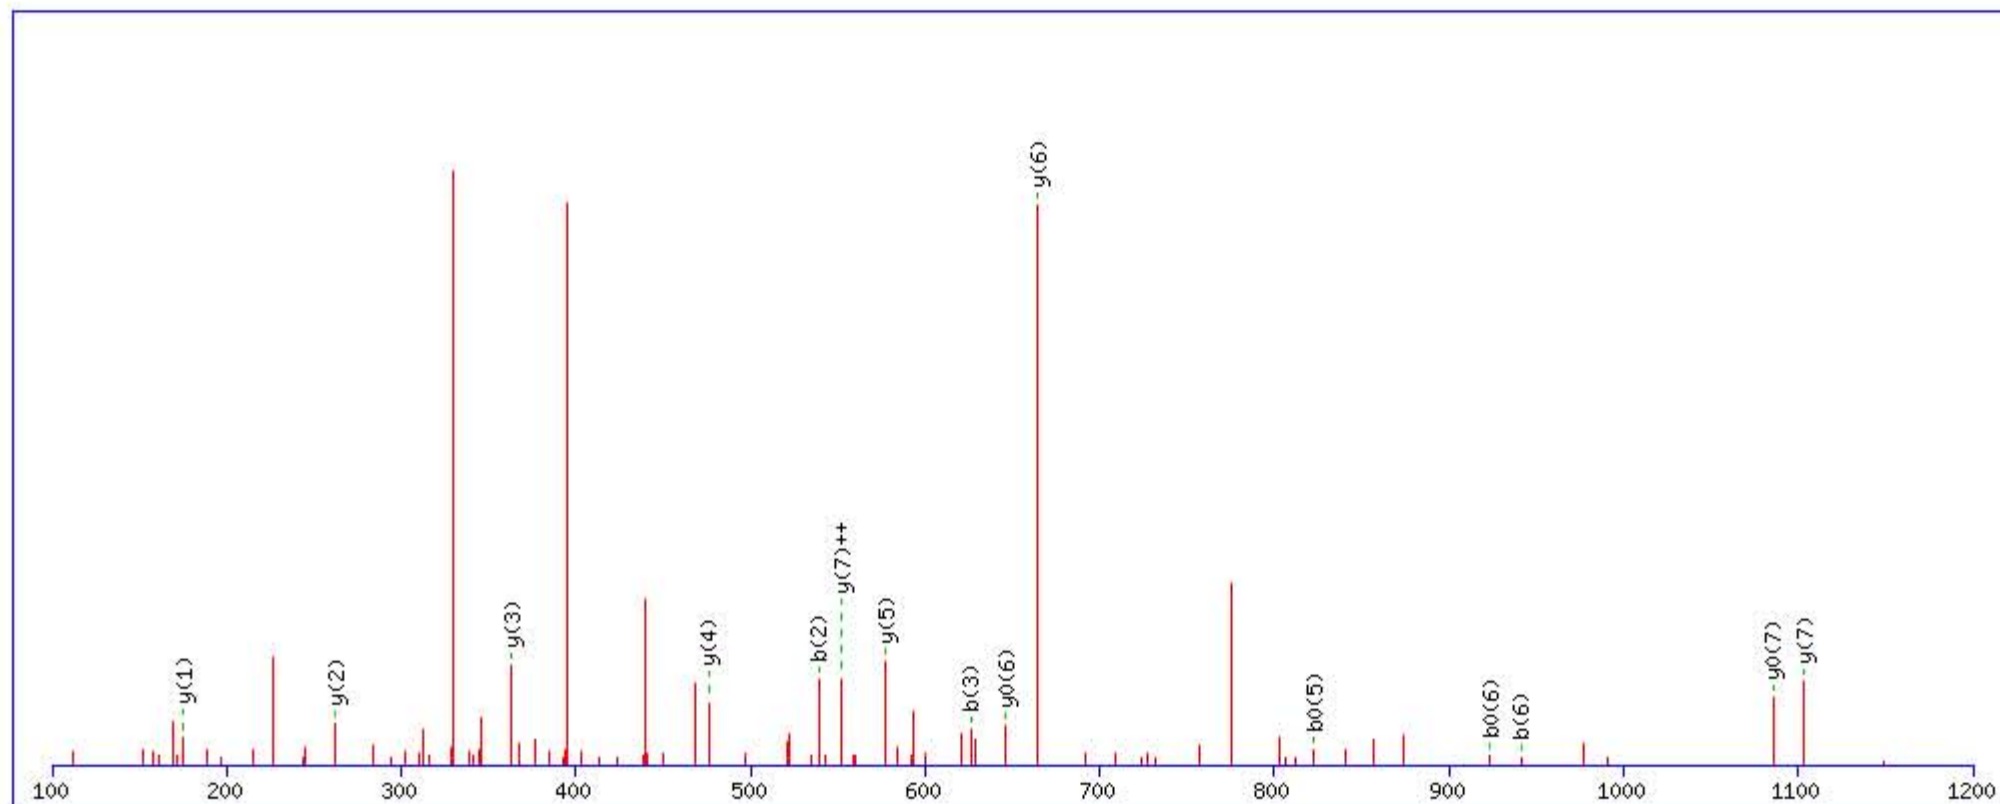

Monoisotopic mass of neutral peptide Mr(calc): 1201.648895

Fixed modifications: Carbamidomethyl (C) (apply to specified residues or termini only)

Variable modifications:

Q2 : Biotin:Thermo-21345 (Q)

Ions Score: 38 Expect: 0.00072

Matches : 15/76 fragment ions using 30 most intense peaks [\(help\)](#)

| # | b                 | b <sup>++</sup> | b <sup>*</sup> | b <sup>*++</sup> | b <sup>0</sup>    | b <sup>0++</sup> | Seq. | y                  | y <sup>++</sup>   | y <sup>*</sup> | y <sup>*++</sup> | y <sup>0</sup>     | y <sup>0++</sup> | # |
|---|-------------------|-----------------|----------------|------------------|-------------------|------------------|------|--------------------|-------------------|----------------|------------------|--------------------|------------------|---|
| 1 | 100.075690        | 50.541483       |                |                  |                   |                  | V    |                    |                   |                |                  |                    |                  | 8 |
| 2 | <b>539.301016</b> | 270.154146      | 522.274467     | 261.640872       |                   |                  | Q    | <b>1103.587756</b> | <b>552.297516</b> | 1086.561207    | 543.784242       | <b>1085.577191</b> | 543.292234       | 7 |
| 3 | <b>626.333044</b> | 313.670160      | 609.306495     | 305.156886       | 608.322479        | 304.664878       | S    | <b>664.362430</b>  | 332.684853        | 647.335881     | 324.171579       | <b>646.351865</b>  | 323.679571       | 6 |
| 4 | 727.380723        | 364.194000      | 710.354174     | 355.680725       | 709.370158        | 355.188717       | T    | <b>577.330402</b>  | 289.168839        | 560.303853     | 280.655565       | 559.319837         | 280.163557       | 5 |
| 5 | 840.464787        | 420.736032      | 823.438238     | 412.222757       | <b>822.454222</b> | 411.730749       | I    | <b>476.282723</b>  | 238.645000        | 459.256174     | 230.131725       | 458.272158         | 229.639717       | 4 |
| 6 | <b>941.512466</b> | 471.259871      | 924.485917     | 462.746597       | <b>923.501901</b> | 462.254589       | T    | <b>363.198659</b>  | 182.102968        | 346.172110     | 173.589693       | 345.188094         | 173.097685       | 3 |
| 7 | 1028.544494       | 514.775885      | 1011.517945    | 506.262611       | 1010.533929       | 505.770603       | S    | <b>262.150980</b>  | 131.579128        | 245.124431     | 123.065854       | 244.140415         | 122.573846       | 2 |
| 8 |                   |                 |                |                  |                   |                  | R    | <b>175.118952</b>  | 88.063114         | 158.092403     | 79.549839        |                    |                  | 1 |

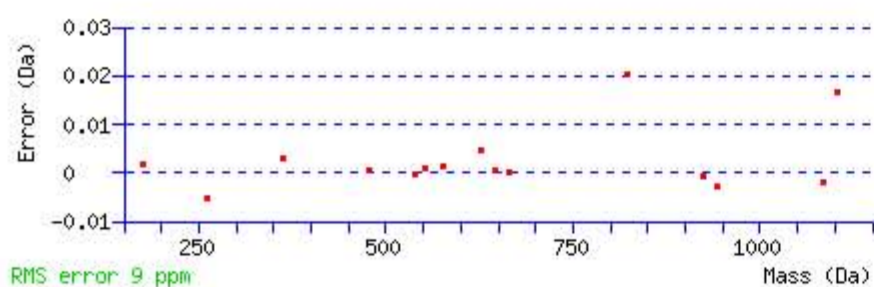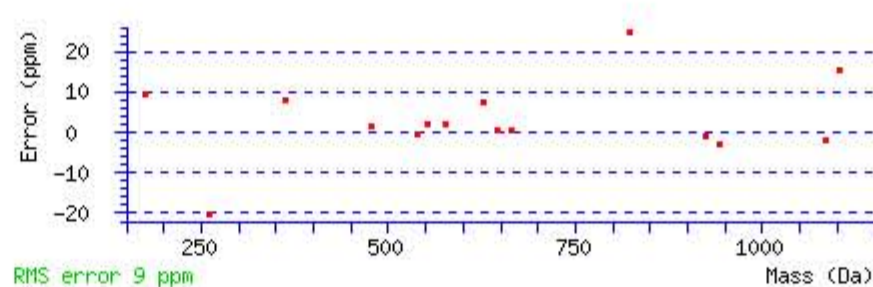

NCBI BLAST search of [VQSTITSR](#)

(Parameters: blastp, nr protein database, expect=20000, no filter, PAM30)

Other BLAST [web gateways](#)

## All matches to this query

| Score | Mr(calc):   | Delta     | Sequence                  |
|-------|-------------|-----------|---------------------------|
| 37.9  | 1201.648895 | 0.001013  | <a href="#">VQSTITSR</a>  |
| 4.1   | 1201.638992 | 0.010916  | <a href="#">VQPPSHAR</a>  |
| 1.2   | 1201.660767 | -0.010859 | <a href="#">VWKPQLFER</a> |
| 0.0   | 1201.638992 | 0.010916  | <a href="#">VQGREFR</a>   |

# MASCOT Search Results

## Peptide View

MS/MS Fragmentation of **MATTMIQSK**

Found in **ITIH2\_HUMAN**, Inter-alpha-trypsin inhibitor heavy chain H2 OS=Homo sapiens GN=ITIH2 PE=1 SV=2

Match to Query 23706: 1336.663148 from(669.338850,2+) rtinseconds(1524) index(44322)

Title: Locus:1.1.1.2579.12 File:"2013-07-02 CLN FXIII 60 min 3rd F 4.wiff"

Data file C:\Program Files (x86)\Matrix Science\Mascot Daemon\mgf\6 FXIII 60 min 3rd\mascot\_daemon\_merge.mgf

Click mouse within plot area to zoom in by factor of two about that point

Or, Plot from  to  Da

Label all possible matches  Label matches used for scoring

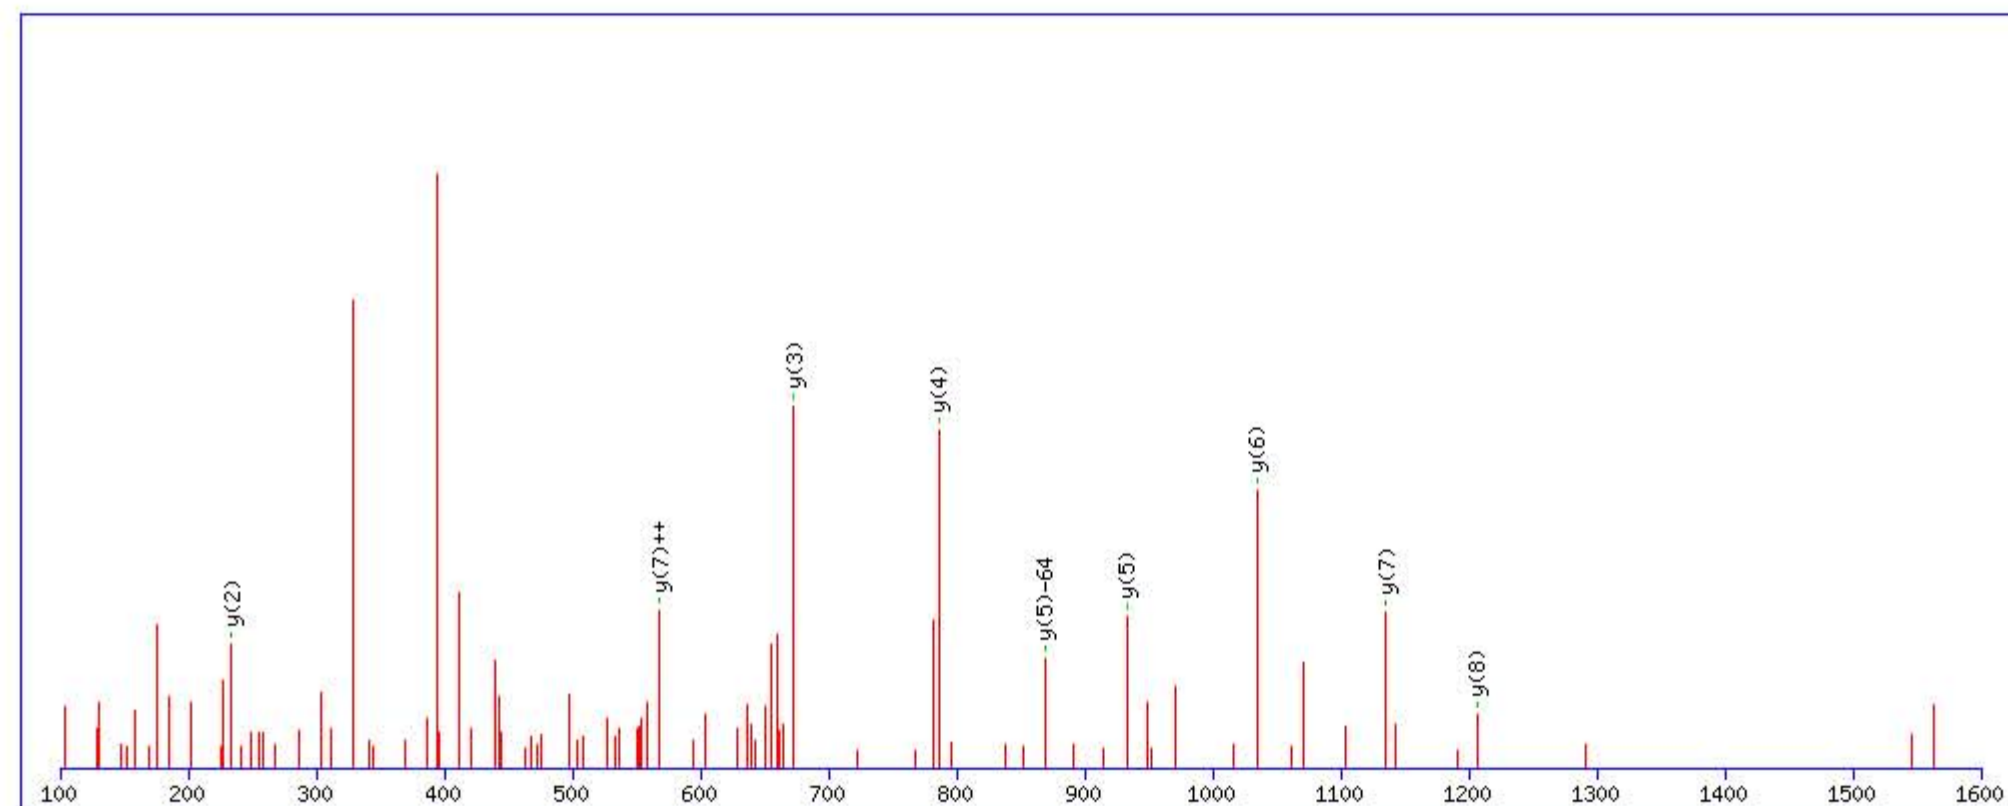

Monoisotopic mass of neutral peptide Mr(calc): 1336.655289

Fixed modifications: Carbamidomethyl (C) (apply to specified residues or termini only)

Variable modifications:

M5 : Oxidation (M), with neutral losses 0.000000 (shown in table), 63.998285

Q7 : Biotin:Thermo-21345 (Q)

Ions Score: 56 Expect: 3.1e-005

Matches : 9/122 fragment ions using 12 most intense peaks ([help](#))

| # | b           | b <sup>++</sup> | b <sup>*</sup> | b <sup>*++</sup> | b <sup>0</sup> | b <sup>0++</sup> | Seq. | y           | y <sup>++</sup> | y <sup>*</sup> | y <sup>*++</sup> | y <sup>0</sup> | y <sup>0++</sup> | # |
|---|-------------|-----------------|----------------|------------------|----------------|------------------|------|-------------|-----------------|----------------|------------------|----------------|------------------|---|
| 1 | 132.047761  | 66.527518       |                |                  |                |                  | M    |             |                 |                |                  |                |                  | 9 |
| 2 | 203.084875  | 102.046075      |                |                  |                |                  | A    | 1206.622094 | 603.814685      | 1189.595545    | 595.301411       | 1188.611529    | 594.809403       | 8 |
| 3 | 304.132554  | 152.569915      |                |                  | 286.121989     | 143.564632       | T    | 1135.584980 | 568.296128      | 1118.558431    | 559.782854       | 1117.574415    | 559.290846       | 7 |
| 4 | 405.180233  | 203.093754      |                |                  | 387.169668     | 194.088472       | T    | 1034.537301 | 517.772289      | 1017.510752    | 509.259014       | 1016.526736    | 508.767006       | 6 |
| 5 | 552.215633  | 276.611455      |                |                  | 534.205068     | 267.606172       | M    | 933.489622  | 467.248449      | 916.463073     | 458.735175       | 915.479057     | 458.243167       | 5 |
| 6 | 665.299697  | 333.153487      |                |                  | 647.289132     | 324.148204       | I    | 786.454222  | 393.730749      | 769.427673     | 385.217475       | 768.443657     | 384.725467       | 4 |
| 7 | 1104.525023 | 552.766149      | 1087.498474    | 544.252875       | 1086.514458    | 543.760867       | Q    | 673.370158  | 337.188717      | 656.343609     | 328.675443       | 655.359593     | 328.183435       | 3 |
| 8 | 1191.557051 | 596.282164      | 1174.530502    | 587.768889       | 1173.546486    | 587.276881       | S    | 234.144832  | 117.576054      | 217.118283     | 109.062780       | 216.134267     | 108.570772       | 2 |
| 9 |             |                 |                |                  |                |                  | K    | 147.112804  | 74.060040       | 130.086255     | 65.546765        |                |                  | 1 |

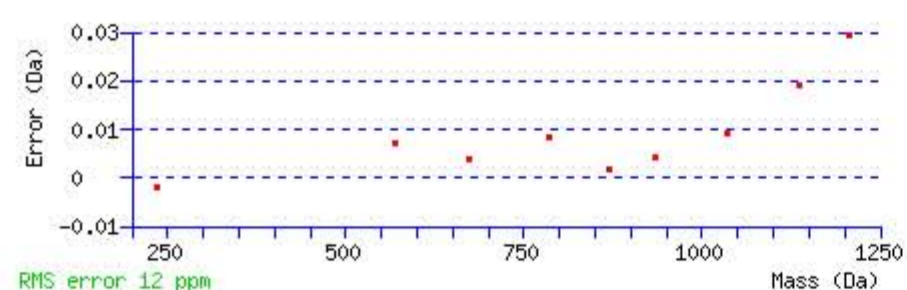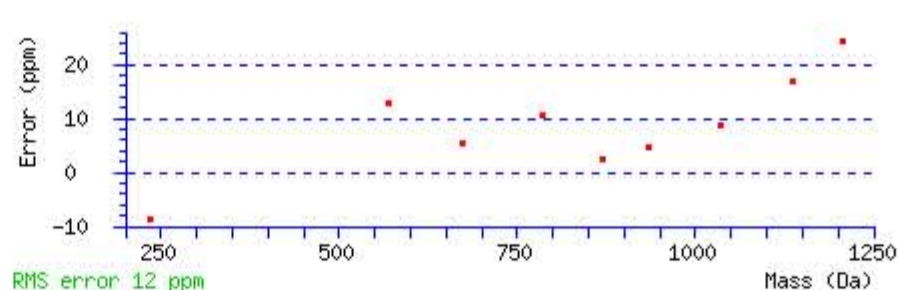

NCBI BLAST search of [MATTMIQSK](#)

(Parameters: blastp, nr protein database, expect=20000, no filter, PAM30)

Other BLAST [web gateways](#)

## All matches to this query

| Score | Mr(calc):   | Delta    | Sequence                      |
|-------|-------------|----------|-------------------------------|
| 55.6  | 1336.655289 | 0.007859 | <a href="#">MATTMIQSK</a>     |
| 7.4   | 1336.647018 | 0.016130 | <a href="#">SDSELVSKSTER</a>  |
| 5.3   | 1336.662308 | 0.000840 | <a href="#">KDTWGVVSSGSSK</a> |
| 4.1   | 1336.655289 | 0.007859 | <a href="#">MATTMIQSK</a>     |

# MASCOT Search Results

## Peptide View

MS/MS Fragmentation of **LSNENHGIAQR**

Found in **ITIH2\_HUMAN**, Inter-alpha-trypsin inhibitor heavy chain H2 OS=Homo sapiens GN=ITIH2 PE=1 SV=2

Match to Query 31128: 1548.765582 from(517.262470,3+) rtinseconds(1418) index(43645)

Title: Locus:1.1.1.2542.16 File:"2013-07-02 CLN FXIII 60 min 3rd F 4.wiff"

Data file C:\Program Files (x86)\Matrix Science\Mascot Daemon\mgf6 FXIII 60 min 3rd\mascot\_daemon\_merge.mgf

Click mouse within plot area to zoom in by factor of two about that point

Or, Plot from  to  Da

Label all possible matches  Label matches used for scoring

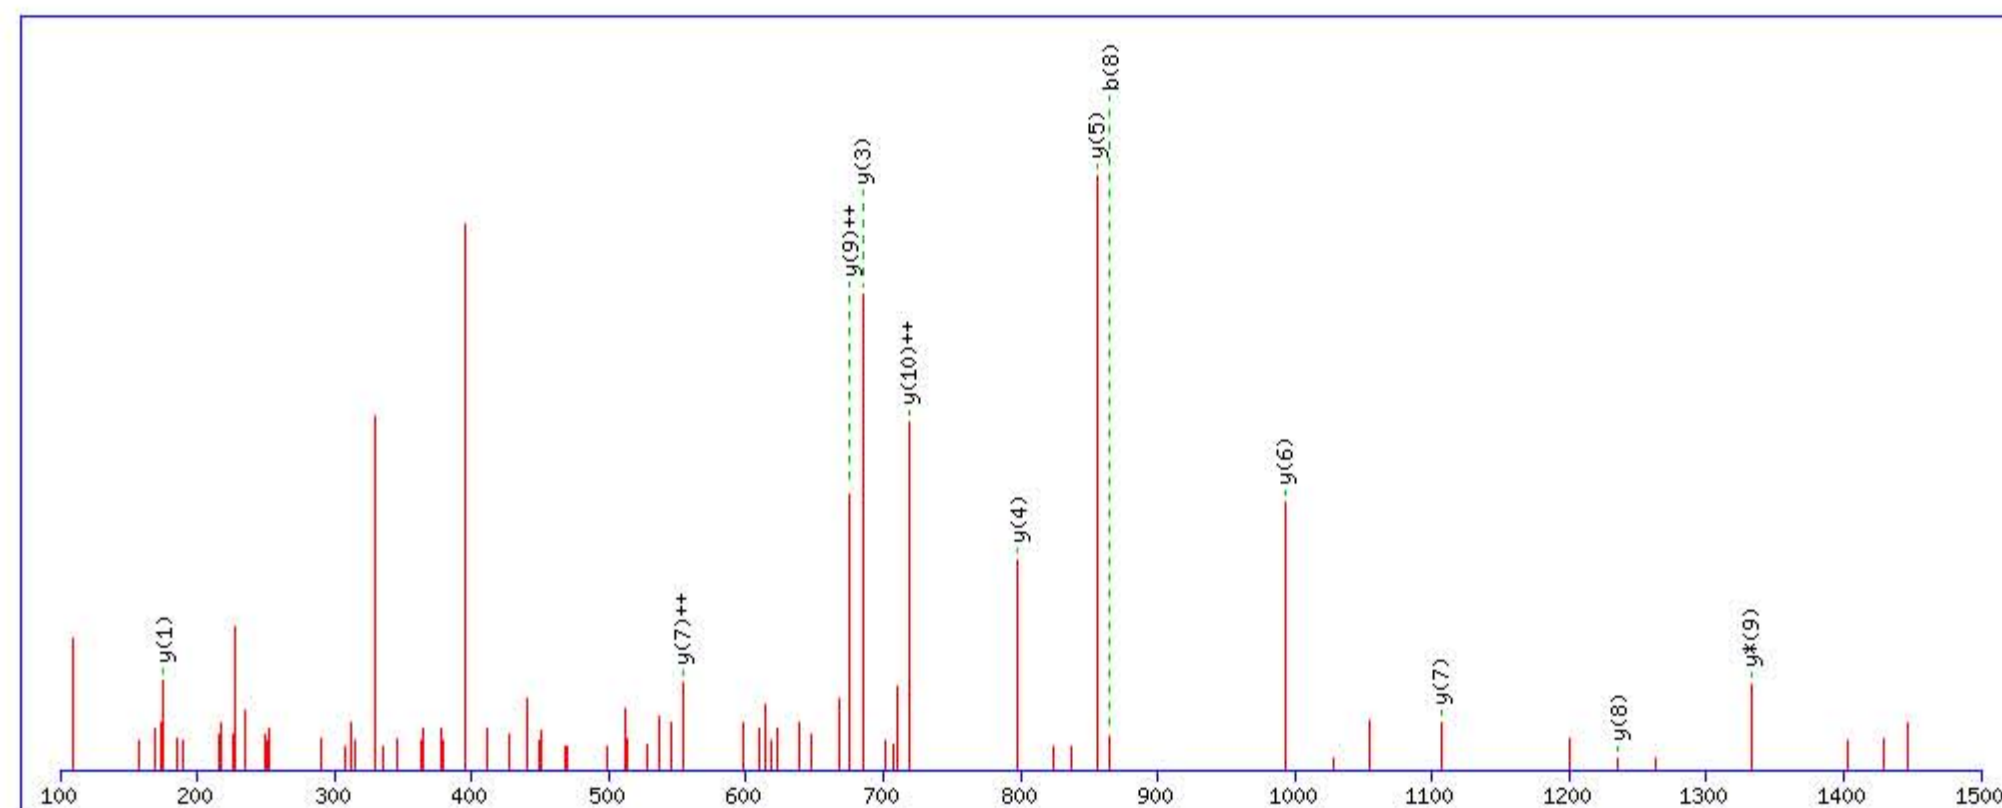

Monoisotopic mass of neutral peptide Mr(calc): 1548.783066

Fixed modifications: Carbamidomethyl (C) (apply to specified residues or termini only)

Variable modifications:

Q10 : Biotin:Thermo-21345 (Q)

Ions Score: 34 Expect: 0.00073

Matches : 12/100 fragment ions using 26 most intense peaks [\(help\)](#)

| #  | b           | b <sup>++</sup> | b <sup>+</sup> | b <sup>*++</sup> | b <sup>0</sup> | b <sup>0++</sup> | Seq. | y           | y <sup>++</sup> | y <sup>+</sup> | y <sup>*++</sup> | y <sup>0</sup> | y <sup>0++</sup> | #  |
|----|-------------|-----------------|----------------|------------------|----------------|------------------|------|-------------|-----------------|----------------|------------------|----------------|------------------|----|
| 1  | 114.091340  | 57.549308       |                |                  |                |                  | L    |             |                 |                |                  |                |                  | 11 |
| 2  | 201.123368  | 101.065322      |                |                  | 183.112803     | 92.060039        | S    | 1436.706307 | 718.856792      | 1419.679758    | 710.343517       | 1418.695742    | 709.851509       | 10 |
| 3  | 315.166295  | 158.086785      | 298.139746     | 149.573511       | 297.155730     | 149.081503       | N    | 1349.674279 | 675.340778      | 1332.647730    | 666.827503       | 1331.663714    | 666.335495       | 9  |
| 4  | 444.208888  | 222.608082      | 427.182339     | 214.094808       | 426.198323     | 213.602800       | E    | 1235.631352 | 618.319314      | 1218.604803    | 609.806040       | 1217.620787    | 609.314032       | 8  |
| 5  | 558.251815  | 279.629546      | 541.225266     | 271.116271       | 540.241250     | 270.624263       | N    | 1106.588759 | 553.798018      | 1089.562210    | 545.284743       |                |                  | 7  |
| 6  | 695.310727  | 348.159002      | 678.284178     | 339.645727       | 677.300162     | 339.153719       | H    | 992.545832  | 496.776554      | 975.519283     | 488.263280       |                |                  | 6  |
| 7  | 752.332191  | 376.669734      | 735.305642     | 368.156459       | 734.321626     | 367.664451       | G    | 855.486920  | 428.247098      | 838.460371     | 419.733824       |                |                  | 5  |
| 8  | 865.416255  | 433.211766      | 848.389706     | 424.698491       | 847.405690     | 424.206483       | I    | 798.465456  | 399.736366      | 781.438907     | 391.223092       |                |                  | 4  |
| 9  | 936.453369  | 468.730323      | 919.426820     | 460.217048       | 918.442804     | 459.725040       | A    | 685.381392  | 343.194334      | 668.354843     | 334.681060       |                |                  | 3  |
| 10 | 1375.678695 | 688.342986      | 1358.652146    | 679.829711       | 1357.668130    | 679.337703       | Q    | 614.344278  | 307.675777      | 597.317729     | 299.162503       |                |                  | 2  |
| 11 |             |                 |                |                  |                |                  | R    | 175.118952  | 88.063114       | 158.092403     | 79.549839        |                |                  | 1  |

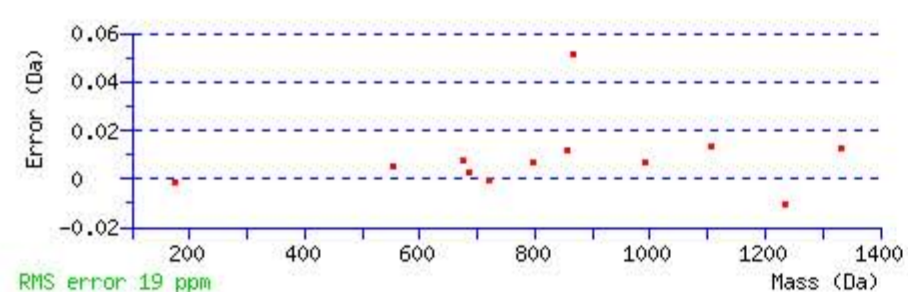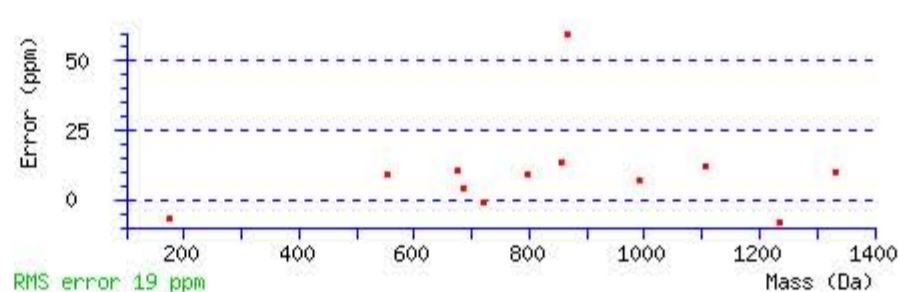

NCBI BLAST search of **LSNENHGIAQR**

(Parameters: blastp, nr protein database, expect=20000, no filter, PAM30)

Other BLAST [web gateways](#)

All matches to this query

| Score | Mr(calc):   | Delta     | Sequence                      |
|-------|-------------|-----------|-------------------------------|
| 33.9  | 1548.783066 | -0.017484 | <a href="#">LSNENHGIAQR</a>   |
| 0.4   | 1548.782394 | -0.016812 | <a href="#">IIPPYTDDAFEIR</a> |

Mascot: <http://www.matrixscience.com/>

# MASCOT Search Results

## Peptide View

MS/MS Fragmentation of **FYNQVSTPLLR**

Found in **ITIH2\_HUMAN**, Inter-alpha-trypsin inhibitor heavy chain H2 OS=Homo sapiens GN=ITIH2 PE=1 SV=2

Match to Query 35402: 1647.899528 from(824.957040,2+) rtinseconds(2278) index(49112)

Title: Locus:1.1.1.2841.10 File:"2013-07-02 CLN FXIII 60 min 3rd F 4.wiff"

Data file C:\Program Files (x86)\Matrix Science\Mascot Daemon\mgf\6 FXIII 60 min 3rd\mascot\_daemon\_merge.mgf

Click mouse within plot area to zoom in by factor of two about that point

Or, Plot from  to  Da

Label all possible matches  Label matches used for scoring

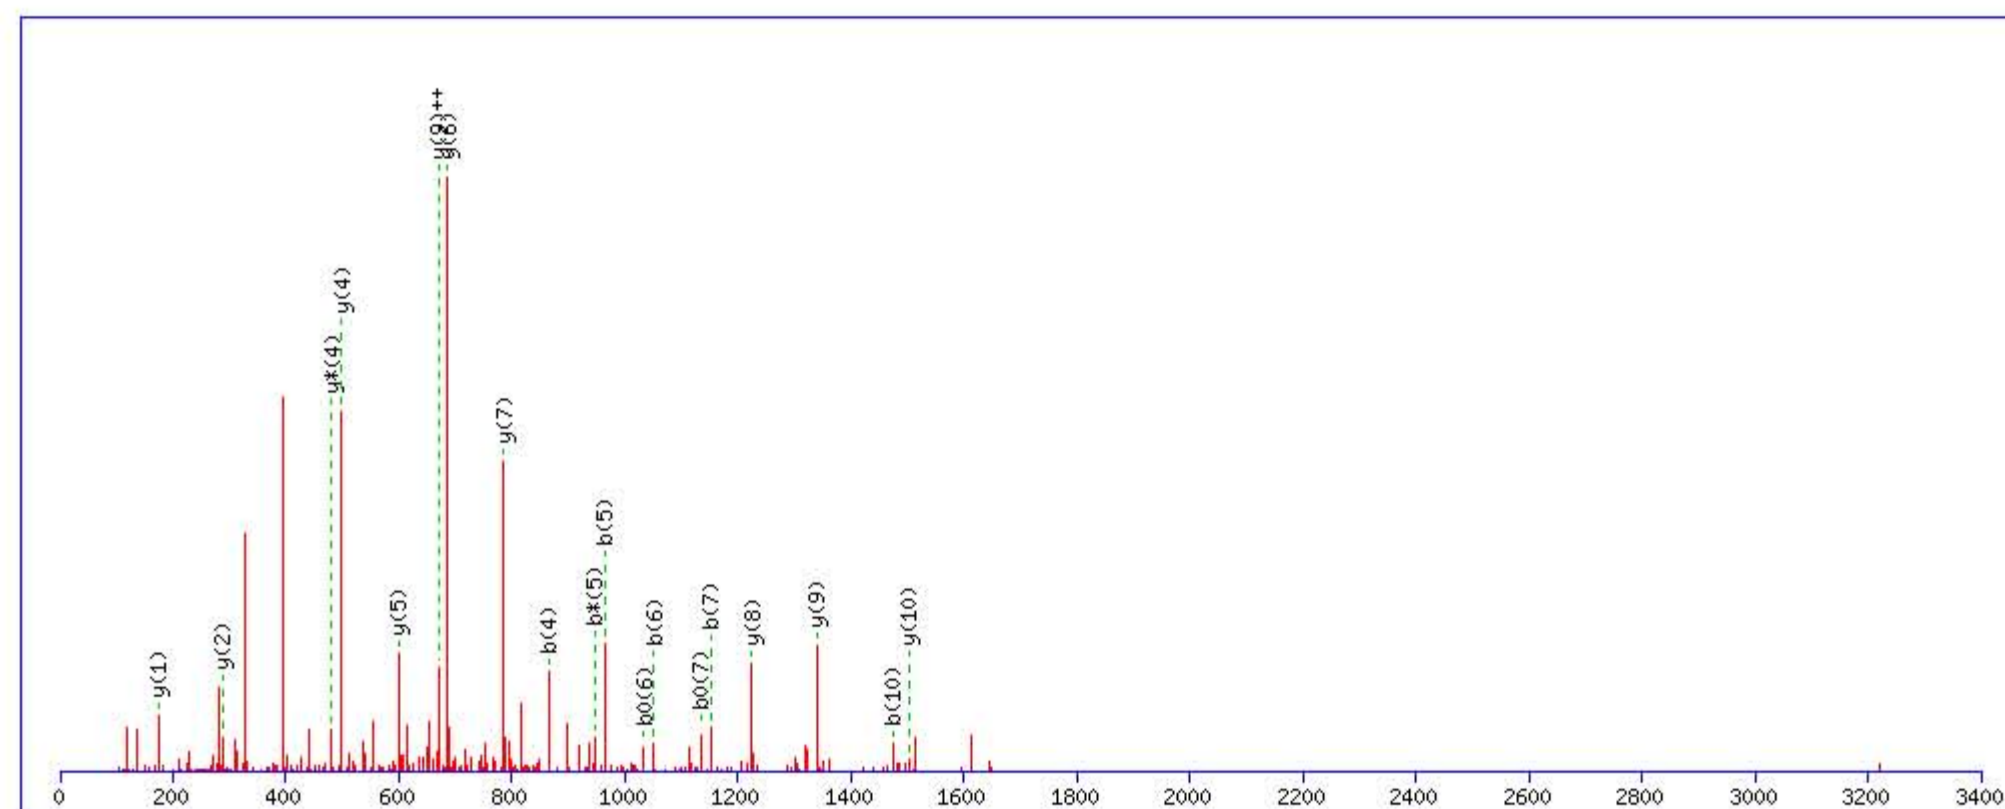

Monoisotopic mass of neutral peptide  $M_r(\text{calc})$ : 1647.880676

Fixed modifications: Carbamidomethyl (C) (apply to specified residues or termini only)

Variable modifications:

Q4 : Biotin:Thermo-21345 (Q)

Ions Score: 62 Expect: 9.4e-006

Matches : 19/98 fragment ions using 32 most intense peaks [\(help\)](#)

| #  | b           | b <sup>++</sup> | b <sup>*</sup> | b <sup>*++</sup> | b <sup>0</sup> | b <sup>0++</sup> | Seq. | y           | y <sup>++</sup> | y <sup>*</sup> | y <sup>*++</sup> | y <sup>0</sup> | y <sup>0++</sup> | #  |
|----|-------------|-----------------|----------------|------------------|----------------|------------------|------|-------------|-----------------|----------------|------------------|----------------|------------------|----|
| 1  | 148.075690  | 74.541483       |                |                  |                |                  | F    |             |                 |                |                  |                |                  | 11 |
| 2  | 311.139019  | 156.073148      |                |                  |                |                  | Y    | 1501.819547 | 751.413411      | 1484.792998    | 742.900137       | 1483.808982    | 742.408129       | 10 |
| 3  | 425.181946  | 213.094611      | 408.155397     | 204.581337       |                |                  | N    | 1338.756218 | 669.881747      | 1321.729669    | 661.368472       | 1320.745653    | 660.876464       | 9  |
| 4  | 864.407272  | 432.707274      | 847.380723     | 424.194000       |                |                  | Q    | 1224.713291 | 612.860283      | 1207.686742    | 604.347009       | 1206.702726    | 603.855001       | 8  |
| 5  | 963.475686  | 482.241481      | 946.449137     | 473.728207       |                |                  | V    | 785.487965  | 393.247620      | 768.461416     | 384.734346       | 767.477400     | 384.242338       | 7  |
| 6  | 1050.507714 | 525.757495      | 1033.481165    | 517.244221       | 1032.497149    | 516.752213       | S    | 686.419551  | 343.713414      | 669.393002     | 335.200139       | 668.408986     | 334.708131       | 6  |
| 7  | 1151.555393 | 576.281335      | 1134.528844    | 567.768060       | 1133.544828    | 567.276052       | T    | 599.387523  | 300.197399      | 582.360974     | 291.684125       | 581.376958     | 291.192117       | 5  |
| 8  | 1248.608157 | 624.807717      | 1231.581608    | 616.294442       | 1230.597592    | 615.802434       | P    | 498.339844  | 249.673560      | 481.313295     | 241.160285       |                |                  | 4  |
| 9  | 1361.692221 | 681.349749      | 1344.665672    | 672.836474       | 1343.681656    | 672.344466       | L    | 401.287080  | 201.147178      | 384.260531     | 192.633903       |                |                  | 3  |
| 10 | 1474.776285 | 737.891780      | 1457.749736    | 729.378506       | 1456.765720    | 728.886498       | L    | 288.203016  | 144.605146      | 271.176467     | 136.091871       |                |                  | 2  |
| 11 |             |                 |                |                  |                |                  | R    | 175.118952  | 88.063114       | 158.092403     | 79.549839        |                |                  | 1  |

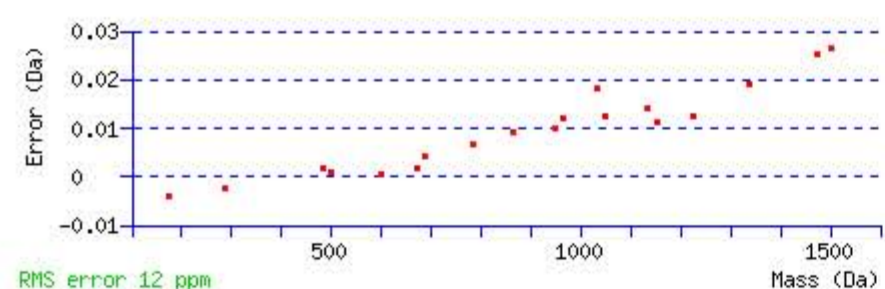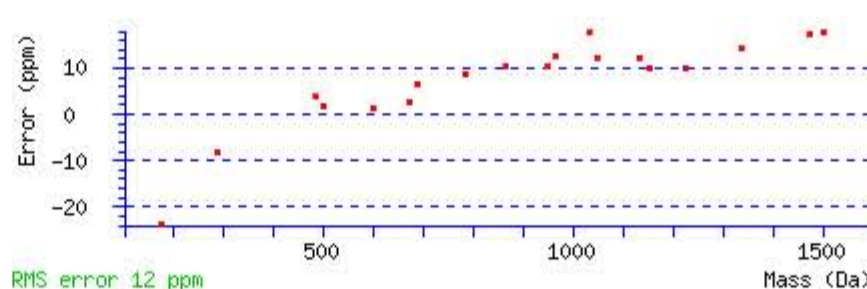

NCBI BLAST search of **FYNQVSTPLLR**

(Parameters: blastp, nr protein database, expect=20000, no filter, PAM30)

Other BLAST [web gateways](#)

All matches to this query

| Score | $M_r(\text{calc})$ : | Delta     | Sequence                       |
|-------|----------------------|-----------|--------------------------------|
| 61.5  | 1647.880676          | 0.018852  | <a href="#">FYNQVSTPLLR</a>    |
| 7.4   | 1647.903137          | -0.003609 | <a href="#">EVRIMRWFGLVSR</a>  |
| 6.0   | 1647.895264          | 0.004264  | <a href="#">MKPILLQGHER</a>    |
| 3.8   | 1647.887878          | 0.011650  | <a href="#">TLNQQLTNHIR</a>    |
| 3.0   | 1647.910339          | -0.010811 | <a href="#">LMRPRREGPPGGLR</a> |
| 2.6   | 1647.887878          | 0.011650  | <a href="#">TLNQQLTNHIR</a>    |
| 0.3   | 1647.894394          | 0.005134  | <a href="#">LSDNIQNVVLKSYR</a> |

Mascot: <http://www.matrixscience.com/>

# MASCOT Search Results

## Peptide View

MS/MS Fragmentation of **IYGNQDTSSQLK**

Found in **ITIH2\_HUMAN**, Inter-alpha-trypsin inhibitor heavy chain H2 OS=Homo sapiens GN=ITIH2 PE=1 SV=2

Match to Query 35702: 1663.829348 from(832.921950,2+) rtinseconds(1642) index(31118)

Title: Locus:1.1.1.3120.20 File:"2013-07-02 CLN FXIII 60 min 3rd F 3.wiff"

Data file C:\Program Files (x86)\Matrix Science\Mascot Daemon\mgf6 FXIII 60 min 3rd\mascot\_daemon\_merge.mgf

Click mouse within plot area to zoom in by factor of two about that point

Or, Plot from  to  Da

Label all possible matches  Label matches used for scoring

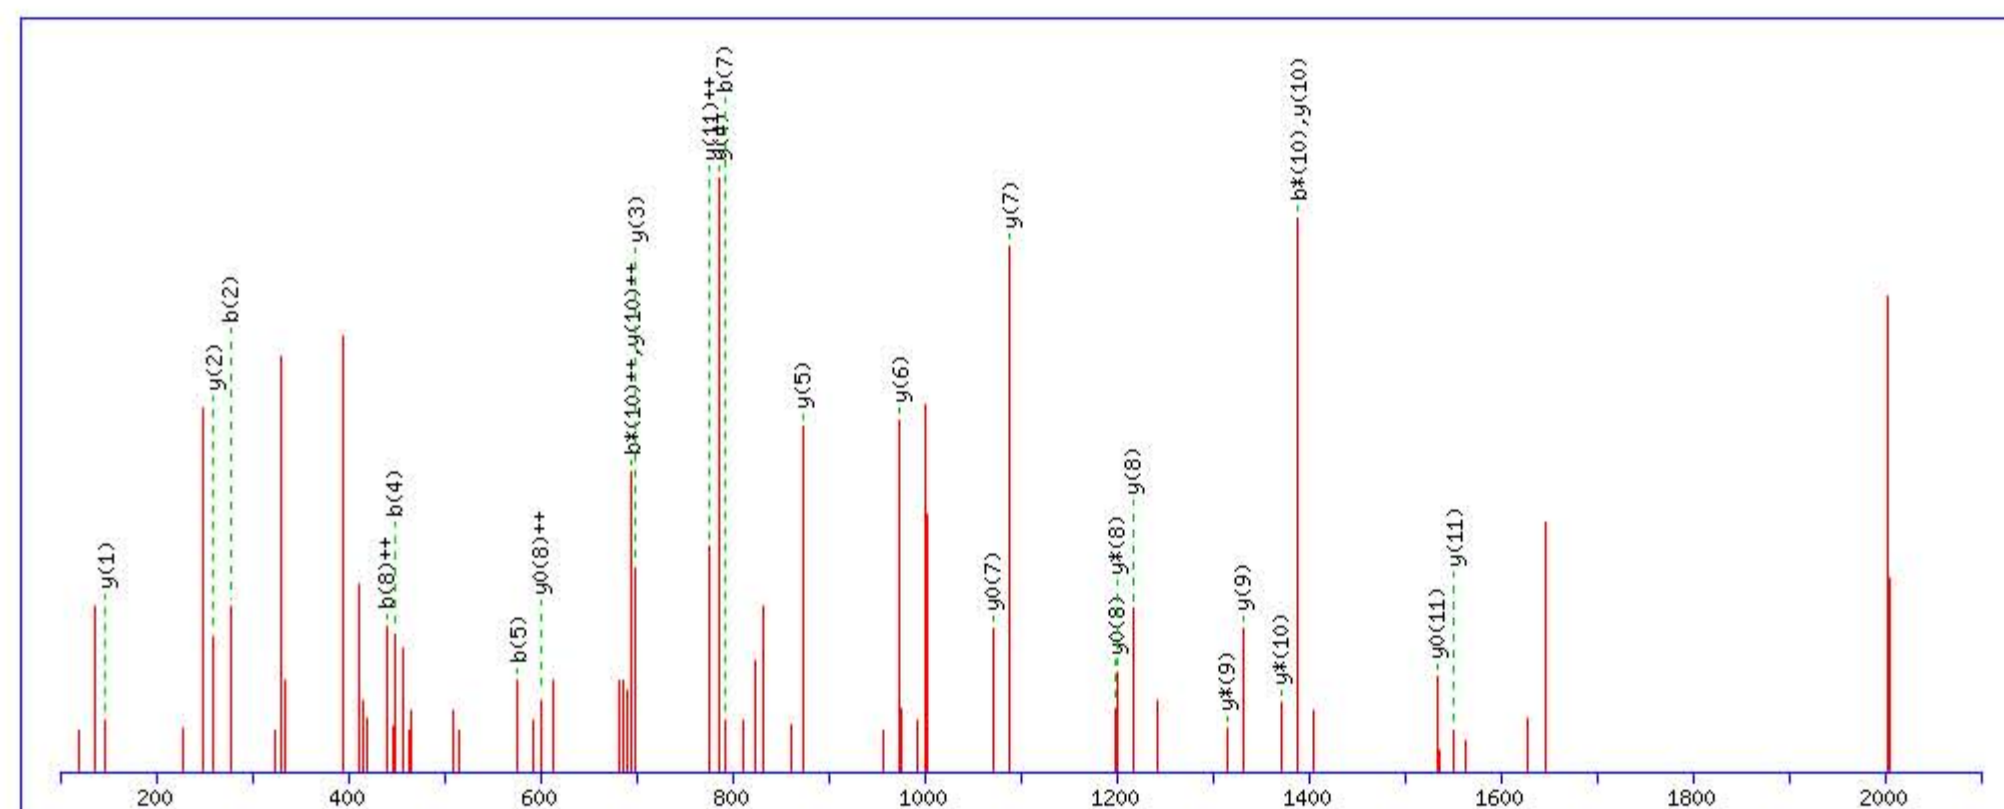

Monoisotopic mass of neutral peptide  $M_r(\text{calc})$ : 1663.823944

Fixed modifications: Carbamidomethyl (C) (apply to specified residues or termini only)

Variable modifications:

Q10 : Biotin:Thermo-21345 (Q)

Ions Score: 82 Expect: 6.4e-008

Matches : 27/110 fragment ions using 42 most intense peaks [\(help\)](#)

| #  | b                 | b <sup>++</sup>   | b <sup>*</sup>     | b <sup>*++</sup>  | b <sup>0</sup> | b <sup>0++</sup> | Seq. | y                  | y <sup>++</sup>   | y <sup>*</sup>     | y <sup>*++</sup> | y <sup>0</sup>     | y <sup>0++</sup>  | #  |
|----|-------------------|-------------------|--------------------|-------------------|----------------|------------------|------|--------------------|-------------------|--------------------|------------------|--------------------|-------------------|----|
| 1  | 114.091340        | 57.549308         |                    |                   |                |                  | I    |                    |                   |                    |                  |                    |                   | 12 |
| 2  | <b>277.154669</b> | 139.080973        |                    |                   |                |                  | Y    | <b>1551.747170</b> | <b>776.377223</b> | 1534.720621        | 767.863948       | <b>1533.736605</b> | 767.371940        | 11 |
| 3  | 334.176133        | 167.591704        |                    |                   |                |                  | G    | <b>1388.683841</b> | <b>694.845558</b> | <b>1371.657292</b> | 686.332284       | 1370.673276        | 685.840276        | 10 |
| 4  | <b>448.219060</b> | 224.613168        | 431.192511         | 216.099894        |                |                  | N    | <b>1331.662377</b> | 666.334826        | <b>1314.635828</b> | 657.821552       | 1313.651812        | 657.329544        | 9  |
| 5  | <b>576.277638</b> | 288.642457        | 559.251089         | 280.129183        |                |                  | Q    | <b>1217.619450</b> | 609.313363        | <b>1200.592901</b> | 600.800088       | <b>1199.608885</b> | <b>600.308080</b> | 8  |
| 6  | 691.304581        | 346.155929        | 674.278032         | 337.642654        | 673.294016     | 337.150646       | D    | <b>1089.560872</b> | 545.284074        | 1072.534323        | 536.770799       | <b>1071.550307</b> | 536.278791        | 7  |
| 7  | <b>792.352260</b> | 396.679768        | 775.325711         | 388.166494        | 774.341695     | 387.674486       | T    | <b>974.533929</b>  | 487.770602        | 957.507380         | 479.257328       | 956.523364         | 478.765320        | 6  |
| 8  | 879.384288        | <b>440.195782</b> | 862.357739         | 431.682507        | 861.373723     | 431.190499       | S    | <b>873.486250</b>  | 437.246763        | 856.459701         | 428.733488       | 855.475685         | 428.241480        | 5  |
| 9  | 966.416316        | 483.711796        | 949.389767         | 475.198521        | 948.405751     | 474.706513       | S    | <b>786.454222</b>  | 393.730749        | 769.427673         | 385.217474       | 768.443657         | 384.725466        | 4  |
| 10 | 1405.641642       | 703.324459        | <b>1388.615093</b> | <b>694.811184</b> | 1387.631077    | 694.319176       | Q    | <b>699.422194</b>  | 350.214735        | 682.395645         | 341.701460       |                    |                   | 3  |
| 11 | 1518.725706       | 759.866491        | 1501.699157        | 751.353216        | 1500.715141    | 750.861208       | L    | <b>260.196868</b>  | 130.602072        | 243.170319         | 122.088797       |                    |                   | 2  |
| 12 |                   |                   |                    |                   |                |                  | K    | <b>147.112804</b>  | 74.060040         | 130.086255         | 65.546765        |                    |                   | 1  |

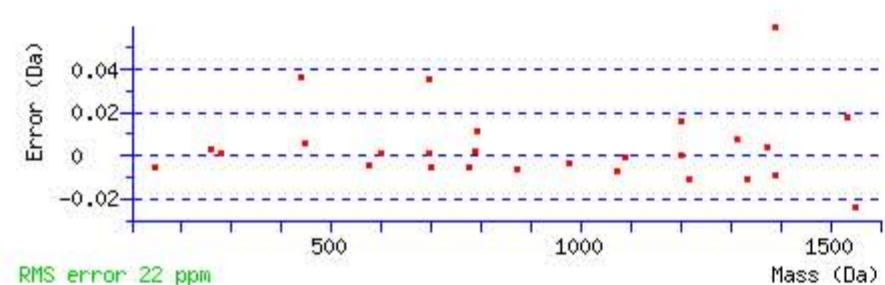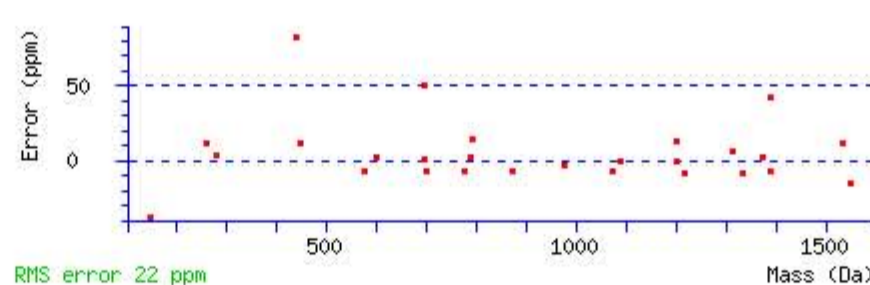

NCBI BLAST search of **IYGNQDTSSQLK**

(Parameters: blastp, nr protein database, expect=20000, no filter, PAM30)

Other BLAST [web gateways](#)

All matches to this query

| Score | $M_r(\text{calc})$ : | Delta     | Sequence                      |
|-------|----------------------|-----------|-------------------------------|
| 82.2  | 1663.823944          | 0.005404  | <a href="#">IYGNQDTSSQLK</a>  |
| 22.8  | 1663.823944          | 0.005404  | <a href="#">IYGNQDTSSQLK</a>  |
| 5.2   | 1663.821442          | 0.007906  | <a href="#">LYGCFLRVYMQSK</a> |
| 2.7   | 1663.806183          | 0.023165  | <a href="#">DLSMFSQNMTHIK</a> |
| 1.4   | 1663.836029          | -0.006681 | <a href="#">LADWKKMACLLCR</a> |

# MASCOT SEARCH RESULTS

## Peptide View

MS/MS Fragmentation of **AHVSFKPTVAQQR**

Found in **ITIH2\_HUMAN**, Inter-alpha-trypsin inhibitor heavy chain H2 OS=Homo sapiens GN=ITIH2 PE=1 SV=2

Match to Query 38124: 1778.955256 from(445.746090,4+) rtinseconds(1524) index(44319)

Title: Locus:1.1.1.2579.9 File:"2013-07-02 CLN FXIII 60 min 3rd F 4.wiff"

Data file C:\Program Files (x86)\Matrix Science\Mascot Daemon\mgf6 FXIII 60 min 3rd\mascot\_daemon\_merge.mgf

Click mouse within plot area to zoom in by factor of two about that point

Or, Plot from  to  Da

Label all possible matches  Label matches used for scoring

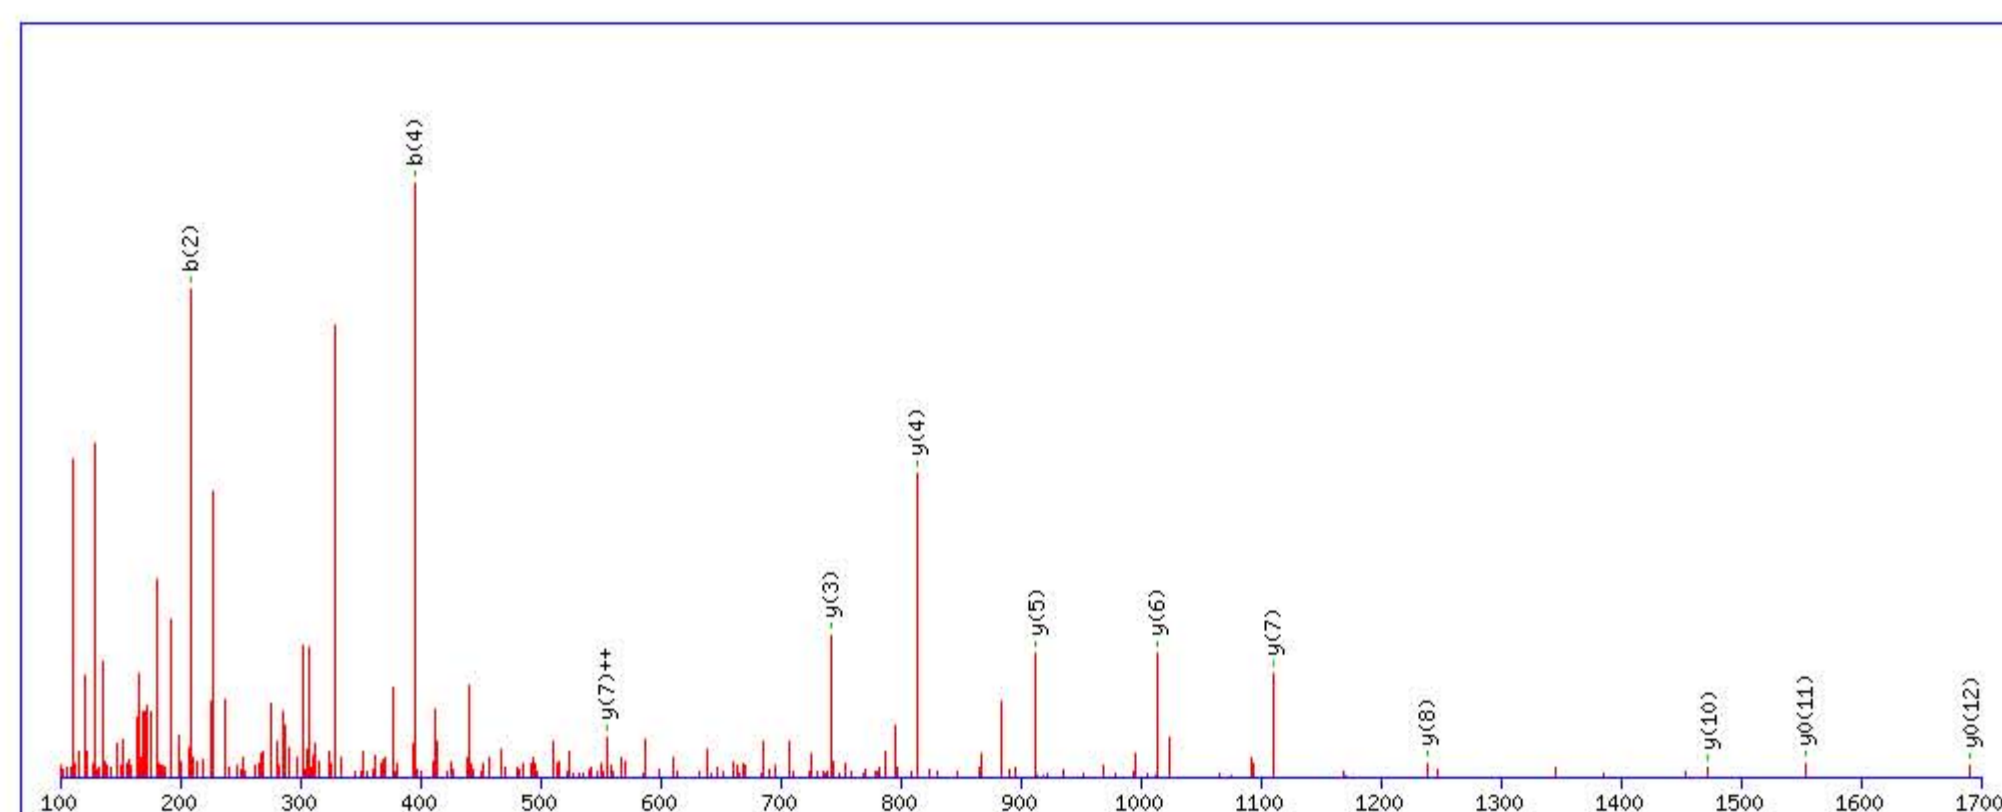

Monoisotopic mass of neutral peptide Mr(calc): 1778.961395

Fixed modifications: Carbamidomethyl (C) (apply to specified residues or termini only)

Variable modifications:

Q12 : Biotin:Thermo-21345 (Q)

Ions Score: 46 Expect: 0.00047

Matches : 12/118 fragment ions using 16 most intense peaks [\(help\)](#)

| #  | b                 | b <sup>++</sup> | b <sup>*</sup> | b <sup>*++</sup> | b <sup>0</sup> | b <sup>0++</sup> | Seq. | y                  | y <sup>++</sup>   | y <sup>*</sup> | y <sup>*++</sup> | y <sup>0</sup>     | y <sup>0++</sup> | #  |
|----|-------------------|-----------------|----------------|------------------|----------------|------------------|------|--------------------|-------------------|----------------|------------------|--------------------|------------------|----|
| 1  | 72.044390         | 36.525833       |                |                  |                |                  | A    |                    |                   |                |                  |                    |                  | 13 |
| 2  | <b>209.103302</b> | 105.055289      |                |                  |                |                  | H    | 1708.931558        | 854.969417        | 1691.905009    | 846.456143       | <b>1690.920993</b> | 845.964135       | 12 |
| 3  | 308.171716        | 154.589496      |                |                  |                |                  | V    | 1571.872646        | 786.439961        | 1554.846097    | 777.926687       | <b>1553.862081</b> | 777.434679       | 11 |
| 4  | <b>395.203744</b> | 198.105510      |                |                  | 377.193179     | 189.100227       | S    | <b>1472.804232</b> | 736.905754        | 1455.777683    | 728.392480       | 1454.793667        | 727.900472       | 10 |
| 5  | 542.272158        | 271.639717      |                |                  | 524.261593     | 262.634435       | F    | 1385.772204        | 693.389740        | 1368.745655    | 684.876466       | 1367.761639        | 684.384458       | 9  |
| 6  | 670.367121        | 335.687199      | 653.340572     | 327.173924       | 652.356556     | 326.681916       | K    | <b>1238.703790</b> | 619.855533        | 1221.677241    | 611.342259       | 1220.693225        | 610.850251       | 8  |
| 7  | 767.419885        | 384.213581      | 750.393336     | 375.700306       | 749.409320     | 375.208298       | P    | <b>1110.608827</b> | <b>555.808052</b> | 1093.582278    | 547.294777       | 1092.598262        | 546.802769       | 7  |
| 8  | 868.467564        | 434.737420      | 851.441015     | 426.224146       | 850.456999     | 425.732138       | T    | <b>1013.556063</b> | 507.281670        | 996.529514     | 498.768395       | 995.545498         | 498.276387       | 6  |
| 9  | 967.535978        | 484.271627      | 950.509429     | 475.758353       | 949.525413     | 475.266345       | V    | <b>912.508384</b>  | 456.757830        | 895.481835     | 448.244556       |                    |                  | 5  |
| 10 | 1038.573092       | 519.790184      | 1021.546543    | 511.276910       | 1020.562527    | 510.784902       | A    | <b>813.439970</b>  | 407.223623        | 796.413421     | 398.710349       |                    |                  | 4  |
| 11 | 1166.631670       | 583.819473      | 1149.605121    | 575.306199       | 1148.621105    | 574.814191       | Q    | <b>742.402856</b>  | 371.705066        | 725.376307     | 363.191792       |                    |                  | 3  |
| 12 | 1605.856996       | 803.432136      | 1588.830447    | 794.918862       | 1587.846431    | 794.426854       | Q    | 614.344278         | 307.675777        | 597.317729     | 299.162503       |                    |                  | 2  |
| 13 |                   |                 |                |                  |                |                  | R    | 175.118952         | 88.063114         | 158.092403     | 79.549839        |                    |                  | 1  |

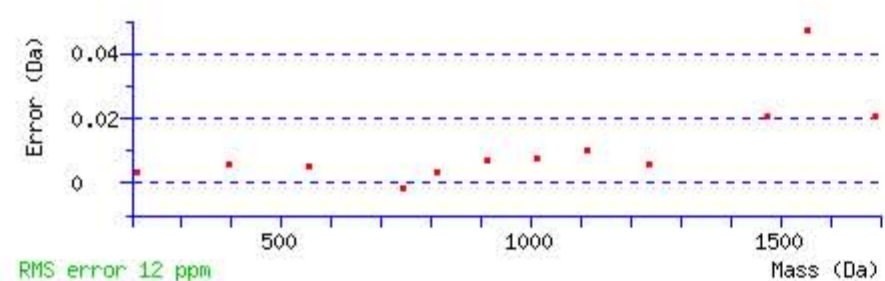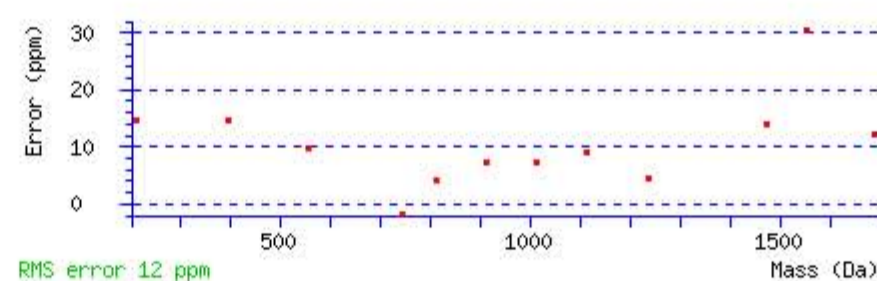

NCBI BLAST search of **AHVSFKPTVAQQR**

(Parameters: blastp, nr protein database, expect=20000, no filter, PAM30)

Other BLAST [web gateways](#)

All matches to this query

| Score | Mr(calc):   | Delta     | Sequence                      |
|-------|-------------|-----------|-------------------------------|
| 46.5  | 1778.961395 | -0.006139 | <a href="#">AHVSFKPTVAQQR</a> |
| 46.5  | 1778.961395 | -0.006139 | <a href="#">AHVSFKPTVAQQR</a> |

Mascot: <http://www.matrixscience.com/>

# MASCOT Search Results

## Peptide View

MS/MS Fragmentation of **AHVSFKPTVAQQR**

Found in **ITIH2\_HUMAN**, Inter-alpha-trypsin inhibitor heavy chain H2 OS=Homo sapiens GN=ITIH2 PE=1 SV=2

Match to Query 38126: 1778.960862 from(593.994230,3+) rtinseconds(1524) index(44321)

Title: Locus:1.1.1.2579.11 File:"2013-07-02 CLN FXIII 60 min 3rd F 4.wiff"

Data file C:\Program Files (x86)\Matrix Science\Mascot Daemon\mgf\6 FXIII 60 min 3rd\mascot\_daemon\_merge.mgf

Click mouse within plot area to zoom in by factor of two about that point

Or, Plot from  to  Da

Label all possible matches  Label matches used for scoring

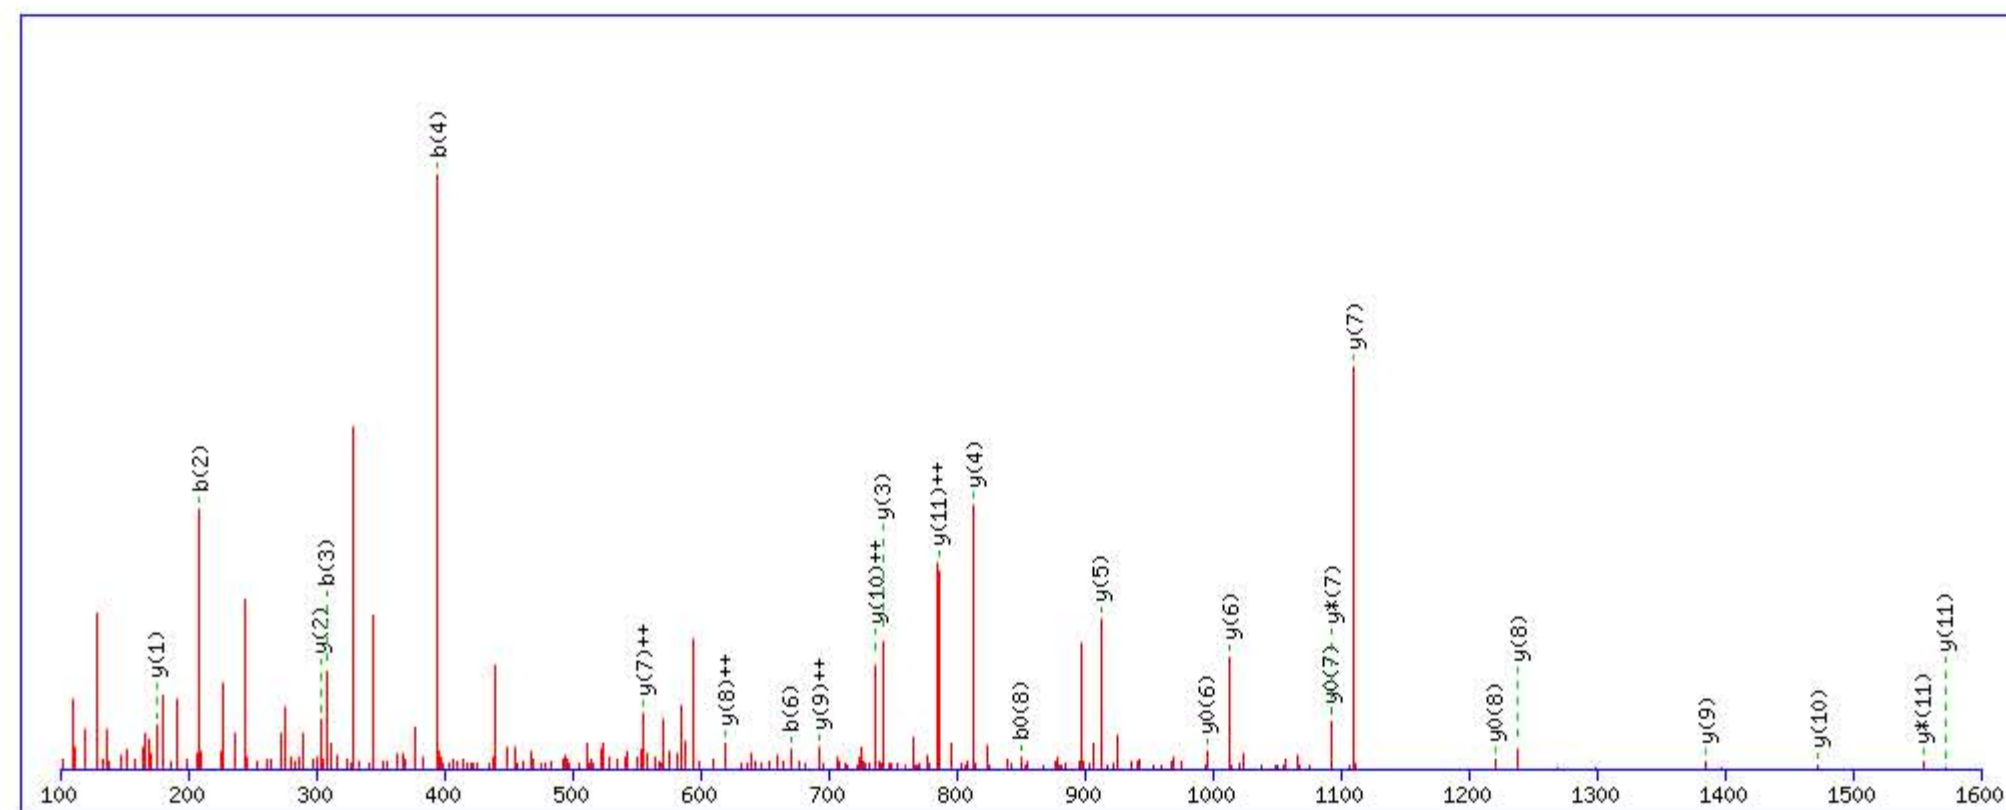

Monoisotopic mass of neutral peptide Mr(calc): 1778.961395

Fixed modifications: Carbamidomethyl (C) (apply to specified residues or termini only)

Variable modifications:

Q11 : Biotin:Thermo-21345 (Q)

Ions Score: 53 Expect: 1.9e-005

Matches : 26/118 fragment ions using 62 most intense peaks [\(help\)](#)

| #  | b                 | b <sup>++</sup> | b <sup>+</sup> | b <sup>+++</sup> | b <sup>0</sup>    | b <sup>0++</sup> | Seq. | y                  | y <sup>++</sup>   | y <sup>+</sup>     | y <sup>+++</sup> | y <sup>0</sup>     | y <sup>0++</sup> | #  |
|----|-------------------|-----------------|----------------|------------------|-------------------|------------------|------|--------------------|-------------------|--------------------|------------------|--------------------|------------------|----|
| 1  | 72.044390         | 36.525833       |                |                  |                   |                  | A    |                    |                   |                    |                  |                    |                  | 13 |
| 2  | <b>209.103302</b> | 105.055289      |                |                  |                   |                  | H    | 1708.931558        | 854.969417        | 1691.905009        | 846.456143       | 1690.920993        | 845.964135       | 12 |
| 3  | <b>308.171716</b> | 154.589496      |                |                  |                   |                  | V    | <b>1571.872646</b> | <b>786.439961</b> | <b>1554.846097</b> | 777.926687       | 1553.862081        | 777.434679       | 11 |
| 4  | <b>395.203744</b> | 198.105510      |                |                  | 377.193179        | 189.100227       | S    | <b>1472.804232</b> | <b>736.905754</b> | 1455.777683        | 728.392480       | 1454.793667        | 727.900472       | 10 |
| 5  | 542.272158        | 271.639717      |                |                  | 524.261593        | 262.634435       | F    | <b>1385.772204</b> | <b>693.389740</b> | 1368.745655        | 684.876466       | 1367.761639        | 684.384458       | 9  |
| 6  | <b>670.367121</b> | 335.687199      | 653.340572     | 327.173924       | 652.356556        | 326.681916       | K    | <b>1238.703790</b> | <b>619.855533</b> | 1221.677241        | 611.342259       | <b>1220.693225</b> | 610.850251       | 8  |
| 7  | 767.419885        | 384.213581      | 750.393336     | 375.700306       | 749.409320        | 375.208298       | P    | <b>1110.608827</b> | <b>555.808052</b> | <b>1093.582278</b> | 547.294777       | <b>1092.598262</b> | 546.802769       | 7  |
| 8  | 868.467564        | 434.737420      | 851.441015     | 426.224146       | <b>850.456999</b> | 425.732138       | T    | <b>1013.556063</b> | 507.281670        | 996.529514         | 498.768395       | <b>995.545498</b>  | 498.276387       | 6  |
| 9  | 967.535978        | 484.271627      | 950.509429     | 475.758353       | 949.525413        | 475.266345       | V    | <b>912.508384</b>  | 456.757830        | 895.481835         | 448.244556       |                    |                  | 5  |
| 10 | 1038.573092       | 519.790184      | 1021.546543    | 511.276910       | 1020.562527       | 510.784902       | A    | <b>813.439970</b>  | 407.223623        | 796.413421         | 398.710349       |                    |                  | 4  |
| 11 | 1477.798418       | 739.402847      | 1460.771869    | 730.889573       | 1459.787853       | 730.397565       | Q    | <b>742.402856</b>  | 371.705066        | 725.376307         | 363.191792       |                    |                  | 3  |
| 12 | 1605.856996       | 803.432136      | 1588.830447    | 794.918862       | 1587.846431       | 794.426854       | Q    | <b>303.177530</b>  | 152.092403        | 286.150981         | 143.579129       |                    |                  | 2  |
| 13 |                   |                 |                |                  |                   |                  | R    | <b>175.118952</b>  | 88.063114         | 158.092403         | 79.549839        |                    |                  | 1  |

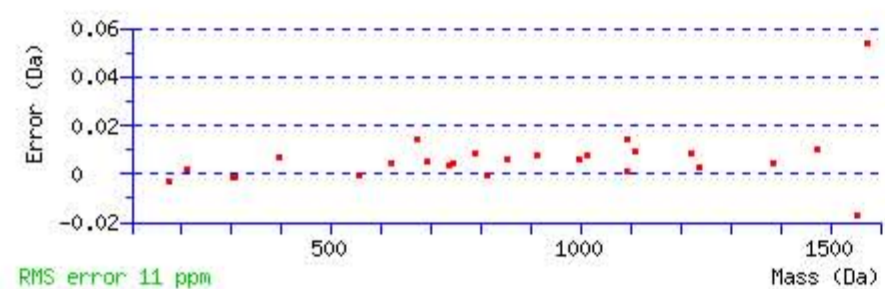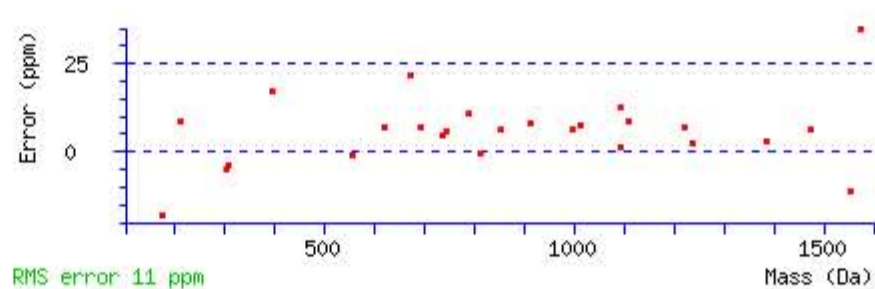

NCBI BLAST search of **AHVSFKPTVAQQR**

(Parameters: blastp, nr protein database, expect=20000, no filter, PAM30)

Other BLAST [web gateways](#)

All matches to this query

| Score | Mr(calc):   | Delta     | Sequence                         |
|-------|-------------|-----------|----------------------------------|
| 53.0  | 1778.961395 | -0.000533 | <a href="#">AHVSFKPTVAQQR</a>    |
| 46.3  | 1778.961395 | -0.000533 | <a href="#">AHVSFKPTVAQQR</a>    |
| 2.6   | 1778.982498 | -0.021636 | <a href="#">SRDAKLVLLNMPGPPR</a> |

# MASCOT SEARCH RESULTS

## Peptide View

MS/MS Fragmentation of **AHVSFKPTVAQQR**

Found in **ITIH2\_HUMAN**, Inter-alpha-trypsin inhibitor heavy chain H2 OS=Homo sapiens GN=ITIH2 PE=1 SV=2

Match to Query 44343: 2090.130216 from(523.539830,4+) rtinseconds(1767) index(45890)

Title: Locus:1.1.1.2664.8 File:"2013-07-02 CLN FXIII 60 min 3rd F 4.wiff"

Data file C:\Program Files (x86)\Matrix Science\Mascot Daemon\mgf6 FXIII 60 min 3rd\mascot\_daemon\_merge.mgf

Click mouse within plot area to zoom in by factor of two about that point

Or, Plot from  to  Da

Label all possible matches  Label matches used for scoring

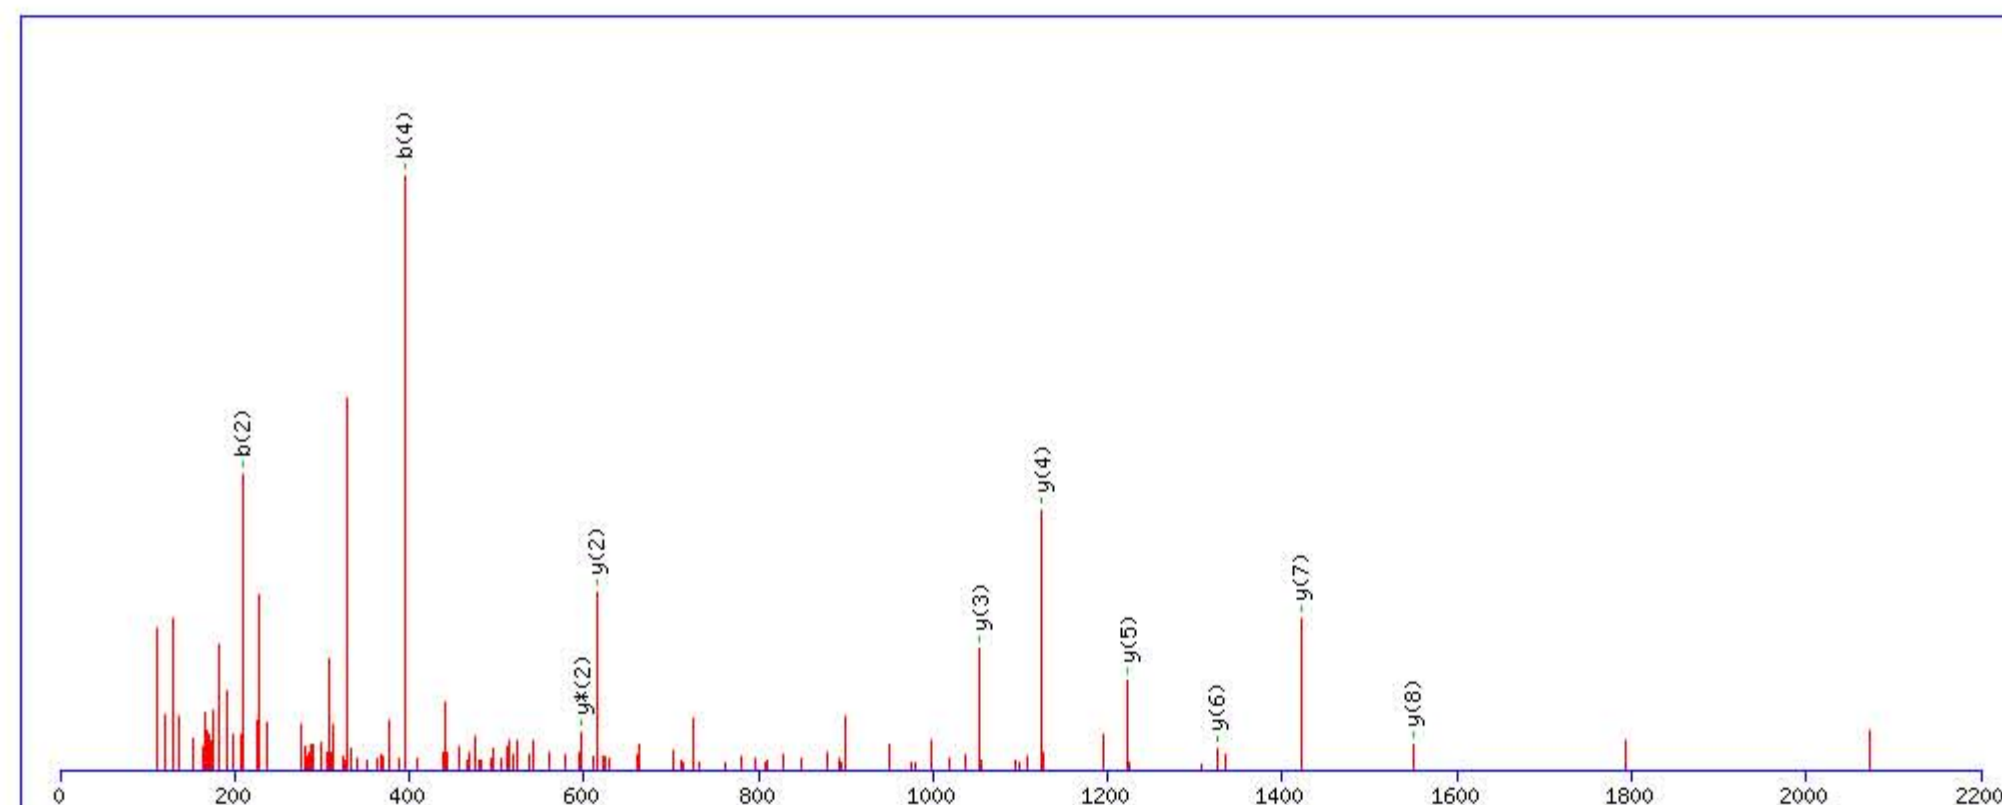

Monoisotopic mass of neutral peptide Mr(calc): 2090.128143

Fixed modifications: Carbamidomethyl (C) (apply to specified residues or termini only)

Variable modifications:

Q11 : Biotin:Thermo-21345 (Q)

Q12 : Biotin:Thermo-21345 (Q)

Ions Score: 41 Expect: 0.0018

Matches : 10/118 fragment ions using 17 most intense peaks ([help](#))

| #  | b                 | b <sup>++</sup> | b <sup>*</sup> | b <sup>+++</sup> | b <sup>0</sup> | b <sup>0++</sup> | Seq. | y                  | y <sup>++</sup> | y <sup>*</sup>    | y <sup>+++</sup> | y <sup>0</sup> | y <sup>0++</sup> | #  |
|----|-------------------|-----------------|----------------|------------------|----------------|------------------|------|--------------------|-----------------|-------------------|------------------|----------------|------------------|----|
| 1  | 72.044390         | 36.525833       |                |                  |                |                  | A    |                    |                 |                   |                  |                |                  | 13 |
| 2  | <b>209.103302</b> | 105.055289      |                |                  |                |                  | H    | 2020.098306        | 1010.552791     | 2003.071757       | 1002.039517      | 2002.087741    | 1001.547509      | 12 |
| 3  | 308.171716        | 154.589496      |                |                  |                |                  | V    | 1883.039394        | 942.023335      | 1866.012845       | 933.510061       | 1865.028829    | 933.018053       | 11 |
| 4  | <b>395.203744</b> | 198.105510      |                |                  | 377.193179     | 189.100227       | S    | 1783.970980        | 892.489128      | 1766.944431       | 883.975854       | 1765.960415    | 883.483846       | 10 |
| 5  | 542.272158        | 271.639717      |                |                  | 524.261593     | 262.634435       | F    | 1696.938952        | 848.973114      | 1679.912403       | 840.459840       | 1678.928387    | 839.967832       | 9  |
| 6  | 670.367121        | 335.687199      | 653.340572     | 327.173924       | 652.356556     | 326.681916       | K    | <b>1549.870538</b> | 775.438907      | 1532.843989       | 766.925633       | 1531.859973    | 766.433625       | 8  |
| 7  | 767.419885        | 384.213581      | 750.393336     | 375.700306       | 749.409320     | 375.208298       | P    | <b>1421.775575</b> | 711.391426      | 1404.749026       | 702.878151       | 1403.765010    | 702.386143       | 7  |
| 8  | 868.467564        | 434.737420      | 851.441015     | 426.224146       | 850.456999     | 425.732138       | T    | <b>1324.722811</b> | 662.865044      | 1307.696262       | 654.351769       | 1306.712246    | 653.859761       | 6  |
| 9  | 967.535978        | 484.271627      | 950.509429     | 475.758353       | 949.525413     | 475.266345       | V    | <b>1223.675132</b> | 612.341204      | 1206.648583       | 603.827930       |                |                  | 5  |
| 10 | 1038.573092       | 519.790184      | 1021.546543    | 511.276910       | 1020.562527    | 510.784902       | A    | <b>1124.606718</b> | 562.806997      | 1107.580169       | 554.293723       |                |                  | 4  |
| 11 | 1477.798418       | 739.402847      | 1460.771869    | 730.889573       | 1459.787853    | 730.397565       | Q    | <b>1053.569604</b> | 527.288440      | 1036.543055       | 518.775166       |                |                  | 3  |
| 12 | 1917.023744       | 959.015510      | 1899.997195    | 950.502236       | 1899.013179    | 950.010228       | Q    | <b>614.344278</b>  | 307.675777      | <b>597.317729</b> | 299.162503       |                |                  | 2  |
| 13 |                   |                 |                |                  |                |                  | R    | 175.118952         | 88.063114       | 158.092403        | 79.549839        |                |                  | 1  |

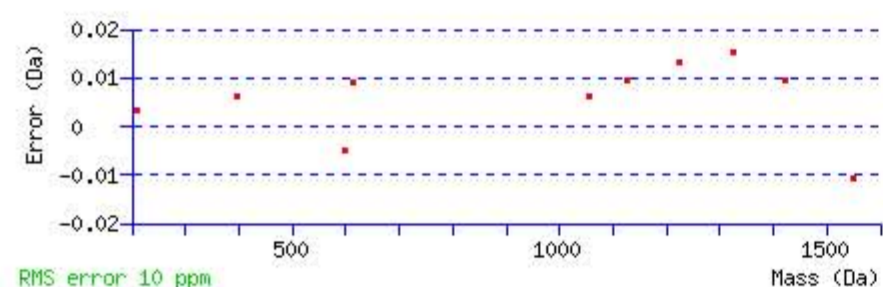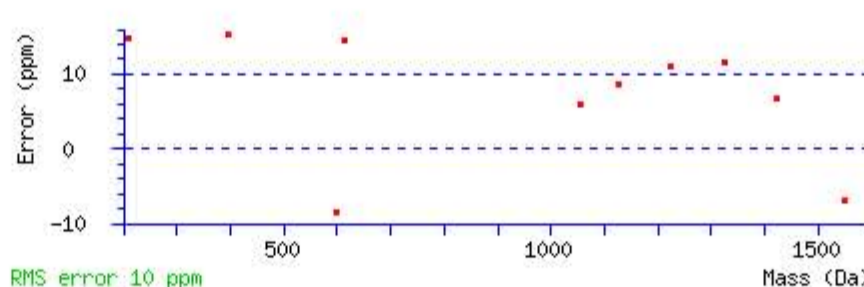

NCBI BLAST search of **AHVSFKPTVAQQR**

(Parameters: blastp, nr protein database, expect=20000, no filter, PAM30)

Other BLAST [web gateways](#)

All matches to this query

| Score | Mr(calc):   | Delta    | Sequence                      |
|-------|-------------|----------|-------------------------------|
| 40.5  | 2090.128143 | 0.002073 | <a href="#">AHVSFKPTVAQQR</a> |

Mascot: <http://www.matrixscience.com/>



# MASCOT SEARCH RESULTS

## Peptide View

MS/MS Fragmentation of **AEDHFSVIDFNQIR**

Found in **ITIH2\_HUMAN**, Inter-alpha-trypsin inhibitor heavy chain H2 OS=Homo sapiens GN=ITIH2 PE=1 SV=2

Match to Query 44683: 2115.034362 from(706.018730,3+) rtinseconds(2277) index(49110)

Title: Locus:1.1.1.2841.8 File:"2013-07-02 CLN FXIII 60 min 3rd F 4.wiff"

Data file C:\Program Files (x86)\Matrix Science\Mascot Daemon\mgf6 FXIII 60 min 3rd\mascot\_daemon\_merge.mgf

Click mouse within plot area to zoom in by factor of two about that point

Or, Plot from  to  Da

Label all possible matches  Label matches used for scoring

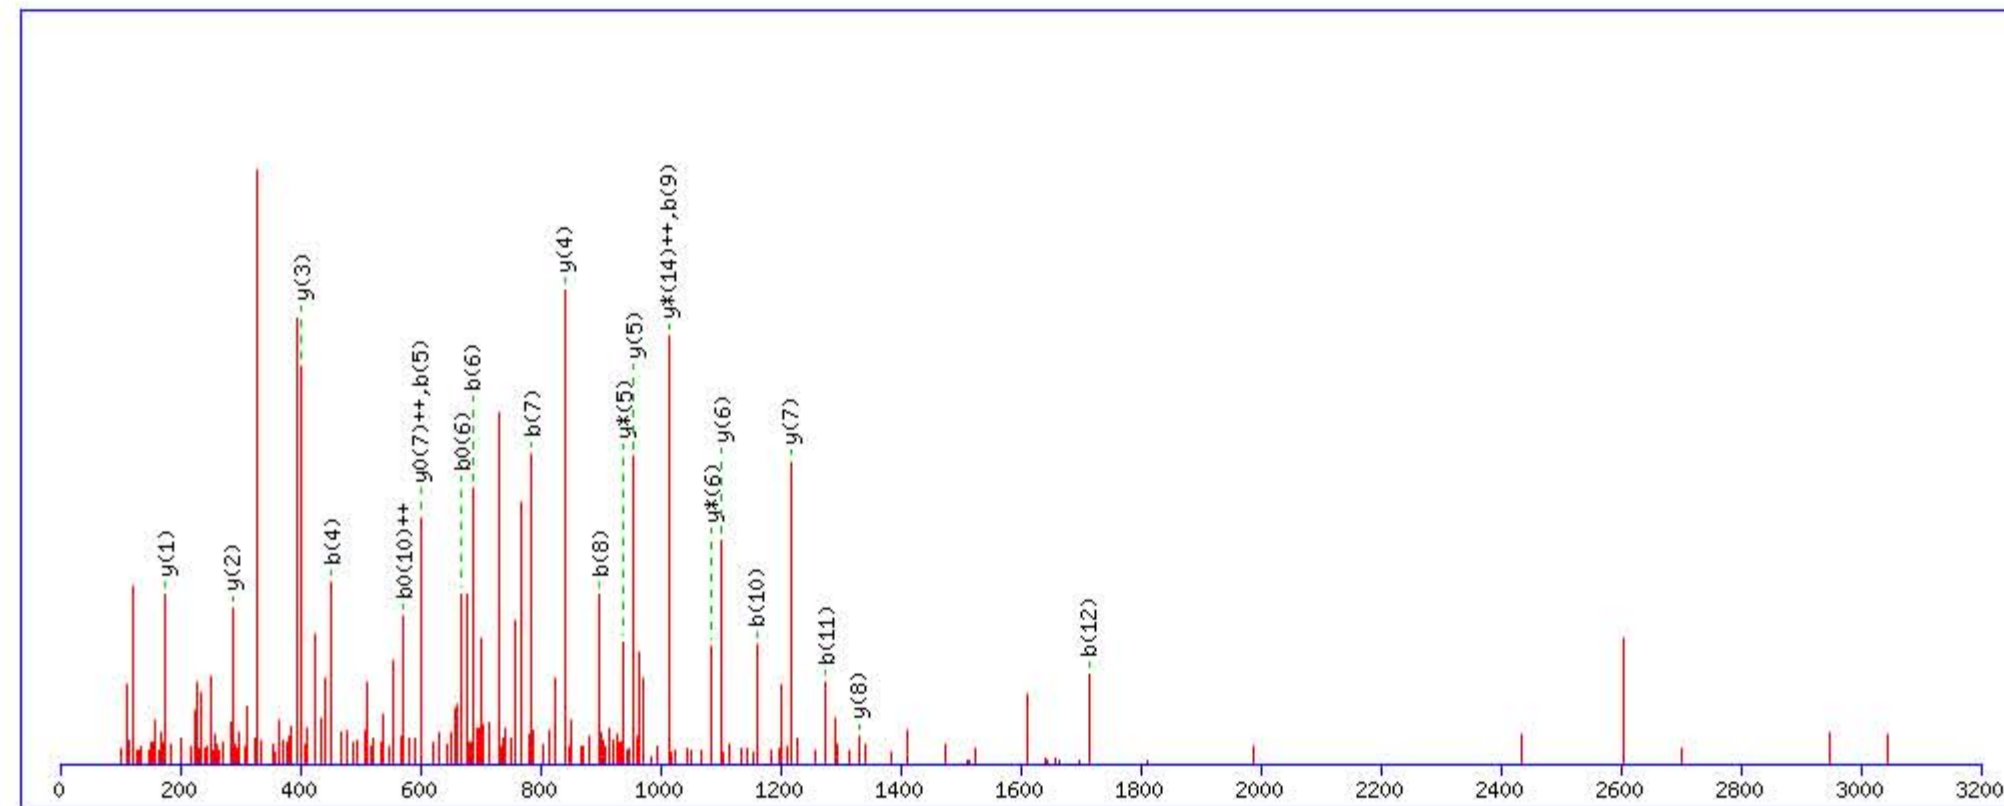

Monoisotopic mass of neutral peptide Mr(calc): 2115.020752

Fixed modifications: Carbamidomethyl (C) (apply to specified residues or termini only)

Variable modifications:

Q12 : Biotin:Thermo-21345 (Q)

Ions Score: 57 Expect: 6.8e-006

Matches : 23/134 fragment ions using 35 most intense peaks [\(help\)](#)

| #  | b           | b <sup>++</sup> | b <sup>*</sup> | b <sup>+++</sup> | b <sup>0</sup> | b <sup>0++</sup> | Seq. | y           | y <sup>++</sup> | y <sup>*</sup> | y <sup>+++</sup> | y <sup>0</sup> | y <sup>0++</sup> | #  |
|----|-------------|-----------------|----------------|------------------|----------------|------------------|------|-------------|-----------------|----------------|------------------|----------------|------------------|----|
| 1  | 72.044390   | 36.525833       |                |                  |                |                  | A    |             |                 |                |                  |                |                  | 15 |
| 2  | 201.086983  | 101.047130      |                |                  | 183.076418     | 92.041847        | E    | 2044.990921 | 1022.999099     | 2027.964372    | 1014.485824      | 2026.980356    | 1013.993816      | 14 |
| 3  | 316.113926  | 158.560601      |                |                  | 298.103361     | 149.555319       | D    | 1915.948328 | 958.477802      | 1898.921779    | 949.964528       | 1897.937763    | 949.472519       | 13 |
| 4  | 453.172838  | 227.090057      |                |                  | 435.162273     | 218.084775       | H    | 1800.921385 | 900.964331      | 1783.894836    | 892.451056       | 1782.910820    | 891.959048       | 12 |
| 5  | 600.241252  | 300.624264      |                |                  | 582.230687     | 291.618982       | F    | 1663.862473 | 832.434874      | 1646.835924    | 823.921600       | 1645.851908    | 823.429592       | 11 |
| 6  | 687.273280  | 344.140278      |                |                  | 669.262715     | 335.134996       | S    | 1516.794059 | 758.900668      | 1499.767510    | 750.387393       | 1498.783494    | 749.895385       | 10 |
| 7  | 786.341694  | 393.674485      |                |                  | 768.331129     | 384.669202       | V    | 1429.762031 | 715.384654      | 1412.735482    | 706.871379       | 1411.751466    | 706.379371       | 9  |
| 8  | 899.425758  | 450.216517      |                |                  | 881.415193     | 441.211234       | I    | 1330.693617 | 665.850447      | 1313.667068    | 657.337172       | 1312.683052    | 656.845164       | 8  |
| 9  | 1014.452701 | 507.729988      |                |                  | 996.442136     | 498.724706       | D    | 1217.609553 | 609.308415      | 1200.583004    | 600.795140       | 1199.598988    | 600.303132       | 7  |
| 10 | 1161.521115 | 581.264196      |                |                  | 1143.510550    | 572.258913       | F    | 1102.582610 | 551.794943      | 1085.556061    | 543.281669       |                |                  | 6  |
| 11 | 1275.564042 | 638.285659      | 1258.537493    | 629.772385       | 1257.553477    | 629.280376       | N    | 955.514196  | 478.260736      | 938.487647     | 469.747462       |                |                  | 5  |
| 12 | 1714.789368 | 857.898322      | 1697.762819    | 849.385048       | 1696.778803    | 848.893039       | Q    | 841.471269  | 421.239273      | 824.444720     | 412.725998       |                |                  | 4  |
| 13 | 1828.832295 | 914.919785      | 1811.805746    | 906.406511       | 1810.821730    | 905.914503       | N    | 402.245943  | 201.626610      | 385.219394     | 193.113335       |                |                  | 3  |
| 14 | 1941.916359 | 971.461817      | 1924.889810    | 962.948543       | 1923.905794    | 962.456535       | I    | 288.203016  | 144.605146      | 271.176467     | 136.091872       |                |                  | 2  |
| 15 |             |                 |                |                  |                |                  | R    | 175.118952  | 88.063114       | 158.092403     | 79.549840        |                |                  | 1  |

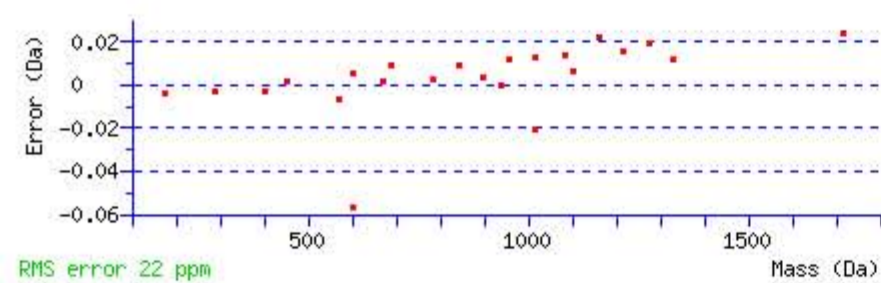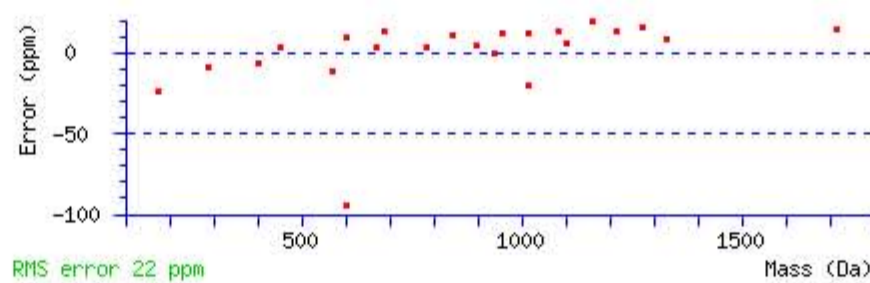

NCBI BLAST search of **AEDHFSVIDFNQIR**

(Parameters: blastp, nr protein database, expect=20000, no filter, PAM30)

Other BLAST [web gateways](#)

All matches to this query

| Score | Mr(calc):   | Delta    | Sequence                        |
|-------|-------------|----------|---------------------------------|
| 57.2  | 2115.020752 | 0.013610 | <a href="#">AEDHFSVIDFNQIR</a>  |
| 2.1   | 2115.033981 | 0.000381 | <a href="#">ESADRQVLMQEEIHK</a> |

Mascot: <http://www.matrixscience.com/>

# MASCOT Search Results

## Peptide View

MS/MS Fragmentation of **MLADAPPQDPSCCSGALYYGSK**

Found in **ITIH2\_HUMAN**, Inter-alpha-trypsin inhibitor heavy chain H2 OS=Homo sapiens GN=ITIH2 PE=1 SV=2

Match to Query 52741: 2698.225002 from(900.415610,3+) rtinseconds(2105) index(48024)

Title: Locus:1.1.1.2781.19 File:"2013-07-02 CLN FXIII 60 min 3rd F 4.wiff"

Data file C:\Program Files (x86)\Matrix Science\Mascot Daemon\mgf6 FXIII 60 min 3rd\mascot\_daemon\_merge.mgf

Click mouse within plot area to zoom in by factor of two about that point

Or, Plot from  to  Da

Label all possible matches  Label matches used for scoring

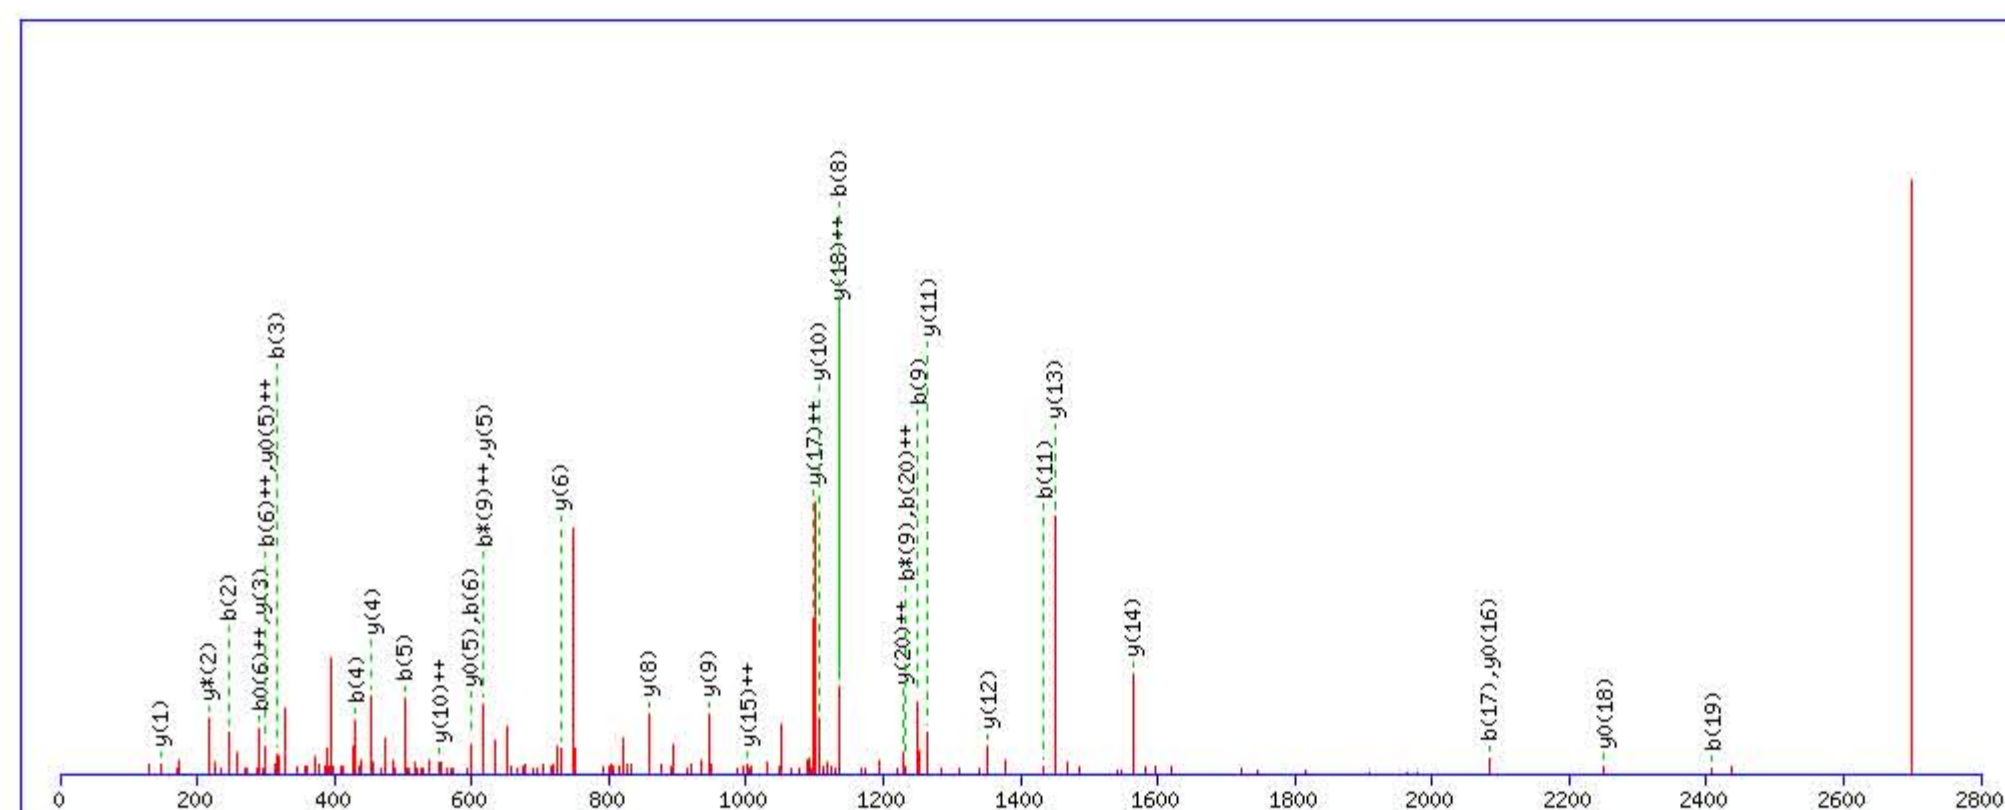

Monoisotopic mass of neutral peptide Mr(calc): 2698.189941

Fixed modifications: Carbamidomethyl (C) (apply to specified residues or termini only)

Variable modifications:

Q8 : Biotin:Thermo-21345 (Q)

Ions Score: 51 Expect: 7.8e-005

Matches : 37/230 fragment ions using 84 most intense peaks [\(help\)](#)

| #  | b                  | b <sup>++</sup>    | b <sup>*</sup>     | b <sup>*++</sup>  | b <sup>0</sup> | b <sup>0++</sup>  | Seq. | y                  | y <sup>++</sup>    | y <sup>*</sup>    | y <sup>*++</sup> | y <sup>0</sup>     | y <sup>0++</sup>  | #  |
|----|--------------------|--------------------|--------------------|-------------------|----------------|-------------------|------|--------------------|--------------------|-------------------|------------------|--------------------|-------------------|----|
| 1  | 132.047761         | 66.527518          |                    |                   |                |                   | M    |                    |                    |                   |                  |                    |                   | 22 |
| 2  | <b>245.131825</b>  | 123.069550         |                    |                   |                |                   | L    | 2568.156746        | 1284.582011        | 2551.130197       | 1276.068736      | 2550.146181        | 1275.576728       | 21 |
| 3  | <b>316.168939</b>  | 158.588107         |                    |                   |                |                   | A    | 2455.072682        | <b>1228.039979</b> | 2438.046133       | 1219.526704      | 2437.062117        | 1219.034696       | 20 |
| 4  | <b>431.195882</b>  | 216.101579         |                    |                   | 413.185317     | 207.096296        | D    | 2384.035568        | 1192.521422        | 2367.009019       | 1184.008148      | 2366.025003        | 1183.516140       | 19 |
| 5  | <b>502.232996</b>  | 251.620136         |                    |                   | 484.222431     | 242.614854        | A    | 2269.008625        | <b>1135.007950</b> | 2251.982076       | 1126.494676      | <b>2250.998060</b> | 1126.002668       | 18 |
| 6  | <b>599.285760</b>  | <b>300.146518</b>  |                    |                   | 581.275195     | <b>291.141236</b> | P    | 2197.971511        | <b>1099.489394</b> | 2180.944962       | 1090.976119      | 2179.960946        | 1090.484111       | 17 |
| 7  | 696.338524         | 348.672900         |                    |                   | 678.327959     | 339.667618        | P    | 2100.918747        | 1050.963012        | 2083.892198       | 1042.449737      | <b>2082.908182</b> | 1041.957729       | 16 |
| 8  | <b>1135.563850</b> | 568.285563         | 1118.537301        | 559.772289        | 1117.553285    | 559.280281        | Q    | 2003.865983        | <b>1002.436630</b> | 1986.839434       | 993.923355       | 1985.855418        | 993.431347        | 15 |
| 9  | <b>1250.590793</b> | 625.799035         | <b>1233.564244</b> | <b>617.285760</b> | 1232.580228    | 616.793752        | D    | <b>1564.640657</b> | 782.823967         | 1547.614108       | 774.310692       | 1546.630092        | 773.818684        | 14 |
| 10 | 1347.643557        | 674.325417         | 1330.617008        | 665.812142        | 1329.632992    | 665.320134        | P    | <b>1449.613714</b> | 725.310495         | 1432.587165       | 716.797221       | 1431.603149        | 716.305213        | 13 |
| 11 | <b>1434.675585</b> | 717.841431         | 1417.649036        | 709.328156        | 1416.665020    | 708.836148        | S    | <b>1352.560950</b> | 676.784113         | 1335.534401       | 668.270839       | 1334.550385        | 667.778831        | 12 |
| 12 | 1594.706234        | 797.856755         | 1577.679685        | 789.343481        | 1576.695669    | 788.851473        | C    | <b>1265.528922</b> | 633.268099         | 1248.502373       | 624.754825       | 1247.518357        | 624.262817        | 11 |
| 13 | 1754.736883        | 877.872080         | 1737.710334        | 869.358805        | 1736.726318    | 868.866797        | C    | <b>1105.498273</b> | <b>553.252775</b>  | 1088.471724       | 544.739500       | 1087.487708        | 544.247492        | 10 |
| 14 | 1841.768911        | 921.388094         | 1824.742362        | 912.874819        | 1823.758346    | 912.382811        | S    | <b>945.467624</b>  | 473.237450         | 928.441075        | 464.724176       | 927.457059         | 464.232168        | 9  |
| 15 | 1898.790375        | 949.898826         | 1881.763826        | 941.385551        | 1880.779810    | 940.893543        | G    | <b>858.435596</b>  | 429.721436         | 841.409047        | 421.208162       | 840.425031         | 420.716154        | 8  |
| 16 | 1969.827489        | 985.417383         | 1952.800940        | 976.904108        | 1951.816924    | 976.412100        | A    | 801.414132         | 401.210704         | 784.387583        | 392.697430       | 783.403567         | 392.205422        | 7  |
| 17 | <b>2082.911553</b> | 1041.959415        | 2065.885004        | 1033.446140       | 2064.900988    | 1032.954132       | L    | <b>730.377018</b>  | 365.692147         | 713.350469        | 357.178873       | 712.366453         | 356.686865        | 6  |
| 18 | 2245.974882        | 1123.491079        | 2228.948333        | 1114.977805       | 2227.964317    | 1114.485797       | Y    | <b>617.292954</b>  | 309.150115         | 600.266405        | 300.636841       | <b>599.282389</b>  | <b>300.144833</b> | 5  |
| 19 | <b>2409.038211</b> | 1205.022744        | 2392.011662        | 1196.509469       | 2391.027646    | 1196.017461       | Y    | <b>454.229625</b>  | 227.618451         | 437.203076        | 219.105176       | 436.219060         | 218.613168        | 4  |
| 20 | 2466.059675        | <b>1233.533476</b> | 2449.033126        | 1225.020201       | 2448.049110    | 1224.528193       | G    | <b>291.166296</b>  | 146.086786         | 274.139747        | 137.573512       | 273.155731         | 137.081504        | 3  |
| 21 | 2553.091703        | 1277.049490        | 2536.065154        | 1268.536215       | 2535.081138    | 1268.044207       | S    | 234.144832         | 117.576054         | <b>217.118283</b> | 109.062780       | 216.134267         | 108.570772        | 2  |
| 22 |                    |                    |                    |                   |                |                   | K    | <b>147.112804</b>  | 74.060040          | 130.086255        | 65.546765        |                    |                   | 1  |

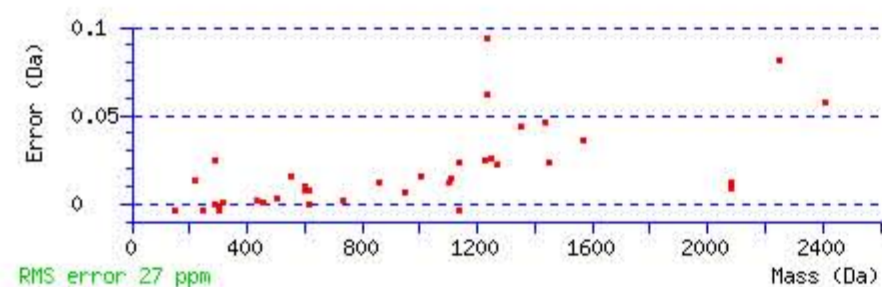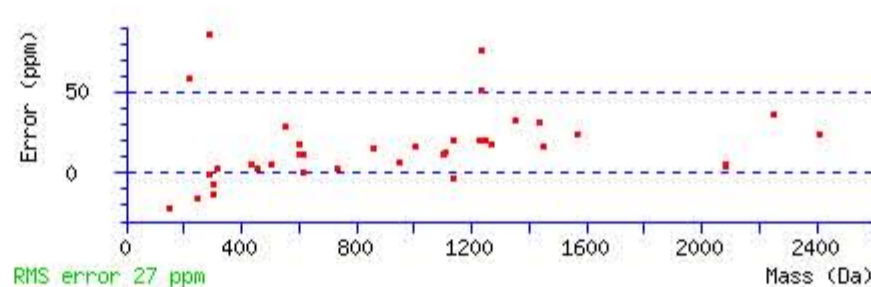

NCBI BLAST search of **MLADAPPQDPSCCSGALYYGSK**

(Parameters: blastp, nr protein database, expect=20000, no filter, PAM30)

Other BLAST [web gateways](#)

All matches to this query

| Score | Mr(calc):   | Delta    | Sequence                      |
|-------|-------------|----------|-------------------------------|
| 51.4  | 2698.189941 | 0.035061 | <b>MLADAPPQDPSCCSGALYYGSK</b> |

**Mascot Search Results**

**Peptide View**

MS/MS Fragmentation of **SILQMSLDHHIVTPLTSLVIENEAGDER**  
 Found in **ITIH2\_HUMAN**, Inter-alpha-trypsin inhibitor heavy chain H2 OS=Homo sapiens GN=ITIH2 PE=1 SV=2

Match to Query 61038: 3443.790656 from(861.954940,4+) rtinseconds(2676) index(51408)  
 Title: Locus:1.1.1.2979.23 File:"2013-07-02 CLN FXIII 60 min 3rd F 4.wiff"  
 Data file C:\Program Files (x86)\Matrix Science\Mascot Daemon\mgf6 FXIII 60 min 3rd\mascot\_daemon\_merge.mgf

Click mouse within plot area to zoom in by factor of two about that point  
 Or,  to  Da   
 Label all possible matches  Label matches used for scoring

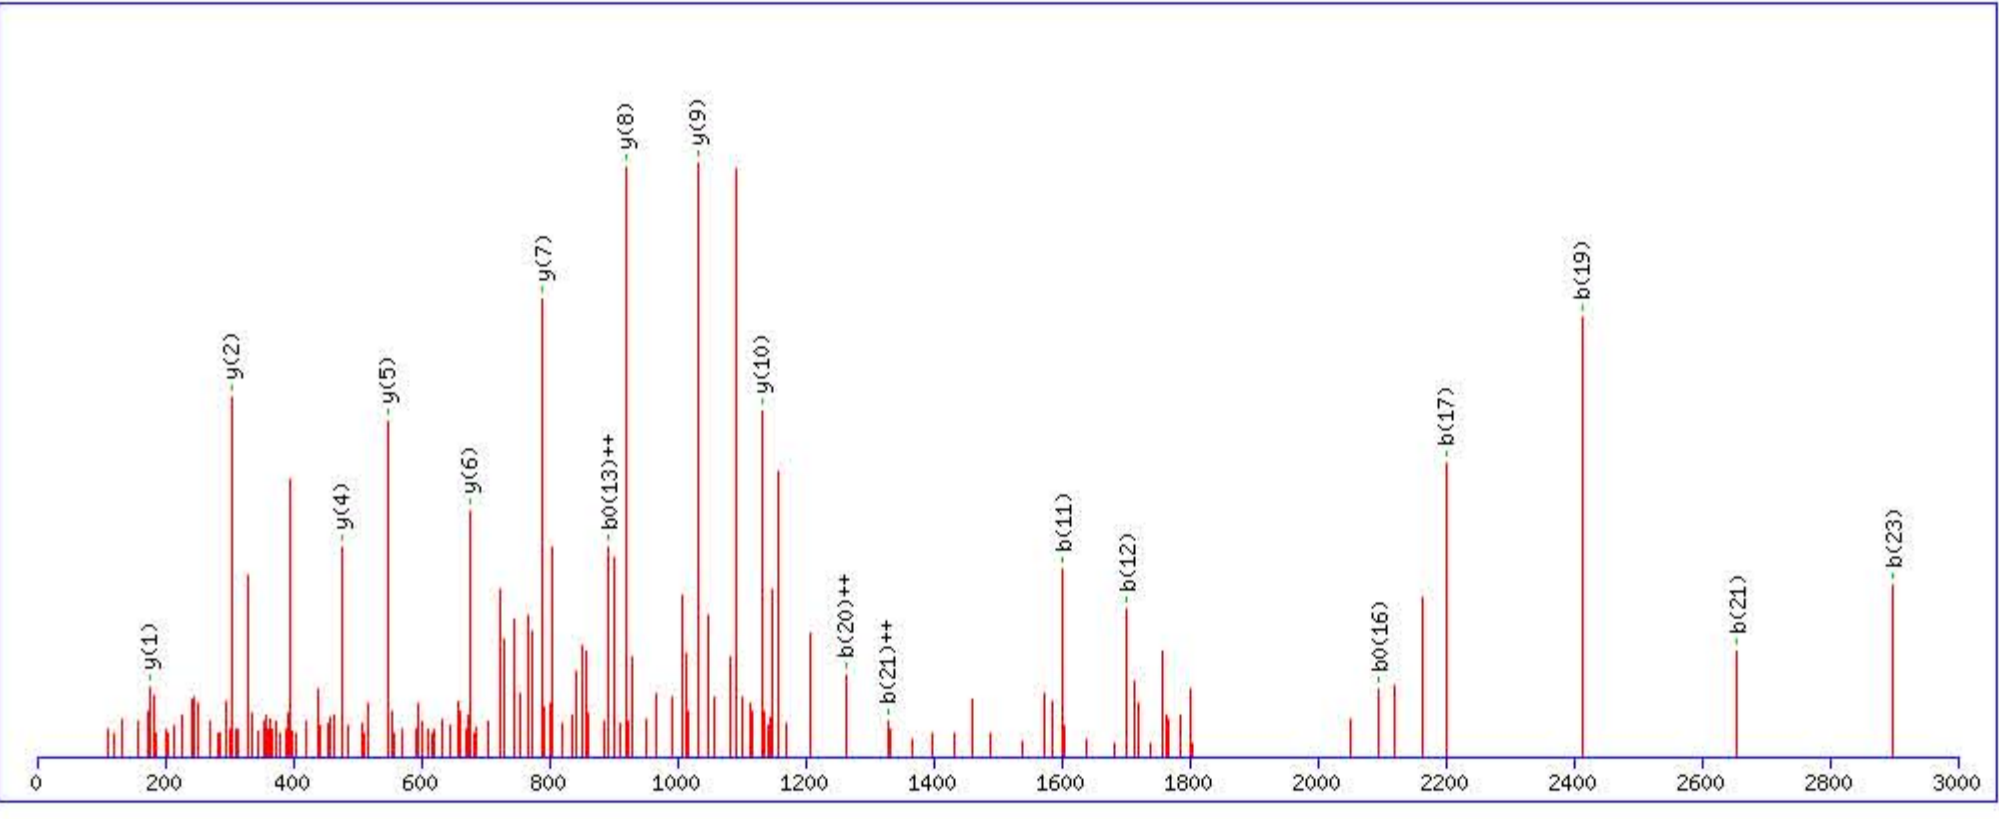

Monoisotopic mass of neutral peptide **Mr(calc): 3443.742859**  
 Fixed modifications: Carbamidomethyl (C) (apply to specified residues or termini only)  
 Variable modifications:  
 Q4 : Biotin:Thermo-21345 (Q)  
 M5 : Oxidation (M), with neutral losses 0.000000(shown in table), 63.998285  
 Ions Score: 70 Expect: 2.3e-006  
 Matches : 19/478 fragment ions using 22 most intense peaks ([help](#))

| #  | b                  | b <sup>++</sup>    | b <sup>*</sup> | b <sup>+++</sup> | b <sup>0</sup>     | b <sup>0++</sup>  | Seq. | y                  | y <sup>++</sup> | y <sup>*</sup> | y <sup>+++</sup> | y <sup>0</sup> | y <sup>0++</sup> | #  |
|----|--------------------|--------------------|----------------|------------------|--------------------|-------------------|------|--------------------|-----------------|----------------|------------------|----------------|------------------|----|
| 1  | 88.039304          | 44.523290          |                |                  | 70.028739          | 35.518008         | S    |                    |                 |                |                  |                |                  | 28 |
| 2  | 201.123368         | 101.065322         |                |                  | 183.112803         | 92.060039         | I    | 3357.718126        | 1679.362701     | 3340.691577    | 1670.849426      | 3339.707561    | 1670.357418      | 27 |
| 3  | 314.207432         | 157.607354         |                |                  | 296.196867         | 148.602071        | L    | 3244.634062        | 1622.820669     | 3227.607513    | 1614.307394      | 3226.623497    | 1613.815386      | 26 |
| 4  | 753.432758         | 377.220017         | 736.406209     | 368.706743       | 735.422193         | 368.214735        | Q    | 3131.549998        | 1566.278637     | 3114.523449    | 1557.765362      | 3113.539433    | 1557.273354      | 25 |
| 5  | 900.468158         | 450.737717         | 883.441609     | 442.224443       | 882.457593         | 441.732435        | M    | 2692.324672        | 1346.665974     | 2675.298123    | 1338.152699      | 2674.314107    | 1337.660691      | 24 |
| 6  | 987.500186         | 494.253731         | 970.473637     | 485.740456       | 969.489621         | 485.248448        | S    | 2545.289272        | 1273.148274     | 2528.262723    | 1264.634999      | 2527.278707    | 1264.142991      | 23 |
| 7  | 1100.584250        | 550.795763         | 1083.557701    | 542.282489       | 1082.573685        | 541.790480        | L    | 2458.257244        | 1229.632260     | 2441.230695    | 1221.118985      | 2440.246679    | 1220.626977      | 22 |
| 8  | 1215.611193        | 608.309235         | 1198.584644    | 599.795960       | 1197.600628        | 599.303952        | D    | 2345.173180        | 1173.090228     | 2328.146631    | 1164.576953      | 2327.162615    | 1164.084945      | 21 |
| 9  | 1352.670105        | 676.838690         | 1335.643556    | 668.325416       | 1334.659540        | 667.833408        | H    | 2230.146237        | 1115.576756     | 2213.119688    | 1107.063482      | 2212.135672    | 1106.571474      | 20 |
| 10 | 1489.729017        | 745.368146         | 1472.702468    | 736.854872       | 1471.718452        | 736.362864        | H    | 2093.087325        | 1047.047300     | 2076.060776    | 1038.534026      | 2075.076760    | 1038.042018      | 19 |
| 11 | <b>1602.813081</b> | 801.910178         | 1585.786532    | 793.396904       | 1584.802516        | 792.904896        | I    | 1956.028413        | 978.517845      | 1939.001864    | 970.004570       | 1938.017848    | 969.512562       | 18 |
| 12 | <b>1701.881495</b> | 851.444385         | 1684.854946    | 842.931111       | 1683.870930        | 842.439103        | V    | 1842.944349        | 921.975813      | 1825.917800    | 913.462538       | 1824.933784    | 912.970530       | 17 |
| 13 | 1802.929174        | 901.968225         | 1785.902625    | 893.454951       | 1784.918609        | <b>892.962942</b> | T    | 1743.875935        | 872.441606      | 1726.849386    | 863.928331       | 1725.865370    | 863.436323       | 16 |
| 14 | 1899.981938        | 950.494607         | 1882.955389    | 941.981333       | 1881.971373        | 941.489324        | P    | 1642.828256        | 821.917766      | 1625.801707    | 813.404492       | 1624.817691    | 812.912484       | 15 |
| 15 | 2013.066002        | 1007.036639        | 1996.039453    | 998.523364       | 1995.055437        | 998.031356        | L    | 1545.775492        | 773.391384      | 1528.748943    | 764.878110       | 1527.764927    | 764.386102       | 14 |
| 16 | 2114.113681        | 1057.560478        | 2097.087132    | 1049.047204      | <b>2096.103116</b> | 1048.555196       | T    | 1432.691428        | 716.849352      | 1415.664879    | 708.336078       | 1414.680863    | 707.844070       | 13 |
| 17 | <b>2201.145709</b> | 1101.076492        | 2184.119160    | 1092.563218      | 2183.135144        | 1092.071210       | S    | 1331.643749        | 666.325513      | 1314.617200    | 657.812238       | 1313.633184    | 657.320230       | 12 |
| 18 | 2314.229773        | 1157.618524        | 2297.203224    | 1149.105250      | 2296.219208        | 1148.613242       | L    | 1244.611721        | 622.809499      | 1227.585172    | 614.296224       | 1226.601156    | 613.804216       | 11 |
| 19 | <b>2413.298187</b> | 1207.152731        | 2396.271638    | 1198.639457      | 2395.287622        | 1198.147449       | V    | <b>1131.527657</b> | 566.267467      | 1114.501108    | 557.754192       | 1113.517092    | 557.262184       | 10 |
| 20 | 2526.382251        | <b>1263.694763</b> | 2509.355702    | 1255.181489      | 2508.371686        | 1254.689481       | I    | <b>1032.459243</b> | 516.733260      | 1015.432694    | 508.219985       | 1014.448678    | 507.727977       | 9  |
| 21 | <b>2655.424844</b> | <b>1328.216060</b> | 2638.398295    | 1319.702785      | 2637.414279        | 1319.210777       | E    | <b>919.375179</b>  | 460.191228      | 902.348630     | 451.677953       | 901.364614     | 451.185945       | 8  |
| 22 | 2769.467771        | 1385.237523        | 2752.441222    | 1376.724249      | 2751.457206        | 1376.232241       | N    | <b>790.332586</b>  | 395.669931      | 773.306037     | 387.156657       | 772.322021     | 386.664649       | 7  |
| 23 | <b>2898.510364</b> | 1449.758820        | 2881.483815    | 1441.245545      | 2880.499799        | 1440.753537       | E    | <b>676.289659</b>  | 338.648468      | 659.263110     | 330.135193       | 658.279094     | 329.643185       | 6  |
| 24 | 2969.547478        | 1485.277377        | 2952.520929    | 1476.764102      | 2951.536913        | 1476.272094       | A    | <b>547.247066</b>  | 274.127171      | 530.220517     | 265.613897       | 529.236501     | 265.121889       | 5  |
| 25 | 3026.568942        | 1513.788109        | 3009.542393    | 1505.274834      | 3008.558377        | 1504.782826       | G    | <b>476.209952</b>  | 238.608614      | 459.183403     | 230.095339       | 458.199387     | 229.603331       | 4  |
| 26 | 3141.595885        | 1571.301580        | 3124.569336    | 1562.788306      | 3123.585320        | 1562.296298       | D    | 419.188488         | 210.097882      | 402.161939     | 201.584607       | 401.177923     | 201.092599       | 3  |
| 27 | 3270.638478        | 1635.822877        | 3253.611929    | 1627.309602      | 3252.627913        | 1626.817594       | E    | <b>304.161545</b>  | 152.584411      | 287.134996     | 144.071136       | 286.150980     | 143.579128       | 2  |
| 28 |                    |                    |                |                  |                    |                   | R    | <b>175.118952</b>  | 88.063114       | 158.092403     | 79.549839        |                |                  | 1  |

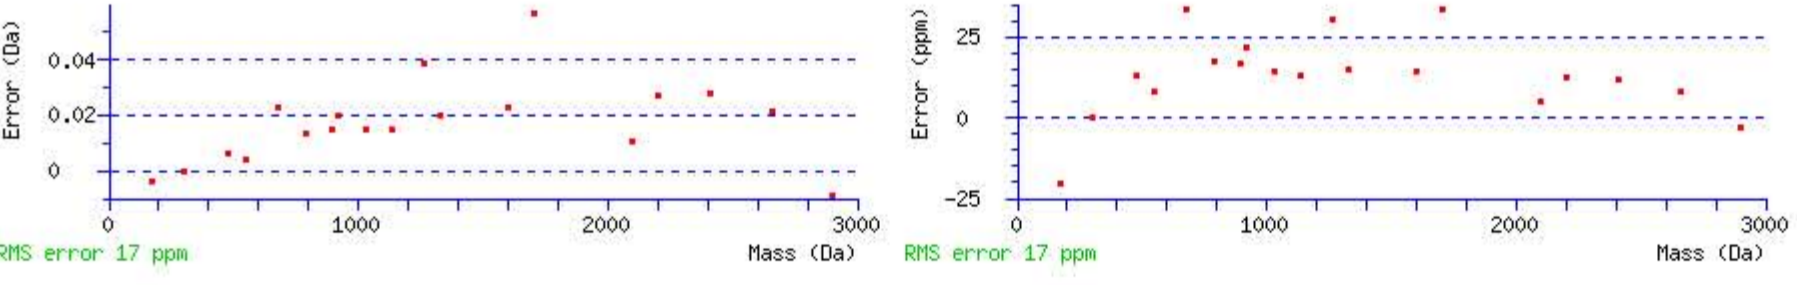

NCBI BLAST search of [SILQMSLDHHIVTPLTSLVIENEAGDER](#)  
 (Parameters: blastp, nr protein database, expect=20000, no filter, PAM30)  
 Other BLAST [web gateways](#)

**All matches to this query**

| Score | Mr(calc):   | Delta    | Sequence                                     |
|-------|-------------|----------|----------------------------------------------|
| 70.0  | 3443.742859 | 0.047797 | <a href="#">SILQMSLDHHIVTPLTSLVIENEAGDER</a> |

# MASCOT SEARCH RESULTS

## Peptide View

MS/MS Fragmentation of **NVQFNYPHTSVTDVTDQNNFHNYFGGSEIVVAGK**

Found in **ITIH2\_HUMAN**, Inter-alpha-trypsin inhibitor heavy chain H2 OS=Homo sapiens GN=ITIH2 PE=1 SV=2

Match to Query 63942: 3993.957920 from(799.798860,5+) rtinseconds(2389) index(49726)

Title: Locus:1.1.1.2880.8 File:"2013-07-02 CLN FXIII 60 min 3rd F 4.wiff"

Data file C:\Program Files (x86)\Matrix Science\Mascot Daemon\mgf\6 FXIII 60 min 3rd\mascot\_daemon\_merge.mgf

Click mouse within plot area to zoom in by factor of two about that point

Or, Plot from 0 to 3400 Da Full range

Label all possible matches  Label matches used for scoring

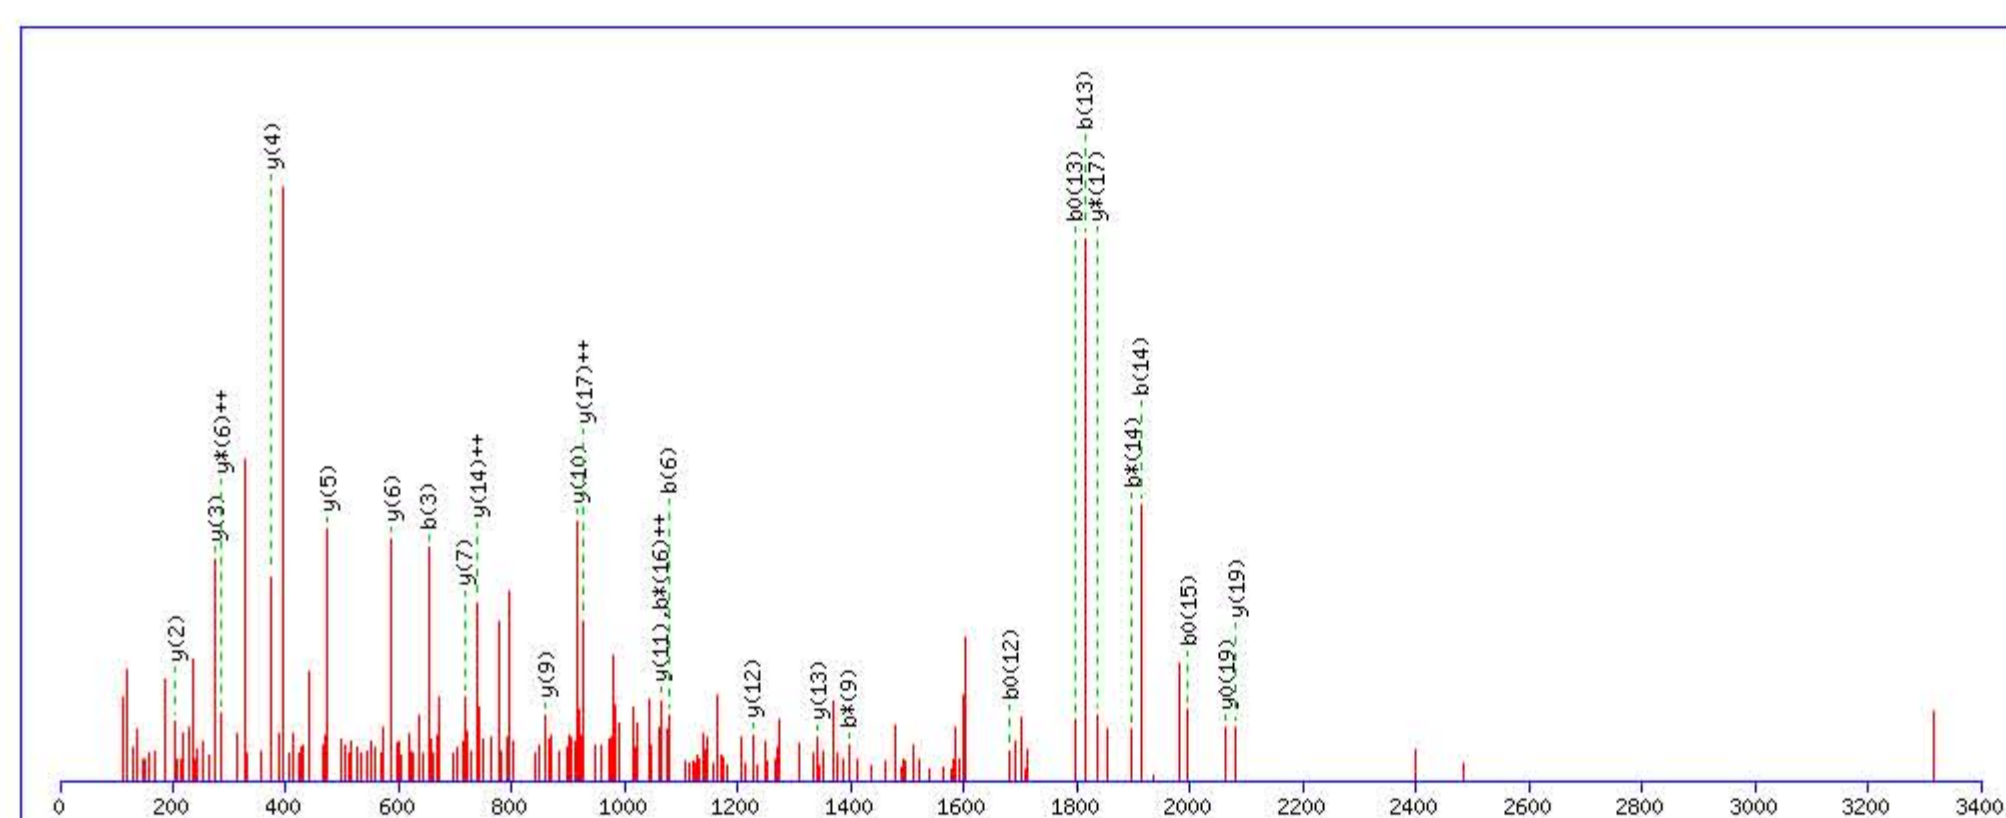

Monoisotopic mass of neutral peptide  $M_r(\text{calc})$ : 3993.910858

Fixed modifications: Carbamidomethyl (C) (apply to specified residues or termini only)

Variable modifications:

Q3 : Biotin:Thermo-21345 (Q)

Ions Score: 28 Expect: 0.037

Matches : 27/356 fragment ions using 79 most intense peaks [\(help\)](#)

| #  | b                  | b <sup>++</sup> | b <sup>*</sup>     | b <sup>***</sup>   | b <sup>0</sup>     | b <sup>0++</sup> | Seq. | y                  | y <sup>++</sup>   | y <sup>*</sup>     | y <sup>***</sup>  | y <sup>0</sup>     | y <sup>0++</sup> | #  |
|----|--------------------|-----------------|--------------------|--------------------|--------------------|------------------|------|--------------------|-------------------|--------------------|-------------------|--------------------|------------------|----|
| 1  | 115.050203         | 58.028740       | 98.023654          | 49.515465          |                    |                  | N    |                    |                   |                    |                   |                    |                  | 33 |
| 2  | 214.118617         | 107.562947      | 197.092068         | 99.049672          |                    |                  | V    | 3880.875173        | 1940.941224       | 3863.848624        | 1932.427950       | 3862.864608        | 1931.935942      | 32 |
| 3  | <b>653.343943</b>  | 327.175610      | 636.317394         | 318.662335         |                    |                  | Q    | 3781.806759        | 1891.407017       | 3764.780210        | 1882.893743       | 3763.796194        | 1882.401735      | 31 |
| 4  | 800.412357         | 400.709817      | 783.385808         | 392.196542         |                    |                  | F    | 3342.581433        | 1671.794354       | 3325.554884        | 1663.281080       | 3324.570868        | 1662.789072      | 30 |
| 5  | 914.455284         | 457.731280      | 897.428735         | 449.218006         |                    |                  | N    | 3195.513019        | 1598.260147       | 3178.486470        | 1589.746873       | 3177.502454        | 1589.254865      | 29 |
| 6  | <b>1077.518613</b> | 539.262945      | 1060.492064        | 530.749670         |                    |                  | Y    | 3081.470092        | 1541.238684       | 3064.443543        | 1532.725409       | 3063.459527        | 1532.233401      | 28 |
| 7  | 1174.571377        | 587.789327      | 1157.544828        | 579.276052         |                    |                  | P    | 2918.406763        | 1459.707019       | 2901.380214        | 1451.193745       | 2900.396198        | 1450.701737      | 27 |
| 8  | 1311.630289        | 656.318783      | 1294.603740        | 647.805508         |                    |                  | H    | 2821.353999        | 1411.180637       | 2804.327450        | 1402.667363       | 2803.343434        | 1402.175355      | 26 |
| 9  | 1412.677968        | 706.842622      | <b>1395.651419</b> | 698.329348         | 1394.667403        | 697.837339       | T    | 2684.295087        | 1342.651181       | 2667.268538        | 1334.137907       | 2666.284522        | 1333.645899      | 25 |
| 10 | 1499.709996        | 750.358636      | 1482.683447        | 741.845362         | 1481.699431        | 741.353354       | S    | 2583.247408        | 1292.127342       | 2566.220859        | 1283.614067       | 2565.236843        | 1283.122059      | 24 |
| 11 | 1598.778410        | 799.892843      | 1581.751861        | 791.379569         | 1580.767845        | 790.887561       | V    | 2496.215380        | 1248.611328       | 2479.188831        | 1240.098053       | 2478.204815        | 1239.606045      | 23 |
| 12 | 1699.826089        | 850.416683      | 1682.799540        | 841.903408         | <b>1681.815524</b> | 841.411400       | T    | 2397.146966        | 1199.077121       | 2380.120417        | 1190.563846       | 2379.136401        | 1190.071838      | 22 |
| 13 | <b>1814.853032</b> | 907.930154      | 1797.826483        | 899.416880         | <b>1796.842467</b> | 898.924872       | D    | 2296.099287        | 1148.553281       | 2279.072738        | 1140.040007       | 2278.088722        | 1139.547999      | 21 |
| 14 | <b>1913.921446</b> | 957.464361      | <b>1896.894897</b> | 948.951087         | 1895.910881        | 948.459079       | V    | 2181.072344        | 1091.039810       | 2164.045795        | 1082.526535       | 2163.061779        | 1082.034527      | 20 |
| 15 | 2014.969125        | 1007.988201     | 1997.942576        | 999.474926         | <b>1996.958560</b> | 998.982918       | T    | <b>2082.003930</b> | 1041.505603       | 2064.977381        | 1032.992328       | <b>2063.993365</b> | 1032.500320      | 19 |
| 16 | 2143.027703        | 1072.017490     | 2126.001154        | <b>1063.504215</b> | 2125.017138        | 1063.012207      | Q    | 1980.956251        | 990.981763        | 1963.929702        | 982.468489        | 1962.945686        | 981.976481       | 18 |
| 17 | 2257.070630        | 1129.038953     | 2240.044081        | 1120.525678        | 2239.060065        | 1120.033671      | N    | 1852.897673        | <b>926.952474</b> | <b>1835.871124</b> | 918.439200        | 1834.887108        | 917.947192       | 17 |
| 18 | 2371.113557        | 1186.060417     | 2354.087008        | 1177.547142        | 2353.102992        | 1177.055134      | N    | 1738.854746        | 869.931011        | 1721.828197        | 861.417736        | 1720.844181        | 860.925728       | 16 |
| 19 | 2518.181971        | 1259.594623     | 2501.155422        | 1251.081349        | 2500.171406        | 1250.589341      | F    | 1624.811819        | 812.909547        | 1607.785270        | 804.396273        | 1606.801254        | 803.904265       | 15 |
| 20 | 2655.240883        | 1328.124079     | 2638.214334        | 1319.610805        | 2637.230318        | 1319.118797      | H    | 1477.743405        | <b>739.375340</b> | 1460.716856        | 730.862066        | 1459.732840        | 730.370058       | 14 |
| 21 | 2769.283810        | 1385.145543     | 2752.257261        | 1376.632268        | 2751.273245        | 1376.140260      | N    | <b>1340.684493</b> | 670.845885        | 1323.657944        | 662.332610        | 1322.673928        | 661.840602       | 13 |
| 22 | 2932.347139        | 1466.677207     | 2915.320590        | 1458.163933        | 2914.336574        | 1457.671925      | Y    | <b>1226.641566</b> | 613.824421        | 1209.615017        | 605.311147        | 1208.631001        | 604.819139       | 12 |
| 23 | 3079.415553        | 1540.211414     | 3062.389004        | 1531.698140        | 3061.404988        | 1531.206132      | F    | <b>1063.578237</b> | 532.292757        | 1046.551688        | 523.779482        | 1045.567672        | 523.287474       | 11 |
| 24 | 3136.437017        | 1568.722146     | 3119.410468        | 1560.208872        | 3118.426452        | 1559.716864      | G    | <b>916.509823</b>  | 458.758550        | 899.483274         | 450.245275        | 898.499258         | 449.753267       | 10 |
| 25 | 3193.458481        | 1597.232878     | 3176.431932        | 1588.719604        | 3175.447916        | 1588.227596      | G    | <b>859.488359</b>  | 430.247818        | 842.461810         | 421.734543        | 841.477794         | 421.242535       | 9  |
| 26 | 3280.490509        | 1640.748892     | 3263.463960        | 1632.235618        | 3262.479944        | 1631.743610      | S    | 802.466895         | 401.737086        | 785.440346         | 393.223811        | 784.456330         | 392.731803       | 8  |
| 27 | 3409.533102        | 1705.270189     | 3392.506553        | 1696.756914        | 3391.522537        | 1696.264906      | E    | <b>715.434867</b>  | 358.221072        | 698.408318         | 349.707797        | 697.424302         | 349.215789       | 7  |
| 28 | 3522.617166        | 1761.812221     | 3505.590617        | 1753.298946        | 3504.606601        | 1752.806938      | I    | <b>586.392274</b>  | 293.699775        | 569.365725         | <b>285.186501</b> |                    |                  | 6  |
| 29 | 3621.685580        | 1811.346428     | 3604.659031        | 1802.833153        | 3603.675015        | 1802.341145      | V    | <b>473.308210</b>  | 237.157743        | 456.281661         | 228.644468        |                    |                  | 5  |
| 30 | 3720.753994        | 1860.880635     | 3703.727445        | 1852.367360        | 3702.743429        | 1851.875352      | V    | <b>374.239796</b>  | 187.623536        | 357.213247         | 179.110261        |                    |                  | 4  |
| 31 | 3791.791108        | 1896.399192     | 3774.764559        | 1887.885917        | 3773.780543        | 1887.393909      | A    | <b>275.171382</b>  | 138.089329        | 258.144833         | 129.576055        |                    |                  | 3  |
| 32 | 3848.812572        | 1924.909924     | 3831.786023        | 1916.396649        | 3830.802007        | 1915.904641      | G    | <b>204.134268</b>  | 102.570772        | 187.107719         | 94.057497         |                    |                  | 2  |
| 33 |                    |                 |                    |                    |                    |                  | K    | 147.112804         | 74.060040         | 130.086255         | 65.546765         |                    |                  | 1  |

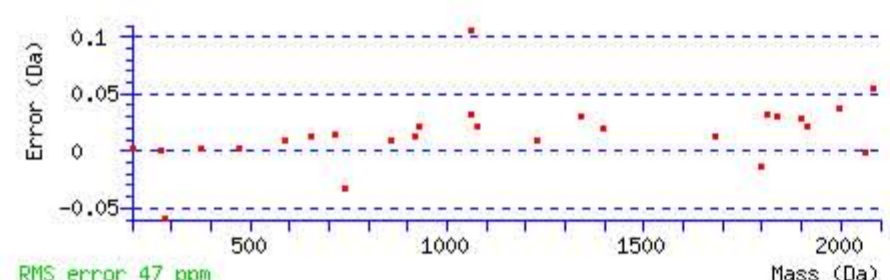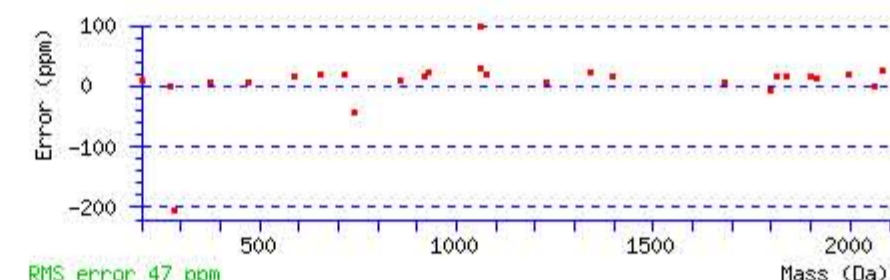

NCBI BLAST search of **NVQFNYPHTSVTDVTDQNNFHNYFGGSEIVVAGK**  
(Parameters: blastp, nr protein database, expect=20000, no filter, PAM30)

Other BLAST [web gateways](#)

All matches to this query

| Score | Mr(calc):   | Delta    | Sequence                                  |
|-------|-------------|----------|-------------------------------------------|
| 28.0  | 3993.910858 | 0.047062 | <b>NVQFNYPHTSVTDVTDQNNFHNYFGGSEIVVAGK</b> |
| 13.7  | 3993.910858 | 0.047062 | <b>NVQFNYPHTSVTDVTDQNNFHNYFGGSEIVVAGK</b> |

# MASCOT Search Results

## Peptide View

MS/MS Fragmentation of **KGHVSFKPSLDQQR**

Found in **ITIH3\_HUMAN**, Inter-alpha-trypsin inhibitor heavy chain H3 OS=Homo sapiens GN=ITIH3 PE=1 SV=2

Match to Query 40876: 1937.023536 from(485.263160,4+) rtinseconds(1458) index(43930)

Title: Locus:1.1.1.2556.10 File:"2013-07-02 CLN FXIII 60 min 3rd F 4.wiff"

Data file C:\Program Files (x86)\Matrix Science\Mascot Daemon\mgf6 FXIII 60 min 3rd\mascot\_daemon\_merge.mgf

Click mouse within plot area to zoom in by factor of two about that point

Or, Plot from  to  Da

Label all possible matches  Label matches used for scoring

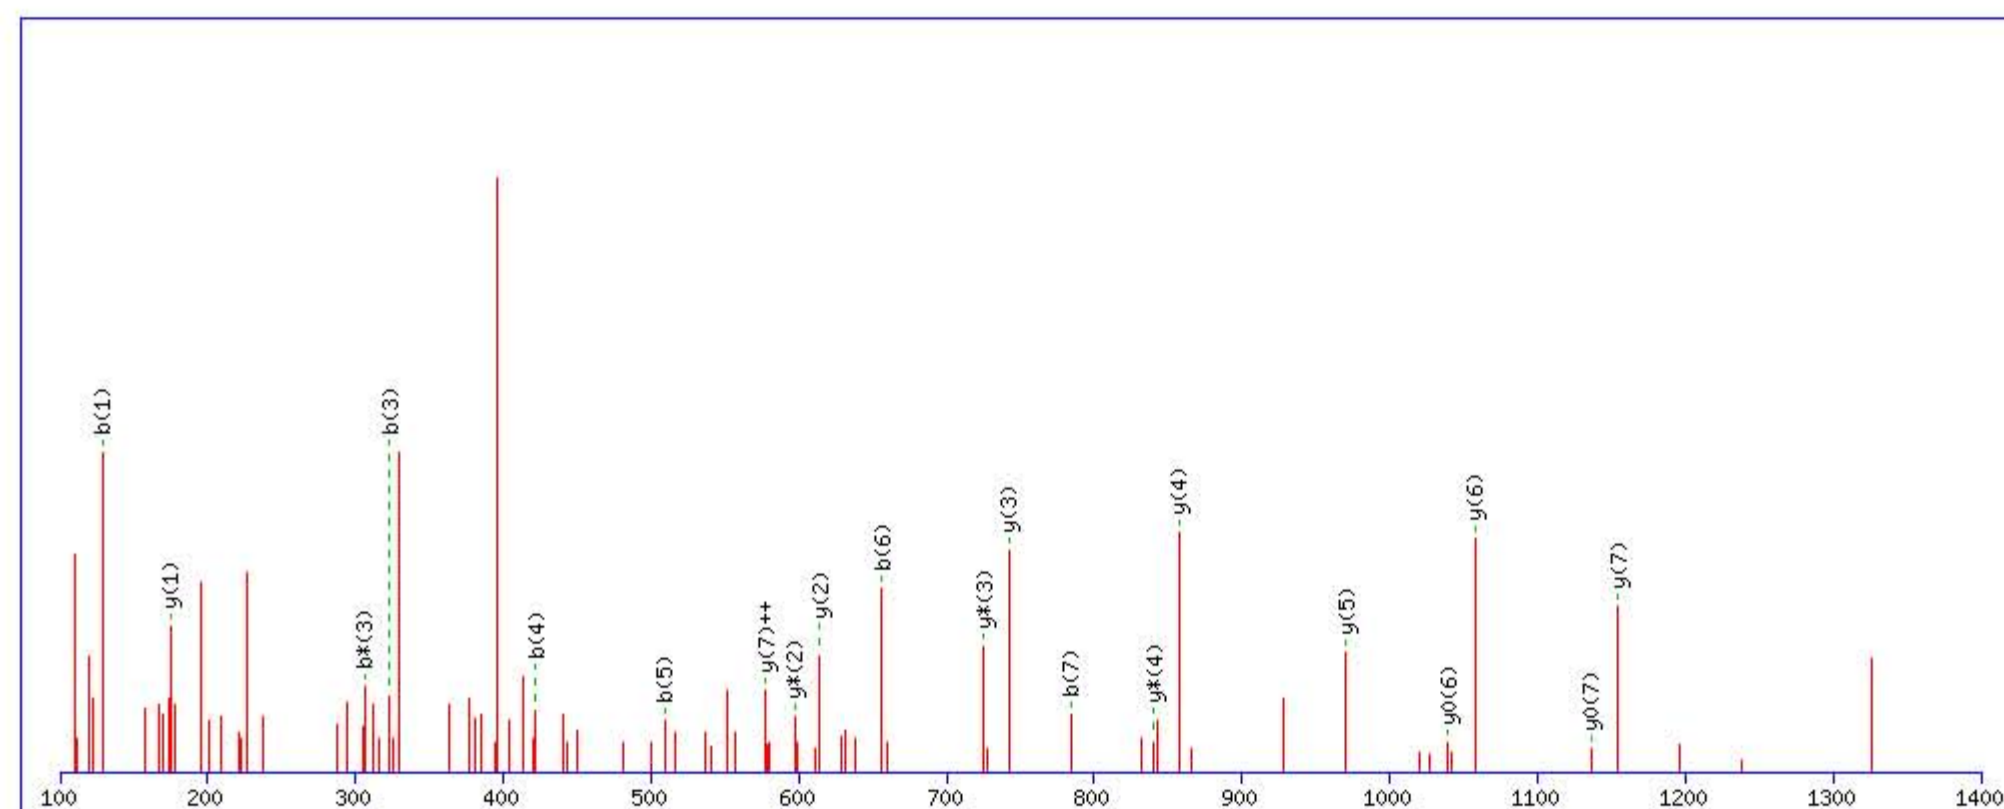

Monoisotopic mass of neutral peptide Mr(calc): 1937.030533

Fixed modifications: Carbamidomethyl (C) (apply to specified residues or termini only)

Variable modifications:

Q13 : Biotin:Thermo-21345 (Q)

Ions Score: 40 Expect: 0.00036

Matches : 20/142 fragment ions using 43 most intense peaks [\(help\)](#)

| #  | b                 | b <sup>++</sup> | b <sup>+</sup>    | b <sup>+++</sup> | b <sup>0</sup> | b <sup>0++</sup> | Seq.     | y                  | y <sup>++</sup>   | y <sup>+</sup>    | y <sup>+++</sup> | y <sup>0</sup>     | y <sup>0++</sup> | #         |
|----|-------------------|-----------------|-------------------|------------------|----------------|------------------|----------|--------------------|-------------------|-------------------|------------------|--------------------|------------------|-----------|
| 1  | <b>129.102239</b> | 65.054757       | 112.075690        | 56.541483        |                |                  | <b>K</b> |                    |                   |                   |                  |                    |                  | <b>14</b> |
| 2  | 186.123703        | 93.565489       | 169.097154        | 85.052215        |                |                  | <b>G</b> | 1809.942850        | 905.475063        | 1792.916301       | 896.961789       | 1791.932285        | 896.469781       | <b>13</b> |
| 3  | <b>323.182615</b> | 162.094945      | <b>306.156066</b> | 153.581671       |                |                  | <b>H</b> | 1752.921386        | 876.964331        | 1735.894837       | 868.451057       | 1734.910821        | 867.959049       | <b>12</b> |
| 4  | <b>422.251029</b> | 211.629153      | 405.224480        | 203.115878       |                |                  | <b>V</b> | 1615.862474        | 808.434875        | 1598.835925       | 799.921601       | 1597.851909        | 799.429593       | <b>11</b> |
| 5  | <b>509.283057</b> | 255.145167      | 492.256508        | 246.631892       | 491.272492     | 246.139884       | <b>S</b> | 1516.794060        | 758.900668        | 1499.767511       | 750.387394       | 1498.783495        | 749.895386       | <b>10</b> |
| 6  | <b>656.351471</b> | 328.679374      | 639.324922        | 320.166099       | 638.340906     | 319.674091       | <b>F</b> | 1429.762032        | 715.384654        | 1412.735483       | 706.871380       | 1411.751467        | 706.379372       | <b>9</b>  |
| 7  | <b>784.446434</b> | 392.726855      | 767.419885        | 384.213581       | 766.435869     | 383.721573       | <b>K</b> | 1282.693618        | 641.850447        | 1265.667069       | 633.337173       | 1264.683053        | 632.845165       | <b>8</b>  |
| 8  | 881.499198        | 441.253237      | 864.472649        | 432.739963       | 863.488633     | 432.247955       | <b>P</b> | <b>1154.598655</b> | <b>577.802966</b> | 1137.572106       | 569.289691       | <b>1136.588090</b> | 568.797683       | <b>7</b>  |
| 9  | 968.531226        | 484.769251      | 951.504677        | 476.255977       | 950.520661     | 475.763969       | <b>S</b> | <b>1057.545891</b> | 529.276584        | 1040.519342       | 520.763309       | <b>1039.535326</b> | 520.271301       | <b>6</b>  |
| 10 | 1081.615290       | 541.311283      | 1064.588741       | 532.798009       | 1063.604725    | 532.306000       | <b>L</b> | <b>970.513863</b>  | 485.760570        | 953.487314        | 477.247295       | 952.503298         | 476.755287       | <b>5</b>  |
| 11 | 1196.642233       | 598.824755      | 1179.615684       | 590.311480       | 1178.631668    | 589.819472       | <b>D</b> | <b>857.429799</b>  | 429.218538        | <b>840.403250</b> | 420.705263       | 839.419234         | 420.213255       | <b>4</b>  |
| 12 | 1324.700811       | 662.854043      | 1307.674262       | 654.340769       | 1306.690246    | 653.848761       | <b>Q</b> | <b>742.402856</b>  | 371.705066        | <b>725.376307</b> | 363.191792       |                    |                  | <b>3</b>  |
| 13 | 1763.926137       | 882.466707      | 1746.899588       | 873.953432       | 1745.915572    | 873.461424       | <b>Q</b> | <b>614.344278</b>  | 307.675777        | <b>597.317729</b> | 299.162503       |                    |                  | <b>2</b>  |
| 14 |                   |                 |                   |                  |                |                  | <b>R</b> | <b>175.118952</b>  | 88.063114         | 158.092403        | 79.549839        |                    |                  | <b>1</b>  |

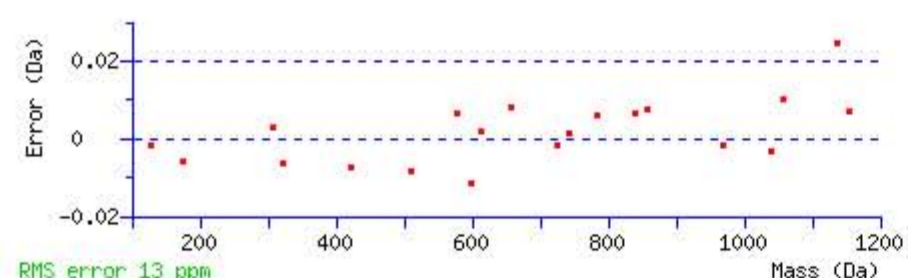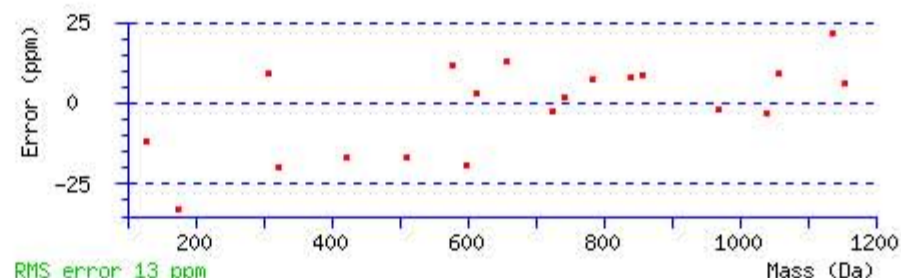

NCBI BLAST search of **KGHVSFKPSLDQQR**

(Parameters: blastp, nr protein database, expect=20000, no filter, PAM30)

Other BLAST [web gateways](#)

All matches to this query

| Score | Mr(calc):   | Delta     | Sequence                          |
|-------|-------------|-----------|-----------------------------------|
| 39.7  | 1937.030533 | -0.006997 | <a href="#">KGHVSFKPSLDQQR</a>    |
| 30.9  | 1937.030533 | -0.006997 | <a href="#">KGHVSFKPSLDQQR</a>    |
| 3.0   | 1937.051620 | -0.028084 | <a href="#">QPLEREQCLALLALGAR</a> |

Mascot: <http://www.matrixscience.com/>

# MASCOT SCIENCE Mascot Search Results

## Peptide View

MS/MS Fragmentation of **KGHVSFKPSLDQQR**

Found in **ITIH3\_HUMAN**, Inter-alpha-trypsin inhibitor heavy chain H3 OS=Homo sapiens GN=ITIH3 PE=1 SV=2

Match to Query 40881: 1937.034732 from(646.685520,3+) rtinseconds(1487) index(44117)

Title: Locus:1.1.1.2566.11 File:"2013-07-02 CLN FXIII 60 min 3rd F 4.wiff"

Data file C:\Program Files (x86)\Matrix Science\Mascot Daemon\mgf\6 FXIII 60 min 3rd\mascot\_daemon\_merge.mgf

Click mouse within plot area to zoom in by factor of two about that point

Or, Plot from  to  Da

Label all possible matches  Label matches used for scoring

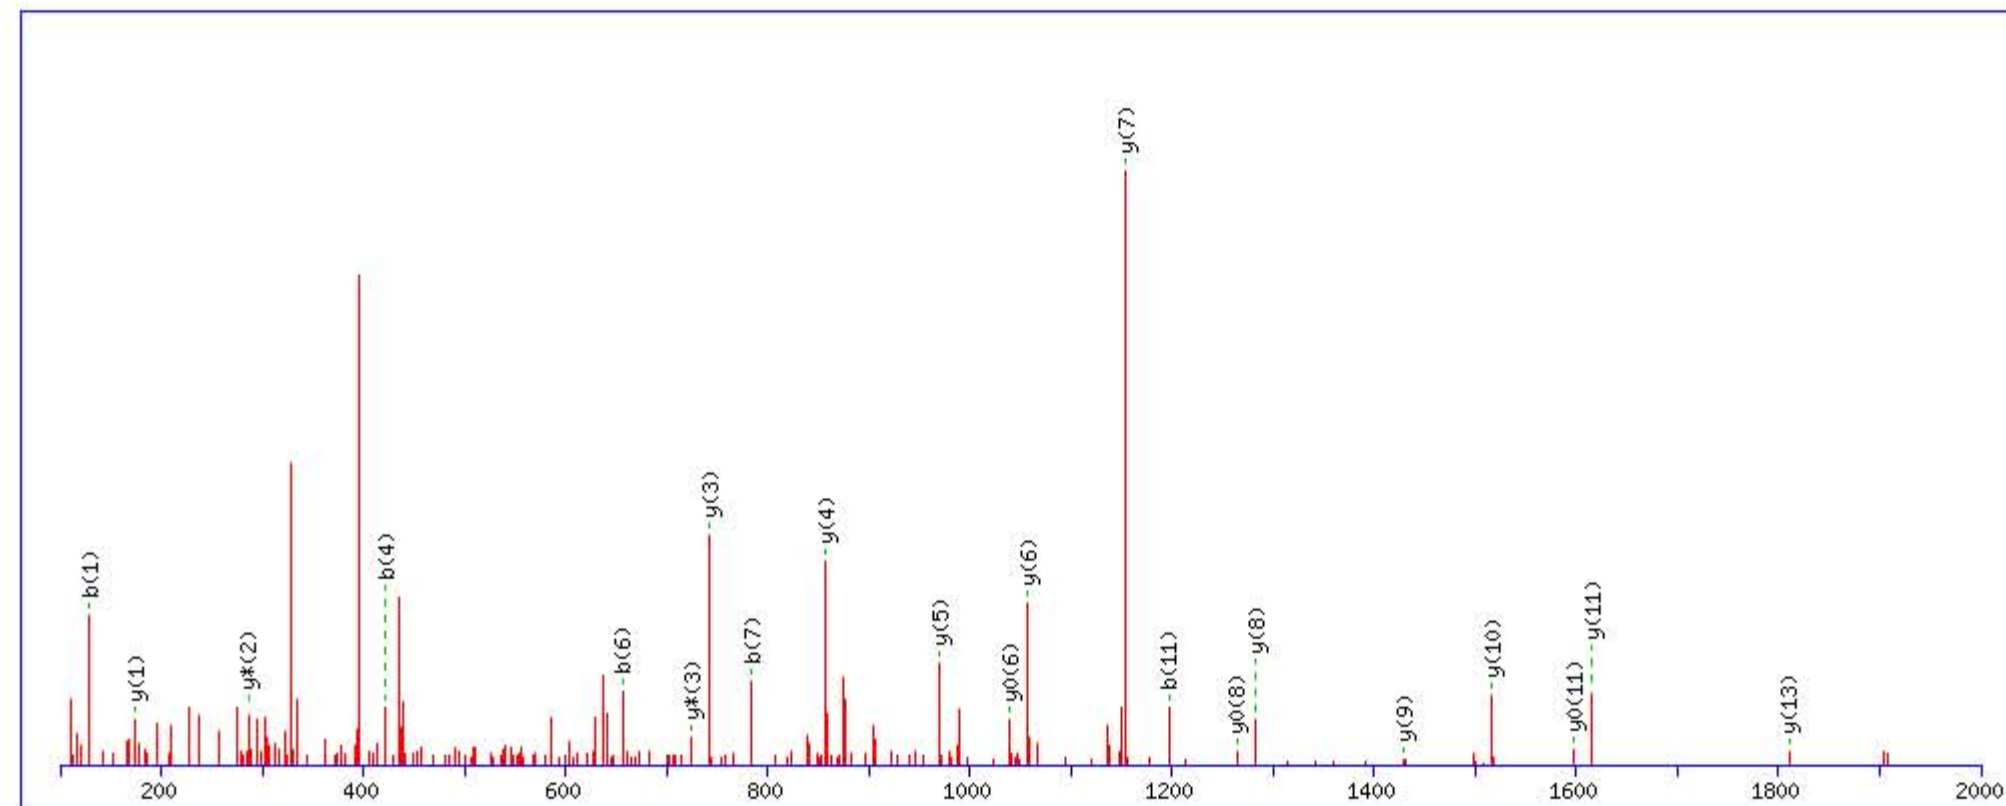

Monoisotopic mass of neutral peptide Mr(calc): 1937.030533

Fixed modifications: Carbamidomethyl (C) (apply to specified residues or termini only)

Variable modifications:

Q12 : Biotin:Thermo-21345 (Q)

Ions Score: 57 Expect: 5e-005

Matches : 21/142 fragment ions using 49 most intense peaks [\(help\)](#)

| #  | b           | b <sup>++</sup> | b <sup>+</sup> | b <sup>+++</sup> | b <sup>0</sup> | b <sup>0++</sup> | Seq. | y           | y <sup>++</sup> | y <sup>+</sup> | y <sup>+++</sup> | y <sup>0</sup> | y <sup>0++</sup> | #  |
|----|-------------|-----------------|----------------|------------------|----------------|------------------|------|-------------|-----------------|----------------|------------------|----------------|------------------|----|
| 1  | 129.102239  | 65.054757       | 112.075690     | 56.541483        |                |                  | K    |             |                 |                |                  |                |                  | 14 |
| 2  | 186.123703  | 93.565489       | 169.097154     | 85.052215        |                |                  | G    | 1809.942850 | 905.475063      | 1792.916301    | 896.961789       | 1791.932285    | 896.469781       | 13 |
| 3  | 323.182615  | 162.094945      | 306.156066     | 153.581671       |                |                  | H    | 1752.921386 | 876.964331      | 1735.894837    | 868.451057       | 1734.910821    | 867.959049       | 12 |
| 4  | 422.251029  | 211.629153      | 405.224480     | 203.115878       |                |                  | V    | 1615.862474 | 808.434875      | 1598.835925    | 799.921601       | 1597.851909    | 799.429593       | 11 |
| 5  | 509.283057  | 255.145167      | 492.256508     | 246.631892       | 491.272492     | 246.139884       | S    | 1516.794060 | 758.900668      | 1499.767511    | 750.387394       | 1498.783495    | 749.895386       | 10 |
| 6  | 656.351471  | 328.679374      | 639.324922     | 320.166099       | 638.340906     | 319.674091       | F    | 1429.762032 | 715.384654      | 1412.735483    | 706.871380       | 1411.751467    | 706.379372       | 9  |
| 7  | 784.446434  | 392.726855      | 767.419885     | 384.213581       | 766.435869     | 383.721573       | K    | 1282.693618 | 641.850447      | 1265.667069    | 633.337173       | 1264.683053    | 632.845165       | 8  |
| 8  | 881.499198  | 441.253237      | 864.472649     | 432.739963       | 863.488633     | 432.247955       | P    | 1154.598655 | 577.802966      | 1137.572106    | 569.289691       | 1136.588090    | 568.797683       | 7  |
| 9  | 968.531226  | 484.769251      | 951.504677     | 476.255977       | 950.520661     | 475.763969       | S    | 1057.545891 | 529.276584      | 1040.519342    | 520.763309       | 1039.535326    | 520.271301       | 6  |
| 10 | 1081.615290 | 541.311283      | 1064.588741    | 532.798009       | 1063.604725    | 532.306000       | L    | 970.513863  | 485.760570      | 953.487314     | 477.247295       | 952.503298     | 476.755287       | 5  |
| 11 | 1196.642233 | 598.824755      | 1179.615684    | 590.311480       | 1178.631668    | 589.819472       | D    | 857.429799  | 429.218538      | 840.403250     | 420.705263       | 839.419234     | 420.213255       | 4  |
| 12 | 1635.867559 | 818.437418      | 1618.841010    | 809.924143       | 1617.856994    | 809.432135       | Q    | 742.402856  | 371.705066      | 725.376307     | 363.191792       |                |                  | 3  |
| 13 | 1763.926137 | 882.466707      | 1746.899588    | 873.953432       | 1745.915572    | 873.461424       | Q    | 303.177530  | 152.092403      | 286.150981     | 143.579129       |                |                  | 2  |
| 14 |             |                 |                |                  |                |                  | R    | 175.118952  | 88.063114       | 158.092403     | 79.549839        |                |                  | 1  |

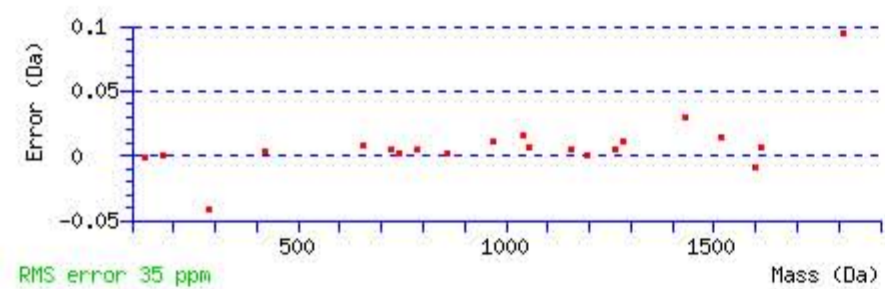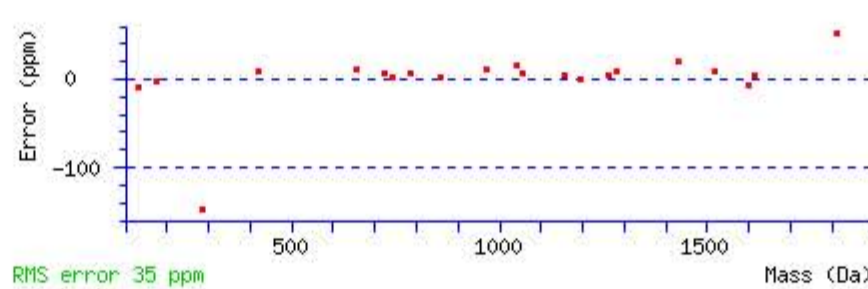

NCBI BLAST search of **KGHVSFKPSLDQQR**

(Parameters: blastp, nr protein database, expect=20000, no filter, PAM30)

Other BLAST [web gateways](#)

All matches to this query

| Score | Mr(calc):   | Delta    | Sequence                       |
|-------|-------------|----------|--------------------------------|
| 56.5  | 1937.030533 | 0.004199 | <a href="#">KGHVSFKPSLDQQR</a> |
| 56.2  | 1937.030533 | 0.004199 | <a href="#">KGHVSFKPSLDQQR</a> |

Mascot: <http://www.matrixscience.com/>

# MASCOT Search Results

## Peptide View

MS/MS Fragmentation of **EHLVQATPENLQEAR**

Found in **ITIH3\_HUMAN**, Inter-alpha-trypsin inhibitor heavy chain H3 OS=Homo sapiens GN=ITIH3 PE=1 SV=2

Match to Query 43561: 2045.043642 from(682.688490,3+) rtinseconds(1730) index(45637)

Title: Locus:1.1.1.2651.8 File:"2013-07-02 CLN FXIII 60 min 3rd F 4.wiff"

Data file C:\Program Files (x86)\Matrix Science\Mascot Daemon\mgf6 FXIII 60 min 3rd\mascot\_daemon\_merge.mgf

Click mouse within plot area to zoom in by factor of two about that point

Or, Plot from  to  Da

Label all possible matches  Label matches used for scoring

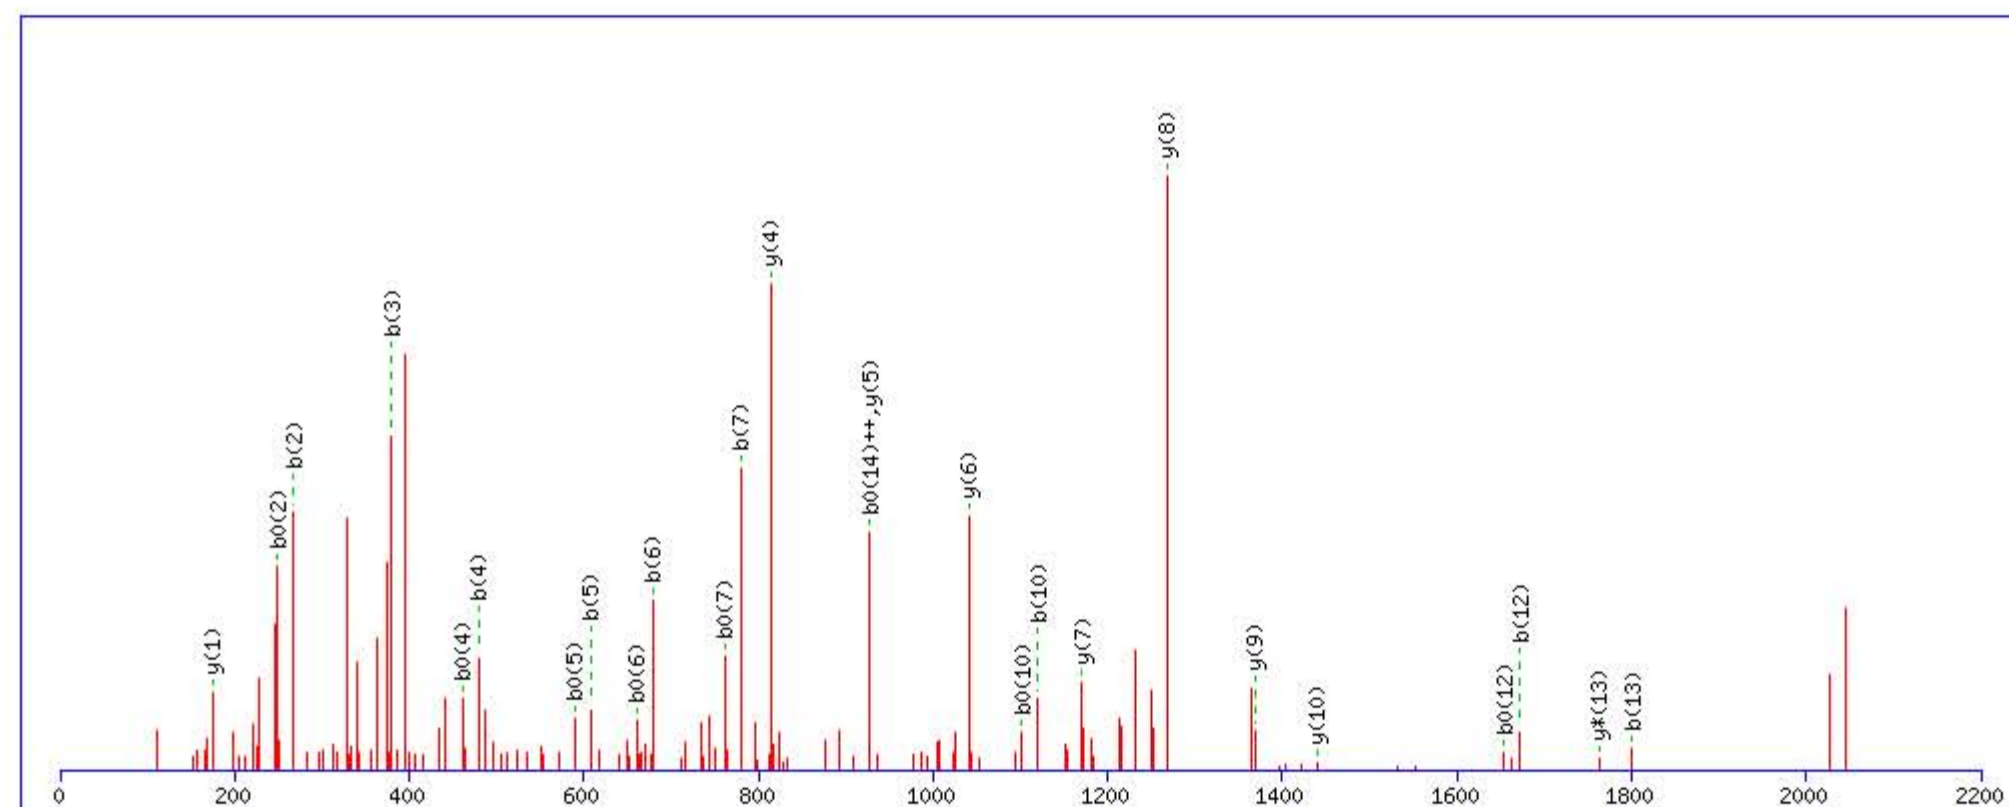

Monoisotopic mass of neutral peptide Mr(calc): 2045.036377

Fixed modifications: Carbamidomethyl (C) (apply to specified residues or termini only)

Variable modifications:

Q12 : Biotin:Thermo-21345 (Q)

Ions Score: 78 Expect: 2.2e-007

Matches : 26/156 fragment ions using 35 most intense peaks [\(help\)](#)

| #  | b                  | b <sup>++</sup> | b <sup>+</sup> | b <sup>+++</sup> | b <sup>0</sup>     | b <sup>0++</sup>  | Seq. | y                  | y <sup>++</sup> | y <sup>+</sup>     | y <sup>+++</sup> | y <sup>0</sup> | y <sup>0++</sup> | #  |
|----|--------------------|-----------------|----------------|------------------|--------------------|-------------------|------|--------------------|-----------------|--------------------|------------------|----------------|------------------|----|
| 1  | 130.049869         | 65.528572       |                |                  | 112.039304         | 56.523290         | E    |                    |                 |                    |                  |                |                  | 15 |
| 2  | <b>267.108781</b>  | 134.058028      |                |                  | <b>249.098216</b>  | 125.052746        | H    | 1917.001094        | 959.004185      | 1899.974545        | 950.490911       | 1898.990529    | 949.998903       | 14 |
| 3  | <b>380.192845</b>  | 190.600060      |                |                  | 362.182280         | 181.594778        | L    | 1779.942182        | 890.474729      | <b>1762.915633</b> | 881.961455       | 1761.931617    | 881.469447       | 13 |
| 4  | <b>479.261259</b>  | 240.134267      |                |                  | <b>461.250694</b>  | 231.128985        | V    | 1666.858118        | 833.932697      | 1649.831569        | 825.419423       | 1648.847553    | 824.927415       | 12 |
| 5  | <b>607.319837</b>  | 304.163557      | 590.293288     | 295.650282       | <b>589.309272</b>  | 295.158274        | Q    | 1567.789704        | 784.398490      | 1550.763155        | 775.885216       | 1549.779139    | 775.393208       | 11 |
| 6  | <b>678.356951</b>  | 339.682114      | 661.330402     | 331.168839       | <b>660.346386</b>  | 330.676831        | A    | <b>1439.731126</b> | 720.369201      | 1422.704577        | 711.855927       | 1421.720561    | 711.363919       | 10 |
| 7  | <b>779.404630</b>  | 390.205953      | 762.378081     | 381.692679       | <b>761.394065</b>  | 381.200671        | T    | <b>1368.694012</b> | 684.850644      | 1351.667463        | 676.337370       | 1350.683447    | 675.845362       | 9  |
| 8  | 876.457394         | 438.732335      | 859.430845     | 430.219061       | 858.446829         | 429.727053        | P    | <b>1267.646333</b> | 634.326805      | 1250.619784        | 625.813530       | 1249.635768    | 625.321522       | 8  |
| 9  | 1005.499987        | 503.253632      | 988.473438     | 494.740357       | 987.489422         | 494.248349        | E    | <b>1170.593569</b> | 585.800423      | 1153.567020        | 577.287148       | 1152.583004    | 576.795140       | 7  |
| 10 | <b>1119.542914</b> | 560.275095      | 1102.516365    | 551.761821       | <b>1101.532349</b> | 551.269813        | N    | <b>1041.550976</b> | 521.279126      | 1024.524427        | 512.765852       | 1023.540411    | 512.273844       | 6  |
| 11 | 1232.626978        | 616.817127      | 1215.600429    | 608.303853       | 1214.616413        | 607.811845        | L    | <b>927.508049</b>  | 464.257663      | 910.481500         | 455.744388       | 909.497484     | 455.252380       | 5  |
| 12 | <b>1671.852304</b> | 836.429790      | 1654.825755    | 827.916516       | <b>1653.841739</b> | 827.424508        | Q    | <b>814.423985</b>  | 407.715631      | 797.397436         | 399.202356       | 796.413420     | 398.710348       | 4  |
| 13 | <b>1800.894897</b> | 900.951087      | 1783.868348    | 892.437812       | 1782.884332        | 891.945804        | E    | 375.198659         | 188.102968      | 358.172110         | 179.589693       | 357.188094     | 179.097685       | 3  |
| 14 | 1871.932011        | 936.469644      | 1854.905462    | 927.956369       | 1853.921446        | <b>927.464361</b> | A    | 246.156066         | 123.581671      | 229.129517         | 115.068396       |                |                  | 2  |
| 15 |                    |                 |                |                  |                    |                   | R    | <b>175.118952</b>  | 88.063114       | 158.092403         | 79.549839        |                |                  | 1  |

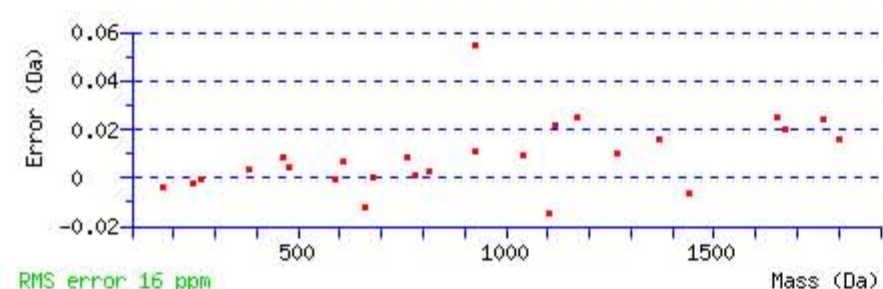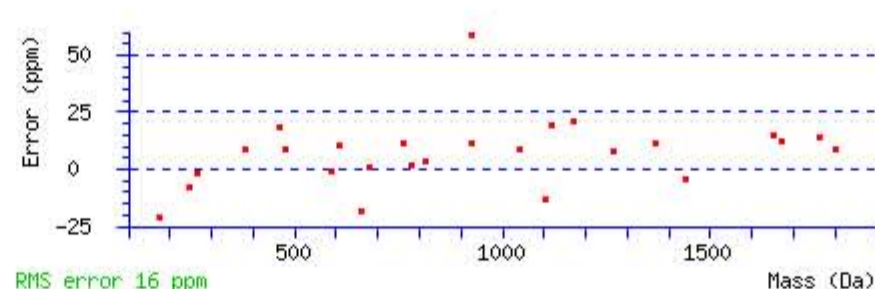

NCBI BLAST search of **EHLVQATPENLQEAR**

(Parameters: blastp, nr protein database, expect=20000, no filter, PAM30)

Other BLAST [web gateways](#)

## All matches to this query

| Score | Mr(calc):   | Delta    | Sequence                           |
|-------|-------------|----------|------------------------------------|
| 78.2  | 2045.036377 | 0.007265 | <a href="#">EHLVQATPENLQEAR</a>    |
| 7.7   | 2045.036377 | 0.007265 | <a href="#">EHLVQATPENLQEAR</a>    |
| 6.9   | 2045.035889 | 0.007753 | <a href="#">LNMEQLLQSASMELK</a>    |
| 5.4   | 2045.022446 | 0.021196 | <a href="#">EHNENMLRNILPSHVAR</a>  |
| 3.9   | 2045.021118 | 0.022524 | <a href="#">VSLVGADDLRKMQEEEAR</a> |

# MASCOT Search Results

## Peptide View

MS/MS Fragmentation of **AEAQAQYSAAVAK**

Found in **ITIH4\_HUMAN**, Inter-alpha-trypsin inhibitor heavy chain H4 OS=Homo sapiens GN=ITIH4 PE=1 SV=4

Match to Query 34036: 1617.816882 from(540.279570,3+) rtinseconds(1613) index(2788)

Title: Locus:1.1.1.3113.19 File:"2013-07-02 CLN FXIII 60 min 3rd F 1.wiff"

Data file C:\Program Files (x86)\Matrix Science\Mascot Daemon\mgf\6 FXIII 60 min 3rd\mascot\_daemon\_merge.mgf

Click mouse within plot area to zoom in by factor of two about that point

Or, Plot from  to  Da

Label all possible matches  Label matches used for scoring

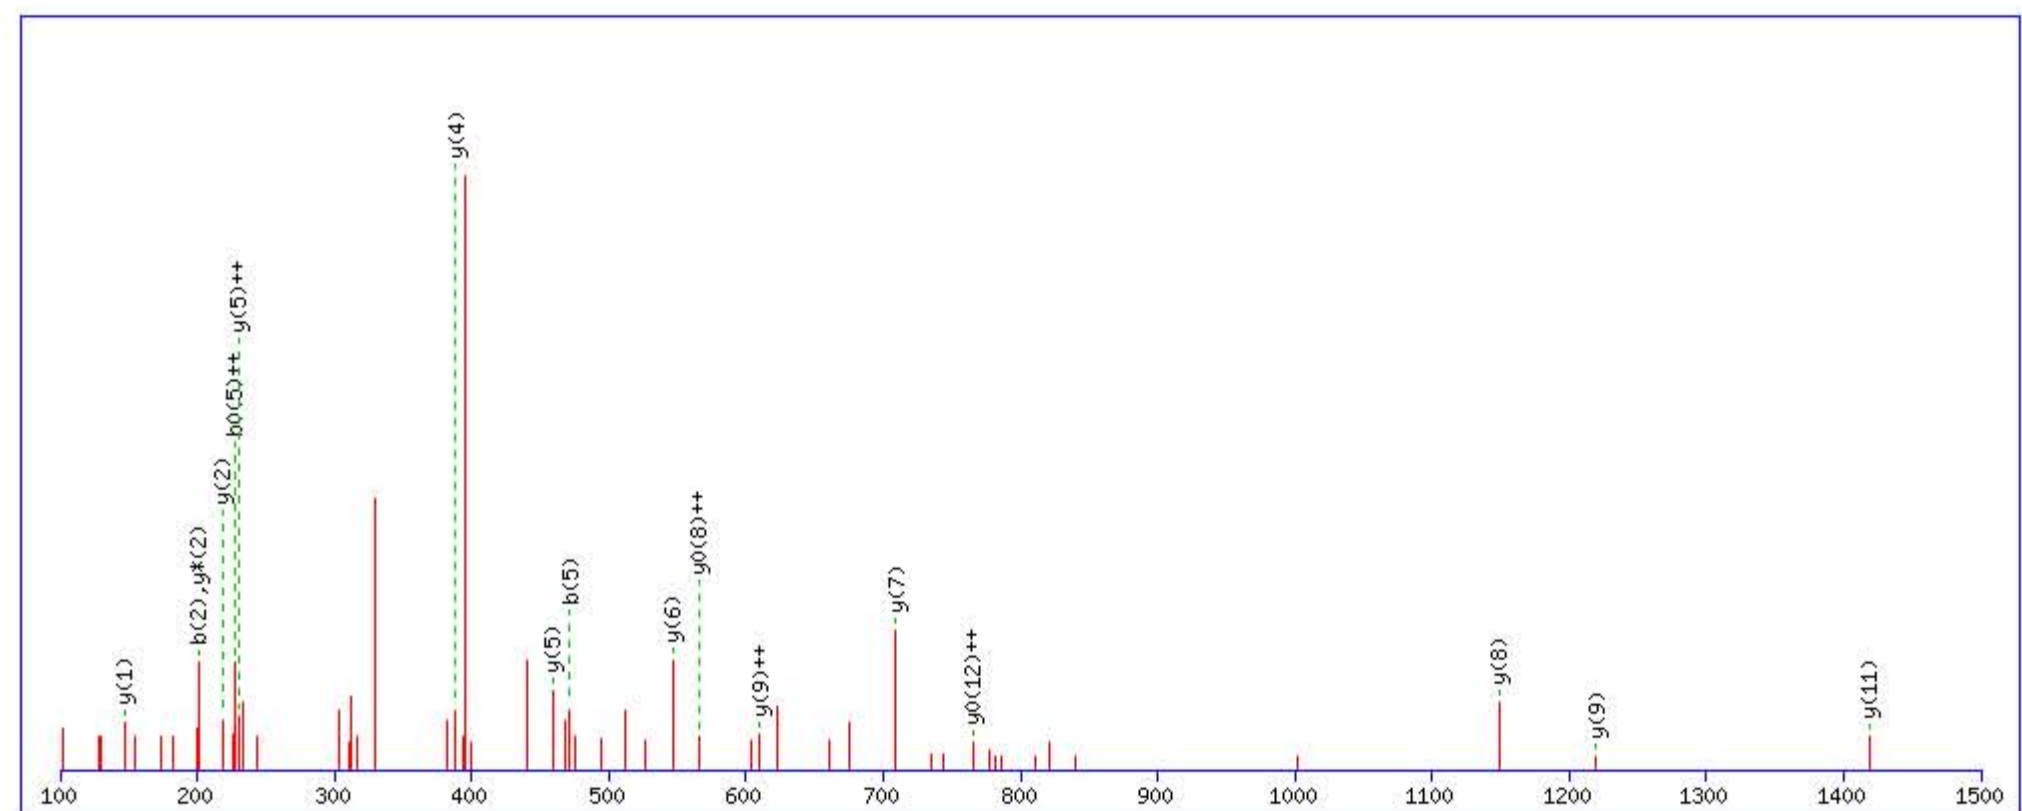

Monoisotopic mass of neutral peptide Mr(calc): 1617.818436

Fixed modifications: Carbamidomethyl (C) (apply to specified residues or termini only)

Variable modifications:

Q6 : Biotin:Thermo-21345 (Q)

Ions Score: 48 Expect: 5.2e-005

Matches : 17/126 fragment ions using 35 most intense peaks [\(help\)](#)

| #  | b                 | b <sup>++</sup> | b <sup>+</sup> | b <sup>+++</sup> | b <sup>0</sup> | b <sup>0++</sup>  | Seq. | y                  | y <sup>++</sup>   | y <sup>+</sup>    | y <sup>+++</sup> | y <sup>0</sup> | y <sup>0++</sup>  | #  |
|----|-------------------|-----------------|----------------|------------------|----------------|-------------------|------|--------------------|-------------------|-------------------|------------------|----------------|-------------------|----|
| 1  | 72.044390         | 36.525833       |                |                  |                |                   | A    |                    |                   |                   |                  |                |                   | 13 |
| 2  | <b>201.086983</b> | 101.047130      |                |                  | 183.076418     | 92.041847         | E    | 1547.788642        | 774.397959        | 1530.762093       | 765.884685       | 1529.778077    | <b>765.392677</b> | 12 |
| 3  | 272.124097        | 136.565687      |                |                  | 254.113532     | 127.560404        | A    | <b>1418.746049</b> | 709.876663        | 1401.719500       | 701.363388       | 1400.735484    | 700.871380        | 11 |
| 4  | 400.182675        | 200.594976      | 383.156126     | 192.081701       | 382.172110     | 191.589693        | Q    | 1347.708935        | 674.358106        | 1330.682386       | 665.844831       | 1329.698370    | 665.352823        | 10 |
| 5  | <b>471.219789</b> | 236.113533      | 454.193240     | 227.600258       | 453.209224     | <b>227.108250</b> | A    | <b>1219.650357</b> | <b>610.328817</b> | 1202.623808       | 601.815542       | 1201.639792    | 601.323534        | 9  |
| 6  | 910.445115        | 455.726196      | 893.418566     | 447.212921       | 892.434550     | 446.720913        | Q    | <b>1148.613243</b> | 574.810260        | 1131.586694       | 566.296985       | 1130.602678    | <b>565.804977</b> | 8  |
| 7  | 1073.508444       | 537.257860      | 1056.481895    | 528.744586       | 1055.497879    | 528.252578        | Y    | <b>709.387917</b>  | 355.197597        | 692.361368        | 346.684322       | 691.377352     | 346.192314        | 7  |
| 8  | 1160.540472       | 580.773874      | 1143.513923    | 572.260600       | 1142.529907    | 571.768592        | S    | <b>546.324588</b>  | 273.665932        | 529.298039        | 265.152658       | 528.314023     | 264.660650        | 6  |
| 9  | 1231.577586       | 616.292431      | 1214.551037    | 607.779157       | 1213.567021    | 607.287149        | A    | <b>459.292560</b>  | <b>230.149918</b> | 442.266011        | 221.636643       |                |                   | 5  |
| 10 | 1302.614700       | 651.810988      | 1285.588151    | 643.297714       | 1284.604135    | 642.805706        | A    | <b>388.255446</b>  | 194.631361        | 371.228897        | 186.118087       |                |                   | 4  |
| 11 | 1401.683114       | 701.345195      | 1384.656565    | 692.831921       | 1383.672549    | 692.339913        | V    | 317.218332         | 159.112804        | 300.191783        | 150.599530       |                |                   | 3  |
| 12 | 1472.720228       | 736.863752      | 1455.693679    | 728.350478       | 1454.709663    | 727.858470        | A    | <b>218.149918</b>  | 109.578597        | <b>201.123369</b> | 101.065322       |                |                   | 2  |
| 13 |                   |                 |                |                  |                |                   | K    | <b>147.112804</b>  | 74.060040         | 130.086255        | 65.546765        |                |                   | 1  |

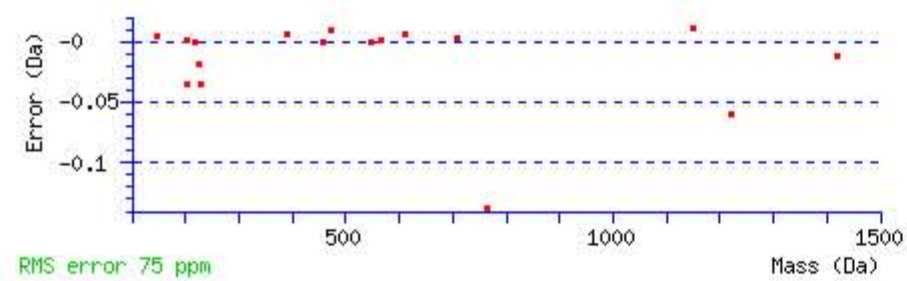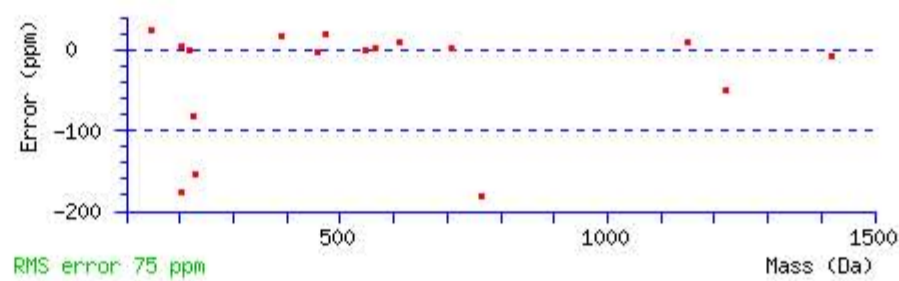

NCBI BLAST search of **AEAQAQYSAAVAK**

(Parameters: blastp, nr protein database, expect=20000, no filter, PAM30)

Other BLAST [web gateways](#)

All matches to this query

| Score | Mr(calc):   | Delta     | Sequence                        |
|-------|-------------|-----------|---------------------------------|
| 47.7  | 1617.818436 | -0.001554 | <a href="#">AEAQAQYSAAVAK</a>   |
| 21.1  | 1617.818436 | -0.001554 | <a href="#">AEAQAQYSAAVAK</a>   |
| 1.9   | 1617.807220 | 0.009662  | <a href="#">WVPLKESAEEMVK</a>   |
| 1.4   | 1617.820953 | -0.004071 | <a href="#">SETGVLDKKEGEQAK</a> |
| 1.1   | 1617.803162 | 0.013720  | <a href="#">EATEINMKNEALQK</a>  |
| 1.0   | 1617.829712 | -0.012830 | <a href="#">EGGHRVLIFSQMTK</a>  |
| 0.6   | 1617.829681 | -0.012799 | <a href="#">NDVMIRKEAYVHK</a>   |



# MASCOT SCIENCE Mascot Search Results

## Peptide View

MS/MS Fragmentation of **EGDCPVQSGK**

Found in **KNG1\_HUMAN**, Kininogen-1 OS=Homo sapiens GN=KNG1 PE=1 SV=2

Match to Query 25743: 1386.634928 from(694.324740,2+) rtinseconds(1399) index(15170)

Title: Locus:1.1.1.3087.18 File:"2013-07-02 CLN FXIII 60 min 3rd F 2.wiff"

Data file C:\Program Files (x86)\Matrix Science\Mascot Daemon\mgf\6 FXIII 60 min 3rd\mascot\_daemon\_merge.mgf

Click mouse within plot area to zoom in by factor of two about that point

Or, Plot from  to  Da

Label all possible matches  Label matches used for scoring

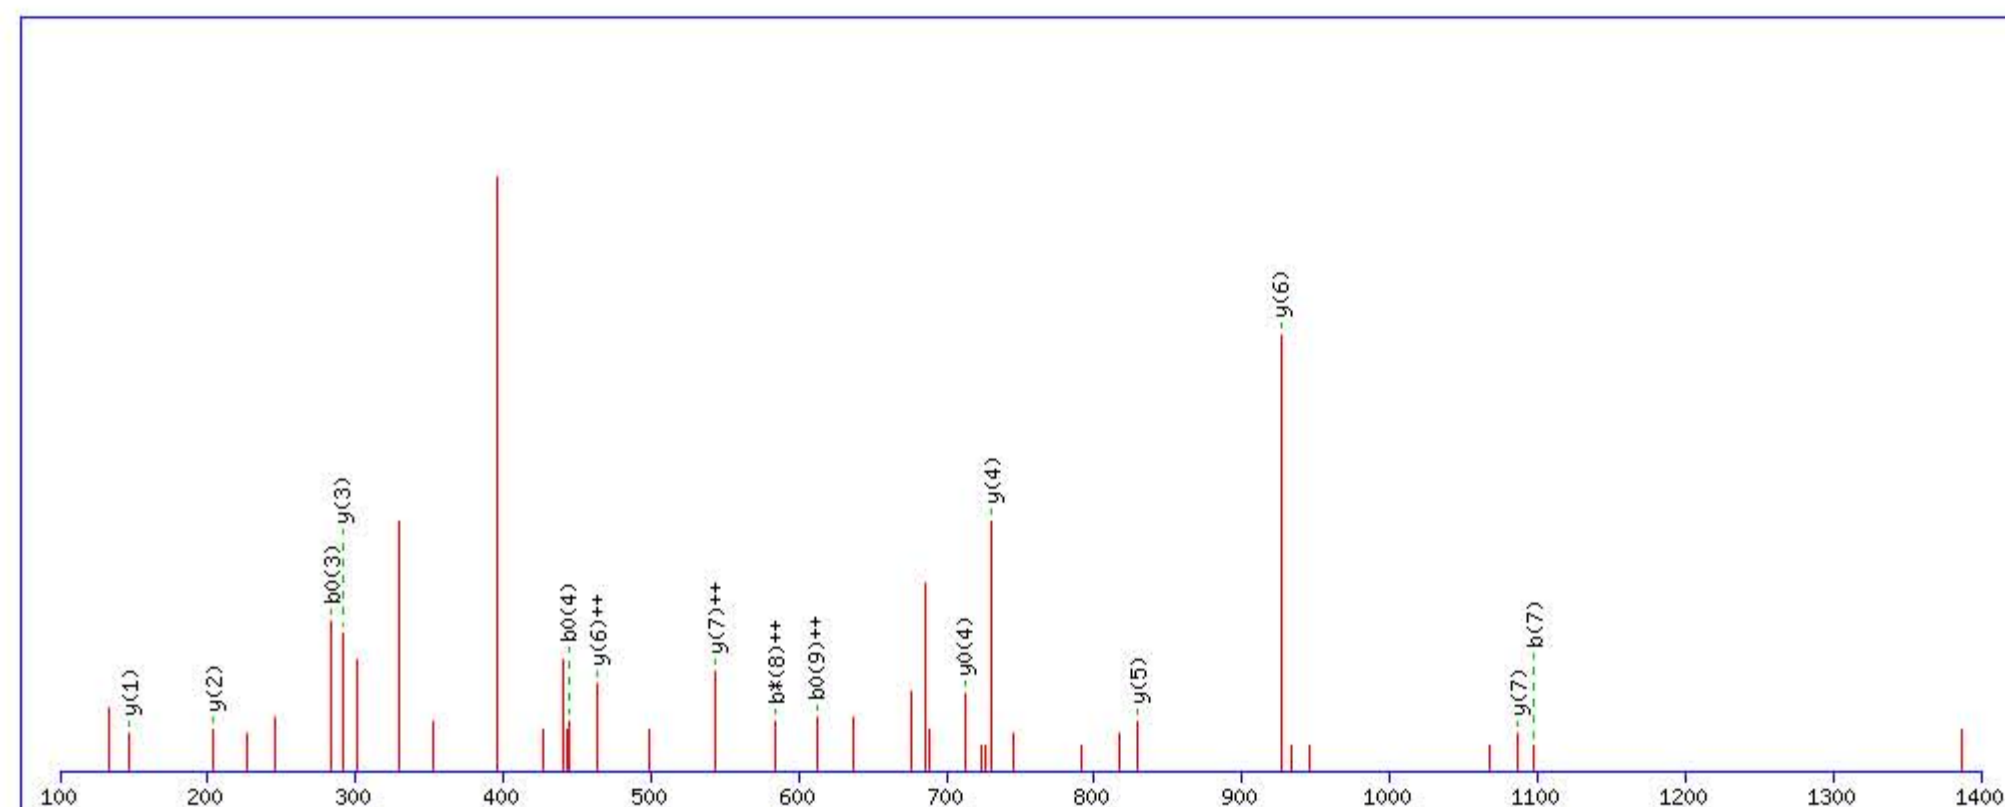

Monoisotopic mass of neutral peptide Mr(calc): 1386.627182

Fixed modifications: Carbamidomethyl (C) (apply to specified residues or termini only)

Variable modifications:

Q7 : Biotin:Thermo-21345 (Q)

Ions Score: 29 Expect: 0.011

Matches : 15/92 fragment ions using 32 most intense peaks [\(help\)](#)

| #  | b           | b <sup>++</sup> | b <sup>*</sup> | b <sup>*++</sup> | b <sup>0</sup> | b <sup>0++</sup> | Seq. | y           | y <sup>++</sup> | y <sup>*</sup> | y <sup>*++</sup> | y <sup>0</sup> | y <sup>0++</sup> | #  |
|----|-------------|-----------------|----------------|------------------|----------------|------------------|------|-------------|-----------------|----------------|------------------|----------------|------------------|----|
| 1  | 130.049869  | 65.528572       |                |                  | 112.039304     | 56.523290        | E    |             |                 |                |                  |                |                  | 10 |
| 2  | 187.071333  | 94.039305       |                |                  | 169.060768     | 85.034022        | G    | 1258.591856 | 629.799566      | 1241.565307    | 621.286292       | 1240.581291    | 620.794284       | 9  |
| 3  | 302.098276  | 151.552776      |                |                  | 284.087711     | 142.547494       | D    | 1201.570392 | 601.288834      | 1184.543843    | 592.775560       | 1183.559827    | 592.283552       | 8  |
| 4  | 462.128925  | 231.568101      |                |                  | 444.118360     | 222.562818       | C    | 1086.543449 | 543.775363      | 1069.516900    | 535.262088       | 1068.532884    | 534.770080       | 7  |
| 5  | 559.181689  | 280.094483      |                |                  | 541.171124     | 271.089200       | P    | 926.512800  | 463.760038      | 909.486251     | 455.246764       | 908.502235     | 454.754756       | 6  |
| 6  | 658.250103  | 329.628690      |                |                  | 640.239538     | 320.623407       | V    | 829.460036  | 415.233656      | 812.433487     | 406.720382       | 811.449471     | 406.228374       | 5  |
| 7  | 1097.475429 | 549.241353      | 1080.448880    | 540.728078       | 1079.464864    | 540.236070       | Q    | 730.391622  | 365.699449      | 713.365073     | 357.186175       | 712.381057     | 356.694167       | 4  |
| 8  | 1184.507457 | 592.757367      | 1167.480908    | 584.244092       | 1166.496892    | 583.752084       | S    | 291.166296  | 146.086786      | 274.139747     | 137.573512       | 273.155731     | 137.081504       | 3  |
| 9  | 1241.528921 | 621.268099      | 1224.502372    | 612.754824       | 1223.518356    | 612.262816       | G    | 204.134268  | 102.570772      | 187.107719     | 94.057497        |                |                  | 2  |
| 10 |             |                 |                |                  |                |                  | K    | 147.112804  | 74.060040       | 130.086255     | 65.546765        |                |                  | 1  |

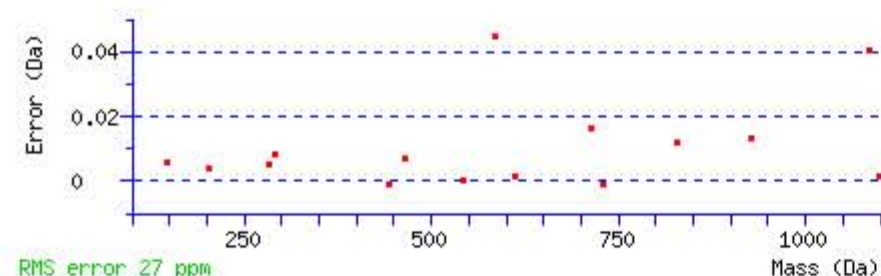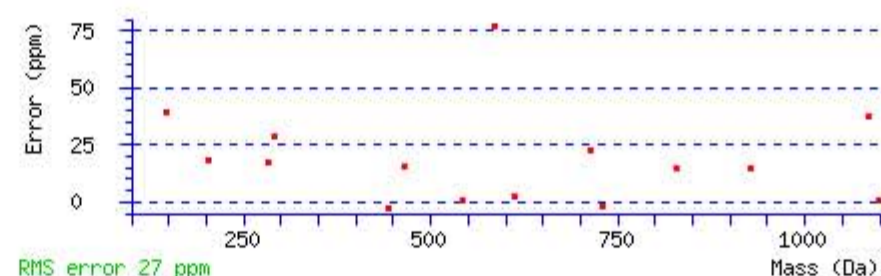

NCBI BLAST search of **EGDCPVQSGK**

(Parameters: blastp, nr protein database, expect=20000, no filter, PAM30)

Other BLAST [web gateways](#)

All matches to this query

| Score | Mr(calc):   | Delta    | Sequence                   |
|-------|-------------|----------|----------------------------|
| 28.8  | 1386.627182 | 0.007746 | <a href="#">EGDCPVQSGK</a> |

Mascot: <http://www.matrixscience.com/>

# MASCOT SCIENCE Mascot Search Results

## Peptide View

MS/MS Fragmentation of **TWQDCEYK**

Found in **KNG1\_HUMAN**, Kininogen-1 OS=Homo sapiens GN=KNG1 PE=1 SV=2

Match to Query 28302: 1439.638648 from(720.826600,2+) rtinseconds(1780) index(17617)

Title: Locus:1.1.1.3220.17 File:"2013-07-02 CLN FXIII 60 min 3rd F 2.wiff"

Data file C:\Program Files (x86)\Matrix Science\Mascot Daemon\mgf\6 FXIII 60 min 3rd\mascot\_daemon\_merge.mgf

Click mouse within plot area to zoom in by factor of two about that point

Or, Plot from  to  Da

Label all possible matches  Label matches used for scoring

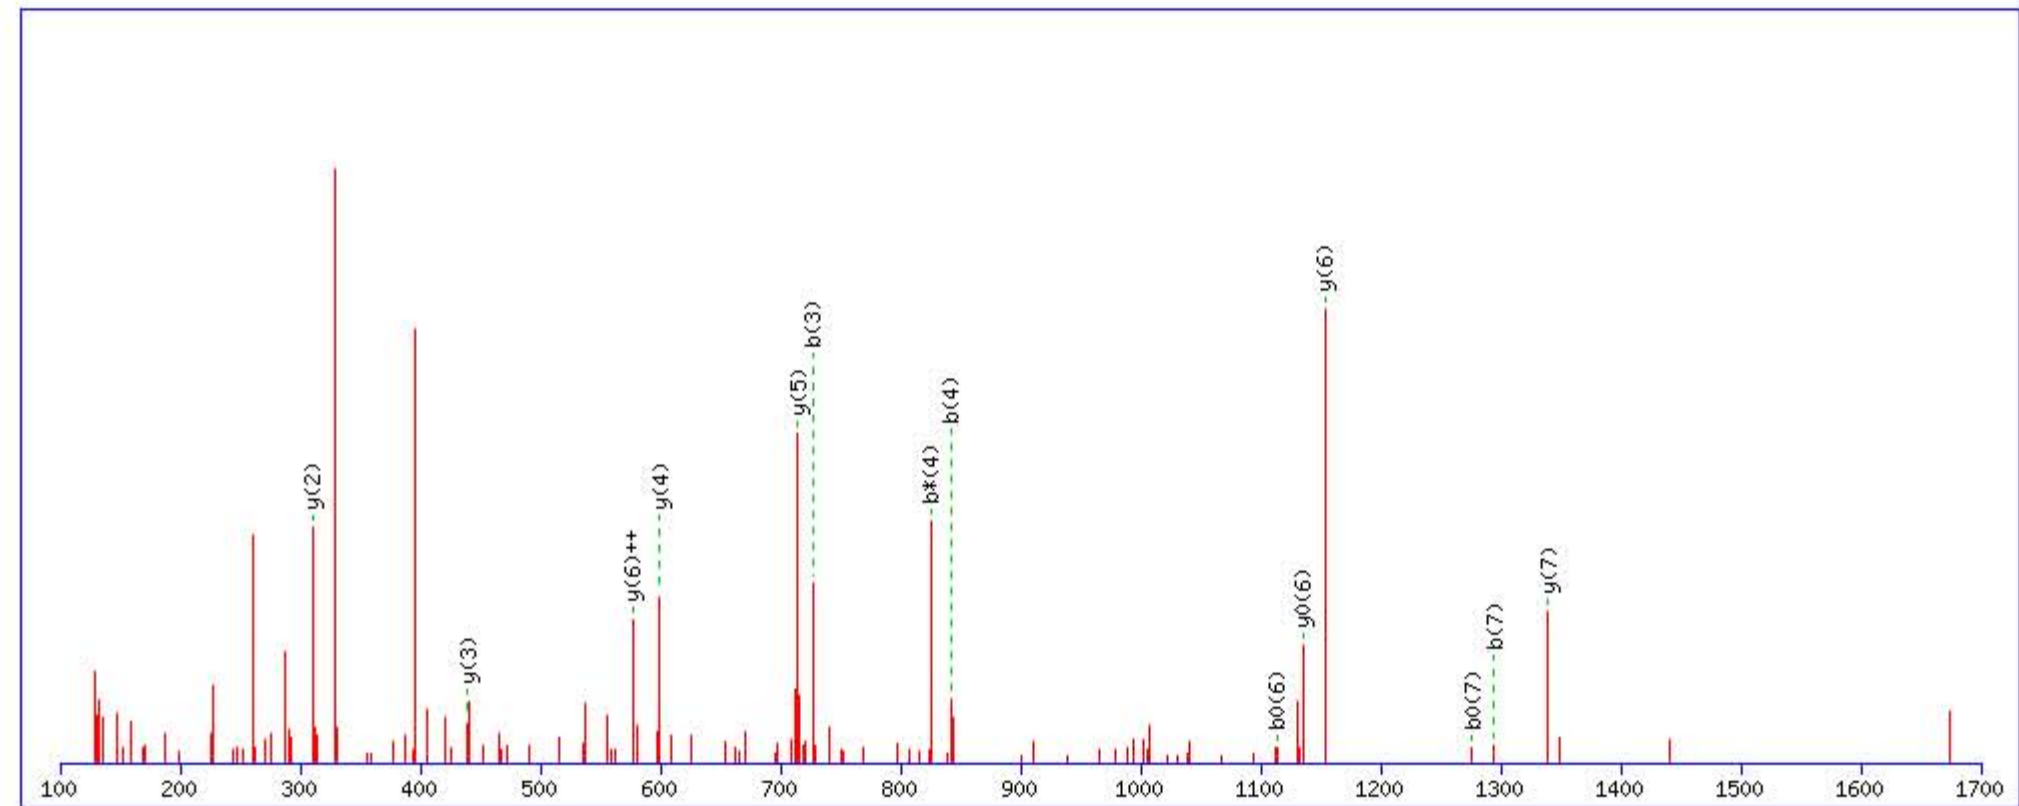

Monoisotopic mass of neutral peptide Mr(calc): 1439.621353

Fixed modifications: Carbamidomethyl (C) (apply to specified residues or termini only)

Variable modifications:

Q3 : Biotin:Thermo-21345 (Q)

Ions Score: 29 Expect: 0.0025

Matches : 14/76 fragment ions using 26 most intense peaks ([help](#))

| # | b           | b <sup>++</sup> | b <sup>*</sup> | b <sup>+++</sup> | b <sup>0</sup> | b <sup>0++</sup> | Seq. | y           | y <sup>++</sup> | y <sup>*</sup> | y <sup>+++</sup> | y <sup>0</sup> | y <sup>0++</sup> | # |
|---|-------------|-----------------|----------------|------------------|----------------|------------------|------|-------------|-----------------|----------------|------------------|----------------|------------------|---|
| 1 | 102.054955  | 51.531116       |                |                  | 84.044390      | 42.525833        | T    |             |                 |                |                  |                |                  | 8 |
| 2 | 288.134268  | 144.570772      |                |                  | 270.123703     | 135.565490       | W    | 1339.580957 | 670.294117      | 1322.554408    | 661.780842       | 1321.570392    | 661.288834       | 7 |
| 3 | 727.359594  | 364.183435      | 710.333045     | 355.670161       | 709.349029     | 355.178153       | Q    | 1153.501644 | 577.254460      | 1136.475095    | 568.741186       | 1135.491079    | 568.249178       | 6 |
| 4 | 842.386537  | 421.696907      | 825.359988     | 413.183632       | 824.375972     | 412.691624       | D    | 714.276318  | 357.641797      | 697.249769     | 349.128523       | 696.265753     | 348.636515       | 5 |
| 5 | 1002.417186 | 501.712231      | 985.390637     | 493.198957       | 984.406621     | 492.706949       | C    | 599.249375  | 300.128326      | 582.222826     | 291.615051       | 581.238810     | 291.123043       | 4 |
| 6 | 1131.459779 | 566.233528      | 1114.433230    | 557.720253       | 1113.449214    | 557.228245       | E    | 439.218726  | 220.113001      | 422.192177     | 211.599727       | 421.208161     | 211.107719       | 3 |
| 7 | 1294.523108 | 647.765192      | 1277.496559    | 639.251918       | 1276.512543    | 638.759910       | Y    | 310.176133  | 155.591705      | 293.149584     | 147.078430       |                |                  | 2 |
| 8 |             |                 |                |                  |                |                  | K    | 147.112804  | 74.060040       | 130.086255     | 65.546765        |                |                  | 1 |

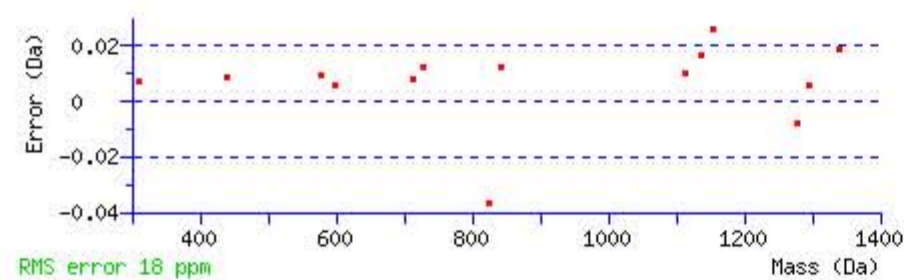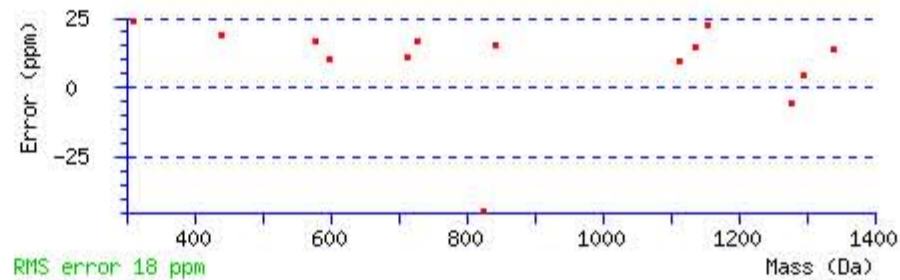

NCBI BLAST search of **TWQDCEYK**

(Parameters: blastp, nr protein database, expect=20000, no filter, PAM30)

Other BLAST [web gateways](#)

### All matches to this query

| Score | Mr(calc):   | Delta     | Sequence                      |
|-------|-------------|-----------|-------------------------------|
| 29.4  | 1439.621353 | 0.017295  | <a href="#">TWQDCEYK</a>      |
| 1.7   | 1439.653702 | -0.015054 | <a href="#">MPNGMYDGSALIR</a> |
| 1.5   | 1439.653702 | -0.015054 | <a href="#">MPNGMYDGSALIR</a> |

Mascot: <http://www.matrixscience.com/>

# MASCOT Search Results

## Peptide View

MS/MS Fragmentation of **SVSEINPTTQMK**

Found in **KNG1\_HUMAN**, Kininogen-1 OS=Homo sapiens GN=KNG1 PE=1 SV=2

Match to Query 35349: 1644.819248 from(823.416900,2+) rtinseconds(1847) index(32131)

Title: Locus:1.1.1.3192.12 File:"2013-07-02 CLN FXIII 60 min 3rd F 3.wiff"

Data file C:\Program Files (x86)\Matrix Science\Mascot Daemon\mgf6 FXIII 60 min 3rd\mascot\_daemon\_merge.mgf

Click mouse within plot area to zoom in by factor of two about that point

Or, Plot from  to  Da

Label all possible matches  Label matches used for scoring

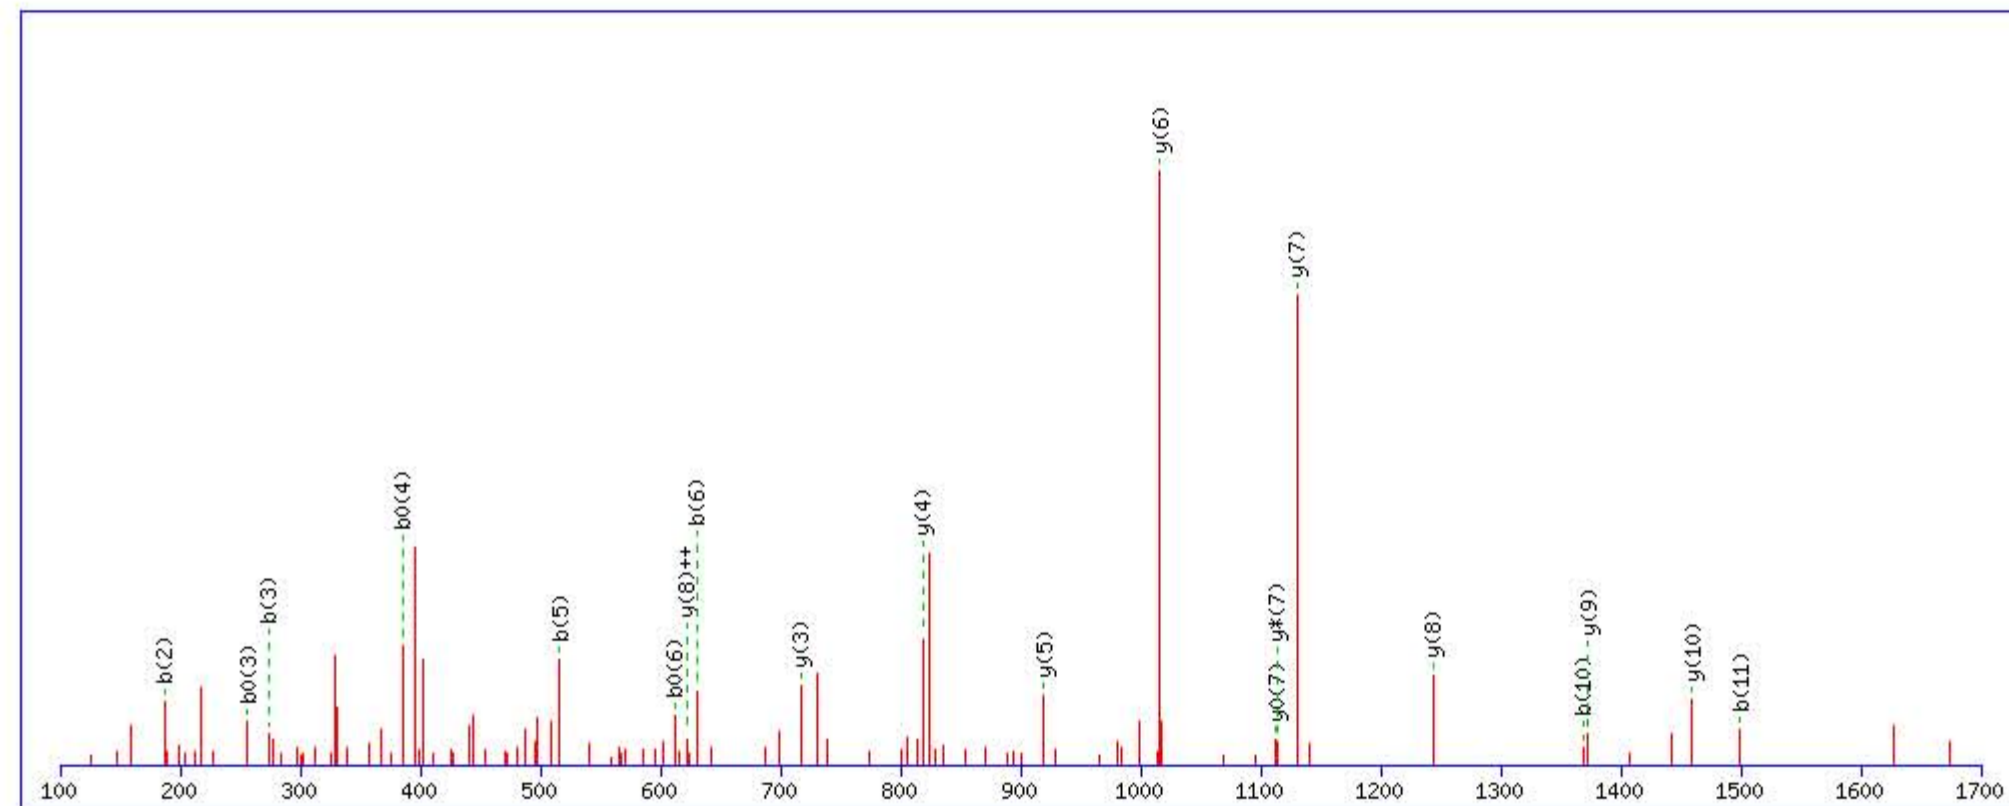

Monoisotopic mass of neutral peptide Mr(calc): 1644.821503

Fixed modifications: Carbamidomethyl (C) (apply to specified residues or termini only)

Variable modifications:

Q10 : Biotin:Thermo-21345 (Q)

Ions Score: 61 Expect: 4.1e-006

Matches : 20/116 fragment ions using 28 most intense peaks [\(help\)](#)

| #  | b                  | b <sup>++</sup> | b <sup>*</sup> | b <sup>*++</sup> | b <sup>0</sup>    | b <sup>0++</sup> | Seq. | y                  | y <sup>++</sup>   | y <sup>*</sup>     | y <sup>*++</sup> | y <sup>0</sup>     | y <sup>0++</sup> | #  |
|----|--------------------|-----------------|----------------|------------------|-------------------|------------------|------|--------------------|-------------------|--------------------|------------------|--------------------|------------------|----|
| 1  | 88.039304          | 44.523290       |                |                  | 70.028739         | 35.518008        | S    |                    |                   |                    |                  |                    |                  | 12 |
| 2  | <b>187.107718</b>  | 94.057497       |                |                  | 169.097153        | 85.052214        | V    | 1558.796763        | 779.902020        | 1541.770214        | 771.388745       | 1540.786198        | 770.896737       | 11 |
| 3  | <b>274.139746</b>  | 137.573511      |                |                  | <b>256.129181</b> | 128.568229       | S    | <b>1459.728349</b> | 730.367813        | 1442.701800        | 721.854538       | 1441.717784        | 721.362530       | 10 |
| 4  | 403.182339         | 202.094808      |                |                  | <b>385.171774</b> | 193.089525       | E    | <b>1372.696321</b> | 686.851799        | 1355.669772        | 678.338524       | 1354.685756        | 677.846516       | 9  |
| 5  | <b>516.266403</b>  | 258.636840      |                |                  | 498.255838        | 249.631557       | I    | <b>1243.653728</b> | <b>622.330502</b> | 1226.627179        | 613.817228       | 1225.643163        | 613.325220       | 8  |
| 6  | <b>630.309330</b>  | 315.658303      | 613.282781     | 307.145029       | <b>612.298765</b> | 306.653021       | N    | <b>1130.569664</b> | 565.788470        | <b>1113.543115</b> | 557.275196       | <b>1112.559099</b> | 556.783188       | 7  |
| 7  | 727.362094         | 364.184685      | 710.335545     | 355.671411       | 709.351529        | 355.179403       | P    | <b>1016.526737</b> | 508.767007        | 999.500188         | 500.253732       | 998.516172         | 499.761724       | 6  |
| 8  | 828.409773         | 414.708525      | 811.383224     | 406.195250       | 810.399208        | 405.703242       | T    | <b>919.473973</b>  | 460.240625        | 902.447424         | 451.727350       | 901.463408         | 451.235342       | 5  |
| 9  | 929.457452         | 465.232364      | 912.430903     | 456.719090       | 911.446887        | 456.227082       | T    | <b>818.426294</b>  | 409.716785        | 801.399745         | 401.203511       | 800.415729         | 400.711503       | 4  |
| 10 | <b>1368.682778</b> | 684.845027      | 1351.656229    | 676.331753       | 1350.672213       | 675.839745       | Q    | <b>717.378615</b>  | 359.192946        | 700.352066         | 350.679671       |                    |                  | 3  |
| 11 | <b>1499.723263</b> | 750.365270      | 1482.696714    | 741.851995       | 1481.712698       | 741.359987       | M    | 278.153289         | 139.580282        | 261.126740         | 131.067008       |                    |                  | 2  |
| 12 |                    |                 |                |                  |                   |                  | K    | 147.112804         | 74.060040         | 130.086255         | 65.546765        |                    |                  | 1  |

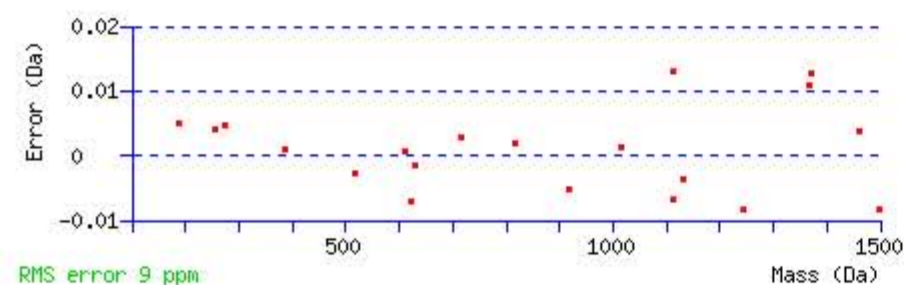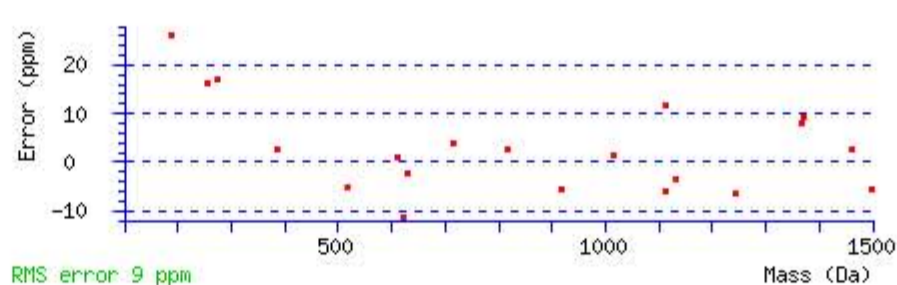

NCBI BLAST search of **SVSEINPTTQMK**

(Parameters: blastp, nr protein database, expect=20000, no filter, PAM30)

Other BLAST [web gateways](#)

All matches to this query

| Score | Mr(calc):   | Delta     | Sequence                         |
|-------|-------------|-----------|----------------------------------|
| 60.9  | 1644.821503 | -0.002255 | <a href="#">SVSEINPTTQMK</a>     |
| 3.3   | 1644.814133 | 0.005115  | <a href="#">VTDQGSPPMSATAIVR</a> |
| 1.1   | 1644.803757 | 0.015491  | <a href="#">IISTMKVMQFQGMK</a>   |
| 0.3   | 1644.810745 | 0.008503  | <a href="#">VSDGENVIISHFNSK</a>  |

Mascot: <http://www.matrixscience.com/>

# MASCOT Search Results

## Peptide View

MS/MS Fragmentation of **YNSQNQSNNQFVLYR**

Found in **KNG1\_HUMAN**, Kininogen-1 OS=Homo sapiens GN=KNG1 PE=1 SV=2

Match to Query 45795: 2185.057872 from(729.359900,3+) rtinseconds(2056) index(19393)

Title: Locus:1.1.1.3316.9 File:"2013-07-02 CLN FXIII 60 min 3rd F 2.wiff"

Data file C:\Program Files (x86)\Matrix Science\Mascot Daemon\mgf\6 FXIII 60 min 3rd\mascot\_daemon\_merge.mgf

Click mouse within plot area to zoom in by factor of two about that point

Or, Plot from  to  Da

Label all possible matches  Label matches used for scoring

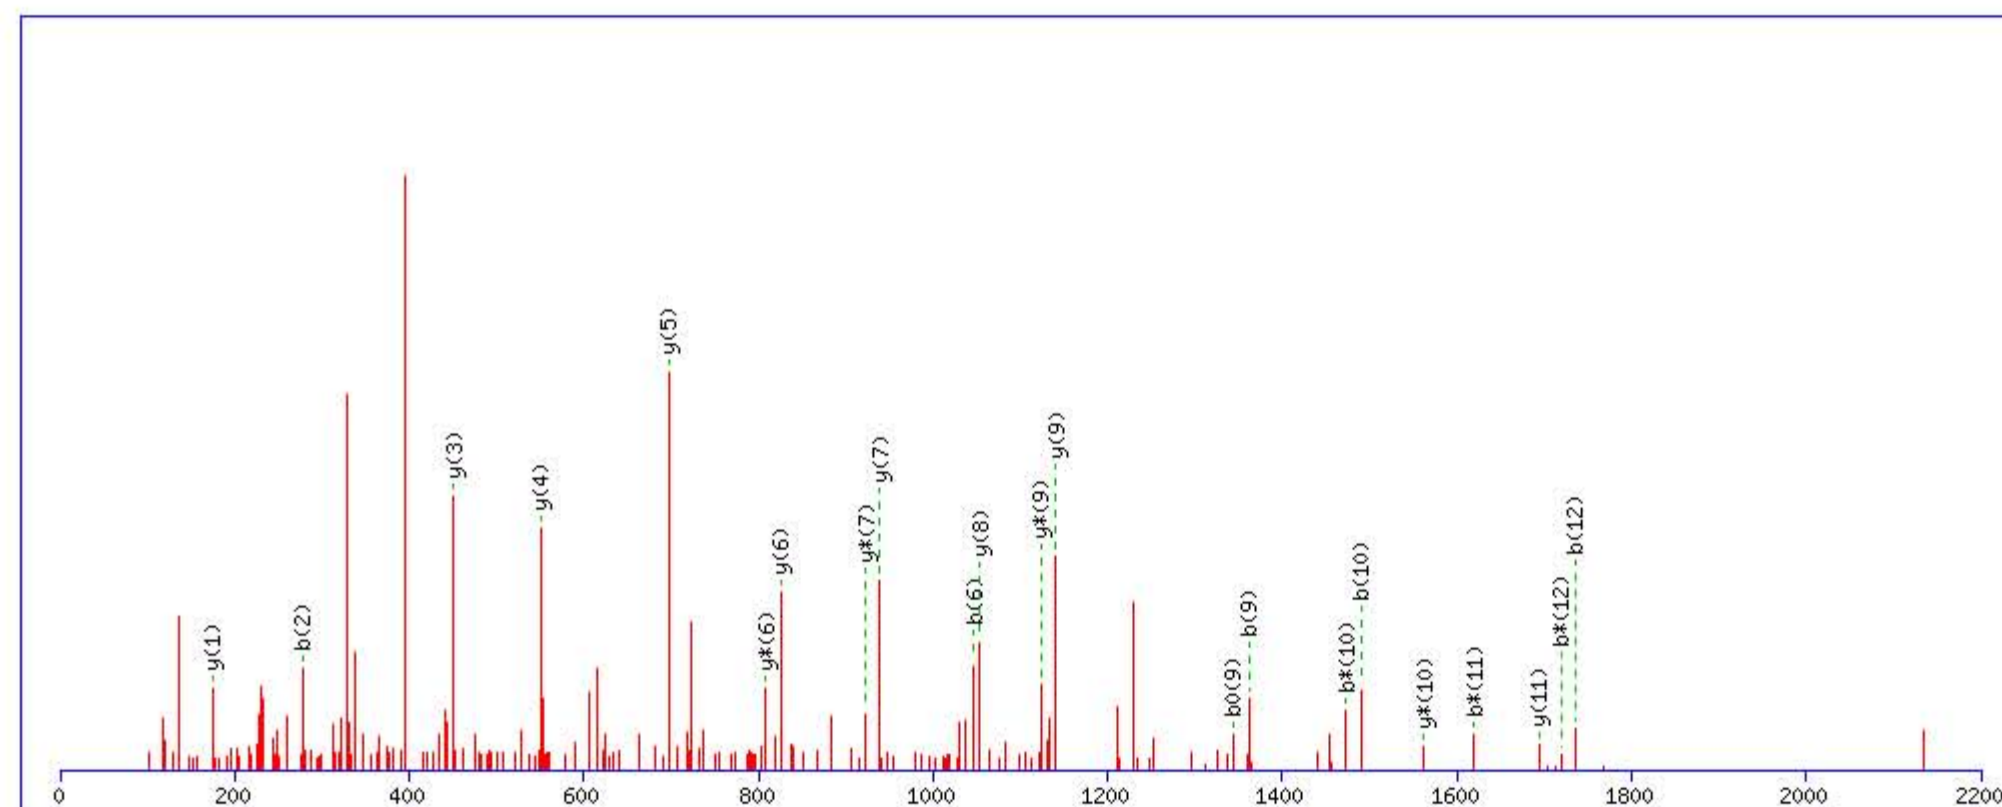

Monoisotopic mass of neutral peptide Mr(calc): 2185.037445

Fixed modifications: Carbamidomethyl (C) (apply to specified residues or termini only)

Variable modifications:

Q6 : Biotin:Thermo-21345 (Q)

Ions Score: 54 Expect: 8.9e-005

Matches : 22/146 fragment ions using 34 most intense peaks [\(help\)](#)

| #  | b                  | b <sup>++</sup> | b*                 | b <sup>+++</sup> | b <sup>0</sup>     | b <sup>0++</sup> | Seq. | y                  | y <sup>++</sup> | y*                 | y <sup>+++</sup> | y <sup>0</sup> | y <sup>0++</sup> | #  |
|----|--------------------|-----------------|--------------------|------------------|--------------------|------------------|------|--------------------|-----------------|--------------------|------------------|----------------|------------------|----|
| 1  | 164.070605         | 82.538940       |                    |                  |                    |                  | Y    |                    |                 |                    |                  |                |                  | 15 |
| 2  | <b>278.113532</b>  | 139.560404      | 261.086983         | 131.047130       |                    |                  | N    | 2022.981419        | 1011.994348     | 2005.954870        | 1003.481073      | 2004.970854    | 1002.989065      | 14 |
| 3  | 365.145560         | 183.076418      | 348.119011         | 174.563144       | 347.134995         | 174.071136       | S    | 1908.938492        | 954.972884      | 1891.911943        | 946.459610       | 1890.927927    | 945.967602       | 13 |
| 4  | 493.204138         | 247.105707      | 476.177589         | 238.592433       | 475.193573         | 238.100425       | Q    | 1821.906464        | 911.456870      | 1804.879915        | 902.943596       | 1803.895899    | 902.451588       | 12 |
| 5  | 607.247065         | 304.127171      | 590.220516         | 295.613896       | 589.236500         | 295.121888       | N    | <b>1693.847886</b> | 847.427581      | 1676.821337        | 838.914307       | 1675.837321    | 838.422299       | 11 |
| 6  | <b>1046.472391</b> | 523.739834      | 1029.445842        | 515.226559       | 1028.461826        | 514.734551       | Q    | 1579.804959        | 790.406118      | <b>1562.778410</b> | 781.892843       | 1561.794394    | 781.400835       | 10 |
| 7  | 1133.504419        | 567.255848      | 1116.477870        | 558.742573       | 1115.493854        | 558.250565       | S    | <b>1140.579633</b> | 570.793455      | <b>1123.553084</b> | 562.280180       | 1122.569068    | 561.788172       | 9  |
| 8  | 1247.547346        | 624.277311      | 1230.520797        | 615.764037       | 1229.536781        | 615.272029       | N    | <b>1053.547605</b> | 527.277441      | 1036.521056        | 518.764166       |                |                  | 8  |
| 9  | <b>1361.590273</b> | 681.298775      | 1344.563724        | 672.785500       | <b>1343.579708</b> | 672.293492       | N    | <b>939.504678</b>  | 470.255977      | <b>922.478129</b>  | 461.742703       |                |                  | 7  |
| 10 | <b>1489.648851</b> | 745.328064      | <b>1472.622302</b> | 736.814789       | 1471.638286        | 736.322781       | Q    | <b>825.461751</b>  | 413.234514      | <b>808.435202</b>  | 404.721239       |                |                  | 6  |
| 11 | 1636.717265        | 818.862271      | <b>1619.690716</b> | 810.348996       | 1618.706700        | 809.856988       | F    | <b>697.403173</b>  | 349.205225      | 680.376624         | 340.691950       |                |                  | 5  |
| 12 | <b>1735.785679</b> | 868.396478      | <b>1718.759130</b> | 859.883203       | 1717.775114        | 859.391195       | V    | <b>550.334759</b>  | 275.671018      | 533.308210         | 267.157743       |                |                  | 4  |
| 13 | 1848.869743        | 924.938510      | 1831.843194        | 916.425235       | 1830.859178        | 915.933227       | L    | <b>451.266345</b>  | 226.136811      | 434.239796         | 217.623536       |                |                  | 3  |
| 14 | 2011.933072        | 1006.470174     | 1994.906523        | 997.956900       | 1993.922507        | 997.464892       | Y    | 338.182281         | 169.594779      | 321.155732         | 161.081504       |                |                  | 2  |
| 15 |                    |                 |                    |                  |                    |                  | R    | <b>175.118952</b>  | 88.063114       | 158.092403         | 79.549840        |                |                  | 1  |

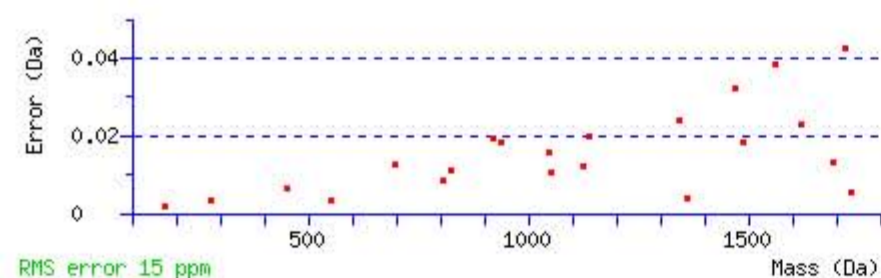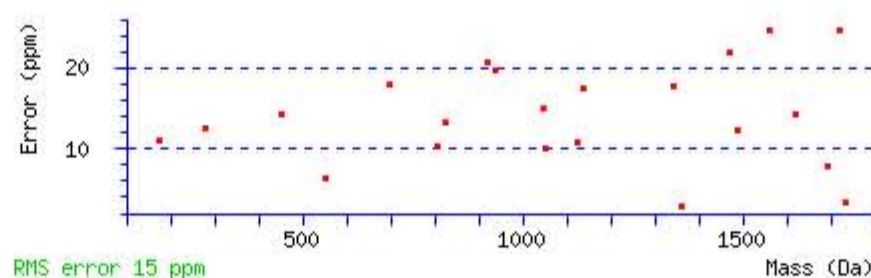

NCBI BLAST search of [YNSQNQSNNQFVLYR](#)

(Parameters: blastp, nr protein database, expect=20000, no filter, PAM30)

Other BLAST [web gateways](#)

All matches to this query

| Score | Mr(calc):   | Delta    | Sequence                        |
|-------|-------------|----------|---------------------------------|
| 53.7  | 2185.037445 | 0.020427 | <a href="#">YNSQNQSNNQFVLYR</a> |
| 41.4  | 2185.037445 | 0.020427 | <a href="#">YNSQNQSNNQFVLYR</a> |
| 9.9   | 2185.037445 | 0.020427 | <a href="#">YNSQNQSNNQFVLYR</a> |

# MASCOT Search Results

## Peptide View

MS/MS Fragmentation of **YNSQNQSNNQFVLYR**

Found in **KNG1\_HUMAN**, Kininogen-1 OS=Homo sapiens GN=KNG1 PE=1 SV=2

Match to Query 45797: 2185.063028 from(1093.538790,2+) rtinseconds(2143) index(19887)

Title: Locus:1.1.1.3346.20 File:"2013-07-02 CLN FXIII 60 min 3rd F 2.wiff"

Data file C:\Program Files (x86)\Matrix Science\Mascot Daemon\mgf\6 FXIII 60 min 3rd\mascot\_daemon\_merge.mgf

Click mouse within plot area to zoom in by factor of two about that point

Or, Plot from  to  Da

Label all possible matches  Label matches used for scoring

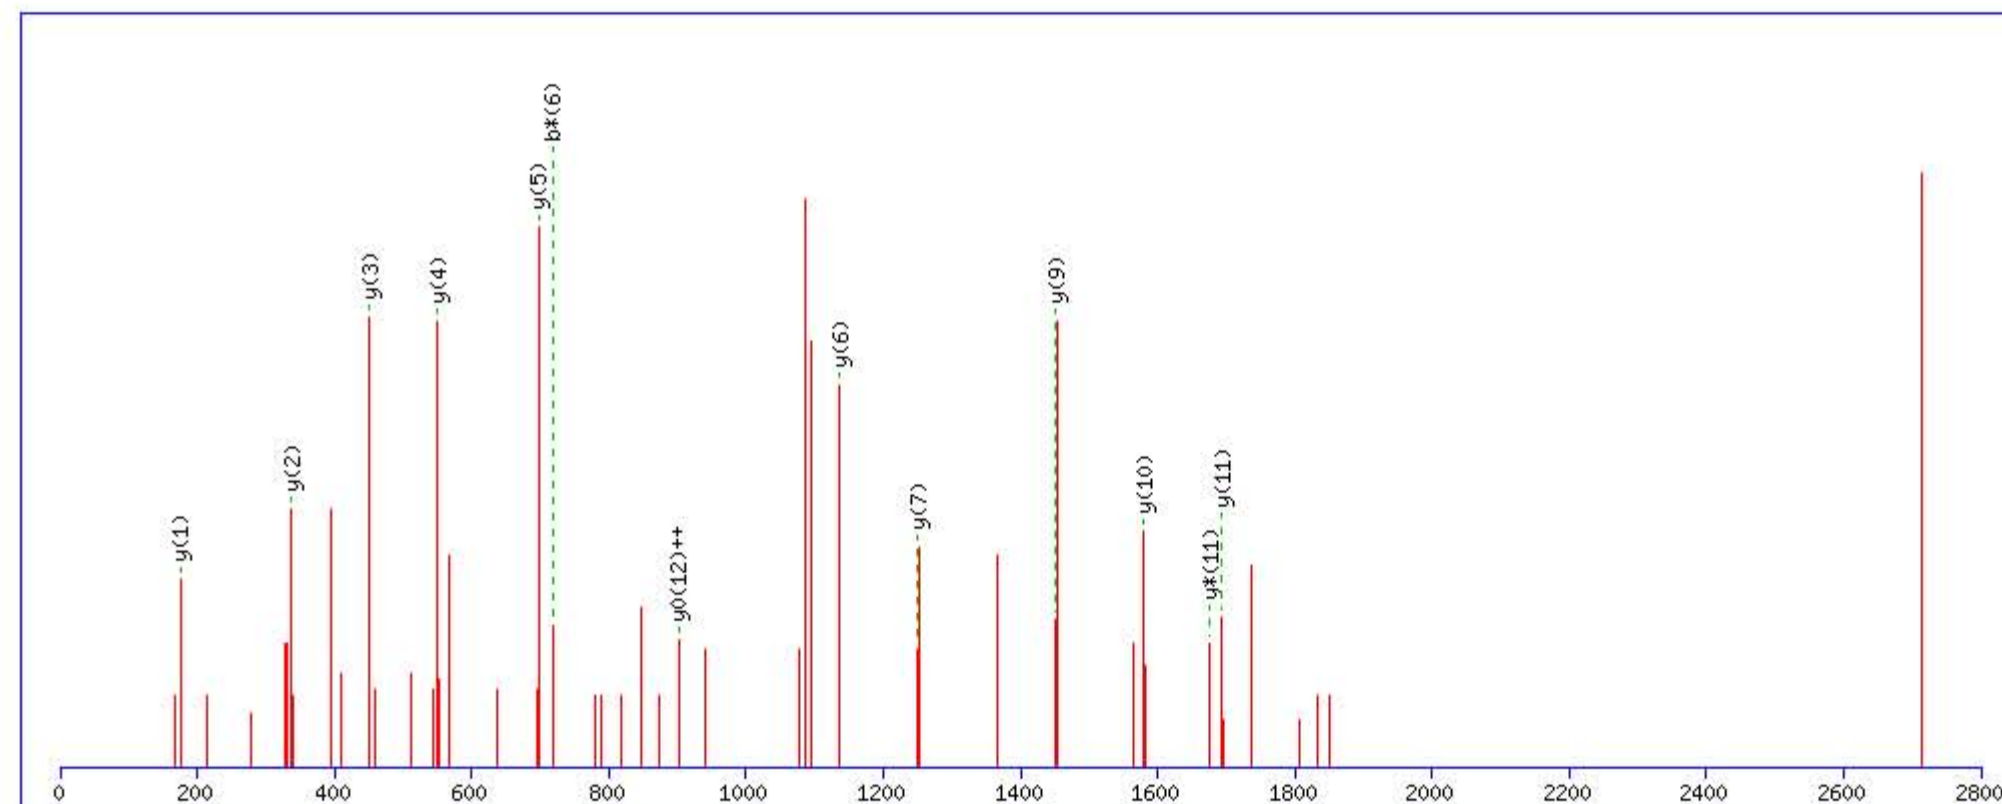

Monoisotopic mass of neutral peptide Mr(calc): 2185.037445

Fixed modifications: Carbamidomethyl (C) (apply to specified residues or termini only)

Variable modifications:

Q10 : Biotin:Thermo-21345 (Q)

Ions Score: 37 Expect: 0.0047

Matches : 13/146 fragment ions using 40 most intense peaks [\(help\)](#)

| #  | b           | b <sup>++</sup> | b <sup>*</sup> | b <sup>+++</sup> | b <sup>0</sup> | b <sup>0++</sup> | Seq. | y           | y <sup>++</sup> | y <sup>*</sup> | y <sup>+++</sup> | y <sup>0</sup> | y <sup>0++</sup> | #  |
|----|-------------|-----------------|----------------|------------------|----------------|------------------|------|-------------|-----------------|----------------|------------------|----------------|------------------|----|
| 1  | 164.070605  | 82.538940       |                |                  |                |                  | Y    |             |                 |                |                  |                |                  | 15 |
| 2  | 278.113532  | 139.560404      | 261.086983     | 131.047130       |                |                  | N    | 2022.981419 | 1011.994348     | 2005.954870    | 1003.481073      | 2004.970854    | 1002.989065      | 14 |
| 3  | 365.145560  | 183.076418      | 348.119011     | 174.563144       | 347.134995     | 174.071136       | S    | 1908.938492 | 954.972884      | 1891.911943    | 946.459610       | 1890.927927    | 945.967602       | 13 |
| 4  | 493.204138  | 247.105707      | 476.177589     | 238.592433       | 475.193573     | 238.100425       | Q    | 1821.906464 | 911.456870      | 1804.879915    | 902.943596       | 1803.895899    | 902.451588       | 12 |
| 5  | 607.247065  | 304.127171      | 590.220516     | 295.613896       | 589.236500     | 295.121888       | N    | 1693.847886 | 847.427581      | 1676.821337    | 838.914307       | 1675.837321    | 838.422299       | 11 |
| 6  | 735.305643  | 368.156460      | 718.279094     | 359.643185       | 717.295078     | 359.151177       | Q    | 1579.804959 | 790.406118      | 1562.778410    | 781.892843       | 1561.794394    | 781.400835       | 10 |
| 7  | 822.337671  | 411.672474      | 805.311122     | 403.159199       | 804.327106     | 402.667191       | S    | 1451.746381 | 726.376829      | 1434.719832    | 717.863554       | 1433.735816    | 717.371546       | 9  |
| 8  | 936.380598  | 468.693937      | 919.354049     | 460.180662       | 918.370033     | 459.688654       | N    | 1364.714353 | 682.860815      | 1347.687804    | 674.347540       |                |                  | 8  |
| 9  | 1050.423525 | 525.715400      | 1033.396976    | 517.202126       | 1032.412960    | 516.710118       | N    | 1250.671426 | 625.839351      | 1233.644877    | 617.326077       |                |                  | 7  |
| 10 | 1489.648851 | 745.328064      | 1472.622302    | 736.814789       | 1471.638286    | 736.322781       | Q    | 1136.628499 | 568.817888      | 1119.601950    | 560.304613       |                |                  | 6  |
| 11 | 1636.717265 | 818.862271      | 1619.690716    | 810.348996       | 1618.706700    | 809.856988       | F    | 697.403173  | 349.205225      | 680.376624     | 340.691950       |                |                  | 5  |
| 12 | 1735.785679 | 868.396478      | 1718.759130    | 859.883203       | 1717.775114    | 859.391195       | V    | 550.334759  | 275.671018      | 533.308210     | 267.157743       |                |                  | 4  |
| 13 | 1848.869743 | 924.938510      | 1831.843194    | 916.425235       | 1830.859178    | 915.933227       | L    | 451.266345  | 226.136811      | 434.239796     | 217.623536       |                |                  | 3  |
| 14 | 2011.933072 | 1006.470174     | 1994.906523    | 997.956900       | 1993.922507    | 997.464892       | Y    | 338.182281  | 169.594779      | 321.155732     | 161.081504       |                |                  | 2  |
| 15 |             |                 |                |                  |                |                  | R    | 175.118952  | 88.063114       | 158.092403     | 79.549840        |                |                  | 1  |

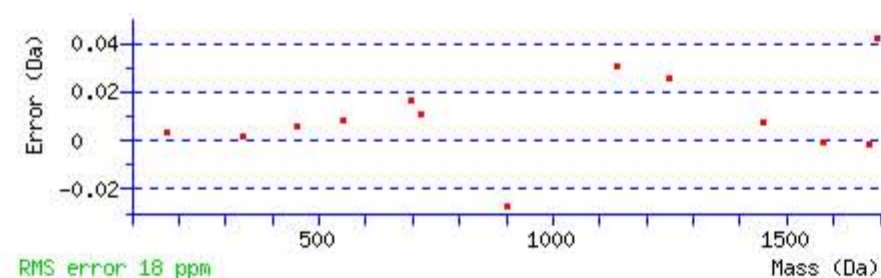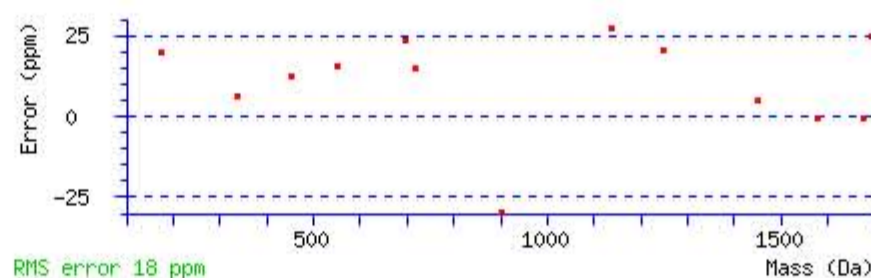

NCBI BLAST search of **YNSQNQSNNQFVLYR**

(Parameters: blastp, nr protein database, expect=20000, no filter, PAM30)

Other BLAST [web gateways](#)

All matches to this query

| Score | Mr(calc):   | Delta    | Sequence                        |
|-------|-------------|----------|---------------------------------|
| 36.8  | 2185.037445 | 0.025583 | <a href="#">YNSQNQSNNQFVLYR</a> |
| 26.1  | 2185.037445 | 0.025583 | <a href="#">YNSQNQSNNQFVLYR</a> |
| 19.7  | 2185.037445 | 0.025583 | <a href="#">YNSQNQSNNQFVLYR</a> |

# MASCOT Search Results

## Peptide View

MS/MS Fragmentation of **LDDDLHQGGHVLDPHGK**  
 Found in **KNG1\_HUMAN**, Kininogen-1 OS=Homo sapiens GN=KNG1 PE=1 SV=2

Match to Query 48332: 2332.093776 from(584.030720,4+) rtinseconds(1543) index(30517)  
 Title: Locus:1.1.1.3086.11 File:"2013-07-02 CLN FXIII 60 min 3rd F 3.wiff"  
 Data file C:\Program Files (x86)\Matrix Science\Mascot Daemon\mgf\6 FXIII 60 min 3rd\mascot\_daemon\_merge.mgf

Click mouse within plot area to zoom in by factor of two about that point

Or, Plot from  to  Da

Label all possible matches  Label matches used for scoring

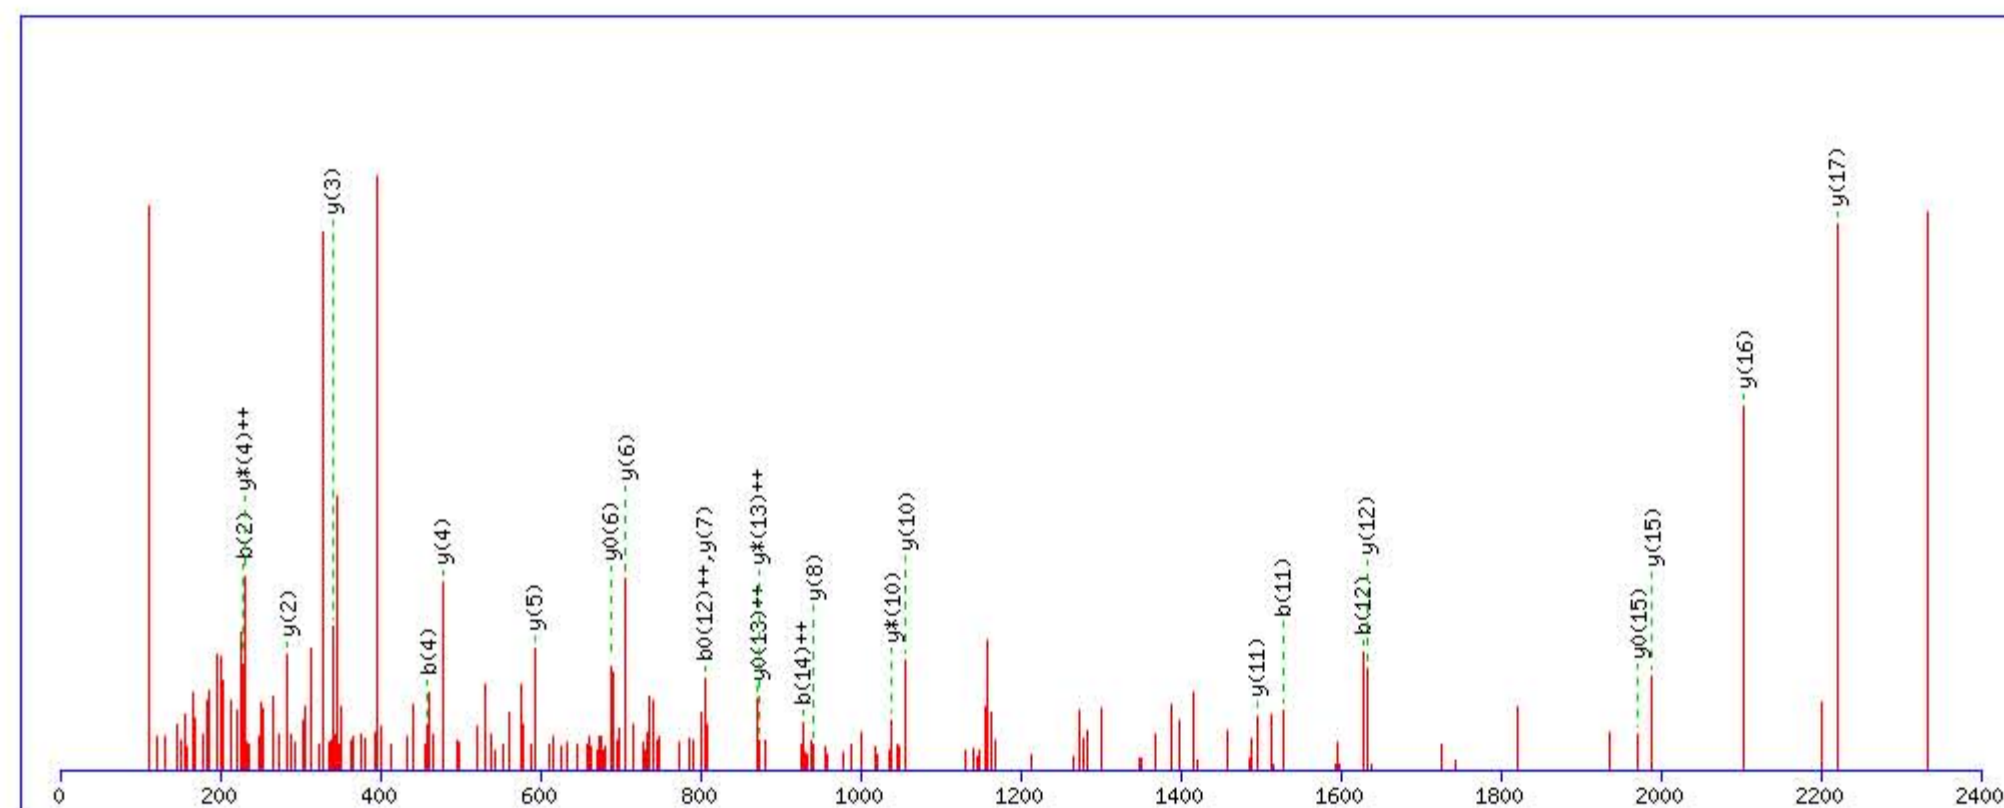

Monoisotopic mass of neutral peptide Mr(calc): 2332.101883  
 Fixed modifications: Carbamidomethyl (C) (apply to specified residues or termini only)  
 Variable modifications:  
 Q8 : Biotin:Thermo-21345 (Q)  
 Ions Score: 48 Expect: 0.00027  
 Matches : 25/180 fragment ions using 73 most intense peaks [\(help\)](#)

| #  | b                  | b <sup>++</sup>   | b <sup>*</sup> | b <sup>*++</sup> | b <sup>0</sup> | b <sup>0++</sup>  | Seq. | y                  | y <sup>++</sup> | y <sup>*</sup>     | y <sup>*++</sup>  | y <sup>0</sup>     | y <sup>0++</sup>  | #  |
|----|--------------------|-------------------|----------------|------------------|----------------|-------------------|------|--------------------|-----------------|--------------------|-------------------|--------------------|-------------------|----|
| 1  | 114.091340         | 57.549308         |                |                  |                |                   | L    |                    |                 |                    |                   |                    |                   | 18 |
| 2  | <b>229.118283</b>  | 115.062779        |                |                  | 211.107718     | 106.057497        | D    | <b>2220.025077</b> | 1110.516176     | 2202.998528        | 1102.002902       | 2202.014512        | 1101.510894       | 17 |
| 3  | 344.145226         | 172.576251        |                |                  | 326.134661     | 163.570968        | D    | <b>2104.998134</b> | 1053.002705     | 2087.971585        | 1044.489430       | 2086.987569        | 1043.997422       | 16 |
| 4  | <b>459.172169</b>  | 230.089722        |                |                  | 441.161604     | 221.084440        | D    | <b>1989.971191</b> | 995.489234      | 1972.944642        | 986.975959        | <b>1971.960626</b> | 986.483951        | 15 |
| 5  | 572.256233         | 286.631755        |                |                  | 554.245668     | 277.626472        | L    | 1874.944248        | 937.975762      | 1857.917699        | 929.462488        | 1856.933683        | 928.970480        | 14 |
| 6  | 701.298826         | 351.153051        |                |                  | 683.288261     | 342.147769        | E    | 1761.860184        | 881.433730      | 1744.833635        | <b>872.920456</b> | 1743.849619        | <b>872.428448</b> | 13 |
| 7  | 838.357738         | 419.682507        |                |                  | 820.347173     | 410.677225        | H    | <b>1632.817591</b> | 816.912434      | 1615.791042        | 808.399159        | 1614.807026        | 807.907151        | 12 |
| 8  | 1277.583064        | 639.295170        | 1260.556515    | 630.781896       | 1259.572499    | 630.289888        | Q    | <b>1495.758679</b> | 748.382978      | 1478.732130        | 739.869703        | 1477.748114        | 739.377695        | 11 |
| 9  | 1334.604528        | 667.805902        | 1317.577979    | 659.292628       | 1316.593963    | 658.800620        | G    | <b>1056.533353</b> | 528.770315      | <b>1039.506804</b> | 520.257040        | 1038.522788        | 519.765032        | 10 |
| 10 | 1391.625992        | 696.316634        | 1374.599443    | 687.803360       | 1373.615427    | 687.311352        | G    | 999.511889         | 500.259583      | 982.485340         | 491.746308        | 981.501324         | 491.254300        | 9  |
| 11 | <b>1528.684904</b> | 764.846090        | 1511.658355    | 756.332816       | 1510.674339    | 755.840807        | H    | <b>942.490425</b>  | 471.748851      | 925.463876         | 463.235576        | 924.479860         | 462.743568        | 8  |
| 12 | <b>1627.753318</b> | 814.380297        | 1610.726769    | 805.867023       | 1609.742753    | <b>805.375015</b> | V    | <b>805.431513</b>  | 403.219395      | 788.404964         | 394.706120        | 787.420948         | 394.214112        | 7  |
| 13 | 1740.837382        | 870.922329        | 1723.810833    | 862.409055       | 1722.826817    | 861.917046        | L    | <b>706.363099</b>  | 353.685188      | 689.336550         | 345.171913        | <b>688.352534</b>  | 344.679905        | 6  |
| 14 | 1855.864325        | <b>928.435801</b> | 1838.837776    | 919.922526       | 1837.853760    | 919.430518        | D    | <b>593.279035</b>  | 297.143156      | 576.252486         | 288.629881        | 575.268470         | 288.137873        | 5  |
| 15 | 1992.923237        | 996.965257        | 1975.896688    | 988.451982       | 1974.912672    | 987.959974        | H    | <b>478.252092</b>  | 239.629684      | 461.225543         | <b>231.116410</b> |                    |                   | 4  |
| 16 | 2049.944701        | 1025.475988       | 2032.918152    | 1016.962714      | 2031.934136    | 1016.470706       | G    | <b>341.193180</b>  | 171.100228      | 324.166631         | 162.586954        |                    |                   | 3  |
| 17 | 2187.003613        | 1094.005444       | 2169.977064    | 1085.492170      | 2168.993048    | 1085.000162       | H    | <b>284.171716</b>  | 142.589496      | 267.145167         | 134.076221        |                    |                   | 2  |
| 18 |                    |                   |                |                  |                |                   | K    | 147.112804         | 74.060040       | 130.086255         | 65.546765         |                    |                   | 1  |

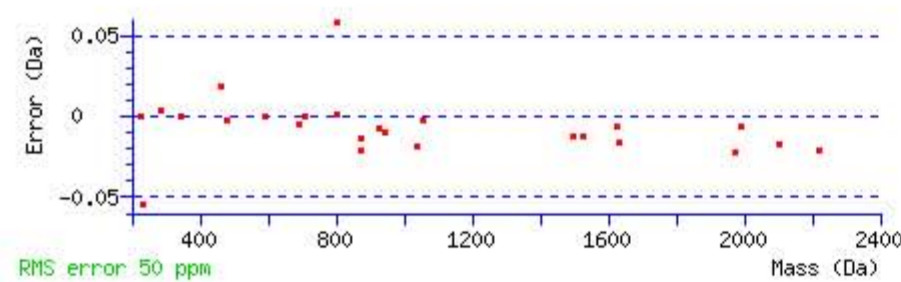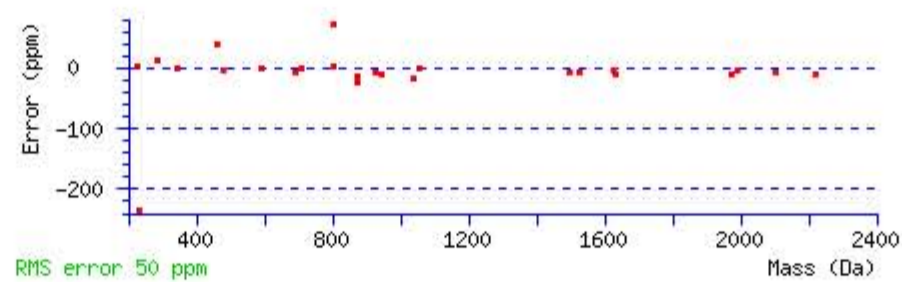

NCBI BLAST search of **LDDDLHQGGHVLDPHGK**  
 (Parameters: blastp, nr protein database, expect=20000, no filter, PAM30)  
 Other BLAST [web gateways](#)

### All matches to this query

| Score | Mr(calc):   | Delta     | Sequence                          |
|-------|-------------|-----------|-----------------------------------|
| 48.1  | 2332.101883 | -0.008107 | <a href="#">LDDDLHQGGHVLDPHGK</a> |

# MASCOT Search Results

## Peptide View

MS/MS Fragmentation of **FSVATQTCQITPAEGPVVTAQYDCLGCVHPISTQSPDLEPILR**  
 Found in **KNG1\_HUMAN**, Kininogen-1 OS=Homo sapiens GN=KNG1 PE=1 SV=2

Match to Query 69282: 5066.484070 from(1014.304090,5+) rtinseconds(2673) index(36676)  
 Title: Locus:1.1.1.3479.17 File:"2013-07-02 CLN FXIII 60 min 3rd F 3.wiff"  
 Data file C:\Program Files (x86)\Matrix Science\Mascot Daemon\mgf\6 FXIII 60 min 3rd\mascot\_daemon\_merge.mgf

Click mouse within plot area to zoom in by factor of two about that point  
 Or, Plot from  to  Da   
 Label all possible matches  Label matches used for scoring

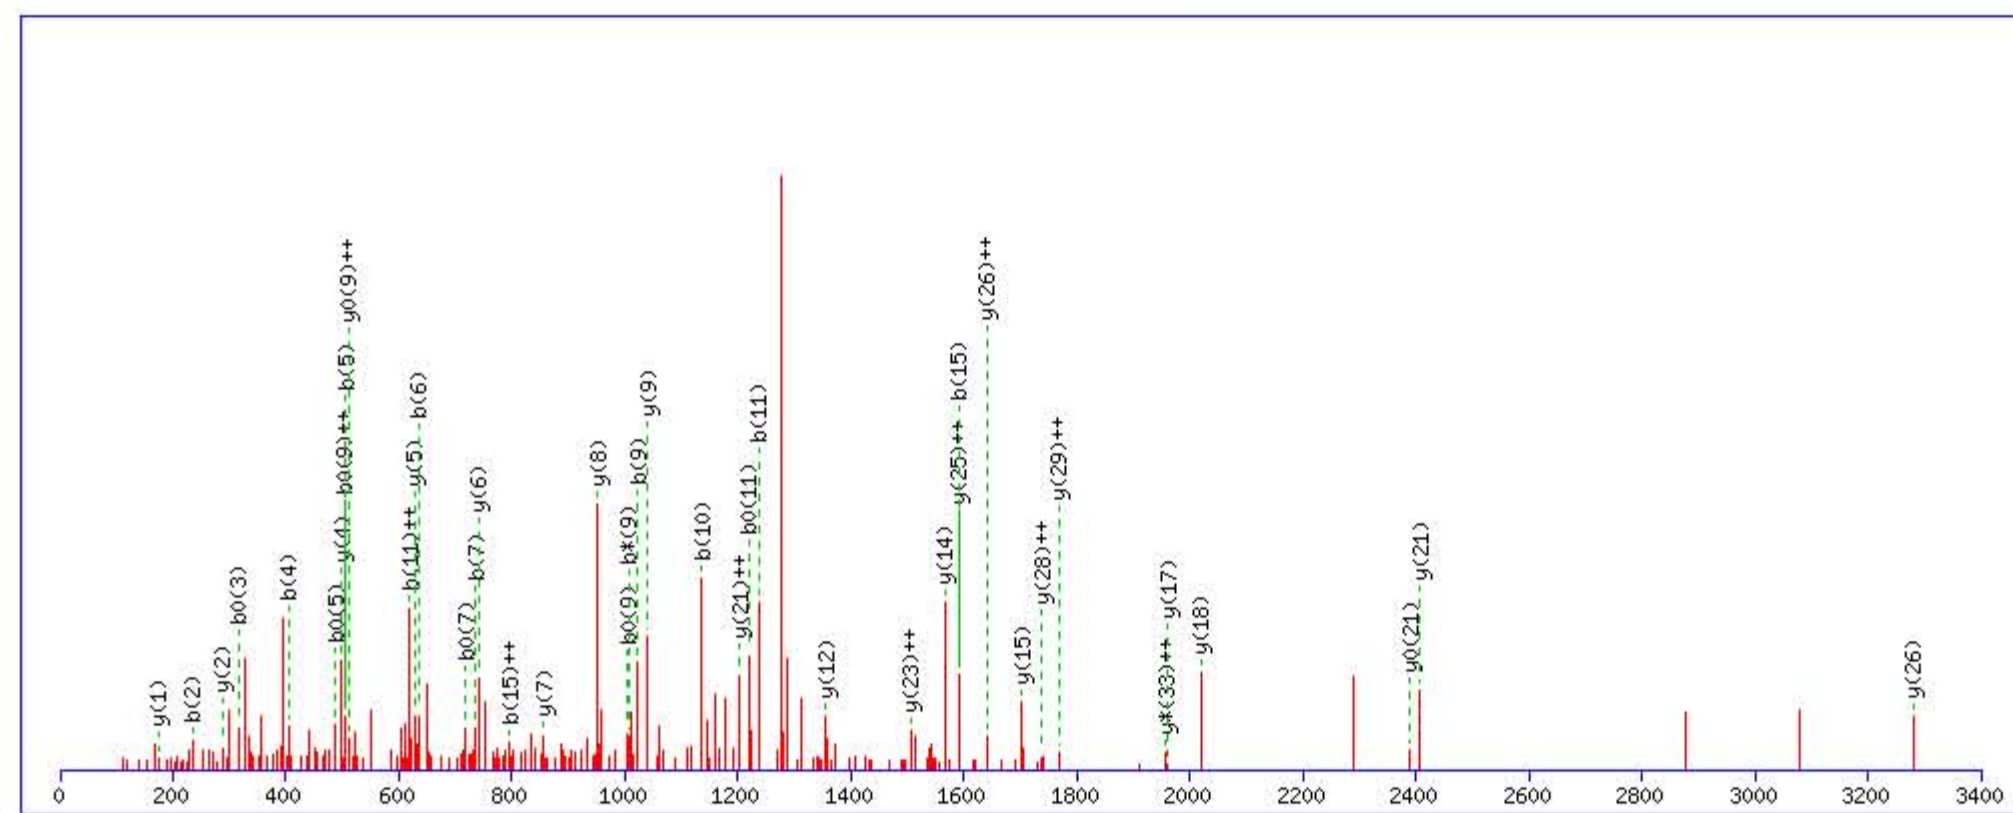

Monoisotopic mass of neutral peptide Mr(calc): 5066.465057  
 Fixed modifications: Carbamidomethyl (C) (apply to specified residues or termini only)  
 Variable modifications:  
 Q21 : Biotin:Thermo-21345 (Q)  
 Ions Score: 60 Expect: 1.9e-005  
 Matches : 42/484 fragment ions using 96 most intense peaks [\(help\)](#)

| #  | b                  | b <sup>++</sup>   | b <sup>*</sup>     | b <sup>***</sup> | b <sup>0</sup>     | b <sup>0++</sup>  | Seq. | y                  | y <sup>++</sup>    | y <sup>*</sup> | y <sup>***</sup>   | y <sup>0</sup>     | y <sup>0++</sup>  | #  |
|----|--------------------|-------------------|--------------------|------------------|--------------------|-------------------|------|--------------------|--------------------|----------------|--------------------|--------------------|-------------------|----|
| 1  | 148.075690         | 74.541483         |                    |                  |                    |                   | F    |                    |                    |                |                    |                    |                   | 43 |
| 2  | <b>235.107718</b>  | 118.057497        |                    |                  | 217.097153         | 109.052214        | S    | 4920.403881        | 2460.705578        | 4903.377332    | 2452.192304        | 4902.393316        | 2451.700296       | 42 |
| 3  | 334.176132         | 167.591704        |                    |                  | <b>316.165567</b>  | 158.586422        | V    | 4833.371853        | 2417.189565        | 4816.345304    | 2408.676290        | 4815.361288        | 2408.184282       | 41 |
| 4  | <b>405.213246</b>  | 203.110261        |                    |                  | 387.202681         | 194.104978        | A    | 4734.303439        | 2367.655357        | 4717.276890    | 2359.142083        | 4716.292874        | 2358.650075       | 40 |
| 5  | <b>506.260925</b>  | 253.634100        |                    |                  | <b>488.250360</b>  | 244.628818        | T    | 4663.266325        | 2332.136800        | 4646.239776    | 2323.623526        | 4645.255760        | 2323.131518       | 39 |
| 6  | <b>634.319503</b>  | 317.663390        | 617.292954         | 309.150115       | 616.308938         | 308.658107        | Q    | 4562.218646        | 2281.612961        | 4545.192097    | 2273.099686        | 4544.208081        | 2272.607679       | 38 |
| 7  | <b>735.367182</b>  | 368.187229        | 718.340633         | 359.673955       | <b>717.356617</b>  | 359.181947        | T    | 4434.160068        | 2217.583672        | 4417.133519    | 2209.070397        | 4416.149503        | 2208.578390       | 37 |
| 8  | 895.397831         | 448.202554        | 878.371282         | 439.689279       | 877.387266         | 439.197271        | C    | 4333.112389        | 2167.059833        | 4316.085840    | 2158.546558        | 4315.101824        | 2158.054550       | 36 |
| 9  | <b>1023.456409</b> | 512.231843        | <b>1006.429860</b> | 503.718568       | <b>1005.445844</b> | <b>503.226560</b> | Q    | 4173.081740        | 2087.044508        | 4156.055191    | 2078.531233        | 4155.071175        | 2078.039226       | 35 |
| 10 | <b>1136.540473</b> | 568.773875        | 1119.513924        | 560.260600       | 1118.529908        | 559.768592        | I    | 4045.023162        | 2023.015219        | 4027.996613    | 2014.501944        | 4027.012597        | 2014.009936       | 34 |
| 11 | <b>1237.588152</b> | <b>619.297714</b> | 1220.561603        | 610.784440       | <b>1219.577587</b> | 610.292432        | T    | 3931.939098        | 1966.473187        | 3914.912549    | <b>1957.959912</b> | 3913.928533        | 1957.467904       | 33 |
| 12 | 1334.640916        | 667.824096        | 1317.614367        | 659.310822       | 1316.630351        | 658.818814        | P    | 3830.891419        | 1915.949347        | 3813.864870    | 1907.436073        | 3812.880854        | 1906.944065       | 32 |
| 13 | 1405.678030        | 703.342653        | 1388.651481        | 694.829379       | 1387.667465        | 694.337371        | A    | 3733.838655        | 1867.422965        | 3716.812106    | 1858.909691        | 3715.828090        | 1858.417683       | 31 |
| 14 | 1534.720623        | 767.863949        | 1517.694074        | 759.350675       | 1516.710058        | 758.858667        | E    | 3662.801541        | 1831.904408        | 3645.774992    | 1823.391134        | 3644.790976        | 1822.899126       | 30 |
| 15 | <b>1591.742087</b> | <b>796.374681</b> | 1574.715538        | 787.861407       | 1573.731522        | 787.369399        | G    | 3533.758948        | <b>1767.383112</b> | 3516.732399    | 1758.869837        | 3515.748383        | 1758.377829       | 29 |
| 16 | 1688.794851        | 844.901063        | 1671.768302        | 836.387789       | 1670.784286        | 835.895781        | P    | 3476.737484        | <b>1738.872380</b> | 3459.710935    | 1730.359105        | 3458.726919        | 1729.867097       | 28 |
| 17 | 1787.863265        | 894.435271        | 1770.836716        | 885.921996       | 1769.852700        | 885.429988        | V    | 3379.684720        | 1690.345998        | 3362.658171    | 1681.832723        | 3361.674155        | 1681.340715       | 27 |
| 18 | 1886.931679        | 943.969478        | 1869.905130        | 935.456203       | 1868.921114        | 934.964195        | V    | <b>3280.616306</b> | <b>1640.811791</b> | 3263.589757    | 1632.298516        | 3262.605741        | 1631.806508       | 26 |
| 19 | 1987.979358        | 994.493317        | 1970.952809        | 985.980043       | 1969.968793        | 985.488035        | T    | 3181.547892        | <b>1591.277584</b> | 3164.521343    | 1582.764309        | 3163.537327        | 1582.272301       | 25 |
| 20 | 2059.016472        | 1030.011874       | 2041.989923        | 1021.498600      | 2041.005907        | 1021.006591       | A    | 3080.500213        | 1540.753744        | 3063.473664    | 1532.240470        | 3062.489648        | 1531.748462       | 24 |
| 21 | 2498.241798        | 1249.624537       | 2481.215249        | 1241.111262      | 2480.231233        | 1240.619254       | Q    | 3009.463099        | <b>1505.235187</b> | 2992.436550    | 1496.721913        | 2991.452534        | 1496.229905       | 23 |
| 22 | 2661.305127        | 1331.156202       | 2644.278578        | 1322.642927      | 2643.294562        | 1322.150919       | Y    | 2570.237773        | 1285.622524        | 2553.211224    | 1277.109250        | 2552.227208        | 1276.617242       | 22 |
| 23 | 2776.332070        | 1388.669673       | 2759.305521        | 1380.156398      | 2758.321505        | 1379.664390       | D    | <b>2407.174444</b> | <b>1204.090860</b> | 2390.147895    | 1195.577585        | <b>2389.163879</b> | 1195.085577       | 21 |
| 24 | 2936.362719        | 1468.684997       | 2919.336170        | 1460.171723      | 2918.352154        | 1459.679715       | C    | 2292.147501        | 1146.577388        | 2275.120952    | 1138.064114        | 2274.136936        | 1137.572106       | 20 |
| 25 | 3049.446783        | 1525.227029       | 3032.420234        | 1516.713755      | 3031.436218        | 1516.221747       | L    | 2132.116852        | 1066.562064        | 2115.090303    | 1058.048789        | 2114.106287        | 1057.556781       | 19 |
| 26 | 3106.468247        | 1553.737761       | 3089.441698        | 1545.224487      | 3088.457682        | 1544.732479       | G    | <b>2019.032788</b> | 1010.020032        | 2002.006239    | 1001.506757        | 2001.022223        | 1001.014749       | 18 |
| 27 | 3266.498896        | 1633.753086       | 3249.472347        | 1625.239811      | 3248.488331        | 1624.747803       | C    | <b>1962.011324</b> | 981.509300         | 1944.984775    | 972.996025         | 1944.000759        | 972.504017        | 17 |
| 28 | 3365.567310        | 1683.287293       | 3348.540761        | 1674.774018      | 3347.556745        | 1674.282010       | V    | 1801.980675        | 901.493975         | 1784.954126    | 892.980701         | 1783.970110        | 892.488693        | 16 |
| 29 | 3502.626222        | 1751.816749       | 3485.599673        | 1743.303474      | 3484.615657        | 1742.811466       | H    | <b>1702.912261</b> | 851.959768         | 1685.885712    | 843.446494         | 1684.901696        | 842.954486        | 15 |
| 30 | 3599.678986        | 1800.343131       | 3582.652437        | 1791.829856      | 3581.668421        | 1791.337848       | P    | <b>1565.853349</b> | 783.430312         | 1548.826800    | 774.917038         | 1547.842784        | 774.425030        | 14 |
| 31 | 3712.763050        | 1856.885163       | 3695.736501        | 1848.371888      | 3694.752485        | 1847.879880       | I    | 1468.800585        | 734.903930         | 1451.774036    | 726.390656         | 1450.790020        | 725.898648        | 13 |
| 32 | 3799.795078        | 1900.401177       | 3782.768529        | 1891.887902      | 3781.784513        | 1891.395894       | S    | <b>1355.716521</b> | 678.361898         | 1338.689972    | 669.848624         | 1337.705956        | 669.356616        | 12 |
| 33 | 3900.842757        | 1950.925016       | 3883.816208        | 1942.411742      | 3882.832192        | 1941.919734       | T    | 1268.684493        | 634.845884         | 1251.657944    | 626.332610         | 1250.673928        | 625.840602        | 11 |
| 34 | 4028.901335        | 2014.954305       | 4011.874786        | 2006.441031      | 4010.890770        | 2005.949023       | Q    | 1167.636814        | 584.322045         | 1150.610265    | 575.808770         | 1149.626249        | 575.316762        | 10 |
| 35 | 4115.933363        | 2058.470320       | 4098.906814        | 2049.957045      | 4097.922798        | 2049.465037       | S    | <b>1039.578236</b> | 520.292756         | 1022.551687    | 511.779481         | 1021.567671        | <b>511.287473</b> | 9  |
| 36 | 4212.986127        | 2106.996702       | 4195.959578        | 2098.483427      | 4194.975562        | 2097.991419       | P    | <b>952.546208</b>  | 476.776742         | 935.519659     | 468.263467         | 934.535643         | 467.771459        | 8  |
| 37 | 4328.013070        | 2164.510173       | 4310.986521        | 2155.996899      | 4310.002505        | 2155.504891       | D    | <b>855.493444</b>  | 428.250360         | 838.466895     | 419.737085         | 837.482879         | 419.245077        | 7  |
| 38 | 4441.097134        | 2221.052205       | 4424.070585        | 2212.538930      | 4423.086569        | 2212.046923       | L    | <b>740.466501</b>  | 370.736888         | 723.439952     | 362.223614         | 722.455936         | 361.731606        | 6  |
| 39 | 4570.139727        | 2285.573502       | 4553.113178        | 2277.060227      | 4552.129162        | 2276.568219       | E    | <b>627.382437</b>  | 314.194856         | 610.355888     | 305.681582         | 609.371872         | 305.189574        | 5  |
| 40 | 4667.192491        | 2334.099884       | 4650.165942        | 2325.586609      | 4649.181926        | 2325.094601       | P    | <b>498.339844</b>  | 249.673560         | 481.313295     | 241.160285         |                    |                   | 4  |
| 41 | 4780.276555        | 2390.641915       | 4763.250006        | 2382.128641      | 4762.265990        | 2381.636633       | I    | 401.287080         | 201.147178         | 384.260531     | 192.633903         |                    |                   | 3  |
| 42 | 4893.360619        | 2447.183947       | 4876.334070        | 2438.670673      | 4875.350054        | 2438.178665       | L    | <b>288.203016</b>  | 144.605146         | 271.176467     | 136.091871         |                    |                   | 2  |
| 43 |                    |                   |                    |                  |                    |                   | R    | <b>175.118952</b>  | 88.063114          | 158.092403     | 79.549839          |                    |                   | 1  |

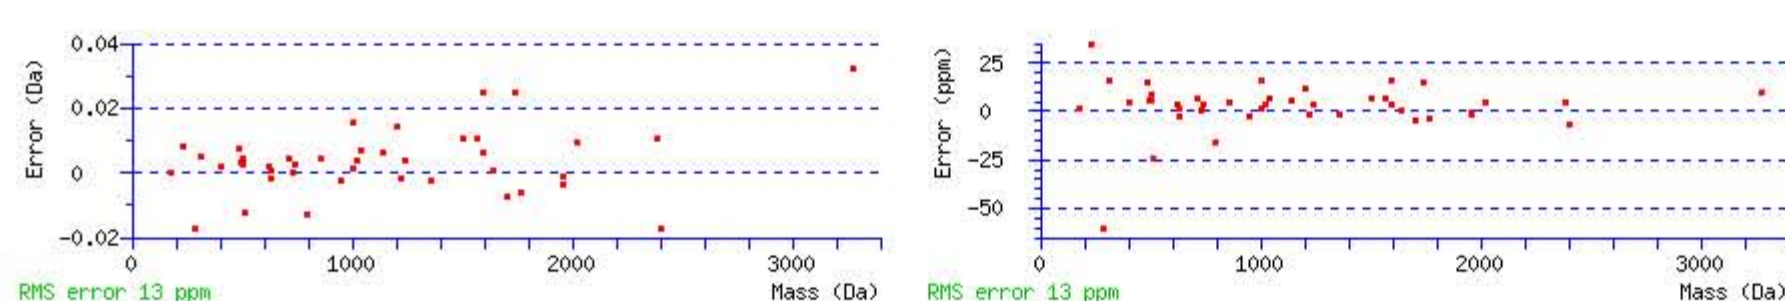

NCBI BLAST search of **FSVATQTCQITPAEGPVVTAQYDCLGCVHPISTQSPDLEPILR**  
 (Parameters: blastp, nr protein database, expect=20000, no filter, PAM30)  
 Other BLAST [web gateways](#)

## All matches to this query

| Score | Mr(calc):   | Delta    | Sequence                                                    |
|-------|-------------|----------|-------------------------------------------------------------|
| 60.1  | 5066.465057 | 0.019013 | <a href="#">FSVATQTCQITPAEGPVVTAQYDCLGCVHPISTQSPDLEPILR</a> |
| 25.0  | 5066.465057 | 0.019013 | <a href="#">FSVATQTCQITPAEGPVVTAQYDCLGCVHPISTQSPDLEPILR</a> |
| 22.1  | 5066.465057 | 0.019013 | <a href="#">FSVATQTCQITPAEGPVVTAQYDCLGCVHPISTQSPDLEPILR</a> |
| 19.8  | 5066.465057 | 0.019013 | <a href="#">FSVATQTCQITPAEGPVVTAQYDCLGCVHPISTQSPDLEPILR</a> |

# MASCOT Search Results

## Peptide View

MS/MS Fragmentation of **VECSDNLFTQR**

Found in **MASP1\_HUMAN**, Mannan-binding lectin serine protease 1 OS=Homo sapiens GN=MASP1 PE=1 SV=3

Match to Query 36031: 1678.783422 from(560.601750,3+) rtinseconds(2095) index(47966)

Title: Locus:1.1.1.2778.4 File:"2013-07-02 CLN FXIII 60 min 3rd F 4.wiff"

Data file C:\Program Files (x86)\Matrix Science\Mascot Daemon\mgf\6 FXIII 60 min 3rd\mascot\_daemon\_merge.mgf

Click mouse within plot area to zoom in by factor of two about that point

Or, Plot from  to  Da

Label all possible matches  Label matches used for scoring

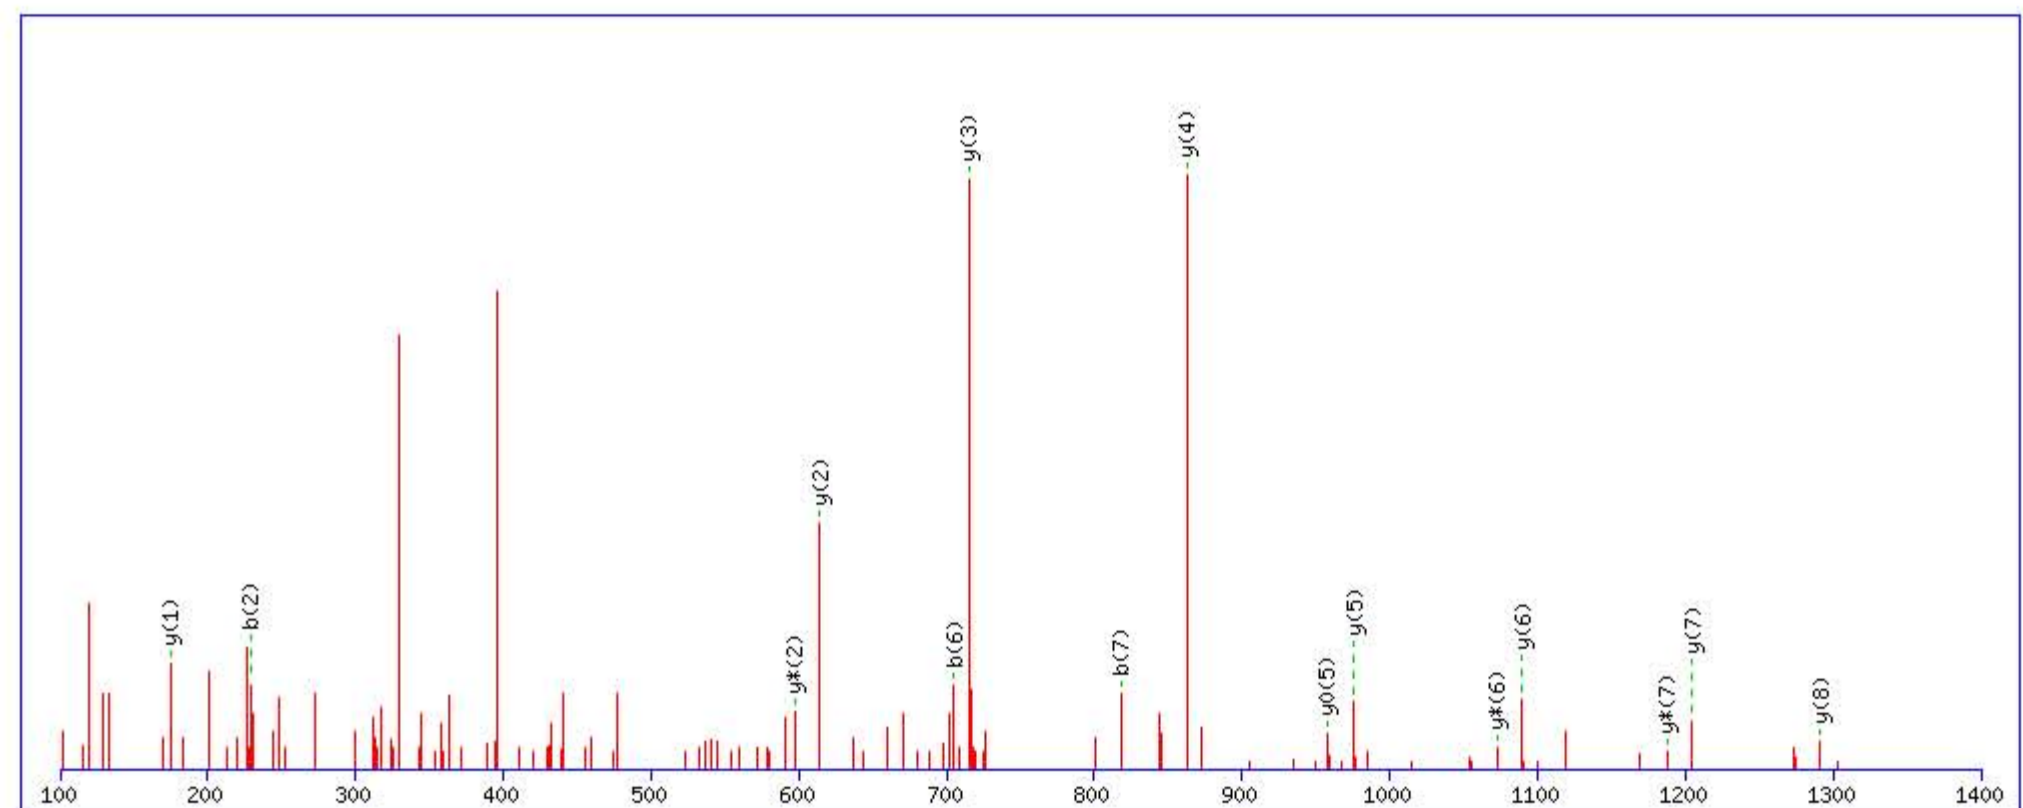

Monoisotopic mass of neutral peptide  $M_r(\text{calc})$ : 1678.780716

Fixed modifications: Carbamidomethyl (C) (apply to specified residues or termini only)

Variable modifications:

Q10 : Biotin:Thermo-21345 (Q)

Ions Score: 50 Expect: 0.00015

Matches : 15/104 fragment ions using 25 most intense peaks [\(help\)](#)

| #  | b                 | b <sup>++</sup> | b <sup>*</sup> | b <sup>*++</sup> | b <sup>0</sup> | b <sup>0++</sup> | Seq. | y                  | y <sup>++</sup> | y <sup>*</sup>     | y <sup>*++</sup> | y <sup>0</sup>    | y <sup>0++</sup> | #  |
|----|-------------------|-----------------|----------------|------------------|----------------|------------------|------|--------------------|-----------------|--------------------|------------------|-------------------|------------------|----|
| 1  | 100.075690        | 50.541483       |                |                  |                |                  | V    |                    |                 |                    |                  |                   |                  | 11 |
| 2  | <b>229.118283</b> | 115.062780      |                |                  | 211.107718     | 106.057497       | E    | 1580.719575        | 790.863426      | 1563.693026        | 782.350151       | 1562.709010       | 781.858143       | 10 |
| 3  | 389.148932        | 195.078104      |                |                  | 371.138367     | 186.072822       | C    | 1451.676982        | 726.342129      | 1434.650433        | 717.828855       | 1433.666417       | 717.336847       | 9  |
| 4  | 476.180960        | 238.594118      |                |                  | 458.170395     | 229.588835       | S    | <b>1291.646333</b> | 646.326805      | 1274.619784        | 637.813530       | 1273.635768       | 637.321522       | 8  |
| 5  | 591.207903        | 296.107590      |                |                  | 573.197338     | 287.102307       | D    | <b>1204.614305</b> | 602.810791      | <b>1187.587756</b> | 594.297516       | 1186.603740       | 593.805508       | 7  |
| 6  | <b>705.250830</b> | 353.129053      | 688.224281     | 344.615778       | 687.240265     | 344.123770       | N    | <b>1089.587362</b> | 545.297319      | <b>1072.560813</b> | 536.784045       | 1071.576797       | 536.292037       | 6  |
| 7  | <b>818.334894</b> | 409.671085      | 801.308345     | 401.157810       | 800.324329     | 400.665802       | L    | <b>975.544435</b>  | 488.275856      | 958.517886         | 479.762581       | <b>957.533870</b> | 479.270573       | 5  |
| 8  | 965.403308        | 483.205292      | 948.376759     | 474.692017       | 947.392743     | 474.200009       | F    | <b>862.460371</b>  | 431.733824      | 845.433822         | 423.220549       | 844.449806        | 422.728541       | 4  |
| 9  | 1066.450987       | 533.729131      | 1049.424438    | 525.215857       | 1048.440422    | 524.723849       | T    | <b>715.391957</b>  | 358.199617      | 698.365408         | 349.686342       | 697.381392        | 349.194334       | 3  |
| 10 | 1505.676313       | 753.341795      | 1488.649764    | 744.828520       | 1487.665748    | 744.336512       | Q    | <b>614.344278</b>  | 307.675777      | <b>597.317729</b>  | 299.162503       |                   |                  | 2  |
| 11 |                   |                 |                |                  |                |                  | R    | <b>175.118952</b>  | 88.063114       | 158.092403         | 79.549839        |                   |                  | 1  |

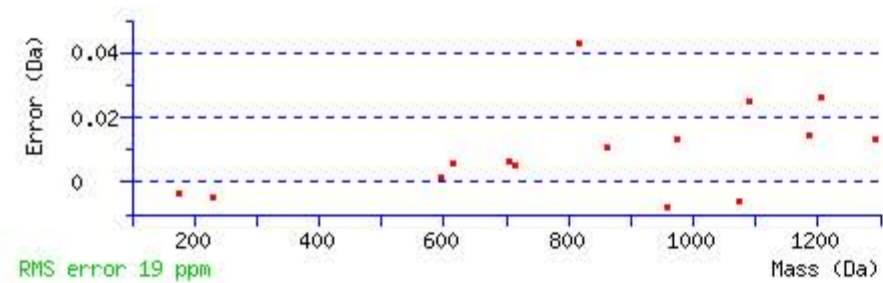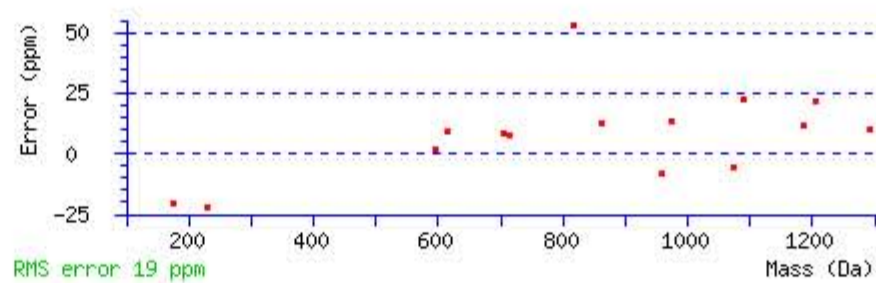

NCBI BLAST search of [VECSDNLFTQR](#)

(Parameters: blastp, nr protein database, expect=20000, no filter, PAM30)

Other BLAST [web gateways](#)

All matches to this query

| Score | Mr(calc):   | Delta    | Sequence                    |
|-------|-------------|----------|-----------------------------|
| 49.5  | 1678.780716 | 0.002706 | <a href="#">VECSDNLFTQR</a> |

Mascot: <http://www.matrixscience.com/>



# MASCOT Search Results

## Peptide View

MS/MS Fragmentation of **FPETLMEIEIPIVDHSTCQK**

Found in **MASP1\_HUMAN**, Mannan-binding lectin serine protease 1 OS=Homo sapiens GN=MASP1 PE=1 SV=3

Match to Query 52735: 2697.349696 from(675.344700,4+) rtinseconds(2751) index(52029)

Title: Locus:1.1.1.3005.5 File:"2013-07-02 CLN FXIII 60 min 3rd F 4.wiff"

Data file C:\Program Files (x86)\Matrix Science\Mascot Daemon\mgf6 FXIII 60 min 3rd\mascot\_daemon\_merge.mgf

Click mouse within plot area to zoom in by factor of two about that point

Or, Plot from  to  Da

Label all possible matches  Label matches used for scoring

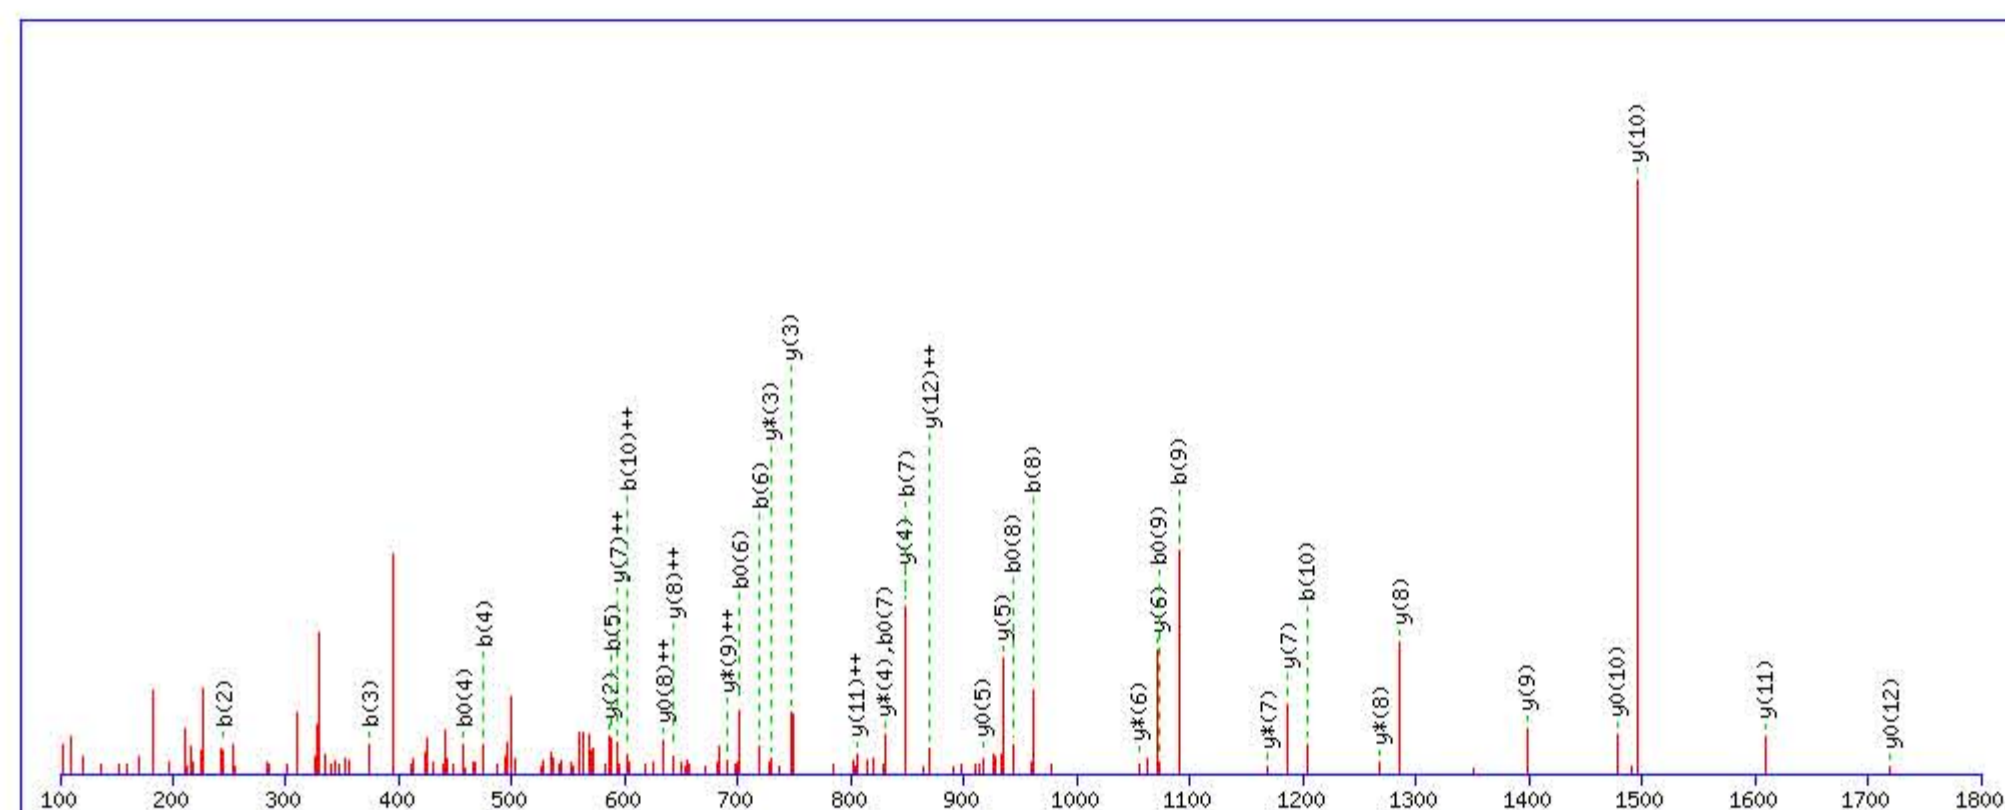

Monoisotopic mass of neutral peptide Mr(calc): 2697.321609

Fixed modifications: Carbamidomethyl (C) (apply to specified residues or termini only)

Variable modifications:

Q19 : Biotin:Thermo-21345 (Q)

Ions Score: 56 Expect: 9.8e-006

Matches : 39/182 fragment ions using 80 most intense peaks [\(help\)](#)

| #  | b                  | b <sup>++</sup>   | b <sup>*</sup> | b <sup>*++</sup> | b <sup>0</sup>     | b <sup>0++</sup> | Seq. | y                  | y <sup>++</sup>   | y <sup>*</sup>     | y <sup>*++</sup>  | y <sup>0</sup>     | y <sup>0++</sup>  | #  |
|----|--------------------|-------------------|----------------|------------------|--------------------|------------------|------|--------------------|-------------------|--------------------|-------------------|--------------------|-------------------|----|
| 1  | 148.075690         | 74.541483         |                |                  |                    |                  | F    |                    |                   |                    |                   |                    |                   | 20 |
| 2  | <b>245.128454</b>  | 123.067865        |                |                  |                    |                  | P    | 2551.260482        | 1276.133879       | 2534.233933        | 1267.620604       | 2533.249917        | 1267.128596       | 19 |
| 3  | <b>374.171047</b>  | 187.589161        |                |                  | 356.160482         | 178.583879       | E    | 2454.207718        | 1227.607497       | 2437.181169        | 1219.094222       | 2436.197153        | 1218.602214       | 18 |
| 4  | <b>475.218726</b>  | 238.113001        |                |                  | <b>457.208161</b>  | 229.107719       | T    | 2325.165125        | 1163.086200       | 2308.138576        | 1154.572926       | 2307.154560        | 1154.080918       | 17 |
| 5  | <b>588.302790</b>  | 294.655033        |                |                  | 570.292225         | 285.649751       | L    | 2224.117446        | 1112.562361       | 2207.090897        | 1104.049086       | 2206.106881        | 1103.557078       | 16 |
| 6  | <b>719.343275</b>  | 360.175276        |                |                  | <b>701.332710</b>  | 351.169993       | M    | 2111.033382        | 1056.020329       | 2094.006833        | 1047.507054       | 2093.022817        | 1047.015046       | 15 |
| 7  | <b>848.385868</b>  | 424.696572        |                |                  | <b>830.375303</b>  | 415.691290       | E    | 1979.992897        | 990.500087        | 1962.966348        | 981.986812        | 1961.982332        | 981.494804        | 14 |
| 8  | <b>961.469932</b>  | 481.238604        |                |                  | <b>943.459367</b>  | 472.233322       | I    | 1850.950304        | 925.978790        | 1833.923755        | 917.465516        | 1832.939739        | 916.973508        | 13 |
| 9  | <b>1090.512525</b> | 545.759901        |                |                  | <b>1072.501960</b> | 536.754618       | E    | 1737.866240        | <b>869.436758</b> | 1720.839691        | 860.923484        | <b>1719.855675</b> | 860.431476        | 12 |
| 10 | <b>1203.596589</b> | <b>602.301933</b> |                |                  | 1185.586024        | 593.296650       | I    | <b>1608.823647</b> | <b>804.915462</b> | 1591.797098        | 796.402187        | 1590.813082        | 795.910179        | 11 |
| 11 | 1300.649353        | 650.828315        |                |                  | 1282.638788        | 641.823032       | P    | <b>1495.739583</b> | 748.373430        | 1478.713034        | 739.860155        | <b>1477.729018</b> | 739.368147        | 10 |
| 12 | 1413.733417        | 707.370346        |                |                  | 1395.722852        | 698.365064       | I    | <b>1398.686819</b> | 699.847048        | 1381.660270        | <b>691.333773</b> | 1380.676254        | 690.841765        | 9  |
| 13 | 1512.801831        | 756.904554        |                |                  | 1494.791266        | 747.899271       | V    | <b>1285.602755</b> | <b>643.305016</b> | <b>1268.576206</b> | 634.791741        | 1267.592190        | <b>634.299733</b> | 8  |
| 14 | 1627.828774        | 814.418025        |                |                  | 1609.818209        | 805.412743       | D    | <b>1186.534341</b> | <b>593.770809</b> | <b>1169.507792</b> | 585.257534        | 1168.523776        | 584.765526        | 7  |
| 15 | 1764.887686        | 882.947481        |                |                  | 1746.877121        | 873.942199       | H    | <b>1071.507398</b> | 536.257337        | <b>1054.480849</b> | 527.744063        | 1053.496833        | 527.252055        | 6  |
| 16 | 1851.919714        | 926.463495        |                |                  | 1833.909149        | 917.458213       | S    | <b>934.448486</b>  | 467.727881        | 917.421937         | 459.214607        | <b>916.437921</b>  | 458.722599        | 5  |
| 17 | 1952.967393        | 976.987335        |                |                  | 1934.956828        | 967.982052       | T    | <b>847.416458</b>  | 424.211867        | <b>830.389909</b>  | 415.698593        | 829.405893         | 415.206585        | 4  |
| 18 | 2112.998042        | 1057.002659       |                |                  | 2094.987477        | 1047.997376      | C    | <b>746.368779</b>  | 373.688028        | <b>729.342230</b>  | 365.174753        |                    |                   | 3  |
| 19 | 2552.223368        | 1276.615322       | 2535.196819    | 1268.102047      | 2534.212803        | 1267.610039      | Q    | <b>586.338130</b>  | 293.672703        | 569.311581         | 285.159429        |                    |                   | 2  |
| 20 |                    |                   |                |                  |                    |                  | K    | 147.112804         | 74.060040         | 130.086255         | 65.546765         |                    |                   | 1  |

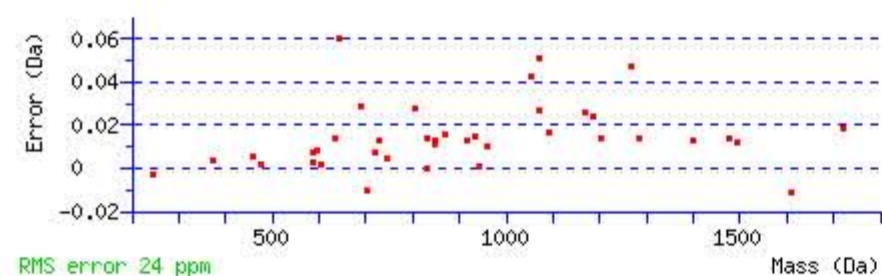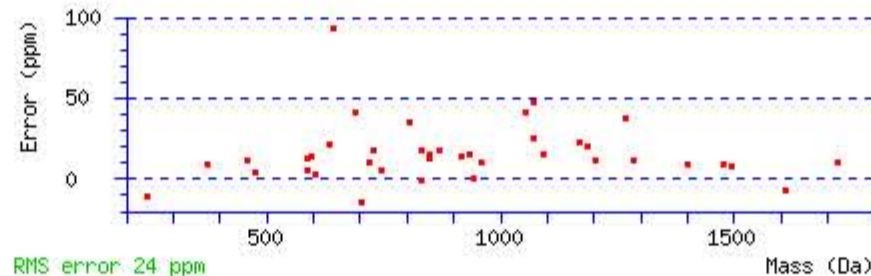

NCBI BLAST search of **FPETLMEIEIPIVDHSTCQK**

(Parameters: blastp, nr protein database, expect=20000, no filter, PAM30)

Other BLAST [web gateways](#)

All matches to this query

| Score | Mr(calc):   | Delta     | Sequence                                  |
|-------|-------------|-----------|-------------------------------------------|
| 55.9  | 2697.321609 | 0.028087  | <a href="#">FPETLMEIEIPIVDHSTCQK</a>      |
| 2.4   | 2697.379593 | -0.029897 | <a href="#">LVVLF SQMRLANFQTDSQESI QK</a> |
| 0.9   | 2697.363159 | -0.013463 | <a href="#">RRGYAPLLYLQSHCDVPADR</a>      |

**Mascot Search Results**

**Peptide View**

MS/MS Fragmentation of **APEPISTQSHSVLILFHSDNSGENR**  
 Found in **MASPI\_HUMAN**, Mannan-binding lectin serine protease 1 OS=Homo sapiens GN=MASPI PE=1 SV=3

Match to Query 56401: 3045.524056 from(762.388290,4+) rtinseconds(2249) index(48968)  
 Title: Locus:1.1.1.2831.15 File:"2013-07-02 CLN FXIII 60 min 3rd F 4.wiff"  
 Data file C:\Program Files (x86)\Matrix Science\Mascot Daemon\mgf\6 FXIII 60 min 3rd\mascot\_daemon\_merge.mgf

Click mouse within plot area to zoom in by factor of two about that point  
 Or, Plot from  to  Da   
 Label all possible matches  Label matches used for scoring

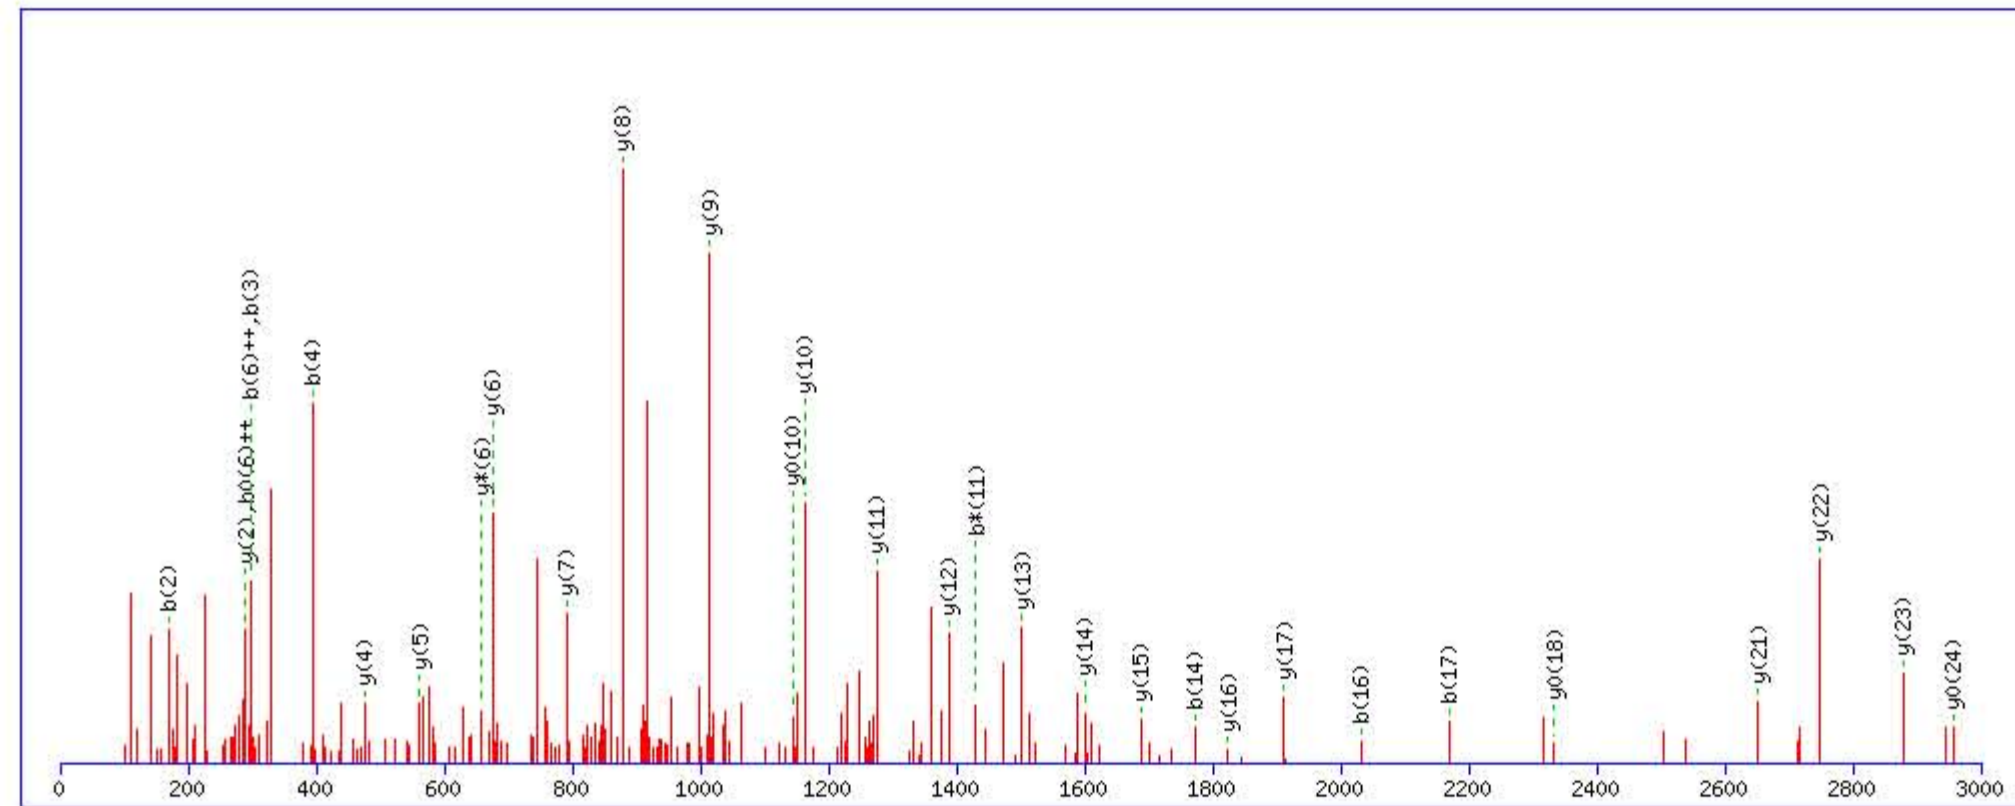

Monoisotopic mass of neutral peptide Mr(calc): 3045.497803  
 Fixed modifications: Carbamidomethyl (C) (apply to specified residues or termini only)  
 Variable modifications:  
 Q8 : Biotin:Thermo-21345 (Q)  
 Ions Score: 98 Expect: 4.8e-009  
 Matches : 31/266 fragment ions using 68 most intense peaks [\(help\)](#)

| #  | b                  | b <sup>++</sup>   | b <sup>+</sup>     | b <sup>+++</sup> | b <sup>0</sup> | b <sup>0++</sup>  | Seq. | y                  | y <sup>++</sup> | y <sup>+</sup>    | y <sup>+++</sup> | y <sup>0</sup>     | y <sup>0++</sup> | #  |
|----|--------------------|-------------------|--------------------|------------------|----------------|-------------------|------|--------------------|-----------------|-------------------|------------------|--------------------|------------------|----|
| 1  | 72.044390          | 36.525833         |                    |                  |                |                   | A    |                    |                 |                   |                  |                    |                  | 25 |
| 2  | <b>169.097154</b>  | 85.052215         |                    |                  |                |                   | P    | 2975.467980        | 1488.237628     | 2958.441431       | 1479.724353      | <b>2957.457415</b> | 1479.232345      | 24 |
| 3  | <b>298.139747</b>  | 149.573512        |                    |                  | 280.129182     | 140.568229        | E    | <b>2878.415216</b> | 1439.711246     | 2861.388667       | 1431.197971      | 2860.404651        | 1430.705963      | 23 |
| 4  | <b>395.192511</b>  | 198.099894        |                    |                  | 377.181946     | 189.094611        | P    | <b>2749.372623</b> | 1375.189949     | 2732.346074       | 1366.676675      | 2731.362058        | 1366.184667      | 22 |
| 5  | 508.276575         | 254.641926        |                    |                  | 490.266010     | 245.636643        | I    | <b>2652.319859</b> | 1326.663567     | 2635.293310       | 1318.150293      | 2634.309294        | 1317.658285      | 21 |
| 6  | 595.308603         | <b>298.157940</b> |                    |                  | 577.298038     | <b>289.152657</b> | S    | 2539.235795        | 1270.121535     | 2522.209246       | 1261.608261      | 2521.225230        | 1261.116253      | 20 |
| 7  | 696.356282         | 348.681779        |                    |                  | 678.345717     | 339.676497        | T    | 2452.203767        | 1226.605521     | 2435.177218       | 1218.092247      | 2434.193202        | 1217.600239      | 19 |
| 8  | 1135.581608        | 568.294442        | 1118.555059        | 559.781168       | 1117.571043    | 559.289160        | Q    | 2351.156088        | 1176.081682     | 2334.129539       | 1167.568407      | <b>2333.145523</b> | 1167.076399      | 18 |
| 9  | 1222.613636        | 611.810456        | 1205.587087        | 603.297182       | 1204.603071    | 602.805174        | S    | <b>1911.930762</b> | 956.469019      | 1894.904213       | 947.955745       | 1893.920197        | 947.463737       | 17 |
| 10 | 1359.672548        | 680.339912        | 1342.645999        | 671.826638       | 1341.661983    | 671.334630        | H    | <b>1824.898734</b> | 912.953005      | 1807.872185       | 904.439731       | 1806.888169        | 903.947723       | 16 |
| 11 | 1446.704576        | 723.855926        | <b>1429.678027</b> | 715.342652       | 1428.694011    | 714.850644        | S    | <b>1687.839822</b> | 844.423549      | 1670.813273       | 835.910275       | 1669.829257        | 835.418267       | 15 |
| 12 | 1545.772990        | 773.390133        | 1528.746441        | 764.876859       | 1527.762425    | 764.384851        | V    | <b>1600.807794</b> | 800.907535      | 1583.781245       | 792.394261       | 1582.797229        | 791.902253       | 14 |
| 13 | 1658.857054        | 829.932165        | 1641.830505        | 821.418891       | 1640.846489    | 820.926883        | L    | <b>1501.739380</b> | 751.373328      | 1484.712831       | 742.860054       | 1483.728815        | 742.368045       | 13 |
| 14 | <b>1771.941118</b> | 886.474197        | 1754.914569        | 877.960923       | 1753.930553    | 877.468915        | I    | <b>1388.655316</b> | 694.831296      | 1371.628767       | 686.318022       | 1370.644751        | 685.826014       | 12 |
| 15 | 1885.025182        | 943.016229        | 1867.998633        | 934.502955       | 1867.014617    | 934.010947        | L    | <b>1275.571252</b> | 638.289264      | 1258.544703       | 629.775990       | 1257.560687        | 629.283982       | 11 |
| 16 | <b>2032.093596</b> | 1016.550436       | 2015.067047        | 1008.037162      | 2014.083031    | 1007.545154       | F    | <b>1162.487188</b> | 581.747232      | 1145.460639       | 573.233958       | <b>1144.476623</b> | 572.741950       | 10 |
| 17 | <b>2169.152508</b> | 1085.079892       | 2152.125959        | 1076.566617      | 2151.141943    | 1076.074610       | H    | <b>1015.418774</b> | 508.213025      | 998.392225        | 499.699751       | 997.408209         | 499.207743       | 9  |
| 18 | 2256.184536        | 1128.595906       | 2239.157987        | 1120.082631      | 2238.173971    | 1119.590624       | S    | <b>878.359862</b>  | 439.683569      | 861.333313        | 431.170295       | 860.349297         | 430.678287       | 8  |
| 19 | 2371.211479        | 1186.109377       | 2354.184930        | 1177.596103      | 2353.200914    | 1177.104095       | D    | <b>791.327834</b>  | 396.167555      | 774.301285        | 387.654280       | 773.317269         | 387.162272       | 7  |
| 20 | 2485.254406        | 1243.130841       | 2468.227857        | 1234.617566      | 2467.243841    | 1234.125558       | N    | <b>676.300891</b>  | 338.654084      | <b>659.274342</b> | 330.140809       | 658.290326         | 329.648801       | 6  |
| 21 | 2572.286434        | 1286.646855       | 2555.259885        | 1278.133580      | 2554.275869    | 1277.641572       | S    | <b>562.257964</b>  | 281.632620      | 545.231415        | 273.119346       | 544.247399         | 272.627338       | 5  |
| 22 | 2629.307898        | 1315.157587       | 2612.281349        | 1306.644312      | 2611.297333    | 1306.152304       | G    | <b>475.225936</b>  | 238.116606      | 458.199387        | 229.603331       | 457.215371         | 229.111323       | 4  |
| 23 | 2758.350491        | 1379.678884       | 2741.323942        | 1371.165609      | 2740.339926    | 1370.673601       | E    | 418.204472         | 209.605874      | 401.177923        | 201.092600       | 400.193907         | 200.600592       | 3  |
| 24 | 2872.393418        | 1436.700347       | 2855.366869        | 1428.187072      | 2854.382853    | 1427.695064       | N    | <b>289.161879</b>  | 145.084577      | 272.135330        | 136.571303       |                    |                  | 2  |
| 25 |                    |                   |                    |                  |                |                   | R    | 175.118952         | 88.063114       | 158.092403        | 79.549839        |                    |                  | 1  |

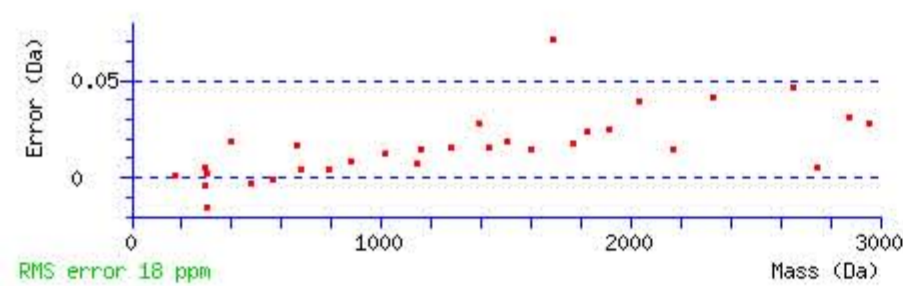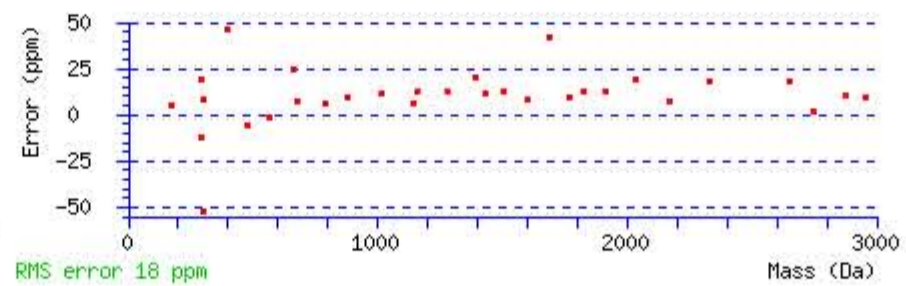

NCBI BLAST search of **APEPISTQSHSVLILFHSDNSGENR**  
 (Parameters: blastp, nr protein database, expect=20000, no filter, PAM30)  
 Other BLAST [web gateways](#)

**All matches to this query**

| Score | Mr(calc):   | Delta    | Sequence                                  |
|-------|-------------|----------|-------------------------------------------|
| 97.6  | 3045.497803 | 0.026253 | <a href="#">APEPISTQSHSVLILFHSDNSGENR</a> |

# MASCOT Search Results

## Peptide View

MS/MS Fragmentation of **VLSIAQAHSPAFSCEQVR**

Found in **CD14\_HUMAN**, Monocyte differentiation antigen CD14 OS=Homo sapiens GN=CD14 PE=1 SV=2

Match to Query 47959: 2310.180896 from(578.552500,4+) rtinseconds(1986) index(18994)

Title: Locus:1.1.1.3292.10 File:"2013-07-02 CLN FXIII 60 min 3rd F 2.wiff"

Data file C:\Program Files (x86)\Matrix Science\Mascot Daemon\mgf\6 FXIII 60 min 3rd\mascot\_daemon\_merge.mgf

Click mouse within plot area to zoom in by factor of two about that point

Or, Plot from  to  Da

Label all possible matches  Label matches used for scoring

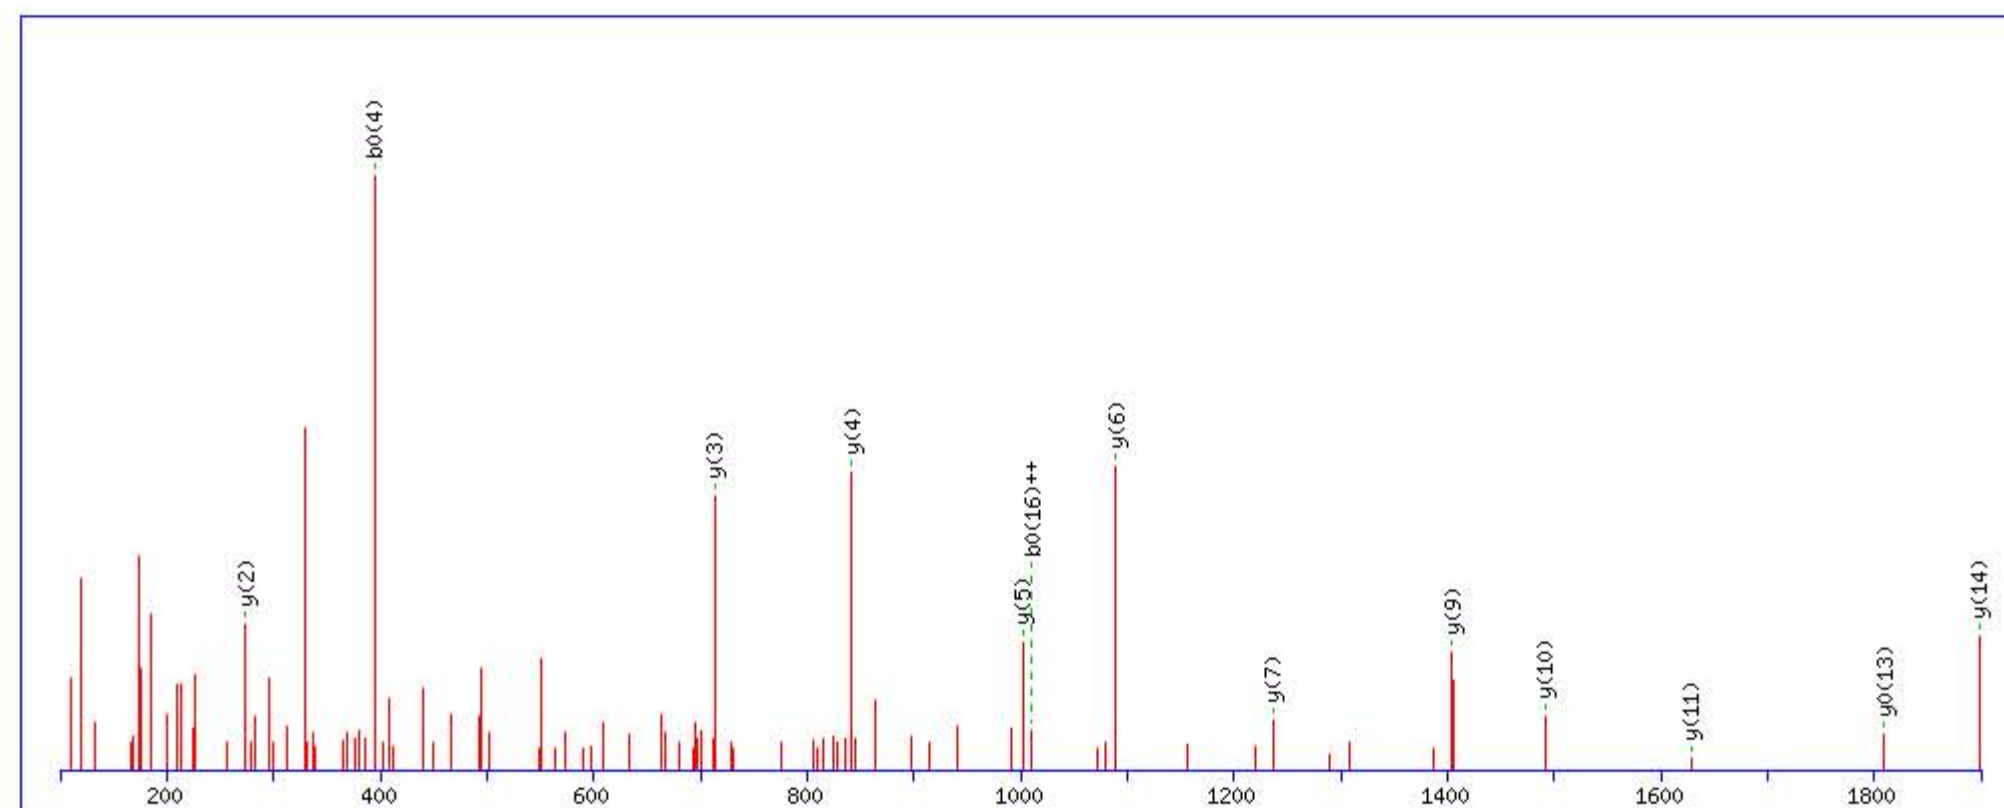

Monoisotopic mass of neutral peptide Mr(calc): 2310.161285

Fixed modifications: Carbamidomethyl (C) (apply to specified residues or termini only)

Variable modifications:

Q16 : Biotin:Thermo-21345 (Q)

Ions Score: 45 Expect: 0.00092

Matches : 13/184 fragment ions using 30 most intense peaks [\(help\)](#)

| #  | b           | b <sup>++</sup> | b <sup>*</sup> | b <sup>*++</sup> | b <sup>0</sup> | b <sup>0++</sup> | Seq. | y           | y <sup>++</sup> | y <sup>*</sup> | y <sup>*++</sup> | y <sup>0</sup> | y <sup>0++</sup> | #  |
|----|-------------|-----------------|----------------|------------------|----------------|------------------|------|-------------|-----------------|----------------|------------------|----------------|------------------|----|
| 1  | 100.075690  | 50.541483       |                |                  |                |                  | V    |             |                 |                |                  |                |                  | 18 |
| 2  | 213.159754  | 107.083515      |                |                  |                |                  | L    | 2212.100156 | 1106.553716     | 2195.073607    | 1098.040441      | 2194.089591    | 1097.548433      | 17 |
| 3  | 300.191782  | 150.599529      |                |                  | 282.181217     | 141.594247       | S    | 2099.016092 | 1050.011684     | 2081.989543    | 1041.498409      | 2081.005527    | 1041.006401      | 16 |
| 4  | 413.275846  | 207.141561      |                |                  | 395.265281     | 198.136279       | I    | 2011.984064 | 1006.495670     | 1994.957515    | 997.982396       | 1993.973499    | 997.490388       | 15 |
| 5  | 484.312960  | 242.660118      |                |                  | 466.302395     | 233.654836       | A    | 1898.900000 | 949.953638      | 1881.873451    | 941.440364       | 1880.889435    | 940.948356       | 14 |
| 6  | 612.371538  | 306.689407      | 595.344989     | 298.176133       | 594.360973     | 297.684125       | Q    | 1827.862886 | 914.435081      | 1810.836337    | 905.921807       | 1809.852321    | 905.429799       | 13 |
| 7  | 683.408652  | 342.207964      | 666.382103     | 333.694690       | 665.398087     | 333.202682       | A    | 1699.804308 | 850.405792      | 1682.777759    | 841.892518       | 1681.793743    | 841.400510       | 12 |
| 8  | 820.467564  | 410.737420      | 803.441015     | 402.224146       | 802.456999     | 401.732138       | H    | 1628.767194 | 814.887235      | 1611.740645    | 806.373961       | 1610.756629    | 805.881953       | 11 |
| 9  | 907.499592  | 454.253434      | 890.473043     | 445.740160       | 889.489027     | 445.248152       | S    | 1491.708282 | 746.357779      | 1474.681733    | 737.844505       | 1473.697717    | 737.352497       | 10 |
| 10 | 1004.552356 | 502.779816      | 987.525807     | 494.266542       | 986.541791     | 493.774534       | P    | 1404.676254 | 702.841765      | 1387.649705    | 694.328491       | 1386.665689    | 693.836483       | 9  |
| 11 | 1075.589470 | 538.298373      | 1058.562921    | 529.785099       | 1057.578905    | 529.293091       | A    | 1307.623490 | 654.315383      | 1290.596941    | 645.802109       | 1289.612925    | 645.310101       | 8  |
| 12 | 1222.657884 | 611.832580      | 1205.631335    | 603.319306       | 1204.647319    | 602.827298       | F    | 1236.586376 | 618.796826      | 1219.559827    | 610.283552       | 1218.575811    | 609.791544       | 7  |
| 13 | 1309.689912 | 655.348594      | 1292.663363    | 646.835320       | 1291.679347    | 646.343312       | S    | 1089.517962 | 545.262619      | 1072.491413    | 536.749345       | 1071.507397    | 536.257337       | 6  |
| 14 | 1469.720561 | 735.363919      | 1452.694012    | 726.850644       | 1451.709996    | 726.358636       | C    | 1002.485934 | 501.746605      | 985.459385     | 493.233331       | 984.475369     | 492.741323       | 5  |
| 15 | 1598.763154 | 799.885215      | 1581.736605    | 791.371941       | 1580.752589    | 790.879933       | E    | 842.455285  | 421.731281      | 825.428736     | 413.218006       | 824.444720     | 412.725998       | 4  |
| 16 | 2037.988480 | 1019.497878     | 2020.961931    | 1010.984604      | 2019.977915    | 1010.492596      | Q    | 713.412692  | 357.209984      | 696.386143     | 348.696710       |                |                  | 3  |
| 17 | 2137.056894 | 1069.032085     | 2120.030345    | 1060.518811      | 2119.046329    | 1060.026803      | V    | 274.187366  | 137.597321      | 257.160817     | 129.084046       |                |                  | 2  |
| 18 |             |                 |                |                  |                |                  | R    | 175.118952  | 88.063114       | 158.092403     | 79.549839        |                |                  | 1  |

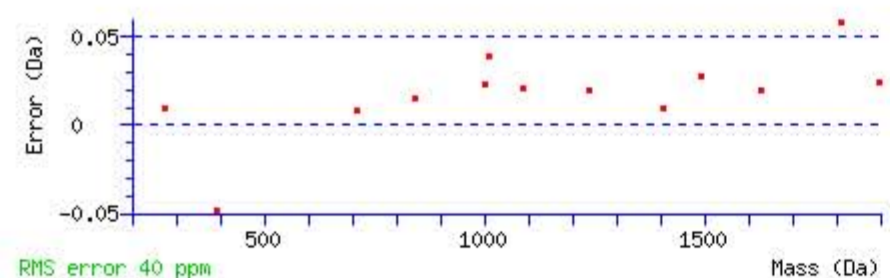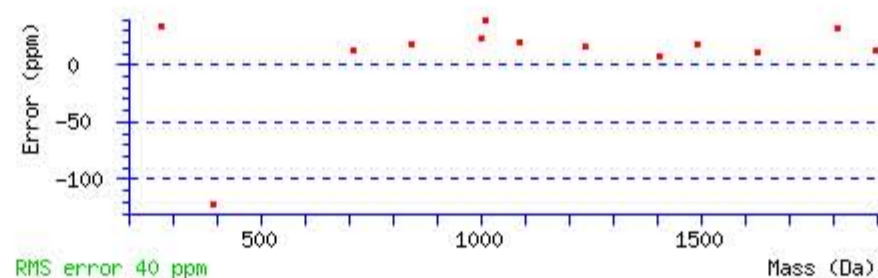

NCBI BLAST search of [VLSIAQAHSPAFSCEQVR](#)

(Parameters: blastp, nr protein database, expect=20000, no filter, PAM30)

Other BLAST [web gateways](#)

All matches to this query

| Score | Mr(calc):   | Delta    | Sequence                           |
|-------|-------------|----------|------------------------------------|
| 44.9  | 2310.161285 | 0.019611 | <a href="#">VLSIAQAHSPAFSCEQVR</a> |

Mascot: <http://www.matrixscience.com/>

# MASCOT Search Results

## Peptide View

MS/MS Fragmentation of **SPEQLR**

Found in **GNPTG\_HUMAN**, N-acetylglucosamine-1-phosphotransferase subunit gamma OS=Homo sapiens GN=GNPTG PE=1 SV=1

Match to Query 14811: 1039.556168 from(520.785360,2+) rtinseconds(1506) index(30312)

Title: Locus:1.1.1.3073.7 File:"2013-07-02 CLN FXIII 60 min 3rd F 3.wiff"

Data file C:\Program Files (x86)\Matrix Science\Mascot Daemon\mgf\6 FXIII 60 min 3rd\mascot\_daemon\_merge.mgf

Click mouse within plot area to zoom in by factor of two about that point

Or, Plot from  to  Da

Label all possible matches  Label matches used for scoring

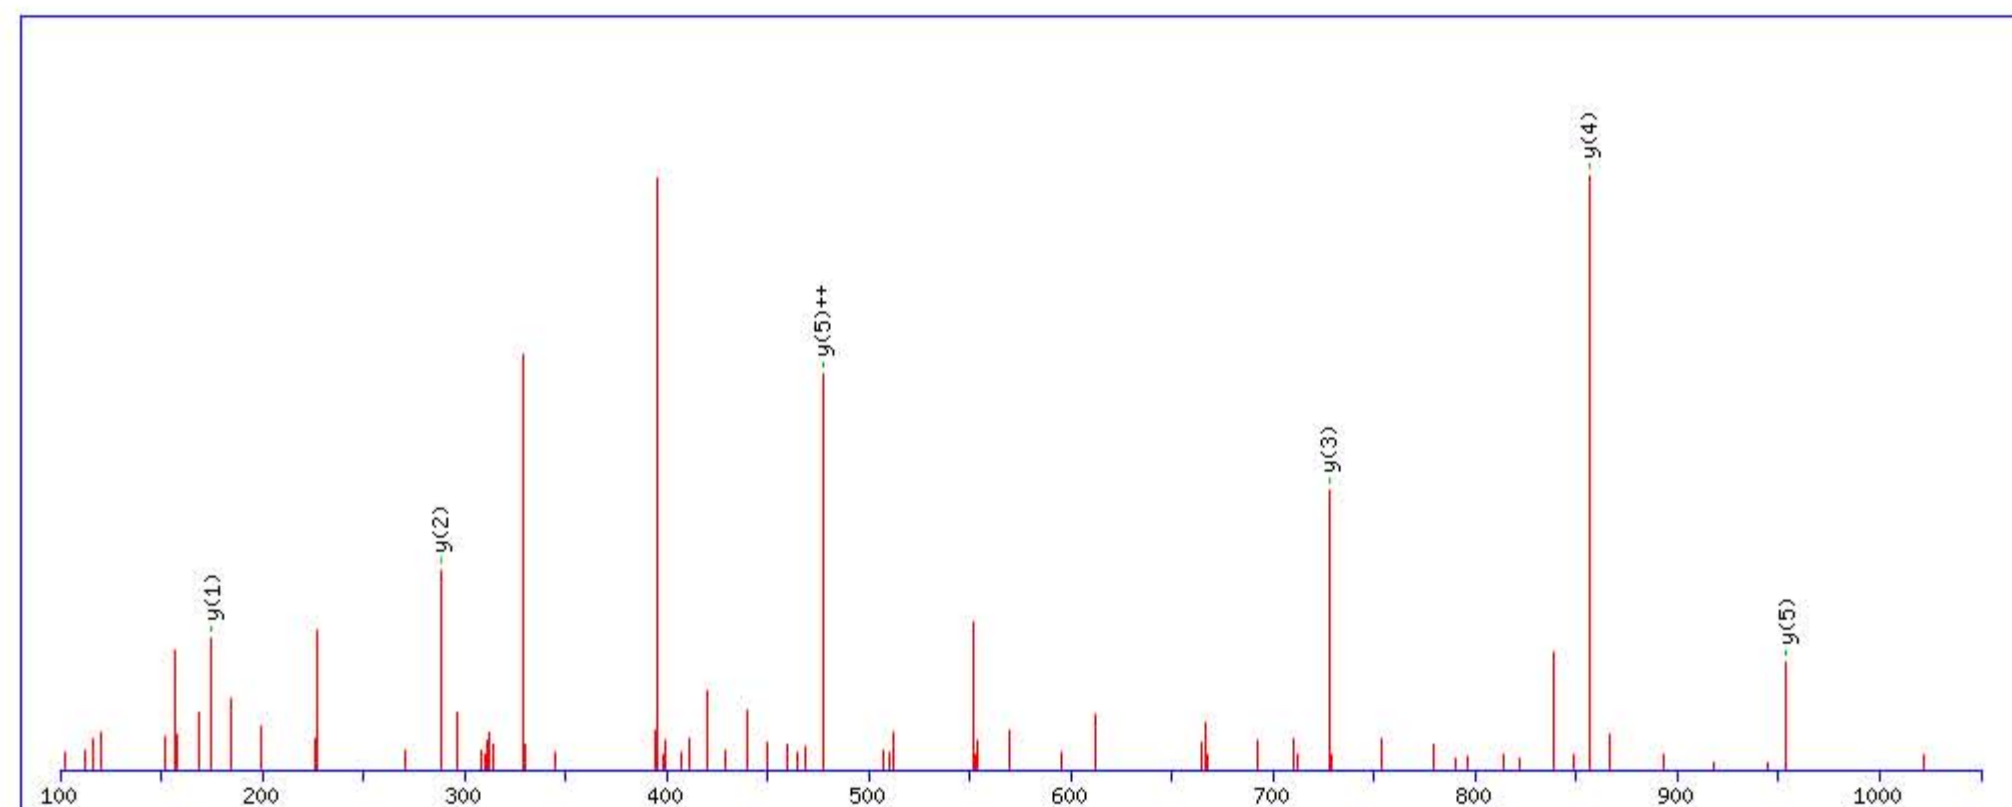

Monoisotopic mass of neutral peptide Mr(calc): 1039.548431

Fixed modifications: Carbamidomethyl (C) (apply to specified residues or termini only)

Variable modifications:

Q4 : Biotin:Thermo-21345 (Q)

Ions Score: 34 Expect: 0.0063

Matches : 6/48 fragment ions using 10 most intense peaks ([help](#))

| # | b          | b <sup>++</sup> | b <sup>*</sup> | b <sup>+++</sup> | b <sup>0</sup> | b <sup>0++</sup> | Seq. | y                 | y <sup>++</sup>   | y <sup>*</sup> | y <sup>+++</sup> | y <sup>0</sup> | y <sup>0++</sup> | # |
|---|------------|-----------------|----------------|------------------|----------------|------------------|------|-------------------|-------------------|----------------|------------------|----------------|------------------|---|
| 1 | 88.039304  | 44.523290       |                |                  | 70.028739      | 35.518008        | S    |                   |                   |                |                  |                |                  | 6 |
| 2 | 185.092068 | 93.049672       |                |                  | 167.081503     | 84.044389        | P    | <b>953.523699</b> | <b>477.265488</b> | 936.497150     | 468.752213       | 935.513134     | 468.260205       | 5 |
| 3 | 314.134661 | 157.570968      |                |                  | 296.124096     | 148.565686       | E    | <b>856.470935</b> | 428.739106        | 839.444386     | 420.225831       | 838.460370     | 419.733823       | 4 |
| 4 | 753.359987 | 377.183632      | 736.333438     | 368.670357       | 735.349422     | 368.178349       | Q    | <b>727.428342</b> | 364.217809        | 710.401793     | 355.704535       |                |                  | 3 |
| 5 | 866.444051 | 433.725664      | 849.417502     | 425.212389       | 848.433486     | 424.720381       | L    | <b>288.203016</b> | 144.605146        | 271.176467     | 136.091872       |                |                  | 2 |
| 6 |            |                 |                |                  |                |                  | R    | <b>175.118952</b> | 88.063114         | 158.092403     | 79.549840        |                |                  | 1 |

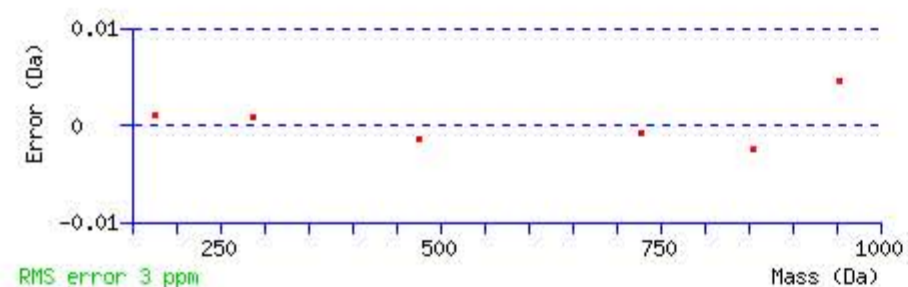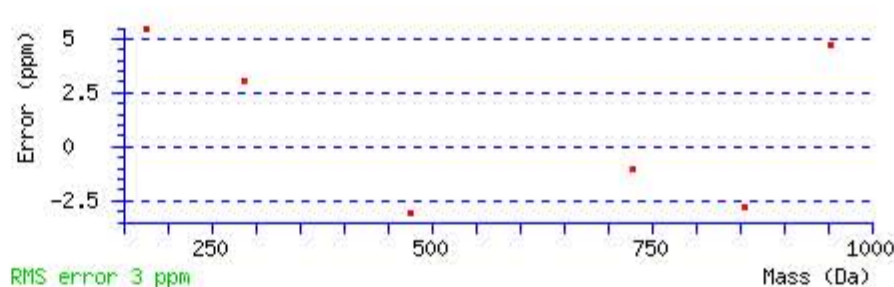

NCBI BLAST search of **SPEQLR**

(Parameters: blastp, nr protein database, expect=20000, no filter, PAM30)

Other BLAST [web gateways](#)

All matches to this query

| Score | Mr(calc):   | Delta     | Sequence                   |
|-------|-------------|-----------|----------------------------|
| 33.9  | 1039.548431 | 0.007737  | <a href="#">SPEQLR</a>     |
| 20.8  | 1039.548431 | 0.007737  | <a href="#">SPEIQR</a>     |
| 17.2  | 1039.541031 | 0.015137  | <a href="#">ALESNHILR</a>  |
| 12.8  | 1039.567535 | -0.011367 | <a href="#">SSLVWHRR</a>   |
| 11.5  | 1039.563492 | -0.007324 | <a href="#">SSLERHRR</a>   |
| 9.8   | 1039.567535 | -0.011367 | <a href="#">SPPPPHRPR</a>  |
| 8.1   | 1039.570892 | -0.014724 | <a href="#">SMGRLAHIR</a>  |
| 5.8   | 1039.541061 | 0.015107  | <a href="#">SSRVTFSTR</a>  |
| 5.5   | 1039.563492 | -0.007324 | <a href="#">SSHLRERR</a>   |
| 4.7   | 1039.541046 | 0.015122  | <a href="#">ALQSGPPQSR</a> |

Mascot: <http://www.matrixscience.com/>

# MASCOT SEARCH RESULTS

## Peptide View

MS/MS Fragmentation of **RPYQEGTPCSQCPSGYHCK**

Found in **PII6\_HUMAN**, Peptidase inhibitor 16 OS=Homo sapiens GN=PII6 PE=1 SV=1

Match to Query 52244: 2622.115056 from(656.536040,4+) rtinseconds(1338) index(29283)

Title: Locus:1.1.1.3014.17 File:"2013-07-02 CLN FXIII 60 min 3rd F 3.wiff"

Data file C:\Program Files (x86)\Matrix Science\Mascot Daemon\mgf\6 FXIII 60 min 3rd\mascot\_daemon\_merge.mgf

Click mouse within plot area to zoom in by factor of two about that point

Or, Plot from 100 to 1600 Da Full range

Label all possible matches  Label matches used for scoring

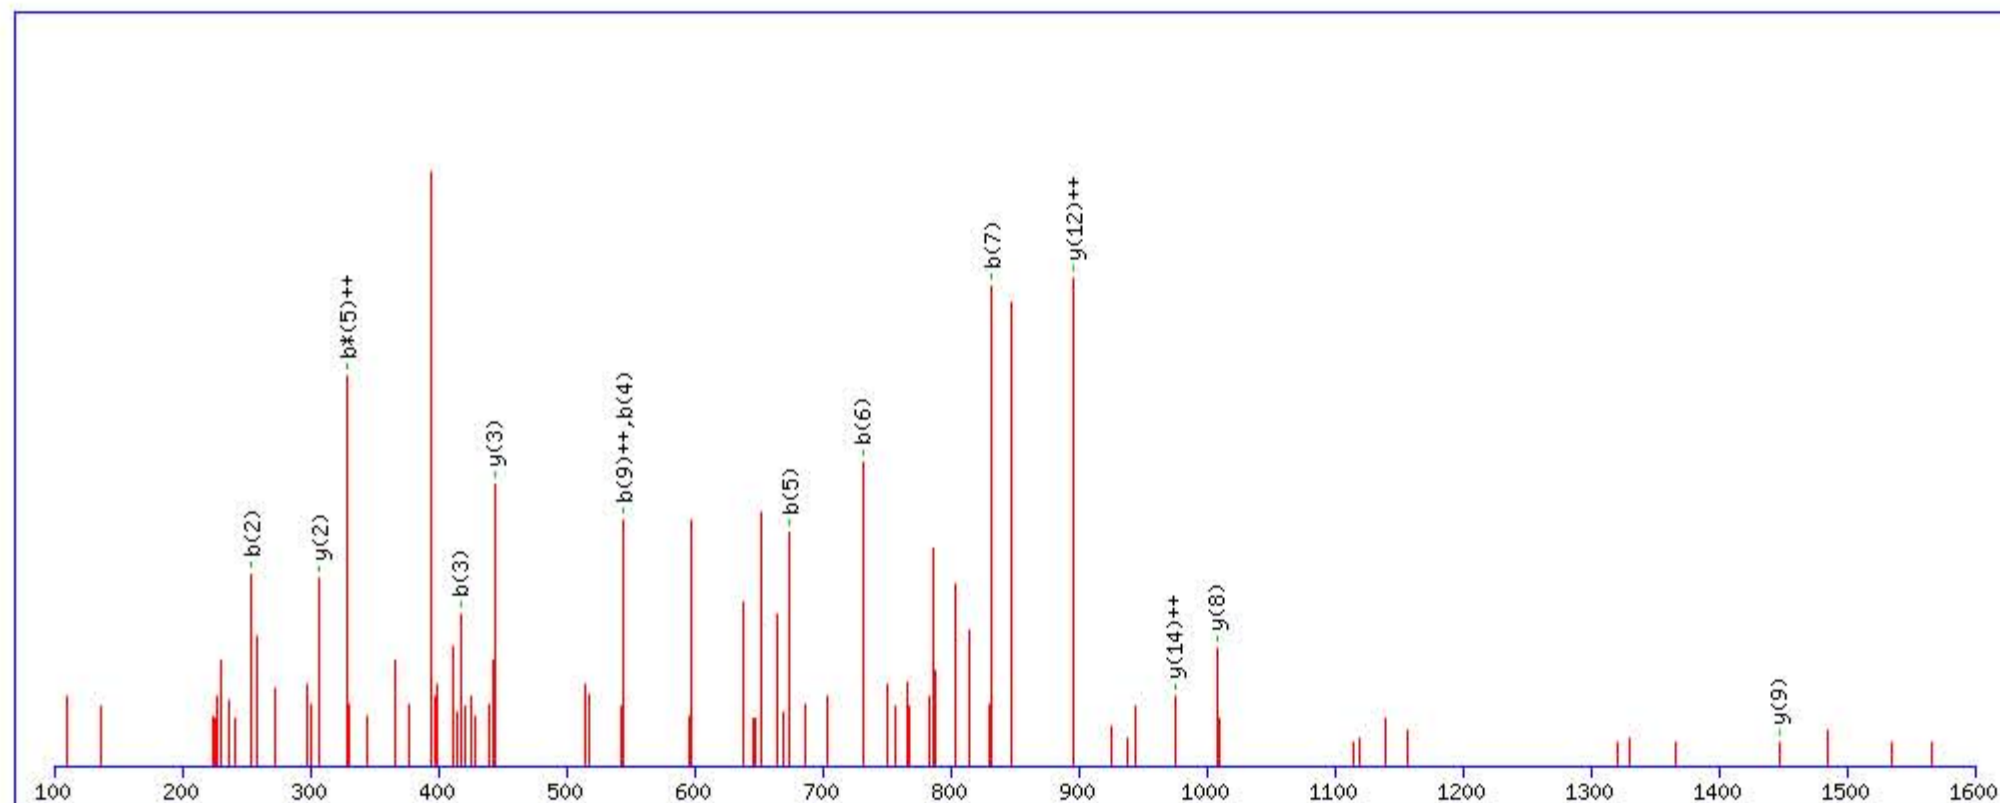

Monoisotopic mass of neutral peptide Mr(calc): 2622.123611

Fixed modifications: Carbamidomethyl (C) (apply to specified residues or termini only)

Variable modifications:

Q11 : Biotin:Thermo-21345 (Q)

Ions Score: 26 Expect: 0.0068

Matches : 14/198 fragment ions using 26 most intense peaks ([help](#))

| #  | b                 | b <sup>++</sup>   | b <sup>+</sup> | b <sup>+++</sup>  | b <sup>0</sup> | b <sup>0++</sup> | Seq. | y                  | y <sup>++</sup>   | y <sup>+</sup> | y <sup>+++</sup> | y <sup>0</sup> | y <sup>0++</sup> | #  |
|----|-------------------|-------------------|----------------|-------------------|----------------|------------------|------|--------------------|-------------------|----------------|------------------|----------------|------------------|----|
| 1  | 157.108387        | 79.057831         | 140.081838     | 70.544557         |                |                  | R    |                    |                   |                |                  |                |                  | 19 |
| 2  | <b>254.161151</b> | 127.584213        | 237.134602     | 119.070939        |                |                  | P    | 2467.029773        | 1234.018524       | 2450.003224    | 1225.505250      | 2449.019208    | 1225.013242      | 18 |
| 3  | <b>417.224480</b> | 209.115878        | 400.197931     | 200.602604        |                |                  | Y    | 2369.977009        | 1185.492142       | 2352.950460    | 1176.978868      | 2351.966444    | 1176.486860      | 17 |
| 4  | <b>545.283058</b> | 273.145167        | 528.256509     | 264.631893        |                |                  | Q    | 2206.913680        | 1103.960478       | 2189.887131    | 1095.447203      | 2188.903115    | 1094.955195      | 16 |
| 5  | <b>674.325651</b> | 337.666464        | 657.299102     | <b>329.153189</b> | 656.315086     | 328.661181       | E    | 2078.855102        | 1039.931189       | 2061.828553    | 1031.417914      | 2060.844537    | 1030.925906      | 15 |
| 6  | <b>731.347115</b> | 366.177196        | 714.320566     | 357.663921        | 713.336550     | 357.171913       | G    | 1949.812509        | <b>975.409892</b> | 1932.785960    | 966.896618       | 1931.801944    | 966.404610       | 14 |
| 7  | <b>832.394794</b> | 416.701035        | 815.368245     | 408.187761        | 814.384229     | 407.695753       | T    | 1892.791045        | 946.899160        | 1875.764496    | 938.385886       | 1874.780480    | 937.893878       | 13 |
| 8  | 929.447558        | 465.227417        | 912.421009     | 456.714143        | 911.436993     | 456.222135       | P    | 1791.743366        | <b>896.375321</b> | 1774.716817    | 887.862047       | 1773.732801    | 887.370038       | 12 |
| 9  | 1089.478207       | <b>545.242742</b> | 1072.451658    | 536.729467        | 1071.467642    | 536.237459       | C    | 1694.690602        | 847.848939        | 1677.664053    | 839.335665       | 1676.680037    | 838.843656       | 11 |
| 10 | 1176.510235       | 588.758756        | 1159.483686    | 580.245481        | 1158.499670    | 579.753473       | S    | 1534.659953        | 767.833614        | 1517.633404    | 759.320340       | 1516.649388    | 758.828332       | 10 |
| 11 | 1615.735561       | 808.371419        | 1598.709012    | 799.858144        | 1597.724996    | 799.366136       | Q    | <b>1447.627925</b> | 724.317600        | 1430.601376    | 715.804326       | 1429.617360    | 715.312318       | 9  |
| 12 | 1775.766210       | 888.386743        | 1758.739661    | 879.873469        | 1757.755645    | 879.381461       | C    | <b>1008.402599</b> | 504.704937        | 991.376050     | 496.191663       | 990.392034     | 495.699655       | 8  |
| 13 | 1872.818974       | 936.913125        | 1855.792425    | 928.399851        | 1854.808409    | 927.907843       | P    | 848.371950         | 424.689613        | 831.345401     | 416.176338       | 830.361385     | 415.684330       | 7  |
| 14 | 1959.851002       | 980.429139        | 1942.824453    | 971.915865        | 1941.840437    | 971.423857       | S    | 751.319186         | 376.163231        | 734.292637     | 367.649956       | 733.308621     | 367.157948       | 6  |
| 15 | 2016.872466       | 1008.939871       | 1999.845917    | 1000.426597       | 1998.861901    | 999.934589       | G    | 664.287158         | 332.647217        | 647.260609     | 324.133942       |                |                  | 5  |
| 16 | 2179.935795       | 1090.471535       | 2162.909246    | 1081.958261       | 2161.925230    | 1081.466253      | Y    | 607.265694         | 304.136485        | 590.239145     | 295.623210       |                |                  | 4  |
| 17 | 2316.994707       | 1159.000991       | 2299.968158    | 1150.487717       | 2298.984142    | 1149.995709      | H    | <b>444.202365</b>  | 222.604820        | 427.175816     | 214.091546       |                |                  | 3  |
| 18 | 2477.025356       | 1239.016316       | 2459.998807    | 1230.503041       | 2459.014791    | 1230.011033      | C    | <b>307.143453</b>  | 154.075364        | 290.116904     | 145.562090       |                |                  | 2  |
| 19 |                   |                   |                |                   |                |                  | K    | 147.112804         | 74.060040         | 130.086255     | 65.546765        |                |                  | 1  |

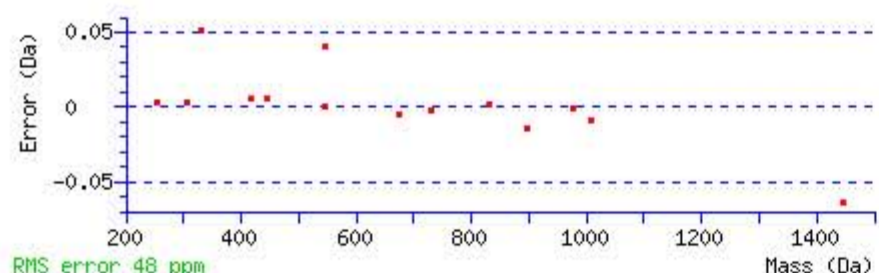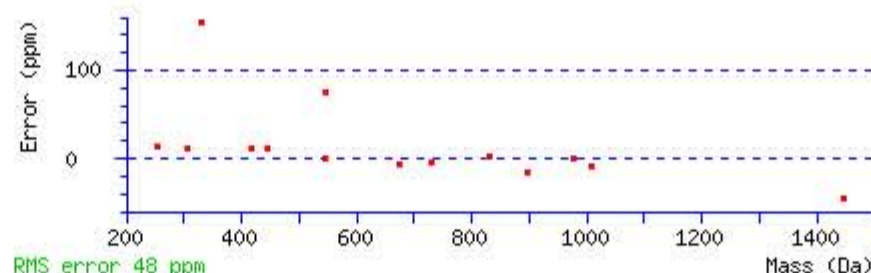

NCBI BLAST search of **RPYQEGTPCSQCPSGYHCK**

(Parameters: blastp, nr protein database, expect=20000, no filter, PAM30)

Other BLAST [web gateways](#)

All matches to this query

| Score | Mr(calc):   | Delta     | Sequence                            |
|-------|-------------|-----------|-------------------------------------|
| 26.4  | 2622.123611 | -0.008555 | <a href="#">RPYQEGTPCSQCPSGYHCK</a> |

Mascot: <http://www.matrixscience.com/>

# MASCOT SCIENCE Mascot Search Results

## Peptide View

MS/MS Fragmentation of **TMFIGGSQLSQK**

Found in **PHLD\_HUMAN**, Phosphatidylinositol-glycan-specific phospholipase D OS=Homo sapiens GN=GPLD1 PE=1 SV=3

Match to Query 33445: 1606.842548 from(804.428550,2+) rtinseconds(2120) index(48139)

Title: Locus:1.1.1.2786.17 File:"2013-07-02 CLN FXIII 60 min 3rd F 4.wiff"

Data file C:\Program Files (x86)\Matrix Science\Mascot Daemon\mgf\6 FXIII 60 min 3rd\mascot\_daemon\_merge.mgf

Click mouse within plot area to zoom in by factor of two about that point

Or, Plot from  to  Da

Label all possible matches  Label matches used for scoring

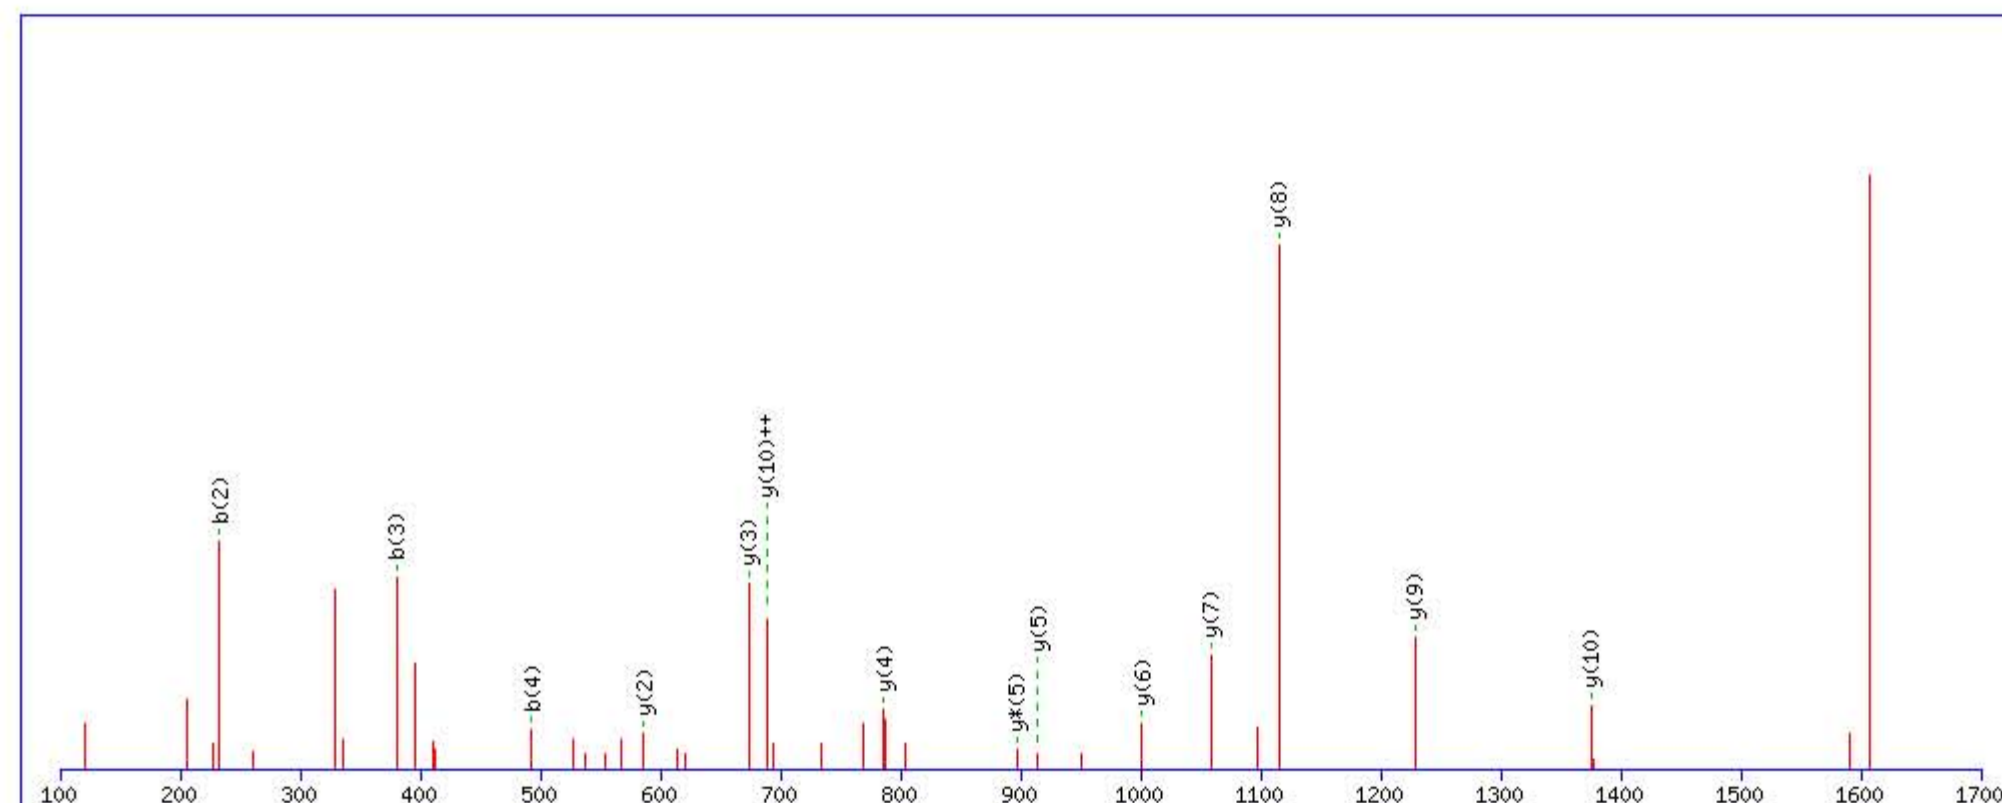

Monoisotopic mass of neutral peptide Mr(calc): 1606.821121

Fixed modifications: Carbamidomethyl (C) (apply to specified residues or termini only)

Variable modifications:

Q11 : Biotin:Thermo-21345 (Q)

Ions Score: 66 Expect: 6.2e-006

Matches : 14/114 fragment ions using 23 most intense peaks [\(help\)](#)

| #  | b                 | b <sup>++</sup> | b <sup>*</sup> | b <sup>*++</sup> | b <sup>0</sup> | b <sup>0++</sup> | Seq. | y                  | y <sup>++</sup>   | y <sup>*</sup>    | y <sup>*++</sup> | y <sup>0</sup> | y <sup>0++</sup> | #  |
|----|-------------------|-----------------|----------------|------------------|----------------|------------------|------|--------------------|-------------------|-------------------|------------------|----------------|------------------|----|
| 1  | 102.054955        | 51.531116       |                |                  | 84.044390      | 42.525833        | T    |                    |                   |                   |                  |                |                  | 12 |
| 2  | <b>233.095440</b> | 117.051358      |                |                  | 215.084875     | 108.046076       | M    | 1506.780719        | 753.893998        | 1489.754170       | 745.380723       | 1488.770154    | 744.888715       | 11 |
| 3  | <b>380.163854</b> | 190.585565      |                |                  | 362.153289     | 181.580282       | F    | <b>1375.740234</b> | <b>688.373755</b> | 1358.713685       | 679.860481       | 1357.729669    | 679.368473       | 10 |
| 4  | <b>493.247918</b> | 247.127597      |                |                  | 475.237353     | 238.122314       | I    | <b>1228.671820</b> | 614.839548        | 1211.645271       | 606.326274       | 1210.661255    | 605.834266       | 9  |
| 5  | 550.269382        | 275.638329      |                |                  | 532.258817     | 266.633047       | G    | <b>1115.587756</b> | 558.297516        | 1098.561207       | 549.784242       | 1097.577191    | 549.292234       | 8  |
| 6  | 607.290846        | 304.149061      |                |                  | 589.280281     | 295.143779       | G    | <b>1058.566292</b> | 529.786784        | 1041.539743       | 521.273510       | 1040.555727    | 520.781502       | 7  |
| 7  | 694.322874        | 347.665075      |                |                  | 676.312309     | 338.659793       | S    | <b>1001.544828</b> | 501.276052        | 984.518279        | 492.762778       | 983.534263     | 492.270770       | 6  |
| 8  | 822.381452        | 411.694364      | 805.354903     | 403.181090       | 804.370887     | 402.689082       | Q    | <b>914.512800</b>  | 457.760038        | <b>897.486251</b> | 449.246764       | 896.502235     | 448.754756       | 5  |
| 9  | 935.465516        | 468.236396      | 918.438967     | 459.723122       | 917.454951     | 459.231114       | L    | <b>786.454222</b>  | 393.730749        | 769.427673        | 385.217475       | 768.443657     | 384.725467       | 4  |
| 10 | 1022.497544       | 511.752410      | 1005.470995    | 503.239136       | 1004.486979    | 502.747128       | S    | <b>673.370158</b>  | 337.188717        | 656.343609        | 328.675443       | 655.359593     | 328.183435       | 3  |
| 11 | 1461.722870       | 731.365073      | 1444.696321    | 722.851799       | 1443.712305    | 722.359791       | Q    | <b>586.338130</b>  | 293.672703        | 569.311581        | 285.159429       |                |                  | 2  |
| 12 |                   |                 |                |                  |                |                  | K    | 147.112804         | 74.060040         | 130.086255        | 65.546765        |                |                  | 1  |

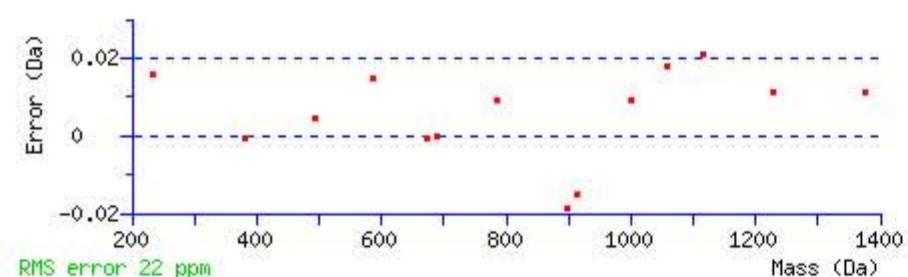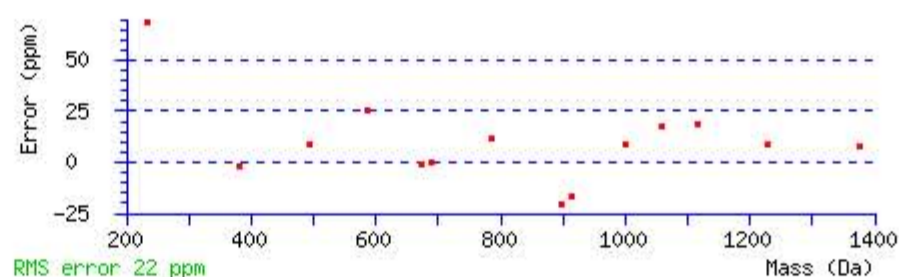

NCBI BLAST search of **TMFIGGSQLSQK**

(Parameters: blastp, nr protein database, expect=20000, no filter, PAM30)

Other BLAST [web gateways](#)

All matches to this query

| Score | Mr(calc):   | Delta    | Sequence                     |
|-------|-------------|----------|------------------------------|
| 65.8  | 1606.821121 | 0.021427 | <a href="#">TMFIGGSQLSQK</a> |
| 31.5  | 1606.821121 | 0.021427 | <a href="#">TMFIGGSQLSQK</a> |

Mascot: <http://www.matrixscience.com/>

# MASCOT Search Results

## Peptide View

MS/MS Fragmentation of **QVLLVGAPTYDDVSK**

Found in **PHLD\_HUMAN**, Phosphatidylinositol-glycan-specific phospholipase D OS=Homo sapiens GN=GPLD1 PE=1 SV=3

Match to Query 40510: 1915.016352 from(639.346060,3+) rtinseconds(2320) index(34918)

Title: Locus:1.1.1.3357.5 File:"2013-07-02 CLN FXIII 60 min 3rd F 3.wiff"

Data file C:\Program Files (x86)\Matrix Science\Mascot Daemon\mgf6 FXIII 60 min 3rd\mascot\_daemon\_merge.mgf

Click mouse within plot area to zoom in by factor of two about that point

Or, Plot from  to  Da

Label all possible matches  Label matches used for scoring

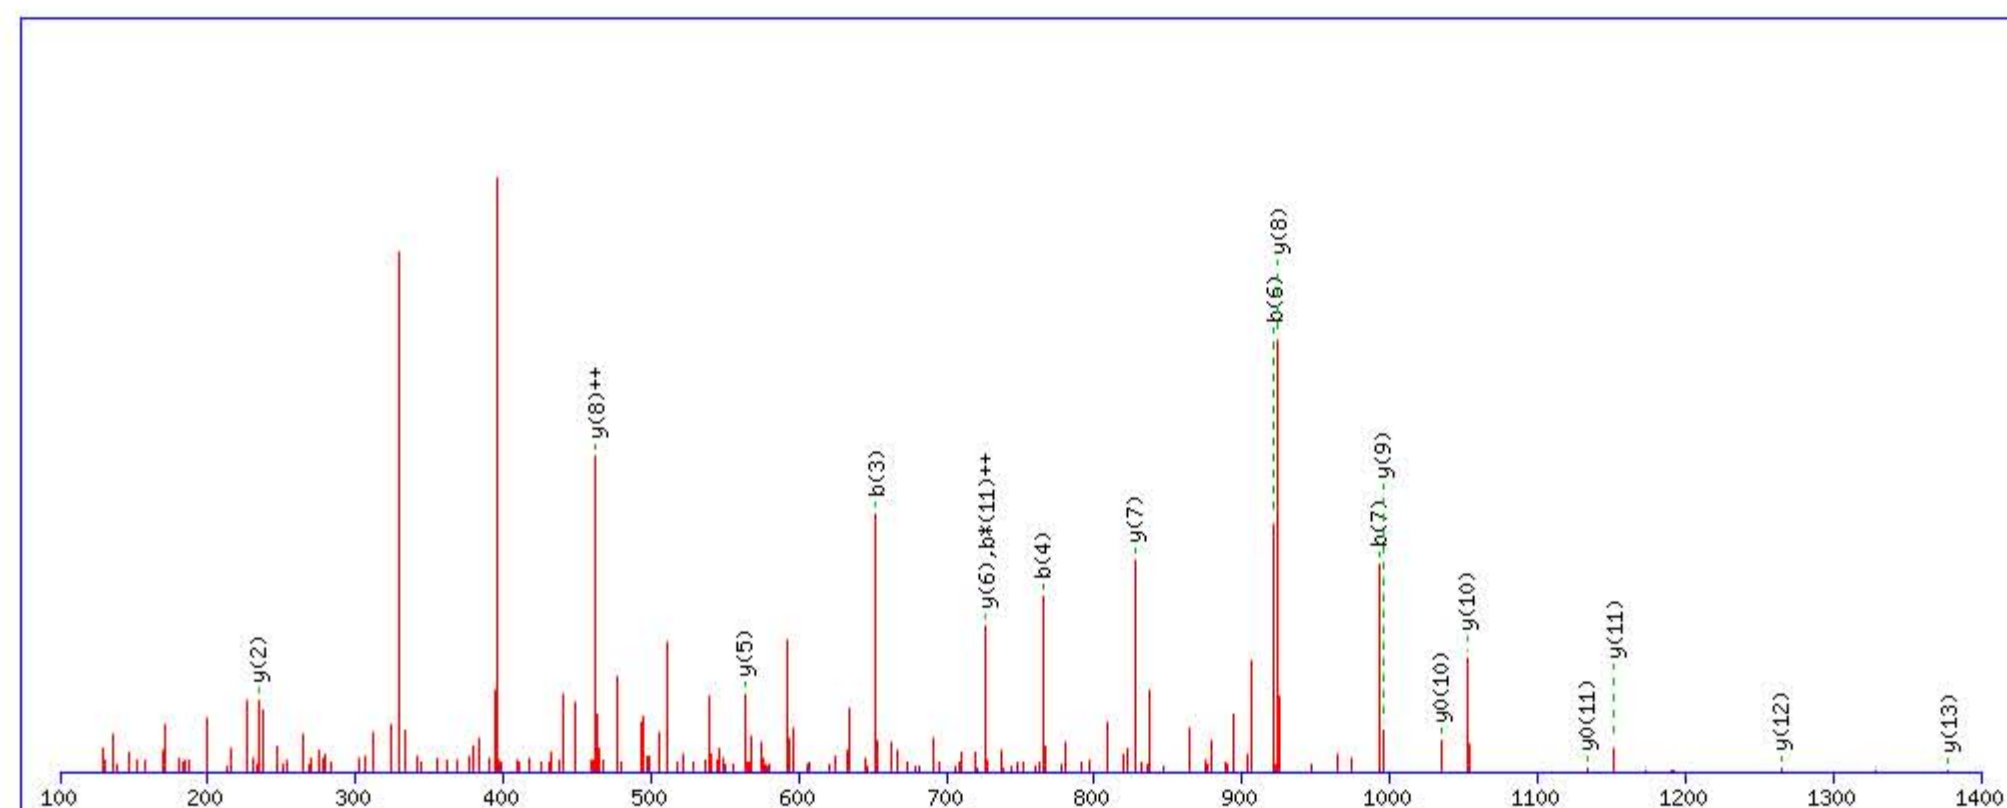

Monoisotopic mass of neutral peptide Mr(calc): 1915.012497

Fixed modifications: Carbamidomethyl (C) (apply to specified residues or termini only)

Variable modifications:

Q1 : Biotin:Thermo-21345 (Q)

Ions Score: 68 Expect: 7.2e-007

Matches : 18/150 fragment ions using 26 most intense peaks [\(help\)](#)

| #  | b                 | b <sup>++</sup> | b <sup>+</sup> | b <sup>+++</sup>  | b <sup>0</sup> | b <sup>0++</sup> | Seq. | y                  | y <sup>++</sup>   | y <sup>+</sup> | y <sup>+++</sup> | y <sup>0</sup>     | y <sup>0++</sup> | #  |
|----|-------------------|-----------------|----------------|-------------------|----------------|------------------|------|--------------------|-------------------|----------------|------------------|--------------------|------------------|----|
| 1  | 440.232602        | 220.619939      | 423.206053     | 212.106664        |                |                  | Q    |                    |                   |                |                  |                    |                  | 15 |
| 2  | 539.301016        | 270.154146      | 522.274467     | 261.640872        |                |                  | V    | 1476.794438        | 738.900857        | 1459.767889    | 730.387583       | 1458.783873        | 729.895575       | 14 |
| 3  | <b>652.385080</b> | 326.696178      | 635.358531     | 318.182904        |                |                  | L    | <b>1377.726024</b> | 689.366650        | 1360.699475    | 680.853376       | 1359.715459        | 680.361368       | 13 |
| 4  | <b>765.469144</b> | 383.238210      | 748.442595     | 374.724936        |                |                  | L    | <b>1264.641960</b> | 632.824618        | 1247.615411    | 624.311344       | 1246.631395        | 623.819336       | 12 |
| 5  | 864.537558        | 432.772417      | 847.511009     | 424.259143        |                |                  | V    | <b>1151.557896</b> | 576.282586        | 1134.531347    | 567.769312       | <b>1133.547331</b> | 567.277304       | 11 |
| 6  | <b>921.559022</b> | 461.283149      | 904.532473     | 452.769875        |                |                  | G    | <b>1052.489482</b> | 526.748379        | 1035.462933    | 518.235105       | <b>1034.478917</b> | 517.743097       | 10 |
| 7  | <b>992.596136</b> | 496.801706      | 975.569587     | 488.288432        |                |                  | A    | <b>995.468018</b>  | 498.237647        | 978.441469     | 489.724373       | 977.457453         | 489.232365       | 9  |
| 8  | 1089.648900       | 545.328088      | 1072.622351    | 536.814814        |                |                  | P    | <b>924.430904</b>  | <b>462.719090</b> | 907.404355     | 454.205816       | 906.420339         | 453.713808       | 8  |
| 9  | 1190.696579       | 595.851927      | 1173.670030    | 587.338653        | 1172.686014    | 586.846645       | T    | <b>827.378140</b>  | 414.192708        | 810.351591     | 405.679434       | 809.367575         | 405.187426       | 7  |
| 10 | 1353.759908       | 677.383592      | 1336.733359    | 668.870318        | 1335.749343    | 668.378310       | Y    | <b>726.330461</b>  | 363.668869        | 709.303912     | 355.155594       | 708.319896         | 354.663586       | 6  |
| 11 | 1468.786851       | 734.897064      | 1451.760302    | <b>726.383789</b> | 1450.776286    | 725.891781       | D    | <b>563.267132</b>  | 282.137204        | 546.240583     | 273.623930       | 545.256567         | 273.131922       | 5  |
| 12 | 1583.813794       | 792.410535      | 1566.787245    | 783.897261        | 1565.803229    | 783.405253       | D    | 448.240189         | 224.623733        | 431.213640     | 216.110458       | 430.229624         | 215.618450       | 4  |
| 13 | 1682.882208       | 841.944742      | 1665.855659    | 833.431468        | 1664.871643    | 832.939460       | V    | 333.213246         | 167.110261        | 316.186697     | 158.596987       | 315.202681         | 158.104979       | 3  |
| 14 | 1769.914236       | 885.460756      | 1752.887687    | 876.947482        | 1751.903671    | 876.455474       | S    | <b>234.144832</b>  | 117.576054        | 217.118283     | 109.062780       | 216.134267         | 108.570772       | 2  |
| 15 |                   |                 |                |                   |                |                  | K    | 147.112804         | 74.060040         | 130.086255     | 65.546765        |                    |                  | 1  |

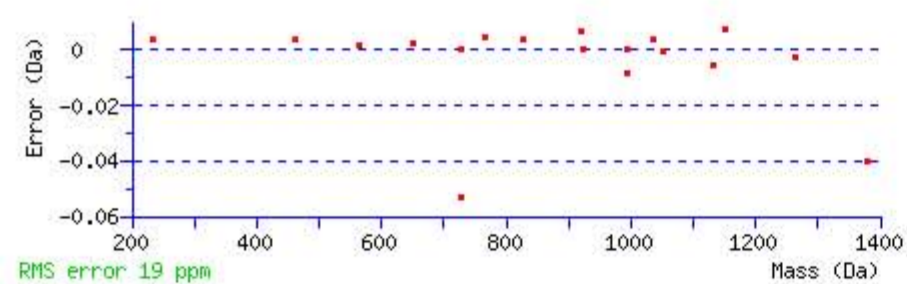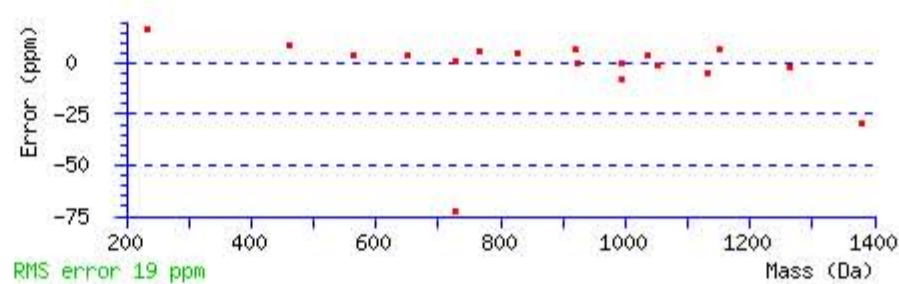

NCBI BLAST search of **QVLLVGAPTYDDVSK**

(Parameters: blastp, nr protein database, expect=20000, no filter, PAM30)

Other BLAST [web gateways](#)

All matches to this query

| Score | Mr(calc):   | Delta    | Sequence                           |
|-------|-------------|----------|------------------------------------|
| 68.2  | 1915.012497 | 0.003855 | <a href="#">QVLLVGAPTYDDVSK</a>    |
| 2.5   | 1915.002411 | 0.013941 | <a href="#">SQHEGRVEVQIGGPGPLR</a> |
| 0.5   | 1914.998550 | 0.017802 | <a href="#">LLAPEAGSHPQQTQK</a>    |
| 0.5   | 1914.998550 | 0.017802 | <a href="#">LLAPEAGSHPQQTQK</a>    |
| 0.5   | 1914.998550 | 0.017802 | <a href="#">LLAPEAGSHPQQTQK</a>    |

# MASCOT SCIENCE Mascot Search Results

## Peptide View

MS/MS Fragmentation of **VSSVEECQK**

Found in **KLKB1\_HUMAN**, Plasma kallikrein OS=Homo sapiens GN=KLKB1 PE=1 SV=1

Match to Query 25529: 1375.647672 from(459.556500,3+) rtinseconds(1405) index(59219)

Title: Locus:1.1.1.3115.5 File:"2013-07-02 CLN FXIII 60 min 3rd FT.wiff"

Data file C:\Program Files (x86)\Matrix Science\Mascot Daemon\mgf\6 FXIII 60 min 3rd\mascot\_daemon\_merge.mgf

Click mouse within plot area to zoom in by factor of two about that point

Or, Plot from  to  Da

Label all possible matches  Label matches used for scoring

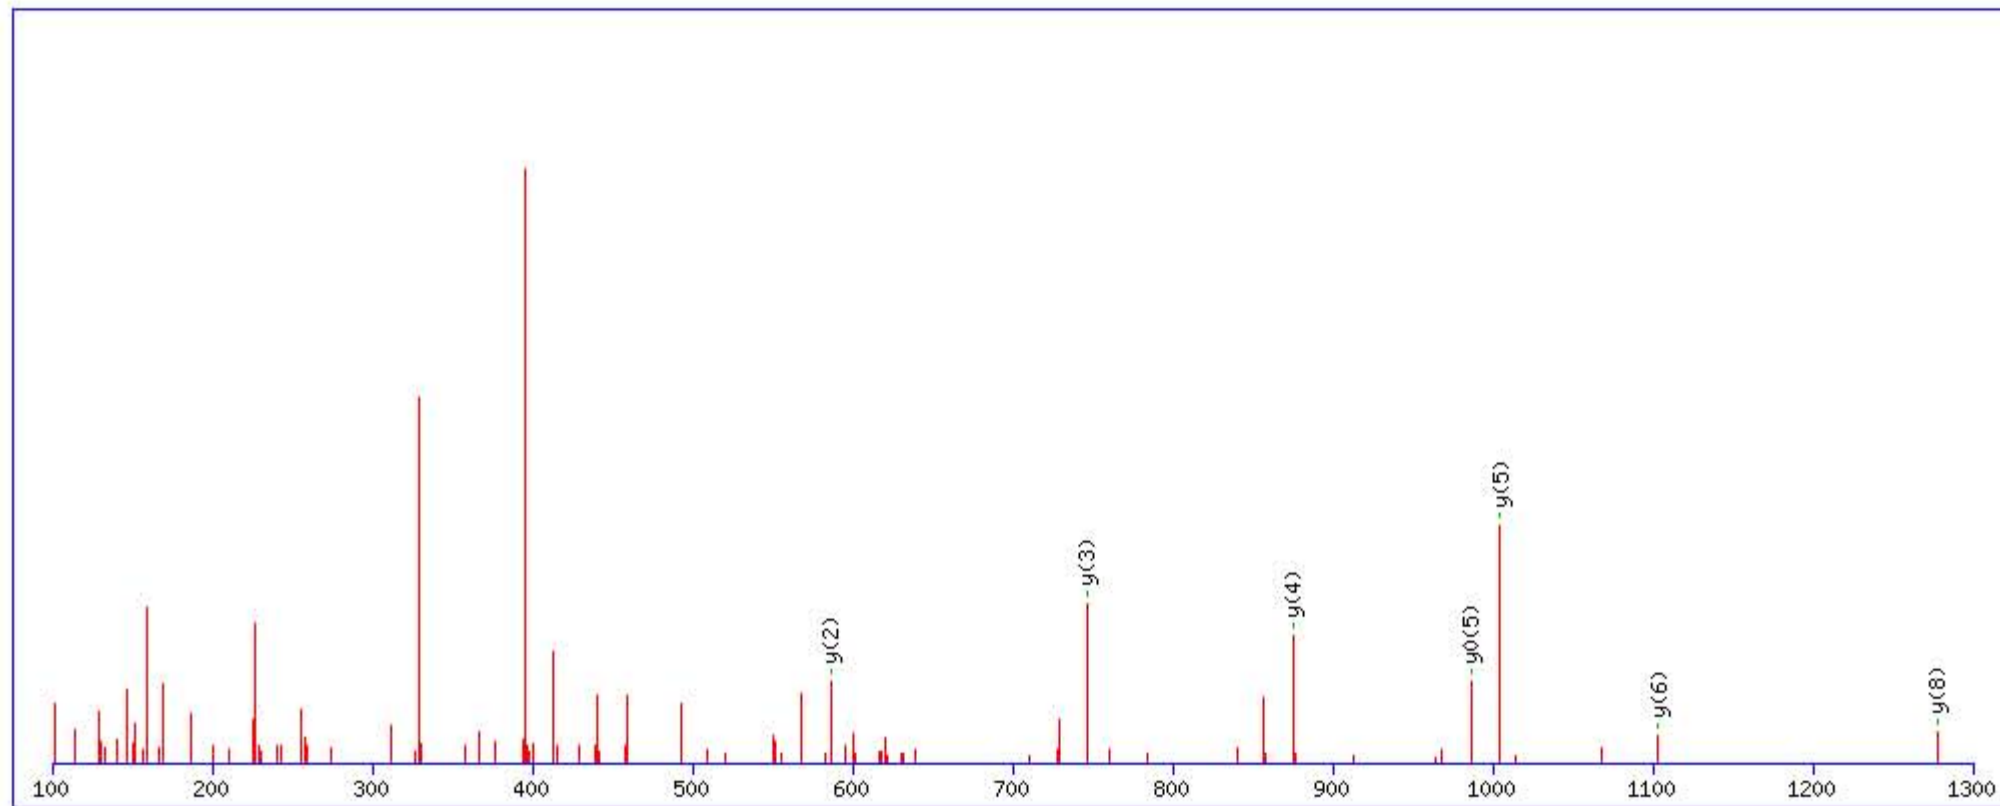

Monoisotopic mass of neutral peptide Mr(calc): 1375.647568

Fixed modifications: Carbamidomethyl (C) (apply to specified residues or termini only)

Variable modifications:

Q8 : Biotin:Thermo-21345 (Q)

Ions Score: 36 Expect: 0.00064

Matches : 7/74 fragment ions using 12 most intense peaks ([help](#))

| # | b           | b <sup>++</sup> | b <sup>*</sup> | b <sup>+++</sup> | b <sup>0</sup> | b <sup>0++</sup> | Seq. | y                  | y <sup>++</sup> | y <sup>*</sup> | y <sup>+++</sup> | y <sup>0</sup>    | y <sup>0++</sup> | # |
|---|-------------|-----------------|----------------|------------------|----------------|------------------|------|--------------------|-----------------|----------------|------------------|-------------------|------------------|---|
| 1 | 100.075690  | 50.541483       |                |                  |                |                  | V    |                    |                 |                |                  |                   |                  | 9 |
| 2 | 187.107718  | 94.057497       |                |                  | 169.097153     | 85.052214        | S    | <b>1277.586435</b> | 639.296856      | 1260.559886    | 630.783581       | 1259.575870       | 630.291573       | 8 |
| 3 | 274.139746  | 137.573511      |                |                  | 256.129181     | 128.568229       | S    | 1190.554407        | 595.780842      | 1173.527858    | 587.267567       | 1172.543842       | 586.775559       | 7 |
| 4 | 373.208160  | 187.107718      |                |                  | 355.197595     | 178.102436       | V    | <b>1103.522379</b> | 552.264828      | 1086.495830    | 543.751553       | 1085.511814       | 543.259545       | 6 |
| 5 | 502.250753  | 251.629015      |                |                  | 484.240188     | 242.623732       | E    | <b>1004.453965</b> | 502.730621      | 987.427416     | 494.217346       | <b>986.443400</b> | 493.725338       | 5 |
| 6 | 631.293346  | 316.150311      |                |                  | 613.282781     | 307.145029       | E    | <b>875.411372</b>  | 438.209324      | 858.384823     | 429.696050       | 857.400807        | 429.204042       | 4 |
| 7 | 791.323995  | 396.165636      |                |                  | 773.313430     | 387.160353       | C    | <b>746.368779</b>  | 373.688028      | 729.342230     | 365.174753       |                   |                  | 3 |
| 8 | 1230.549321 | 615.778299      | 1213.522772    | 607.265024       | 1212.538756    | 606.773016       | Q    | <b>586.338130</b>  | 293.672703      | 569.311581     | 285.159429       |                   |                  | 2 |
| 9 |             |                 |                |                  |                |                  | K    | 147.112804         | 74.060040       | 130.086255     | 65.546765        |                   |                  | 1 |

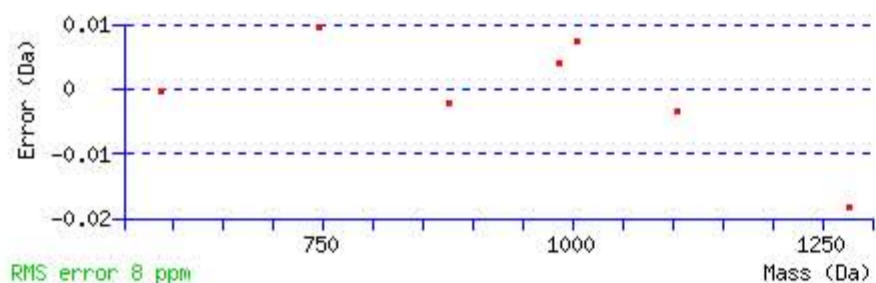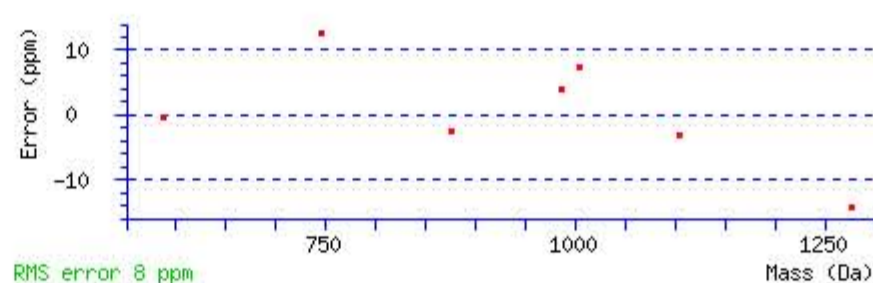

NCBI BLAST search of **VSSVEECQK**

(Parameters: blastp, nr protein database, expect=20000, no filter, PAM30)

Other BLAST [web gateways](#)

All matches to this query

| Score | Mr(calc):   | Delta     | Sequence                  |
|-------|-------------|-----------|---------------------------|
| 36.4  | 1375.647568 | 0.000104  | <a href="#">VSSVEECQK</a> |
| 2.3   | 1375.662827 | -0.015155 | <a href="#">GFSIPECQK</a> |

Mascot: <http://www.matrixscience.com/>



# Mascot Search Results

## Peptide View

MS/MS Fragmentation of **QCGHQISACHR**

Found in **KLKB1\_HUMAN**, Plasma kallikrein OS=Homo sapiens GN=KLKB1 PE=1 SV=1

Match to Query 35694: 1663.752342 from(555.591390,3+) rtinseconds(1127) index(58265)

Title: Locus:1.1.1.3018.13 File:"2013-07-02 CLN FXIII 60 min 3rd FT.wiff"

Data file C:\Program Files (x86)\Matrix Science\Mascot Daemon\mgf\6 FXIII 60 min 3rd\mascot\_daemon\_merge.mgf

Click mouse within plot area to zoom in by factor of two about that point

Or, Plot from  to  Da

Label all possible matches  Label matches used for scoring

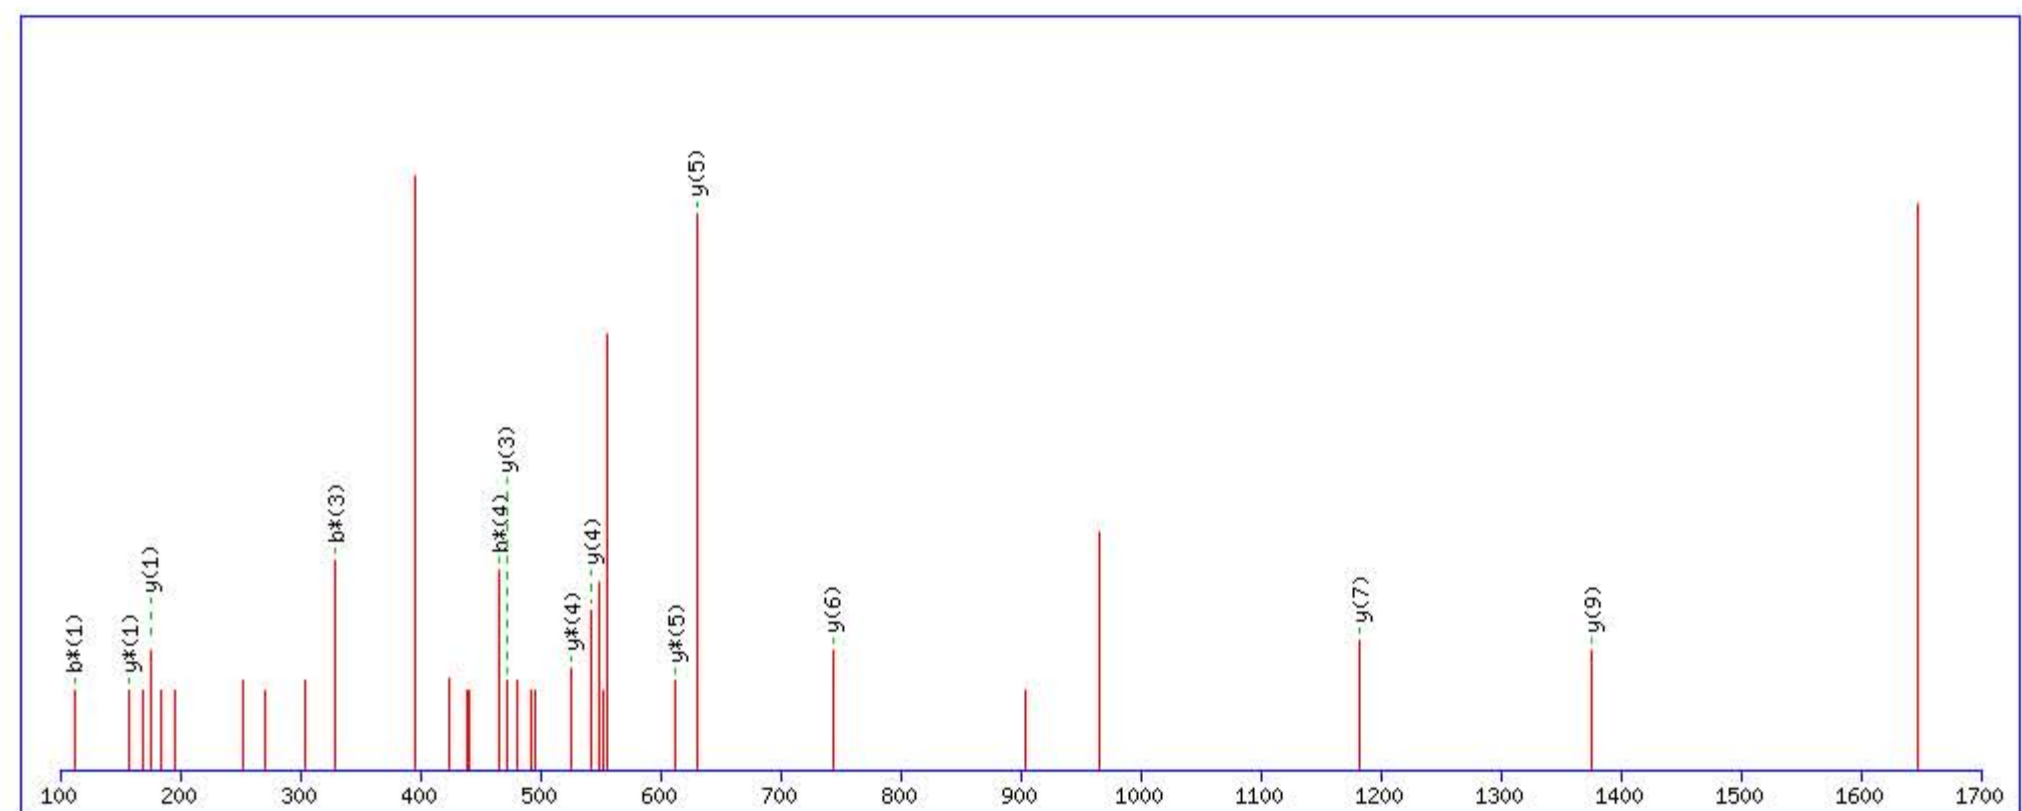

Monoisotopic mass of neutral peptide Mr(calc): 1663.749374

Fixed modifications: Carbamidomethyl (C) (apply to specified residues or termini only)

Variable modifications:

Q5 : Biotin:Thermo-21345 (Q)

Ions Score: 34 Expect: 0.0016

Matches : 13/100 fragment ions using 25 most intense peaks [\(help\)](#)

| #  | b           | b <sup>++</sup> | b <sup>+</sup> | b <sup>+++</sup> | b <sup>0</sup> | b <sup>0++</sup> | Seq. | y           | y <sup>++</sup> | y <sup>+</sup> | y <sup>+++</sup> | y <sup>0</sup> | y <sup>0++</sup> | #  |
|----|-------------|-----------------|----------------|------------------|----------------|------------------|------|-------------|-----------------|----------------|------------------|----------------|------------------|----|
| 1  | 129.065854  | 65.036565       | 112.039305     | 56.523291        |                |                  | Q    |             |                 |                |                  |                |                  | 11 |
| 2  | 289.096503  | 145.051890      | 272.069954     | 136.538615       |                |                  | C    | 1536.698070 | 768.852673      | 1519.671521    | 760.339399       | 1518.687505    | 759.847391       | 10 |
| 3  | 346.117967  | 173.562622      | 329.091418     | 165.049347       |                |                  | G    | 1376.667421 | 688.837348      | 1359.640872    | 680.324074       | 1358.656856    | 679.832066       | 9  |
| 4  | 483.176879  | 242.092078      | 466.150330     | 233.578803       |                |                  | H    | 1319.645957 | 660.326617      | 1302.619408    | 651.813342       | 1301.635392    | 651.321334       | 8  |
| 5  | 922.402205  | 461.704741      | 905.375656     | 453.191466       |                |                  | Q    | 1182.587045 | 591.797161      | 1165.560496    | 583.283886       | 1164.576480    | 582.791878       | 7  |
| 6  | 1035.486269 | 518.246773      | 1018.459720    | 509.733498       |                |                  | I    | 743.361719  | 372.184498      | 726.335170     | 363.671223       | 725.351154     | 363.179215       | 6  |
| 7  | 1122.518297 | 561.762787      | 1105.491748    | 553.249512       | 1104.507732    | 552.757504       | S    | 630.277655  | 315.642466      | 613.251106     | 307.129191       | 612.267090     | 306.637183       | 5  |
| 8  | 1193.555411 | 597.281344      | 1176.528862    | 588.768069       | 1175.544846    | 588.276061       | A    | 543.245627  | 272.126452      | 526.219078     | 263.613177       |                |                  | 4  |
| 9  | 1353.586060 | 677.296668      | 1336.559511    | 668.783394       | 1335.575495    | 668.291386       | C    | 472.208513  | 236.607894      | 455.181964     | 228.094620       |                |                  | 3  |
| 10 | 1490.644972 | 745.826124      | 1473.618423    | 737.312850       | 1472.634407    | 736.820842       | H    | 312.177864  | 156.592570      | 295.151315     | 148.079295       |                |                  | 2  |
| 11 |             |                 |                |                  |                |                  | R    | 175.118952  | 88.063114       | 158.092403     | 79.549839        |                |                  | 1  |

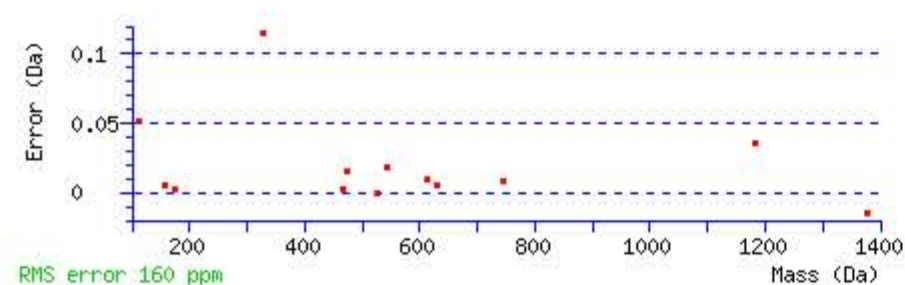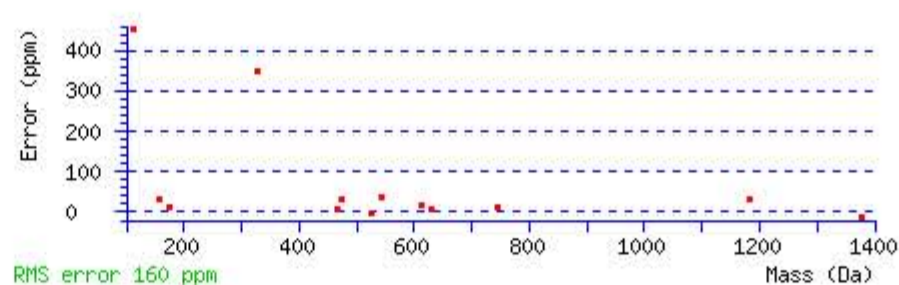

NCBI BLAST search of **QCGHQISACHR**

(Parameters: blastp, nr protein database, expect=20000, no filter, PAM30)

Other BLAST [web gateways](#)

All matches to this query

| Score | Mr(calc):   | Delta     | Sequence                         |
|-------|-------------|-----------|----------------------------------|
| 33.8  | 1663.749374 | 0.002968  | <a href="#">QCGHQISACHR</a>      |
| 15.9  | 1663.749374 | 0.002968  | <a href="#">QCGHQISACHR</a>      |
| 3.7   | 1663.768906 | -0.016564 | <a href="#">QLSVEPYSQEEAER</a>   |
| 2.2   | 1663.744675 | 0.007667  | <a href="#">QCQALVIWTDCCR</a>    |
| 2.0   | 1663.737213 | 0.015129  | <a href="#">EQWAEREREMER</a>     |
| 0.6   | 1663.774521 | -0.022179 | <a href="#">RMQWAMQTGGR</a>      |
| 0.1   | 1663.740616 | 0.011726  | <a href="#">ESPMVRSARDDMDR</a>   |
| 0.0   | 1663.772278 | -0.019936 | <a href="#">NLTEEMAALDESVAR</a>  |
| 0.0   | 1663.773651 | -0.021309 | <a href="#">AGSDGAKIGNCPFSQR</a> |

# MASCOT SEARCH RESULTS

## Peptide View

MS/MS Fragmentation of **VNIPLVTNEECQK**

Found in **KLKB1\_HUMAN**, Plasma kallikrein OS=Homo sapiens GN=KLKB1 PE=1 SV=1

Match to Query 39531: 1853.941272 from(618.987700,3+) rtinseconds(2165) index(63498)

Title: Locus:1.1.1.3380.15 File:"2013-07-02 CLN FXIII 60 min 3rd FT.wiff"

Data file C:\Program Files (x86)\Matrix Science\Mascot Daemon\mgf\6 FXIII 60 min 3rd\mascot\_daemon\_merge.mgf

Click mouse within plot area to zoom in by factor of two about that point

Or, Plot from  to  Da

Label all possible matches  Label matches used for scoring

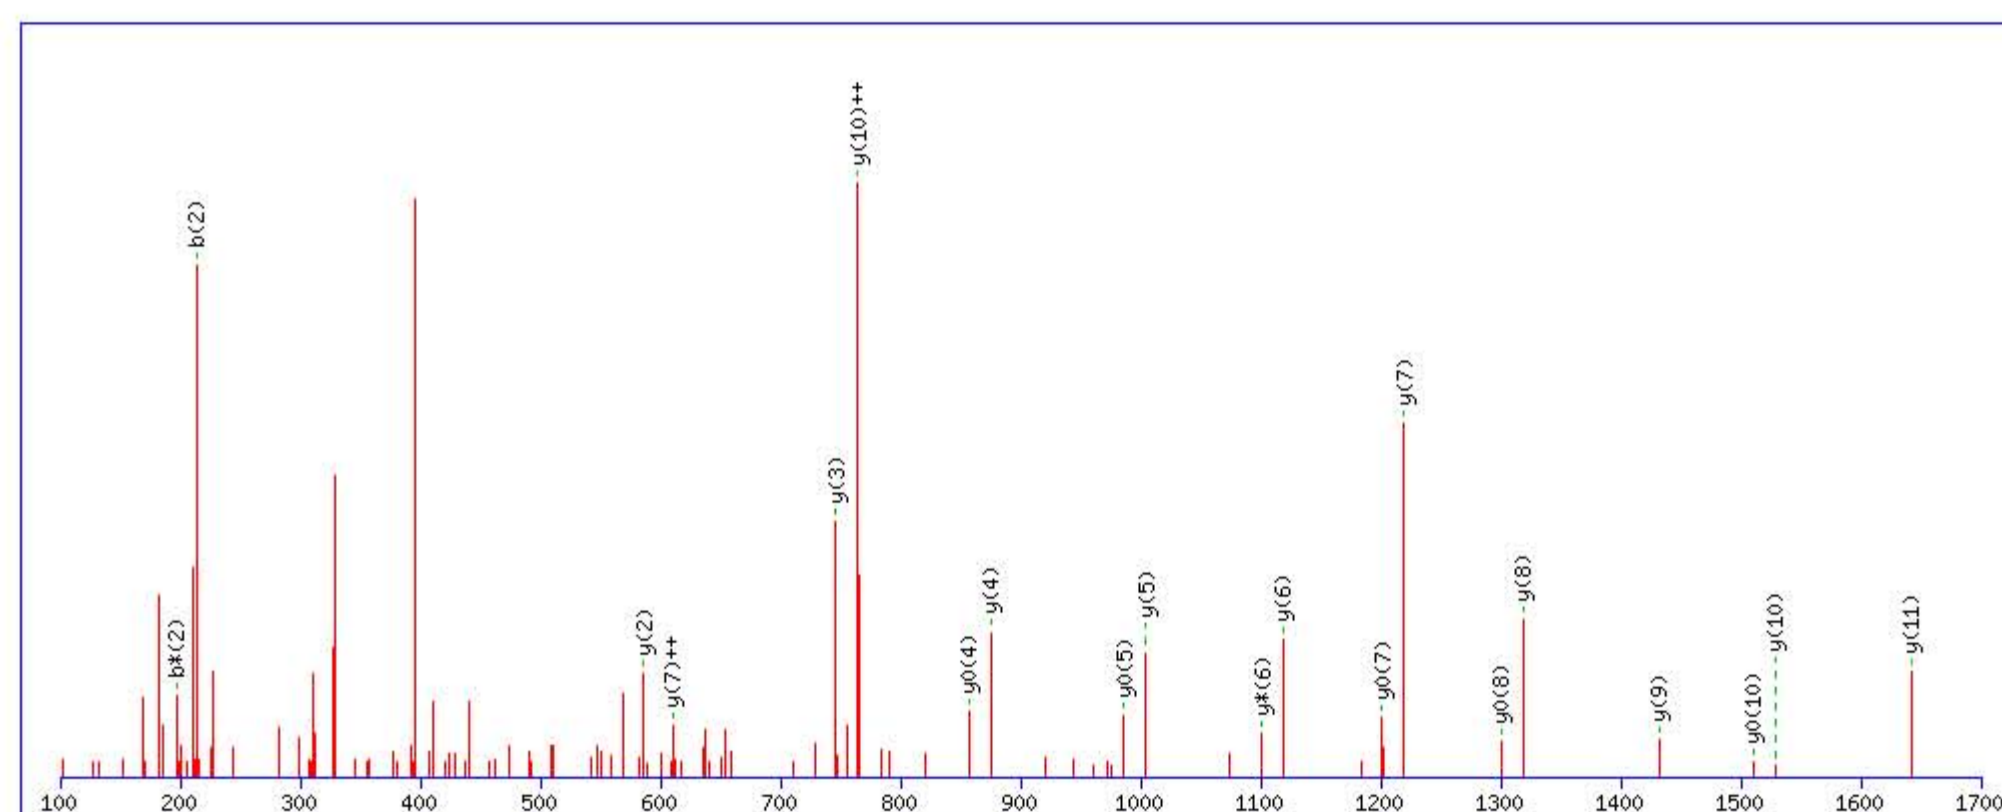

Monoisotopic mass of neutral peptide Mr(calc): 1853.937927

Fixed modifications: Carbamidomethyl (C) (apply to specified residues or termini only)

Variable modifications:

Q12 : Biotin:Thermo-21345 (Q)

Ions Score: 66 Expect: 1.5e-006

Matches : 20/124 fragment ions using 31 most intense peaks [\(help\)](#)

| #  | b           | b <sup>++</sup> | b <sup>*</sup> | b <sup>*++</sup> | b <sup>0</sup> | b <sup>0++</sup> | Seq. | y           | y <sup>++</sup> | y <sup>*</sup> | y <sup>*++</sup> | y <sup>0</sup> | y <sup>0++</sup> | #  |
|----|-------------|-----------------|----------------|------------------|----------------|------------------|------|-------------|-----------------|----------------|------------------|----------------|------------------|----|
| 1  | 100.075690  | 50.541483       |                |                  |                |                  | V    |             |                 |                |                  |                |                  | 13 |
| 2  | 214.118617  | 107.562947      | 197.092068     | 99.049672        |                |                  | N    | 1755.876804 | 878.442040      | 1738.850255    | 869.928766       | 1737.866239    | 869.436758       | 12 |
| 3  | 327.202681  | 164.104978      | 310.176132     | 155.591704       |                |                  | I    | 1641.833877 | 821.420577      | 1624.807328    | 812.907302       | 1623.823312    | 812.415294       | 11 |
| 4  | 424.255445  | 212.631360      | 407.228896     | 204.118086       |                |                  | P    | 1528.749813 | 764.878545      | 1511.723264    | 756.365270       | 1510.739248    | 755.873262       | 10 |
| 5  | 537.339509  | 269.173393      | 520.312960     | 260.660118       |                |                  | L    | 1431.697049 | 716.352163      | 1414.670500    | 707.838888       | 1413.686484    | 707.346880       | 9  |
| 6  | 636.407923  | 318.707600      | 619.381374     | 310.194325       |                |                  | V    | 1318.612985 | 659.810131      | 1301.586436    | 651.296856       | 1300.602420    | 650.804848       | 8  |
| 7  | 737.455602  | 369.231439      | 720.429053     | 360.718165       | 719.445037     | 360.226157       | T    | 1219.544571 | 610.275924      | 1202.518022    | 601.762649       | 1201.534006    | 601.270641       | 7  |
| 8  | 851.498529  | 426.252903      | 834.471980     | 417.739628       | 833.487964     | 417.247620       | N    | 1118.496892 | 559.752084      | 1101.470343    | 551.238810       | 1100.486327    | 550.746802       | 6  |
| 9  | 980.541122  | 490.774199      | 963.514573     | 482.260924       | 962.530557     | 481.768916       | E    | 1004.453965 | 502.730621      | 987.427416     | 494.217346       | 986.443400     | 493.725338       | 5  |
| 10 | 1109.583715 | 555.295496      | 1092.557166    | 546.782221       | 1091.573150    | 546.290213       | E    | 875.411372  | 438.209324      | 858.384823     | 429.696050       | 857.400807     | 429.204042       | 4  |
| 11 | 1269.614364 | 635.310820      | 1252.587815    | 626.797546       | 1251.603799    | 626.305538       | C    | 746.368779  | 373.688028      | 729.342230     | 365.174753       |                |                  | 3  |
| 12 | 1708.839690 | 854.923483      | 1691.813141    | 846.410209       | 1690.829125    | 845.918201       | Q    | 586.338130  | 293.672703      | 569.311581     | 285.159429       |                |                  | 2  |
| 13 |             |                 |                |                  |                |                  | K    | 147.112804  | 74.060040       | 130.086255     | 65.546765        |                |                  | 1  |

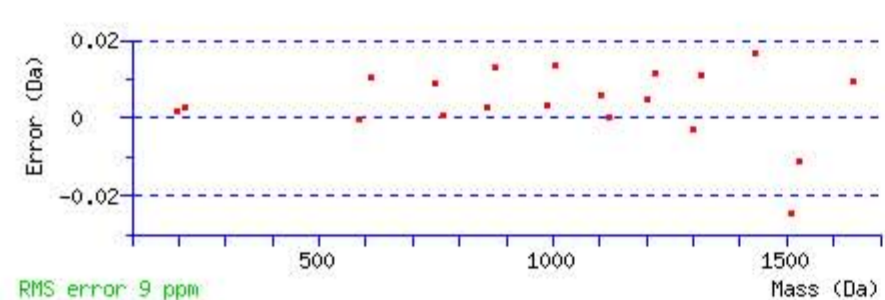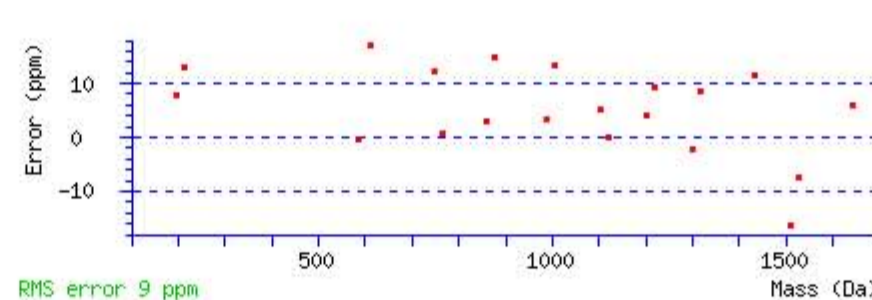

NCBI BLAST search of **VNIPLVTNEECQK**

(Parameters: blastp, nr protein database, expect=20000, no filter, PAM30)

Other BLAST [web gateways](#)

All matches to this query

| Score | Mr(calc):   | Delta    | Sequence                         |
|-------|-------------|----------|----------------------------------|
| 65.7  | 1853.937927 | 0.003345 | <a href="#">VNIPLVTNEECQK</a>    |
| 3.7   | 1853.934341 | 0.006931 | <a href="#">RGLSNPNELQAIDSNR</a> |

Mascot: <http://www.matrixscience.com/>

# MASCOT Search Results

## Peptide View

MS/MS Fragmentation of **GGDVASMYTPNAQYCQMR**

Found in **KLKB1\_HUMAN**, Plasma kallikrein OS=Homo sapiens GN=KLKB1 PE=1 SV=1

Match to Query 48621: 2359.037112 from(787.352980,3+) rtinseconds(2094) index(63046)

Title: Locus:1.1.1.3355.15 File:"2013-07-02 CLN FXIII 60 min 3rd FT.wiff"

Data file C:\Program Files (x86)\Matrix Science\Mascot Daemon\mgf\6 FXIII 60 min 3rd\mascot\_daemon\_merge.mgf

Click mouse within plot area to zoom in by factor of two about that point

Or, Plot from  to  Da

Label all possible matches  Label matches used for scoring

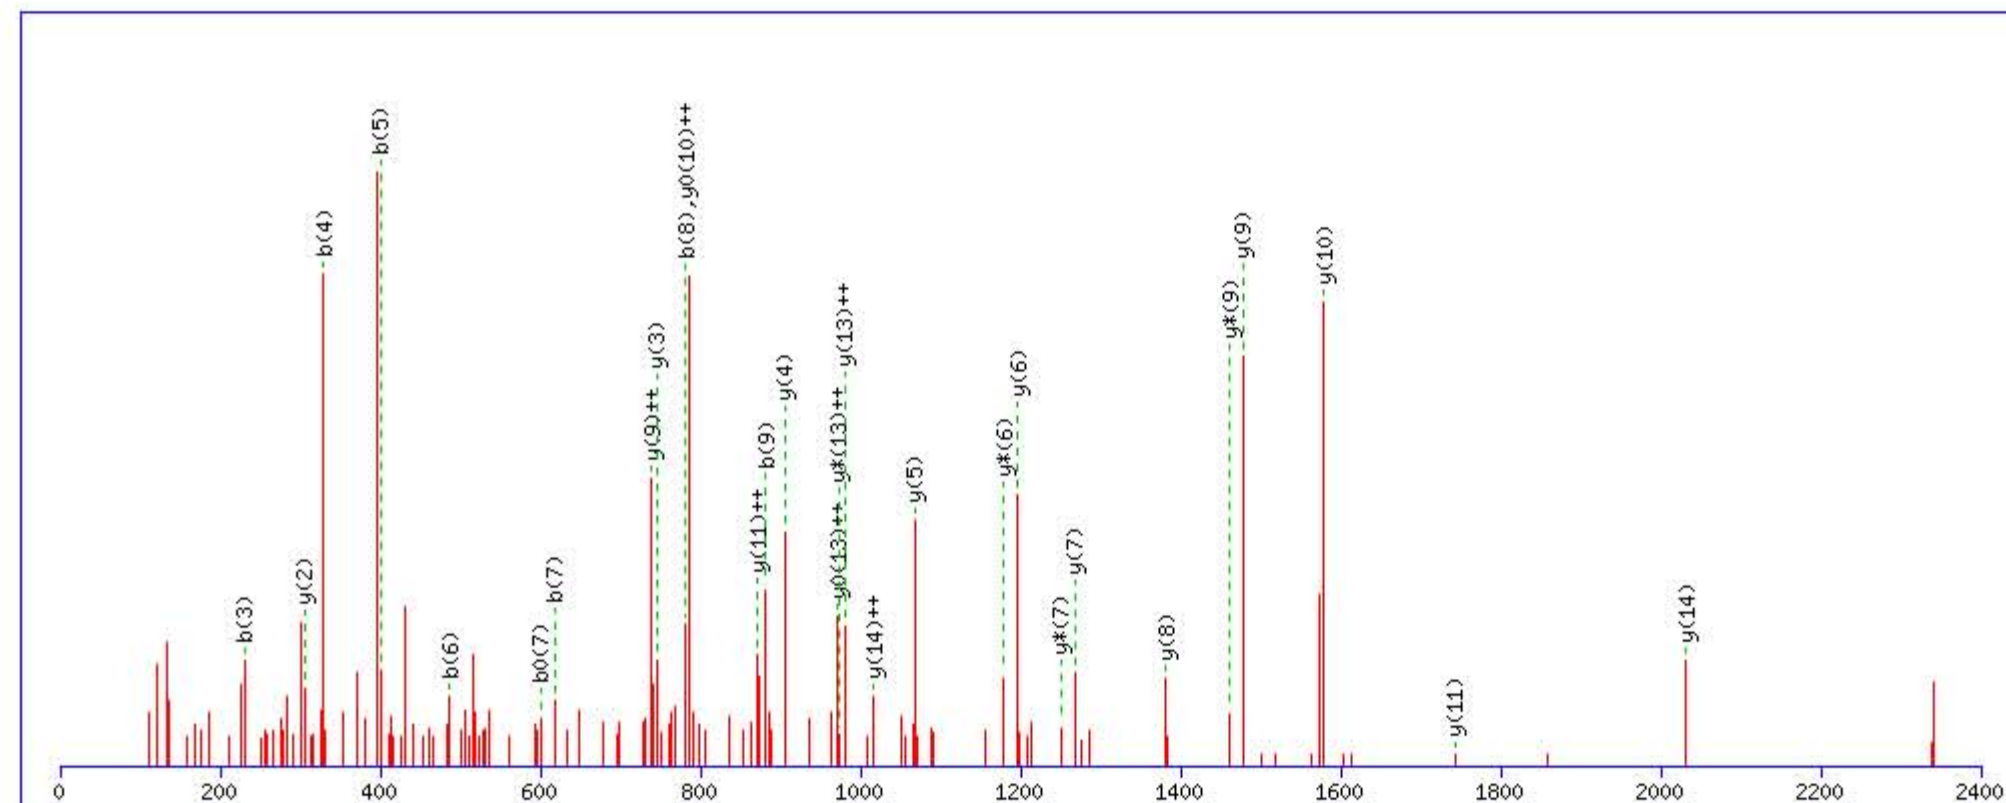

Monoisotopic mass of neutral peptide Mr(calc): 2359.021759

Fixed modifications: Carbamidomethyl (C) (apply to specified residues or termini only)

Variable modifications:

Q16 : Biotin:Thermo-21345 (Q)

Ions Score: 50 Expect: 6.6e-005

Matches : 29/162 fragment ions using 63 most intense peaks [\(help\)](#)

| #  | b                 | b <sup>++</sup> | b <sup>+</sup> | b <sup>+++</sup> | b <sup>0</sup>    | b <sup>0++</sup> | Seq.     | y                  | y <sup>++</sup>    | y <sup>+</sup>     | y <sup>+++</sup>  | y <sup>0</sup> | y <sup>0++</sup>  | #  |
|----|-------------------|-----------------|----------------|------------------|-------------------|------------------|----------|--------------------|--------------------|--------------------|-------------------|----------------|-------------------|----|
| 1  | 58.028740         | 29.518008       |                |                  |                   |                  | <b>G</b> |                    |                    |                    |                   |                |                   | 18 |
| 2  | 115.050204        | 58.028740       |                |                  |                   |                  | <b>G</b> | 2303.007580        | 1152.007428        | 2285.981031        | 1143.494153       | 2284.997015    | 1143.002145       | 17 |
| 3  | <b>230.077147</b> | 115.542211      |                |                  | 212.066582        | 106.536929       | <b>D</b> | 2245.986116        | 1123.496696        | 2228.959567        | 1114.983421       | 2227.975551    | 1114.491413       | 16 |
| 4  | <b>329.145561</b> | 165.076418      |                |                  | 311.134996        | 156.071136       | <b>V</b> | 2130.959173        | 1065.983224        | 2113.932624        | 1057.469950       | 2112.948608    | 1056.977942       | 15 |
| 5  | <b>400.182675</b> | 200.594975      |                |                  | 382.172110        | 191.589693       | <b>A</b> | <b>2031.890759</b> | <b>1016.449018</b> | 2014.864210        | 1007.935743       | 2013.880194    | 1007.443735       | 14 |
| 6  | <b>487.214703</b> | 244.110989      |                |                  | 469.204138        | 235.105707       | <b>S</b> | 1960.853645        | <b>980.930461</b>  | 1943.827096        | <b>972.417186</b> | 1942.843080    | <b>971.925178</b> | 13 |
| 7  | <b>618.255188</b> | 309.631232      |                |                  | <b>600.244623</b> | 300.625949       | <b>M</b> | 1873.821617        | 937.414447         | 1856.795068        | 928.901172        | 1855.811052    | 928.409164        | 12 |
| 8  | <b>781.318517</b> | 391.162896      |                |                  | 763.307952        | 382.157614       | <b>Y</b> | <b>1742.781132</b> | <b>871.894204</b>  | 1725.754583        | 863.380930        | 1724.770567    | 862.888922        | 11 |
| 9  | <b>882.366196</b> | 441.686736      |                |                  | 864.355631        | 432.681453       | <b>T</b> | <b>1579.717803</b> | 790.362540         | 1562.691254        | 781.849265        | 1561.707238    | <b>781.357257</b> | 10 |
| 10 | 979.418960        | 490.213118      |                |                  | 961.408395        | 481.207835       | <b>P</b> | <b>1478.670124</b> | <b>739.838700</b>  | <b>1461.643575</b> | 731.325426        |                |                   | 9  |
| 11 | 1093.461887       | 547.234581      | 1076.435338    | 538.721307       | 1075.451322       | 538.229299       | <b>N</b> | <b>1381.617360</b> | 691.312318         | 1364.590811        | 682.799044        |                |                   | 8  |
| 12 | 1164.499001       | 582.753138      | 1147.472452    | 574.239864       | 1146.488436       | 573.747856       | <b>A</b> | <b>1267.574433</b> | 634.290855         | <b>1250.547884</b> | 625.777580        |                |                   | 7  |
| 13 | 1292.557579       | 646.782428      | 1275.531030    | 638.269153       | 1274.547014       | 637.777145       | <b>Q</b> | <b>1196.537319</b> | 598.772298         | <b>1179.510770</b> | 590.259023        |                |                   | 6  |
| 14 | 1455.620908       | 728.314092      | 1438.594359    | 719.800818       | 1437.610343       | 719.308810       | <b>Y</b> | <b>1068.478741</b> | 534.743009         | 1051.452192        | 526.229734        |                |                   | 5  |
| 15 | 1615.651557       | 808.329417      | 1598.625008    | 799.816142       | 1597.640992       | 799.324134       | <b>C</b> | <b>905.415412</b>  | 453.211344         | 888.388863         | 444.698070        |                |                   | 4  |
| 16 | 2054.876883       | 1027.942079     | 2037.850334    | 1019.428805      | 2036.866318       | 1018.936797      | <b>Q</b> | <b>745.384763</b>  | 373.196020         | 728.358214         | 364.682745        |                |                   | 3  |
| 17 | 2185.917368       | 1093.462322     | 2168.890819    | 1084.949047      | 2167.906803       | 1084.457039      | <b>M</b> | <b>306.159437</b>  | 153.583356         | 289.132888         | 145.070082        |                |                   | 2  |
| 18 |                   |                 |                |                  |                   |                  | <b>R</b> | 175.118952         | 88.063114          | 158.092403         | 79.549839         |                |                   | 1  |

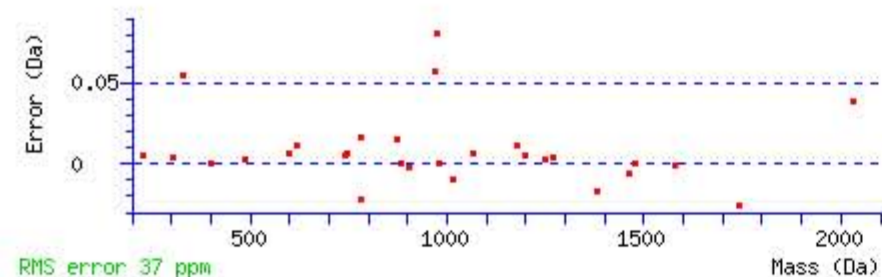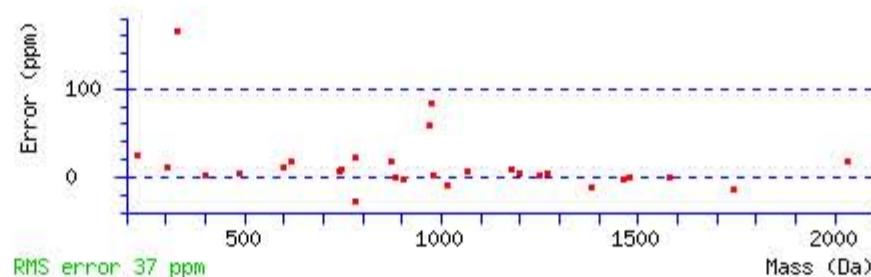

NCBI BLAST search of [GGDVASMYTPNAQYCQMR](#)

(Parameters: blastp, nr protein database, expect=20000, no filter, PAM30)

Other BLAST [web gateways](#)

All matches to this query

| Score | Mr(calc):   | Delta    | Sequence                           |
|-------|-------------|----------|------------------------------------|
| 49.6  | 2359.021759 | 0.015353 | <a href="#">GGDVASMYTPNAQYCQMR</a> |
| 30.2  | 2359.021759 | 0.015353 | <a href="#">GGDVASMYTPNAQYCQMR</a> |

Mascot: <http://www.matrixscience.com/>

# MASCOT SCIENCE Mascot Search Results

## Peptide View

MS/MS Fragmentation of **DFTCVHQALK**

Found in **IC1\_HUMAN**, Plasma protease C1 inhibitor OS=Homo sapiens GN=SERPING1 PE=1 SV=2

Match to Query 30790: 1528.755912 from(510.592580,3+) rtinseconds(1823) index(32026)

Title: Locus:1.1.1.3184.5 File:"2013-07-02 CLN FXIII 60 min 3rd F 3.wiff"

Data file C:\Program Files (x86)\Matrix Science\Mascot Daemon\mgf\6 FXIII 60 min 3rd\mascot\_daemon\_merge.mgf

Click mouse within plot area to zoom in by factor of two about that point

Or, Plot from  to  Da

Label all possible matches  Label matches used for scoring

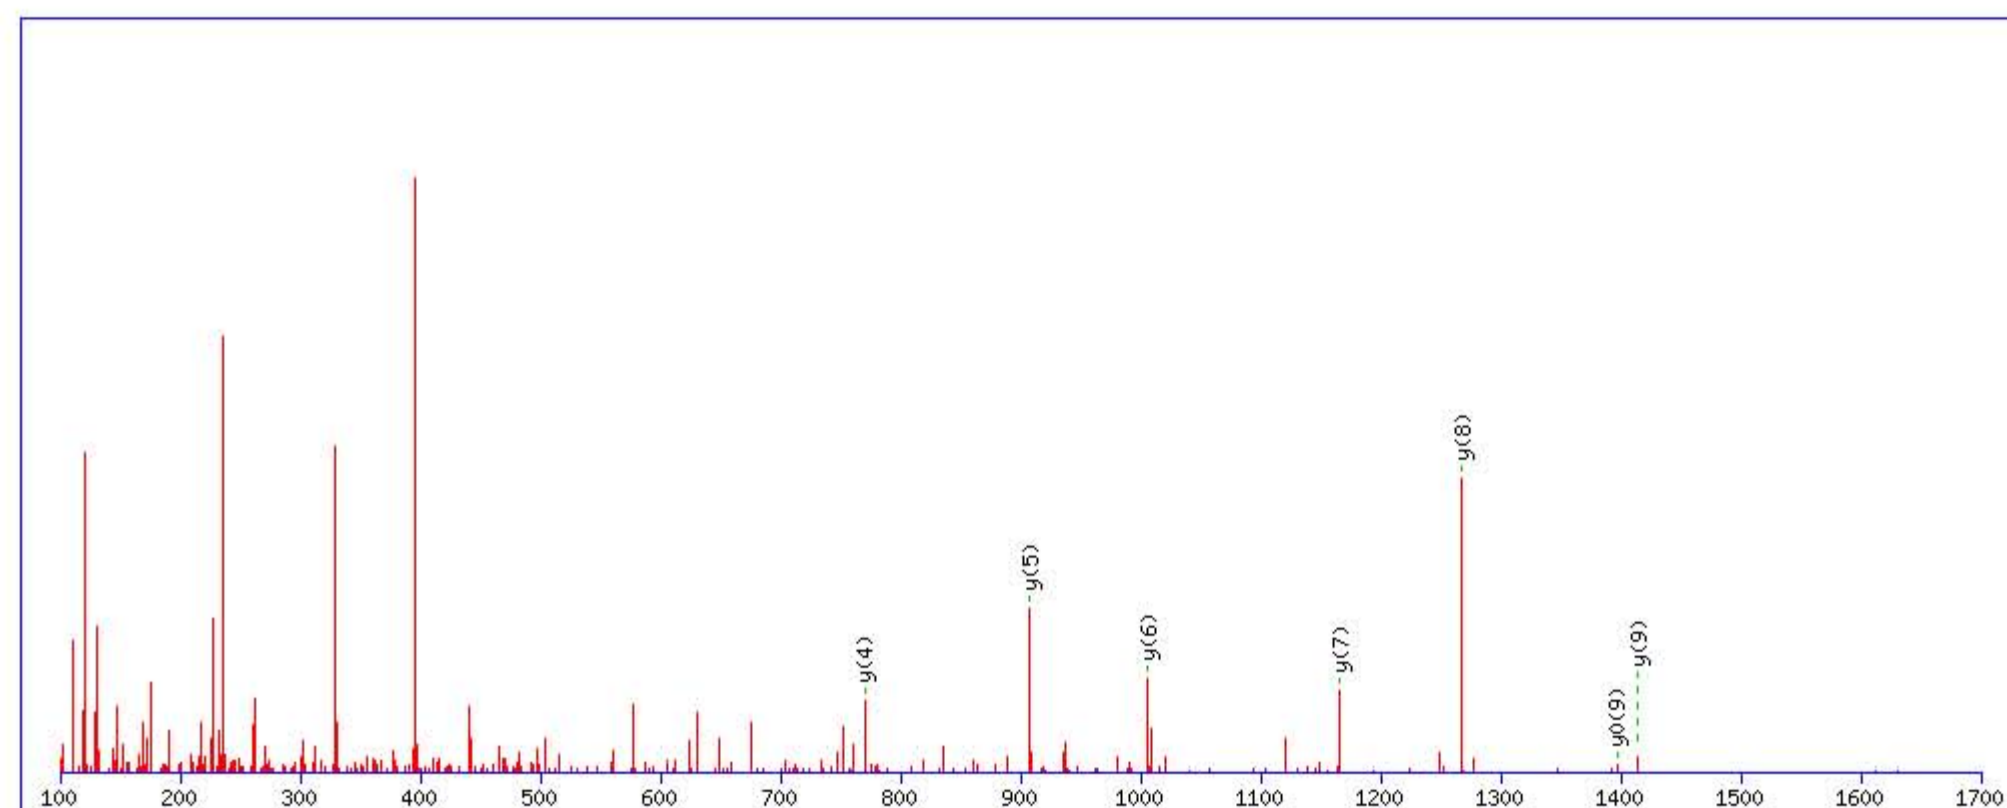

Monoisotopic mass of neutral peptide  $M_r(\text{calc})$ : 1528.753052

Fixed modifications: Carbamidomethyl (C) (apply to specified residues or termini only)

Variable modifications:

Q7 : Biotin:Thermo-21345 (Q)

Ions Score: 30 Expect: 0.0035

Matches : 7/82 fragment ions using 14 most intense peaks [\(help\)](#)

| #  | b           | b <sup>++</sup> | b <sup>*</sup> | b <sup>*++</sup> | b <sup>0</sup> | b <sup>0++</sup> | Seq. | y           | y <sup>++</sup> | y <sup>*</sup> | y <sup>*++</sup> | y <sup>0</sup> | y <sup>0++</sup> | #  |
|----|-------------|-----------------|----------------|------------------|----------------|------------------|------|-------------|-----------------|----------------|------------------|----------------|------------------|----|
| 1  | 116.034219  | 58.520748       |                |                  | 98.023654      | 49.515465        | D    |             |                 |                |                  |                |                  | 10 |
| 2  | 263.102633  | 132.054954      |                |                  | 245.092068     | 123.049672       | F    | 1414.733376 | 707.870326      | 1397.706827    | 699.357051       | 1396.722811    | 698.865043       | 9  |
| 3  | 364.150312  | 182.578794      |                |                  | 346.139747     | 173.573512       | T    | 1267.664962 | 634.336119      | 1250.638413    | 625.822844       | 1249.654397    | 625.330836       | 8  |
| 4  | 524.180961  | 262.594119      |                |                  | 506.170396     | 253.588836       | C    | 1166.617283 | 583.812279      | 1149.590734    | 575.299005       |                |                  | 7  |
| 5  | 623.249375  | 312.128326      |                |                  | 605.238810     | 303.123043       | V    | 1006.586634 | 503.796955      | 989.560085     | 495.283680       |                |                  | 6  |
| 6  | 760.308287  | 380.657782      |                |                  | 742.297722     | 371.652499       | H    | 907.518220  | 454.262748      | 890.491671     | 445.749473       |                |                  | 5  |
| 7  | 1199.533613 | 600.270444      | 1182.507064    | 591.757170       | 1181.523048    | 591.265162       | Q    | 770.459308  | 385.733292      | 753.432759     | 377.220017       |                |                  | 4  |
| 8  | 1270.570727 | 635.789001      | 1253.544178    | 627.275727       | 1252.560162    | 626.783719       | A    | 331.233982  | 166.120629      | 314.207433     | 157.607354       |                |                  | 3  |
| 9  | 1383.654791 | 692.331033      | 1366.628242    | 683.817759       | 1365.644226    | 683.325751       | L    | 260.196868  | 130.602072      | 243.170319     | 122.088797       |                |                  | 2  |
| 10 |             |                 |                |                  |                |                  | K    | 147.112804  | 74.060040       | 130.086255     | 65.546765        |                |                  | 1  |

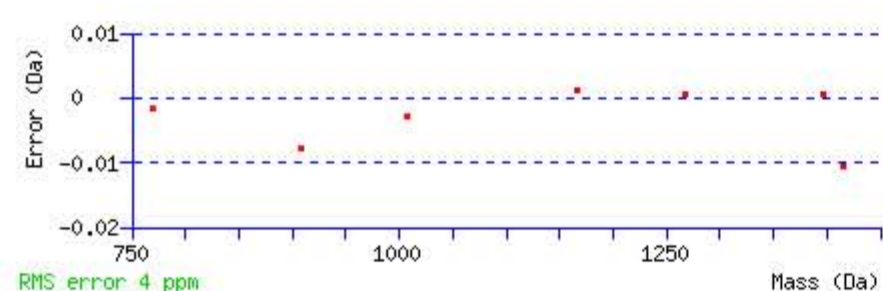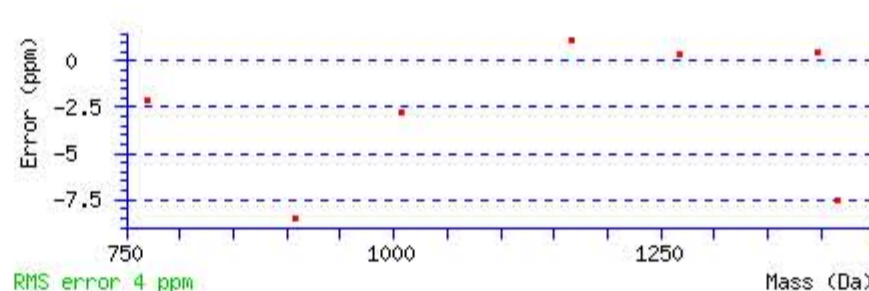

NCBI BLAST search of **DFTCVHQALK**

(Parameters: blastp, nr protein database, expect=20000, no filter, PAM30)

Other BLAST [web gateways](#)

All matches to this query

| Score | $M_r(\text{calc})$ : | Delta     | Sequence                      |
|-------|----------------------|-----------|-------------------------------|
| 29.7  | 1528.753052          | 0.002860  | <a href="#">DFTCVHQALK</a>    |
| 3.5   | 1528.764084          | -0.008172 | <a href="#">HTRQMRNTVAGSR</a> |

# MASCOT SCIENCE Mascot Search Results

## Peptide View

MS/MS Fragmentation of **LEDMEQALSPSVFK**

Found in **IC1\_HUMAN**, Plasma protease C1 inhibitor OS=Homo sapiens GN=SERPING1 PE=1 SV=2

Match to Query 40248: 1903.952468 from(952.983510,2+) rtinseconds(2439) index(35396)

Title: Locus:1.1.1.3398.12 File:"2013-07-02 CLN FXIII 60 min 3rd F 3.wiff"

Data file C:\Program Files (x86)\Matrix Science\Mascot Daemon\mgf\6 FXIII 60 min 3rd\mascot\_daemon\_merge.mgf

Click mouse within plot area to zoom in by factor of two about that point

Or, Plot from  to  Da

Label all possible matches  Label matches used for scoring

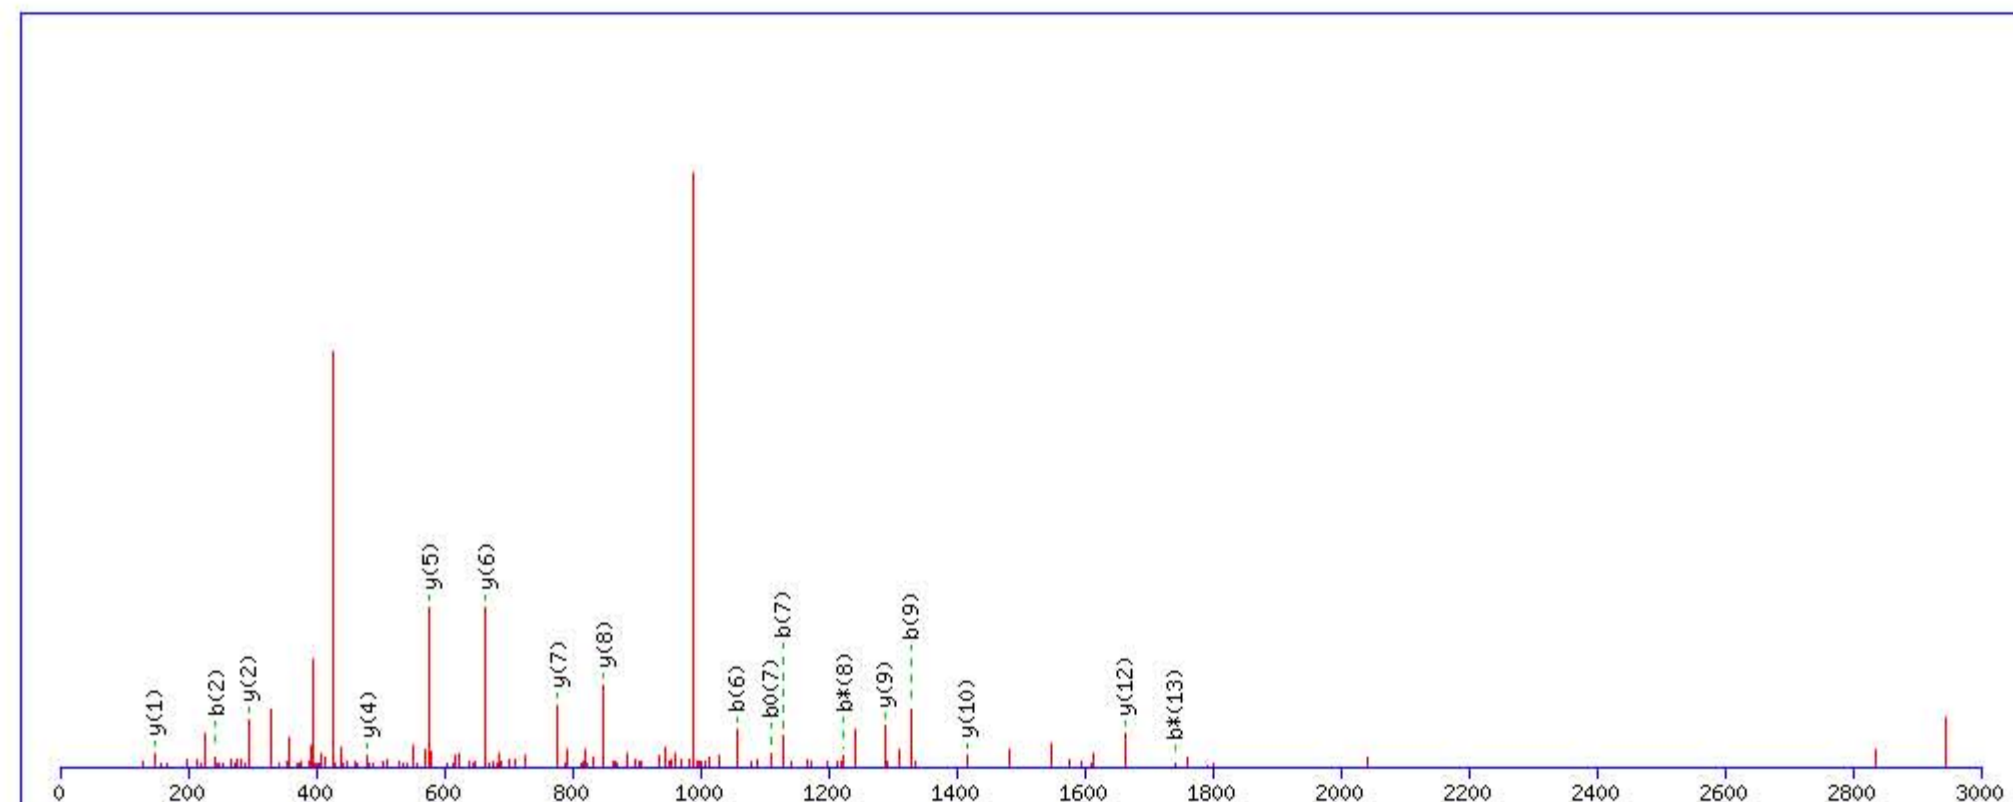

Monoisotopic mass of neutral peptide Mr(calc): 1903.942337

Fixed modifications: Carbamidomethyl (C) (apply to specified residues or termini only)

Variable modifications:

Q6 : Biotin:Thermo-21345 (Q)

Ions Score: 37 Expect: 0.0051

Matches : 17/138 fragment ions using 49 most intense peaks [\(help\)](#)

| #  | b                  | b <sup>++</sup> | b <sup>*</sup>     | b <sup>*++</sup> | b <sup>0</sup>     | b <sup>0++</sup> | Seq. | y                  | y <sup>++</sup> | y <sup>*</sup> | y <sup>*++</sup> | y <sup>0</sup> | y <sup>0++</sup> | #  |
|----|--------------------|-----------------|--------------------|------------------|--------------------|------------------|------|--------------------|-----------------|----------------|------------------|----------------|------------------|----|
| 1  | 114.091340         | 57.549308       |                    |                  |                    |                  | L    |                    |                 |                |                  |                |                  | 14 |
| 2  | <b>243.133933</b>  | 122.070605      |                    |                  | 225.123368         | 113.065322       | E    | 1791.865570        | 896.436423      | 1774.839021    | 887.923149       | 1773.855005    | 887.431141       | 13 |
| 3  | 358.160876         | 179.584076      |                    |                  | 340.150311         | 170.578794       | D    | <b>1662.822977</b> | 831.915127      | 1645.796428    | 823.401852       | 1644.812412    | 822.909844       | 12 |
| 4  | 489.201361         | 245.104319      |                    |                  | 471.190796         | 236.099036       | M    | 1547.796034        | 774.401655      | 1530.769485    | 765.888381       | 1529.785469    | 765.396373       | 11 |
| 5  | 618.243954         | 309.625615      |                    |                  | 600.233389         | 300.620333       | E    | <b>1416.755549</b> | 708.881413      | 1399.729000    | 700.368138       | 1398.744984    | 699.876130       | 10 |
| 6  | <b>1057.469280</b> | 529.238278      | 1040.442731        | 520.725004       | 1039.458715        | 520.232996       | Q    | <b>1287.712956</b> | 644.360116      | 1270.686407    | 635.846842       | 1269.702391    | 635.354834       | 9  |
| 7  | <b>1128.506394</b> | 564.756835      | 1111.479845        | 556.243561       | <b>1110.495829</b> | 555.751553       | A    | <b>848.487630</b>  | 424.747453      | 831.461081     | 416.234179       | 830.477065     | 415.742171       | 8  |
| 8  | 1241.590458        | 621.298867      | <b>1224.563909</b> | 612.785593       | 1223.579893        | 612.293584       | L    | <b>777.450516</b>  | 389.228896      | 760.423967     | 380.715622       | 759.439951     | 380.223614       | 7  |
| 9  | <b>1328.622486</b> | 664.814881      | 1311.595937        | 656.301607       | 1310.611921        | 655.809598       | S    | <b>664.366452</b>  | 332.686864      | 647.339903     | 324.173590       | 646.355887     | 323.681582       | 6  |
| 10 | 1425.675250        | 713.341263      | 1408.648701        | 704.827989       | 1407.664685        | 704.335981       | P    | <b>577.334424</b>  | 289.170850      | 560.307875     | 280.657576       | 559.323859     | 280.165568       | 5  |
| 11 | 1512.707278        | 756.857277      | 1495.680729        | 748.344003       | 1494.696713        | 747.851995       | S    | <b>480.281660</b>  | 240.644468      | 463.255111     | 232.131194       | 462.271095     | 231.639186       | 4  |
| 12 | 1611.775692        | 806.391484      | 1594.749143        | 797.878210       | 1593.765127        | 797.386202       | V    | 393.249632         | 197.128454      | 376.223083     | 188.615180       |                |                  | 3  |
| 13 | 1758.844106        | 879.925691      | <b>1741.817557</b> | 871.412417       | 1740.833541        | 870.920409       | F    | <b>294.181218</b>  | 147.594247      | 277.154669     | 139.080973       |                |                  | 2  |
| 14 |                    |                 |                    |                  |                    |                  | K    | <b>147.112804</b>  | 74.060040       | 130.086255     | 65.546765        |                |                  | 1  |

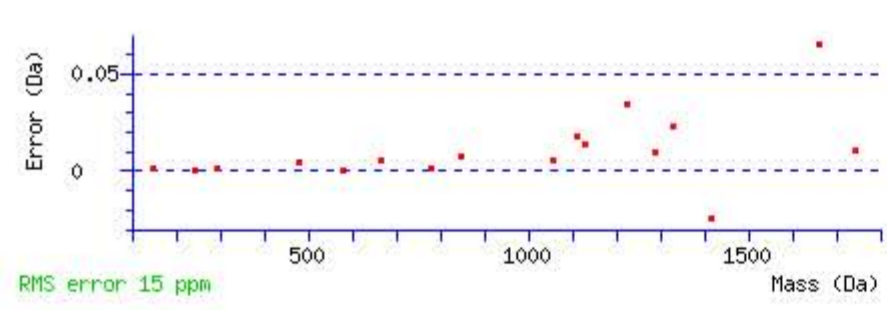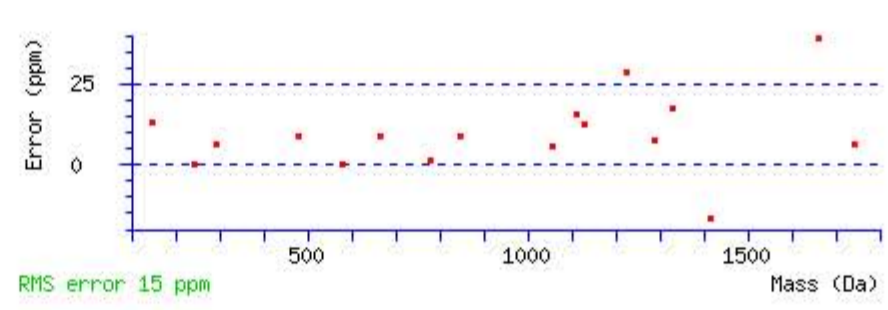

NCBI BLAST search of [LEDMEQALSPSVFK](#)

(Parameters: blastp, nr protein database, expect=20000, no filter, PAM30)

Other BLAST [web gateways](#)

### All matches to this query

| Score | Mr(calc):   | Delta    | Sequence                       |
|-------|-------------|----------|--------------------------------|
| 37.3  | 1903.942337 | 0.010131 | <a href="#">LEDMEQALSPSVFK</a> |

Mascot: <http://www.matrixscience.com/>

# MASCOT SCIENCE Mascot Search Results

## Peptide View

MS/MS Fragmentation of **GVTSVVSQIFHSPDLAIR**

Found in **IC1\_HUMAN**, Plasma protease C1 inhibitor OS=Homo sapiens GN=SERPING1 PE=1 SV=2

Match to Query 45002: 2137.146252 from(713.389360,3+) rtinseconds(2366) index(35074)

Title: Locus:1.1.1.3373.6 File:"2013-07-02 CLN FXIII 60 min 3rd F 3.wiff"

Data file C:\Program Files (x86)\Matrix Science\Mascot Daemon\mgf\6 FXIII 60 min 3rd\mascot\_daemon\_merge.mgf

Click mouse within plot area to zoom in by factor of two about that point

Or, Plot from  to  Da

Label all possible matches  Label matches used for scoring

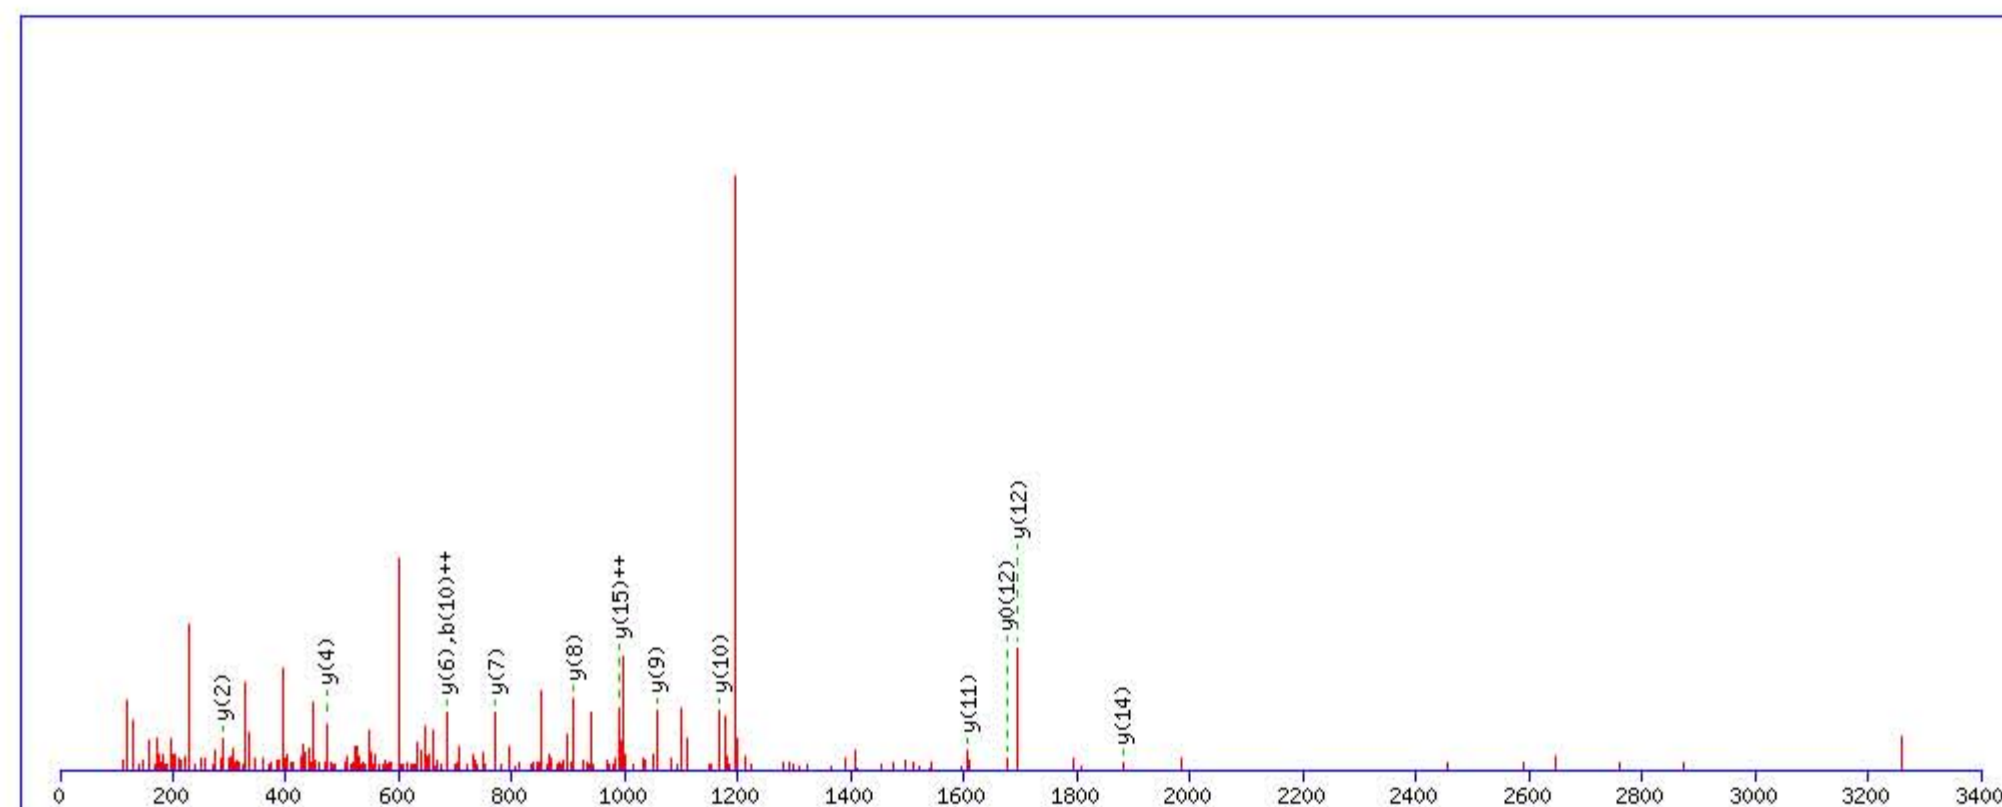

Monoisotopic mass of neutral peptide Mr(calc): 2137.135406

Fixed modifications: Carbamidomethyl (C) (apply to specified residues or termini only)

Variable modifications:

Q7 : Biotin:Thermo-21345 (Q)

Ions Score: 35 Expect: 0.0061

Matches : 13/168 fragment ions using 36 most intense peaks [\(help\)](#)

| #  | b           | b <sup>++</sup>   | b <sup>*</sup> | b <sup>*++</sup> | b <sup>0</sup> | b <sup>0++</sup> | Seq.     | y                  | y <sup>++</sup>   | y <sup>*</sup> | y <sup>*++</sup> | y <sup>0</sup>     | y <sup>0++</sup> | #  |
|----|-------------|-------------------|----------------|------------------|----------------|------------------|----------|--------------------|-------------------|----------------|------------------|--------------------|------------------|----|
| 1  | 58.028740   | 29.518008         |                |                  |                |                  | <b>G</b> |                    |                   |                |                  |                    |                  | 17 |
| 2  | 157.097154  | 79.052215         |                |                  |                |                  | <b>V</b> | 2081.121208        | 1041.064242       | 2064.094659    | 1032.550967      | 2063.110643        | 1032.058959      | 16 |
| 3  | 258.144833  | 129.576055        |                |                  | 240.134268     | 120.570772       | <b>T</b> | 1982.052794        | <b>991.530035</b> | 1965.026245    | 983.016761       | 1964.042229        | 982.524753       | 15 |
| 4  | 345.176861  | 173.092068        |                |                  | 327.166296     | 164.086786       | <b>S</b> | <b>1881.005115</b> | 941.006196        | 1863.978566    | 932.492921       | 1862.994550        | 932.000913       | 14 |
| 5  | 444.245275  | 222.626275        |                |                  | 426.234710     | 213.620993       | <b>V</b> | 1793.973087        | 897.490182        | 1776.946538    | 888.976907       | 1775.962522        | 888.484899       | 13 |
| 6  | 531.277303  | 266.142290        |                |                  | 513.266738     | 257.137007       | <b>S</b> | <b>1694.904673</b> | 847.955975        | 1677.878124    | 839.442700       | <b>1676.894108</b> | 838.950692       | 12 |
| 7  | 970.502629  | 485.754953        | 953.476080     | 477.241678       | 952.492064     | 476.749670       | <b>Q</b> | <b>1607.872645</b> | 804.439961        | 1590.846096    | 795.926686       | 1589.862080        | 795.434678       | 11 |
| 8  | 1083.586693 | 542.296985        | 1066.560144    | 533.783710       | 1065.576128    | 533.291702       | <b>I</b> | <b>1168.647319</b> | 584.827298        | 1151.620770    | 576.314023       | 1150.636754        | 575.822015       | 10 |
| 9  | 1230.655107 | 615.831192        | 1213.628558    | 607.317917       | 1212.644542    | 606.825909       | <b>F</b> | <b>1055.563255</b> | 528.285266        | 1038.536706    | 519.771991       | 1037.552690        | 519.279983       | 9  |
| 10 | 1367.714019 | <b>684.360648</b> | 1350.687470    | 675.847373       | 1349.703454    | 675.355365       | <b>H</b> | <b>908.494841</b>  | 454.751059        | 891.468292     | 446.237784       | 890.484276         | 445.745776       | 8  |
| 11 | 1454.746047 | 727.876662        | 1437.719498    | 719.363387       | 1436.735482    | 718.871379       | <b>S</b> | <b>771.435929</b>  | 386.221603        | 754.409380     | 377.708328       | 753.425364         | 377.216320       | 7  |
| 12 | 1551.798811 | 776.403044        | 1534.772262    | 767.889769       | 1533.788246    | 767.397761       | <b>P</b> | <b>684.403901</b>  | 342.705589        | 667.377352     | 334.192314       | 666.393336         | 333.700306       | 6  |
| 13 | 1666.825754 | 833.916515        | 1649.799205    | 825.403241       | 1648.815189    | 824.911233       | <b>D</b> | 587.351137         | 294.179207        | 570.324588     | 285.665932       | 569.340572         | 285.173924       | 5  |
| 14 | 1779.909818 | 890.458547        | 1762.883269    | 881.945273       | 1761.899253    | 881.453265       | <b>L</b> | <b>472.324194</b>  | 236.665735        | 455.297645     | 228.152460       |                    |                  | 4  |
| 15 | 1850.946932 | 925.977104        | 1833.920383    | 917.463830       | 1832.936367    | 916.971822       | <b>A</b> | 359.240130         | 180.123703        | 342.213581     | 171.610429       |                    |                  | 3  |
| 16 | 1964.030996 | 982.519136        | 1947.004447    | 974.005862       | 1946.020431    | 973.513853       | <b>I</b> | <b>288.203016</b>  | 144.605146        | 271.176467     | 136.091872       |                    |                  | 2  |
| 17 |             |                   |                |                  |                |                  | <b>R</b> | 175.118952         | 88.063114         | 158.092403     | 79.549840        |                    |                  | 1  |

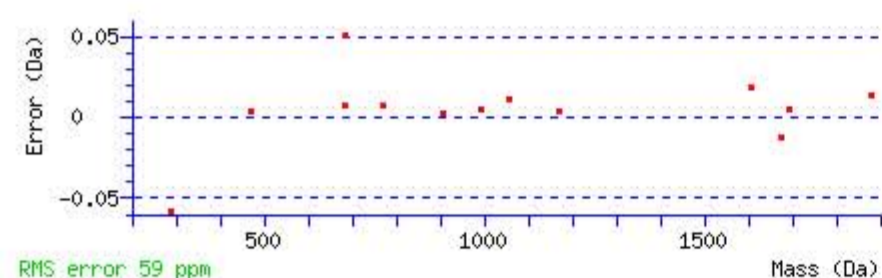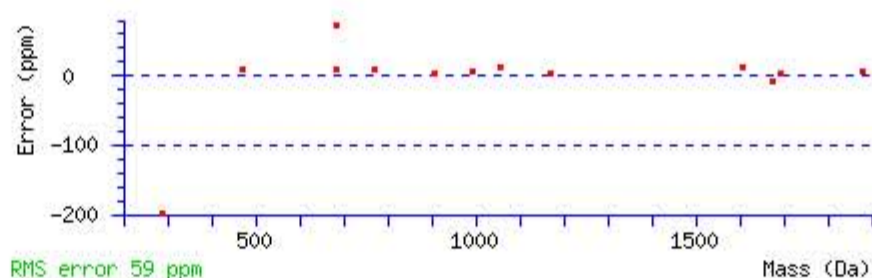

NCBI BLAST search of [GVTSVVSQIFHSPDLAIR](#)

(Parameters: blastp, nr protein database, expect=20000, no filter, PAM30)

Other BLAST [web gateways](#)

## All matches to this query

| Score | Mr(calc):   | Delta    | Sequence                           |
|-------|-------------|----------|------------------------------------|
| 35.2  | 2137.135406 | 0.010846 | <a href="#">GVTSVVSQIFHSPDLAIR</a> |

Mascot: <http://www.matrixscience.com/>

# MASCOT SCIENCE Mascot Search Results

## Peptide View

MS/MS Fragmentation of **EAQLPVIENK**

Found in **PLMN\_HUMAN**, Plasminogen OS=Homo sapiens GN=PLG PE=1 SV=2

Match to Query 28627: 1450.785728 from(726.400140,2+) rtinseconds(1983) index(4868)

Title: Locus:1.1.1.3242.14 File:"2013-07-02 CLN FXIII 60 min 3rd F 1.wiff"

Data file C:\Program Files (x86)\Matrix Science\Mascot Daemon\mgf\6 FXIII 60 min 3rd\mascot\_daemon\_merge.mgf

Click mouse within plot area to zoom in by factor of two about that point

Or, Plot from  to  Da

Label all possible matches  Label matches used for scoring

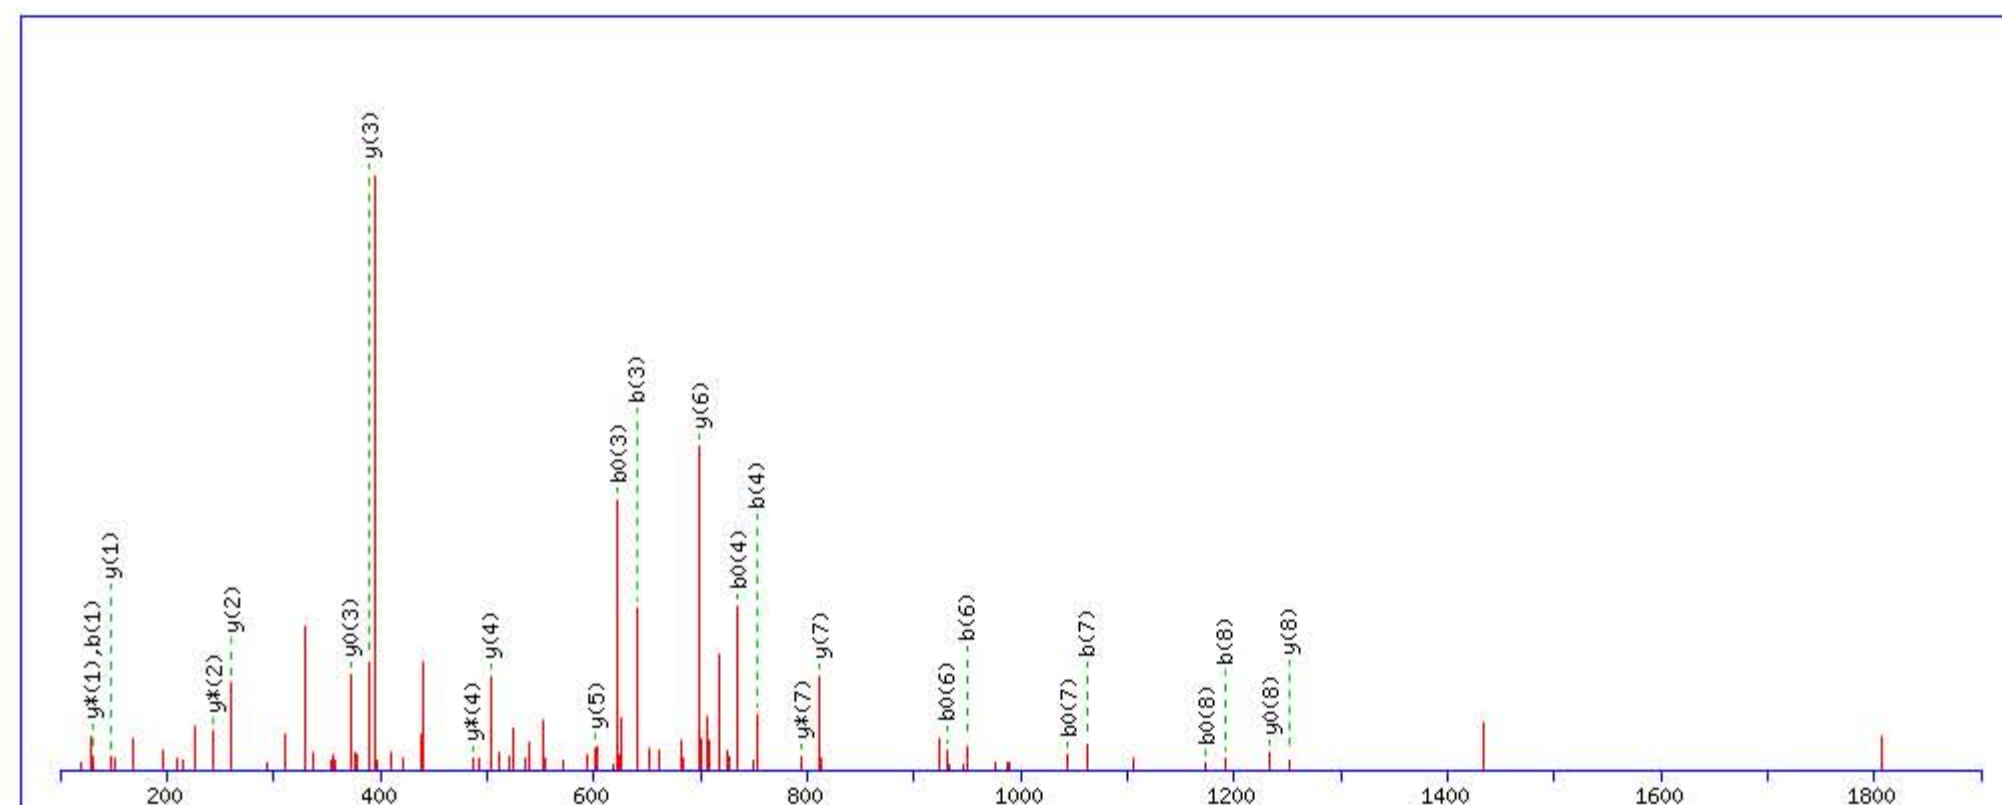

Monoisotopic mass of neutral peptide Mr(calc): 1450.785355

Fixed modifications: Carbamidomethyl (C) (apply to specified residues or termini only)

Variable modifications:

Q3 : Biotin:Thermo-21345 (Q)

Ions Score: 43 Expect: 0.00014

Matches : 25/100 fragment ions using 48 most intense peaks [\(help\)](#)

| #  | b                  | b <sup>++</sup> | b <sup>+</sup> | b <sup>*++</sup> | b <sup>0</sup>     | b <sup>0++</sup> | Seq. | y                  | y <sup>++</sup> | y <sup>+</sup>    | y <sup>*++</sup> | y <sup>0</sup>     | y <sup>0++</sup> | #  |
|----|--------------------|-----------------|----------------|------------------|--------------------|------------------|------|--------------------|-----------------|-------------------|------------------|--------------------|------------------|----|
| 1  | <b>130.049869</b>  | 65.528572       |                |                  | 112.039304         | 56.523290        | E    |                    |                 |                   |                  |                    |                  | 10 |
| 2  | 201.086983         | 101.047130      |                |                  | 183.076418         | 92.041847        | A    | 1322.750070        | 661.878673      | 1305.723521       | 653.365398       | 1304.739505        | 652.873390       | 9  |
| 3  | <b>640.312309</b>  | 320.659793      | 623.285760     | 312.146518       | <b>622.301744</b>  | 311.654510       | Q    | <b>1251.712956</b> | 626.360116      | 1234.686407       | 617.846841       | <b>1233.702391</b> | 617.354833       | 8  |
| 4  | <b>753.396373</b>  | 377.201825      | 736.369824     | 368.688550       | <b>735.385808</b>  | 368.196542       | L    | <b>812.487630</b>  | 406.747453      | <b>795.461081</b> | 398.234178       | 794.477065         | 397.742170       | 7  |
| 5  | 850.449137         | 425.728207      | 833.422588     | 417.214932       | 832.438572         | 416.722924       | P    | <b>699.403566</b>  | 350.205421      | 682.377017        | 341.692146       | 681.393001         | 341.200138       | 6  |
| 6  | <b>949.517551</b>  | 475.262414      | 932.491002     | 466.749139       | <b>931.506986</b>  | 466.257131       | V    | <b>602.350802</b>  | 301.679039      | 585.324253        | 293.165764       | 584.340237         | 292.673756       | 5  |
| 7  | <b>1062.601615</b> | 531.804446      | 1045.575066    | 523.291171       | <b>1044.591050</b> | 522.799163       | I    | <b>503.282388</b>  | 252.144832      | <b>486.255839</b> | 243.631557       | 485.271823         | 243.139549       | 4  |
| 8  | <b>1191.644208</b> | 596.325742      | 1174.617659    | 587.812468       | <b>1173.633643</b> | 587.320459       | E    | <b>390.198324</b>  | 195.602800      | 373.171775        | 187.089525       | <b>372.187759</b>  | 186.597517       | 3  |
| 9  | 1305.687135        | 653.347205      | 1288.660586    | 644.833931       | 1287.676570        | 644.341923       | N    | <b>261.155731</b>  | 131.081503      | <b>244.129182</b> | 122.568229       |                    |                  | 2  |
| 10 |                    |                 |                |                  |                    |                  | K    | <b>147.112804</b>  | 74.060040       | <b>130.086255</b> | 65.546765        |                    |                  | 1  |

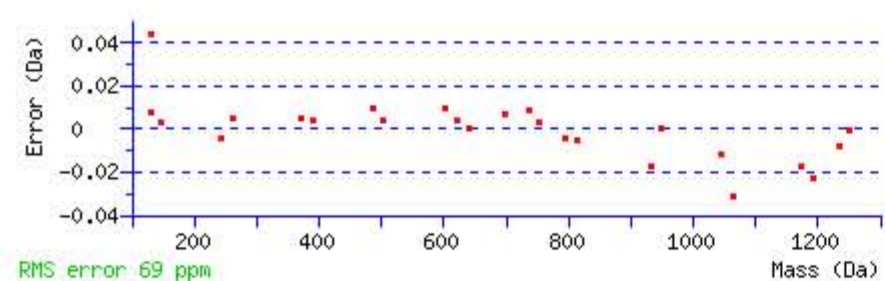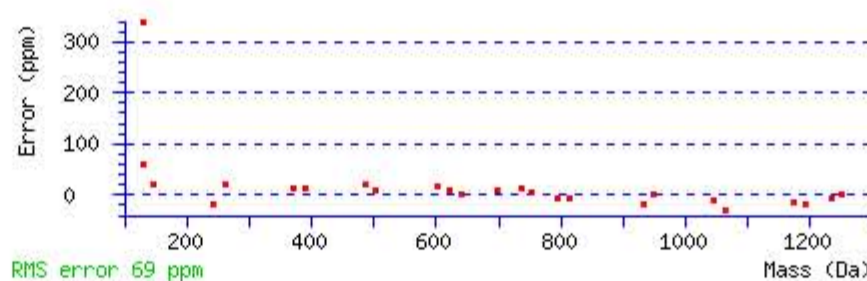

NCBI BLAST search of [EAQLPVIENK](#)

(Parameters: blastp, nr protein database, expect=20000, no filter, PAM30)

Other BLAST [web gateways](#)

All matches to this query

| Score | Mr(calc):   | Delta     | Sequence                    |
|-------|-------------|-----------|-----------------------------|
| 42.8  | 1450.785355 | 0.000373  | <a href="#">EAQLPVIENK</a>  |
| 1.7   | 1450.764236 | 0.021492  | <a href="#">EIFHPEIQK</a>   |
| 1.0   | 1450.790527 | -0.004799 | <a href="#">QNIWRHNRLSK</a> |

Mascot: <http://www.matrixscience.com/>

# MASCOT SCIENCE Mascot Search Results

## Peptide View

MS/MS Fragmentation of **EQQCVIMAENR**

Found in **PLGB\_HUMAN**, Plasminogen-like protein B OS=Homo sapiens GN=PLGLB1 PE=1 SV=1

Match to Query 36215: 1687.785312 from(563.602380,3+) rtinseconds(1832) index(61552)

Title: Locus:1.1.1.3264.5 File:"2013-07-02 CLN FXIII 60 min 3rd FT.wiff"

Data file C:\Program Files (x86)\Matrix Science\Mascot Daemon\mgf\6 FXIII 60 min 3rd\mascot\_daemon\_merge.mgf

Click mouse within plot area to zoom in by factor of two about that point

Or, Plot from  to  Da

Label all possible matches  Label matches used for scoring

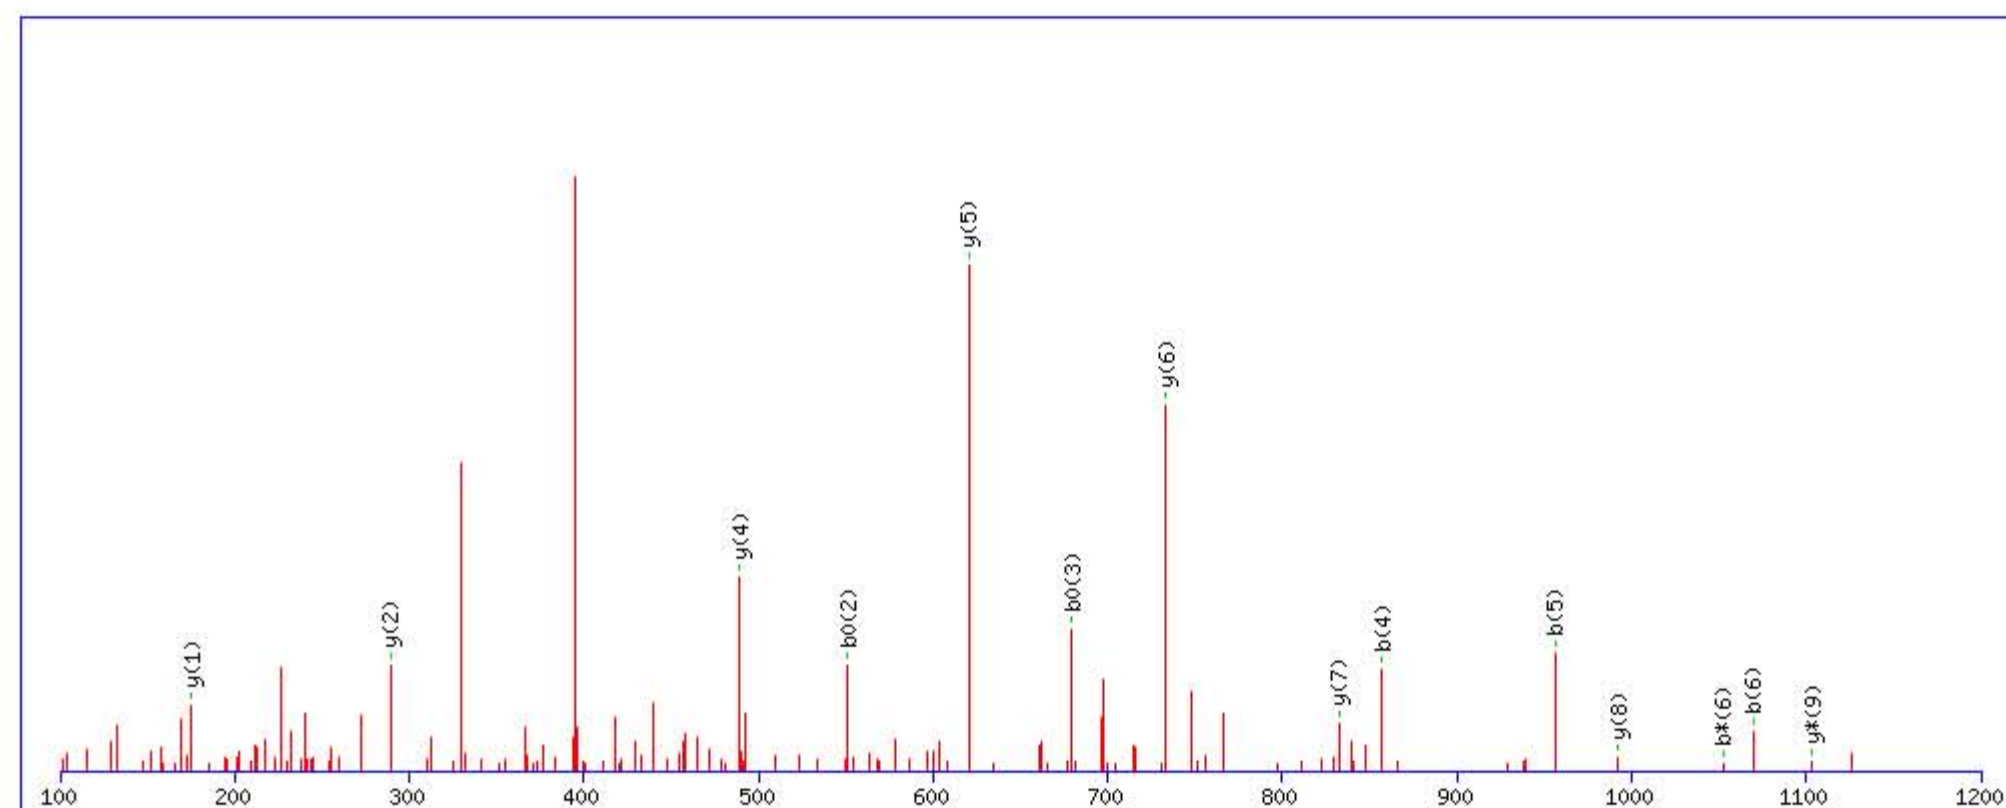

Monoisotopic mass of neutral peptide Mr(calc): 1687.784393

Fixed modifications: Carbamidomethyl (C) (apply to specified residues or termini only)

Variable modifications:

Q2 : Biotin:Thermo-21345 (Q)

Ions Score: 43 Expect: 0.00023

Matches : 14/114 fragment ions using 22 most intense peaks [\(help\)](#)

| #  | b           | b <sup>++</sup> | b <sup>+</sup> | b <sup>+++</sup> | b <sup>0</sup> | b <sup>0++</sup> | Seq. | y           | y <sup>++</sup> | y <sup>+</sup> | y <sup>+++</sup> | y <sup>0</sup> | y <sup>0++</sup> | #  |
|----|-------------|-----------------|----------------|------------------|----------------|------------------|------|-------------|-----------------|----------------|------------------|----------------|------------------|----|
| 1  | 130.049869  | 65.528572       |                |                  | 112.039304     | 56.523290        | E    |             |                 |                |                  |                |                  | 11 |
| 2  | 569.275195  | 285.141236      | 552.248646     | 276.627961       | 551.264630     | 276.135953       | Q    | 1559.749102 | 780.378189      | 1542.722553    | 771.864915       | 1541.738537    | 771.372907       | 10 |
| 3  | 697.333773  | 349.170525      | 680.307224     | 340.657250       | 679.323208     | 340.165242       | Q    | 1120.523776 | 560.765526      | 1103.497227    | 552.252252       | 1102.513211    | 551.760244       | 9  |
| 4  | 857.364422  | 429.185849      | 840.337873     | 420.672575       | 839.353857     | 420.180567       | C    | 992.465198  | 496.736237      | 975.438649     | 488.222963       | 974.454633     | 487.730955       | 8  |
| 5  | 956.432836  | 478.720056      | 939.406287     | 470.206782       | 938.422271     | 469.714774       | V    | 832.434549  | 416.720913      | 815.408000     | 408.207638       | 814.423984     | 407.715630       | 7  |
| 6  | 1069.516900 | 535.262088      | 1052.490351    | 526.748814       | 1051.506335    | 526.256806       | I    | 733.366135  | 367.186706      | 716.339586     | 358.673431       | 715.355570     | 358.181423       | 6  |
| 7  | 1200.557385 | 600.782331      | 1183.530836    | 592.269056       | 1182.546820    | 591.777048       | M    | 620.282071  | 310.644674      | 603.255522     | 302.131399       | 602.271506     | 301.639391       | 5  |
| 8  | 1271.594499 | 636.300888      | 1254.567950    | 627.787613       | 1253.583934    | 627.295605       | A    | 489.241586  | 245.124431      | 472.215037     | 236.611156       | 471.231021     | 236.119148       | 4  |
| 9  | 1400.637092 | 700.822184      | 1383.610543    | 692.308910       | 1382.626527    | 691.816902       | E    | 418.204472  | 209.605874      | 401.177923     | 201.092600       | 400.193907     | 200.600592       | 3  |
| 10 | 1514.680019 | 757.843648      | 1497.653470    | 749.330373       | 1496.669454    | 748.838365       | N    | 289.161879  | 145.084577      | 272.135330     | 136.571303       |                |                  | 2  |
| 11 |             |                 |                |                  |                |                  | R    | 175.118952  | 88.063114       | 158.092403     | 79.549839        |                |                  | 1  |

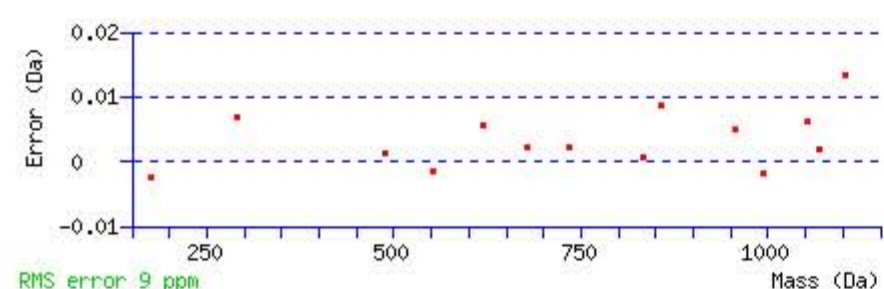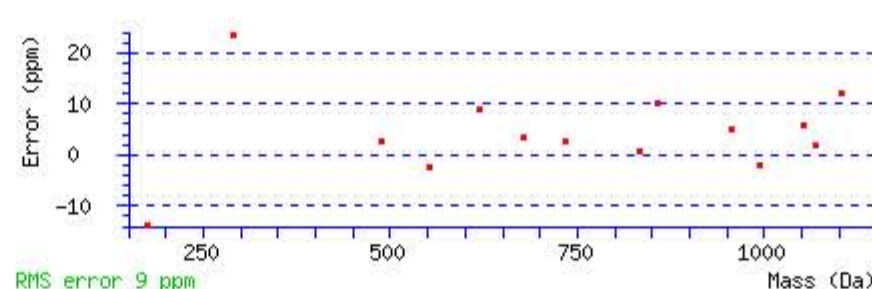

NCBI BLAST search of **EQQCVIMAENR**

(Parameters: blastp, nr protein database, expect=20000, no filter, PAM30)

Other BLAST [web gateways](#)

All matches to this query

| Score | Mr(calc):   | Delta     | Sequence                          |
|-------|-------------|-----------|-----------------------------------|
| 43.1  | 1687.784393 | 0.000919  | <a href="#">EQQCVIMAENR</a>       |
| 38.6  | 1687.784393 | 0.000919  | <a href="#">EQQCVIMAENR</a>       |
| 4.0   | 1687.773666 | 0.011646  | <a href="#">ITGPPSGQMPDNPPHR</a>  |
| 1.7   | 1687.776093 | 0.009219  | <a href="#">QQEEAQAAAAAASAESR</a> |
| 1.4   | 1687.787552 | -0.002240 | <a href="#">GASEDGEYFLMIRGK</a>   |
| 0.1   | 1687.765778 | 0.019534  | <a href="#">NVMNKVSEMSSFQR</a>    |



# MASCOT Search Results

## Peptide View

MS/MS Fragmentation of **APWCHTTNSQVR**

Found in **PLMN\_HUMAN**, Plasminogen OS=Homo sapiens GN=PLG PE=1 SV=2

Match to Query 37832: 1766.831292 from(589.951040,3+) rtinseconds(1540) index(60064)

Title: Locus:1.1.1.3162.12 File:"2013-07-02 CLN FXIII 60 min 3rd FT.wiff"

Data file C:\Program Files (x86)\Matrix Science\Mascot Daemon\mgf\6 FXIII 60 min 3rd\mascot\_daemon\_merge.mgf

Click mouse within plot area to zoom in by factor of two about that point

Or, Plot from  to  Da

Label all possible matches  Label matches used for scoring

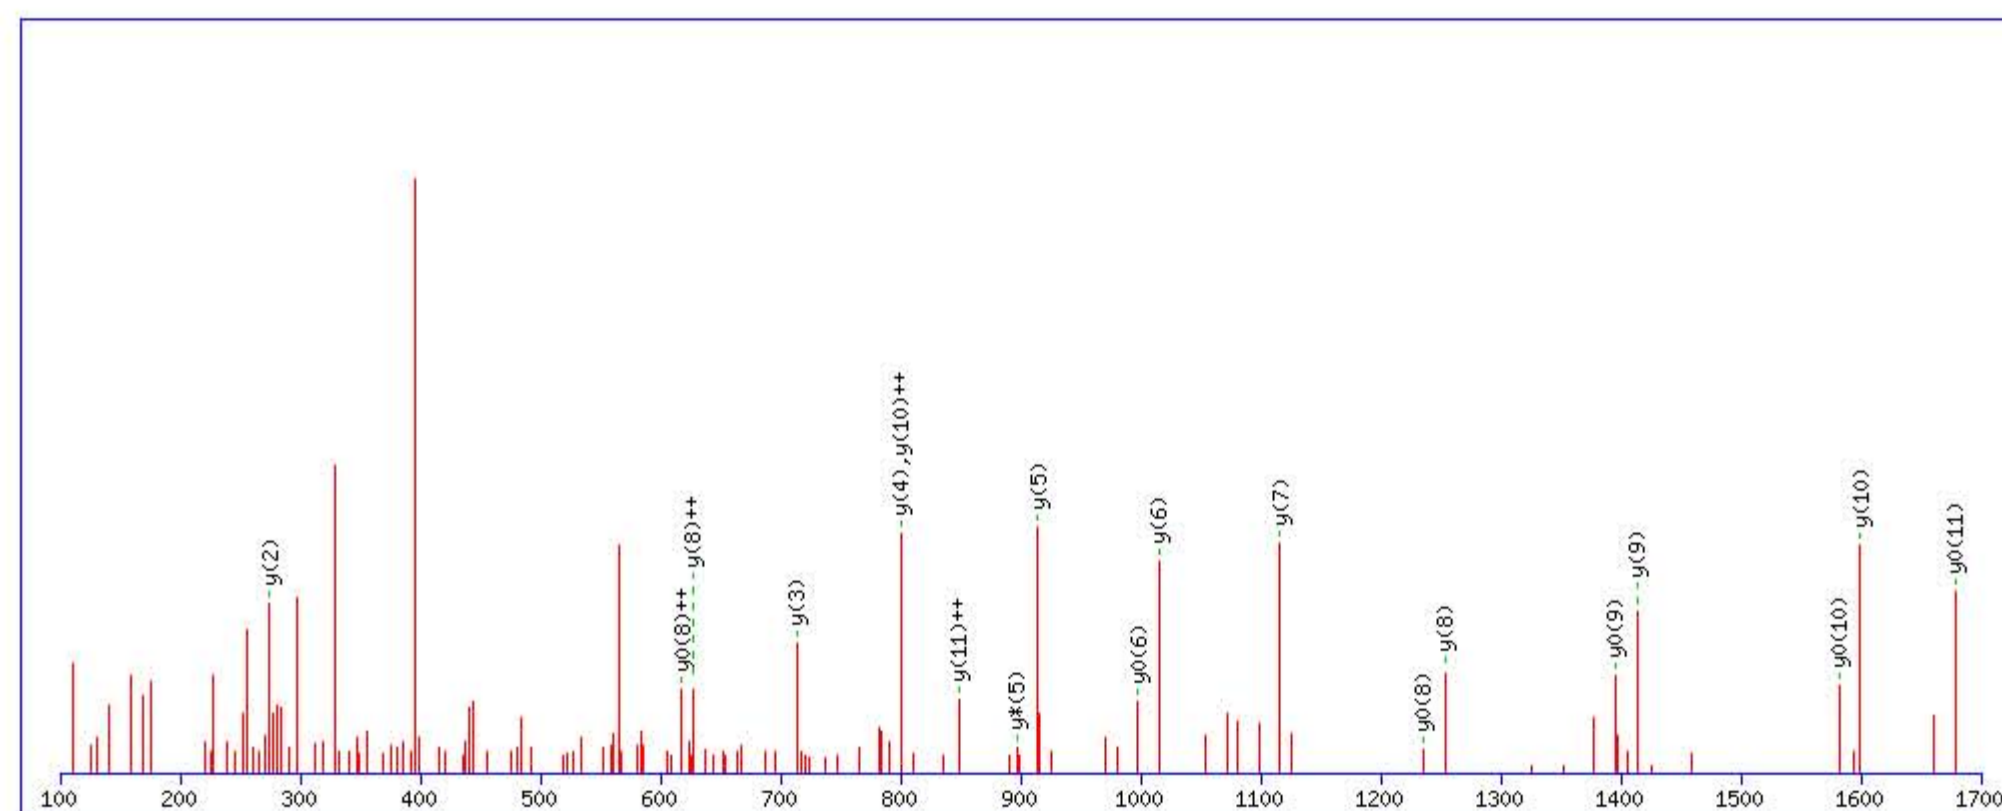

Monoisotopic mass of neutral peptide Mr(calc): 1766.834488

Fixed modifications: Carbamidomethyl (C) (apply to specified residues or termini only)

Variable modifications:

Q10 : Biotin:Thermo-21345 (Q)

Ions Score: 54 Expect: 5.9e-005

Matches : 19/102 fragment ions using 32 most intense peaks [\(help\)](#)

| #  | b           | b <sup>++</sup> | b <sup>+</sup> | b <sup>*++</sup> | b <sup>0</sup> | b <sup>0++</sup> | Seq. | y           | y <sup>++</sup> | y <sup>+</sup> | y <sup>*++</sup> | y <sup>0</sup> | y <sup>0++</sup> | #  |
|----|-------------|-----------------|----------------|------------------|----------------|------------------|------|-------------|-----------------|----------------|------------------|----------------|------------------|----|
| 1  | 72.044390   | 36.525833       |                |                  |                |                  | A    |             |                 |                |                  |                |                  | 12 |
| 2  | 169.097154  | 85.052215       |                |                  |                |                  | P    | 1696.804643 | 848.905960      | 1679.778094    | 840.392685       | 1678.794078    | 839.900677       | 11 |
| 3  | 355.176467  | 178.091872      |                |                  |                |                  | W    | 1599.751879 | 800.379578      | 1582.725330    | 791.866303       | 1581.741314    | 791.374295       | 10 |
| 4  | 515.207116  | 258.107196      |                |                  |                |                  | C    | 1413.672566 | 707.339921      | 1396.646017    | 698.826647       | 1395.662001    | 698.334639       | 9  |
| 5  | 652.266028  | 326.636652      |                |                  |                |                  | H    | 1253.641917 | 627.324597      | 1236.615368    | 618.811322       | 1235.631352    | 618.319314       | 8  |
| 6  | 753.313707  | 377.160492      |                |                  | 735.303142     | 368.155209       | T    | 1116.583005 | 558.795141      | 1099.556456    | 550.281866       | 1098.572440    | 549.789858       | 7  |
| 7  | 854.361386  | 427.684331      |                |                  | 836.350821     | 418.679049       | T    | 1015.535326 | 508.271301      | 998.508777     | 499.758027       | 997.524761     | 499.266019       | 6  |
| 8  | 968.404313  | 484.705795      | 951.377764     | 476.192520       | 950.393748     | 475.700512       | N    | 914.487647  | 457.747462      | 897.461098     | 449.234187       | 896.477082     | 448.742179       | 5  |
| 9  | 1055.436341 | 528.221809      | 1038.409792    | 519.708534       | 1037.425776    | 519.216526       | S    | 800.444720  | 400.725998      | 783.418171     | 392.212724       | 782.434155     | 391.720716       | 4  |
| 10 | 1494.661667 | 747.834472      | 1477.635118    | 739.321197       | 1476.651102    | 738.829189       | Q    | 713.412692  | 357.209984      | 696.386143     | 348.696710       |                |                  | 3  |
| 11 | 1593.730081 | 797.368679      | 1576.703532    | 788.855404       | 1575.719516    | 788.363396       | V    | 274.187366  | 137.597321      | 257.160817     | 129.084047       |                |                  | 2  |
| 12 |             |                 |                |                  |                |                  | R    | 175.118952  | 88.063114       | 158.092403     | 79.549839        |                |                  | 1  |

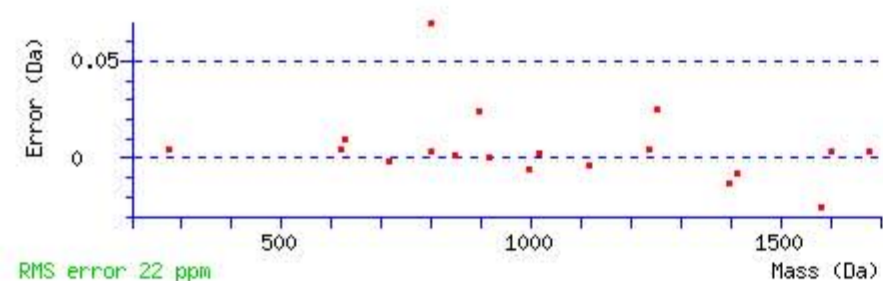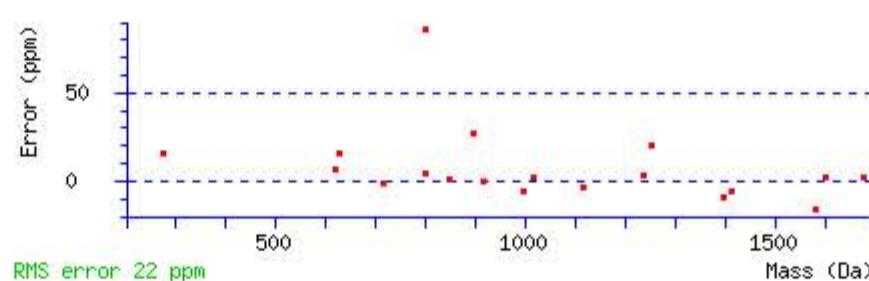

NCBI BLAST search of **APWCHTTNSQVR**

(Parameters: blastp, nr protein database, expect=20000, no filter, PAM30)

Other BLAST [web gateways](#)

All matches to this query

| Score | Mr(calc):   | Delta     | Sequence                     |
|-------|-------------|-----------|------------------------------|
| 54.3  | 1766.834488 | -0.003196 | <a href="#">APWCHTTNSQVR</a> |

Mascot: <http://www.matrixscience.com/>

# MASCOT SCIENCE Mascot Search Results

## Peptide View

MS/MS Fragmentation of **KCQSWSSMTPHR**

Found in **PLMN\_HUMAN**, Plasminogen OS=Homo sapiens GN=PLG PE=1 SV=2

Match to Query 38829: 1814.836616 from(454.716430,4+) rtinseconds(1594) index(60356)

Title: Locus:1.1.1.3181.8 File:"2013-07-02 CLN FXIII 60 min 3rd FT.wiff"

Data file C:\Program Files (x86)\Matrix Science\Mascot Daemon\mgf\6 FXIII 60 min 3rd\mascot\_daemon\_merge.mgf

Click mouse within plot area to zoom in by factor of two about that point

Or, Plot from  to  Da

Label all possible matches  Label matches used for scoring

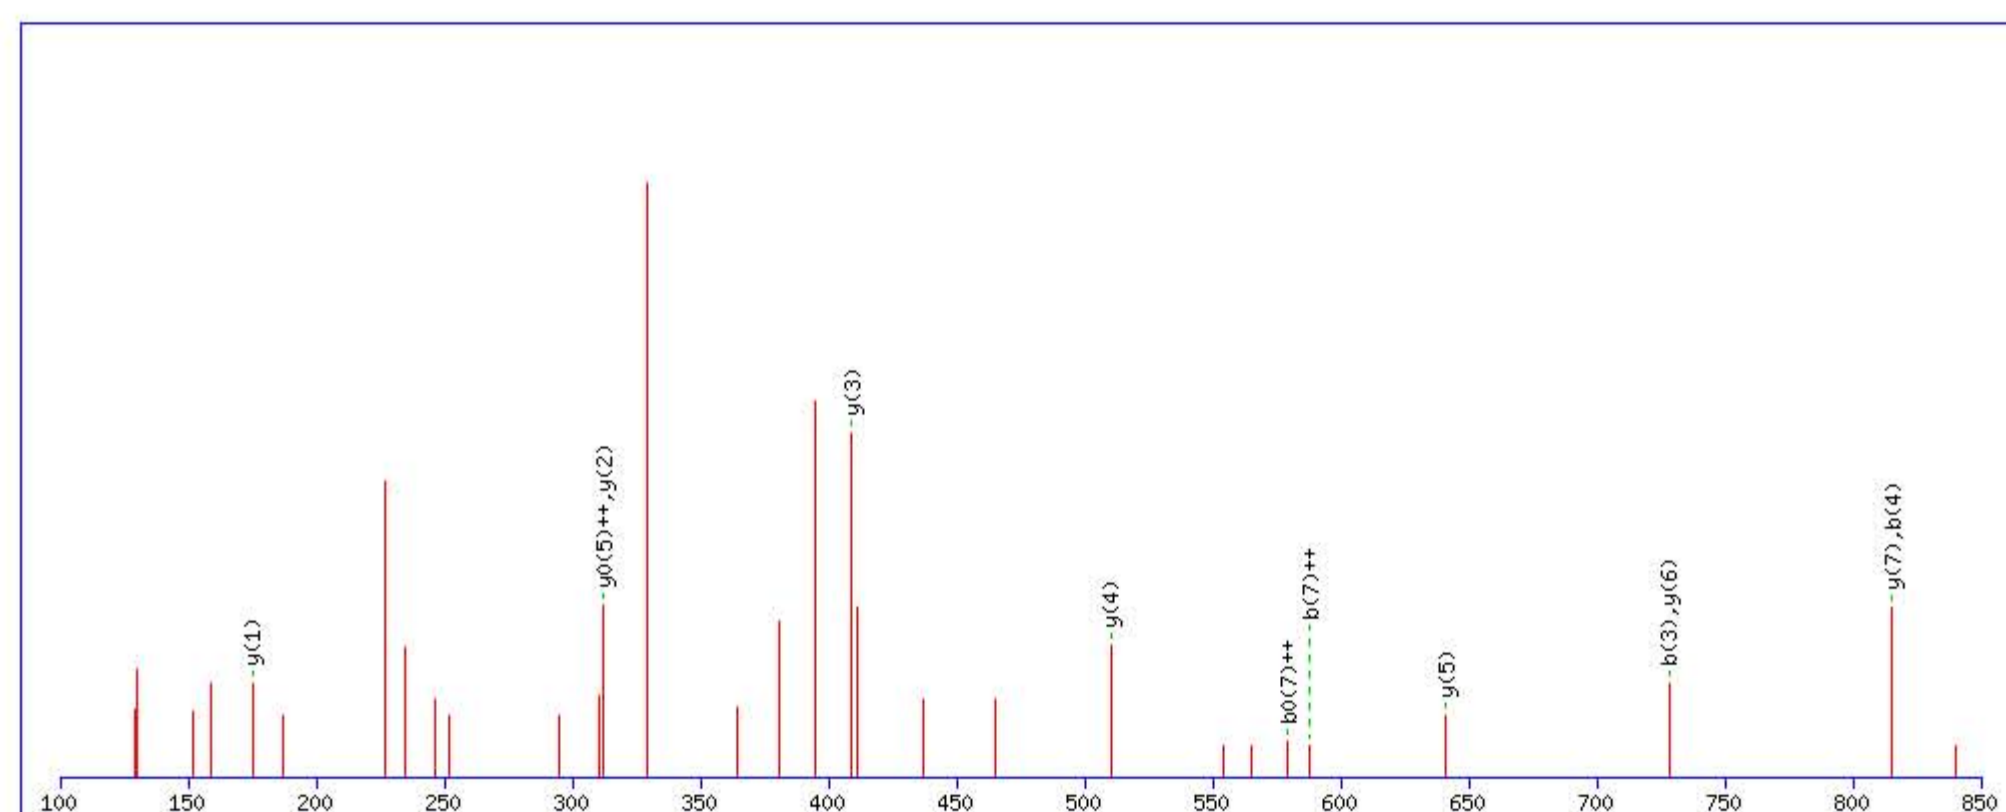

Monoisotopic mass of neutral peptide Mr(calc): 1814.837845

Fixed modifications: Carbamidomethyl (C) (apply to specified residues or termini only)

Variable modifications:

Q3 : Biotin:Thermo-21345 (Q)

Ions Score: 33 Expect: 0.0064

Matches : 12/120 fragment ions using 19 most intense peaks [\(help\)](#)

| #  | b                 | b <sup>++</sup>   | b <sup>*</sup> | b <sup>*++</sup> | b <sup>0</sup> | b <sup>0++</sup>  | Seq.     | y                 | y <sup>++</sup> | y <sup>*</sup> | y <sup>*++</sup> | y <sup>0</sup> | y <sup>0++</sup>  | #  |
|----|-------------------|-------------------|----------------|------------------|----------------|-------------------|----------|-------------------|-----------------|----------------|------------------|----------------|-------------------|----|
| 1  | 129.102239        | 65.054757         | 112.075690     | 56.541483        |                |                   | <b>K</b> |                   |                 |                |                  |                |                   | 12 |
| 2  | 289.132888        | 145.070082        | 272.106339     | 136.556808       |                |                   | <b>C</b> | 1687.750164       | 844.378720      | 1670.723615    | 835.865446       | 1669.739599    | 835.373438        | 11 |
| 3  | <b>728.358214</b> | 364.682745        | 711.331665     | 356.169471       |                |                   | <b>Q</b> | 1527.719515       | 764.363396      | 1510.692966    | 755.850121       | 1509.708950    | 755.358113        | 10 |
| 4  | <b>815.390242</b> | 408.198759        | 798.363693     | 399.685485       | 797.379677     | 399.193477        | <b>S</b> | 1088.494189       | 544.750733      | 1071.467640    | 536.237458       | 1070.483624    | 535.745450        | 9  |
| 5  | 1001.469555       | 501.238416        | 984.443006     | 492.725141       | 983.458990     | 492.233133        | <b>W</b> | 1001.462161       | 501.234719      | 984.435612     | 492.721444       | 983.451596     | 492.229436        | 8  |
| 6  | 1088.501583       | 544.754430        | 1071.475034    | 536.241155       | 1070.491018    | 535.749147        | <b>S</b> | <b>815.382848</b> | 408.195062      | 798.356299     | 399.681788       | 797.372283     | 399.189780        | 7  |
| 7  | 1175.533611       | <b>588.270444</b> | 1158.507062    | 579.757169       | 1157.523046    | <b>579.265161</b> | <b>S</b> | <b>728.350820</b> | 364.679048      | 711.324271     | 356.165774       | 710.340255     | 355.673766        | 6  |
| 8  | 1306.574096       | 653.790686        | 1289.547547    | 645.277412       | 1288.563531    | 644.785404        | <b>M</b> | <b>641.318792</b> | 321.163034      | 624.292243     | 312.649760       | 623.308227     | <b>312.157752</b> | 5  |
| 9  | 1407.621775       | 704.314526        | 1390.595226    | 695.801251       | 1389.611210    | 695.309243        | <b>T</b> | <b>510.278307</b> | 255.642791      | 493.251758     | 247.129517       | 492.267742     | 246.637509        | 4  |
| 10 | 1504.674539       | 752.840908        | 1487.647990    | 744.327633       | 1486.663974    | 743.835625        | <b>P</b> | <b>409.230628</b> | 205.118952      | 392.204079     | 196.605677       |                |                   | 3  |
| 11 | 1641.733451       | 821.370364        | 1624.706902    | 812.857089       | 1623.722886    | 812.365081        | <b>H</b> | <b>312.177864</b> | 156.592570      | 295.151315     | 148.079295       |                |                   | 2  |
| 12 |                   |                   |                |                  |                |                   | <b>R</b> | <b>175.118952</b> | 88.063114       | 158.092403     | 79.549839        |                |                   | 1  |

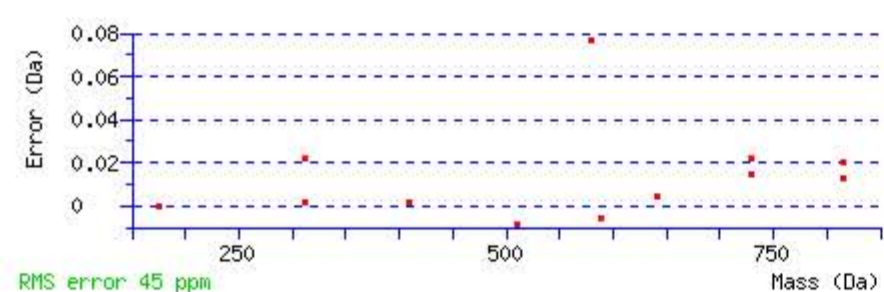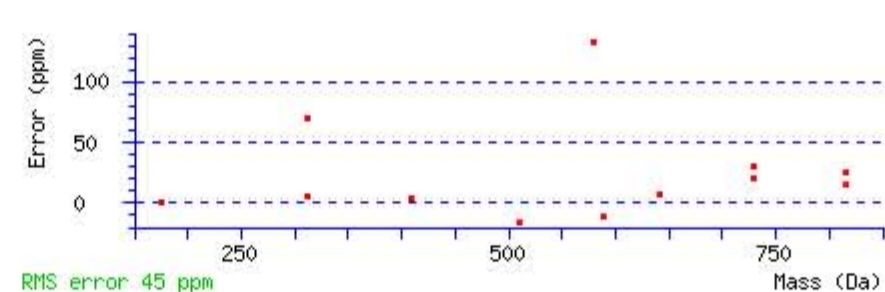

NCBI BLAST search of **KCQSWSSMTPHR**

(Parameters: blastp, nr protein database, expect=20000, no filter, PAM30)

Other BLAST [web gateways](#)

All matches to this query

| Score | Mr(calc):   | Delta     | Sequence                         |
|-------|-------------|-----------|----------------------------------|
| 32.5  | 1814.837845 | -0.001229 | <a href="#">KCQSWSSMTPHR</a>     |
| 9.5   | 1814.811371 | 0.025245  | <a href="#">EVVAMDCEMVGLGPHR</a> |
| 3.5   | 1814.811371 | 0.025245  | <a href="#">EVVAMDCEMVGLGPHR</a> |

Mascot: <http://www.matrixscience.com/>

# MASCOT Search Results

## Peptide View

MS/MS Fragmentation of **EQQCHEMAENR**

Found in **PLGB\_HUMAN**, Plasminogen-like protein B OS=Homo sapiens GN=PLGLB1 PE=1 SV=1

Match to Query 42014: 1998.953292 from(667.325040,3+) rtinseconds(2145) index(63386)

Title: Locus:1.1.1.3373.11 File:"2013-07-02 CLN FXIII 60 min 3rd FT.wiff"

Data file C:\Program Files (x86)\Matrix Science\Mascot Daemon\mgf\6 FXIII 60 min 3rd\mascot\_daemon\_merge.mgf

Click mouse within plot area to zoom in by factor of two about that point

Or, Plot from  to  Da

Label all possible matches  Label matches used for scoring

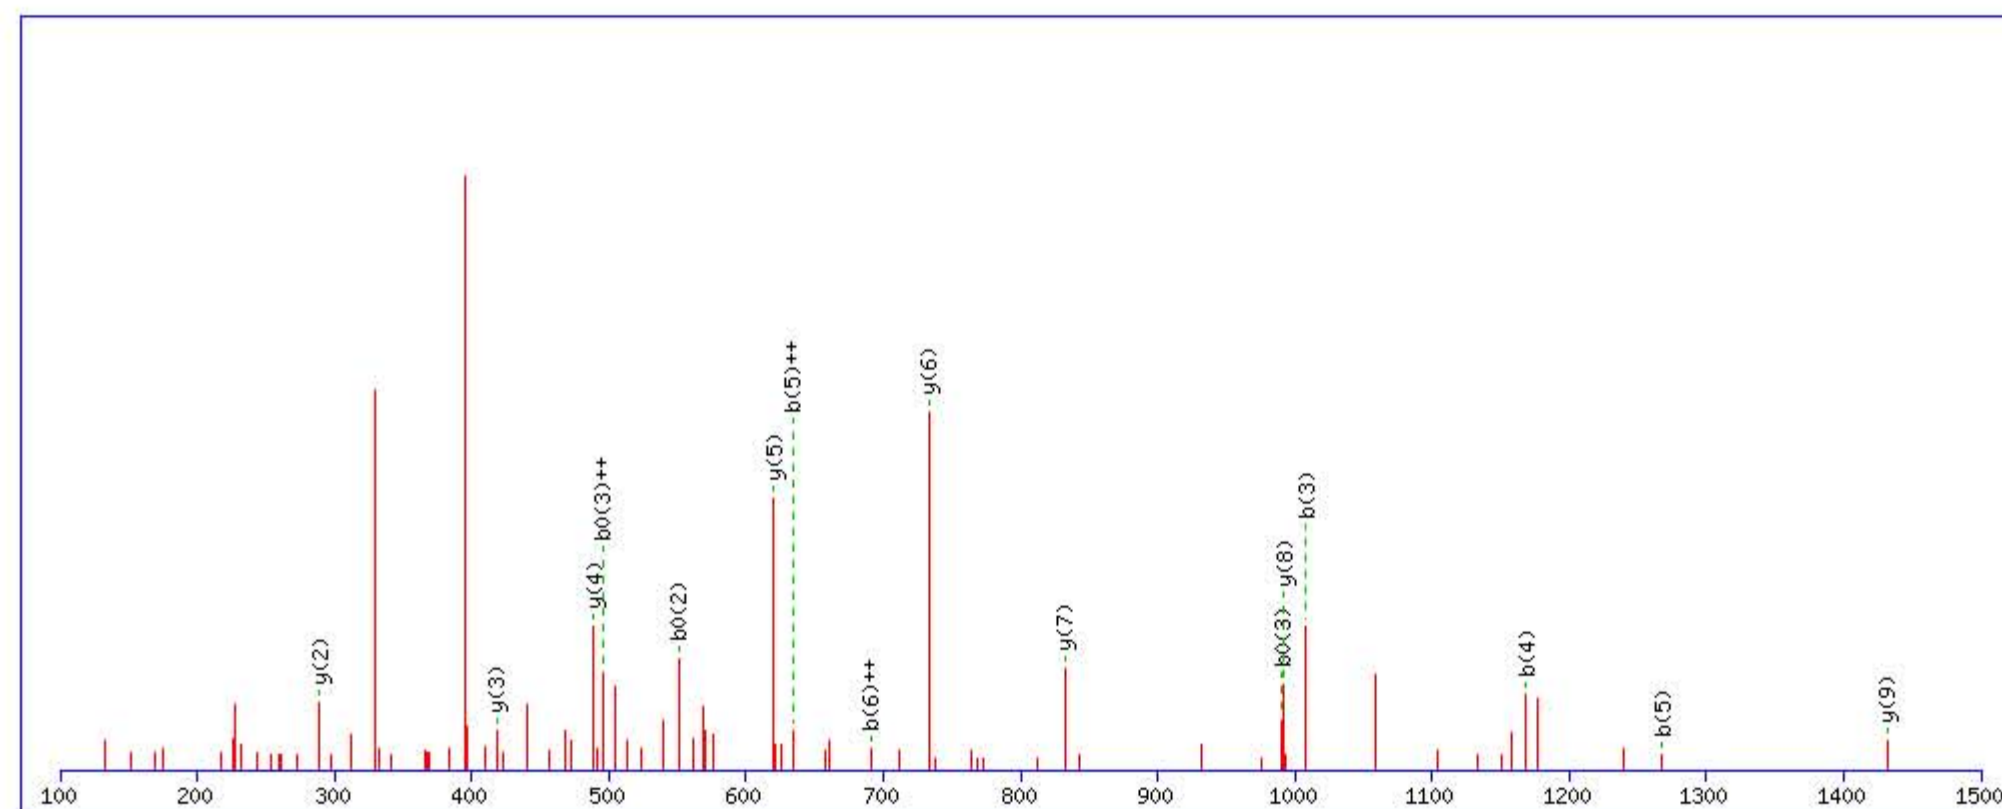

Monoisotopic mass of neutral peptide Mr(calc): 1998.951141

Fixed modifications: Carbamidomethyl (C) (apply to specified residues or termini only)

Variable modifications:

Q2 : Biotin:Thermo-21345 (Q)

Q3 : Biotin:Thermo-21345 (Q)

Ions Score: 36 Expect: 0.0048

Matches : 16/114 fragment ions using 34 most intense peaks [\(help\)](#)

| #  | b                  | b <sup>++</sup>   | b <sup>*</sup> | b <sup>*++</sup> | b <sup>0</sup>    | b <sup>0++</sup>  | Seq. | y                  | y <sup>++</sup> | y <sup>*</sup> | y <sup>*++</sup> | y <sup>0</sup> | y <sup>0++</sup> | #  |
|----|--------------------|-------------------|----------------|------------------|-------------------|-------------------|------|--------------------|-----------------|----------------|------------------|----------------|------------------|----|
| 1  | 130.049869         | 65.528572         |                |                  | 112.039304        | 56.523290         | E    |                    |                 |                |                  |                |                  | 11 |
| 2  | 569.275195         | 285.141236        | 552.248646     | 276.627961       | 551.264630        | 276.135953        | Q    | 1870.915850        | 935.961563      | 1853.889301    | 927.448288       | 1852.905285    | 926.956280       | 10 |
| 3  | <b>1008.500521</b> | 504.753899        | 991.473972     | 496.240624       | <b>990.489956</b> | <b>495.748616</b> | Q    | <b>1431.690524</b> | 716.348900      | 1414.663975    | 707.835625       | 1413.679959    | 707.343617       | 9  |
| 4  | <b>1168.531170</b> | 584.769223        | 1151.504621    | 576.255949       | 1150.520605       | 575.763940        | C    | <b>992.465198</b>  | 496.736237      | 975.438649     | 488.222962       | 974.454633     | 487.730954       | 8  |
| 5  | <b>1267.599584</b> | <b>634.303430</b> | 1250.573035    | 625.790156       | 1249.589019       | 625.298148        | V    | <b>832.434549</b>  | 416.720912      | 815.408000     | 408.207638       | 814.423984     | 407.715630       | 7  |
| 6  | 1380.683648        | <b>690.845462</b> | 1363.657099    | 682.332188       | 1362.673083       | 681.840179        | I    | <b>733.366135</b>  | 367.186705      | 716.339586     | 358.673431       | 715.355570     | 358.181423       | 6  |
| 7  | 1511.724133        | 756.365704        | 1494.697584    | 747.852430       | 1493.713568       | 747.360422        | M    | <b>620.282071</b>  | 310.644673      | 603.255522     | 302.131399       | 602.271506     | 301.639391       | 5  |
| 8  | 1582.761247        | 791.884261        | 1565.734698    | 783.370987       | 1564.750682       | 782.878979        | A    | <b>489.241586</b>  | 245.124431      | 472.215037     | 236.611156       | 471.231021     | 236.119148       | 4  |
| 9  | 1711.803840        | 856.405558        | 1694.777291    | 847.892283       | 1693.793275       | 847.400275        | E    | <b>418.204472</b>  | 209.605874      | 401.177923     | 201.092599       | 400.193907     | 200.600591       | 3  |
| 10 | 1825.846767        | 913.427021        | 1808.820218    | 904.913747       | 1807.836202       | 904.421739        | N    | <b>289.161879</b>  | 145.084577      | 272.135330     | 136.571303       |                |                  | 2  |
| 11 |                    |                   |                |                  |                   |                   | R    | 175.118952         | 88.063114       | 158.092403     | 79.549839        |                |                  | 1  |

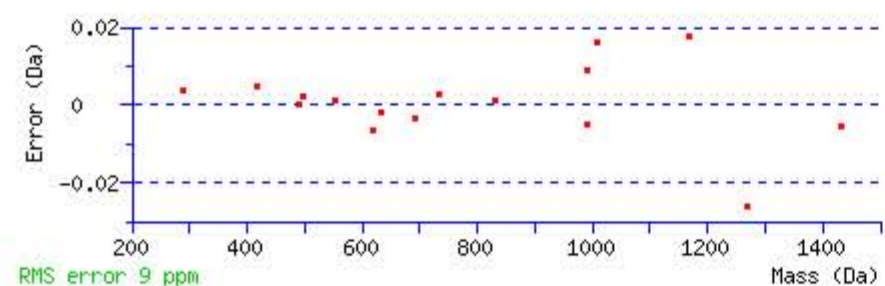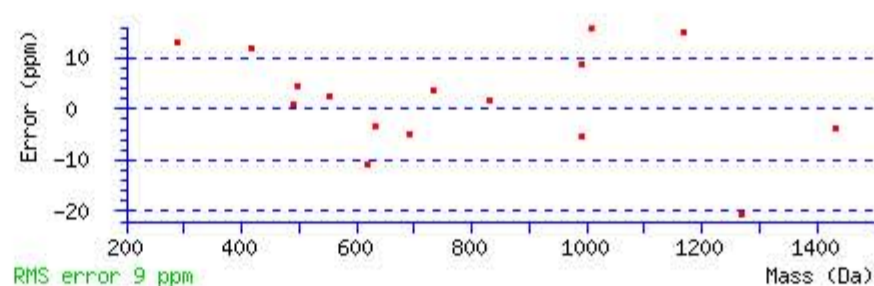

NCBI BLAST search of [EQQCHEMAENR](#)

(Parameters: blastp, nr protein database, expect=20000, no filter, PAM30)

Other BLAST [web gateways](#)

All matches to this query

| Score | Mr(calc):   | Delta    | Sequence                    |
|-------|-------------|----------|-----------------------------|
| 36.1  | 1998.951141 | 0.002151 | <a href="#">EQQCHEMAENR</a> |

Mascot: <http://www.matrixscience.com/>

# MASCOT Search Results

## Peptide View

MS/MS Fragmentation of **CTTPPPSSGPTYQCLK**

Found in **PLMN\_HUMAN**, Plasminogen OS=Homo sapiens GN=PLG PE=1 SV=2

Match to Query 44550: 2103.981552 from(702.334460,3+) rtinseconds(1787) index(61351)

Title: Locus:1.1.1.3248.18 File:"2013-07-02 CLN FXIII 60 min 3rd FT.wiff"

Data file C:\Program Files (x86)\Matrix Science\Mascot Daemon\mgf6 FXIII 60 min 3rd\mascot\_daemon\_merge.mgf

Click mouse within plot area to zoom in by factor of two about that point

Or, Plot from  to  Da

Label all possible matches  Label matches used for scoring

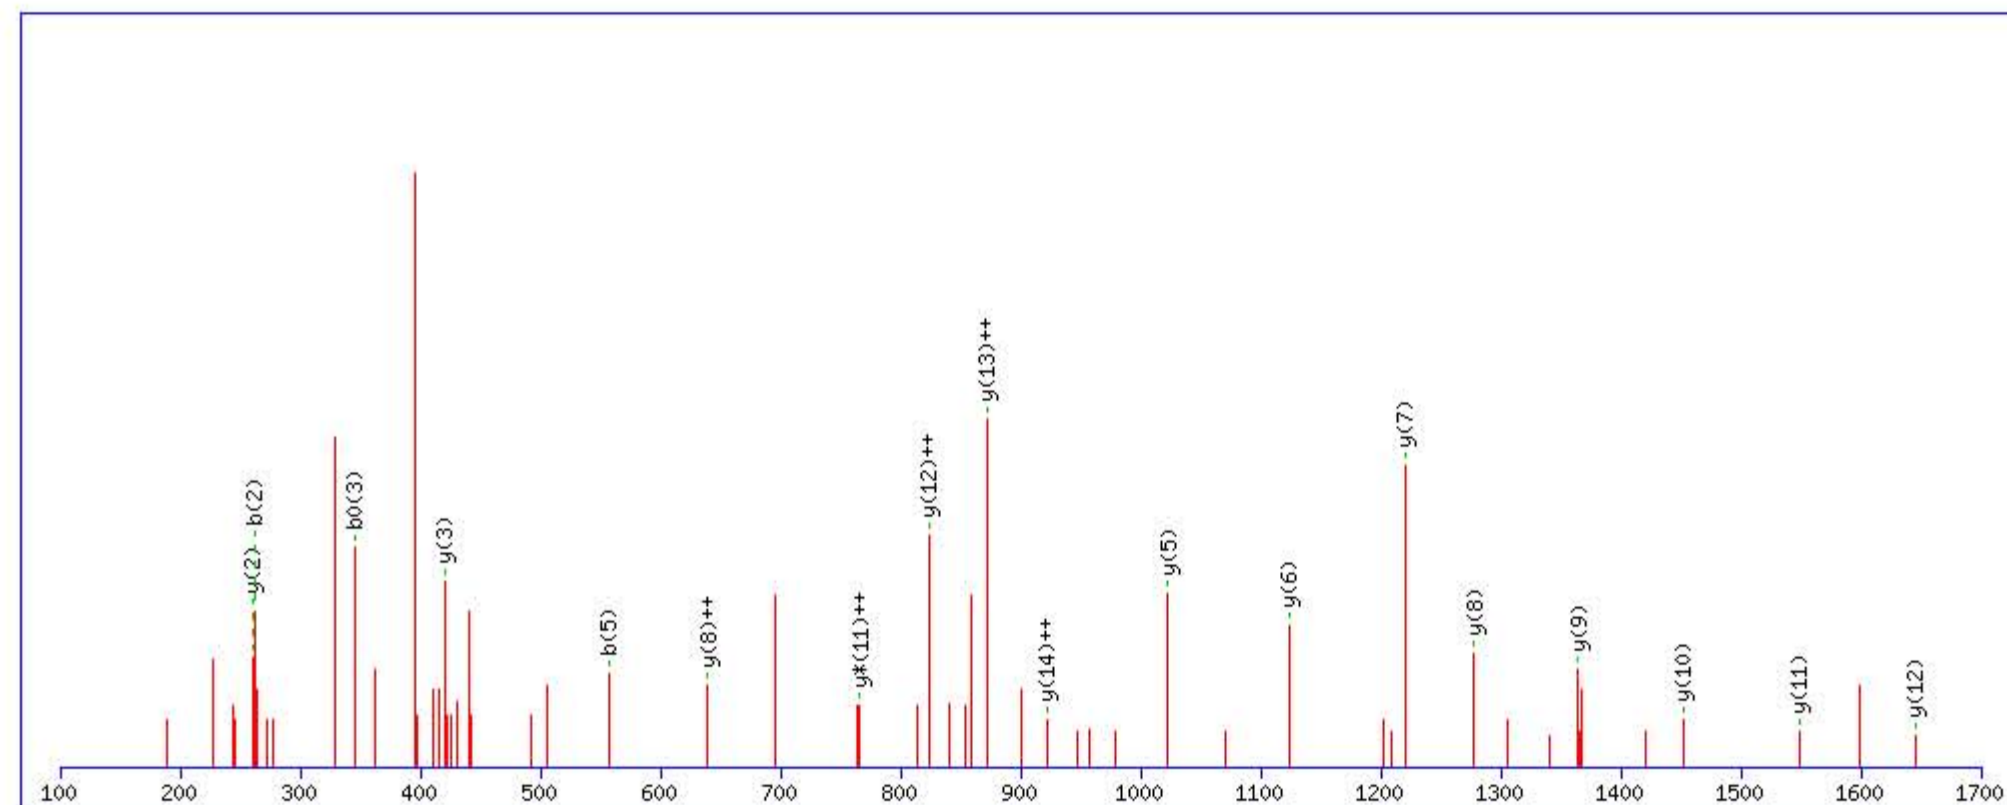

Monoisotopic mass of neutral peptide Mr(calc): 2103.979172

Fixed modifications: Carbamidomethyl (C) (apply to specified residues or termini only)

Variable modifications:

Q13 : Biotin:Thermo-21345 (Q)

Ions Score: 68 Expect: 1.5e-006

Matches : 18/144 fragment ions using 28 most intense peaks [\(help\)](#)

| #  | b                 | b <sup>++</sup> | b <sup>*</sup> | b <sup>*++</sup> | b <sup>0</sup>    | b <sup>0++</sup> | Seq. | y                  | y <sup>++</sup>   | y <sup>*</sup> | y <sup>*++</sup>  | y <sup>0</sup> | y <sup>0++</sup> | #  |
|----|-------------------|-----------------|----------------|------------------|-------------------|------------------|------|--------------------|-------------------|----------------|-------------------|----------------|------------------|----|
| 1  | 161.037925        | 81.022600       |                |                  |                   |                  | C    |                    |                   |                |                   |                |                  | 16 |
| 2  | <b>262.085604</b> | 131.546440      |                |                  | 244.075039        | 122.541158       | T    | 1944.955785        | 972.981531        | 1927.929236    | 964.468256        | 1926.945220    | 963.976248       | 15 |
| 3  | 363.133283        | 182.070280      |                |                  | <b>345.122718</b> | 173.064997       | T    | 1843.908106        | <b>922.457691</b> | 1826.881557    | 913.944417        | 1825.897541    | 913.452409       | 14 |
| 4  | 460.186047        | 230.596661      |                |                  | 442.175482        | 221.591379       | P    | 1742.860427        | <b>871.933852</b> | 1725.833878    | 863.420577        | 1724.849862    | 862.928569       | 13 |
| 5  | <b>557.238811</b> | 279.123044      |                |                  | 539.228246        | 270.117761       | P    | <b>1645.807663</b> | <b>823.407470</b> | 1628.781114    | 814.894195        | 1627.797098    | 814.402187       | 12 |
| 6  | 654.291575        | 327.649426      |                |                  | 636.281010        | 318.644143       | P    | <b>1548.754899</b> | 774.881088        | 1531.728350    | <b>766.367813</b> | 1530.744334    | 765.875805       | 11 |
| 7  | 741.323603        | 371.165440      |                |                  | 723.313038        | 362.160157       | S    | <b>1451.702135</b> | 726.354706        | 1434.675586    | 717.841431        | 1433.691570    | 717.349423       | 10 |
| 8  | 828.355631        | 414.681454      |                |                  | 810.345066        | 405.676171       | S    | <b>1364.670107</b> | 682.838692        | 1347.643558    | 674.325417        | 1346.659542    | 673.833409       | 9  |
| 9  | 885.377095        | 443.192186      |                |                  | 867.366530        | 434.186903       | G    | <b>1277.638079</b> | <b>639.322678</b> | 1260.611530    | 630.809403        | 1259.627514    | 630.317395       | 8  |
| 10 | 982.429859        | 491.718568      |                |                  | 964.419294        | 482.713285       | P    | <b>1220.616615</b> | 610.811946        | 1203.590066    | 602.298671        | 1202.606050    | 601.806663       | 7  |
| 11 | 1083.477538       | 542.242407      |                |                  | 1065.466973       | 533.237125       | T    | <b>1123.563851</b> | 562.285564        | 1106.537302    | 553.772289        | 1105.553286    | 553.280281       | 6  |
| 12 | 1246.540867       | 623.774072      |                |                  | 1228.530302       | 614.768789       | Y    | <b>1022.516172</b> | 511.761724        | 1005.489623    | 503.248450        |                |                  | 5  |
| 13 | 1685.766193       | 843.386735      | 1668.739644    | 834.873460       | 1667.755628       | 834.381452       | Q    | 859.452843         | 430.230060        | 842.426294     | 421.716785        |                |                  | 4  |
| 14 | 1845.796842       | 923.402059      | 1828.770293    | 914.888785       | 1827.786277       | 914.396777       | C    | <b>420.227517</b>  | 210.617396        | 403.200968     | 202.104122        |                |                  | 3  |
| 15 | 1958.880906       | 979.944091      | 1941.854357    | 971.430817       | 1940.870341       | 970.938809       | L    | <b>260.196868</b>  | 130.602072        | 243.170319     | 122.088797        |                |                  | 2  |
| 16 |                   |                 |                |                  |                   |                  | K    | 147.112804         | 74.060040         | 130.086255     | 65.546765         |                |                  | 1  |

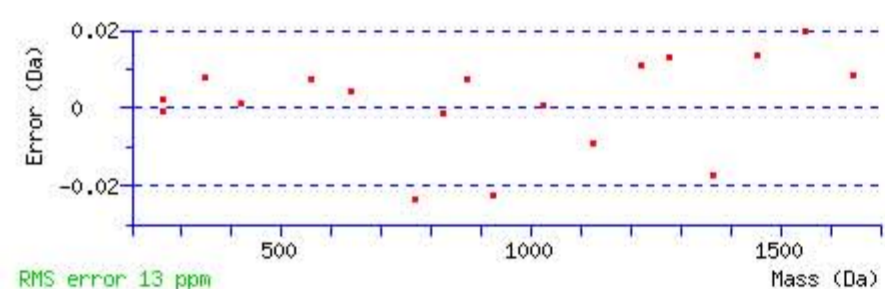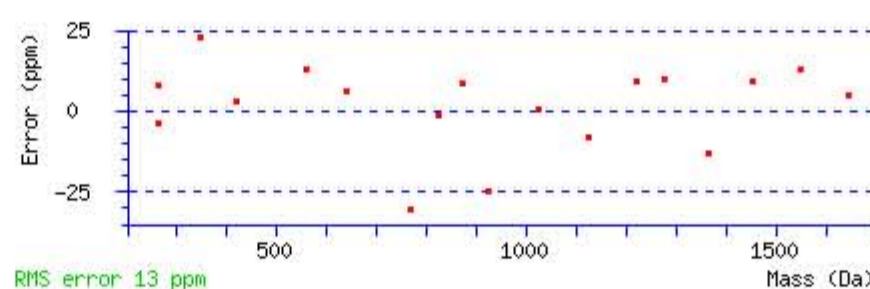

NCBI BLAST search of [CTTPPPSSGPTYQCLK](#)

(Parameters: blastp, nr protein database, expect=20000, no filter, PAM30)

Other BLAST [web gateways](#)

### All matches to this query

| Score | Mr(calc):   | Delta    | Sequence                           |
|-------|-------------|----------|------------------------------------|
| 68.0  | 2103.979172 | 0.002380 | <a href="#">CTTPPPSSGPTYQCLK</a>   |
| 6.0   | 2103.964554 | 0.016998 | <a href="#">TAADTPAIMNWDLFFTMK</a> |

# MASCOT Search Results

## Peptide View

MS/MS Fragmentation of **ATTVTGTPCQDWAAQEPHR**

Found in **PLMN\_HUMAN**, Plasminogen OS=Homo sapiens GN=PLG PE=1 SV=2

Match to Query 49702: 2436.134892 from(813.052240,3+) rtinseconds(1885) index(61746)

Title: Locus:1.1.1.3282.9 File:"2013-07-02 CLN FXIII 60 min 3rd FT.wiff"

Data file C:\Program Files (x86)\Matrix Science\Mascot Daemon\mgf6 FXIII 60 min 3rd\mascot\_daemon\_merge.mgf

Click mouse within plot area to zoom in by factor of two about that point

Or, Plot from  to  Da

Label all possible matches  Label matches used for scoring

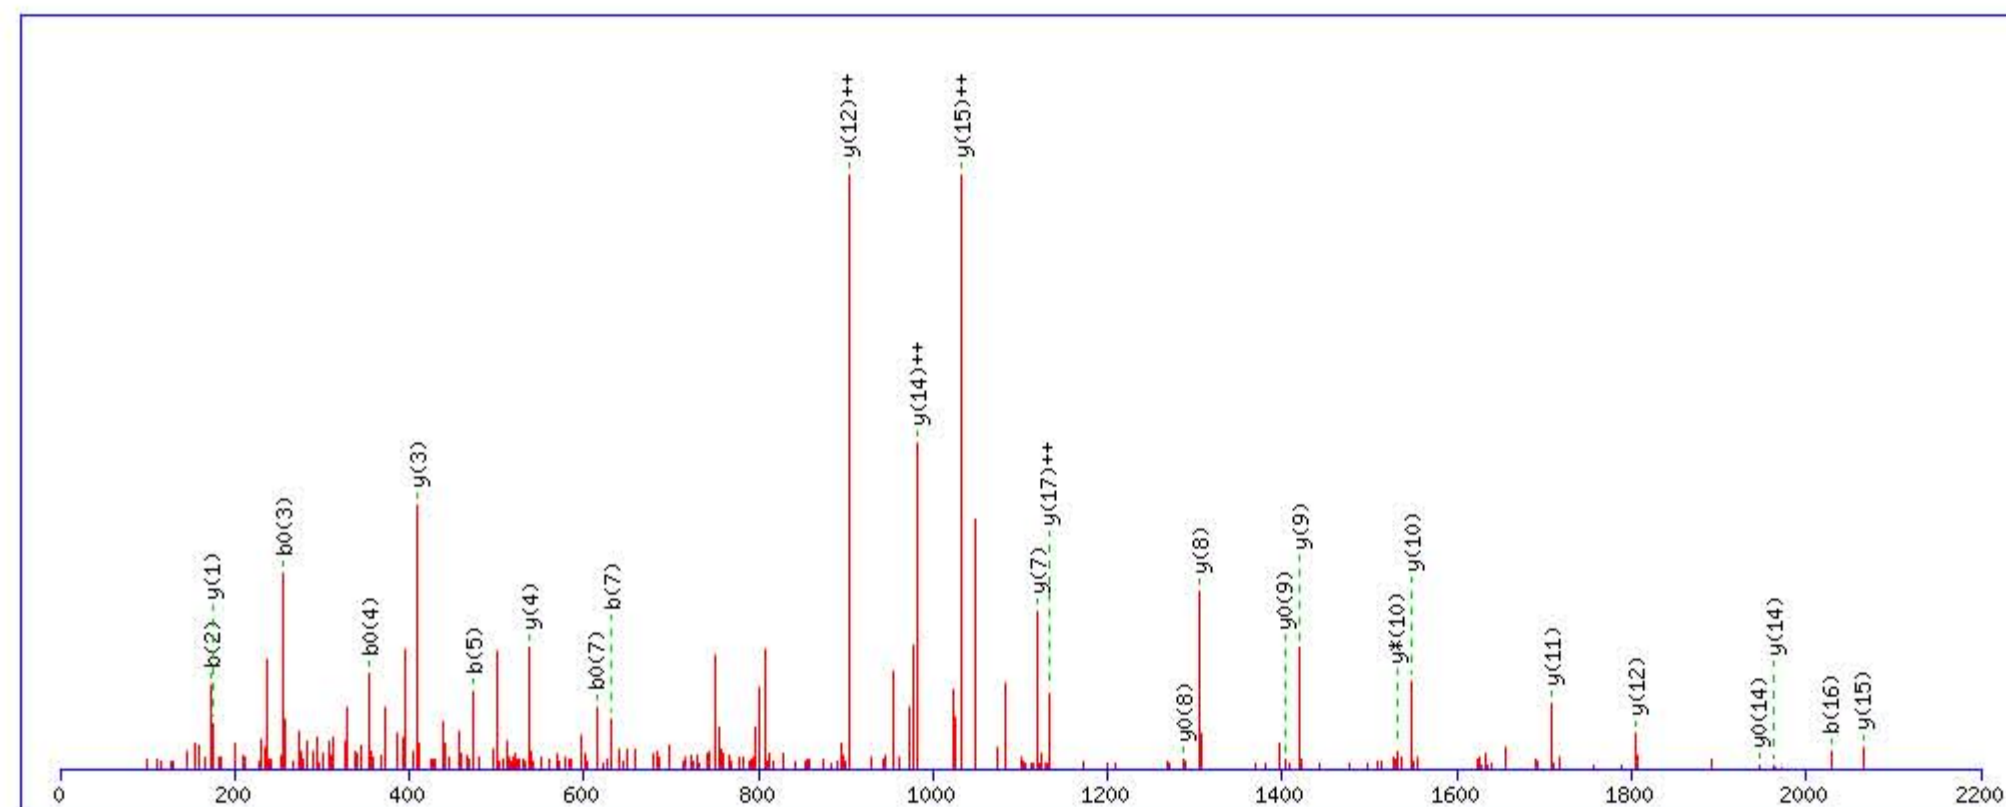

Monoisotopic mass of neutral peptide Mr(calc): 2436.131470

Fixed modifications: Carbamidomethyl (C) (apply to specified residues or termini only)

Variable modifications:

Q15 : Biotin:Thermo-21345 (Q)

Ions Score: 70 Expect: 6e-007

Matches : 26/190 fragment ions using 40 most intense peaks [\(help\)](#)

| #  | b                  | b <sup>++</sup> | b <sup>*</sup> | b <sup>*++</sup> | b <sup>0</sup>    | b <sup>0++</sup> | Seq. | y                  | y <sup>++</sup>    | y <sup>*</sup>     | y <sup>*++</sup> | y <sup>0</sup>     | y <sup>0++</sup> | #  |
|----|--------------------|-----------------|----------------|------------------|-------------------|------------------|------|--------------------|--------------------|--------------------|------------------|--------------------|------------------|----|
| 1  | 72.044390          | 36.525833       |                |                  |                   |                  | A    |                    |                    |                    |                  |                    |                  | 19 |
| 2  | <b>173.092069</b>  | 87.049672       |                |                  | 155.081504        | 78.044390        | T    | 2366.101616        | 1183.554446        | 2349.075067        | 1175.041171      | 2348.091051        | 1174.549163      | 18 |
| 3  | 274.139748         | 137.573512      |                |                  | <b>256.129183</b> | 128.568230       | T    | 2265.053937        | <b>1133.030606</b> | 2248.027388        | 1124.517332      | 2247.043372        | 1124.025324      | 17 |
| 4  | 373.208162         | 187.107719      |                |                  | <b>355.197597</b> | 178.102437       | V    | 2164.006258        | 1082.506767        | 2146.979709        | 1073.993492      | 2145.995693        | 1073.501484      | 16 |
| 5  | <b>474.255841</b>  | 237.631559      |                |                  | 456.245276        | 228.626276       | T    | <b>2064.937844</b> | <b>1032.972560</b> | 2047.911295        | 1024.459285      | 2046.927279        | 1023.967277      | 15 |
| 6  | 531.277305         | 266.142291      |                |                  | 513.266740        | 257.137008       | G    | <b>1963.890165</b> | <b>982.448721</b>  | 1946.863616        | 973.935446       | <b>1945.879600</b> | 973.443438       | 14 |
| 7  | <b>632.324984</b>  | 316.666130      |                |                  | <b>614.314419</b> | 307.660848       | T    | 1906.868701        | 953.937989         | 1889.842152        | 945.424714       | 1888.858136        | 944.932706       | 13 |
| 8  | 729.377748         | 365.192512      |                |                  | 711.367183        | 356.187230       | P    | <b>1805.821022</b> | <b>903.414149</b>  | 1788.794473        | 894.900875       | 1787.810457        | 894.408867       | 12 |
| 9  | 889.408397         | 445.207837      |                |                  | 871.397832        | 436.202554       | C    | <b>1708.768258</b> | 854.887767         | 1691.741709        | 846.374493       | 1690.757693        | 845.882485       | 11 |
| 10 | 1017.466975        | 509.237126      | 1000.440426    | 500.723851       | 999.456410        | 500.231843       | Q    | <b>1548.737609</b> | 774.872443         | <b>1531.711060</b> | 766.359168       | 1530.727044        | 765.867160       | 10 |
| 11 | 1132.493918        | 566.750597      | 1115.467369    | 558.237323       | 1114.483353       | 557.745315       | D    | <b>1420.679031</b> | 710.843154         | 1403.652482        | 702.329879       | <b>1402.668466</b> | 701.837871       | 9  |
| 12 | 1318.573231        | 659.790254      | 1301.546682    | 651.276979       | 1300.562666       | 650.784971       | W    | <b>1305.652088</b> | 653.329682         | 1288.625539        | 644.816408       | <b>1287.641523</b> | 644.324400       | 8  |
| 13 | 1389.610345        | 695.308811      | 1372.583796    | 686.795536       | 1371.599780       | 686.303528       | A    | <b>1119.572775</b> | 560.290026         | 1102.546226        | 551.776751       | 1101.562210        | 551.284743       | 7  |
| 14 | 1460.647459        | 730.827368      | 1443.620910    | 722.314093       | 1442.636894       | 721.822085       | A    | 1048.535661        | 524.771469         | 1031.509112        | 516.258194       | 1030.525096        | 515.766186       | 6  |
| 15 | 1899.872785        | 950.440031      | 1882.846236    | 941.926756       | 1881.862220       | 941.434748       | Q    | 977.498547         | 489.252912         | 960.471998         | 480.739637       | 959.487982         | 480.247629       | 5  |
| 16 | <b>2028.915378</b> | 1014.961327     | 2011.888829    | 1006.448053      | 2010.904813       | 1005.956045      | E    | <b>538.273221</b>  | 269.640249         | 521.246672         | 261.126974       | 520.262656         | 260.634966       | 4  |
| 17 | 2125.968142        | 1063.487709     | 2108.941593    | 1054.974434      | 2107.957577       | 1054.482427      | P    | <b>409.230628</b>  | 205.118952         | 392.204079         | 196.605677       |                    |                  | 3  |
| 18 | 2263.027054        | 1132.017165     | 2246.000505    | 1123.503890      | 2245.016489       | 1123.011883      | H    | 312.177864         | 156.592570         | 295.151315         | 148.079295       |                    |                  | 2  |
| 19 |                    |                 |                |                  |                   |                  | R    | <b>175.118952</b>  | 88.063114          | 158.092403         | 79.549839        |                    |                  | 1  |

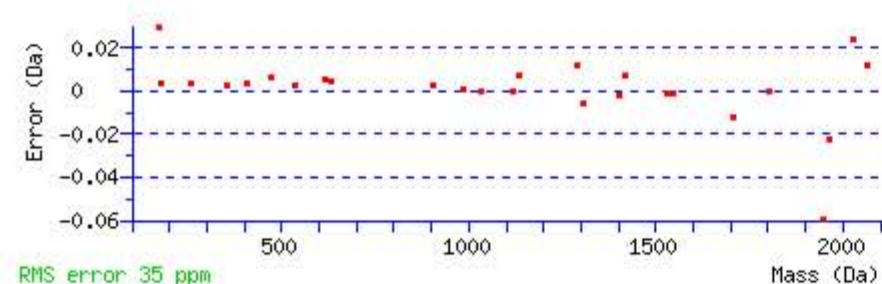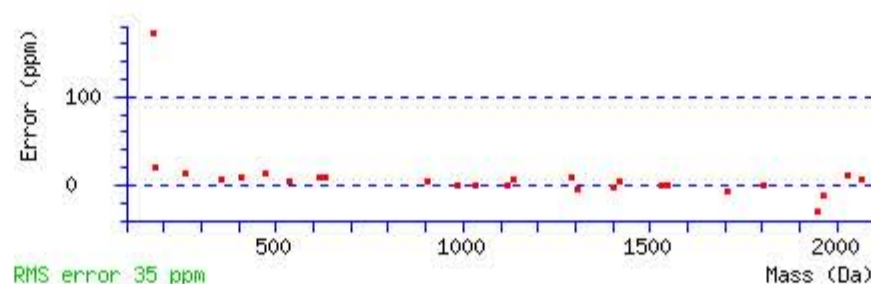

NCBI BLAST search of [ATTVTGTPCQDWAAQEPHR](#)

(Parameters: blastp, nr protein database, expect=20000, no filter, PAM30)

Other BLAST [web gateways](#)

### All matches to this query

| Score | Mr(calc):   | Delta     | Sequence                                 |
|-------|-------------|-----------|------------------------------------------|
| 70.1  | 2436.131470 | 0.003422  | <a href="#">ATTVTGTPCQDWAAQEPHR</a>      |
| 35.9  | 2436.131470 | 0.003422  | <a href="#">ATTVTGTPCQDWAAQEPHR</a>      |
| 3.7   | 2436.162506 | -0.027614 | <a href="#">CLVVCDSPPSADGAVTSSLGISVR</a> |

# MASCOT Search Results

## Peptide View

MS/MS Fragmentation of **VVGGCVAHPHSWPWQVSLR**

Found in **PLMN\_HUMAN**, Plasminogen OS=Homo sapiens GN=PLG PE=1 SV=2

Match to Query 50628: 2482.255016 from(621.571030,4+) rtinseconds(2231) index(63859)

Title: Locus:1.1.1.3403.10 File:"2013-07-02 CLN FXIII 60 min 3rd FT.wiff"

Data file C:\Program Files (x86)\Matrix Science\Mascot Daemon\mgf\6 FXIII 60 min 3rd\mascot\_daemon\_merge.mgf

Click mouse within plot area to zoom in by factor of two about that point

Or, Plot from  to  Da

Label all possible matches  Label matches used for scoring

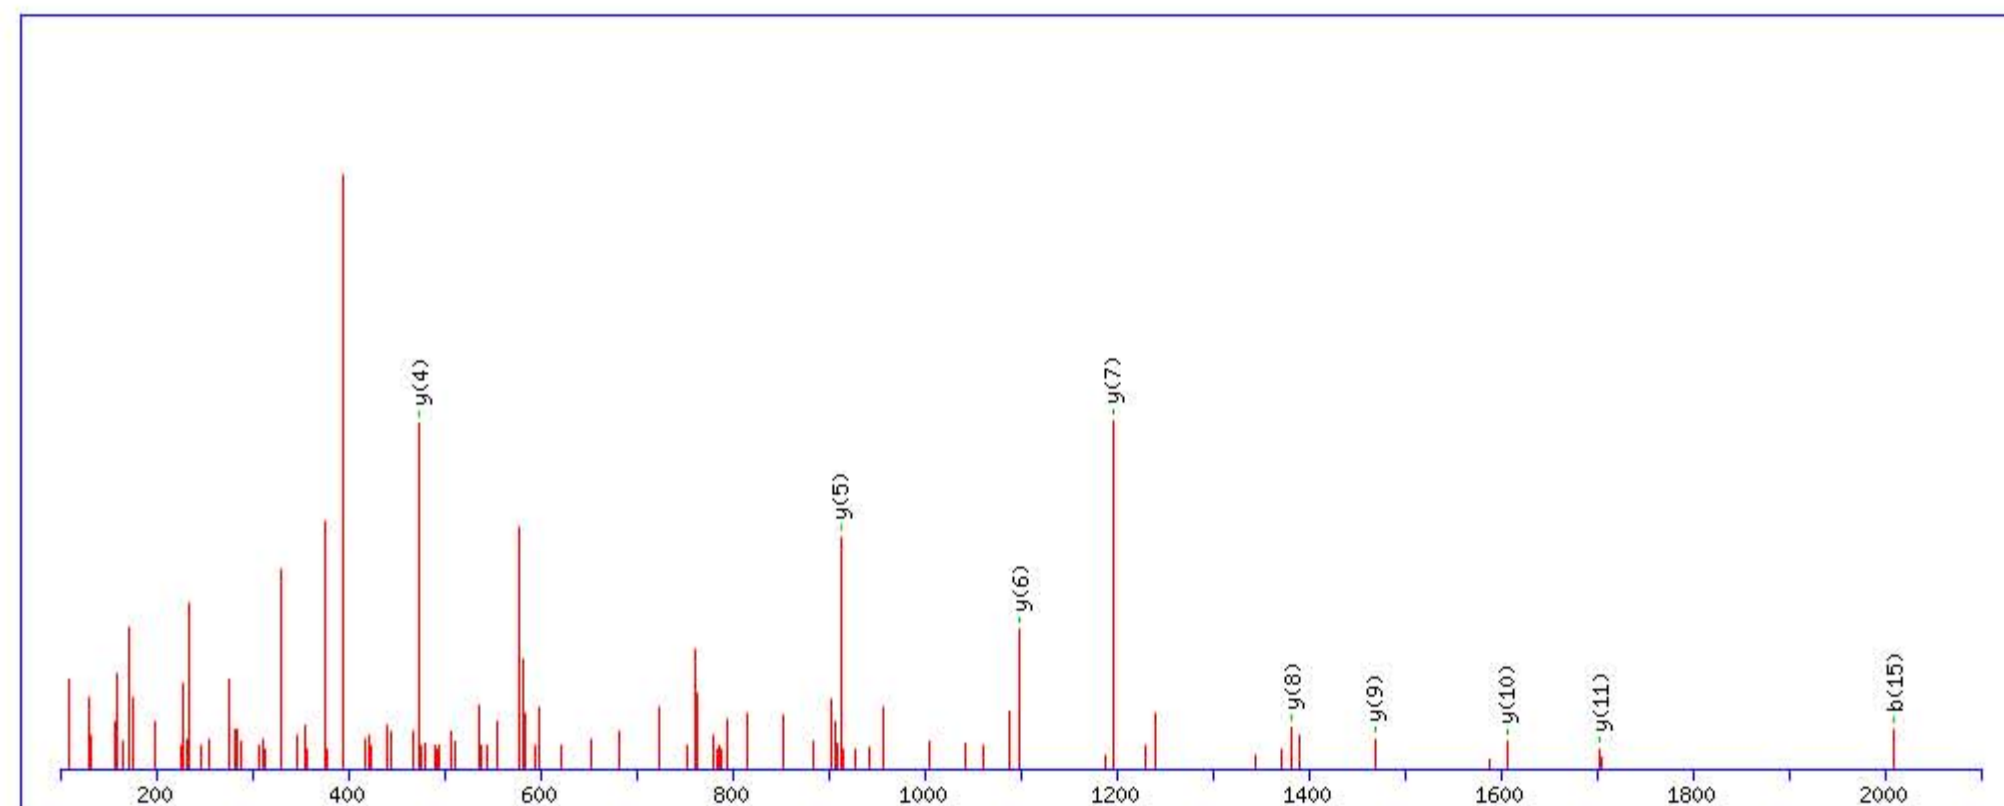

Monoisotopic mass of neutral peptide Mr(calc): 2482.251480

Fixed modifications: Carbamidomethyl (C) (apply to specified residues or termini only)

Variable modifications:

Q15 : Biotin:Thermo-21345 (Q)

Ions Score: 38 Expect: 0.0045

Matches : 9/164 fragment ions using 17 most intense peaks [\(help\)](#)

| #  | b                  | b <sup>++</sup> | b <sup>+</sup> | b <sup>+++</sup> | b <sup>0</sup> | b <sup>0++</sup> | Seq. | y                  | y <sup>++</sup> | y <sup>+</sup> | y <sup>+++</sup> | y <sup>0</sup> | y <sup>0++</sup> | #  |
|----|--------------------|-----------------|----------------|------------------|----------------|------------------|------|--------------------|-----------------|----------------|------------------|----------------|------------------|----|
| 1  | 100.075690         | 50.541483       |                |                  |                |                  | V    |                    |                 |                |                  |                |                  | 19 |
| 2  | 199.144104         | 100.075690      |                |                  |                |                  | V    | 2384.190309        | 1192.598792     | 2367.163760    | 1184.085518      | 2366.179744    | 1183.593510      | 18 |
| 3  | 256.165568         | 128.586422      |                |                  |                |                  | G    | 2285.121895        | 1143.064585     | 2268.095346    | 1134.551311      | 2267.111330    | 1134.059303      | 17 |
| 4  | 313.187032         | 157.097154      |                |                  |                |                  | G    | 2228.100431        | 1114.553853     | 2211.073882    | 1106.040579      | 2210.089866    | 1105.548571      | 16 |
| 5  | 473.217681         | 237.112479      |                |                  |                |                  | C    | 2171.078967        | 1086.043121     | 2154.052418    | 1077.529847      | 2153.068402    | 1077.037839      | 15 |
| 6  | 572.286095         | 286.646686      |                |                  |                |                  | V    | 2011.048318        | 1006.027797     | 1994.021769    | 997.514523       | 1993.037753    | 997.022515       | 14 |
| 7  | 643.323209         | 322.165243      |                |                  |                |                  | A    | 1911.979904        | 956.493590      | 1894.953355    | 947.980316       | 1893.969339    | 947.488308       | 13 |
| 8  | 780.382121         | 390.694699      |                |                  |                |                  | H    | 1840.942790        | 920.975033      | 1823.916241    | 912.461759       | 1822.932225    | 911.969751       | 12 |
| 9  | 877.434885         | 439.221081      |                |                  |                |                  | P    | <b>1703.883878</b> | 852.445577      | 1686.857329    | 843.932303       | 1685.873313    | 843.440295       | 11 |
| 10 | 1014.493797        | 507.750537      |                |                  |                |                  | H    | <b>1606.831114</b> | 803.919195      | 1589.804565    | 795.405921       | 1588.820549    | 794.913913       | 10 |
| 11 | 1101.525825        | 551.266550      |                |                  | 1083.515260    | 542.261268       | S    | <b>1469.772202</b> | 735.389739      | 1452.745653    | 726.876465       | 1451.761637    | 726.384457       | 9  |
| 12 | 1287.605138        | 644.306207      |                |                  | 1269.594573    | 635.300924       | W    | <b>1382.740174</b> | 691.873725      | 1365.713625    | 683.360451       | 1364.729609    | 682.868443       | 8  |
| 13 | 1384.657902        | 692.832589      |                |                  | 1366.647337    | 683.827306       | P    | <b>1196.660861</b> | 598.834069      | 1179.634312    | 590.320794       | 1178.650296    | 589.828786       | 7  |
| 14 | 1570.737215        | 785.872245      |                |                  | 1552.726650    | 776.866963       | W    | <b>1099.608097</b> | 550.307687      | 1082.581548    | 541.794412       | 1081.597532    | 541.302404       | 6  |
| 15 | <b>2009.962541</b> | 1005.484909     | 1992.935992    | 996.971634       | 1991.951976    | 996.479626       | Q    | <b>913.528784</b>  | 457.268030      | 896.502235     | 448.754756       | 895.518219     | 448.262748       | 5  |
| 16 | 2109.030955        | 1055.019115     | 2092.004406    | 1046.505841      | 2091.020390    | 1046.013833      | V    | <b>474.303458</b>  | 237.655367      | 457.276909     | 229.142092       | 456.292893     | 228.650084       | 4  |
| 17 | 2196.062983        | 1098.535129     | 2179.036434    | 1090.021855      | 2178.052418    | 1089.529847      | S    | 375.235044         | 188.121160      | 358.208495     | 179.607886       | 357.224479     | 179.115878       | 3  |
| 18 | 2309.147047        | 1155.077161     | 2292.120498    | 1146.563887      | 2291.136482    | 1146.071879      | L    | 288.203016         | 144.605146      | 271.176467     | 136.091872       |                |                  | 2  |
| 19 |                    |                 |                |                  |                |                  | R    | 175.118952         | 88.063114       | 158.092403     | 79.549839        |                |                  | 1  |

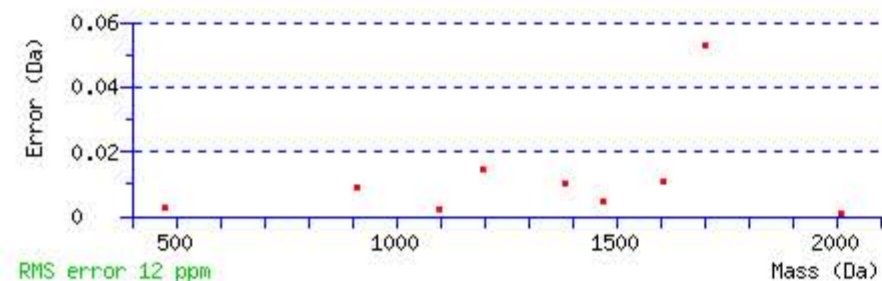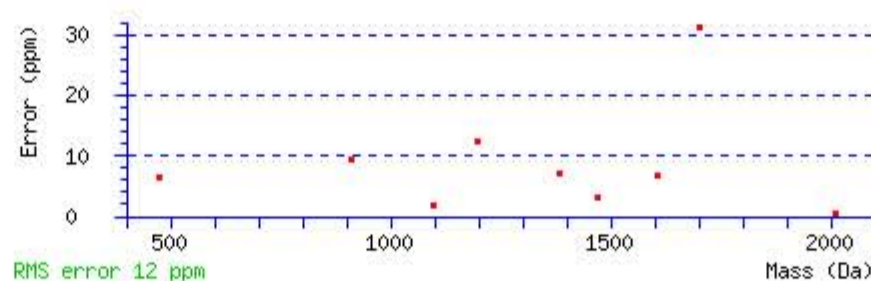

NCBI BLAST search of [VVGGCVAHPHSWPWQVSLR](#)

(Parameters: blastp, nr protein database, expect=20000, no filter, PAM30)

Other BLAST [web gateways](#)

All matches to this query

| Score | Mr(calc):   | Delta    | Sequence                            |
|-------|-------------|----------|-------------------------------------|
| 38.3  | 2482.251480 | 0.003536 | <a href="#">VVGGCVAHPHSWPWQVSLR</a> |

Mascot: <http://www.matrixscience.com/>

# MASCOT Search Results

## Peptide View

MS/MS Fragmentation of **NPDNDPQGPWCYTTDPEKR**  
 Found in **PLMN\_HUMAN**, Plasminogen OS=Homo sapiens GN=PLG PE=1 SV=2

Match to Query 52101: 2600.143696 from(651.043200,4+) rtinseconds(1973) index(62344)  
 Title: Locus:1.1.1.3313.18 File:"2013-07-02 CLN FXIII 60 min 3rd FT.wiff"  
 Data file C:\Program Files (x86)\Matrix Science\Mascot Daemon\mgf\6 FXIII 60 min 3rd\mascot\_daemon\_merge.mgf

Click mouse within plot area to zoom in by factor of two about that point

Or, Plot from  to  Da

Label all possible matches  Label matches used for scoring

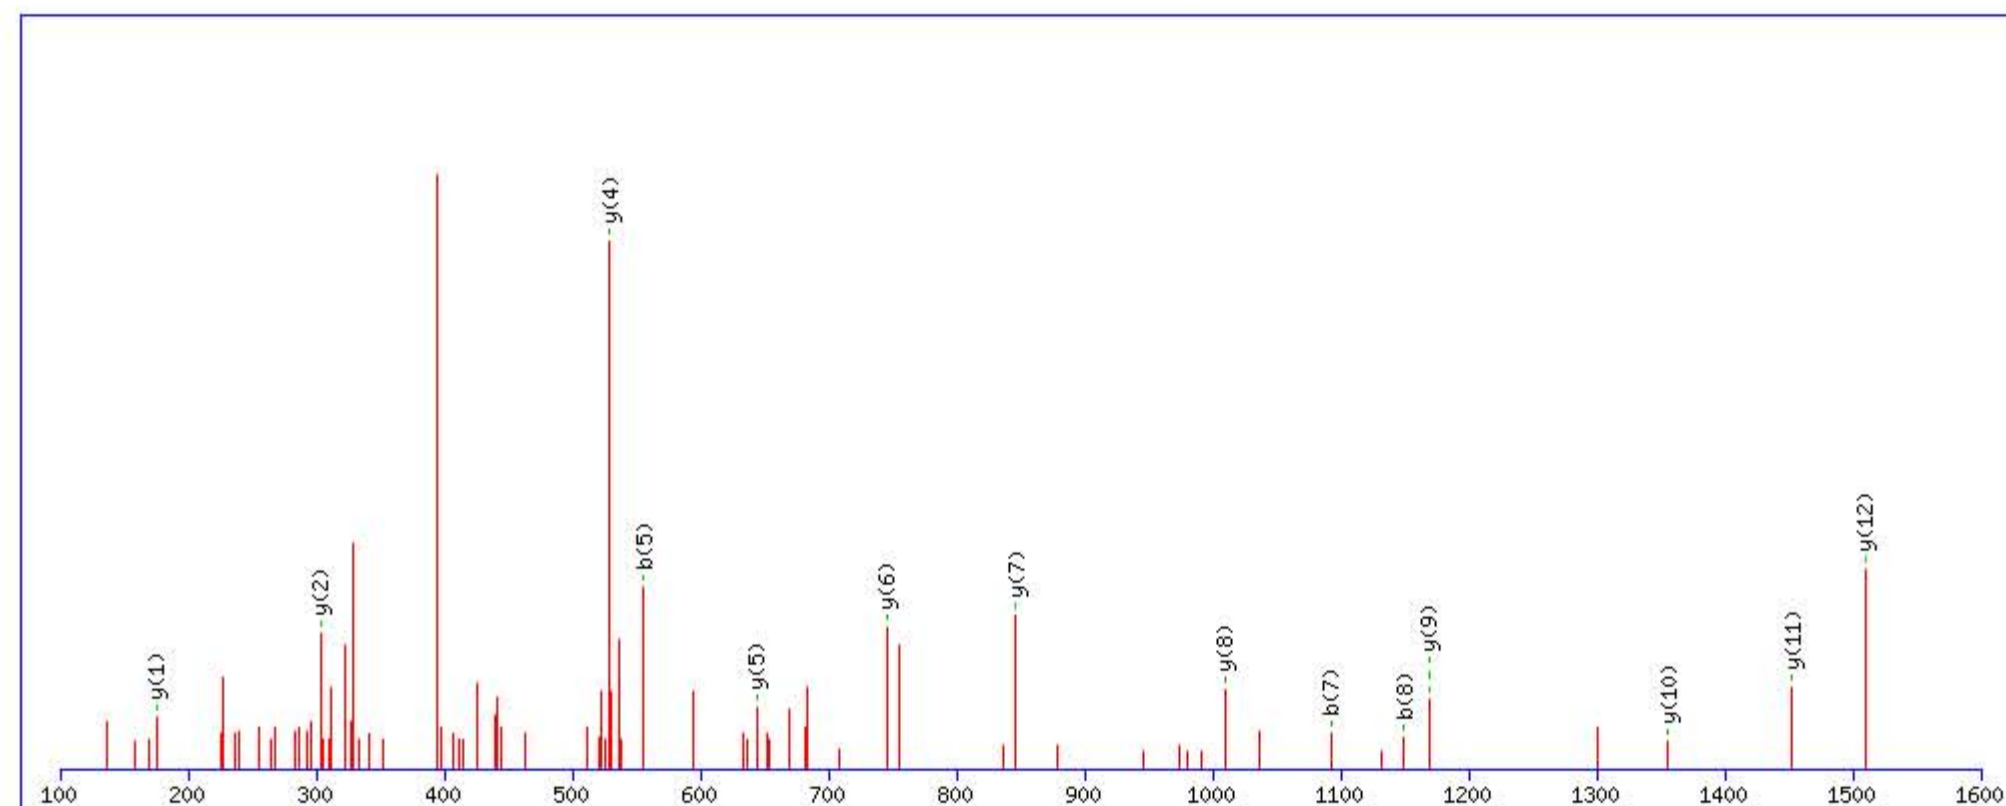

Monoisotopic mass of neutral peptide Mr(calc): 2600.142410  
 Fixed modifications: Carbamidomethyl (C) (apply to specified residues or termini only)  
 Variable modifications:  
 Q7 : Biotin:Thermo-21345 (Q)  
 Ions Score: 65 Expect: 1.8e-006  
 Matches : 14/208 fragment ions using 26 most intense peaks [\(help\)](#)

| #  | b                  | b <sup>++</sup> | b <sup>+</sup> | b <sup>+++</sup> | b <sup>0</sup> | b <sup>0++</sup> | Seq. | y                  | y <sup>++</sup> | y <sup>+</sup> | y <sup>+++</sup> | y <sup>0</sup> | y <sup>0++</sup> | #  |
|----|--------------------|-----------------|----------------|------------------|----------------|------------------|------|--------------------|-----------------|----------------|------------------|----------------|------------------|----|
| 1  | 115.050203         | 58.028740       | 98.023654      | 49.515465        |                |                  | N    |                    |                 |                |                  |                |                  | 19 |
| 2  | 212.102967         | 106.555121      | 195.076418     | 98.041847        |                |                  | P    | 2487.106759        | 1244.057017     | 2470.080210    | 1235.543743      | 2469.096194    | 1235.051735      | 18 |
| 3  | 327.129910         | 164.068593      | 310.103361     | 155.555319       | 309.119345     | 155.063311       | D    | 2390.053995        | 1195.530635     | 2373.027446    | 1187.017361      | 2372.043430    | 1186.525353      | 17 |
| 4  | 441.172837         | 221.090057      | 424.146288     | 212.576782       | 423.162272     | 212.084774       | N    | 2275.027052        | 1138.017164     | 2258.000503    | 1129.503889      | 2257.016487    | 1129.011881      | 16 |
| 5  | <b>556.199780</b>  | 278.603528      | 539.173231     | 270.090254       | 538.189215     | 269.598246       | D    | 2160.984125        | 1080.995700     | 2143.957576    | 1072.482426      | 2142.973560    | 1071.990418      | 15 |
| 6  | 653.252544         | 327.129910      | 636.225995     | 318.616636       | 635.241979     | 318.124628       | P    | 2045.957182        | 1023.482229     | 2028.930633    | 1014.968955      | 2027.946617    | 1014.476946      | 14 |
| 7  | <b>1092.477870</b> | 546.742573      | 1075.451321    | 538.229299       | 1074.467305    | 537.737290       | Q    | 1948.904418        | 974.955847      | 1931.877869    | 966.442572       | 1930.893853    | 965.950564       | 13 |
| 8  | <b>1149.499334</b> | 575.253305      | 1132.472785    | 566.740030       | 1131.488769    | 566.248022       | G    | <b>1509.679092</b> | 755.343184      | 1492.652543    | 746.829910       | 1491.668527    | 746.337902       | 12 |
| 9  | 1246.552098        | 623.779687      | 1229.525549    | 615.266413       | 1228.541533    | 614.774404       | P    | <b>1452.657628</b> | 726.832452      | 1435.631079    | 718.319178       | 1434.647063    | 717.827170       | 11 |
| 10 | 1432.631411        | 716.819343      | 1415.604862    | 708.306069       | 1414.620846    | 707.814061       | W    | <b>1355.604864</b> | 678.306070      | 1338.578315    | 669.792796       | 1337.594299    | 669.300788       | 10 |
| 11 | 1592.662060        | 796.834668      | 1575.635511    | 788.321394       | 1574.651495    | 787.829385       | C    | <b>1169.525551</b> | 585.266414      | 1152.499002    | 576.753139       | 1151.514986    | 576.261131       | 9  |
| 12 | 1755.725389        | 878.366333      | 1738.698840    | 869.853058       | 1737.714824    | 869.361050       | Y    | <b>1009.494902</b> | 505.251089      | 992.468353     | 496.737815       | 991.484337     | 496.245807       | 8  |
| 13 | 1856.773068        | 928.890172      | 1839.746519    | 920.376898       | 1838.762503    | 919.884889       | T    | <b>846.431573</b>  | 423.719425      | 829.405024     | 415.206150       | 828.421008     | 414.714142       | 7  |
| 14 | 1957.820747        | 979.414012      | 1940.794198    | 970.900737       | 1939.810182    | 970.408729       | T    | <b>745.383894</b>  | 373.195585      | 728.357345     | 364.682311       | 727.373329     | 364.190303       | 6  |
| 15 | 2072.847690        | 1036.927483     | 2055.821141    | 1028.414208      | 2054.837125    | 1027.922200      | D    | <b>644.336215</b>  | 322.671746      | 627.309666     | 314.158471       | 626.325650     | 313.666463       | 5  |
| 16 | 2169.900454        | 1085.453865     | 2152.873905    | 1076.940590      | 2151.889889    | 1076.448582      | P    | <b>529.309272</b>  | 265.158274      | 512.282723     | 256.645000       | 511.298707     | 256.152992       | 4  |
| 17 | 2298.943047        | 1149.975161     | 2281.916498    | 1141.461887      | 2280.932482    | 1140.969879      | E    | 432.256508         | 216.631892      | 415.229959     | 208.118618       | 414.245943     | 207.626610       | 3  |
| 18 | 2427.038010        | 1214.022643     | 2410.011461    | 1205.509368      | 2409.027445    | 1205.017360      | K    | <b>303.213915</b>  | 152.110595      | 286.187366     | 143.597321       |                |                  | 2  |
| 19 |                    |                 |                |                  |                |                  | R    | <b>175.118952</b>  | 88.063114       | 158.092403     | 79.549839        |                |                  | 1  |

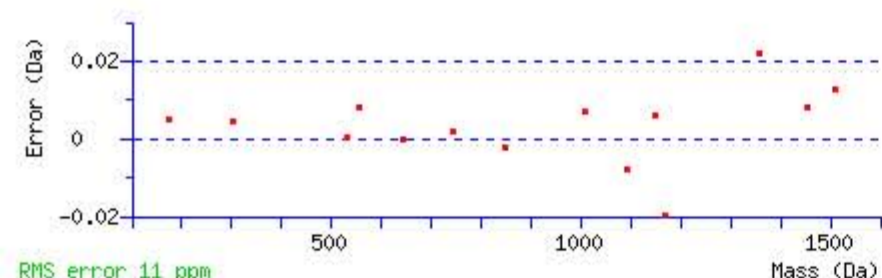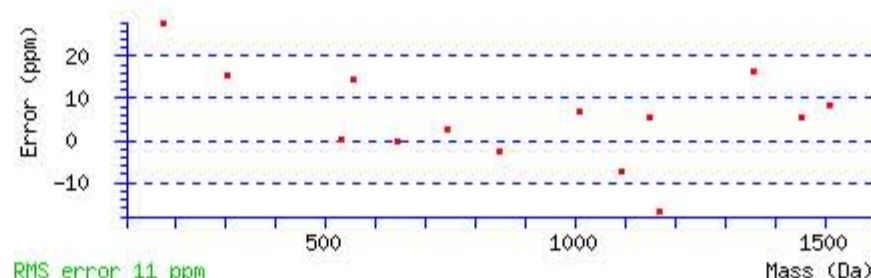

NCBI BLAST search of [NPDNDPQGPWCYTTDPEKR](#)  
 (Parameters: blastp, nr protein database, expect=20000, no filter, PAM30)  
 Other BLAST [web gateways](#)

### All matches to this query

| Score | Mr(calc):   | Delta    | Sequence                            |
|-------|-------------|----------|-------------------------------------|
| 65.3  | 2600.142410 | 0.001286 | <a href="#">NPDNDPQGPWCYTTDPEKR</a> |

**Peptide View**

MS/MS Fragmentation of **VILGAHQEVNLEPHVQEIEVSR**  
 Found in **PLMN\_HUMAN**, Plasminogen OS=Homo sapiens GN=PLG PE=1 SV=2

Match to Query 53854: 2806.483136 from(702.628060,4+) rtinseconds(2088) index(63016)  
 Title: Locus:1.1.1.3353.11 File:"2013-07-02 CLN FXIII 60 min 3rd FT.wiff"  
 Data file C:\Program Files (x86)\Matrix Science\Mascot Daemon\mgf6 FXIII 60 min 3rd\mascot\_daemon\_merge.mgf

Click mouse within plot area to zoom in by factor of two about that point  
 Or, Plot from  to  Da   
 Label all possible matches  Label matches used for scoring

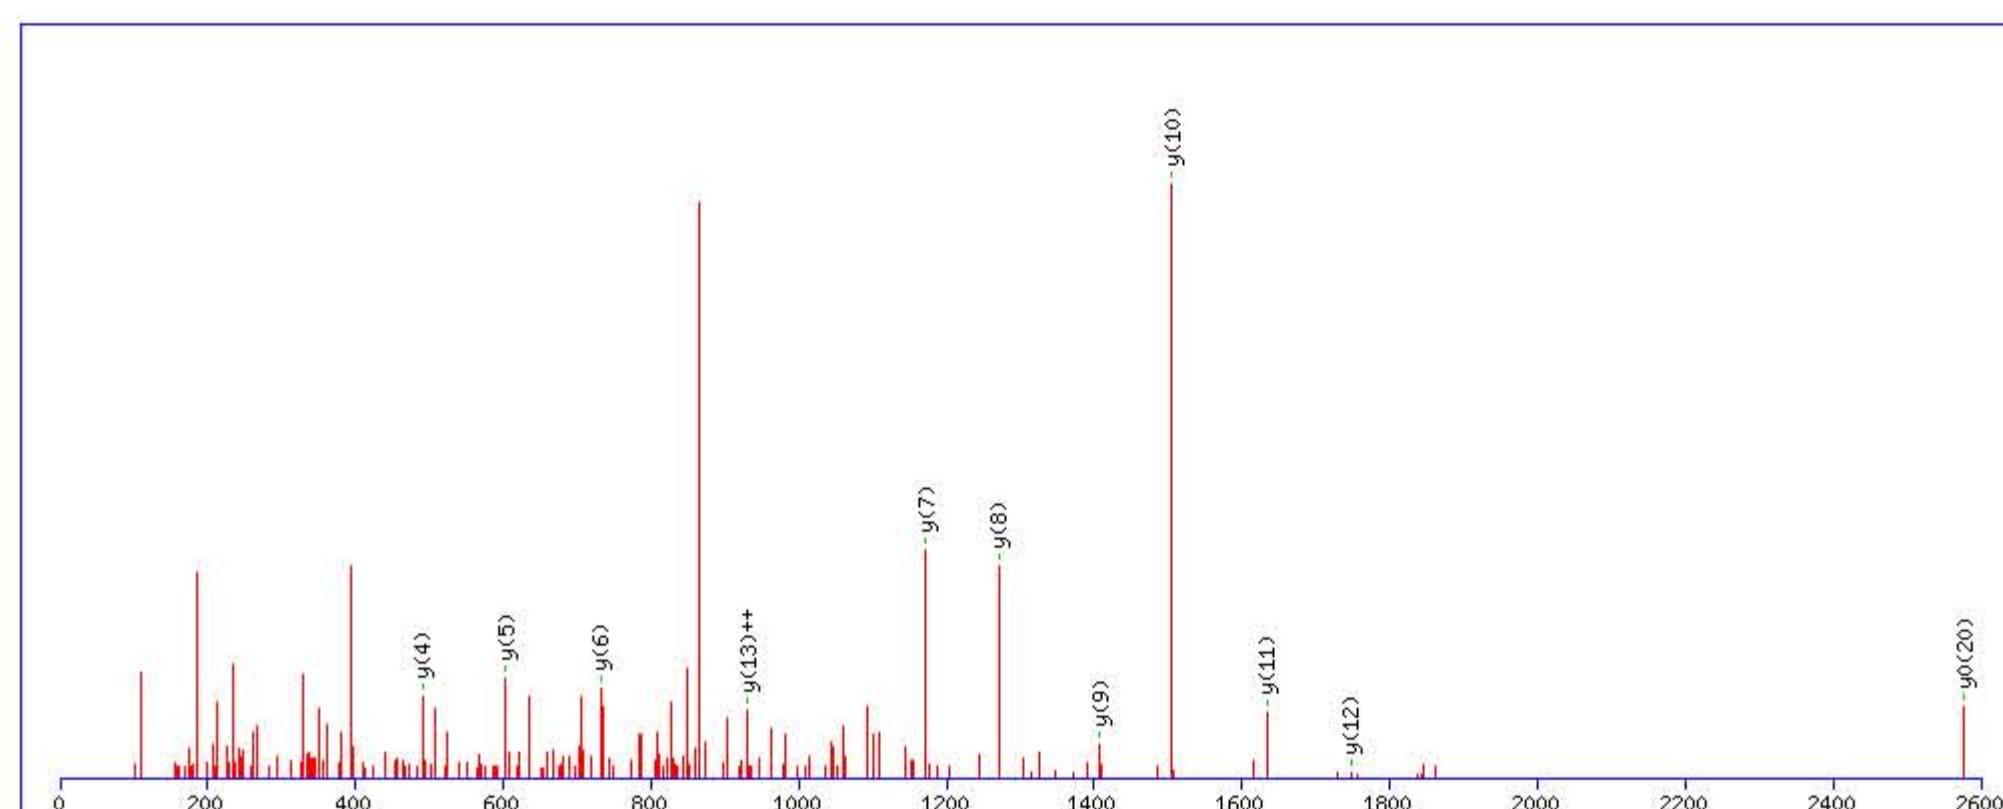

Monoisotopic mass of neutral peptide Mr(calc): 2806.479965  
 Fixed modifications: Carbamidomethyl (C) (apply to specified residues or termini only)  
 Variable modifications:  
 Q16 : Biotin:Thermo-21345 (Q)  
 Ions Score: 47 Expect: 0.00042  
 Matches : 11/224 fragment ions using 19 most intense peaks [\(help\)](#)

| #  | b           | b <sup>++</sup> | b <sup>*</sup> | b <sup>*++</sup> | b <sup>0</sup> | b <sup>0++</sup> | Seq. | y           | y <sup>++</sup> | y <sup>*</sup> | y <sup>*++</sup> | y <sup>0</sup> | y <sup>0++</sup> | #  |
|----|-------------|-----------------|----------------|------------------|----------------|------------------|------|-------------|-----------------|----------------|------------------|----------------|------------------|----|
| 1  | 100.075690  | 50.541483       |                |                  |                |                  | V    |             |                 |                |                  |                |                  | 22 |
| 2  | 213.159754  | 107.083515      |                |                  |                |                  | I    | 2708.418847 | 1354.713061     | 2691.392298    | 1346.199787      | 2690.408282    | 1345.707779      | 21 |
| 3  | 326.243818  | 163.625547      |                |                  |                |                  | L    | 2595.334783 | 1298.171029     | 2578.308234    | 1289.657755      | 2577.324218    | 1289.165747      | 20 |
| 4  | 383.265282  | 192.136279      |                |                  |                |                  | G    | 2482.250719 | 1241.628997     | 2465.224170    | 1233.115723      | 2464.240154    | 1232.623715      | 19 |
| 5  | 454.302396  | 227.654836      |                |                  |                |                  | A    | 2425.229255 | 1213.118265     | 2408.202706    | 1204.604991      | 2407.218690    | 1204.112983      | 18 |
| 6  | 591.361308  | 296.184292      |                |                  |                |                  | H    | 2354.192141 | 1177.599708     | 2337.165592    | 1169.086434      | 2336.181576    | 1168.594426      | 17 |
| 7  | 719.419886  | 360.213581      | 702.393337     | 351.700307       |                |                  | Q    | 2217.133229 | 1109.070252     | 2200.106680    | 1100.556978      | 2199.122664    | 1100.064970      | 16 |
| 8  | 848.462479  | 424.734878      | 831.435930     | 416.221603       | 830.451914     | 415.729595       | E    | 2089.074651 | 1045.040963     | 2072.048102    | 1036.527689      | 2071.064086    | 1036.035681      | 15 |
| 9  | 947.530893  | 474.269085      | 930.504344     | 465.755810       | 929.520328     | 465.263802       | V    | 1960.032058 | 980.519667      | 1943.005509    | 972.006393       | 1942.021493    | 971.514385       | 14 |
| 10 | 1061.573820 | 531.290548      | 1044.547271    | 522.777274       | 1043.563255    | 522.285266       | N    | 1860.963644 | 930.985460      | 1843.937095    | 922.472186       | 1842.953079    | 921.980178       | 13 |
| 11 | 1174.657884 | 587.832580      | 1157.631335    | 579.319306       | 1156.647319    | 578.827297       | L    | 1746.920717 | 873.963997      | 1729.894168    | 865.450722       | 1728.910152    | 864.958714       | 12 |
| 12 | 1303.700477 | 652.353877      | 1286.673928    | 643.840602       | 1285.689912    | 643.348594       | E    | 1633.836653 | 817.421965      | 1616.810104    | 808.908690       | 1615.826088    | 808.416682       | 11 |
| 13 | 1400.753241 | 700.880259      | 1383.726692    | 692.366984       | 1382.742676    | 691.874976       | P    | 1504.794060 | 752.900668      | 1487.767511    | 744.387394       | 1486.783495    | 743.895386       | 10 |
| 14 | 1537.812153 | 769.409715      | 1520.785604    | 760.896440       | 1519.801588    | 760.404432       | H    | 1407.741296 | 704.374286      | 1390.714747    | 695.861012       | 1389.730731    | 695.369004       | 9  |
| 15 | 1636.880567 | 818.943922      | 1619.854018    | 810.430647       | 1618.870002    | 809.938639       | V    | 1270.682384 | 635.844830      | 1253.655835    | 627.331556       | 1252.671819    | 626.839548       | 8  |
| 16 | 2076.105893 | 1038.556584     | 2059.079344    | 1030.043310      | 2058.095328    | 1029.551302      | Q    | 1171.613970 | 586.310623      | 1154.587421    | 577.797349       | 1153.603405    | 577.305341       | 7  |
| 17 | 2205.148486 | 1103.077881     | 2188.121937    | 1094.564606      | 2187.137921    | 1094.072598      | E    | 732.388644  | 366.697960      | 715.362095     | 358.184686       | 714.378079     | 357.692678       | 6  |
| 18 | 2318.232550 | 1159.619913     | 2301.206001    | 1151.106638      | 2300.221985    | 1150.614631      | I    | 603.346051  | 302.176664      | 586.319502     | 293.663389       | 585.335486     | 293.171381       | 5  |
| 19 | 2447.275143 | 1224.141210     | 2430.248594    | 1215.627935      | 2429.264578    | 1215.135927      | E    | 490.261987  | 245.634631      | 473.235438     | 237.121357       | 472.251422     | 236.629349       | 4  |
| 20 | 2546.343557 | 1273.675417     | 2529.317008    | 1265.162142      | 2528.332992    | 1264.670134      | V    | 361.219394  | 181.113335      | 344.192845     | 172.600060       | 343.208829     | 172.108052       | 3  |
| 21 | 2633.375585 | 1317.191431     | 2616.349036    | 1308.678156      | 2615.365020    | 1308.186148      | S    | 262.150980  | 131.579128      | 245.124431     | 123.065854       | 244.140415     | 122.573846       | 2  |
| 22 |             |                 |                |                  |                |                  | R    | 175.118952  | 88.063114       | 158.092403     | 79.549839        |                |                  | 1  |

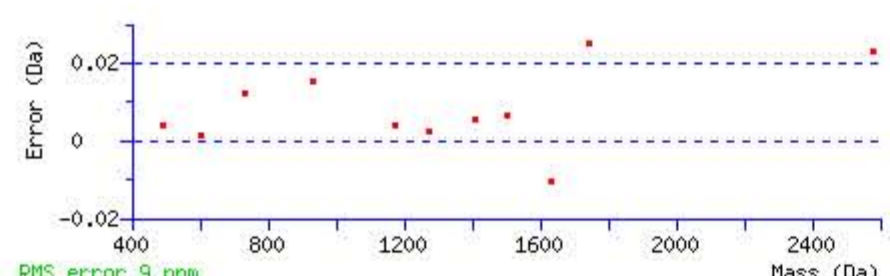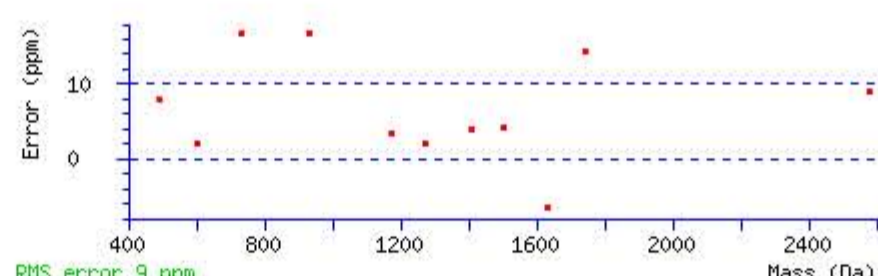

NCBI BLAST search of [VILGAHQEVNLEPHVQEIEVSR](#)  
 (Parameters: blastp, nr protein database, expect=20000, no filter, PAM30)  
 Other BLAST [web gateways](#)

**All matches to this query**

| Score | Mr(calc):   | Delta    | Sequence                               |
|-------|-------------|----------|----------------------------------------|
| 47.1  | 2806.479965 | 0.003171 | <a href="#">VILGAHQEVNLEPHVQEIEVSR</a> |



# MASCOT SEARCH RESULTS

## Peptide View

MS/MS Fragmentation of **VILGAHQEVNLEPHVQEIIVSR**

Found in **PLMN\_HUMAN**, Plasminogen OS=Homo sapiens GN=PLG PE=1 SV=2

Match to Query 53856: 2806.485576 from(702.628670,4+) rtinseconds(2117) index(63230)

Title: Locus:1.1.1.3363.22 File:"2013-07-02 CLN FXIII 60 min 3rd FT.wiff"

Data file C:\Program Files (x86)\Matrix Science\Mascot Daemon\mgf6 FXIII 60 min 3rd\mascot\_daemon\_merge.mgf

Click mouse within plot area to zoom in by factor of two about that point

Or, Plot from 0 to 2800 Da Full range

Label all possible matches  Label matches used for scoring

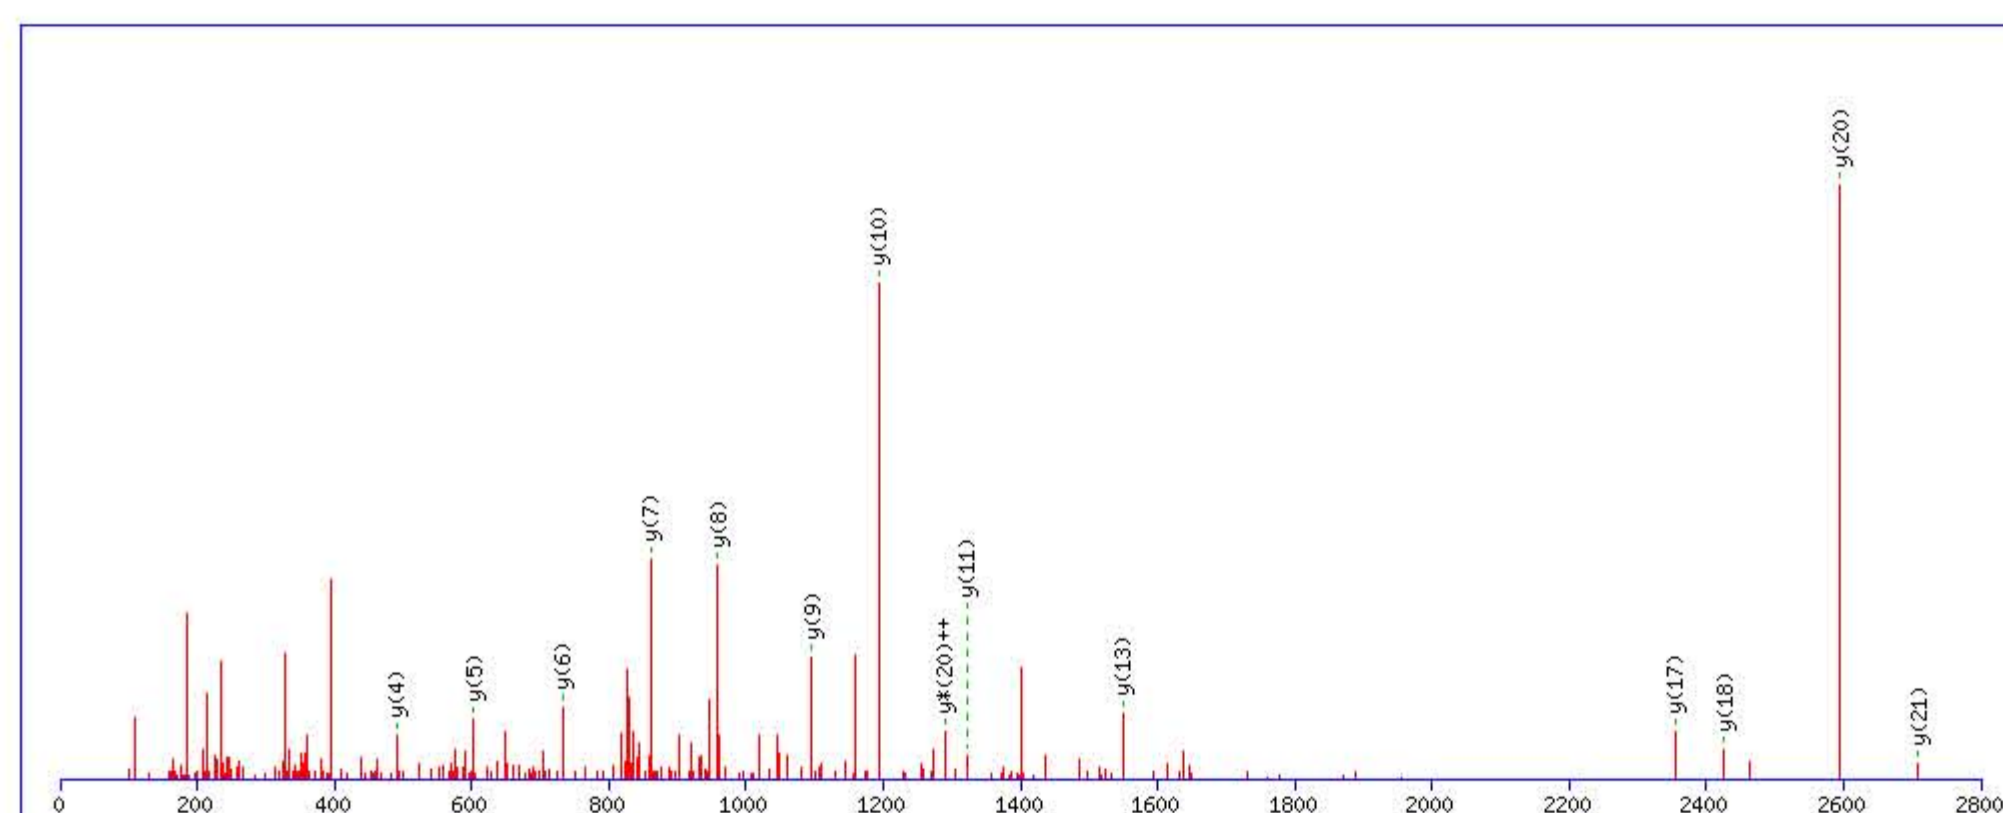

Monoisotopic mass of neutral peptide Mr(calc): 2806.479965

Fixed modifications: Carbamidomethyl (C) (apply to specified residues or termini only)

Variable modifications:

Q7 : Biotin:Thermo-21345 (Q)

Ions Score: 91 Expect: 4.8e-009

Matches : 14/224 fragment ions using 23 most intense peaks [\(help\)](#)

| #  | b           | b <sup>++</sup> | b <sup>*</sup> | b <sup>*++</sup> | b <sup>0</sup> | b <sup>0++</sup> | Seq. | y           | y <sup>++</sup> | y <sup>*</sup> | y <sup>*++</sup> | y <sup>0</sup> | y <sup>0++</sup> | #  |
|----|-------------|-----------------|----------------|------------------|----------------|------------------|------|-------------|-----------------|----------------|------------------|----------------|------------------|----|
| 1  | 100.075690  | 50.541483       |                |                  |                |                  | V    |             |                 |                |                  |                |                  | 22 |
| 2  | 213.159754  | 107.083515      |                |                  |                |                  | I    | 2708.418847 | 1354.713061     | 2691.392298    | 1346.199787      | 2690.408282    | 1345.707779      | 21 |
| 3  | 326.243818  | 163.625547      |                |                  |                |                  | L    | 2595.334783 | 1298.171029     | 2578.308234    | 1289.657755      | 2577.324218    | 1289.165747      | 20 |
| 4  | 383.265282  | 192.136279      |                |                  |                |                  | G    | 2482.250719 | 1241.628997     | 2465.224170    | 1233.115723      | 2464.240154    | 1232.623715      | 19 |
| 5  | 454.302396  | 227.654836      |                |                  |                |                  | A    | 2425.229255 | 1213.118265     | 2408.202706    | 1204.604991      | 2407.218690    | 1204.112983      | 18 |
| 6  | 591.361308  | 296.184292      |                |                  |                |                  | H    | 2354.192141 | 1177.599708     | 2337.165592    | 1169.086434      | 2336.181576    | 1168.594426      | 17 |
| 7  | 1030.586634 | 515.796955      | 1013.560085    | 507.283681       |                |                  | Q    | 2217.133229 | 1109.070252     | 2200.106680    | 1100.556978      | 2199.122664    | 1100.064970      | 16 |
| 8  | 1159.629227 | 580.318252      | 1142.602678    | 571.804977       | 1141.618662    | 571.312969       | E    | 1777.907903 | 889.457590      | 1760.881354    | 880.944315       | 1759.897338    | 880.452307       | 15 |
| 9  | 1258.697641 | 629.852459      | 1241.671092    | 621.339184       | 1240.687076    | 620.847176       | V    | 1648.865310 | 824.936293      | 1631.838761    | 816.423019       | 1630.854745    | 815.931011       | 14 |
| 10 | 1372.740568 | 686.873922      | 1355.714019    | 678.360648       | 1354.730003    | 677.868640       | N    | 1549.796896 | 775.402086      | 1532.770347    | 766.888812       | 1531.786331    | 766.396804       | 13 |
| 11 | 1485.824632 | 743.415954      | 1468.798083    | 734.902680       | 1467.814067    | 734.410672       | L    | 1435.753969 | 718.380623      | 1418.727420    | 709.867348       | 1417.743404    | 709.375340       | 12 |
| 12 | 1614.867225 | 807.937251      | 1597.840676    | 799.423976       | 1596.856660    | 798.931968       | E    | 1322.669905 | 661.838591      | 1305.643356    | 653.325316       | 1304.659340    | 652.833308       | 11 |
| 13 | 1711.919989 | 856.463633      | 1694.893440    | 847.950358       | 1693.909424    | 847.458350       | P    | 1193.627312 | 597.317294      | 1176.600763    | 588.804020       | 1175.616747    | 588.312012       | 10 |
| 14 | 1848.978901 | 924.993089      | 1831.952352    | 916.479814       | 1830.968336    | 915.987806       | H    | 1096.574548 | 548.790912      | 1079.547999    | 540.277638       | 1078.563983    | 539.785630       | 9  |
| 15 | 1948.047315 | 974.527296      | 1931.020766    | 966.014021       | 1930.036750    | 965.522013       | V    | 959.515636  | 480.261456      | 942.489087     | 471.748182       | 941.505071     | 471.256174       | 8  |
| 16 | 2076.105893 | 1038.556584     | 2059.079344    | 1030.043310      | 2058.095328    | 1029.551302      | Q    | 860.447222  | 430.727249      | 843.420673     | 422.213975       | 842.436657     | 421.721967       | 7  |
| 17 | 2205.148486 | 1103.077881     | 2188.121937    | 1094.564606      | 2187.137921    | 1094.072598      | E    | 732.388644  | 366.697960      | 715.362095     | 358.184686       | 714.378079     | 357.692678       | 6  |
| 18 | 2318.232550 | 1159.619913     | 2301.206001    | 1151.106638      | 2300.221985    | 1150.614631      | I    | 603.346051  | 302.176664      | 586.319502     | 293.663389       | 585.335486     | 293.171381       | 5  |
| 19 | 2447.275143 | 1224.141210     | 2430.248594    | 1215.627935      | 2429.264578    | 1215.135927      | E    | 490.261987  | 245.634631      | 473.235438     | 237.121357       | 472.251422     | 236.629349       | 4  |
| 20 | 2546.343557 | 1273.675417     | 2529.317008    | 1265.162142      | 2528.332992    | 1264.670134      | V    | 361.219394  | 181.113335      | 344.192845     | 172.600060       | 343.208829     | 172.108052       | 3  |
| 21 | 2633.375585 | 1317.191431     | 2616.349036    | 1308.678156      | 2615.365020    | 1308.186148      | S    | 262.150980  | 131.579128      | 245.124431     | 123.065854       | 244.140415     | 122.573846       | 2  |
| 22 |             |                 |                |                  |                |                  | R    | 175.118952  | 88.063114       | 158.092403     | 79.549839        |                |                  | 1  |

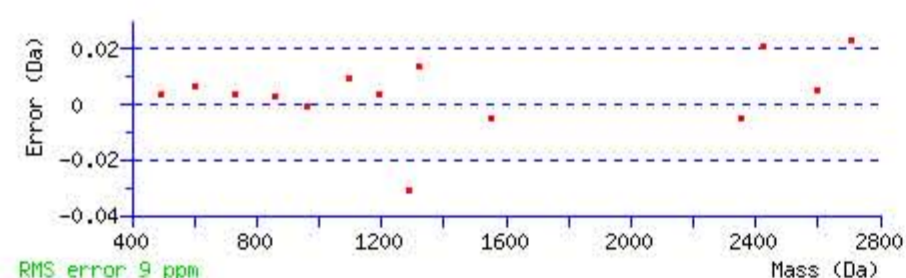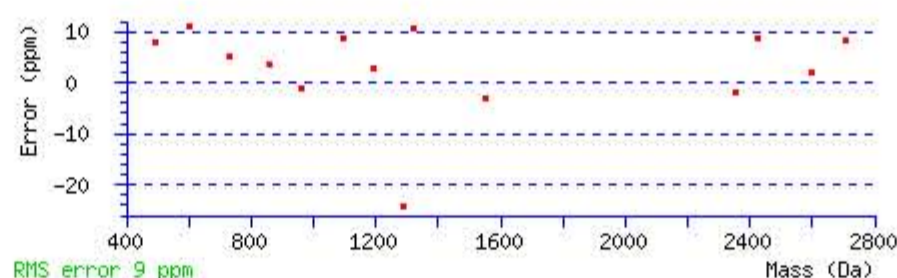

NCBI BLAST search of [VILGAHQEVNLEPHVQEIIVSR](#)

(Parameters: blastp, nr protein database, expect=20000, no filter, PAM30)

Other BLAST [web gateways](#)

## All matches to this query

| Score | Mr(calc):   | Delta     | Sequence                               |
|-------|-------------|-----------|----------------------------------------|
| 90.8  | 2806.479965 | 0.005611  | <a href="#">VILGAHQEVNLEPHVQEIIVSR</a> |
| 24.0  | 2806.479965 | 0.005611  | <a href="#">VILGAHQEVNLEPHVQEIIVSR</a> |
| 2.0   | 2806.516327 | -0.030751 | <a href="#">VLLGVIQELEKGEAHREGLSYR</a> |

# Mascot Search Results

## Peptide View

MS/MS Fragmentation of **TMSGLECAWDSQSPHAHGYPISK**  
 Found in **PLMN\_HUMAN**, Plasminogen OS=Homo sapiens GN=PLG PE=1 SV=2

Match to Query 56043: 2997.361296 from(750.347600,4+) rtinseconds(1985) index(4883)  
 Title: Locus:1.1.1.3243.13 File:"2013-07-02 CLN FXIII 60 min 3rd F 1.wiff"  
 Data file C:\Program Files (x86)\Matrix Science\Mascot Daemon\mgf6 FXIII 60 min 3rd\mascot\_daemon\_merge.mgf

Click mouse within plot area to zoom in by factor of two about that point  
 Or, Plot from  to  Da   
 Label all possible matches  Label matches used for scoring

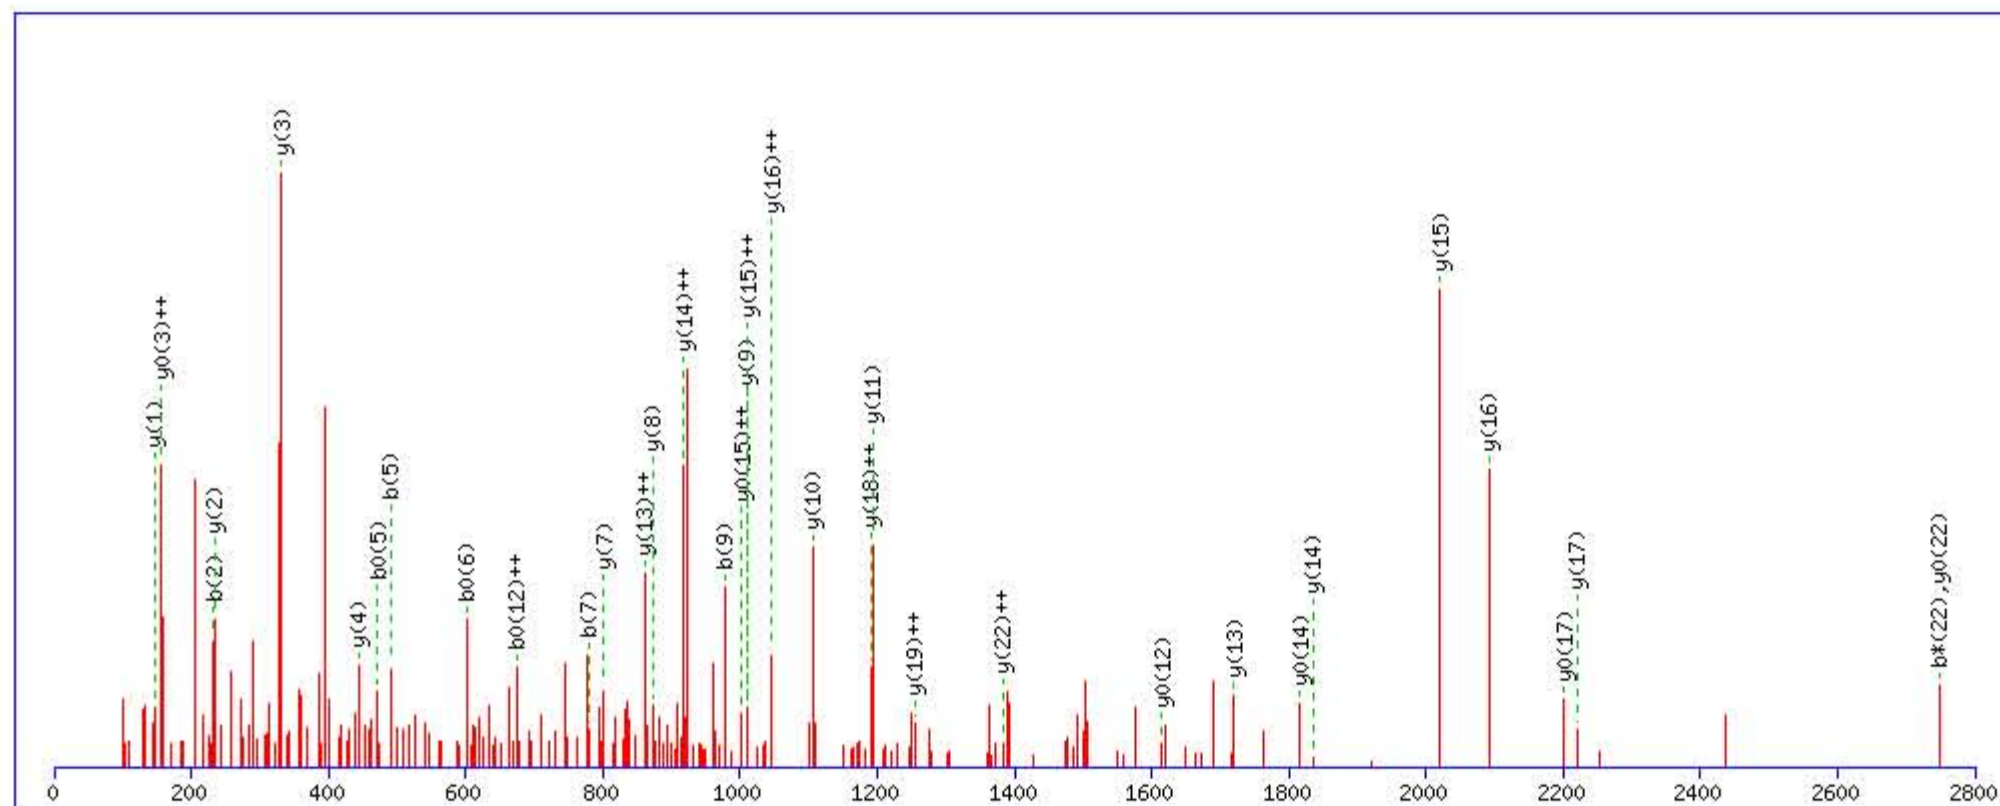

Monoisotopic mass of neutral peptide Mr(calcd): 2997.357162  
 Fixed modifications: Carbamidomethyl (C) (apply to specified residues or termini only)  
 Variable modifications:  
 Q13 : Biotin:Thermo-21345 (Q)  
 Ions Score: 48 Expect: 0.00017  
 Matches : 35/260 fragment ions using 94 most intense peaks [\(help\)](#)

| #  | b                 | b <sup>++</sup> | b <sup>+</sup>     | b <sup>+++</sup> | b <sup>0</sup>    | b <sup>0++</sup> | Seq. | y                  | y <sup>++</sup>    | y <sup>+</sup> | y <sup>+++</sup> | y <sup>0</sup>     | y <sup>0++</sup>   | #  |
|----|-------------------|-----------------|--------------------|------------------|-------------------|------------------|------|--------------------|--------------------|----------------|------------------|--------------------|--------------------|----|
| 1  | 102.054955        | 51.531116       |                    |                  | 84.044390         | 42.525833        | T    |                    |                    |                |                  |                    |                    | 24 |
| 2  | <b>233.095440</b> | 117.051358      |                    |                  | 215.084875        | 108.046076       | M    | 2897.316768        | 1449.162022        | 2880.290219    | 1440.648748      | 2879.306203        | 1440.156740        | 23 |
| 3  | 320.127468        | 160.567372      |                    |                  | 302.116903        | 151.562089       | S    | 2766.276283        | <b>1383.641780</b> | 2749.249734    | 1375.128505      | <b>2748.265718</b> | 1374.636497        | 22 |
| 4  | 377.148932        | 189.078104      |                    |                  | 359.138367        | 180.072821       | G    | 2679.244255        | 1340.125766        | 2662.217706    | 1331.612491      | 2661.233690        | 1331.120483        | 21 |
| 5  | <b>490.232996</b> | 245.620136      |                    |                  | <b>472.222431</b> | 236.614853       | L    | 2622.222791        | 1311.615034        | 2605.196242    | 1303.101759      | 2604.212226        | 1302.609751        | 20 |
| 6  | 619.275589        | 310.141433      |                    |                  | <b>601.265024</b> | 301.136150       | E    | 2509.138727        | <b>1255.073002</b> | 2492.112178    | 1246.559727      | 2491.128162        | 1246.067719        | 19 |
| 7  | <b>779.306238</b> | 390.156757      |                    |                  | 761.295673        | 381.151475       | C    | 2380.096134        | <b>1190.551705</b> | 2363.069585    | 1182.038431      | 2362.085569        | 1181.546423        | 18 |
| 8  | 907.364816        | 454.186046      | 890.338267         | 445.672772       | 889.354251        | 445.180764       | Q    | <b>2220.065485</b> | 1110.536381        | 2203.038936    | 1102.023106      | <b>2202.054920</b> | 1101.531098        | 17 |
| 9  | <b>978.401930</b> | 489.704603      | 961.375381         | 481.191329       | 960.391365        | 480.699321       | A    | <b>2092.006907</b> | <b>1046.507092</b> | 2074.980358    | 1037.993817      | 2073.996342        | 1037.501809        | 16 |
| 10 | 1164.481243       | 582.744260      | 1147.454694        | 574.230985       | 1146.470678       | 573.738977       | W    | <b>2020.969793</b> | <b>1010.988535</b> | 2003.943244    | 1002.475260      | 2002.959228        | <b>1001.983252</b> | 15 |
| 11 | 1279.508186       | 640.257731      | 1262.481637        | 631.744457       | 1261.497621       | 631.252449       | D    | <b>1834.890480</b> | <b>917.948878</b>  | 1817.863931    | 909.435604       | <b>1816.879915</b> | 908.943596         | 14 |
| 12 | 1366.540214       | 683.773745      | 1349.513665        | 675.260471       | 1348.529649       | 674.768463       | S    | <b>1719.863537</b> | <b>860.435407</b>  | 1702.836988    | 851.922132       | 1701.852972        | 851.430124         | 13 |
| 13 | 1805.765540       | 903.386408      | 1788.738991        | 894.873134       | 1787.754975       | 894.381126       | Q    | 1632.831509        | 816.919393         | 1615.804960    | 808.406118       | <b>1614.820944</b> | 807.914110         | 12 |
| 14 | 1892.797568       | 946.902422      | 1875.771019        | 938.389148       | 1874.787003       | 937.897140       | S    | <b>1193.606183</b> | 597.306730         | 1176.579634    | 588.793455       | 1175.595618        | 588.301447         | 11 |
| 15 | 1989.850332       | 995.428804      | 1972.823783        | 986.915530       | 1971.839767       | 986.423522       | P    | <b>1106.574155</b> | 553.790716         | 1089.547606    | 545.277441       | 1088.563590        | 544.785433         | 10 |
| 16 | 2126.909244       | 1063.958260     | 2109.882695        | 1055.444986      | 2108.898679       | 1054.952978      | H    | <b>1009.521391</b> | 505.264334         | 992.494842     | 496.751059       | 991.510826         | 496.259051         | 9  |
| 17 | 2197.946358       | 1099.476817     | 2180.919809        | 1090.963543      | 2179.935793       | 1090.471535      | A    | <b>872.462479</b>  | 436.734878         | 855.435930     | 428.221603       | 854.451914         | 427.729595         | 8  |
| 18 | 2335.005270       | 1168.006273     | 2317.978721        | 1159.492999      | 2316.994705       | 1159.000991      | H    | <b>801.425365</b>  | 401.216321         | 784.398816     | 392.703046       | 783.414800         | 392.211038         | 7  |
| 19 | 2392.026734       | 1196.517005     | 2375.000185        | 1188.003731      | 2374.016169       | 1187.511723      | G    | 664.366453         | 332.686865         | 647.339904     | 324.173590       | 646.355888         | 323.681582         | 6  |
| 20 | 2555.090063       | 1278.048670     | 2538.063514        | 1269.535395      | 2537.079498       | 1269.043387      | Y    | 607.344989         | 304.176133         | 590.318440     | 295.662858       | 589.334424         | 295.170850         | 5  |
| 21 | 2668.174127       | 1334.590702     | 2651.147578        | 1326.077427      | 2650.163562       | 1325.585419      | I    | <b>444.281660</b>  | 222.644468         | 427.255111     | 214.131194       | 426.271095         | 213.639186         | 4  |
| 22 | 2765.226891       | 1383.117084     | <b>2748.200342</b> | 1374.603809      | 2747.216326       | 1374.111801      | P    | <b>331.197596</b>  | 166.102436         | 314.171047     | 157.589162       | 313.187031         | <b>157.097154</b>  | 3  |
| 23 | 2852.258919       | 1426.633098     | 2835.232370        | 1418.119823      | 2834.248354       | 1417.627815      | S    | <b>234.144832</b>  | 117.576054         | 217.118283     | 109.062780       | 216.134267         | 108.570772         | 2  |
| 24 |                   |                 |                    |                  |                   |                  | K    | <b>147.112804</b>  | 74.060040          | 130.086255     | 65.546765        |                    |                    | 1  |

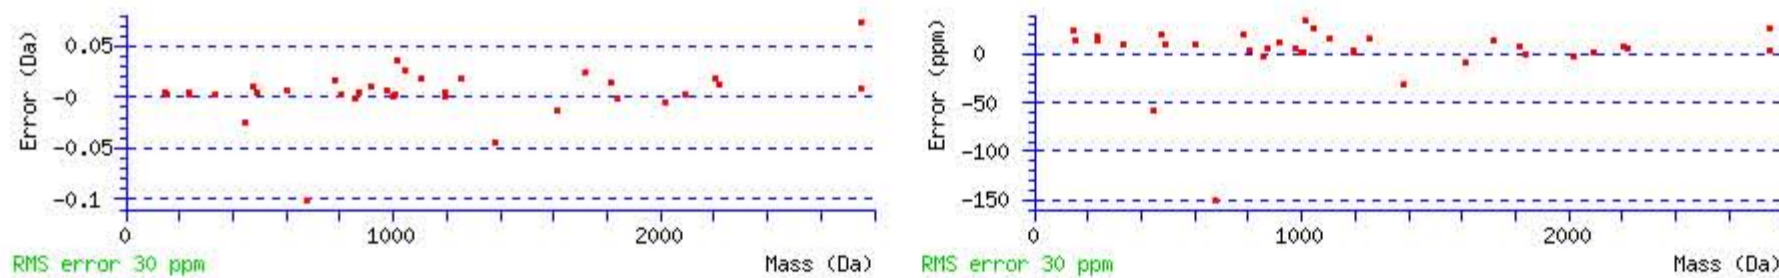

NCBI BLAST search of [TMSGLECAWDSQSPHAHGYPISK](#)  
 (Parameters: blastp, nr protein database, expect=20000, no filter, PAM30)  
 Other BLAST [web gateways](#)

## All matches to this query

| Score | Mr(calcd):  | Delta    | Sequence                                |
|-------|-------------|----------|-----------------------------------------|
| 48.0  | 2997.357162 | 0.004134 | <a href="#">TMSGLECAWDSQSPHAHGYPISK</a> |
| 15.2  | 2997.357162 | 0.004134 | <a href="#">TMSGLECAWDSQSPHAHGYPISK</a> |

# Mascot Search Results

## Peptide View

MS/MS Fragmentation of **GNVAVTVSGHTCQHWSAQTPHTHNR**

Found in **PLMN\_HUMAN**, Plasminogen OS=Homo sapiens GN=PLG PE=1 SV=2

Match to Query 56688: 3092.451220 from(619.497520,5+) rtinseconds(1441) index(59414)

Title: Locus:1.1.1.3127.21 File:"2013-07-02 CLN FXIII 60 min 3rd FT.wiff"

Data file C:\Program Files (x86)\Matrix Science\Mascot Daemon\mgf\6 FXIII 60 min 3rd\mascot\_daemon\_merge.mgf

Click mouse within plot area to zoom in by factor of two about that point

Or, Plot from  to  Da

Label all possible matches  Label matches used for scoring

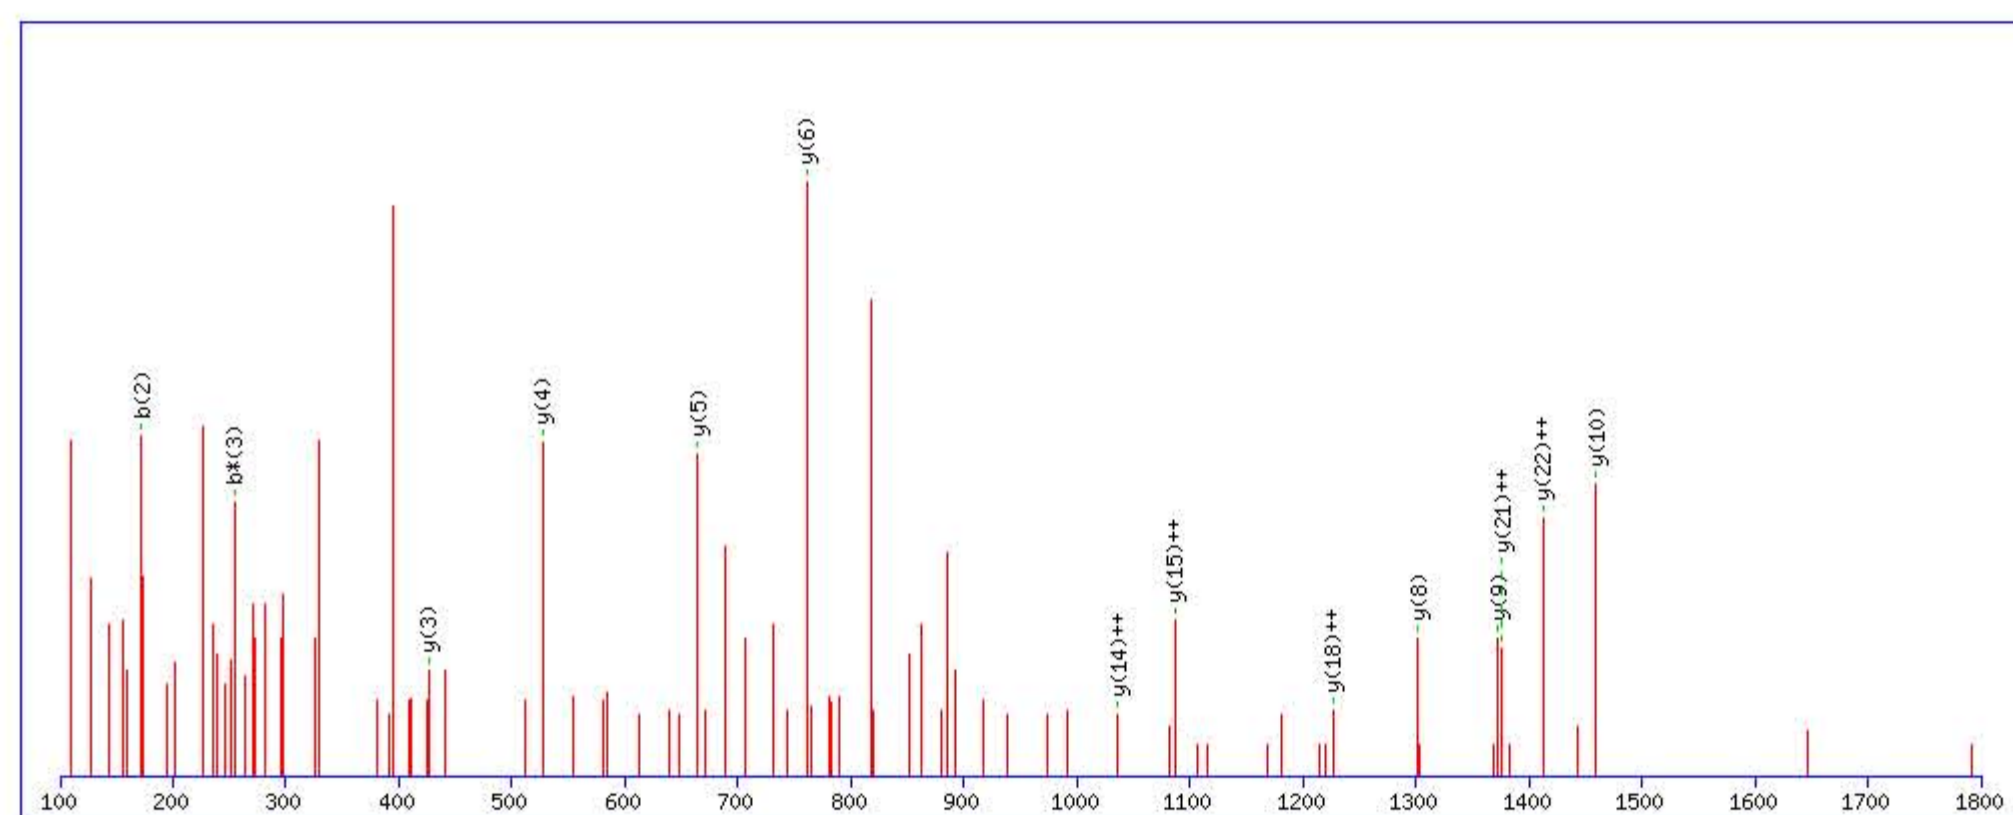

Monoisotopic mass of neutral peptide Mr(calc): 3092.457016

Fixed modifications: Carbamidomethyl (C) (apply to specified residues or termini only)

Variable modifications:

Q18 : Biotin:Thermo-21345 (Q)

Ions Score: 29 Expect: 0.021

Matches : 14/270 fragment ions using 30 most intense peaks [\(help\)](#)

| #  | b           | b <sup>++</sup> | b <sup>+</sup> | b <sup>+++</sup> | b <sup>0</sup> | b <sup>0++</sup> | Seq. | y           | y <sup>++</sup> | y <sup>+</sup> | y <sup>+++</sup> | y <sup>0</sup> | y <sup>0++</sup> | #  |
|----|-------------|-----------------|----------------|------------------|----------------|------------------|------|-------------|-----------------|----------------|------------------|----------------|------------------|----|
| 1  | 58.028740   | 29.518008       |                |                  |                |                  | G    |             |                 |                |                  |                |                  | 25 |
| 2  | 172.071667  | 86.539471       | 155.045118     | 78.026197        |                |                  | N    | 3036.442790 | 1518.725033     | 3019.416241    | 1510.211758      | 3018.432225    | 1509.719750      | 24 |
| 3  | 271.140081  | 136.073679      | 254.113532     | 127.560404       |                |                  | V    | 2922.399863 | 1461.703569     | 2905.373314    | 1453.190295      | 2904.389298    | 1452.698287      | 23 |
| 4  | 342.177195  | 171.592236      | 325.150646     | 163.078961       |                |                  | A    | 2823.331449 | 1412.169362     | 2806.304900    | 1403.656088      | 2805.320884    | 1403.164080      | 22 |
| 5  | 441.245609  | 221.126443      | 424.219060     | 212.613168       |                |                  | V    | 2752.294335 | 1376.650805     | 2735.267786    | 1368.137531      | 2734.283770    | 1367.645523      | 21 |
| 6  | 542.293288  | 271.650282      | 525.266739     | 263.137008       | 524.282723     | 262.645000       | T    | 2653.225921 | 1327.116598     | 2636.199372    | 1318.603324      | 2635.215356    | 1318.111316      | 20 |
| 7  | 641.361702  | 321.184489      | 624.335153     | 312.671215       | 623.351137     | 312.179207       | V    | 2552.178242 | 1276.592759     | 2535.151693    | 1268.079484      | 2534.167677    | 1267.587476      | 19 |
| 8  | 728.393730  | 364.700503      | 711.367181     | 356.187229       | 710.383165     | 355.695221       | S    | 2453.109828 | 1227.058552     | 2436.083279    | 1218.545277      | 2435.099263    | 1218.053269      | 18 |
| 9  | 785.415194  | 393.211235      | 768.388645     | 384.697961       | 767.404629     | 384.205953       | G    | 2366.077800 | 1183.542538     | 2349.051251    | 1175.029263      | 2348.067235    | 1174.537255      | 17 |
| 10 | 922.474106  | 461.740691      | 905.447557     | 453.227417       | 904.463541     | 452.735409       | H    | 2309.056336 | 1155.031806     | 2292.029787    | 1146.518531      | 2291.045771    | 1146.026523      | 16 |
| 11 | 1023.521785 | 512.264530      | 1006.495236    | 503.751256       | 1005.511220    | 503.259248       | T    | 2171.997424 | 1086.502350     | 2154.970875    | 1077.989075      | 2153.986859    | 1077.497067      | 15 |
| 12 | 1183.552434 | 592.279855      | 1166.525885    | 583.766581       | 1165.541869    | 583.274572       | C    | 2070.949745 | 1035.978510     | 2053.923196    | 1027.465236      | 2052.939180    | 1026.973228      | 14 |
| 13 | 1311.611012 | 656.309144      | 1294.584463    | 647.795870       | 1293.600447    | 647.303862       | Q    | 1910.919096 | 955.963186      | 1893.892547    | 947.449911       | 1892.908531    | 946.957903       | 13 |
| 14 | 1448.669924 | 724.838600      | 1431.643375    | 716.325326       | 1430.659359    | 715.833318       | H    | 1782.860518 | 891.933897      | 1765.833969    | 883.420622       | 1764.849953    | 882.928614       | 12 |
| 15 | 1634.749237 | 817.878257      | 1617.722688    | 809.364982       | 1616.738672    | 808.872974       | W    | 1645.801606 | 823.404441      | 1628.775057    | 814.891166       | 1627.791041    | 814.399158       | 11 |
| 16 | 1721.781265 | 861.394271      | 1704.754716    | 852.880996       | 1703.770700    | 852.388988       | S    | 1459.722293 | 730.364784      | 1442.695744    | 721.851510       | 1441.711728    | 721.359502       | 10 |
| 17 | 1792.818379 | 896.912828      | 1775.791830    | 888.399553       | 1774.807814    | 887.907545       | A    | 1372.690265 | 686.848770      | 1355.663716    | 678.335496       | 1354.679700    | 677.843488       | 9  |
| 18 | 2232.043705 | 1116.525490     | 2215.017156    | 1108.012216      | 2214.033140    | 1107.520208      | Q    | 1301.653151 | 651.330213      | 1284.626602    | 642.816939       | 1283.642586    | 642.324931       | 8  |
| 19 | 2333.091384 | 1167.049330     | 2316.064835    | 1158.536055      | 2315.080819    | 1158.044047      | T    | 862.427825  | 431.717550      | 845.401276     | 423.204276       | 844.417260     | 422.712268       | 7  |
| 20 | 2430.144148 | 1215.575712     | 2413.117599    | 1207.062437      | 2412.133583    | 1206.570429      | P    | 761.380146  | 381.193711      | 744.353597     | 372.680436       | 743.369581     | 372.188428       | 6  |
| 21 | 2567.203060 | 1284.105168     | 2550.176511    | 1275.591893      | 2549.192495    | 1275.099885      | H    | 664.327382  | 332.667329      | 647.300833     | 324.154054       | 646.316817     | 323.662046       | 5  |
| 22 | 2668.250739 | 1334.629007     | 2651.224190    | 1326.115733      | 2650.240174    | 1325.623725      | T    | 527.268470  | 264.137873      | 510.241921     | 255.624598       | 509.257905     | 255.132590       | 4  |
| 23 | 2805.309651 | 1403.158463     | 2788.283102    | 1394.645189      | 2787.299086    | 1394.153181      | H    | 426.220791  | 213.614033      | 409.194242     | 205.100759       |                |                  | 3  |
| 24 | 2919.352578 | 1460.179927     | 2902.326029    | 1451.666652      | 2901.342013    | 1451.174644      | N    | 289.161879  | 145.084577      | 272.135330     | 136.571303       |                |                  | 2  |
| 25 |             |                 |                |                  |                |                  | R    | 175.118952  | 88.063114       | 158.092403     | 79.549839        |                |                  | 1  |

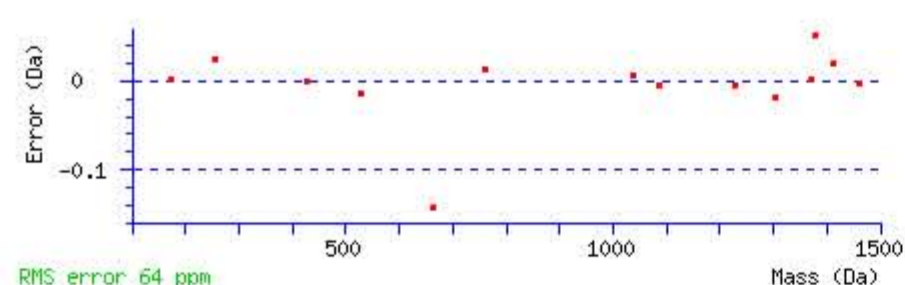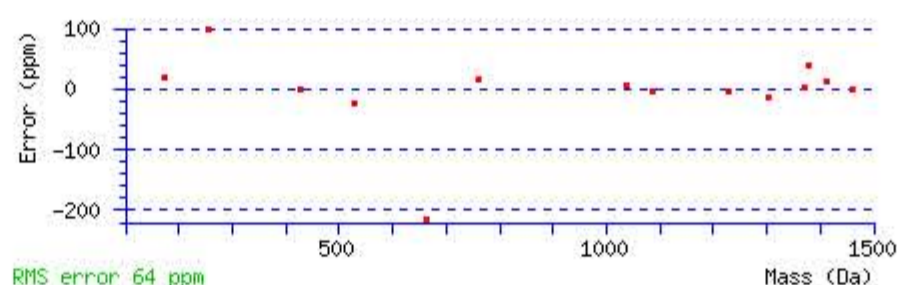

NCBI BLAST search of [GNVAVTVSGHTCQHWSAQTPHTHNR](#)

(Parameters: blastp, nr protein database, expect=20000, no filter, PAM30)

Other BLAST [web gateways](#)

All matches to this query

| Score | Mr(calc):   | Delta     | Sequence                                  |
|-------|-------------|-----------|-------------------------------------------|
| 29.1  | 3092.457016 | -0.005796 | <a href="#">GNVAVTVSGHTCQHWSAQTPHTHNR</a> |
| 12.4  | 3092.457016 | -0.005796 | <a href="#">GNVAVTVSGHTCQHWSAQTPHTHNR</a> |

Mascot: <http://www.matrixscience.com/>

# MASCOT Search Results

## Peptide View

MS/MS Fragmentation of **GNVAVTVSGHTCQHWSAQTPHTHNR**  
 Found in **PLMN\_HUMAN**, Plasminogen OS=Homo sapiens GN=PLG PE=1 SV=2

Match to Query 56693: 3092.453244 from(516.416150,6+) rtinseconds(1486) index(59755)  
 Title: Locus:1.1.1.3143.14 File:"2013-07-02 CLN FXIII 60 min 3rd FT.wiff"  
 Data file C:\Program Files (x86)\Matrix Science\Mascot Daemon\mgf6 FXIII 60 min 3rd\mascot\_daemon\_merge.mgf

Click mouse within plot area to zoom in by factor of two about that point  
 Or, Plot from 0 to 2800 Da Full range  
 Label all possible matches  Label matches used for scoring

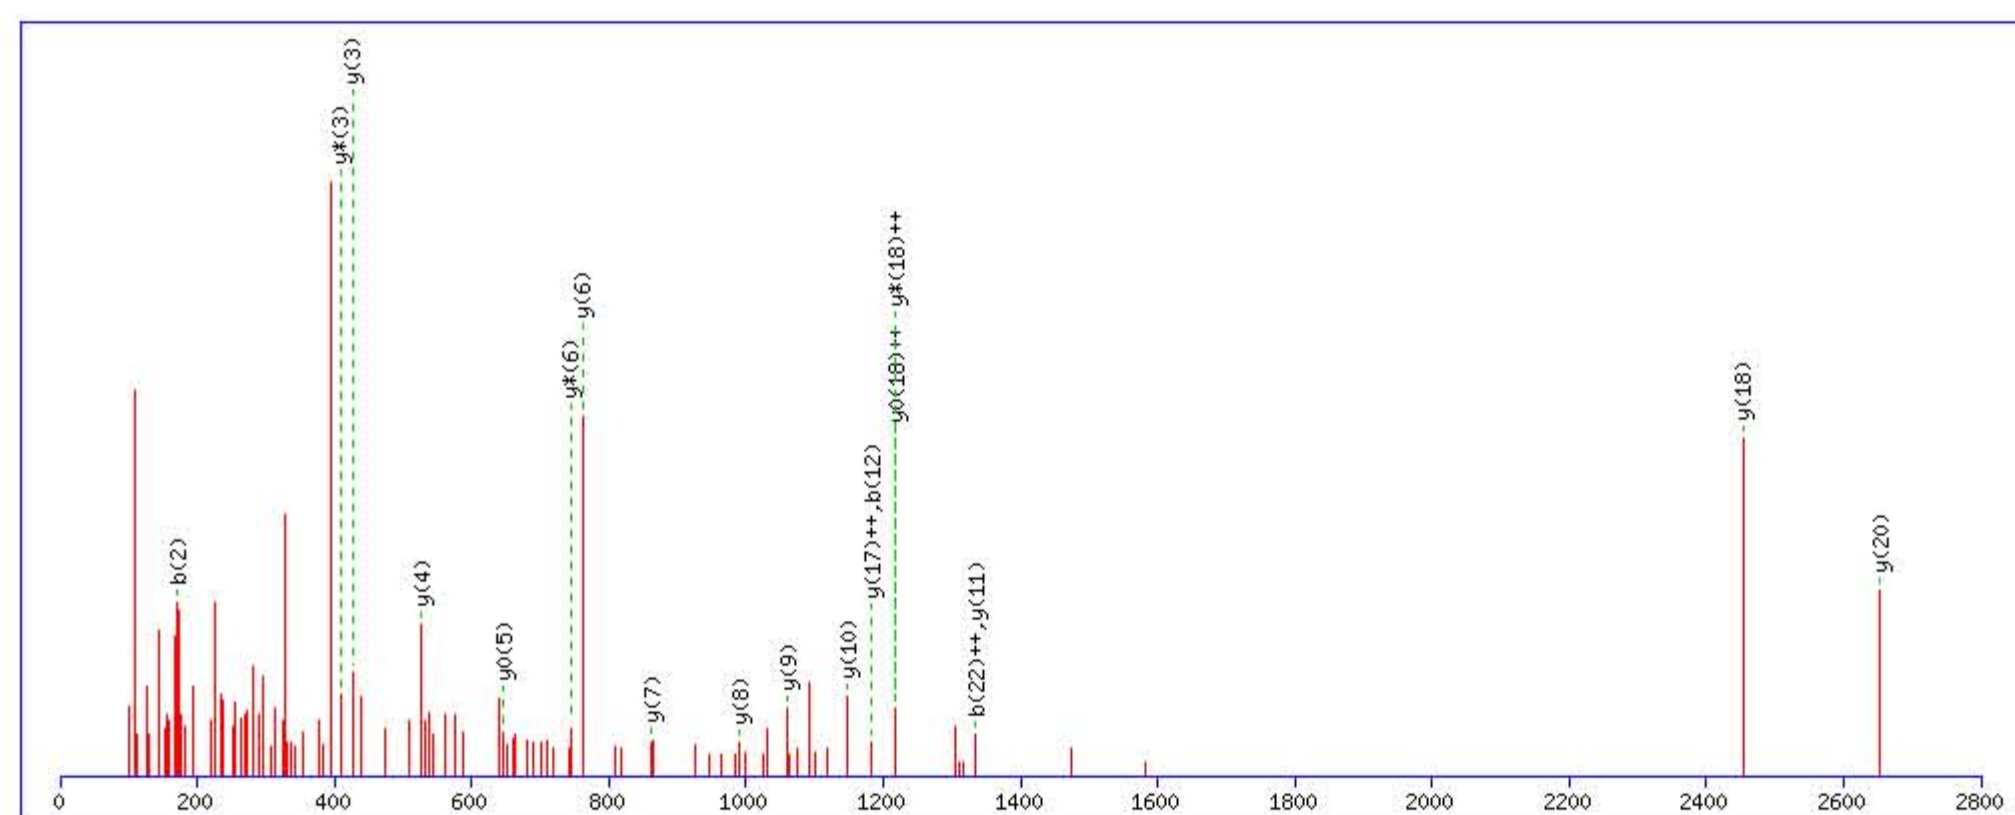

Monoisotopic mass of neutral peptide Mr(calc): 3092.457016  
 Fixed modifications: Carbamidomethyl (C) (apply to specified residues or termini only)  
 Variable modifications:  
 Q13 : Biotin:Thermo-21345 (Q)  
 Ions Score: 51 Expect: 0.00013  
 Matches : 19/270 fragment ions using 30 most intense peaks [\(help\)](#)

| #  | b                  | b <sup>++</sup>    | b <sup>+</sup> | b <sup>+++</sup> | b <sup>0</sup> | b <sup>0++</sup> | Seq. | y                  | y <sup>++</sup>    | y <sup>+</sup>    | y <sup>+++</sup>   | y <sup>0</sup>    | y <sup>0++</sup>   | #  |
|----|--------------------|--------------------|----------------|------------------|----------------|------------------|------|--------------------|--------------------|-------------------|--------------------|-------------------|--------------------|----|
| 1  | 58.028740          | 29.518008          |                |                  |                |                  | G    |                    |                    |                   |                    |                   |                    | 25 |
| 2  | <b>172.071667</b>  | 86.539471          | 155.045118     | 78.026197        |                |                  | N    | 3036.442790        | 1518.725033        | 3019.416241       | 1510.211758        | 3018.432225       | 1509.719750        | 24 |
| 3  | 271.140081         | 136.073679         | 254.113532     | 127.560404       |                |                  | V    | 2922.399863        | 1461.703569        | 2905.373314       | 1453.190295        | 2904.389298       | 1452.698287        | 23 |
| 4  | 342.177195         | 171.592236         | 325.150646     | 163.078961       |                |                  | A    | 2823.331449        | 1412.169362        | 2806.304900       | 1403.656088        | 2805.320884       | 1403.164080        | 22 |
| 5  | 441.245609         | 221.126443         | 424.219060     | 212.613168       |                |                  | V    | 2752.294335        | 1376.650805        | 2735.267786       | 1368.137531        | 2734.283770       | 1367.645523        | 21 |
| 6  | 542.293288         | 271.650282         | 525.266739     | 263.137008       | 524.282723     | 262.645000       | T    | <b>2653.225921</b> | 1327.116598        | 2636.199372       | 1318.603324        | 2635.215356       | 1318.111316        | 20 |
| 7  | 641.361702         | 321.184489         | 624.335153     | 312.671215       | 623.351137     | 312.179207       | V    | 2552.178242        | 1276.592759        | 2535.151693       | 1268.079484        | 2534.167677       | 1267.587476        | 19 |
| 8  | 728.393730         | 364.700503         | 711.367181     | 356.187229       | 710.383165     | 355.695221       | S    | <b>2453.109828</b> | 1227.058552        | 2436.083279       | <b>1218.545277</b> | 2435.099263       | <b>1218.053269</b> | 18 |
| 9  | 785.415194         | 393.211235         | 768.388645     | 384.697961       | 767.404629     | 384.205953       | G    | 2366.077800        | <b>1183.542538</b> | 2349.051251       | 1175.029263        | 2348.067235       | 1174.537255        | 17 |
| 10 | 922.474106         | 461.740691         | 905.447557     | 453.227417       | 904.463541     | 452.735409       | H    | 2309.056336        | 1155.031806        | 2292.029787       | 1146.518531        | 2291.045771       | 1146.026523        | 16 |
| 11 | 1023.521785        | 512.264530         | 1006.495236    | 503.751256       | 1005.511220    | 503.259248       | T    | 2171.997424        | 1086.502350        | 2154.970875       | 1077.989075        | 2153.986859       | 1077.497067        | 15 |
| 12 | <b>1183.552434</b> | 592.279855         | 1166.525885    | 583.766581       | 1165.541869    | 583.274572       | C    | 2070.949745        | 1035.978510        | 2053.923196       | 1027.465236        | 2052.939180       | 1026.973228        | 14 |
| 13 | 1622.777760        | 811.892518         | 1605.751211    | 803.379244       | 1604.767195    | 802.887236       | Q    | 1910.919096        | 955.963186         | 1893.892547       | 947.449911         | 1892.908531       | 946.957903         | 13 |
| 14 | 1759.836672        | 880.421974         | 1742.810123    | 871.908700       | 1741.826107    | 871.416692       | H    | 1471.693770        | 736.350523         | 1454.667221       | 727.837248         | 1453.683205       | 727.345240         | 12 |
| 15 | 1945.915985        | 973.461631         | 1928.889436    | 964.948356       | 1927.905420    | 964.456348       | W    | <b>1334.634858</b> | 667.821067         | 1317.608309       | 659.307792         | 1316.624293       | 658.815784         | 11 |
| 16 | 2032.948013        | 1016.977645        | 2015.921464    | 1008.464370      | 2014.937448    | 1007.972362      | S    | <b>1148.555545</b> | 574.781410         | 1131.528996       | 566.268136         | 1130.544980       | 565.776128         | 10 |
| 17 | 2103.985127        | 1052.496201        | 2086.958578    | 1043.982927      | 2085.974562    | 1043.490919      | A    | <b>1061.523517</b> | 531.265396         | 1044.496968       | 522.752122         | 1043.512952       | 522.260114         | 9  |
| 18 | 2232.043705        | 1116.525490        | 2215.017156    | 1108.012216      | 2214.033140    | 1107.520208      | Q    | <b>990.486403</b>  | 495.746839         | 973.459854        | 487.233565         | 972.475838        | 486.741557         | 8  |
| 19 | 2333.091384        | 1167.049330        | 2316.064835    | 1158.536055      | 2315.080819    | 1158.044047      | T    | <b>862.427825</b>  | 431.717550         | 845.401276        | 423.204276         | 844.417260        | 422.712268         | 7  |
| 20 | 2430.144148        | 1215.575712        | 2413.117599    | 1207.062437      | 2412.133583    | 1206.570429      | P    | <b>761.380146</b>  | 381.193711         | <b>744.353597</b> | 372.680436         | 743.369581        | 372.188428         | 6  |
| 21 | 2567.203060        | 1284.105168        | 2550.176511    | 1275.591893      | 2549.192495    | 1275.099885      | H    | 664.327382         | 332.667329         | 647.300833        | 324.154054         | <b>646.316817</b> | 323.662046         | 5  |
| 22 | 2668.250739        | <b>1334.629007</b> | 2651.224190    | 1326.115733      | 2650.240174    | 1325.623725      | T    | <b>527.268470</b>  | 264.137873         | 510.241921        | 255.624598         | 509.257905        | 255.132590         | 4  |
| 23 | 2805.309651        | 1403.158463        | 2788.283102    | 1394.645189      | 2787.299086    | 1394.153181      | H    | <b>426.220791</b>  | 213.614033         | <b>409.194242</b> | 205.100759         |                   |                    | 3  |
| 24 | 2919.352578        | 1460.179927        | 2902.326029    | 1451.666652      | 2901.342013    | 1451.174644      | N    | 289.161879         | 145.084577         | 272.135330        | 136.571303         |                   |                    | 2  |
| 25 |                    |                    |                |                  |                |                  | R    | 175.118952         | 88.063114          | 158.092403        | 79.549839          |                   |                    | 1  |

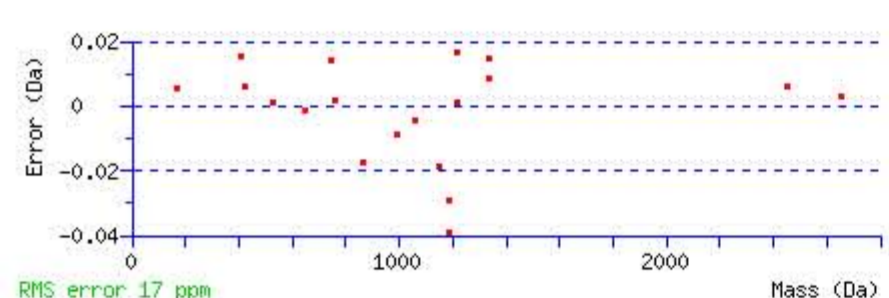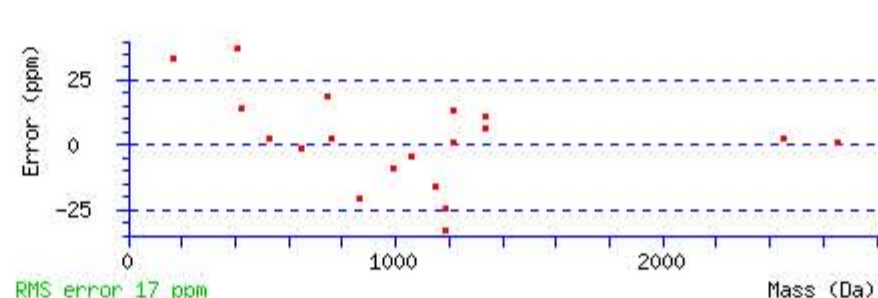

NCBI BLAST search of **GNVAVTVSGHTCQHWSAQTPHTHNR**  
 (Parameters: blastp, nr protein database, expect=20000, no filter, PAM30)  
 Other BLAST [web gateways](#)

### All matches to this query

| Score | Mr(calc):   | Delta     | Sequence                                  |
|-------|-------------|-----------|-------------------------------------------|
| 51.3  | 3092.457016 | -0.003772 | <a href="#">GNVAVTVSGHTCQHWSAQTPHTHNR</a> |
| 16.0  | 3092.457016 | -0.003772 | <a href="#">GNVAVTVSGHTCQHWSAQTPHTHNR</a> |

# MASCOT Search Results

## Peptide View

MS/MS Fragmentation of **LYDYCDVPQCAAPSFDCGKQPVEPK**

Found in **PLMN\_HUMAN**, Plasminogen OS=Homo sapiens GN=PLG PE=1 SV=2

Match to Query 59426: 3254.463376 from(814.623120,4+) rtinseconds(2111) index(63177)

Title: Locus:1.1.1.3361.19 File:"2013-07-02 CLN FXIII 60 min 3rd FT.wiff"

Data file C:\Program Files (x86)\Matrix Science\Mascot Daemon\mgf6 FXIII 60 min 3rd\mascot\_daemon\_merge.mgf

Click mouse within plot area to zoom in by factor of two about that point

Or, Plot from 0 to 2600 Da Full range

Label all possible matches  Label matches used for scoring

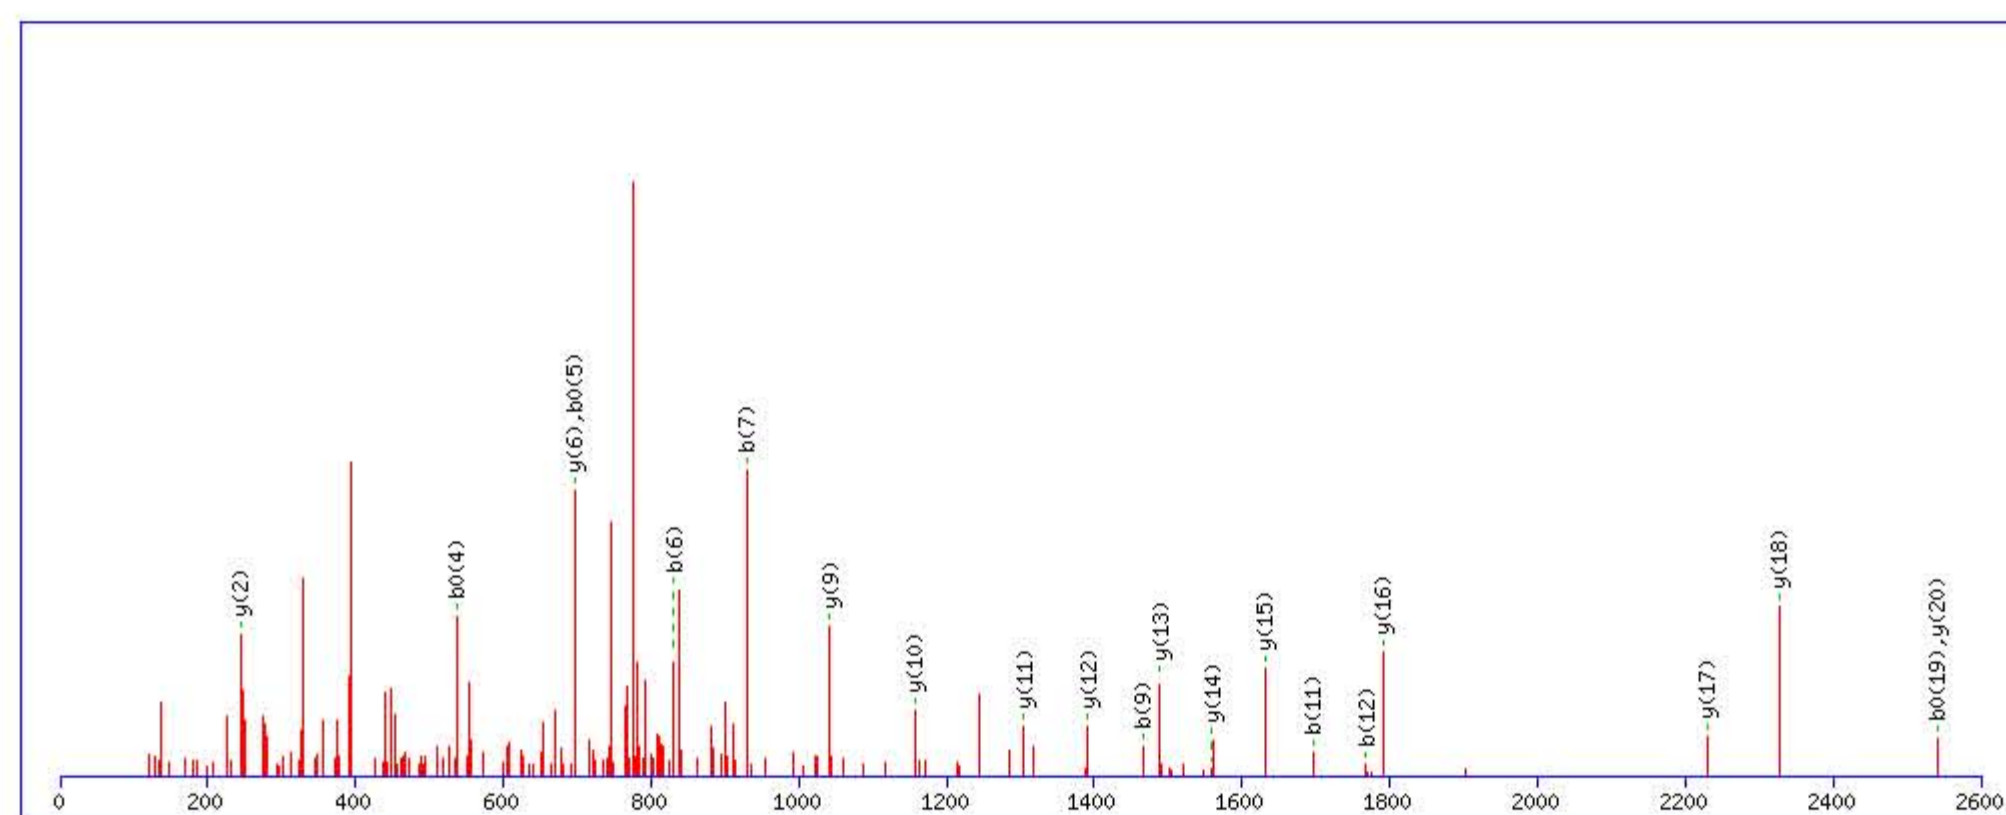

Monoisotopic mass of neutral peptide Mr(calc): 3254.454514

Fixed modifications: Carbamidomethyl (C) (apply to specified residues or termini only)

Variable modifications:

Q9 : Biotin:Thermo-21345 (Q)

Ions Score: 67 Expect: 1.9e-006

Matches : 21/264 fragment ions using 38 most intense peaks [\(help\)](#)

| #  | b           | b <sup>++</sup> | b <sup>+</sup> | b <sup>+++</sup> | b <sup>0</sup> | b <sup>0++</sup> | Seq. | y           | y <sup>++</sup> | y <sup>+</sup> | y <sup>+++</sup> | y <sup>0</sup> | y <sup>0++</sup> | #  |
|----|-------------|-----------------|----------------|------------------|----------------|------------------|------|-------------|-----------------|----------------|------------------|----------------|------------------|----|
| 1  | 114.091340  | 57.549308       |                |                  |                |                  | L    |             |                 |                |                  |                |                  | 25 |
| 2  | 277.154669  | 139.080973      |                |                  |                |                  | Y    | 3142.377716 | 1571.692496     | 3125.351167    | 1563.179221      | 3124.367151    | 1562.687213      | 24 |
| 3  | 392.181612  | 196.594444      |                |                  | 374.171047     | 187.589162       | D    | 2979.314387 | 1490.160831     | 2962.287838    | 1481.647557      | 2961.303822    | 1481.155549      | 23 |
| 4  | 555.244941  | 278.126109      |                |                  | 537.234376     | 269.120826       | Y    | 2864.287444 | 1432.647360     | 2847.260895    | 1424.134085      | 2846.276879    | 1423.642077      | 22 |
| 5  | 715.275590  | 358.141433      |                |                  | 697.265025     | 349.136151       | C    | 2701.224115 | 1351.115695     | 2684.197566    | 1342.602421      | 2683.213550    | 1342.110413      | 21 |
| 6  | 830.302533  | 415.654905      |                |                  | 812.291968     | 406.649622       | D    | 2541.193466 | 1271.100371     | 2524.166917    | 1262.587096      | 2523.182901    | 1262.095088      | 20 |
| 7  | 929.370947  | 465.189112      |                |                  | 911.360382     | 456.183829       | V    | 2426.166523 | 1213.586899     | 2409.139974    | 1205.073625      | 2408.155958    | 1204.581617      | 19 |
| 8  | 1026.423711 | 513.715494      |                |                  | 1008.413146    | 504.710211       | P    | 2327.098109 | 1164.052692     | 2310.071560    | 1155.539418      | 2309.087544    | 1155.047410      | 18 |
| 9  | 1465.649037 | 733.328157      | 1448.622488    | 724.814882       | 1447.638472    | 724.322874       | Q    | 2230.045345 | 1115.526310     | 2213.018796    | 1107.013036      | 2212.034780    | 1106.521028      | 17 |
| 10 | 1625.679686 | 813.343481      | 1608.653137    | 804.830207       | 1607.669121    | 804.338199       | C    | 1790.820019 | 895.913648      | 1773.793470    | 887.400373       | 1772.809454    | 886.908365       | 16 |
| 11 | 1696.716800 | 848.862038      | 1679.690251    | 840.348764       | 1678.706235    | 839.856756       | A    | 1630.789370 | 815.898323      | 1613.762821    | 807.385049       | 1612.778805    | 806.893040       | 15 |
| 12 | 1767.753914 | 884.380595      | 1750.727365    | 875.867321       | 1749.743349    | 875.375313       | A    | 1559.752256 | 780.379766      | 1542.725707    | 771.866492       | 1541.741691    | 771.374484       | 14 |
| 13 | 1864.806678 | 932.906977      | 1847.780129    | 924.393703       | 1846.796113    | 923.901695       | P    | 1488.715142 | 744.861209      | 1471.688593    | 736.347935       | 1470.704577    | 735.855927       | 13 |
| 14 | 1951.838706 | 976.422991      | 1934.812157    | 967.909717       | 1933.828141    | 967.417709       | S    | 1391.662378 | 696.334827      | 1374.635829    | 687.821553       | 1373.651813    | 687.329545       | 12 |
| 15 | 2098.907120 | 1049.957198     | 2081.880571    | 1041.443924      | 2080.896555    | 1040.951916      | F    | 1304.630350 | 652.818813      | 1287.603801    | 644.305539       | 1286.619785    | 643.813530       | 11 |
| 16 | 2213.934063 | 1107.470670     | 2196.907514    | 1098.957395      | 2195.923498    | 1098.465387      | D    | 1157.561936 | 579.284606      | 1140.535387    | 570.771331       | 1139.551371    | 570.279323       | 10 |
| 17 | 2373.964712 | 1187.485994     | 2356.938163    | 1178.972719      | 2355.954147    | 1178.480711      | C    | 1042.534993 | 521.771135      | 1025.508444    | 513.257860       | 1024.524428    | 512.765852       | 9  |
| 18 | 2430.986176 | 1215.996726     | 2413.959627    | 1207.483451      | 2412.975611    | 1206.991443      | G    | 882.504344  | 441.755810      | 865.477795     | 433.242536       | 864.493779     | 432.750528       | 8  |
| 19 | 2559.081139 | 1280.044207     | 2542.054590    | 1271.530933      | 2541.070574    | 1271.038925      | K    | 825.482880  | 413.245078      | 808.456331     | 404.731804       | 807.472315     | 404.239796       | 7  |
| 20 | 2656.133903 | 1328.570589     | 2639.107354    | 1320.057315      | 2638.123338    | 1319.565307      | P    | 697.387917  | 349.197597      | 680.361368     | 340.684322       | 679.377352     | 340.192314       | 6  |
| 21 | 2784.192481 | 1392.599878     | 2767.165932    | 1384.086604      | 2766.181916    | 1383.594596      | Q    | 600.335153  | 300.671215      | 583.308604     | 292.157940       | 582.324588     | 291.665932       | 5  |
| 22 | 2883.260895 | 1442.134085     | 2866.234346    | 1433.620811      | 2865.250330    | 1433.128803      | V    | 472.276575  | 236.641925      | 455.250026     | 228.128651       | 454.266010     | 227.636643       | 4  |
| 23 | 3012.303488 | 1506.655382     | 2995.276939    | 1498.142107      | 2994.292923    | 1497.650099      | E    | 373.208161  | 187.107719      | 356.181612     | 178.594444       | 355.197596     | 178.102436       | 3  |
| 24 | 3109.356252 | 1555.181764     | 3092.329703    | 1546.668489      | 3091.345687    | 1546.176481      | P    | 244.165568  | 122.586422      | 227.139019     | 114.073148       |                |                  | 2  |
| 25 |             |                 |                |                  |                |                  | K    | 147.112804  | 74.060040       | 130.086255     | 65.546765        |                |                  | 1  |

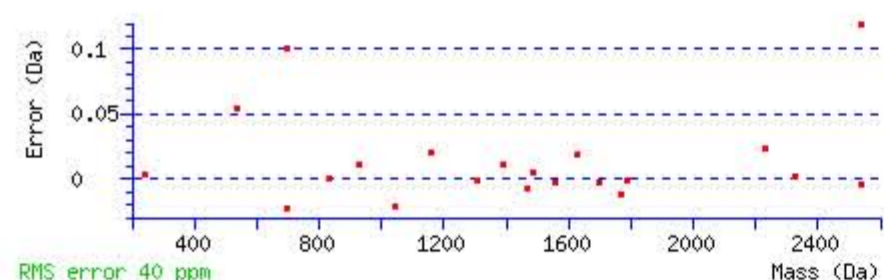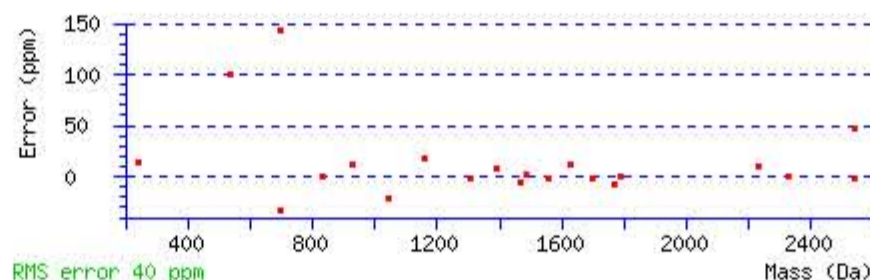

NCBI BLAST search of **LYDYCDVPQCAAPSFDCGKQPVEPK**

(Parameters: blastp, nr protein database, expect=20000, no filter, PAM30)

Other BLAST [web gateways](#)

## All matches to this query

| Score | Mr(calc):   | Delta    | Sequence                                  |
|-------|-------------|----------|-------------------------------------------|
| 66.7  | 3254.454514 | 0.008862 | <a href="#">LYDYCDVPQCAAPSFDCGKQPVEPK</a> |
| 6.5   | 3254.454514 | 0.008862 | <a href="#">LYDYCDVPQCAAPSFDCGKQPVEPK</a> |

# **MASCOT** Mascot Search Results

## Peptide View

MS/MS Fragmentation of **KLYDYCDVPQCAAPSFDCGKPKQVEPK**  
 Found in **PLMN\_HUMAN**, Plasminogen OS=Homo sapiens GN=PLG PE=1 SV=2

Match to Query 60573: 3382.550456 from(846.644890,4+) rtinseconds(1968) index(62301)  
 Title: Locus:1.1.1.3311.25 File:"2013-07-02 CLN FXIII 60 min 3rd FT.wiff"  
 Data file C:\Program Files (x86)\Matrix Science\Mascot Daemon\mgf6 FXIII 60 min 3rd\mascot\_daemon\_merge.mgf

Click mouse within plot area to zoom in by factor of two about that point  
 Or, Plot from  to  Da   
 Label all possible matches  Label matches used for scoring

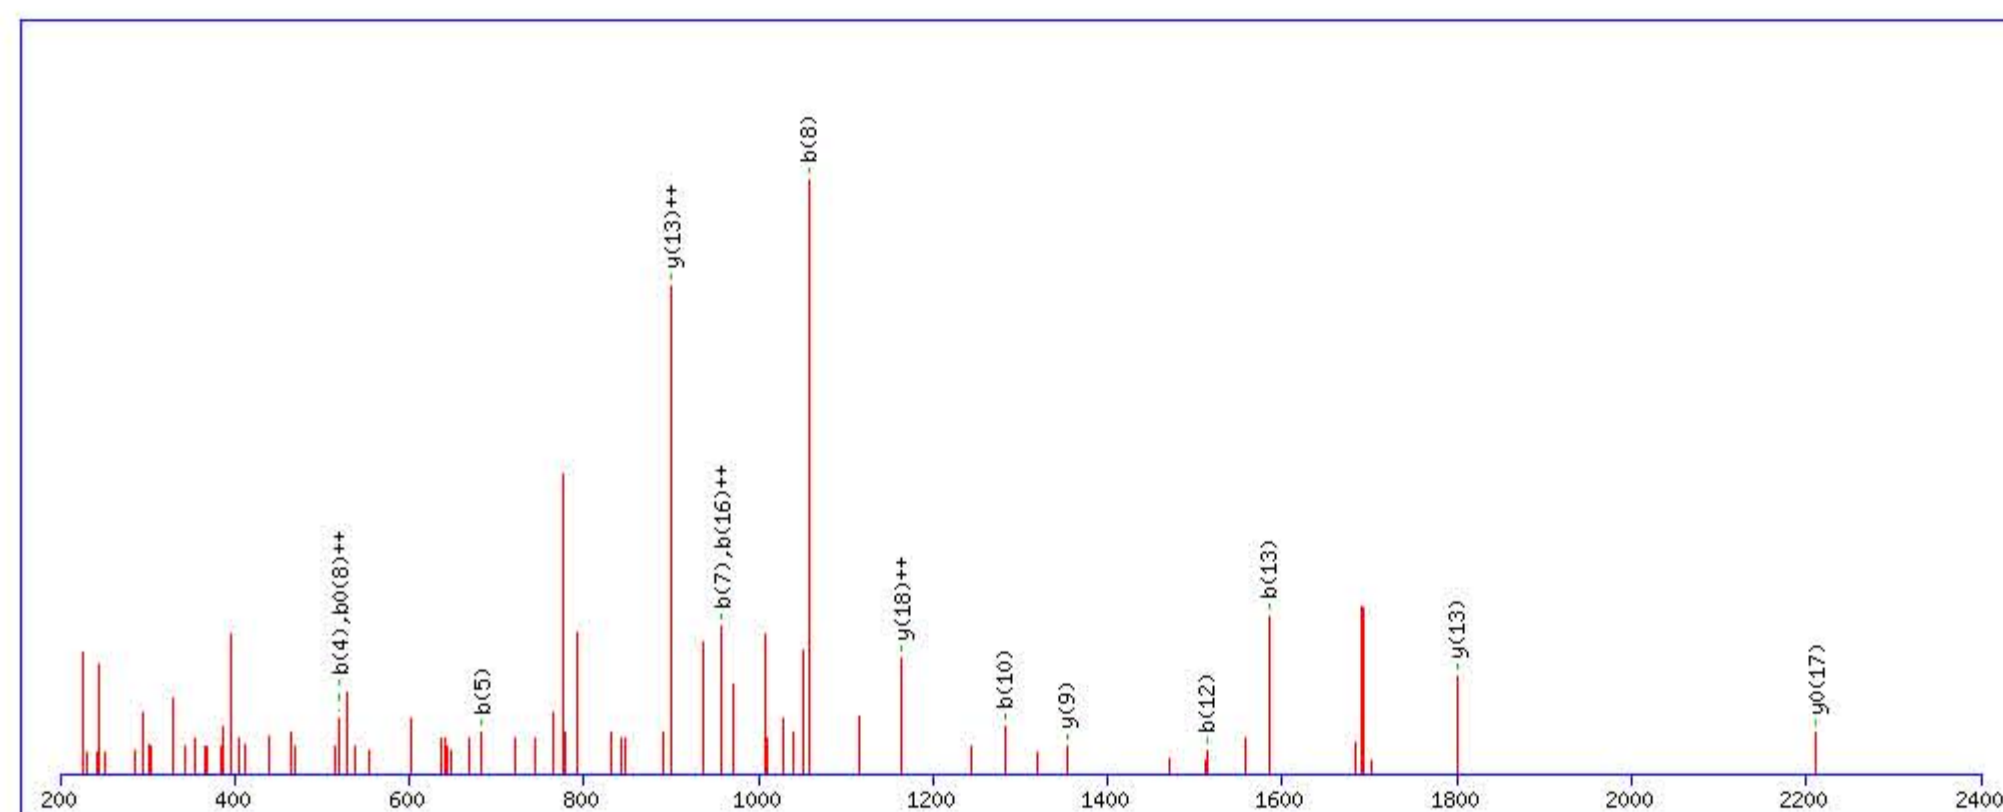

Monoisotopic mass of neutral peptide Mr(calc): 3382.549469  
 Fixed modifications: Carbamidomethyl (C) (apply to specified residues or termini only)  
 Variable modifications:  
 Q22 : Biotin:Thermo-21345 (Q)  
 Ions Score: 38 Expect: 0.0016  
 Matches : 14/290 fragment ions using 17 most intense peaks [\(help\)](#)

| #  | b                  | b <sup>++</sup>   | b <sup>*</sup> | b <sup>+++</sup> | b <sup>0</sup> | b <sup>0++</sup>  | Seq.     | y                  | y <sup>++</sup>    | y <sup>*</sup> | y <sup>+++</sup> | y <sup>0</sup>     | y <sup>0++</sup> | #         |
|----|--------------------|-------------------|----------------|------------------|----------------|-------------------|----------|--------------------|--------------------|----------------|------------------|--------------------|------------------|-----------|
| 1  | 129.102239         | 65.054757         | 112.075690     | 56.541483        |                |                   | <b>K</b> |                    |                    |                |                  |                    |                  | <b>26</b> |
| 2  | 242.186303         | 121.596790        | 225.159754     | 113.083515       |                |                   | <b>L</b> | 3255.461780        | 1628.234528        | 3238.435231    | 1619.721253      | 3237.451215        | 1619.229245      | <b>25</b> |
| 3  | 405.249632         | 203.128454        | 388.223083     | 194.615180       |                |                   | <b>Y</b> | 3142.377716        | 1571.692496        | 3125.351167    | 1563.179221      | 3124.367151        | 1562.687213      | <b>24</b> |
| 4  | <b>520.276575</b>  | 260.641926        | 503.250026     | 252.128651       | 502.266010     | 251.636643        | <b>D</b> | 2979.314387        | 1490.160831        | 2962.287838    | 1481.647557      | 2961.303822        | 1481.155549      | <b>23</b> |
| 5  | <b>683.339904</b>  | 342.173590        | 666.313355     | 333.660316       | 665.329339     | 333.168308        | <b>Y</b> | 2864.287444        | 1432.647360        | 2847.260895    | 1424.134085      | 2846.276879        | 1423.642077      | <b>22</b> |
| 6  | 843.370553         | 422.188915        | 826.344004     | 413.675640       | 825.359988     | 413.183632        | <b>C</b> | 2701.224115        | 1351.115695        | 2684.197566    | 1342.602421      | 2683.213550        | 1342.110413      | <b>21</b> |
| 7  | <b>958.397496</b>  | 479.702386        | 941.370947     | 471.189112       | 940.386931     | 470.697104        | <b>D</b> | 2541.193466        | 1271.100371        | 2524.166917    | 1262.587096      | 2523.182901        | 1262.095089      | <b>20</b> |
| 8  | <b>1057.465910</b> | 529.236593        | 1040.439361    | 520.723319       | 1039.455345    | <b>520.231311</b> | <b>V</b> | 2426.166523        | 1213.586899        | 2409.139974    | 1205.073625      | 2408.155958        | 1204.581617      | <b>19</b> |
| 9  | 1154.518674        | 577.762975        | 1137.492125    | 569.249701       | 1136.508109    | 568.757693        | <b>P</b> | 2327.098109        | <b>1164.052692</b> | 2310.071560    | 1155.539418      | 2309.087544        | 1155.047410      | <b>18</b> |
| 10 | <b>1282.577252</b> | 641.792264        | 1265.550703    | 633.278990       | 1264.566687    | 632.786982        | <b>Q</b> | 2230.045345        | 1115.526310        | 2213.018796    | 1107.013036      | <b>2212.034780</b> | 1106.521028      | <b>17</b> |
| 11 | 1442.607901        | 721.807589        | 1425.581352    | 713.294314       | 1424.597336    | 712.802306        | <b>C</b> | 2101.986767        | 1051.497021        | 2084.960218    | 1042.983747      | 2083.976202        | 1042.491739      | <b>16</b> |
| 12 | <b>1513.645015</b> | 757.326146        | 1496.618466    | 748.812871       | 1495.634450    | 748.320863        | <b>A</b> | 1941.956118        | 971.481697         | 1924.929569    | 962.968423       | 1923.945553        | 962.476415       | <b>15</b> |
| 13 | <b>1584.682129</b> | 792.844703        | 1567.655580    | 784.331428       | 1566.671564    | 783.839420        | <b>A</b> | 1870.919004        | 935.963140         | 1853.892455    | 927.449866       | 1852.908439        | 926.957858       | <b>14</b> |
| 14 | 1681.734893        | 841.371085        | 1664.708344    | 832.857810       | 1663.724328    | 832.365802        | <b>P</b> | <b>1799.881890</b> | <b>900.444583</b>  | 1782.855341    | 891.931309       | 1781.871325        | 891.439301       | <b>13</b> |
| 15 | 1768.766921        | 884.887099        | 1751.740372    | 876.373824       | 1750.756356    | 875.881816        | <b>S</b> | 1702.829126        | 851.918201         | 1685.802577    | 843.404927       | 1684.818561        | 842.912919       | <b>12</b> |
| 16 | 1915.835335        | <b>958.421306</b> | 1898.808786    | 949.908031       | 1897.824770    | 949.416023        | <b>F</b> | 1615.797098        | 808.402187         | 1598.770549    | 799.888913       | 1597.786533        | 799.396905       | <b>11</b> |
| 17 | 2030.862278        | 1015.934777       | 2013.835729    | 1007.421503      | 2012.851713    | 1006.929495       | <b>D</b> | 1468.728684        | 734.867980         | 1451.702135    | 726.354706       | 1450.718119        | 725.862698       | <b>10</b> |
| 18 | 2190.892927        | 1095.950102       | 2173.866378    | 1087.436827      | 2172.882362    | 1086.944819       | <b>C</b> | <b>1353.701741</b> | 677.354509         | 1336.675192    | 668.841234       | 1335.691176        | 668.349226       | <b>9</b>  |
| 19 | 2247.914391        | 1124.460834       | 2230.887842    | 1115.947559      | 2229.903826    | 1115.455551       | <b>G</b> | 1193.671092        | 597.339184         | 1176.644543    | 588.825910       | 1175.660527        | 588.333902       | <b>8</b>  |
| 20 | 2376.009354        | 1188.508315       | 2358.982805    | 1179.995041      | 2357.998789    | 1179.503033       | <b>K</b> | 1136.649628        | 568.828452         | 1119.623079    | 560.315178       | 1118.639063        | 559.823170       | <b>7</b>  |
| 21 | 2473.062118        | 1237.034697       | 2456.035569    | 1228.521423      | 2455.051553    | 1228.029415       | <b>P</b> | 1008.554665        | 504.780971         | 991.528116     | 496.267696       | 990.544100         | 495.775688       | <b>6</b>  |
| 22 | 2912.287444        | 1456.647360       | 2895.260895    | 1448.134086      | 2894.276879    | 1447.642078       | <b>Q</b> | 911.501901         | 456.254589         | 894.475352     | 447.741314       | 893.491336         | 447.249306       | <b>5</b>  |
| 23 | 3011.355858        | 1506.181567       | 2994.329309    | 1497.668293      | 2993.345293    | 1497.176285       | <b>V</b> | 472.276575         | 236.641925         | 455.250026     | 228.128651       | 454.266010         | 227.636643       | <b>4</b>  |
| 24 | 3140.398451        | 1570.702864       | 3123.371902    | 1562.189589      | 3122.387886    | 1561.697581       | <b>E</b> | 373.208161         | 187.107719         | 356.181612     | 178.594444       | 355.197596         | 178.102436       | <b>3</b>  |
| 25 | 3237.451215        | 1619.229246       | 3220.424666    | 1610.715971      | 3219.440650    | 1610.223963       | <b>P</b> | 244.165568         | 122.586422         | 227.139019     | 114.073148       |                    |                  | <b>2</b>  |
| 26 |                    |                   |                |                  |                |                   | <b>K</b> | 147.112804         | 74.060040          | 130.086255     | 65.546765        |                    |                  | <b>1</b>  |

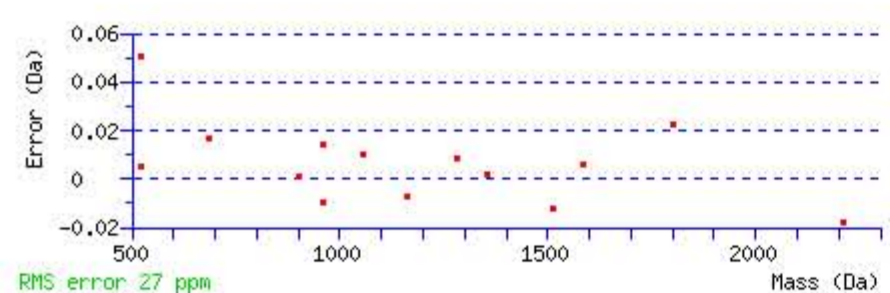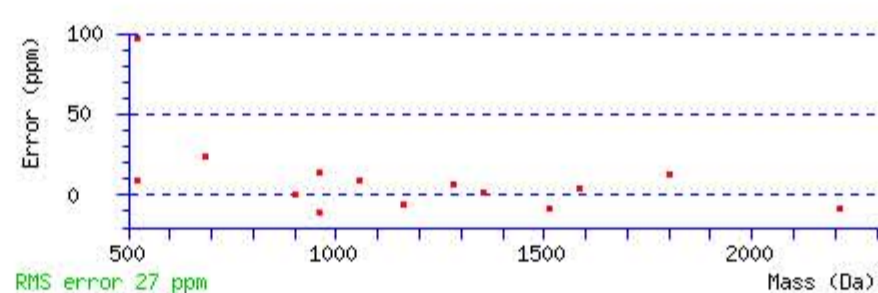

NCBI BLAST search of **KLYDYCDVPQCAAPSFDCGKPKQVEPK**  
 (Parameters: blastp, nr protein database, expect=20000, no filter, PAM30)  
 Other BLAST [web gateways](#)

### All matches to this query

| Score | Mr(calc):   | Delta    | Sequence                                    |
|-------|-------------|----------|---------------------------------------------|
| 38.4  | 3382.549469 | 0.000987 | <a href="#">KLYDYCDVPQCAAPSFDCGKPKQVEPK</a> |
| 2.6   | 3382.549469 | 0.000987 | <a href="#">KLYDYCDVPQCAAPSFDCGKPKQVEPK</a> |

# Mascot Search Results

## Peptide View

MS/MS Fragmentation of **GNVAVTVSGHTCQHWSAQTPHTHNR**  
 Found in **PLMN\_HUMAN**, Plasminogen OS=Homo sapiens GN=PLG PE=1 SV=2

Match to Query 60785: 3403.626970 from(681.732670,5+) rtinseconds(1699) index(60864)  
 Title: Locus:1.1.1.3217.13 File:"2013-07-02 CLN FXIII 60 min 3rd FT.wiff"  
 Data file C:\Program Files (x86)\Matrix Science\Mascot Daemon\mgf\6 FXIII 60 min 3rd\mascot\_daemon\_merge.mgf

Click mouse within plot area to zoom in by factor of two about that point  
 Or, Plot from  to  Da   
 Label all possible matches  Label matches used for scoring

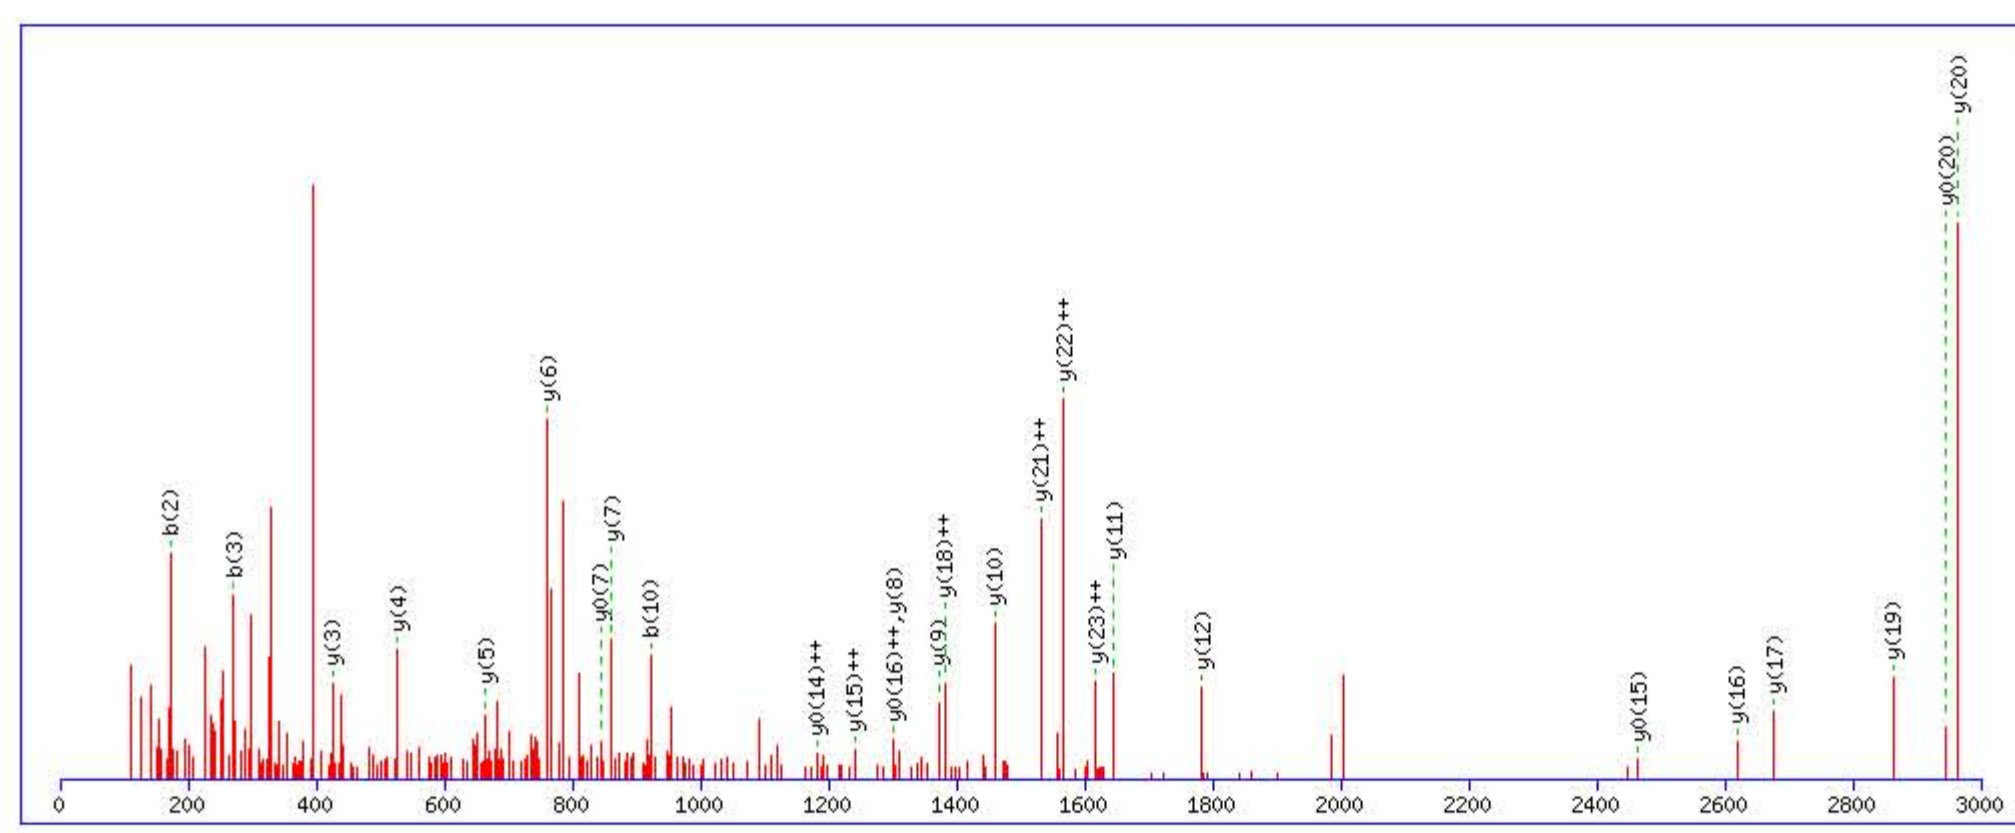

Monoisotopic mass of neutral peptide Mr(calc): 3403.623764  
 Fixed modifications: Carbamidomethyl (C) (apply to specified residues or termini only)  
 Variable modifications:  
 Q13 : Biotin:Thermo-21345 (Q)  
 Q18 : Biotin:Thermo-21345 (Q)  
 Ions Score: 80 Expect: 2.5e-007  
 Matches : 27/270 fragment ions using 45 most intense peaks ([help](#))

| #  | b                 | b <sup>++</sup> | b <sup>+</sup> | b <sup>+++</sup> | b <sup>0</sup> | b <sup>0++</sup> | Seq. | y                  | y <sup>++</sup>    | y <sup>+</sup> | y <sup>+++</sup> | y <sup>0</sup>     | y <sup>0++</sup>   | #  |
|----|-------------------|-----------------|----------------|------------------|----------------|------------------|------|--------------------|--------------------|----------------|------------------|--------------------|--------------------|----|
| 1  | 58.028740         | 29.518008       |                |                  |                |                  | G    |                    |                    |                |                  |                    |                    | 25 |
| 2  | <b>172.071667</b> | 86.539471       | 155.045118     | 78.026197        |                |                  | N    | 3347.609538        | 1674.308407        | 3330.582989    | 1665.795132      | 3329.598973        | 1665.303124        | 24 |
| 3  | <b>271.140081</b> | 136.073679      | 254.113532     | 127.560404       |                |                  | V    | 3233.566611        | <b>1617.286943</b> | 3216.540062    | 1608.773669      | 3215.556046        | 1608.281661        | 23 |
| 4  | 342.177195        | 171.592236      | 325.150646     | 163.078961       |                |                  | A    | 3134.498197        | <b>1567.752736</b> | 3117.471648    | 1559.239462      | 3116.487632        | 1558.747454        | 22 |
| 5  | 441.245609        | 221.126443      | 424.219060     | 212.613168       |                |                  | V    | 3063.461083        | <b>1532.234179</b> | 3046.434534    | 1523.720905      | 3045.450518        | 1523.228897        | 21 |
| 6  | 542.293288        | 271.650282      | 525.266739     | 263.137008       | 524.282723     | 262.645000       | T    | <b>2964.392669</b> | 1482.699972        | 2947.366120    | 1474.186698      | <b>2946.382104</b> | 1473.694690        | 20 |
| 7  | 641.361702        | 321.184489      | 624.335153     | 312.671215       | 623.351137     | 312.179207       | V    | <b>2863.344990</b> | 1432.176133        | 2846.318441    | 1423.662858      | 2845.334425        | 1423.170850        | 19 |
| 8  | 728.393730        | 364.700503      | 711.367181     | 356.187229       | 710.383165     | 355.695221       | S    | 2764.276576        | <b>1382.641926</b> | 2747.250027    | 1374.128651      | 2746.266011        | 1373.636643        | 18 |
| 9  | 785.415194        | 393.211235      | 768.388645     | 384.697961       | 767.404629     | 384.205953       | G    | <b>2677.244548</b> | 1339.125912        | 2660.217999    | 1330.612637      | 2659.233983        | 1330.120629        | 17 |
| 10 | <b>922.474106</b> | 461.740691      | 905.447557     | 453.227417       | 904.463541     | 452.735409       | H    | <b>2620.223084</b> | 1310.615180        | 2603.196535    | 1302.101905      | 2602.212519        | <b>1301.609897</b> | 16 |
| 11 | 1023.521785       | 512.264530      | 1006.495236    | 503.751256       | 1005.511220    | 503.259248       | T    | 2483.164172        | <b>1242.085724</b> | 2466.137623    | 1233.572449      | <b>2465.153607</b> | 1233.080441        | 15 |
| 12 | 1183.552434       | 592.279855      | 1166.525885    | 583.766581       | 1165.541869    | 583.274572       | C    | 2382.116493        | 1191.561884        | 2365.089944    | 1183.048610      | 2364.105928        | <b>1182.556602</b> | 14 |
| 13 | 1622.777760       | 811.892518      | 1605.751211    | 803.379244       | 1604.767195    | 802.887236       | Q    | 2222.085844        | 1111.546560        | 2205.059295    | 1103.033285      | 2204.075279        | 1102.541277        | 13 |
| 14 | 1759.836672       | 880.421974      | 1742.810123    | 871.908700       | 1741.826107    | 871.416692       | H    | <b>1782.860518</b> | 891.933897         | 1765.833969    | 883.420622       | 1764.849953        | 882.928614         | 12 |
| 15 | 1945.915985       | 973.461631      | 1928.889436    | 964.948356       | 1927.905420    | 964.456348       | W    | <b>1645.801606</b> | 823.404441         | 1628.775057    | 814.891166       | 1627.791041        | 814.399158         | 11 |
| 16 | 2032.948013       | 1016.977645     | 2015.921464    | 1008.464370      | 2014.937448    | 1007.972362      | S    | <b>1459.722293</b> | 730.364784         | 1442.695744    | 721.851510       | 1441.711728        | 721.359502         | 10 |
| 17 | 2103.985127       | 1052.496201     | 2086.958578    | 1043.982927      | 2085.974562    | 1043.490919      | A    | <b>1372.690265</b> | 686.848770         | 1355.663716    | 678.335496       | 1354.679700        | 677.843488         | 9  |
| 18 | 2543.210453       | 1272.108865     | 2526.183904    | 1263.595590      | 2525.199888    | 1263.103582      | Q    | <b>1301.653151</b> | 651.330213         | 1284.626602    | 642.816939       | 1283.642586        | 642.324931         | 8  |
| 19 | 2644.258132       | 1322.632704     | 2627.231583    | 1314.119429      | 2626.247567    | 1313.627421      | T    | <b>862.427825</b>  | 431.717550         | 845.401276     | 423.204276       | <b>844.417260</b>  | 422.712268         | 7  |
| 20 | 2741.310896       | 1371.159086     | 2724.284347    | 1362.645811      | 2723.300331    | 1362.153803      | P    | <b>761.380146</b>  | 381.193711         | 744.353597     | 372.680436       | 743.369581         | 372.188428         | 6  |
| 21 | 2878.369808       | 1439.688542     | 2861.343259    | 1431.175267      | 2860.359243    | 1430.683259      | H    | <b>664.327382</b>  | 332.667329         | 647.300833     | 324.154054       | 646.316817         | 323.662046         | 5  |
| 22 | 2979.417487       | 1490.212381     | 2962.390938    | 1481.699107      | 2961.406922    | 1481.207099      | T    | <b>527.268470</b>  | 264.137873         | 510.241921     | 255.624598       | 509.257905         | 255.132590         | 4  |
| 23 | 3116.476399       | 1558.741837     | 3099.449850    | 1550.228563      | 3098.465834    | 1549.736555      | H    | <b>426.220791</b>  | 213.614033         | 409.194242     | 205.100759       |                    |                    | 3  |
| 24 | 3230.519326       | 1615.763301     | 3213.492777    | 1607.250026      | 3212.508761    | 1606.758018      | N    | 289.161879         | 145.084577         | 272.135330     | 136.571303       |                    |                    | 2  |
| 25 |                   |                 |                |                  |                |                  | R    | 175.118952         | 88.063114          | 158.092403     | 79.549839        |                    |                    | 1  |

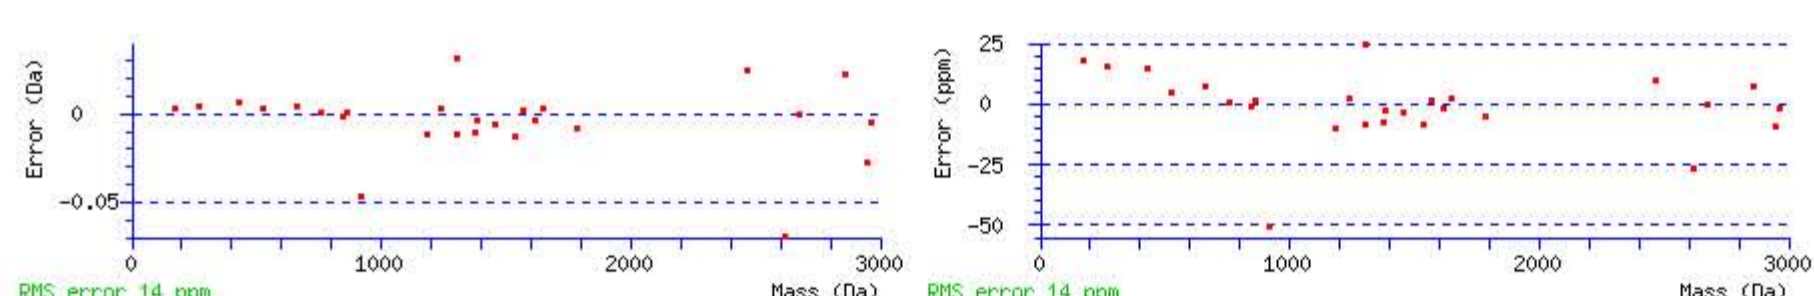

NCBI BLAST search of **GNVAVTVSGHTCQHWSAQTPHTHNR**  
 (Parameters: blastp, nr protein database, expect=20000, no filter, PAM30)  
 Other BLAST [web gateways](#)

### All matches to this query

| Score | Mr(calc):   | Delta    | Sequence                                  |
|-------|-------------|----------|-------------------------------------------|
| 79.8  | 3403.623764 | 0.003206 | <a href="#">GNVAVTVSGHTCQHWSAQTPHTHNR</a> |

# Mascot Search Results

## Peptide View

MS/MS Fragmentation of **KCSAPEPSQKPPGKPCPGLAYEQR**  
 Found in **PROP\_HUMAN**, Properdin OS=Homo sapiens GN=CFP PE=1 SV=2

Match to Query 56004: 2992.467920 from(599.500860,5+) rtinseconds(1472) index(59649)  
 Title: Locus:1.1.1.3138.20 File:"2013-07-02 CLN FXIII 60 min 3rd FT.wiff"  
 Data file C:\Program Files (x86)\Matrix Science\Mascot Daemon\mgf6 FXIII 60 min 3rd\mascot\_daemon\_merge.mgf

Click mouse within plot area to zoom in by factor of two about that point

Or, Plot from  to  Da

Label all possible matches  Label matches used for scoring

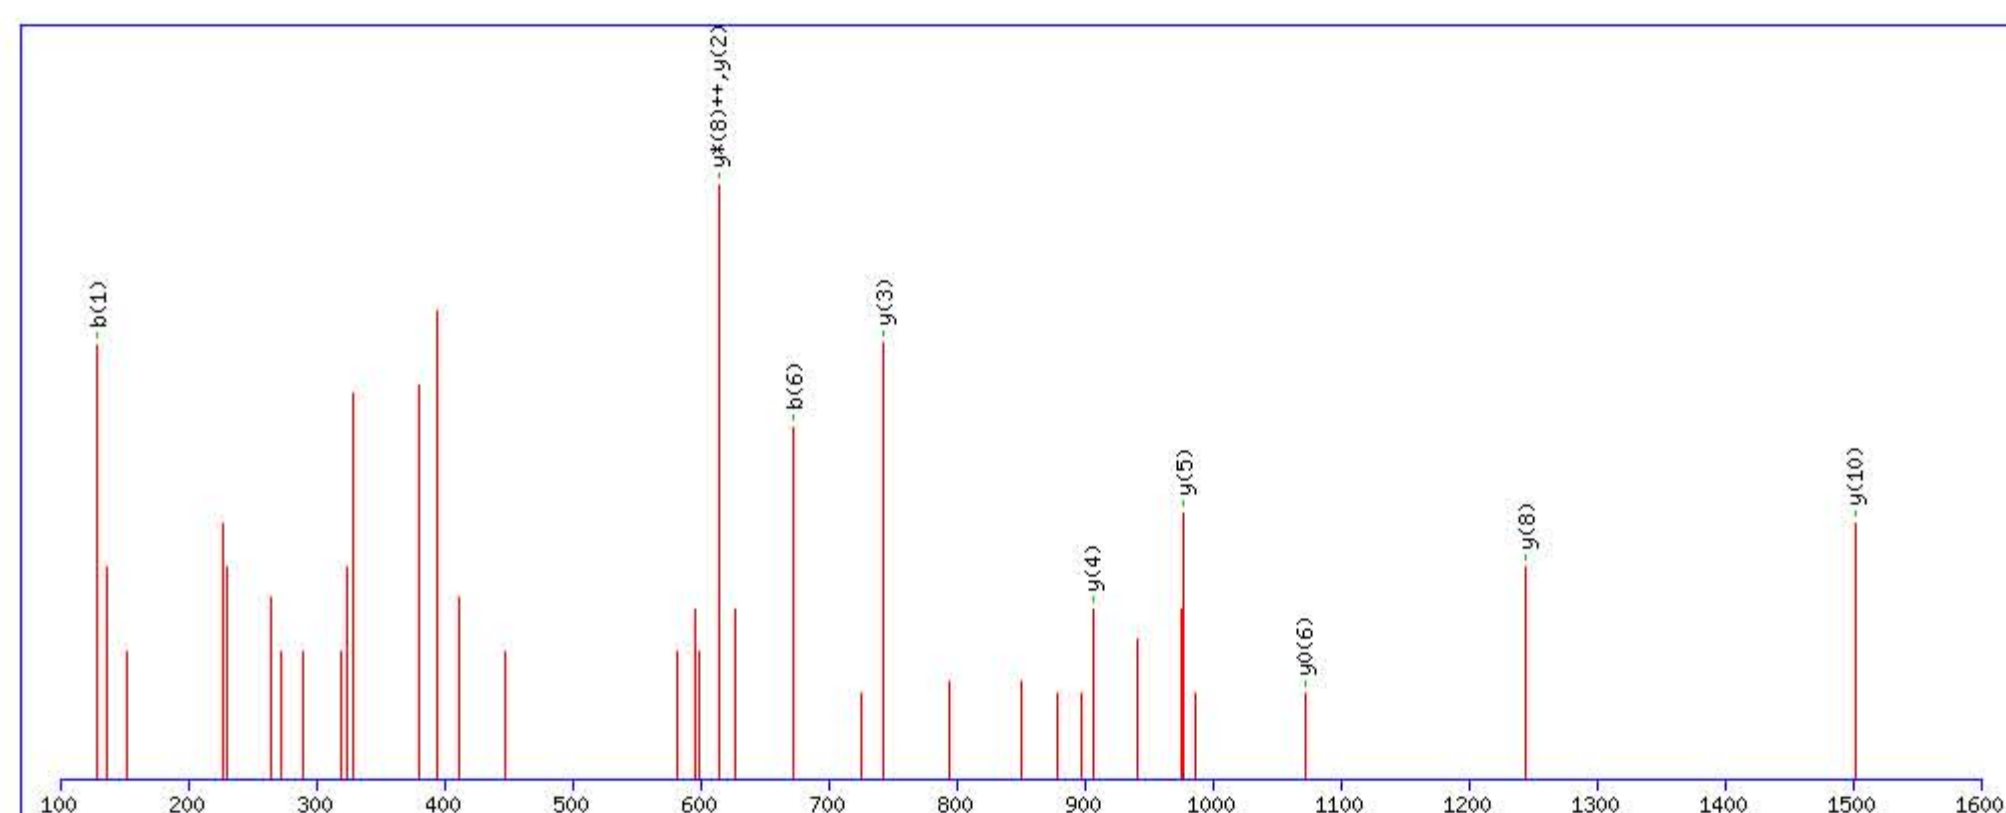

Monoisotopic mass of neutral peptide Mr(calc): 2992.472107  
 Fixed modifications: Carbamidomethyl (C) (apply to specified residues or termini only)

Variable modifications:  
 Q23 : Biotin:Thermo-21345 (Q)  
 Ions Score: 36 Expect: 0.00042

Matches : 10/268 fragment ions using 12 most intense peaks [\(help\)](#)

| #  | b                 | b <sup>++</sup> | b <sup>+</sup> | b <sup>+++</sup> | b <sup>0</sup> | b <sup>0++</sup> | Seq.     | y                  | y <sup>++</sup> | y <sup>+</sup> | y <sup>+++</sup>  | y <sup>0</sup>     | y <sup>0++</sup> | #         |
|----|-------------------|-----------------|----------------|------------------|----------------|------------------|----------|--------------------|-----------------|----------------|-------------------|--------------------|------------------|-----------|
| 1  | <b>129.102239</b> | 65.054757       | 112.075690     | 56.541483        |                |                  | <b>K</b> |                    |                 |                |                   |                    |                  | <b>24</b> |
| 2  | 289.132888        | 145.070082      | 272.106339     | 136.556808       |                |                  | <b>C</b> | 2865.384455        | 1433.195865     | 2848.357906    | 1424.682591       | 2847.373890        | 1424.190583      | <b>23</b> |
| 3  | 376.164916        | 188.586096      | 359.138367     | 180.072822       | 358.154351     | 179.580814       | <b>S</b> | 2705.353806        | 1353.180541     | 2688.327257    | 1344.667266       | 2687.343241        | 1344.175258      | <b>22</b> |
| 4  | 447.202030        | 224.104653      | 430.175481     | 215.591378       | 429.191465     | 215.099370       | <b>A</b> | 2618.321778        | 1309.664527     | 2601.295229    | 1301.151252       | 2600.311213        | 1300.659244      | <b>21</b> |
| 5  | 544.254794        | 272.631035      | 527.228245     | 264.117761       | 526.244229     | 263.625753       | <b>P</b> | 2547.284664        | 1274.145970     | 2530.258115    | 1265.632695       | 2529.274099        | 1265.140687      | <b>20</b> |
| 6  | <b>673.297387</b> | 337.152332      | 656.270838     | 328.639057       | 655.286822     | 328.147049       | <b>E</b> | 2450.231900        | 1225.619588     | 2433.205351    | 1217.106313       | 2432.221335        | 1216.614305      | <b>19</b> |
| 7  | 770.350151        | 385.678714      | 753.323602     | 377.165439       | 752.339586     | 376.673431       | <b>P</b> | 2321.189307        | 1161.098292     | 2304.162758    | 1152.585017       | 2303.178742        | 1152.093009      | <b>18</b> |
| 8  | 857.382179        | 429.194728      | 840.355630     | 420.681453       | 839.371614     | 420.189445       | <b>S</b> | 2224.136543        | 1112.571909     | 2207.109994    | 1104.058635       | 2206.125978        | 1103.566627      | <b>17</b> |
| 9  | 985.440757        | 493.224017      | 968.414208     | 484.710742       | 967.430192     | 484.218734       | <b>Q</b> | 2137.104515        | 1069.055895     | 2120.077966    | 1060.542621       | 2119.093950        | 1060.050613      | <b>16</b> |
| 10 | 1113.535720       | 557.271498      | 1096.509171    | 548.758224       | 1095.525155    | 548.266216       | <b>K</b> | 2009.045937        | 1005.026607     | 1992.019388    | 996.513332        | 1991.035372        | 996.021324       | <b>15</b> |
| 11 | 1210.588484       | 605.797880      | 1193.561935    | 597.284606       | 1192.577919    | 596.792598       | <b>P</b> | 1880.950974        | 940.979125      | 1863.924425    | 932.465851        | 1862.940409        | 931.973843       | <b>14</b> |
| 12 | 1307.641248       | 654.324262      | 1290.614699    | 645.810988       | 1289.630683    | 645.318980       | <b>P</b> | 1783.898210        | 892.452743      | 1766.871661    | 883.939469        | 1765.887645        | 883.447461       | <b>13</b> |
| 13 | 1364.662712       | 682.834994      | 1347.636163    | 674.321720       | 1346.652147    | 673.829712       | <b>G</b> | 1686.845446        | 843.926361      | 1669.818897    | 835.413087        | 1668.834881        | 834.921079       | <b>12</b> |
| 14 | 1492.757675       | 746.882476      | 1475.731126    | 738.369201       | 1474.747110    | 737.877193       | <b>K</b> | 1629.823982        | 815.415629      | 1612.797433    | 806.902355        | 1611.813417        | 806.410347       | <b>11</b> |
| 15 | 1589.810439       | 795.408858      | 1572.783890    | 786.895583       | 1571.799874    | 786.403575       | <b>P</b> | <b>1501.729019</b> | 751.368148      | 1484.702470    | 742.854873        | 1483.718454        | 742.362865       | <b>10</b> |
| 16 | 1749.841088       | 875.424182      | 1732.814539    | 866.910908       | 1731.830523    | 866.418900       | <b>C</b> | 1404.676255        | 702.841766      | 1387.649706    | 694.328491        | 1386.665690        | 693.836483       | <b>9</b>  |
| 17 | 1846.893852       | 923.950564      | 1829.867303    | 915.437290       | 1828.883287    | 914.945282       | <b>P</b> | <b>1244.645606</b> | 622.826441      | 1227.619057    | <b>614.313167</b> | 1226.635041        | 613.821159       | <b>8</b>  |
| 18 | 1903.915316       | 952.461296      | 1886.888767    | 943.948022       | 1885.904751    | 943.456014       | <b>G</b> | 1147.592842        | 574.300059      | 1130.566293    | 565.786785        | 1129.582277        | 565.294777       | <b>7</b>  |
| 19 | 2016.999380       | 1009.003328     | 1999.972831    | 1000.490054      | 1998.988815    | 999.998045       | <b>L</b> | 1090.571378        | 545.789327      | 1073.544829    | 537.276053        | <b>1072.560813</b> | 536.784045       | <b>6</b>  |
| 20 | 2088.036494       | 1044.521885     | 2071.009945    | 1036.008610      | 2070.025929    | 1035.516602      | <b>A</b> | <b>977.487314</b>  | 489.247295      | 960.460765     | 480.734021        | 959.476749         | 480.242013       | <b>5</b>  |
| 21 | 2251.099823       | 1126.053549     | 2234.073274    | 1117.540275      | 2233.089258    | 1117.048267      | <b>Y</b> | <b>906.450200</b>  | 453.728738      | 889.423651     | 445.215464        | 888.439635         | 444.723456       | <b>4</b>  |
| 22 | 2380.142416       | 1190.574846     | 2363.115867    | 1182.061571      | 2362.131851    | 1181.569564      | <b>E</b> | <b>743.386871</b>  | 372.197074      | 726.360322     | 363.683799        | 725.376306         | 363.191791       | <b>3</b>  |
| 23 | 2819.367742       | 1410.187509     | 2802.341193    | 1401.674235      | 2801.357177    | 1401.182227      | <b>Q</b> | <b>614.344278</b>  | 307.675777      | 597.317729     | 299.162503        |                    |                  | <b>2</b>  |
| 24 |                   |                 |                |                  |                |                  | <b>R</b> | 175.118952         | 88.063114       | 158.092403     | 79.549839         |                    |                  | <b>1</b>  |

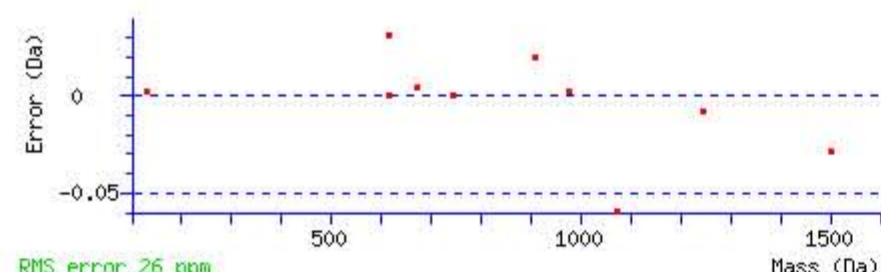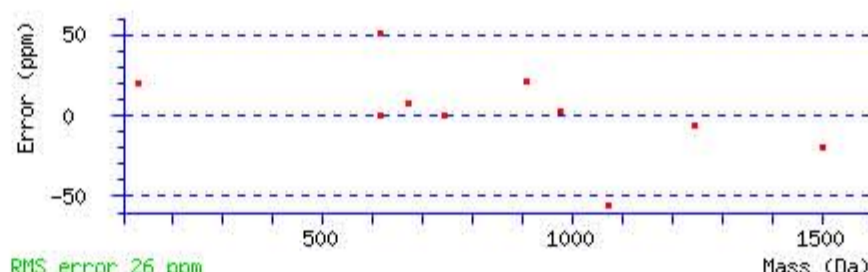

NCBI BLAST search of [KCSAPEPSQKPPGKPCPGLAYEQR](#)  
 (Parameters: blastp, nr protein database, expect=20000, no filter, PAM30)  
 Other BLAST [web gateways](#)

## All matches to this query

| Score | Mr(calc):   | Delta     | Sequence                                  |
|-------|-------------|-----------|-------------------------------------------|
| 36.5  | 2992.472107 | -0.004187 | <a href="#">KCSAPEPSQKPPGKPCPGLAYEQR</a>  |
| 0.5   | 2992.492355 | -0.024435 | <a href="#">ESSRSHAVFTTIESMEKSNEIVNIR</a> |



# MASCOT Search Results

## Peptide View

MS/MS Fragmentation of **ECLQTCR**

Found in **AMBP\_HUMAN**, Protein AMBP OS=Homo sapiens GN=AMBP PE=1 SV=1

Match to Query 22342: 1276.570548 from(639.292550,2+) rtinseconds(1472) index(30086)

Title: Locus:1.1.1.3061.20 File:"2013-07-02 CLN FXIII 60 min 3rd F 3.wiff"

Data file C:\Program Files (x86)\Matrix Science\Mascot Daemon\mgf6 FXIII 60 min 3rd\mascot\_daemon\_merge.mgf

Click mouse within plot area to zoom in by factor of two about that point

Or, Plot from  to  Da

Label all possible matches  Label matches used for scoring

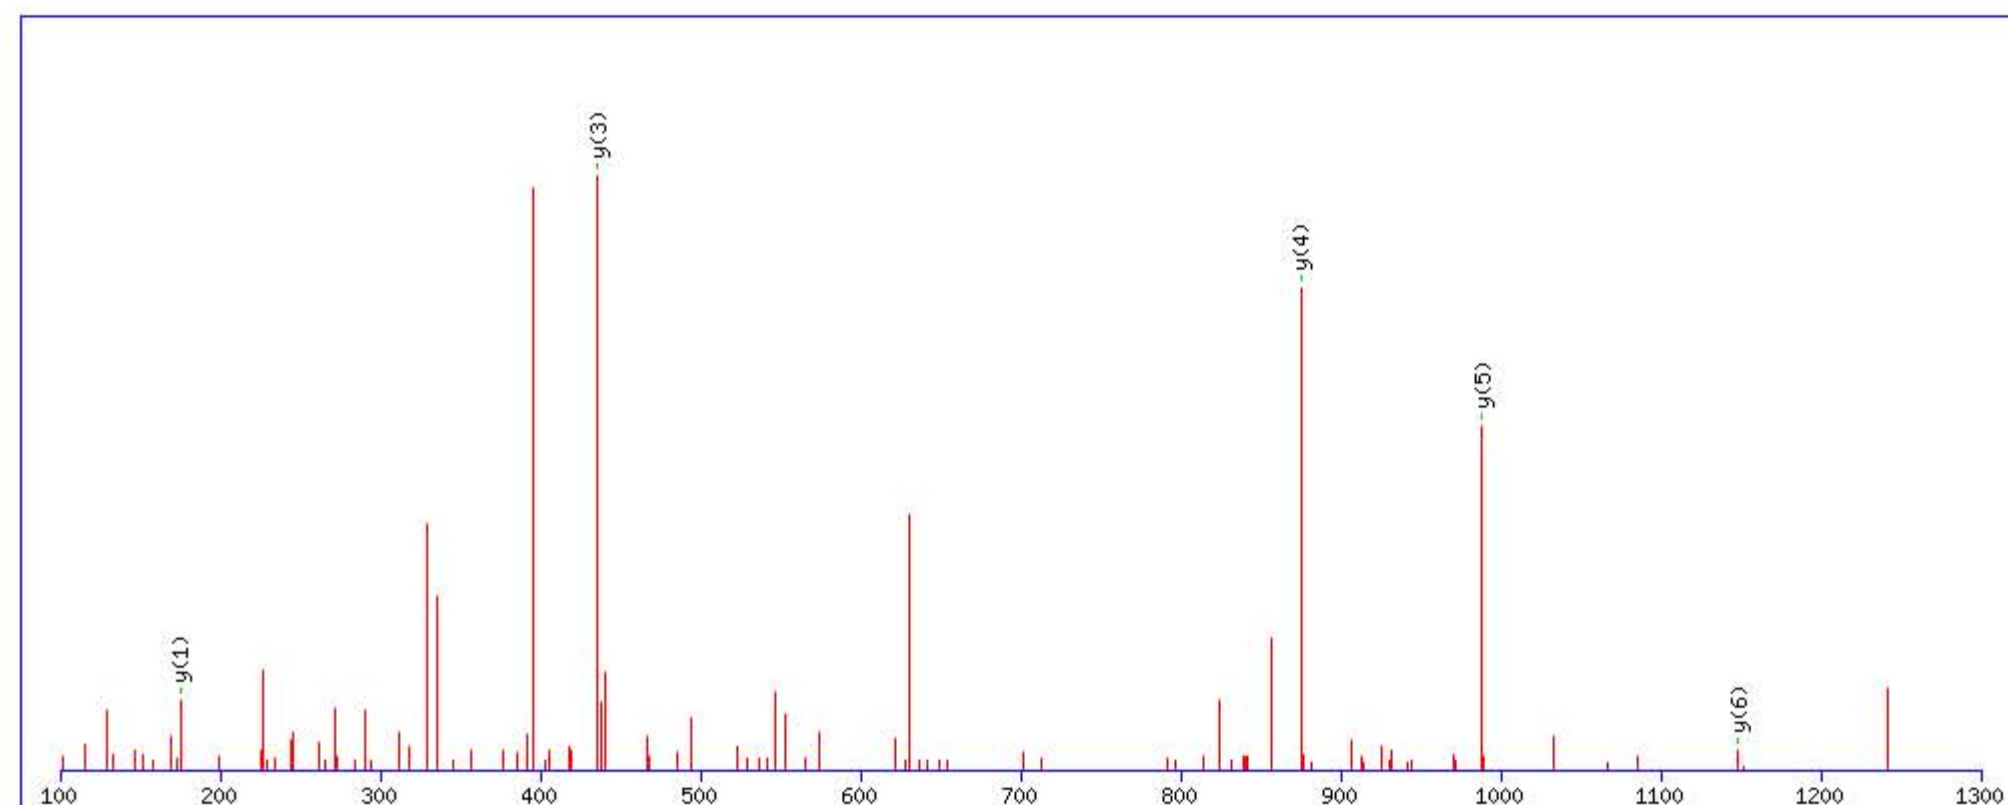

Monoisotopic mass of neutral peptide Mr(calc): 1276.572632

Fixed modifications: Carbamidomethyl (C) (apply to specified residues or termini only)

Variable modifications:

Q4 : Biotin:Thermo-21345 (Q)

Ions Score: 28 Expect: 0.0099

Matches : 5/62 fragment ions using 12 most intense peaks [\(help\)](#)

| # | b           | b <sup>++</sup> | b <sup>*</sup> | b <sup>*++</sup> | b <sup>0</sup> | b <sup>0++</sup> | Seq. | y                  | y <sup>++</sup> | y <sup>*</sup> | y <sup>*++</sup> | y <sup>0</sup> | y <sup>0++</sup> | # |
|---|-------------|-----------------|----------------|------------------|----------------|------------------|------|--------------------|-----------------|----------------|------------------|----------------|------------------|---|
| 1 | 130.049869  | 65.528572       |                |                  | 112.039304     | 56.523290        | E    |                    |                 |                |                  |                |                  | 7 |
| 2 | 290.080518  | 145.543897      |                |                  | 272.069953     | 136.538615       | C    | <b>1148.537319</b> | 574.772298      | 1131.510770    | 566.259023       | 1130.526754    | 565.767015       | 6 |
| 3 | 403.164582  | 202.085929      |                |                  | 385.154017     | 193.080647       | L    | <b>988.506670</b>  | 494.756973      | 971.480121     | 486.243699       | 970.496105     | 485.751691       | 5 |
| 4 | 842.389908  | 421.698592      | 825.363359     | 413.185318       | 824.379343     | 412.693310       | Q    | <b>875.422606</b>  | 438.214941      | 858.396057     | 429.701667       | 857.412041     | 429.209659       | 4 |
| 5 | 943.437587  | 472.222432      | 926.411038     | 463.709157       | 925.427022     | 463.217149       | T    | <b>436.197280</b>  | 218.602278      | 419.170731     | 210.089003       | 418.186715     | 209.596995       | 3 |
| 6 | 1103.468236 | 552.237756      | 1086.441687    | 543.724482       | 1085.457671    | 543.232474       | C    | 335.149601         | 168.078438      | 318.123052     | 159.565164       |                |                  | 2 |
| 7 |             |                 |                |                  |                |                  | R    | <b>175.118952</b>  | 88.063114       | 158.092403     | 79.549839        |                |                  | 1 |

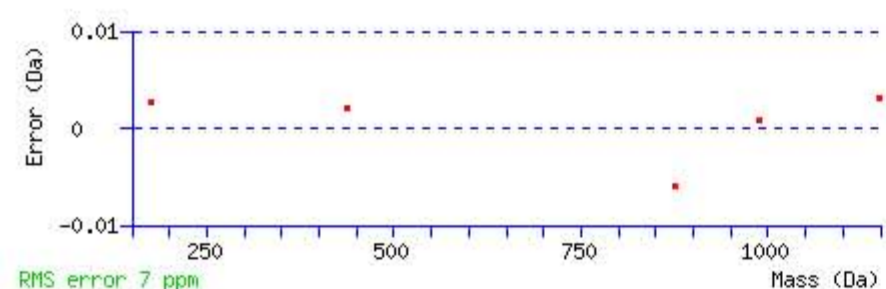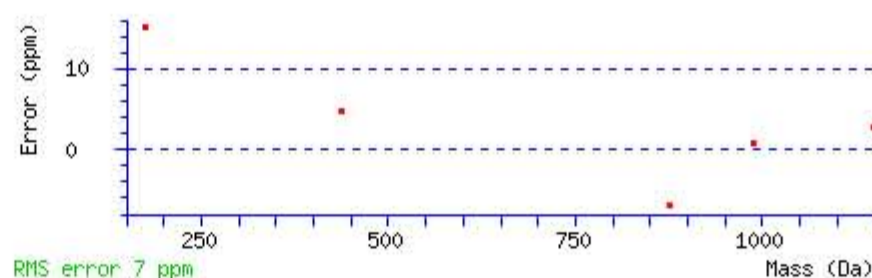

NCBI BLAST search of **ECLQTCR**

(Parameters: blastp, nr protein database, expect=20000, no filter, PAM30)

Other BLAST [web gateways](#)

All matches to this query

| Score | Mr(calc):   | Delta     | Sequence                    |
|-------|-------------|-----------|-----------------------------|
| 27.8  | 1276.572632 | -0.002084 | <a href="#">ECLQTCR</a>     |
| 10.1  | 1276.553116 | 0.017432  | <a href="#">EDLDNASKDDR</a> |
| 5.3   | 1276.587006 | -0.016458 | <a href="#">EDGTWAPMRSK</a> |
| 4.8   | 1276.579605 | -0.009057 | <a href="#">EEQRSPFNDR</a>  |
| 2.6   | 1276.582977 | -0.012429 | <a href="#">EMQLGREDQR</a>  |
| 2.1   | 1276.572388 | -0.001840 | <a href="#">EDSYANYFIR</a>  |
| 1.7   | 1276.569229 | 0.001319  | <a href="#">MTGRYEMYAR</a>  |
| 0.3   | 1276.560516 | 0.010032  | <a href="#">QQVPSEDSMEK</a> |

# MASCOT Search Results

## Peptide View

MS/MS Fragmentation of **GECVPGEQEPELIPR**

Found in **AMBP\_HUMAN**, Protein AMBP OS=Homo sapiens GN=AMBP PE=1 SV=1

Match to Query 46569: 2230.119312 from(744.380380,3+) rtinseconds(2304) index(6605)

Title: Locus:1.1.1.3354.11 File:"2013-07-02 CLN FXIII 60 min 3rd F 1.wiff"

Data file C:\Program Files (x86)\Matrix Science\Mascot Daemon\mgf\6 FXIII 60 min 3rd\mascot\_daemon\_merge.mgf

Click mouse within plot area to zoom in by factor of two about that point

Or, Plot from  to  Da

Label all possible matches  Label matches used for scoring

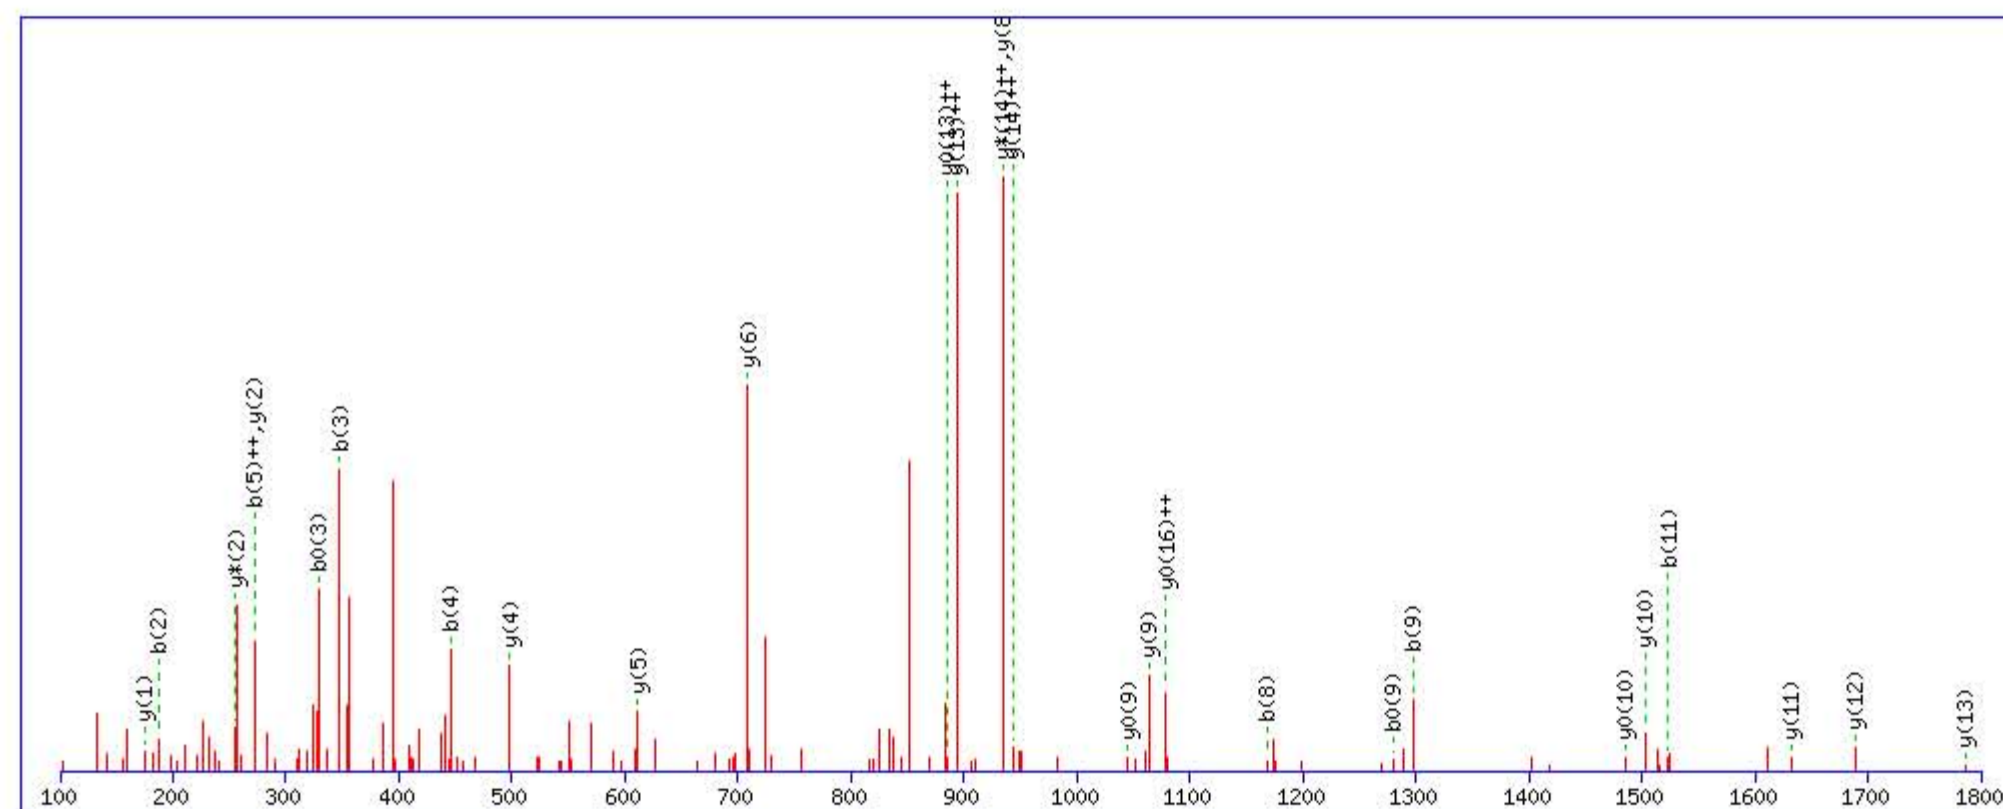

Monoisotopic mass of neutral peptide Mr(calc): 2230.112595

Fixed modifications: Carbamidomethyl (C) (apply to specified residues or termini only)

Variable modifications:

Q8 : Biotin:Thermo-21345 (Q)

Ions Score: 50 Expect: 0.00034

Matches : 28/164 fragment ions using 59 most intense peaks [\(help\)](#)

| #  | b                  | b <sup>++</sup>   | b <sup>*</sup> | b <sup>*++</sup> | b <sup>0</sup>     | b <sup>0++</sup> | Seq. | y                  | y <sup>++</sup>   | y <sup>*</sup>    | y <sup>*++</sup>  | y <sup>0</sup>     | y <sup>0++</sup>   | #  |
|----|--------------------|-------------------|----------------|------------------|--------------------|------------------|------|--------------------|-------------------|-------------------|-------------------|--------------------|--------------------|----|
| 1  | 58.028740          | 29.518008         |                |                  |                    |                  | G    |                    |                   |                   |                   |                    |                    | 17 |
| 2  | <b>187.071333</b>  | 94.039305         |                |                  | 169.060768         | 85.034022        | E    | 2174.098425        | 1087.552850       | 2157.071876       | 1079.039576       | 2156.087860        | <b>1078.547568</b> | 16 |
| 3  | <b>347.101982</b>  | 174.054629        |                |                  | <b>329.091417</b>  | 165.049347       | C    | 2045.055832        | 1023.031554       | 2028.029283       | 1014.518279       | 2027.045267        | 1014.026271        | 15 |
| 4  | <b>446.170396</b>  | 223.588836        |                |                  | 428.159831         | 214.583554       | V    | 1885.025183        | <b>943.016229</b> | 1867.998634       | <b>934.502955</b> | 1867.014618        | 934.010947         | 14 |
| 5  | 543.223160         | <b>272.115218</b> |                |                  | 525.212595         | 263.109936       | P    | <b>1785.956769</b> | <b>893.482022</b> | 1768.930220       | 884.968748        | 1767.946204        | <b>884.476740</b>  | 13 |
| 6  | 600.244624         | 300.625950        |                |                  | 582.234059         | 291.620668       | G    | <b>1688.904005</b> | 844.955640        | 1671.877456       | 836.442366        | 1670.893440        | 835.950358         | 12 |
| 7  | 729.287217         | 365.147247        |                |                  | 711.276652         | 356.141964       | E    | <b>1631.882541</b> | 816.444908        | 1614.855992       | 807.931634        | 1613.871976        | 807.439626         | 11 |
| 8  | <b>1168.512543</b> | 584.759910        | 1151.485994    | 576.246635       | 1150.501978        | 575.754627       | Q    | <b>1502.839948</b> | 751.923612        | 1485.813399       | 743.410337        | <b>1484.829383</b> | 742.918329         | 10 |
| 9  | <b>1297.555136</b> | 649.281206        | 1280.528587    | 640.767932       | <b>1279.544571</b> | 640.275924       | E    | <b>1063.614622</b> | 532.310949        | 1046.588073       | 523.797674        | <b>1045.604057</b> | 523.305666         | 9  |
| 10 | 1394.607900        | 697.807588        | 1377.581351    | 689.294314       | 1376.597335        | 688.802306       | P    | <b>934.572029</b>  | 467.789652        | 917.545480        | 459.276378        | 916.561464         | 458.784370         | 8  |
| 11 | <b>1523.650493</b> | 762.328885        | 1506.623944    | 753.815610       | 1505.639928        | 753.323602       | E    | 837.519265         | 419.263270        | 820.492716        | 410.749996        | 819.508700         | 410.257988         | 7  |
| 12 | 1620.703257        | 810.855267        | 1603.676708    | 802.341992       | 1602.692692        | 801.849984       | P    | <b>708.476672</b>  | 354.741974        | 691.450123        | 346.228699        |                    |                    | 6  |
| 13 | 1733.787321        | 867.397299        | 1716.760772    | 858.884024       | 1715.776756        | 858.392016       | I    | <b>611.423908</b>  | 306.215592        | 594.397359        | 297.702317        |                    |                    | 5  |
| 14 | 1846.871385        | 923.939331        | 1829.844836    | 915.426056       | 1828.860820        | 914.934048       | L    | <b>498.339844</b>  | 249.673560        | 481.313295        | 241.160285        |                    |                    | 4  |
| 15 | 1959.955449        | 980.481363        | 1942.928900    | 971.968088       | 1941.944884        | 971.476080       | I    | 385.255780         | 193.131528        | 368.229231        | 184.618253        |                    |                    | 3  |
| 16 | 2057.008213        | 1029.007744       | 2039.981664    | 1020.494470      | 2038.997648        | 1020.002462      | P    | <b>272.171716</b>  | 136.589496        | <b>255.145167</b> | 128.076221        |                    |                    | 2  |
| 17 |                    |                   |                |                  |                    |                  | R    | <b>175.118952</b>  | 88.063114         | 158.092403        | 79.549839         |                    |                    | 1  |

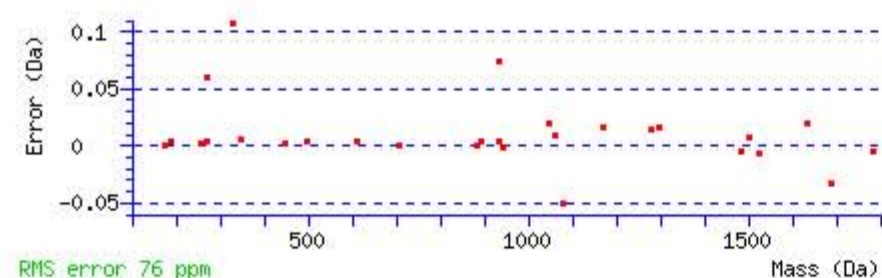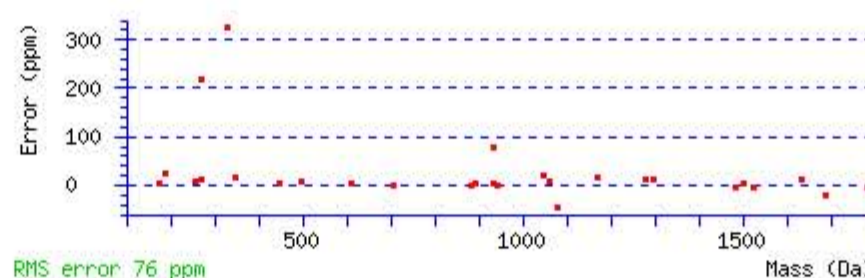

NCBI BLAST search of [GECVPGEQEPELIPR](#)

(Parameters: blastp, nr protein database, expect=20000, no filter, PAM30)

Other BLAST [web gateways](#)

All matches to this query

| Score | Mr(calc):   | Delta    | Sequence                        |
|-------|-------------|----------|---------------------------------|
| 49.5  | 2230.112595 | 0.006717 | <a href="#">GECVPGEQEPELIPR</a> |

Mascot: <http://www.matrixscience.com/>

# MASCOT Search Results

## Peptide View

MS/MS Fragmentation of **KEDSQLGYSAGPCMGMTSR**  
 Found in **AMBP\_HUMAN**, Protein AMBP OS=Homo sapiens GN=AMBP PE=1 SV=1

Match to Query 51669: 2545.121022 from(849.380950,3+) rtinseconds(1872) index(46434)  
 Title: Locus:1.1.1.2700.12 File:"2013-07-02 CLN FXIII 60 min 3rd F 4.wiff"  
 Data file C:\Program Files (x86)\Matrix Science\Mascot Daemon\mgf6 FXIII 60 min 3rd\mascot\_daemon\_merge.mgf

Click mouse within plot area to zoom in by factor of two about that point  
 Or, Plot from  to  Da   
 Label all possible matches  Label matches used for scoring

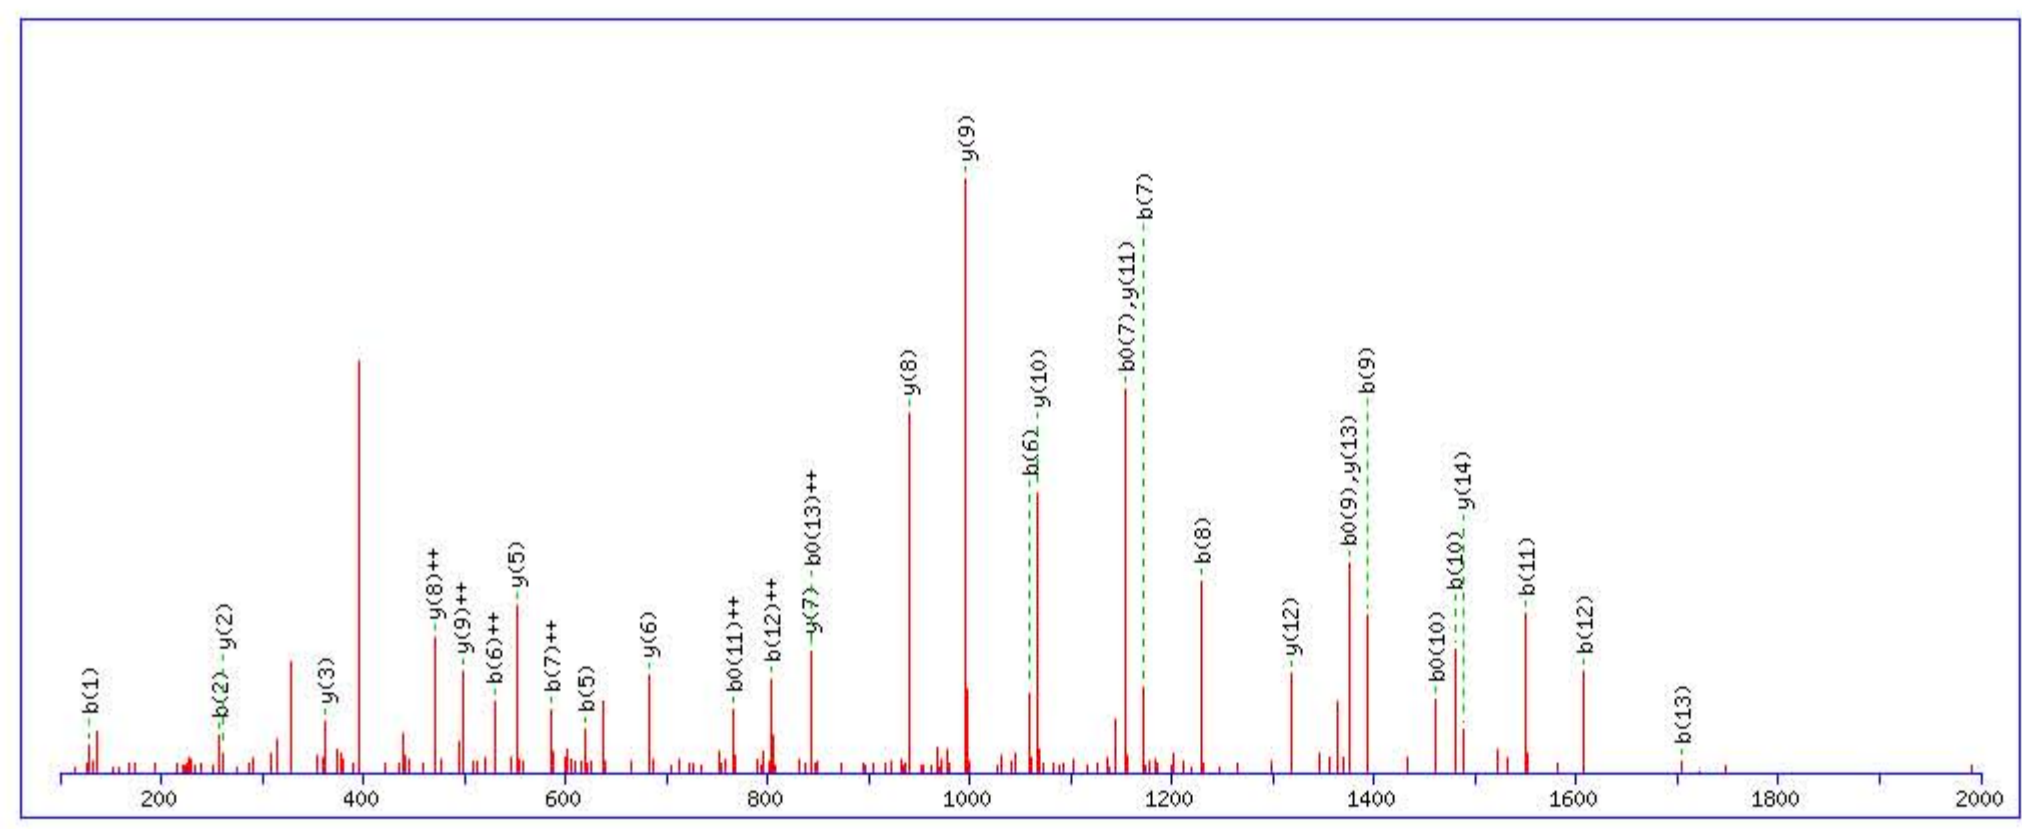

Monoisotopic mass of neutral peptide Mr(calc): 2545.089188  
 Fixed modifications: Carbamidomethyl (C) (apply to specified residues or termini only)  
 Variable modifications:  
 Q6 : Biotin:Thermo-21345 (Q)  
 Ions Score: 86 Expect: 1.4e-008  
 Matches : 33/224 fragment ions using 49 most intense peaks [\(help\)](#)

| #  | b                  | b <sup>++</sup>   | b <sup>+</sup> | b <sup>+++</sup> | b <sup>0</sup>     | b <sup>0++</sup> | Seq.     | y                  | y <sup>++</sup>   | y <sup>+</sup> | y <sup>+++</sup> | y <sup>0</sup> | y <sup>0++</sup> | #  |
|----|--------------------|-------------------|----------------|------------------|--------------------|------------------|----------|--------------------|-------------------|----------------|------------------|----------------|------------------|----|
| 1  | <b>129.102239</b>  | 65.054757         | 112.075690     | 56.541483        |                    |                  | <b>K</b> |                    |                   |                |                  |                |                  | 20 |
| 2  | <b>258.144832</b>  | 129.576054        | 241.118283     | 121.062780       | 240.134267         | 120.570772       | <b>E</b> | 2418.001508        | 1209.504392       | 2400.974959    | 1200.991117      | 2399.990943    | 1200.499109      | 19 |
| 3  | 373.171775         | 187.089526        | 356.145226     | 178.576251       | 355.161210         | 178.084243       | <b>D</b> | 2288.958915        | 1144.983095       | 2271.932366    | 1136.469821      | 2270.948350    | 1135.977813      | 18 |
| 4  | 460.203803         | 230.605540        | 443.177254     | 222.092265       | 442.193238         | 221.600257       | <b>S</b> | 2173.931972        | 1087.469624       | 2156.905423    | 1078.956349      | 2155.921407    | 1078.464341      | 17 |
| 5  | <b>620.234452</b>  | 310.620864        | 603.207903     | 302.107590       | 602.223887         | 301.615582       | <b>C</b> | 2086.899944        | 1043.953610       | 2069.873395    | 1035.440335      | 2068.889379    | 1034.948327      | 16 |
| 6  | <b>1059.459778</b> | <b>530.233527</b> | 1042.433229    | 521.720253       | 1041.449213        | 521.228245       | <b>Q</b> | 1926.869295        | 963.938286        | 1909.842746    | 955.425011       | 1908.858730    | 954.933003       | 15 |
| 7  | <b>1172.543842</b> | <b>586.775559</b> | 1155.517293    | 578.262285       | <b>1154.533277</b> | 577.770277       | <b>L</b> | <b>1487.643969</b> | 744.325623        | 1470.617420    | 735.812348       | 1469.633404    | 735.320340       | 14 |
| 8  | <b>1229.565306</b> | 615.286291        | 1212.538757    | 606.773017       | 1211.554741        | 606.281008       | <b>G</b> | <b>1374.559905</b> | 687.783591        | 1357.533356    | 679.270316       | 1356.549340    | 678.778308       | 13 |
| 9  | <b>1392.628635</b> | 696.817956        | 1375.602086    | 688.304681       | <b>1374.618070</b> | 687.812673       | <b>Y</b> | <b>1317.538441</b> | 659.272859        | 1300.511892    | 650.759584       | 1299.527876    | 650.267576       | 12 |
| 10 | <b>1479.660663</b> | 740.333970        | 1462.634114    | 731.820695       | <b>1461.650098</b> | 731.328687       | <b>S</b> | <b>1154.475112</b> | 577.741194        | 1137.448563    | 569.227920       | 1136.464547    | 568.735912       | 11 |
| 11 | <b>1550.697777</b> | 775.852527        | 1533.671228    | 767.339252       | 1532.687212        | 766.847244       | <b>A</b> | <b>1067.443084</b> | 534.225180        | 1050.416535    | 525.711906       | 1049.432519    | 525.219898       | 10 |
| 12 | <b>1607.719241</b> | <b>804.363259</b> | 1590.692692    | 795.849984       | 1589.708676        | 795.357976       | <b>G</b> | <b>996.405970</b>  | <b>498.706623</b> | 979.379421     | 490.193349       | 978.395405     | 489.701341       | 9  |
| 13 | <b>1704.772005</b> | 852.889641        | 1687.745456    | 844.376366       | 1686.761440        | 843.884358       | <b>P</b> | <b>939.384506</b>  | <b>470.195891</b> | 922.357957     | 461.682617       | 921.373941     | 461.190609       | 8  |
| 14 | 1864.802654        | 932.904965        | 1847.776105    | 924.391691       | 1846.792089        | 923.899683       | <b>C</b> | <b>842.331742</b>  | 421.669509        | 825.305193     | 413.156235       | 824.321177     | 412.664227       | 7  |
| 15 | 1995.843139        | 998.425208        | 1978.816590    | 989.911933       | 1977.832574        | 989.419925       | <b>M</b> | <b>682.301093</b>  | 341.654185        | 665.274544     | 333.140910       | 664.290528     | 332.648902       | 6  |
| 16 | 2052.864603        | 1026.935939       | 2035.838054    | 1018.422665      | 2034.854038        | 1017.930657      | <b>G</b> | <b>551.260608</b>  | 276.133942        | 534.234059     | 267.620668       | 533.250043     | 267.128660       | 5  |
| 17 | 2183.905088        | 1092.456182       | 2166.878539    | 1083.942907      | 2165.894523        | 1083.450899      | <b>M</b> | 494.239144         | 247.623210        | 477.212595     | 239.109935       | 476.228579     | 238.617927       | 4  |
| 18 | 2284.952767        | 1142.980021       | 2267.926218    | 1134.466747      | 2266.942202        | 1133.974739      | <b>T</b> | <b>363.198659</b>  | 182.102967        | 346.172110     | 173.589693       | 345.188094     | 173.097685       | 3  |
| 19 | 2371.984795        | 1186.496035       | 2354.958246    | 1177.982761      | 2353.974230        | 1177.490753      | <b>S</b> | <b>262.150980</b>  | 131.579128        | 245.124431     | 123.065854       | 244.140415     | 122.573846       | 2  |
| 20 |                    |                   |                |                  |                    |                  | <b>R</b> | 175.118952         | 88.063114         | 158.092403     | 79.549839        |                |                  | 1  |

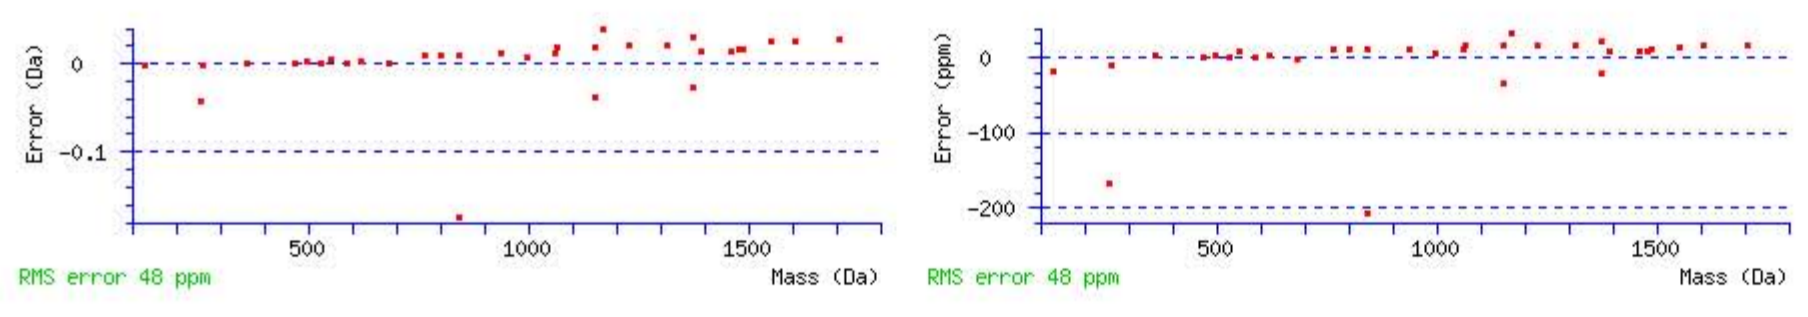

NCBI BLAST search of **KEDSQLGYSAGPCMGMTSR**  
 (Parameters: blastp, nr protein database, expect=20000, no filter, PAM30)  
 Other BLAST [web gateways](#)

### All matches to this query

| Score | Mr(calc):   | Delta    | Sequence                   |
|-------|-------------|----------|----------------------------|
| 85.8  | 2545.089188 | 0.031834 | <b>KEDSQLGYSAGPCMGMTSR</b> |

# MASCOT Search Results

## Peptide View

MS/MS Fragmentation of **GTAIEQR**

Found in **HEG1\_HUMAN**, Protein HEG homolog 1 OS=Homo sapiens GN=HEG1 PE=1 SV=3

Match to Query 15868: 1084.567848 from(543.291200,2+) rtinseconds(1470) index(30062)

Title: Locus:1.1.1.3060.21 File:"2013-07-02 CLN FXIII 60 min 3rd F 3.wiff"

Data file C:\Program Files (x86)\Matrix Science\Mascot Daemon\mgf\6 FXIII 60 min 3rd\mascot\_daemon\_merge.mgf

Click mouse within plot area to zoom in by factor of two about that point

Or, Plot from  to  Da

Label all possible matches  Label matches used for scoring

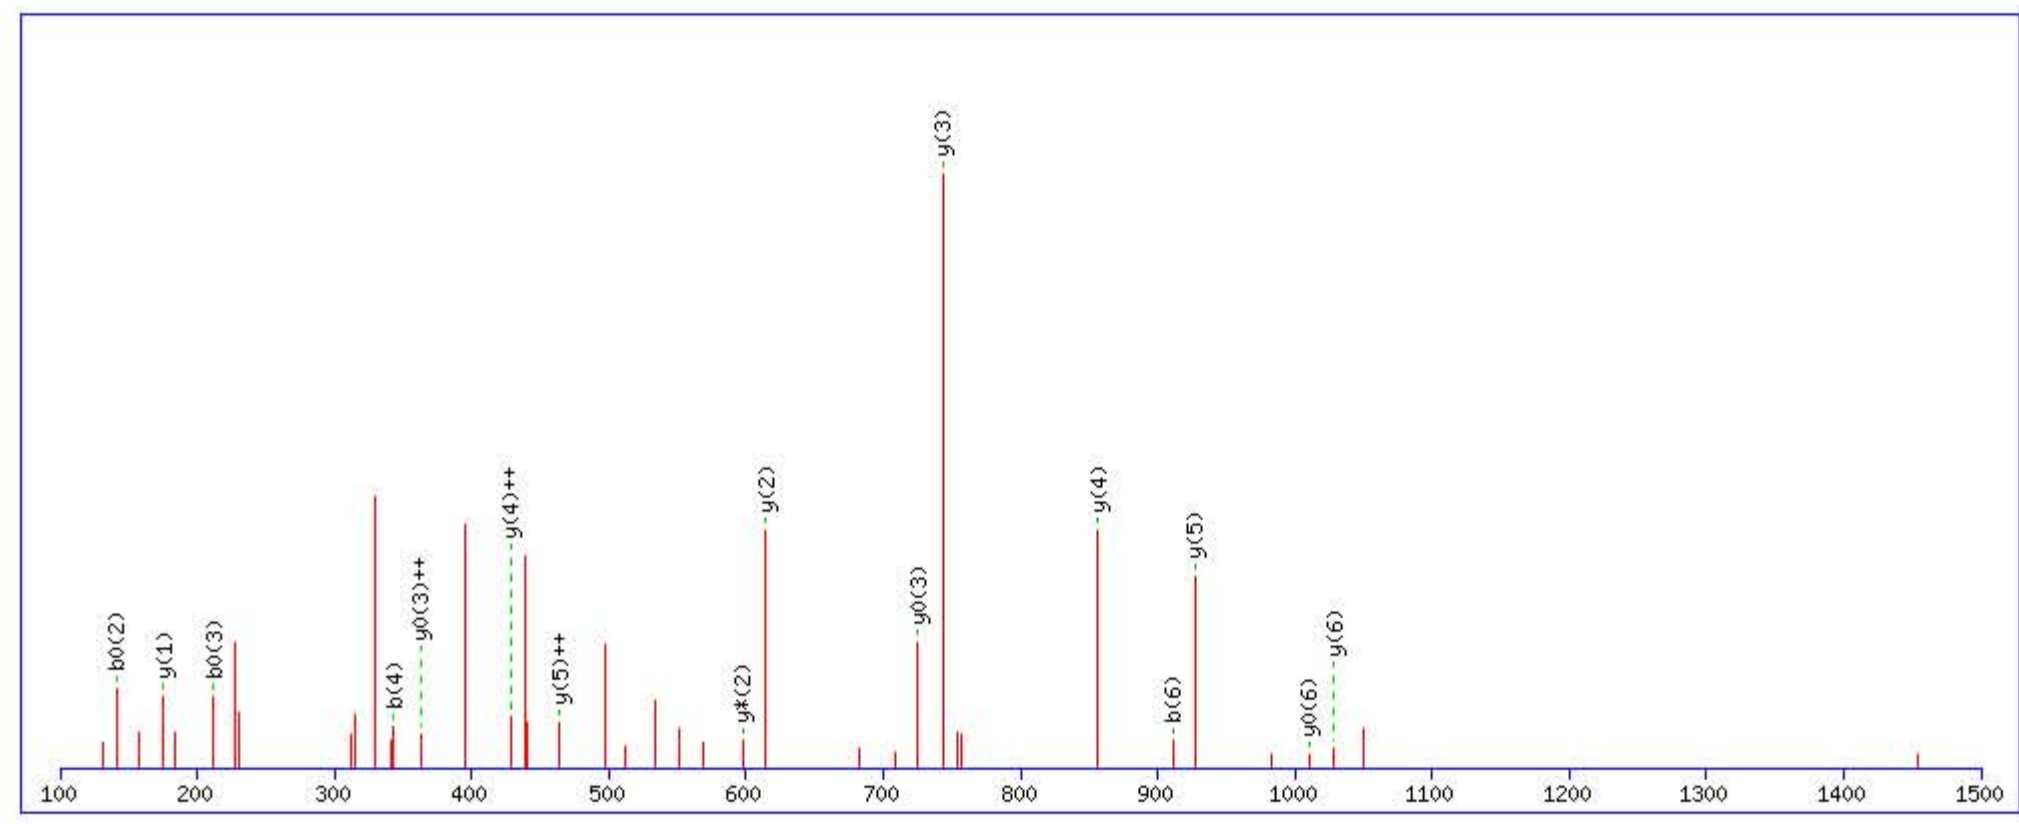

Monoisotopic mass of neutral peptide Mr(calc): 1084.569901

Fixed modifications: Carbamidomethyl (C) (apply to specified residues or termini only)

Variable modifications:

Q6 : Biotin:Thermo-21345 (Q)

Ions Score: 35 Expect: 0.0061

Matches : 16/56 fragment ions using 33 most intense peaks [\(help\)](#)

| # | b          | b <sup>++</sup> | b <sup>*</sup> | b <sup>*++</sup> | b <sup>0</sup> | b <sup>0++</sup> | Seq.     | y           | y <sup>++</sup> | y <sup>*</sup> | y <sup>*++</sup> | y <sup>0</sup> | y <sup>0++</sup> | # |
|---|------------|-----------------|----------------|------------------|----------------|------------------|----------|-------------|-----------------|----------------|------------------|----------------|------------------|---|
| 1 | 58.028740  | 29.518008       |                |                  |                |                  | <b>G</b> |             |                 |                |                  |                |                  | 7 |
| 2 | 159.076419 | 80.041847       |                |                  | 141.065854     | 71.036565        | <b>T</b> | 1028.555728 | 514.781502      | 1011.529179    | 506.268228       | 1010.545163    | 505.776220       | 6 |
| 3 | 230.113533 | 115.560404      |                |                  | 212.102968     | 106.555122       | <b>A</b> | 927.508049  | 464.257663      | 910.481500     | 455.744388       | 909.497484     | 455.252380       | 5 |
| 4 | 343.197597 | 172.102436      |                |                  | 325.187032     | 163.097154       | <b>I</b> | 856.470935  | 428.739106      | 839.444386     | 420.225831       | 838.460370     | 419.733823       | 4 |
| 5 | 472.240190 | 236.623733      |                |                  | 454.229625     | 227.618450       | <b>E</b> | 743.386871  | 372.197074      | 726.360322     | 363.683799       | 725.376306     | 363.191791       | 3 |
| 6 | 911.465516 | 456.236396      | 894.438967     | 447.723122       | 893.454951     | 447.231114       | <b>Q</b> | 614.344278  | 307.675777      | 597.317729     | 299.162503       |                |                  | 2 |
| 7 |            |                 |                |                  |                |                  | <b>R</b> | 175.118952  | 88.063114       | 158.092403     | 79.549840        |                |                  | 1 |

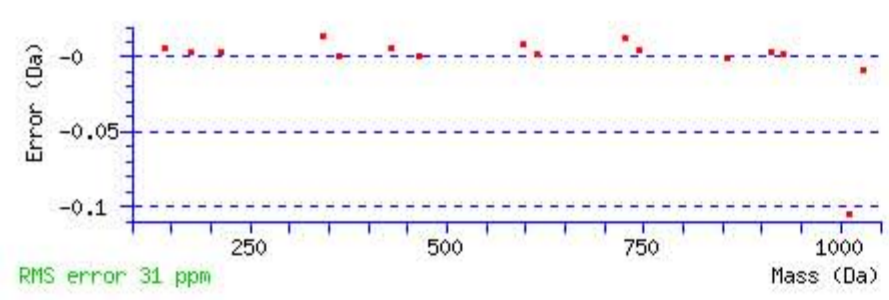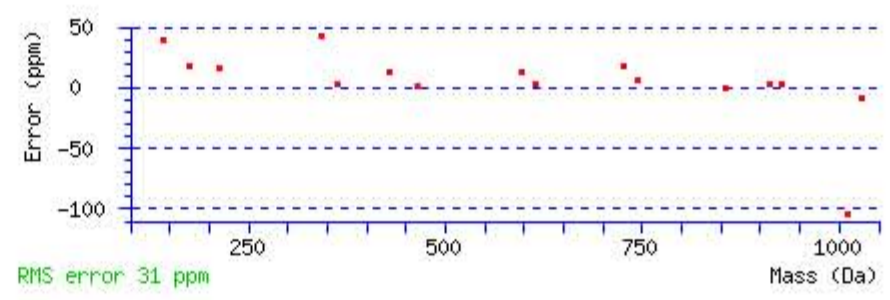

NCBI BLAST search of **GTAIEQR**

(Parameters: blastp, nr protein database, expect=20000, no filter, PAM30)

Other BLAST [web gateways](#)

All matches to this query

| Score | Mr(calc):   | Delta     | Sequence                   |
|-------|-------------|-----------|----------------------------|
| 34.9  | 1084.569901 | -0.002053 | <a href="#">GTAIEQR</a>    |
| 10.6  | 1084.569885 | -0.002037 | <a href="#">ASAEIQR</a>    |
| 7.9   | 1084.573730 | -0.005882 | <a href="#">RGELPRDSR</a>  |
| 6.3   | 1084.569916 | -0.002068 | <a href="#">TKMDLGGHVK</a> |
| 6.3   | 1084.569885 | -0.002037 | <a href="#">QELAASR</a>    |
| 6.3   | 1084.569901 | -0.002053 | <a href="#">QELAGTR</a>    |
| 3.1   | 1084.566559 | 0.001289  | <a href="#">DGGVLFHVNK</a> |
| 3.1   | 1084.573715 | -0.005867 | <a href="#">ARTREAEPR</a>  |
| 1.2   | 1084.573746 | -0.005898 | <a href="#">TGRHSIASTR</a> |
| 1.0   | 1084.562485 | 0.005363  | <a href="#">RSEALEAGPR</a> |

# MASCOT SCIENCE Mascot Search Results

## Peptide View

MS/MS Fragmentation of **VGALSQLR**

Found in **MENT\_HUMAN**, Protein MENT OS=Homo sapiens GN=MENT PE=2 SV=1

Match to Query 18957: 1153.664988 from(577.839770,2+) rtinseconds(1935) index(32703)

Title: Locus:1.1.1.3223.10 File:"2013-07-02 CLN FXIII 60 min 3rd F 3.wiff"

Data file C:\Program Files (x86)\Matrix Science\Mascot Daemon\mgf\6 FXIII 60 min 3rd\mascot\_daemon\_merge.mgf

Click mouse within plot area to zoom in by factor of two about that point

Or, Plot from  to  Da

Label all possible matches  Label matches used for scoring

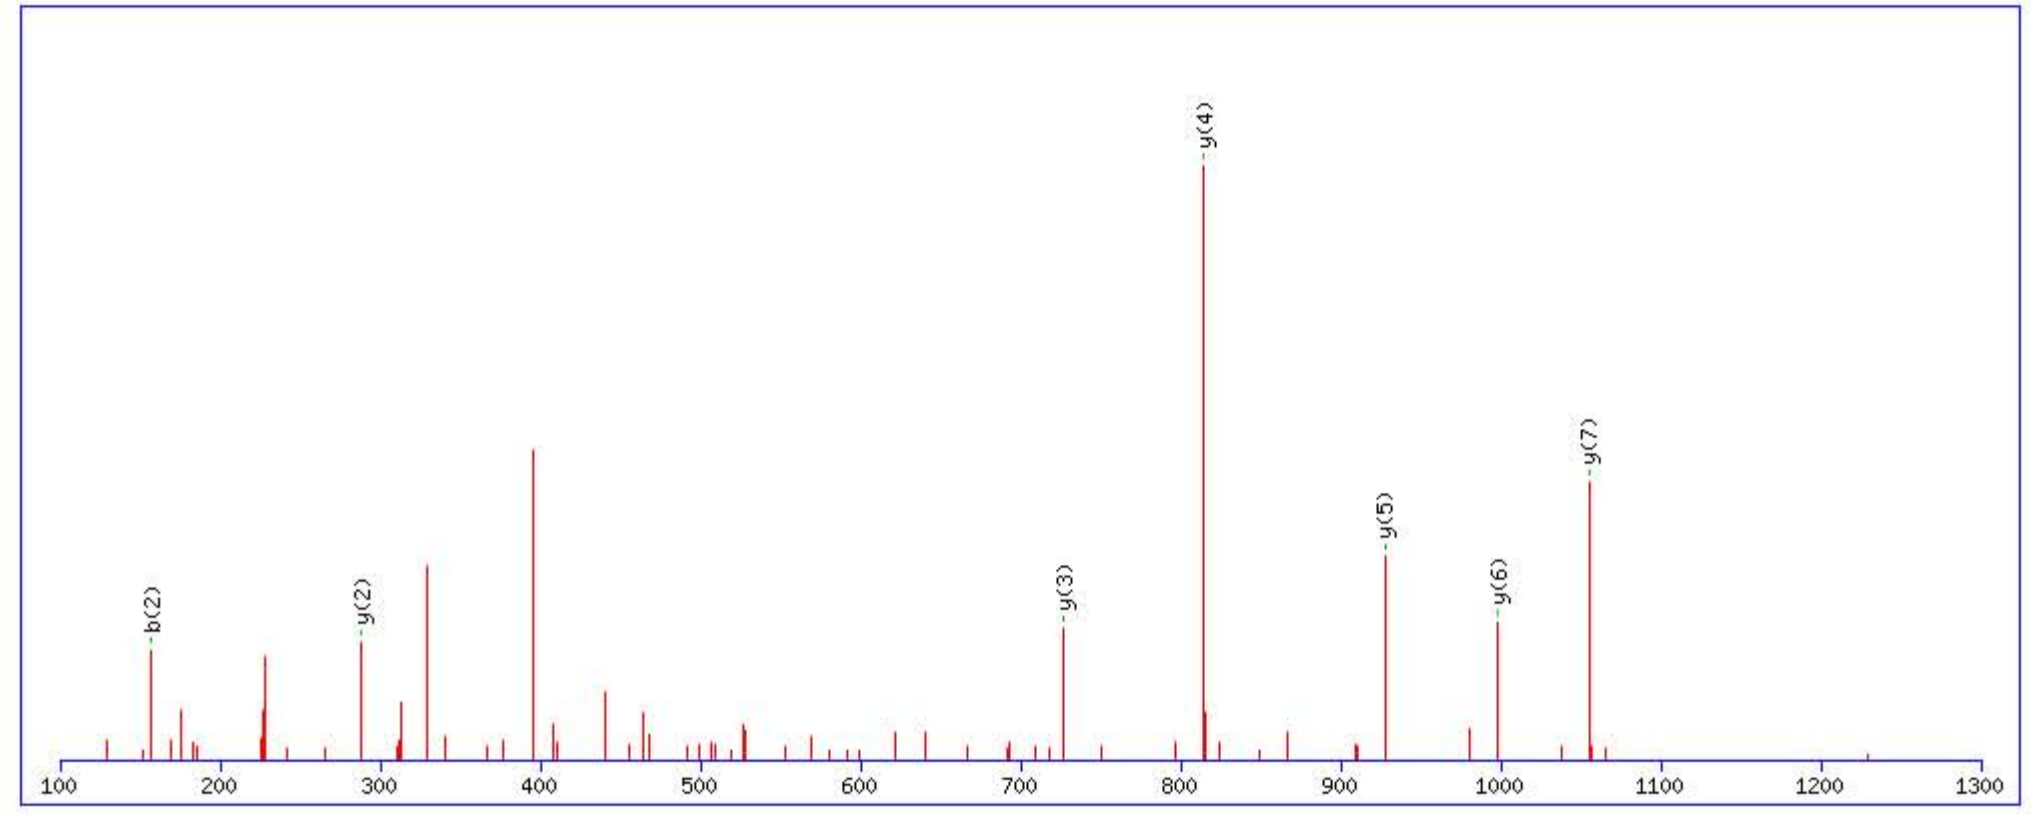

Monoisotopic mass of neutral peptide Mr(calc): 1153.664139

Fixed modifications: Carbamidomethyl (C) (apply to specified residues or termini only)

Variable modifications:

Q6 : Biotin:Thermo-21345 (Q)

Ions Score: 48 Expect: 0.00023

Matches : 7/60 fragment ions using 10 most intense peaks [\(help\)](#)

| # | b                 | b <sup>++</sup> | b <sup>*</sup> | b <sup>*++</sup> | b <sup>0</sup> | b <sup>0++</sup> | Seq. | y                  | y <sup>++</sup> | y <sup>*</sup> | y <sup>*++</sup> | y <sup>0</sup> | y <sup>0++</sup> | # |
|---|-------------------|-----------------|----------------|------------------|----------------|------------------|------|--------------------|-----------------|----------------|------------------|----------------|------------------|---|
| 1 | 100.075690        | 50.541483       |                |                  |                |                  | V    |                    |                 |                |                  |                |                  | 8 |
| 2 | <b>157.097154</b> | 79.052215       |                |                  |                |                  | G    | <b>1055.603012</b> | 528.305144      | 1038.576463    | 519.791870       | 1037.592447    | 519.299862       | 7 |
| 3 | 228.134268        | 114.570772      |                |                  |                |                  | A    | <b>998.581548</b>  | 499.794412      | 981.554999     | 491.281138       | 980.570983     | 490.789130       | 6 |
| 4 | 341.218332        | 171.112804      |                |                  |                |                  | L    | <b>927.544434</b>  | 464.275855      | 910.517885     | 455.762581       | 909.533869     | 455.270573       | 5 |
| 5 | 428.250360        | 214.628818      |                |                  | 410.239795     | 205.623535       | S    | <b>814.460370</b>  | 407.733823      | 797.433821     | 399.220549       | 796.449805     | 398.728541       | 4 |
| 6 | 867.475686        | 434.241481      | 850.449137     | 425.728207       | 849.465121     | 425.236199       | Q    | <b>727.428342</b>  | 364.217809      | 710.401793     | 355.704535       |                |                  | 3 |
| 7 | 980.559750        | 490.783513      | 963.533201     | 482.270239       | 962.549185     | 481.778231       | L    | <b>288.203016</b>  | 144.605146      | 271.176467     | 136.091872       |                |                  | 2 |
| 8 |                   |                 |                |                  |                |                  | R    | 175.118952         | 88.063114       | 158.092403     | 79.549840        |                |                  | 1 |

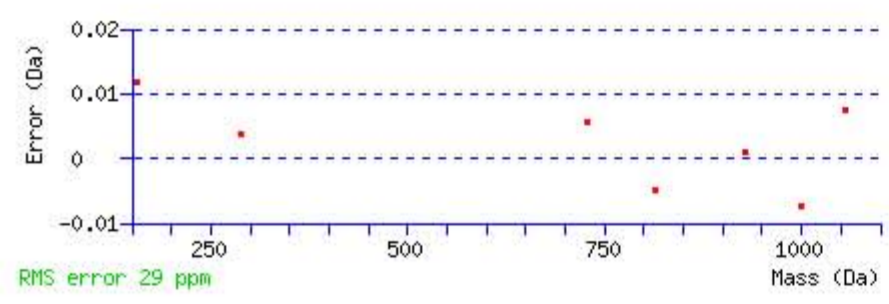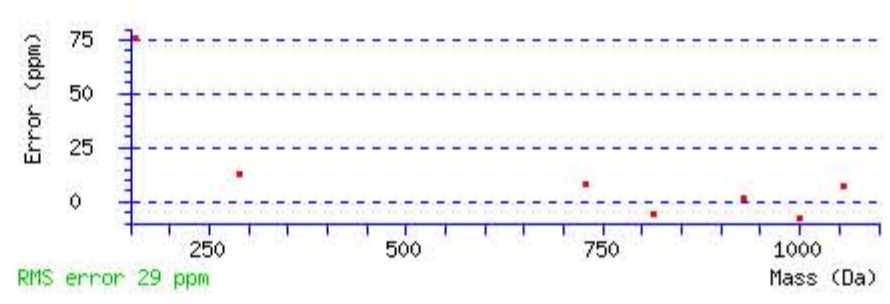

NCBI BLAST search of **VGALSQLR**

(Parameters: blastp, nr protein database, expect=20000, no filter, PAM30)

Other BLAST [web gateways](#)

### All matches to this query

| Score | Mr(calc):   | Delta     | Sequence                    |
|-------|-------------|-----------|-----------------------------|
| 48.3  | 1153.664139 | 0.000849  | <a href="#">VGALSQLR</a>    |
| 15.9  | 1153.667953 | -0.002965 | <a href="#">RANPNSIRVK</a>  |
| 12.3  | 1153.681870 | -0.016882 | <a href="#">RALENLLPTK</a>  |
| 11.1  | 1153.681885 | -0.016897 | <a href="#">VQKKTALPLR</a>  |
| 10.9  | 1153.664124 | 0.000864  | <a href="#">VKQEALR</a>     |
| 10.4  | 1153.675354 | -0.010366 | <a href="#">RALLSQR</a>     |
| 10.4  | 1153.675369 | -0.010381 | <a href="#">RALTVQR</a>     |
| 5.2   | 1153.664139 | 0.000849  | <a href="#">VTQINLR</a>     |
| 4.3   | 1153.660767 | 0.004221  | <a href="#">VPTAAGAWLLR</a> |
| 4.3   | 1153.675369 | -0.010381 | <a href="#">QTVRALR</a>     |

# MASCOT SCIENCE Mascot Search Results

## Peptide View

MS/MS Fragmentation of **ETAASLLQAGYK**

Found in **THRB\_HUMAN**, Prothrombin OS=Homo sapiens GN=F2 PE=1 SV=2

Match to Query 31437: 1561.831408 from(781.922980,2+) rtinseconds(2125) index(48175)

Title: Locus:1.1.1.2788.16 File:"2013-07-02 CLN FXIII 60 min 3rd F 4.wiff"

Data file C:\Program Files (x86)\Matrix Science\Mascot Daemon\mgf\6 FXIII 60 min 3rd\mascot\_daemon\_merge.mgf

Click mouse within plot area to zoom in by factor of two about that point

Or, Plot from  to  Da

Label all possible matches  Label matches used for scoring

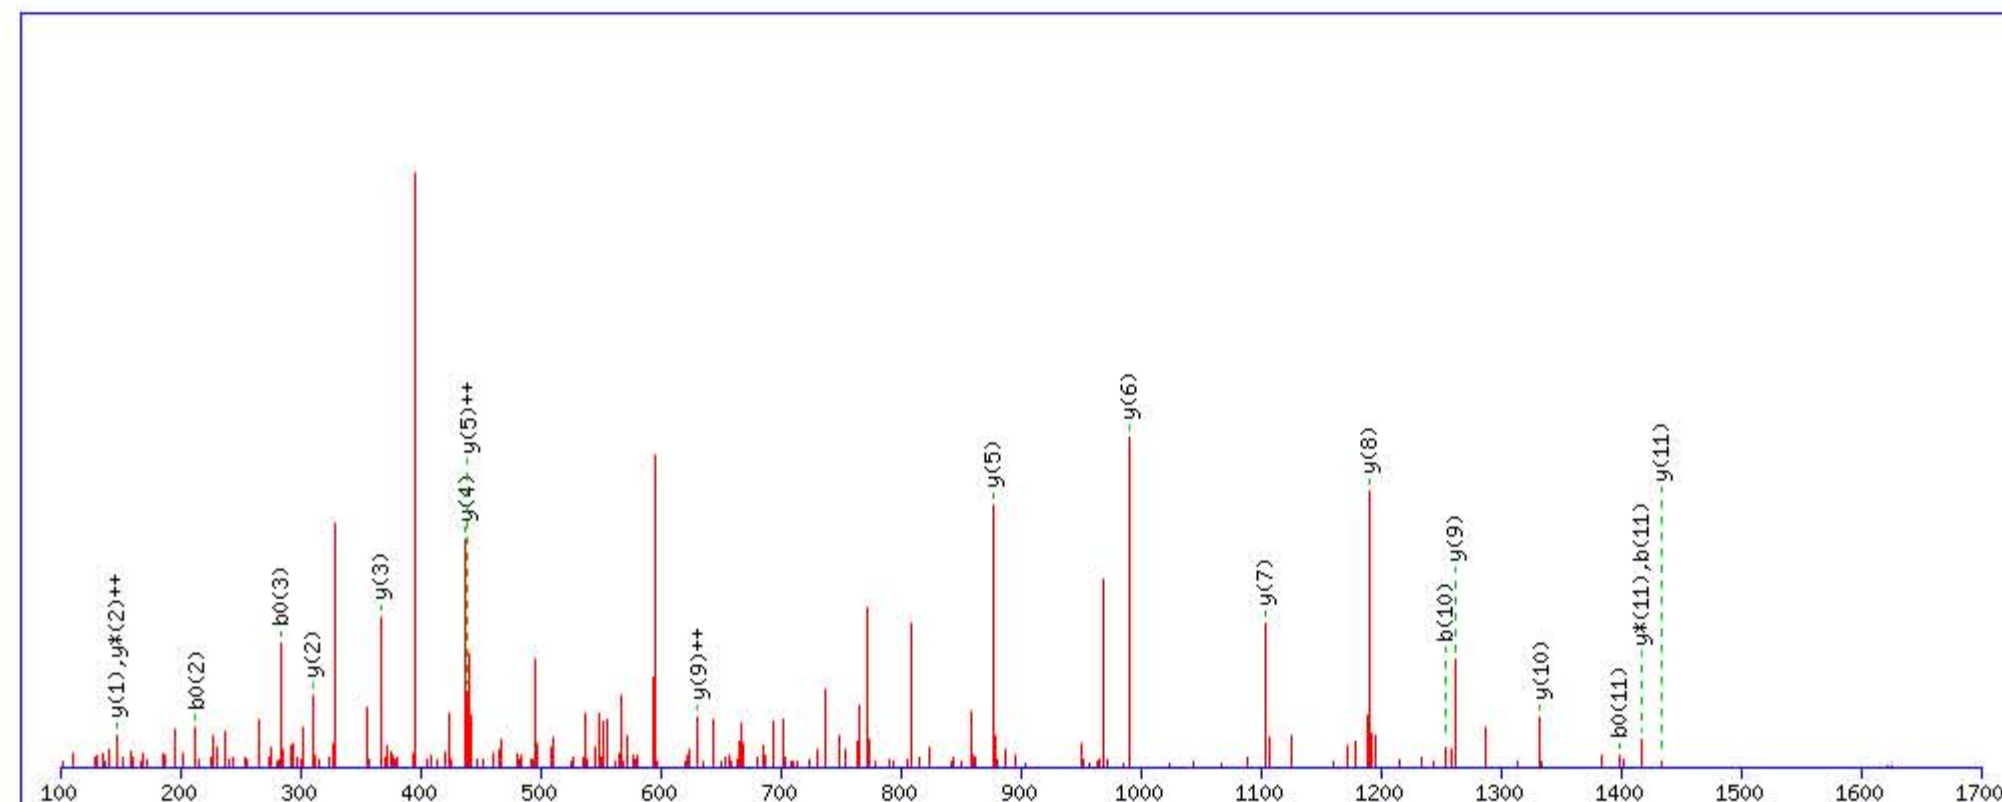

Monoisotopic mass of neutral peptide Mr(calc): 1561.817383

Fixed modifications: Carbamidomethyl (C) (apply to specified residues or termini only)

Variable modifications:

Q8 : Biotin:Thermo-21345 (Q)

Ions Score: 51 Expect: 2.5e-005

Matches : 20/104 fragment ions using 55 most intense peaks [\(help\)](#)

| #  | b           | b <sup>++</sup> | b <sup>*</sup> | b <sup>*++</sup> | b <sup>0</sup> | b <sup>0++</sup> | Seq. | y           | y <sup>++</sup> | y <sup>*</sup> | y <sup>*++</sup> | y <sup>0</sup> | y <sup>0++</sup> | #  |
|----|-------------|-----------------|----------------|------------------|----------------|------------------|------|-------------|-----------------|----------------|------------------|----------------|------------------|----|
| 1  | 130.049869  | 65.528572       |                |                  | 112.039304     | 56.523290        | E    |             |                 |                |                  |                |                  | 12 |
| 2  | 231.097548  | 116.052412      |                |                  | 213.086983     | 107.047130       | T    | 1433.782100 | 717.394688      | 1416.755551    | 708.881414       | 1415.771535    | 708.389406       | 11 |
| 3  | 302.134662  | 151.570969      |                |                  | 284.124097     | 142.565687       | A    | 1332.734421 | 666.870848      | 1315.707872    | 658.357574       | 1314.723856    | 657.865566       | 10 |
| 4  | 373.171776  | 187.089526      |                |                  | 355.161211     | 178.084243       | A    | 1261.697307 | 631.352292      | 1244.670758    | 622.839017       | 1243.686742    | 622.347009       | 9  |
| 5  | 460.203804  | 230.605540      |                |                  | 442.193239     | 221.600257       | S    | 1190.660193 | 595.833734      | 1173.633644    | 587.320460       | 1172.649628    | 586.828452       | 8  |
| 6  | 573.287868  | 287.147572      |                |                  | 555.277303     | 278.142290       | L    | 1103.628165 | 552.317721      | 1086.601616    | 543.804446       |                |                  | 7  |
| 7  | 686.371932  | 343.689604      |                |                  | 668.361367     | 334.684322       | L    | 990.544101  | 495.775689      | 973.517552     | 487.262414       |                |                  | 6  |
| 8  | 1125.597258 | 563.302267      | 1108.570709    | 554.788993       | 1107.586693    | 554.296985       | Q    | 877.460037  | 439.233657      | 860.433488     | 430.720382       |                |                  | 5  |
| 9  | 1196.634372 | 598.820824      | 1179.607823    | 590.307550       | 1178.623807    | 589.815541       | A    | 438.234711  | 219.620993      | 421.208162     | 211.107719       |                |                  | 4  |
| 10 | 1253.655836 | 627.331556      | 1236.629287    | 618.818282       | 1235.645271    | 618.326273       | G    | 367.197597  | 184.102436      | 350.171048     | 175.589162       |                |                  | 3  |
| 11 | 1416.719165 | 708.863221      | 1399.692616    | 700.349946       | 1398.708600    | 699.857938       | Y    | 310.176133  | 155.591705      | 293.149584     | 147.078430       |                |                  | 2  |
| 12 |             |                 |                |                  |                |                  | K    | 147.112804  | 74.060040       | 130.086255     | 65.546765        |                |                  | 1  |

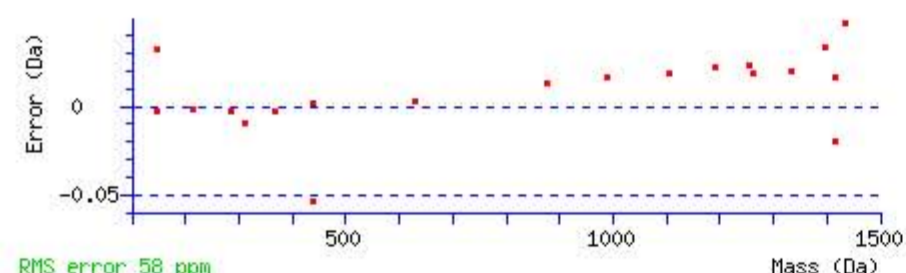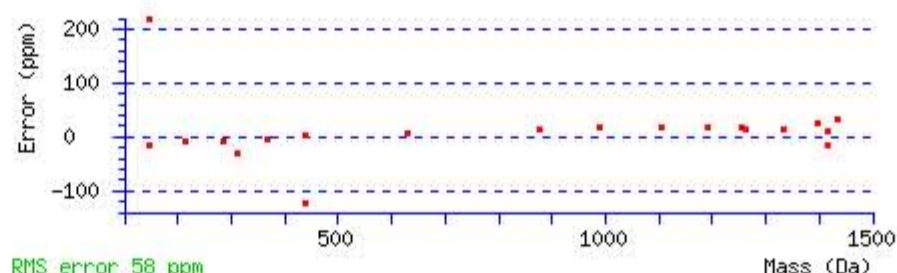

NCBI BLAST search of [ETAASLLQAGYK](#)

(Parameters: blastp, nr protein database, expect=20000, no filter, PAM30)

Other BLAST [web gateways](#)

All matches to this query

| Score | Mr(calc):   | Delta     | Sequence                      |
|-------|-------------|-----------|-------------------------------|
| 51.5  | 1561.817383 | 0.014025  | <a href="#">ETAASLLQAGYK</a>  |
| 2.2   | 1561.817398 | 0.014010  | <a href="#">VLPEVLEKQCGYK</a> |
| 0.3   | 1561.843903 | -0.012495 | <a href="#">HLSGLSWPQVK</a>   |

Mascot: <http://www.matrixscience.com/>

# MASCOT Search Results

## Peptide View

MS/MS Fragmentation of **SPQELLCGASLISDR**

Found in **THRB\_HUMAN**, Prothrombin OS=Homo sapiens GN=F2 PE=1 SV=2

Match to Query 41172: 1956.003852 from(653.008560,3+) rtinseconds(2490) index(50209)

Title: Locus:1.1.1.2915.19 File:"2013-07-02 CLN FXIII 60 min 3rd F 4.wiff"

Data file C:\Program Files (x86)\Matrix Science\Mascot Daemon\mgf\6 FXIII 60 min 3rd\mascot\_daemon\_merge.mgf

Click mouse within plot area to zoom in by factor of two about that point

Or, Plot from  to  Da

Label all possible matches  Label matches used for scoring

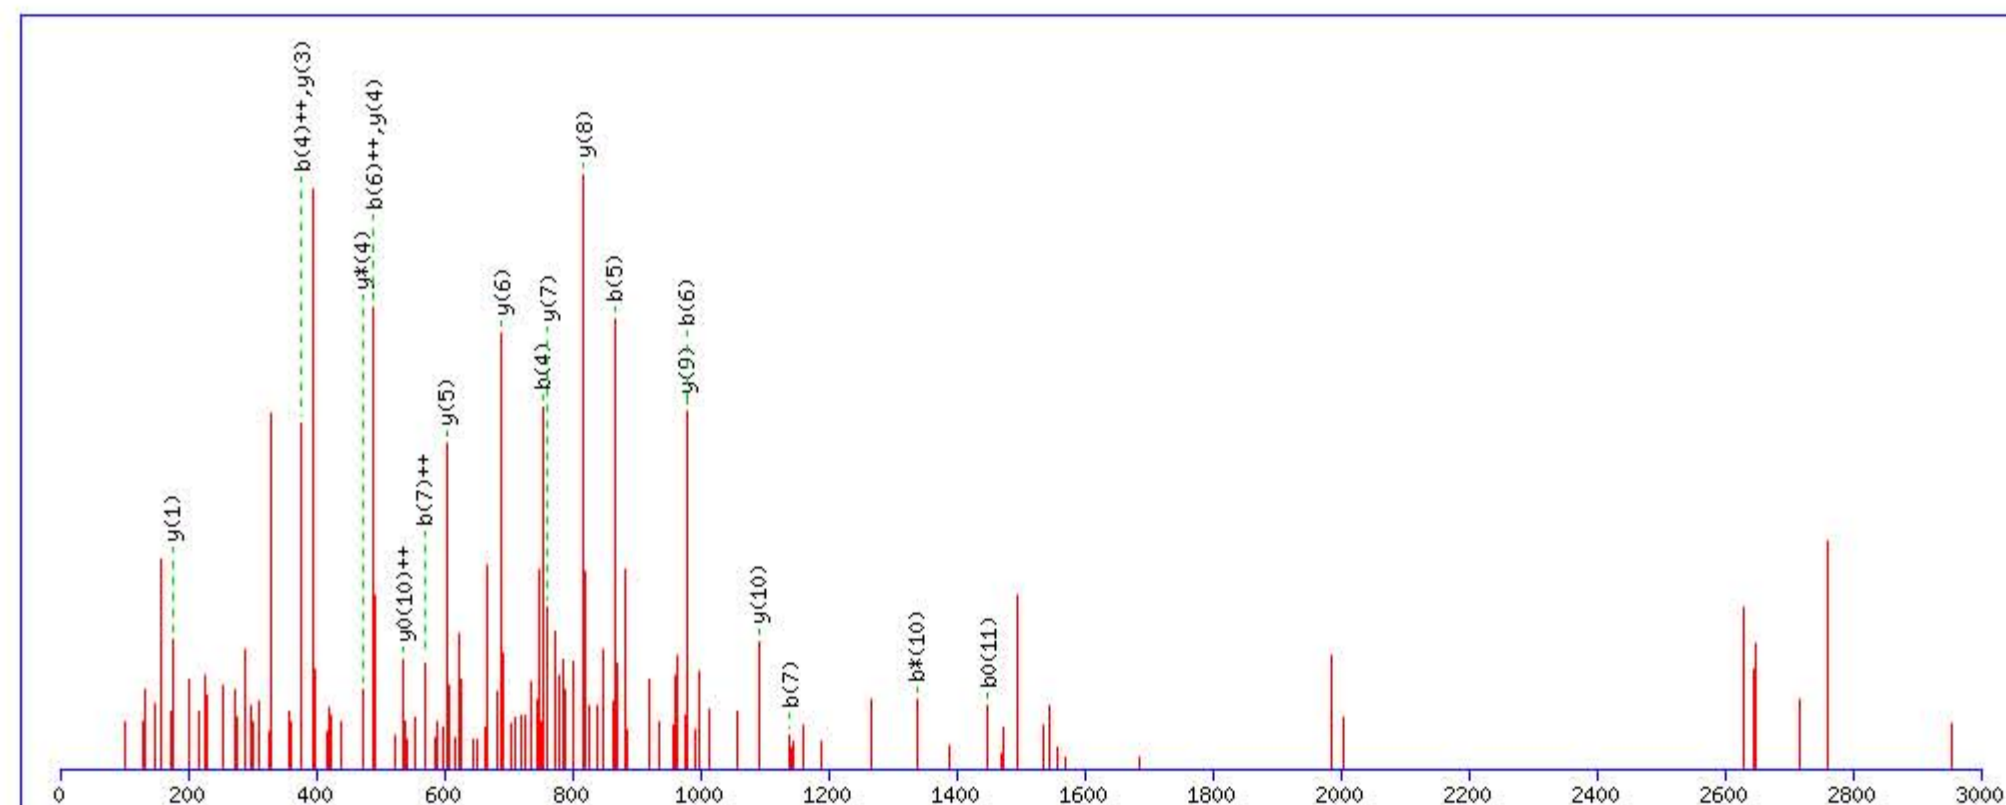

Monoisotopic mass of neutral peptide Mr(calc): 1955.980850

Fixed modifications: Carbamidomethyl (C) (apply to specified residues or termini only)

Variable modifications:

Q3 : Biotin:Thermo-21345 (Q)

Ions Score: 38 Expect: 0.0045

Matches : 20/162 fragment ions using 44 most intense peaks [\(help\)](#)

| #  | b                  | b <sup>++</sup>   | b <sup>+</sup>     | b <sup>+++</sup> | b <sup>0</sup>     | b <sup>0++</sup> | Seq. | y                  | y <sup>++</sup> | y <sup>+</sup>    | y <sup>+++</sup> | y <sup>0</sup> | y <sup>0++</sup>  | #  |
|----|--------------------|-------------------|--------------------|------------------|--------------------|------------------|------|--------------------|-----------------|-------------------|------------------|----------------|-------------------|----|
| 1  | 88.039304          | 44.523290         |                    |                  | 70.028739          | 35.518008        | S    |                    |                 |                   |                  |                |                   | 15 |
| 2  | 185.092068         | 93.049672         |                    |                  | 167.081503         | 84.044389        | P    | 1869.956117        | 935.481697      | 1852.929568       | 926.968422       | 1851.945552    | 926.476414        | 14 |
| 3  | 624.317394         | 312.662335        | 607.290845         | 304.149061       | 606.306829         | 303.657053       | Q    | 1772.903353        | 886.955314      | 1755.876804       | 878.442040       | 1754.892788    | 877.950032        | 13 |
| 4  | <b>753.359987</b>  | <b>377.183632</b> | 736.333438         | 368.670357       | 735.349422         | 368.178349       | E    | 1333.678027        | 667.342652      | 1316.651478       | 658.829377       | 1315.667462    | 658.337369        | 12 |
| 5  | <b>866.444051</b>  | 433.725664        | 849.417502         | 425.212389       | 848.433486         | 424.720381       | L    | 1204.635434        | 602.821355      | 1187.608885       | 594.308081       | 1186.624869    | 593.816073        | 11 |
| 6  | <b>979.528115</b>  | <b>490.267696</b> | 962.501566         | 481.754421       | 961.517550         | 481.262413       | L    | <b>1091.551370</b> | 546.279323      | 1074.524821       | 537.766049       | 1073.540805    | <b>537.274040</b> | 10 |
| 7  | <b>1139.558764</b> | <b>570.283020</b> | 1122.532215        | 561.769746       | 1121.548199        | 561.277738       | C    | <b>978.467306</b>  | 489.737291      | 961.440757        | 481.224017       | 960.456741     | 480.732009        | 9  |
| 8  | 1196.580228        | 598.793752        | 1179.553679        | 590.280478       | 1178.569663        | 589.788470       | G    | <b>818.436657</b>  | 409.721967      | 801.410108        | 401.208692       | 800.426092     | 400.716684        | 8  |
| 9  | 1267.617342        | 634.312309        | 1250.590793        | 625.799035       | 1249.606777        | 625.307027       | A    | <b>761.415193</b>  | 381.211235      | 744.388644        | 372.697960       | 743.404628     | 372.205952        | 7  |
| 10 | 1354.649370        | 677.828323        | <b>1337.622821</b> | 669.315049       | 1336.638805        | 668.823041       | S    | <b>690.378079</b>  | 345.692678      | 673.351530        | 337.179403       | 672.367514     | 336.687395        | 6  |
| 11 | 1467.733434        | 734.370355        | 1450.706885        | 725.857081       | <b>1449.722869</b> | 725.365073       | L    | <b>603.346051</b>  | 302.176664      | 586.319502        | 293.663389       | 585.335486     | 293.171381        | 5  |
| 12 | 1580.817498        | 790.912387        | 1563.790949        | 782.399113       | 1562.806933        | 781.907104       | I    | <b>490.261987</b>  | 245.634631      | <b>473.235438</b> | 237.121357       | 472.251422     | 236.629349        | 4  |
| 13 | 1667.849526        | 834.428401        | 1650.822977        | 825.915127       | 1649.838961        | 825.423118       | S    | <b>377.177923</b>  | 189.092600      | 360.151374        | 180.579325       | 359.167358     | 180.087317        | 3  |
| 14 | 1782.876469        | 891.941873        | 1765.849920        | 883.428598       | 1764.865904        | 882.936590       | D    | 290.145895         | 145.576585      | 273.119346        | 137.063311       | 272.135330     | 136.571303        | 2  |
| 15 |                    |                   |                    |                  |                    |                  | R    | <b>175.118952</b>  | 88.063114       | 158.092403        | 79.549839        |                |                   | 1  |

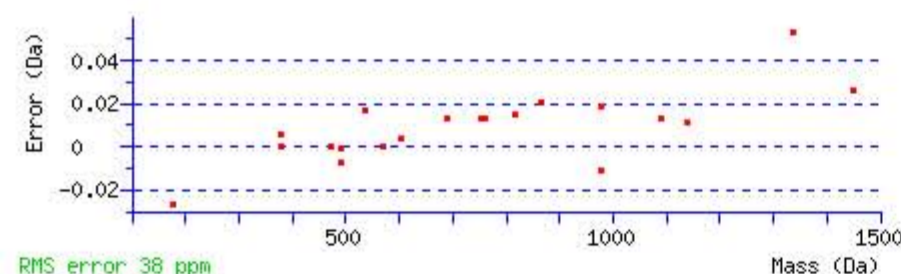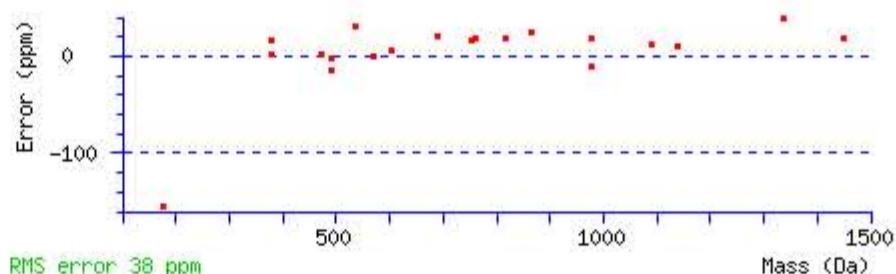

NCBI BLAST search of [SPQELLCGASLISDR](#)

(Parameters: blastp, nr protein database, expect=20000, no filter, PAM30)

Other BLAST [web gateways](#)

All matches to this query

| Score | Mr(calc):   | Delta    | Sequence                        |
|-------|-------------|----------|---------------------------------|
| 37.9  | 1955.980850 | 0.023002 | <a href="#">SPQELLCGASLISDR</a> |

Mascot: <http://www.matrixscience.com/>

# MASCOT Search Results

## Peptide View

MS/MS Fragmentation of **HQDFNSAVQLVENFCR**

Found in **THRB\_HUMAN**, Prothrombin OS=Homo sapiens GN=F2 PE=1 SV=2

Match to Query 47303: 2274.078792 from(759.033540,3+) rtinseconds(2480) index(65007)

Title: Locus:1.1.1.3490.11 File:"2013-07-02 CLN FXIII 60 min 3rd FT.wiff"

Data file C:\Program Files (x86)\Matrix Science\Mascot Daemon\mgf\6 FXIII 60 min 3rd\mascot\_daemon\_merge.mgf

Click mouse within plot area to zoom in by factor of two about that point

Or, Plot from  to  Da

Label all possible matches  Label matches used for scoring

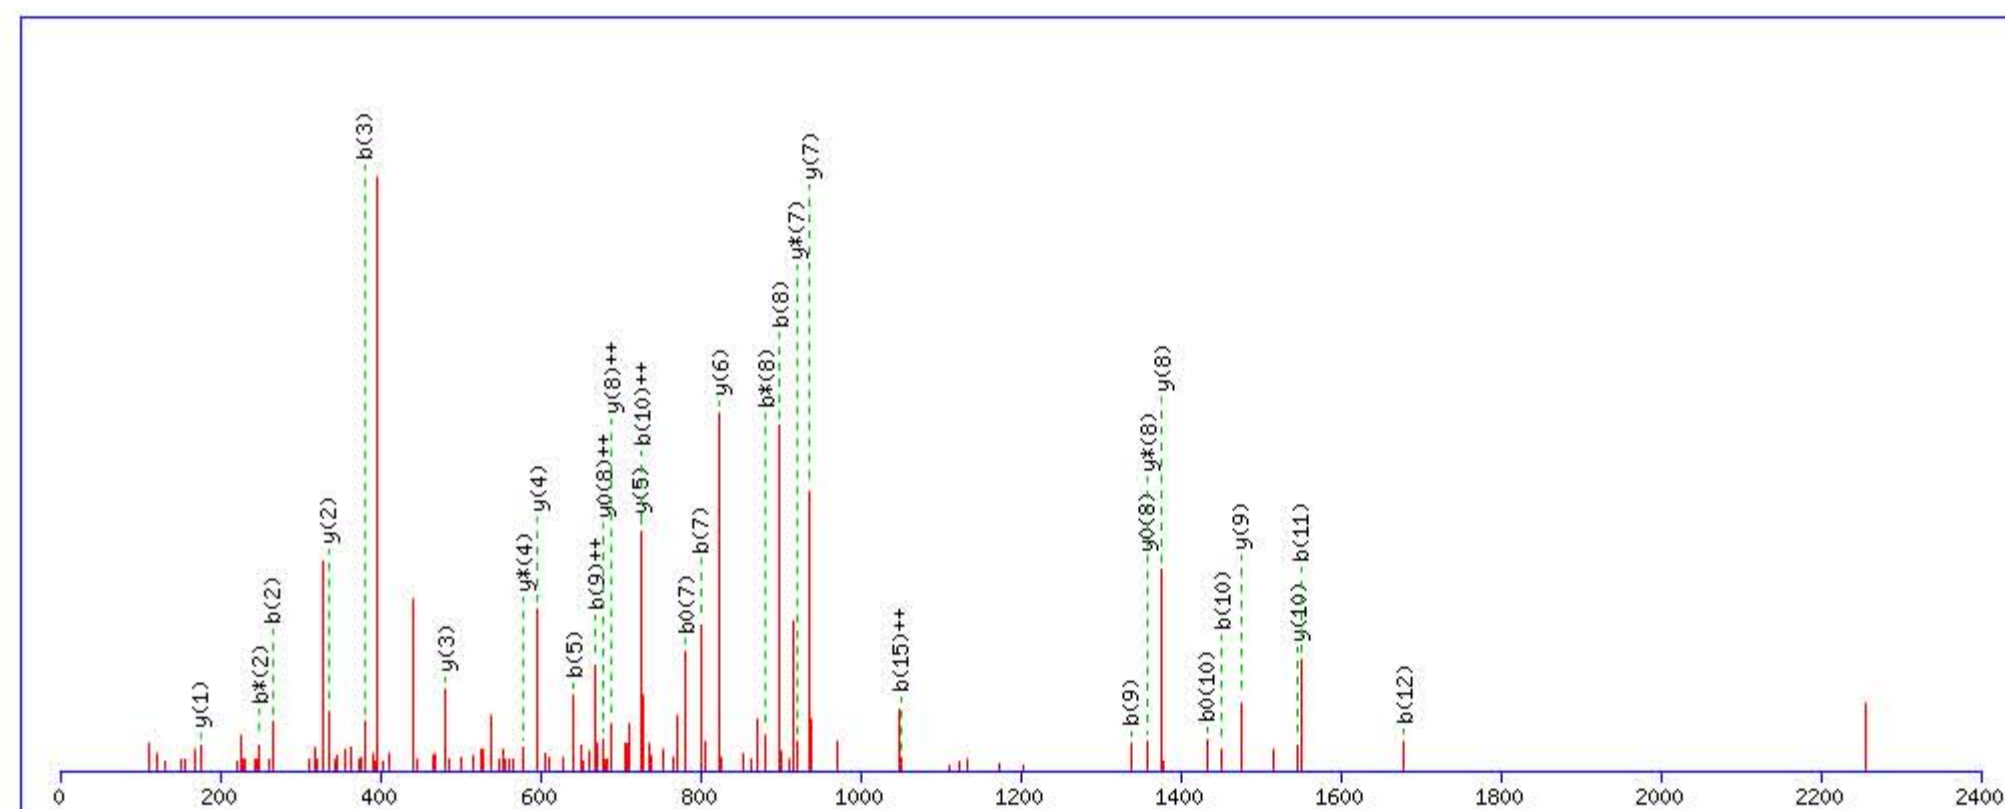

Monoisotopic mass of neutral peptide Mr(calc): 2274.067398

Fixed modifications: Carbamidomethyl (C) (apply to specified residues or termini only)

Variable modifications:

Q9 : Biotin:Thermo-21345 (Q)

Ions Score: 61 Expect: 1.5e-005

Matches : 32/166 fragment ions using 55 most intense peaks [\(help\)](#)

| #  | b                  | b <sup>++</sup>    | b <sup>*</sup>    | b <sup>*++</sup> | b <sup>0</sup>     | b <sup>0++</sup> | Seq. | y                  | y <sup>++</sup>   | y <sup>*</sup>     | y <sup>*++</sup> | y <sup>0</sup>     | y <sup>0++</sup>  | #  |
|----|--------------------|--------------------|-------------------|------------------|--------------------|------------------|------|--------------------|-------------------|--------------------|------------------|--------------------|-------------------|----|
| 1  | 138.066188         | 69.536732          |                   |                  |                    |                  | H    |                    |                   |                    |                  |                    |                   | 16 |
| 2  | <b>266.124766</b>  | 133.566021         | <b>249.098217</b> | 125.052746       |                    |                  | Q    | 2138.015757        | 1069.511516       | 2120.989208        | 1060.998242      | 2120.005192        | 1060.506234       | 15 |
| 3  | <b>381.151709</b>  | 191.079492         | 364.125160        | 182.566218       | 363.141144         | 182.074210       | D    | 2009.957179        | 1005.482228       | 1992.930630        | 996.968953       | 1991.946614        | 996.476945        | 14 |
| 4  | 528.220123         | 264.613700         | 511.193574        | 256.100425       | 510.209558         | 255.608417       | F    | 1894.930236        | 947.968756        | 1877.903687        | 939.455482       | 1876.919671        | 938.963474        | 13 |
| 5  | <b>642.263050</b>  | 321.635163         | 625.236501        | 313.121889       | 624.252485         | 312.629881       | N    | 1747.861822        | 874.434549        | 1730.835273        | 865.921275       | 1729.851257        | 865.429267        | 12 |
| 6  | 729.295078         | 365.151177         | 712.268529        | 356.637903       | 711.284513         | 356.145895       | S    | 1633.818895        | 817.413086        | 1616.792346        | 808.899811       | 1615.808330        | 808.407803        | 11 |
| 7  | <b>800.332192</b>  | 400.669734         | 783.305643        | 392.156459       | <b>782.321627</b>  | 391.664451       | A    | <b>1546.786867</b> | 773.897072        | 1529.760318        | 765.383797       | 1528.776302        | 764.891789        | 10 |
| 8  | <b>899.400606</b>  | 450.203941         | <b>882.374057</b> | 441.690666       | 881.390041         | 441.198658       | V    | <b>1475.749753</b> | 738.378515        | 1458.723204        | 729.865240       | 1457.739188        | 729.373232        | 9  |
| 9  | <b>1338.625932</b> | <b>669.816604</b>  | 1321.599383       | 661.303330       | 1320.615367        | 660.811322       | Q    | <b>1376.681339</b> | <b>688.844308</b> | <b>1359.654790</b> | 680.331033       | <b>1358.670774</b> | <b>679.839025</b> | 8  |
| 10 | <b>1451.709996</b> | <b>726.358636</b>  | 1434.683447       | 717.845362       | <b>1433.699431</b> | 717.353354       | L    | <b>937.456013</b>  | 469.231645        | <b>920.429464</b>  | 460.718370       | 919.445448         | 460.226362        | 7  |
| 11 | <b>1550.778410</b> | 775.892843         | 1533.751861       | 767.379569       | 1532.767845        | 766.887561       | V    | <b>824.371949</b>  | 412.689613        | 807.345400         | 404.176338       | 806.361384         | 403.684330        | 6  |
| 12 | <b>1679.821003</b> | 840.414140         | 1662.794454       | 831.900865       | 1661.810438        | 831.408857       | E    | <b>725.303535</b>  | 363.155406        | 708.276986         | 354.642131       | 707.292970         | 354.150123        | 5  |
| 13 | 1793.863930        | 897.435603         | 1776.837381       | 888.922329       | 1775.853365        | 888.430321       | N    | <b>596.260942</b>  | 298.634109        | <b>579.234393</b>  | 290.120835       |                    |                   | 4  |
| 14 | 1940.932344        | 970.969810         | 1923.905795       | 962.456536       | 1922.921779        | 961.964528       | F    | <b>482.218015</b>  | 241.612646        | 465.191466         | 233.099371       |                    |                   | 3  |
| 15 | 2100.962993        | <b>1050.985135</b> | 2083.936444       | 1042.471860      | 2082.952428        | 1041.979852      | C    | <b>335.149601</b>  | 168.078438        | 318.123052         | 159.565164       |                    |                   | 2  |
| 16 |                    |                    |                   |                  |                    |                  | R    | <b>175.118952</b>  | 88.063114         | 158.092403         | 79.549839        |                    |                   | 1  |

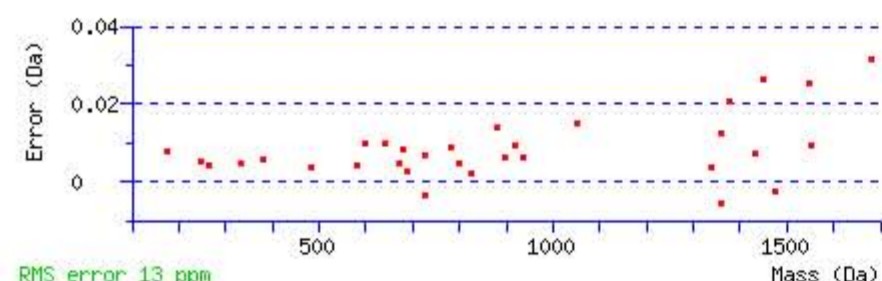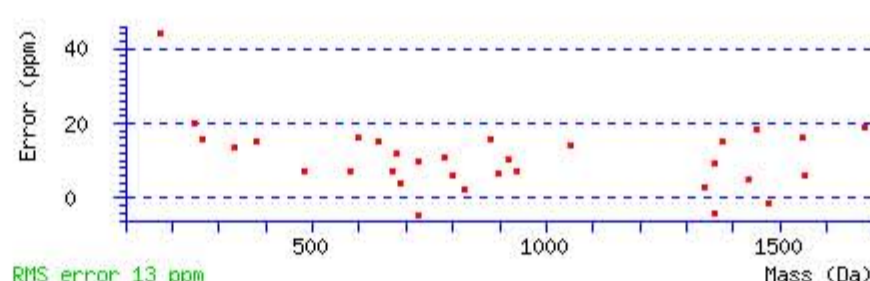

NCBI BLAST search of **HQDFNSAVQLVENFCR**

(Parameters: blastp, nr protein database, expect=20000, no filter, PAM30)

Other BLAST [web gateways](#)

## All matches to this query

| Score | Mr(calc):   | Delta    | Sequence                         |
|-------|-------------|----------|----------------------------------|
| 61.2  | 2274.067398 | 0.011394 | <a href="#">HQDFNSAVQLVENFCR</a> |
| 22.0  | 2274.067398 | 0.011394 | <a href="#">HQDFNSAVQLVENFCR</a> |



# MASCOT Search Results

## Peptide View

MS/MS Fragmentation of **LAVTTHGLPCLAWASAQAK**  
 Found in **THRB\_HUMAN**, Prothrombin OS=Homo sapiens GN=F2 PE=1 SV=2

Match to Query 47894: 2305.235082 from(769.418970,3+) rtinseconds(2343) index(49456)  
 Title: Locus:1.1.1.2864.11 File:"2013-07-02 CLN FXIII 60 min 3rd F 4.wiff"  
 Data file C:\Program Files (x86)\Matrix Science\Mascot Daemon\mgf6 FXIII 60 min 3rd\mascot\_daemon\_merge.mgf

Click mouse within plot area to zoom in by factor of two about that point  
 Or, Plot from  to  Da   
 Label all possible matches  Label matches used for scoring

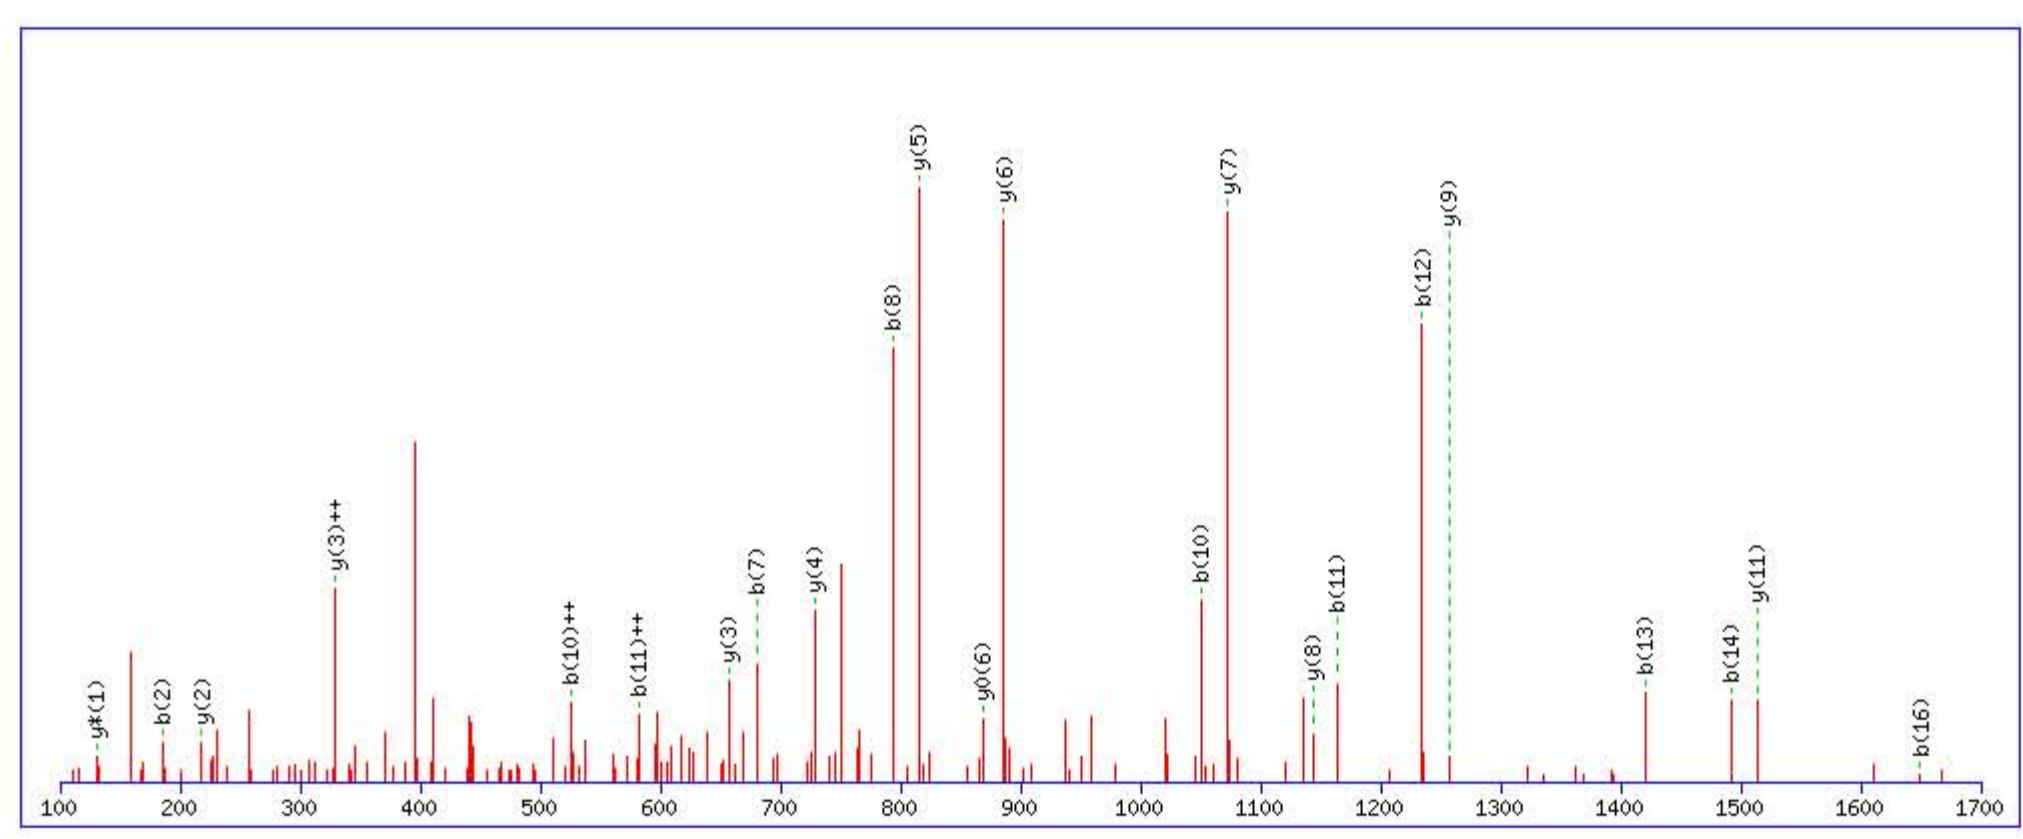

Monoisotopic mass of neutral peptide Mr(calc): 2305.207504  
 Fixed modifications: Carbamidomethyl (C) (apply to specified residues or termini only)  
 Variable modifications:  
 Q17 : Biotin:Thermo-21345 (Q)  
 Ions Score: 49 Expect: 0.00027  
 Matches : 23/170 fragment ions using 46 most intense peaks [\(help\)](#)

| #  | b                  | b <sup>++</sup>   | b <sup>*</sup> | b <sup>++</sup> | b <sup>0</sup> | b <sup>0++</sup> | Seq. | y                  | y <sup>++</sup>   | y <sup>*</sup>    | y <sup>++</sup> | y <sup>0</sup>    | y <sup>0++</sup> | #  |
|----|--------------------|-------------------|----------------|-----------------|----------------|------------------|------|--------------------|-------------------|-------------------|-----------------|-------------------|------------------|----|
| 1  | 114.091340         | 57.549308         |                |                 |                |                  | L    |                    |                   |                   |                 |                   |                  | 19 |
| 2  | <b>185.128454</b>  | 93.067865         |                |                 |                |                  | A    | 2193.130730        | 1097.069003       | 2176.104181       | 1088.555728     | 2175.120165       | 1088.063720      | 18 |
| 3  | 284.196868         | 142.602072        |                |                 |                |                  | V    | 2122.093616        | 1061.550446       | 2105.067067       | 1053.037171     | 2104.083051       | 1052.545163      | 17 |
| 4  | 385.244547         | 193.125912        |                |                 | 367.233982     | 184.120629       | T    | 2023.025202        | 1012.016239       | 2005.998653       | 1003.502965     | 2005.014637       | 1003.010957      | 16 |
| 5  | 486.292226         | 243.649751        |                |                 | 468.281661     | 234.644469       | T    | 1921.977523        | 961.492400        | 1904.950974       | 952.979125      | 1903.966958       | 952.487117       | 15 |
| 6  | 623.351138         | 312.179207        |                |                 | 605.340573     | 303.173925       | H    | 1820.929844        | 910.968560        | 1803.903295       | 902.455286      | 1802.919279       | 901.963278       | 14 |
| 7  | <b>680.372602</b>  | 340.689939        |                |                 | 662.362037     | 331.684657       | G    | 1683.870932        | 842.439104        | 1666.844383       | 833.925830      | 1665.860367       | 833.433822       | 13 |
| 8  | <b>793.456666</b>  | 397.231971        |                |                 | 775.446101     | 388.226689       | L    | 1626.849468        | 813.928372        | 1609.822919       | 805.415098      | 1608.838903       | 804.923090       | 12 |
| 9  | 890.509430         | 445.758353        |                |                 | 872.498865     | 436.753071       | P    | <b>1513.765404</b> | 757.386340        | 1496.738855       | 748.873066      | 1495.754839       | 748.381058       | 11 |
| 10 | <b>1050.540079</b> | <b>525.773678</b> |                |                 | 1032.529514    | 516.768395       | C    | 1416.712640        | 708.859958        | 1399.686091       | 700.346684      | 1398.702075       | 699.854675       | 10 |
| 11 | <b>1163.624143</b> | <b>582.315710</b> |                |                 | 1145.613578    | 573.310427       | L    | <b>1256.681991</b> | 628.844634        | 1239.655442       | 620.331359      | 1238.671426       | 619.839351       | 9  |
| 12 | <b>1234.661257</b> | 617.834267        |                |                 | 1216.650692    | 608.828984       | A    | <b>1143.597927</b> | 572.302602        | 1126.571378       | 563.789327      | 1125.587362       | 563.297319       | 8  |
| 13 | <b>1420.740570</b> | 710.873923        |                |                 | 1402.730005    | 701.868640       | W    | <b>1072.560813</b> | 536.784045        | 1055.534264       | 528.270770      | 1054.550248       | 527.778762       | 7  |
| 14 | <b>1491.777684</b> | 746.392480        |                |                 | 1473.767119    | 737.387197       | A    | <b>886.481500</b>  | 443.744388        | 869.454951        | 435.231114      | <b>868.470935</b> | 434.739106       | 6  |
| 15 | 1578.809712        | 789.908494        |                |                 | 1560.799147    | 780.903212       | S    | <b>815.444386</b>  | 408.225831        | 798.417837        | 399.712557      | 797.433821        | 399.220549       | 5  |
| 16 | <b>1649.846826</b> | 825.427051        |                |                 | 1631.836261    | 816.421768       | A    | <b>728.412358</b>  | 364.709817        | 711.385809        | 356.196543      |                   |                  | 4  |
| 17 | 2089.072152        | 1045.039714       | 2072.045603    | 1036.526439     | 2071.061587    | 1036.034431      | Q    | <b>657.375244</b>  | <b>329.191260</b> | 640.348695        | 320.677986      |                   |                  | 3  |
| 18 | 2160.109266        | 1080.558271       | 2143.082717    | 1072.044996     | 2142.098701    | 1071.552988      | A    | <b>218.149918</b>  | 109.578597        | 201.123369        | 101.065323      |                   |                  | 2  |
| 19 |                    |                   |                |                 |                |                  | K    | 147.112804         | 74.060040         | <b>130.086255</b> | 65.546765       |                   |                  | 1  |

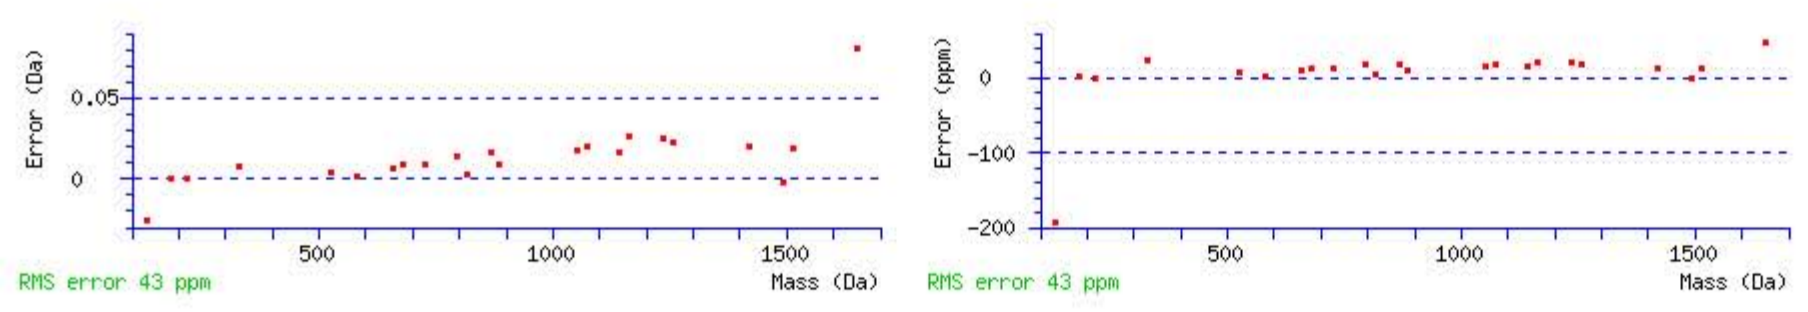

NCBI BLAST search of **LAVTTHGLPCLAWASAQAK**  
 (Parameters: blastp, nr protein database, expect=20000, no filter, PAM30)  
 Other BLAST [web gateways](#)

### All matches to this query

| Score | Mr(calc):   | Delta    | Sequence                            |
|-------|-------------|----------|-------------------------------------|
| 49.0  | 2305.207504 | 0.027578 | <a href="#">LAVTTHGLPCLAWASAQAK</a> |

# Mascot Search Results

## Peptide View

MS/MS Fragmentation of **SEGSSVNLSPPLEQCVDPDR**

Found in **THRB\_HUMAN**, Prothrombin OS=Homo sapiens GN=F2 PE=1 SV=2

Match to Query 48793: 2381.159262 from(794.727030,3+) rtinseconds(2157) index(48381)

Title: Locus:1.1.1.2799.19 File:"2013-07-02 CLN FXIII 60 min 3rd F 4.wiff"

Data file C:\Program Files (x86)\Matrix Science\Mascot Daemon\mgf6 FXIII 60 min 3rd\mascot\_daemon\_merge.mgf

Click mouse within plot area to zoom in by factor of two about that point

Or, Plot from  to  Da

Label all possible matches  Label matches used for scoring

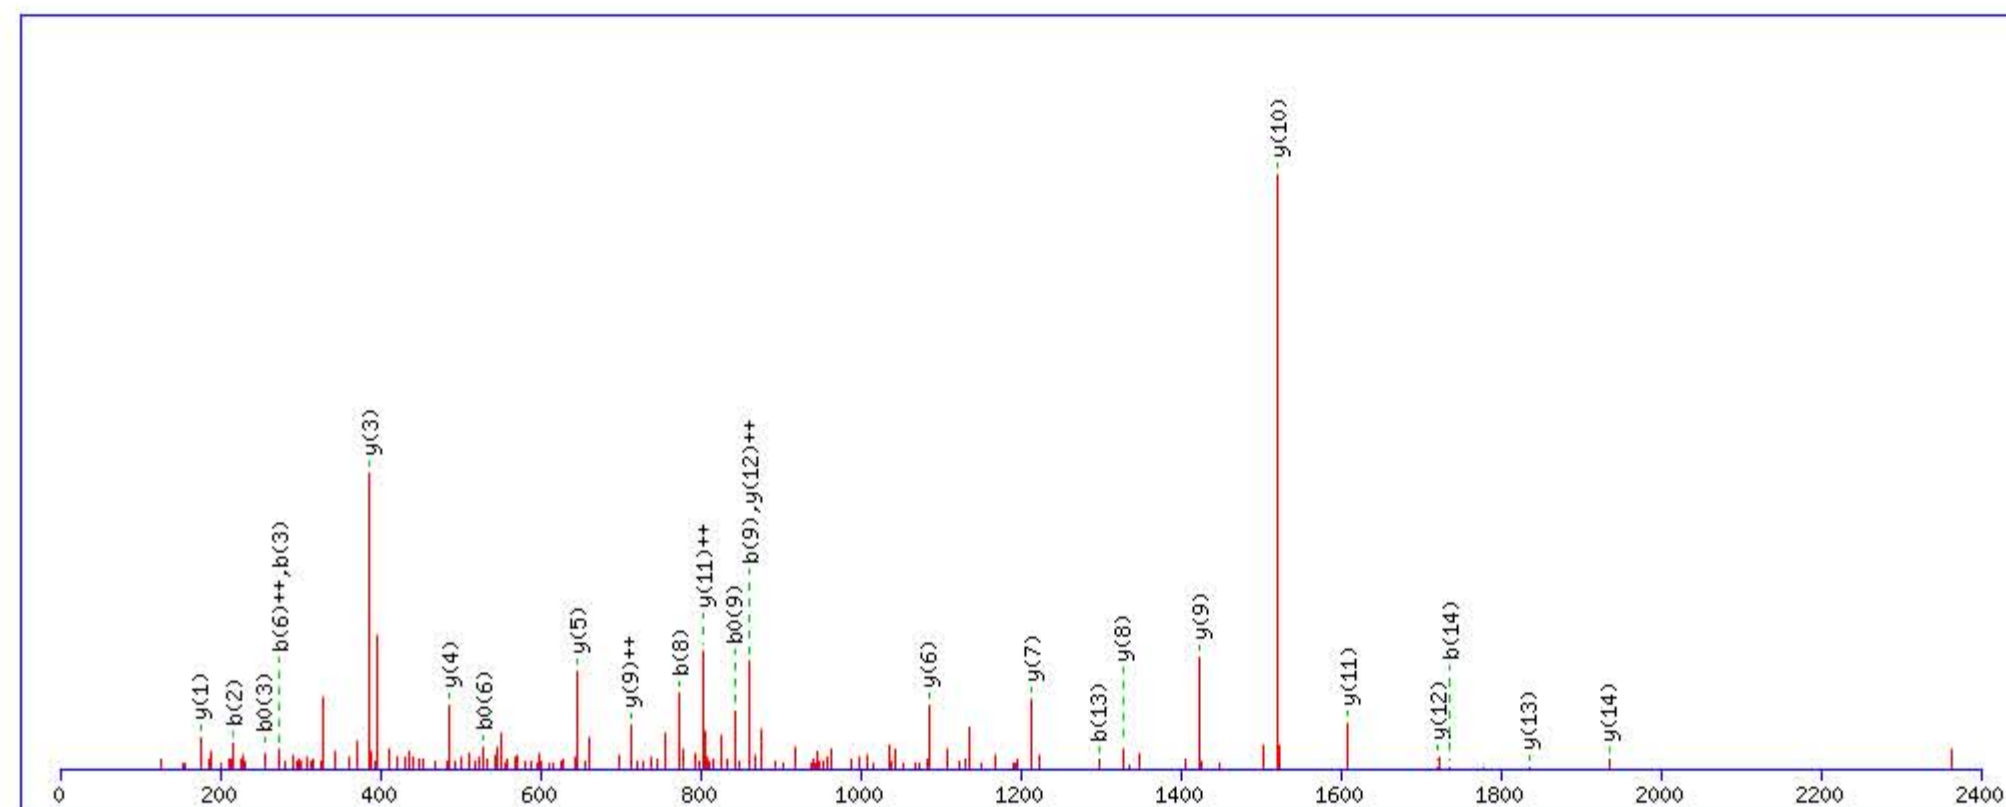

Monoisotopic mass of neutral peptide Mr(calc): 2381.135529

Fixed modifications: Carbamidomethyl (C) (apply to specified residues or termini only)

Variable modifications:

Q14 : Biotin:Thermo-21345 (Q)

Ions Score: 101 Expect: 2.2e-009

Matches : 26/202 fragment ions using 35 most intense peaks [\(help\)](#)

| #  | b                  | b <sup>++</sup>   | b <sup>*</sup> | b <sup>*++</sup> | b <sup>0</sup>    | b <sup>0++</sup> | Seq. | y                  | y <sup>++</sup>   | y <sup>*</sup> | y <sup>*++</sup> | y <sup>0</sup> | y <sup>0++</sup> | #  |
|----|--------------------|-------------------|----------------|------------------|-------------------|------------------|------|--------------------|-------------------|----------------|------------------|----------------|------------------|----|
| 1  | 88.039304          | 44.523290         |                |                  | 70.028739         | 35.518008        | S    |                    |                   |                |                  |                |                  | 19 |
| 2  | <b>217.081897</b>  | 109.044586        |                |                  | 199.071332        | 100.039304       | E    | 2295.110779        | 1148.059027       | 2278.084230    | 1139.545753      | 2277.100214    | 1139.053745      | 18 |
| 3  | <b>274.103361</b>  | 137.555319        |                |                  | <b>256.092796</b> | 128.550036       | G    | 2166.068186        | 1083.537731       | 2149.041637    | 1075.024456      | 2148.057621    | 1074.532448      | 17 |
| 4  | 361.135389         | 181.071332        |                |                  | 343.124824        | 172.066050       | S    | 2109.046722        | 1055.026999       | 2092.020173    | 1046.513724      | 2091.036157    | 1046.021716      | 16 |
| 5  | 448.167417         | 224.587346        |                |                  | 430.156852        | 215.582064       | S    | 2022.014694        | 1011.510985       | 2004.988145    | 1002.997711      | 2004.004129    | 1002.505703      | 15 |
| 6  | 547.235831         | <b>274.121554</b> |                |                  | <b>529.225266</b> | 265.116271       | V    | <b>1934.982666</b> | 967.994971        | 1917.956117    | 959.481697       | 1916.972101    | 958.989689       | 14 |
| 7  | 661.278758         | 331.143017        | 644.252209     | 322.629742       | 643.268193        | 322.137734       | N    | <b>1835.914252</b> | 918.460764        | 1818.887703    | 909.947490       | 1817.903687    | 909.455482       | 13 |
| 8  | <b>774.362822</b>  | 387.685049        | 757.336273     | 379.171774       | 756.352257        | 378.679766       | L    | <b>1721.871325</b> | <b>861.439301</b> | 1704.844776    | 852.926026       | 1703.860760    | 852.434018       | 12 |
| 9  | <b>861.394850</b>  | 431.201063        | 844.368301     | 422.687788       | <b>843.384285</b> | 422.195780       | S    | <b>1608.787261</b> | <b>804.897269</b> | 1591.760712    | 796.383994       | 1590.776696    | 795.891986       | 11 |
| 10 | 958.447614         | 479.727445        | 941.421065     | 471.214170       | 940.437049        | 470.722162       | P    | <b>1521.755233</b> | 761.381255        | 1504.728684    | 752.867980       | 1503.744668    | 752.375972       | 10 |
| 11 | 1055.500378        | 528.253827        | 1038.473829    | 519.740553       | 1037.489813       | 519.248544       | P    | <b>1424.702469</b> | <b>712.854873</b> | 1407.675920    | 704.341598       | 1406.691904    | 703.849590       | 9  |
| 12 | 1168.584442        | 584.795859        | 1151.557893    | 576.282584       | 1150.573877       | 575.790576       | L    | <b>1327.649705</b> | 664.328491        | 1310.623156    | 655.815216       | 1309.639140    | 655.323208       | 8  |
| 13 | <b>1297.627035</b> | 649.317155        | 1280.600486    | 640.803881       | 1279.616470       | 640.311873       | E    | <b>1214.565641</b> | 607.786459        | 1197.539092    | 599.273184       | 1196.555076    | 598.781176       | 7  |
| 14 | <b>1736.852361</b> | 868.929819        | 1719.825812    | 860.416544       | 1718.841796       | 859.924536       | Q    | <b>1085.523048</b> | 543.265162        | 1068.496499    | 534.751888       | 1067.512483    | 534.259880       | 6  |
| 15 | 1896.883010        | 948.945143        | 1879.856461    | 940.431869       | 1878.872445       | 939.939861       | C    | <b>646.297722</b>  | 323.652499        | 629.271173     | 315.139225       | 628.287157     | 314.647217       | 5  |
| 16 | 1995.951424        | 998.479350        | 1978.924875    | 989.966076       | 1977.940859       | 989.474068       | V    | <b>486.267073</b>  | 243.637174        | 469.240524     | 235.123900       | 468.256508     | 234.631892       | 4  |
| 17 | 2093.004188        | 1047.005732       | 2075.977639    | 1038.492457      | 2074.993623       | 1038.000449      | P    | <b>387.198659</b>  | 194.102967        | 370.172110     | 185.589693       | 369.188094     | 185.097685       | 3  |
| 18 | 2208.031131        | 1104.519203       | 2191.004582    | 1096.005929      | 2190.020566       | 1095.513921      | D    | 290.145895         | 145.576585        | 273.119346     | 137.063311       | 272.135330     | 136.571303       | 2  |
| 19 |                    |                   |                |                  |                   |                  | R    | <b>175.118952</b>  | 88.063114         | 158.092403     | 79.549839        |                |                  | 1  |

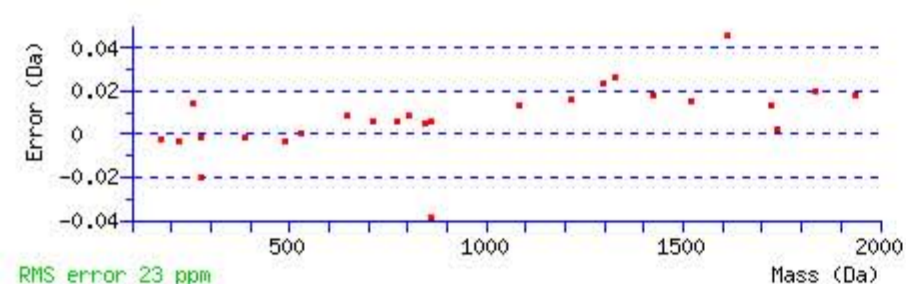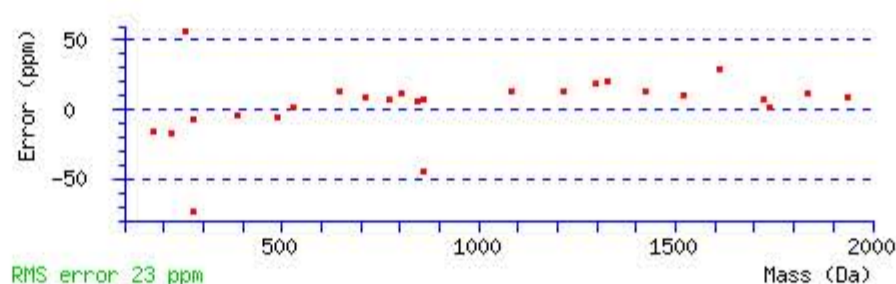

NCBI BLAST search of [SEGSSVNLSPPLEQCVDPDR](#)

(Parameters: blastp, nr protein database, expect=20000, no filter, PAM30)

Other BLAST [web gateways](#)

All matches to this query

| Score | Mr(calc):   | Delta     | Sequence                               |
|-------|-------------|-----------|----------------------------------------|
| 100.7 | 2381.135529 | 0.023733  | <a href="#">SEGSSVNLSPPLEQCVDPDR</a>   |
| 8.1   | 2381.168564 | -0.009302 | <a href="#">GNAVVGYLQCFDLEGESGLVVR</a> |
| 2.0   | 2381.160675 | -0.001413 | <a href="#">IPSTVEFCSTPAEKMAETVLR</a>  |

Mascot: <http://www.matrixscience.com/>

# Mascot Search Results

## Peptide View

MS/MS Fragmentation of **IVEGSDAEIGMSPWQVMLFR**

Found in **THRB\_HUMAN**, Prothrombin OS=Homo sapiens GN=F2 PE=1 SV=2

Match to Query 52165: 2607.285552 from(870.102460,3+) rtinseconds(2738) index(51922)

Title: Locus:1.1.1.3000.23 File:"2013-07-02 CLN FXIII 60 min 3rd F 4.wiff"

Data file C:\Program Files (x86)\Matrix Science\Mascot Daemon\mgf6 FXIII 60 min 3rd\mascot\_daemon\_merge.mgf

Click mouse within plot area to zoom in by factor of two about that point

Or, Plot from  to  Da

Label all possible matches  Label matches used for scoring

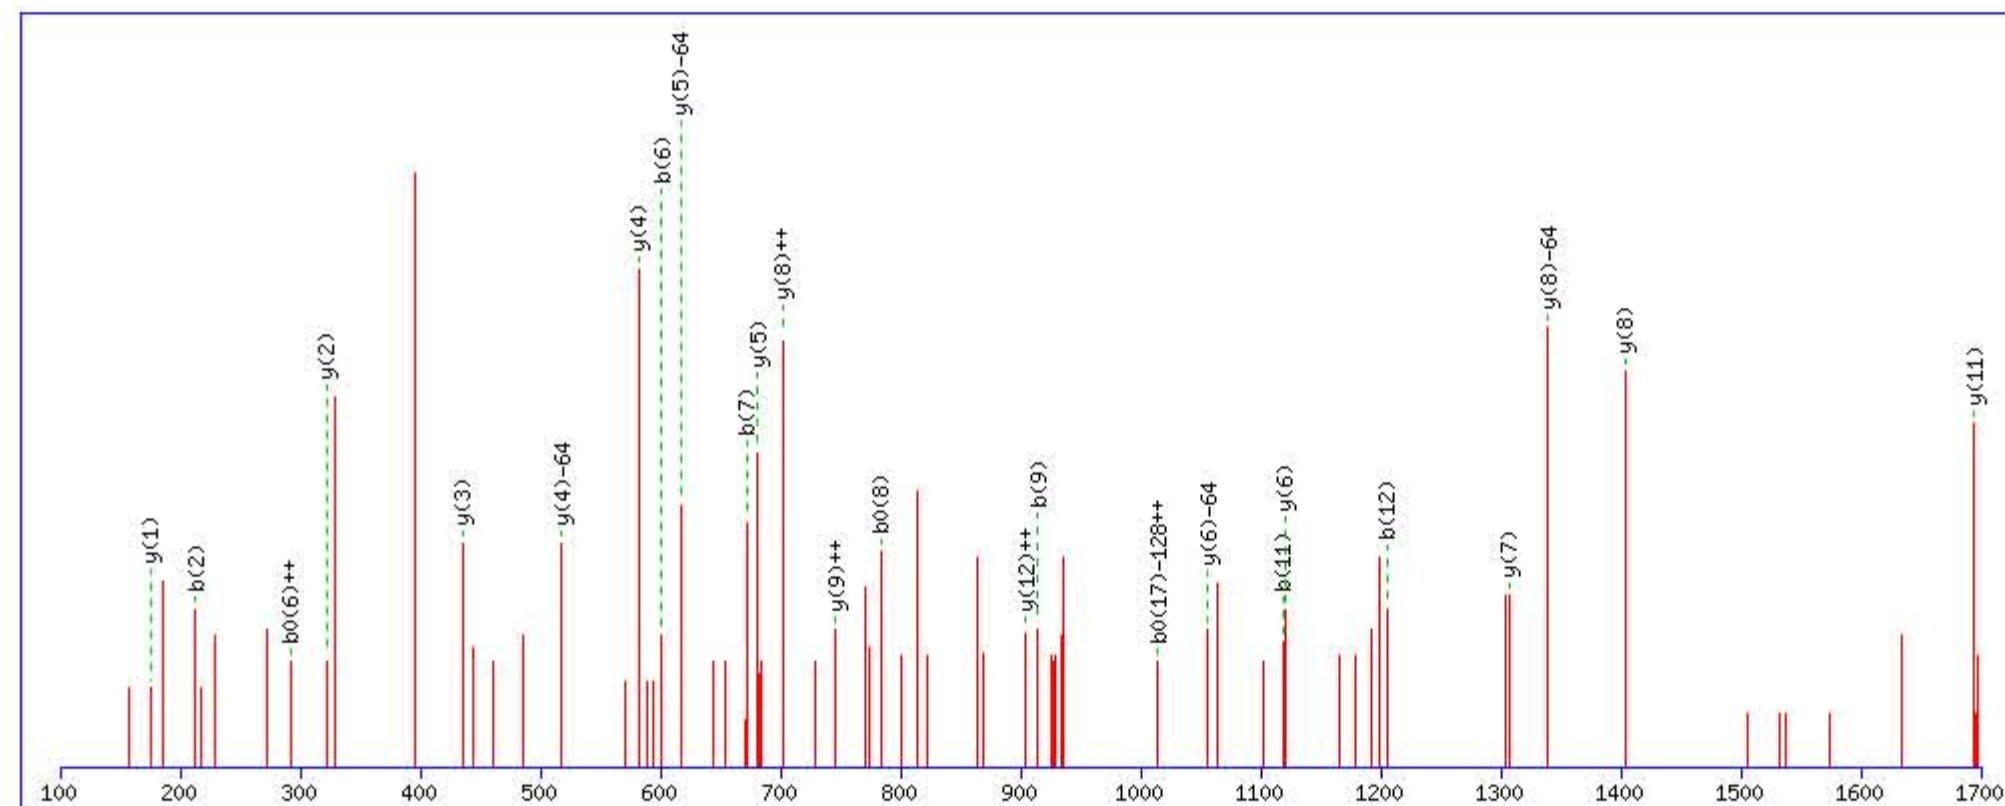

Monoisotopic mass of neutral peptide Mr(calc): 2607.253540

Fixed modifications: Carbamidomethyl (C) (apply to specified residues or termini only)

Variable modifications:

M11 : Oxidation (M), with neutral losses 0.000000 (shown in table), 63.998285

Q15 : Biotin:Thermo-21345 (Q)

M17 : Oxidation (M), with neutral losses 0.000000 (shown in table), 63.998285

Ions Score: 41 Expect: 0.0023

Matches : 25/312 fragment ions using 52 most intense peaks [\(help\)](#)

| #  | b                  | b <sup>++</sup> | b <sup>*</sup> | b <sup>*++</sup> | b <sup>0</sup>    | b <sup>0++</sup>  | Seq. | y                  | y <sup>++</sup>   | y <sup>*</sup> | y <sup>*++</sup> | y <sup>0</sup> | y <sup>0++</sup> | #  |
|----|--------------------|-----------------|----------------|------------------|-------------------|-------------------|------|--------------------|-------------------|----------------|------------------|----------------|------------------|----|
| 1  | 114.091340         | 57.549308       |                |                  |                   |                   | I    |                    |                   |                |                  |                |                  | 20 |
| 2  | <b>213.159754</b>  | 107.083515      |                |                  |                   |                   | V    | 2495.176752        | 1248.092014       | 2478.150203    | 1239.578739      | 2477.166187    | 1239.086731      | 19 |
| 3  | 342.202347         | 171.604811      |                |                  | 324.191782        | 162.599529        | E    | 2396.108338        | 1198.557807       | 2379.081789    | 1190.044532      | 2378.097773    | 1189.552524      | 18 |
| 4  | 399.223811         | 200.115543      |                |                  | 381.213246        | 191.110261        | G    | 2267.065745        | 1134.036510       | 2250.039196    | 1125.523236      | 2249.055180    | 1125.031228      | 17 |
| 5  | 486.255839         | 243.631557      |                |                  | 468.245274        | 234.626275        | S    | 2210.044281        | 1105.525778       | 2193.017732    | 1097.012504      | 2192.033716    | 1096.520496      | 16 |
| 6  | <b>601.282782</b>  | 301.145029      |                |                  | 583.272217        | <b>292.139747</b> | D    | 2123.012253        | 1062.009764       | 2105.985704    | 1053.496490      | 2105.001688    | 1053.004482      | 15 |
| 7  | <b>672.319896</b>  | 336.663586      |                |                  | 654.309331        | 327.658303        | A    | 2007.985310        | 1004.496293       | 1990.958761    | 995.983019       | 1989.974745    | 995.491011       | 14 |
| 8  | 801.362489         | 401.184883      |                |                  | <b>783.351924</b> | 392.179600        | E    | 1936.948196        | 968.977736        | 1919.921647    | 960.464462       | 1918.937631    | 959.972454       | 13 |
| 9  | <b>914.446553</b>  | 457.726915      |                |                  | 896.435988        | 448.721632        | I    | 1807.905603        | <b>904.456440</b> | 1790.879054    | 895.943165       | 1789.895038    | 895.451157       | 12 |
| 10 | 971.468017         | 486.237647      |                |                  | 953.457452        | 477.232364        | G    | <b>1694.821539</b> | 847.914408        | 1677.794990    | 839.401133       | 1676.810974    | 838.909125       | 11 |
| 11 | <b>1118.503417</b> | 559.755346      |                |                  | 1100.492852       | 550.750064        | M    | 1637.800075        | 819.403676        | 1620.773526    | 810.890401       | 1619.789510    | 810.398393       | 10 |
| 12 | <b>1205.535445</b> | 603.271361      |                |                  | 1187.524880       | 594.266078        | S    | 1490.764675        | <b>745.885976</b> | 1473.738126    | 737.372701       | 1472.754110    | 736.880693       | 9  |
| 13 | 1302.588209        | 651.797743      |                |                  | 1284.577644       | 642.792460        | P    | <b>1403.732647</b> | <b>702.369962</b> | 1386.706098    | 693.856687       |                |                  | 8  |
| 14 | 1488.667522        | 744.837399      |                |                  | 1470.656957       | 735.832116        | W    | <b>1306.679883</b> | 653.843580        | 1289.653334    | 645.330305       |                |                  | 7  |
| 15 | 1927.892848        | 964.450062      | 1910.866299    | 955.936788       | 1909.882283       | 955.444780        | Q    | <b>1120.600570</b> | 560.803923        | 1103.574021    | 552.290649       |                |                  | 6  |
| 16 | 2026.961262        | 1013.984269     | 2009.934713    | 1005.470995      | 2008.950697       | 1004.978987       | V    | <b>681.375244</b>  | 341.191260        | 664.348695     | 332.677986       |                |                  | 5  |
| 17 | 2173.996662        | 1087.501969     | 2156.970113    | 1078.988694      | 2155.986097       | 1078.496686       | M    | <b>582.306830</b>  | 291.657053        | 565.280281     | 283.143779       |                |                  | 4  |
| 18 | 2287.080726        | 1144.044001     | 2270.054177    | 1135.530726      | 2269.070161       | 1135.038719       | L    | <b>435.271430</b>  | 218.139353        | 418.244881     | 209.626078       |                |                  | 3  |
| 19 | 2434.149140        | 1217.578208     | 2417.122591    | 1209.064933      | 2416.138575       | 1208.572925       | F    | <b>322.187366</b>  | 161.597321        | 305.160817     | 153.084046       |                |                  | 2  |
| 20 |                    |                 |                |                  |                   |                   | R    | <b>175.118952</b>  | 88.063114         | 158.092403     | 79.549839        |                |                  | 1  |

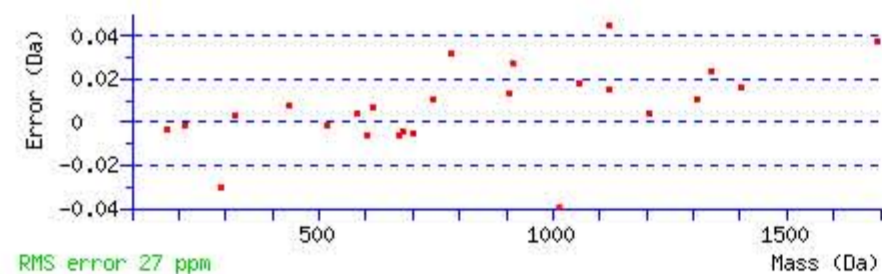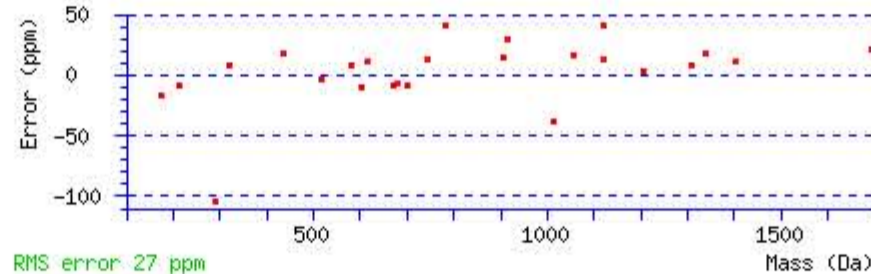

NCBI BLAST search of **IVEGSDAEIGMSPWQVMLFR**

(Parameters: blastp, nr protein database, expect=20000, no filter, PAM30)

Other BLAST [web gateways](#)

All matches to this query

| Score | Mr(calc):   | Delta    | Sequence                    |
|-------|-------------|----------|-----------------------------|
| 40.6  | 2607.253540 | 0.032012 | <b>IVEGSDAEIGMSPWQVMLFR</b> |

# MASCOT Search Results

## Peptide View

MS/MS Fragmentation of **RQECSIPVCGQDQVTAMTPR**

Found in **THRB\_HUMAN**, Prothrombin OS=Homo sapiens GN=F2 PE=1 SV=2

Match to Query 53189: 2742.337542 from(915.119790,3+) rtinseconds(1967) index(47205)

Title: Locus:1.1.1.2733.21 File:"2013-07-02 CLN FXIII 60 min 3rd F 4.wiff"

Data file C:\Program Files (x86)\Matrix Science\Mascot Daemon\mgf6 FXIII 60 min 3rd\mascot\_daemon\_merge.mgf

Click mouse within plot area to zoom in by factor of two about that point

Or, Plot from  to  Da

Label all possible matches  Label matches used for scoring

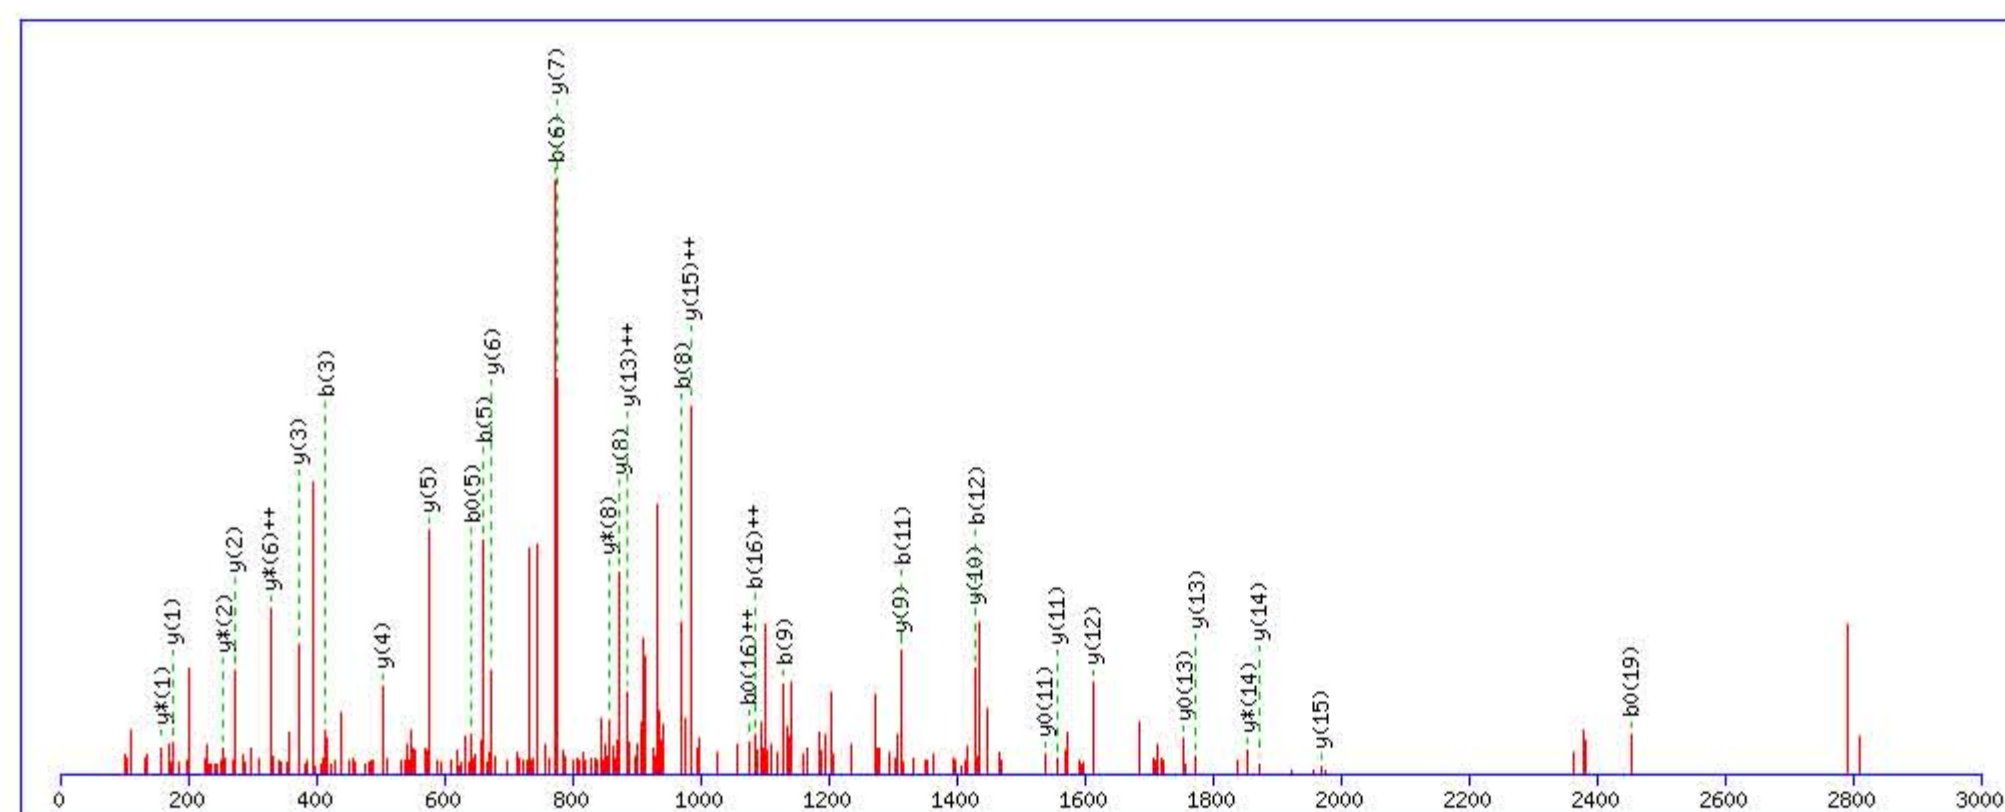

Monoisotopic mass of neutral peptide Mr(calc): 2742.307404

Fixed modifications: Carbamidomethyl (C) (apply to specified residues or termini only)

Variable modifications:

Q13 : Biotin:Thermo-21345 (Q)

Ions Score: 72 Expect: 1.7e-006

Matches : 35/232 fragment ions using 77 most intense peaks [\(help\)](#)

| #  | b                  | b <sup>++</sup>    | b <sup>*</sup> | b <sup>*++</sup> | b <sup>0</sup>     | b <sup>0++</sup>   | Seq. | y                  | y <sup>++</sup>   | y <sup>*</sup>     | y <sup>*++</sup>  | y <sup>0</sup>     | y <sup>0++</sup> | #  |
|----|--------------------|--------------------|----------------|------------------|--------------------|--------------------|------|--------------------|-------------------|--------------------|-------------------|--------------------|------------------|----|
| 1  | 157.108387         | 79.057831          | 140.081838     | 70.544557        |                    |                    | R    |                    |                   |                    |                   |                    |                  | 21 |
| 2  | 285.166965         | 143.087121         | 268.140416     | 134.573846       |                    |                    | Q    | 2587.213551        | 1294.110413       | 2570.187002        | 1285.597139       | 2569.202986        | 1285.105131      | 20 |
| 3  | <b>414.209558</b>  | 207.608417         | 397.183009     | 199.095143       | 396.198993         | 198.603135         | E    | 2459.154973        | 1230.081124       | 2442.128424        | 1221.567850       | 2441.144408        | 1221.075842      | 19 |
| 4  | 574.240207         | 287.623742         | 557.213658     | 279.110467       | 556.229642         | 278.618459         | C    | 2330.112380        | 1165.559828       | 2313.085831        | 1157.046553       | 2312.101815        | 1156.554545      | 18 |
| 5  | <b>661.272235</b>  | 331.139756         | 644.245686     | 322.626481       | <b>643.261670</b>  | 322.134473         | S    | 2170.081731        | 1085.544503       | 2153.055182        | 1077.031229       | 2152.071166        | 1076.539221      | 17 |
| 6  | <b>774.356299</b>  | 387.681788         | 757.329750     | 379.168513       | 756.345734         | 378.676505         | I    | 2083.049703        | 1042.028489       | 2066.023154        | 1033.515215       | 2065.039138        | 1033.023207      | 16 |
| 7  | 871.409063         | 436.208170         | 854.382514     | 427.694895       | 853.398498         | 427.202887         | P    | <b>1969.965639</b> | <b>985.486458</b> | 1952.939090        | 976.973183        | 1951.955074        | 976.481175       | 15 |
| 8  | <b>970.477477</b>  | 485.742377         | 953.450928     | 477.229102       | 952.466912         | 476.737094         | V    | <b>1872.912875</b> | 936.960076        | <b>1855.886326</b> | 928.446801        | 1854.902310        | 927.954793       | 14 |
| 9  | <b>1130.508126</b> | 565.757701         | 1113.481577    | 557.244427       | 1112.497561        | 556.752418         | C    | <b>1773.844461</b> | <b>887.425868</b> | 1756.817912        | 878.912594        | <b>1755.833896</b> | 878.420586       | 13 |
| 10 | 1187.529590        | 594.268433         | 1170.503041    | 585.755158       | 1169.519025        | 585.263150         | G    | <b>1613.813812</b> | 807.410544        | 1596.787263        | 798.897270        | 1595.803247        | 798.405262       | 12 |
| 11 | <b>1315.588168</b> | 658.297722         | 1298.561619    | 649.784448       | 1297.577603        | 649.292440         | Q    | <b>1556.792348</b> | 778.899812        | 1539.765799        | 770.386538        | <b>1538.781783</b> | 769.894530       | 11 |
| 12 | <b>1430.615111</b> | 715.811194         | 1413.588562    | 707.297919       | 1412.604546        | 706.805911         | D    | <b>1428.733770</b> | 714.870523        | 1411.707221        | 706.357249        | 1410.723205        | 705.865241       | 10 |
| 13 | 1869.840437        | 935.423857         | 1852.813888    | 926.910582       | 1851.829872        | 926.418574         | Q    | <b>1313.706827</b> | 657.357052        | 1296.680278        | 648.843777        | 1295.696262        | 648.351769       | 9  |
| 14 | 1968.908851        | 984.958064         | 1951.882302    | 976.444789       | 1950.898286        | 975.952781         | V    | <b>874.481501</b>  | 437.744389        | <b>857.454952</b>  | 429.231114        | 856.470936         | 428.739106       | 8  |
| 15 | 2069.956530        | 1035.481903        | 2052.929981    | 1026.968628      | 2051.945965        | 1026.476620        | T    | <b>775.413087</b>  | 388.210181        | 758.386538         | 379.696907        | 757.402522         | 379.204899       | 7  |
| 16 | 2169.024944        | <b>1085.016110</b> | 2151.998395    | 1076.502835      | 2151.014379        | <b>1076.010827</b> | V    | <b>674.365408</b>  | 337.686342        | 657.338859         | <b>329.173067</b> | 656.354843         | 328.681059       | 6  |
| 17 | 2240.062058        | 1120.534667        | 2223.035509    | 1112.021392      | 2222.051493        | 1111.529384        | A    | <b>575.296994</b>  | 288.152135        | 558.270445         | 279.638861        | 557.286429         | 279.146853       | 5  |
| 18 | 2371.102543        | 1186.054909        | 2354.075994    | 1177.541635      | 2353.091978        | 1177.049627        | M    | <b>504.259880</b>  | 252.633578        | 487.233331         | 244.120303        | 486.249315         | 243.628295       | 4  |
| 19 | 2472.150222        | 1236.578749        | 2455.123673    | 1228.065474      | <b>2454.139657</b> | 1227.573466        | T    | <b>373.219395</b>  | 187.113335        | 356.192846         | 178.600061        | 355.208830         | 178.108053       | 3  |
| 20 | 2569.202986        | 1285.105131        | 2552.176437    | 1276.591856      | 2551.192421        | 1276.099848        | P    | <b>272.171716</b>  | 136.589496        | <b>255.145167</b>  | 128.076221        |                    |                  | 2  |
| 21 |                    |                    |                |                  |                    |                    | R    | <b>175.118952</b>  | 88.063114         | <b>158.092403</b>  | 79.549839         |                    |                  | 1  |

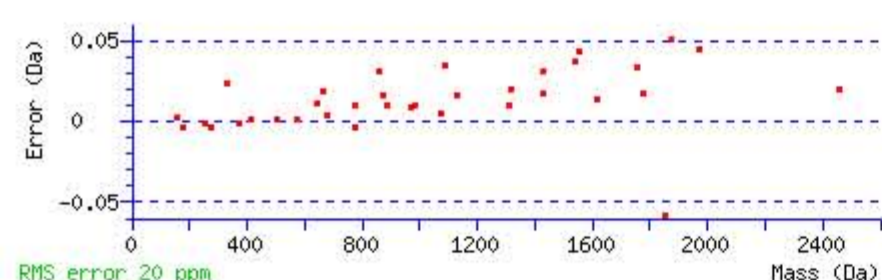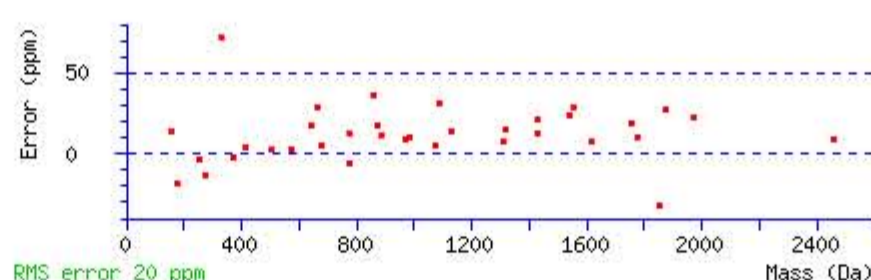

NCBI BLAST search of [RQECSIPVCGQDQVTAMTPR](#)

(Parameters: blastp, nr protein database, expect=20000, no filter, PAM30)

Other BLAST [web gateways](#)

All matches to this query

| Score | Mr(calc):   | Delta    | Sequence                             |
|-------|-------------|----------|--------------------------------------|
| 72.1  | 2742.307404 | 0.030138 | <a href="#">RQECSIPVCGQDQVTAMTPR</a> |
| 50.6  | 2742.307404 | 0.030138 | <a href="#">RQECSIPVCGQDQVTAMTPR</a> |
| 10.1  | 2742.307404 | 0.030138 | <a href="#">RQECSIPVCGQDQVTAMTPR</a> |

# MASCOT Search Results

## Peptide View

MS/MS Fragmentation of **RQECSIPVCGQDQVTAMTPR**

Found in **THRB\_HUMAN**, Prothrombin OS=Homo sapiens GN=F2 PE=1 SV=2

Match to Query 56433: 3053.498336 from(764.381860,4+) rtinseconds(2205) index(48628)

Title: Locus:1.1.1.2816.7 File:"2013-07-02 CLN FXIII 60 min 3rd F 4.wiff"

Data file C:\Program Files (x86)\Matrix Science\Mascot Daemon\mgf6 FXIII 60 min 3rd\mascot\_daemon\_merge.mgf

Click mouse within plot area to zoom in by factor of two about that point

Or, Plot from  to  Da

Label all possible matches  Label matches used for scoring

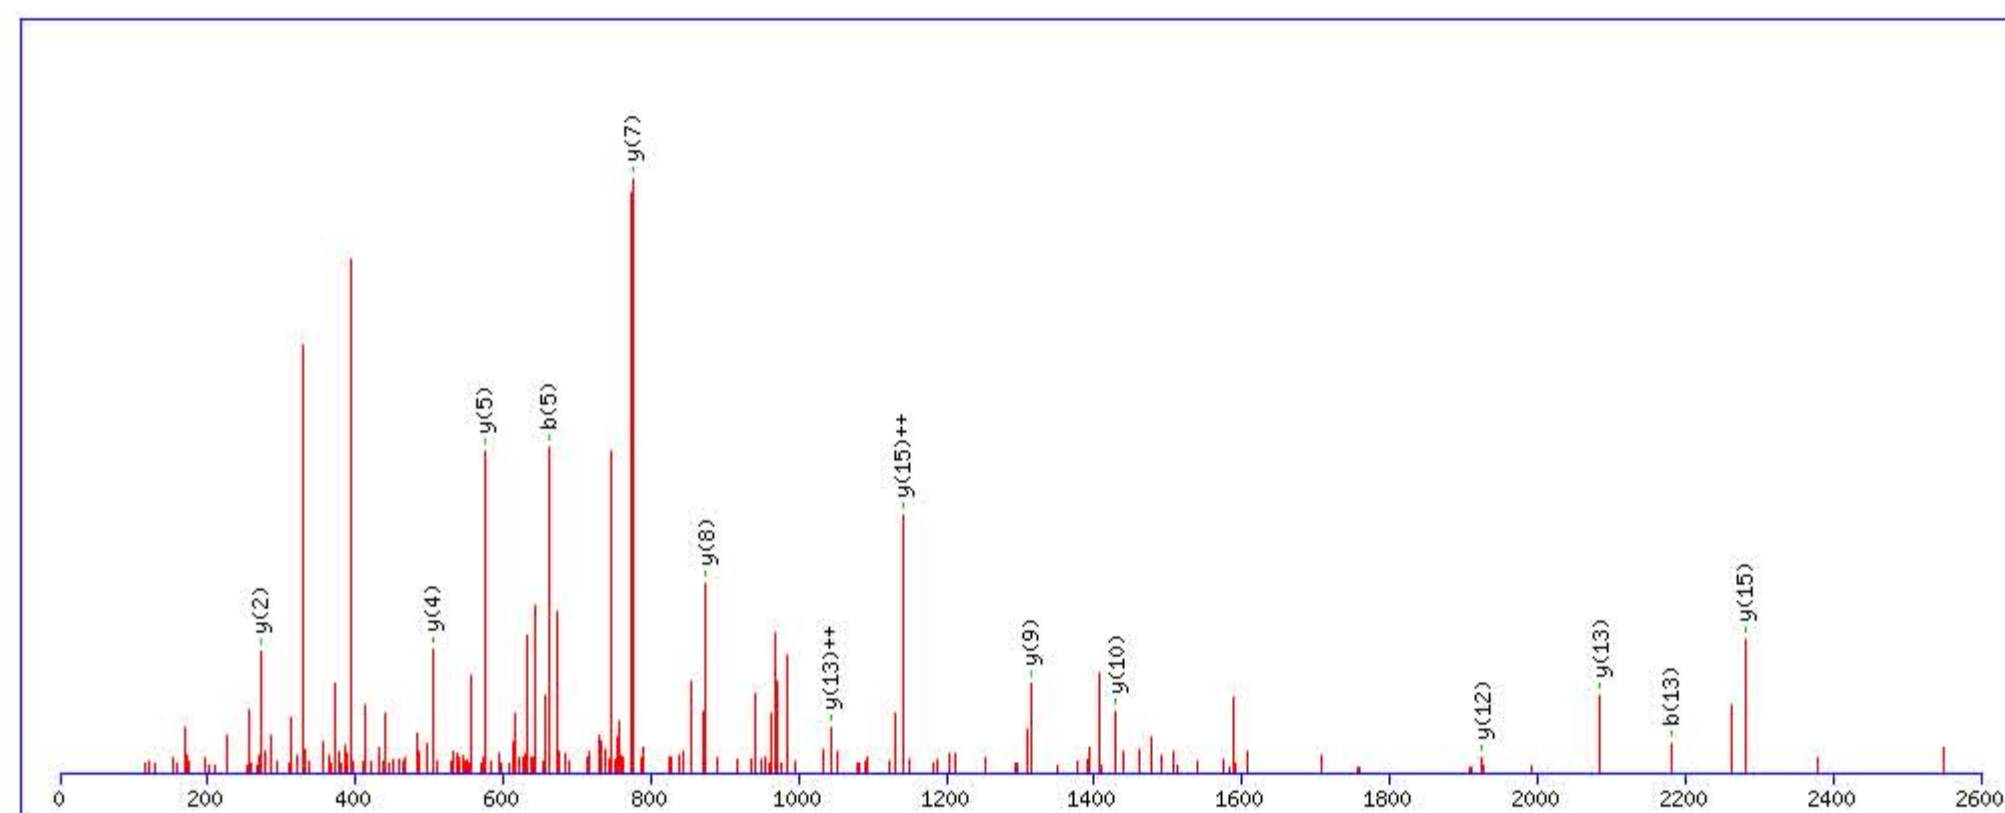

Monoisotopic mass of neutral peptide Mr(calc): 3053.474152

Fixed modifications: Carbamidomethyl (C) (apply to specified residues or termini only)

Variable modifications:

Q11 : Biotin:Thermo-21345 (Q)

Q13 : Biotin:Thermo-21345 (Q)

Ions Score: 55 Expect: 8.3e-005

Matches : 14/232 fragment ions using 24 most intense peaks [\(help\)](#)

| #  | b                  | b <sup>++</sup> | b <sup>+</sup> | b <sup>*++</sup> | b <sup>0</sup> | b <sup>0++</sup> | Seq. | y                  | y <sup>++</sup>    | y <sup>+</sup> | y <sup>*++</sup> | y <sup>0</sup> | y <sup>0++</sup> | #  |
|----|--------------------|-----------------|----------------|------------------|----------------|------------------|------|--------------------|--------------------|----------------|------------------|----------------|------------------|----|
| 1  | 157.108387         | 79.057831       | 140.081838     | 70.544557        |                |                  | R    |                    |                    |                |                  |                |                  | 21 |
| 2  | 285.166965         | 143.087121      | 268.140416     | 134.573846       |                |                  | Q    | 2898.380299        | 1449.693787        | 2881.353750    | 1441.180513      | 2880.369734    | 1440.688505      | 20 |
| 3  | 414.209558         | 207.608417      | 397.183009     | 199.095143       | 396.198993     | 198.603135       | E    | 2770.321721        | 1385.664498        | 2753.295172    | 1377.151224      | 2752.311156    | 1376.659216      | 19 |
| 4  | 574.240207         | 287.623742      | 557.213658     | 279.110467       | 556.229642     | 278.618459       | C    | 2641.279128        | 1321.143202        | 2624.252579    | 1312.629927      | 2623.268563    | 1312.137919      | 18 |
| 5  | <b>661.272235</b>  | 331.139756      | 644.245686     | 322.626481       | 643.261670     | 322.134473       | S    | 2481.248479        | 1241.127877        | 2464.221930    | 1232.614603      | 2463.237914    | 1232.122595      | 17 |
| 6  | 774.356299         | 387.681788      | 757.329750     | 379.168513       | 756.345734     | 378.676505       | I    | 2394.216451        | 1197.611863        | 2377.189902    | 1189.098589      | 2376.205886    | 1188.606581      | 16 |
| 7  | 871.409063         | 436.208170      | 854.382514     | 427.694895       | 853.398498     | 427.202887       | P    | <b>2281.132387</b> | <b>1141.069831</b> | 2264.105838    | 1132.556557      | 2263.121822    | 1132.064549      | 15 |
| 8  | 970.477477         | 485.742377      | 953.450928     | 477.229102       | 952.466912     | 476.737094       | V    | 2184.079623        | 1092.543449        | 2167.053074    | 1084.030175      | 2166.069058    | 1083.538167      | 14 |
| 9  | 1130.508126        | 565.757701      | 1113.481577    | 557.244427       | 1112.497561    | 556.752418       | C    | <b>2085.011209</b> | <b>1043.009242</b> | 2067.984660    | 1034.495968      | 2067.000644    | 1034.003960      | 13 |
| 10 | 1187.529590        | 594.268433      | 1170.503041    | 585.755158       | 1169.519025    | 585.263150       | G    | <b>1924.980560</b> | 962.993918         | 1907.954011    | 954.480643       | 1906.969995    | 953.988635       | 12 |
| 11 | 1626.754916        | 813.881096      | 1609.728367    | 805.367822       | 1608.744351    | 804.875814       | Q    | 1867.959096        | 934.483186         | 1850.932547    | 925.969911       | 1849.948531    | 925.477903       | 11 |
| 12 | 1741.781859        | 871.394568      | 1724.755310    | 862.881293       | 1723.771294    | 862.389285       | D    | <b>1428.733770</b> | 714.870523         | 1411.707221    | 706.357248       | 1410.723205    | 705.865240       | 10 |
| 13 | <b>2181.007185</b> | 1091.007230     | 2163.980636    | 1082.493956      | 2162.996620    | 1082.001948      | Q    | <b>1313.706827</b> | 657.357051         | 1296.680278    | 648.843777       | 1295.696262    | 648.351769       | 9  |
| 14 | 2280.075599        | 1140.541437     | 2263.049050    | 1132.028163      | 2262.065034    | 1131.536155      | V    | <b>874.481501</b>  | 437.744388         | 857.454952     | 429.231114       | 856.470936     | 428.739106       | 8  |
| 15 | 2381.123278        | 1191.065277     | 2364.096729    | 1182.552002      | 2363.112713    | 1182.059994      | T    | <b>775.413087</b>  | 388.210181         | 758.386538     | 379.696907       | 757.402522     | 379.204899       | 7  |
| 16 | 2480.191692        | 1240.599484     | 2463.165143    | 1232.086209      | 2462.181127    | 1231.594201      | V    | 674.365408         | 337.686342         | 657.338859     | 329.173067       | 656.354843     | 328.681059       | 6  |
| 17 | 2551.228806        | 1276.118041     | 2534.202257    | 1267.604766      | 2533.218241    | 1267.112758      | A    | <b>575.296994</b>  | 288.152135         | 558.270445     | 279.638861       | 557.286429     | 279.146853       | 5  |
| 18 | 2682.269291        | 1341.638283     | 2665.242742    | 1333.125009      | 2664.258726    | 1332.633001      | M    | <b>504.259880</b>  | 252.633578         | 487.233331     | 244.120303       | 486.249315     | 243.628295       | 4  |
| 19 | 2783.316970        | 1392.162123     | 2766.290421    | 1383.648848      | 2765.306405    | 1383.156840      | T    | 373.219395         | 187.113335         | 356.192846     | 178.600061       | 355.208830     | 178.108053       | 3  |
| 20 | 2880.369734        | 1440.688505     | 2863.343185    | 1432.175230      | 2862.359169    | 1431.683222      | P    | <b>272.171716</b>  | 136.589496         | 255.145167     | 128.076221       |                |                  | 2  |
| 21 |                    |                 |                |                  |                |                  | R    | 175.118952         | 88.063114          | 158.092403     | 79.549839        |                |                  | 1  |

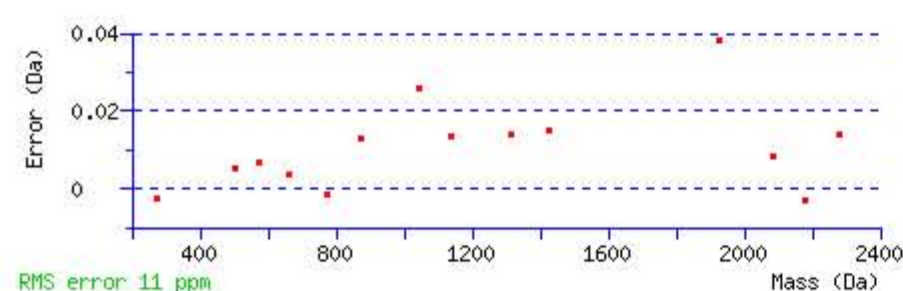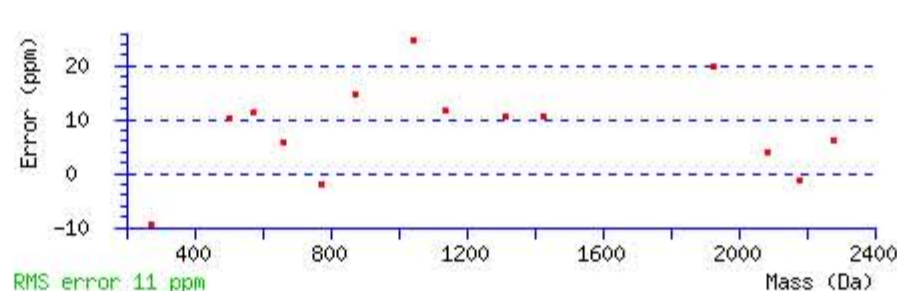

NCBI BLAST search of [RQECSIPVCGQDQVTAMTPR](#)

(Parameters: blastp, nr protein database, expect=20000, no filter, PAM30)

Other BLAST [web gateways](#)

## All matches to this query

| Score | Mr(calc):   | Delta    | Sequence                             |
|-------|-------------|----------|--------------------------------------|
| 55.5  | 3053.474152 | 0.024184 | <a href="#">RQECSIPVCGQDQVTAMTPR</a> |
| 18.8  | 3053.474152 | 0.024184 | <a href="#">RQECSIPVCGQDQVTAMTPR</a> |
| 4.0   | 3053.474152 | 0.024184 | <a href="#">RQECSIPVCGQDQVTAMTPR</a> |

# MASCOT Search Results

## Peptide View

MS/MS Fragmentation of **CINQLLCK**

Found in **SEPP1\_HUMAN**, Selenoprotein P OS=Homo sapiens GN=SEPP1 PE=1 SV=3

Match to Query 24921: 1358.684108 from(680.349330,2+) rtinseconds(2005) index(62621)

Title: Locus:1.1.1.3324.20 File:"2013-07-02 CLN FXIII 60 min 3rd FT.wiff"

Data file C:\Program Files (x86)\Matrix Science\Mascot Daemon\mgf\6 FXIII 60 min 3rd\mascot\_daemon\_merge.mgf

Click mouse within plot area to zoom in by factor of two about that point

Or, Plot from  to  Da

Label all possible matches  Label matches used for scoring

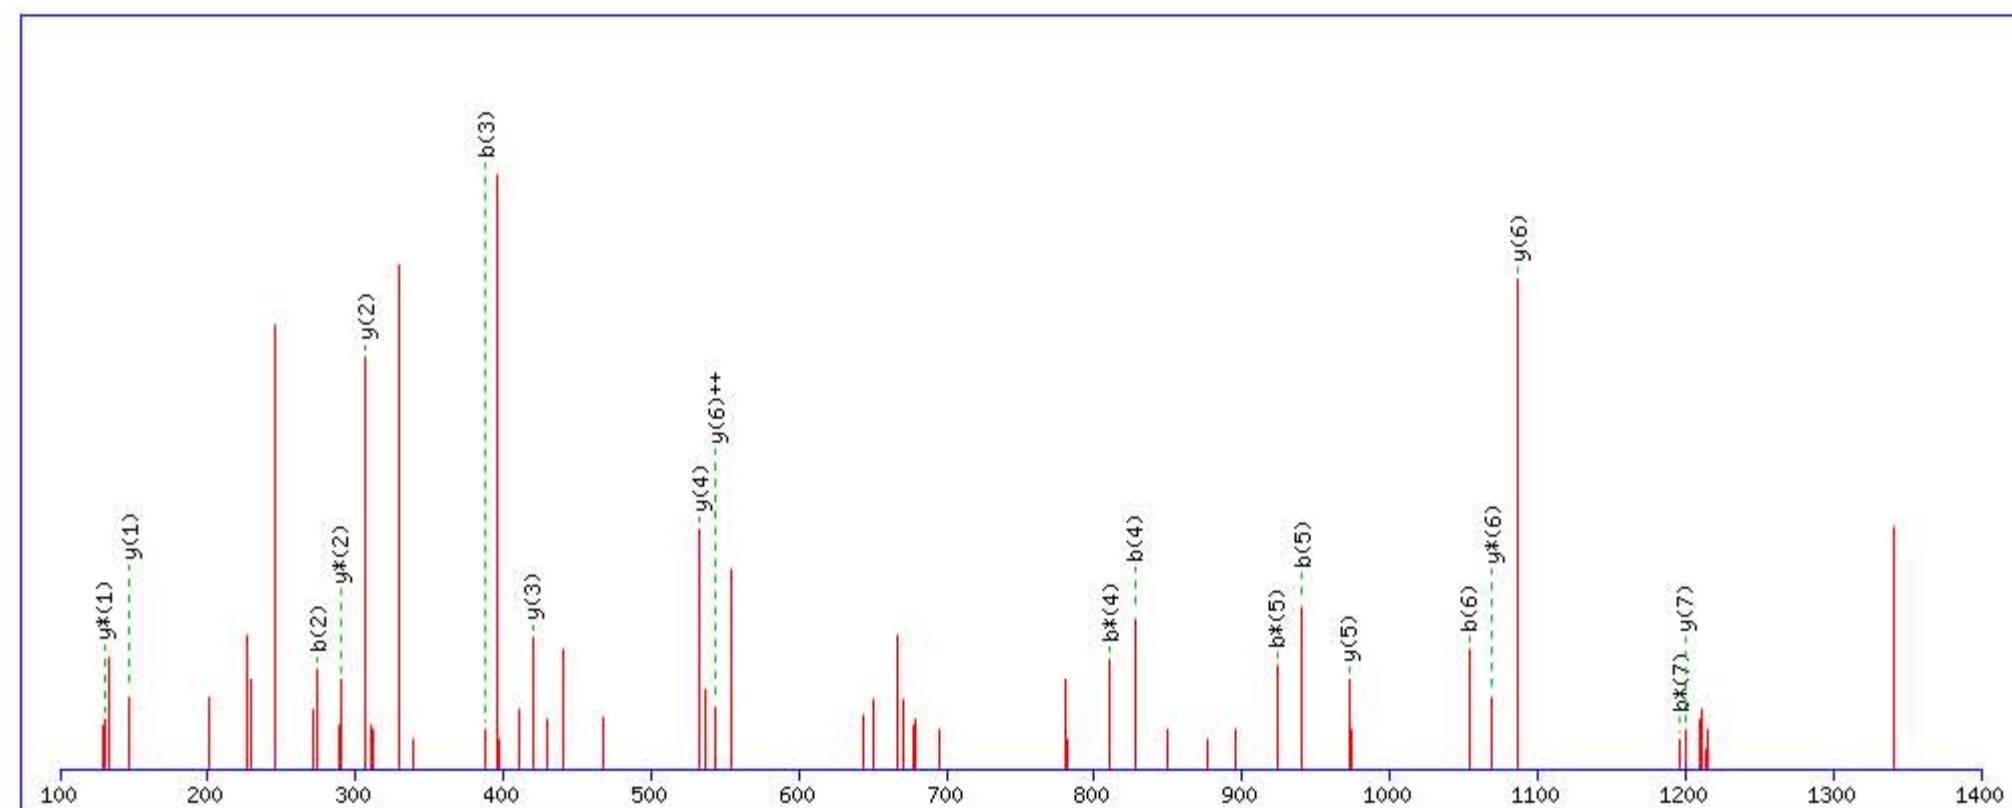

Monoisotopic mass of neutral peptide Mr(calc): 1358.687256

Fixed modifications: Carbamidomethyl (C) (apply to specified residues or termini only)

Variable modifications:

Q4 : Biotin:Thermo-21345 (Q)

Ions Score: 28 Expect: 0.0063

Matches : 19/52 fragment ions using 48 most intense peaks [\(help\)](#)

| # | b                  | b <sup>++</sup> | b <sup>*</sup>     | b <sup>*++</sup> | Seq. | y                  | y <sup>++</sup>   | y <sup>*</sup>     | y <sup>*++</sup> | # |
|---|--------------------|-----------------|--------------------|------------------|------|--------------------|-------------------|--------------------|------------------|---|
| 1 | 161.037925         | 81.022600       |                    |                  | C    |                    |                   |                    |                  | 8 |
| 2 | <b>274.121989</b>  | 137.564632      |                    |                  | I    | <b>1199.663898</b> | 600.335587        | 1182.637349        | 591.822313       | 7 |
| 3 | <b>388.164916</b>  | 194.586096      | 371.138367         | 186.072822       | N    | <b>1086.579834</b> | <b>543.793555</b> | <b>1069.553285</b> | 535.280281       | 6 |
| 4 | <b>827.390242</b>  | 414.198759      | <b>810.363693</b>  | 405.685485       | Q    | <b>972.536907</b>  | 486.772092        | 955.510358         | 478.258817       | 5 |
| 5 | <b>940.474306</b>  | 470.740791      | <b>923.447757</b>  | 462.227517       | L    | <b>533.311581</b>  | 267.159429        | 516.285032         | 258.646154       | 4 |
| 6 | <b>1053.558370</b> | 527.282823      | 1036.531821        | 518.769549       | L    | <b>420.227517</b>  | 210.617396        | 403.200968         | 202.104122       | 3 |
| 7 | 1213.589019        | 607.298148      | <b>1196.562470</b> | 598.784873       | C    | <b>307.143453</b>  | 154.075365        | <b>290.116904</b>  | 145.562090       | 2 |
| 8 |                    |                 |                    |                  | K    | <b>147.112804</b>  | 74.060040         | <b>130.086255</b>  | 65.546765        | 1 |

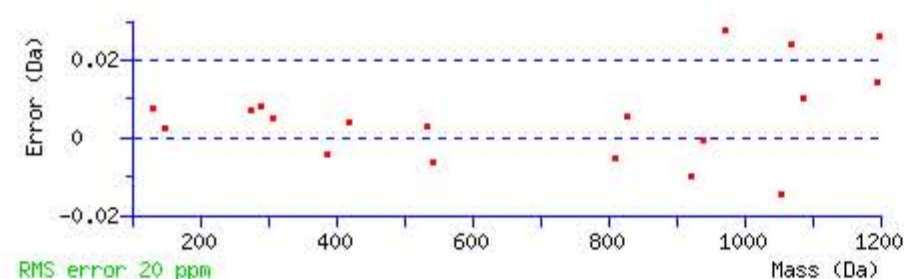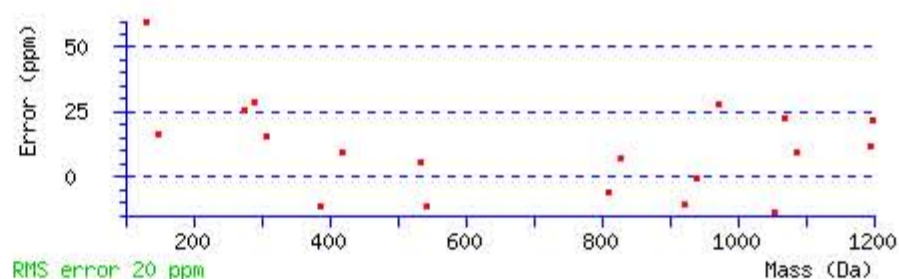

NCBI BLAST search of **CINQLLCK**

(Parameters: blastp, nr protein database, expect=20000, no filter, PAM30)

Other BLAST [web gateways](#)

All matches to this query

| Score | Mr(calc):   | Delta     | Sequence                      |
|-------|-------------|-----------|-------------------------------|
| 27.5  | 1358.687256 | -0.003148 | <a href="#">CINQLLCK</a>      |
| 4.0   | 1358.701630 | -0.017522 | <a href="#">KKIYAMGGGSYGK</a> |

Mascot: <http://www.matrixscience.com/>

# MASCOT SEARCH RESULTS

## Peptide View

MS/MS Fragmentation of **DMPASEDLQDLQK**

Found in **SEPP1\_HUMAN**, Selenoprotein P OS=Homo sapiens GN=SEPP1 PE=1 SV=3

Match to Query 38485: 1799.852368 from(900.933460,2+) rtinseconds(2189) index(34168)

Title: Locus:1.1.1.3311.10 File:"2013-07-02 CLN FXIII 60 min 3rd F 3.wiff"

Data file C:\Program Files (x86)\Matrix Science\Mascot Daemon\mgf\6 FXIII 60 min 3rd\mascot\_daemon\_merge.mgf

Click mouse within plot area to zoom in by factor of two about that point

Or, Plot from  to  Da

Label all possible matches  Label matches used for scoring

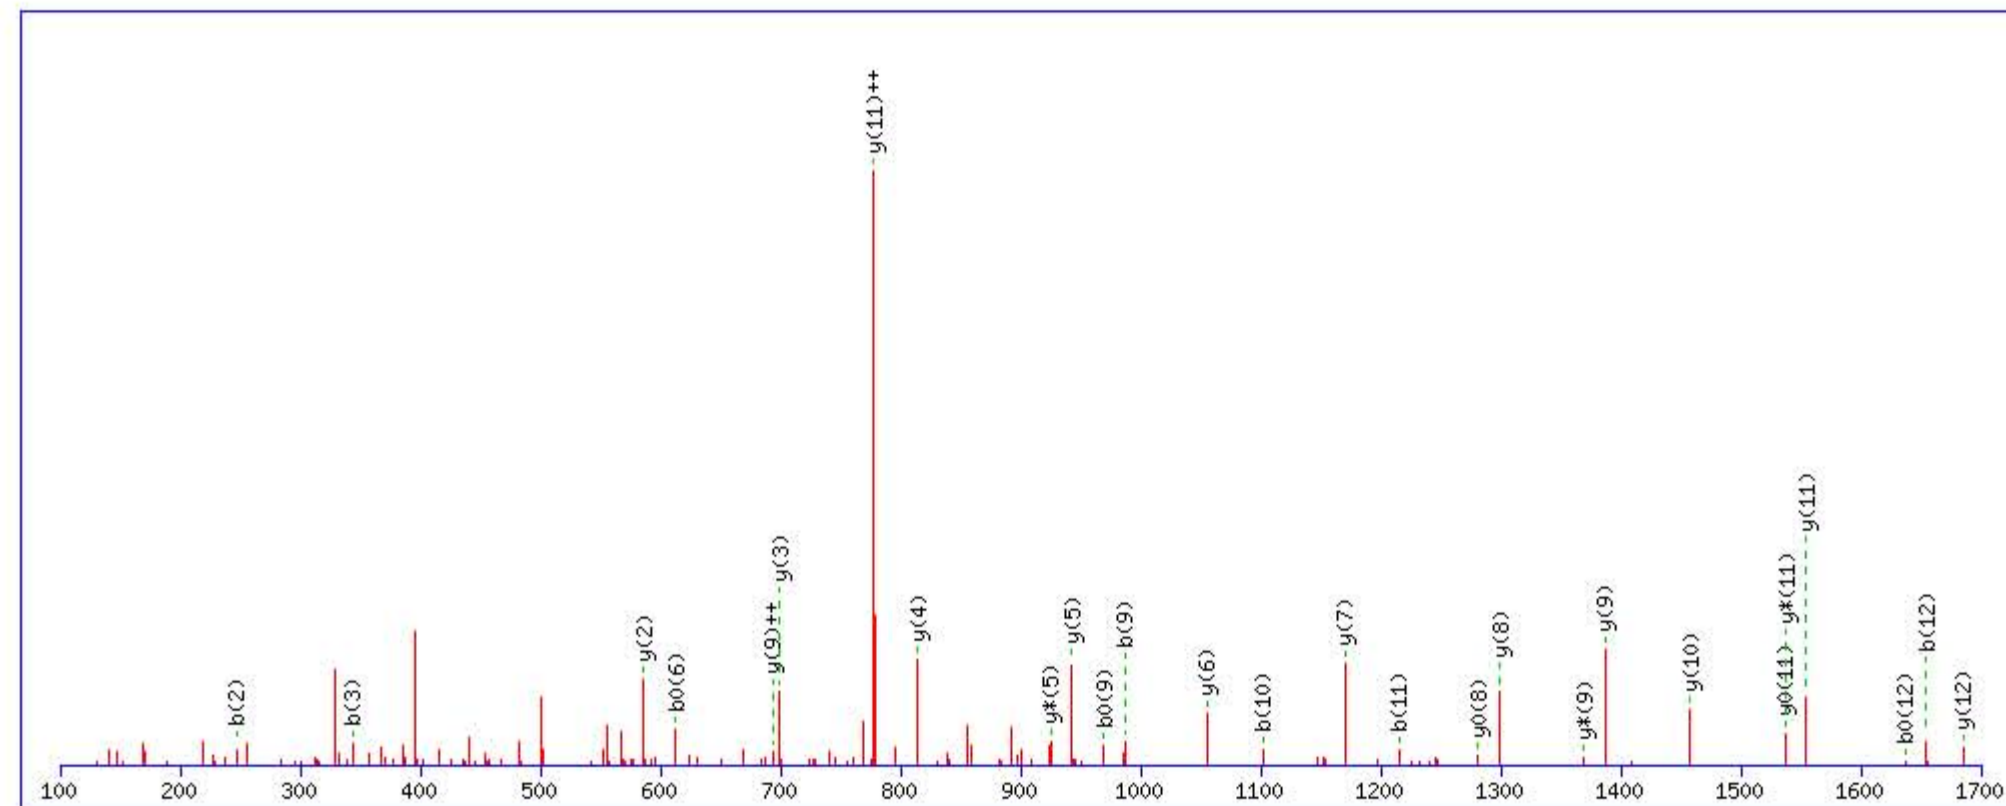

Monoisotopic mass of neutral peptide Mr(calc): 1799.843353

Fixed modifications: Carbamidomethyl (C) (apply to specified residues or termini only)

Variable modifications:

Q12 : Biotin:Thermo-21345 (Q)

Ions Score: 74 Expect: 2.1e-007

Matches : 27/122 fragment ions using 46 most intense peaks [\(help\)](#)

| #  | b                  | b <sup>++</sup> | b <sup>+</sup> | b <sup>+++</sup> | b <sup>0</sup>     | b <sup>0++</sup> | Seq. | y                  | y <sup>++</sup>   | y <sup>+</sup>     | y <sup>+++</sup> | y <sup>0</sup>     | y <sup>0++</sup> | #  |
|----|--------------------|-----------------|----------------|------------------|--------------------|------------------|------|--------------------|-------------------|--------------------|------------------|--------------------|------------------|----|
| 1  | 116.034219         | 58.520748       |                |                  | 98.023654          | 49.515465        | D    |                    |                   |                    |                  |                    |                  | 13 |
| 2  | <b>247.074704</b>  | 124.040990      |                |                  | 229.064139         | 115.035708       | M    | <b>1685.823706</b> | 843.415491        | 1668.797157        | 834.902217       | 1667.813141        | 834.410209       | 12 |
| 3  | <b>344.127468</b>  | 172.567372      |                |                  | 326.116903         | 163.562089       | P    | <b>1554.783221</b> | <b>777.895249</b> | <b>1537.756672</b> | 769.381974       | <b>1536.772656</b> | 768.889966       | 11 |
| 4  | 415.164582         | 208.085929      |                |                  | 397.154017         | 199.080646       | A    | <b>1457.730457</b> | 729.368867        | 1440.703908        | 720.855592       | 1439.719892        | 720.363584       | 10 |
| 5  | 502.196610         | 251.601943      |                |                  | 484.186045         | 242.596660       | S    | <b>1386.693343</b> | <b>693.850310</b> | <b>1369.666794</b> | 685.337035       | 1368.682778        | 684.845027       | 9  |
| 6  | 631.239203         | 316.123240      |                |                  | <b>613.228638</b>  | 307.117957       | E    | <b>1299.661315</b> | 650.334296        | 1282.634766        | 641.821021       | <b>1281.650750</b> | 641.329013       | 8  |
| 7  | 746.266146         | 373.636711      |                |                  | 728.255581         | 364.631428       | D    | <b>1170.618722</b> | 585.812999        | 1153.592173        | 577.299725       | 1152.608157        | 576.807717       | 7  |
| 8  | 859.350210         | 430.178743      |                |                  | 841.339645         | 421.173460       | L    | <b>1055.591779</b> | 528.299528        | 1038.565230        | 519.786253       | 1037.581214        | 519.294245       | 6  |
| 9  | <b>987.408788</b>  | 494.208032      | 970.382239     | 485.694757       | <b>969.398223</b>  | 485.202749       | Q    | <b>942.507715</b>  | 471.757496        | <b>925.481166</b>  | 463.244221       | 924.497150         | 462.752213       | 5  |
| 10 | <b>1102.435731</b> | 551.721504      | 1085.409182    | 543.208229       | 1084.425166        | 542.716221       | D    | <b>814.449137</b>  | 407.728207        | 797.422588         | 399.214932       | 796.438572         | 398.722924       | 4  |
| 11 | <b>1215.519795</b> | 608.263535      | 1198.493246    | 599.750261       | 1197.509230        | 599.258253       | L    | <b>699.422194</b>  | 350.214735        | 682.395645         | 341.701461       |                    |                  | 3  |
| 12 | <b>1654.745121</b> | 827.876199      | 1637.718572    | 819.362924       | <b>1636.734556</b> | 818.870916       | Q    | <b>586.338130</b>  | 293.672703        | 569.311581         | 285.159429       |                    |                  | 2  |
| 13 |                    |                 |                |                  |                    |                  | K    | 147.112804         | 74.060040         | 130.086255         | 65.546765        |                    |                  | 1  |

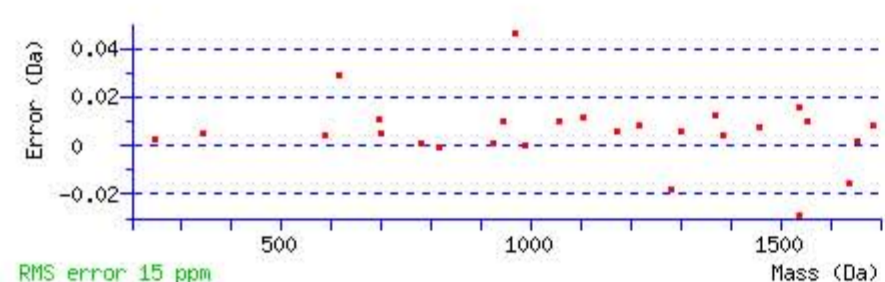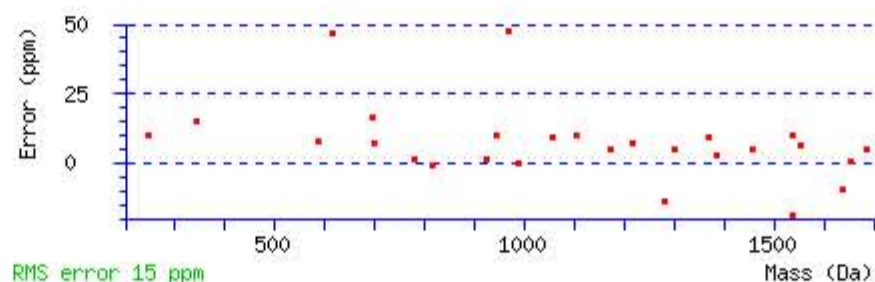

NCBI BLAST search of **DMPASEDLQDLQK**

(Parameters: blastp, nr protein database, expect=20000, no filter, PAM30)

Other BLAST [web gateways](#)

All matches to this query

| Score | Mr(calc):   | Delta     | Sequence                          |
|-------|-------------|-----------|-----------------------------------|
| 73.6  | 1799.843353 | 0.009015  | <a href="#">DMPASEDLQDLQK</a>     |
| 36.8  | 1799.843353 | 0.009015  | <a href="#">DMPASEDLQDLQK</a>     |
| 2.3   | 1799.855057 | -0.002689 | <a href="#">GDETPREPSSWGARAGK</a> |

Mascot: <http://www.matrixscience.com/>

# MASCOT SEARCH RESULTS

## Peptide View

MS/MS Fragmentation of **HQTVPQNTGGK**

Found in **TRFE\_HUMAN**, Serotransferrin OS=Homo sapiens GN=TF PE=1 SV=3

Match to Query 29354: 1476.752712 from(493.258180,3+) rtinseconds(1227) index(58532)

Title: Locus:1.1.1.3053.4 File:"2013-07-02 CLN FXIII 60 min 3rd FT.wiff"

Data file C:\Program Files (x86)\Matrix Science\Mascot Daemon\mgf\6 FXIII 60 min 3rd\mascot\_daemon\_merge.mgf

Click mouse within plot area to zoom in by factor of two about that point

Or, Plot from  to  Da

Label all possible matches  Label matches used for scoring

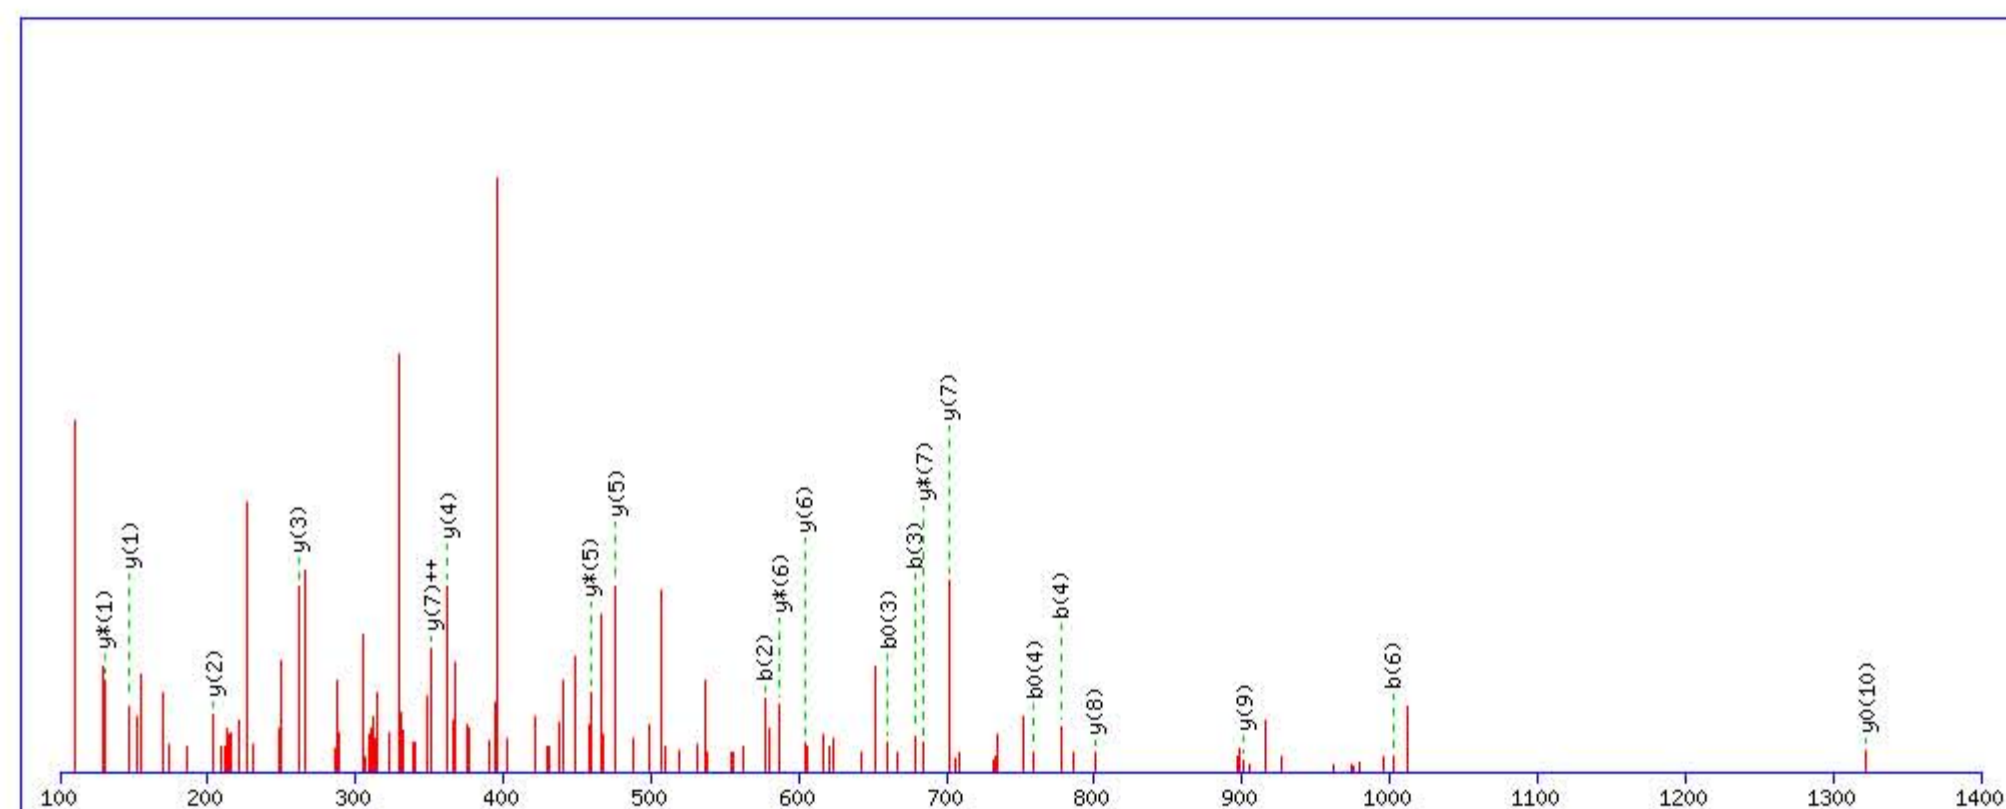

Monoisotopic mass of neutral peptide Mr(calc): 1476.750748

Fixed modifications: Carbamidomethyl (C) (apply to specified residues or termini only)

Variable modifications:

Q2 : Biotin:Thermo-21345 (Q)

Ions Score: 31 Expect: 0.003

Matches : 21/108 fragment ions using 62 most intense peaks [\(help\)](#)

| #  | b                  | b <sup>++</sup> | b <sup>*</sup> | b <sup>*++</sup> | b <sup>0</sup>    | b <sup>0++</sup> | Seq. | y                 | y <sup>++</sup>   | y <sup>*</sup>    | y <sup>*++</sup> | y <sup>0</sup>     | y <sup>0++</sup> | #  |
|----|--------------------|-----------------|----------------|------------------|-------------------|------------------|------|-------------------|-------------------|-------------------|------------------|--------------------|------------------|----|
| 1  | 138.066188         | 69.536732       |                |                  |                   |                  | H    |                   |                   |                   |                  |                    |                  | 11 |
| 2  | <b>577.291514</b>  | 289.149395      | 560.264965     | 280.636121       |                   |                  | Q    | 1340.699099       | 670.853187        | 1323.672550       | 662.339913       | <b>1322.688534</b> | 661.847905       | 10 |
| 3  | <b>678.339193</b>  | 339.673235      | 661.312644     | 331.159960       | <b>660.328628</b> | 330.667952       | T    | <b>901.473773</b> | 451.240524        | 884.447224        | 442.727250       | 883.463208         | 442.235242       | 9  |
| 4  | <b>777.407607</b>  | 389.207442      | 760.381058     | 380.694167       | <b>759.397042</b> | 380.202159       | V    | <b>800.426094</b> | 400.716685        | 783.399545        | 392.203410       | 782.415529         | 391.711402       | 8  |
| 5  | 874.460371         | 437.733824      | 857.433822     | 429.220549       | 856.449806        | 428.728541       | P    | <b>701.357680</b> | <b>351.182478</b> | <b>684.331131</b> | 342.669203       | 683.347115         | 342.177195       | 7  |
| 6  | <b>1002.518949</b> | 501.763113      | 985.492400     | 493.249838       | 984.508384        | 492.757830       | Q    | <b>604.304916</b> | 302.656096        | <b>587.278367</b> | 294.142821       | 586.294351         | 293.650813       | 6  |
| 7  | 1116.561876        | 558.784576      | 1099.535327    | 550.271302       | 1098.551311       | 549.779293       | N    | <b>476.246338</b> | 238.626807        | <b>459.219789</b> | 230.113532       | 458.235773         | 229.621524       | 5  |
| 8  | 1217.609555        | 609.308416      | 1200.583006    | 600.795141       | 1199.598990       | 600.303133       | T    | <b>362.203411</b> | 181.605343        | 345.176862        | 173.092069       | 344.192846         | 172.600061       | 4  |
| 9  | 1274.631019        | 637.819147      | 1257.604470    | 629.305873       | 1256.620454       | 628.813865       | G    | <b>261.155732</b> | 131.081504        | 244.129183        | 122.568229       |                    |                  | 3  |
| 10 | 1331.652483        | 666.329879      | 1314.625934    | 657.816605       | 1313.641918       | 657.324597       | G    | <b>204.134268</b> | 102.570772        | 187.107719        | 94.057497        |                    |                  | 2  |
| 11 |                    |                 |                |                  |                   |                  | K    | <b>147.112804</b> | 74.060040         | <b>130.086255</b> | 65.546765        |                    |                  | 1  |

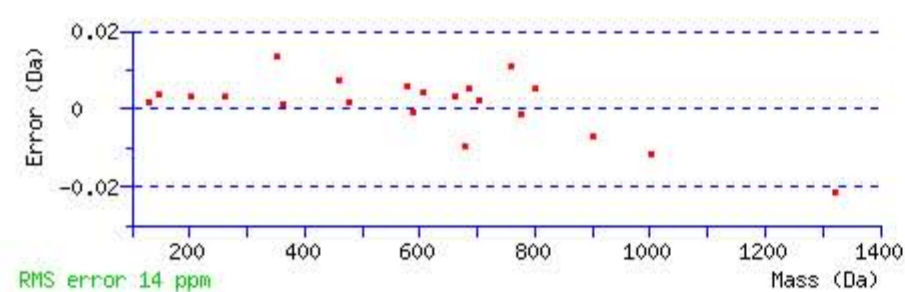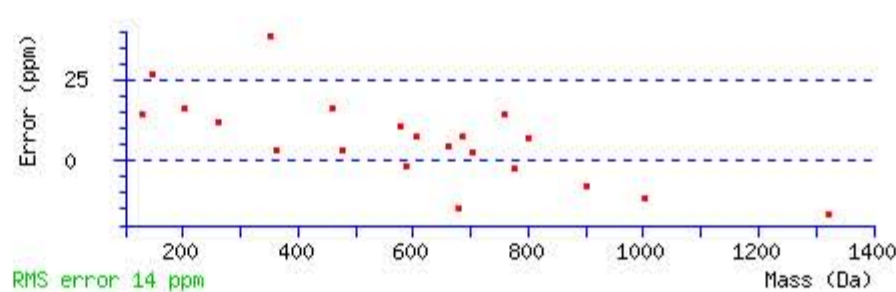

NCBI BLAST search of [HQTVPQNTGGK](#)

(Parameters: blastp, nr protein database, expect=20000, no filter, PAM30)

Other BLAST [web gateways](#)

All matches to this query

| Score | Mr(calc):   | Delta    | Sequence                       |
|-------|-------------|----------|--------------------------------|
| 31.3  | 1476.750748 | 0.001964 | <a href="#">HQTVPQNTGGK</a>    |
| 19.5  | 1476.750748 | 0.001964 | <a href="#">HQTVPQNTGGK</a>    |
| 4.3   | 1476.736115 | 0.016597 | <a href="#">HQEALIGQSFYGGK</a> |

Mascot: <http://www.matrixscience.com/>



# MASCOT SEARCH RESULTS

## Peptide View

MS/MS Fragmentation of **HQTVPQNTGGK**

Found in **TRFE\_HUMAN**, Serotransferrin OS=Homo sapiens GN=TF PE=1 SV=3

Match to Query 29355: 1476.752742 from(493.258190,3+) rtinseconds(1201) index(58459)  
 Title: Locus:1.1.1.3044.6 File:"2013-07-02 CLN FXIII 60 min 3rd FT.wiff"

Data file C:\Program Files (x86)\Matrix Science\Mascot Daemon\mgf6 FXIII 60 min 3rd\mascot\_daemon\_merge.mgf

Click mouse within plot area to zoom in by factor of two about that point

Or, Plot from  to  Da

Label all possible matches  Label matches used for scoring

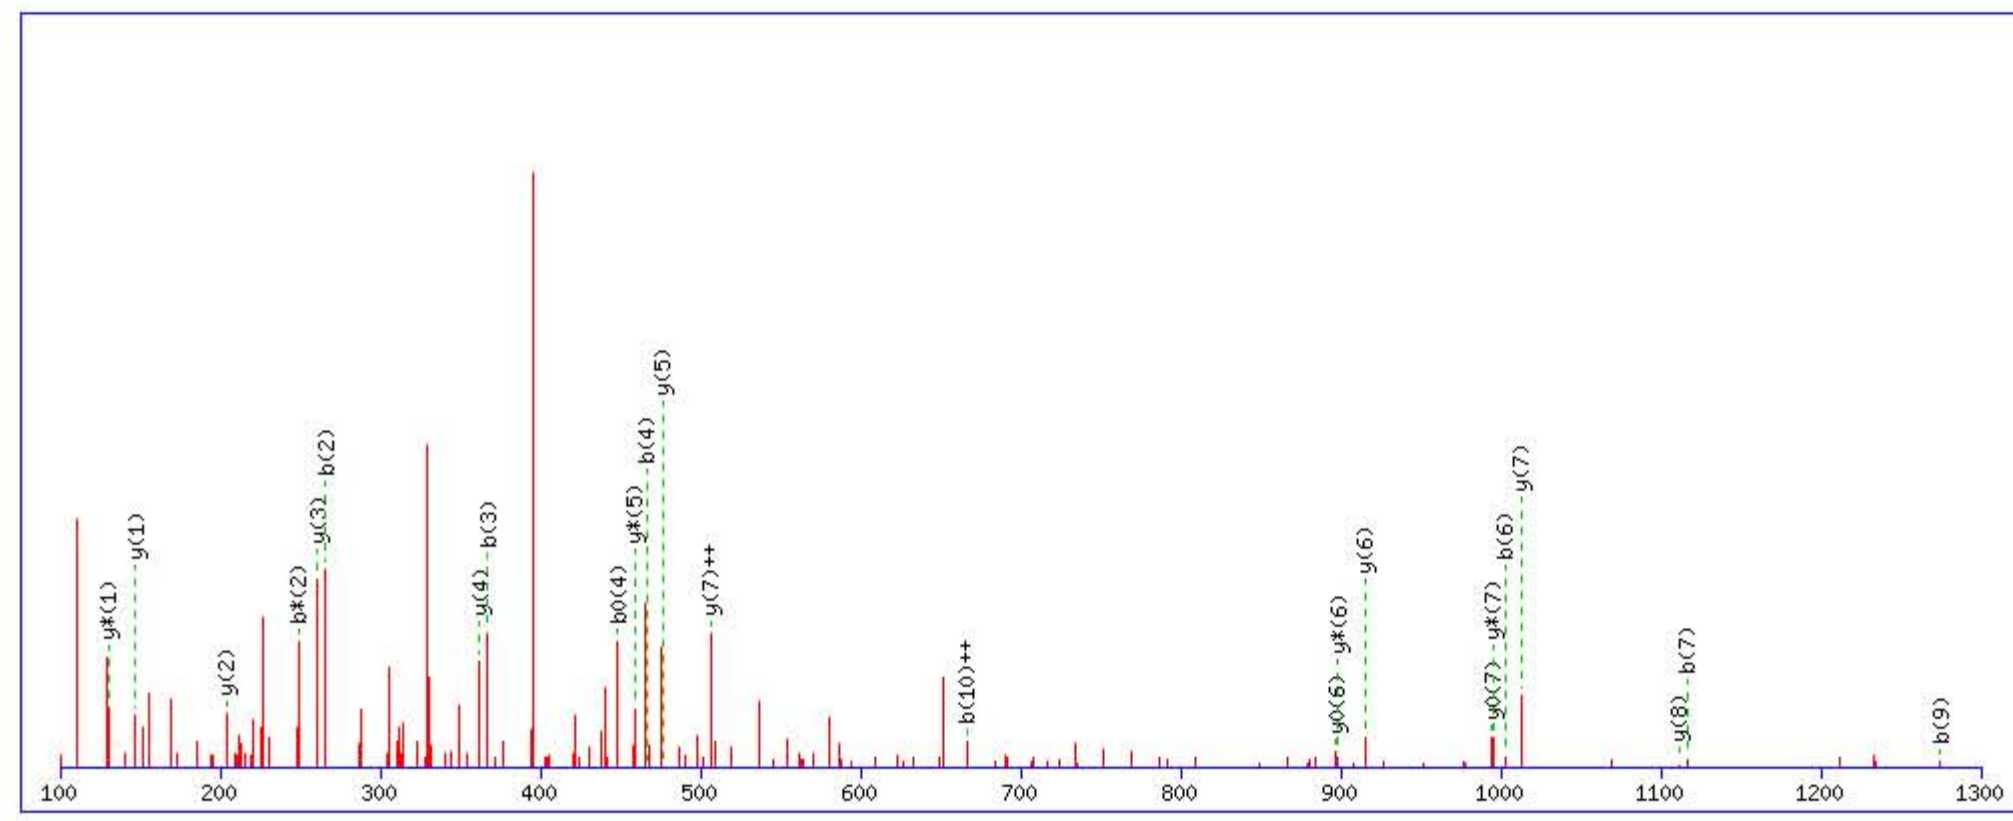

Monoisotopic mass of neutral peptide Mr(calc): 1476.750748

Fixed modifications: Carbamidomethyl (C) (apply to specified residues or termini only)

Variable modifications:

Q6 : Biotin:Thermo-21345 (Q)

Ions Score: 27 Expect: 0.029

Matches : 24/108 fragment ions using 63 most intense peaks [\(help\)](#)

| #  | b                  | b <sup>++</sup>   | b <sup>*</sup>    | b <sup>*++</sup> | b <sup>0</sup>    | b <sup>0++</sup> | Seq. | y                  | y <sup>++</sup>   | y <sup>*</sup>    | y <sup>*++</sup> | y <sup>0</sup>    | y <sup>0++</sup> | #  |
|----|--------------------|-------------------|-------------------|------------------|-------------------|------------------|------|--------------------|-------------------|-------------------|------------------|-------------------|------------------|----|
| 1  | 138.066188         | 69.536732         |                   |                  |                   |                  | H    |                    |                   |                   |                  |                   |                  | 11 |
| 2  | <b>266.124766</b>  | 133.566021        | <b>249.098217</b> | 125.052746       |                   |                  | Q    | 1340.699099        | 670.853187        | 1323.672550       | 662.339913       | 1322.688534       | 661.847905       | 10 |
| 3  | <b>367.172445</b>  | 184.089860        | 350.145896        | 175.576586       | 349.161880        | 175.084578       | T    | 1212.640521        | 606.823899        | 1195.613972       | 598.310624       | 1194.629956       | 597.818616       | 9  |
| 4  | <b>466.240859</b>  | 233.624068        | 449.214310        | 225.110793       | <b>448.230294</b> | 224.618785       | V    | <b>1111.592842</b> | 556.300059        | 1094.566293       | 547.786784       | 1093.582277       | 547.294776       | 8  |
| 5  | 563.293623         | 282.150450        | 546.267074        | 273.637175       | 545.283058        | 273.145167       | P    | <b>1012.524428</b> | <b>506.765852</b> | <b>995.497879</b> | 498.252577       | <b>994.513863</b> | 497.760569       | 7  |
| 6  | <b>1002.518949</b> | 501.763113        | 985.492400        | 493.249838       | 984.508384        | 492.757830       | Q    | <b>915.471664</b>  | 458.239470        | <b>898.445115</b> | 449.726195       | <b>897.461099</b> | 449.234187       | 6  |
| 7  | <b>1116.561876</b> | 558.784576        | 1099.535327       | 550.271302       | 1098.551311       | 549.779293       | N    | <b>476.246338</b>  | 238.626807        | <b>459.219789</b> | 230.113532       | 458.235773        | 229.621524       | 5  |
| 8  | 1217.609555        | 609.308416        | 1200.583006       | 600.795141       | 1199.598990       | 600.303133       | T    | <b>362.203411</b>  | 181.605343        | 345.176862        | 173.092069       | 344.192846        | 172.600061       | 4  |
| 9  | <b>1274.631019</b> | 637.819147        | 1257.604470       | 629.305873       | 1256.620454       | 628.813865       | G    | <b>261.155732</b>  | 131.081504        | 244.129183        | 122.568229       |                   |                  | 3  |
| 10 | 1331.652483        | <b>666.329879</b> | 1314.625934       | 657.816605       | 1313.641918       | 657.324597       | G    | <b>204.134268</b>  | 102.570772        | 187.107719        | 94.057497        |                   |                  | 2  |
| 11 |                    |                   |                   |                  |                   |                  | K    | <b>147.112804</b>  | 74.060040         | <b>130.086255</b> | 65.546765        |                   |                  | 1  |

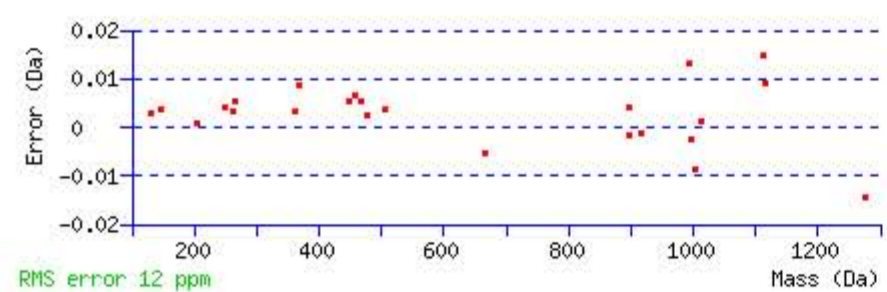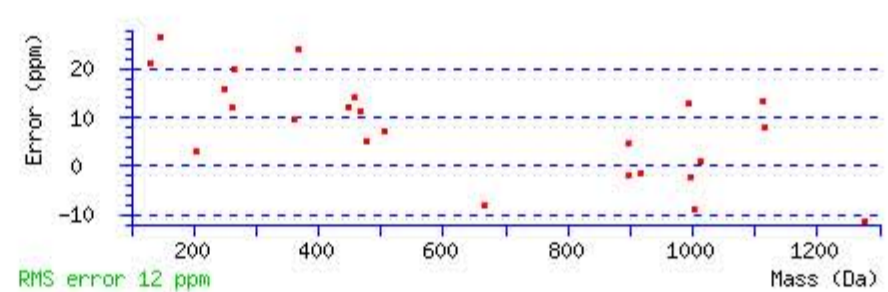

NCBI BLAST search of **HQTVPQNTGGK**

(Parameters: blastp, nr protein database, expect=20000, no filter, PAM30)

Other BLAST [web gateways](#)

All matches to this query

| Score | Mr(calc):   | Delta    | Sequence                       |
|-------|-------------|----------|--------------------------------|
| 27.2  | 1476.750748 | 0.001994 | <a href="#">HQTVPQNTGGK</a>    |
| 10.2  | 1476.736115 | 0.016627 | <a href="#">HQEALIGQSIFYGK</a> |
| 1.9   | 1476.750748 | 0.001994 | <a href="#">HQTVPQNTGGK</a>    |
| 1.3   | 1476.750687 | 0.002055 | <a href="#">NKMEIQGNPKYR</a>   |

# MASCOT SEARCH RESULTS

## Peptide View

MS/MS Fragmentation of **DSGFQMNQLR**

Found in **TRFE\_HUMAN**, Serotransferrin OS=Homo sapiens GN=TF PE=1 SV=3

Match to Query 30077: 1505.712868 from(753.863710,2+) rtinseconds(2077) index(62967)

Title: Locus:1.1.1.3349.11 File:"2013-07-02 CLN FXIII 60 min 3rd FT.wiff"

Data file C:\Program Files (x86)\Matrix Science\Mascot Daemon\mgf6 FXIII 60 min 3rd\mascot\_daemon\_merge.mgf

Click mouse within plot area to zoom in by factor of two about that point

Or, Plot from  to  Da

Label all possible matches  Label matches used for scoring

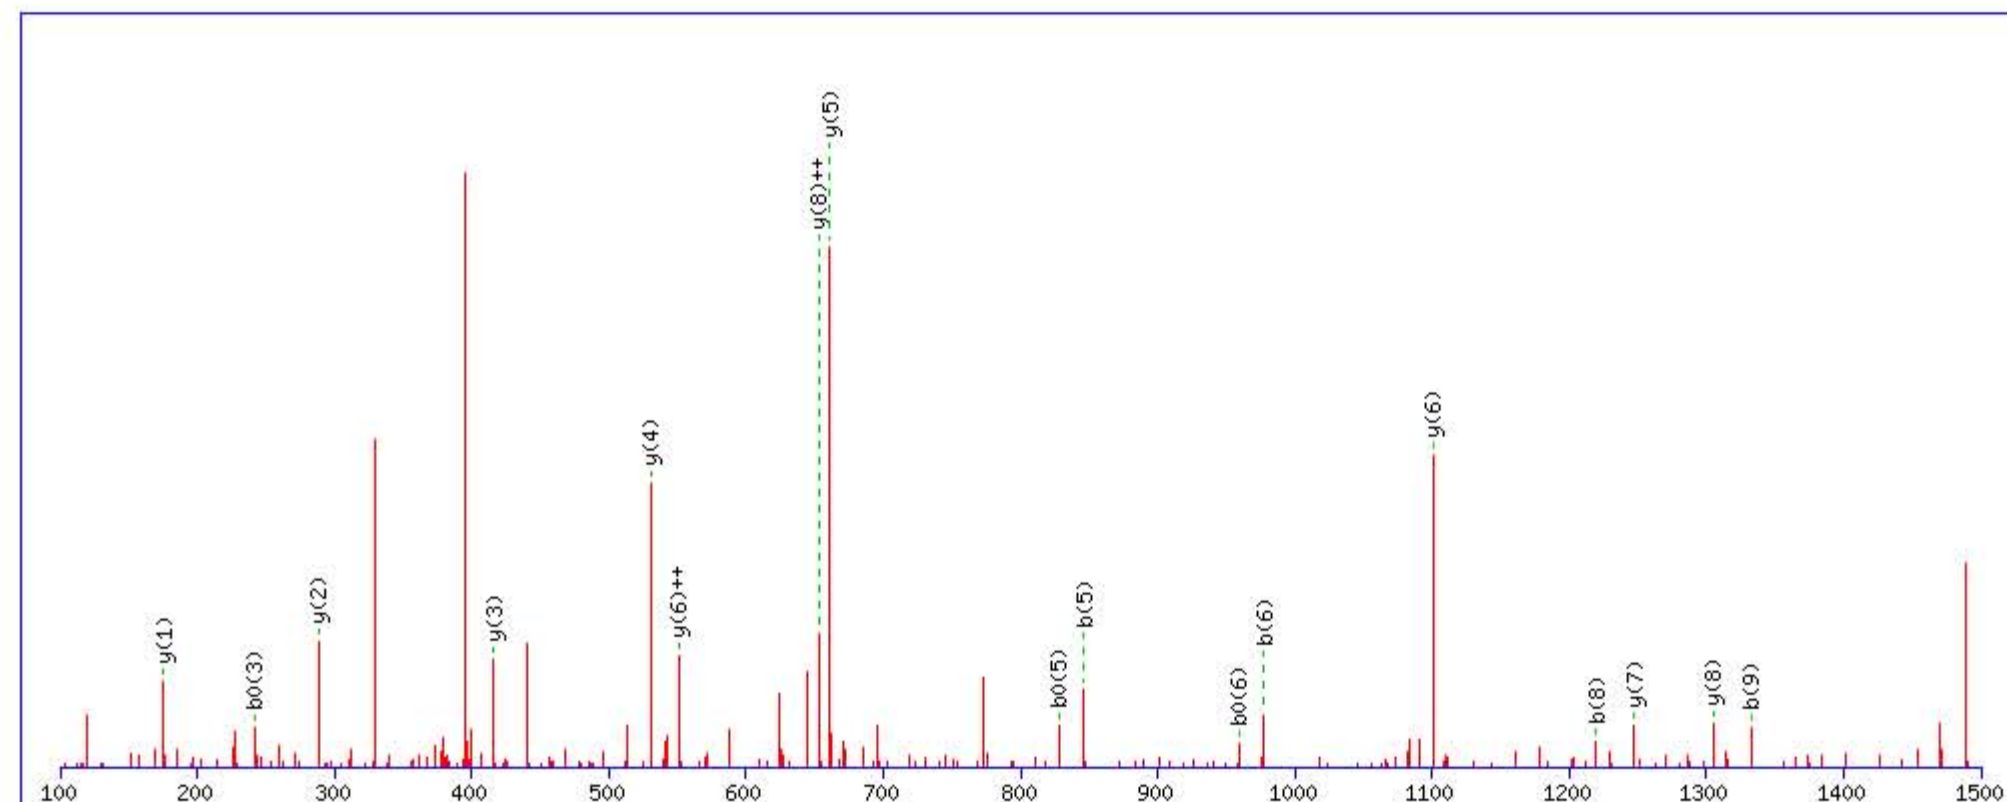

Monoisotopic mass of neutral peptide Mr(calc): 1505.711899

Fixed modifications: Carbamidomethyl (C) (apply to specified residues or termini only)

Variable modifications:

Q5 : Biotin:Thermo-21345 (Q)

Ions Score: 57 Expect: 3.3e-005

Matches : 17/84 fragment ions using 28 most intense peaks [\(help\)](#)

| #  | b           | b <sup>++</sup> | b <sup>*</sup> | b <sup>*++</sup> | b <sup>0</sup> | b <sup>0++</sup> | Seq. | y           | y <sup>++</sup> | y <sup>*</sup> | y <sup>*++</sup> | y <sup>0</sup> | y <sup>0++</sup> | #  |
|----|-------------|-----------------|----------------|------------------|----------------|------------------|------|-------------|-----------------|----------------|------------------|----------------|------------------|----|
| 1  | 116.034219  | 58.520748       |                |                  | 98.023654      | 49.515465        | D    |             |                 |                |                  |                |                  | 10 |
| 2  | 203.066247  | 102.036761      |                |                  | 185.055682     | 93.031479        | S    | 1391.692238 | 696.349757      | 1374.665689    | 687.836482       | 1373.681673    | 687.344474       | 9  |
| 3  | 260.087711  | 130.547493      |                |                  | 242.077146     | 121.542211       | G    | 1304.660210 | 652.833743      | 1287.633661    | 644.320469       |                |                  | 8  |
| 4  | 407.156125  | 204.081700      |                |                  | 389.145560     | 195.076418       | F    | 1247.638746 | 624.323011      | 1230.612197    | 615.809736       |                |                  | 7  |
| 5  | 846.381451  | 423.694364      | 829.354902     | 415.181089       | 828.370886     | 414.689081       | Q    | 1100.570332 | 550.788804      | 1083.543783    | 542.275530       |                |                  | 6  |
| 6  | 977.421936  | 489.214606      | 960.395387     | 480.701331       | 959.411371     | 480.209323       | M    | 661.345006  | 331.176141      | 644.318457     | 322.662867       |                |                  | 5  |
| 7  | 1091.464863 | 546.236069      | 1074.438314    | 537.722795       | 1073.454298    | 537.230787       | N    | 530.304521  | 265.655899      | 513.277972     | 257.142624       |                |                  | 4  |
| 8  | 1219.523441 | 610.265359      | 1202.496892    | 601.752084       | 1201.512876    | 601.260076       | Q    | 416.261594  | 208.634435      | 399.235045     | 200.121160       |                |                  | 3  |
| 9  | 1332.607505 | 666.807391      | 1315.580956    | 658.294116       | 1314.596940    | 657.802108       | L    | 288.203016  | 144.605146      | 271.176467     | 136.091871       |                |                  | 2  |
| 10 |             |                 |                |                  |                |                  | R    | 175.118952  | 88.063114       | 158.092403     | 79.549839        |                |                  | 1  |

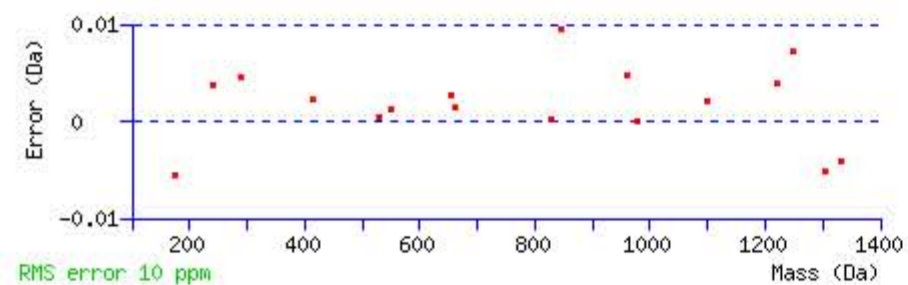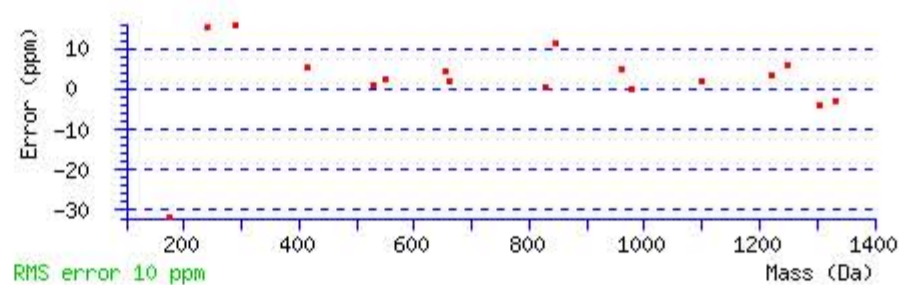

NCBI BLAST search of **DSGFQMNQLR**

(Parameters: blastp, nr protein database, expect=20000, no filter, PAM30)

Other BLAST [web gateways](#)

All matches to this query

| Score | Mr(calc):   | Delta    | Sequence                     |
|-------|-------------|----------|------------------------------|
| 56.5  | 1505.711899 | 0.000969 | <a href="#">DSGFQMNQLR</a>   |
| 19.1  | 1505.711899 | 0.000969 | <a href="#">DSGFQMNQLR</a>   |
| 16.7  | 1505.703140 | 0.009728 | <a href="#">DETMEEQDIKLR</a> |
| 7.3   | 1505.704025 | 0.008843 | <a href="#">MQMEIDQLR</a>    |
| 5.4   | 1505.691910 | 0.020958 | <a href="#">MEDLLDLDEELR</a> |

Mascot: <http://www.matrixscience.com/>

# MASCOT Search Results

## Peptide View

MS/MS Fragmentation of **EFQLFSSPHGK**

Found in **TRFE\_HUMAN**, Serotransferrin OS=Homo sapiens GN=TF PE=1 SV=3

Match to Query 32646: 1586.792262 from(529.938030,3+) rtinseconds(2121) index(63262)

Title: Locus:1.1.1.3365.6 File:"2013-07-02 CLN FXIII 60 min 3rd FT.wiff"

Data file C:\Program Files (x86)\Matrix Science\Mascot Daemon\mgf\6 FXIII 60 min 3rd\mascot\_daemon\_merge.mgf

Click mouse within plot area to zoom in by factor of two about that point

Or, Plot from  to  Da

Label all possible matches  Label matches used for scoring

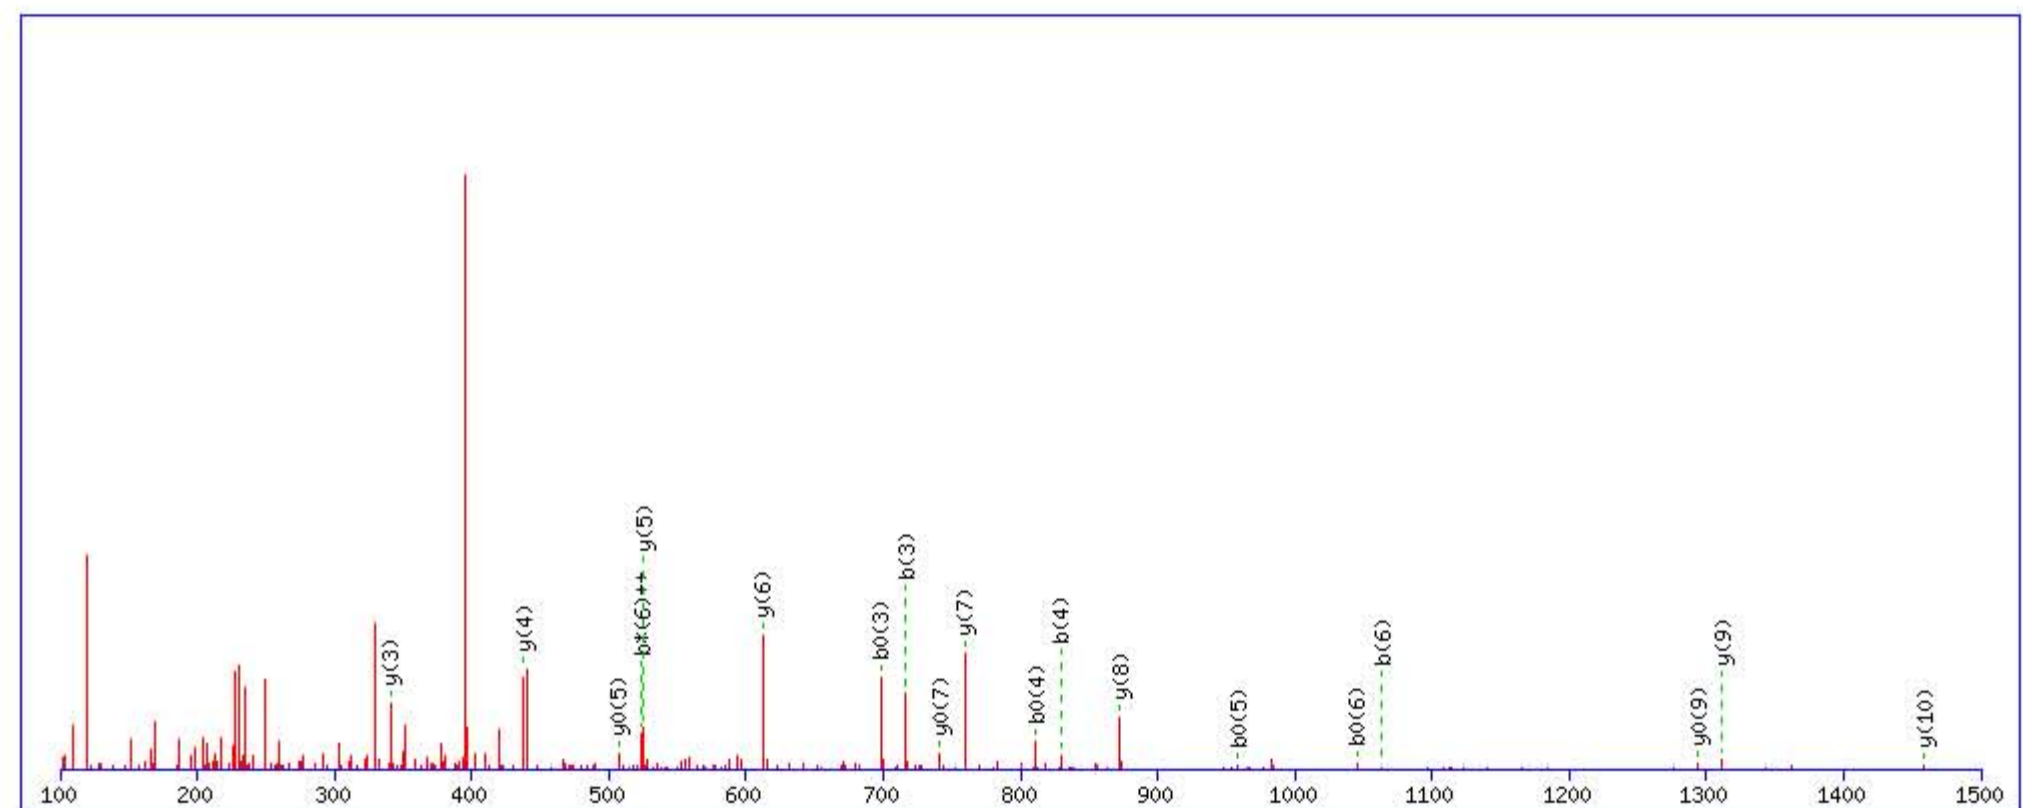

Monoisotopic mass of neutral peptide  $M_r(\text{calc})$ : 1586.791534

Fixed modifications: Carbamidomethyl (C) (apply to specified residues or termini only)

Variable modifications:

Q3 : Biotin:Thermo-21345 (Q)

Ions Score: 38 Expect: 0.0041

Matches : 19/108 fragment ions using 39 most intense peaks [\(help\)](#)

| #  | b                  | b <sup>++</sup> | b <sup>*</sup> | b <sup>*++</sup>  | b <sup>0</sup>     | b <sup>0++</sup> | Seq. | y                  | y <sup>++</sup> | y <sup>*</sup> | y <sup>*++</sup> | y <sup>0</sup>     | y <sup>0++</sup> | #  |
|----|--------------------|-----------------|----------------|-------------------|--------------------|------------------|------|--------------------|-----------------|----------------|------------------|--------------------|------------------|----|
| 1  | 130.049869         | 65.528572       |                |                   | 112.039304         | 56.523290        | E    |                    |                 |                |                  |                    |                  | 11 |
| 2  | 277.118283         | 139.062779      |                |                   | 259.107718         | 130.057497       | F    | <b>1458.756218</b> | 729.881747      | 1441.729669    | 721.368473       | 1440.745653        | 720.876465       | 10 |
| 3  | <b>716.343609</b>  | 358.675443      | 699.317060     | 350.162168        | <b>698.333044</b>  | 349.670160       | Q    | <b>1311.687804</b> | 656.347540      | 1294.661255    | 647.834266       | <b>1293.677239</b> | 647.342258       | 9  |
| 4  | <b>829.427673</b>  | 415.217475      | 812.401124     | 406.704200        | <b>811.417108</b>  | 406.212192       | L    | <b>872.462478</b>  | 436.734877      | 855.435929     | 428.221603       | 854.451913         | 427.729595       | 8  |
| 5  | 976.496087         | 488.751682      | 959.469538     | 480.238407        | <b>958.485522</b>  | 479.746399       | F    | <b>759.378414</b>  | 380.192845      | 742.351865     | 371.679571       | <b>741.367849</b>  | 371.187563       | 7  |
| 6  | <b>1063.528115</b> | 532.267696      | 1046.501566    | <b>523.754421</b> | <b>1045.517550</b> | 523.262413       | S    | <b>612.310000</b>  | 306.658638      | 595.283451     | 298.145364       | 594.299435         | 297.653356       | 6  |
| 7  | 1150.560143        | 575.783710      | 1133.533594    | 567.270435        | 1132.549578        | 566.778427       | S    | <b>525.277972</b>  | 263.142624      | 508.251423     | 254.629350       | <b>507.267407</b>  | 254.137342       | 5  |
| 8  | 1247.612907        | 624.310092      | 1230.586358    | 615.796817        | 1229.602342        | 615.304809       | P    | <b>438.245944</b>  | 219.626610      | 421.219395     | 211.113335       |                    |                  | 4  |
| 9  | 1384.671819        | 692.839548      | 1367.645270    | 684.326273        | 1366.661254        | 683.834265       | H    | <b>341.193180</b>  | 171.100228      | 324.166631     | 162.586953       |                    |                  | 3  |
| 10 | 1441.693283        | 721.350280      | 1424.666734    | 712.837005        | 1423.682718        | 712.344997       | G    | 204.134268         | 102.570772      | 187.107719     | 94.057497        |                    |                  | 2  |
| 11 |                    |                 |                |                   |                    |                  | K    | 147.112804         | 74.060040       | 130.086255     | 65.546765        |                    |                  | 1  |

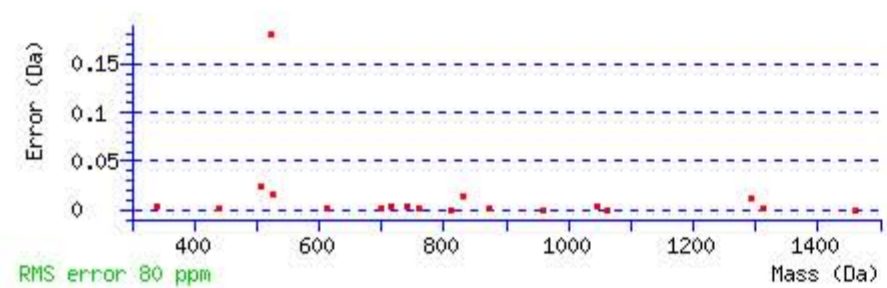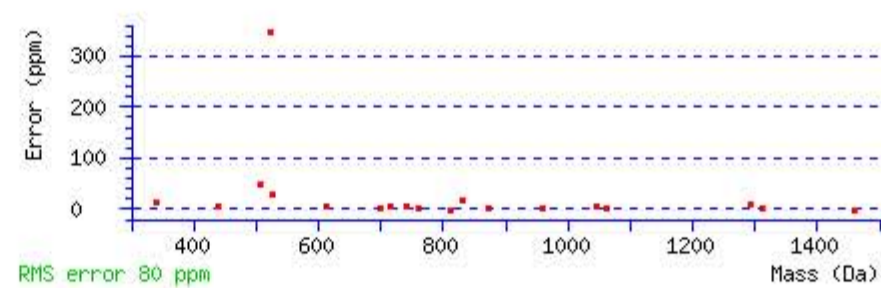

NCBI BLAST search of **EFQLFSSPHGK**

(Parameters: blastp, nr protein database, expect=20000, no filter, PAM30)

Other BLAST [web gateways](#)

All matches to this query

| Score | Mr(calc):   | Delta    | Sequence           |
|-------|-------------|----------|--------------------|
| 37.9  | 1586.791534 | 0.000728 | <b>EFQLFSSPHGK</b> |

Mascot: <http://www.matrixscience.com/>

**Peptide View**

MS/MS Fragmentation of **KDSGFQMNQLR**  
 Found in **TRFE\_HUMAN**, Serotransferrin OS=Homo sapiens GN=TF PE=1 SV=3

Match to Query 35061: 1633.810228 from(817.912390,2+) rtinseconds(1870) index(61695)  
 Title: Locus:1.1.1.3277.15 File:"2013-07-02 CLN FXIII 60 min 3rd FT.wiff"  
 Data file C:\Program Files (x86)\Matrix Science\Mascot Daemon\mgf6 FXIII 60 min 3rd\mascot\_daemon\_merge.mgf

Click mouse within plot area to zoom in by factor of two about that point  
 Or, Plot from 100 to 1700 Da Full range  
 Label all possible matches  Label matches used for scoring

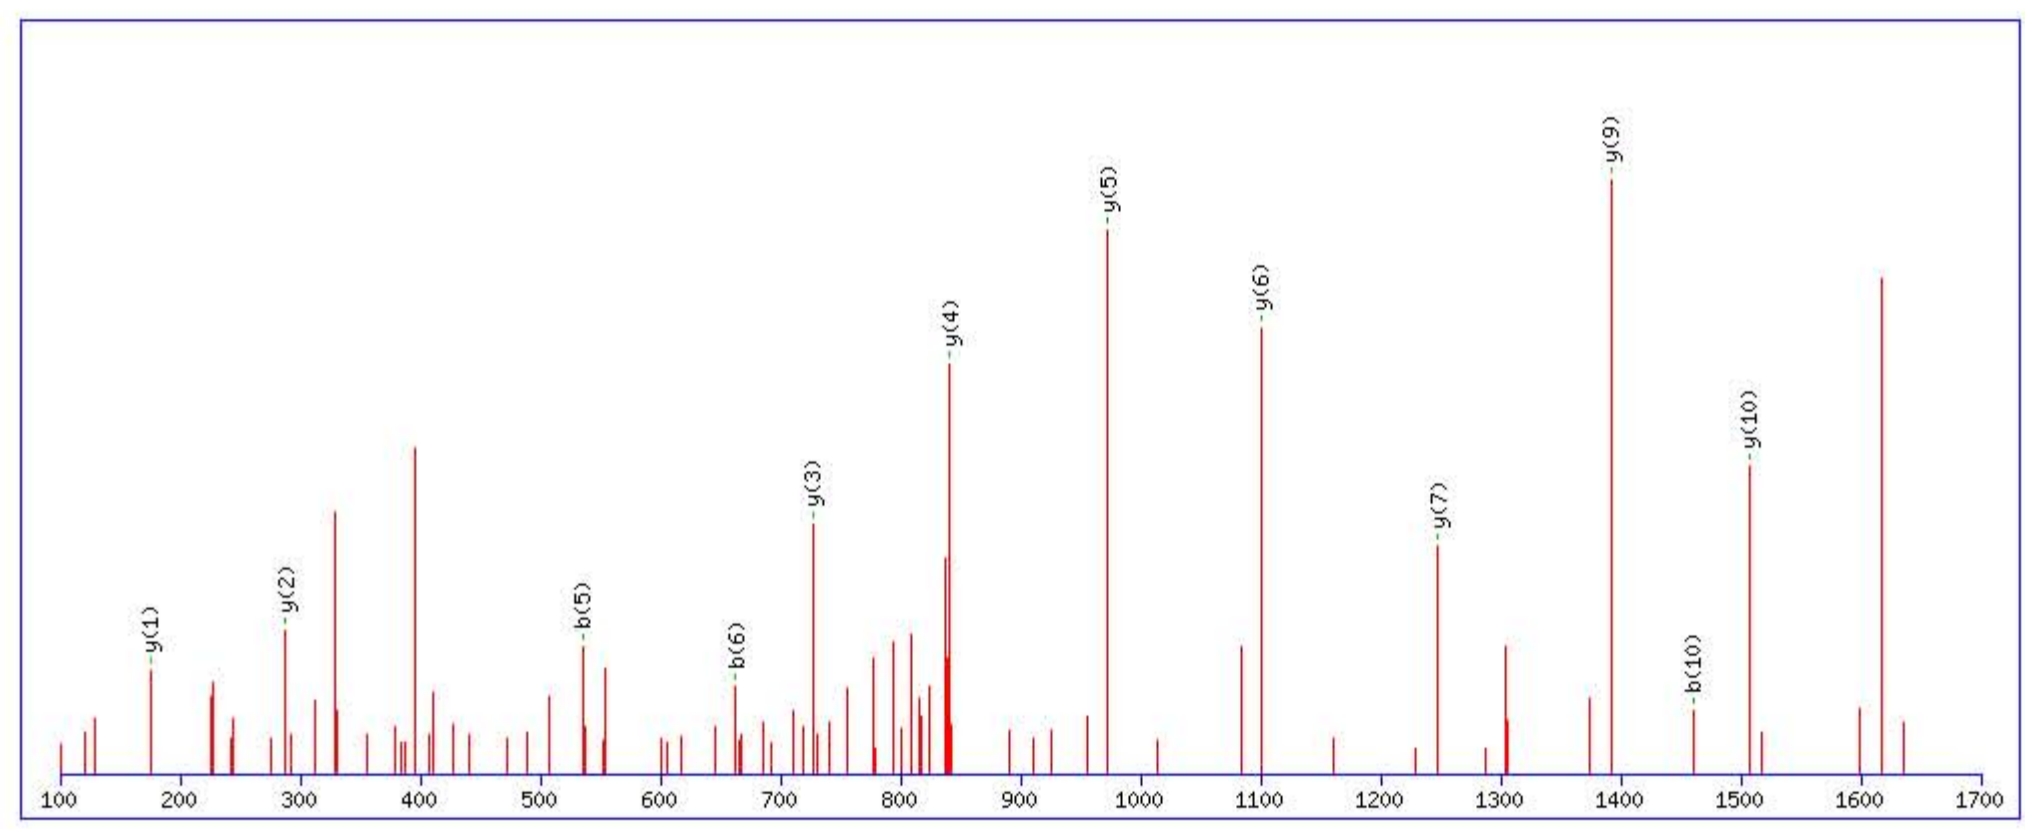

Monoisotopic mass of neutral peptide Mr(calc): 1633.806854  
 Fixed modifications: Carbamidomethyl (C) (apply to specified residues or termini only)  
 Variable modifications: Q9 : Biotin:Thermo-21345 (Q)  
 Ions Score: 81 Expect: 2e-007  
 Matches : 12/102 fragment ions using 16 most intense peaks (help)

| #  | b           | b <sup>++</sup> | b <sup>*</sup> | b <sup>+++</sup> | b <sup>0</sup> | b <sup>0++</sup> | Seq. | y           | y <sup>++</sup> | y <sup>*</sup> | y <sup>+++</sup> | y <sup>0</sup> | y <sup>0++</sup> | #  |
|----|-------------|-----------------|----------------|------------------|----------------|------------------|------|-------------|-----------------|----------------|------------------|----------------|------------------|----|
| 1  | 129.102239  | 65.054757       | 112.075690     | 56.541483        |                |                  | K    |             |                 |                |                  |                |                  | 11 |
| 2  | 244.129182  | 122.568229      | 227.102633     | 114.054955       | 226.118617     | 113.562947       | D    | 1506.719181 | 753.863228      | 1489.692632    | 745.349954       | 1488.708616    | 744.857946       | 10 |
| 3  | 331.161210  | 166.084243      | 314.134661     | 157.570969       | 313.150645     | 157.078961       | S    | 1391.692238 | 696.349757      | 1374.665689    | 687.836482       | 1373.681673    | 687.344474       | 9  |
| 4  | 388.182674  | 194.594975      | 371.156125     | 186.081701       | 370.172109     | 185.589693       | G    | 1304.660210 | 652.833743      | 1287.633661    | 644.320468       |                |                  | 8  |
| 5  | 535.251088  | 268.129182      | 518.224539     | 259.615908       | 517.240523     | 259.123900       | F    | 1247.638746 | 624.323011      | 1230.612197    | 615.809736       |                |                  | 7  |
| 6  | 663.309666  | 332.158471      | 646.283117     | 323.645197       | 645.299101     | 323.153189       | Q    | 1100.570332 | 550.788804      | 1083.543783    | 542.275530       |                |                  | 6  |
| 7  | 794.350151  | 397.678714      | 777.323602     | 389.165439       | 776.339586     | 388.673431       | M    | 972.511754  | 486.759515      | 955.485205     | 478.246240       |                |                  | 5  |
| 8  | 908.393078  | 454.700177      | 891.366529     | 446.186903       | 890.382513     | 445.694895       | N    | 841.471269  | 421.239272      | 824.444720     | 412.725998       |                |                  | 4  |
| 9  | 1347.618404 | 674.312840      | 1330.591855    | 665.799566       | 1329.607839    | 665.307558       | Q    | 727.428342  | 364.217809      | 710.401793     | 355.704534       |                |                  | 3  |
| 10 | 1460.702468 | 730.854872      | 1443.675919    | 722.341598       | 1442.691903    | 721.849589       | L    | 288.203016  | 144.605146      | 271.176467     | 136.091871       |                |                  | 2  |
| 11 |             |                 |                |                  |                |                  | R    | 175.118952  | 88.063114       | 158.092403     | 79.549839        |                |                  | 1  |

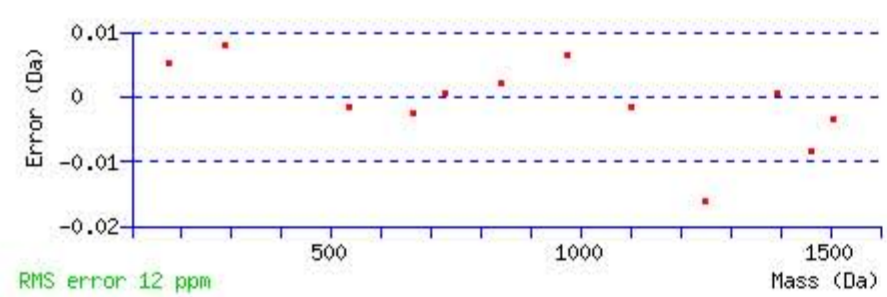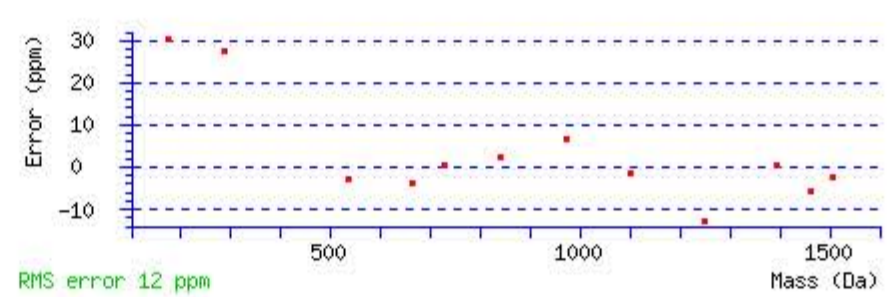

NCBI BLAST search of **KDSGFQMNQLR**  
 (Parameters: blastp, nr protein database, expect=20000, no filter, PAM30)  
 Other BLAST [web gateways](#)

**All matches to this query**

| Score | Mr(calc):   | Delta     | Sequence                          |
|-------|-------------|-----------|-----------------------------------|
| 80.5  | 1633.806854 | 0.003374  | <a href="#">KDSGFQMNQLR</a>       |
| 33.8  | 1633.806854 | 0.003374  | <a href="#">KDSGFQMNQLR</a>       |
| 14.3  | 1633.799454 | 0.010774  | <a href="#">DANSFKSRDQR</a>       |
| 9.4   | 1633.834518 | -0.024290 | <a href="#">KADIGVAMGIAGSDVSK</a> |
| 9.2   | 1633.832016 | -0.021788 | <a href="#">MSIFTPTNQIR</a>       |
| 8.1   | 1633.795609 | 0.014619  | <a href="#">KFMEDEQQLR</a>        |
| 5.9   | 1633.822128 | -0.011900 | <a href="#">QFMKGQVSWGR</a>       |
| 5.6   | 1633.810699 | -0.000471 | <a href="#">DQTIRIWCSRGR</a>      |
| 5.5   | 1633.798096 | 0.012132  | <a href="#">QDQEKDNMIEKLLK</a>    |
| 2.2   | 1633.817184 | -0.006956 | <a href="#">HLHEGAKSASAEELR</a>   |

# MASCOT Search Results

## Peptide View

MS/MS Fragmentation of **HQTVPQNTGGK**

Found in **TRFE\_HUMAN**, Serotransferrin OS=Homo sapiens GN=TF PE=1 SV=3

Match to Query 38264: 1787.915832 from(596.979220,3+) rtinseconds(1612) index(60507)

Title: Locus:1.1.1.3187.9 File:"2013-07-02 CLN FXIII 60 min 3rd FT.wiff"

Data file C:\Program Files (x86)\Matrix Science\Mascot Daemon\mgf\6 FXIII 60 min 3rd\mascot\_daemon\_merge.mgf

Click mouse within plot area to zoom in by factor of two about that point

Or, Plot from  to  Da

Label all possible matches  Label matches used for scoring

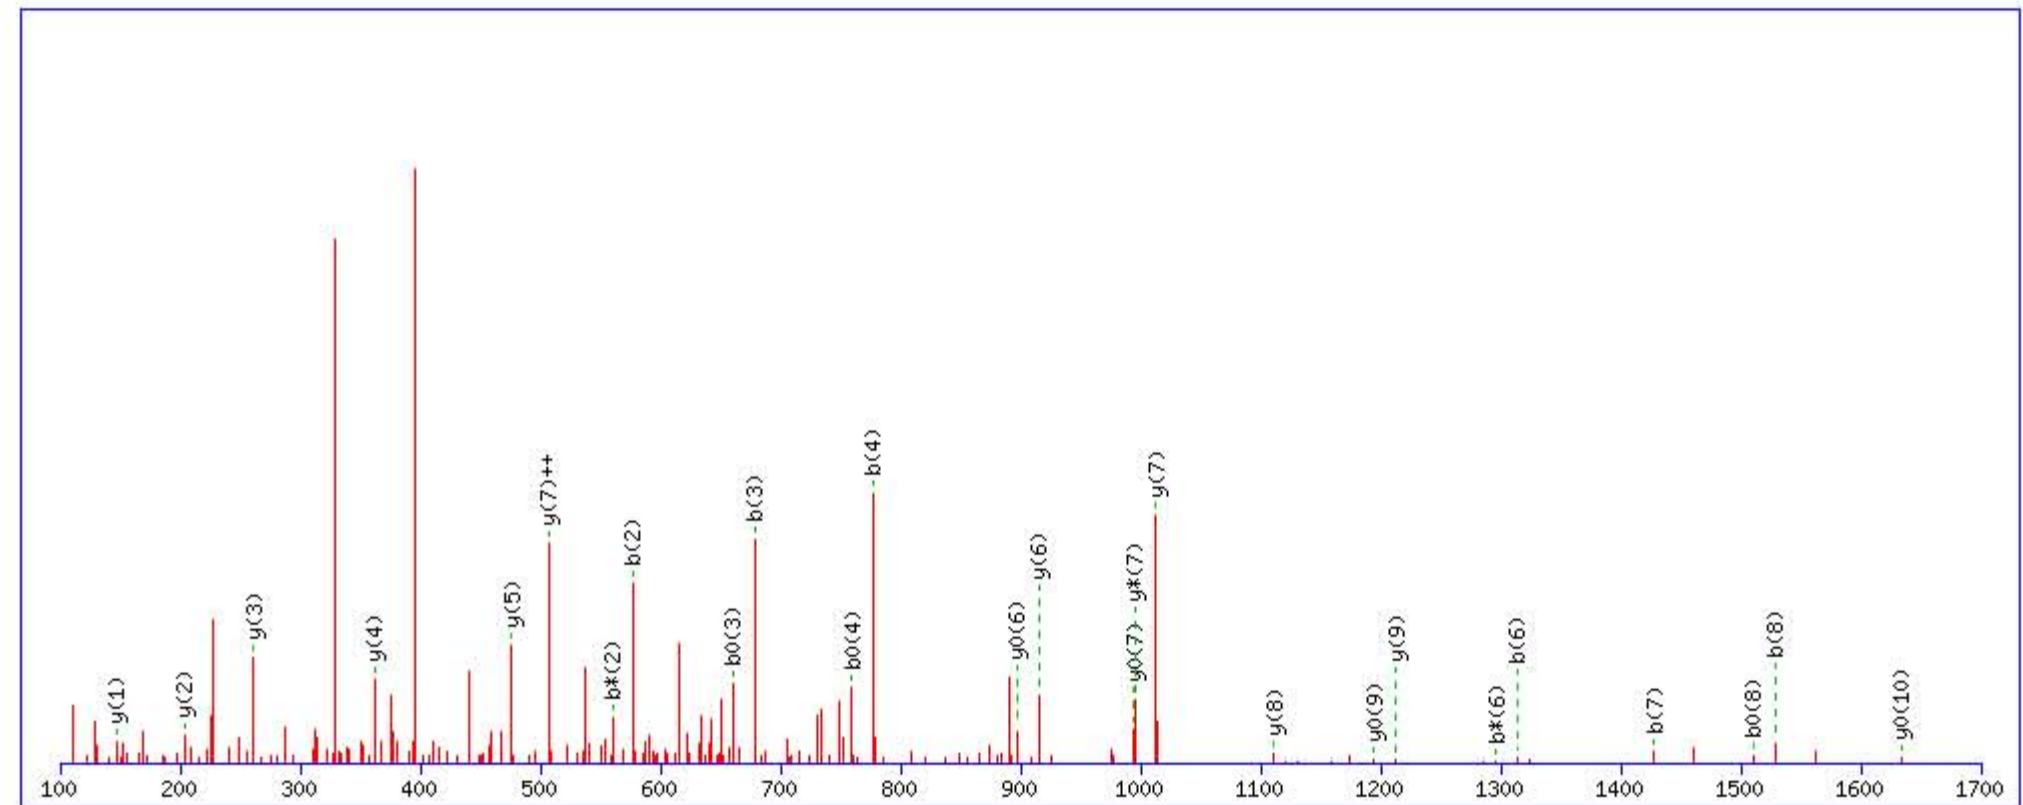

Monoisotopic mass of neutral peptide Mr(calc): 1787.917496

Fixed modifications: Carbamidomethyl (C) (apply to specified residues or termini only)

Variable modifications:

Q2 : Biotin:Thermo-21345 (Q)

Q6 : Biotin:Thermo-21345 (Q)

Ions Score: 33 Expect: 0.015

Matches : 26/108 fragment ions using 64 most intense peaks ([help](#))

| #  | b                  | b <sup>++</sup> | b <sup>*</sup>     | b <sup>*++</sup> | b <sup>0</sup>     | b <sup>0++</sup> | Seq. | y                  | y <sup>++</sup>   | y <sup>*</sup>    | y <sup>*++</sup> | y <sup>0</sup>     | y <sup>0++</sup> | #  |
|----|--------------------|-----------------|--------------------|------------------|--------------------|------------------|------|--------------------|-------------------|-------------------|------------------|--------------------|------------------|----|
| 1  | 138.066188         | 69.536732       |                    |                  |                    |                  | H    |                    |                   |                   |                  |                    |                  | 11 |
| 2  | <b>577.291514</b>  | 289.149395      | <b>560.264965</b>  | 280.636121       |                    |                  | Q    | 1651.865847        | 826.436562        | 1634.839298       | 817.923287       | <b>1633.855282</b> | 817.431279       | 10 |
| 3  | <b>678.339193</b>  | 339.673235      | 661.312644         | 331.159960       | <b>660.328628</b>  | 330.667952       | T    | <b>1212.640521</b> | 606.823899        | 1195.613972       | 598.310624       | <b>1194.629956</b> | 597.818616       | 9  |
| 4  | <b>777.407607</b>  | 389.207442      | 760.381058         | 380.694167       | <b>759.397042</b>  | 380.202159       | V    | <b>1111.592842</b> | 556.300059        | 1094.566293       | 547.786785       | 1093.582277        | 547.294777       | 8  |
| 5  | 874.460371         | 437.733824      | 857.433822         | 429.220549       | 856.449806         | 428.728541       | P    | <b>1012.524428</b> | <b>506.765852</b> | <b>995.497879</b> | 498.252578       | <b>994.513863</b>  | 497.760570       | 7  |
| 6  | <b>1313.685697</b> | 657.346487      | <b>1296.659148</b> | 648.833212       | 1295.675132        | 648.341204       | Q    | <b>915.471664</b>  | 458.239470        | 898.445115        | 449.726196       | <b>897.461099</b>  | 449.234188       | 6  |
| 7  | <b>1427.728624</b> | 714.367950      | 1410.702075        | 705.854676       | 1409.718059        | 705.362668       | N    | <b>476.246338</b>  | 238.626807        | 459.219789        | 230.113532       | <b>458.235773</b>  | 229.621524       | 5  |
| 8  | <b>1528.776303</b> | 764.891790      | 1511.749754        | 756.378515       | <b>1510.765738</b> | 755.886507       | T    | <b>362.203411</b>  | 181.605343        | 345.176862        | 173.092069       | 344.192846         | 172.600061       | 4  |
| 9  | 1585.797767        | 793.402522      | 1568.771218        | 784.889247       | 1567.787202        | 784.397239       | G    | <b>261.155732</b>  | 131.081504        | 244.129183        | 122.568229       |                    |                  | 3  |
| 10 | 1642.819231        | 821.913254      | 1625.792682        | 813.399979       | 1624.808666        | 812.907971       | G    | <b>204.134268</b>  | 102.570772        | 187.107719        | 94.057497        |                    |                  | 2  |
| 11 |                    |                 |                    |                  |                    |                  | K    | <b>147.112804</b>  | 74.060040         | 130.086255        | 65.546765        |                    |                  | 1  |

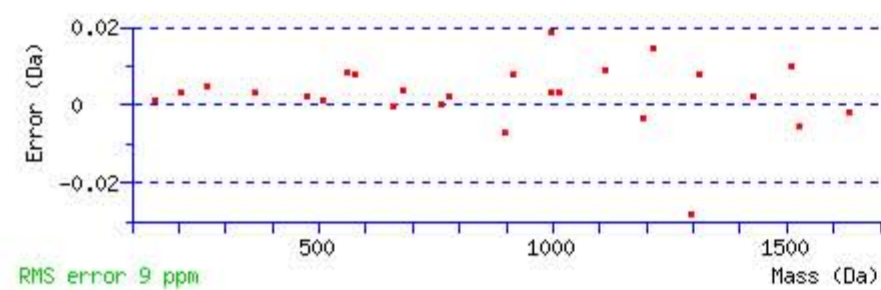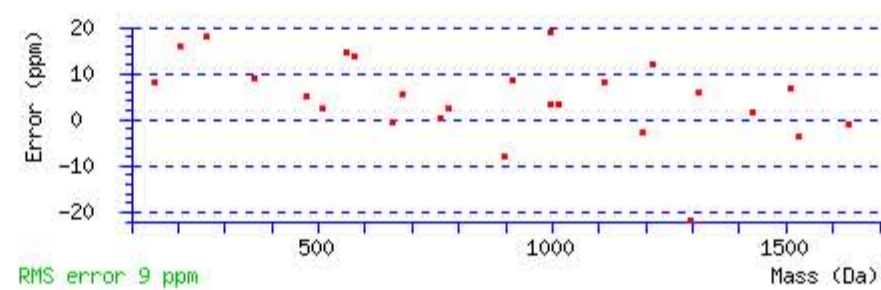

NCBI BLAST search of [HQTVPQNTGGK](#)

(Parameters: blastp, nr protein database, expect=20000, no filter, PAM30)

Other BLAST [web gateways](#)

All matches to this query

| Score | Mr(calc):   | Delta     | Sequence                    |
|-------|-------------|-----------|-----------------------------|
| 33.0  | 1787.917496 | -0.001664 | <a href="#">HQTVPQNTGGK</a> |

Mascot: <http://www.matrixscience.com/>

# MASCOT SCIENCE Mascot Search Results

## Peptide View

MS/MS Fragmentation of **EDPQTFYYAVAVVK**

Found in **TRFE\_HUMAN**, Serotransferrin OS=Homo sapiens GN=TF PE=1 SV=3

Match to Query 40919: 1939.983702 from(647.668510,3+) rtinseconds(2574) index(65537)

Title: Locus:1.1.1.3523.6 File:"2013-07-02 CLN FXIII 60 min 3rd FT.wiff"

Data file C:\Program Files (x86)\Matrix Science\Mascot Daemon\mgf6 FXIII 60 min 3rd\mascot\_daemon\_merge.mgf

Click mouse within plot area to zoom in by factor of two about that point

Or, Plot from  to  Da

Label all possible matches  Label matches used for scoring

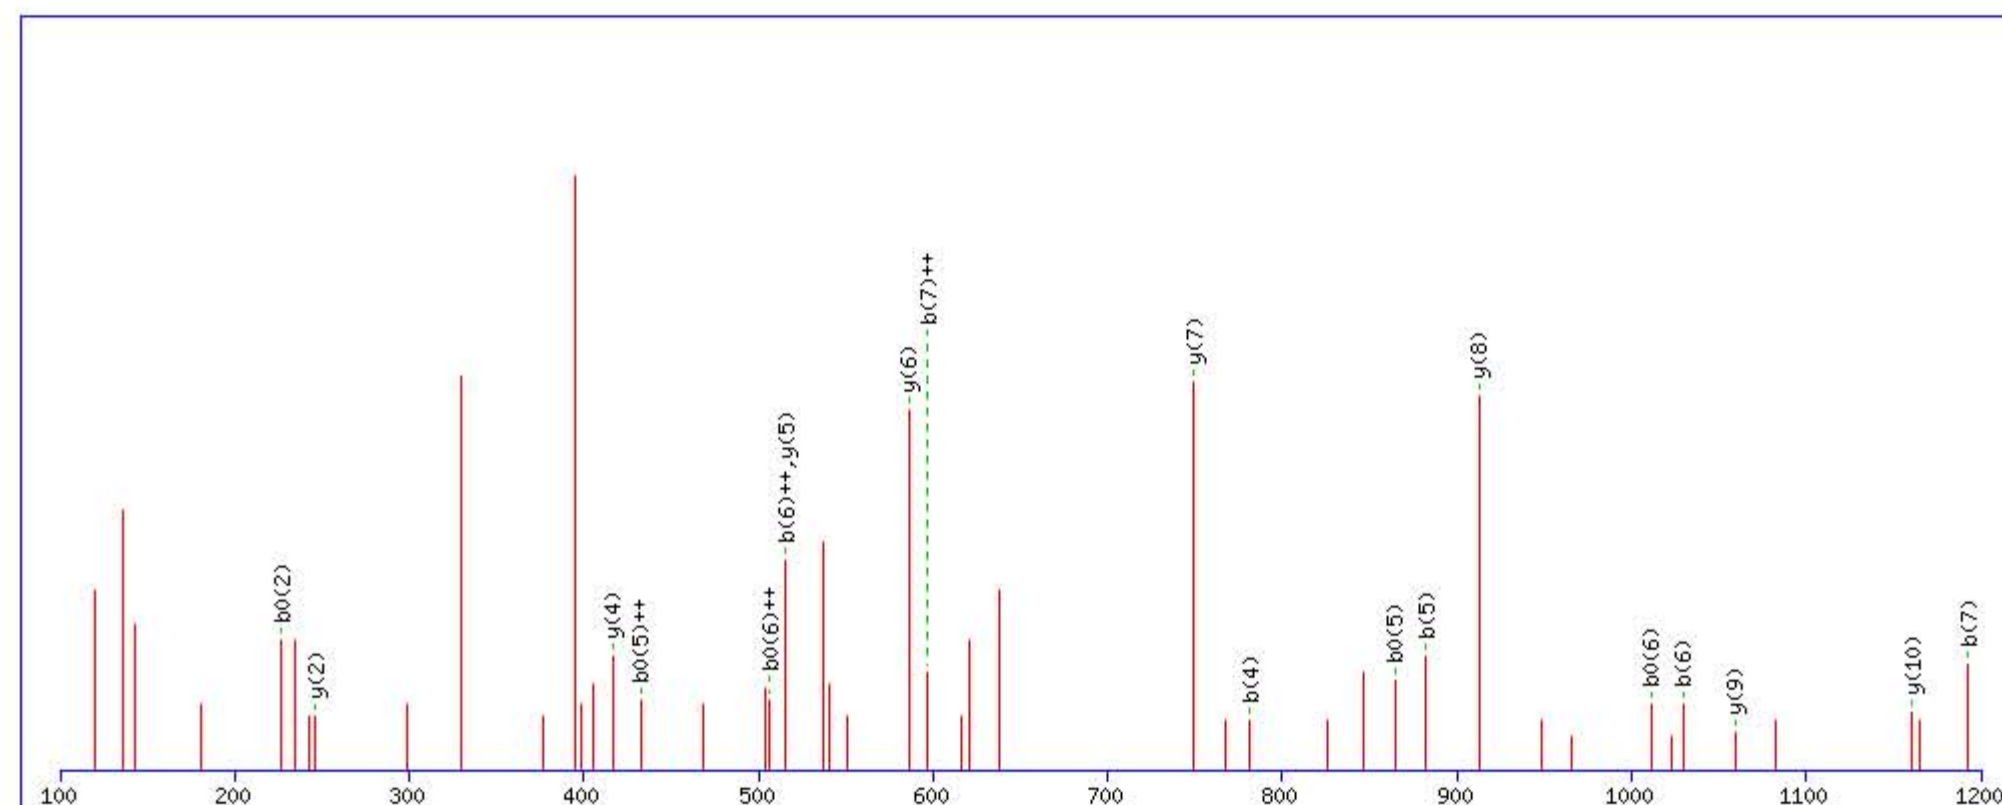

Monoisotopic mass of neutral peptide Mr(calc): 1939.975372

Fixed modifications: Carbamidomethyl (C) (apply to specified residues or termini only)

Variable modifications:

Q4 : Biotin:Thermo-21345 (Q)

Ions Score: 34 Expect: 0.012

Matches : 19/132 fragment ions using 40 most intense peaks [\(help\)](#)

| #  | b           | b <sup>++</sup> | b <sup>*</sup> | b <sup>*++</sup> | b <sup>0</sup> | b <sup>0++</sup> | Seq. | y           | y <sup>++</sup> | y <sup>*</sup> | y <sup>*++</sup> | y <sup>0</sup> | y <sup>0++</sup> | #  |
|----|-------------|-----------------|----------------|------------------|----------------|------------------|------|-------------|-----------------|----------------|------------------|----------------|------------------|----|
| 1  | 130.049869  | 65.528572       |                |                  | 112.039304     | 56.523290        | E    |             |                 |                |                  |                |                  | 14 |
| 2  | 245.076812  | 123.042044      |                |                  | 227.066247     | 114.036762       | D    | 1811.940058 | 906.473667      | 1794.913509    | 897.960393       | 1793.929493    | 897.468385       | 13 |
| 3  | 342.129576  | 171.568426      |                |                  | 324.119011     | 162.563144       | P    | 1696.913115 | 848.960196      | 1679.886566    | 840.446921       | 1678.902550    | 839.954913       | 12 |
| 4  | 781.354902  | 391.181089      | 764.328353     | 382.667815       | 763.344337     | 382.175807       | Q    | 1599.860351 | 800.433814      | 1582.833802    | 791.920539       | 1581.849786    | 791.428531       | 11 |
| 5  | 882.402581  | 441.704929      | 865.376032     | 433.191654       | 864.392016     | 432.699646       | T    | 1160.635025 | 580.821151      | 1143.608476    | 572.307876       | 1142.624460    | 571.815868       | 10 |
| 6  | 1029.470995 | 515.239136      | 1012.444446    | 506.725861       | 1011.460430    | 506.233853       | F    | 1059.587346 | 530.297311      | 1042.560797    | 521.784037       |                |                  | 9  |
| 7  | 1192.534324 | 596.770800      | 1175.507775    | 588.257526       | 1174.523759    | 587.765518       | Y    | 912.518932  | 456.763104      | 895.492383     | 448.249830       |                |                  | 8  |
| 8  | 1355.597653 | 678.302465      | 1338.571104    | 669.789190       | 1337.587088    | 669.297182       | Y    | 749.455603  | 375.231440      | 732.429054     | 366.718165       |                |                  | 7  |
| 9  | 1426.634767 | 713.821022      | 1409.608218    | 705.307747       | 1408.624202    | 704.815739       | A    | 586.392274  | 293.699775      | 569.365725     | 285.186501       |                |                  | 6  |
| 10 | 1525.703181 | 763.355229      | 1508.676632    | 754.841954       | 1507.692616    | 754.349946       | V    | 515.355160  | 258.181218      | 498.328611     | 249.667944       |                |                  | 5  |
| 11 | 1596.740295 | 798.873786      | 1579.713746    | 790.360511       | 1578.729730    | 789.868503       | A    | 416.286746  | 208.647011      | 399.260197     | 200.133737       |                |                  | 4  |
| 12 | 1695.808709 | 848.407993      | 1678.782160    | 839.894718       | 1677.798144    | 839.402710       | V    | 345.249632  | 173.128454      | 328.223083     | 164.615180       |                |                  | 3  |
| 13 | 1794.877123 | 897.942200      | 1777.850574    | 889.428925       | 1776.866558    | 888.936917       | V    | 246.181218  | 123.594247      | 229.154669     | 115.080973       |                |                  | 2  |
| 14 |             |                 |                |                  |                |                  | K    | 147.112804  | 74.060040       | 130.086255     | 65.546765        |                |                  | 1  |

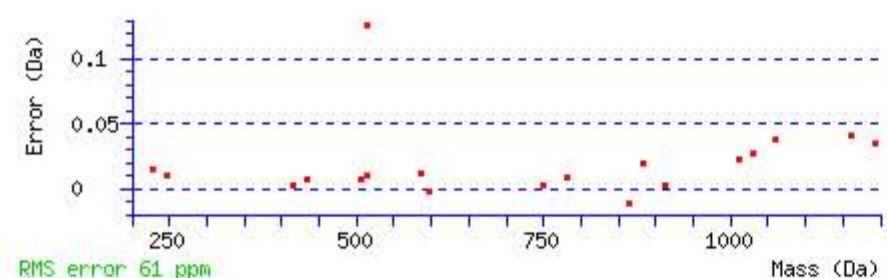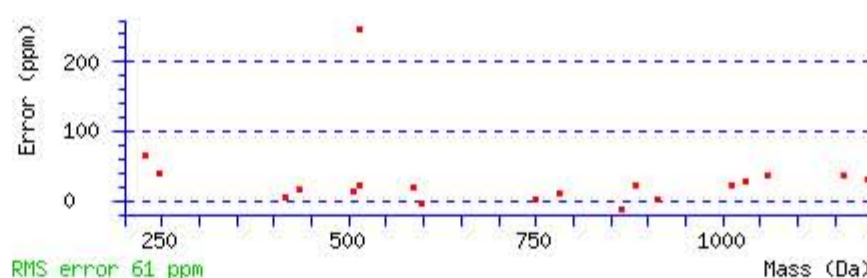

NCBI BLAST search of [EDPQTFYYAVAVVK](#)

(Parameters: blastp, nr protein database, expect=20000, no filter, PAM30)

Other BLAST [web gateways](#)

## All matches to this query

| Score | Mr(calc):   | Delta    | Sequence                       |
|-------|-------------|----------|--------------------------------|
| 34.2  | 1939.975372 | 0.008330 | <a href="#">EDPQTFYYAVAVVK</a> |

Mascot: <http://www.matrixscience.com/>

# MASCOT SEARCH RESULTS

## Peptide View

MS/MS Fragmentation of **KDSGFQMNQLR**

Found in **TRFE\_HUMAN**, Serotransferrin OS=Homo sapiens GN=TF PE=1 SV=3

Match to Query 40999: 1944.976152 from(649.332660,3+) rtinseconds(2106) index(63129)

Title: Locus:1.1.1.3359.21 File:"2013-07-02 CLN FXIII 60 min 3rd FT.wiff"

Data file C:\Program Files (x86)\Matrix Science\Mascot Daemon\mgf6 FXIII 60 min 3rd\mascot\_daemon\_merge.mgf

Click mouse within plot area to zoom in by factor of two about that point

Or, Plot from  to  Da

Label all possible matches  Label matches used for scoring

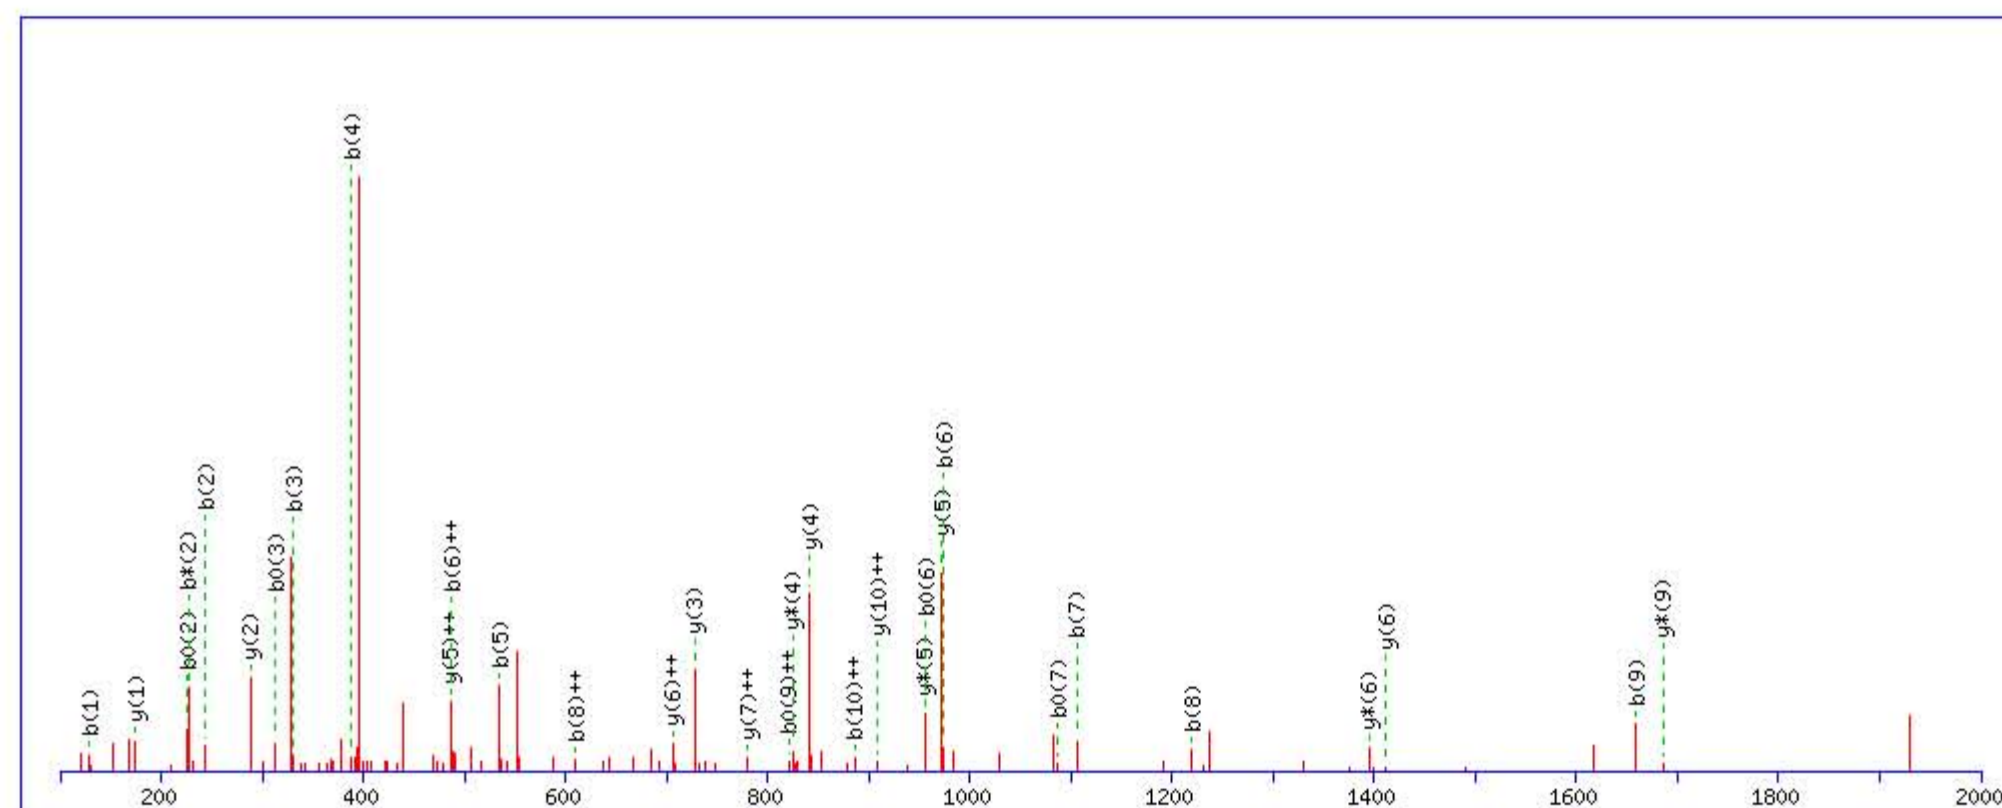

Monoisotopic mass of neutral peptide Mr(calc): 1944.973602

Fixed modifications: Carbamidomethyl (C) (apply to specified residues or termini only)

Variable modifications:

Q6 : Biotin:Thermo-21345 (Q)

Q9 : Biotin:Thermo-21345 (Q)

Ions Score: 30 Expect: 0.0018

Matches : 32/102 fragment ions using 85 most intense peaks [\(help\)](#)

| #  | b           | b <sup>++</sup> | b <sup>*</sup> | b <sup>*++</sup> | b <sup>0</sup> | b <sup>0++</sup> | Seq. | y           | y <sup>++</sup> | y <sup>*</sup> | y <sup>*++</sup> | y <sup>0</sup> | y <sup>0++</sup> | #  |
|----|-------------|-----------------|----------------|------------------|----------------|------------------|------|-------------|-----------------|----------------|------------------|----------------|------------------|----|
| 1  | 129.102239  | 65.054757       | 112.075690     | 56.541483        |                |                  | K    |             |                 |                |                  |                |                  | 11 |
| 2  | 244.129182  | 122.568229      | 227.102633     | 114.054955       | 226.118617     | 113.562947       | D    | 1817.885929 | 909.446603      | 1800.859380    | 900.933328       | 1799.875364    | 900.441320       | 10 |
| 3  | 331.161210  | 166.084243      | 314.134661     | 157.570969       | 313.150645     | 157.078961       | S    | 1702.858986 | 851.933131      | 1685.832437    | 843.419857       | 1684.848421    | 842.927848       | 9  |
| 4  | 388.182674  | 194.594975      | 371.156125     | 186.081701       | 370.172109     | 185.589693       | G    | 1615.826958 | 808.417117      | 1598.800409    | 799.903843       |                |                  | 8  |
| 5  | 535.251088  | 268.129182      | 518.224539     | 259.615908       | 517.240523     | 259.123900       | F    | 1558.805494 | 779.906385      | 1541.778945    | 771.393111       |                |                  | 7  |
| 6  | 974.476414  | 487.741845      | 957.449865     | 479.228571       | 956.465849     | 478.736563       | Q    | 1411.737080 | 706.372178      | 1394.710531    | 697.858904       |                |                  | 6  |
| 7  | 1105.516899 | 553.262088      | 1088.490350    | 544.748813       | 1087.506334    | 544.256805       | M    | 972.511754  | 486.759515      | 955.485205     | 478.246241       |                |                  | 5  |
| 8  | 1219.559826 | 610.283551      | 1202.533277    | 601.770277       | 1201.549261    | 601.278268       | N    | 841.471269  | 421.239273      | 824.444720     | 412.725998       |                |                  | 4  |
| 9  | 1658.785152 | 829.896214      | 1641.758603    | 821.382940       | 1640.774587    | 820.890932       | Q    | 727.428342  | 364.217809      | 710.401793     | 355.704535       |                |                  | 3  |
| 10 | 1771.869216 | 886.438246      | 1754.842667    | 877.924972       | 1753.858651    | 877.432964       | L    | 288.203016  | 144.605146      | 271.176467     | 136.091871       |                |                  | 2  |
| 11 |             |                 |                |                  |                |                  | R    | 175.118952  | 88.063114       | 158.092403     | 79.549839        |                |                  | 1  |

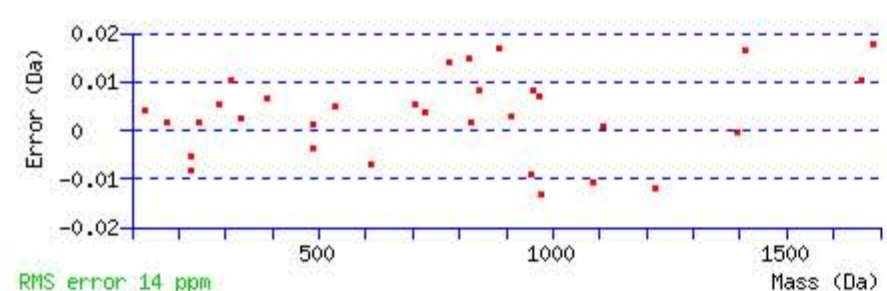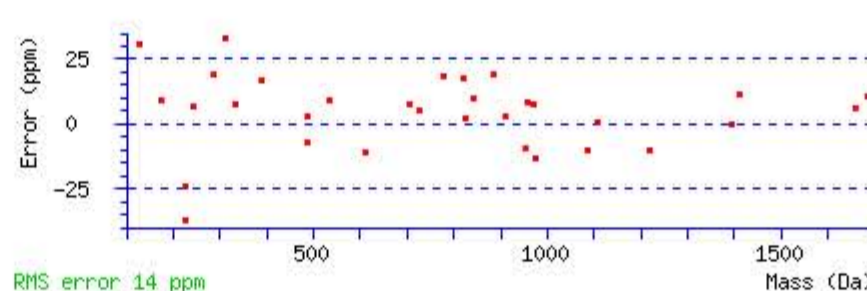

NCBI BLAST search of **KDSGFQMNQLR**

(Parameters: blastp, nr protein database, expect=20000, no filter, PAM30)

Other BLAST [web gateways](#)

All matches to this query

| Score | Mr(calc):   | Delta    | Sequence                    |
|-------|-------------|----------|-----------------------------|
| 29.5  | 1944.973602 | 0.002550 | <a href="#">KDSGFQMNQLR</a> |
| 0.3   | 1944.965729 | 0.010423 | <a href="#">QQITMEMSALR</a> |

# MASCOT SEARCH RESULTS

## Peptide View

MS/MS Fragmentation of **ADRDQYELLCLDNTR**

Found in **TRFE\_HUMAN**, Serotransferrin OS=Homo sapiens GN=TF PE=1 SV=3

Match to Query 45912: 2192.042352 from(731.688060,3+) rtinseconds(2215) index(63750)

Title: Locus:1.1.1.3397.7 File:"2013-07-02 CLN FXIII 60 min 3rd FT.wiff"

Data file C:\Program Files (x86)\Matrix Science\Mascot Daemon\mgf6 FXIII 60 min 3rd\mascot\_daemon\_merge.mgf

Click mouse within plot area to zoom in by factor of two about that point

Or, Plot from 0 to 2200 Da Full range

Label all possible matches  Label matches used for scoring

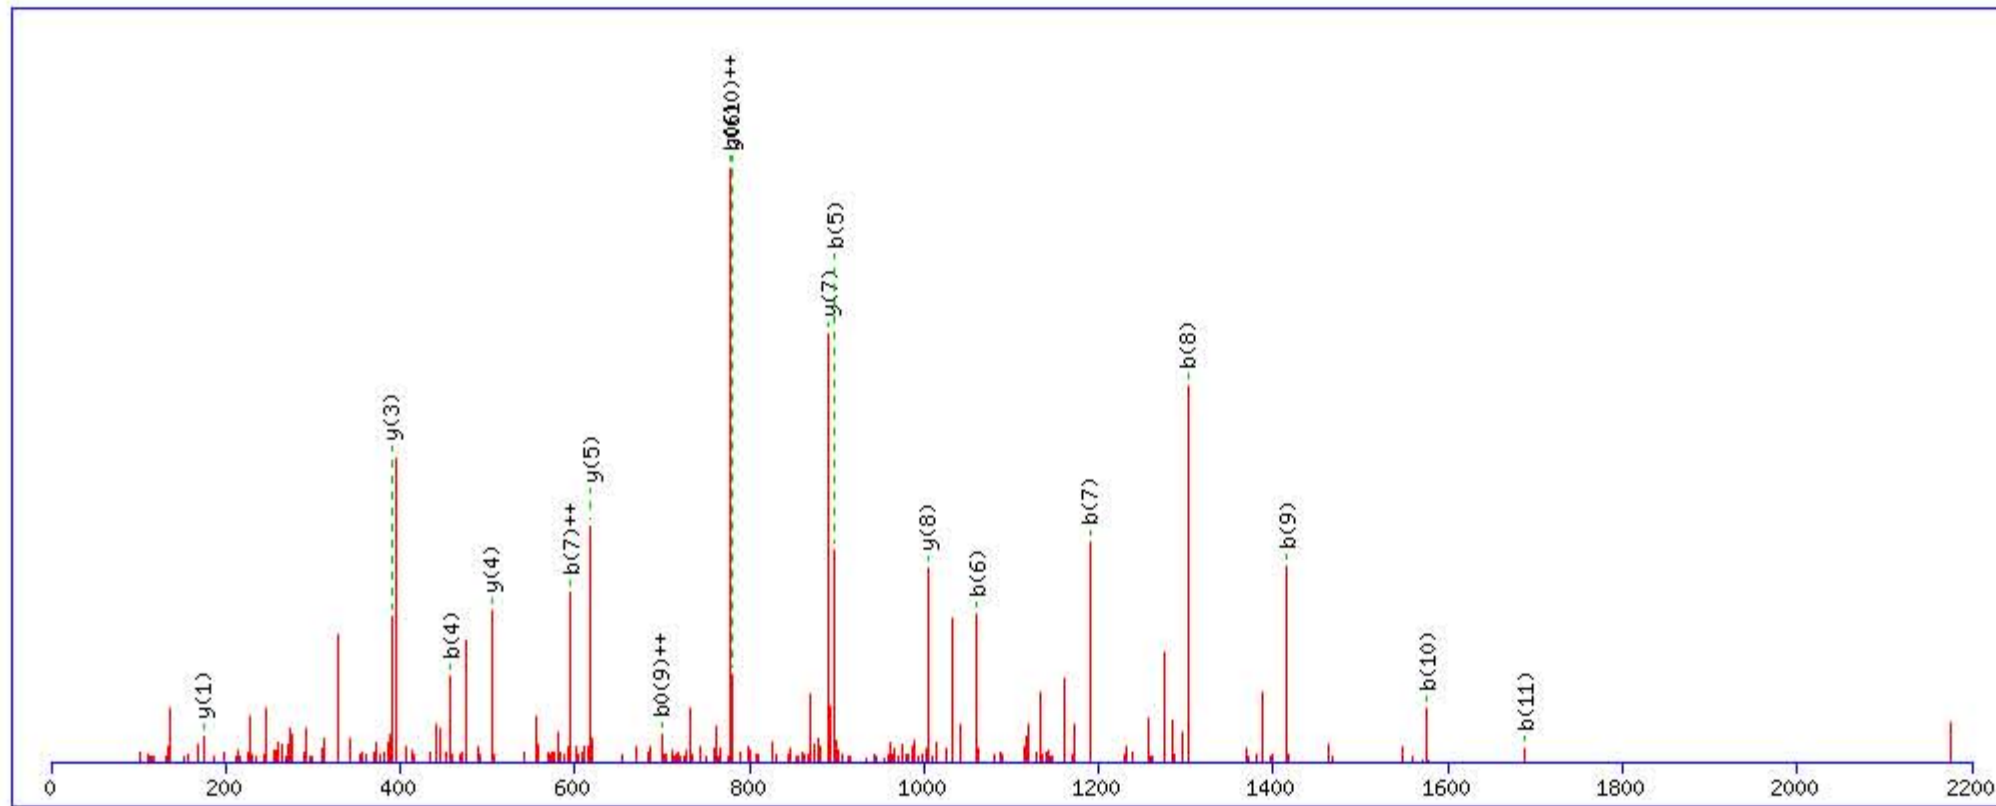

Monoisotopic mass of neutral peptide Mr(calc): 2192.035400

Fixed modifications: Carbamidomethyl (C) (apply to specified residues or termini only)

Variable modifications:

Q5 : Biotin:Thermo-21345 (Q)

Ions Score: 48 Expect: 0.00032

Matches : 18/160 fragment ions using 32 most intense peaks [\(help\)](#)

| #  | b                  | b <sup>++</sup>   | b <sup>*</sup> | b <sup>*++</sup> | b <sup>0</sup> | b <sup>0++</sup>  | Seq. | y                  | y <sup>++</sup> | y <sup>*</sup> | y <sup>*++</sup> | y <sup>0</sup> | y <sup>0++</sup> | #  |
|----|--------------------|-------------------|----------------|------------------|----------------|-------------------|------|--------------------|-----------------|----------------|------------------|----------------|------------------|----|
| 1  | 72.044390          | 36.525833         |                |                  |                |                   | A    |                    |                 |                |                  |                |                  | 15 |
| 2  | 187.071333         | 94.039304         |                |                  | 169.060768     | 85.034022         | D    | 2122.005587        | 1061.506431     | 2104.979038    | 1052.993157      | 2103.995022    | 1052.501149      | 14 |
| 3  | 343.172444         | 172.089860        | 326.145895     | 163.576585       | 325.161879     | 163.084577        | R    | 2006.978644        | 1003.992960     | 1989.952095    | 995.479685       | 1988.968079    | 994.987677       | 13 |
| 4  | <b>458.199387</b>  | 229.603332        | 441.172838     | 221.090057       | 440.188822     | 220.598049        | D    | 1850.877533        | 925.942404      | 1833.850984    | 917.429130       | 1832.866968    | 916.937122       | 12 |
| 5  | <b>897.424713</b>  | 449.215995        | 880.398164     | 440.702720       | 879.414148     | 440.210712        | Q    | 1735.850590        | 868.428933      | 1718.824041    | 859.915658       | 1717.840025    | 859.423650       | 11 |
| 6  | <b>1060.488042</b> | 530.747659        | 1043.461493    | 522.234385       | 1042.477477    | 521.742376        | Y    | 1296.625264        | 648.816270      | 1279.598715    | 640.302995       | 1278.614699    | 639.810987       | 10 |
| 7  | <b>1189.530635</b> | <b>595.268955</b> | 1172.504086    | 586.755681       | 1171.520070    | 586.263673        | E    | 1133.561935        | 567.284605      | 1116.535386    | 558.771331       | 1115.551370    | 558.279323       | 9  |
| 8  | <b>1302.614699</b> | 651.810987        | 1285.588150    | 643.297713       | 1284.604134    | 642.805705        | L    | <b>1004.519342</b> | 502.763309      | 987.492793     | 494.250034       | 986.508777     | 493.758026       | 8  |
| 9  | <b>1415.698763</b> | 708.353019        | 1398.672214    | 699.839745       | 1397.688198    | <b>699.347737</b> | L    | <b>891.435278</b>  | 446.221277      | 874.408729     | 437.708002       | 873.424713     | 437.215994       | 7  |
| 10 | <b>1575.729412</b> | 788.368344        | 1558.702863    | 779.855069       | 1557.718847    | <b>779.363061</b> | C    | <b>778.351214</b>  | 389.679245      | 761.324665     | 381.165971       | 760.340649     | 380.673963       | 6  |
| 11 | <b>1688.813476</b> | 844.910376        | 1671.786927    | 836.397101       | 1670.802911    | 835.905093        | L    | <b>618.320565</b>  | 309.663921      | 601.294016     | 301.150646       | 600.310000     | 300.658638       | 5  |
| 12 | 1803.840419        | 902.423847        | 1786.813870    | 893.910573       | 1785.829854    | 893.418565        | D    | <b>505.236501</b>  | 253.121888      | 488.209952     | 244.608614       | 487.225936     | 244.116606       | 4  |
| 13 | 1917.883346        | 959.445311        | 1900.856797    | 950.932036       | 1899.872781    | 950.440028        | N    | <b>390.209558</b>  | 195.608417      | 373.183009     | 187.095142       | 372.198993     | 186.603134       | 3  |
| 14 | 2018.931025        | 1009.969150       | 2001.904476    | 1001.455876      | 2000.920460    | 1000.963868       | T    | 276.166631         | 138.586953      | 259.140082     | 130.073679       | 258.156066     | 129.581671       | 2  |
| 15 |                    |                   |                |                  |                |                   | R    | <b>175.118952</b>  | 88.063114       | 158.092403     | 79.549839        |                |                  | 1  |

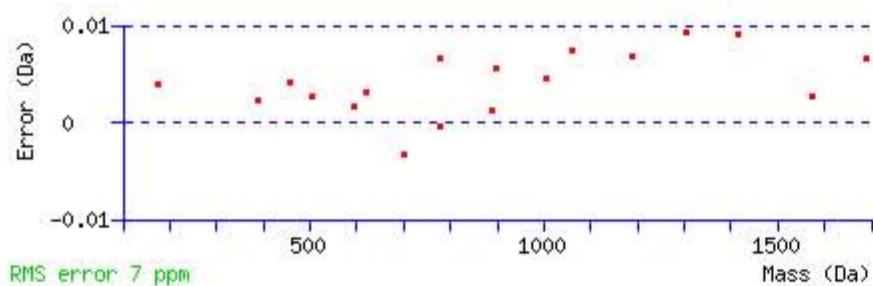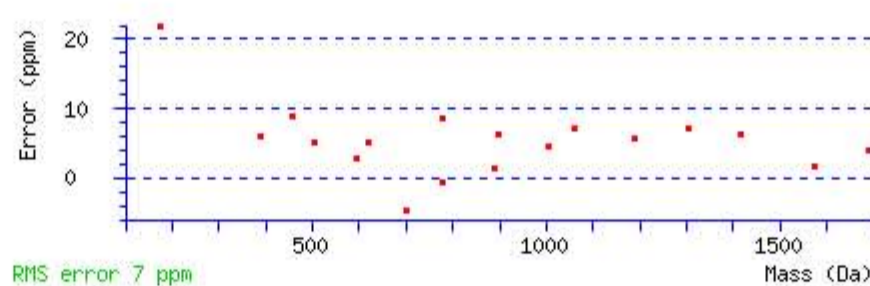

NCBI BLAST search of [ADRDQYELLCLDNTR](#)

(Parameters: blastp, nr protein database, expect=20000, no filter, PAM30)

Other BLAST [web gateways](#)

All matches to this query

| Score | Mr(calc):   | Delta    | Sequence                        |
|-------|-------------|----------|---------------------------------|
| 47.8  | 2192.035400 | 0.006952 | <a href="#">ADRDQYELLCLDNTR</a> |



# Mascot Search Results

## Peptide View

MS/MS Fragmentation of **SMGGKEDLIWELLNQAQEHFGK**

Found in **TRFE\_HUMAN**, Serotransferrin OS=Homo sapiens GN=TF PE=1 SV=3

Match to Query 54313: 2840.412696 from(711.110450,4+) rtinseconds(3013) index(68637)

Title: Locus:1.1.1.3672.3 File:"2013-07-02 CLN FXIII 60 min 3rd FT.wiff"

Data file C:\Program Files (x86)\Matrix Science\Mascot Daemon\mgf6 FXIII 60 min 3rd\mascot\_daemon\_merge.mgf

Click mouse within plot area to zoom in by factor of two about that point

Or, Plot from  to  Da

Label all possible matches  Label matches used for scoring

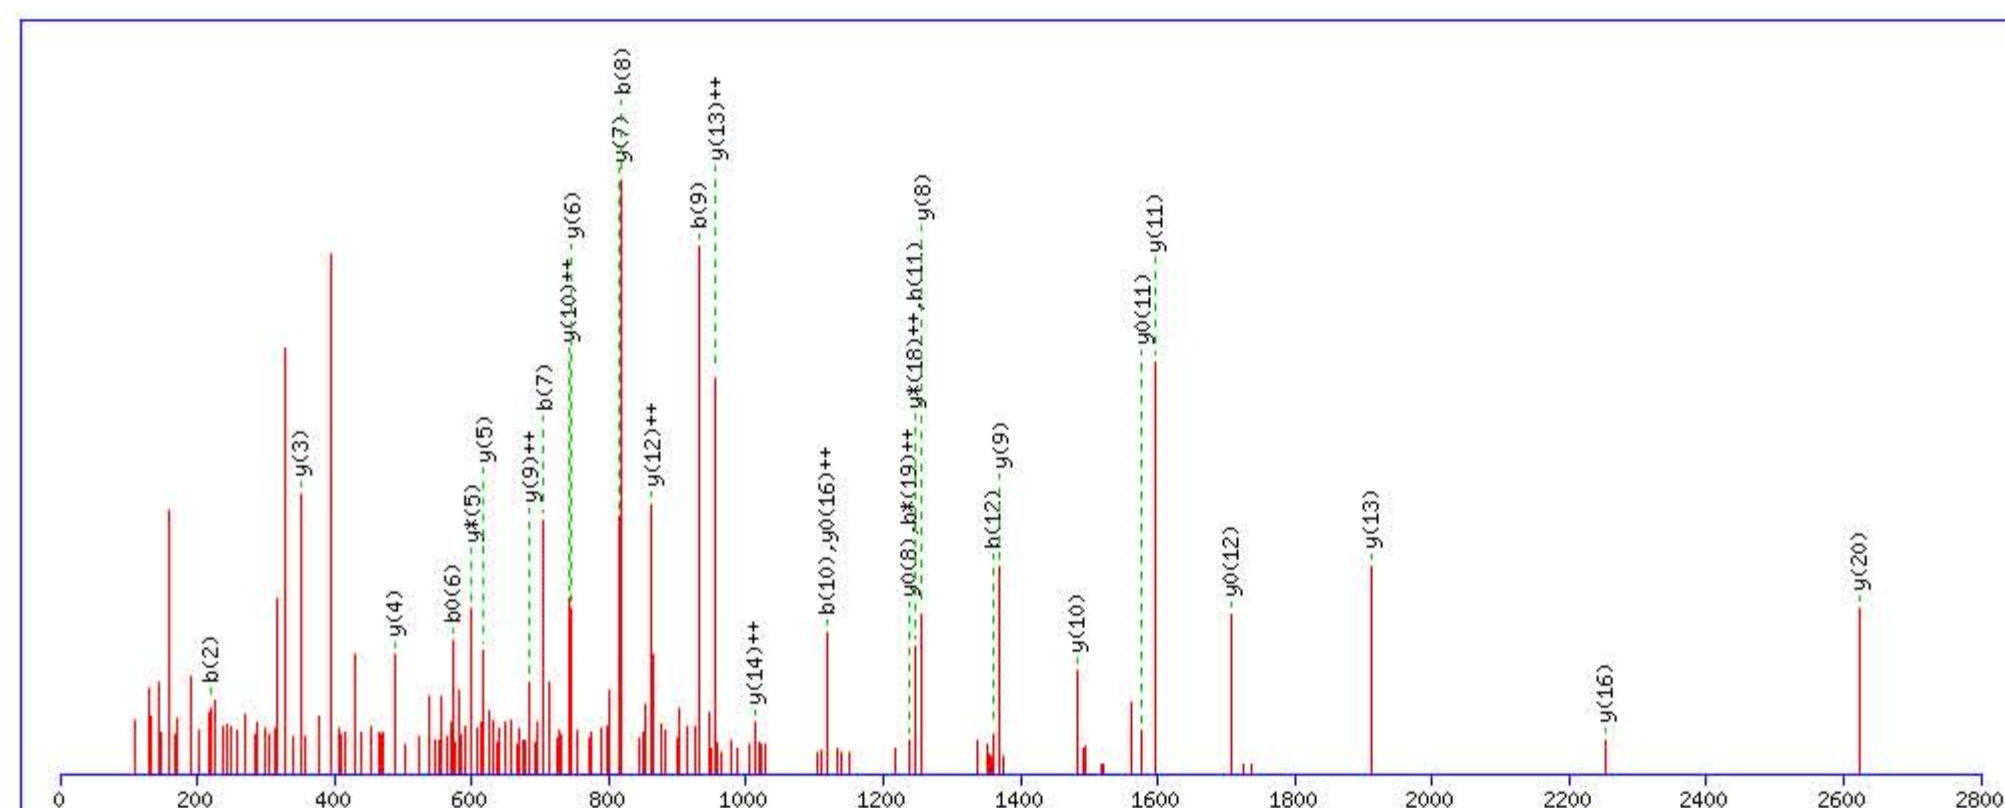

Monoisotopic mass of neutral peptide Mr(calc): 2840.398926

Fixed modifications: Carbamidomethyl (C) (apply to specified residues or termini only)

Variable modifications:

Q15 : Biotin:Thermo-21345 (Q)

Ions Score: 65 Expect: 9.2e-007

Matches : 32/236 fragment ions using 51 most intense peaks [\(help\)](#)

| #  | b                  | b <sup>++</sup> | b <sup>*</sup> | b <sup>*++</sup>   | b <sup>0</sup>    | b <sup>0++</sup> | Seq. | y                  | y <sup>++</sup>    | y <sup>*</sup>    | y <sup>*++</sup>   | y <sup>0</sup>     | y <sup>0++</sup>   | #  |
|----|--------------------|-----------------|----------------|--------------------|-------------------|------------------|------|--------------------|--------------------|-------------------|--------------------|--------------------|--------------------|----|
| 1  | 88.039304          | 44.523290       |                |                    | 70.028739         | 35.518008        | S    |                    |                    |                   |                    |                    |                    | 22 |
| 2  | <b>219.079789</b>  | 110.043532      |                |                    | 201.069224        | 101.038250       | M    | 2754.374206        | 1377.690741        | 2737.347657       | 1369.177466        | 2736.363641        | 1368.685458        | 21 |
| 3  | 276.101253         | 138.554264      |                |                    | 258.090688        | 129.548982       | G    | <b>2623.333721</b> | 1312.170498        | 2606.307172       | 1303.657224        | 2605.323156        | 1303.165216        | 20 |
| 4  | 333.122717         | 167.064996      |                |                    | 315.112152        | 158.059714       | G    | 2566.312257        | 1283.659766        | 2549.285708       | 1275.146492        | 2548.301692        | 1274.654484        | 19 |
| 5  | 461.217680         | 231.112478      | 444.191131     | 222.599203         | 443.207115        | 222.107195       | K    | 2509.290793        | 1255.149034        | 2492.264244       | <b>1246.635760</b> | 2491.280228        | 1246.143752        | 18 |
| 6  | 590.260273         | 295.633775      | 573.233724     | 287.120500         | <b>572.249708</b> | 286.628492       | E    | 2381.195830        | 1191.101553        | 2364.169281       | 1182.588278        | 2363.185265        | 1182.096270        | 17 |
| 7  | <b>705.287216</b>  | 353.147246      | 688.260667     | 344.633972         | 687.276651        | 344.141964       | D    | <b>2252.153237</b> | 1126.580256        | 2235.126688       | 1118.066982        | 2234.142672        | <b>1117.574974</b> | 16 |
| 8  | <b>818.371280</b>  | 409.689278      | 801.344731     | 401.176004         | 800.360715        | 400.683996       | L    | 2137.126294        | 1069.066785        | 2120.099745       | 1060.553510        | 2119.115729        | 1060.061502        | 15 |
| 9  | <b>931.455344</b>  | 466.231310      | 914.428795     | 457.718036         | 913.444779        | 457.226028       | I    | 2024.042230        | <b>1012.524753</b> | 2007.015681       | 1004.011479        | 2006.031665        | 1003.519471        | 14 |
| 10 | <b>1117.534657</b> | 559.270967      | 1100.508108    | 550.757692         | 1099.524092       | 550.265684       | W    | <b>1910.958166</b> | <b>955.982721</b>  | 1893.931617       | 947.469447         | 1892.947601        | 946.977439         | 13 |
| 11 | <b>1246.577250</b> | 623.792263      | 1229.550701    | 615.278989         | 1228.566685       | 614.786981       | E    | 1724.878853        | <b>862.943065</b>  | 1707.852304       | 854.429790         | <b>1706.868288</b> | 853.937782         | 12 |
| 12 | <b>1359.661314</b> | 680.334295      | 1342.634765    | 671.821021         | 1341.650749       | 671.329012       | L    | <b>1595.836260</b> | 798.421768         | 1578.809711       | 789.908494         | <b>1577.825695</b> | 789.416486         | 11 |
| 13 | 1472.745378        | 736.876327      | 1455.718829    | 728.363052         | 1454.734813       | 727.871044       | L    | <b>1482.752196</b> | <b>741.879736</b>  | 1465.725647       | 733.366462         | 1464.741631        | 732.874454         | 10 |
| 14 | 1586.788305        | 793.897790      | 1569.761756    | 785.384516         | 1568.777740       | 784.892508       | N    | <b>1369.668132</b> | <b>685.337704</b>  | 1352.641583       | 676.824430         | 1351.657567        | 676.332422         | 9  |
| 15 | 2026.013631        | 1013.510454     | 2008.987082    | 1004.997179        | 2008.003066       | 1004.505171      | Q    | <b>1255.625205</b> | 628.316241         | 1238.598656       | 619.802966         | <b>1237.614640</b> | 619.310958         | 8  |
| 16 | 2097.050745        | 1049.029010     | 2080.024196    | 1040.515736        | 2079.040180       | 1040.023728      | A    | <b>816.399879</b>  | 408.703578         | 799.373330        | 400.190303         | 798.389314         | 399.698295         | 7  |
| 17 | 2225.109323        | 1113.058300     | 2208.082774    | 1104.545025        | 2207.098758       | 1104.053017      | Q    | <b>745.362765</b>  | 373.185021         | 728.336216        | 364.671746         | 727.352200         | 364.179738         | 6  |
| 18 | 2354.151916        | 1177.579596     | 2337.125367    | 1169.066322        | 2336.141351       | 1168.574314      | E    | <b>617.304187</b>  | 309.155732         | <b>600.277638</b> | 300.642457         | 599.293622         | 300.150449         | 5  |
| 19 | 2491.210828        | 1246.109052     | 2474.184279    | <b>1237.595777</b> | 2473.200263       | 1237.103770      | H    | <b>488.261594</b>  | 244.634435         | 471.235045        | 236.121160         |                    |                    | 4  |
| 20 | 2638.279242        | 1319.643259     | 2621.252693    | 1311.129984        | 2620.268677       | 1310.637976      | F    | <b>351.202682</b>  | 176.104979         | 334.176133        | 167.591704         |                    |                    | 3  |
| 21 | 2695.300706        | 1348.153991     | 2678.274157    | 1339.640716        | 2677.290141       | 1339.148708      | G    | 204.134268         | 102.570772         | 187.107719        | 94.057497          |                    |                    | 2  |
| 22 |                    |                 |                |                    |                   |                  | K    | 147.112804         | 74.060040          | 130.086255        | 65.546765          |                    |                    | 1  |

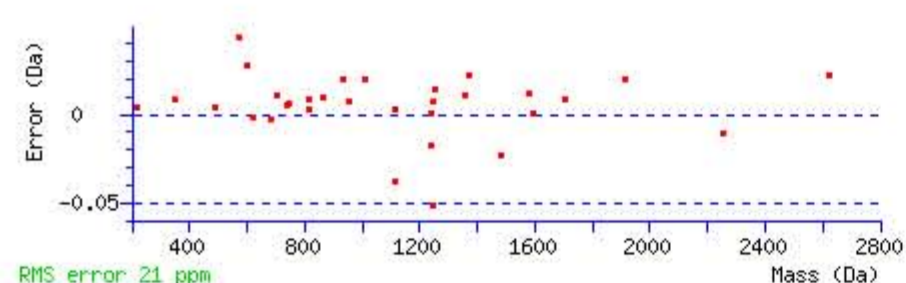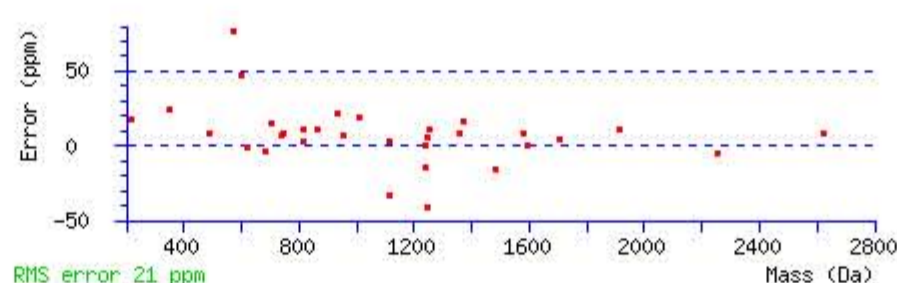

NCBI BLAST search of [SMGGKEDLIWELLNQAQEHFGK](#)

(Parameters: blastp, nr protein database, expect=20000, no filter, PAM30)

Other BLAST [web gateways](#)

All matches to this query

| Score | Mr(calc):   | Delta    | Sequence                               |
|-------|-------------|----------|----------------------------------------|
| 64.6  | 2840.398926 | 0.013770 | <a href="#">SMGGKEDLIWELLNQAQEHFGK</a> |
| 49.9  | 2840.398926 | 0.013770 | <a href="#">SMGGKEDLIWELLNQAQEHFGK</a> |
| 0.2   | 2840.380539 | 0.032157 | <a href="#">SLGTIQCCDAIDHLCRIEK</a>    |

# MASCOT Search Results

## Peptide View

MS/MS Fragmentation of **KPVDEYKDCHLAQVPSHTVVAR**  
 Found in **TRFE\_HUMAN**, Serotransferrin OS=Homo sapiens GN=TF PE=1 SV=3

Match to Query 54768: 2859.448020 from(572.896880,5+) rtinseconds(1561) index(60177)  
 Title: Locus:1.1.1.3169.20 File:"2013-07-02 CLN FXIII 60 min 3rd FT.wiff"  
 Data file C:\Program Files (x86)\Matrix Science\Mascot Daemon\mgf\6 FXIII 60 min 3rd\mascot\_daemon\_merge.mgf

Click mouse within plot area to zoom in by factor of two about that point  
 Or, Plot from  to  Da   
 Label all possible matches  Label matches used for scoring

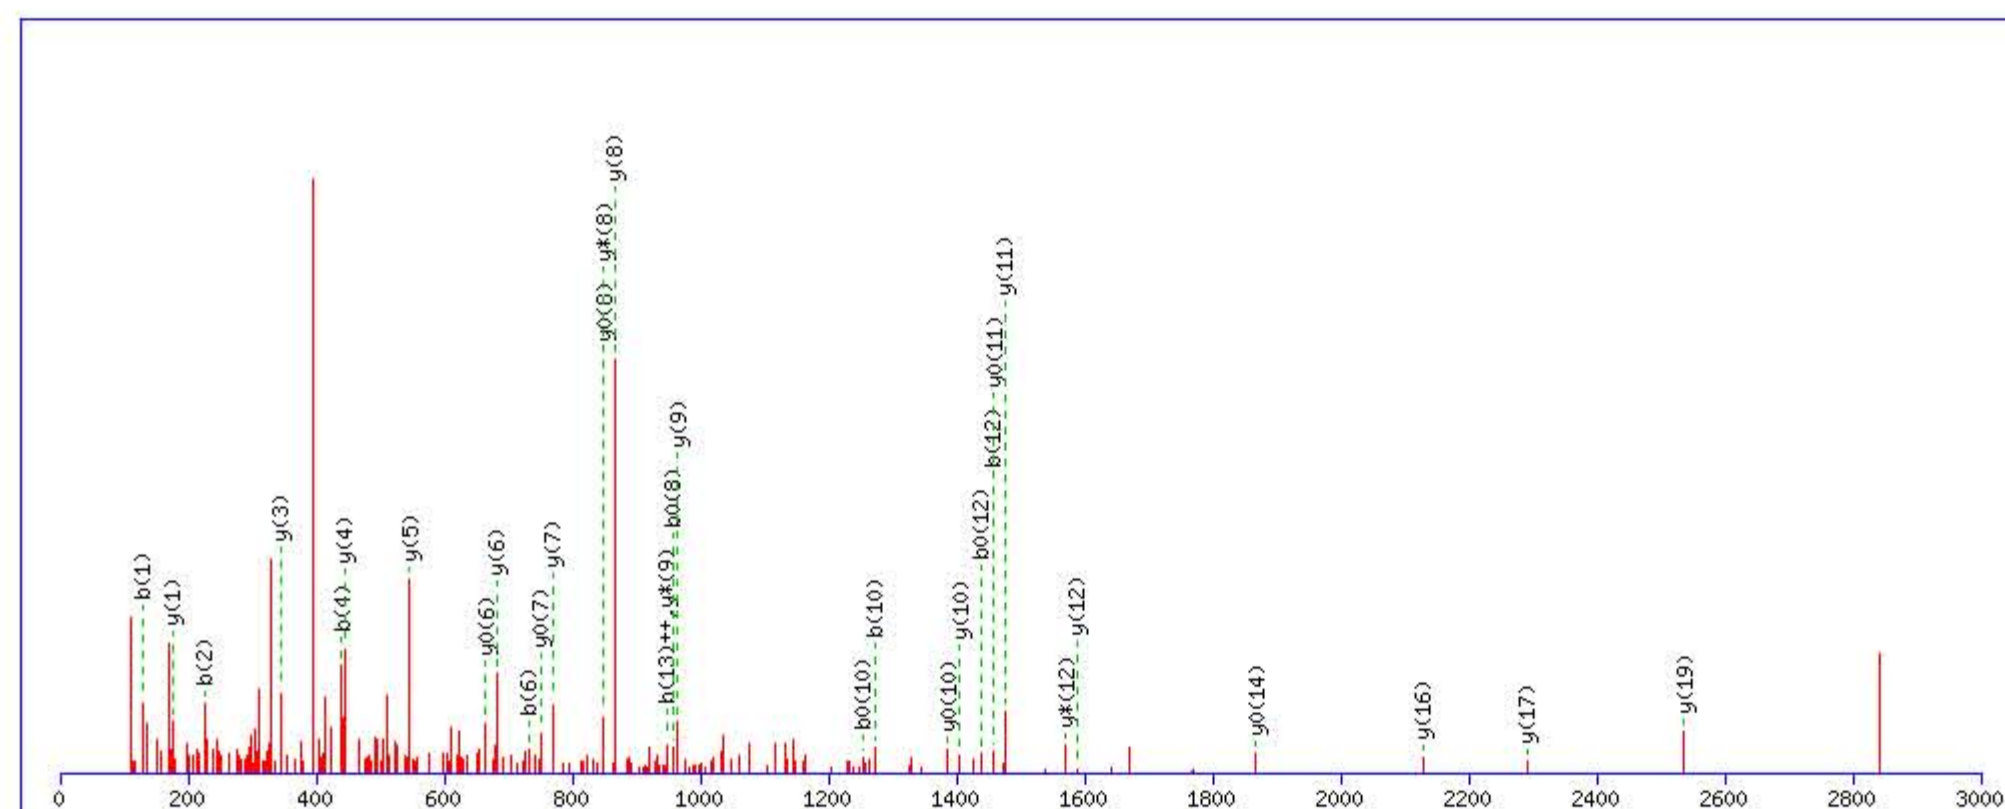

Monoisotopic mass of neutral peptide Mr(calc): 2859.452393  
 Fixed modifications: Carbamidomethyl (C) (apply to specified residues or termini only)  
 Variable modifications:  
 Q13 : Biotin:Thermo-21345 (Q)  
 Ions Score: 66 Expect: 7e-006  
 Matches : 33/238 fragment ions using 70 most intense peaks [\(help\)](#)

| #  | b           | b <sup>++</sup> | b <sup>*</sup> | b <sup>*++</sup> | b <sup>0</sup> | b <sup>0++</sup> | Seq. | y           | y <sup>++</sup> | y <sup>*</sup> | y <sup>*++</sup> | y <sup>0</sup> | y <sup>0++</sup> | #  |
|----|-------------|-----------------|----------------|------------------|----------------|------------------|------|-------------|-----------------|----------------|------------------|----------------|------------------|----|
| 1  | 129.102239  | 65.054757       | 112.075690     | 56.541483        |                |                  | K    |             |                 |                |                  |                |                  | 22 |
| 2  | 226.155003  | 113.581139      | 209.128454     | 105.067865       |                |                  | P    | 2732.364705 | 1366.685990     | 2715.338156    | 1358.172716      | 2714.354140    | 1357.680708      | 21 |
| 3  | 325.223417  | 163.115346      | 308.196868     | 154.602072       |                |                  | V    | 2635.311941 | 1318.159608     | 2618.285392    | 1309.646334      | 2617.301376    | 1309.154326      | 20 |
| 4  | 440.250360  | 220.628818      | 423.223811     | 212.115544       | 422.239795     | 211.623536       | D    | 2536.243527 | 1268.625401     | 2519.216978    | 1260.112127      | 2518.232962    | 1259.620119      | 19 |
| 5  | 569.292953  | 285.150115      | 552.266404     | 276.636840       | 551.282388     | 276.144832       | E    | 2421.216584 | 1211.111930     | 2404.190035    | 1202.598655      | 2403.206019    | 1202.106647      | 18 |
| 6  | 732.356282  | 366.681779      | 715.329733     | 358.168505       | 714.345717     | 357.676497       | Y    | 2292.173991 | 1146.590633     | 2275.147442    | 1138.077359      | 2274.163426    | 1137.585351      | 17 |
| 7  | 860.451245  | 430.729261      | 843.424696     | 422.215986       | 842.440680     | 421.723978       | K    | 2129.110662 | 1065.058969     | 2112.084113    | 1056.545694      | 2111.100097    | 1056.053686      | 16 |
| 8  | 975.478188  | 488.242732      | 958.451639     | 479.729458       | 957.467623     | 479.237450       | D    | 2001.015699 | 1001.011487     | 1983.989150    | 992.498213       | 1983.005134    | 992.006205       | 15 |
| 9  | 1135.508837 | 568.258057      | 1118.482288    | 559.744782       | 1117.498272    | 559.252774       | C    | 1885.988756 | 943.498016      | 1868.962207    | 934.984741       | 1867.978191    | 934.492733       | 14 |
| 10 | 1272.567749 | 636.787513      | 1255.541200    | 628.274238       | 1254.557184    | 627.782230       | H    | 1725.958107 | 863.482691      | 1708.931558    | 854.969417       | 1707.947542    | 854.477409       | 13 |
| 11 | 1385.651813 | 693.329545      | 1368.625264    | 684.816270       | 1367.641248    | 684.324262       | L    | 1588.899195 | 794.953235      | 1571.872646    | 786.439961       | 1570.888630    | 785.947953       | 12 |
| 12 | 1456.688927 | 728.848101      | 1439.662378    | 720.334827       | 1438.678362    | 719.842819       | A    | 1475.815131 | 738.411203      | 1458.788582    | 729.897929       | 1457.804566    | 729.405921       | 11 |
| 13 | 1895.914253 | 948.460765      | 1878.887704    | 939.947490       | 1877.903688    | 939.455482       | Q    | 1404.778017 | 702.892646      | 1387.751468    | 694.379372       | 1386.767452    | 693.887364       | 10 |
| 14 | 1994.982667 | 997.994972      | 1977.956118    | 989.481697       | 1976.972102    | 988.989689       | V    | 965.552691  | 483.279983      | 948.526142     | 474.766709       | 947.542126     | 474.274701       | 9  |
| 15 | 2092.035431 | 1046.521353     | 2075.008882    | 1038.008079      | 2074.024866    | 1037.516071      | P    | 866.484277  | 433.745776      | 849.457728     | 425.232502       | 848.473712     | 424.740494       | 8  |
| 16 | 2179.067459 | 1090.037367     | 2162.040910    | 1081.524093      | 2161.056894    | 1081.032085      | S    | 769.431513  | 385.219394      | 752.404964     | 376.706120       | 751.420948     | 376.214112       | 7  |
| 17 | 2316.126371 | 1158.566823     | 2299.099822    | 1150.053549      | 2298.115806    | 1149.561541      | H    | 682.399485  | 341.703380      | 665.372936     | 333.190106       | 664.388920     | 332.698098       | 6  |
| 18 | 2417.174050 | 1209.090663     | 2400.147501    | 1200.577388      | 2399.163485    | 1200.085380      | T    | 545.340573  | 273.173924      | 528.314024     | 264.660650       | 527.330008     | 264.168642       | 5  |
| 19 | 2516.242464 | 1258.624870     | 2499.215915    | 1250.111595      | 2498.231899    | 1249.619587      | V    | 444.292894  | 222.650085      | 427.266345     | 214.136810       |                |                  | 4  |
| 20 | 2615.310878 | 1308.159077     | 2598.284329    | 1299.645802      | 2597.300313    | 1299.153794      | V    | 345.224480  | 173.115878      | 328.197931     | 164.602603       |                |                  | 3  |
| 21 | 2686.347992 | 1343.677634     | 2669.321443    | 1335.164359      | 2668.337427    | 1334.672351      | A    | 246.156066  | 123.581671      | 229.129517     | 115.068397       |                |                  | 2  |
| 22 |             |                 |                |                  |                |                  | R    | 175.118952  | 88.063114       | 158.092403     | 79.549839        |                |                  | 1  |

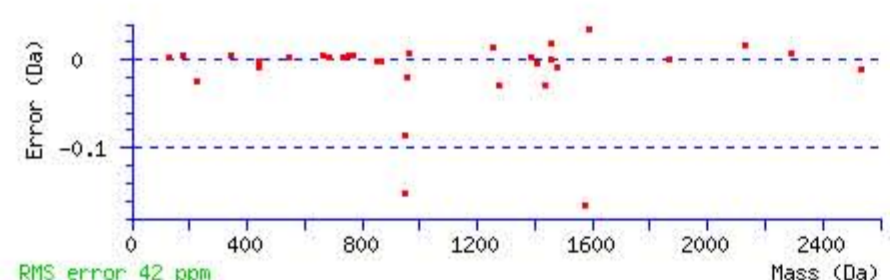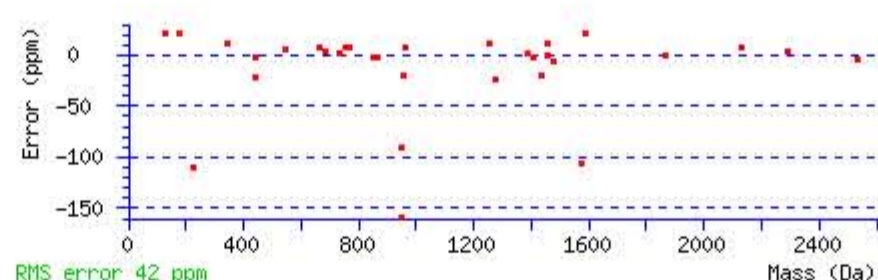

NCBI BLAST search of **KPVDEYKDCHLAQVPSHTVVAR**  
 (Parameters: blastp, nr protein database, expect=20000, no filter, PAM30)  
 Other BLAST [web gateways](#)

### All matches to this query

| Score | Mr(calc):   | Delta     | Sequence                               |
|-------|-------------|-----------|----------------------------------------|
| 66.2  | 2859.452393 | -0.004373 | <a href="#">KPVDEYKDCHLAQVPSHTVVAR</a> |

# MASCOT Search Results

## Peptide View

MS/MS Fragmentation of **FQNALLVR**

Found in **ALBU\_HUMAN**, Serum albumin OS=Homo sapiens GN=ALB PE=1 SV=2

Match to Query 22229: 1270.719388 from(636.366970,2+) rtinseconds(2140) index(5725)

Title: Locus:1.1.1.3297.18 File:"2013-07-02 CLN FXIII 60 min 3rd F 1.wiff"

Data file C:\Program Files (x86)\Matrix Science\Mascot Daemon\mgf\6 FXIII 60 min 3rd\mascot\_daemon\_merge.mgf

Click mouse within plot area to zoom in by factor of two about that point

Or, Plot from  to  Da

Label all possible matches  Label matches used for scoring

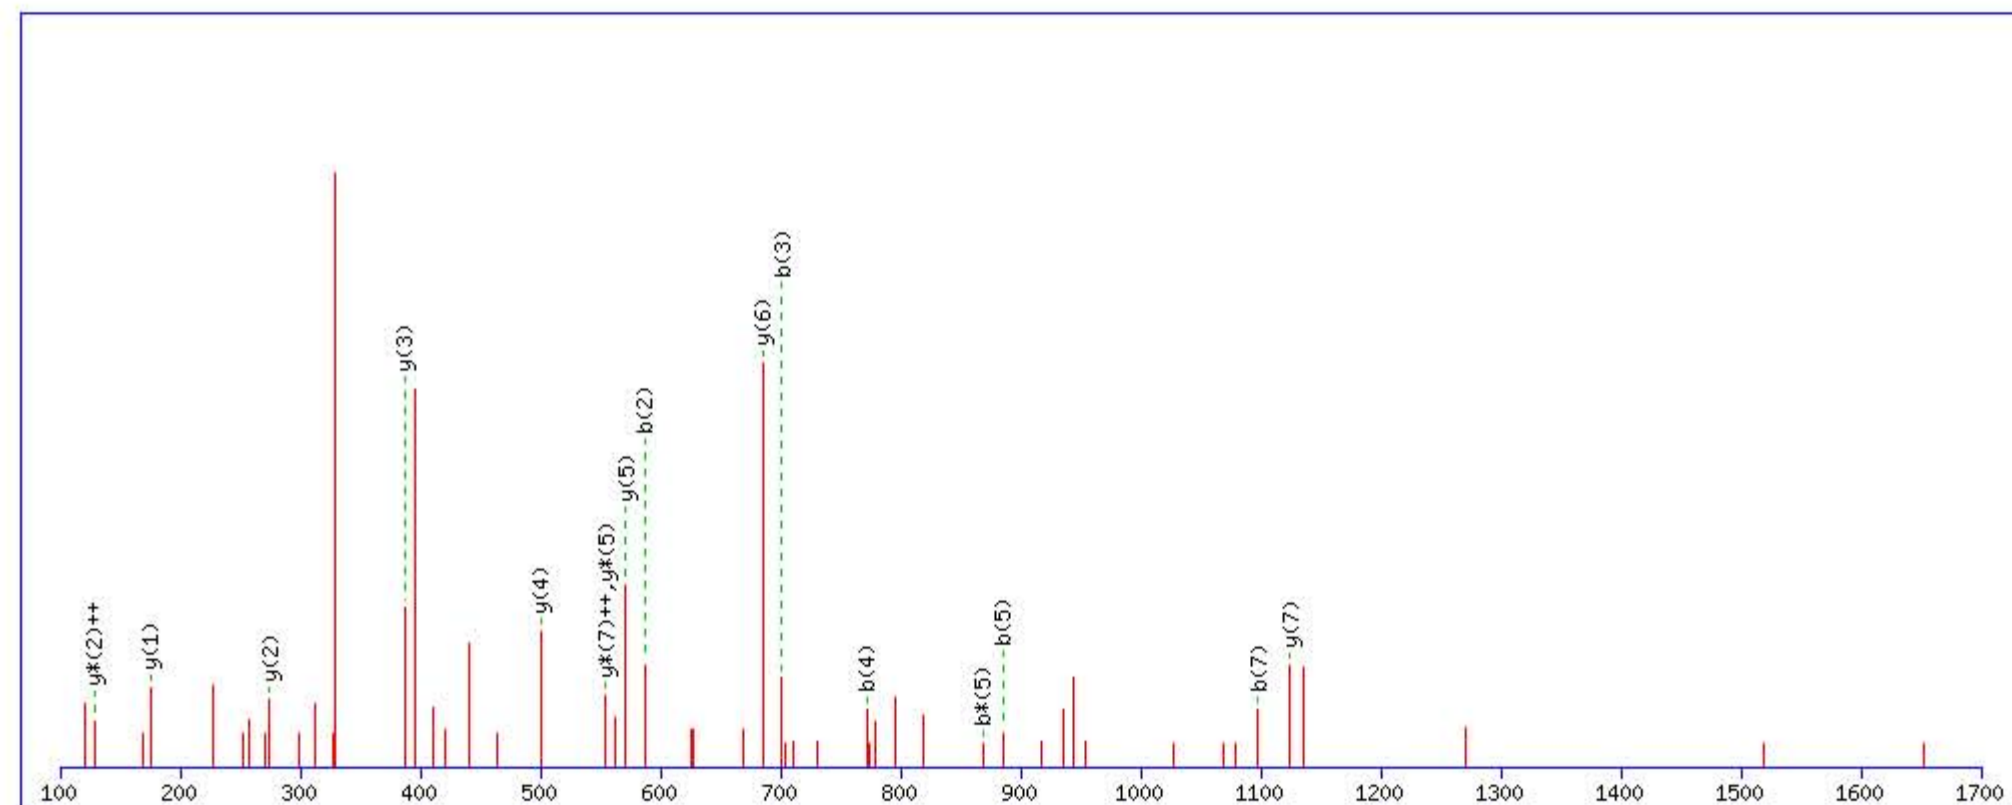

Monoisotopic mass of neutral peptide Mr(calc): 1270.721985

Fixed modifications: Carbamidomethyl (C) (apply to specified residues or termini only)

Variable modifications:

Q2 : Biotin:Thermo-21345 (Q)

Ions Score: 38 Expect: 0.005

Matches : 16/54 fragment ions using 32 most intense peaks [\(help\)](#)

| # | b                  | b <sup>++</sup> | b <sup>*</sup>    | b <sup>***</sup> | Seq. | y                  | y <sup>++</sup> | y <sup>*</sup>    | y <sup>***</sup>  | # |
|---|--------------------|-----------------|-------------------|------------------|------|--------------------|-----------------|-------------------|-------------------|---|
| 1 | 148.075690         | 74.541483       |                   |                  | F    |                    |                 |                   |                   | 8 |
| 2 | <b>587.301016</b>  | 294.154146      | 570.274467        | 285.640872       | Q    | <b>1124.660861</b> | 562.834068      | 1107.634312       | <b>554.320794</b> | 7 |
| 3 | <b>701.343943</b>  | 351.175610      | 684.317394        | 342.662335       | N    | <b>685.435535</b>  | 343.221406      | 668.408986        | 334.708131        | 6 |
| 4 | <b>772.381057</b>  | 386.694166      | 755.354508        | 378.180892       | A    | <b>571.392608</b>  | 286.199942      | <b>554.366059</b> | 277.686668        | 5 |
| 5 | <b>885.465121</b>  | 443.236199      | <b>868.438572</b> | 434.722924       | L    | <b>500.355494</b>  | 250.681385      | 483.328945        | 242.168110        | 4 |
| 6 | 998.549185         | 499.778231      | 981.522636        | 491.264956       | L    | <b>387.271430</b>  | 194.139353      | 370.244881        | 185.626078        | 3 |
| 7 | <b>1097.617599</b> | 549.312437      | 1080.591050       | 540.799163       | V    | <b>274.187366</b>  | 137.597321      | 257.160817        | <b>129.084046</b> | 2 |
| 8 |                    |                 |                   |                  | R    | <b>175.118952</b>  | 88.063114       | 158.092403        | 79.549839         | 1 |

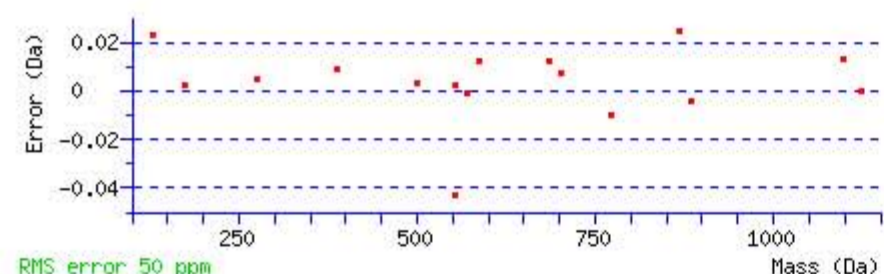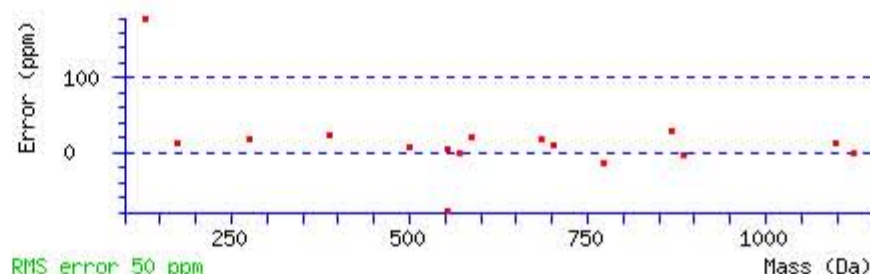

NCBI BLAST search of [FQNALLVR](#)

(Parameters: blastp, nr protein database, expect=20000, no filter, PAM30)

Other BLAST [web gateways](#)

All matches to this query

| Score | Mr(calc):   | Delta     | Sequence                     |
|-------|-------------|-----------|------------------------------|
| 38.0  | 1270.721985 | -0.002597 | <a href="#">FQNALLVR</a>     |
| 14.1  | 1270.733215 | -0.013827 | <a href="#">MFHIRAVILR</a>   |
| 11.3  | 1270.735687 | -0.016299 | <a href="#">KEAELRSGIIR</a>  |
| 10.6  | 1270.706711 | 0.012677  | <a href="#">NMPAKTELIVR</a>  |
| 7.6   | 1270.706696 | 0.012692  | <a href="#">LPALLEKNAMR</a>  |
| 7.1   | 1270.722000 | -0.002612 | <a href="#">FQIAQVVR</a>     |
| 6.0   | 1270.733215 | -0.013827 | <a href="#">FQRQILR</a>      |
| 4.5   | 1270.710541 | 0.008847  | <a href="#">AVNSKAEVARAR</a> |
| 1.9   | 1270.724457 | -0.005069 | <a href="#">EKELLIDKQR</a>   |
| 1.8   | 1270.725357 | -0.005969 | <a href="#">QKVMAIVR</a>     |

# MASCOT Search Results

## Peptide View

MS/MS Fragmentation of **KVPQVSTPTLVEVSR**

Found in **ALBU\_HUMAN**, Serum albumin OS=Homo sapiens GN=ALB PE=1 SV=2

Match to Query 41093: 1950.104562 from(651.042130,3+) rtinseconds(2011) index(62654)

Title: Locus:1.1.1.3326.15 File:"2013-07-02 CLN FXIII 60 min 3rd FT.wiff"

Data file C:\Program Files (x86)\Matrix Science\Mascot Daemon\mgf\6 FXIII 60 min 3rd\mascot\_daemon\_merge.mgf

Click mouse within plot area to zoom in by factor of two about that point

Or, Plot from  to  Da

Label all possible matches  Label matches used for scoring

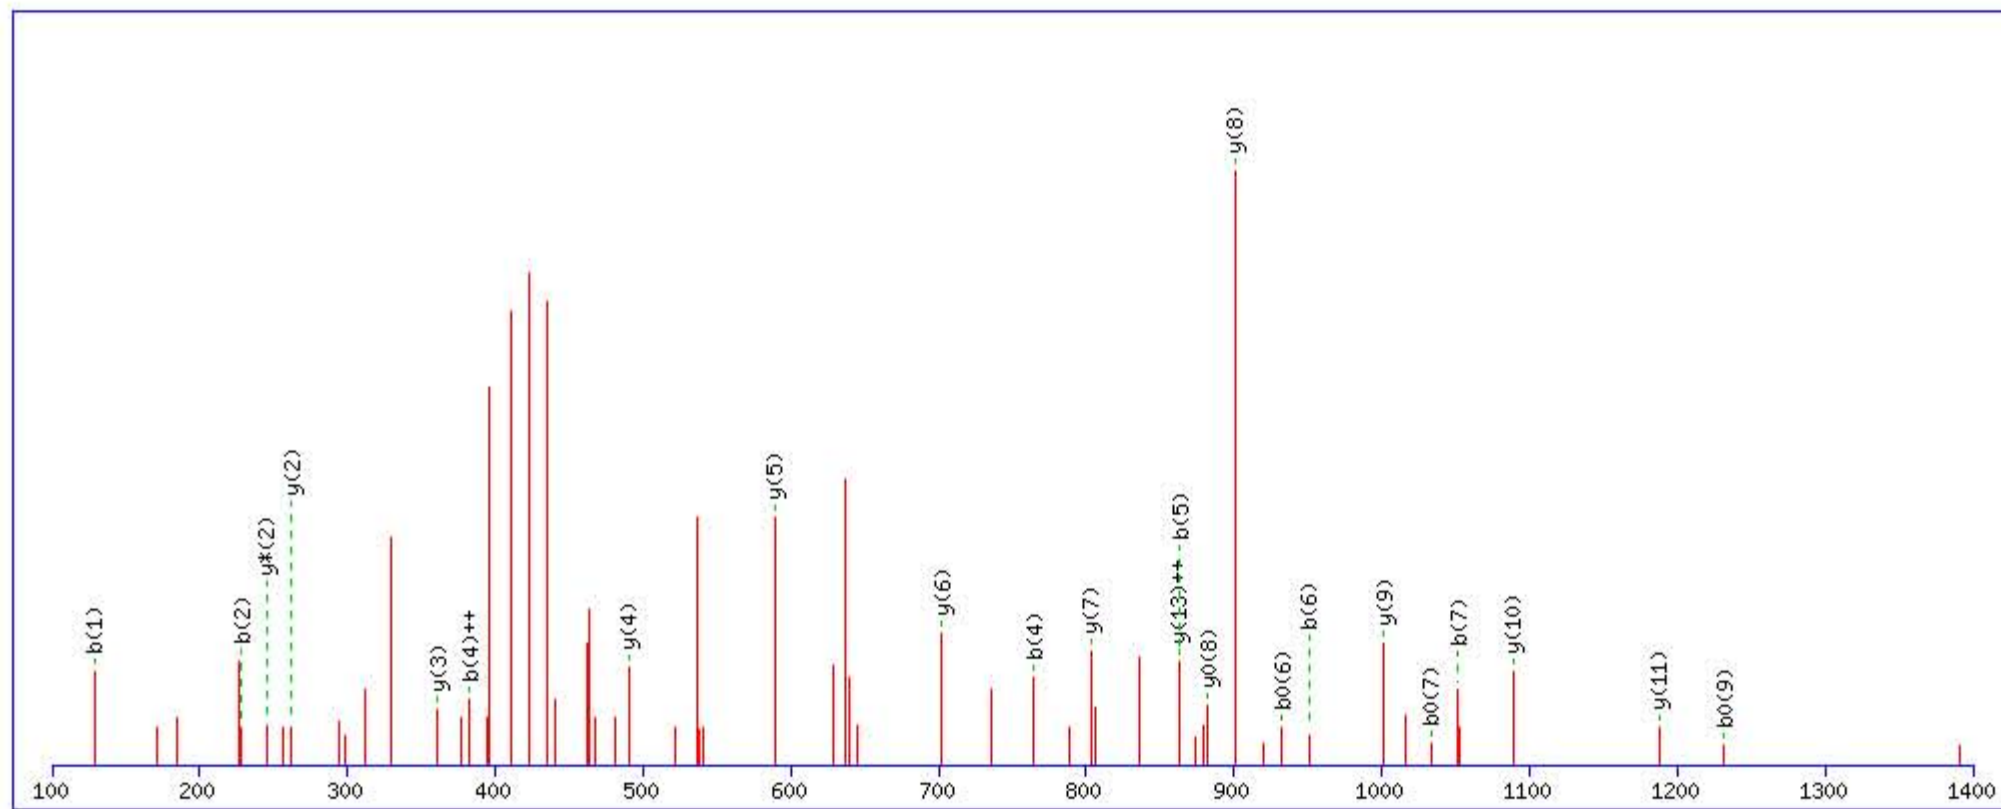

Monoisotopic mass of neutral peptide Mr(calc): 1950.097229

Fixed modifications: Carbamidomethyl (C) (apply to specified residues or termini only)

Variable modifications:

Q4 : Biotin:Thermo-21345 (Q)

Ions Score: 40 Expect: 0.0011

Matches : 23/156 fragment ions using 56 most intense peaks [\(help\)](#)

| #  | b           | b <sup>++</sup> | b <sup>+</sup> | b <sup>+++</sup> | b <sup>0</sup> | b <sup>0++</sup> | Seq. | y           | y <sup>++</sup> | y <sup>+</sup> | y <sup>+++</sup> | y <sup>0</sup> | y <sup>0++</sup> | #  |
|----|-------------|-----------------|----------------|------------------|----------------|------------------|------|-------------|-----------------|----------------|------------------|----------------|------------------|----|
| 1  | 129.102239  | 65.054757       | 112.075690     | 56.541483        |                |                  | K    |             |                 |                |                  |                |                  | 15 |
| 2  | 228.170653  | 114.588965      | 211.144104     | 106.075690       |                |                  | V    | 1823.009533 | 912.008404      | 1805.982984    | 903.495130       | 1804.998968    | 903.003122       | 14 |
| 3  | 325.223417  | 163.115346      | 308.196868     | 154.602072       |                |                  | P    | 1723.941119 | 862.474197      | 1706.914570    | 853.960923       | 1705.930554    | 853.468915       | 13 |
| 4  | 764.448743  | 382.728010      | 747.422194     | 374.214735       |                |                  | Q    | 1626.888355 | 813.947815      | 1609.861806    | 805.434541       | 1608.877790    | 804.942533       | 12 |
| 5  | 863.517157  | 432.262217      | 846.490608     | 423.748942       |                |                  | V    | 1187.663029 | 594.335153      | 1170.636480    | 585.821878       | 1169.652464    | 585.329870       | 11 |
| 6  | 950.549185  | 475.778231      | 933.522636     | 467.264956       | 932.538620     | 466.772948       | S    | 1088.594615 | 544.800946      | 1071.568066    | 536.287671       | 1070.584050    | 535.795663       | 10 |
| 7  | 1051.596864 | 526.302070      | 1034.570315    | 517.788795       | 1033.586299    | 517.296787       | T    | 1001.562587 | 501.284932      | 984.536038     | 492.771657       | 983.552022     | 492.279649       | 9  |
| 8  | 1148.649628 | 574.828452      | 1131.623079    | 566.315178       | 1130.639063    | 565.823169       | P    | 900.514908  | 450.761092      | 883.488359     | 442.247818       | 882.504343     | 441.755810       | 8  |
| 9  | 1249.697307 | 625.352291      | 1232.670758    | 616.839017       | 1231.686742    | 616.347009       | T    | 803.462144  | 402.234710      | 786.435595     | 393.721436       | 785.451579     | 393.229428       | 7  |
| 10 | 1362.781371 | 681.894323      | 1345.754822    | 673.381049       | 1344.770806    | 672.889041       | L    | 702.414465  | 351.710871      | 685.387916     | 343.197596       | 684.403900     | 342.705588       | 6  |
| 11 | 1461.849785 | 731.428530      | 1444.823236    | 722.915256       | 1443.839220    | 722.423248       | V    | 589.330401  | 295.168839      | 572.303852     | 286.655564       | 571.319836     | 286.163556       | 5  |
| 12 | 1590.892378 | 795.949827      | 1573.865829    | 787.436552       | 1572.881813    | 786.944544       | E    | 490.261987  | 245.634631      | 473.235438     | 237.121357       | 472.251422     | 236.629349       | 4  |
| 13 | 1689.960792 | 845.484034      | 1672.934243    | 836.970759       | 1671.950227    | 836.478751       | V    | 361.219394  | 181.113335      | 344.192845     | 172.600061       | 343.208829     | 172.108053       | 3  |
| 14 | 1776.992820 | 889.000048      | 1759.966271    | 880.486774       | 1758.982255    | 879.994765       | S    | 262.150980  | 131.579128      | 245.124431     | 123.065854       | 244.140415     | 122.573846       | 2  |
| 15 |             |                 |                |                  |                |                  | R    | 175.118952  | 88.063114       | 158.092403     | 79.549839        |                |                  | 1  |

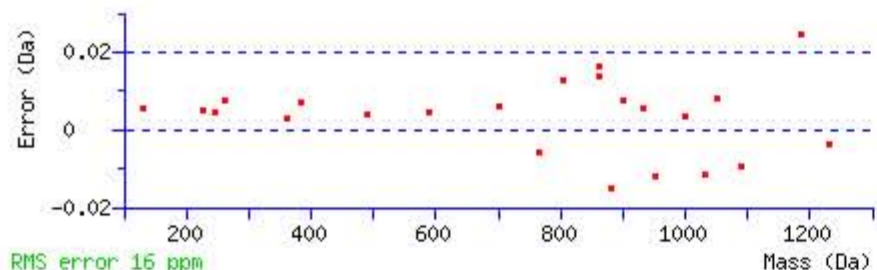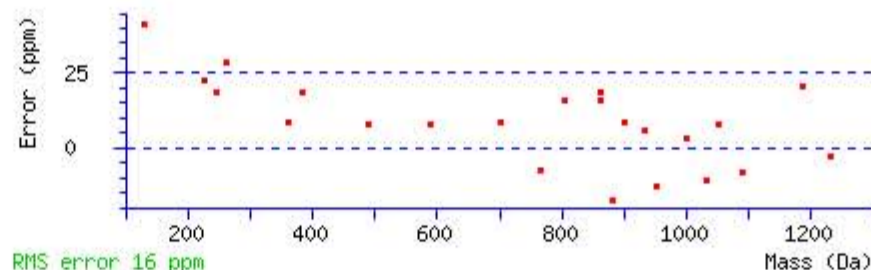

NCBI BLAST search of **KVPQVSTPTLVEVSR**

(Parameters: blastp, nr protein database, expect=20000, no filter, PAM30)

Other BLAST [web gateways](#)

All matches to this query

| Score | Mr(calc):   | Delta    | Sequence                        |
|-------|-------------|----------|---------------------------------|
| 39.7  | 1950.097229 | 0.007333 | <a href="#">KVPQVSTPTLVEVSR</a> |

Mascot: <http://www.matrixscience.com/>

# Mascot Search Results

## Peptide View

MS/MS Fragmentation of **NHQSSYQTR**

Found in **PON1\_HUMAN**, Serum paraoxonase/arylesterase 1 OS=Homo sapiens GN=PON1 PE=1 SV=3

Match to Query 28031: 1430.671002 from(477.897610,3+) rtinseconds(1185) index(42651)

Title: Locus:1.1.1.2461.6 File:"2013-07-02 CLN FXIII 60 min 3rd F 4.wiff"

Data file C:\Program Files (x86)\Matrix Science\Mascot Daemon\mgf\6 FXIII 60 min 3rd\mascot\_daemon\_merge.mgf

Click mouse within plot area to zoom in by factor of two about that point

Or, Plot from  to  Da

Label all possible matches  Label matches used for scoring

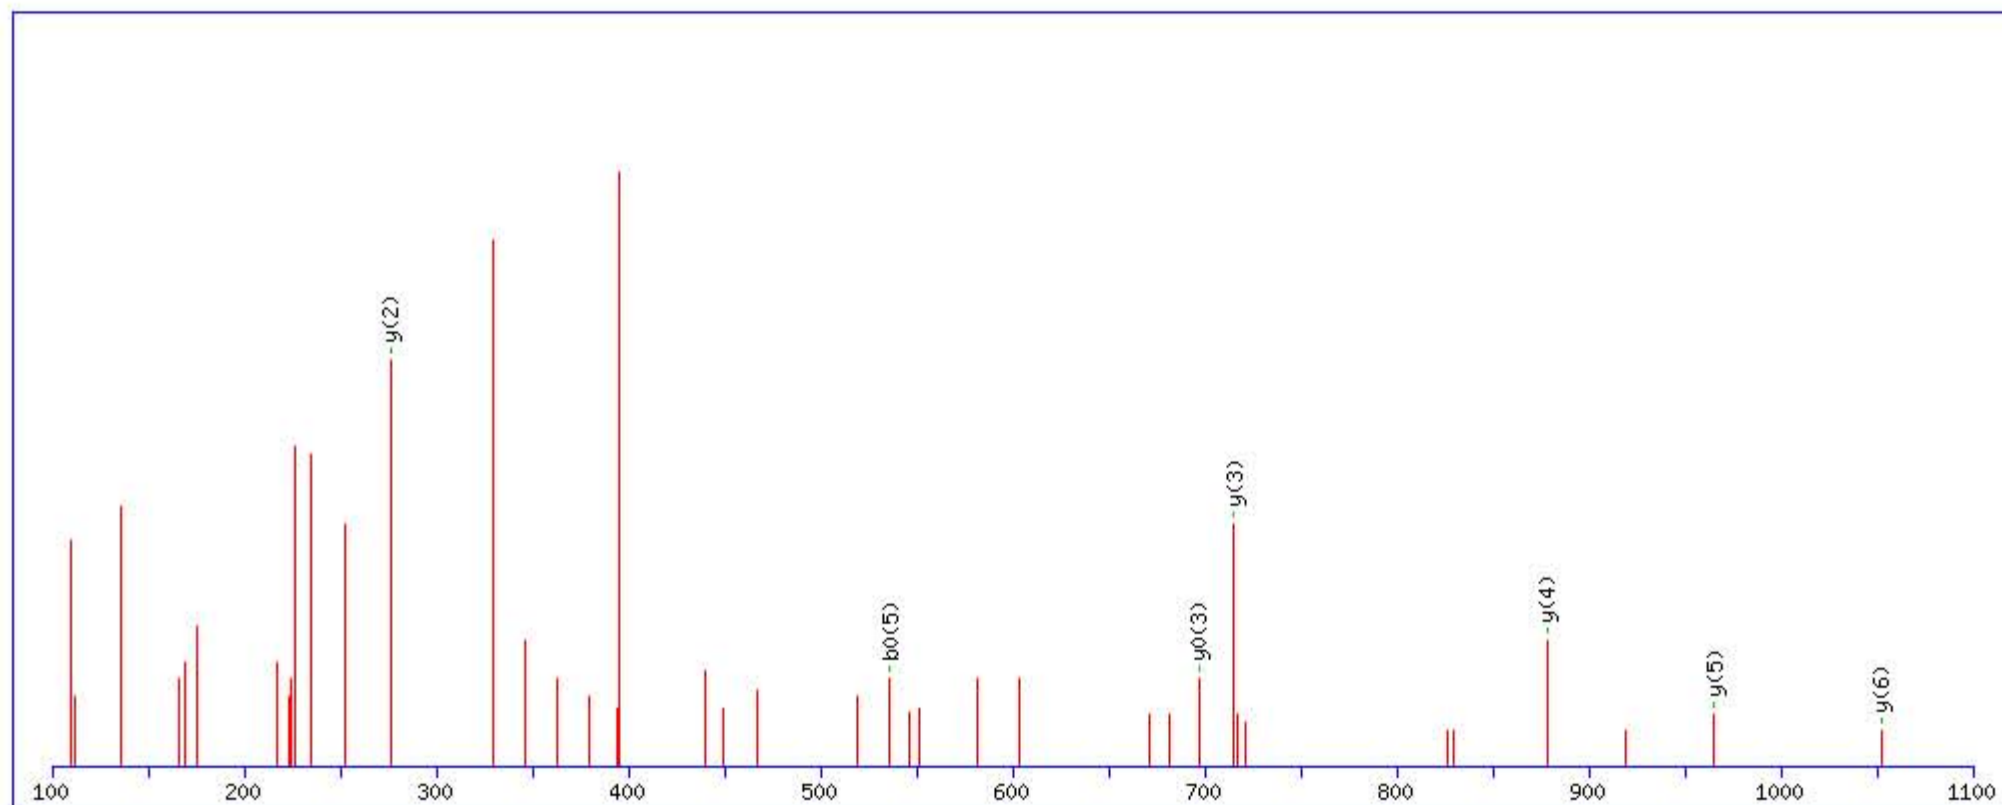

Monoisotopic mass of neutral peptide Mr(calc): 1430.672470

Fixed modifications: Carbamidomethyl (C) (apply to specified residues or termini only)

Variable modifications:

Q7 : Biotin:Thermo-21345 (Q)

Ions Score: 28 Expect: 0.022

Matches : 7/88 fragment ions using 10 most intense peaks [\(help\)](#)

| # | b           | b <sup>++</sup> | b <sup>*</sup> | b <sup>*++</sup> | b <sup>0</sup>    | b <sup>0++</sup> | Seq. | y                  | y <sup>++</sup> | y <sup>*</sup> | y <sup>*++</sup> | y <sup>0</sup>    | y <sup>0++</sup> | # |
|---|-------------|-----------------|----------------|------------------|-------------------|------------------|------|--------------------|-----------------|----------------|------------------|-------------------|------------------|---|
| 1 | 115.050203  | 58.028740       | 98.023654      | 49.515465        |                   |                  | N    |                    |                 |                |                  |                   |                  | 9 |
| 2 | 252.109115  | 126.558195      | 235.082566     | 118.044921       |                   |                  | H    | 1317.636832        | 659.322054      | 1300.610283    | 650.808780       | 1299.626267       | 650.316772       | 8 |
| 3 | 380.167693  | 190.587484      | 363.141144     | 182.074210       |                   |                  | Q    | 1180.577920        | 590.792598      | 1163.551371    | 582.279324       | 1162.567355       | 581.787316       | 7 |
| 4 | 467.199721  | 234.103499      | 450.173172     | 225.590224       | 449.189156        | 225.098216       | S    | <b>1052.519342</b> | 526.763309      | 1035.492793    | 518.250035       | 1034.508777       | 517.758027       | 6 |
| 5 | 554.231749  | 277.619513      | 537.205200     | 269.106238       | <b>536.221184</b> | 268.614230       | S    | <b>965.487314</b>  | 483.247295      | 948.460765     | 474.734021       | 947.476749        | 474.242013       | 5 |
| 6 | 717.295078  | 359.151177      | 700.268529     | 350.637903       | 699.284513        | 350.145895       | Y    | <b>878.455286</b>  | 439.731281      | 861.428737     | 431.218007       | 860.444721        | 430.725999       | 4 |
| 7 | 1156.520404 | 578.763840      | 1139.493855    | 570.250566       | 1138.509839       | 569.758558       | Q    | <b>715.391957</b>  | 358.199617      | 698.365408     | 349.686342       | <b>697.381392</b> | 349.194334       | 3 |
| 8 | 1257.568083 | 629.287680      | 1240.541534    | 620.774405       | 1239.557518       | 620.282397       | T    | <b>276.166631</b>  | 138.586953      | 259.140082     | 130.073679       | 258.156066        | 129.581671       | 2 |
| 9 |             |                 |                |                  |                   |                  | R    | 175.118952         | 88.063114       | 158.092403     | 79.549839        |                   |                  | 1 |

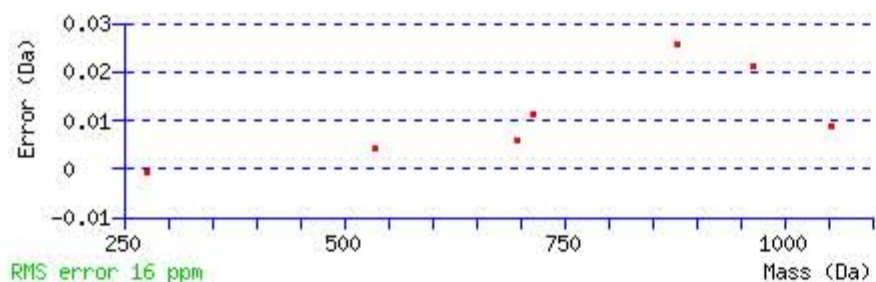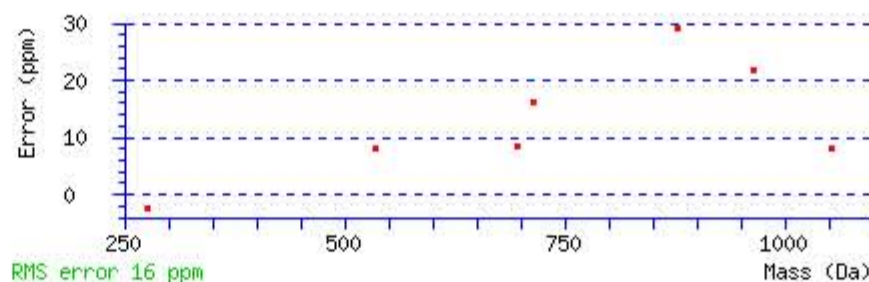

NCBI BLAST search of **NHQSSYQTR**

(Parameters: blastp, nr protein database, expect=20000, no filter, PAM30)

Other BLAST [web gateways](#)

All matches to this query

| Score | Mr(calc):   | Delta     | Sequence                  |
|-------|-------------|-----------|---------------------------|
| 28.1  | 1430.672470 | -0.001468 | <a href="#">NHQSSYQTR</a> |

Mascot: <http://www.matrixscience.com/>

# MASCOT Search Results

## Peptide View

MS/MS Fragmentation of **NHQSSYQTR**

Found in **PON1\_HUMAN**, Serum paraoxonase/arylesterase 1 OS=Homo sapiens GN=PON1 PE=1 SV=3

Match to Query 28034: 1430.672292 from(477.898040,3+) rtinseconds(1151) index(28617)

Title: Locus:1.1.1.2949.7 File:"2013-07-02 CLN FXIII 60 min 3rd F 3.wiff"

Data file C:\Program Files (x86)\Matrix Science\Mascot Daemon\mgf\6 FXIII 60 min 3rd\mascot\_daemon\_merge.mgf

Click mouse within plot area to zoom in by factor of two about that point

Or, Plot from  to  Da

Label all possible matches  Label matches used for scoring

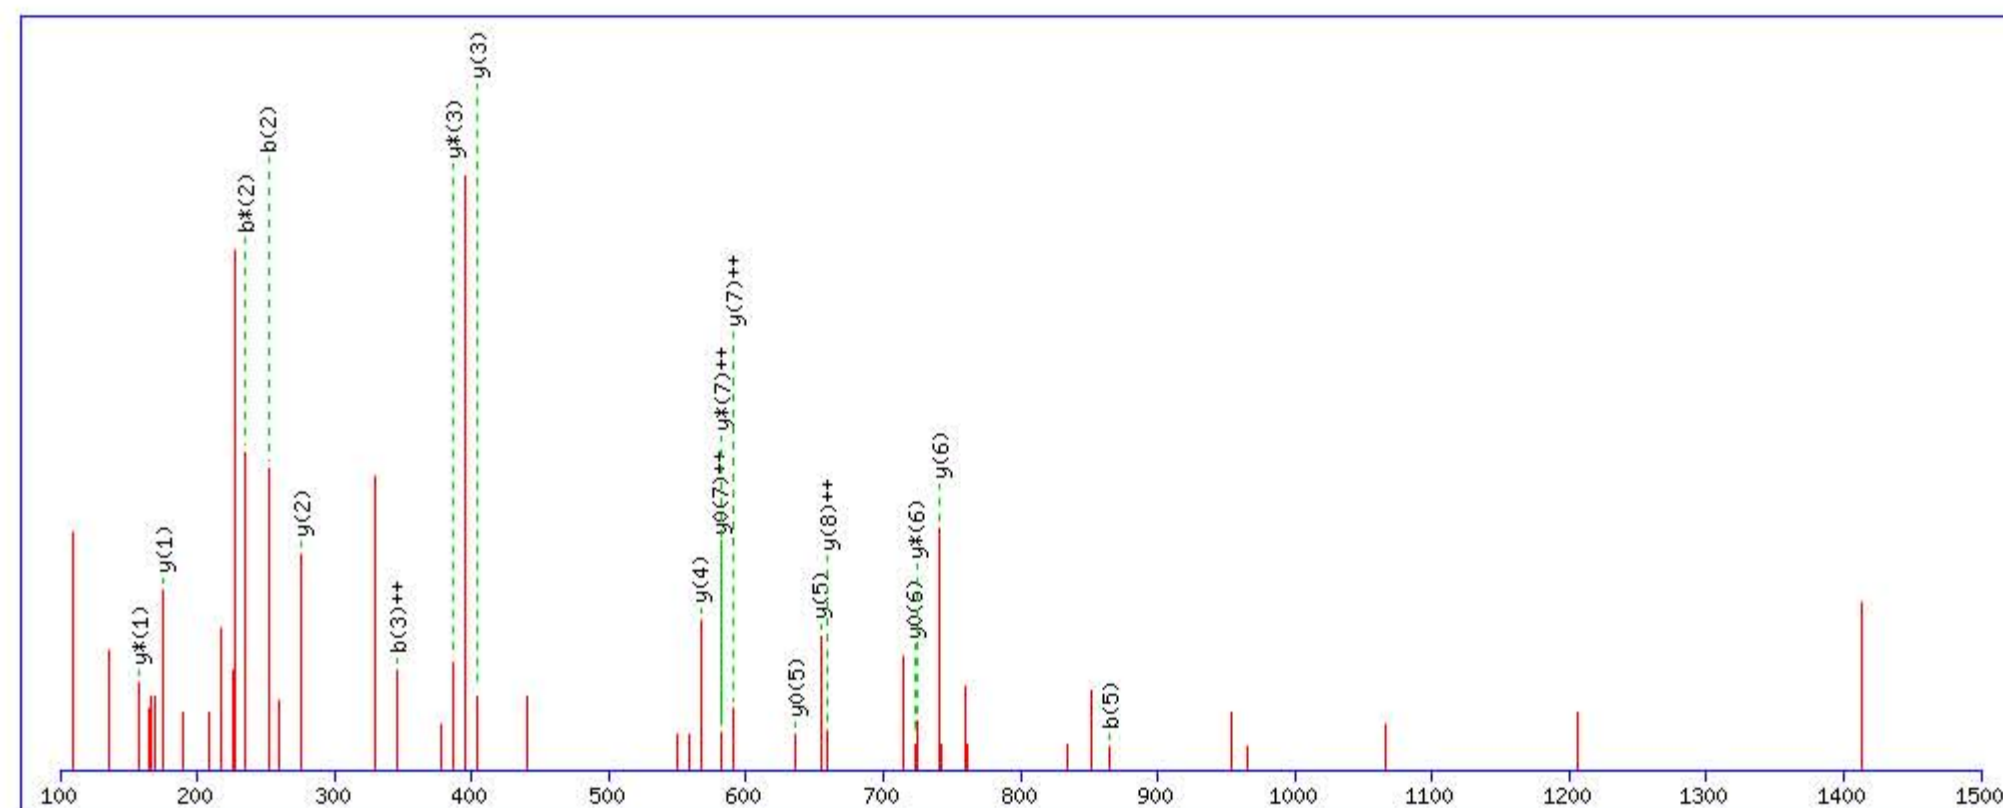

Monoisotopic mass of neutral peptide Mr(calc): 1430.672470

Fixed modifications: Carbamidomethyl (C) (apply to specified residues or termini only)

Variable modifications:

Q3 : Biotin:Thermo-21345 (Q)

Ions Score: 27 Expect: 0.0073

Matches : 19/88 fragment ions using 37 most intense peaks [\(help\)](#)

| # | b                 | b <sup>++</sup>   | b <sup>+</sup>    | b <sup>*++</sup> | b <sup>0</sup> | b <sup>0++</sup> | Seq. | y                 | y <sup>++</sup>   | y <sup>+</sup>    | y <sup>*++</sup>  | y <sup>0</sup>    | y <sup>0++</sup>  | # |
|---|-------------------|-------------------|-------------------|------------------|----------------|------------------|------|-------------------|-------------------|-------------------|-------------------|-------------------|-------------------|---|
| 1 | 115.050203        | 58.028740         | 98.023654         | 49.515465        |                |                  | N    |                   |                   |                   |                   |                   |                   | 9 |
| 2 | <b>252.109115</b> | 126.558195        | <b>235.082566</b> | 118.044921       |                |                  | H    | 1317.636832       | <b>659.322054</b> | 1300.610283       | 650.808780        | 1299.626267       | 650.316772        | 8 |
| 3 | 691.334441        | <b>346.170859</b> | 674.307892        | 337.657584       |                |                  | Q    | 1180.577920       | <b>590.792598</b> | 1163.551371       | <b>582.279324</b> | 1162.567355       | <b>581.787316</b> | 7 |
| 4 | 778.366469        | 389.686872        | 761.339920        | 381.173598       | 760.355904     | 380.681590       | S    | <b>741.352594</b> | 371.179935        | <b>724.326045</b> | 362.666661        | <b>723.342029</b> | 362.174653        | 6 |
| 5 | <b>865.398497</b> | 433.202886        | 848.371948        | 424.689612       | 847.387932     | 424.197604       | S    | <b>654.320566</b> | 327.663921        | 637.294017        | 319.150647        | <b>636.310001</b> | 318.658639        | 5 |
| 6 | 1028.461826       | 514.734551        | 1011.435277       | 506.221276       | 1010.451261    | 505.729268       | Y    | <b>567.288538</b> | 284.147907        | 550.261989        | 275.634633        | 549.277973        | 275.142625        | 4 |
| 7 | 1156.520404       | 578.763840        | 1139.493855       | 570.250566       | 1138.509839    | 569.758558       | Q    | <b>404.225209</b> | 202.616243        | <b>387.198660</b> | 194.102968        | 386.214644        | 193.610960        | 3 |
| 8 | 1257.568083       | 629.287680        | 1240.541534       | 620.774405       | 1239.557518    | 620.282397       | T    | <b>276.166631</b> | 138.586953        | 259.140082        | 130.073679        | 258.156066        | 129.581671        | 2 |
| 9 |                   |                   |                   |                  |                |                  | R    | <b>175.118952</b> | 88.063114         | <b>158.092403</b> | 79.549839         |                   |                   | 1 |

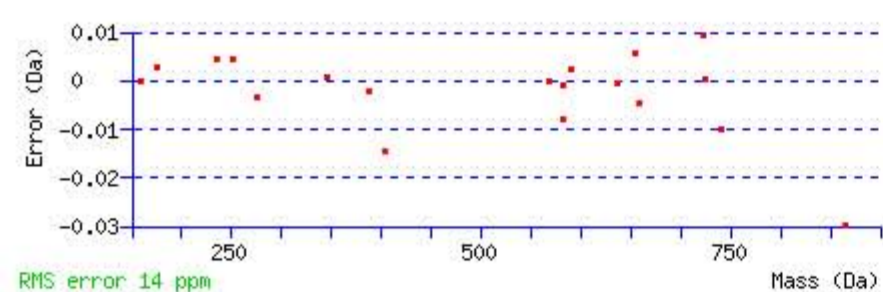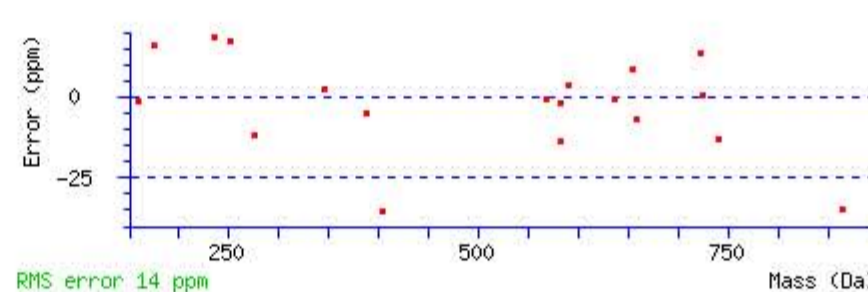

NCBI BLAST search of **NHQSSYQTR**

(Parameters: blastp, nr protein database, expect=20000, no filter, PAM30)

Other BLAST [web gateways](#)

All matches to this query

| Score | Mr(calc):   | Delta     | Sequence                     |
|-------|-------------|-----------|------------------------------|
| 27.4  | 1430.672470 | -0.000178 | <a href="#">NHQSSYQTR</a>    |
| 6.2   | 1430.672470 | -0.000178 | <a href="#">NHQSSYQTR</a>    |
| 4.4   | 1430.689743 | -0.017451 | <a href="#">QLGMAAAESDK</a>  |
| 0.9   | 1430.686371 | -0.014079 | <a href="#">LICESLYASGYR</a> |

Mascot: <http://www.matrixscience.com/>

# MASCOT Search Results

## Peptide View

MS/MS Fragmentation of **IQNILTEEPK**

Found in **PON1\_HUMAN**, Serum paraoxonase/arylesterase 1 OS=Homo sapiens GN=PON1 PE=1 SV=3

Match to Query 29813: 1494.821508 from(748.418030,2+) rtinseconds(2024) index(47569)

Title: Locus:1.1.1.2753.11 File:"2013-07-02 CLN FXIII 60 min 3rd F 4.wiff"

Data file C:\Program Files (x86)\Matrix Science\Mascot Daemon\mgf6 FXIII 60 min 3rd\mascot\_daemon\_merge.mgf

Click mouse within plot area to zoom in by factor of two about that point

Or, Plot from  to  Da

Label all possible matches  Label matches used for scoring

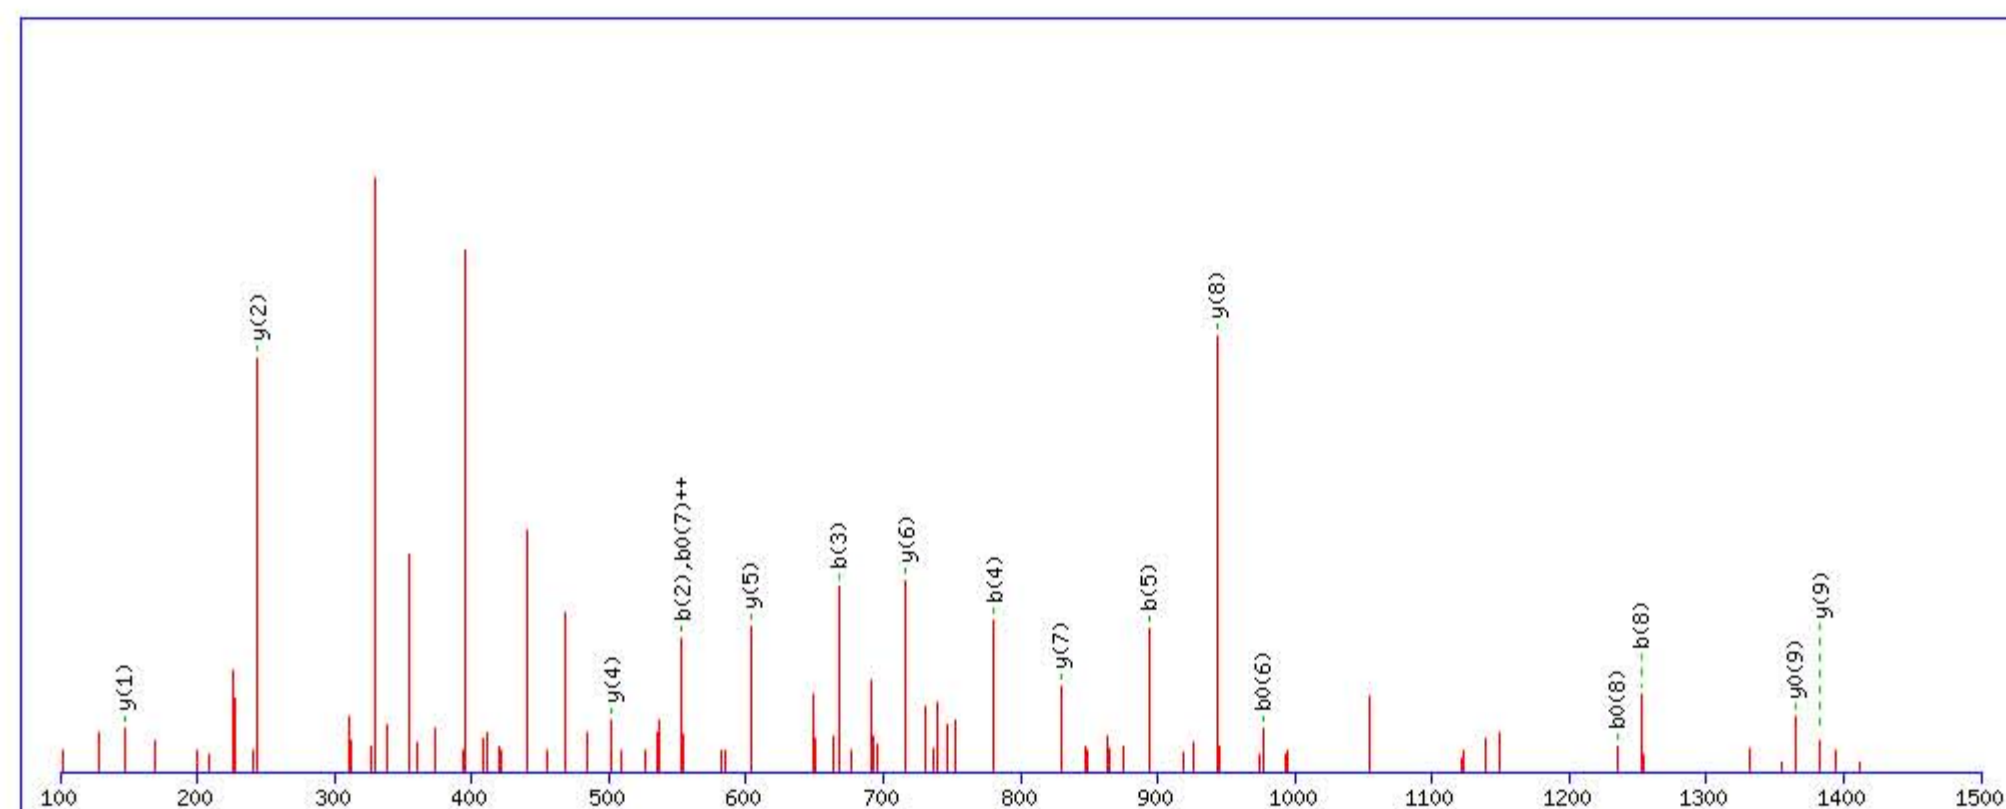

Monoisotopic mass of neutral peptide Mr(calc): 1494.811569

Fixed modifications: Carbamidomethyl (C) (apply to specified residues or termini only)

Variable modifications:

Q2 : Biotin:Thermo-21345 (Q)

Ions Score: 53 Expect: 9.7e-005

Matches : 17/92 fragment ions using 26 most intense peaks [\(help\)](#)

| #  | b                  | b <sup>++</sup> | b <sup>*</sup> | b <sup>*++</sup> | b <sup>0</sup>     | b <sup>0++</sup>  | Seq. | y                  | y <sup>++</sup> | y <sup>*</sup> | y <sup>*++</sup> | y <sup>0</sup>     | y <sup>0++</sup> | #  |
|----|--------------------|-----------------|----------------|------------------|--------------------|-------------------|------|--------------------|-----------------|----------------|------------------|--------------------|------------------|----|
| 1  | 114.091340         | 57.549308       |                |                  |                    |                   | I    |                    |                 |                |                  |                    |                  | 10 |
| 2  | <b>553.316666</b>  | 277.161971      | 536.290117     | 268.648697       |                    |                   | Q    | <b>1382.734814</b> | 691.871045      | 1365.708265    | 683.357771       | <b>1364.724249</b> | 682.865763       | 9  |
| 3  | <b>667.359593</b>  | 334.183435      | 650.333044     | 325.670160       |                    |                   | N    | <b>943.509488</b>  | 472.258382      | 926.482939     | 463.745108       | 925.498923         | 463.253100       | 8  |
| 4  | <b>780.443657</b>  | 390.725467      | 763.417108     | 382.212192       |                    |                   | I    | <b>829.466561</b>  | 415.236919      | 812.440012     | 406.723644       | 811.455996         | 406.231636       | 7  |
| 5  | <b>893.527721</b>  | 447.267499      | 876.501172     | 438.754224       |                    |                   | L    | <b>716.382497</b>  | 358.694887      | 699.355948     | 350.181612       | 698.371932         | 349.689604       | 6  |
| 6  | 994.575400         | 497.791338      | 977.548851     | 489.278064       | <b>976.564835</b>  | 488.786056        | T    | <b>603.298433</b>  | 302.152855      | 586.271884     | 293.639580       | 585.287868         | 293.147572       | 5  |
| 7  | 1123.617993        | 562.312635      | 1106.591444    | 553.799360       | 1105.607428        | <b>553.307352</b> | E    | <b>502.250754</b>  | 251.629015      | 485.224205     | 243.115741       | 484.240189         | 242.623733       | 4  |
| 8  | <b>1252.660586</b> | 626.833931      | 1235.634037    | 618.320657       | <b>1234.650021</b> | 617.828649        | E    | 373.208161         | 187.107719      | 356.181612     | 178.594444       | 355.197596         | 178.102436       | 3  |
| 9  | 1349.713350        | 675.360313      | 1332.686801    | 666.847039       | 1331.702785        | 666.355031        | P    | <b>244.165568</b>  | 122.586422      | 227.139019     | 114.073148       |                    |                  | 2  |
| 10 |                    |                 |                |                  |                    |                   | K    | <b>147.112804</b>  | 74.060040       | 130.086255     | 65.546765        |                    |                  | 1  |

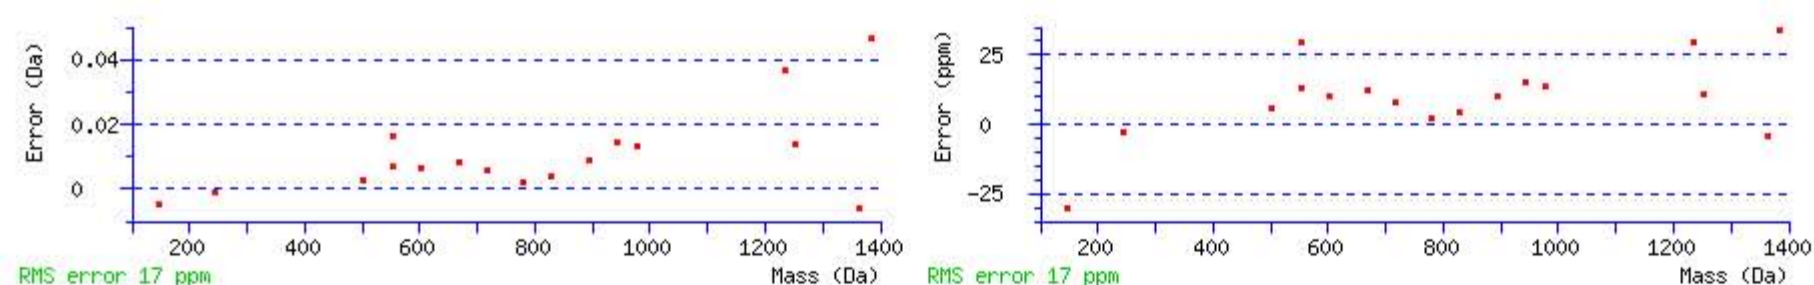

NCBI BLAST search of **IQNILTEEPK**

(Parameters: blastp, nr protein database, expect=20000, no filter, PAM30)

Other BLAST [web gateways](#)

## All matches to this query

| Score | Mr(calc):   | Delta     | Sequence                       |
|-------|-------------|-----------|--------------------------------|
| 52.7  | 1494.811569 | 0.009939  | <a href="#">IQNILTEEPK</a>     |
| 9.5   | 1494.815430 | 0.006078  | <a href="#">KGSTKDSGHLQIPK</a> |
| 6.3   | 1494.834030 | -0.012522 | <a href="#">QLLRALEEGR</a>     |
| 5.2   | 1494.834030 | -0.012522 | <a href="#">QLNAIRDNIK</a>     |
| 1.5   | 1494.841446 | -0.019938 | <a href="#">QLTKQOK</a>        |
| 0.7   | 1494.819427 | 0.002081  | <a href="#">NKFGRDYILLEIK</a>  |
| 0.3   | 1494.824142 | -0.002634 | <a href="#">QIRSYPHRK</a>      |

Mascot: <http://www.matrixscience.com/>

# MASCOT Search Results

## Peptide View

MS/MS Fragmentation of **KGHQLQLDYFGACK**

Found in **SPRL1\_HUMAN**, SPARC-like protein 1 OS=Homo sapiens GN=SPARCL1 PE=1 SV=2

Match to Query 41600: 1974.993102 from(659.338310,3+) rtinseconds(1949) index(47058)

Title: Locus:1.1.1.2727.11 File:"2013-07-02 CLN FXIII 60 min 3rd F 4.wiff"

Data file C:\Program Files (x86)\Matrix Science\Mascot Daemon\mgf6 FXIII 60 min 3rd\mascot\_daemon\_merge.mgf

Click mouse within plot area to zoom in by factor of two about that point

Or, Plot from  to  Da

Label all possible matches  Label matches used for scoring

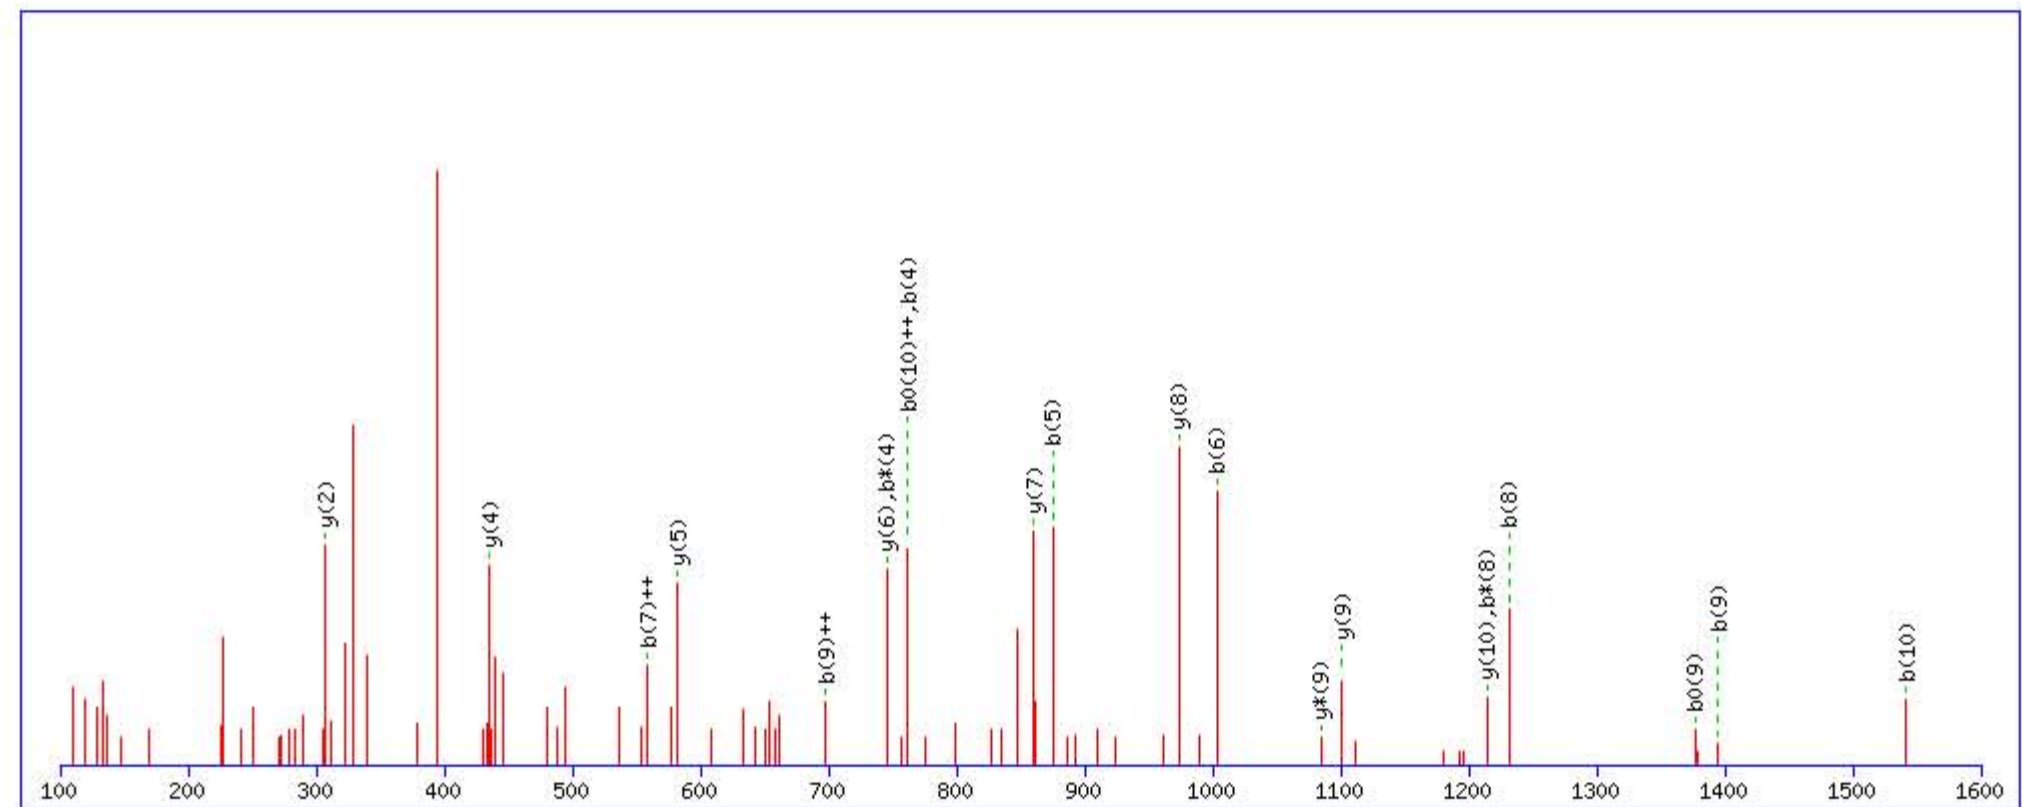

Monoisotopic mass of neutral peptide Mr(calc): 1974.980804

Fixed modifications: Carbamidomethyl (C) (apply to specified residues or termini only)

Variable modifications:

Q4 : Biotin:Thermo-21345 (Q)

Ions Score: 51 Expect: 0.00011

Matches : 21/130 fragment ions using 27 most intense peaks [\(help\)](#)

| #  | b                  | b <sup>++</sup>   | b <sup>*</sup>     | b <sup>*++</sup> | b <sup>0</sup>     | b <sup>0++</sup>  | Seq.     | y                  | y <sup>++</sup> | y <sup>*</sup>     | y <sup>*++</sup> | y <sup>0</sup> | y <sup>0++</sup> | #         |
|----|--------------------|-------------------|--------------------|------------------|--------------------|-------------------|----------|--------------------|-----------------|--------------------|------------------|----------------|------------------|-----------|
| 1  | 129.102239         | 65.054757         | 112.075690         | 56.541483        |                    |                   | <b>K</b> |                    |                 |                    |                  |                |                  | <b>14</b> |
| 2  | 186.123703         | 93.565489         | 169.097154         | 85.052215        |                    |                   | <b>G</b> | 1847.893125        | 924.450201      | 1830.866576        | 915.936926       | 1829.882560    | 915.444918       | <b>13</b> |
| 3  | 323.182615         | 162.094945        | 306.156066         | 153.581671       |                    |                   | <b>H</b> | 1790.871661        | 895.939469      | 1773.845112        | 887.426194       | 1772.861096    | 886.934186       | <b>12</b> |
| 4  | <b>762.407941</b>  | 381.707609        | <b>745.381392</b>  | 373.194334       |                    |                   | <b>Q</b> | 1653.812749        | 827.410013      | 1636.786200        | 818.896738       | 1635.802184    | 818.404730       | <b>11</b> |
| 5  | <b>875.492005</b>  | 438.249641        | 858.465456         | 429.736366       |                    |                   | <b>L</b> | <b>1214.587423</b> | 607.797350      | 1197.560874        | 599.284075       | 1196.576858    | 598.792067       | <b>10</b> |
| 6  | <b>1003.550583</b> | 502.278930        | 986.524034         | 493.765655       |                    |                   | <b>Q</b> | <b>1101.503359</b> | 551.255318      | <b>1084.476810</b> | 542.742043       | 1083.492794    | 542.250035       | <b>9</b>  |
| 7  | 1116.634647        | <b>558.820962</b> | 1099.608098        | 550.307687       |                    |                   | <b>L</b> | <b>973.444781</b>  | 487.226029      | 956.418232         | 478.712754       | 955.434216     | 478.220746       | <b>8</b>  |
| 8  | <b>1231.661590</b> | 616.334433        | <b>1214.635041</b> | 607.821159       | 1213.651025        | 607.329151        | <b>D</b> | <b>860.360717</b>  | 430.683997      | 843.334168         | 422.170722       | 842.350152     | 421.678714       | <b>7</b>  |
| 9  | <b>1394.724919</b> | <b>697.866098</b> | 1377.698370        | 689.352823       | <b>1376.714354</b> | 688.860815        | <b>Y</b> | <b>745.333774</b>  | 373.170525      | 728.307225         | 364.657251       |                |                  | <b>6</b>  |
| 10 | <b>1541.793333</b> | 771.400305        | 1524.766784        | 762.887030       | 1523.782768        | <b>762.395022</b> | <b>F</b> | <b>582.270445</b>  | 291.638861      | 565.243896         | 283.125586       |                |                  | <b>5</b>  |
| 11 | 1598.814797        | 799.911037        | 1581.788248        | 791.397762       | 1580.804232        | 790.905754        | <b>G</b> | <b>435.202031</b>  | 218.104653      | 418.175482         | 209.591379       |                |                  | <b>4</b>  |
| 12 | 1669.851911        | 835.429594        | 1652.825362        | 826.916319       | 1651.841346        | 826.424311        | <b>A</b> | 378.180567         | 189.593921      | 361.154018         | 181.080647       |                |                  | <b>3</b>  |
| 13 | 1829.882560        | 915.444918        | 1812.856011        | 906.931644       | 1811.871995        | 906.439636        | <b>C</b> | <b>307.143453</b>  | 154.075365      | 290.116904         | 145.562090       |                |                  | <b>2</b>  |
| 14 |                    |                   |                    |                  |                    |                   | <b>K</b> | 147.112804         | 74.060040       | 130.086255         | 65.546765        |                |                  | <b>1</b>  |

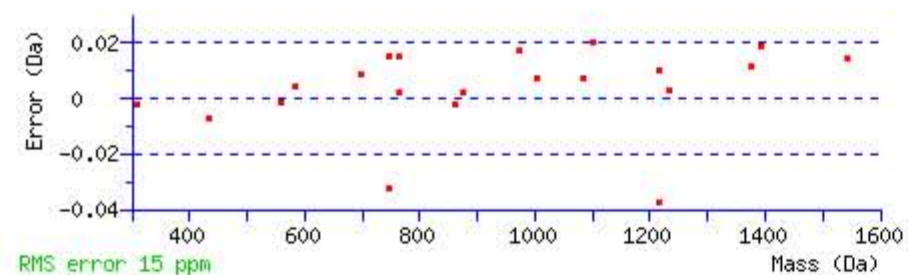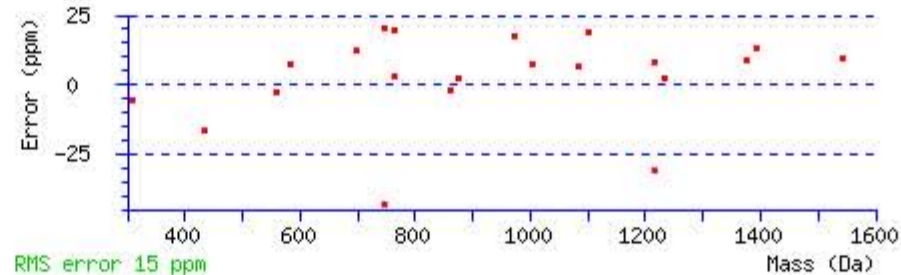

NCBI BLAST search of **KGHQLQLDYFGACK**

(Parameters: blastp, nr protein database, expect=20000, no filter, PAM30)

Other BLAST [web gateways](#)

All matches to this query

| Score | Mr(calc):   | Delta    | Sequence                         |
|-------|-------------|----------|----------------------------------|
| 50.6  | 1974.980804 | 0.012298 | <a href="#">KGHQLQLDYFGACK</a>   |
| 27.0  | 1974.980804 | 0.012298 | <a href="#">KGHQLQLDYFGACK</a>   |
| 8.6   | 1974.966888 | 0.026214 | <a href="#">HMHIHISTVNHAFKCK</a> |

Mascot: <http://www.matrixscience.com/>



# MASCOT Search Results

## Peptide View

MS/MS Fragmentation of **SIPTCTDFEVIQFPLR**

Found in **SPRL1\_HUMAN**, SPARC-like protein 1 OS=Homo sapiens GN=SPARCL1 PE=1 SV=2

Match to Query 46624: 2233.151802 from(745.391210,3+) rtinseconds(2822) index(52614)

Title: Locus:1.1.1.3029.13 File:"2013-07-02 CLN FXIII 60 min 3rd F 4.wiff"

Data file C:\Program Files (x86)\Matrix Science\Mascot Daemon\mgf\6 FXIII 60 min 3rd\mascot\_daemon\_merge.mgf

Click mouse within plot area to zoom in by factor of two about that point

Or, Plot from  to  Da

Label all possible matches  Label matches used for scoring

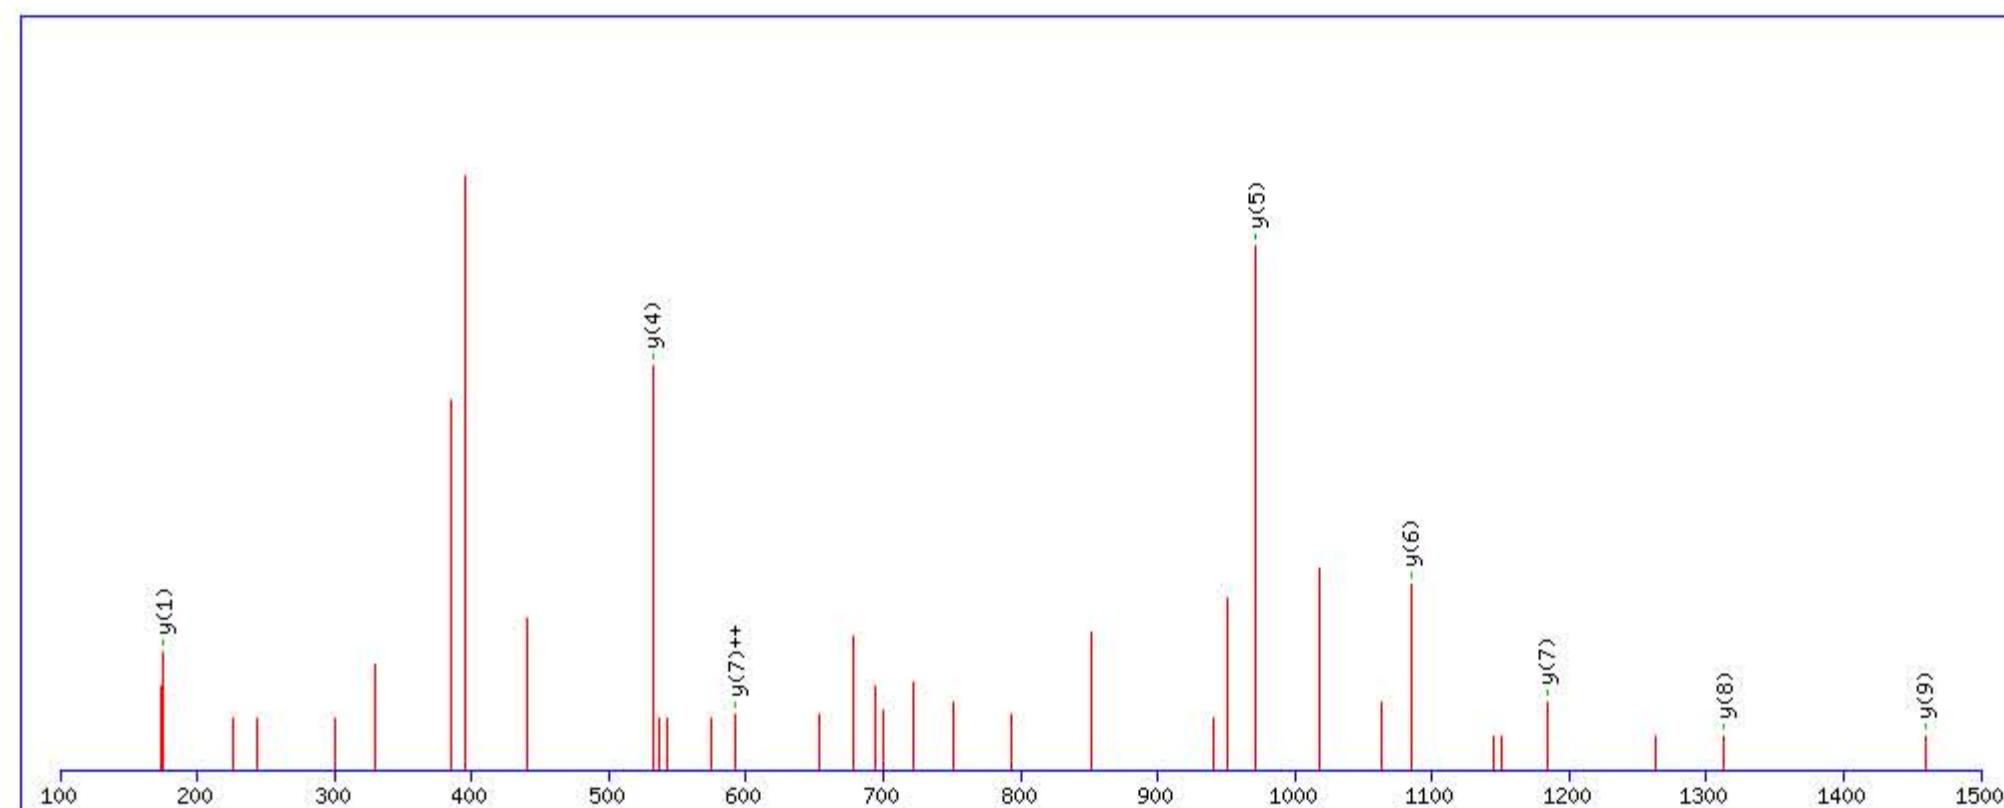

Monoisotopic mass of neutral peptide Mr(calc): 2233.127548

Fixed modifications: Carbamidomethyl (C) (apply to specified residues or termini only)

Variable modifications:

Q12 : Biotin:Thermo-21345 (Q)

Ions Score: 42 Expect: 0.00056

Matches : 8/144 fragment ions using 13 most intense peaks [\(help\)](#)

| #  | b           | b <sup>++</sup> | b <sup>*</sup> | b <sup>***</sup> | b <sup>0</sup> | b <sup>0++</sup> | Seq. | y                  | y <sup>++</sup>   | y <sup>*</sup> | y <sup>***</sup> | y <sup>0</sup> | y <sup>0++</sup> | #  |
|----|-------------|-----------------|----------------|------------------|----------------|------------------|------|--------------------|-------------------|----------------|------------------|----------------|------------------|----|
| 1  | 88.039304   | 44.523290       |                |                  | 70.028739      | 35.518008        | S    |                    |                   |                |                  |                |                  | 16 |
| 2  | 201.123368  | 101.065322      |                |                  | 183.112803     | 92.060039        | I    | 2147.102783        | 1074.055029       | 2130.076234    | 1065.541755      | 2129.092218    | 1065.049747      | 15 |
| 3  | 298.176132  | 149.591704      |                |                  | 280.165567     | 140.586422       | P    | 2034.018719        | 1017.512998       | 2016.992170    | 1008.999723      | 2016.008154    | 1008.507715      | 14 |
| 4  | 399.223811  | 200.115544      |                |                  | 381.213246     | 191.110261       | T    | 1936.965955        | 968.986616        | 1919.939406    | 960.473341       | 1918.955390    | 959.981333       | 13 |
| 5  | 559.254460  | 280.130868      |                |                  | 541.243895     | 271.125586       | C    | 1835.918276        | 918.462776        | 1818.891727    | 909.949502       | 1817.907711    | 909.457494       | 12 |
| 6  | 660.302139  | 330.654708      |                |                  | 642.291574     | 321.649425       | T    | 1675.887627        | 838.447452        | 1658.861078    | 829.934177       | 1657.877062    | 829.442169       | 11 |
| 7  | 775.329082  | 388.168179      |                |                  | 757.318517     | 379.162897       | D    | 1574.839948        | 787.923612        | 1557.813399    | 779.410338       | 1556.829383    | 778.918330       | 10 |
| 8  | 922.397496  | 461.702386      |                |                  | 904.386931     | 452.697104       | F    | <b>1459.813005</b> | 730.410141        | 1442.786456    | 721.896866       | 1441.802440    | 721.404858       | 9  |
| 9  | 1051.440089 | 526.223683      |                |                  | 1033.429524    | 517.218400       | E    | <b>1312.744591</b> | 656.875934        | 1295.718042    | 648.362659       | 1294.734026    | 647.870651       | 8  |
| 10 | 1150.508503 | 575.757890      |                |                  | 1132.497938    | 566.752607       | V    | <b>1183.701998</b> | <b>592.354637</b> | 1166.675449    | 583.841363       |                |                  | 7  |
| 11 | 1263.592567 | 632.299921      |                |                  | 1245.582002    | 623.294639       | I    | <b>1084.633584</b> | 542.820430        | 1067.607035    | 534.307156       |                |                  | 6  |
| 12 | 1702.817893 | 851.912585      | 1685.791344    | 843.399310       | 1684.807328    | 842.907302       | Q    | <b>971.549520</b>  | 486.278398        | 954.522971     | 477.765124       |                |                  | 5  |
| 13 | 1849.886307 | 925.446792      | 1832.859758    | 916.933517       | 1831.875742    | 916.441509       | F    | <b>532.324194</b>  | 266.665735        | 515.297645     | 258.152461       |                |                  | 4  |
| 14 | 1946.939071 | 973.973174      | 1929.912522    | 965.459899       | 1928.928506    | 964.967891       | P    | 385.255780         | 193.131528        | 368.229231     | 184.618253       |                |                  | 3  |
| 15 | 2060.023135 | 1030.515205     | 2042.996586    | 1022.001931      | 2042.012570    | 1021.509923      | L    | 288.203016         | 144.605146        | 271.176467     | 136.091871       |                |                  | 2  |
| 16 |             |                 |                |                  |                |                  | R    | <b>175.118952</b>  | 88.063114         | 158.092403     | 79.549839        |                |                  | 1  |

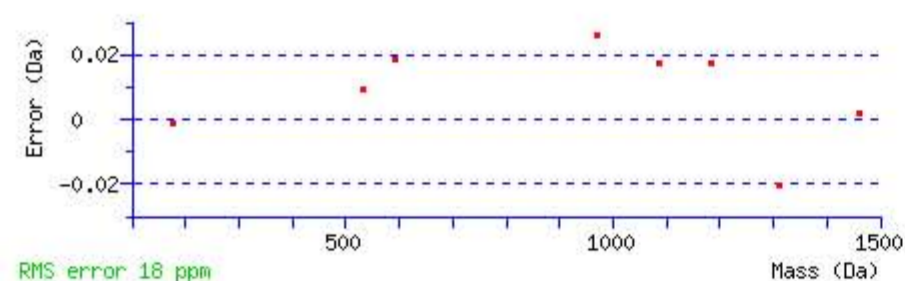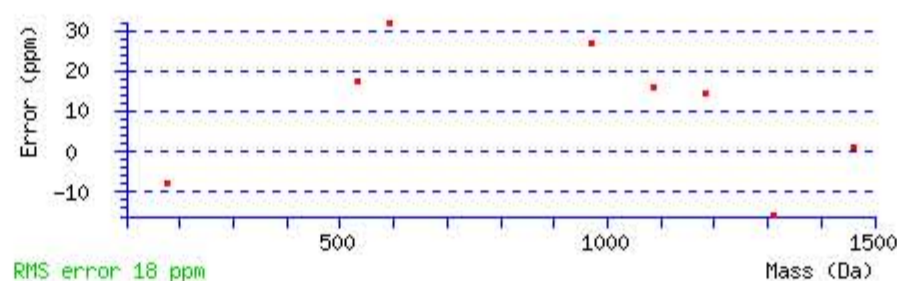

NCBI BLAST search of [SIPTCTDFEVIQFPLR](#)

(Parameters: blastp, nr protein database, expect=20000, no filter, PAM30)

Other BLAST [web gateways](#)

### All matches to this query

| Score | Mr(calc):   | Delta    | Sequence                            |
|-------|-------------|----------|-------------------------------------|
| 41.9  | 2233.127548 | 0.024254 | <a href="#">SIPTCTDFEVIQFPLR</a>    |
| 6.8   | 2233.141861 | 0.009941 | <a href="#">FELPLDIPPEEEARYWAKK</a> |
| 1.1   | 2233.142090 | 0.009712 | <a href="#">EMAMLIAQALQTINYGR</a>   |

# MASCOT Search Results

## Peptide View

MS/MS Fragmentation of **GAAHPDSEEQQQR**

Found in **TLN1\_HUMAN**, Talin-1 OS=Homo sapiens GN=TLN1 PE=1 SV=3

Match to Query 39104: 1833.842142 from(612.287990,3+) rtinseconds(1143) index(42495)

Title: Locus:1.1.1.2446.11 File:"2013-07-02 CLN FXIII 60 min 3rd F 4.wiff"

Data file C:\Program Files (x86)\Matrix Science\Mascot Daemon\mgf\6 FXIII 60 min 3rd\mascot\_daemon\_merge.mgf

Click mouse within plot area to zoom in by factor of two about that point

Or, Plot from  to  Da

Label all possible matches  Label matches used for scoring

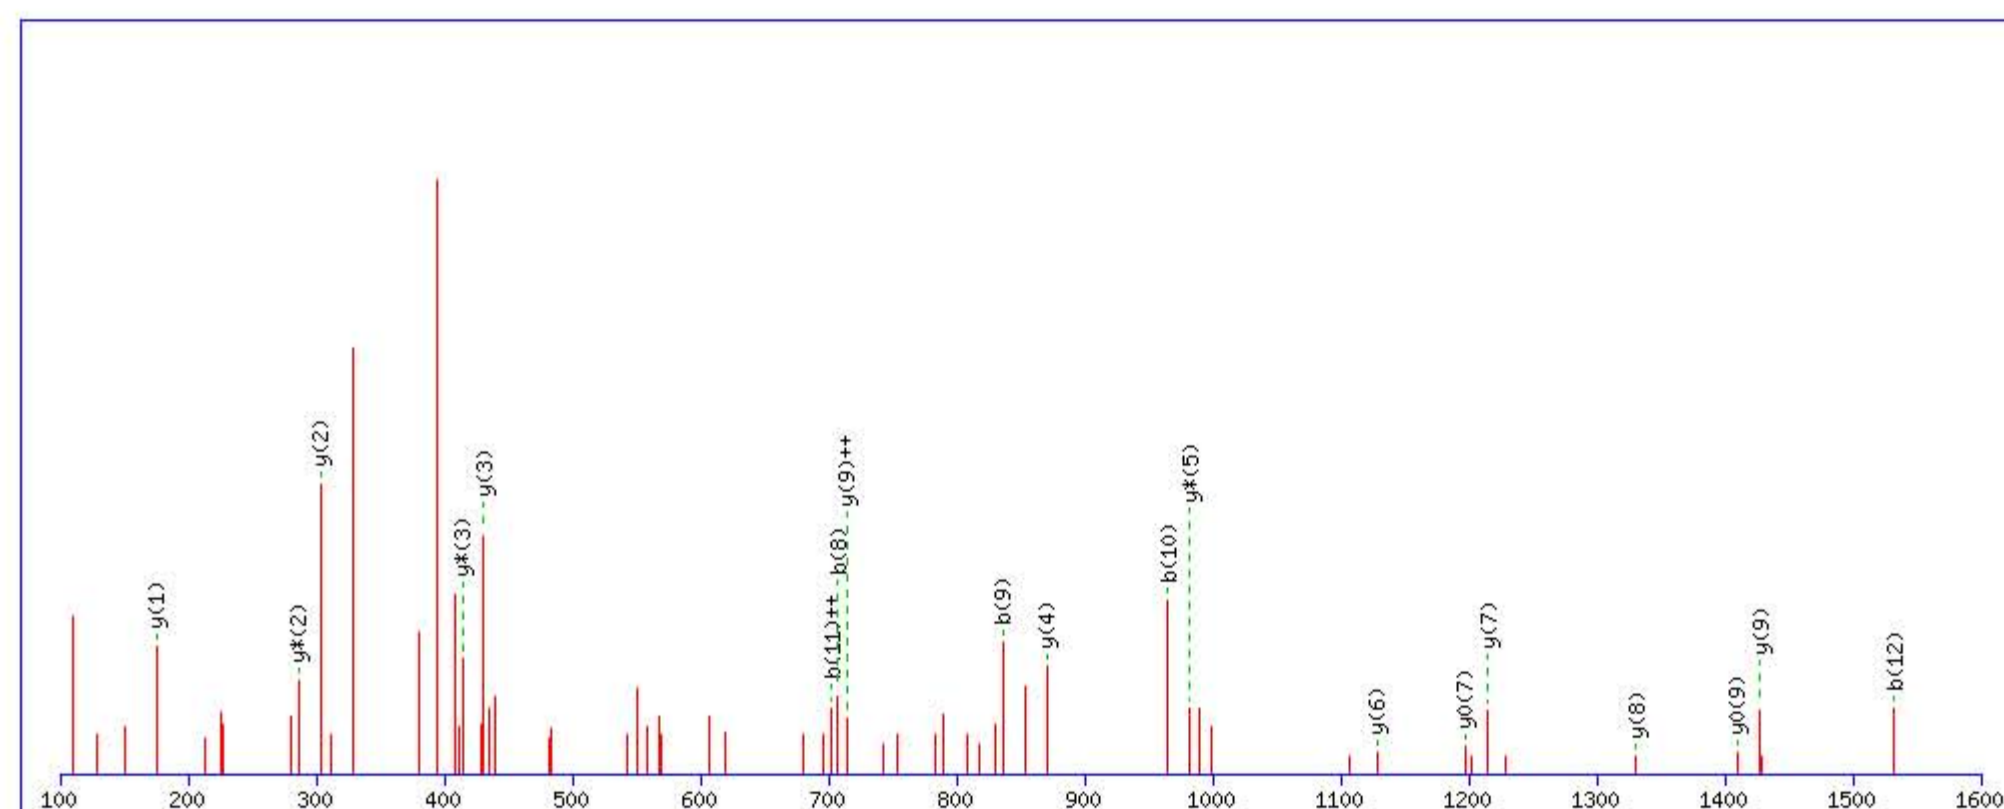

Monoisotopic mass of neutral peptide Mr(calc): 1833.842773

Fixed modifications: Carbamidomethyl (C) (apply to specified residues or termini only)

Variable modifications:

Q11 : Biotin:Thermo-21345 (Q)

Ions Score: 48 Expect: 0.00019

Matches : 19/116 fragment ions using 28 most intense peaks [\(help\)](#)

| #  | b                  | b <sup>++</sup>   | b <sup>*</sup> | b <sup>+++</sup> | b <sup>0</sup> | b <sup>0++</sup> | Seq. | y                  | y <sup>++</sup>   | y <sup>*</sup>    | y <sup>+++</sup> | y <sup>0</sup>     | y <sup>0++</sup> | #  |
|----|--------------------|-------------------|----------------|------------------|----------------|------------------|------|--------------------|-------------------|-------------------|------------------|--------------------|------------------|----|
| 1  | 58.028740          | 29.518008         |                |                  |                |                  | G    |                    |                   |                   |                  |                    |                  | 14 |
| 2  | 129.065854         | 65.036565         |                |                  |                |                  | A    | 1777.828609        | 889.417943        | 1760.802060       | 880.904668       | 1759.818044        | 880.412660       | 13 |
| 3  | 200.102968         | 100.555122        |                |                  |                |                  | A    | 1706.791495        | 853.899386        | 1689.764946       | 845.386111       | 1688.780930        | 844.894103       | 12 |
| 4  | 271.140082         | 136.073679        |                |                  |                |                  | A    | 1635.754381        | 818.380829        | 1618.727832       | 809.867554       | 1617.743816        | 809.375546       | 11 |
| 5  | 408.198994         | 204.603135        |                |                  |                |                  | H    | 1564.717267        | 782.862272        | 1547.690718       | 774.348997       | 1546.706702        | 773.856989       | 10 |
| 6  | 505.251758         | 253.129517        |                |                  |                |                  | P    | <b>1427.658355</b> | <b>714.332816</b> | 1410.631806       | 705.819541       | <b>1409.647790</b> | 705.327533       | 9  |
| 7  | 620.278701         | 310.642989        |                |                  | 602.268136     | 301.637706       | D    | <b>1330.605591</b> | 665.806434        | 1313.579042       | 657.293159       | 1312.595026        | 656.801151       | 8  |
| 8  | <b>707.310729</b>  | 354.159003        |                |                  | 689.300164     | 345.153720       | S    | <b>1215.578648</b> | 608.292962        | 1198.552099       | 599.779688       | <b>1197.568083</b> | 599.287680       | 7  |
| 9  | <b>836.353322</b>  | 418.680299        |                |                  | 818.342757     | 409.675017       | E    | <b>1128.546620</b> | 564.776948        | 1111.520071       | 556.263674       | 1110.536055        | 555.771666       | 6  |
| 10 | <b>965.395915</b>  | 483.201596        |                |                  | 947.385350     | 474.196313       | E    | 999.504027         | 500.255652        | <b>982.477478</b> | 491.742377       | 981.493462         | 491.250369       | 5  |
| 11 | 1404.621241        | <b>702.814259</b> | 1387.594692    | 694.300984       | 1386.610676    | 693.808976       | Q    | <b>870.461434</b>  | 435.734355        | 853.434885        | 427.221081       |                    |                  | 4  |
| 12 | <b>1532.679819</b> | 766.843548        | 1515.653270    | 758.330273       | 1514.669254    | 757.838265       | Q    | <b>431.236108</b>  | 216.121692        | <b>414.209559</b> | 207.608418       |                    |                  | 3  |
| 13 | 1660.738397        | 830.872837        | 1643.711848    | 822.359562       | 1642.727832    | 821.867554       | Q    | <b>303.177530</b>  | 152.092403        | <b>286.150981</b> | 143.579129       |                    |                  | 2  |
| 14 |                    |                   |                |                  |                |                  | R    | <b>175.118952</b>  | 88.063114         | 158.092403        | 79.549839        |                    |                  | 1  |

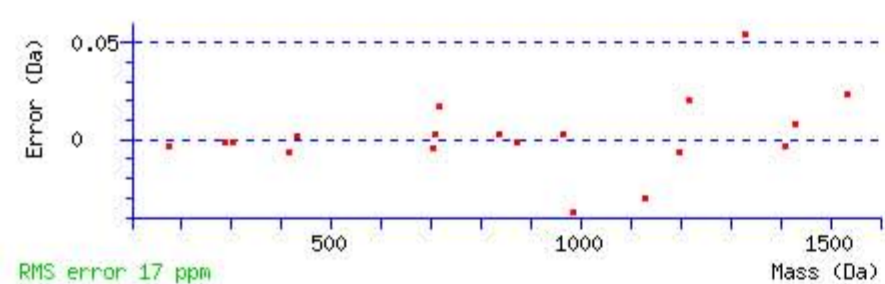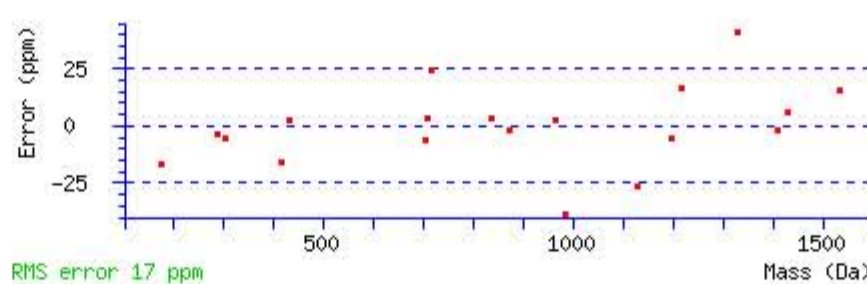

NCBI BLAST search of **GAAHPDSEEQQQR**

(Parameters: blastp, nr protein database, expect=20000, no filter, PAM30)

Other BLAST [web gateways](#)

All matches to this query

| Score | Mr(calc):   | Delta     | Sequence                      |
|-------|-------------|-----------|-------------------------------|
| 47.5  | 1833.842773 | -0.000631 | <a href="#">GAAHPDSEEQQQR</a> |
| 34.2  | 1833.842773 | -0.000631 | <a href="#">GAAHPDSEEQQQR</a> |
| 24.7  | 1833.842773 | -0.000631 | <a href="#">GAAHPDSEEQQQR</a> |
| 7.5   | 1833.864761 | -0.022619 | <a href="#">QREQMEQMKQR</a>   |
| 6.8   | 1833.864761 | -0.022619 | <a href="#">QREQMEQMKQR</a>   |
| 4.9   | 1833.864761 | -0.022619 | <a href="#">QREQMEQMKQR</a>   |
| 1.0   | 1833.820297 | 0.021845  | <a href="#">YYKLSMTEQDQQR</a> |

# MASCOT Search Results

## Peptide View

MS/MS Fragmentation of **SPYQLVLQHSR**

Found in **BGH3\_HUMAN**, Transforming growth factor-beta-induced protein ig-h3 OS=Homo sapiens GN=TGFBI PE=1 SV=1

Match to Query 35171: 1637.873172 from(546.965000,3+) rtinseconds(1902) index(46656)

Title: Locus:1.1.1.2711.9 File:"2013-07-02 CLN FXIII 60 min 3rd F 4.wiff"

Data file C:\Program Files (x86)\Matrix Science\Mascot Daemon\mgf\6 FXIII 60 min 3rd\mascot\_daemon\_merge.mgf

Click mouse within plot area to zoom in by factor of two about that point

Or, Plot from  to  Da

Label all possible matches  Label matches used for scoring

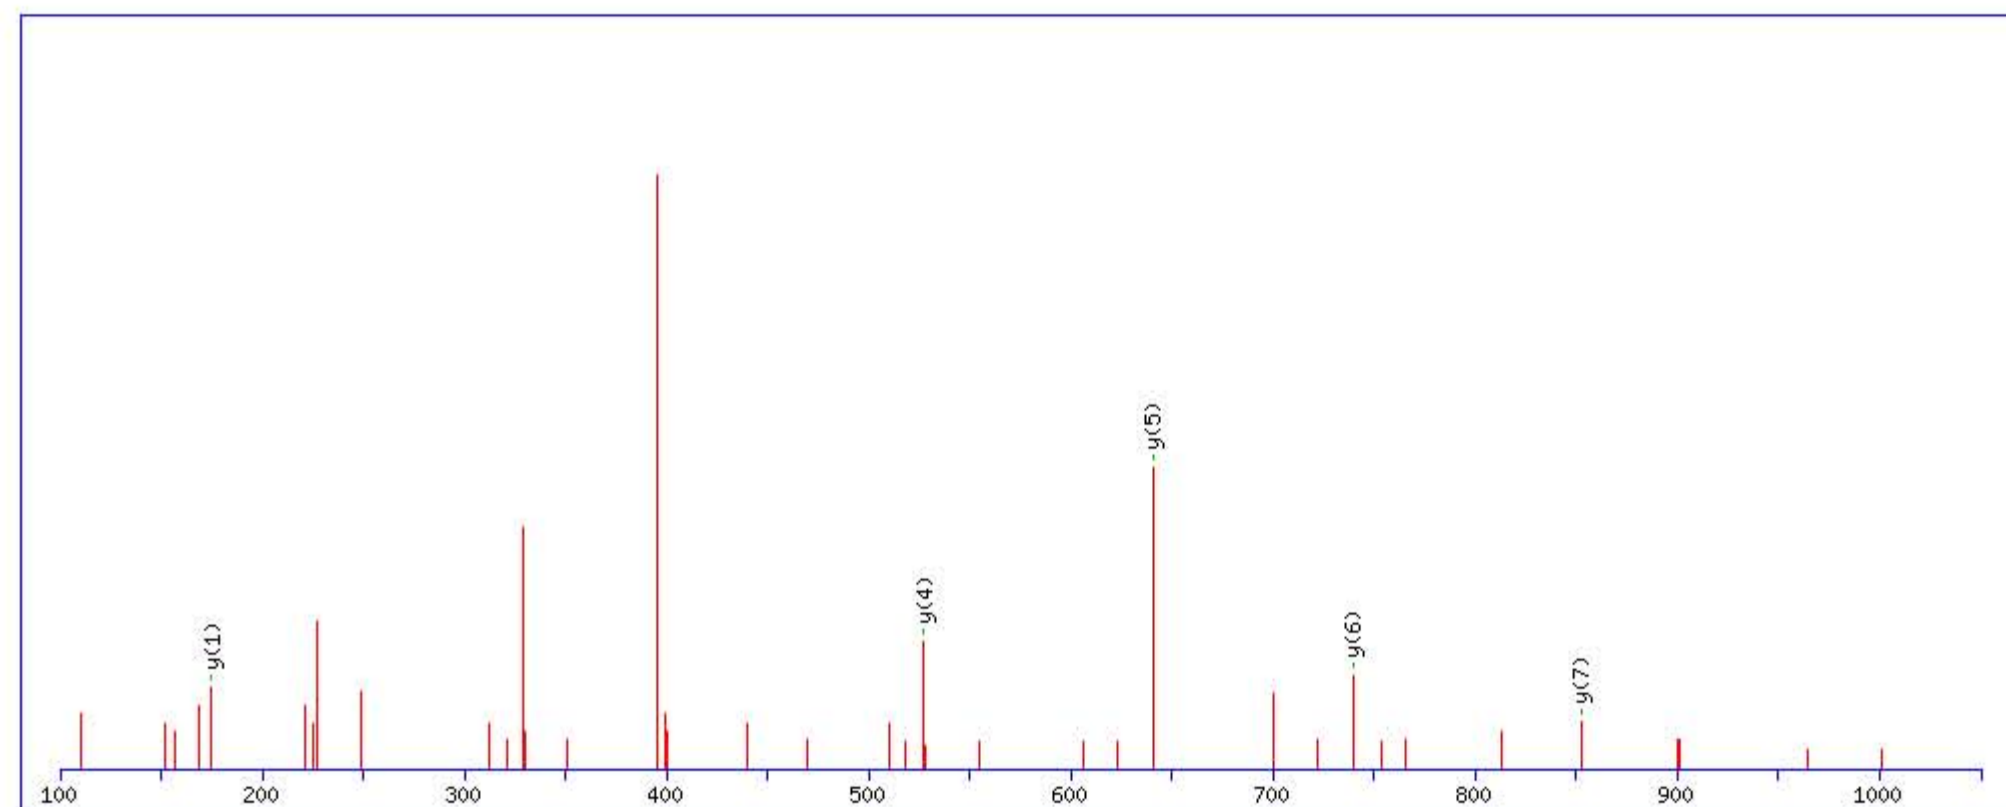

Monoisotopic mass of neutral peptide Mr(calc): 1637.871170

Fixed modifications: Carbamidomethyl (C) (apply to specified residues or termini only)

Variable modifications:

Q4 : Biotin:Thermo-21345 (Q)

Ions Score: 27 Expect: 0.0057

Matches : 5/112 fragment ions using 9 most intense peaks [\(help\)](#)

| #  | b           | b <sup>++</sup> | b <sup>*</sup> | b <sup>*++</sup> | b <sup>0</sup> | b <sup>0++</sup> | Seq. | y                 | y <sup>++</sup> | y <sup>*</sup> | y <sup>*++</sup> | y <sup>0</sup> | y <sup>0++</sup> | #  |
|----|-------------|-----------------|----------------|------------------|----------------|------------------|------|-------------------|-----------------|----------------|------------------|----------------|------------------|----|
| 1  | 88.039304   | 44.523290       |                |                  | 70.028739      | 35.518008        | S    |                   |                 |                |                  |                |                  | 11 |
| 2  | 185.092068  | 93.049672       |                |                  | 167.081503     | 84.044389        | P    | 1551.846431       | 776.426853      | 1534.819882    | 767.913579       | 1533.835866    | 767.421571       | 10 |
| 3  | 348.155397  | 174.581336      |                |                  | 330.144832     | 165.576054       | Y    | 1454.793667       | 727.900471      | 1437.767118    | 719.387197       | 1436.783102    | 718.895189       | 9  |
| 4  | 787.380723  | 394.194000      | 770.354174     | 385.680725       | 769.370158     | 385.188717       | Q    | 1291.730338       | 646.368807      | 1274.703789    | 637.855532       | 1273.719773    | 637.363524       | 8  |
| 5  | 900.464787  | 450.736032      | 883.438238     | 442.222757       | 882.454222     | 441.730749       | L    | <b>852.505012</b> | 426.756144      | 835.478463     | 418.242869       | 834.494447     | 417.750861       | 7  |
| 6  | 999.533201  | 500.270239      | 982.506652     | 491.756964       | 981.522636     | 491.264956       | V    | <b>739.420948</b> | 370.214112      | 722.394399     | 361.700837       | 721.410383     | 361.208829       | 6  |
| 7  | 1112.617265 | 556.812270      | 1095.590716    | 548.298996       | 1094.606700    | 547.806988       | L    | <b>640.352534</b> | 320.679905      | 623.325985     | 312.166630       | 622.341969     | 311.674622       | 5  |
| 8  | 1240.675843 | 620.841559      | 1223.649294    | 612.328285       | 1222.665278    | 611.836277       | Q    | <b>527.268470</b> | 264.137873      | 510.241921     | 255.624598       | 509.257905     | 255.132590       | 4  |
| 9  | 1377.734755 | 689.371015      | 1360.708206    | 680.857741       | 1359.724190    | 680.365733       | H    | 399.209892        | 200.108584      | 382.183343     | 191.595309       | 381.199327     | 191.103301       | 3  |
| 10 | 1464.766783 | 732.887029      | 1447.740234    | 724.373755       | 1446.756218    | 723.881747       | S    | 262.150980        | 131.579128      | 245.124431     | 123.065854       | 244.140415     | 122.573846       | 2  |
| 11 |             |                 |                |                  |                |                  | R    | <b>175.118952</b> | 88.063114       | 158.092403     | 79.549839        |                |                  | 1  |

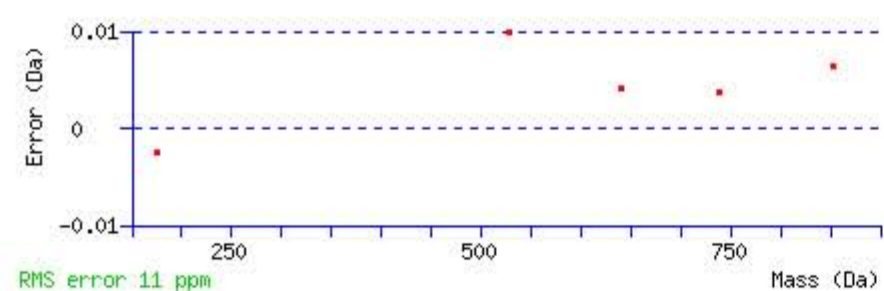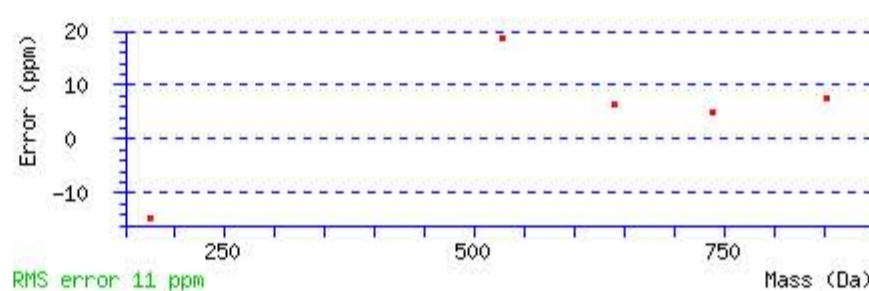

NCBI BLAST search of **SPYQLVLQHSR**

(Parameters: blastp, nr protein database, expect=20000, no filter, PAM30)

Other BLAST [web gateways](#)

All matches to this query

| Score | Mr(calc):   | Delta     | Sequence                          |
|-------|-------------|-----------|-----------------------------------|
| 26.9  | 1637.871170 | 0.002002  | <a href="#">SPYQLVLQHSR</a>       |
| 2.9   | 1637.857254 | 0.015918  | <a href="#">RSQQHAKVVPWMR</a>     |
| 1.0   | 1637.888916 | -0.015744 | <a href="#">APAPPPAGALLPEPGQR</a> |

Mascot: <http://www.matrixscience.com/>

# MASCOT Search Results

## Peptide View

MS/MS Fragmentation of **NLHDLVDSDNQLER**

Found in **VASN\_HUMAN**, Vasorin OS=Homo sapiens GN=VASN PE=1 SV=1

Match to Query 41615: 1977.955392 from(660.325740,3+) rtinseconds(1951) index(4638)

Title: Locus:1.1.1.3231.20 File:"2013-07-02 CLN FXIII 60 min 3rd F 1.wiff"

Data file C:\Program Files (x86)\Matrix Science\Mascot Daemon\mgf\6 FXIII 60 min 3rd\mascot\_daemon\_merge.mgf

Click mouse within plot area to zoom in by factor of two about that point

Or, Plot from  to  Da

Label all possible matches  Label matches used for scoring

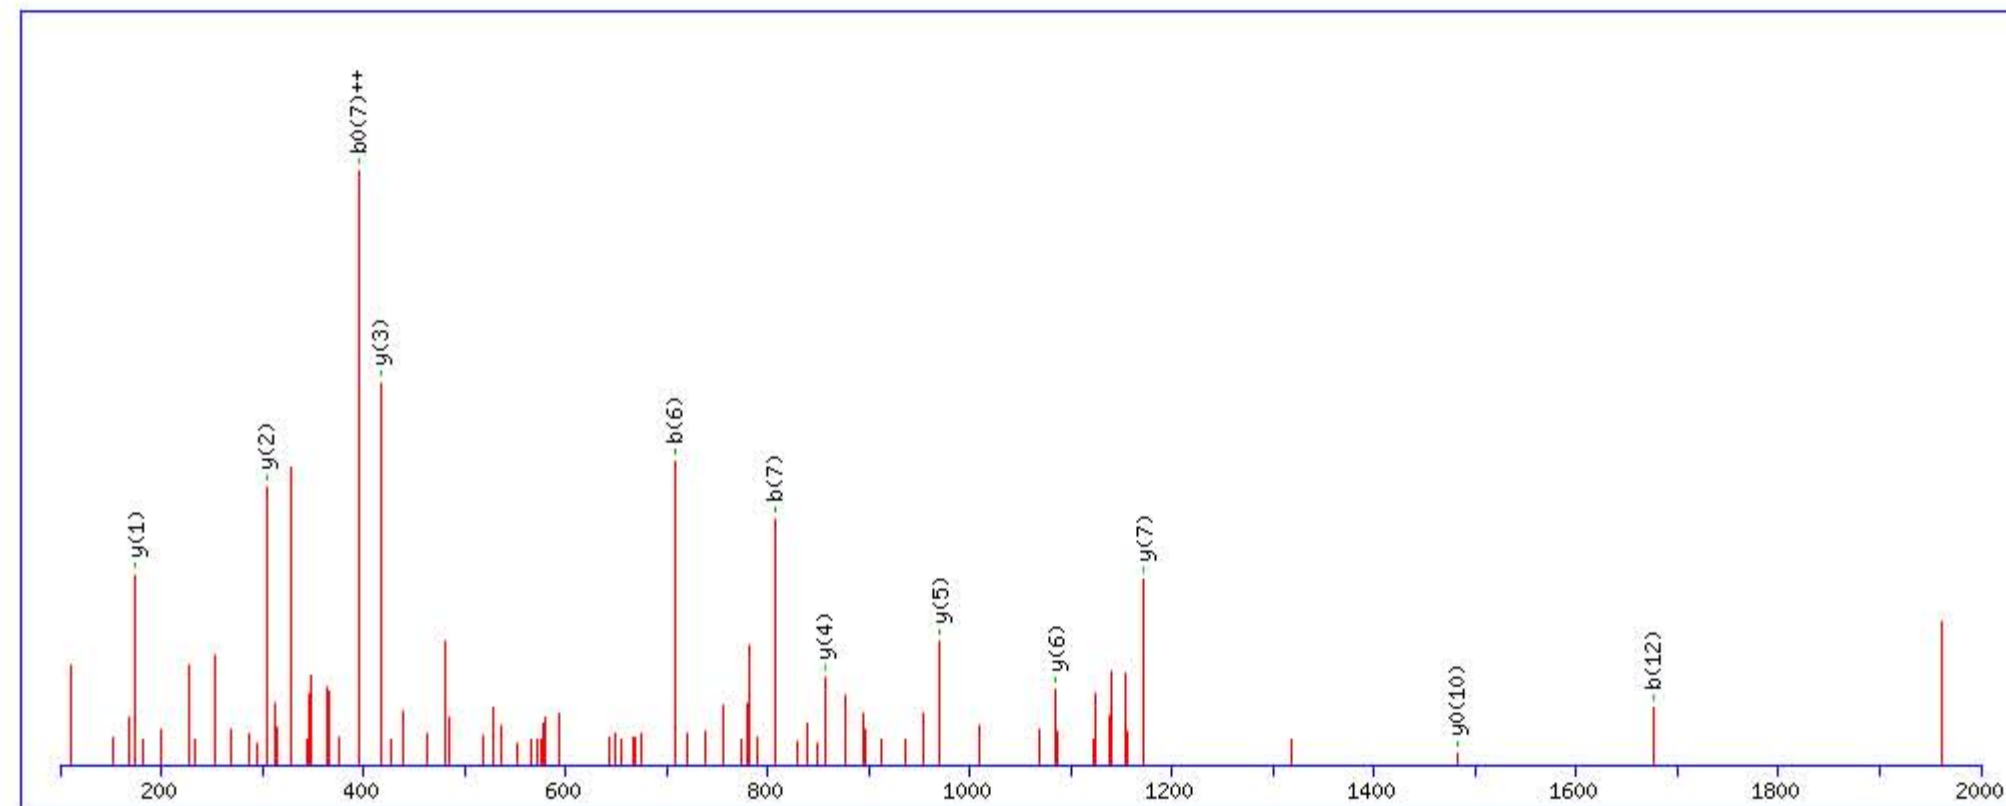

Monoisotopic mass of neutral peptide Mr(calc): 1977.957809

Fixed modifications: Carbamidomethyl (C) (apply to specified residues or termini only)

Variable modifications:

Q11 : Biotin:Thermo-21345 (Q)

Ions Score: 57 Expect: 5.2e-006

Matches : 12/148 fragment ions using 15 most intense peaks [\(help\)](#)

| #  | b                  | b <sup>++</sup> | b <sup>+</sup> | b <sup>*++</sup> | b <sup>0</sup> | b <sup>0++</sup> | Seq. | y                  | y <sup>++</sup> | y <sup>+</sup> | y <sup>*++</sup> | y <sup>0</sup> | y <sup>0++</sup> | #  |
|----|--------------------|-----------------|----------------|------------------|----------------|------------------|------|--------------------|-----------------|----------------|------------------|----------------|------------------|----|
| 1  | 115.050203         | 58.028740       | 98.023654      | 49.515465        |                |                  | N    |                    |                 |                |                  |                |                  | 14 |
| 2  | 228.134267         | 114.570771      | 211.107718     | 106.057497       |                |                  | L    | 1864.922173        | 932.964724      | 1847.895624    | 924.451450       | 1846.911608    | 923.959442       | 13 |
| 3  | 365.193179         | 183.100227      | 348.166630     | 174.586953       |                |                  | H    | 1751.838109        | 876.422692      | 1734.811560    | 867.909418       | 1733.827544    | 867.417410       | 12 |
| 4  | 480.220122         | 240.613699      | 463.193573     | 232.100425       | 462.209557     | 231.608417       | D    | 1614.779197        | 807.893236      | 1597.752648    | 799.379962       | 1596.768632    | 798.887954       | 11 |
| 5  | 593.304186         | 297.155731      | 576.277637     | 288.642457       | 575.293621     | 288.150449       | L    | 1499.752254        | 750.379765      | 1482.725705    | 741.866490       | 1481.741689    | 741.374482       | 10 |
| 6  | <b>708.331129</b>  | 354.669203      | 691.304580     | 346.155928       | 690.320564     | 345.663920       | D    | 1386.668190        | 693.837733      | 1369.641641    | 685.324458       | 1368.657625    | 684.832450       | 9  |
| 7  | <b>807.399543</b>  | 404.203410      | 790.372994     | 395.690135       | 789.388978     | 395.198127       | V    | 1271.641247        | 636.324261      | 1254.614698    | 627.810987       | 1253.630682    | 627.318979       | 8  |
| 8  | 894.431571         | 447.719424      | 877.405022     | 439.206149       | 876.421006     | 438.714141       | S    | <b>1172.572833</b> | 586.790054      | 1155.546284    | 578.276780       | 1154.562268    | 577.784772       | 7  |
| 9  | 1009.458514        | 505.232895      | 992.431965     | 496.719620       | 991.447949     | 496.227612       | D    | <b>1085.540805</b> | 543.274040      | 1068.514256    | 534.760766       | 1067.530240    | 534.268758       | 6  |
| 10 | 1123.501441        | 562.254358      | 1106.474892    | 553.741084       | 1105.490876    | 553.249076       | N    | <b>970.513862</b>  | 485.760569      | 953.487313     | 477.247294       | 952.503297     | 476.755286       | 5  |
| 11 | 1562.726767        | 781.867021      | 1545.700218    | 773.353747       | 1544.716202    | 772.861739       | Q    | <b>856.470935</b>  | 428.739105      | 839.444386     | 420.225831       | 838.460370     | 419.733823       | 4  |
| 12 | <b>1675.810831</b> | 838.409053      | 1658.784282    | 829.895779       | 1657.800266    | 829.403771       | L    | <b>417.245609</b>  | 209.126442      | 400.219060     | 200.613168       | 399.235044     | 200.121160       | 3  |
| 13 | 1804.853424        | 902.930350      | 1787.826875    | 894.417075       | 1786.842859    | 893.925067       | E    | <b>304.161545</b>  | 152.584410      | 287.134996     | 144.071136       | 286.150980     | 143.579128       | 2  |
| 14 |                    |                 |                |                  |                |                  | R    | <b>175.118952</b>  | 88.063114       | 158.092403     | 79.549839        |                |                  | 1  |

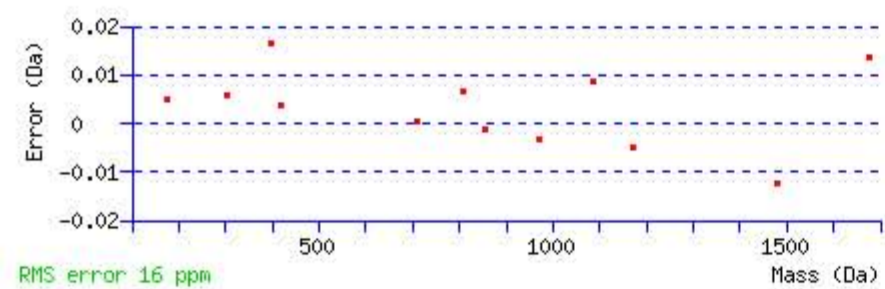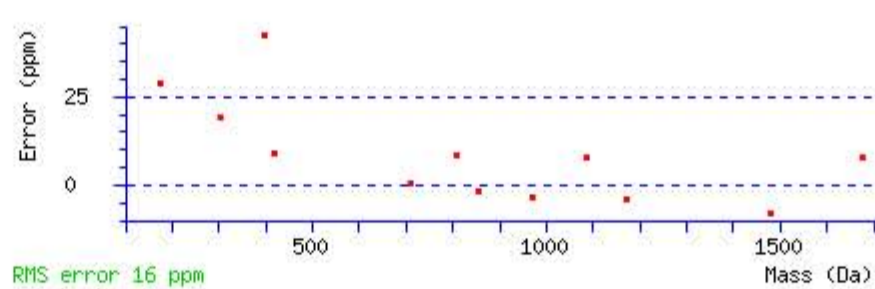

NCBI BLAST search of **NLHDLVDSDNQLER**

(Parameters: blastp, nr protein database, expect=20000, no filter, PAM30)

Other BLAST [web gateways](#)

All matches to this query

| Score | Mr(calc):   | Delta     | Sequence                          |
|-------|-------------|-----------|-----------------------------------|
| 56.5  | 1977.957809 | -0.002417 | <a href="#">NLHDLVDSDNQLER</a>    |
| 0.2   | 1977.979813 | -0.024421 | <a href="#">TMPRTVPGSTMKGSLER</a> |

Mascot: <http://www.matrixscience.com/>

# MASCOT Search Results

## Peptide View

MS/MS Fragmentation of **GQELCADYSENTFTEYK**  
 Found in **VTDB\_HUMAN**, Vitamin D-binding protein OS=Homo sapiens GN=GC PE=1 SV=1

Match to Query 48664: 2365.030932 from(789.350920,3+) rtinseconds(2174) index(63561)  
 Title: Locus:1.1.1.3383.16 File:"2013-07-02 CLN FXIII 60 min 3rd FT.wiff"  
 Data file C:\Program Files (x86)\Matrix Science\Mascot Daemon\mgf\6 FXIII 60 min 3rd\mascot\_daemon\_merge.mgf

Click mouse within plot area to zoom in by factor of two about that point  
 Or, Plot from  to  Da   
 Label all possible matches  Label matches used for scoring

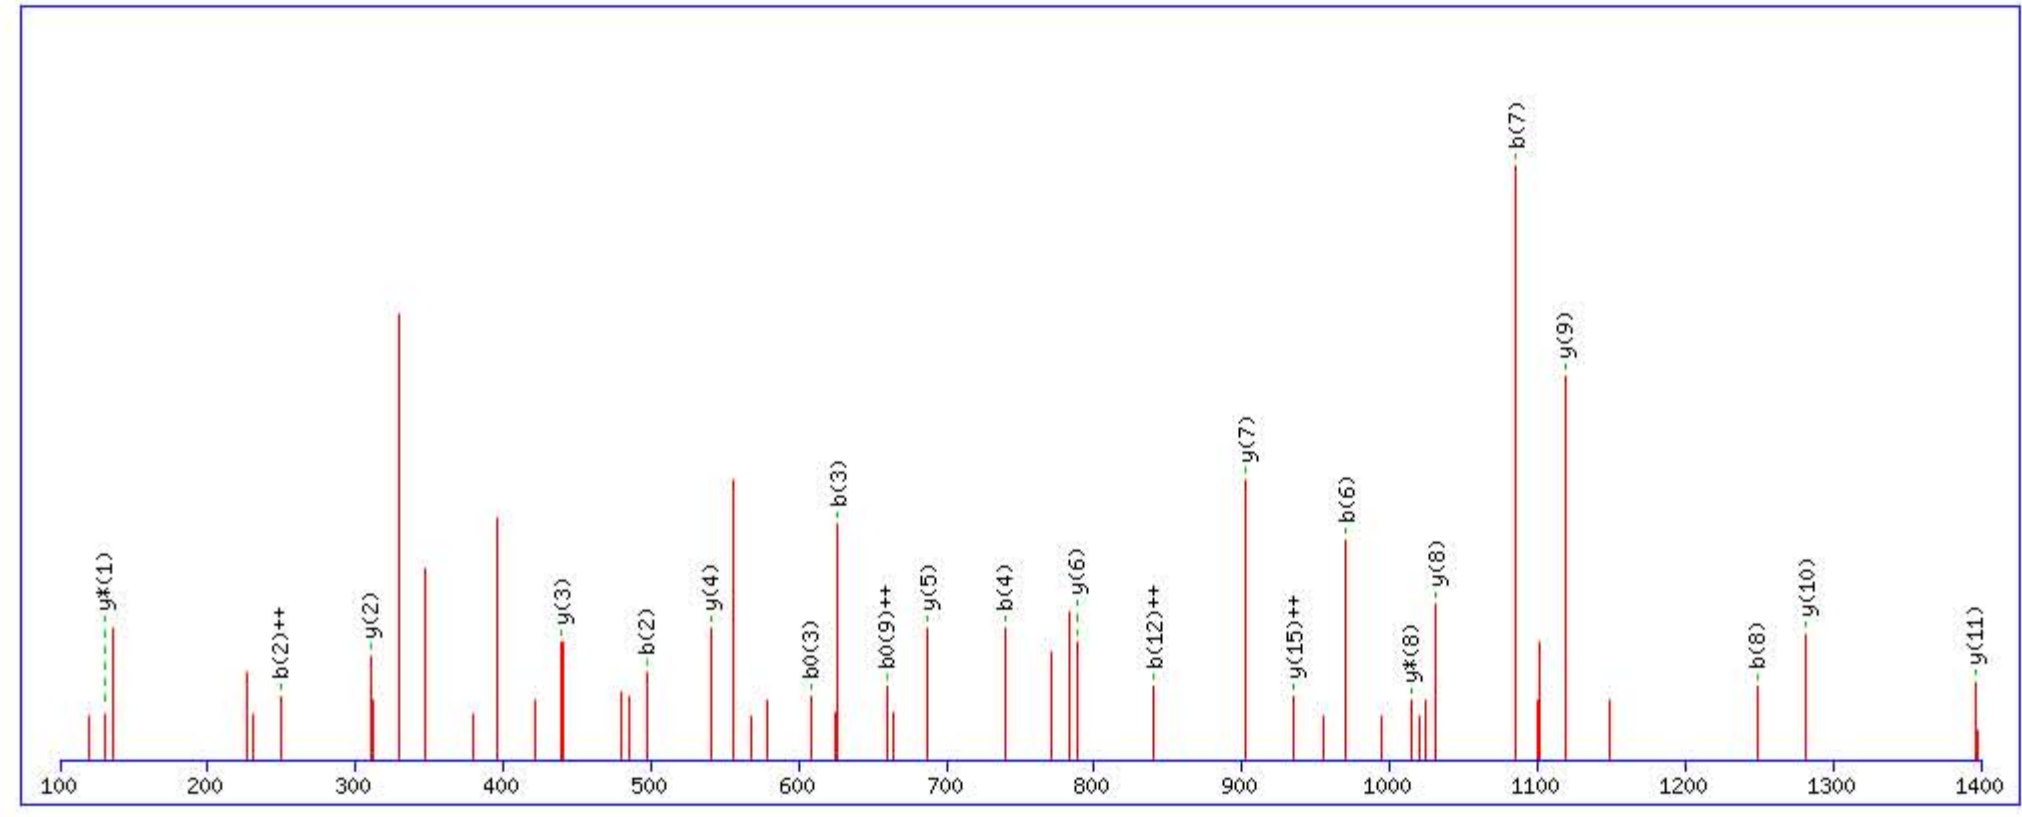

Monoisotopic mass of neutral peptide Mr(calc): 2365.024231  
 Fixed modifications: Carbamidomethyl (C) (apply to specified residues or termini only)  
 Variable modifications:  
 Q2 : Biotin:Thermo-21345 (Q)  
 Ions Score: 63 Expect: 2e-006  
 Matches : 23/182 fragment ions using 35 most intense peaks [\(help\)](#)

| #  | b                  | b <sup>++</sup>   | b <sup>*</sup> | b <sup>*++</sup> | b <sup>0</sup>    | b <sup>0++</sup>  | Seq. | y                  | y <sup>++</sup>   | y <sup>*</sup>     | y <sup>*++</sup> | y <sup>0</sup> | y <sup>0++</sup> | #  |
|----|--------------------|-------------------|----------------|------------------|-------------------|-------------------|------|--------------------|-------------------|--------------------|------------------|----------------|------------------|----|
| 1  | 58.028740          | 29.518008         |                |                  |                   |                   | G    |                    |                   |                    |                  |                |                  | 17 |
| 2  | <b>497.254066</b>  | <b>249.130671</b> | 480.227517     | 240.617397       |                   |                   | Q    | 2309.010064        | 1155.008670       | 2291.983515        | 1146.495395      | 2290.999499    | 1146.003387      | 16 |
| 3  | <b>626.296659</b>  | 313.651968        | 609.270110     | 305.138693       | <b>608.286094</b> | 304.646685        | E    | 1869.784738        | <b>935.396007</b> | 1852.758189        | 926.882733       | 1851.774173    | 926.390725       | 15 |
| 4  | <b>739.380723</b>  | 370.194000        | 722.354174     | 361.680725       | 721.370158        | 361.188717        | L    | 1740.742145        | 870.874711        | 1723.715596        | 862.361436       | 1722.731580    | 861.869428       | 14 |
| 5  | 899.411372         | 450.209324        | 882.384823     | 441.696050       | 881.400807        | 441.204042        | C    | 1627.658081        | 814.332679        | 1610.631532        | 805.819404       | 1609.647516    | 805.327396       | 13 |
| 6  | <b>970.448486</b>  | 485.727881        | 953.421937     | 477.214607       | 952.437921        | 476.722599        | A    | 1467.627432        | 734.317354        | 1450.600883        | 725.804080       | 1449.616867    | 725.312072       | 12 |
| 7  | <b>1085.475429</b> | 543.241353        | 1068.448880    | 534.728078       | 1067.464864       | 534.236070        | D    | <b>1396.590318</b> | 698.798797        | 1379.563769        | 690.285523       | 1378.579753    | 689.793515       | 11 |
| 8  | <b>1248.538758</b> | 624.773017        | 1231.512209    | 616.259743       | 1230.528193       | 615.767735        | Y    | <b>1281.563375</b> | 641.285326        | 1264.536826        | 632.772051       | 1263.552810    | 632.280043       | 10 |
| 9  | 1335.570786        | 668.289031        | 1318.544237    | 659.775757       | 1317.560221       | <b>659.283749</b> | S    | <b>1118.500046</b> | 559.753661        | 1101.473497        | 551.240387       | 1100.489481    | 550.748379       | 9  |
| 10 | 1464.613379        | 732.810328        | 1447.586830    | 724.297053       | 1446.602814       | 723.805045        | E    | <b>1031.468018</b> | 516.237647        | <b>1014.441469</b> | 507.724373       | 1013.457453    | 507.232365       | 8  |
| 11 | 1578.656306        | 789.831791        | 1561.629757    | 781.318517       | 1560.645741       | 780.826509        | N    | <b>902.425425</b>  | 451.716351        | 885.398876         | 443.203076       | 884.414860     | 442.711068       | 7  |
| 12 | 1679.703985        | <b>840.355631</b> | 1662.677436    | 831.842356       | 1661.693420       | 831.350348        | T    | <b>788.382498</b>  | 394.694887        | 771.355949         | 386.181613       | 770.371933     | 385.689605       | 6  |
| 13 | 1826.772399        | 913.889838        | 1809.745850    | 905.376563       | 1808.761834       | 904.884555        | F    | <b>687.334819</b>  | 344.171048        | 670.308270         | 335.657773       | 669.324254     | 335.165765       | 5  |
| 14 | 1927.820078        | 964.413677        | 1910.793529    | 955.900403       | 1909.809513       | 955.408395        | T    | <b>540.266405</b>  | 270.636841        | 523.239856         | 262.123566       | 522.255840     | 261.631558       | 4  |
| 15 | 2056.862671        | 1028.934973       | 2039.836122    | 1020.421699      | 2038.852106       | 1019.929691       | E    | <b>439.218726</b>  | 220.113001        | 422.192177         | 211.599726       | 421.208161     | 211.107718       | 3  |
| 16 | 2219.926000        | 1110.466638       | 2202.899451    | 1101.953363      | 2201.915435       | 1101.461355       | Y    | <b>310.176133</b>  | 155.591705        | 293.149584         | 147.078430       |                |                  | 2  |
| 17 |                    |                   |                |                  |                   |                   | K    | 147.112804         | 74.060040         | <b>130.086255</b>  | 65.546765        |                |                  | 1  |

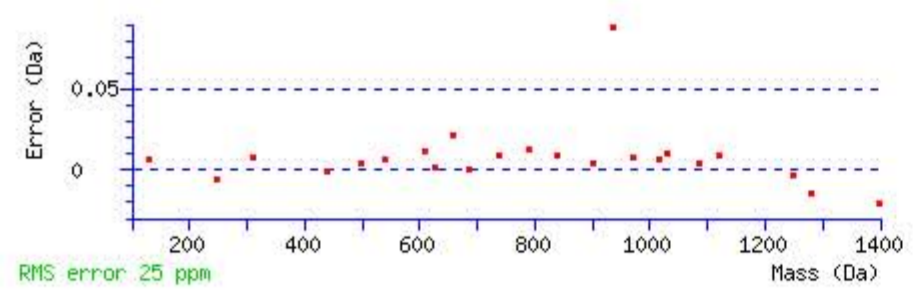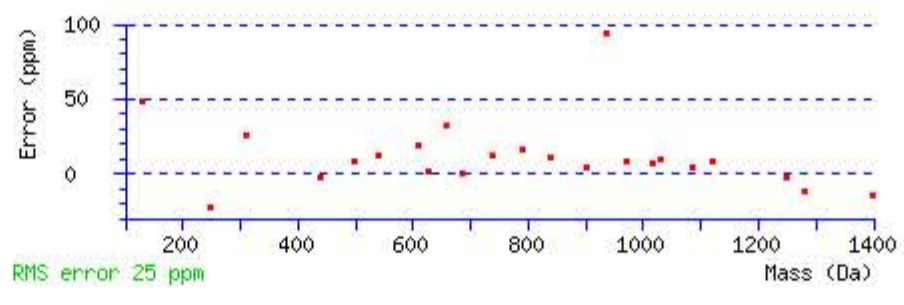

NCBI BLAST search of **GQELCADYSENTFTEYK**  
 (Parameters: blastp, nr protein database, expect=20000, no filter, PAM30)  
 Other BLAST [web gateways](#)

### All matches to this query

| Score | Mr(calc):   | Delta    | Sequence                          |
|-------|-------------|----------|-----------------------------------|
| 63.2  | 2365.024231 | 0.006701 | <a href="#">GQELCADYSENTFTEYK</a> |

# MASCOT Search Results

## Peptide View

MS/MS Fragmentation of **LGDDLLQCHPAVK**

Found in **PROC\_HUMAN**, Vitamin K-dependent protein C OS=Homo sapiens GN=PROC PE=1 SV=1

Match to Query 38081: 1775.914602 from(592.978810,3+) rtinseconds(1963) index(47167)

Title: Locus:1.1.1.2732.8 File:"2013-07-02 CLN FXIII 60 min 3rd F 4.wiff"

Data file C:\Program Files (x86)\Matrix Science\Mascot Daemon\mgf6 FXIII 60 min 3rd\mascot\_daemon\_merge.mgf

Click mouse within plot area to zoom in by factor of two about that point

Or, Plot from  to  Da

Label all possible matches  Label matches used for scoring

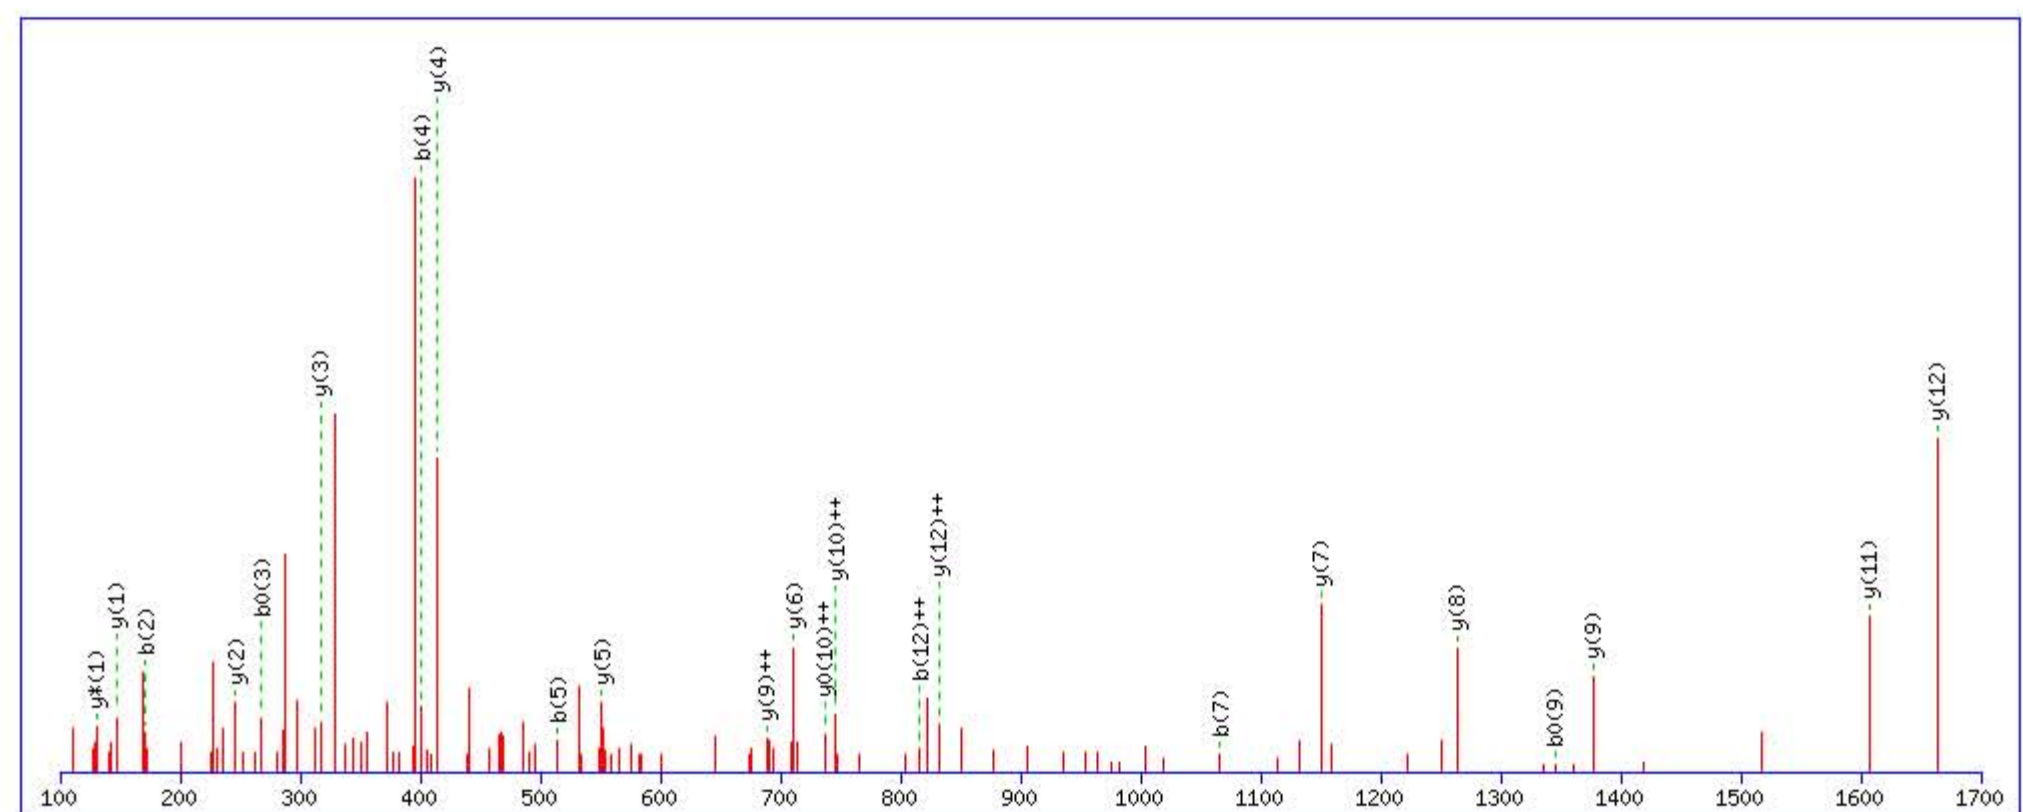

Monoisotopic mass of neutral peptide Mr(calc): 1775.906250

Fixed modifications: Carbamidomethyl (C) (apply to specified residues or termini only)

Variable modifications:

Q7 : Biotin:Thermo-21345 (Q)

Ions Score: 49 Expect: 0.00036

Matches : 23/110 fragment ions using 62 most intense peaks [\(help\)](#)

| #  | b                  | b <sup>++</sup>   | b <sup>*</sup> | b <sup>+++</sup> | b <sup>0</sup>     | b <sup>0++</sup> | Seq. | y                  | y <sup>++</sup>   | y <sup>*</sup>    | y <sup>+++</sup> | y <sup>0</sup> | y <sup>0++</sup>  | #  |
|----|--------------------|-------------------|----------------|------------------|--------------------|------------------|------|--------------------|-------------------|-------------------|------------------|----------------|-------------------|----|
| 1  | 114.091340         | 57.549308         |                |                  |                    |                  | L    |                    |                   |                   |                  |                |                   | 13 |
| 2  | <b>171.112804</b>  | 86.060040         |                |                  |                    |                  | G    | <b>1663.829461</b> | <b>832.418369</b> | 1646.802912       | 823.905094       | 1645.818896    | 823.413086        | 12 |
| 3  | 286.139747         | 143.573512        |                |                  | <b>268.129182</b>  | 134.568229       | D    | <b>1606.807997</b> | 803.907637        | 1589.781448       | 795.394362       | 1588.797432    | 794.902354        | 11 |
| 4  | <b>401.166690</b>  | 201.086983        |                |                  | 383.156125         | 192.081701       | D    | 1491.781054        | <b>746.394165</b> | 1474.754505       | 737.880891       | 1473.770489    | <b>737.388883</b> | 10 |
| 5  | <b>514.250754</b>  | 257.629015        |                |                  | 496.240189         | 248.623733       | L    | <b>1376.754111</b> | <b>688.880694</b> | 1359.727562       | 680.367419       |                |                   | 9  |
| 6  | 627.334818         | 314.171047        |                |                  | 609.324253         | 305.165765       | L    | <b>1263.670047</b> | 632.338662        | 1246.643498       | 623.825387       |                |                   | 8  |
| 7  | <b>1066.560144</b> | 533.783710        | 1049.533595    | 525.270436       | 1048.549579        | 524.778428       | Q    | <b>1150.585983</b> | 575.796630        | 1133.559434       | 567.283355       |                |                   | 7  |
| 8  | 1226.590793        | 613.799035        | 1209.564244    | 605.285760       | 1208.580228        | 604.793752       | C    | <b>711.360657</b>  | 356.183967        | 694.334108        | 347.670692       |                |                   | 6  |
| 9  | 1363.649705        | 682.328491        | 1346.623156    | 673.815216       | <b>1345.639140</b> | 673.323208       | H    | <b>551.330008</b>  | 276.168642        | 534.303459        | 267.655368       |                |                   | 5  |
| 10 | 1460.702469        | 730.854873        | 1443.675920    | 722.341598       | 1442.691904        | 721.849590       | P    | <b>414.271096</b>  | 207.639186        | 397.244547        | 199.125912       |                |                   | 4  |
| 11 | 1531.739583        | 766.373430        | 1514.713034    | 757.860155       | 1513.729018        | 757.368147       | A    | <b>317.218332</b>  | 159.112804        | 300.191783        | 150.599530       |                |                   | 3  |
| 12 | 1630.807997        | <b>815.907637</b> | 1613.781448    | 807.394362       | 1612.797432        | 806.902354       | V    | <b>246.181218</b>  | 123.594247        | 229.154669        | 115.080973       |                |                   | 2  |
| 13 |                    |                   |                |                  |                    |                  | K    | <b>147.112804</b>  | 74.060040         | <b>130.086255</b> | 65.546765        |                |                   | 1  |

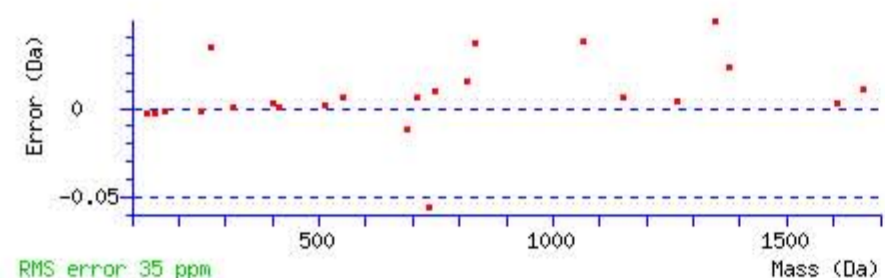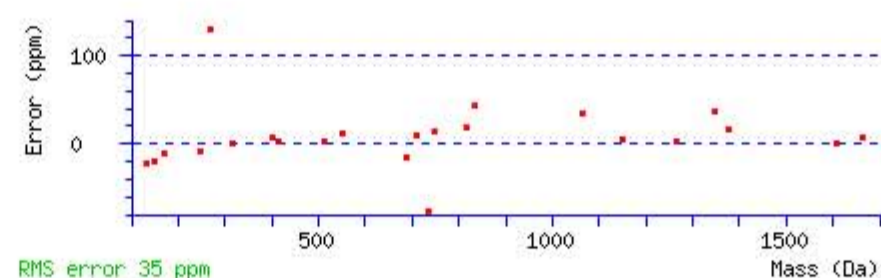

NCBI BLAST search of **LGDDLLQCHPAVK**

(Parameters: blastp, nr protein database, expect=20000, no filter, PAM30)

Other BLAST [web gateways](#)

All matches to this query

| Score | Mr(calc):   | Delta    | Sequence             |
|-------|-------------|----------|----------------------|
| 48.5  | 1775.906250 | 0.008352 | <b>LGDDLLQCHPAVK</b> |

Mascot: <http://www.matrixscience.com/>

# MASCOT Search Results

## Peptide View

MS/MS Fragmentation of **ELNQAGQETLVGTGWGYHSSR**

Found in **PROC\_HUMAN**, Vitamin K-dependent protein C OS=Homo sapiens GN=PROC PE=1 SV=1

Match to Query 51648: 2543.237936 from(636.816760,4+) rtinseconds(2156) index(48375)

Title: Locus:1.1.1.2799.13 File:"2013-07-02 CLN FXIII 60 min 3rd F 4.wiff"

Data file C:\Program Files (x86)\Matrix Science\Mascot Daemon\mgf\6 FXIII 60 min 3rd\mascot\_daemon\_merge.mgf

Click mouse within plot area to zoom in by factor of two about that point

Or, Plot from 0 to 2200 Da Full range

Label all possible matches  Label matches used for scoring

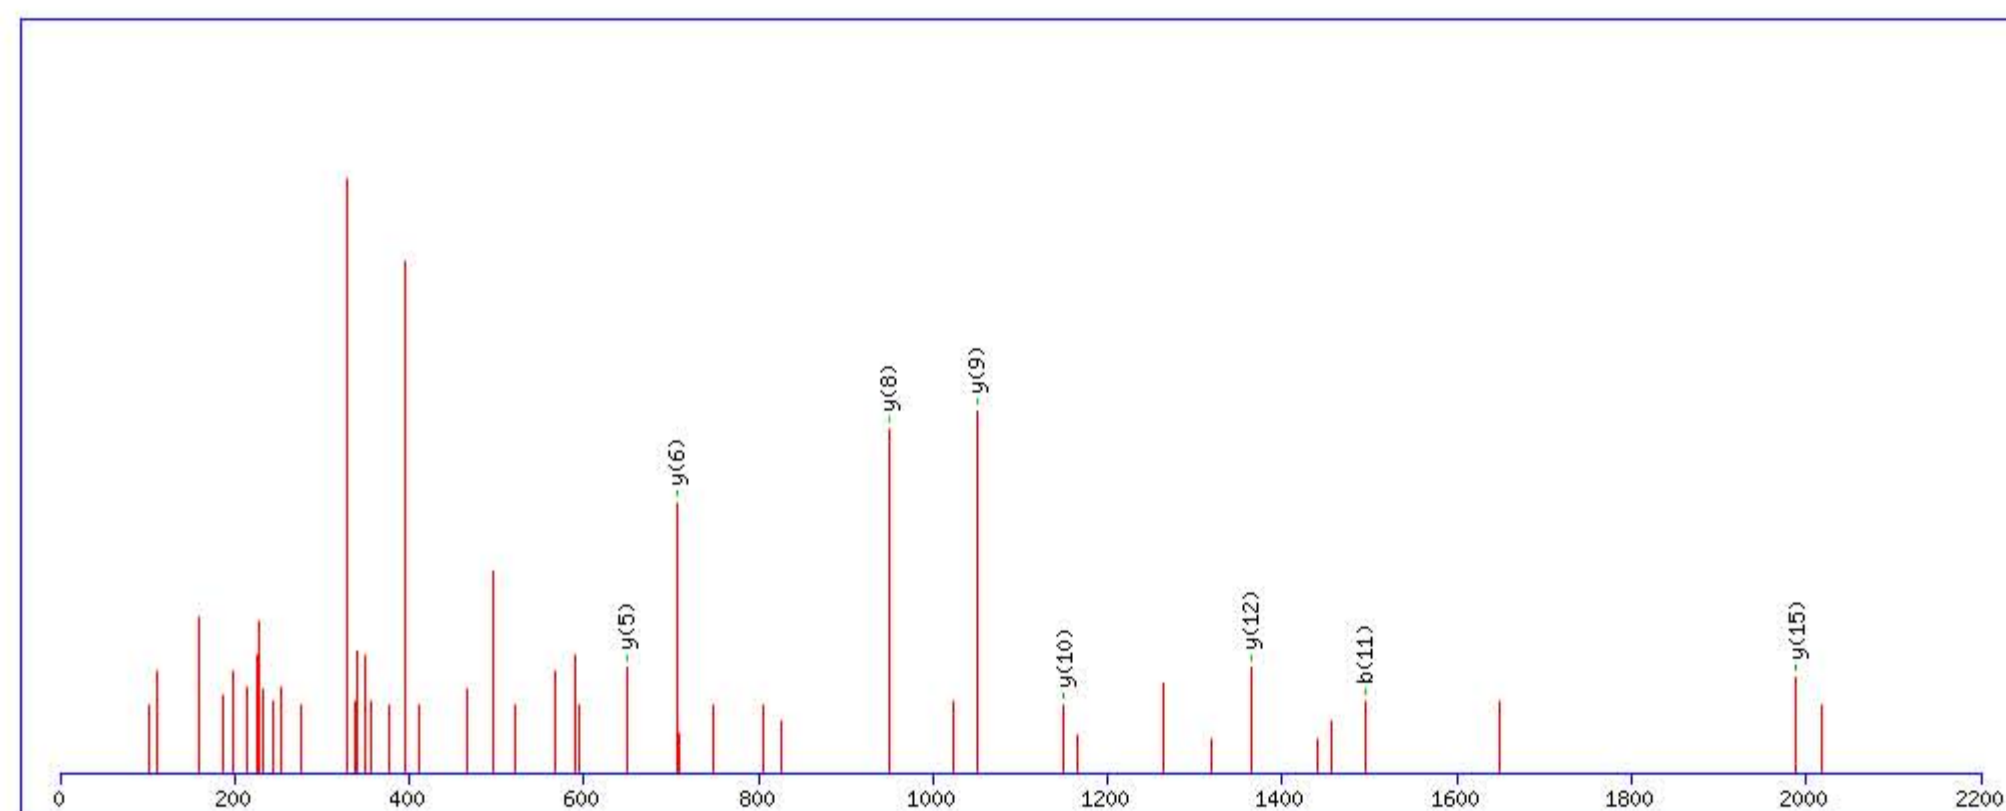

Monoisotopic mass of neutral peptide Mr(calc): 2543.222702

Fixed modifications: Carbamidomethyl (C) (apply to specified residues or termini only)

Variable modifications:

Q7 : Biotin:Thermo-21345 (Q)

Ions Score: 31 Expect: 0.021

Matches : 8/222 fragment ions using 17 most intense peaks [\(help\)](#)

| #  | b                  | b <sup>++</sup> | b <sup>*</sup> | b <sup>*++</sup> | b <sup>0</sup> | b <sup>0++</sup> | Seq. | y                  | y <sup>++</sup> | y <sup>*</sup> | y <sup>*++</sup> | y <sup>0</sup> | y <sup>0++</sup> | #  |
|----|--------------------|-----------------|----------------|------------------|----------------|------------------|------|--------------------|-----------------|----------------|------------------|----------------|------------------|----|
| 1  | 130.049869         | 65.528572       |                |                  | 112.039304     | 56.523290        | E    |                    |                 |                |                  |                |                  | 20 |
| 2  | 243.133933         | 122.070605      |                |                  | 225.123368     | 113.065322       | L    | 2415.187392        | 1208.097334     | 2398.160843    | 1199.584059      | 2397.176827    | 1199.092051      | 19 |
| 3  | 357.176860         | 179.092068      | 340.150311     | 170.578794       | 339.166295     | 170.086786       | N    | 2302.103328        | 1151.555302     | 2285.076779    | 1143.042027      | 2284.092763    | 1142.550019      | 18 |
| 4  | 485.235438         | 243.121357      | 468.208889     | 234.608083       | 467.224873     | 234.116075       | Q    | 2188.060401        | 1094.533838     | 2171.033852    | 1086.020564      | 2170.049836    | 1085.528556      | 17 |
| 5  | 556.272552         | 278.639914      | 539.246003     | 270.126640       | 538.261987     | 269.634632       | A    | 2060.001823        | 1030.504549     | 2042.975274    | 1021.991275      | 2041.991258    | 1021.499267      | 16 |
| 6  | 613.294016         | 307.150646      | 596.267467     | 298.637372       | 595.283451     | 298.145364       | G    | <b>1988.964709</b> | 994.985993      | 1971.938160    | 986.472718       | 1970.954144    | 985.980710       | 15 |
| 7  | 1052.519342        | 526.763309      | 1035.492793    | 518.250035       | 1034.508777    | 517.758027       | Q    | 1931.943245        | 966.475261      | 1914.916696    | 957.961986       | 1913.932680    | 957.469978       | 14 |
| 8  | 1181.561935        | 591.284606      | 1164.535386    | 582.771331       | 1163.551370    | 582.279323       | E    | 1492.717919        | 746.862597      | 1475.691370    | 738.349323       | 1474.707354    | 737.857315       | 13 |
| 9  | 1282.609614        | 641.808445      | 1265.583065    | 633.295171       | 1264.599049    | 632.803163       | T    | <b>1363.675326</b> | 682.341301      | 1346.648777    | 673.828026       | 1345.664761    | 673.336018       | 12 |
| 10 | 1395.693678        | 698.350477      | 1378.667129    | 689.837203       | 1377.683113    | 689.345195       | L    | 1262.627647        | 631.817461      | 1245.601098    | 623.304187       | 1244.617082    | 622.812179       | 11 |
| 11 | <b>1494.762092</b> | 747.884684      | 1477.735543    | 739.371410       | 1476.751527    | 738.879402       | V    | <b>1149.543583</b> | 575.275429      | 1132.517034    | 566.762155       | 1131.533018    | 566.270147       | 10 |
| 12 | 1595.809771        | 798.408524      | 1578.783222    | 789.895249       | 1577.799206    | 789.403241       | T    | <b>1050.475169</b> | 525.741222      | 1033.448620    | 517.227948       | 1032.464604    | 516.735940       | 9  |
| 13 | 1652.831235        | 826.919256      | 1635.804686    | 818.405981       | 1634.820670    | 817.913973       | G    | <b>949.427490</b>  | 475.217383      | 932.400941     | 466.704108       | 931.416925     | 466.212100       | 8  |
| 14 | 1838.910548        | 919.958912      | 1821.883999    | 911.445638       | 1820.899983    | 910.953630       | W    | 892.406026         | 446.706651      | 875.379477     | 438.193376       | 874.395461     | 437.701368       | 7  |
| 15 | 1895.932012        | 948.469644      | 1878.905463    | 939.956370       | 1877.921447    | 939.464362       | G    | <b>706.326713</b>  | 353.666994      | 689.300164     | 345.153720       | 688.316148     | 344.661712       | 6  |
| 16 | 2058.995341        | 1030.001308     | 2041.968792    | 1021.488034      | 2040.984776    | 1020.996026      | Y    | <b>649.305249</b>  | 325.156263      | 632.278700     | 316.642988       | 631.294684     | 316.150980       | 5  |
| 17 | 2196.054253        | 1098.530764     | 2179.027704    | 1090.017490      | 2178.043688    | 1089.525482      | H    | 486.241920         | 243.624598      | 469.215371     | 235.111324       | 468.231355     | 234.619316       | 4  |
| 18 | 2283.086281        | 1142.046778     | 2266.059732    | 1133.533504      | 2265.075716    | 1133.041496      | S    | 349.183008         | 175.095142      | 332.156459     | 166.581868       | 331.172443     | 166.089860       | 3  |
| 19 | 2370.118309        | 1185.562792     | 2353.091760    | 1177.049518      | 2352.107744    | 1176.557510      | S    | 262.150980         | 131.579128      | 245.124431     | 123.065854       | 244.140415     | 122.573846       | 2  |
| 20 |                    |                 |                |                  |                |                  | R    | 175.118952         | 88.063114       | 158.092403     | 79.549839        |                |                  | 1  |

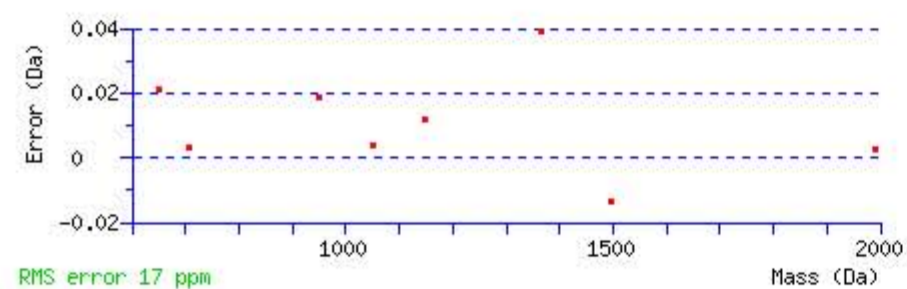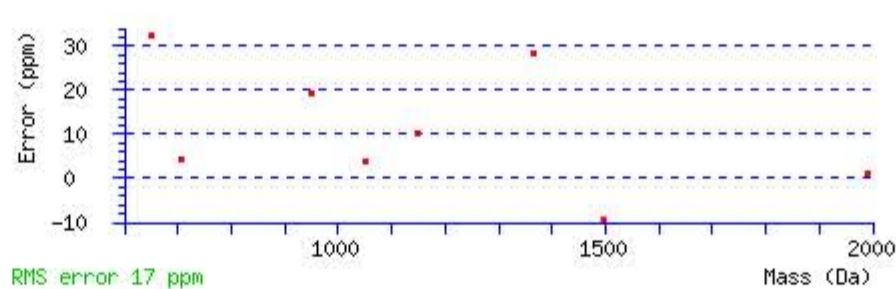

NCBI BLAST search of [ELNQAGQETLVGTGWGYHSSR](#)

(Parameters: blastp, nr protein database, expect=20000, no filter, PAM30)

Other BLAST [web gateways](#)

All matches to this query

| Score | Mr(calc):   | Delta    | Sequence                              |
|-------|-------------|----------|---------------------------------------|
| 30.8  | 2543.222702 | 0.015234 | <a href="#">ELNQAGQETLVGTGWGYHSSR</a> |
| 21.1  | 2543.222702 | 0.015234 | <a href="#">ELNQAGQETLVGTGWGYHSSR</a> |

# MASCOT Search Results

## Peptide View

MS/MS Fragmentation of **ELNQAGQETLVGTGWGYHSSR**

Found in **PROC\_HUMAN**, Vitamin K-dependent protein C OS=Homo sapiens GN=PROC PE=1 SV=1

Match to Query 51649: 2543.254002 from(848.758610,3+) rtinseconds(2157) index(48385)

Title: Locus:1.1.1.2799.23 File:"2013-07-02 CLN FXIII 60 min 3rd F 4.wiff"

Data file C:\Program Files (x86)\Matrix Science\Mascot Daemon\mgf6 FXIII 60 min 3rd\mascot\_daemon\_merge.mgf

Click mouse within plot area to zoom in by factor of two about that point

Or, Plot from 0 to 2200 Da Full range

Label all possible matches  Label matches used for scoring

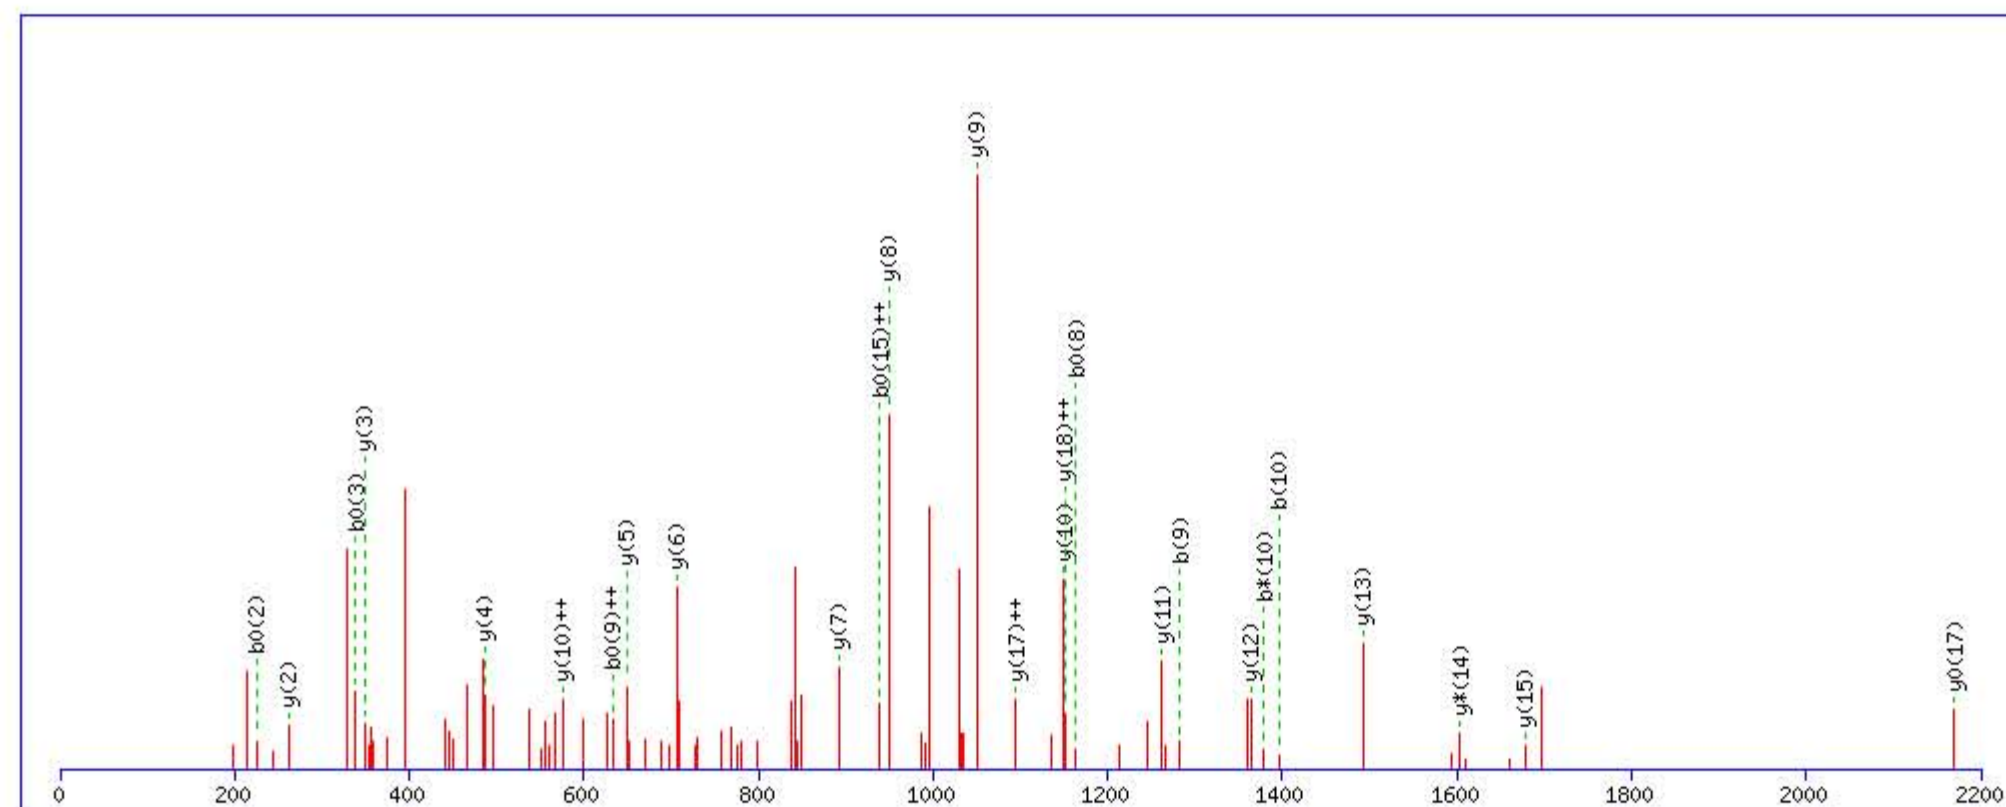

Monoisotopic mass of neutral peptide Mr(calc): 2543.222702

Fixed modifications: Carbamidomethyl (C) (apply to specified residues or termini only)

Variable modifications:

Q4 : Biotin:Thermo-21345 (Q)

Ions Score: 67 Expect: 5.3e-006

Matches : 26/222 fragment ions using 55 most intense peaks ([help](#))

| #  | b           | b <sup>++</sup> | b <sup>*</sup> | b <sup>*++</sup> | b <sup>0</sup> | b <sup>0++</sup> | Seq. | y           | y <sup>++</sup> | y <sup>*</sup> | y <sup>*++</sup> | y <sup>0</sup> | y <sup>0++</sup> | #  |
|----|-------------|-----------------|----------------|------------------|----------------|------------------|------|-------------|-----------------|----------------|------------------|----------------|------------------|----|
| 1  | 130.049869  | 65.528572       |                |                  | 112.039304     | 56.523290        | E    |             |                 |                |                  |                |                  | 20 |
| 2  | 243.133933  | 122.070605      |                |                  | 225.123368     | 113.065322       | L    | 2415.187392 | 1208.097334     | 2398.160843    | 1199.584059      | 2397.176827    | 1199.092051      | 19 |
| 3  | 357.176860  | 179.092068      | 340.150311     | 170.578794       | 339.166295     | 170.086786       | N    | 2302.103328 | 1151.555302     | 2285.076779    | 1143.042027      | 2284.092763    | 1142.550019      | 18 |
| 4  | 796.402186  | 398.704731      | 779.375637     | 390.191457       | 778.391621     | 389.699449       | Q    | 2188.060401 | 1094.533838     | 2171.033852    | 1086.020564      | 2170.049836    | 1085.528556      | 17 |
| 5  | 867.439300  | 434.223288      | 850.412751     | 425.710014       | 849.428735     | 425.218006       | A    | 1748.835075 | 874.921175      | 1731.808526    | 866.407901       | 1730.824510    | 865.915893       | 16 |
| 6  | 924.460764  | 462.734020      | 907.434215     | 454.220746       | 906.450199     | 453.728738       | G    | 1677.797961 | 839.402618      | 1660.771412    | 830.889344       | 1659.787396    | 830.397336       | 15 |
| 7  | 1052.519342 | 526.763309      | 1035.492793    | 518.250035       | 1034.508777    | 517.758027       | Q    | 1620.776497 | 810.891886      | 1603.749948    | 802.378612       | 1602.765932    | 801.886604       | 14 |
| 8  | 1181.561935 | 591.284606      | 1164.535386    | 582.771331       | 1163.551370    | 582.279323       | E    | 1492.717919 | 746.862597      | 1475.691370    | 738.349323       | 1474.707354    | 737.857315       | 13 |
| 9  | 1282.609614 | 641.808445      | 1265.583065    | 633.295171       | 1264.599049    | 632.803162       | T    | 1363.675326 | 682.341301      | 1346.648777    | 673.828026       | 1345.664761    | 673.336018       | 12 |
| 10 | 1395.693678 | 698.350477      | 1378.667129    | 689.837202       | 1377.683113    | 689.345194       | L    | 1262.627647 | 631.817461      | 1245.601098    | 623.304187       | 1244.617082    | 622.812179       | 11 |
| 11 | 1494.762092 | 747.884684      | 1477.735543    | 739.371410       | 1476.751527    | 738.879401       | V    | 1149.543583 | 575.275429      | 1132.517034    | 566.762155       | 1131.533018    | 566.270147       | 10 |
| 12 | 1595.809771 | 798.408524      | 1578.783222    | 789.895249       | 1577.799206    | 789.403241       | T    | 1050.475169 | 525.741222      | 1033.448620    | 517.227948       | 1032.464604    | 516.735940       | 9  |
| 13 | 1652.831235 | 826.919255      | 1635.804686    | 818.405981       | 1634.820670    | 817.913973       | G    | 949.427490  | 475.217383      | 932.400941     | 466.704108       | 931.416925     | 466.212100       | 8  |
| 14 | 1838.910548 | 919.958912      | 1821.883999    | 911.445637       | 1820.899983    | 910.953629       | W    | 892.406026  | 446.706651      | 875.379477     | 438.193376       | 874.395461     | 437.701368       | 7  |
| 15 | 1895.932012 | 948.469644      | 1878.905463    | 939.956369       | 1877.921447    | 939.464361       | G    | 706.326713  | 353.666994      | 689.300164     | 345.153720       | 688.316148     | 344.661712       | 6  |
| 16 | 2058.995341 | 1030.001308     | 2041.968792    | 1021.488034      | 2040.984776    | 1020.996026      | Y    | 649.305249  | 325.156263      | 632.278700     | 316.642988       | 631.294684     | 316.150980       | 5  |
| 17 | 2196.054253 | 1098.530764     | 2179.027704    | 1090.017490      | 2178.043688    | 1089.525482      | H    | 486.241920  | 243.624598      | 469.215371     | 235.111324       | 468.231355     | 234.619316       | 4  |
| 18 | 2283.086281 | 1142.046778     | 2266.059732    | 1133.533504      | 2265.075716    | 1133.041496      | S    | 349.183008  | 175.095142      | 332.156459     | 166.581868       | 331.172443     | 166.089860       | 3  |
| 19 | 2370.118309 | 1185.562792     | 2353.091760    | 1177.049518      | 2352.107744    | 1176.557510      | S    | 262.150980  | 131.579128      | 245.124431     | 123.065854       | 244.140415     | 122.573846       | 2  |
| 20 |             |                 |                |                  |                |                  | R    | 175.118952  | 88.063114       | 158.092403     | 79.549839        |                |                  | 1  |

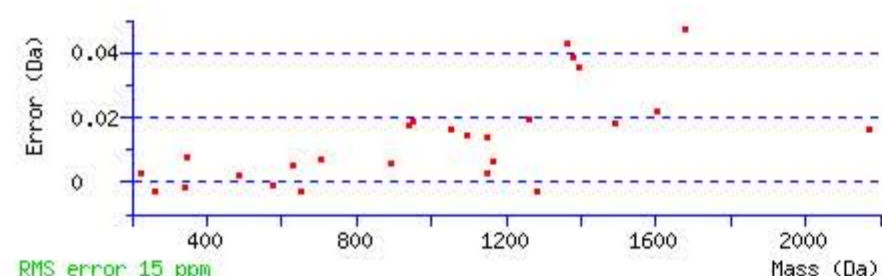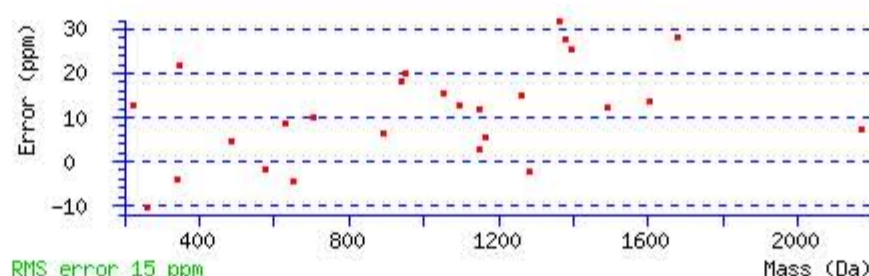

NCBI BLAST search of [ELNQAGQETLVGTGWGYHSSR](#)

(Parameters: blastp, nr protein database, expect=20000, no filter, PAM30)

Other BLAST [web gateways](#)

All matches to this query

| Score | Mr(calc):   | Delta    | Sequence                              |
|-------|-------------|----------|---------------------------------------|
| 67.1  | 2543.222702 | 0.031300 | <a href="#">ELNQAGQETLVGTGWGYHSSR</a> |
| 63.7  | 2543.222702 | 0.031300 | <a href="#">ELNQAGQETLVGTGWGYHSSR</a> |



# MASCOT Search Results

## Peptide View

MS/MS Fragmentation of **QLAVLDK**

Found in **PROS\_HUMAN**, Vitamin K-dependent protein S OS=Homo sapiens GN=PROS1 PE=1 SV=1

Match to Query 16121: 1096.634888 from(549.324720,2+) rtinseconds(1963) index(47165)

Title: Locus:1.1.1.2732.6 File:"2013-07-02 CLN FXIII 60 min 3rd F 4.wiff"

Data file C:\Program Files (x86)\Matrix Science\Mascot Daemon\mgf\6 FXIII 60 min 3rd\mascot\_daemon\_merge.mgf

Click mouse within plot area to zoom in by factor of two about that point

Or, Plot from  to  Da

Label all possible matches  Label matches used for scoring

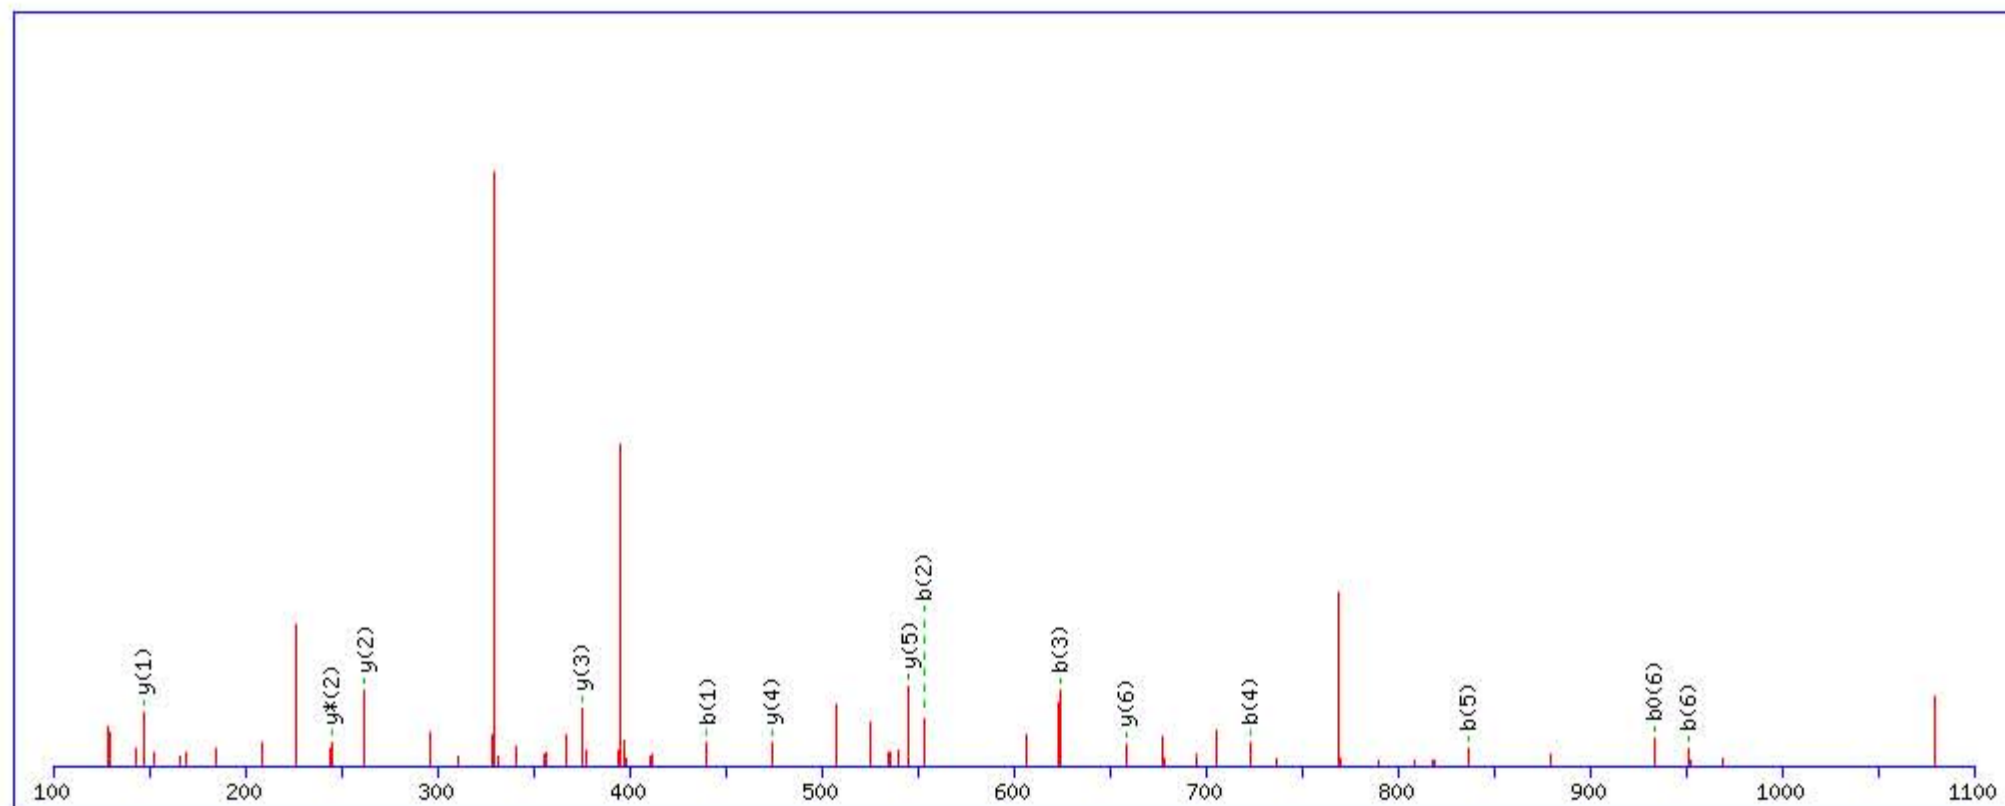

Monoisotopic mass of neutral peptide Mr(calc): 1096.631439

Fixed modifications: Carbamidomethyl (C) (apply to specified residues or termini only)

Variable modifications:

Q1 : Biotin:Thermo-21345 (Q)

Ions Score: 26 Expect: 0.041

Matches : 14/60 fragment ions using 35 most intense peaks ([help](#))

| # | b                 | b <sup>++</sup> | b <sup>*</sup> | b <sup>*++</sup> | b <sup>0</sup>    | b <sup>0++</sup> | Seq. | y                 | y <sup>++</sup> | y <sup>*</sup>    | y <sup>*++</sup> | y <sup>0</sup> | y <sup>0++</sup> | # |
|---|-------------------|-----------------|----------------|------------------|-------------------|------------------|------|-------------------|-----------------|-------------------|------------------|----------------|------------------|---|
| 1 | <b>440.232602</b> | 220.619939      | 423.206053     | 212.106664       |                   |                  | Q    |                   |                 |                   |                  |                |                  | 7 |
| 2 | <b>553.316666</b> | 277.161971      | 536.290117     | 268.648697       |                   |                  | L    | <b>658.413403</b> | 329.710340      | 641.386854        | 321.197065       | 640.402838     | 320.705057       | 6 |
| 3 | <b>624.353780</b> | 312.680528      | 607.327231     | 304.167254       |                   |                  | A    | <b>545.329339</b> | 273.168308      | 528.302790        | 264.655033       | 527.318774     | 264.163025       | 5 |
| 4 | <b>723.422194</b> | 362.214735      | 706.395645     | 353.701461       |                   |                  | V    | <b>474.292225</b> | 237.649750      | 457.265676        | 229.136476       | 456.281660     | 228.644468       | 4 |
| 5 | <b>836.506258</b> | 418.756767      | 819.479709     | 410.243493       |                   |                  | L    | <b>375.223811</b> | 188.115543      | 358.197262        | 179.602269       | 357.213246     | 179.110261       | 3 |
| 6 | <b>951.533201</b> | 476.270239      | 934.506652     | 467.756964       | <b>933.522636</b> | 467.264956       | D    | <b>262.139747</b> | 131.573511      | <b>245.113198</b> | 123.060237       | 244.129182     | 122.568229       | 2 |
| 7 |                   |                 |                |                  |                   |                  | K    | <b>147.112804</b> | 74.060040       | 130.086255        | 65.546765        |                |                  | 1 |

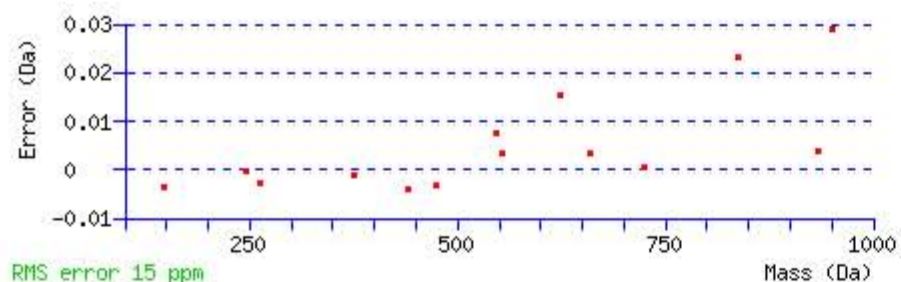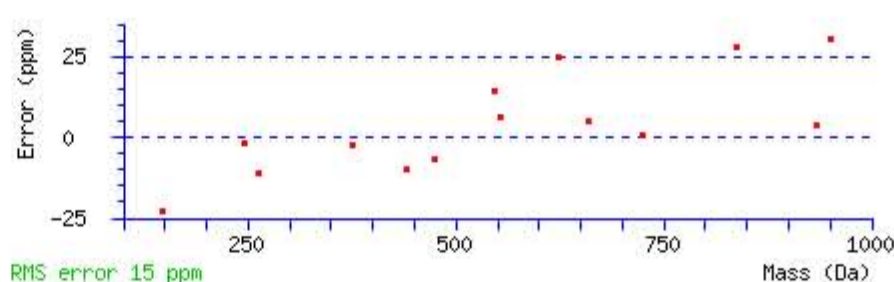

NCBI BLAST search of [QLAVLDK](#)

(Parameters: blastp, nr protein database, expect=20000, no filter, PAM30)

Other BLAST [web gateways](#)

## All matches to this query

| Score | Mr(calc):   | Delta     | Sequence                   |
|-------|-------------|-----------|----------------------------|
| 25.5  | 1096.631439 | 0.003449  | <a href="#">QLAVLDK</a>    |
| 17.4  | 1096.624054 | 0.010834  | <a href="#">KPVDSVPLSR</a> |
| 8.7   | 1096.646500 | -0.011612 | <a href="#">KPDQARVRK</a>  |
| 6.8   | 1096.639297 | -0.004409 | <a href="#">AHVSPLFKAK</a> |
| 6.6   | 1096.624023 | 0.010865  | <a href="#">IPRENLLDK</a>  |
| 3.6   | 1096.649200 | -0.014312 | <a href="#">KSPVPVETLK</a> |
| 1.2   | 1096.631439 | 0.003449  | <a href="#">GILQLDK</a>    |
| 1.2   | 1096.642654 | -0.007766 | <a href="#">NITMHLK</a>    |
| 0.1   | 1096.631439 | 0.003449  | <a href="#">QIDVAIK</a>    |

# MASCOT SCIENCE Mascot Search Results

## Peptide View

MS/MS Fragmentation of **QSTNAYPDLR**

Found in **PROS\_HUMAN**, Vitamin K-dependent protein S OS=Homo sapiens GN=PROS1 PE=1 SV=1

Match to Query 29282: 1474.722522 from(492.581450,3+) rtinseconds(1759) index(45839)

Title: Locus:1.1.1.2661.9 File:"2013-07-02 CLN FXIII 60 min 3rd F 4.wiff"

Data file C:\Program Files (x86)\Matrix Science\Mascot Daemon\mgf\6 FXIII 60 min 3rd\mascot\_daemon\_merge.mgf

Click mouse within plot area to zoom in by factor of two about that point

Or, Plot from  to  Da

Label all possible matches  Label matches used for scoring

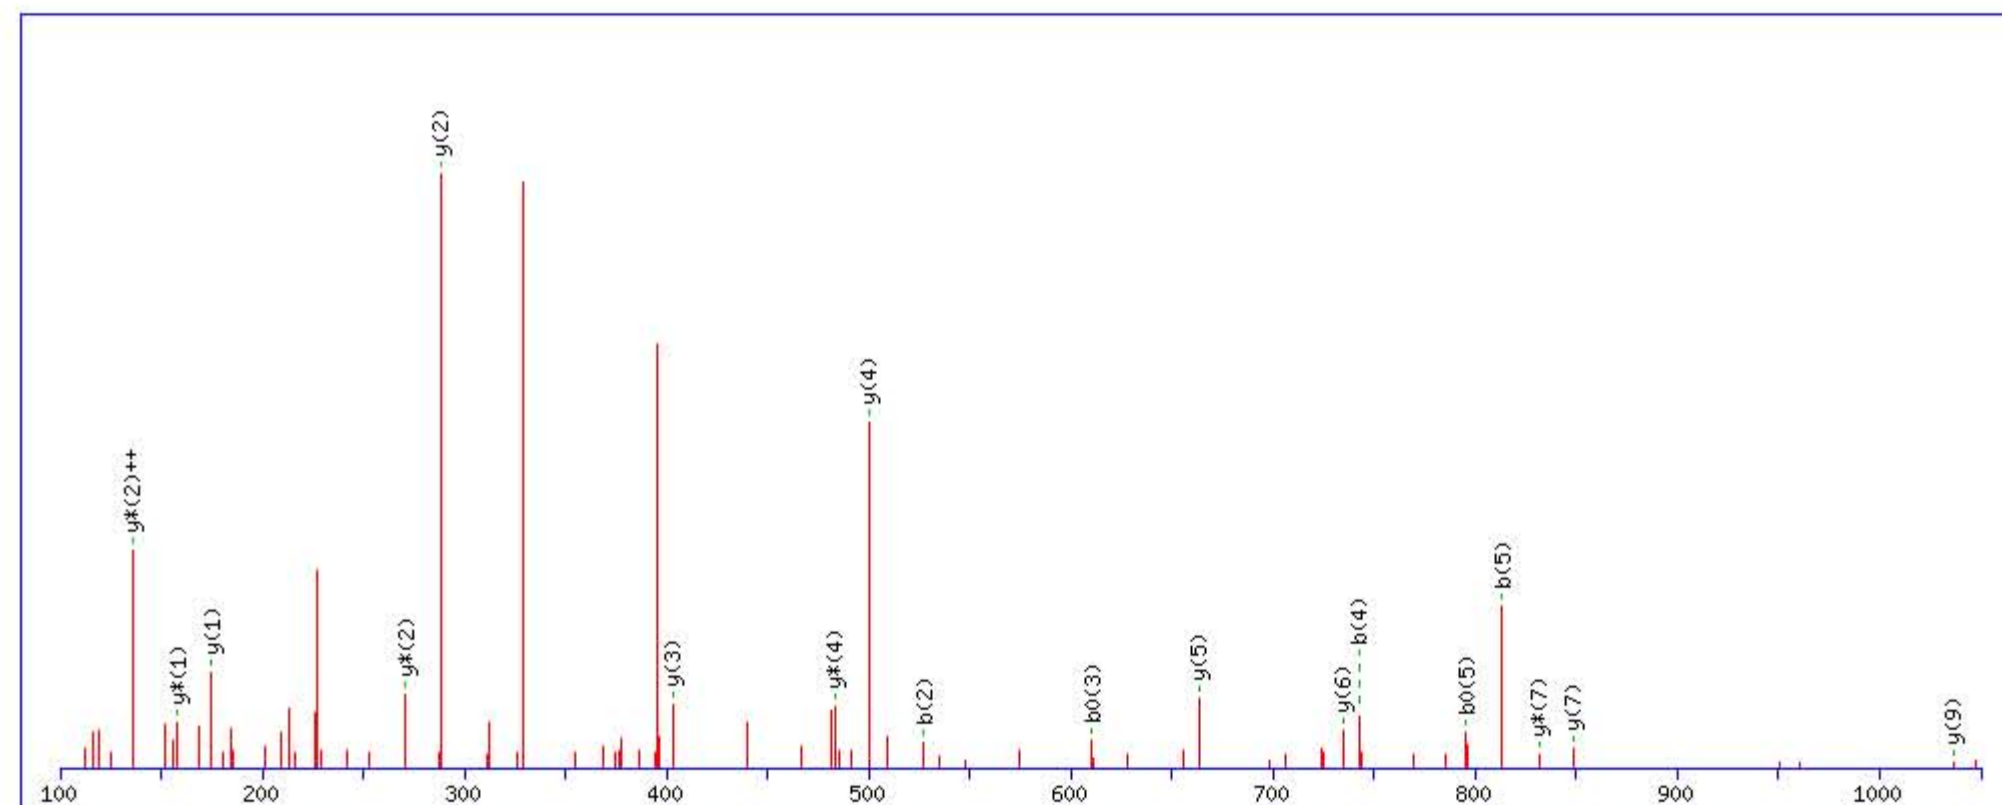

Monoisotopic mass of neutral peptide Mr(calc): 1474.723831

Fixed modifications: Carbamidomethyl (C) (apply to specified residues or termini only)

Variable modifications:

Q1 : Biotin:Thermo-21345 (Q)

Ions Score: 55 Expect: 5.6e-005

Matches : 18/102 fragment ions using 28 most intense peaks [\(help\)](#)

| #  | b                 | b <sup>++</sup> | b <sup>*</sup> | b <sup>*++</sup> | b <sup>0</sup>    | b <sup>0++</sup> | Seq. | y                  | y <sup>++</sup> | y <sup>*</sup>    | y <sup>*++</sup>  | y <sup>0</sup> | y <sup>0++</sup> | #  |
|----|-------------------|-----------------|----------------|------------------|-------------------|------------------|------|--------------------|-----------------|-------------------|-------------------|----------------|------------------|----|
| 1  | 440.232602        | 220.619939      | 423.206053     | 212.106664       |                   |                  | Q    |                    |                 |                   |                   |                |                  | 10 |
| 2  | <b>527.264630</b> | 264.135953      | 510.238081     | 255.622679       | 509.254065        | 255.130671       | S    | <b>1036.505800</b> | 518.756538      | 1019.479251       | 510.243263        | 1018.495235    | 509.751255       | 9  |
| 3  | 628.312309        | 314.659793      | 611.285760     | 306.146518       | <b>610.301744</b> | 305.654510       | T    | 949.473772         | 475.240524      | 932.447223        | 466.727249        | 931.463207     | 466.235241       | 8  |
| 4  | <b>742.355236</b> | 371.681256      | 725.328687     | 363.167982       | 724.344671        | 362.675974       | N    | <b>848.426093</b>  | 424.716684      | <b>831.399544</b> | 416.203410        | 830.415528     | 415.711402       | 7  |
| 5  | <b>813.392350</b> | 407.199813      | 796.365801     | 398.686538       | <b>795.381785</b> | 398.194530       | A    | <b>734.383166</b>  | 367.695221      | 717.356617        | 359.181946        | 716.372601     | 358.689938       | 6  |
| 6  | 976.455679        | 488.731477      | 959.429130     | 480.218203       | 958.445114        | 479.726195       | Y    | <b>663.346052</b>  | 332.176664      | 646.319503        | 323.663389        | 645.335487     | 323.171382       | 5  |
| 7  | 1073.508443       | 537.257860      | 1056.481894    | 528.744585       | 1055.497878       | 528.252577       | P    | <b>500.282723</b>  | 250.644999      | <b>483.256174</b> | 242.131725        | 482.272158     | 241.639717       | 4  |
| 8  | 1188.535386       | 594.771331      | 1171.508837    | 586.258057       | 1170.524821       | 585.766049       | D    | <b>403.229959</b>  | 202.118617      | 386.203410        | 193.605343        | 385.219394     | 193.113335       | 3  |
| 9  | 1301.619450       | 651.313363      | 1284.592901    | 642.800089       | 1283.608885       | 642.308080       | L    | <b>288.203016</b>  | 144.605146      | <b>271.176467</b> | <b>136.091871</b> |                |                  | 2  |
| 10 |                   |                 |                |                  |                   |                  | R    | <b>175.118952</b>  | 88.063114       | <b>158.092403</b> | 79.549839         |                |                  | 1  |

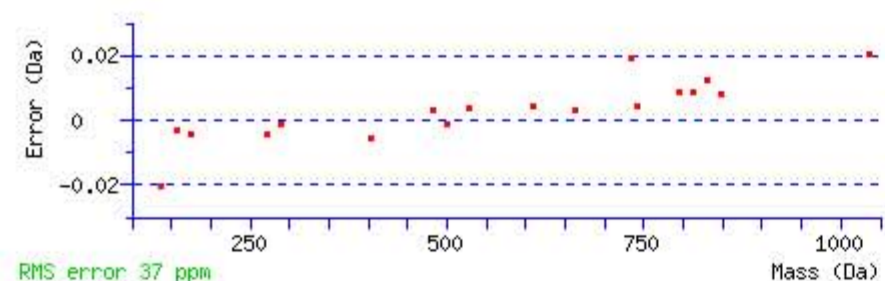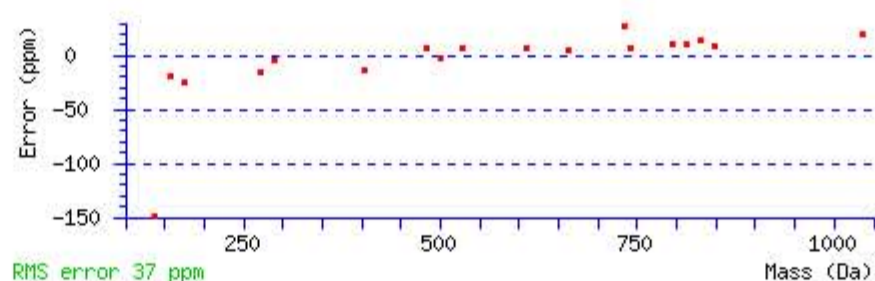

NCBI BLAST search of **QSTNAYPDLR**

(Parameters: blastp, nr protein database, expect=20000, no filter, PAM30)

Other BLAST [web gateways](#)

## All matches to this query

| Score | Mr(calc):   | Delta     | Sequence                      |
|-------|-------------|-----------|-------------------------------|
| 54.6  | 1474.723831 | -0.001309 | <a href="#">QSTNAYPDLR</a>    |
| 8.7   | 1474.741592 | -0.019070 | <a href="#">SSLEHGSDVYLLR</a> |
| 8.3   | 1474.719788 | 0.002734  | <a href="#">QQUELEQMRLR</a>   |
| 6.0   | 1474.719803 | 0.002719  | <a href="#">ALPNSGDETLMRR</a> |
| 3.1   | 1474.721161 | 0.001361  | <a href="#">QSTHGERGHR</a>    |
| 1.7   | 1474.719788 | 0.002734  | <a href="#">QRLQEQEMLR</a>    |
| 1.5   | 1474.725159 | -0.002637 | <a href="#">HEEFRWMRLR</a>    |

Mascot: <http://www.matrixscience.com/>

# MASCOT Search Results

## Peptide View

MS/MS Fragmentation of **SFQTGLFTAAR**

Found in **PROS\_HUMAN**, Vitamin K-dependent protein S OS=Homo sapiens GN=PROS1 PE=1 SV=1

Match to Query 30243: 1508.787888 from(755.401220,2+) rtinseconds(2315) index(34898)

Title: Locus:1.1.1.3355.12 File:"2013-07-02 CLN FXIII 60 min 3rd F 3.wiff"

Data file C:\Program Files (x86)\Matrix Science\Mascot Daemon\mgf6 FXIII 60 min 3rd\mascot\_daemon\_merge.mgf

Click mouse within plot area to zoom in by factor of two about that point

Or, Plot from 0 to 3000 Da Full range

Label all possible matches  Label matches used for scoring

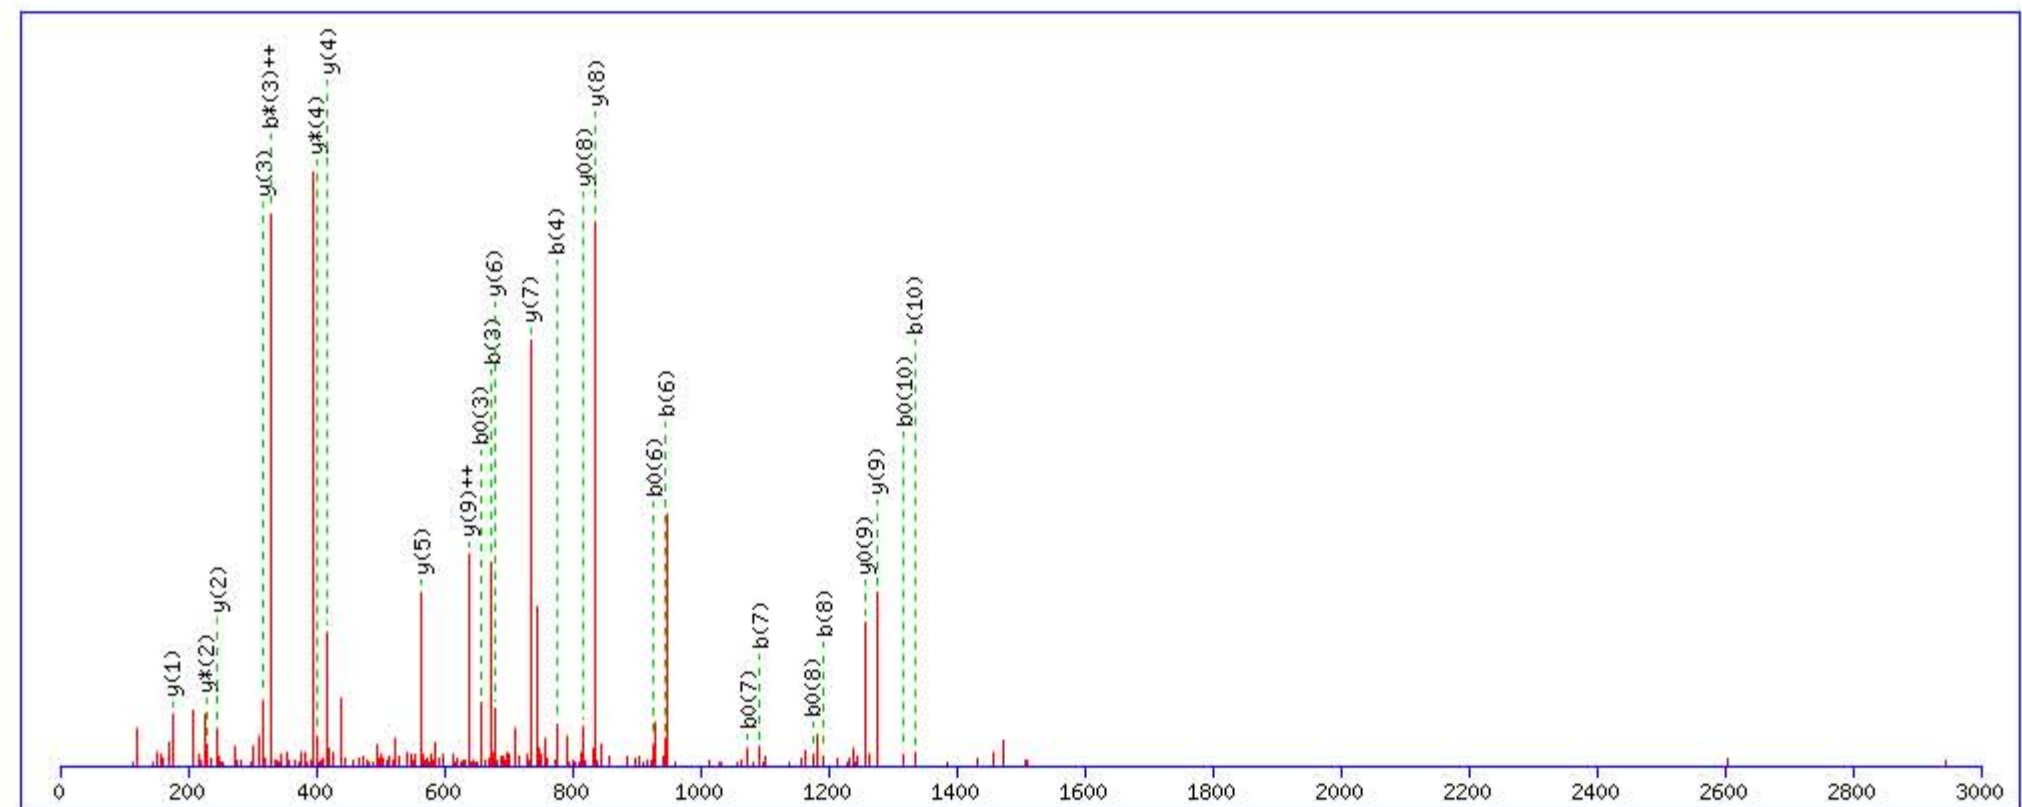

Monoisotopic mass of neutral peptide Mr(calc): 1508.780975

Fixed modifications: Carbamidomethyl (C) (apply to specified residues or termini only)

Variable modifications:

Q3 : Biotin:Thermo-21345 (Q)

Ions Score: 48 Expect: 0.00023

Matches : 26/110 fragment ions using 55 most intense peaks (help)

| #  | b                  | b <sup>++</sup> | b <sup>+</sup> | b <sup>+++</sup>  | b <sup>0</sup>     | b <sup>0++</sup> | Seq. | y                  | y <sup>++</sup>   | y <sup>+</sup>    | y <sup>+++</sup> | y <sup>0</sup>     | y <sup>0++</sup> | #  |
|----|--------------------|-----------------|----------------|-------------------|--------------------|------------------|------|--------------------|-------------------|-------------------|------------------|--------------------|------------------|----|
| 1  | 88.039304          | 44.523290       |                |                   | 70.028739          | 35.518008        | S    |                    |                   |                   |                  |                    |                  | 11 |
| 2  | 235.107718         | 118.057497      |                |                   | 217.097153         | 109.052214       | F    | 1422.756220        | 711.881748        | 1405.729671       | 703.368474       | 1404.745655        | 702.876465       | 10 |
| 3  | <b>674.333044</b>  | 337.670160      | 657.306495     | <b>329.156885</b> | <b>656.322479</b>  | 328.664877       | Q    | <b>1275.687806</b> | <b>638.347541</b> | 1258.661257       | 629.834267       | <b>1257.677241</b> | 629.342259       | 9  |
| 4  | <b>775.380723</b>  | 388.194000      | 758.354174     | 379.680725        | 757.370158         | 379.188717       | T    | <b>836.462480</b>  | 418.734878        | 819.435931        | 410.221604       | <b>818.451915</b>  | 409.729596       | 8  |
| 5  | 832.402187         | 416.704732      | 815.375638     | 408.191457        | 814.391622         | 407.699449       | G    | <b>735.414801</b>  | 368.211039        | 718.388252        | 359.697764       | 717.404236         | 359.205756       | 7  |
| 6  | <b>945.486251</b>  | 473.246764      | 928.459702     | 464.733489        | <b>927.475686</b>  | 464.241481       | L    | <b>678.393337</b>  | 339.700307        | 661.366788        | 331.187032       | 660.382772         | 330.695024       | 6  |
| 7  | <b>1092.554665</b> | 546.780971      | 1075.528116    | 538.267696        | <b>1074.544100</b> | 537.775688       | F    | <b>565.309273</b>  | 283.158275        | 548.282724        | 274.645000       | 547.298708         | 274.152992       | 5  |
| 8  | <b>1193.602344</b> | 597.304810      | 1176.575795    | 588.791536        | <b>1175.591779</b> | 588.299528       | T    | <b>418.240859</b>  | 209.624067        | <b>401.214310</b> | 201.110793       | 400.230294         | 200.618785       | 4  |
| 9  | 1264.639458        | 632.823367      | 1247.612909    | 624.310093        | 1246.628893        | 623.818085       | A    | <b>317.193180</b>  | 159.100228        | 300.166631        | 150.586953       |                    |                  | 3  |
| 10 | <b>1335.676572</b> | 668.341924      | 1318.650023    | 659.828650        | <b>1317.666007</b> | 659.336642       | A    | <b>246.156066</b>  | 123.581671        | <b>229.129517</b> | 115.068396       |                    |                  | 2  |
| 11 |                    |                 |                |                   |                    |                  | R    | <b>175.118952</b>  | 88.063114         | 158.092403        | 79.549839        |                    |                  | 1  |

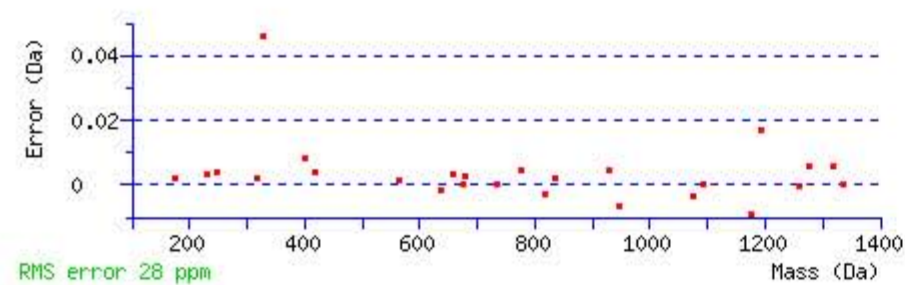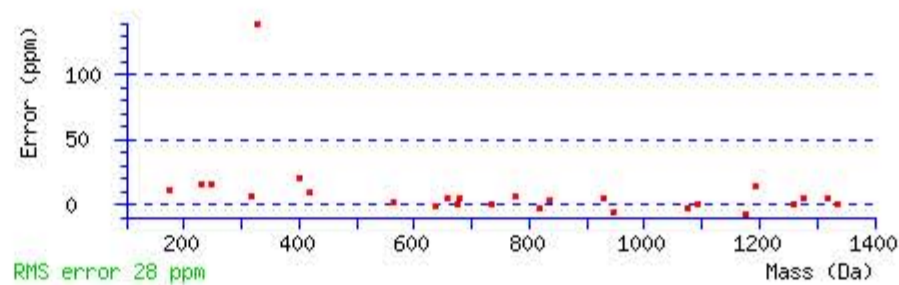

NCBI BLAST search of **SFQTGLFTAAR**

(Parameters: blastp, nr protein database, expect=20000, no filter, PAM30)

Other BLAST [web gateways](#)

All matches to this query

| Score | Mr(calc):   | Delta     | Sequence                       |
|-------|-------------|-----------|--------------------------------|
| 48.2  | 1508.780975 | 0.006913  | <a href="#">SFQTGLFTAAR</a>    |
| 8.8   | 1508.805893 | -0.018005 | <a href="#">RLELPASDAEPR</a>   |
| 5.3   | 1508.776917 | 0.010971  | <a href="#">MYLDLLSQSQRR</a>   |
| 5.2   | 1508.798721 | -0.010833 | <a href="#">SSYGVAAPVDFLRK</a> |
| 4.3   | 1508.765701 | 0.022187  | <a href="#">TKPLSMLYVDNGR</a>  |
| 3.8   | 1508.776932 | 0.010956  | <a href="#">LMGADSLQLFRSR</a>  |
| 2.9   | 1508.780960 | 0.006928  | <a href="#">TQPPPENLFR</a>     |
| 0.3   | 1508.765686 | 0.022202  | <a href="#">TKAFQIMQEELR</a>   |
| 0.3   | 1508.765701 | 0.022187  | <a href="#">LATNMAVITDFSAR</a> |

Mascot: <http://www.matrixscience.com/>

# MASCOT Search Results

## Peptide View

MS/MS Fragmentation of **IETISHEDLQR**

Found in **PROS\_HUMAN**, Vitamin K-dependent protein S OS=Homo sapiens GN=PROS1 PE=1 SV=1

Match to Query 35456: 1650.852068 from(826.433310,2+) rtinseconds(1622) index(45007)

Title: Locus:1.1.1.2613.14 File:"2013-07-02 CLN FXIII 60 min 3rd F 4.wiff"

Data file C:\Program Files (x86)\Matrix Science\Mascot Daemon\mgf6 FXIII 60 min 3rd\mascot\_daemon\_merge.mgf

Click mouse within plot area to zoom in by factor of two about that point

Or, Plot from 0 to 2600 Da Full range

Label all possible matches  Label matches used for scoring

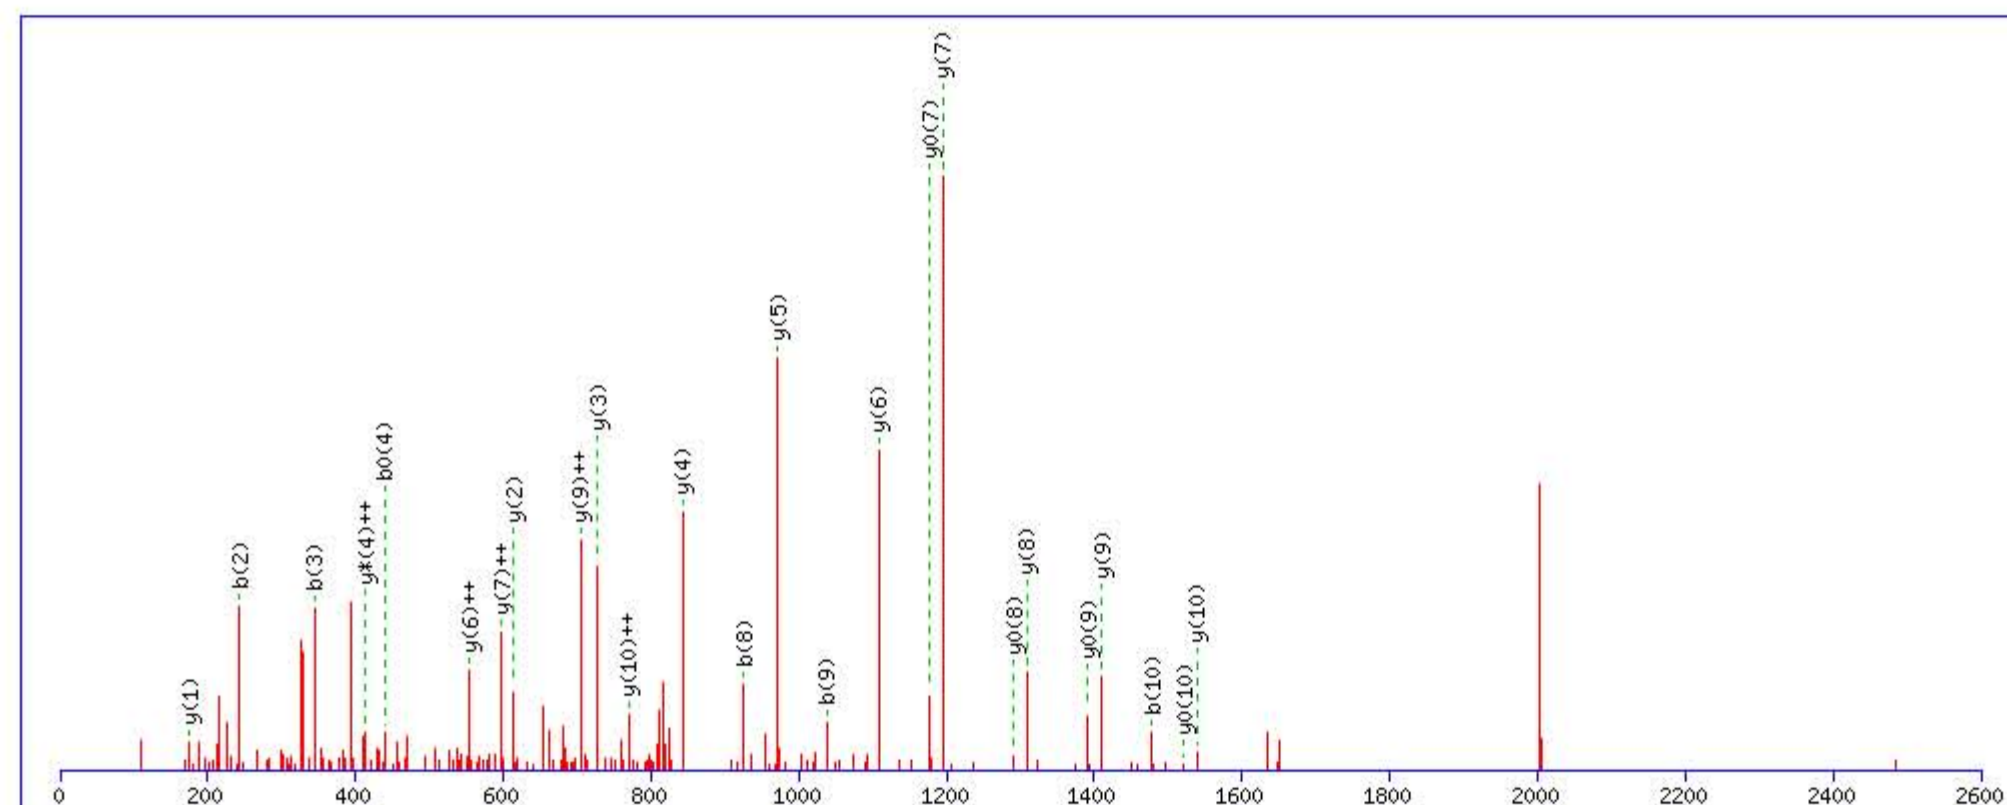

Monoisotopic mass of neutral peptide Mr(calc): 1650.839920

Fixed modifications: Carbamidomethyl (C) (apply to specified residues or termini only)

Variable modifications:

Q10 : Biotin:Thermo-21345 (Q)

Ions Score: 91 Expect: 2.1e-008

Matches : 25/94 fragment ions using 32 most intense peaks [\(help\)](#)

| #  | b                  | b <sup>++</sup> | b <sup>*</sup> | b <sup>+++</sup> | b <sup>0</sup>    | b <sup>0++</sup> | Seq. | y                  | y <sup>++</sup>   | y <sup>*</sup> | y <sup>+++</sup>  | y <sup>0</sup>     | y <sup>0++</sup> | #  |
|----|--------------------|-----------------|----------------|------------------|-------------------|------------------|------|--------------------|-------------------|----------------|-------------------|--------------------|------------------|----|
| 1  | 114.091340         | 57.549308       |                |                  |                   |                  | I    |                    |                   |                |                   |                    |                  | 11 |
| 2  | <b>243.133933</b>  | 122.070605      |                |                  | 225.123368        | 113.065322       | E    | <b>1538.763154</b> | <b>769.885215</b> | 1521.736605    | 761.371941        | <b>1520.752589</b> | 760.879933       | 10 |
| 3  | <b>344.181612</b>  | 172.594444      |                |                  | 326.171047        | 163.589162       | T    | <b>1409.720561</b> | <b>705.363919</b> | 1392.694012    | 696.850644        | <b>1391.709996</b> | 696.358636       | 9  |
| 4  | 457.265676         | 229.136476      |                |                  | <b>439.255111</b> | 220.131194       | I    | <b>1308.672882</b> | 654.840079        | 1291.646333    | 646.326805        | <b>1290.662317</b> | 645.834797       | 8  |
| 5  | 544.297704         | 272.652490      |                |                  | 526.287139        | 263.647208       | S    | <b>1195.588818</b> | <b>598.298047</b> | 1178.562269    | 589.784773        | <b>1177.578253</b> | 589.292764       | 7  |
| 6  | 681.356616         | 341.181946      |                |                  | 663.346051        | 332.176664       | H    | <b>1108.556790</b> | <b>554.782033</b> | 1091.530241    | 546.268759        | 1090.546225        | 545.776751       | 6  |
| 7  | 810.399209         | 405.703243      |                |                  | 792.388644        | 396.697960       | E    | <b>971.497878</b>  | 486.252577        | 954.471329     | 477.739303        | 953.487313         | 477.247295       | 5  |
| 8  | <b>925.426152</b>  | 463.216714      |                |                  | 907.415587        | 454.211432       | D    | <b>842.455285</b>  | 421.731281        | 825.428736     | <b>413.218006</b> | 824.444720         | 412.725998       | 4  |
| 9  | <b>1038.510216</b> | 519.758746      |                |                  | 1020.499651       | 510.753463       | L    | <b>727.428342</b>  | 364.217809        | 710.401793     | 355.704535        |                    |                  | 3  |
| 10 | <b>1477.735542</b> | 739.371409      | 1460.708993    | 730.858135       | 1459.724977       | 730.366127       | Q    | <b>614.344278</b>  | 307.675777        | 597.317729     | 299.162503        |                    |                  | 2  |
| 11 |                    |                 |                |                  |                   |                  | R    | <b>175.118952</b>  | 88.063114         | 158.092403     | 79.549839         |                    |                  | 1  |

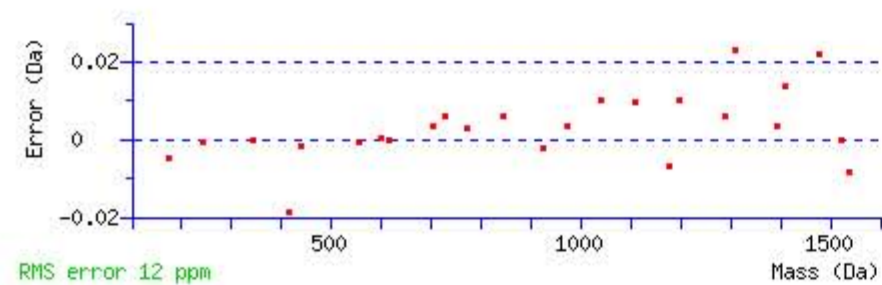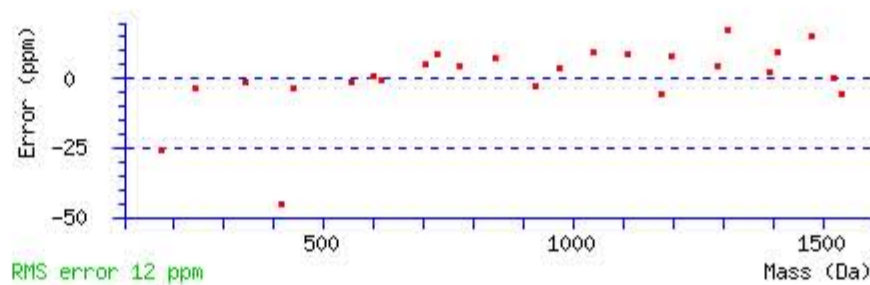

NCBI BLAST search of **IETISHEDLQR**

(Parameters: blastp, nr protein database, expect=20000, no filter, PAM30)

Other BLAST [web gateways](#)

All matches to this query

| Score | Mr(calc):   | Delta     | Sequence                        |
|-------|-------------|-----------|---------------------------------|
| 90.6  | 1650.839920 | 0.012148  | <a href="#">IETISHEDLQR</a>     |
| 15.8  | 1650.870239 | -0.018171 | <a href="#">LFRSNSHLKEHQR</a>   |
| 9.8   | 1650.855881 | -0.003813 | <a href="#">MQRTGGGAPRPGR</a>   |
| 8.2   | 1650.858551 | -0.006483 | <a href="#">LQQEQDLR</a>        |
| 7.7   | 1650.833389 | 0.018679  | <a href="#">QQLEHIMATNR</a>     |
| 7.3   | 1650.839935 | 0.012133  | <a href="#">MQLLKDVVGNNTYR</a>  |
| 4.5   | 1650.843765 | 0.008303  | <a href="#">TLQPSSQNTKAHPSR</a> |
| 3.4   | 1650.868896 | -0.016828 | <a href="#">LELLELDHEQTRR</a>   |
| 2.6   | 1650.847305 | 0.004763  | <a href="#">LLFQELMSMSIAPR</a>  |
| 2.3   | 1650.858536 | -0.006468 | <a href="#">QLNEELQR</a>        |

# MASCOT Search Results

## Peptide View

MS/MS Fragmentation of **IQALSLCSDQQSHLEFR**

Found in **PROS\_HUMAN**, Vitamin K-dependent protein S OS=Homo sapiens GN=PROS1 PE=1 SV=1

Match to Query 48440: 2342.156262 from(781.726030,3+) rtinseconds(2202) index(63702)

Title: Locus:1.1.1.3393.6 File:"2013-07-02 CLN FXIII 60 min 3rd FT.wiff"

Data file C:\Program Files (x86)\Matrix Science\Mascot Daemon\mgf\6 FXIII 60 min 3rd\mascot\_daemon\_merge.mgf

Click mouse within plot area to zoom in by factor of two about that point

Or, Plot from 0 to 2400 Da Full range

Label all possible matches  Label matches used for scoring

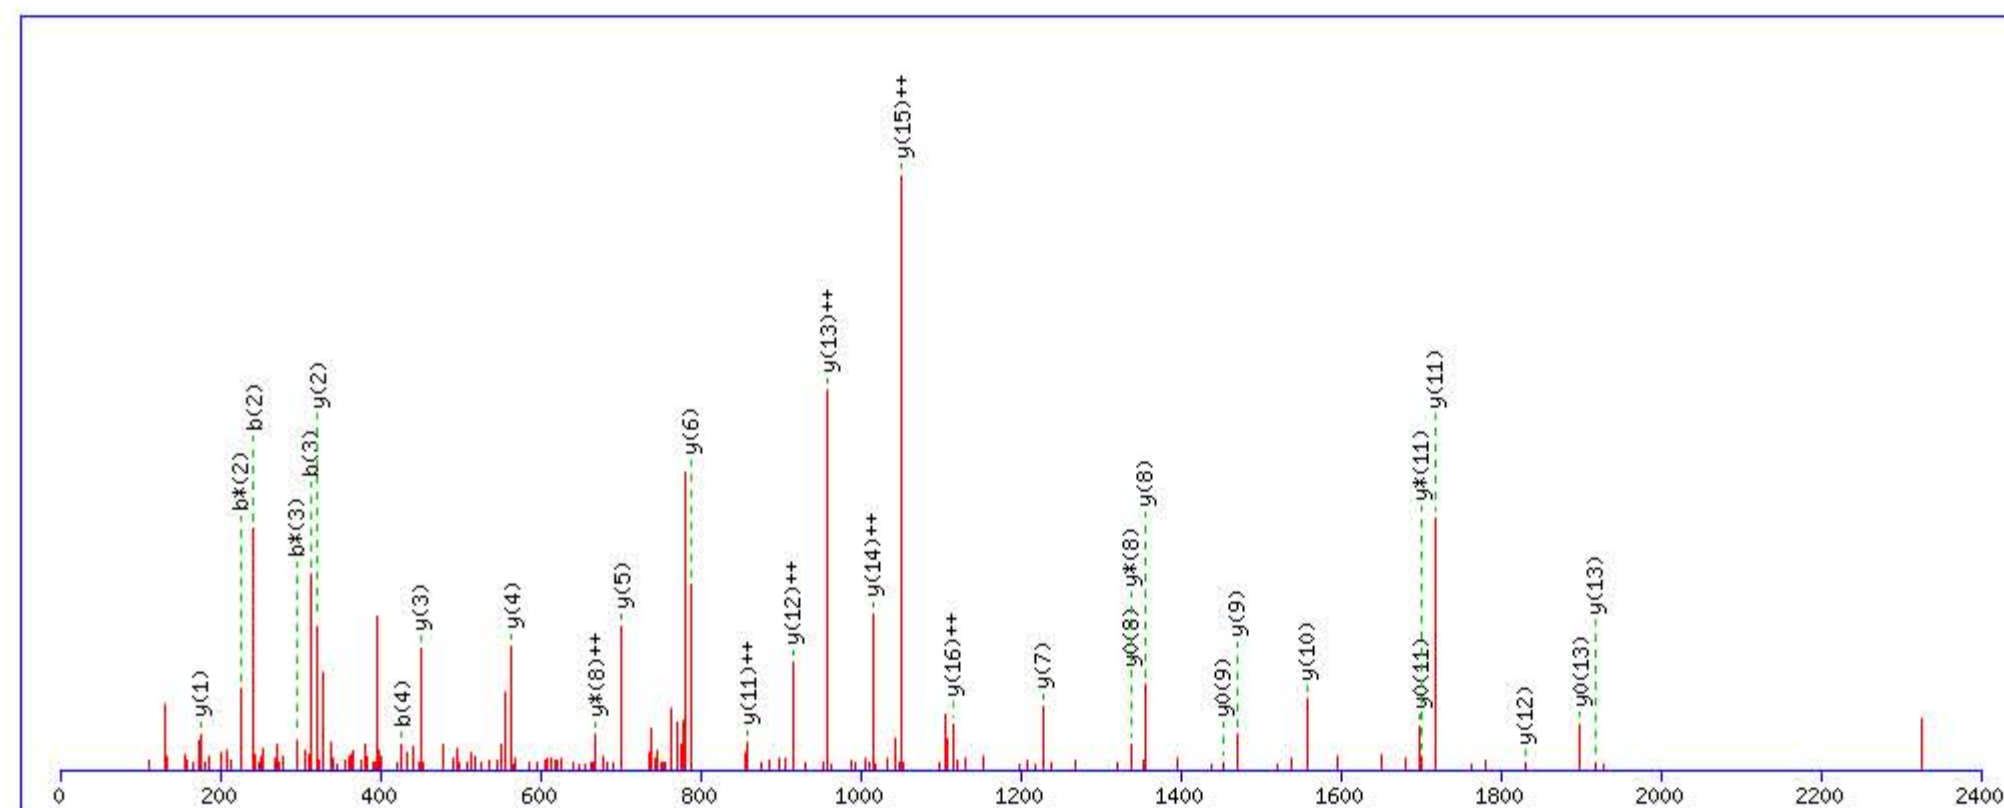

Monoisotopic mass of neutral peptide Mr(calc): 2342.151108

Fixed modifications: Carbamidomethyl (C) (apply to specified residues or termini only)

Variable modifications:

Q11 : Biotin:Thermo-21345 (Q)

Ions Score: 79 Expect: 3.7e-007

Matches : 31/178 fragment ions using 57 most intense peaks [\(help\)](#)

| #  | b                 | b <sup>++</sup> | b <sup>*</sup>    | b <sup>*++</sup> | b <sup>0</sup> | b <sup>0++</sup> | Seq. | y                  | y <sup>++</sup>    | y <sup>*</sup>     | y <sup>*++</sup>  | y <sup>0</sup>     | y <sup>0++</sup> | #  |
|----|-------------------|-----------------|-------------------|------------------|----------------|------------------|------|--------------------|--------------------|--------------------|-------------------|--------------------|------------------|----|
| 1  | 114.091340        | 57.549308       |                   |                  |                |                  | I    |                    |                    |                    |                   |                    |                  | 17 |
| 2  | <b>242.149918</b> | 121.578597      | <b>225.123369</b> | 113.065323       |                |                  | Q    | 2230.074335        | <b>1115.540805</b> | 2213.047786        | 1107.027531       | 2212.063770        | 1106.535523      | 16 |
| 3  | <b>313.187032</b> | 157.097154      | <b>296.160483</b> | 148.583879       |                |                  | A    | 2102.015757        | <b>1051.511516</b> | 2084.989208        | 1042.998242       | 2084.005192        | 1042.506234      | 15 |
| 4  | <b>426.271096</b> | 213.639186      | 409.244547        | 205.125912       |                |                  | L    | 2030.978643        | <b>1015.992959</b> | 2013.952094        | 1007.479685       | 2012.968078        | 1006.987677      | 14 |
| 5  | 513.303124        | 257.155200      | 496.276575        | 248.641926       | 495.292559     | 248.149918       | S    | <b>1917.894579</b> | <b>959.450927</b>  | 1900.868030        | 950.937653        | <b>1899.884014</b> | 950.445645       | 13 |
| 6  | 626.387188        | 313.697232      | 609.360639        | 305.183958       | 608.376623     | 304.691950       | L    | <b>1830.862551</b> | <b>915.934913</b>  | 1813.836002        | 907.421639        | 1812.851986        | 906.929631       | 12 |
| 7  | 786.417837        | 393.712557      | 769.391288        | 385.199282       | 768.407272     | 384.707274       | C    | <b>1717.778487</b> | <b>859.392881</b>  | <b>1700.751938</b> | 850.879607        | <b>1699.767922</b> | 850.387599       | 11 |
| 8  | 873.449865        | 437.228571      | 856.423316        | 428.715296       | 855.439300     | 428.223288       | S    | <b>1557.747838</b> | 779.377557         | 1540.721289        | 770.864282        | 1539.737273        | 770.372274       | 10 |
| 9  | 988.476808        | 494.742042      | 971.450259        | 486.228768       | 970.466243     | 485.736760       | D    | <b>1470.715810</b> | 735.861543         | 1453.689261        | 727.348268        | <b>1452.705245</b> | 726.856260       | 9  |
| 10 | 1116.535386       | 558.771331      | 1099.508837       | 550.258057       | 1098.524821    | 549.766049       | Q    | <b>1355.688867</b> | 678.348071         | <b>1338.662318</b> | <b>669.834797</b> | <b>1337.678302</b> | 669.342789       | 8  |
| 11 | 1555.760712       | 778.383994      | 1538.734163       | 769.870720       | 1537.750147    | 769.378712       | Q    | <b>1227.630289</b> | 614.318782         | 1210.603740        | 605.805508        | 1209.619724        | 605.313500       | 7  |
| 12 | 1642.792740       | 821.900008      | 1625.766191       | 813.386734       | 1624.782175    | 812.894726       | S    | <b>788.404963</b>  | 394.706119         | 771.378414         | 386.192845        | 770.394398         | 385.700837       | 6  |
| 13 | 1779.851652       | 890.429464      | 1762.825103       | 881.916190       | 1761.841087    | 881.424182       | H    | <b>701.372935</b>  | 351.190105         | 684.346386         | 342.676831        | 683.362370         | 342.184823       | 5  |
| 14 | 1892.935716       | 946.971496      | 1875.909167       | 938.458222       | 1874.925151    | 937.966213       | L    | <b>564.314023</b>  | 282.660649         | 547.287474         | 274.147375        | 546.303458         | 273.655367       | 4  |
| 15 | 2021.978309       | 1011.492793     | 2004.951760       | 1002.979518      | 2003.967744    | 1002.487510      | E    | <b>451.229959</b>  | 226.118617         | 434.203410         | 217.605343        | 433.219394         | 217.113335       | 3  |
| 16 | 2169.046723       | 1085.026999     | 2152.020174       | 1076.513725      | 2151.036158    | 1076.021717      | F    | <b>322.187366</b>  | 161.597321         | 305.160817         | 153.084046        |                    |                  | 2  |
| 17 |                   |                 |                   |                  |                |                  | R    | <b>175.118952</b>  | 88.063114          | 158.092403         | 79.549839         |                    |                  | 1  |

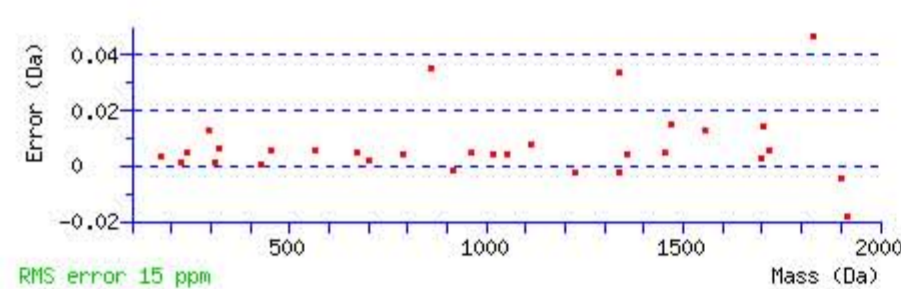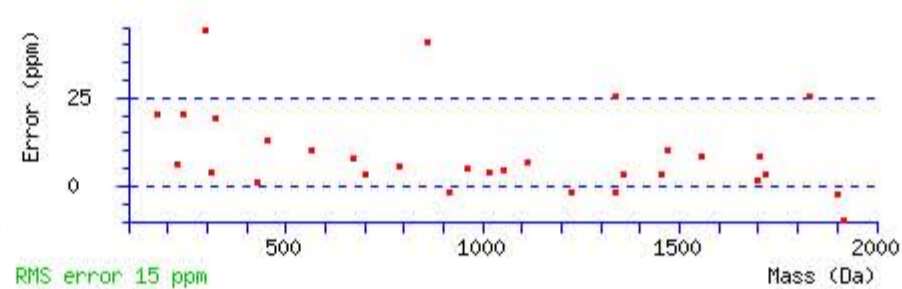

NCBI BLAST search of **IQALSLCSDQQSHLEFR**

(Parameters: blastp, nr protein database, expect=20000, no filter, PAM30)

Other BLAST [web gateways](#)

## All matches to this query

| Score | Mr(calc):   | Delta    | Sequence                          |
|-------|-------------|----------|-----------------------------------|
| 79.0  | 2342.151108 | 0.005154 | <a href="#">IQALSLCSDQQSHLEFR</a> |
| 67.6  | 2342.151108 | 0.005154 | <a href="#">IQALSLCSDQQSHLEFR</a> |

Mascot: <http://www.matrixscience.com/>

# MASCOT Search Results

## Peptide View

MS/MS Fragmentation of **QCVPHDQCACGVLTSEK**

Found in **PROZ\_HUMAN**, Vitamin K-dependent protein Z OS=Homo sapiens GN=PROZ PE=1 SV=2

Match to Query 47800: 2299.031532 from(767.351120,3+) rtinseconds(1610) index(44930)

Title: Locus:1.1.1.2609.14 File:"2013-07-02 CLN FXIII 60 min 3rd F 4.wiff"

Data file C:\Program Files (x86)\Matrix Science\Mascot Daemon\mgf6 FXIII 60 min 3rd\mascot\_daemon\_merge.mgf

Click mouse within plot area to zoom in by factor of two about that point

Or, Plot from  to  Da

Label all possible matches  Label matches used for scoring

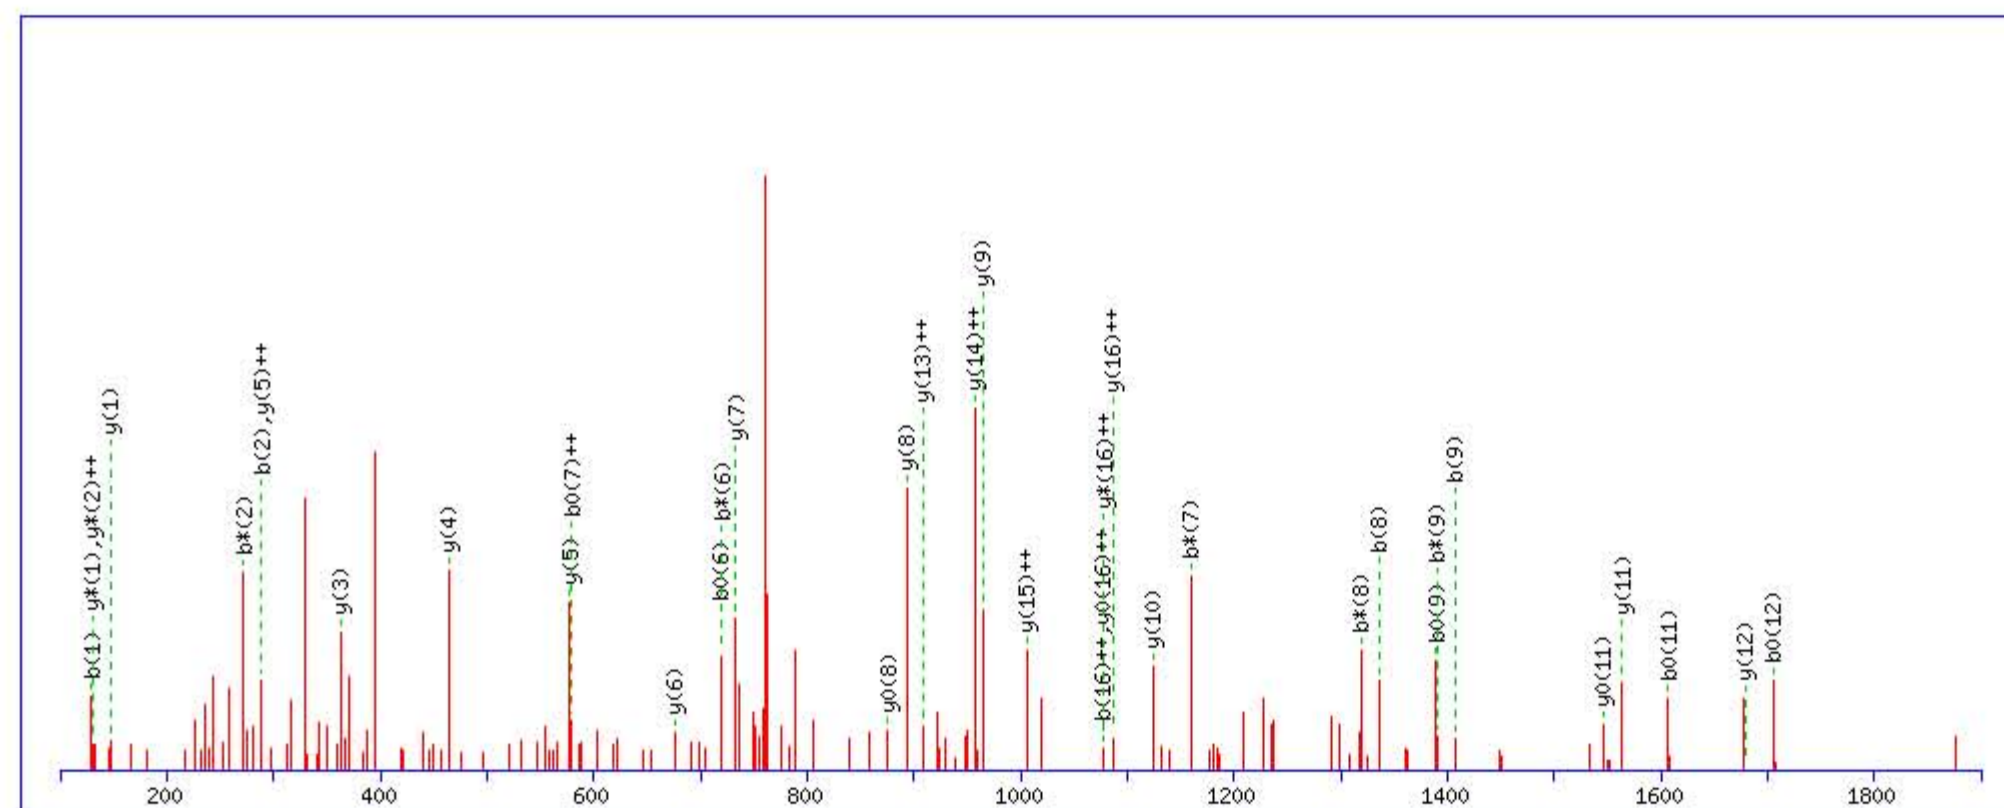

Monoisotopic mass of neutral peptide Mr(calc): 2299.021790

Fixed modifications: Carbamidomethyl (C) (apply to specified residues or termini only)

Variable modifications:

Q7 : Biotin:Thermo-21345 (Q)

Ions Score: 57 Expect: 2.1e-005

Matches : 37/180 fragment ions using 63 most intense peaks [\(help\)](#)

| #  | b           | b <sup>++</sup> | b <sup>*</sup> | b <sup>***</sup> | b <sup>0</sup> | b <sup>0++</sup> | Seq. | y           | y <sup>++</sup> | y <sup>*</sup> | y <sup>***</sup> | y <sup>0</sup> | y <sup>0++</sup> | #  |
|----|-------------|-----------------|----------------|------------------|----------------|------------------|------|-------------|-----------------|----------------|------------------|----------------|------------------|----|
| 1  | 129.065854  | 65.036565       | 112.039305     | 56.523291        |                |                  | Q    |             |                 |                |                  |                |                  | 17 |
| 2  | 289.096503  | 145.051890      | 272.069954     | 136.538615       |                |                  | C    | 2171.970466 | 1086.488871     | 2154.943917    | 1077.975596      | 2153.959901    | 1077.483588      | 16 |
| 3  | 388.164917  | 194.586097      | 371.138368     | 186.072822       |                |                  | V    | 2011.939817 | 1006.473547     | 1994.913268    | 997.960272       | 1993.929252    | 997.468264       | 15 |
| 4  | 485.217681  | 243.112479      | 468.191132     | 234.599204       |                |                  | P    | 1912.871403 | 956.939340      | 1895.844854    | 948.426065       | 1894.860838    | 947.934057       | 14 |
| 5  | 622.276593  | 311.641935      | 605.250044     | 303.128660       |                |                  | H    | 1815.818639 | 908.412958      | 1798.792090    | 899.899683       | 1797.808074    | 899.407675       | 13 |
| 6  | 737.303536  | 369.155406      | 720.276987     | 360.642132       | 719.292971     | 360.150124       | D    | 1678.759727 | 839.883502      | 1661.733178    | 831.370227       | 1660.749162    | 830.878219       | 12 |
| 7  | 1176.528862 | 588.768069      | 1159.502313    | 580.254795       | 1158.518297    | 579.762786       | Q    | 1563.732784 | 782.370030      | 1546.706235    | 773.856756       | 1545.722219    | 773.364748       | 11 |
| 8  | 1336.559511 | 668.783393      | 1319.532962    | 660.270119       | 1318.548946    | 659.778111       | C    | 1124.507458 | 562.757367      | 1107.480909    | 554.244093       | 1106.496893    | 553.752085       | 10 |
| 9  | 1407.596625 | 704.301950      | 1390.570076    | 695.788676       | 1389.586060    | 695.296668       | A    | 964.476809  | 482.742043      | 947.450260     | 474.228768       | 946.466244     | 473.736760       | 9  |
| 10 | 1567.627274 | 784.317275      | 1550.600725    | 775.804001       | 1549.616709    | 775.311992       | C    | 893.439695  | 447.223486      | 876.413146     | 438.710211       | 875.429130     | 438.218203       | 8  |
| 11 | 1624.648738 | 812.828007      | 1607.622189    | 804.314732       | 1606.638173    | 803.822724       | G    | 733.409046  | 367.208161      | 716.382497     | 358.694887       | 715.398481     | 358.202879       | 7  |
| 12 | 1723.717152 | 862.362214      | 1706.690603    | 853.848940       | 1705.706587    | 853.356931       | V    | 676.387582  | 338.697429      | 659.361033     | 330.184155       | 658.377017     | 329.692147       | 6  |
| 13 | 1836.801216 | 918.904246      | 1819.774667    | 910.390971       | 1818.790651    | 909.898963       | L    | 577.319168  | 289.163222      | 560.292619     | 280.649948       | 559.308603     | 280.157940       | 5  |
| 14 | 1937.848895 | 969.428085      | 1920.822346    | 960.914811       | 1919.838330    | 960.422803       | T    | 464.235104  | 232.621190      | 447.208555     | 224.107916       | 446.224539     | 223.615908       | 4  |
| 15 | 2024.880923 | 1012.944100     | 2007.854374    | 1004.430825      | 2006.870358    | 1003.938817      | S    | 363.187425  | 182.097351      | 346.160876     | 173.584076       | 345.176860     | 173.092068       | 3  |
| 16 | 2153.923516 | 1077.465396     | 2136.896967    | 1068.952121      | 2135.912951    | 1068.460113      | E    | 276.155397  | 138.581337      | 259.128848     | 130.068062       | 258.144832     | 129.576054       | 2  |
| 17 |             |                 |                |                  |                |                  | K    | 147.112804  | 74.060040       | 130.086255     | 65.546765        |                |                  | 1  |

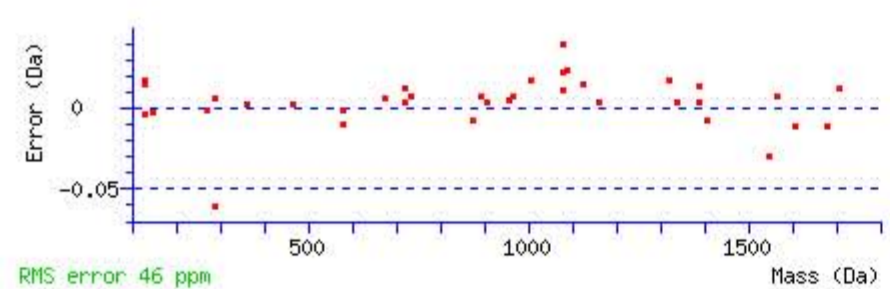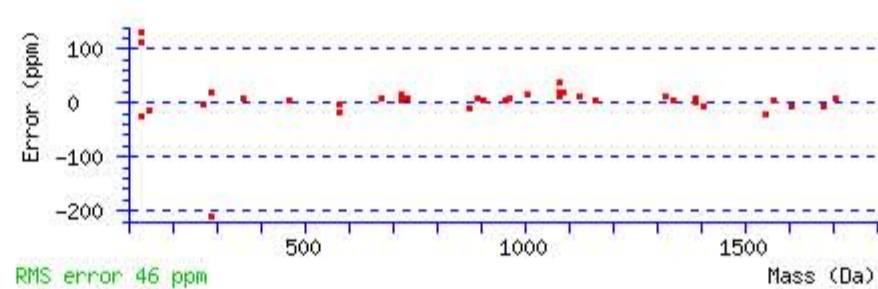

NCBI BLAST search of **QCVPHDQCACGVLTSEK**

(Parameters: blastp, nr protein database, expect=20000, no filter, PAM30)

Other BLAST [web gateways](#)

## All matches to this query

| Score | Mr(calc):   | Delta    | Sequence                          |
|-------|-------------|----------|-----------------------------------|
| 56.9  | 2299.021790 | 0.009742 | <a href="#">QCVPHDQCACGVLTSEK</a> |
| 23.9  | 2299.021790 | 0.009742 | <a href="#">QCVPHDQCACGVLTSEK</a> |

# MASCOT SEARCH RESULTS

## Peptide View

MS/MS Fragmentation of **TDGCQHFCLPGQESYTCSCAQGYR**  
 Found in **PROZ\_HUMAN**, Vitamin K-dependent protein Z OS=Homo sapiens GN=PROZ PE=1 SV=2

Match to Query 57532: 3192.325696 from(799.088700,4+) rtinseconds(2050) index(47700)  
 Title: Locus:1.1.1.2762.10 File:"2013-07-02 CLN FXIII 60 min 3rd F 4.wiff"  
 Data file C:\Program Files (x86)\Matrix Science\Mascot Daemon\mgf\6 FXIII 60 min 3rd\mascot\_daemon\_merge.mgf

Click mouse within plot area to zoom in by factor of two about that point  
 Or, Plot from  to  Da   
 Label all possible matches  Label matches used for scoring

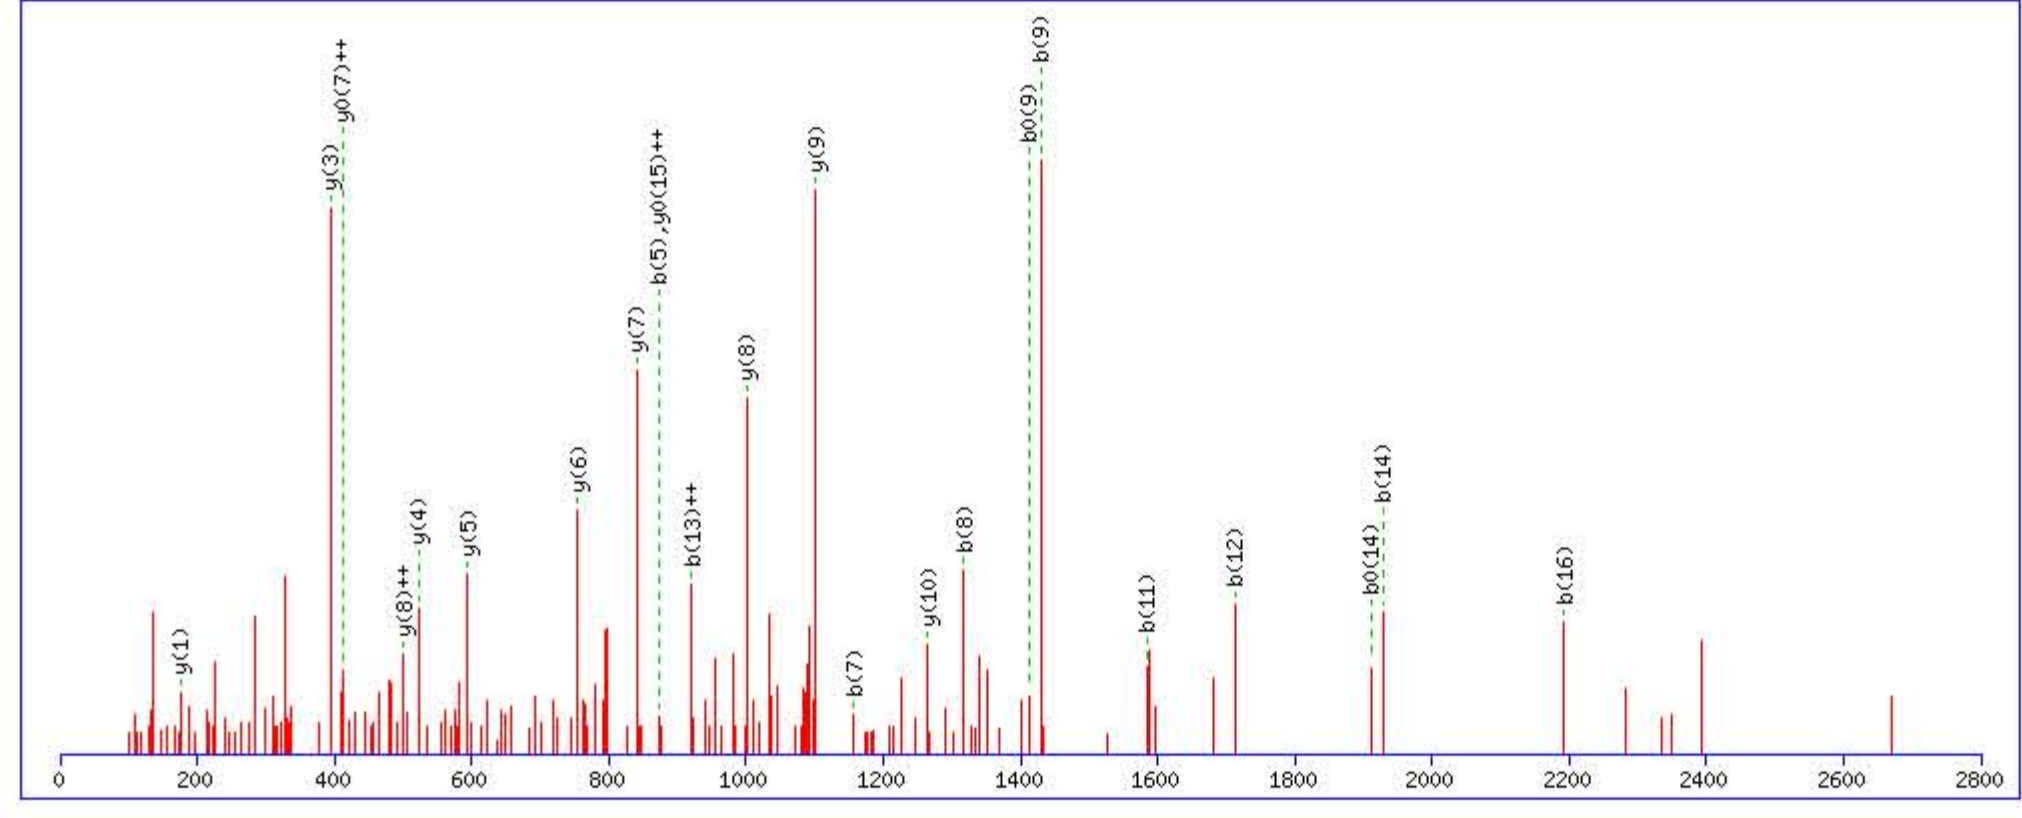

Monoisotopic mass of neutral peptide Mr(calc): 3192.298050  
 Fixed modifications: Carbamidomethyl (C) (apply to specified residues or termini only)  
 Variable modifications:  
 Q5 : Biotin:Thermo-21345 (Q)  
 Ions Score: 57 Expect: 3.6e-006  
 Matches : 23/256 fragment ions using 39 most intense peaks [\(help\)](#)

| #  | b                  | b <sup>++</sup>   | b <sup>+</sup> | b <sup>+++</sup> | b <sup>0</sup>     | b <sup>0++</sup> | Seq. | y                  | y <sup>++</sup>   | y <sup>+</sup> | y <sup>+++</sup> | y <sup>0</sup> | y <sup>0++</sup>  | #  |
|----|--------------------|-------------------|----------------|------------------|--------------------|------------------|------|--------------------|-------------------|----------------|------------------|----------------|-------------------|----|
| 1  | 102.054955         | 51.531116         |                |                  | 84.044390          | 42.525833        | T    |                    |                   |                |                  |                |                   | 24 |
| 2  | 217.081898         | 109.044587        |                |                  | 199.071333         | 100.039304       | D    | 3092.257619        | 1546.632447       | 3075.231070    | 1538.119173      | 3074.247054    | 1537.627165       | 23 |
| 3  | 274.103362         | 137.555319        |                |                  | 256.092797         | 128.550037       | G    | 2977.230676        | 1489.118976       | 2960.204127    | 1480.605701      | 2959.220111    | 1480.113693       | 22 |
| 4  | 434.134011         | 217.570644        |                |                  | 416.123446         | 208.565361       | C    | 2920.209212        | 1460.608244       | 2903.182663    | 1452.094969      | 2902.198647    | 1451.602961       | 21 |
| 5  | <b>873.359337</b>  | 437.183307        | 856.332788     | 428.670032       | 855.348772         | 428.178024       | Q    | 2760.178563        | 1380.592919       | 2743.152014    | 1372.079645      | 2742.167998    | 1371.587637       | 20 |
| 6  | 1010.418249        | 505.712763        | 993.391700     | 497.199488       | 992.407684         | 496.707480       | H    | 2320.953237        | 1160.980256       | 2303.926688    | 1152.466982      | 2302.942672    | 1151.974974       | 19 |
| 7  | <b>1157.486663</b> | 579.246970        | 1140.460114    | 570.733695       | 1139.476098        | 570.241687       | F    | 2183.894325        | 1092.450800       | 2166.867776    | 1083.937526      | 2165.883760    | 1083.445518       | 18 |
| 8  | <b>1317.517312</b> | 659.262294        | 1300.490763    | 650.749020       | 1299.506747        | 650.257012       | C    | 2036.825911        | 1018.916594       | 2019.799362    | 1010.403319      | 2018.815346    | 1009.911311       | 17 |
| 9  | <b>1430.601376</b> | 715.804326        | 1413.574827    | 707.291052       | <b>1412.590811</b> | 706.799044       | L    | 1876.795262        | 938.901269        | 1859.768713    | 930.387994       | 1858.784697    | 929.895986        | 16 |
| 10 | 1527.654140        | 764.330708        | 1510.627591    | 755.817434       | 1509.643575        | 755.325426       | P    | 1763.711198        | 882.359237        | 1746.684649    | 873.845963       | 1745.700633    | <b>873.353954</b> | 15 |
| 11 | <b>1584.675604</b> | 792.841440        | 1567.649055    | 784.328166       | 1566.665039        | 783.836158       | G    | 1666.658434        | 833.832855        | 1649.631885    | 825.319581       | 1648.647869    | 824.827572        | 14 |
| 12 | <b>1712.734182</b> | 856.870729        | 1695.707633    | 848.357455       | 1694.723617        | 847.865446       | Q    | 1609.636970        | 805.322123        | 1592.610421    | 796.808849       | 1591.626405    | 796.316841        | 13 |
| 13 | 1841.776775        | <b>921.392026</b> | 1824.750226    | 912.878751       | 1823.766210        | 912.386743       | E    | 1481.578392        | 741.292834        | 1464.551843    | 732.779560       | 1463.567827    | 732.287552        | 12 |
| 14 | <b>1928.808803</b> | 964.908040        | 1911.782254    | 956.394765       | <b>1910.798238</b> | 955.902757       | S    | 1352.535799        | 676.771538        | 1335.509250    | 668.258263       | 1334.525234    | 667.766255        | 11 |
| 15 | 2091.872132        | 1046.439704       | 2074.845583    | 1037.926429      | 2073.861567        | 1037.434421      | Y    | <b>1265.503771</b> | 633.255523        | 1248.477222    | 624.742249       | 1247.493206    | 624.250241        | 10 |
| 16 | <b>2192.919811</b> | 1096.963543       | 2175.893262    | 1088.450269      | 2174.909246        | 1087.958261      | T    | <b>1102.440442</b> | 551.723859        | 1085.413893    | 543.210584       | 1084.429877    | 542.718576        | 9  |
| 17 | 2352.950460        | 1176.978868       | 2335.923911    | 1168.465593      | 2334.939895        | 1167.973585      | C    | <b>1001.392763</b> | <b>501.200020</b> | 984.366214     | 492.686745       | 983.382198     | 492.194737        | 8  |
| 18 | 2439.982488        | 1220.494882       | 2422.955939    | 1211.981607      | 2421.971923        | 1211.489599      | S    | <b>841.362114</b>  | 421.184695        | 824.335565     | 412.671421       | 823.351549     | <b>412.179413</b> | 7  |
| 19 | 2600.013137        | 1300.510206       | 2582.986588    | 1291.996932      | 2582.002572        | 1291.504924      | C    | <b>754.330086</b>  | 377.668681        | 737.303537     | 369.155407       |                |                   | 6  |
| 20 | 2671.050251        | 1336.028763       | 2654.023702    | 1327.515489      | 2653.039686        | 1327.023481      | A    | <b>594.299437</b>  | 297.653357        | 577.272888     | 289.140082       |                |                   | 5  |
| 21 | 2799.108829        | 1400.058052       | 2782.082280    | 1391.544778      | 2781.098264        | 1391.052770      | Q    | <b>523.262323</b>  | 262.134800        | 506.235774     | 253.621525       |                |                   | 4  |
| 22 | 2856.130293        | 1428.568784       | 2839.103744    | 1420.055510      | 2838.119728        | 1419.563502      | G    | <b>395.203745</b>  | 198.105510        | 378.177196     | 189.592236       |                |                   | 3  |
| 23 | 3019.193622        | 1510.100449       | 3002.167073    | 1501.587174      | 3001.183057        | 1501.095166      | Y    | 338.182281         | 169.594778        | 321.155732     | 161.081504       |                |                   | 2  |
| 24 |                    |                   |                |                  |                    |                  | R    | <b>175.118952</b>  | 88.063114         | 158.092403     | 79.549839        |                |                   | 1  |

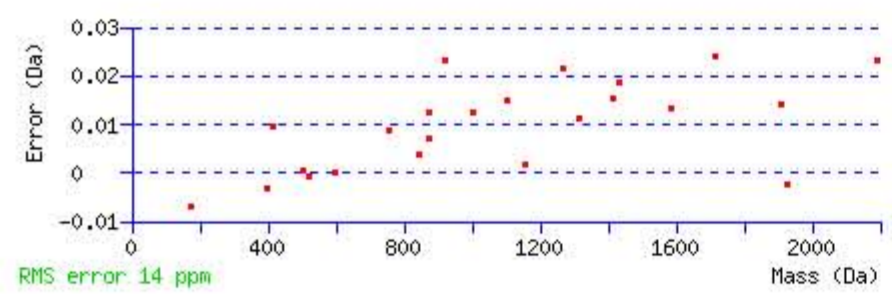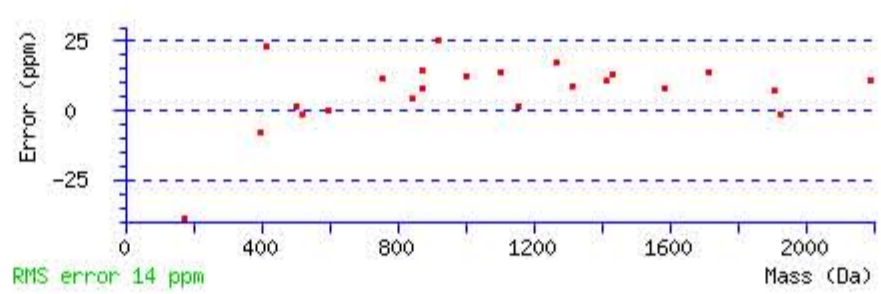

NCBI BLAST search of **TDGCQHFCLPGQESYTCSCAQGYR**  
 (Parameters: blastp, nr protein database, expect=20000, no filter, PAM30)  
 Other BLAST [web gateways](#)

### All matches to this query

| Score | Mr(calc):   | Delta    | Sequence                                 |
|-------|-------------|----------|------------------------------------------|
| 57.1  | 3192.298050 | 0.027646 | <a href="#">TDGCQHFCLPGQESYTCSCAQGYR</a> |
| 29.5  | 3192.298050 | 0.027646 | <a href="#">TDGCQHFCLPGQESYTCSCAQGYR</a> |

# MASCOT Search Results

## Peptide View

MS/MS Fragmentation of **GQYCYELDEK**

Found in **VTNC\_HUMAN**, Vitronectin OS=Homo sapiens GN=VTN PE=1 SV=1

Match to Query 33812: 1614.722828 from(808.368690,2+) rtinseconds(1865) index(46397)

Title: Locus:1.1.1.2698.10 File:"2013-07-02 CLN FXIII 60 min 3rd F 4.wiff"

Data file C:\Program Files (x86)\Matrix Science\Mascot Daemon\mgf6 FXIII 60 min 3rd\mascot\_daemon\_merge.mgf

Click mouse within plot area to zoom in by factor of two about that point

Or, Plot from  to  Da

Label all possible matches  Label matches used for scoring

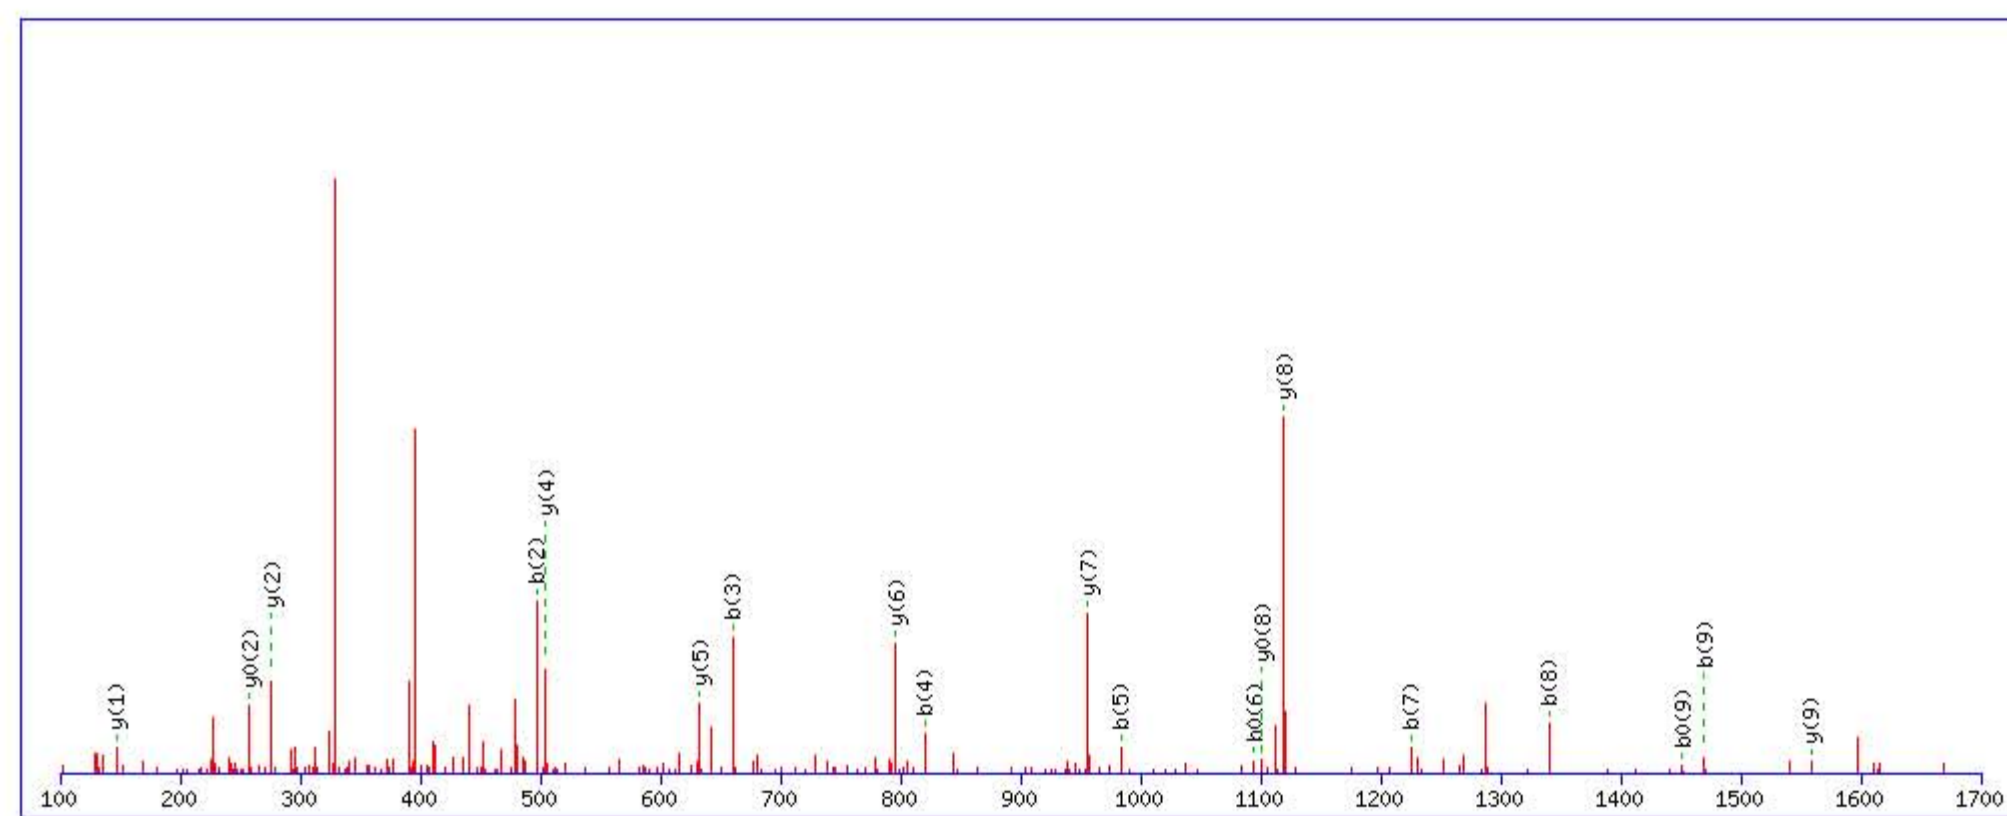

Monoisotopic mass of neutral peptide Mr(calc): 1614.705795

Fixed modifications: Carbamidomethyl (C) (apply to specified residues or termini only)

Variable modifications:

Q2 : Biotin:Thermo-21345 (Q)

Ions Score: 51 Expect: 4.2e-005

Matches : 19/94 fragment ions using 32 most intense peaks [\(help\)](#)

| #  | b           | b <sup>++</sup> | b <sup>+</sup> | b <sup>*++</sup> | b <sup>0</sup> | b <sup>0++</sup> | Seq. | y           | y <sup>++</sup> | y <sup>+</sup> | y <sup>*++</sup> | y <sup>0</sup> | y <sup>0++</sup> | #  |
|----|-------------|-----------------|----------------|------------------|----------------|------------------|------|-------------|-----------------|----------------|------------------|----------------|------------------|----|
| 1  | 58.028740   | 29.518008       |                |                  |                |                  | G    |             |                 |                |                  |                |                  | 10 |
| 2  | 497.254066  | 249.130671      | 480.227517     | 240.617397       |                |                  | Q    | 1558.691630 | 779.849453      | 1541.665081    | 771.336179       | 1540.681065    | 770.844171       | 9  |
| 3  | 660.317395  | 330.662336      | 643.290846     | 322.149061       |                |                  | Y    | 1119.466304 | 560.236790      | 1102.439755    | 551.723516       | 1101.455739    | 551.231508       | 8  |
| 4  | 820.348044  | 410.677660      | 803.321495     | 402.164386       |                |                  | C    | 956.402975  | 478.705126      | 939.376426     | 470.191851       | 938.392410     | 469.699843       | 7  |
| 5  | 983.411373  | 492.209325      | 966.384824     | 483.696050       |                |                  | Y    | 796.372326  | 398.689801      | 779.345777     | 390.176527       | 778.361761     | 389.684519       | 6  |
| 6  | 1112.453966 | 556.730621      | 1095.427417    | 548.217347       | 1094.443401    | 547.725339       | E    | 633.308997  | 317.158137      | 616.282448     | 308.644862       | 615.298432     | 308.152854       | 5  |
| 7  | 1225.538030 | 613.272653      | 1208.511481    | 604.759379       | 1207.527465    | 604.267371       | L    | 504.266404  | 252.636840      | 487.239855     | 244.123566       | 486.255839     | 243.631558       | 4  |
| 8  | 1340.564973 | 670.786125      | 1323.538424    | 662.272850       | 1322.554408    | 661.780842       | D    | 391.182340  | 196.094808      | 374.155791     | 187.581534       | 373.171775     | 187.089526       | 3  |
| 9  | 1469.607566 | 735.307421      | 1452.581017    | 726.794147       | 1451.597001    | 726.302139       | E    | 276.155397  | 138.581337      | 259.128848     | 130.068062       | 258.144832     | 129.576054       | 2  |
| 10 |             |                 |                |                  |                |                  | K    | 147.112804  | 74.060040       | 130.086255     | 65.546765        |                |                  | 1  |

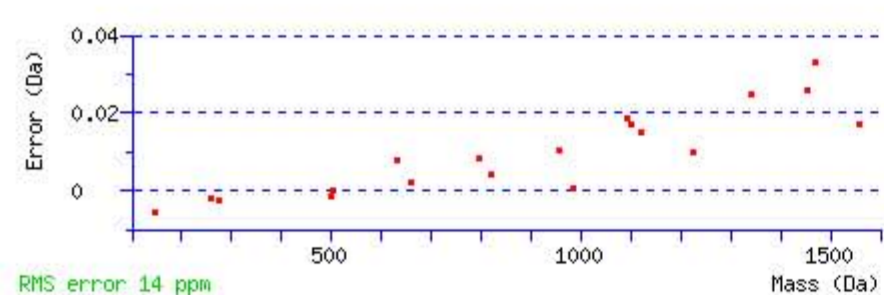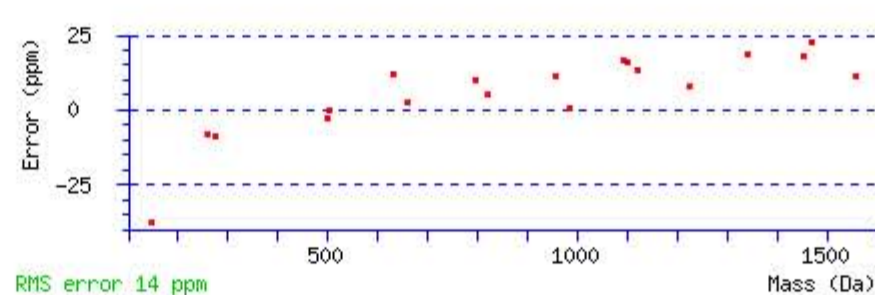

NCBI BLAST search of [GQYCYELDEK](#)

(Parameters: blastp, nr protein database, expect=20000, no filter, PAM30)

Other BLAST [web gateways](#)

All matches to this query

| Score | Mr(calc):   | Delta     | Sequence                       |
|-------|-------------|-----------|--------------------------------|
| 51.2  | 1614.705795 | 0.017033  | <a href="#">GQYCYELDEK</a>     |
| 6.8   | 1614.717010 | 0.005818  | <a href="#">EYFRMELMHAEK</a>   |
| 3.7   | 1614.738129 | -0.015301 | <a href="#">EKAKADAECYTAMK</a> |

Mascot: <http://www.matrixscience.com/>



# MASCOT Search Results

## Peptide View

MS/MS Fragmentation of **DWHGVPGQVDAAMAGR**

Found in **VTNC\_HUMAN**, Vitronectin OS=Homo sapiens GN=VTN PE=1 SV=1

Match to Query 41611: 1976.947692 from(659.989840,3+) rtinseconds(2162) index(48425)

Title: Locus:1.1.1.2801.13 File:"2013-07-02 CLN FXIII 60 min 3rd F 4.wiff"

Data file C:\Program Files (x86)\Matrix Science\Mascot Daemon\mgf\6 FXIII 60 min 3rd\mascot\_daemon\_merge.mgf

Click mouse within plot area to zoom in by factor of two about that point

Or, Plot from  to  Da

Label all possible matches  Label matches used for scoring

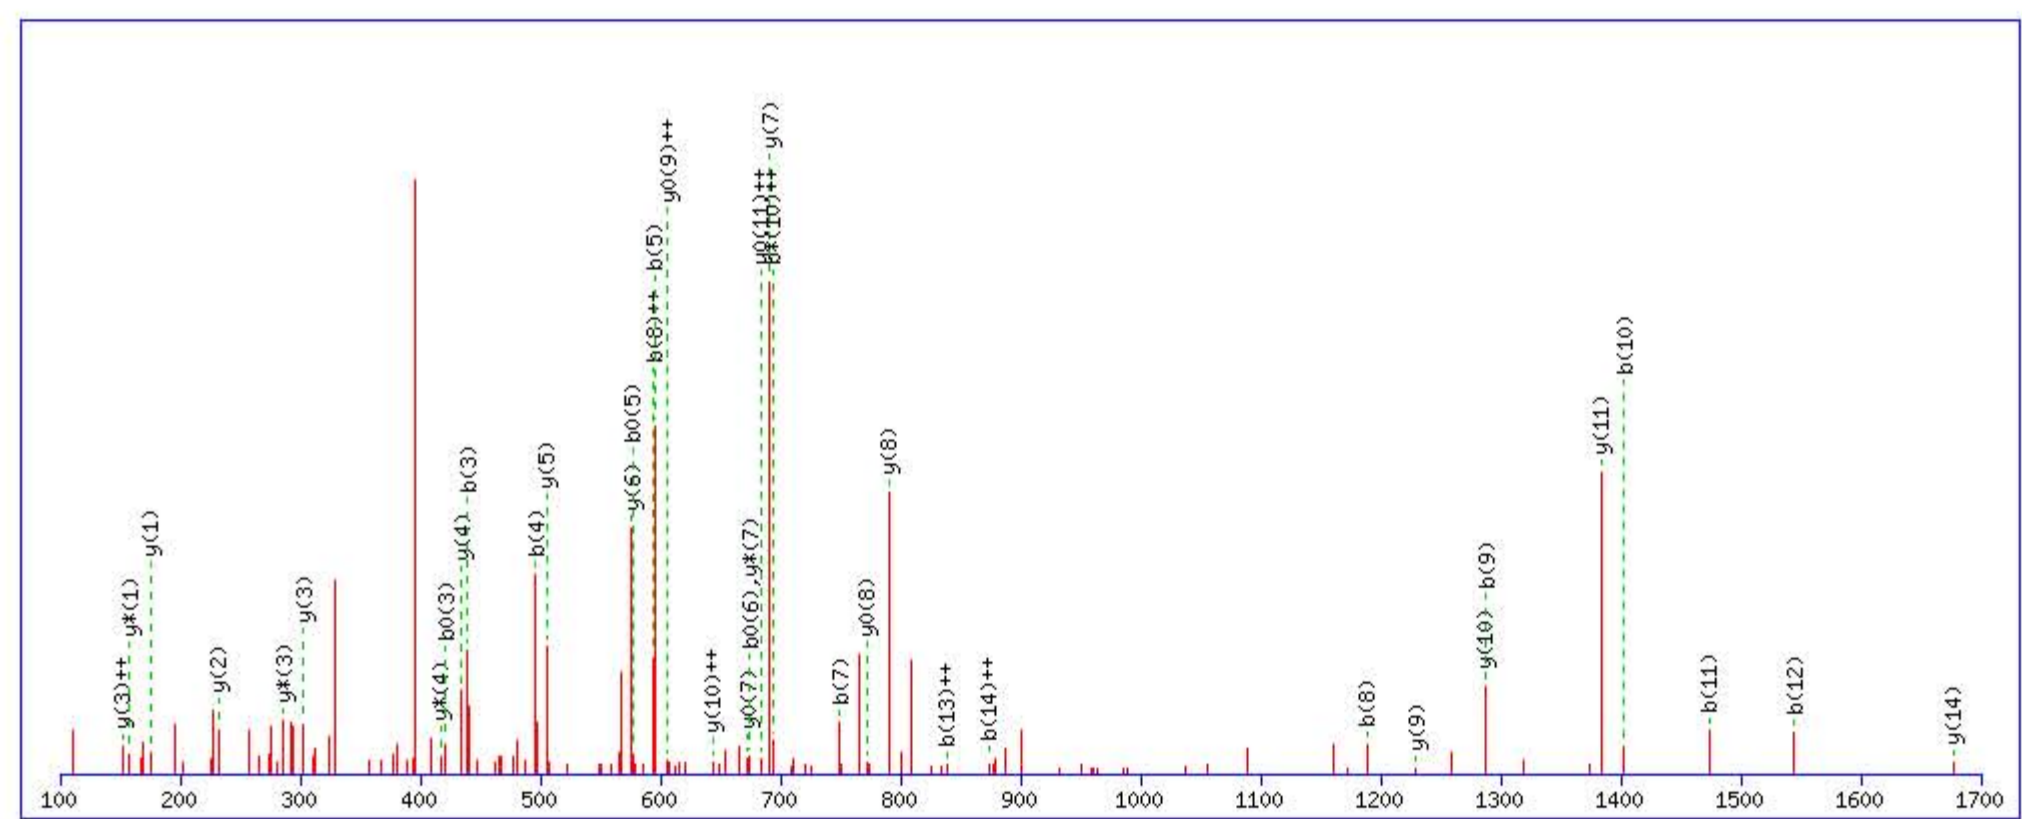

Monoisotopic mass of neutral peptide Mr(calc): 1976.934937

Fixed modifications: Carbamidomethyl (C) (apply to specified residues or termini only)

Variable modifications:

Q8 : Biotin:Thermo-21345 (Q)

Ions Score: 52 Expect: 4.6e-005

Matches : 38/154 fragment ions using 94 most intense peaks [\(help\)](#)

| #  | b                  | b <sup>++</sup>   | b <sup>*</sup> | b <sup>*++</sup>  | b <sup>0</sup>    | b <sup>0++</sup> | Seq. | y                  | y <sup>++</sup>   | y <sup>*</sup>    | y <sup>*++</sup> | y <sup>0</sup>    | y <sup>0++</sup>  | #  |
|----|--------------------|-------------------|----------------|-------------------|-------------------|------------------|------|--------------------|-------------------|-------------------|------------------|-------------------|-------------------|----|
| 1  | 116.034219         | 58.520748         |                |                   | 98.023654         | 49.515465        | D    |                    |                   |                   |                  |                   |                   | 16 |
| 2  | 302.113532         | 151.560404        |                |                   | 284.102967        | 142.555122       | W    | 1862.915257        | 931.961266        | 1845.888708       | 923.447992       | 1844.904692       | 922.955984        | 15 |
| 3  | <b>439.172444</b>  | 220.089860        |                |                   | <b>421.161879</b> | 211.084577       | H    | <b>1676.835944</b> | 838.921610        | 1659.809395       | 830.408336       | 1658.825379       | 829.916327        | 14 |
| 4  | <b>496.193908</b>  | 248.600592        |                |                   | 478.183343        | 239.595309       | G    | 1539.777032        | 770.392154        | 1522.750483       | 761.878880       | 1521.766467       | 761.386871        | 13 |
| 5  | <b>595.262322</b>  | 298.134799        |                |                   | <b>577.251757</b> | 289.129517       | V    | 1482.755568        | 741.881422        | 1465.729019       | 733.368148       | 1464.745003       | 732.876140        | 12 |
| 6  | 692.315086         | 346.661181        |                |                   | <b>674.304521</b> | 337.655899       | P    | <b>1383.687154</b> | 692.347215        | 1366.660605       | 683.833941       | 1365.676589       | <b>683.341932</b> | 11 |
| 7  | <b>749.336550</b>  | 375.171913        |                |                   | 731.325985        | 366.166631       | G    | <b>1286.634390</b> | <b>643.820833</b> | 1269.607841       | 635.307559       | 1268.623825       | 634.815550        | 10 |
| 8  | <b>1188.561876</b> | <b>594.784576</b> | 1171.535327    | 586.271302        | 1170.551311       | 585.779293       | Q    | <b>1229.612926</b> | 615.310101        | 1212.586377       | 606.796827       | 1211.602361       | <b>606.304819</b> | 9  |
| 9  | <b>1287.630290</b> | 644.318783        | 1270.603741    | 635.805509        | 1269.619725       | 635.313501       | V    | <b>790.387600</b>  | 395.697438        | 773.361051        | 387.184164       | <b>772.377035</b> | 386.692156        | 8  |
| 10 | <b>1402.657233</b> | 701.832255        | 1385.630684    | <b>693.318980</b> | 1384.646668       | 692.826972       | D    | <b>691.319186</b>  | 346.163231        | <b>674.292637</b> | 337.649956       | <b>673.308621</b> | 337.157948        | 7  |
| 11 | <b>1473.694347</b> | 737.350812        | 1456.667798    | 728.837537        | 1455.683782       | 728.345529       | A    | <b>576.292243</b>  | 288.649759        | 559.265694        | 280.136485       |                   |                   | 6  |
| 12 | <b>1544.731461</b> | 772.869369        | 1527.704912    | 764.356094        | 1526.720896       | 763.864086       | A    | <b>505.255129</b>  | 253.131202        | 488.228580        | 244.617928       |                   |                   | 5  |
| 13 | 1675.771946        | <b>838.389611</b> | 1658.745397    | 829.876337        | 1657.761381       | 829.384329       | M    | <b>434.218015</b>  | 217.612645        | <b>417.191466</b> | 209.099371       |                   |                   | 4  |
| 14 | 1746.809060        | <b>873.908168</b> | 1729.782511    | 865.394894        | 1728.798495       | 864.902886       | A    | <b>303.177530</b>  | <b>152.092403</b> | <b>286.150981</b> | 143.579128       |                   |                   | 3  |
| 15 | 1803.830524        | 902.418900        | 1786.803975    | 893.905626        | 1785.819959       | 893.413617       | G    | <b>232.140416</b>  | 116.573846        | 215.113867        | 108.060571       |                   |                   | 2  |
| 16 |                    |                   |                |                   |                   |                  | R    | <b>175.118952</b>  | 88.063114         | <b>158.092403</b> | 79.549839        |                   |                   | 1  |

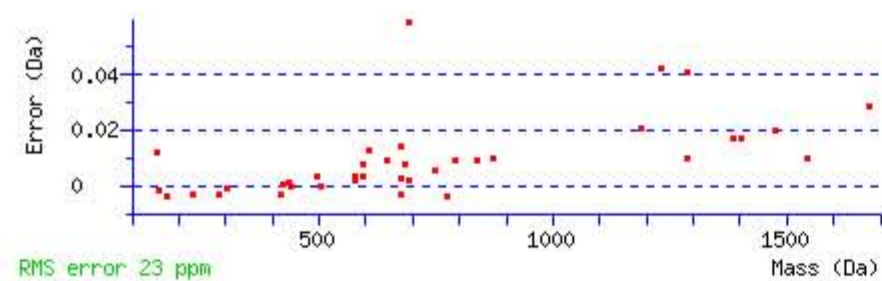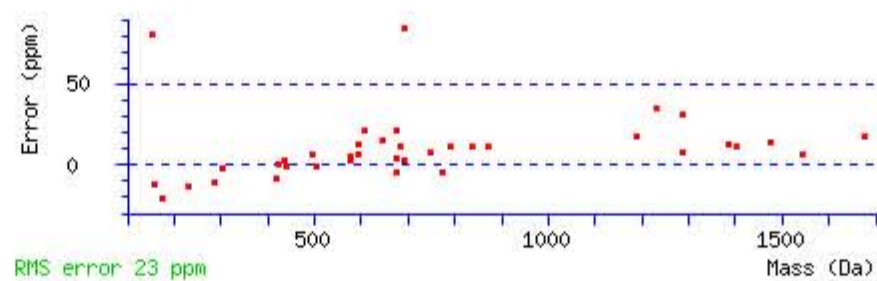

NCBI BLAST search of **DWHGVPGQVDAAMAGR**

(Parameters: blastp, nr protein database, expect=20000, no filter, PAM30)

Other BLAST [web gateways](#)

### All matches to this query

| Score | Mr(calc):   | Delta    | Sequence                          |
|-------|-------------|----------|-----------------------------------|
| 52.0  | 1976.934937 | 0.012755 | <a href="#">DWHGVPGQVDAAMAGR</a>  |
| 5.8   | 1976.918793 | 0.028899 | <a href="#">DDGLQYRPDVKDASDQR</a> |

# MASCOT Search Results

## Peptide View

MS/MS Fragmentation of **CQCDELCSYYQSCCTDYTAECKPQVTR**  
 Found in **VTNC\_HUMAN**, Vitronectin OS=Homo sapiens GN=VTN PE=1 SV=1

Match to Query 62956: 3792.552456 from(949.145390,4+) rtinseconds(1944) index(47018)  
 Title: Locus:1.1.1.2725.21 File:"2013-07-02 CLN FXIII 60 min 3rd F 4.wiff"  
 Data file C:\Program Files (x86)\Matrix Science\Mascot Daemon\mgf6 FXIII 60 min 3rd\mascot\_daemon\_merge.mgf

Click mouse within plot area to zoom in by factor of two about that point  
 Or, Plot from  to  Da   
 Label all possible matches  Label matches used for scoring

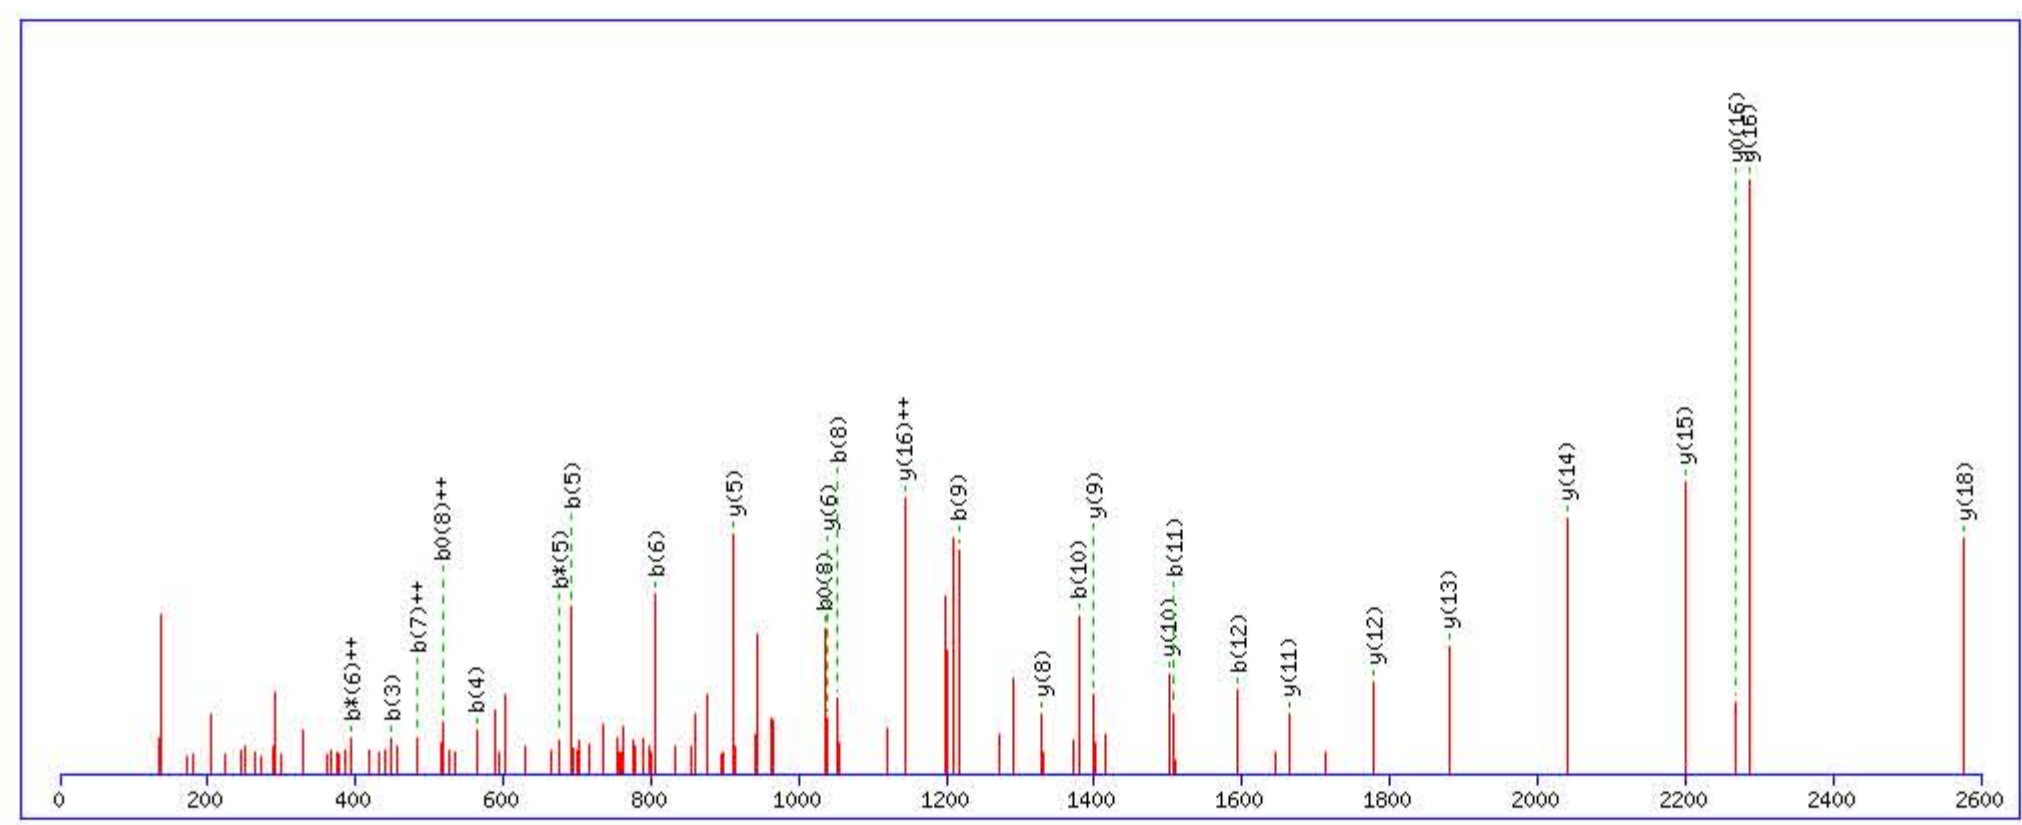

Monoisotopic mass of neutral peptide Mr(calc): 3792.511536  
 Fixed modifications: Carbamidomethyl (C) (apply to specified residues or termini only)  
 Variable modifications:  
 Q24 : Biotin:Thermo-21345 (Q)  
 Ions Score: 62 Expect: 6.3e-007  
 Matches : 28/302 fragment ions using 54 most intense peaks [\(help\)](#)

| #  | b                  | b <sup>++</sup>   | b <sup>*</sup>    | b <sup>+++</sup>  | b <sup>0</sup>     | b <sup>0++</sup>  | Seq. | y                  | y <sup>++</sup>    | y <sup>*</sup> | y <sup>+++</sup> | y <sup>0</sup>     | y <sup>0++</sup> | #  |
|----|--------------------|-------------------|-------------------|-------------------|--------------------|-------------------|------|--------------------|--------------------|----------------|------------------|--------------------|------------------|----|
| 1  | 161.037925         | 81.022600         |                   |                   |                    |                   | C    |                    |                    |                |                  |                    |                  | 27 |
| 2  | 289.096503         | 145.051890        | 272.069954        | 136.538615        |                    |                   | Q    | 3633.488150        | 1817.247713        | 3616.461601    | 1808.734438      | 3615.477585        | 1808.242431      | 26 |
| 3  | <b>449.127152</b>  | 225.067214        | 432.100603        | 216.553940        |                    |                   | C    | 3505.429572        | 1753.218424        | 3488.403023    | 1744.705149      | 3487.419007        | 1744.213141      | 25 |
| 4  | <b>564.154095</b>  | 282.580686        | 547.127546        | 274.067411        | 546.143530         | 273.575403        | D    | 3345.398923        | 1673.203099        | 3328.372374    | 1664.689825      | 3327.388358        | 1664.197817      | 24 |
| 5  | <b>693.196688</b>  | 347.101982        | <b>676.170139</b> | 338.588708        | 675.186123         | 338.096700        | E    | 3230.371980        | 1615.689628        | 3213.345431    | 1607.176353      | 3212.361415        | 1606.684345      | 23 |
| 6  | <b>806.280752</b>  | 403.644014        | 789.254203        | <b>395.130740</b> | 788.270187         | 394.638732        | L    | 3101.329387        | 1551.168331        | 3084.302838    | 1542.655057      | 3083.318822        | 1542.163049      | 22 |
| 7  | 966.311401         | <b>483.659339</b> | 949.284852        | 475.146064        | 948.300836         | 474.654056        | C    | 2988.245323        | 1494.626299        | 2971.218774    | 1486.113025      | 2970.234758        | 1485.621017      | 21 |
| 8  | <b>1053.343429</b> | 527.175353        | 1036.316880       | 518.662078        | <b>1035.332864</b> | <b>518.170070</b> | S    | 2828.214674        | 1414.610975        | 2811.188125    | 1406.097700      | 2810.204109        | 1405.605692      | 20 |
| 9  | <b>1216.406758</b> | 608.707017        | 1199.380209       | 600.193743        | 1198.396193        | 599.701735        | Y    | 2741.182646        | 1371.094961        | 2724.156097    | 1362.581686      | 2723.172081        | 1362.089678      | 19 |
| 10 | <b>1379.470087</b> | 690.238682        | 1362.443538       | 681.725407        | 1361.459522        | 681.233399        | Y    | <b>2578.119317</b> | 1289.563296        | 2561.092768    | 1281.050022      | 2560.108752        | 1280.558014      | 18 |
| 11 | <b>1507.528665</b> | 754.267971        | 1490.502116       | 745.754696        | 1489.518100        | 745.262688        | Q    | 2415.055988        | 1208.031632        | 2398.029439    | 1199.518357      | 2397.045423        | 1199.026349      | 17 |
| 12 | <b>1594.560693</b> | 797.783985        | 1577.534144       | 789.270710        | 1576.550128        | 788.778702        | S    | <b>2286.997410</b> | <b>1144.002343</b> | 2269.970861    | 1135.489068      | <b>2268.986845</b> | 1134.997060      | 16 |
| 13 | 1754.591342        | 877.799309        | 1737.564793       | 869.286035        | 1736.580777        | 868.794027        | C    | <b>2199.965382</b> | 1100.486329        | 2182.938833    | 1091.973054      | 2181.954817        | 1091.481046      | 15 |
| 14 | 1914.621991        | 957.814634        | 1897.595442       | 949.301359        | 1896.611426        | 948.809351        | C    | <b>2039.934733</b> | 1020.471005        | 2022.908184    | 1011.957730      | 2021.924168        | 1011.465722      | 14 |
| 15 | 2015.669670        | 1008.338473       | 1998.643121       | 999.825199        | 1997.659105        | 999.333191        | T    | <b>1879.904084</b> | 940.455680         | 1862.877535    | 931.942406       | 1861.893519        | 931.450398       | 13 |
| 16 | 2130.696613        | 1065.851945       | 2113.670064       | 1057.338670       | 2112.686048        | 1056.846662       | D    | <b>1778.856405</b> | 889.931841         | 1761.829856    | 881.418566       | 1760.845840        | 880.926558       | 12 |
| 17 | 2293.759942        | 1147.383609       | 2276.733393       | 1138.870335       | 2275.749377        | 1138.378327       | Y    | <b>1663.829462</b> | 832.418369         | 1646.802913    | 823.905095       | 1645.818897        | 823.413086       | 11 |
| 18 | 2394.807621        | 1197.907449       | 2377.781072       | 1189.394174       | 2376.797056        | 1188.902166       | T    | <b>1500.766133</b> | 750.886704         | 1483.739584    | 742.373430       | 1482.755568        | 741.881422       | 10 |
| 19 | 2465.844735        | 1233.426006       | 2448.818186       | 1224.912731       | 2447.834170        | 1224.420723       | A    | <b>1399.718454</b> | 700.362865         | 1382.691905    | 691.849591       | 1381.707889        | 691.357583       | 9  |
| 20 | 2594.887328        | 1297.947302       | 2577.860779       | 1289.434028       | 2576.876763        | 1288.942020       | E    | <b>1328.681340</b> | 664.844308         | 1311.654791    | 656.331033       | 1310.670775        | 655.839025       | 8  |
| 21 | 2754.917977        | 1377.962627       | 2737.891428       | 1369.449352       | 2736.907412        | 1368.957344       | C    | 1199.638747        | 600.323011         | 1182.612198    | 591.809737       | 1181.628182        | 591.317729       | 7  |
| 22 | 2883.012940        | 1442.010108       | 2865.986391       | 1433.496834       | 2865.002375        | 1433.004826       | K    | <b>1039.608098</b> | 520.307687         | 1022.581549    | 511.794412       | 1021.597533        | 511.302404       | 6  |
| 23 | 2980.065704        | 1490.536490       | 2963.039155       | 1482.023216       | 2962.055139        | 1481.531208       | P    | <b>911.513135</b>  | 456.260205         | 894.486586     | 447.746931       | 893.502570         | 447.254923       | 5  |
| 24 | 3419.291030        | 1710.149153       | 3402.264481       | 1701.635879       | 3401.280465        | 1701.143871       | Q    | 814.460371         | 407.733823         | 797.433822     | 399.220549       | 796.449806         | 398.728541       | 4  |
| 25 | 3518.359444        | 1759.683360       | 3501.332895       | 1751.170086       | 3500.348879        | 1750.678078       | V    | 375.235045         | 188.121160         | 358.208496     | 179.607886       | 357.224480         | 179.115878       | 3  |
| 26 | 3619.407123        | 1810.207200       | 3602.380574       | 1801.693925       | 3601.396558        | 1801.201917       | T    | 276.166631         | 138.586953         | 259.140082     | 130.073679       | 258.156066         | 129.581671       | 2  |
| 27 |                    |                   |                   |                   |                    |                   | R    | 175.118952         | 88.063114          | 158.092403     | 79.549839        |                    |                  | 1  |

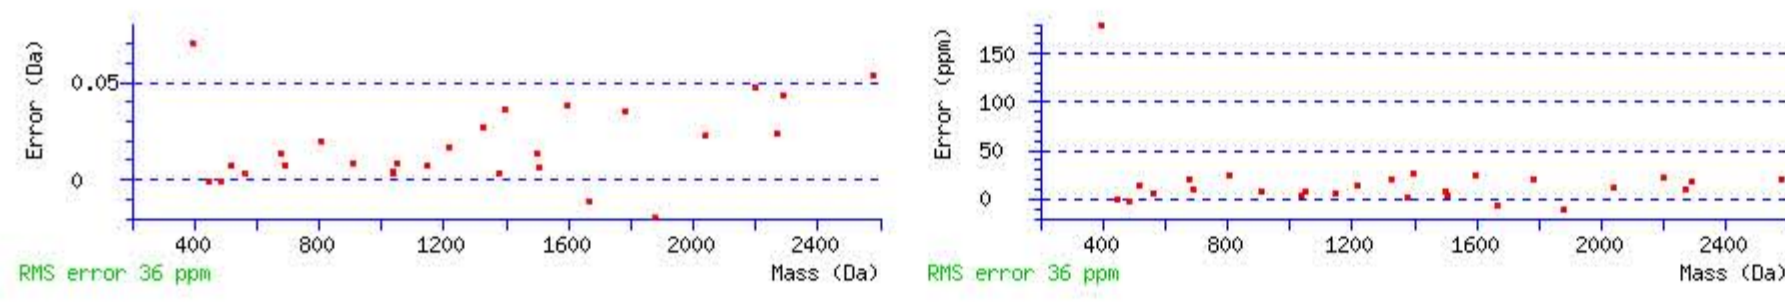

NCBI BLAST search of [CQCDELCSYYQSCCTDYTAECKPQVTR](#)  
 (Parameters: blastp, nr protein database, expect=20000, no filter, PAM30)  
 Other BLAST [web gateways](#)

### All matches to this query

| Score | Mr(calc):   | Delta    | Sequence                                    |
|-------|-------------|----------|---------------------------------------------|
| 62.0  | 3792.511536 | 0.040920 | <a href="#">CQCDELCSYYQSCCTDYTAECKPQVTR</a> |
| 9.9   | 3792.511536 | 0.040920 | <a href="#">CQCDELCSYYQSCCTDYTAECKPQVTR</a> |

# Mascot Search Results

## Peptide View

MS/MS Fragmentation of **GNPEQTPVLKPEEEAPAVEVGASKPEGIDSRPETLHPGRPQPPAEELCSGKPFDAFTDLK**  
 Found in **VTNC\_HUMAN**, Vitronectin OS=Homo sapiens GN=VTN PE=1 SV=1

Match to Query 70831: 6883.397632 from(861.431980,8+) rtinseconds(2086) index(33617)  
 Title: Locus:1.1.1.3275.17 File:"2013-07-02 CLN FXIII 60 min 3rd F 3.wiff"  
 Data file C:\Program Files (x86)\Matrix Science\Mascot Daemon\mgf6 FXIII 60 min 3rd\mascot\_daemon\_merge.mgf

Click mouse within plot area to zoom in by factor of two about that point  
 Or, Plot from  to  Da Full range  
 Label all possible matches  Label matches used for scoring

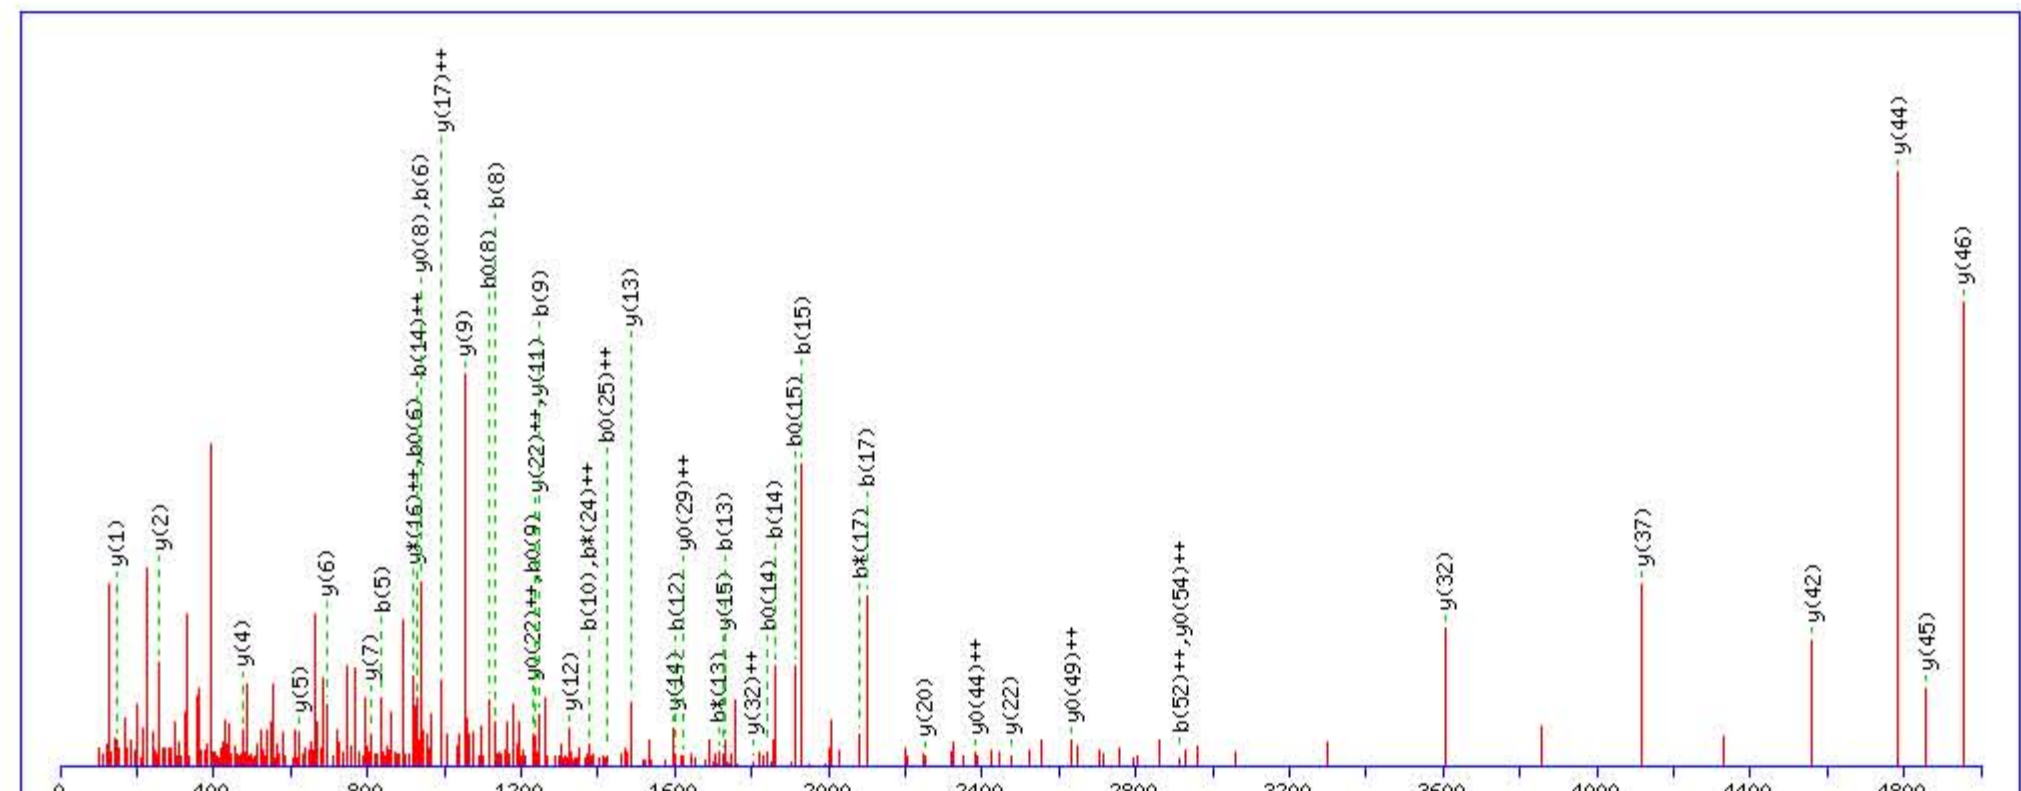

Monoisotopic mass of neutral peptide Mr(calc): 6883.374893  
 Fixed modifications: Carbamidomethyl (C) (apply to specified residues or termini only)  
 Variable modifications:  
 Q5 : Biotin:Thermo-21345 (Q)  
 Ions Score: 36 Expect: 0.0031  
 Matches : 51/708 fragment ions using 157 most intense peaks [\(help\)](#)

| #  | b                  | b <sup>++</sup>    | b <sup>+</sup>     | b <sup>+++</sup>   | b <sup>0</sup>     | b <sup>0++</sup>   | Seq. | y                  | y <sup>++</sup>    | y <sup>+</sup> | y <sup>+++</sup>  | y <sup>0</sup> | y <sup>0++</sup>   | #  |
|----|--------------------|--------------------|--------------------|--------------------|--------------------|--------------------|------|--------------------|--------------------|----------------|-------------------|----------------|--------------------|----|
| 1  | 58.028740          | 29.518008          |                    |                    |                    |                    | G    |                    |                    |                |                   |                |                    | 61 |
| 2  | 172.071667         | 86.539471          | 155.045118         | 78.026197          |                    |                    | N    | 6827.360757        | 3414.184017        | 6810.334208    | 3405.670742       | 6809.350192    | 3405.178734        | 60 |
| 3  | 269.124431         | 135.065854         | 252.097882         | 126.552579         |                    |                    | P    | 6713.317830        | 3357.162553        | 6696.291281    | 3348.649279       | 6695.307265    | 3348.157271        | 59 |
| 4  | 398.167024         | 199.587150         | 381.140475         | 191.073876         | 380.156459         | 190.581868         | E    | 6616.265066        | 3308.636171        | 6599.238517    | 3300.122897       | 6598.254501    | 3299.630889        | 58 |
| 5  | <b>837.392350</b>  | 419.199813         | 820.365801         | 410.686539         | 819.381785         | 410.194531         | Q    | 6487.222473        | 3244.114875        | 6470.195924    | 3235.601600       | 6469.211908    | 3235.109592        | 57 |
| 6  | <b>938.440029</b>  | 469.723653         | 921.413480         | 461.210378         | <b>920.429464</b>  | 460.718370         | T    | 6047.997147        | 3024.502212        | 6030.970598    | 3015.988937       | 6029.986582    | 3015.496929        | 56 |
| 7  | 1035.492793        | 518.250035         | 1018.466244        | 509.736760         | 1017.482228        | 509.244752         | P    | 5946.949468        | 2973.978372        | 5929.922919    | 2965.465098       | 5928.938903    | 2964.973090        | 55 |
| 8  | <b>1134.561207</b> | 567.784242         | 1117.534658        | 559.270967         | <b>1116.550642</b> | 558.778959         | V    | 5849.896704        | 2925.451990        | 5832.870155    | 2916.938716       | 5831.886139    | <b>2916.446708</b> | 54 |
| 9  | <b>1247.645271</b> | 624.326274         | 1230.618722        | 615.812999         | <b>1229.634706</b> | 615.320991         | L    | 5750.828290        | 2875.917783        | 5733.801741    | 2867.404509       | 5732.817725    | 2866.912501        | 53 |
| 10 | <b>1375.740234</b> | 688.373755         | 1358.713685        | 679.860481         | 1357.729669        | 679.368473         | K    | 5637.744226        | 2819.375751        | 5620.717677    | 2810.862477       | 5619.733661    | 2810.370469        | 52 |
| 11 | 1472.792998        | 736.900137         | 1455.766449        | 728.386863         | 1454.782433        | 727.894855         | P    | 5509.649263        | 2755.328270        | 5492.622714    | 2746.814995       | 5491.638698    | 2746.322987        | 51 |
| 12 | <b>1601.835591</b> | 801.421434         | 1584.809042        | 792.908159         | 1583.825026        | 792.416151         | E    | 5412.596499        | 2706.801888        | 5395.569950    | 2698.288613       | 5394.585934    | 2697.796605        | 50 |
| 13 | <b>1730.878184</b> | 865.942730         | <b>1713.851635</b> | 857.429456         | 1712.867619        | 856.937448         | E    | 5283.553906        | 2642.280591        | 5266.527357    | 2633.767317       | 5265.543341    | <b>2633.275309</b> | 49 |
| 14 | <b>1859.920777</b> | <b>930.464027</b>  | 1842.894228        | 921.950752         | <b>1841.910212</b> | 921.458744         | E    | 5154.511313        | 2577.759295        | 5137.484764    | 2569.246020       | 5136.500748    | 2568.754012        | 48 |
| 15 | <b>1930.957891</b> | 965.982584         | 1913.931342        | 957.469309         | <b>1912.947326</b> | 956.977301         | A    | 5025.468720        | 2513.237998        | 5008.442171    | 2504.724724       | 5007.458155    | 2504.232716        | 47 |
| 16 | 2028.010655        | 1014.508966        | 2010.984106        | 1005.995691        | 2010.000090        | 1005.503683        | P    | <b>4954.431606</b> | 2477.719441        | 4937.405057    | 2469.206167       | 4936.421041    | 2468.714159        | 46 |
| 17 | <b>2099.047769</b> | 1050.027523        | <b>2082.021220</b> | 1041.514248        | 2081.037204        | 1041.022240        | A    | <b>4857.378842</b> | 2429.193059        | 4840.352293    | 2420.679785       | 4839.368277    | 2420.187777        | 45 |
| 18 | 2196.100533        | 1098.553905        | 2179.073984        | 1090.040630        | 2178.089968        | 1089.548622        | P    | <b>4786.341728</b> | 2393.674502        | 4769.315179    | 2385.161228       | 4768.331163    | <b>2384.669220</b> | 44 |
| 19 | 2325.143126        | 1163.075201        | 2308.116577        | 1154.561927        | 2307.132561        | 1154.069919        | E    | 4689.288964        | 2345.148120        | 4672.262415    | 2336.634846       | 4671.278399    | 2336.142838        | 43 |
| 20 | 2424.211540        | 1212.609408        | 2407.184991        | 1204.096134        | 2406.200975        | 1203.604126        | V    | <b>4560.246371</b> | 2280.626824        | 4543.219822    | 2272.113549       | 4542.235806    | 2271.621541        | 42 |
| 21 | 2481.233004        | 1241.120140        | 2464.206455        | 1232.606865        | 2463.222439        | 1232.114858        | G    | 4461.177957        | 2231.092617        | 4444.151408    | 2222.579342       | 4443.167392    | 2222.087334        | 41 |
| 22 | 2552.270118        | 1276.638697        | 2535.243569        | 1268.125423        | 2534.259553        | 1267.633415        | A    | 4404.156493        | 2202.581885        | 4387.129944    | 2194.068610       | 4386.145928    | 2193.576602        | 40 |
| 23 | 2639.302146        | 1320.154711        | 2622.275597        | 1311.641437        | 2621.291581        | 1311.149429        | S    | 4333.119379        | 2167.063328        | 4316.092830    | 2158.550053       | 4315.108814    | 2158.058045        | 39 |
| 24 | 2767.397109        | 1384.202193        | 2750.370560        | <b>1375.688918</b> | 2749.386544        | 1375.196910        | K    | 4246.087351        | 2123.547314        | 4229.060802    | 2115.034039       | 4228.076786    | 2114.542031        | 38 |
| 25 | 2864.449873        | 1432.728575        | 2847.423324        | 1424.215300        | 2846.439308        | <b>1423.723292</b> | P    | <b>4117.992388</b> | 2059.499832        | 4100.965839    | 2050.986558       | 4099.981823    | 2050.494550        | 37 |
| 26 | 2993.492466        | 1497.249871        | 2976.465917        | 1488.736597        | 2975.481901        | 1488.244589        | E    | 4020.939624        | 2010.973450        | 4003.913075    | 2002.460176       | 4002.929059    | 2001.968168        | 36 |
| 27 | 3050.513930        | 1525.760603        | 3033.487381        | 1517.247329        | 3032.503365        | 1516.755321        | G    | 3891.897031        | 1946.452154        | 3874.870482    | 1937.938879       | 3873.886466    | 1937.446871        | 35 |
| 28 | 3163.597994        | 1582.302635        | 3146.571445        | 1573.789361        | 3145.587429        | 1573.297353        | I    | 3834.875567        | 1917.941422        | 3817.849018    | 1909.428147       | 3816.865002    | 1908.936139        | 34 |
| 29 | 3278.624937        | 1639.816107        | 3261.598388        | 1631.302832        | 3260.614372        | 1630.810824        | D    | 3721.791503        | 1861.399390        | 3704.764954    | 1852.886115       | 3703.780938    | 1852.394107        | 33 |
| 30 | 3365.656965        | 1683.332121        | 3348.630416        | 1674.818846        | 3347.646400        | 1674.326838        | S    | <b>3606.764560</b> | <b>1803.885918</b> | 3589.738011    | 1795.372644       | 3588.753995    | 1794.880636        | 32 |
| 31 | 3521.758076        | 1761.382676        | 3504.731527        | 1752.869402        | 3503.747511        | 1752.377394        | R    | 3519.732532        | 1760.369904        | 3502.705983    | 1751.856630       | 3501.721967    | 1751.364622        | 31 |
| 32 | 3618.810840        | 1809.909058        | 3601.784291        | 1801.395784        | 3600.800275        | 1800.903776        | P    | 3363.631421        | 1682.319349        | 3346.604872    | 1673.806074       | 3345.620856    | 1673.314066        | 30 |
| 33 | 3747.853433        | 1874.430355        | 3730.826884        | 1865.917080        | 3729.842868        | 1865.425072        | E    | 3266.578657        | 1633.792967        | 3249.552108    | 1625.279692       | 3248.568092    | <b>1624.787684</b> | 29 |
| 34 | 3848.901112        | 1924.954194        | 3831.874563        | 1916.440920        | 3830.890547        | 1915.948912        | T    | 3137.536064        | 1569.271670        | 3120.509515    | 1560.758396       | 3119.525499    | 1560.266388        | 28 |
| 35 | 3961.985176        | 1981.496226        | 3944.958627        | 1972.982952        | 3943.974611        | 1972.490944        | L    | 3036.488385        | 1518.747831        | 3019.461836    | 1510.234556       | 3018.477820    | 1509.742548        | 27 |
| 36 | 4099.044088        | 2050.025682        | 4082.017539        | 2041.512408        | 4081.033523        | 2041.020400        | H    | 2923.404321        | 1462.205799        | 2906.377772    | 1453.692524       | 2905.393756    | 1453.200516        | 26 |
| 37 | 4196.096852        | 2098.552064        | 4179.070303        | 2090.038790        | 4178.086287        | 2089.546782        | P    | 2786.345409        | 1393.676343        | 2769.318860    | 1385.163068       | 2768.334844    | 1384.671060        | 25 |
| 38 | 4253.118316        | 2127.062796        | 4236.091767        | 2118.549522        | 4235.107751        | 2118.057514        | G    | 2689.292645        | 1345.149961        | 2672.266096    | 1336.636686       | 2671.282080    | 1336.144678        | 24 |
| 39 | 4409.219427        | 2205.113352        | 4392.192878        | 2196.600077        | 4391.208862        | 2196.108069        | R    | 2632.271181        | 1316.639229        | 2615.244632    | 1308.125954       | 2614.260616    | 1307.633946        | 23 |
| 40 | 4506.272191        | 2253.639734        | 4489.245642        | 2245.126459        | 4488.261626        | 2244.634451        | P    | <b>2476.170070</b> | <b>1238.588673</b> | 2459.143521    | 1230.075399       | 2458.159505    | <b>1229.583391</b> | 22 |
| 41 | 4634.330769        | 2317.669023        | 4617.304220        | 2309.155748        | 4616.320204        | 2308.663740        | Q    | 2379.117306        | 1190.062291        | 2362.090757    | 1181.549017       | 2361.106741    | 1181.057009        | 21 |
| 42 | 4731.383533        | 2366.195405        | 4714.356984        | 2357.682130        | 4713.372968        | 2357.190122        | P    | <b>2251.058728</b> | 1126.033002        | 2234.032179    | 1117.519728       | 2233.048163    | 1117.027720        | 20 |
| 43 | 4828.436297        | 2414.721787        | 4811.409748        | 2406.208512        | 4810.425732        | 2405.716504        | P    | 2154.005964        | 1077.506620        | 2136.979415    | 1068.993346       | 2135.995399    | 1068.501338        | 19 |
| 44 | 4899.473411        | 2450.240344        | 4882.446862        | 2441.727069        | 4881.462846        | 2441.235061        | A    | 2056.953200        | 1028.980238        | 2039.926651    | 1020.466964       | 2038.942635    | 1019.974956        | 18 |
| 45 | 5028.516004        | 2514.761640        | 5011.489455        | 2506.248366        | 5010.505439        | 2505.756358        | E    | 1985.916086        | <b>993.461681</b>  | 1968.889537    | 984.948407        | 1967.905521    | 984.456399         | 17 |
| 46 | 5157.558597        | 2579.282937        | 5140.532048        | 2570.769662        | 5139.548032        | 2570.277654        | E    | 1856.873493        | 928.940385         | 1839.846944    | <b>920.427110</b> | 1838.862928    | 919.935102         | 16 |
| 47 | 5286.601190        | 2643.804233        | 5269.574641        | 2635.290959        | 5268.590625        | 2634.798951        | E    | <b>1727.830900</b> | 864.419088         | 1710.804351    | 855.905814        | 1709.820335    | 855.413806         | 15 |
| 48 | 5399.685254        | 2700.346265        | 5382.658705        | 2691.832991        | 5381.674689        | 2691.340983        | L    | <b>1598.788307</b> | 799.897792         | 1581.761758    | 791.384517        | 1580.777742    | 790.892509         | 14 |
| 49 | 5559.715903        | 2780.361590        | 5542.689354        | 2771.848315        | 5541.705338        | 2771.356307        | C    | <b>1485.704243</b> | 743.355760         | 1468.677694    | 734.842485        | 1467.693678    | 734.350477         | 13 |
| 50 | 5646.747931        | 2823.877604        | 5629.721382        | 2815.364329        | 5628.737366        | 2814.872321        | S    | <b>1325.673594</b> | 663.340435         | 1308.647045    | 654.827161        | 1307.663029    | 654.335153         | 12 |
| 51 | 5703.769395        | 2852.388336        | 5686.742846        | 2843.875061        | 5685.758830        | 2843.383053        | G    | <b>1238.641566</b> | 619.824421         | 1221.615017    | 611.311147        | 1220.631001    | 610.819139         | 11 |
| 52 | 5831.864358        | <b>2916.435817</b> | 5814.837809        | 2907.922543        | 5813.853793        | 2907.430535        | K    | 1181.620102        | 591.313689         | 1164.593553    | 582.800415        | 1163.609537    | 582.308407         | 10 |
| 53 | 5928.917122        | 2964.962199        | 5911.890573        | 2956.448925        | 5910.906557        | 2955.956917        | P    | <b>1053.525139</b> | 527.266208         | 1036.498590    | 518.752933        | 1035.5         |                    |    |

# MASCOT SEARCH RESULTS

## Peptide View

MS/MS Fragmentation of **GGQIMTLK**

Found in **VWF\_HUMAN**, von Willebrand factor OS=Homo sapiens GN=VWF PE=1 SV=4

Match to Query 19020: 1157.628388 from(579.821470,2+) rtinseconds(1919) index(32561)

Title: Locus:1.1.1.3217.18 File:"2013-07-02 CLN FXIII 60 min 3rd F 3.wiff"

Data file C:\Program Files (x86)\Matrix Science\Mascot Daemon\mgf\6 FXIII 60 min 3rd\mascot\_daemon\_merge.mgf

Click mouse within plot area to zoom in by factor of two about that point

Or, Plot from  to  Da

Label all possible matches  Label matches used for scoring

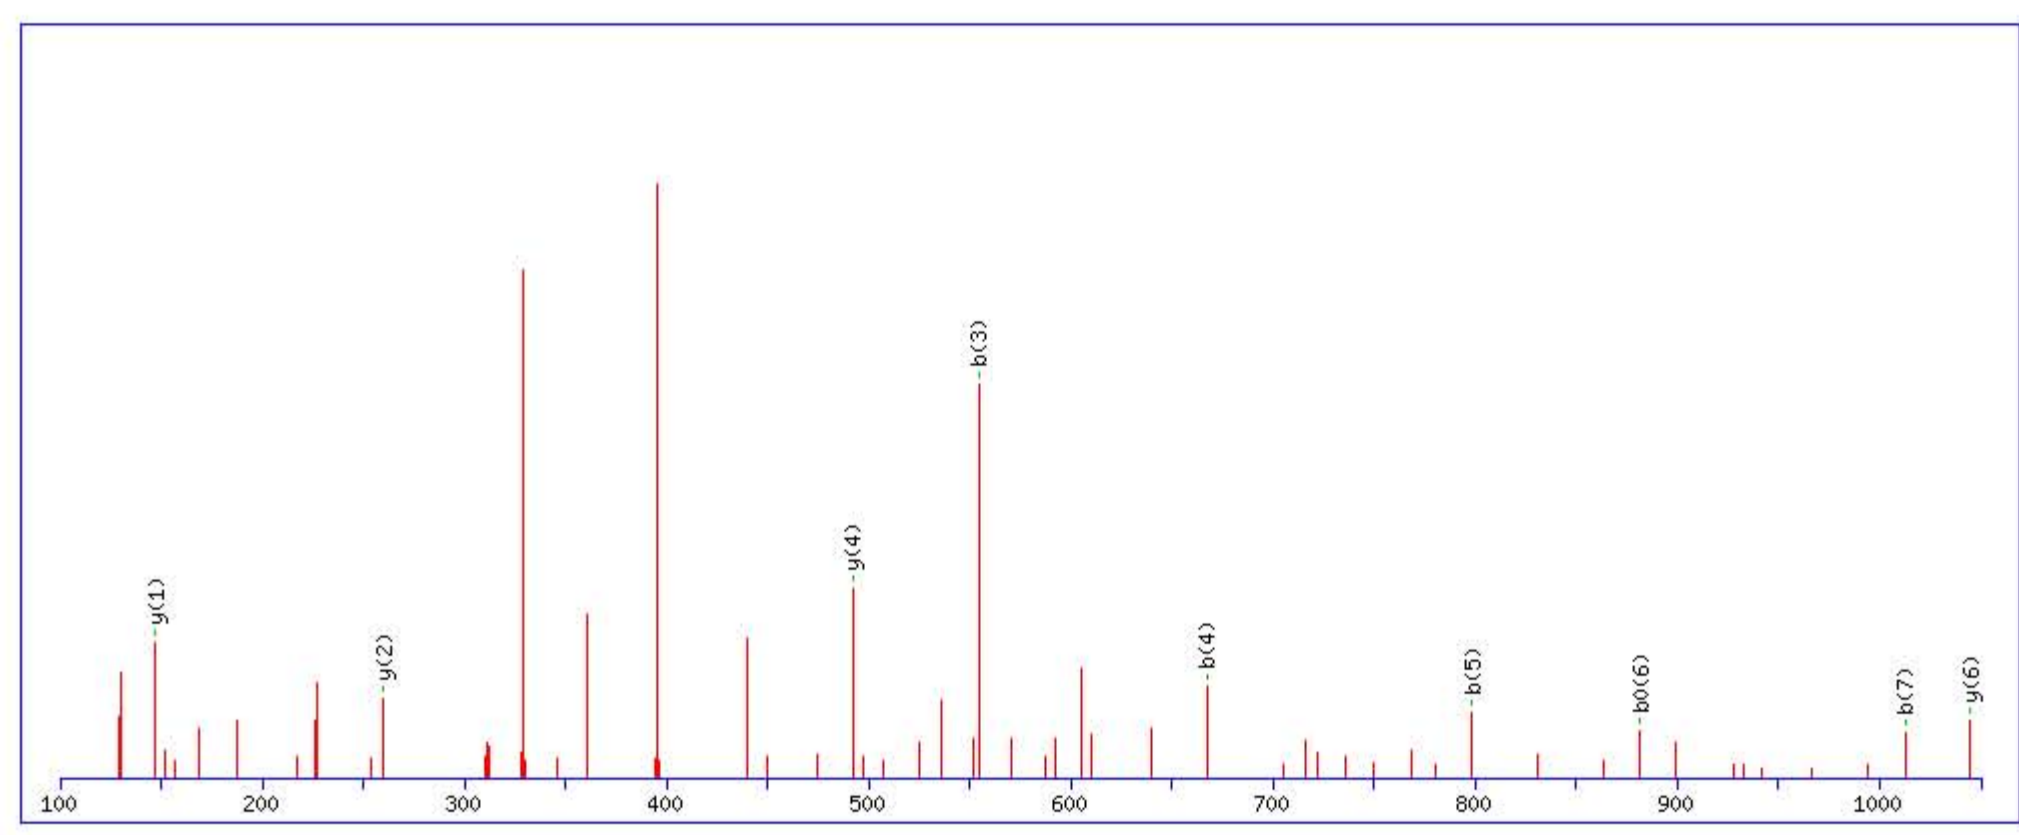

Monoisotopic mass of neutral peptide Mr(calc): 1157.630066

Fixed modifications: Carbamidomethyl (C) (apply to specified residues or termini only)

Variable modifications:

Q3 : Biotin:Thermo-21345 (Q)

Ions Score: 41 Expect: 0.0022

Matches : 9/66 fragment ions using 10 most intense peaks [\(help\)](#)

| # | b                  | b <sup>++</sup> | b <sup>*</sup> | b <sup>*++</sup> | b <sup>0</sup>    | b <sup>0++</sup> | Seq. | y                  | y <sup>++</sup> | y <sup>*</sup> | y <sup>*++</sup> | y <sup>0</sup> | y <sup>0++</sup> | # |
|---|--------------------|-----------------|----------------|------------------|-------------------|------------------|------|--------------------|-----------------|----------------|------------------|----------------|------------------|---|
| 1 | 58.028740          | 29.518008       |                |                  |                   |                  | G    |                    |                 |                |                  |                |                  | 8 |
| 2 | 115.050204         | 58.028740       |                |                  |                   |                  | G    | 1101.615886        | 551.311581      | 1084.589337    | 542.798307       | 1083.605321    | 542.306299       | 7 |
| 3 | <b>554.275530</b>  | 277.641403      | 537.248981     | 269.128129       |                   |                  | Q    | <b>1044.594422</b> | 522.800849      | 1027.567873    | 514.287575       | 1026.583857    | 513.795567       | 6 |
| 4 | <b>667.359594</b>  | 334.183435      | 650.333045     | 325.670161       |                   |                  | I    | 605.369096         | 303.188186      | 588.342547     | 294.674912       | 587.358531     | 294.182904       | 5 |
| 5 | <b>798.400079</b>  | 399.703678      | 781.373530     | 391.190403       |                   |                  | M    | <b>492.285032</b>  | 246.646154      | 475.258483     | 238.132880       | 474.274467     | 237.640872       | 4 |
| 6 | 899.447758         | 450.227517      | 882.421209     | 441.714243       | <b>881.437193</b> | 441.222235       | T    | 361.244547         | 181.125912      | 344.217998     | 172.612637       | 343.233982     | 172.120629       | 3 |
| 7 | <b>1012.531822</b> | 506.769549      | 995.505273     | 498.256275       | 994.521257        | 497.764267       | L    | <b>260.196868</b>  | 130.602072      | 243.170319     | 122.088798       |                |                  | 2 |
| 8 |                    |                 |                |                  |                   |                  | K    | <b>147.112804</b>  | 74.060040       | 130.086255     | 65.546765        |                |                  | 1 |

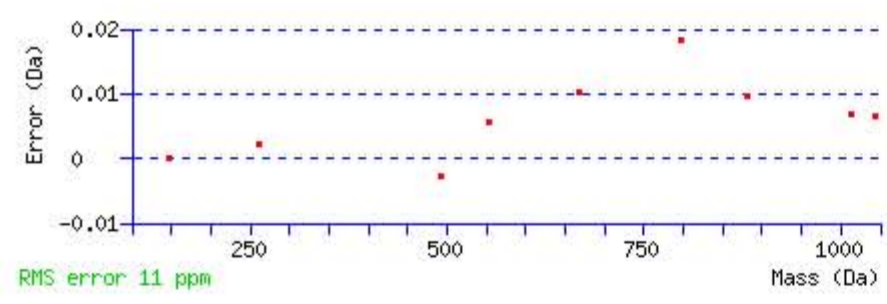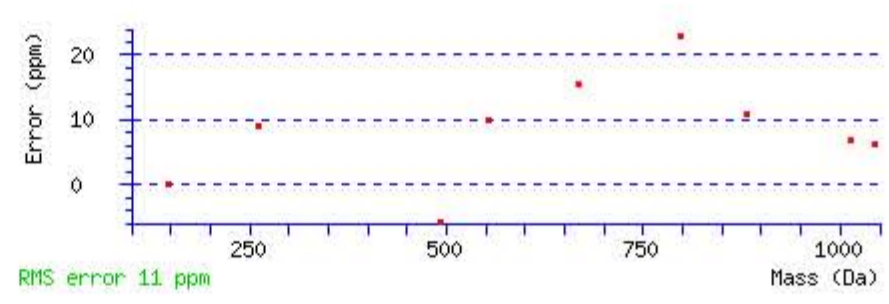

NCBI BLAST search of [GGQIMTLK](#)

(Parameters: blastp, nr protein database, expect=20000, no filter, PAM30)

Other BLAST [web gateways](#)

### All matches to this query

| Score | Mr(calc):   | Delta     | Sequence                    |
|-------|-------------|-----------|-----------------------------|
| 41.1  | 1157.630066 | -0.001678 | <a href="#">GGQIMTLK</a>    |
| 16.2  | 1157.630051 | -0.001663 | <a href="#">QLSQMLK</a>     |
| 12.7  | 1157.630051 | -0.001663 | <a href="#">QIKSMLQ</a>     |
| 12.7  | 1157.630051 | -0.001663 | <a href="#">QLSQMLK</a>     |
| 10.8  | 1157.640411 | -0.012023 | <a href="#">AQQLSSGNLK</a>  |
| 10.5  | 1157.619293 | 0.009095  | <a href="#">TNFEGPPRLK</a>  |
| 10.2  | 1157.630035 | -0.001647 | <a href="#">EAQKMLK</a>     |
| 9.6   | 1157.630051 | -0.001663 | <a href="#">QAGAMLLK</a>    |
| 8.2   | 1157.622665 | 0.005723  | <a href="#">QRTDSLK</a>     |
| 6.9   | 1157.640411 | -0.012023 | <a href="#">SPGKNSSIQLK</a> |

# MASCOT SCIENCE Mascot Search Results

## Peptide View

MS/MS Fragmentation of **GDSQSSWK**

Found in **VWF\_HUMAN**, von Willebrand factor OS=Homo sapiens GN=VWF PE=1 SV=4

Match to Query 20409: 1204.554508 from(603.284530,2+) rtinseconds(1584) index(30774)

Title: Locus:1.1.1.3100.23 File:"2013-07-02 CLN FXIII 60 min 3rd F 3.wiff"

Data file C:\Program Files (x86)\Matrix Science\Mascot Daemon\mgf\6 FXIII 60 min 3rd\mascot\_daemon\_merge.mgf

Click mouse within plot area to zoom in by factor of two about that point

Or, Plot from  to  Da

Label all possible matches  Label matches used for scoring

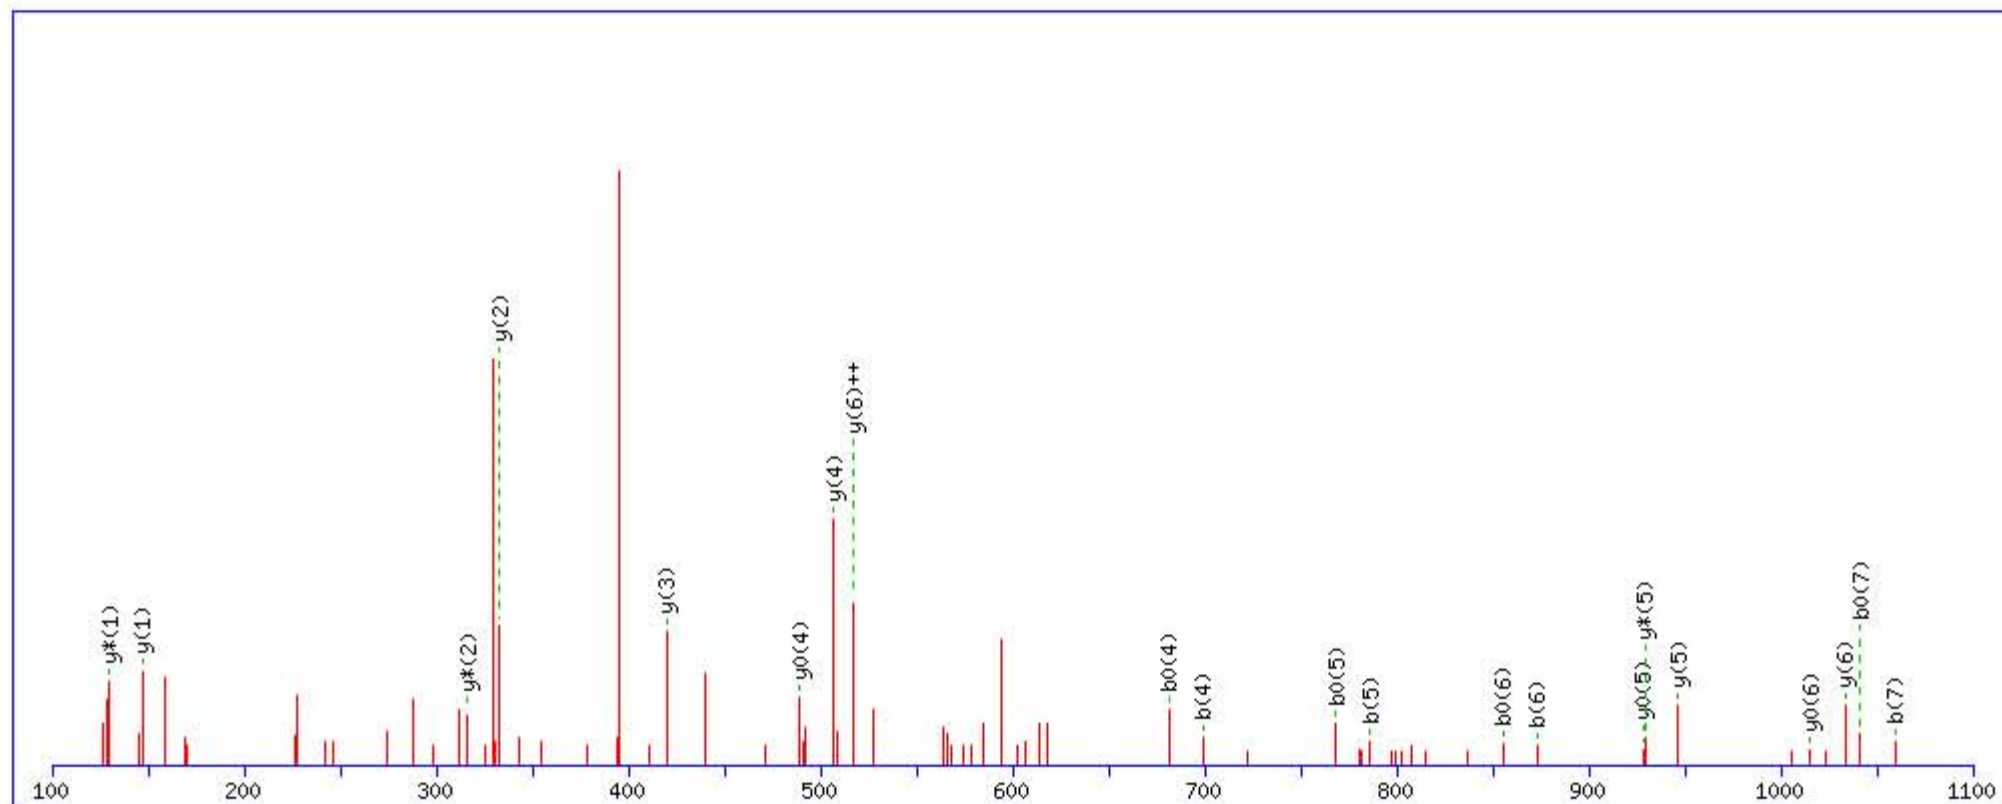

Monoisotopic mass of neutral peptide Mr(calc): 1204.554657

Fixed modifications: Carbamidomethyl (C) (apply to specified residues or termini only)

Variable modifications:

Q4 : Biotin:Thermo-21345 (Q)

Ions Score: 32 Expect: 0.0049

Matches : 21/72 fragment ions using 37 most intense peaks [\(help\)](#)

| # | b                  | b <sup>++</sup> | b <sup>*</sup> | b <sup>*++</sup> | b <sup>0</sup>     | b <sup>0++</sup> | Seq. | y                  | y <sup>++</sup>   | y <sup>*</sup>    | y <sup>*++</sup> | y <sup>0</sup>     | y <sup>0++</sup> | # |
|---|--------------------|-----------------|----------------|------------------|--------------------|------------------|------|--------------------|-------------------|-------------------|------------------|--------------------|------------------|---|
| 1 | 58.028740          | 29.518008       |                |                  |                    |                  | G    |                    |                   |                   |                  |                    |                  | 8 |
| 2 | 173.055683         | 87.031479       |                |                  | 155.045118         | 78.026197        | D    | 1148.540470        | 574.773873        | 1131.513921       | 566.260599       | 1130.529905        | 565.768591       | 7 |
| 3 | 260.087711         | 130.547493      |                |                  | 242.077146         | 121.542211       | S    | <b>1033.513527</b> | <b>517.260402</b> | 1016.486978       | 508.747127       | <b>1015.502962</b> | 508.255119       | 6 |
| 4 | <b>699.313037</b>  | 350.160157      | 682.286488     | 341.646882       | <b>681.302472</b>  | 341.154874       | Q    | <b>946.481499</b>  | 473.744388        | <b>929.454950</b> | 465.231113       | <b>928.470934</b>  | 464.739105       | 5 |
| 5 | <b>786.345065</b>  | 393.676171      | 769.318516     | 385.162896       | <b>768.334500</b>  | 384.670888       | S    | <b>507.256173</b>  | 254.131724        | 490.229624        | 245.618450       | <b>489.245608</b>  | 245.126442       | 4 |
| 6 | <b>873.377093</b>  | 437.192185      | 856.350544     | 428.678910       | <b>855.366528</b>  | 428.186902       | S    | <b>420.224145</b>  | 210.615711        | 403.197596        | 202.102436       | 402.213580         | 201.610428       | 3 |
| 7 | <b>1059.456406</b> | 530.231841      | 1042.429857    | 521.718567       | <b>1041.445841</b> | 521.226559       | W    | <b>333.192117</b>  | 167.099697        | <b>316.165568</b> | 158.586422       |                    |                  | 2 |
| 8 |                    |                 |                |                  |                    |                  | K    | <b>147.112804</b>  | 74.060040         | <b>130.086255</b> | 65.546765        |                    |                  | 1 |

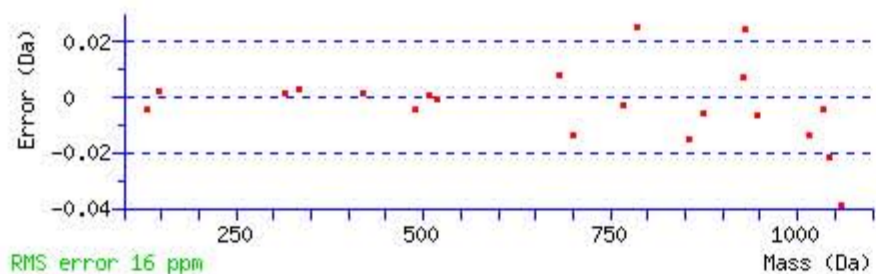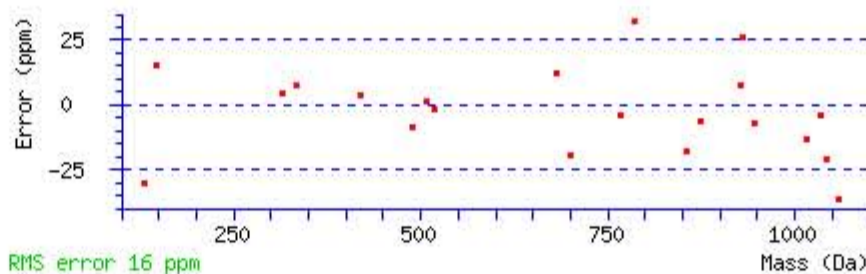

NCBI BLAST search of [GDSQSSWK](#)

(Parameters: blastp, nr protein database, expect=20000, no filter, PAM30)

Other BLAST [web gateways](#)

## All matches to this query

| Score | Mr(calc):   | Delta     | Sequence                   |
|-------|-------------|-----------|----------------------------|
| 31.6  | 1204.554657 | -0.000149 | <a href="#">GDSQSSWK</a>   |
| 6.6   | 1204.540253 | 0.014255  | <a href="#">QMQECAK</a>    |
| 4.9   | 1204.565872 | -0.011364 | <a href="#">QAKQACDAWK</a> |
| 0.9   | 1204.545883 | 0.008625  | <a href="#">EDLKEEEEGK</a> |

# MASCOT Search Results

## Peptide View

MS/MS Fragmentation of **VSSQCADTR**

Found in **VWF\_HUMAN**, von Willebrand factor OS=Homo sapiens GN=VWF PE=1 SV=4

Match to Query 23629: 1333.607108 from(667.810830,2+) rtinseconds(1273) index(42936)

Title: Locus:1.1.1.2491.14 File:"2013-07-02 CLN FXIII 60 min 3rd F 4.wiff"

Data file C:\Program Files (x86)\Matrix Science\Mascot Daemon\mgf\6 FXIII 60 min 3rd\mascot\_daemon\_merge.mgf

Click mouse within plot area to zoom in by factor of two about that point

Or, Plot from  to  Da

Label all possible matches  Label matches used for scoring

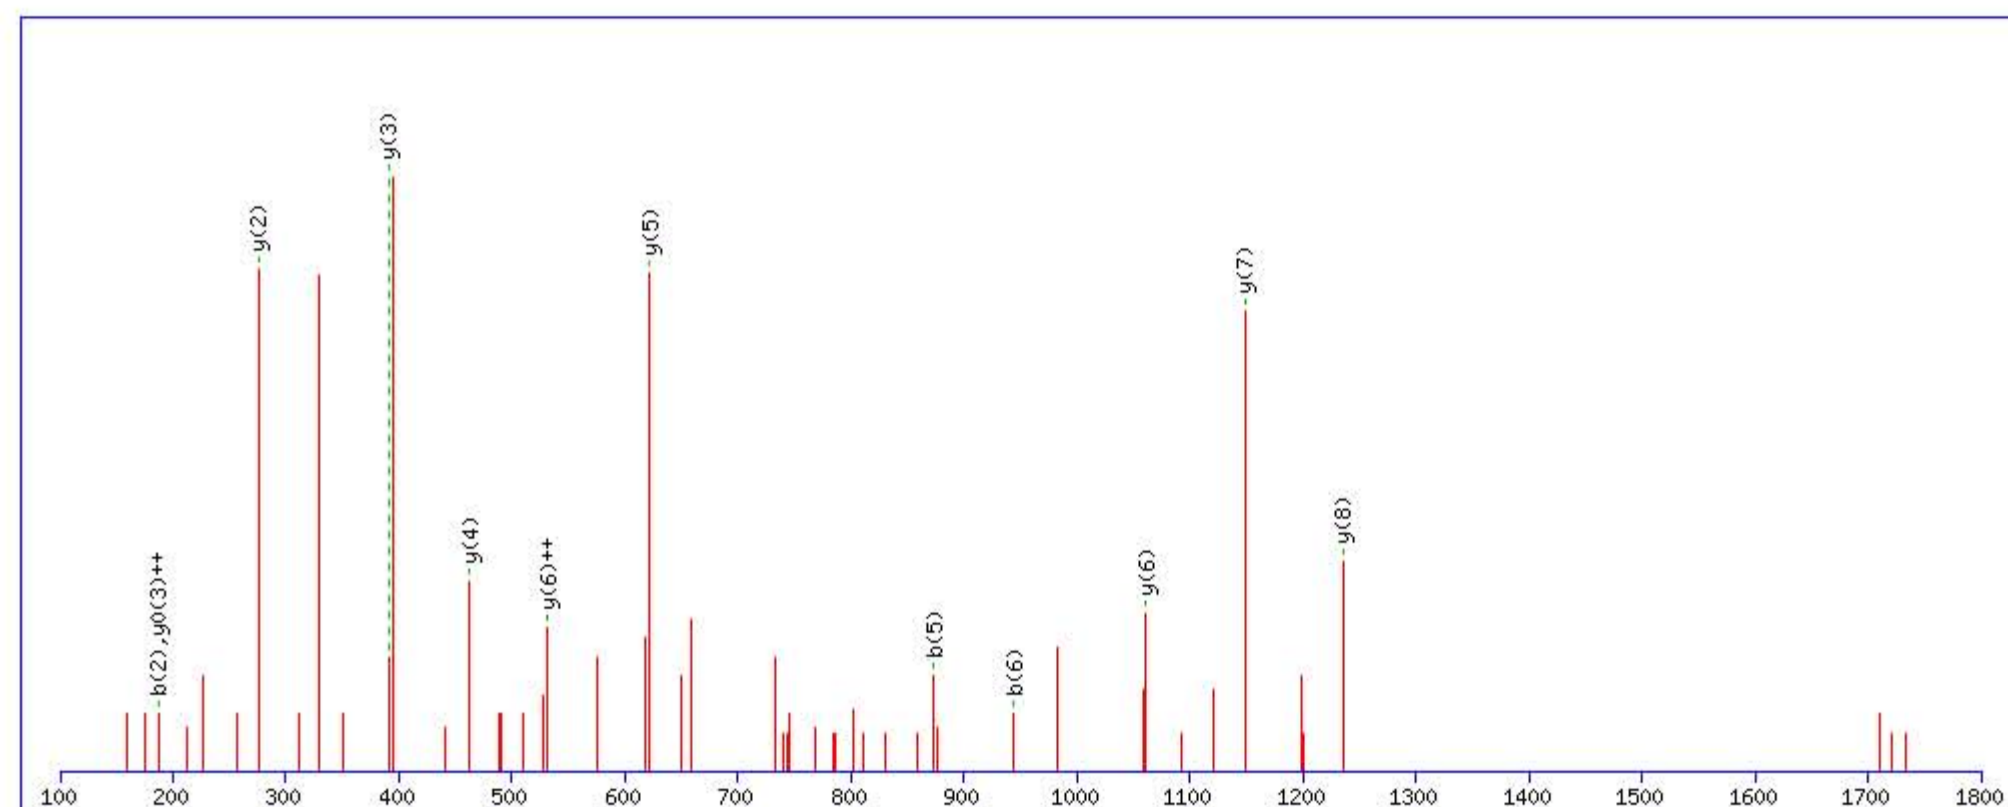

Monoisotopic mass of neutral peptide Mr(calc): 1333.611862

Fixed modifications: Carbamidomethyl (C) (apply to specified residues or termini only)

Variable modifications:

Q4 : Biotin:Thermo-21345 (Q)

Ions Score: 42 Expect: 0.00027

Matches : 12/86 fragment ions using 21 most intense peaks ([help](#))

| # | b                 | b <sup>++</sup> | b <sup>*</sup> | b <sup>+++</sup> | b <sup>0</sup> | b <sup>0++</sup> | Seq. | y                  | y <sup>++</sup>   | y <sup>*</sup> | y <sup>+++</sup> | y <sup>0</sup> | y <sup>0++</sup>  | # |
|---|-------------------|-----------------|----------------|------------------|----------------|------------------|------|--------------------|-------------------|----------------|------------------|----------------|-------------------|---|
| 1 | 100.075690        | 50.541483       |                |                  |                |                  | V    |                    |                   |                |                  |                |                   | 9 |
| 2 | <b>187.107718</b> | 94.057497       |                |                  | 169.097153     | 85.052214        | S    | <b>1235.550719</b> | 618.278998        | 1218.524170    | 609.765723       | 1217.540154    | 609.273715        | 8 |
| 3 | 274.139746        | 137.573511      |                |                  | 256.129181     | 128.568229       | S    | <b>1148.518691</b> | 574.762984        | 1131.492142    | 566.249709       | 1130.508126    | 565.757701        | 7 |
| 4 | 713.365072        | 357.186174      | 696.338523     | 348.672900       | 695.354507     | 348.180892       | Q    | <b>1061.486663</b> | <b>531.246970</b> | 1044.460114    | 522.733695       | 1043.476098    | 522.241687        | 6 |
| 5 | <b>873.395721</b> | 437.201499      | 856.369172     | 428.688224       | 855.385156     | 428.196216       | C    | <b>622.261337</b>  | 311.634307        | 605.234788     | 303.121032       | 604.250772     | 302.629024        | 5 |
| 6 | <b>944.432835</b> | 472.720056      | 927.406286     | 464.206781       | 926.422270     | 463.714773       | A    | <b>462.230688</b>  | 231.618982        | 445.204139     | 223.105707       | 444.220123     | 222.613700        | 4 |
| 7 | 1059.459778       | 530.233527      | 1042.433229    | 521.720253       | 1041.449213    | 521.228245       | D    | <b>391.193574</b>  | 196.100425        | 374.167025     | 187.587151       | 373.183009     | <b>187.095143</b> | 3 |
| 8 | 1160.507457       | 580.757367      | 1143.480908    | 572.244092       | 1142.496892    | 571.752084       | T    | <b>276.166631</b>  | 138.586953        | 259.140082     | 130.073679       | 258.156066     | 129.581671        | 2 |
| 9 |                   |                 |                |                  |                |                  | R    | 175.118952         | 88.063114         | 158.092403     | 79.549839        |                |                   | 1 |

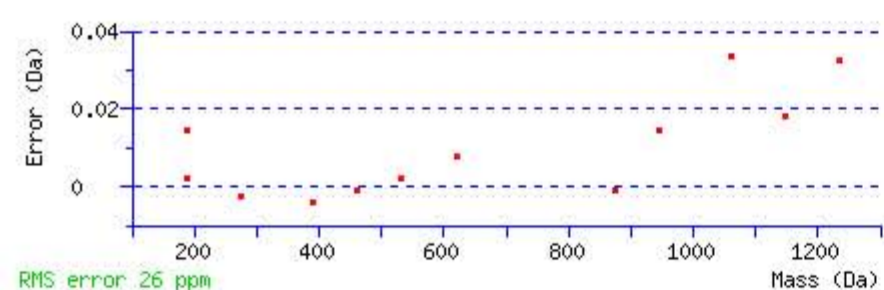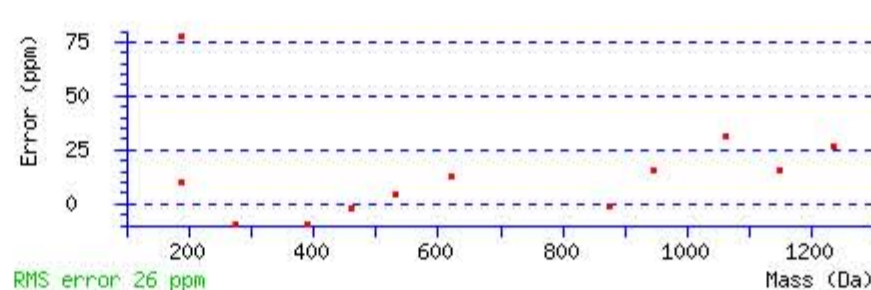

NCBI BLAST search of **VSSQCADTR**

(Parameters: blastp, nr protein database, expect=20000, no filter, PAM30)

Other BLAST [web gateways](#)

All matches to this query

| Score | Mr(calc):   | Delta     | Sequence                     |
|-------|-------------|-----------|------------------------------|
| 42.5  | 1333.611862 | -0.004754 | <a href="#">VSSQCADTR</a>    |
| 4.4   | 1333.607117 | -0.000009 | <a href="#">GEIEIESDAPMK</a> |

Mascot: <http://www.matrixscience.com/>

# MASCOT SCIENCE Mascot Search Results

## Peptide View

MS/MS Fragmentation of **VKEEVFIQQR**

Found in **VWF\_HUMAN**, von Willebrand factor OS=Homo sapiens GN=VWF PE=1 SV=4

Match to Query 32626: 1585.866132 from(529.629320,3+) rtinseconds(1776) index(45937)

Title: Locus:1.1.1.2667.6 File:"2013-07-02 CLN FXIII 60 min 3rd F 4.wiff"

Data file C:\Program Files (x86)\Matrix Science\Mascot Daemon\mgf\6 FXIII 60 min 3rd\mascot\_daemon\_merge.mgf

Click mouse within plot area to zoom in by factor of two about that point

Or, Plot from  to  Da

Label all possible matches  Label matches used for scoring

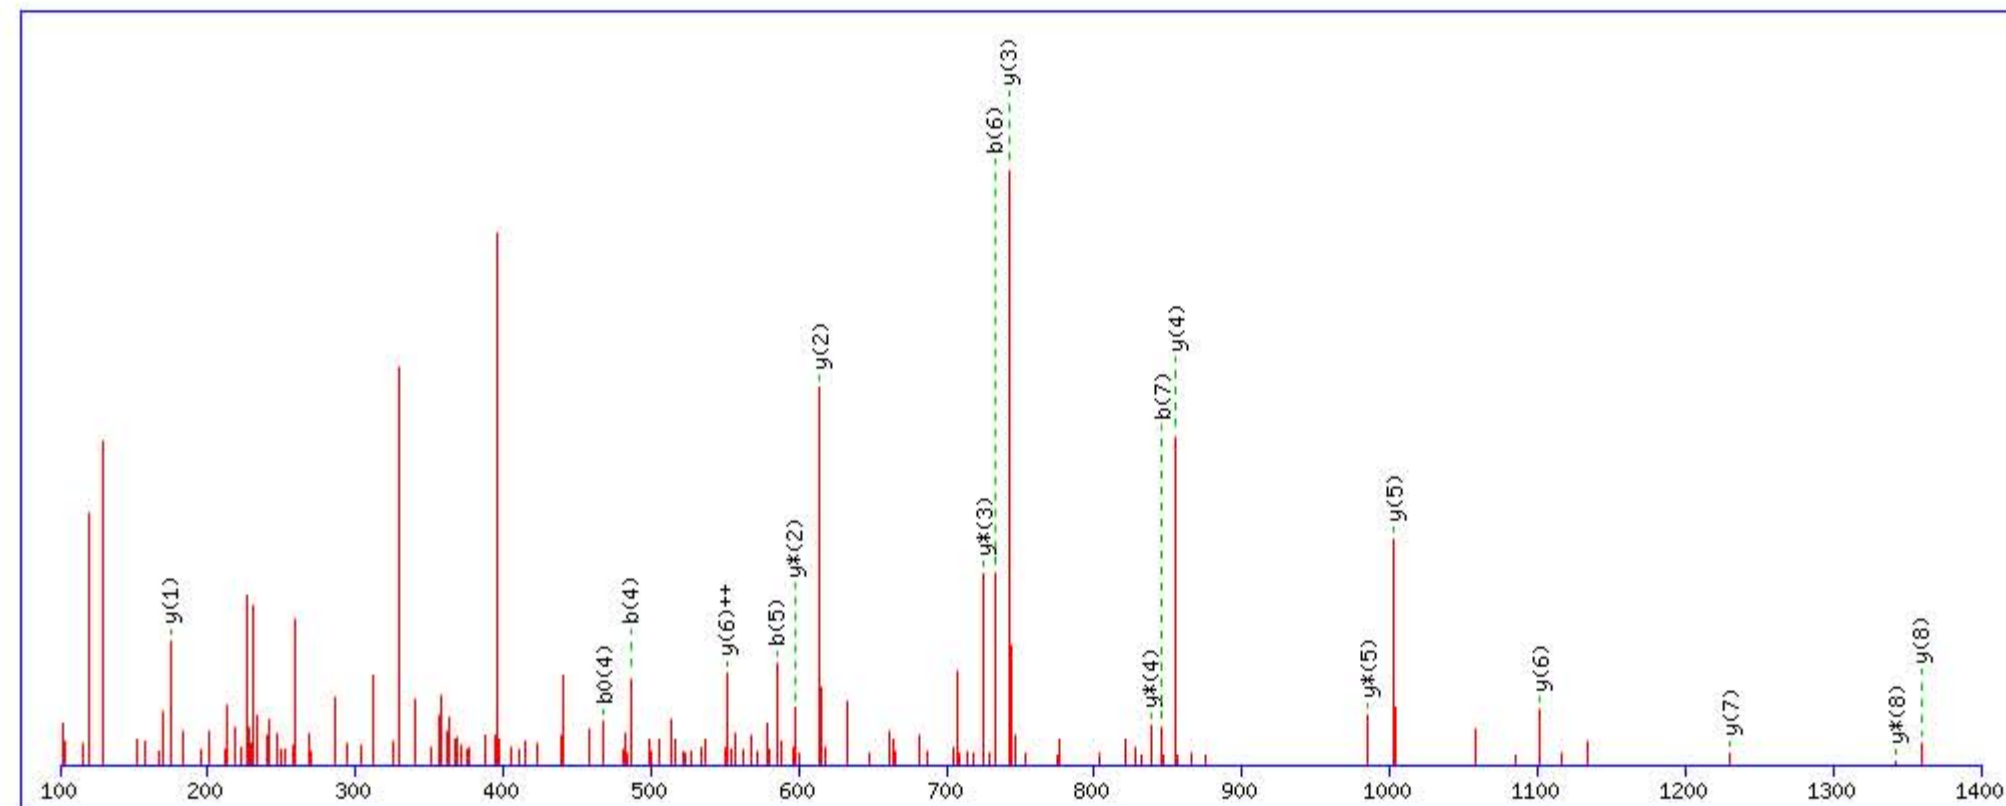

Monoisotopic mass of neutral peptide Mr(calc): 1585.865021

Fixed modifications: Carbamidomethyl (C) (apply to specified residues or termini only)

Variable modifications:

Q9 : Biotin:Thermo-21345 (Q)

Ions Score: 42 Expect: 0.0013

Matches : 19/90 fragment ions using 35 most intense peaks [\(help\)](#)

| #  | b                 | b <sup>++</sup> | b <sup>+</sup> | b <sup>+++</sup> | b <sup>0</sup>    | b <sup>0++</sup> | Seq. | y                  | y <sup>++</sup>   | y <sup>+</sup>     | y <sup>+++</sup> | y <sup>0</sup> | y <sup>0++</sup> | #  |
|----|-------------------|-----------------|----------------|------------------|-------------------|------------------|------|--------------------|-------------------|--------------------|------------------|----------------|------------------|----|
| 1  | 100.075690        | 50.541483       |                |                  |                   |                  | V    |                    |                   |                    |                  |                |                  | 10 |
| 2  | 228.170653        | 114.588965      | 211.144104     | 106.075690       |                   |                  | K    | 1487.803897        | 744.405587        | 1470.777348        | 735.892312       | 1469.793332    | 735.400304       | 9  |
| 3  | 357.213246        | 179.110261      | 340.186697     | 170.596987       | 339.202681        | 170.104979       | E    | <b>1359.708934</b> | 680.358105        | <b>1342.682385</b> | 671.844831       | 1341.698369    | 671.352823       | 8  |
| 4  | <b>486.255839</b> | 243.631558      | 469.229290     | 235.118283       | <b>468.245274</b> | 234.626275       | E    | <b>1230.666341</b> | 615.836809        | 1213.639792        | 607.323534       | 1212.655776    | 606.831526       | 7  |
| 5  | <b>585.324253</b> | 293.165765      | 568.297704     | 284.652490       | 567.313688        | 284.160482       | V    | <b>1101.623748</b> | <b>551.315512</b> | 1084.597199        | 542.802238       |                |                  | 6  |
| 6  | <b>732.392667</b> | 366.699972      | 715.366118     | 358.186697       | 714.382102        | 357.694689       | F    | <b>1002.555334</b> | 501.781305        | <b>985.528785</b>  | 493.268031       |                |                  | 5  |
| 7  | <b>845.476731</b> | 423.242004      | 828.450182     | 414.728729       | 827.466166        | 414.236721       | I    | <b>855.486920</b>  | 428.247098        | <b>838.460371</b>  | 419.733824       |                |                  | 4  |
| 8  | 973.535309        | 487.271293      | 956.508760     | 478.758018       | 955.524744        | 478.266010       | Q    | <b>742.402856</b>  | 371.705066        | <b>725.376307</b>  | 363.191792       |                |                  | 3  |
| 9  | 1412.760635       | 706.883956      | 1395.734086    | 698.370681       | 1394.750070       | 697.878673       | Q    | <b>614.344278</b>  | 307.675777        | <b>597.317729</b>  | 299.162503       |                |                  | 2  |
| 10 |                   |                 |                |                  |                   |                  | R    | <b>175.118952</b>  | 88.063114         | 158.092403         | 79.549839        |                |                  | 1  |

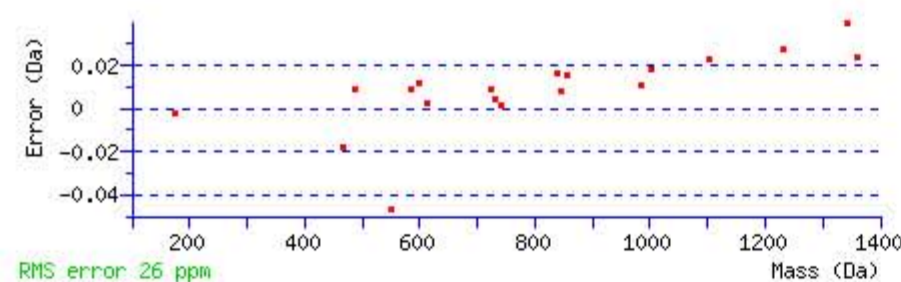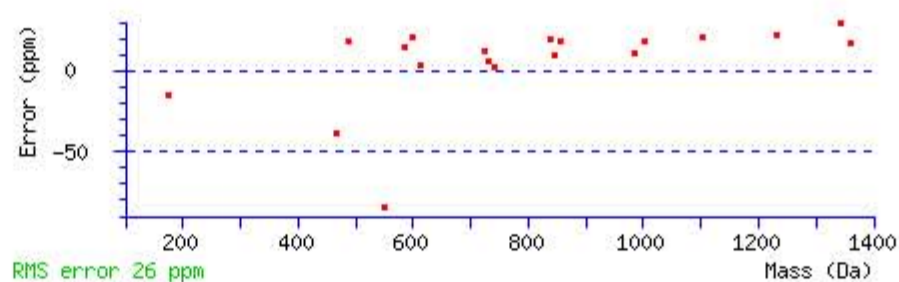

NCBI BLAST search of **VKEEVFIQQR**

(Parameters: blastp, nr protein database, expect=20000, no filter, PAM30)

Other BLAST [web gateways](#)

All matches to this query

| Score | Mr(calc):   | Delta    | Sequence                        |
|-------|-------------|----------|---------------------------------|
| 42.5  | 1585.865021 | 0.001111 | <a href="#">VKEEVFIQQR</a>      |
| 30.1  | 1585.865021 | 0.001111 | <a href="#">VKEEVFIQQR</a>      |
| 11.4  | 1585.842392 | 0.023740 | <a href="#">EIQTTTGNQQVLVR</a>  |
| 7.6   | 1585.857605 | 0.008527 | <a href="#">QEEVAGIRAKFPNK</a>  |
| 3.0   | 1585.842407 | 0.023725 | <a href="#">QLQTGGIHDIVTGQR</a> |
| 0.2   | 1585.842361 | 0.023771 | <a href="#">QSVLVKSNEEGIQR</a>  |

Mascot: <http://www.matrixscience.com/>

# MASCOT SEARCH RESULTS

## Peptide View

MS/MS Fragmentation of **QHSDPCALNPR**

Found in **VWF\_HUMAN**, von Willebrand factor OS=Homo sapiens GN=VWF PE=1 SV=4

Match to Query 33387: 1604.750442 from(535.924090,3+) rtinseconds(1429) index(29761)

Title: Locus:1.1.1.3046.17 File:"2013-07-02 CLN FXIII 60 min 3rd F 3.wiff"

Data file C:\Program Files (x86)\Matrix Science\Mascot Daemon\mgf6 FXIII 60 min 3rd\mascot\_daemon\_merge.mgf

Click mouse within plot area to zoom in by factor of two about that point

Or, Plot from  to  Da

Label all possible matches  Label matches used for scoring

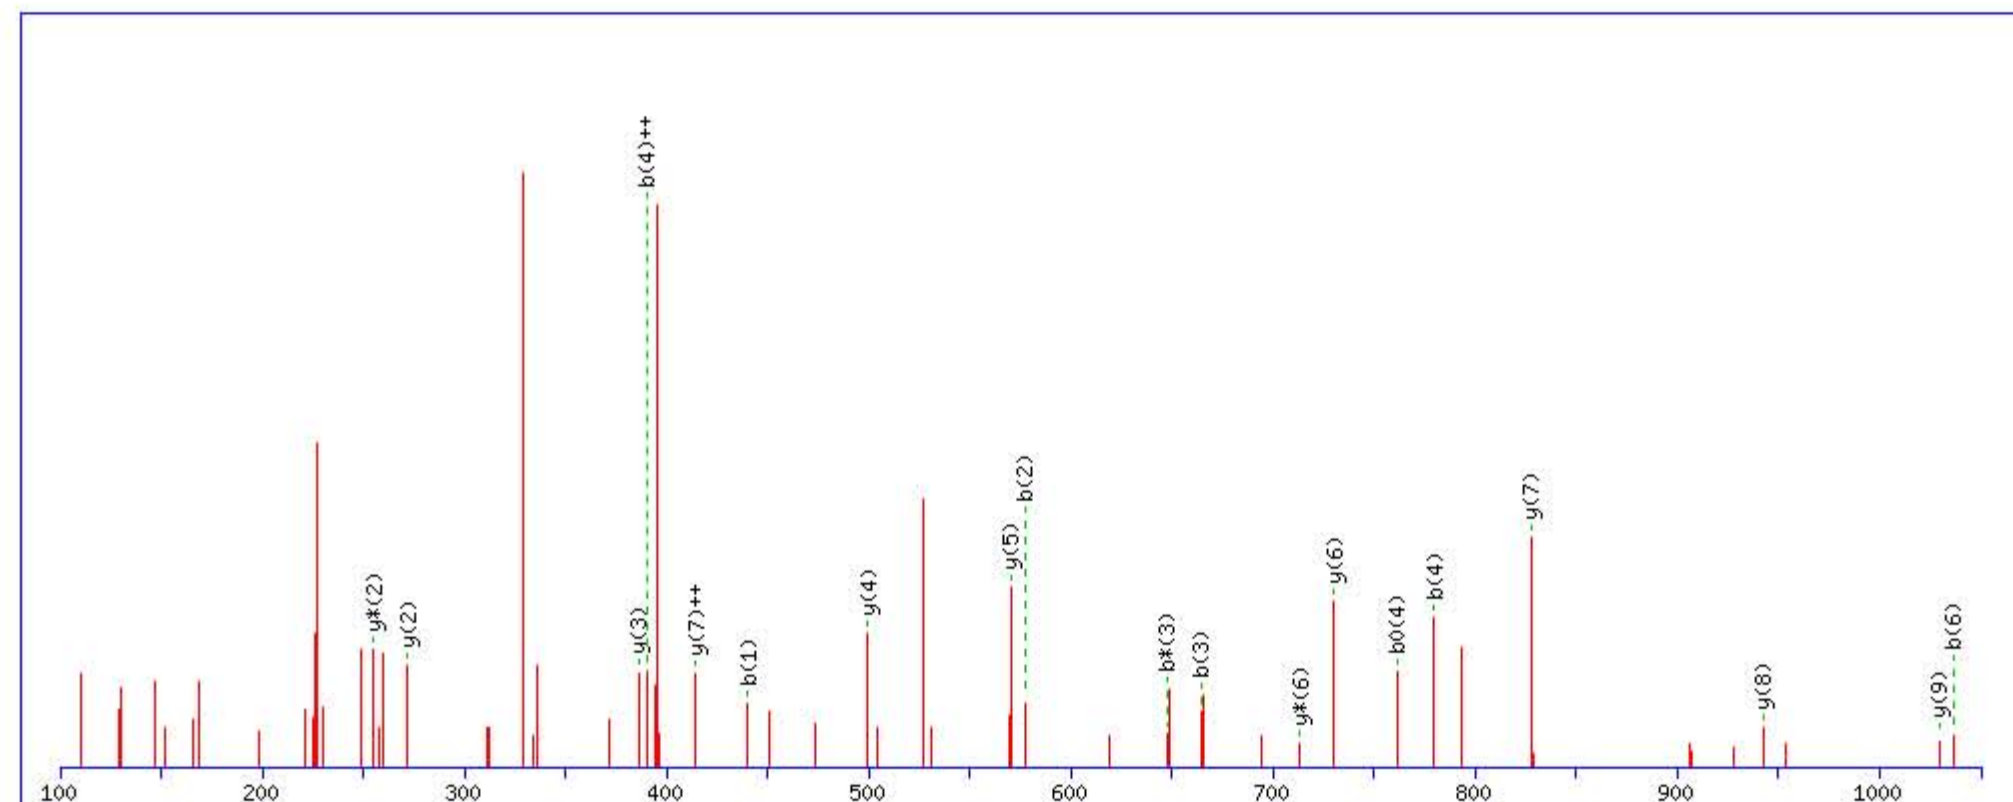

Monoisotopic mass of neutral peptide Mr(calc): 1604.755157

Fixed modifications: Carbamidomethyl (C) (apply to specified residues or termini only)

Variable modifications:

Q1 : Biotin:Thermo-21345 (Q)

Ions Score: 27 Expect: 0.014

Matches : 19/102 fragment ions using 50 most intense peaks [\(help\)](#)

| #  | b           | b <sup>++</sup> | b <sup>*</sup> | b <sup>*++</sup> | b <sup>0</sup> | b <sup>0++</sup> | Seq. | y           | y <sup>++</sup> | y <sup>*</sup> | y <sup>*++</sup> | y <sup>0</sup> | y <sup>0++</sup> | #  |
|----|-------------|-----------------|----------------|------------------|----------------|------------------|------|-------------|-----------------|----------------|------------------|----------------|------------------|----|
| 1  | 440.232602  | 220.619939      | 423.206053     | 212.106664       |                |                  | Q    |             |                 |                |                  |                |                  | 11 |
| 2  | 577.291514  | 289.149395      | 560.264965     | 280.636121       |                |                  | H    | 1166.537117 | 583.772196      | 1149.510568    | 575.258922       | 1148.526552    | 574.766914       | 10 |
| 3  | 664.323542  | 332.665409      | 647.296993     | 324.152134       | 646.312977     | 323.660126       | S    | 1029.478205 | 515.242740      | 1012.451656    | 506.729466       | 1011.467640    | 506.237458       | 9  |
| 4  | 779.350485  | 390.178880      | 762.323936     | 381.665606       | 761.339920     | 381.173598       | D    | 942.446177  | 471.726726      | 925.419628     | 463.213452       | 924.435612     | 462.721444       | 8  |
| 5  | 876.403249  | 438.705263      | 859.376700     | 430.191988       | 858.392684     | 429.699980       | P    | 827.419234  | 414.213255      | 810.392685     | 405.699980       |                |                  | 7  |
| 6  | 1036.433898 | 518.720587      | 1019.407349    | 510.207313       | 1018.423333    | 509.715305       | C    | 730.366470  | 365.686873      | 713.339921     | 357.173598       |                |                  | 6  |
| 7  | 1107.471012 | 554.239144      | 1090.444463    | 545.725870       | 1089.460447    | 545.233861       | A    | 570.335821  | 285.671548      | 553.309272     | 277.158274       |                |                  | 5  |
| 8  | 1220.555076 | 610.781176      | 1203.528527    | 602.267901       | 1202.544511    | 601.775893       | L    | 499.298707  | 250.152991      | 482.272158     | 241.639717       |                |                  | 4  |
| 9  | 1334.598003 | 667.802639      | 1317.571454    | 659.289365       | 1316.587438    | 658.797357       | N    | 386.214643  | 193.610959      | 369.188094     | 185.097685       |                |                  | 3  |
| 10 | 1431.650767 | 716.329021      | 1414.624218    | 707.815747       | 1413.640202    | 707.323739       | P    | 272.171716  | 136.589496      | 255.145167     | 128.076221       |                |                  | 2  |
| 11 |             |                 |                |                  |                |                  | R    | 175.118952  | 88.063114       | 158.092403     | 79.549839        |                |                  | 1  |

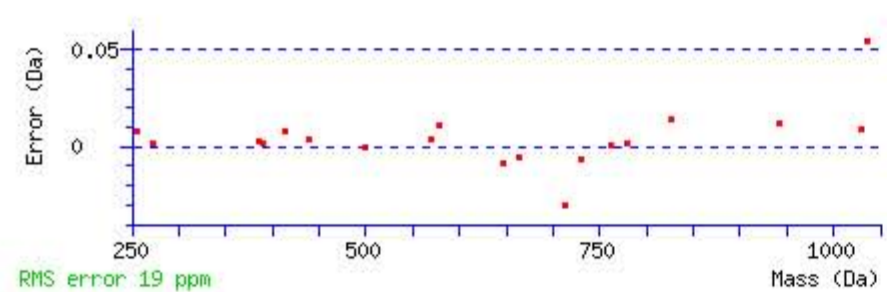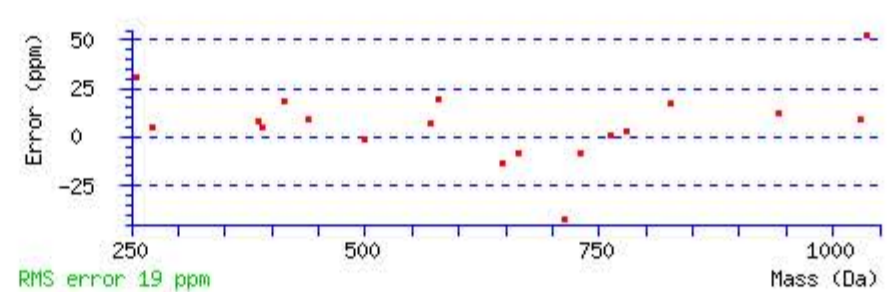

NCBI BLAST search of **QHSDPCALNPR**

(Parameters: blastp, nr protein database, expect=20000, no filter, PAM30)

Other BLAST [web gateways](#)

### All matches to this query

| Score | Mr(calc):   | Delta     | Sequence                      |
|-------|-------------|-----------|-------------------------------|
| 27.3  | 1604.755157 | -0.004715 | <a href="#">QHSDPCALNPR</a>   |
| 7.5   | 1604.736725 | 0.013717  | <a href="#">EGMGWSYLVFCLK</a> |
| 7.0   | 1604.743912 | 0.006530  | <a href="#">QMIMKDKNWHDK</a>  |
| 5.8   | 1604.772247 | -0.021805 | <a href="#">TDDIPVWDQEFK</a>  |



# MASCOT SCIENCE Mascot Search Results

## Peptide View

MS/MS Fragmentation of **VAQCSQKPCEDSCR**

Found in **VWF\_HUMAN**, von Willebrand factor OS=Homo sapiens GN=VWF PE=1 SV=4

Match to Query 43294: 2034.879702 from(679.300510,3+) rtinseconds(1186) index(42657)

Title: Locus:1.1.1.2461.12 File:"2013-07-02 CLN FXIII 60 min 3rd F 4.wiff"

Data file C:\Program Files (x86)\Matrix Science\Mascot Daemon\mgf\6 FXIII 60 min 3rd\mascot\_daemon\_merge.mgf

Click mouse within plot area to zoom in by factor of two about that point

Or, Plot from  to  Da

Label all possible matches  Label matches used for scoring

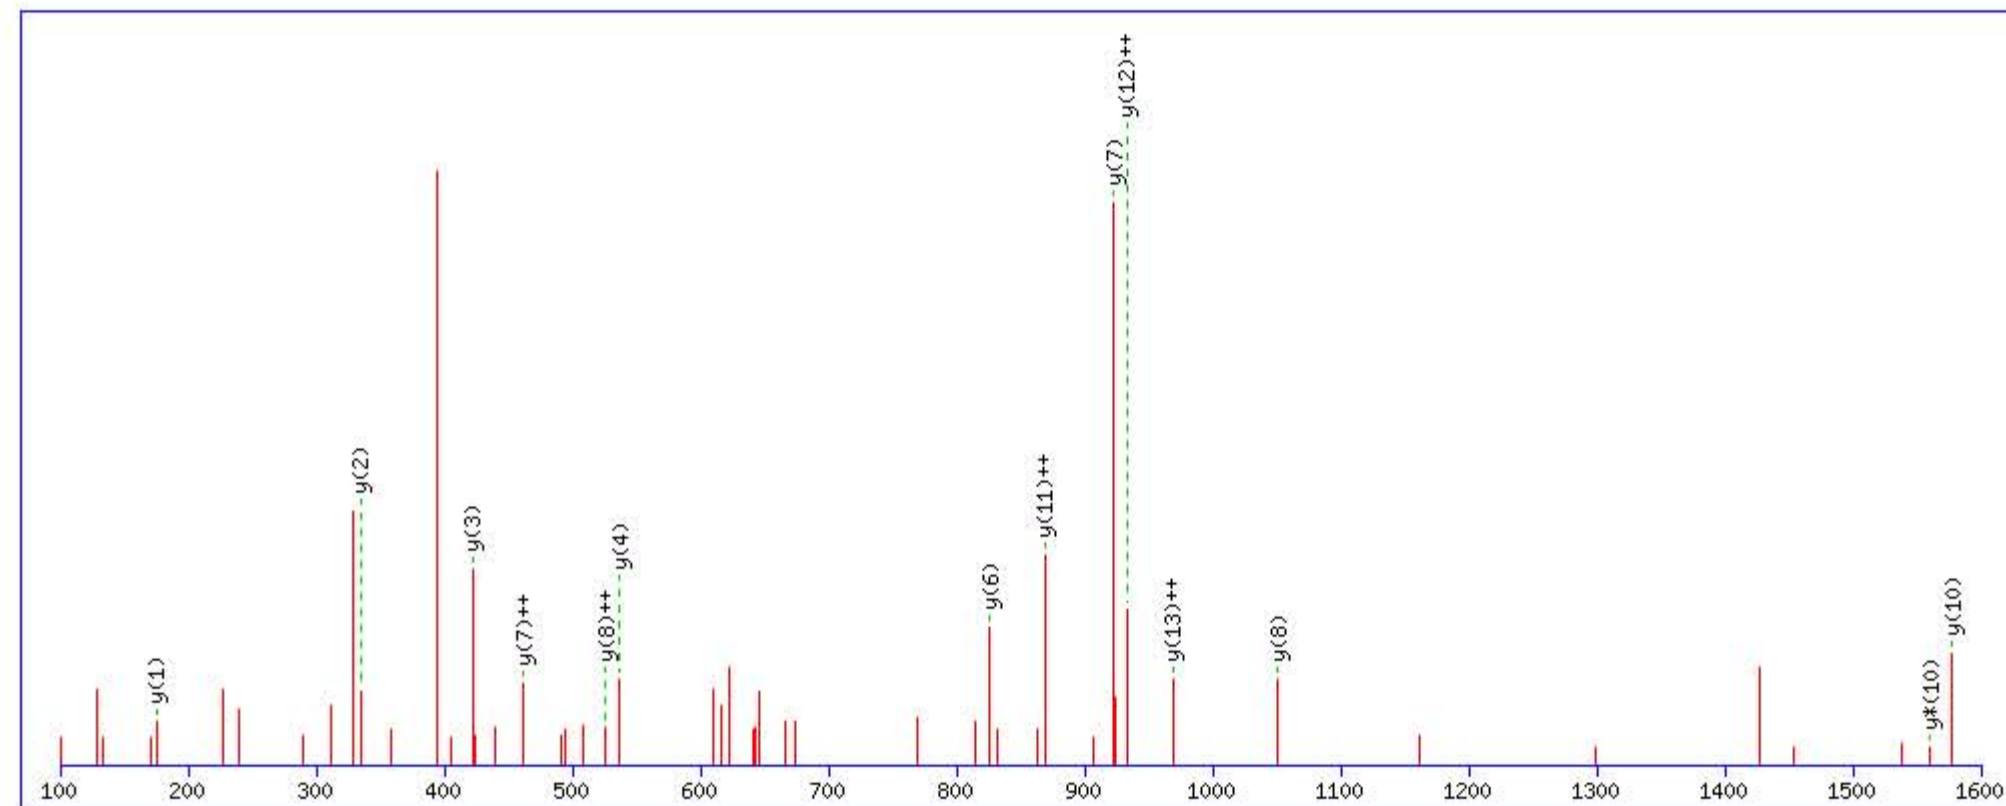

Monoisotopic mass of neutral peptide Mr(calc): 2034.874374

Fixed modifications: Carbamidomethyl (C) (apply to specified residues or termini only)

Variable modifications:

Q6 : Biotin:Thermo-21345 (Q)

Ions Score: 38 Expect: 0.00069

Matches : 14/140 fragment ions using 33 most intense peaks [\(help\)](#)

| #  | b           | b <sup>++</sup> | b <sup>+</sup> | b <sup>+++</sup> | b <sup>0</sup> | b <sup>0++</sup> | Seq. | y           | y <sup>++</sup> | y <sup>+</sup> | y <sup>+++</sup> | y <sup>0</sup> | y <sup>0++</sup> | #  |
|----|-------------|-----------------|----------------|------------------|----------------|------------------|------|-------------|-----------------|----------------|------------------|----------------|------------------|----|
| 1  | 100.075690  | 50.541483       |                |                  |                |                  | V    |             |                 |                |                  |                |                  | 14 |
| 2  | 171.112804  | 86.060040       |                |                  |                |                  | A    | 1936.813236 | 968.910256      | 1919.786687    | 960.396982       | 1918.802671    | 959.904973       | 13 |
| 3  | 299.171382  | 150.089329      | 282.144833     | 141.576055       |                |                  | Q    | 1865.776122 | 933.391699      | 1848.749573    | 924.878425       | 1847.765557    | 924.386417       | 12 |
| 4  | 459.202031  | 230.104653      | 442.175482     | 221.591379       |                |                  | C    | 1737.717544 | 869.362410      | 1720.690995    | 860.849136       | 1719.706979    | 860.357128       | 11 |
| 5  | 546.234059  | 273.620668      | 529.207510     | 265.107393       | 528.223494     | 264.615385       | S    | 1577.686895 | 789.347086      | 1560.660346    | 780.833811       | 1559.676330    | 780.341803       | 10 |
| 6  | 985.459385  | 493.233331      | 968.432836     | 484.720056       | 967.448820     | 484.228048       | Q    | 1490.654867 | 745.831072      | 1473.628318    | 737.317797       | 1472.644302    | 736.825789       | 9  |
| 7  | 1113.554348 | 557.280812      | 1096.527799    | 548.767538       | 1095.543783    | 548.275529       | K    | 1051.429541 | 526.218409      | 1034.402992    | 517.705134       | 1033.418976    | 517.213126       | 8  |
| 8  | 1210.607112 | 605.807194      | 1193.580563    | 597.293920       | 1192.596547    | 596.801911       | P    | 923.334578  | 462.170927      | 906.308029     | 453.657653       | 905.324013     | 453.165645       | 7  |
| 9  | 1370.637761 | 685.822519      | 1353.611212    | 677.309244       | 1352.627196    | 676.817236       | C    | 826.281814  | 413.644545      | 809.255265     | 405.131271       | 808.271249     | 404.639263       | 6  |
| 10 | 1499.680354 | 750.343815      | 1482.653805    | 741.830540       | 1481.669789    | 741.338532       | E    | 666.251165  | 333.629221      | 649.224616     | 325.115946       | 648.240600     | 324.623938       | 5  |
| 11 | 1614.707297 | 807.857286      | 1597.680748    | 799.344012       | 1596.696732    | 798.852004       | D    | 537.208572  | 269.107924      | 520.182023     | 260.594650       | 519.198007     | 260.102642       | 4  |
| 12 | 1701.739325 | 851.373301      | 1684.712776    | 842.860026       | 1683.728760    | 842.368018       | S    | 422.181629  | 211.594453      | 405.155080     | 203.081178       | 404.171064     | 202.589170       | 3  |
| 13 | 1861.769974 | 931.388625      | 1844.743425    | 922.875351       | 1843.759409    | 922.383343       | C    | 335.149601  | 168.078438      | 318.123052     | 159.565164       |                |                  | 2  |
| 14 |             |                 |                |                  |                |                  | R    | 175.118952  | 88.063114       | 158.092403     | 79.549839        |                |                  | 1  |

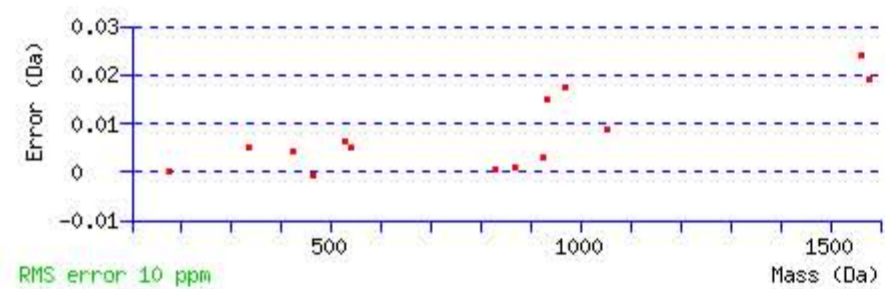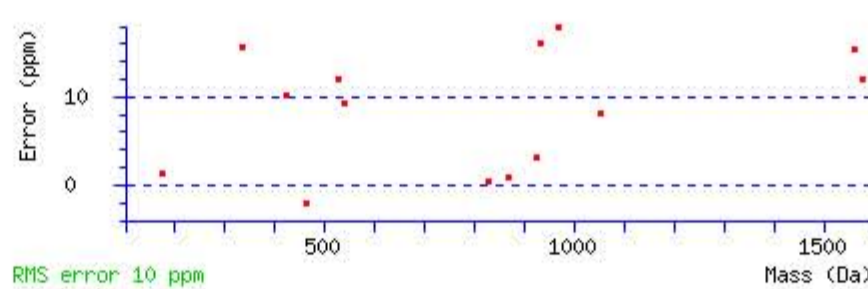

NCBI BLAST search of **VAQCSQKPCEDSCR**

(Parameters: blastp, nr protein database, expect=20000, no filter, PAM30)

Other BLAST [web gateways](#)

All matches to this query

| Score | Mr(calc):   | Delta    | Sequence                       |
|-------|-------------|----------|--------------------------------|
| 38.0  | 2034.874374 | 0.005328 | <a href="#">VAQCSQKPCEDSCR</a> |
| 32.5  | 2034.874374 | 0.005328 | <a href="#">VAQCSQKPCEDSCR</a> |

# MASCOT Search Results

## Peptide View

MS/MS Fragmentation of **TCQSLHINEMCQER**

Found in **VWF\_HUMAN**, von Willebrand factor OS=Homo sapiens GN=VWF PE=1 SV=4

Match to Query 44688: 2115.932562 from(706.318130,3+) rtinseconds(1738) index(31600)

Title: Locus:1.1.1.3154.13 File:"2013-07-02 CLN FXIII 60 min 3rd F 3.wiff"

Data file C:\Program Files (x86)\Matrix Science\Mascot Daemon\mgf6 FXIII 60 min 3rd\mascot\_daemon\_merge.mgf

Click mouse within plot area to zoom in by factor of two about that point

Or, Plot from  to  Da

Label all possible matches  Label matches used for scoring

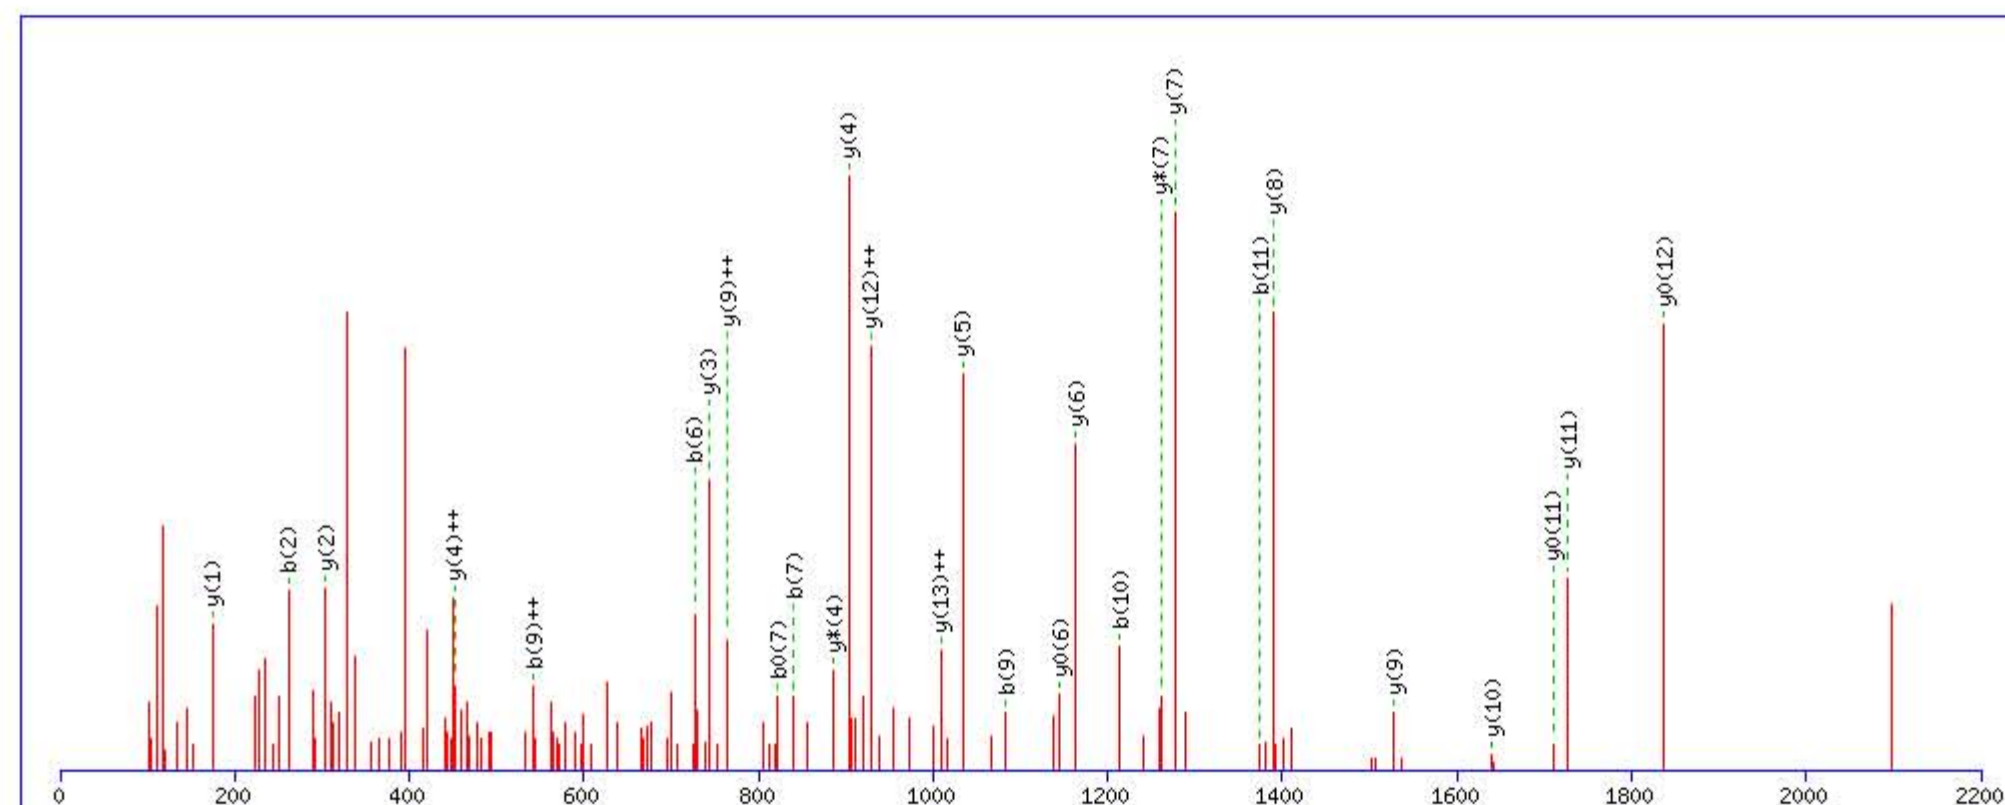

Monoisotopic mass of neutral peptide Mr(calc): 2115.932205

Fixed modifications: Carbamidomethyl (C) (apply to specified residues or termini only)

Variable modifications:

Q12 : Biotin:Thermo-21345 (Q)

Ions Score: 63 Expect: 3e-006

Matches : 28/150 fragment ions using 50 most intense peaks [\(help\)](#)

| #  | b                  | b <sup>++</sup>   | b <sup>*</sup> | b <sup>+++</sup> | b <sup>0</sup>    | b <sup>0++</sup> | Seq. | y                  | y <sup>++</sup>    | y <sup>*</sup>     | y <sup>+++</sup> | y <sup>0</sup>     | y <sup>0++</sup> | #  |
|----|--------------------|-------------------|----------------|------------------|-------------------|------------------|------|--------------------|--------------------|--------------------|------------------|--------------------|------------------|----|
| 1  | 102.054955         | 51.531116         |                |                  | 84.044390         | 42.525833        | T    |                    |                    |                    |                  |                    |                  | 14 |
| 2  | <b>262.085604</b>  | 131.546440        |                |                  | 244.075039        | 122.541158       | C    | 2015.891820        | <b>1008.449548</b> | 1998.865271        | 999.936274       | 1997.881255        | 999.444266       | 13 |
| 3  | 390.144182         | 195.575729        | 373.117633     | 187.062455       | 372.133617        | 186.570447       | Q    | 1855.861171        | <b>928.434224</b>  | 1838.834622        | 919.920949       | <b>1837.850606</b> | 919.428941       | 12 |
| 4  | 477.176210         | 239.091743        | 460.149661     | 230.578469       | 459.165645        | 230.086461       | S    | <b>1727.802593</b> | 864.404935         | 1710.776044        | 855.891660       | <b>1709.792028</b> | 855.399652       | 11 |
| 5  | 590.260274         | 295.633775        | 573.233725     | 287.120501       | 572.249709        | 286.628493       | L    | <b>1640.770565</b> | 820.888921         | 1623.744016        | 812.375646       | 1622.760000        | 811.883638       | 10 |
| 6  | <b>727.319186</b>  | 364.163231        | 710.292637     | 355.649957       | 709.308621        | 355.157949       | H    | <b>1527.686501</b> | <b>764.346889</b>  | 1510.659952        | 755.833614       | 1509.675936        | 755.341606       | 9  |
| 7  | <b>840.403250</b>  | 420.705263        | 823.376701     | 412.191989       | <b>822.392685</b> | 411.699981       | I    | <b>1390.627589</b> | 695.817433         | 1373.601040        | 687.304158       | 1372.617024        | 686.812150       | 8  |
| 8  | 954.446177         | 477.726727        | 937.419628     | 469.213452       | 936.435612        | 468.721444       | N    | <b>1277.543525</b> | 639.275401         | <b>1260.516976</b> | 630.762126       | 1259.532960        | 630.270118       | 7  |
| 9  | <b>1083.488770</b> | <b>542.248023</b> | 1066.462221    | 533.734749       | 1065.478205       | 533.242741       | E    | <b>1163.500598</b> | 582.253937         | 1146.474049        | 573.740663       | <b>1145.490033</b> | 573.248655       | 6  |
| 10 | <b>1214.529255</b> | 607.768266        | 1197.502706    | 599.254991       | 1196.518690       | 598.762983       | M    | <b>1034.458005</b> | 517.732641         | 1017.431456        | 509.219366       | 1016.447440        | 508.727358       | 5  |
| 11 | <b>1374.559904</b> | 687.783590        | 1357.533355    | 679.270316       | 1356.549339       | 678.778308       | C    | <b>903.417520</b>  | <b>452.212398</b>  | <b>886.390971</b>  | 443.699124       | 885.406955         | 443.207116       | 4  |
| 12 | 1813.785230        | 907.396253        | 1796.758681    | 898.882979       | 1795.774665       | 898.390971       | Q    | <b>743.386871</b>  | 372.197074         | 726.360322         | 363.683799       | 725.376306         | 363.191791       | 3  |
| 13 | 1942.827823        | 971.917550        | 1925.801274    | 963.404275       | 1924.817258       | 962.912267       | E    | <b>304.161545</b>  | 152.584411         | 287.134996         | 144.071136       | 286.150980         | 143.579128       | 2  |
| 14 |                    |                   |                |                  |                   |                  | R    | <b>175.118952</b>  | 88.063114          | 158.092403         | 79.549839        |                    |                  | 1  |

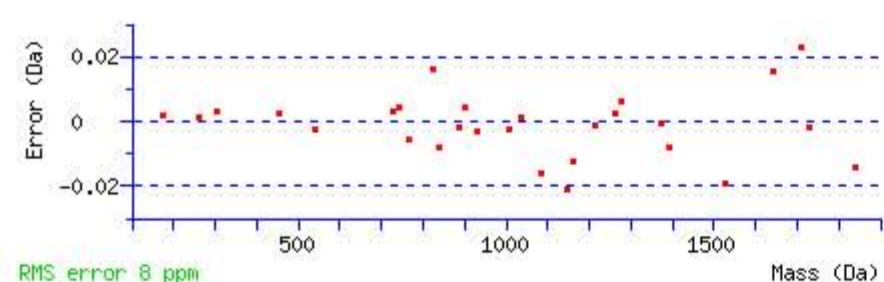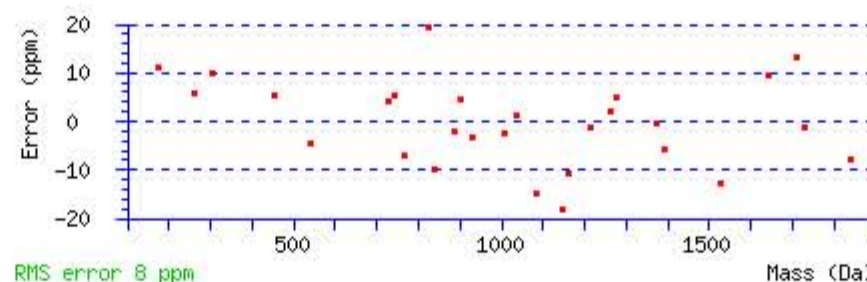

NCBI BLAST search of [TCQSLHINEMCQER](#)

(Parameters: blastp, nr protein database, expect=20000, no filter, PAM30)

Other BLAST [web gateways](#)

All matches to this query

| Score | Mr(calc):   | Delta    | Sequence                       |
|-------|-------------|----------|--------------------------------|
| 62.9  | 2115.932205 | 0.000357 | <a href="#">TCQSLHINEMCQER</a> |

Mascot: <http://www.matrixscience.com/>
