# Supplementary material
Source: PubMed Central journal article supplement (PMC3945317)
Supplement: supp_M113.517904_jbc.M113.517904-10.pdf [file supp_M113.517904_jbc.M113.517904-10.pdf]

# MASCOT Search Results

## Peptide View

MS/MS Fragmentation of **LAEQAER**

Found in **1433B\_HUMAN**, 14-3-3 protein beta/alpha OS=Homo sapiens GN=YWHAB PE=1 SV=3

Match to Query 20271: 1126.592068 from(564.303310,2+) rtinseconds(1407) index(56577)

Title: Locus:1.1.1.2913.17 File:"2013-07-02 CLN FXIII 180 min 1st F 4.wiff"

Data file C:\Program Files (x86)\Matrix Science\Mascot Daemon\mgf\7 FXIII 180 min 1st\mascot\_daemon\_merge.mgf

Click mouse within plot area to zoom in by factor of two about that point

Or, Plot from  to  Da

Label all possible matches  Label matches used for scoring

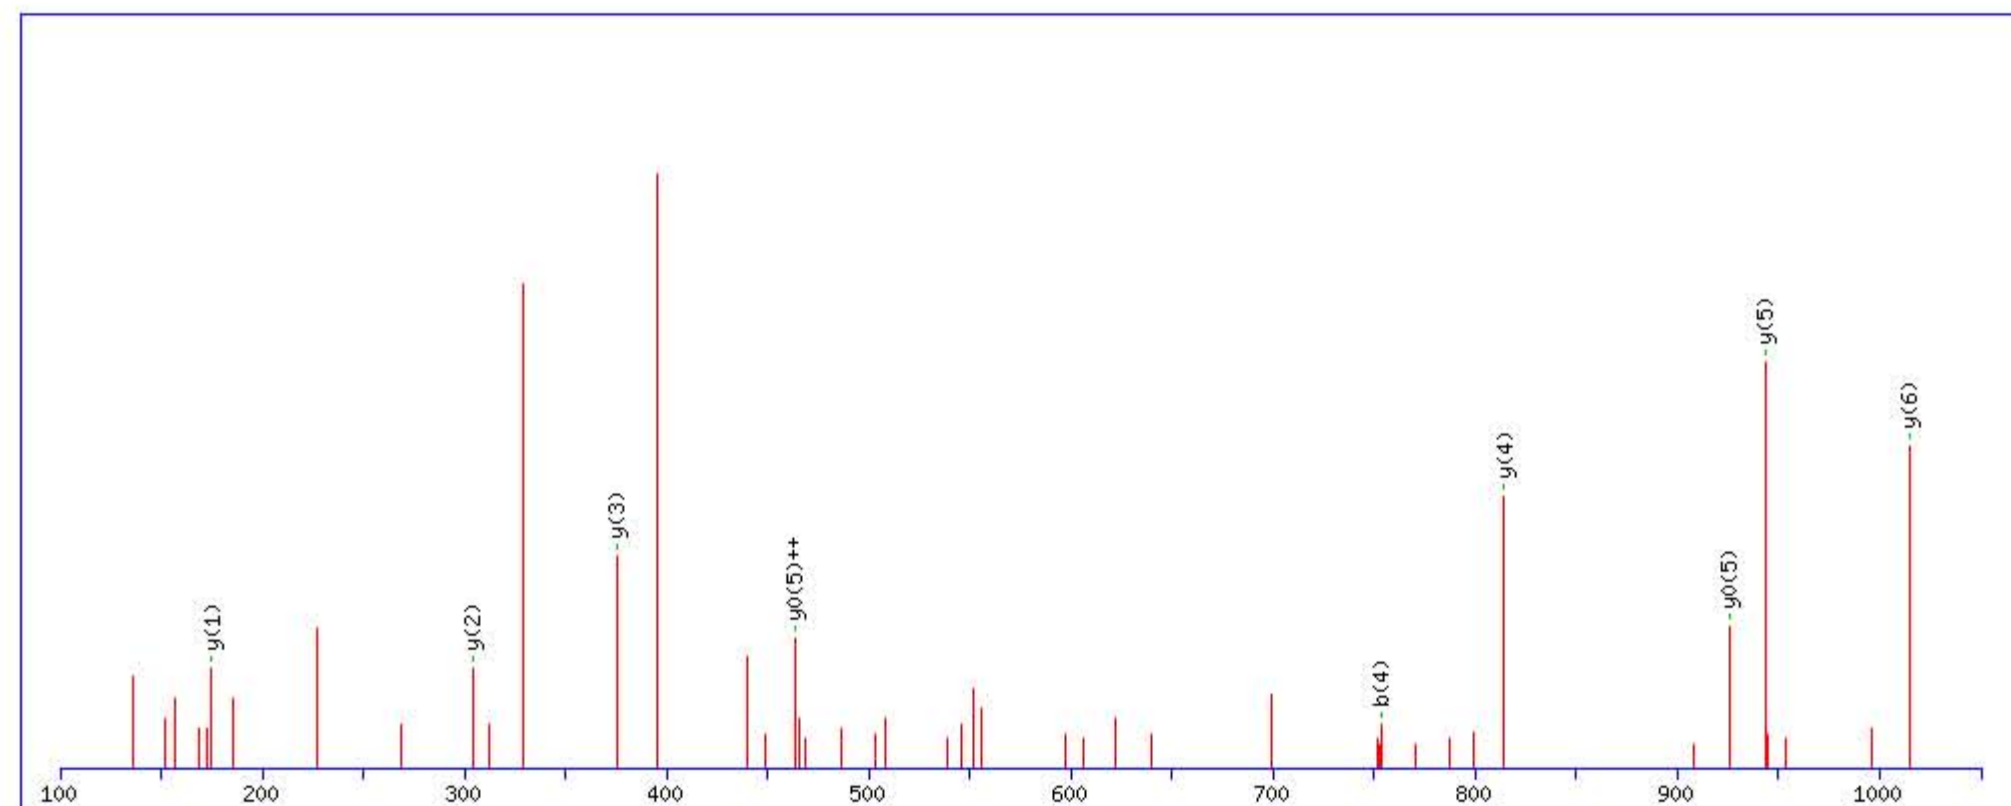

Monoisotopic mass of neutral peptide Mr(calc): 1126.580444

Fixed modifications: Carbamidomethyl (C) (apply to specified residues or termini only)

Variable modifications:

Q4 : Biotin:Thermo-21345 (Q)

Ions Score: 35 Expect: 0.0057

Matches : 9/60 fragment ions using 18 most intense peaks [\(help\)](#)

| # | b          | b <sup>++</sup> | b <sup>*</sup> | b <sup>*++</sup> | b <sup>0</sup> | b <sup>0++</sup> | Seq. | y           | y <sup>++</sup> | y <sup>*</sup> | y <sup>*++</sup> | y <sup>0</sup> | y <sup>0++</sup> | # |
|---|------------|-----------------|----------------|------------------|----------------|------------------|------|-------------|-----------------|----------------|------------------|----------------|------------------|---|
| 1 | 114.091340 | 57.549308       |                |                  |                |                  | L    |             |                 |                |                  |                |                  | 7 |
| 2 | 185.128454 | 93.067865       |                |                  |                |                  | A    | 1014.503692 | 507.755484      | 997.477143     | 499.242210       | 996.493127     | 498.750202       | 6 |
| 3 | 314.171047 | 157.589161      |                |                  | 296.160482     | 148.583879       | E    | 943.466578  | 472.236927      | 926.440029     | 463.723653       | 925.456013     | 463.231645       | 5 |
| 4 | 753.396373 | 377.201825      | 736.369824     | 368.688550       | 735.385808     | 368.196542       | Q    | 814.423985  | 407.715631      | 797.397436     | 399.202356       | 796.413420     | 398.710348       | 4 |
| 5 | 824.433487 | 412.720382      | 807.406938     | 404.207107       | 806.422922     | 403.715099       | A    | 375.198659  | 188.102968      | 358.172110     | 179.589693       | 357.188094     | 179.097685       | 3 |
| 6 | 953.476080 | 477.241678      | 936.449531     | 468.728404       | 935.465515     | 468.236396       | E    | 304.161545  | 152.584411      | 287.134996     | 144.071136       | 286.150980     | 143.579128       | 2 |
| 7 |            |                 |                |                  |                |                  | R    | 175.118952  | 88.063114       | 158.092403     | 79.549840        |                |                  | 1 |

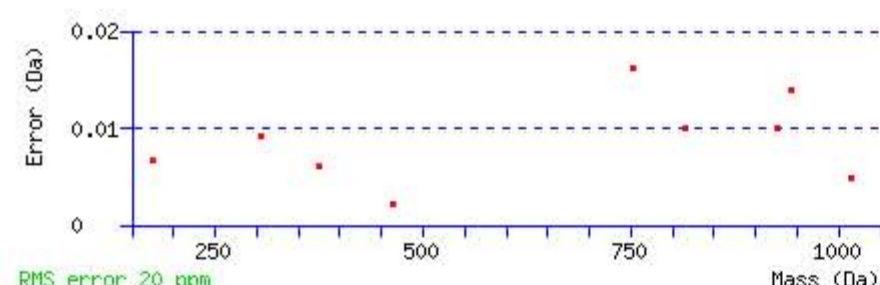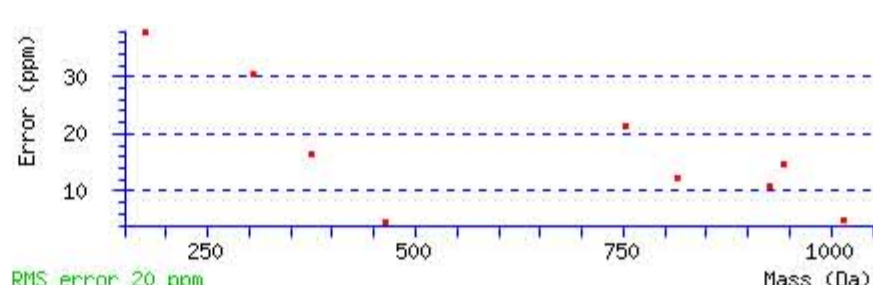

NCBI BLAST search of **LAEQAER**

(Parameters: blastp, nr protein database, expect=20000, no filter, PAM30)

Other BLAST [web gateways](#)

All matches to this query

| Score | Mr(calc):   | Delta     | Sequence                    |
|-------|-------------|-----------|-----------------------------|
| 35.4  | 1126.580444 | 0.011624  | <a href="#">LAEQAER</a>     |
| 13.4  | 1126.580444 | 0.011624  | <a href="#">LAQAEEER</a>    |
| 12.1  | 1126.605606 | -0.013538 | <a href="#">AIEDQLK</a>     |
| 11.2  | 1126.599075 | -0.007007 | <a href="#">MAMFKKSLR</a>   |
| 9.6   | 1126.598221 | -0.006153 | <a href="#">LISDPAGELGR</a> |
| 7.0   | 1126.605621 | -0.013553 | <a href="#">LAQESGLV</a>    |
| 4.9   | 1126.580444 | 0.011624  | <a href="#">AIQAEEER</a>    |
| 4.2   | 1126.577789 | 0.014279  | <a href="#">MRGAGGPRGPR</a> |
| 2.2   | 1126.585648 | 0.006420  | <a href="#">RLSGGHAHHR</a>  |
| 0.6   | 1126.602280 | -0.010212 | <a href="#">QLSFTGVTFK</a>  |

Mascot: <http://www.matrixscience.com/>

# **MASCOT** Mascot Search Results

## Peptide View

MS/MS Fragmentation of **HQGVMVGMGQK**

Found in **ACTA\_HUMAN**, Actin, aortic smooth muscle OS=Homo sapiens GN=ACTA2 PE=1 SV=1

Match to Query 34437: 1481.752028 from(741.883290,2+) rtinseconds(1560) index(39236)

Title: Locus:1.1.1.2992.20 File:"2013-07-02 CLN FXIII 180 min 1st F 3.wiff"

Data file C:\Program Files (x86)\Matrix Science\Mascot Daemon\mgf\7 FXIII 180 min 1st\mascot\_daemon\_merge.mgf

Click mouse within plot area to zoom in by factor of two about that point

Or, Plot from  to  Da

Label all possible matches  Label matches used for scoring

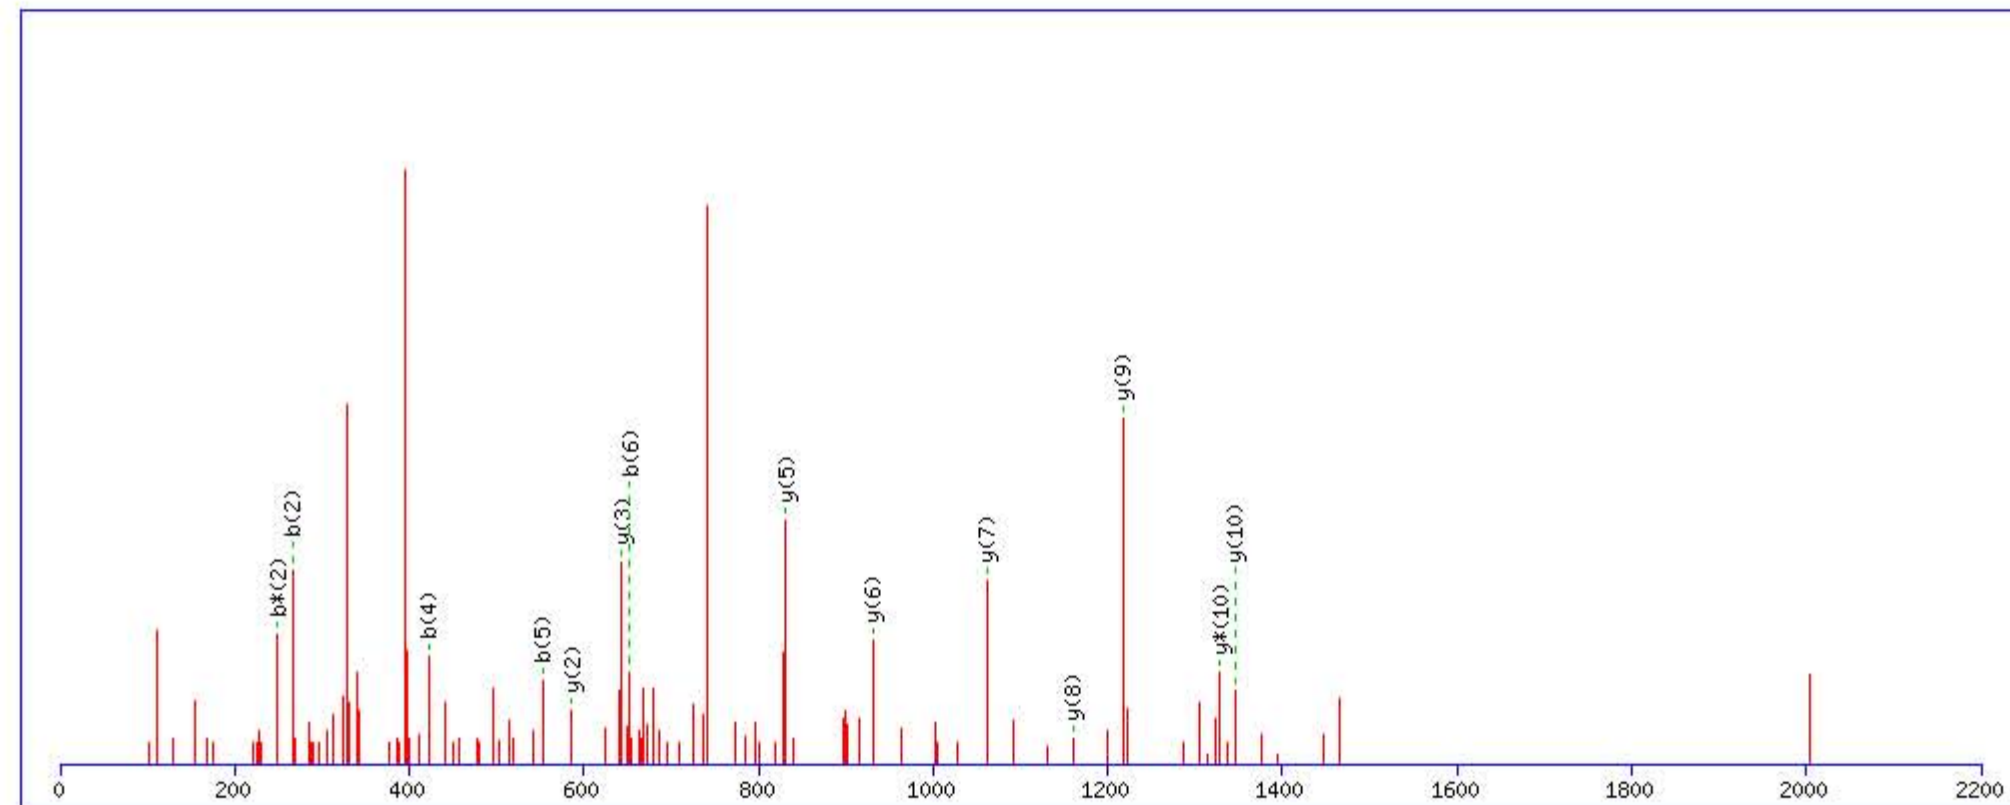

Monoisotopic mass of neutral peptide  $M_r(\text{calc})$ : 1481.730545

Fixed modifications: Carbamidomethyl (C) (apply to specified residues or termini only)

Variable modifications:

Q10 : Biotin:Thermo-21345 (Q)

Ions Score: 49 Expect: 0.00017

Matches : 14/78 fragment ions using 28 most intense peaks [\(help\)](#)

| #  | b                 | b <sup>++</sup> | b <sup>*</sup>    | b <sup>*++</sup> | Seq. | y                  | y <sup>++</sup> | y <sup>*</sup>     | y <sup>*++</sup> | #  |
|----|-------------------|-----------------|-------------------|------------------|------|--------------------|-----------------|--------------------|------------------|----|
| 1  | 138.066188        | 69.536732       |                   |                  | H    |                    |                 |                    |                  | 11 |
| 2  | <b>266.124766</b> | 133.566021      | <b>249.098217</b> | 125.052746       | Q    | <b>1345.678898</b> | 673.343087      | <b>1328.652349</b> | 664.829813       | 10 |
| 3  | 323.146230        | 162.076753      | 306.119681        | 153.563478       | G    | <b>1217.620320</b> | 609.313798      | 1200.593771        | 600.800524       | 9  |
| 4  | <b>422.214644</b> | 211.610960      | 405.188095        | 203.097685       | V    | <b>1160.598856</b> | 580.803066      | 1143.572307        | 572.289792       | 8  |
| 5  | <b>553.255129</b> | 277.131203      | 536.228580        | 268.617928       | M    | <b>1061.530442</b> | 531.268859      | 1044.503893        | 522.755585       | 7  |
| 6  | <b>652.323543</b> | 326.665410      | 635.296994        | 318.152135       | V    | <b>930.489957</b>  | 465.748617      | 913.463408         | 457.235342       | 6  |
| 7  | 709.345007        | 355.176142      | 692.318458        | 346.662867       | G    | <b>831.421543</b>  | 416.214410      | 814.394994         | 407.701135       | 5  |
| 8  | 840.385492        | 420.696384      | 823.358943        | 412.183110       | M    | 774.400079         | 387.703678      | 757.373530         | 379.190403       | 4  |
| 9  | 897.406956        | 449.207116      | 880.380407        | 440.693842       | G    | <b>643.359594</b>  | 322.183435      | 626.333045         | 313.670161       | 3  |
| 10 | 1336.632282       | 668.819779      | 1319.605733       | 660.306505       | Q    | <b>586.338130</b>  | 293.672703      | 569.311581         | 285.159429       | 2  |
| 11 |                   |                 |                   |                  | K    | 147.112804         | 74.060040       | 130.086255         | 65.546765        | 1  |

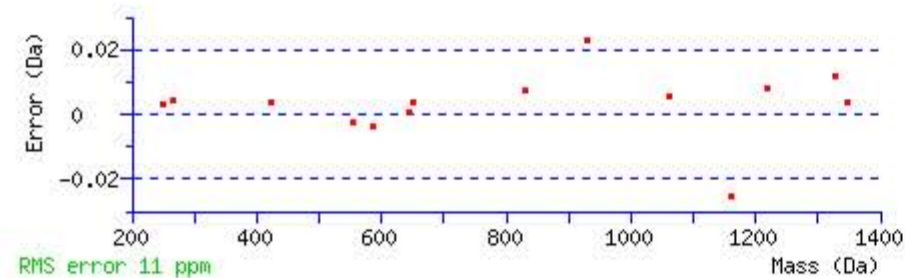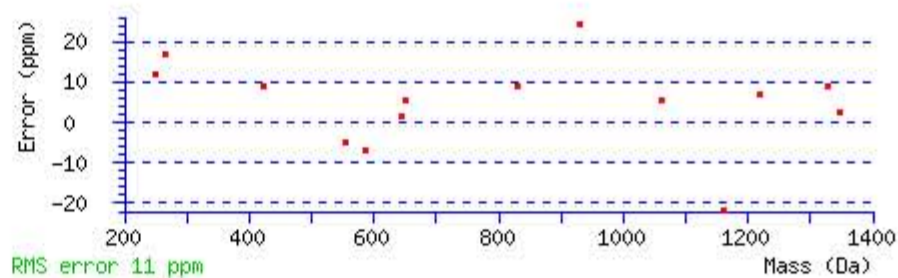

NCBI BLAST search of **HQGVMVGMGQK**

(Parameters: blastp, nr protein database, expect=20000, no filter, PAM30)

Other BLAST [web gateways](#)

## All matches to this query

| Score | $M_r(\text{calc})$ : | Delta     | Sequence                      |
|-------|----------------------|-----------|-------------------------------|
| 48.7  | 1481.730545          | 0.021483  | <a href="#">HQGVMVGMGQK</a>   |
| 8.2   | 1481.747391          | 0.004637  | <a href="#">SLQADAKDLEQHK</a> |
| 2.1   | 1481.772568          | -0.020540 | <a href="#">TLVVQDEEITAHK</a> |

# MASCOT Search Results

## Peptide View

MS/MS Fragmentation of **DSYVGDEAQSK**

Found in **ACTA\_HUMAN**, Actin, aortic smooth muscle OS=Homo sapiens GN=ACTA2 PE=1 SV=1

Match to Query 35324: 1508.693908 from(755.354230,2+) rtinseconds(1579) index(57856)

Title: Locus:1.1.1.2973.17 File:"2013-07-02 CLN FXIII 180 min 1st F 4.wiff"

Data file C:\Program Files (x86)\Matrix Science\Mascot Daemon\mgf\7 FXIII 180 min 1st\mascot\_daemon\_merge.mgf

Click mouse within plot area to zoom in by factor of two about that point

Or, Plot from  to  Da

Label all possible matches  Label matches used for scoring

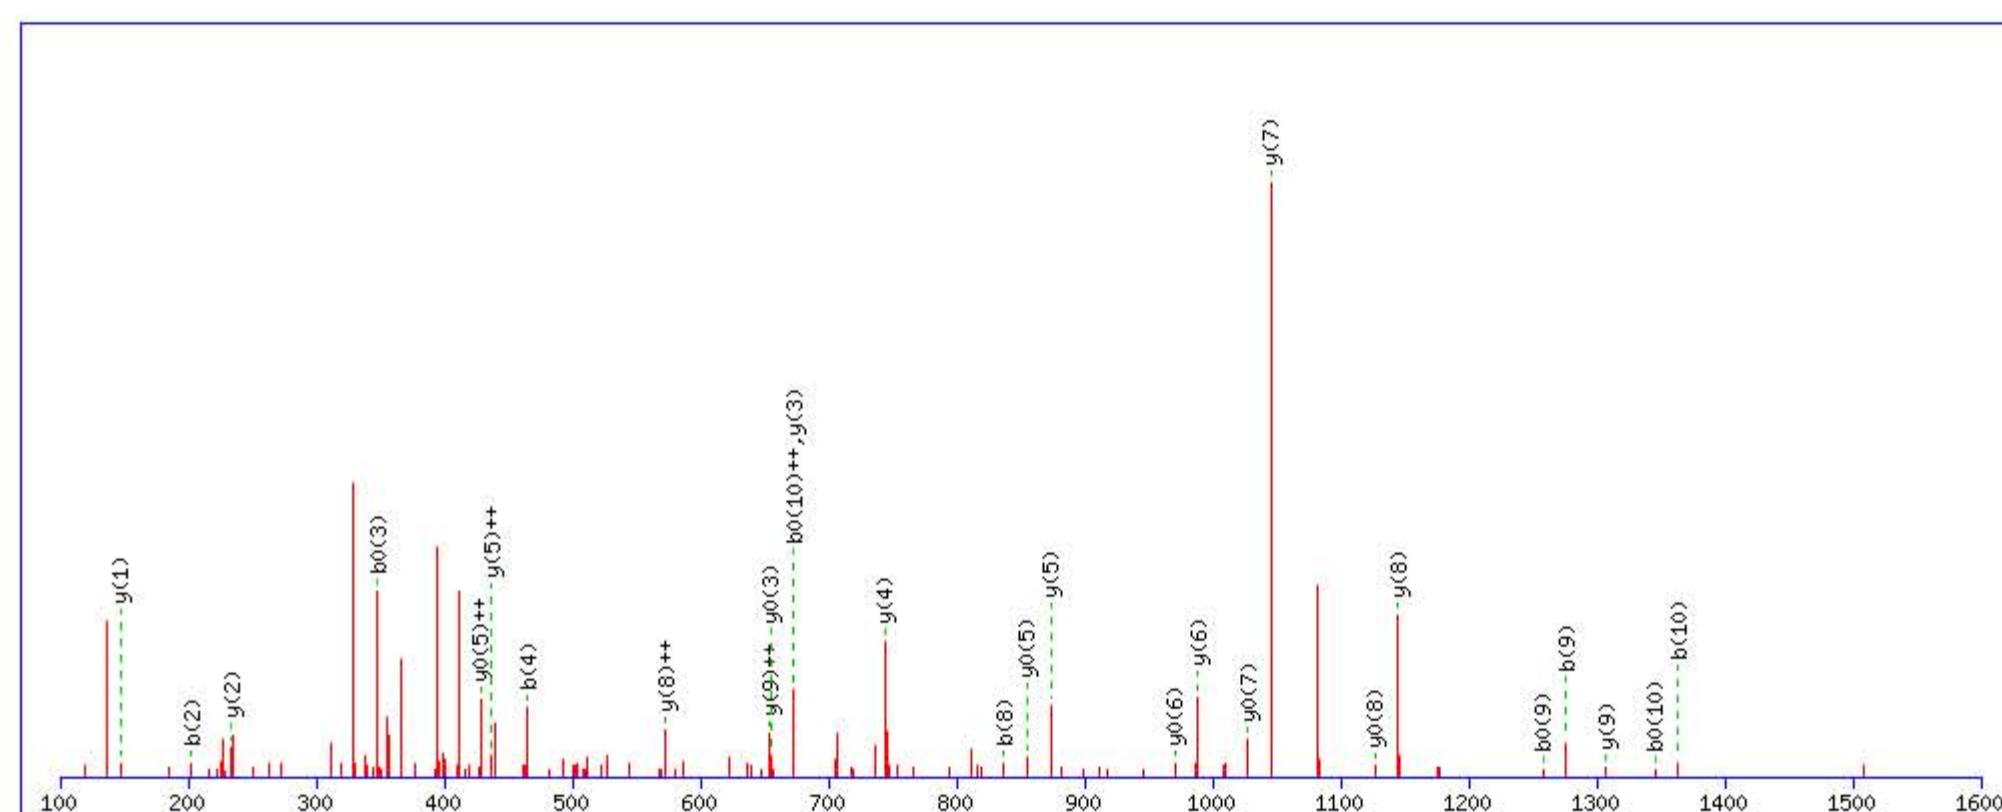

Monoisotopic mass of neutral peptide Mr(calc): 1508.681702

Fixed modifications: Carbamidomethyl (C) (apply to specified residues or termini only)

Variable modifications:

Q9 : Biotin:Thermo-21345 (Q)

Ions Score: 54 Expect: 3.7e-005

Matches : 27/102 fragment ions using 49 most intense peaks [\(help\)](#)

| #  | b                  | b <sup>++</sup> | b <sup>*</sup> | b <sup>*++</sup> | b <sup>0</sup>     | b <sup>0++</sup>  | Seq. | y                  | y <sup>++</sup>   | y <sup>*</sup> | y <sup>*++</sup> | y <sup>0</sup>     | y <sup>0++</sup>  | #  |
|----|--------------------|-----------------|----------------|------------------|--------------------|-------------------|------|--------------------|-------------------|----------------|------------------|--------------------|-------------------|----|
| 1  | 116.034219         | 58.520748       |                |                  | 98.023654          | 49.515465         | D    |                    |                   |                |                  |                    |                   | 11 |
| 2  | <b>203.066247</b>  | 102.036761      |                |                  | 185.055682         | 93.031479         | S    | 1394.662043        | 697.834660        | 1377.635494    | 689.321385       | 1376.651478        | 688.829377        | 10 |
| 3  | 366.129576         | 183.568426      |                |                  | <b>348.119011</b>  | 174.563144        | Y    | <b>1307.630015</b> | <b>654.318646</b> | 1290.603466    | 645.805371       | 1289.619450        | 645.313363        | 9  |
| 4  | <b>465.197990</b>  | 233.102633      |                |                  | 447.187425         | 224.097351        | V    | <b>1144.566686</b> | <b>572.786981</b> | 1127.540137    | 564.273707       | <b>1126.556121</b> | 563.781699        | 8  |
| 5  | 522.219454         | 261.613365      |                |                  | 504.208889         | 252.608083        | G    | <b>1045.498272</b> | 523.252774        | 1028.471723    | 514.739500       | <b>1027.487707</b> | 514.247492        | 7  |
| 6  | 637.246397         | 319.126837      |                |                  | 619.235832         | 310.121554        | D    | <b>988.476808</b>  | 494.742042        | 971.450259     | 486.228768       | <b>970.466243</b>  | 485.736760        | 6  |
| 7  | 766.288990         | 383.648133      |                |                  | 748.278425         | 374.642851        | E    | <b>873.449865</b>  | <b>437.228571</b> | 856.423316     | 428.715296       | <b>855.439300</b>  | <b>428.223288</b> | 5  |
| 8  | <b>837.326104</b>  | 419.166690      |                |                  | 819.315539         | 410.161408        | A    | <b>744.407272</b>  | 372.707274        | 727.380723     | 364.194000       | 726.396707         | 363.701992        | 4  |
| 9  | <b>1276.551430</b> | 638.779353      | 1259.524881    | 630.266079       | <b>1258.540865</b> | 629.774070        | Q    | <b>673.370158</b>  | 337.188717        | 656.343609     | 328.675443       | <b>655.359593</b>  | 328.183435        | 3  |
| 10 | <b>1363.583458</b> | 682.295367      | 1346.556909    | 673.782093       | <b>1345.572893</b> | <b>673.290085</b> | S    | <b>234.144832</b>  | 117.576054        | 217.118283     | 109.062780       | 216.134267         | 108.570772        | 2  |
| 11 |                    |                 |                |                  |                    |                   | K    | <b>147.112804</b>  | 74.060040         | 130.086255     | 65.546765        |                    |                   | 1  |

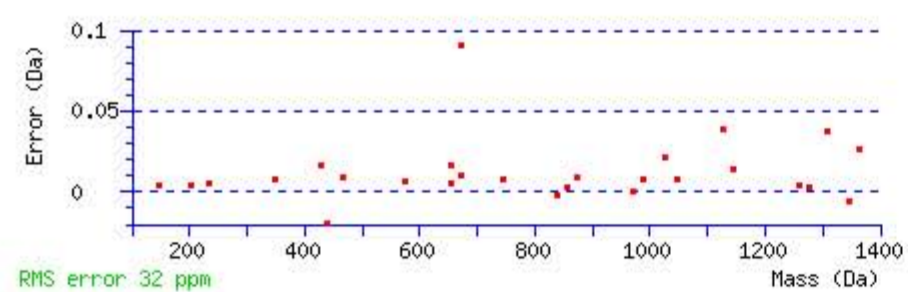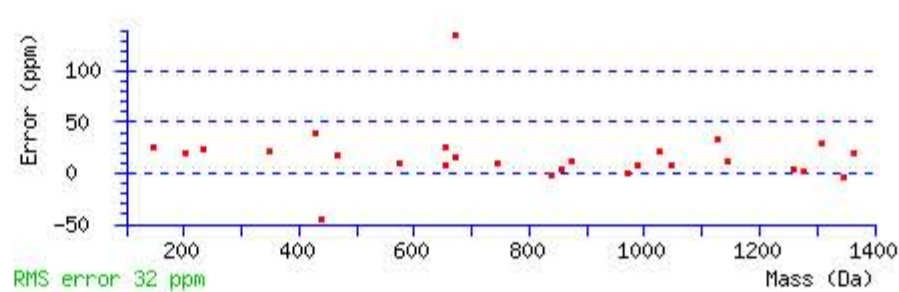

NCBI BLAST search of **DSYVGDEAQSK**

(Parameters: blastp, nr protein database, expect=20000, no filter, PAM30)

Other BLAST [web gateways](#)

All matches to this query

| Score | Mr(calc):   | Delta     | Sequence                         |
|-------|-------------|-----------|----------------------------------|
| 53.8  | 1508.681702 | 0.012206  | <a href="#">DSYVGDEAQSK</a>      |
| 6.2   | 1508.703461 | -0.009553 | <a href="#">LKSFTYEYEDSK</a>     |
| 4.8   | 1508.690277 | 0.003631  | <a href="#">GGRGGMGGSDRGGFNK</a> |
| 2.0   | 1508.714066 | -0.020158 | <a href="#">EGTQLSSQQSVMSK</a>   |

Mascot: <http://www.matrixscience.com/>

# MASCOT Search Results

## Peptide View

MS/MS Fragmentation of **QDSISSK**

Found in **AFAM\_HUMAN**, Afamin OS=Homo sapiens GN=AFM PE=1 SV=1

Match to Query 18298: 1074.538328 from(538.276440,2+) rtinseconds(1377) index(20095)

Title: Locus:1.1.1.2622.19 File:"2013-07-02 CLN FXIII 180 min 1st F 2.wiff"

Data file C:\Program Files (x86)\Matrix Science\Mascot Daemon\mgf7 FXIII 180 min 1st\mascot\_daemon\_merge.mgf

Click mouse within plot area to zoom in by factor of two about that point

Or, Plot from  to  Da

Label all possible matches  Label matches used for scoring

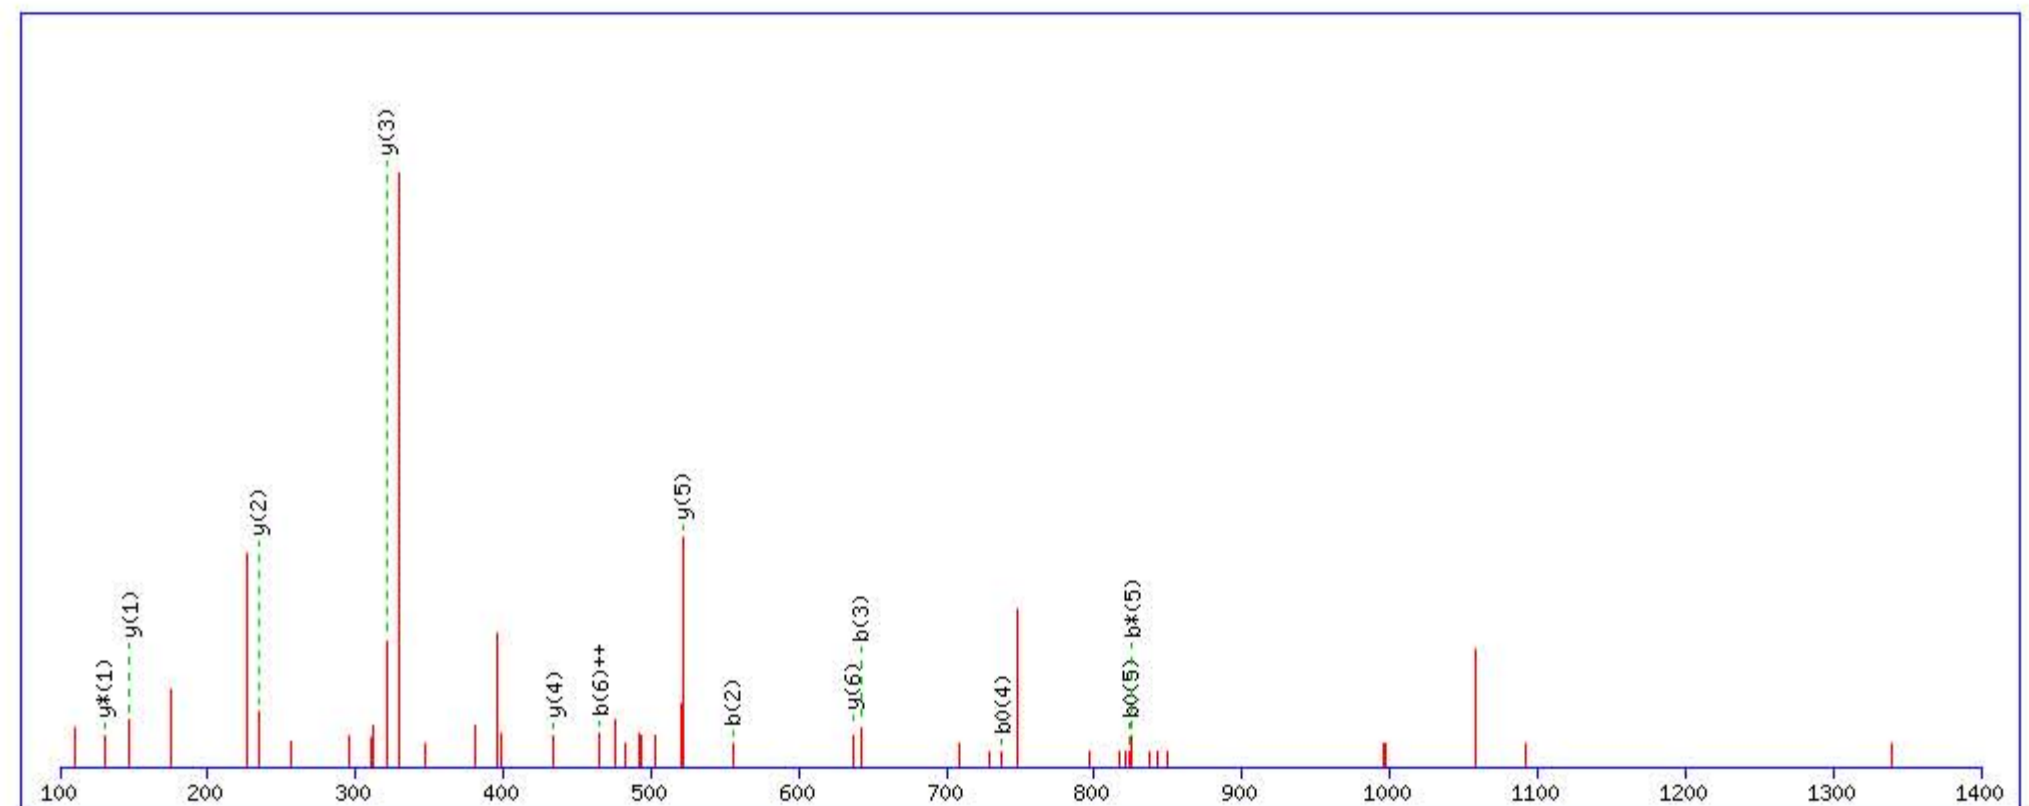

Monoisotopic mass of neutral peptide Mr(calc): 1074.537933

Fixed modifications: Carbamidomethyl (C) (apply to specified residues or termini only)

Variable modifications:

Q1 : Biotin:Thermo-21345 (Q)

Ions Score: 27 Expect: 0.037

Matches : 13/68 fragment ions using 33 most intense peaks [\(help\)](#)

| # | b                 | b <sup>++</sup>   | b <sup>*</sup>    | b <sup>*++</sup> | b <sup>0</sup>    | b <sup>0++</sup> | Seq. | y                 | y <sup>++</sup> | y <sup>*</sup>    | y <sup>*++</sup> | y <sup>0</sup> | y <sup>0++</sup> | # |
|---|-------------------|-------------------|-------------------|------------------|-------------------|------------------|------|-------------------|-----------------|-------------------|------------------|----------------|------------------|---|
| 1 | 440.232602        | 220.619939        | 423.206053        | 212.106664       |                   |                  | Q    |                   |                 |                   |                  |                |                  | 7 |
| 2 | <b>555.259545</b> | 278.133411        | 538.232996        | 269.620136       | 537.248980        | 269.128128       | D    | <b>636.319895</b> | 318.663586      | 619.293346        | 310.150311       | 618.309330     | 309.658303       | 6 |
| 3 | <b>642.291573</b> | 321.649425        | 625.265024        | 313.136150       | 624.281008        | 312.644142       | S    | <b>521.292952</b> | 261.150114      | 504.266403        | 252.636840       | 503.282387     | 252.144832       | 5 |
| 4 | 755.375637        | 378.191457        | 738.349088        | 369.678182       | <b>737.365072</b> | 369.186174       | I    | <b>434.260924</b> | 217.634100      | 417.234375        | 209.120826       | 416.250359     | 208.628818       | 4 |
| 5 | 842.407665        | 421.707471        | <b>825.381116</b> | 413.194196       | <b>824.397100</b> | 412.702188       | S    | <b>321.176860</b> | 161.092068      | 304.150311        | 152.578794       | 303.166295     | 152.086786       | 3 |
| 6 | 929.439693        | <b>465.223484</b> | 912.413144        | 456.710210       | 911.429128        | 456.218202       | S    | <b>234.144832</b> | 117.576054      | 217.118283        | 109.062780       | 216.134267     | 108.570772       | 2 |
| 7 |                   |                   |                   |                  |                   |                  | K    | <b>147.112804</b> | 74.060040       | <b>130.086255</b> | 65.546766        |                |                  | 1 |

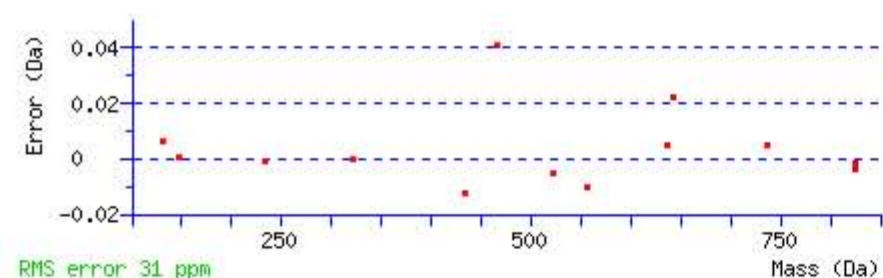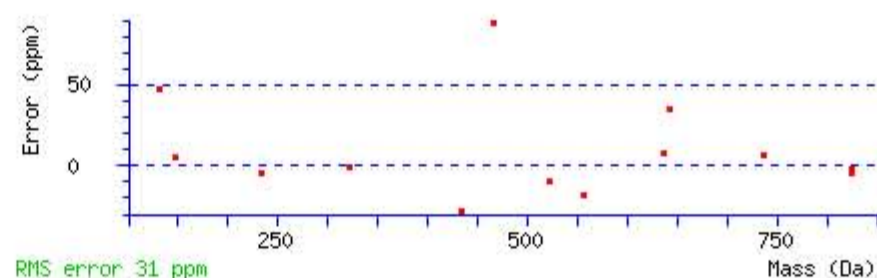

NCBI BLAST search of **QDSISSK**

(Parameters: blastp, nr protein database, expect=20000, no filter, PAM30)

Other BLAST [web gateways](#)

### All matches to this query

| Score | Mr(calc):   | Delta     | Sequence                   |
|-------|-------------|-----------|----------------------------|
| 27.3  | 1074.537933 | 0.000395  | <a href="#">QDSISSK</a>    |
| 13.8  | 1074.530548 | 0.007780  | <a href="#">QVTEPTSSAR</a> |
| 9.7   | 1074.531418 | 0.006910  | <a href="#">LLACPSVCR</a>  |
| 7.8   | 1074.537933 | 0.000395  | <a href="#">QDSSKSI</a>    |
| 1.8   | 1074.549179 | -0.010851 | <a href="#">AQEVVMSGVR</a> |
| 1.2   | 1074.531891 | 0.006437  | <a href="#">HLHTPGSNGR</a> |
| 0.3   | 1074.530518 | 0.007810  | <a href="#">VDNAASEKNK</a> |
| 0.3   | 1074.541763 | -0.003435 | <a href="#">DKRLESGDR</a>  |

Mascot: <http://www.matrixscience.com/>

# {MATRIX} SCIENCE Mascot Search Results

## Peptide View

MS/MS Fragmentation of **AFSSYQK**

Found in **AFAM\_HUMAN**, Afamin OS=Homo sapiens GN=AFM PE=1 SV=1

Match to Query 21517: 1140.568748 from(571.291650,2+) rtinseconds(1566) index(3794)

Title: Locus:1.1.1.2799.14 File:"2013-07-02 CLN FXIII 180 min 1st F 1.wiff"

Data file C:\Program Files (x86)\Matrix Science\Mascot Daemon\mgf\7 FXIII 180 min 1st\mascot\_daemon\_merge.mgf

Click mouse within plot area to zoom in by factor of two about that point

Or, Plot from  to  Da

Label all possible matches  Label matches used for scoring

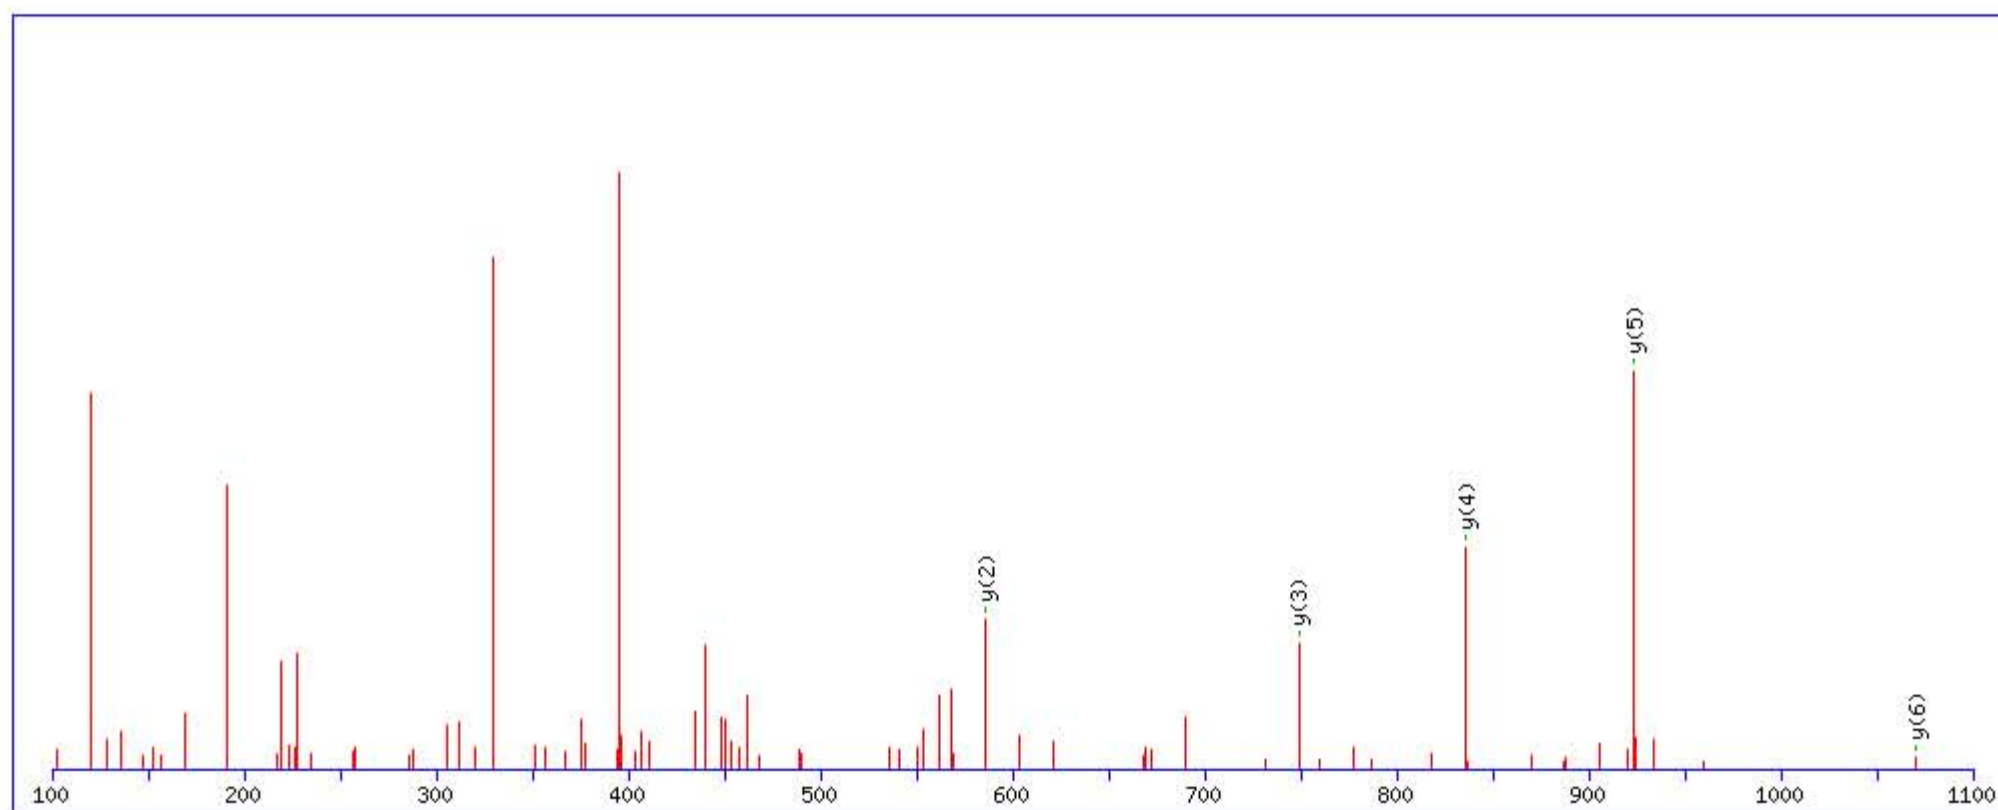

Monoisotopic mass of neutral peptide Mr(calc): 1140.563751

Fixed modifications: Carbamidomethyl (C) (apply to specified residues or termini only)

Variable modifications:

Q6 : Biotin:Thermo-21345 (Q)

Ions Score: 27 Expect: 0.0086

Matches : 5/52 fragment ions using 10 most intense peaks ([help](#))

| # | b          | b <sup>++</sup> | b <sup>*</sup> | b <sup>+++</sup> | b <sup>0</sup> | b <sup>0++</sup> | Seq. | y           | y <sup>++</sup> | y <sup>*</sup> | y <sup>+++</sup> | y <sup>0</sup> | y <sup>0++</sup> | # |
|---|------------|-----------------|----------------|------------------|----------------|------------------|------|-------------|-----------------|----------------|------------------|----------------|------------------|---|
| 1 | 72.044390  | 36.525833       |                |                  |                |                  | A    |             |                 |                |                  |                |                  | 7 |
| 2 | 219.112804 | 110.060040      |                |                  |                |                  | F    | 1070.533929 | 535.770603      | 1053.507380    | 527.257328       | 1052.523364    | 526.765320       | 6 |
| 3 | 306.144832 | 153.576054      |                |                  | 288.134267     | 144.570772       | S    | 923.465515  | 462.236396      | 906.438966     | 453.723121       | 905.454950     | 453.231113       | 5 |
| 4 | 393.176860 | 197.092068      |                |                  | 375.166295     | 188.086785       | S    | 836.433487  | 418.720382      | 819.406938     | 410.207107       | 818.422922     | 409.715099       | 4 |
| 5 | 556.240189 | 278.623733      |                |                  | 538.229624     | 269.618450       | Y    | 749.401459  | 375.204368      | 732.374910     | 366.691093       |                |                  | 3 |
| 6 | 995.465515 | 498.236396      | 978.438966     | 489.723121       | 977.454950     | 489.231113       | Q    | 586.338130  | 293.672703      | 569.311581     | 285.159429       |                |                  | 2 |
| 7 |            |                 |                |                  |                |                  | K    | 147.112804  | 74.060040       | 130.086255     | 65.546765        |                |                  | 1 |

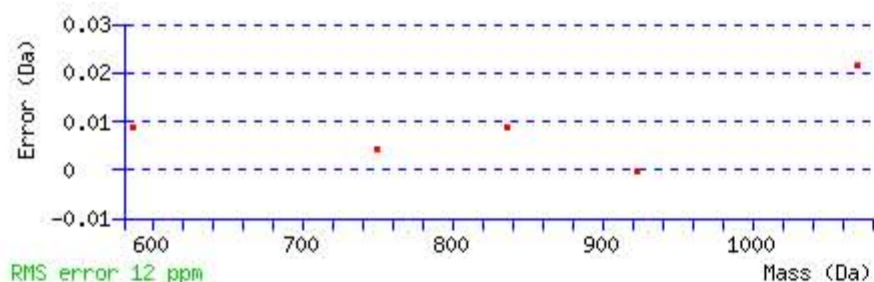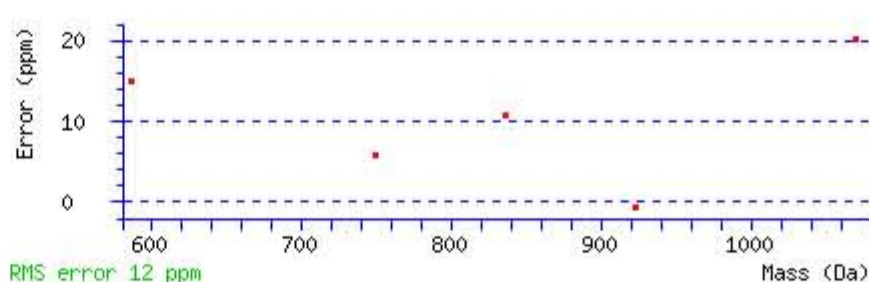

NCBI BLAST search of **AFSSYQK**

(Parameters: blastp, nr protein database, expect=20000, no filter, PAM30)

Other BLAST [web gateways](#)

All matches to this query

| Score | Mr(calc):   | Delta    | Sequence                   |
|-------|-------------|----------|----------------------------|
| 27.0  | 1140.563751 | 0.004997 | <a href="#">AFSSYQK</a>    |
| 5.0   | 1140.559723 | 0.009025 | <a href="#">AFSRSSDLMK</a> |

# MASCOT SEARCH RESULTS

## Peptide View

MS/MS Fragmentation of **VNCLQTR**

Found in **AFAM\_HUMAN**, Afamin OS=Homo sapiens GN=AFM PE=1 SV=1

Match to Query 23706: 1200.611908 from(601.313230,2+) rtinseconds(1483) index(20869)

Title: Locus:1.1.1.2659.9 File:"2013-07-02 CLN FXIII 180 min 1st F 2.wiff"

Data file C:\Program Files (x86)\Matrix Science\Mascot Daemon\mgf\7 FXIII 180 min 1st\mascot\_daemon\_merge.mgf

Click mouse within plot area to zoom in by factor of two about that point

Or, Plot from  to  Da

Label all possible matches  Label matches used for scoring

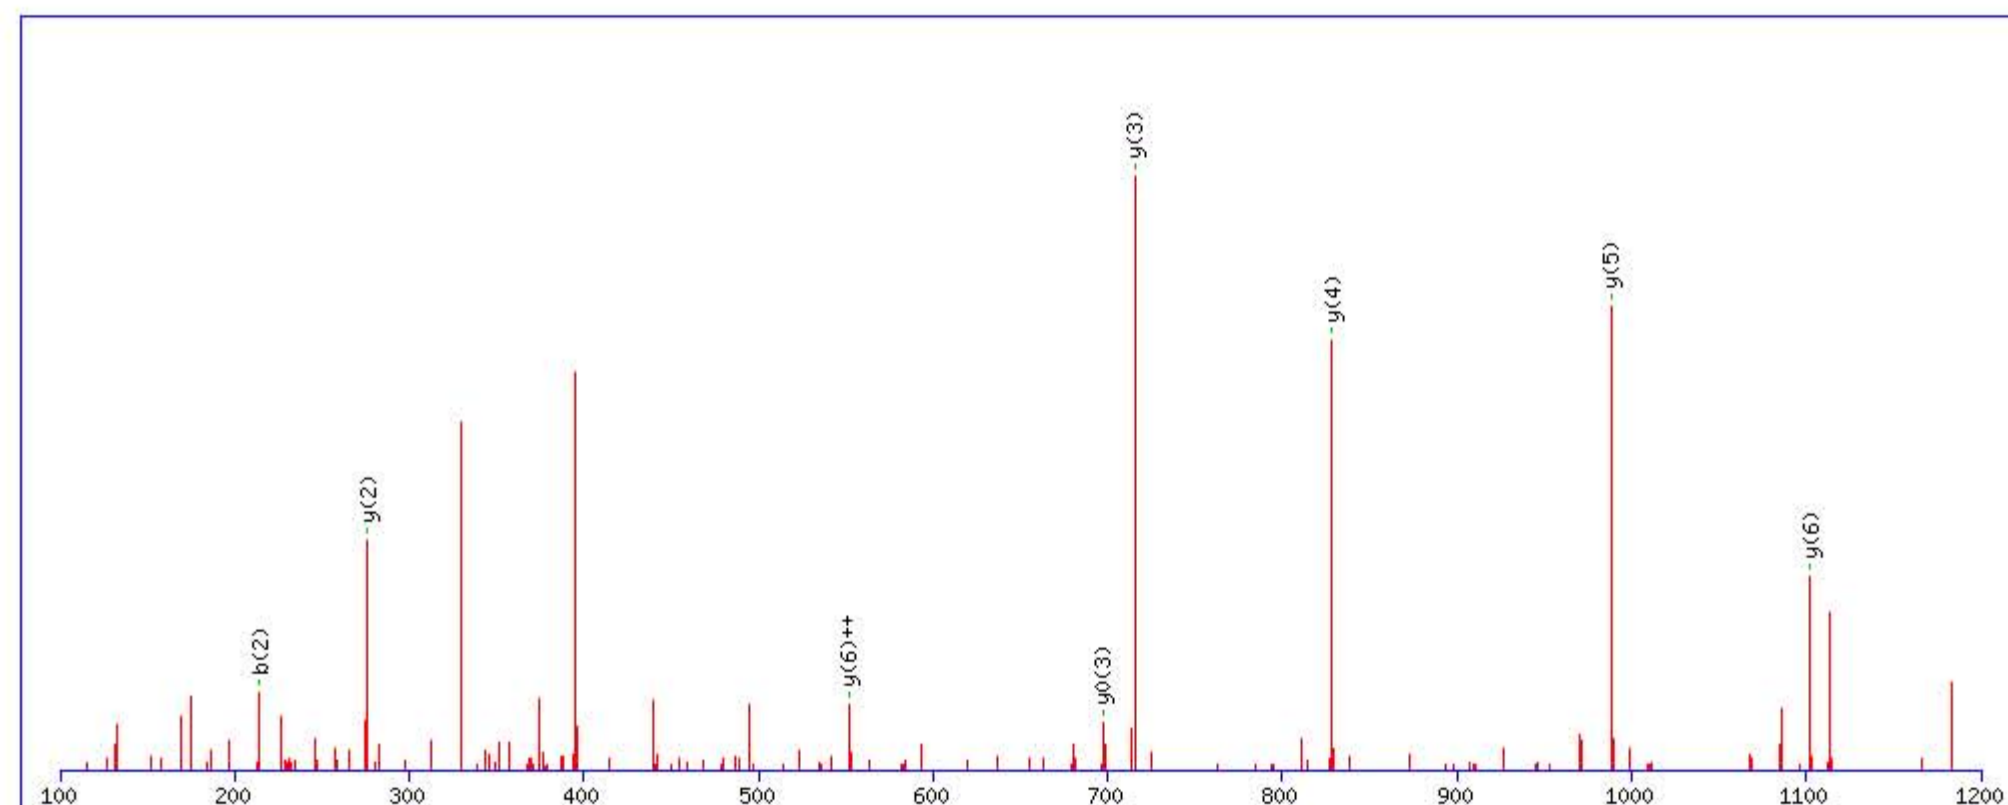

Monoisotopic mass of neutral peptide Mr(calc): 1200.610733

Fixed modifications: Carbamidomethyl (C) (apply to specified residues or termini only)

Variable modifications:

Q5 : Biotin:Thermo-21345 (Q)

Ions Score: 40 Expect: 0.00076

Matches : 8/58 fragment ions using 11 most intense peaks [\(help\)](#)

| # | b                 | b <sup>++</sup> | b <sup>*</sup> | b <sup>*++</sup> | b <sup>0</sup> | b <sup>0++</sup> | Seq. | y                  | y <sup>++</sup>   | y <sup>*</sup> | y <sup>*++</sup> | y <sup>0</sup>    | y <sup>0++</sup> | # |
|---|-------------------|-----------------|----------------|------------------|----------------|------------------|------|--------------------|-------------------|----------------|------------------|-------------------|------------------|---|
| 1 | 100.075690        | 50.541483       |                |                  |                |                  | V    |                    |                   |                |                  |                   |                  | 7 |
| 2 | <b>214.118617</b> | 107.562947      | 197.092068     | 99.049672        |                |                  | N    | <b>1102.549597</b> | <b>551.778437</b> | 1085.523048    | 543.265162       | 1084.539032       | 542.773154       | 6 |
| 3 | 374.149266        | 187.578271      | 357.122717     | 179.064997       |                |                  | C    | <b>988.506670</b>  | 494.756973        | 971.480121     | 486.243698       | 970.496105        | 485.751691       | 5 |
| 4 | 487.233330        | 244.120303      | 470.206781     | 235.607029       |                |                  | L    | <b>828.476021</b>  | 414.741649        | 811.449472     | 406.228374       | 810.465456        | 405.736366       | 4 |
| 5 | 926.458656        | 463.732966      | 909.432107     | 455.219692       |                |                  | Q    | <b>715.391957</b>  | 358.199617        | 698.365408     | 349.686342       | <b>697.381392</b> | 349.194334       | 3 |
| 6 | 1027.506335       | 514.256806      | 1010.479786    | 505.743531       | 1009.495770    | 505.251523       | T    | <b>276.166631</b>  | 138.586953        | 259.140082     | 130.073679       | 258.156066        | 129.581671       | 2 |
| 7 |                   |                 |                |                  |                |                  | R    | 175.118952         | 88.063114         | 158.092403     | 79.549839        |                   |                  | 1 |

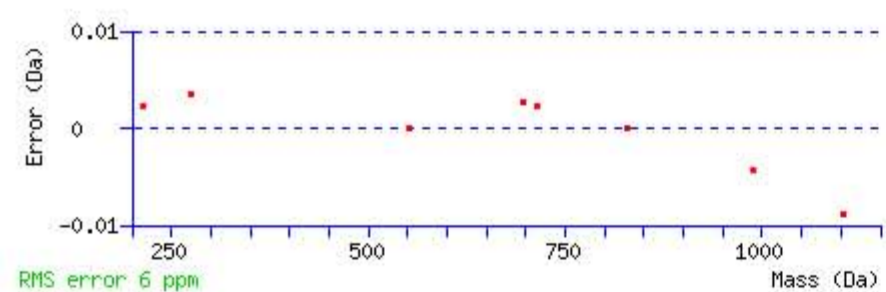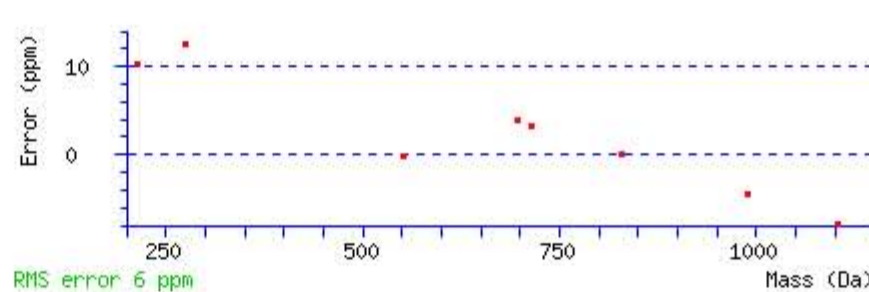

NCBI BLAST search of **VNCLQTR**

(Parameters: blastp, nr protein database, expect=20000, no filter, PAM30)

Other BLAST [web gateways](#)

All matches to this query

| Score | Mr(calc):   | Delta     | Sequence                     |
|-------|-------------|-----------|------------------------------|
| 40.5  | 1200.610733 | 0.001175  | <a href="#">VNCLQTR</a>      |
| 6.8   | 1200.603333 | 0.008575  | <a href="#">GRIAEPSVCGR</a>  |
| 5.9   | 1200.628479 | -0.016571 | <a href="#">MVAALLGGGEAR</a> |
| 1.9   | 1200.607361 | 0.004547  | <a href="#">RGDYVHVMPK</a>   |
| 1.3   | 1200.609848 | 0.002060  | <a href="#">ERAPVSGTQEK</a>  |
| 0.2   | 1200.621948 | -0.010040 | <a href="#">VNMLKHCKR</a>    |
| 0.1   | 1200.617233 | -0.005325 | <a href="#">VMEETPNILR</a>   |
| 0.1   | 1200.621094 | -0.009186 | <a href="#">ESRPVQQTTR</a>   |

# MASCOT SCIENCE Mascot Search Results

## Peptide View

MS/MS Fragmentation of **MVQQECK**

Found in **AFAM\_HUMAN**, Afamin OS=Homo sapiens GN=AFM PE=1 SV=1

Match to Query 25188: 1248.571008 from(625.292780,2+) rtinseconds(1179) index(1166)

Title: Locus:1.1.1.2664.23 File:"2013-07-02 CLN FXIII 180 min 1st F 1.wiff"

Data file C:\Program Files (x86)\Matrix Science\Mascot Daemon\mgf\7 FXIII 180 min 1st\mascot\_daemon\_merge.mgf

Click mouse within plot area to zoom in by factor of two about that point

Or, Plot from  to  Da

Label all possible matches  Label matches used for scoring

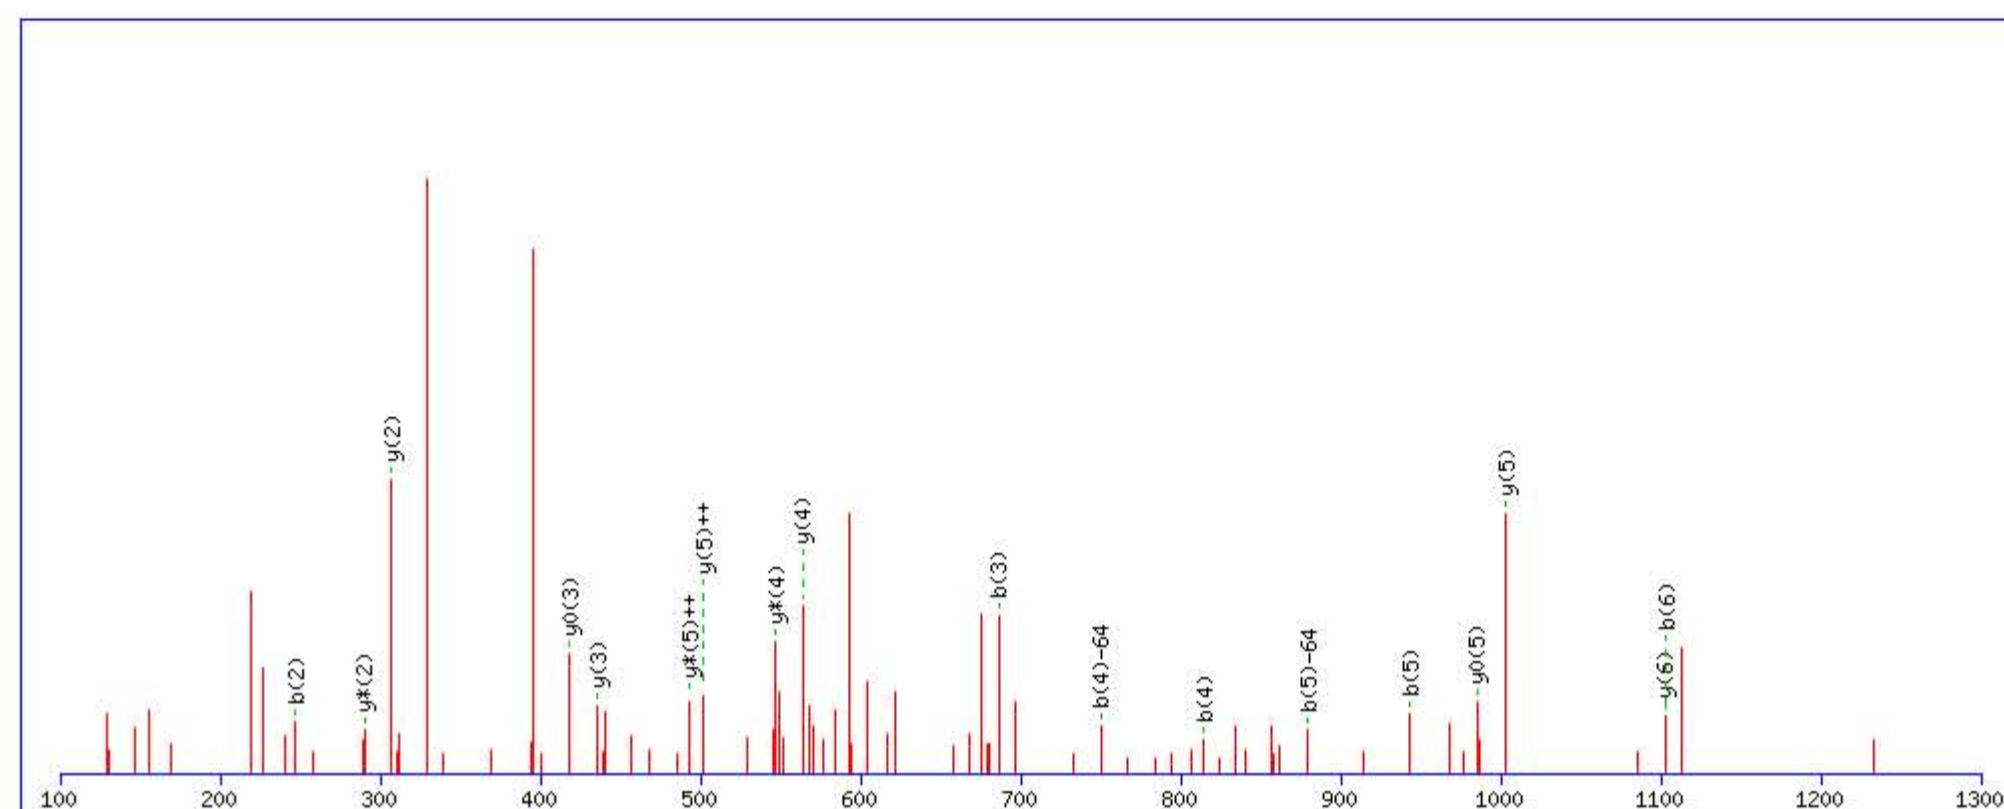

Monoisotopic mass of neutral peptide Mr(calc): 1248.566483

Fixed modifications: Carbamidomethyl (C) (apply to specified residues or termini only)

Variable modifications:

M1 : Oxidation (M), with neutral losses 0.000000 (shown in table), 63.998285

Q3 : Biotin:Thermo-21345 (Q)

Ions Score: 28 Expect: 0.015

Matches : 18/80 fragment ions using 31 most intense peaks [\(help\)](#)

| # | b                  | b <sup>++</sup> | b <sup>+</sup> | b <sup>+++</sup> | b <sup>0</sup> | b <sup>0++</sup> | Seq. | y                  | y <sup>++</sup>   | y <sup>+</sup>    | y <sup>+++</sup>  | y <sup>0</sup>    | y <sup>0++</sup> | # |
|---|--------------------|-----------------|----------------|------------------|----------------|------------------|------|--------------------|-------------------|-------------------|-------------------|-------------------|------------------|---|
| 1 | 148.042676         | 74.524976       |                |                  |                |                  | M    |                    |                   |                   |                   |                   |                  | 7 |
| 2 | <b>247.111090</b>  | 124.059183      |                |                  |                |                  | V    | <b>1102.538364</b> | 551.772820        | 1085.511815       | 543.259546        | 1084.527799       | 542.767538       | 6 |
| 3 | <b>686.336416</b>  | 343.671846      | 669.309867     | 335.158572       |                |                  | Q    | <b>1003.469950</b> | <b>502.238613</b> | 986.443401        | <b>493.725339</b> | <b>985.459385</b> | 493.233331       | 5 |
| 4 | <b>814.394994</b>  | 407.701135      | 797.368445     | 399.187861       |                |                  | Q    | <b>564.244624</b>  | 282.625950        | <b>547.218075</b> | 274.112676        | 546.234059        | 273.620668       | 4 |
| 5 | <b>943.437587</b>  | 472.222432      | 926.411038     | 463.709157       | 925.427022     | 463.217149       | E    | <b>436.186046</b>  | 218.596661        | 419.159497        | 210.083387        | <b>418.175481</b> | 209.591379       | 3 |
| 6 | <b>1103.468236</b> | 552.237756      | 1086.441687    | 543.724482       | 1085.457671    | 543.232474       | C    | <b>307.143453</b>  | 154.075365        | <b>290.116904</b> | 145.562090        |                   |                  | 2 |
| 7 |                    |                 |                |                  |                |                  | K    | 147.112804         | 74.060040         | 130.086255        | 65.546765         |                   |                  | 1 |

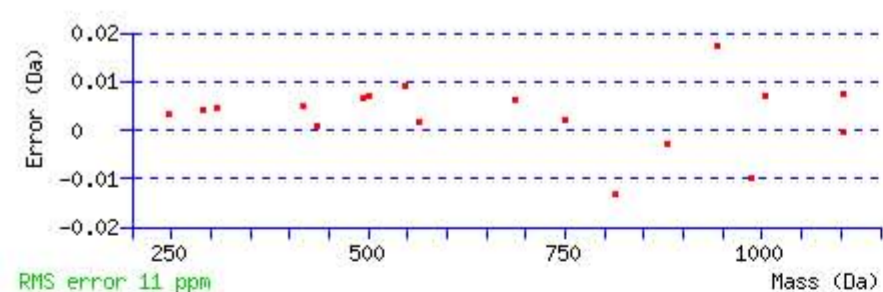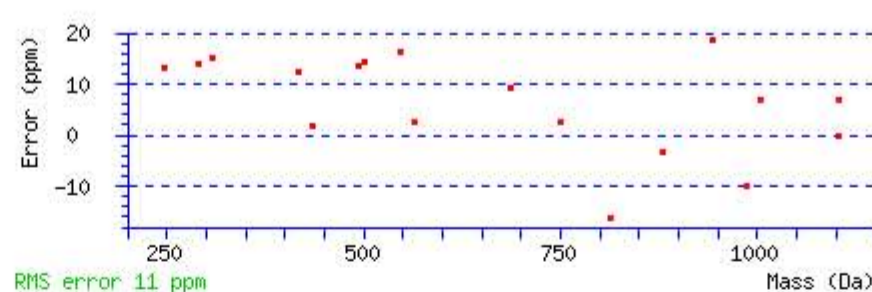

NCBI BLAST search of [MVQQECK](#)

(Parameters: blastp, nr protein database, expect=20000, no filter, PAM30)

Other BLAST [web gateways](#)

All matches to this query

| Score | Mr(calc):   | Delta     | Sequence                    |
|-------|-------------|-----------|-----------------------------|
| 28.2  | 1248.566483 | 0.004525  | <a href="#">MVQQECK</a>     |
| 16.9  | 1248.566483 | 0.004525  | <a href="#">MVQQECK</a>     |
| 11.4  | 1248.588089 | -0.017081 | <a href="#">MVDVGGQRSER</a> |

Mascot: <http://www.matrixscience.com/>

# MASCOT SCIENCE Mascot Search Results

## Peptide View

MS/MS Fragmentation of **MVQQECK**

Found in **AFAM\_HUMAN**, Afamin OS=Homo sapiens GN=AFM PE=1 SV=1

Match to Query 25192: 1248.571748 from(625.293150,2+) rtinseconds(1205) index(1333)

Title: Locus:1.1.1.2673.8 File:"2013-07-02 CLN FXIII 180 min 1st F 1.wiff"

Data file C:\Program Files (x86)\Matrix Science\Mascot Daemon\mgf\7 FXIII 180 min 1st\mascot\_daemon\_merge.mgf

Click mouse within plot area to zoom in by factor of two about that point

Or, Plot from  to  Da

Label all possible matches  Label matches used for scoring

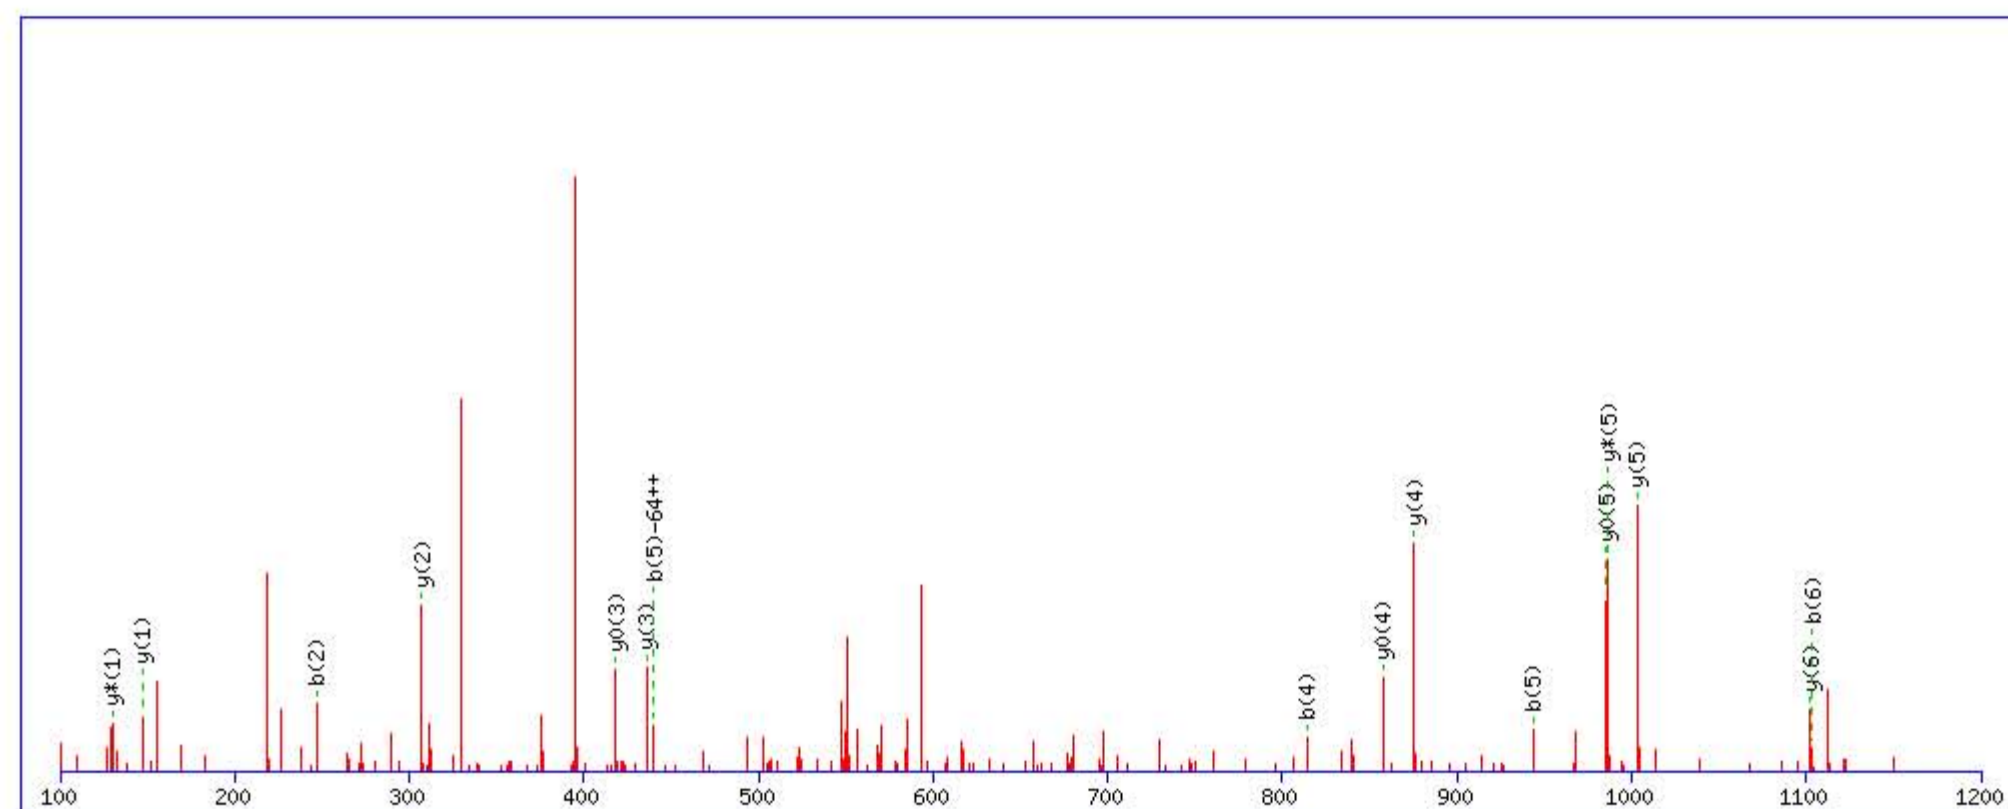

Monoisotopic mass of neutral peptide Mr(calc): 1248.566483

Fixed modifications: Carbamidomethyl (C) (apply to specified residues or termini only)

Variable modifications:

M1 : Oxidation (M), with neutral losses 0.000000 (shown in table), 63.998285

Q4 : Biotin:Thermo-21345 (Q)

Ions Score: 29 Expect: 0.012

Matches : 16/80 fragment ions using 33 most intense peaks [\(help\)](#)

| # | b                  | b <sup>++</sup> | b <sup>*</sup> | b <sup>*++</sup> | b <sup>0</sup> | b <sup>0++</sup> | Seq. | y                  | y <sup>++</sup> | y <sup>*</sup>    | y <sup>*++</sup> | y <sup>0</sup>    | y <sup>0++</sup> | # |
|---|--------------------|-----------------|----------------|------------------|----------------|------------------|------|--------------------|-----------------|-------------------|------------------|-------------------|------------------|---|
| 1 | 148.042676         | 74.524976       |                |                  |                |                  | M    |                    |                 |                   |                  |                   |                  | 7 |
| 2 | <b>247.111090</b>  | 124.059183      |                |                  |                |                  | V    | <b>1102.538364</b> | 551.772820      | 1085.511815       | 543.259546       | 1084.527799       | 542.767538       | 6 |
| 3 | 375.169668         | 188.088472      | 358.143119     | 179.575198       |                |                  | Q    | <b>1003.469950</b> | 502.238613      | <b>986.443401</b> | 493.725338       | <b>985.459385</b> | 493.233330       | 5 |
| 4 | <b>814.394994</b>  | 407.701135      | 797.368445     | 399.187861       |                |                  | Q    | <b>875.411372</b>  | 438.209324      | 858.384823        | 429.696050       | <b>857.400807</b> | 429.204042       | 4 |
| 5 | <b>943.437587</b>  | 472.222432      | 926.411038     | 463.709157       | 925.427022     | 463.217149       | E    | <b>436.186046</b>  | 218.596661      | 419.159497        | 210.083386       | <b>418.175481</b> | 209.591378       | 3 |
| 6 | <b>1103.468236</b> | 552.237756      | 1086.441687    | 543.724482       | 1085.457671    | 543.232473       | C    | <b>307.143453</b>  | 154.075364      | 290.116904        | 145.562090       |                   |                  | 2 |
| 7 |                    |                 |                |                  |                |                  | K    | <b>147.112804</b>  | 74.060040       | <b>130.086255</b> | 65.546765        |                   |                  | 1 |

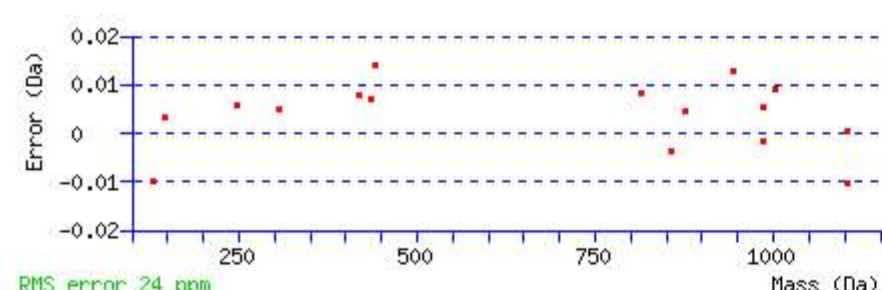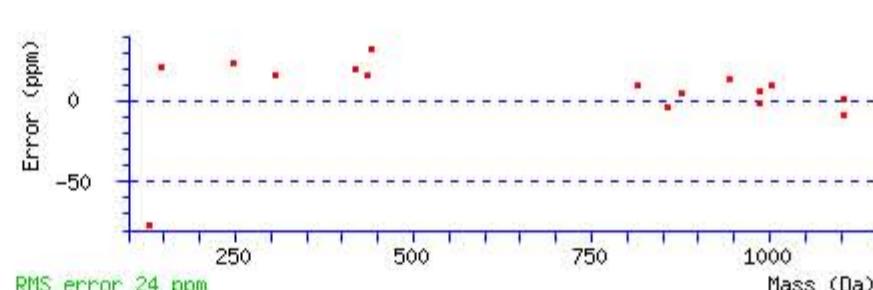

NCBI BLAST search of **MVQQECK**

(Parameters: blastp, nr protein database, expect=20000, no filter, PAM30)

Other BLAST [web gateways](#)

All matches to this query

| Score | Mr(calc):   | Delta     | Sequence                    |
|-------|-------------|-----------|-----------------------------|
| 29.0  | 1248.566483 | 0.005265  | <a href="#">MVQQECK</a>     |
| 19.2  | 1248.566483 | 0.005265  | <a href="#">MVQQECK</a>     |
| 13.2  | 1248.576813 | -0.005065 | <a href="#">KCESLEQEAR</a>  |
| 6.9   | 1248.584244 | -0.012496 | <a href="#">MHSMISSVDVK</a> |
| 3.8   | 1248.584244 | -0.012496 | <a href="#">MHSMISSVDVK</a> |
| 1.1   | 1248.588089 | -0.016341 | <a href="#">MVDVGGQSRER</a> |

Mascot: <http://www.matrixscience.com/>



# MASCOT SCIENCE Mascot Search Results

## Peptide View

MS/MS Fragmentation of **CQAYESNR**

Found in **AFAM\_HUMAN**, Afamin OS=Homo sapiens GN=AFM PE=1 SV=1

Match to Query 27794: 1337.594548 from(669.804550,2+) rtinseconds(1369) index(2344)

Title: Locus:1.1.1.2730.25 File:"2013-07-02 CLN FXIII 180 min 1st F 1.wiff"

Data file C:\Program Files (x86)\Matrix Science\Mascot Daemon\mgf\7 FXIII 180 min 1st\mascot\_daemon\_merge.mgf

Click mouse within plot area to zoom in by factor of two about that point

Or, Plot from  to  Da

Label all possible matches  Label matches used for scoring

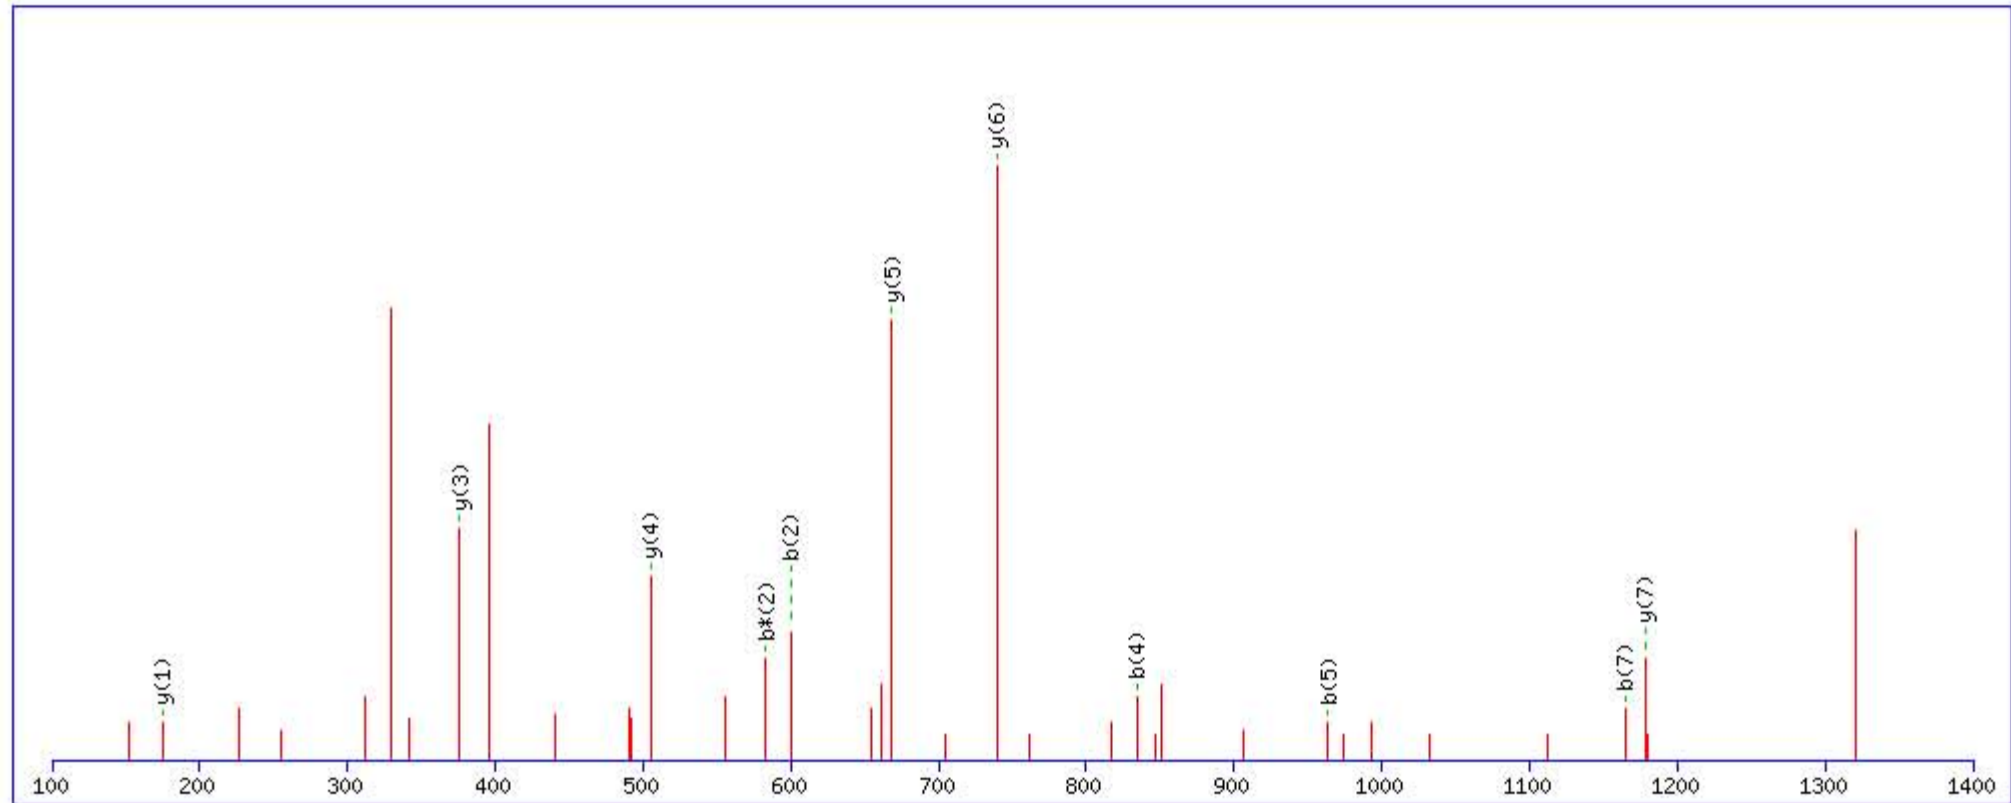

Monoisotopic mass of neutral peptide Mr(calc): 1337.585617

Fixed modifications: Carbamidomethyl (C) (apply to specified residues or termini only)

Variable modifications:

Q2 : Biotin:Thermo-21345 (Q)

Ions Score: 27 Expect: 0.011

Matches : 11/70 fragment ions using 30 most intense peaks ([help](#))

| # | b                  | b <sup>++</sup> | b <sup>*</sup>    | b <sup>*++</sup> | b <sup>0</sup> | b <sup>0++</sup> | Seq. | y                  | y <sup>++</sup> | y <sup>*</sup> | y <sup>*++</sup> | y <sup>0</sup> | y <sup>0++</sup> | # |
|---|--------------------|-----------------|-------------------|------------------|----------------|------------------|------|--------------------|-----------------|----------------|------------------|----------------|------------------|---|
| 1 | 161.037925         | 81.022600       |                   |                  |                |                  | C    |                    |                 |                |                  |                |                  | 8 |
| 2 | <b>600.263251</b>  | 300.635264      | <b>583.236702</b> | 292.121989       |                |                  | Q    | <b>1178.562269</b> | 589.784773      | 1161.535720    | 581.271498       | 1160.551704    | 580.779490       | 7 |
| 3 | 671.300365         | 336.153821      | 654.273816        | 327.640546       |                |                  | A    | <b>739.336943</b>  | 370.172110      | 722.310394     | 361.658835       | 721.326378     | 361.166827       | 6 |
| 4 | <b>834.363694</b>  | 417.685485      | 817.337145        | 409.172211       |                |                  | Y    | <b>668.299829</b>  | 334.653553      | 651.273280     | 326.140278       | 650.289264     | 325.648270       | 5 |
| 5 | <b>963.406287</b>  | 482.206782      | 946.379738        | 473.693507       | 945.395722     | 473.201499       | E    | <b>505.236500</b>  | 253.121888      | 488.209951     | 244.608613       | 487.225935     | 244.116605       | 4 |
| 6 | 1050.438315        | 525.722796      | 1033.411766       | 517.209521       | 1032.427750    | 516.717513       | S    | <b>376.193907</b>  | 188.600591      | 359.167358     | 180.087317       | 358.183342     | 179.595309       | 3 |
| 7 | <b>1164.481242</b> | 582.744259      | 1147.454693       | 574.230985       | 1146.470677    | 573.738977       | N    | 289.161879         | 145.084577      | 272.135330     | 136.571303       |                |                  | 2 |
| 8 |                    |                 |                   |                  |                |                  | R    | <b>175.118952</b>  | 88.063114       | 158.092403     | 79.549839        |                |                  | 1 |

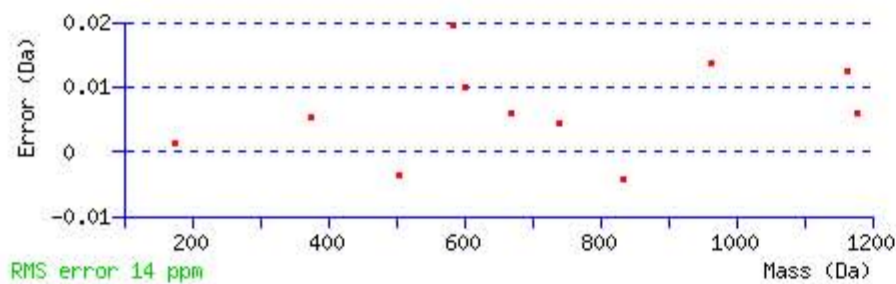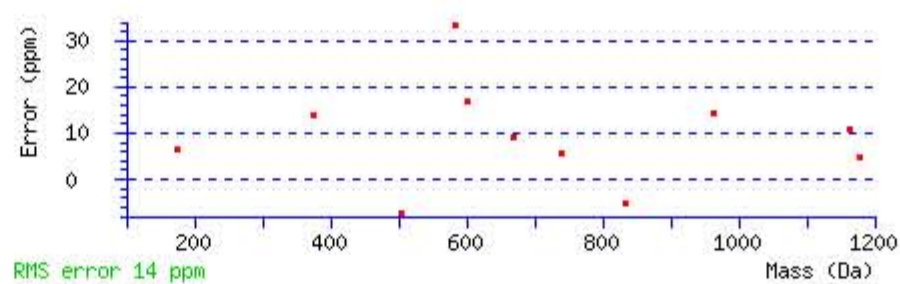

NCBI BLAST search of **CQAYESNR**

(Parameters: blastp, nr protein database, expect=20000, no filter, PAM30)

Other BLAST [web gateways](#)

All matches to this query

| Score | Mr(calc):   | Delta     | Sequence                    |
|-------|-------------|-----------|-----------------------------|
| 27.2  | 1337.585617 | 0.008931  | <a href="#">CQAYESNR</a>    |
| 8.2   | 1337.596848 | -0.002300 | <a href="#">CYEMASHLRR</a>  |
| 3.6   | 1337.592148 | 0.002400  | <a href="#">ELDFAACVEER</a> |

# MASCOT SCIENCE Mascot Search Results

## Peptide View

MS/MS Fragmentation of **LPNNVLQEK**

Found in **AFAM\_HUMAN**, Afamin OS=Homo sapiens GN=AFM PE=1 SV=1

Match to Query 29392: 1364.760848 from(683.387700,2+) rtinseconds(1787) index(5137)

Title: Locus:1.1.1.2876.23 File:"2013-07-02 CLN FXIII 180 min 1st F 1.wiff"

Data file C:\Program Files (x86)\Matrix Science\Mascot Daemon\mgf\7 FXIII 180 min 1st\mascot\_daemon\_merge.mgf

Click mouse within plot area to zoom in by factor of two about that point

Or, Plot from  to  Da

Label all possible matches  Label matches used for scoring

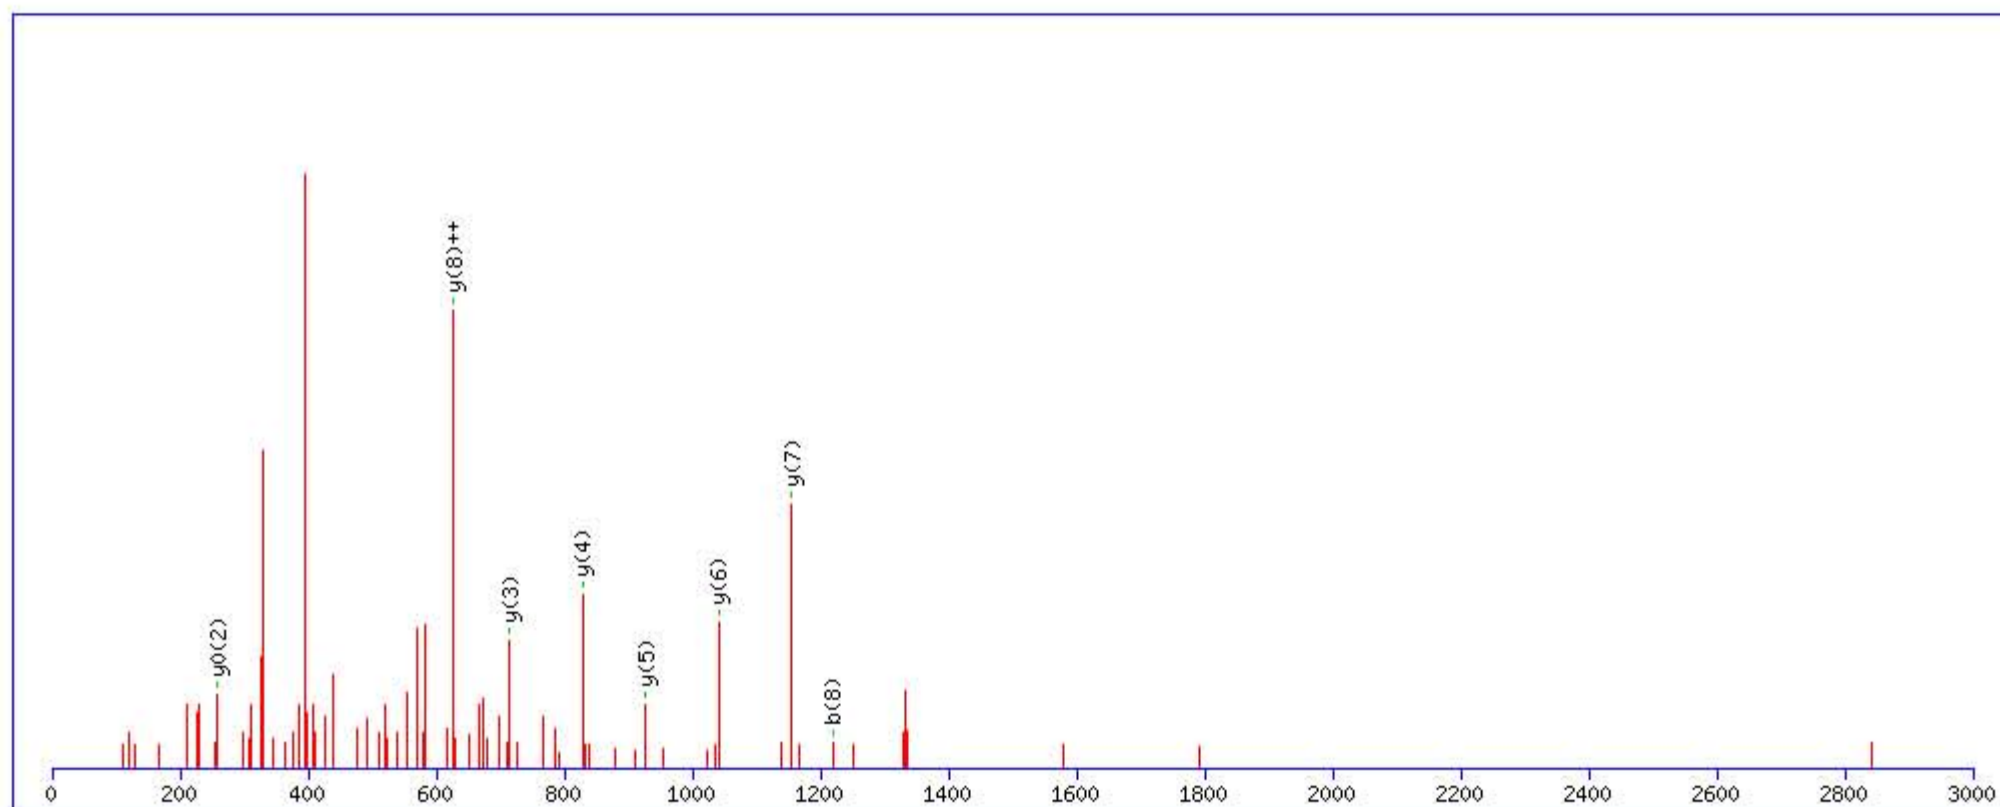

Monoisotopic mass of neutral peptide Mr(calc): 1364.748581

Fixed modifications: Carbamidomethyl (C) (apply to specified residues or termini only)

Variable modifications:

Q7 : Biotin:Thermo-21345 (Q)

Ions Score: 28 Expect: 0.0027

Matches : 8/76 fragment ions using 13 most intense peaks [\(help\)](#)

| # | b           | b <sup>++</sup> | b <sup>*</sup> | b <sup>+++</sup> | b <sup>0</sup> | b <sup>0++</sup> | Seq. | y           | y <sup>++</sup> | y <sup>*</sup> | y <sup>+++</sup> | y <sup>0</sup> | y <sup>0++</sup> | # |
|---|-------------|-----------------|----------------|------------------|----------------|------------------|------|-------------|-----------------|----------------|------------------|----------------|------------------|---|
| 1 | 114.091340  | 57.549308       |                |                  |                |                  | L    |             |                 |                |                  |                |                  | 9 |
| 2 | 211.144104  | 106.075690      |                |                  |                |                  | P    | 1252.671819 | 626.839548      | 1235.645270    | 618.326273       | 1234.661254    | 617.834265       | 8 |
| 3 | 325.187031  | 163.097153      | 308.160482     | 154.583879       |                |                  | N    | 1155.619055 | 578.313166      | 1138.592506    | 569.799891       | 1137.608490    | 569.307883       | 7 |
| 4 | 439.229958  | 220.118617      | 422.203409     | 211.605343       |                |                  | N    | 1041.576128 | 521.291702      | 1024.549579    | 512.778428       | 1023.565563    | 512.286420       | 6 |
| 5 | 538.298372  | 269.652824      | 521.271823     | 261.139550       |                |                  | V    | 927.533201  | 464.270239      | 910.506652     | 455.756964       | 909.522636     | 455.264956       | 5 |
| 6 | 651.382436  | 326.194856      | 634.355887     | 317.681582       |                |                  | L    | 828.464787  | 414.736032      | 811.438238     | 406.222757       | 810.454222     | 405.730749       | 4 |
| 7 | 1090.607762 | 545.807519      | 1073.581213    | 537.294245       |                |                  | Q    | 715.380723  | 358.194000      | 698.354174     | 349.680725       | 697.370158     | 349.188717       | 3 |
| 8 | 1219.650355 | 610.328816      | 1202.623806    | 601.815541       | 1201.639790    | 601.323533       | E    | 276.155397  | 138.581336      | 259.128848     | 130.068062       | 258.144832     | 129.576054       | 2 |
| 9 |             |                 |                |                  |                |                  | K    | 147.112804  | 74.060040       | 130.086255     | 65.546765        |                |                  | 1 |

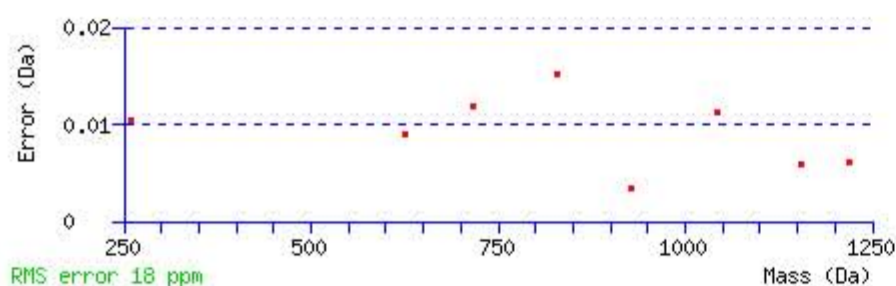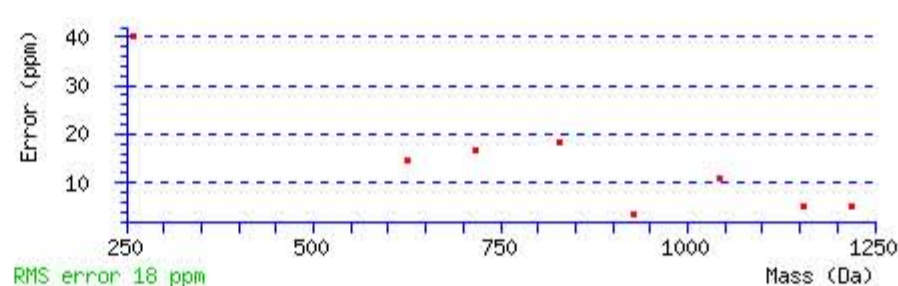

NCBI BLAST search of **LPNNVLQEK**

(Parameters: blastp, nr protein database, expect=20000, no filter, PAM30)

Other BLAST [web gateways](#)

All matches to this query

| Score | Mr(calc):   | Delta    | Sequence                   |
|-------|-------------|----------|----------------------------|
| 28.4  | 1364.748581 | 0.012267 | <a href="#">LPNNVLQEK</a>  |
| 0.9   | 1364.745239 | 0.015609 | <a href="#">KVSWIDVYTR</a> |

Mascot: <http://www.matrixscience.com/>

# MASCOT Search Results

## Peptide View

MS/MS Fragmentation of **ICAMEGLPQK**

Found in **AFAM\_HUMAN**, Afamin OS=Homo sapiens GN=AFM PE=1 SV=1

Match to Query 33613: 1456.739288 from(729.376920,2+) rtinseconds(1916) index(24097)

Title: Locus:1.1.1.2809.17 File:"2013-07-02 CLN FXIII 180 min 1st F 2.wiff"

Data file C:\Program Files (x86)\Matrix Science\Mascot Daemon\mgf\7 FXIII 180 min 1st\mascot\_daemon\_merge.mgf

Click mouse within plot area to zoom in by factor of two about that point

Or, Plot from  to  Da

Label all possible matches  Label matches used for scoring

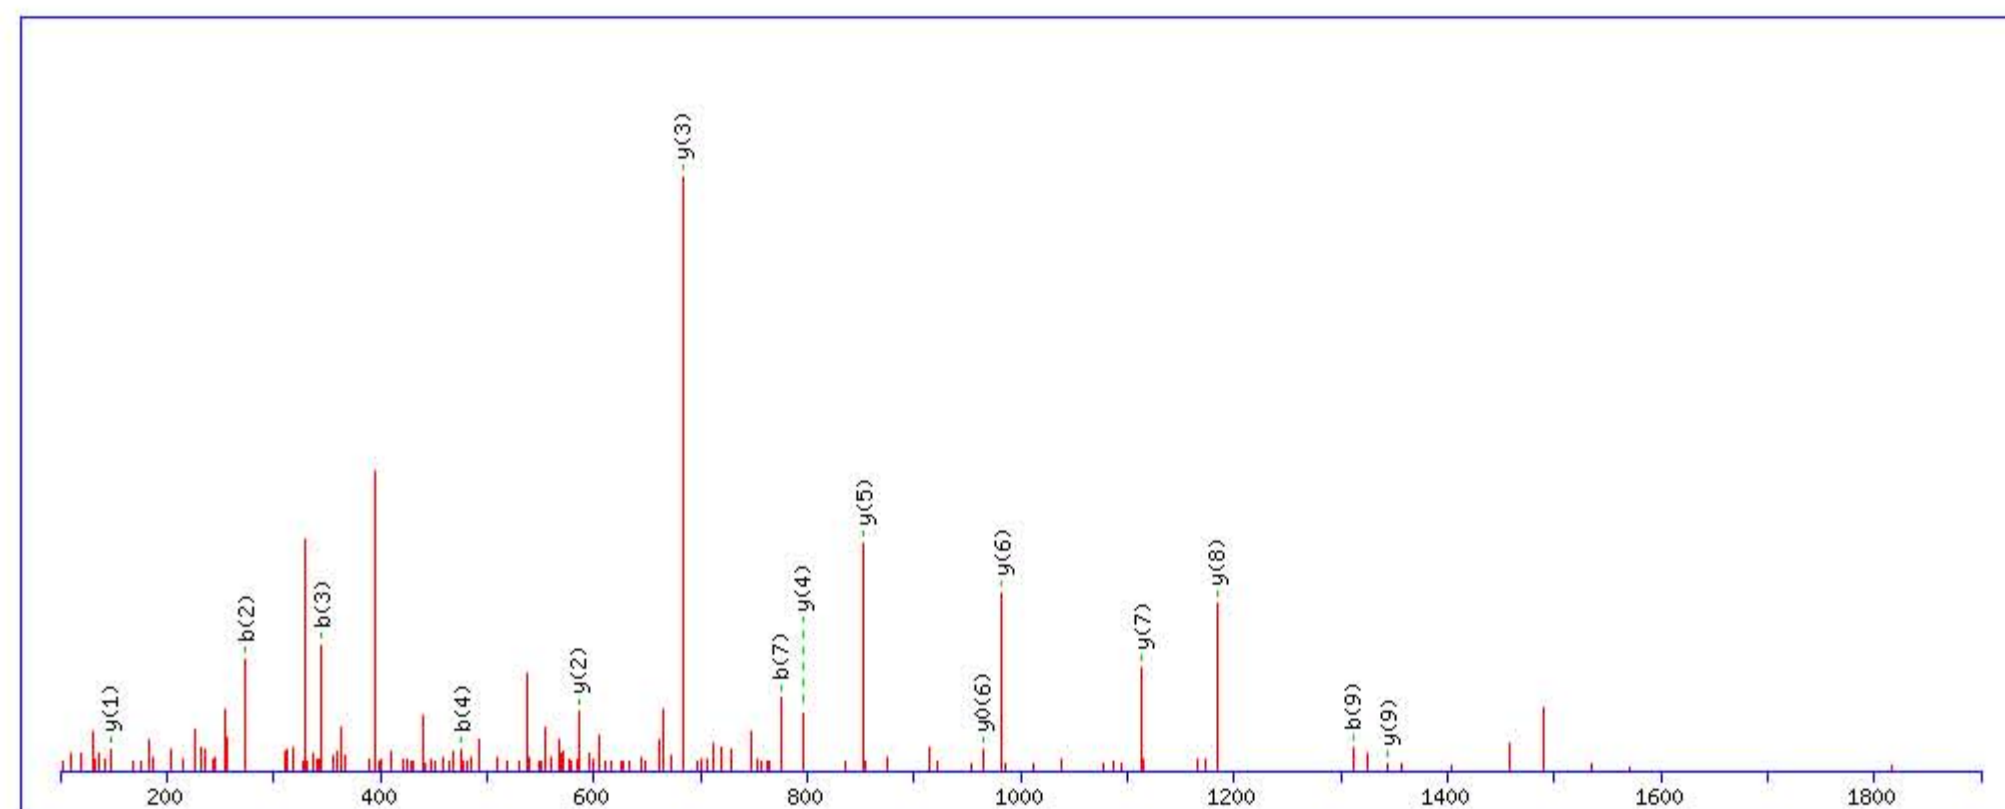

Monoisotopic mass of neutral peptide Mr(calc): 1456.724030

Fixed modifications: Carbamidomethyl (C) (apply to specified residues or termini only)

Variable modifications:

Q9 : Biotin:Thermo-21345 (Q)

Ions Score: 47 Expect: 0.00055

Matches : 15/74 fragment ions using 37 most intense peaks [\(help\)](#)

| #  | b                  | b <sup>++</sup> | b <sup>*</sup> | b <sup>*++</sup> | b <sup>0</sup> | b <sup>0++</sup> | Seq. | y                  | y <sup>++</sup> | y <sup>*</sup> | y <sup>*++</sup> | y <sup>0</sup>    | y <sup>0++</sup> | #  |
|----|--------------------|-----------------|----------------|------------------|----------------|------------------|------|--------------------|-----------------|----------------|------------------|-------------------|------------------|----|
| 1  | 114.091340         | 57.549308       |                |                  |                |                  | I    |                    |                 |                |                  |                   |                  | 10 |
| 2  | <b>274.121989</b>  | 137.564632      |                |                  |                |                  | C    | <b>1344.647263</b> | 672.827270      | 1327.620714    | 664.313995       | 1326.636698       | 663.821987       | 9  |
| 3  | <b>345.159103</b>  | 173.083190      |                |                  |                |                  | A    | <b>1184.616614</b> | 592.811945      | 1167.590065    | 584.298671       | 1166.606049       | 583.806663       | 8  |
| 4  | <b>476.199588</b>  | 238.603432      |                |                  |                |                  | M    | <b>1113.579500</b> | 557.293388      | 1096.552951    | 548.780114       | 1095.568935       | 548.288106       | 7  |
| 5  | 605.242181         | 303.124729      |                |                  | 587.231616     | 294.119446       | E    | <b>982.539015</b>  | 491.773146      | 965.512466     | 483.259871       | <b>964.528450</b> | 482.767863       | 6  |
| 6  | 662.263645         | 331.635461      |                |                  | 644.253080     | 322.630178       | G    | <b>853.496422</b>  | 427.251849      | 836.469873     | 418.738575       |                   |                  | 5  |
| 7  | <b>775.347709</b>  | 388.177493      |                |                  | 757.337144     | 379.172210       | L    | <b>796.474958</b>  | 398.741117      | 779.448409     | 390.227843       |                   |                  | 4  |
| 8  | 872.400473         | 436.703875      |                |                  | 854.389908     | 427.698592       | P    | <b>683.390894</b>  | 342.199085      | 666.364345     | 333.685811       |                   |                  | 3  |
| 9  | <b>1311.625799</b> | 656.316538      | 1294.599250    | 647.803263       | 1293.615234    | 647.311255       | Q    | <b>586.338130</b>  | 293.672703      | 569.311581     | 285.159429       |                   |                  | 2  |
| 10 |                    |                 |                |                  |                |                  | K    | <b>147.112804</b>  | 74.060040       | 130.086255     | 65.546765        |                   |                  | 1  |

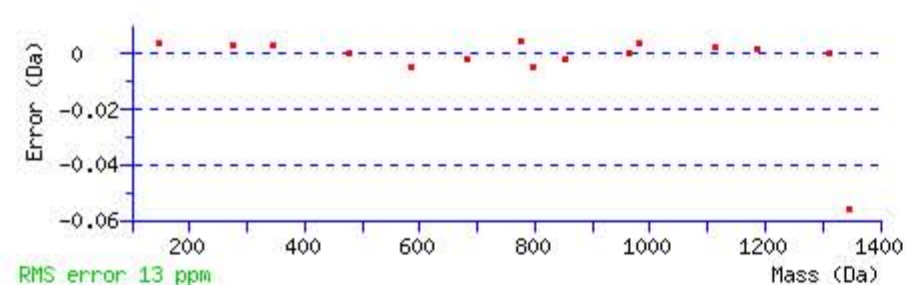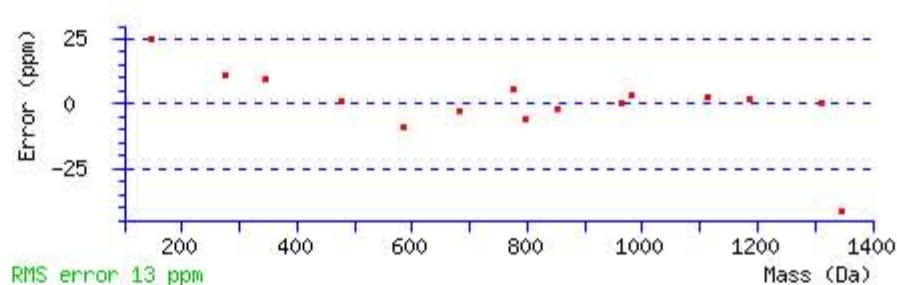

NCBI BLAST search of **ICAMEGLPQK**

(Parameters: blastp, nr protein database, expect=20000, no filter, PAM30)

Other BLAST [web gateways](#)

## All matches to this query

| Score | Mr(calc):   | Delta     | Sequence                        |
|-------|-------------|-----------|---------------------------------|
| 46.7  | 1456.724030 | 0.015258  | <a href="#">ICAMEGLPQK</a>      |
| 12.4  | 1456.740921 | -0.001633 | <a href="#">ATVPAGEGVSLEEAK</a> |
| 7.8   | 1456.723145 | 0.016143  | <a href="#">QQTLEAEEAK</a>      |
| 6.4   | 1456.745605 | -0.006317 | <a href="#">QNENTRKEK</a>       |
| 4.3   | 1456.723160 | 0.016128  | <a href="#">ALAVMVDHLESEK</a>   |
| 4.2   | 1456.745621 | -0.006333 | <a href="#">LKEPHTMSRSQK</a>    |
| 3.8   | 1456.742279 | -0.002991 | <a href="#">LSGSHSQGVAYPVR</a>  |
| 2.0   | 1456.723145 | 0.016143  | <a href="#">QQTLEAEEAK</a>      |
| 0.5   | 1456.759521 | -0.020233 | <a href="#">SKMIYASSKDAIK</a>   |

# MASCOT SCIENCE Mascot Search Results

## Peptide View

MS/MS Fragmentation of **FTDSENVQER**

Found in **AFAM\_HUMAN**, Afamin OS=Homo sapiens GN=AFM PE=1 SV=1

Match to Query 42317: 1694.747232 from(565.923020,3+) rtinseconds(1540) index(3596)

Title: Locus:1.1.1.2790.11 File:"2013-07-02 CLN FXIII 180 min 1st F 1.wiff"

Data file C:\Program Files (x86)\Matrix Science\Mascot Daemon\mgf\7 FXIII 180 min 1st\mascot\_daemon\_merge.mgf

Click mouse within plot area to zoom in by factor of two about that point

Or, Plot from  to  Da

Label all possible matches  Label matches used for scoring

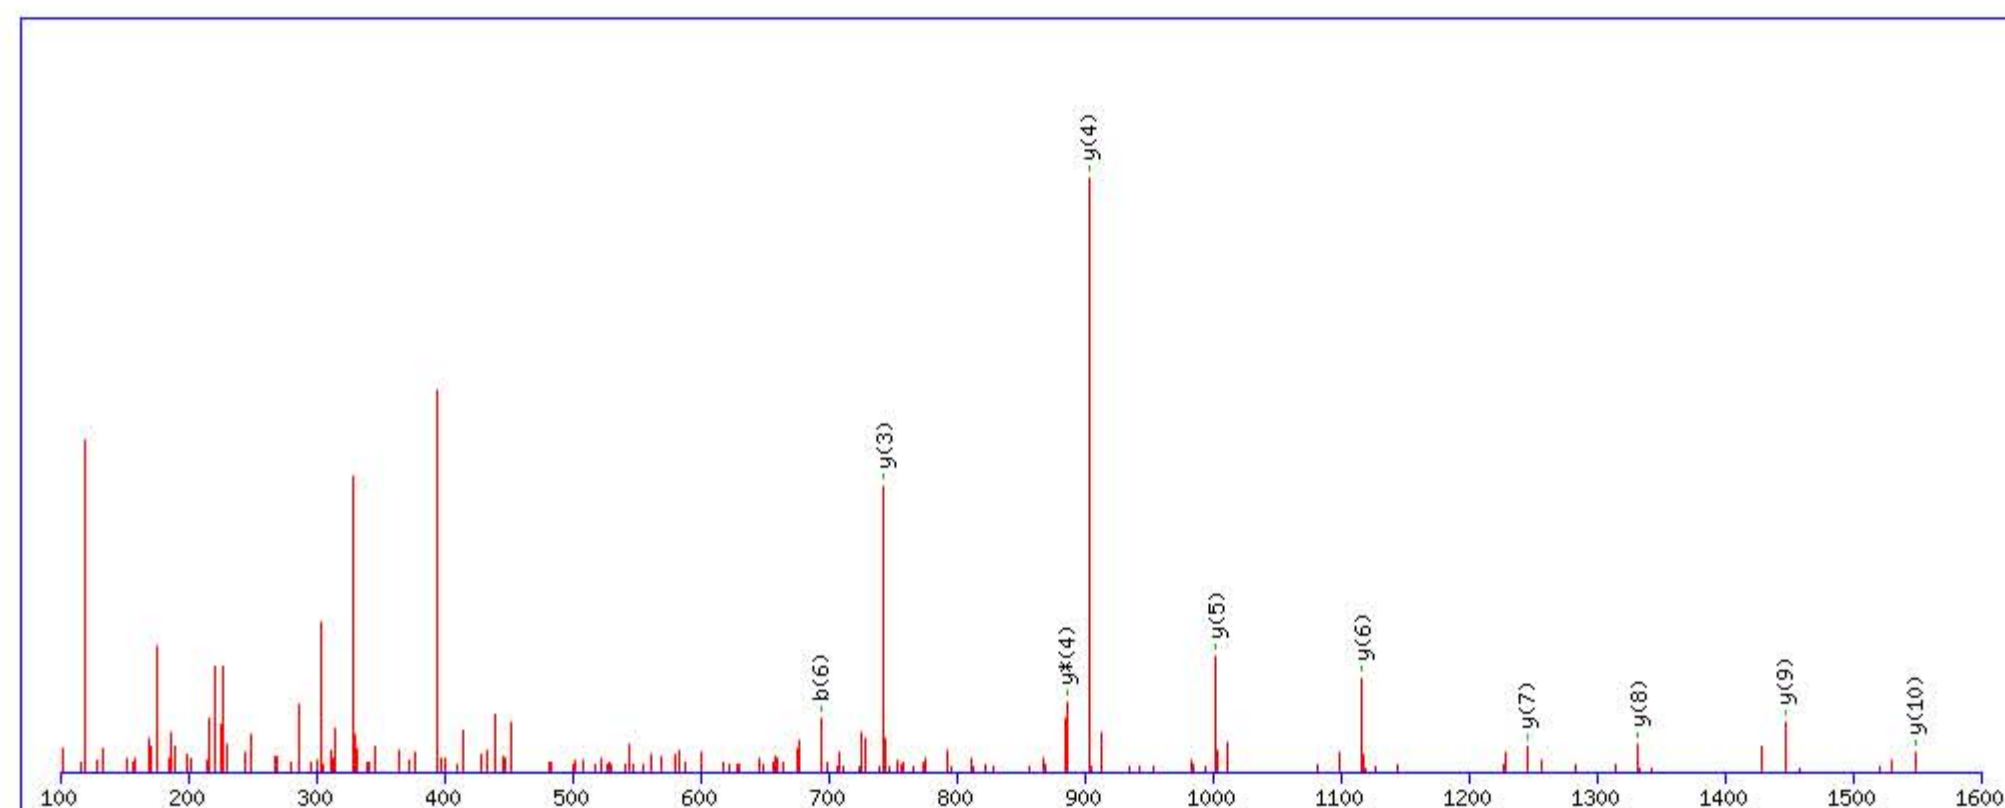

Monoisotopic mass of neutral peptide  $M_r(\text{calc})$ : 1694.739243

Fixed modifications: Carbamidomethyl (C) (apply to specified residues or termini only)

Variable modifications:

Q9 : Biotin:Thermo-21345 (Q)

Ions Score: 54 Expect: 2.2e-005

Matches : 10/106 fragment ions using 15 most intense peaks ([help](#))

| #  | b           | b <sup>++</sup> | b <sup>*</sup> | b <sup>*++</sup> | b <sup>0</sup> | b <sup>0++</sup> | Seq. | y           | y <sup>++</sup> | y <sup>*</sup> | y <sup>*++</sup> | y <sup>0</sup> | y <sup>0++</sup> | #  |
|----|-------------|-----------------|----------------|------------------|----------------|------------------|------|-------------|-----------------|----------------|------------------|----------------|------------------|----|
| 1  | 148.075690  | 74.541483       |                |                  |                |                  | F    |             |                 |                |                  |                |                  | 11 |
| 2  | 249.123369  | 125.065322      |                |                  | 231.112804     | 116.060040       | T    | 1548.678104 | 774.842690      | 1531.651555    | 766.329416       | 1530.667539    | 765.837408       | 10 |
| 3  | 364.150312  | 182.578794      |                |                  | 346.139747     | 173.573512       | D    | 1447.630425 | 724.318851      | 1430.603876    | 715.805576       | 1429.619860    | 715.313568       | 9  |
| 4  | 451.182340  | 226.094808      |                |                  | 433.171775     | 217.089526       | S    | 1332.603482 | 666.805379      | 1315.576933    | 658.292105       | 1314.592917    | 657.800097       | 8  |
| 5  | 580.224933  | 290.616105      |                |                  | 562.214368     | 281.610822       | E    | 1245.571454 | 623.289365      | 1228.544905    | 614.776091       | 1227.560889    | 614.284083       | 7  |
| 6  | 694.267860  | 347.637568      | 677.241311     | 339.124294       | 676.257295     | 338.632286       | N    | 1116.528861 | 558.768069      | 1099.502312    | 550.254794       | 1098.518296    | 549.762786       | 6  |
| 7  | 793.336274  | 397.171775      | 776.309725     | 388.658501       | 775.325709     | 388.166493       | V    | 1002.485934 | 501.746605      | 985.459385     | 493.233331       | 984.475369     | 492.741323       | 5  |
| 8  | 953.366923  | 477.187100      | 936.340374     | 468.673825       | 935.356358     | 468.181817       | C    | 903.417520  | 452.212398      | 886.390971     | 443.699124       | 885.406955     | 443.207116       | 4  |
| 9  | 1392.592249 | 696.799763      | 1375.565700    | 688.286488       | 1374.581684    | 687.794480       | Q    | 743.386871  | 372.197074      | 726.360322     | 363.683799       | 725.376306     | 363.191791       | 3  |
| 10 | 1521.634842 | 761.321059      | 1504.608293    | 752.807785       | 1503.624277    | 752.315777       | E    | 304.161545  | 152.584411      | 287.134996     | 144.071136       | 286.150980     | 143.579128       | 2  |
| 11 |             |                 |                |                  |                |                  | R    | 175.118952  | 88.063114       | 158.092403     | 79.549839        |                |                  | 1  |

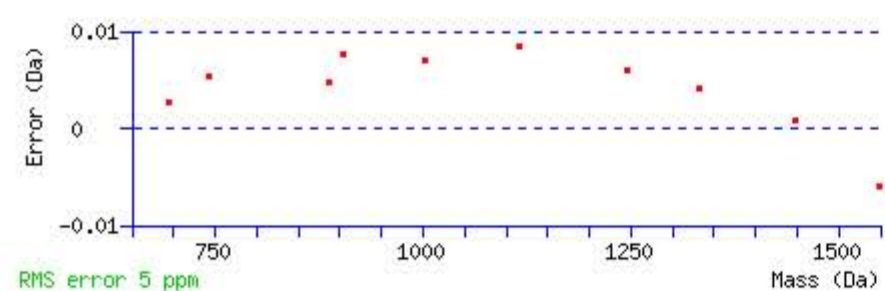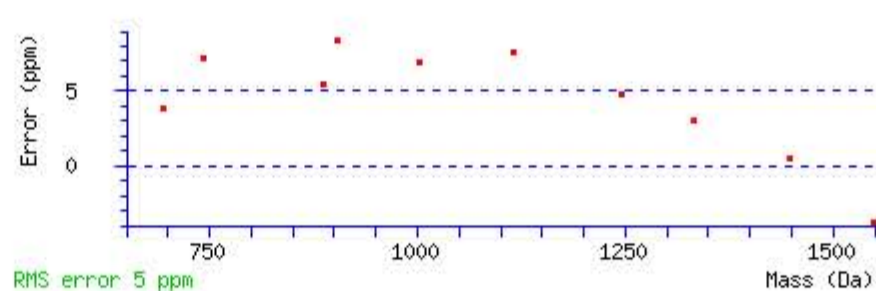

NCBI BLAST search of [FTDSENVQER](#)

(Parameters: blastp, nr protein database, expect=20000, no filter, PAM30)

Other BLAST [web gateways](#)

All matches to this query

| Score | $M_r(\text{calc})$ : | Delta    | Sequence                   |
|-------|----------------------|----------|----------------------------|
| 53.9  | 1694.739243          | 0.007989 | <a href="#">FTDSENVQER</a> |

Mascot: <http://www.matrixscience.com/>

# MASCOT Search Results

## Peptide View

MS/MS Fragmentation of **GQCIINSNKDDRPK**

Found in **AFAM\_HUMAN**, Afamin OS=Homo sapiens GN=AFM PE=1 SV=1

Match to Query 48807: 1954.979472 from(652.667100,3+) rtinseconds(1351) index(2211)

Title: Locus:1.1.1.2724.13 File:"2013-07-02 CLN FXIII 180 min 1st F 1.wiff"

Data file C:\Program Files (x86)\Matrix Science\Mascot Daemon\mgf7 FXIII 180 min 1st\mascot\_daemon\_merge.mgf

Click mouse within plot area to zoom in by factor of two about that point

Or, Plot from  to  Da

Label all possible matches  Label matches used for scoring

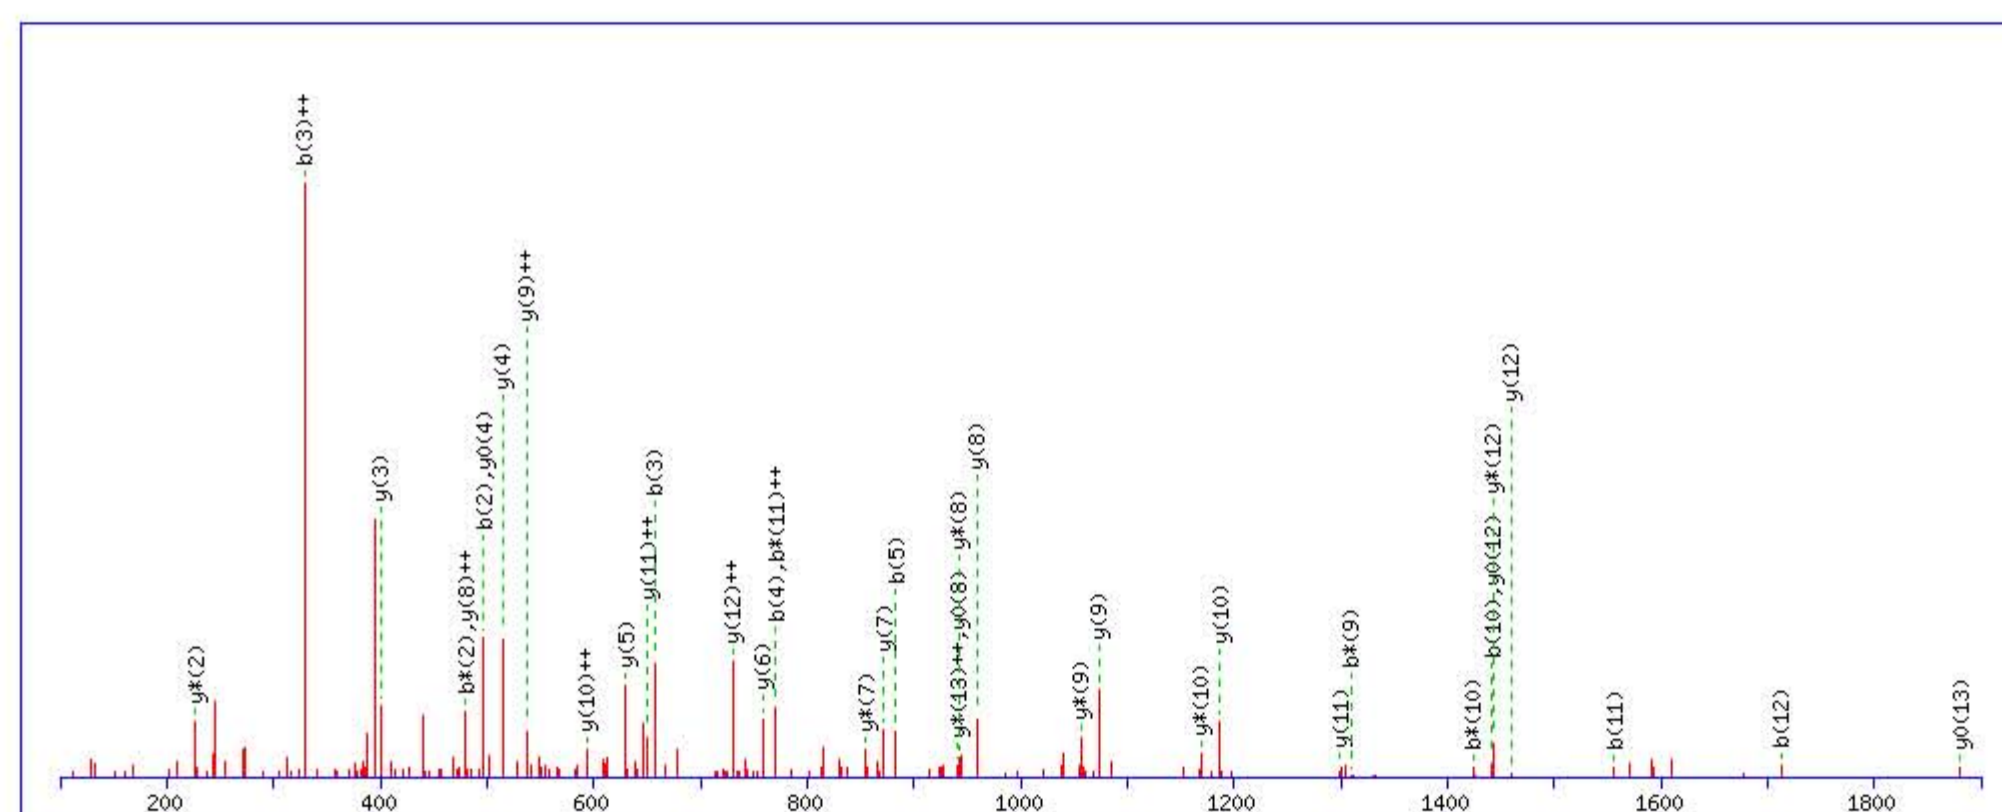

Monoisotopic mass of neutral peptide Mr(calc): 1954.971680

Fixed modifications: Carbamidomethyl (C) (apply to specified residues or termini only)

Variable modifications:

Q2 : Biotin:Thermo-21345 (Q)

Ions Score: 51 Expect: 0.0002

Matches : 38/136 fragment ions using 61 most intense peaks [\(help\)](#)

| #  | b                  | b <sup>++</sup>   | b <sup>*</sup>     | b <sup>*++</sup>  | b <sup>0</sup> | b <sup>0++</sup> | Seq. | y                  | y <sup>++</sup>   | y <sup>*</sup>     | y <sup>*++</sup>  | y <sup>0</sup>     | y <sup>0++</sup> | #  |
|----|--------------------|-------------------|--------------------|-------------------|----------------|------------------|------|--------------------|-------------------|--------------------|-------------------|--------------------|------------------|----|
| 1  | 58.028740          | 29.518008         |                    |                   |                |                  | G    |                    |                   |                    |                   |                    |                  | 14 |
| 2  | <b>497.254066</b>  | 249.130671        | <b>480.227517</b>  | 240.617397        |                |                  | Q    | 1898.957513        | 949.982395        | 1881.930964        | <b>941.469120</b> | <b>1880.946948</b> | 940.977112       | 13 |
| 3  | <b>657.284715</b>  | <b>329.145996</b> | 640.258166         | 320.632721        |                |                  | C    | <b>1459.732187</b> | <b>730.369732</b> | <b>1442.705638</b> | 721.856457        | <b>1441.721622</b> | 721.364449       | 12 |
| 4  | <b>770.368779</b>  | 385.688028        | 753.342230         | 377.174753        |                |                  | I    | <b>1299.701538</b> | <b>650.354407</b> | 1282.674989        | 641.841133        | 1281.690973        | 641.349125       | 11 |
| 5  | <b>883.452843</b>  | 442.230060        | 866.426294         | 433.716785        |                |                  | I    | <b>1186.617474</b> | <b>593.812375</b> | <b>1169.590925</b> | 585.299101        | 1168.606909        | 584.807093       | 10 |
| 6  | 997.495770         | 499.251523        | 980.469221         | 490.738249        |                |                  | N    | <b>1073.533410</b> | <b>537.270343</b> | <b>1056.506861</b> | 528.757069        | 1055.522845        | 528.265061       | 9  |
| 7  | 1084.527798        | 542.767537        | 1067.501249        | 534.254263        | 1066.517233    | 533.762255       | S    | <b>959.490483</b>  | <b>480.248880</b> | <b>942.463934</b>  | 471.735605        | <b>941.479918</b>  | 471.243597       | 8  |
| 8  | 1198.570725        | 599.789001        | 1181.544176        | 591.275726        | 1180.560160    | 590.783718       | N    | <b>872.458455</b>  | 436.732866        | <b>855.431906</b>  | 428.219591        | 854.447890         | 427.727583       | 7  |
| 9  | 1326.665688        | 663.836482        | <b>1309.639139</b> | 655.323208        | 1308.655123    | 654.831200       | K    | <b>758.415528</b>  | 379.711402        | 741.388979         | 371.198128        | 740.404963         | 370.706120       | 6  |
| 10 | <b>1441.692631</b> | 721.349954        | <b>1424.666082</b> | 712.836679        | 1423.682066    | 712.344671       | D    | <b>630.320565</b>  | 315.663921        | 613.294016         | 307.150646        | 612.310000         | 306.658638       | 5  |
| 11 | <b>1556.719574</b> | 778.863425        | 1539.693025        | <b>770.350151</b> | 1538.709009    | 769.858143       | D    | <b>515.293622</b>  | 258.150449        | 498.267073         | 249.637175        | <b>497.283057</b>  | 249.145167       | 4  |
| 12 | <b>1712.820685</b> | 856.913981        | 1695.794136        | 848.400706        | 1694.810120    | 847.908698       | R    | <b>400.266679</b>  | 200.636977        | 383.240130         | 192.123703        |                    |                  | 3  |
| 13 | 1809.873449        | 905.440363        | 1792.846900        | 896.927088        | 1791.862884    | 896.435080       | P    | 244.165568         | 122.586422        | <b>227.139019</b>  | 114.073148        |                    |                  | 2  |
| 14 |                    |                   |                    |                   |                |                  | K    | 147.112804         | 74.060040         | 130.086255         | 65.546765         |                    |                  | 1  |

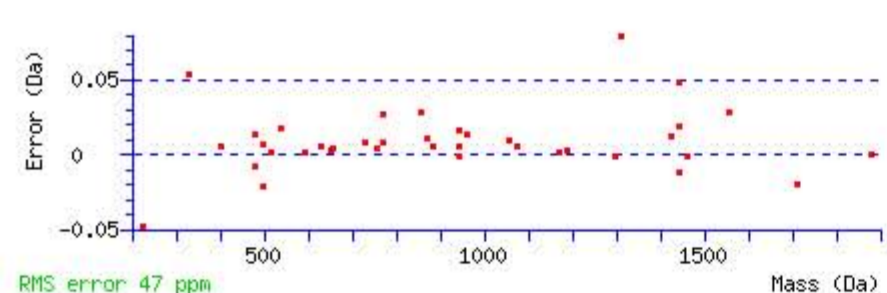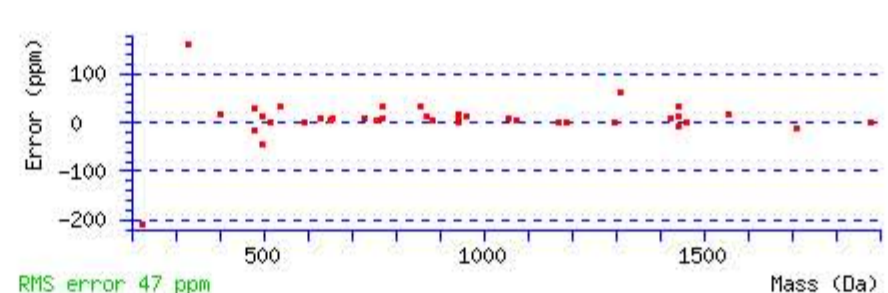

NCBI BLAST search of [GQCIINSNKDDRPK](#)

(Parameters: blastp, nr protein database, expect=20000, no filter, PAM30)

Other BLAST [web gateways](#)

### All matches to this query

| Score | Mr(calc):   | Delta    | Sequence                       |
|-------|-------------|----------|--------------------------------|
| 51.2  | 1954.971680 | 0.007792 | <a href="#">GQCIINSNKDDRPK</a> |

Mascot: <http://www.matrixscience.com/>

# MASCOT SCIENCE Mascot Search Results

## Peptide View

MS/MS Fragmentation of **SCCEEQNKVNCLQTR**

Found in **AFAM\_HUMAN**, Afamin OS=Homo sapiens GN=AFM PE=1 SV=1

Match to Query 56323: 2235.987612 from(746.336480,3+) rtinseconds(1432) index(2804)

Title: Locus:1.1.1.2752.25 File:"2013-07-02 CLN FXIII 180 min 1st F 1.wiff"

Data file C:\Program Files (x86)\Matrix Science\Mascot Daemon\mgf\7 FXIII 180 min 1st\mascot\_daemon\_merge.mgf

Click mouse within plot area to zoom in by factor of two about that point

Or, Plot from  to  Da

Label all possible matches  Label matches used for scoring

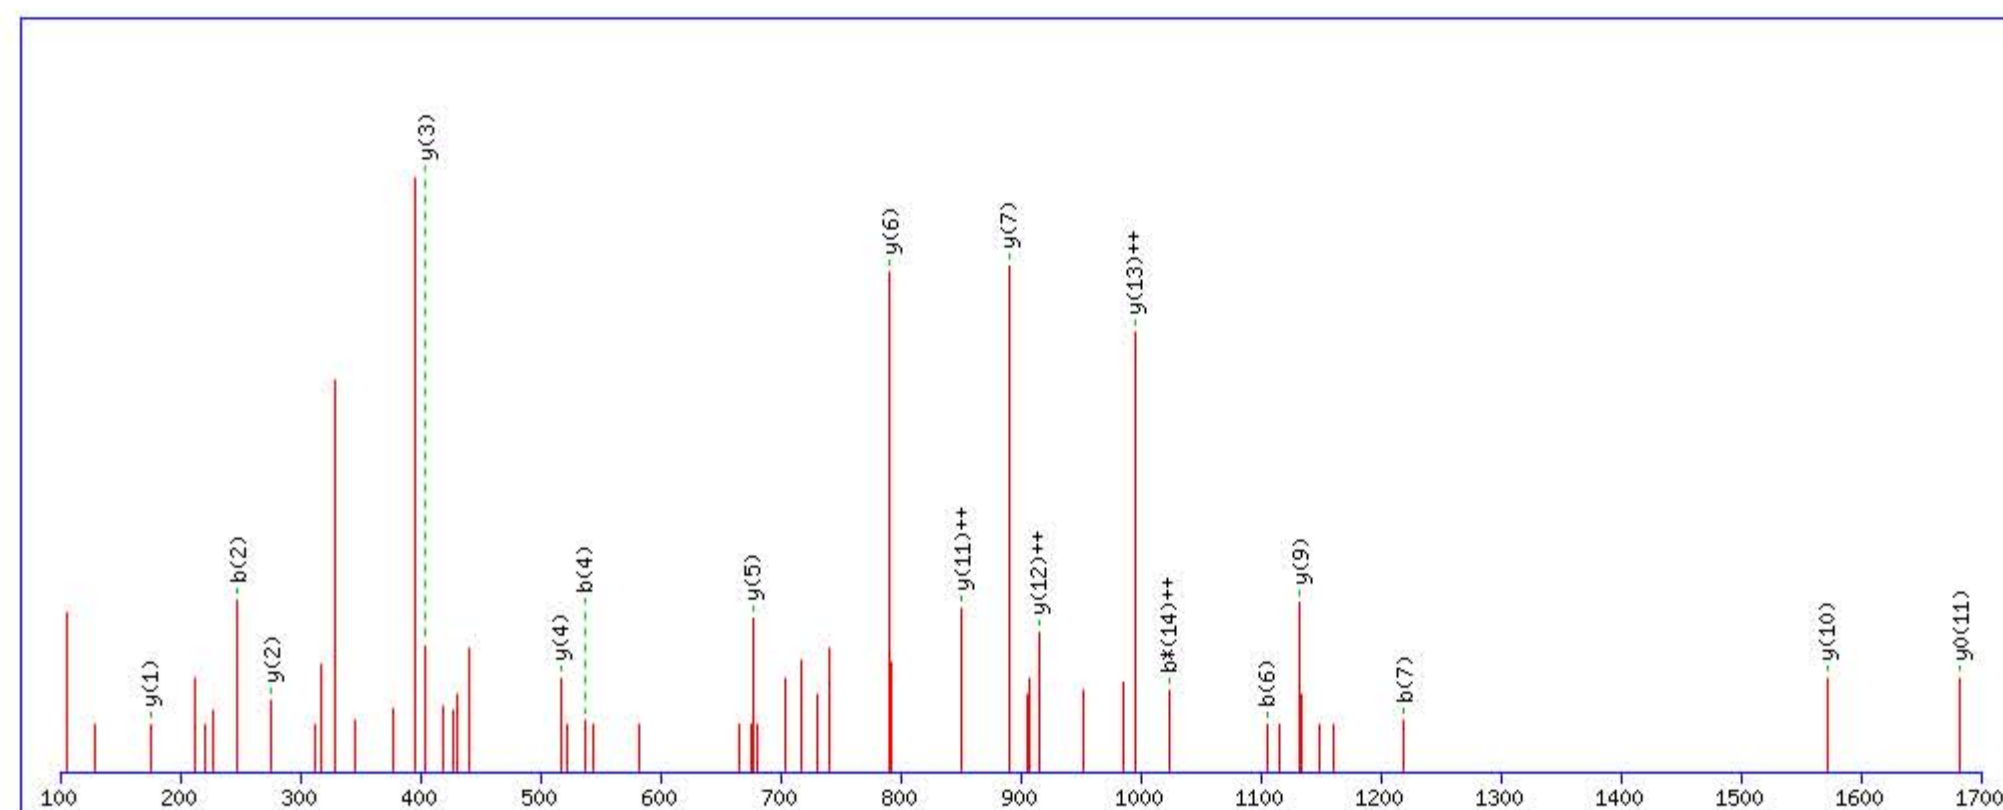

Monoisotopic mass of neutral peptide Mr(calc): 2235.985703

Fixed modifications: Carbamidomethyl (C) (apply to specified residues or termini only)

Variable modifications:

Q6 : Biotin:Thermo-21345 (Q)

Ions Score: 46 Expect: 0.00013

Matches : 18/156 fragment ions using 34 most intense peaks [\(help\)](#)

| #  | b                  | b <sup>++</sup> | b <sup>*</sup> | b <sup>+++</sup>   | b <sup>0</sup> | b <sup>0++</sup> | Seq. | y                  | y <sup>++</sup>   | y <sup>*</sup> | y <sup>+++</sup> | y <sup>0</sup>     | y <sup>0++</sup> | #  |
|----|--------------------|-----------------|----------------|--------------------|----------------|------------------|------|--------------------|-------------------|----------------|------------------|--------------------|------------------|----|
| 1  | 88.039304          | 44.523290       |                |                    | 70.028739      | 35.518008        | S    |                    |                   |                |                  |                    |                  | 15 |
| 2  | <b>248.069953</b>  | 124.538614      |                |                    | 230.059388     | 115.533332       | C    | 2149.960963        | 1075.484119       | 2132.934414    | 1066.970845      | 2131.950398        | 1066.478837      | 14 |
| 3  | 408.100602         | 204.553939      |                |                    | 390.090037     | 195.548657       | C    | 1989.930314        | <b>995.468795</b> | 1972.903765    | 986.955521       | 1971.919749        | 986.463512       | 13 |
| 4  | <b>537.143195</b>  | 269.075236      |                |                    | 519.132630     | 260.069953       | E    | 1829.899665        | <b>915.453470</b> | 1812.873116    | 906.940196       | 1811.889100        | 906.448188       | 12 |
| 5  | 666.185788         | 333.596532      |                |                    | 648.175223     | 324.591250       | E    | 1700.857072        | <b>850.932174</b> | 1683.830523    | 842.418899       | <b>1682.846507</b> | 841.926891       | 11 |
| 6  | <b>1105.411114</b> | 553.209195      | 1088.384565    | 544.695921         | 1087.400549    | 544.203913       | Q    | <b>1571.814479</b> | 786.410877        | 1554.787930    | 777.897603       | 1553.803914        | 777.405595       | 10 |
| 7  | <b>1219.454041</b> | 610.230659      | 1202.427492    | 601.717384         | 1201.443476    | 601.225376       | N    | <b>1132.589153</b> | 566.798214        | 1115.562604    | 558.284940       | 1114.578588        | 557.792932       | 9  |
| 8  | 1347.549004        | 674.278140      | 1330.522455    | 665.764866         | 1329.538439    | 665.272858       | K    | 1018.546226        | 509.776751        | 1001.519677    | 501.263476       | 1000.535661        | 500.771468       | 8  |
| 9  | 1446.617418        | 723.812347      | 1429.590869    | 715.299073         | 1428.606853    | 714.807065       | V    | <b>890.451263</b>  | 445.729269        | 873.424714     | 437.215995       | 872.440698         | 436.723987       | 7  |
| 10 | 1560.660345        | 780.833811      | 1543.633796    | 772.320536         | 1542.649780    | 771.828528       | N    | <b>791.382849</b>  | 396.195062        | 774.356300     | 387.681788       | 773.372284         | 387.189780       | 6  |
| 11 | 1720.690994        | 860.849135      | 1703.664445    | 852.335861         | 1702.680429    | 851.843853       | C    | <b>677.339922</b>  | 339.173599        | 660.313373     | 330.660324       | 659.329357         | 330.168316       | 5  |
| 12 | 1833.775058        | 917.391167      | 1816.748509    | 908.877893         | 1815.764493    | 908.385885       | L    | <b>517.309273</b>  | 259.158274        | 500.282724     | 250.645000       | 499.298708         | 250.152992       | 4  |
| 13 | 1961.833636        | 981.420456      | 1944.807087    | 972.907182         | 1943.823071    | 972.415174       | Q    | <b>404.225209</b>  | 202.616242        | 387.198660     | 194.102968       | 386.214644         | 193.610960       | 3  |
| 14 | 2062.881315        | 1031.944295     | 2045.854766    | <b>1023.431021</b> | 2044.870750    | 1022.939013      | T    | <b>276.166631</b>  | 138.586953        | 259.140082     | 130.073679       | 258.156066         | 129.581671       | 2  |
| 15 |                    |                 |                |                    |                |                  | R    | <b>175.118952</b>  | 88.063114         | 158.092403     | 79.549839        |                    |                  | 1  |

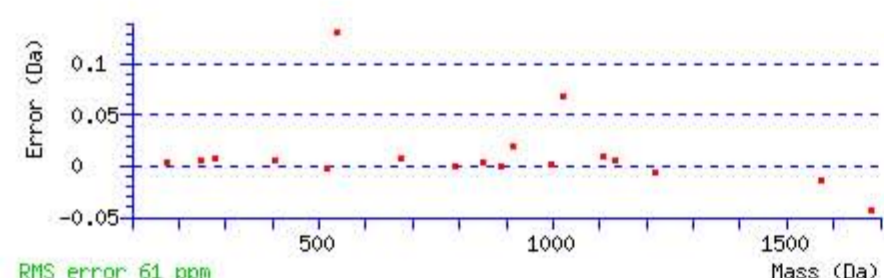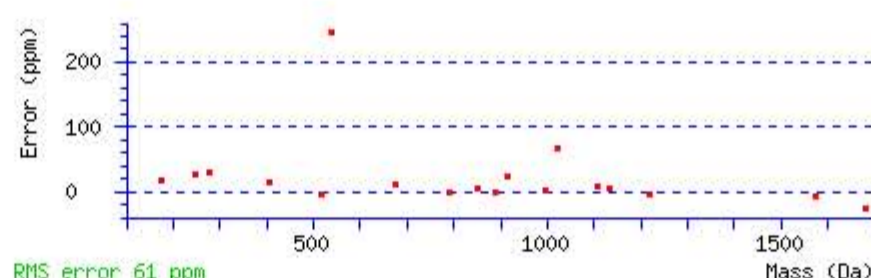

NCBI BLAST search of **SCCEEQNKVNCLQTR**

(Parameters: blastp, nr protein database, expect=20000, no filter, PAM30)

Other BLAST [web gateways](#)

All matches to this query

| Score | Mr(calc):   | Delta    | Sequence                        |
|-------|-------------|----------|---------------------------------|
| 46.4  | 2235.985703 | 0.001909 | <a href="#">SCCEEQNKVNCLQTR</a> |
| 5.8   | 2235.985703 | 0.001909 | <a href="#">SCCEEQNKVNCLQTR</a> |

Mascot: <http://www.matrixscience.com/>

# MATRIX SCIENCE Mascot Search Results

## Peptide View

MS/MS Fragmentation of **HQFLLTGDTQGR**

Found in **A1BG\_HUMAN**, Alpha-1B-glycoprotein OS=Homo sapiens GN=A1BG PE=1 SV=4

Match to Query 42068: 1682.867202 from(561.963010,3+) rtinseconds(1921) index(6025)

Title: Locus:1.1.1.2923.10 File:"2013-07-02 CLN FXIII 180 min 1st F 1.wiff"

Data file C:\Program Files (x86)\Matrix Science\Mascot Daemon\mgf\7 FXIII 180 min 1st\mascot\_daemon\_merge.mgf

Click mouse within plot area to zoom in by factor of two about that point

Or, Plot from  to  Da

Label all possible matches  Label matches used for scoring

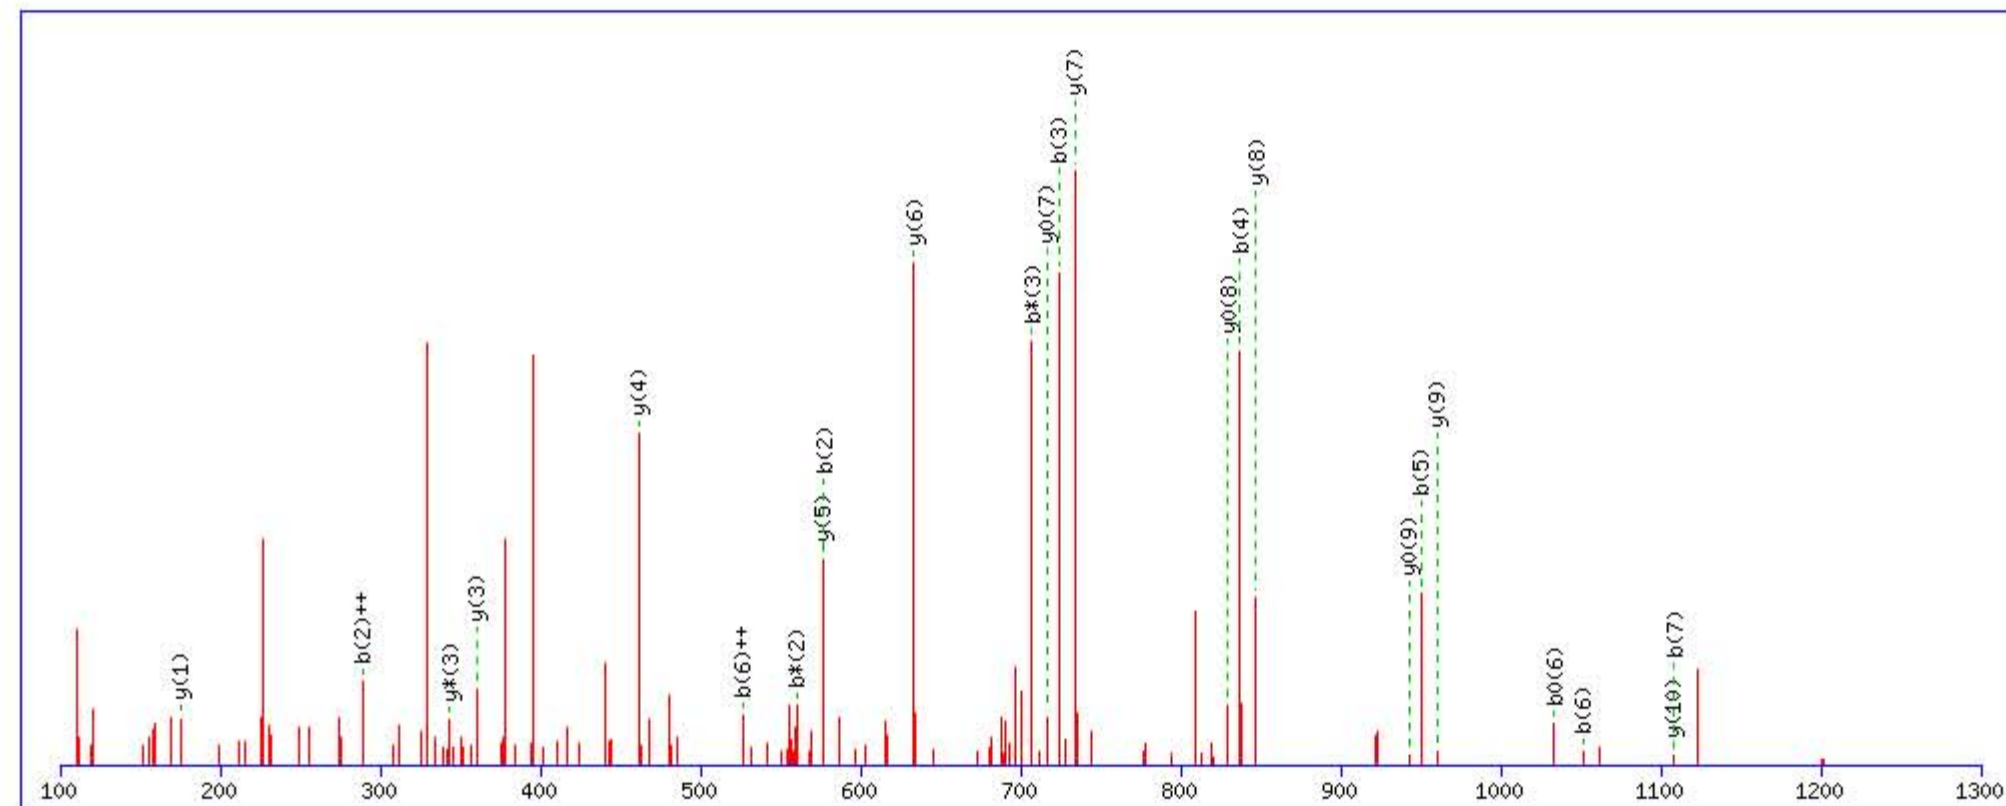

Monoisotopic mass of neutral peptide Mr(calc): 1682.856277

Fixed modifications: Carbamidomethyl (C) (apply to specified residues or termini only)

Variable modifications:

Q2 : Biotin:Thermo-21345 (Q)

Ions Score: 42 Expect: 0.00028

Matches : 24/114 fragment ions using 53 most intense peaks [\(help\)](#)

| #  | b                  | b <sup>++</sup>   | b <sup>+</sup>    | b <sup>*++</sup> | b <sup>0</sup>     | b <sup>0++</sup> | Seq. | y                  | y <sup>++</sup> | y <sup>+</sup>    | y <sup>*++</sup> | y <sup>0</sup>    | y <sup>0++</sup> | #  |
|----|--------------------|-------------------|-------------------|------------------|--------------------|------------------|------|--------------------|-----------------|-------------------|------------------|-------------------|------------------|----|
| 1  | 138.066188         | 69.536732         |                   |                  |                    |                  | H    |                    |                 |                   |                  |                   |                  | 12 |
| 2  | <b>577.291514</b>  | <b>289.149395</b> | <b>560.264965</b> | 280.636121       |                    |                  | Q    | 1546.804627        | 773.905951      | 1529.778078       | 765.392677       | 1528.794062       | 764.900669       | 11 |
| 3  | <b>724.359928</b>  | 362.683602        | <b>707.333379</b> | 354.170327       |                    |                  | F    | <b>1107.579301</b> | 554.293288      | 1090.552752       | 545.780014       | 1089.568736       | 545.288006       | 10 |
| 4  | <b>837.443992</b>  | 419.225634        | 820.417443        | 410.712359       |                    |                  | L    | <b>960.510887</b>  | 480.759081      | 943.484338        | 472.245807       | <b>942.500322</b> | 471.753799       | 9  |
| 5  | <b>950.528056</b>  | 475.767666        | 933.501507        | 467.254392       |                    |                  | L    | <b>847.426823</b>  | 424.217049      | 830.400274        | 415.703775       | <b>829.416258</b> | 415.211767       | 8  |
| 6  | <b>1051.575735</b> | <b>526.291505</b> | 1034.549186       | 517.778231       | <b>1033.565170</b> | 517.286223       | T    | <b>734.342759</b>  | 367.675017      | 717.316210        | 359.161743       | <b>716.332194</b> | 358.669735       | 7  |
| 7  | <b>1108.597199</b> | 554.802237        | 1091.570650       | 546.288963       | 1090.586634        | 545.796955       | G    | <b>633.295080</b>  | 317.151178      | 616.268531        | 308.637903       | 615.284515        | 308.145895       | 6  |
| 8  | 1223.624142        | 612.315709        | 1206.597593       | 603.802435       | 1205.613577        | 603.310426       | D    | <b>576.273616</b>  | 288.640446      | 559.247067        | 280.127171       | 558.263051        | 279.635163       | 5  |
| 9  | 1324.671821        | 662.839548        | 1307.645272       | 654.326274       | 1306.661256        | 653.834266       | T    | <b>461.246673</b>  | 231.126974      | 444.220124        | 222.613700       | 443.236108        | 222.121692       | 4  |
| 10 | 1452.730399        | 726.868837        | 1435.703850       | 718.355563       | 1434.719834        | 717.863555       | Q    | <b>360.198994</b>  | 180.603135      | <b>343.172445</b> | 172.089860       |                   |                  | 3  |
| 11 | 1509.751863        | 755.379569        | 1492.725314       | 746.866295       | 1491.741298        | 746.374287       | G    | 232.140416         | 116.573846      | 215.113867        | 108.060571       |                   |                  | 2  |
| 12 |                    |                   |                   |                  |                    |                  | R    | <b>175.118952</b>  | 88.063114       | 158.092403        | 79.549839        |                   |                  | 1  |

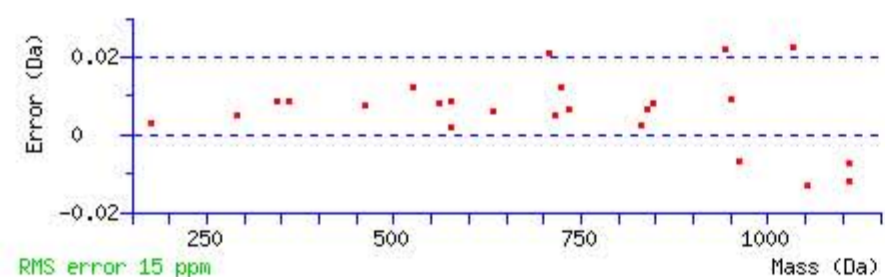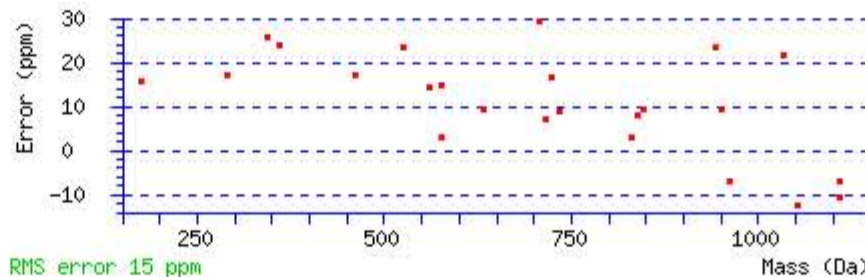

NCBI BLAST search of [HQFLLTGDTQGR](#)

(Parameters: blastp, nr protein database, expect=20000, no filter, PAM30)

Other BLAST [web gateways](#)

All matches to this query

| Score | Mr(calc):   | Delta    | Sequence                       |
|-------|-------------|----------|--------------------------------|
| 41.9  | 1682.856277 | 0.010925 | <a href="#">HQFLLTGDTQGR</a>   |
| 3.7   | 1682.845032 | 0.022170 | <a href="#">APEHCELVVDLFVR</a> |
| 0.8   | 1682.845032 | 0.022170 | <a href="#">QFHLTDDLLR</a>     |
| 0.5   | 1682.848389 | 0.018813 | <a href="#">AMMQQKVVTSEIFR</a> |

# MASCOT Search Results

## Peptide View

MS/MS Fragmentation of **HQFLLTGDTQGR**

Found in **A1BG\_HUMAN**, Alpha-1B-glycoprotein OS=Homo sapiens GN=A1BG PE=1 SV=4

Match to Query 42070: 1682.873652 from(561.965160,3+) rtinseconds(1869) index(5585)

Title: Locus:1.1.1.2905.11 File:"2013-07-02 CLN FXIII 180 min 1st F 1.wiff"

Data file C:\Program Files (x86)\Matrix Science\Mascot Daemon\mgf\7 FXIII 180 min 1st\mascot\_daemon\_merge.mgf

Click mouse within plot area to zoom in by factor of two about that point

Or, Plot from  to  Da

Label all possible matches  Label matches used for scoring

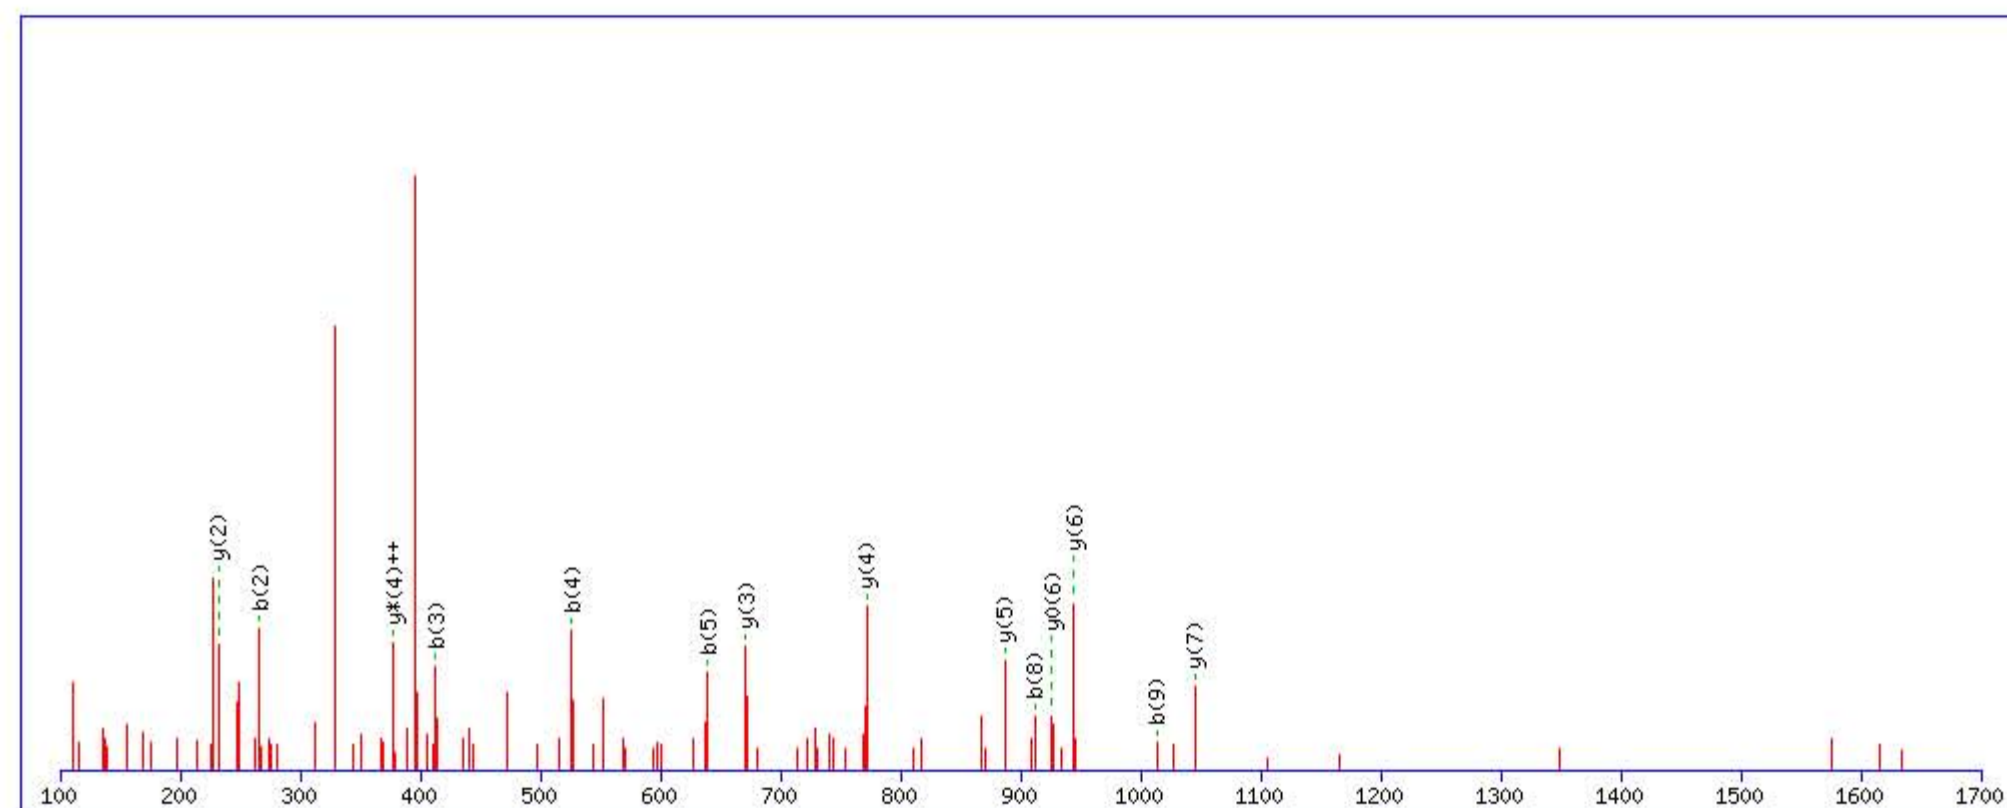

Monoisotopic mass of neutral peptide Mr(calc): 1682.856277

Fixed modifications: Carbamidomethyl (C) (apply to specified residues or termini only)

Variable modifications:

Q10 : Biotin:Thermo-21345 (Q)

Ions Score: 28 Expect: 0.039

Matches : 14/114 fragment ions using 35 most intense peaks [\(help\)](#)

| #  | b                  | b <sup>++</sup> | b <sup>+</sup> | b <sup>*++</sup> | b <sup>0</sup> | b <sup>0++</sup> | Seq. | y                  | y <sup>++</sup> | y <sup>+</sup> | y <sup>*++</sup>  | y <sup>0</sup>    | y <sup>0++</sup> | #  |
|----|--------------------|-----------------|----------------|------------------|----------------|------------------|------|--------------------|-----------------|----------------|-------------------|-------------------|------------------|----|
| 1  | 138.066188         | 69.536732       |                |                  |                |                  | H    |                    |                 |                |                   |                   |                  | 12 |
| 2  | <b>266.124766</b>  | 133.566021      | 249.098217     | 125.052746       |                |                  | Q    | 1546.804627        | 773.905952      | 1529.778078    | 765.392677        | 1528.794062       | 764.900669       | 11 |
| 3  | <b>413.193180</b>  | 207.100228      | 396.166631     | 198.586953       |                |                  | F    | 1418.746049        | 709.876663      | 1401.719500    | 701.363388        | 1400.735484       | 700.871380       | 10 |
| 4  | <b>526.277244</b>  | 263.642260      | 509.250695     | 255.128986       |                |                  | L    | 1271.677635        | 636.342456      | 1254.651086    | 627.829181        | 1253.667070       | 627.337173       | 9  |
| 5  | <b>639.361308</b>  | 320.184292      | 622.334759     | 311.671018       |                |                  | L    | 1158.593571        | 579.800424      | 1141.567022    | 571.287149        | 1140.583006       | 570.795141       | 8  |
| 6  | 740.408987         | 370.708132      | 723.382438     | 362.194857       | 722.398422     | 361.702849       | T    | <b>1045.509507</b> | 523.258392      | 1028.482958    | 514.745117        | 1027.498942       | 514.253109       | 7  |
| 7  | 797.430451         | 399.218864      | 780.403902     | 390.705589       | 779.419886     | 390.213581       | G    | <b>944.461828</b>  | 472.734552      | 927.435279     | 464.221278        | <b>926.451263</b> | 463.729270       | 6  |
| 8  | <b>912.457394</b>  | 456.732335      | 895.430845     | 448.219061       | 894.446829     | 447.727053       | D    | <b>887.440364</b>  | 444.223820      | 870.413815     | 435.710546        | 869.429799        | 435.218538       | 5  |
| 9  | <b>1013.505073</b> | 507.256175      | 996.478524     | 498.742900       | 995.494508     | 498.250892       | T    | <b>772.413421</b>  | 386.710349      | 755.386872     | <b>378.197074</b> | 754.402856        | 377.705066       | 4  |
| 10 | 1452.730399        | 726.868838      | 1435.703850    | 718.355563       | 1434.719834    | 717.863555       | Q    | <b>671.365742</b>  | 336.186509      | 654.339193     | 327.673235        |                   |                  | 3  |
| 11 | 1509.751863        | 755.379570      | 1492.725314    | 746.866295       | 1491.741298    | 746.374287       | G    | <b>232.140416</b>  | 116.573846      | 215.113867     | 108.060571        |                   |                  | 2  |
| 12 |                    |                 |                |                  |                |                  | R    | 175.118952         | 88.063114       | 158.092403     | 79.549839         |                   |                  | 1  |

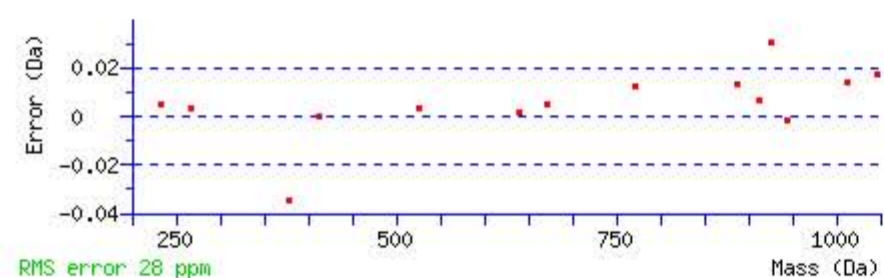

RMS error 28 ppm

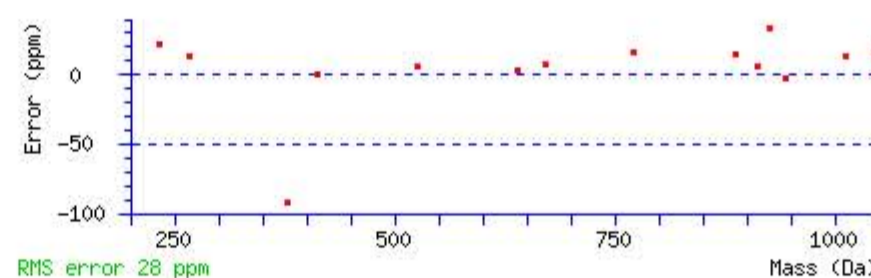

RMS error 28 ppm

NCBI BLAST search of [HQFLLTGDTQGR](#)

(Parameters: blastp, nr protein database, expect=20000, no filter, PAM30)

Other BLAST [web gateways](#)

All matches to this query

| Score | Mr(calc):   | Delta    | Sequence                     |
|-------|-------------|----------|------------------------------|
| 28.0  | 1682.856277 | 0.017375 | <a href="#">HQFLLTGDTQGR</a> |

Mascot: <http://www.matrixscience.com/>



# Mascot Search Results

## Peptide View

MS/MS Fragmentation of **LQQVLHAGSGPCLPHLLSR**

Found in **A2AP\_HUMAN**, Alpha-2-antiplasmin OS=Homo sapiens GN=SERPINF2 PE=1 SV=3

Match to Query 23625: 2393.316936 from(599.336510,4+) rtinseconds(2088) index(7056)

Title: Locus:1.1.1.2981.9 File:"2013-07-02 CLN FXIII 180 min 1st F 1.wiff"

Data file C:\Program Files (x86)\Matrix Science\Mascot Daemon\mgf\7 FXIII 180 min 1st\mascot\_daemon\_merge.mgf

Click mouse within plot area to zoom in by factor of two about that point

Or, Plot from  to  Da

Label all possible matches  Label matches used for scoring

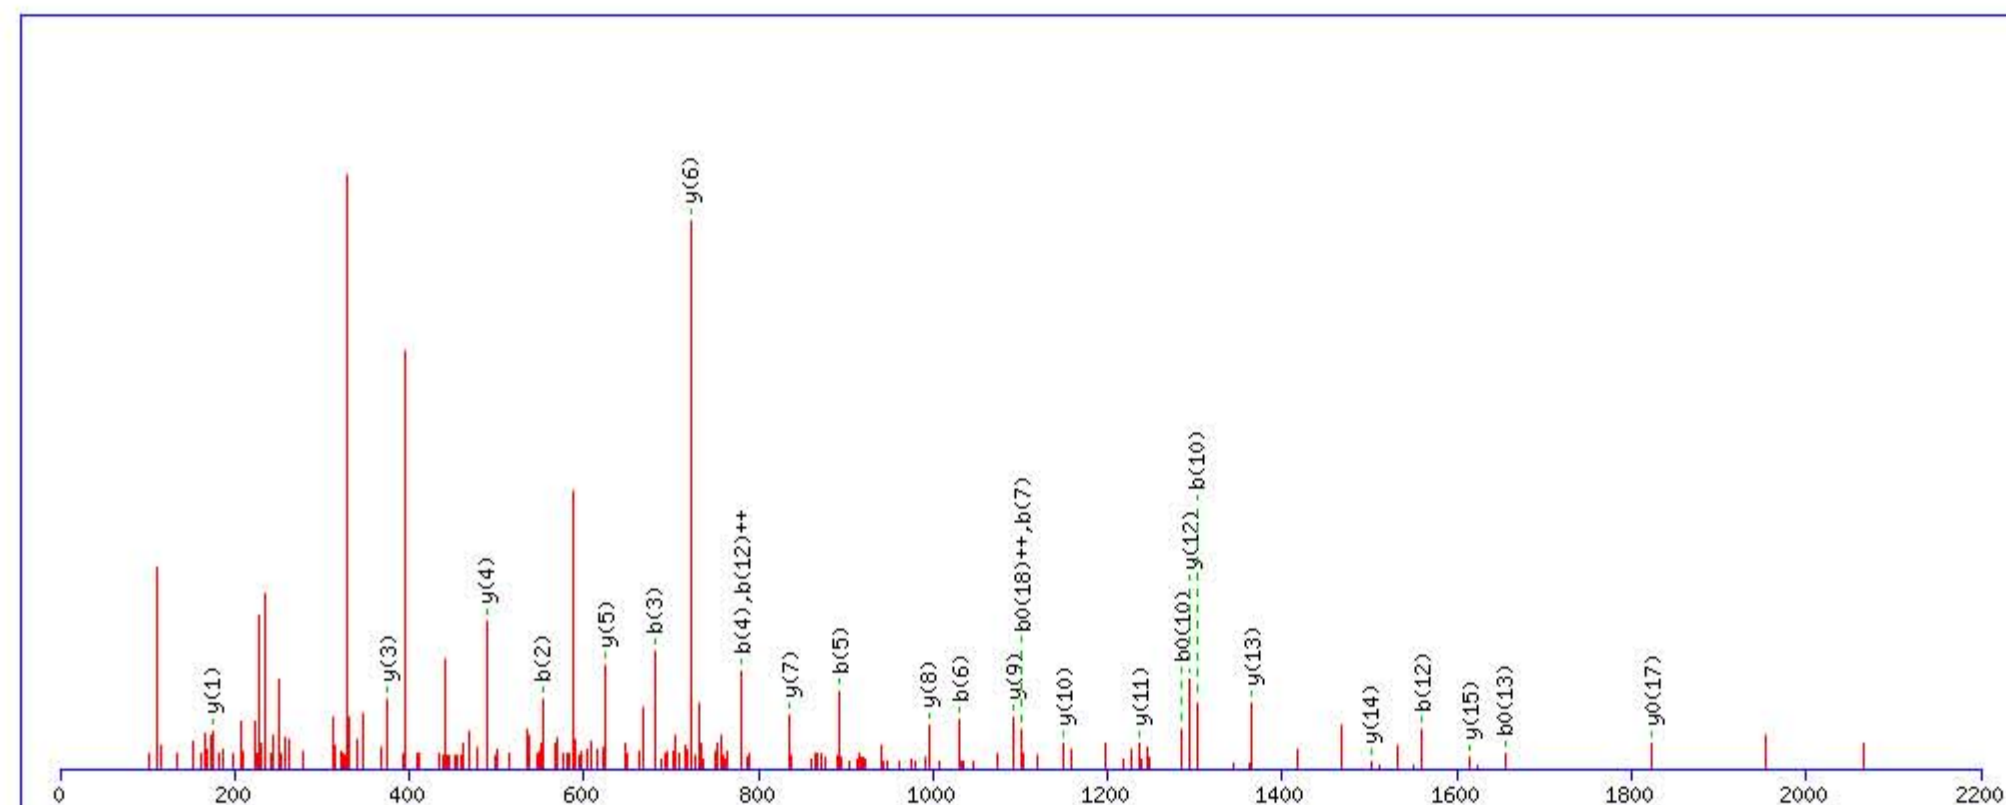

Monoisotopic mass of neutral peptide Mr(calc): 2393.282410

Fixed modifications: Carbamidomethyl (C) (apply to specified residues or termini only)

Variable modifications:

Q2 : Biotin:Thermo-21345 (Q)

Ions Score: 82 Expect: 3.3e-007

Matches : 27/196 fragment ions using 50 most intense peaks [\(help\)](#)

| #  | b                  | b <sup>++</sup>   | b <sup>*</sup> | b <sup>*++</sup> | b <sup>0</sup>     | b <sup>0++</sup>   | Seq. | y                  | y <sup>++</sup> | y <sup>*</sup> | y <sup>*++</sup> | y <sup>0</sup>     | y <sup>0++</sup> | #  |
|----|--------------------|-------------------|----------------|------------------|--------------------|--------------------|------|--------------------|-----------------|----------------|------------------|--------------------|------------------|----|
| 1  | 114.091340         | 57.549308         |                |                  |                    |                    | L    |                    |                 |                |                  |                    |                  | 19 |
| 2  | <b>553.316666</b>  | 277.161971        | 536.290117     | 268.648697       |                    |                    | Q    | 2281.205625        | 1141.106450     | 2264.179076    | 1132.593176      | 2263.195060        | 1132.101168      | 18 |
| 3  | <b>681.375244</b>  | 341.191260        | 664.348695     | 332.677986       |                    |                    | Q    | 1841.980299        | 921.493788      | 1824.953750    | 912.980513       | <b>1823.969734</b> | 912.488505       | 17 |
| 4  | <b>780.443658</b>  | 390.725467        | 763.417109     | 382.212193       |                    |                    | V    | 1713.921721        | 857.464498      | 1696.895172    | 848.951224       | 1695.911156        | 848.459216       | 16 |
| 5  | <b>893.527722</b>  | 447.267499        | 876.501173     | 438.754225       |                    |                    | L    | <b>1614.853307</b> | 807.930292      | 1597.826758    | 799.417017       | 1596.842742        | 798.925009       | 15 |
| 6  | <b>1030.586634</b> | 515.796955        | 1013.560085    | 507.283681       |                    |                    | H    | <b>1501.769243</b> | 751.388260      | 1484.742694    | 742.874985       | 1483.758678        | 742.382977       | 14 |
| 7  | <b>1101.623748</b> | 551.315512        | 1084.597199    | 542.802238       |                    |                    | A    | <b>1364.710331</b> | 682.858804      | 1347.683782    | 674.345529       | 1346.699766        | 673.853521       | 13 |
| 8  | 1158.645212        | 579.826244        | 1141.618663    | 571.312970       |                    |                    | G    | <b>1293.673217</b> | 647.340247      | 1276.646668    | 638.826972       | 1275.662652        | 638.334964       | 12 |
| 9  | 1245.677240        | 623.342258        | 1228.650691    | 614.828984       | 1227.666675        | 614.336975         | S    | <b>1236.651753</b> | 618.829515      | 1219.625204    | 610.316240       | 1218.641188        | 609.824232       | 11 |
| 10 | <b>1302.698704</b> | 651.852990        | 1285.672155    | 643.339716       | <b>1284.688139</b> | 642.847707         | G    | <b>1149.619725</b> | 575.313501      | 1132.593176    | 566.800226       | 1131.609160        | 566.308218       | 10 |
| 11 | 1399.751468        | 700.379372        | 1382.724919    | 691.866098       | 1381.740903        | 691.374089         | P    | <b>1092.598261</b> | 546.802769      | 1075.571712    | 538.289494       | 1074.587696        | 537.797486       | 9  |
| 12 | <b>1559.782117</b> | <b>780.394697</b> | 1542.755568    | 771.881422       | 1541.771552        | 771.389414         | C    | <b>995.545497</b>  | 498.276387      | 978.518948     | 489.763112       | 977.534932         | 489.271104       | 8  |
| 13 | 1672.866181        | 836.936728        | 1655.839632    | 828.423454       | <b>1654.855616</b> | 827.931446         | L    | <b>835.514848</b>  | 418.261062      | 818.488299     | 409.747788       | 817.504283         | 409.255780       | 7  |
| 14 | 1769.918945        | 885.463110        | 1752.892396    | 876.949836       | 1751.908380        | 876.457828         | P    | <b>722.430784</b>  | 361.719030      | 705.404235     | 353.205756       | 704.420219         | 352.713748       | 6  |
| 15 | 1906.977857        | 953.992566        | 1889.951308    | 945.479292       | 1888.967292        | 944.987284         | H    | <b>625.378020</b>  | 313.192648      | 608.351471     | 304.679374       | 607.367455         | 304.187366       | 5  |
| 16 | 2020.061921        | 1010.534598       | 2003.035372    | 1002.021324      | 2002.051356        | 1001.529316        | L    | <b>488.319108</b>  | 244.663192      | 471.292559     | 236.149918       | 470.308543         | 235.657910       | 4  |
| 17 | 2133.145985        | 1067.076630       | 2116.119436    | 1058.563356      | 2115.135420        | 1058.071348        | L    | <b>375.235044</b>  | 188.121160      | 358.208495     | 179.607886       | 357.224479         | 179.115878       | 3  |
| 18 | 2220.178013        | 1110.592644       | 2203.151464    | 1102.079370      | 2202.167448        | <b>1101.587362</b> | S    | 262.150980         | 131.579128      | 245.124431     | 123.065854       | 244.140415         | 122.573846       | 2  |
| 19 |                    |                   |                |                  |                    |                    | R    | <b>175.118952</b>  | 88.063114       | 158.092403     | 79.549839        |                    |                  | 1  |

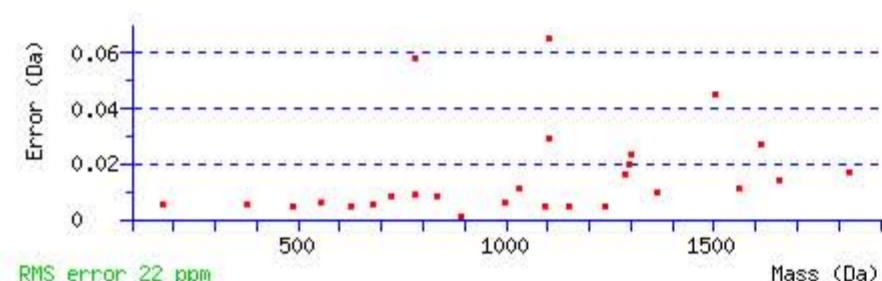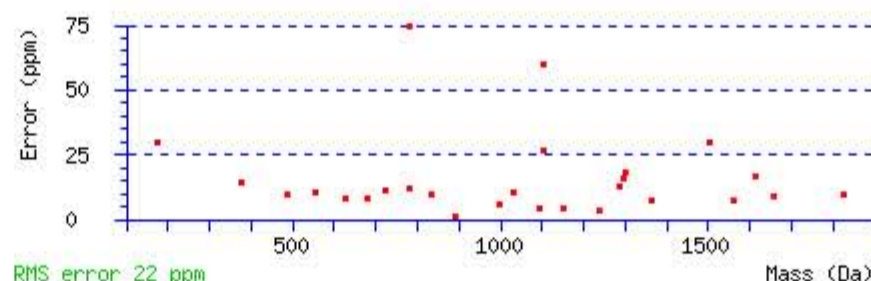

NCBI BLAST search of [LQQVLHAGSGPCLPHLLSR](#)

(Parameters: blastp, nr protein database, expect=20000, no filter, PAM30)

Other BLAST [web gateways](#)

All matches to this query

| Score | Mr(calc):   | Delta    | Sequence                            |
|-------|-------------|----------|-------------------------------------|
| 82.1  | 2393.282410 | 0.034526 | <a href="#">LQQVLHAGSGPCLPHLLSR</a> |
| 77.9  | 2393.282410 | 0.034526 | <a href="#">LQQVLHAGSGPCLPHLLSR</a> |

# MASCOT SEARCH RESULTS

## Peptide View

MS/MS Fragmentation of **FDPSLTQR**

Found in **A2AP\_HUMAN**, Alpha-2-antiplasmin OS=Homo sapiens GN=SERPINF2 PE=1 SV=3

Match to Query 26038: 1273.658628 from(637.836590,2+) rtinseconds(1882) index(5684)

Title: Locus:1.1.1.2909.19 File:"2013-07-02 CLN FXIII 180 min 1st F 1.wiff"

Data file C:\Program Files (x86)\Matrix Science\Mascot Daemon\mgf\7 FXIII 180 min 1st\mascot\_daemon\_merge.mgf

Click mouse within plot area to zoom in by factor of two about that point

Or, Plot from  to  Da

Label all possible matches  Label matches used for scoring

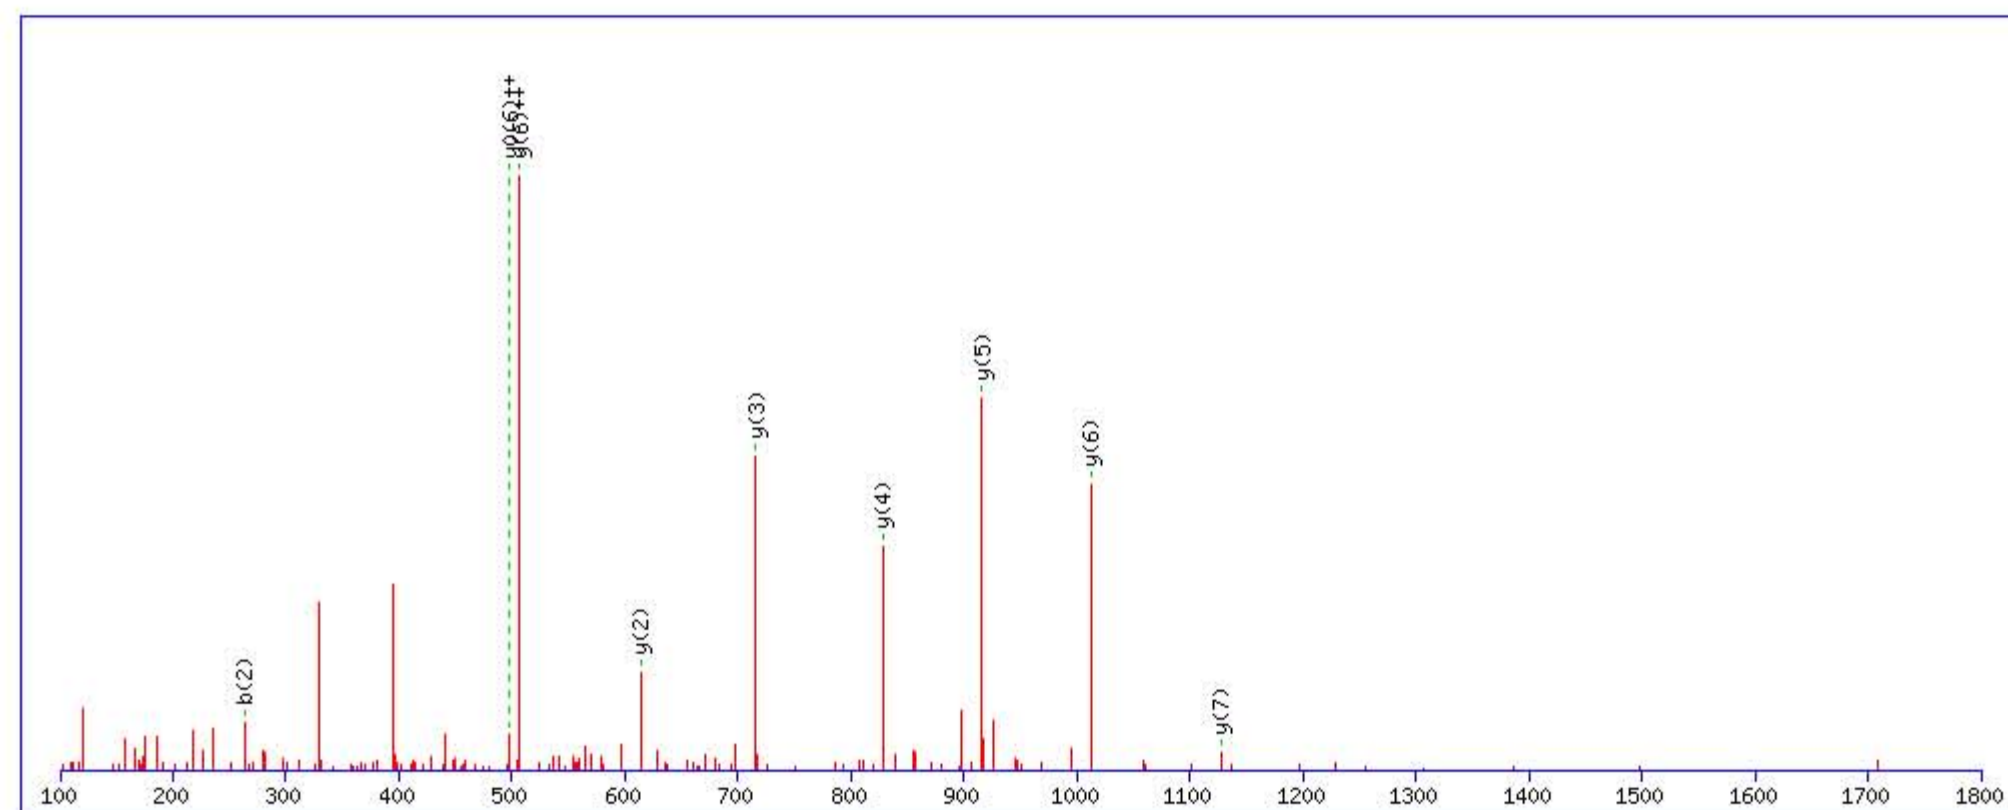

Monoisotopic mass of neutral peptide Mr(calc): 1273.648895

Fixed modifications: Carbamidomethyl (C) (apply to specified residues or termini only)

Variable modifications:

Q7 : Biotin:Thermo-21345 (Q)

Ions Score: 48 Expect: 0.00037

Matches : 9/66 fragment ions using 12 most intense peaks [\(help\)](#)

| # | b                 | b <sup>++</sup> | b <sup>*</sup> | b <sup>*++</sup> | b <sup>0</sup> | b <sup>0++</sup> | Seq. | y                  | y <sup>++</sup>   | y <sup>*</sup> | y <sup>*++</sup> | y <sup>0</sup> | y <sup>0++</sup>  | # |
|---|-------------------|-----------------|----------------|------------------|----------------|------------------|------|--------------------|-------------------|----------------|------------------|----------------|-------------------|---|
| 1 | 148.075690        | 74.541483       |                |                  |                |                  | F    |                    |                   |                |                  |                |                   | 8 |
| 2 | <b>263.102633</b> | 132.054954      |                |                  | 245.092068     | 123.049672       | D    | <b>1127.587756</b> | 564.297516        | 1110.561207    | 555.784242       | 1109.577191    | 555.292233        | 7 |
| 3 | 360.155397        | 180.581336      |                |                  | 342.144832     | 171.576054       | P    | <b>1012.560813</b> | <b>506.784045</b> | 995.534264     | 498.270770       | 994.550248     | <b>497.778762</b> | 6 |
| 4 | 447.187425        | 224.097350      |                |                  | 429.176860     | 215.092068       | S    | <b>915.508049</b>  | 458.257663        | 898.481500     | 449.744388       | 897.497484     | 449.252380        | 5 |
| 5 | 560.271489        | 280.639383      |                |                  | 542.260924     | 271.634100       | L    | <b>828.476021</b>  | 414.741649        | 811.449472     | 406.228374       | 810.465456     | 405.736366        | 4 |
| 6 | 661.319168        | 331.163222      |                |                  | 643.308603     | 322.157940       | T    | <b>715.391957</b>  | 358.199617        | 698.365408     | 349.686342       | 697.381392     | 349.194334        | 3 |
| 7 | 1100.544494       | 550.775885      | 1083.517945    | 542.262611       | 1082.533929    | 541.770603       | Q    | <b>614.344278</b>  | 307.675777        | 597.317729     | 299.162503       |                |                   | 2 |
| 8 |                   |                 |                |                  |                |                  | R    | 175.118952         | 88.063114         | 158.092403     | 79.549839        |                |                   | 1 |

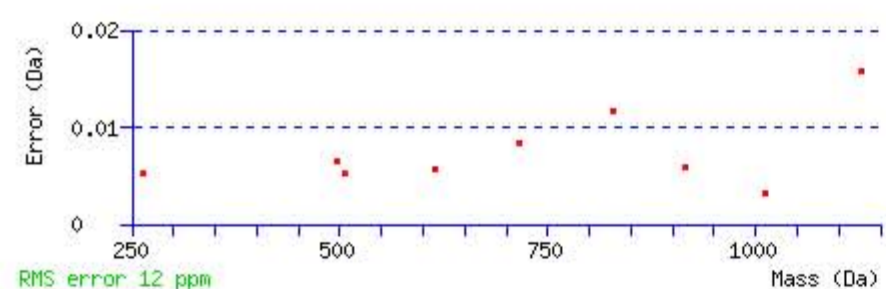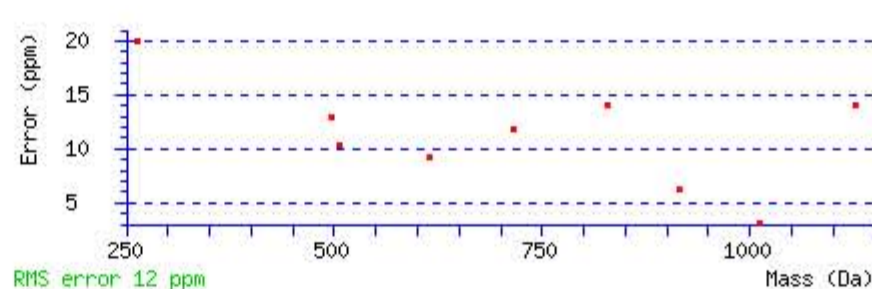

NCBI BLAST search of **FDPSLTQR**

(Parameters: blastp, nr protein database, expect=20000, no filter, PAM30)

Other BLAST [web gateways](#)

All matches to this query

| Score | Mr(calc):   | Delta     | Sequence                    |
|-------|-------------|-----------|-----------------------------|
| 48.5  | 1273.648895 | 0.009733  | <a href="#">FDPSLTQR</a>    |
| 21.7  | 1273.670654 | -0.012026 | <a href="#">FDIAIYYTR</a>   |
| 2.6   | 1273.671356 | -0.012728 | <a href="#">LLCARIFHTR</a>  |
| 1.1   | 1273.652695 | 0.005933  | <a href="#">EHQAHLEALAR</a> |
| 0.7   | 1273.677399 | -0.018771 | <a href="#">MVSLLQEK</a>    |
| 0.5   | 1273.667984 | -0.009356 | <a href="#">RGSYLVHWR</a>   |
| 0.1   | 1273.670013 | -0.011385 | <a href="#">DLVTMVEQLAR</a> |

Mascot: <http://www.matrixscience.com/>

# MASCOT Search Results

## Peptide View

MS/MS Fragmentation of **EQQDSPGNK**

Found in **A2AP\_HUMAN**, Alpha-2-antiplasmin OS=Homo sapiens GN=SERPINF2 PE=1 SV=3

Match to Query 27204: 1312.597368 from(657.305960,2+) rtinseconds(1151) index(18676)

Title: Locus:1.1.1.2543.11 File:"2013-07-02 CLN FXIII 180 min 1st F 2.wiff"

Data file C:\Program Files (x86)\Matrix Science\Mascot Daemon\mgf\7 FXIII 180 min 1st\mascot\_daemon\_merge.mgf

Click mouse within plot area to zoom in by factor of two about that point

Or, Plot from  to  Da

Label all possible matches  Label matches used for scoring

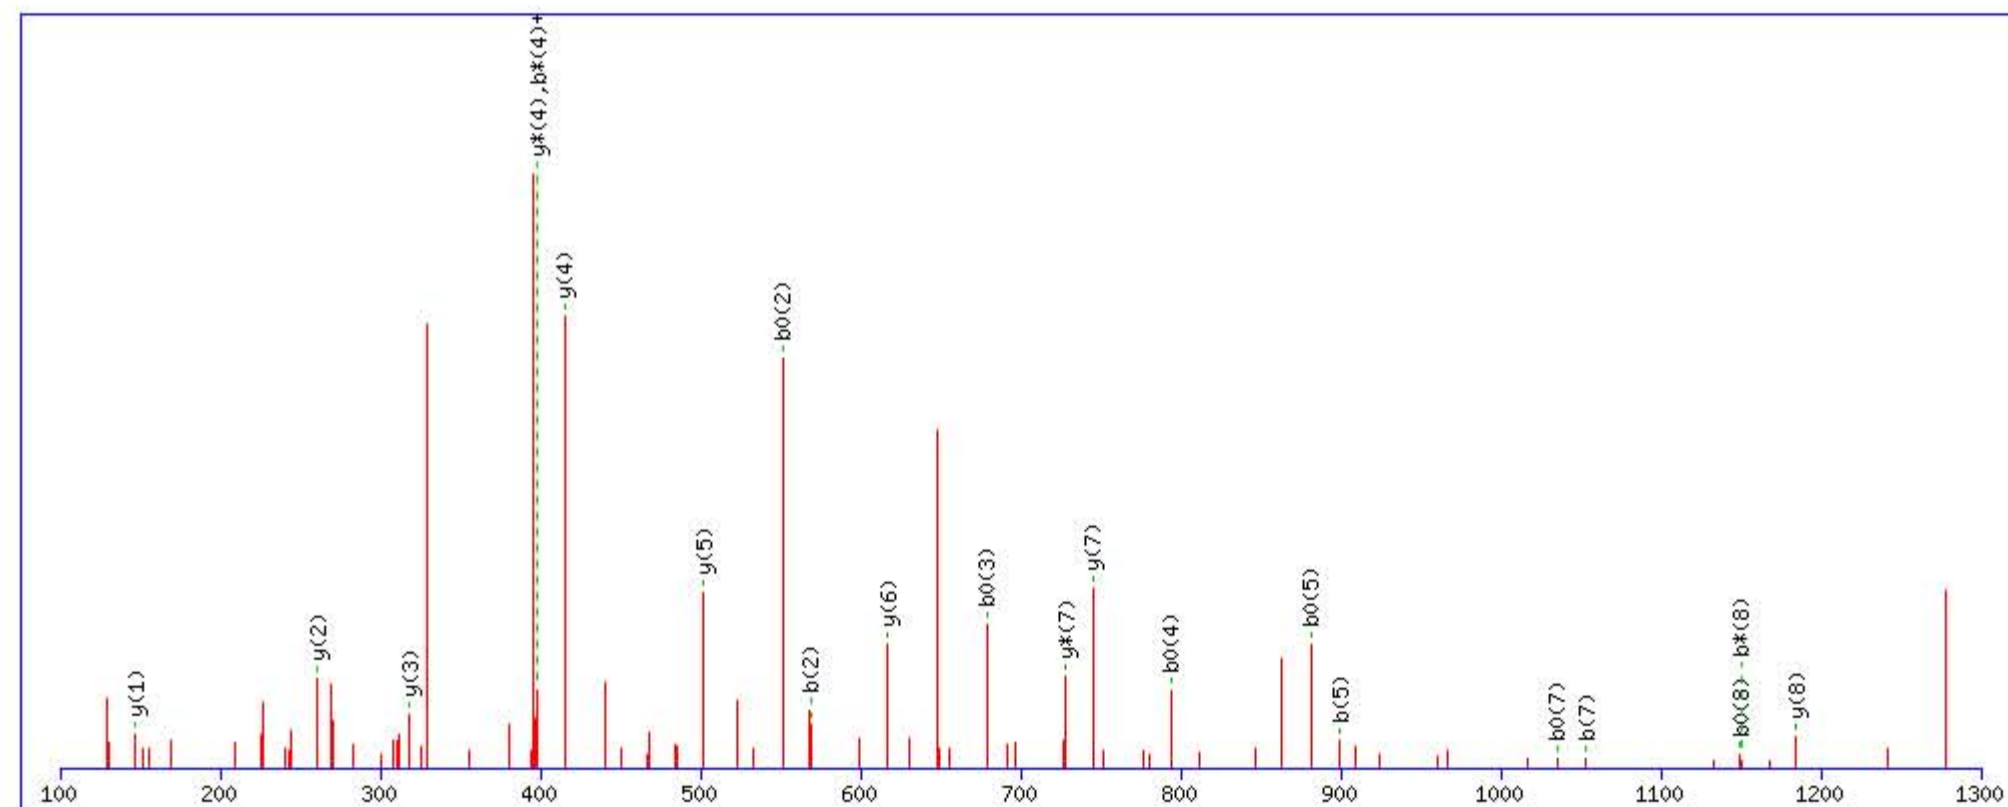

Monoisotopic mass of neutral peptide Mr(calc): 1312.608139

Fixed modifications: Carbamidomethyl (C) (apply to specified residues or termini only)

Variable modifications:

Q2 : Biotin:Thermo-21345 (Q)

Ions Score: 46 Expect: 0.00071

Matches : 21/86 fragment ions using 43 most intense peaks ([help](#))

| # | b                  | b <sup>++</sup> | b <sup>*</sup>     | b <sup>+++</sup>  | b <sup>0</sup>     | b <sup>0++</sup> | Seq. | y                  | y <sup>++</sup> | y <sup>*</sup>    | y <sup>+++</sup> | y <sup>0</sup> | y <sup>0++</sup> | # |
|---|--------------------|-----------------|--------------------|-------------------|--------------------|------------------|------|--------------------|-----------------|-------------------|------------------|----------------|------------------|---|
| 1 | 130.049869         | 65.528572       |                    |                   | 112.039304         | 56.523290        | E    |                    |                 |                   |                  |                |                  | 9 |
| 2 | <b>569.275195</b>  | 285.141236      | 552.248646         | 276.627961        | <b>551.264630</b>  | 276.135953       | Q    | <b>1184.572834</b> | 592.790055      | 1167.546285       | 584.276780       | 1166.562269    | 583.784772       | 8 |
| 3 | 697.333773         | 349.170525      | 680.307224         | 340.657250        | <b>679.323208</b>  | 340.165242       | Q    | <b>745.347508</b>  | 373.177392      | <b>728.320959</b> | 364.664117       | 727.336943     | 364.172109       | 7 |
| 4 | 812.360716         | 406.683996      | 795.334167         | <b>398.170722</b> | <b>794.350151</b>  | 397.678714       | D    | <b>617.288930</b>  | 309.148103      | 600.262381        | 300.634828       | 599.278365     | 300.142820       | 6 |
| 5 | <b>899.392744</b>  | 450.200010      | 882.366195         | 441.686736        | <b>881.382179</b>  | 441.194728       | S    | <b>502.261987</b>  | 251.634631      | 485.235438        | 243.121357       | 484.251422     | 242.629349       | 5 |
| 6 | 996.445508         | 498.726392      | 979.418959         | 490.213118        | 978.434943         | 489.721110       | P    | <b>415.229959</b>  | 208.118617      | <b>398.203410</b> | 199.605343       |                |                  | 4 |
| 7 | <b>1053.466972</b> | 527.237124      | 1036.440423        | 518.723850        | <b>1035.456407</b> | 518.231841       | G    | <b>318.177195</b>  | 159.592235      | 301.150646        | 151.078961       |                |                  | 3 |
| 8 | 1167.509899        | 584.258587      | <b>1150.483350</b> | 575.745313        | <b>1149.499334</b> | 575.253305       | N    | <b>261.155731</b>  | 131.081503      | 244.129182        | 122.568229       |                |                  | 2 |
| 9 |                    |                 |                    |                   |                    |                  | K    | <b>147.112804</b>  | 74.060040       | 130.086255        | 65.546765        |                |                  | 1 |

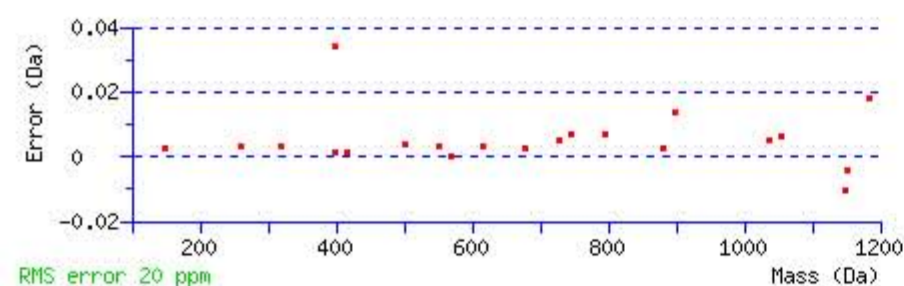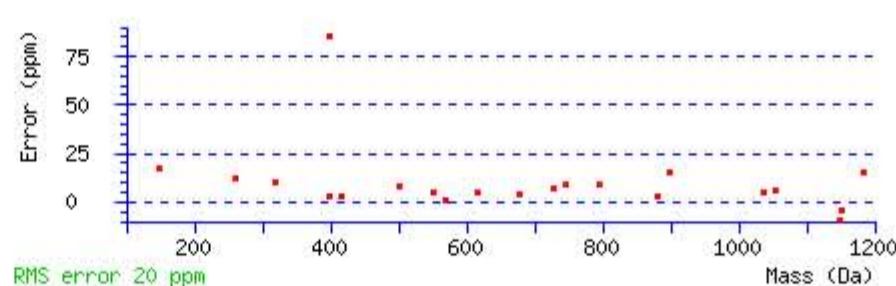

NCBI BLAST search of [EQQDSPGNK](#)

(Parameters: blastp, nr protein database, expect=20000, no filter, PAM30)

Other BLAST [web gateways](#)

All matches to this query

| Score | Mr(calc):   | Delta     | Sequence                  |
|-------|-------------|-----------|---------------------------|
| 46.0  | 1312.608139 | -0.010771 | <a href="#">EQQDSPGNK</a> |
| 30.5  | 1312.608139 | -0.010771 | <a href="#">EQQDSPGNK</a> |

Mascot: <http://www.matrixscience.com/>

# MASCOT Search Results

## Peptide View

MS/MS Fragmentation of **LG<sub>N</sub>QEPGGQTALK**

Found in **A2AP\_HUMAN**, Alpha-2-antiplasmin OS=Homo sapiens GN=SERPINF2 PE=1 SV=3

Match to Query 39839: 1622.853288 from(812.433920,2+) rtinseconds(1598) index(3977)

Title: Locus:1.1.1.2810.18 File:"2013-07-02 CLN FXIII 180 min 1st F 1.wiff"

Data file C:\Program Files (x86)\Matrix Science\Mascot Daemon\mgf7 FXIII 180 min 1st\mascot\_daemon\_merge.mgf

Click mouse within plot area to zoom in by factor of two about that point

Or, Plot from  to  Da

Label all possible matches  Label matches used for scoring

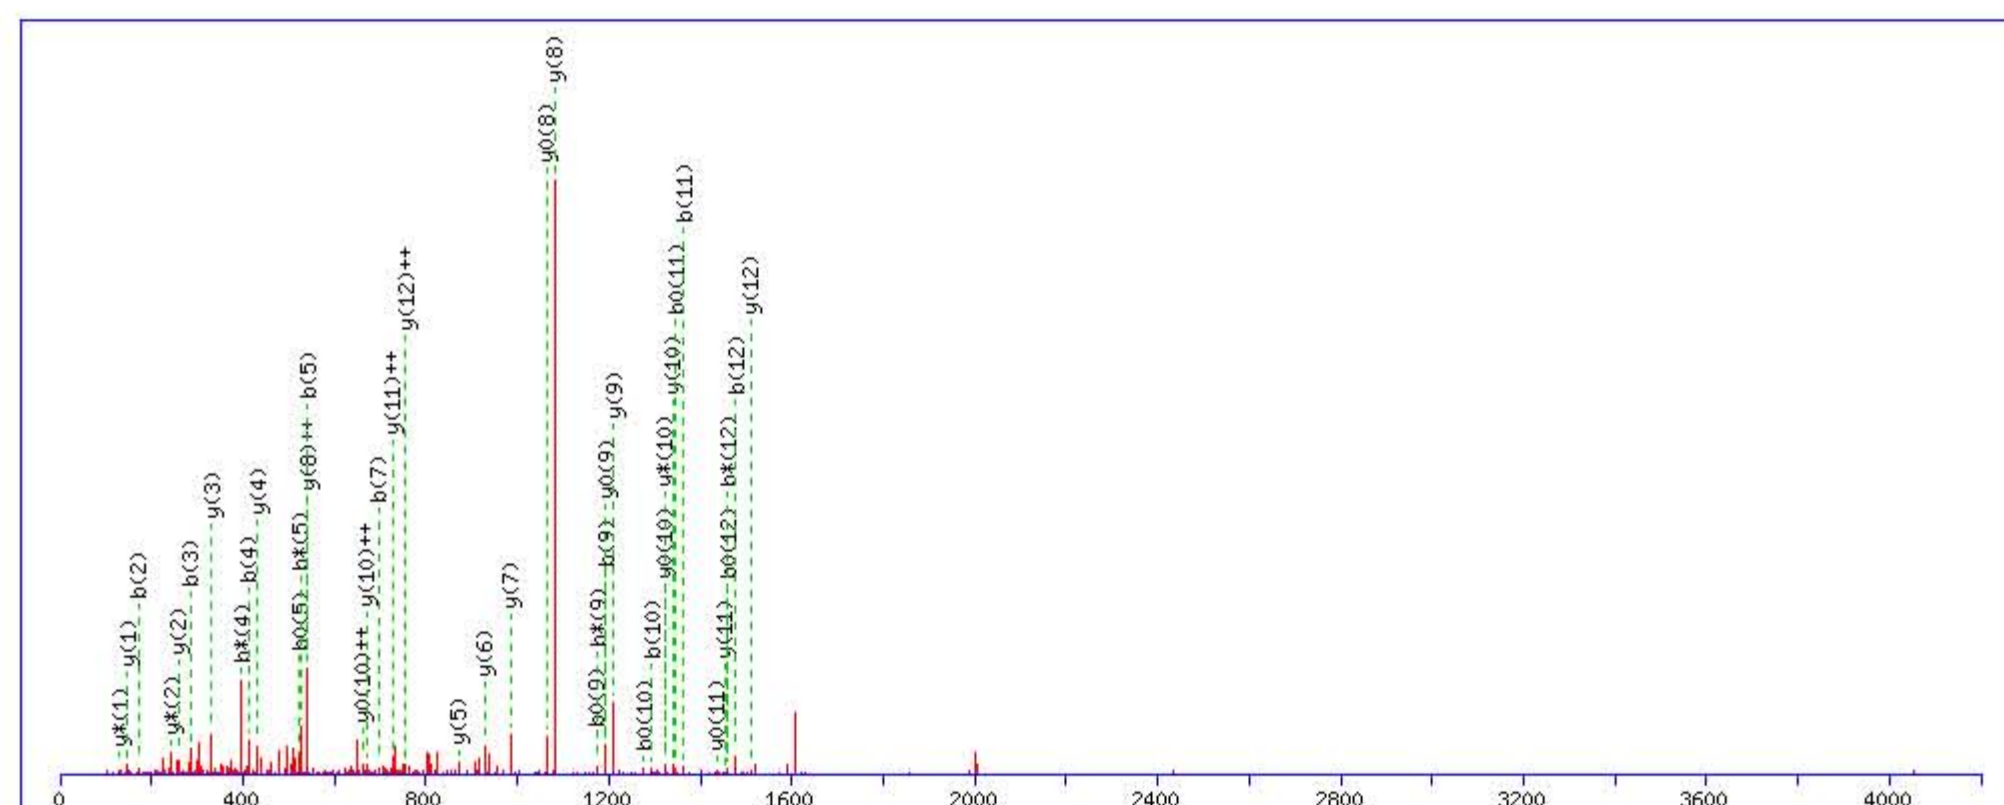

Monoisotopic mass of neutral peptide Mr(calc): 1622.845016

Fixed modifications: Carbamidomethyl (C) (apply to specified residues or termini only)

Variable modifications:

Q9 : Biotin:Thermo-21345 (Q)

Ions Score: 69 Expect: 2.5e-006

Matches : 42/126 fragment ions using 92 most intense peaks [\(help\)](#)

| #  | b                  | b <sup>++</sup> | b <sup>*</sup>     | b <sup>+++</sup> | b <sup>0</sup>     | b <sup>0++</sup> | Seq. | y                  | y <sup>++</sup>   | y <sup>*</sup>     | y <sup>+++</sup> | y <sup>0</sup>     | y <sup>0++</sup>  | #  |
|----|--------------------|-----------------|--------------------|------------------|--------------------|------------------|------|--------------------|-------------------|--------------------|------------------|--------------------|-------------------|----|
| 1  | 114.091340         | 57.549308       |                    |                  |                    |                  | L    |                    |                   |                    |                  |                    |                   | 13 |
| 2  | <b>171.112804</b>  | 86.060040       |                    |                  |                    |                  | G    | <b>1510.768241</b> | <b>755.887759</b> | 1493.741692        | 747.374484       | 1492.757676        | 746.882476        | 12 |
| 3  | <b>285.155731</b>  | 143.081504      | 268.129182         | 134.568229       |                    |                  | N    | <b>1453.746777</b> | <b>727.377027</b> | 1436.720228        | 718.863752       | <b>1435.736212</b> | 718.371744        | 11 |
| 4  | <b>413.214309</b>  | 207.110793      | <b>396.187760</b>  | 198.597518       |                    |                  | Q    | <b>1339.703850</b> | <b>670.355563</b> | <b>1322.677301</b> | 661.842289       | <b>1321.693285</b> | <b>661.350281</b> | 10 |
| 5  | <b>542.256902</b>  | 271.632089      | <b>525.230353</b>  | 263.118815       | <b>524.246337</b>  | 262.626807       | E    | <b>1211.645272</b> | 606.326274        | 1194.618723        | 597.813000       | <b>1193.634707</b> | 597.320991        | 9  |
| 6  | 639.309666         | 320.158471      | 622.283117         | 311.645197       | 621.299101         | 311.153189       | P    | <b>1082.602679</b> | <b>541.804978</b> | 1065.576130        | 533.291703       | <b>1064.592114</b> | 532.799695        | 8  |
| 7  | <b>696.331130</b>  | 348.669203      | 679.304581         | 340.155929       | 678.320565         | 339.663921       | G    | <b>985.549915</b>  | 493.278596        | 968.523366         | 484.765321       | 967.539350         | 484.273313        | 7  |
| 8  | 753.352594         | 377.179935      | 736.326045         | 368.666661       | 735.342029         | 368.174653       | G    | <b>928.528451</b>  | 464.767864        | 911.501902         | 456.254589       | 910.517886         | 455.762581        | 6  |
| 9  | <b>1192.577920</b> | 596.792598      | <b>1175.551371</b> | 588.279324       | <b>1174.567355</b> | 587.787316       | Q    | <b>871.506987</b>  | 436.257132        | 854.480438         | 427.743857       | 853.496422         | 427.251849        | 5  |
| 10 | <b>1293.625599</b> | 647.316438      | 1276.599050        | 638.803163       | <b>1275.615034</b> | 638.311155       | T    | <b>432.281661</b>  | 216.644468        | 415.255112         | 208.131194       | 414.271096         | 207.639186        | 4  |
| 11 | <b>1364.662713</b> | 682.834995      | 1347.636164        | 674.321720       | <b>1346.652148</b> | 673.829712       | A    | <b>331.233982</b>  | 166.120629        | 314.207433         | 157.607354       |                    |                   | 3  |
| 12 | <b>1477.746777</b> | 739.377027      | <b>1460.720228</b> | 730.863752       | <b>1459.736212</b> | 730.371744       | L    | <b>260.196868</b>  | 130.602072        | <b>243.170319</b>  | 122.088797       |                    |                   | 2  |
| 13 |                    |                 |                    |                  |                    |                  | K    | <b>147.112804</b>  | 74.060040         | <b>130.086255</b>  | 65.546765        |                    |                   | 1  |

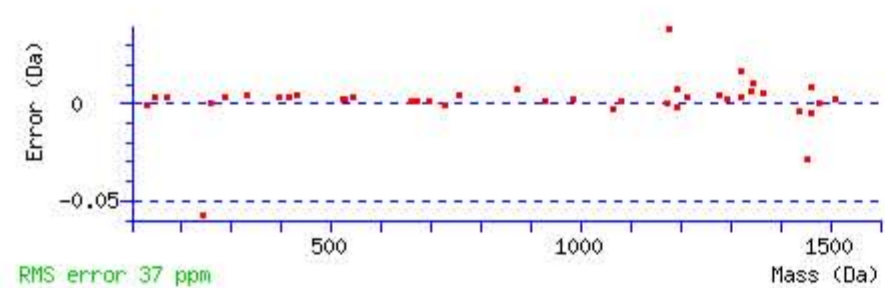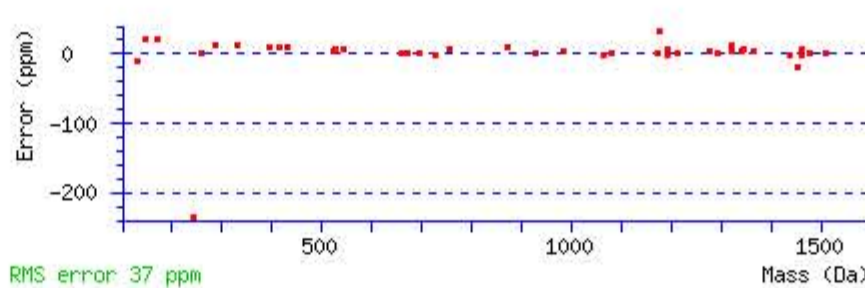

NCBI BLAST search of **LG<sub>N</sub>QEPGGQTALK**

(Parameters: blastp, nr protein database, expect=20000, no filter, PAM30)

Other BLAST [web gateways](#)

All matches to this query

| Score | Mr(calc):   | Delta     | Sequence                                 |
|-------|-------------|-----------|------------------------------------------|
| 68.8  | 1622.845016 | 0.008272  | <a href="#">LG<sub>N</sub>QEPGGQTALK</a> |
| 28.8  | 1622.845016 | 0.008272  | <a href="#">LG<sub>N</sub>QEPGGQTALK</a> |
| 8.5   | 1622.831085 | 0.022203  | <a href="#">GLNPNPSHQMTKRK</a>           |
| 5.2   | 1622.858917 | -0.005629 | <a href="#">SVLLMELEVNYGLK</a>           |
| 3.7   | 1622.837601 | 0.015687  | <a href="#">SQSEKQTYLEVRR</a>            |
| 2.7   | 1622.864288 | -0.011000 | <a href="#">FPLPSMYRALVWK</a>            |
| 2.3   | 1622.860260 | -0.006972 | <a href="#">EHSAFQAPAVKK</a>             |
| 2.3   | 1622.849045 | 0.004243  | <a href="#">IPMPDFDLHLKGP</a>            |
| 0.7   | 1622.863632 | -0.010344 | <a href="#">KRMILSTISWMGGK</a>           |
| 0.2   | 1622.833771 | 0.019517  | <a href="#">LDLAGRDLTDYLMK</a>           |

# Mascot Search Results

## Peptide View

MS/MS Fragmentation of **LGNQEPGGQTALK**

Found in **A2AP\_HUMAN**, Alpha-2-antiplasmin OS=Homo sapiens GN=SERPINF2 PE=1 SV=3

Match to Query 48369: 1934.030968 from(968.022760,2+) rtinseconds(1958) index(6285)

Title: Locus:1.1.1.2935.26 File:"2013-07-02 CLN FXIII 180 min 1st F 1.wiff"

Data file C:\Program Files (x86)\Matrix Science\Mascot Daemon\mgf\7 FXIII 180 min 1st\mascot\_daemon\_merge.mgf

Click mouse within plot area to zoom in by factor of two about that point

Or, Plot from 100 to 2000 Da Full range

Label all possible matches  Label matches used for scoring

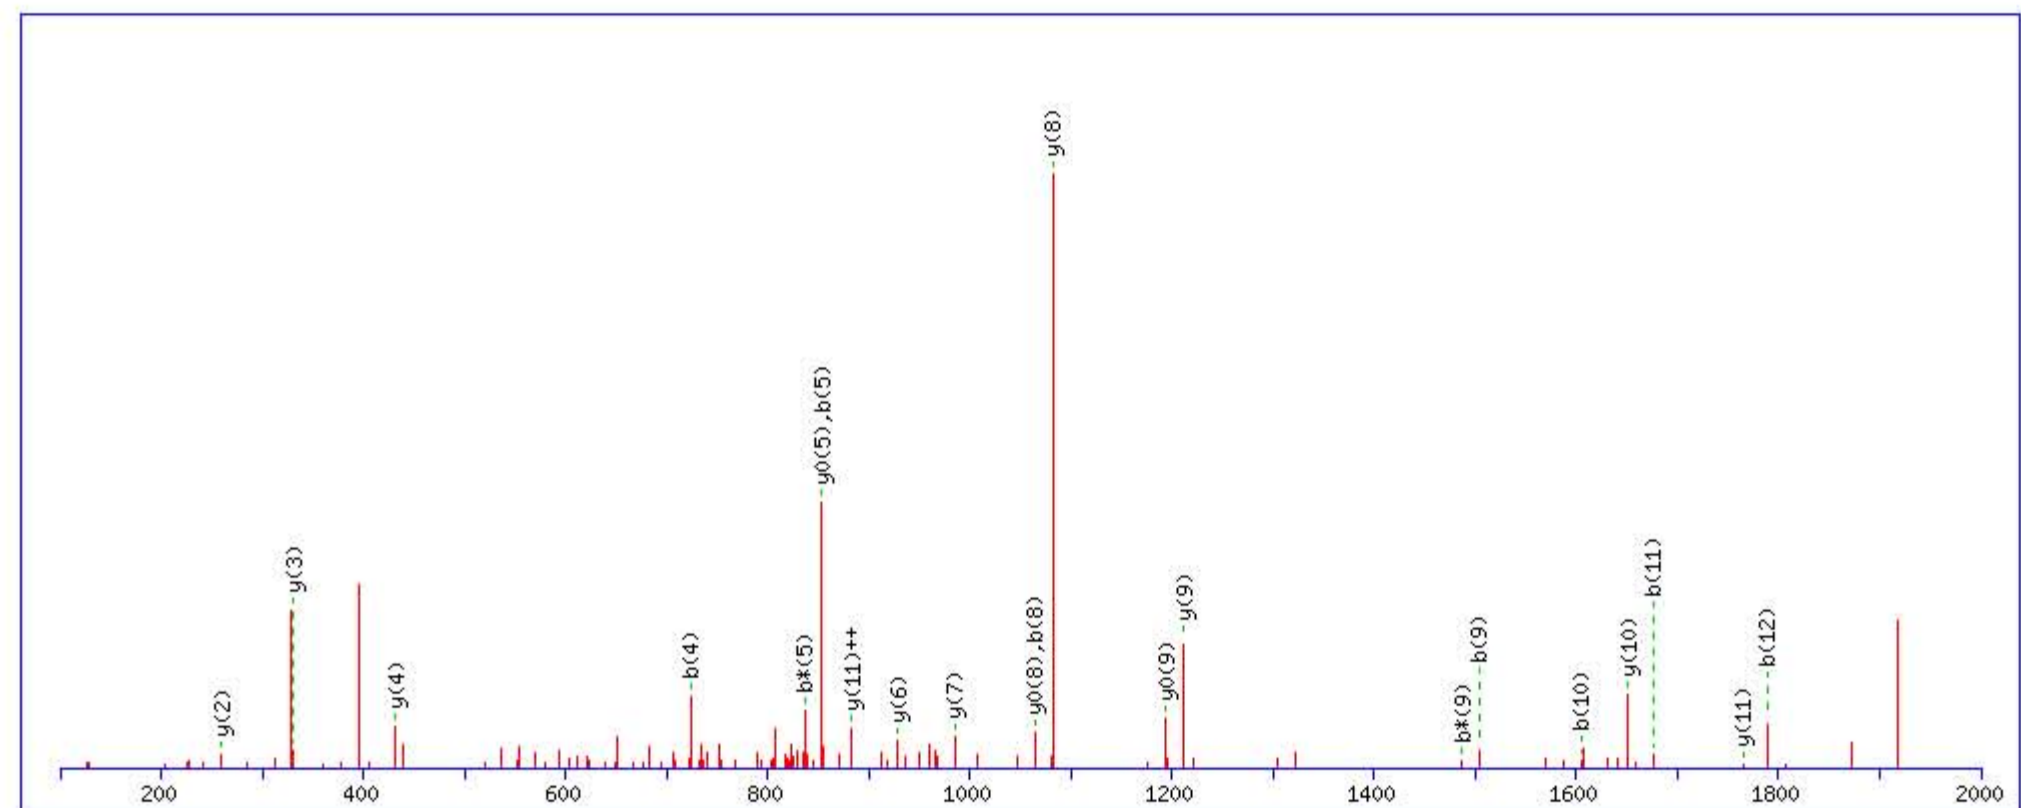

Monoisotopic mass of neutral peptide Mr(calc): 1934.011765

Fixed modifications: Carbamidomethyl (C) (apply to specified residues or termini only)

Variable modifications:

Q4 : Biotin:Thermo-21345 (Q)

Q9 : Biotin:Thermo-21345 (Q)

Ions Score: 43 Expect: 0.0013

Matches : 22/126 fragment ions using 48 most intense peaks [\(help\)](#)

| #  | b                  | b <sup>++</sup> | b <sup>*</sup>     | b <sup>+++</sup> | b <sup>0</sup> | b <sup>0++</sup> | Seq. | y                  | y <sup>++</sup>   | y <sup>*</sup> | y <sup>+++</sup> | y <sup>0</sup>     | y <sup>0++</sup> | #  |
|----|--------------------|-----------------|--------------------|------------------|----------------|------------------|------|--------------------|-------------------|----------------|------------------|--------------------|------------------|----|
| 1  | 114.091340         | 57.549308       |                    |                  |                |                  | L    |                    |                   |                |                  |                    |                  | 13 |
| 2  | 171.112804         | 86.060040       |                    |                  |                |                  | G    | 1821.934989        | 911.471133        | 1804.908440    | 902.957858       | 1803.924424        | 902.465850       | 12 |
| 3  | 285.155731         | 143.081504      | 268.129182         | 134.568229       |                |                  | N    | <b>1764.913525</b> | <b>882.960400</b> | 1747.886976    | 874.447126       | 1746.902960        | 873.955118       | 11 |
| 4  | <b>724.381057</b>  | 362.694167      | 707.354508         | 354.180892       |                |                  | Q    | <b>1650.870598</b> | 825.938937        | 1633.844049    | 817.425663       | 1632.860033        | 816.933654       | 10 |
| 5  | <b>853.423650</b>  | 427.215463      | <b>836.397101</b>  | 418.702189       | 835.413085     | 418.210181       | E    | <b>1211.645272</b> | 606.326274        | 1194.618723    | 597.813000       | <b>1193.634707</b> | 597.320991       | 9  |
| 6  | 950.476414         | 475.741845      | 933.449865         | 467.228571       | 932.465849     | 466.736563       | P    | <b>1082.602679</b> | 541.804977        | 1065.576130    | 533.291703       | <b>1064.592114</b> | 532.799695       | 8  |
| 7  | 1007.497878        | 504.252577      | 990.471329         | 495.739303       | 989.487313     | 495.247295       | G    | <b>985.549915</b>  | 493.278595        | 968.523366     | 484.765321       | 967.539350         | 484.273313       | 7  |
| 8  | <b>1064.519342</b> | 532.763309      | 1047.492793        | 524.250035       | 1046.508777    | 523.758027       | G    | <b>928.528451</b>  | 464.767863        | 911.501902     | 456.254589       | 910.517886         | 455.762581       | 6  |
| 9  | <b>1503.744668</b> | 752.375972      | <b>1486.718119</b> | 743.862698       | 1485.734103    | 743.370690       | Q    | 871.506987         | 436.257132        | 854.480438     | 427.743857       | <b>853.496422</b>  | 427.251849       | 5  |
| 10 | <b>1604.792347</b> | 802.899812      | 1587.765798        | 794.386537       | 1586.781782    | 793.894529       | T    | <b>432.281661</b>  | 216.644468        | 415.255112     | 208.131194       | 414.271096         | 207.639186       | 4  |
| 11 | <b>1675.829461</b> | 838.418369      | 1658.802912        | 829.905094       | 1657.818896    | 829.413086       | A    | <b>331.233982</b>  | 166.120629        | 314.207433     | 157.607354       |                    |                  | 3  |
| 12 | <b>1788.913525</b> | 894.960400      | 1771.886976        | 886.447126       | 1770.902960    | 885.955118       | L    | <b>260.196868</b>  | 130.602072        | 243.170319     | 122.088797       |                    |                  | 2  |
| 13 |                    |                 |                    |                  |                |                  | K    | 147.112804         | 74.060040         | 130.086255     | 65.546765        |                    |                  | 1  |

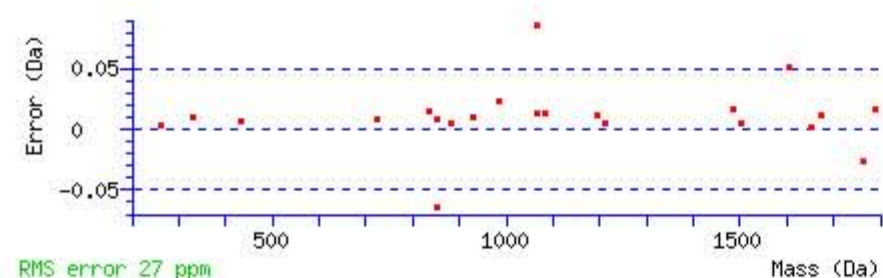

RMS error 27 ppm

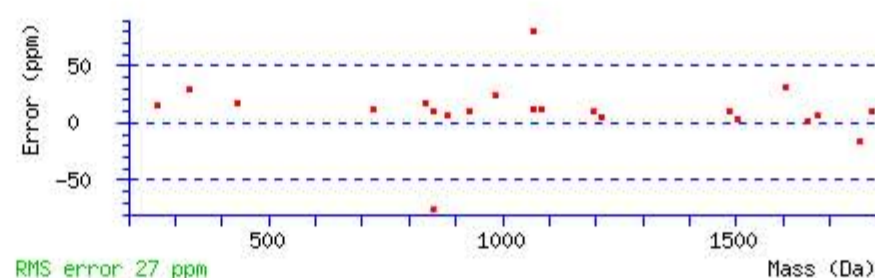

RMS error 27 ppm

NCBI BLAST search of **LGNQEPGGQTALK**

(Parameters: blastp, nr protein database, expect=20000, no filter, PAM30)

Other BLAST [web gateways](#)

All matches to this query

| Score | Mr(calc):   | Delta     | Sequence                           |
|-------|-------------|-----------|------------------------------------|
| 42.6  | 1934.011765 | 0.019203  | <a href="#">LGNQEPGGQTALK</a>      |
| 11.3  | 1934.032867 | -0.001899 | <a href="#">KSRPLTGLMDLAKEMTK</a>  |
| 5.6   | 1934.032867 | -0.001899 | <a href="#">KSRPLTGLMDLAKEMTK</a>  |
| 4.7   | 1934.004349 | 0.026619  | <a href="#">SQSEKQTYLEVRR</a>      |
| 2.7   | 1934.015594 | 0.015374  | <a href="#">RCRTTYSASQLHTLIK</a>   |
| 1.5   | 1934.037369 | -0.006401 | <a href="#">NYLEGIYNVPVA AVRTR</a> |
| 1.1   | 1934.034225 | -0.003257 | <a href="#">QVQSQAHLQMRLLK</a>     |
| 0.3   | 1934.027008 | 0.003960  | <a href="#">VSFRLHITEPKMMFAK</a>   |

# Mascot Search Results

## Peptide View

MS/MS Fragmentation of **QLTSGPNQEQVSPLTLK**

Found in **A2AP\_HUMAN**, Alpha-2-antiplasmin OS=Homo sapiens GN=SERPINF2 PE=1 SV=3

Match to Query 57027: 2263.248342 from(755.423390,3+) rtinseconds(2508) index(28121)

Title: Locus:1.1.1.3015.11 File:"2013-07-02 CLN FXIII 180 min 1st F 2.wiff"

Data file C:\Program Files (x86)\Matrix Science\Mascot Daemon\mgf\7 FXIII 180 min 1st\mascot\_daemon\_merge.mgf

Click mouse within plot area to zoom in by factor of two about that point

Or, Plot from  to  Da

Label all possible matches  Label matches used for scoring

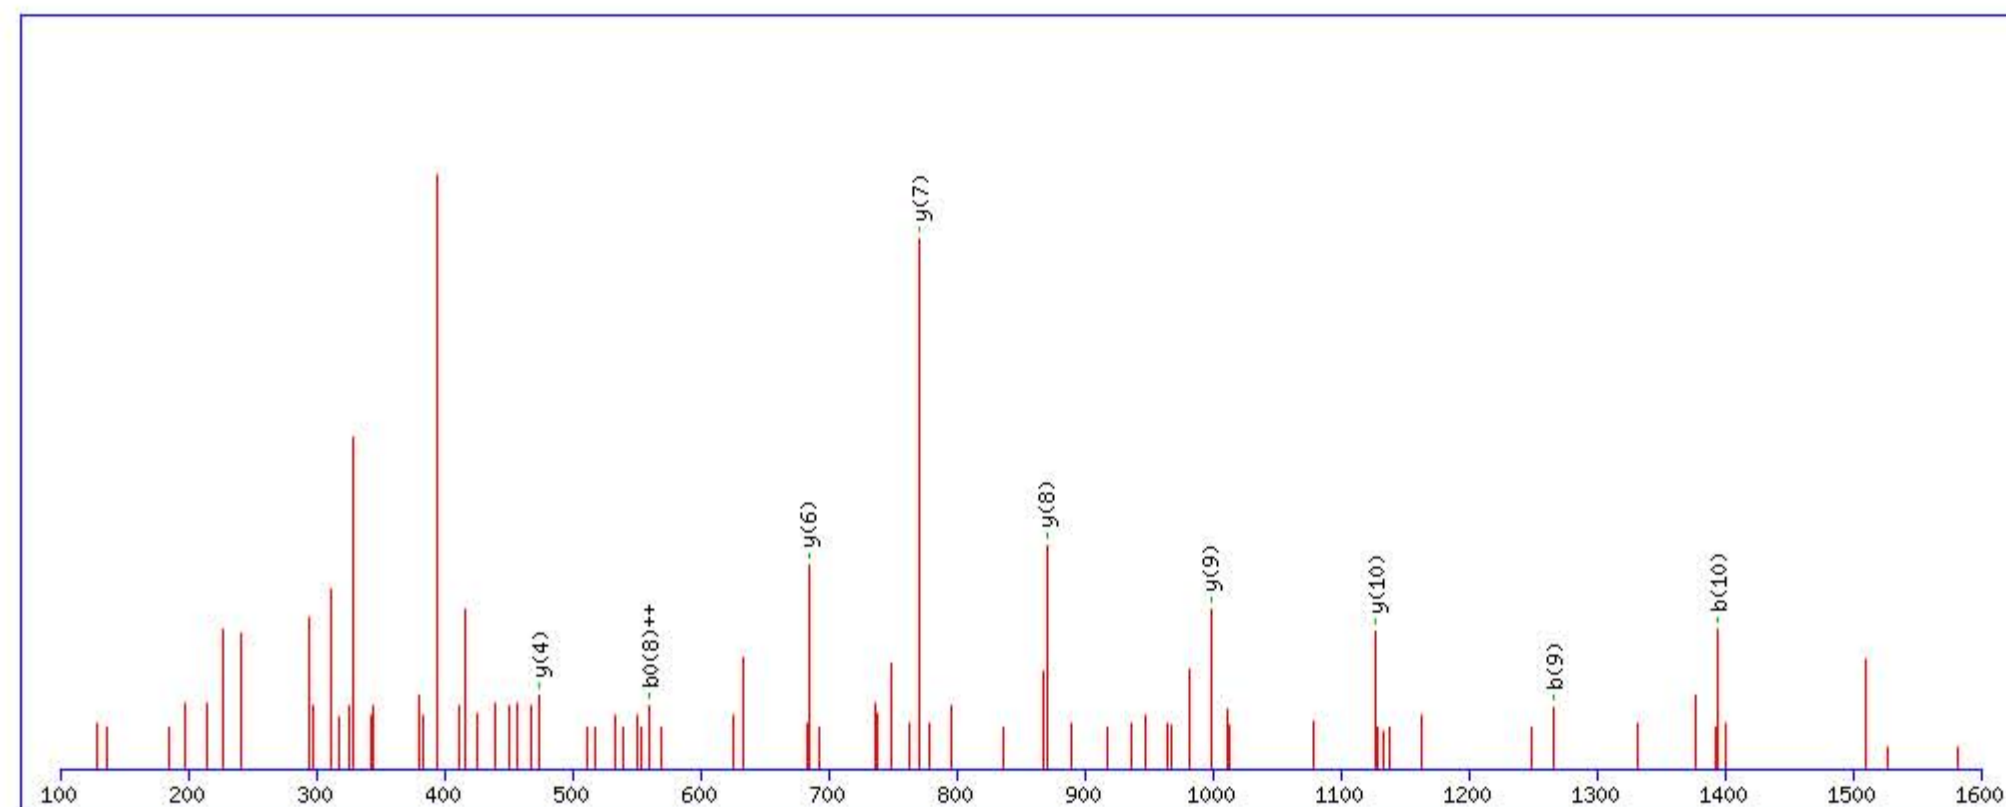

Monoisotopic mass of neutral peptide Mr(calc): 2263.224594

Fixed modifications: Carbamidomethyl (C) (apply to specified residues or termini only)

Variable modifications:

Q8 : Biotin:Thermo-21345 (Q)

Ions Score: 30 Expect: 0.0036

Matches : 9/194 fragment ions using 15 most intense peaks [\(help\)](#)

| #  | b                  | b <sup>++</sup> | b <sup>*</sup> | b <sup>*++</sup> | b <sup>0</sup> | b <sup>0++</sup> | Seq. | y                  | y <sup>++</sup> | y <sup>*</sup> | y <sup>*++</sup> | y <sup>0</sup> | y <sup>0++</sup> | #  |
|----|--------------------|-----------------|----------------|------------------|----------------|------------------|------|--------------------|-----------------|----------------|------------------|----------------|------------------|----|
| 1  | 129.065854         | 65.036565       | 112.039305     | 56.523291        |                |                  | Q    |                    |                 |                |                  |                |                  | 18 |
| 2  | 242.149918         | 121.578597      | 225.123369     | 113.065323       |                |                  | L    | 2136.173304        | 1068.590290     | 2119.146755    | 1060.077015      | 2118.162739    | 1059.585007      | 17 |
| 3  | 343.197597         | 172.102437      | 326.171048     | 163.589162       | 325.187032     | 163.097154       | T    | 2023.089240        | 1012.048258     | 2006.062691    | 1003.534984      | 2005.078675    | 1003.042976      | 16 |
| 4  | 430.229625         | 215.618450      | 413.203076     | 207.105176       | 412.219060     | 206.613168       | S    | 1922.041561        | 961.524419      | 1905.015012    | 953.011144       | 1904.030996    | 952.519136       | 15 |
| 5  | 487.251089         | 244.129182      | 470.224540     | 235.615908       | 469.240524     | 235.123900       | G    | 1835.009533        | 918.008405      | 1817.982984    | 909.495130       | 1816.998968    | 909.003122       | 14 |
| 6  | 584.303853         | 292.655565      | 567.277304     | 284.142290       | 566.293288     | 283.650282       | P    | 1777.988069        | 889.497673      | 1760.961520    | 880.984398       | 1759.977504    | 880.492390       | 13 |
| 7  | 698.346780         | 349.677028      | 681.320231     | 341.163753       | 680.336215     | 340.671745       | N    | 1680.935305        | 840.971291      | 1663.908756    | 832.458016       | 1662.924740    | 831.966008       | 12 |
| 8  | 1137.572106        | 569.289691      | 1120.545557    | 560.776416       | 1119.561541    | 560.284408       | Q    | 1566.892378        | 783.949827      | 1549.865829    | 775.436553       | 1548.881813    | 774.944545       | 11 |
| 9  | <b>1266.614699</b> | 633.810988      | 1249.588150    | 625.297713       | 1248.604134    | 624.805705       | E    | <b>1127.667052</b> | 564.337164      | 1110.640503    | 555.823890       | 1109.656487    | 555.331882       | 10 |
| 10 | <b>1394.673277</b> | 697.840277      | 1377.646728    | 689.327002       | 1376.662712    | 688.834994       | Q    | <b>998.624459</b>  | 499.815868      | 981.597910     | 491.302593       | 980.613894     | 490.810585       | 9  |
| 11 | 1493.741691        | 747.374484      | 1476.715142    | 738.861209       | 1475.731126    | 738.369201       | V    | <b>870.565881</b>  | 435.786579      | 853.539332     | 427.273304       | 852.555316     | 426.781296       | 8  |
| 12 | 1580.773719        | 790.890498      | 1563.747170    | 782.377223       | 1562.763154    | 781.885215       | S    | <b>771.497467</b>  | 386.252372      | 754.470918     | 377.739097       | 753.486902     | 377.247089       | 7  |
| 13 | 1677.826483        | 839.416880      | 1660.799934    | 830.903605       | 1659.815918    | 830.411597       | P    | <b>684.465439</b>  | 342.736358      | 667.438890     | 334.223083       | 666.454874     | 333.731075       | 6  |
| 14 | 1790.910547        | 895.958912      | 1773.883998    | 887.445637       | 1772.899982    | 886.953629       | L    | 587.412675         | 294.209976      | 570.386126     | 285.696701       | 569.402110     | 285.204693       | 5  |
| 15 | 1891.958226        | 946.482751      | 1874.931677    | 937.969477       | 1873.947661    | 937.477469       | T    | <b>474.328611</b>  | 237.667944      | 457.302062     | 229.154669       | 456.318046     | 228.662661       | 4  |
| 16 | 2005.042290        | 1003.024783     | 1988.015741    | 994.511509       | 1987.031725    | 994.019501       | L    | 373.280932         | 187.144104      | 356.254383     | 178.630830       |                |                  | 3  |
| 17 | 2118.126354        | 1059.566815     | 2101.099805    | 1051.053540      | 2100.115789    | 1050.561532      | L    | 260.196868         | 130.602072      | 243.170319     | 122.088798       |                |                  | 2  |
| 18 |                    |                 |                |                  |                |                  | K    | 147.112804         | 74.060040       | 130.086255     | 65.546765        |                |                  | 1  |

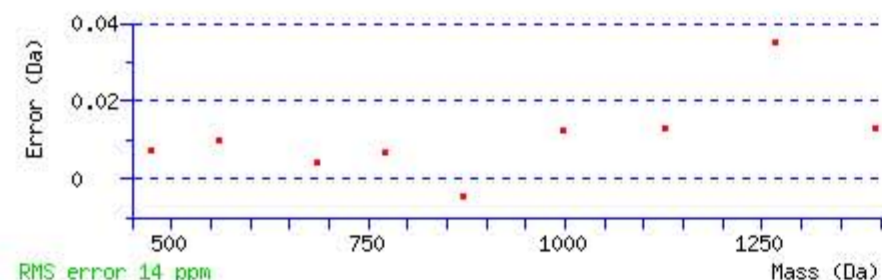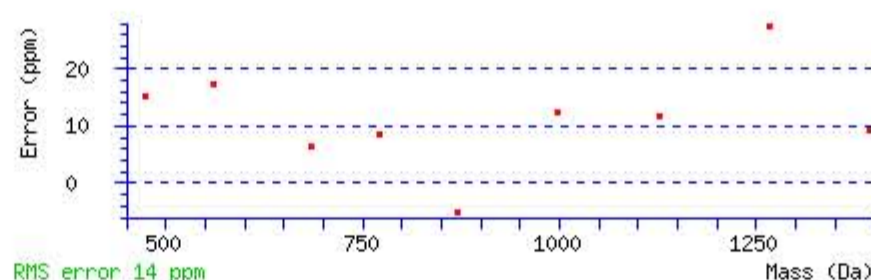

NCBI BLAST search of **QLTSGPNQEQVSPLTLK**

(Parameters: blastp, nr protein database, expect=20000, no filter, PAM30)

Other BLAST [web gateways](#)

## All matches to this query

| Score | Mr(calc):   | Delta    | Sequence                            |
|-------|-------------|----------|-------------------------------------|
| 30.0  | 2263.224594 | 0.023748 | <a href="#">QLTSGPNQEQVSPLTLK</a>   |
| 30.0  | 2263.224594 | 0.023748 | <a href="#">QLTSGPNQEQVSPLTLK</a>   |
| 5.6   | 2263.224594 | 0.023748 | <a href="#">QLTSGPNQEQVSPLTLK</a>   |
| 4.0   | 2263.224594 | 0.023748 | <a href="#">GLALSSNKVKSVMVFDNEK</a> |

# MASCOT Search Results

## Peptide View

MS/MS Fragmentation of **WFLLEQPEIQVAHFPEK**

Found in **A2AP\_HUMAN**, Alpha-2-antiplasmin OS=Homo sapiens GN=SERPINF2 PE=1 SV=3

Match to Query 61171: 2439.311442 from(814.111090,3+) rtinseconds(2904) index(12378)

Title: Locus:1.1.1.3263.14 File:"2013-07-02 CLN FXIII 180 min 1st F 1.wiff"

Data file C:\Program Files (x86)\Matrix Science\Mascot Daemon\mgf\7 FXIII 180 min 1st\mascot\_daemon\_merge.mgf

Click mouse within plot area to zoom in by factor of two about that point

Or, Plot from  to  Da

Label all possible matches  Label matches used for scoring

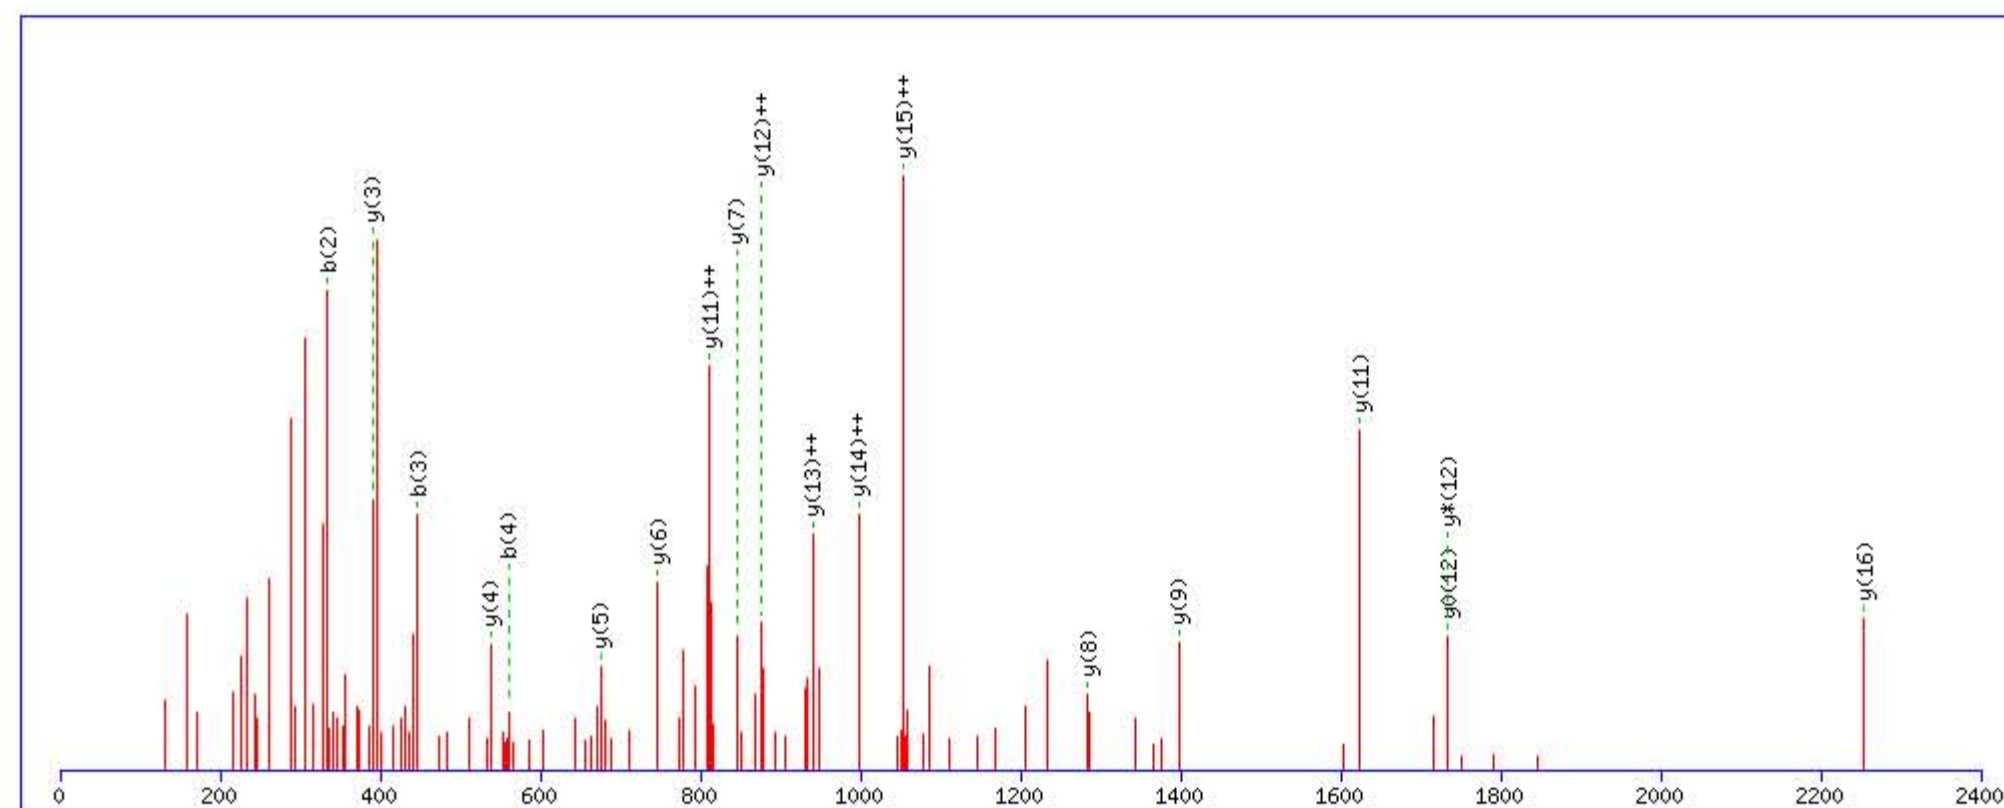

Monoisotopic mass of neutral peptide Mr(calc): 2439.281326

Fixed modifications: Carbamidomethyl (C) (apply to specified residues or termini only)

Variable modifications:

Q10 : Biotin:Thermo-21345 (Q)

Ions Score: 37 Expect: 0.0042

Matches : 19/156 fragment ions using 48 most intense peaks [\(help\)](#)

| #  | b                 | b <sup>++</sup> | b <sup>*</sup> | b <sup>*++</sup> | b <sup>0</sup> | b <sup>0++</sup> | Seq. | y                  | y <sup>++</sup>    | y <sup>*</sup>     | y <sup>*++</sup> | y <sup>0</sup>     | y <sup>0++</sup> | #  |
|----|-------------------|-----------------|----------------|------------------|----------------|------------------|------|--------------------|--------------------|--------------------|------------------|--------------------|------------------|----|
| 1  | 187.086589        | 94.046932       |                |                  |                |                  | W    |                    |                    |                    |                  |                    |                  | 17 |
| 2  | <b>334.155003</b> | 167.581140      |                |                  |                |                  | F    | <b>2254.209296</b> | 1127.608286        | 2237.182747        | 1119.095011      | 2236.198731        | 1118.603003      | 16 |
| 3  | <b>447.239067</b> | 224.123172      |                |                  |                |                  | L    | 2107.140882        | <b>1054.074079</b> | 2090.114333        | 1045.560804      | 2089.130317        | 1045.068796      | 15 |
| 4  | <b>560.323131</b> | 280.665204      |                |                  |                |                  | L    | 1994.056818        | <b>997.532047</b>  | 1977.030269        | 989.018772       | 1976.046253        | 988.526764       | 14 |
| 5  | 689.365724        | 345.186500      |                |                  | 671.355159     | 336.181218       | E    | 1880.972754        | <b>940.990015</b>  | 1863.946205        | 932.476741       | 1862.962189        | 931.984732       | 13 |
| 6  | 817.424302        | 409.215789      | 800.397753     | 400.702515       | 799.413737     | 400.210507       | Q    | 1751.930161        | <b>876.468719</b>  | <b>1734.903612</b> | 867.955444       | <b>1733.919596</b> | 867.463436       | 12 |
| 7  | 914.477066        | 457.742171      | 897.450517     | 449.228897       | 896.466501     | 448.736889       | P    | <b>1623.871583</b> | <b>812.439429</b>  | 1606.845034        | 803.926155       | 1605.861018        | 803.434147       | 11 |
| 8  | 1043.519659       | 522.263468      | 1026.493110    | 513.750193       | 1025.509094    | 513.258185       | E    | 1526.818819        | 763.913047         | 1509.792270        | 755.399773       | 1508.808254        | 754.907765       | 10 |
| 9  | 1156.603723       | 578.805500      | 1139.577174    | 570.292225       | 1138.593158    | 569.800217       | I    | <b>1397.776226</b> | 699.391751         | 1380.749677        | 690.878476       |                    |                  | 9  |
| 10 | 1595.829049       | 798.418163      | 1578.802500    | 789.904888       | 1577.818484    | 789.412880       | Q    | <b>1284.692162</b> | 642.849719         | 1267.665613        | 634.336444       |                    |                  | 8  |
| 11 | 1694.897463       | 847.952370      | 1677.870914    | 839.439095       | 1676.886898    | 838.947087       | V    | <b>845.466836</b>  | 423.237056         | 828.440287         | 414.723781       |                    |                  | 7  |
| 12 | 1765.934577       | 883.470927      | 1748.908028    | 874.957652       | 1747.924012    | 874.465644       | A    | <b>746.398422</b>  | 373.702849         | 729.371873         | 365.189574       |                    |                  | 6  |
| 13 | 1902.993489       | 952.000383      | 1885.966940    | 943.487108       | 1884.982924    | 942.995100       | H    | <b>675.361308</b>  | 338.184292         | 658.334759         | 329.671017       |                    |                  | 5  |
| 14 | 2050.061903       | 1025.534589     | 2033.035354    | 1017.021315      | 2032.051338    | 1016.529307      | F    | <b>538.302396</b>  | 269.654836         | 521.275847         | 261.141561       |                    |                  | 4  |
| 15 | 2147.114667       | 1074.060971     | 2130.088118    | 1065.547697      | 2129.104102    | 1065.055689      | P    | <b>391.233982</b>  | 196.120629         | 374.207433         | 187.607354       |                    |                  | 3  |
| 16 | 2294.183081       | 1147.595178     | 2277.156532    | 1139.081904      | 2276.172516    | 1138.589896      | F    | 294.181218         | 147.594247         | 277.154669         | 139.080972       |                    |                  | 2  |
| 17 |                   |                 |                |                  |                |                  | K    | 147.112804         | 74.060040          | 130.086255         | 65.546765        |                    |                  | 1  |

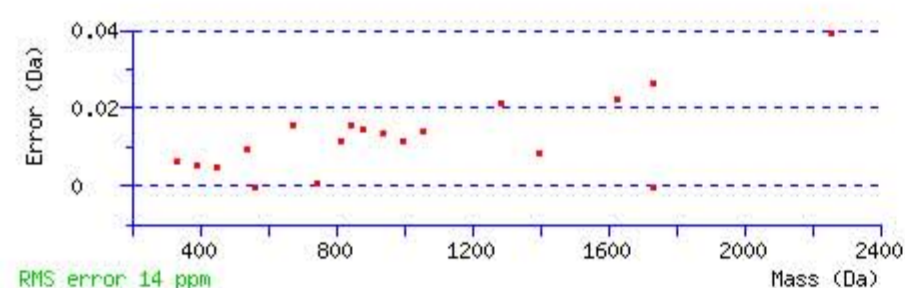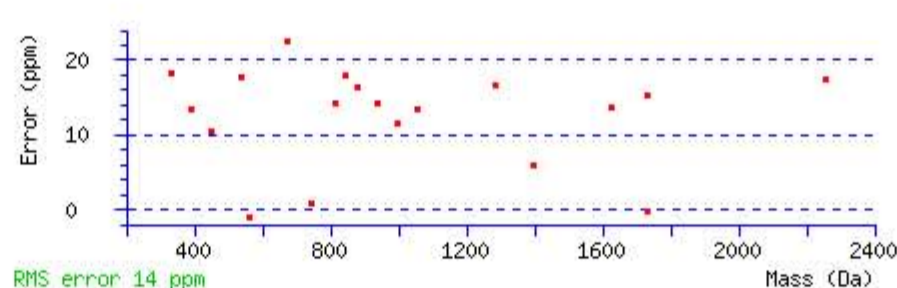

NCBI BLAST search of **WFLLEQPEIQVAHFPEK**

(Parameters: blastp, nr protein database, expect=20000, no filter, PAM30)

Other BLAST [web gateways](#)

## All matches to this query

| Score | Mr(calc):   | Delta    | Sequence                          |
|-------|-------------|----------|-----------------------------------|
| 36.6  | 2439.281326 | 0.030116 | <a href="#">WFLLEQPEIQVAHFPEK</a> |
| 15.0  | 2439.281326 | 0.030116 | <a href="#">WFLLEQPEIQVAHFPEK</a> |

Mascot: <http://www.matrixscience.com/>





# Mascot Search Results

## Peptide View

### MS/MS Fragmentation of QLTSGPNQEQVSPLTLK

Found in **A2AP\_HUMAN**, Alpha-2-antiplasmin OS=Homo sapiens GN=SERPINF2 PE=1 SV=3

Match to Query 64174: 2574.423792 from(859.148540,3+) rtinseconds(2676) index(10838)

Title: Locus:1.1.1.3185.24 File:"2013-07-02 CLN FXIII 180 min 1st F 1.wiff"

Data file C:\Program Files (x86)\Matrix Science\Mascot Daemon\mgf\7 FXIII 180 min 1st\mascot\_daemon\_merge.mgf

Click mouse within plot area to zoom in by factor of two about that point

Or, Plot from 0 to 2800 Da Full range

Label all possible matches  Label matches used for scoring

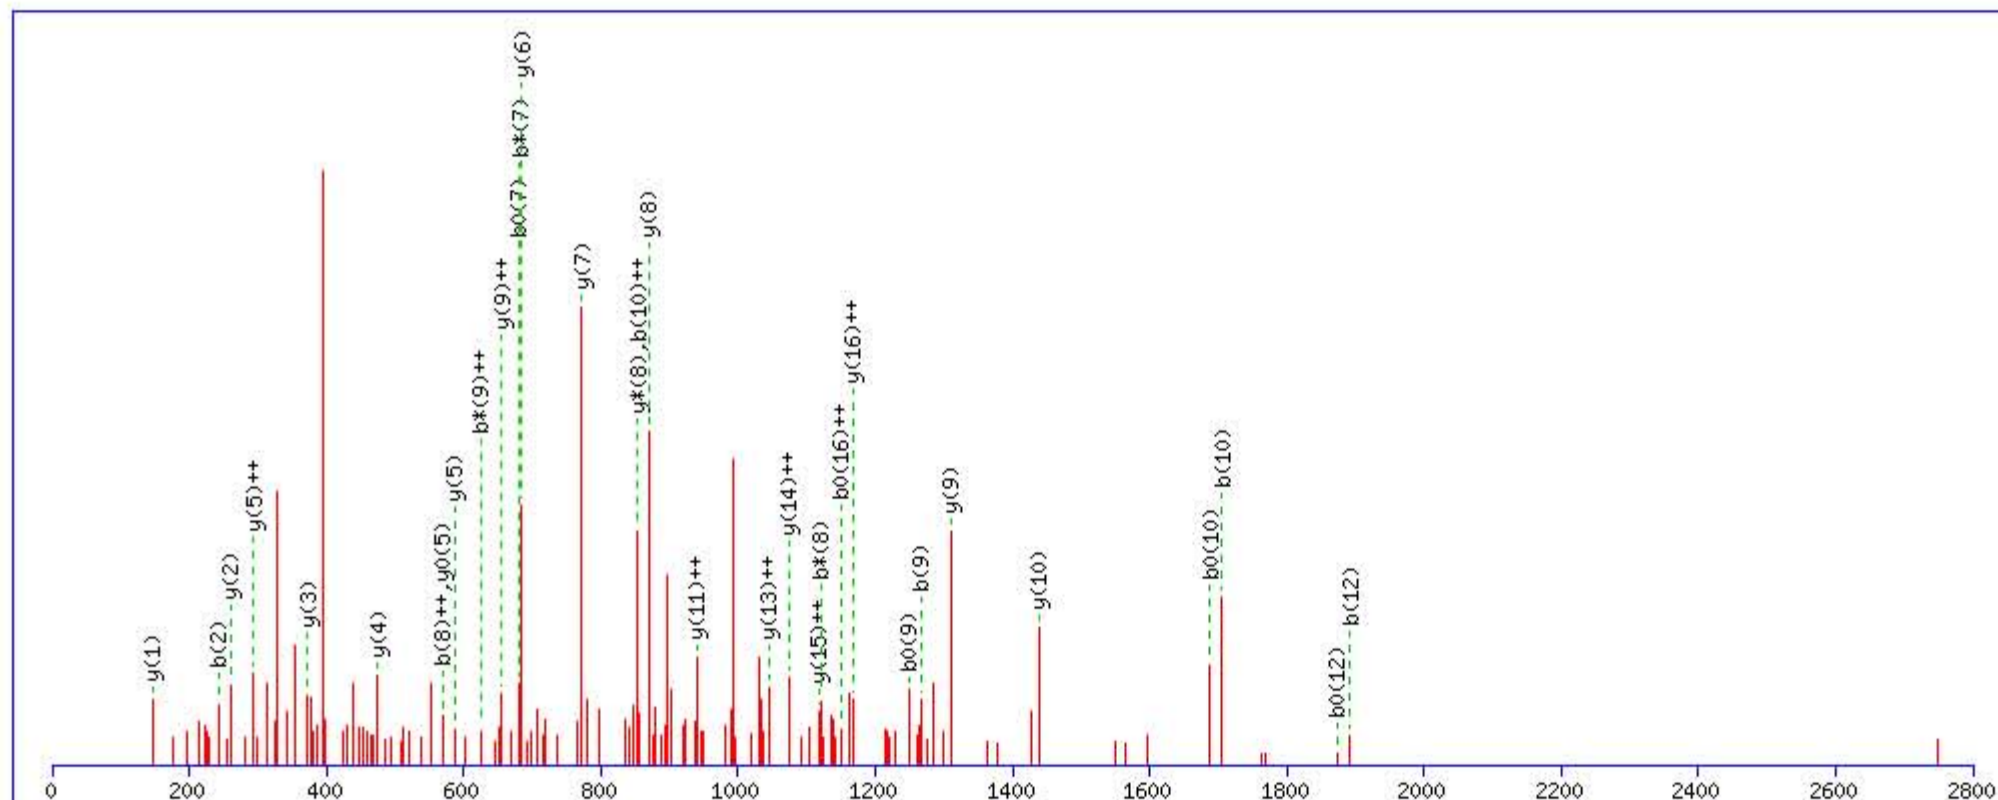

Monoisotopic mass of neutral peptide Mr(calc): 2574.391342  
 Fixed modifications: Carbamidomethyl (C) (apply to specified residues or termini only)  
 Variable modifications:  
 Q8 : Biotin:Thermo-21345 (Q)  
 Q10 : Biotin:Thermo-21345 (Q)  
 Ions Score: 51 Expect: 8.1e-005  
 Matches : 33/194 fragment ions using 62 most intense peaks (help)

| #  | b                  | b <sup>++</sup>   | b*                 | b <sup>+++</sup>  | b <sup>0</sup>     | b <sup>0++</sup> | Seq. | y                  | y <sup>++</sup>    | y*                | y <sup>+++</sup> | y <sup>0</sup>    | y <sup>0++</sup> | #  |
|----|--------------------|-------------------|--------------------|-------------------|--------------------|------------------|------|--------------------|--------------------|-------------------|------------------|-------------------|------------------|----|
| 1  | 129.065854         | 65.036565         | 112.039305         | 56.523291         |                    |                  | Q    |                    |                    |                   |                  |                   |                  | 18 |
| 2  | <b>242.149918</b>  | 121.578597        | 225.123369         | 113.065323        |                    |                  | L    | 2447.340052        | 1224.173664        | 2430.313503       | 1215.660389      | 2429.329487       | 1215.168381      | 17 |
| 3  | 343.197597         | 172.102437        | 326.171048         | 163.589162        | 325.187032         | 163.097154       | T    | 2334.255988        | <b>1167.631632</b> | 2317.229439       | 1159.118357      | 2316.245423       | 1158.626349      | 16 |
| 4  | 430.229625         | 215.618450        | 413.203076         | 207.105176        | 412.219060         | 206.613168       | S    | 2233.208309        | <b>1117.107792</b> | 2216.181760       | 1108.594518      | 2215.197744       | 1108.102510      | 15 |
| 5  | 487.251089         | 244.129182        | 470.224540         | 235.615908        | 469.240524         | 235.123900       | G    | 2146.176281        | <b>1073.591778</b> | 2129.149732       | 1065.078504      | 2128.165716       | 1064.586496      | 14 |
| 6  | 584.303853         | 292.655565        | 567.277304         | 284.142290        | 566.293288         | 283.650282       | P    | 2089.154817        | <b>1045.081046</b> | 2072.128268       | 1036.567772      | 2071.144252       | 1036.075764      | 13 |
| 7  | 698.346780         | 349.677028        | <b>681.320231</b>  | 341.163753        | <b>680.336215</b>  | 340.671745       | N    | 1992.102053        | 996.554665         | 1975.075504       | 988.041390       | 1974.091488       | 987.549382       | 12 |
| 8  | 1137.572106        | <b>569.289691</b> | <b>1120.545557</b> | 560.776416        | 1119.561541        | 560.284408       | Q    | 1878.059126        | <b>939.533201</b>  | 1861.032577       | 931.019927       | 1860.048561       | 930.527919       | 11 |
| 9  | <b>1266.614699</b> | 633.810988        | 1249.588150        | <b>625.297713</b> | <b>1248.604134</b> | 624.805705       | E    | <b>1438.833800</b> | 719.920538         | 1421.807251       | 711.407264       | 1420.823235       | 710.915256       | 10 |
| 10 | <b>1705.840025</b> | <b>853.423651</b> | 1688.813476        | 844.910376        | <b>1687.829460</b> | 844.418368       | Q    | <b>1309.791207</b> | <b>655.399242</b>  | 1292.764658       | 646.885967       | 1291.780642       | 646.393959       | 9  |
| 11 | 1804.908439        | 902.957858        | 1787.881890        | 894.444583        | 1786.897874        | 893.952575       | V    | <b>870.565881</b>  | 435.786579         | <b>853.539332</b> | 427.273304       | 852.555316        | 426.781296       | 8  |
| 12 | <b>1891.940467</b> | 946.473872        | 1874.913918        | 937.960597        | <b>1873.929902</b> | 937.468589       | S    | <b>771.497467</b>  | 386.252372         | 754.470918        | 377.739097       | 753.486902        | 377.247089       | 7  |
| 13 | 1988.993231        | 995.000254        | 1971.966682        | 986.486979        | 1970.982666        | 985.994971       | P    | <b>684.465439</b>  | 342.736358         | 667.438890        | 334.223083       | 666.454874        | 333.731075       | 6  |
| 14 | 2102.077295        | 1051.542285       | 2085.050746        | 1043.029011       | 2084.066730        | 1042.537003      | L    | <b>587.412675</b>  | <b>294.209976</b>  | 570.386126        | 285.696701       | <b>569.402110</b> | 285.204693       | 5  |
| 15 | 2203.124974        | 1102.066125       | 2186.098425        | 1093.552850       | 2185.114409        | 1093.060842      | T    | <b>474.328611</b>  | 237.667944         | 457.302062        | 229.154669       | 456.318046        | 228.662661       | 4  |
| 16 | 2316.209038        | 1158.608157       | 2299.182489        | 1150.094882       | 2298.198473        | 1149.602874      | L    | <b>373.280932</b>  | 187.144104         | 356.254383        | 178.630830       |                   |                  | 3  |
| 17 | 2429.293102        | 1215.150189       | 2412.266553        | 1206.636914       | 2411.282537        | 1206.144906      | L    | <b>260.196868</b>  | 130.602072         | 243.170319        | 122.088798       |                   |                  | 2  |
| 18 |                    |                   |                    |                   |                    |                  | K    | <b>147.112804</b>  | 74.060040          | 130.086255        | 65.546765        |                   |                  | 1  |

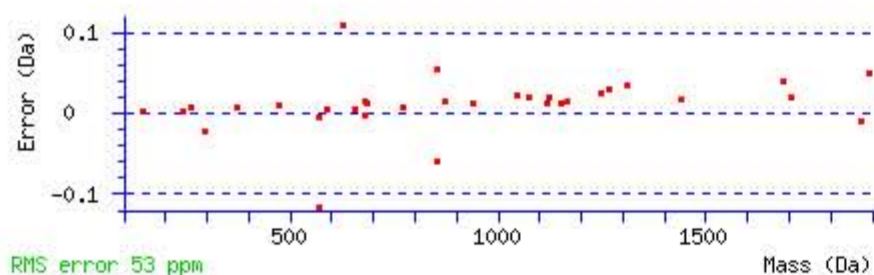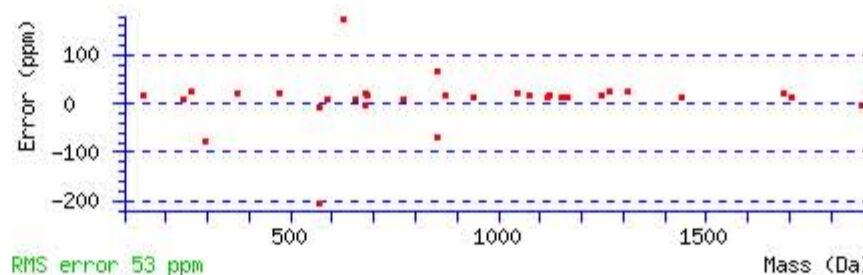

NCBI BLAST search of [QLTSGPNQEQVSPLTLK](#)  
 (Parameters: blastp, nr protein database, expect=20000, no filter, PAM30)  
 Other BLAST [web gateways](#)

## All matches to this query

| Score | Mr(calc):   | Delta    | Sequence                          |
|-------|-------------|----------|-----------------------------------|
| 51.3  | 2574.391342 | 0.032450 | <a href="#">QLTSGPNQEQVSPLTLK</a> |
| 34.9  | 2574.391342 | 0.032450 | <a href="#">QLTSGPNQEQVSPLTLK</a> |
| 14.5  | 2574.391342 | 0.032450 | <a href="#">QLTSGPNQEQVSPLTLK</a> |



# MASCOT Search Results

## Peptide View

MS/MS Fragmentation of **HTLNQIDEVK**

Found in **FETUA\_HUMAN**, Alpha-2-HS-glycoprotein OS=Homo sapiens GN=AHSG PE=1 SV=1

Match to Query 35225: 1506.790428 from(754.402490,2+) rtinseconds(1566) index(21511)

Title: Locus:1.1.1.2688.8 File:"2013-07-02 CLN FXIII 180 min 1st F 2.wiff"

Data file C:\Program Files (x86)\Matrix Science\Mascot Daemon\mgf\7 FXIII 180 min 1st\mascot\_daemon\_merge.mgf

Click mouse within plot area to zoom in by factor of two about that point

Or, Plot from  to  Da

Label all possible matches  Label matches used for scoring

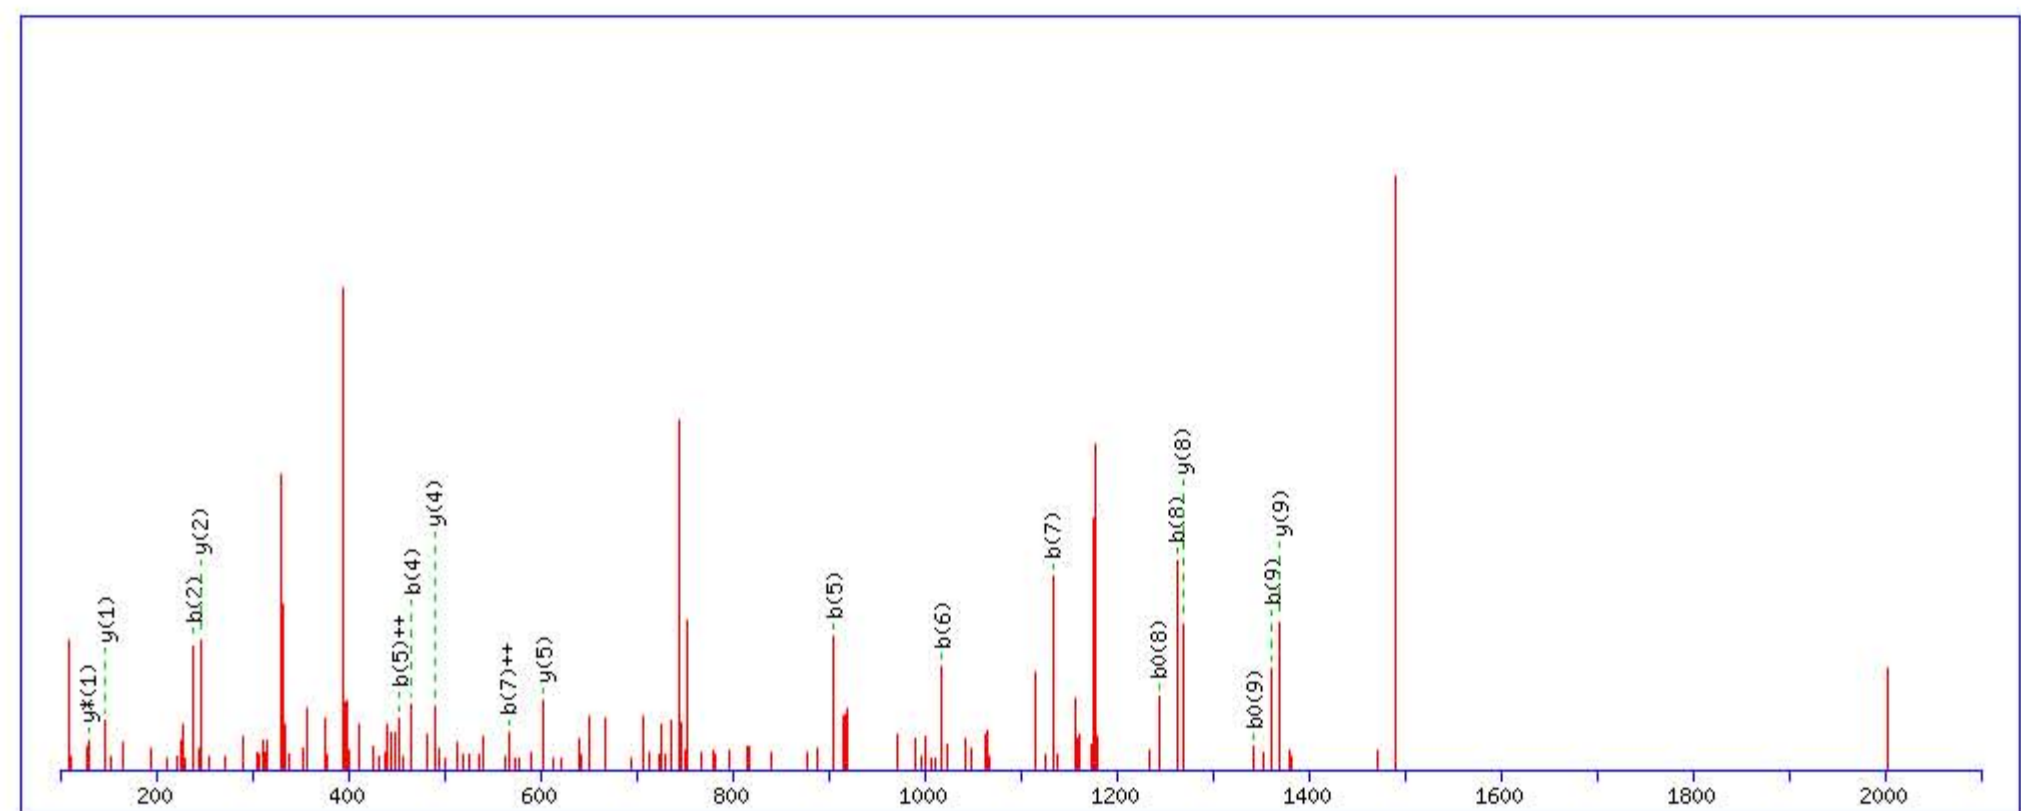

Monoisotopic mass of neutral peptide Mr(calc): 1506.786438

Fixed modifications: Carbamidomethyl (C) (apply to specified residues or termini only)

Variable modifications:

Q5 : Biotin:Thermo-21345 (Q)

Ions Score: 35 Expect: 0.0044

Matches : 18/96 fragment ions using 41 most intense peaks [\(help\)](#)

| #  | b                  | b <sup>++</sup>   | b <sup>+</sup> | b <sup>+++</sup> | b <sup>0</sup>     | b <sup>0++</sup> | Seq. | y                  | y <sup>++</sup> | y <sup>+</sup>    | y <sup>+++</sup> | y <sup>0</sup> | y <sup>0++</sup> | #  |
|----|--------------------|-------------------|----------------|------------------|--------------------|------------------|------|--------------------|-----------------|-------------------|------------------|----------------|------------------|----|
| 1  | 138.066188         | 69.536732         |                |                  |                    |                  | H    |                    |                 |                   |                  |                |                  | 10 |
| 2  | <b>239.113867</b>  | 120.060571        |                |                  | 221.103302         | 111.055289       | T    | <b>1370.734814</b> | 685.871045      | 1353.708265       | 677.357771       | 1352.724249    | 676.865763       | 9  |
| 3  | 352.197931         | 176.602603        |                |                  | 334.187366         | 167.597321       | L    | <b>1269.687135</b> | 635.347206      | 1252.660586       | 626.833931       | 1251.676570    | 626.341923       | 8  |
| 4  | <b>466.240858</b>  | 233.624067        | 449.214309     | 225.110793       | 448.230293         | 224.618785       | N    | 1156.603071        | 578.805174      | 1139.576522       | 570.291899       | 1138.592506    | 569.799891       | 7  |
| 5  | <b>905.466184</b>  | <b>453.236730</b> | 888.439635     | 444.723456       | 887.455619         | 444.231448       | Q    | 1042.560144        | 521.783710      | 1025.533595       | 513.270436       | 1024.549579    | 512.778428       | 6  |
| 6  | <b>1018.550248</b> | 509.778762        | 1001.523699    | 501.265488       | 1000.539683        | 500.773480       | I    | <b>603.334818</b>  | 302.171047      | 586.308269        | 293.657773       | 585.324253     | 293.165765       | 5  |
| 7  | <b>1133.577191</b> | <b>567.292234</b> | 1116.550642    | 558.778959       | 1115.566626        | 558.286951       | D    | <b>490.250754</b>  | 245.629015      | 473.224205        | 237.115741       | 472.240189     | 236.623733       | 4  |
| 8  | <b>1262.619784</b> | 631.813530        | 1245.593235    | 623.300256       | <b>1244.609219</b> | 622.808248       | E    | 375.223811         | 188.115544      | 358.197262        | 179.602269       | 357.213246     | 179.110261       | 3  |
| 9  | <b>1361.688198</b> | 681.347737        | 1344.661649    | 672.834463       | <b>1343.677633</b> | 672.342455       | V    | <b>246.181218</b>  | 123.594247      | 229.154669        | 115.080973       |                |                  | 2  |
| 10 |                    |                   |                |                  |                    |                  | K    | <b>147.112804</b>  | 74.060040       | <b>130.086255</b> | 65.546765        |                |                  | 1  |

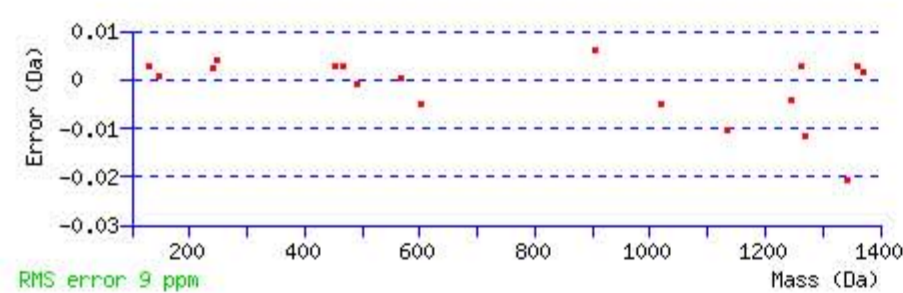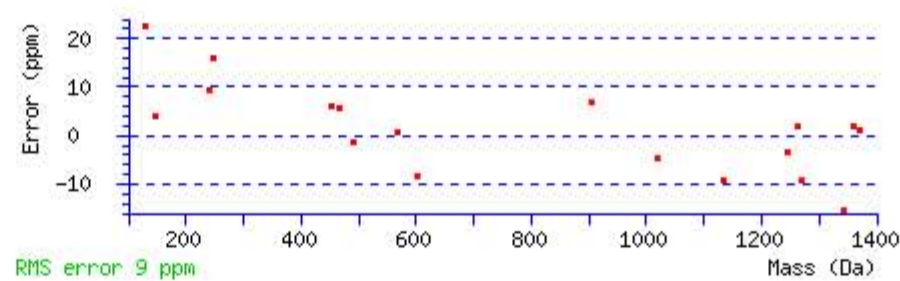

NCBI BLAST search of **HTLNQIDEVK**

(Parameters: blastp, nr protein database, expect=20000, no filter, PAM30)

Other BLAST [web gateways](#)

## All matches to this query

| Score | Mr(calc):   | Delta     | Sequence                       |
|-------|-------------|-----------|--------------------------------|
| 34.6  | 1506.786438 | 0.003990  | <a href="#">HTLNQIDEVK</a>     |
| 8.9   | 1506.794983 | -0.004555 | <a href="#">HRATQSGQRR</a>     |
| 7.3   | 1506.779037 | 0.011391  | <a href="#">EHQALQDLVDLAR</a>  |
| 6.5   | 1506.790253 | 0.000175  | <a href="#">SSRFLKEGNLSR</a>   |
| 4.4   | 1506.783081 | 0.007347  | <a href="#">SPKFQLFGSPSGQK</a> |
| 3.8   | 1506.771149 | 0.019279  | <a href="#">GEKSSMERLLTEK</a>  |
| 2.8   | 1506.792953 | -0.002525 | <a href="#">DIDYLIGKESQVK</a>  |
| 2.7   | 1506.772507 | 0.017921  | <a href="#">QHISRNAQDK</a>     |
| 2.5   | 1506.790482 | -0.000054 | <a href="#">EGQKDFVFK</a>      |
| 0.5   | 1506.792969 | -0.002541 | <a href="#">IGDFGLTKAIETDK</a> |

Mascot: <http://www.matrixscience.com/>

# MASCOT Search Results

## Peptide View

MS/MS Fragmentation of **EHAVEGDCDFQLLK**

Found in **FETUA\_HUMAN**, Alpha-2-HS-glycoprotein OS=Homo sapiens GN=AHSG PE=1 SV=1

Match to Query 49286: 1970.935452 from(657.985760,3+) rtinseconds(2029) index(24899)

Title: Locus:1.1.1.2849.6 File:"2013-07-02 CLN FXIII 180 min 1st F 2.wiff"

Data file C:\Program Files (x86)\Matrix Science\Mascot Daemon\mgf\7 FXIII 180 min 1st\mascot\_daemon\_merge.mgf

Click mouse within plot area to zoom in by factor of two about that point

Or, Plot from 100 to 1800 Da Full range

Label all possible matches  Label matches used for scoring

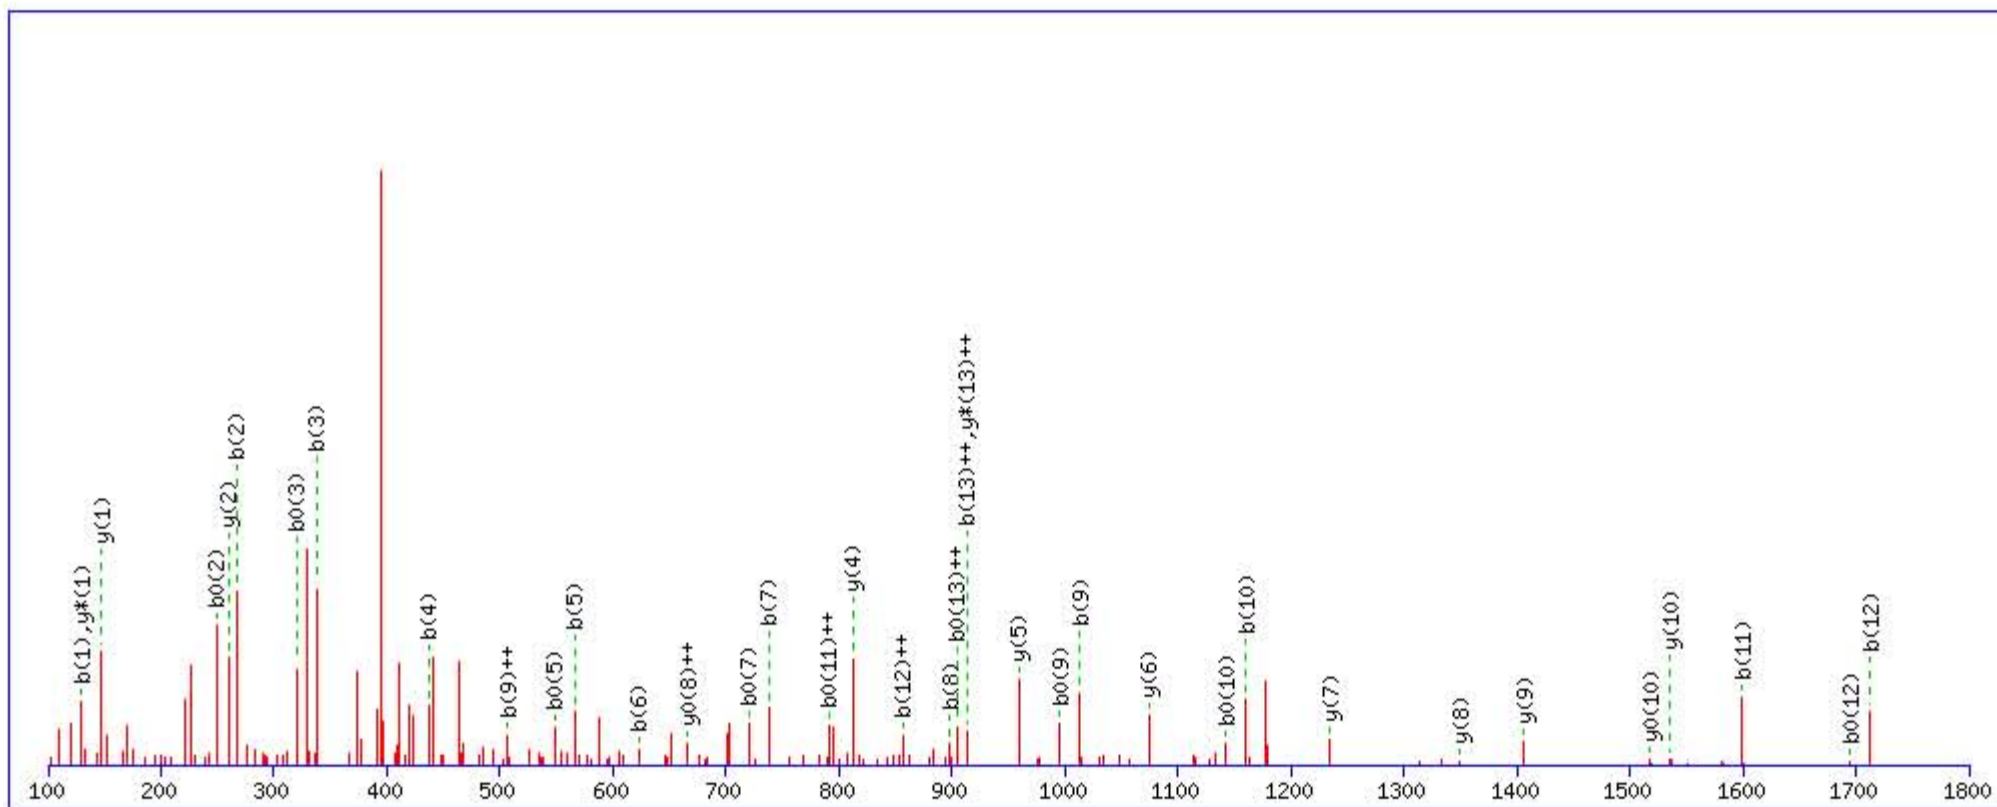

Monoisotopic mass of neutral peptide Mr(calc): 1970.923019

Fixed modifications: Carbamidomethyl (C) (apply to specified residues or termini only)

Variable modifications:

Q11 : Biotin:Thermo-21345 (Q)

Ions Score: 81 Expect: 9.9e-008

Matches : 37/126 fragment ions using 55 most intense peaks [\(help\)](#)

| #  | b           | b <sup>++</sup> | b <sup>*</sup> | b <sup>+++</sup> | b <sup>0</sup> | b <sup>0++</sup> | Seq. | y           | y <sup>++</sup> | y <sup>*</sup> | y <sup>+++</sup> | y <sup>0</sup> | y <sup>0++</sup> | #  |
|----|-------------|-----------------|----------------|------------------|----------------|------------------|------|-------------|-----------------|----------------|------------------|----------------|------------------|----|
| 1  | 130.049869  | 65.528572       |                |                  | 112.039304     | 56.523290        | E    |             |                 |                |                  |                |                  | 14 |
| 2  | 267.108781  | 134.058028      |                |                  | 249.098216     | 125.052746       | H    | 1842.887704 | 921.947490      | 1825.861155    | 913.434216       | 1824.877139    | 912.942207       | 13 |
| 3  | 338.145895  | 169.576585      |                |                  | 320.135330     | 160.571303       | A    | 1705.828792 | 853.418034      | 1688.802243    | 844.904760       | 1687.818227    | 844.412752       | 12 |
| 4  | 437.214309  | 219.110792      |                |                  | 419.203744     | 210.105510       | V    | 1634.791678 | 817.899477      | 1617.765129    | 809.386203       | 1616.781113    | 808.894195       | 11 |
| 5  | 566.256902  | 283.632089      |                |                  | 548.246337     | 274.626807       | E    | 1535.723264 | 768.365270      | 1518.696715    | 759.851996       | 1517.712699    | 759.359988       | 10 |
| 6  | 623.278366  | 312.142821      |                |                  | 605.267801     | 303.137539       | G    | 1406.680671 | 703.843974      | 1389.654122    | 695.330699       | 1388.670106    | 694.838691       | 9  |
| 7  | 738.305309  | 369.656293      |                |                  | 720.294744     | 360.651010       | D    | 1349.659207 | 675.333241      | 1332.632658    | 666.819967       | 1331.648642    | 666.327959       | 8  |
| 8  | 898.335958  | 449.671617      |                |                  | 880.325393     | 440.666335       | C    | 1234.632264 | 617.819770      | 1217.605715    | 609.306496       | 1216.621699    | 608.814488       | 7  |
| 9  | 1013.362901 | 507.185089      |                |                  | 995.352336     | 498.179806       | D    | 1074.601615 | 537.804446      | 1057.575066    | 529.291171       | 1056.591050    | 528.799163       | 6  |
| 10 | 1160.431315 | 580.719296      |                |                  | 1142.420750    | 571.714013       | F    | 959.574672  | 480.290974      | 942.548123     | 471.777700       |                |                  | 5  |
| 11 | 1599.656641 | 800.331959      | 1582.630092    | 791.818684       | 1581.646076    | 791.326676       | Q    | 812.506258  | 406.756767      | 795.479709     | 398.243493       |                |                  | 4  |
| 12 | 1712.740705 | 856.873991      | 1695.714156    | 848.360716       | 1694.730140    | 847.868708       | L    | 373.280932  | 187.144104      | 356.254383     | 178.630829       |                |                  | 3  |
| 13 | 1825.824769 | 913.416023      | 1808.798220    | 904.902748       | 1807.814204    | 904.410740       | L    | 260.196868  | 130.602072      | 243.170319     | 122.088797       |                |                  | 2  |
| 14 |             |                 |                |                  |                |                  | K    | 147.112804  | 74.060040       | 130.086255     | 65.546765        |                |                  | 1  |

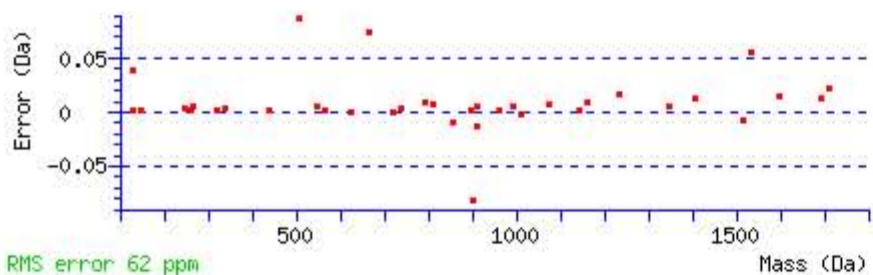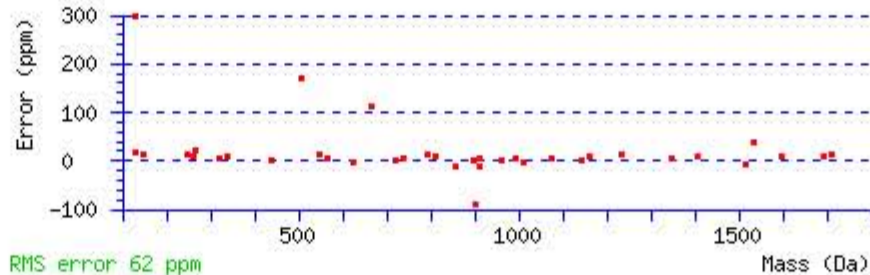

NCBI BLAST search of **EHAVEGDCDFQLLK**

(Parameters: blastp, nr protein database, expect=20000, no filter, PAM30)

Other BLAST [web gateways](#)

All matches to this query

| Score | Mr(calc):   | Delta     | Sequence                         |
|-------|-------------|-----------|----------------------------------|
| 80.6  | 1970.923019 | 0.012433  | <a href="#">EHAVEGDCDFQLLK</a>   |
| 5.7   | 1970.959396 | -0.023944 | <a href="#">DVQSAMDRYTAFLK</a>   |
| 3.2   | 1970.959381 | -0.023929 | <a href="#">NEEKPVQMMFKQSTFK</a> |

Mascot: <http://www.matrixscience.com/>

# MASCOT Search Results

## Peptide View

MS/MS Fragmentation of **QGIPFFGQVR**

Found in **A2MG\_HUMAN**, Alpha-2-macroglobulin OS=Homo sapiens GN=A2M PE=1 SV=3

Match to Query 33661: 1458.795568 from(730.405060,2+) rtinseconds(2502) index(28074)

Title: Locus:1.1.1.3013.14 File:"2013-07-02 CLN FXIII 180 min 1st F 2.wiff"

Data file C:\Program Files (x86)\Matrix Science\Mascot Daemon\mgf\7 FXIII 180 min 1st\mascot\_daemon\_merge.mgf

Click mouse within plot area to zoom in by factor of two about that point

Or, Plot from  to  Da

Label all possible matches  Label matches used for scoring

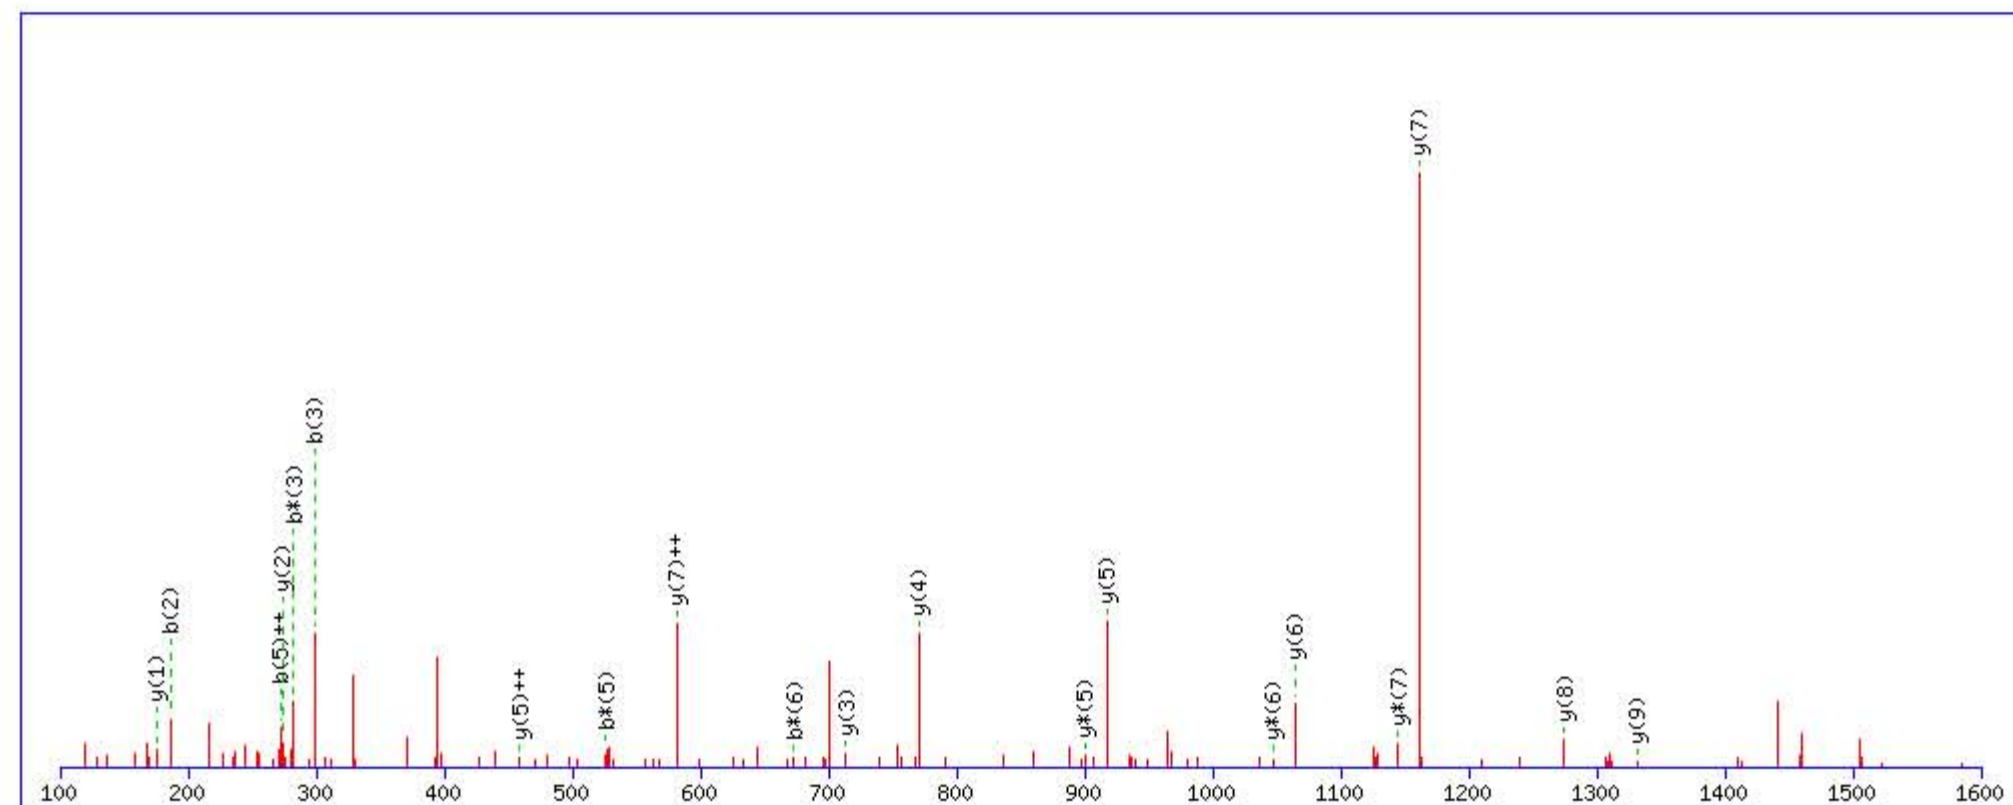

Monoisotopic mass of neutral peptide Mr(calc): 1458.780594

Fixed modifications: Carbamidomethyl (C) (apply to specified residues or termini only)

Variable modifications:

Q8 : Biotin:Thermo-21345 (Q)

Ions Score: 34 Expect: 0.00071

Matches : 20/72 fragment ions using 63 most intense peaks [\(help\)](#)

| #  | b                 | b <sup>++</sup>   | b <sup>+</sup>    | b <sup>+++</sup> | Seq. | y                  | y <sup>++</sup>   | y <sup>+</sup>     | y <sup>+++</sup> | #  |
|----|-------------------|-------------------|-------------------|------------------|------|--------------------|-------------------|--------------------|------------------|----|
| 1  | 129.065854        | 65.036565         | 112.039305        | 56.523291        | Q    |                    |                   |                    |                  | 10 |
| 2  | <b>186.087318</b> | 93.547297         | 169.060769        | 85.034023        | G    | <b>1331.729276</b> | 666.368276        | 1314.702727        | 657.855002       | 9  |
| 3  | <b>299.171382</b> | 150.089329        | <b>282.144833</b> | 141.576055       | I    | <b>1274.707812</b> | 637.857544        | 1257.681263        | 629.344270       | 8  |
| 4  | 396.224146        | 198.615711        | 379.197597        | 190.102436       | P    | <b>1161.623748</b> | <b>581.315512</b> | <b>1144.597199</b> | 572.802238       | 7  |
| 5  | 543.292560        | <b>272.149918</b> | <b>526.266011</b> | 263.636643       | F    | <b>1064.570984</b> | 532.789130        | <b>1047.544435</b> | 524.275856       | 6  |
| 6  | 690.360974        | 345.684125        | <b>673.334425</b> | 337.170850       | F    | <b>917.502570</b>  | <b>459.254923</b> | <b>900.476021</b>  | 450.741649       | 5  |
| 7  | 747.382438        | 374.194857        | 730.355889        | 365.681582       | G    | <b>770.434156</b>  | 385.720716        | 753.407607         | 377.207442       | 4  |
| 8  | 1186.607764       | 593.807520        | 1169.581215       | 585.294246       | Q    | <b>713.412692</b>  | 357.209984        | 696.386143         | 348.696710       | 3  |
| 9  | 1285.676178       | 643.341727        | 1268.649629       | 634.828453       | V    | <b>274.187366</b>  | 137.597321        | 257.160817         | 129.084047       | 2  |
| 10 |                   |                   |                   |                  | R    | <b>175.118952</b>  | 88.063114         | 158.092403         | 79.549839        | 1  |

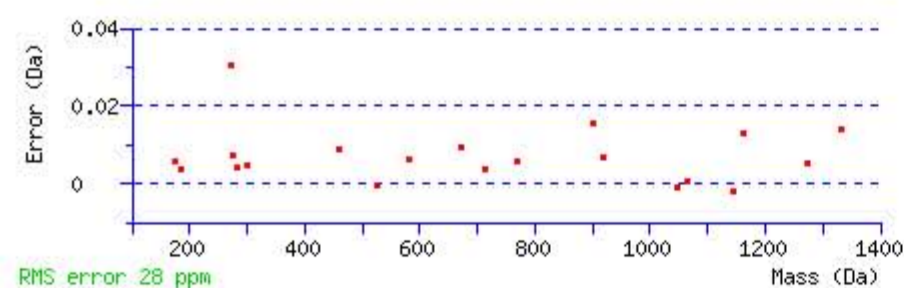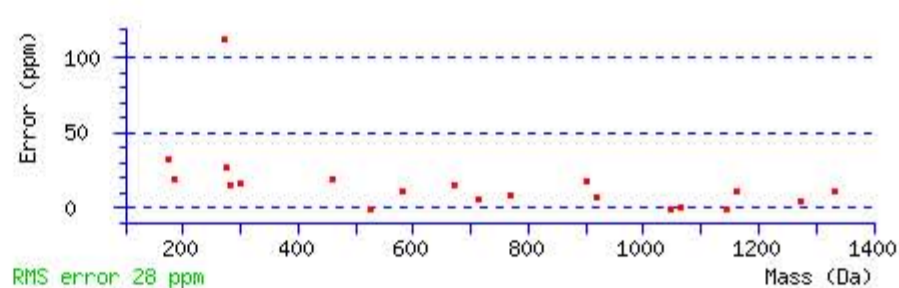

NCBI BLAST search of **QGIPFFGQVR**

(Parameters: blastp, nr protein database, expect=20000, no filter, PAM30)

Other BLAST [web gateways](#)

All matches to this query

| Score | Mr(calc):   | Delta     | Sequence                      |
|-------|-------------|-----------|-------------------------------|
| 34.5  | 1458.780594 | 0.014974  | <a href="#">QGIPFFGQVR</a>    |
| 0.9   | 1458.805054 | -0.009486 | <a href="#">AVQPLLKVSMSMR</a> |
| 0.6   | 1458.775177 | 0.020391  | <a href="#">SEMDKQALIPIAK</a> |

Mascot: <http://www.matrixscience.com/>

# MASCOT Search Results

## Peptide View

MS/MS Fragmentation of **AIGYLNTGYQR**

Found in **A2MG\_HUMAN**, Alpha-2-macroglobulin OS=Homo sapiens GN=A2M PE=1 SV=3

Match to Query 36976: 1565.814748 from(783.914650,2+) rtinseconds(1973) index(24489)

Title: Locus:1.1.1.2829.14 File:"2013-07-02 CLN FXIII 180 min 1st F 2.wiff"

Data file C:\Program Files (x86)\Matrix Science\Mascot Daemon\mgf\7 FXIII 180 min 1st\mascot\_daemon\_merge.mgf

Click mouse within plot area to zoom in by factor of two about that point

Or, Plot from  to  Da

Label all possible matches  Label matches used for scoring

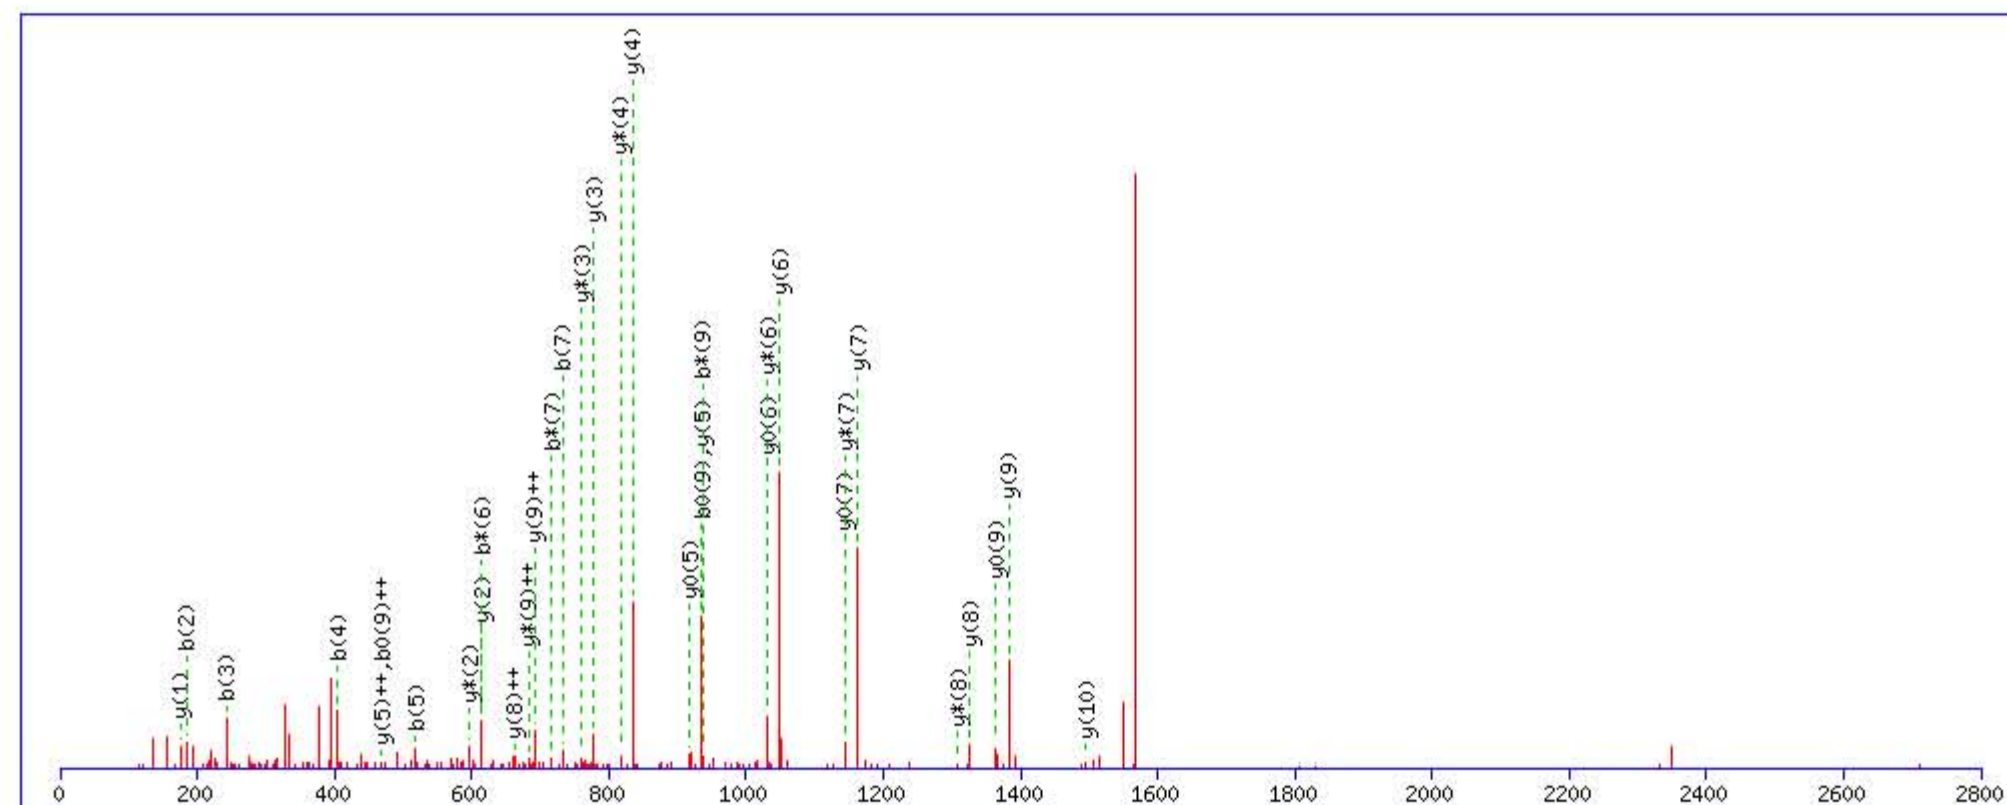

Monoisotopic mass of neutral peptide Mr(calc): 1565.802414

Fixed modifications: Carbamidomethyl (C) (apply to specified residues or termini only)

Variable modifications:

Q10 : Biotin:Thermo-21345 (Q)

Ions Score: 63 Expect: 9.8e-006

Matches : 34/90 fragment ions using 56 most intense peaks [\(help\)](#)

| #  | b                 | b <sup>++</sup> | b <sup>*</sup>    | b <sup>*++</sup> | b <sup>0</sup>    | b <sup>0++</sup>  | Seq. | y                  | y <sup>++</sup> | y <sup>*</sup>     | y <sup>*++</sup>  | y <sup>0</sup>     | y <sup>0++</sup> | #  |
|----|-------------------|-----------------|-------------------|------------------|-------------------|-------------------|------|--------------------|-----------------|--------------------|-------------------|--------------------|------------------|----|
| 1  | 72.044390         | 36.525833       |                   |                  |                   |                   | A    |                    |                 |                    |                   |                    |                  | 11 |
| 2  | <b>185.128454</b> | 93.067865       |                   |                  |                   |                   | I    | <b>1495.772598</b> | 748.389937      | 1478.746049        | 739.876663        | 1477.762033        | 739.384655       | 10 |
| 3  | <b>242.149918</b> | 121.578597      |                   |                  |                   |                   | G    | <b>1382.688534</b> | 691.847905      | 1365.661985        | <b>683.334631</b> | <b>1364.677969</b> | 682.842623       | 9  |
| 4  | <b>405.213247</b> | 203.110261      |                   |                  |                   |                   | Y    | <b>1325.667070</b> | 663.337173      | <b>1308.640521</b> | 654.823899        | 1307.656505        | 654.331890       | 8  |
| 5  | <b>518.297311</b> | 259.652294      |                   |                  |                   |                   | L    | <b>1162.603741</b> | 581.805509      | <b>1145.577192</b> | 573.292234        | <b>1144.593176</b> | 572.800226       | 7  |
| 6  | 632.340238        | 316.673757      | <b>615.313689</b> | 308.160483       |                   |                   | N    | <b>1049.519677</b> | 525.263477      | <b>1032.493128</b> | 516.750202        | <b>1031.509112</b> | 516.258194       | 6  |
| 7  | <b>733.387917</b> | 367.197597      | <b>716.361368</b> | 358.684322       | 715.377352        | 358.192314        | T    | <b>935.476750</b>  | 468.242013      | 918.450201         | 459.728739        | <b>917.466185</b>  | 459.236731       | 5  |
| 8  | 790.409381        | 395.708329      | 773.382832        | 387.195054       | 772.398816        | 386.703046        | G    | <b>834.429071</b>  | 417.718174      | <b>817.402522</b>  | 409.204899        |                    |                  | 4  |
| 9  | 953.472710        | 477.239993      | <b>936.446161</b> | 468.726719       | <b>935.462145</b> | <b>468.234711</b> | Y    | <b>777.407607</b>  | 389.207442      | <b>760.381058</b>  | 380.694167        |                    |                  | 3  |
| 10 | 1392.698036       | 696.852656      | 1375.671487       | 688.339382       | 1374.687471       | 687.847374        | Q    | <b>614.344278</b>  | 307.675777      | <b>597.317729</b>  | 299.162503        |                    |                  | 2  |
| 11 |                   |                 |                   |                  |                   |                   | R    | <b>175.118952</b>  | 88.063114       | 158.092403         | 79.549839         |                    |                  | 1  |

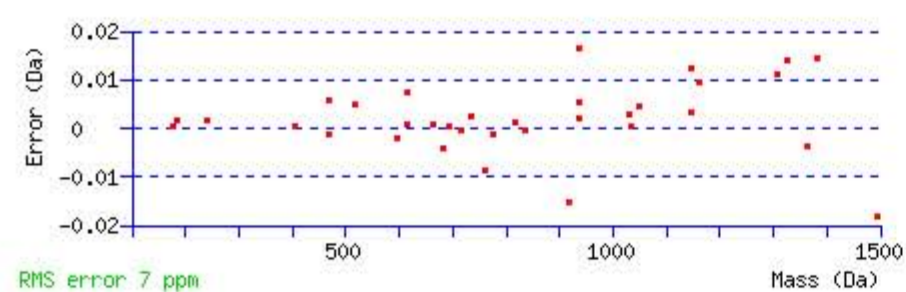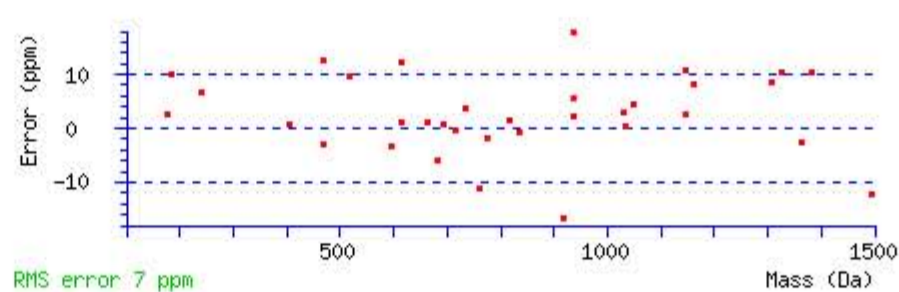

NCBI BLAST search of **AIGYLNTGYQR**

(Parameters: blastp, nr protein database, expect=20000, no filter, PAM30)

Other BLAST [web gateways](#)

All matches to this query

| Score | Mr(calc):   | Delta     | Sequence                       |
|-------|-------------|-----------|--------------------------------|
| 62.9  | 1565.802414 | 0.012334  | <a href="#">AIGYLNTGYQR</a>    |
| 9.1   | 1565.827393 | -0.012645 | <a href="#">VHPALNVSTRTSER</a> |
| 2.8   | 1565.816132 | -0.001384 | <a href="#">SQIEKEGLEHQLR</a>  |

Mascot: <http://www.matrixscience.com/>

Peptide View

MS/MS Fragmentation of **VTAAPQSVCALR**  
 Found in **A2MG\_HUMAN**, Alpha-2-macroglobulin OS=Homo sapiens GN=A2M PE=1 SV=3

Match to Query 37721: 1582.843088 from(792.428820,2+) rtinseconds(1791) index(23162)  
 Title: Locus:1.1.1.2766.12 File:"2013-07-02 CLN FXIII 180 min 1st F 2.wiff"  
 Data file C:\Program Files (x86)\Matrix Science\Mascot Daemon\mgf7 FXIII 180 min 1st\mascot\_daemon\_merge.mgf

Click mouse within plot area to zoom in by factor of two about that point  
 Or,  Plot from  to  Da   
 Label all possible matches  Label matches used for scoring

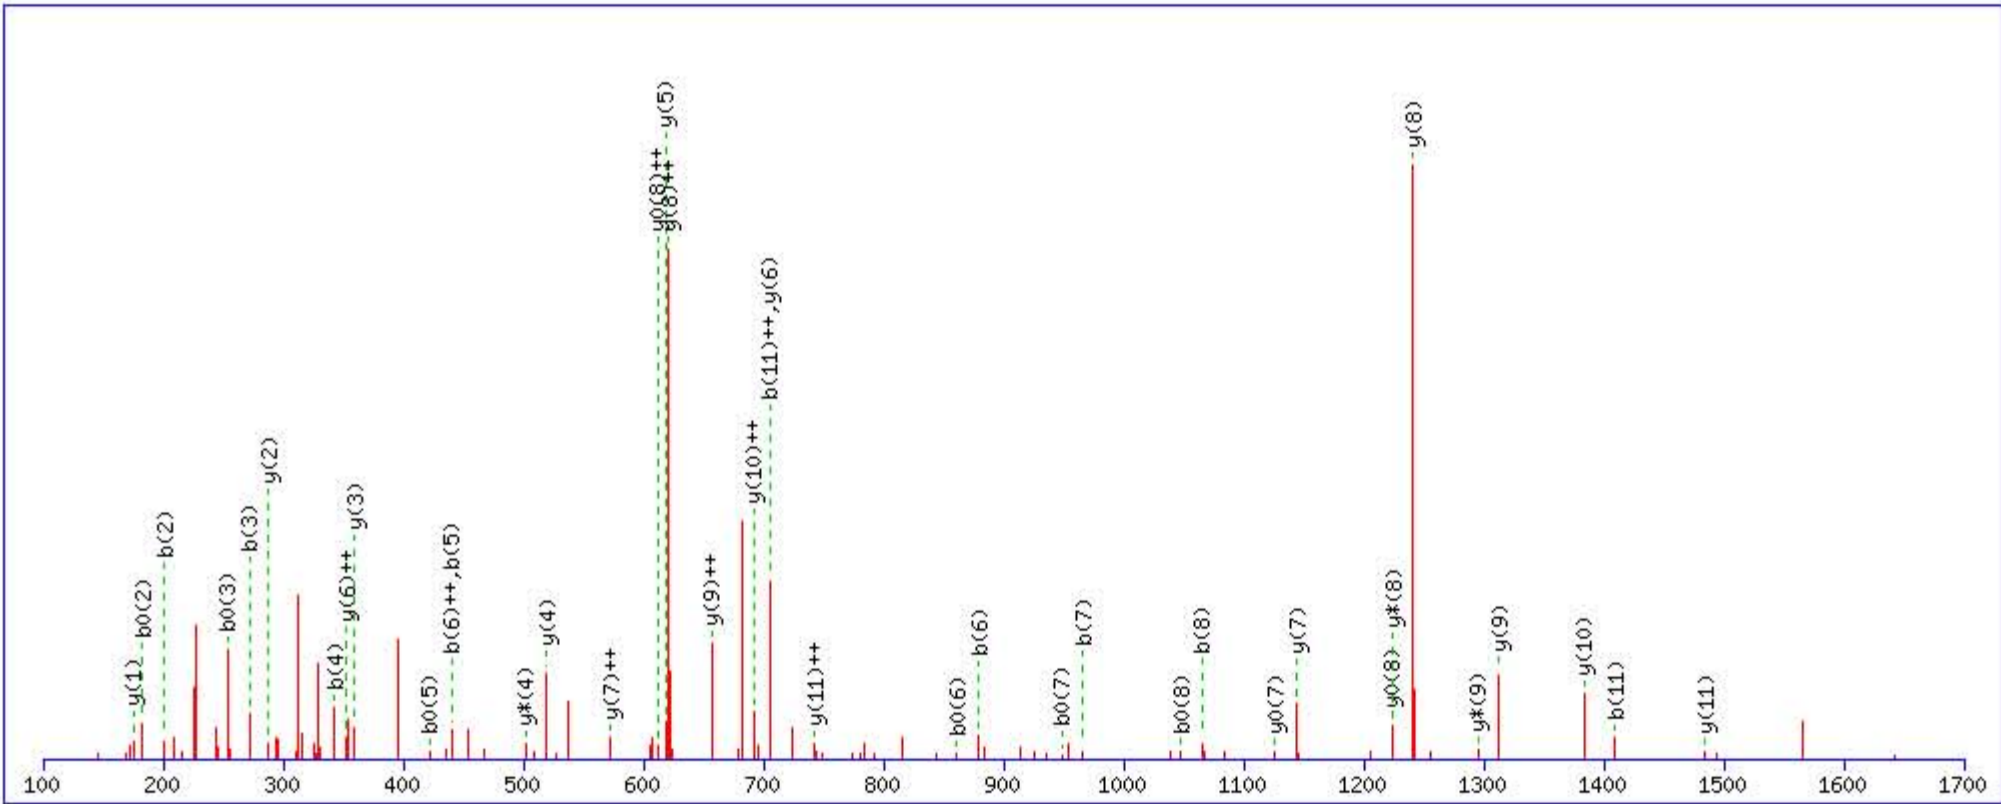

Monoisotopic mass of neutral peptide  $M_r(\text{calc})$ : 1582.832352  
 Fixed modifications: Carbamidomethyl (C) (apply to specified residues or termini only)  
 Variable modifications:  
 Q6 : Biotin:Thermo-21345 (Q)  
 Ions Score: 52 Expect: 9.8e-005  
 Matches : 39/110 fragment ions using 93 most intense peaks [\(help\)](#)

| #  | b                  | b <sup>++</sup>   | b <sup>*</sup> | b <sup>***</sup> | b <sup>0</sup>     | b <sup>0++</sup> | Seq. | y                  | y <sup>++</sup>   | y <sup>*</sup>     | y <sup>***</sup> | y <sup>0</sup>     | y <sup>0++</sup>  | #  |
|----|--------------------|-------------------|----------------|------------------|--------------------|------------------|------|--------------------|-------------------|--------------------|------------------|--------------------|-------------------|----|
| 1  | 100.075690         | 50.541483         |                |                  |                    |                  | V    |                    |                   |                    |                  |                    |                   | 12 |
| 2  | <b>201.123369</b>  | 101.065322        |                |                  | 183.112804         | 92.060040        | T    | <b>1484.771218</b> | <b>742.889247</b> | 1467.744669        | 734.375972       | 1466.760653        | 733.883964        | 11 |
| 3  | <b>272.160483</b>  | 136.583879        |                |                  | <b>254.149918</b>  | 127.578597       | A    | <b>1383.723539</b> | <b>692.365407</b> | 1366.696990        | 683.852133       | 1365.712974        | 683.360125        | 10 |
| 4  | <b>343.197597</b>  | 172.102437        |                |                  | 325.187032         | 163.097154       | A    | <b>1312.686425</b> | <b>656.846850</b> | <b>1295.659876</b> | 648.333576       | 1294.675860        | 647.841568        | 9  |
| 5  | <b>440.250361</b>  | 220.628819        |                |                  | <b>422.239796</b>  | 211.623536       | P    | <b>1241.649311</b> | <b>621.328293</b> | <b>1224.622762</b> | 612.815019       | <b>1223.638746</b> | <b>612.323011</b> | 8  |
| 6  | <b>879.475687</b>  | <b>440.241482</b> | 862.449138     | 431.728207       | <b>861.465122</b>  | 431.236199       | Q    | <b>1144.596547</b> | <b>572.801911</b> | 1127.569998        | 564.288637       | <b>1126.585982</b> | 563.796629        | 7  |
| 7  | <b>966.507715</b>  | 483.757496        | 949.481166     | 475.244221       | <b>948.497150</b>  | 474.752213       | S    | <b>705.371221</b>  | <b>353.189248</b> | 688.344672         | 344.675974       | 687.360656         | 344.183966        | 6  |
| 8  | <b>1065.576129</b> | 533.291703        | 1048.549580    | 524.778428       | <b>1047.565564</b> | 524.286420       | V    | <b>618.339193</b>  | 309.673234        | 601.312644         | 301.159960       |                    |                   | 5  |
| 9  | 1225.606778        | 613.307027        | 1208.580229    | 604.793753       | 1207.596213        | 604.301745       | C    | <b>519.270779</b>  | 260.139028        | <b>502.244230</b>  | 251.625753       |                    |                   | 4  |
| 10 | 1296.643892        | 648.825584        | 1279.617343    | 640.312310       | 1278.633327        | 639.820302       | A    | <b>359.240130</b>  | 180.123703        | 342.213581         | 171.610428       |                    |                   | 3  |
| 11 | <b>1409.727956</b> | <b>705.367616</b> | 1392.701407    | 696.854342       | 1391.717391        | 696.362333       | L    | <b>288.203016</b>  | 144.605146        | 271.176467         | 136.091871       |                    |                   | 2  |
| 12 |                    |                   |                |                  |                    |                  | R    | <b>175.118952</b>  | 88.063114         | 158.092403         | 79.549839        |                    |                   | 1  |

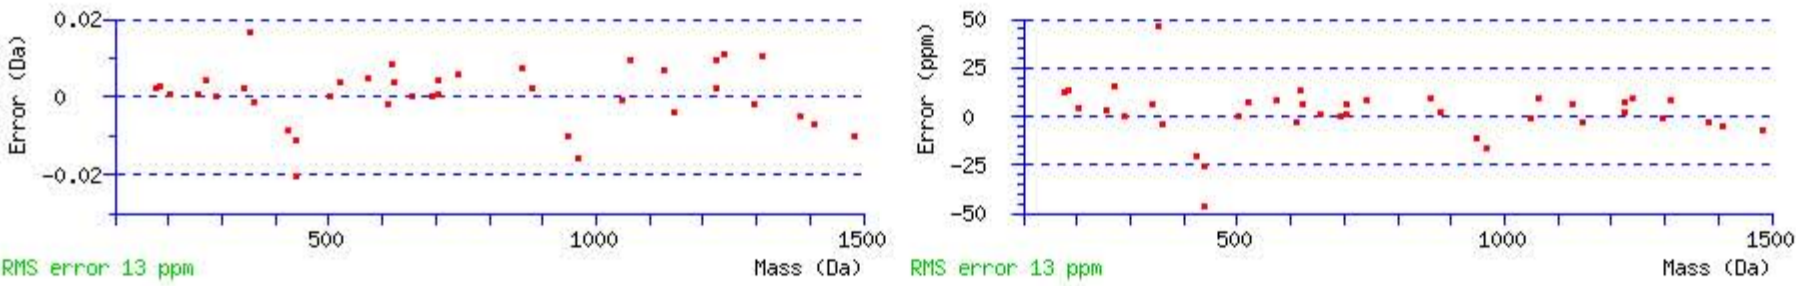

NCBI BLAST search of **VTAAPQSVCALR**  
 (Parameters: blastp, nr protein database, expect=20000, no filter, PAM30)  
 Other BLAST [web gateways](#)

All matches to this query

| Score | $M_r(\text{calc})$ | Delta     | Sequence                          |
|-------|--------------------|-----------|-----------------------------------|
| 52.4  | 1582.832352        | 0.010736  | <a href="#">VTAAPQSVCALR</a>      |
| 9.1   | 1582.865356        | -0.022268 | <a href="#">QPAPGPVEKPPR</a>      |
| 5.7   | 1582.821579        | 0.021509  | <a href="#">IGGHGPTLKAYQEGR</a>   |
| 1.5   | 1582.821564        | 0.021524  | <a href="#">LSKAVATWHANTER</a>    |
| 1.3   | 1582.850128        | -0.007040 | <a href="#">GLTPTGMLPSGVLAGGR</a> |
| 1.1   | 1582.853912        | -0.010824 | <a href="#">RKPASGGLAASSAPAR</a>  |
| 0.2   | 1582.836868        | 0.006220  | <a href="#">LHTVDGHWWAPVPR</a>    |

# Mascot Search Results

## Peptide View

### MS/MS Fragmentation of **FSGQLNSHGCFYQQVK**

Found in **A2MG\_HUMAN**, Alpha-2-macroglobulin OS=Homo sapiens GN=A2M PE=1 SV=3

Match to Query 55593: 2210.056812 from(737.692880,3+) rtinseconds(1852) index(23581)

Title: Locus:1.1.1.2787.21 File:"2013-07-02 CLN FXIII 180 min 1st F 2.wiff"

Data file C:\Program Files (x86)\Matrix Science\Mascot Daemon\mgf\7 FXIII 180 min 1st\mascot\_daemon\_merge.mgf

Click mouse within plot area to zoom in by factor of two about that point

Or, Plot from  to  Da

Label all possible matches  Label matches used for scoring

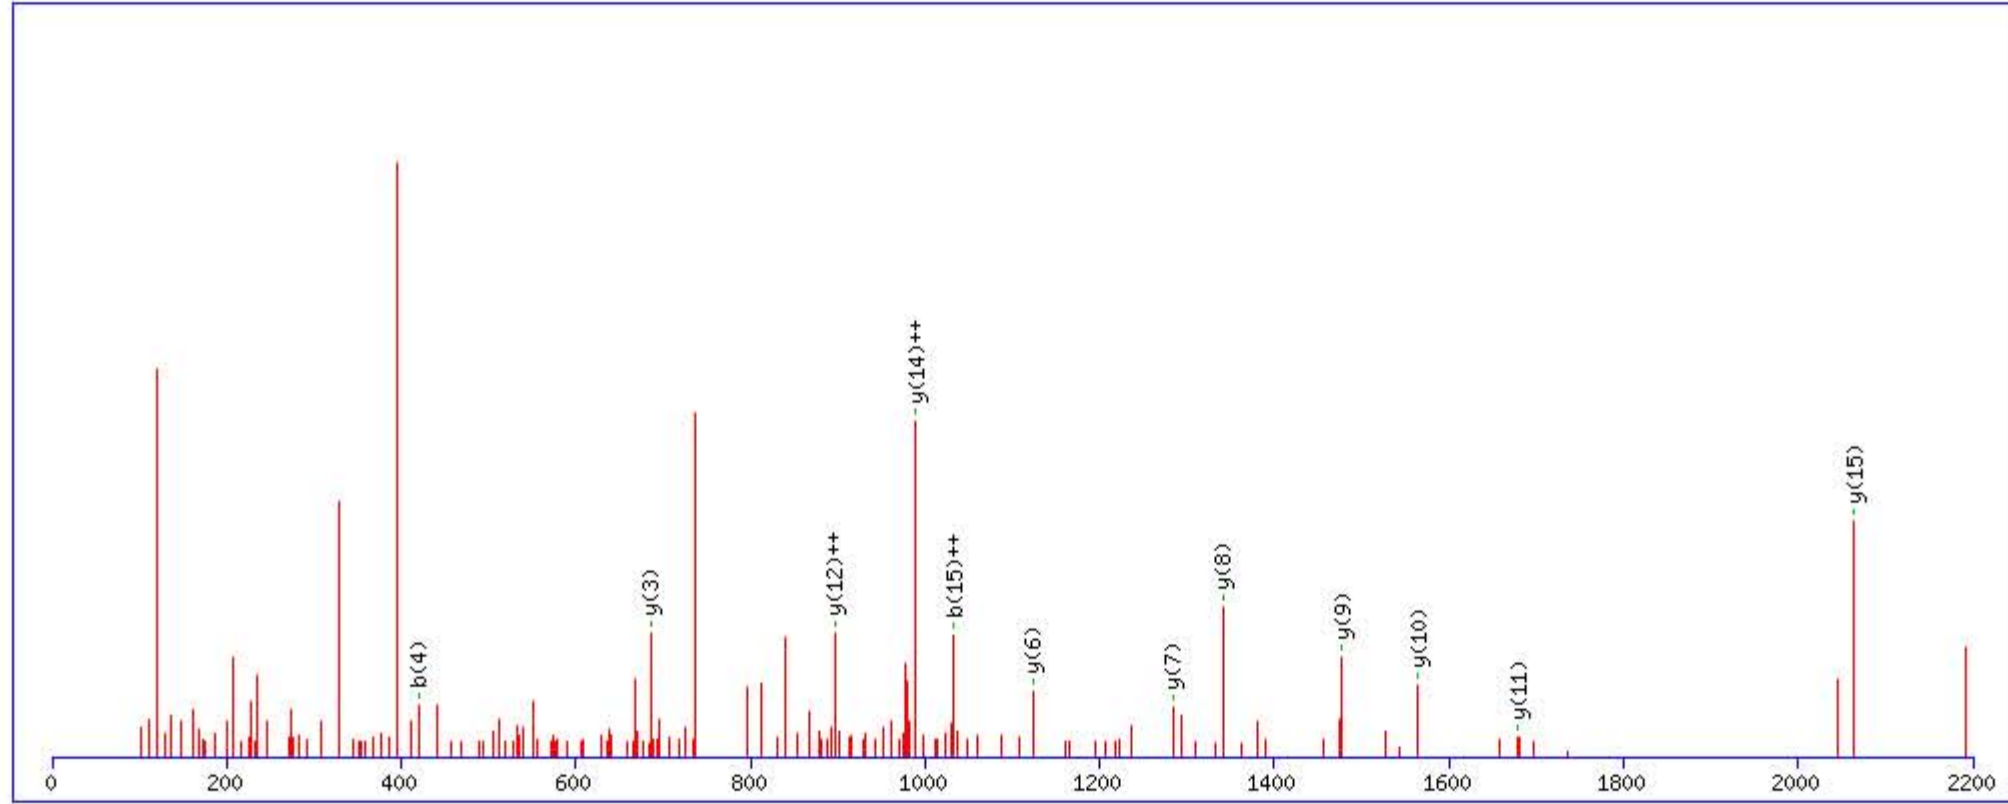

Monoisotopic mass of neutral peptide  $M_r(\text{calc})$ : 2210.040131

Fixed modifications: Carbamidomethyl (C) (apply to specified residues or termini only)

Variable modifications:

Q14 : Biotin:Thermo-21345 (Q)

Ions Score: 42 Expect: 0.00023

Matches : 12/154 fragment ions using 19 most intense peaks [\(help\)](#)

| #  | b                 | b <sup>++</sup>    | b <sup>*</sup> | b <sup>*++</sup> | b <sup>0</sup> | b <sup>0++</sup> | Seq.     | y                  | y <sup>++</sup>   | y <sup>*</sup> | y <sup>*++</sup> | y <sup>0</sup> | y <sup>0++</sup> | #  |
|----|-------------------|--------------------|----------------|------------------|----------------|------------------|----------|--------------------|-------------------|----------------|------------------|----------------|------------------|----|
| 1  | 148.075690        | 74.541483          |                |                  |                |                  | <b>F</b> |                    |                   |                |                  |                |                  | 16 |
| 2  | 235.107718        | 118.057497         |                |                  | 217.097153     | 109.052214       | <b>S</b> | <b>2063.978979</b> | 1032.493127       | 2046.952430    | 1023.979853      | 2045.968414    | 1023.487845      | 15 |
| 3  | 292.129182        | 146.568229         |                |                  | 274.118617     | 137.562946       | <b>G</b> | 1976.946951        | <b>988.977114</b> | 1959.920402    | 980.463839       | 1958.936386    | 979.971831       | 14 |
| 4  | <b>420.187760</b> | 210.597518         | 403.161211     | 202.084243       | 402.177195     | 201.592235       | <b>Q</b> | 1919.925487        | 960.466382        | 1902.898938    | 951.953107       | 1901.914922    | 951.461099       | 13 |
| 5  | 533.271824        | 267.139550         | 516.245275     | 258.626276       | 515.261259     | 258.134268       | <b>L</b> | 1791.866909        | <b>896.437093</b> | 1774.840360    | 887.923818       | 1773.856344    | 887.431810       | 12 |
| 6  | 647.314751        | 324.161014         | 630.288202     | 315.647739       | 629.304186     | 315.155731       | <b>N</b> | <b>1678.782845</b> | 839.895061        | 1661.756296    | 831.381786       | 1660.772280    | 830.889778       | 11 |
| 7  | 734.346779        | 367.677028         | 717.320230     | 359.163753       | 716.336214     | 358.671745       | <b>S</b> | <b>1564.739918</b> | 782.873597        | 1547.713369    | 774.360323       | 1546.729353    | 773.868315       | 10 |
| 8  | 871.405691        | 436.206483         | 854.379142     | 427.693209       | 853.395126     | 427.201201       | <b>H</b> | <b>1477.707890</b> | 739.357583        | 1460.681341    | 730.844309       |                |                  | 9  |
| 9  | 928.427155        | 464.717216         | 911.400606     | 456.203941       | 910.416590     | 455.711933       | <b>G</b> | <b>1340.648978</b> | 670.828127        | 1323.622429    | 662.314853       |                |                  | 8  |
| 10 | 1088.457804       | 544.732540         | 1071.431255    | 536.219266       | 1070.447239    | 535.727257       | <b>C</b> | <b>1283.627514</b> | 642.317395        | 1266.600965    | 633.804121       |                |                  | 7  |
| 11 | 1235.526218       | 618.266747         | 1218.499669    | 609.753473       | 1217.515653    | 609.261464       | <b>F</b> | <b>1123.596865</b> | 562.302071        | 1106.570316    | 553.788796       |                |                  | 6  |
| 12 | 1398.589547       | 699.798412         | 1381.562998    | 691.285137       | 1380.578982    | 690.793129       | <b>Y</b> | 976.528451         | 488.767864        | 959.501902     | 480.254589       |                |                  | 5  |
| 13 | 1526.648125       | 763.827700         | 1509.621576    | 755.314426       | 1508.637560    | 754.822418       | <b>Q</b> | 813.465122         | 407.236199        | 796.438573     | 398.722925       |                |                  | 4  |
| 14 | 1965.873451       | 983.440364         | 1948.846902    | 974.927089       | 1947.862886    | 974.435081       | <b>Q</b> | <b>685.406544</b>  | 343.206910        | 668.379995     | 334.693636       |                |                  | 3  |
| 15 | 2064.941865       | <b>1032.974570</b> | 2047.915316    | 1024.461296      | 2046.931300    | 1023.969288      | <b>V</b> | 246.181218         | 123.594247        | 229.154669     | 115.080972       |                |                  | 2  |
| 16 |                   |                    |                |                  |                |                  | <b>K</b> | 147.112804         | 74.060040         | 130.086255     | 65.546765        |                |                  | 1  |

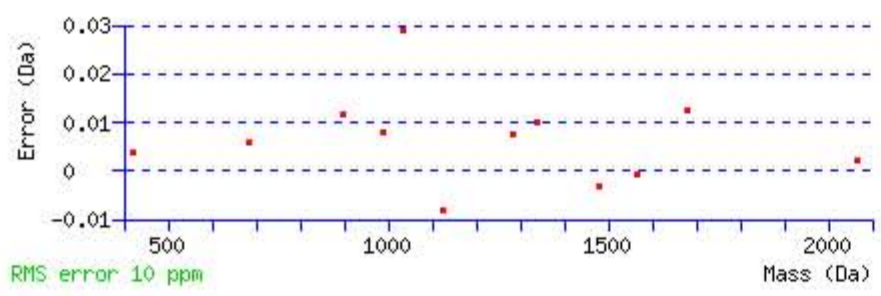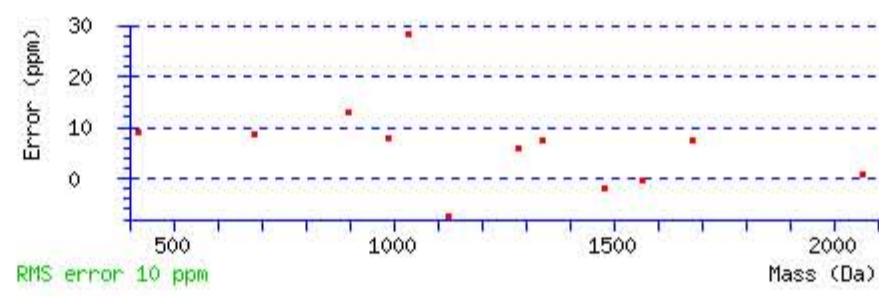

NCBI BLAST search of **FSGQLNSHGCFYQQVK**

(Parameters: blastp, nr protein database, expect=20000, no filter, PAM30)

Other BLAST [web gateways](#)

## All matches to this query

| Score | $M_r(\text{calc})$ : | Delta     | Sequence                         |
|-------|----------------------|-----------|----------------------------------|
| 42.4  | 2210.040131          | 0.016681  | <a href="#">FSGQLNSHGCFYQQVK</a> |
| 31.1  | 2210.040131          | 0.016681  | <a href="#">FSGQLNSHGCFYQQVK</a> |
| 3.4   | 2210.058075          | -0.001263 | <a href="#">FSHLSRNMTMQRTMK</a>  |
| 3.4   | 2210.058075          | -0.001263 | <a href="#">FSHLSRNMTMQRTMK</a>  |
| 0.0   | 2210.045486          | 0.011326  | <a href="#">MSMKEVDEQMLAIQSK</a> |



# MASCOT Search Results

## Peptide View

MS/MS Fragmentation of **FSGQLNSHGCFYQQVK**

Found in **A2MG\_HUMAN**, Alpha-2-macroglobulin OS=Homo sapiens GN=A2M PE=1 SV=3

Match to Query 55597: 2210.057082 from(737.692970,3+) rtinseconds(1826) index(23382)

Title: Locus:1.1.1.2778.14 File:"2013-07-02 CLN FXIII 180 min 1st F 2.wiff"

Data file C:\Program Files (x86)\Matrix Science\Mascot Daemon\mgf\7 FXIII 180 min 1st\mascot\_daemon\_merge.mgf

Click mouse within plot area to zoom in by factor of two about that point

Or, Plot from  to  Da

Label all possible matches  Label matches used for scoring

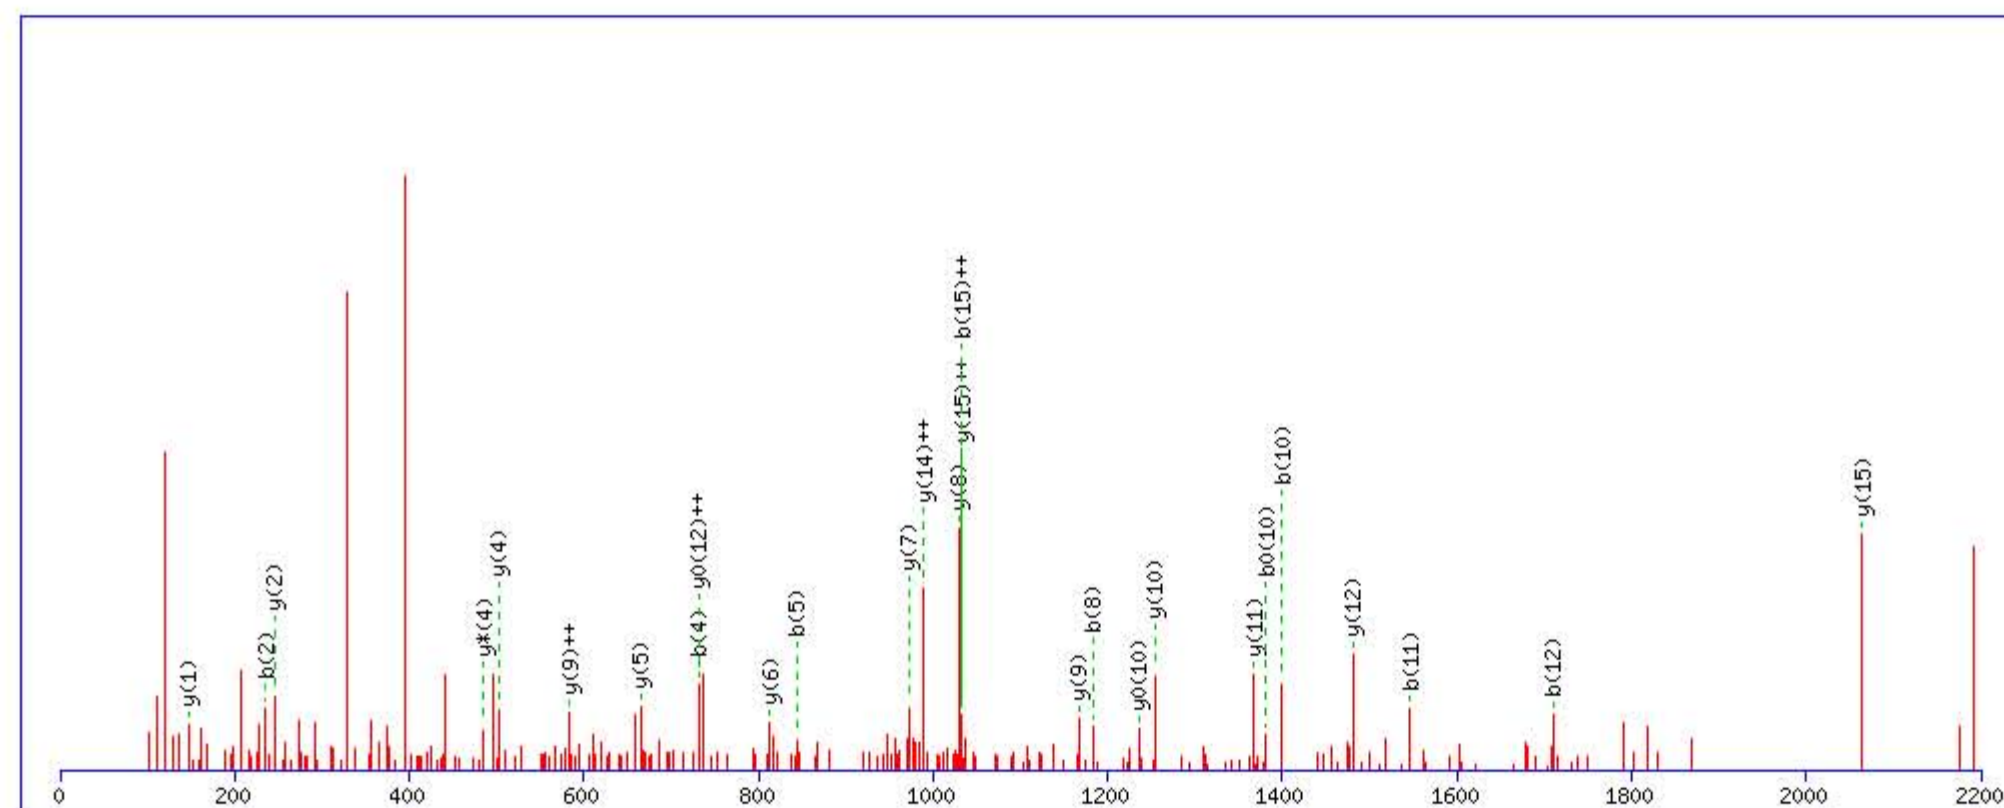

Monoisotopic mass of neutral peptide Mr(calc): 2210.040131

Fixed modifications: Carbamidomethyl (C) (apply to specified residues or termini only)

Variable modifications:

Q4 : Biotin:Thermo-21345 (Q)

Ions Score: 63 Expect: 1.3e-006

Matches : 27/154 fragment ions using 57 most intense peaks [\(help\)](#)

| #  | b                  | b <sup>++</sup>    | b <sup>*</sup> | b <sup>***</sup> | b <sup>0</sup>     | b <sup>0++</sup> | Seq. | y                  | y <sup>++</sup>    | y <sup>*</sup>    | y <sup>***</sup> | y <sup>0</sup>     | y <sup>0++</sup>  | #  |
|----|--------------------|--------------------|----------------|------------------|--------------------|------------------|------|--------------------|--------------------|-------------------|------------------|--------------------|-------------------|----|
| 1  | 148.075690         | 74.541483          |                |                  |                    |                  | F    |                    |                    |                   |                  |                    |                   | 16 |
| 2  | <b>235.107718</b>  | 118.057497         |                |                  | 217.097153         | 109.052214       | S    | <b>2063.978979</b> | <b>1032.493127</b> | 2046.952430       | 1023.979853      | 2045.968414        | 1023.487845       | 15 |
| 3  | 292.129182         | 146.568229         |                |                  | 274.118617         | 137.562946       | G    | 1976.946951        | <b>988.977114</b>  | 1959.920402       | 980.463839       | 1958.936386        | 979.971831        | 14 |
| 4  | <b>731.354508</b>  | 366.180892         | 714.327959     | 357.667618       | 713.343943         | 357.175610       | Q    | 1919.925487        | 960.466382         | 1902.898938       | 951.953107       | 1901.914922        | 951.461099        | 13 |
| 5  | <b>844.438572</b>  | 422.722924         | 827.412023     | 414.209650       | 826.428007         | 413.717642       | L    | <b>1480.700161</b> | 740.853719         | 1463.673612       | 732.340444       | 1462.689596        | <b>731.848436</b> | 12 |
| 6  | 958.481499         | 479.744388         | 941.454950     | 471.231113       | 940.470934         | 470.739105       | N    | <b>1367.616097</b> | 684.311687         | 1350.589548       | 675.798412       | 1349.605532        | 675.306404        | 11 |
| 7  | 1045.513527        | 523.260402         | 1028.486978    | 514.747127       | 1027.502962        | 514.255119       | S    | <b>1253.573170</b> | 627.290223         | 1236.546621       | 618.776949       | <b>1235.562605</b> | 618.284941        | 10 |
| 8  | <b>1182.572439</b> | 591.789858         | 1165.545890    | 583.276583       | 1164.561874        | 582.784575       | H    | <b>1166.541142</b> | <b>583.774209</b>  | 1149.514593       | 575.260935       |                    |                   | 9  |
| 9  | 1239.593903        | 620.300590         | 1222.567354    | 611.787315       | 1221.583338        | 611.295307       | G    | <b>1029.482230</b> | 515.244753         | 1012.455681       | 506.731479       |                    |                   | 8  |
| 10 | <b>1399.624552</b> | 700.315914         | 1382.598003    | 691.802640       | <b>1381.613987</b> | 691.310632       | C    | <b>972.460766</b>  | 486.734021         | 955.434217        | 478.220747       |                    |                   | 7  |
| 11 | <b>1546.692966</b> | 773.850121         | 1529.666417    | 765.336847       | 1528.682401        | 764.844839       | F    | <b>812.430117</b>  | 406.718697         | 795.403568        | 398.205422       |                    |                   | 6  |
| 12 | <b>1709.756295</b> | 855.381786         | 1692.729746    | 846.868511       | 1691.745730        | 846.376503       | Y    | <b>665.361703</b>  | 333.184490         | 648.335154        | 324.671215       |                    |                   | 5  |
| 13 | 1837.814873        | 919.411075         | 1820.788324    | 910.897800       | 1819.804308        | 910.405792       | Q    | <b>502.298374</b>  | 251.652825         | <b>485.271825</b> | 243.139550       |                    |                   | 4  |
| 14 | 1965.873451        | 983.440364         | 1948.846902    | 974.927089       | 1947.862886        | 974.435081       | Q    | 374.239796         | 187.623536         | 357.213247        | 179.110261       |                    |                   | 3  |
| 15 | 2064.941865        | <b>1032.974570</b> | 2047.915316    | 1024.461296      | 2046.931300        | 1023.969288      | V    | <b>246.181218</b>  | 123.594247         | 229.154669        | 115.080972       |                    |                   | 2  |
| 16 |                    |                    |                |                  |                    |                  | K    | <b>147.112804</b>  | 74.060040          | 130.086255        | 65.546765        |                    |                   | 1  |

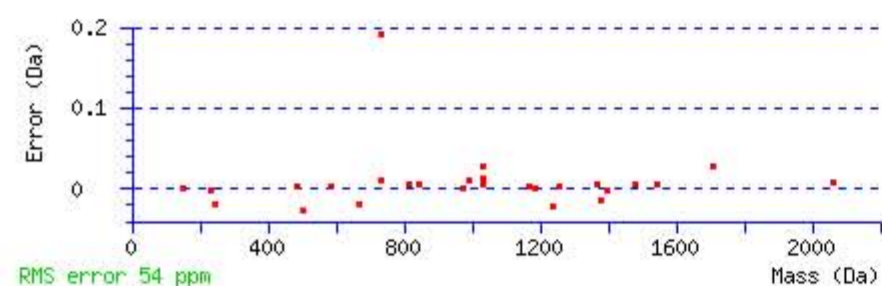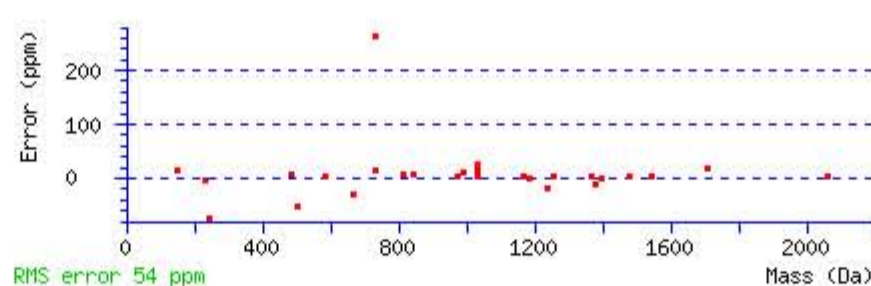

NCBI BLAST search of **FSGQLNSHGCFYQQVK**

(Parameters: blastp, nr protein database, expect=20000, no filter, PAM30)

Other BLAST [web gateways](#)

All matches to this query

| Score | Mr(calc):   | Delta    | Sequence                           |
|-------|-------------|----------|------------------------------------|
| 62.7  | 2210.040131 | 0.016951 | <a href="#">FSGQLNSHGCFYQQVK</a>   |
| 4.3   | 2210.040131 | 0.016951 | <a href="#">FSGQLNSHGCFYQQVK</a>   |
| 0.1   | 2210.037872 | 0.019210 | <a href="#">RDKPSVEPVEEYDYEDLK</a> |

**Peptide View**

MS/MS Fragmentation of **LLLQVSLPELPGEYSMK**  
 Found in **A2MG\_HUMAN**, Alpha-2-macroglobulin OS=Homo sapiens GN=A2M PE=1 SV=3

Match to Query 59167: 2355.257148 from(1178.635850,2+) rtinseconds(2815) index(30158)  
 Title: Locus:1.1.1.3121.23 File:"2013-07-02 CLN FXIII 180 min 1st F 2.wiff"  
 Data file C:\Program Files (x86)\Matrix Science\Mascot Daemon\mgf7 FXIII 180 min 1st\mascot\_daemon\_merge.mgf

Click mouse within plot area to zoom in by factor of two about that point

Or, Plot from 0 to 2400 Da Full range

Label all possible matches  Label matches used for scoring

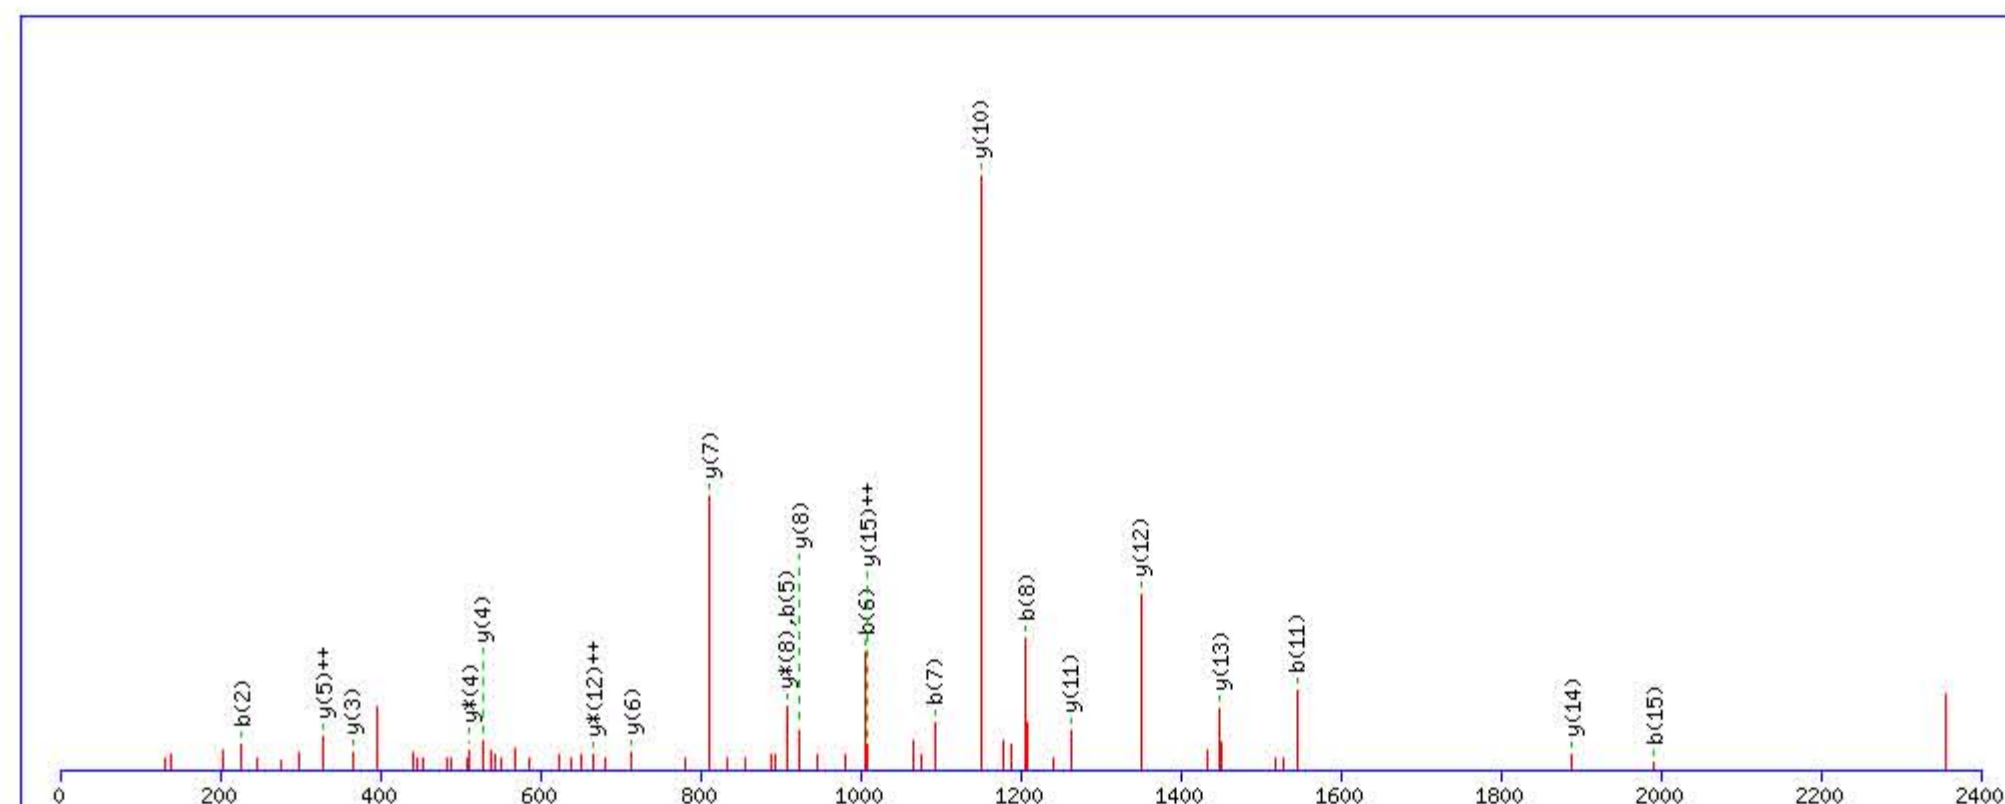

Monoisotopic mass of neutral peptide  $M_r(\text{calc})$ : 2355.258179  
 Fixed modifications: Carbamidomethyl (C) (apply to specified residues or termini only)  
 Variable modifications:  
 Q5 : Biotin:Thermo-21345 (Q)  
 Ions Score: 68 Expect: 6.6e-007  
 Matches : 22/182 fragment ions using 31 most intense peaks [\(help\)](#)

| #  | b                  | b <sup>++</sup> | b <sup>*</sup> | b <sup>*++</sup> | b <sup>0</sup> | b <sup>0++</sup> | Seq. | y                  | y <sup>++</sup>    | y <sup>*</sup>    | y <sup>*++</sup>  | y <sup>0</sup> | y <sup>0++</sup> | #  |
|----|--------------------|-----------------|----------------|------------------|----------------|------------------|------|--------------------|--------------------|-------------------|-------------------|----------------|------------------|----|
| 1  | 114.091340         | 57.549308       |                |                  |                |                  | L    |                    |                    |                   |                   |                |                  | 18 |
| 2  | <b>227.175404</b>  | 114.091340      |                |                  |                |                  | L    | 2243.181426        | 1122.094351        | 2226.154877       | 1113.581076       | 2225.170861    | 1113.089068      | 17 |
| 3  | 340.259468         | 170.633372      |                |                  |                |                  | L    | 2130.097362        | 1065.552319        | 2113.070813       | 1057.039044       | 2112.086797    | 1056.547036      | 16 |
| 4  | 468.318046         | 234.662661      | 451.291497     | 226.149386       |                |                  | Q    | 2017.013298        | <b>1009.010287</b> | 1999.986749       | 1000.497013       | 1999.002733    | 1000.005005      | 15 |
| 5  | <b>907.543372</b>  | 454.275324      | 890.516823     | 445.762049       |                |                  | Q    | <b>1888.954720</b> | 944.980998         | 1871.928171       | 936.467724        | 1870.944155    | 935.975715       | 14 |
| 6  | <b>1006.611786</b> | 503.809531      | 989.585237     | 495.296256       |                |                  | V    | <b>1449.729394</b> | 725.368335         | 1432.702845       | 716.855061        | 1431.718829    | 716.363053       | 13 |
| 7  | <b>1093.643814</b> | 547.325545      | 1076.617265    | 538.812271       | 1075.633249    | 538.320263       | S    | <b>1350.660980</b> | 675.834128         | 1333.634431       | <b>667.320854</b> | 1332.650415    | 666.828846       | 12 |
| 8  | <b>1206.727878</b> | 603.867577      | 1189.701329    | 595.354303       | 1188.717313    | 594.862294       | L    | <b>1263.628952</b> | 632.318114         | 1246.602403       | 623.804840        | 1245.618387    | 623.312832       | 11 |
| 9  | 1303.780642        | 652.393959      | 1286.754093    | 643.880685       | 1285.770077    | 643.388676       | P    | <b>1150.544888</b> | 575.776082         | 1133.518339       | 567.262808        | 1132.534323    | 566.770800       | 10 |
| 10 | 1432.823235        | 716.915256      | 1415.796686    | 708.401981       | 1414.812670    | 707.909973       | E    | 1053.492124        | 527.249700         | 1036.465575       | 518.736426        | 1035.481559    | 518.244418       | 9  |
| 11 | <b>1545.907299</b> | 773.457288      | 1528.880750    | 764.944013       | 1527.896734    | 764.452005       | L    | <b>924.449531</b>  | 462.728404         | <b>907.422982</b> | 454.215129        | 906.438966     | 453.723121       | 8  |
| 12 | 1642.960063        | 821.983670      | 1625.933514    | 813.470395       | 1624.949498    | 812.978387       | P    | <b>811.365467</b>  | 406.186372         | 794.338918        | 397.673097        | 793.354902     | 397.181089       | 7  |
| 13 | 1699.981527        | 850.494401      | 1682.954978    | 841.981127       | 1681.970962    | 841.489119       | G    | <b>714.312703</b>  | 357.659990         | 697.286154        | 349.146715        | 696.302138     | 348.654707       | 6  |
| 14 | 1829.024120        | 915.015698      | 1811.997571    | 906.502423       | 1811.013555    | 906.010415       | E    | 657.291239         | <b>329.149258</b>  | 640.264690        | 320.635983        | 639.280674     | 320.143975       | 5  |
| 15 | <b>1992.087449</b> | 996.547362      | 1975.060900    | 988.034088       | 1974.076884    | 987.542080       | Y    | <b>528.248646</b>  | 264.627961         | <b>511.222097</b> | 256.114687        | 510.238081     | 255.622679       | 4  |
| 16 | 2079.119477        | 1040.063376     | 2062.092928    | 1031.550102      | 2061.108912    | 1031.058094      | S    | <b>365.185317</b>  | 183.096297         | 348.158768        | 174.583022        | 347.174752     | 174.091014       | 3  |
| 17 | 2210.159962        | 1105.583619     | 2193.133413    | 1097.070344      | 2192.149397    | 1096.578336      | M    | 278.153289         | 139.580282         | 261.126740        | 131.067008        |                |                  | 2  |
| 18 |                    |                 |                |                  |                |                  | K    | 147.112804         | 74.060040          | 130.086255        | 65.546765         |                |                  | 1  |

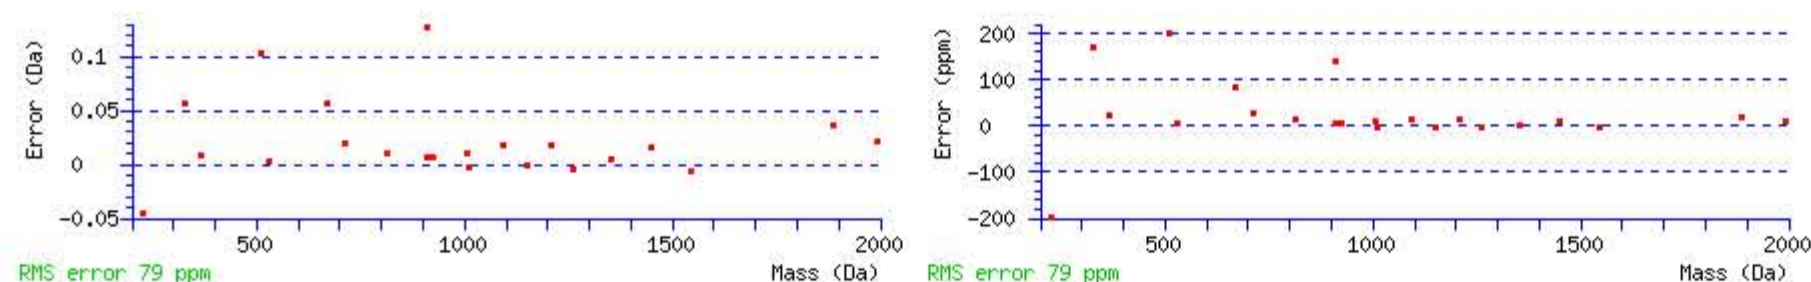

NCBI BLAST search of **LLLQVSLPELPGEYSMK**  
 (Parameters: blastp, nr protein database, expect=20000, no filter, PAM30)  
 Other BLAST [web gateways](#)

**All matches to this query**

| Score | $M_r(\text{calc})$ : | Delta     | Sequence                           |
|-------|----------------------|-----------|------------------------------------|
| 67.7  | 2355.258179          | -0.001031 | <a href="#">LLLQVSLPELPGEYSMK</a>  |
| 58.1  | 2355.258179          | -0.001031 | <a href="#">LLLQVSLPELPGEYSMK</a>  |
| 1.7   | 2355.288498          | -0.031350 | <a href="#">LIQERALLNFTWKR</a>     |
| 1.7   | 2355.288498          | -0.031350 | <a href="#">LIQERALLNFTWKR</a>     |
| 1.2   | 2355.229019          | 0.028129  | <a href="#">QKMELEQNVLVQQQSK</a>   |
| 0.7   | 2355.248795          | 0.008353  | <a href="#">FYEQVVQAIQRHIFDVK</a>  |
| 0.3   | 2355.259354          | -0.002206 | <a href="#">SQPRASGPPRSIQPVSPR</a> |

# MASCOT SCIENCE Mascot Search Results

## Peptide View

MS/MS Fragmentation of **LLLQQVSLPELPGEYSMK**

Found in **A2MG\_HUMAN**, Alpha-2-macroglobulin OS=Homo sapiens GN=A2M PE=1 SV=3

Match to Query 59174: 2355.285072 from(786.102300,3+) rtinseconds(2838) index(30349)  
 Title: Locus:1.1.1.3129.14 File:"2013-07-02 CLN FXIII 180 min 1st F 2.wiff"  
 Data file C:\Program Files (x86)\Matrix Science\Mascot Daemon\mgf7 FXIII 180 min 1st\mascot\_daemon\_merge.mgf

Click mouse within plot area to zoom in by factor of two about that point  
 Or, Plot from  to  Da   
 Label all possible matches  Label matches used for scoring

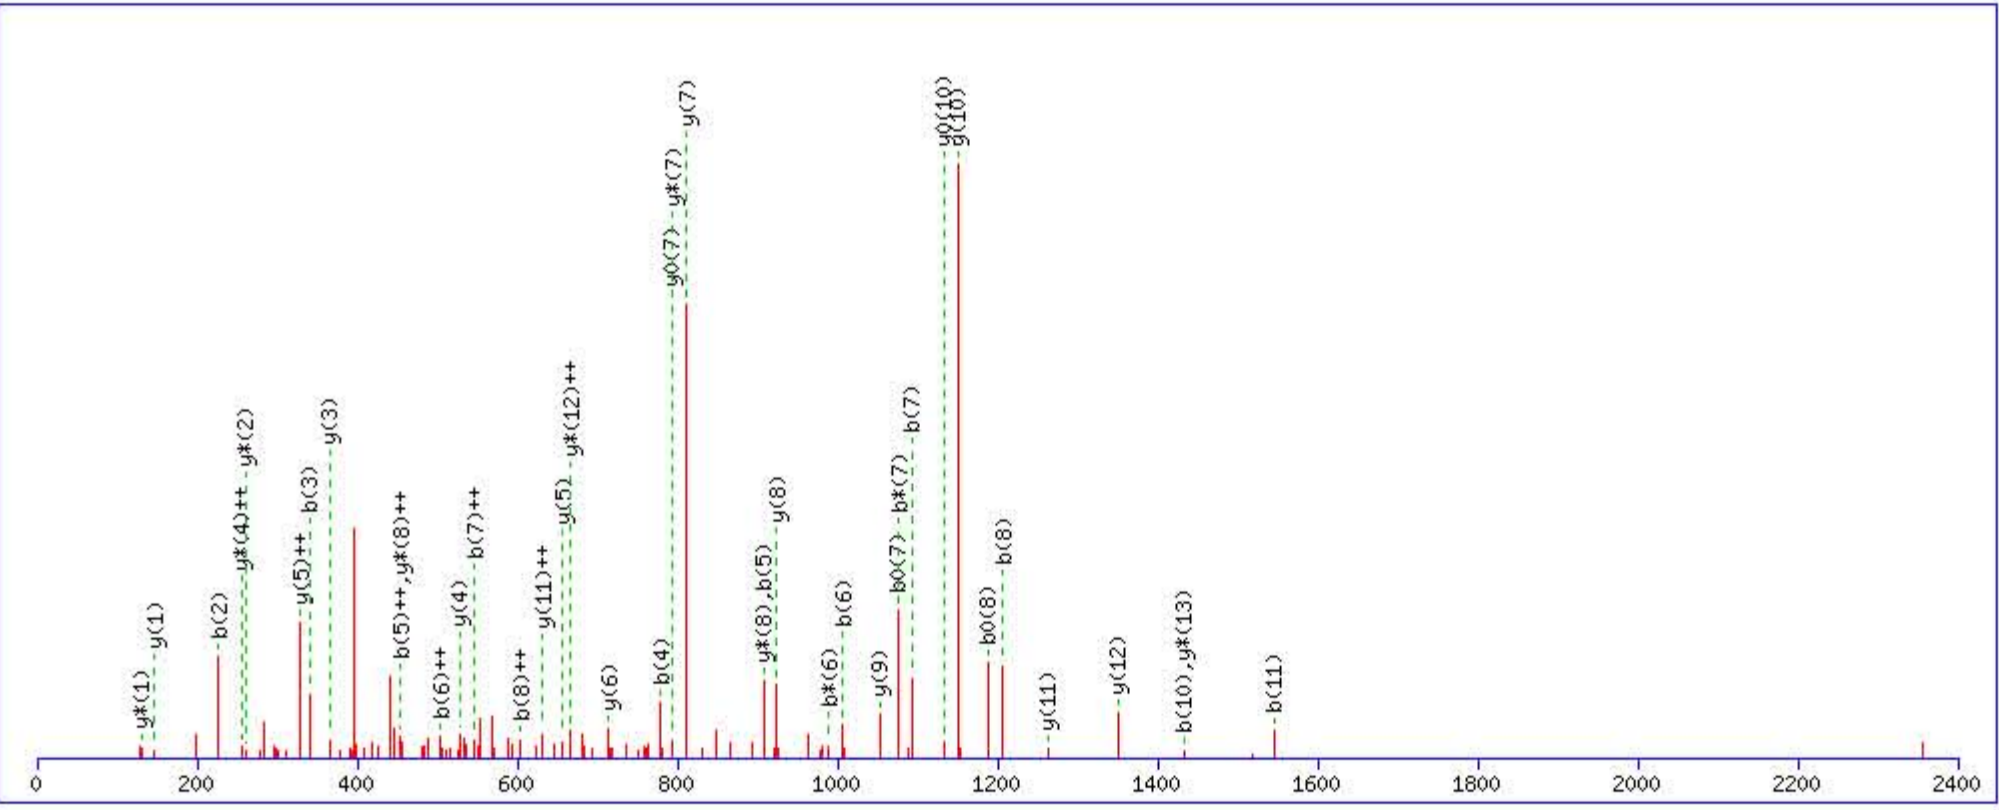

Monoisotopic mass of neutral peptide Mr(calc): 2355.258179

Fixed modifications: Carbamidomethyl (C) (apply to specified residues or termini only)

Variable modifications:  
 Q4 : Biotin:Thermo-21345 (Q)

Ions Score: 64 Expect: 5e-006

Matches : 40/182 fragment ions using 69 most intense peaks [\(help\)](#)

| #  | b                  | b <sup>++</sup>   | b*                 | b <sup>*++</sup> | b <sup>0</sup>     | b <sup>0++</sup> | Seq. | y                  | y <sup>++</sup>   | y*                 | y <sup>*++</sup>  | y <sup>0</sup>     | y <sup>0++</sup> | #  |
|----|--------------------|-------------------|--------------------|------------------|--------------------|------------------|------|--------------------|-------------------|--------------------|-------------------|--------------------|------------------|----|
| 1  | 114.091340         | 57.549308         |                    |                  |                    |                  | L    |                    |                   |                    |                   |                    |                  | 18 |
| 2  | <b>227.175404</b>  | 114.091340        |                    |                  |                    |                  | L    | 2243.181426        | 1122.094351       | 2226.154877        | 1113.581076       | 2225.170861        | 1113.089068      | 17 |
| 3  | <b>340.259468</b>  | 170.633372        |                    |                  |                    |                  | L    | 2130.097362        | 1065.552319       | 2113.070813        | 1057.039044       | 2112.086797        | 1056.547036      | 16 |
| 4  | <b>779.484794</b>  | 390.246035        | 762.458245         | 381.732760       |                    |                  | Q    | 2017.013298        | 1009.010287       | 1999.986749        | 1000.497013       | 1999.002733        | 1000.005005      | 15 |
| 5  | <b>907.543372</b>  | <b>454.275324</b> | 890.516823         | 445.762049       |                    |                  | Q    | 1577.787972        | 789.397624        | 1560.761423        | 780.884350        | 1559.777407        | 780.392342       | 14 |
| 6  | <b>1006.611786</b> | <b>503.809531</b> | <b>989.585237</b>  | 495.296256       |                    |                  | V    | 1449.729394        | 725.368335        | <b>1432.702845</b> | 716.855061        | 1431.718829        | 716.363053       | 13 |
| 7  | <b>1093.643814</b> | <b>547.325545</b> | <b>1076.617265</b> | 538.812271       | <b>1075.633249</b> | 538.320263       | S    | <b>1350.660980</b> | 675.834128        | 1333.634431        | <b>667.320854</b> | 1332.650415        | 666.828846       | 12 |
| 8  | <b>1206.727878</b> | <b>603.867577</b> | 1189.701329        | 595.354303       | <b>1188.717313</b> | 594.862294       | L    | <b>1263.628952</b> | <b>632.318114</b> | 1246.602403        | 623.804840        | 1245.618387        | 623.312832       | 11 |
| 9  | 1303.780642        | 652.393959        | 1286.754093        | 643.880685       | 1285.770077        | 643.388676       | P    | <b>1150.544888</b> | 575.776082        | 1133.518339        | 567.262808        | <b>1132.534323</b> | 566.770800       | 10 |
| 10 | <b>1432.823235</b> | 716.915256        | 1415.796686        | 708.401981       | 1414.812670        | 707.909973       | E    | <b>1053.492124</b> | 527.249700        | 1036.465575        | 518.736426        | 1035.481559        | 518.244418       | 9  |
| 11 | <b>1545.907299</b> | 773.457288        | 1528.880750        | 764.944013       | 1527.896734        | 764.452005       | L    | <b>924.449531</b>  | 462.728404        | <b>907.422982</b>  | <b>454.215129</b> | 906.438966         | 453.723121       | 8  |
| 12 | 1642.960063        | 821.983670        | 1625.933514        | 813.470395       | 1624.949498        | 812.978387       | P    | <b>811.365467</b>  | 406.186372        | <b>794.338918</b>  | 397.673097        | <b>793.354902</b>  | 397.181089       | 7  |
| 13 | 1699.981527        | 850.494401        | 1682.954978        | 841.981127       | 1681.970962        | 841.489119       | G    | <b>714.312703</b>  | 357.659990        | 697.286154         | 349.146715        | 696.302138         | 348.654707       | 6  |
| 14 | 1829.024120        | 915.015698        | 1811.997571        | 906.502423       | 1811.013555        | 906.010415       | E    | <b>657.291239</b>  | <b>329.149258</b> | 640.264690         | 320.635983        | 639.280674         | 320.143975       | 5  |
| 15 | 1992.087449        | 996.547362        | 1975.060900        | 988.034088       | 1974.076884        | 987.542080       | Y    | <b>528.248646</b>  | 264.627961        | 511.222097         | <b>256.114687</b> | 510.238081         | 255.622679       | 4  |
| 16 | 2079.119477        | 1040.063376       | 2062.092928        | 1031.550102      | 2061.108912        | 1031.058094      | S    | <b>365.185317</b>  | 183.096297        | 348.158768         | 174.583022        | 347.174752         | 174.091014       | 3  |
| 17 | 2210.159962        | 1105.583619       | 2193.133413        | 1097.070344      | 2192.149397        | 1096.578336      | M    | 278.153289         | 139.580282        | <b>261.126740</b>  | 131.067008        |                    |                  | 2  |
| 18 |                    |                   |                    |                  |                    |                  | K    | <b>147.112804</b>  | 74.060040         | <b>130.086255</b>  | 65.546765         |                    |                  | 1  |

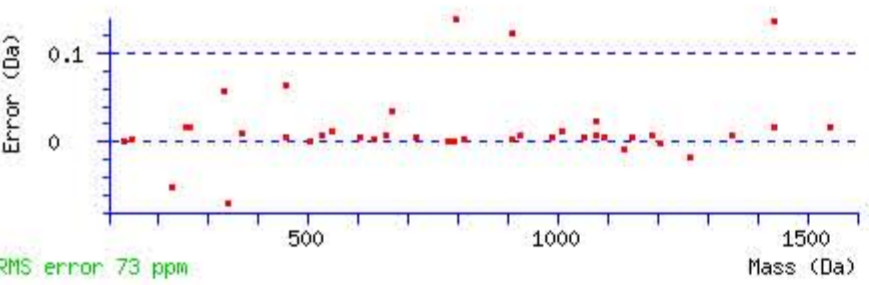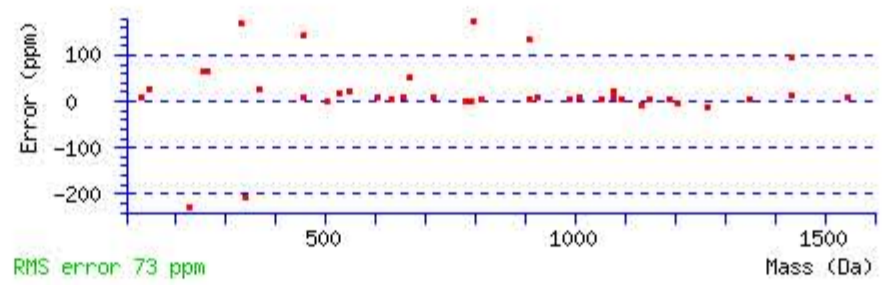

NCBI BLAST search of **LLLQQVSLPELPGEYSMK**

(Parameters: blastp, nr protein database, expect=20000, no filter, PAM30)

Other BLAST [web gateways](#)

All matches to this query

| Score | Mr(calc):   | Delta     | Sequence                           |
|-------|-------------|-----------|------------------------------------|
| 63.7  | 2355.258179 | 0.026893  | <a href="#">LLLQQVSLPELPGEYSMK</a> |
| 56.2  | 2355.258179 | 0.026893  | <a href="#">LLLQQVSLPELPGEYSMK</a> |
| 6.8   | 2355.288498 | -0.003426 | <a href="#">LIQQRALLNFTWKR</a>     |
| 1.4   | 2355.288498 | -0.003426 | <a href="#">LIQQRALLNFTWKR</a>     |
| 1.2   | 2355.259354 | 0.025718  | <a href="#">SQPRASGPPRSIQPVSPR</a> |

# Mascot Search Results

## Peptide View

MS/MS Fragmentation of **VDLSFSPSQSLPASHAHLR**

Found in **A2MG\_HUMAN**, Alpha-2-macroglobulin OS=Homo sapiens GN=A2M PE=1 SV=3

Match to Query 59248: 2359.220216 from(590.812330,4+) rtinseconds(1975) index(24502)

Title: Locus:1.1.1.2830.9 File:"2013-07-02 CLN FXIII 180 min 1st F 2.wiff"

Data file C:\Program Files (x86)\Matrix Science\Mascot Daemon\mgf\7 FXIII 180 min 1st\mascot\_daemon\_merge.mgf

Click mouse within plot area to zoom in by factor of two about that point

Or, Plot from  to  Da

Label all possible matches  Label matches used for scoring

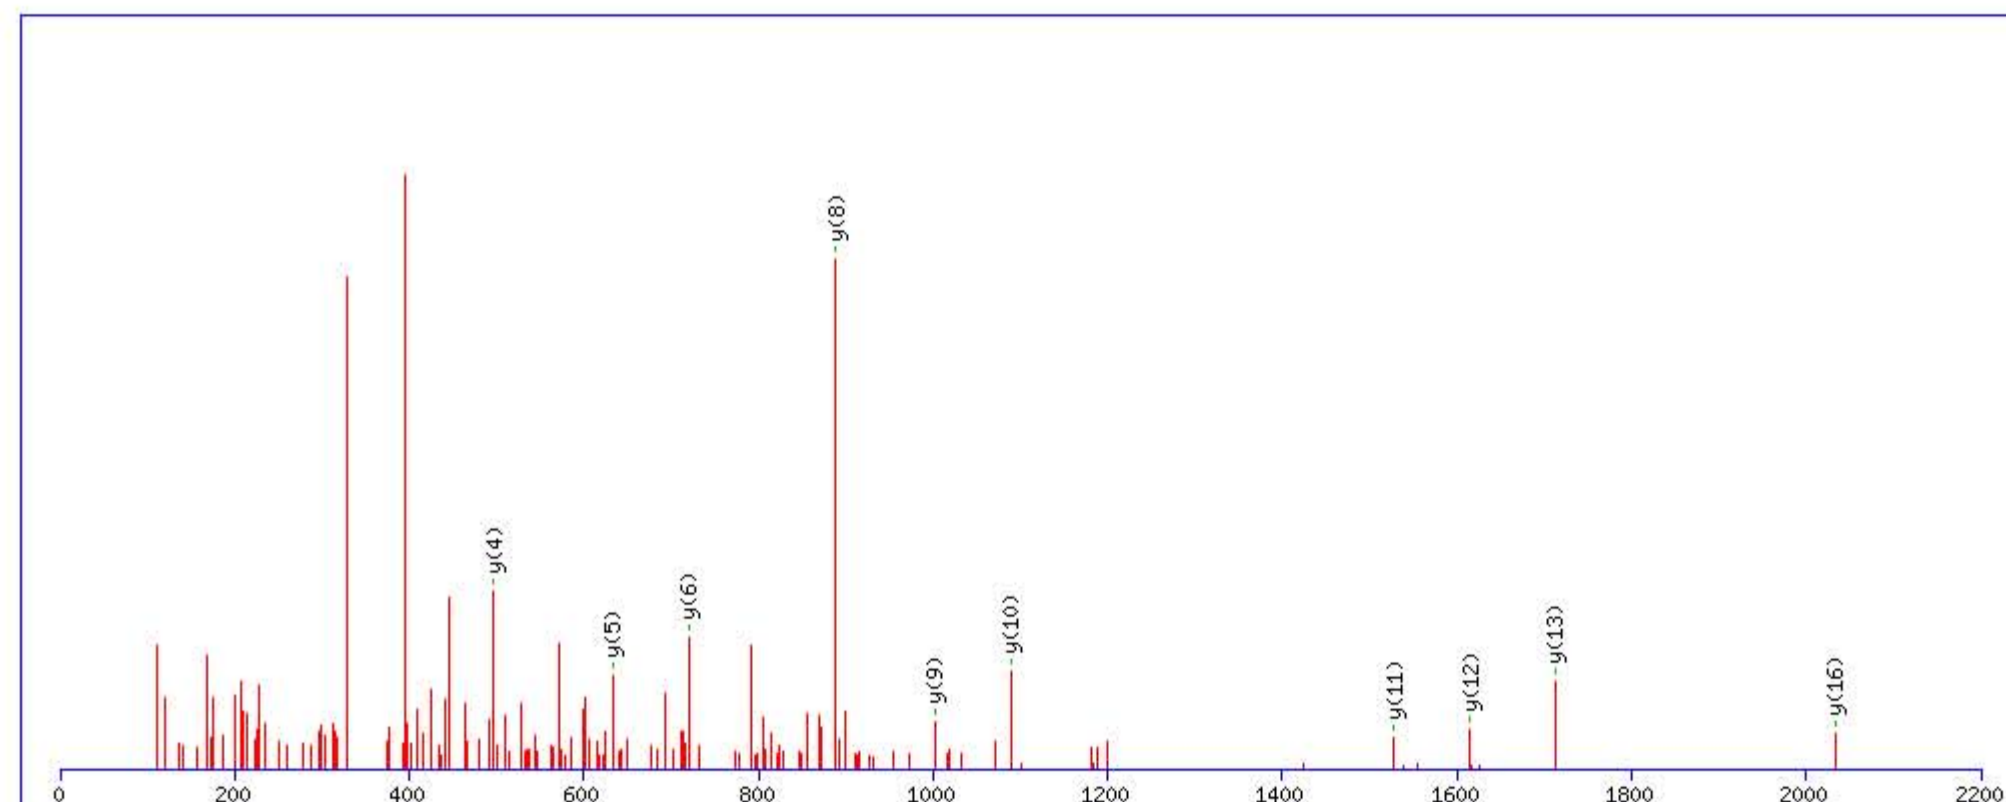

Monoisotopic mass of neutral peptide  $M_r(\text{calc})$ : 2359.210678

Fixed modifications: Carbamidomethyl (C) (apply to specified residues or termini only)

Variable modifications:

Q9 : Biotin:Thermo-21345 (Q)

Ions Score: 67 Expect: 6.2e-006

Matches : 10/188 fragment ions using 16 most intense peaks ([help](#))

| #  | b           | b <sup>++</sup> | b <sup>+</sup> | b <sup>+++</sup> | b <sup>0</sup> | b <sup>0++</sup> | Seq. | y                  | y <sup>++</sup> | y <sup>+</sup> | y <sup>+++</sup> | y <sup>0</sup> | y <sup>0++</sup> | #  |
|----|-------------|-----------------|----------------|------------------|----------------|------------------|------|--------------------|-----------------|----------------|------------------|----------------|------------------|----|
| 1  | 100.075690  | 50.541483       |                |                  |                |                  | V    |                    |                 |                |                  |                |                  | 19 |
| 2  | 215.102633  | 108.054954      |                |                  | 197.092068     | 99.049672        | D    | 2261.149547        | 1131.078411     | 2244.122998    | 1122.565137      | 2243.138982    | 1122.073129      | 18 |
| 3  | 328.186697  | 164.596986      |                |                  | 310.176132     | 155.591704       | L    | 2146.122604        | 1073.564940     | 2129.096055    | 1065.051665      | 2128.112039    | 1064.559657      | 17 |
| 4  | 415.218725  | 208.113001      |                |                  | 397.208160     | 199.107718       | S    | <b>2033.038540</b> | 1017.022908     | 2016.011991    | 1008.509634      | 2015.027975    | 1008.017626      | 16 |
| 5  | 562.287139  | 281.647208      |                |                  | 544.276574     | 272.641925       | F    | 1946.006512        | 973.506894      | 1928.979963    | 964.993620       | 1927.995947    | 964.501612       | 15 |
| 6  | 649.319167  | 325.163222      |                |                  | 631.308602     | 316.157939       | S    | 1798.938098        | 899.972687      | 1781.911549    | 891.459413       | 1780.927533    | 890.967405       | 14 |
| 7  | 746.371931  | 373.689604      |                |                  | 728.361366     | 364.684321       | P    | <b>1711.906070</b> | 856.456673      | 1694.879521    | 847.943399       | 1693.895505    | 847.451391       | 13 |
| 8  | 833.403959  | 417.205618      |                |                  | 815.393394     | 408.200335       | S    | <b>1614.853306</b> | 807.930291      | 1597.826757    | 799.417017       | 1596.842741    | 798.925009       | 12 |
| 9  | 1272.629285 | 636.818281      | 1255.602736    | 628.305006       | 1254.618720    | 627.812998       | Q    | <b>1527.821278</b> | 764.414277      | 1510.794729    | 755.901003       | 1509.810713    | 755.408995       | 11 |
| 10 | 1359.661313 | 680.334295      | 1342.634764    | 671.821020       | 1341.650748    | 671.329012       | S    | <b>1088.595952</b> | 544.801614      | 1071.569403    | 536.288340       | 1070.585387    | 535.796332       | 10 |
| 11 | 1472.745377 | 736.876327      | 1455.718828    | 728.363052       | 1454.734812    | 727.871044       | L    | <b>1001.563924</b> | 501.285600      | 984.537375     | 492.772326       | 983.553359     | 492.280318       | 9  |
| 12 | 1569.798141 | 785.402709      | 1552.771592    | 776.889434       | 1551.787576    | 776.397426       | P    | <b>888.479860</b>  | 444.743568      | 871.453311     | 436.230294       | 870.469295     | 435.738286       | 8  |
| 13 | 1640.835255 | 820.921266      | 1623.808706    | 812.407991       | 1622.824690    | 811.915983       | A    | 791.427096         | 396.217186      | 774.400547     | 387.703912       | 773.416531     | 387.211904       | 7  |
| 14 | 1727.867283 | 864.437280      | 1710.840734    | 855.924005       | 1709.856718    | 855.431997       | S    | <b>720.389982</b>  | 360.698629      | 703.363433     | 352.185355       | 702.379417     | 351.693347       | 6  |
| 15 | 1864.926195 | 932.966736      | 1847.899646    | 924.453461       | 1846.915630    | 923.961453       | H    | <b>633.357954</b>  | 317.182615      | 616.331405     | 308.669341       |                |                  | 5  |
| 16 | 1935.963309 | 968.485293      | 1918.936760    | 959.972018       | 1917.952744    | 959.480010       | A    | <b>496.299042</b>  | 248.653159      | 479.272493     | 240.139884       |                |                  | 4  |
| 17 | 2073.022221 | 1037.014748     | 2055.995672    | 1028.501474      | 2055.011656    | 1028.009466      | H    | 425.261928         | 213.134602      | 408.235379     | 204.621328       |                |                  | 3  |
| 18 | 2186.106285 | 1093.556780     | 2169.079736    | 1085.043506      | 2168.095720    | 1084.551498      | L    | 288.203016         | 144.605146      | 271.176467     | 136.091872       |                |                  | 2  |
| 19 |             |                 |                |                  |                |                  | R    | 175.118952         | 88.063114       | 158.092403     | 79.549839        |                |                  | 1  |

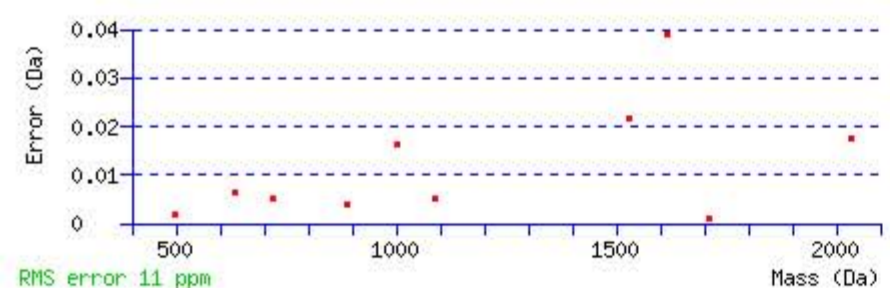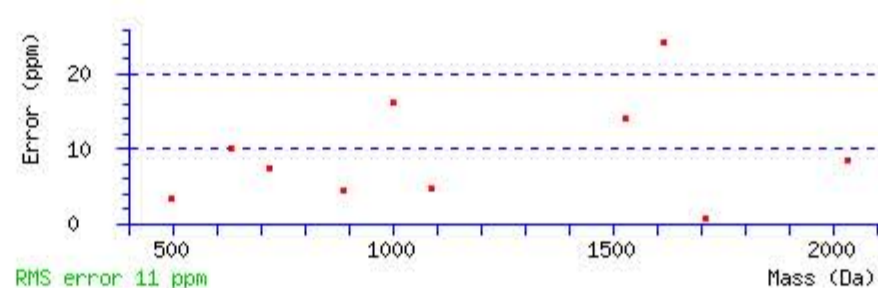

NCBI BLAST search of [VDLSFSPSQSLPASHAHLR](#)

(Parameters: blastp, nr protein database, expect=20000, no filter, PAM30)

Other BLAST [web gateways](#)

All matches to this query

| Score | Mr(calc):   | Delta    | Sequence                            |
|-------|-------------|----------|-------------------------------------|
| 67.1  | 2359.210678 | 0.009538 | <a href="#">VDLSFSPSQSLPASHAHLR</a> |

Mascot: <http://www.matrixscience.com/>

# MASCOT Search Results

## Peptide View

MS/MS Fragmentation of **MCPQLQQYEMHGPEGLR**  
Found in **A2MG\_HUMAN**, Alpha-2-macroglobulin OS=Homo sapiens GN=A2M PE=1 SV=3

Match to Query 59563: 2384.099776 from(597.032220,4+) rtinseconds(1972) index(24481)  
Title: Locus:1.1.1.2829.6 File:"2013-07-02 CLN FXIII 180 min 1st F 2.wiff"  
Data file C:\Program Files (x86)\Matrix Science\Mascot Daemon\mgf7 FXIII 180 min 1st\mascot\_daemon\_merge.mgf

Click mouse within plot area to zoom in by factor of two about that point

Or, Plot from 0 to 2200 Da Full range

Label all possible matches  Label matches used for scoring

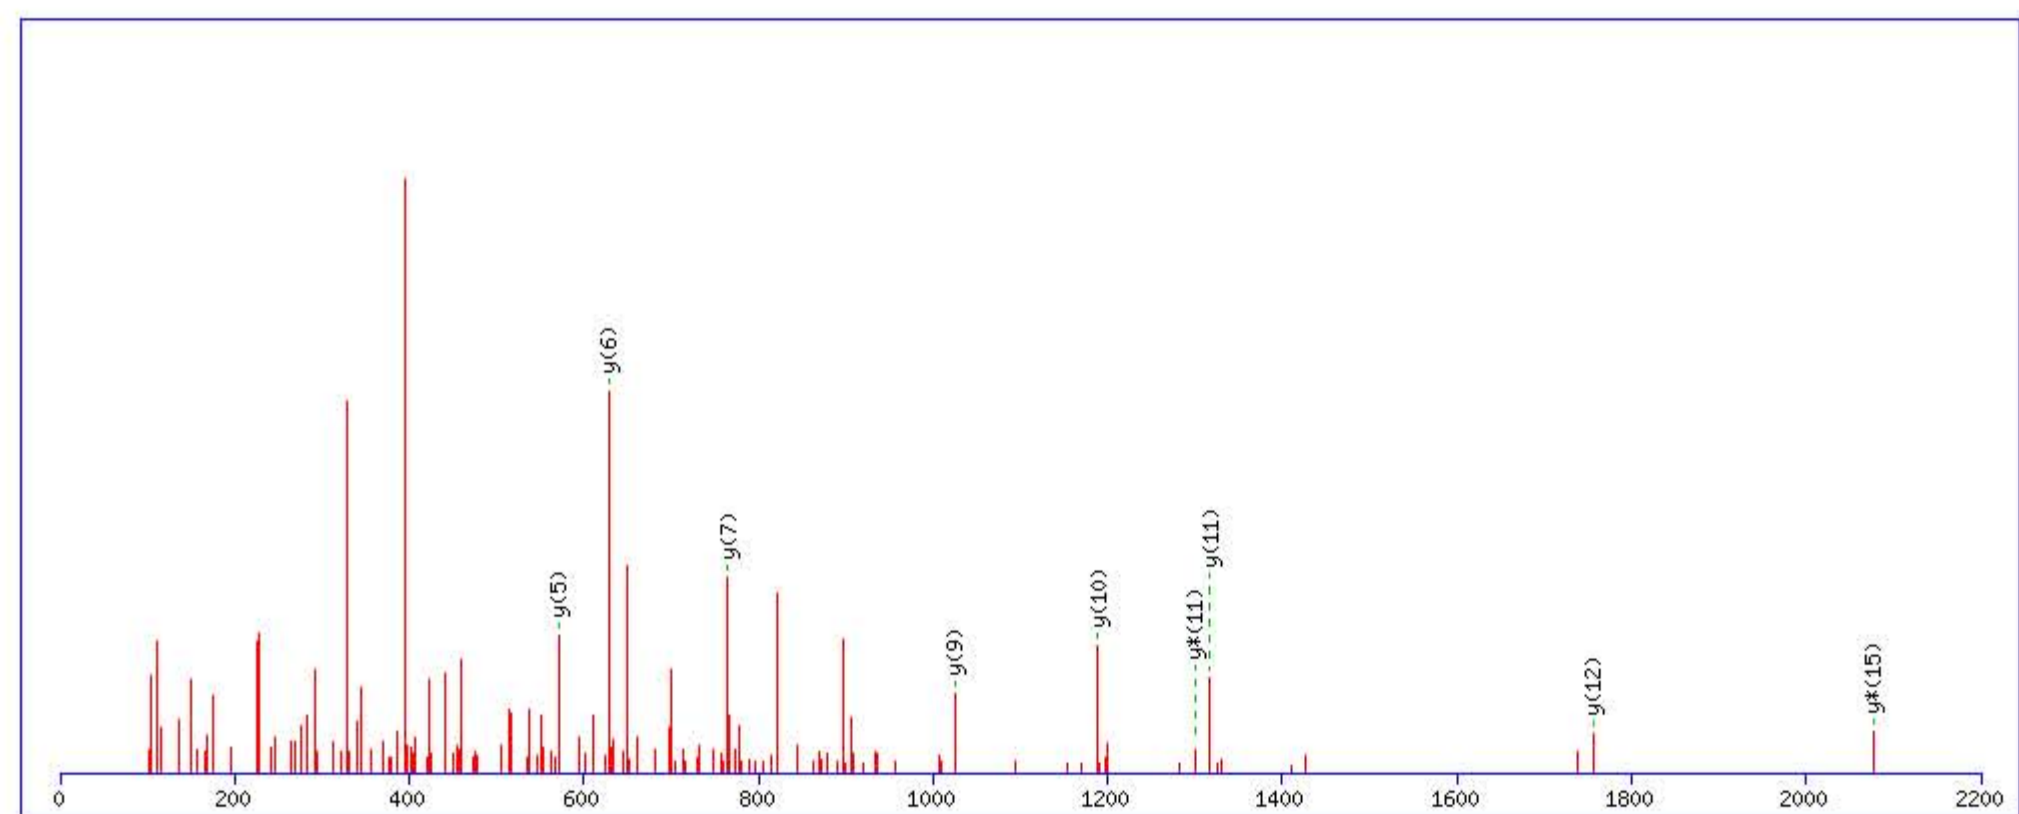

Monoisotopic mass of neutral peptide Mr(calc): 2384.089767  
Fixed modifications: Carbamidomethyl (C) (apply to specified residues or termini only)  
Variable modifications:  
Q6 : Biotin:Thermo-21345 (Q)  
Ions Score: 35 Expect: 0.0043  
Matches : 9/164 fragment ions using 16 most intense peaks ([help](#))

| #  | b           | b <sup>++</sup> | b <sup>+</sup> | b <sup>+++</sup> | b <sup>0</sup> | b <sup>0++</sup> | Seq.     | y                  | y <sup>++</sup> | y <sup>+</sup>     | y <sup>+++</sup> | y <sup>0</sup> | y <sup>0++</sup> | #  |
|----|-------------|-----------------|----------------|------------------|----------------|------------------|----------|--------------------|-----------------|--------------------|------------------|----------------|------------------|----|
| 1  | 132.047761  | 66.527518       |                |                  |                |                  | <b>M</b> |                    |                 |                    |                  |                |                  | 17 |
| 2  | 292.078410  | 146.542843      |                |                  |                |                  | <b>C</b> | 2254.056579        | 1127.531927     | 2237.030030        | 1119.018653      | 2236.046014    | 1118.526645      | 16 |
| 3  | 389.131174  | 195.069225      |                |                  |                |                  | <b>P</b> | 2094.025930        | 1047.516603     | <b>2076.999381</b> | 1039.003328      | 2076.015365    | 1038.511320      | 15 |
| 4  | 517.189752  | 259.098514      | 500.163203     | 250.585240       |                |                  | <b>Q</b> | 1996.973166        | 998.990221      | 1979.946617        | 990.476947       | 1978.962601    | 989.984939       | 14 |
| 5  | 630.273816  | 315.640546      | 613.247267     | 307.127272       |                |                  | <b>L</b> | 1868.914588        | 934.960932      | 1851.888039        | 926.447658       | 1850.904023    | 925.955650       | 13 |
| 6  | 1069.499142 | 535.253209      | 1052.472593    | 526.739935       |                |                  | <b>Q</b> | <b>1755.830524</b> | 878.418900      | 1738.803975        | 869.905626       | 1737.819959    | 869.413618       | 12 |
| 7  | 1197.557720 | 599.282498      | 1180.531171    | 590.769224       |                |                  | <b>Q</b> | <b>1316.605198</b> | 658.806237      | <b>1299.578649</b> | 650.292963       | 1298.594633    | 649.800955       | 11 |
| 8  | 1360.621049 | 680.814163      | 1343.594500    | 672.300888       |                |                  | <b>Y</b> | <b>1188.546620</b> | 594.776948      | 1171.520071        | 586.263674       | 1170.536055    | 585.771666       | 10 |
| 9  | 1489.663642 | 745.335459      | 1472.637093    | 736.822185       | 1471.653077    | 736.330177       | <b>E</b> | <b>1025.483291</b> | 513.245284      | 1008.456742        | 504.732009       | 1007.472726    | 504.240001       | 9  |
| 10 | 1620.704127 | 810.855702      | 1603.677578    | 802.342427       | 1602.693562    | 801.850419       | <b>M</b> | 896.440698         | 448.723987      | 879.414149         | 440.210713       | 878.430133     | 439.718705       | 8  |
| 11 | 1757.763039 | 879.385158      | 1740.736490    | 870.871883       | 1739.752474    | 870.379875       | <b>H</b> | <b>765.400213</b>  | 383.203745      | 748.373664         | 374.690470       | 747.389648     | 374.198462       | 7  |
| 12 | 1814.784503 | 907.895890      | 1797.757954    | 899.382615       | 1796.773938    | 898.890607       | <b>G</b> | <b>628.341301</b>  | 314.674289      | 611.314752         | 306.161014       | 610.330736     | 305.669006       | 6  |
| 13 | 1911.837267 | 956.422272      | 1894.810718    | 947.908997       | 1893.826702    | 947.416989       | <b>P</b> | <b>571.319837</b>  | 286.163557      | 554.293288         | 277.650282       | 553.309272     | 277.158274       | 5  |
| 14 | 2040.879860 | 1020.943568     | 2023.853311    | 1012.430294      | 2022.869295    | 1011.938286      | <b>E</b> | 474.267073         | 237.637175      | 457.240524         | 229.123900       | 456.256508     | 228.631892       | 4  |
| 15 | 2097.901324 | 1049.454300     | 2080.874775    | 1040.941025      | 2079.890759    | 1040.449017      | <b>G</b> | 345.224480         | 173.115878      | 328.197931         | 164.602603       |                |                  | 3  |
| 16 | 2210.985388 | 1105.996332     | 2193.958839    | 1097.483057      | 2192.974823    | 1096.991049      | <b>L</b> | 288.203016         | 144.605146      | 271.176467         | 136.091872       |                |                  | 2  |
| 17 |             |                 |                |                  |                |                  | <b>R</b> | 175.118952         | 88.063114       | 158.092403         | 79.549839        |                |                  | 1  |

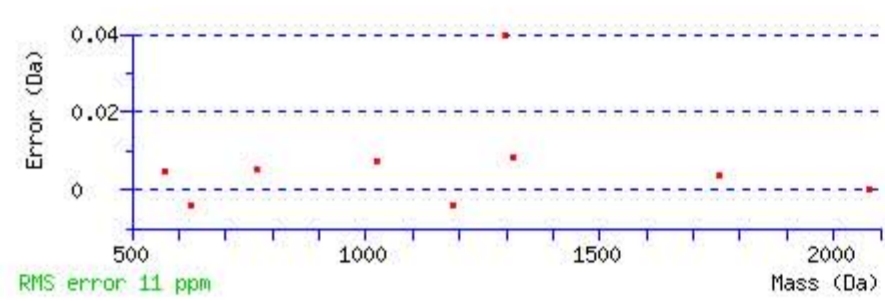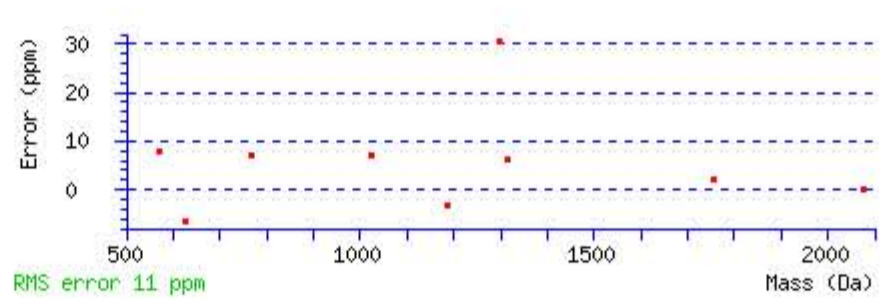

NCBI BLAST search of [MCPQLQQYEMHGPEGLR](#)  
(Parameters: blastp, nr protein database, expect=20000, no filter, PAM30)  
Other BLAST [web gateways](#)

### All matches to this query

| Score | Mr(calc):   | Delta    | Sequence                          |
|-------|-------------|----------|-----------------------------------|
| 34.9  | 2384.089767 | 0.010009 | <a href="#">MCPQLQQYEMHGPEGLR</a> |
| 26.5  | 2384.089767 | 0.010009 | <a href="#">MCPQLQQYEMHGPEGLR</a> |
| 22.9  | 2384.089767 | 0.010009 | <a href="#">MCPQLQQYEMHGPEGLR</a> |

## Peptide View

MS/MS Fragmentation of **MCPQLQQYEMHGPEGLR**

Found in **A2MG\_HUMAN**, Alpha-2-macroglobulin OS=Homo sapiens GN=A2M PE=1 SV=3

Match to Query 59577: 2384.112168 from(1193.063360,2+) rtinseconds(2018) index(6609)

Title: Locus:1.1.1.2956.14 File:"2013-07-02 CLN FXIII 180 min 1st F 1.wiff"

Data file C:\Program Files (x86)\Matrix Science\Mascot Daemon\mgf\7 FXIII 180 min 1st\mascot\_daemon\_merge.mgf

Click mouse within plot area to zoom in by factor of two about that point

Or, Plot from 0 to 2800 Da Full range

Label all possible matches  Label matches used for scoring

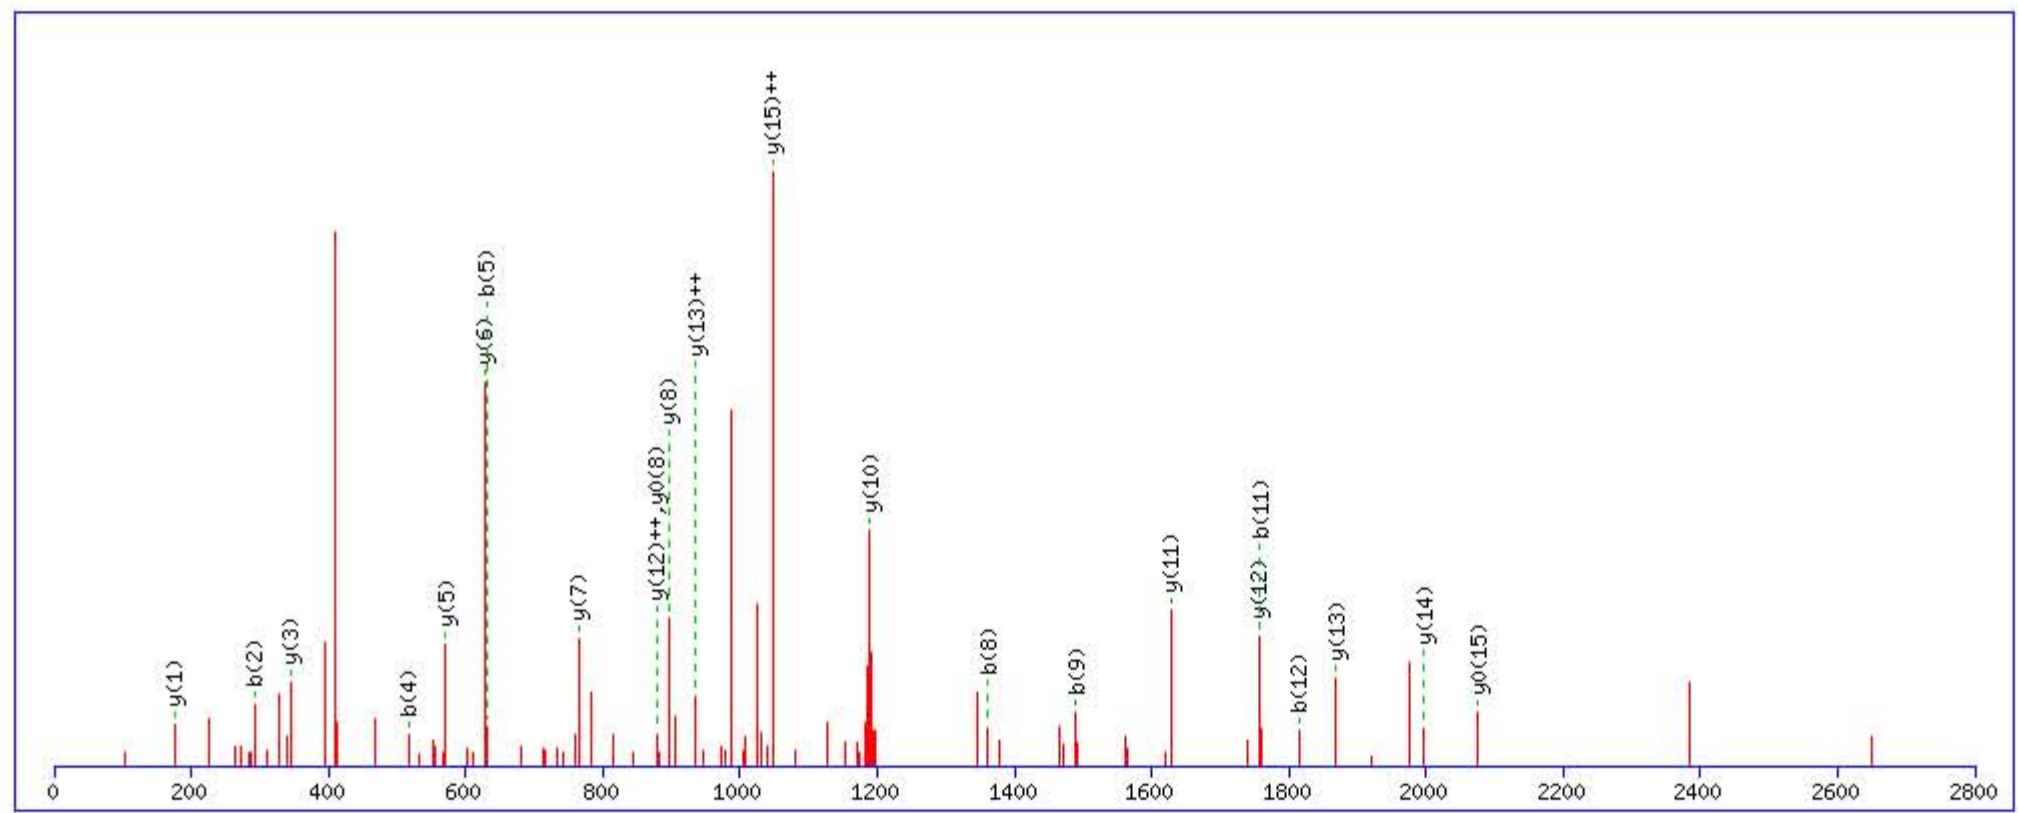

Monoisotopic mass of neutral peptide  $M_r(\text{calc})$ : 2384.089767

Fixed modifications: Carbamidomethyl (C) (apply to specified residues or termini only)

Variable modifications:

Q7 : Biotin:Thermo-21345 (Q)

Ions Score: 67 Expect: 5.4e-007

Matches : 23/164 fragment ions using 37 most intense peaks [\(help\)](#)

| #  | b                  | b <sup>++</sup> | b <sup>*</sup> | b <sup>*++</sup> | b <sup>0</sup> | b <sup>0++</sup> | Seq. | y                  | y <sup>++</sup>    | y <sup>*</sup> | y <sup>*++</sup> | y <sup>0</sup>     | y <sup>0++</sup> | #  |
|----|--------------------|-----------------|----------------|------------------|----------------|------------------|------|--------------------|--------------------|----------------|------------------|--------------------|------------------|----|
| 1  | 132.047761         | 66.527518       |                |                  |                |                  | M    |                    |                    |                |                  |                    |                  | 17 |
| 2  | <b>292.078410</b>  | 146.542843      |                |                  |                |                  | C    | 2254.056579        | 1127.531927        | 2237.030030    | 1119.018653      | 2236.046014        | 1118.526645      | 16 |
| 3  | 389.131174         | 195.069225      |                |                  |                |                  | P    | 2094.025930        | <b>1047.516603</b> | 2076.999381    | 1039.003328      | <b>2076.015365</b> | 1038.511320      | 15 |
| 4  | <b>517.189752</b>  | 259.098514      | 500.163203     | 250.585240       |                |                  | Q    | <b>1996.973166</b> | 998.990221         | 1979.946617    | 990.476947       | 1978.962601        | 989.984939       | 14 |
| 5  | <b>630.273816</b>  | 315.640546      | 613.247267     | 307.127272       |                |                  | L    | <b>1868.914588</b> | <b>934.960932</b>  | 1851.888039    | 926.447658       | 1850.904023        | 925.955650       | 13 |
| 6  | 758.332394         | 379.669835      | 741.305845     | 371.156561       |                |                  | Q    | <b>1755.830524</b> | <b>878.418900</b>  | 1738.803975    | 869.905626       | 1737.819959        | 869.413618       | 12 |
| 7  | 1197.557720        | 599.282498      | 1180.531171    | 590.769224       |                |                  | Q    | <b>1627.771946</b> | 814.389611         | 1610.745397    | 805.876337       | 1609.761381        | 805.384329       | 11 |
| 8  | <b>1360.621049</b> | 680.814163      | 1343.594500    | 672.300888       |                |                  | Y    | <b>1188.546620</b> | 594.776948         | 1171.520071    | 586.263674       | 1170.536055        | 585.771666       | 10 |
| 9  | <b>1489.663642</b> | 745.335459      | 1472.637093    | 736.822185       | 1471.653077    | 736.330177       | E    | 1025.483291        | 513.245284         | 1008.456742    | 504.732009       | 1007.472726        | 504.240001       | 9  |
| 10 | 1620.704127        | 810.855702      | 1603.677578    | 802.342427       | 1602.693562    | 801.850419       | M    | <b>896.440698</b>  | 448.723987         | 879.414149     | 440.210713       | <b>878.430133</b>  | 439.718705       | 8  |
| 11 | <b>1757.763039</b> | 879.385158      | 1740.736490    | 870.871883       | 1739.752474    | 870.379875       | H    | <b>765.400213</b>  | 383.203745         | 748.373664     | 374.690470       | 747.389648         | 374.198462       | 7  |
| 12 | <b>1814.784503</b> | 907.895890      | 1797.757954    | 899.382615       | 1796.773938    | 898.890607       | G    | <b>628.341301</b>  | 314.674289         | 611.314752     | 306.161014       | 610.330736         | 305.669006       | 6  |
| 13 | 1911.837267        | 956.422272      | 1894.810718    | 947.908997       | 1893.826702    | 947.416989       | P    | <b>571.319837</b>  | 286.163557         | 554.293288     | 277.650282       | 553.309272         | 277.158274       | 5  |
| 14 | 2040.879860        | 1020.943568     | 2023.853311    | 1012.430294      | 2022.869295    | 1011.938286      | E    | 474.267073         | 237.637175         | 457.240524     | 229.123900       | 456.256508         | 228.631892       | 4  |
| 15 | 2097.901324        | 1049.454300     | 2080.874775    | 1040.941025      | 2079.890759    | 1040.449017      | G    | <b>345.224480</b>  | 173.115878         | 328.197931     | 164.602603       |                    |                  | 3  |
| 16 | 2210.985388        | 1105.996332     | 2193.958839    | 1097.483057      | 2192.974823    | 1096.991049      | L    | 288.203016         | 144.605146         | 271.176467     | 136.091872       |                    |                  | 2  |
| 17 |                    |                 |                |                  |                |                  | R    | <b>175.118952</b>  | 88.063114          | 158.092403     | 79.549839        |                    |                  | 1  |

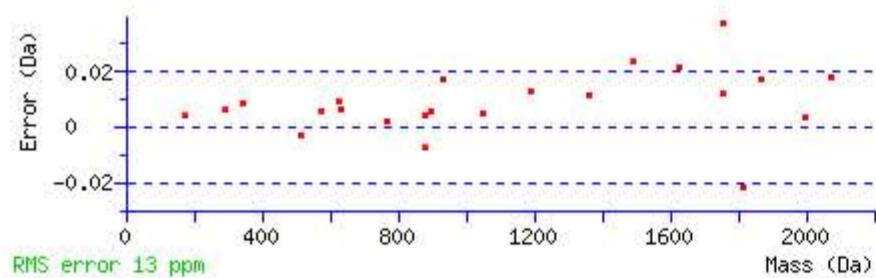

RMS error 13 ppm

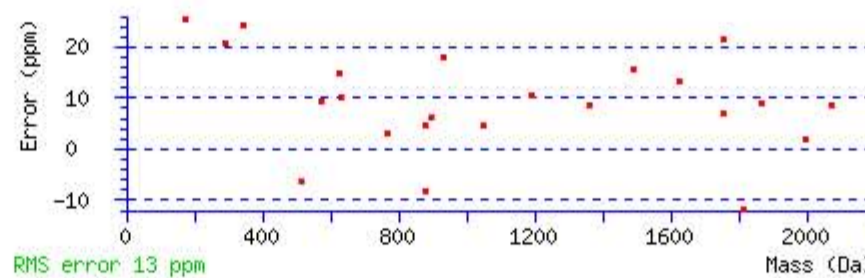

RMS error 13 ppm

NCBI BLAST search of **MCPQLQQYEMHGPEGLR**

(Parameters: blastp, nr protein database, expect=20000, no filter, PAM30)

Other BLAST [web gateways](#)

## All matches to this query

| Score | $M_r(\text{calc})$ | Delta    | Sequence                                |
|-------|--------------------|----------|-----------------------------------------|
| 67.0  | 2384.089767        | 0.022401 | <a href="#">MCPQLQQYEMHGPEGLR</a>       |
| 55.8  | 2384.089767        | 0.022401 | <a href="#">MCPQLQQYEMHGPEGLR</a>       |
| 29.3  | 2384.089767        | 0.022401 | <a href="#">MCPQLQQYEMHGPEGLR</a>       |
| 0.1   | 2384.111389        | 0.000779 | <a href="#">HPGDAAATLGPSAQDMVAVHMHR</a> |

# Mascot Search Results

## Peptide View

MS/MS Fragmentation of **YSDASDCHGEDSQAFCEK**

Found in **A2MG\_HUMAN**, Alpha-2-macroglobulin OS=Homo sapiens GN=A2M PE=1 SV=3

Match to Query 60416: 2415.946512 from(806.322780,3+) rtinseconds(1521) index(21150)

Title: Locus:1.1.1.2672.19 File:"2013-07-02 CLN FXIII 180 min 1st F 2.wiff"

Data file C:\Program Files (x86)\Matrix Science\Mascot Daemon\mgf\7 FXIII 180 min 1st\mascot\_daemon\_merge.mgf

Click mouse within plot area to zoom in by factor of two about that point

Or, Plot from  to  Da

Label all possible matches  Label matches used for scoring

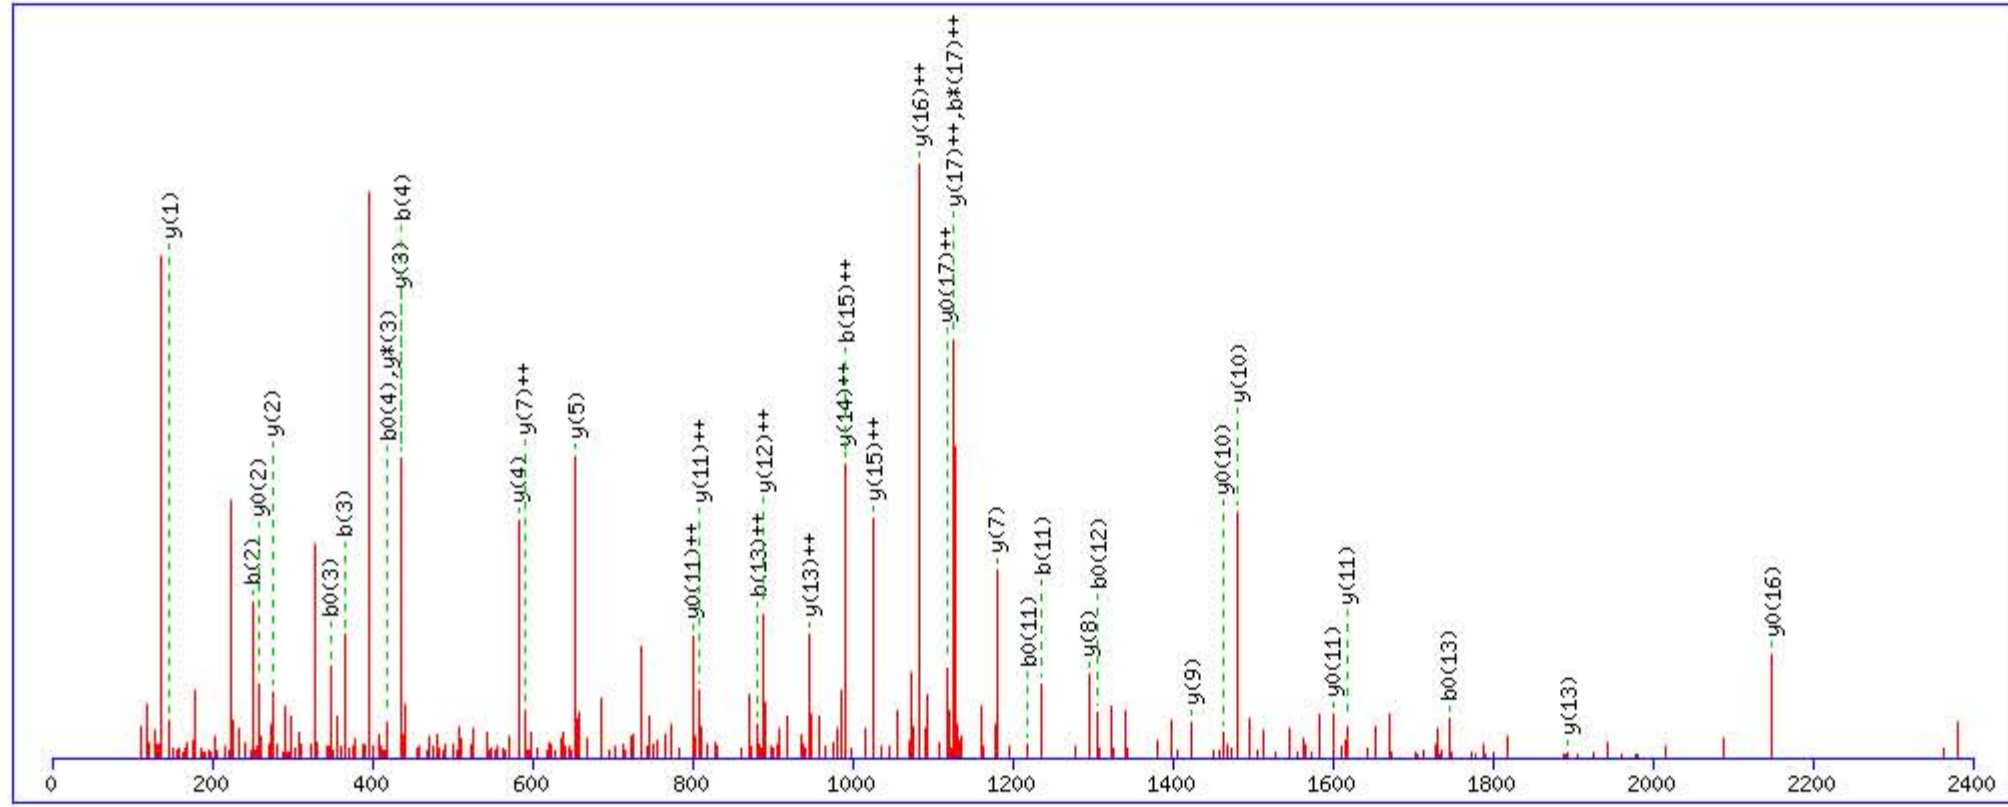

Monoisotopic mass of neutral peptide Mr(calc): 2415.940598

Fixed modifications: Carbamidomethyl (C) (apply to specified residues or termini only)

Variable modifications:

Q13 : Biotin:Thermo-21345 (Q)

Ions Score: 55 Expect: 3.2e-006

Matches : 38/176 fragment ions using 81 most intense peaks [\(help\)](#)

| #  | b                  | b <sup>++</sup>   | b <sup>*</sup> | b <sup>*++</sup>   | b <sup>0</sup>     | b <sup>0++</sup> | Seq. | y                  | y <sup>++</sup>    | y <sup>*</sup>    | y <sup>*++</sup> | y <sup>0</sup>     | y <sup>0++</sup>   | #  |
|----|--------------------|-------------------|----------------|--------------------|--------------------|------------------|------|--------------------|--------------------|-------------------|------------------|--------------------|--------------------|----|
| 1  | 164.070605         | 82.538940         |                |                    |                    |                  | Y    |                    |                    |                   |                  |                    |                    | 18 |
| 2  | <b>251.102633</b>  | 126.054954        |                |                    | 233.092068         | 117.049672       | S    | 2253.884545        | <b>1127.445910</b> | 2236.857996       | 1118.932636      | 2235.873980        | <b>1118.440628</b> | 17 |
| 3  | <b>366.129576</b>  | 183.568426        |                |                    | <b>348.119011</b>  | 174.563144       | D    | 2166.852517        | <b>1083.929896</b> | 2149.825968       | 1075.416622      | <b>2148.841952</b> | 1074.924614        | 16 |
| 4  | <b>437.166690</b>  | 219.086983        |                |                    | <b>419.156125</b>  | 210.081700       | A    | 2051.825574        | <b>1026.416425</b> | 2034.799025       | 1017.903150      | 2033.815009        | 1017.411142        | 15 |
| 5  | 524.198718         | 262.602997        |                |                    | 506.188153         | 253.597715       | S    | 1980.788460        | <b>990.897868</b>  | 1963.761911       | 982.384594       | 1962.777895        | 981.892586         | 14 |
| 6  | 639.225661         | 320.116469        |                |                    | 621.215096         | 311.111186       | D    | <b>1893.756432</b> | <b>947.381854</b>  | 1876.729883       | 938.868580       | 1875.745867        | 938.376572         | 13 |
| 7  | 799.256310         | 400.131793        |                |                    | 781.245745         | 391.126510       | C    | 1778.729489        | <b>889.868383</b>  | 1761.702940       | 881.355108       | 1760.718924        | 880.863100         | 12 |
| 8  | 936.315222         | 468.661249        |                |                    | 918.304657         | 459.655966       | H    | <b>1618.698840</b> | <b>809.853058</b>  | 1601.672291       | 801.339784       | <b>1600.688275</b> | <b>800.847776</b>  | 11 |
| 9  | 993.336686         | 497.171981        |                |                    | 975.326121         | 488.166699       | G    | <b>1481.639928</b> | 741.323602         | 1464.613379       | 732.810328       | <b>1463.629363</b> | 732.318320         | 10 |
| 10 | 1122.379279        | 561.693278        |                |                    | 1104.368714        | 552.687995       | E    | <b>1424.618464</b> | 712.812870         | 1407.591915       | 704.299596       | 1406.607899        | 703.807588         | 9  |
| 11 | <b>1237.406222</b> | 619.206749        |                |                    | <b>1219.395657</b> | 610.201467       | D    | <b>1295.575871</b> | 648.291574         | 1278.549322       | 639.778299       | 1277.565306        | 639.286291         | 8  |
| 12 | 1324.438250        | 662.722763        |                |                    | <b>1306.427685</b> | 653.717481       | S    | <b>1180.548928</b> | <b>590.778102</b>  | 1163.522379       | 582.264828       | 1162.538363        | 581.772820         | 7  |
| 13 | 1763.663576        | <b>882.335426</b> | 1746.637027    | 873.822152         | <b>1745.653011</b> | 873.330144       | Q    | 1093.516900        | 547.262088         | 1076.490351       | 538.748814       | 1075.506335        | 538.256806         | 6  |
| 14 | 1834.700690        | 917.853983        | 1817.674141    | 909.340709         | 1816.690125        | 908.848701       | A    | <b>654.291574</b>  | 327.649425         | 637.265025        | 319.136151       | 636.281009         | 318.644143         | 5  |
| 15 | 1981.769104        | <b>991.388190</b> | 1964.742555    | 982.874916         | 1963.758539        | 982.382908       | F    | <b>583.254460</b>  | 292.130868         | 566.227911        | 283.617594       | 565.243895         | 283.125586         | 4  |
| 16 | 2141.799753        | 1071.403514       | 2124.773204    | 1062.890240        | 2123.789188        | 1062.398232      | C    | <b>436.186046</b>  | 218.596661         | <b>419.159497</b> | 210.083386       | 418.175481         | 209.591378         | 3  |
| 17 | 2270.842346        | 1135.924811       | 2253.815797    | <b>1127.411536</b> | 2252.831781        | 1126.919528      | E    | <b>276.155397</b>  | 138.581337         | 259.128848        | 130.068062       | <b>258.144832</b>  | 129.576054         | 2  |
| 18 |                    |                   |                |                    |                    |                  | K    | <b>147.112804</b>  | 74.060040          | 130.086255        | 65.546765        |                    |                    | 1  |

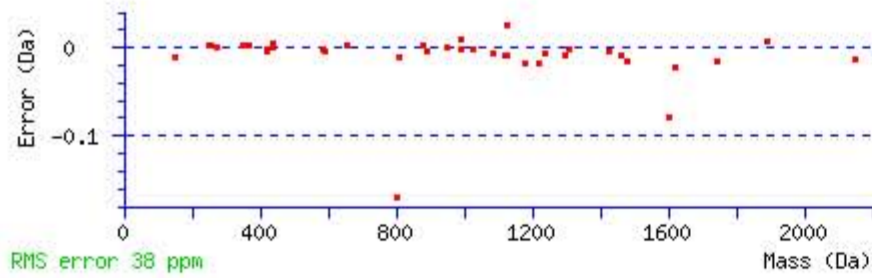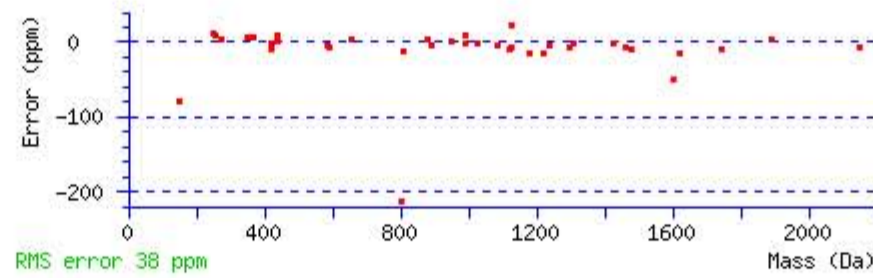

NCBI BLAST search of [YSDASDCHGEDSQAFCEK](#)

(Parameters: blastp, nr protein database, expect=20000, no filter, PAM30)

Other BLAST [web gateways](#)

All matches to this query

| Score | Mr(calc):   | Delta    | Sequence                           |
|-------|-------------|----------|------------------------------------|
| 54.9  | 2415.940598 | 0.005914 | <a href="#">YSDASDCHGEDSQAFCEK</a> |

Mascot: <http://www.matrixscience.com/>

**MASCOT** Mascot Search Results

**Peptide View**

MS/MS Fragmentation of **MCPQLQQYEMHGPEGLR**

Found in **A2MG\_HUMAN**, Alpha-2-macroglobulin OS=Homo sapiens GN=A2M PE=1 SV=3

Match to Query 65613: 2695.275176 from(674.826070,4+) rtinseconds(2160) index(25839)

Title: Locus:1.1.1.2894.17 File:"2013-07-02 CLN FXIII 180 min 1st F 2.wiff"

Data file C:\Program Files (x86)\Matrix Science\Mascot Daemon\mgf\7 FXIII 180 min 1st\mascot\_daemon\_merge.mgf

Click mouse within plot area to zoom in by factor of two about that point

Or, Plot from  to  Da

Label all possible matches  Label matches used for scoring

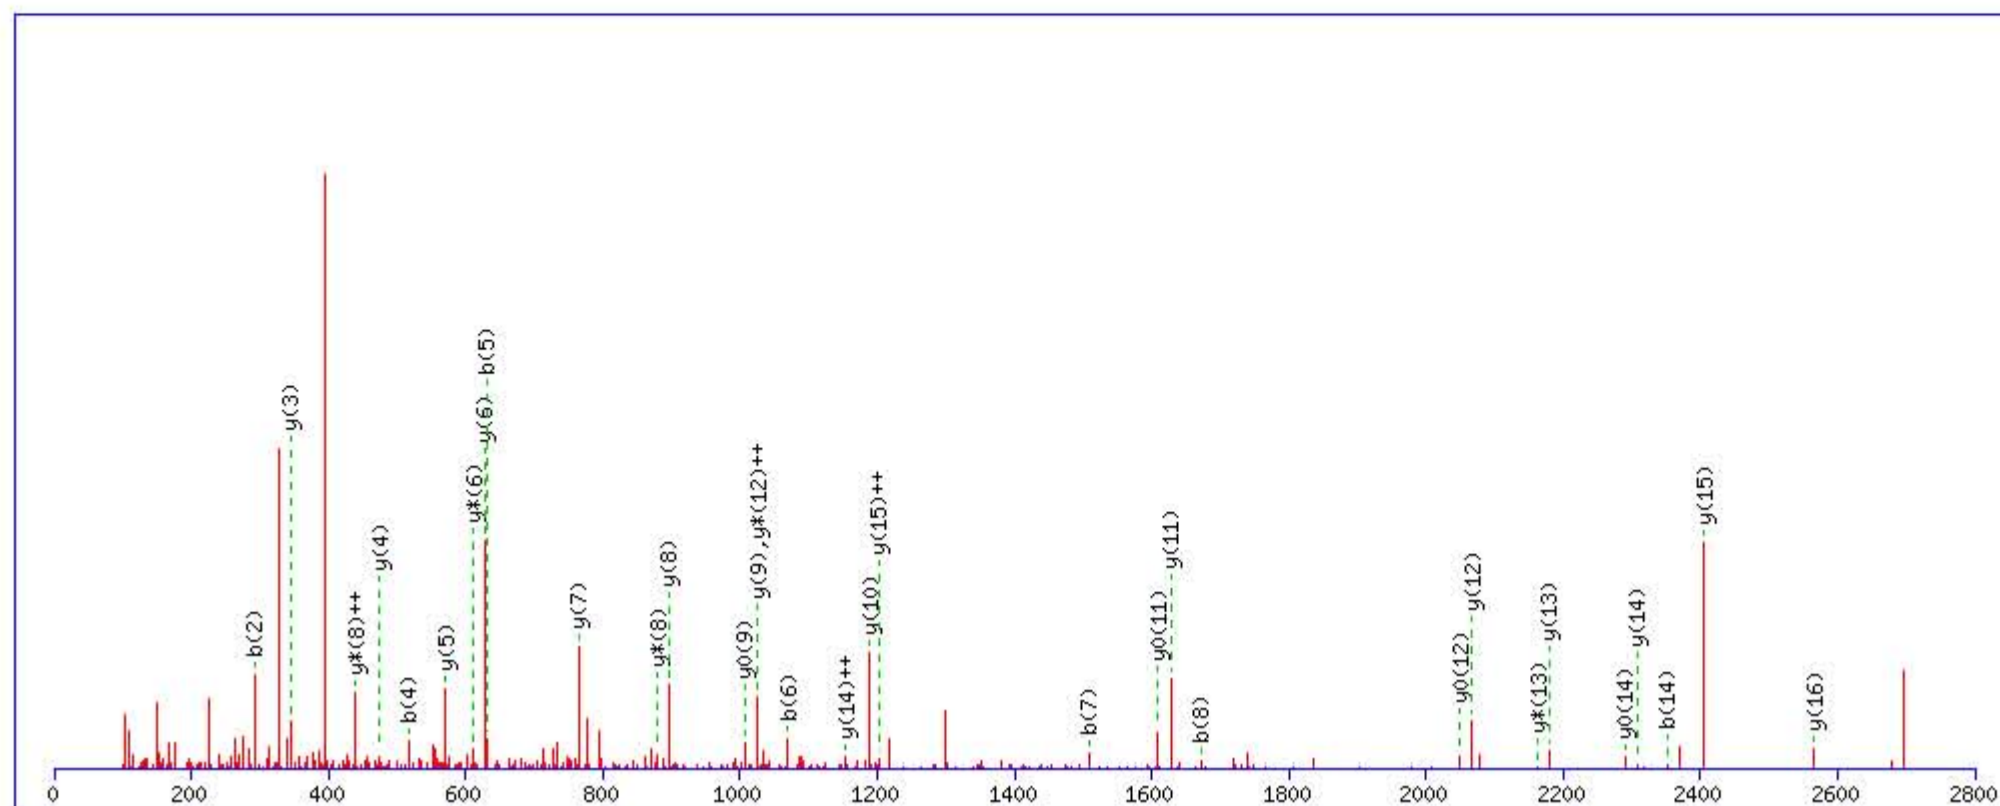

Monoisotopic mass of neutral peptide Mr(calc): 2695.256516

Fixed modifications: Carbamidomethyl (C) (apply to specified residues or termini only)

Variable modifications:

Q6 : Biotin:Thermo-21345 (Q)

Q7 : Biotin:Thermo-21345 (Q)

Ions Score: 70 Expect: 2e-006

Matches : 32/164 fragment ions using 67 most intense peaks [\(help\)](#)

| #  | b           | b <sup>++</sup> | b <sup>+</sup> | b <sup>+++</sup> | b <sup>0</sup> | b <sup>0++</sup> | Seq. | y           | y <sup>++</sup> | y <sup>+</sup> | y <sup>+++</sup> | y <sup>0</sup> | y <sup>0++</sup> | #  |
|----|-------------|-----------------|----------------|------------------|----------------|------------------|------|-------------|-----------------|----------------|------------------|----------------|------------------|----|
| 1  | 132.047761  | 66.527518       |                |                  |                |                  | M    |             |                 |                |                  |                |                  | 17 |
| 2  | 292.078410  | 146.542843      |                |                  |                |                  | C    | 2565.223327 | 1283.115301     | 2548.196778    | 1274.602027      | 2547.212762    | 1274.110019      | 16 |
| 3  | 389.131174  | 195.069225      |                |                  |                |                  | P    | 2405.192678 | 1203.099977     | 2388.166129    | 1194.586702      | 2387.182113    | 1194.094694      | 15 |
| 4  | 517.189752  | 259.098514      | 500.163203     | 250.585240       |                |                  | Q    | 2308.139914 | 1154.573595     | 2291.113365    | 1146.060320      | 2290.129349    | 1145.568312      | 14 |
| 5  | 630.273816  | 315.640546      | 613.247267     | 307.127272       |                |                  | L    | 2180.081336 | 1090.544306     | 2163.054787    | 1082.031031      | 2162.070771    | 1081.539023      | 13 |
| 6  | 1069.499142 | 535.253209      | 1052.472593    | 526.739935       |                |                  | Q    | 2066.997272 | 1034.002274     | 2049.970723    | 1025.488999      | 2048.986707    | 1024.996991      | 12 |
| 7  | 1508.724468 | 754.865872      | 1491.697919    | 746.352598       |                |                  | Q    | 1627.771946 | 814.389611      | 1610.745397    | 805.876337       | 1609.761381    | 805.384329       | 11 |
| 8  | 1671.787797 | 836.397537      | 1654.761248    | 827.884262       |                |                  | Y    | 1188.546620 | 594.776948      | 1171.520071    | 586.263674       | 1170.536055    | 585.771666       | 10 |
| 9  | 1800.830390 | 900.918833      | 1783.803841    | 892.405559       | 1782.819825    | 891.913551       | E    | 1025.483291 | 513.245284      | 1008.456742    | 504.732009       | 1007.472726    | 504.240001       | 9  |
| 10 | 1931.870875 | 966.439076      | 1914.844326    | 957.925801       | 1913.860310    | 957.433793       | M    | 896.440698  | 448.723987      | 879.414149     | 440.210713       | 878.430133     | 439.718705       | 8  |
| 11 | 2068.929787 | 1034.968531     | 2051.903238    | 1026.455257      | 2050.919222    | 1025.963249      | H    | 765.400213  | 383.203745      | 748.373664     | 374.690470       | 747.389648     | 374.198462       | 7  |
| 12 | 2125.951251 | 1063.479263     | 2108.924702    | 1054.965989      | 2107.940686    | 1054.473981      | G    | 628.341301  | 314.674289      | 611.314752     | 306.161014       | 610.330736     | 305.669006       | 6  |
| 13 | 2223.004015 | 1112.005645     | 2205.977466    | 1103.492371      | 2204.993450    | 1103.000363      | P    | 571.319837  | 286.163557      | 554.293288     | 277.650282       | 553.309272     | 277.158274       | 5  |
| 14 | 2352.046608 | 1176.526942     | 2335.020059    | 1168.013667      | 2334.036043    | 1167.521659      | E    | 474.267073  | 237.637175      | 457.240524     | 229.123900       | 456.256508     | 228.631892       | 4  |
| 15 | 2409.068072 | 1205.037674     | 2392.041523    | 1196.524399      | 2391.057507    | 1196.032391      | G    | 345.224480  | 173.115878      | 328.197931     | 164.602603       |                |                  | 3  |
| 16 | 2522.152136 | 1261.579706     | 2505.125587    | 1253.066431      | 2504.141571    | 1252.574424      | L    | 288.203016  | 144.605146      | 271.176467     | 136.091872       |                |                  | 2  |
| 17 |             |                 |                |                  |                |                  | R    | 175.118952  | 88.063114       | 158.092403     | 79.549839        |                |                  | 1  |

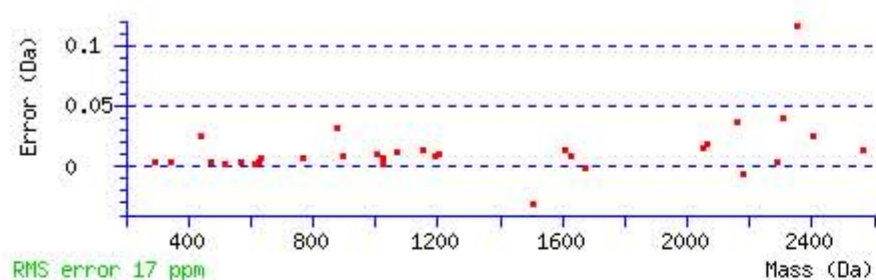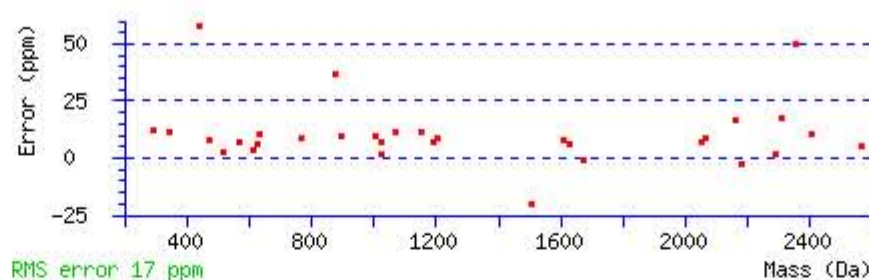

NCBI BLAST search of [MCPQLQQYEMHGPEGLR](#)

(Parameters: blastp, nr protein database, expect=20000, no filter, PAM30)

Other BLAST [web gateways](#)

**All matches to this query**

| Score | Mr(calc):   | Delta    | Sequence                          |
|-------|-------------|----------|-----------------------------------|
| 69.6  | 2695.256516 | 0.018660 | <a href="#">MCPQLQQYEMHGPEGLR</a> |
| 47.2  | 2695.256516 | 0.018660 | <a href="#">MCPQLQQYEMHGPEGLR</a> |
| 39.2  | 2695.256516 | 0.018660 | <a href="#">MCPQLQQYEMHGPEGLR</a> |



# Mascot Search Results

## Peptide View

MS/MS Fragmentation of **MCPQLQQYEMHGPEGLR**

Found in **A2MG\_HUMAN**, Alpha-2-macroglobulin OS=Homo sapiens GN=A2M PE=1 SV=3

Match to Query 65805: 2711.271496 from(678.825150,4+) rtinseconds(2084) index(25281)

Title: Locus:1.1.1.2868.9 File:"2013-07-02 CLN FXIII 180 min 1st F 2.wiff"

Data file C:\Program Files (x86)\Matrix Science\Mascot Daemon\mgf\7 FXIII 180 min 1st\mascot\_daemon\_merge.mgf

Click mouse within plot area to zoom in by factor of two about that point

Or, Plot from 0 to 2800 Da Full range

Label all possible matches  Label matches used for scoring

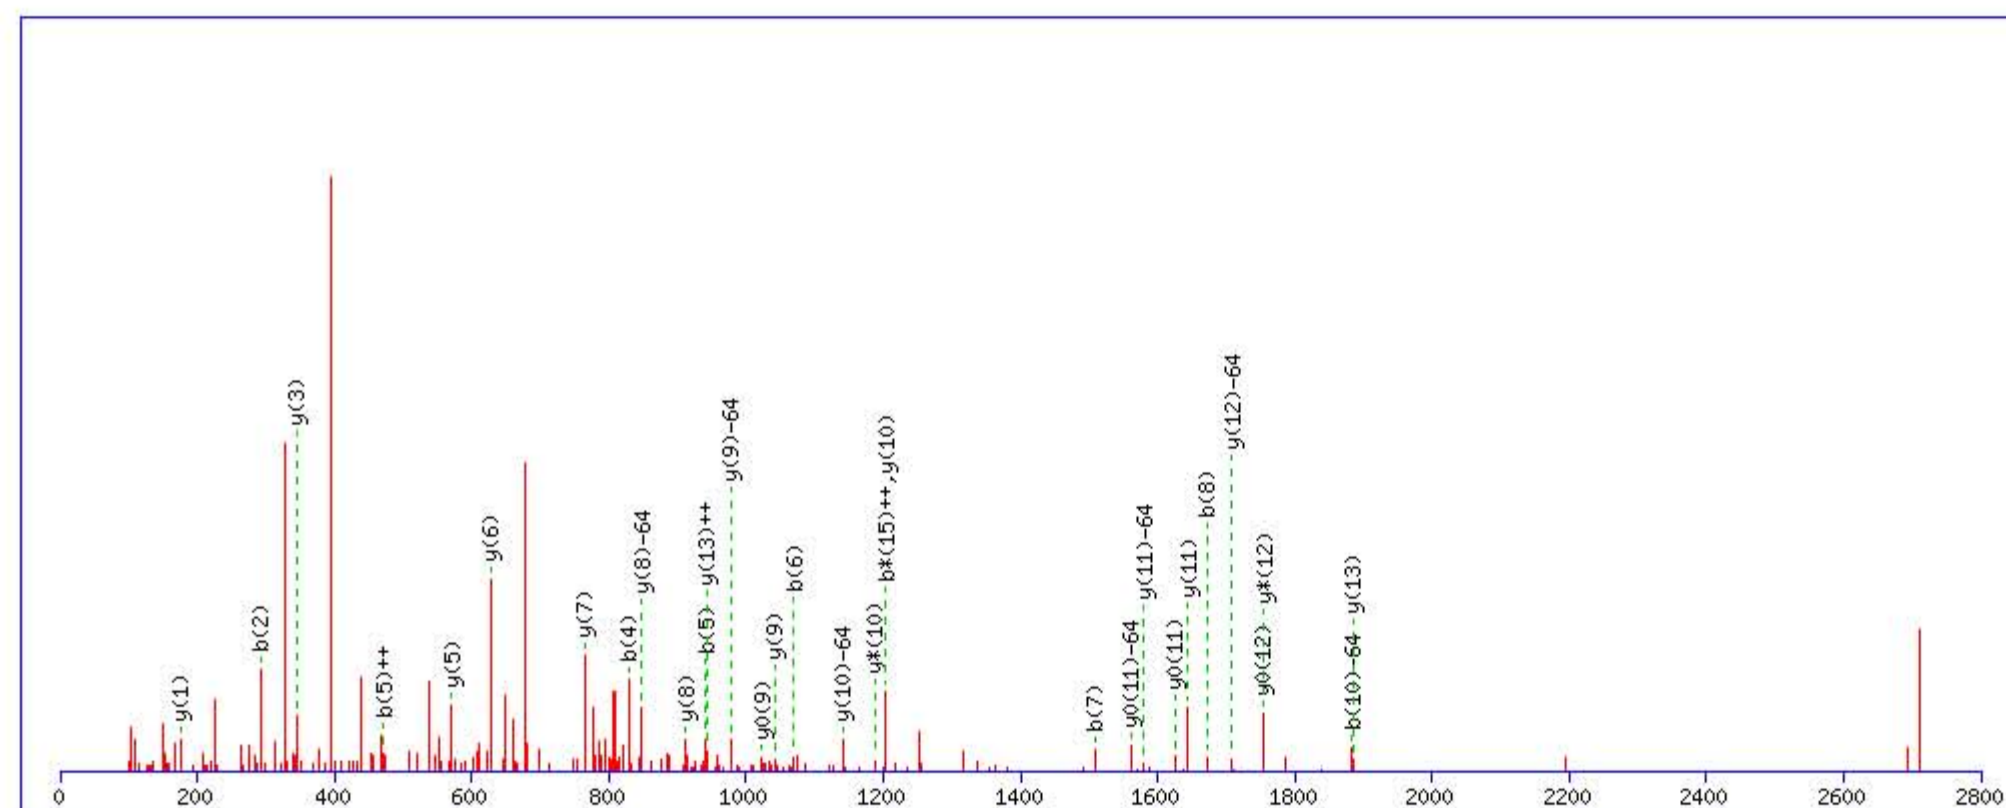

Monoisotopic mass of neutral peptide Mr(calc): 2711.251434

Fixed modifications: Carbamidomethyl (C) (apply to specified residues or termini only)

Variable modifications:

Q4 : Biotin:Thermo-21345 (Q)

Q7 : Biotin:Thermo-21345 (Q)

M10 : Oxidation (M), with neutral losses 0.000000 (shown in table), 63.998285

Ions Score: 32 Expect: 0.011

Matches : 31/260 fragment ions using 70 most intense peaks [\(help\)](#)

| #  | b                  | b <sup>++</sup>   | b <sup>*</sup> | b <sup>*++</sup>   | b <sup>0</sup> | b <sup>0++</sup> | Seq. | y                  | y <sup>++</sup>   | y <sup>*</sup>     | y <sup>*++</sup> | y <sup>0</sup>     | y <sup>0++</sup> | #  |
|----|--------------------|-------------------|----------------|--------------------|----------------|------------------|------|--------------------|-------------------|--------------------|------------------|--------------------|------------------|----|
| 1  | 132.047761         | 66.527518         |                |                    |                |                  | M    |                    |                   |                    |                  |                    |                  | 17 |
| 2  | <b>292.078410</b>  | 146.542843        |                |                    |                |                  | C    | 2581.218242        | 1291.112759       | 2564.191693        | 1282.599484      | 2563.207677        | 1282.107476      | 16 |
| 3  | 389.131174         | 195.069225        |                |                    |                |                  | P    | 2421.187593        | 1211.097435       | 2404.161044        | 1202.584160      | 2403.177028        | 1202.092152      | 15 |
| 4  | <b>828.356500</b>  | 414.681888        | 811.329951     | 406.168614         |                |                  | Q    | 2324.134829        | 1162.571053       | 2307.108280        | 1154.057778      | 2306.124264        | 1153.565770      | 14 |
| 5  | <b>941.440564</b>  | <b>471.223920</b> | 924.414015     | 462.710646         |                |                  | L    | <b>1884.909503</b> | <b>942.958390</b> | 1867.882954        | 934.445115       | 1866.898938        | 933.953107       | 13 |
| 6  | <b>1069.499142</b> | 535.253209        | 1052.472593    | 526.739935         |                |                  | Q    | 1771.825439        | 886.416358        | <b>1754.798890</b> | 877.903083       | <b>1753.814874</b> | 877.411075       | 12 |
| 7  | <b>1508.724468</b> | 754.865872        | 1491.697919    | 746.352598         |                |                  | Q    | <b>1643.766861</b> | 822.387069        | 1626.740312        | 813.873794       | <b>1625.756296</b> | 813.381786       | 11 |
| 8  | <b>1671.787797</b> | 836.397537        | 1654.761248    | 827.884262         |                |                  | Y    | <b>1204.541535</b> | 602.774406        | <b>1187.514986</b> | 594.261131       | 1186.530970        | 593.769123       | 10 |
| 9  | 1800.830390        | 900.918833        | 1783.803841    | 892.405559         | 1782.819825    | 891.913551       | E    | <b>1041.478206</b> | 521.242741        | 1024.451657        | 512.729467       | <b>1023.467641</b> | 512.237459       | 9  |
| 10 | 1947.865790        | 974.436533        | 1930.839241    | 965.923259         | 1929.855225    | 965.431251       | M    | <b>912.435613</b>  | 456.721445        | 895.409064         | 448.208170       | 894.425048         | 447.716162       | 8  |
| 11 | 2084.924702        | 1042.965989       | 2067.898153    | 1034.452715        | 2066.914137    | 1033.960707      | H    | <b>765.400213</b>  | 383.203745        | 748.373664         | 374.690470       | 747.389648         | 374.198462       | 7  |
| 12 | 2141.946166        | 1071.476721       | 2124.919617    | 1062.963446        | 2123.935601    | 1062.471439      | G    | <b>628.341301</b>  | 314.674289        | 611.314752         | 306.161014       | 610.330736         | 305.669006       | 6  |
| 13 | 2238.998930        | 1120.003103       | 2221.972381    | 1111.489828        | 2220.988365    | 1110.997821      | P    | <b>571.319837</b>  | 286.163557        | 554.293288         | 277.650282       | 553.309272         | 277.158274       | 5  |
| 14 | 2368.041523        | 1184.524400       | 2351.014974    | 1176.011125        | 2350.030958    | 1175.519117      | E    | 474.267073         | 237.637175        | 457.240524         | 229.123900       | 456.256508         | 228.631892       | 4  |
| 15 | 2425.062987        | 1213.035132       | 2408.036438    | <b>1204.521857</b> | 2407.052422    | 1204.029849      | G    | <b>345.224480</b>  | 173.115878        | 328.197931         | 164.602603       |                    |                  | 3  |
| 16 | 2538.147051        | 1269.577164       | 2521.120502    | 1261.063889        | 2520.136486    | 1260.571881      | L    | 288.203016         | 144.605146        | 271.176467         | 136.091872       |                    |                  | 2  |
| 17 |                    |                   |                |                    |                |                  | R    | <b>175.118952</b>  | 88.063114         | 158.092403         | 79.549839        |                    |                  | 1  |

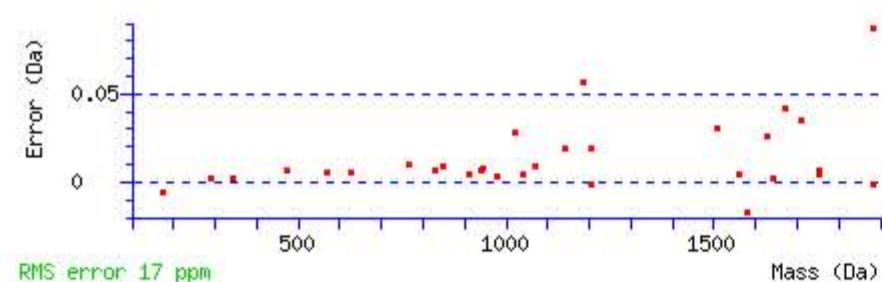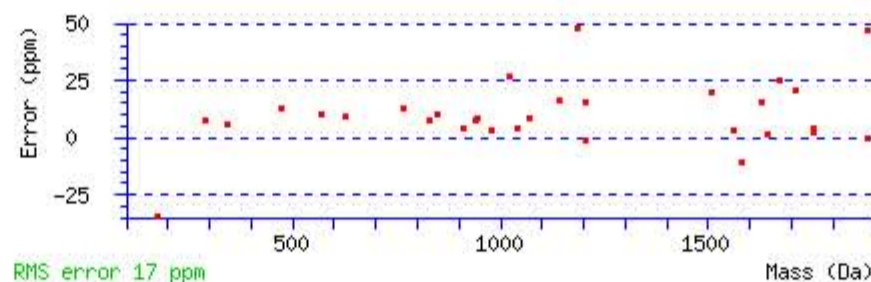

NCBI BLAST search of **MCPQLQQYEMHGPEGLR**

(Parameters: blastp, nr protein database, expect=20000, no filter, PAM30)

Other BLAST [web gateways](#)

## All matches to this query

| Score | Mr(calc):   | Delta    | Sequence                          |
|-------|-------------|----------|-----------------------------------|
| 32.1  | 2711.251434 | 0.020062 | <a href="#">MCPQLQQYEMHGPEGLR</a> |
| 22.2  | 2711.251434 | 0.020062 | <a href="#">MCPQLQQYEMHGPEGLR</a> |
| 19.7  | 2711.251434 | 0.020062 | <a href="#">MCPQLQQYEMHGPEGLR</a> |

Mascot: <http://www.matrixscience.com/>

# Mascot Search Results

## Peptide View

MS/MS Fragmentation of **MCPQLQQYEMHGPEGLR**

Found in **A2MG\_HUMAN**, Alpha-2-macroglobulin OS=Homo sapiens GN=A2M PE=1 SV=3

Match to Query 70478: 3006.456896 from(752.621500,4+) rtinseconds(2325) index(26978)

Title: Locus:1.1.1.2951.21 File:"2013-07-02 CLN FXIII 180 min 1st F 2.wiff"

Data file C:\Program Files (x86)\Matrix Science\Mascot Daemon\mgf\7 FXIII 180 min 1st\mascot\_daemon\_merge.mgf

Click mouse within plot area to zoom in by factor of two about that point

Or, Plot from  to  Da

Label all possible matches  Label matches used for scoring

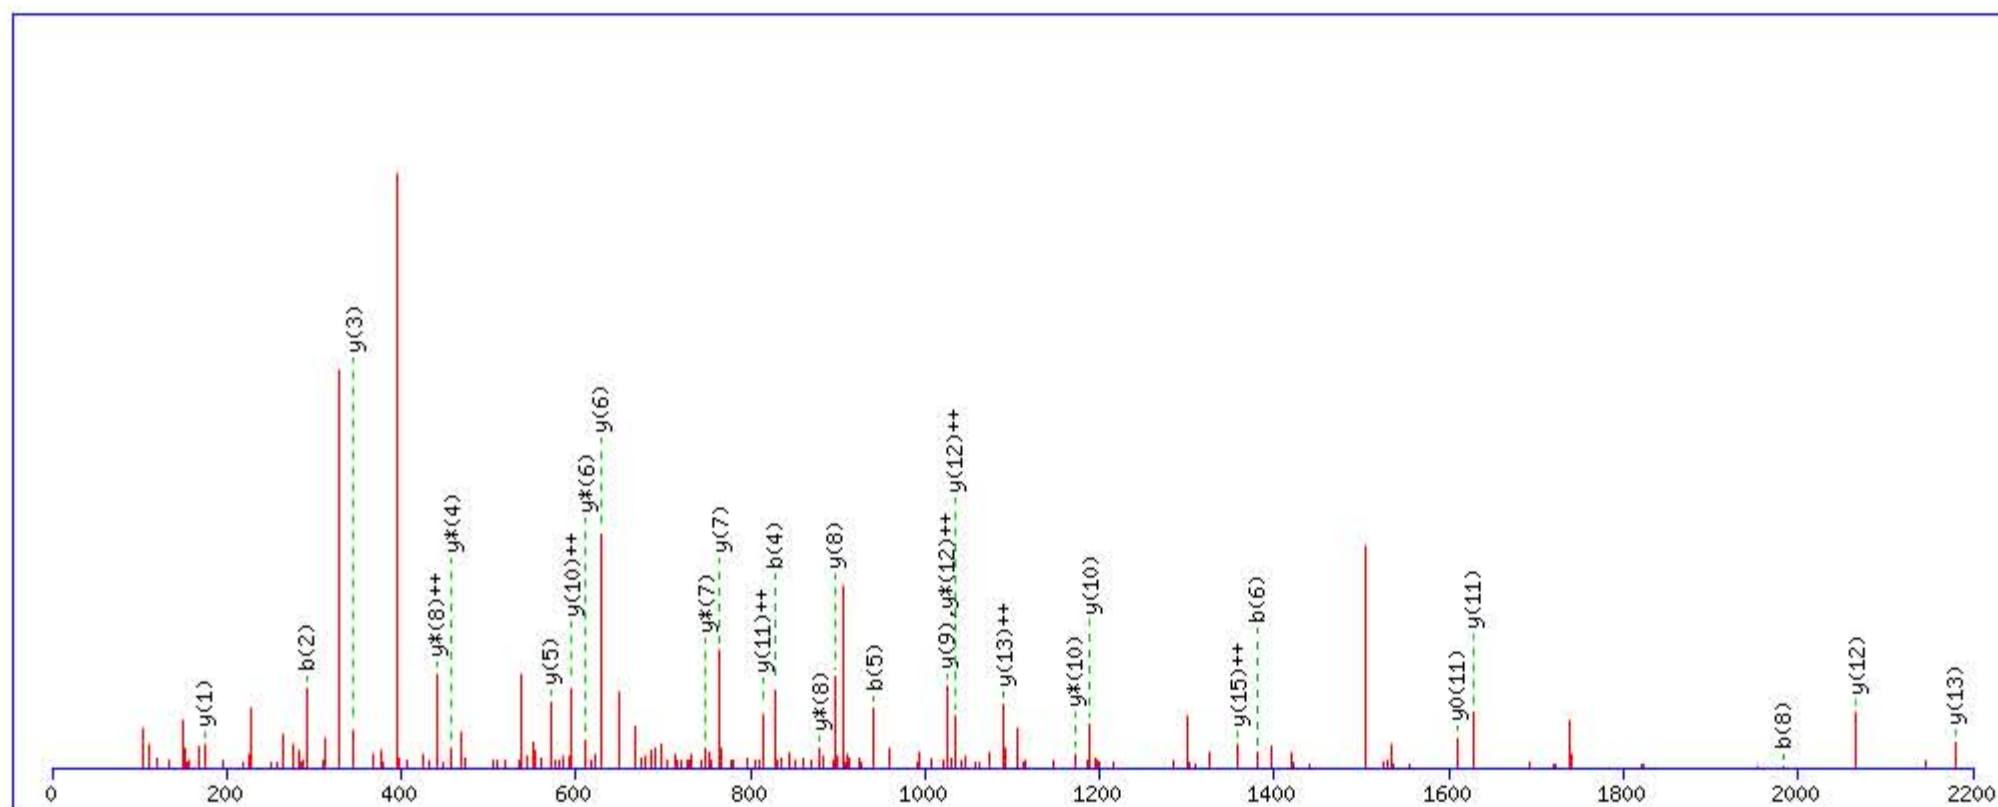

Monoisotopic mass of neutral peptide Mr(calc): 3006.423264

Fixed modifications: Carbamidomethyl (C) (apply to specified residues or termini only)

Variable modifications:

Q4 : Biotin:Thermo-21345 (Q)

Q6 : Biotin:Thermo-21345 (Q)

Q7 : Biotin:Thermo-21345 (Q)

Ions Score: 34 Expect: 0.012

Matches : 29/164 fragment ions using 74 most intense peaks [\(help\)](#)

| #  | b           | b <sup>++</sup> | b <sup>*</sup> | b <sup>+++</sup> | b <sup>0</sup> | b <sup>0++</sup> | Seq. | y           | y <sup>++</sup> | y <sup>*</sup> | y <sup>+++</sup> | y <sup>0</sup> | y <sup>0++</sup> | #  |
|----|-------------|-----------------|----------------|------------------|----------------|------------------|------|-------------|-----------------|----------------|------------------|----------------|------------------|----|
| 1  | 132.047761  | 66.527518       |                |                  |                |                  | M    |             |                 |                |                  |                |                  | 17 |
| 2  | 292.078410  | 146.542843      |                |                  |                |                  | C    | 2876.390075 | 1438.698675     | 2859.363526    | 1430.185401      | 2858.379510    | 1429.693393      | 16 |
| 3  | 389.131174  | 195.069225      |                |                  |                |                  | P    | 2716.359426 | 1358.683351     | 2699.332877    | 1350.170076      | 2698.348861    | 1349.678068      | 15 |
| 4  | 828.356500  | 414.681888      | 811.329951     | 406.168614       |                |                  | Q    | 2619.306662 | 1310.156969     | 2602.280113    | 1301.643694      | 2601.296097    | 1301.151686      | 14 |
| 5  | 941.440564  | 471.223920      | 924.414015     | 462.710646       |                |                  | L    | 2180.081336 | 1090.544306     | 2163.054787    | 1082.031031      | 2162.070771    | 1081.539023      | 13 |
| 6  | 1380.665890 | 690.836583      | 1363.639341    | 682.323309       |                |                  | Q    | 2066.997272 | 1034.002274     | 2049.970723    | 1025.488999      | 2048.986707    | 1024.996991      | 12 |
| 7  | 1819.891216 | 910.449246      | 1802.864667    | 901.935972       |                |                  | Q    | 1627.771946 | 814.389611      | 1610.745397    | 805.876337       | 1609.761381    | 805.384329       | 11 |
| 8  | 1982.954545 | 991.980911      | 1965.927996    | 983.467636       |                |                  | Y    | 1188.546620 | 594.776948      | 1171.520071    | 586.263674       | 1170.536055    | 585.771666       | 10 |
| 9  | 2111.997138 | 1056.502207     | 2094.970589    | 1047.988932      | 2093.986573    | 1047.496925      | E    | 1025.483291 | 513.245284      | 1008.456742    | 504.732009       | 1007.472726    | 504.240001       | 9  |
| 10 | 2243.037623 | 1122.022450     | 2226.011074    | 1113.509175      | 2225.027058    | 1113.017167      | M    | 896.440698  | 448.723987      | 879.414149     | 440.210713       | 878.430133     | 439.718705       | 8  |
| 11 | 2380.096535 | 1190.551906     | 2363.069986    | 1182.038631      | 2362.085970    | 1181.546623      | H    | 765.400213  | 383.203745      | 748.373664     | 374.690470       | 747.389648     | 374.198462       | 7  |
| 12 | 2437.117999 | 1219.062637     | 2420.091450    | 1210.549363      | 2419.107434    | 1210.057355      | G    | 628.341301  | 314.674289      | 611.314752     | 306.161014       | 610.330736     | 305.669006       | 6  |
| 13 | 2534.170763 | 1267.589019     | 2517.144214    | 1259.075745      | 2516.160198    | 1258.583737      | P    | 571.319837  | 286.163557      | 554.293288     | 277.650282       | 553.309272     | 277.158274       | 5  |
| 14 | 2663.213356 | 1332.110316     | 2646.186807    | 1323.597041      | 2645.202791    | 1323.105034      | E    | 474.267073  | 237.637175      | 457.240524     | 229.123900       | 456.256508     | 228.631892       | 4  |
| 15 | 2720.234820 | 1360.621048     | 2703.208271    | 1352.107773      | 2702.224255    | 1351.615766      | G    | 345.224480  | 173.115878      | 328.197931     | 164.602603       |                |                  | 3  |
| 16 | 2833.318884 | 1417.163080     | 2816.292335    | 1408.649806      | 2815.308319    | 1408.157798      | L    | 288.203016  | 144.605146      | 271.176467     | 136.091872       |                |                  | 2  |
| 17 |             |                 |                |                  |                |                  | R    | 175.118952  | 88.063114       | 158.092403     | 79.549839        |                |                  | 1  |

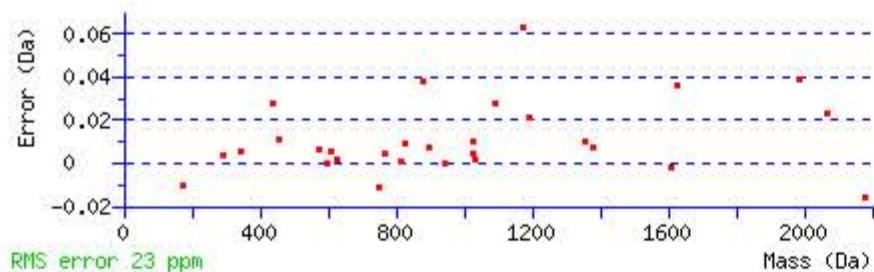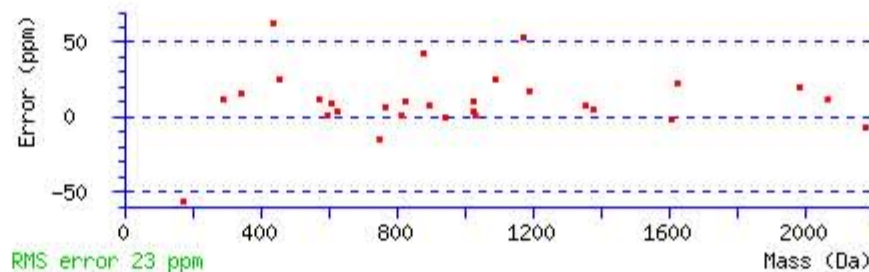

NCBI BLAST search of [MCPQLQQYEMHGPEGLR](#)

(Parameters: blastp, nr protein database, expect=20000, no filter, PAM30)

Other BLAST [web gateways](#)

All matches to this query

| Score | Mr(calc):   | Delta    | Sequence                          |
|-------|-------------|----------|-----------------------------------|
| 33.7  | 3006.423264 | 0.033632 | <a href="#">MCPQLQQYEMHGPEGLR</a> |

# MASCOT SEARCH RESULTS

## Peptide View

MS/MS Fragmentation of **AVDQSVLLMKPDAELSASSVYNLLPEK**

Found in **A2MG\_HUMAN**, Alpha-2-macroglobulin OS=Homo sapiens GN=A2M PE=1 SV=3

Match to Query 73321: 3227.721296 from(807.937600,4+) rtinseconds(2739) index(29724)

Title: Locus:1.1.1.3094.17 File:"2013-07-02 CLN FXIII 180 min 1st F 2.wiff"

Data file C:\Program Files (x86)\Matrix Science\Mascot Daemon\mgf7 FXIII 180 min 1st\mascot\_daemon\_merge.mgf

Click mouse within plot area to zoom in by factor of two about that point

Or, Plot from 0 to 2800 Da Full range

Label all possible matches  Label matches used for scoring

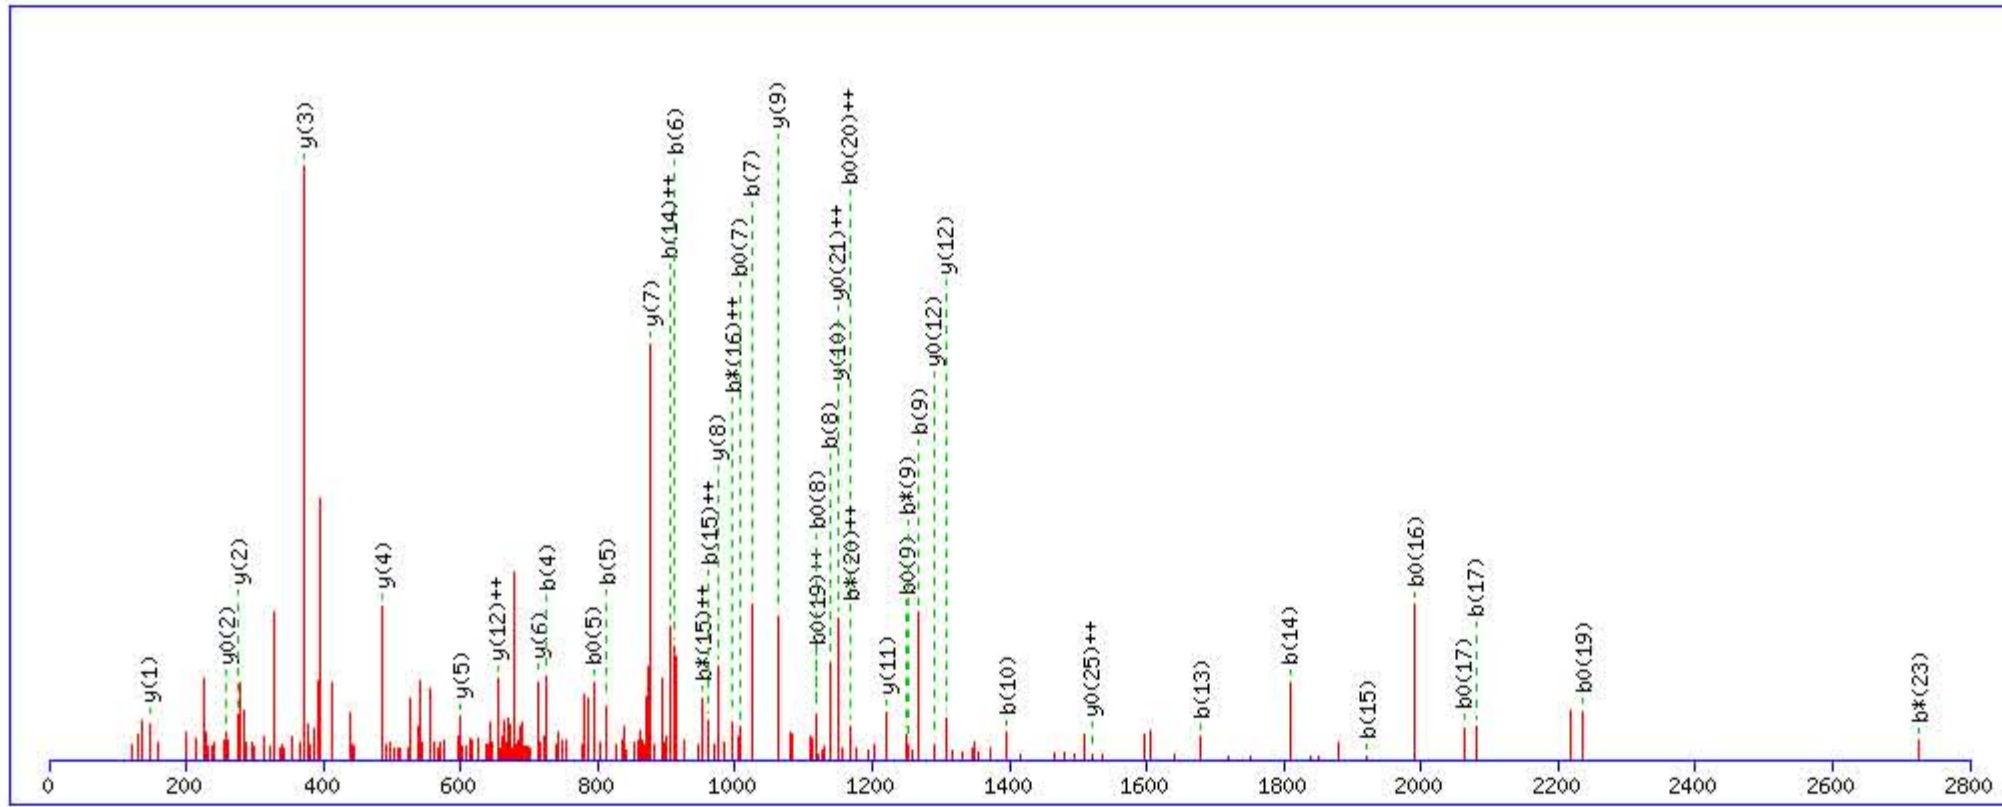

Monoisotopic mass of neutral peptide Mr(calc): 3227.682129  
 Fixed modifications: Carbamidomethyl (C) (apply to specified residues or termini only)  
 Variable modifications:  
 Q4 : Biotin:Thermo-21345 (Q)  
 Ions Score: 66 Expect: 4.5e-006  
 Matches : 44/300 fragment ions using 103 most intense peaks ([help](#))

| #  | b                  | b <sup>++</sup>   | b <sup>*</sup>     | b <sup>+++</sup>   | b <sup>0</sup>     | b <sup>0++</sup>   | Seq. | y                  | y <sup>++</sup>   | y <sup>*</sup> | y <sup>+++</sup> | y <sup>0</sup>     | y <sup>0++</sup> | #  |
|----|--------------------|-------------------|--------------------|--------------------|--------------------|--------------------|------|--------------------|-------------------|----------------|------------------|--------------------|------------------|----|
| 1  | 72.044390          | 36.525833         |                    |                    |                    |                    | A    |                    |                   |                |                  |                    |                  | 27 |
| 2  | 171.112804         | 86.060040         |                    |                    |                    |                    | V    | 3157.652336        | 1579.329806       | 3140.625787    | 1570.816531      | 3139.641771        | 1570.324523      | 26 |
| 3  | 286.139747         | 143.573512        |                    |                    | 268.129182         | 134.568229         | D    | 3058.583922        | 1529.795599       | 3041.557373    | 1521.282324      | 3040.573357        | 1520.790316      | 25 |
| 4  | <b>725.365073</b>  | 363.186175        | 708.338524         | 354.672900         | 707.354508         | 354.180892         | Q    | 2943.556979        | 1472.282127       | 2926.530430    | 1463.768853      | 2925.546414        | 1463.276845      | 24 |
| 5  | <b>812.397101</b>  | 406.702189        | 795.370552         | 398.188914         | <b>794.386536</b>  | 397.696906         | S    | 2504.331653        | 1252.669464       | 2487.305104    | 1244.156190      | 2486.321088        | 1243.664182      | 23 |
| 6  | <b>911.465515</b>  | 456.236396        | 894.438966         | 447.723121         | 893.454950         | 447.231113         | V    | 2417.299625        | 1209.153451       | 2400.273076    | 1200.640176      | 2399.289060        | 1200.148168      | 22 |
| 7  | <b>1024.549579</b> | 512.778427        | 1007.523030        | 504.265153         | <b>1006.539014</b> | 503.773145         | L    | 2318.231211        | 1159.619243       | 2301.204662    | 1151.105969      | 2300.220646        | 1150.613961      | 21 |
| 8  | <b>1137.633643</b> | 569.320459        | 1120.607094        | 560.807185         | <b>1119.623078</b> | 560.315177         | L    | 2205.147147        | 1103.077212       | 2188.120598    | 1094.563937      | 2187.136582        | 1094.071929      | 20 |
| 9  | <b>1268.674128</b> | 634.840702        | <b>1251.647579</b> | 626.327428         | <b>1250.663563</b> | 625.835419         | M    | 2092.063083        | 1046.535179       | 2075.036534    | 1038.021905      | 2074.052518        | 1037.529897      | 19 |
| 10 | <b>1396.769091</b> | 698.888183        | 1379.742542        | 690.374909         | 1378.758526        | 689.882901         | K    | 1961.022598        | 981.014937        | 1943.996049    | 972.501663       | 1943.012033        | 972.009655       | 18 |
| 11 | 1493.821855        | 747.414565        | 1476.795306        | 738.901291         | 1475.811290        | 738.409283         | P    | 1832.927635        | 916.967456        | 1815.901086    | 908.454181       | 1814.917070        | 907.962173       | 17 |
| 12 | 1608.848798        | 804.928037        | 1591.822249        | 796.414763         | 1590.838233        | 795.922755         | D    | 1735.874871        | 868.441074        | 1718.848322    | 859.927799       | 1717.864306        | 859.435791       | 16 |
| 13 | <b>1679.885912</b> | 840.446594        | 1662.859363        | 831.933320         | 1661.875347        | 831.441311         | A    | 1620.847928        | 810.927602        | 1603.821379    | 802.414328       | 1602.837363        | 801.922320       | 15 |
| 14 | <b>1808.928505</b> | <b>904.967891</b> | 1791.901956        | 896.454616         | 1790.917940        | 895.962608         | E    | 1549.810814        | 775.409045        | 1532.784265    | 766.895771       | 1531.800249        | 766.403763       | 14 |
| 15 | <b>1922.012569</b> | <b>961.509923</b> | 1904.986020        | <b>952.996648</b>  | 1904.002004        | 952.504640         | L    | 1420.768221        | 710.887749        | 1403.741672    | 702.374474       | 1402.757656        | 701.882466       | 13 |
| 16 | 2009.044597        | 1005.025937       | 1992.018048        | <b>996.512662</b>  | <b>1991.034032</b> | 996.020654         | S    | <b>1307.684157</b> | <b>654.345717</b> | 1290.657608    | 645.832442       | <b>1289.673592</b> | 645.340434       | 12 |
| 17 | <b>2080.081711</b> | 1040.544493       | 2063.055162        | 1032.031219        | <b>2062.071146</b> | 1031.539211        | A    | <b>1220.652129</b> | 610.829703        | 1203.625580    | 602.316428       | 1202.641564        | 601.824420       | 11 |
| 18 | 2167.113739        | 1084.060507       | 2150.087190        | 1075.547233        | 2149.103174        | 1075.055225        | S    | <b>1149.615015</b> | 575.311146        | 1132.588466    | 566.797871       | 1131.604450        | 566.305863       | 10 |
| 19 | 2254.145767        | 1127.576521       | 2237.119218        | 1119.063247        | <b>2236.135202</b> | <b>1118.571239</b> | S    | <b>1062.582987</b> | 531.795132        | 1045.556438    | 523.281857       | 1044.572422        | 522.789849       | 9  |
| 20 | 2353.214181        | 1177.110728       | 2336.187632        | <b>1168.597454</b> | 2335.203616        | <b>1168.105446</b> | V    | <b>975.550959</b>  | 488.279118        | 958.524410     | 479.765843       | 957.540394         | 479.273835       | 8  |
| 21 | 2516.277510        | 1258.642393       | 2499.250961        | 1250.129118        | 2498.266945        | 1249.637110        | Y    | <b>876.482545</b>  | 438.744911        | 859.455996     | 430.231636       | 858.471980         | 429.739628       | 7  |
| 22 | 2630.320437        | 1315.663856       | 2613.293888        | 1307.150582        | 2612.309872        | 1306.658574        | N    | <b>713.419216</b>  | 357.213246        | 696.392667     | 348.699972       | 695.408651         | 348.207964       | 6  |
| 23 | 2743.404501        | 1372.205888       | <b>2726.377952</b> | 1363.692614        | 2725.393936        | 1363.200606        | L    | <b>599.376289</b>  | 300.191783        | 582.349740     | 291.678508       | 581.365724         | 291.186500       | 5  |
| 24 | 2856.488565        | 1428.747921       | 2839.462016        | 1420.234646        | 2838.478000        | 1419.742638        | L    | <b>486.292225</b>  | 243.649751        | 469.265676     | 235.136476       | 468.281660         | 234.644468       | 4  |
| 25 | 2953.541329        | 1477.274303       | 2936.514780        | 1468.761028        | 2935.530764        | 1468.269020        | P    | <b>373.208161</b>  | 187.107719        | 356.181612     | 178.594444       | 355.197596         | 178.102436       | 3  |
| 26 | 3082.583922        | 1541.795599       | 3065.557373        | 1533.282325        | 3064.573357        | 1532.790317        | E    | <b>276.155397</b>  | 138.581337        | 259.128848     | 130.068062       | <b>258.144832</b>  | 129.576054       | 2  |
| 27 |                    |                   |                    |                    |                    |                    | K    | <b>147.112804</b>  | 74.060040         | 130.086255     | 65.546765        |                    |                  | 1  |

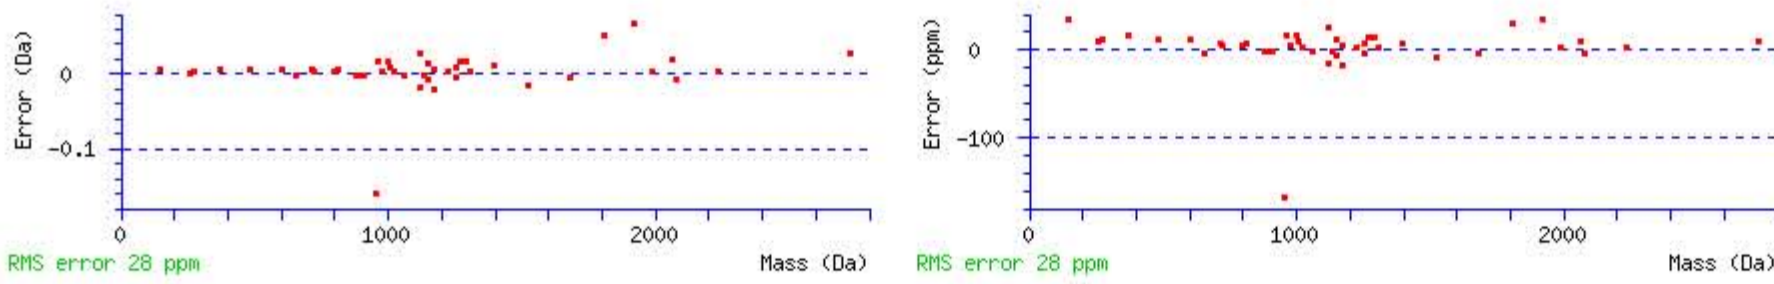

NCBI BLAST search of **AVDQSVLLMKPDAELSASSVYNLLPEK**  
 (Parameters: blastp, nr protein database, expect=20000, no filter, PAM30)  
 Other BLAST [web gateways](#)

### All matches to this query

| Score | Mr(calc):   | Delta    | Sequence                                    |
|-------|-------------|----------|---------------------------------------------|
| 65.7  | 3227.682129 | 0.039167 | <a href="#">AVDQSVLLMKPDAELSASSVYNLLPEK</a> |

Mascot: <http://www.matrixscience.com/>

# MASCOT Search Results

## Peptide View

MS/MS Fragmentation of **SPCYGYQWVSEEHEEAHHTAYLVFSPSK**  
 Found in **A2MG\_HUMAN**, Alpha-2-macroglobulin OS=Homo sapiens GN=A2M PE=1 SV=3

Match to Query 78975: 3648.692456 from(913.180390,4+) rtinseconds(2135) index(25623)  
 Title: Locus:1.1.1.2885.13 File:"2013-07-02 CLN FXIII 180 min 1st F 2.wiff"  
 Data file C:\Program Files (x86)\Matrix Science\Mascot Daemon\mgf7 FXIII 180 min 1st\mascot\_daemon\_merge.mgf

Click mouse within plot area to zoom in by factor of two about that point  
 Or, Plot from [0] to [3000] Da [Full range]  
 Label all possible matches  Label matches used for scoring

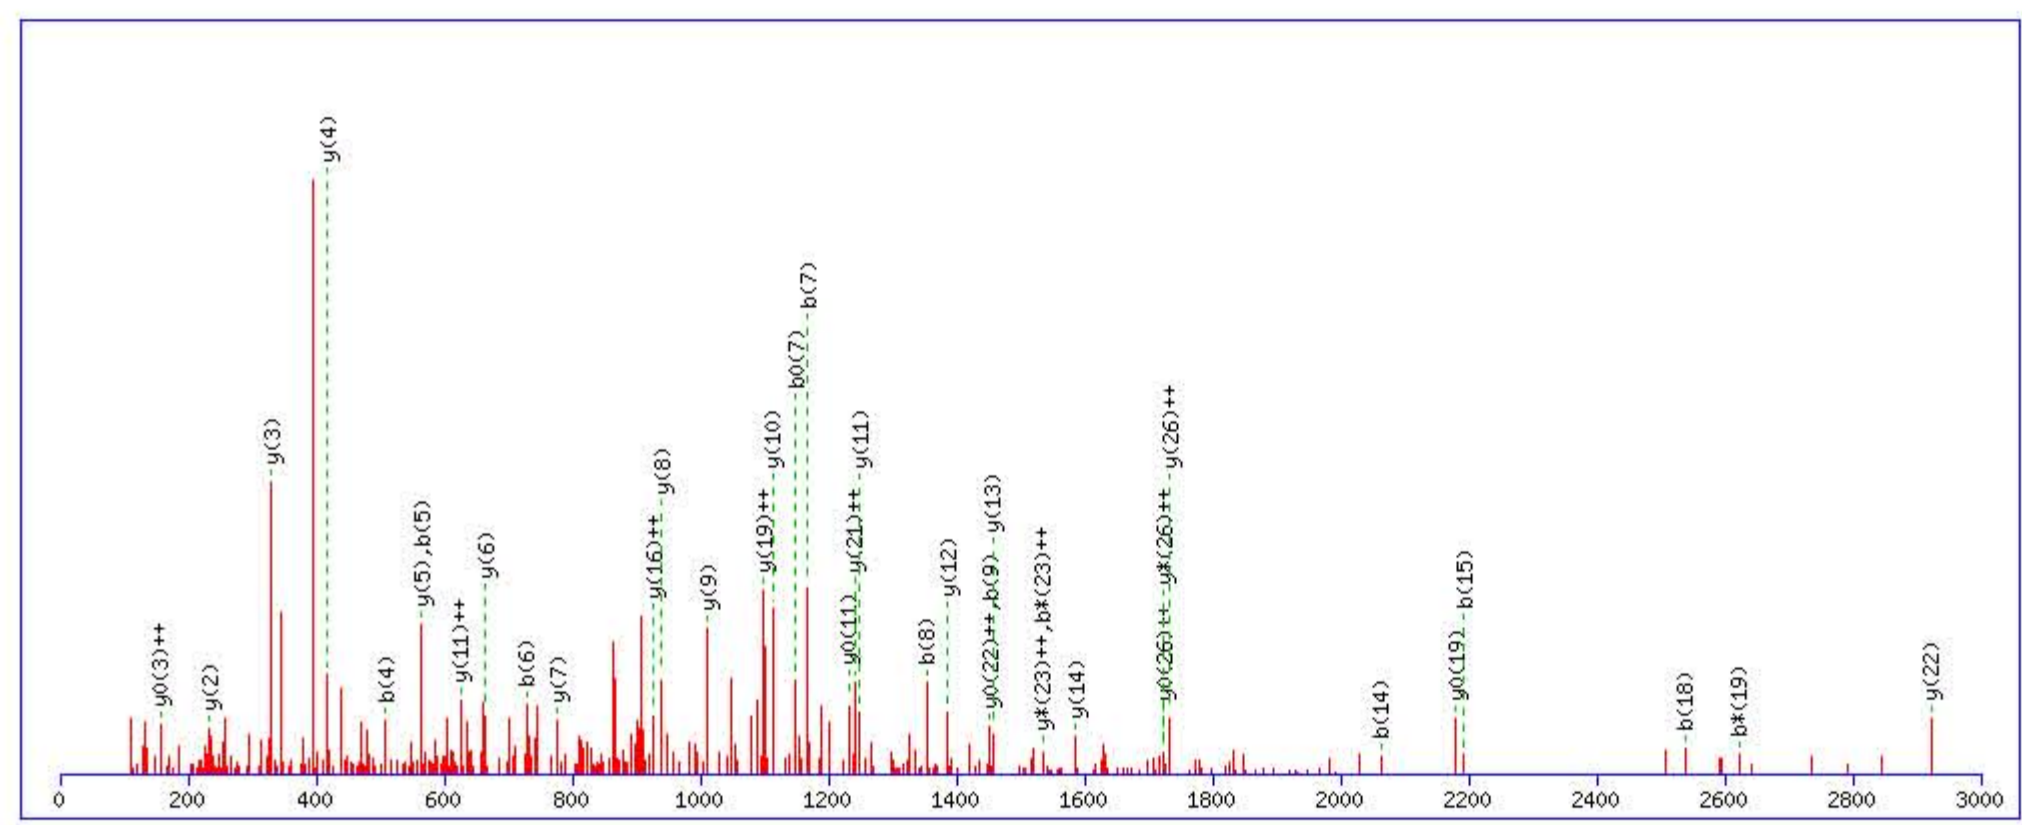

Monoisotopic mass of neutral peptide  $M_r(\text{calc})$ : 3648.644211  
 Fixed modifications: Carbamidomethyl (C) (apply to specified residues or termini only)  
 Variable modifications:  
 Q7 : Biotin:Thermo-21345 (Q)  
 Ions Score: 62 Expect: 9.4e-006  
 Matches : 38/310 fragment ions using 71 most intense peaks [\(help\)](#)

| #  | b                  | b <sup>++</sup> | b <sup>*</sup>     | b <sup>+++</sup>   | b <sup>0</sup>     | b <sup>0++</sup> | Seq. | y                  | y <sup>++</sup>    | y <sup>*</sup> | y <sup>+++</sup>   | y <sup>0</sup>     | y <sup>0++</sup>   | #  |
|----|--------------------|-----------------|--------------------|--------------------|--------------------|------------------|------|--------------------|--------------------|----------------|--------------------|--------------------|--------------------|----|
| 1  | 88.039304          | 44.523290       |                    |                    | 70.028739          | 35.518008        | S    |                    |                    |                |                    |                    |                    | 28 |
| 2  | 185.092068         | 93.049672       |                    |                    | 167.081503         | 84.044389        | P    | 3562.619476        | 1781.813376        | 3545.592927    | 1773.300101        | 3544.608911        | 1772.808093        | 27 |
| 3  | 345.122717         | 173.064997      |                    |                    | 327.112152         | 164.059714       | C    | 3465.566712        | <b>1733.286994</b> | 3448.540163    | <b>1724.773719</b> | 3447.556147        | <b>1724.281711</b> | 26 |
| 4  | <b>508.186046</b>  | 254.596661      |                    |                    | 490.175481         | 245.591379       | Y    | 3305.536063        | 1653.271669        | 3288.509514    | 1644.758395        | 3287.525498        | 1644.266387        | 25 |
| 5  | <b>565.207510</b>  | 283.107393      |                    |                    | 547.196945         | 274.102111       | G    | 3142.472734        | 1571.740005        | 3125.446185    | 1563.226730        | 3124.462169        | 1562.734722        | 24 |
| 6  | <b>728.270839</b>  | 364.639058      |                    |                    | 710.260274         | 355.633775       | Y    | 3085.451270        | 1543.229273        | 3068.424721    | <b>1534.715998</b> | 3067.440705        | 1534.223990        | 23 |
| 7  | <b>1167.496165</b> | 584.251721      | 1150.469616        | 575.738446         | <b>1149.485600</b> | 575.246438       | Q    | <b>2922.387941</b> | 1461.697608        | 2905.361392    | 1453.184334        | 2904.377376        | <b>1452.692326</b> | 22 |
| 8  | <b>1353.575478</b> | 677.291377      | 1336.548929        | 668.778103         | 1335.564913        | 668.286094       | W    | 2483.162615        | <b>1242.084945</b> | 2466.136066    | 1233.571671        | 2465.152050        | 1233.079663        | 21 |
| 9  | <b>1452.643892</b> | 726.825584      | 1435.617343        | 718.312310         | 1434.633327        | 717.820302       | V    | 2297.083302        | 1149.045289        | 2280.056753    | 1140.532014        | 2279.072737        | 1140.040006        | 20 |
| 10 | 1539.675920        | 770.341598      | 1522.649371        | 761.828324         | 1521.665355        | 761.336316       | S    | 2198.014888        | <b>1099.511082</b> | 2180.988339    | 1090.997807        | <b>2180.004323</b> | 1090.505800        | 19 |
| 11 | 1668.718513        | 834.862895      | 1651.691964        | 826.349620         | 1650.707948        | 825.857612       | E    | 2110.982860        | 1055.995068        | 2093.956311    | 1047.481793        | 2092.972295        | 1046.989785        | 18 |
| 12 | 1797.761106        | 899.384191      | 1780.734557        | 890.870917         | 1779.750541        | 890.378909       | E    | 1981.940267        | 991.473772         | 1964.913718    | 982.960497         | 1963.929702        | 982.468489         | 17 |
| 13 | 1934.820018        | 967.913647      | 1917.793469        | 959.400373         | 1916.809453        | 958.908365       | H    | 1852.897674        | <b>926.952475</b>  | 1835.871125    | 918.439201         | 1834.887109        | 917.947193         | 16 |
| 14 | <b>2063.862611</b> | 1032.434943     | 2046.836062        | 1023.921669        | 2045.852046        | 1023.429661      | E    | 1715.838762        | 858.423019         | 1698.812213    | 849.909745         | 1697.828197        | 849.417737         | 15 |
| 15 | <b>2192.905204</b> | 1096.956240     | 2175.878655        | 1088.442965        | 2174.894639        | 1087.950958      | E    | <b>1586.796169</b> | 793.901723         | 1569.769620    | 785.388448         | 1568.785604        | 784.896440         | 14 |
| 16 | 2263.942318        | 1132.474797     | 2246.915769        | 1123.961523        | 2245.931753        | 1123.469515      | A    | <b>1457.753576</b> | 729.380426         | 1440.727027    | 720.867152         | 1439.743011        | 720.375144         | 13 |
| 17 | 2401.001230        | 1201.004253     | 2383.974681        | 1192.490979        | 2382.990665        | 1191.998971      | H    | <b>1386.716462</b> | 693.861869         | 1369.689913    | 685.348595         | 1368.705897        | 684.856587         | 12 |
| 18 | <b>2538.060142</b> | 1269.533709     | 2521.033593        | 1261.020435        | 2520.049577        | 1260.528427      | H    | <b>1249.657550</b> | <b>625.332413</b>  | 1232.631001    | 616.819139         | <b>1231.646985</b> | 616.327131         | 11 |
| 19 | 2639.107821        | 1320.057548     | <b>2622.081272</b> | 1311.544274        | 2621.097256        | 1311.052266      | T    | <b>1112.598638</b> | 556.802957         | 1095.572089    | 548.289683         | 1094.588073        | 547.797675         | 10 |
| 20 | 2710.144935        | 1355.576106     | 2693.118386        | 1347.062831        | 2692.134370        | 1346.570823      | A    | <b>1011.550959</b> | 506.279118         | 994.524410     | 497.765843         | 993.540394         | 497.273835         | 9  |
| 21 | 2873.208264        | 1437.107770     | 2856.181715        | 1428.594496        | 2855.197699        | 1428.102488      | Y    | <b>940.513845</b>  | 470.760561         | 923.487296     | 462.247286         | 922.503280         | 461.755278         | 8  |
| 22 | 2986.292328        | 1493.649802     | 2969.265779        | 1485.136528        | 2968.281763        | 1484.644520      | L    | <b>777.450516</b>  | 389.228896         | 760.423967     | 380.715622         | 759.439951         | 380.223614         | 7  |
| 23 | 3085.360742        | 1543.184009     | 3068.334193        | <b>1534.670735</b> | 3067.350177        | 1534.178727      | V    | <b>664.366452</b>  | 332.686864         | 647.339903     | 324.173589         | 646.355887         | 323.681581         | 6  |
| 24 | 3232.429156        | 1616.718216     | 3215.402607        | 1608.204941        | 3214.418591        | 1607.712934      | F    | <b>565.298038</b>  | 283.152657         | 548.271489     | 274.639383         | 547.287473         | 274.147375         | 5  |
| 25 | 3319.461184        | 1660.234230     | 3302.434635        | 1651.720955        | 3301.450619        | 1651.228948      | S    | <b>418.229624</b>  | 209.618450         | 401.203075     | 201.105176         | 400.219059         | 200.613168         | 4  |
| 26 | 3416.513948        | 1708.760612     | 3399.487399        | 1700.247338        | 3398.503383        | 1699.755330      | P    | <b>331.197596</b>  | 166.102436         | 314.171047     | 157.589162         | 313.187031         | <b>157.097154</b>  | 3  |
| 27 | 3503.545976        | 1752.276626     | 3486.519427        | 1743.763352        | 3485.535411        | 1743.271344      | S    | <b>234.144832</b>  | 117.576054         | 217.118283     | 109.062780         | 216.134267         | 108.570772         | 2  |
| 28 |                    |                 |                    |                    |                    |                  | K    | 147.112804         | 74.060040          | 130.086255     | 65.546765          |                    |                    | 1  |

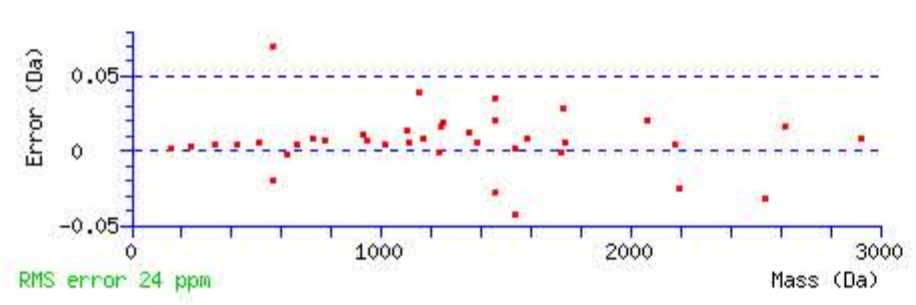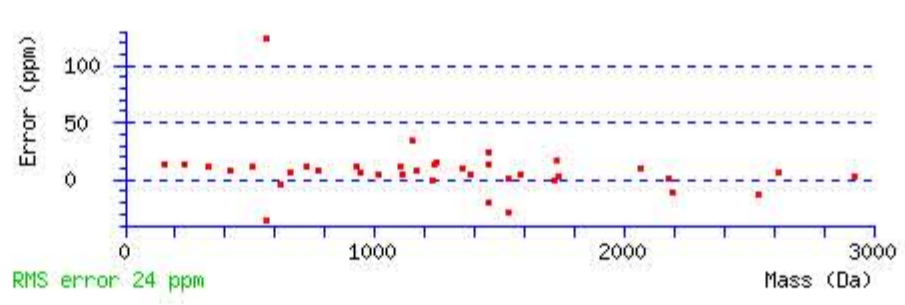

NCBI BLAST search of **SPCYGYQWVSEEHEEAHHTAYLVFSPSK**  
 (Parameters: blastp, nr protein database, expect=20000, no filter, PAM30)  
 Other BLAST [web gateways](#)

### All matches to this query

| Score | $M_r(\text{calc})$ : | Delta    | Sequence                                     |
|-------|----------------------|----------|----------------------------------------------|
| 62.1  | 3648.644211          | 0.048245 | <a href="#">SPCYGYQWVSEEHEEAHHTAYLVFSPSK</a> |

Mascot: <http://www.matrixscience.com/>

# MASCOT Search Results

## Peptide View

MS/MS Fragmentation of **KATEDEGSEQK**  
 Found in **ANT3\_HUMAN**, Antithrombin-III OS=Homo sapiens GN=SERPINC1 PE=1 SV=1

Match to Query 35996: 1531.722868 from(766.868710,2+) rtinseconds(1002) index(17999)  
 Title: Locus:1.1.1.2491.14 File:"2013-07-02 CLN FXIII 180 min 1st F 2.wiff"  
 Data file C:\Program Files (x86)\Matrix Science\Mascot Daemon\mgf\7 FXIII 180 min 1st\mascot\_daemon\_merge.mgf

Click mouse within plot area to zoom in by factor of two about that point

Or, Plot from  to  Da

Label all possible matches  Label matches used for scoring

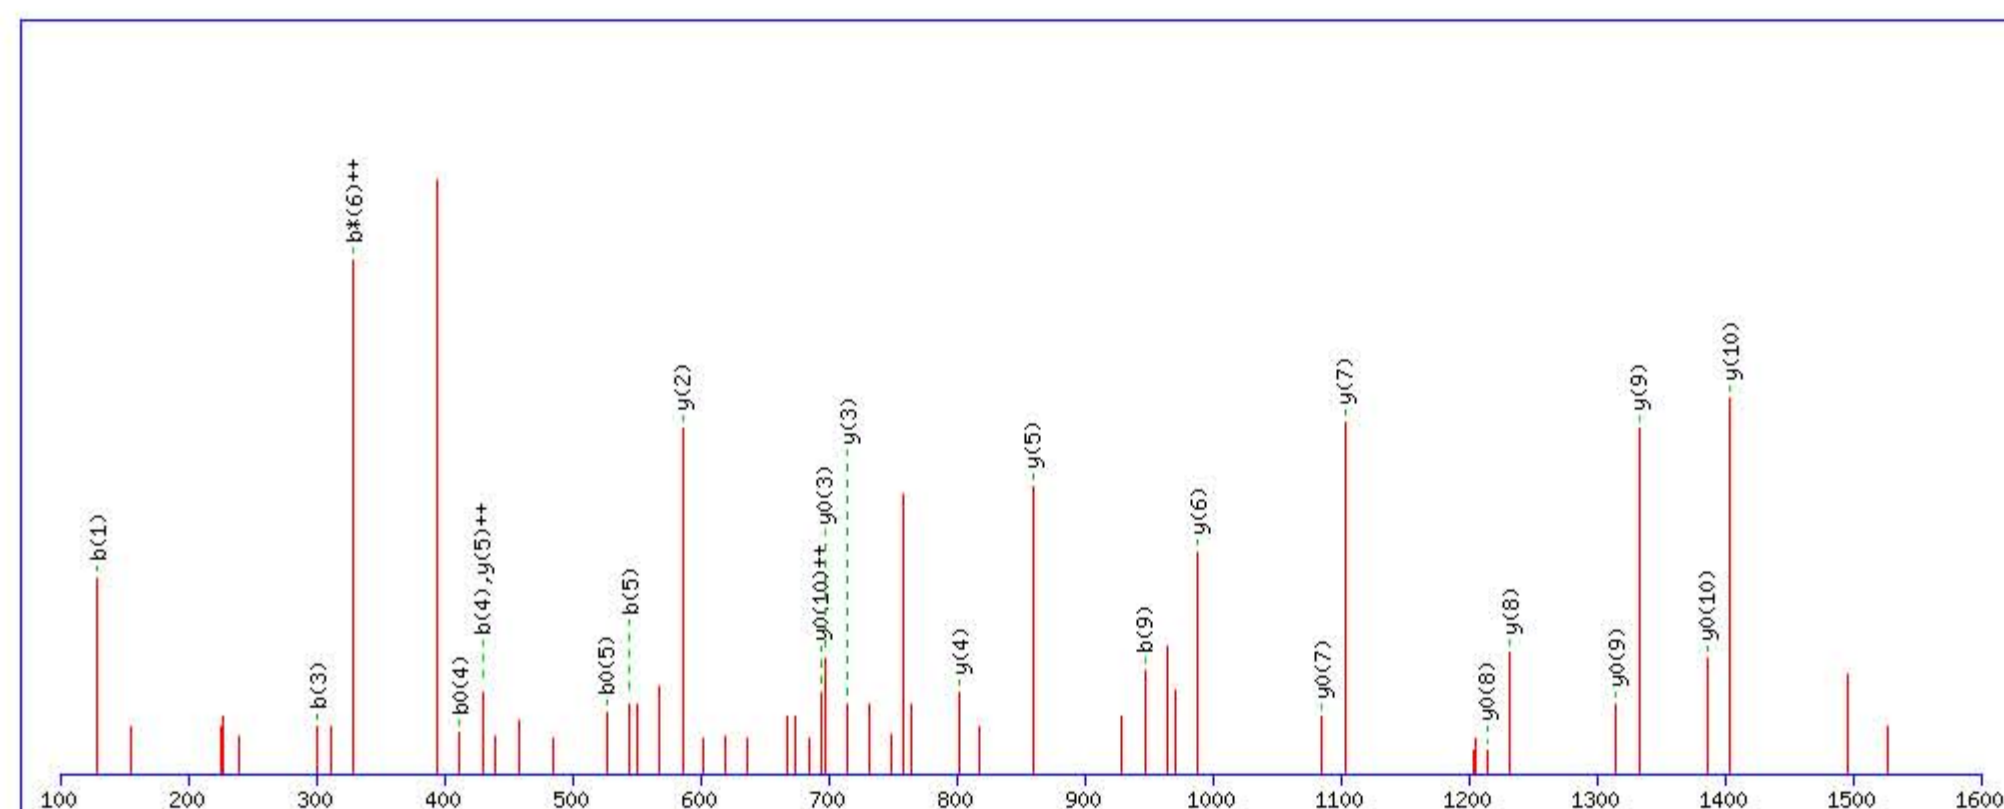

Monoisotopic mass of neutral peptide Mr(calc): 1531.718796  
 Fixed modifications: Carbamidomethyl (C) (apply to specified residues or termini only)  
 Variable modifications:  
 Q10 : Biotin:Thermo-21345 (Q)  
 Ions Score: 68 Expect: 2.7e-006  
 Matches : 26/112 fragment ions using 37 most intense peaks [\(help\)](#)

| #  | b                  | b <sup>++</sup>   | b <sup>*</sup> | b <sup>+++</sup>  | b <sup>0</sup>    | b <sup>0++</sup> | Seq.     | y                  | y <sup>++</sup>   | y <sup>*</sup> | y <sup>+++</sup> | y <sup>0</sup>     | y <sup>0++</sup>  | #         |
|----|--------------------|-------------------|----------------|-------------------|-------------------|------------------|----------|--------------------|-------------------|----------------|------------------|--------------------|-------------------|-----------|
| 1  | <b>129.102239</b>  | 65.054757         | 112.075690     | 56.541483         |                   |                  | <b>K</b> |                    |                   |                |                  |                    |                   | <b>11</b> |
| 2  | 200.139353         | 100.573315        | 183.112804     | 92.060040         |                   |                  | <b>A</b> | <b>1404.631137</b> | 702.819207        | 1387.604588    | 694.305932       | <b>1386.620572</b> | <b>693.813924</b> | <b>10</b> |
| 3  | <b>301.187032</b>  | 151.097154        | 284.160483     | 142.583879        | 283.176467        | 142.091872       | <b>T</b> | <b>1333.594023</b> | 667.300650        | 1316.567474    | 658.787375       | <b>1315.583458</b> | 658.295367        | <b>9</b>  |
| 4  | <b>430.229625</b>  | 215.618450        | 413.203076     | 207.105176        | <b>412.219060</b> | 206.613168       | <b>E</b> | <b>1232.546344</b> | 616.776810        | 1215.519795    | 608.263536       | <b>1214.535779</b> | 607.771528        | <b>8</b>  |
| 5  | <b>545.256568</b>  | 273.131922        | 528.230019     | 264.618648        | <b>527.246003</b> | 264.126640       | <b>D</b> | <b>1103.503751</b> | 552.255514        | 1086.477202    | 543.742239       | <b>1085.493186</b> | 543.250231        | <b>7</b>  |
| 6  | 674.299161         | 337.653219        | 657.272612     | <b>329.139944</b> | 656.288596        | 328.647936       | <b>E</b> | <b>988.476808</b>  | 494.742042        | 971.450259     | 486.228768       | 970.466243         | 485.736760        | <b>6</b>  |
| 7  | 731.320625         | 366.163951        | 714.294076     | 357.650676        | 713.310060        | 357.158668       | <b>G</b> | <b>859.434215</b>  | <b>430.220746</b> | 842.407666     | 421.707471       | 841.423650         | 421.215463        | <b>5</b>  |
| 8  | 818.352653         | 409.679965        | 801.326104     | 401.166690        | 800.342088        | 400.674682       | <b>S</b> | <b>802.412751</b>  | 401.710014        | 785.386202     | 393.196739       | 784.402186         | 392.704731        | <b>4</b>  |
| 9  | <b>947.395246</b>  | 474.201261        | 930.368697     | 465.687987        | 929.384681        | 465.195979       | <b>E</b> | <b>715.380723</b>  | 358.194000        | 698.354174     | 349.680725       | <b>697.370158</b>  | 349.188717        | <b>3</b>  |
| 10 | <b>1386.620572</b> | <b>693.813924</b> | 1369.594023    | 685.300650        | 1368.610007       | 684.808642       | <b>Q</b> | <b>586.338130</b>  | 293.672703        | 569.311581     | 285.159429       |                    |                   | <b>2</b>  |
| 11 |                    |                   |                |                   |                   |                  | <b>K</b> | 147.112804         | 74.060040         | 130.086255     | 65.546765        |                    |                   | <b>1</b>  |

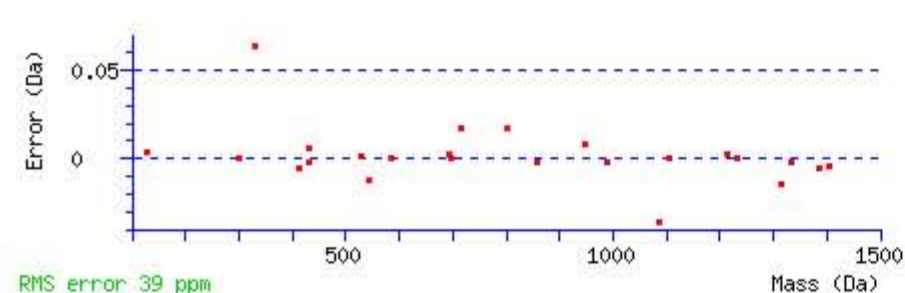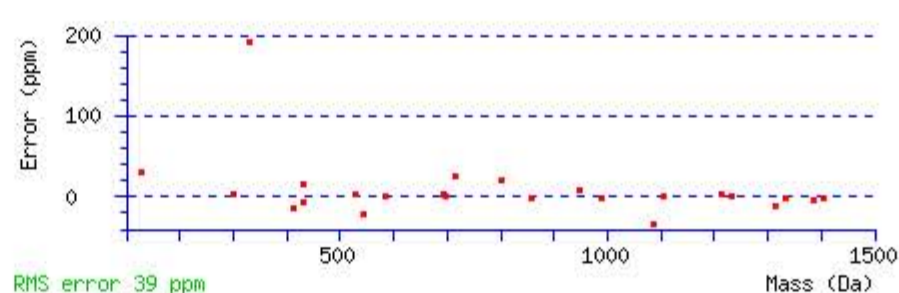

NCBI BLAST search of **KATEDEGSEQK**  
 (Parameters: blastp, nr protein database, expect=20000, no filter, PAM30)  
 Other BLAST [web gateways](#)

## All matches to this query

| Score | Mr(calc):   | Delta     | Sequence                       |
|-------|-------------|-----------|--------------------------------|
| 67.9  | 1531.718796 | 0.004072  | <a href="#">KATEDEGSEQK</a>    |
| 14.6  | 1531.715454 | 0.007414  | <a href="#">EWNGVVSESDSPVK</a> |
| 11.9  | 1531.716309 | 0.006559  | <a href="#">QVDSMWAEQK</a>     |
| 7.7   | 1531.734055 | -0.011187 | <a href="#">VNPQEESYQK</a>     |
| 7.0   | 1531.722626 | 0.000242  | <a href="#">EAQQATETQRNEK</a>  |
| 6.9   | 1531.730072 | -0.007204 | <a href="#">DGQQSGTVSSQK</a>   |
| 3.2   | 1531.734055 | -0.011187 | <a href="#">DKGEKNFAMSYVK</a>  |
| 0.8   | 1531.730698 | -0.007830 | <a href="#">AGYFGDPLAPNADK</a> |
| 0.3   | 1531.711380 | 0.011488  | <a href="#">KDSEEEAASPEGKR</a> |
| 0.2   | 1531.701523 | 0.021345  | <a href="#">EGFDPQGASQLNNR</a> |

# MASCOT Search Results

## Peptide View

MS/MS Fragmentation of **TSDQIHFFFAK**

Found in **ANT3\_HUMAN**, Antithrombin-III OS=Homo sapiens GN=SERPINC1 PE=1 SV=1

Match to Query 41203: 1650.835872 from(551.285900,3+) rtinseconds(2311) index(26886)

Title: Locus:1.1.1.2947.3 File:"2013-07-02 CLN FXIII 180 min 1st F 2.wiff"

Data file C:\Program Files (x86)\Matrix Science\Mascot Daemon\mgf7 FXIII 180 min 1st\mascot\_daemon\_merge.mgf

Click mouse within plot area to zoom in by factor of two about that point

Or, Plot from  to  Da

Label all possible matches  Label matches used for scoring

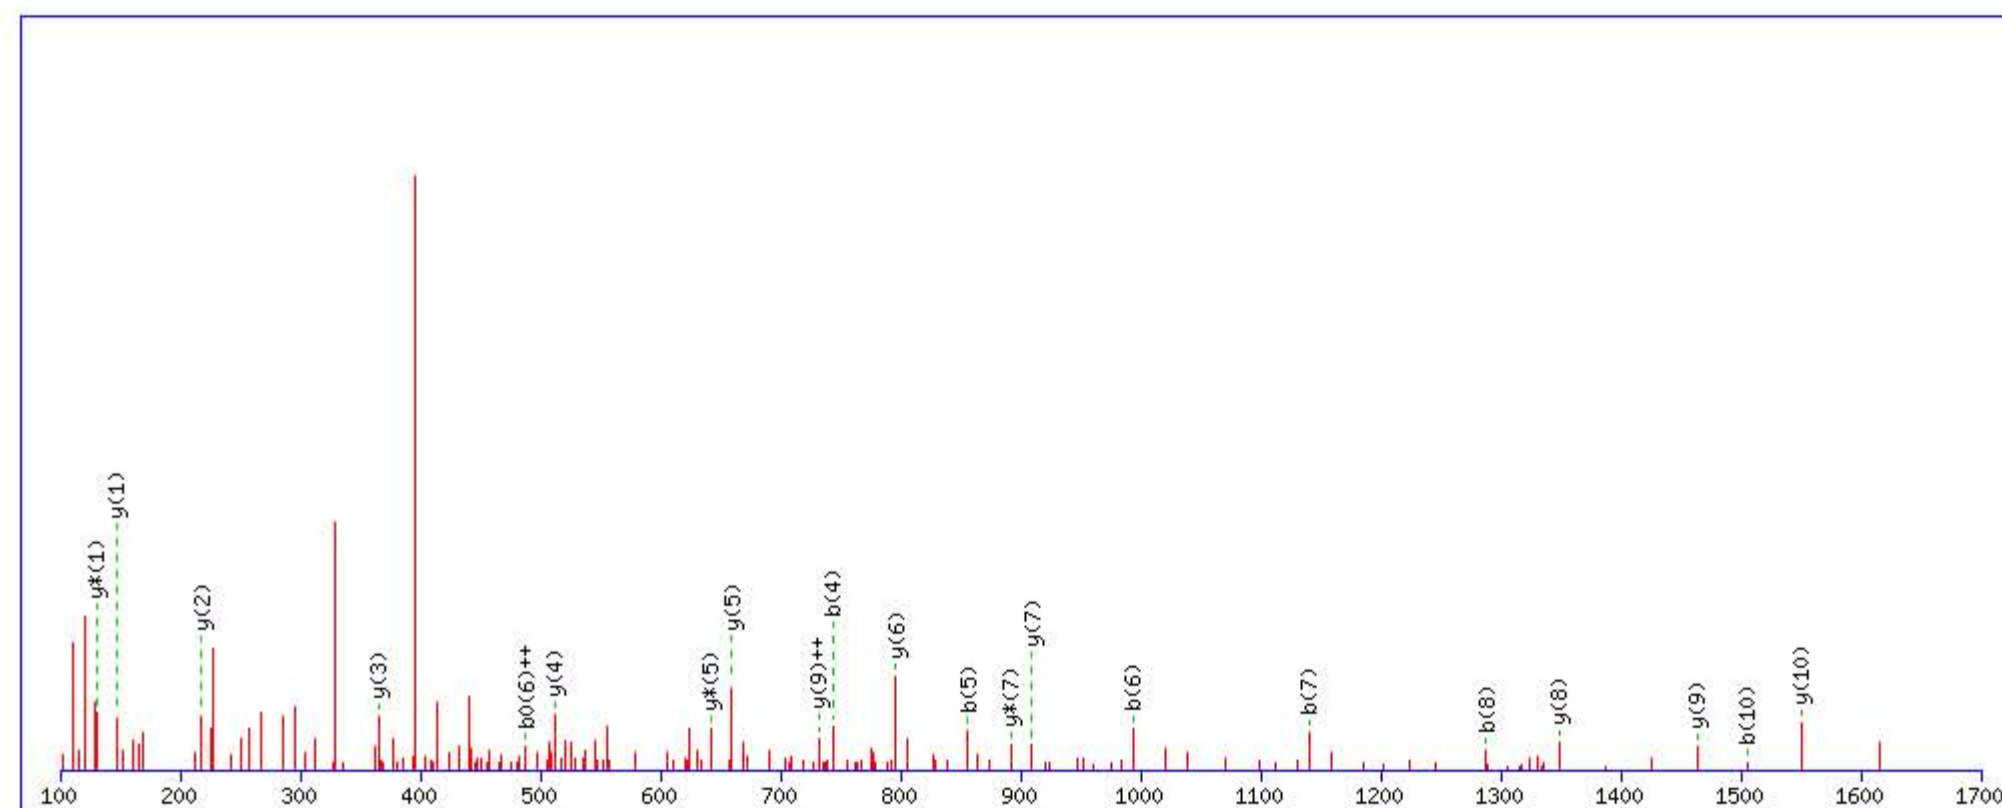

Monoisotopic mass of neutral peptide Mr(calc): 1650.822845

Fixed modifications: Carbamidomethyl (C) (apply to specified residues or termini only)

Variable modifications:

Q4 : Biotin:Thermo-21345 (Q)

Ions Score: 35 Expect: 0.00093

Matches : 21/98 fragment ions using 68 most intense peaks [\(help\)](#)

| #  | b           | b <sup>++</sup> | b <sup>+</sup> | b <sup>*++</sup> | b <sup>0</sup> | b <sup>0++</sup> | Seq. | y           | y <sup>++</sup> | y <sup>+</sup> | y <sup>*++</sup> | y <sup>0</sup> | y <sup>0++</sup> | #  |
|----|-------------|-----------------|----------------|------------------|----------------|------------------|------|-------------|-----------------|----------------|------------------|----------------|------------------|----|
| 1  | 102.054955  | 51.531116       |                |                  | 84.044390      | 42.525833        | T    |             |                 |                |                  |                |                  | 11 |
| 2  | 189.086983  | 95.047129       |                |                  | 171.076418     | 86.041847        | S    | 1550.782433 | 775.894855      | 1533.755884    | 767.381580       | 1532.771868    | 766.889572       | 10 |
| 3  | 304.113926  | 152.560601      |                |                  | 286.103361     | 143.555319       | D    | 1463.750405 | 732.378841      | 1446.723856    | 723.865566       | 1445.739840    | 723.373558       | 9  |
| 4  | 743.339252  | 372.173264      | 726.312703     | 363.659989       | 725.328687     | 363.167982       | Q    | 1348.723462 | 674.865369      | 1331.696913    | 666.352095       |                |                  | 8  |
| 5  | 856.423316  | 428.715296      | 839.396767     | 420.202022       | 838.412751     | 419.710014       | I    | 909.498136  | 455.252706      | 892.471587     | 446.739432       |                |                  | 7  |
| 6  | 993.482228  | 497.244752      | 976.455679     | 488.731477       | 975.471663     | 488.239469       | H    | 796.414072  | 398.710674      | 779.387523     | 390.197400       |                |                  | 6  |
| 7  | 1140.550642 | 570.778959      | 1123.524093    | 562.265685       | 1122.540077    | 561.773676       | F    | 659.355160  | 330.181218      | 642.328611     | 321.667944       |                |                  | 5  |
| 8  | 1287.619056 | 644.313166      | 1270.592507    | 635.799892       | 1269.608491    | 635.307884       | F    | 512.286746  | 256.647011      | 495.260197     | 248.133737       |                |                  | 4  |
| 9  | 1434.687470 | 717.847373      | 1417.660921    | 709.334099       | 1416.676905    | 708.842091       | F    | 365.218332  | 183.112804      | 348.191783     | 174.599530       |                |                  | 3  |
| 10 | 1505.724584 | 753.365930      | 1488.698035    | 744.852656       | 1487.714019    | 744.360648       | A    | 218.149918  | 109.578597      | 201.123369     | 101.065322       |                |                  | 2  |
| 11 |             |                 |                |                  |                |                  | K    | 147.112804  | 74.060040       | 130.086255     | 65.546765        |                |                  | 1  |

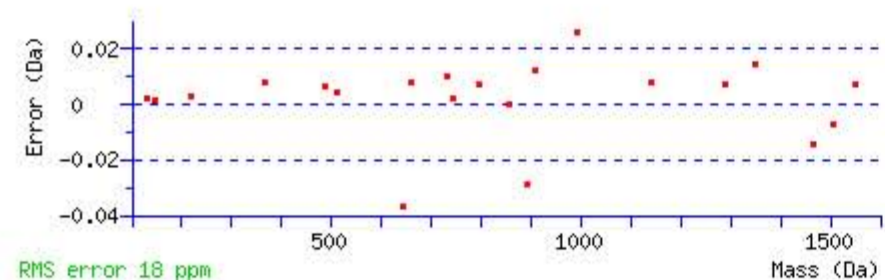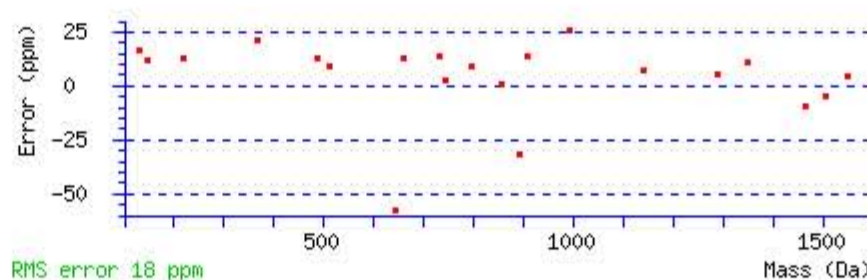

NCBI BLAST search of **TSDQIHFFFAK**

(Parameters: blastp, nr protein database, expect=20000, no filter, PAM30)

Other BLAST [web gateways](#)

All matches to this query

| Score | Mr(calc):   | Delta    | Sequence                      |
|-------|-------------|----------|-------------------------------|
| 34.7  | 1650.822845 | 0.013027 | <a href="#">TSDQIHFFFAK</a>   |
| 2.3   | 1650.814789 | 0.021083 | <a href="#">EVTTLTPMHARHK</a> |

Mascot: <http://www.matrixscience.com/>

# MASCOT SCIENCE Mascot Search Results

## Peptide View

MS/MS Fragmentation of **VAEGTQVLELPPFK**

Found in **ANT3\_HUMAN**, Antithrombin-III OS=Homo sapiens GN=SERPINC1 PE=1 SV=1

Match to Query 43495: 1740.970268 from(871.492410,2+) rtinseconds(2523) index(28244)

Title: Locus:1.1.1.3020.9 File:"2013-07-02 CLN FXIII 180 min 1st F 2.wiff"

Data file C:\Program Files (x86)\Matrix Science\Mascot Daemon\mgf\7 FXIII 180 min 1st\mascot\_daemon\_merge.mgf

Click mouse within plot area to zoom in by factor of two about that point

Or, Plot from  to  Da

Label all possible matches  Label matches used for scoring

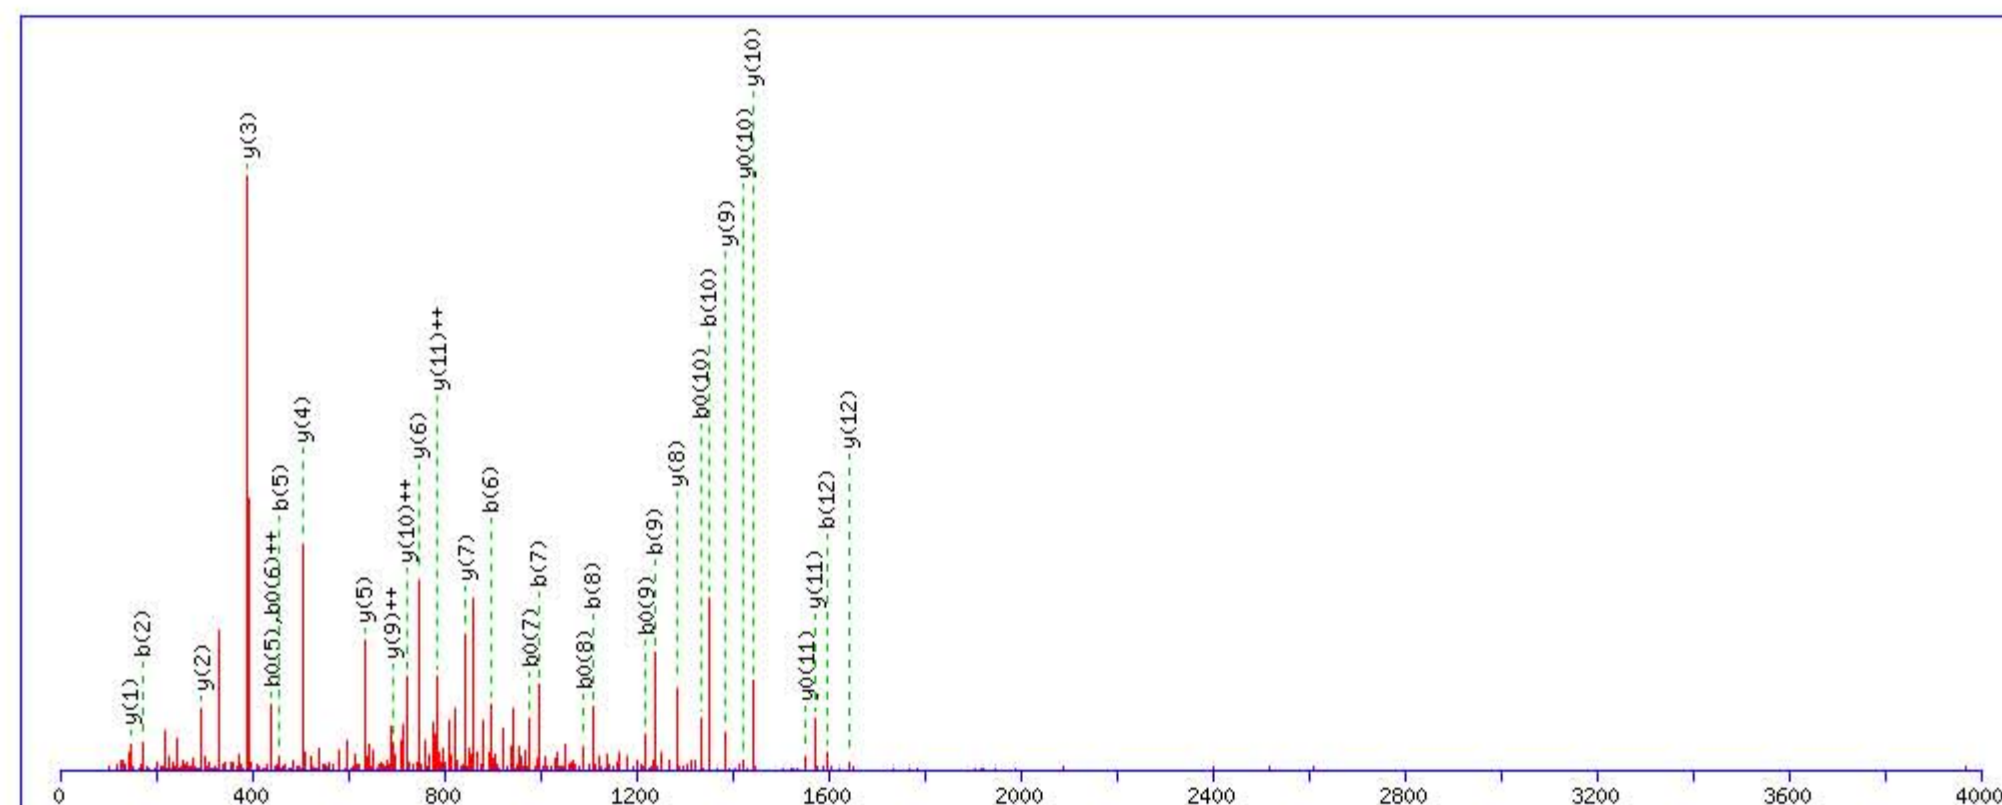

Monoisotopic mass of neutral peptide Mr(calc): 1740.948425

Fixed modifications: Carbamidomethyl (C) (apply to specified residues or termini only)

Variable modifications:

Q6 : Biotin:Thermo-21345 (Q)

Ions Score: 89 Expect: 2e-008

Matches : 31/122 fragment ions using 49 most intense peaks [\(help\)](#)

| #  | b                  | b <sup>++</sup> | b <sup>*</sup> | b <sup>*++</sup> | b <sup>0</sup>     | b <sup>0++</sup>  | Seq. | y                  | y <sup>++</sup>   | y <sup>*</sup> | y <sup>*++</sup> | y <sup>0</sup>     | y <sup>0++</sup> | #  |
|----|--------------------|-----------------|----------------|------------------|--------------------|-------------------|------|--------------------|-------------------|----------------|------------------|--------------------|------------------|----|
| 1  | 100.075690         | 50.541483       |                |                  |                    |                   | V    |                    |                   |                |                  |                    |                  | 13 |
| 2  | <b>171.112804</b>  | 86.060040       |                |                  |                    |                   | A    | <b>1642.887293</b> | 821.947284        | 1625.860744    | 813.434010       | 1624.876728        | 812.942002       | 12 |
| 3  | 300.155397         | 150.581336      |                |                  | 282.144832         | 141.576054        | E    | <b>1571.850179</b> | <b>786.428727</b> | 1554.823630    | 777.915453       | <b>1553.839614</b> | 777.423445       | 11 |
| 4  | 357.176861         | 179.092068      |                |                  | 339.166296         | 170.086786        | G    | <b>1442.807586</b> | <b>721.907431</b> | 1425.781037    | 713.394157       | <b>1424.797021</b> | 712.902148       | 10 |
| 5  | <b>458.224540</b>  | 229.615908      |                |                  | <b>440.213975</b>  | 220.610626        | T    | <b>1385.786122</b> | <b>693.396699</b> | 1368.759573    | 684.883424       | 1367.775557        | 684.391416       | 9  |
| 6  | <b>897.449866</b>  | 449.228571      | 880.423317     | 440.715297       | 879.439301         | <b>440.223289</b> | Q    | <b>1284.738443</b> | 642.872860        | 1267.711894    | 634.359585       | 1266.727878        | 633.867577       | 8  |
| 7  | <b>996.518280</b>  | 498.762778      | 979.491731     | 490.249504       | <b>978.507715</b>  | 489.757496        | V    | <b>845.513117</b>  | 423.260196        | 828.486568     | 414.746922       | 827.502552         | 414.254914       | 7  |
| 8  | <b>1109.602344</b> | 555.304810      | 1092.575795    | 546.791536       | <b>1091.591779</b> | 546.299527        | L    | <b>746.444703</b>  | 373.725989        | 729.418154     | 365.212715       | 728.434138         | 364.720707       | 6  |
| 9  | <b>1238.644937</b> | 619.826106      | 1221.618388    | 611.312832       | <b>1220.634372</b> | 610.820824        | E    | <b>633.360639</b>  | 317.183958        | 616.334090     | 308.670683       | 615.350074         | 308.178675       | 5  |
| 10 | <b>1351.729001</b> | 676.368138      | 1334.702452    | 667.854864       | <b>1333.718436</b> | 667.362856        | L    | <b>504.318046</b>  | 252.662661        | 487.291497     | 244.149386       |                    |                  | 4  |
| 11 | 1448.781765        | 724.894520      | 1431.755216    | 716.381246       | 1430.771200        | 715.889238        | P    | <b>391.233982</b>  | 196.120629        | 374.207433     | 187.607355       |                    |                  | 3  |
| 12 | <b>1595.850179</b> | 798.428727      | 1578.823630    | 789.915453       | 1577.839614        | 789.423445        | F    | <b>294.181218</b>  | 147.594247        | 277.154669     | 139.080973       |                    |                  | 2  |
| 13 |                    |                 |                |                  |                    |                   | K    | <b>147.112804</b>  | 74.060040         | 130.086255     | 65.546765        |                    |                  | 1  |

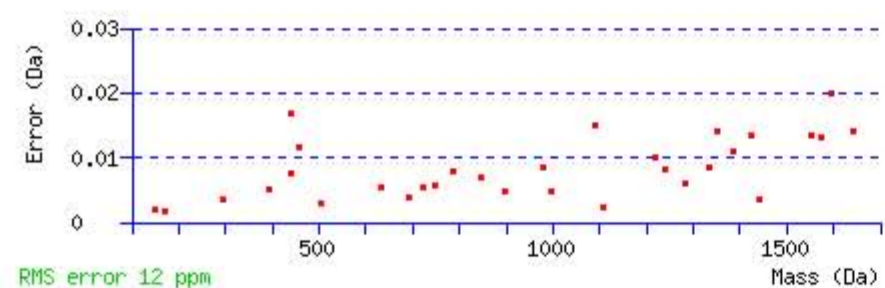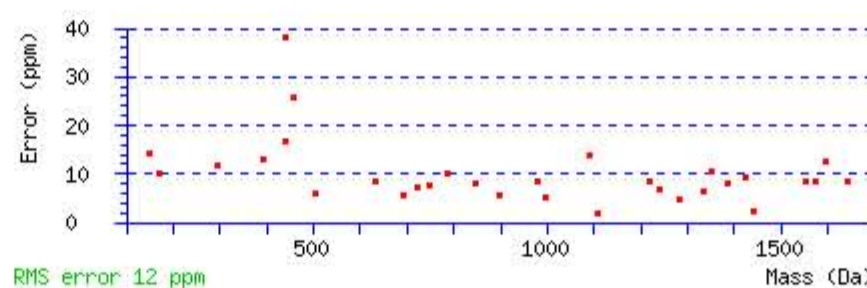

NCBI BLAST search of **VAEGTQVLELPPFK**

(Parameters: blastp, nr protein database, expect=20000, no filter, PAM30)

Other BLAST [web gateways](#)

All matches to this query

| Score | Mr(calc):   | Delta    | Sequence                       |
|-------|-------------|----------|--------------------------------|
| 88.5  | 1740.948425 | 0.021843 | <a href="#">VAEGTQVLELPPFK</a> |
| 8.4   | 1740.962982 | 0.007286 | <a href="#">ISRQLAEELMK</a>    |

Mascot: <http://www.matrixscience.com/>

# MATRIX SCIENCE Mascot Search Results

## Peptide View

MS/MS Fragmentation of **FATTFYQHLADSK**

Found in **ANT3\_HUMAN**, Antithrombin-III OS=Homo sapiens GN=SERPINC1 PE=1 SV=1

Match to Query 46199: 1838.913672 from(613.978500,3+) rtinseconds(2038) index(24966)

Title: Locus:1.1.1.2852.5 File:"2013-07-02 CLN FXIII 180 min 1st F 2.wiff"

Data file C:\Program Files (x86)\Matrix Science\Mascot Daemon\mgf\7 FXIII 180 min 1st\mascot\_daemon\_merge.mgf

Click mouse within plot area to zoom in by factor of two about that point

Or, Plot from  to  Da

Label all possible matches  Label matches used for scoring

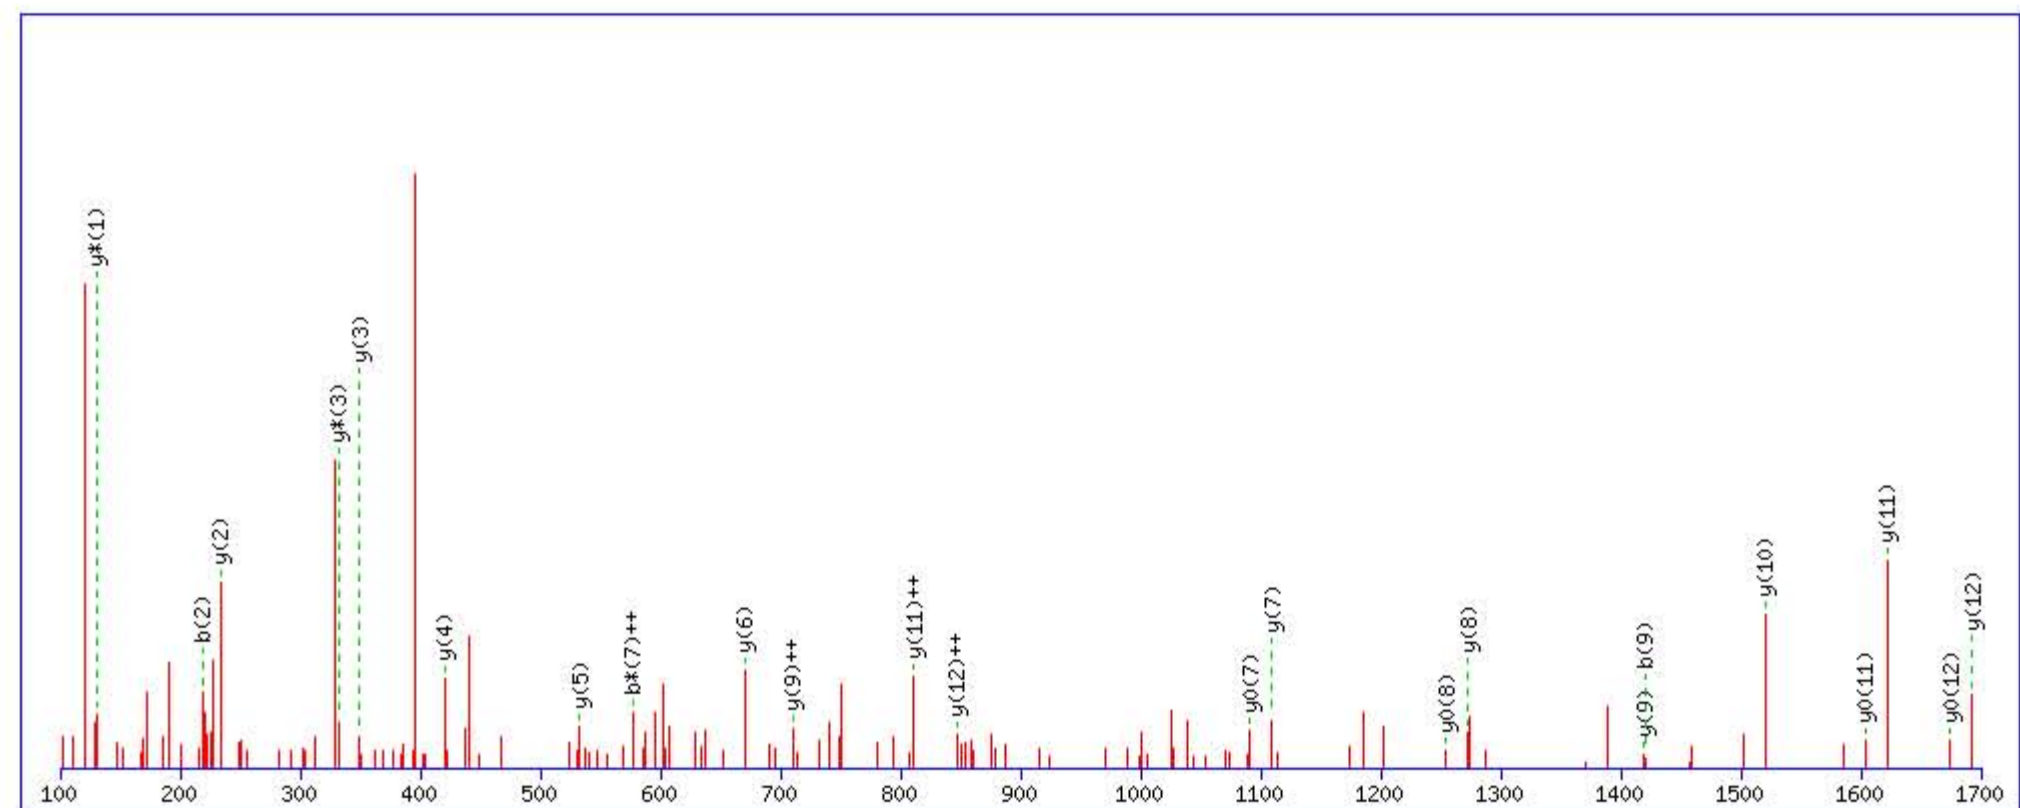

Monoisotopic mass of neutral peptide Mr(calc): 1838.902542

Fixed modifications: Carbamidomethyl (C) (apply to specified residues or termini only)

Variable modifications:

Q7 : Biotin:Thermo-21345 (Q)

Ions Score: 48 Expect: 0.00036

Matches : 23/126 fragment ions using 60 most intense peaks [\(help\)](#)

| #  | b                  | b <sup>++</sup> | b <sup>*</sup> | b <sup>*++</sup>  | b <sup>0</sup> | b <sup>0++</sup> | Seq. | y                  | y <sup>++</sup>   | y <sup>*</sup>    | y <sup>*++</sup> | y <sup>0</sup>     | y <sup>0++</sup> | #  |
|----|--------------------|-----------------|----------------|-------------------|----------------|------------------|------|--------------------|-------------------|-------------------|------------------|--------------------|------------------|----|
| 1  | 148.075690         | 74.541483       |                |                   |                |                  | F    |                    |                   |                   |                  |                    |                  | 13 |
| 2  | <b>219.112804</b>  | 110.060040      |                |                   |                |                  | A    | <b>1692.841406</b> | <b>846.924341</b> | 1675.814857       | 838.411067       | <b>1674.830841</b> | 837.919059       | 12 |
| 3  | 320.160483         | 160.583879      |                |                   | 302.149918     | 151.578597       | T    | <b>1621.804292</b> | <b>811.405784</b> | 1604.777743       | 802.892510       | <b>1603.793727</b> | 802.400502       | 11 |
| 4  | 421.208162         | 211.107719      |                |                   | 403.197597     | 202.102437       | T    | <b>1520.756613</b> | 760.881945        | 1503.730064       | 752.368670       | 1502.746048        | 751.876662       | 10 |
| 5  | 568.276576         | 284.641926      |                |                   | 550.266011     | 275.636644       | F    | <b>1419.708934</b> | <b>710.358105</b> | 1402.682385       | 701.844831       | 1401.698369        | 701.352823       | 9  |
| 6  | 731.339905         | 366.173591      |                |                   | 713.329340     | 357.168308       | Y    | <b>1272.640520</b> | 636.823898        | 1255.613971       | 628.310624       | <b>1254.629955</b> | 627.818616       | 8  |
| 7  | 1170.565231        | 585.786254      | 1153.538682    | <b>577.272979</b> | 1152.554666    | 576.780971       | Q    | <b>1109.577191</b> | 555.292234        | 1092.550642       | 546.778959       | <b>1091.566626</b> | 546.286951       | 7  |
| 8  | 1307.624143        | 654.315710      | 1290.597594    | 645.802435        | 1289.613578    | 645.310427       | H    | <b>670.351865</b>  | 335.679571        | 653.325316        | 327.166296       | 652.341300         | 326.674288       | 6  |
| 9  | <b>1420.708207</b> | 710.857741      | 1403.681658    | 702.344467        | 1402.697642    | 701.852459       | L    | <b>533.292953</b>  | 267.150115        | 516.266404        | 258.636840       | 515.282388         | 258.144832       | 5  |
| 10 | 1491.745321        | 746.376298      | 1474.718772    | 737.863024        | 1473.734756    | 737.371016       | A    | <b>420.208889</b>  | 210.608083        | 403.182340        | 202.094808       | 402.198324         | 201.602800       | 4  |
| 11 | 1606.772264        | 803.889770      | 1589.745715    | 795.376496        | 1588.761699    | 794.884487       | D    | <b>349.171775</b>  | 175.089526        | <b>332.145226</b> | 166.576251       | 331.161210         | 166.084243       | 3  |
| 12 | 1693.804292        | 847.405784      | 1676.777743    | 838.892510        | 1675.793727    | 838.400502       | S    | <b>234.144832</b>  | 117.576054        | 217.118283        | 109.062780       | 216.134267         | 108.570772       | 2  |
| 13 |                    |                 |                |                   |                |                  | K    | 147.112804         | 74.060040         | <b>130.086255</b> | 65.546765        |                    |                  | 1  |

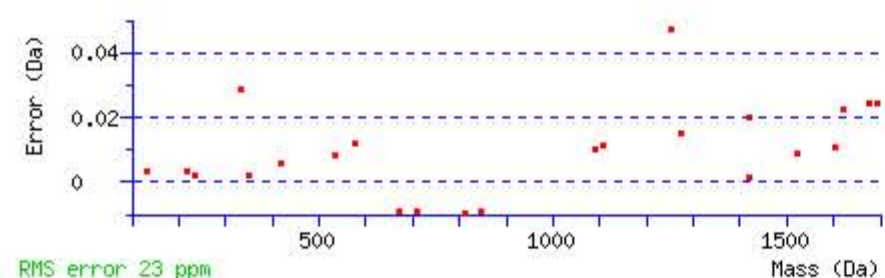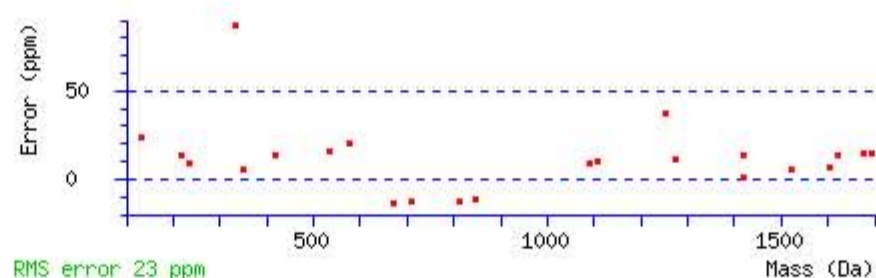

NCBI BLAST search of **FATTFYQHLADSK**

(Parameters: blastp, nr protein database, expect=20000, no filter, PAM30)

Other BLAST [web gateways](#)

All matches to this query

| Score | Mr(calc):   | Delta    | Sequence             |
|-------|-------------|----------|----------------------|
| 48.0  | 1838.902542 | 0.011130 | <b>FATTFYQHLADSK</b> |

Mascot: <http://www.matrixscience.com/>



# MASCOT SEARCH RESULTS

## Peptide View

MS/MS Fragmentation of **LQPLDFKENAEQSR**

Found in **ANT3\_HUMAN**, Antithrombin-III OS=Homo sapiens GN=SERPINC1 PE=1 SV=1

Match to Query 49569: 1985.017632 from(662.679820,3+) rtinseconds(1880) index(23812)

Title: Locus:1.1.1.2797.12 File:"2013-07-02 CLN FXIII 180 min 1st F 2.wiff"

Data file C:\Program Files (x86)\Matrix Science\Mascot Daemon\mgf\7 FXIII 180 min 1st\mascot\_daemon\_merge.mgf

Click mouse within plot area to zoom in by factor of two about that point

Or, Plot from  to  Da

Label all possible matches  Label matches used for scoring

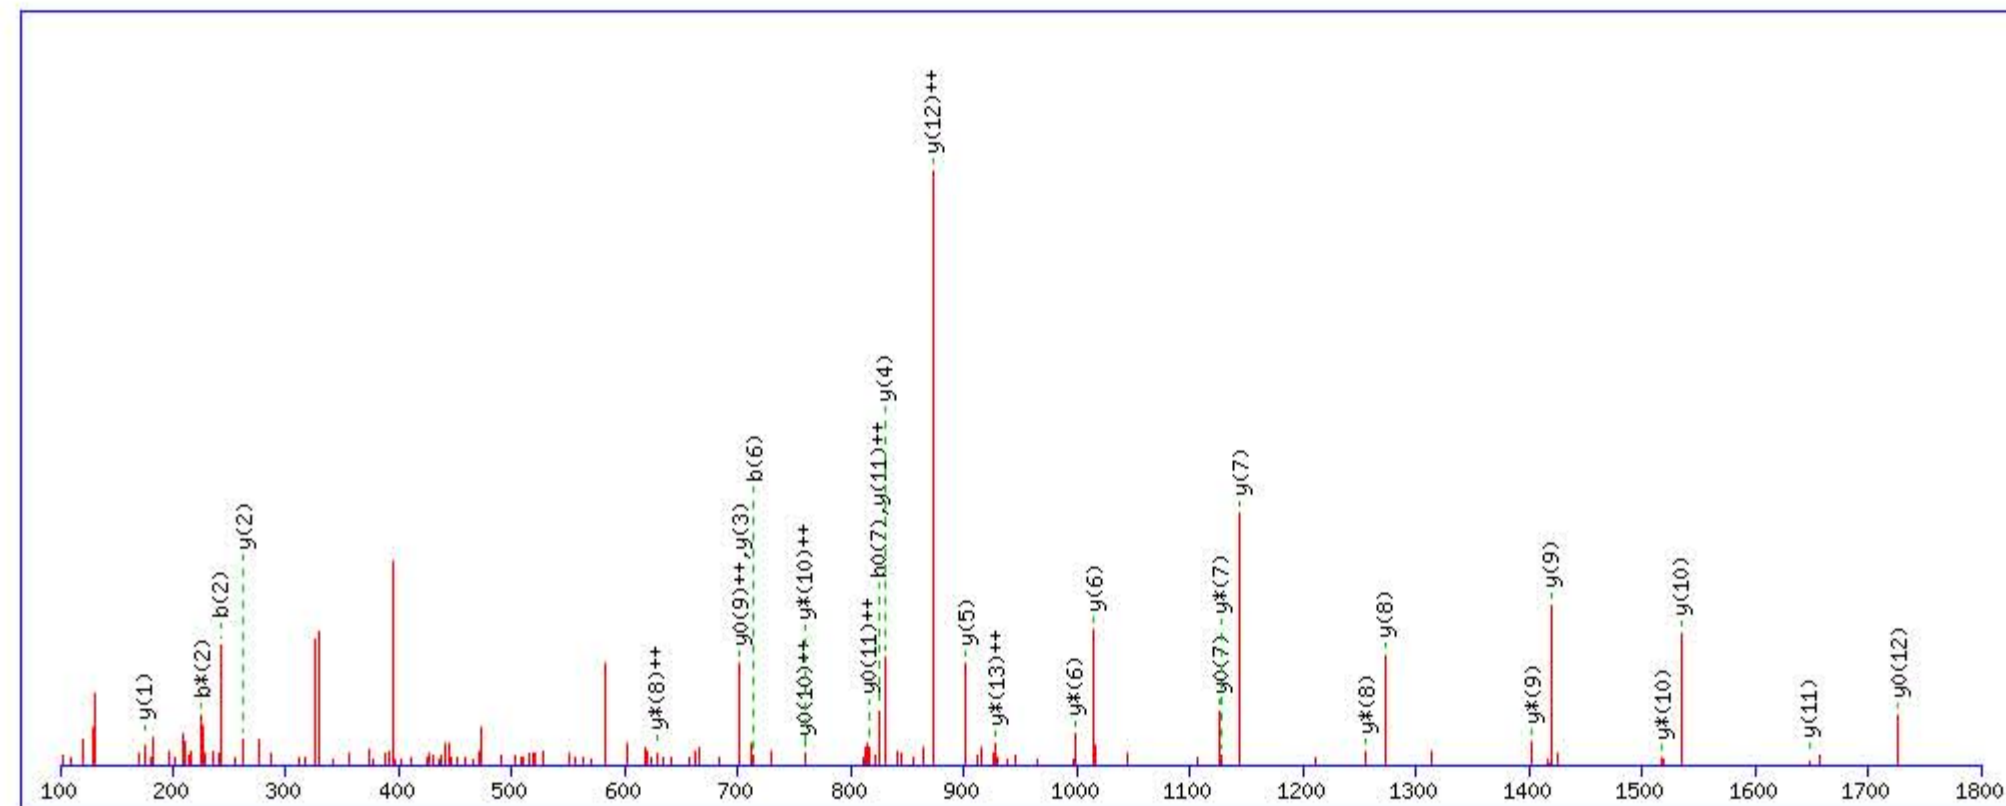

Monoisotopic mass of neutral peptide Mr(calc): 1985.004013

Fixed modifications: Carbamidomethyl (C) (apply to specified residues or termini only)

Variable modifications:

Q12 : Biotin:Thermo-21345 (Q)

Ions Score: 45 Expect: 9.8e-005

Matches : 30/144 fragment ions using 75 most intense peaks [\(help\)](#)

| #  | b                 | b <sup>++</sup> | b <sup>+</sup>    | b <sup>+++</sup> | b <sup>0</sup>    | b <sup>0++</sup> | Seq. | y                  | y <sup>++</sup>   | y <sup>+</sup>     | y <sup>+++</sup>  | y <sup>0</sup>     | y <sup>0++</sup>  | #  |
|----|-------------------|-----------------|-------------------|------------------|-------------------|------------------|------|--------------------|-------------------|--------------------|-------------------|--------------------|-------------------|----|
| 1  | 114.091340        | 57.549308       |                   |                  |                   |                  | L    |                    |                   |                    |                   |                    |                   | 14 |
| 2  | <b>242.149918</b> | 121.578597      | <b>225.123369</b> | 113.065323       |                   |                  | Q    | 1872.927259        | 936.967268        | 1855.900710        | <b>928.453993</b> | 1854.916694        | 927.961985        | 13 |
| 3  | 339.202682        | 170.104979      | 322.176133        | 161.591705       |                   |                  | P    | 1744.868681        | <b>872.937979</b> | 1727.842132        | 864.424704        | <b>1726.858116</b> | 863.932696        | 12 |
| 4  | 452.286746        | 226.647011      | 435.260197        | 218.133737       |                   |                  | L    | <b>1647.815917</b> | <b>824.411597</b> | 1630.789368        | 815.898322        | 1629.805352        | <b>815.406314</b> | 11 |
| 5  | 567.313689        | 284.160483      | 550.287140        | 275.647208       | 549.303124        | 275.155200       | D    | <b>1534.731853</b> | 767.869565        | <b>1517.705304</b> | <b>759.356290</b> | 1516.721288        | <b>758.864282</b> | 10 |
| 6  | <b>714.382103</b> | 357.694690      | 697.355554        | 349.181415       | 696.371538        | 348.689407       | F    | <b>1419.704910</b> | 710.356093        | <b>1402.678361</b> | 701.842819        | 1401.694345        | <b>701.350811</b> | 9  |
| 7  | 842.477066        | 421.742171      | 825.450517        | 413.228897       | <b>824.466501</b> | 412.736889       | K    | <b>1272.636496</b> | 636.821886        | <b>1255.609947</b> | <b>628.308612</b> | 1254.625931        | 627.816604        | 8  |
| 8  | 971.519659        | 486.263468      | 954.493110        | 477.750193       | 953.509094        | 477.258185       | E    | <b>1144.541533</b> | 572.774405        | <b>1127.514984</b> | 564.261130        | <b>1126.530968</b> | 563.769122        | 7  |
| 9  | 1085.562586       | 543.284931      | 1068.536037       | 534.771657       | 1067.552021       | 534.279649       | N    | <b>1015.498940</b> | 508.253108        | <b>998.472391</b>  | 499.739834        | 997.488375         | 499.247826        | 6  |
| 10 | 1156.599700       | 578.803488      | 1139.573151       | 570.290214       | 1138.589135       | 569.798205       | A    | <b>901.456013</b>  | 451.231645        | 884.429464         | 442.718370        | 883.445448         | 442.226362        | 5  |
| 11 | 1285.642293       | 643.324785      | 1268.615744       | 634.811510       | 1267.631728       | 634.319502       | E    | <b>830.418899</b>  | 415.713088        | 813.392350         | 407.199813        | 812.408334         | 406.707805        | 4  |
| 12 | 1724.867619       | 862.937448      | 1707.841070       | 854.424173       | 1706.857054       | 853.932165       | Q    | <b>701.376306</b>  | 351.191791        | 684.349757         | 342.678517        | 683.365741         | 342.186509        | 3  |
| 13 | 1811.899647       | 906.453462      | 1794.873098       | 897.940187       | 1793.889082       | 897.448179       | S    | <b>262.150980</b>  | 131.579128        | 245.124431         | 123.065854        | 244.140415         | 122.573846        | 2  |
| 14 |                   |                 |                   |                  |                   |                  | R    | <b>175.118952</b>  | 88.063114         | 158.092403         | 79.549839         |                    |                   | 1  |

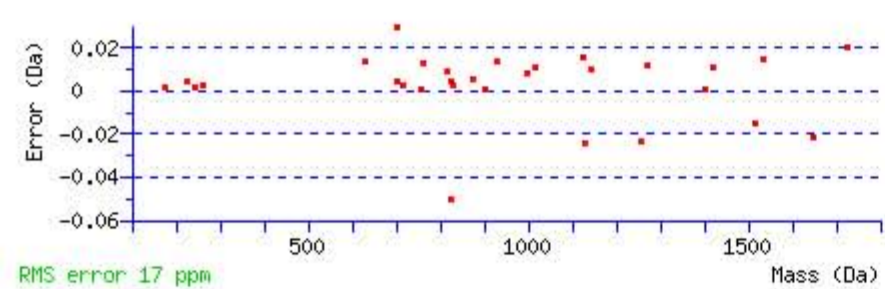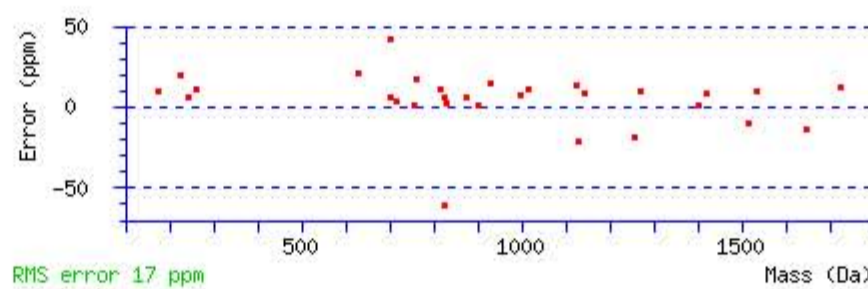

NCBI BLAST search of **LQPLDFKENAEQSR**

(Parameters: blastp, nr protein database, expect=20000, no filter, PAM30)

Other BLAST [web gateways](#)

All matches to this query

| Score | Mr(calc):   | Delta     | Sequence                       |
|-------|-------------|-----------|--------------------------------|
| 44.9  | 1985.004013 | 0.013619  | <a href="#">LQPLDFKENAEQSR</a> |
| 2.1   | 1985.043762 | -0.026130 | <a href="#">QLIEKMNLSAIQDR</a> |

# MASCOT SEARCH RESULTS

## Peptide View

MS/MS Fragmentation of **EQLQDMGLVDFLSPEK**  
 Found in **ANT3\_HUMAN**, Antithrombin-III OS=Homo sapiens GN=SERPINC1 PE=1 SV=1

Match to Query 54347: 2159.087682 from(720.703170,3+) rtinseconds(2890) index(30706)  
 Title: Locus:1.1.1.3147.8 File:"2013-07-02 CLN FXIII 180 min 1st F 2.wiff"  
 Data file C:\Program Files (x86)\Matrix Science\Mascot Daemon\mgf\7 FXIII 180 min 1st\mascot\_daemon\_merge.mgf

Click mouse within plot area to zoom in by factor of two about that point  
 Or, Plot from  to  Da   
 Label all possible matches  Label matches used for scoring

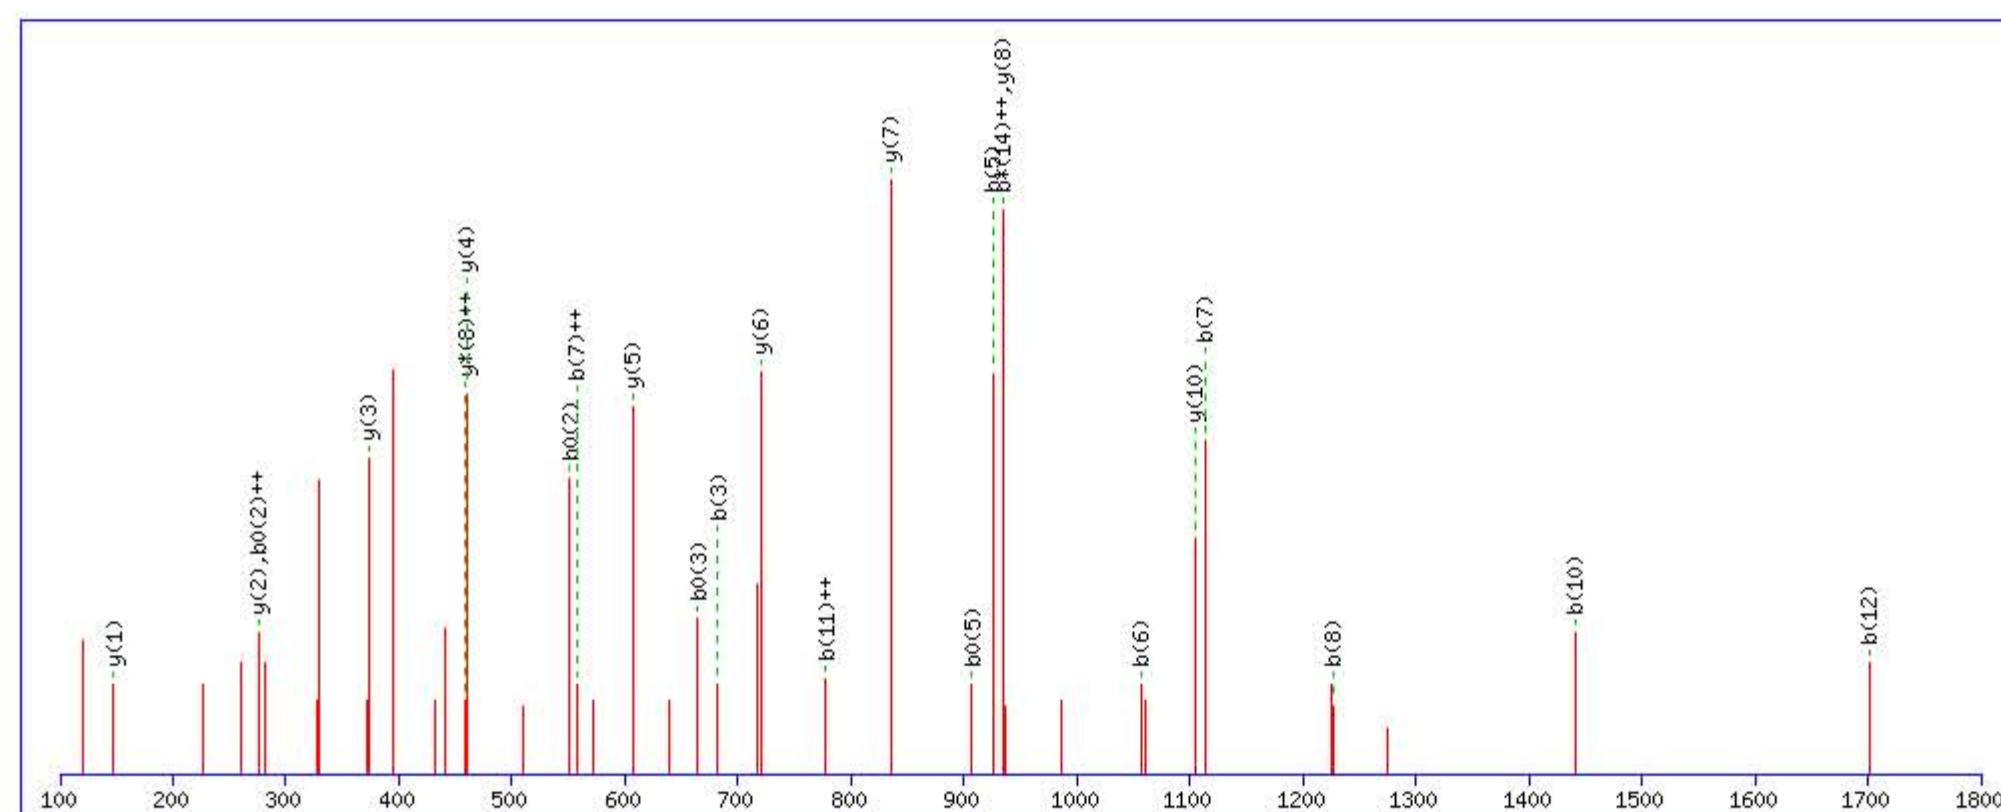

Monoisotopic mass of neutral peptide Mr(calc): 2159.064255  
 Fixed modifications: Carbamidomethyl (C) (apply to specified residues or termini only)  
 Variable modifications:  
 Q2 : Biotin:Thermo-21345 (Q)  
 Ions Score: 68 Expect: 4.9e-007  
 Matches : 24/176 fragment ions using 32 most intense peaks [\(help\)](#)

| #  | b           | b <sup>++</sup> | b <sup>*</sup> | b <sup>*++</sup> | b <sup>0</sup> | b <sup>0++</sup> | Seq. | y           | y <sup>++</sup> | y <sup>*</sup> | y <sup>*++</sup> | y <sup>0</sup> | y <sup>0++</sup> | #  |
|----|-------------|-----------------|----------------|------------------|----------------|------------------|------|-------------|-----------------|----------------|------------------|----------------|------------------|----|
| 1  | 130.049869  | 65.528572       |                |                  | 112.039304     | 56.523290        | E    |             |                 |                |                  |                |                  | 16 |
| 2  | 569.275195  | 285.141236      | 552.248646     | 276.627961       | 551.264630     | 276.135953       | Q    | 2031.028948 | 1016.018112     | 2014.002399    | 1007.504838      | 2013.018383    | 1007.012830      | 15 |
| 3  | 682.359259  | 341.683268      | 665.332710     | 333.169993       | 664.348694     | 332.677985       | L    | 1591.803622 | 796.405449      | 1574.777073    | 787.892175       | 1573.793057    | 787.400167       | 14 |
| 4  | 810.417837  | 405.712557      | 793.391288     | 397.199282       | 792.407272     | 396.707274       | Q    | 1478.719558 | 739.863417      | 1461.693009    | 731.350143       | 1460.708993    | 730.858135       | 13 |
| 5  | 925.444780  | 463.226028      | 908.418231     | 454.712754       | 907.434215     | 454.220746       | D    | 1350.660980 | 675.834128      | 1333.634431    | 667.320854       | 1332.650415    | 666.828845       | 12 |
| 6  | 1056.485265 | 528.746271      | 1039.458716    | 520.232996       | 1038.474700    | 519.740988       | M    | 1235.634037 | 618.320657      | 1218.607488    | 609.807382       | 1217.623472    | 609.315374       | 11 |
| 7  | 1113.506729 | 557.257003      | 1096.480180    | 548.743728       | 1095.496164    | 548.251720       | G    | 1104.593552 | 552.800414      | 1087.567003    | 544.287140       | 1086.582987    | 543.795132       | 10 |
| 8  | 1226.590793 | 613.799034      | 1209.564244    | 605.285760       | 1208.580228    | 604.793752       | L    | 1047.572088 | 524.289682      | 1030.545539    | 515.776408       | 1029.561523    | 515.284400       | 9  |
| 9  | 1325.659207 | 663.333241      | 1308.632658    | 654.819967       | 1307.648642    | 654.327959       | V    | 934.488024  | 467.747650      | 917.461475     | 459.234376       | 916.477459     | 458.742368       | 8  |
| 10 | 1440.686150 | 720.846713      | 1423.659601    | 712.333439       | 1422.675585    | 711.841431       | D    | 835.419610  | 418.213443      | 818.393061     | 409.700169       | 817.409045     | 409.208161       | 7  |
| 11 | 1553.770214 | 777.388745      | 1536.743665    | 768.875471       | 1535.759649    | 768.383462       | L    | 720.392667  | 360.699972      | 703.366118     | 352.186697       | 702.382102     | 351.694689       | 6  |
| 12 | 1700.838628 | 850.922952      | 1683.812079    | 842.409678       | 1682.828063    | 841.917669       | F    | 607.308603  | 304.157940      | 590.282054     | 295.644665       | 589.298038     | 295.152657       | 5  |
| 13 | 1787.870656 | 894.438966      | 1770.844107    | 885.925692       | 1769.860091    | 885.433684       | S    | 460.240189  | 230.623732      | 443.213640     | 222.110458       | 442.229624     | 221.618450       | 4  |
| 14 | 1884.923420 | 942.965348      | 1867.896871    | 934.452074       | 1866.912855    | 933.960066       | P    | 373.208161  | 187.107718      | 356.181612     | 178.594444       | 355.197596     | 178.102436       | 3  |
| 15 | 2013.966013 | 1007.486645     | 1996.939464    | 998.973370       | 1995.955448    | 998.481362       | E    | 276.155397  | 138.581336      | 259.128848     | 130.068062       | 258.144832     | 129.576054       | 2  |
| 16 |             |                 |                |                  |                |                  | K    | 147.112804  | 74.060040       | 130.086255     | 65.546765        |                |                  | 1  |

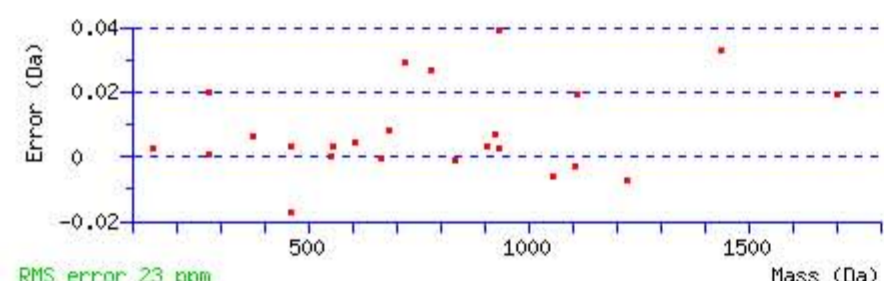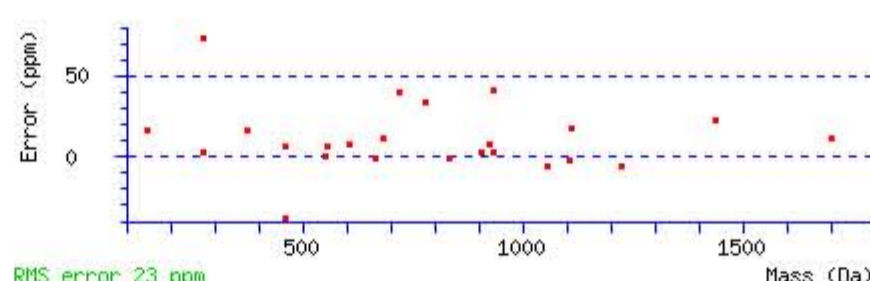

NCBI BLAST search of **EQLQDMGLVDFLSPEK**  
 (Parameters: blastp, nr protein database, expect=20000, no filter, PAM30)  
 Other BLAST [web gateways](#)

### All matches to this query

| Score | Mr(calc):   | Delta    | Sequence                            |
|-------|-------------|----------|-------------------------------------|
| 67.8  | 2159.064255 | 0.023427 | <a href="#">EQLQDMGLVDFLSPEK</a>    |
| 58.9  | 2159.064255 | 0.023427 | <a href="#">EQLQDMGLVDFLSPEK</a>    |
| 0.4   | 2159.074600 | 0.013082 | <a href="#">EKTTIAVTSRGGYGLEDEK</a> |

# MASCOT SEARCH RESULTS

## Peptide View

MS/MS Fragmentation of **LFLEPTQADIALLK**

Found in **APOA\_HUMAN**, Apolipoprotein(a) OS=Homo sapiens GN=LPA PE=1 SV=1

Match to Query 47194: 1882.091052 from(628.370960,3+) rtinseconds(2742) index(47337)

Title: Locus:1.1.1.3402.8 File:"2013-07-02 CLN FXIII 180 min 1st F 3.wiff"

Data file C:\Program Files (x86)\Matrix Science\Mascot Daemon\mgf\7 FXIII 180 min 1st\mascot\_daemon\_merge.mgf

Click mouse within plot area to zoom in by factor of two about that point

Or, Plot from  to  Da

Label all possible matches  Label matches used for scoring

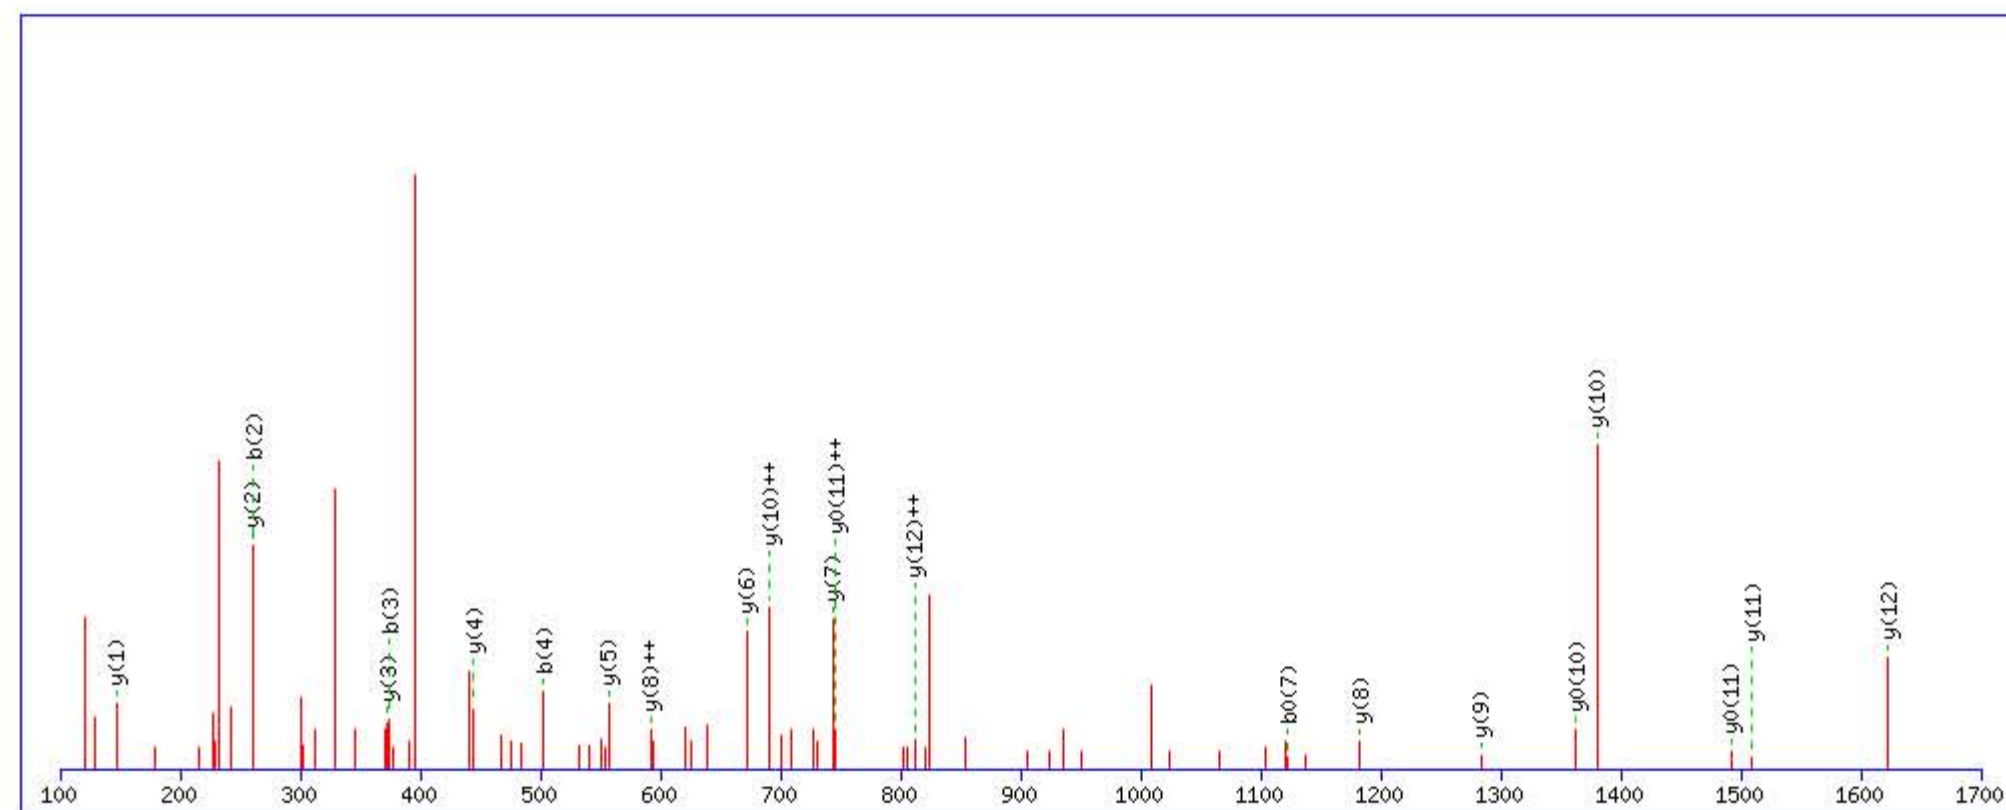

Monoisotopic mass of neutral peptide Mr(calc): 1882.063766

Fixed modifications: Carbamidomethyl (C) (apply to specified residues or termini only)

Variable modifications:

Q7 : Biotin:Thermo-21345 (Q)

Ions Score: 68 Expect: 4.5e-007

Matches : 22/128 fragment ions using 49 most intense peaks [\(help\)](#)

| #  | b                 | b <sup>++</sup> | b <sup>*</sup> | b <sup>*+</sup> | b <sup>0</sup>     | b <sup>0+</sup> | Seq. | y                  | y <sup>++</sup>   | y <sup>*</sup> | y <sup>*+</sup> | y <sup>0</sup>     | y <sup>0+</sup>   | #  |
|----|-------------------|-----------------|----------------|-----------------|--------------------|-----------------|------|--------------------|-------------------|----------------|-----------------|--------------------|-------------------|----|
| 1  | 114.091340        | 57.549308       |                |                 |                    |                 | L    |                    |                   |                |                 |                    |                   | 14 |
| 2  | <b>261.159754</b> | 131.083515      |                |                 |                    |                 | F    | 1769.987007        | 885.497142        | 1752.960458    | 876.983867      | 1751.976442        | 876.491859        | 13 |
| 3  | <b>374.243818</b> | 187.625547      |                |                 |                    |                 | L    | <b>1622.918593</b> | <b>811.962934</b> | 1605.892044    | 803.449660      | 1604.908028        | 802.957652        | 12 |
| 4  | <b>503.286411</b> | 252.146843      |                |                 | 485.275846         | 243.141561      | E    | <b>1509.834529</b> | 755.420903        | 1492.807980    | 746.907628      | <b>1491.823964</b> | <b>746.415620</b> | 11 |
| 5  | 600.339175        | 300.673226      |                |                 | 582.328610         | 291.667943      | P    | <b>1380.791936</b> | <b>690.899606</b> | 1363.765387    | 682.386331      | <b>1362.781371</b> | 681.894323        | 10 |
| 6  | 701.386854        | 351.197065      |                |                 | 683.376289         | 342.191783      | T    | <b>1283.739172</b> | 642.373224        | 1266.712623    | 633.859949      | 1265.728607        | 633.367941        | 9  |
| 7  | 1140.612180       | 570.809728      | 1123.585631    | 562.296454      | <b>1122.601615</b> | 561.804446      | Q    | <b>1182.691493</b> | <b>591.849384</b> | 1165.664944    | 583.336110      | 1164.680928        | 582.844102        | 8  |
| 8  | 1211.649294       | 606.328285      | 1194.622745    | 597.815011      | 1193.638729        | 597.323003      | A    | <b>743.466167</b>  | 372.236721        | 726.439618     | 363.723447      | 725.455602         | 363.231439        | 7  |
| 9  | 1326.676237       | 663.841757      | 1309.649688    | 655.328482      | 1308.665672        | 654.836474      | D    | <b>672.429053</b>  | 336.718164        | 655.402504     | 328.204890      | 654.418488         | 327.712882        | 6  |
| 10 | 1439.760301       | 720.383789      | 1422.733752    | 711.870514      | 1421.749736        | 711.378506      | I    | <b>557.402110</b>  | 279.204693        | 540.375561     | 270.691418      |                    |                   | 5  |
| 11 | 1510.797415       | 755.902346      | 1493.770866    | 747.389071      | 1492.786850        | 746.897063      | A    | <b>444.318046</b>  | 222.662661        | 427.291497     | 214.149386      |                    |                   | 4  |
| 12 | 1623.881479       | 812.444377      | 1606.854930    | 803.931103      | 1605.870914        | 803.439095      | L    | <b>373.280932</b>  | 187.144104        | 356.254383     | 178.630829      |                    |                   | 3  |
| 13 | 1736.965543       | 868.986409      | 1719.938994    | 860.473135      | 1718.954978        | 859.981127      | L    | <b>260.196868</b>  | 130.602072        | 243.170319     | 122.088797      |                    |                   | 2  |
| 14 |                   |                 |                |                 |                    |                 | K    | <b>147.112804</b>  | 74.060040         | 130.086255     | 65.546765       |                    |                   | 1  |

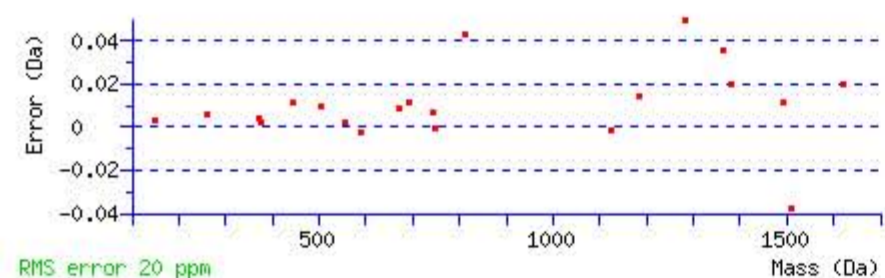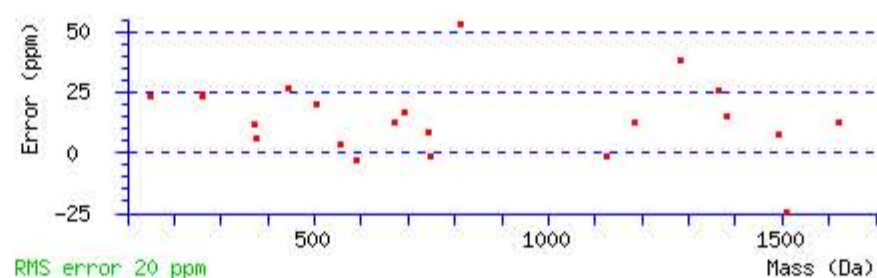

NCBI BLAST search of **LFLEPTQADIALLK**

(Parameters: blastp, nr protein database, expect=20000, no filter, PAM30)

Other BLAST [web gateways](#)

All matches to this query

| Score | Mr(calc):   | Delta     | Sequence                       |
|-------|-------------|-----------|--------------------------------|
| 68.2  | 1882.063766 | 0.027286  | <a href="#">LFLEPTQADIALLK</a> |
| 0.5   | 1882.100143 | -0.009091 | <a href="#">KMNILLVLSFLYLK</a> |

Mascot: <http://www.matrixscience.com/>

# MASCOT Search Results

## Peptide View

MS/MS Fragmentation of **AELQEGAR**

Found in **APOA1\_HUMAN**, Apolipoprotein A-I OS=Homo sapiens GN=APOA1 PE=1 SV=1

Match to Query 23209: 1183.603788 from(592.809170,2+) rtinseconds(1460) index(20695)

Title: Locus:1.1.1.2651.16 File:"2013-07-02 CLN FXIII 180 min 1st F 2.wiff"

Data file C:\Program Files (x86)\Matrix Science\Mascot Daemon\mgf7 FXIII 180 min 1st\mascot\_daemon\_merge.mgf

Click mouse within plot area to zoom in by factor of two about that point

Or, Plot from  to  Da

Label all possible matches  Label matches used for scoring

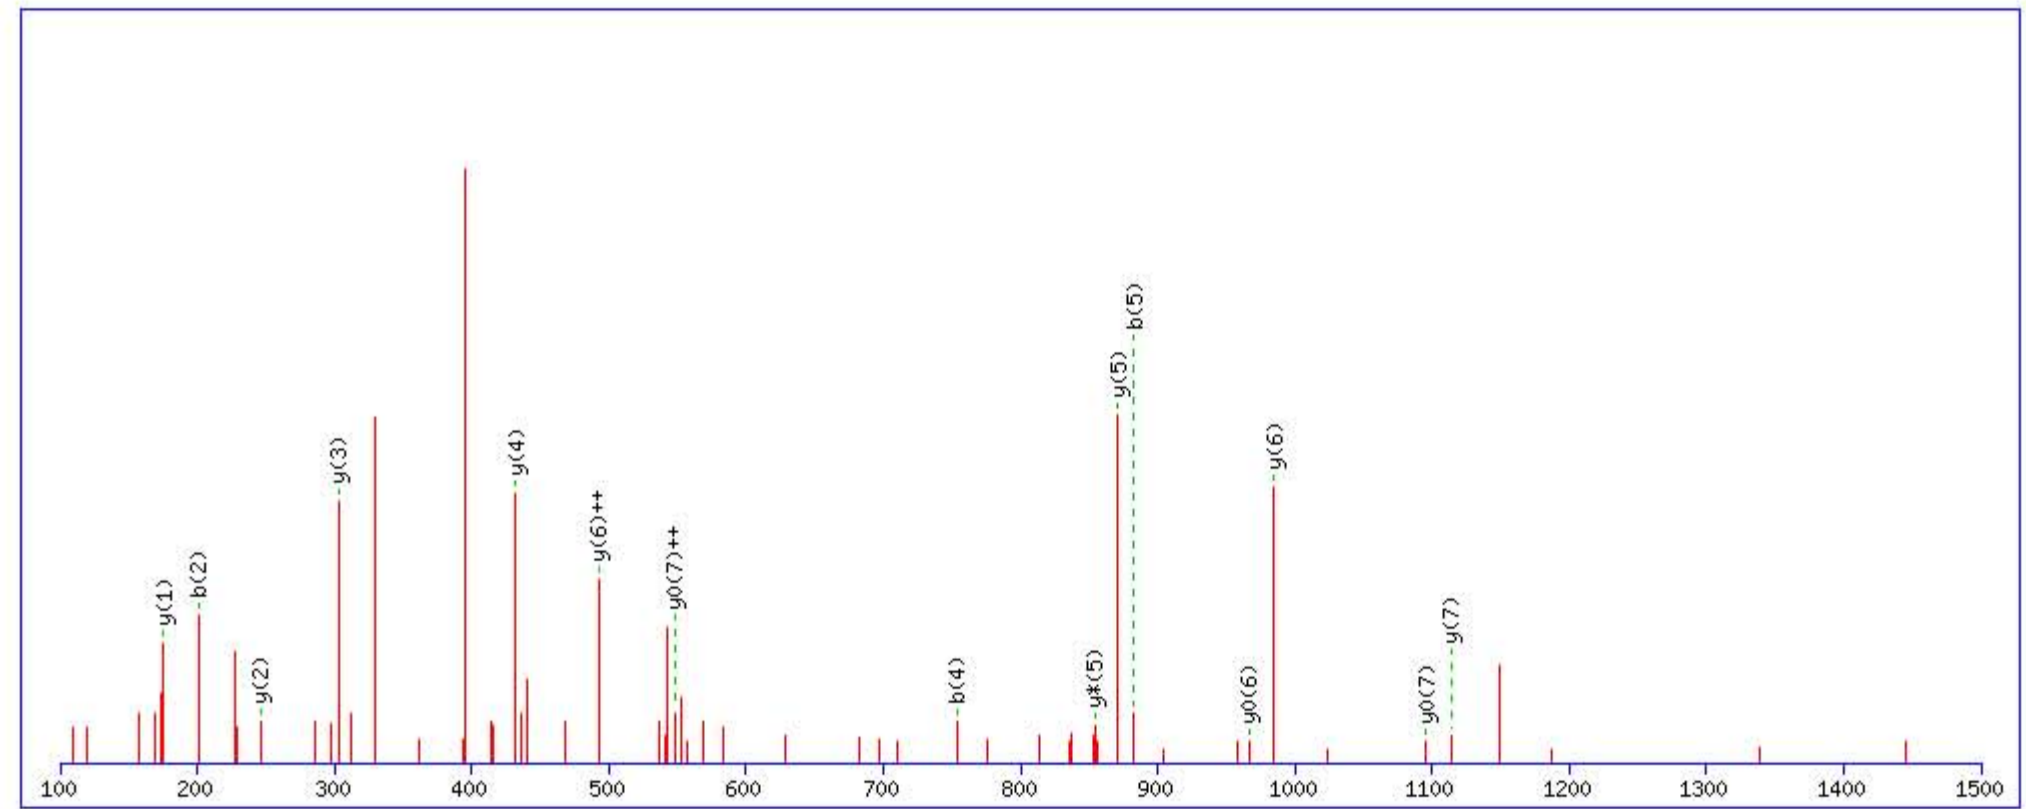

Monoisotopic mass of neutral peptide Mr(calc): 1183.601913

Fixed modifications: Carbamidomethyl (C) (apply to specified residues or termini only)

Variable modifications:

Q4 : Biotin:Thermo-21345 (Q)

Ions Score: 40 Expect: 0.0019

Matches : 15/70 fragment ions using 31 most intense peaks [\(help\)](#)

| # | b                 | b <sup>++</sup> | b <sup>*</sup> | b <sup>*++</sup> | b <sup>0</sup> | b <sup>0++</sup> | Seq. | y                  | y <sup>++</sup>   | y <sup>*</sup>    | y <sup>*++</sup> | y <sup>0</sup>     | y <sup>0++</sup>  | # |
|---|-------------------|-----------------|----------------|------------------|----------------|------------------|------|--------------------|-------------------|-------------------|------------------|--------------------|-------------------|---|
| 1 | 72.044390         | 36.525833       |                |                  |                |                  | A    |                    |                   |                   |                  |                    |                   | 8 |
| 2 | <b>201.086983</b> | 101.047130      |                |                  | 183.076418     | 92.041847        | E    | <b>1113.572106</b> | 557.289691        | 1096.545557       | 548.776417       | <b>1095.561541</b> | <b>548.284409</b> | 7 |
| 3 | 314.171047        | 157.589161      |                |                  | 296.160482     | 148.583879       | L    | <b>984.529513</b>  | <b>492.768395</b> | 967.502964        | 484.255120       | <b>966.518948</b>  | 483.763112        | 6 |
| 4 | <b>753.396373</b> | 377.201825      | 736.369824     | 368.688550       | 735.385808     | 368.196542       | Q    | <b>871.445449</b>  | 436.226363        | <b>854.418900</b> | 427.713088       | 853.434884         | 427.221080        | 5 |
| 5 | <b>882.438966</b> | 441.723121      | 865.412417     | 433.209847       | 864.428401     | 432.717839       | E    | <b>432.220123</b>  | 216.613699        | 415.193574        | 208.100425       | 414.209558         | 207.608417        | 4 |
| 6 | 939.460430        | 470.233853      | 922.433881     | 461.720579       | 921.449865     | 461.228571       | G    | <b>303.177530</b>  | 152.092403        | 286.150981        | 143.579128       |                    |                   | 3 |
| 7 | 1010.497544       | 505.752410      | 993.470995     | 497.239136       | 992.486979     | 496.747128       | A    | <b>246.156066</b>  | 123.581671        | 229.129517        | 115.068396       |                    |                   | 2 |
| 8 |                   |                 |                |                  |                |                  | R    | <b>175.118952</b>  | 88.063114         | 158.092403        | 79.549839        |                    |                   | 1 |

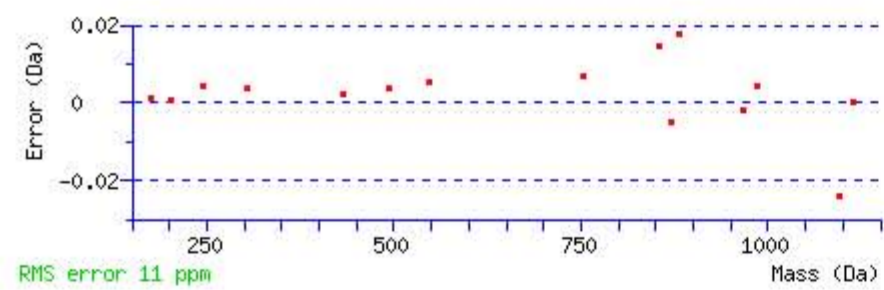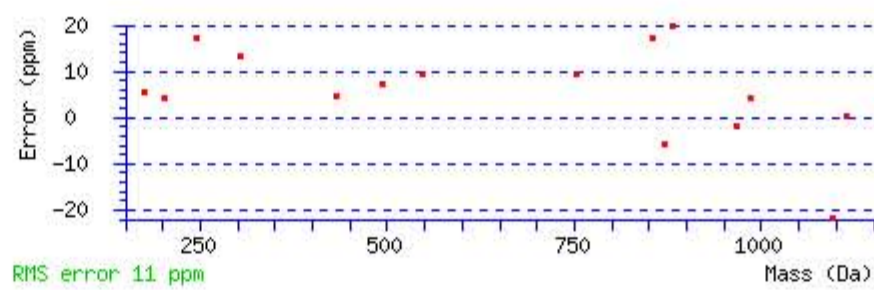

NCBI BLAST search of [AELQEGAR](#)

(Parameters: blastp, nr protein database, expect=20000, no filter, PAM30)

Other BLAST [web gateways](#)

All matches to this query

| Score | Mr(calc):   | Delta     | Sequence                     |
|-------|-------------|-----------|------------------------------|
| 39.7  | 1183.601913 | 0.001875  | <a href="#">AELQEGAR</a>     |
| 11.1  | 1183.601913 | 0.001875  | <a href="#">EALQQR</a>       |
| 7.9   | 1183.613815 | -0.010027 | <a href="#">FHFEALPPAR</a>   |
| 5.8   | 1183.601913 | 0.001875  | <a href="#">ELQAEAGR</a>     |
| 5.5   | 1183.587997 | 0.015791  | <a href="#">EAKLDHCRR</a>    |
| 3.7   | 1183.617172 | -0.013384 | <a href="#">AQLEAWR</a>      |
| 3.0   | 1183.595413 | 0.008375  | <a href="#">AFCRMVTRK</a>    |
| 1.8   | 1183.601913 | 0.001875  | <a href="#">LQEAQER</a>      |
| 1.7   | 1183.617172 | -0.013384 | <a href="#">AIQEAWR</a>      |
| 0.9   | 1183.609802 | -0.006014 | <a href="#">ATPHFSGLAAGR</a> |

# MASCOT Search Results

## Peptide View

MS/MS Fragmentation of **QGLLPVLESFK**

Found in **APOA1\_HUMAN**, Apolipoprotein A-I OS=Homo sapiens GN=APOA1 PE=1 SV=1

Match to Query 36238: 1540.884448 from(771.449500,2+) rtinseconds(2787) index(84185)

Title: Locus:1.1.1.2319.13 File:"2013-07-02 CLN FXIII 180 min 1st FT.wiff"

Data file C:\Program Files (x86)\Matrix Science\Mascot Daemon\mgf\7 FXIII 180 min 1st\mascot\_daemon\_merge.mgf

Click mouse within plot area to zoom in by factor of two about that point

Or, Plot from  to  Da

Label all possible matches  Label matches used for scoring

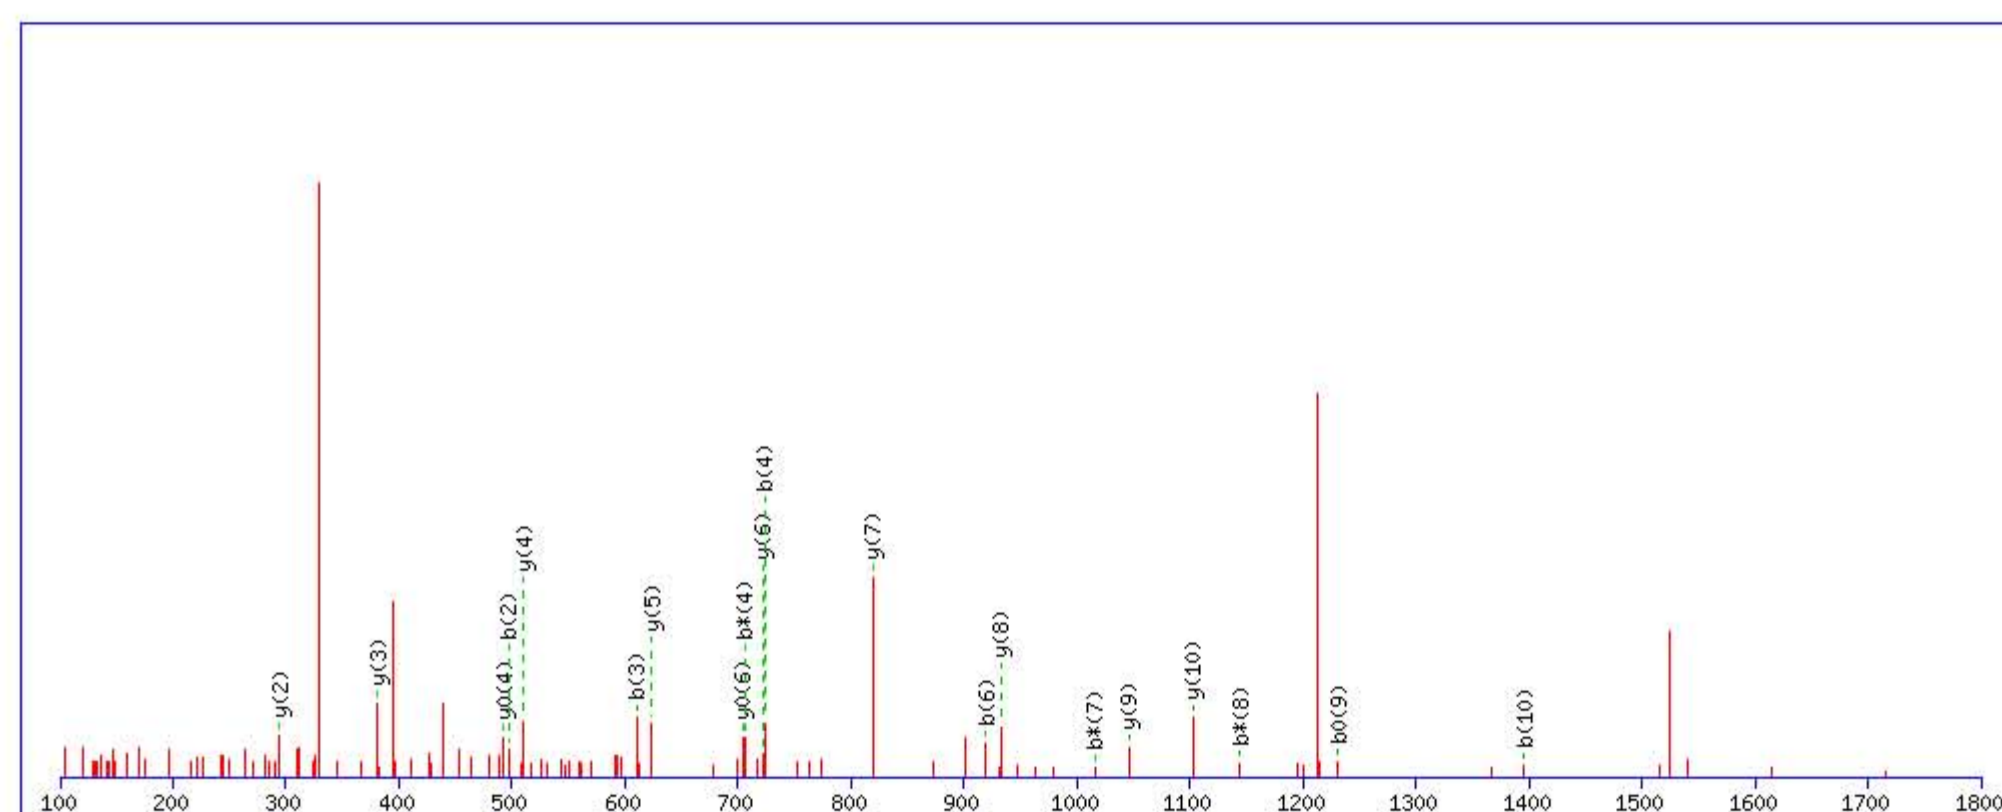

Monoisotopic mass of neutral peptide Mr(calc): 1540.868713

Fixed modifications: Carbamidomethyl (C) (apply to specified residues or termini only)

Variable modifications:

Q1 : Biotin:Thermo-21345 (Q)

Ions Score: 52 Expect: 7.2e-005

Matches : 20/102 fragment ions using 40 most intense peaks [\(help\)](#)

| #  | b                  | b <sup>++</sup> | b <sup>*</sup>     | b <sup>*++</sup> | b <sup>0</sup>     | b <sup>0++</sup> | Seq. | y                  | y <sup>++</sup> | y <sup>*</sup> | y <sup>*++</sup> | y <sup>0</sup>    | y <sup>0++</sup> | #  |
|----|--------------------|-----------------|--------------------|------------------|--------------------|------------------|------|--------------------|-----------------|----------------|------------------|-------------------|------------------|----|
| 1  | 440.232602         | 220.619939      | 423.206053         | 212.106664       |                    |                  | Q    |                    |                 |                |                  |                   |                  | 11 |
| 2  | <b>497.254066</b>  | 249.130671      | 480.227517         | 240.617396       |                    |                  | G    | <b>1102.650673</b> | 551.828975      | 1085.624124    | 543.315700       | 1084.640108       | 542.823692       | 10 |
| 3  | <b>610.338130</b>  | 305.672703      | 593.311581         | 297.159428       |                    |                  | L    | <b>1045.629209</b> | 523.318243      | 1028.602660    | 514.804968       | 1027.618644       | 514.312960       | 9  |
| 4  | <b>723.422194</b>  | 362.214735      | <b>706.395645</b>  | 353.701461       |                    |                  | L    | <b>932.545145</b>  | 466.776211      | 915.518596     | 458.262936       | 914.534580        | 457.770928       | 8  |
| 5  | 820.474958         | 410.741117      | 803.448409         | 402.227843       |                    |                  | P    | <b>819.461081</b>  | 410.234179      | 802.434532     | 401.720904       | 801.450516        | 401.228896       | 7  |
| 6  | <b>919.543372</b>  | 460.275324      | 902.516823         | 451.762049       |                    |                  | V    | <b>722.408317</b>  | 361.707797      | 705.381768     | 353.194522       | <b>704.397752</b> | 352.702514       | 6  |
| 7  | 1032.627436        | 516.817356      | <b>1015.600887</b> | 508.304082       |                    |                  | L    | <b>623.339903</b>  | 312.173590      | 606.313354     | 303.660315       | 605.329338        | 303.168307       | 5  |
| 8  | 1161.670029        | 581.338653      | <b>1144.643480</b> | 572.825378       | 1143.659464        | 572.333370       | E    | <b>510.255839</b>  | 255.631558      | 493.229290     | 247.118283       | <b>492.245274</b> | 246.626275       | 4  |
| 9  | 1248.702057        | 624.854667      | 1231.675508        | 616.341392       | <b>1230.691492</b> | 615.849384       | S    | <b>381.213246</b>  | 191.110261      | 364.186697     | 182.596987       | 363.202681        | 182.104979       | 3  |
| 10 | <b>1395.770471</b> | 698.388874      | 1378.743922        | 689.875599       | 1377.759906        | 689.383591       | F    | <b>294.181218</b>  | 147.594247      | 277.154669     | 139.080973       |                   |                  | 2  |
| 11 |                    |                 |                    |                  |                    |                  | K    | 147.112804         | 74.060040       | 130.086255     | 65.546765        |                   |                  | 1  |

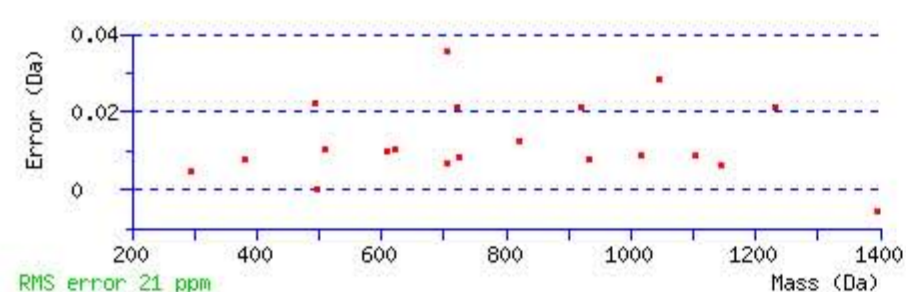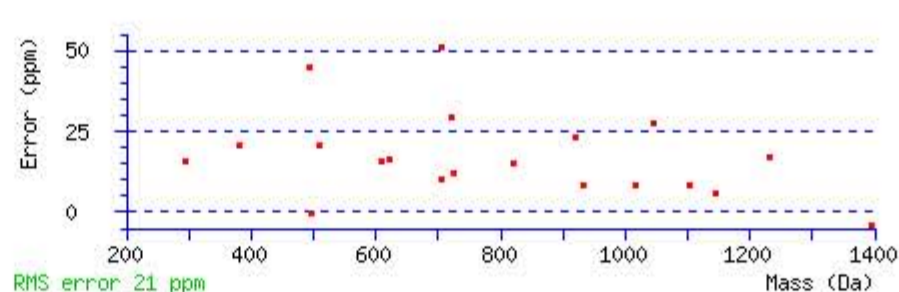

NCBI BLAST search of **QGLLPVLESFK**

(Parameters: blastp, nr protein database, expect=20000, no filter, PAM30)

Other BLAST [web gateways](#)

All matches to this query

| Score | Mr(calc):   | Delta     | Sequence                      |
|-------|-------------|-----------|-------------------------------|
| 51.8  | 1540.868713 | 0.015735  | <a href="#">QGLLPVLESFK</a>   |
| 14.8  | 1540.894531 | -0.010083 | <a href="#">QAVLSMVRKAK</a>   |
| 0.2   | 1540.864700 | 0.019748  | <a href="#">KVTVGKDDIQK</a>   |
| 0.2   | 1540.893677 | -0.009229 | <a href="#">LKSVDVGLQLREK</a> |

Mascot: <http://www.matrixscience.com/>

# MASCOT SEARCH RESULTS

## Peptide View

MS/MS Fragmentation of **VQPYLDDFQK**

Found in **APOA1\_HUMAN**, Apolipoprotein A-I OS=Homo sapiens GN=APOA1 PE=1 SV=1

Match to Query 36860: 1562.795488 from(782.405020,2+) rtinseconds(2154) index(25787)

Title: Locus:1.1.1.2892.15 File:"2013-07-02 CLN FXIII 180 min 1st F 2.wiff"

Data file C:\Program Files (x86)\Matrix Science\Mascot Daemon\mgf\7 FXIII 180 min 1st\mascot\_daemon\_merge.mgf

Click mouse within plot area to zoom in by factor of two about that point

Or, Plot from  to  Da

Label all possible matches  Label matches used for scoring

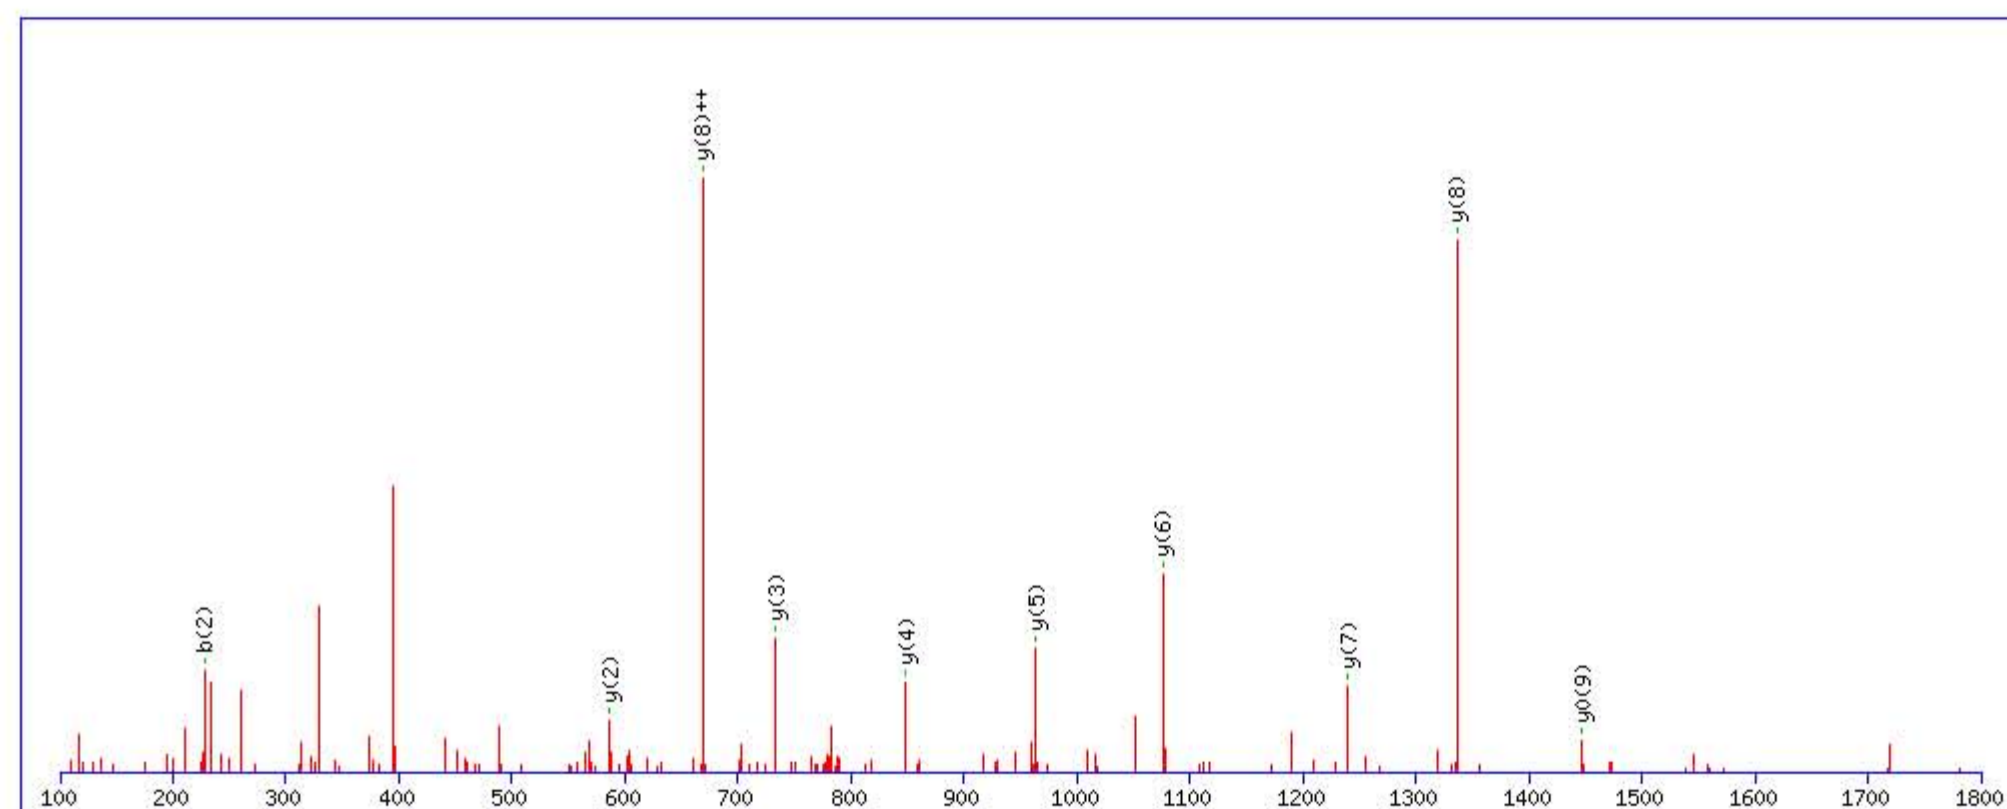

Monoisotopic mass of neutral peptide Mr(calc): 1562.780304

Fixed modifications: Carbamidomethyl (C) (apply to specified residues or termini only)

Variable modifications:

Q9 : Biotin:Thermo-21345 (Q)

Ions Score: 47 Expect: 0.00014

Matches : 10/90 fragment ions using 15 most intense peaks [\(help\)](#)

| #  | b                 | b <sup>++</sup> | b <sup>*</sup> | b <sup>*++</sup> | b <sup>0</sup> | b <sup>0++</sup> | Seq. | y                  | y <sup>++</sup>   | y <sup>*</sup> | y <sup>*++</sup> | y <sup>0</sup>     | y <sup>0++</sup> | #  |
|----|-------------------|-----------------|----------------|------------------|----------------|------------------|------|--------------------|-------------------|----------------|------------------|--------------------|------------------|----|
| 1  | 100.075690        | 50.541483       |                |                  |                |                  | V    |                    |                   |                |                  |                    |                  | 10 |
| 2  | <b>228.134268</b> | 114.570772      | 211.107719     | 106.057498       |                |                  | Q    | 1464.719165        | 732.863221        | 1447.692616    | 724.349946       | <b>1446.708600</b> | 723.857938       | 9  |
| 3  | 325.187032        | 163.097154      | 308.160483     | 154.583879       |                |                  | P    | <b>1336.660587</b> | <b>668.833932</b> | 1319.634038    | 660.320657       | 1318.650022        | 659.828649       | 8  |
| 4  | 488.250361        | 244.628818      | 471.223812     | 236.115544       |                |                  | Y    | <b>1239.607823</b> | 620.307550        | 1222.581274    | 611.794275       | 1221.597258        | 611.302267       | 7  |
| 5  | 601.334425        | 301.170851      | 584.307876     | 292.657576       |                |                  | L    | <b>1076.544494</b> | 538.775885        | 1059.517945    | 530.262611       | 1058.533929        | 529.770603       | 6  |
| 6  | 716.361368        | 358.684322      | 699.334819     | 350.171047       | 698.350803     | 349.679039       | D    | <b>963.460430</b>  | 482.233853        | 946.433881     | 473.720579       | 945.449865         | 473.228571       | 5  |
| 7  | 831.388311        | 416.197793      | 814.361762     | 407.684519       | 813.377746     | 407.192511       | D    | <b>848.433487</b>  | 424.720382        | 831.406938     | 416.207107       | 830.422922         | 415.715099       | 4  |
| 8  | 978.456725        | 489.732000      | 961.430176     | 481.218726       | 960.446160     | 480.726718       | F    | <b>733.406544</b>  | 367.206910        | 716.379995     | 358.693636       |                    |                  | 3  |
| 9  | 1417.682051       | 709.344664      | 1400.655502    | 700.831389       | 1399.671486    | 700.339381       | Q    | <b>586.338130</b>  | 293.672703        | 569.311581     | 285.159429       |                    |                  | 2  |
| 10 |                   |                 |                |                  |                |                  | K    | 147.112804         | 74.060040         | 130.086255     | 65.546765        |                    |                  | 1  |

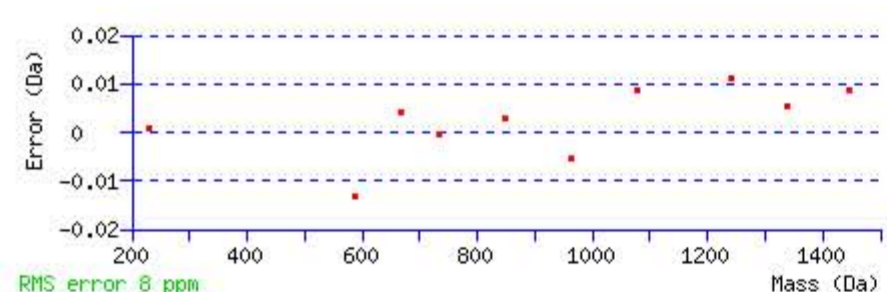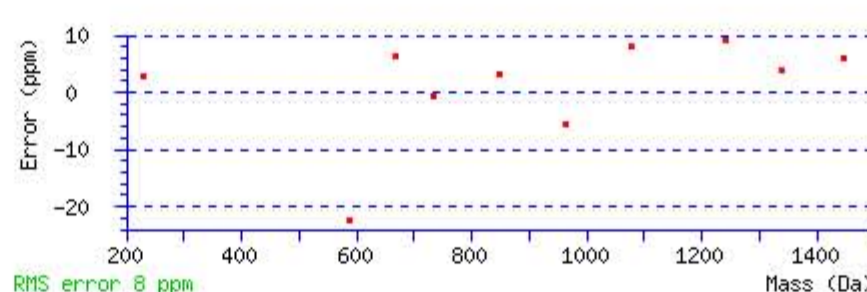

NCBI BLAST search of **VQPYLDDFQK**

(Parameters: blastp, nr protein database, expect=20000, no filter, PAM30)

Other BLAST [web gateways](#)

All matches to this query

| Score | Mr(calc):   | Delta     | Sequence                       |
|-------|-------------|-----------|--------------------------------|
| 46.9  | 1562.780304 | 0.015184  | <a href="#">VQPYLDDFQK</a>     |
| 5.4   | 1562.804764 | -0.009276 | <a href="#">QVEELLMAMEKVK</a>  |
| 0.5   | 1562.808624 | -0.013136 | <a href="#">LNSPTTTSQIMARK</a> |
| 0.3   | 1562.795364 | 0.000124  | <a href="#">KVKFTQQNYHDR</a>   |

Mascot: <http://www.matrixscience.com/>

# MASCOT SCIENCE Mascot Search Results

## Peptide View

MS/MS Fragmentation of **DYVSQFEGSALGK**

Found in **APOA1\_HUMAN**, Apolipoprotein A-I OS=Homo sapiens GN=APOA1 PE=1 SV=1

Match to Query 42761: 1710.824208 from(856.419380,2+) rtinseconds(2387) index(63520)  
 Title: Locus:1.1.1.3253.12 File:"2013-07-02 CLN FXIII 180 min 1st F 4.wiff"

Data file C:\Program Files (x86)\Matrix Science\Mascot Daemon\mgf7 FXIII 180 min 1st\mascot\_daemon\_merge.mgf

Click mouse within plot area to zoom in by factor of two about that point

Or, Plot from  to  Da

Label all possible matches  Label matches used for scoring

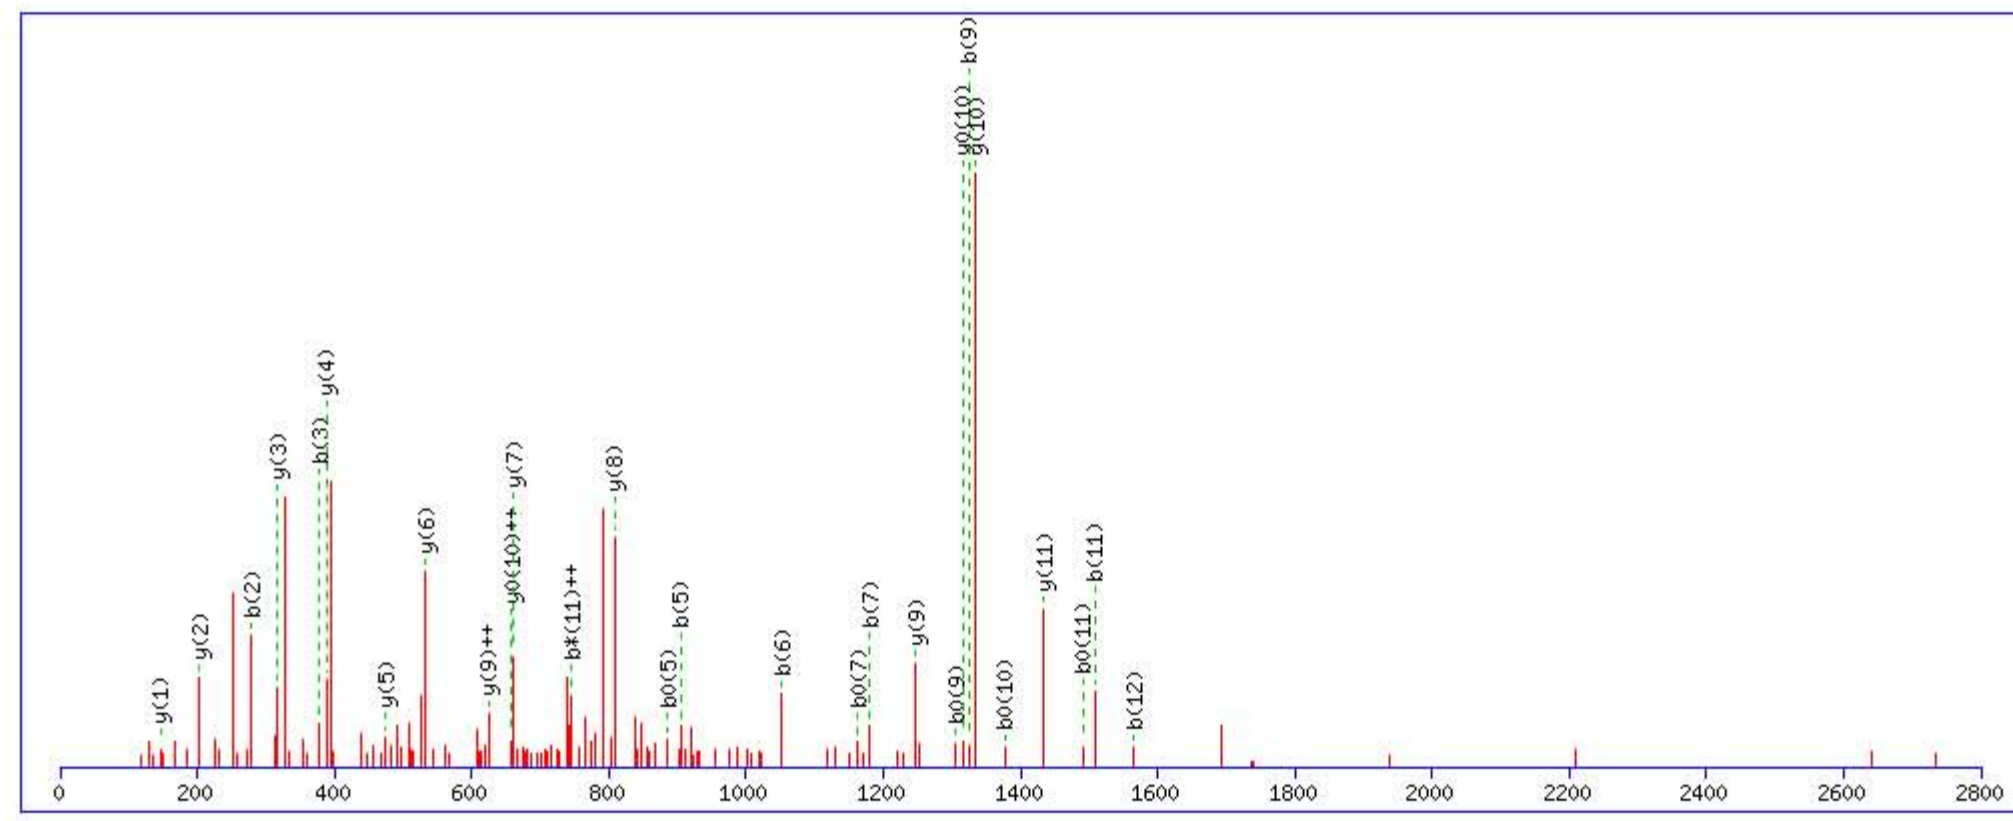

Monoisotopic mass of neutral peptide Mr(calc): 1710.828705

Fixed modifications: Carbamidomethyl (C) (apply to specified residues or termini only)

Variable modifications:

Q5 : Biotin:Thermo-21345 (Q)

Ions Score: 66 Expect: 9.8e-007

Matches : 28/128 fragment ions using 56 most intense peaks [\(help\)](#)

| #  | b                  | b <sup>++</sup> | b <sup>*</sup> | b <sup>*++</sup>  | b <sup>0</sup>     | b <sup>0++</sup> | Seq. | y                  | y <sup>++</sup>   | y <sup>*</sup> | y <sup>*++</sup> | y <sup>0</sup>     | y <sup>0++</sup>  | #  |
|----|--------------------|-----------------|----------------|-------------------|--------------------|------------------|------|--------------------|-------------------|----------------|------------------|--------------------|-------------------|----|
| 1  | 116.034219         | 58.520748       |                |                   | 98.023654          | 49.515465        | D    |                    |                   |                |                  |                    |                   | 13 |
| 2  | <b>279.097548</b>  | 140.052412      |                |                   | 261.086983         | 131.047130       | Y    | 1596.809042        | 798.908159        | 1579.782493    | 790.394884       | 1578.798477        | 789.902876        | 12 |
| 3  | <b>378.165962</b>  | 189.586619      |                |                   | 360.155397         | 180.581337       | V    | <b>1433.745713</b> | 717.376495        | 1416.719164    | 708.863220       | 1415.735148        | 708.371212        | 11 |
| 4  | 465.197990         | 233.102633      |                |                   | 447.187425         | 224.097351       | S    | <b>1334.677299</b> | 667.842288        | 1317.650750    | 659.329013       | <b>1316.666734</b> | <b>658.837005</b> | 10 |
| 5  | <b>904.423316</b>  | 452.715296      | 887.396767     | 444.202022        | <b>886.412751</b>  | 443.710014       | Q    | <b>1247.645271</b> | <b>624.326273</b> | 1230.618722    | 615.812999       | 1229.634706        | 615.320991        | 9  |
| 6  | <b>1051.491730</b> | 526.249503      | 1034.465181    | 517.736229        | 1033.481165        | 517.244221       | F    | <b>808.419945</b>  | 404.713610        | 791.393396     | 396.200336       | 790.409380         | 395.708328        | 8  |
| 7  | <b>1180.534323</b> | 590.770800      | 1163.507774    | 582.257525        | <b>1162.523758</b> | 581.765517       | E    | <b>661.351531</b>  | 331.179403        | 644.324982     | 322.666129       | 643.340966         | 322.174121        | 7  |
| 8  | 1237.555787        | 619.281532      | 1220.529238    | 610.768257        | 1219.545222        | 610.276249       | G    | <b>532.308938</b>  | 266.658107        | 515.282389     | 258.144832       | 514.298373         | 257.652824        | 6  |
| 9  | <b>1324.587815</b> | 662.797546      | 1307.561266    | 654.284271        | <b>1306.577250</b> | 653.792263       | S    | <b>475.287474</b>  | 238.147375        | 458.260925     | 229.634100       | 457.276909         | 229.142092        | 5  |
| 10 | 1395.624929        | 698.316103      | 1378.598380    | 689.802828        | <b>1377.614364</b> | 689.310820       | A    | <b>388.255446</b>  | 194.631361        | 371.228897     | 186.118086       |                    |                   | 4  |
| 11 | <b>1508.708993</b> | 754.858135      | 1491.682444    | <b>746.344860</b> | <b>1490.698428</b> | 745.852852       | L    | <b>317.218332</b>  | 159.112804        | 300.191783     | 150.599529       |                    |                   | 3  |
| 12 | <b>1565.730457</b> | 783.368866      | 1548.703908    | 774.855592        | 1547.719892        | 774.363584       | G    | <b>204.134268</b>  | 102.570772        | 187.107719     | 94.057497        |                    |                   | 2  |
| 13 |                    |                 |                |                   |                    |                  | K    | <b>147.112804</b>  | 74.060040         | 130.086255     | 65.546765        |                    |                   | 1  |

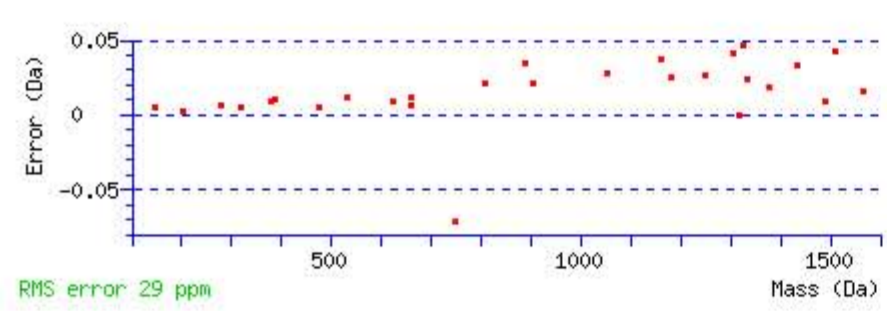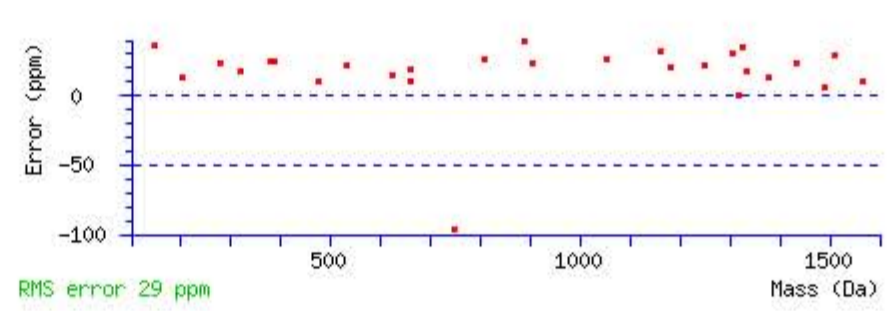

NCBI BLAST search of **DYVSQFEGSALGK**

(Parameters: blastp, nr protein database, expect=20000, no filter, PAM30)

Other BLAST [web gateways](#)

All matches to this query

| Score | Mr(calc):   | Delta     | Sequence                          |
|-------|-------------|-----------|-----------------------------------|
| 66.2  | 1710.828705 | -0.004497 | <a href="#">DYVSQFEGSALGK</a>     |
| 2.1   | 1710.799500 | 0.024708  | <a href="#">QAYTGNNSSQIQ AAMK</a> |

Mascot: <http://www.matrixscience.com/>

# MASCOT Search Results

## Peptide View

MS/MS Fragmentation of **EQLTPLIK**

Found in **APOA2\_HUMAN**, Apolipoprotein A-II OS=Homo sapiens GN=APOA2 PE=1 SV=1

Match to Query 25365: 1251.724908 from(626.869730,2+) rtinseconds(2090) index(25310)

Title: Locus:1.1.1.2870.9 File:"2013-07-02 CLN FXIII 180 min 1st F 2.wiff"

Data file C:\Program Files (x86)\Matrix Science\Mascot Daemon\mgf\7 FXIII 180 min 1st\mascot\_daemon\_merge.mgf

Click mouse within plot area to zoom in by factor of two about that point

Or, Plot from  to  Da

Label all possible matches  Label matches used for scoring

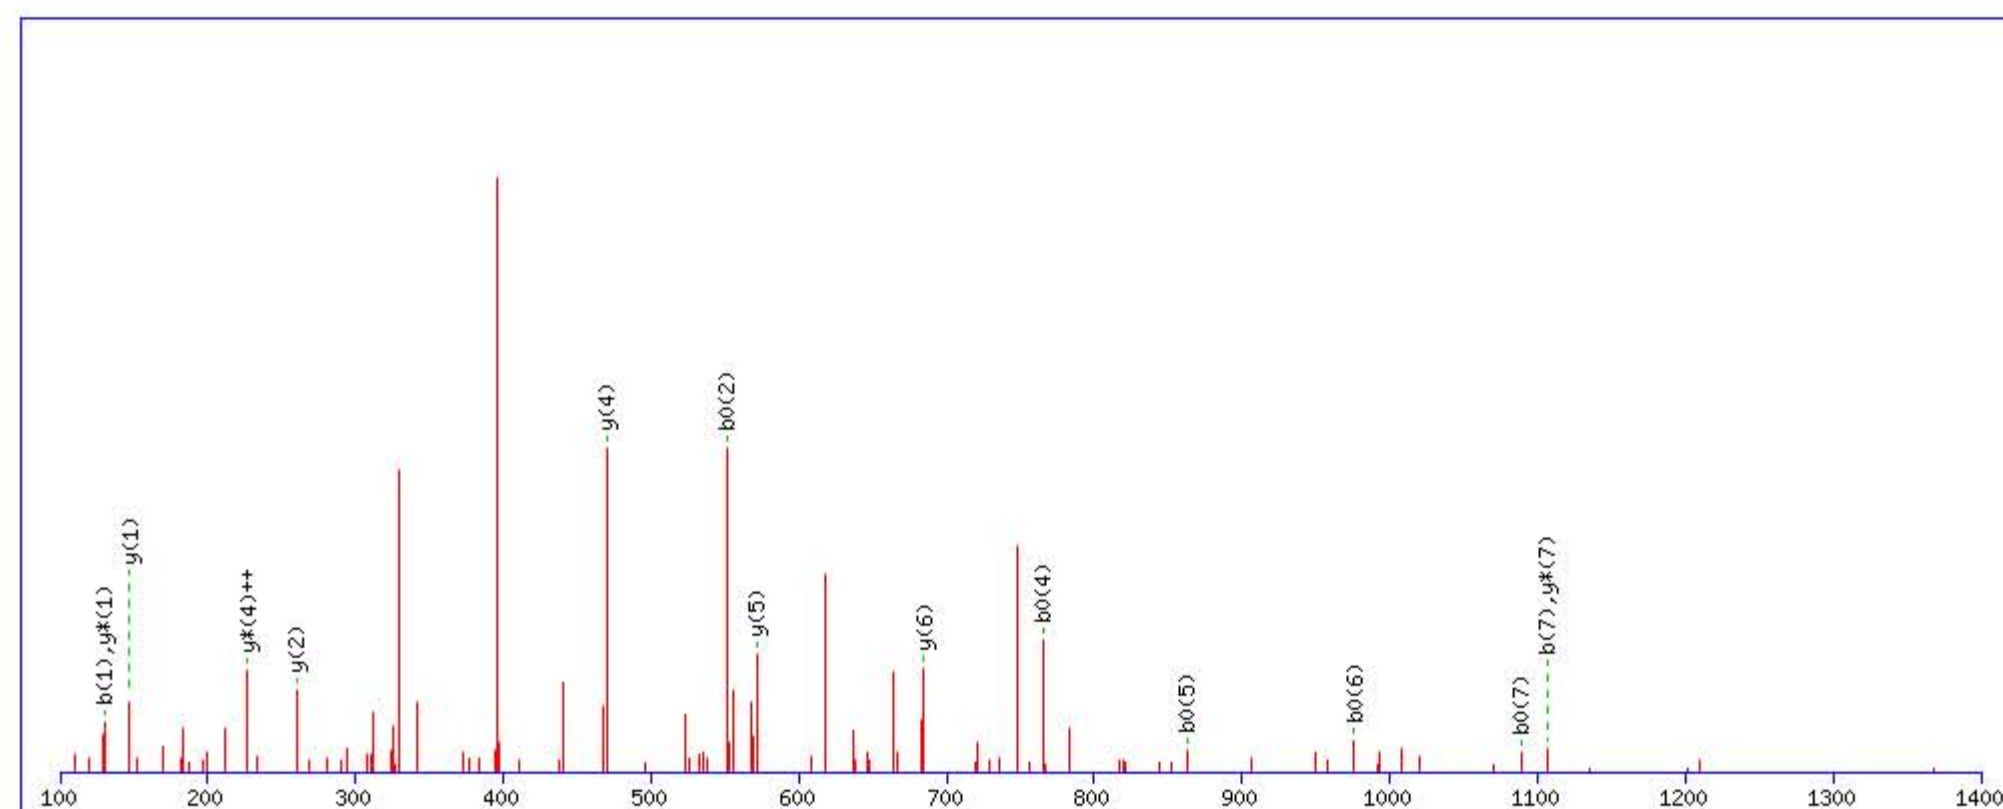

Monoisotopic mass of neutral peptide Mr(calc): 1251.726059

Fixed modifications: Carbamidomethyl (C) (apply to specified residues or termini only)

Variable modifications:

Q2 : Biotin:Thermo-21345 (Q)

Ions Score: 28 Expect: 0.017

Matches : 15/74 fragment ions using 22 most intense peaks [\(help\)](#)

| # | b           | b <sup>++</sup> | b <sup>*</sup> | b <sup>+++</sup> | b <sup>0</sup> | b <sup>0++</sup> | Seq. | y           | y <sup>++</sup> | y <sup>*</sup> | y <sup>+++</sup> | y <sup>0</sup> | y <sup>0++</sup> | # |
|---|-------------|-----------------|----------------|------------------|----------------|------------------|------|-------------|-----------------|----------------|------------------|----------------|------------------|---|
| 1 | 130.049869  | 65.528572       |                |                  | 112.039304     | 56.523290        | E    |             |                 |                |                  |                |                  | 8 |
| 2 | 569.275195  | 285.141236      | 552.248646     | 276.627961       | 551.264630     | 276.135953       | Q    | 1123.690765 | 562.349021      | 1106.664216    | 553.835746       | 1105.680200    | 553.343738       | 7 |
| 3 | 682.359259  | 341.683268      | 665.332710     | 333.169993       | 664.348694     | 332.677985       | L    | 684.465439  | 342.736358      | 667.438890     | 334.223083       | 666.454874     | 333.731075       | 6 |
| 4 | 783.406938  | 392.207107      | 766.380389     | 383.693833       | 765.396373     | 383.201825       | T    | 571.381375  | 286.194326      | 554.354826     | 277.681051       | 553.370810     | 277.189043       | 5 |
| 5 | 880.459702  | 440.733489      | 863.433153     | 432.220215       | 862.449137     | 431.728207       | P    | 470.333696  | 235.670486      | 453.307147     | 227.157212       |                |                  | 4 |
| 6 | 993.543766  | 497.275521      | 976.517217     | 488.762247       | 975.533201     | 488.270239       | L    | 373.280932  | 187.144104      | 356.254383     | 178.630830       |                |                  | 3 |
| 7 | 1106.627830 | 553.817553      | 1089.601281    | 545.304279       | 1088.617265    | 544.812271       | I    | 260.196868  | 130.602072      | 243.170319     | 122.088798       |                |                  | 2 |
| 8 |             |                 |                |                  |                |                  | K    | 147.112804  | 74.060040       | 130.086255     | 65.546765        |                |                  | 1 |

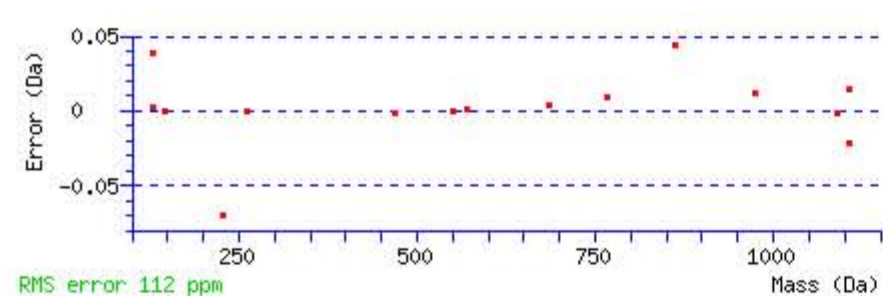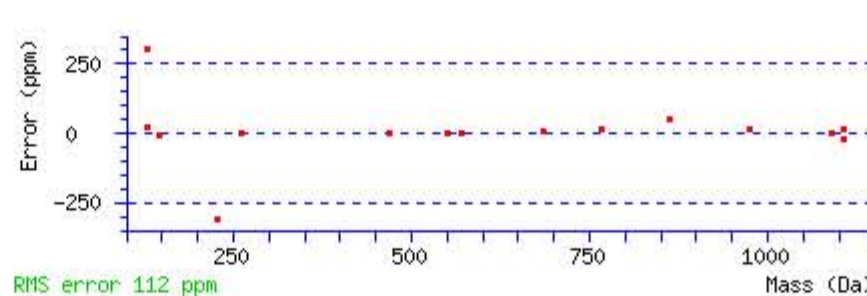

NCBI BLAST search of **EQLTPLIK**

(Parameters: blastp, nr protein database, expect=20000, no filter, PAM30)

Other BLAST [web gateways](#)

All matches to this query

| Score | Mr(calc):   | Delta     | Sequence                       |
|-------|-------------|-----------|--------------------------------|
| 27.7  | 1251.726059 | -0.001151 | <a href="#">EQLTPLIK</a>       |
| 15.8  | 1251.722672 | 0.002236  | <a href="#">NYIPYLTKLK</a>     |
| 4.1   | 1251.722702 | 0.002206  | <a href="#">FFKTLQDLLK</a>     |
| 3.0   | 1251.729874 | -0.004966 | <a href="#">RHKLESELIK</a>     |
| 2.8   | 1251.718689 | 0.006219  | <a href="#">ASGVGLPGGSLPIK</a> |
| 1.4   | 1251.712143 | 0.012765  | <a href="#">KMGVKLTPHNK</a>    |

Mascot: <http://www.matrixscience.com/>



# MASCOT Search Results

## Peptide View

### MS/MS Fragmentation of SPELQAEAK

Found in **APOA2\_HUMAN**, Apolipoprotein A-II OS=Homo sapiens GN=APOA2 PE=1 SV=1

Match to Query 26441: 1282.659328 from(642.336940,2+) rtinseconds(1541) index(21322)

Title: Locus:1.1.1.2679.16 File:"2013-07-02 CLN FXIII 180 min 1st F 2.wiff"

Data file C:\Program Files (x86)\Matrix Science\Mascot Daemon\mgf\7 FXIII 180 min 1st\mascot\_daemon\_merge.mgf

Click mouse within plot area to zoom in by factor of two about that point

Or, Plot from  to  Da

Label all possible matches  Label matches used for scoring

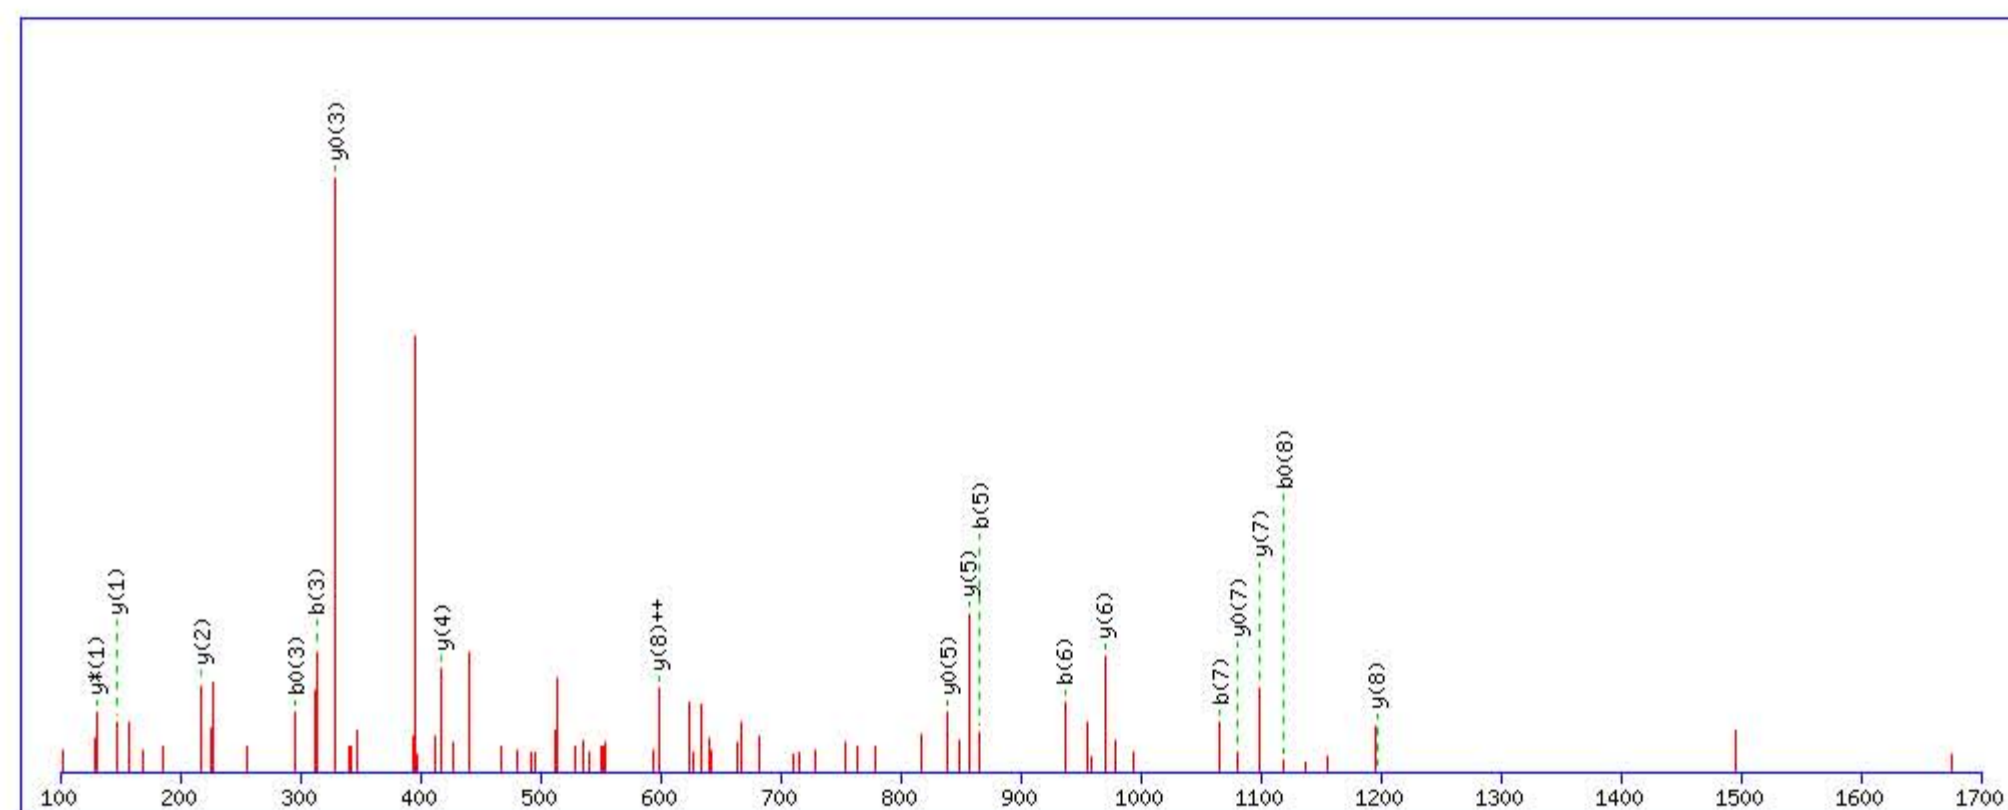

Monoisotopic mass of neutral peptide Mr(calc): 1282.659088

Fixed modifications: Carbamidomethyl (C) (apply to specified residues or termini only)

Variable modifications:

Q5 : Biotin:Thermo-21345 (Q)

Ions Score: 42 Expect: 0.00041

Matches : 18/84 fragment ions using 33 most intense peaks [\(help\)](#)

| # | b                  | b <sup>++</sup> | b <sup>*</sup> | b <sup>+++</sup> | b <sup>0</sup>     | b <sup>0++</sup> | Seq. | y                  | y <sup>++</sup>   | y <sup>*</sup>    | y <sup>+++</sup> | y <sup>0</sup>     | y <sup>0++</sup> | # |
|---|--------------------|-----------------|----------------|------------------|--------------------|------------------|------|--------------------|-------------------|-------------------|------------------|--------------------|------------------|---|
| 1 | 88.039304          | 44.523290       |                |                  | 70.028739          | 35.518008        | S    |                    |                   |                   |                  |                    |                  | 9 |
| 2 | 185.092068         | 93.049672       |                |                  | 167.081503         | 84.044389        | P    | <b>1196.634372</b> | <b>598.820824</b> | 1179.607823       | 590.307550       | 1178.623807        | 589.815541       | 8 |
| 3 | <b>314.134661</b>  | 157.570968      |                |                  | <b>296.124096</b>  | 148.565686       | E    | <b>1099.581608</b> | 550.294442        | 1082.555059       | 541.781168       | <b>1081.571043</b> | 541.289160       | 7 |
| 4 | 427.218725         | 214.113001      |                |                  | 409.208160         | 205.107718       | L    | <b>970.539015</b>  | 485.773146        | 953.512466        | 477.259871       | 952.528450         | 476.767863       | 6 |
| 5 | <b>866.444051</b>  | 433.725664      | 849.417502     | 425.212389       | 848.433486         | 424.720381       | Q    | <b>857.454951</b>  | 429.231114        | 840.428402        | 420.717839       | <b>839.444386</b>  | 420.225831       | 5 |
| 6 | <b>937.481165</b>  | 469.244221      | 920.454616     | 460.730946       | 919.470600         | 460.238938       | A    | <b>418.229625</b>  | 209.618450        | 401.203076        | 201.105176       | 400.219060         | 200.613168       | 4 |
| 7 | <b>1066.523758</b> | 533.765517      | 1049.497209    | 525.252243       | 1048.513193        | 524.760235       | E    | 347.192511         | 174.099893        | 330.165962        | 165.586619       | <b>329.181946</b>  | 165.094611       | 3 |
| 8 | 1137.560872        | 569.284074      | 1120.534323    | 560.770800       | <b>1119.550307</b> | 560.278792       | A    | <b>218.149918</b>  | 109.578597        | 201.123369        | 101.065322       |                    |                  | 2 |
| 9 |                    |                 |                |                  |                    |                  | K    | <b>147.112804</b>  | 74.060040         | <b>130.086255</b> | 65.546765        |                    |                  | 1 |

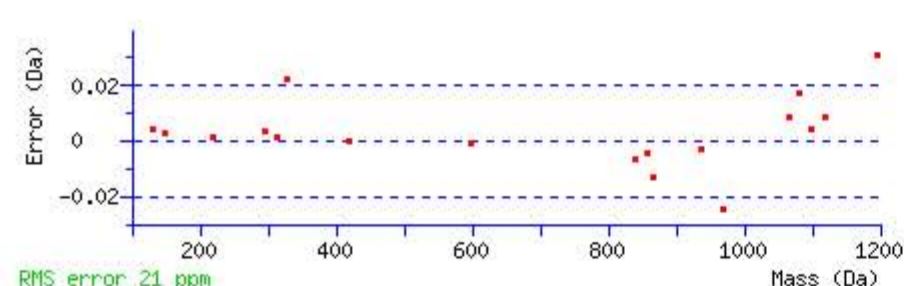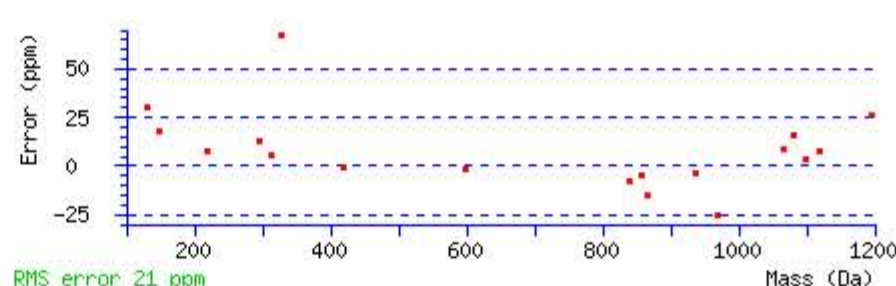

### NCBI BLAST search of SPELQAEAK

(Parameters: blastp, nr protein database, expect=20000, no filter, PAM30)

Other BLAST [web gateways](#)

### All matches to this query

| Score | Mr(calc):   | Delta     | Sequence                       |
|-------|-------------|-----------|--------------------------------|
| 42.1  | 1282.659088 | 0.000240  | <a href="#">SPELQAEAK</a>      |
| 5.7   | 1282.652573 | 0.006755  | <a href="#">KMRAISWTMK</a>     |
| 4.5   | 1282.651688 | 0.007640  | <a href="#">KKQELDEHEK</a>     |
| 3.6   | 1282.670334 | -0.011006 | <a href="#">QQQEQIAK</a>       |
| 2.7   | 1282.655716 | 0.003612  | <a href="#">ALEAEKYGFQK</a>    |
| 2.3   | 1282.662949 | -0.003621 | <a href="#">DLSDTQRHLAK</a>    |
| 0.8   | 1282.645203 | 0.014125  | <a href="#">AAGPGLGNVAMGPR</a> |
| 0.7   | 1282.678207 | -0.018879 | <a href="#">SLQQGPPKWSR</a>    |

**Peptide View**

MS/MS Fragmentation of **EPCVESLVSQYFQTVTDYGK**

Found in **APOA2\_HUMAN**, Apolipoprotein A-II OS=Homo sapiens GN=APOA2 PE=1 SV=1

Match to Query 65203: 2660.280432 from(887.767420,3+) rtinseconds(3135) index(32335)

Title: Locus:1.1.1.3230.17 File:"2013-07-02 CLN FXIII 180 min 1st F 2.wiff"

Data file C:\Program Files (x86)\Matrix Science\Mascot Daemon\mgf\7 FXIII 180 min 1st\mascot\_daemon\_merge.mgf

Click mouse within plot area to zoom in by factor of two about that point

Or, Plot from 100 to 1800 Da Full range

Label all possible matches  Label matches used for scoring

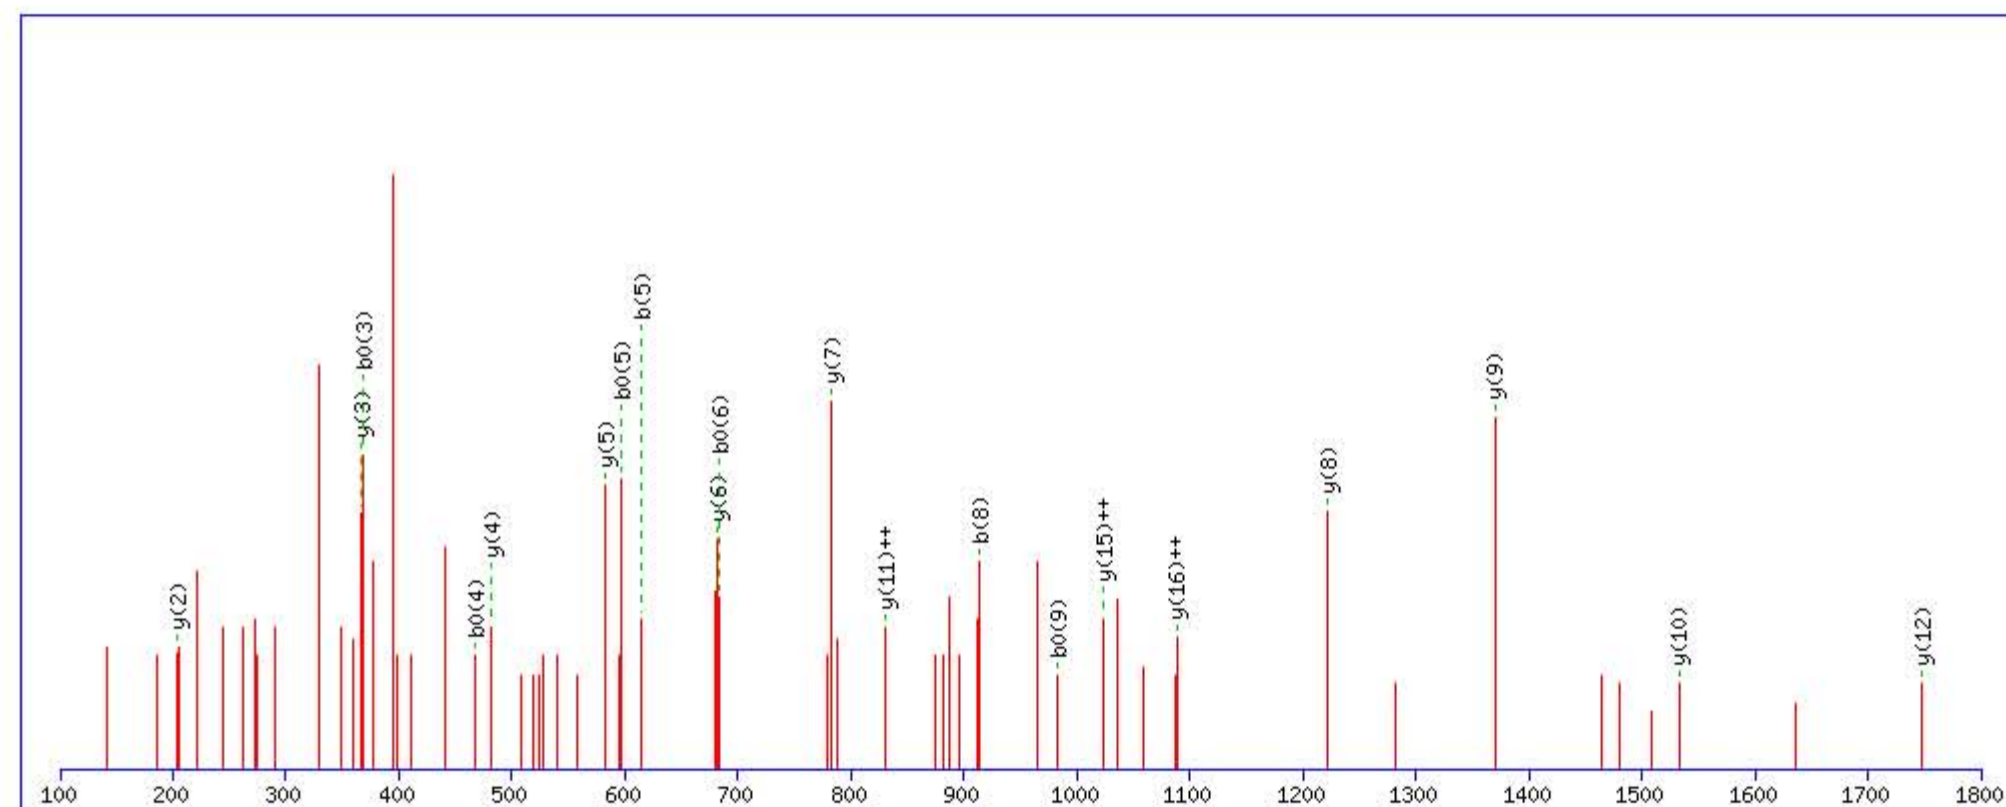

Monoisotopic mass of neutral peptide Mr(calc): 2660.250244

Fixed modifications: Carbamidomethyl (C) (apply to specified residues or termini only)

Variable modifications:

Q13 : Biotin:Thermo-21345 (Q)

Ions Score: 39 Expect: 0.003

Matches : 20/204 fragment ions using 48 most intense peaks [\(help\)](#)

| #  | b           | b <sup>++</sup> | b <sup>*</sup> | b <sup>*++</sup> | b <sup>0</sup> | b <sup>0++</sup> | Seq. | y           | y <sup>++</sup> | y <sup>*</sup> | y <sup>*++</sup> | y <sup>0</sup> | y <sup>0++</sup> | #  |
|----|-------------|-----------------|----------------|------------------|----------------|------------------|------|-------------|-----------------|----------------|------------------|----------------|------------------|----|
| 1  | 130.049869  | 65.528572       |                |                  | 112.039304     | 56.523290        | E    |             |                 |                |                  |                |                  | 20 |
| 2  | 227.102633  | 114.054954      |                |                  | 209.092068     | 105.049672       | P    | 2532.214913 | 1266.611094     | 2515.188364    | 1258.097820      | 2514.204348    | 1257.605812      | 19 |
| 3  | 387.133282  | 194.070279      |                |                  | 369.122717     | 185.064997       | C    | 2435.162149 | 1218.084712     | 2418.135600    | 1209.571438      | 2417.151584    | 1209.079430      | 18 |
| 4  | 486.201696  | 243.604486      |                |                  | 468.191131     | 234.599204       | V    | 2275.131500 | 1138.069388     | 2258.104951    | 1129.556113      | 2257.120935    | 1129.064105      | 17 |
| 5  | 615.244289  | 308.125783      |                |                  | 597.233724     | 299.120500       | E    | 2176.063086 | 1088.535181     | 2159.036537    | 1080.021906      | 2158.052521    | 1079.529898      | 16 |
| 6  | 702.276317  | 351.641797      |                |                  | 684.265752     | 342.636514       | S    | 2047.020493 | 1024.013885     | 2029.993944    | 1015.500610      | 2029.009928    | 1015.008602      | 15 |
| 7  | 815.360381  | 408.183829      |                |                  | 797.349816     | 399.178546       | L    | 1959.988465 | 980.497871      | 1942.961916    | 971.984596       | 1941.977900    | 971.492588       | 14 |
| 8  | 914.428795  | 457.718036      |                |                  | 896.418230     | 448.712753       | V    | 1846.904401 | 923.955839      | 1829.877852    | 915.442564       | 1828.893836    | 914.950556       | 13 |
| 9  | 1001.460823 | 501.234050      |                |                  | 983.450258     | 492.228767       | S    | 1747.835987 | 874.421632      | 1730.809438    | 865.908357       | 1729.825422    | 865.416349       | 12 |
| 10 | 1129.519401 | 565.263339      | 1112.492852    | 556.750064       | 1111.508836    | 556.258056       | Q    | 1660.803959 | 830.905618      | 1643.777410    | 822.392343       | 1642.793394    | 821.900335       | 11 |
| 11 | 1292.582730 | 646.795003      | 1275.556181    | 638.281729       | 1274.572165    | 637.789721       | Y    | 1532.745381 | 766.876329      | 1515.718832    | 758.363054       | 1514.734816    | 757.871046       | 10 |
| 12 | 1439.651144 | 720.329210      | 1422.624595    | 711.815936       | 1421.640579    | 711.323928       | F    | 1369.682052 | 685.344664      | 1352.655503    | 676.831390       | 1351.671487    | 676.339382       | 9  |
| 13 | 1878.876470 | 939.941873      | 1861.849921    | 931.428599       | 1860.865905    | 930.936591       | Q    | 1222.613638 | 611.810457      | 1205.587089    | 603.297183       | 1204.603073    | 602.805175       | 8  |
| 14 | 1979.924149 | 990.465713      | 1962.897600    | 981.952438       | 1961.913584    | 981.460430       | T    | 783.388312  | 392.197794      | 766.361763     | 383.684519       | 765.377747     | 383.192511       | 7  |
| 15 | 2078.992563 | 1039.999920     | 2061.966014    | 1031.486645      | 2060.981998    | 1030.994637      | V    | 682.340633  | 341.673954      | 665.314084     | 333.160680       | 664.330068     | 332.668672       | 6  |
| 16 | 2180.040242 | 1090.523759     | 2163.013693    | 1082.010484      | 2162.029677    | 1081.518476      | T    | 583.272219  | 292.139747      | 566.245670     | 283.626473       | 565.261654     | 283.134465       | 5  |
| 17 | 2295.067185 | 1148.037230     | 2278.040636    | 1139.523956      | 2277.056620    | 1139.031948      | D    | 482.224540  | 241.615908      | 465.197991     | 233.102633       | 464.213975     | 232.610625       | 4  |
| 18 | 2458.130514 | 1229.568895     | 2441.103965    | 1221.055620      | 2440.119949    | 1220.563612      | Y    | 367.197597  | 184.102436      | 350.171048     | 175.589162       |                |                  | 3  |
| 19 | 2515.151978 | 1258.079627     | 2498.125429    | 1249.566352      | 2497.141413    | 1249.074344      | G    | 204.134268  | 102.570772      | 187.107719     | 94.057497        |                |                  | 2  |
| 20 |             |                 |                |                  |                |                  | K    | 147.112804  | 74.060040       | 130.086255     | 65.546765        |                |                  | 1  |

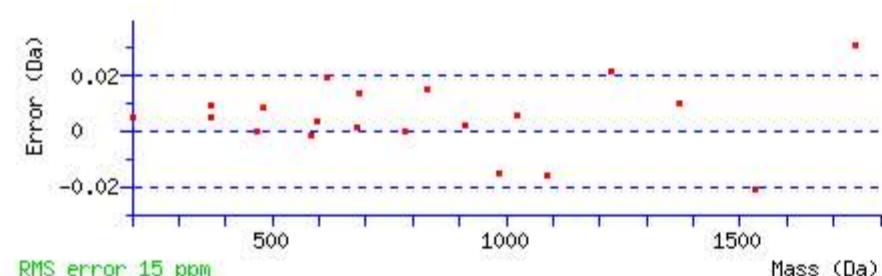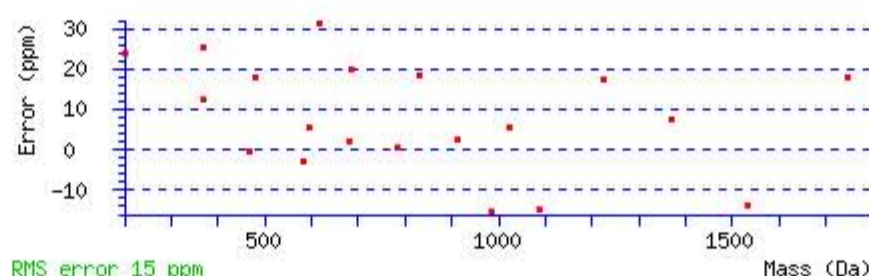

NCBI BLAST search of **EPCVESLVSQYFQTVTDYGK**

(Parameters: blastp, nr protein database, expect=20000, no filter, PAM30)

Other BLAST [web gateways](#)

All matches to this query

| Score | Mr(calc):   | Delta    | Sequence                             |
|-------|-------------|----------|--------------------------------------|
| 39.1  | 2660.250244 | 0.030188 | <a href="#">EPCVESLVSQYFQTVTDYGK</a> |
| 38.7  | 2660.250244 | 0.030188 | <a href="#">EPCVESLVSQYFQTVTDYGK</a> |



# {MATRIX} {SCIENCE} Mascot Search Results

## Peptide View

MS/MS Fragmentation of **EIQQR**

Found in **T161A\_HUMAN**, Transmembrane protein 161A OS=Homo sapiens GN=TMEM161A PE=2 SV=1

Match to Query 15332: 983.524408 from(492.769480,2+) rtinseconds(1379) index(2437)

Title: Locus:1.1.1.2734.18 File:"2013-07-02 CLN FXIII 180 min 1st F 1.wiff"

Data file C:\Program Files (x86)\Matrix Science\Mascot Daemon\mgf\7 FXIII 180 min 1st\mascot\_daemon\_merge.mgf

Click mouse within plot area to zoom in by factor of two about that point

Or, Plot from  to  Da

Label all possible matches  Label matches used for scoring

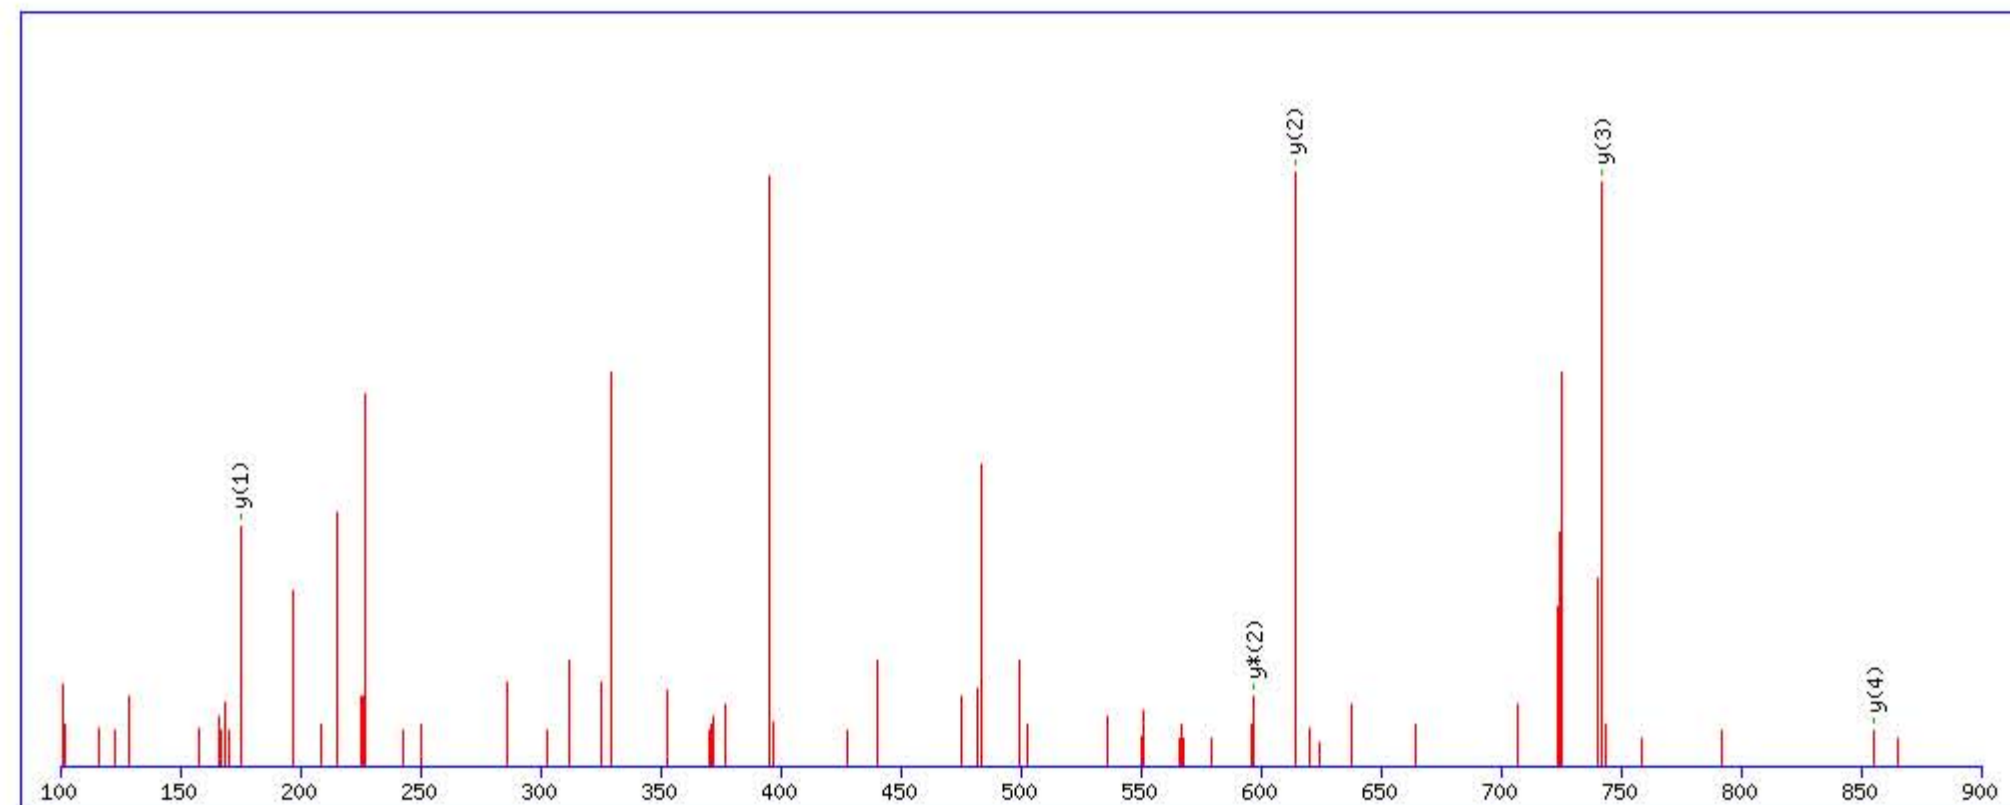

Monoisotopic mass of neutral peptide Mr(calc): 983.522217

Fixed modifications: Carbamidomethyl (C) (apply to specified residues or termini only)

Variable modifications:

Q4 : Biotin:Thermo-21345 (Q)

Ions Score: 28 Expect: 0.029

Matches : 5/36 fragment ions using 8 most intense peaks [\(help\)](#)

| # | b          | b <sup>++</sup> | b <sup>*</sup> | b <sup>*++</sup> | b <sup>0</sup> | b <sup>0++</sup> | Seq. | y          | y <sup>++</sup> | y <sup>*</sup> | y <sup>*++</sup> | # |
|---|------------|-----------------|----------------|------------------|----------------|------------------|------|------------|-----------------|----------------|------------------|---|
| 1 | 130.049869 | 65.528572       |                |                  | 112.039304     | 56.523290        | E    |            |                 |                |                  | 5 |
| 2 | 243.133933 | 122.070605      |                |                  | 225.123368     | 113.065322       | I    | 855.486920 | 428.247098      | 838.460371     | 419.733824       | 4 |
| 3 | 371.192511 | 186.099894      | 354.165962     | 177.586619       | 353.181946     | 177.094611       | Q    | 742.402856 | 371.705066      | 725.376307     | 363.191792       | 3 |
| 4 | 810.417837 | 405.712557      | 793.391288     | 397.199282       | 792.407272     | 396.707274       | Q    | 614.344278 | 307.675777      | 597.317729     | 299.162503       | 2 |
| 5 |            |                 |                |                  |                |                  | R    | 175.118952 | 88.063114       | 158.092403     | 79.549840        | 1 |

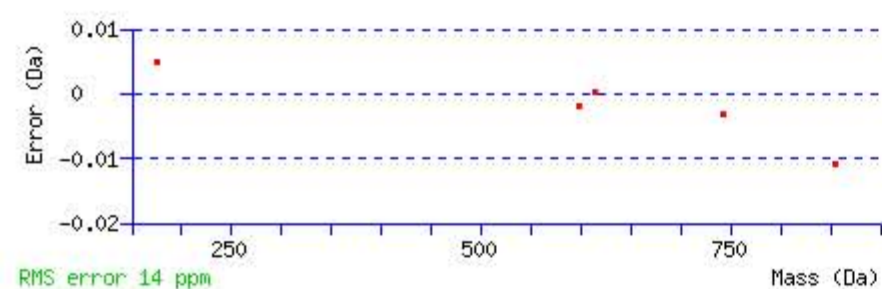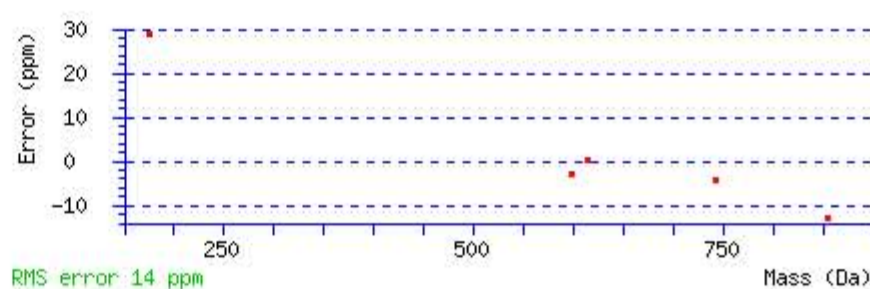

NCBI BLAST search of [EIQQR](#)

(Parameters: blastp, nr protein database, expect=20000, no filter, PAM30)

Other BLAST [web gateways](#)

## All matches to this query

| Score | Mr(calc):  | Delta     | Sequence                 |
|-------|------------|-----------|--------------------------|
| 28.3  | 983.522217 | 0.002191  | <a href="#">EIQQR</a>    |
| 28.3  | 983.522217 | 0.002191  | <a href="#">ELQQR</a>    |
| 15.4  | 983.522217 | 0.002191  | <a href="#">IEQQR</a>    |
| 15.4  | 983.522217 | 0.002191  | <a href="#">LEQQR</a>    |
| 13.8  | 983.522217 | 0.002191  | <a href="#">EAAVQR</a>   |
| 13.8  | 983.522217 | 0.002191  | <a href="#">EGLAQR</a>   |
| 13.8  | 983.514816 | 0.009592  | <a href="#">EKISHNTR</a> |
| 13.8  | 983.522217 | 0.002191  | <a href="#">EQIQR</a>    |
| 13.8  | 983.522217 | 0.002191  | <a href="#">EQLQR</a>    |
| 13.1  | 983.533447 | -0.009039 | <a href="#">NKQQR</a>    |

# **Mascot Search Results**

## Peptide View

MS/MS Fragmentation of **GNTEGLQK**

Found in **APOA4\_HUMAN**, Apolipoprotein A-IV OS=Homo sapiens GN=APOA4 PE=1 SV=3

Match to Query 22066: 1156.590908 from(579.302730,2+) rtinseconds(1412) index(20337)

Title: Locus:1.1.1.2634.18 File:"2013-07-02 CLN FXIII 180 min 1st F 2.wiff"

Data file C:\Program Files (x86)\Matrix Science\Mascot Daemon\mgf\7 FXIII 180 min 1st\mascot\_daemon\_merge.mgf

Click mouse within plot area to zoom in by factor of two about that point

Or, Plot from  to  Da

Label all possible matches  Label matches used for scoring

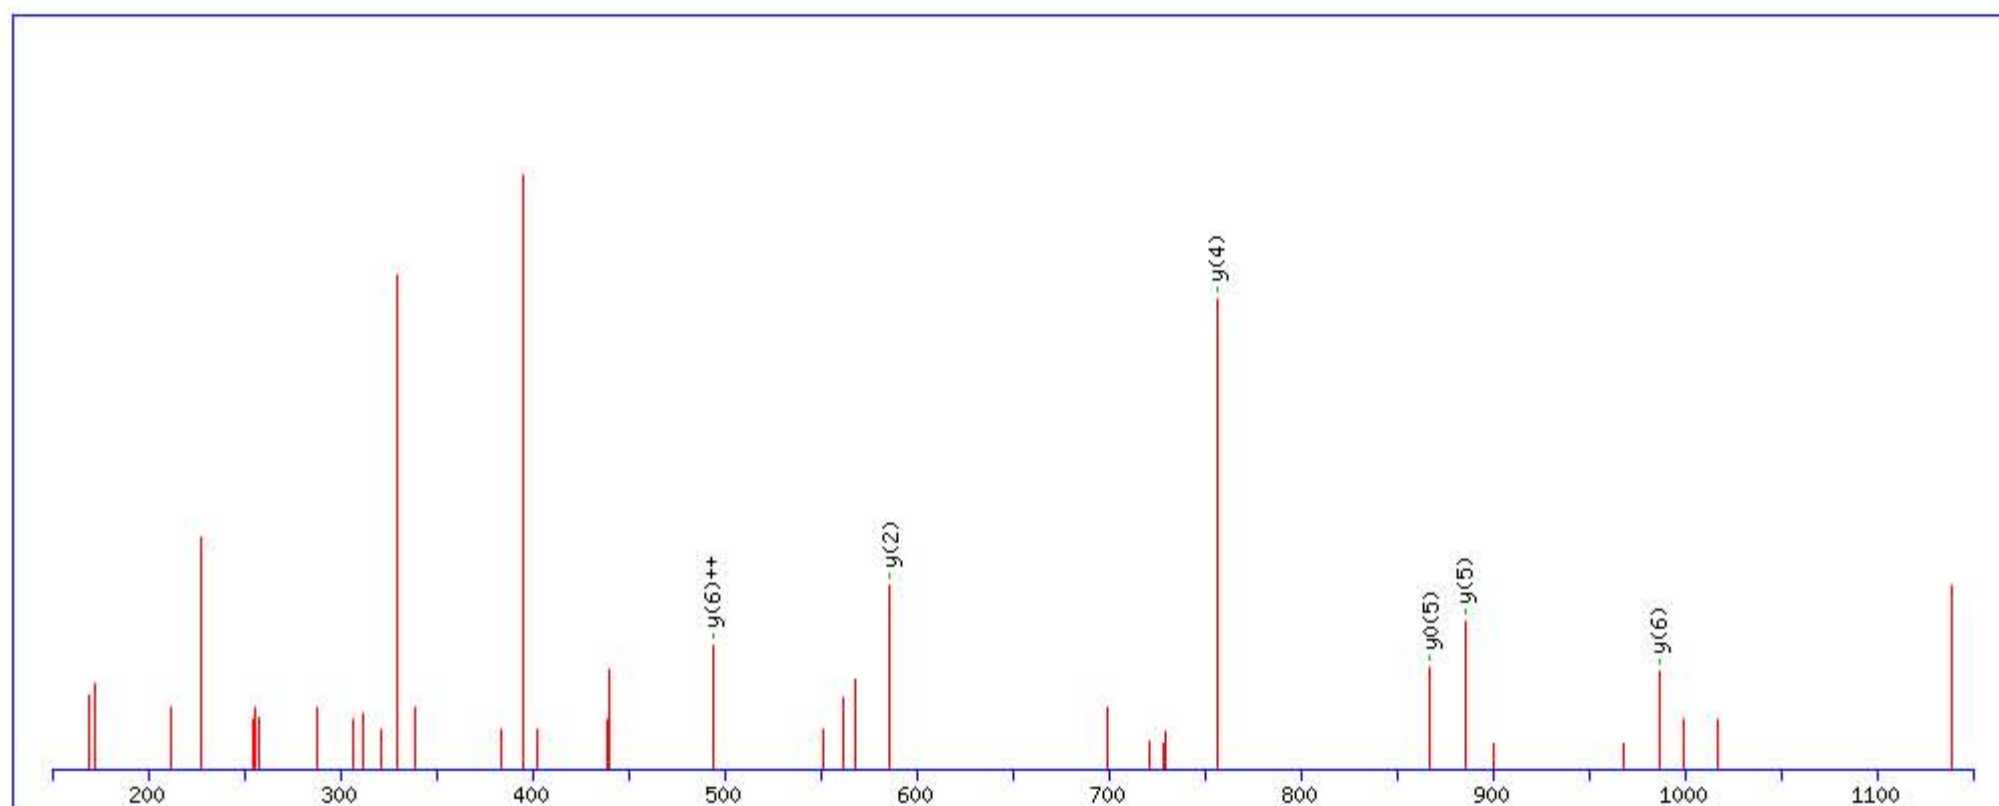

Monoisotopic mass of neutral peptide Mr(calc): 1156.591034

Fixed modifications: Carbamidomethyl (C) (apply to specified residues or termini only)

Variable modifications:

Q7 : Biotin:Thermo-21345 (Q)

Ions Score: 25 Expect: 0.055

Matches : 6/70 fragment ions using 10 most intense peaks [\(help\)](#)

| # | b           | b <sup>++</sup> | b <sup>*</sup> | b <sup>+++</sup> | b <sup>0</sup> | b <sup>0++</sup> | Seq.     | y                 | y <sup>++</sup>   | y <sup>*</sup> | y <sup>+++</sup> | y <sup>0</sup>    | y <sup>0++</sup> | #        |
|---|-------------|-----------------|----------------|------------------|----------------|------------------|----------|-------------------|-------------------|----------------|------------------|-------------------|------------------|----------|
| 1 | 58.028740   | 29.518008       |                |                  |                |                  | <b>G</b> |                   |                   |                |                  |                   |                  | <b>8</b> |
| 2 | 172.071667  | 86.539471       | 155.045118     | 78.026197        |                |                  | <b>N</b> | 1100.576857       | 550.792067        | 1083.550308    | 542.278792       | 1082.566292       | 541.786784       | <b>7</b> |
| 3 | 273.119346  | 137.063311      | 256.092797     | 128.550037       | 255.108781     | 128.058029       | <b>T</b> | <b>986.533930</b> | <b>493.770603</b> | 969.507381     | 485.257329       | 968.523365        | 484.765321       | <b>6</b> |
| 4 | 402.161939  | 201.584608      | 385.135390     | 193.071333       | 384.151374     | 192.579325       | <b>E</b> | <b>885.486251</b> | 443.246764        | 868.459702     | 434.733489       | <b>867.475686</b> | 434.241481       | <b>5</b> |
| 5 | 459.183403  | 230.095339      | 442.156854     | 221.582065       | 441.172838     | 221.090057       | <b>G</b> | <b>756.443658</b> | 378.725467        | 739.417109     | 370.212193       |                   |                  | <b>4</b> |
| 6 | 572.267467  | 286.637372      | 555.240918     | 278.124097       | 554.256902     | 277.632089       | <b>L</b> | 699.422194        | 350.214735        | 682.395645     | 341.701461       |                   |                  | <b>3</b> |
| 7 | 1011.492793 | 506.250035      | 994.466244     | 497.736760       | 993.482228     | 497.244752       | <b>Q</b> | <b>586.338130</b> | 293.672703        | 569.311581     | 285.159429       |                   |                  | <b>2</b> |
| 8 |             |                 |                |                  |                |                  | <b>K</b> | 147.112804        | 74.060040         | 130.086255     | 65.546766        |                   |                  | <b>1</b> |

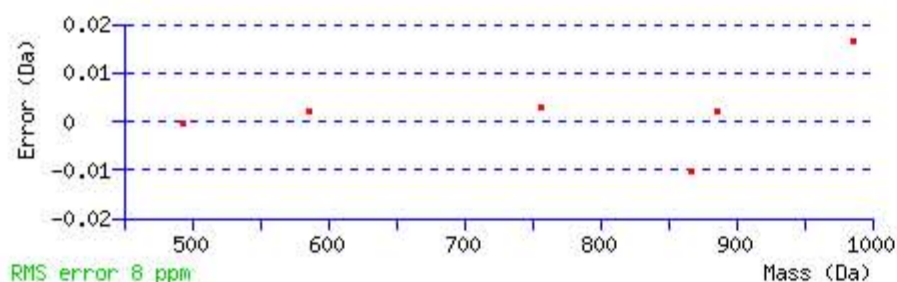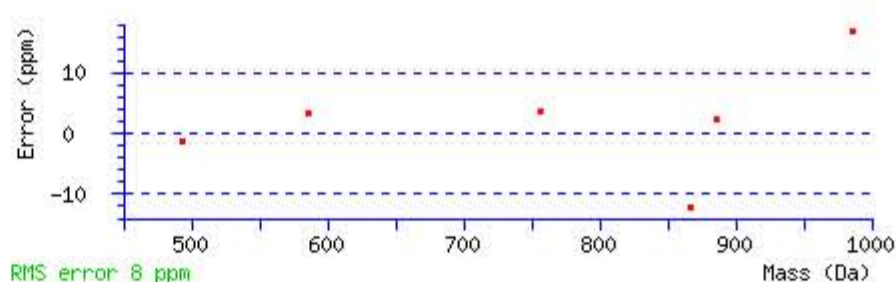

NCBI BLAST search of [GNTEGLQK](#)

(Parameters: blastp, nr protein database, expect=20000, no filter, PAM30)

Other BLAST [web gateways](#)

All matches to this query

| Score | Mr(calc):   | Delta     | Sequence                 |
|-------|-------------|-----------|--------------------------|
| 25.2  | 1156.591034 | -0.000126 | <a href="#">GNTEGLQK</a> |

Mascot: <http://www.matrixscience.com/>

# MASCOT Search Results

## Peptide View

MS/MS Fragmentation of **IDQNVEELK**

Found in **APOA4\_HUMAN**, Apolipoprotein A-IV OS=Homo sapiens GN=APOA4 PE=1 SV=3

Match to Query 30688: 1397.726868 from(699.870710,2+) rtinseconds(1802) index(23227)

Title: Locus:1.1.1.2770.6 File:"2013-07-02 CLN FXIII 180 min 1st F 2.wiff"

Data file C:\Program Files (x86)\Matrix Science\Mascot Daemon\mgf7 FXIII 180 min 1st\mascot\_daemon\_merge.mgf

Click mouse within plot area to zoom in by factor of two about that point

Or, Plot from  to  Da

Label all possible matches  Label matches used for scoring

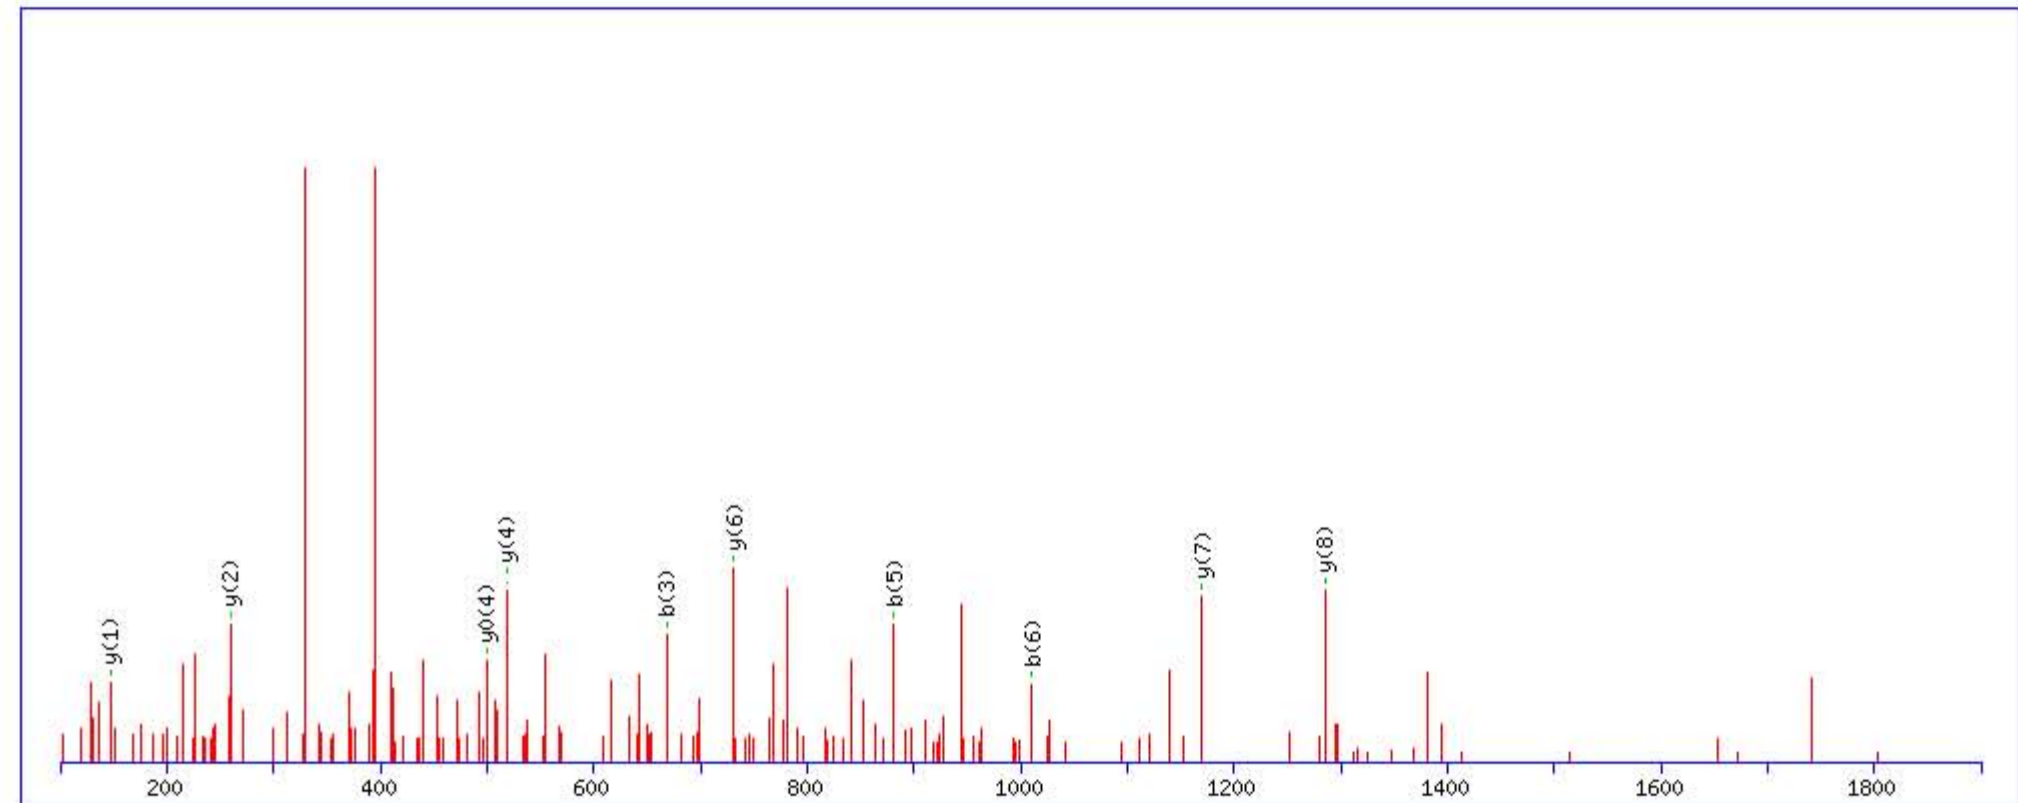

Monoisotopic mass of neutral peptide Mr(calc): 1397.722427

Fixed modifications: Carbamidomethyl (C) (apply to specified residues or termini only)

Variable modifications:

Q3 : Biotin:Thermo-21345 (Q)

Ions Score: 47 Expect: 0.00023

Matches : 10/86 fragment ions using 13 most intense peaks [\(help\)](#)

| # | b           | b <sup>++</sup> | b <sup>*</sup> | b <sup>*++</sup> | b <sup>0</sup> | b <sup>0++</sup> | Seq. | y           | y <sup>++</sup> | y <sup>*</sup> | y <sup>*++</sup> | y <sup>0</sup> | y <sup>0++</sup> | # |
|---|-------------|-----------------|----------------|------------------|----------------|------------------|------|-------------|-----------------|----------------|------------------|----------------|------------------|---|
| 1 | 114.091340  | 57.549308       |                |                  |                |                  | I    |             |                 |                |                  |                |                  | 9 |
| 2 | 229.118283  | 115.062779      |                |                  | 211.107718     | 106.057497       | D    | 1285.645664 | 643.326470      | 1268.619115    | 634.813196       | 1267.635099    | 634.321187       | 8 |
| 3 | 668.343609  | 334.675443      | 651.317060     | 326.162168       | 650.333044     | 325.670160       | Q    | 1170.618721 | 585.812998      | 1153.592172    | 577.299724       | 1152.608156    | 576.807716       | 7 |
| 4 | 782.386536  | 391.696906      | 765.359987     | 383.183631       | 764.375971     | 382.691623       | N    | 731.393395  | 366.200335      | 714.366846     | 357.687061       | 713.382830     | 357.195053       | 6 |
| 5 | 881.454950  | 441.231113      | 864.428401     | 432.717838       | 863.444385     | 432.225830       | V    | 617.350468  | 309.178872      | 600.323919     | 300.665597       | 599.339903     | 300.173589       | 5 |
| 6 | 1010.497543 | 505.752410      | 993.470994     | 497.239135       | 992.486978     | 496.747127       | E    | 518.282054  | 259.644665      | 501.255505     | 251.131390       | 500.271489     | 250.639382       | 4 |
| 7 | 1139.540136 | 570.273706      | 1122.513587    | 561.760431       | 1121.529571    | 561.268423       | E    | 389.239461  | 195.123368      | 372.212912     | 186.610094       | 371.228896     | 186.118086       | 3 |
| 8 | 1252.624200 | 626.815738      | 1235.597651    | 618.302463       | 1234.613635    | 617.810455       | L    | 260.196868  | 130.602072      | 243.170319     | 122.088797       |                |                  | 2 |
| 9 |             |                 |                |                  |                |                  | K    | 147.112804  | 74.060040       | 130.086255     | 65.546765        |                |                  | 1 |

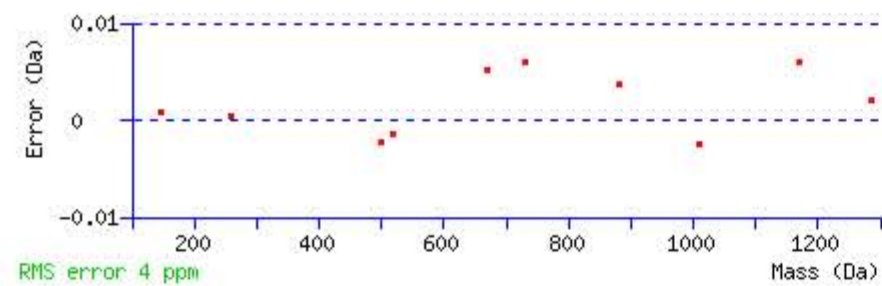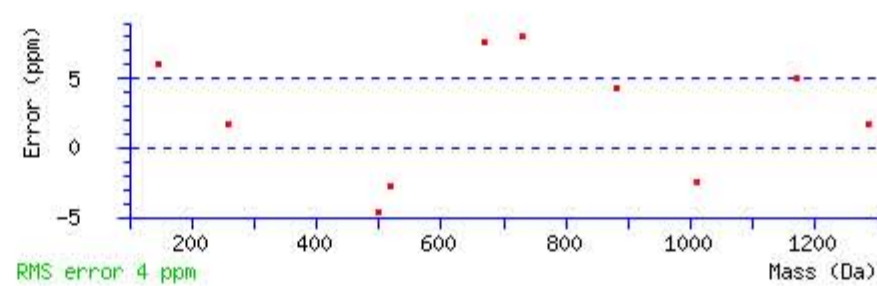

NCBI BLAST search of [IDQNVEELK](#)

(Parameters: blastp, nr protein database, expect=20000, no filter, PAM30)

Other BLAST [web gateways](#)

## All matches to this query

| Score | Mr(calc):   | Delta     | Sequence                      |
|-------|-------------|-----------|-------------------------------|
| 46.6  | 1397.722427 | 0.004441  | <a href="#">IDQNVEELK</a>     |
| 7.3   | 1397.744873 | -0.018005 | <a href="#">MLEKARHQELK</a>   |
| 7.3   | 1397.744873 | -0.018005 | <a href="#">QRREEELK</a>      |
| 6.5   | 1397.737686 | -0.010818 | <a href="#">LKEFCGEFLKK</a>   |
| 3.3   | 1397.744904 | -0.018036 | <a href="#">SSGPQRAGSLK</a>   |
| 1.6   | 1397.708527 | 0.018341  | <a href="#">EGLHGREITCVK</a>  |
| 1.1   | 1397.723785 | 0.003083  | <a href="#">LFVSHMIDKHR</a>   |
| 1.1   | 1397.715057 | 0.011811  | <a href="#">LEDGSHLTGQTLK</a> |
| 0.7   | 1397.722412 | 0.004456  | <a href="#">QLEAQLK</a>       |
| 0.6   | 1397.733688 | -0.006820 | <a href="#">LCDVTLKIGDHK</a>  |

# MASCOT Search Results

## Peptide View

MS/MS Fragmentation of **IDQTVEELR**

Found in **APOA4\_HUMAN**, Apolipoprotein A-IV OS=Homo sapiens GN=APOA4 PE=1 SV=3

Match to Query 31784: 1412.741468 from(707.378010,2+) rtinseconds(1878) index(23791)

Title: Locus:1.1.1.2796.16 File:"2013-07-02 CLN FXIII 180 min 1st F 2.wiff"

Data file C:\Program Files (x86)\Matrix Science\Mascot Daemon\mgf\7 FXIII 180 min 1st\mascot\_daemon\_merge.mgf

Click mouse within plot area to zoom in by factor of two about that point

Or, Plot from  to  Da

Label all possible matches  Label matches used for scoring

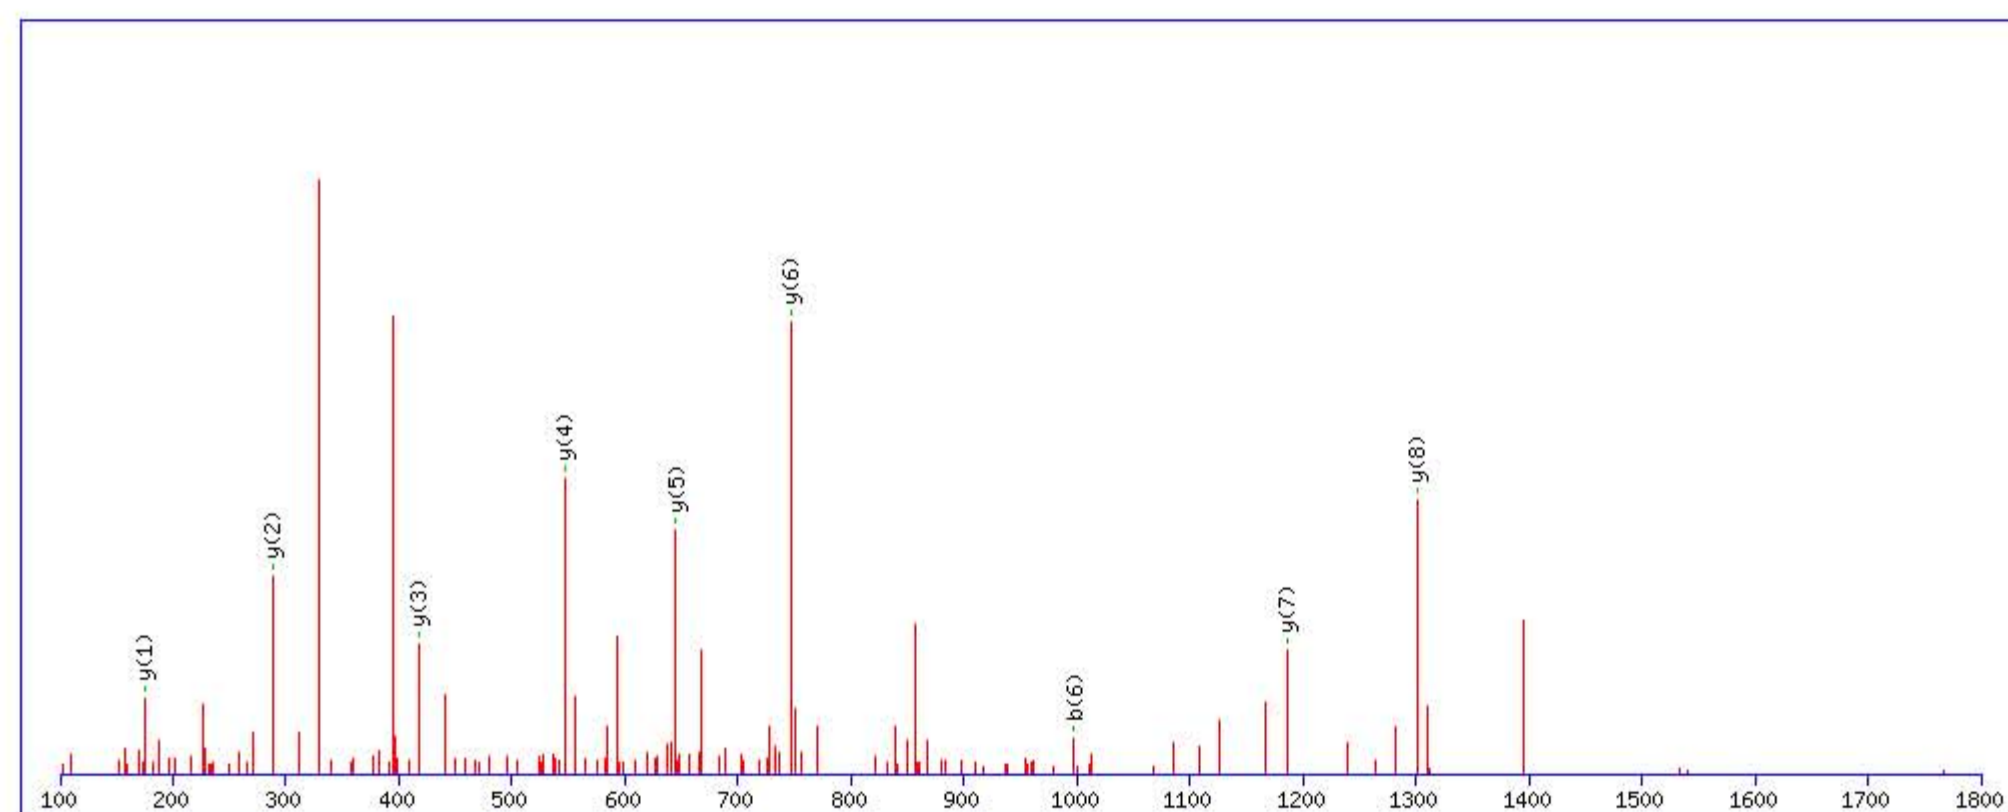

Monoisotopic mass of neutral peptide Mr(calc): 1412.733337

Fixed modifications: Carbamidomethyl (C) (apply to specified residues or termini only)

Variable modifications:

Q3 : Biotin:Thermo-21345 (Q)

Ions Score: 69 Expect: 2.9e-006

Matches : 9/86 fragment ions using 13 most intense peaks [\(help\)](#)

| # | b           | b <sup>++</sup> | b <sup>*</sup> | b <sup>*++</sup> | b <sup>0</sup> | b <sup>0++</sup> | Seq. | y           | y <sup>++</sup> | y <sup>*</sup> | y <sup>*++</sup> | y <sup>0</sup> | y <sup>0++</sup> | # |
|---|-------------|-----------------|----------------|------------------|----------------|------------------|------|-------------|-----------------|----------------|------------------|----------------|------------------|---|
| 1 | 114.091340  | 57.549308       |                |                  |                |                  | I    |             |                 |                |                  |                |                  | 9 |
| 2 | 229.118283  | 115.062779      |                |                  | 211.107718     | 106.057497       | D    | 1300.656564 | 650.831920      | 1283.630015    | 642.318646       | 1282.645999    | 641.826638       | 8 |
| 3 | 668.343609  | 334.675443      | 651.317060     | 326.162168       | 650.333044     | 325.670160       | Q    | 1185.629621 | 593.318449      | 1168.603072    | 584.805174       | 1167.619056    | 584.313166       | 7 |
| 4 | 769.391288  | 385.199282      | 752.364739     | 376.686008       | 751.380723     | 376.194000       | T    | 746.404295  | 373.705786      | 729.377746     | 365.192511       | 728.393730     | 364.700503       | 6 |
| 5 | 868.459702  | 434.733489      | 851.433153     | 426.220215       | 850.449137     | 425.728207       | V    | 645.356616  | 323.181946      | 628.330067     | 314.668672       | 627.346051     | 314.176664       | 5 |
| 6 | 997.502295  | 499.254786      | 980.475746     | 490.741511       | 979.491730     | 490.249503       | E    | 546.288202  | 273.647739      | 529.261653     | 265.134465       | 528.277637     | 264.642457       | 4 |
| 7 | 1126.544888 | 563.776082      | 1109.518339    | 555.262808       | 1108.534323    | 554.770800       | E    | 417.245609  | 209.126442      | 400.219060     | 200.613168       | 399.235044     | 200.121160       | 3 |
| 8 | 1239.628952 | 620.318114      | 1222.602403    | 611.804840       | 1221.618387    | 611.312832       | L    | 288.203016  | 144.605146      | 271.176467     | 136.091871       |                |                  | 2 |
| 9 |             |                 |                |                  |                |                  | R    | 175.118952  | 88.063114       | 158.092403     | 79.549839        |                |                  | 1 |

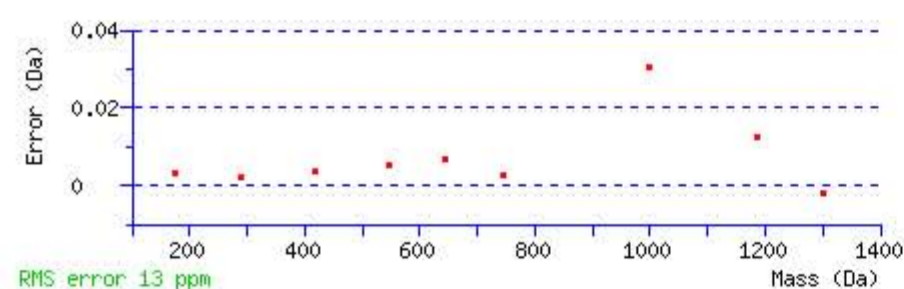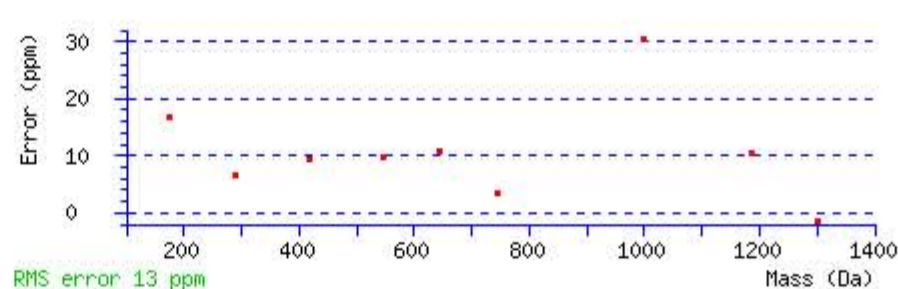

NCBI BLAST search of **IDQTVEELR**

(Parameters: blastp, nr protein database, expect=20000, no filter, PAM30)

Other BLAST [web gateways](#)

All matches to this query

| Score | Mr(calc):   | Delta     | Sequence                      |
|-------|-------------|-----------|-------------------------------|
| 69.4  | 1412.733337 | 0.008131  | <a href="#">IDQTVEELR</a>     |
| 16.2  | 1412.744537 | -0.003069 | <a href="#">IPPEKMRELER</a>   |
| 9.6   | 1412.734665 | 0.006803  | <a href="#">MPADWRQQLR</a>    |
| 9.2   | 1412.741211 | 0.000257  | <a href="#">KVTIYSFTGNQR</a>  |
| 6.1   | 1412.737167 | 0.004301  | <a href="#">ARPEDVISEGRGK</a> |
| 4.5   | 1412.730621 | 0.010847  | <a href="#">ARMEHSRELLR</a>   |
| 4.3   | 1412.741196 | 0.000272  | <a href="#">SSLHYKPTPDLR</a>  |
| 3.6   | 1412.752426 | -0.010958 | <a href="#">WKQSVDRPELR</a>   |
| 3.6   | 1412.741180 | 0.000288  | <a href="#">WQQELIAELR</a>    |
| 3.3   | 1412.762299 | -0.020831 | <a href="#">EEELRAAVEVLR</a>  |

**MASCOT** SCIENCE } Mascot Search Results

Peptide View

MS/MS Fragmentation of **LEPYADQLR**  
 Found in **APOA4\_HUMAN**, Apolipoprotein A-IV OS=Homo sapiens GN=APOA4 PE=1 SV=3

Match to Query 31821: 1414.736928 from(708.375740,2+) rtinseconds(1958) index(24409)  
 Title: Locus:1.1.1.2824.8 File:"2013-07-02 CLN FXIII 180 min 1st F 2.wiff"  
 Data file C:\Program Files (x86)\Matrix Science\Mascot Daemon\mgf\7 FXIII 180 min 1st\mascot\_daemon\_merge.mgf

Click mouse within plot area to zoom in by factor of two about that point  
 Or, Plot from  to  Da   
 Label all possible matches  Label matches used for scoring

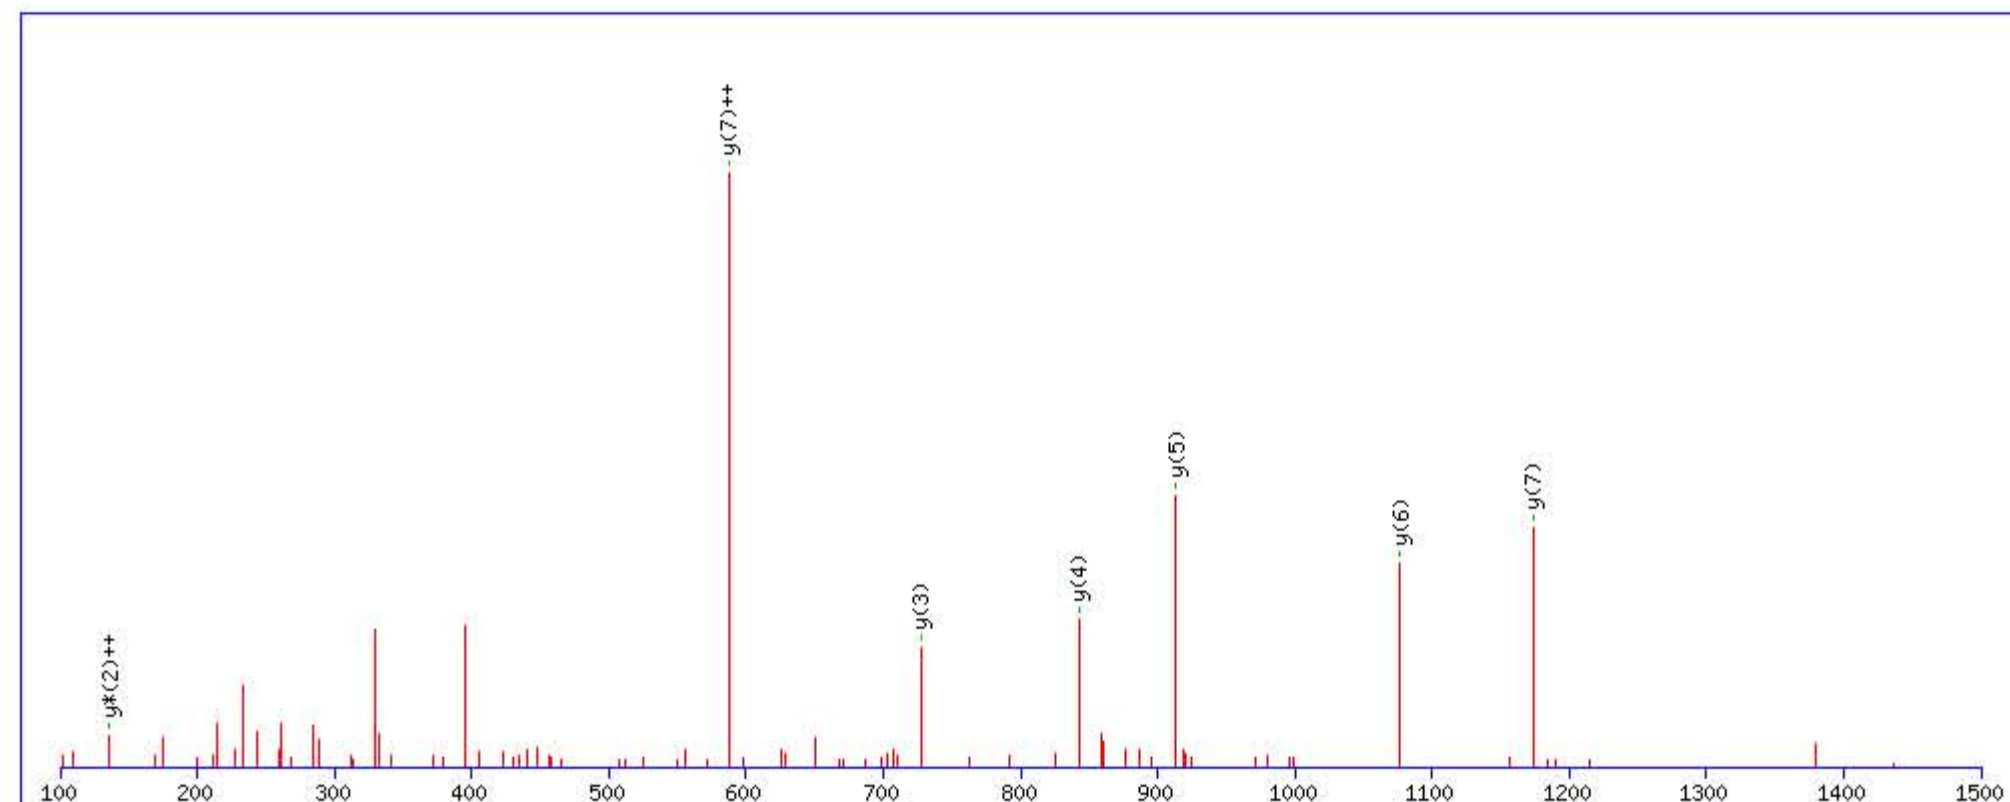

Monoisotopic mass of neutral peptide  $M_r(\text{calc})$ : 1414.727844  
 Fixed modifications: Carbamidomethyl (C) (apply to specified residues or termini only)  
 Variable modifications:  
 Q7 : Biotin:Thermo-21345 (Q)  
 Ions Score: 29 Expect: 0.018  
 Matches : 7/76 fragment ions using 13 most intense peaks ([help](#))

| # | b           | b <sup>++</sup> | b <sup>+</sup> | b <sup>*++</sup> | b <sup>0</sup> | b <sup>0++</sup> | Seq. | y                  | y <sup>++</sup>   | y <sup>+</sup> | y <sup>*++</sup>  | y <sup>0</sup> | y <sup>0++</sup> | # |
|---|-------------|-----------------|----------------|------------------|----------------|------------------|------|--------------------|-------------------|----------------|-------------------|----------------|------------------|---|
| 1 | 114.091340  | 57.549308       |                |                  |                |                  | L    |                    |                   |                |                   |                |                  | 9 |
| 2 | 243.133933  | 122.070605      |                |                  | 225.123368     | 113.065322       | E    | 1302.651085        | 651.829181        | 1285.624536    | 643.315906        | 1284.640520    | 642.823898       | 8 |
| 3 | 340.186697  | 170.596987      |                |                  | 322.176132     | 161.591704       | P    | <b>1173.608492</b> | <b>587.307884</b> | 1156.581943    | 578.794610        | 1155.597927    | 578.302602       | 7 |
| 4 | 503.250026  | 252.128651      |                |                  | 485.239461     | 243.123369       | Y    | <b>1076.555728</b> | 538.781502        | 1059.529179    | 530.268228        | 1058.545163    | 529.776220       | 6 |
| 5 | 574.287140  | 287.647208      |                |                  | 556.276575     | 278.641926       | A    | <b>913.492399</b>  | 457.249838        | 896.465850     | 448.736563        | 895.481834     | 448.244555       | 5 |
| 6 | 689.314083  | 345.160680      |                |                  | 671.303518     | 336.155397       | D    | <b>842.455285</b>  | 421.731281        | 825.428736     | 413.218006        | 824.444720     | 412.725998       | 4 |
| 7 | 1128.539409 | 564.773343      | 1111.512860    | 556.260068       | 1110.528844    | 555.768060       | Q    | <b>727.428342</b>  | 364.217809        | 710.401793     | 355.704535        |                |                  | 3 |
| 8 | 1241.623473 | 621.315375      | 1224.596924    | 612.802100       | 1223.612908    | 612.310092       | L    | 288.203016         | 144.605146        | 271.176467     | <b>136.091871</b> |                |                  | 2 |
| 9 |             |                 |                |                  |                |                  | R    | 175.118952         | 88.063114         | 158.092403     | 79.549839         |                |                  | 1 |

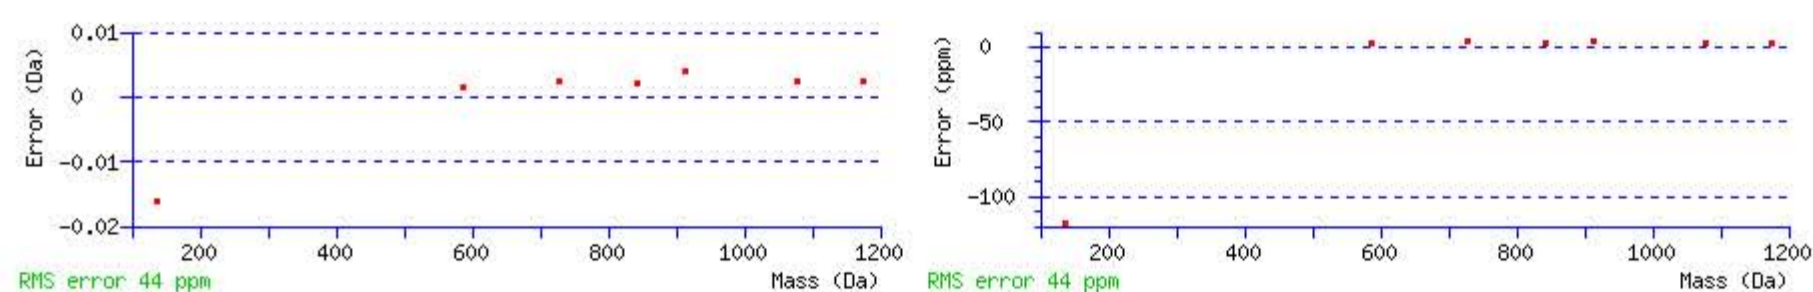

NCBI BLAST search of **LEPYADQLR**  
 (Parameters: blastp, nr protein database, expect=20000, no filter, PAM30)  
 Other BLAST [web gateways](#)

All matches to this query

| Score | $M_r(\text{calc})$ : | Delta     | Sequence                     |
|-------|----------------------|-----------|------------------------------|
| 28.9  | 1414.727844          | 0.009084  | <a href="#">LEPYADQLR</a>    |
| 9.6   | 1414.756821          | -0.019893 | <a href="#">QNPKNLFAINEK</a> |
| 2.4   | 1414.741592          | -0.004664 | <a href="#">TINEVENQVLTR</a> |
| 0.5   | 1414.757690          | -0.020762 | <a href="#">NKLMIMHWKAK</a>  |



# MASCOT Search Results

## Peptide View

MS/MS Fragmentation of **ALVQQMEQLR**

Found in **APOA4\_HUMAN**, Apolipoprotein A-IV OS=Homo sapiens GN=APOA4 PE=1 SV=3

Match to Query 35866: 1525.822448 from(763.918500,2+) rtinseconds(2099) index(79533)

Title: Locus:1.1.1.2081.20 File:"2013-07-02 CLN FXIII 180 min 1st FT.wiff"

Data file C:\Program Files (x86)\Matrix Science\Mascot Daemon\mgf\7 FXIII 180 min 1st\mascot\_daemon\_merge.mgf

Click mouse within plot area to zoom in by factor of two about that point

Or, Plot from  to  Da

Label all possible matches  Label matches used for scoring

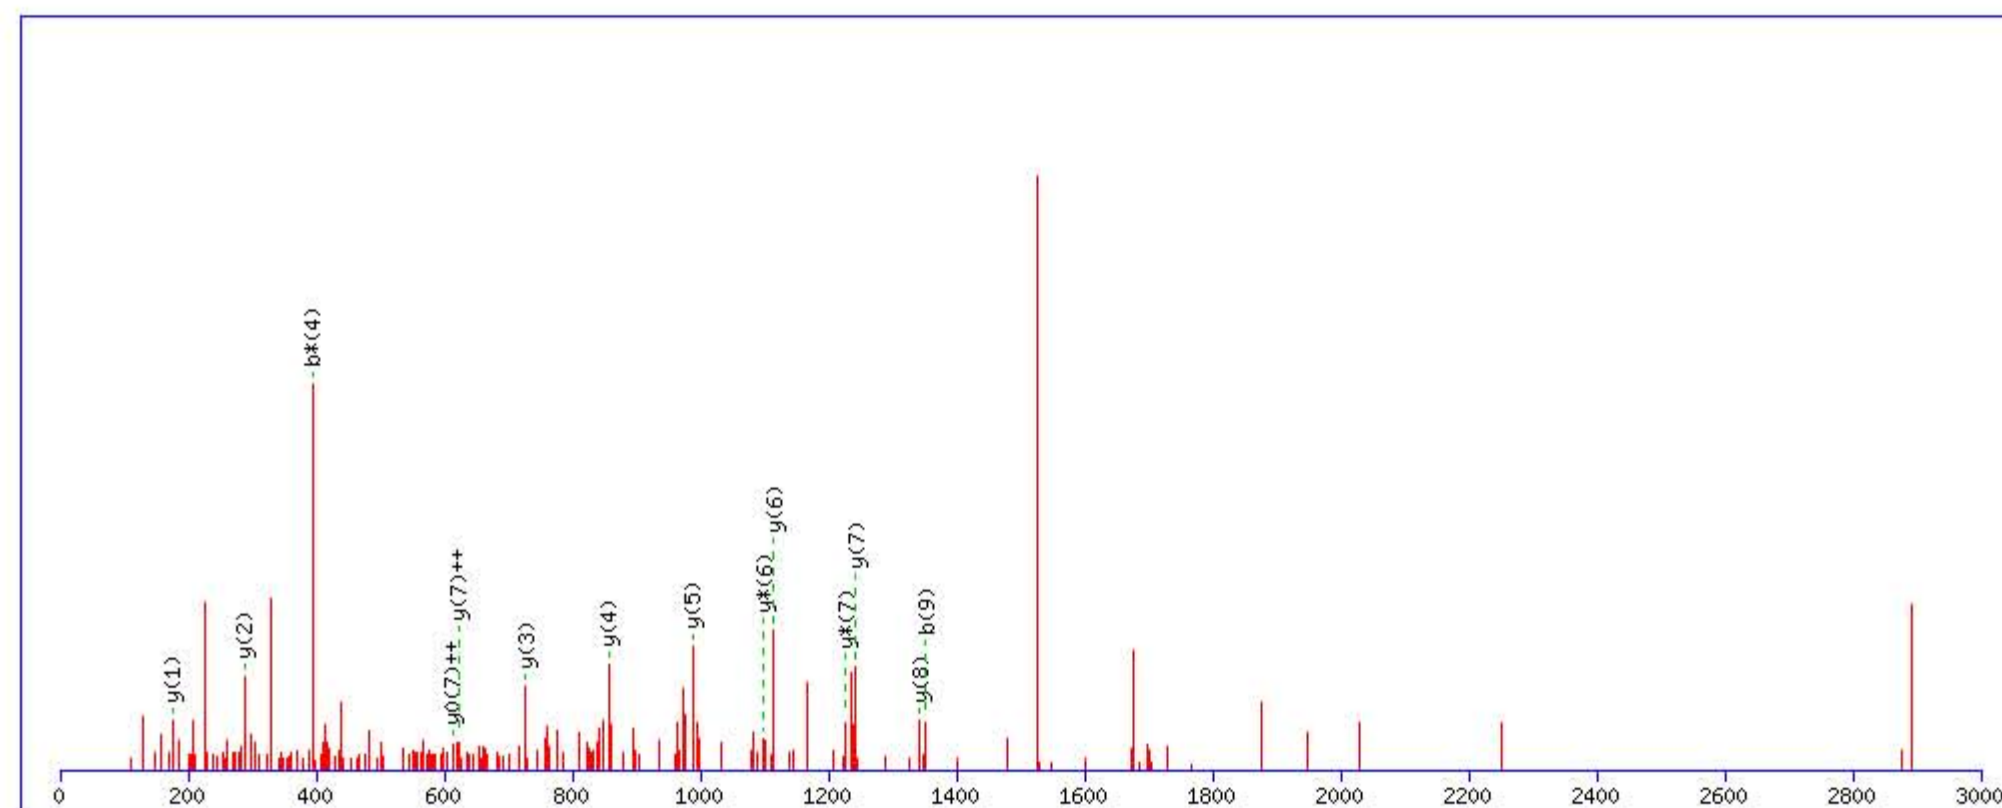

Monoisotopic mass of neutral peptide Mr(calc): 1525.810867

Fixed modifications: Carbamidomethyl (C) (apply to specified residues or termini only)

Variable modifications:

Q8 : Biotin:Thermo-21345 (Q)

Ions Score: 27 Expect: 0.0083

Matches : 14/84 fragment ions using 40 most intense peaks [\(help\)](#)

| #  | b                  | b <sup>++</sup> | b <sup>+</sup>    | b <sup>*++</sup> | b <sup>0</sup> | b <sup>0++</sup> | Seq. | y                  | y <sup>++</sup>   | y <sup>+</sup>     | y <sup>*++</sup> | y <sup>0</sup> | y <sup>0++</sup>  | #  |
|----|--------------------|-----------------|-------------------|------------------|----------------|------------------|------|--------------------|-------------------|--------------------|------------------|----------------|-------------------|----|
| 1  | 72.044390          | 36.525833       |                   |                  |                |                  | A    |                    |                   |                    |                  |                |                   | 10 |
| 2  | 185.128454         | 93.067865       |                   |                  |                |                  | L    | 1455.781054        | 728.394165        | 1438.754505        | 719.880890       | 1437.770489    | 719.388882        | 9  |
| 3  | 284.196868         | 142.602072      |                   |                  |                |                  | V    | <b>1342.696990</b> | 671.852133        | 1325.670441        | 663.338858       | 1324.686425    | 662.846850        | 8  |
| 4  | 412.255446         | 206.631361      | <b>395.228897</b> | 198.118087       |                |                  | Q    | <b>1243.628576</b> | <b>622.317926</b> | <b>1226.602027</b> | 613.804651       | 1225.618011    | <b>613.312643</b> | 7  |
| 5  | 540.314024         | 270.660650      | 523.287475        | 262.147376       |                |                  | Q    | <b>1115.569998</b> | 558.288637        | <b>1098.543449</b> | 549.775362       | 1097.559433    | 549.283354        | 6  |
| 6  | 671.354509         | 336.180893      | 654.327960        | 327.667618       |                |                  | M    | <b>987.511420</b>  | 494.259348        | 970.484871         | 485.746073       | 969.500855     | 485.254065        | 5  |
| 7  | 800.397102         | 400.702189      | 783.370553        | 392.188915       | 782.386537     | 391.696907       | E    | <b>856.470935</b>  | 428.739105        | 839.444386         | 420.225831       | 838.460370     | 419.733823        | 4  |
| 8  | 1239.622428        | 620.314852      | 1222.595879       | 611.801578       | 1221.611863    | 611.309569       | Q    | <b>727.428342</b>  | 364.217809        | 710.401793         | 355.704534       |                |                   | 3  |
| 9  | <b>1352.706492</b> | 676.856884      | 1335.679943       | 668.343609       | 1334.695927    | 667.851601       | L    | <b>288.203016</b>  | 144.605146        | 271.176467         | 136.091871       |                |                   | 2  |
| 10 |                    |                 |                   |                  |                |                  | R    | <b>175.118952</b>  | 88.063114         | 158.092403         | 79.549839        |                |                   | 1  |

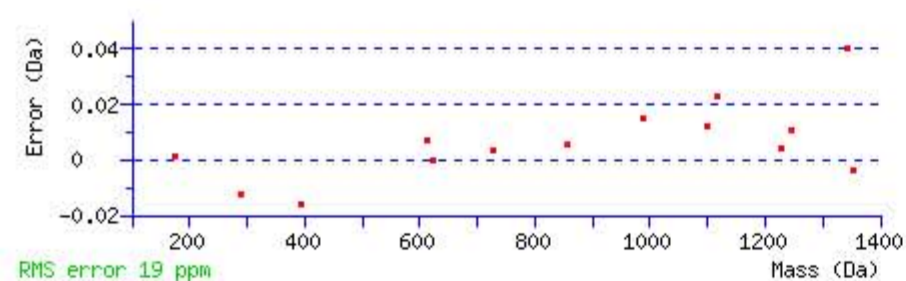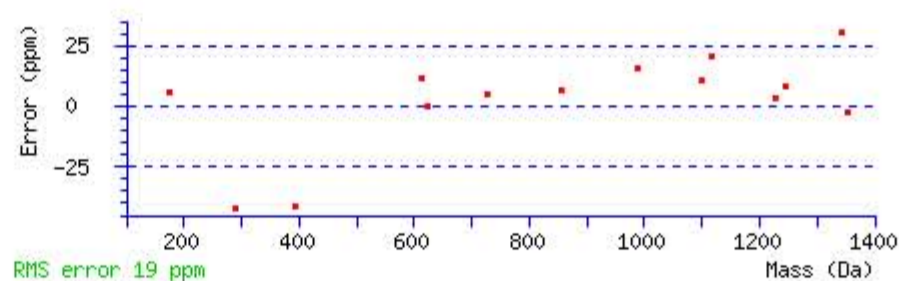

NCBI BLAST search of [ALVQQMEQLR](#)

(Parameters: blastp, nr protein database, expect=20000, no filter, PAM30)

Other BLAST [web gateways](#)

All matches to this query

| Score | Mr(calc):   | Delta    | Sequence                      |
|-------|-------------|----------|-------------------------------|
| 26.7  | 1525.810867 | 0.011581 | <a href="#">ALVQQMEQLR</a>    |
| 6.4   | 1525.810867 | 0.011581 | <a href="#">ALVQQMEQLR</a>    |
| 4.5   | 1525.807495 | 0.014953 | <a href="#">WPPQQLMLSAALR</a> |

# MASCOT Search Results

## Peptide View

MS/MS Fragmentation of **LLPHANEVSQK**

Found in **APOA4\_HUMAN**, Apolipoprotein A-IV OS=Homo sapiens GN=APOA4 PE=1 SV=3

Match to Query 36371: 1545.840882 from(516.287570,3+) rtinseconds(1508) index(3381)

Title: Locus:1.1.1.2779.8 File:"2013-07-02 CLN FXIII 180 min 1st F 1.wiff"

Data file C:\Program Files (x86)\Matrix Science\Mascot Daemon\mgf\7 FXIII 180 min 1st\mascot\_daemon\_merge.mgf

Click mouse within plot area to zoom in by factor of two about that point

Or, Plot from  to  Da

Label all possible matches  Label matches used for scoring

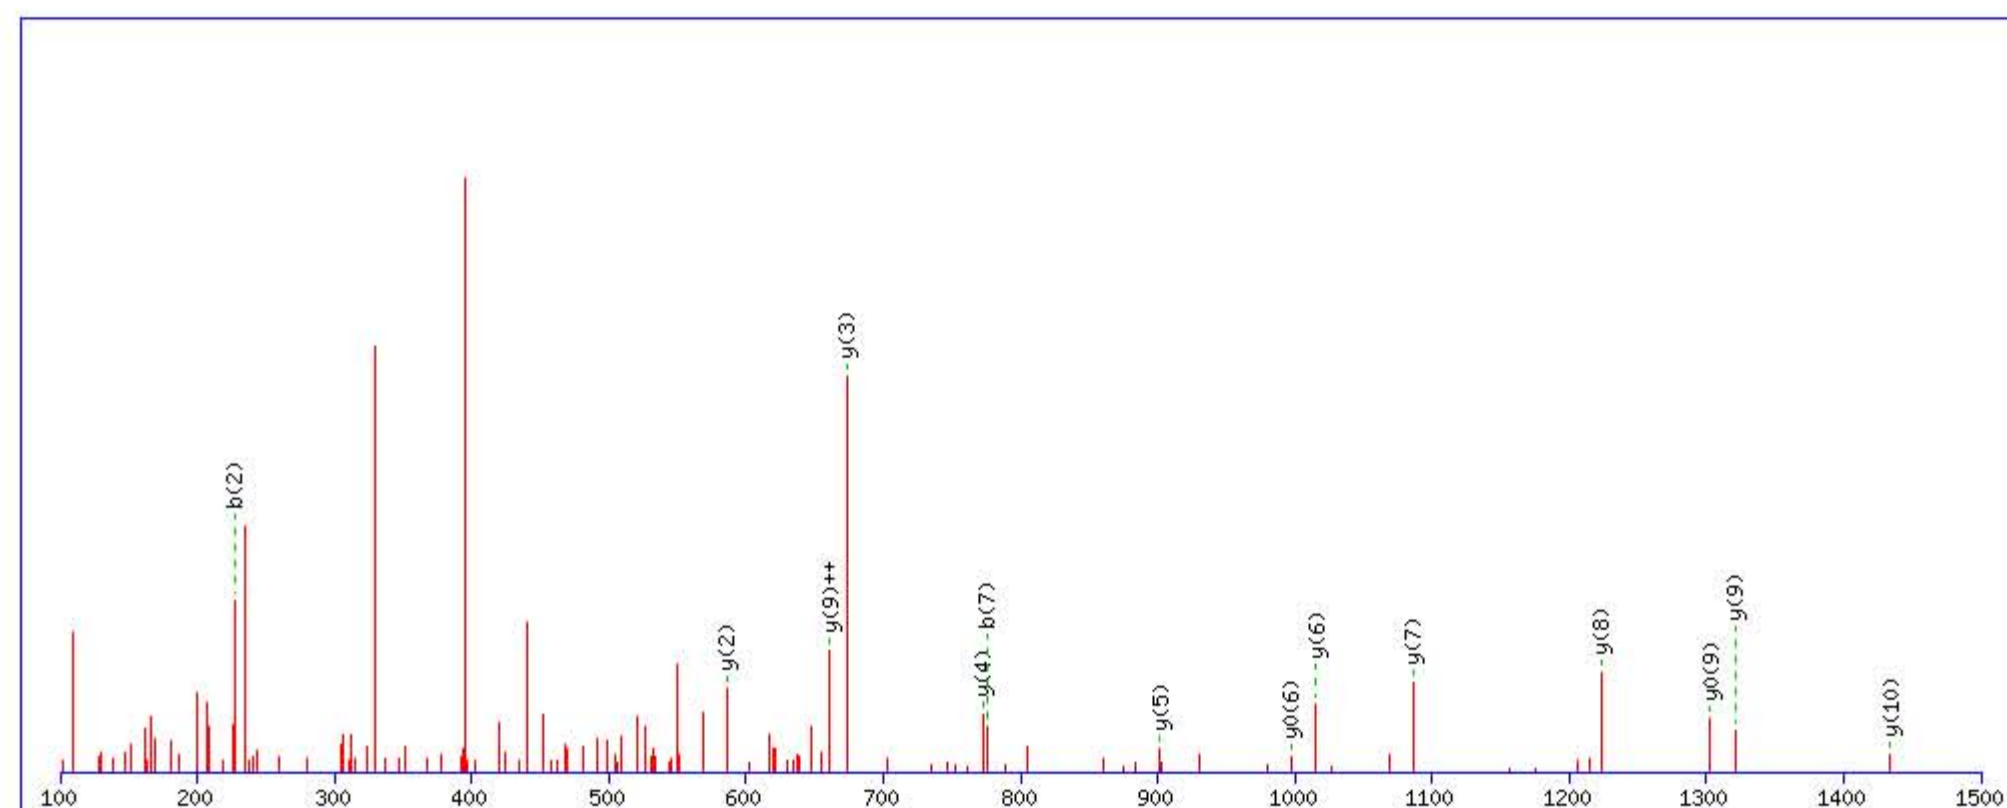

Monoisotopic mass of neutral peptide Mr(calc): 1545.833710

Fixed modifications: Carbamidomethyl (C) (apply to specified residues or termini only)

Variable modifications:

Q10 : Biotin:Thermo-21345 (Q)

Ions Score: 54 Expect: 9.5e-005

Matches : 14/94 fragment ions using 27 most intense peaks [\(help\)](#)

| #  | b                 | b <sup>++</sup> | b <sup>*</sup> | b <sup>*++</sup> | b <sup>0</sup> | b <sup>0++</sup> | Seq. | y                  | y <sup>++</sup>   | y <sup>*</sup> | y <sup>*++</sup> | y <sup>0</sup>     | y <sup>0++</sup> | #  |
|----|-------------------|-----------------|----------------|------------------|----------------|------------------|------|--------------------|-------------------|----------------|------------------|--------------------|------------------|----|
| 1  | 114.091340        | 57.549308       |                |                  |                |                  | L    |                    |                   |                |                  |                    |                  | 11 |
| 2  | <b>227.175404</b> | 114.091340      |                |                  |                |                  | L    | <b>1433.756946</b> | 717.382111        | 1416.730397    | 708.868837       | 1415.746381        | 708.376828       | 10 |
| 3  | 324.228168        | 162.617722      |                |                  |                |                  | P    | <b>1320.672882</b> | <b>660.840079</b> | 1303.646333    | 652.326804       | <b>1302.662317</b> | 651.834796       | 9  |
| 4  | 461.287080        | 231.147178      |                |                  |                |                  | H    | <b>1223.620118</b> | 612.313697        | 1206.593569    | 603.800422       | 1205.609553        | 603.308414       | 8  |
| 5  | 532.324194        | 266.665735      |                |                  |                |                  | A    | <b>1086.561206</b> | 543.784241        | 1069.534657    | 535.270966       | 1068.550641        | 534.778958       | 7  |
| 6  | 646.367121        | 323.687199      | 629.340572     | 315.173924       |                |                  | N    | <b>1015.524092</b> | 508.265684        | 998.497543     | 499.752409       | <b>997.513527</b>  | 499.260401       | 6  |
| 7  | <b>775.409714</b> | 388.208495      | 758.383165     | 379.695221       | 757.399149     | 379.203213       | E    | <b>901.481165</b>  | 451.244220        | 884.454616     | 442.730946       | 883.470600         | 442.238938       | 5  |
| 8  | 874.478128        | 437.742702      | 857.451579     | 429.229427       | 856.467563     | 428.737419       | V    | <b>772.438572</b>  | 386.722924        | 755.412023     | 378.209649       | 754.428007         | 377.717641       | 4  |
| 9  | 961.510156        | 481.258716      | 944.483607     | 472.745441       | 943.499591     | 472.253433       | S    | <b>673.370158</b>  | 337.188717        | 656.343609     | 328.675442       | 655.359593         | 328.183434       | 3  |
| 10 | 1400.735482       | 700.871379      | 1383.708933    | 692.358104       | 1382.724917    | 691.866096       | Q    | <b>586.338130</b>  | 293.672703        | 569.311581     | 285.159428       |                    |                  | 2  |
| 11 |                   |                 |                |                  |                |                  | K    | 147.112804         | 74.060040         | 130.086255     | 65.546765        |                    |                  | 1  |

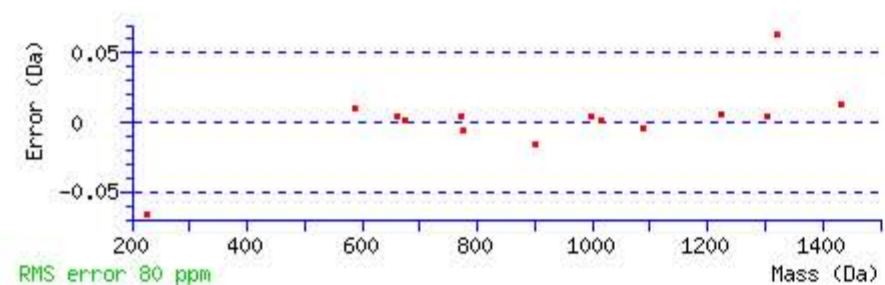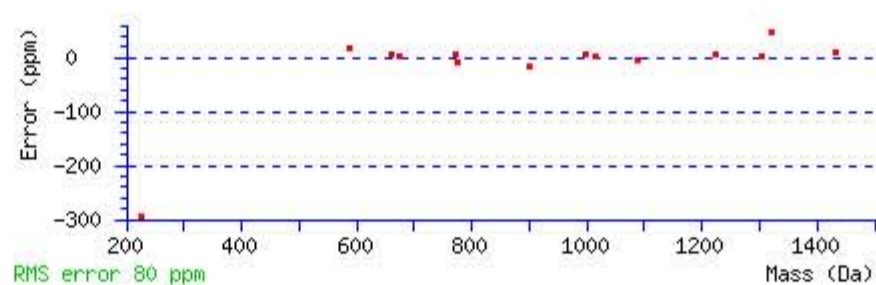

NCBI BLAST search of [LLPHANEVSQK](#)

(Parameters: blastp, nr protein database, expect=20000, no filter, PAM30)

Other BLAST [web gateways](#)

All matches to this query

| Score | Mr(calc):   | Delta    | Sequence                    |
|-------|-------------|----------|-----------------------------|
| 53.7  | 1545.833710 | 0.007172 | <a href="#">LLPHANEVSQK</a> |

Mascot: <http://www.matrixscience.com/>

# MASCOT Search Results

## Peptide View

MS/MS Fragmentation of **TQVNTQAEQLR**

Found in **APOA4\_HUMAN**, Apolipoprotein A-IV OS=Homo sapiens GN=APOA4 PE=1 SV=3

Match to Query 38685: 1597.837392 from(533.619740,3+) rtinseconds(1546) index(76051)

Title: Locus:1.1.1.1889.12 File:"2013-07-02 CLN FXIII 180 min 1st FT.wiff"

Data file C:\Program Files (x86)\Matrix Science\Mascot Daemon\mgf\7 FXIII 180 min 1st\mascot\_daemon\_merge.mgf

Click mouse within plot area to zoom in by factor of two about that point

Or, Plot from  to  Da

Label all possible matches  Label matches used for scoring

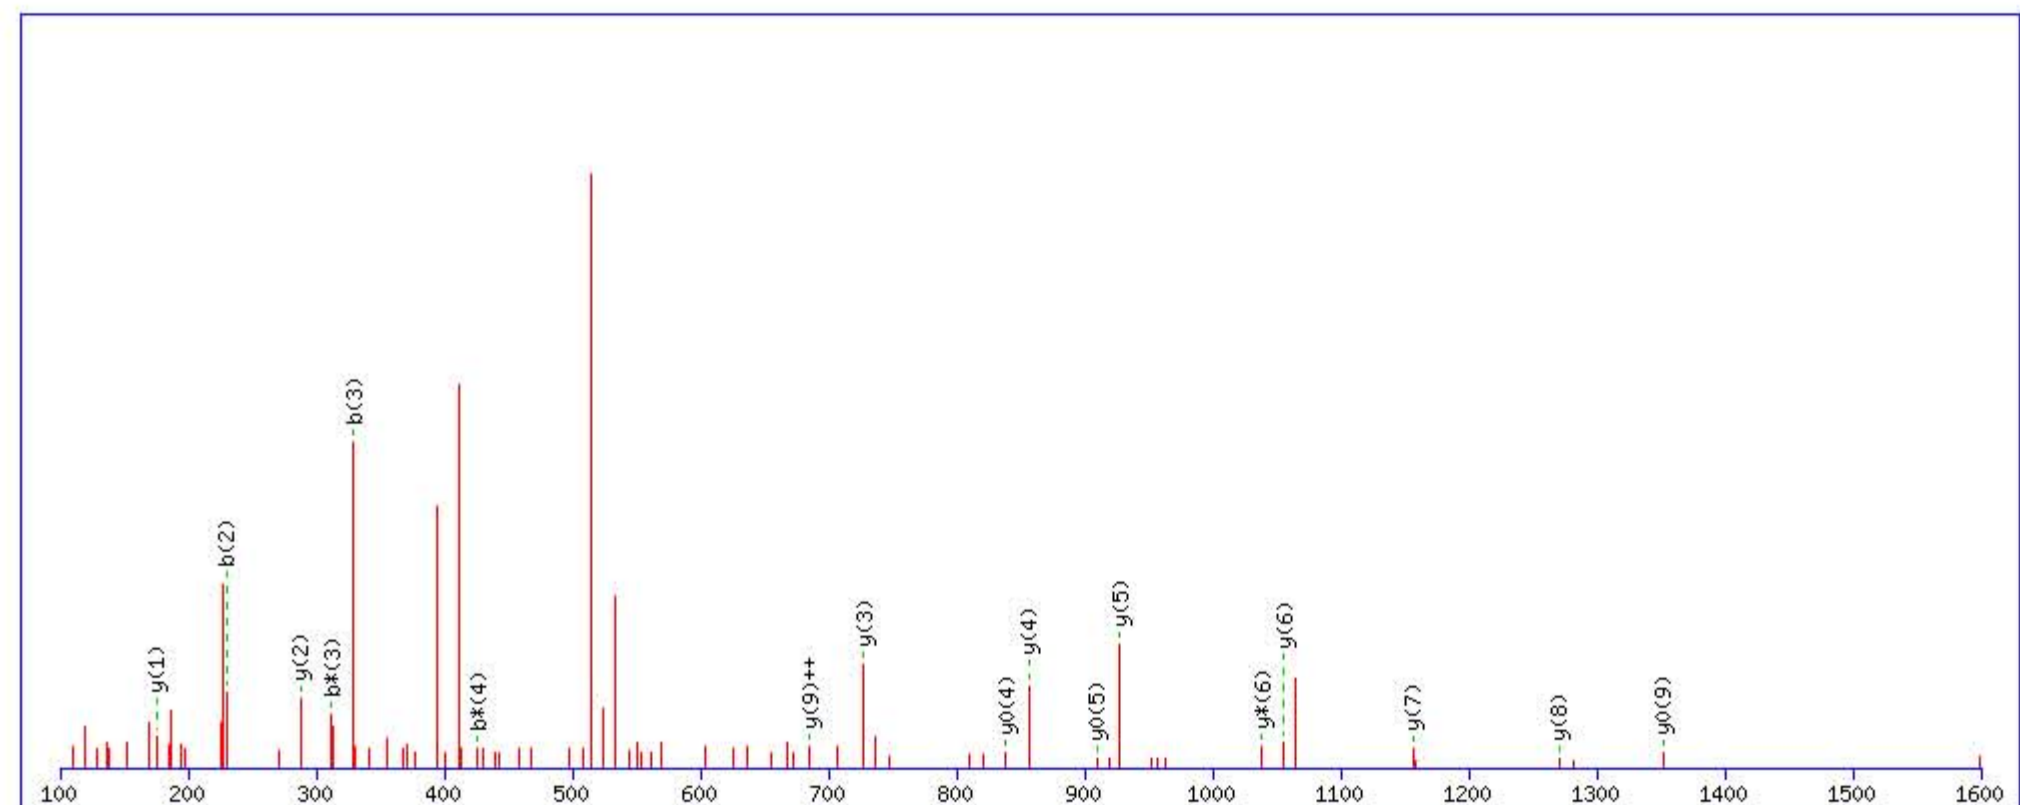

Monoisotopic mass of neutral peptide Mr(calc): 1597.824615

Fixed modifications: Carbamidomethyl (C) (apply to specified residues or termini only)

Variable modifications:

Q9 : Biotin:Thermo-21345 (Q)

Ions Score: 30 Expect: 0.0034

Matches : 17/112 fragment ions using 44 most intense peaks [\(help\)](#)

| #  | b                 | b <sup>++</sup> | b <sup>*</sup>    | b <sup>+++</sup> | b <sup>0</sup> | b <sup>0++</sup> | Seq. | y                  | y <sup>++</sup>   | y <sup>*</sup>     | y <sup>+++</sup> | y <sup>0</sup>     | y <sup>0++</sup> | #  |
|----|-------------------|-----------------|-------------------|------------------|----------------|------------------|------|--------------------|-------------------|--------------------|------------------|--------------------|------------------|----|
| 1  | 102.054955        | 51.531116       |                   |                  | 84.044390      | 42.525833        | T    |                    |                   |                    |                  |                    |                  | 11 |
| 2  | <b>230.113533</b> | 115.560405      | 213.086984        | 107.047130       | 212.102968     | 106.555122       | Q    | 1497.784225        | 749.395751        | 1480.757676        | 740.882476       | 1479.773660        | 740.390468       | 10 |
| 3  | <b>329.181947</b> | 165.094612      | <b>312.155398</b> | 156.581337       | 311.171382     | 156.089329       | V    | 1369.725647        | <b>685.366462</b> | 1352.699098        | 676.853187       | <b>1351.715082</b> | 676.361179       | 9  |
| 4  | 443.224874        | 222.116075      | <b>426.198325</b> | 213.602801       | 425.214309     | 213.110793       | N    | <b>1270.657233</b> | 635.832255        | 1253.630684        | 627.318980       | 1252.646668        | 626.826972       | 8  |
| 5  | 544.272553        | 272.639915      | 527.246004        | 264.126640       | 526.261988     | 263.634632       | T    | <b>1156.614306</b> | 578.810791        | 1139.587757        | 570.297517       | 1138.603741        | 569.805509       | 7  |
| 6  | 672.331131        | 336.669204      | 655.304582        | 328.155929       | 654.320566     | 327.663921       | Q    | <b>1055.566627</b> | 528.286951        | <b>1038.540078</b> | 519.773677       | 1037.556062        | 519.281669       | 6  |
| 7  | 743.368245        | 372.187761      | 726.341696        | 363.674486       | 725.357680     | 363.182478       | A    | <b>927.508049</b>  | 464.257663        | 910.481500         | 455.744388       | <b>909.497484</b>  | 455.252380       | 5  |
| 8  | 872.410838        | 436.709057      | 855.384289        | 428.195783       | 854.400273     | 427.703775       | E    | <b>856.470935</b>  | 428.739106        | 839.444386         | 420.225831       | <b>838.460370</b>  | 419.733823       | 4  |
| 9  | 1311.636164       | 656.321720      | 1294.609615       | 647.808446       | 1293.625599    | 647.316438       | Q    | <b>727.428342</b>  | 364.217809        | 710.401793         | 355.704535       |                    |                  | 3  |
| 10 | 1424.720228       | 712.863752      | 1407.693679       | 704.350478       | 1406.709663    | 703.858470       | L    | <b>288.203016</b>  | 144.605146        | 271.176467         | 136.091871       |                    |                  | 2  |
| 11 |                   |                 |                   |                  |                |                  | R    | <b>175.118952</b>  | 88.063114         | 158.092403         | 79.549839        |                    |                  | 1  |

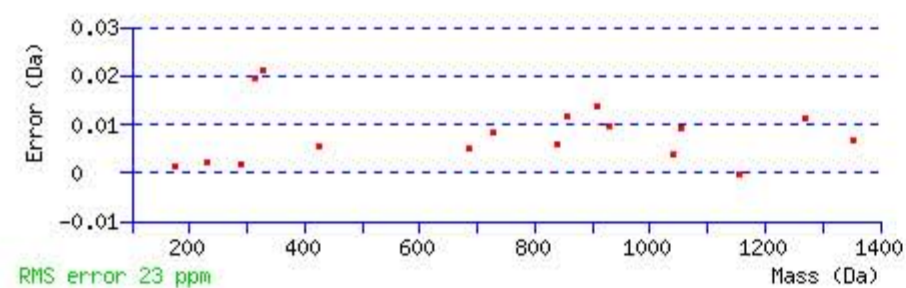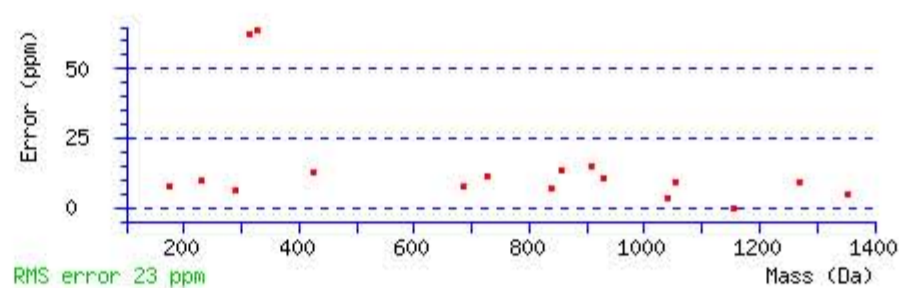

NCBI BLAST search of **TQVNTQAEQLR**

(Parameters: blastp, nr protein database, expect=20000, no filter, PAM30)

Other BLAST [web gateways](#)

All matches to this query

| Score | Mr(calc):   | Delta     | Sequence                       |
|-------|-------------|-----------|--------------------------------|
| 29.5  | 1597.824615 | 0.012777  | <a href="#">TQVNTQAEQLR</a>    |
| 5.0   | 1597.824615 | 0.012777  | <a href="#">TQVNTQAEQLR</a>    |
| 3.3   | 1597.846375 | -0.008983 | <a href="#">EQLPIFKAQNPKAK</a> |

Mascot: <http://www.matrixscience.com/>

# MASCOT SEARCH RESULTS

## Peptide View

MS/MS Fragmentation of **SLAPYAQDTQEK**

Found in **APOA4\_HUMAN**, Apolipoprotein A-IV OS=Homo sapiens GN=APOA4 PE=1 SV=3

Match to Query 41490: 1660.817412 from(554.613080,3+) rtinseconds(1695) index(22418)

Title: Locus:1.1.1.2733.6 File:"2013-07-02 CLN FXIII 180 min 1st F 2.wiff"

Data file C:\Program Files (x86)\Matrix Science\Mascot Daemon\mgf7 FXIII 180 min 1st\mascot\_daemon\_merge.mgf

Click mouse within plot area to zoom in by factor of two about that point

Or, Plot from  to  Da

Label all possible matches  Label matches used for scoring

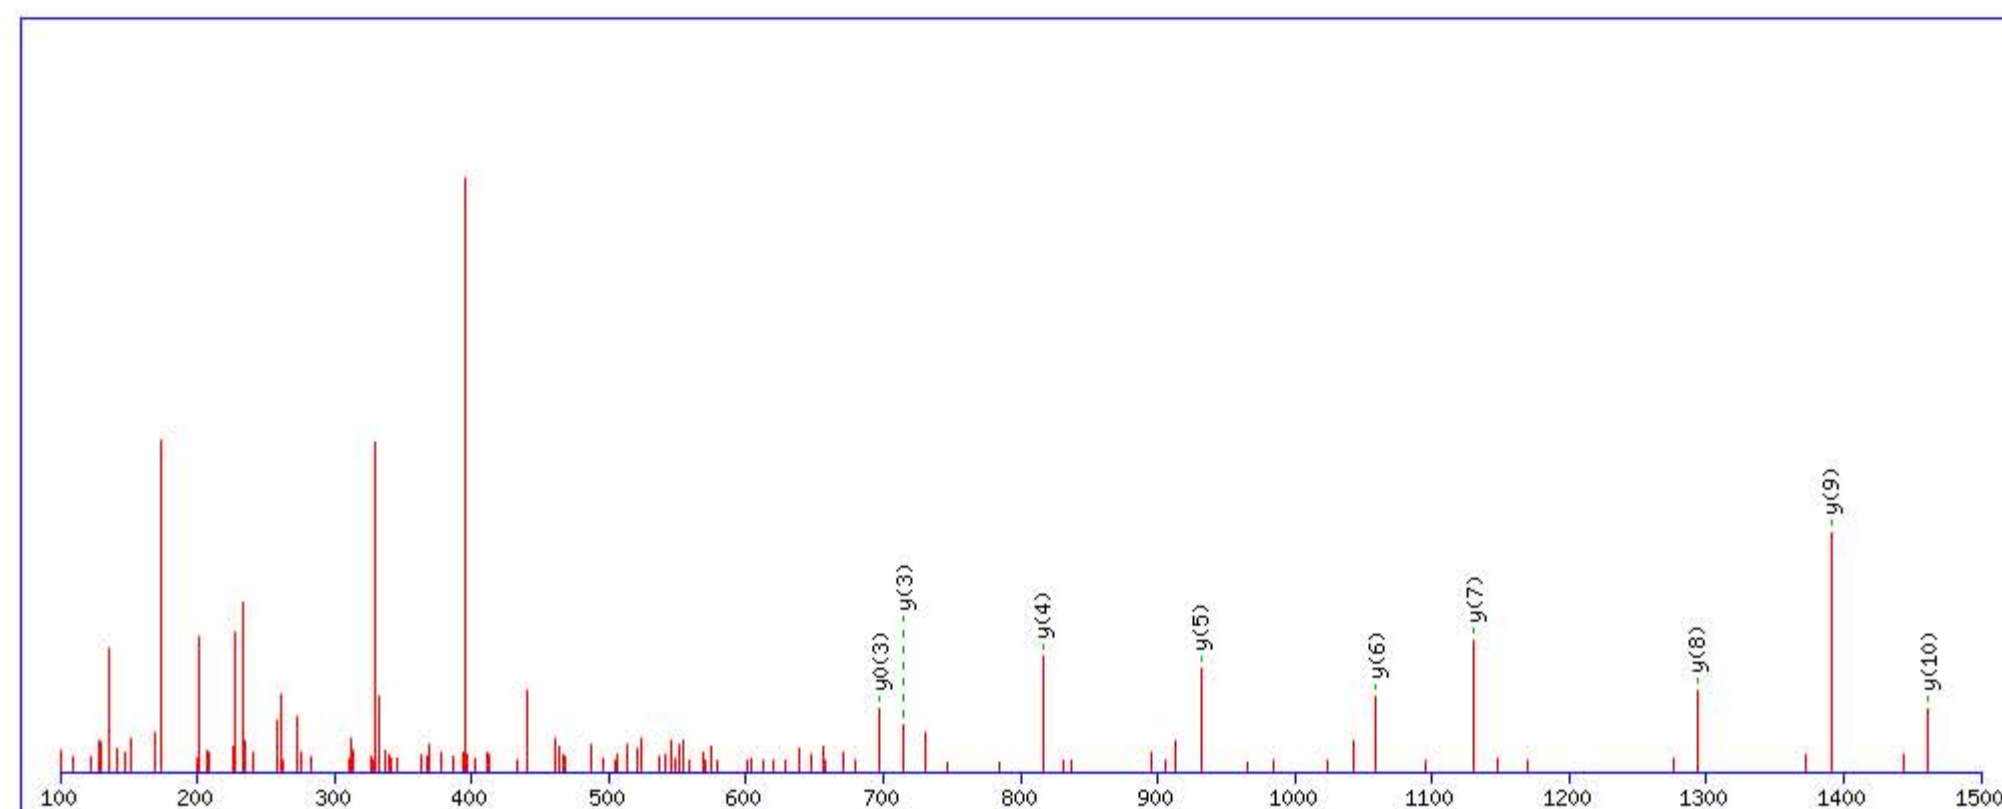

Monoisotopic mass of neutral peptide Mr(calc): 1660.813034

Fixed modifications: Carbamidomethyl (C) (apply to specified residues or termini only)

Variable modifications:

Q10 : Biotin:Thermo-21345 (Q)

Ions Score: 57 Expect: 4.8e-005

Matches : 9/118 fragment ions using 14 most intense peaks [\(help\)](#)

| #  | b           | b <sup>++</sup> | b <sup>*</sup> | b <sup>*++</sup> | b <sup>0</sup> | b <sup>0++</sup> | Seq. | y                  | y <sup>++</sup> | y <sup>*</sup> | y <sup>*++</sup> | y <sup>0</sup>    | y <sup>0++</sup> | #  |
|----|-------------|-----------------|----------------|------------------|----------------|------------------|------|--------------------|-----------------|----------------|------------------|-------------------|------------------|----|
| 1  | 88.039304   | 44.523290       |                |                  | 70.028739      | 35.518008        | S    |                    |                 |                |                  |                   |                  | 12 |
| 2  | 201.123368  | 101.065322      |                |                  | 183.112803     | 92.060039        | L    | 1574.788308        | 787.897792      | 1557.761759    | 779.384518       | 1556.777743       | 778.892510       | 11 |
| 3  | 272.160482  | 136.583879      |                |                  | 254.149917     | 127.578596       | A    | <b>1461.704244</b> | 731.355760      | 1444.677695    | 722.842486       | 1443.693679       | 722.350478       | 10 |
| 4  | 369.213246  | 185.110261      |                |                  | 351.202681     | 176.104978       | P    | <b>1390.667130</b> | 695.837203      | 1373.640581    | 687.323929       | 1372.656565       | 686.831921       | 9  |
| 5  | 532.276575  | 266.641926      |                |                  | 514.266010     | 257.636643       | Y    | <b>1293.614366</b> | 647.310821      | 1276.587817    | 638.797547       | 1275.603801       | 638.305539       | 8  |
| 6  | 603.313689  | 302.160483      |                |                  | 585.303124     | 293.155200       | A    | <b>1130.551037</b> | 565.779157      | 1113.524488    | 557.265882       | 1112.540472       | 556.773874       | 7  |
| 7  | 731.372267  | 366.189772      | 714.345718     | 357.676497       | 713.361702     | 357.184489       | Q    | <b>1059.513923</b> | 530.260600      | 1042.487374    | 521.747325       | 1041.503358       | 521.255317       | 6  |
| 8  | 846.399210  | 423.703243      | 829.372661     | 415.189969       | 828.388645     | 414.697961       | D    | <b>931.455345</b>  | 466.231311      | 914.428796     | 457.718036       | 913.444780        | 457.226028       | 5  |
| 9  | 947.446889  | 474.227083      | 930.420340     | 465.713808       | 929.436324     | 465.221800       | T    | <b>816.428402</b>  | 408.717839      | 799.401853     | 400.204565       | 798.417837        | 399.712557       | 4  |
| 10 | 1386.672215 | 693.839746      | 1369.645666    | 685.326471       | 1368.661650    | 684.834463       | Q    | <b>715.380723</b>  | 358.194000      | 698.354174     | 349.680725       | <b>697.370158</b> | 349.188717       | 3  |
| 11 | 1515.714808 | 758.361042      | 1498.688259    | 749.847768       | 1497.704243    | 749.355760       | E    | 276.155397         | 138.581337      | 259.128848     | 130.068062       | 258.144832        | 129.576054       | 2  |
| 12 |             |                 |                |                  |                |                  | K    | 147.112804         | 74.060040       | 130.086255     | 65.546765        |                   |                  | 1  |

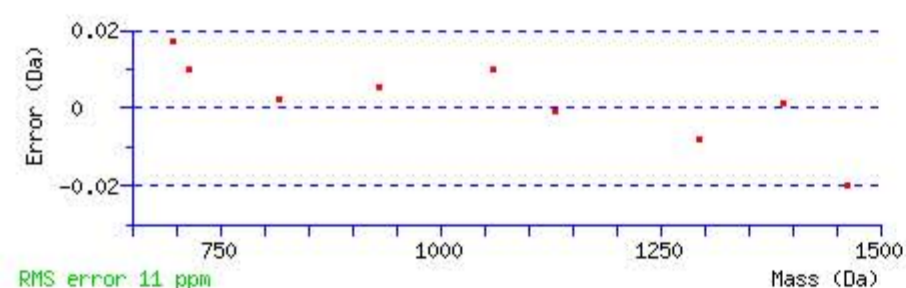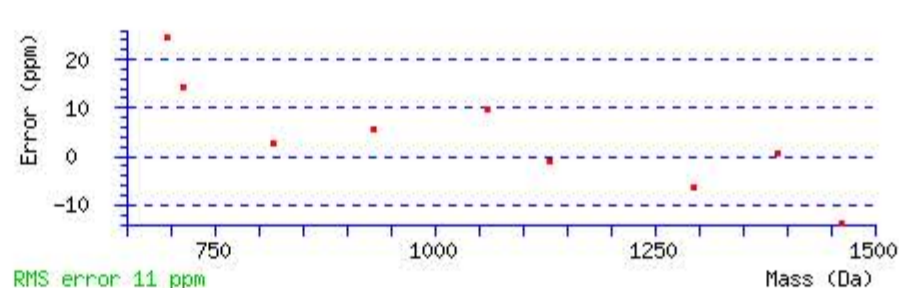

NCBI BLAST search of **SLAPYAQDTQEK**

(Parameters: blastp, nr protein database, expect=20000, no filter, PAM30)

Other BLAST [web gateways](#)

All matches to this query

| Score | Mr(calc):   | Delta    | Sequence                     |
|-------|-------------|----------|------------------------------|
| 56.7  | 1660.813034 | 0.004378 | <a href="#">SLAPYAQDTQEK</a> |
| 15.5  | 1660.813034 | 0.004378 | <a href="#">SLAPYAQDTQEK</a> |

Mascot: <http://www.matrixscience.com/>

# MASCOT Search Results

## Peptide View

MS/MS Fragmentation of **LGEVNTYAGDLQK**

Found in **APOA4\_HUMAN**, Apolipoprotein A-IV OS=Homo sapiens GN=APOA4 PE=1 SV=3

Match to Query 42957: 1717.887248 from(859.950900,2+) rtinseconds(1959) index(24419)

Title: Locus:1.1.1.2824.18 File:"2013-07-02 CLN FXIII 180 min 1st F 2.wiff"

Data file C:\Program Files (x86)\Matrix Science\Mascot Daemon\mgf\7 FXIII 180 min 1st\mascot\_daemon\_merge.mgf

Click mouse within plot area to zoom in by factor of two about that point

Or, Plot from  to  Da

Label all possible matches  Label matches used for scoring

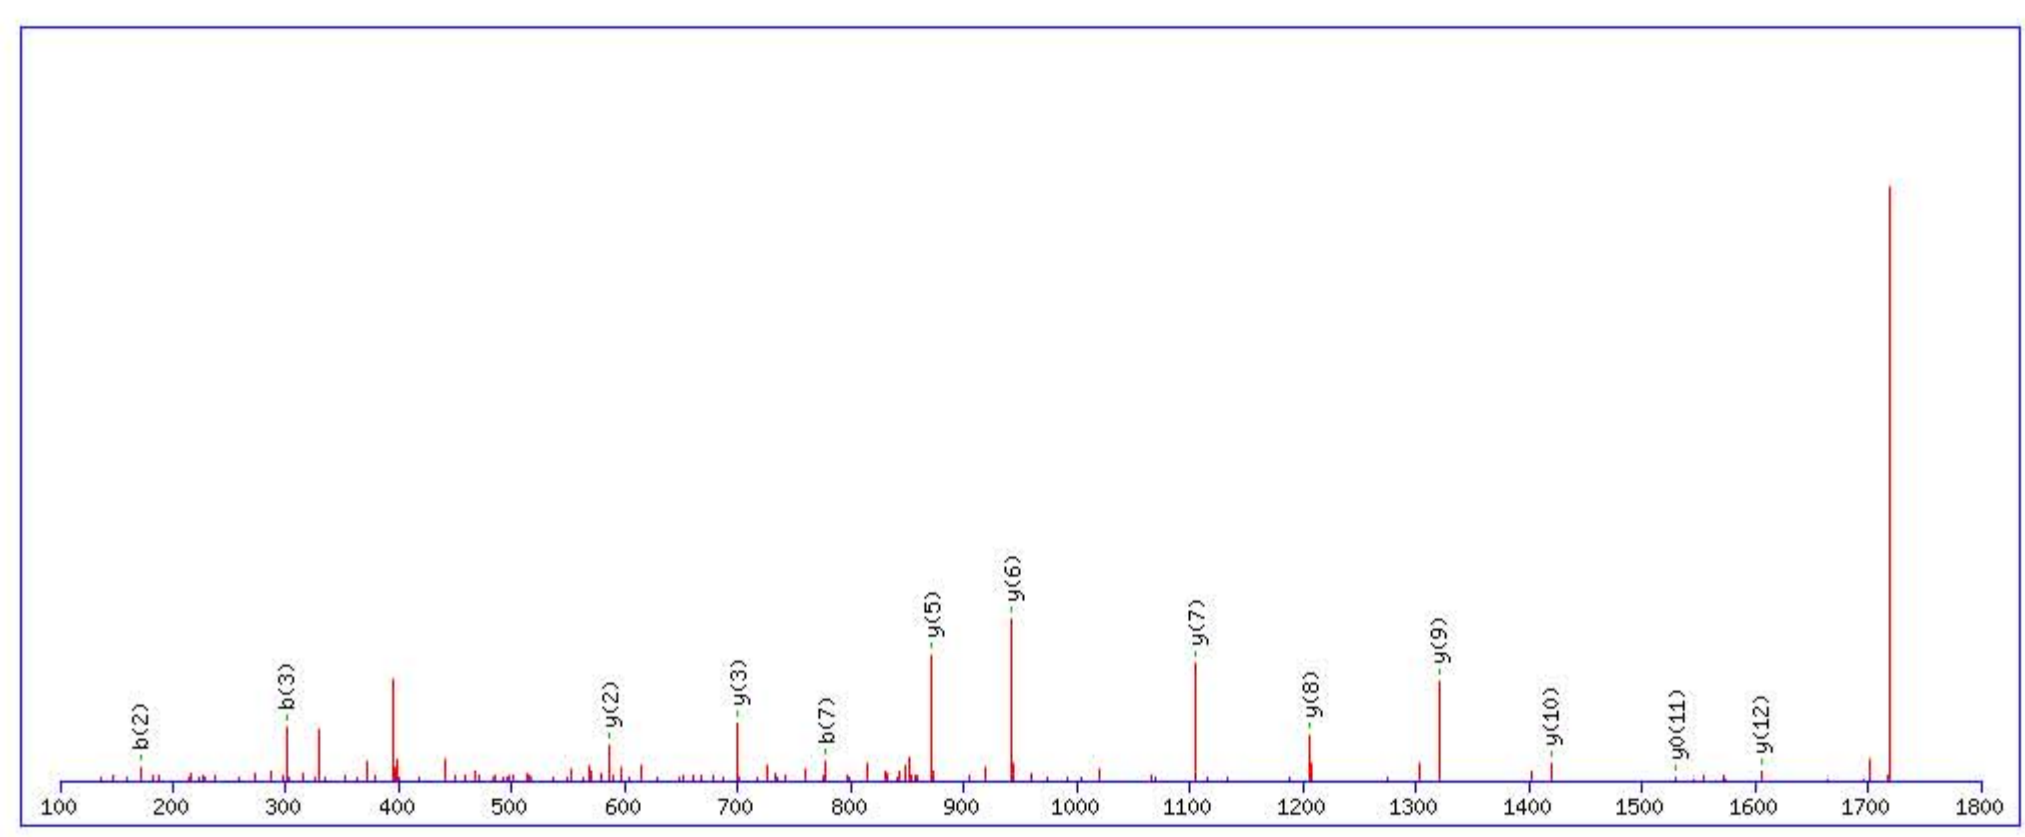

Monoisotopic mass of neutral peptide Mr(calc): 1717.870895

Fixed modifications: Carbamidomethyl (C) (apply to specified residues or termini only)

Variable modifications:

Q12 : Biotin:Thermo-21345 (Q)

Ions Score: 83 Expect: 1.4e-007

Matches : 13/126 fragment ions using 16 most intense peaks [\(help\)](#)

| #  | b                 | b <sup>++</sup> | b <sup>+</sup> | b <sup>+++</sup> | b <sup>0</sup> | b <sup>0++</sup> | Seq. | y                  | y <sup>++</sup> | y <sup>+</sup> | y <sup>+++</sup> | y <sup>0</sup>     | y <sup>0++</sup> | #  |
|----|-------------------|-----------------|----------------|------------------|----------------|------------------|------|--------------------|-----------------|----------------|------------------|--------------------|------------------|----|
| 1  | 114.091340        | 57.549308       |                |                  |                |                  | L    |                    |                 |                |                  |                    |                  | 13 |
| 2  | <b>171.112804</b> | 86.060040       |                |                  |                |                  | G    | <b>1605.794121</b> | 803.400699      | 1588.767572    | 794.887424       | 1587.783556        | 794.395416       | 12 |
| 3  | <b>300.155397</b> | 150.581336      |                |                  | 282.144832     | 141.576054       | E    | 1548.772657        | 774.889967      | 1531.746108    | 766.376692       | <b>1530.762092</b> | 765.884684       | 11 |
| 4  | 399.223811        | 200.115544      |                |                  | 381.213246     | 191.110261       | V    | <b>1419.730064</b> | 710.368670      | 1402.703515    | 701.855396       | 1401.719499        | 701.363388       | 10 |
| 5  | 513.266738        | 257.137007      | 496.240189     | 248.623733       | 495.256173     | 248.131725       | N    | <b>1320.661650</b> | 660.834463      | 1303.635101    | 652.321189       | 1302.651085        | 651.829181       | 9  |
| 6  | 614.314417        | 307.660847      | 597.287868     | 299.147572       | 596.303852     | 298.655564       | T    | <b>1206.618723</b> | 603.813000      | 1189.592174    | 595.299725       | 1188.608158        | 594.807717       | 8  |
| 7  | <b>777.377746</b> | 389.192511      | 760.351197     | 380.679237       | 759.367181     | 380.187229       | Y    | <b>1105.571044</b> | 553.289160      | 1088.544495    | 544.775886       | 1087.560479        | 544.283878       | 7  |
| 8  | 848.414860        | 424.711068      | 831.388311     | 416.197794       | 830.404295     | 415.705786       | A    | <b>942.507715</b>  | 471.757496      | 925.481166     | 463.244221       | 924.497150         | 462.752213       | 6  |
| 9  | 905.436324        | 453.221800      | 888.409775     | 444.708526       | 887.425759     | 444.216518       | G    | <b>871.470601</b>  | 436.238939      | 854.444052     | 427.725664       | 853.460036         | 427.233656       | 5  |
| 10 | 1020.463267       | 510.735272      | 1003.436718    | 502.221997       | 1002.452702    | 501.729989       | D    | 814.449137         | 407.728207      | 797.422588     | 399.214932       | 796.438572         | 398.722924       | 4  |
| 11 | 1133.547331       | 567.277304      | 1116.520782    | 558.764029       | 1115.536766    | 558.272021       | L    | <b>699.422194</b>  | 350.214735      | 682.395645     | 341.701461       |                    |                  | 3  |
| 12 | 1572.772657       | 786.889967      | 1555.746108    | 778.376692       | 1554.762092    | 777.884684       | Q    | <b>586.338130</b>  | 293.672703      | 569.311581     | 285.159429       |                    |                  | 2  |
| 13 |                   |                 |                |                  |                |                  | K    | 147.112804         | 74.060040       | 130.086255     | 65.546765        |                    |                  | 1  |

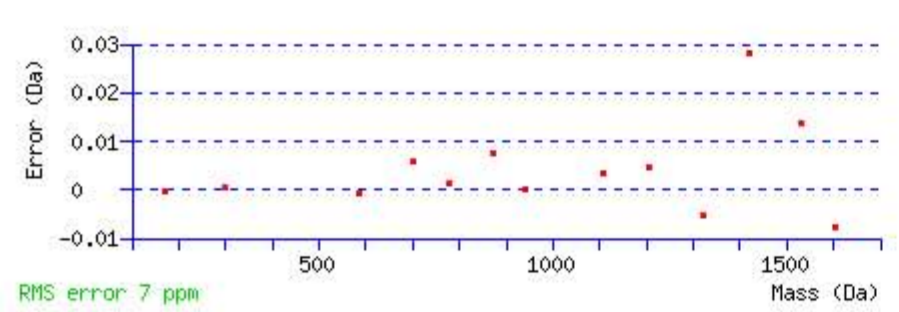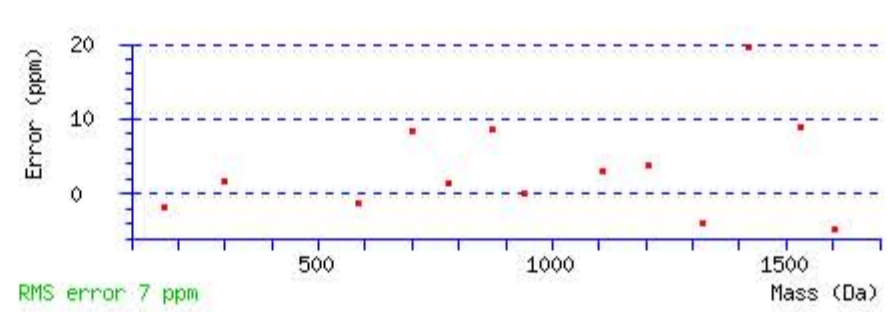

NCBI BLAST search of **LGEVNTYAGDLQK**

(Parameters: blastp, nr protein database, expect=20000, no filter, PAM30)

Other BLAST [web gateways](#)

All matches to this query

| Score | Mr(calc):   | Delta     | Sequence                          |
|-------|-------------|-----------|-----------------------------------|
| 83.3  | 1717.870895 | 0.016353  | <a href="#">LGEVNTYAGDLQK</a>     |
| 10.4  | 1717.866867 | 0.020381  | <a href="#">IDAVNAETIREVCTK</a>   |
| 5.2   | 1717.878754 | 0.008494  | <a href="#">IDAVAWNTTPYQLAR</a>   |
| 3.3   | 1717.878067 | 0.009181  | <a href="#">RATEKEINNMGNTLK</a>   |
| 2.4   | 1717.863495 | 0.023753  | <a href="#">KSNISVYEVDGKDHK</a>   |
| 1.4   | 1717.885956 | 0.001292  | <a href="#">SLGGAVAIHLASENSHR</a> |
| 0.0   | 1717.892014 | -0.004766 | <a href="#">LSTAVNIGKMDSPIEK</a>  |

# MASCOT SEARCH RESULTS

## Peptide View

MS/MS Fragmentation of **ALVQQMEQLR**

Found in **APOA4\_HUMAN**, Apolipoprotein A-IV OS=Homo sapiens GN=APOA4 PE=1 SV=3

Match to Query 46166: 1837.002822 from(613.341550,3+) rtinseconds(2326) index(8654)

Title: Locus:1.1.1.3064.4 File:"2013-07-02 CLN FXIII 180 min 1st F 1.wiff"

Data file C:\Program Files (x86)\Matrix Science\Mascot Daemon\mgf\7 FXIII 180 min 1st\mascot\_daemon\_merge.mgf

Click mouse within plot area to zoom in by factor of two about that point

Or, Plot from  to  Da

Label all possible matches  Label matches used for scoring

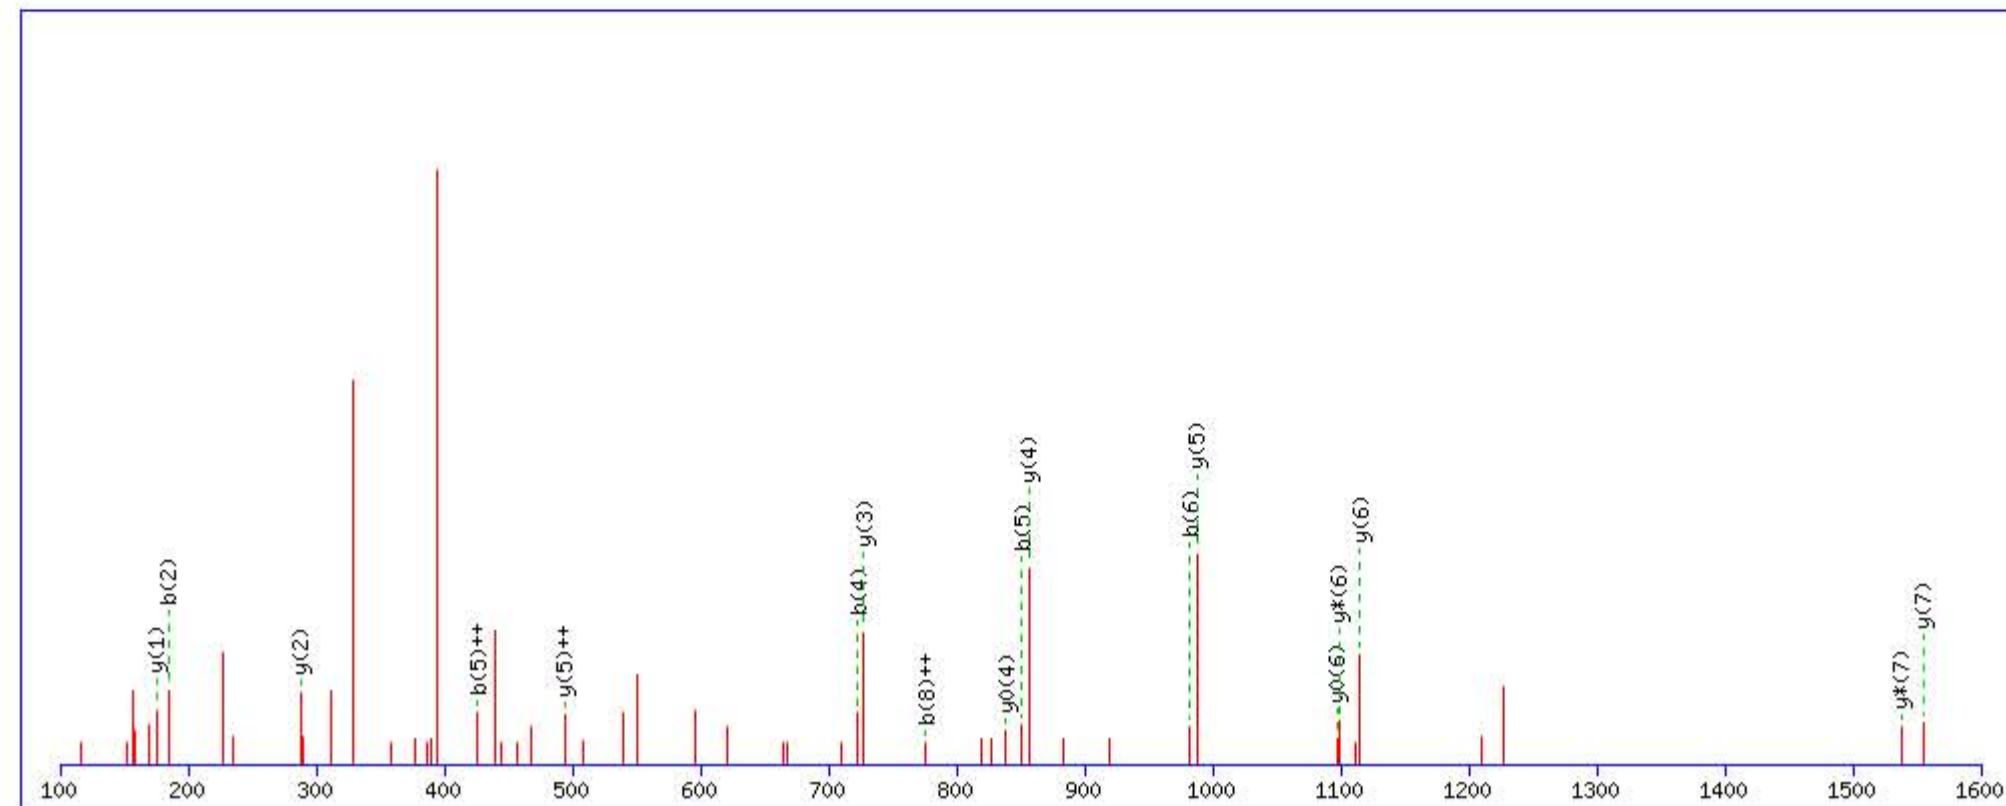

Monoisotopic mass of neutral peptide Mr(calc): 1836.977615

Fixed modifications: Carbamidomethyl (C) (apply to specified residues or termini only)

Variable modifications:

Q4 : Biotin:Thermo-21345 (Q)

Q8 : Biotin:Thermo-21345 (Q)

Ions Score: 30 Expect: 0.0074

Matches : 18/84 fragment ions using 35 most intense peaks [\(help\)](#)

| #  | b                 | b <sup>++</sup>   | b <sup>*</sup> | b <sup>+++</sup> | b <sup>0</sup> | b <sup>0++</sup> | Seq. | y                  | y <sup>++</sup>   | y <sup>*</sup>     | y <sup>+++</sup> | y <sup>0</sup>     | y <sup>0++</sup> | #  |
|----|-------------------|-------------------|----------------|------------------|----------------|------------------|------|--------------------|-------------------|--------------------|------------------|--------------------|------------------|----|
| 1  | 72.044390         | 36.525833         |                |                  |                |                  | A    |                    |                   |                    |                  |                    |                  | 10 |
| 2  | <b>185.128454</b> | 93.067865         |                |                  |                |                  | L    | 1766.947802        | 883.977539        | 1749.921253        | 875.464265       | 1748.937237        | 874.972256       | 9  |
| 3  | 284.196868        | 142.602072        |                |                  |                |                  | V    | 1653.863738        | 827.435507        | 1636.837189        | 818.922232       | 1635.853173        | 818.430224       | 8  |
| 4  | <b>723.422194</b> | 362.214735        | 706.395645     | 353.701461       |                |                  | Q    | <b>1554.795324</b> | 777.901300        | <b>1537.768775</b> | 769.388026       | 1536.784759        | 768.896017       | 7  |
| 5  | <b>851.480772</b> | <b>426.244024</b> | 834.454223     | 417.730750       |                |                  | Q    | <b>1115.569998</b> | 558.288637        | <b>1098.543449</b> | 549.775363       | <b>1097.559433</b> | 549.283354       | 6  |
| 6  | <b>982.521257</b> | 491.764267        | 965.494708     | 483.250992       |                |                  | M    | <b>987.511420</b>  | <b>494.259348</b> | 970.484871         | 485.746073       | 969.500855         | 485.254065       | 5  |
| 7  | 1111.563850       | 556.285563        | 1094.537301    | 547.772289       | 1093.553285    | 547.280281       | E    | <b>856.470935</b>  | 428.739105        | 839.444386         | 420.225831       | <b>838.460370</b>  | 419.733823       | 4  |
| 8  | 1550.789176       | <b>775.898226</b> | 1533.762627    | 767.384952       | 1532.778611    | 766.892944       | Q    | <b>727.428342</b>  | 364.217809        | 710.401793         | 355.704534       |                    |                  | 3  |
| 9  | 1663.873240       | 832.440258        | 1646.846691    | 823.926984       | 1645.862675    | 823.434975       | L    | <b>288.203016</b>  | 144.605146        | 271.176467         | 136.091871       |                    |                  | 2  |
| 10 |                   |                   |                |                  |                |                  | R    | <b>175.118952</b>  | 88.063114         | 158.092403         | 79.549839        |                    |                  | 1  |

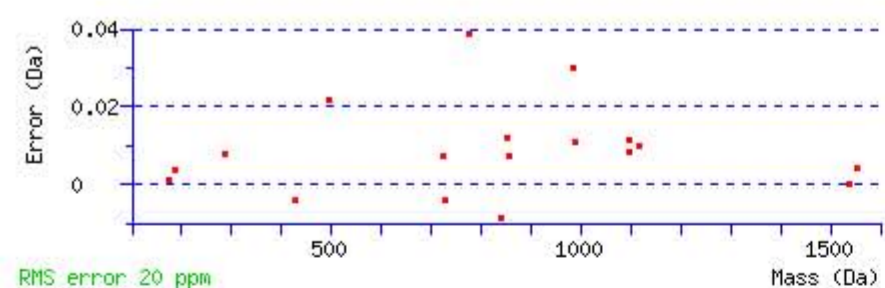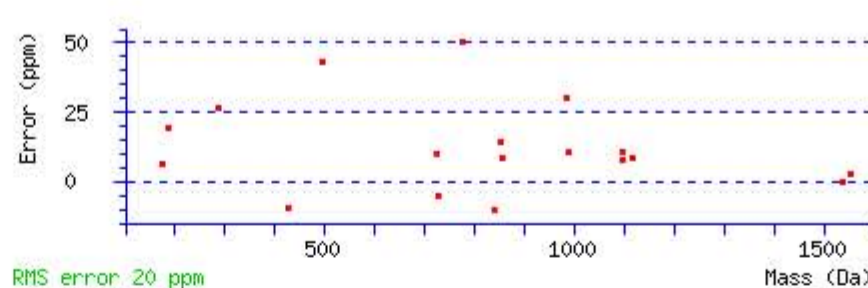

NCBI BLAST search of [ALVQQMEQLR](#)

(Parameters: blastp, nr protein database, expect=20000, no filter, PAM30)

Other BLAST [web gateways](#)

All matches to this query

| Score | Mr(calc):   | Delta     | Sequence                         |
|-------|-------------|-----------|----------------------------------|
| 30.1  | 1836.977615 | 0.025207  | <a href="#">ALVQQMEQLR</a>       |
| 20.4  | 1836.977615 | 0.025207  | <a href="#">ALVQQMEQLR</a>       |
| 7.2   | 1836.999207 | 0.003615  | <a href="#">QQSLQRQLEQLR</a>     |
| 6.4   | 1837.005722 | -0.002900 | <a href="#">AIVTEPKTEKPERPSR</a> |
| 4.5   | 1837.004578 | -0.001756 | <a href="#">RHSWRQQIFLR</a>      |

Mascot: <http://www.matrixscience.com/>

# MASCOT SEARCH RESULTS

## Peptide View

MS/MS Fragmentation of **LNHQLEGLTFQMK**  
 Found in **APOA4\_HUMAN**, Apolipoprotein A-IV OS=Homo sapiens GN=APOA4 PE=1 SV=3

Match to Query 46937: 1868.976372 from(623.999400,3+) rtinseconds(2126) index(79694)  
 Title: Locus:1.1.1.2091.7 File:"2013-07-02 CLN FXIII 180 min 1st FT.wiff"  
 Data file C:\Program Files (x86)\Matrix Science\Mascot Daemon\mgf7 FXIII 180 min 1st\mascot\_daemon\_merge.mgf

Click mouse within plot area to zoom in by factor of two about that point  
 Or, Plot from  to  Da   
 Label all possible matches  Label matches used for scoring

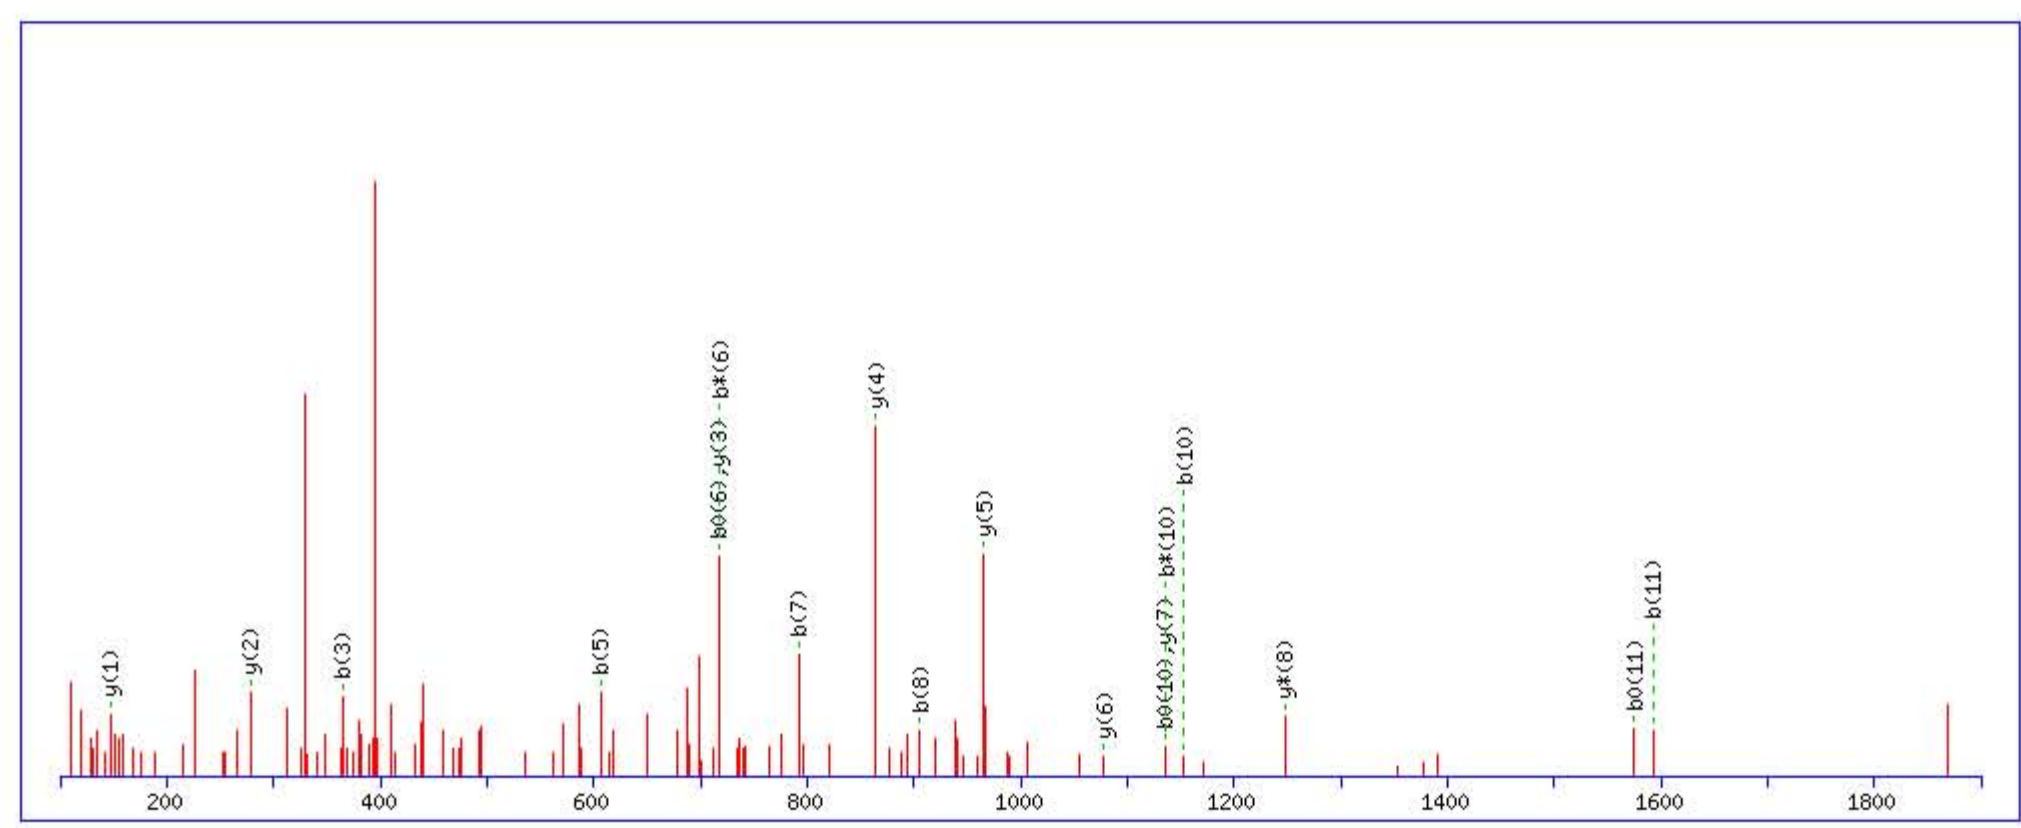

Monoisotopic mass of neutral peptide Mr(calc): 1868.964081  
 Fixed modifications: Carbamidomethyl (C) (apply to specified residues or termini only)  
 Variable modifications:  
 Q11 : Biotin:Thermo-21345 (Q)  
 Ions Score: 31 Expect: 0.024  
 Matches : 19/124 fragment ions using 38 most intense peaks [\(help\)](#)

| #  | b                  | b <sup>++</sup> | b <sup>*</sup>     | b <sup>*++</sup> | b <sup>0</sup>     | b <sup>0++</sup> | Seq. | y                  | y <sup>++</sup> | y <sup>*</sup>     | y <sup>*++</sup> | y <sup>0</sup> | y <sup>0++</sup> | #  |
|----|--------------------|-----------------|--------------------|------------------|--------------------|------------------|------|--------------------|-----------------|--------------------|------------------|----------------|------------------|----|
| 1  | 114.091340         | 57.549308       |                    |                  |                    |                  | L    |                    |                 |                    |                  |                |                  | 13 |
| 2  | 228.134267         | 114.570771      | 211.107718         | 106.057497       |                    |                  | N    | 1756.887310        | 878.947293      | 1739.860761        | 870.434019       | 1738.876745    | 869.942011       | 12 |
| 3  | <b>365.193179</b>  | 183.100227      | 348.166630         | 174.586953       |                    |                  | H    | 1642.844383        | 821.925830      | 1625.817834        | 813.412555       | 1624.833818    | 812.920547       | 11 |
| 4  | 493.251757         | 247.129516      | 476.225208         | 238.616242       |                    |                  | Q    | 1505.785471        | 753.396374      | 1488.758922        | 744.883099       | 1487.774906    | 744.391091       | 10 |
| 5  | <b>606.335821</b>  | 303.671549      | 589.309272         | 295.158274       |                    |                  | L    | 1377.726893        | 689.367085      | 1360.700344        | 680.853810       | 1359.716328    | 680.361802       | 9  |
| 6  | 735.378414         | 368.192845      | <b>718.351865</b>  | 359.679571       | <b>717.367849</b>  | 359.187563       | E    | 1264.642829        | 632.825053      | <b>1247.616280</b> | 624.311778       | 1246.632264    | 623.819770       | 8  |
| 7  | <b>792.399878</b>  | 396.703577      | 775.373329         | 388.190303       | 774.389313         | 387.698295       | G    | <b>1135.600236</b> | 568.303756      | 1118.573687        | 559.790482       | 1117.589671    | 559.298474       | 7  |
| 8  | <b>905.483942</b>  | 453.245609      | 888.457393         | 444.732335       | 887.473377         | 444.240327       | L    | <b>1078.578772</b> | 539.793024      | 1061.552223        | 531.279750       | 1060.568207    | 530.787742       | 6  |
| 9  | 1006.531621        | 503.769449      | 989.505072         | 495.256174       | 988.521056         | 494.764166       | T    | <b>965.494708</b>  | 483.250992      | 948.468159         | 474.737718       | 947.484143     | 474.245710       | 5  |
| 10 | <b>1153.600035</b> | 577.303656      | <b>1136.573486</b> | 568.790381       | <b>1135.589470</b> | 568.298373       | F    | <b>864.447029</b>  | 432.727153      | 847.420480         | 424.213878       |                |                  | 4  |
| 11 | <b>1592.825361</b> | 796.916319      | 1575.798812        | 788.403044       | <b>1574.814796</b> | 787.911036       | Q    | <b>717.378615</b>  | 359.192946      | 700.352066         | 350.679671       |                |                  | 3  |
| 12 | 1723.865846        | 862.436561      | 1706.839297        | 853.923287       | 1705.855281        | 853.431279       | M    | <b>278.153289</b>  | 139.580282      | 261.126740         | 131.067008       |                |                  | 2  |
| 13 |                    |                 |                    |                  |                    |                  | K    | <b>147.112804</b>  | 74.060040       | 130.086255         | 65.546765        |                |                  | 1  |

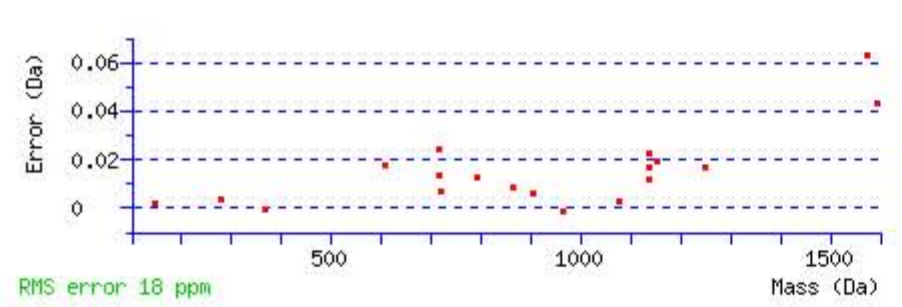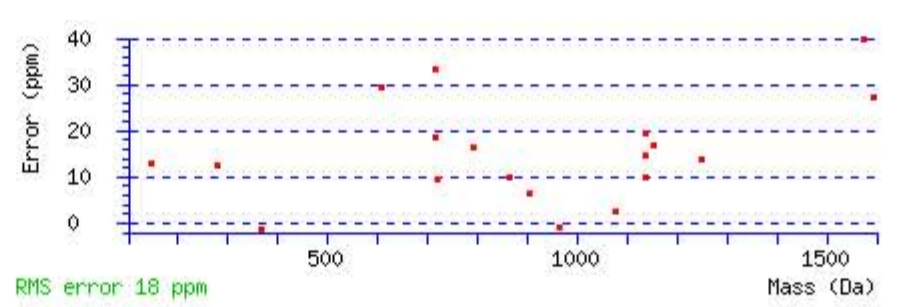

NCBI BLAST search of **LNHQLEGLTFQMK**  
 (Parameters: blastp, nr protein database, expect=20000, no filter, PAM30)  
 Other BLAST [web gateways](#)

### All matches to this query

| Score | Mr(calc):   | Delta    | Sequence                      |
|-------|-------------|----------|-------------------------------|
| 30.9  | 1868.964081 | 0.012291 | <a href="#">LNHQLEGLTFQMK</a> |

# MASCOT SEARCH RESULTS

## Peptide View

MS/MS Fragmentation of **LNHQLEGLTFQMK**

Found in **APOA4\_HUMAN**, Apolipoprotein A-IV OS=Homo sapiens GN=APOA4 PE=1 SV=3

Match to Query 46939: 1868.981712 from(624.001180,3+) rtinseconds(2155) index(7491)

Title: Locus:1.1.1.3004.16 File:"2013-07-02 CLN FXIII 180 min 1st F 1.wiff"

Data file C:\Program Files (x86)\Matrix Science\Mascot Daemon\mgf\7 FXIII 180 min 1st\mascot\_daemon\_merge.mgf

Click mouse within plot area to zoom in by factor of two about that point

Or, Plot from  to  Da

Label all possible matches  Label matches used for scoring

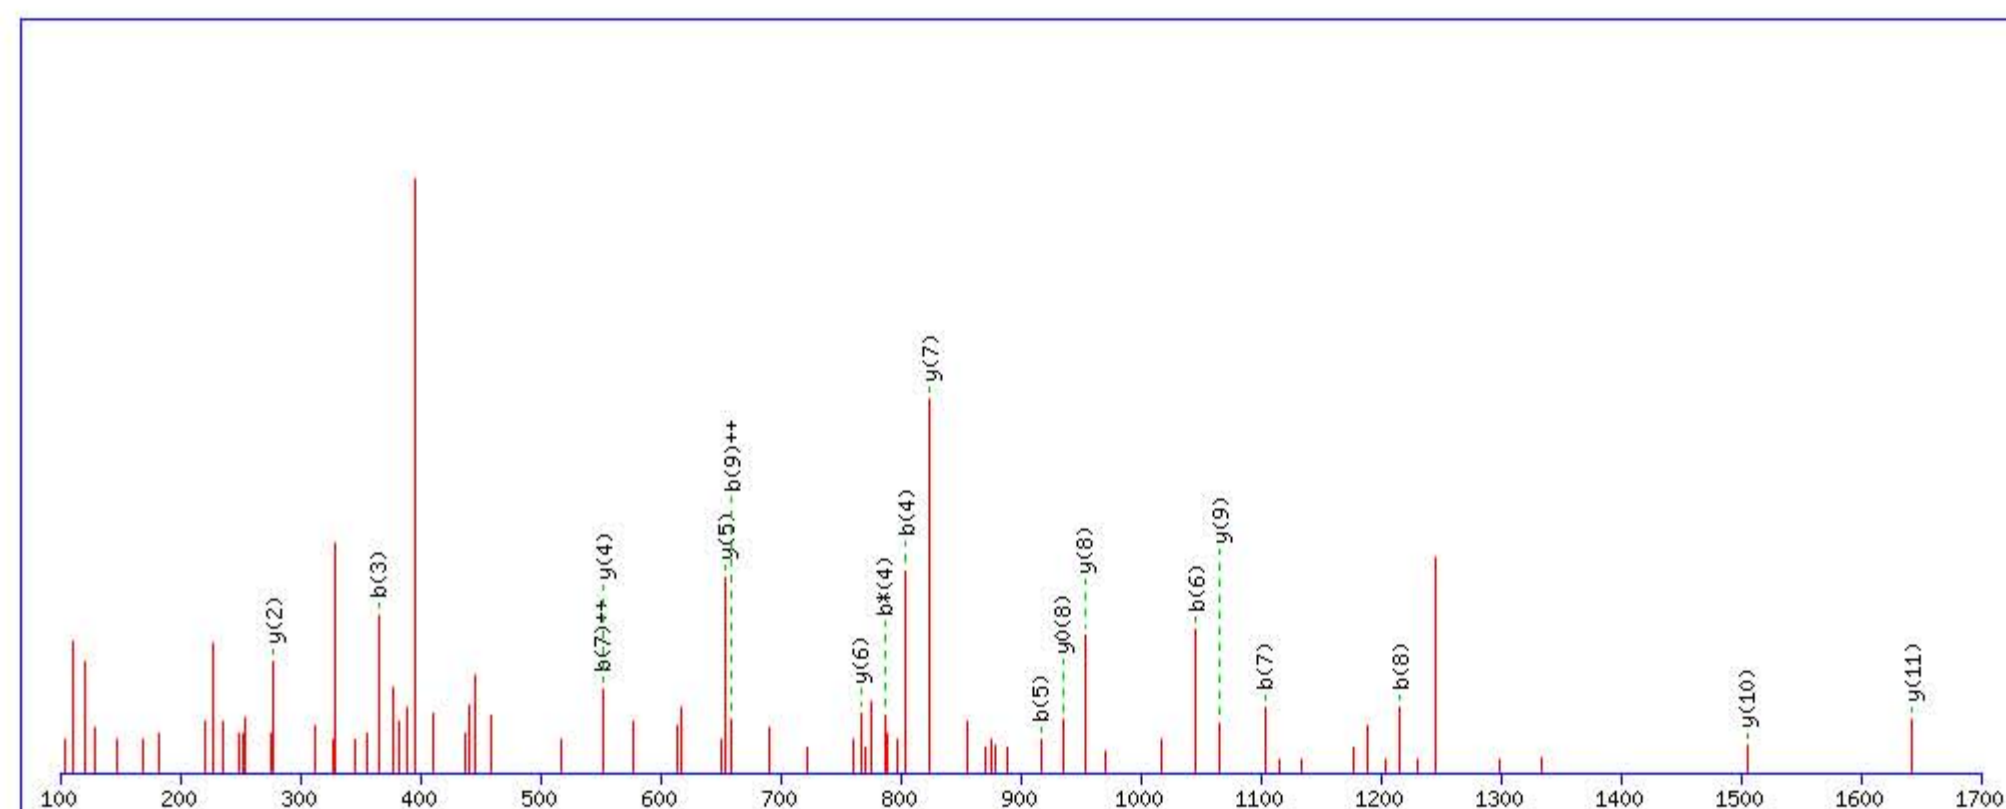

Monoisotopic mass of neutral peptide Mr(calc): 1868.964081

Fixed modifications: Carbamidomethyl (C) (apply to specified residues or termini only)

Variable modifications:

Q4 : Biotin:Thermo-21345 (Q)

Ions Score: 46 Expect: 0.0002

Matches : 19/124 fragment ions using 39 most intense peaks [\(help\)](#)

| #  | b                  | b <sup>++</sup>   | b <sup>+</sup>    | b <sup>+++</sup> | b <sup>0</sup> | b <sup>0++</sup> | Seq. | y                  | y <sup>++</sup> | y <sup>+</sup> | y <sup>+++</sup> | y <sup>0</sup>    | y <sup>0++</sup> | #  |
|----|--------------------|-------------------|-------------------|------------------|----------------|------------------|------|--------------------|-----------------|----------------|------------------|-------------------|------------------|----|
| 1  | 114.091340         | 57.549308         |                   |                  |                |                  | L    |                    |                 |                |                  |                   |                  | 13 |
| 2  | 228.134267         | 114.570771        | 211.107718        | 106.057497       |                |                  | N    | 1756.887310        | 878.947293      | 1739.860761    | 870.434019       | 1738.876745       | 869.942011       | 12 |
| 3  | <b>365.193179</b>  | 183.100227        | 348.166630        | 174.586953       |                |                  | H    | <b>1642.844383</b> | 821.925829      | 1625.817834    | 813.412555       | 1624.833818       | 812.920547       | 11 |
| 4  | <b>804.418505</b>  | 402.712891        | <b>787.391956</b> | 394.199616       |                |                  | Q    | <b>1505.785471</b> | 753.396373      | 1488.758922    | 744.883099       | 1487.774906       | 744.391091       | 10 |
| 5  | <b>917.502569</b>  | 459.254923        | 900.476020        | 450.741648       |                |                  | L    | <b>1066.560145</b> | 533.783710      | 1049.533596    | 525.270436       | 1048.549580       | 524.778428       | 9  |
| 6  | <b>1046.545162</b> | 523.776219        | 1029.518613       | 515.262945       | 1028.534597    | 514.770937       | E    | <b>953.476081</b>  | 477.241678      | 936.449532     | 468.728404       | <b>935.465516</b> | 468.236396       | 8  |
| 7  | <b>1103.566626</b> | <b>552.286951</b> | 1086.540077       | 543.773677       | 1085.556061    | 543.281669       | G    | <b>824.433488</b>  | 412.720382      | 807.406939     | 404.207107       | 806.422923        | 403.715099       | 7  |
| 8  | <b>1216.650690</b> | 608.828983        | 1199.624141       | 600.315709       | 1198.640125    | 599.823700       | L    | <b>767.412024</b>  | 384.209650      | 750.385475     | 375.696375       | 749.401459        | 375.204367       | 6  |
| 9  | 1317.698369        | <b>659.352823</b> | 1300.671820       | 650.839548       | 1299.687804    | 650.347540       | T    | <b>654.327960</b>  | 327.667618      | 637.301411     | 319.154344       | 636.317395        | 318.662336       | 5  |
| 10 | 1464.766783        | 732.887030        | 1447.740234       | 724.373755       | 1446.756218    | 723.881747       | F    | <b>553.280281</b>  | 277.143779      | 536.253732     | 268.630504       |                   |                  | 4  |
| 11 | 1592.825361        | 796.916318        | 1575.798812       | 788.403044       | 1574.814796    | 787.911036       | Q    | 406.211867         | 203.609571      | 389.185318     | 195.096297       |                   |                  | 3  |
| 12 | 1723.865846        | 862.436561        | 1706.839297       | 853.923287       | 1705.855281    | 853.431278       | M    | <b>278.153289</b>  | 139.580282      | 261.126740     | 131.067008       |                   |                  | 2  |
| 13 |                    |                   |                   |                  |                |                  | K    | 147.112804         | 74.060040       | 130.086255     | 65.546765        |                   |                  | 1  |

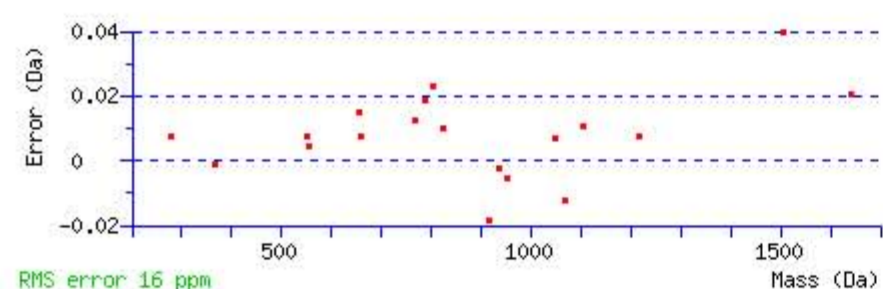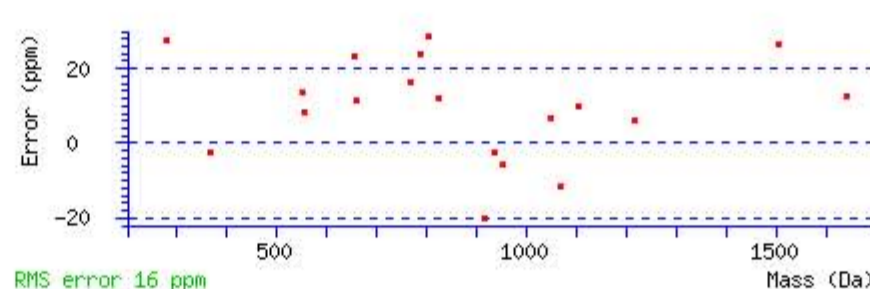

NCBI BLAST search of **LNHQLEGLTFQMK**

(Parameters: blastp, nr protein database, expect=20000, no filter, PAM30)

Other BLAST [web gateways](#)

All matches to this query

| Score | Mr(calc):   | Delta     | Sequence                      |
|-------|-------------|-----------|-------------------------------|
| 45.7  | 1868.964081 | 0.017631  | <a href="#">LNHQLEGLTFQMK</a> |
| 6.0   | 1868.971970 | 0.009742  | <a href="#">GFSWQSVLLTHQR</a> |
| 1.7   | 1868.989227 | -0.007515 | <a href="#">SLSPQELQAFK</a>   |

Mascot: <http://www.matrixscience.com/>



# MASCOT Search Results

## Peptide View

MS/MS Fragmentation of **TQVNTQAEQLR**

Found in **APOA4\_HUMAN**, Apolipoprotein A-IV OS=Homo sapiens GN=APOA4 PE=1 SV=3

Match to Query 47731: 1909.003872 from(637.341900,3+) rtinseconds(1907) index(5901)

Title: Locus:1.1.1.2918.11 File:"2013-07-02 CLN FXIII 180 min 1st F 1.wiff"

Data file C:\Program Files (x86)\Matrix Science\Mascot Daemon\mgf\7 FXIII 180 min 1st\mascot\_daemon\_merge.mgf

Click mouse within plot area to zoom in by factor of two about that point

Or, Plot from  to  Da

Label all possible matches  Label matches used for scoring

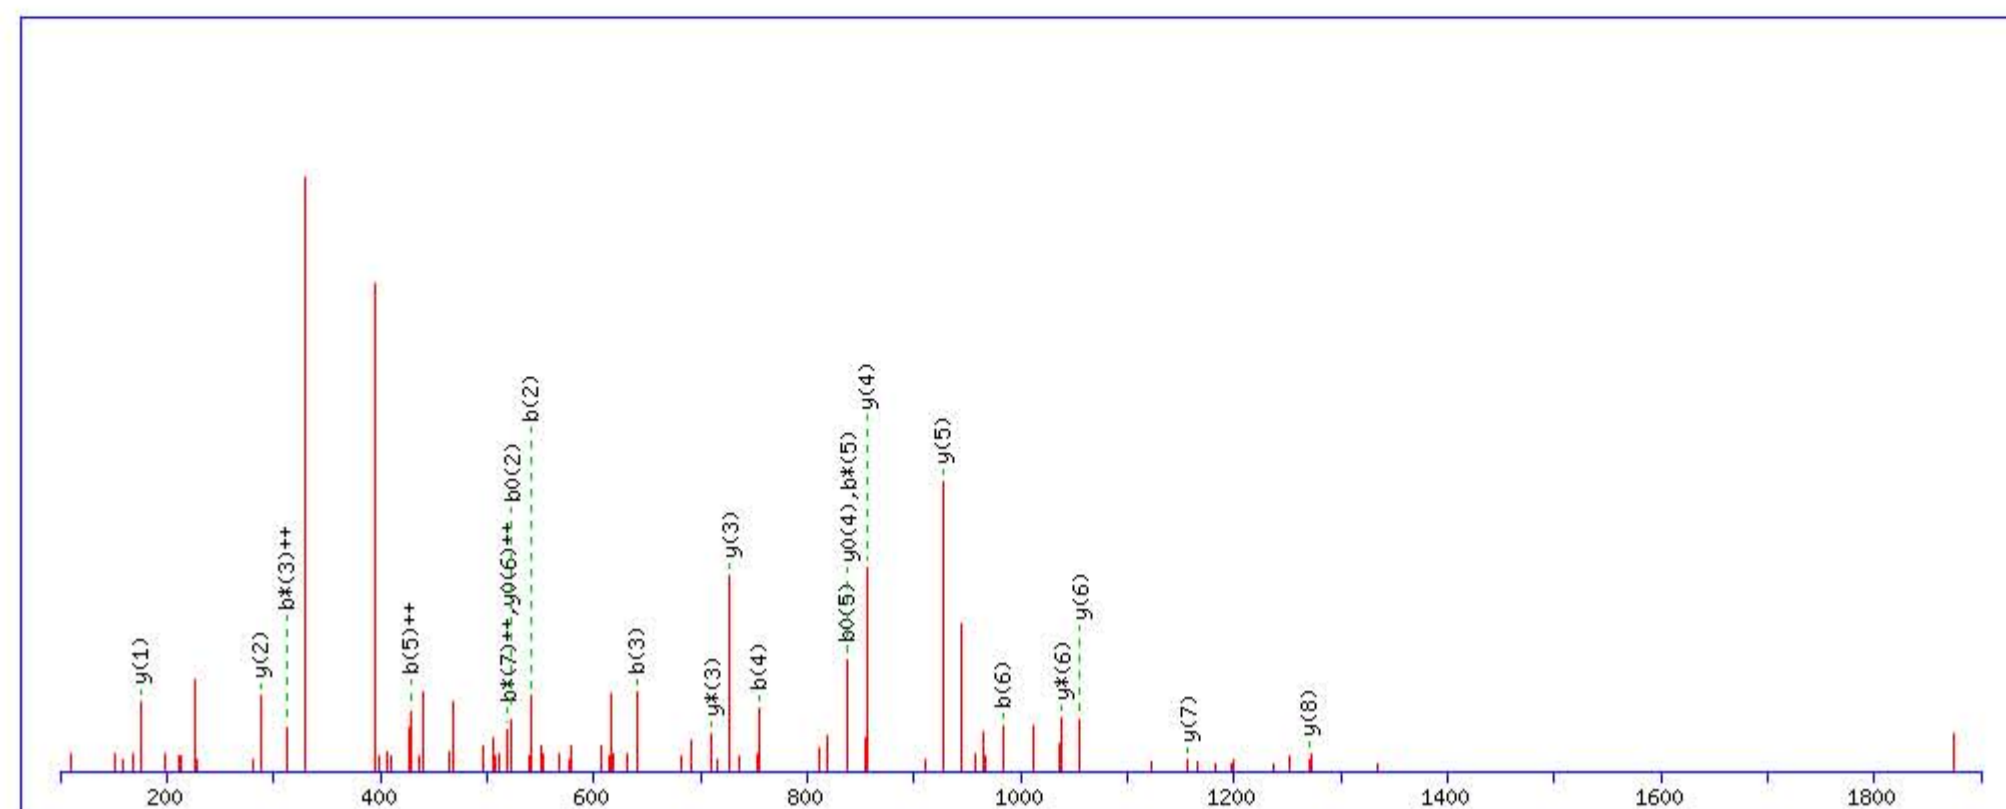

Monoisotopic mass of neutral peptide Mr(calc): 1908.991364

Fixed modifications: Carbamidomethyl (C) (apply to specified residues or termini only)

Variable modifications:

Q2 : Biotin:Thermo-21345 (Q)

Q9 : Biotin:Thermo-21345 (Q)

Ions Score: 39 Expect: 0.00025

Matches : 22/112 fragment ions using 38 most intense peaks [\(help\)](#)

| #  | b                 | b <sup>++</sup>   | b <sup>*</sup>    | b <sup>+++</sup>  | b <sup>0</sup>    | b <sup>0++</sup> | Seq. | y                  | y <sup>++</sup> | y <sup>*</sup>     | y <sup>+++</sup> | y <sup>0</sup>    | y <sup>0++</sup>  | #  |
|----|-------------------|-------------------|-------------------|-------------------|-------------------|------------------|------|--------------------|-----------------|--------------------|------------------|-------------------|-------------------|----|
| 1  | 102.054955        | 51.531116         |                   |                   | 84.044390         | 42.525833        | T    |                    |                 |                    |                  |                   |                   | 11 |
| 2  | <b>541.280281</b> | 271.143779        | 524.253732        | 262.630504        | <b>523.269716</b> | 262.138496       | Q    | 1808.950973        | 904.979125      | 1791.924424        | 896.465850       | 1790.940408       | 895.973842        | 10 |
| 3  | <b>640.348695</b> | 320.677986        | 623.322146        | <b>312.164711</b> | 622.338130        | 311.672703       | V    | 1369.725647        | 685.366462      | 1352.699098        | 676.853187       | 1351.715082       | 676.361179        | 9  |
| 4  | <b>754.391622</b> | 377.699449        | 737.365073        | 369.186174        | 736.381057        | 368.694166       | N    | <b>1270.657233</b> | 635.832255      | 1253.630684        | 627.318980       | 1252.646668       | 626.826972        | 8  |
| 5  | 855.439301        | <b>428.223289</b> | <b>838.412752</b> | 419.710014        | <b>837.428736</b> | 419.218006       | T    | <b>1156.614306</b> | 578.810791      | 1139.587757        | 570.297517       | 1138.603741       | 569.805509        | 7  |
| 6  | <b>983.497879</b> | 492.252578        | 966.471330        | 483.739303        | 965.487314        | 483.247295       | Q    | <b>1055.566627</b> | 528.286952      | <b>1038.540078</b> | 519.773677       | 1037.556062       | <b>519.281669</b> | 6  |
| 7  | 1054.534993       | 527.771135        | 1037.508444       | <b>519.257860</b> | 1036.524428       | 518.765852       | A    | <b>927.508049</b>  | 464.257663      | 910.481500         | 455.744388       | 909.497484        | 455.252380        | 5  |
| 8  | 1183.577586       | 592.292431        | 1166.551037       | 583.779157        | 1165.567021       | 583.287149       | E    | <b>856.470935</b>  | 428.739106      | 839.444386         | 420.225831       | <b>838.460370</b> | 419.733823        | 4  |
| 9  | 1622.802912       | 811.905094        | 1605.776363       | 803.391820        | 1604.792347       | 802.899812       | Q    | <b>727.428342</b>  | 364.217809      | <b>710.401793</b>  | 355.704535       |                   |                   | 3  |
| 10 | 1735.886976       | 868.447126        | 1718.860427       | 859.933852        | 1717.876411       | 859.441844       | L    | <b>288.203016</b>  | 144.605146      | 271.176467         | 136.091871       |                   |                   | 2  |
| 11 |                   |                   |                   |                   |                   |                  | R    | <b>175.118952</b>  | 88.063114       | 158.092403         | 79.549839        |                   |                   | 1  |

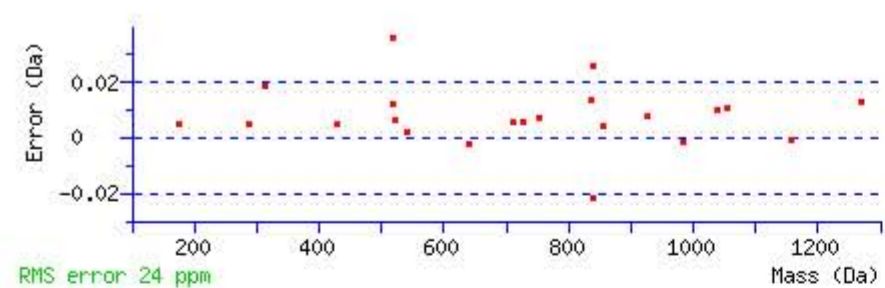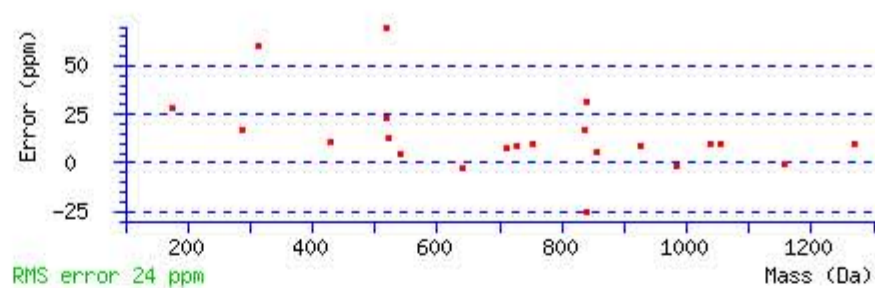

NCBI BLAST search of **TQVNTQAEQLR**

(Parameters: blastp, nr protein database, expect=20000, no filter, PAM30)

Other BLAST [web gateways](#)

All matches to this query

| Score | Mr(calc):   | Delta     | Sequence                            |
|-------|-------------|-----------|-------------------------------------|
| 38.7  | 1908.991364 | 0.012508  | <a href="#">TQVNTQAEQLR</a>         |
| 13.5  | 1908.991364 | 0.012508  | <a href="#">TQVNTQAEQLR</a>         |
| 9.9   | 1908.991364 | 0.012508  | <a href="#">TQVNTQAEQLR</a>         |
| 0.3   | 1909.015610 | -0.011738 | <a href="#">SSIALTAPDAAADPKEKPK</a> |

Mascot: <http://www.matrixscience.com/>

# MASCOT Search Results

## Peptide View

MS/MS Fragmentation of **SELTQQLNALFQDK**

Found in **APOA4\_HUMAN**, Apolipoprotein A-IV OS=Homo sapiens GN=APOA4 PE=1 SV=3

Match to Query 48576: 1945.008228 from(973.511390,2+) rtinseconds(2849) index(12025)

Title: Locus:1.1.1.3244.25 File:"2013-07-02 CLN FXIII 180 min 1st F 1.wiff"

Data file C:\Program Files (x86)\Matrix Science\Mascot Daemon\mgf7 FXIII 180 min 1st\mascot\_daemon\_merge.mgf

Click mouse within plot area to zoom in by factor of two about that point

Or, Plot from  to  Da

Label all possible matches  Label matches used for scoring

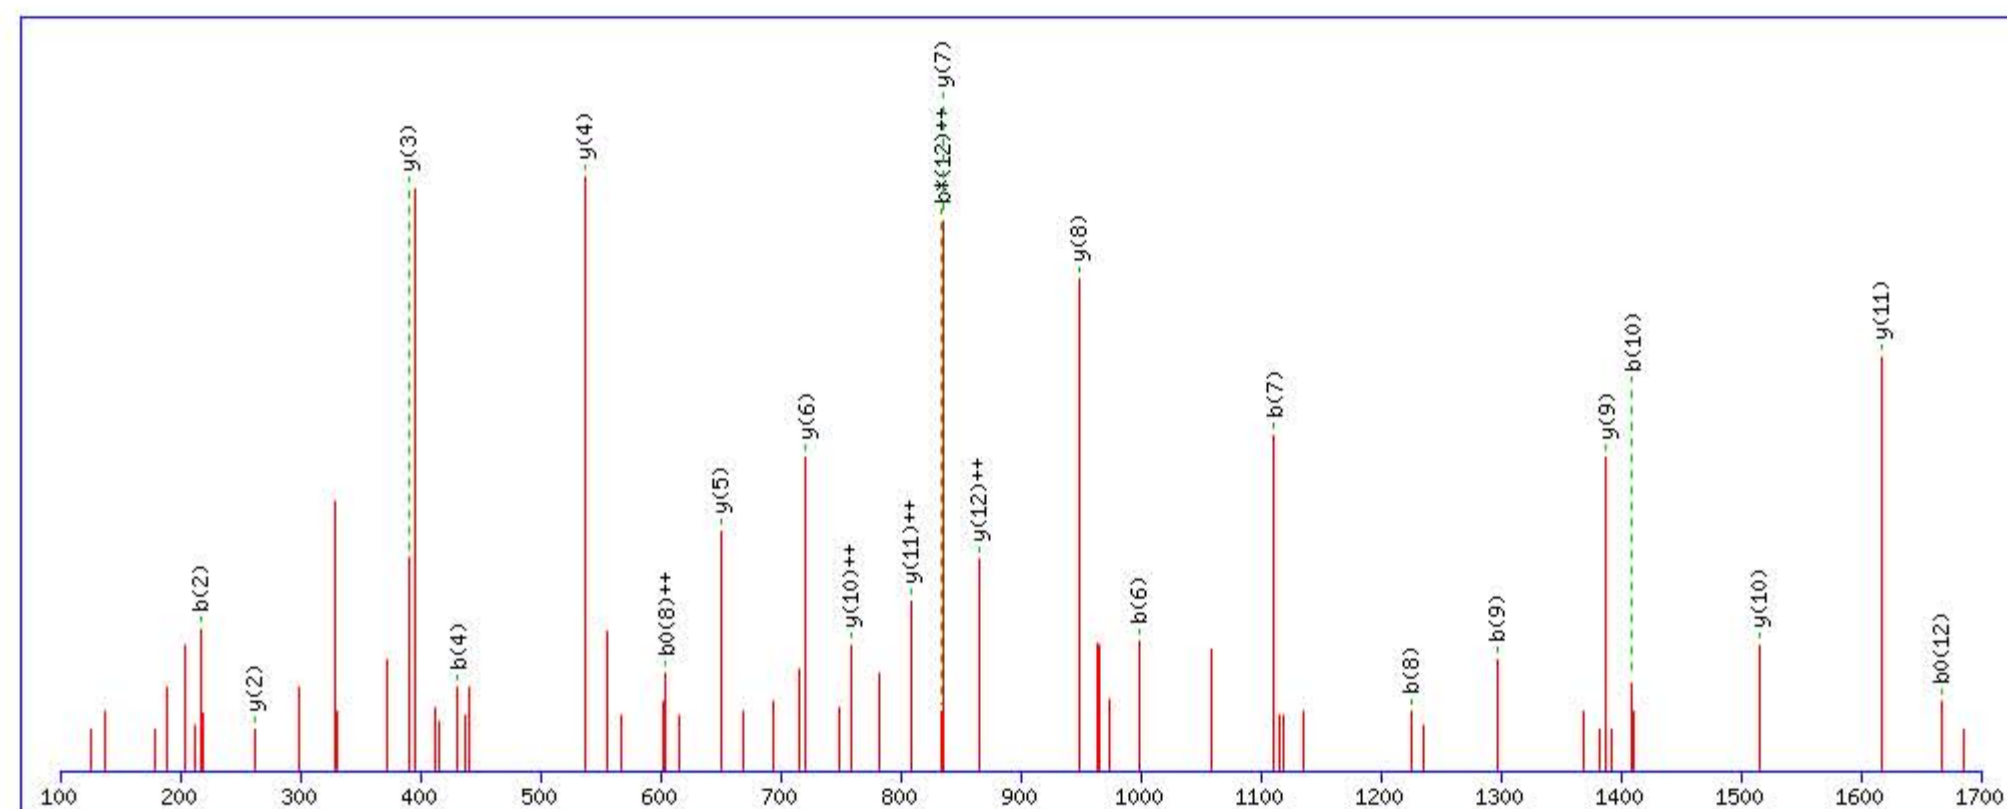

Monoisotopic mass of neutral peptide Mr(calc): 1944.997879

Fixed modifications: Carbamidomethyl (C) (apply to specified residues or termini only)

Variable modifications:

Q6 : Biotin:Thermo-21345 (Q)

Ions Score: 63 Expect: 1.4e-006

Matches : 23/146 fragment ions using 40 most intense peaks [\(help\)](#)

| #  | b                  | b <sup>++</sup> | b <sup>*</sup> | b <sup>*++</sup>  | b <sup>0</sup>     | b <sup>0++</sup> | Seq. | y                  | y <sup>++</sup>   | y <sup>*</sup> | y <sup>*++</sup> | y <sup>0</sup> | y <sup>0++</sup> | #  |
|----|--------------------|-----------------|----------------|-------------------|--------------------|------------------|------|--------------------|-------------------|----------------|------------------|----------------|------------------|----|
| 1  | 88.039304          | 44.523290       |                |                   | 70.028739          | 35.518008        | S    |                    |                   |                |                  |                |                  | 14 |
| 2  | <b>217.081897</b>  | 109.044586      |                |                   | 199.071332         | 100.039304       | E    | 1858.973148        | 929.990212        | 1841.946599    | 921.476938       | 1840.962583    | 920.984930       | 13 |
| 3  | 330.165961         | 165.586618      |                |                   | 312.155396         | 156.581336       | L    | 1729.930555        | <b>865.468916</b> | 1712.904006    | 856.955641       | 1711.919990    | 856.463633       | 12 |
| 4  | <b>431.213640</b>  | 216.110458      |                |                   | 413.203075         | 207.105176       | T    | <b>1616.846491</b> | <b>808.926884</b> | 1599.819942    | 800.413609       | 1598.835926    | 799.921601       | 11 |
| 5  | 559.272218         | 280.139747      | 542.245669     | 271.626473        | 541.261653         | 271.134465       | Q    | <b>1515.798812</b> | <b>758.403044</b> | 1498.772263    | 749.889770       | 1497.788247    | 749.397762       | 10 |
| 6  | <b>998.497544</b>  | 499.752410      | 981.470995     | 491.239136        | 980.486979         | 490.747128       | Q    | <b>1387.740234</b> | 694.373755        | 1370.713685    | 685.860481       | 1369.729669    | 685.368473       | 9  |
| 7  | <b>1111.581608</b> | 556.294442      | 1094.555059    | 547.781168        | 1093.571043        | 547.289159       | L    | <b>948.514908</b>  | 474.761092        | 931.488359     | 466.247818       | 930.504343     | 465.755810       | 8  |
| 8  | <b>1225.624535</b> | 613.315905      | 1208.597986    | 604.802631        | 1207.613970        | 604.310623       | N    | <b>835.430844</b>  | 418.219060        | 818.404295     | 409.705786       | 817.420279     | 409.213778       | 7  |
| 9  | <b>1296.661649</b> | 648.834462      | 1279.635100    | 640.321188        | 1278.651084        | 639.829180       | A    | <b>721.387917</b>  | 361.197597        | 704.361368     | 352.684322       | 703.377352     | 352.192314       | 6  |
| 10 | <b>1409.745713</b> | 705.376494      | 1392.719164    | 696.863220        | 1391.735148        | 696.371212       | L    | <b>650.350803</b>  | 325.679040        | 633.324254     | 317.165765       | 632.340238     | 316.673757       | 5  |
| 11 | 1556.814127        | 778.910701      | 1539.787578    | 770.397427        | 1538.803562        | 769.905419       | F    | <b>537.266739</b>  | 269.137008        | 520.240190     | 260.623733       | 519.256174     | 260.131725       | 4  |
| 12 | 1684.872705        | 842.939991      | 1667.846156    | <b>834.426716</b> | <b>1666.862140</b> | 833.934708       | Q    | <b>390.198325</b>  | 195.602801        | 373.171776     | 187.089526       | 372.187760     | 186.597518       | 3  |
| 13 | 1799.899648        | 900.453462      | 1782.873099    | 891.940188        | 1781.889083        | 891.448180       | D    | <b>262.139747</b>  | 131.573512        | 245.113198     | 123.060237       | 244.129182     | 122.568229       | 2  |
| 14 |                    |                 |                |                   |                    |                  | K    | 147.112804         | 74.060040         | 130.086255     | 65.546765        |                |                  | 1  |

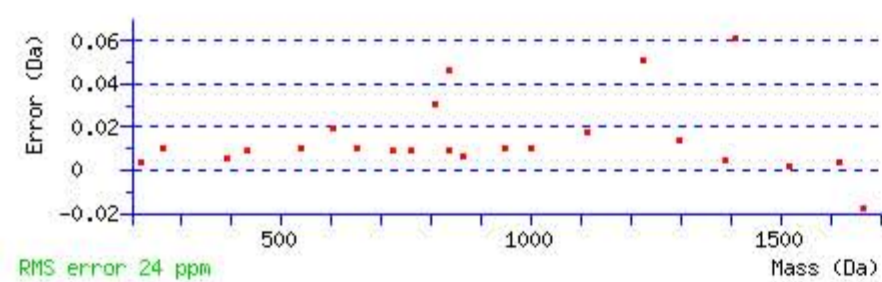

RMS error 24 ppm

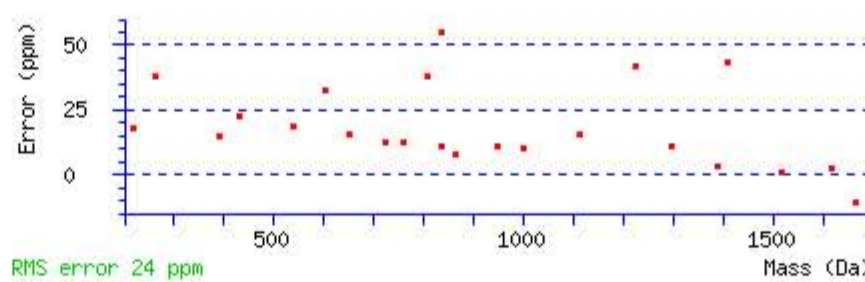

RMS error 24 ppm

NCBI BLAST search of [SELTQQLNALFQDK](#)

(Parameters: blastp, nr protein database, expect=20000, no filter, PAM30)

Other BLAST [web gateways](#)

All matches to this query

| Score | Mr(calc):   | Delta     | Sequence                        |
|-------|-------------|-----------|---------------------------------|
| 63.1  | 1944.997879 | 0.010349  | <a href="#">SELTQQLNALFQDK</a>  |
| 53.0  | 1944.997879 | 0.010349  | <a href="#">SELTQQLNALFQDK</a>  |
| 6.0   | 1944.997879 | 0.010349  | <a href="#">SELTQQLNALFQDK</a>  |
| 0.5   | 1945.009109 | -0.000881 | <a href="#">ESQTALVANQRSLFA</a> |
| 0.2   | 1945.005280 | 0.002948  | <a href="#">QPPSDAALTMLSFIK</a> |

# MASCOT Search Results

## Peptide View

MS/MS Fragmentation of **SLAELGGHLDQQVEEFR**  
 Found in **APOA4\_HUMAN**, Apolipoprotein A-IV OS=Homo sapiens GN=APOA4 PE=1 SV=3

Match to Query 56359: 2238.127032 from(747.049620,3+) rtinseconds(2200) index(26150)  
 Title: Locus:1.1.1.2908.10 File:"2013-07-02 CLN FXIII 180 min 1st F 2.wiff"  
 Data file C:\Program Files (x86)\Matrix Science\Mascot Daemon\mgf\7 FXIII 180 min 1st\mascot\_daemon\_merge.mgf

Click mouse within plot area to zoom in by factor of two about that point

Or, Plot from  to  Da

Label all possible matches  Label matches used for scoring

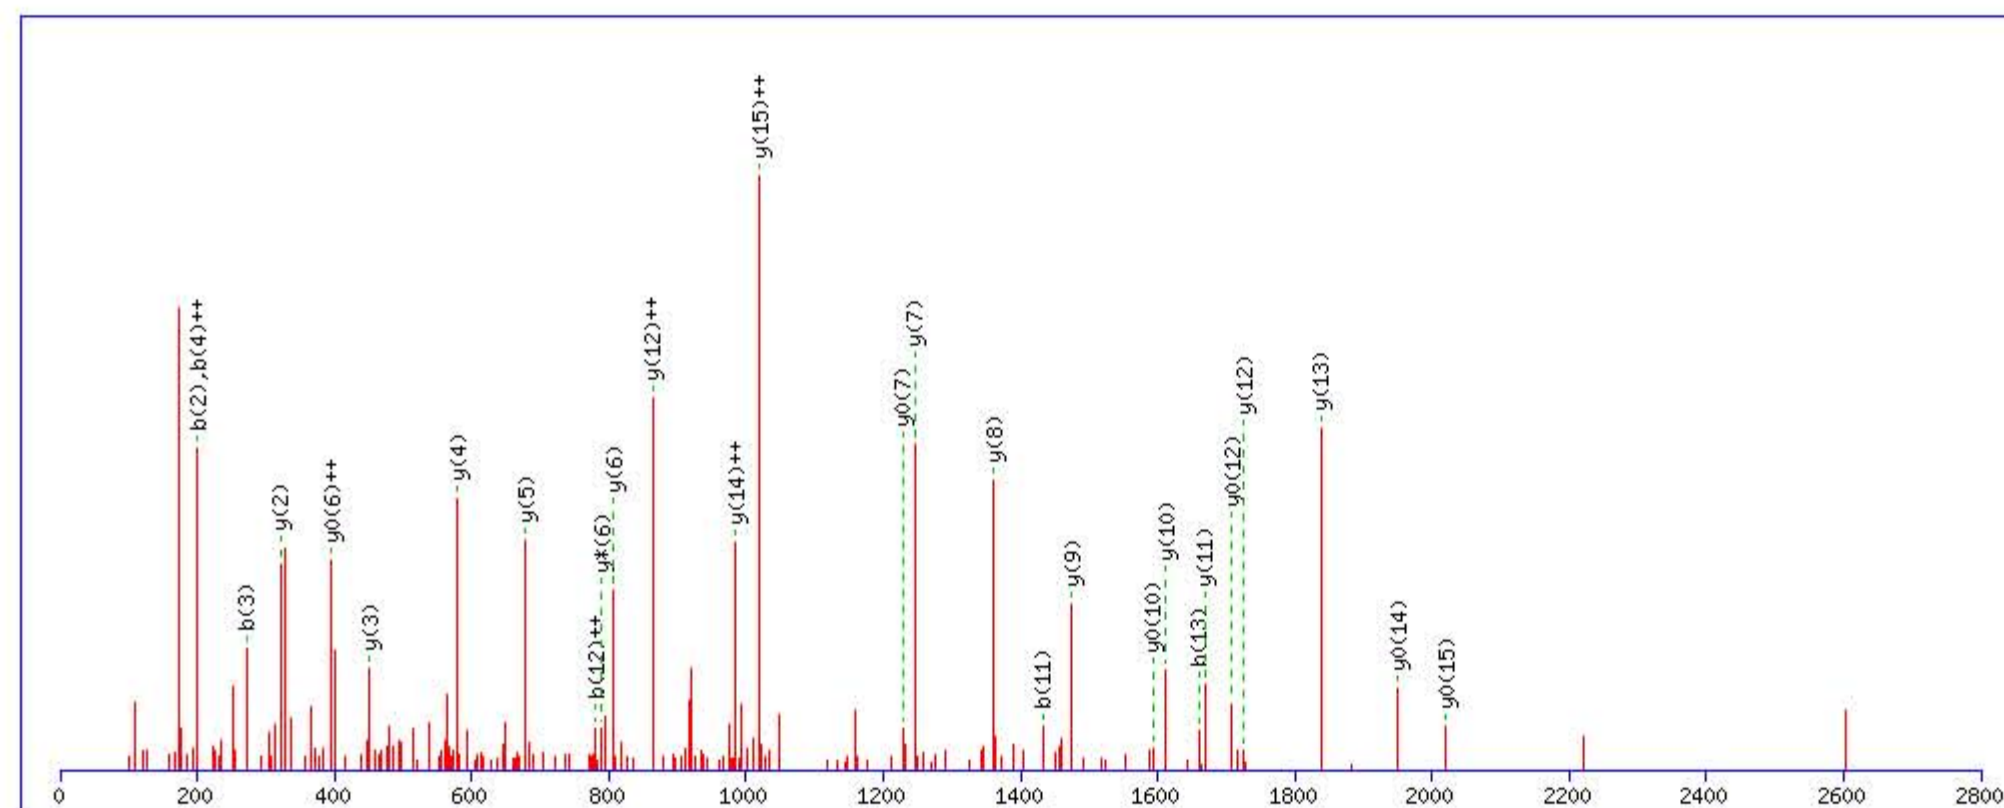

Monoisotopic mass of neutral peptide Mr(calc): 2238.110291  
 Fixed modifications: Carbamidomethyl (C) (apply to specified residues or termini only)  
 Variable modifications:  
 Q11 : Biotin:Thermo-21345 (Q)  
 Ions Score: 64 Expect: 1.1e-005  
 Matches : 28/168 fragment ions using 56 most intense peaks [\(help\)](#)

| #  | b                  | b <sup>++</sup>   | b <sup>*</sup> | b <sup>***</sup> | b <sup>0</sup> | b <sup>0++</sup> | Seq. | y                  | y <sup>++</sup>    | y <sup>*</sup>    | y <sup>***</sup> | y <sup>0</sup>     | y <sup>0++</sup>  | #  |
|----|--------------------|-------------------|----------------|------------------|----------------|------------------|------|--------------------|--------------------|-------------------|------------------|--------------------|-------------------|----|
| 1  | 88.039304          | 44.523290         |                |                  | 70.028739      | 35.518008        | S    |                    |                    |                   |                  |                    |                   | 17 |
| 2  | <b>201.123368</b>  | 101.065322        |                |                  | 183.112803     | 92.060039        | L    | 2152.085552        | 1076.546414        | 2135.059003       | 1068.033139      | 2134.074987        | 1067.541131       | 16 |
| 3  | <b>272.160482</b>  | 136.583879        |                |                  | 254.149917     | 127.578596       | A    | 2039.001488        | <b>1020.004382</b> | 2021.974939       | 1011.491108      | <b>2020.990923</b> | 1010.999100       | 15 |
| 4  | 401.203075         | <b>201.105175</b> |                |                  | 383.192510     | 192.099893       | E    | 1967.964374        | <b>984.485825</b>  | 1950.937825       | 975.972551       | <b>1949.953809</b> | 975.480543        | 14 |
| 5  | 514.287139         | 257.647208        |                |                  | 496.276574     | 248.641925       | L    | <b>1838.921781</b> | 919.964529         | 1821.895232       | 911.451254       | 1820.911216        | 910.959246        | 13 |
| 6  | 571.308603         | 286.157940        |                |                  | 553.298038     | 277.152657       | G    | <b>1725.837717</b> | <b>863.422497</b>  | 1708.811168       | 854.909222       | <b>1707.827152</b> | 854.417214        | 12 |
| 7  | 628.330067         | 314.668672        |                |                  | 610.319502     | 305.663389       | G    | <b>1668.816253</b> | 834.911765         | 1651.789704       | 826.398490       | 1650.805688        | 825.906482        | 11 |
| 8  | 765.388979         | 383.198128        |                |                  | 747.378414     | 374.192845       | H    | <b>1611.794789</b> | 806.401033         | 1594.768240       | 797.887758       | <b>1593.784224</b> | 797.395750        | 10 |
| 9  | 878.473043         | 439.740160        |                |                  | 860.462478     | 430.734877       | L    | <b>1474.735877</b> | 737.871577         | 1457.709328       | 729.358302       | 1456.725312        | 728.866294        | 9  |
| 10 | 993.499986         | 497.253631        |                |                  | 975.489421     | 488.248349       | D    | <b>1361.651813</b> | 681.329545         | 1344.625264       | 672.816270       | 1343.641248        | 672.324262        | 8  |
| 11 | <b>1432.725312</b> | 716.866294        | 1415.698763    | 708.353020       | 1414.714747    | 707.861012       | Q    | <b>1246.624870</b> | 623.816073         | 1229.598321       | 615.302799       | <b>1228.614305</b> | 614.810791        | 7  |
| 12 | 1560.783890        | <b>780.895583</b> | 1543.757341    | 772.382309       | 1542.773325    | 771.890301       | Q    | <b>807.399544</b>  | 404.203410         | <b>790.372995</b> | 395.690136       | 789.388979         | <b>395.198128</b> | 6  |
| 13 | <b>1659.852304</b> | 830.429790        | 1642.825755    | 821.916516       | 1641.841739    | 821.424508       | V    | <b>679.340966</b>  | 340.174121         | 662.314417        | 331.660846       | 661.330401         | 331.168838        | 5  |
| 14 | 1788.894897        | 894.951087        | 1771.868348    | 886.437812       | 1770.884332    | 885.945804       | E    | <b>580.272552</b>  | 290.639914         | 563.246003        | 282.126639       | 562.261987         | 281.634631        | 4  |
| 15 | 1917.937490        | 959.472383        | 1900.910941    | 950.959109       | 1899.926925    | 950.467101       | E    | <b>451.229959</b>  | 226.118617         | 434.203410        | 217.605343       | 433.219394         | 217.113335        | 3  |
| 16 | 2065.005904        | 1033.006590       | 2047.979355    | 1024.493316      | 2046.995339    | 1024.001307      | F    | <b>322.187366</b>  | 161.597321         | 305.160817        | 153.084046       |                    |                   | 2  |
| 17 |                    |                   |                |                  |                |                  | R    | 175.118952         | 88.063114          | 158.092403        | 79.549839        |                    |                   | 1  |

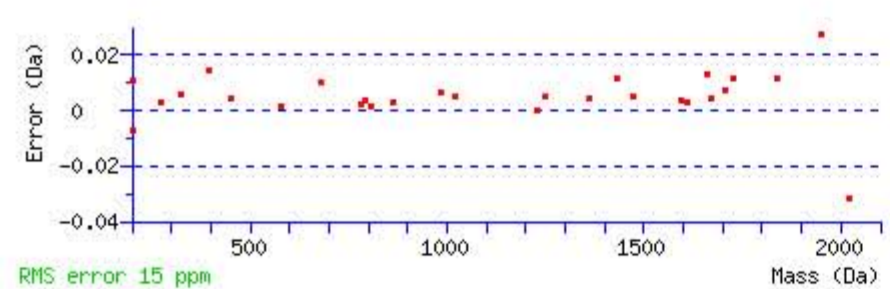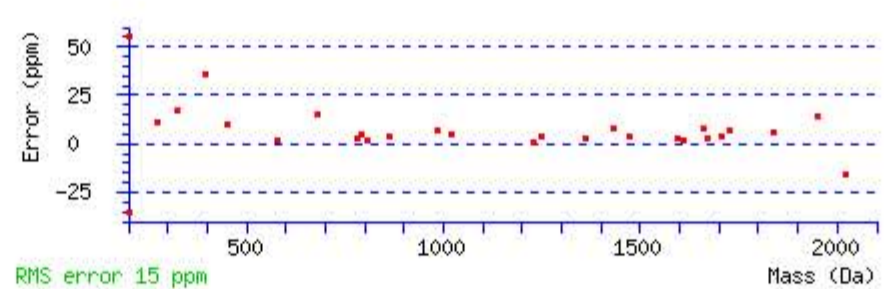

NCBI BLAST search of **SLAELGGHLDQQVEEFR**  
 (Parameters: blastp, nr protein database, expect=20000, no filter, PAM30)  
 Other BLAST [web gateways](#)

### All matches to this query

| Score | Mr(calc):   | Delta    | Sequence                          |
|-------|-------------|----------|-----------------------------------|
| 64.1  | 2238.110291 | 0.016741 | <a href="#">SLAELGGHLDQQVEEFR</a> |
| 55.4  | 2238.110291 | 0.016741 | <a href="#">SLAELGGHLDQQVEEFR</a> |

# MASCOT SEARCH RESULTS

## Peptide View

MS/MS Fragmentation of **ENADSLQASLRPHADELK**

Found in **APOA4\_HUMAN**, Apolipoprotein A-IV OS=Homo sapiens GN=APOA4 PE=1 SV=3

Match to Query 58142: 2304.170712 from(769.064180,3+) rtinseconds(1868) index(77883)

Title: Locus:1.1.1.2001.25 File:"2013-07-02 CLN FXIII 180 min 1st FT.wiff"

Data file C:\Program Files (x86)\Matrix Science\Mascot Daemon\mgf\7 FXIII 180 min 1st\mascot\_daemon\_merge.mgf

Click mouse within plot area to zoom in by factor of two about that point

Or, Plot from  to  Da

Label all possible matches  Label matches used for scoring

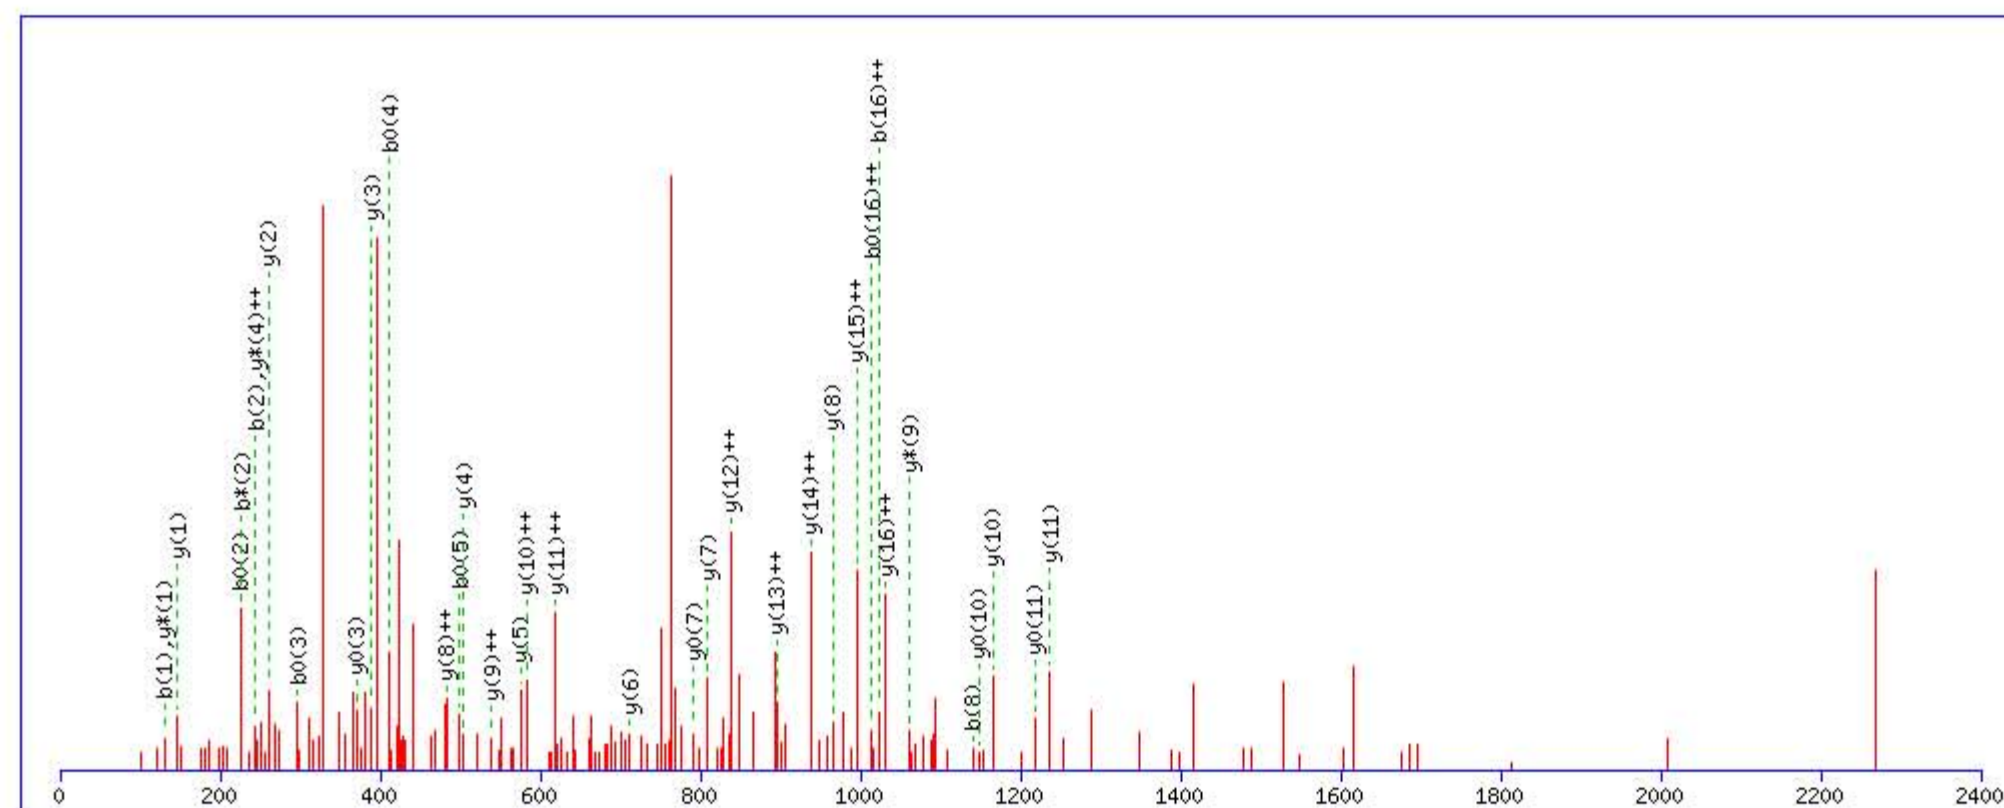

Monoisotopic mass of neutral peptide Mr(calc): 2304.153183

Fixed modifications: Carbamidomethyl (C) (apply to specified residues or termini only)

Variable modifications:

Q7 : Biotin:Thermo-21345 (Q)

Ions Score: 43 Expect: 0.0014

Matches : 36/198 fragment ions using 97 most intense peaks [\(help\)](#)

| #  | b           | b <sup>++</sup> | b <sup>*</sup> | b <sup>***</sup> | b <sup>0</sup> | b <sup>0++</sup> | Seq. | y           | y <sup>++</sup> | y <sup>*</sup> | y <sup>***</sup> | y <sup>0</sup> | y <sup>0++</sup> | #  |
|----|-------------|-----------------|----------------|------------------|----------------|------------------|------|-------------|-----------------|----------------|------------------|----------------|------------------|----|
| 1  | 130.049869  | 65.528572       |                |                  | 112.039304     | 56.523290        | E    |             |                 |                |                  |                |                  | 18 |
| 2  | 244.092796  | 122.550036      | 227.066247     | 114.036762       | 226.082231     | 113.544754       | N    | 2176.117913 | 1088.562594     | 2159.091364    | 1080.049320      | 2158.107348    | 1079.557312      | 17 |
| 3  | 315.129910  | 158.068593      | 298.103361     | 149.555319       | 297.119345     | 149.063311       | A    | 2062.074986 | 1031.541131     | 2045.048437    | 1023.027856      | 2044.064421    | 1022.535848      | 16 |
| 4  | 430.156853  | 215.582065      | 413.130304     | 207.068790       | 412.146288     | 206.576782       | D    | 1991.037872 | 996.022574      | 1974.011323    | 987.509300       | 1973.027307    | 987.017292       | 15 |
| 5  | 517.188881  | 259.098079      | 500.162332     | 250.584804       | 499.178316     | 250.092796       | S    | 1876.010929 | 938.509103      | 1858.984380    | 929.995828       | 1858.000364    | 929.503820       | 14 |
| 6  | 630.272945  | 315.640111      | 613.246396     | 307.126836       | 612.262380     | 306.634828       | L    | 1788.978901 | 894.993089      | 1771.952352    | 886.479814       | 1770.968336    | 885.987806       | 13 |
| 7  | 1069.498271 | 535.252774      | 1052.471722    | 526.739499       | 1051.487706    | 526.247491       | Q    | 1675.894837 | 838.451057      | 1658.868288    | 829.937782       | 1657.884272    | 829.445774       | 12 |
| 8  | 1140.535385 | 570.771331      | 1123.508836    | 562.258056       | 1122.524820    | 561.766048       | A    | 1236.669511 | 618.838394      | 1219.642962    | 610.325119       | 1218.658946    | 609.833111       | 11 |
| 9  | 1227.567413 | 614.287345      | 1210.540864    | 605.774070       | 1209.556848    | 605.282062       | S    | 1165.632397 | 583.319837      | 1148.605848    | 574.806562       | 1147.621832    | 574.314554       | 10 |
| 10 | 1340.651477 | 670.829377      | 1323.624928    | 662.316102       | 1322.640912    | 661.824094       | L    | 1078.600369 | 539.803823      | 1061.573820    | 531.290548       | 1060.589804    | 530.798540       | 9  |
| 11 | 1496.752588 | 748.879932      | 1479.726039    | 740.366658       | 1478.742023    | 739.874650       | R    | 965.516305  | 483.261791      | 948.489756     | 474.748516       | 947.505740     | 474.256508       | 8  |
| 12 | 1593.805352 | 797.406314      | 1576.778803    | 788.893040       | 1575.794787    | 788.401032       | P    | 809.415194  | 405.211235      | 792.388645     | 396.697961       | 791.404629     | 396.205953       | 7  |
| 13 | 1730.864264 | 865.935770      | 1713.837715    | 857.422496       | 1712.853699    | 856.930488       | H    | 712.362430  | 356.684853      | 695.335881     | 348.171579       | 694.351865     | 347.679571       | 6  |
| 14 | 1801.901378 | 901.454327      | 1784.874829    | 892.941053       | 1783.890813    | 892.449045       | A    | 575.303518  | 288.155397      | 558.276969     | 279.642123       | 557.292953     | 279.150115       | 5  |
| 15 | 1916.928321 | 958.967799      | 1899.901772    | 950.454524       | 1898.917756    | 949.962516       | D    | 504.266404  | 252.636840      | 487.239855     | 244.123566       | 486.255839     | 243.631558       | 4  |
| 16 | 2045.970914 | 1023.489095     | 2028.944365    | 1014.975821      | 2027.960349    | 1014.483813      | E    | 389.239461  | 195.123369      | 372.212912     | 186.610094       | 371.228896     | 186.118086       | 3  |
| 17 | 2159.054978 | 1080.031127     | 2142.028429    | 1071.517852      | 2141.044413    | 1071.025844      | L    | 260.196868  | 130.602072      | 243.170319     | 122.088798       |                |                  | 2  |
| 18 |             |                 |                |                  |                |                  | K    | 147.112804  | 74.060040       | 130.086255     | 65.546765        |                |                  | 1  |

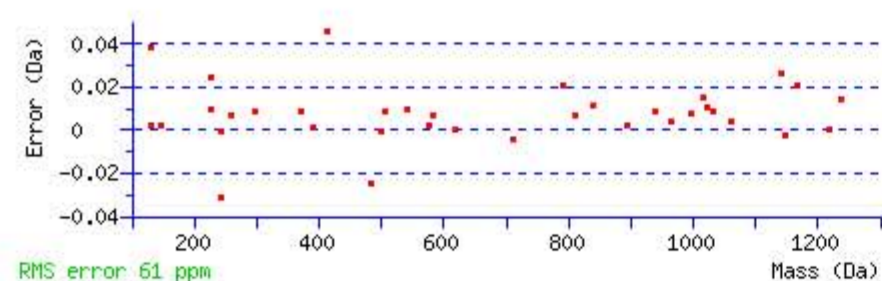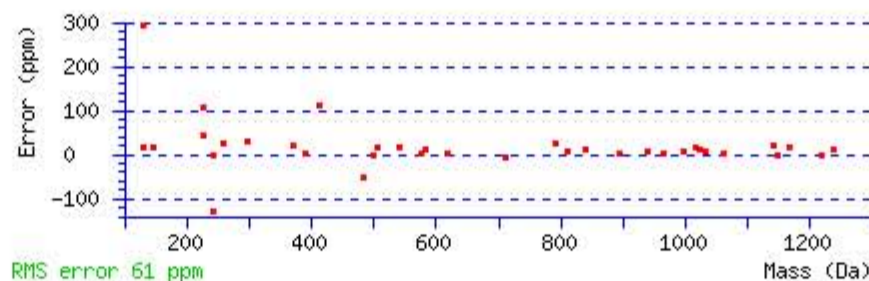

NCBI BLAST search of [ENADSLQASLRPHADELK](#)

(Parameters: blastp, nr protein database, expect=20000, no filter, PAM30)

Other BLAST [web gateways](#)

### All matches to this query

| Score | Mr(calc):   | Delta    | Sequence                           |
|-------|-------------|----------|------------------------------------|
| 43.0  | 2304.153183 | 0.017529 | <a href="#">ENADSLQASLRPHADELK</a> |

# MASCOT Search Results

## Peptide View

MS/MS Fragmentation of **QSELSAK**

Found in **APOC1\_HUMAN**, Apolipoprotein C-I OS=Homo sapiens GN=APOC1 PE=1 SV=1

Match to Query 18251: 1072.564088 from(537.289320,2+) rtinseconds(1428) index(2771)

Title: Locus:1.1.1.2751.17 File:"2013-07-02 CLN FXIII 180 min 1st F 1.wiff"

Data file C:\Program Files (x86)\Matrix Science\Mascot Daemon\mgf\7 FXIII 180 min 1st\mascot\_daemon\_merge.mgf

Click mouse within plot area to zoom in by factor of two about that point

Or, Plot from  to  Da

Label all possible matches  Label matches used for scoring

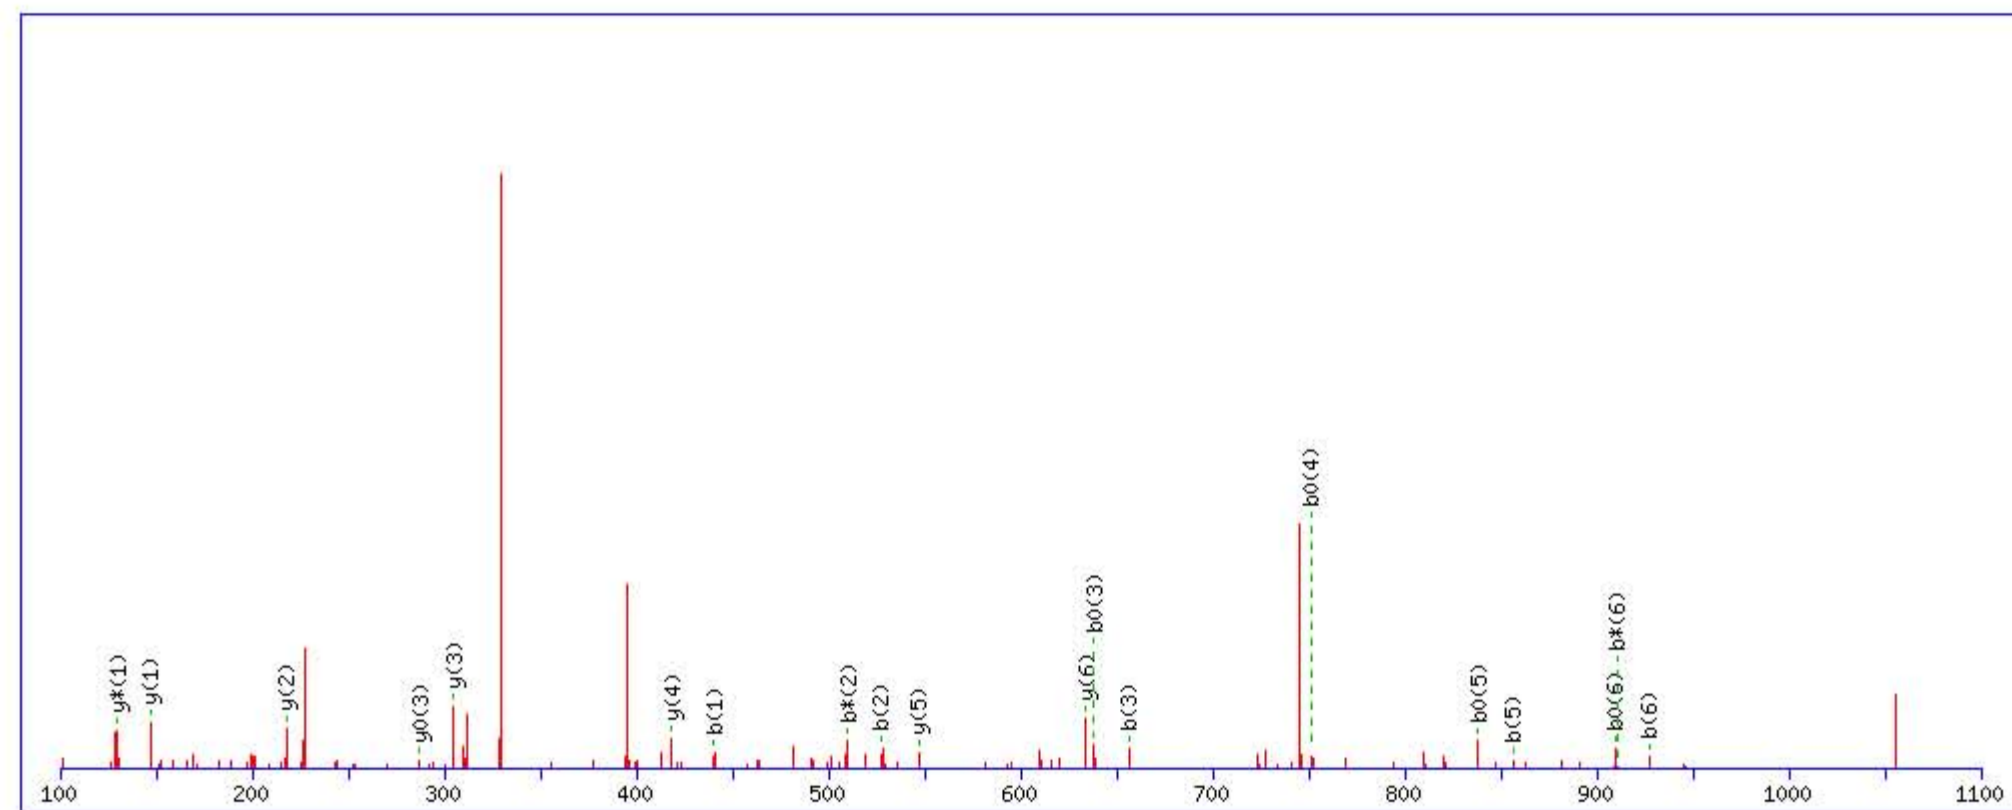

Monoisotopic mass of neutral peptide Mr(calc): 1072.558655

Fixed modifications: Carbamidomethyl (C) (apply to specified residues or termini only)

Variable modifications:

Q1 : Biotin:Thermo-21345 (Q)

Ions Score: 25 Expect: 0.065

Matches : 19/66 fragment ions using 46 most intense peaks [\(help\)](#)

| # | b                 | b <sup>++</sup> | b*                | b <sup>+++</sup> | b <sup>0</sup>    | b <sup>0++</sup> | Seq. | y                 | y <sup>++</sup> | y*                | y <sup>+++</sup> | y <sup>0</sup>    | y <sup>0++</sup> | # |
|---|-------------------|-----------------|-------------------|------------------|-------------------|------------------|------|-------------------|-----------------|-------------------|------------------|-------------------|------------------|---|
| 1 | <b>440.232602</b> | 220.619939      | 423.206053        | 212.106664       |                   |                  | Q    |                   |                 |                   |                  |                   |                  | 7 |
| 2 | <b>527.264630</b> | 264.135953      | <b>510.238081</b> | 255.622679       | 509.254065        | 255.130671       | S    | <b>634.340631</b> | 317.673954      | 617.314082        | 309.160679       | 616.330066        | 308.668671       | 6 |
| 3 | <b>656.307223</b> | 328.657250      | 639.280674        | 320.143975       | <b>638.296658</b> | 319.651967       | E    | <b>547.308603</b> | 274.157940      | 530.282054        | 265.644665       | 529.298038        | 265.152657       | 5 |
| 4 | 769.391287        | 385.199282      | 752.364738        | 376.686007       | <b>751.380722</b> | 376.193999       | L    | <b>418.266010</b> | 209.636643      | 401.239461        | 201.123368       | 400.255445        | 200.631360       | 4 |
| 5 | <b>856.423315</b> | 428.715296      | 839.396766        | 420.202021       | <b>838.412750</b> | 419.710013       | S    | <b>305.181946</b> | 153.094611      | 288.155397        | 144.581336       | <b>287.171381</b> | 144.089328       | 3 |
| 6 | <b>927.460429</b> | 464.233853      | <b>910.433880</b> | 455.720578       | <b>909.449864</b> | 455.228570       | A    | <b>218.149918</b> | 109.578597      | 201.123369        | 101.065322       |                   |                  | 2 |
| 7 |                   |                 |                   |                  |                   |                  | K    | <b>147.112804</b> | 74.060040       | <b>130.086255</b> | 65.546765        |                   |                  | 1 |

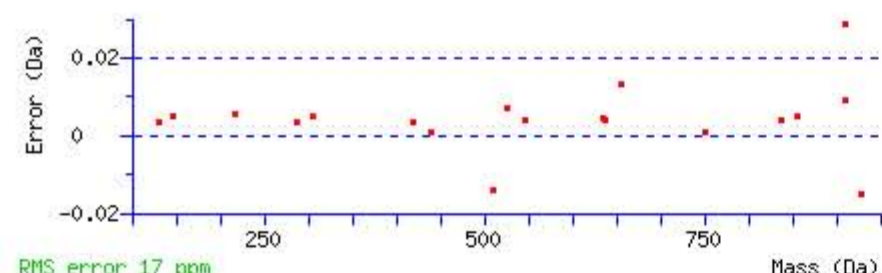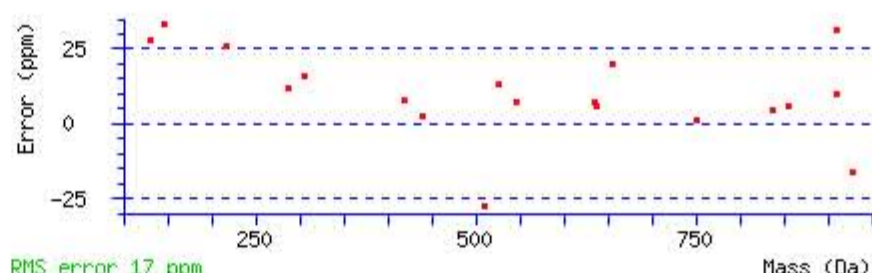

NCBI BLAST search of **QSELSAK**

(Parameters: blastp, nr protein database, expect=20000, no filter, PAM30)

Other BLAST [web gateways](#)

All matches to this query

| Score | Mr(calc):   | Delta     | Sequence                   |
|-------|-------------|-----------|----------------------------|
| 25.4  | 1072.558655 | 0.005433  | <a href="#">QSELSAK</a>    |
| 11.9  | 1072.551239 | 0.012849  | <a href="#">ERQEALEAK</a>  |
| 10.6  | 1072.551239 | 0.012849  | <a href="#">EAERELQAK</a>  |
| 10.2  | 1072.562500 | 0.001588  | <a href="#">KQQQQQSAK</a>  |
| 9.6   | 1072.558655 | 0.005433  | <a href="#">QSLSAEK</a>    |
| 9.5   | 1072.551254 | 0.012834  | <a href="#">KEAPRDETK</a>  |
| 9.1   | 1072.562500 | 0.001588  | <a href="#">HSSTSSRIAK</a> |
| 8.9   | 1072.576401 | -0.012313 | <a href="#">KEADEQLIK</a>  |
| 7.8   | 1072.576401 | -0.012313 | <a href="#">QLEEEVKAK</a>  |
| 7.4   | 1072.576401 | -0.012313 | <a href="#">IKEGVEEAAK</a> |

Mascot: <http://www.matrixscience.com/>

# MASCOT Search Results

## Peptide View

MS/MS Fragmentation of **TAAQNLYEK**

Found in **APOC2\_HUMAN**, Apolipoprotein C-II OS=Homo sapiens GN=APOC2 PE=1 SV=1

Match to Query 28041: 1347.697608 from(674.856080,2+) rtinseconds(1600) index(39504)

Title: Locus:1.1.1.3006.8 File:"2013-07-02 CLN FXIII 180 min 1st F 3.wiff"

Data file C:\Program Files (x86)\Matrix Science\Mascot Daemon\mgf7 FXIII 180 min 1st\mascot\_daemon\_merge.mgf

Click mouse within plot area to zoom in by factor of two about that point

Or, Plot from  to  Da

Label all possible matches  Label matches used for scoring

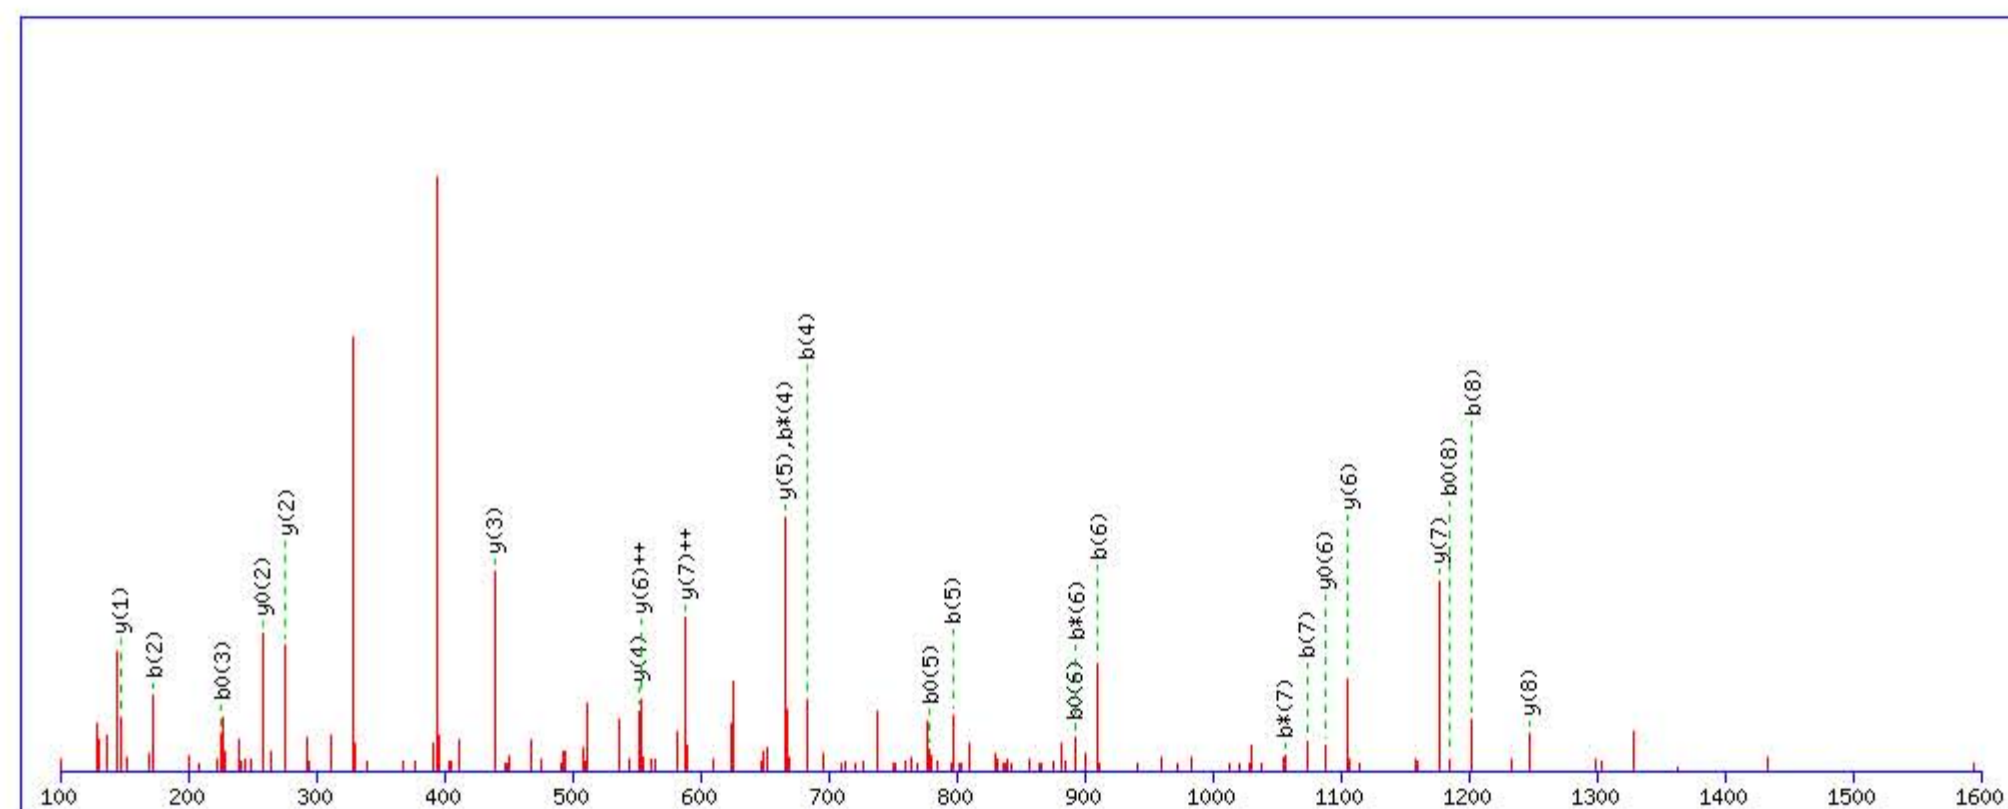

Monoisotopic mass of neutral peptide Mr(calc): 1347.685638

Fixed modifications: Carbamidomethyl (C) (apply to specified residues or termini only)

Variable modifications:

Q4 : Biotin:Thermo-21345 (Q)

Ions Score: 39 Expect: 0.0019

Matches : 25/88 fragment ions using 50 most intense peaks [\(help\)](#)

| # | b           | b <sup>++</sup> | b <sup>*</sup> | b <sup>+++</sup> | b <sup>0</sup> | b <sup>0++</sup> | Seq. | y           | y <sup>++</sup> | y <sup>*</sup> | y <sup>+++</sup> | y <sup>0</sup> | y <sup>0++</sup> | # |
|---|-------------|-----------------|----------------|------------------|----------------|------------------|------|-------------|-----------------|----------------|------------------|----------------|------------------|---|
| 1 | 102.054955  | 51.531116       |                |                  | 84.044390      | 42.525833        | T    |             |                 |                |                  |                |                  | 9 |
| 2 | 173.092069  | 87.049672       |                |                  | 155.081504     | 78.044390        | A    | 1247.645271 | 624.326273      | 1230.618722    | 615.812999       | 1229.634706    | 615.320991       | 8 |
| 3 | 244.129183  | 122.568229      |                |                  | 226.118618     | 113.562947       | A    | 1176.608157 | 588.807716      | 1159.581608    | 580.294442       | 1158.597592    | 579.802434       | 7 |
| 4 | 683.354509  | 342.180893      | 666.327960     | 333.667618       | 665.343944     | 333.175610       | Q    | 1105.571043 | 553.289159      | 1088.544494    | 544.775885       | 1087.560478    | 544.283877       | 6 |
| 5 | 797.397436  | 399.202356      | 780.370887     | 390.689081       | 779.386871     | 390.197073       | N    | 666.345717  | 333.676496      | 649.319168     | 325.163222       | 648.335152     | 324.671214       | 5 |
| 6 | 910.481500  | 455.744388      | 893.454951     | 447.231113       | 892.470935     | 446.739105       | L    | 552.302790  | 276.655033      | 535.276241     | 268.141758       | 534.292225     | 267.649750       | 4 |
| 7 | 1073.544829 | 537.276052      | 1056.518280    | 528.762778       | 1055.534264    | 528.270770       | Y    | 439.218726  | 220.113001      | 422.192177     | 211.599726       | 421.208161     | 211.107718       | 3 |
| 8 | 1202.587422 | 601.797349      | 1185.560873    | 593.284074       | 1184.576857    | 592.792066       | E    | 276.155397  | 138.581336      | 259.128848     | 130.068062       | 258.144832     | 129.576054       | 2 |
| 9 |             |                 |                |                  |                |                  | K    | 147.112804  | 74.060040       | 130.086255     | 65.546765        |                |                  | 1 |

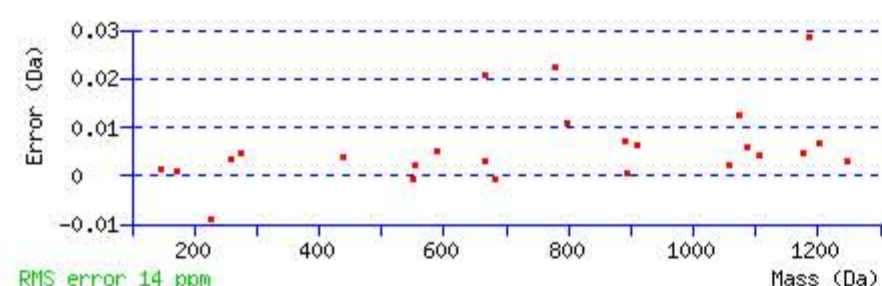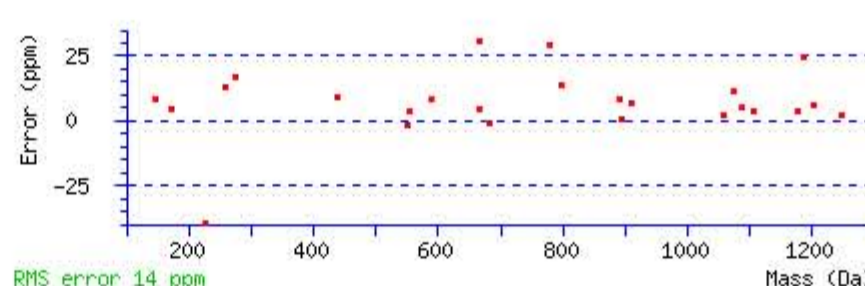

NCBI BLAST search of **TAAQNLYEK**

(Parameters: blastp, nr protein database, expect=20000, no filter, PAM30)

Other BLAST [web gateways](#)

## All matches to this query

| Score | Mr(calc):   | Delta     | Sequence                      |
|-------|-------------|-----------|-------------------------------|
| 39.4  | 1347.685638 | 0.011970  | <a href="#">TAAQNLYEK</a>     |
| 9.8   | 1347.682297 | 0.015311  | <a href="#">TAYFSLDTRFK</a>   |
| 5.0   | 1347.689011 | 0.008597  | <a href="#">DKCMLPKSLEK</a>   |
| 4.9   | 1347.714645 | -0.017037 | <a href="#">GADNVIFERLSK</a>  |
| 4.0   | 1347.699371 | -0.001763 | <a href="#">EKPKSGDAKSSSK</a> |
| 3.4   | 1347.681610 | 0.015998  | <a href="#">RSQISMEQLEK</a>   |
| 3.2   | 1347.682480 | 0.015128  | <a href="#">QSRMKMEK</a>      |
| 2.5   | 1347.704086 | -0.006478 | <a href="#">KPTRSNMQRSK</a>   |
| 1.2   | 1347.681625 | 0.015983  | <a href="#">GLERNLAVMSDK</a>  |

# MASCOT Search Results

## Peptide View

MS/MS Fragmentation of **STAAMSTYTGIFTDQVLSVLK**

Found in **APOC2\_HUMAN**, Apolipoprotein C-II OS=Homo sapiens GN=APOC2 PE=1 SV=1

Match to Query 63785: 2543.334072 from(848.785300,3+) rtinseconds(3204) index(32852)

Title: Locus:1.1.1.3253.15 File:"2013-07-02 CLN FXIII 180 min 1st F 2.wiff"

Data file C:\Program Files (x86)\Matrix Science\Mascot Daemon\mgf\7 FXIII 180 min 1st\mascot\_daemon\_merge.mgf

Click mouse within plot area to zoom in by factor of two about that point

Or, Plot from  to  Da

Label all possible matches  Label matches used for scoring

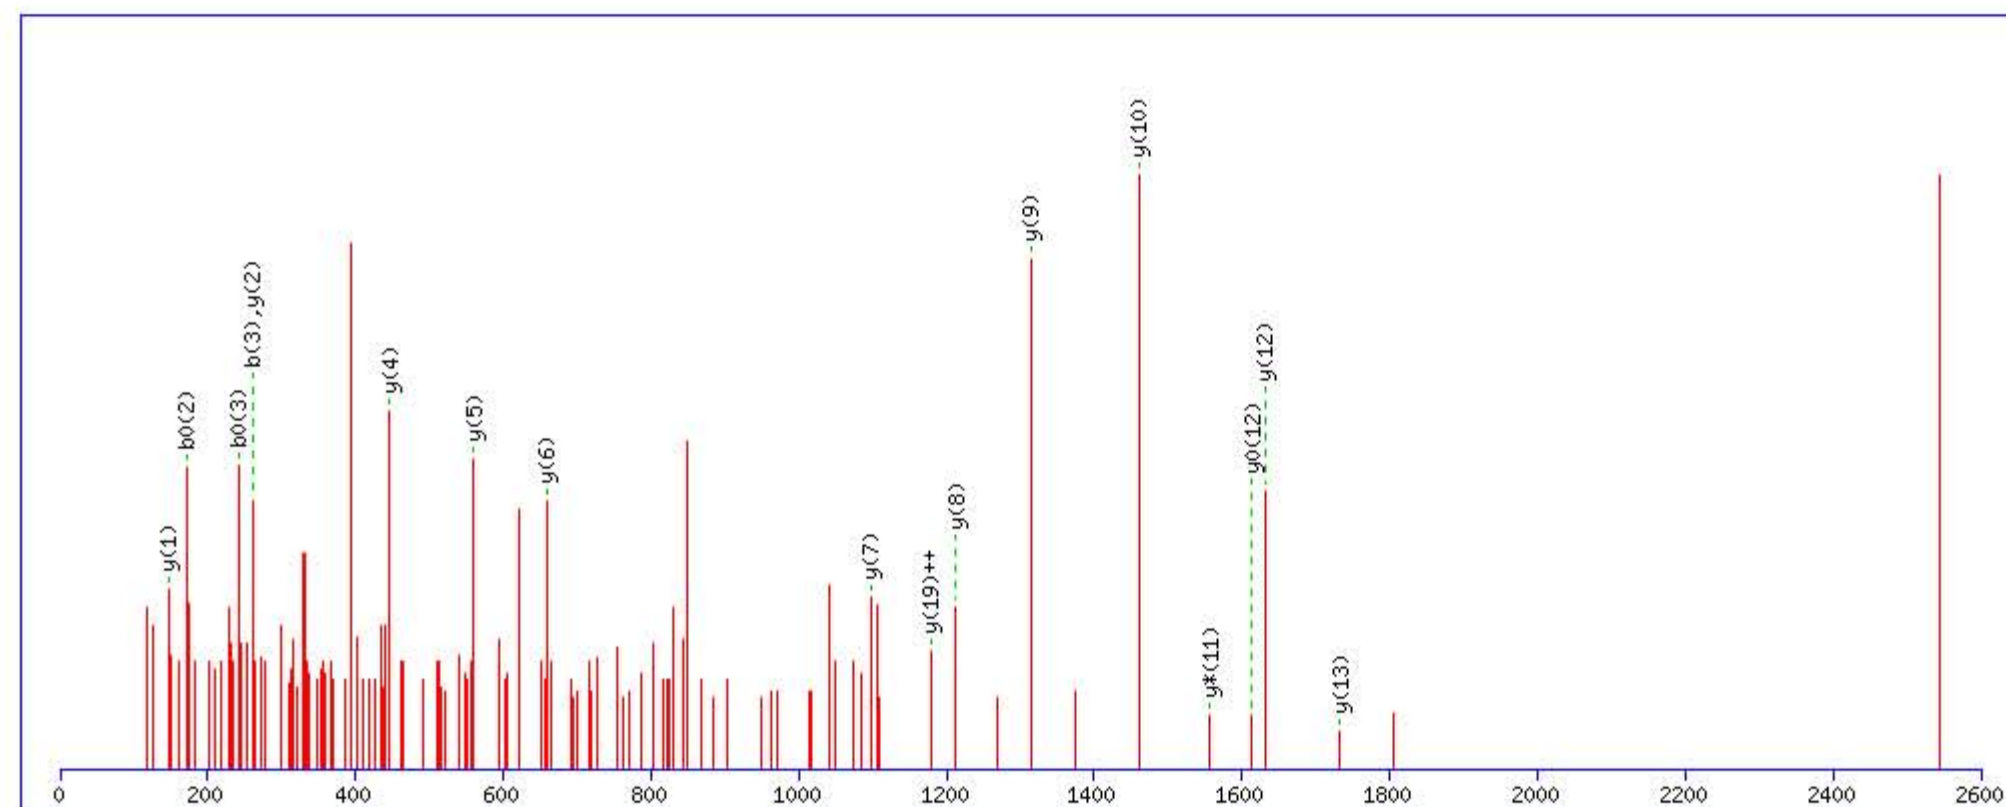

Monoisotopic mass of neutral peptide Mr(calc): 2543.301544

Fixed modifications: Carbamidomethyl (C) (apply to specified residues or termini only)

Variable modifications:

Q15 : Biotin:Thermo-21345 (Q)

Ions Score: 52 Expect: 0.00015

Matches : 17/206 fragment ions using 32 most intense peaks ([help](#))

| #  | b           | b <sup>++</sup> | b <sup>*</sup> | b <sup>*++</sup> | b <sup>0</sup> | b <sup>0++</sup> | Seq. | y           | y <sup>++</sup> | y <sup>*</sup> | y <sup>*++</sup> | y <sup>0</sup> | y <sup>0++</sup> | #  |
|----|-------------|-----------------|----------------|------------------|----------------|------------------|------|-------------|-----------------|----------------|------------------|----------------|------------------|----|
| 1  | 88.039304   | 44.523290       |                |                  | 70.028739      | 35.518008        | S    |             |                 |                |                  |                |                  | 21 |
| 2  | 189.086983  | 95.047129       |                |                  | 171.076418     | 86.041847        | T    | 2457.276785 | 1229.142030     | 2440.250236    | 1220.628756      | 2439.266220    | 1220.136748      | 20 |
| 3  | 260.124097  | 130.565686      |                |                  | 242.113532     | 121.560404       | A    | 2356.229106 | 1178.618191     | 2339.202557    | 1170.104916      | 2338.218541    | 1169.612908      | 19 |
| 4  | 331.161211  | 166.084243      |                |                  | 313.150646     | 157.078961       | A    | 2285.191992 | 1143.099634     | 2268.165443    | 1134.586359      | 2267.181427    | 1134.094351      | 18 |
| 5  | 462.201696  | 231.604486      |                |                  | 444.191131     | 222.599203       | M    | 2214.154878 | 1107.581077     | 2197.128329    | 1099.067802      | 2196.144313    | 1098.575794      | 17 |
| 6  | 549.233724  | 275.120500      |                |                  | 531.223159     | 266.115217       | S    | 2083.114393 | 1042.060834     | 2066.087844    | 1033.547560      | 2065.103828    | 1033.055552      | 16 |
| 7  | 650.281403  | 325.644340      |                |                  | 632.270838     | 316.639057       | T    | 1996.082365 | 998.544821      | 1979.055816    | 990.031546       | 1978.071800    | 989.539538       | 15 |
| 8  | 813.344732  | 407.176004      |                |                  | 795.334167     | 398.170722       | Y    | 1895.034686 | 948.020981      | 1878.008137    | 939.507707       | 1877.024121    | 939.015699       | 14 |
| 9  | 914.392411  | 457.699844      |                |                  | 896.381846     | 448.694561       | T    | 1731.971357 | 866.489317      | 1714.944808    | 857.976042       | 1713.960792    | 857.484034       | 13 |
| 10 | 971.413875  | 486.210576      |                |                  | 953.403310     | 477.205293       | G    | 1630.923678 | 815.965477      | 1613.897129    | 807.452203       | 1612.913113    | 806.960195       | 12 |
| 11 | 1084.497939 | 542.752608      |                |                  | 1066.487374    | 533.747325       | I    | 1573.902214 | 787.454745      | 1556.875665    | 778.941471       | 1555.891649    | 778.449463       | 11 |
| 12 | 1231.566353 | 616.286815      |                |                  | 1213.555788    | 607.281532       | F    | 1460.818150 | 730.912713      | 1443.791601    | 722.399439       | 1442.807585    | 721.907431       | 10 |
| 13 | 1332.614032 | 666.810654      |                |                  | 1314.603467    | 657.805372       | T    | 1313.749736 | 657.378506      | 1296.723187    | 648.865232       | 1295.739171    | 648.373224       | 9  |
| 14 | 1447.640975 | 724.324126      |                |                  | 1429.630410    | 715.318843       | D    | 1212.702057 | 606.854667      | 1195.675508    | 598.341392       | 1194.691492    | 597.849384       | 8  |
| 15 | 1886.866301 | 943.936789      | 1869.839752    | 935.423514       | 1868.855736    | 934.931506       | Q    | 1097.675114 | 549.341195      | 1080.648565    | 540.827921       | 1079.664549    | 540.335913       | 7  |
| 16 | 1985.934715 | 993.470996      | 1968.908166    | 984.957721       | 1967.924150    | 984.465713       | V    | 658.449788  | 329.728532      | 641.423239     | 321.215258       | 640.439223     | 320.723250       | 6  |
| 17 | 2099.018779 | 1050.013027     | 2081.992230    | 1041.499753      | 2081.008214    | 1041.007745      | L    | 559.381374  | 280.194325      | 542.354825     | 271.681051       | 541.370809     | 271.189043       | 5  |
| 18 | 2186.050807 | 1093.529041     | 2169.024258    | 1085.015767      | 2168.040242    | 1084.523759      | S    | 446.297310  | 223.652293      | 429.270761     | 215.139019       | 428.286745     | 214.647011       | 4  |
| 19 | 2285.119221 | 1143.063248     | 2268.092672    | 1134.549974      | 2267.108656    | 1134.057966      | V    | 359.265282  | 180.136279      | 342.238733     | 171.623004       |                |                  | 3  |
| 20 | 2398.203285 | 1199.605280     | 2381.176736    | 1191.092006      | 2380.192720    | 1190.599998      | L    | 260.196868  | 130.602072      | 243.170319     | 122.088798       |                |                  | 2  |
| 21 |             |                 |                |                  |                |                  | K    | 147.112804  | 74.060040       | 130.086255     | 65.546765        |                |                  | 1  |

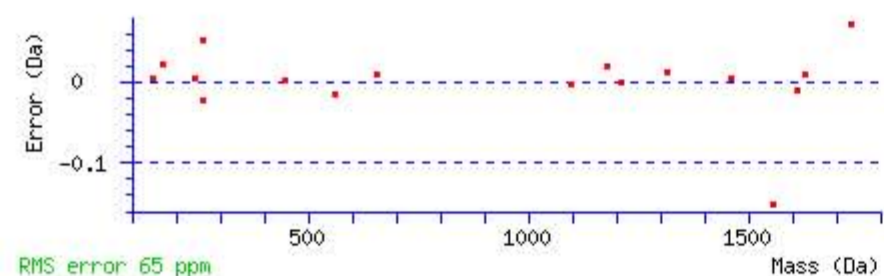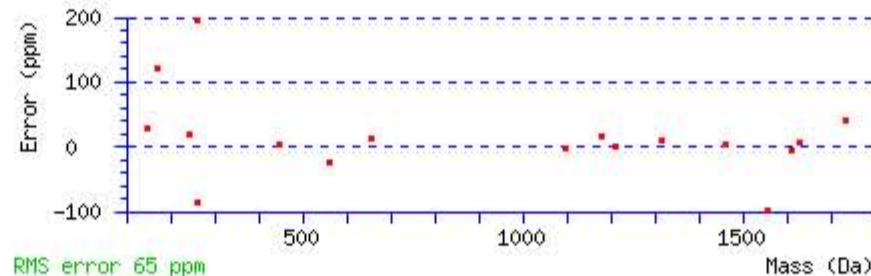

NCBI BLAST search of [STAAMSTYTGIFTDQVLSVLK](#)

(Parameters: blastp, nr protein database, expect=20000, no filter, PAM30)

Other BLAST [web gateways](#)

All matches to this query

| Score | Mr(calc):   | Delta    | Sequence                              |
|-------|-------------|----------|---------------------------------------|
| 52.2  | 2543.301544 | 0.032528 | <a href="#">STAAMSTYTGIFTDQVLSVLK</a> |

Mascot: <http://www.matrixscience.com/>

# MASCOT Search Results

## Peptide View

MS/MS Fragmentation of **DALSSVQESQVAQQAR**

Found in **APOC3\_HUMAN**, Apolipoprotein C-III OS=Homo sapiens GN=APOC3 PE=1 SV=1

Match to Query 51431: 2027.023602 from(676.681810,3+) rtinseconds(1872) index(23745)

Title: Locus:1.1.1.2794.20 File:"2013-07-02 CLN FXIII 180 min 1st F 2.wiff"

Data file C:\Program Files (x86)\Matrix Science\Mascot Daemon\mgf\7 FXIII 180 min 1st\mascot\_daemon\_merge.mgf

Click mouse within plot area to zoom in by factor of two about that point

Or, Plot from  to  Da

Label all possible matches  Label matches used for scoring

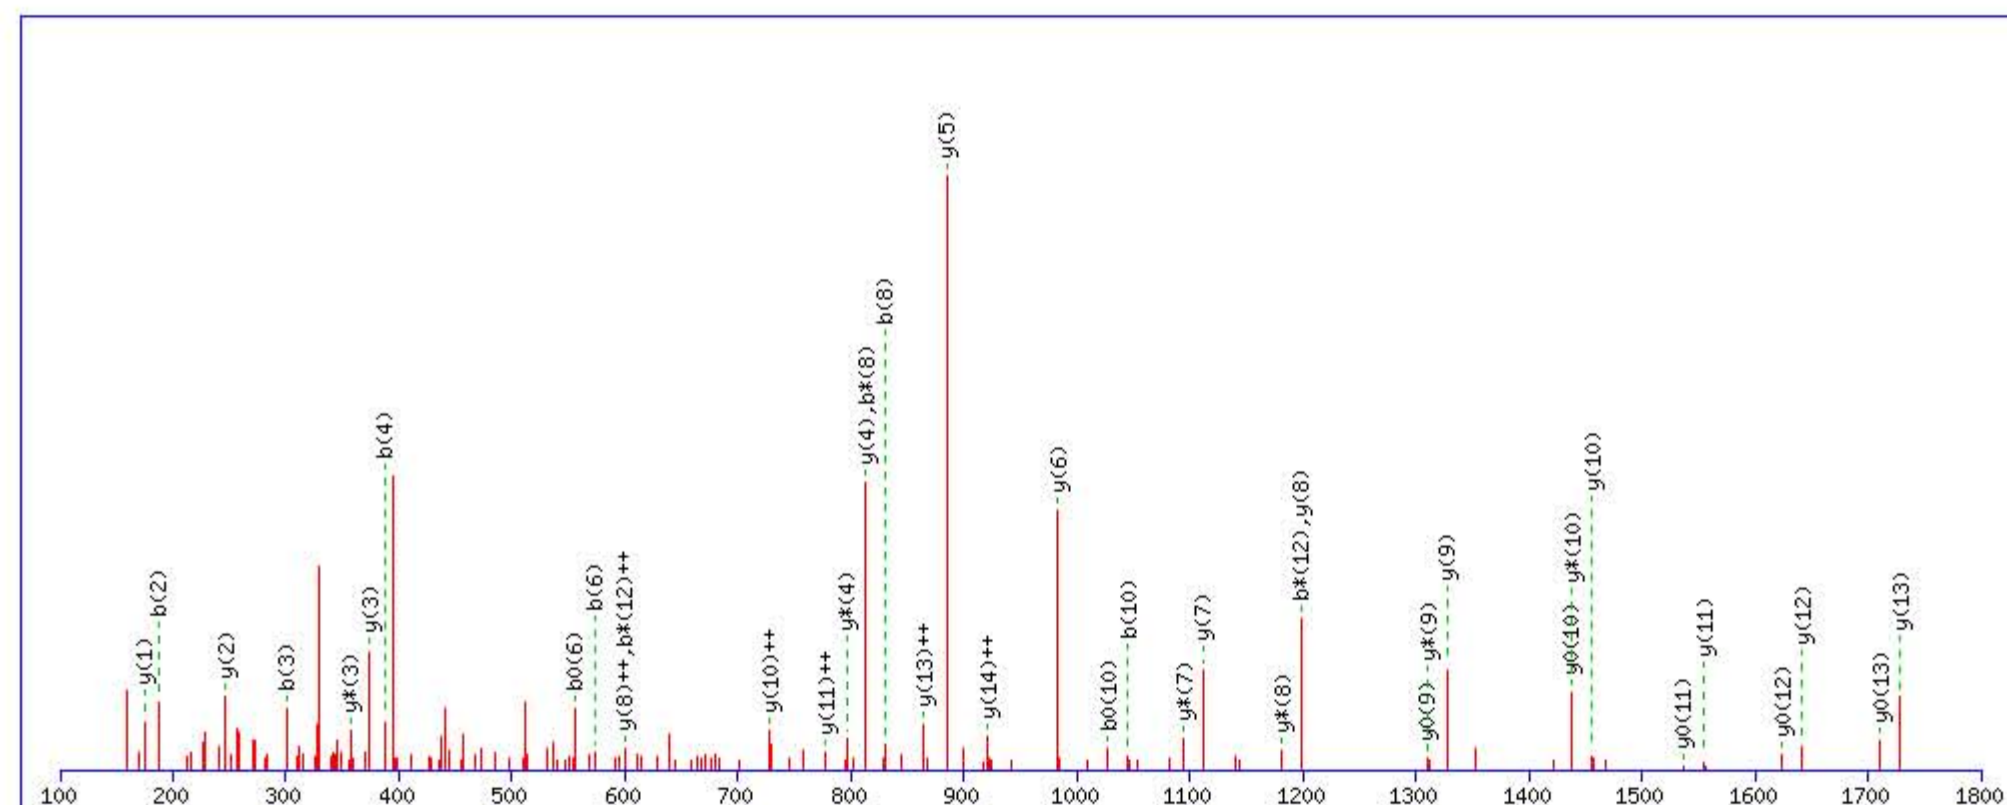

Monoisotopic mass of neutral peptide Mr(calc): 2027.010574

Fixed modifications: Carbamidomethyl (C) (apply to specified residues or termini only)

Variable modifications:

Q13 : Biotin:Thermo-21345 (Q)

Ions Score: 89 Expect: 5.3e-009

Matches : 40/154 fragment ions using 59 most intense peaks [\(help\)](#)

| #  | b                  | b <sup>++</sup> | b <sup>*</sup>     | b <sup>+++</sup>  | b <sup>0</sup>     | b <sup>0++</sup> | Seq. | y                  | y <sup>++</sup>   | y <sup>*</sup>     | y <sup>+++</sup> | y <sup>0</sup>     | y <sup>0++</sup> | #  |
|----|--------------------|-----------------|--------------------|-------------------|--------------------|------------------|------|--------------------|-------------------|--------------------|------------------|--------------------|------------------|----|
| 1  | 116.034219         | 58.520748       |                    |                   | 98.023654          | 49.515465        | D    |                    |                   |                    |                  |                    |                  | 16 |
| 2  | <b>187.071333</b>  | 94.039304       |                    |                   | 169.060768         | 85.034022        | A    | 1912.990923        | 956.999100        | 1895.964374        | 948.485825       | 1894.980358        | 947.993817       | 15 |
| 3  | <b>300.155397</b>  | 150.581336      |                    |                   | 282.144832         | 141.576054       | L    | 1841.953809        | <b>921.480543</b> | 1824.927260        | 912.967268       | 1823.943244        | 912.475260       | 14 |
| 4  | <b>387.187425</b>  | 194.097351      |                    |                   | 369.176860         | 185.092068       | S    | <b>1728.869745</b> | <b>864.938511</b> | 1711.843196        | 856.425236       | <b>1710.859180</b> | 855.933228       | 13 |
| 5  | 474.219453         | 237.613364      |                    |                   | 456.208888         | 228.608082       | S    | <b>1641.837717</b> | 821.422497        | 1624.811168        | 812.909222       | <b>1623.827152</b> | 812.417214       | 12 |
| 6  | <b>573.287867</b>  | 287.147572      |                    |                   | <b>555.277302</b>  | 278.142289       | V    | <b>1554.805689</b> | <b>777.906483</b> | 1537.779140        | 769.393208       | <b>1536.795124</b> | 768.901200       | 11 |
| 7  | 701.346445         | 351.176861      | 684.319896         | 342.663586        | 683.335880         | 342.171578       | Q    | <b>1455.737275</b> | <b>728.372276</b> | <b>1438.710726</b> | 719.859001       | <b>1437.726710</b> | 719.366993       | 10 |
| 8  | <b>830.389038</b>  | 415.698157      | <b>813.362489</b>  | 407.184883        | 812.378473         | 406.692875       | E    | <b>1327.678697</b> | 664.342987        | <b>1310.652148</b> | 655.829712       | <b>1309.668132</b> | 655.337704       | 9  |
| 9  | 917.421066         | 459.214171      | 900.394517         | 450.700897        | 899.410501         | 450.208889       | S    | <b>1198.636104</b> | <b>599.821690</b> | <b>1181.609555</b> | 591.308416       | 1180.625539        | 590.816408       | 8  |
| 10 | <b>1045.479644</b> | 523.243460      | 1028.453095        | 514.730186        | <b>1027.469079</b> | 514.238178       | Q    | <b>1111.604076</b> | 556.305676        | <b>1094.577527</b> | 547.792402       |                    |                  | 7  |
| 11 | 1144.548058        | 572.777667      | 1127.521509        | 564.264393        | 1126.537493        | 563.772385       | V    | <b>983.545498</b>  | 492.276387        | 966.518949         | 483.763113       |                    |                  | 6  |
| 12 | 1215.585172        | 608.296224      | <b>1198.558623</b> | <b>599.782950</b> | 1197.574607        | 599.290942       | A    | <b>884.477084</b>  | 442.742180        | 867.450535         | 434.228906       |                    |                  | 5  |
| 13 | 1654.810498        | 827.908887      | 1637.783949        | 819.395613        | 1636.799933        | 818.903605       | Q    | <b>813.439970</b>  | 407.223623        | <b>796.413421</b>  | 398.710349       |                    |                  | 4  |
| 14 | 1782.869076        | 891.938176      | 1765.842527        | 883.424902        | 1764.858511        | 882.932894       | Q    | <b>374.214644</b>  | 187.610960        | <b>357.188095</b>  | 179.097686       |                    |                  | 3  |
| 15 | 1853.906190        | 927.456733      | 1836.879641        | 918.943459        | 1835.895625        | 918.451451       | A    | <b>246.156066</b>  | 123.581671        | 229.129517         | 115.068396       |                    |                  | 2  |
| 16 |                    |                 |                    |                   |                    |                  | R    | <b>175.118952</b>  | 88.063114         | 158.092403         | 79.549839        |                    |                  | 1  |

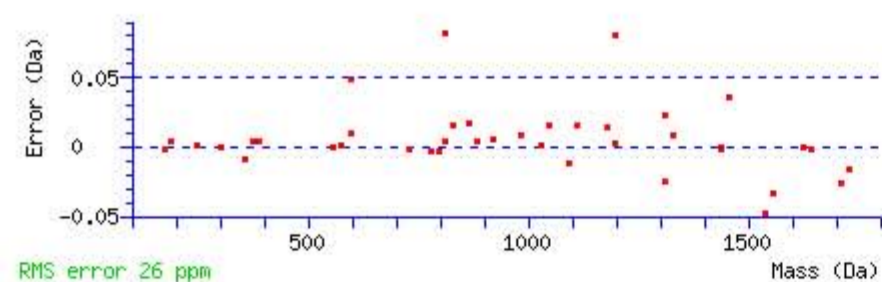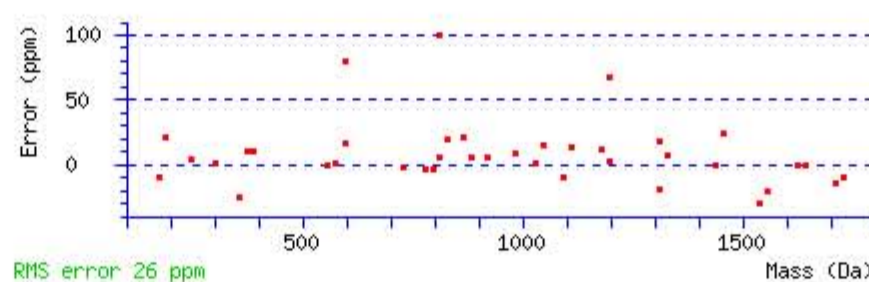

NCBI BLAST search of **DALSSVQESQVAQQAR**

(Parameters: blastp, nr protein database, expect=20000, no filter, PAM30)

Other BLAST [web gateways](#)

All matches to this query

| Score | Mr(calc):   | Delta    | Sequence                          |
|-------|-------------|----------|-----------------------------------|
| 88.9  | 2027.010574 | 0.013028 | <a href="#">DALSSVQESQVAQQAR</a>  |
| 74.7  | 2027.010574 | 0.013028 | <a href="#">DALSSVQESQVAQQAR</a>  |
| 59.0  | 2027.010574 | 0.013028 | <a href="#">DALSSVQESQVAQQAR</a>  |
| 21.5  | 2027.010574 | 0.013028 | <a href="#">DALSSVQESQVAQQAR</a>  |
| 0.6   | 2027.017960 | 0.005642 | <a href="#">MFELTLRGMSEALVDKR</a> |



# MASCOT Search Results

## Peptide View

MS/MS Fragmentation of **DALSSVQESQVAQQAR**

Found in **APOC3\_HUMAN**, Apolipoprotein C-III OS=Homo sapiens GN=APOC3 PE=1 SV=1

Match to Query 51432: 2027.023602 from(676.681810,3+) rtinseconds(1926) index(24169)

Title: Locus:1.1.1.2813.8 File:"2013-07-02 CLN FXIII 180 min 1st F 2.wiff"

Data file C:\Program Files (x86)\Matrix Science\Mascot Daemon\mgf\7 FXIII 180 min 1st\mascot\_daemon\_merge.mgf

Click mouse within plot area to zoom in by factor of two about that point

Or, Plot from  to  Da

Label all possible matches  Label matches used for scoring

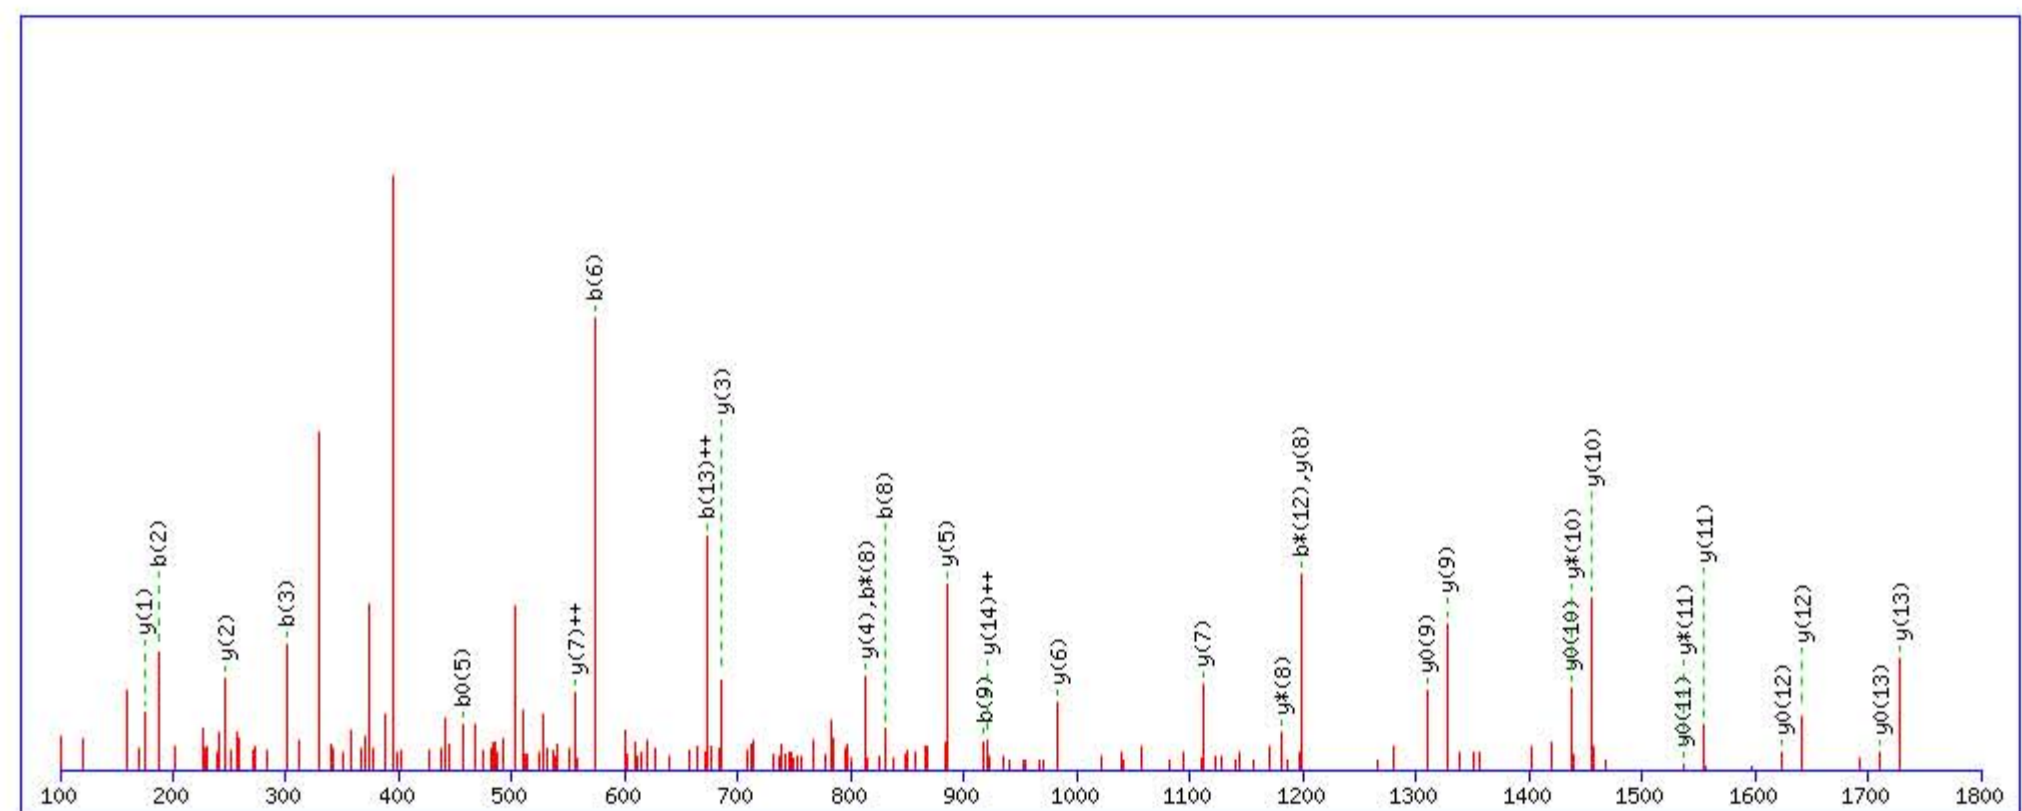

Monoisotopic mass of neutral peptide Mr(calc): 2027.010574

Fixed modifications: Carbamidomethyl (C) (apply to specified residues or termini only)

Variable modifications:

Q14 : Biotin:Thermo-21345 (Q)

Ions Score: 88 Expect: 4.2e-008

Matches : 32/154 fragment ions using 49 most intense peaks [\(help\)](#)

| #  | b                 | b <sup>++</sup>   | b <sup>+</sup>     | b <sup>+++</sup> | b <sup>0</sup>    | b <sup>0++</sup> | Seq. | y                  | y <sup>++</sup>   | y <sup>+</sup>     | y <sup>+++</sup> | y <sup>0</sup>     | y <sup>0++</sup> | #  |
|----|-------------------|-------------------|--------------------|------------------|-------------------|------------------|------|--------------------|-------------------|--------------------|------------------|--------------------|------------------|----|
| 1  | 116.034219        | 58.520748         |                    |                  | 98.023654         | 49.515465        | D    |                    |                   |                    |                  |                    |                  | 16 |
| 2  | <b>187.071333</b> | 94.039304         |                    |                  | 169.060768        | 85.034022        | A    | 1912.990923        | 956.999100        | 1895.964374        | 948.485825       | 1894.980358        | 947.993817       | 15 |
| 3  | <b>300.155397</b> | 150.581336        |                    |                  | 282.144832        | 141.576054       | L    | 1841.953809        | <b>921.480543</b> | 1824.927260        | 912.967268       | 1823.943244        | 912.475260       | 14 |
| 4  | 387.187425        | 194.097351        |                    |                  | 369.176860        | 185.092068       | S    | <b>1728.869745</b> | 864.938511        | 1711.843196        | 856.425236       | <b>1710.859180</b> | 855.933228       | 13 |
| 5  | 474.219453        | 237.613364        |                    |                  | <b>456.208888</b> | 228.608082       | S    | <b>1641.837717</b> | 821.422497        | 1624.811168        | 812.909222       | <b>1623.827152</b> | 812.417214       | 12 |
| 6  | <b>573.287867</b> | 287.147572        |                    |                  | 555.277302        | 278.142289       | V    | <b>1554.805689</b> | 777.906483        | <b>1537.779140</b> | 769.393208       | <b>1536.795124</b> | 768.901200       | 11 |
| 7  | 701.346445        | 351.176861        | 684.319896         | 342.663586       | 683.335880        | 342.171578       | Q    | <b>1455.737275</b> | 728.372276        | <b>1438.710726</b> | 719.859001       | <b>1437.726710</b> | 719.366993       | 10 |
| 8  | <b>830.389038</b> | 415.698157        | <b>813.362489</b>  | 407.184883       | 812.378473        | 406.692875       | E    | <b>1327.678697</b> | 664.342987        | 1310.652148        | 655.829712       | <b>1309.668132</b> | 655.337704       | 9  |
| 9  | <b>917.421066</b> | 459.214171        | 900.394517         | 450.700897       | 899.410501        | 450.208889       | S    | <b>1198.636104</b> | 599.821690        | <b>1181.609555</b> | 591.308416       | 1180.625539        | 590.816408       | 8  |
| 10 | 1045.479644       | 523.243460        | 1028.453095        | 514.730186       | 1027.469079       | 514.238178       | Q    | <b>1111.604076</b> | <b>556.305676</b> | 1094.577527        | 547.792402       |                    |                  | 7  |
| 11 | 1144.548058       | 572.777667        | 1127.521509        | 564.264393       | 1126.537493       | 563.772385       | V    | <b>983.545498</b>  | 492.276387        | 966.518949         | 483.763113       |                    |                  | 6  |
| 12 | 1215.585172       | 608.296224        | <b>1198.558623</b> | 599.782950       | 1197.574607       | 599.290942       | A    | <b>884.477084</b>  | 442.742180        | 867.450535         | 434.228906       |                    |                  | 5  |
| 13 | 1343.643750       | <b>672.325513</b> | 1326.617201        | 663.812239       | 1325.633185       | 663.320230       | Q    | <b>813.439970</b>  | 407.223623        | 796.413421         | 398.710349       |                    |                  | 4  |
| 14 | 1782.869076       | 891.938176        | 1765.842527        | 883.424902       | 1764.858511       | 882.932894       | Q    | <b>685.381392</b>  | 343.194334        | 668.354843         | 334.681060       |                    |                  | 3  |
| 15 | 1853.906190       | 927.456733        | 1836.879641        | 918.943459       | 1835.895625       | 918.451451       | A    | <b>246.156066</b>  | 123.581671        | 229.129517         | 115.068396       |                    |                  | 2  |
| 16 |                   |                   |                    |                  |                   |                  | R    | <b>175.118952</b>  | 88.063114         | 158.092403         | 79.549839        |                    |                  | 1  |

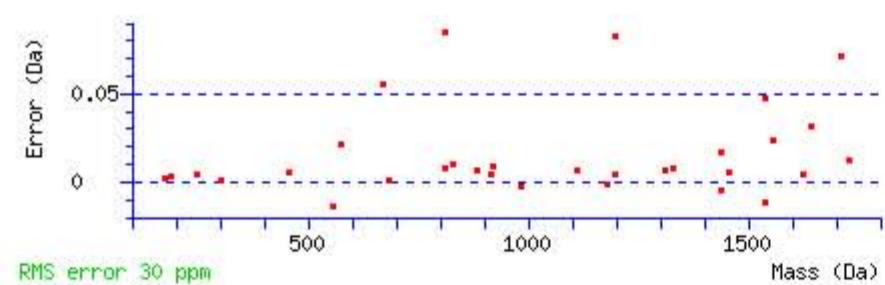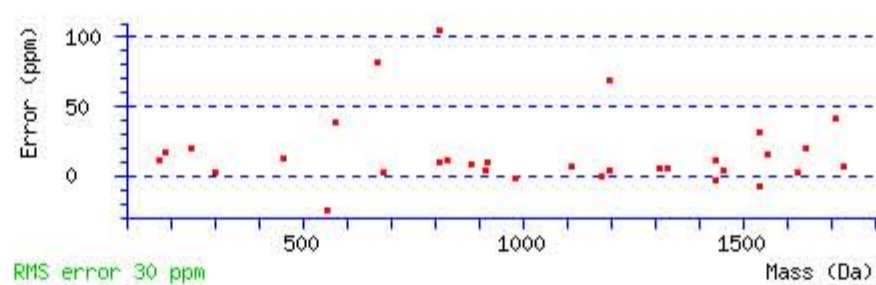

NCBI BLAST search of **DALSSVQESQVAQQAR**

(Parameters: blastp, nr protein database, expect=20000, no filter, PAM30)

Other BLAST [web gateways](#)

All matches to this query

| Score | Mr(calc):   | Delta    | Sequence                         |
|-------|-------------|----------|----------------------------------|
| 88.0  | 2027.010574 | 0.013028 | <a href="#">DALSSVQESQVAQQAR</a> |
| 88.0  | 2027.010574 | 0.013028 | <a href="#">DALSSVQESQVAQQAR</a> |
| 87.8  | 2027.010574 | 0.013028 | <a href="#">DALSSVQESQVAQQAR</a> |
| 44.1  | 2027.010574 | 0.013028 | <a href="#">DALSSVQESQVAQQAR</a> |

# MASCOT Search Results

## Peptide View

MS/MS Fragmentation of **DALSSVQESQVAQQAR**

Found in **APOC3\_HUMAN**, Apolipoprotein C-III OS=Homo sapiens GN=APOC3 PE=1 SV=1

Match to Query 51436: 2027.031912 from(676.684580,3+) rtinseconds(1967) index(42009)

Title: Locus:1.1.1.3134.14 File:"2013-07-02 CLN FXIII 180 min 1st F 3.wiff"

Data file C:\Program Files (x86)\Matrix Science\Mascot Daemon\mgf\7 FXIII 180 min 1st\mascot\_daemon\_merge.mgf

Click mouse within plot area to zoom in by factor of two about that point

Or, Plot from  to  Da

Label all possible matches  Label matches used for scoring

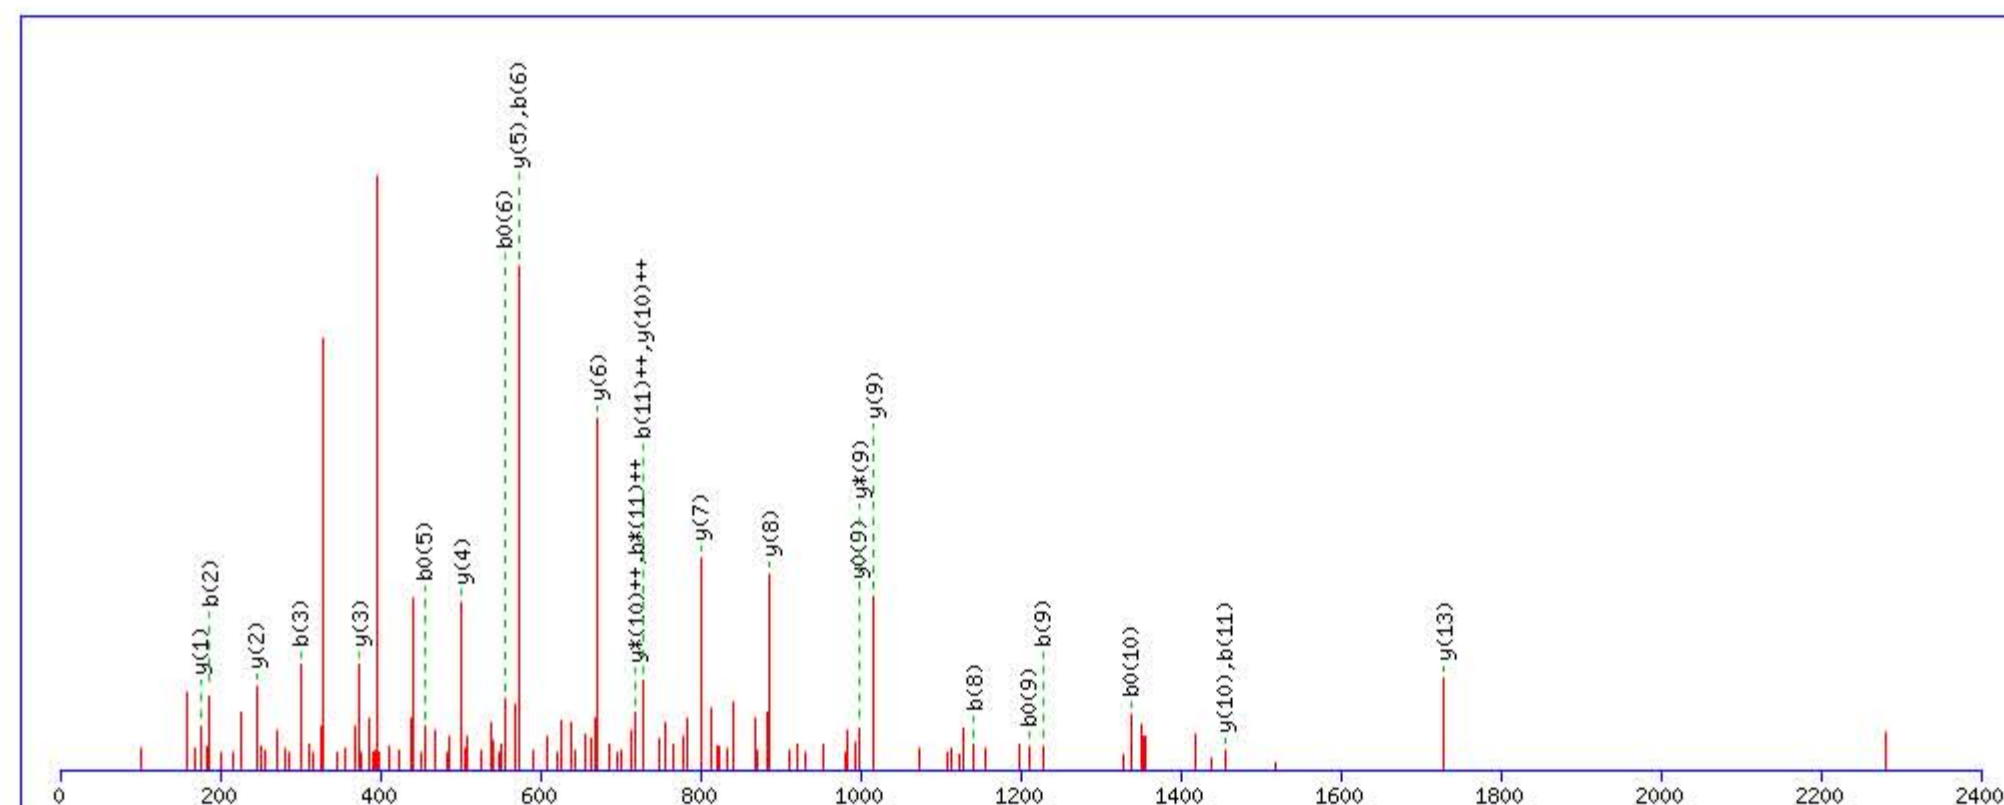

Monoisotopic mass of neutral peptide Mr(calc): 2027.010574

Fixed modifications: Carbamidomethyl (C) (apply to specified residues or termini only)

Variable modifications:

Q7 : Biotin:Thermo-21345 (Q)

Ions Score: 64 Expect: 2.4e-006

Matches : 27/154 fragment ions using 42 most intense peaks [\(help\)](#)

| #  | b                  | b <sup>++</sup>   | b <sup>*</sup> | b <sup>+++</sup>  | b <sup>0</sup>     | b <sup>0++</sup> | Seq. | y                  | y <sup>++</sup>   | y <sup>*</sup>    | y <sup>+++</sup>  | y <sup>0</sup>    | y <sup>0++</sup> | #  |
|----|--------------------|-------------------|----------------|-------------------|--------------------|------------------|------|--------------------|-------------------|-------------------|-------------------|-------------------|------------------|----|
| 1  | 116.034219         | 58.520748         |                |                   | 98.023654          | 49.515465        | D    |                    |                   |                   |                   |                   |                  | 16 |
| 2  | <b>187.071333</b>  | 94.039304         |                |                   | 169.060768         | 85.034022        | A    | 1912.990923        | 956.999100        | 1895.964374       | 948.485825        | 1894.980358       | 947.993817       | 15 |
| 3  | <b>300.155397</b>  | 150.581336        |                |                   | 282.144832         | 141.576054       | L    | 1841.953809        | 921.480543        | 1824.927260       | 912.967268        | 1823.943244       | 912.475260       | 14 |
| 4  | 387.187425         | 194.097351        |                |                   | 369.176860         | 185.092068       | S    | <b>1728.869745</b> | 864.938511        | 1711.843196       | 856.425236        | 1710.859180       | 855.933228       | 13 |
| 5  | 474.219453         | 237.613364        |                |                   | <b>456.208888</b>  | 228.608082       | S    | 1641.837717        | 821.422497        | 1624.811168       | 812.909222        | 1623.827152       | 812.417214       | 12 |
| 6  | <b>573.287867</b>  | 287.147572        |                |                   | <b>555.277302</b>  | 278.142289       | V    | 1554.805689        | 777.906483        | 1537.779140       | 769.393208        | 1536.795124       | 768.901200       | 11 |
| 7  | 1012.513193        | 506.760235        | 995.486644     | 498.246960        | 994.502628         | 497.754952       | Q    | <b>1455.737275</b> | <b>728.372276</b> | 1438.710726       | <b>719.859001</b> | 1437.726710       | 719.366993       | 10 |
| 8  | <b>1141.555786</b> | 571.281531        | 1124.529237    | 562.768257        | 1123.545221        | 562.276249       | E    | <b>1016.511949</b> | 508.759613        | <b>999.485400</b> | 500.246338        | <b>998.501384</b> | 499.754330       | 9  |
| 9  | <b>1228.587814</b> | 614.797545        | 1211.561265    | 606.284271        | <b>1210.577249</b> | 605.792263       | S    | <b>887.469356</b>  | 444.238316        | 870.442807        | 435.725042        | 869.458791        | 435.233034       | 8  |
| 10 | 1356.646392        | 678.826834        | 1339.619843    | 670.313560        | <b>1338.635827</b> | 669.821552       | Q    | <b>800.437328</b>  | 400.722302        | 783.410779        | 392.209028        |                   |                  | 7  |
| 11 | <b>1455.714806</b> | <b>728.361041</b> | 1438.688257    | <b>719.847767</b> | 1437.704241        | 719.355759       | V    | <b>672.378750</b>  | 336.693013        | 655.352201        | 328.179739        |                   |                  | 6  |
| 12 | 1526.751920        | 763.879598        | 1509.725371    | 755.366324        | 1508.741355        | 754.874316       | A    | <b>573.310336</b>  | 287.158806        | 556.283787        | 278.645532        |                   |                  | 5  |
| 13 | 1654.810498        | 827.908887        | 1637.783949    | 819.395613        | 1636.799933        | 818.903605       | Q    | <b>502.273222</b>  | 251.640249        | 485.246673        | 243.126975        |                   |                  | 4  |
| 14 | 1782.869076        | 891.938176        | 1765.842527    | 883.424902        | 1764.858511        | 882.932894       | Q    | <b>374.214644</b>  | 187.610960        | 357.188095        | 179.097686        |                   |                  | 3  |
| 15 | 1853.906190        | 927.456733        | 1836.879641    | 918.943459        | 1835.895625        | 918.451451       | A    | <b>246.156066</b>  | 123.581671        | 229.129517        | 115.068396        |                   |                  | 2  |
| 16 |                    |                   |                |                   |                    |                  | R    | <b>175.118952</b>  | 88.063114         | 158.092403        | 79.549839         |                   |                  | 1  |

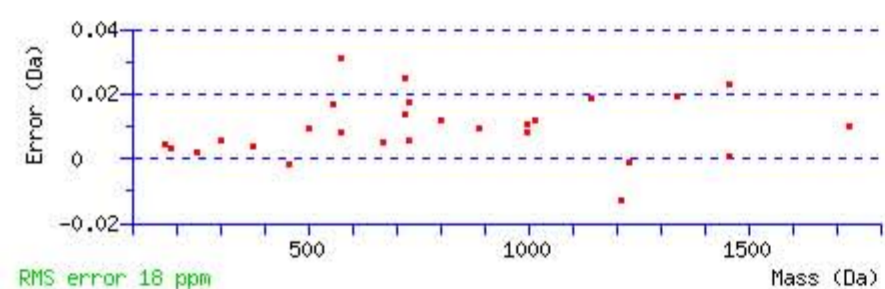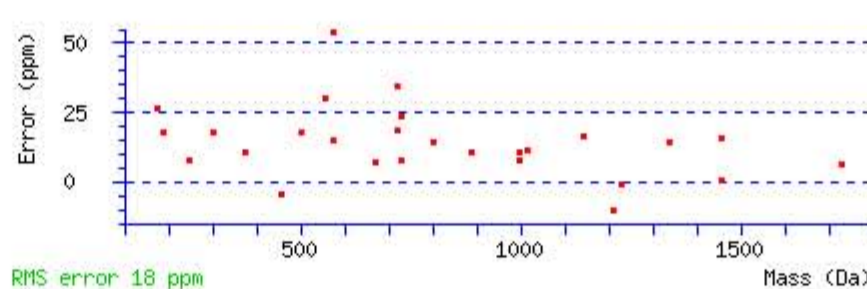

NCBI BLAST search of **DALSSVQESQVAQQAR**

(Parameters: blastp, nr protein database, expect=20000, no filter, PAM30)

Other BLAST [web gateways](#)

### All matches to this query

| Score | Mr(calc):   | Delta    | Sequence                          |
|-------|-------------|----------|-----------------------------------|
| 63.5  | 2027.010574 | 0.021338 | <a href="#">DALSSVQESQVAQQAR</a>  |
| 33.7  | 2027.010574 | 0.021338 | <a href="#">DALSSVQESQVAQQAR</a>  |
| 29.7  | 2027.010574 | 0.021338 | <a href="#">DALSSVQESQVAQQAR</a>  |
| 28.7  | 2027.010574 | 0.021338 | <a href="#">DALSSVQESQVAQQAR</a>  |
| 3.6   | 2027.010559 | 0.021353 | <a href="#">LTGRGAEDSLADQAANK</a> |

# MASCOT Search Results

## Peptide View

MS/MS Fragmentation of **DALSSVQESQVAQQAR**

Found in **APOC3\_HUMAN**, Apolipoprotein C-III OS=Homo sapiens GN=APOC3 PE=1 SV=1

Match to Query 51441: 2027.035068 from(1014.524810,2+) rtinseconds(1925) index(24160)

Title: Locus:1.1.1.2812.24 File:"2013-07-02 CLN FXIII 180 min 1st F 2.wiff"

Data file C:\Program Files (x86)\Matrix Science\Mascot Daemon\mgf7 FXIII 180 min 1st\mascot\_daemon\_merge.mgf

Click mouse within plot area to zoom in by factor of two about that point

Or, Plot from  to  Da

Label all possible matches  Label matches used for scoring

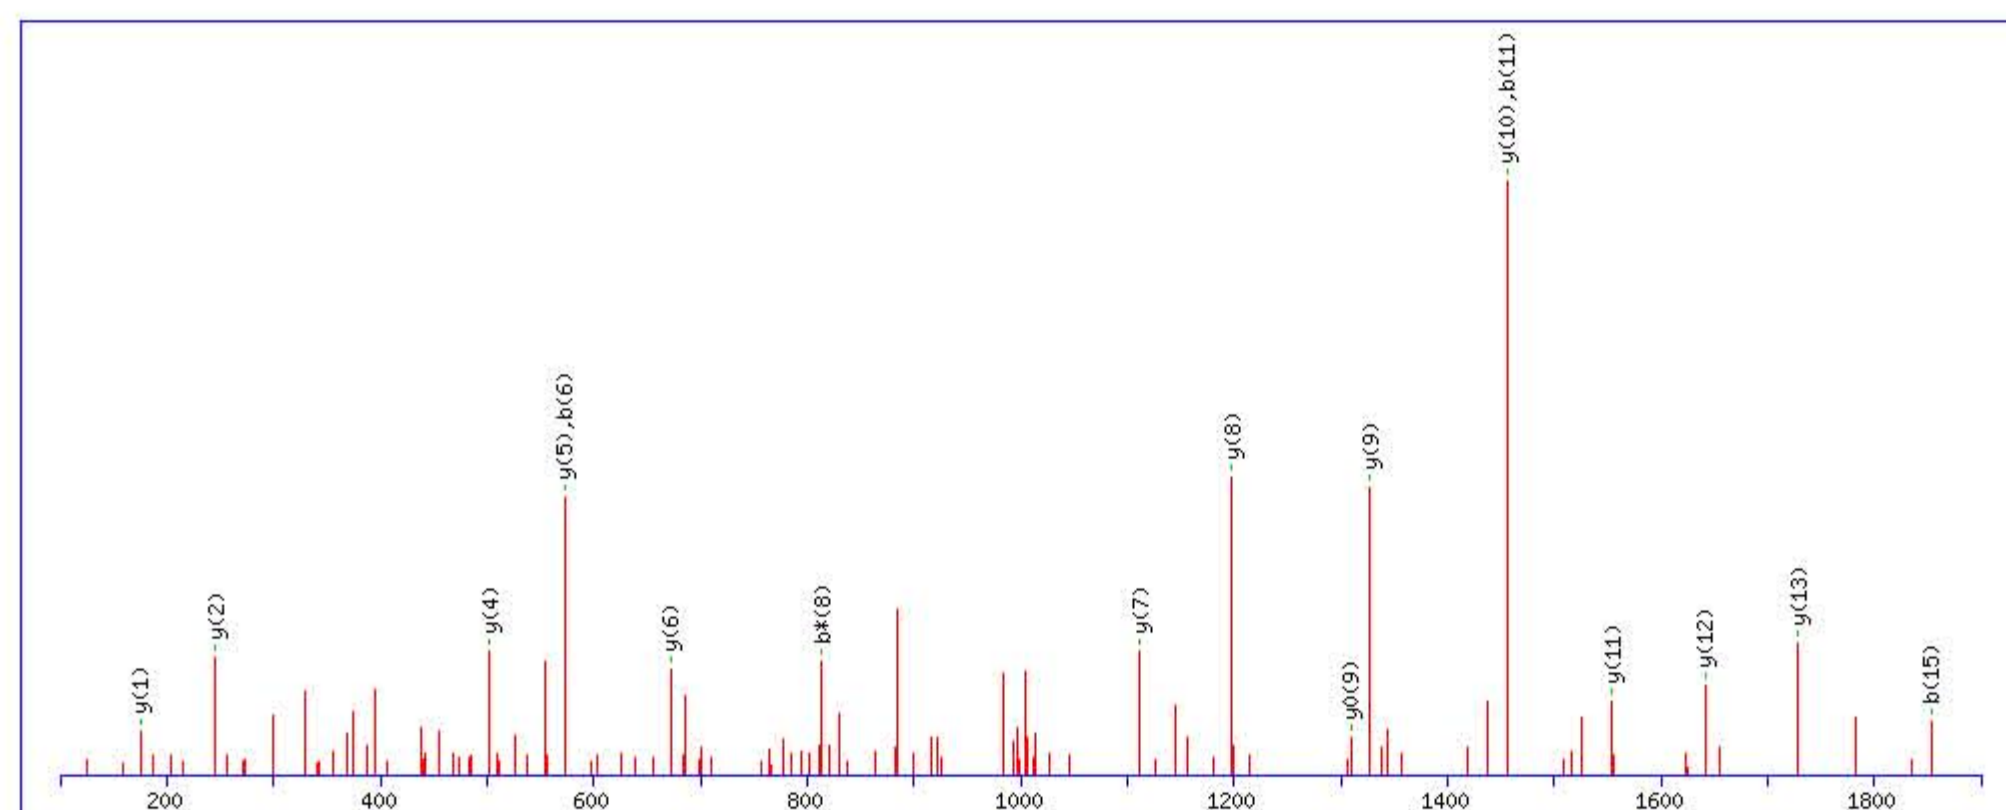

Monoisotopic mass of neutral peptide Mr(calc): 2027.010574

Fixed modifications: Carbamidomethyl (C) (apply to specified residues or termini only)

Variable modifications:

Q10 : Biotin:Thermo-21345 (Q)

Ions Score: 117 Expect: 5e-011

Matches : 17/154 fragment ions using 18 most intense peaks [\(help\)](#)

| #  | b                  | b <sup>++</sup> | b <sup>+</sup>    | b <sup>+++</sup> | b <sup>0</sup> | b <sup>0++</sup> | Seq. | y                  | y <sup>++</sup> | y <sup>*</sup> | y <sup>+++</sup> | y <sup>0</sup>     | y <sup>0++</sup> | #  |
|----|--------------------|-----------------|-------------------|------------------|----------------|------------------|------|--------------------|-----------------|----------------|------------------|--------------------|------------------|----|
| 1  | 116.034219         | 58.520748       |                   |                  | 98.023654      | 49.515465        | D    |                    |                 |                |                  |                    |                  | 16 |
| 2  | 187.071333         | 94.039304       |                   |                  | 169.060768     | 85.034022        | A    | 1912.990923        | 956.999100      | 1895.964374    | 948.485825       | 1894.980358        | 947.993817       | 15 |
| 3  | 300.155397         | 150.581336      |                   |                  | 282.144832     | 141.576054       | L    | 1841.953809        | 921.480543      | 1824.927260    | 912.967268       | 1823.943244        | 912.475260       | 14 |
| 4  | 387.187425         | 194.097351      |                   |                  | 369.176860     | 185.092068       | S    | <b>1728.869745</b> | 864.938511      | 1711.843196    | 856.425236       | 1710.859180        | 855.933228       | 13 |
| 5  | 474.219453         | 237.613364      |                   |                  | 456.208888     | 228.608082       | S    | <b>1641.837717</b> | 821.422497      | 1624.811168    | 812.909222       | 1623.827152        | 812.417214       | 12 |
| 6  | <b>573.287867</b>  | 287.147572      |                   |                  | 555.277302     | 278.142289       | V    | <b>1554.805689</b> | 777.906483      | 1537.779140    | 769.393208       | 1536.795124        | 768.901200       | 11 |
| 7  | 701.346445         | 351.176861      | 684.319896        | 342.663586       | 683.335880     | 342.171578       | Q    | <b>1455.737275</b> | 728.372276      | 1438.710726    | 719.859001       | 1437.726710        | 719.366993       | 10 |
| 8  | 830.389038         | 415.698157      | <b>813.362489</b> | 407.184883       | 812.378473     | 406.692875       | E    | <b>1327.678697</b> | 664.342987      | 1310.652148    | 655.829712       | <b>1309.668132</b> | 655.337704       | 9  |
| 9  | 917.421066         | 459.214171      | 900.394517        | 450.700897       | 899.410501     | 450.208889       | S    | <b>1198.636104</b> | 599.821690      | 1181.609555    | 591.308416       | 1180.625539        | 590.816408       | 8  |
| 10 | 1356.646392        | 678.826834      | 1339.619843       | 670.313560       | 1338.635827    | 669.821551       | Q    | <b>1111.604076</b> | 556.305676      | 1094.577527    | 547.792402       |                    |                  | 7  |
| 11 | <b>1455.714806</b> | 728.361041      | 1438.688257       | 719.847767       | 1437.704241    | 719.355758       | V    | <b>672.378750</b>  | 336.693013      | 655.352201     | 328.179739       |                    |                  | 6  |
| 12 | 1526.751920        | 763.879598      | 1509.725371       | 755.366324       | 1508.741355    | 754.874315       | A    | <b>573.310336</b>  | 287.158806      | 556.283787     | 278.645532       |                    |                  | 5  |
| 13 | 1654.810498        | 827.908887      | 1637.783949       | 819.395613       | 1636.799933    | 818.903605       | Q    | <b>502.273222</b>  | 251.640249      | 485.246673     | 243.126975       |                    |                  | 4  |
| 14 | 1782.869076        | 891.938176      | 1765.842527       | 883.424902       | 1764.858511    | 882.932894       | Q    | 374.214644         | 187.610960      | 357.188095     | 179.097686       |                    |                  | 3  |
| 15 | <b>1853.906190</b> | 927.456733      | 1836.879641       | 918.943459       | 1835.895625    | 918.451451       | A    | <b>246.156066</b>  | 123.581671      | 229.129517     | 115.068396       |                    |                  | 2  |
| 16 |                    |                 |                   |                  |                |                  | R    | <b>175.118952</b>  | 88.063114       | 158.092403     | 79.549839        |                    |                  | 1  |

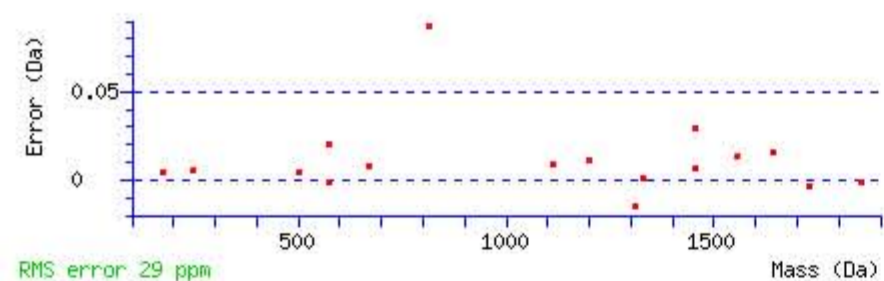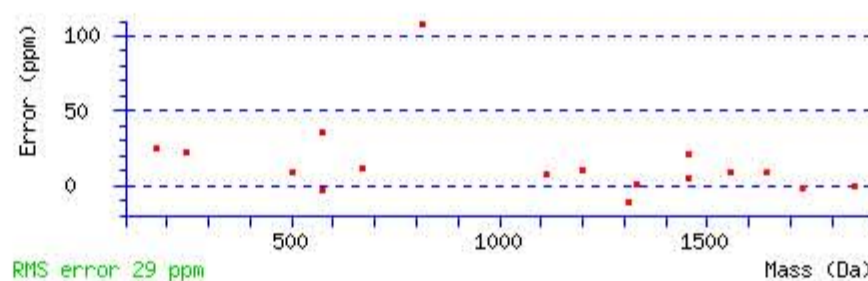

NCBI BLAST search of **DALSSVQESQVAQQAR**

(Parameters: blastp, nr protein database, expect=20000, no filter, PAM30)

Other BLAST [web gateways](#)

### All matches to this query

| Score | Mr(calc):   | Delta     | Sequence                             |
|-------|-------------|-----------|--------------------------------------|
| 117.4 | 2027.010574 | 0.024494  | <a href="#">DALSSVQESQVAQQAR</a>     |
| 107.2 | 2027.010574 | 0.024494  | <a href="#">DALSSVQESQVAQQAR</a>     |
| 99.4  | 2027.010574 | 0.024494  | <a href="#">DALSSVQESQVAQQAR</a>     |
| 59.8  | 2027.010574 | 0.024494  | <a href="#">DALSSVQESQVAQQAR</a>     |
| 12.9  | 2027.021805 | 0.013263  | <a href="#">VASVESQSQEISGNRR</a>     |
| 9.4   | 2027.029633 | 0.005435  | <a href="#">QESEHSHKHLIELRR</a>      |
| 4.3   | 2027.017960 | 0.017108  | <a href="#">MFELTLRGMSEALVDKR</a>    |
| 3.0   | 2027.039520 | -0.004452 | <a href="#">GLERALEEAANSGLNLSAR</a>  |
| 2.9   | 2027.021820 | 0.013248  | <a href="#">DTDNKAAIRDCCGGVPALVR</a> |
| 2.7   | 2027.021805 | 0.013263  | <a href="#">VASVESQSQEISGNRR</a>     |

# MASCOT SCIENCE Mascot Search Results

## Peptide View

MS/MS Fragmentation of **EQVAEVR**

Found in **APOE\_HUMAN**, Apolipoprotein E OS=Homo sapiens GN=APOE PE=1 SV=1

Match to Query 21525: 1140.605628 from(571.310090,2+) rtinseconds(1507) index(38824)

Title: Locus:1.1.1.2974.15 File:"2013-07-02 CLN FXIII 180 min 1st F 3.wiff"

Data file C:\Program Files (x86)\Matrix Science\Mascot Daemon\mgf\7 FXIII 180 min 1st\mascot\_daemon\_merge.mgf

Click mouse within plot area to zoom in by factor of two about that point

Or, Plot from  to  Da

Label all possible matches  Label matches used for scoring

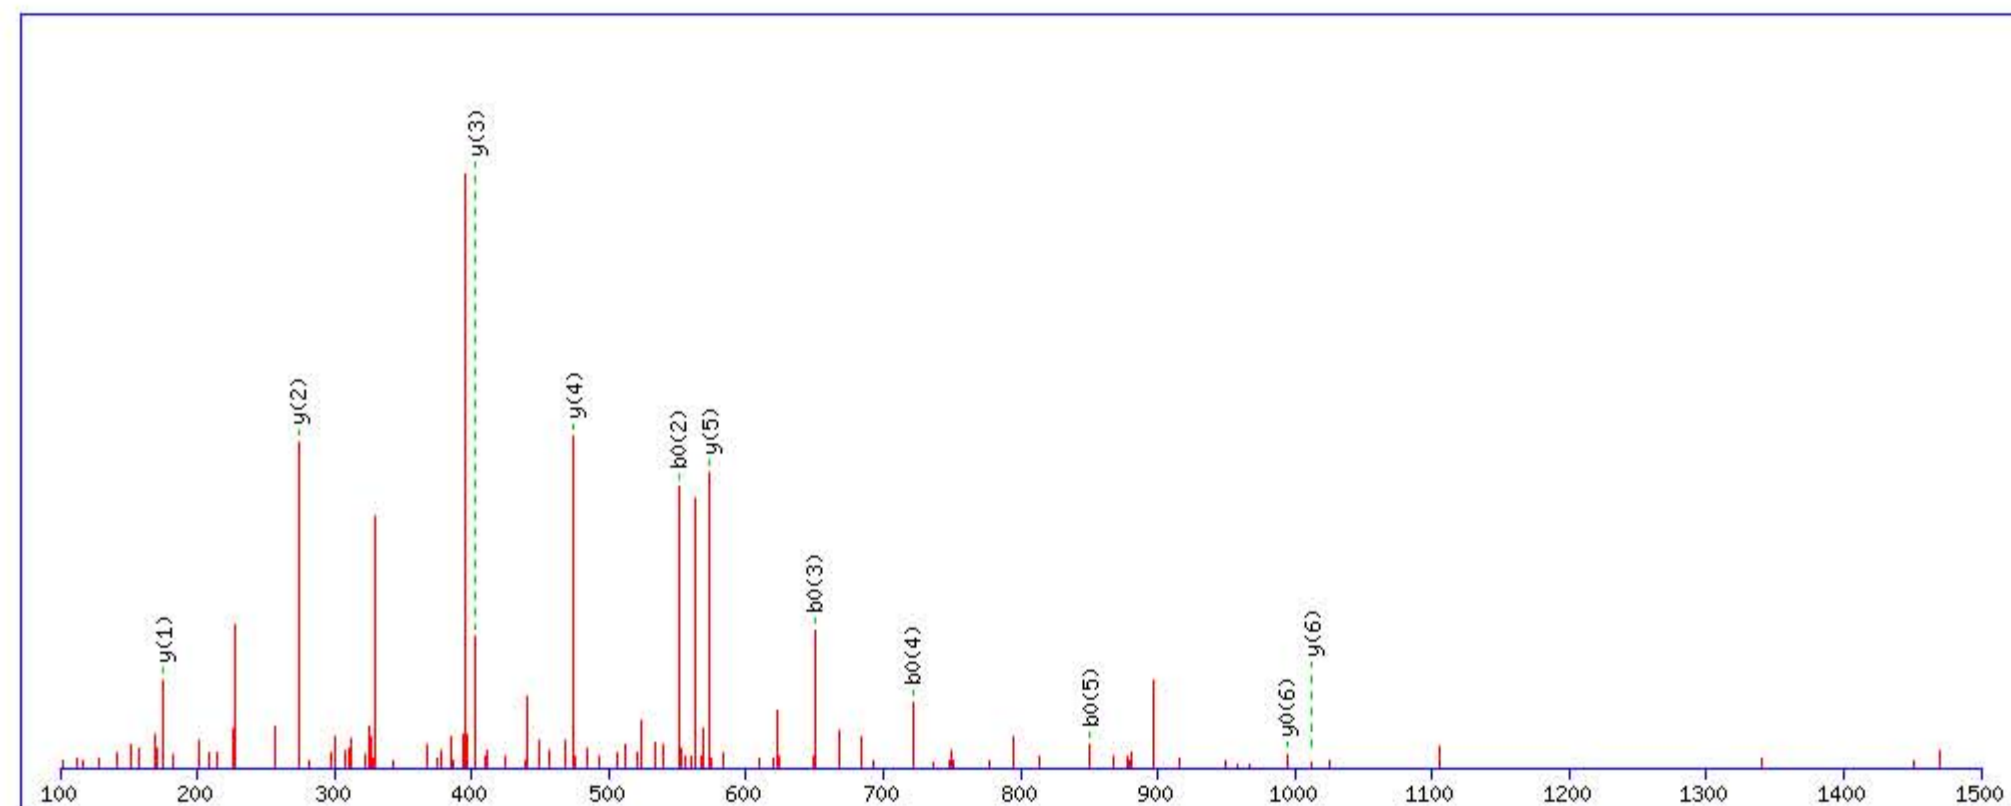

Monoisotopic mass of neutral peptide Mr(calc): 1140.596115

Fixed modifications: Carbamidomethyl (C) (apply to specified residues or termini only)

Variable modifications:

Q2 : Biotin:Thermo-21345 (Q)

Ions Score: 27 Expect: 0.052

Matches : 11/66 fragment ions using 21 most intense peaks [\(help\)](#)

| # | b          | b <sup>++</sup> | b <sup>*</sup> | b <sup>*++</sup> | b <sup>0</sup> | b <sup>0++</sup> | Seq. | y           | y <sup>++</sup> | y <sup>*</sup> | y <sup>*++</sup> | y <sup>0</sup> | y <sup>0++</sup> | # |
|---|------------|-----------------|----------------|------------------|----------------|------------------|------|-------------|-----------------|----------------|------------------|----------------|------------------|---|
| 1 | 130.049869 | 65.528572       |                |                  | 112.039304     | 56.523290        | E    |             |                 |                |                  |                |                  | 7 |
| 2 | 569.275195 | 285.141236      | 552.248646     | 276.627961       | 551.264630     | 276.135953       | Q    | 1012.560813 | 506.784044      | 995.534264     | 498.270770       | 994.550248     | 497.778762       | 6 |
| 3 | 668.343609 | 334.675443      | 651.317060     | 326.162168       | 650.333044     | 325.670160       | V    | 573.335487  | 287.171382      | 556.308938     | 278.658107       | 555.324922     | 278.166099       | 5 |
| 4 | 739.380723 | 370.194000      | 722.354174     | 361.680725       | 721.370158     | 361.188717       | A    | 474.267073  | 237.637174      | 457.240524     | 229.123900       | 456.256508     | 228.631892       | 4 |
| 5 | 868.423316 | 434.715296      | 851.396767     | 426.202022       | 850.412751     | 425.710014       | E    | 403.229959  | 202.118617      | 386.203410     | 193.605343       | 385.219394     | 193.113335       | 3 |
| 6 | 967.491730 | 484.249503      | 950.465181     | 475.736228       | 949.481165     | 475.244220       | V    | 274.187366  | 137.597321      | 257.160817     | 129.084046       |                |                  | 2 |
| 7 |            |                 |                |                  |                |                  | R    | 175.118952  | 88.063114       | 158.092403     | 79.549839        |                |                  | 1 |

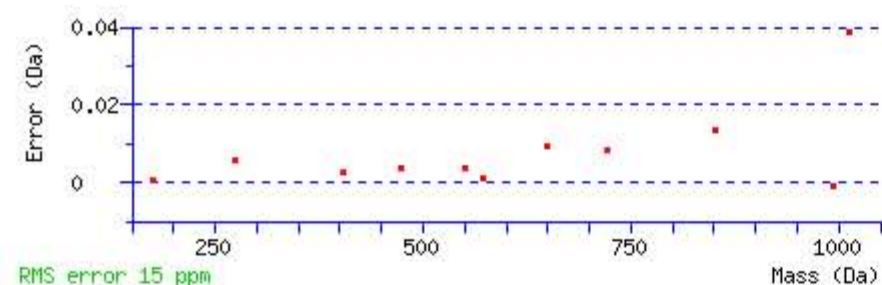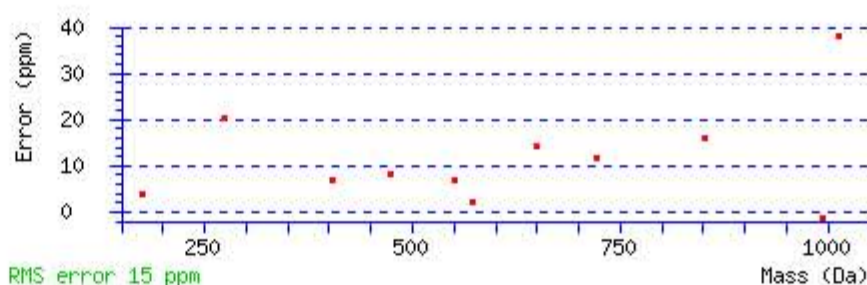

NCBI BLAST search of [EQVAEVR](#)

(Parameters: blastp, nr protein database, expect=20000, no filter, PAM30)

Other BLAST [web gateways](#)

## All matches to this query

| Score | Mr(calc):   | Delta     | Sequence                    |
|-------|-------------|-----------|-----------------------------|
| 26.7  | 1140.596115 | 0.009513  | <a href="#">EQVAEVR</a>     |
| 12.1  | 1140.596115 | 0.009513  | <a href="#">QEVALDLR</a>    |
| 7.9   | 1140.596115 | 0.009513  | <a href="#">EQALDVR</a>     |
| 6.0   | 1140.599945 | 0.005683  | <a href="#">ERVALSHSSR</a>  |
| 4.0   | 1140.599945 | 0.005683  | <a href="#">SSSKLAQHQR</a>  |
| 3.3   | 1140.596115 | 0.009513  | <a href="#">QEGLDLR</a>     |
| 3.1   | 1140.588715 | 0.016913  | <a href="#">RLAADDPEVR</a>  |
| 3.1   | 1140.613876 | -0.008248 | <a href="#">LLQAPDIDL</a>   |
| 3.1   | 1140.592789 | 0.012839  | <a href="#">IGTGSFGTVFR</a> |
| 2.4   | 1140.596115 | 0.009513  | <a href="#">EQSTLPR</a>     |

# MASCOT SCIENCE Mascot Search Results

## Peptide View

MS/MS Fragmentation of **ELQAAQAR**

Found in **APOE\_HUMAN**, Apolipoprotein E OS=Homo sapiens GN=APOE PE=1 SV=1

Match to Query 23620: 1196.644228 from(599.329390,2+) rtinseconds(1456) index(38425)

Title: Locus:1.1.1.2956.21 File:"2013-07-02 CLN FXIII 180 min 1st F 3.wiff"

Data file C:\Program Files (x86)\Matrix Science\Mascot Daemon\mgf\7 FXIII 180 min 1st\mascot\_daemon\_merge.mgf

Click mouse within plot area to zoom in by factor of two about that point

Or, Plot from  to  Da

Label all possible matches  Label matches used for scoring

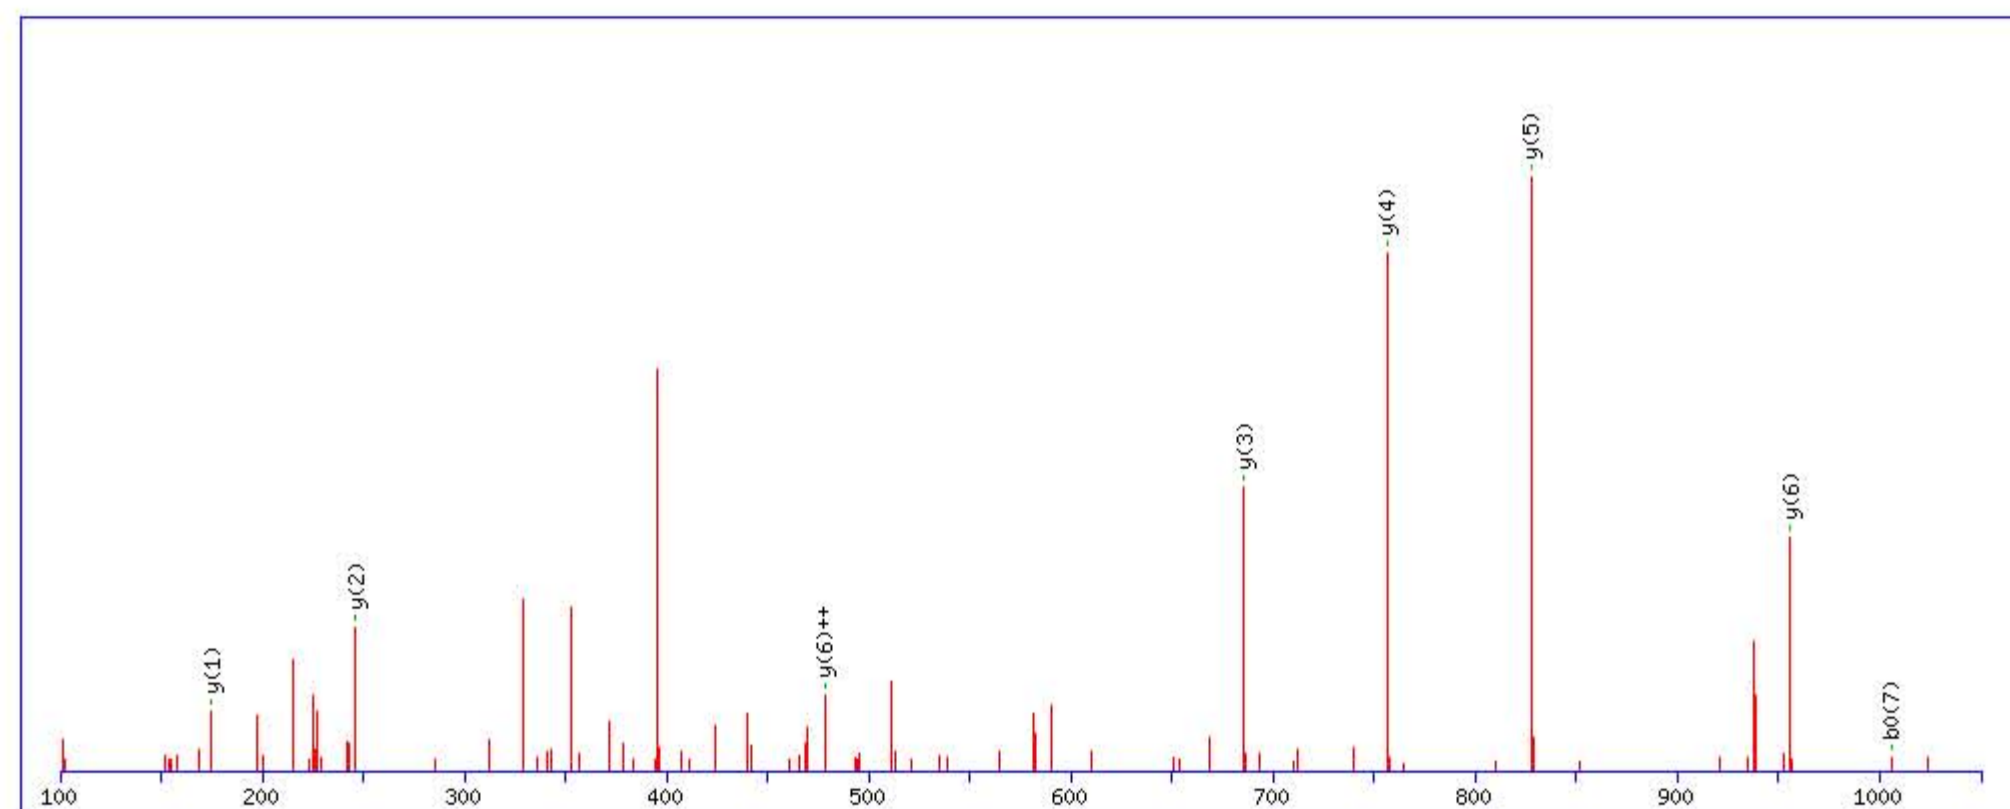

Monoisotopic mass of neutral peptide Mr(calc): 1196.633545

Fixed modifications: Carbamidomethyl (C) (apply to specified residues or termini only)

Variable modifications:

Q6 : Biotin:Thermo-21345 (Q)

Ions Score: 48 Expect: 0.00018

Matches : 8/66 fragment ions using 10 most intense peaks ([help](#))

| # | b           | b <sup>++</sup> | b <sup>*</sup> | b <sup>+++</sup> | b <sup>0</sup>     | b <sup>0++</sup> | Seq. | y                 | y <sup>++</sup>   | y <sup>*</sup> | y <sup>+++</sup> | # |
|---|-------------|-----------------|----------------|------------------|--------------------|------------------|------|-------------------|-------------------|----------------|------------------|---|
| 1 | 130.049869  | 65.528572       |                |                  | 112.039304         | 56.523290        | E    |                   |                   |                |                  | 8 |
| 2 | 243.133933  | 122.070605      |                |                  | 225.123368         | 113.065322       | L    | 1068.598262       | 534.802769        | 1051.571713    | 526.289495       | 7 |
| 3 | 371.192511  | 186.099894      | 354.165962     | 177.586619       | 353.181946         | 177.094611       | Q    | <b>955.514198</b> | <b>478.260737</b> | 938.487649     | 469.747463       | 6 |
| 4 | 442.229625  | 221.618450      | 425.203076     | 213.105176       | 424.219060         | 212.613168       | A    | <b>827.455620</b> | 414.231448        | 810.429071     | 405.718174       | 5 |
| 5 | 513.266739  | 257.137008      | 496.240190     | 248.623733       | 495.256174         | 248.131725       | A    | <b>756.418506</b> | 378.712891        | 739.391957     | 370.199617       | 4 |
| 6 | 952.492065  | 476.749671      | 935.465516     | 468.236396       | 934.481500         | 467.744388       | Q    | <b>685.381392</b> | 343.194334        | 668.354843     | 334.681060       | 3 |
| 7 | 1023.529179 | 512.268227      | 1006.502630    | 503.754953       | <b>1005.518614</b> | 503.262945       | A    | <b>246.156066</b> | 123.581671        | 229.129517     | 115.068397       | 2 |
| 8 |             |                 |                |                  |                    |                  | R    | <b>175.118952</b> | 88.063114         | 158.092403     | 79.549840        | 1 |

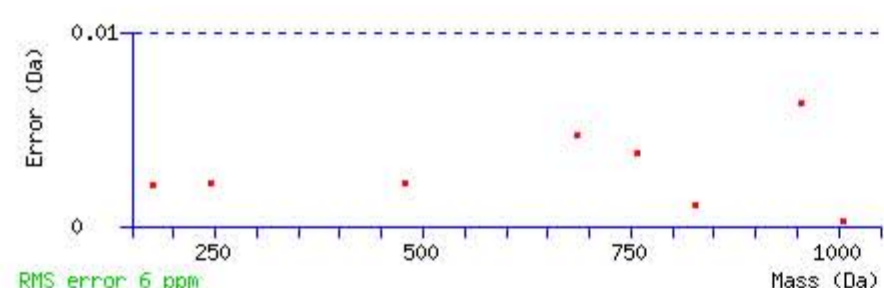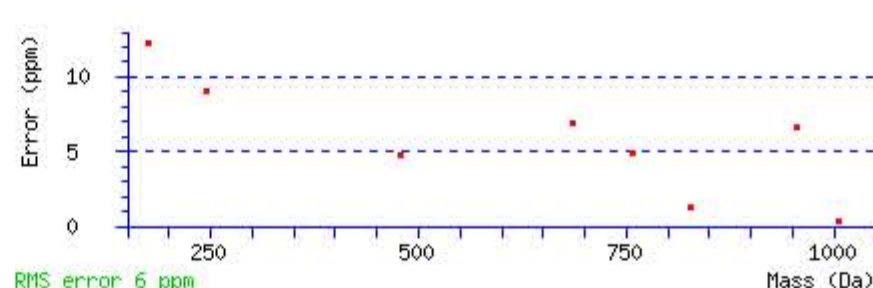

NCBI BLAST search of [ELQAAQAR](#)

(Parameters: blastp, nr protein database, expect=20000, no filter, PAM30)

Other BLAST [web gateways](#)

### All matches to this query

| Score | Mr(calc):   | Delta     | Sequence                    |
|-------|-------------|-----------|-----------------------------|
| 47.9  | 1196.633545 | 0.010683  | <a href="#">ELQAAQAR</a>    |
| 7.5   | 1196.633575 | 0.010653  | <a href="#">QASTQVPR</a>    |
| 6.0   | 1196.633545 | 0.010683  | <a href="#">ELQAAQAR</a>    |
| 4.0   | 1196.627029 | 0.017199  | <a href="#">AGMPRQAR</a>    |
| 4.0   | 1196.648819 | -0.004591 | <a href="#">LNVWQAR</a>     |
| 3.2   | 1196.641434 | 0.002794  | <a href="#">STRPQAWVPR</a>  |
| 3.0   | 1196.637390 | 0.006838  | <a href="#">TLRQAGAPNNR</a> |
| 1.1   | 1196.655350 | -0.011122 | <a href="#">FITEKAVFSR</a>  |
| 1.1   | 1196.641418 | 0.002810  | <a href="#">EAKKAGPGFHR</a> |
| 0.3   | 1196.640091 | 0.004137  | <a href="#">LDIDSPITAR</a>  |

# **MASCOT** Mascot Search Results

## Peptide View

MS/MS Fragmentation of **ELQAAQAR**

Found in **APOE\_HUMAN**, Apolipoprotein E OS=Homo sapiens GN=APOE PE=1 SV=1

Match to Query 23622: 1196.648668 from(599.331610,2+) rtinseconds(1442) index(38317)

Title: Locus:1.1.1.2951.21 File:"2013-07-02 CLN FXIII 180 min 1st F 3.wiff"

Data file C:\Program Files (x86)\Matrix Science\Mascot Daemon\mgf\7 FXIII 180 min 1st\mascot\_daemon\_merge.mgf

Click mouse within plot area to zoom in by factor of two about that point

Or, Plot from  to  Da

Label all possible matches  Label matches used for scoring

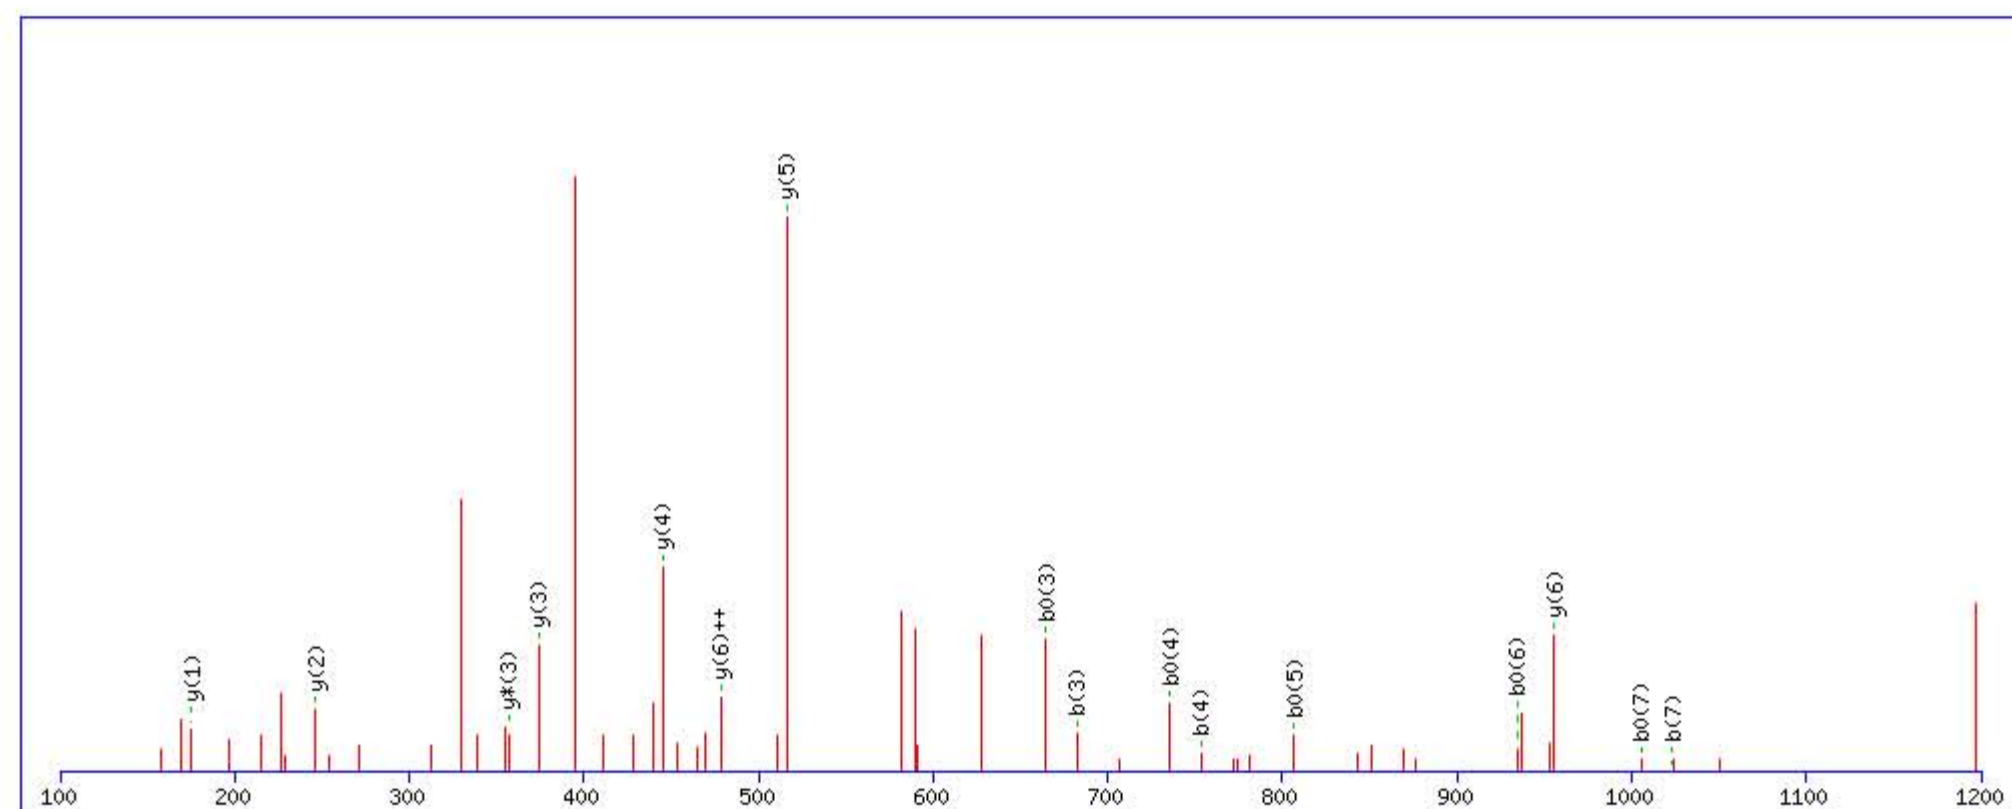

Monoisotopic mass of neutral peptide Mr(calc): 1196.633545

Fixed modifications: Carbamidomethyl (C) (apply to specified residues or termini only)

Variable modifications:

Q3 : Biotin:Thermo-21345 (Q)

Ions Score: 31 Expect: 0.015

Matches : 16/66 fragment ions using 35 most intense peaks [\(help\)](#)

| # | b                  | b <sup>++</sup> | b <sup>*</sup> | b <sup>*++</sup> | b <sup>0</sup>     | b <sup>0++</sup> | Seq. | y                 | y <sup>++</sup>   | y <sup>*</sup>    | y <sup>*++</sup> | # |
|---|--------------------|-----------------|----------------|------------------|--------------------|------------------|------|-------------------|-------------------|-------------------|------------------|---|
| 1 | 130.049869         | 65.528572       |                |                  | 112.039304         | 56.523290        | E    |                   |                   |                   |                  | 8 |
| 2 | 243.133933         | 122.070605      |                |                  | 225.123368         | 113.065322       | L    | 1068.598262       | 534.802769        | 1051.571713       | 526.289495       | 7 |
| 3 | <b>682.359259</b>  | 341.683268      | 665.332710     | 333.169993       | <b>664.348694</b>  | 332.677985       | Q    | <b>955.514198</b> | <b>478.260737</b> | 938.487649        | 469.747463       | 6 |
| 4 | <b>753.396373</b>  | 377.201825      | 736.369824     | 368.688550       | <b>735.385808</b>  | 368.196542       | A    | <b>516.288872</b> | 258.648074        | 499.262323        | 250.134800       | 5 |
| 5 | 824.433487         | 412.720382      | 807.406938     | 404.207107       | <b>806.422922</b>  | 403.715099       | A    | <b>445.251758</b> | 223.129517        | 428.225209        | 214.616243       | 4 |
| 6 | 952.492065         | 476.749671      | 935.465516     | 468.236396       | <b>934.481500</b>  | 467.744388       | Q    | <b>374.214644</b> | 187.610960        | <b>357.188095</b> | 179.097686       | 3 |
| 7 | <b>1023.529179</b> | 512.268227      | 1006.502630    | 503.754953       | <b>1005.518614</b> | 503.262945       | A    | <b>246.156066</b> | 123.581671        | 229.129517        | 115.068397       | 2 |
| 8 |                    |                 |                |                  |                    |                  | R    | <b>175.118952</b> | 88.063114         | 158.092403        | 79.549840        | 1 |

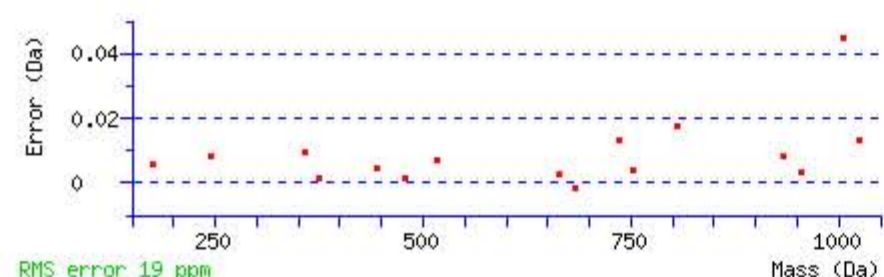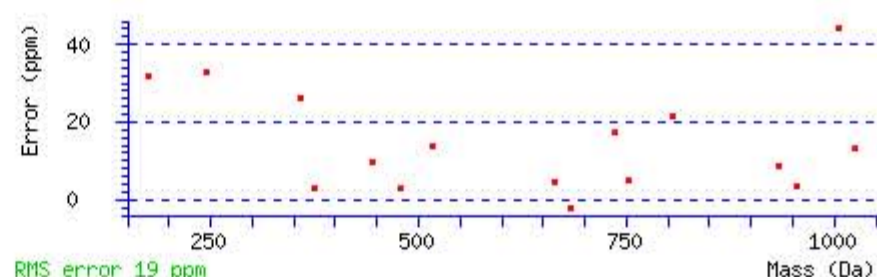

NCBI BLAST search of **ELQAAQAR**

(Parameters: blastp, nr protein database, expect=20000, no filter, PAM30)

Other BLAST [web gateways](#)

### All matches to this query

| Score | Mr(calc):   | Delta     | Sequence                     |
|-------|-------------|-----------|------------------------------|
| 31.0  | 1196.633545 | 0.015123  | <a href="#">ELQAAQAR</a>     |
| 10.9  | 1196.644775 | 0.003893  | <a href="#">LEQANRR</a>      |
| 10.6  | 1196.658707 | -0.010039 | <a href="#">MIIAVTSYKR</a>   |
| 7.3   | 1196.641418 | 0.007250  | <a href="#">EAKKAGPGFHR</a>  |
| 6.3   | 1196.644791 | 0.003877  | <a href="#">QALEGGR</a>      |
| 6.1   | 1196.666565 | -0.017897 | <a href="#">LLLAFAQHR</a>    |
| 4.7   | 1196.666565 | -0.017897 | <a href="#">LFALQAEIHR</a>   |
| 4.2   | 1196.662537 | -0.013869 | <a href="#">KSIAPANGNLGR</a> |
| 4.0   | 1196.633560 | 0.015108  | <a href="#">QNQDILR</a>      |
| 4.0   | 1196.658707 | -0.010039 | <a href="#">LQEVEIR</a>      |

# **MASCOT** Mascot Search Results

## Peptide View

MS/MS Fragmentation of **LGPLVEQGR**

Found in **APOE\_HUMAN**, Apolipoprotein E OS=Homo sapiens GN=APOE PE=1 SV=1

Match to Query 26176: 1278.715108 from(640.364830,2+) rtinseconds(1932) index(24223)

Title: Locus:1.1.1.2815.12 File:"2013-07-02 CLN FXIII 180 min 1st F 2.wiff"

Data file C:\Program Files (x86)\Matrix Science\Mascot Daemon\mgf\7 FXIII 180 min 1st\mascot\_daemon\_merge.mgf

Click mouse within plot area to zoom in by factor of two about that point

Or, Plot from  to  Da

Label all possible matches  Label matches used for scoring

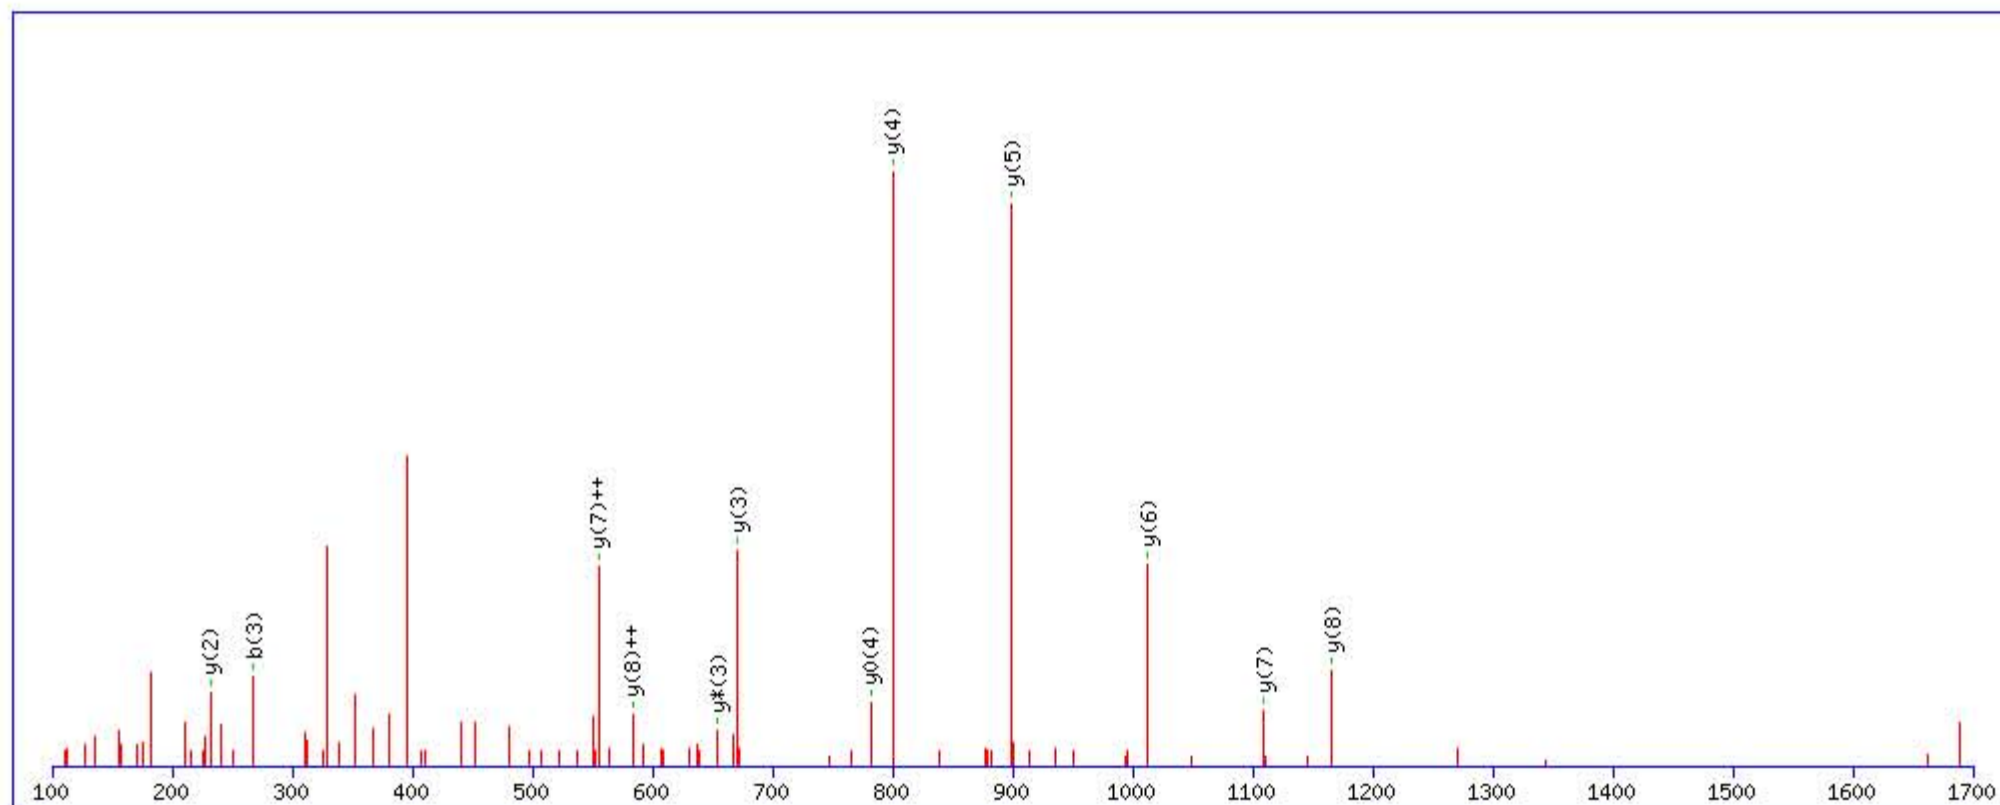

Monoisotopic mass of neutral peptide Mr(calc): 1278.711823

Fixed modifications: Carbamidomethyl (C) (apply to specified residues or termini only)

Variable modifications:

Q7 : Biotin:Thermo-21345 (Q)

Ions Score: 42 Expect: 0.00099

Matches : 12/68 fragment ions using 23 most intense peaks [\(help\)](#)

| # | b           | b <sup>++</sup> | b <sup>*</sup> | b <sup>*++</sup> | b <sup>0</sup> | b <sup>0++</sup> | Seq. | y           | y <sup>++</sup> | y <sup>*</sup> | y <sup>*++</sup> | y <sup>0</sup> | y <sup>0++</sup> | # |
|---|-------------|-----------------|----------------|------------------|----------------|------------------|------|-------------|-----------------|----------------|------------------|----------------|------------------|---|
| 1 | 114.091340  | 57.549308       |                |                  |                |                  | L    |             |                 |                |                  |                |                  | 9 |
| 2 | 171.112804  | 86.060040       |                |                  |                |                  | G    | 1166.635041 | 583.821159      | 1149.608492    | 575.307884       | 1148.624476    | 574.815876       | 8 |
| 3 | 268.165568  | 134.586422      |                |                  |                |                  | P    | 1109.613577 | 555.310426      | 1092.587028    | 546.797152       | 1091.603012    | 546.305144       | 7 |
| 4 | 381.249632  | 191.128454      |                |                  |                |                  | L    | 1012.560813 | 506.784044      | 995.534264     | 498.270770       | 994.550248     | 497.778762       | 6 |
| 5 | 480.318046  | 240.662661      |                |                  |                |                  | V    | 899.476749  | 450.242012      | 882.450200     | 441.728738       | 881.466184     | 441.236730       | 5 |
| 6 | 609.360639  | 305.183958      |                |                  | 591.350074     | 296.178675       | E    | 800.408335  | 400.707805      | 783.381786     | 392.194531       | 782.397770     | 391.702523       | 4 |
| 7 | 1048.585965 | 524.796621      | 1031.559416    | 516.283346       | 1030.575400    | 515.791338       | Q    | 671.365742  | 336.186509      | 654.339193     | 327.673234       |                |                  | 3 |
| 8 | 1105.607429 | 553.307352      | 1088.580880    | 544.794078       | 1087.596864    | 544.302070       | G    | 232.140416  | 116.573846      | 215.113867     | 108.060571       |                |                  | 2 |
| 9 |             |                 |                |                  |                |                  | R    | 175.118952  | 88.063114       | 158.092403     | 79.549839        |                |                  | 1 |

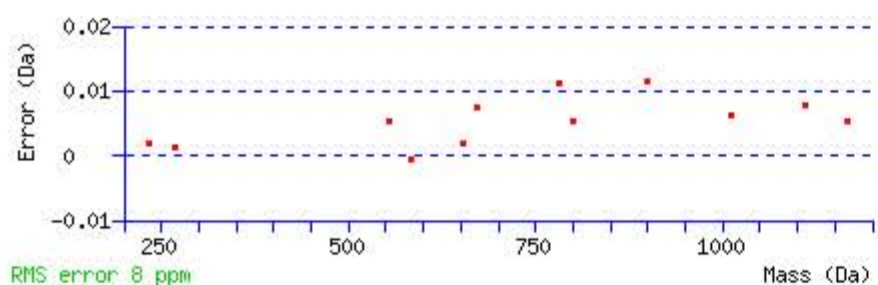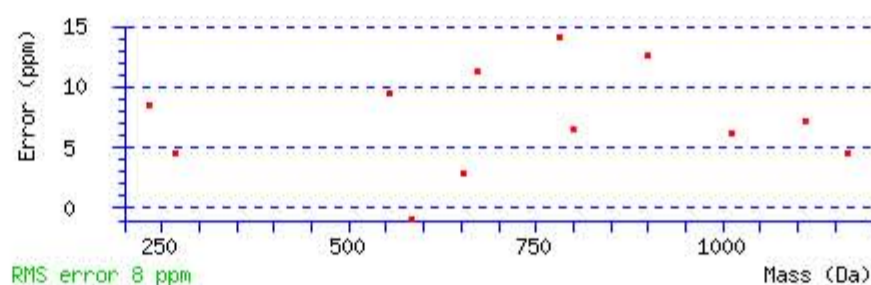

NCBI BLAST search of **LGPLVEQGR**

(Parameters: blastp, nr protein database, expect=20000, no filter, PAM30)

Other BLAST [web gateways](#)

All matches to this query

| Score | Mr(calc):   | Delta    | Sequence                  |
|-------|-------------|----------|---------------------------|
| 41.6  | 1278.711823 | 0.003285 | <a href="#">LGPLVEQGR</a> |

Mascot: <http://www.matrixscience.com/>

# MASCOT Search Results

## Peptide View

MS/MS Fragmentation of **LQAEAFQAR**

Found in **APOE\_HUMAN**, Apolipoprotein E OS=Homo sapiens GN=APOE PE=1 SV=1

Match to Query 27956: 1343.706168 from(672.860360,2+) rtinseconds(1768) index(23005)

Title: Locus:1.1.1.2758.12 File:"2013-07-02 CLN FXIII 180 min 1st F 2.wiff"

Data file C:\Program Files (x86)\Matrix Science\Mascot Daemon\mgf7 FXIII 180 min 1st\mascot\_daemon\_merge.mgf

Click mouse within plot area to zoom in by factor of two about that point

Or, Plot from  to  Da

Label all possible matches  Label matches used for scoring

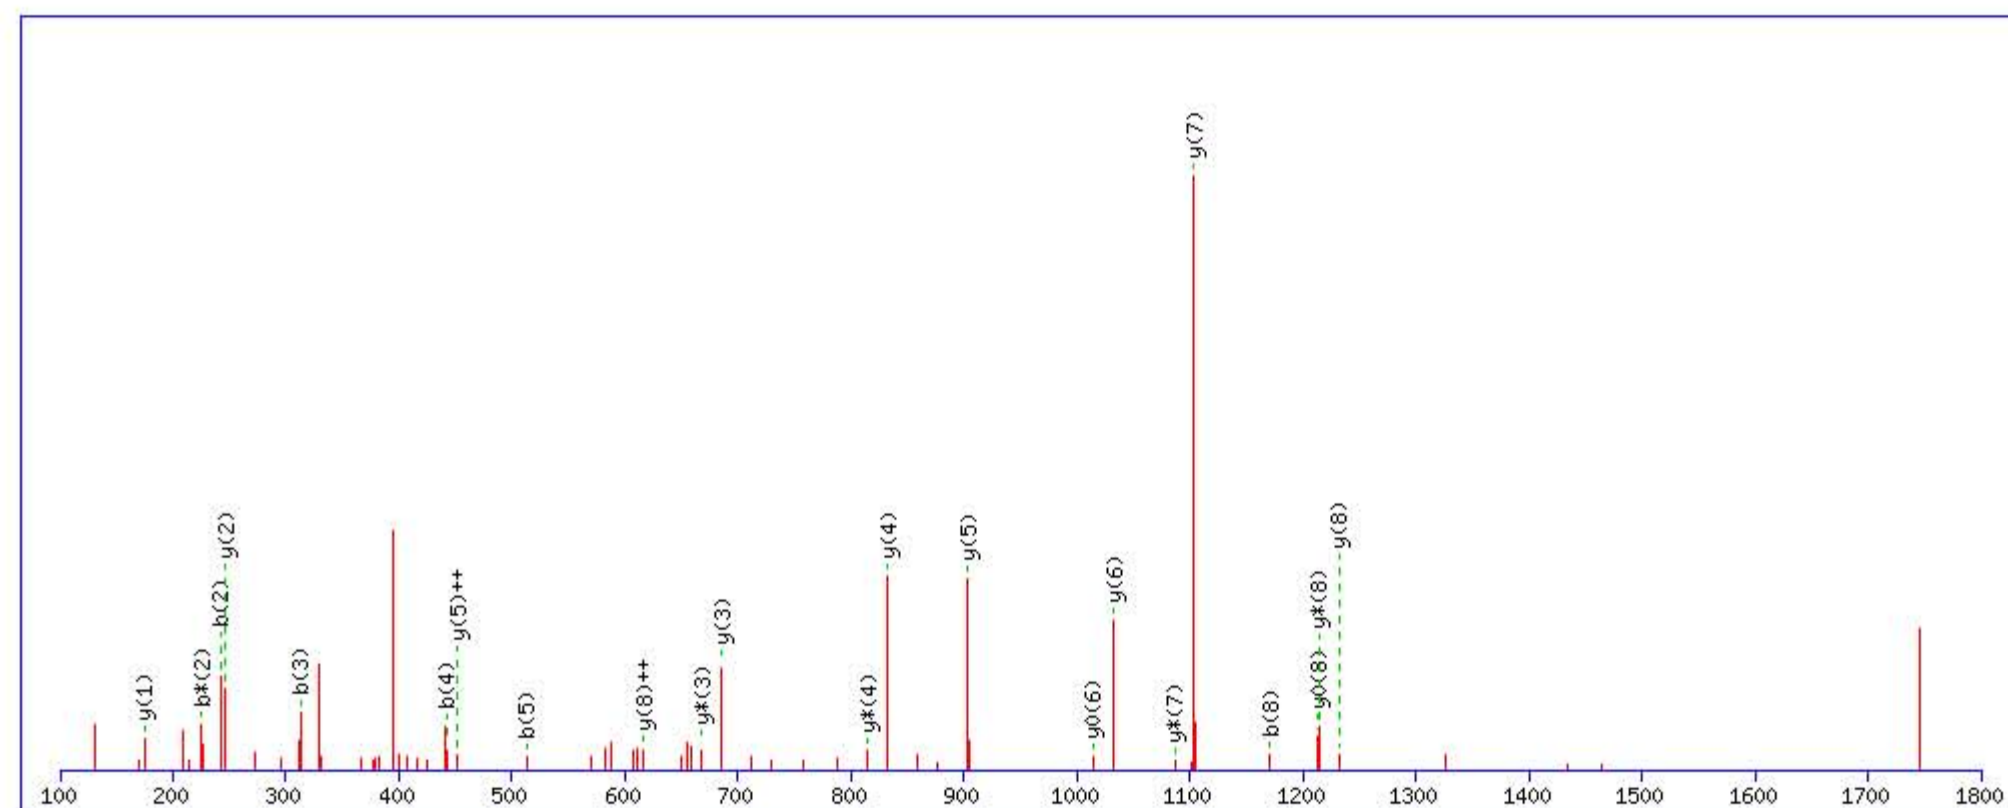

Monoisotopic mass of neutral peptide Mr(calc): 1343.701965

Fixed modifications: Carbamidomethyl (C) (apply to specified residues or termini only)

Variable modifications:

Q7 : Biotin:Thermo-21345 (Q)

Ions Score: 50 Expect: 0.00026

Matches : 22/78 fragment ions using 41 most intense peaks [\(help\)](#)

| # | b                  | b <sup>++</sup> | b <sup>*</sup>    | b <sup>*++</sup> | b <sup>0</sup> | b <sup>0++</sup> | Seq. | y                  | y <sup>++</sup>   | y <sup>*</sup>     | y <sup>*++</sup> | y <sup>0</sup>     | y <sup>0++</sup> | # |
|---|--------------------|-----------------|-------------------|------------------|----------------|------------------|------|--------------------|-------------------|--------------------|------------------|--------------------|------------------|---|
| 1 | 114.091340         | 57.549308       |                   |                  |                |                  | L    |                    |                   |                    |                  |                    |                  | 9 |
| 2 | <b>242.149918</b>  | 121.578597      | <b>225.123369</b> | 113.065323       |                |                  | Q    | <b>1231.625205</b> | 616.316241        | <b>1214.598656</b> | 607.802966       | <b>1213.614640</b> | 607.310958       | 8 |
| 3 | <b>313.187032</b>  | 157.097154      | 296.160483        | 148.583879       |                |                  | A    | <b>1103.566627</b> | 552.286951        | <b>1086.540078</b> | 543.773677       | 1085.556062        | 543.281669       | 7 |
| 4 | <b>442.229625</b>  | 221.618450      | 425.203076        | 213.105176       | 424.219060     | 212.613168       | E    | <b>1032.529513</b> | 516.768395        | 1015.502964        | 508.255120       | <b>1014.518948</b> | 507.763112       | 6 |
| 5 | <b>513.266739</b>  | 257.137008      | 496.240190        | 248.623733       | 495.256174     | 248.131725       | A    | <b>903.486920</b>  | <b>452.247098</b> | 886.460371         | 443.733823       |                    |                  | 5 |
| 6 | 660.335153         | 330.671215      | 643.308604        | 322.157940       | 642.324588     | 321.665932       | F    | <b>832.449806</b>  | 416.728541        | <b>815.423257</b>  | 408.215266       |                    |                  | 4 |
| 7 | 1099.560479        | 550.283878      | 1082.533930       | 541.770603       | 1081.549914    | 541.278595       | Q    | <b>685.381392</b>  | 343.194334        | <b>668.354843</b>  | 334.681060       |                    |                  | 3 |
| 8 | <b>1170.597593</b> | 585.802435      | 1153.571044       | 577.289160       | 1152.587028    | 576.797152       | A    | <b>246.156066</b>  | 123.581671        | 229.129517         | 115.068396       |                    |                  | 2 |
| 9 |                    |                 |                   |                  |                |                  | R    | <b>175.118952</b>  | 88.063114         | 158.092403         | 79.549839        |                    |                  | 1 |

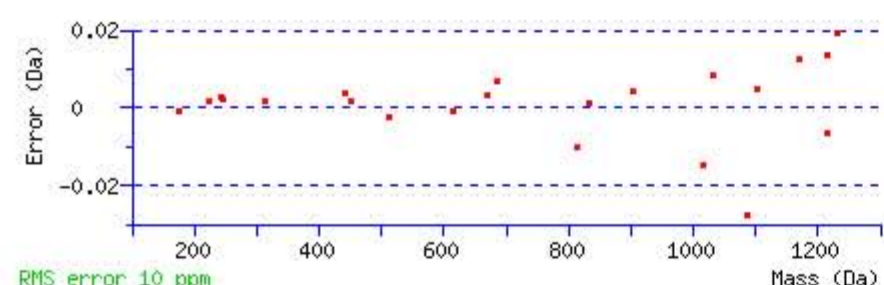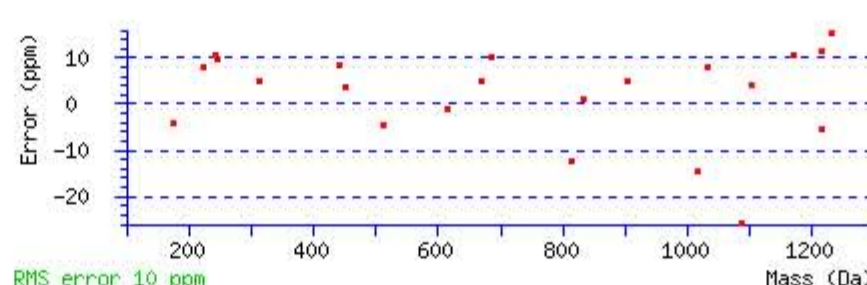

NCBI BLAST search of **LQAEAFQAR**

(Parameters: blastp, nr protein database, expect=20000, no filter, PAM30)

Other BLAST [web gateways](#)

All matches to this query

| Score | Mr(calc):   | Delta     | Sequence                      |
|-------|-------------|-----------|-------------------------------|
| 50.0  | 1343.701965 | 0.004203  | <a href="#">LQAEAFQAR</a>     |
| 12.5  | 1343.694107 | 0.012061  | <a href="#">IQAMSEVQK</a>     |
| 7.5   | 1343.715683 | -0.009515 | <a href="#">LKDSEAE LQRR</a>  |
| 7.5   | 1343.716583 | -0.010415 | <a href="#">LQQVMSRR</a>      |
| 6.5   | 1343.704453 | 0.001715  | <a href="#">IQEKKDEDIAR</a>   |
| 6.0   | 1343.704453 | 0.001715  | <a href="#">IKGEELSEANVR</a>  |
| 4.1   | 1343.693237 | 0.012931  | <a href="#">LQDLELDLETR</a>   |
| 3.1   | 1343.686707 | 0.019461  | <a href="#">AAVQMDPELAKR</a>  |
| 2.9   | 1343.697952 | 0.008216  | <a href="#">AMGTVREAAGLPR</a> |
| 2.3   | 1343.715683 | -0.009515 | <a href="#">QSLIEDARKER</a>   |



# MASCOT SEARCH RESULTS

## Peptide View

MS/MS Fragmentation of **LEEQAQQIR**

Found in **APOE\_HUMAN**, Apolipoprotein E OS=Homo sapiens GN=APOE PE=1 SV=1

Match to Query 32443: 1424.745428 from(713.379990,2+) rtinseconds(1532) index(21248)

Title: Locus:1.1.1.2676.17 File:"2013-07-02 CLN FXIII 180 min 1st F 2.wiff"

Data file C:\Program Files (x86)\Matrix Science\Mascot Daemon\mgf7 FXIII 180 min 1st\mascot\_daemon\_merge.mgf

Click mouse within plot area to zoom in by factor of two about that point

Or, Plot from  to  Da

Label all possible matches  Label matches used for scoring

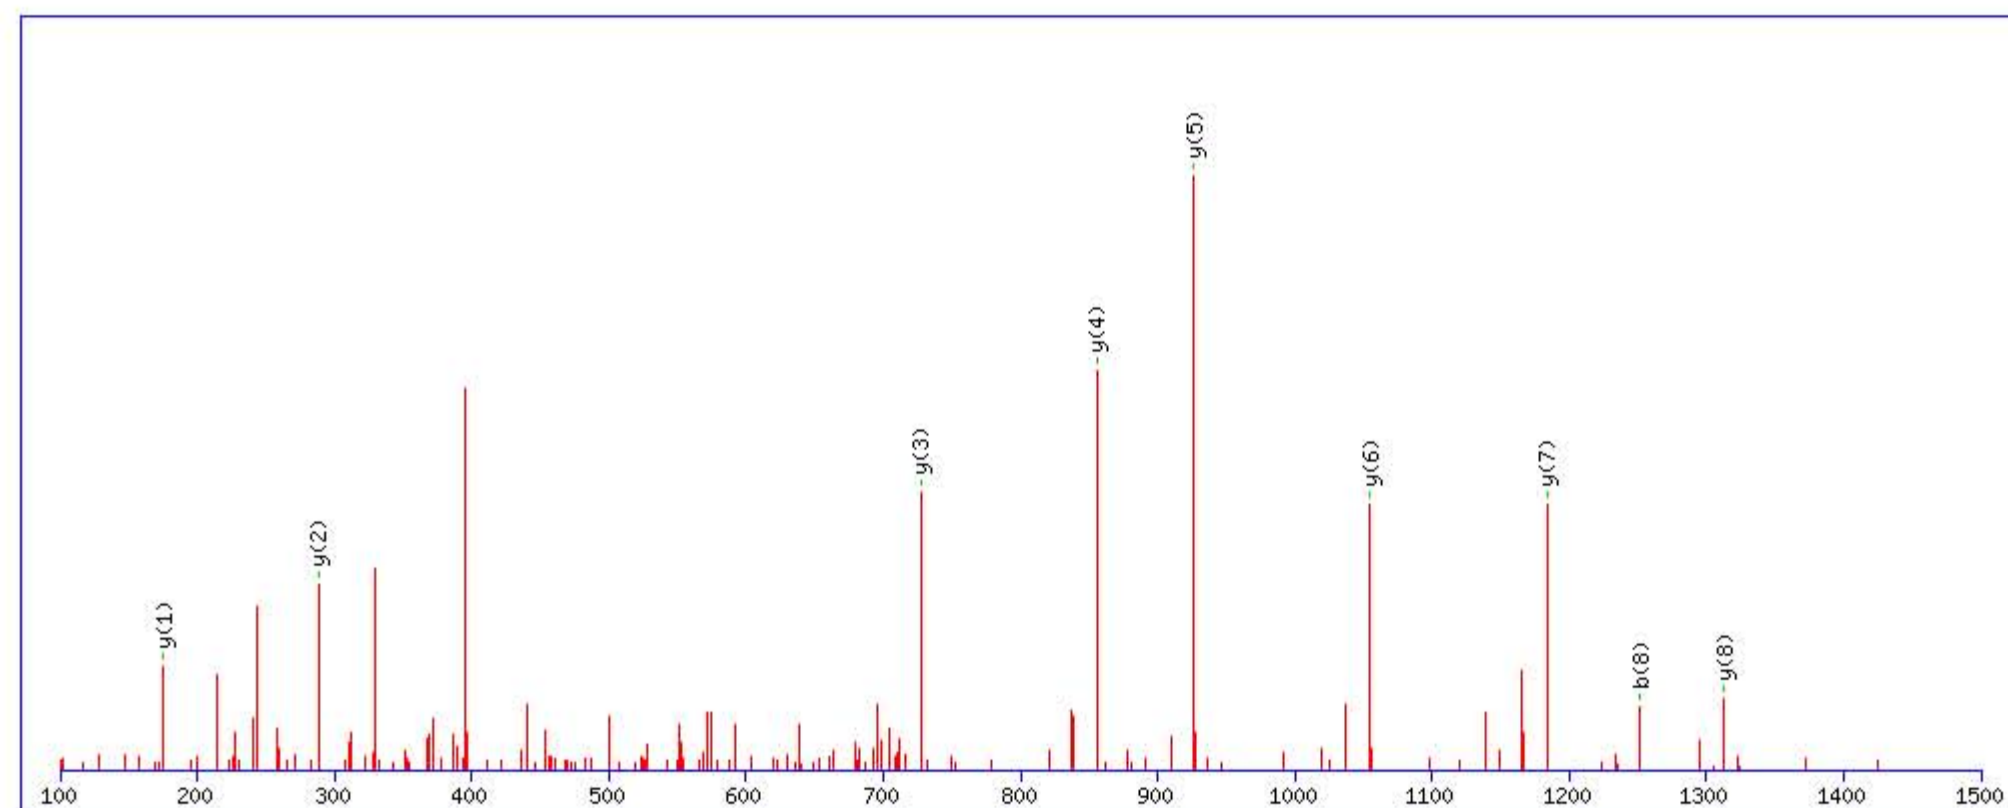

Monoisotopic mass of neutral peptide Mr(calc): 1424.744553

Fixed modifications: Carbamidomethyl (C) (apply to specified residues or termini only)

Variable modifications:

Q7 : Biotin:Thermo-21345 (Q)

Ions Score: 70 Expect: 2.2e-006

Matches : 9/76 fragment ions using 13 most intense peaks [\(help\)](#)

| # | b           | b <sup>++</sup> | b <sup>*</sup> | b <sup>*++</sup> | b <sup>0</sup> | b <sup>0++</sup> | Seq. | y           | y <sup>++</sup> | y <sup>*</sup> | y <sup>*++</sup> | y <sup>0</sup> | y <sup>0++</sup> | # |
|---|-------------|-----------------|----------------|------------------|----------------|------------------|------|-------------|-----------------|----------------|------------------|----------------|------------------|---|
| 1 | 114.091340  | 57.549308       |                |                  |                |                  | L    |             |                 |                |                  |                |                  | 9 |
| 2 | 243.133933  | 122.070605      |                |                  | 225.123368     | 113.065322       | E    | 1312.667798 | 656.837537      | 1295.641249    | 648.324263       | 1294.657233    | 647.832255       | 8 |
| 3 | 372.176526  | 186.591901      |                |                  | 354.165961     | 177.586619       | E    | 1183.625205 | 592.316241      | 1166.598656    | 583.802966       | 1165.614640    | 583.310958       | 7 |
| 4 | 500.235104  | 250.621190      | 483.208555     | 242.107916       | 482.224539     | 241.615908       | Q    | 1054.582612 | 527.794944      | 1037.556063    | 519.281670       |                |                  | 6 |
| 5 | 571.272218  | 286.139747      | 554.245669     | 277.626473       | 553.261653     | 277.134465       | A    | 926.524034  | 463.765655      | 909.497485     | 455.252381       |                |                  | 5 |
| 6 | 699.330796  | 350.169036      | 682.304247     | 341.655762       | 681.320231     | 341.163754       | Q    | 855.486920  | 428.247098      | 838.460371     | 419.733824       |                |                  | 4 |
| 7 | 1138.556122 | 569.781699      | 1121.529573    | 561.268425       | 1120.545557    | 560.776417       | Q    | 727.428342  | 364.217809      | 710.401793     | 355.704535       |                |                  | 3 |
| 8 | 1251.640186 | 626.323731      | 1234.613637    | 617.810457       | 1233.629621    | 617.318449       | I    | 288.203016  | 144.605146      | 271.176467     | 136.091871       |                |                  | 2 |
| 9 |             |                 |                |                  |                |                  | R    | 175.118952  | 88.063114       | 158.092403     | 79.549839        |                |                  | 1 |

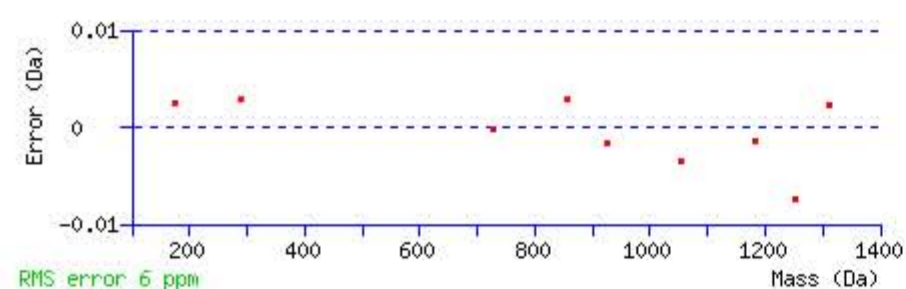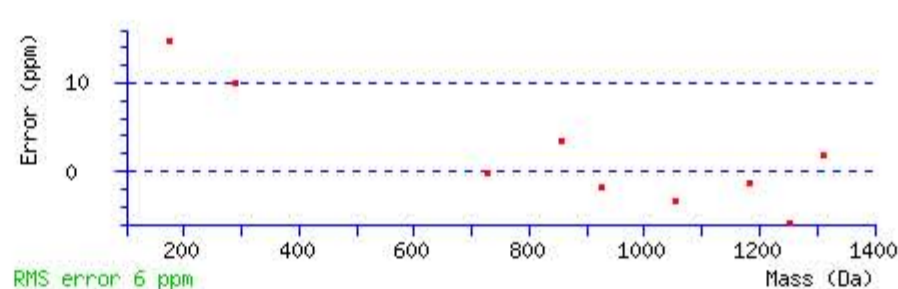

NCBI BLAST search of [LEEQAQQIR](#)

(Parameters: blastp, nr protein database, expect=20000, no filter, PAM30)

Other BLAST [web gateways](#)

## All matches to this query

| Score | Mr(calc):   | Delta     | Sequence                     |
|-------|-------------|-----------|------------------------------|
| 70.1  | 1424.744553 | 0.000875  | <a href="#">LEEQAQQIR</a>    |
| 53.7  | 1424.744553 | 0.000875  | <a href="#">LEEQAQQIR</a>    |
| 24.4  | 1424.744553 | 0.000875  | <a href="#">LEEQAQQIR</a>    |
| 16.1  | 1424.733322 | 0.012106  | <a href="#">LEQETEPLR</a>    |
| 14.4  | 1424.745438 | -0.000010 | <a href="#">QMQQIR</a>       |
| 9.3   | 1424.726807 | 0.018621  | <a href="#">QMNLLQQQPK</a>   |
| 7.3   | 1424.744583 | 0.000845  | <a href="#">QLSGDQPTIR</a>   |
| 6.9   | 1424.744583 | 0.000845  | <a href="#">QLSGDQPTIR</a>   |
| 6.8   | 1424.734680 | 0.010748  | <a href="#">WVLTAAHCLAQR</a> |
| 5.8   | 1424.745438 | -0.000010 | <a href="#">QMQQIR</a>       |

# MASCOT Search Results

## Peptide View

MS/MS Fragmentation of **QQTEWQSGQR**

Found in **APOE\_HUMAN**, Apolipoprotein E OS=Homo sapiens GN=APOE PE=1 SV=1

Match to Query 36604: 1557.739868 from(779.877210,2+) rtinseconds(1536) index(21280)

Title: Locus:1.1.1.2677.24 File:"2013-07-02 CLN FXIII 180 min 1st F 2.wiff"

Data file C:\Program Files (x86)\Matrix Science\Mascot Daemon\mgf\7 FXIII 180 min 1st\mascot\_daemon\_merge.mgf

Click mouse within plot area to zoom in by factor of two about that point

Or, Plot from  to  Da

Label all possible matches  Label matches used for scoring

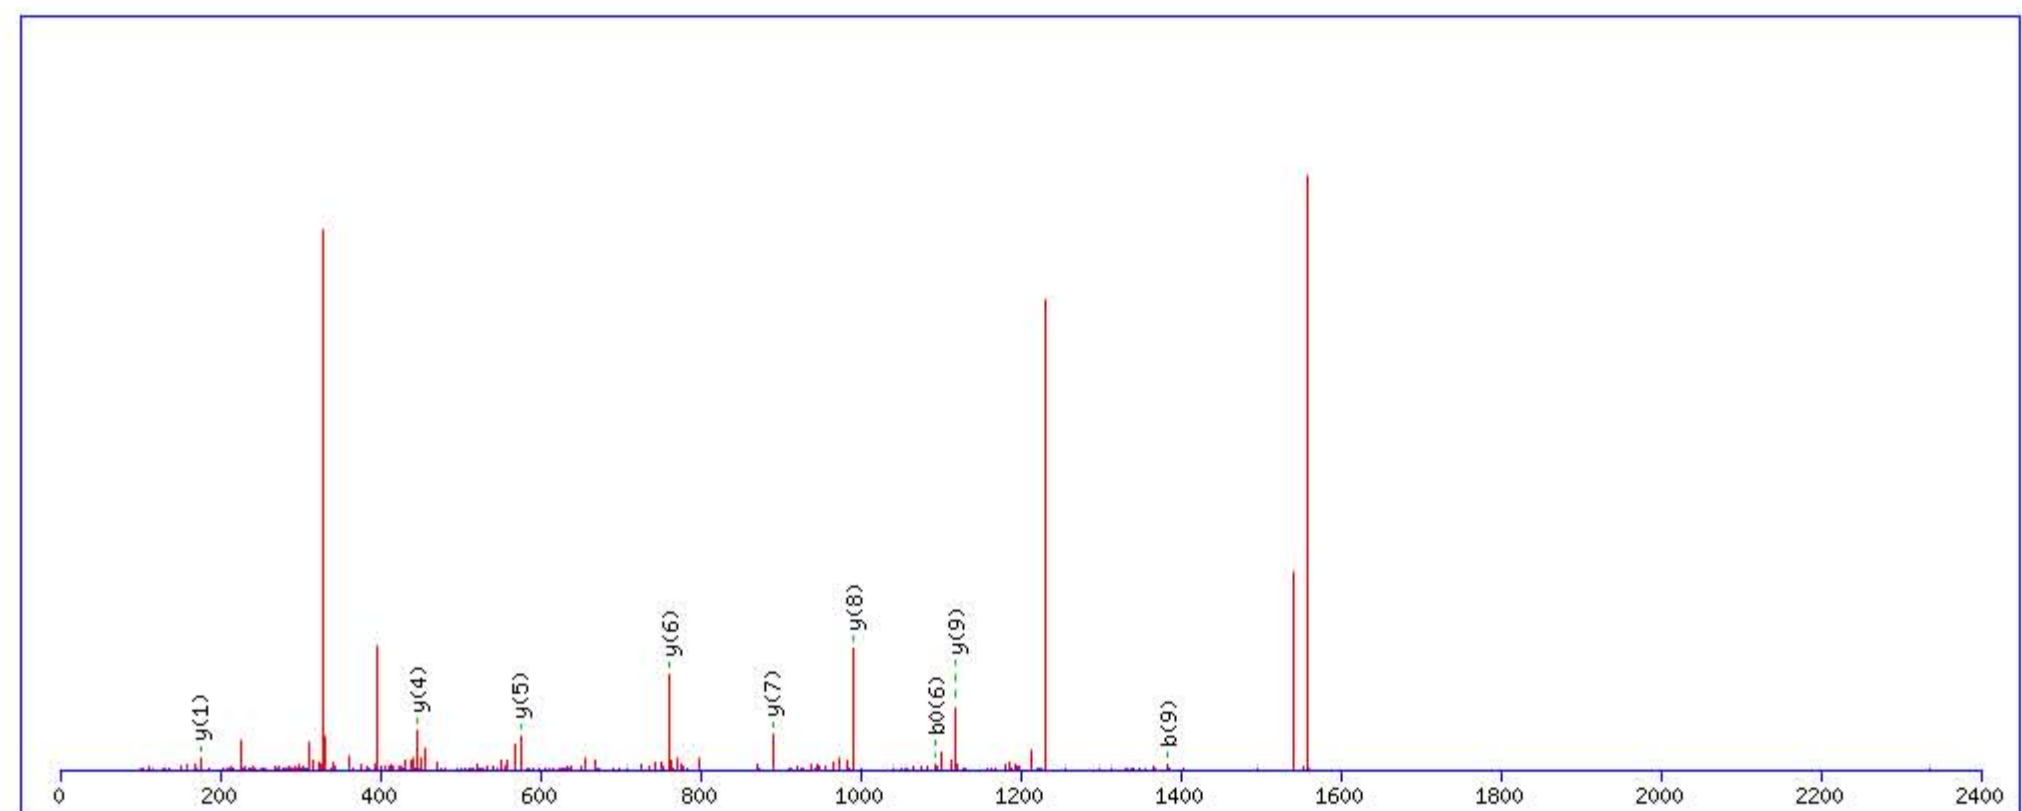

Monoisotopic mass of neutral peptide Mr(calc): 1557.735809

Fixed modifications: Carbamidomethyl (C) (apply to specified residues or termini only)

Variable modifications:

Q1 : Biotin:Thermo-21345 (Q)

Ions Score: 41 Expect: 0.0011

Matches : 9/98 fragment ions using 15 most intense peaks [\(help\)](#)

| #  | b           | b <sup>++</sup> | b <sup>+</sup> | b <sup>+++</sup> | b <sup>0</sup> | b <sup>0++</sup> | Seq. | y           | y <sup>++</sup> | y <sup>+</sup> | y <sup>+++</sup> | y <sup>0</sup> | y <sup>0++</sup> | #  |
|----|-------------|-----------------|----------------|------------------|----------------|------------------|------|-------------|-----------------|----------------|------------------|----------------|------------------|----|
| 1  | 440.232602  | 220.619939      | 423.206053     | 212.106664       |                |                  | Q    |             |                 |                |                  |                |                  | 10 |
| 2  | 568.291180  | 284.649228      | 551.264631     | 276.135954       |                |                  | Q    | 1119.517763 | 560.262520      | 1102.491214    | 551.749245       | 1101.507198    | 551.257237       | 9  |
| 3  | 669.338859  | 335.173068      | 652.312310     | 326.659793       | 651.328294     | 326.167785       | T    | 991.459185  | 496.233231      | 974.432636     | 487.719956       | 973.448620     | 487.227948       | 8  |
| 4  | 798.381452  | 399.694364      | 781.354903     | 391.181090       | 780.370887     | 390.689082       | E    | 890.411506  | 445.709391      | 873.384957     | 437.196117       | 872.400941     | 436.704109       | 7  |
| 5  | 984.460765  | 492.734021      | 967.434216     | 484.220746       | 966.450200     | 483.728738       | W    | 761.368913  | 381.188095      | 744.342364     | 372.674820       | 743.358348     | 372.182812       | 6  |
| 6  | 1112.519343 | 556.763310      | 1095.492794    | 548.250035       | 1094.508778    | 547.758027       | Q    | 575.289600  | 288.148438      | 558.263051     | 279.635164       | 557.279035     | 279.143156       | 5  |
| 7  | 1199.551371 | 600.279324      | 1182.524822    | 591.766049       | 1181.540806    | 591.274041       | S    | 447.231022  | 224.119149      | 430.204473     | 215.605875       | 429.220457     | 215.113867       | 4  |
| 8  | 1256.572835 | 628.790056      | 1239.546286    | 620.276781       | 1238.562270    | 619.784773       | G    | 360.198994  | 180.603135      | 343.172445     | 172.089860       |                |                  | 3  |
| 9  | 1384.631413 | 692.819345      | 1367.604864    | 684.306070       | 1366.620848    | 683.814062       | Q    | 303.177530  | 152.092403      | 286.150981     | 143.579129       |                |                  | 2  |
| 10 |             |                 |                |                  |                |                  | R    | 175.118952  | 88.063114       | 158.092403     | 79.549839        |                |                  | 1  |

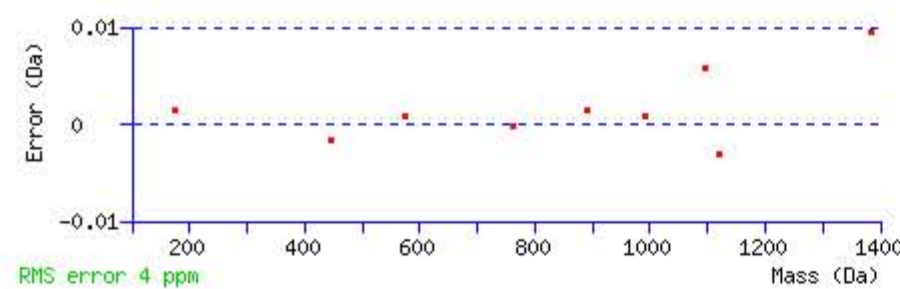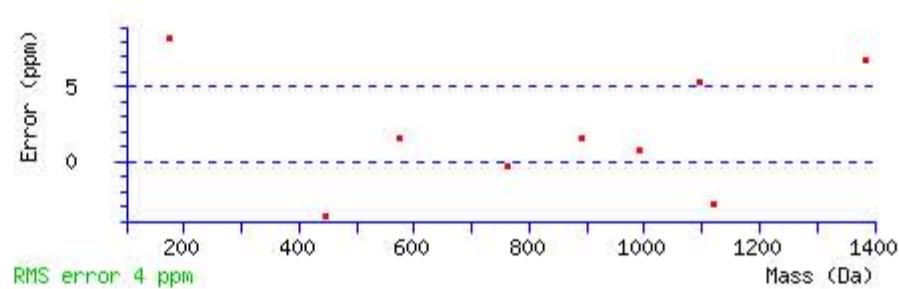

NCBI BLAST search of **QQTEWQSGQR**

(Parameters: blastp, nr protein database, expect=20000, no filter, PAM30)

Other BLAST [web gateways](#)

## All matches to this query

| Score | Mr(calc):   | Delta     | Sequence                         |
|-------|-------------|-----------|----------------------------------|
| 41.1  | 1557.735809 | 0.004059  | <a href="#">QQTEWQSGQR</a>       |
| 28.7  | 1557.735809 | 0.004059  | <a href="#">QQTEWQSGQR</a>       |
| 9.2   | 1557.747040 | -0.007172 | <a href="#">AFSHCSSLTKHQR</a>    |
| 6.4   | 1557.742340 | -0.002472 | <a href="#">TQSFEIQPDSGPR</a>    |
| 6.0   | 1557.746567 | -0.006699 | <a href="#">QMSSPQSR</a>         |
| 3.7   | 1557.760925 | -0.021057 | <a href="#">AKEEAQWQTR</a>       |
| 3.7   | 1557.720551 | 0.019317  | <a href="#">LSQVSPEDDRPCR</a>    |
| 3.7   | 1557.756897 | -0.017029 | <a href="#">MAASAAAELQASGGPR</a> |
| 3.7   | 1557.749496 | -0.009628 | <a href="#">QAEATRQAAAQEER</a>   |
| 3.7   | 1557.720566 | 0.019302  | <a href="#">QEAATGVDTICTHR</a>   |

# MASCOT SEARCH RESULTS

## Peptide View

MS/MS Fragmentation of **AATVGSLAGQPLQER**

Found in **APOE\_HUMAN**, Apolipoprotein E OS=Homo sapiens GN=APOE PE=1 SV=1

Match to Query 45466: 1807.968912 from(603.663580,3+) rtinseconds(1932) index(24219)

Title: Locus:1.1.1.2815.8 File:"2013-07-02 CLN FXIII 180 min 1st F 2.wiff"

Data file C:\Program Files (x86)\Matrix Science\Mascot Daemon\mgf\7 FXIII 180 min 1st\mascot\_daemon\_merge.mgf

Click mouse within plot area to zoom in by factor of two about that point

Or, Plot from  to  Da

Label all possible matches  Label matches used for scoring

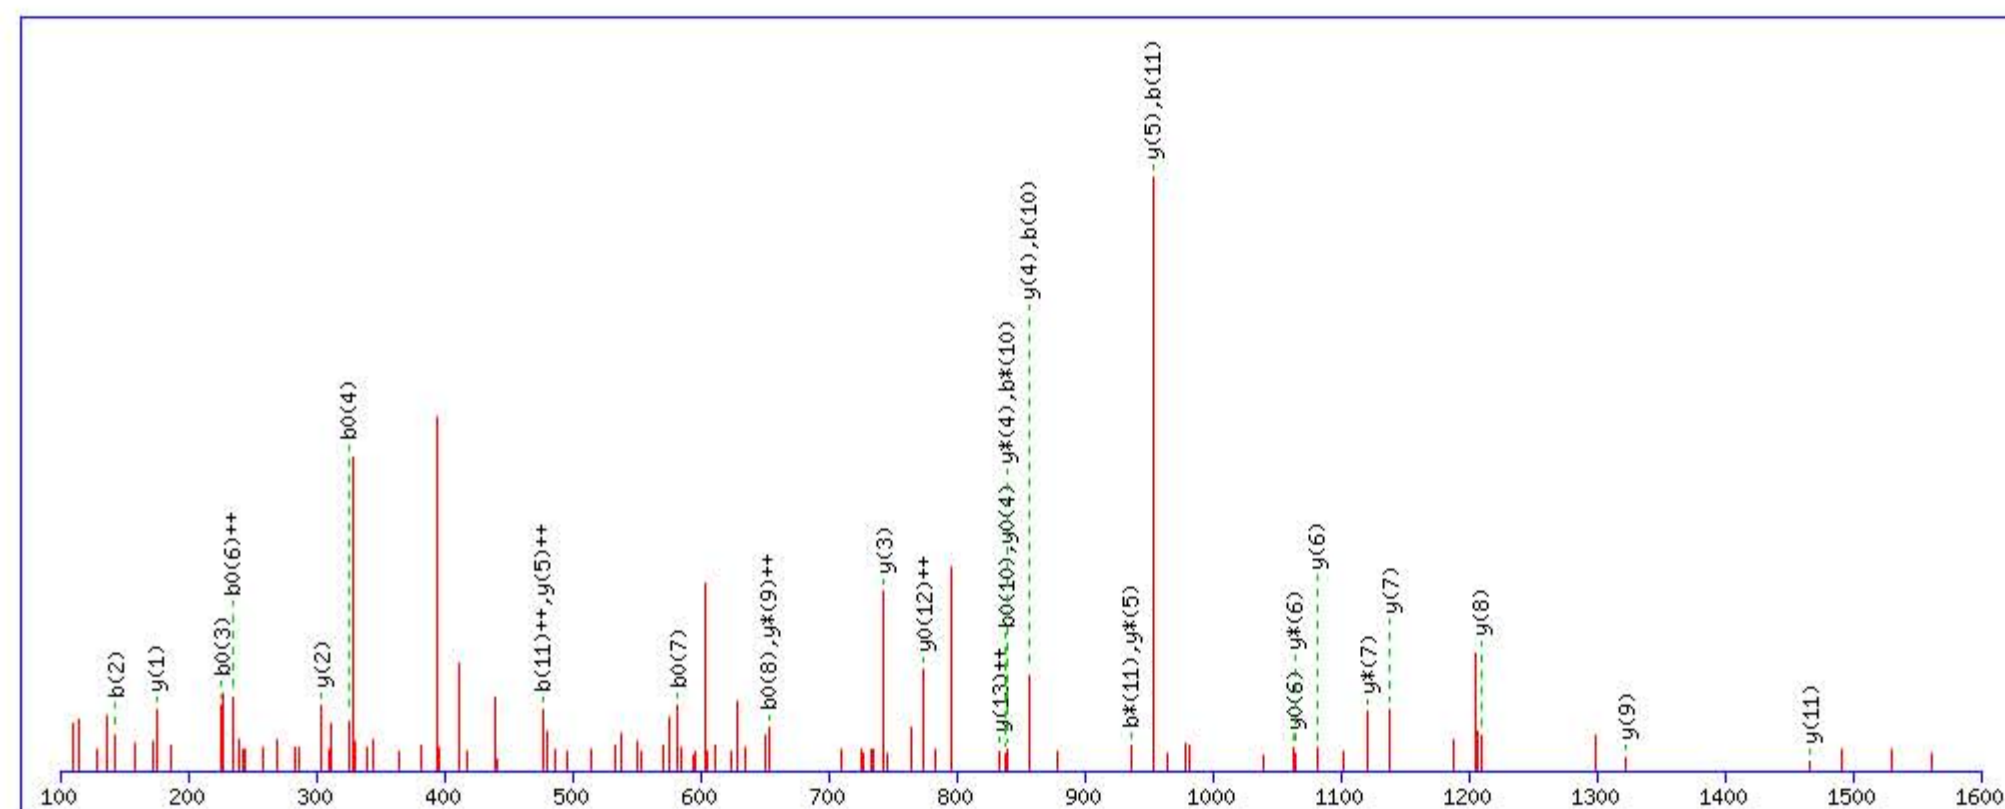

Monoisotopic mass of neutral peptide Mr(calc): 1807.961441

Fixed modifications: Carbamidomethyl (C) (apply to specified residues or termini only)

Variable modifications:

Q13 : Biotin:Thermo-21345 (Q)

Ions Score: 43 Expect: 0.00019

Matches : 32/144 fragment ions using 61 most intense peaks [\(help\)](#)

| #  | b                 | b <sup>++</sup>   | b <sup>*</sup>    | b <sup>*++</sup> | b <sup>0</sup>    | b <sup>0++</sup>  | Seq. | y                  | y <sup>++</sup>   | y <sup>*</sup>     | y <sup>*++</sup>  | y <sup>0</sup>     | y <sup>0++</sup>  | #  |
|----|-------------------|-------------------|-------------------|------------------|-------------------|-------------------|------|--------------------|-------------------|--------------------|-------------------|--------------------|-------------------|----|
| 1  | 72.044390         | 36.525833         |                   |                  |                   |                   | A    |                    |                   |                    |                   |                    |                   | 15 |
| 2  | <b>143.081504</b> | 72.044390         |                   |                  |                   |                   | A    | 1737.931618        | 869.469447        | 1720.905069        | 860.956173        | 1719.921053        | 860.464165        | 14 |
| 3  | 244.129183        | 122.568230        |                   |                  | 226.118618        | 113.562947        | T    | 1666.894504        | <b>833.950890</b> | 1649.867955        | 825.437616        | 1648.883939        | 824.945608        | 13 |
| 4  | 343.197597        | 172.102437        |                   |                  | 325.187032        | 163.097154        | V    | 1565.846825        | 783.427051        | 1548.820276        | 774.913776        | 1547.836260        | <b>774.421768</b> | 12 |
| 5  | 400.219061        | 200.613169        |                   |                  | 382.208496        | 191.607886        | G    | <b>1466.778411</b> | 733.892844        | 1449.751862        | 725.379569        | 1448.767846        | 724.887561        | 11 |
| 6  | 487.251089        | 244.129183        |                   |                  | 469.240524        | <b>235.123900</b> | S    | 1409.756947        | 705.382112        | 1392.730398        | 696.868837        | 1391.746382        | 696.376829        | 10 |
| 7  | 600.335153        | 300.671215        |                   |                  | 582.324588        | 291.665932        | L    | <b>1322.724919</b> | 661.866098        | 1305.698370        | <b>653.352823</b> | 1304.714354        | 652.860815        | 9  |
| 8  | 671.372267        | 336.189772        |                   |                  | 653.361702        | 327.184489        | A    | <b>1209.640855</b> | 605.324066        | 1192.614306        | 596.810791        | 1191.630290        | 596.318783        | 8  |
| 9  | 728.393731        | 364.700504        |                   |                  | 710.383166        | 355.695221        | G    | <b>1138.603741</b> | 569.805509        | <b>1121.577192</b> | 561.292234        | 1120.593176        | 560.800226        | 7  |
| 10 | <b>856.452309</b> | 428.729793        | <b>839.425760</b> | 420.216518       | <b>838.441744</b> | 419.724510        | Q    | <b>1081.582277</b> | 541.294777        | <b>1064.555728</b> | 532.781502        | <b>1063.571712</b> | 532.289494        | 6  |
| 11 | <b>953.505073</b> | <b>477.256175</b> | <b>936.478524</b> | 468.742900       | 935.494508        | 468.250892        | P    | <b>953.523699</b>  | <b>477.265488</b> | <b>936.497150</b>  | 468.752213        | 935.513134         | 468.260205        | 5  |
| 12 | 1066.589137       | 533.798207        | 1049.562588       | 525.284932       | 1048.578572       | 524.792924        | L    | <b>856.470935</b>  | 428.739106        | <b>839.444386</b>  | 420.225831        | <b>838.460370</b>  | 419.733823        | 4  |
| 13 | 1505.814463       | 753.410870        | 1488.787914       | 744.897595       | 1487.803898       | 744.405587        | Q    | <b>743.386871</b>  | 372.197074        | 726.360322         | 363.683799        | 725.376306         | 363.191791        | 3  |
| 14 | 1634.857056       | 817.932166        | 1617.830507       | 809.418892       | 1616.846491       | 808.926884        | E    | <b>304.161545</b>  | 152.584411        | 287.134996         | 144.071136        | 286.150980         | 143.579128        | 2  |
| 15 |                   |                   |                   |                  |                   |                   | R    | <b>175.118952</b>  | 88.063114         | 158.092403         | 79.549839         |                    |                   | 1  |

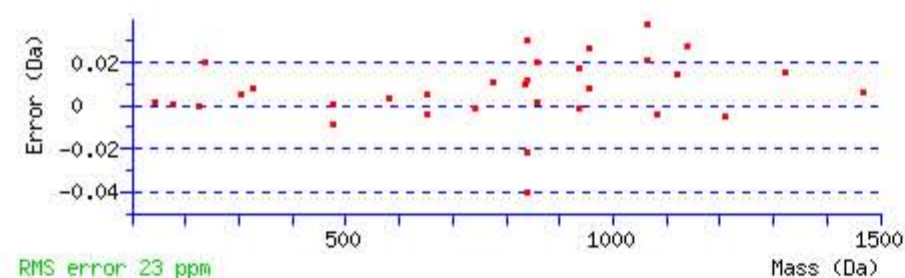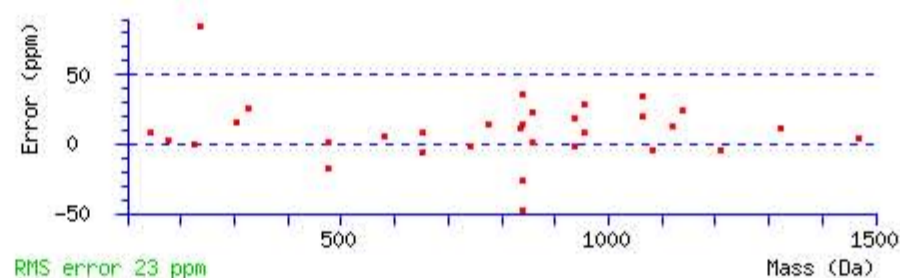

NCBI BLAST search of **AATVGSLAGQPLQER**

(Parameters: blastp, nr protein database, expect=20000, no filter, PAM30)

Other BLAST [web gateways](#)

All matches to this query

| Score | Mr(calc):   | Delta    | Sequence                         |
|-------|-------------|----------|----------------------------------|
| 42.8  | 1807.961441 | 0.007471 | <a href="#">AATVGSLAGQPLQER</a>  |
| 10.8  | 1807.961441 | 0.007471 | <a href="#">AATVGSLAGQPLQER</a>  |
| 3.2   | 1807.947510 | 0.021402 | <a href="#">VGLAQAAMDISRGNHR</a> |

# MASCOT SEARCH RESULTS

## Peptide View

MS/MS Fragmentation of **SWFEPLVEDMQR**

Found in **APOE\_HUMAN**, Apolipoprotein E OS=Homo sapiens GN=APOE PE=1 SV=1

Match to Query 46399: 1846.890732 from(616.637520,3+) rtinseconds(2810) index(30114)

Title: Locus:1.1.1.3120.4 File:"2013-07-02 CLN FXIII 180 min 1st F 2.wiff"

Data file C:\Program Files (x86)\Matrix Science\Mascot Daemon\mgf7 FXIII 180 min 1st\mascot\_daemon\_merge.mgf

Click mouse within plot area to zoom in by factor of two about that point

Or, Plot from  to  Da

Label all possible matches  Label matches used for scoring

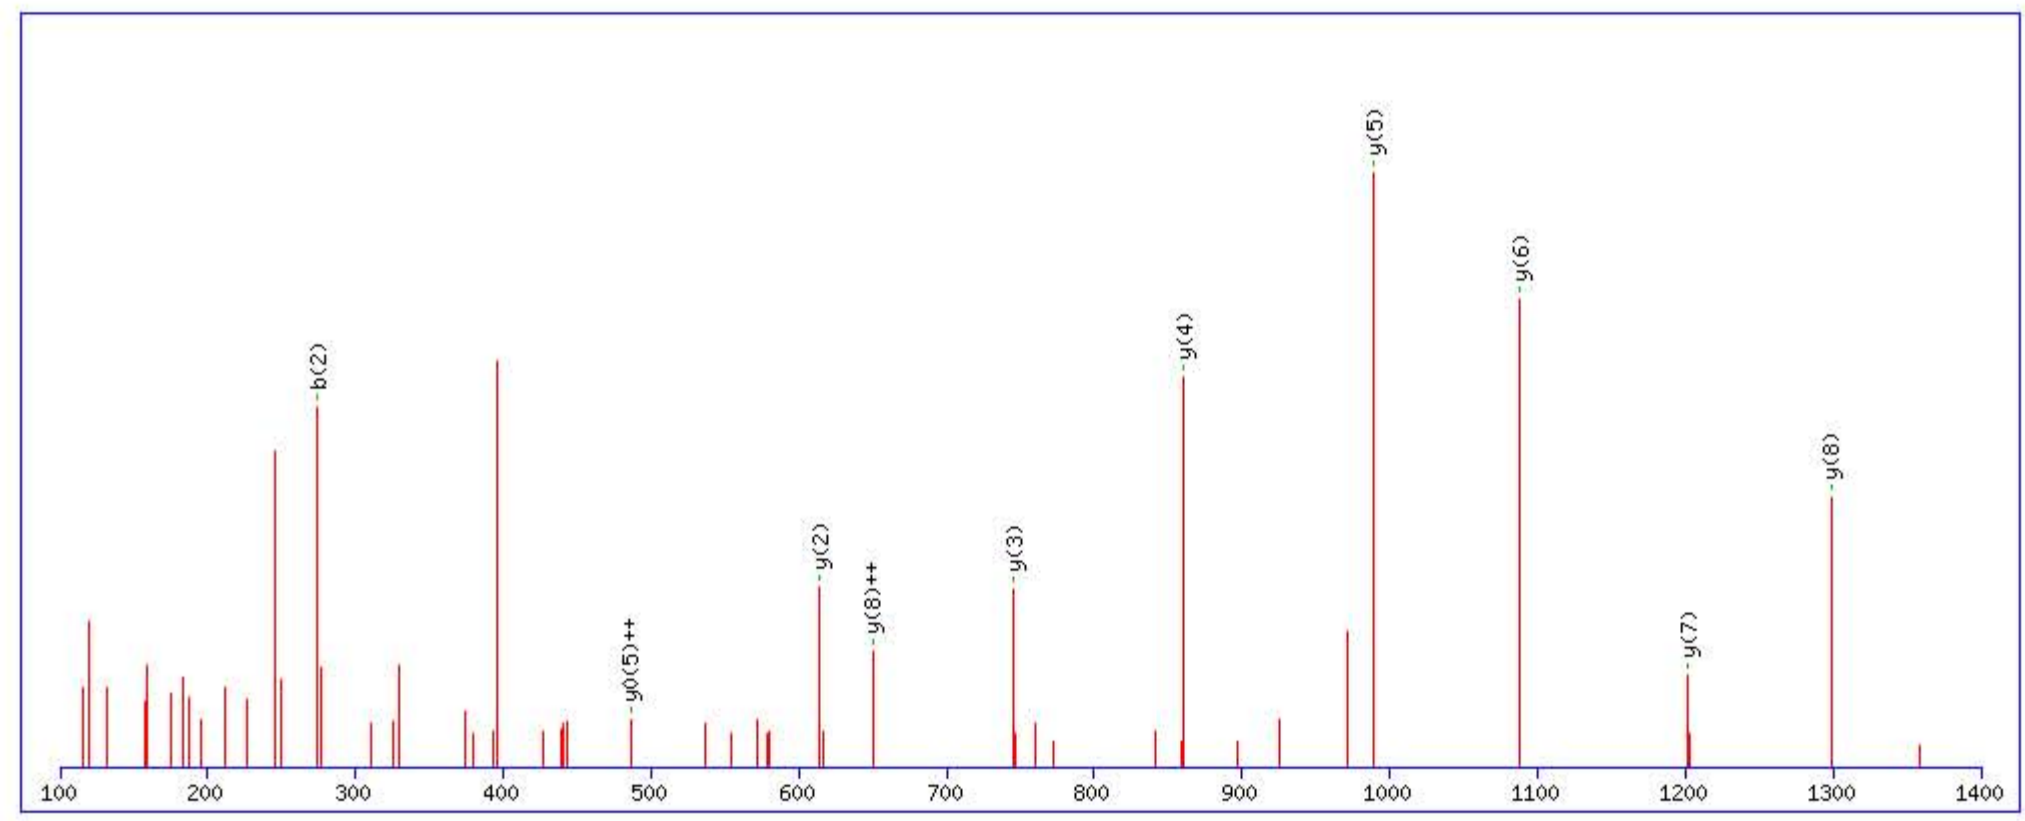

Monoisotopic mass of neutral peptide Mr(calc): 1846.874603

Fixed modifications: Carbamidomethyl (C) (apply to specified residues or termini only)

Variable modifications:

Q11 : Biotin:Thermo-21345 (Q)

Ions Score: 54 Expect: 1.7e-005

Matches : 10/106 fragment ions using 13 most intense peaks [\(help\)](#)

| #  | b                 | b <sup>++</sup> | b <sup>*</sup> | b <sup>*++</sup> | b <sup>0</sup> | b <sup>0++</sup> | Seq. | y                  | y <sup>++</sup>   | y <sup>*</sup> | y <sup>*++</sup> | y <sup>0</sup> | y <sup>0++</sup>  | #  |
|----|-------------------|-----------------|----------------|------------------|----------------|------------------|------|--------------------|-------------------|----------------|------------------|----------------|-------------------|----|
| 1  | 88.039304         | 44.523290       |                |                  | 70.028739      | 35.518008        | S    |                    |                   |                |                  |                |                   | 12 |
| 2  | <b>274.118617</b> | 137.562947      |                |                  | 256.108052     | 128.557664       | W    | 1760.849861        | 880.928568        | 1743.823312    | 872.415294       | 1742.839296    | 871.923286        | 11 |
| 3  | 421.187031        | 211.097153      |                |                  | 403.176466     | 202.091871       | F    | 1574.770548        | 787.888912        | 1557.743999    | 779.375638       | 1556.759983    | 778.883629        | 10 |
| 4  | 550.229624        | 275.618450      |                |                  | 532.219059     | 266.613168       | E    | 1427.702134        | 714.354705        | 1410.675585    | 705.841431       | 1409.691569    | 705.349422        | 9  |
| 5  | 647.282388        | 324.144832      |                |                  | 629.271823     | 315.139550       | P    | <b>1298.659541</b> | <b>649.833409</b> | 1281.632992    | 641.320134       | 1280.648976    | 640.828126        | 8  |
| 6  | 760.366452        | 380.686864      |                |                  | 742.355887     | 371.681582       | L    | <b>1201.606777</b> | 601.307027        | 1184.580228    | 592.793752       | 1183.596212    | 592.301744        | 7  |
| 7  | 859.434866        | 430.221071      |                |                  | 841.424301     | 421.215789       | V    | <b>1088.522713</b> | 544.764995        | 1071.496164    | 536.251720       | 1070.512148    | 535.759712        | 6  |
| 8  | 988.477459        | 494.742368      |                |                  | 970.466894     | 485.737085       | E    | <b>989.454299</b>  | 495.230788        | 972.427750     | 486.717513       | 971.443734     | <b>486.225505</b> | 5  |
| 9  | 1103.504402       | 552.255839      |                |                  | 1085.493837    | 543.250557       | D    | <b>860.411706</b>  | 430.709491        | 843.385157     | 422.196216       | 842.401141     | 421.704208        | 4  |
| 10 | 1234.544887       | 617.776082      |                |                  | 1216.534322    | 608.770799       | M    | <b>745.384763</b>  | 373.196020        | 728.358214     | 364.682745       |                |                   | 3  |
| 11 | 1673.770213       | 837.388745      | 1656.743664    | 828.875470       | 1655.759648    | 828.383462       | Q    | <b>614.344278</b>  | 307.675777        | 597.317729     | 299.162503       |                |                   | 2  |
| 12 |                   |                 |                |                  |                |                  | R    | 175.118952         | 88.063114         | 158.092403     | 79.549839        |                |                   | 1  |

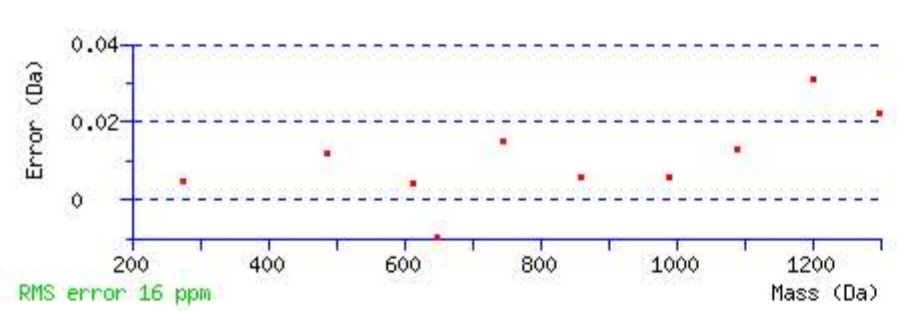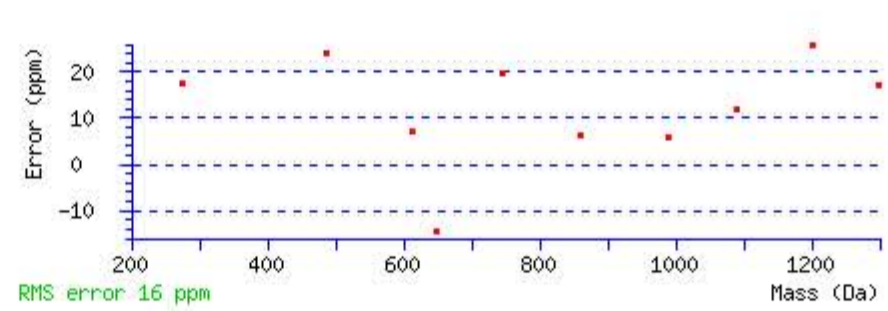

NCBI BLAST search of **SWFEPLVEDMQR**

(Parameters: blastp, nr protein database, expect=20000, no filter, PAM30)

Other BLAST [web gateways](#)

All matches to this query

| Score | Mr(calc):   | Delta     | Sequence                           |
|-------|-------------|-----------|------------------------------------|
| 53.7  | 1846.874603 | 0.016129  | <a href="#">SWFEPLVEDMQR</a>       |
| 2.8   | 1846.895721 | -0.004989 | <a href="#">LQLEETMPSPYGR</a>      |
| 1.8   | 1846.902084 | -0.011352 | <a href="#">GTSRVDDKPPSPGDSSKK</a> |

# MASCOT Search Results

## Peptide View

MS/MS Fragmentation of **VQAAVGTSAAPVPSDNH**

Found in **APOE\_HUMAN**, Apolipoprotein E OS=Homo sapiens GN=APOE PE=1 SV=1

Match to Query 48226: 1930.973082 from(644.664970,3+) rtinseconds(1674) index(39887)

Title: Locus:1.1.1.3032.13 File:"2013-07-02 CLN FXIII 180 min 1st F 3.wiff"

Data file C:\Program Files (x86)\Matrix Science\Mascot Daemon\mgf\7 FXIII 180 min 1st\mascot\_daemon\_merge.mgf

Click mouse within plot area to zoom in by factor of two about that point

Or, Plot from  to  Da

Label all possible matches  Label matches used for scoring

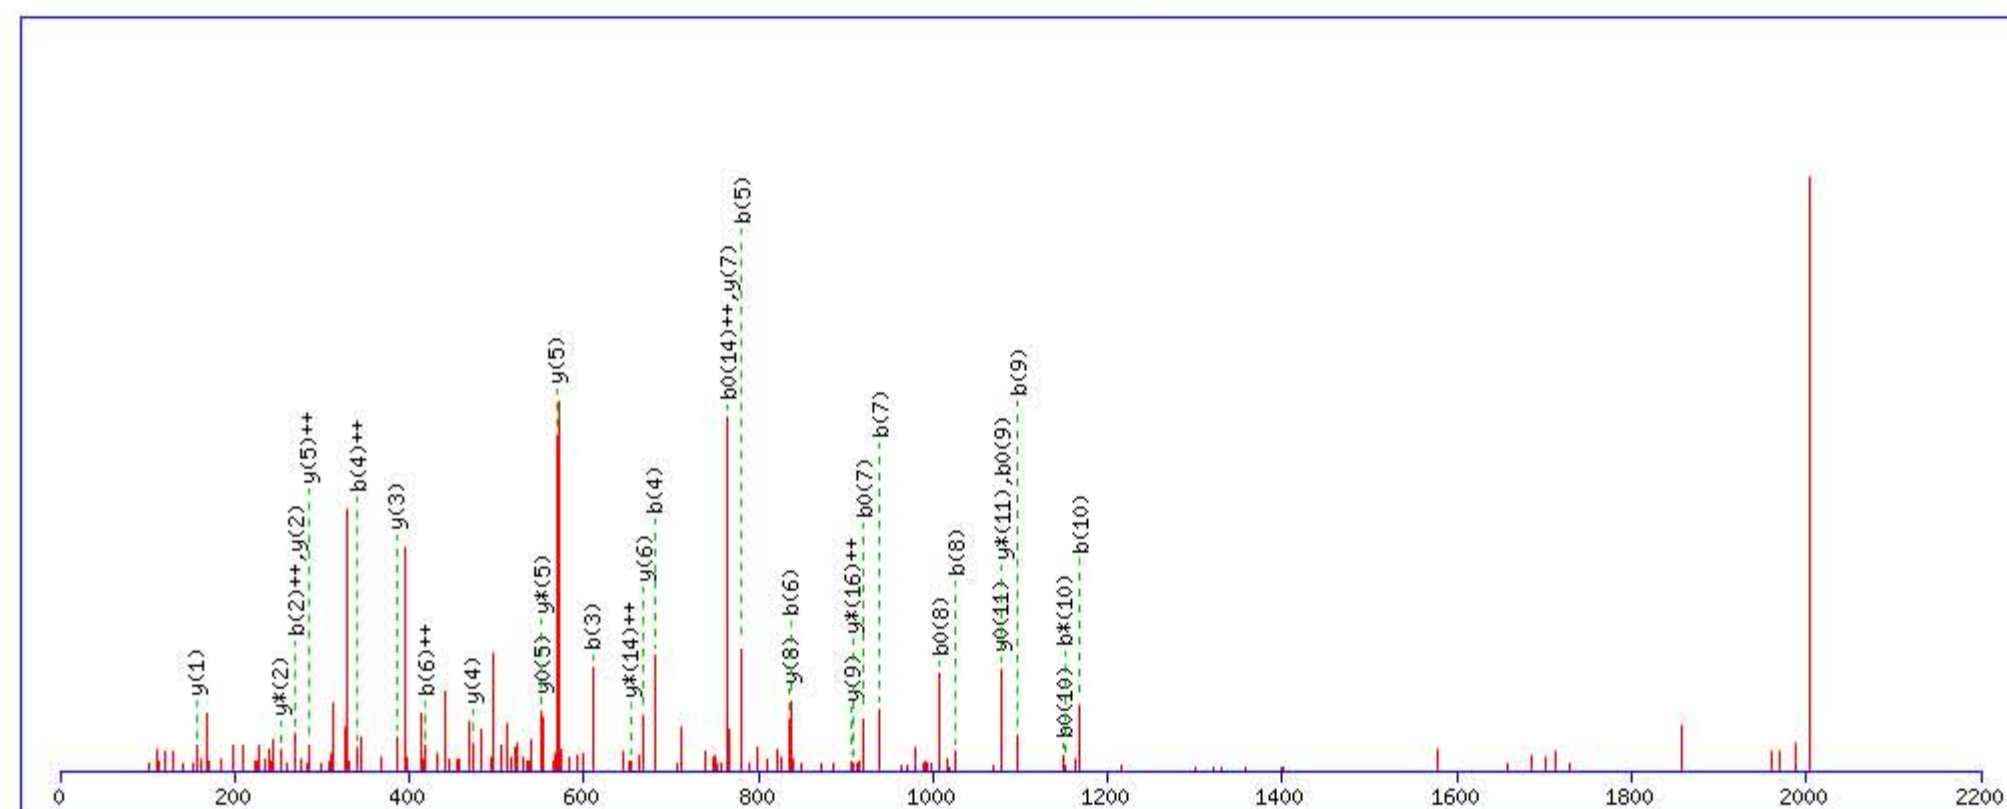

Monoisotopic mass of neutral peptide Mr(calc): 1930.957108

Fixed modifications: Carbamidomethyl (C) (apply to specified residues or termini only)

Variable modifications:

Q2 : Biotin:Thermo-21345 (Q)

Ions Score: 39 Expect: 0.004

Matches : 34/172 fragment ions using 89 most intense peaks [\(help\)](#)

| #  | b                  | b <sup>++</sup>   | b <sup>*</sup>     | b <sup>+++</sup> | b <sup>0</sup>     | b <sup>0++</sup> | Seq. | y                 | y <sup>++</sup>   | y <sup>*</sup>     | y <sup>+++</sup>  | y <sup>0</sup>     | y <sup>0++</sup> | #  |
|----|--------------------|-------------------|--------------------|------------------|--------------------|------------------|------|-------------------|-------------------|--------------------|-------------------|--------------------|------------------|----|
| 1  | 100.075690         | 50.541483         |                    |                  |                    |                  | V    |                   |                   |                    |                   |                    |                  | 17 |
| 2  | 539.301016         | <b>270.154146</b> | 522.274467         | 261.640872       |                    |                  | Q    | 1832.895960       | 916.951618        | 1815.869411        | <b>908.438344</b> | 1814.885395        | 907.946336       | 16 |
| 3  | <b>610.338130</b>  | 305.672703        | 593.311581         | 297.159429       |                    |                  | A    | 1393.670634       | 697.338955        | 1376.644085        | 688.825681        | 1375.660069        | 688.333673       | 15 |
| 4  | <b>681.375244</b>  | <b>341.191260</b> | 664.348695         | 332.677986       |                    |                  | A    | 1322.633520       | 661.820398        | 1305.606971        | <b>653.307124</b> | 1304.622955        | 652.815116       | 14 |
| 5  | <b>780.443658</b>  | 390.725467        | 763.417109         | 382.212193       |                    |                  | V    | 1251.596406       | 626.301841        | 1234.569857        | 617.788567        | 1233.585841        | 617.296559       | 13 |
| 6  | <b>837.465122</b>  | <b>419.236199</b> | 820.438573         | 410.722925       |                    |                  | G    | 1152.527992       | 576.767634        | 1135.501443        | 568.254360        | 1134.517427        | 567.762352       | 12 |
| 7  | <b>938.512801</b>  | 469.760039        | 921.486252         | 461.246764       | <b>920.502236</b>  | 460.754756       | T    | 1095.506528       | 548.256902        | <b>1078.479979</b> | 539.743628        | <b>1077.495963</b> | 539.251620       | 11 |
| 8  | <b>1025.544829</b> | 513.276053        | 1008.518280        | 504.762778       | <b>1007.534264</b> | 504.270770       | S    | 994.458849        | 497.733063        | 977.432300         | 489.219788        | 976.448284         | 488.727780       | 10 |
| 9  | <b>1096.581943</b> | 548.794610        | 1079.555394        | 540.281335       | <b>1078.571378</b> | 539.789327       | A    | <b>907.426821</b> | 454.217049        | 890.400272         | 445.703774        | 889.416256         | 445.211766       | 9  |
| 10 | <b>1167.619057</b> | 584.313167        | <b>1150.592508</b> | 575.799892       | <b>1149.608492</b> | 575.307884       | A    | <b>836.389707</b> | 418.698492        | 819.363158         | 410.185217        | 818.379142         | 409.693209       | 8  |
| 11 | 1264.671821        | 632.839549        | 1247.645272        | 624.326274       | 1246.661256        | 623.834266       | P    | <b>765.352593</b> | 383.179935        | 748.326044         | 374.666660        | 747.342028         | 374.174652       | 7  |
| 12 | 1363.740235        | 682.373756        | 1346.713686        | 673.860481       | 1345.729670        | 673.368473       | V    | <b>668.299829</b> | 334.653553        | 651.273280         | 326.140278        | 650.289264         | 325.648270       | 6  |
| 13 | 1460.792999        | 730.900138        | 1443.766450        | 722.386863       | 1442.782434        | 721.894855       | P    | <b>569.231415</b> | <b>285.119346</b> | <b>552.204866</b>  | 276.606071        | <b>551.220850</b>  | 276.114063       | 5  |
| 14 | 1547.825027        | 774.416152        | 1530.798478        | 765.902877       | 1529.814462        | 765.410869       | S    | <b>472.178651</b> | 236.592964        | 455.152102         | 228.079689        | 454.168086         | 227.587681       | 4  |
| 15 | 1662.851970        | 831.929623        | 1645.825421        | 823.416349       | 1644.841405        | 822.924341       | D    | <b>385.146623</b> | 193.076949        | 368.120074         | 184.563675        | 367.136058         | 184.071667       | 3  |
| 16 | 1776.894897        | 888.951087        | 1759.868348        | 880.437812       | 1758.884332        | 879.945804       | N    | <b>270.119680</b> | 135.563478        | <b>253.093131</b>  | 127.050203        |                    |                  | 2  |
| 17 |                    |                   |                    |                  |                    |                  | H    | <b>156.076753</b> | 78.542014         |                    |                   |                    |                  | 1  |

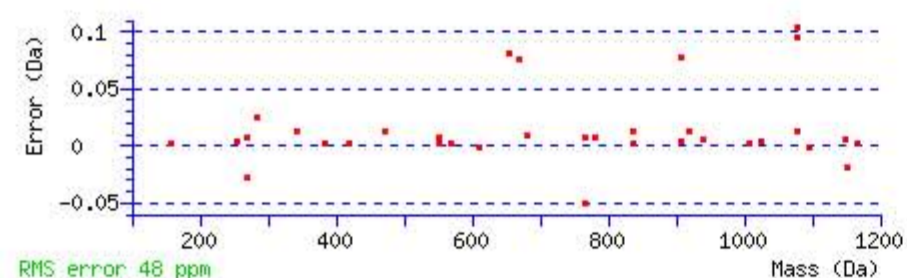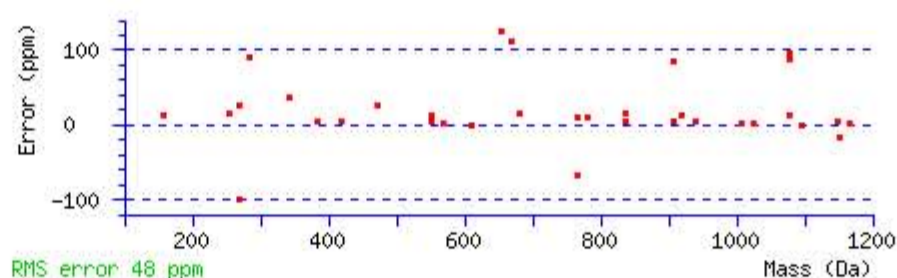

NCBI BLAST search of **VQAAVGTSAAPVPSDNH**

(Parameters: blastp, nr protein database, expect=20000, no filter, PAM30)

Other BLAST [web gateways](#)

All matches to this query

| Score | Mr(calc):   | Delta    | Sequence                          |
|-------|-------------|----------|-----------------------------------|
| 38.5  | 1930.957108 | 0.015974 | <a href="#">VQAAVGTSAAPVPSDNH</a> |

Mascot: <http://www.matrixscience.com/>

# MASCOT Search Results

## Peptide View

MS/MS Fragmentation of **VEQAVETEPEPEL**R

Found in **APOE\_HUMAN**, Apolipoprotein E OS=Homo sapiens GN=APOE PE=1 SV=1

Match to Query 48393: 1935.986442 from(646.336090,3+) rtinseconds(1866) index(59736)

Title: Locus:1.1.1.3073.15 File:"2013-07-02 CLN FXIII 180 min 1st F 4.wiff"

Data file C:\Program Files (x86)\Matrix Science\Mascot Daemon\mgf7 FXIII 180 min 1st\mascot\_daemon\_merge.mgf

Click mouse within plot area to zoom in by factor of two about that point

Or, Plot from  to  Da

Label all possible matches  Label matches used for scoring

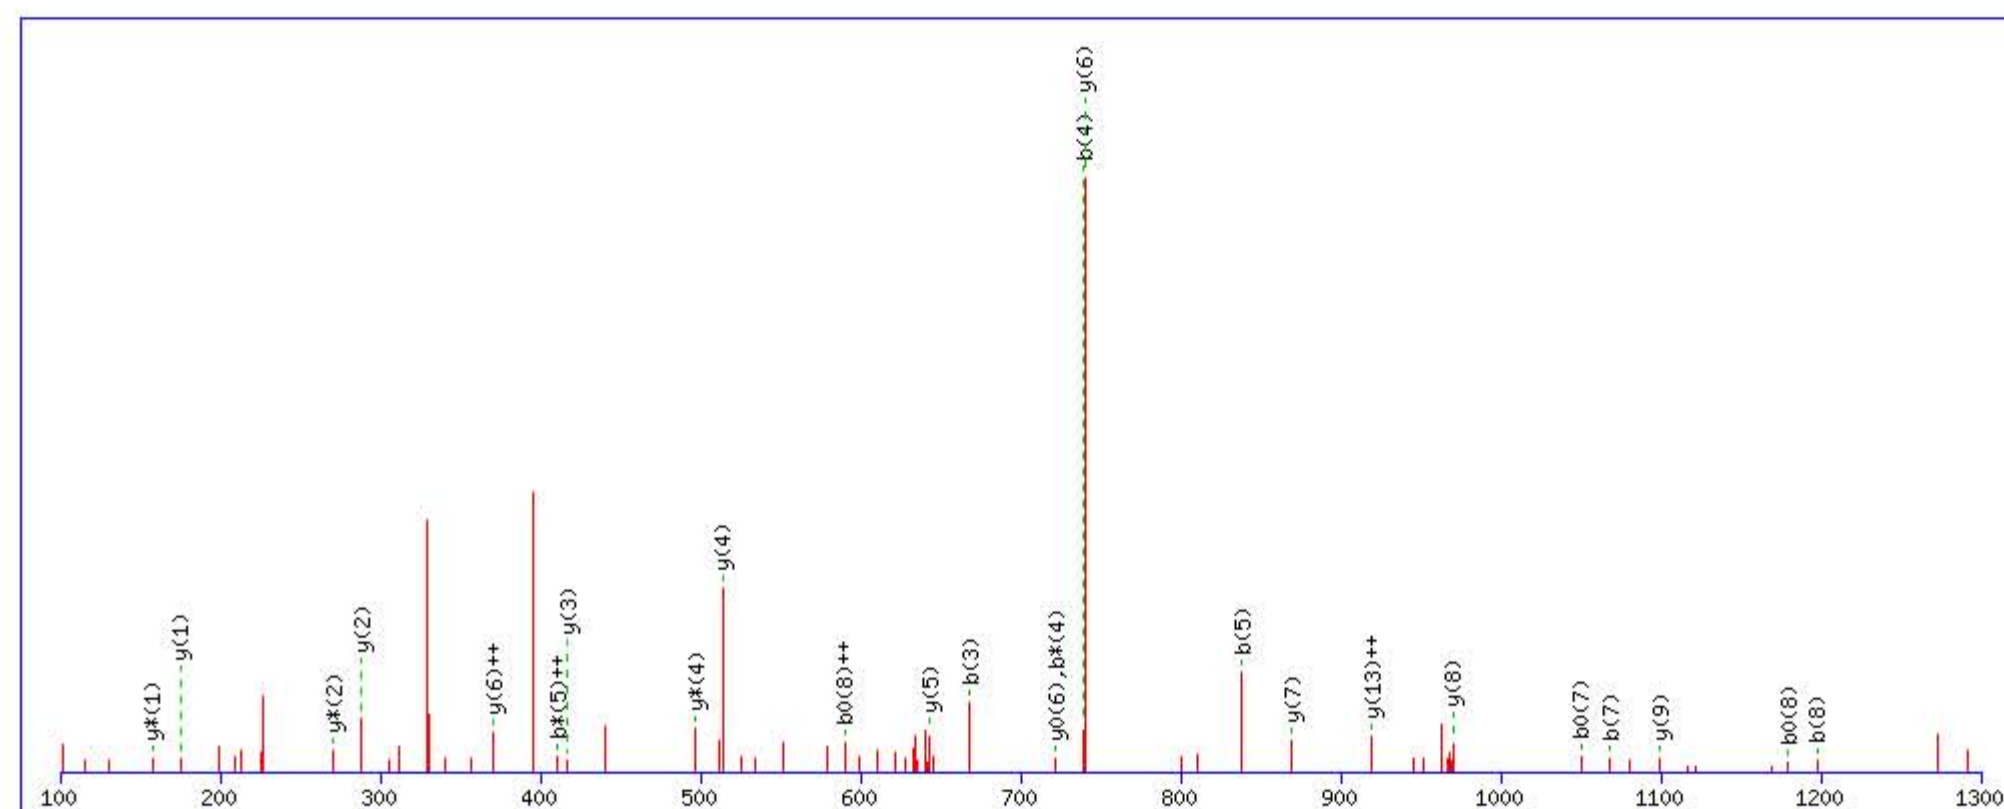

Monoisotopic mass of neutral peptide Mr(calc): 1935.961151

Fixed modifications: Carbamidomethyl (C) (apply to specified residues or termini only)

Variable modifications:

Q3 : Biotin:Thermo-21345 (Q)

Ions Score: 47 Expect: 6.3e-005

Matches : 25/146 fragment ions using 45 most intense peaks [\(help\)](#)

| #  | b           | b <sup>++</sup> | b <sup>*</sup> | b <sup>*++</sup> | b <sup>0</sup> | b <sup>0++</sup> | Seq. | y           | y <sup>++</sup> | y <sup>*</sup> | y <sup>*++</sup> | y <sup>0</sup> | y <sup>0++</sup> | #  |
|----|-------------|-----------------|----------------|------------------|----------------|------------------|------|-------------|-----------------|----------------|------------------|----------------|------------------|----|
| 1  | 100.075690  | 50.541483       |                |                  |                |                  | V    |             |                 |                |                  |                |                  | 14 |
| 2  | 229.118283  | 115.062780      |                |                  | 211.107718     | 106.057497       | E    | 1837.900042 | 919.453659      | 1820.873493    | 910.940385       | 1819.889477    | 910.448376       | 13 |
| 3  | 668.343609  | 334.675443      | 651.317060     | 326.162168       | 650.333044     | 325.670160       | Q    | 1708.857449 | 854.932363      | 1691.830900    | 846.419088       | 1690.846884    | 845.927080       | 12 |
| 4  | 739.380723  | 370.194000      | 722.354174     | 361.680725       | 721.370158     | 361.188717       | A    | 1269.632123 | 635.319700      | 1252.605574    | 626.806425       | 1251.621558    | 626.314417       | 11 |
| 5  | 838.449137  | 419.728207      | 821.422588     | 411.214932       | 820.438572     | 410.722924       | V    | 1198.595009 | 599.801143      | 1181.568460    | 591.287868       | 1180.584444    | 590.795860       | 10 |
| 6  | 967.491730  | 484.249503      | 950.465181     | 475.736228       | 949.481165     | 475.244220       | E    | 1099.526595 | 550.266936      | 1082.500046    | 541.753661       | 1081.516030    | 541.261653       | 9  |
| 7  | 1068.539409 | 534.773343      | 1051.512860    | 526.260068       | 1050.528844    | 525.768060       | T    | 970.484002  | 485.745639      | 953.457453     | 477.232365       | 952.473437     | 476.740357       | 8  |
| 8  | 1197.582002 | 599.294639      | 1180.555453    | 590.781365       | 1179.571437    | 590.289356       | E    | 869.436323  | 435.221800      | 852.409774     | 426.708525       | 851.425758     | 426.216517       | 7  |
| 9  | 1294.634766 | 647.821021      | 1277.608217    | 639.307747       | 1276.624201    | 638.815738       | P    | 740.393730  | 370.700503      | 723.367181     | 362.187229       | 722.383165     | 361.695221       | 6  |
| 10 | 1423.677359 | 712.342318      | 1406.650810    | 703.829043       | 1405.666794    | 703.337035       | E    | 643.340966  | 322.174121      | 626.314417     | 313.660847       | 625.330401     | 313.168839       | 5  |
| 11 | 1520.730123 | 760.868700      | 1503.703574    | 752.355425       | 1502.719558    | 751.863417       | P    | 514.298373  | 257.652825      | 497.271824     | 249.139550       | 496.287808     | 248.647542       | 4  |
| 12 | 1649.772716 | 825.389996      | 1632.746167    | 816.876722       | 1631.762151    | 816.384714       | E    | 417.245609  | 209.126442      | 400.219060     | 200.613168       | 399.235044     | 200.121160       | 3  |
| 13 | 1762.856780 | 881.932028      | 1745.830231    | 873.418754       | 1744.846215    | 872.926746       | L    | 288.203016  | 144.605146      | 271.176467     | 136.091871       |                |                  | 2  |
| 14 |             |                 |                |                  |                |                  | R    | 175.118952  | 88.063114       | 158.092403     | 79.549839        |                |                  | 1  |

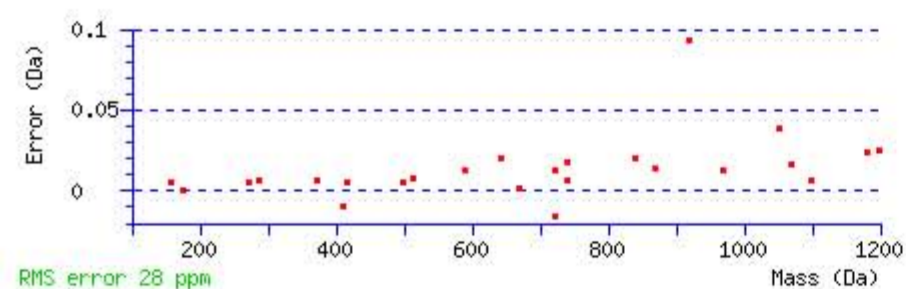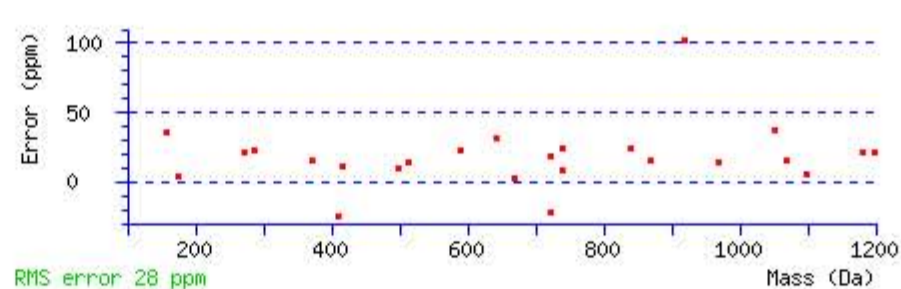

NCBI BLAST search of [VEQAVETEPEPEL](#)R

(Parameters: blastp, nr protein database, expect=20000, no filter, PAM30)

Other BLAST [web gateways](#)

All matches to this query

| Score | Mr(calc):   | Delta     | Sequence                        |
|-------|-------------|-----------|---------------------------------|
| 46.7  | 1935.961151 | 0.025291  | <a href="#">VEQAVETEPEPEL</a> R |
| 1.9   | 1935.991028 | -0.004586 | <a href="#">TDLKTFMGKAQNQK</a>  |
| 1.9   | 1935.991028 | -0.004586 | <a href="#">TDLKTFMGKAQNQK</a>  |

Mascot: <http://www.matrixscience.com/>

# MASCOT Search Results

## Peptide View

MS/MS Fragmentation of **SGVQQLIQYYQDQK**

Found in **APOF\_HUMAN**, Apolipoprotein F OS=Homo sapiens GN=APOF PE=1 SV=2

Match to Query 51006: 2008.037352 from(670.353060,3+) rtinseconds(2483) index(45458)

Title: Locus:1.1.1.3313.17 File:"2013-07-02 CLN FXIII 180 min 1st F 3.wiff"

Data file C:\Program Files (x86)\Matrix Science\Mascot Daemon\mgf\7 FXIII 180 min 1st\mascot\_daemon\_merge.mgf

Click mouse within plot area to zoom in by factor of two about that point

Or, Plot from  to  Da

Label all possible matches  Label matches used for scoring

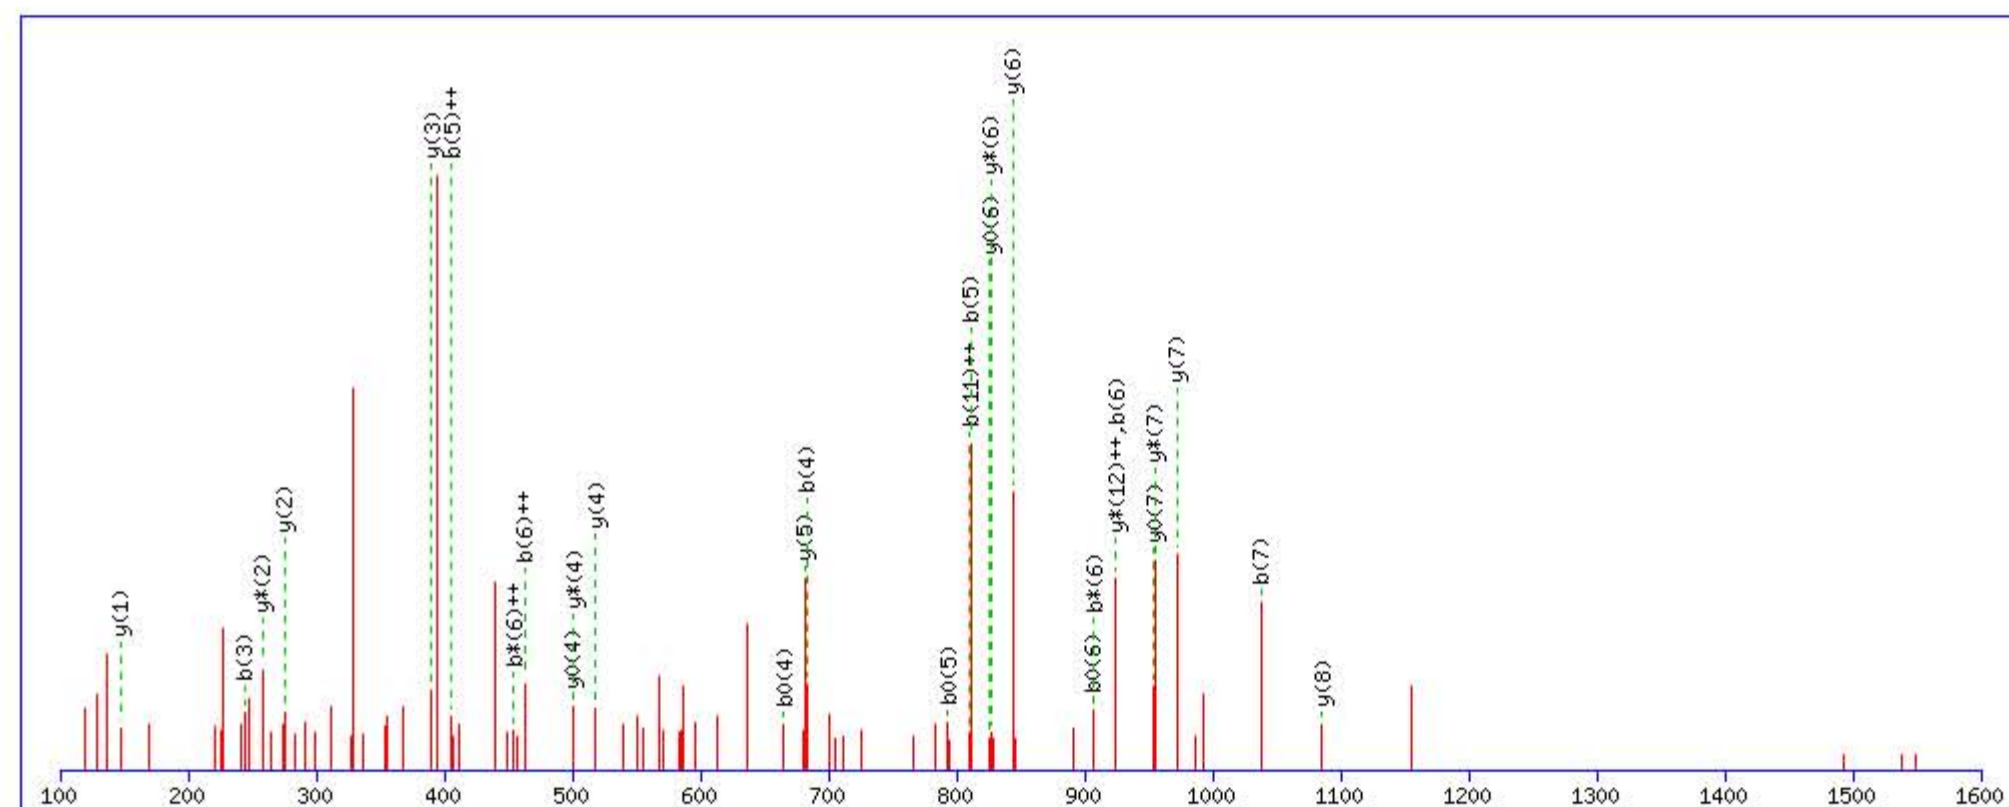

Monoisotopic mass of neutral peptide Mr(calc): 2008.008789

Fixed modifications: Carbamidomethyl (C) (apply to specified residues or termini only)

Variable modifications:

Q4 : Biotin:Thermo-21345 (Q)

Ions Score: 35 Expect: 0.00066

Matches : 29/146 fragment ions using 59 most intense peaks [\(help\)](#)

| #  | b                  | b <sup>++</sup>   | b <sup>+</sup>    | b <sup>+++</sup>  | b <sup>0</sup>    | b <sup>0++</sup> | Seq. | y                  | y <sup>++</sup> | y <sup>+</sup>    | y <sup>+++</sup>  | y <sup>0</sup>    | y <sup>0++</sup> | #  |
|----|--------------------|-------------------|-------------------|-------------------|-------------------|------------------|------|--------------------|-----------------|-------------------|-------------------|-------------------|------------------|----|
| 1  | 88.039304          | 44.523290         |                   |                   | 70.028739         | 35.518008        | S    |                    |                 |                   |                   |                   |                  | 14 |
| 2  | 145.060768         | 73.034022         |                   |                   | 127.050203        | 64.028740        | G    | 1921.984049        | 961.495663      | 1904.957500       | 952.982388        | 1903.973484       | 952.490380       | 13 |
| 3  | <b>244.129182</b>  | 122.568229        |                   |                   | 226.118617        | 113.562947       | V    | 1864.962585        | 932.984931      | 1847.936036       | <b>924.471656</b> | 1846.952020       | 923.979648       | 12 |
| 4  | <b>683.354508</b>  | 342.180892        | 666.327959        | 333.667618        | <b>665.343943</b> | 333.175610       | Q    | 1765.894171        | 883.450724      | 1748.867622       | 874.937449        | 1747.883606       | 874.445441       | 11 |
| 5  | <b>811.413086</b>  | <b>406.210181</b> | 794.386537        | 397.696907        | <b>793.402521</b> | 397.204899       | Q    | 1326.668845        | 663.838061      | 1309.642296       | 655.324786        | 1308.658280       | 654.832778       | 10 |
| 6  | <b>924.497150</b>  | <b>462.752213</b> | <b>907.470601</b> | <b>454.238939</b> | <b>906.486585</b> | 453.746931       | L    | 1198.610267        | 599.808772      | 1181.583718       | 591.295497        | 1180.599702       | 590.803489       | 9  |
| 7  | <b>1037.581214</b> | 519.294245        | 1020.554665       | 510.780971        | 1019.570649       | 510.288963       | I    | <b>1085.526203</b> | 543.266740      | 1068.499654       | 534.753465        | 1067.515638       | 534.261457       | 8  |
| 8  | 1165.639792        | 583.323534        | 1148.613243       | 574.810260        | 1147.629227       | 574.318252       | Q    | <b>972.442139</b>  | 486.724708      | <b>955.415590</b> | 478.211433        | <b>954.431574</b> | 477.719425       | 7  |
| 9  | 1328.703121        | 664.855199        | 1311.676572       | 656.341924        | 1310.692556       | 655.849916       | Y    | <b>844.383561</b>  | 422.695419      | <b>827.357012</b> | 414.182144        | <b>826.372996</b> | 413.690136       | 6  |
| 10 | 1491.766450        | 746.386863        | 1474.739901       | 737.873589        | 1473.755885       | 737.381581       | Y    | <b>681.320232</b>  | 341.163754      | 664.293683        | 332.650480        | 663.309667        | 332.158472       | 5  |
| 11 | 1619.825028        | <b>810.416152</b> | 1602.798479       | 801.902878        | 1601.814463       | 801.410870       | Q    | <b>518.256903</b>  | 259.632090      | <b>501.230354</b> | 251.118815        | <b>500.246338</b> | 250.626807       | 4  |
| 12 | 1734.851971        | 867.929624        | 1717.825422       | 859.416349        | 1716.841406       | 858.924341       | D    | <b>390.198325</b>  | 195.602800      | 373.171776        | 187.089526        | 372.187760        | 186.597518       | 3  |
| 13 | 1862.910549        | 931.958913        | 1845.884000       | 923.445638        | 1844.899984       | 922.953630       | Q    | <b>275.171382</b>  | 138.089329      | <b>258.144833</b> | 129.576054        |                   |                  | 2  |
| 14 |                    |                   |                   |                   |                   |                  | K    | <b>147.112804</b>  | 74.060040       | 130.086255        | 65.546765         |                   |                  | 1  |

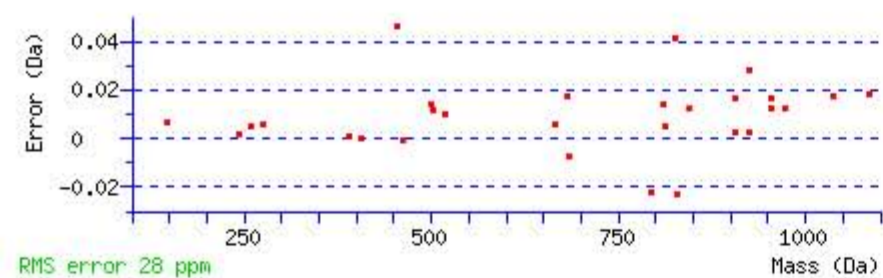

RMS error 28 ppm

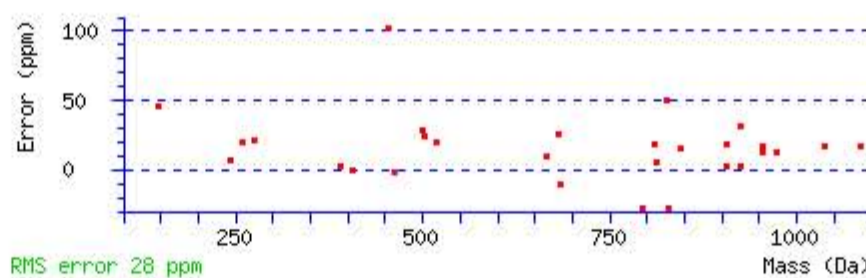

RMS error 28 ppm

NCBI BLAST search of **SGVQQLIQYYQDQK**

(Parameters: blastp, nr protein database, expect=20000, no filter, PAM30)

Other BLAST [web gateways](#)

All matches to this query

| Score | Mr(calc):   | Delta     | Sequence                       |
|-------|-------------|-----------|--------------------------------|
| 34.6  | 2008.008789 | 0.028563  | <a href="#">SGVQQLIQYYQDQK</a> |
| 30.3  | 2008.008789 | 0.028563  | <a href="#">SGVQQLIQYYQDQK</a> |
| 16.1  | 2008.008789 | 0.028563  | <a href="#">SGVQQLIQYYQDQK</a> |
| 12.6  | 2008.008789 | 0.028563  | <a href="#">SGVQQLIQYYQDQK</a> |
| 12.5  | 2008.008789 | 0.028563  | <a href="#">SGVQQLIQYYQDQK</a> |
| 0.6   | 2008.063568 | -0.026216 | <a href="#">QQLEAQRAEAERLR</a> |

Mascot: <http://www.matrixscience.com/>

# MASCOT Search Results

## Peptide View

MS/MS Fragmentation of **VAQELEEK**

Found in **APOLI\_HUMAN**, Apolipoprotein L1 OS=Homo sapiens GN=APOL1 PE=1 SV=5

Match to Query 25458: 1255.648568 from(628.831560,2+) rtinseconds(1532) index(21246)

Title: Locus:1.1.1.2676.15 File:"2013-07-02 CLN FXIII 180 min 1st F 2.wiff"

Data file C:\Program Files (x86)\Matrix Science\Mascot Daemon\mgf\7 FXIII 180 min 1st\mascot\_daemon\_merge.mgf

Click mouse within plot area to zoom in by factor of two about that point

Or, Plot from  to  Da

Label all possible matches  Label matches used for scoring

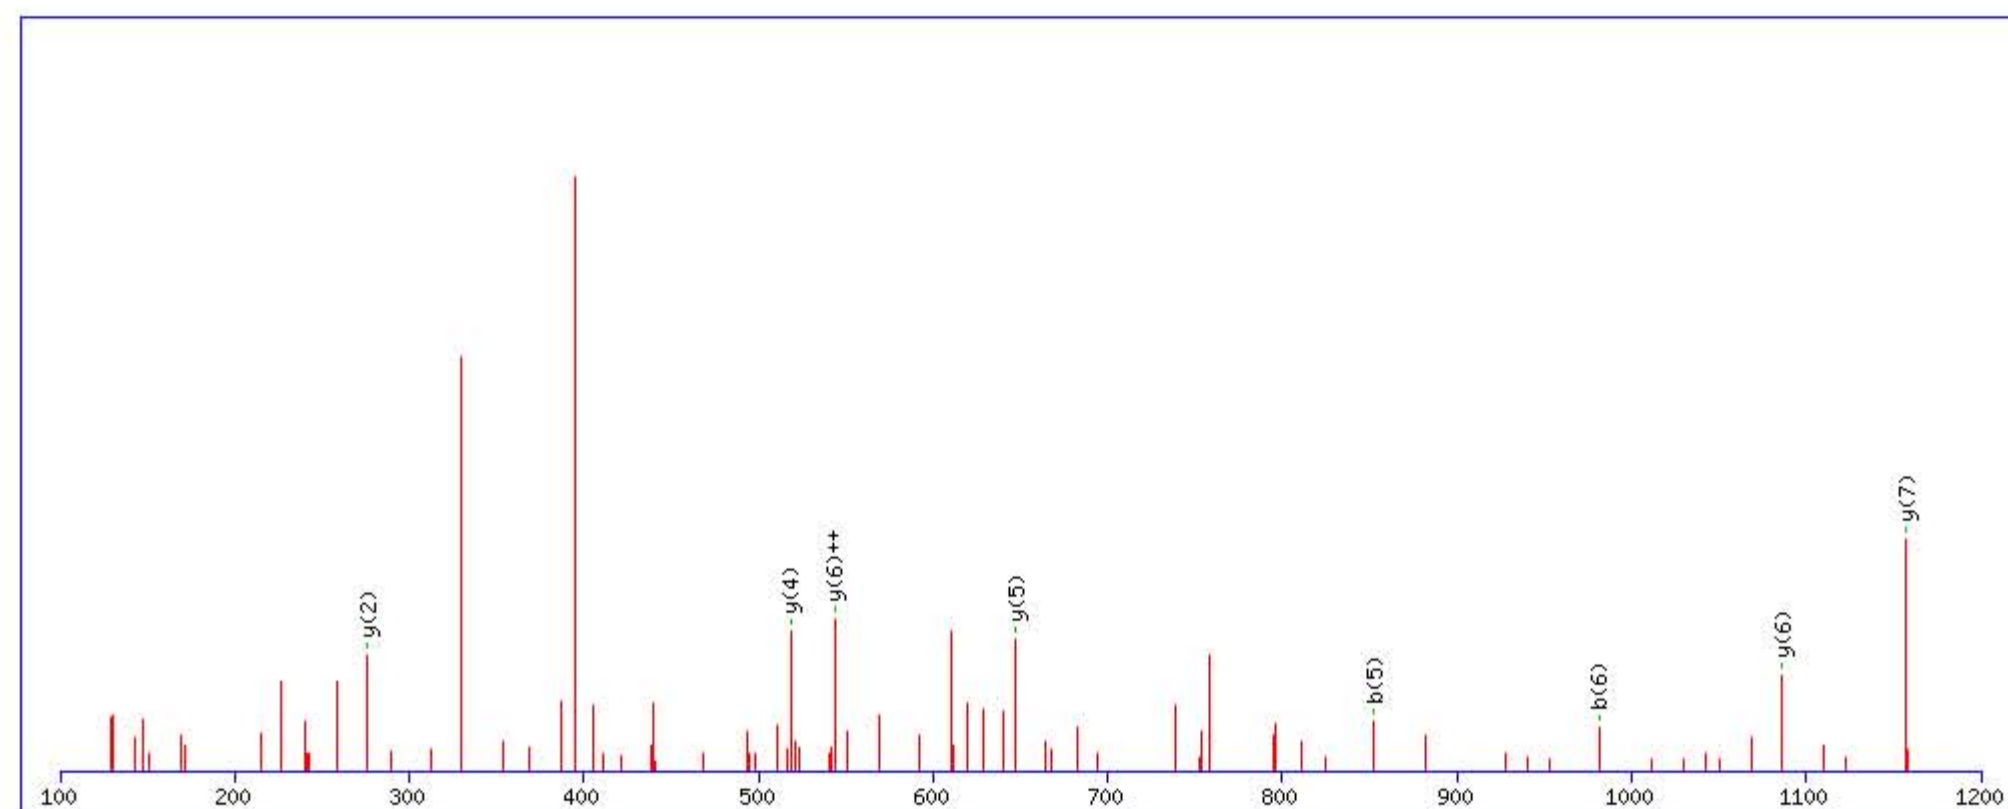

Monoisotopic mass of neutral peptide Mr(calc): 1255.648193

Fixed modifications: Carbamidomethyl (C) (apply to specified residues or termini only)

Variable modifications:

Q3 : Biotin:Thermo-21345 (Q)

Ions Score: 33 Expect: 0.012

Matches : 8/72 fragment ions using 11 most intense peaks [\(help\)](#)

| # | b           | b <sup>++</sup> | b <sup>*</sup> | b <sup>+++</sup> | b <sup>0</sup> | b <sup>0++</sup> | Seq. | y           | y <sup>++</sup> | y <sup>*</sup> | y <sup>+++</sup> | y <sup>0</sup> | y <sup>0++</sup> | # |
|---|-------------|-----------------|----------------|------------------|----------------|------------------|------|-------------|-----------------|----------------|------------------|----------------|------------------|---|
| 1 | 100.075690  | 50.541483       |                |                  |                |                  | V    |             |                 |                |                  |                |                  | 8 |
| 2 | 171.112804  | 86.060040       |                |                  |                |                  | A    | 1157.587087 | 579.297182      | 1140.560538    | 570.783907       | 1139.576522    | 570.291899       | 7 |
| 3 | 610.338130  | 305.672703      | 593.311581     | 297.159429       |                |                  | Q    | 1086.549973 | 543.778625      | 1069.523424    | 535.265350       | 1068.539408    | 534.773342       | 6 |
| 4 | 739.380723  | 370.194000      | 722.354174     | 361.680725       | 721.370158     | 361.188717       | E    | 647.324647  | 324.165962      | 630.298098     | 315.652687       | 629.314082     | 315.160679       | 5 |
| 5 | 852.464787  | 426.736032      | 835.438238     | 418.222757       | 834.454222     | 417.730749       | L    | 518.282054  | 259.644665      | 501.255505     | 251.131391       | 500.271489     | 250.639383       | 4 |
| 6 | 981.507380  | 491.257328      | 964.480831     | 482.744054       | 963.496815     | 482.252046       | E    | 405.197990  | 203.102633      | 388.171441     | 194.589359       | 387.187425     | 194.097351       | 3 |
| 7 | 1110.549973 | 555.778625      | 1093.523424    | 547.265350       | 1092.539408    | 546.773342       | E    | 276.155397  | 138.581336      | 259.128848     | 130.068062       | 258.144832     | 129.576054       | 2 |
| 8 |             |                 |                |                  |                |                  | K    | 147.112804  | 74.060040       | 130.086255     | 65.546765        |                |                  | 1 |

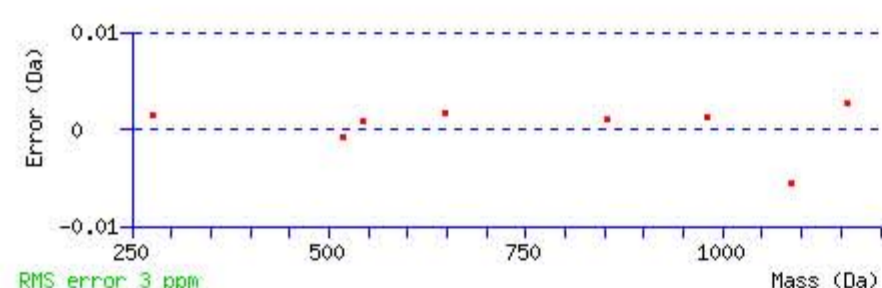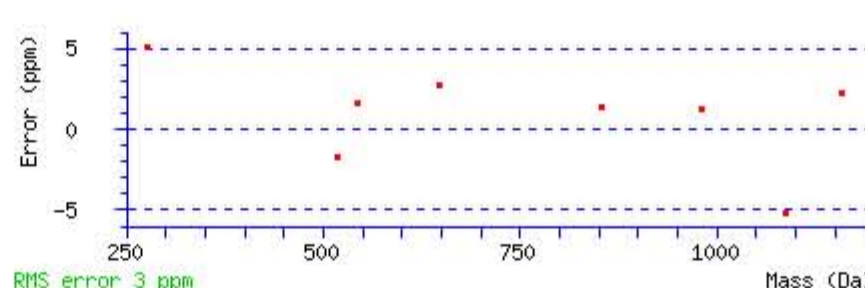

NCBI BLAST search of **VAQELEEK**

(Parameters: blastp, nr protein database, expect=20000, no filter, PAM30)

Other BLAST [web gateways](#)

All matches to this query

| Score | Mr(calc):   | Delta     | Sequence                    |
|-------|-------------|-----------|-----------------------------|
| 33.1  | 1255.648193 | 0.000375  | <a href="#">VAQELEEK</a>    |
| 13.7  | 1255.659424 | -0.010856 | <a href="#">QAEKNVEK</a>    |
| 8.2   | 1255.659439 | -0.010871 | <a href="#">GLQGEKGEK</a>   |
| 7.9   | 1255.656067 | -0.007499 | <a href="#">ALPIQSFSHEK</a> |
| 7.7   | 1255.659439 | -0.010871 | <a href="#">STGAQPKEK</a>   |
| 7.2   | 1255.645508 | 0.003060  | <a href="#">TRMIEANIHR</a>  |
| 7.0   | 1255.640793 | 0.007775  | <a href="#">DTHKKLEEEK</a>  |
| 6.0   | 1255.648193 | 0.000375  | <a href="#">EQVEIAEK</a>    |
| 5.7   | 1255.659439 | -0.010871 | <a href="#">LLIENGVSMHK</a> |
| 5.6   | 1255.648193 | 0.000375  | <a href="#">QALEDLEK</a>    |



# MASCOT SCIENCE Mascot Search Results

## Peptide View

MS/MS Fragmentation of **VTEPISAESGEQVER**

Found in **APOL1\_HUMAN**, Apolipoprotein L1 OS=Homo sapiens GN=APOL1 PE=1 SV=5

Match to Query 48495: 1940.961552 from(647.994460,3+) rtinseconds(1695) index(22419)

Title: Locus:1.1.1.2733.7 File:"2013-07-02 CLN FXIII 180 min 1st F 2.wiff"

Data file C:\Program Files (x86)\Matrix Science\Mascot Daemon\mgf\7 FXIII 180 min 1st\mascot\_daemon\_merge.mgf

Click mouse within plot area to zoom in by factor of two about that point

Or, Plot from  to  Da

Label all possible matches  Label matches used for scoring

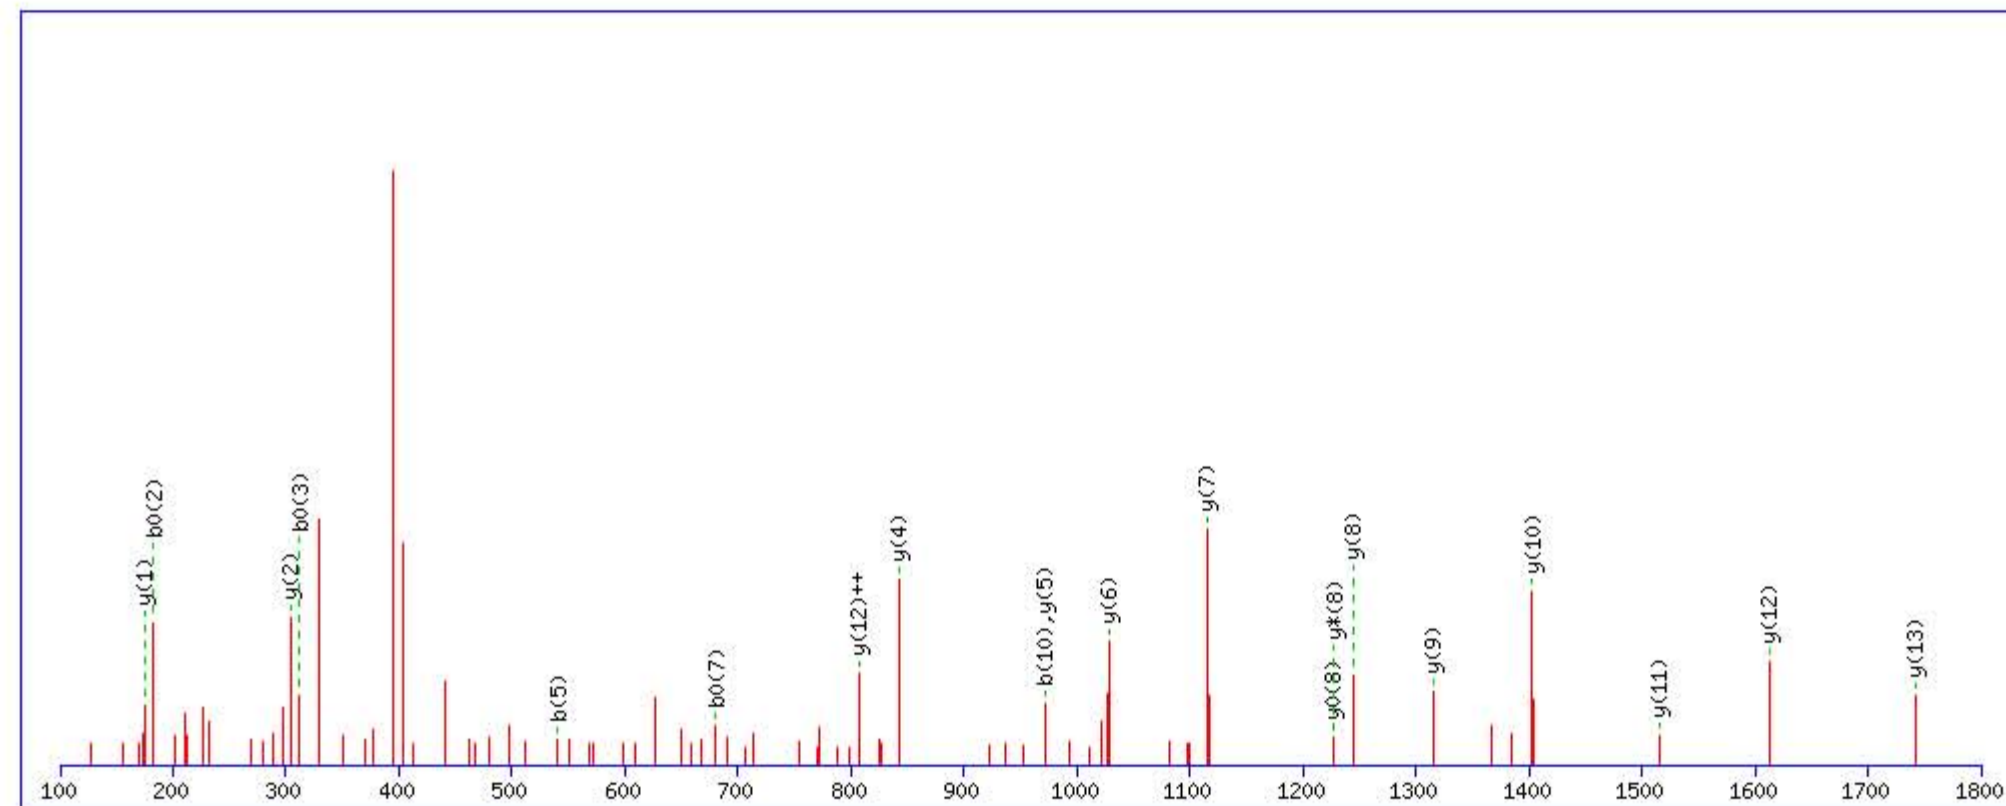

Monoisotopic mass of neutral peptide Mr(calc): 1940.951324

Fixed modifications: Carbamidomethyl (C) (apply to specified residues or termini only)

Variable modifications:

Q12 : Biotin:Thermo-21345 (Q)

Ions Score: 90 Expect: 2.8e-008

Matches : 20/142 fragment ions using 29 most intense peaks [\(help\)](#)

| #  | b           | b <sup>++</sup> | b <sup>+</sup> | b <sup>+++</sup> | b <sup>0</sup> | b <sup>0++</sup> | Seq. | y           | y <sup>++</sup> | y <sup>+</sup> | y <sup>+++</sup> | y <sup>0</sup> | y <sup>0++</sup> | #  |
|----|-------------|-----------------|----------------|------------------|----------------|------------------|------|-------------|-----------------|----------------|------------------|----------------|------------------|----|
| 1  | 100.075690  | 50.541483       |                |                  |                |                  | V    |             |                 |                |                  |                |                  | 15 |
| 2  | 201.123369  | 101.065322      |                |                  | 183.112804     | 92.060040        | T    | 1842.890205 | 921.948741      | 1825.863656    | 913.435466       | 1824.879640    | 912.943458       | 14 |
| 3  | 330.165962  | 165.586619      |                |                  | 312.155397     | 156.581336       | E    | 1741.842526 | 871.424901      | 1724.815977    | 862.911627       | 1723.831961    | 862.419619       | 13 |
| 4  | 427.218726  | 214.113001      |                |                  | 409.208161     | 205.107719       | P    | 1612.799933 | 806.903605      | 1595.773384    | 798.390330       | 1594.789368    | 797.898322       | 12 |
| 5  | 540.302790  | 270.655033      |                |                  | 522.292225     | 261.649751       | I    | 1515.747169 | 758.377223      | 1498.720620    | 749.863948       | 1497.736604    | 749.371940       | 11 |
| 6  | 627.334818  | 314.171047      |                |                  | 609.324253     | 305.165765       | S    | 1402.663105 | 701.835191      | 1385.636556    | 693.321916       | 1384.652540    | 692.829908       | 10 |
| 7  | 698.371932  | 349.689604      |                |                  | 680.361367     | 340.684322       | A    | 1315.631077 | 658.319177      | 1298.604528    | 649.805902       | 1297.620512    | 649.313894       | 9  |
| 8  | 827.414525  | 414.210901      |                |                  | 809.403960     | 405.205618       | E    | 1244.593963 | 622.800620      | 1227.567414    | 614.287345       | 1226.583398    | 613.795337       | 8  |
| 9  | 914.446553  | 457.726915      |                |                  | 896.435988     | 448.721632       | S    | 1115.551370 | 558.279323      | 1098.524821    | 549.766049       | 1097.540805    | 549.274041       | 7  |
| 10 | 971.468017  | 486.237647      |                |                  | 953.457452     | 477.232364       | G    | 1028.519342 | 514.763309      | 1011.492793    | 506.250035       | 1010.508777    | 505.758027       | 6  |
| 11 | 1100.510610 | 550.758943      |                |                  | 1082.500045    | 541.753661       | E    | 971.497878  | 486.252577      | 954.471329     | 477.739303       | 953.487313     | 477.247295       | 5  |
| 12 | 1539.735936 | 770.371606      | 1522.709387    | 761.858332       | 1521.725371    | 761.366324       | Q    | 842.455285  | 421.731281      | 825.428736     | 413.218006       | 824.444720     | 412.725998       | 4  |
| 13 | 1638.804350 | 819.905813      | 1621.777801    | 811.392539       | 1620.793785    | 810.900531       | V    | 403.229959  | 202.118617      | 386.203410     | 193.605343       | 385.219394     | 193.113335       | 3  |
| 14 | 1767.846943 | 884.427110      | 1750.820394    | 875.913835       | 1749.836378    | 875.421827       | E    | 304.161545  | 152.584410      | 287.134996     | 144.071136       | 286.150980     | 143.579128       | 2  |
| 15 |             |                 |                |                  |                |                  | R    | 175.118952  | 88.063114       | 158.092403     | 79.549839        |                |                  | 1  |

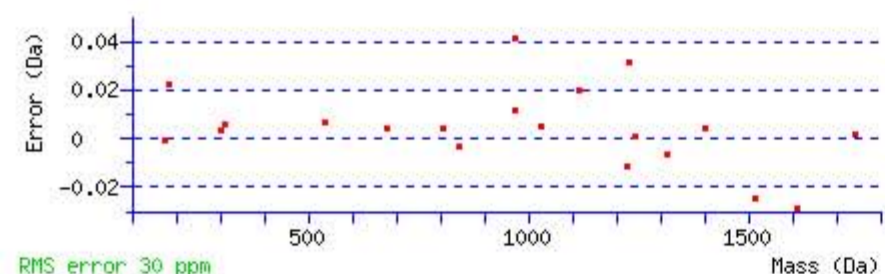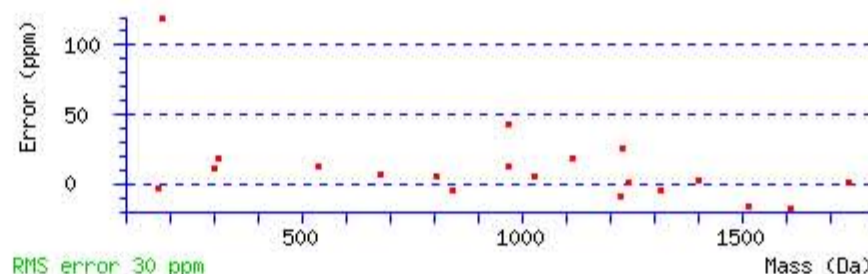

NCBI BLAST search of **VTEPISAESGEQVER**

(Parameters: blastp, nr protein database, expect=20000, no filter, PAM30)

Other BLAST [web gateways](#)

All matches to this query

| Score | Mr(calc):   | Delta    | Sequence                        |
|-------|-------------|----------|---------------------------------|
| 89.6  | 1940.951324 | 0.010228 | <a href="#">VTEPISAESGEQVER</a> |

Mascot: <http://www.matrixscience.com/>

# MASCOT Search Results

## Peptide View

MS/MS Fragmentation of **NQEACELSNN**

Found in **APOM\_HUMAN**, Apolipoprotein M OS=Homo sapiens GN=APOM PE=1 SV=2

Match to Query 34553: 1488.640068 from(745.327310,2+) rtinseconds(1644) index(21995)

Title: Locus:1.1.1.2715.12 File:"2013-07-02 CLN FXIII 180 min 1st F 2.wiff"

Data file C:\Program Files (x86)\Matrix Science\Mascot Daemon\mgf\7 FXIII 180 min 1st\mascot\_daemon\_merge.mgf

Click mouse within plot area to zoom in by factor of two about that point

Or, Plot from  to  Da

Label all possible matches  Label matches used for scoring

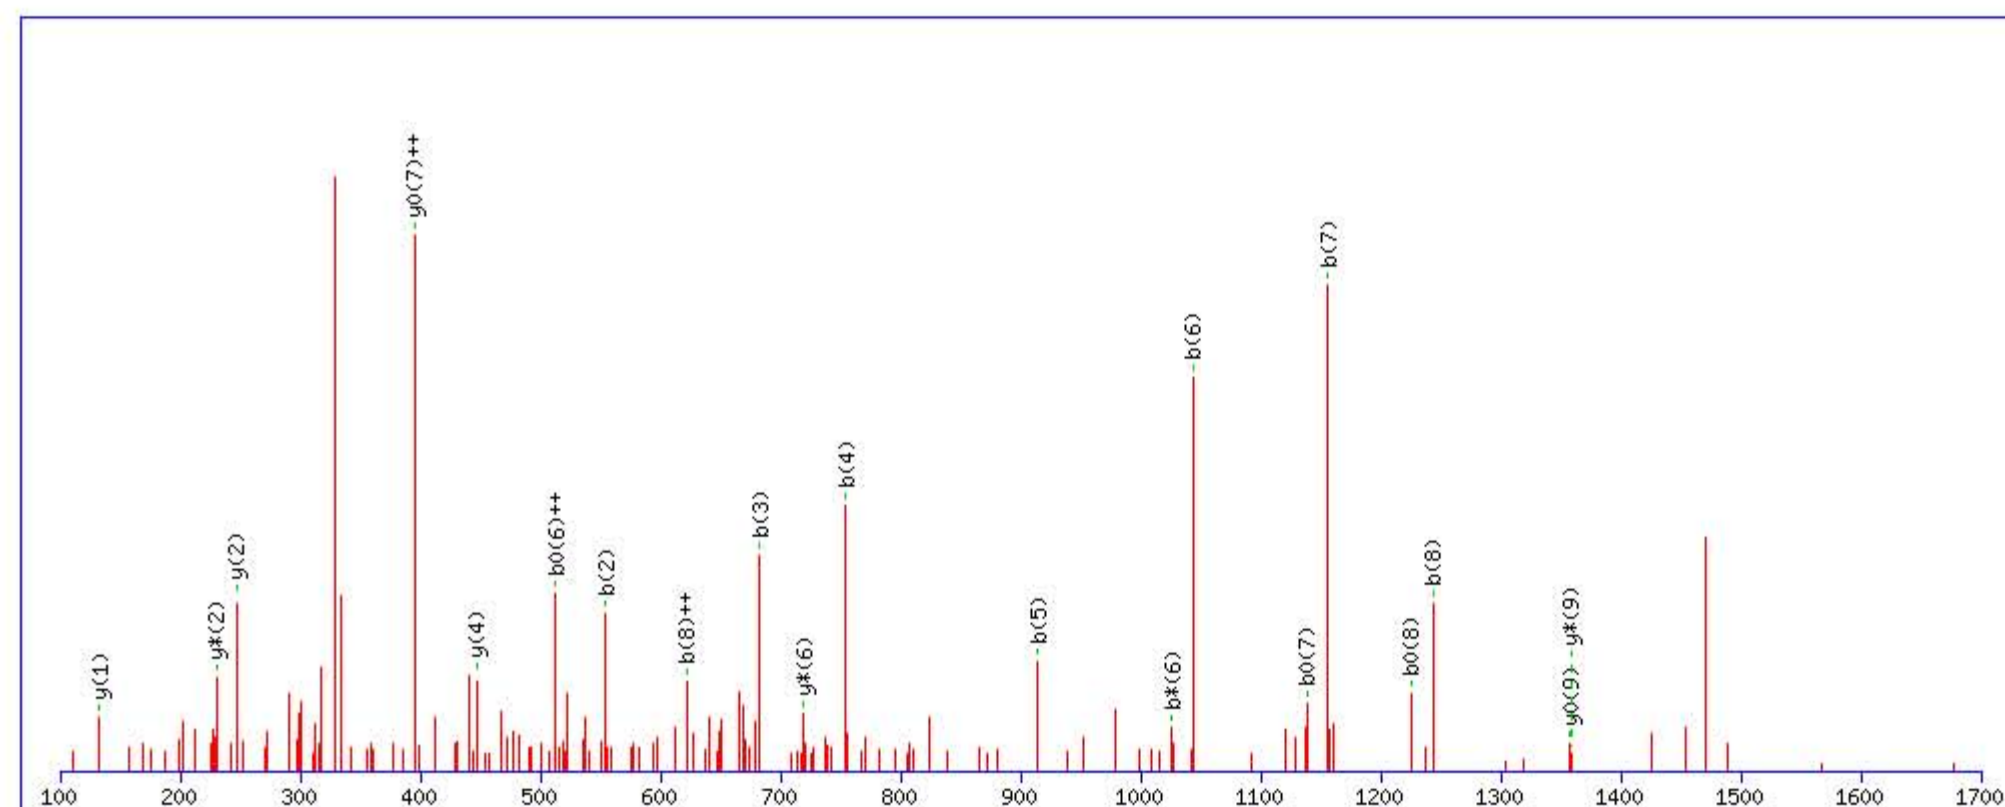

Monoisotopic mass of neutral peptide Mr(calc): 1488.633682

Fixed modifications: Carbamidomethyl (C) (apply to specified residues or termini only)

Variable modifications:

Q2 : Biotin:Thermo-21345 (Q)

Ions Score: 61 Expect: 3.2e-006

Matches : 21/100 fragment ions using 28 most intense peaks ([help](#))

| #  | b                  | b <sup>++</sup>   | b <sup>*</sup>     | b <sup>*++</sup> | b <sup>0</sup>     | b <sup>0++</sup>  | Seq. | y                 | y <sup>++</sup> | y <sup>*</sup>     | y <sup>*++</sup> | y <sup>0</sup>     | y <sup>0++</sup>  | #  |
|----|--------------------|-------------------|--------------------|------------------|--------------------|-------------------|------|-------------------|-----------------|--------------------|------------------|--------------------|-------------------|----|
| 1  | 115.050203         | 58.028740         | 98.023654          | 49.515465        |                    |                   | N    |                   |                 |                    |                  |                    |                   | 10 |
| 2  | <b>554.275529</b>  | 277.641403        | 537.248980         | 269.128128       |                    |                   | Q    | 1375.598062       | 688.302669      | <b>1358.571513</b> | 679.789395       | <b>1357.587497</b> | 679.297387        | 9  |
| 3  | <b>683.318122</b>  | 342.162699        | 666.291573         | 333.649425       | 665.307557         | 333.157417        | E    | 936.372736        | 468.690006      | 919.346187         | 460.176732       | 918.362171         | 459.684724        | 8  |
| 4  | <b>754.355236</b>  | 377.681256        | 737.328687         | 369.167982       | 736.344671         | 368.675974        | A    | 807.330143        | 404.168710      | 790.303594         | 395.655435       | 789.319578         | <b>395.163427</b> | 7  |
| 5  | <b>914.385885</b>  | 457.696581        | 897.359336         | 449.183306       | 896.375320         | 448.691298        | C    | 736.293029        | 368.650153      | <b>719.266480</b>  | 360.136878       | 718.282464         | 359.644870        | 6  |
| 6  | <b>1043.428478</b> | 522.217877        | <b>1026.401929</b> | 513.704603       | 1025.417913        | <b>513.212595</b> | E    | 576.262380        | 288.634828      | 559.235831         | 280.121554       | 558.251815         | 279.629546        | 5  |
| 7  | <b>1156.512542</b> | 578.759909        | 1139.485993        | 570.246635       | <b>1138.501977</b> | 569.754626        | L    | <b>447.219787</b> | 224.113531      | 430.193238         | 215.600257       | 429.209222         | 215.108249        | 4  |
| 8  | <b>1243.544570</b> | <b>622.275923</b> | 1226.518021        | 613.762649       | <b>1225.534005</b> | 613.270641        | S    | 334.135723        | 167.571499      | 317.109174         | 159.058225       | 316.125158         | 158.566217        | 3  |
| 9  | <b>1357.587497</b> | 679.297387        | 1340.560948        | 670.784112       | 1339.576932        | 670.292104        | N    | <b>247.103695</b> | 124.055485      | <b>230.077146</b>  | 115.542211       |                    |                   | 2  |
| 10 |                    |                   |                    |                  |                    |                   | N    | <b>133.060768</b> | 67.034022       | 116.034219         | 58.520747        |                    |                   | 1  |

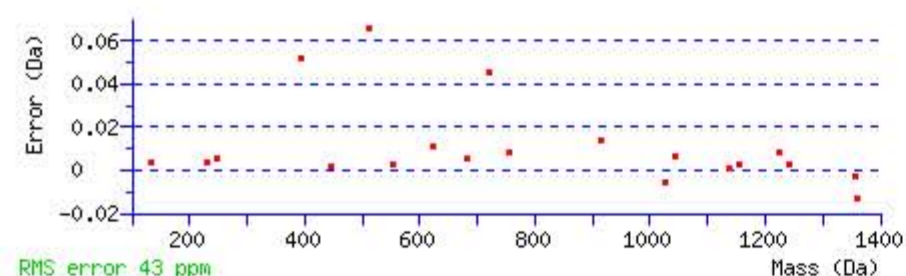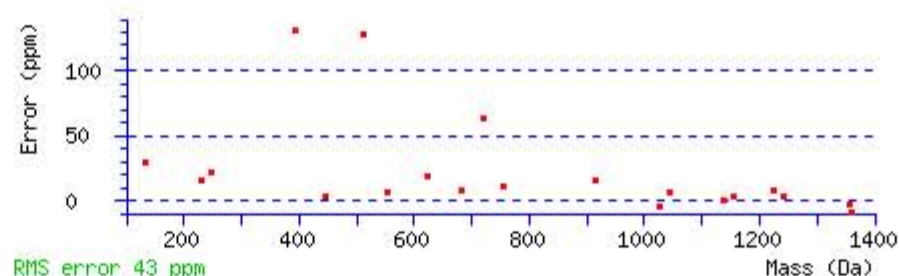

NCBI BLAST search of [NQEACELSNN](#)

(Parameters: blastp, nr protein database, expect=20000, no filter, PAM30)

Other BLAST [web gateways](#)

All matches to this query

| Score | Mr(calc):   | Delta    | Sequence                   |
|-------|-------------|----------|----------------------------|
| 61.1  | 1488.633682 | 0.006386 | <a href="#">NQEACELSNN</a> |

Mascot: <http://www.matrixscience.com/>

# MASCOT Search Results

## Peptide View

MS/MS Fragmentation of **QSFLLK**

Found in **AGAP2\_HUMAN**, Arf-GAP with GTPase, ANK repeat and PH domain-containing protein 2 OS=Homo sapiens GN=AGAP2 PE=1 SV=2

Match to Query 17419: 1045.613508 from(523.814030,2+) rtinseconds(2051) index(61072)

Title: Locus:1.1.1.3137.4 File:"2013-07-02 CLN FXIII 180 min 1st F 4.wiff"

Data file C:\Program Files (x86)\Matrix Science\Mascot Daemon\mgf\7 FXIII 180 min 1st\mascot\_daemon\_merge.mgf

Click mouse within plot area to zoom in by factor of two about that point

Or, Plot from  to  Da

Label all possible matches  Label matches used for scoring

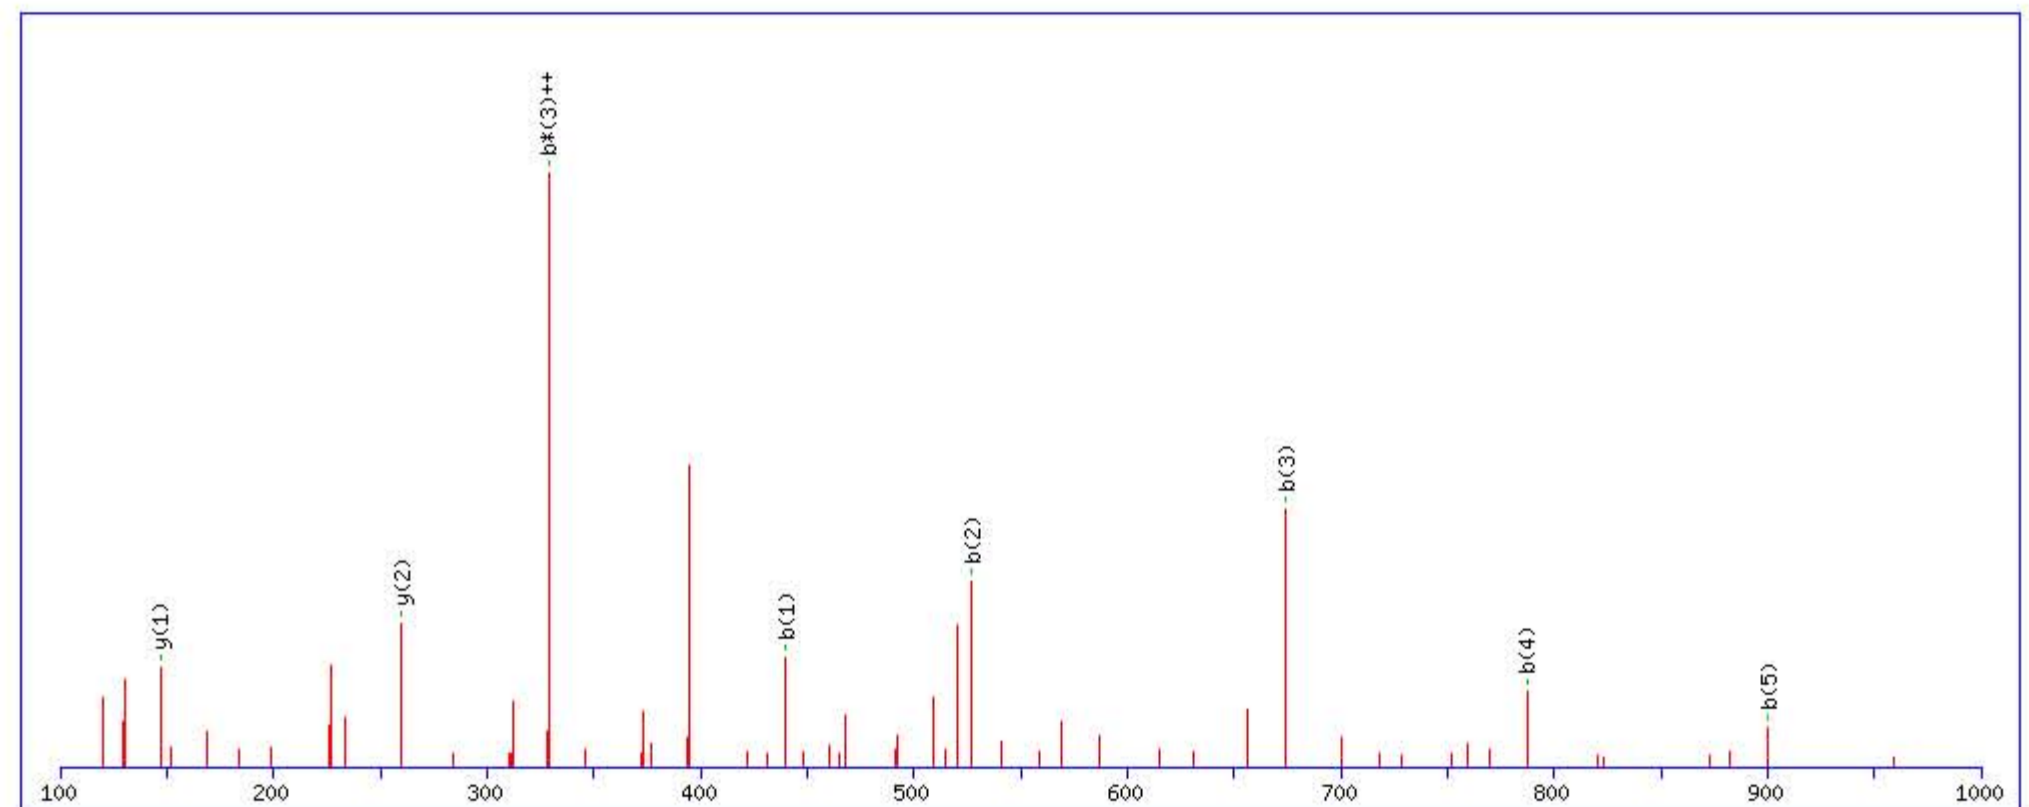

Monoisotopic mass of neutral peptide Mr(calc): 1045.599411

Fixed modifications: Carbamidomethyl (C) (apply to specified residues or termini only)

Variable modifications:

Q1 : Biotin:Thermo-21345 (Q)

Ions Score: 45 Expect: 0.00032

Matches : 8/50 fragment ions using 9 most intense peaks ([help](#))

| # | b                 | b <sup>++</sup> | b <sup>*</sup> | b <sup>*++</sup>  | b <sup>0</sup> | b <sup>0++</sup> | Seq.     | y                 | y <sup>++</sup> | y <sup>*</sup> | y <sup>*++</sup> | y <sup>0</sup> | y <sup>0++</sup> | #        |
|---|-------------------|-----------------|----------------|-------------------|----------------|------------------|----------|-------------------|-----------------|----------------|------------------|----------------|------------------|----------|
| 1 | <b>440.232602</b> | 220.619939      | 423.206053     | 212.106664        |                |                  | <b>Q</b> |                   |                 |                |                  |                |                  | <b>6</b> |
| 2 | <b>527.264630</b> | 264.135953      | 510.238081     | 255.622679        | 509.254065     | 255.130671       | <b>S</b> | 607.381374        | 304.194325      | 590.354825     | 295.681051       | 589.370809     | 295.189043       | <b>5</b> |
| 3 | <b>674.333044</b> | 337.670160      | 657.306495     | <b>329.156885</b> | 656.322479     | 328.664877       | <b>F</b> | 520.349346        | 260.678311      | 503.322797     | 252.165037       |                |                  | <b>4</b> |
| 4 | <b>787.417108</b> | 394.212192      | 770.390559     | 385.698917        | 769.406543     | 385.206909       | <b>L</b> | 373.280932        | 187.144104      | 356.254383     | 178.630830       |                |                  | <b>3</b> |
| 5 | <b>900.501172</b> | 450.754224      | 883.474623     | 442.240950        | 882.490607     | 441.748942       | <b>L</b> | <b>260.196868</b> | 130.602072      | 243.170319     | 122.088798       |                |                  | <b>2</b> |
| 6 |                   |                 |                |                   |                |                  | <b>K</b> | <b>147.112804</b> | 74.060040       | 130.086255     | 65.546765        |                |                  | <b>1</b> |

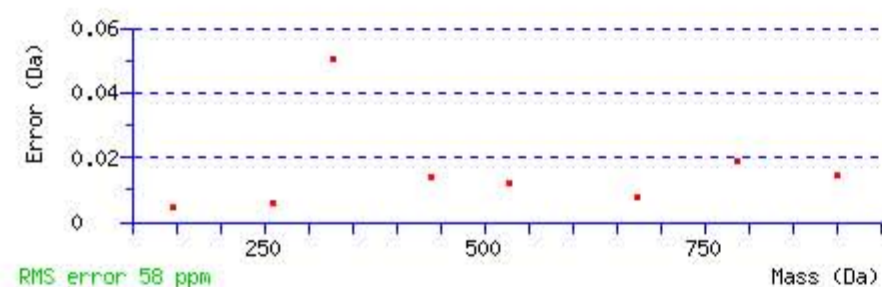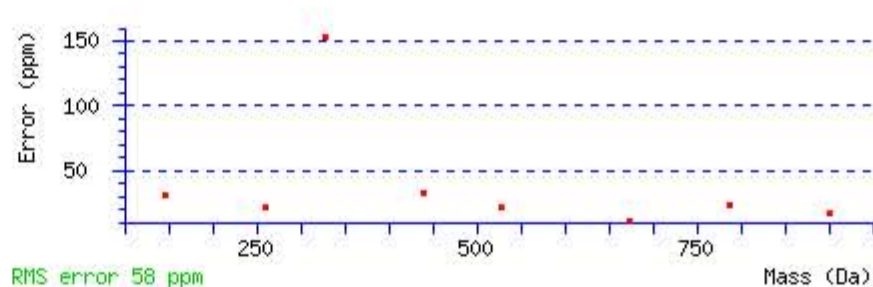

NCBI BLAST search of **QSFLLK**

(Parameters: blastp, nr protein database, expect=20000, no filter, PAM30)

Other BLAST [web gateways](#)

## All matches to this query

| Score | Mr(calc):   | Delta     | Sequence                  |
|-------|-------------|-----------|---------------------------|
| 45.1  | 1045.599411 | 0.014097  | <a href="#">QSFLLK</a>    |
| 35.6  | 1045.599411 | 0.014097  | <a href="#">SQFLIK</a>    |
| 19.7  | 1045.601883 | 0.011625  | <a href="#">EESISKLIK</a> |
| 19.7  | 1045.613113 | 0.000395  | <a href="#">ESKKSNNLK</a> |
| 19.5  | 1045.599426 | 0.014082  | <a href="#">VFLCPGLLK</a> |
| 19.3  | 1045.599411 | 0.014097  | <a href="#">SQLFLK</a>    |
| 16.6  | 1045.628387 | -0.014879 | <a href="#">FIRQEIIK</a>  |
| 16.6  | 1045.620514 | -0.007006 | <a href="#">KETMALILK</a> |
| 16.6  | 1045.599411 | 0.014097  | <a href="#">QVFAPMLLK</a> |
| 16.6  | 1045.599396 | 0.014112  | <a href="#">YQALLK</a>    |

# MASCOT Search Results

## Peptide View

MS/MS Fragmentation of **SCALDQNCQWEPR**

Found in **ATRN\_HUMAN**, Attractin OS=Homo sapiens GN=ATRN PE=1 SV=2

Match to Query 49336: 1973.875668 from(987.945110,2+) rtinseconds(1957) index(24401)

Title: Locus:1.1.1.2823.22 File:"2013-07-02 CLN FXIII 180 min 1st F 2.wiff"

Data file C:\Program Files (x86)\Matrix Science\Mascot Daemon\mgf\7 FXIII 180 min 1st\mascot\_daemon\_merge.mgf

Click mouse within plot area to zoom in by factor of two about that point

Or, Plot from  to  Da

Label all possible matches  Label matches used for scoring

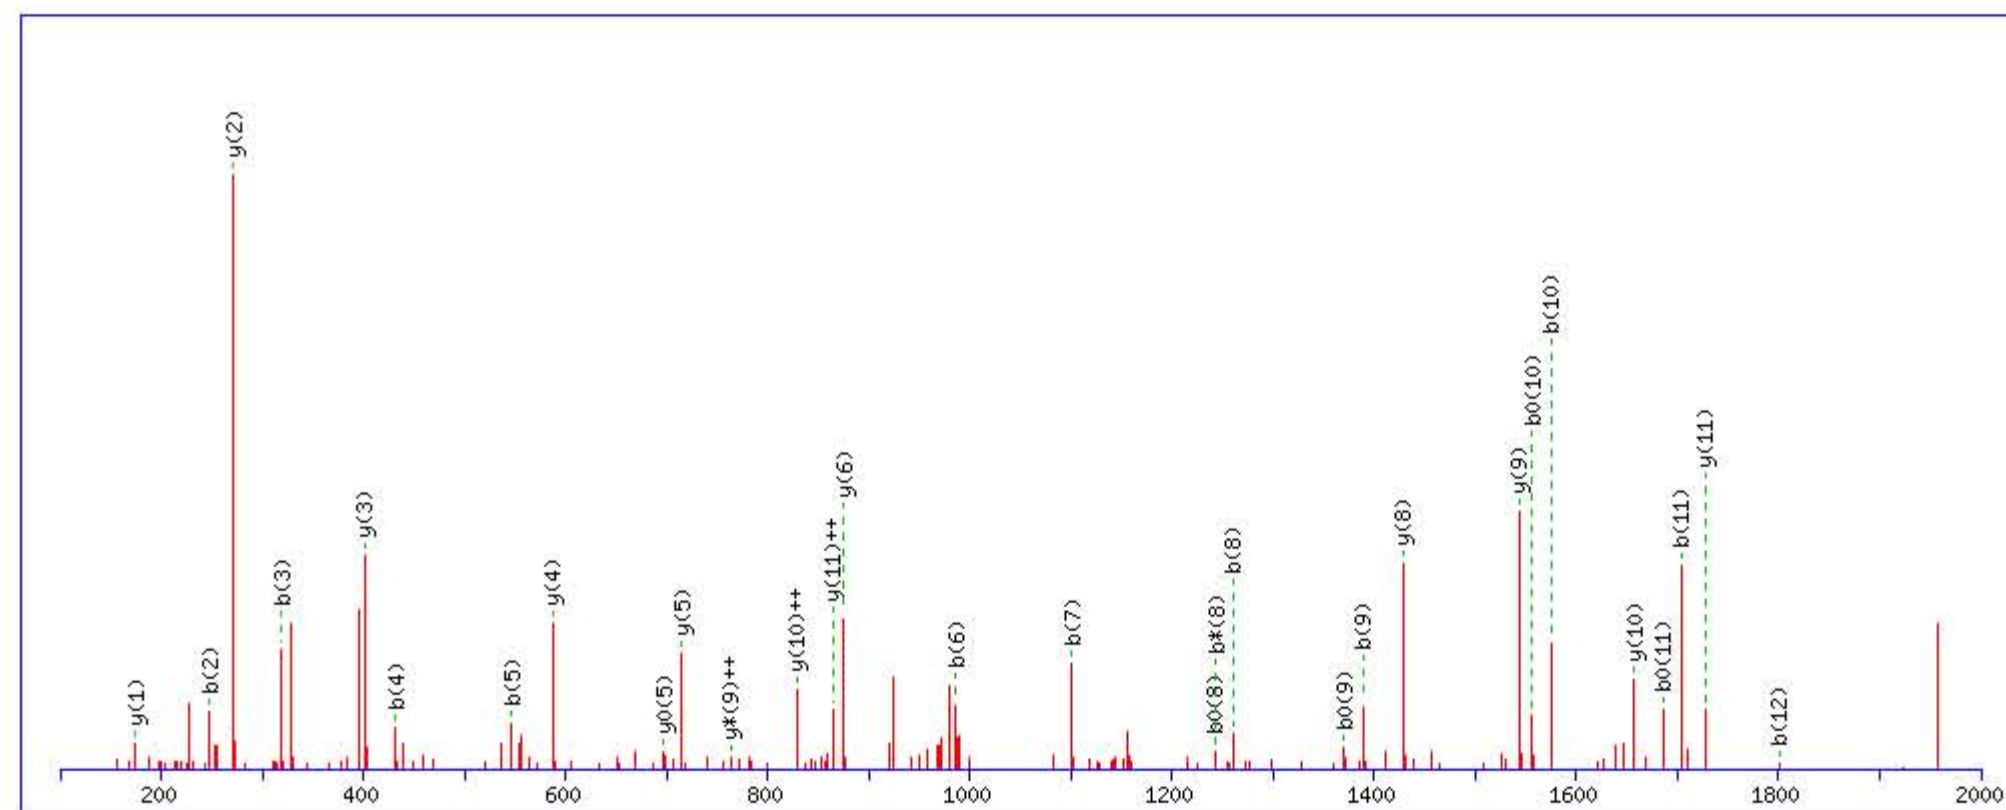

Monoisotopic mass of neutral peptide Mr(calc): 1973.854614

Fixed modifications: Carbamidomethyl (C) (apply to specified residues or termini only)

Variable modifications:

Q6 : Biotin:Thermo-21345 (Q)

Ions Score: 74 Expect: 2.8e-007

Matches : 30/130 fragment ions using 51 most intense peaks [\(help\)](#)

| #  | b                  | b <sup>++</sup> | b <sup>+</sup>     | b <sup>+++</sup> | b <sup>0</sup>     | b <sup>0++</sup> | Seq. | y                  | y <sup>++</sup>   | y <sup>+</sup> | y <sup>+++</sup>  | y <sup>0</sup>    | y <sup>0++</sup> | #  |
|----|--------------------|-----------------|--------------------|------------------|--------------------|------------------|------|--------------------|-------------------|----------------|-------------------|-------------------|------------------|----|
| 1  | 88.039304          | 44.523290       |                    |                  | 70.028739          | 35.518008        | S    |                    |                   |                |                   |                   |                  | 13 |
| 2  | <b>248.069953</b>  | 124.538614      |                    |                  | 230.059388         | 115.533332       | C    | 1887.829872        | 944.418574        | 1870.803323    | 935.905300        | 1869.819307       | 935.413292       | 12 |
| 3  | <b>319.107067</b>  | 160.057171      |                    |                  | 301.096502         | 151.051889       | A    | <b>1727.799223</b> | <b>864.403250</b> | 1710.772674    | 855.889975        | 1709.788658       | 855.397967       | 11 |
| 4  | <b>432.191131</b>  | 216.599203      |                    |                  | 414.180566         | 207.593921       | L    | <b>1656.762109</b> | <b>828.884693</b> | 1639.735560    | 820.371418        | 1638.751544       | 819.879410       | 10 |
| 5  | <b>547.218074</b>  | 274.112675      |                    |                  | 529.207509         | 265.107393       | D    | <b>1543.678045</b> | 772.342661        | 1526.651496    | <b>763.829386</b> | 1525.667480       | 763.337378       | 9  |
| 6  | <b>986.443400</b>  | 493.725338      | 969.416851         | 485.212064       | 968.432835         | 484.720056       | Q    | <b>1428.651102</b> | 714.829189        | 1411.624553    | 706.315915        | 1410.640537       | 705.823907       | 8  |
| 7  | <b>1100.486327</b> | 550.746802      | 1083.459778        | 542.233527       | 1082.475762        | 541.741519       | N    | 989.425776         | 495.216526        | 972.399227     | 486.703252        | 971.415211        | 486.211244       | 7  |
| 8  | <b>1260.516976</b> | 630.762126      | <b>1243.490427</b> | 622.248852       | <b>1242.506411</b> | 621.756844       | C    | <b>875.382849</b>  | 438.195063        | 858.356300     | 429.681788        | 857.372284        | 429.189780       | 6  |
| 9  | <b>1388.575554</b> | 694.791415      | 1371.549005        | 686.278141       | <b>1370.564989</b> | 685.786133       | Q    | <b>715.352200</b>  | 358.179738        | 698.325651     | 349.666464        | <b>697.341635</b> | 349.174456       | 5  |
| 10 | <b>1574.654867</b> | 787.831072      | 1557.628318        | 779.317797       | <b>1556.644302</b> | 778.825789       | W    | <b>587.293622</b>  | 294.150449        | 570.267073     | 285.637174        | 569.283057        | 285.145166       | 4  |
| 11 | <b>1703.697460</b> | 852.352368      | 1686.670911        | 843.839094       | <b>1685.686895</b> | 843.347086       | E    | <b>401.214309</b>  | 201.110792        | 384.187760     | 192.597518        | 383.203744        | 192.105510       | 3  |
| 12 | <b>1800.750224</b> | 900.878750      | 1783.723675        | 892.365476       | 1782.739659        | 891.873468       | P    | <b>272.171716</b>  | 136.589496        | 255.145167     | 128.076221        |                   |                  | 2  |
| 13 |                    |                 |                    |                  |                    |                  | R    | <b>175.118952</b>  | 88.063114         | 158.092403     | 79.549839         |                   |                  | 1  |

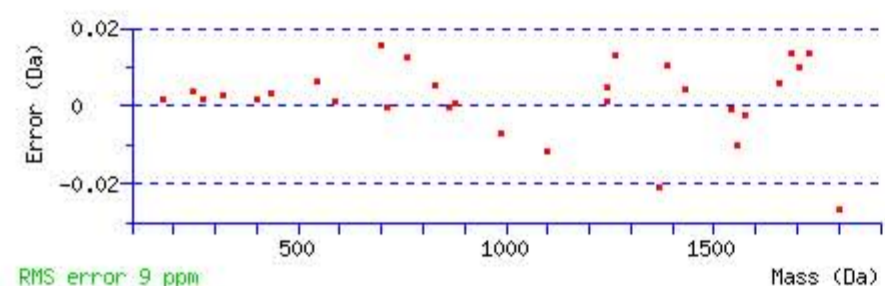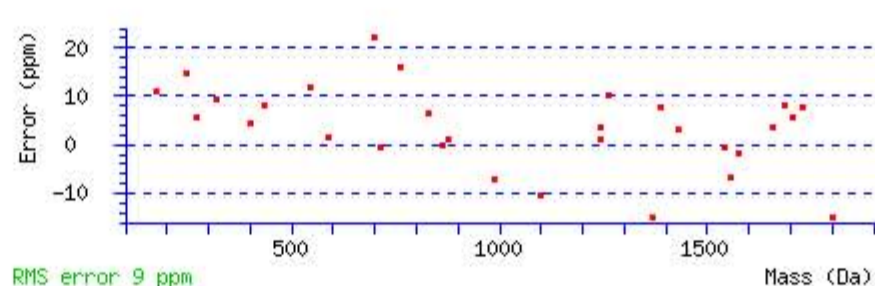

NCBI BLAST search of **SCALDQNCQWEPR**

(Parameters: blastp, nr protein database, expect=20000, no filter, PAM30)

Other BLAST [web gateways](#)

All matches to this query

| Score | Mr(calc):   | Delta    | Sequence                           |
|-------|-------------|----------|------------------------------------|
| 73.5  | 1973.854614 | 0.021054 | <a href="#">SCALDQNCQWEPR</a>      |
| 36.1  | 1973.854614 | 0.021054 | <a href="#">SCALDQNCQWEPR</a>      |
| 14.4  | 1973.853729 | 0.021939 | <a href="#">DSPETGEEMGRAEGAWPR</a> |

Mascot: <http://www.matrixscience.com/>

# MASCOT Search Results

## Peptide View

MS/MS Fragmentation of **KCSYTEDAQCIDGTIEVPK**  
 Found in **APOH\_HUMAN**, Beta-2-glycoprotein 1 OS=Homo sapiens GN=APOH PE=1 SV=3

Match to Query 63512: 2524.189152 from(842.403660,3+) rtinseconds(1959) index(78651)  
 Title: Locus:1.1.1.2032.25 File:"2013-07-02 CLN FXIII 180 min 1st FT.wiff"  
 Data file C:\Program Files (x86)\Matrix Science\Mascot Daemon\mgf7 FXIII 180 min 1st\mascot\_daemon\_merge.mgf

Click mouse within plot area to zoom in by factor of two about that point  
 Or, Plot from  to  Da   
 Label all possible matches  Label matches used for scoring

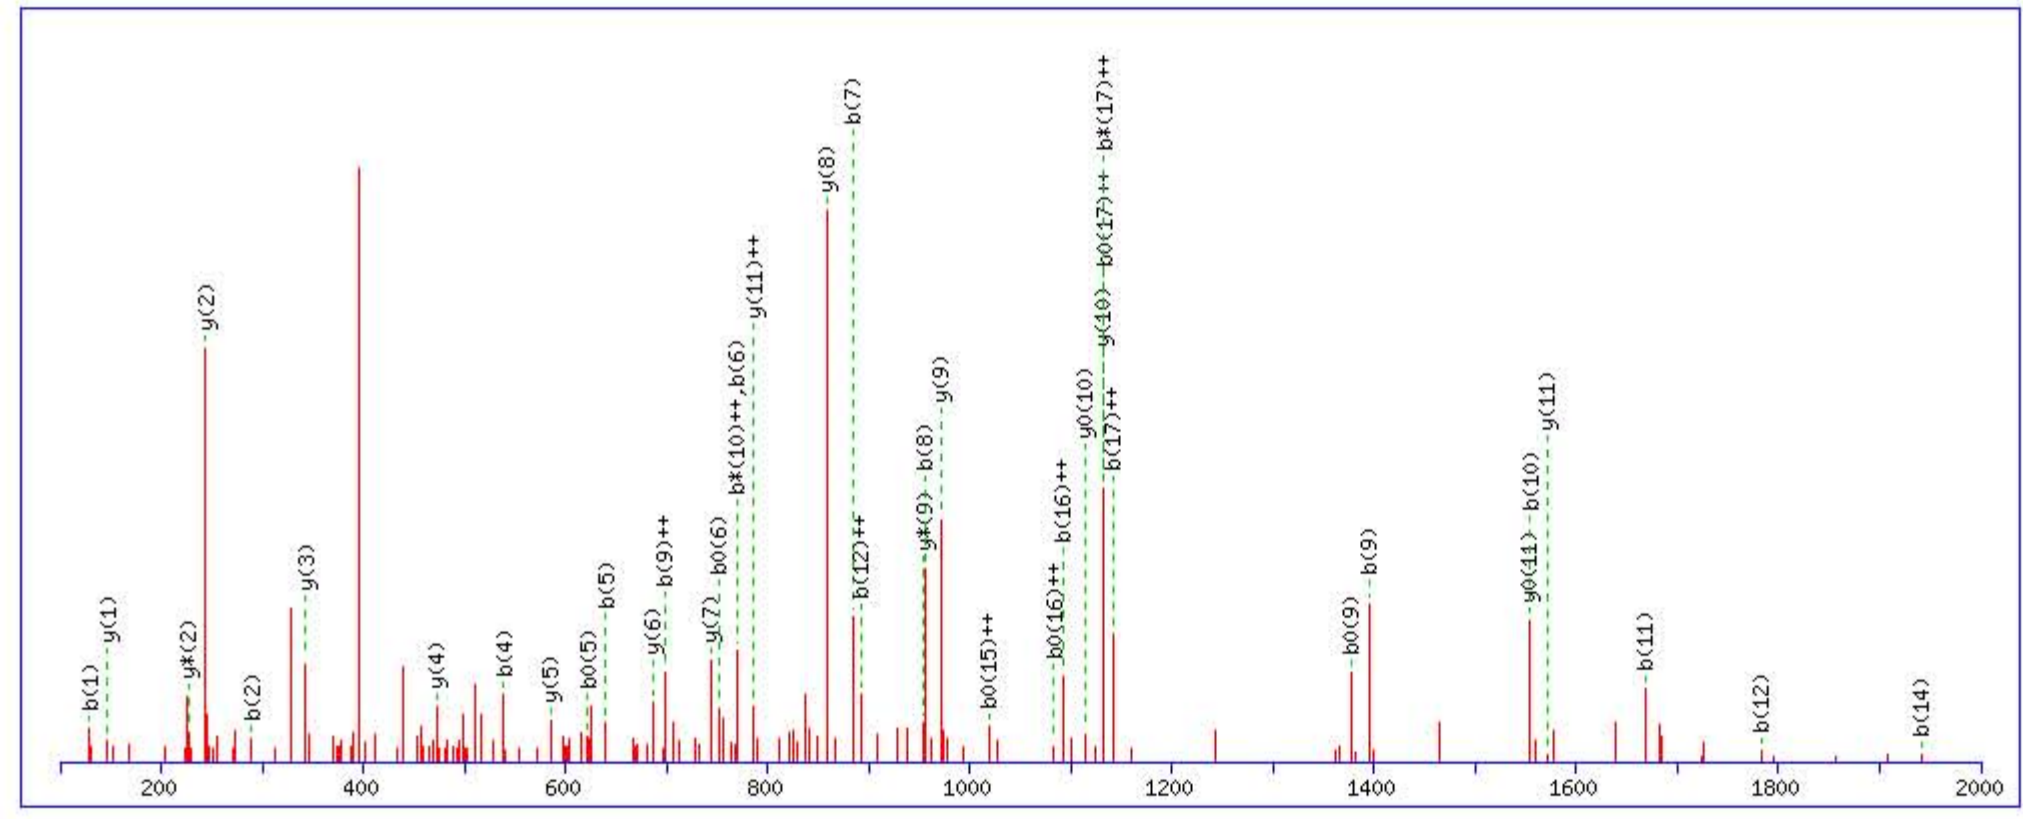

Monoisotopic mass of neutral peptide Mr(calc): 2524.164780  
 Fixed modifications: Carbamidomethyl (C) (apply to specified residues or termini only)  
 Variable modifications:  
 Q9 : Biotin:Thermo-21345 (Q)  
 Ions Score: 70 Expect: 1.9e-006  
 Matches : 40/206 fragment ions using 78 most intense peaks [\(help\)](#)

| #  | b                  | b <sup>++</sup>    | b <sup>*</sup> | b <sup>*++</sup>   | b <sup>0</sup>     | b <sup>0++</sup>   | Seq.     | y                  | y <sup>++</sup>   | y <sup>*</sup>    | y <sup>*++</sup> | y <sup>0</sup>     | y <sup>0++</sup> | #         |
|----|--------------------|--------------------|----------------|--------------------|--------------------|--------------------|----------|--------------------|-------------------|-------------------|------------------|--------------------|------------------|-----------|
| 1  | <b>129.102239</b>  | 65.054757          | 112.075690     | 56.541483          |                    |                    | <b>K</b> |                    |                   |                   |                  |                    |                  | <b>19</b> |
| 2  | <b>289.132888</b>  | 145.070082         | 272.106339     | 136.556808         |                    |                    | <b>C</b> | 2397.077099        | 1199.042187       | 2380.050550       | 1190.528913      | 2379.066534        | 1190.036905      | <b>18</b> |
| 3  | 376.164916         | 188.586096         | 359.138367     | 180.072822         | 358.154351         | 179.580814         | <b>S</b> | 2237.046450        | 1119.026863       | 2220.019901       | 1110.513588      | 2219.035885        | 1110.021580      | <b>17</b> |
| 4  | <b>539.228245</b>  | 270.117761         | 522.201696     | 261.604486         | 521.217680         | 261.112478         | <b>Y</b> | 2150.014422        | 1075.510849       | 2132.987873       | 1066.997574      | 2132.003857        | 1066.505566      | <b>16</b> |
| 5  | <b>640.275924</b>  | 320.641600         | 623.249375     | 312.128326         | <b>622.265359</b>  | 311.636318         | <b>T</b> | 1986.951093        | 993.979185        | 1969.924544       | 985.465910       | 1968.940528        | 984.973902       | <b>15</b> |
| 6  | <b>769.318517</b>  | 385.162897         | 752.291968     | 376.649622         | <b>751.307952</b>  | 376.157614         | <b>E</b> | 1885.903414        | 943.455345        | 1868.876865       | 934.942071       | 1867.892849        | 934.450063       | <b>14</b> |
| 7  | <b>884.345460</b>  | 442.676368         | 867.318911     | 434.163094         | 866.334895         | 433.671086         | <b>D</b> | 1756.860821        | 878.934049        | 1739.834272       | 870.420774       | 1738.850256        | 869.928766       | <b>13</b> |
| 8  | <b>955.382574</b>  | 478.194925         | 938.356025     | 469.681650         | 937.372009         | 469.189642         | <b>A</b> | 1641.833878        | 821.420577        | 1624.807329       | 812.907303       | 1623.823313        | 812.415295       | <b>12</b> |
| 9  | <b>1394.607900</b> | <b>697.807588</b>  | 1377.581351    | 689.294314         | <b>1376.597335</b> | 688.802306         | <b>Q</b> | <b>1570.796764</b> | <b>785.902020</b> | 1553.770215       | 777.388746       | <b>1552.786199</b> | 776.896738       | <b>11</b> |
| 10 | <b>1554.638549</b> | 777.822913         | 1537.612000    | <b>769.309638</b>  | 1536.627984        | 768.817630         | <b>C</b> | <b>1131.571438</b> | 566.289357        | 1114.544889       | 557.776083       | <b>1113.560873</b> | 557.284075       | <b>10</b> |
| 11 | <b>1667.722613</b> | 834.364945         | 1650.696064    | 825.851670         | 1649.712048        | 825.359662         | <b>I</b> | <b>971.540789</b>  | 486.274033        | <b>954.514240</b> | 477.760758       | 953.530224         | 477.268750       | <b>9</b>  |
| 12 | <b>1782.749556</b> | <b>891.878416</b>  | 1765.723007    | 883.365142         | 1764.738991        | 882.873134         | <b>D</b> | <b>858.456725</b>  | 429.732001        | 841.430176        | 421.218726       | 840.446160         | 420.726718       | <b>8</b>  |
| 13 | 1839.771020        | 920.389148         | 1822.744471    | 911.875874         | 1821.760455        | 911.383866         | <b>G</b> | <b>743.429782</b>  | 372.218529        | 726.403233        | 363.705255       | 725.419217         | 363.213247       | <b>7</b>  |
| 14 | <b>1940.818699</b> | 970.912988         | 1923.792150    | 962.399713         | 1922.808134        | 961.907705         | <b>T</b> | <b>686.408318</b>  | 343.707797        | 669.381769        | 335.194523       | 668.397753         | 334.702515       | <b>6</b>  |
| 15 | 2053.902763        | 1027.455019        | 2036.876214    | 1018.941745        | 2035.892198        | <b>1018.449737</b> | <b>I</b> | <b>585.360639</b>  | 293.183958        | 568.334090        | 284.670683       | 567.350074         | 284.178675       | <b>5</b>  |
| 16 | 2182.945356        | <b>1091.976316</b> | 2165.918807    | 1083.463041        | 2164.934791        | <b>1082.971034</b> | <b>E</b> | <b>472.276575</b>  | 236.641925        | 455.250026        | 228.128651       | 454.266010         | 227.636643       | <b>4</b>  |
| 17 | 2282.013770        | <b>1141.510523</b> | 2264.987221    | <b>1132.997248</b> | 2264.003205        | <b>1132.505240</b> | <b>V</b> | <b>343.233982</b>  | 172.120629        | 326.207433        | 163.607354       |                    |                  | <b>3</b>  |
| 18 | 2379.066534        | 1190.036905        | 2362.039985    | 1181.523630        | 2361.055969        | 1181.031622        | <b>P</b> | <b>244.165568</b>  | 122.586422        | <b>227.139019</b> | 114.073148       |                    |                  | <b>2</b>  |
| 19 |                    |                    |                |                    |                    |                    | <b>K</b> | <b>147.112804</b>  | 74.060040         | 130.086255        | 65.546765        |                    |                  | <b>1</b>  |

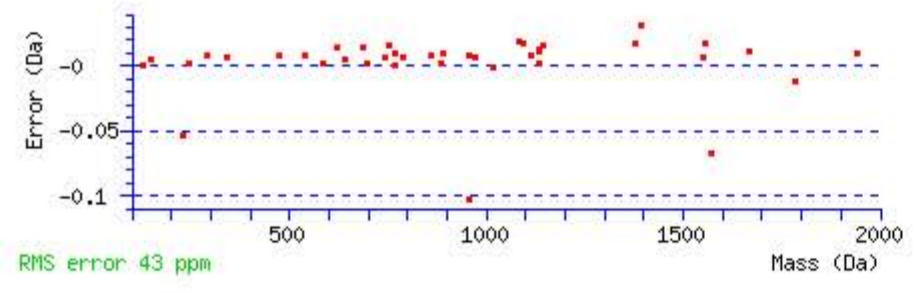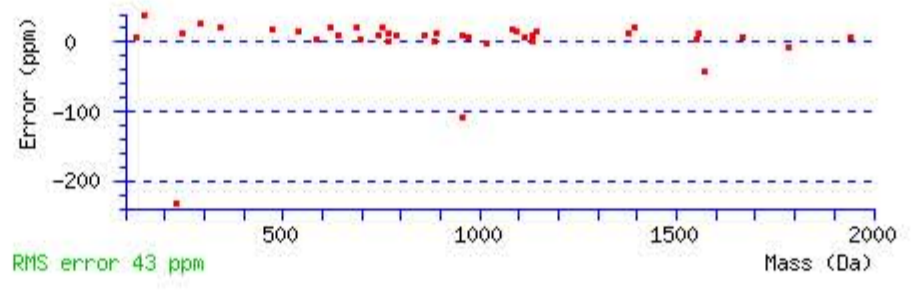

NCBI BLAST search of **KCSYTEDAQCIDGTIEVPK**  
 (Parameters: blastp, nr protein database, expect=20000, no filter, PAM30)  
 Other BLAST [web gateways](#)

### All matches to this query

| Score | Mr(calc):   | Delta    | Sequence                            |
|-------|-------------|----------|-------------------------------------|
| 69.7  | 2524.164780 | 0.024372 | <a href="#">KCSYTEDAQCIDGTIEVPK</a> |

# **MASCOT** SCIENCE Mascot Search Results

## Peptide View

MS/MS Fragmentation of **CEVQDR**

Found in **C4BPA\_HUMAN**, C4b-binding protein alpha chain OS=Homo sapiens GN=C4BPA PE=1 SV=2

Match to Query 19907: 1116.514948 from(559.264750,2+) rtinseconds(1316) index(55989)

Title: Locus:1.1.1.2881.20 File:"2013-07-02 CLN FXIII 180 min 1st F 4.wiff"

Data file C:\Program Files (x86)\Matrix Science\Mascot Daemon\mgf\7 FXIII 180 min 1st\mascot\_daemon\_merge.mgf

Click mouse within plot area to zoom in by factor of two about that point

Or, Plot from  to  Da

Label all possible matches  Label matches used for scoring

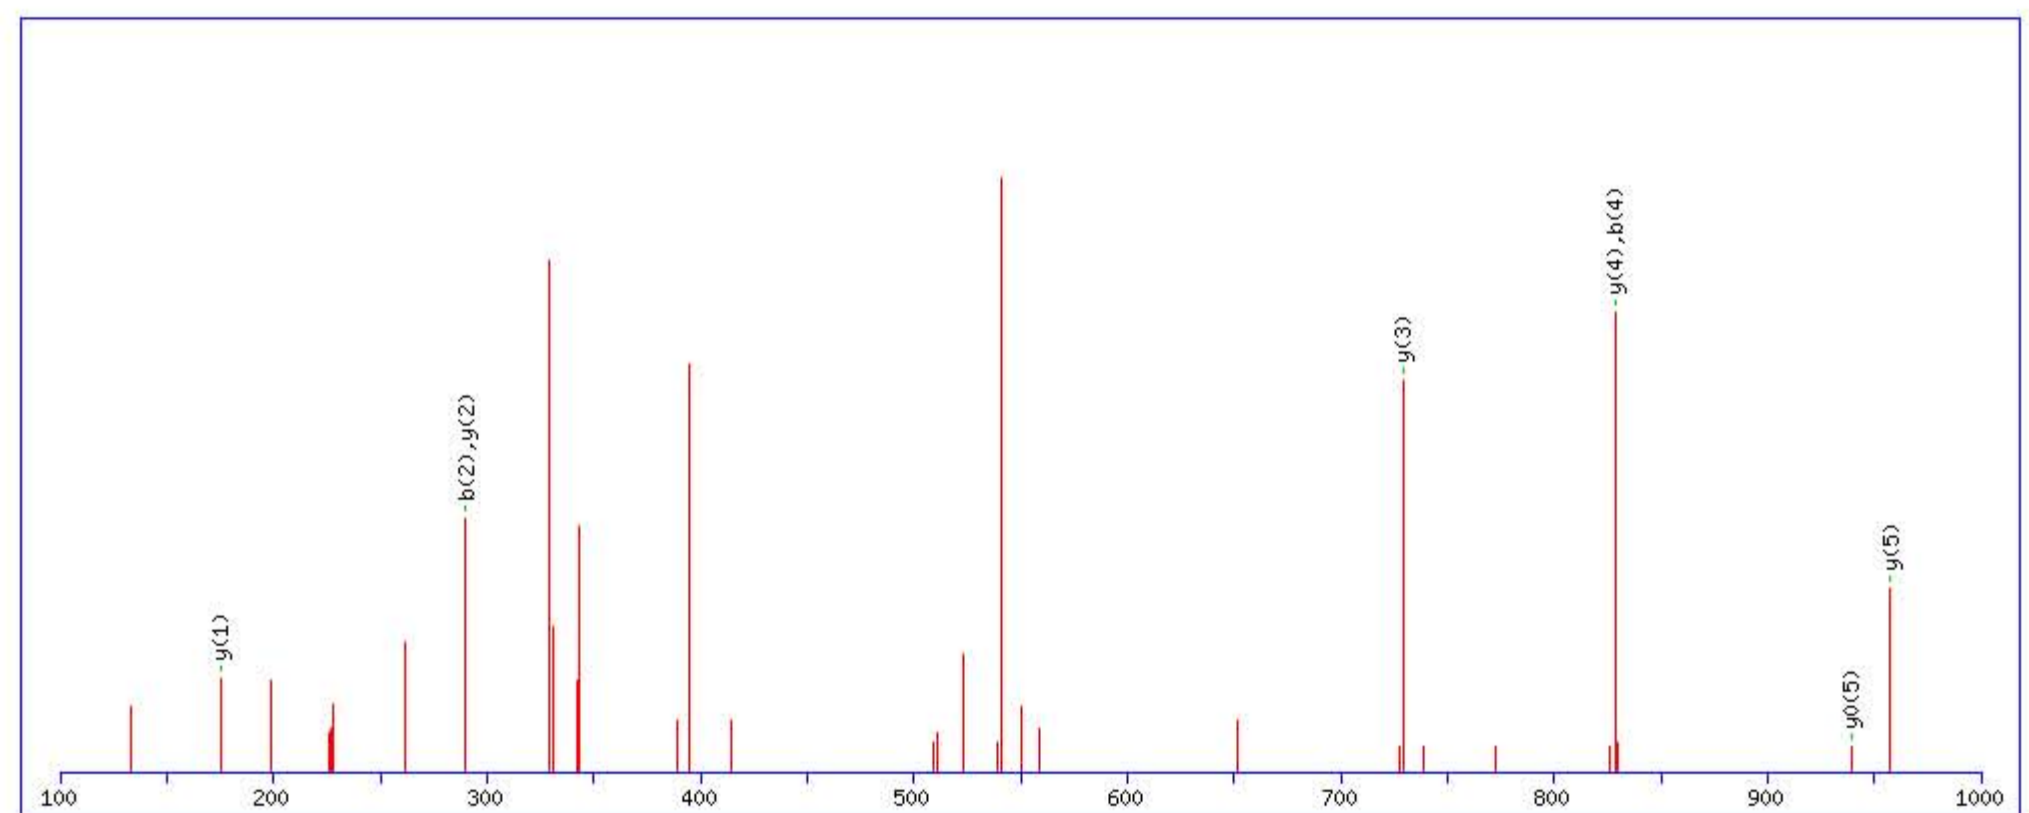

Monoisotopic mass of neutral peptide Mr(calc): 1116.505600

Fixed modifications: Carbamidomethyl (C) (apply to specified residues or termini only)

Variable modifications:

Q4 : Biotin:Thermo-21345 (Q)

Ions Score: 27 Expect: 0.013

Matches : 8/50 fragment ions using 16 most intense peaks [\(help\)](#)

| # | b                 | b <sup>++</sup> | b <sup>*</sup> | b <sup>*++</sup> | b <sup>0</sup> | b <sup>0++</sup> | Seq. | y                 | y <sup>++</sup> | y <sup>*</sup> | y <sup>*++</sup> | y <sup>0</sup>    | y <sup>0++</sup> | # |
|---|-------------------|-----------------|----------------|------------------|----------------|------------------|------|-------------------|-----------------|----------------|------------------|-------------------|------------------|---|
| 1 | 161.037925        | 81.022600       |                |                  |                |                  | C    |                   |                 |                |                  |                   |                  | 6 |
| 2 | <b>290.080518</b> | 145.543897      |                |                  | 272.069953     | 136.538615       | E    | <b>957.482228</b> | 479.244752      | 940.455679     | 470.731478       | <b>939.471663</b> | 470.239470       | 5 |
| 3 | 389.148932        | 195.078104      |                |                  | 371.138367     | 186.072822       | V    | <b>828.439635</b> | 414.723456      | 811.413086     | 406.210181       | 810.429070        | 405.718173       | 4 |
| 4 | <b>828.374258</b> | 414.690767      | 811.347709     | 406.177493       | 810.363693     | 405.685485       | Q    | <b>729.371221</b> | 365.189249      | 712.344672     | 356.675974       | 711.360656        | 356.183966       | 3 |
| 5 | 943.401201        | 472.204239      | 926.374652     | 463.690964       | 925.390636     | 463.198956       | D    | <b>290.145895</b> | 145.576585      | 273.119346     | 137.063311       | 272.135330        | 136.571303       | 2 |
| 6 |                   |                 |                |                  |                |                  | R    | <b>175.118952</b> | 88.063114       | 158.092403     | 79.549839        |                   |                  | 1 |

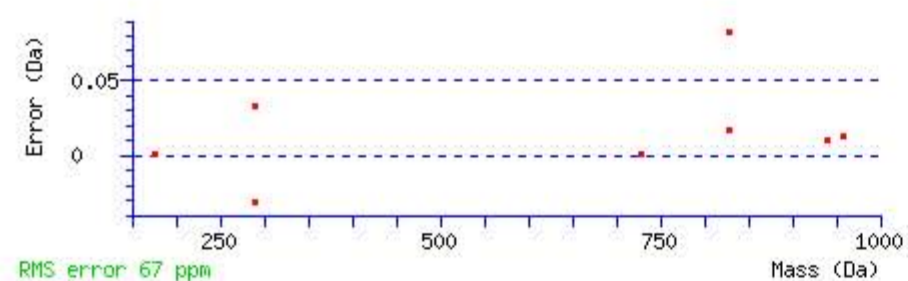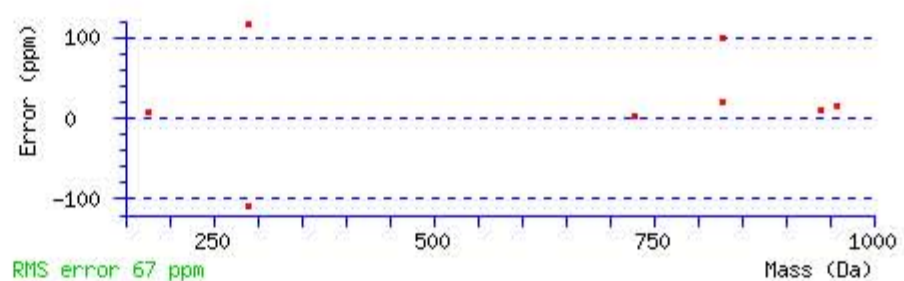

NCBI BLAST search of [CEVQDR](#)

(Parameters: blastp, nr protein database, expect=20000, no filter, PAM30)

Other BLAST [web gateways](#)

All matches to this query

| Score | Mr(calc):   | Delta     | Sequence                   |
|-------|-------------|-----------|----------------------------|
| 27.5  | 1116.505600 | 0.009348  | <a href="#">CEVQDR</a>     |
| 6.9   | 1116.527206 | -0.012258 | <a href="#">TSTSGTHRDR</a> |
| 5.5   | 1116.505600 | 0.009348  | <a href="#">DICQDR</a>     |
| 5.5   | 1116.502228 | 0.012720  | <a href="#">SWDQDR</a>     |
| 0.7   | 1116.504700 | 0.010248  | <a href="#">ELQAEQEDR</a>  |
| 0.3   | 1116.523346 | -0.008398 | <a href="#">ETQSADR</a>    |
| 0.3   | 1116.524689 | -0.009741 | <a href="#">QHRQFMDR</a>   |
| 0.2   | 1116.509644 | 0.005304  | <a href="#">CFSVLGFCK</a>  |

**MATRIX SCIENCE Mascot Search Results**

**Peptide View**

MS/MS Fragmentation of **GYILVGQAK**

Found in **C4BPA\_HUMAN**, C4b-binding protein alpha chain OS=Homo sapiens GN=C4BPA PE=1 SV=2

Match to Query 25502: 1258.723368 from(630.368960,2+) rtinseconds(2041) index(42506)

Title: Locus:1.1.1.3160.7 File:"2013-07-02 CLN FXIII 180 min 1st F 3.wiff"

Data file C:\Program Files (x86)\Matrix Science\Mascot Daemon\mgf\7 FXIII 180 min 1st\mascot\_daemon\_merge.mgf

Click mouse within plot area to zoom in by factor of two about that point

Or, Plot from  to  Da

Label all possible matches  Label matches used for scoring

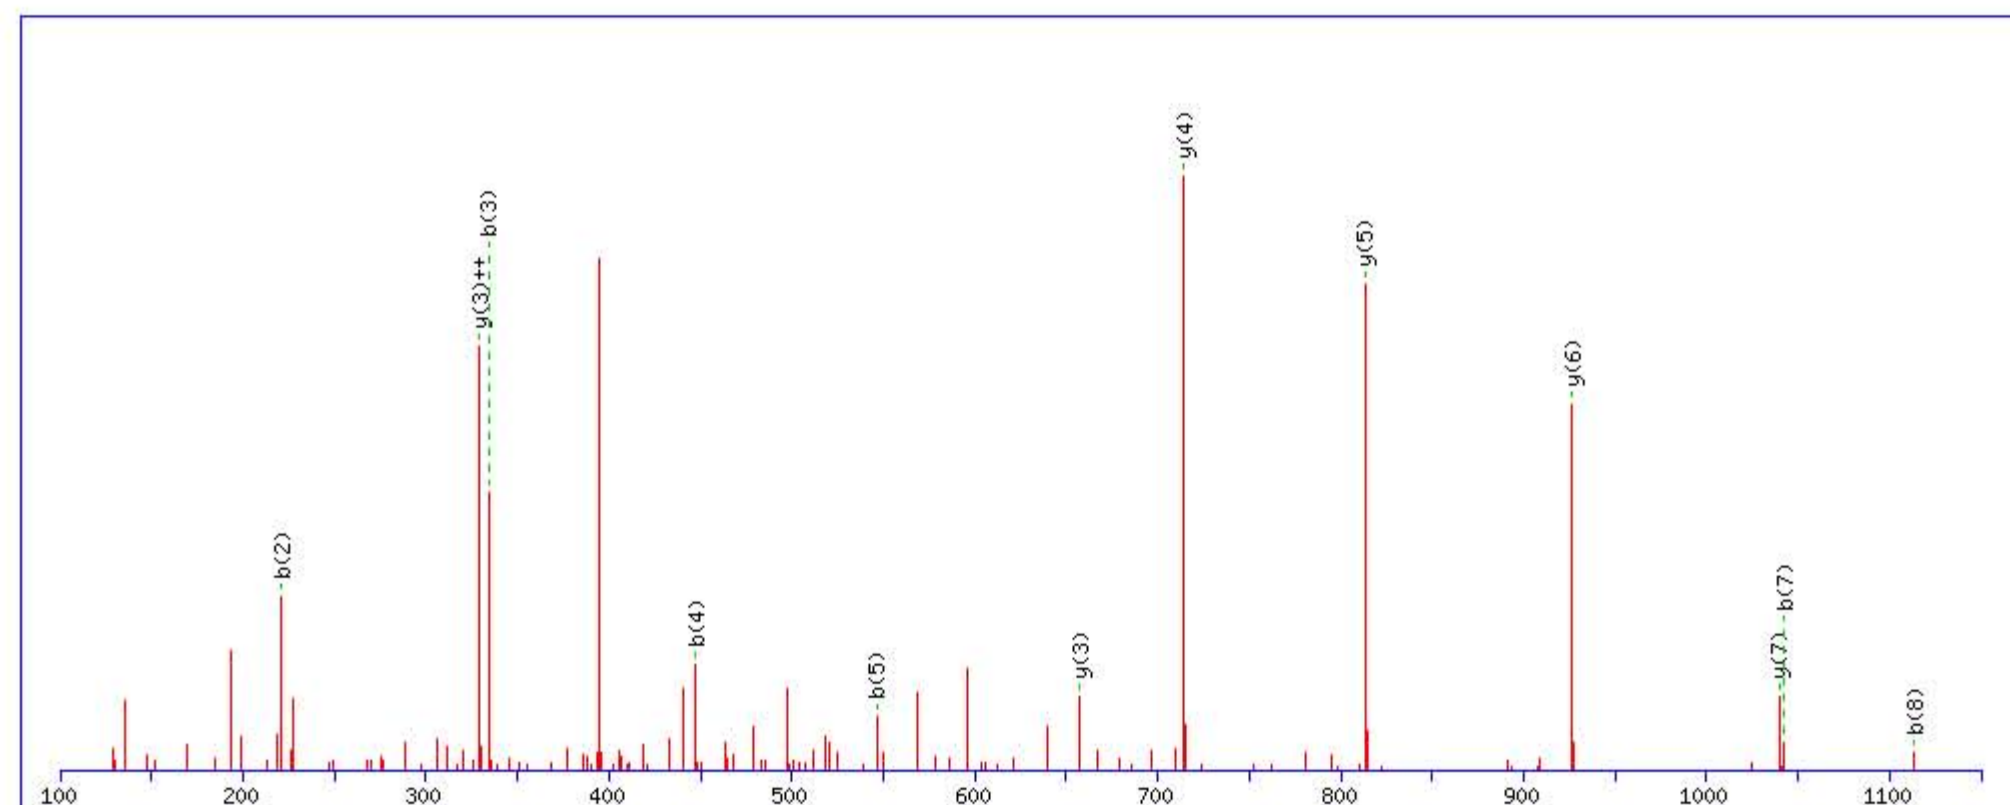

Monoisotopic mass of neutral peptide Mr(calc): 1258.710754

Fixed modifications: Carbamidomethyl (C) (apply to specified residues or termini only)

Variable modifications:

Q7 : Biotin:Thermo-21345 (Q)

Ions Score: 28 Expect: 0.021

Matches : 12/52 fragment ions using 28 most intense peaks [\(help\)](#)

| # | b                  | b <sup>++</sup> | b <sup>*</sup> | b <sup>*++</sup> | Seq.     | y                  | y <sup>++</sup>   | y <sup>*</sup> | y <sup>*++</sup> | #        |
|---|--------------------|-----------------|----------------|------------------|----------|--------------------|-------------------|----------------|------------------|----------|
| 1 | 58.028740          | 29.518008       |                |                  | <b>G</b> |                    |                   |                |                  | <b>9</b> |
| 2 | <b>221.092069</b>  | 111.049673      |                |                  | <b>Y</b> | 1202.696579        | 601.851928        | 1185.670030    | 593.338653       | <b>8</b> |
| 3 | <b>334.176133</b>  | 167.591704      |                |                  | <b>I</b> | <b>1039.633250</b> | 520.320263        | 1022.606701    | 511.806989       | <b>7</b> |
| 4 | <b>447.260197</b>  | 224.133737      |                |                  | <b>L</b> | <b>926.549186</b>  | 463.778231        | 909.522637     | 455.264957       | <b>6</b> |
| 5 | <b>546.328611</b>  | 273.667944      |                |                  | <b>V</b> | <b>813.465122</b>  | 407.236199        | 796.438573     | 398.722925       | <b>5</b> |
| 6 | 603.350075         | 302.178676      |                |                  | <b>G</b> | <b>714.396708</b>  | 357.701992        | 697.370159     | 349.188718       | <b>4</b> |
| 7 | <b>1042.575401</b> | 521.791339      | 1025.548852    | 513.278064       | <b>Q</b> | <b>657.375244</b>  | <b>329.191260</b> | 640.348695     | 320.677986       | <b>3</b> |
| 8 | <b>1113.612515</b> | 557.309896      | 1096.585966    | 548.796621       | <b>A</b> | 218.149918         | 109.578597        | 201.123369     | 101.065322       | <b>2</b> |
| 9 |                    |                 |                |                  | <b>K</b> | 147.112804         | 74.060040         | 130.086255     | 65.546765        | <b>1</b> |

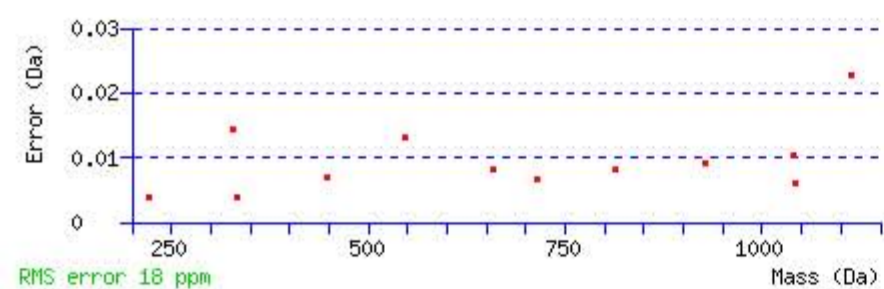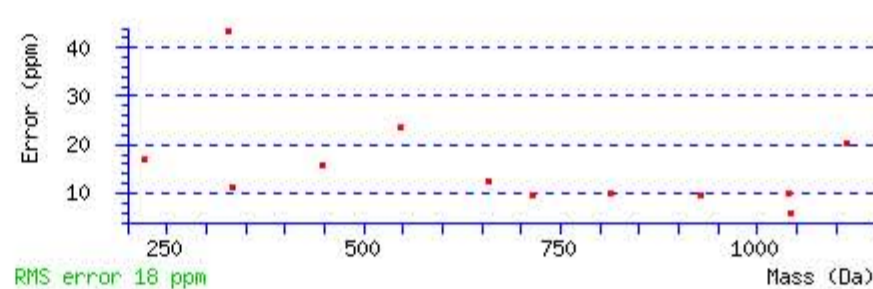

NCBI BLAST search of **GYILVGQAK**

(Parameters: blastp, nr protein database, expect=20000, no filter, PAM30)

Other BLAST [web gateways](#)

**All matches to this query**

| Score | Mr(calc):   | Delta     | Sequence                    |
|-------|-------------|-----------|-----------------------------|
| 28.4  | 1258.710754 | 0.012614  | <a href="#">GYILVGQAK</a>   |
| 10.6  | 1258.721970 | 0.001398  | <a href="#">GYILQAKR</a>    |
| 8.3   | 1258.717941 | 0.005427  | <a href="#">RILAKVQEMR</a>  |
| 2.1   | 1258.739731 | -0.016363 | <a href="#">ALDFRTPLKAK</a> |

# MATRIX SCIENCE Mascot Search Results

## Peptide View

MS/MS Fragmentation of **GVGWSHPLPQCEIVK**

Found in **C4BPA\_HUMAN**, C4b-binding protein alpha chain OS=Homo sapiens GN=C4BPA PE=1 SV=2

Match to Query 27978: 2017.045272 from(673.355700,3+) rtinseconds(2045) index(42527)

Title: Locus:1.1.1.3161.11 File:"2013-07-02 CLN FXIII 180 min 1st F 3.wiff"

Data file C:\Program Files (x86)\Matrix Science\Mascot Daemon\mgf\7 FXIII 180 min 1st\mascot\_daemon\_merge.mgf

Click mouse within plot area to zoom in by factor of two about that point

Or, Plot from  to  Da

Label all possible matches  Label matches used for scoring

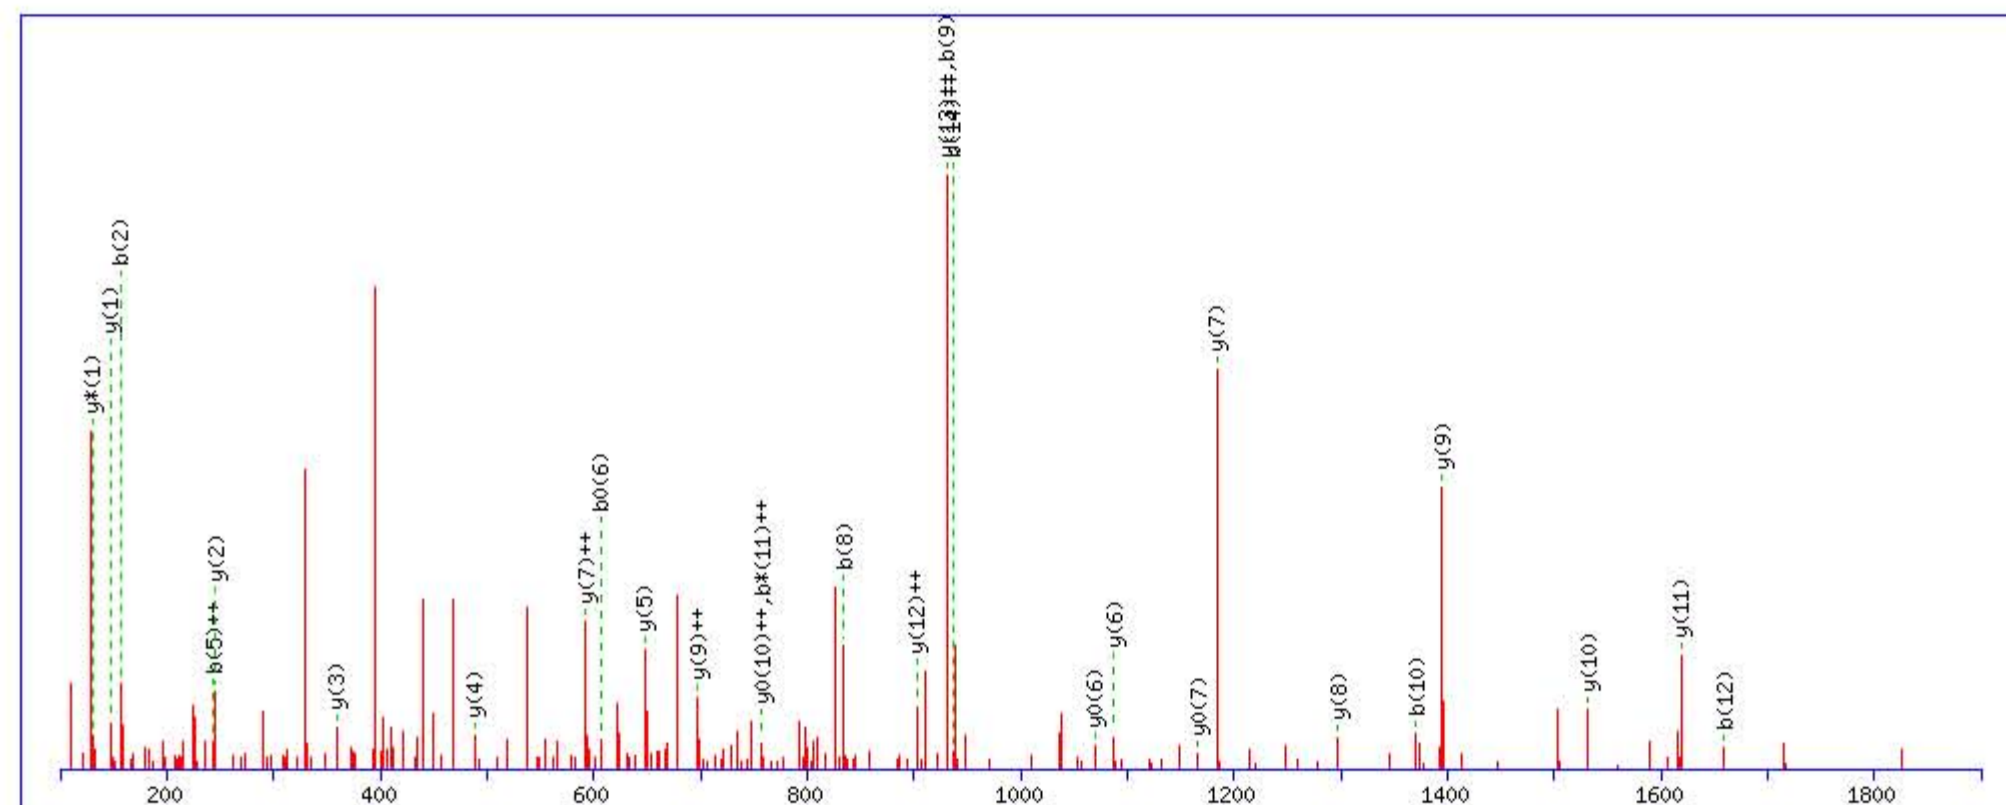

Monoisotopic mass of neutral peptide Mr(calc): 2017.027771

Fixed modifications: Carbamidomethyl (C) (apply to specified residues or termini only)

Variable modifications:

Q10 : Biotin:Thermo-21345 (Q)

Ions Score: 30 Expect: 0.0017

Matches : 28/136 fragment ions using 93 most intense peaks [\(help\)](#)

| #  | b                  | b <sup>++</sup>   | b <sup>+</sup> | b <sup>+++</sup>  | b <sup>0</sup>    | b <sup>0++</sup> | Seq. | y                  | y <sup>++</sup>   | y <sup>+</sup>    | y <sup>+++</sup> | y <sup>0</sup>     | y <sup>0++</sup>  | #  |
|----|--------------------|-------------------|----------------|-------------------|-------------------|------------------|------|--------------------|-------------------|-------------------|------------------|--------------------|-------------------|----|
| 1  | 58.028740          | 29.518008         |                |                   |                   |                  | G    |                    |                   |                   |                  |                    |                   | 15 |
| 2  | <b>157.097154</b>  | 79.052215         |                |                   |                   |                  | V    | 1961.013573        | 981.010425        | 1943.987024       | 972.497150       | 1943.003008        | 972.005142        | 14 |
| 3  | 214.118618         | 107.562947        |                |                   |                   |                  | G    | 1861.945159        | <b>931.476217</b> | 1844.918610       | 922.962943       | 1843.934594        | 922.470935        | 13 |
| 4  | 400.197931         | 200.602603        |                |                   |                   |                  | W    | 1804.923695        | <b>902.965486</b> | 1787.897146       | 894.452211       | 1786.913130        | 893.960203        | 12 |
| 5  | 487.229959         | <b>244.118617</b> |                |                   | 469.219394        | 235.113335       | S    | <b>1618.844382</b> | 809.925829        | 1601.817833       | 801.412555       | 1600.833817        | 800.920547        | 11 |
| 6  | 624.288871         | 312.648074        |                |                   | <b>606.278306</b> | 303.642791       | H    | <b>1531.812354</b> | 766.409815        | 1514.785805       | 757.896541       | 1513.801789        | <b>757.404532</b> | 10 |
| 7  | 721.341635         | 361.174456        |                |                   | 703.331070        | 352.169173       | P    | <b>1394.753442</b> | <b>697.880359</b> | 1377.726893       | 689.367085       | 1376.742877        | 688.875076        | 9  |
| 8  | <b>834.425699</b>  | 417.716488        |                |                   | 816.415134        | 408.711205       | L    | <b>1297.700678</b> | 649.353977        | 1280.674129       | 640.840703       | 1279.690113        | 640.348694        | 8  |
| 9  | <b>931.478463</b>  | 466.242870        |                |                   | 913.467898        | 457.237587       | P    | <b>1184.616614</b> | <b>592.811945</b> | 1167.590065       | 584.298670       | <b>1166.606049</b> | 583.806662        | 7  |
| 10 | <b>1370.703789</b> | 685.855532        | 1353.677240    | 677.342258        | 1352.693224       | 676.850250       | Q    | <b>1087.563850</b> | 544.285563        | 1070.537301       | 535.772288       | <b>1069.553285</b> | 535.280280        | 6  |
| 11 | 1530.734438        | 765.870857        | 1513.707889    | <b>757.357583</b> | 1512.723873       | 756.865574       | C    | <b>648.338524</b>  | 324.672900        | 631.311975        | 316.159626       | 630.327959         | 315.667618        | 5  |
| 12 | <b>1659.777031</b> | 830.392153        | 1642.750482    | 821.878879        | 1641.766466       | 821.386871       | E    | <b>488.307875</b>  | 244.657575        | 471.281326        | 236.144301       | 470.297310         | 235.652293        | 4  |
| 13 | 1772.861095        | 886.934185        | 1755.834546    | 878.420911        | 1754.850530       | 877.928903       | I    | <b>359.265282</b>  | 180.136279        | 342.238733        | 171.623004       |                    |                   | 3  |
| 14 | 1871.929509        | <b>936.468392</b> | 1854.902960    | 927.955118        | 1853.918944       | 927.463110       | V    | <b>246.181218</b>  | 123.594247        | 229.154669        | 115.080973       |                    |                   | 2  |
| 15 |                    |                   |                |                   |                   |                  | K    | <b>147.112804</b>  | 74.060040         | <b>130.086255</b> | 65.546765        |                    |                   | 1  |

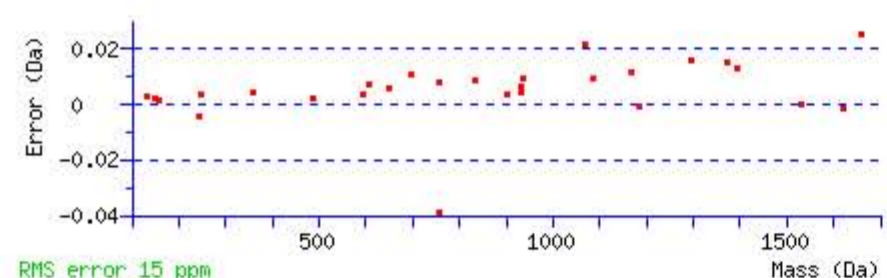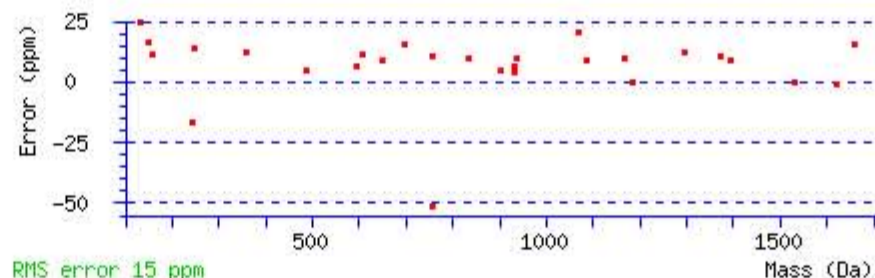

NCBI BLAST search of **GVGWSHPLPQCEIVK**

(Parameters: blastp, nr protein database, expect=20000, no filter, PAM30)

Other BLAST [web gateways](#)

All matches to this query

| Score | Mr(calc):   | Delta    | Sequence                        |
|-------|-------------|----------|---------------------------------|
| 29.9  | 2017.027771 | 0.017501 | <a href="#">GVGWSHPLPQCEIVK</a> |

Mascot: <http://www.matrixscience.com/>



# MASCOT Search Results

## Peptide View

MS/MS Fragmentation of **QSSSYSFFK**  
 Found in **C4BPA\_HUMAN**, C4b-binding protein alpha chain OS=Homo sapiens GN=C4BPA PE=1 SV=2  
 Match to Query 30342: 1390.679148 from(696.346850,2+) rtinseconds(2106) index(42938)  
 Title: Locus:1.1.1.3182.17 File:"2013-07-02 CLN FXIII 180 min 1st F 3.wiff"  
 Data file C:\Program Files (x86)\Matrix Science\Mascot Daemon\mgf7 FXIII 180 min 1st\mascot\_daemon\_merge.mgf

Click mouse within plot area to zoom in by factor of two about that point  
 Or, Plot from  to  Da   
 Label all possible matches  Label matches used for scoring

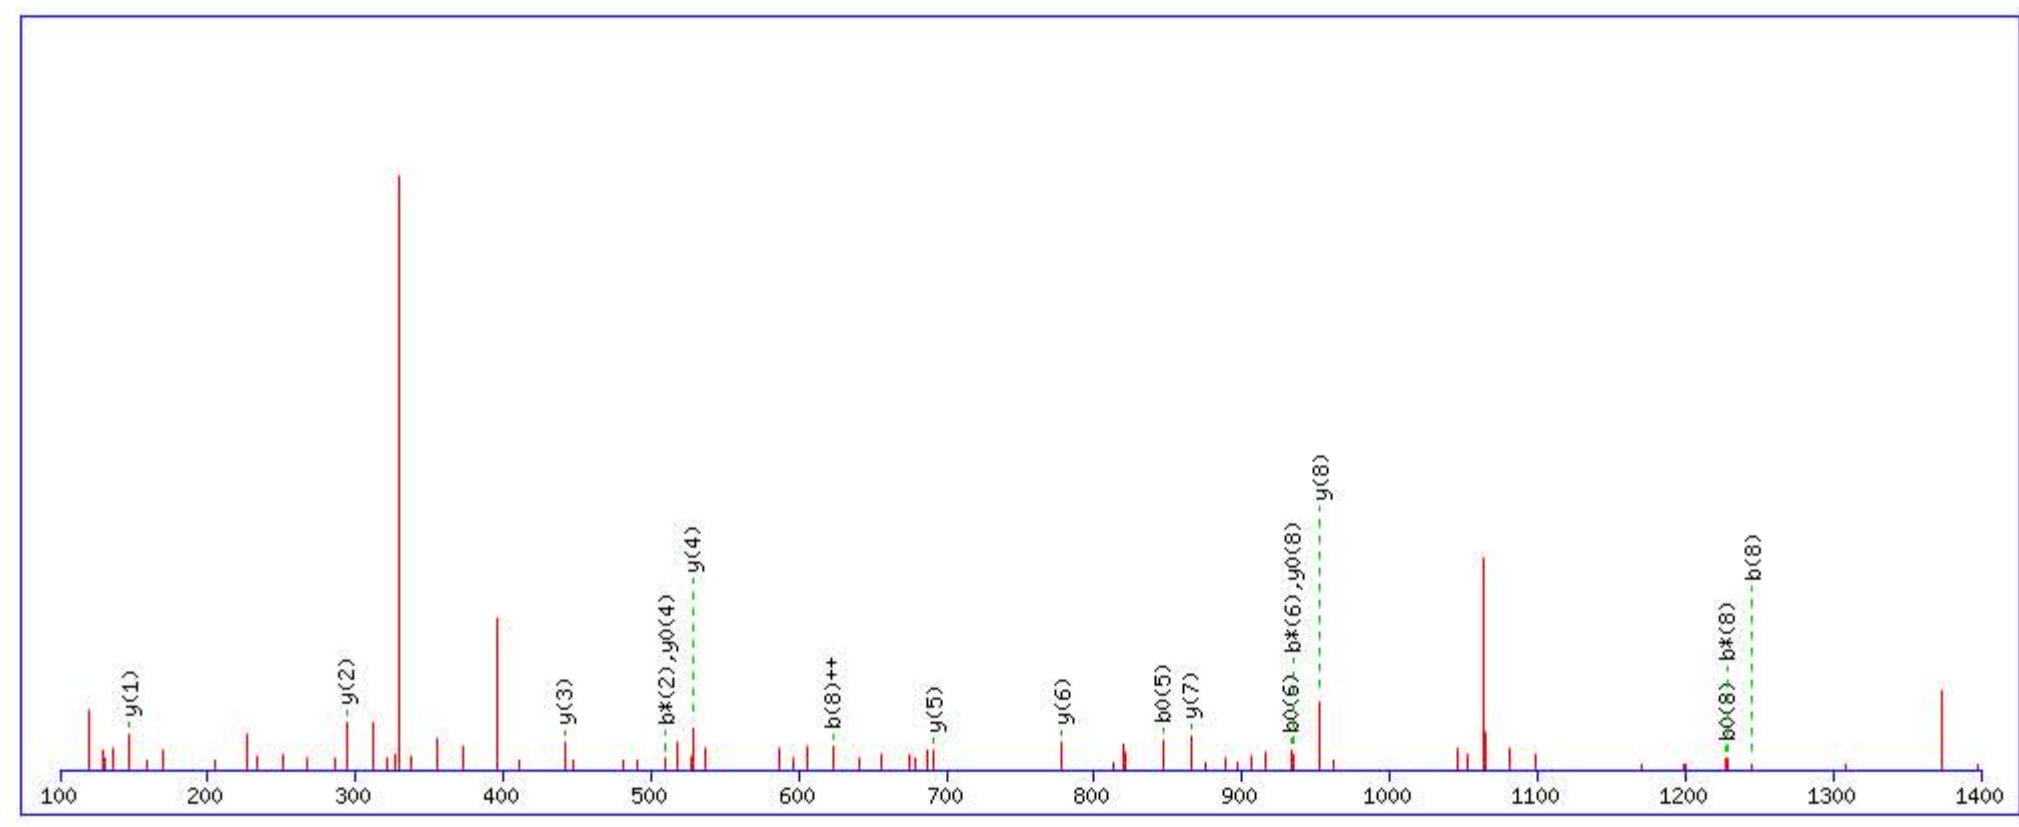

Monoisotopic mass of neutral peptide  $M_r(\text{calc})$ : 1390.659119  
 Fixed modifications: Carbamidomethyl (C) (apply to specified residues or termini only)  
 Variable modifications:  
 Q1 : Biotin:Thermo-21345 (Q)  
 Ions Score: 31 Expect: 0.0089  
 Matches : 18/88 fragment ions using 37 most intense peaks [\(help\)](#)

| # | b           | b <sup>++</sup> | b <sup>+</sup> | b <sup>+++</sup> | b <sup>0</sup> | b <sup>0++</sup> | Seq. | y          | y <sup>++</sup> | y <sup>+</sup> | y <sup>+++</sup> | y <sup>0</sup> | y <sup>0++</sup> | # |
|---|-------------|-----------------|----------------|------------------|----------------|------------------|------|------------|-----------------|----------------|------------------|----------------|------------------|---|
| 1 | 440.232602  | 220.619939      | 423.206053     | 212.106664       |                |                  | Q    |            |                 |                |                  |                |                  | 9 |
| 2 | 527.264630  | 264.135953      | 510.238081     | 255.622679       | 509.254065     | 255.130671       | S    | 952.441073 | 476.724175      | 935.414524     | 468.210900       | 934.430508     | 467.718892       | 8 |
| 3 | 614.296658  | 307.651967      | 597.270109     | 299.138692       | 596.286093     | 298.646684       | S    | 865.409045 | 433.208161      | 848.382496     | 424.694886       | 847.398480     | 424.202878       | 7 |
| 4 | 701.328686  | 351.167981      | 684.302137     | 342.654706       | 683.318121     | 342.162698       | S    | 778.377017 | 389.692147      | 761.350468     | 381.178872       | 760.366452     | 380.686864       | 6 |
| 5 | 864.392015  | 432.699645      | 847.365466     | 424.186371       | 846.381450     | 423.694363       | Y    | 691.344989 | 346.176133      | 674.318440     | 337.662858       | 673.334424     | 337.170850       | 5 |
| 6 | 951.424043  | 476.215659      | 934.397494     | 467.702385       | 933.413478     | 467.210377       | S    | 528.281660 | 264.644468      | 511.255111     | 256.131194       | 510.271095     | 255.639186       | 4 |
| 7 | 1098.492457 | 549.749866      | 1081.465908    | 541.236592       | 1080.481892    | 540.744584       | F    | 441.249632 | 221.128454      | 424.223083     | 212.615180       |                |                  | 3 |
| 8 | 1245.560871 | 623.284073      | 1228.534322    | 614.770799       | 1227.550306    | 614.278791       | F    | 294.181218 | 147.594247      | 277.154669     | 139.080973       |                |                  | 2 |
| 9 |             |                 |                |                  |                |                  | K    | 147.112804 | 74.060040       | 130.086255     | 65.546765        |                |                  | 1 |

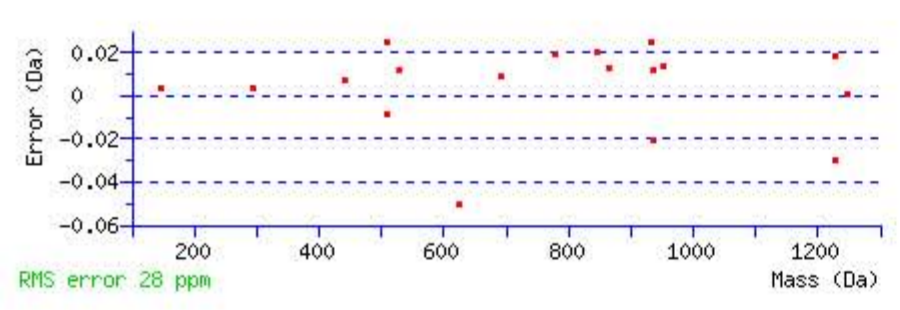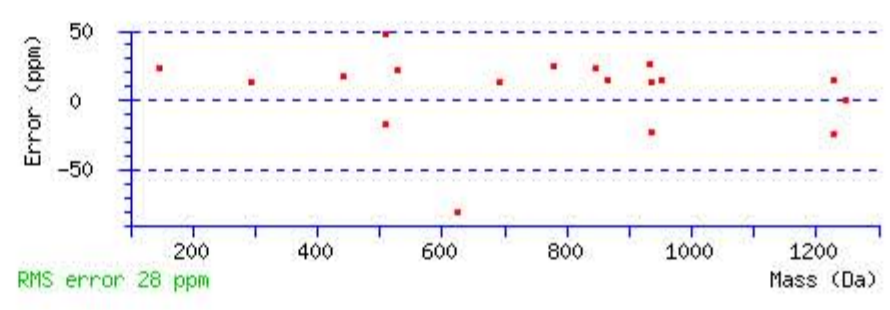

NCBI BLAST search of **QSSSYSFFK**  
 (Parameters: blastp, nr protein database, expect=20000, no filter, PAM30)  
 Other BLAST [web gateways](#)

### All matches to this query

| Score | $M_r(\text{calc})$ : | Delta     | Sequence                     |
|-------|----------------------|-----------|------------------------------|
| 31.2  | 1390.659119          | 0.020029  | <a href="#">QSSSYSFFK</a>    |
| 8.7   | 1390.691467          | -0.012319 | <a href="#">VTKEMNEFIHK</a>  |
| 5.8   | 1390.676208          | 0.002940  | <a href="#">AEKSSSTDQK</a>   |
| 4.7   | 1390.676208          | 0.002940  | <a href="#">LTENNSQPLMTK</a> |
| 2.4   | 1390.670135          | 0.009013  | <a href="#">YRNQESKSSHR</a>  |
| 2.3   | 1390.659088          | 0.020060  | <a href="#">YFSKKEWEMK</a>   |
| 1.6   | 1390.688766          | -0.009618 | <a href="#">YMHRNREITR</a>   |
| 1.4   | 1390.673706          | 0.005442  | <a href="#">TLNADLMMFAHK</a> |
| 0.5   | 1390.658447          | 0.020701  | <a href="#">AAVKCCPEESLK</a> |
| 0.5   | 1390.664963          | 0.014185  | <a href="#">EEGLEEGLLQMK</a> |

# MASCOT Search Results

## Peptide View

MS/MS Fragmentation of **LNNGEITQHR**

Found in **C4BPA\_HUMAN**, C4b-binding protein alpha chain OS=Homo sapiens GN=C4BPA PE=1 SV=2

Match to Query 34685: 1491.764922 from(498.262250,3+) rtinseconds(1410) index(38060)

Title: Locus:1.1.1.2940.8 File:"2013-07-02 CLN FXIII 180 min 1st F 3.wiff"

Data file C:\Program Files (x86)\Matrix Science\Mascot Daemon\mgf7 FXIII 180 min 1st\mascot\_daemon\_merge.mgf

Click mouse within plot area to zoom in by factor of two about that point

Or, Plot from  to  Da

Label all possible matches  Label matches used for scoring

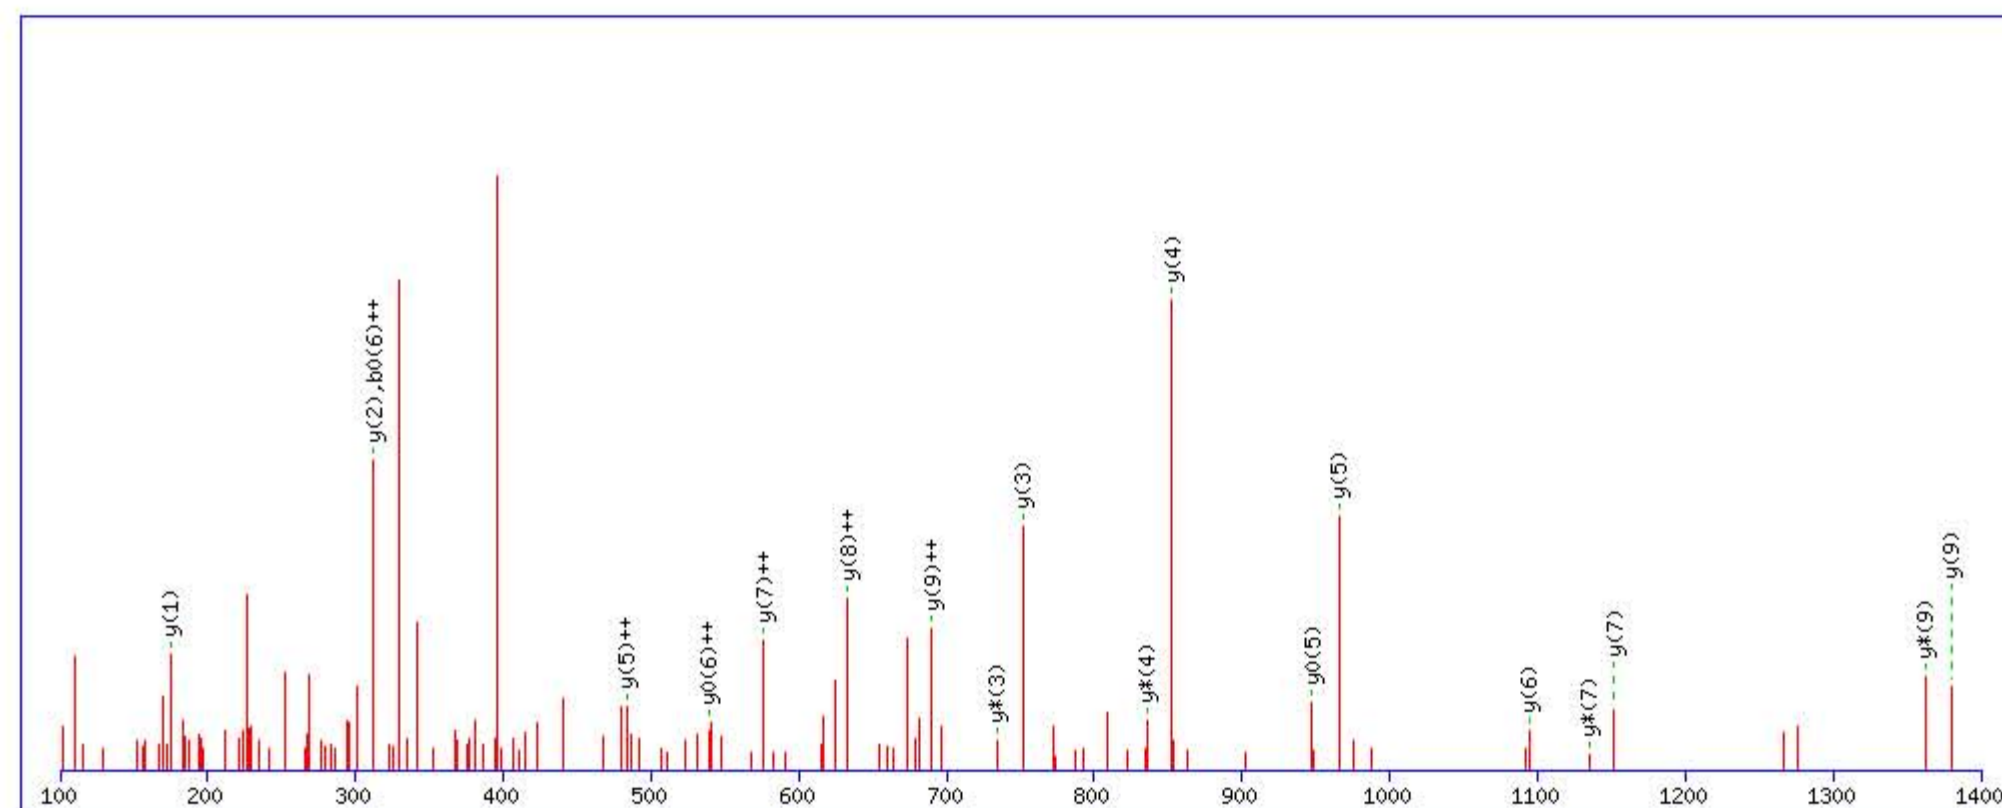

Monoisotopic mass of neutral peptide Mr(calc): 1491.761612

Fixed modifications: Carbamidomethyl (C) (apply to specified residues or termini only)

Variable modifications:

Q8 : Biotin:Thermo-21345 (Q)

Ions Score: 43 Expect: 0.00011

Matches : 19/92 fragment ions using 36 most intense peaks [\(help\)](#)

| #  | b           | b <sup>++</sup> | b <sup>+</sup> | b <sup>*++</sup> | b <sup>0</sup> | b <sup>0++</sup> | Seq. | y           | y <sup>++</sup> | y <sup>+</sup> | y <sup>*++</sup> | y <sup>0</sup> | y <sup>0++</sup> | #  |
|----|-------------|-----------------|----------------|------------------|----------------|------------------|------|-------------|-----------------|----------------|------------------|----------------|------------------|----|
| 1  | 114.091340  | 57.549308       |                |                  |                |                  | L    |             |                 |                |                  |                |                  | 10 |
| 2  | 228.134267  | 114.570771      | 211.107718     | 106.057497       |                |                  | N    | 1379.684844 | 690.346060      | 1362.658295    | 681.832786       | 1361.674279    | 681.340778       | 9  |
| 3  | 342.177194  | 171.592235      | 325.150645     | 163.078960       |                |                  | N    | 1265.641917 | 633.324596      | 1248.615368    | 624.811322       | 1247.631352    | 624.319314       | 8  |
| 4  | 399.198658  | 200.102967      | 382.172109     | 191.589692       |                |                  | G    | 1151.598990 | 576.303133      | 1134.572441    | 567.789859       | 1133.588425    | 567.297850       | 7  |
| 5  | 528.241251  | 264.624264      | 511.214702     | 256.110989       | 510.230686     | 255.618981       | E    | 1094.577526 | 547.792401      | 1077.550977    | 539.279127       | 1076.566961    | 538.787119       | 6  |
| 6  | 641.325315  | 321.166296      | 624.298766     | 312.653021       | 623.314750     | 312.161013       | I    | 965.534933  | 483.271105      | 948.508384     | 474.757830       | 947.524368     | 474.265822       | 5  |
| 7  | 742.372994  | 371.690135      | 725.346445     | 363.176861       | 724.362429     | 362.684853       | T    | 852.450869  | 426.729073      | 835.424320     | 418.215798       | 834.440304     | 417.723790       | 4  |
| 8  | 1181.598320 | 591.302798      | 1164.571771    | 582.789524       | 1163.587755    | 582.297516       | Q    | 751.403190  | 376.205233      | 734.376641     | 367.691959       |                |                  | 3  |
| 9  | 1318.657232 | 659.832254      | 1301.630683    | 651.318980       | 1300.646667    | 650.826972       | H    | 312.177864  | 156.592570      | 295.151315     | 148.079295       |                |                  | 2  |
| 10 |             |                 |                |                  |                |                  | R    | 175.118952  | 88.063114       | 158.092403     | 79.549839        |                |                  | 1  |

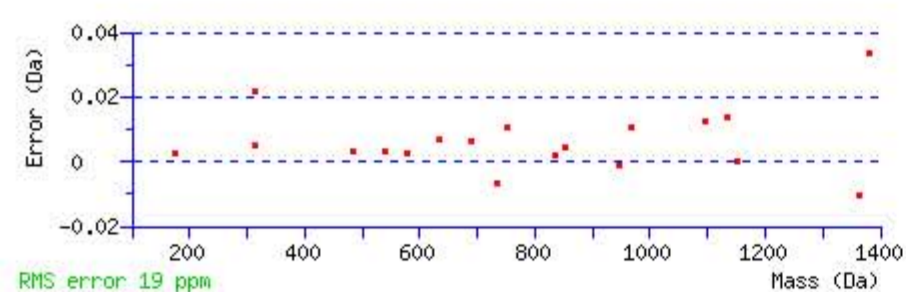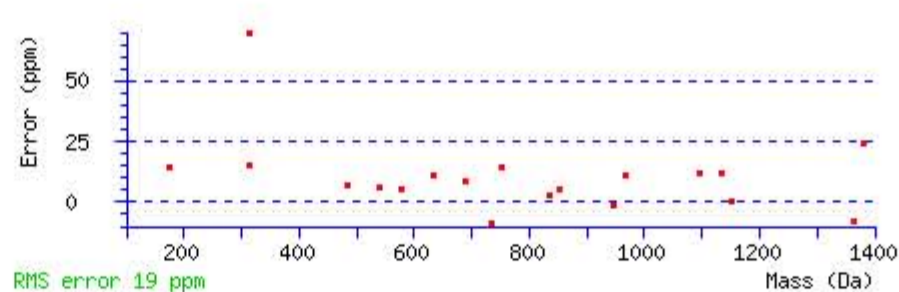

NCBI BLAST search of [LNNGEITQHR](#)

(Parameters: blastp, nr protein database, expect=20000, no filter, PAM30)

Other BLAST [web gateways](#)

All matches to this query

| Score | Mr(calc):   | Delta    | Sequence                       |
|-------|-------------|----------|--------------------------------|
| 42.6  | 1491.761612 | 0.003310 | <a href="#">LNNGEITQHR</a>     |
| 0.5   | 1491.745667 | 0.019255 | <a href="#">EQAVIPLTDSEYK</a>  |
| 0.3   | 1491.756927 | 0.007995 | <a href="#">IEEVIGTGSFGEVR</a> |

Mascot: <http://www.matrixscience.com/>

# MASCOT SEARCH RESULTS

## Peptide View

MS/MS Fragmentation of **FSAICQGDGTWSPR**

Found in **C4BPA\_HUMAN**, C4b-binding protein alpha chain OS=Homo sapiens GN=C4BPA PE=1 SV=2

Match to Query 47341: 1891.896222 from(631.639350,3+) rtinseconds(2137) index(43135)

Title: Locus:1.1.1.3193.11 File:"2013-07-02 CLN FXIII 180 min 1st F 3.wiff"

Data file C:\Program Files (x86)\Matrix Science\Mascot Daemon\mgf7 FXIII 180 min 1st\mascot\_daemon\_merge.mgf

Click mouse within plot area to zoom in by factor of two about that point

Or, Plot from  to  Da

Label all possible matches  Label matches used for scoring

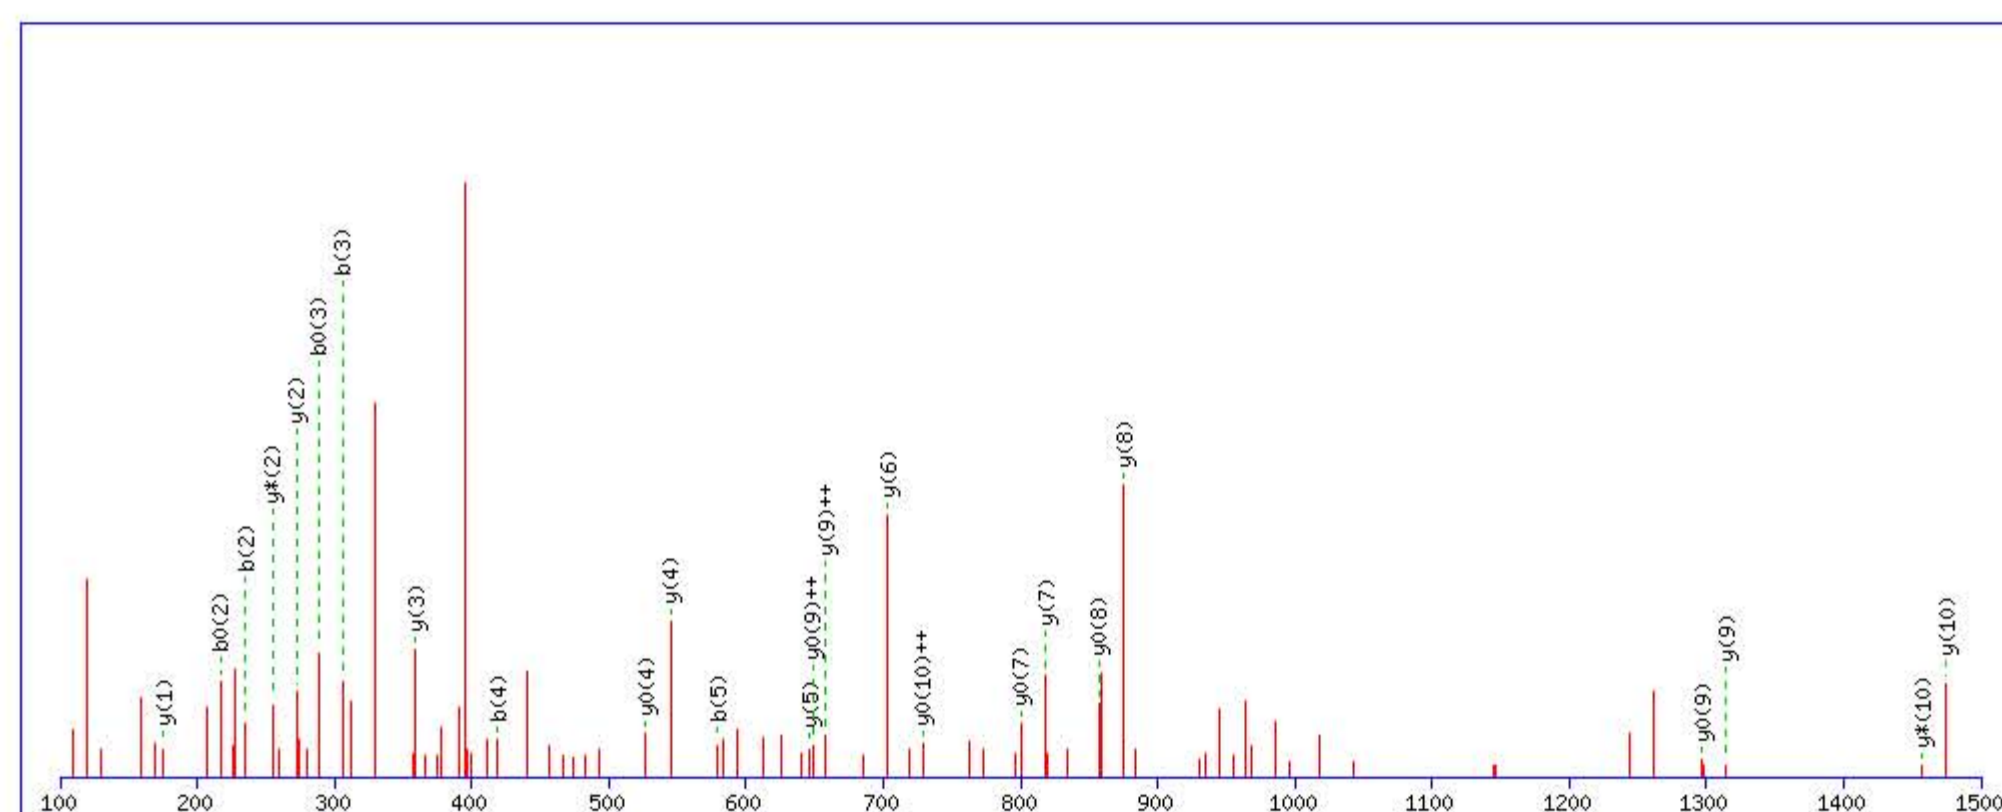

Monoisotopic mass of neutral peptide Mr(calc): 1891.870941

Fixed modifications: Carbamidomethyl (C) (apply to specified residues or termini only)

Variable modifications:

Q6 : Biotin:Thermo-21345 (Q)

Ions Score: 34 Expect: 0.0071

Matches : 25/140 fragment ions using 71 most intense peaks [\(help\)](#)

| #  | b                 | b <sup>++</sup> | b <sup>*</sup> | b <sup>*++</sup> | b <sup>0</sup> | b <sup>0++</sup> | Seq. | y                  | y <sup>++</sup>   | y <sup>*</sup>     | y <sup>*++</sup> | y <sup>0</sup>     | y <sup>0++</sup>  | #  |
|----|-------------------|-----------------|----------------|------------------|----------------|------------------|------|--------------------|-------------------|--------------------|------------------|--------------------|-------------------|----|
| 1  | 148.075690        | 74.541483       |                |                  |                |                  | F    |                    |                   |                    |                  |                    |                   | 14 |
| 2  | <b>235.107718</b> | 118.057497      |                |                  | 217.097153     | 109.052214       | S    | 1745.809788        | 873.408532        | 1728.783239        | 864.895258       | 1727.799223        | 864.403250        | 13 |
| 3  | <b>306.144832</b> | 153.576054      |                |                  | 288.134267     | 144.570772       | A    | 1658.777760        | 829.892518        | 1641.751211        | 821.379244       | 1640.767195        | 820.887236        | 12 |
| 4  | <b>419.228896</b> | 210.118086      |                |                  | 401.218331     | 201.112804       | I    | 1587.740646        | 794.373961        | 1570.714097        | 785.860687       | 1569.730081        | 785.368678        | 11 |
| 5  | <b>579.259545</b> | 290.133411      |                |                  | 561.248980     | 281.128128       | C    | <b>1474.656582</b> | 737.831929        | <b>1457.630033</b> | 729.318655       | 1456.646017        | <b>728.826647</b> | 10 |
| 6  | 1018.484871       | 509.746074      | 1001.458322    | 501.232799       | 1000.474306    | 500.740791       | Q    | <b>1314.625933</b> | <b>657.816605</b> | 1297.599384        | 649.303330       | <b>1296.615368</b> | <b>648.811322</b> | 9  |
| 7  | 1075.506335       | 538.256806      | 1058.479786    | 529.743531       | 1057.495770    | 529.251523       | G    | <b>875.400607</b>  | 438.203942        | 858.374058         | 429.690667       | <b>857.390042</b>  | 429.198659        | 8  |
| 8  | 1190.533278       | 595.770277      | 1173.506729    | 587.257003       | 1172.522713    | 586.764995       | D    | <b>818.379143</b>  | 409.693210        | 801.352594         | 401.179935       | <b>800.368578</b>  | 400.687927        | 7  |
| 9  | 1247.554742       | 624.281009      | 1230.528193    | 615.767735       | 1229.544177    | 615.275727       | G    | <b>703.352200</b>  | 352.179738        | 686.325651         | 343.666464       | 685.341635         | 343.174456        | 6  |
| 10 | 1348.602421       | 674.804849      | 1331.575872    | 666.291574       | 1330.591856    | 665.799566       | T    | <b>646.330736</b>  | 323.669006        | 629.304187         | 315.155732       | 628.320171         | 314.663724        | 5  |
| 11 | 1534.681734       | 767.844505      | 1517.655185    | 759.331231       | 1516.671169    | 758.839223       | W    | <b>545.283057</b>  | 273.145167        | 528.256508         | 264.631892       | <b>527.272492</b>  | 264.139884        | 4  |
| 12 | 1621.713762       | 811.360519      | 1604.687213    | 802.847245       | 1603.703197    | 802.355237       | S    | <b>359.203744</b>  | 180.105510        | 342.177195         | 171.592236       | 341.193179         | 171.100228        | 3  |
| 13 | 1718.766526       | 859.886901      | 1701.739977    | 851.373627       | 1700.755961    | 850.881619       | P    | <b>272.171716</b>  | 136.589496        | <b>255.145167</b>  | 128.076221       |                    |                   | 2  |
| 14 |                   |                 |                |                  |                |                  | R    | <b>175.118952</b>  | 88.063114         | 158.092403         | 79.549839        |                    |                   | 1  |

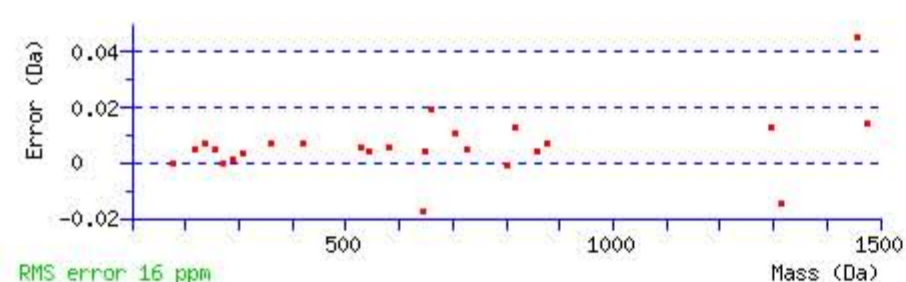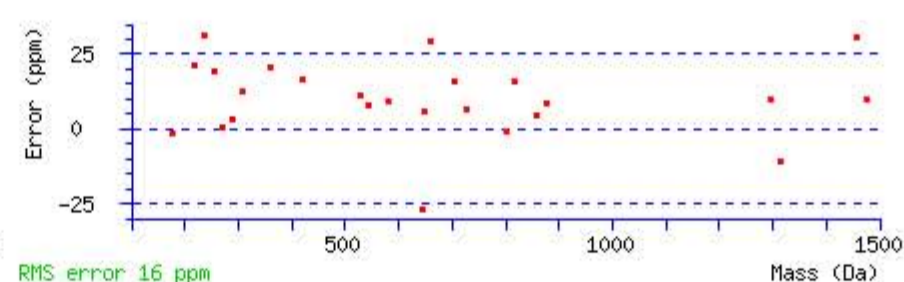

NCBI BLAST search of **FSAICQGDGTWSPR**

(Parameters: blastp, nr protein database, expect=20000, no filter, PAM30)

Other BLAST [web gateways](#)

All matches to this query

| Score | Mr(calc):   | Delta    | Sequence                       |
|-------|-------------|----------|--------------------------------|
| 33.9  | 1891.870941 | 0.025281 | <a href="#">FSAICQGDGTWSPR</a> |

Mascot: <http://www.matrixscience.com/>

# MASCOT Search Results

## Peptide View

MS/MS Fragmentation of **LSCSYSHWSAPAPQCK**

Found in **C4BPA\_HUMAN**, C4b-binding protein alpha chain OS=Homo sapiens GN=C4BPA PE=1 SV=2

Match to Query 55133: 2189.009832 from(730.677220,3+) rtinseconds(1778) index(40624)

Title: Locus:1.1.1.3068.19 File:"2013-07-02 CLN FXIII 180 min 1st F 3.wiff"

Data file C:\Program Files (x86)\Matrix Science\Mascot Daemon\mgf\7 FXIII 180 min 1st\mascot\_daemon\_merge.mgf

Click mouse within plot area to zoom in by factor of two about that point

Or, Plot from  to  Da

Label all possible matches  Label matches used for scoring

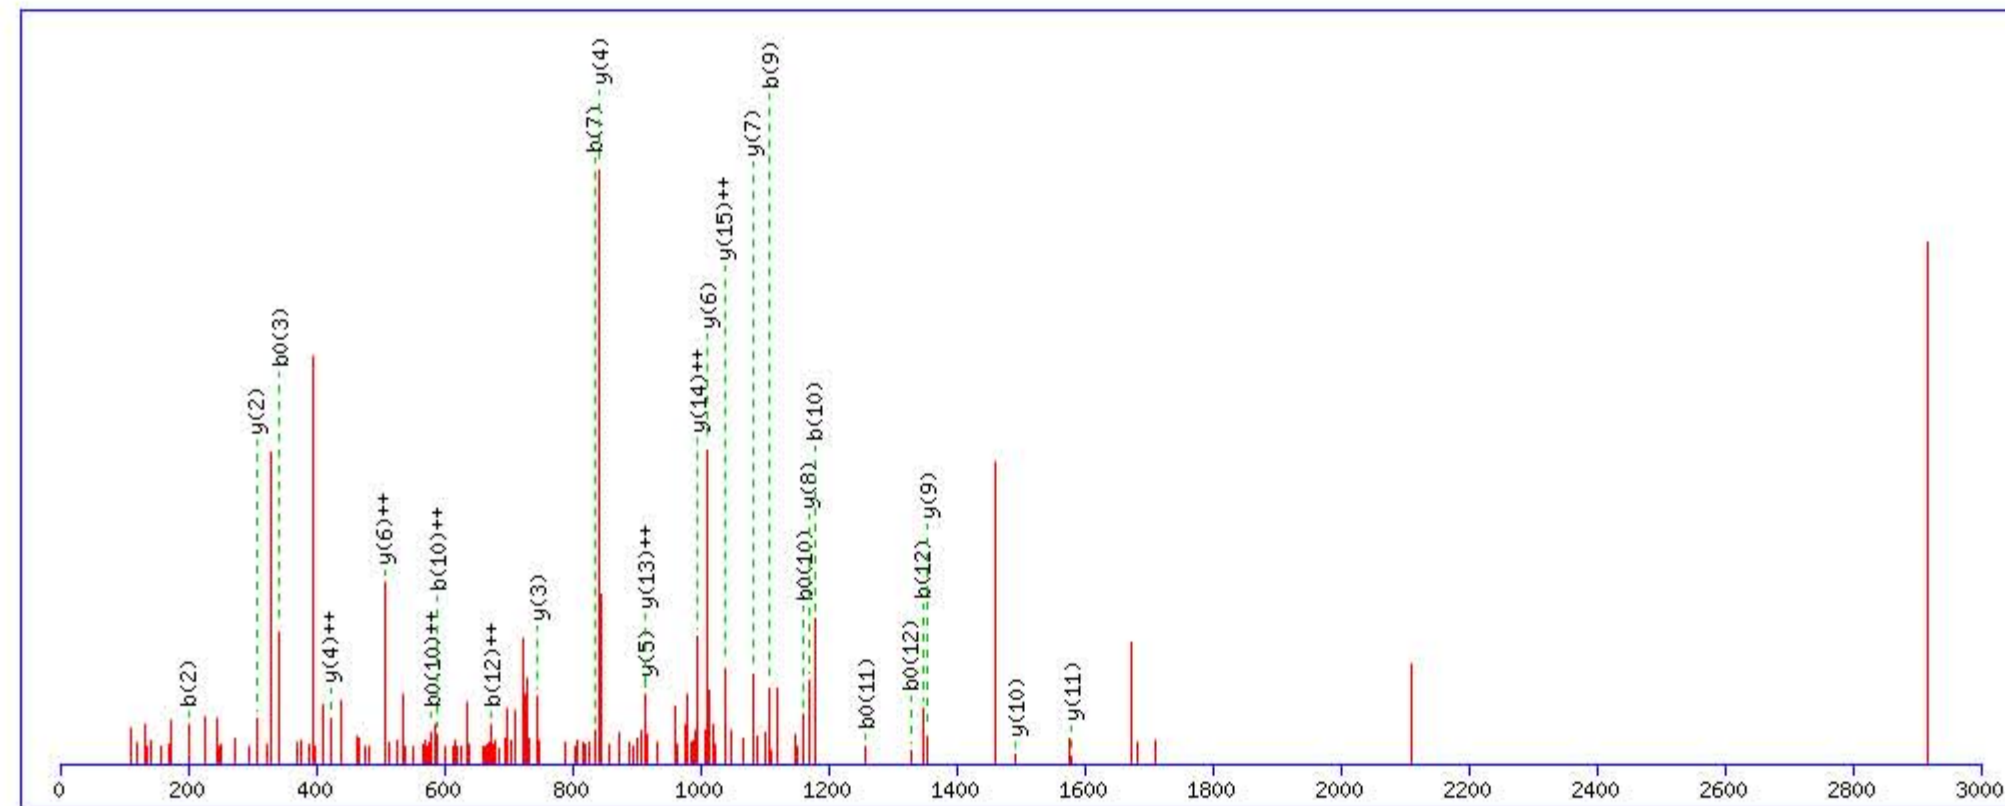

Monoisotopic mass of neutral peptide Mr(calc): 2188.985626

Fixed modifications: Carbamidomethyl (C) (apply to specified residues or termini only)

Variable modifications:

Q14 : Biotin:Thermo-21345 (Q)

Ions Score: 37 Expect: 0.0026

Matches : 27/138 fragment ions using 67 most intense peaks [\(help\)](#)

| #  | b                  | b <sup>++</sup>   | b <sup>*</sup> | b <sup>+++</sup> | b <sup>0</sup>     | b <sup>0++</sup>  | Seq. | y                  | y <sup>++</sup>    | y <sup>*</sup> | y <sup>+++</sup> | y <sup>0</sup> | y <sup>0++</sup> | #  |
|----|--------------------|-------------------|----------------|------------------|--------------------|-------------------|------|--------------------|--------------------|----------------|------------------|----------------|------------------|----|
| 1  | 114.091340         | 57.549308         |                |                  |                    |                   | L    |                    |                    |                |                  |                |                  | 16 |
| 2  | <b>201.123368</b>  | 101.065322        |                |                  | 183.112803         | 92.060039         | S    | 2076.908850        | <b>1038.958063</b> | 2059.882301    | 1030.444788      | 2058.898285    | 1029.952780      | 15 |
| 3  | 361.154017         | 181.080647        |                |                  | <b>343.143452</b>  | 172.075364        | C    | 1989.876822        | <b>995.442049</b>  | 1972.850273    | 986.928775       | 1971.866257    | 986.436767       | 14 |
| 4  | 448.186045         | 224.596660        |                |                  | 430.175480         | 215.591378        | S    | 1829.846173        | <b>915.426725</b>  | 1812.819624    | 906.913450       | 1811.835608    | 906.421442       | 13 |
| 5  | 611.249374         | 306.128325        |                |                  | 593.238809         | 297.123043        | Y    | 1742.814145        | 871.910711         | 1725.787596    | 863.397436       | 1724.803580    | 862.905428       | 12 |
| 6  | 698.281402         | 349.644339        |                |                  | 680.270837         | 340.639056        | S    | <b>1579.750816</b> | 790.379046         | 1562.724267    | 781.865772       | 1561.740251    | 781.373764       | 11 |
| 7  | <b>835.340314</b>  | 418.173795        |                |                  | 817.329749         | 409.168512        | H    | <b>1492.718788</b> | 746.863032         | 1475.692239    | 738.349758       | 1474.708223    | 737.857750       | 10 |
| 8  | 1021.419627        | 511.213452        |                |                  | 1003.409062        | 502.208169        | W    | <b>1355.659876</b> | 678.333576         | 1338.633327    | 669.820302       | 1337.649311    | 669.328294       | 9  |
| 9  | <b>1108.451655</b> | 554.729466        |                |                  | 1090.441090        | 545.724183        | S    | <b>1169.580563</b> | 585.293920         | 1152.554014    | 576.780645       | 1151.569998    | 576.288637       | 8  |
| 10 | <b>1179.488769</b> | <b>590.248023</b> |                |                  | <b>1161.478204</b> | <b>581.242740</b> | A    | <b>1082.548535</b> | 541.777906         | 1065.521986    | 533.264631       |                |                  | 7  |
| 11 | 1276.541533        | 638.774405        |                |                  | <b>1258.530968</b> | 629.769122        | P    | <b>1011.511421</b> | <b>506.259349</b>  | 994.484872     | 497.746074       |                |                  | 6  |
| 12 | <b>1347.578647</b> | <b>674.292962</b> |                |                  | <b>1329.568082</b> | 665.287679        | A    | <b>914.458657</b>  | 457.732967         | 897.432108     | 449.219692       |                |                  | 5  |
| 13 | 1444.631411        | 722.819344        |                |                  | 1426.620846        | 713.814061        | P    | <b>843.421543</b>  | <b>422.214410</b>  | 826.394994     | 413.701135       |                |                  | 4  |
| 14 | 1883.856737        | 942.432007        | 1866.830188    | 933.918732       | 1865.846172        | 933.426724        | Q    | <b>746.368779</b>  | 373.688028         | 729.342230     | 365.174753       |                |                  | 3  |
| 15 | 2043.887386        | 1022.447331       | 2026.860837    | 1013.934057      | 2025.876821        | 1013.442049       | C    | <b>307.143453</b>  | 154.075365         | 290.116904     | 145.562090       |                |                  | 2  |
| 16 |                    |                   |                |                  |                    |                   | K    | 147.112804         | 74.060040          | 130.086255     | 65.546766        |                |                  | 1  |

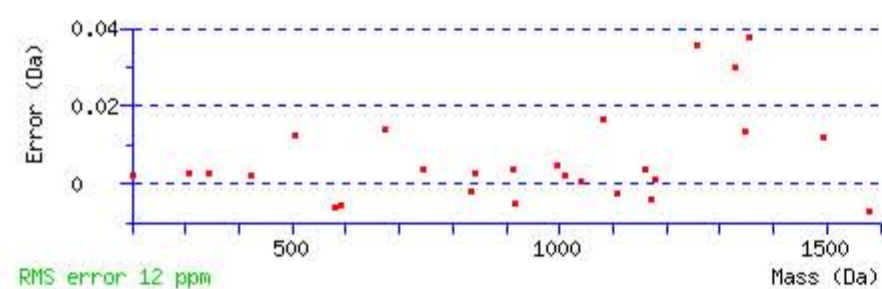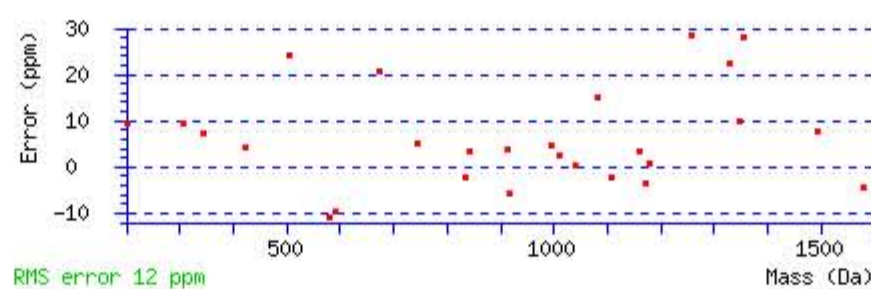

NCBI BLAST search of **LSCSYSHWSAPAPQCK**

(Parameters: blastp, nr protein database, expect=20000, no filter, PAM30)

Other BLAST [web gateways](#)

All matches to this query

| Score | Mr(calc):   | Delta    | Sequence                         |
|-------|-------------|----------|----------------------------------|
| 37.0  | 2188.985626 | 0.024206 | <a href="#">LSCSYSHWSAPAPQCK</a> |

Mascot: <http://www.matrixscience.com/>

# MASCOT Search Results

## Peptide View

MS/MS Fragmentation of **WTPYQGCEALCCPEPK**

Found in **C4BPA\_HUMAN**, C4b-binding protein alpha chain OS=Homo sapiens GN=C4BPA PE=1 SV=2

Match to Query 58197: 2306.029062 from(769.683630,3+) rtinseconds(2109) index(42961)

Title: Locus:1.1.1.3183.19 File:"2013-07-02 CLN FXIII 180 min 1st F 3.wiff"

Data file C:\Program Files (x86)\Matrix Science\Mascot Daemon\mgf\7 FXIII 180 min 1st\mascot\_daemon\_merge.mgf

Click mouse within plot area to zoom in by factor of two about that point

Or, Plot from  to  Da

Label all possible matches  Label matches used for scoring

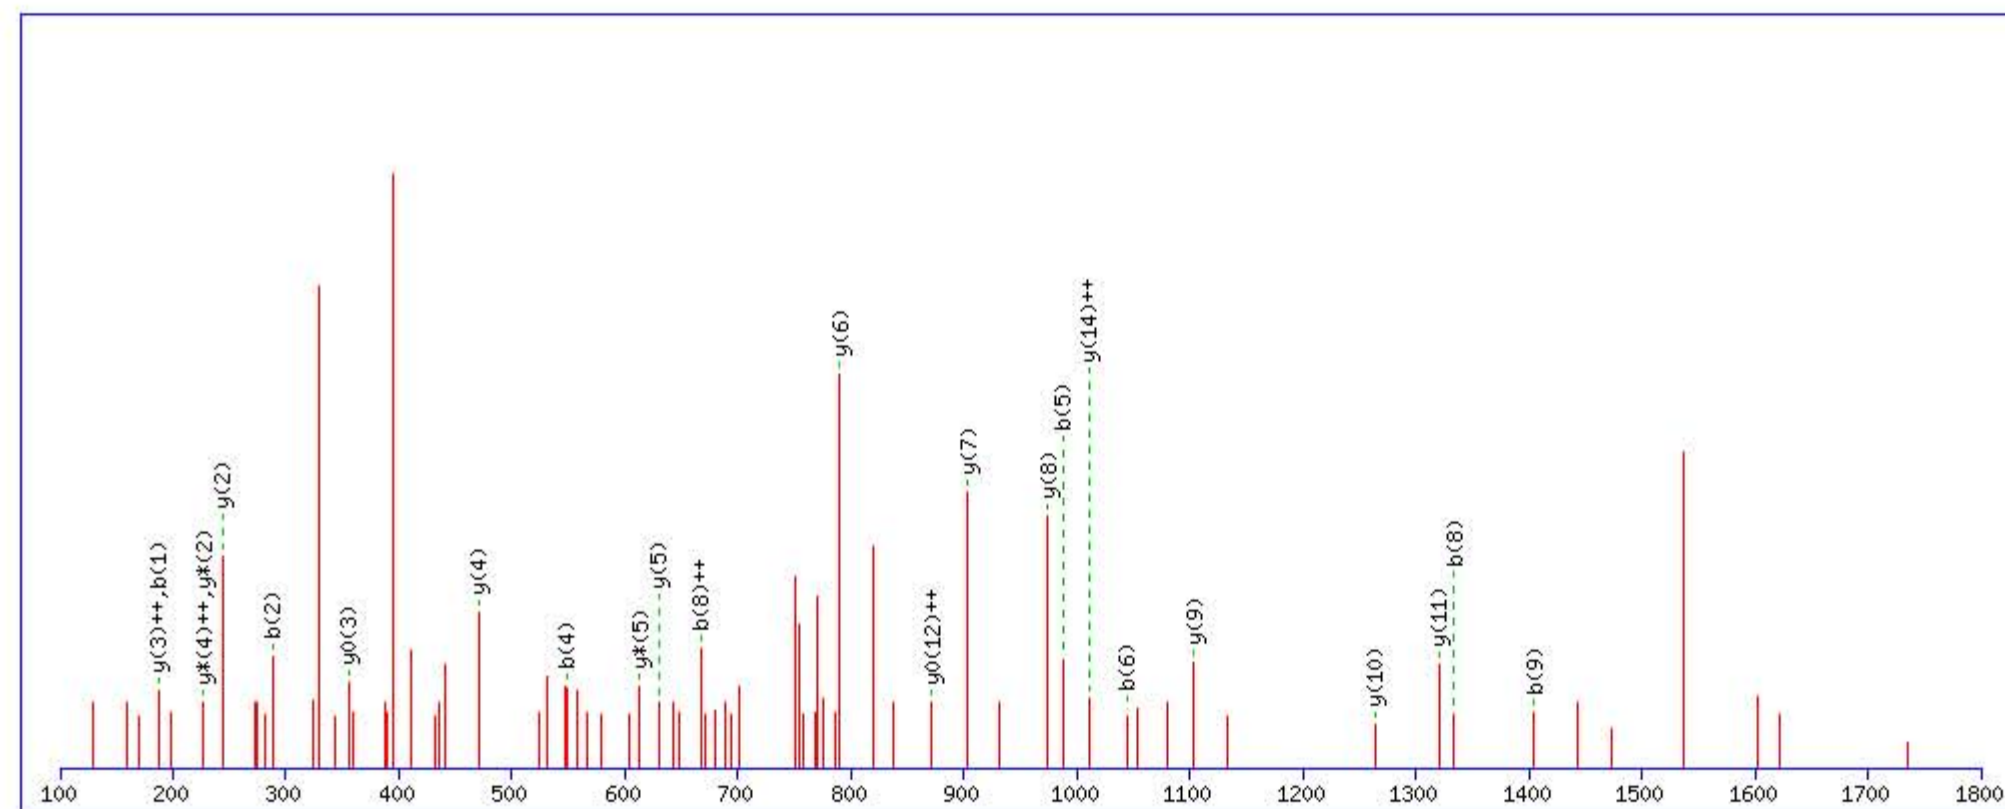

Monoisotopic mass of neutral peptide Mr(calc): 2305.999237

Fixed modifications: Carbamidomethyl (C) (apply to specified residues or termini only)

Variable modifications:

Q5 : Biotin:Thermo-21345 (Q)

Ions Score: 39 Expect: 0.001

Matches : 24/166 fragment ions using 50 most intense peaks [\(help\)](#)

| #  | b                  | b <sup>++</sup>   | b <sup>*</sup> | b <sup>+++</sup> | b <sup>0</sup> | b <sup>0++</sup> | Seq. | y                  | y <sup>++</sup>    | y <sup>*</sup>    | y <sup>+++</sup>  | y <sup>0</sup>    | y <sup>0++</sup>  | #  |
|----|--------------------|-------------------|----------------|------------------|----------------|------------------|------|--------------------|--------------------|-------------------|-------------------|-------------------|-------------------|----|
| 1  | <b>187.086589</b>  | 94.046932         |                |                  |                |                  | W    |                    |                    |                   |                   |                   |                   | 16 |
| 2  | <b>288.134268</b>  | 144.570772        |                |                  | 270.123703     | 135.565490       | T    | 2120.927205        | 1060.967240        | 2103.900656       | 1052.453966       | 2102.916640       | 1051.961958       | 15 |
| 3  | 385.187032         | 193.097154        |                |                  | 367.176467     | 184.091872       | P    | 2019.879526        | <b>1010.443401</b> | 2002.852977       | 1001.930127       | 2001.868961       | 1001.438119       | 14 |
| 4  | <b>548.250361</b>  | 274.628819        |                |                  | 530.239796     | 265.623536       | Y    | 1922.826762        | 961.917019         | 1905.800213       | 953.403745        | 1904.816197       | 952.911737        | 13 |
| 5  | <b>987.475687</b>  | 494.241482        | 970.449138     | 485.728207       | 969.465122     | 485.236199       | Q    | 1759.763433        | 880.385355         | 1742.736884       | 871.872080        | 1741.752868       | <b>871.380072</b> | 12 |
| 6  | <b>1044.497151</b> | 522.752214        | 1027.470602    | 514.238939       | 1026.486586    | 513.746931       | G    | <b>1320.538107</b> | 660.772692         | 1303.511558       | 652.259417        | 1302.527542       | 651.767409        | 11 |
| 7  | 1204.527800        | 602.767538        | 1187.501251    | 594.254264       | 1186.517235    | 593.762256       | C    | <b>1263.516643</b> | 632.261960         | 1246.490094       | 623.748685        | 1245.506078       | 623.256677        | 10 |
| 8  | <b>1333.570393</b> | <b>667.288835</b> | 1316.543844    | 658.775560       | 1315.559828    | 658.283552       | E    | <b>1103.485994</b> | 552.246635         | 1086.459445       | 543.733361        | 1085.475429       | 543.241353        | 9  |
| 9  | <b>1404.607507</b> | 702.807392        | 1387.580958    | 694.294117       | 1386.596942    | 693.802109       | A    | <b>974.443401</b>  | 487.725339         | 957.416852        | 479.212064        | 956.432836        | 478.720056        | 8  |
| 10 | 1517.691571        | 759.349424        | 1500.665022    | 750.836149       | 1499.681006    | 750.344141       | L    | <b>903.406287</b>  | 452.206782         | 886.379738        | 443.693507        | 885.395722        | 443.201499        | 7  |
| 11 | 1677.722220        | 839.364748        | 1660.695671    | 830.851474       | 1659.711655    | 830.359466       | C    | <b>790.322223</b>  | 395.664750         | 773.295674        | 387.151475        | 772.311658        | 386.659467        | 6  |
| 12 | 1837.752869        | 919.380073        | 1820.726320    | 910.866798       | 1819.742304    | 910.374790       | C    | <b>630.291574</b>  | 315.649425         | <b>613.265025</b> | 307.136151        | 612.281009        | 306.644143        | 5  |
| 13 | 1934.805633        | 967.906455        | 1917.779084    | 959.393180       | 1916.795068    | 958.901172       | P    | <b>470.260925</b>  | 235.634101         | 453.234376        | <b>227.120826</b> | 452.250360        | 226.628818        | 4  |
| 14 | 2063.848226        | 1032.427751       | 2046.821677    | 1023.914477      | 2045.837661    | 1023.422469      | E    | 373.208161         | <b>187.107719</b>  | 356.181612        | 178.594444        | <b>355.197596</b> | 178.102436        | 3  |
| 15 | 2160.900990        | 1080.954133       | 2143.874441    | 1072.440858      | 2142.890425    | 1071.948850      | P    | <b>244.165568</b>  | 122.586422         | <b>227.139019</b> | 114.073148        |                   |                   | 2  |
| 16 |                    |                   |                |                  |                |                  | K    | 147.112804         | 74.060040          | 130.086255        | 65.546765         |                   |                   | 1  |

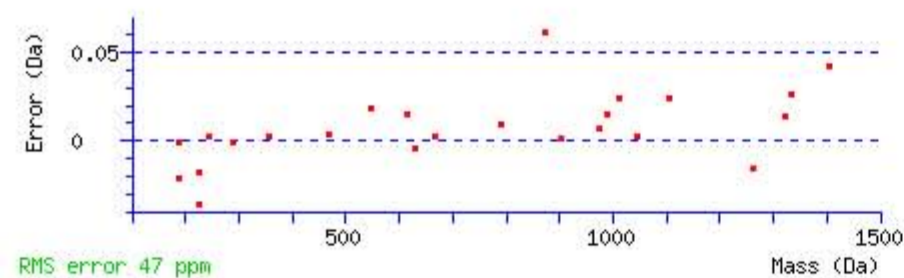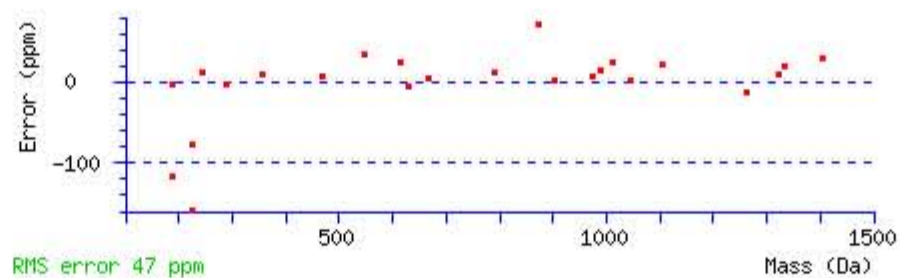

NCBI BLAST search of **WTPYQGCEALCCPEPK**

(Parameters: blastp, nr protein database, expect=20000, no filter, PAM30)

Other BLAST [web gateways](#)

All matches to this query

| Score | Mr(calc):   | Delta    | Sequence                         |
|-------|-------------|----------|----------------------------------|
| 38.8  | 2305.999237 | 0.029825 | <a href="#">WTPYQGCEALCCPEPK</a> |

Mascot: <http://www.matrixscience.com/>

# MASCOT Search Results

## Peptide View

MS/MS Fragmentation of **CHPGYKPTTDEPTTVICQK**

Found in **C4BPA\_HUMAN**, C4b-binding protein alpha chain OS=Homo sapiens GN=C4BPA PE=1 SV=2

Match to Query 63761: 2542.221456 from(636.562640,4+) rtinseconds(1576) index(39350)

Title: Locus:1.1.1.2998.10 File:"2013-07-02 CLN FXIII 180 min 1st F 3.wiff"

Data file C:\Program Files (x86)\Matrix Science\Mascot Daemon\mgf7 FXIII 180 min 1st\mascot\_daemon\_merge.mgf

Click mouse within plot area to zoom in by factor of two about that point

Or, Plot from  to  Da

Label all possible matches  Label matches used for scoring

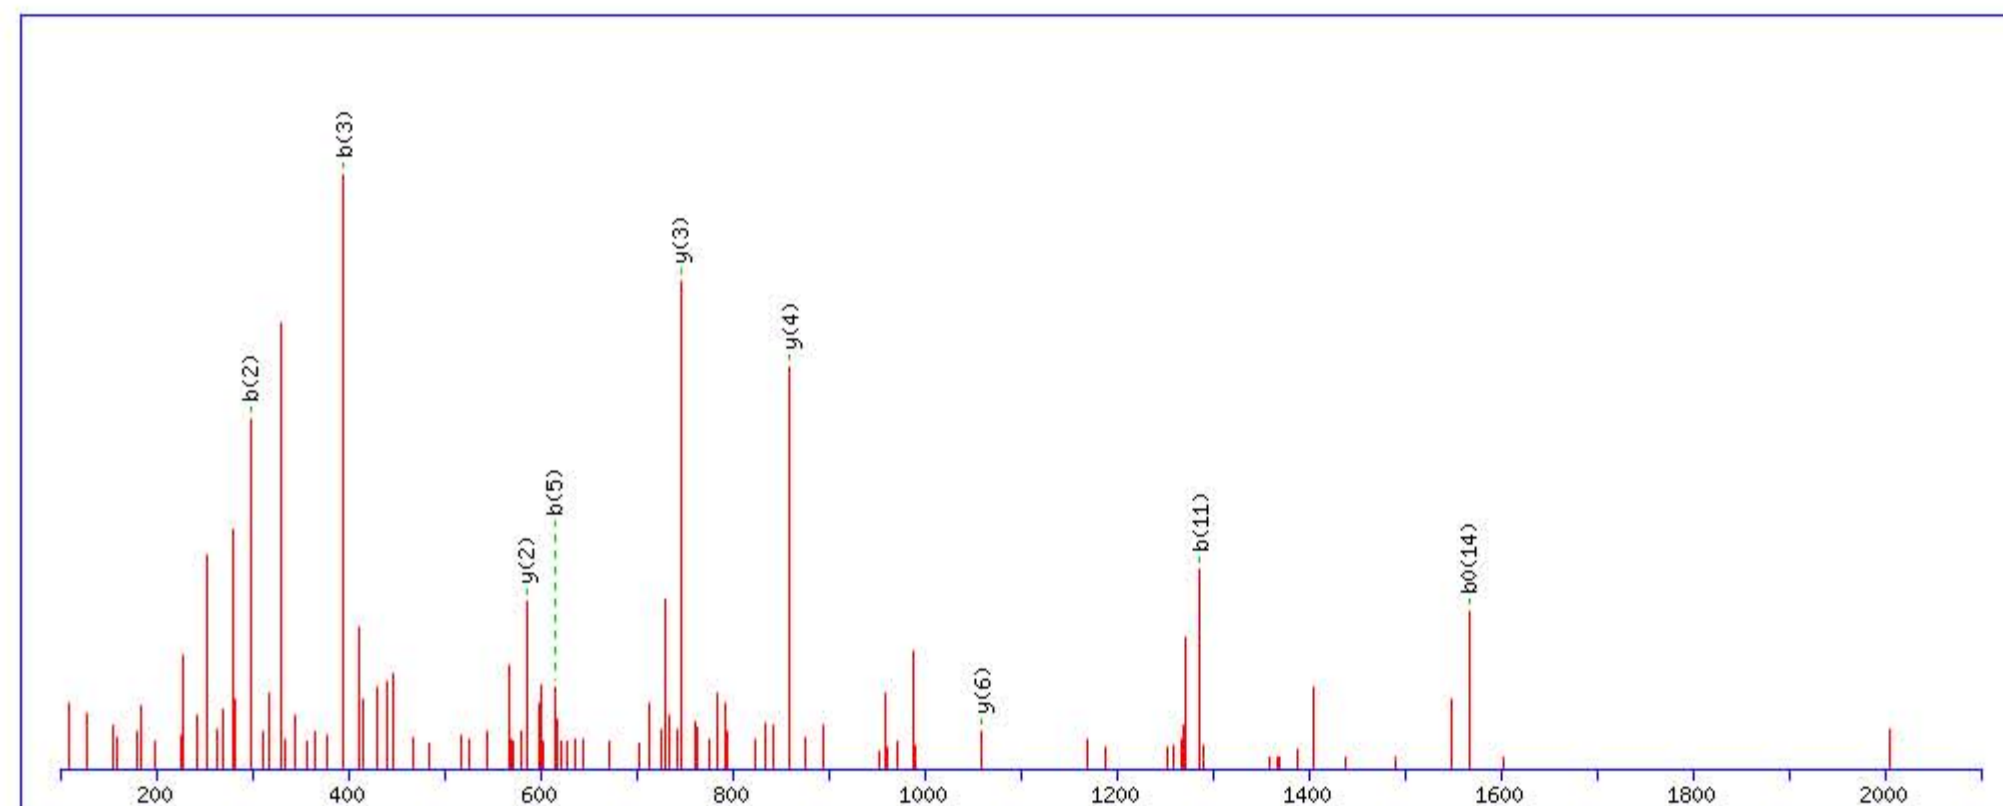

Monoisotopic mass of neutral peptide Mr(calc): 2542.201859

Fixed modifications: Carbamidomethyl (C) (apply to specified residues or termini only)

Variable modifications:

Q18 : Biotin:Thermo-21345 (Q)

Ions Score: 25 Expect: 0.066

Matches : 9/182 fragment ions using 16 most intense peaks [\(help\)](#)

| #  | b                  | b <sup>++</sup> | b <sup>*</sup> | b <sup>*++</sup> | b <sup>0</sup>     | b <sup>0++</sup> | Seq. | y                  | y <sup>++</sup> | y <sup>*</sup> | y <sup>*++</sup> | y <sup>0</sup> | y <sup>0++</sup> | #  |
|----|--------------------|-----------------|----------------|------------------|--------------------|------------------|------|--------------------|-----------------|----------------|------------------|----------------|------------------|----|
| 1  | 161.037925         | 81.022600       |                |                  |                    |                  | C    |                    |                 |                |                  |                |                  | 19 |
| 2  | <b>298.096837</b>  | 149.552056      |                |                  |                    |                  | H    | 2383.178469        | 1192.092872     | 2366.151920    | 1183.579598      | 2365.167904    | 1183.087590      | 18 |
| 3  | <b>395.149601</b>  | 198.078439      |                |                  |                    |                  | P    | 2246.119557        | 1123.563416     | 2229.093008    | 1115.050142      | 2228.108992    | 1114.558134      | 17 |
| 4  | 452.171065         | 226.589170      |                |                  |                    |                  | G    | 2149.066793        | 1075.037034     | 2132.040244    | 1066.523760      | 2131.056228    | 1066.031752      | 16 |
| 5  | <b>615.234394</b>  | 308.120835      |                |                  |                    |                  | Y    | 2092.045329        | 1046.526302     | 2075.018780    | 1038.013028      | 2074.034764    | 1037.521020      | 15 |
| 6  | 743.329357         | 372.168317      | 726.302808     | 363.655042       |                    |                  | K    | 1928.982000        | 964.994638      | 1911.955451    | 956.481364       | 1910.971435    | 955.989356       | 14 |
| 7  | 840.382121         | 420.694699      | 823.355572     | 412.181424       |                    |                  | P    | 1800.887037        | 900.947157      | 1783.860488    | 892.433882       | 1782.876472    | 891.941874       | 13 |
| 8  | 941.429800         | 471.218538      | 924.403251     | 462.705264       | 923.419235         | 462.213256       | T    | 1703.834273        | 852.420775      | 1686.807724    | 843.907500       | 1685.823708    | 843.415492       | 12 |
| 9  | 1042.477479        | 521.742378      | 1025.450930    | 513.229103       | 1024.466914        | 512.737095       | T    | 1602.786594        | 801.896935      | 1585.760045    | 793.383661       | 1584.776029    | 792.891653       | 11 |
| 10 | 1157.504422        | 579.255849      | 1140.477873    | 570.742575       | 1139.493857        | 570.250567       | D    | 1501.738915        | 751.373096      | 1484.712366    | 742.859821       | 1483.728350    | 742.367813       | 10 |
| 11 | <b>1286.547015</b> | 643.777146      | 1269.520466    | 635.263871       | 1268.536450        | 634.771863       | E    | 1386.711972        | 693.859624      | 1369.685423    | 685.346350       | 1368.701407    | 684.854342       | 9  |
| 12 | 1383.599779        | 692.303528      | 1366.573230    | 683.790253       | 1365.589214        | 683.298245       | P    | 1257.669379        | 629.338328      | 1240.642830    | 620.825053       | 1239.658814    | 620.333045       | 8  |
| 13 | 1484.647458        | 742.827367      | 1467.620909    | 734.314093       | 1466.636893        | 733.822085       | T    | 1160.616615        | 580.811946      | 1143.590066    | 572.298671       | 1142.606050    | 571.806663       | 7  |
| 14 | 1585.695137        | 793.351207      | 1568.668588    | 784.837932       | <b>1567.684572</b> | 784.345924       | T    | <b>1059.568936</b> | 530.288106      | 1042.542387    | 521.774832       | 1041.558371    | 521.282824       | 6  |
| 15 | 1684.763551        | 842.885414      | 1667.737002    | 834.372139       | 1666.752986        | 833.880131       | V    | 958.521257         | 479.764267      | 941.494708     | 471.250992       |                |                  | 5  |
| 16 | 1797.847615        | 899.427446      | 1780.821066    | 890.914171       | 1779.837050        | 890.422163       | I    | <b>859.452843</b>  | 430.230060      | 842.426294     | 421.716785       |                |                  | 4  |
| 17 | 1957.878264        | 979.442770      | 1940.851715    | 970.929496       | 1939.867699        | 970.437488       | C    | <b>746.368779</b>  | 373.688028      | 729.342230     | 365.174753       |                |                  | 3  |
| 18 | 2397.103590        | 1199.055433     | 2380.077041    | 1190.542158      | 2379.093025        | 1190.050151      | Q    | <b>586.338130</b>  | 293.672703      | 569.311581     | 285.159429       |                |                  | 2  |
| 19 |                    |                 |                |                  |                    |                  | K    | 147.112804         | 74.060040       | 130.086255     | 65.546765        |                |                  | 1  |

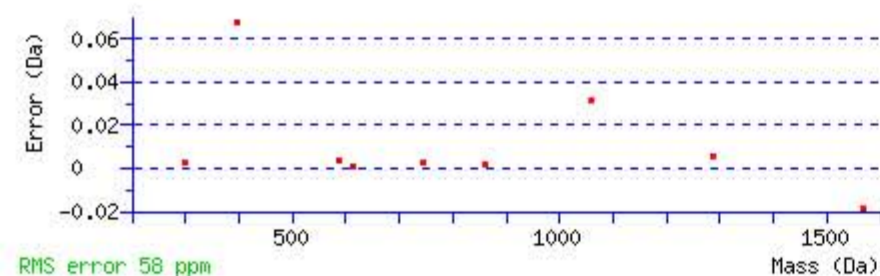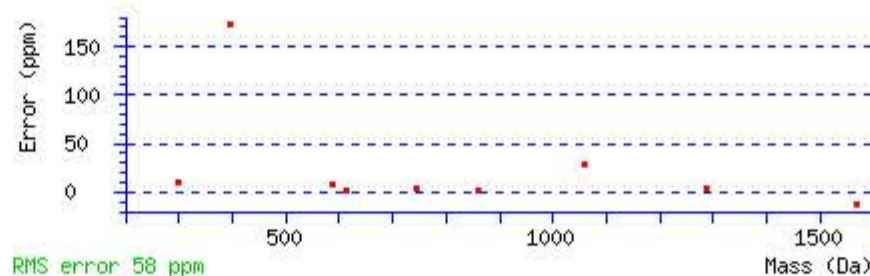

NCBI BLAST search of [CHPGYKPTTDEPTTVICQK](#)

(Parameters: blastp, nr protein database, expect=20000, no filter, PAM30)

Other BLAST [web gateways](#)

All matches to this query

| Score | Mr(calc):   | Delta    | Sequence                            |
|-------|-------------|----------|-------------------------------------|
| 25.2  | 2542.201859 | 0.019597 | <a href="#">CHPGYKPTTDEPTTVICQK</a> |

Mascot: <http://www.matrixscience.com/>

# MASCOT Search Results

## Peptide View

MS/MS Fragmentation of **SQCLEDHTWAPFPICK**

Found in **C4BPB\_HUMAN**, C4b-binding protein beta chain OS=Homo sapiens GN=C4BPB PE=1 SV=1

Match to Query 23658: 2396.137776 from(600.041720,4+) rtinseconds(2312) index(44346)

Title: Locus:1.1.1.3254.6 File:"2013-07-02 CLN FXIII 180 min 1st F 3.wiff"

Data file C:\Program Files (x86)\Matrix Science\Mascot Daemon\mgf\7 FXIII 180 min 1st\mascot\_daemon\_merge.mgf

Click mouse within plot area to zoom in by factor of two about that point

Or, Plot from  to  Da

Label all possible matches  Label matches used for scoring

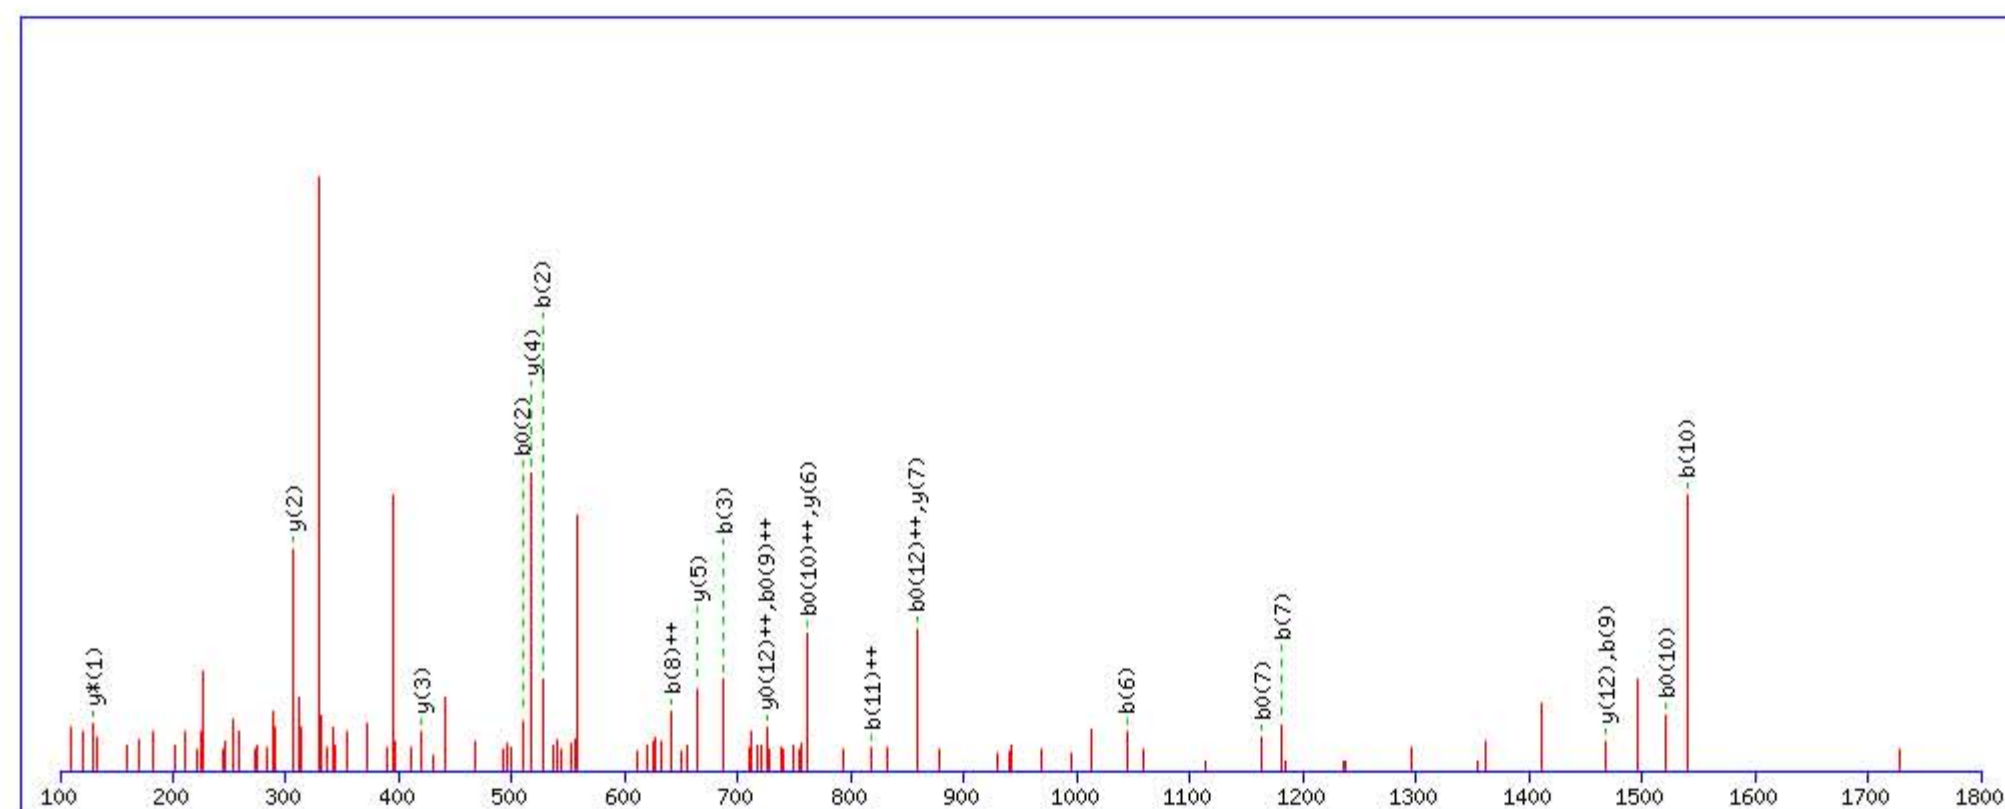

Monoisotopic mass of neutral peptide Mr(calc): 2396.111572

Fixed modifications: Carbamidomethyl (C) (apply to specified residues or termini only)

Variable modifications:

Q2 : Biotin:Thermo-21345 (Q)

Ions Score: 31 Expect: 0.018

Matches : 23/172 fragment ions using 44 most intense peaks [\(help\)](#)

| #  | b                  | b <sup>++</sup>   | b <sup>*</sup> | b <sup>*++</sup> | b <sup>0</sup>     | b <sup>0++</sup>  | Seq. | y                  | y <sup>++</sup> | y <sup>*</sup>    | y <sup>*++</sup> | y <sup>0</sup> | y <sup>0++</sup>  | #  |
|----|--------------------|-------------------|----------------|------------------|--------------------|-------------------|------|--------------------|-----------------|-------------------|------------------|----------------|-------------------|----|
| 1  | 88.039304          | 44.523290         |                |                  | 70.028739          | 35.518008         | S    |                    |                 |                   |                  |                |                   | 17 |
| 2  | <b>527.264630</b>  | 264.135953        | 510.238081     | 255.622679       | <b>509.254065</b>  | 255.130671        | Q    | 2310.086816        | 1155.547046     | 2293.060267       | 1147.033771      | 2292.076251    | 1146.541763       | 16 |
| 3  | <b>687.295279</b>  | 344.151278        | 670.268730     | 335.638003       | 669.284714         | 335.145995        | C    | 1870.861490        | 935.934383      | 1853.834941       | 927.421109       | 1852.850925    | 926.929101        | 15 |
| 4  | 800.379343         | 400.693310        | 783.352794     | 392.180035       | 782.368778         | 391.688027        | L    | 1710.830841        | 855.919058      | 1693.804292       | 847.405784       | 1692.820276    | 846.913776        | 14 |
| 5  | 929.421936         | 465.214606        | 912.395387     | 456.701332       | 911.411371         | 456.209324        | E    | 1597.746777        | 799.377026      | 1580.720228       | 790.863752       | 1579.736212    | 790.371744        | 13 |
| 6  | <b>1044.448879</b> | 522.728078        | 1027.422330    | 514.214803       | 1026.438314        | 513.722795        | D    | <b>1468.704184</b> | 734.855730      | 1451.677635       | 726.342456       | 1450.693619    | <b>725.850447</b> | 12 |
| 7  | <b>1181.507791</b> | 591.257534        | 1164.481242    | 582.744259       | <b>1163.497226</b> | 582.252251        | H    | 1353.677241        | 677.342258      | 1336.650692       | 668.828984       | 1335.666676    | 668.336976        | 11 |
| 8  | 1282.555470        | <b>641.781373</b> | 1265.528921    | 633.268099       | 1264.544905        | 632.776091        | T    | 1216.618329        | 608.812802      | 1199.591780       | 600.299528       | 1198.607764    | 599.807520        | 10 |
| 9  | <b>1468.634783</b> | 734.821030        | 1451.608234    | 726.307755       | 1450.624218        | <b>725.815747</b> | W    | 1115.570650        | 558.288963      | 1098.544101       | 549.775689       |                |                   | 9  |
| 10 | <b>1539.671897</b> | 770.339587        | 1522.645348    | 761.826312       | <b>1521.661332</b> | <b>761.334304</b> | A    | 929.491337         | 465.249306      | 912.464788        | 456.736032       |                |                   | 8  |
| 11 | 1636.724661        | <b>818.865969</b> | 1619.698112    | 810.352694       | 1618.714096        | 809.860686        | P    | <b>858.454223</b>  | 429.730750      | 841.427674        | 421.217475       |                |                   | 7  |
| 12 | 1733.777425        | 867.392351        | 1716.750876    | 858.879076       | 1715.766860        | <b>858.387068</b> | P    | <b>761.401459</b>  | 381.204367      | 744.374910        | 372.691093       |                |                   | 6  |
| 13 | 1880.845839        | 940.926558        | 1863.819290    | 932.413283       | 1862.835274        | 931.921275        | F    | <b>664.348695</b>  | 332.677985      | 647.322146        | 324.164711       |                |                   | 5  |
| 14 | 1977.898603        | 989.452940        | 1960.872054    | 980.939665       | 1959.888038        | 980.447657        | P    | <b>517.280281</b>  | 259.143778      | 500.253732        | 250.630504       |                |                   | 4  |
| 15 | 2090.982667        | 1045.994971       | 2073.956118    | 1037.481697      | 2072.972102        | 1036.989689       | I    | <b>420.227517</b>  | 210.617396      | 403.200968        | 202.104122       |                |                   | 3  |
| 16 | 2251.013316        | 1126.010296       | 2233.986767    | 1117.497021      | 2233.002751        | 1117.005013       | C    | <b>307.143453</b>  | 154.075364      | 290.116904        | 145.562090       |                |                   | 2  |
| 17 |                    |                   |                |                  |                    |                   | K    | 147.112804         | 74.060040       | <b>130.086255</b> | 65.546765        |                |                   | 1  |

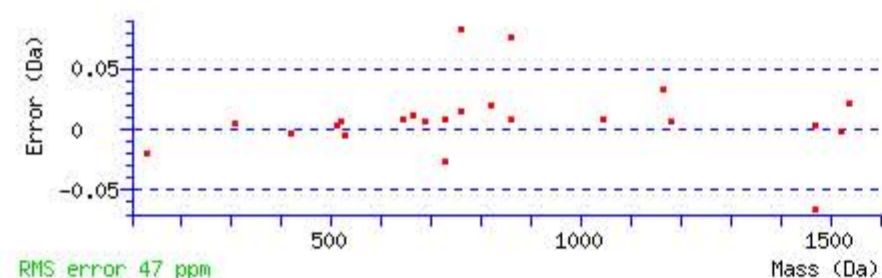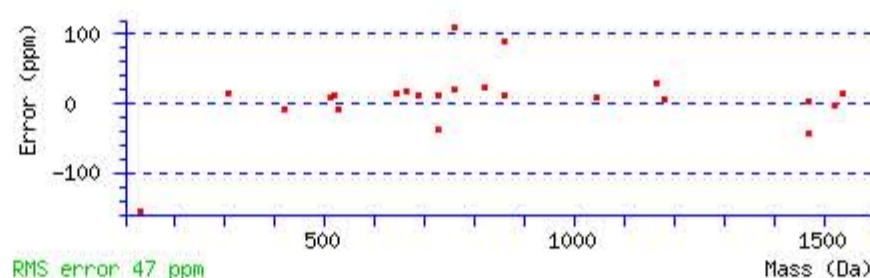

NCBI BLAST search of **SQCLEDHTWAPFPICK**

(Parameters: blastp, nr protein database, expect=20000, no filter, PAM30)

Other BLAST [web gateways](#)

## All matches to this query

| Score | Mr(calc):   | Delta    | Sequence                         |
|-------|-------------|----------|----------------------------------|
| 30.9  | 2396.111572 | 0.026204 | <a href="#">SQCLEDHTWAPFPICK</a> |

Mascot: <http://www.matrixscience.com/>

# MASCOT Search Results

## Peptide View

MS/MS Fragmentation of **ALLAFQESK**

Found in **C4BPB\_HUMAN**, C4b-binding protein beta chain OS=Homo sapiens GN=C4BPB PE=1 SV=1

Match to Query 27307: 1316.727068 from(659.370810,2+) rtinseconds(2206) index(43668)

Title: Locus:1.1.1.3217.9 File:"2013-07-02 CLN FXIII 180 min 1st F 3.wiff"

Data file C:\Program Files (x86)\Matrix Science\Mascot Daemon\mgf\7 FXIII 180 min 1st\mascot\_daemon\_merge.mgf

Click mouse within plot area to zoom in by factor of two about that point

Or, Plot from  to  Da

Label all possible matches  Label matches used for scoring

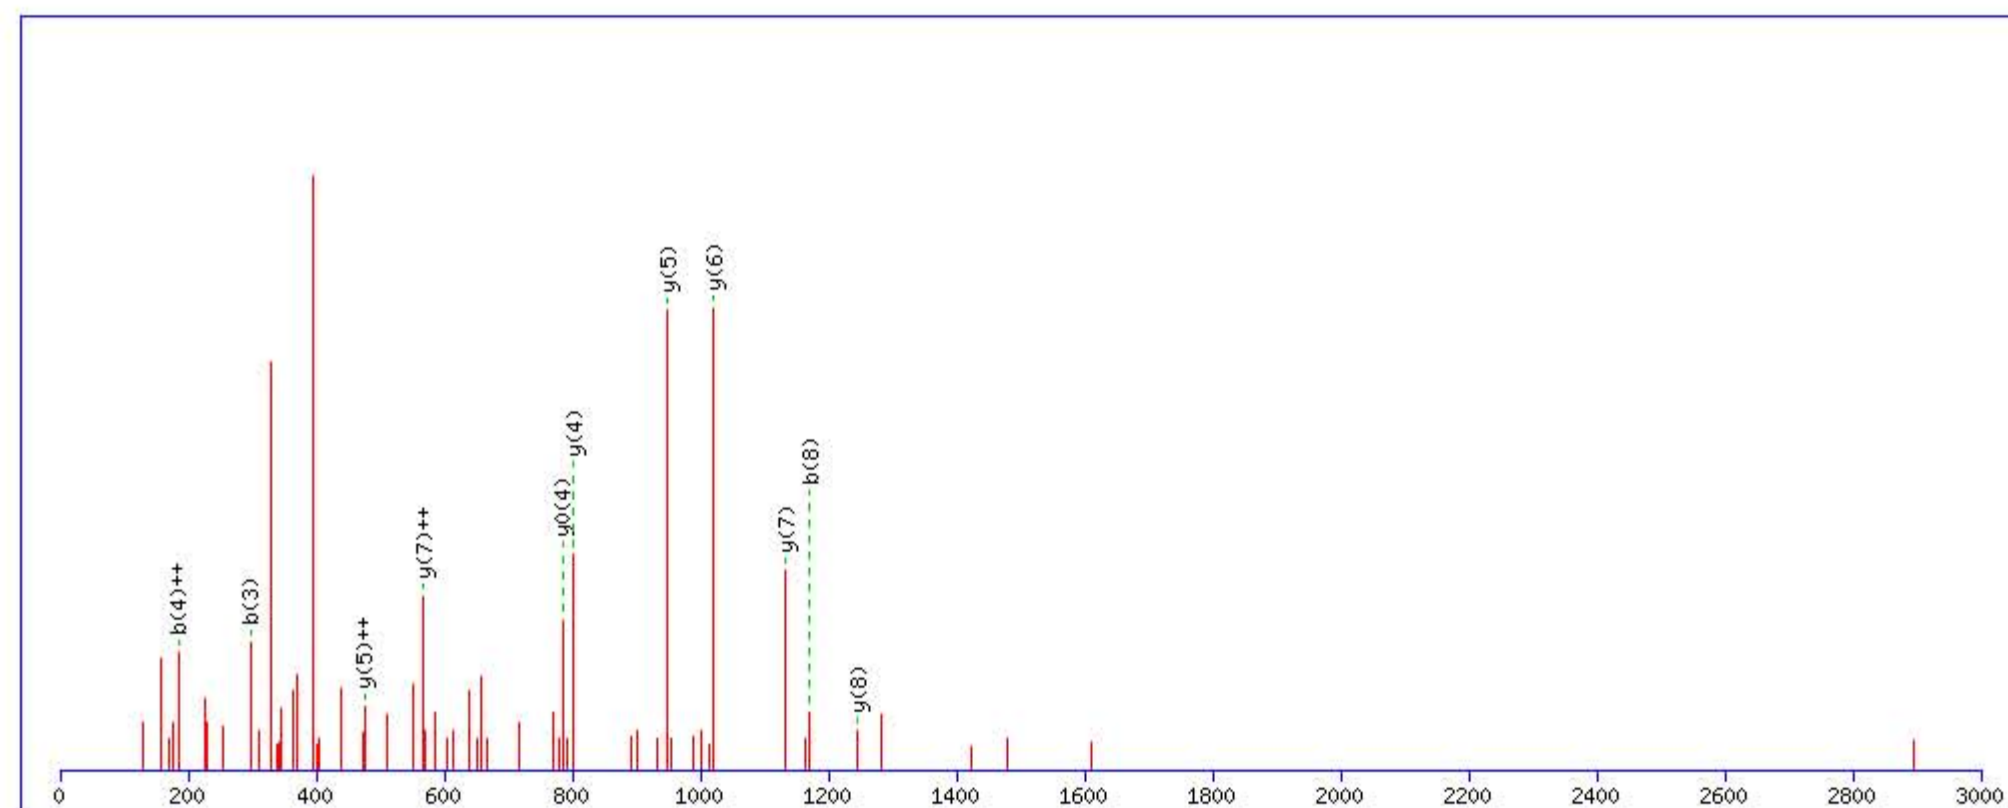

Monoisotopic mass of neutral peptide  $M_r(\text{calc})$ : 1316.716217

Fixed modifications: Carbamidomethyl (C) (apply to specified residues or termini only)

Variable modifications:

Q6 : Biotin:Thermo-21345 (Q)

Ions Score: 25 Expect: 0.024

Matches : 12/72 fragment ions using 22 most intense peaks [\(help\)](#)

| # | b                  | b <sup>++</sup>   | b <sup>*</sup> | b <sup>*++</sup> | b <sup>0</sup> | b <sup>0++</sup> | Seq. | y                  | y <sup>++</sup>   | y <sup>*</sup> | y <sup>*++</sup> | y <sup>0</sup>    | y <sup>0++</sup> | # |
|---|--------------------|-------------------|----------------|------------------|----------------|------------------|------|--------------------|-------------------|----------------|------------------|-------------------|------------------|---|
| 1 | 72.044390          | 36.525833         |                |                  |                |                  | A    |                    |                   |                |                  |                   |                  | 9 |
| 2 | <b>185.128454</b>  | 93.067865         |                |                  |                |                  | L    | <b>1246.686407</b> | 623.846842        | 1229.659858    | 615.333567       | 1228.675842       | 614.841559       | 8 |
| 3 | <b>298.212518</b>  | 149.609897        |                |                  |                |                  | L    | <b>1133.602343</b> | <b>567.304810</b> | 1116.575794    | 558.791535       | 1115.591778       | 558.299527       | 7 |
| 4 | 369.249632         | <b>185.128454</b> |                |                  |                |                  | A    | <b>1020.518279</b> | 510.762778        | 1003.491730    | 502.249503       | 1002.507714       | 501.757495       | 6 |
| 5 | 516.318046         | 258.662661        |                |                  |                |                  | F    | <b>949.481165</b>  | <b>475.244221</b> | 932.454616     | 466.730946       | 931.470600        | 466.238938       | 5 |
| 6 | 955.543372         | 478.275324        | 938.516823     | 469.762049       |                |                  | Q    | <b>802.412751</b>  | 401.710014        | 785.386202     | 393.196739       | <b>784.402186</b> | 392.704731       | 4 |
| 7 | 1084.585965        | 542.796621        | 1067.559416    | 534.283346       | 1066.575400    | 533.791338       | E    | 363.187425         | 182.097351        | 346.160876     | 173.584076       | 345.176860        | 173.092068       | 3 |
| 8 | <b>1171.617993</b> | 586.312635        | 1154.591444    | 577.799360       | 1153.607428    | 577.307352       | S    | 234.144832         | 117.576054        | 217.118283     | 109.062780       | 216.134267        | 108.570772       | 2 |
| 9 |                    |                   |                |                  |                |                  | K    | 147.112804         | 74.060040         | 130.086255     | 65.546765        |                   |                  | 1 |

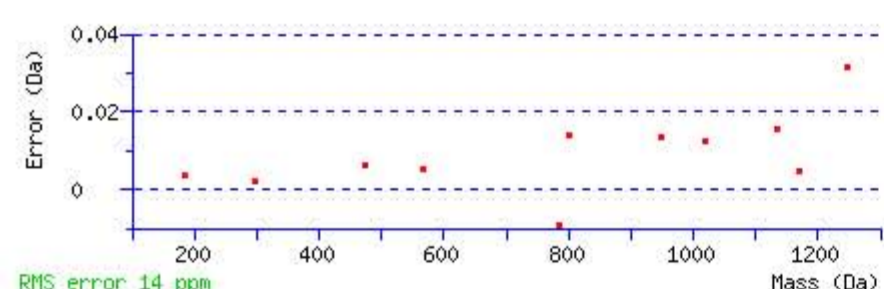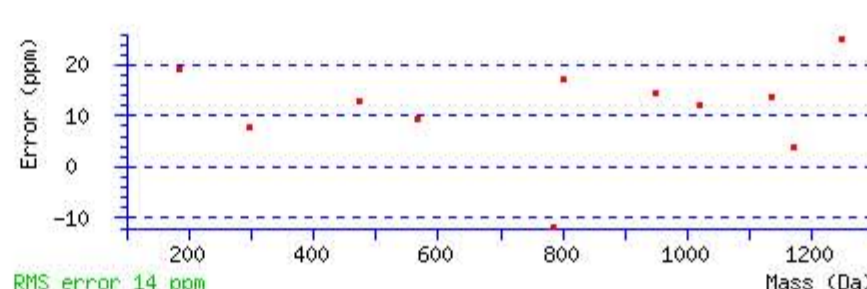

NCBI BLAST search of [ALLAFQESK](#)

(Parameters: blastp, nr protein database, expect=20000, no filter, PAM30)

Other BLAST [web gateways](#)

## All matches to this query

| Score | $M_r(\text{calc})$ : | Delta     | Sequence                      |
|-------|----------------------|-----------|-------------------------------|
| 25.2  | 1316.716217          | 0.010851  | <a href="#">ALLAFQESK</a>     |
| 7.5   | 1316.731308          | -0.004240 | <a href="#">KTFPISGARGGAR</a> |
| 7.4   | 1316.742050          | -0.014982 | <a href="#">AILCRKGKPMK</a>   |
| 4.5   | 1316.731293          | -0.004225 | <a href="#">RVLAFISRNQN</a>   |
| 3.3   | 1316.741165          | -0.014097 | <a href="#">ALSEKSLQSAK</a>   |
| 2.7   | 1316.733994          | -0.006926 | <a href="#">LALVINGDFLDK</a>  |
| 2.7   | 1316.745224          | -0.018156 | <a href="#">SPLQLQTVIYR</a>   |
| 2.4   | 1316.745193          | -0.018125 | <a href="#">LAALEEFRLQK</a>   |
| 1.2   | 1316.729950          | -0.002882 | <a href="#">KTLSEVERDLK</a>   |
| 0.5   | 1316.723434          | 0.003634  | <a href="#">ILASMPRTIGR</a>   |



# MASCOT SEARCH RESULTS

## Peptide View

MS/MS Fragmentation of **EVEGQILGTYVCIK**

Found in **C4BPB\_HUMAN**, C4b-binding protein beta chain OS=Homo sapiens GN=C4BPB PE=1 SV=1

Match to Query 47955: 1919.017362 from(640.679730,3+) rtinseconds(2461) index(45278)

Title: Locus:1.1.1.3306.4 File:"2013-07-02 CLN FXIII 180 min 1st F 3.wiff"

Data file C:\Program Files (x86)\Matrix Science\Mascot Daemon\mgf7 FXIII 180 min 1st\mascot\_daemon\_merge.mgf

Click mouse within plot area to zoom in by factor of two about that point

Or, Plot from  to  Da

Label all possible matches  Label matches used for scoring

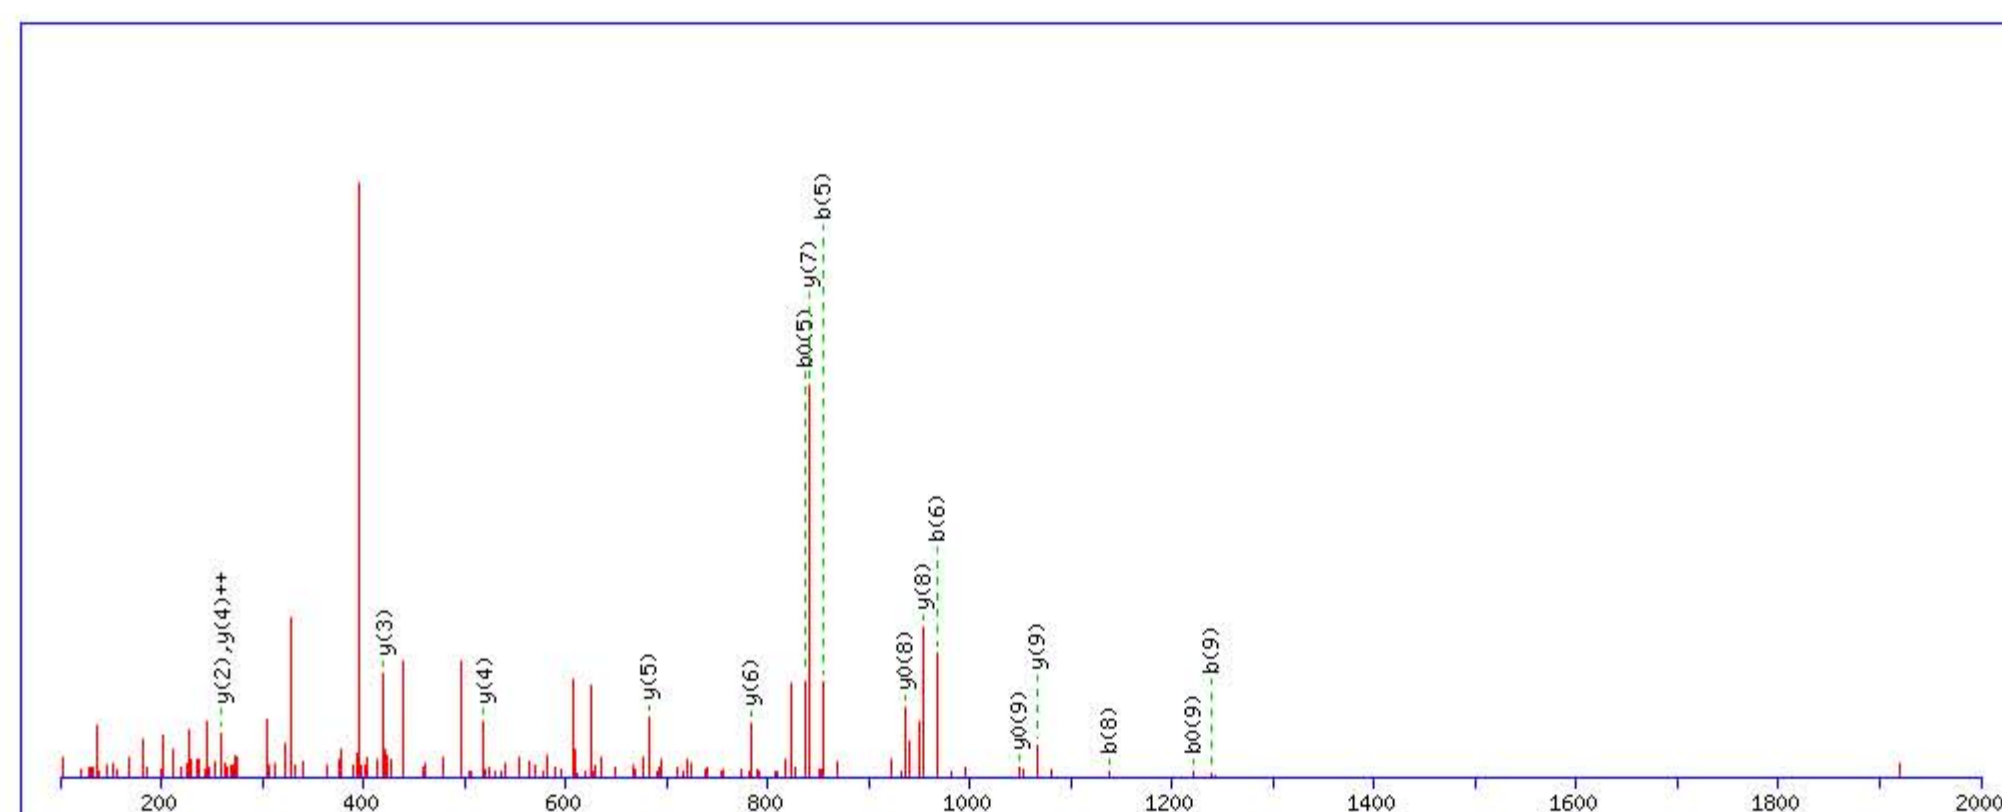

Monoisotopic mass of neutral peptide Mr(calc): 1918.989639

Fixed modifications: Carbamidomethyl (C) (apply to specified residues or termini only)

Variable modifications:

Q5 : Biotin:Thermo-21345 (Q)

Ions Score: 36 Expect: 0.0055

Matches : 17/138 fragment ions using 34 most intense peaks [\(help\)](#)

| #  | b                  | b <sup>++</sup> | b <sup>*</sup> | b <sup>*++</sup> | b <sup>0</sup>     | b <sup>0++</sup> | Seq. | y                  | y <sup>++</sup>   | y <sup>*</sup> | y <sup>*++</sup> | y <sup>0</sup>     | y <sup>0++</sup> | #  |
|----|--------------------|-----------------|----------------|------------------|--------------------|------------------|------|--------------------|-------------------|----------------|------------------|--------------------|------------------|----|
| 1  | 130.049869         | 65.528572       |                |                  | 112.039304         | 56.523290        | E    |                    |                   |                |                  |                    |                  | 14 |
| 2  | 229.118283         | 115.062780      |                |                  | 211.107718         | 106.057497       | V    | 1790.954328        | 895.980802        | 1773.927779    | 887.467528       | 1772.943763        | 886.975520       | 13 |
| 3  | 358.160876         | 179.584076      |                |                  | 340.150311         | 170.578794       | E    | 1691.885914        | 846.446595        | 1674.859365    | 837.933321       | 1673.875349        | 837.441313       | 12 |
| 4  | 415.182340         | 208.094808      |                |                  | 397.171775         | 199.089526       | G    | 1562.843321        | 781.925299        | 1545.816772    | 773.412024       | 1544.832756        | 772.920016       | 11 |
| 5  | <b>854.407666</b>  | 427.707471      | 837.381117     | 419.194197       | <b>836.397101</b>  | 418.702189       | Q    | 1505.821857        | 753.414567        | 1488.795308    | 744.901292       | 1487.811292        | 744.409284       | 10 |
| 6  | <b>967.491730</b>  | 484.249503      | 950.465181     | 475.736229       | 949.481165         | 475.244221       | I    | <b>1066.596531</b> | 533.801904        | 1049.569982    | 525.288629       | <b>1048.585966</b> | 524.796621       | 9  |
| 7  | 1080.575794        | 540.791535      | 1063.549245    | 532.278261       | 1062.565229        | 531.786253       | L    | <b>953.512467</b>  | 477.259872        | 936.485918     | 468.746597       | <b>935.501902</b>  | 468.254589       | 8  |
| 8  | <b>1137.597258</b> | 569.302267      | 1120.570709    | 560.788993       | 1119.586693        | 560.296985       | G    | <b>840.428403</b>  | 420.717840        | 823.401854     | 412.204565       | 822.417838         | 411.712557       | 7  |
| 9  | <b>1238.644937</b> | 619.826107      | 1221.618388    | 611.312832       | <b>1220.634372</b> | 610.820824       | T    | <b>783.406939</b>  | 392.207108        | 766.380390     | 383.693833       | 765.396374         | 383.201825       | 6  |
| 10 | 1401.708266        | 701.357771      | 1384.681717    | 692.844497       | 1383.697701        | 692.352489       | Y    | <b>682.359260</b>  | 341.683268        | 665.332711     | 333.169994       |                    |                  | 5  |
| 11 | 1500.776680        | 750.891978      | 1483.750131    | 742.378704       | 1482.766115        | 741.886696       | V    | <b>519.295931</b>  | <b>260.151604</b> | 502.269382     | 251.638329       |                    |                  | 4  |
| 12 | 1660.807329        | 830.907303      | 1643.780780    | 822.394028       | 1642.796764        | 821.902020       | C    | <b>420.227517</b>  | 210.617396        | 403.200968     | 202.104122       |                    |                  | 3  |
| 13 | 1773.891393        | 887.449335      | 1756.864844    | 878.936060       | 1755.880828        | 878.444052       | I    | <b>260.196868</b>  | 130.602072        | 243.170319     | 122.088797       |                    |                  | 2  |
| 14 |                    |                 |                |                  |                    |                  | K    | 147.112804         | 74.060040         | 130.086255     | 65.546765        |                    |                  | 1  |

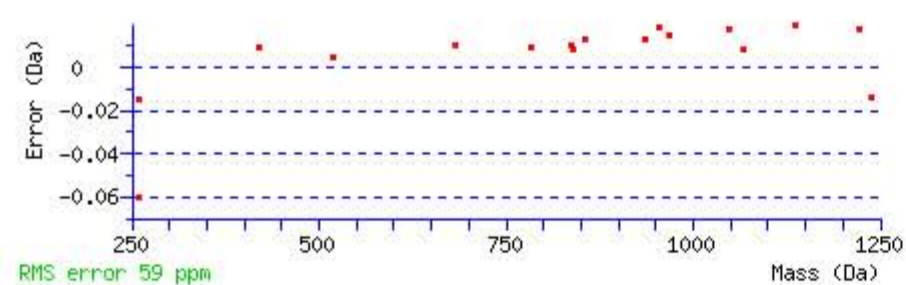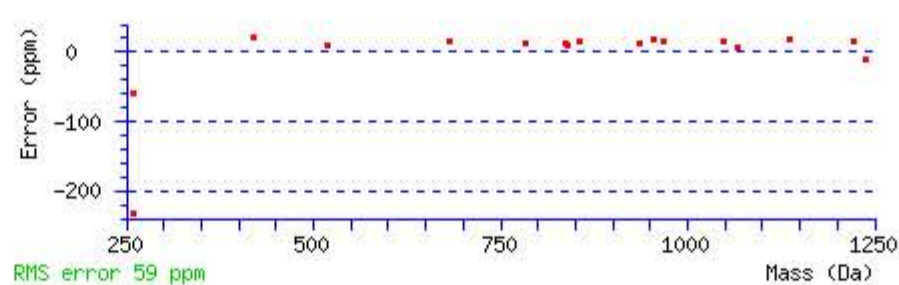

NCBI BLAST search of **EVEGQILGTYVCIK**

(Parameters: blastp, nr protein database, expect=20000, no filter, PAM30)

Other BLAST [web gateways](#)

All matches to this query

| Score | Mr(calc):   | Delta    | Sequence                       |
|-------|-------------|----------|--------------------------------|
| 36.4  | 1918.989639 | 0.027723 | <a href="#">EVEGQILGTYVCIK</a> |

Mascot: <http://www.matrixscience.com/>

# MASCOT Search Results

## Peptide View

MS/MS Fragmentation of **NLCEAMENFMQQLK**

Found in **C4BPB\_HUMAN**, C4b-binding protein beta chain OS=Homo sapiens GN=C4BPB PE=1 SV=1

Match to Query 52450: 2065.973112 from(689.664980,3+) rtinseconds(3067) index(49782)

Title: Locus:1.1.1.3513.5 File:"2013-07-02 CLN FXIII 180 min 1st F 3.wiff"

Data file C:\Program Files (x86)\Matrix Science\Mascot Daemon\mgf\7 FXIII 180 min 1st\mascot\_daemon\_merge.mgf

Click mouse within plot area to zoom in by factor of two about that point

Or, Plot from  to  Da

Label all possible matches  Label matches used for scoring

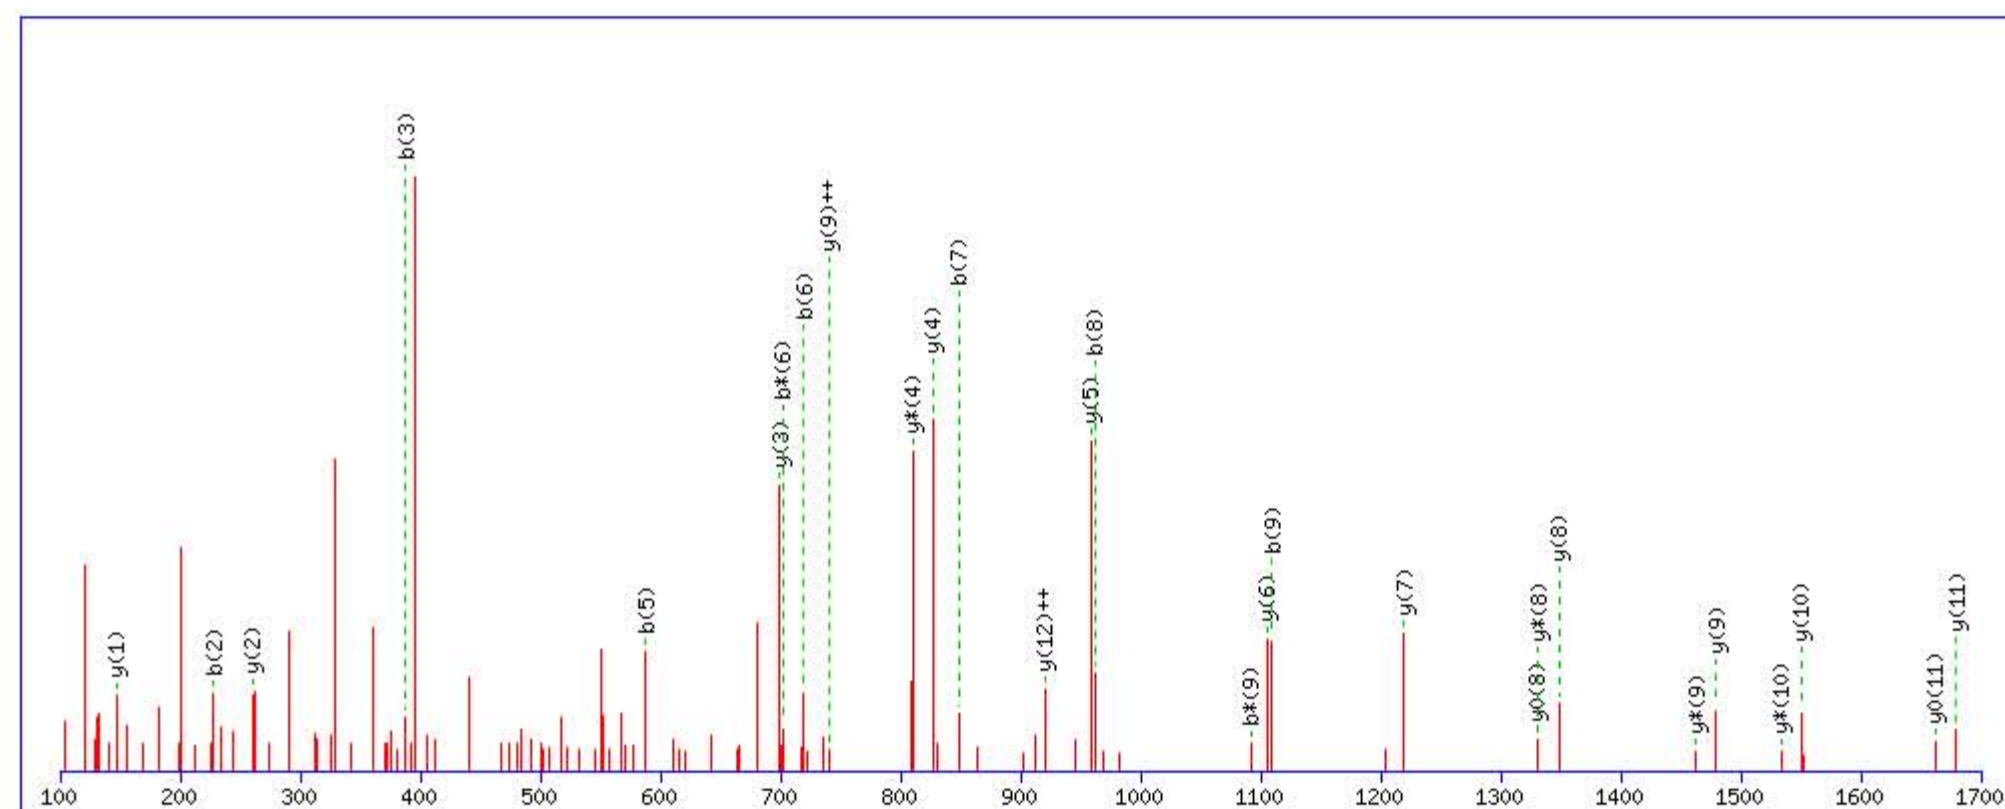

Monoisotopic mass of neutral peptide Mr(calc): 2065.945709

Fixed modifications: Carbamidomethyl (C) (apply to specified residues or termini only)

Variable modifications:

Q12 : Biotin:Thermo-21345 (Q)

Ions Score: 60 Expect: 1.5e-005

Matches : 28/136 fragment ions using 53 most intense peaks [\(help\)](#)

| #  | b                  | b <sup>++</sup> | b <sup>*</sup>     | b <sup>*++</sup> | b <sup>0</sup> | b <sup>0++</sup> | Seq. | y                  | y <sup>++</sup>   | y <sup>*</sup>     | y <sup>*++</sup> | y <sup>0</sup>     | y <sup>0++</sup> | #  |
|----|--------------------|-----------------|--------------------|------------------|----------------|------------------|------|--------------------|-------------------|--------------------|------------------|--------------------|------------------|----|
| 1  | 115.050203         | 58.028740       | 98.023654          | 49.515465        |                |                  | N    |                    |                   |                    |                  |                    |                  | 14 |
| 2  | <b>228.134267</b>  | 114.570771      | 211.107718         | 106.057497       |                |                  | L    | 1952.910096        | 976.958686        | 1935.883547        | 968.445412       | 1934.899531        | 967.953404       | 13 |
| 3  | <b>388.164916</b>  | 194.586096      | 371.138367         | 186.072822       |                |                  | C    | 1839.826032        | <b>920.416654</b> | 1822.799483        | 911.903380       | 1821.815467        | 911.411371       | 12 |
| 4  | 517.207509         | 259.107393      | 500.180960         | 250.594118       | 499.196944     | 250.102110       | E    | <b>1679.795383</b> | 840.401329        | 1662.768834        | 831.888055       | <b>1661.784818</b> | 831.396047       | 11 |
| 5  | <b>588.244623</b>  | 294.625950      | 571.218074         | 286.112675       | 570.234058     | 285.620667       | A    | <b>1550.752790</b> | 775.880033        | <b>1533.726241</b> | 767.366759       | 1532.742225        | 766.874751       | 10 |
| 6  | <b>719.285108</b>  | 360.146192      | <b>702.258559</b>  | 351.632918       | 701.274543     | 351.140910       | M    | <b>1479.715676</b> | <b>740.361476</b> | <b>1462.689127</b> | 731.848202       | 1461.705111        | 731.356194       | 9  |
| 7  | <b>848.327701</b>  | 424.667489      | 831.301152         | 416.154214       | 830.317136     | 415.662206       | E    | <b>1348.675191</b> | 674.841234        | <b>1331.648642</b> | 666.327959       | <b>1330.664626</b> | 665.835951       | 8  |
| 8  | <b>962.370628</b>  | 481.688952      | 945.344079         | 473.175678       | 944.360063     | 472.683670       | N    | <b>1219.632598</b> | 610.319937        | 1202.606049        | 601.806663       |                    |                  | 7  |
| 9  | <b>1109.439042</b> | 555.223159      | <b>1092.412493</b> | 546.709885       | 1091.428477    | 546.217876       | F    | <b>1105.589671</b> | 553.298474        | 1088.563122        | 544.785199       |                    |                  | 6  |
| 10 | 1240.479527        | 620.743402      | 1223.452978        | 612.230127       | 1222.468962    | 611.738119       | M    | <b>958.521257</b>  | 479.764267        | 941.494708         | 471.250992       |                    |                  | 5  |
| 11 | 1368.538105        | 684.772690      | 1351.511556        | 676.259416       | 1350.527540    | 675.767408       | Q    | <b>827.480772</b>  | 414.244024        | <b>810.454223</b>  | 405.730750       |                    |                  | 4  |
| 12 | 1807.763431        | 904.385354      | 1790.736882        | 895.872079       | 1789.752866    | 895.380071       | Q    | <b>699.422194</b>  | 350.214735        | 682.395645         | 341.701461       |                    |                  | 3  |
| 13 | 1920.847495        | 960.927386      | 1903.820946        | 952.414111       | 1902.836930    | 951.922103       | L    | <b>260.196868</b>  | 130.602072        | 243.170319         | 122.088797       |                    |                  | 2  |
| 14 |                    |                 |                    |                  |                |                  | K    | <b>147.112804</b>  | 74.060040         | 130.086255         | 65.546765        |                    |                  | 1  |

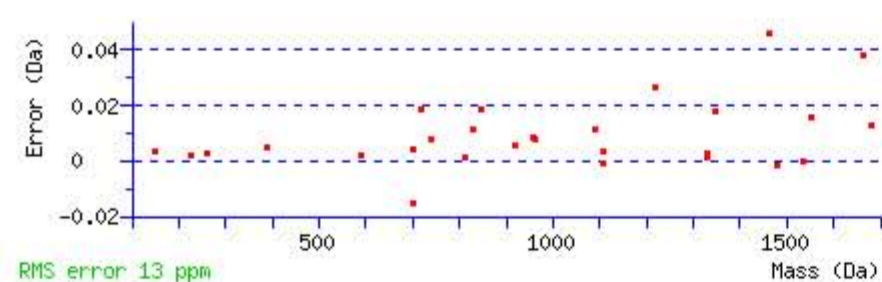

RMS error 13 ppm

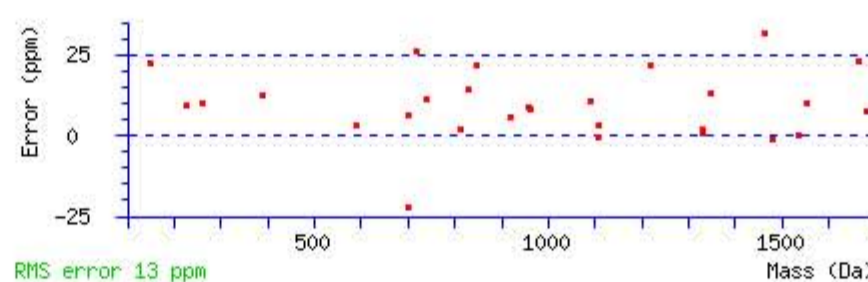

RMS error 13 ppm

NCBI BLAST search of **NLCEAMENFMQQLK**

(Parameters: blastp, nr protein database, expect=20000, no filter, PAM30)

Other BLAST [web gateways](#)

All matches to this query

| Score | Mr(calc):   | Delta     | Sequence                           |
|-------|-------------|-----------|------------------------------------|
| 60.1  | 2065.945709 | 0.027403  | <a href="#">NLCEAMENFMQQLK</a>     |
| 58.1  | 2065.945709 | 0.027403  | <a href="#">NLCEAMENFMQQLK</a>     |
| 17.3  | 2066.002350 | -0.029238 | <a href="#">AQLQMMENLISSSQETIK</a> |
| 7.9   | 2066.002350 | -0.029238 | <a href="#">AQLQMMENLISSSQETIK</a> |

# MASCOT Search Results

## Peptide View

MS/MS Fragmentation of **EALIQFLEQVHQGIK**

Found in **CBPN\_HUMAN**, Carboxypeptidase N catalytic chain OS=Homo sapiens GN=CPN1 PE=1 SV=1

Match to Query 52419: 2063.154012 from(688.725280,3+) rtinseconds(2745) index(47364)

Title: Locus:1.1.1.3403.10 File:"2013-07-02 CLN FXIII 180 min 1st F 3.wiff"

Data file C:\Program Files (x86)\Matrix Science\Mascot Daemon\mgf\7 FXIII 180 min 1st\mascot\_daemon\_merge.mgf

Click mouse within plot area to zoom in by factor of two about that point

Or, Plot from  to  Da

Label all possible matches  Label matches used for scoring

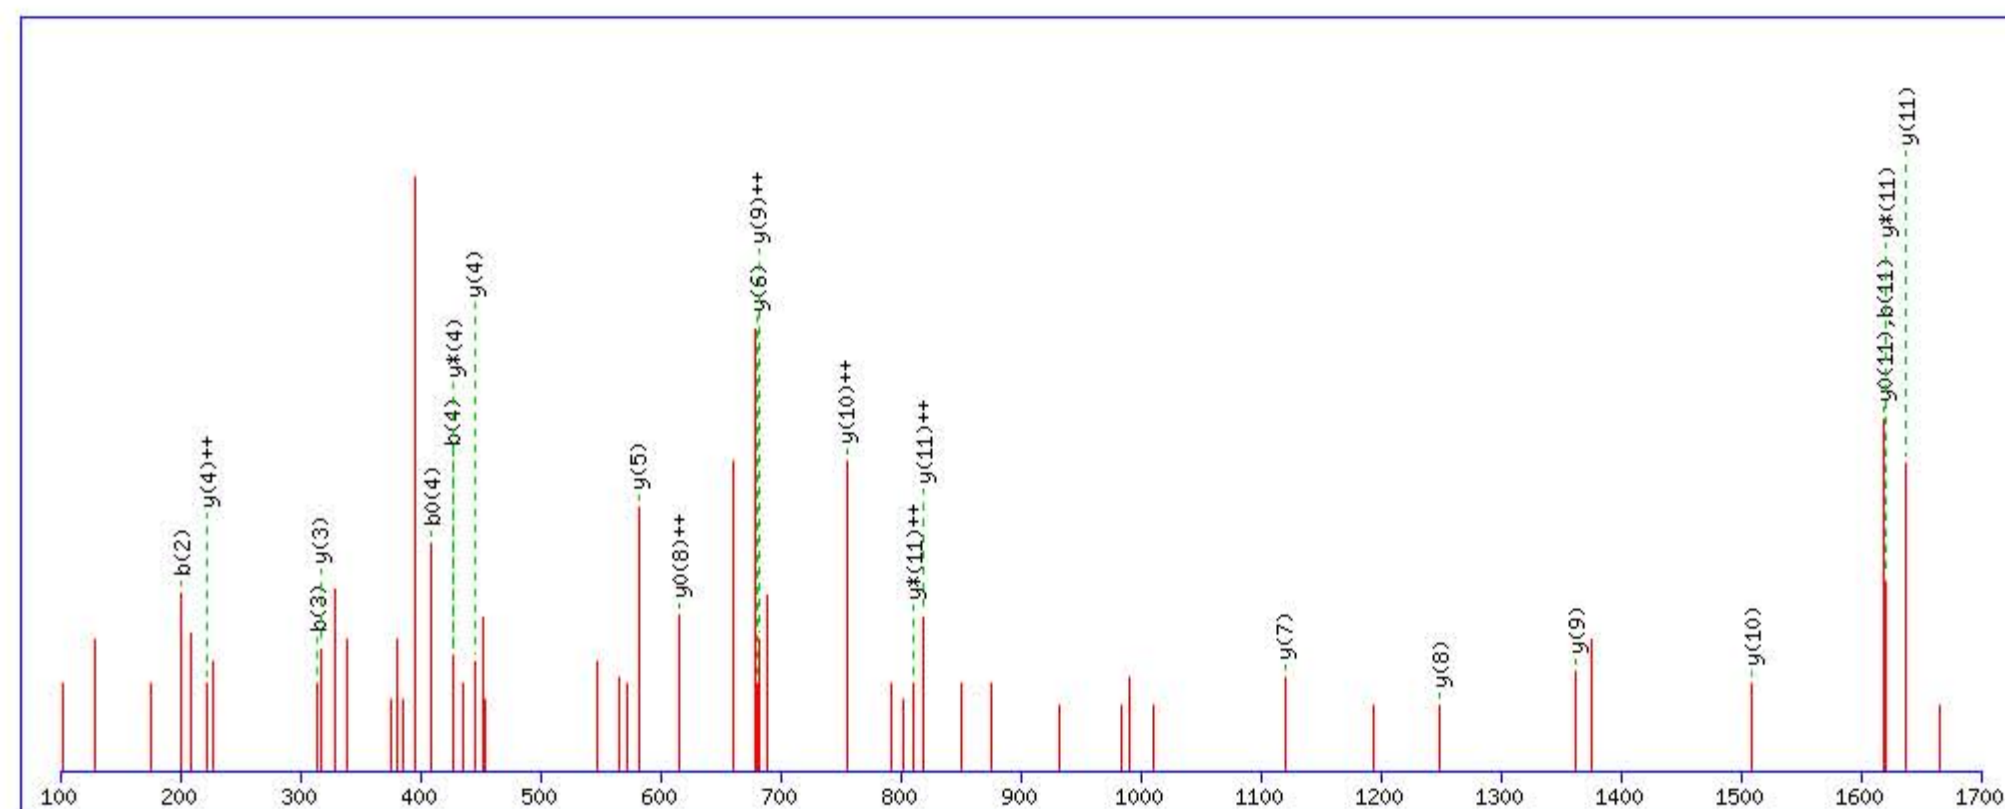

Monoisotopic mass of neutral peptide Mr(calc): 2063.123749

Fixed modifications: Carbamidomethyl (C) (apply to specified residues or termini only)

Variable modifications:

Q9 : Biotin:Thermo-21345 (Q)

Ions Score: 35 Expect: 0.0043

Matches : 23/146 fragment ions using 54 most intense peaks [\(help\)](#)

| #  | b                  | b <sup>++</sup> | b <sup>*</sup> | b <sup>*++</sup> | b <sup>0</sup>    | b <sup>0++</sup> | Seq. | y                  | y <sup>++</sup>   | y <sup>*</sup>     | y <sup>*++</sup>  | y <sup>0</sup>     | y <sup>0++</sup>  | #  |
|----|--------------------|-----------------|----------------|------------------|-------------------|------------------|------|--------------------|-------------------|--------------------|-------------------|--------------------|-------------------|----|
| 1  | 130.049869         | 65.528572       |                |                  | 112.039304        | 56.523290        | E    |                    |                   |                    |                   |                    |                   | 15 |
| 2  | <b>201.086983</b>  | 101.047130      |                |                  | 183.076418        | 92.041847        | A    | 1935.088453        | 968.047865        | 1918.061904        | 959.534590        | 1917.077888        | 959.042582        | 14 |
| 3  | <b>314.171047</b>  | 157.589161      |                |                  | 296.160482        | 148.583879       | L    | 1864.051339        | 932.529307        | 1847.024790        | 924.016033        | 1846.040774        | 923.524025        | 13 |
| 4  | <b>427.255111</b>  | 214.131193      |                |                  | <b>409.244546</b> | 205.125911       | I    | 1750.967275        | 875.987276        | 1733.940726        | 867.474001        | 1732.956710        | 866.981993        | 12 |
| 5  | 555.313689         | 278.160483      | 538.287140     | 269.647208       | 537.303124        | 269.155200       | Q    | <b>1637.883211</b> | <b>819.445244</b> | <b>1620.856662</b> | <b>810.931969</b> | <b>1619.872646</b> | 810.439961        | 11 |
| 6  | 702.382103         | 351.694690      | 685.355554     | 343.181415       | 684.371538        | 342.689407       | F    | <b>1509.824633</b> | <b>755.415955</b> | 1492.798084        | 746.902680        | 1491.814068        | 746.410672        | 10 |
| 7  | 815.466167         | 408.236722      | 798.439618     | 399.723447       | 797.455602        | 399.231439       | L    | <b>1362.756219</b> | <b>681.881748</b> | 1345.729670        | 673.368473        | 1344.745654        | 672.876465        | 9  |
| 8  | 944.508760         | 472.758018      | 927.482211     | 464.244744       | 926.498195        | 463.752736       | E    | <b>1249.672155</b> | 625.339716        | 1232.645606        | 616.826441        | 1231.661590        | <b>616.334433</b> | 8  |
| 9  | 1383.734086        | 692.370681      | 1366.707537    | 683.857407       | 1365.723521       | 683.365399       | Q    | <b>1120.629562</b> | 560.818419        | 1103.603013        | 552.305144        |                    |                   | 7  |
| 10 | 1482.802500        | 741.904888      | 1465.775951    | 733.391614       | 1464.791935       | 732.899606       | V    | <b>681.404236</b>  | 341.205756        | 664.377687         | 332.692481        |                    |                   | 6  |
| 11 | <b>1619.861412</b> | 810.434344      | 1602.834863    | 801.921070       | 1601.850847       | 801.429062       | H    | <b>582.335822</b>  | 291.671549        | 565.309273         | 283.158274        |                    |                   | 5  |
| 12 | 1747.919990        | 874.463633      | 1730.893441    | 865.950359       | 1729.909425       | 865.458351       | Q    | <b>445.276910</b>  | <b>223.142093</b> | <b>428.250361</b>  | 214.628818        |                    |                   | 4  |
| 13 | 1804.941454        | 902.974365      | 1787.914905    | 894.461091       | 1786.930889       | 893.969083       | G    | <b>317.218332</b>  | 159.112804        | 300.191783         | 150.599529        |                    |                   | 3  |
| 14 | 1918.025518        | 959.516397      | 1900.998969    | 951.003123       | 1900.014953       | 950.511114       | I    | 260.196868         | 130.602072        | 243.170319         | 122.088797        |                    |                   | 2  |
| 15 |                    |                 |                |                  |                   |                  | K    | 147.112804         | 74.060040         | 130.086255         | 65.546765         |                    |                   | 1  |

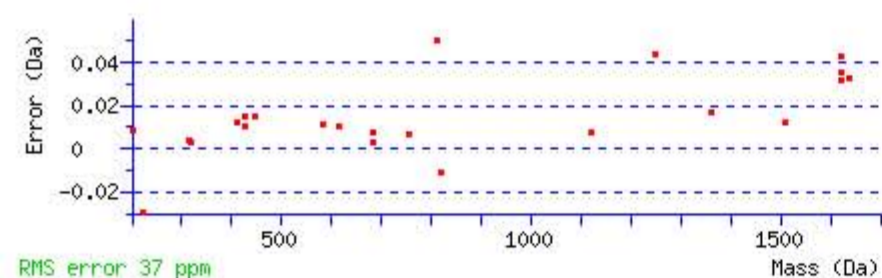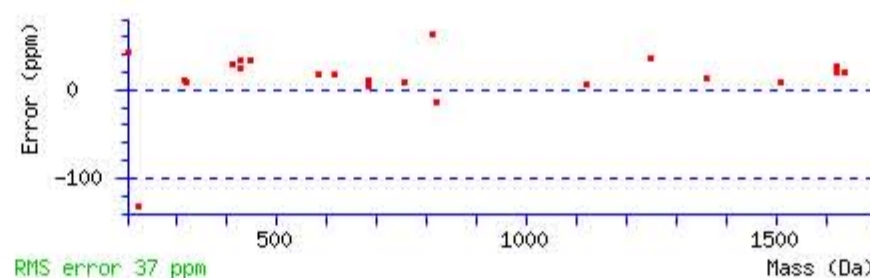

NCBI BLAST search of **EALIQFLEQVHQGIK**

(Parameters: blastp, nr protein database, expect=20000, no filter, PAM30)

Other BLAST [web gateways](#)

All matches to this query

| Score | Mr(calc):   | Delta    | Sequence                        |
|-------|-------------|----------|---------------------------------|
| 34.8  | 2063.123749 | 0.030263 | <a href="#">EALIQFLEQVHQGIK</a> |
| 13.8  | 2063.123749 | 0.030263 | <a href="#">EALIQFLEQVHQGIK</a> |
| 8.6   | 2063.123749 | 0.030263 | <a href="#">EALIQFLEQVHQGIK</a> |

# MASCOT SEARCH RESULTS

## Peptide View

MS/MS Fragmentation of **QLVCPVTR**

Found in **CPN2\_HUMAN**, Carboxypeptidase N subunit 2 OS=Homo sapiens GN=CPN2 PE=1 SV=3

Match to Query 26453: 1282.699288 from(642.356920,2+) rtinseconds(1748) index(40424)

Title: Locus:1.1.1.3058.14 File:"2013-07-02 CLN FXIII 180 min 1st F 3.wiff"

Data file C:\Program Files (x86)\Matrix Science\Mascot Daemon\mgf\7 FXIII 180 min 1st\mascot\_daemon\_merge.mgf

Click mouse within plot area to zoom in by factor of two about that point

Or, Plot from  to  Da

Label all possible matches  Label matches used for scoring

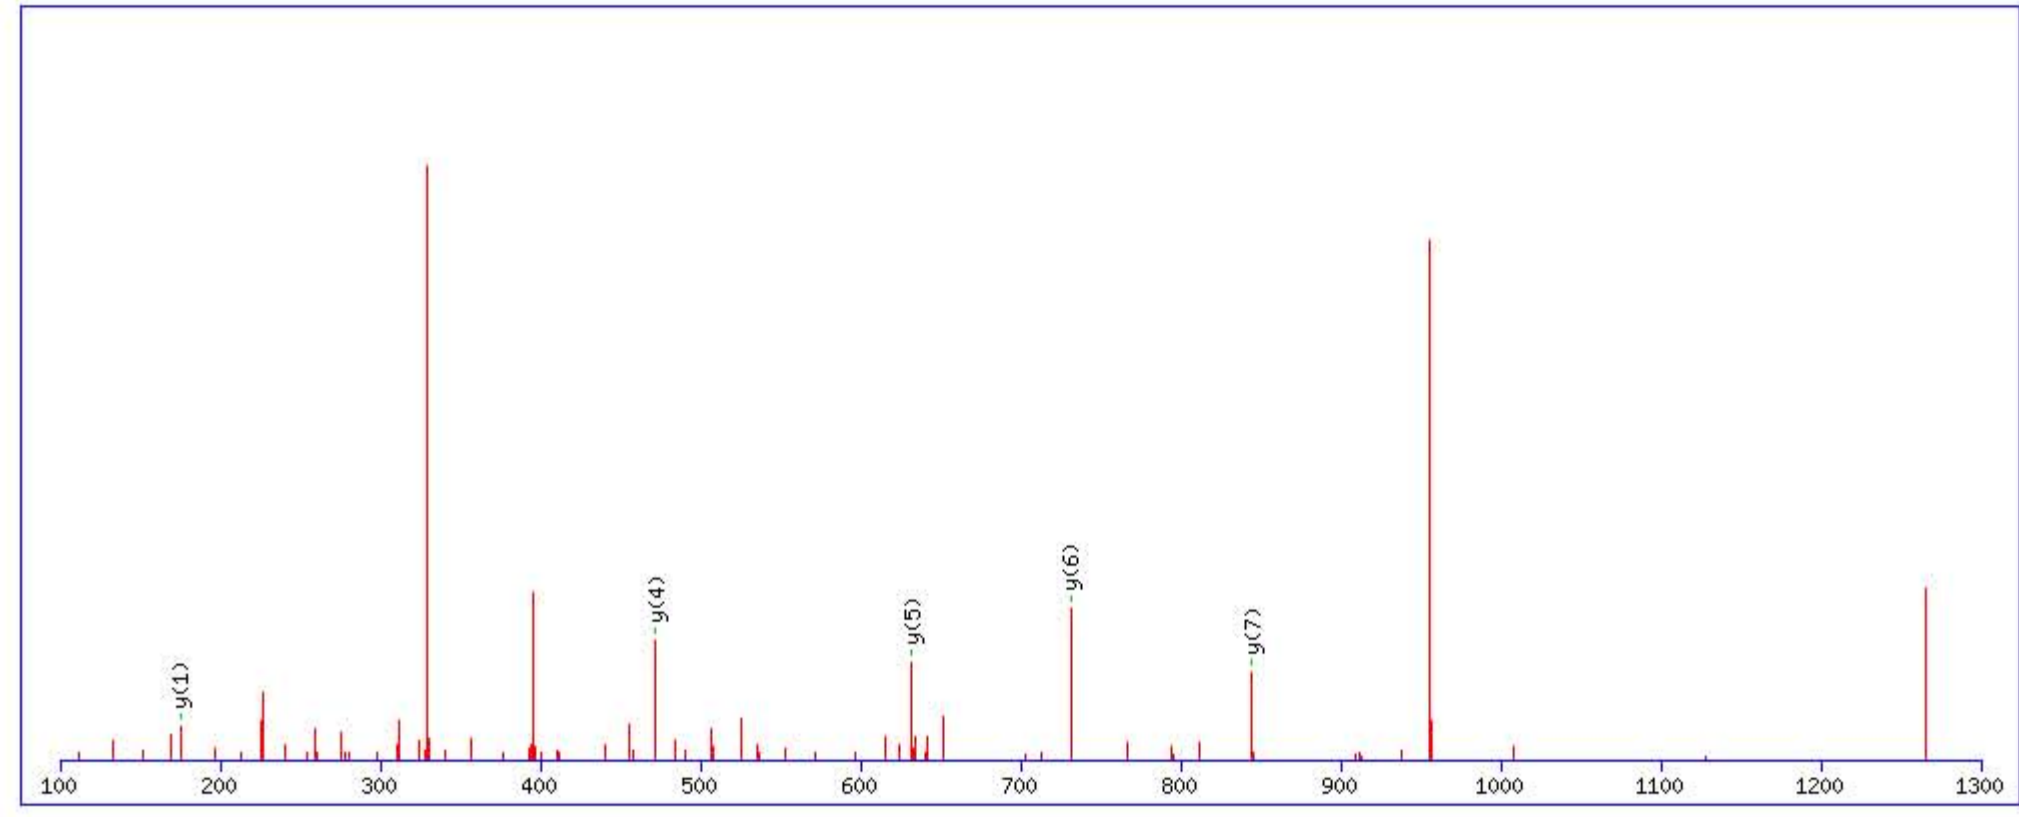

Monoisotopic mass of neutral peptide Mr(calc): 1282.688995

Fixed modifications: Carbamidomethyl (C) (apply to specified residues or termini only)

Variable modifications:

Q1 : Biotin:Thermo-21345 (Q)

Ions Score: 27 Expect: 0.033

Matches : 5/70 fragment ions using 11 most intense peaks [\(help\)](#)

| # | b           | b <sup>++</sup> | b <sup>*</sup> | b <sup>*++</sup> | b <sup>0</sup> | b <sup>0++</sup> | Seq. | y          | y <sup>++</sup> | y <sup>*</sup> | y <sup>*++</sup> | y <sup>0</sup> | y <sup>0++</sup> | # |
|---|-------------|-----------------|----------------|------------------|----------------|------------------|------|------------|-----------------|----------------|------------------|----------------|------------------|---|
| 1 | 440.232602  | 220.619939      | 423.206053     | 212.106664       |                |                  | Q    |            |                 |                |                  |                |                  | 8 |
| 2 | 553.316666  | 277.161971      | 536.290117     | 268.648697       |                |                  | L    | 844.470936 | 422.739106      | 827.444387     | 414.225831       | 826.460371     | 413.733823       | 7 |
| 3 | 652.385080  | 326.696178      | 635.358531     | 318.182904       |                |                  | V    | 731.386872 | 366.197074      | 714.360323     | 357.683799       | 713.376307     | 357.191791       | 6 |
| 4 | 812.415729  | 406.711503      | 795.389180     | 398.198228       |                |                  | C    | 632.318458 | 316.662867      | 615.291909     | 308.149592       | 614.307893     | 307.657584       | 5 |
| 5 | 909.468493  | 455.237885      | 892.441944     | 446.724610       |                |                  | P    | 472.287809 | 236.647542      | 455.261260     | 228.134268       | 454.277244     | 227.642260       | 4 |
| 6 | 1008.536907 | 504.772092      | 991.510358     | 496.258817       |                |                  | V    | 375.235045 | 188.121160      | 358.208496     | 179.607886       | 357.224480     | 179.115878       | 3 |
| 7 | 1109.584586 | 555.295931      | 1092.558037    | 546.782657       | 1091.574021    | 546.290648       | T    | 276.166631 | 138.586953      | 259.140082     | 130.073679       | 258.156066     | 129.581671       | 2 |
| 8 |             |                 |                |                  |                |                  | R    | 175.118952 | 88.063114       | 158.092403     | 79.549839        |                |                  | 1 |

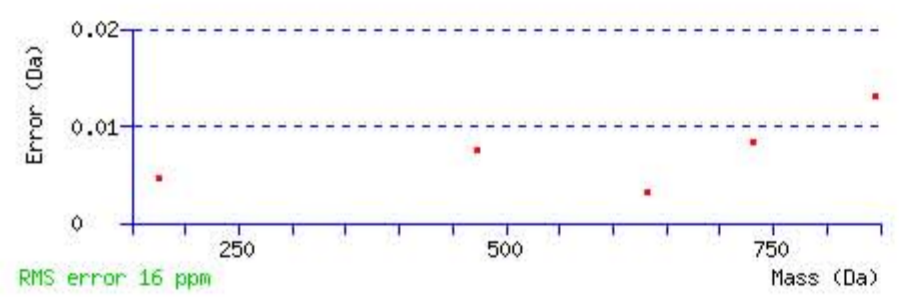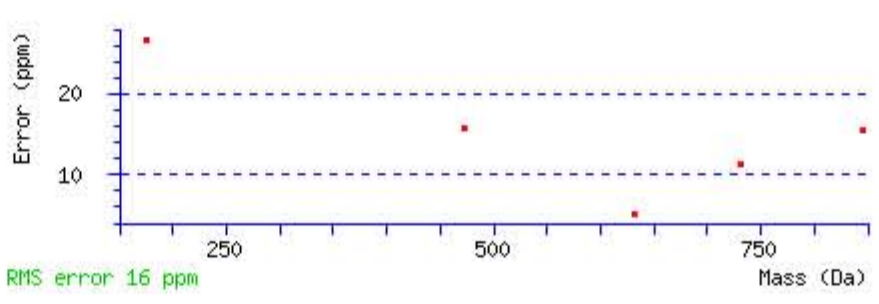

NCBI BLAST search of **QLVCPVTR**

(Parameters: blastp, nr protein database, expect=20000, no filter, PAM30)

Other BLAST [web gateways](#)

### All matches to this query

| Score | Mr(calc):   | Delta     | Sequence                      |
|-------|-------------|-----------|-------------------------------|
| 27.4  | 1282.688995 | 0.010293  | <a href="#">QLVCPVTR</a>      |
| 10.9  | 1282.717957 | -0.018669 | <a href="#">QLGLTERR</a>      |
| 9.1   | 1282.688065 | 0.011223  | <a href="#">EEAAGIARPLEK</a>  |
| 8.6   | 1282.699341 | -0.000053 | <a href="#">LSAISLGQGQGPR</a> |
| 5.9   | 1282.693466 | 0.005822  | <a href="#">FQIPWKHATR</a>    |
| 5.8   | 1282.699326 | -0.000038 | <a href="#">IGRIIEGSPADR</a>  |
| 5.8   | 1282.681549 | 0.017739  | <a href="#">QLEERAAR</a>      |
| 5.8   | 1282.685593 | 0.013695  | <a href="#">QLEGLWAR</a>      |
| 4.8   | 1282.710556 | -0.011268 | <a href="#">RLPGENVKTNR</a>   |
| 3.3   | 1282.704041 | -0.004753 | <a href="#">AAALVRRGCGPR</a>  |

# MASCOT Search Results

## Peptide View

MS/MS Fragmentation of **DHLGFQVTPDESK**

Found in **CPN2\_HUMAN**, Carboxypeptidase N subunit 2 OS=Homo sapiens GN=CPN2 PE=1 SV=3

Match to Query 49236: 1968.967182 from(657.329670,3+) rtinseconds(2309) index(44325)

Title: Locus:1.1.1.3253.9 File:"2013-07-02 CLN FXIII 180 min 1st F 3.wiff"

Data file C:\Program Files (x86)\Matrix Science\Mascot Daemon\mgf7 FXIII 180 min 1st\mascot\_daemon\_merge.mgf

Click mouse within plot area to zoom in by factor of two about that point

Or, Plot from 0 to 2200 Da Full range

Label all possible matches  Label matches used for scoring

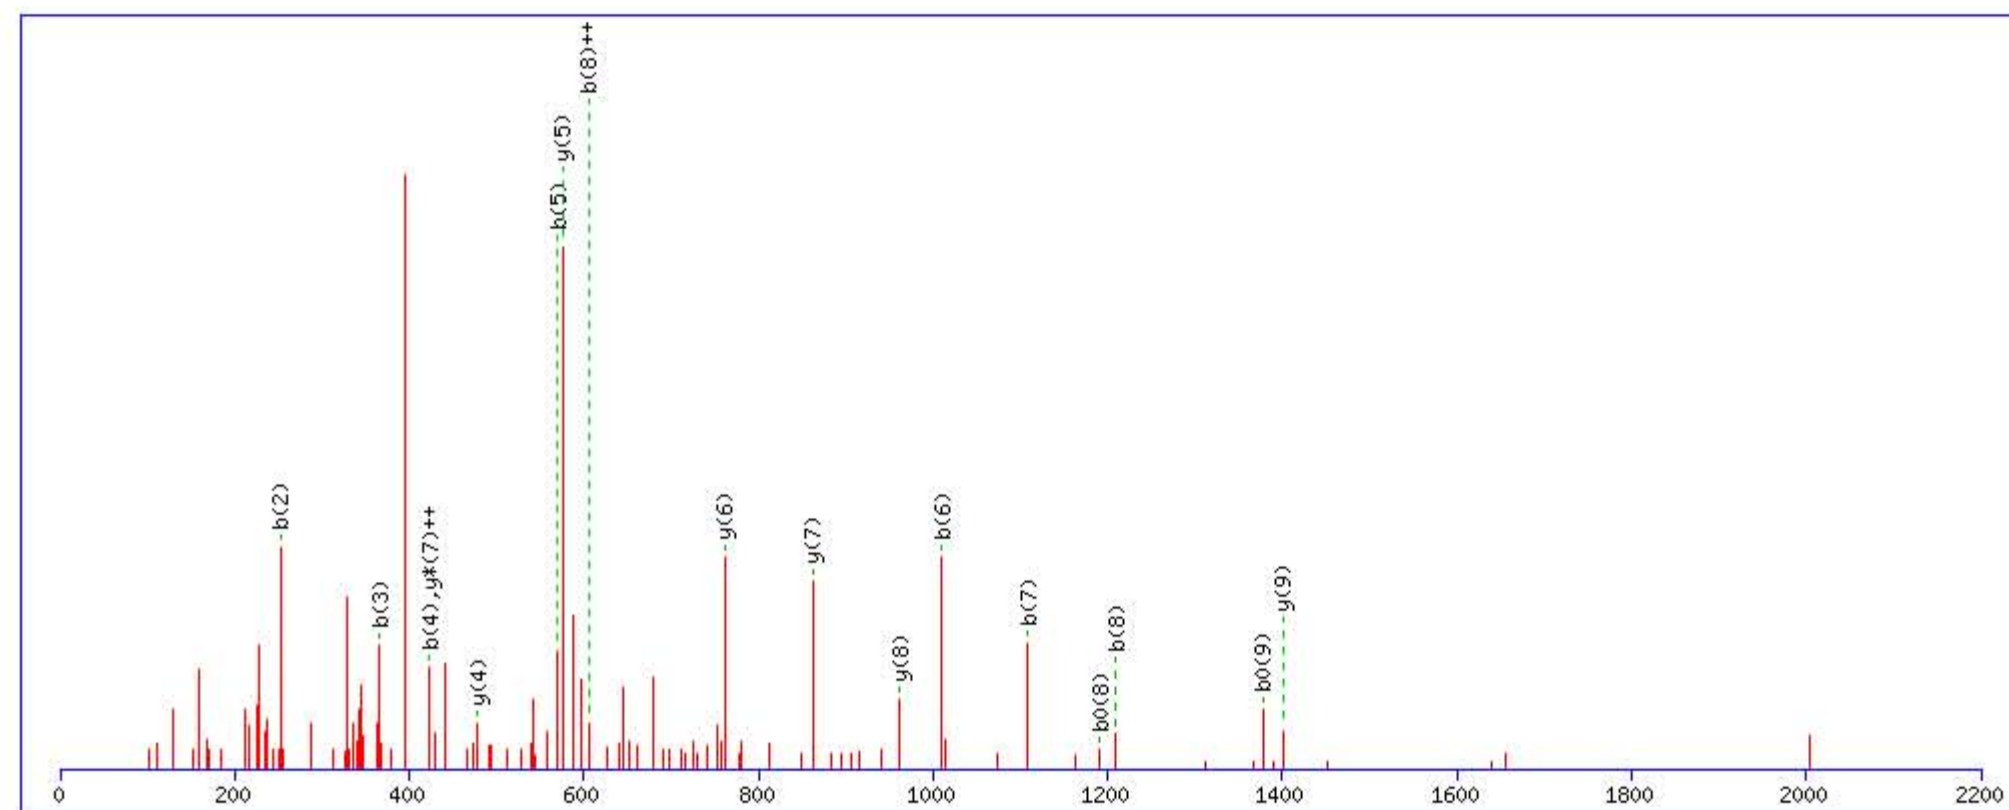

Monoisotopic mass of neutral peptide Mr(calc): 1968.940399

Fixed modifications: Carbamidomethyl (C) (apply to specified residues or termini only)

Variable modifications:

Q6 : Biotin:Thermo-21345 (Q)

Ions Score: 27 Expect: 0.021

Matches : 17/144 fragment ions using 40 most intense peaks [\(help\)](#)

| #  | b                  | b <sup>++</sup>   | b <sup>*</sup> | b <sup>*++</sup> | b <sup>0</sup>     | b <sup>0++</sup> | Seq. | y                  | y <sup>++</sup> | y <sup>*</sup> | y <sup>*++</sup>  | y <sup>0</sup> | y <sup>0++</sup> | #  |
|----|--------------------|-------------------|----------------|------------------|--------------------|------------------|------|--------------------|-----------------|----------------|-------------------|----------------|------------------|----|
| 1  | 116.034219         | 58.520748         |                |                  | 98.023654          | 49.515465        | D    |                    |                 |                |                   |                |                  | 14 |
| 2  | <b>253.093131</b>  | 127.050203        |                |                  | 235.082566         | 118.044921       | H    | 1854.920718        | 927.963997      | 1837.894169    | 919.450723        | 1836.910153    | 918.958715       | 13 |
| 3  | <b>366.177195</b>  | 183.592235        |                |                  | 348.166630         | 174.586953       | L    | 1717.861806        | 859.434541      | 1700.835257    | 850.921267        | 1699.851241    | 850.429259       | 12 |
| 4  | <b>423.198659</b>  | 212.102967        |                |                  | 405.188094         | 203.097685       | G    | 1604.777742        | 802.892509      | 1587.751193    | 794.379235        | 1586.767177    | 793.887227       | 11 |
| 5  | <b>570.267073</b>  | 285.637175        |                |                  | 552.256508         | 276.631892       | F    | 1547.756278        | 774.381777      | 1530.729729    | 765.868503        | 1529.745713    | 765.376495       | 10 |
| 6  | <b>1009.492399</b> | 505.249838        | 992.465850     | 496.736563       | 991.481834         | 496.244555       | Q    | <b>1400.687864</b> | 700.847570      | 1383.661315    | 692.334296        | 1382.677299    | 691.842288       | 9  |
| 7  | <b>1108.560813</b> | 554.784045        | 1091.534264    | 546.270770       | 1090.550248        | 545.778762       | V    | <b>961.462538</b>  | 481.234907      | 944.435989     | 472.721633        | 943.451973     | 472.229625       | 8  |
| 8  | <b>1209.608492</b> | <b>605.307884</b> | 1192.581943    | 596.794610       | <b>1191.597927</b> | 596.302602       | T    | <b>862.394124</b>  | 431.700700      | 845.367575     | <b>423.187426</b> | 844.383559     | 422.695418       | 7  |
| 9  | 1395.687805        | 698.347541        | 1378.661256    | 689.834266       | <b>1377.677240</b> | 689.342258       | W    | <b>761.346445</b>  | 381.176861      | 744.319896     | 372.663586        | 743.335880     | 372.171578       | 6  |
| 10 | 1492.740569        | 746.873923        | 1475.714020    | 738.360648       | 1474.730004        | 737.868640       | P    | <b>575.267132</b>  | 288.137204      | 558.240583     | 279.623930        | 557.256567     | 279.131922       | 5  |
| 11 | 1607.767512        | 804.387394        | 1590.740963    | 795.874120       | 1589.756947        | 795.382112       | D    | <b>478.214368</b>  | 239.610822      | 461.187819     | 231.097548        | 460.203803     | 230.605540       | 4  |
| 12 | 1736.810105        | 868.908691        | 1719.783556    | 860.395416       | 1718.799540        | 859.903408       | E    | 363.187425         | 182.097351      | 346.160876     | 173.584076        | 345.176860     | 173.092068       | 3  |
| 13 | 1823.842133        | 912.424705        | 1806.815584    | 903.911430       | 1805.831568        | 903.419422       | S    | 234.144832         | 117.576054      | 217.118283     | 109.062780        | 216.134267     | 108.570772       | 2  |
| 14 |                    |                   |                |                  |                    |                  | K    | 147.112804         | 74.060040       | 130.086255     | 65.546765         |                |                  | 1  |

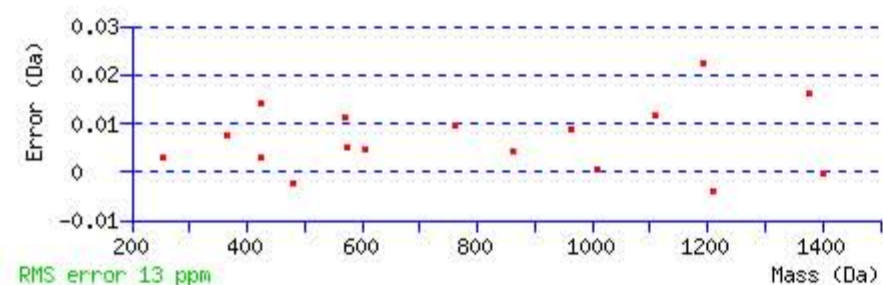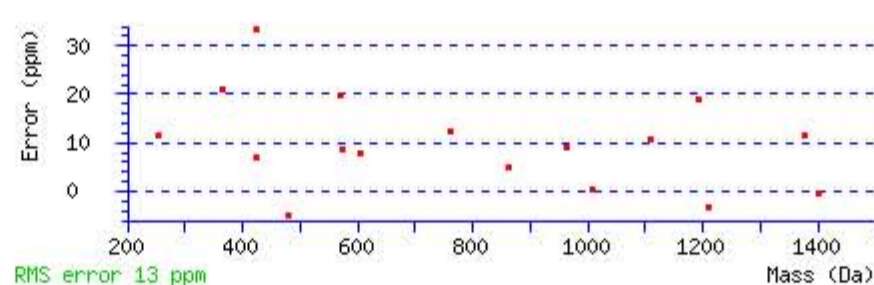

NCBI BLAST search of **DHLGFQVTPDESK**

(Parameters: blastp, nr protein database, expect=20000, no filter, PAM30)

Other BLAST [web gateways](#)

All matches to this query

| Score | Mr(calc):   | Delta    | Sequence                           |
|-------|-------------|----------|------------------------------------|
| 27.1  | 1968.940399 | 0.026783 | <a href="#">DHLGFQVTPDESK</a>      |
| 9.2   | 1968.949585 | 0.017597 | <a href="#">EGQMESVEAAMSSKTLKK</a> |

Mascot: <http://www.matrixscience.com/>

# MASCOT Search Results

## Peptide View

### MS/MS Fragmentation of QLVCPVTR

Found in **CPN2\_HUMAN**, Carboxypeptidase N subunit 2 OS=Homo sapiens GN=CPN2 PE=1 SV=3

Match to Query 8155: 1282.694802 from(428.572210,3+) rtinseconds(1753) index(40450)

Title: Locus:1.1.1.3060.4 File:"2013-07-02 CLN FXIII 180 min 1st F 3.wiff"

Data file C:\Program Files (x86)\Matrix Science\Mascot Daemon\mgf7 FXIII 180 min 1st\mascot\_daemon\_merge.mgf

Click mouse within plot area to zoom in by factor of two about that point

Or, Plot from  to  Da

Label all possible matches  Label matches used for scoring

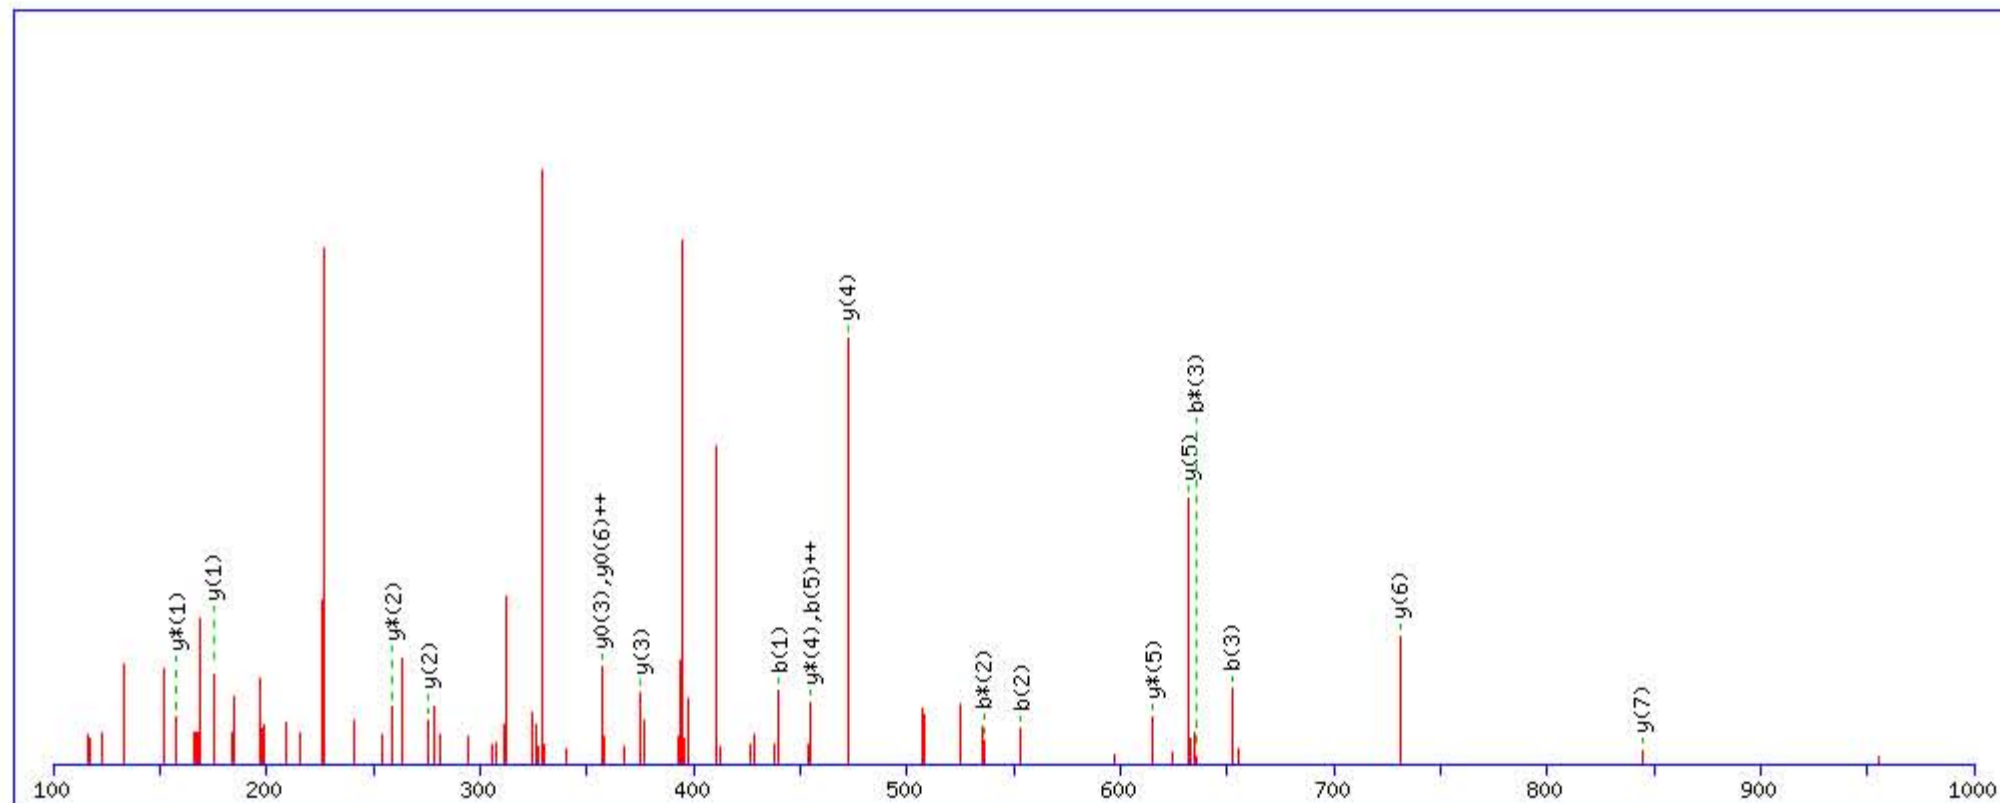

Monoisotopic mass of neutral peptide Mr(calc): 1282.688995

Fixed modifications: Carbamidomethyl (C) (apply to specified residues or termini only)

Variable modifications:

Q1 : Biotin:Thermo-21345 (Q)

Ions Score: 27 Expect: 0.003

Matches : 19/70 fragment ions using 48 most intense peaks [\(help\)](#)

| # | b                 | b <sup>++</sup>   | b <sup>*</sup>    | b <sup>+++</sup> | b <sup>0</sup> | b <sup>0++</sup> | Seq. | y                 | y <sup>++</sup> | y <sup>*</sup>    | y <sup>+++</sup> | y <sup>0</sup>    | y <sup>0++</sup>  | # |
|---|-------------------|-------------------|-------------------|------------------|----------------|------------------|------|-------------------|-----------------|-------------------|------------------|-------------------|-------------------|---|
| 1 | <b>440.232602</b> | 220.619939        | 423.206053        | 212.106664       |                |                  | Q    |                   |                 |                   |                  |                   |                   | 8 |
| 2 | <b>553.316666</b> | 277.161971        | <b>536.290117</b> | 268.648697       |                |                  | L    | <b>844.470936</b> | 422.739106      | 827.444387        | 414.225831       | 826.460371        | 413.733823        | 7 |
| 3 | <b>652.385080</b> | 326.696178        | <b>635.358531</b> | 318.182904       |                |                  | V    | <b>731.386872</b> | 366.197074      | 714.360323        | 357.683799       | 713.376307        | <b>357.191791</b> | 6 |
| 4 | 812.415729        | 406.711503        | 795.389180        | 398.198228       |                |                  | C    | <b>632.318458</b> | 316.662867      | <b>615.291909</b> | 308.149592       | 614.307893        | 307.657584        | 5 |
| 5 | 909.468493        | <b>455.237885</b> | 892.441944        | 446.724610       |                |                  | P    | <b>472.287809</b> | 236.647542      | <b>455.261260</b> | 228.134268       | 454.277244        | 227.642260        | 4 |
| 6 | 1008.536907       | 504.772092        | 991.510358        | 496.258817       |                |                  | V    | <b>375.235045</b> | 188.121160      | 358.208496        | 179.607886       | <b>357.224480</b> | 179.115878        | 3 |
| 7 | 1109.584586       | 555.295931        | 1092.558037       | 546.782657       | 1091.574021    | 546.290648       | T    | <b>276.166631</b> | 138.586953      | <b>259.140082</b> | 130.073679       | 258.156066        | 129.581671        | 2 |
| 8 |                   |                   |                   |                  |                |                  | R    | <b>175.118952</b> | 88.063114       | <b>158.092403</b> | 79.549839        |                   |                   | 1 |

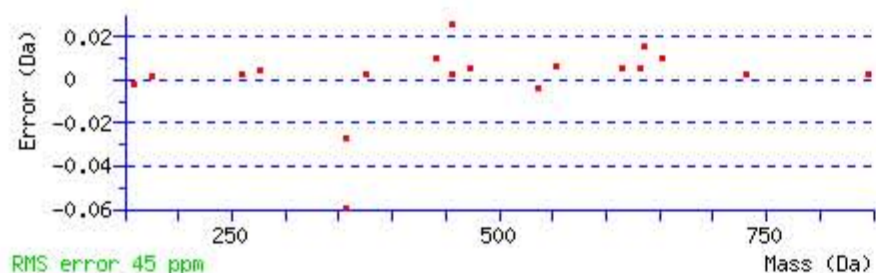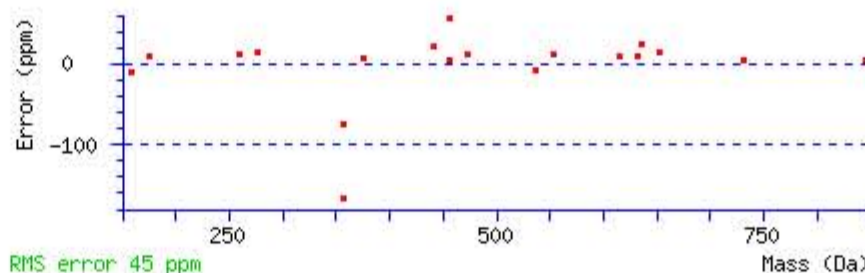

### NCBI BLAST search of QLVCPVTR

(Parameters: blastp, nr protein database, expect=20000, no filter, PAM30)

Other BLAST [web gateways](#)

### All matches to this query

| Score | Mr(calc):   | Delta    | Sequence                      |
|-------|-------------|----------|-------------------------------|
| 27.2  | 1282.688995 | 0.005807 | <a href="#">QLVCPVTR</a>      |
| 0.4   | 1282.677750 | 0.017052 | <a href="#">VTKYCLICVK</a>    |
| 0.3   | 1282.681595 | 0.013207 | <a href="#">KNMGGLGGLVHGK</a> |

# MASCOT Search Results

## Peptide View

MS/MS Fragmentation of **SSTGPGEQLR**

Found in **COMP\_HUMAN**, Cartilage oligomeric matrix protein OS=Homo sapiens GN=COMP PE=1 SV=2

Match to Query 27906: 1341.689068 from(671.851810,2+) rtinseconds(1568) index(57761)

Title: Locus:1.1.1.2969.19 File:"2013-07-02 CLN FXIII 180 min 1st F 4.wiff"

Data file C:\Program Files (x86)\Matrix Science\Mascot Daemon\mgf\7 FXIII 180 min 1st\mascot\_daemon\_merge.mgf

Click mouse within plot area to zoom in by factor of two about that point

Or, Plot from  to  Da

Label all possible matches  Label matches used for scoring

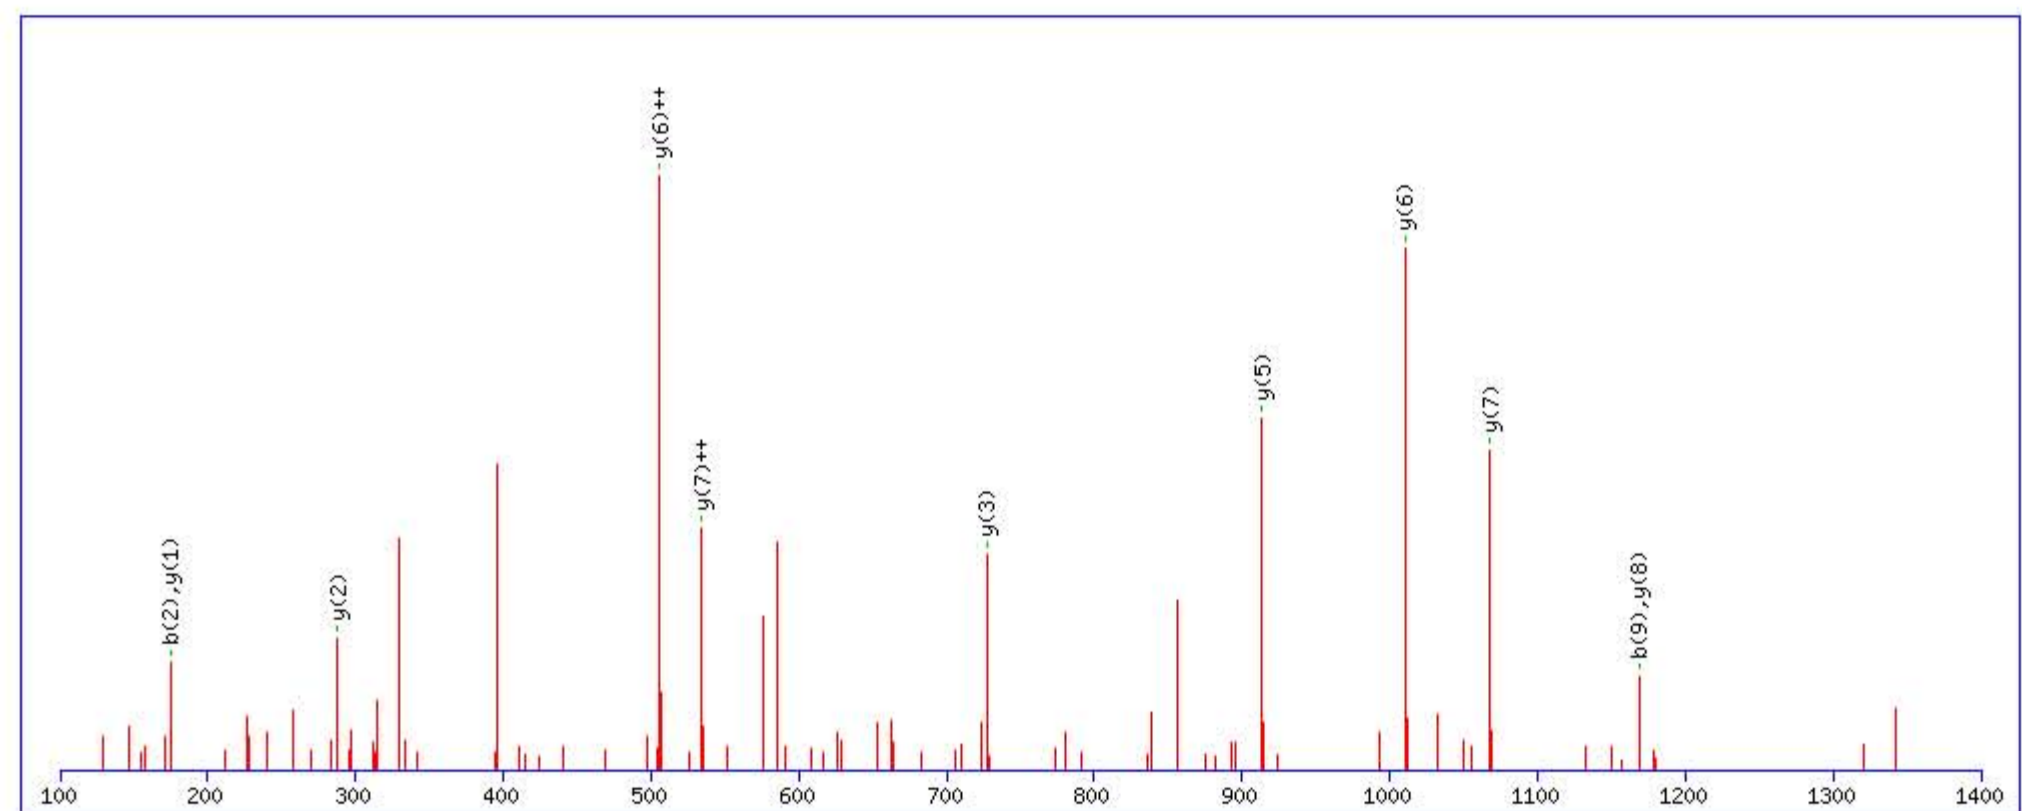

Monoisotopic mass of neutral peptide Mr(calc): 1341.671082

Fixed modifications: Carbamidomethyl (C) (apply to specified residues or termini only)

Variable modifications:

Q8 : Biotin:Thermo-21345 (Q)

Ions Score: 58 Expect: 4.1e-005

Matches : 11/88 fragment ions using 12 most intense peaks [\(help\)](#)

| #  | b                  | b <sup>++</sup> | b <sup>+</sup> | b <sup>+++</sup> | b <sup>0</sup> | b <sup>0++</sup> | Seq. | y                  | y <sup>++</sup>   | y <sup>+</sup> | y <sup>+++</sup> | y <sup>0</sup> | y <sup>0++</sup> | #  |
|----|--------------------|-----------------|----------------|------------------|----------------|------------------|------|--------------------|-------------------|----------------|------------------|----------------|------------------|----|
| 1  | 88.039304          | 44.523290       |                |                  | 70.028739      | 35.518008        | S    |                    |                   |                |                  |                |                  | 10 |
| 2  | <b>175.071332</b>  | 88.039304       |                |                  | 157.060767     | 79.034021        | S    | 1255.646334        | 628.326805        | 1238.619785    | 619.813530       | 1237.635769    | 619.321522       | 9  |
| 3  | 276.119011         | 138.563144      |                |                  | 258.108446     | 129.557861       | T    | <b>1168.614306</b> | 584.810791        | 1151.587757    | 576.297517       | 1150.603741    | 575.805508       | 8  |
| 4  | 333.140475         | 167.073875      |                |                  | 315.129910     | 158.068593       | G    | <b>1067.566627</b> | <b>534.286951</b> | 1050.540078    | 525.773677       | 1049.556062    | 525.281669       | 7  |
| 5  | 430.193239         | 215.600258      |                |                  | 412.182674     | 206.594975       | P    | <b>1010.545163</b> | <b>505.776219</b> | 993.518614     | 497.262945       | 992.534598     | 496.770937       | 6  |
| 6  | 487.214703         | 244.110989      |                |                  | 469.204138     | 235.105707       | G    | <b>913.492399</b>  | 457.249837        | 896.465850     | 448.736563       | 895.481834     | 448.244555       | 5  |
| 7  | 616.257296         | 308.632286      |                |                  | 598.246731     | 299.627004       | E    | 856.470935         | 428.739105        | 839.444386     | 420.225831       | 838.460370     | 419.733823       | 4  |
| 8  | 1055.482622        | 528.244949      | 1038.456073    | 519.731675       | 1037.472057    | 519.239667       | Q    | <b>727.428342</b>  | 364.217809        | 710.401793     | 355.704534       |                |                  | 3  |
| 9  | <b>1168.566686</b> | 584.786981      | 1151.540137    | 576.273707       | 1150.556121    | 575.781698       | L    | <b>288.203016</b>  | 144.605146        | 271.176467     | 136.091871       |                |                  | 2  |
| 10 |                    |                 |                |                  |                |                  | R    | <b>175.118952</b>  | 88.063114         | 158.092403     | 79.549839        |                |                  | 1  |

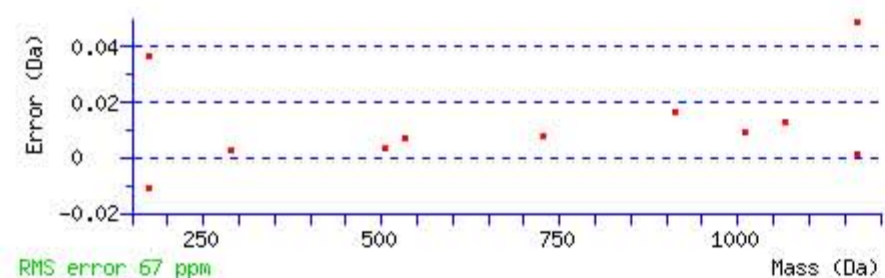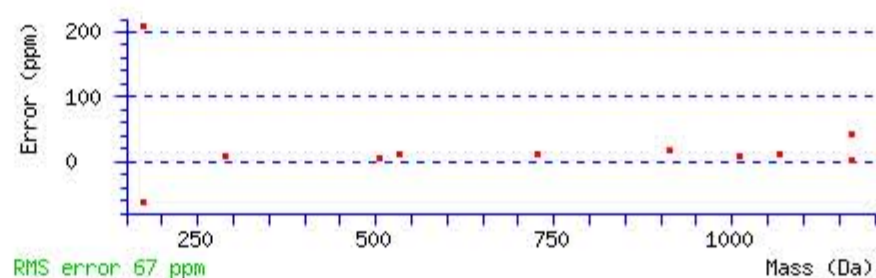

NCBI BLAST search of **SSTGPGEQLR**

(Parameters: blastp, nr protein database, expect=20000, no filter, PAM30)

Other BLAST [web gateways](#)

## All matches to this query

| Score | Mr(calc):   | Delta     | Sequence                      |
|-------|-------------|-----------|-------------------------------|
| 57.9  | 1341.671082 | 0.017986  | <a href="#">SSTGPGEQLR</a>    |
| 12.4  | 1341.674911 | 0.014157  | <a href="#">TSPERREPGTGR</a>  |
| 10.8  | 1341.686142 | 0.002926  | <a href="#">RTGAPAQADSRGR</a> |
| 10.7  | 1341.704117 | -0.015049 | <a href="#">VSVWENVPVGTR</a>  |
| 5.2   | 1341.707443 | -0.018375 | <a href="#">QEKEIQTR</a>      |
| 4.2   | 1341.697556 | -0.008488 | <a href="#">QASEWVRR</a>      |
| 4.1   | 1341.693512 | -0.004444 | <a href="#">ASEQERRR</a>      |
| 4.0   | 1341.694199 | -0.005131 | <a href="#">KGAFFSWSRTR</a>   |
| 3.8   | 1341.696198 | -0.007130 | <a href="#">KQAEIEGK</a>      |
| 3.7   | 1341.688828 | 0.000240  | <a href="#">DDAQLSGLPSALR</a> |

**Peptide View**

MS/MS Fragmentation of **GVWGSVCDDNWGEKEDQVVCK**  
 Found in **CD5L\_HUMAN**, CD5 antigen-like OS=Homo sapiens GN=CD5L PE=1 SV=1

Match to Query 66750: 2777.263496 from(695.323150,4+) rtinseconds(2117) index(43008)  
 Title: Locus:1.1.1.3186.9 File:"2013-07-02 CLN FXIII 180 min 1st F 3.wiff"  
 Data file C:\Program Files (x86)\Matrix Science\Mascot Daemon\mgf\7 FXIII 180 min 1st\mascot\_daemon\_merge.mgf

Click mouse within plot area to zoom in by factor of two about that point

Or, Plot from  to  Da

Label all possible matches  Label matches used for scoring

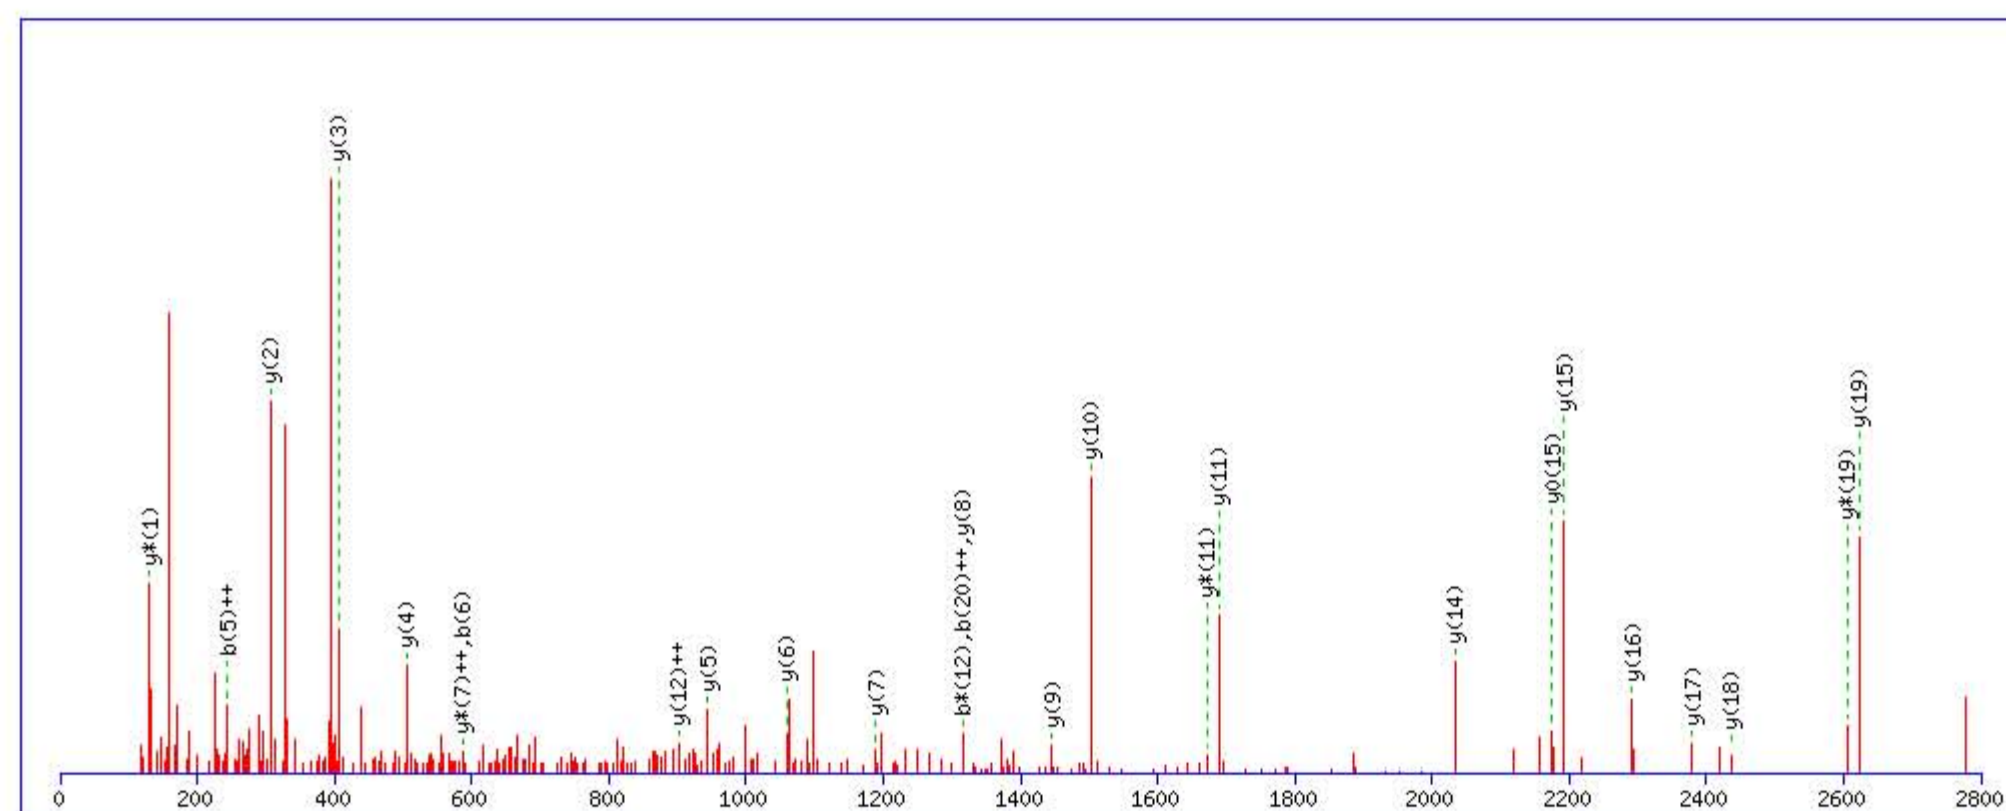

Monoisotopic mass of neutral peptide Mr(calc): 2777.224792  
 Fixed modifications: Carbamidomethyl (C) (apply to specified residues or termini only)  
 Variable modifications:  
 Q17 : Biotin:Thermo-21345 (Q)  
 Ions Score: 68 Expect: 1.6e-006  
 Matches : 26/204 fragment ions using 69 most intense peaks [\(help\)](#)

| #  | b           | b <sup>++</sup> | b <sup>*</sup> | b <sup>*++</sup> | b <sup>0</sup> | b <sup>0++</sup> | Seq. | y           | y <sup>++</sup> | y <sup>*</sup> | y <sup>*++</sup> | y <sup>0</sup> | y <sup>0++</sup> | #  |
|----|-------------|-----------------|----------------|------------------|----------------|------------------|------|-------------|-----------------|----------------|------------------|----------------|------------------|----|
| 1  | 58.028740   | 29.518008       |                |                  |                |                  | G    |             |                 |                |                  |                |                  | 21 |
| 2  | 157.097154  | 79.052215       |                |                  |                |                  | V    | 2721.210571 | 1361.108923     | 2704.184022    | 1352.595649      | 2703.200006    | 1352.103641      | 20 |
| 3  | 343.176467  | 172.091872      |                |                  |                |                  | W    | 2622.142157 | 1311.574716     | 2605.115608    | 1303.061442      | 2604.131592    | 1302.569434      | 19 |
| 4  | 400.197931  | 200.602603      |                |                  |                |                  | G    | 2436.062844 | 1218.535060     | 2419.036295    | 1210.021785      | 2418.052279    | 1209.529777      | 18 |
| 5  | 487.229959  | 244.118617      |                |                  | 469.219394     | 235.113335       | S    | 2379.041380 | 1190.024328     | 2362.014831    | 1181.511053      | 2361.030815    | 1181.019045      | 17 |
| 6  | 586.298373  | 293.652825      |                |                  | 568.287808     | 284.647542       | V    | 2292.009352 | 1146.508314     | 2274.982803    | 1137.995039      | 2273.998787    | 1137.503031      | 16 |
| 7  | 746.329022  | 373.668149      |                |                  | 728.318457     | 364.662867       | C    | 2192.940938 | 1096.974107     | 2175.914389    | 1088.460832      | 2174.930373    | 1087.968824      | 15 |
| 8  | 861.355965  | 431.181621      |                |                  | 843.345400     | 422.176338       | D    | 2032.910289 | 1016.958782     | 2015.883740    | 1008.445508      | 2014.899724    | 1007.953500      | 14 |
| 9  | 976.382908  | 488.695092      |                |                  | 958.372343     | 479.689809       | D    | 1917.883346 | 959.445311      | 1900.856797    | 950.932036       | 1899.872781    | 950.440028       | 13 |
| 10 | 1090.425835 | 545.716556      | 1073.399286    | 537.203281       | 1072.415270    | 536.711273       | N    | 1802.856403 | 901.931840      | 1785.829854    | 893.418565       | 1784.845838    | 892.926557       | 12 |
| 11 | 1276.505148 | 638.756212      | 1259.478599    | 630.242938       | 1258.494583    | 629.750929       | W    | 1688.813476 | 844.910376      | 1671.786927    | 836.397101       | 1670.802911    | 835.905093       | 11 |
| 12 | 1333.526612 | 667.266944      | 1316.500063    | 658.753670       | 1315.516047    | 658.261661       | G    | 1502.734163 | 751.870719      | 1485.707614    | 743.357445       | 1484.723598    | 742.865437       | 10 |
| 13 | 1462.569205 | 731.788241      | 1445.542656    | 723.274966       | 1444.558640    | 722.782958       | E    | 1445.712699 | 723.359987      | 1428.686150    | 714.846713       | 1427.702134    | 714.354705       | 9  |
| 14 | 1590.664168 | 795.835722      | 1573.637619    | 787.322448       | 1572.653603    | 786.830440       | K    | 1316.670106 | 658.838691      | 1299.643557    | 650.325416       | 1298.659541    | 649.833408       | 8  |
| 15 | 1719.706761 | 860.357019      | 1702.680212    | 851.843744       | 1701.696196    | 851.351736       | E    | 1188.575143 | 594.791209      | 1171.548594    | 586.277935       | 1170.564578    | 585.785927       | 7  |
| 16 | 1834.733704 | 917.870490      | 1817.707155    | 909.357216       | 1816.723139    | 908.865208       | D    | 1059.532550 | 530.269913      | 1042.506001    | 521.756638       | 1041.521985    | 521.264630       | 6  |
| 17 | 2273.959030 | 1137.483153     | 2256.932481    | 1128.969878      | 2255.948465    | 1128.477870      | Q    | 944.505607  | 472.756441      | 927.479058     | 464.243167       |                |                  | 5  |
| 18 | 2373.027444 | 1187.017360     | 2356.000895    | 1178.504085      | 2355.016879    | 1178.012077      | V    | 505.280281  | 253.143778      | 488.253732     | 244.630504       |                |                  | 4  |
| 19 | 2472.095858 | 1236.551567     | 2455.069309    | 1228.038292      | 2454.085293    | 1227.546284      | V    | 406.211867  | 203.609571      | 389.185318     | 195.096297       |                |                  | 3  |
| 20 | 2632.126507 | 1316.566891     | 2615.099958    | 1308.053617      | 2614.115942    | 1307.561609      | C    | 307.143453  | 154.075364      | 290.116904     | 145.562090       |                |                  | 2  |
| 21 |             |                 |                |                  |                |                  | K    | 147.112804  | 74.060040       | 130.086255     | 65.546765        |                |                  | 1  |

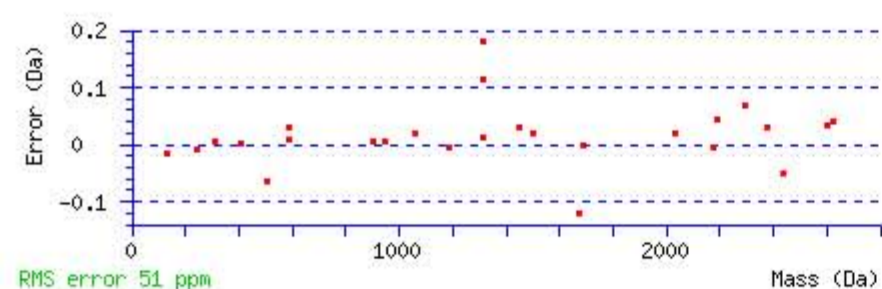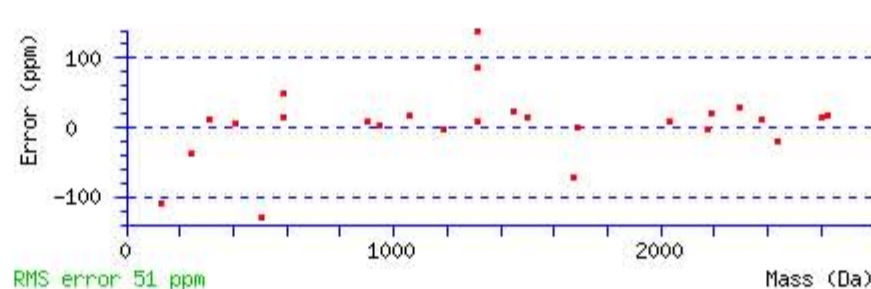

NCBI BLAST search of **GVWGSVCDDNWGEKEDQVVCK**  
 (Parameters: blastp, nr protein database, expect=20000, no filter, PAM30)  
 Other BLAST [web gateways](#)

**All matches to this query**

| Score | Mr(calc):   | Delta    | Sequence                     |
|-------|-------------|----------|------------------------------|
| 67.9  | 2777.224792 | 0.038704 | <b>GVWGSVCDDNWGEKEDQVVCK</b> |



# MASCOT SEARCH RESULTS

## Peptide View

MS/MS Fragmentation of **VDKDNEDFQESNR**

Found in **CERU\_HUMAN**, Ceruloplasmin OS=Homo sapiens GN=CP PE=1 SV=1

Match to Query 47572: 1905.873132 from(636.298320,3+) rtinseconds(1460) index(38453)

Title: Locus:1.1.1.2957.24 File:"2013-07-02 CLN FXIII 180 min 1st F 3.wiff"

Data file C:\Program Files (x86)\Matrix Science\Mascot Daemon\mgf\7 FXIII 180 min 1st\mascot\_daemon\_merge.mgf

Click mouse within plot area to zoom in by factor of two about that point

Or, Plot from  to  Da

Label all possible matches  Label matches used for scoring

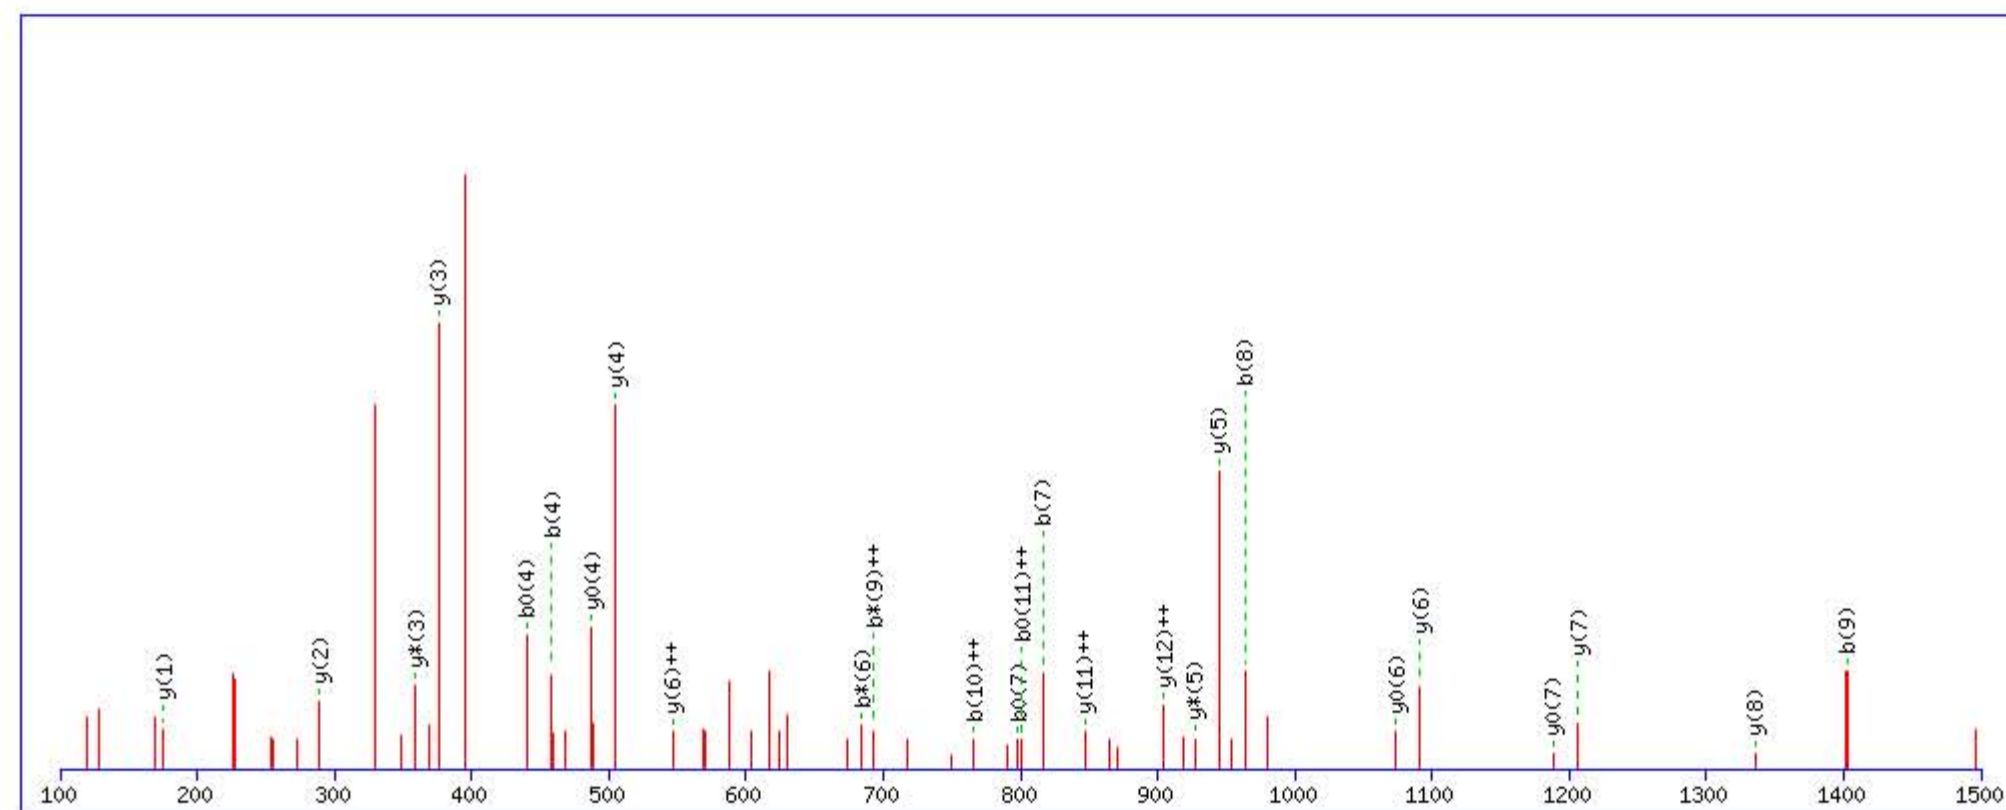

Monoisotopic mass of neutral peptide Mr(calc): 1905.852676

Fixed modifications: Carbamidomethyl (C) (apply to specified residues or termini only)

Variable modifications:

Q9 : Biotin:Thermo-21345 (Q)

Ions Score: 40 Expect: 0.0012

Matches : 26/134 fragment ions using 44 most intense peaks [\(help\)](#)

| #  | b           | b <sup>++</sup> | b <sup>+</sup> | b <sup>+++</sup> | b <sup>0</sup> | b <sup>0++</sup> | Seq. | y           | y <sup>++</sup> | y <sup>+</sup> | y <sup>+++</sup> | y <sup>0</sup> | y <sup>0++</sup> | #  |
|----|-------------|-----------------|----------------|------------------|----------------|------------------|------|-------------|-----------------|----------------|------------------|----------------|------------------|----|
| 1  | 100.075690  | 50.541483       |                |                  |                |                  | V    |             |                 |                |                  |                |                  | 13 |
| 2  | 215.102633  | 108.054954      |                |                  | 197.092068     | 99.049672        | D    | 1807.791552 | 904.399414      | 1790.765003    | 895.886140       | 1789.780987    | 895.394132       | 12 |
| 3  | 343.197596  | 172.102436      | 326.171047     | 163.589162       | 325.187031     | 163.097154       | K    | 1692.764609 | 846.885943      | 1675.738060    | 838.372668       | 1674.754044    | 837.880660       | 11 |
| 4  | 458.224539  | 229.615908      | 441.197990     | 221.102633       | 440.213974     | 220.610625       | D    | 1564.669646 | 782.838461      | 1547.643097    | 774.325187       | 1546.659081    | 773.833179       | 10 |
| 5  | 572.267466  | 286.637371      | 555.240917     | 278.124097       | 554.256901     | 277.632089       | N    | 1449.642703 | 725.324990      | 1432.616154    | 716.811715       | 1431.632138    | 716.319707       | 9  |
| 6  | 701.310059  | 351.158668      | 684.283510     | 342.645393       | 683.299494     | 342.153385       | E    | 1335.599776 | 668.303526      | 1318.573227    | 659.790252       | 1317.589211    | 659.298244       | 8  |
| 7  | 816.337002  | 408.672139      | 799.310453     | 400.158865       | 798.326437     | 399.666857       | D    | 1206.557183 | 603.782230      | 1189.530634    | 595.268955       | 1188.546618    | 594.776947       | 7  |
| 8  | 963.405416  | 482.206346      | 946.378867     | 473.693072       | 945.394851     | 473.201064       | F    | 1091.530240 | 546.268758      | 1074.503691    | 537.755484       | 1073.519675    | 537.263476       | 6  |
| 9  | 1402.630742 | 701.819009      | 1385.604193    | 693.305735       | 1384.620177    | 692.813727       | Q    | 944.461826  | 472.734551      | 927.435277     | 464.221277       | 926.451261     | 463.729269       | 5  |
| 10 | 1531.673335 | 766.340306      | 1514.646786    | 757.827031       | 1513.662770    | 757.335023       | E    | 505.236500  | 253.121888      | 488.209951     | 244.608614       | 487.225935     | 244.116606       | 4  |
| 11 | 1618.705363 | 809.856320      | 1601.678814    | 801.343045       | 1600.694798    | 800.851037       | S    | 376.193907  | 188.600591      | 359.167358     | 180.087317       | 358.183342     | 179.595309       | 3  |
| 12 | 1732.748290 | 866.877783      | 1715.721741    | 858.364509       | 1714.737725    | 857.872501       | N    | 289.161879  | 145.084577      | 272.135330     | 136.571303       |                |                  | 2  |
| 13 |             |                 |                |                  |                |                  | R    | 175.118952  | 88.063114       | 158.092403     | 79.549839        |                |                  | 1  |

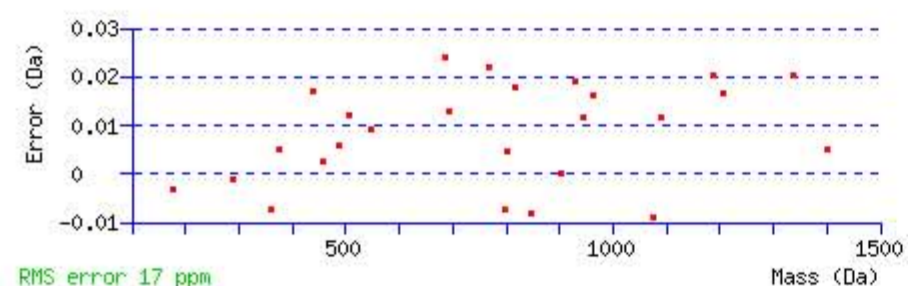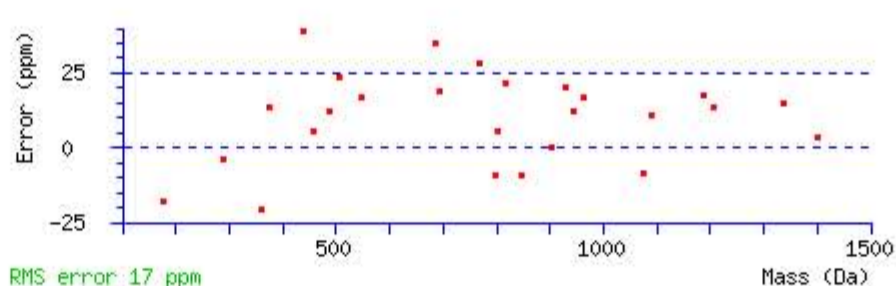

NCBI BLAST search of **VDKDNEDFQESNR**

(Parameters: blastp, nr protein database, expect=20000, no filter, PAM30)

Other BLAST [web gateways](#)

All matches to this query

| Score | Mr(calc):   | Delta     | Sequence                            |
|-------|-------------|-----------|-------------------------------------|
| 40.4  | 1905.852676 | 0.020456  | <a href="#">VDKDNEDFQESNR</a>       |
| 9.8   | 1905.897095 | -0.023963 | <a href="#">LLYDEYMFYLVHR</a>       |
| 6.1   | 1905.892883 | -0.019751 | <a href="#">SHAAEPARDGVEASAEGPR</a> |

Mascot: <http://www.matrixscience.com/>

# MASCOT Search Results

## Peptide View

MS/MS Fragmentation of **NNEGTYYSNPYNPQSR**

Found in **CERU\_HUMAN**, Ceruloplasmin OS=Homo sapiens GN=CP PE=1 SV=1

Match to Query 55742: 2214.005562 from(739.009130,3+) rtinseconds(1792) index(40721)

Title: Locus:1.1.1.3073.23 File:"2013-07-02 CLN FXIII 180 min 1st F 3.wiff"

Data file C:\Program Files (x86)\Matrix Science\Mascot Daemon\mgf\7 FXIII 180 min 1st\mascot\_daemon\_merge.mgf

Click mouse within plot area to zoom in by factor of two about that point

Or, Plot from  to  Da

Label all possible matches  Label matches used for scoring

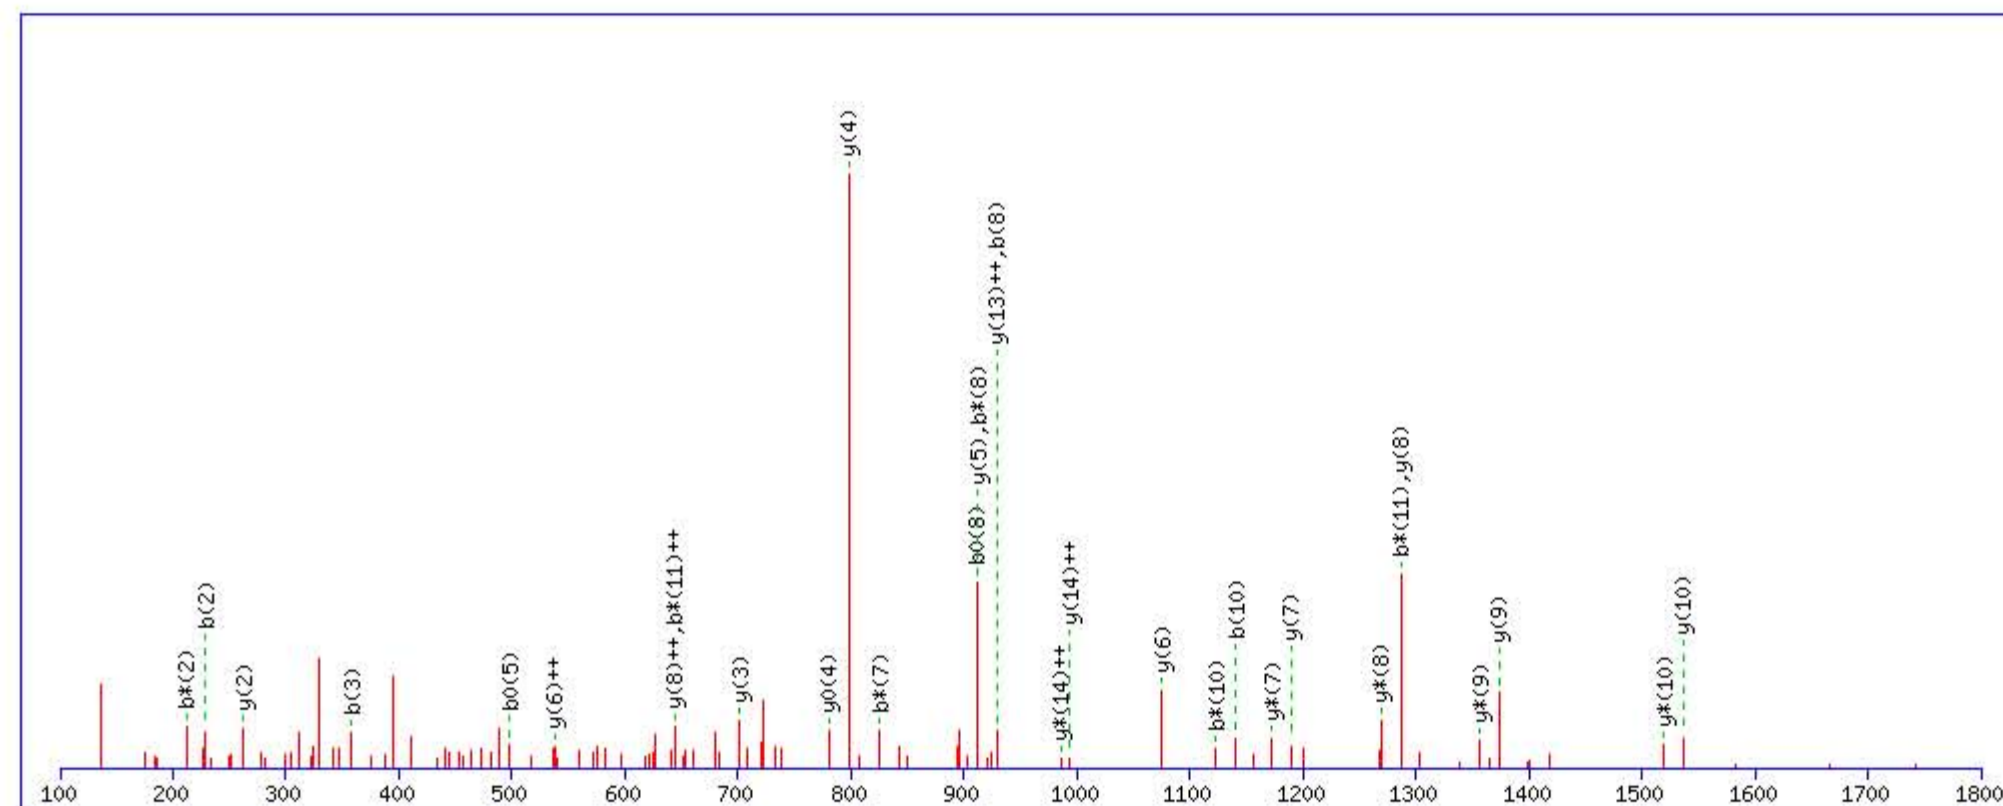

Monoisotopic mass of neutral peptide Mr(calc): 2213.979980

Fixed modifications: Carbamidomethyl (C) (apply to specified residues or termini only)

Variable modifications:

Q14 : Biotin:Thermo-21345 (Q)

Ions Score: 53 Expect: 6e-005

Matches : 31/174 fragment ions using 42 most intense peaks [\(help\)](#)

| #  | b                  | b <sup>++</sup> | b <sup>*</sup>     | b <sup>+++</sup>  | b <sup>0</sup>    | b <sup>0++</sup> | Seq. | y                  | y <sup>++</sup>   | y <sup>*</sup>     | y <sup>+++</sup>  | y <sup>0</sup>    | y <sup>0++</sup> | #  |
|----|--------------------|-----------------|--------------------|-------------------|-------------------|------------------|------|--------------------|-------------------|--------------------|-------------------|-------------------|------------------|----|
| 1  | 115.050203         | 58.028740       | 98.023654          | 49.515465         |                   |                  | N    |                    |                   |                    |                   |                   |                  | 16 |
| 2  | <b>229.093130</b>  | 115.050203      | <b>212.066581</b>  | 106.536929        |                   |                  | N    | 2100.944366        | 1050.975821       | 2083.917817        | 1042.462546       | 2082.933801       | 1041.970538      | 15 |
| 3  | <b>358.135723</b>  | 179.571500      | 341.109174         | 171.058225        | 340.125158        | 170.566217       | E    | 1986.901439        | <b>993.954358</b> | 1969.874890        | <b>985.441083</b> | 1968.890874       | 984.949075       | 14 |
| 4  | 415.157187         | 208.082232      | 398.130638         | 199.568957        | 397.146622        | 199.076949       | G    | 1857.858846        | <b>929.433061</b> | 1840.832297        | 920.919787        | 1839.848281       | 920.427779       | 13 |
| 5  | 516.204866         | 258.606071      | 499.178317         | 250.092797        | <b>498.194301</b> | 249.600789       | T    | 1800.837382        | 900.922329        | 1783.810833        | 892.409055        | 1782.826817       | 891.917047       | 12 |
| 6  | 679.268195         | 340.137736      | 662.241646         | 331.624461        | 661.257630        | 331.132453       | Y    | 1699.789703        | 850.398490        | 1682.763154        | 841.885215        | 1681.779138       | 841.393207       | 11 |
| 7  | 842.331524         | 421.669400      | <b>825.304975</b>  | 413.156126        | 824.320959        | 412.664118       | Y    | <b>1536.726374</b> | 768.866825        | <b>1519.699825</b> | 760.353551        | 1518.715809       | 759.861543       | 10 |
| 8  | <b>929.363552</b>  | 465.185414      | <b>912.337003</b>  | 456.672140        | <b>911.352987</b> | 456.180132       | S    | <b>1373.663045</b> | 687.335161        | <b>1356.636496</b> | 678.821886        | 1355.652480       | 678.329878       | 9  |
| 9  | 1026.416316        | 513.711796      | 1009.389767        | 505.198522        | 1008.405751       | 504.706514       | P    | <b>1286.631017</b> | <b>643.819147</b> | <b>1269.604468</b> | 635.305872        | 1268.620452       | 634.813864       | 8  |
| 10 | <b>1140.459243</b> | 570.733260      | <b>1123.432694</b> | 562.219985        | 1122.448678       | 561.727977       | N    | <b>1189.578253</b> | 595.292765        | <b>1172.551704</b> | 586.779490        | 1171.567688       | 586.287482       | 7  |
| 11 | 1303.522572        | 652.264924      | <b>1286.496023</b> | <b>643.751650</b> | 1285.512007       | 643.259642       | Y    | <b>1075.535326</b> | <b>538.271301</b> | 1058.508777        | 529.758027        | 1057.524761       | 529.266019       | 6  |
| 12 | 1417.565499        | 709.286388      | 1400.538950        | 700.773113        | 1399.554934       | 700.281105       | N    | <b>912.471997</b>  | 456.739637        | 895.445448         | 448.226362        | 894.461432        | 447.734354       | 5  |
| 13 | 1514.618263        | 757.812770      | 1497.591714        | 749.299495        | 1496.607698       | 748.807487       | P    | <b>798.429070</b>  | 399.718173        | 781.402521         | 391.204899        | <b>780.418505</b> | 390.712891       | 4  |
| 14 | 1953.843589        | 977.425433      | 1936.817040        | 968.912158        | 1935.833024       | 968.420150       | Q    | <b>701.376306</b>  | 351.191791        | 684.349757         | 342.678517        | 683.365741        | 342.186509       | 3  |
| 15 | 2040.875617        | 1020.941447     | 2023.849068        | 1012.428172       | 2022.865052       | 1011.936164      | S    | <b>262.150980</b>  | 131.579128        | 245.124431         | 123.065854        | 244.140415        | 122.573846       | 2  |
| 16 |                    |                 |                    |                   |                   |                  | R    | 175.118952         | 88.063114         | 158.092403         | 79.549839         |                   |                  | 1  |

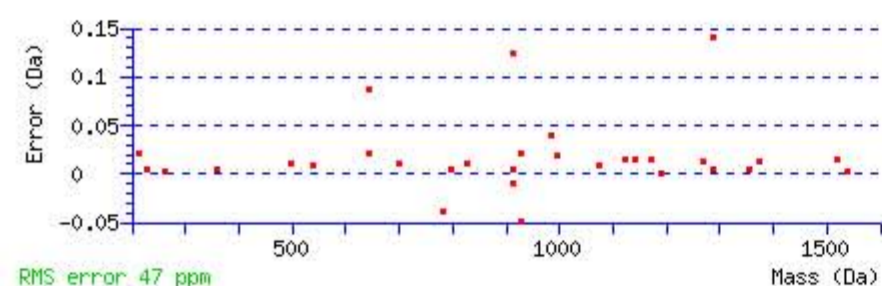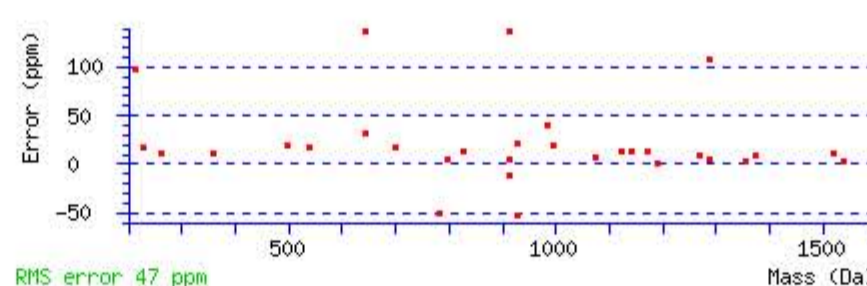

NCBI BLAST search of [NNEGTYYSNPYNPQSR](#)

(Parameters: blastp, nr protein database, expect=20000, no filter, PAM30)

Other BLAST [web gateways](#)

All matches to this query

| Score | Mr(calc):   | Delta    | Sequence                         |
|-------|-------------|----------|----------------------------------|
| 52.6  | 2213.979980 | 0.025582 | <a href="#">NNEGTYYSNPYNPQSR</a> |

Mascot: <http://www.matrixscience.com/>

# MASCOT Search Results

## Peptide View

MS/MS Fragmentation of **KAEEEHLGILGPQLHADVGDK**

Found in **CERU\_HUMAN**, Ceruloplasmin OS=Homo sapiens GN=CP PE=1 SV=1

Match to Query 64021: 2566.338520 from(514.274980,5+) rtinseconds(1915) index(41557)

Title: Locus:1.1.1.3116.12 File:"2013-07-02 CLN FXIII 180 min 1st F 3.wiff"

Data file C:\Program Files (x86)\Matrix Science\Mascot Daemon\mgf\7 FXIII 180 min 1st\mascot\_daemon\_merge.mgf

Click mouse within plot area to zoom in by factor of two about that point

Or, Plot from  to  Da

Label all possible matches  Label matches used for scoring

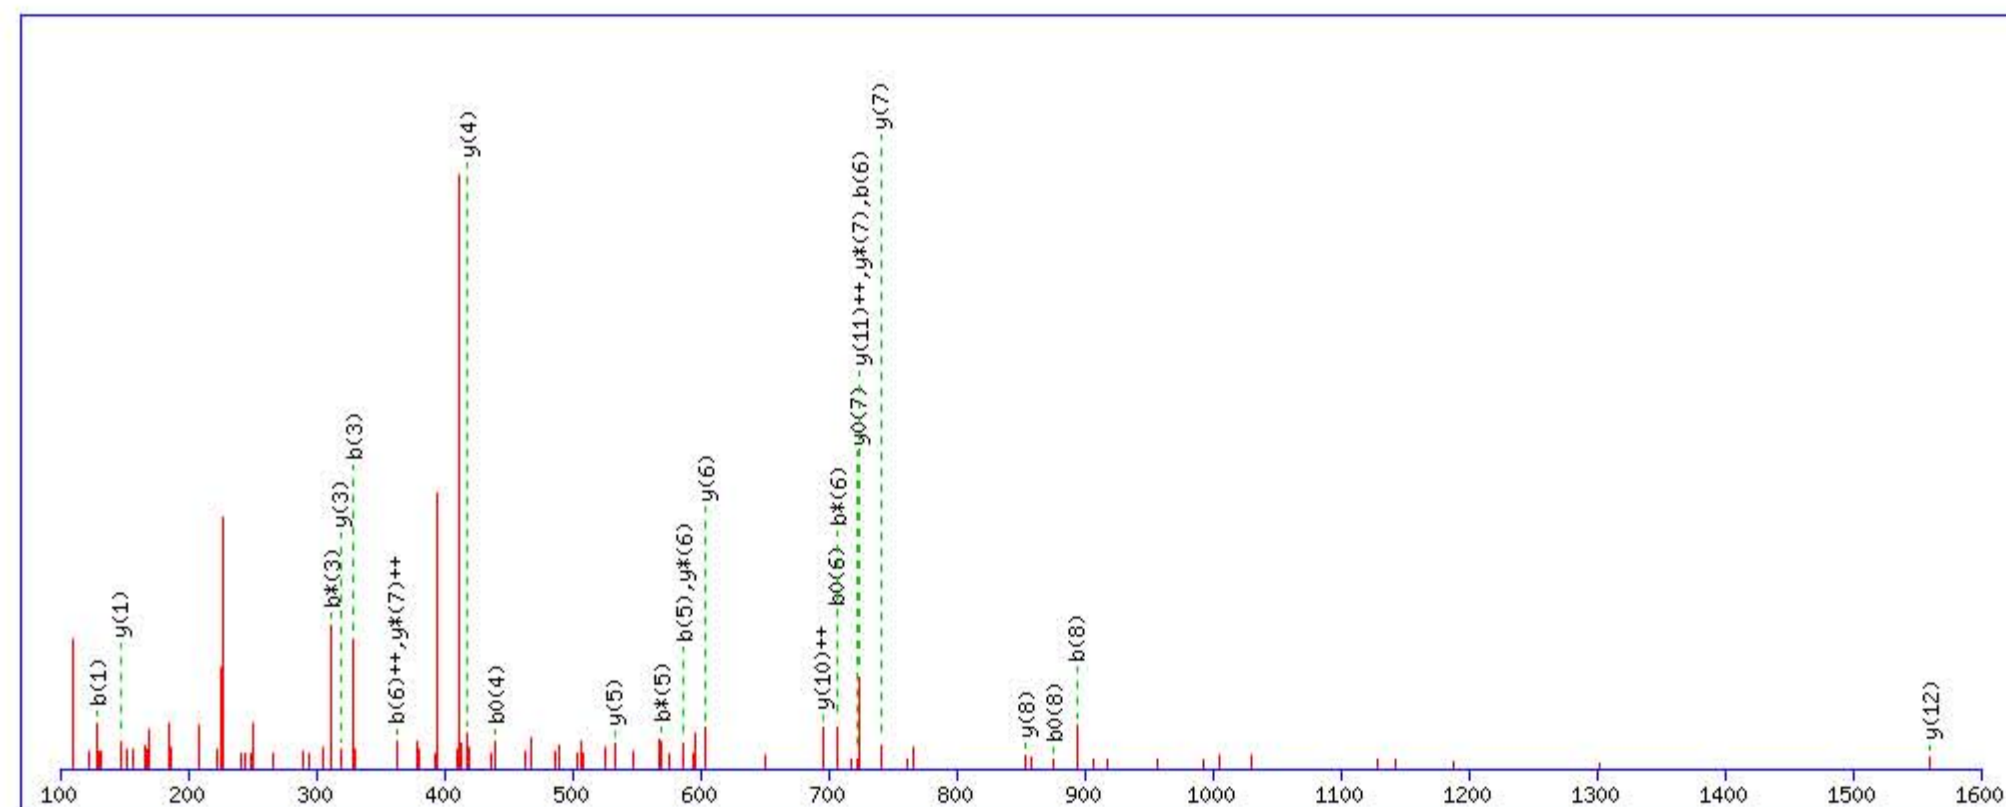

Monoisotopic mass of neutral peptide Mr(calc): 2566.321335

Fixed modifications: Carbamidomethyl (C) (apply to specified residues or termini only)

Variable modifications:

Q13 : Biotin:Thermo-21345 (Q)

Ions Score: 26 Expect: 0.063

Matches : 26/234 fragment ions using 61 most intense peaks [\(help\)](#)

| #  | b                 | b <sup>++</sup>   | b <sup>*</sup>    | b <sup>*++</sup> | b <sup>0</sup>    | b <sup>0++</sup> | Seq.     | y                  | y <sup>++</sup>   | y <sup>*</sup>    | y <sup>*++</sup>  | y <sup>0</sup>    | y <sup>0++</sup> | #         |
|----|-------------------|-------------------|-------------------|------------------|-------------------|------------------|----------|--------------------|-------------------|-------------------|-------------------|-------------------|------------------|-----------|
| 1  | <b>129.102239</b> | 65.054757         | 112.075690        | 56.541483        |                   |                  | <b>K</b> |                    |                   |                   |                   |                   |                  | <b>21</b> |
| 2  | 200.139353        | 100.573315        | 183.112804        | 92.060040        |                   |                  | <b>A</b> | 2439.233673        | 1220.120474       | 2422.207124       | 1211.607200       | 2421.223108       | 1211.115192      | <b>20</b> |
| 3  | <b>329.181946</b> | 165.094611        | <b>312.155397</b> | 156.581336       | 311.171381        | 156.089328       | <b>E</b> | 2368.196559        | 1184.601917       | 2351.170010       | 1176.088643       | 2350.185994       | 1175.596635      | <b>19</b> |
| 4  | 458.224539        | 229.615907        | 441.197990        | 221.102633       | <b>440.213974</b> | 220.610625       | <b>E</b> | 2239.153966        | 1120.080621       | 2222.127417       | 1111.567346       | 2221.143401       | 1111.075338      | <b>18</b> |
| 5  | <b>587.267132</b> | 294.137204        | <b>570.240583</b> | 285.623930       | 569.256567        | 285.131922       | <b>E</b> | 2110.111373        | 1055.559324       | 2093.084824       | 1047.046050       | 2092.100808       | 1046.554042      | <b>17</b> |
| 6  | <b>724.326044</b> | <b>362.666660</b> | <b>707.299495</b> | 354.153386       | <b>706.315479</b> | 353.661378       | <b>H</b> | 1981.068780        | 991.038028        | 1964.042231       | 982.524753        | 1963.058215       | 982.032745       | <b>16</b> |
| 7  | 837.410108        | 419.208692        | 820.383559        | 410.695418       | 819.399543        | 410.203410       | <b>L</b> | 1844.009868        | 922.508572        | 1826.983319       | 913.995297        | 1825.999303       | 913.503289       | <b>15</b> |
| 8  | <b>894.431572</b> | 447.719424        | 877.405023        | 439.206150       | <b>876.421007</b> | 438.714142       | <b>G</b> | 1730.925804        | 865.966540        | 1713.899255       | 857.453265        | 1712.915239       | 856.961257       | <b>14</b> |
| 9  | 1007.515636       | 504.261456        | 990.489087        | 495.748182       | 989.505071        | 495.256174       | <b>I</b> | 1673.904340        | 837.455808        | 1656.877791       | 828.942533        | 1655.893775       | 828.450525       | <b>13</b> |
| 10 | 1120.599700       | 560.803488        | 1103.573151       | 552.290214       | 1102.589135       | 551.798205       | <b>L</b> | <b>1560.820276</b> | 780.913776        | 1543.793727       | 772.400501        | 1542.809711       | 771.908493       | <b>12</b> |
| 11 | 1177.621164       | 589.314220        | 1160.594615       | 580.800946       | 1159.610599       | 580.308937       | <b>G</b> | 1447.736212        | <b>724.371744</b> | 1430.709663       | 715.858469        | 1429.725647       | 715.366461       | <b>11</b> |
| 12 | 1274.673928       | 637.840602        | 1257.647379       | 629.327328       | 1256.663363       | 628.835319       | <b>P</b> | 1390.714748        | <b>695.861012</b> | 1373.688199       | 687.347737        | 1372.704183       | 686.855729       | <b>10</b> |
| 13 | 1713.899254       | 857.453265        | 1696.872705       | 848.939991       | 1695.888689       | 848.447983       | <b>Q</b> | 1293.661984        | 647.334630        | 1276.635435       | 638.821355        | 1275.651419       | 638.329347       | <b>9</b>  |
| 14 | 1826.983318       | 913.995297        | 1809.956769       | 905.482023       | 1808.972753       | 904.990015       | <b>L</b> | <b>854.436658</b>  | 427.721967        | 837.410109        | 419.208692        | 836.426093        | 418.716684       | <b>8</b>  |
| 15 | 1964.042230       | 982.524753        | 1947.015681       | 974.011479       | 1946.031665       | 973.519471       | <b>H</b> | <b>741.352594</b>  | 371.179935        | <b>724.326045</b> | <b>362.666660</b> | <b>723.342029</b> | 362.174652       | <b>7</b>  |
| 16 | 2035.079344       | 1018.043310       | 2018.052795       | 1009.530036      | 2017.068779       | 1009.038028      | <b>A</b> | <b>604.293682</b>  | 302.650479        | <b>587.267133</b> | 294.137204        | 586.283117        | 293.645196       | <b>6</b>  |
| 17 | 2150.106287       | 1075.556781       | 2133.079738       | 1067.043507      | 2132.095722       | 1066.551499      | <b>D</b> | <b>533.256568</b>  | 267.131922        | 516.230019        | 258.618647        | 515.246003        | 258.126639       | <b>5</b>  |
| 18 | 2249.174701       | 1125.090988       | 2232.148152       | 1116.577714      | 2231.164136       | 1116.085706      | <b>V</b> | <b>418.229625</b>  | 209.618450        | 401.203076        | 201.105176        | 400.219060        | 200.613168       | <b>4</b>  |
| 19 | 2306.196165       | 1153.601720       | 2289.169616       | 1145.088446      | 2288.185600       | 1144.596438      | <b>G</b> | <b>319.161211</b>  | 160.084243        | 302.134662        | 151.570969        | 301.150646        | 151.078961       | <b>3</b>  |
| 20 | 2421.223108       | 1211.115192       | 2404.196559       | 1202.601917      | 2403.212543       | 1202.109909      | <b>D</b> | 262.139747         | 131.573511        | 245.113198        | 123.060237        | 244.129182        | 122.568229       | <b>2</b>  |
| 21 |                   |                   |                   |                  |                   |                  | <b>K</b> | <b>147.112804</b>  | 74.060040         | 130.086255        | 65.546765         |                   |                  | <b>1</b>  |

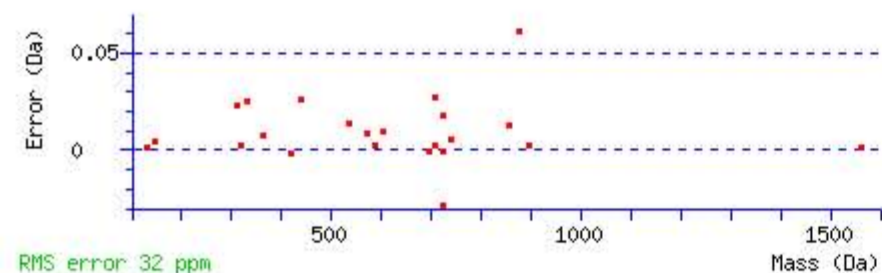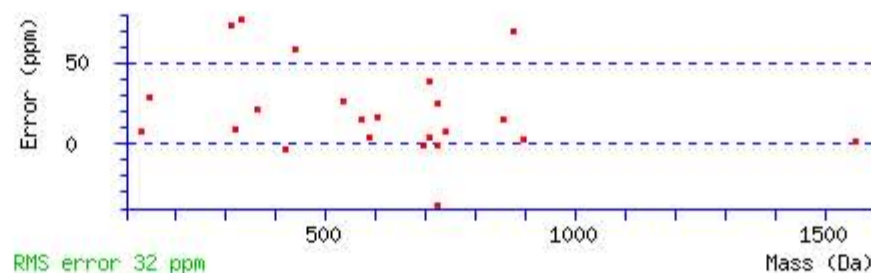

NCBI BLAST search of **KAEEEHLGILGPQLHADVGDK**

(Parameters: blastp, nr protein database, expect=20000, no filter, PAM30)

Other BLAST [web gateways](#)

All matches to this query

| Score | Mr(calc):   | Delta    | Sequence                              |
|-------|-------------|----------|---------------------------------------|
| 26.2  | 2566.321335 | 0.017185 | <a href="#">KAEEEHLGILGPQLHADVGDK</a> |

Mascot: <http://www.matrixscience.com/>

# MASCOT Search Results

## Peptide View

MS/MS Fragmentation of **ELDESLQVAER**

Found in **CLUS\_HUMAN**, Clusterin OS=Homo sapiens GN=CLU PE=1 SV=1

Match to Query 38727: 1598.810388 from(800.412470,2+) rtinseconds(1934) index(6126)

Title: Locus:1.1.1.2927.13 File:"2013-07-02 CLN FXIII 180 min 1st F 1.wiff"

Data file C:\Program Files (x86)\Matrix Science\Mascot Daemon\mgf\7 FXIII 180 min 1st\mascot\_daemon\_merge.mgf

Click mouse within plot area to zoom in by factor of two about that point

Or, Plot from  to  Da

Label all possible matches  Label matches used for scoring

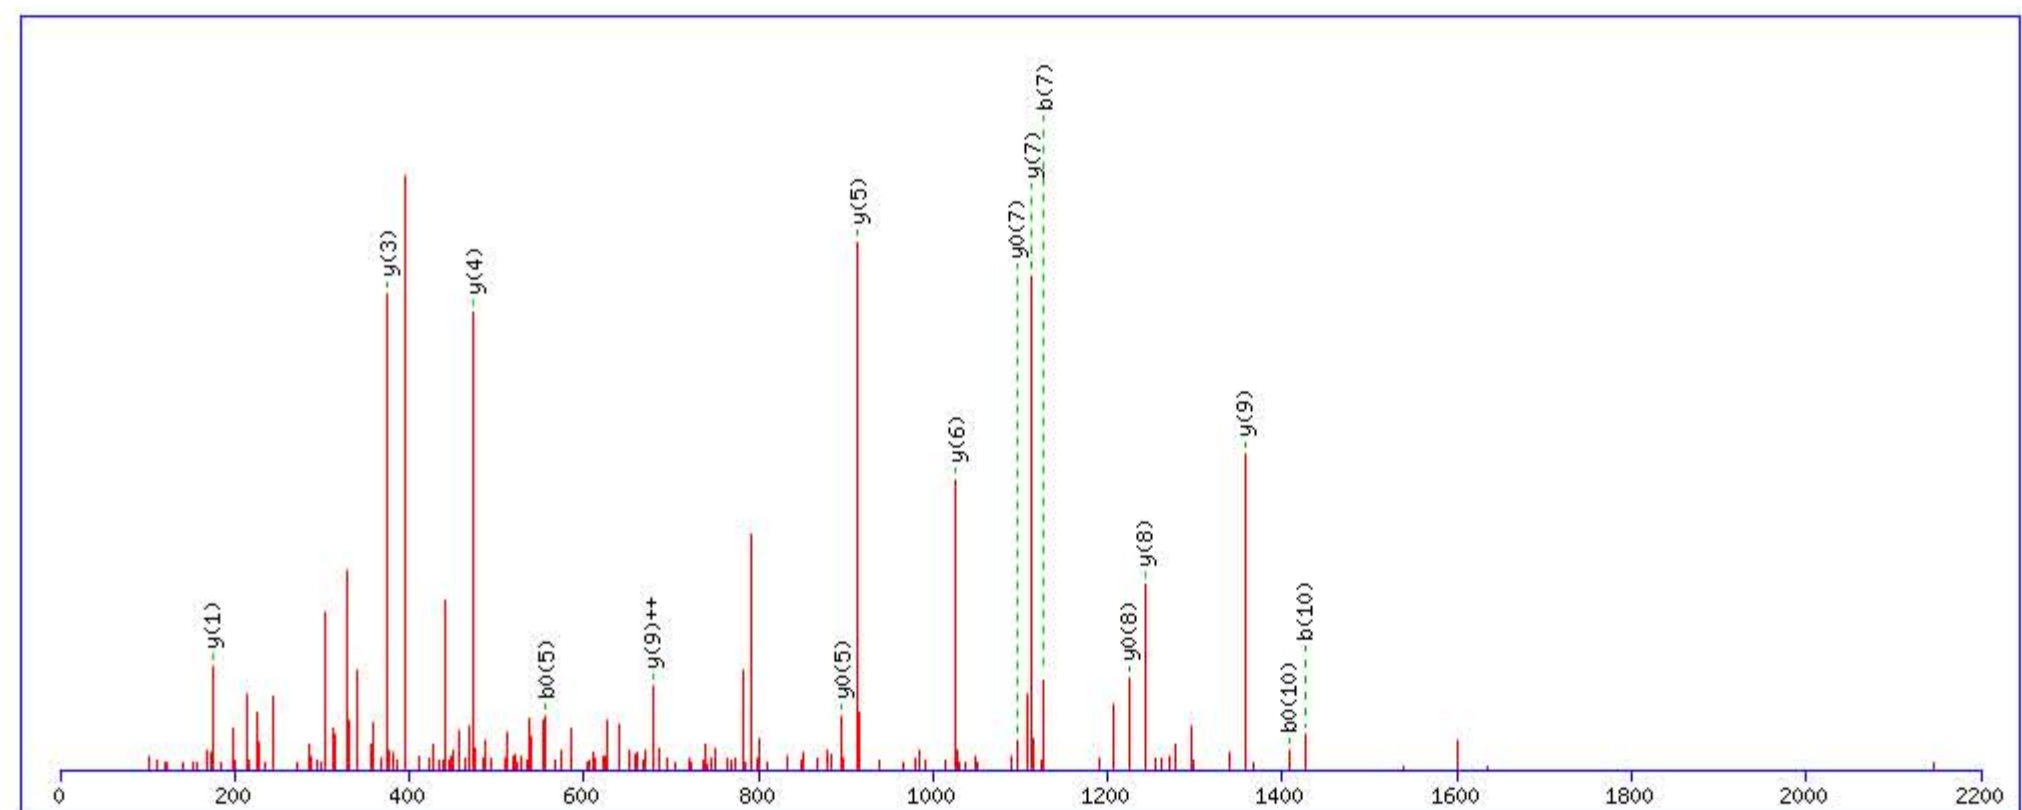

Monoisotopic mass of neutral peptide Mr(calc): 1598.797379

Fixed modifications: Carbamidomethyl (C) (apply to specified residues or termini only)

Variable modifications:

Q7 : Biotin:Thermo-21345 (Q)

Ions Score: 50 Expect: 8e-005

Matches : 16/106 fragment ions using 29 most intense peaks [\(help\)](#)

| #  | b                  | b <sup>++</sup> | b <sup>*</sup> | b <sup>+++</sup> | b <sup>0</sup>     | b <sup>0++</sup> | Seq. | y                  | y <sup>++</sup>   | y <sup>*</sup> | y <sup>+++</sup> | y <sup>0</sup>     | y <sup>0++</sup> | #  |
|----|--------------------|-----------------|----------------|------------------|--------------------|------------------|------|--------------------|-------------------|----------------|------------------|--------------------|------------------|----|
| 1  | 130.049869         | 65.528572       |                |                  | 112.039304         | 56.523290        | E    |                    |                   |                |                  |                    |                  | 11 |
| 2  | 243.133933         | 122.070605      |                |                  | 225.123368         | 113.065322       | L    | 1470.762091        | 735.884684        | 1453.735542    | 727.371409       | 1452.751526        | 726.879401       | 10 |
| 3  | 358.160876         | 179.584076      |                |                  | 340.150311         | 170.578794       | D    | <b>1357.678027</b> | <b>679.342652</b> | 1340.651478    | 670.829377       | 1339.667462        | 670.337369       | 9  |
| 4  | 487.203469         | 244.105373      |                |                  | 469.192904         | 235.100090       | E    | <b>1242.651084</b> | 621.829180        | 1225.624535    | 613.315906       | <b>1224.640519</b> | 612.823898       | 8  |
| 5  | 574.235497         | 287.621387      |                |                  | <b>556.224932</b>  | 278.616104       | S    | <b>1113.608491</b> | 557.307884        | 1096.581942    | 548.794609       | <b>1095.597926</b> | 548.302601       | 7  |
| 6  | 687.319561         | 344.163419      |                |                  | 669.308996         | 335.158136       | L    | <b>1026.576463</b> | 513.791870        | 1009.549914    | 505.278595       | 1008.565898        | 504.786587       | 6  |
| 7  | <b>1126.544887</b> | 563.776082      | 1109.518338    | 555.262807       | 1108.534322        | 554.770799       | Q    | <b>913.492399</b>  | 457.249838        | 896.465850     | 448.736563       | <b>895.481834</b>  | 448.244555       | 5  |
| 8  | 1225.613301        | 613.310289      | 1208.586752    | 604.797014       | 1207.602736        | 604.305006       | V    | <b>474.267073</b>  | 237.637175        | 457.240524     | 229.123900       | 456.256508         | 228.631892       | 4  |
| 9  | 1296.650415        | 648.828846      | 1279.623866    | 640.315571       | 1278.639850        | 639.823563       | A    | <b>375.198659</b>  | 188.102968        | 358.172110     | 179.589693       | 357.188094         | 179.097685       | 3  |
| 10 | <b>1425.693008</b> | 713.350142      | 1408.666459    | 704.836868       | <b>1407.682443</b> | 704.344860       | E    | 304.161545         | 152.584411        | 287.134996     | 144.071136       | 286.150980         | 143.579128       | 2  |
| 11 |                    |                 |                |                  |                    |                  | R    | <b>175.118952</b>  | 88.063114         | 158.092403     | 79.549839        |                    |                  | 1  |

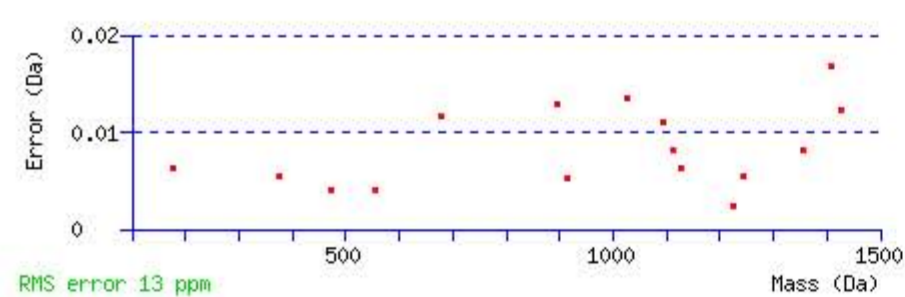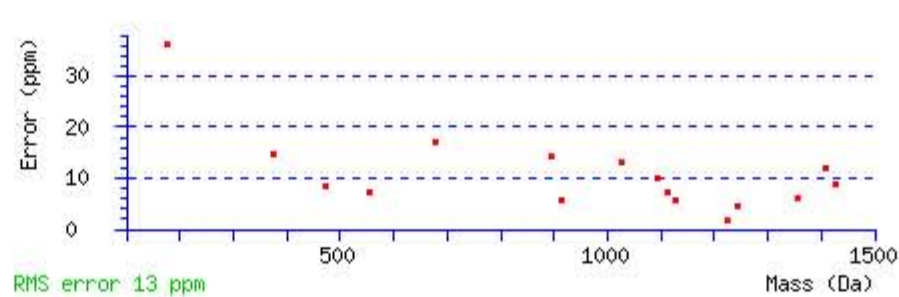

NCBI BLAST search of **ELDESLQVAER**

(Parameters: blastp, nr protein database, expect=20000, no filter, PAM30)

Other BLAST [web gateways](#)

All matches to this query

| Score | Mr(calc):   | Delta     | Sequence                         |
|-------|-------------|-----------|----------------------------------|
| 50.0  | 1598.797379 | 0.013009  | <a href="#">ELDESLQVAER</a>      |
| 5.9   | 1598.827271 | -0.016883 | <a href="#">LQGQLCDVSIR</a>      |
| 5.7   | 1598.790024 | 0.020364  | <a href="#">VTAEGDSHTEVVISR</a>  |
| 3.4   | 1598.787506 | 0.022882  | <a href="#">APQASGPSTPGYR</a>    |
| 3.2   | 1598.823883 | -0.013495 | <a href="#">TPTEKVEKMFPHR</a>    |
| 3.0   | 1598.797379 | 0.013009  | <a href="#">LEESDVLQEAR</a>      |
| 0.9   | 1598.789993 | 0.020395  | <a href="#">AGATSGELPVVEAENR</a> |
| 0.9   | 1598.787506 | 0.022882  | <a href="#">AGGSWDLAVQER</a>     |
| 0.9   | 1598.797409 | 0.012979  | <a href="#">EDVDDLVSQLR</a>      |
| 0.7   | 1598.817352 | -0.006964 | <a href="#">DRAALCQLWR</a>       |

# MASCOT Search Results

## Peptide View

MS/MS Fragmentation of **ASSIIDELFQDR**

Found in **CLUS\_HUMAN**, Clusterin OS=Homo sapiens GN=CLU PE=1 SV=1

Match to Query 42610: 1703.875348 from(852.944950,2+) rtinseconds(2826) index(30250)

Title: Locus:1.1.1.3125.15 File:"2013-07-02 CLN FXIII 180 min 1st F 2.wiff"

Data file C:\Program Files (x86)\Matrix Science\Mascot Daemon\mgf7 FXIII 180 min 1st\mascot\_daemon\_merge.mgf

Click mouse within plot area to zoom in by factor of two about that point

Or, Plot from  to  Da

Label all possible matches  Label matches used for scoring

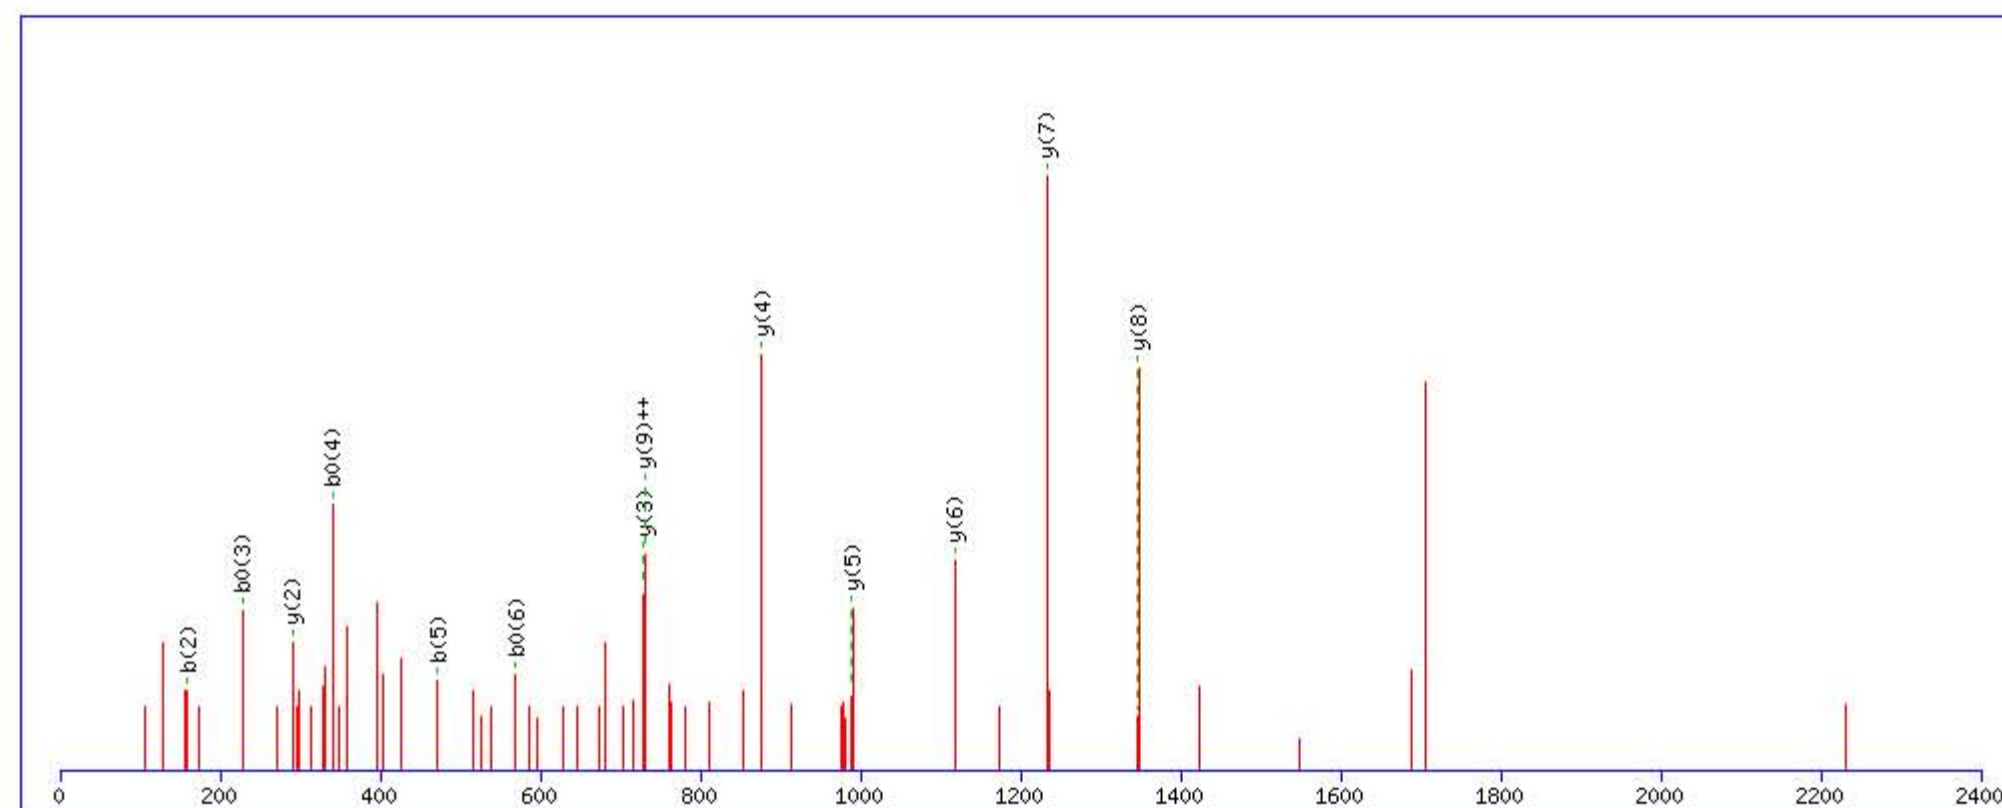

Monoisotopic mass of neutral peptide  $M_r(\text{calc})$ : 1703.855240

Fixed modifications: Carbamidomethyl (C) (apply to specified residues or termini only)

Variable modifications:

Q10 : Biotin:Thermo-21345 (Q)

Ions Score: 33 Expect: 0.015

Matches : 13/110 fragment ions using 27 most intense peaks [\(help\)](#)

| #  | b                 | b <sup>++</sup> | b <sup>+</sup> | b <sup>*++</sup> | b <sup>0</sup>    | b <sup>0++</sup> | Seq. | y                  | y <sup>++</sup>   | y <sup>+</sup> | y <sup>*++</sup> | y <sup>0</sup> | y <sup>0++</sup> | #  |
|----|-------------------|-----------------|----------------|------------------|-------------------|------------------|------|--------------------|-------------------|----------------|------------------|----------------|------------------|----|
| 1  | 72.044390         | 36.525833       |                |                  |                   |                  | A    |                    |                   |                |                  |                |                  | 12 |
| 2  | <b>159.076418</b> | 80.041847       |                |                  | 141.065853        | 71.036564        | S    | 1633.825419        | 817.416348        | 1616.798870    | 808.903073       | 1615.814854    | 808.411065       | 11 |
| 3  | 246.108446        | 123.557861      |                |                  | <b>228.097881</b> | 114.552578       | S    | 1546.793391        | 773.900333        | 1529.766842    | 765.387059       | 1528.782826    | 764.895051       | 10 |
| 4  | 359.192510        | 180.099893      |                |                  | <b>341.181945</b> | 171.094610       | I    | 1459.761363        | <b>730.384320</b> | 1442.734814    | 721.871045       | 1441.750798    | 721.379037       | 9  |
| 5  | <b>472.276574</b> | 236.641925      |                |                  | 454.266009        | 227.636642       | I    | <b>1346.677299</b> | 673.842288        | 1329.650750    | 665.329013       | 1328.666734    | 664.837005       | 8  |
| 6  | 587.303517        | 294.155397      |                |                  | <b>569.292952</b> | 285.150114       | D    | <b>1233.593235</b> | 617.300256        | 1216.566686    | 608.786981       | 1215.582670    | 608.294973       | 7  |
| 7  | 716.346110        | 358.676693      |                |                  | 698.335545        | 349.671411       | E    | <b>1118.566292</b> | 559.786784        | 1101.539743    | 551.273510       | 1100.555727    | 550.781501       | 6  |
| 8  | 829.430174        | 415.218725      |                |                  | 811.419609        | 406.213443       | L    | <b>989.523699</b>  | 495.265488        | 972.497150     | 486.752213       | 971.513134     | 486.260205       | 5  |
| 9  | 976.498588        | 488.752932      |                |                  | 958.488023        | 479.747650       | F    | <b>876.439635</b>  | 438.723456        | 859.413086     | 430.210181       | 858.429070     | 429.718173       | 4  |
| 10 | 1415.723914       | 708.365595      | 1398.697365    | 699.852321       | 1397.713349       | 699.360312       | Q    | <b>729.371221</b>  | 365.189249        | 712.344672     | 356.675974       | 711.360656     | 356.183966       | 3  |
| 11 | 1530.750857       | 765.879067      | 1513.724308    | 757.365792       | 1512.740292       | 756.873784       | D    | <b>290.145895</b>  | 145.576585        | 273.119346     | 137.063311       | 272.135330     | 136.571303       | 2  |
| 12 |                   |                 |                |                  |                   |                  | R    | 175.118952         | 88.063114         | 158.092403     | 79.549839        |                |                  | 1  |

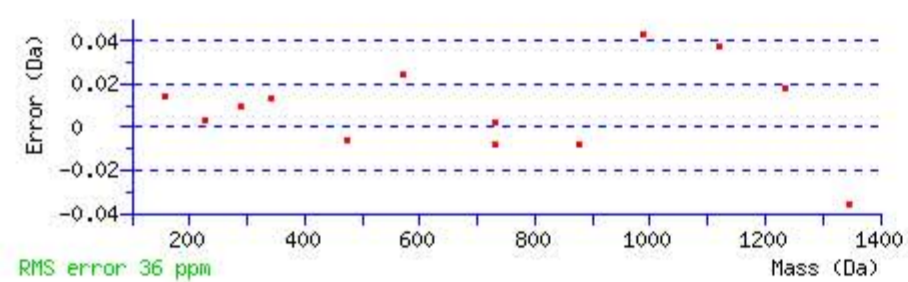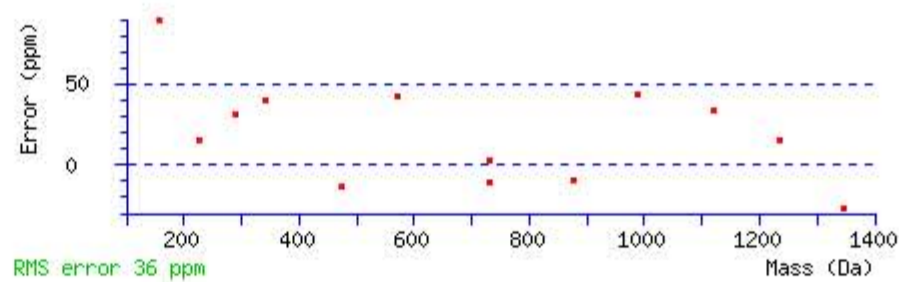

NCBI BLAST search of **ASSIIDELFQDR**

(Parameters: blastp, nr protein database, expect=20000, no filter, PAM30)

Other BLAST [web gateways](#)

All matches to this query

| Score | $M_r(\text{calc})$ : | Delta    | Sequence                     |
|-------|----------------------|----------|------------------------------|
| 32.8  | 1703.855240          | 0.020108 | <a href="#">ASSIIDELFQDR</a> |

Mascot: <http://www.matrixscience.com/>

# MASCOT Search Results

## Peptide View

MS/MS Fragmentation of **EILSVDCSTNNPSQAK**

Found in **CLUS\_HUMAN**, Clusterin OS=Homo sapiens GN=CLU PE=1 SV=1

Match to Query 52570: 2073.005588 from(1037.510070,2+) rtinseconds(1778) index(23078)

Title: Locus:1.1.1.2761.25 File:"2013-07-02 CLN FXIII 180 min 1st F 2.wiff"

Data file C:\Program Files (x86)\Matrix Science\Mascot Daemon\mgf\7 FXIII 180 min 1st\mascot\_daemon\_merge.mgf

Click mouse within plot area to zoom in by factor of two about that point

Or, Plot from  to  Da

Label all possible matches  Label matches used for scoring

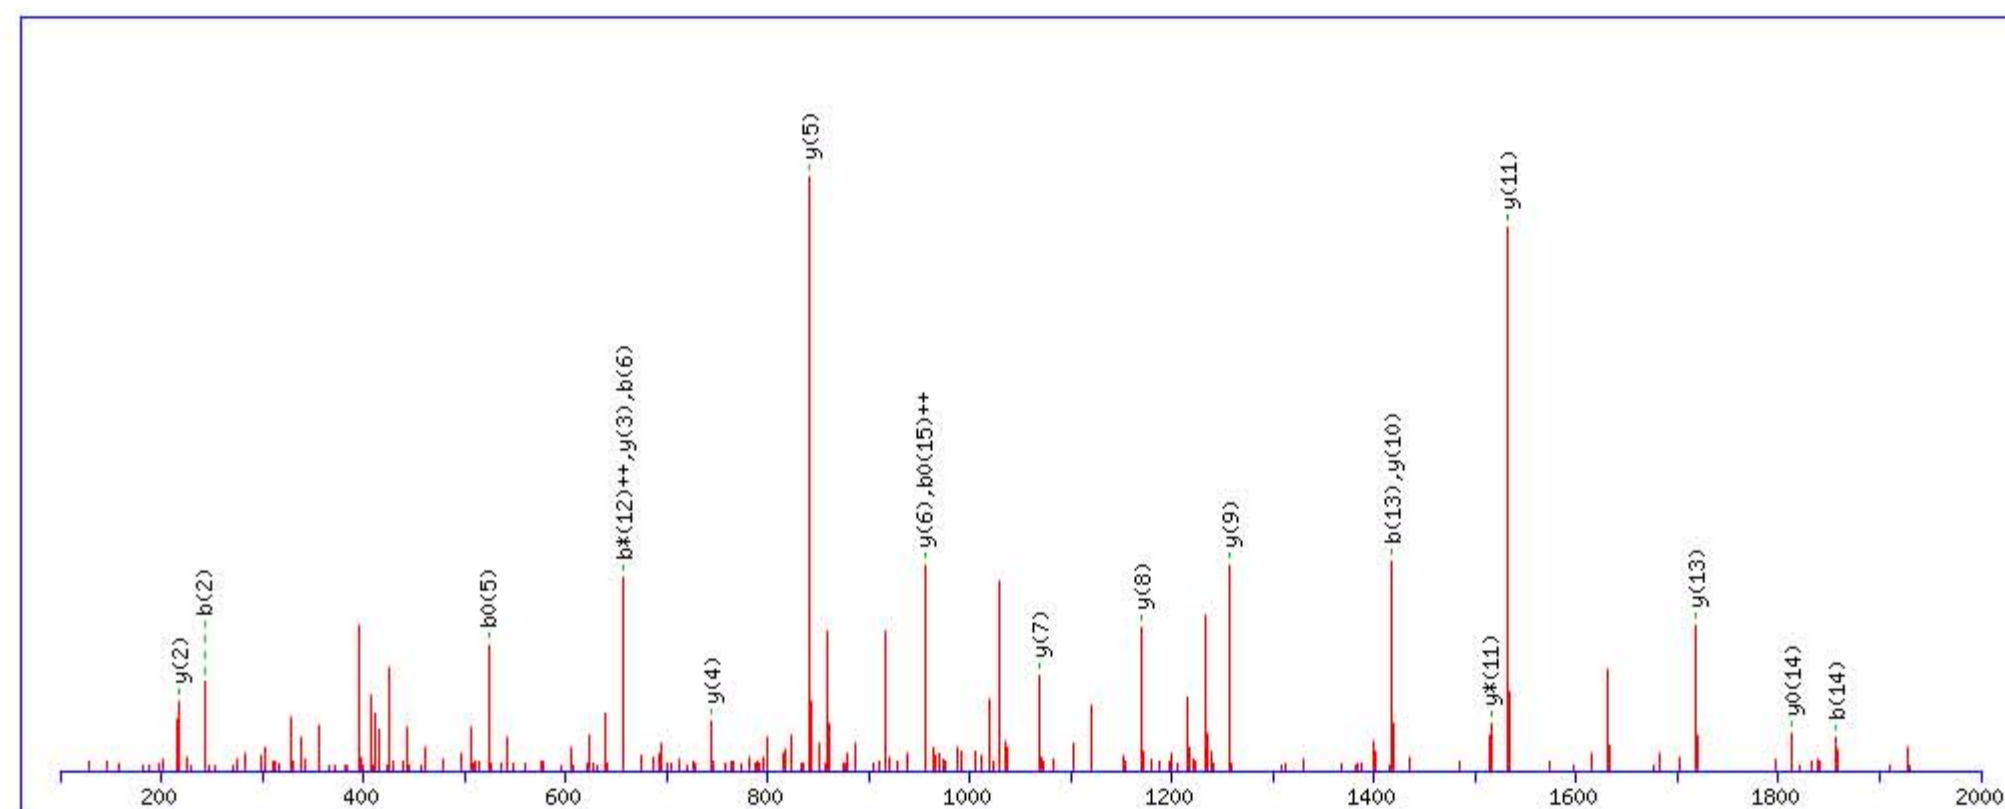

Monoisotopic mass of neutral peptide Mr(calc): 2072.987061

Fixed modifications: Carbamidomethyl (C) (apply to specified residues or termini only)

Variable modifications:

Q14 : Biotin:Thermo-21345 (Q)

Ions Score: 104 Expect: 5.4e-010

Matches : 20/156 fragment ions using 18 most intense peaks [\(help\)](#)

| #  | b                  | b <sup>++</sup> | b <sup>*</sup> | b <sup>*++</sup>  | b <sup>0</sup>    | b <sup>0++</sup>  | Seq. | y                  | y <sup>++</sup> | y <sup>*</sup>     | y <sup>*++</sup> | y <sup>0</sup>     | y <sup>0++</sup> | #  |
|----|--------------------|-----------------|----------------|-------------------|-------------------|-------------------|------|--------------------|-----------------|--------------------|------------------|--------------------|------------------|----|
| 1  | 130.049869         | 65.528572       |                |                   | 112.039304        | 56.523290         | E    |                    |                 |                    |                  |                    |                  | 16 |
| 2  | <b>243.133933</b>  | 122.070605      |                |                   | 225.123368        | 113.065322        | I    | 1944.951759        | 972.979517      | 1927.925210        | 964.466243       | 1926.941194        | 963.974235       | 15 |
| 3  | 356.217997         | 178.612637      |                |                   | 338.207432        | 169.607354        | L    | 1831.867695        | 916.437485      | 1814.841146        | 907.924211       | <b>1813.857130</b> | 907.432203       | 14 |
| 4  | 443.250025         | 222.128650      |                |                   | 425.239460        | 213.123368        | S    | <b>1718.783631</b> | 859.895454      | 1701.757082        | 851.382179       | 1700.773066        | 850.890171       | 13 |
| 5  | 542.318439         | 271.662858      |                |                   | <b>524.307874</b> | 262.657575        | V    | 1631.751603        | 816.379439      | 1614.725054        | 807.866165       | 1613.741038        | 807.374157       | 12 |
| 6  | <b>657.345382</b>  | 329.176329      |                |                   | 639.334817        | 320.171046        | D    | <b>1532.683189</b> | 766.845233      | <b>1515.656640</b> | 758.331958       | 1514.672624        | 757.839950       | 11 |
| 7  | 817.376031         | 409.191654      |                |                   | 799.365466        | 400.186371        | C    | <b>1417.656246</b> | 709.331761      | 1400.629697        | 700.818487       | 1399.645681        | 700.326479       | 10 |
| 8  | 904.408059         | 452.707668      |                |                   | 886.397494        | 443.702385        | S    | <b>1257.625597</b> | 629.316437      | 1240.599048        | 620.803162       | 1239.615032        | 620.311154       | 9  |
| 9  | 1005.455738        | 503.231507      |                |                   | 987.445173        | 494.226225        | T    | <b>1170.593569</b> | 585.800422      | 1153.567020        | 577.287148       | 1152.583004        | 576.795140       | 8  |
| 10 | 1119.498665        | 560.252971      | 1102.472116    | 551.739696        | 1101.488100       | 551.247688        | N    | <b>1069.545890</b> | 535.276583      | 1052.519341        | 526.763309       | 1051.535325        | 526.271301       | 7  |
| 11 | 1233.541592        | 617.274434      | 1216.515043    | 608.761160        | 1215.531027       | 608.269152        | N    | <b>955.502963</b>  | 478.255119      | 938.476414         | 469.741845       | 937.492398         | 469.249837       | 6  |
| 12 | 1330.594356        | 665.800816      | 1313.567807    | <b>657.287542</b> | 1312.583791       | 656.795534        | P    | <b>841.460036</b>  | 421.233656      | 824.433487         | 412.720381       | 823.449471         | 412.228373       | 5  |
| 13 | <b>1417.626384</b> | 709.316830      | 1400.599835    | 700.803556        | 1399.615819       | 700.311548        | S    | <b>744.407272</b>  | 372.707274      | 727.380723         | 364.193999       | 726.396707         | 363.701991       | 4  |
| 14 | <b>1856.851710</b> | 928.929493      | 1839.825161    | 920.416219        | 1838.841145       | 919.924211        | Q    | <b>657.375244</b>  | 329.191260      | 640.348695         | 320.677985       |                    |                  | 3  |
| 15 | 1927.888824        | 964.448050      | 1910.862275    | 955.934776        | 1909.878259       | <b>955.442768</b> | A    | <b>218.149918</b>  | 109.578597      | 201.123369         | 101.065322       |                    |                  | 2  |
| 16 |                    |                 |                |                   |                   |                   | K    | 147.112804         | 74.060040       | 130.086255         | 65.546765        |                    |                  | 1  |

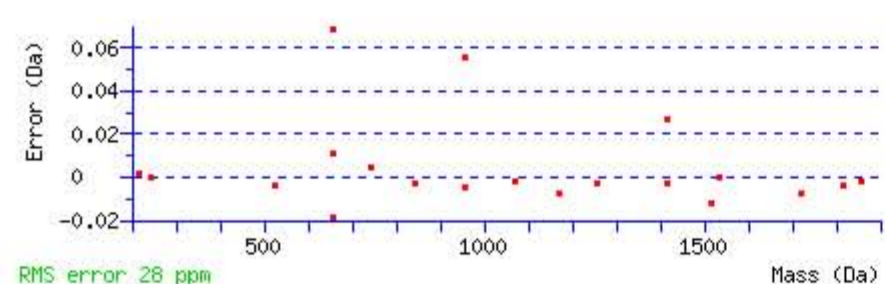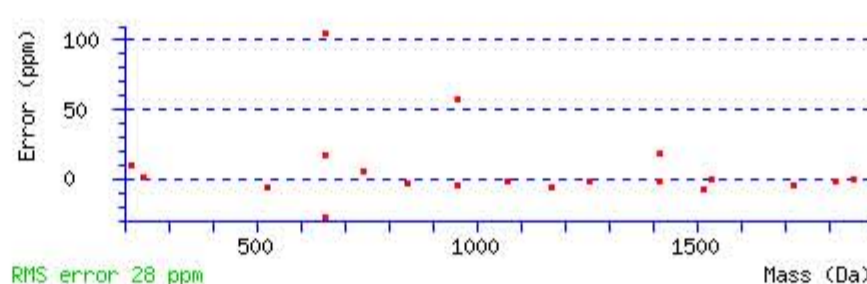

NCBI BLAST search of [EILSVDCSTNNPSQAK](#)

(Parameters: blastp, nr protein database, expect=20000, no filter, PAM30)

Other BLAST [web gateways](#)

### All matches to this query

| Score | Mr(calc):   | Delta     | Sequence                           |
|-------|-------------|-----------|------------------------------------|
| 103.8 | 2072.987061 | 0.018527  | <a href="#">EILSVDCSTNNPSQAK</a>   |
| 4.6   | 2073.023865 | -0.018277 | <a href="#">QAENAIANERFISAPNNK</a> |
| 0.2   | 2072.994492 | 0.011096  | <a href="#">ELVKSGLGADGVCMTFMK</a> |

# MASCOT Search Results

## Peptide View

MS/MS Fragmentation of **QQTHMLDVMQDHF<sup>R</sup>**

Found in **CLUS\_HUMAN**, Clusterin OS=Homo sapiens GN=CLU PE=1 SV=1

Match to Query 54969: 2183.015816 from(546.761230,4+) rtinseconds(1975) index(24500)

Title: Locus:1.1.1.2830.7 File:"2013-07-02 CLN FXIII 180 min 1st F 2.wiff"

Data file C:\Program Files (x86)\Matrix Science\Mascot Daemon\mgf\7 FXIII 180 min 1st\mascot\_daemon\_merge.mgf

Click mouse within plot area to zoom in by factor of two about that point

Or, Plot from  to  Da

Label all possible matches  Label matches used for scoring

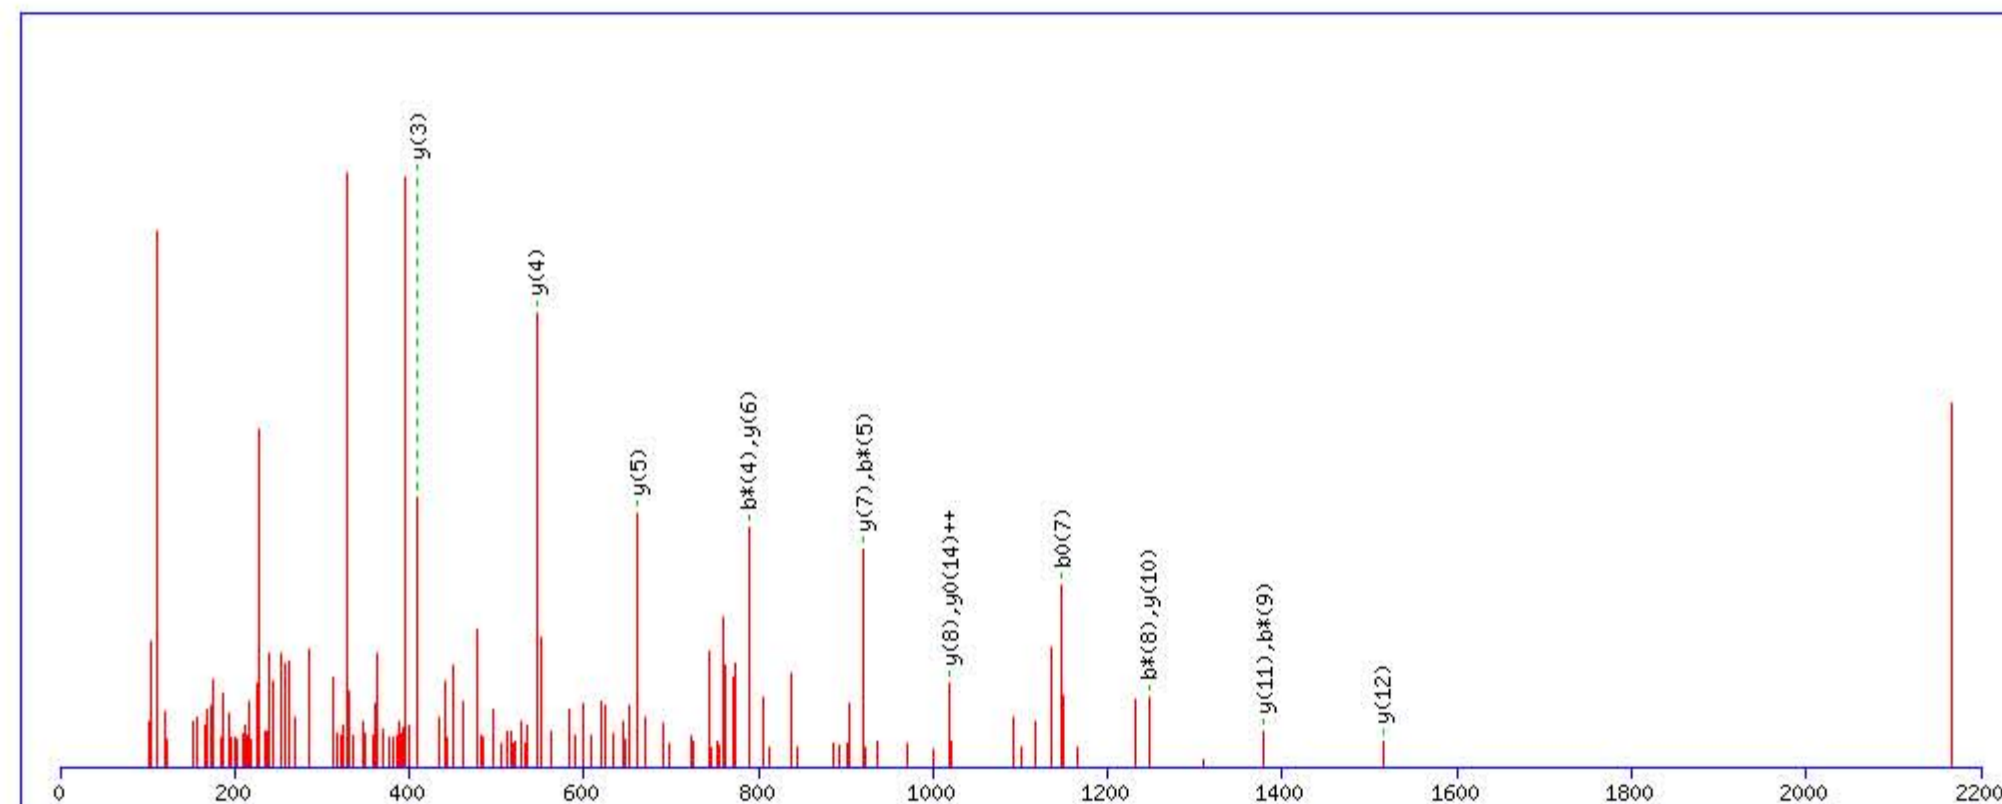

Monoisotopic mass of neutral peptide Mr(calc): 2183.007446

Fixed modifications: Carbamidomethyl (C) (apply to specified residues or termini only)

Variable modifications:

Q2 : Biotin:Thermo-21345 (Q)

Ions Score: 63 Expect: 8.1e-006

Matches : 15/162 fragment ions using 15 most intense peaks [\(help\)](#)

| #  | b           | b <sup>++</sup> | b <sup>*</sup> | b <sup>*++</sup> | b <sup>0</sup> | b <sup>0++</sup> | Seq. | y           | y <sup>++</sup> | y <sup>*</sup> | y <sup>*++</sup> | y <sup>0</sup> | y <sup>0++</sup> | #  |
|----|-------------|-----------------|----------------|------------------|----------------|------------------|------|-------------|-----------------|----------------|------------------|----------------|------------------|----|
| 1  | 129.065854  | 65.036565       | 112.039305     | 56.523291        |                |                  | Q    |             |                 |                |                  |                |                  | 15 |
| 2  | 568.291180  | 284.649228      | 551.264631     | 276.135954       |                |                  | Q    | 2055.956135 | 1028.481705     | 2038.929586    | 1019.968431      | 2037.945570    | 1019.476423      | 14 |
| 3  | 669.338859  | 335.173068      | 652.312310     | 326.659793       | 651.328294     | 326.167785       | T    | 1616.730809 | 808.869043      | 1599.704260    | 800.355768       | 1598.720244    | 799.863760       | 13 |
| 4  | 806.397771  | 403.702524      | 789.371222     | 395.189249       | 788.387206     | 394.697241       | H    | 1515.683130 | 758.345203      | 1498.656581    | 749.831929       | 1497.672565    | 749.339921       | 12 |
| 5  | 937.438256  | 469.222766      | 920.411707     | 460.709492       | 919.427691     | 460.217484       | M    | 1378.624218 | 689.815747      | 1361.597669    | 681.302473       | 1360.613653    | 680.810465       | 11 |
| 6  | 1050.522320 | 525.764798      | 1033.495771    | 517.251524       | 1032.511755    | 516.759516       | L    | 1247.583733 | 624.295505      | 1230.557184    | 615.782230       | 1229.573168    | 615.290222       | 10 |
| 7  | 1165.549263 | 583.278270      | 1148.522714    | 574.764995       | 1147.538698    | 574.272987       | D    | 1134.499669 | 567.753473      | 1117.473120    | 559.240198       | 1116.489104    | 558.748190       | 9  |
| 8  | 1264.617677 | 632.812477      | 1247.591128    | 624.299202       | 1246.607112    | 623.807194       | V    | 1019.472726 | 510.240001      | 1002.446177    | 501.726727       | 1001.462161    | 501.234719       | 8  |
| 9  | 1395.658162 | 698.332719      | 1378.631613    | 689.819445       | 1377.647597    | 689.327437       | M    | 920.404312  | 460.705794      | 903.377763     | 452.192520       | 902.393747     | 451.700512       | 7  |
| 10 | 1523.716740 | 762.362008      | 1506.690191    | 753.848734       | 1505.706175    | 753.356726       | Q    | 789.363827  | 395.185552      | 772.337278     | 386.672277       | 771.353262     | 386.180269       | 6  |
| 11 | 1638.743683 | 819.875480      | 1621.717134    | 811.362205       | 1620.733118    | 810.870197       | D    | 661.305249  | 331.156263      | 644.278700     | 322.642988       | 643.294684     | 322.150980       | 5  |
| 12 | 1775.802595 | 888.404936      | 1758.776046    | 879.891661       | 1757.792030    | 879.399653       | H    | 546.278306  | 273.642791      | 529.251757     | 265.129517       | 528.267741     | 264.637509       | 4  |
| 13 | 1922.871009 | 961.939143      | 1905.844460    | 953.425868       | 1904.860444    | 952.933860       | F    | 409.219394  | 205.113335      | 392.192845     | 196.600061       | 391.208829     | 196.108053       | 3  |
| 14 | 2009.903037 | 1005.455157     | 1992.876488    | 996.941882       | 1991.892472    | 996.449874       | S    | 262.150980  | 131.579128      | 245.124431     | 123.065854       | 244.140415     | 122.573846       | 2  |
| 15 |             |                 |                |                  |                |                  | R    | 175.118952  | 88.063114       | 158.092403     | 79.549839        |                |                  | 1  |

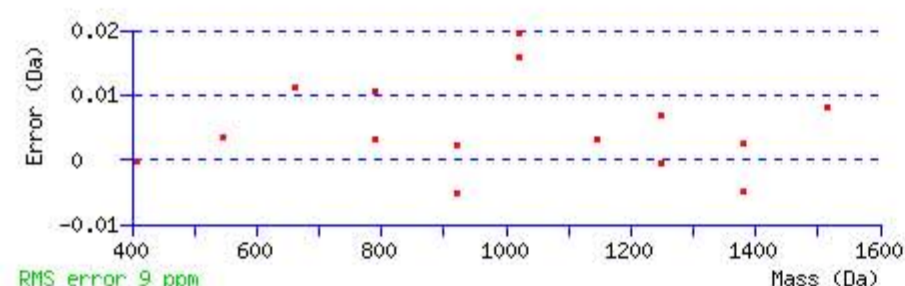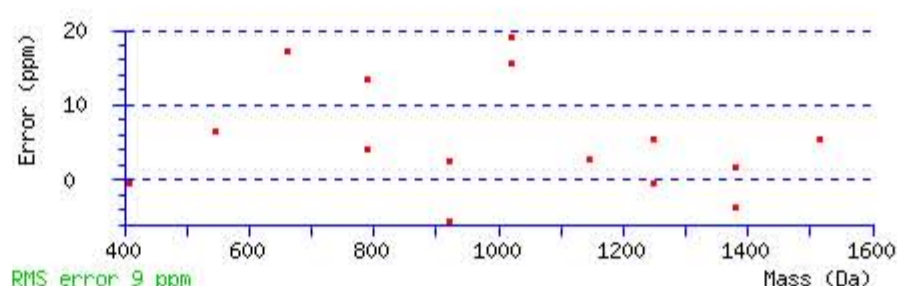

NCBI BLAST search of **QQTHMLDVMQDHF<sup>R</sup>**

(Parameters: blastp, nr protein database, expect=20000, no filter, PAM30)

Other BLAST [web gateways](#)

All matches to this query

| Score | Mr(calc):   | Delta    | Sequence                                  |
|-------|-------------|----------|-------------------------------------------|
| 62.6  | 2183.007446 | 0.008370 | <a href="#">QQTHMLDVMQDHF<sup>R</sup></a> |
| 62.6  | 2183.007446 | 0.008370 | <a href="#">QQTHMLDVMQDHF<sup>R</sup></a> |
| 3.9   | 2183.007446 | 0.008370 | <a href="#">QQTHMLDVMQDHF<sup>R</sup></a> |

# MASCOT SEARCH RESULTS

## Peptide View

MS/MS Fragmentation of **QQTHMLDVMQDHF<sup>SR</sup>**

Found in **CLUS\_HUMAN**, Clusterin OS=Homo sapiens GN=CLU PE=1 SV=1

Match to Query 54975: 2183.026576 from(546.763920,4+) rtinseconds(1996) index(6498)

Title: Locus:1.1.1.2949.11 File:"2013-07-02 CLN FXIII 180 min 1st F 1.wiff"

Data file C:\Program Files (x86)\Matrix Science\Mascot Daemon\mgf7 FXIII 180 min 1st\mascot\_daemon\_merge.mgf

Click mouse within plot area to zoom in by factor of two about that point

Or, Plot from  to  Da

Label all possible matches  Label matches used for scoring

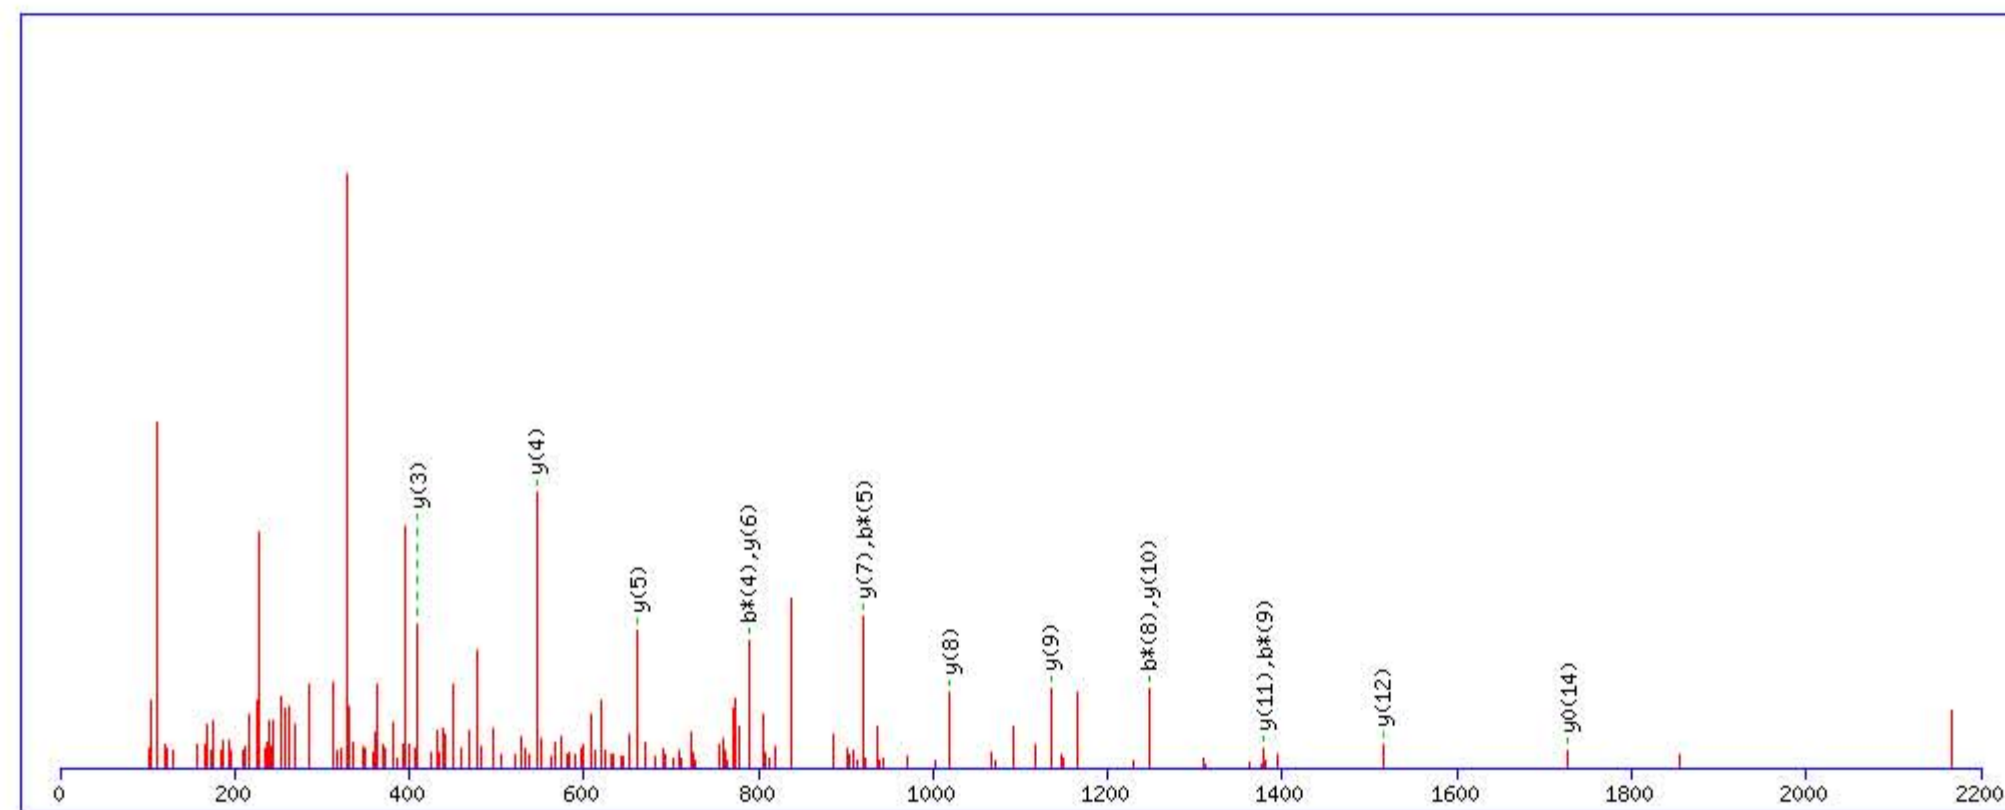

Monoisotopic mass of neutral peptide Mr(calc): 2183.007446

Fixed modifications: Carbamidomethyl (C) (apply to specified residues or termini only)

Variable modifications:

Q1 : Biotin:Thermo-21345 (Q)

Ions Score: 74 Expect: 6.5e-007

Matches : 15/162 fragment ions using 17 most intense peaks [\(help\)](#)

| #  | b           | b <sup>++</sup> | b <sup>*</sup> | b <sup>*++</sup> | b <sup>0</sup> | b <sup>0++</sup> | Seq. | y           | y <sup>++</sup> | y <sup>*</sup> | y <sup>*++</sup> | y <sup>0</sup> | y <sup>0++</sup> | #  |
|----|-------------|-----------------|----------------|------------------|----------------|------------------|------|-------------|-----------------|----------------|------------------|----------------|------------------|----|
| 1  | 440.232602  | 220.619939      | 423.206053     | 212.106664       |                |                  | Q    |             |                 |                |                  |                |                  | 15 |
| 2  | 568.291180  | 284.649228      | 551.264631     | 276.135954       |                |                  | Q    | 1744.789387 | 872.898332      | 1727.762838    | 864.385057       | 1726.778822    | 863.893049       | 14 |
| 3  | 669.338859  | 335.173068      | 652.312310     | 326.659793       | 651.328294     | 326.167785       | T    | 1616.730809 | 808.869043      | 1599.704260    | 800.355768       | 1598.720244    | 799.863760       | 13 |
| 4  | 806.397771  | 403.702524      | 789.371222     | 395.189249       | 788.387206     | 394.697241       | H    | 1515.683130 | 758.345203      | 1498.656581    | 749.831929       | 1497.672565    | 749.339921       | 12 |
| 5  | 937.438256  | 469.222766      | 920.411707     | 460.709492       | 919.427691     | 460.217484       | M    | 1378.624218 | 689.815747      | 1361.597669    | 681.302473       | 1360.613653    | 680.810465       | 11 |
| 6  | 1050.522320 | 525.764798      | 1033.495771    | 517.251524       | 1032.511755    | 516.759516       | L    | 1247.583733 | 624.295505      | 1230.557184    | 615.782230       | 1229.573168    | 615.290222       | 10 |
| 7  | 1165.549263 | 583.278270      | 1148.522714    | 574.764995       | 1147.538698    | 574.272987       | D    | 1134.499669 | 567.753473      | 1117.473120    | 559.240198       | 1116.489104    | 558.748190       | 9  |
| 8  | 1264.617677 | 632.812477      | 1247.591128    | 624.299202       | 1246.607112    | 623.807194       | V    | 1019.472726 | 510.240001      | 1002.446177    | 501.726727       | 1001.462161    | 501.234719       | 8  |
| 9  | 1395.658162 | 698.332719      | 1378.631613    | 689.819445       | 1377.647597    | 689.327437       | M    | 920.404312  | 460.705794      | 903.377763     | 452.192520       | 902.393747     | 451.700512       | 7  |
| 10 | 1523.716740 | 762.362008      | 1506.690191    | 753.848734       | 1505.706175    | 753.356726       | Q    | 789.363827  | 395.185552      | 772.337278     | 386.672277       | 771.353262     | 386.180269       | 6  |
| 11 | 1638.743683 | 819.875480      | 1621.717134    | 811.362205       | 1620.733118    | 810.870197       | D    | 661.305249  | 331.156263      | 644.278700     | 322.642988       | 643.294684     | 322.150980       | 5  |
| 12 | 1775.802595 | 888.404936      | 1758.776046    | 879.891661       | 1757.792030    | 879.399653       | H    | 546.278306  | 273.642791      | 529.251757     | 265.129517       | 528.267741     | 264.637509       | 4  |
| 13 | 1922.871009 | 961.939143      | 1905.844460    | 953.425868       | 1904.860444    | 952.933860       | F    | 409.219394  | 205.113335      | 392.192845     | 196.600061       | 391.208829     | 196.108053       | 3  |
| 14 | 2009.903037 | 1005.455157     | 1992.876488    | 996.941882       | 1991.892472    | 996.449874       | S    | 262.150980  | 131.579128      | 245.124431     | 123.065854       | 244.140415     | 122.573846       | 2  |
| 15 |             |                 |                |                  |                |                  | R    | 175.118952  | 88.063114       | 158.092403     | 79.549839        |                |                  | 1  |

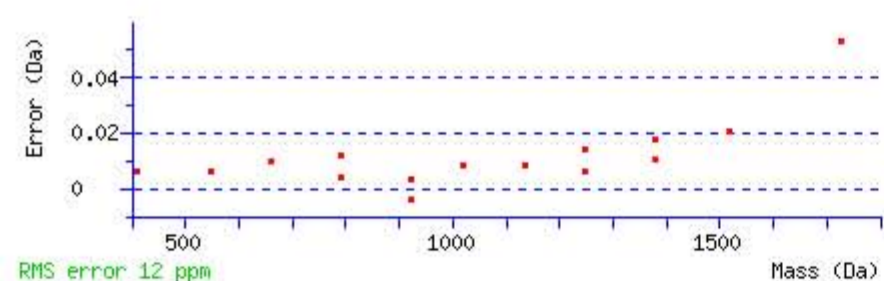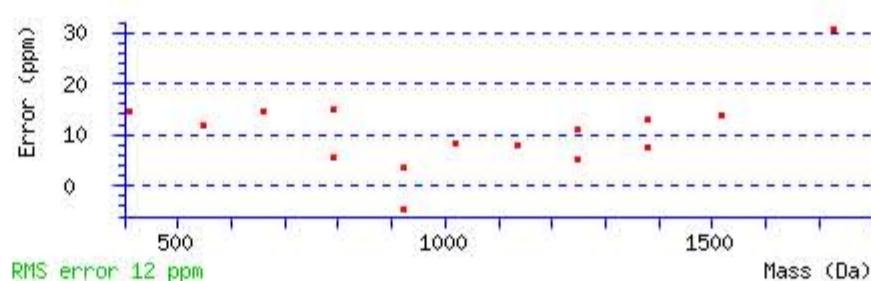

NCBI BLAST search of **QQTHMLDVMQDHF<sup>SR</sup>**

(Parameters: blastp, nr protein database, expect=20000, no filter, PAM30)

Other BLAST [web gateways](#)

All matches to this query

| Score | Mr(calc):   | Delta    | Sequence                                   |
|-------|-------------|----------|--------------------------------------------|
| 74.0  | 2183.007446 | 0.019130 | <a href="#">QQTHMLDVMQDHF<sup>SR</sup></a> |
| 70.2  | 2183.007446 | 0.019130 | <a href="#">QQTHMLDVMQDHF<sup>SR</sup></a> |

Mascot: <http://www.matrixscience.com/>



# MASCOT SEARCH RESULTS

## Peptide View

MS/MS Fragmentation of **VSVSQTSK**

Found in **FA9\_HUMAN**, Coagulation factor IX OS=Homo sapiens GN=F9 PE=1 SV=2

Match to Query 21707: 1145.626548 from(573.820550,2+) rtinseconds(1411) index(56607)

Title: Locus:1.1.1.2914.22 File:"2013-07-02 CLN FXIII 180 min 1st F 4.wiff"

Data file C:\Program Files (x86)\Matrix Science\Mascot Daemon\mgf7 FXIII 180 min 1st\mascot\_daemon\_merge.mgf

Click mouse within plot area to zoom in by factor of two about that point

Or, Plot from  to  Da

Label all possible matches  Label matches used for scoring

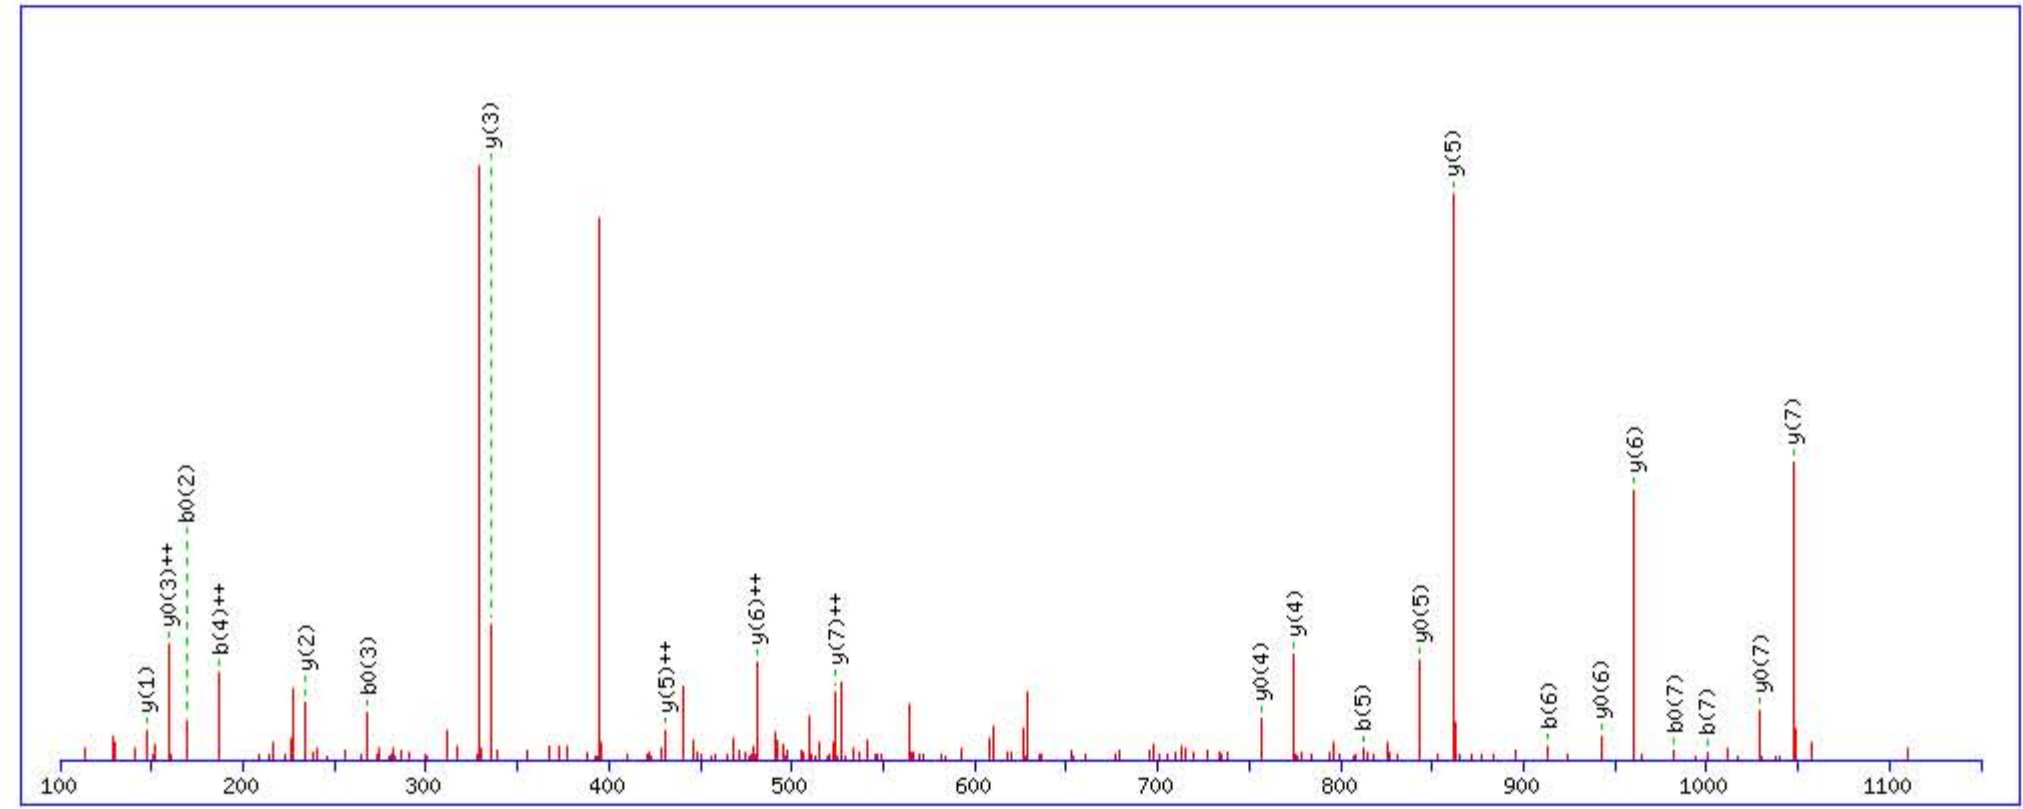

Monoisotopic mass of neutral peptide Mr(calc): 1145.611450

Fixed modifications: Carbamidomethyl (C) (apply to specified residues or termini only)

Variable modifications:

Q5 : Biotin:Thermo-21345 (Q)

Ions Score: 35 Expect: 0.0051

Matches : 23/72 fragment ions using 50 most intense peaks [\(help\)](#)

| # | b                  | b <sup>++</sup>   | b <sup>*</sup> | b <sup>***</sup> | b <sup>0</sup>    | b <sup>0++</sup> | Seq. | y                  | y <sup>++</sup>   | y <sup>*</sup> | y <sup>***</sup> | y <sup>0</sup>     | y <sup>0++</sup>  | # |
|---|--------------------|-------------------|----------------|------------------|-------------------|------------------|------|--------------------|-------------------|----------------|------------------|--------------------|-------------------|---|
| 1 | 100.075690         | 50.541483         |                |                  |                   |                  | V    |                    |                   |                |                  |                    |                   | 8 |
| 2 | <b>187.107718</b>  | 94.057497         |                |                  | 169.097153        | 85.052214        | S    | <b>1047.550307</b> | <b>524.278792</b> | 1030.523758    | 515.765517       | <b>1029.539742</b> | 515.273509        | 7 |
| 3 | 286.176132         | 143.591704        |                |                  | <b>268.165567</b> | 134.586422       | V    | <b>960.518279</b>  | <b>480.762778</b> | 943.491730     | 472.249503       | <b>942.507714</b>  | 471.757495        | 6 |
| 4 | 373.208160         | <b>187.107718</b> |                |                  | 355.197595        | 178.102435       | S    | <b>861.449865</b>  | <b>431.228571</b> | 844.423316     | 422.715296       | <b>843.439300</b>  | 422.223288        | 5 |
| 5 | <b>812.433486</b>  | 406.720381        | 795.406937     | 398.207107       | 794.422921        | 397.715099       | Q    | <b>774.417837</b>  | 387.712557        | 757.391288     | 379.199282       | <b>756.407272</b>  | 378.707274        | 4 |
| 6 | <b>913.481165</b>  | 457.244221        | 896.454616     | 448.730946       | 895.470600        | 448.238938       | T    | <b>335.192511</b>  | 168.099893        | 318.165962     | 159.586619       | 317.181946         | <b>159.094611</b> | 3 |
| 7 | <b>1000.513193</b> | 500.760235        | 983.486644     | 492.246960       | <b>982.502628</b> | 491.754952       | S    | <b>234.144832</b>  | 117.576054        | 217.118283     | 109.062779       | 216.134267         | 108.570771        | 2 |
| 8 |                    |                   |                |                  |                   |                  | K    | <b>147.112804</b>  | 74.060040         | 130.086255     | 65.546765        |                    |                   | 1 |

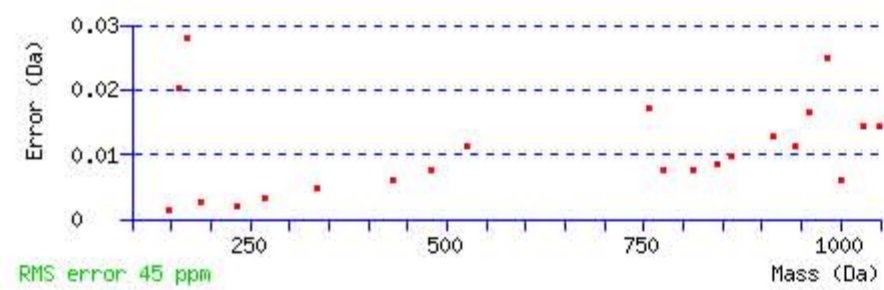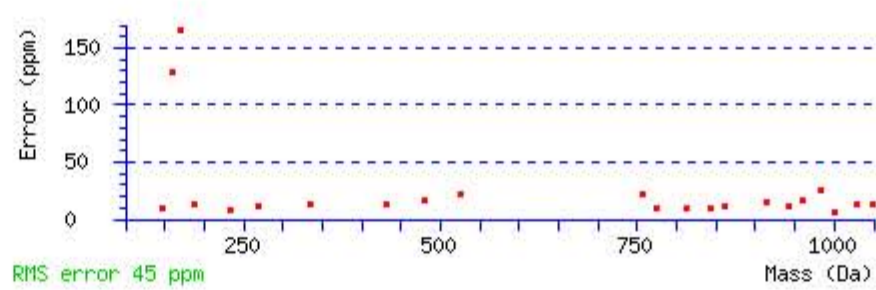

NCBI BLAST search of **VSVSQTSK**

(Parameters: blastp, nr protein database, expect=20000, no filter, PAM30)

Other BLAST [web gateways](#)

All matches to this query

| Score | Mr(calc):   | Delta     | Sequence                     |
|-------|-------------|-----------|------------------------------|
| 34.9  | 1145.611450 | 0.015098  | <a href="#">VSVSQTSK</a>     |
| 9.8   | 1145.629196 | -0.002648 | <a href="#">GEVLGLSSSLGK</a> |
| 5.5   | 1145.629181 | -0.002633 | <a href="#">VAKEVVEASSK</a>  |
| 4.5   | 1145.611420 | 0.015128  | <a href="#">KSIMVQSPEK</a>   |
| 4.0   | 1145.619278 | 0.007270  | <a href="#">WELQRSLSK</a>    |
| 2.7   | 1145.629166 | -0.002618 | <a href="#">TALQEEIKSK</a>   |
| 2.0   | 1145.623337 | 0.003211  | <a href="#">WVDGGKPLFK</a>   |
| 1.6   | 1145.622650 | 0.003898  | <a href="#">VSMDLRANLK</a>   |
| 1.5   | 1145.640411 | -0.013863 | <a href="#">EIKERVGTSK</a>   |
| 1.4   | 1145.634537 | -0.007989 | <a href="#">WWKTLREK</a>     |

# MASCOT Search Results

## Peptide View

MS/MS Fragmentation of **ITVVAGEHNIETEHTEQK**

Found in **FA9\_HUMAN**, Coagulation factor IX OS=Homo sapiens GN=F9 PE=1 SV=2

Match to Query 62121: 2474.241216 from(619.567580,4+) rtinseconds(1604) index(58042)

Title: Locus:1.1.1.2982.9 File:"2013-07-02 CLN FXIII 180 min 1st F 4.wiff"

Data file C:\Program Files (x86)\Matrix Science\Mascot Daemon\mgf\7 FXIII 180 min 1st\mascot\_daemon\_merge.mgf

Click mouse within plot area to zoom in by factor of two about that point

Or, Plot from  to  Da

Label all possible matches  Label matches used for scoring

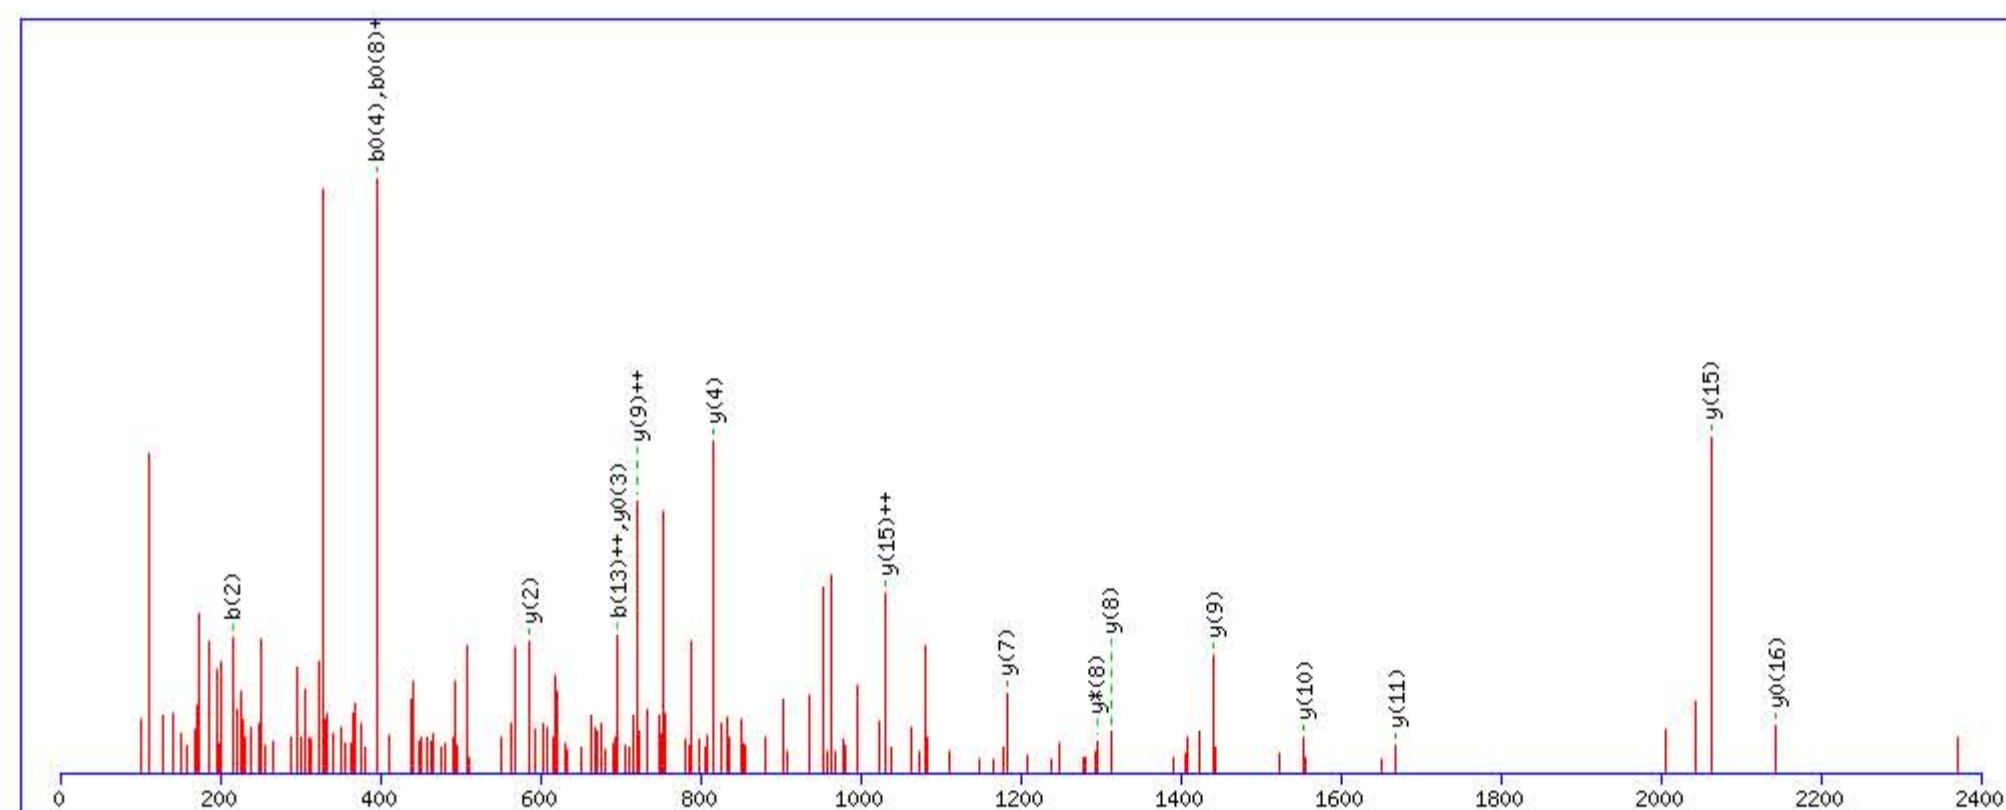

Monoisotopic mass of neutral peptide Mr(calc): 2474.211121

Fixed modifications: Carbamidomethyl (C) (apply to specified residues or termini only)

Variable modifications:

Q18 : Biotin:Thermo-21345 (Q)

Ions Score: 49 Expect: 0.0004

Matches : 17/194 fragment ions using 19 most intense peaks [\(help\)](#)

| #  | b                 | b <sup>++</sup>   | b <sup>+</sup> | b <sup>+++</sup> | b <sup>0</sup>    | b <sup>0++</sup>  | Seq. | y                  | y <sup>++</sup>    | y <sup>+</sup>     | y <sup>+++</sup> | y <sup>0</sup>     | y <sup>0++</sup> | #  |
|----|-------------------|-------------------|----------------|------------------|-------------------|-------------------|------|--------------------|--------------------|--------------------|------------------|--------------------|------------------|----|
| 1  | 114.091340        | 57.549308         |                |                  |                   |                   | I    |                    |                    |                    |                  |                    |                  | 19 |
| 2  | <b>215.139019</b> | 108.073147        |                |                  | 197.128454        | 99.067865         | T    | 2362.134353        | 1181.570814        | 2345.107804        | 1173.057540      | 2344.123788        | 1172.565532      | 18 |
| 3  | 314.207433        | 157.607354        |                |                  | 296.196868        | 148.602072        | V    | 2261.086674        | 1131.046975        | 2244.060125        | 1122.533700      | 2243.076109        | 1122.041692      | 17 |
| 4  | 413.275847        | 207.141561        |                |                  | <b>395.265282</b> | 198.136279        | V    | 2162.018260        | 1081.512768        | 2144.991711        | 1072.999493      | <b>2144.007695</b> | 1072.507485      | 16 |
| 5  | 484.312961        | 242.660119        |                |                  | 466.302396        | 233.654836        | A    | <b>2062.949846</b> | <b>1031.978561</b> | 2045.923297        | 1023.465286      | 2044.939281        | 1022.973278      | 15 |
| 6  | 541.334425        | 271.170851        |                |                  | 523.323860        | 262.165568        | G    | 1991.912732        | 996.460004         | 1974.886183        | 987.946730       | 1973.902167        | 987.454722       | 14 |
| 7  | 670.377018        | 335.692147        |                |                  | 652.366453        | 326.686865        | E    | 1934.891268        | 967.949272         | 1917.864719        | 959.435998       | 1916.880703        | 958.943990       | 13 |
| 8  | 807.435930        | 404.221603        |                |                  | 789.425365        | <b>395.216321</b> | H    | 1805.848675        | 903.427976         | 1788.822126        | 894.914701       | 1787.838110        | 894.422693       | 12 |
| 9  | 921.478857        | 461.243067        | 904.452308     | 452.729792       | 903.468292        | 452.237784        | N    | <b>1668.789763</b> | 834.898520         | 1651.763214        | 826.385245       | 1650.779198        | 825.893237       | 11 |
| 10 | 1034.562921       | 517.785099        | 1017.536372    | 509.271824       | 1016.552356       | 508.779816        | I    | <b>1554.746836</b> | 777.877056         | 1537.720287        | 769.363782       | 1536.736271        | 768.871774       | 10 |
| 11 | 1163.605514       | 582.306395        | 1146.578965    | 573.793121       | 1145.594949       | 573.301113        | E    | <b>1441.662772</b> | <b>721.335024</b>  | 1424.636223        | 712.821750       | 1423.652207        | 712.329742       | 9  |
| 12 | 1292.648107       | 646.827692        | 1275.621558    | 638.314417       | 1274.637542       | 637.822409        | E    | <b>1312.620179</b> | 656.813728         | <b>1295.593630</b> | 648.300453       | 1294.609614        | 647.808445       | 8  |
| 13 | 1393.695786       | <b>697.351531</b> | 1376.669237    | 688.838257       | 1375.685221       | 688.346249        | T    | <b>1183.577586</b> | 592.292431         | 1166.551037        | 583.779157       | 1165.567021        | 583.287149       | 7  |
| 14 | 1522.738379       | 761.872828        | 1505.711830    | 753.359553       | 1504.727814       | 752.867545        | E    | 1082.529907        | 541.768592         | 1065.503358        | 533.255317       | 1064.519342        | 532.763309       | 6  |
| 15 | 1659.797291       | 830.402284        | 1642.770742    | 821.889009       | 1641.786726       | 821.397001        | H    | 953.487314         | 477.247295         | 936.460765         | 468.734021       | 935.476749         | 468.242013       | 5  |
| 16 | 1760.844970       | 880.926123        | 1743.818421    | 872.412849       | 1742.834405       | 871.920841        | T    | <b>816.428402</b>  | 408.717839         | 799.401853         | 400.204565       | 798.417837         | 399.712557       | 4  |
| 17 | 1889.887563       | 945.447420        | 1872.861014    | 936.934145       | 1871.876998       | 936.442137        | E    | 715.380723         | 358.194000         | 698.354174         | 349.680725       | <b>697.370158</b>  | 349.188717       | 3  |
| 18 | 2329.112889       | 1165.060082       | 2312.086340    | 1156.546808      | 2311.102324       | 1156.054800       | Q    | <b>586.338130</b>  | 293.672703         | 569.311581         | 285.159429       |                    |                  | 2  |
| 19 |                   |                   |                |                  |                   |                   | K    | 147.112804         | 74.060040          | 130.086255         | 65.546765        |                    |                  | 1  |

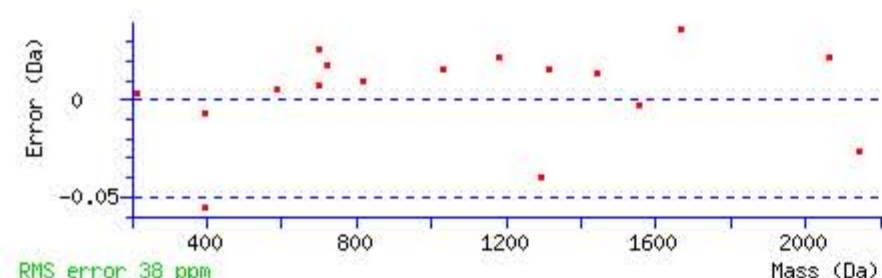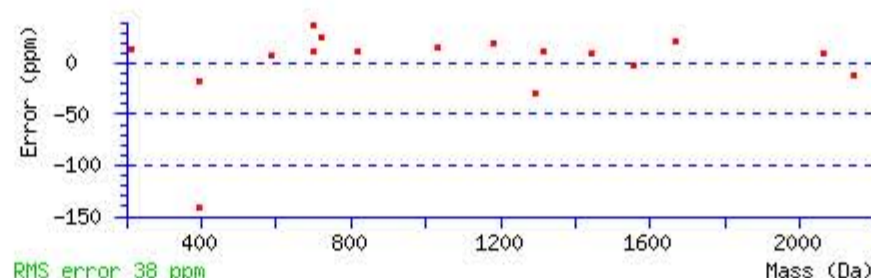

NCBI BLAST search of [ITVVAGEHNIETEHTEQK](#)

(Parameters: blastp, nr protein database, expect=20000, no filter, PAM30)

Other BLAST [web gateways](#)

All matches to this query

| Score | Mr(calc):   | Delta    | Sequence                           |
|-------|-------------|----------|------------------------------------|
| 48.6  | 2474.211121 | 0.030095 | <a href="#">ITVVAGEHNIETEHTEQK</a> |

Mascot: <http://www.matrixscience.com/>

# **MASCOT** Mascot Search Results

## Peptide View

MS/MS Fragmentation of **SQFLIK**

Found in **FA5\_HUMAN**, Coagulation factor V OS=Homo sapiens GN=F5 PE=1 SV=4

Match to Query 17419: 1045.613508 from(523.814030,2+) rtinseconds(2051) index(61072)

Title: Locus:1.1.1.3137.4 File:"2013-07-02 CLN FXIII 180 min 1st F 4.wiff"

Data file C:\Program Files (x86)\Matrix Science\Mascot Daemon\mgf\7 FXIII 180 min 1st\mascot\_daemon\_merge.mgf

Click mouse within plot area to zoom in by factor of two about that point

Or, Plot from  to  Da

Label all possible matches  Label matches used for scoring

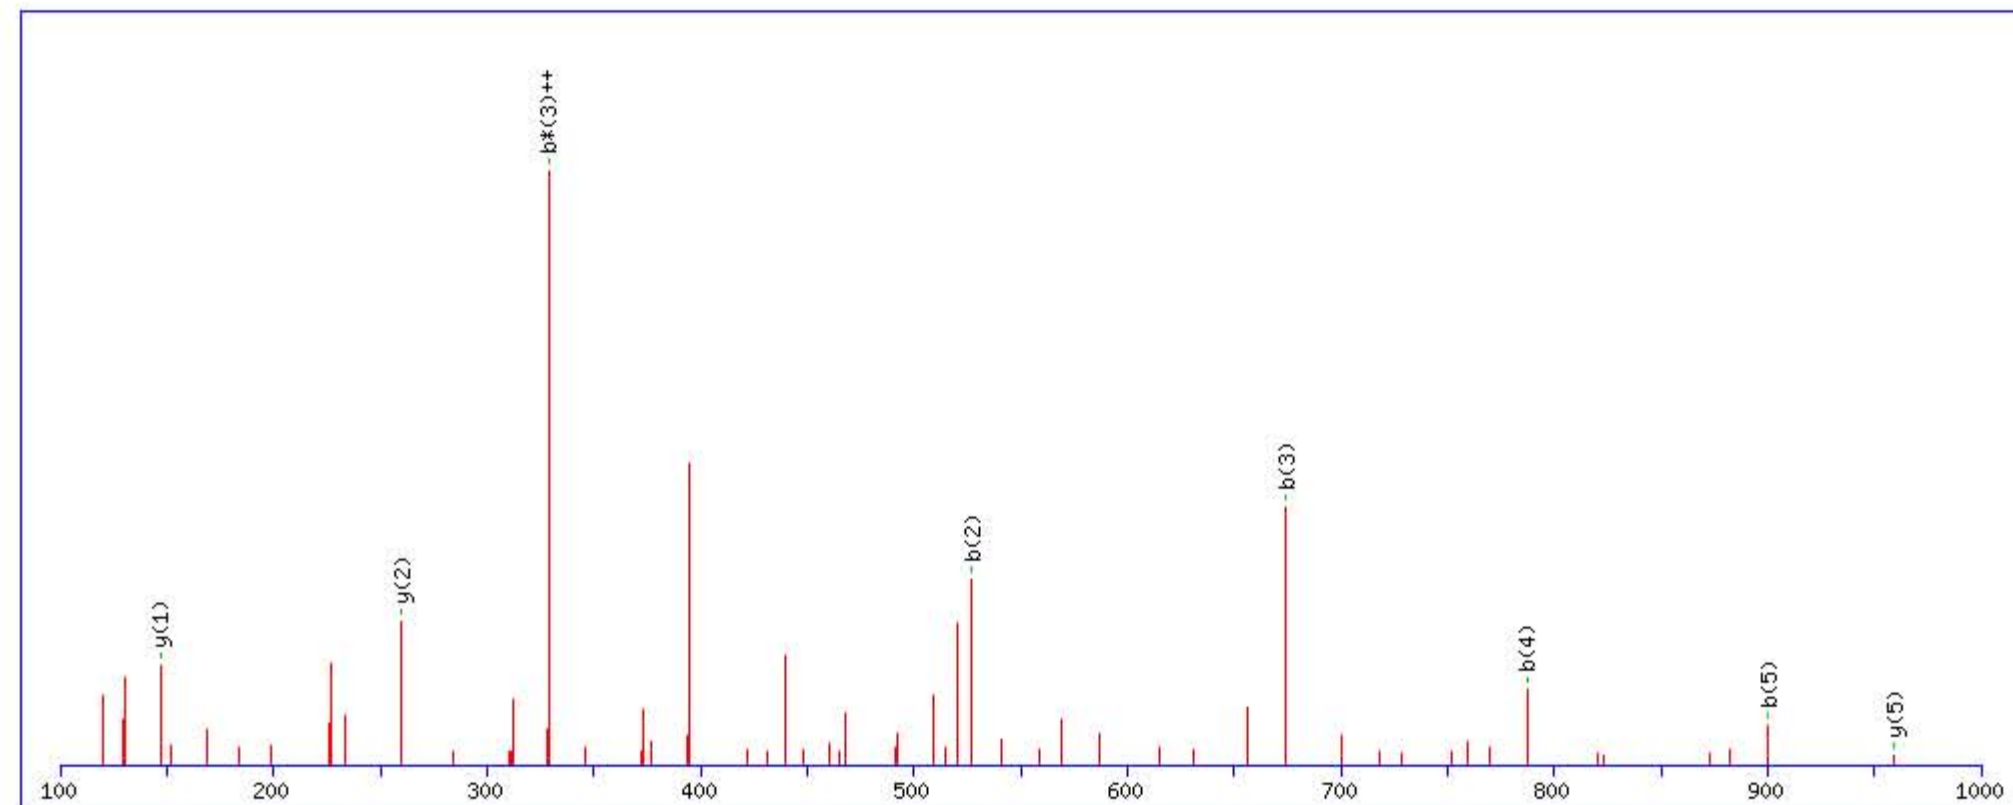

Monoisotopic mass of neutral peptide Mr(calc): 1045.599411

Fixed modifications: Carbamidomethyl (C) (apply to specified residues or termini only)

Variable modifications:

Q2 : Biotin:Thermo-21345 (Q)

Ions Score: 36 Expect: 0.0028

Matches : 8/48 fragment ions using 9 most intense peaks [\(help\)](#)

| # | b                 | b <sup>++</sup> | b <sup>*</sup> | b <sup>*++</sup>  | b <sup>0</sup> | b <sup>0++</sup> | Seq. | y                 | y <sup>++</sup> | y <sup>*</sup> | y <sup>*++</sup> | # |
|---|-------------------|-----------------|----------------|-------------------|----------------|------------------|------|-------------------|-----------------|----------------|------------------|---|
| 1 | 88.039304         | 44.523290       |                |                   | 70.028739      | 35.518008        | S    |                   |                 |                |                  | 6 |
| 2 | <b>527.264630</b> | 264.135953      | 510.238081     | 255.622679        | 509.254065     | 255.130671       | Q    | <b>959.574672</b> | 480.290974      | 942.548123     | 471.777700       | 5 |
| 3 | <b>674.333044</b> | 337.670160      | 657.306495     | <b>329.156885</b> | 656.322479     | 328.664877       | F    | 520.349346        | 260.678311      | 503.322797     | 252.165037       | 4 |
| 4 | <b>787.417108</b> | 394.212192      | 770.390559     | 385.698917        | 769.406543     | 385.206909       | L    | 373.280932        | 187.144104      | 356.254383     | 178.630830       | 3 |
| 5 | <b>900.501172</b> | 450.754224      | 883.474623     | 442.240950        | 882.490607     | 441.748942       | I    | <b>260.196868</b> | 130.602072      | 243.170319     | 122.088798       | 2 |
| 6 |                   |                 |                |                   |                |                  | K    | <b>147.112804</b> | 74.060040       | 130.086255     | 65.546765        | 1 |

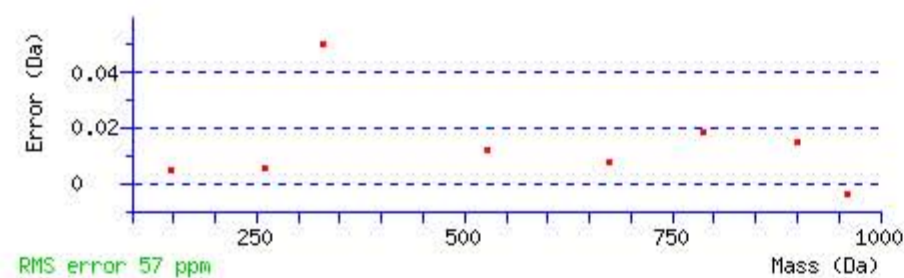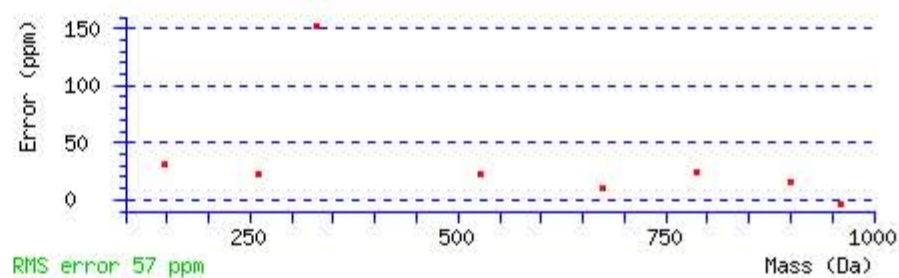

NCBI BLAST search of **SQFLIK**

(Parameters: blastp, nr protein database, expect=20000, no filter, PAM30)

Other BLAST [web gateways](#)

## All matches to this query

| Score | Mr(calc):   | Delta     | Sequence                   |
|-------|-------------|-----------|----------------------------|
| 45.1  | 1045.599411 | 0.014097  | <a href="#">QSFLLK</a>     |
| 35.6  | 1045.599411 | 0.014097  | <a href="#">SQFLIK</a>     |
| 19.7  | 1045.601883 | 0.011625  | <a href="#">EESISKLIK</a>  |
| 19.7  | 1045.613113 | 0.000395  | <a href="#">ESKKSNULLK</a> |
| 19.5  | 1045.599426 | 0.014082  | <a href="#">VFLCPGLLK</a>  |
| 19.3  | 1045.599411 | 0.014097  | <a href="#">SQLFLK</a>     |
| 16.6  | 1045.628387 | -0.014879 | <a href="#">FIRQEIIK</a>   |
| 16.6  | 1045.620514 | -0.007006 | <a href="#">KETMALILK</a>  |
| 16.6  | 1045.599411 | 0.014097  | <a href="#">QVFAPMLLK</a>  |
| 16.6  | 1045.599396 | 0.014112  | <a href="#">YQALLK</a>     |

# MASCOT SEARCH RESULTS

## Peptide View

MS/MS Fragmentation of **APSHQQATTAGSPLR**

Found in **FA5\_HUMAN**, Coagulation factor V OS=Homo sapiens GN=F5 PE=1 SV=4

Match to Query 46075: 1831.960512 from(611.660780,3+) rtinseconds(1407) index(56579)

Title: Locus:1.1.1.2913.19 File:"2013-07-02 CLN FXIII 180 min 1st F 4.wiff"

Data file C:\Program Files (x86)\Matrix Science\Mascot Daemon\mgf\7 FXIII 180 min 1st\mascot\_daemon\_merge.mgf

Click mouse within plot area to zoom in by factor of two about that point

Or, Plot from  to  Da

Label all possible matches  Label matches used for scoring

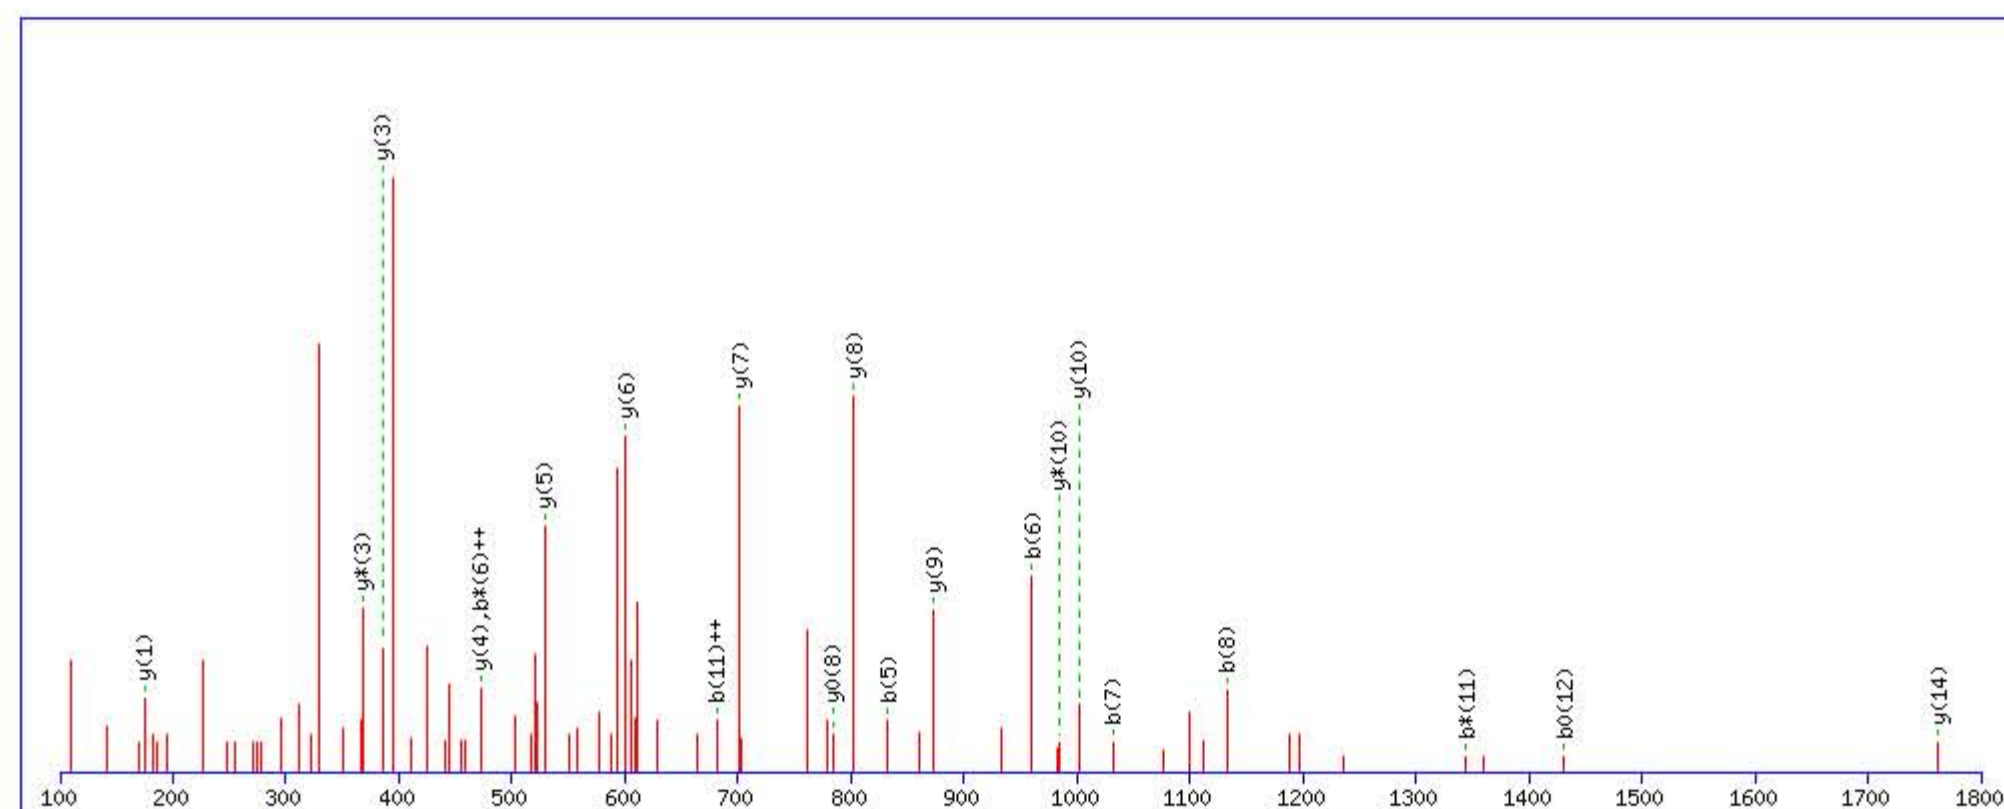

Monoisotopic mass of neutral peptide Mr(calc): 1831.936295

Fixed modifications: Carbamidomethyl (C) (apply to specified residues or termini only)

Variable modifications:

Q5 : Biotin:Thermo-21345 (Q)

Ions Score: 47 Expect: 0.00061

Matches : 21/150 fragment ions using 47 most intense peaks [\(help\)](#)

| #  | b           | b <sup>++</sup> | b <sup>*</sup> | b <sup>*++</sup> | b <sup>0</sup> | b <sup>0++</sup> | Seq. | y           | y <sup>++</sup> | y <sup>*</sup> | y <sup>*++</sup> | y <sup>0</sup> | y <sup>0++</sup> | #  |
|----|-------------|-----------------|----------------|------------------|----------------|------------------|------|-------------|-----------------|----------------|------------------|----------------|------------------|----|
| 1  | 72.044390   | 36.525833       |                |                  |                |                  | A    |             |                 |                |                  |                |                  | 15 |
| 2  | 169.097154  | 85.052215       |                |                  |                |                  | P    | 1761.906466 | 881.456871      | 1744.879917    | 872.943597       | 1743.895901    | 872.451588       | 14 |
| 3  | 256.129182  | 128.568229      |                |                  | 238.118617     | 119.562947       | S    | 1664.853702 | 832.930489      | 1647.827153    | 824.417215       | 1646.843137    | 823.925206       | 13 |
| 4  | 393.188094  | 197.097685      |                |                  | 375.177529     | 188.092402       | H    | 1577.821674 | 789.414475      | 1560.795125    | 780.901200       | 1559.811109    | 780.409192       | 12 |
| 5  | 832.413420  | 416.710348      | 815.386871     | 408.197073       | 814.402855     | 407.705065       | Q    | 1440.762762 | 720.885019      | 1423.736213    | 712.371744       | 1422.752197    | 711.879736       | 11 |
| 6  | 960.471998  | 480.739637      | 943.445449     | 472.226362       | 942.461433     | 471.734354       | Q    | 1001.537436 | 501.272356      | 984.510887     | 492.759081       | 983.526871     | 492.267073       | 10 |
| 7  | 1031.509112 | 516.258194      | 1014.482563    | 507.744919       | 1013.498547    | 507.252911       | A    | 873.478858  | 437.243067      | 856.452309     | 428.729792       | 855.468293     | 428.237784       | 9  |
| 8  | 1132.556791 | 566.782034      | 1115.530242    | 558.268759       | 1114.546226    | 557.776751       | T    | 802.441744  | 401.724510      | 785.415195     | 393.211235       | 784.431179     | 392.719227       | 8  |
| 9  | 1233.604470 | 617.305873      | 1216.577921    | 608.792599       | 1215.593905    | 608.300591       | T    | 701.394065  | 351.200671      | 684.367516     | 342.687396       | 683.383500     | 342.195388       | 7  |
| 10 | 1304.641584 | 652.824430      | 1287.615035    | 644.311156       | 1286.631019    | 643.819147       | A    | 600.346386  | 300.676831      | 583.319837     | 292.163556       | 582.335821     | 291.671548       | 6  |
| 11 | 1361.663048 | 681.335162      | 1344.636499    | 672.821888       | 1343.652483    | 672.329879       | G    | 529.309272  | 265.158274      | 512.282723     | 256.644999       | 511.298707     | 256.152991       | 5  |
| 12 | 1448.695076 | 724.851176      | 1431.668527    | 716.337902       | 1430.684511    | 715.845893       | S    | 472.287808  | 236.647542      | 455.261259     | 228.134267       | 454.277243     | 227.642259       | 4  |
| 13 | 1545.747840 | 773.377558      | 1528.721291    | 764.864284       | 1527.737275    | 764.372276       | P    | 385.255780  | 193.131528      | 368.229231     | 184.618253       |                |                  | 3  |
| 14 | 1658.831904 | 829.919590      | 1641.805355    | 821.406316       | 1640.821339    | 820.914307       | L    | 288.203016  | 144.605146      | 271.176467     | 136.091871       |                |                  | 2  |
| 15 |             |                 |                |                  |                |                  | R    | 175.118952  | 88.063114       | 158.092403     | 79.549839        |                |                  | 1  |

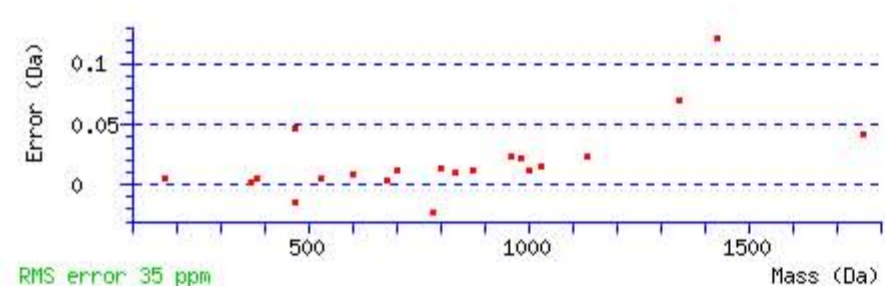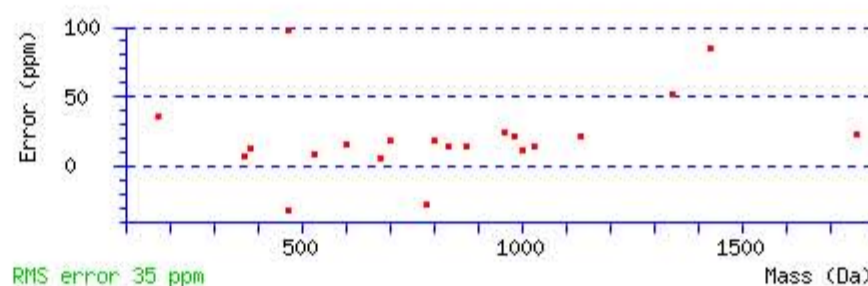

NCBI BLAST search of [APSHQQATTAGSPLR](#)

(Parameters: blastp, nr protein database, expect=20000, no filter, PAM30)

Other BLAST [web gateways](#)

All matches to this query

| Score | Mr(calc):   | Delta    | Sequence                        |
|-------|-------------|----------|---------------------------------|
| 46.6  | 1831.936295 | 0.024217 | <a href="#">APSHQQATTAGSPLR</a> |
| 35.4  | 1831.936295 | 0.024217 | <a href="#">APSHQQATTAGSPLR</a> |

Mascot: <http://www.matrixscience.com/>

# MASCOT SCIENCE Mascot Search Results

## Peptide View

MS/MS Fragmentation of **AADIEQQAVFAVFDENK**

Found in **FA5\_HUMAN**, Coagulation factor V OS=Homo sapiens GN=F5 PE=1 SV=4

Match to Query 55490: 2205.101652 from(736.041160,3+) rtinseconds(2727) index(83683)

Title: Locus:1.1.1.2299.11 File:"2013-07-02 CLN FXIII 180 min 1st FT.wiff"

Data file C:\Program Files (x86)\Matrix Science\Mascot Daemon\mgf\7 FXIII 180 min 1st\mascot\_daemon\_merge.mgf

Click mouse within plot area to zoom in by factor of two about that point

Or, Plot from  to  Da

Label all possible matches  Label matches used for scoring

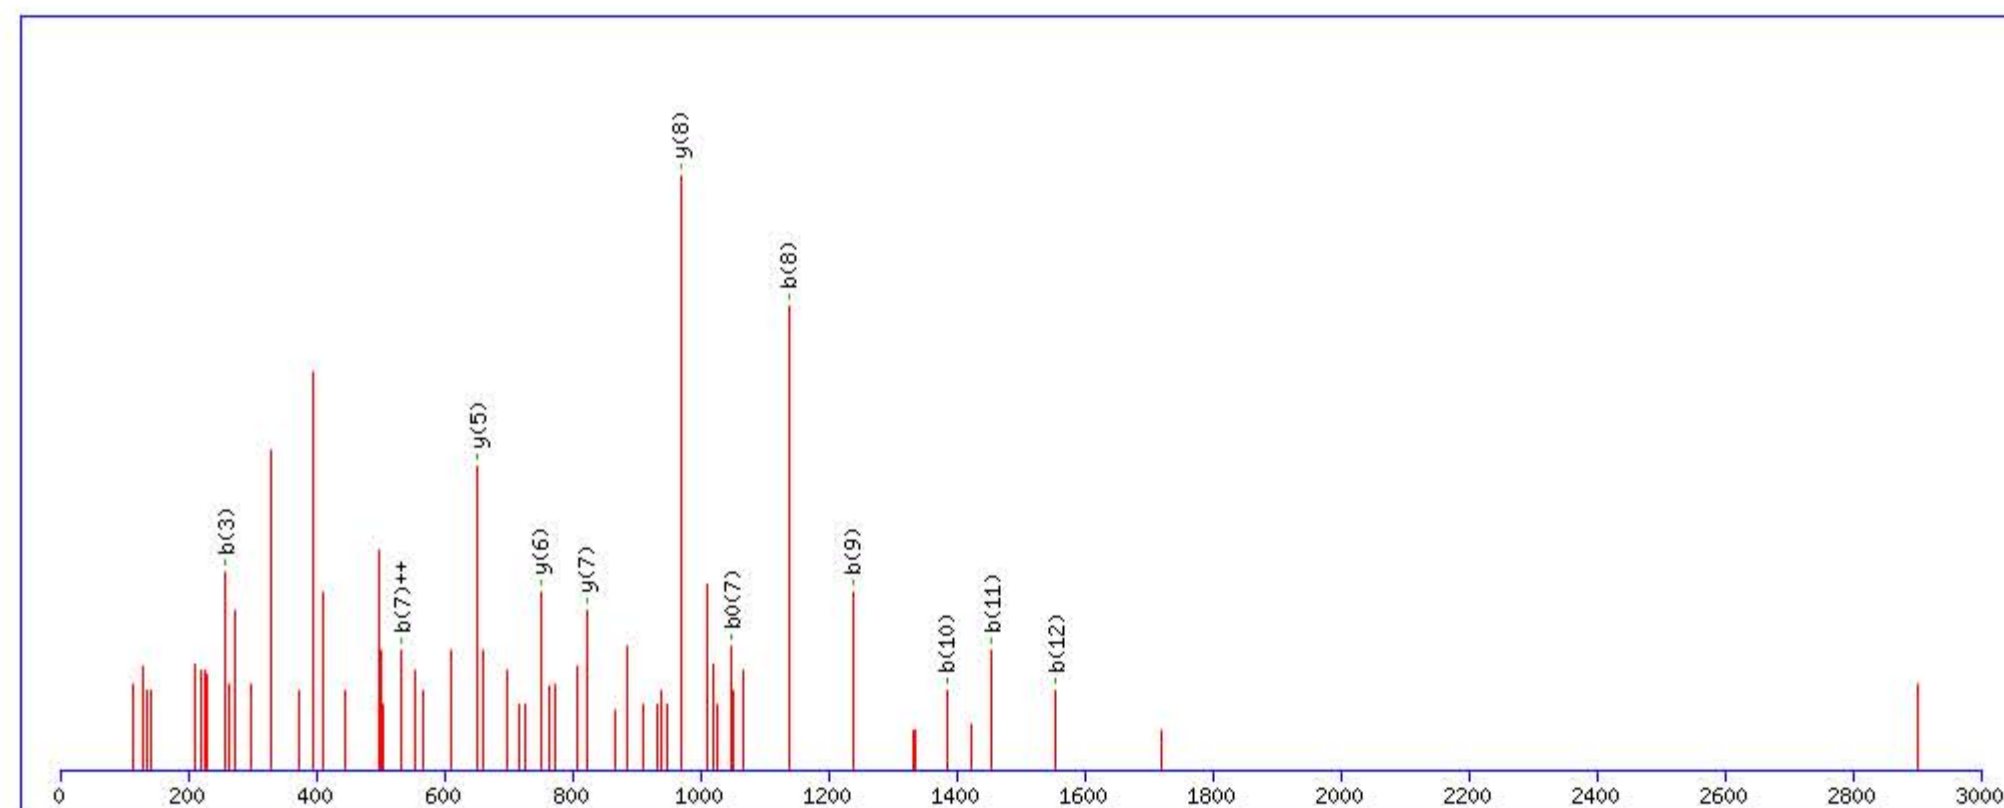

Monoisotopic mass of neutral peptide Mr(calc): 2205.077591

Fixed modifications: Carbamidomethyl (C) (apply to specified residues or termini only)

Variable modifications:

Q7 : Biotin:Thermo-21345 (Q)

Ions Score: 35 Expect: 0.009

Matches : 12/174 fragment ions using 16 most intense peaks [\(help\)](#)

| #  | b                  | b <sup>++</sup>   | b <sup>*</sup> | b <sup>***</sup> | b <sup>0</sup>     | b <sup>0++</sup> | Seq. | y                 | y <sup>++</sup> | y <sup>*</sup> | y <sup>***</sup> | y <sup>0</sup> | y <sup>0++</sup> | #  |
|----|--------------------|-------------------|----------------|------------------|--------------------|------------------|------|-------------------|-----------------|----------------|------------------|----------------|------------------|----|
| 1  | 72.044390          | 36.525833         |                |                  |                    |                  | A    |                   |                 |                |                  |                |                  | 17 |
| 2  | 143.081504         | 72.044390         |                |                  |                    |                  | A    | 2135.047769       | 1068.027522     | 2118.021220    | 1059.514248      | 2117.037204    | 1059.022240      | 16 |
| 3  | <b>258.108447</b>  | 129.557862        |                |                  | 240.097882         | 120.552579       | D    | 2064.010655       | 1032.508965     | 2046.984106    | 1023.995691      | 2046.000090    | 1023.503683      | 15 |
| 4  | 371.192511         | 186.099894        |                |                  | 353.181946         | 177.094611       | I    | 1948.983712       | 974.995494      | 1931.957163    | 966.482220       | 1930.973147    | 965.990212       | 14 |
| 5  | 500.235104         | 250.621190        |                |                  | 482.224539         | 241.615908       | E    | 1835.899648       | 918.453462      | 1818.873099    | 909.940188       | 1817.889083    | 909.448180       | 13 |
| 6  | 628.293682         | 314.650479        | 611.267133     | 306.137205       | 610.283117         | 305.645197       | Q    | 1706.857055       | 853.932166      | 1689.830506    | 845.418891       | 1688.846490    | 844.926883       | 12 |
| 7  | 1067.519008        | <b>534.263142</b> | 1050.492459    | 525.749868       | <b>1049.508443</b> | 525.257860       | Q    | 1578.798477       | 789.902877      | 1561.771928    | 781.389602       | 1560.787912    | 780.897594       | 11 |
| 8  | <b>1138.556122</b> | 569.781699        | 1121.529573    | 561.268425       | 1120.545557        | 560.776416       | A    | 1139.573151       | 570.290214      | 1122.546602    | 561.776939       | 1121.562586    | 561.284931       | 10 |
| 9  | <b>1237.624536</b> | 619.315906        | 1220.597987    | 610.802632       | 1219.613971        | 610.310624       | V    | 1068.536037       | 534.771657      | 1051.509488    | 526.258382       | 1050.525472    | 525.766374       | 9  |
| 10 | <b>1384.692950</b> | 692.850113        | 1367.666401    | 684.336839       | 1366.682385        | 683.844831       | F    | <b>969.467623</b> | 485.237450      | 952.441074     | 476.724175       | 951.457058     | 476.232167       | 8  |
| 11 | <b>1455.730064</b> | 728.368670        | 1438.703515    | 719.855396       | 1437.719499        | 719.363388       | A    | <b>822.399209</b> | 411.703243      | 805.372660     | 403.189968       | 804.388644     | 402.697960       | 7  |
| 12 | <b>1554.798478</b> | 777.902877        | 1537.771929    | 769.389603       | 1536.787913        | 768.897595       | V    | <b>751.362095</b> | 376.184686      | 734.335546     | 367.671411       | 733.351530     | 367.179403       | 6  |
| 13 | 1701.866892        | 851.437084        | 1684.840343    | 842.923810       | 1683.856327        | 842.431802       | F    | <b>652.293681</b> | 326.650479      | 635.267132     | 318.137204       | 634.283116     | 317.645196       | 5  |
| 14 | 1816.893835        | 908.950556        | 1799.867286    | 900.437281       | 1798.883270        | 899.945273       | D    | 505.225267        | 253.116271      | 488.198718     | 244.602997       | 487.214702     | 244.110989       | 4  |
| 15 | 1945.936428        | 973.471852        | 1928.909879    | 964.958578       | 1927.925863        | 964.466570       | E    | 390.198324        | 195.602800      | 373.171775     | 187.089525       | 372.187759     | 186.597517       | 3  |
| 16 | 2059.979355        | 1030.493315       | 2042.952806    | 1021.980041      | 2041.968790        | 1021.488033      | N    | 261.155731        | 131.081503      | 244.129182     | 122.568229       |                |                  | 2  |
| 17 |                    |                   |                |                  |                    |                  | K    | 147.112804        | 74.060040       | 130.086255     | 65.546765        |                |                  | 1  |

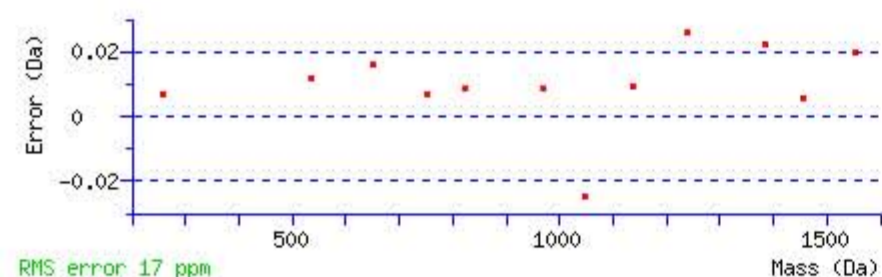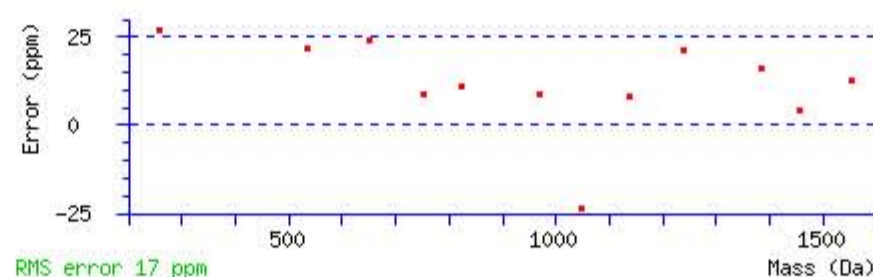

NCBI BLAST search of **AADIEQQAVFAVFDENK**

(Parameters: blastp, nr protein database, expect=20000, no filter, PAM30)

Other BLAST [web gateways](#)

## All matches to this query

| Score | Mr(calc):   | Delta    | Sequence                          |
|-------|-------------|----------|-----------------------------------|
| 34.9  | 2205.077591 | 0.024061 | <a href="#">AADIEQQAVFAVFDENK</a> |
| 34.9  | 2205.077591 | 0.024061 | <a href="#">AADIEQQAVFAVFDENK</a> |

# MASCOT Search Results

## Peptide View

MS/MS Fragmentation of **IVGGQECK**

Found in **FA10\_HUMAN**, Coagulation factor X OS=Homo sapiens GN=F10 PE=1 SV=2

Match to Query 23708: 1200.614928 from(601.314740,2+) rtinseconds(1413) index(56631)

Title: Locus:1.1.1.2915.21 File:"2013-07-02 CLN FXIII 180 min 1st F 4.wiff"

Data file C:\Program Files (x86)\Matrix Science\Mascot Daemon\mgf\7 FXIII 180 min 1st\mascot\_daemon\_merge.mgf

Click mouse within plot area to zoom in by factor of two about that point

Or, Plot from  to  Da

Label all possible matches  Label matches used for scoring

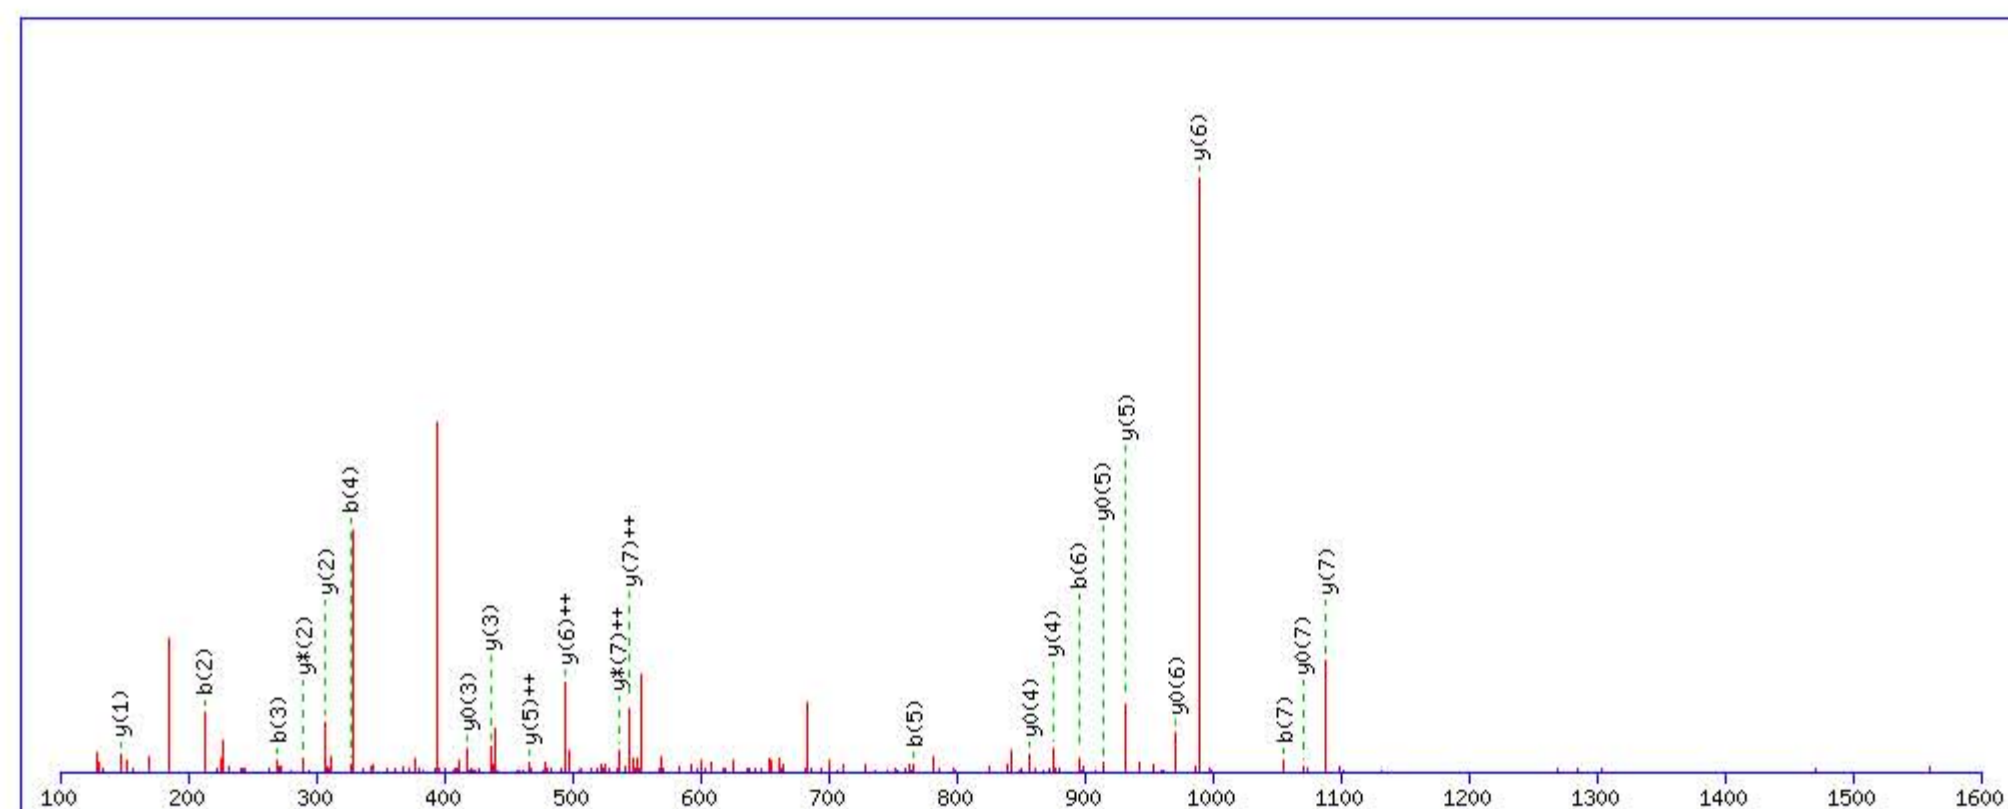

Monoisotopic mass of neutral peptide Mr(calc): 1200.599503

Fixed modifications: Carbamidomethyl (C) (apply to specified residues or termini only)

Variable modifications:

Q5 : Biotin:Thermo-21345 (Q)

Ions Score: 33 Expect: 0.0029

Matches : 23/62 fragment ions using 51 most intense peaks [\(help\)](#)

| # | b           | b <sup>++</sup> | b <sup>*</sup> | b <sup>*++</sup> | b <sup>0</sup> | b <sup>0++</sup> | Seq. | y           | y <sup>++</sup> | y <sup>*</sup> | y <sup>*++</sup> | y <sup>0</sup> | y <sup>0++</sup> | # |
|---|-------------|-----------------|----------------|------------------|----------------|------------------|------|-------------|-----------------|----------------|------------------|----------------|------------------|---|
| 1 | 114.091340  | 57.549308       |                |                  |                |                  | I    |             |                 |                |                  |                |                  | 8 |
| 2 | 213.159754  | 107.083515      |                |                  |                |                  | V    | 1088.522714 | 544.764995      | 1071.496165    | 536.251721       | 1070.512149    | 535.759713       | 7 |
| 3 | 270.181218  | 135.594247      |                |                  |                |                  | G    | 989.454300  | 495.230788      | 972.427751     | 486.717514       | 971.443735     | 486.225506       | 6 |
| 4 | 327.202682  | 164.104979      |                |                  |                |                  | G    | 932.432836  | 466.720056      | 915.406287     | 458.206782       | 914.422271     | 457.714774       | 5 |
| 5 | 766.428008  | 383.717642      | 749.401459     | 375.204368       |                |                  | Q    | 875.411372  | 438.209324      | 858.384823     | 429.696050       | 857.400807     | 429.204042       | 4 |
| 6 | 895.470601  | 448.238939      | 878.444052     | 439.725664       | 877.460036     | 439.233656       | E    | 436.186046  | 218.596661      | 419.159497     | 210.083386       | 418.175481     | 209.591378       | 3 |
| 7 | 1055.501250 | 528.254263      | 1038.474701    | 519.740989       | 1037.490685    | 519.248981       | C    | 307.143453  | 154.075364      | 290.116904     | 145.562090       |                |                  | 2 |
| 8 |             |                 |                |                  |                |                  | K    | 147.112804  | 74.060040       | 130.086255     | 65.546765        |                |                  | 1 |

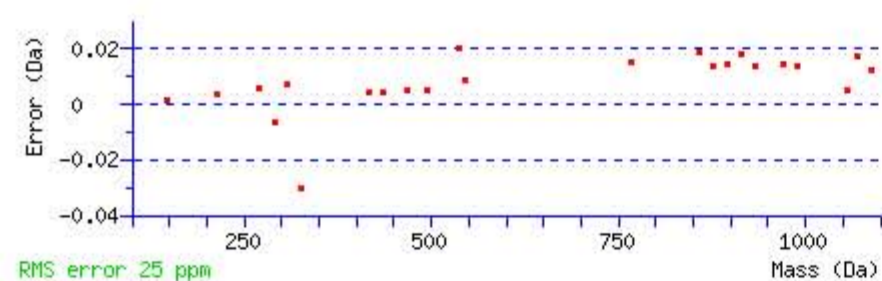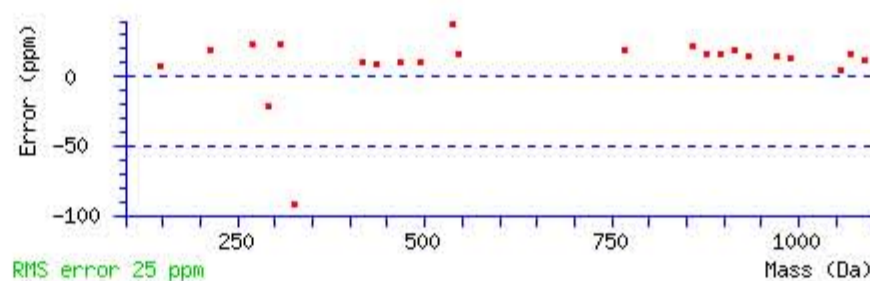

NCBI BLAST search of **IVGGQECK**

(Parameters: blastp, nr protein database, expect=20000, no filter, PAM30)

Other BLAST [web gateways](#)

All matches to this query

| Score | Mr(calc):   | Delta     | Sequence                    |
|-------|-------------|-----------|-----------------------------|
| 33.0  | 1200.599503 | 0.015425  | <a href="#">IVGGQECK</a>    |
| 5.6   | 1200.628479 | -0.013551 | <a href="#">IVQISGNSMPR</a> |
| 3.4   | 1200.621048 | -0.006120 | <a href="#">IRQKEEENR</a>   |
| 2.1   | 1200.598587 | 0.016341  | <a href="#">ILADLEEENR</a>  |
| 1.3   | 1200.599503 | 0.015425  | <a href="#">LIQGDGCK</a>    |
| 0.4   | 1200.609863 | 0.005065  | <a href="#">QTVEADVNGLR</a> |

# MASCOT SCIENCE Mascot Search Results

## Peptide View

MS/MS Fragmentation of **QEDACQGDSSGGPHVTR**

Found in **FA10\_HUMAN**, Coagulation factor X OS=Homo sapiens GN=F10 PE=1 SV=2

Match to Query 51371: 2023.911732 from(675.644520,3+) rtinseconds(1313) index(55970)

Title: Locus:1.1.1.2880.26 File:"2013-07-02 CLN FXIII 180 min 1st F 4.wiff"

Data file C:\Program Files (x86)\Matrix Science\Mascot Daemon\mgf\7 FXIII 180 min 1st\mascot\_daemon\_merge.mgf

Click mouse within plot area to zoom in by factor of two about that point

Or, Plot from  to  Da

Label all possible matches  Label matches used for scoring

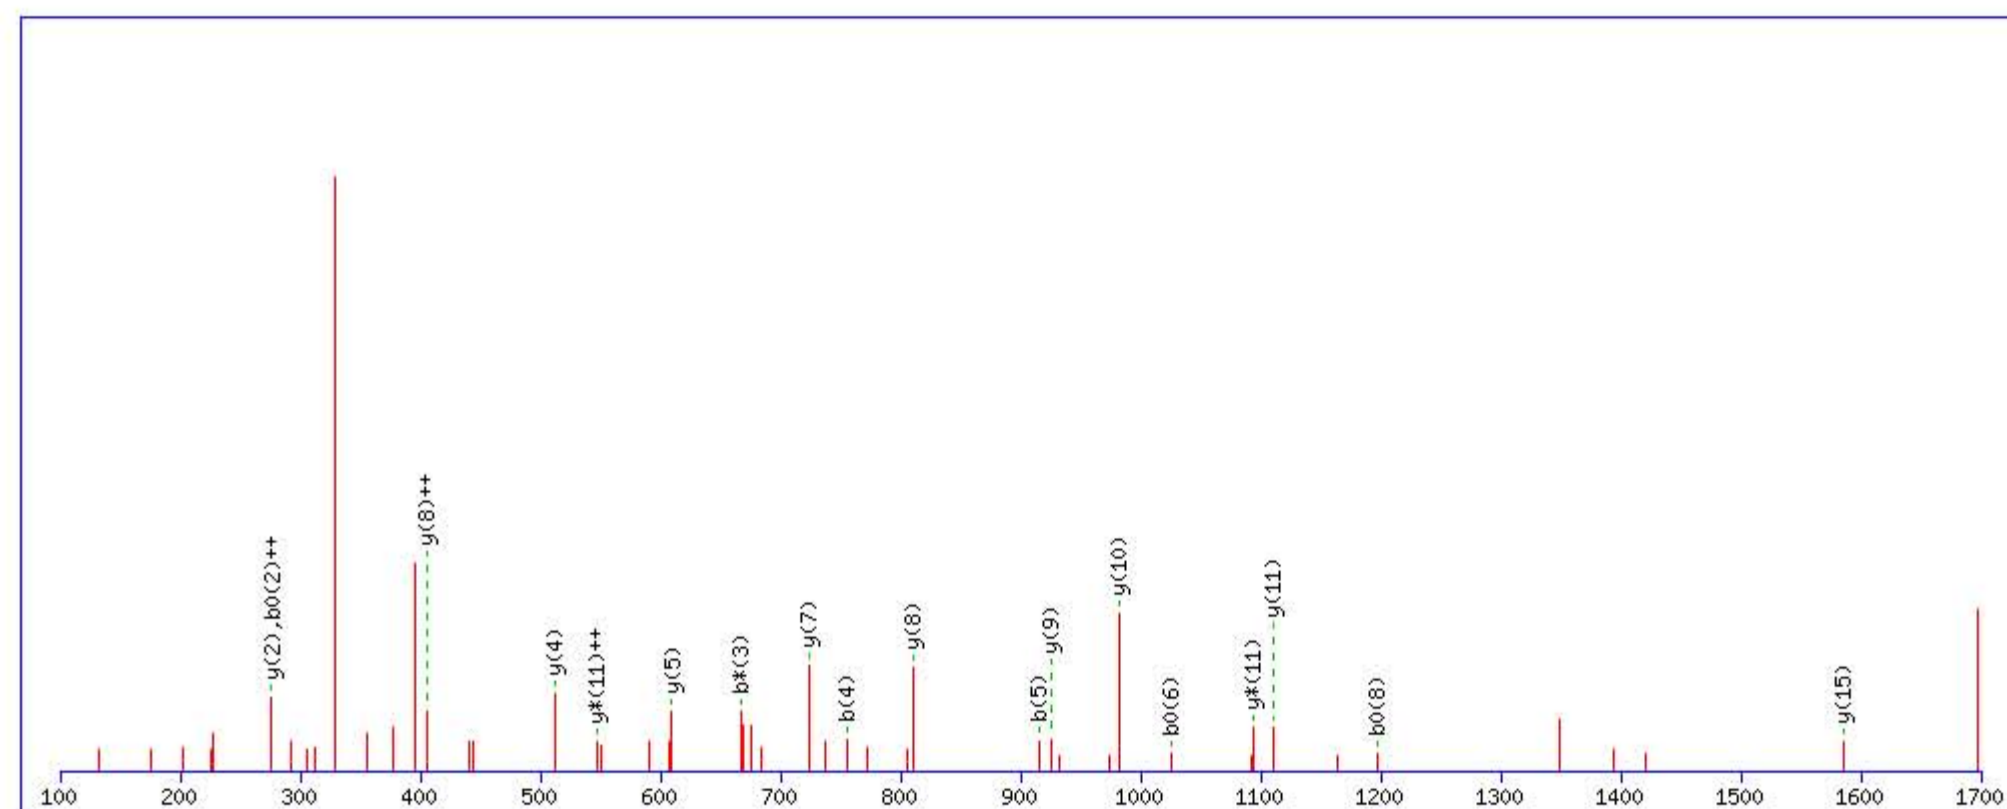

Monoisotopic mass of neutral peptide  $M_r(\text{calc})$ : 2023.884033

Fixed modifications: Carbamidomethyl (C) (apply to specified residues or termini only)

Variable modifications:

Q1 : Biotin:Thermo-21345 (Q)

Ions Score: 56 Expect: 5.9e-006

Matches : 18/176 fragment ions using 26 most intense peaks [\(help\)](#)

| #  | b           | b <sup>++</sup> | b <sup>*</sup> | b <sup>*++</sup> | b <sup>0</sup> | b <sup>0++</sup> | Seq. | y           | y <sup>++</sup> | y <sup>*</sup> | y <sup>*++</sup> | y <sup>0</sup> | y <sup>0++</sup> | #  |
|----|-------------|-----------------|----------------|------------------|----------------|------------------|------|-------------|-----------------|----------------|------------------|----------------|------------------|----|
| 1  | 440.232602  | 220.619939      | 423.206053     | 212.106664       |                |                  | Q    |             |                 |                |                  |                |                  | 16 |
| 2  | 569.275195  | 285.141236      | 552.248646     | 276.627961       | 551.264630     | 276.135953       | E    | 1585.665961 | 793.336618      | 1568.639412    | 784.823344       | 1567.655396    | 784.331336       | 15 |
| 3  | 684.302138  | 342.654707      | 667.275589     | 334.141433       | 666.291573     | 333.649425       | D    | 1456.623368 | 728.815322      | 1439.596819    | 720.302047       | 1438.612803    | 719.810039       | 14 |
| 4  | 755.339252  | 378.173264      | 738.312703     | 369.659989       | 737.328687     | 369.167982       | A    | 1341.596425 | 671.301851      | 1324.569876    | 662.788576       | 1323.585860    | 662.296568       | 13 |
| 5  | 915.369901  | 458.188589      | 898.343352     | 449.675314       | 897.359336     | 449.183306       | C    | 1270.559311 | 635.783294      | 1253.532762    | 627.270019       | 1252.548746    | 626.778011       | 12 |
| 6  | 1043.428479 | 522.217877      | 1026.401930    | 513.704603       | 1025.417914    | 513.212595       | Q    | 1110.528662 | 555.767969      | 1093.502113    | 547.254695       | 1092.518097    | 546.762686       | 11 |
| 7  | 1100.449943 | 550.728609      | 1083.423394    | 542.215335       | 1082.439378    | 541.723327       | G    | 982.470084  | 491.738680      | 965.443535     | 483.225406       | 964.459519     | 482.733398       | 10 |
| 8  | 1215.476886 | 608.242081      | 1198.450337    | 599.728807       | 1197.466321    | 599.236798       | D    | 925.448620  | 463.227948      | 908.422071     | 454.714674       | 907.438055     | 454.222666       | 9  |
| 9  | 1302.508914 | 651.758095      | 1285.482365    | 643.244821       | 1284.498349    | 642.752813       | S    | 810.421677  | 405.714477      | 793.395128     | 397.201202       | 792.411112     | 396.709194       | 8  |
| 10 | 1359.530378 | 680.268827      | 1342.503829    | 671.755553       | 1341.519813    | 671.263544       | G    | 723.389649  | 362.198463      | 706.363100     | 353.685188       | 705.379084     | 353.193180       | 7  |
| 11 | 1416.551842 | 708.779559      | 1399.525293    | 700.266284       | 1398.541277    | 699.774276       | G    | 666.368185  | 333.687731      | 649.341636     | 325.174456       | 648.357620     | 324.682448       | 6  |
| 12 | 1513.604606 | 757.305941      | 1496.578057    | 748.792667       | 1495.594041    | 748.300658       | P    | 609.346721  | 305.176999      | 592.320172     | 296.663724       | 591.336156     | 296.171716       | 5  |
| 13 | 1650.663518 | 825.835397      | 1633.636969    | 817.322122       | 1632.652953    | 816.830114       | H    | 512.293957  | 256.650617      | 495.267408     | 248.137342       | 494.283392     | 247.645334       | 4  |
| 14 | 1749.731932 | 875.369604      | 1732.705383    | 866.856330       | 1731.721367    | 866.364321       | V    | 375.235045  | 188.121161      | 358.208496     | 179.607886       | 357.224480     | 179.115878       | 3  |
| 15 | 1850.779611 | 925.893443      | 1833.753062    | 917.380169       | 1832.769046    | 916.888161       | T    | 276.166631  | 138.586953      | 259.140082     | 130.073679       | 258.156066     | 129.581671       | 2  |
| 16 |             |                 |                |                  |                |                  | R    | 175.118952  | 88.063114       | 158.092403     | 79.549839        |                |                  | 1  |

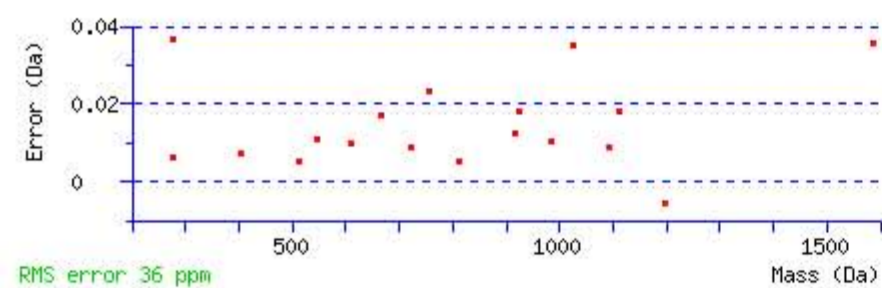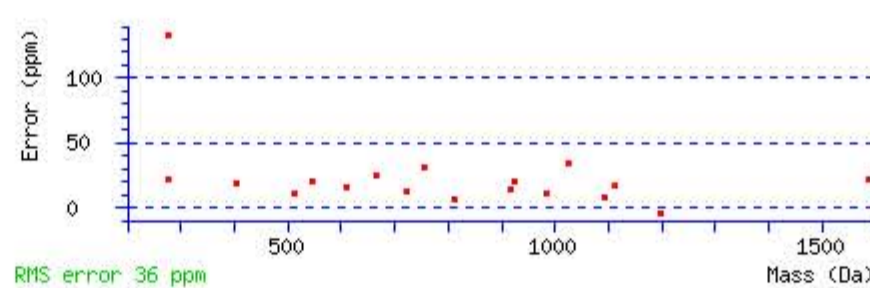

NCBI BLAST search of [QEDACQGDSSGGPHVTR](#)

(Parameters: blastp, nr protein database, expect=20000, no filter, PAM30)

Other BLAST [web gateways](#)

## All matches to this query

| Score | $M_r(\text{calc})$ : | Delta     | Sequence                          |
|-------|----------------------|-----------|-----------------------------------|
| 56.4  | 2023.884033          | 0.027699  | <a href="#">QEDACQGDSSGGPHVTR</a> |
| 24.8  | 2023.884033          | 0.027699  | <a href="#">QEDACQGDSSGGPHVTR</a> |
| 0.6   | 2023.930908          | -0.019176 | <a href="#">WDAWNLKGTSKEDAMK</a>  |

# MASCOT Search Results

## Peptide View

MS/MS Fragmentation of **QEDACQGDSSGGPHVTR**

Found in **FA10\_HUMAN**, Coagulation factor X OS=Homo sapiens GN=F10 PE=1 SV=2

Match to Query 51373: 2023.912212 from(675.644680,3+) rtinseconds(1327) index(56070)

Title: Locus:1.1.1.2885.11 File:"2013-07-02 CLN FXIII 180 min 1st F 4.wiff"

Data file C:\Program Files (x86)\Matrix Science\Mascot Daemon\mgf7 FXIII 180 min 1st\mascot\_daemon\_merge.mgf

Click mouse within plot area to zoom in by factor of two about that point

Or, Plot from  to  Da

Label all possible matches  Label matches used for scoring

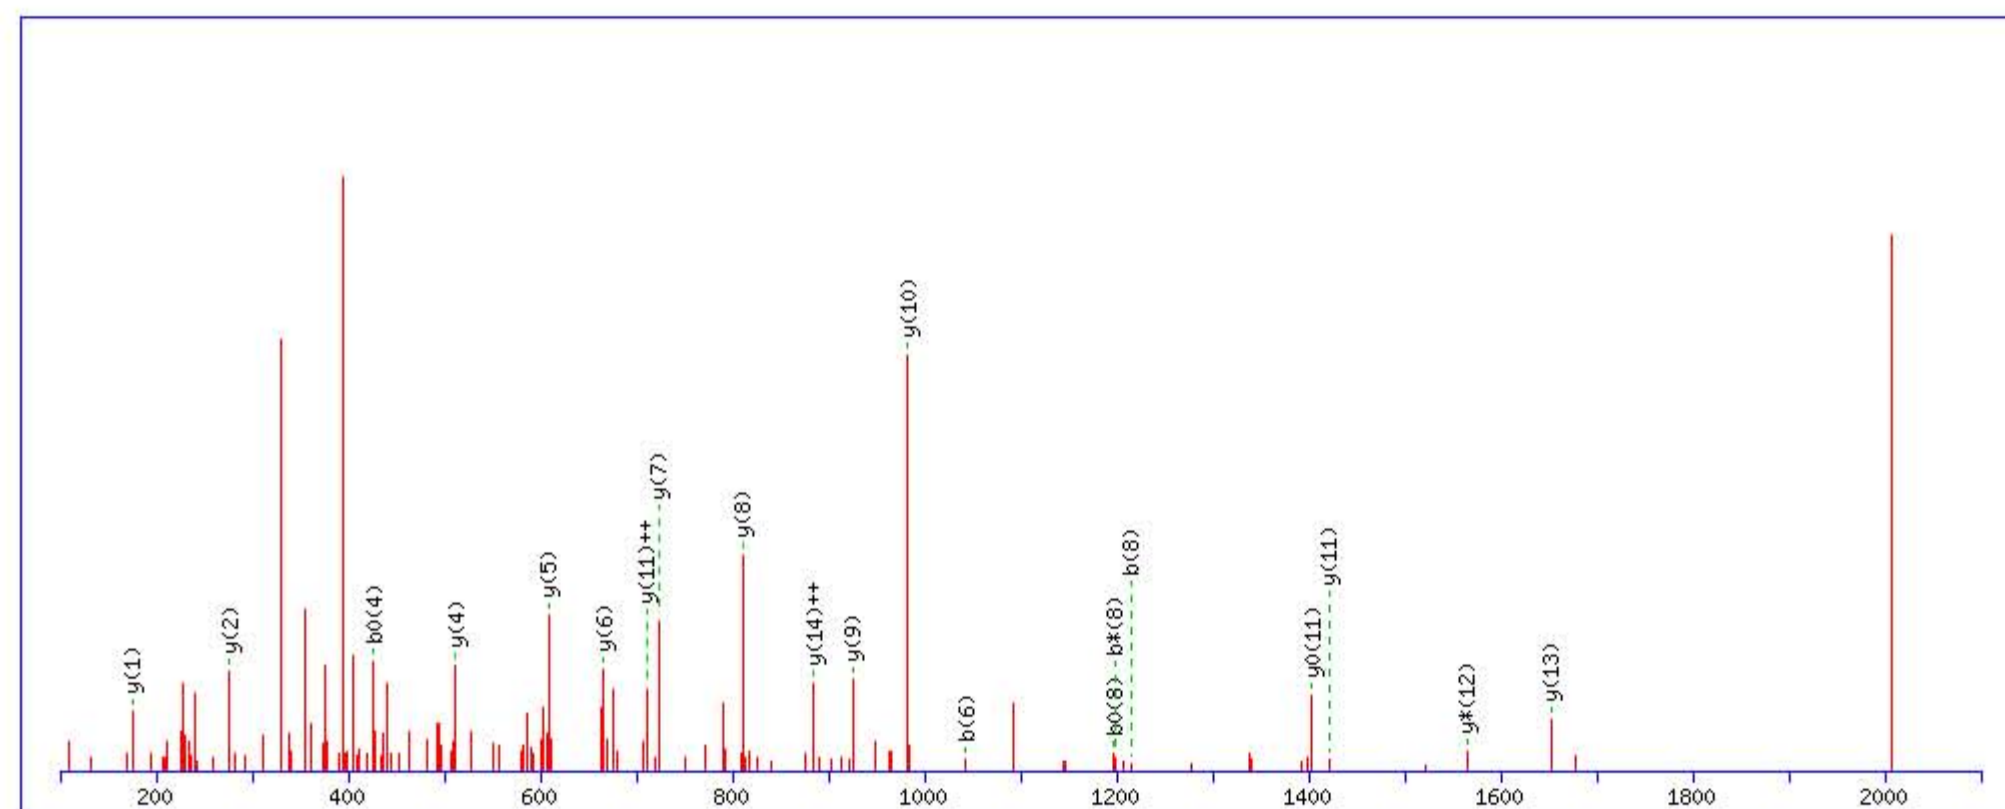

Monoisotopic mass of neutral peptide Mr(calc): 2023.884033

Fixed modifications: Carbamidomethyl (C) (apply to specified residues or termini only)

Variable modifications:

Q6 : Biotin:Thermo-21345 (Q)

Ions Score: 76 Expect: 8.7e-008

Matches : 20/176 fragment ions using 33 most intense peaks [\(help\)](#)

| #  | b           | b <sup>++</sup> | b <sup>*</sup> | b <sup>*++</sup> | b <sup>0</sup> | b <sup>0++</sup> | Seq. | y           | y <sup>++</sup> | y <sup>*</sup> | y <sup>*++</sup> | y <sup>0</sup> | y <sup>0++</sup> | #  |
|----|-------------|-----------------|----------------|------------------|----------------|------------------|------|-------------|-----------------|----------------|------------------|----------------|------------------|----|
| 1  | 129.065854  | 65.036565       | 112.039305     | 56.523291        |                |                  | Q    |             |                 |                |                  |                |                  | 16 |
| 2  | 258.108447  | 129.557862      | 241.081898     | 121.044587       | 240.097882     | 120.552579       | E    | 1896.832709 | 948.919993      | 1879.806160    | 940.406718       | 1878.822144    | 939.914710       | 15 |
| 3  | 373.135390  | 187.071333      | 356.108841     | 178.558059       | 355.124825     | 178.066051       | D    | 1767.790116 | 884.398696      | 1750.763567    | 875.885422       | 1749.779551    | 875.393414       | 14 |
| 4  | 444.172504  | 222.589890      | 427.145955     | 214.076616       | 426.161939     | 213.584608       | A    | 1652.763173 | 826.885225      | 1635.736624    | 818.371950       | 1634.752608    | 817.879942       | 13 |
| 5  | 604.203153  | 302.605215      | 587.176604     | 294.091940       | 586.192588     | 293.599932       | C    | 1581.726059 | 791.366668      | 1564.699510    | 782.853393       | 1563.715494    | 782.361385       | 12 |
| 6  | 1043.428479 | 522.217878      | 1026.401930    | 513.704603       | 1025.417914    | 513.212595       | Q    | 1421.695410 | 711.351343      | 1404.668861    | 702.838069       | 1403.684845    | 702.346061       | 11 |
| 7  | 1100.449943 | 550.728610      | 1083.423394    | 542.215335       | 1082.439378    | 541.723327       | G    | 982.470084  | 491.738680      | 965.443535     | 483.225406       | 964.459519     | 482.733398       | 10 |
| 8  | 1215.476886 | 608.242081      | 1198.450337    | 599.728807       | 1197.466321    | 599.236799       | D    | 925.448620  | 463.227948      | 908.422071     | 454.714674       | 907.438055     | 454.222666       | 9  |
| 9  | 1302.508914 | 651.758095      | 1285.482365    | 643.244821       | 1284.498349    | 642.752813       | S    | 810.421677  | 405.714477      | 793.395128     | 397.201202       | 792.411112     | 396.709194       | 8  |
| 10 | 1359.530378 | 680.268827      | 1342.503829    | 671.755553       | 1341.519813    | 671.263545       | G    | 723.389649  | 362.198463      | 706.363100     | 353.685188       | 705.379084     | 353.193180       | 7  |
| 11 | 1416.551842 | 708.779559      | 1399.525293    | 700.266285       | 1398.541277    | 699.774277       | G    | 666.368185  | 333.687731      | 649.341636     | 325.174456       | 648.357620     | 324.682448       | 6  |
| 12 | 1513.604606 | 757.305941      | 1496.578057    | 748.792667       | 1495.594041    | 748.300659       | P    | 609.346721  | 305.176999      | 592.320172     | 296.663724       | 591.336156     | 296.171716       | 5  |
| 13 | 1650.663518 | 825.835397      | 1633.636969    | 817.322123       | 1632.652953    | 816.830115       | H    | 512.293957  | 256.650617      | 495.267408     | 248.137342       | 494.283392     | 247.645334       | 4  |
| 14 | 1749.731932 | 875.369604      | 1732.705383    | 866.856330       | 1731.721367    | 866.364322       | V    | 375.235045  | 188.121161      | 358.208496     | 179.607886       | 357.224480     | 179.115878       | 3  |
| 15 | 1850.779611 | 925.893444      | 1833.753062    | 917.380169       | 1832.769046    | 916.888161       | T    | 276.166631  | 138.586953      | 259.140082     | 130.073679       | 258.156066     | 129.581671       | 2  |
| 16 |             |                 |                |                  |                |                  | R    | 175.118952  | 88.063114       | 158.092403     | 79.549839        |                |                  | 1  |

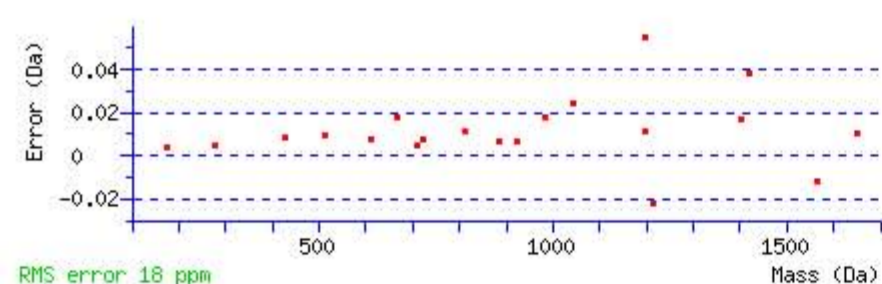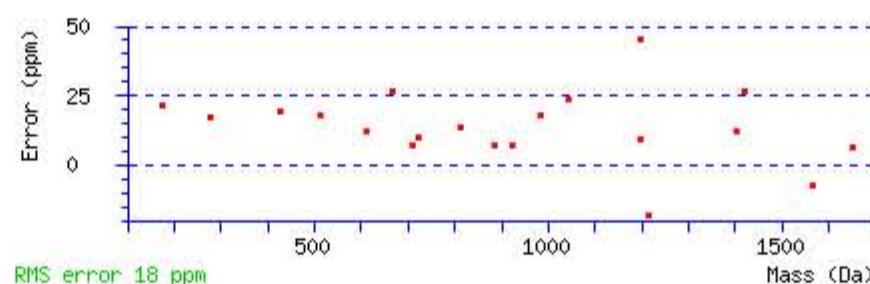

NCBI BLAST search of [QEDACQGDSSGGPHVTR](#)

(Parameters: blastp, nr protein database, expect=20000, no filter, PAM30)

Other BLAST [web gateways](#)

## All matches to this query

| Score | Mr(calc):   | Delta     | Sequence                          |
|-------|-------------|-----------|-----------------------------------|
| 75.8  | 2023.884033 | 0.028179  | <a href="#">QEDACQGDSSGGPHVTR</a> |
| 45.2  | 2023.884033 | 0.028179  | <a href="#">QEDACQGDSSGGPHVTR</a> |
| 0.5   | 2023.930908 | -0.018696 | <a href="#">WDAWNLKGTSKEDAMK</a>  |



# MASCOT SEARCH RESULTS

## Peptide View

MS/MS Fragmentation of **DGDQCETSPCQNQGK**

Found in **FA10\_HUMAN**, Coagulation factor X OS=Homo sapiens GN=F10 PE=1 SV=2

Match to Query 51616: 2033.854272 from(678.958700,3+) rtinseconds(1342) index(56128)

Title: Locus:1.1.1.2890.14 File:"2013-07-02 CLN FXIII 180 min 1st F 4.wiff"

Data file C:\Program Files (x86)\Matrix Science\Mascot Daemon\mgf7 FXIII 180 min 1st\mascot\_daemon\_merge.mgf

Click mouse within plot area to zoom in by factor of two about that point

Or, Plot from  to  Da

Label all possible matches  Label matches used for scoring

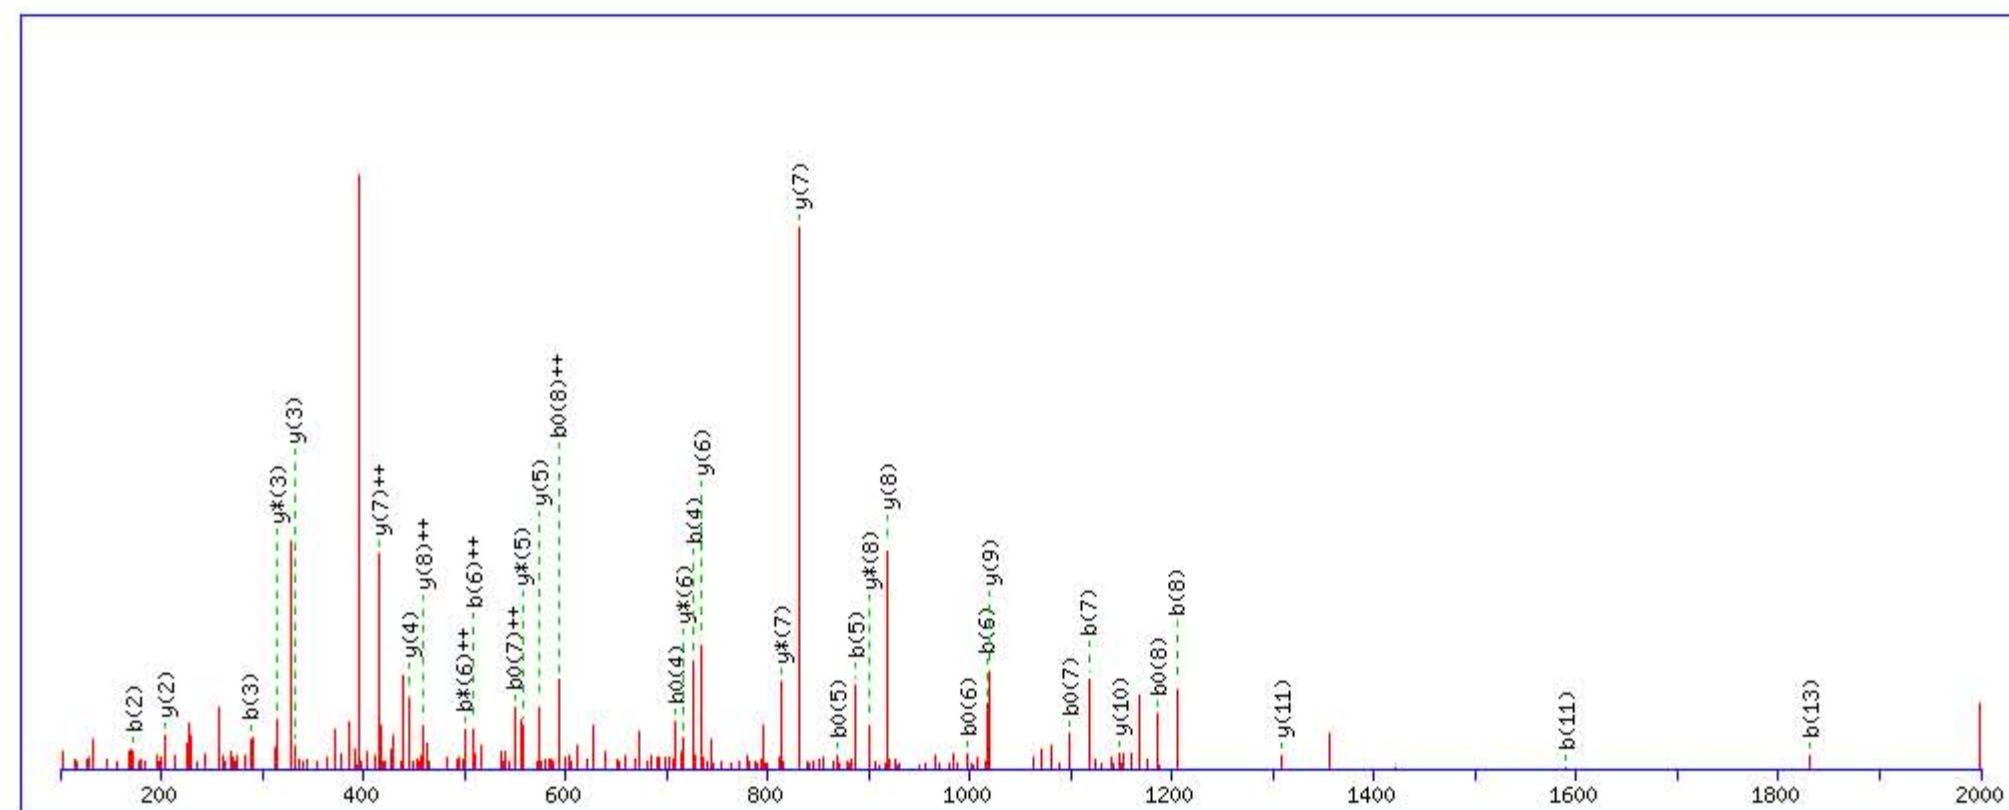

Monoisotopic mass of neutral peptide Mr(calc): 2033.824127

Fixed modifications: Carbamidomethyl (C) (apply to specified residues or termini only)

Variable modifications:

Q4 : Biotin:Thermo-21345 (Q)

Ions Score: 47 Expect: 5.5e-005

Matches : 35/148 fragment ions using 73 most intense peaks [\(help\)](#)

| #  | b                  | b <sup>++</sup>   | b <sup>*</sup> | b <sup>*++</sup>  | b <sup>0</sup>     | b <sup>0++</sup>  | Seq. | y                  | y <sup>++</sup>   | y <sup>*</sup>    | y <sup>*++</sup> | y <sup>0</sup> | y <sup>0++</sup> | #  |
|----|--------------------|-------------------|----------------|-------------------|--------------------|-------------------|------|--------------------|-------------------|-------------------|------------------|----------------|------------------|----|
| 1  | 116.034219         | 58.520748         |                |                   | 98.023654          | 49.515465         | D    |                    |                   |                   |                  |                |                  | 15 |
| 2  | <b>173.055683</b>  | 87.031479         |                |                   | 155.045118         | 78.026197         | G    | 1919.804446        | 960.405861        | 1902.777897       | 951.892587       | 1901.793881    | 951.400579       | 14 |
| 3  | <b>288.082626</b>  | 144.544951        |                |                   | 270.072061         | 135.539669        | D    | 1862.782982        | 931.895129        | 1845.756433       | 923.381855       | 1844.772417    | 922.889847       | 13 |
| 4  | <b>727.307952</b>  | 364.157614        | 710.281403     | 355.644340        | <b>709.297387</b>  | 355.152332        | Q    | 1747.756039        | 874.381658        | 1730.729490       | 865.868383       | 1729.745474    | 865.376375       | 12 |
| 5  | <b>887.338601</b>  | 444.172939        | 870.312052     | 435.659664        | <b>869.328036</b>  | 435.167656        | C    | <b>1308.530713</b> | 654.768995        | 1291.504164       | 646.255720       | 1290.520148    | 645.763712       | 11 |
| 6  | <b>1016.381194</b> | <b>508.694235</b> | 999.354645     | <b>500.180961</b> | <b>998.370629</b>  | 499.688953        | E    | <b>1148.500064</b> | 574.753670        | 1131.473515       | 566.240396       | 1130.489499    | 565.748388       | 10 |
| 7  | <b>1117.428873</b> | 559.218075        | 1100.402324    | 550.704800        | <b>1099.418308</b> | <b>550.212792</b> | T    | <b>1019.457471</b> | 510.232374        | 1002.430922       | 501.719099       | 1001.446906    | 501.227091       | 9  |
| 8  | <b>1204.460901</b> | 602.734089        | 1187.434352    | 594.220814        | <b>1186.450336</b> | <b>593.728806</b> | S    | <b>918.409792</b>  | <b>459.708534</b> | <b>901.383243</b> | 451.195260       | 900.399227     | 450.703252       | 8  |
| 9  | 1301.513665        | 651.260471        | 1284.487116    | 642.747196        | 1283.503100        | 642.255188        | P    | <b>831.377764</b>  | <b>416.192520</b> | <b>814.351215</b> | 407.679246       |                |                  | 7  |
| 10 | 1461.544314        | 731.275795        | 1444.517765    | 722.762521        | 1443.533749        | 722.270513        | C    | <b>734.325000</b>  | 367.666138        | <b>717.298451</b> | 359.152864       |                |                  | 6  |
| 11 | <b>1589.602892</b> | 795.305084        | 1572.576343    | 786.791810        | 1571.592327        | 786.299802        | Q    | <b>574.294351</b>  | 287.650814        | <b>557.267802</b> | 279.137539       |                |                  | 5  |
| 12 | 1703.645819        | 852.326548        | 1686.619270    | 843.813273        | 1685.635254        | 843.321265        | N    | <b>446.235773</b>  | 223.621524        | 429.209224        | 215.108250       |                |                  | 4  |
| 13 | <b>1831.704397</b> | 916.355837        | 1814.677848    | 907.842562        | 1813.693832        | 907.350554        | Q    | <b>332.192846</b>  | 166.600061        | <b>315.166297</b> | 158.086787       |                |                  | 3  |
| 14 | 1888.725861        | 944.866569        | 1871.699312    | 936.353294        | 1870.715296        | 935.861286        | G    | <b>204.134268</b>  | 102.570772        | 187.107719        | 94.057497        |                |                  | 2  |
| 15 |                    |                   |                |                   |                    |                   | K    | 147.112804         | 74.060040         | 130.086255        | 65.546765        |                |                  | 1  |

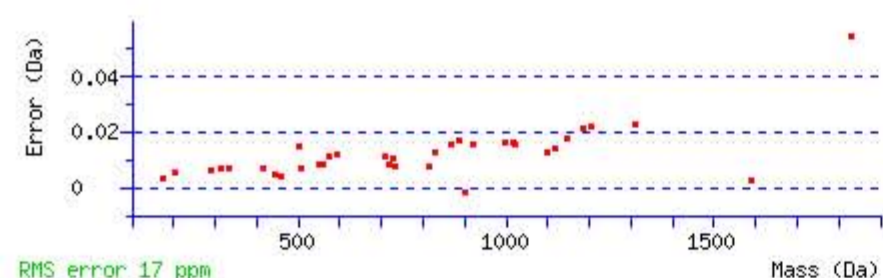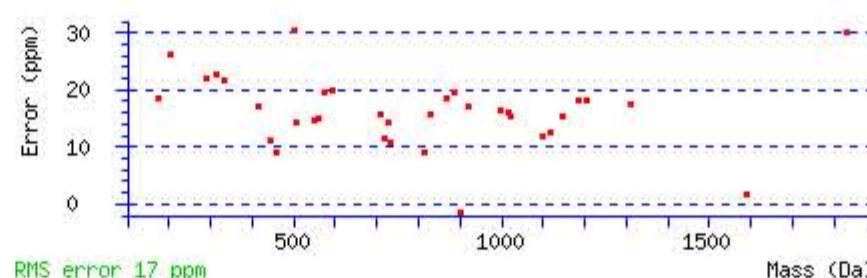

NCBI BLAST search of **DGDQCETSPCQNQGK**

(Parameters: blastp, nr protein database, expect=20000, no filter, PAM30)

Other BLAST [web gateways](#)

All matches to this query

| Score | Mr(calc):   | Delta    | Sequence                        |
|-------|-------------|----------|---------------------------------|
| 46.6  | 2033.824127 | 0.030145 | <a href="#">DGDQCETSPCQNQGK</a> |

Mascot: <http://www.matrixscience.com/>

# MASCOT SCIENCE Mascot Search Results

## Peptide View

MS/MS Fragmentation of **IPLVTNEECQK**

Found in **FA11\_HUMAN**, Coagulation factor XI OS=Homo sapiens GN=F11 PE=1 SV=1

Match to Query 40962: 1640.836782 from(547.952870,3+) rtinseconds(1861) index(77829)

Title: Locus:1.1.1.1999.12 File:"2013-07-02 CLN FXIII 180 min 1st FT.wiff"

Data file C:\Program Files (x86)\Matrix Science\Mascot Daemon\mgf\7 FXIII 180 min 1st\mascot\_daemon\_merge.mgf

Click mouse within plot area to zoom in by factor of two about that point

Or, Plot from  to  Da

Label all possible matches  Label matches used for scoring

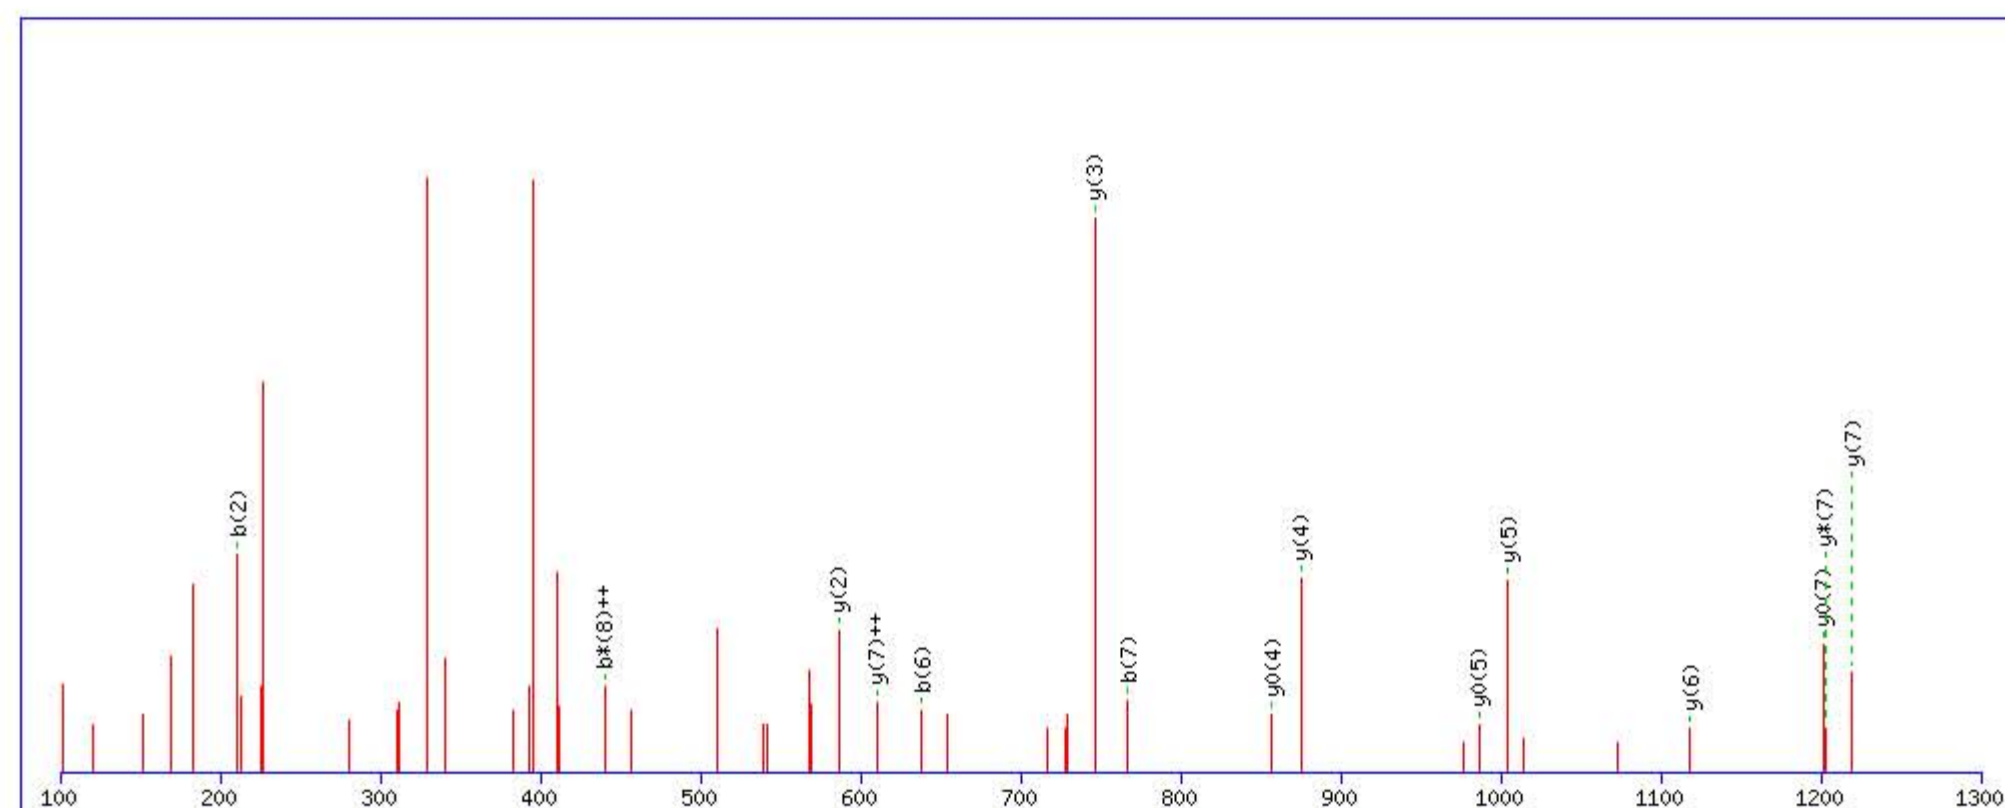

Monoisotopic mass of neutral peptide Mr(calc): 1640.826584

Fixed modifications: Carbamidomethyl (C) (apply to specified residues or termini only)

Variable modifications:

Q10 : Biotin:Thermo-21345 (Q)

Ions Score: 31 Expect: 0.019

Matches : 15/96 fragment ions using 24 most intense peaks [\(help\)](#)

| #  | b                 | b <sup>++</sup> | b <sup>*</sup> | b <sup>*++</sup>  | b <sup>0</sup> | b <sup>0++</sup> | Seq. | y                  | y <sup>++</sup>   | y <sup>*</sup>     | y <sup>*++</sup> | y <sup>0</sup>     | y <sup>0++</sup> | #  |
|----|-------------------|-----------------|----------------|-------------------|----------------|------------------|------|--------------------|-------------------|--------------------|------------------|--------------------|------------------|----|
| 1  | 114.091340        | 57.549308       |                |                   |                |                  | I    |                    |                   |                    |                  |                    |                  | 11 |
| 2  | <b>211.144104</b> | 106.075690      |                |                   |                |                  | P    | 1528.749813        | 764.878545        | 1511.723264        | 756.365270       | 1510.739248        | 755.873262       | 10 |
| 3  | 324.228168        | 162.617722      |                |                   |                |                  | L    | 1431.697049        | 716.352163        | 1414.670500        | 707.838888       | 1413.686484        | 707.346880       | 9  |
| 4  | 423.296582        | 212.151929      |                |                   |                |                  | V    | 1318.612985        | 659.810131        | 1301.586436        | 651.296856       | 1300.602420        | 650.804848       | 8  |
| 5  | 524.344261        | 262.675769      |                |                   | 506.333696     | 253.670486       | T    | <b>1219.544571</b> | <b>610.275924</b> | <b>1202.518022</b> | 601.762649       | <b>1201.534006</b> | 601.270641       | 7  |
| 6  | <b>638.387188</b> | 319.697232      | 621.360639     | 311.183958        | 620.376623     | 310.691950       | N    | <b>1118.496892</b> | 559.752084        | 1101.470343        | 551.238810       | 1100.486327        | 550.746802       | 6  |
| 7  | <b>767.429781</b> | 384.218529      | 750.403232     | 375.705254        | 749.419216     | 375.213246       | E    | <b>1004.453965</b> | 502.730621        | 987.427416         | 494.217346       | <b>986.443400</b>  | 493.725338       | 5  |
| 8  | 896.472374        | 448.739825      | 879.445825     | <b>440.226551</b> | 878.461809     | 439.734543       | E    | <b>875.411372</b>  | 438.209324        | 858.384823         | 429.696050       | <b>857.400807</b>  | 429.204042       | 4  |
| 9  | 1056.503023       | 528.755150      | 1039.476474    | 520.241875        | 1038.492458    | 519.749867       | C    | <b>746.368779</b>  | 373.688028        | 729.342230         | 365.174753       |                    |                  | 3  |
| 10 | 1495.728349       | 748.367813      | 1478.701800    | 739.854538        | 1477.717784    | 739.362530       | Q    | <b>586.338130</b>  | 293.672703        | 569.311581         | 285.159429       |                    |                  | 2  |
| 11 |                   |                 |                |                   |                |                  | K    | 147.112804         | 74.060040         | 130.086255         | 65.546765        |                    |                  | 1  |

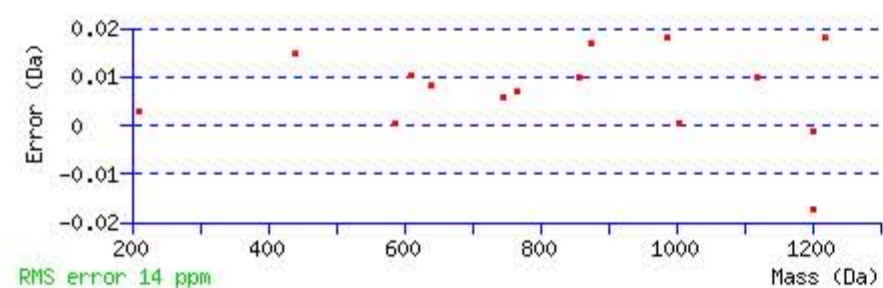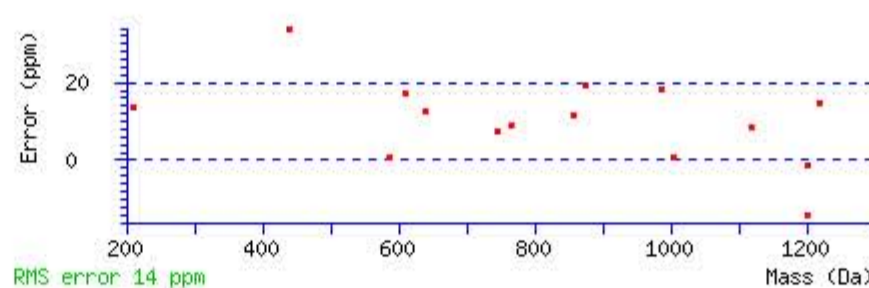

NCBI BLAST search of [IPLVTNEECQK](#)

(Parameters: blastp, nr protein database, expect=20000, no filter, PAM30)

Other BLAST [web gateways](#)

All matches to this query

| Score | Mr(calc):   | Delta    | Sequence                    |
|-------|-------------|----------|-----------------------------|
| 31.3  | 1640.826584 | 0.010198 | <a href="#">IPLVTNEECQK</a> |

Mascot: <http://www.matrixscience.com/>

# Mascot Search Results

## Peptide View

MS/MS Fragmentation of **LASQACR**

Found in **FA12\_HUMAN**, Coagulation factor XII OS=Homo sapiens GN=F12 PE=1 SV=3

Match to Query 19886: 1115.558848 from(558.786700,2+) rtinseconds(1337) index(19767)

Title: Locus:1.1.1.2608.20 File:"2013-07-02 CLN FXIII 180 min 1st F 2.wiff"

Data file C:\Program Files (x86)\Matrix Science\Mascot Daemon\mgf\7 FXIII 180 min 1st\mascot\_daemon\_merge.mgf

Click mouse within plot area to zoom in by factor of two about that point

Or, Plot from  to  Da

Label all possible matches  Label matches used for scoring

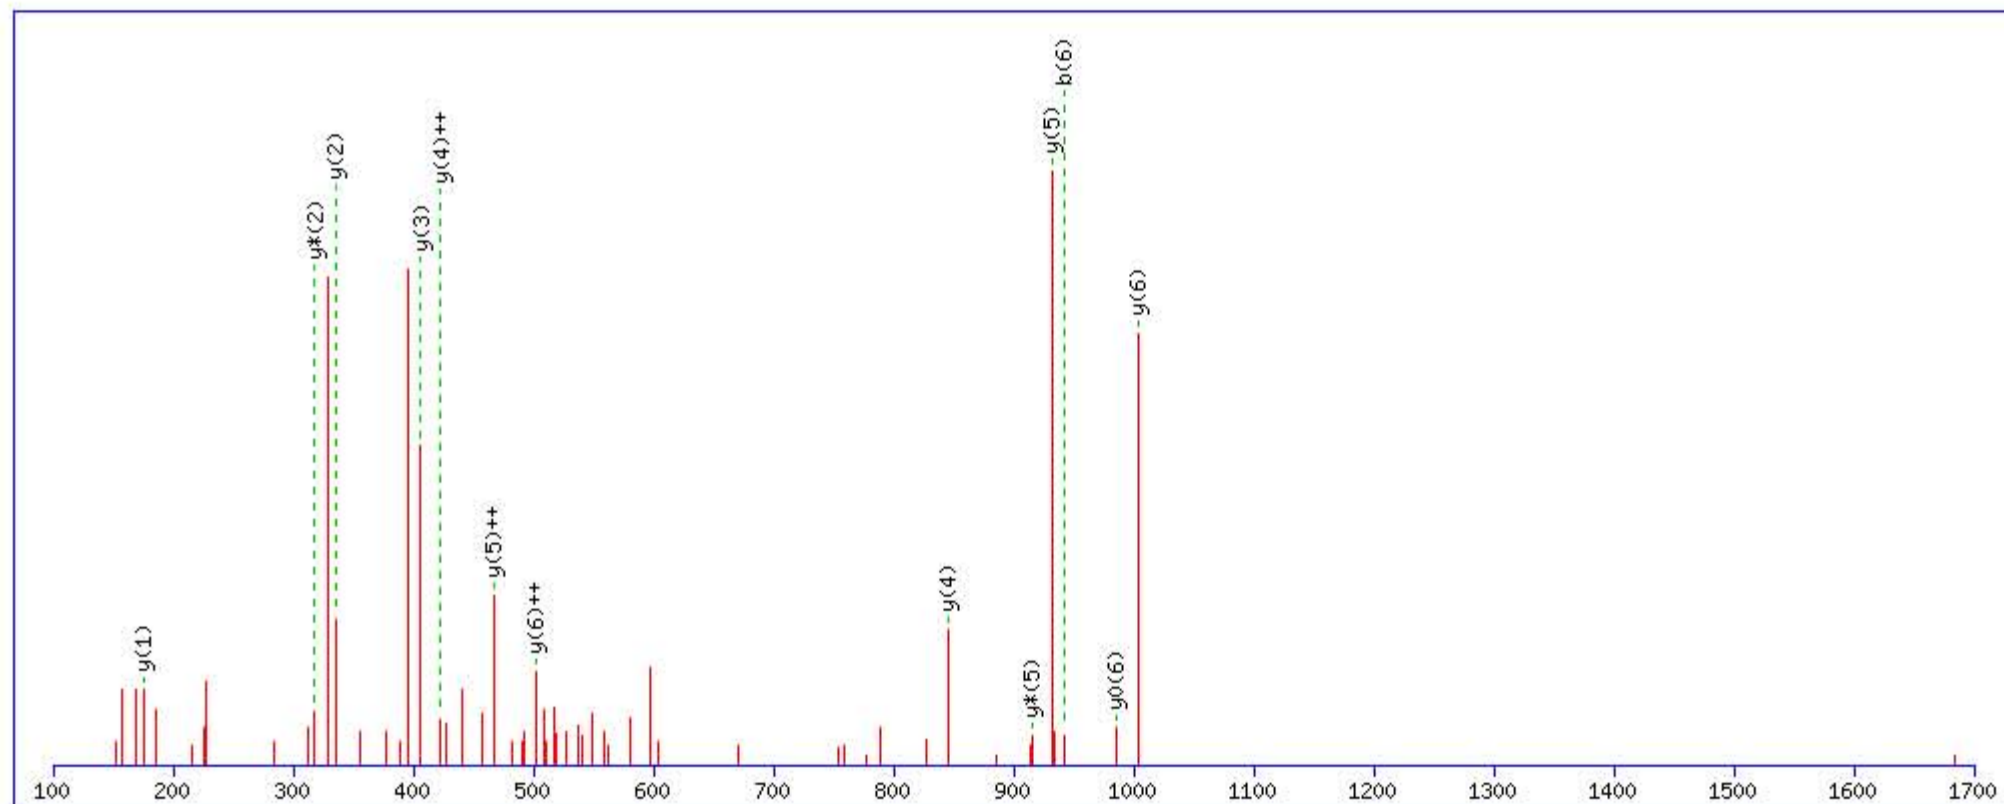

Monoisotopic mass of neutral peptide Mr(calc): 1115.557953

Fixed modifications: Carbamidomethyl (C) (apply to specified residues or termini only)

Variable modifications:

Q4 : Biotin:Thermo-21345 (Q)

Ions Score: 26 Expect: 0.021

Matches : 13/54 fragment ions using 31 most intense peaks ([help](#))

| # | b          | b <sup>++</sup> | b <sup>*</sup> | b <sup>*++</sup> | b <sup>0</sup> | b <sup>0++</sup> | Seq. | y           | y <sup>++</sup> | y <sup>*</sup> | y <sup>*++</sup> | y <sup>0</sup> | y <sup>0++</sup> | # |
|---|------------|-----------------|----------------|------------------|----------------|------------------|------|-------------|-----------------|----------------|------------------|----------------|------------------|---|
| 1 | 114.091340 | 57.549308       |                |                  |                |                  | L    |             |                 |                |                  |                |                  | 7 |
| 2 | 185.128454 | 93.067865       |                |                  |                |                  | A    | 1003.481183 | 502.244230      | 986.454634     | 493.730955       | 985.470618     | 493.238947       | 6 |
| 3 | 272.160482 | 136.583879      |                |                  | 254.149917     | 127.578596       | S    | 932.444069  | 466.725673      | 915.417520     | 458.212398       | 914.433504     | 457.720390       | 5 |
| 4 | 711.385808 | 356.196542      | 694.359259     | 347.683268       | 693.375243     | 347.191260       | Q    | 845.412041  | 423.209659      | 828.385492     | 414.696384       |                |                  | 4 |
| 5 | 782.422922 | 391.715099      | 765.396373     | 383.201824       | 764.412357     | 382.709816       | A    | 406.186715  | 203.596995      | 389.160166     | 195.083721       |                |                  | 3 |
| 6 | 942.453571 | 471.730424      | 925.427022     | 463.217149       | 924.443006     | 462.725141       | C    | 335.149601  | 168.078438      | 318.123052     | 159.565164       |                |                  | 2 |
| 7 |            |                 |                |                  |                |                  | R    | 175.118952  | 88.063114       | 158.092403     | 79.549839        |                |                  | 1 |

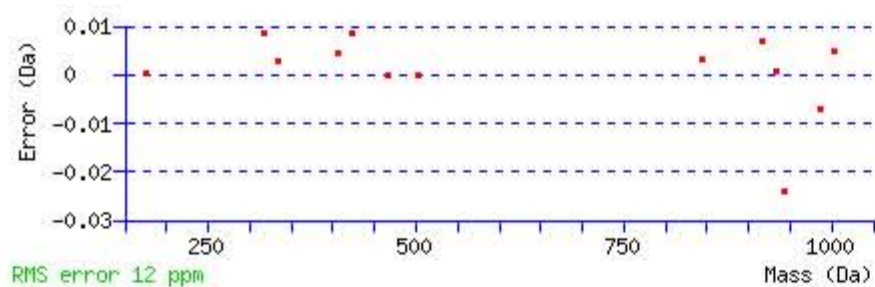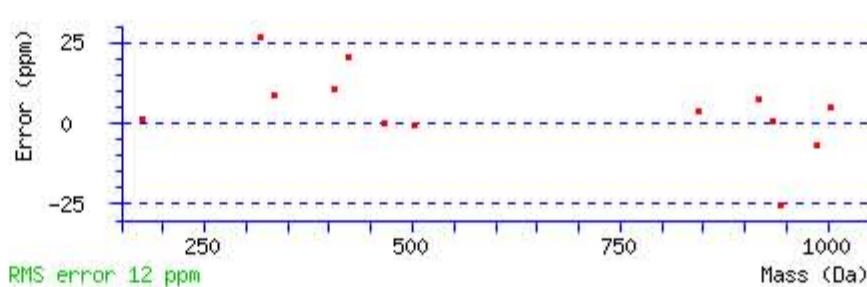

NCBI BLAST search of **LASQACR**

(Parameters: blastp, nr protein database, expect=20000, no filter, PAM30)

Other BLAST [web gateways](#)

All matches to this query

| Score | Mr(calc):   | Delta    | Sequence                   |
|-------|-------------|----------|----------------------------|
| 26.4  | 1115.557953 | 0.000895 | <a href="#">LASQACR</a>    |
| 8.1   | 1115.543350 | 0.015498 | <a href="#">SFCYISALR</a>  |
| 3.9   | 1115.557083 | 0.001765 | <a href="#">IQEAAVQSDR</a> |
| 3.7   | 1115.550552 | 0.008296 | <a href="#">LAAGSRCPER</a> |
| 0.7   | 1115.546722 | 0.012126 | <a href="#">LAQDACK</a>    |

# MASCOT SCIENCE Mascot Search Results

## Peptide View

MS/MS Fragmentation of **TEQAAVAR**

Found in **FA12\_HUMAN**, Coagulation factor XII OS=Homo sapiens GN=F12 PE=1 SV=3

Match to Query 22045: 1155.611268 from(578.812910,2+) rtinseconds(1380) index(2442)

Title: Locus:1.1.1.2734.23 File:"2013-07-02 CLN FXIII 180 min 1st F 1.wiff"

Data file C:\Program Files (x86)\Matrix Science\Mascot Daemon\mgf7 FXIII 180 min 1st\mascot\_daemon\_merge.mgf

Click mouse within plot area to zoom in by factor of two about that point

Or, Plot from  to  Da

Label all possible matches  Label matches used for scoring

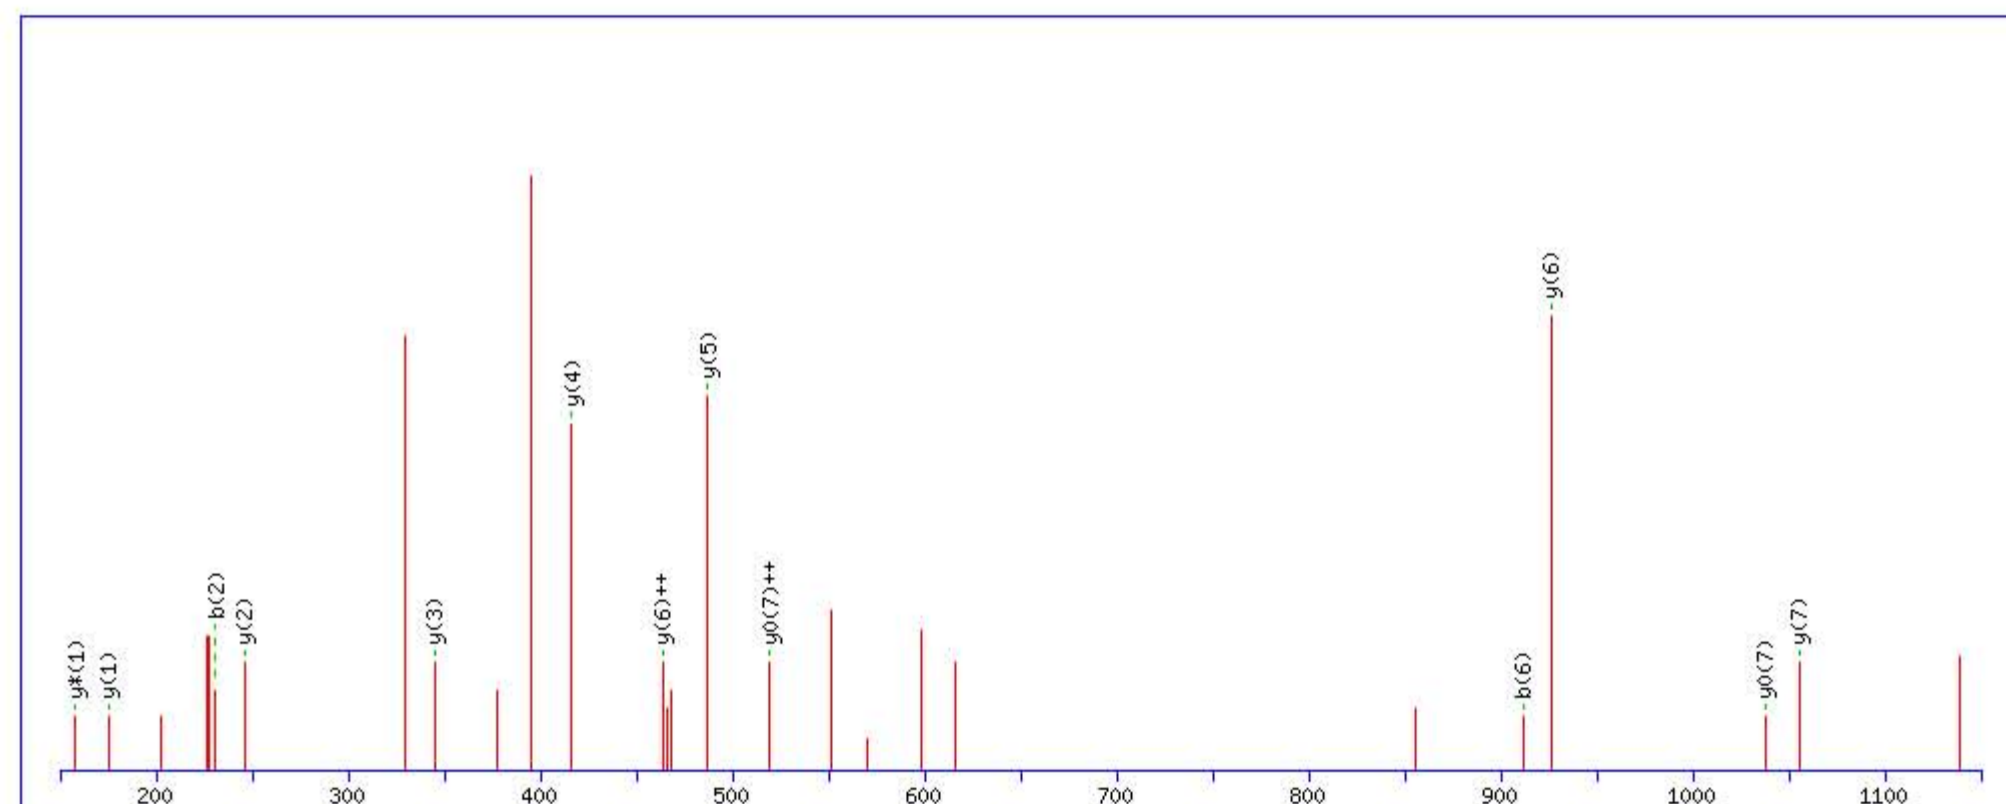

Monoisotopic mass of neutral peptide Mr(calc): 1155.607010

Fixed modifications: Carbamidomethyl (C) (apply to specified residues or termini only)

Variable modifications:

Q3 : Biotin:Thermo-21345 (Q)

Ions Score: 45 Expect: 0.00029

Matches : 13/68 fragment ions using 26 most intense peaks [\(help\)](#)

| # | b                 | b <sup>++</sup> | b <sup>+</sup> | b <sup>+++</sup> | b <sup>0</sup> | b <sup>0++</sup> | Seq. | y                  | y <sup>++</sup>   | y <sup>+</sup>    | y <sup>+++</sup> | y <sup>0</sup>     | y <sup>0++</sup>  | # |
|---|-------------------|-----------------|----------------|------------------|----------------|------------------|------|--------------------|-------------------|-------------------|------------------|--------------------|-------------------|---|
| 1 | 102.054955        | 51.531116       |                |                  | 84.044390      | 42.525833        | T    |                    |                   |                   |                  |                    |                   | 8 |
| 2 | <b>231.097548</b> | 116.052412      |                |                  | 213.086983     | 107.047130       | E    | <b>1055.566627</b> | 528.286951        | 1038.540078       | 519.773677       | <b>1037.556062</b> | <b>519.281669</b> | 7 |
| 3 | 670.322874        | 335.665075      | 653.296325     | 327.151801       | 652.312309     | 326.659793       | Q    | <b>926.524034</b>  | <b>463.765655</b> | 909.497485        | 455.252380       |                    |                   | 6 |
| 4 | 741.359988        | 371.183632      | 724.333439     | 362.670358       | 723.349423     | 362.178350       | A    | <b>487.298708</b>  | 244.152992        | 470.272159        | 235.639717       |                    |                   | 5 |
| 5 | 812.397102        | 406.702189      | 795.370553     | 398.188915       | 794.386537     | 397.696907       | A    | <b>416.261594</b>  | 208.634435        | 399.235045        | 200.121160       |                    |                   | 4 |
| 6 | <b>911.465516</b> | 456.236396      | 894.438967     | 447.723121       | 893.454951     | 447.231113       | V    | <b>345.224480</b>  | 173.115878        | 328.197931        | 164.602603       |                    |                   | 3 |
| 7 | 982.502630        | 491.754953      | 965.476081     | 483.241678       | 964.492065     | 482.749670       | A    | <b>246.156066</b>  | 123.581671        | 229.129517        | 115.068396       |                    |                   | 2 |
| 8 |                   |                 |                |                  |                |                  | R    | <b>175.118952</b>  | 88.063114         | <b>158.092403</b> | 79.549839        |                    |                   | 1 |

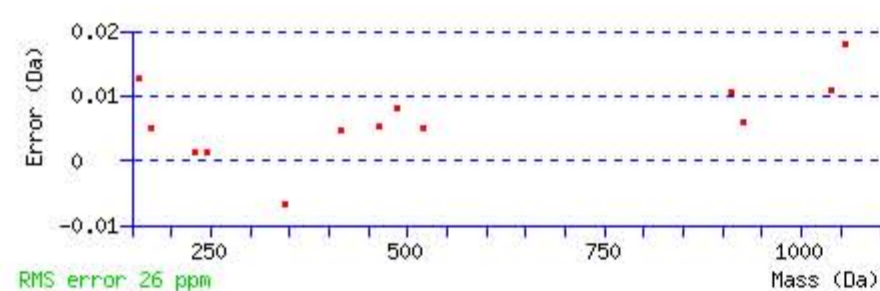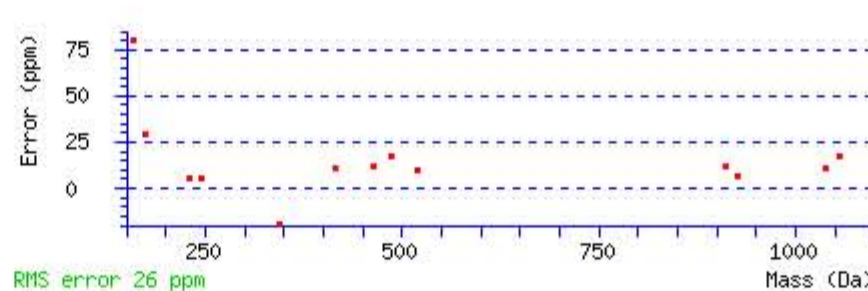

NCBI BLAST search of [TEQAAVAR](#)

(Parameters: blastp, nr protein database, expect=20000, no filter, PAM30)

Other BLAST [web gateways](#)

## All matches to this query

| Score | Mr(calc):   | Delta     | Sequence                    |
|-------|-------------|-----------|-----------------------------|
| 44.8  | 1155.607010 | 0.004258  | <a href="#">TEQAAVAR</a>    |
| 6.7   | 1155.607025 | 0.004243  | <a href="#">VQDSAVAR</a>    |
| 3.4   | 1155.626114 | -0.014846 | <a href="#">APGGHLHLQAR</a> |
| 1.8   | 1155.599594 | 0.011674  | <a href="#">TKESKHEAAR</a>  |
| 1.4   | 1155.607040 | 0.004228  | <a href="#">TPACVPVSIQR</a> |

Mascot: <http://www.matrixscience.com/>

**MASCOT** Mascot Search Results

**Peptide View**

MS/MS Fragmentation of **AEHTVVLTVTGEPCHFPFQYHR**  
 Found in **FA12\_HUMAN**, Coagulation factor XII OS=Homo sapiens GN=F12 PE=1 SV=3

Match to Query 70982: 3064.506336 from(767.133860,4+) rtinseconds(2122) index(79660)  
 Title: Locus:1.1.1.2089.21 File:"2013-07-02 CLN FXIII 180 min 1st FT.wiff"  
 Data file C:\Program Files (x86)\Matrix Science\Mascot Daemon\mgf\7 FXIII 180 min 1st\mascot\_daemon\_merge.mgf

Click mouse within plot area to zoom in by factor of two about that point  
 Or, Plot from  to  Da   
 Label all possible matches  Label matches used for scoring

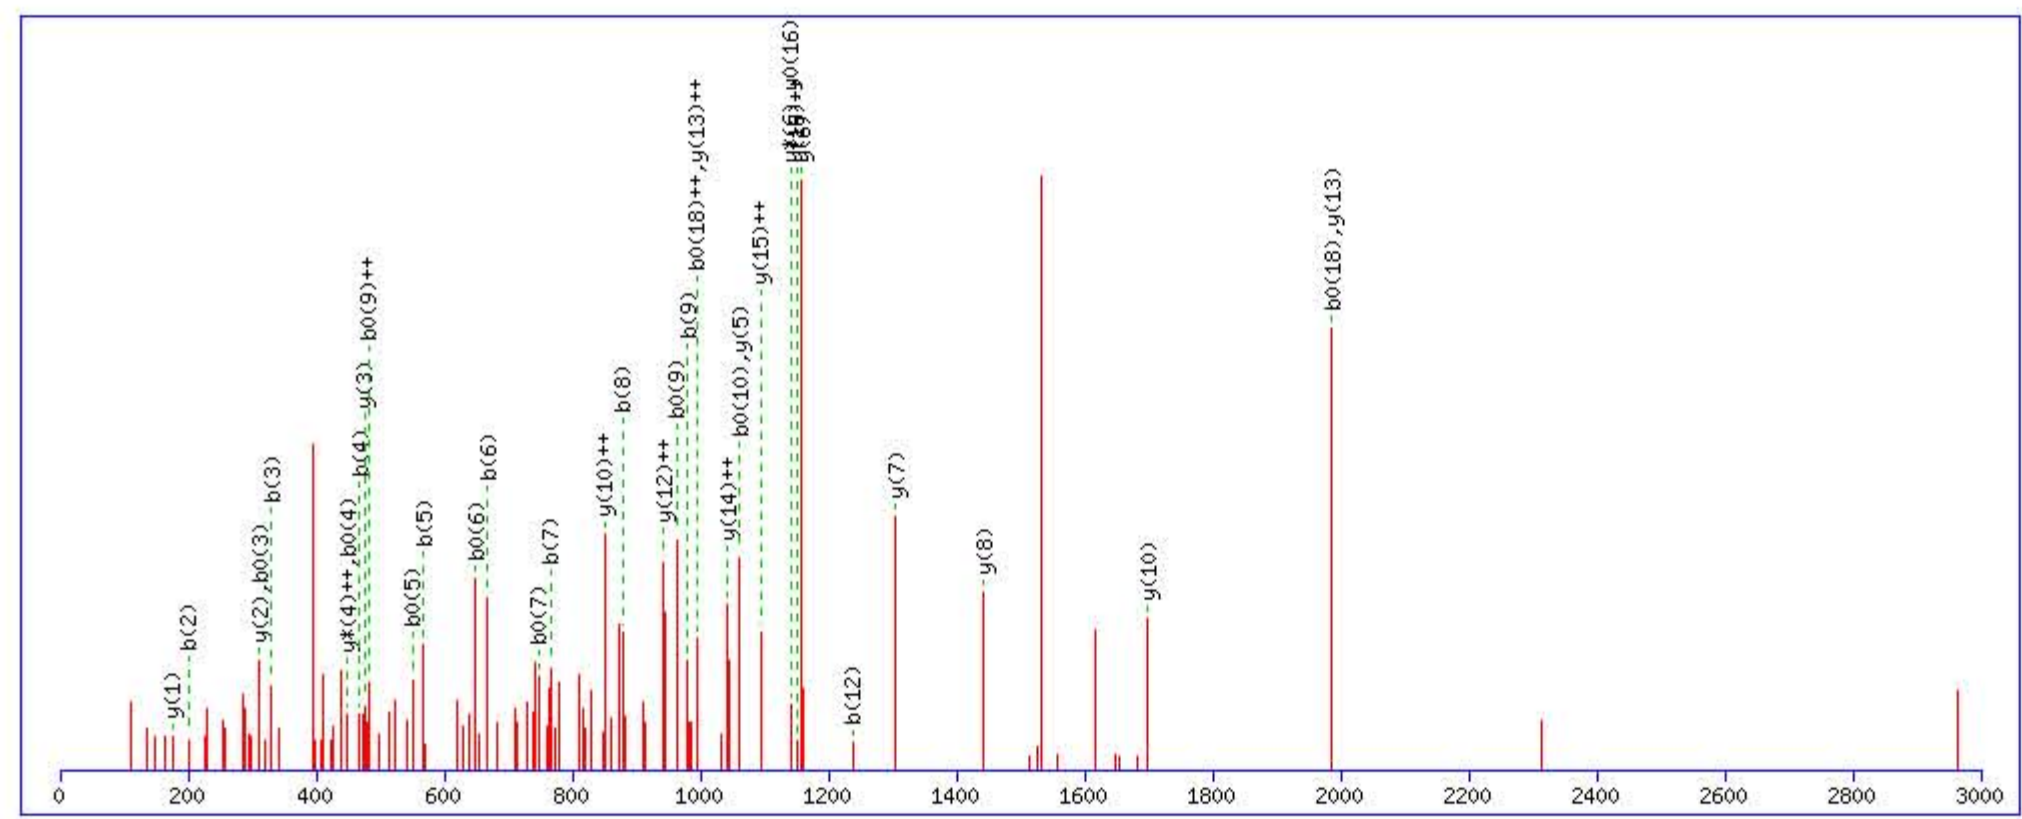

Monoisotopic mass of neutral peptide Mr(calc): 3064.468796  
 Fixed modifications: Carbamidomethyl (C) (apply to specified residues or termini only)  
 Variable modifications:  
 Q20 : Biotin:Thermo-21345 (Q)  
 Ions Score: 49 Expect: 0.00035  
 Matches : 37/204 fragment ions using 79 most intense peaks [\(help\)](#)

| #  | b                  | b <sup>++</sup> | b <sup>*</sup> | b <sup>+++</sup> | b <sup>0</sup>     | b <sup>0++</sup>  | Seq. | y                  | y <sup>++</sup>    | y <sup>*</sup>     | y <sup>+++</sup>  | y <sup>0</sup> | y <sup>0++</sup>   | #  |
|----|--------------------|-----------------|----------------|------------------|--------------------|-------------------|------|--------------------|--------------------|--------------------|-------------------|----------------|--------------------|----|
| 1  | 72.044390          | 36.525833       |                |                  |                    |                   | A    |                    |                    |                    |                   |                |                    | 23 |
| 2  | <b>201.086983</b>  | 101.047130      |                |                  | 183.076418         | 92.041847         | E    | 2994.438934        | 1497.723105        | 2977.412385        | 1489.209830       | 2976.428369    | 1488.717822        | 22 |
| 3  | <b>330.129576</b>  | 165.568426      |                |                  | <b>312.119011</b>  | 156.563144        | E    | 2865.396341        | 1433.201808        | 2848.369792        | 1424.688534       | 2847.385776    | 1424.196526        | 21 |
| 4  | <b>467.188488</b>  | 234.097882      |                |                  | <b>449.177923</b>  | 225.092599        | H    | 2736.353748        | 1368.680512        | 2719.327199        | 1360.167237       | 2718.343183    | 1359.675229        | 20 |
| 5  | <b>568.236167</b>  | 284.621722      |                |                  | <b>550.225602</b>  | 275.616439        | T    | 2599.294836        | 1300.151056        | 2582.268287        | 1291.637781       | 2581.284271    | 1291.145773        | 19 |
| 6  | <b>667.304581</b>  | 334.155929      |                |                  | <b>649.294016</b>  | 325.150646        | V    | 2498.247157        | 1249.627216        | 2481.220608        | 1241.113942       | 2480.236592    | 1240.621934        | 18 |
| 7  | <b>766.372995</b>  | 383.690136      |                |                  | <b>748.362430</b>  | 374.684853        | V    | 2399.178743        | 1200.093009        | 2382.152194        | 1191.579735       | 2381.168178    | 1191.087727        | 17 |
| 8  | <b>879.457059</b>  | 440.232168      |                |                  | 861.446494         | 431.226885        | L    | 2300.110329        | <b>1150.558802</b> | 2283.083780        | 1142.045528       | 2282.099764    | <b>1141.553520</b> | 16 |
| 9  | <b>980.504738</b>  | 490.756007      |                |                  | <b>962.494173</b>  | <b>481.750724</b> | T    | 2187.026265        | <b>1094.016770</b> | 2169.999716        | 1085.503496       | 2169.015700    | 1085.011488        | 15 |
| 10 | 1079.573152        | 540.290214      |                |                  | <b>1061.562587</b> | 531.284931        | V    | 2085.978586        | <b>1043.492931</b> | 2068.952037        | 1034.979656       | 2067.968021    | 1034.487648        | 14 |
| 11 | 1180.620831        | 590.814054      |                |                  | 1162.610266        | 581.808771        | T    | <b>1986.910172</b> | <b>993.958724</b>  | 1969.883623        | 985.445450        | 1968.899607    | 984.953442         | 13 |
| 12 | <b>1237.642295</b> | 619.324785      |                |                  | 1219.631730        | 610.319503        | G    | 1885.862493        | <b>943.434885</b>  | 1868.835944        | 934.921610        | 1867.851928    | 934.429602         | 12 |
| 13 | 1366.684888        | 683.846082      |                |                  | 1348.674323        | 674.840800        | E    | 1828.841029        | 914.924153         | 1811.814480        | 906.410878        | 1810.830464    | 905.918870         | 11 |
| 14 | 1463.737652        | 732.372464      |                |                  | 1445.727087        | 723.367182        | P    | <b>1699.798436</b> | <b>850.402856</b>  | 1682.771887        | 841.889582        |                |                    | 10 |
| 15 | 1623.768301        | 812.387789      |                |                  | 1605.757736        | 803.382506        | C    | 1602.745672        | 801.876474         | 1585.719123        | 793.363200        |                |                    | 9  |
| 16 | 1760.827213        | 880.917245      |                |                  | 1742.816648        | 871.911962        | H    | <b>1442.715023</b> | 721.861150         | 1425.688474        | 713.347875        |                |                    | 8  |
| 17 | 1907.895627        | 954.451452      |                |                  | 1889.885062        | 945.446169        | F    | <b>1305.656111</b> | 653.331694         | 1288.629562        | 644.818419        |                |                    | 7  |
| 18 | 2004.948391        | 1002.977834     |                |                  | <b>1986.937826</b> | <b>993.972551</b> | P    | <b>1158.587697</b> | 579.797487         | <b>1141.561148</b> | 571.284212        |                |                    | 6  |
| 19 | 2152.016805        | 1076.512040     |                |                  | 2134.006240        | 1067.506758       | F    | <b>1061.534933</b> | 531.271105         | 1044.508384        | 522.757830        |                |                    | 5  |
| 20 | 2591.242131        | 1296.124703     | 2574.215582    | 1287.611429      | 2573.231566        | 1287.119421       | Q    | 914.466519         | 457.736898         | 897.439970         | <b>449.223623</b> |                |                    | 4  |
| 21 | 2754.305460        | 1377.656368     | 2737.278911    | 1369.143093      | 2736.294895        | 1368.651085       | Y    | <b>475.241193</b>  | 238.124234         | 458.214644         | 229.610960        |                |                    | 3  |
| 22 | 2891.364372        | 1446.185824     | 2874.337823    | 1437.672549      | 2873.353807        | 1437.180541       | H    | <b>312.177864</b>  | 156.592570         | 295.151315         | 148.079295        |                |                    | 2  |
| 23 |                    |                 |                |                  |                    |                   | R    | <b>175.118952</b>  | 88.063114          | 158.092403         | 79.549839         |                |                    | 1  |

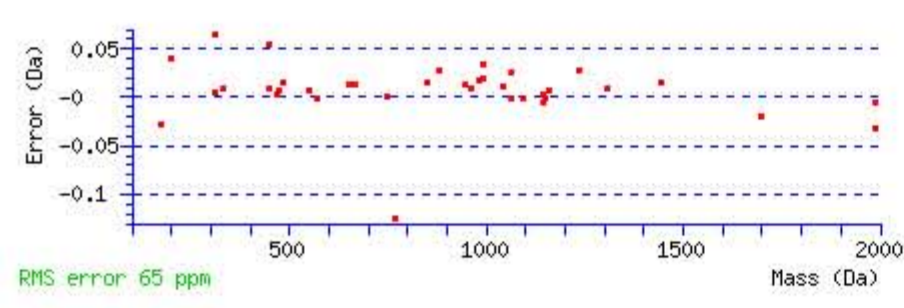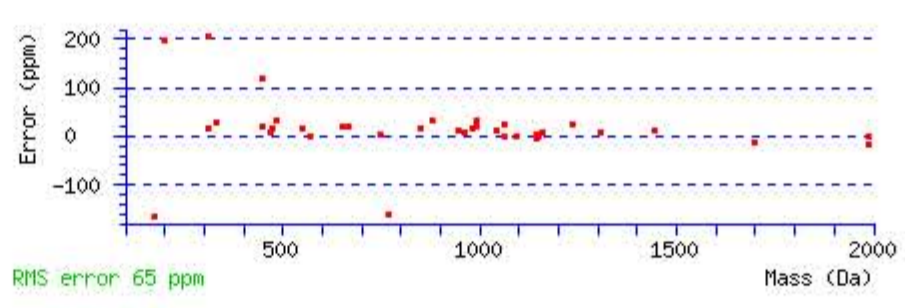

NCBI BLAST search of [AEHTVVLTVTGEPCHFPFQYHR](#)  
 (Parameters: blastp, nr protein database, expect=20000, no filter, PAM30)  
 Other BLAST [web gateways](#)

**All matches to this query**

| Score | Mr(calc):   | Delta    | Sequence                               |
|-------|-------------|----------|----------------------------------------|
| 48.8  | 3064.468796 | 0.037540 | <a href="#">AEHTVVLTVTGEPCHFPFQYHR</a> |

# MASCOT Search Results

## Peptide View

MS/MS Fragmentation of **AQMDLSGR**

Found in **F13A\_HUMAN**, Coagulation factor XIII A chain OS=Homo sapiens GN=F13A1 PE=1 SV=4

Match to Query 23774: 1203.576108 from(602.795330,2+) rtinseconds(1448) index(20610)

Title: Locus:1.1.1.2647.7 File:"2013-07-02 CLN FXIII 180 min 1st F 2.wiff"

Data file C:\Program Files (x86)\Matrix Science\Mascot Daemon\mgf\7 FXIII 180 min 1st\mascot\_daemon\_merge.mgf

Click mouse within plot area to zoom in by factor of two about that point

Or, Plot from  to  Da

Label all possible matches  Label matches used for scoring

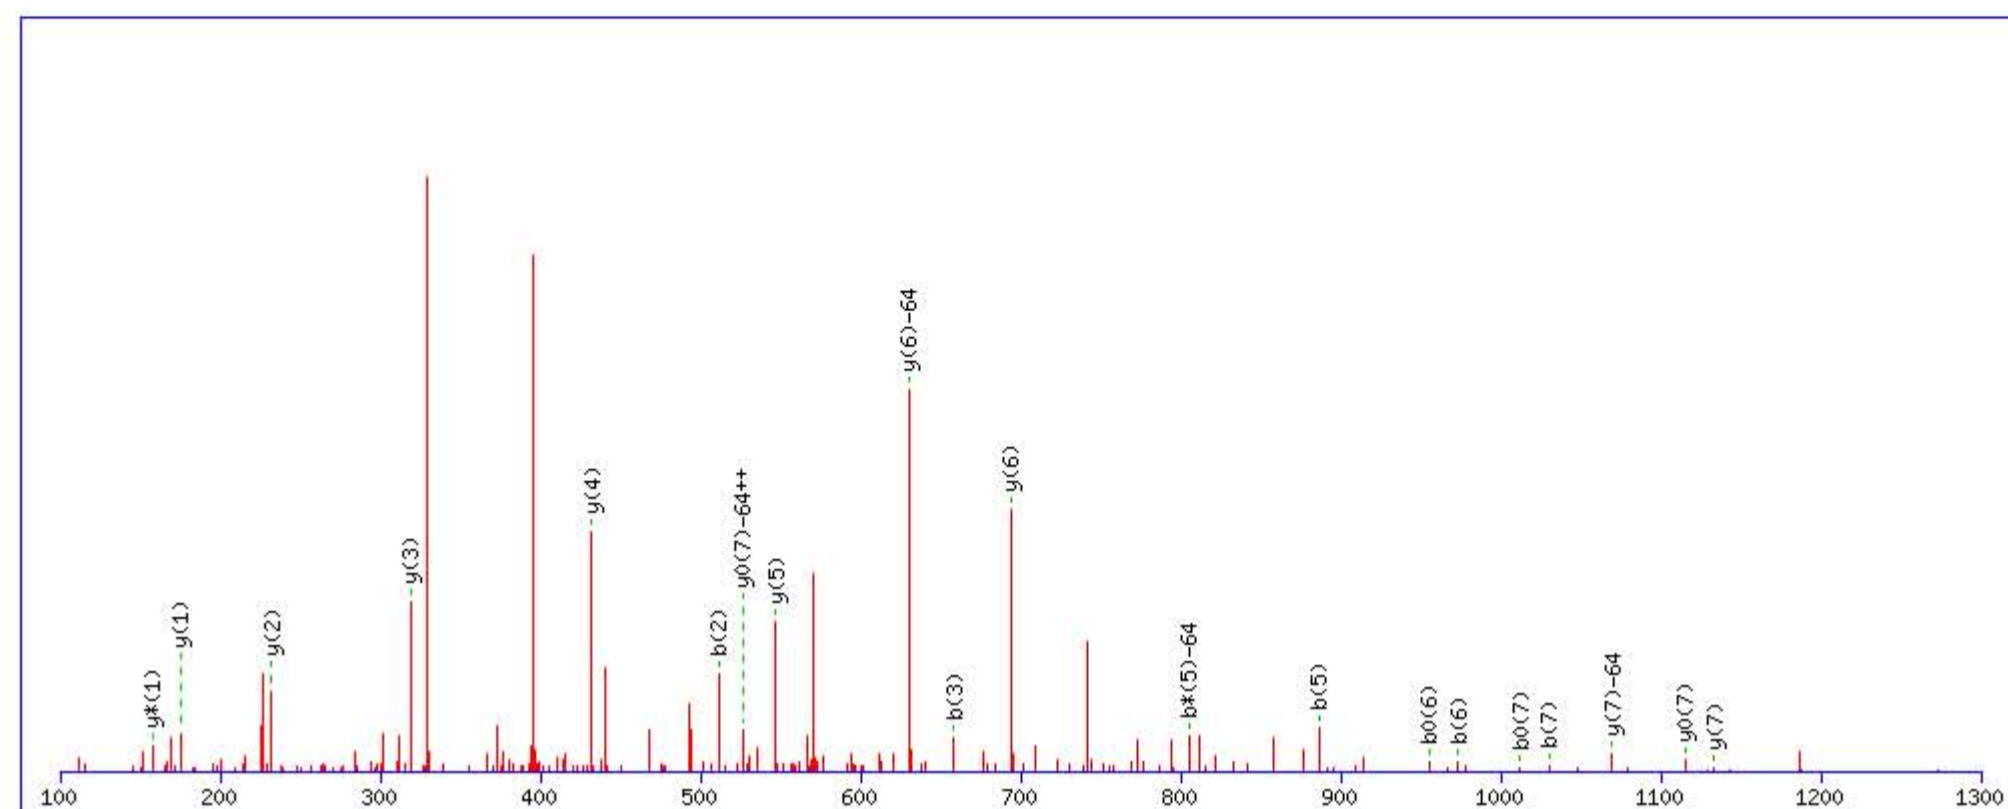

Monoisotopic mass of neutral peptide Mr(calc): 1203.574005

Fixed modifications: Carbamidomethyl (C) (apply to specified residues or termini only)

Variable modifications:

Q2 : Biotin:Thermo-21345 (Q)

M3 : Oxidation (M), with neutral losses 0.000000 (shown in table), 63.998285

Ions Score: 45 Expect: 0.00052

Matches : 20/112 fragment ions using 33 most intense peaks [\(help\)](#)

| # | b                  | b <sup>++</sup> | b <sup>*</sup> | b <sup>+++</sup> | b <sup>0</sup>     | b <sup>0++</sup> | Seq. | y                  | y <sup>++</sup> | y <sup>*</sup>    | y <sup>+++</sup> | y <sup>0</sup>     | y <sup>0++</sup> | # |
|---|--------------------|-----------------|----------------|------------------|--------------------|------------------|------|--------------------|-----------------|-------------------|------------------|--------------------|------------------|---|
| 1 | 72.044390          | 36.525833       |                |                  |                    |                  | A    |                    |                 |                   |                  |                    |                  | 8 |
| 2 | <b>511.269716</b>  | 256.138496      | 494.243167     | 247.625221       |                    |                  | Q    | <b>1133.544177</b> | 567.275727      | 1116.517628       | 558.762452       | <b>1115.533612</b> | 558.270444       | 7 |
| 3 | <b>658.305116</b>  | 329.656196      | 641.278567     | 321.142922       |                    |                  | M    | <b>694.318851</b>  | 347.663064      | 677.292302        | 339.149789       | 676.308286         | 338.657781       | 6 |
| 4 | 773.332059         | 387.169668      | 756.305510     | 378.656393       | 755.321494         | 378.164385       | D    | <b>547.283451</b>  | 274.145364      | 530.256902        | 265.632089       | 529.272886         | 265.140081       | 5 |
| 5 | <b>886.416123</b>  | 443.711700      | 869.389574     | 435.198425       | 868.405558         | 434.706417       | L    | <b>432.256508</b>  | 216.631892      | 415.229959        | 208.118617       | 414.245943         | 207.626609       | 4 |
| 6 | <b>973.448151</b>  | 487.227713      | 956.421602     | 478.714439       | <b>955.437586</b>  | 478.222431       | S    | <b>319.172444</b>  | 160.089860      | 302.145895        | 151.576585       | 301.161879         | 151.084577       | 3 |
| 7 | <b>1030.469615</b> | 515.738446      | 1013.443066    | 507.225171       | <b>1012.459050</b> | 506.733163       | G    | <b>232.140416</b>  | 116.573846      | 215.113867        | 108.060571       |                    |                  | 2 |
| 8 |                    |                 |                |                  |                    |                  | R    | <b>175.118952</b>  | 88.063114       | <b>158.092403</b> | 79.549839        |                    |                  | 1 |

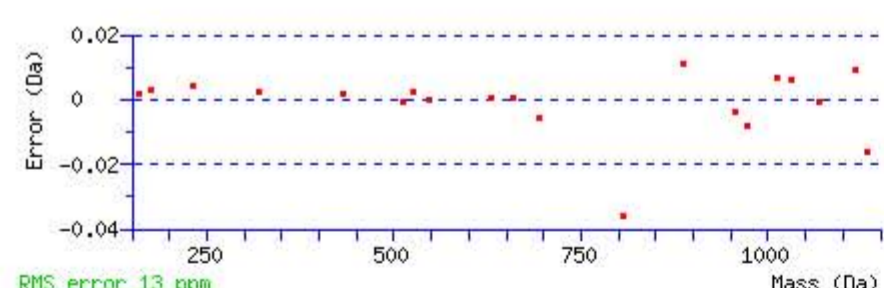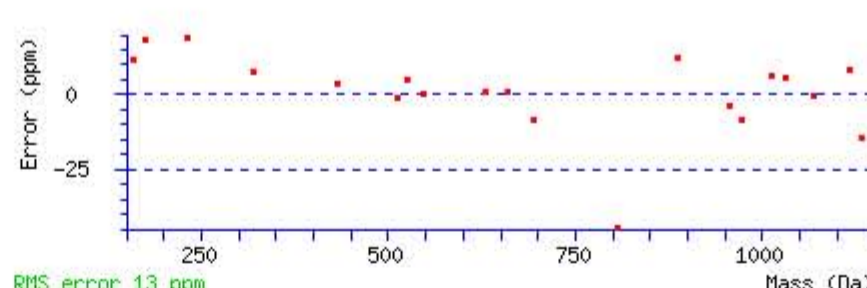

NCBI BLAST search of **AQMDLSGR**

(Parameters: blastp, nr protein database, expect=20000, no filter, PAM30)

Other BLAST [web gateways](#)

All matches to this query

| Score | Mr(calc):   | Delta     | Sequence                    |
|-------|-------------|-----------|-----------------------------|
| 44.5  | 1203.574005 | 0.002103  | <a href="#">AQMDLSGR</a>    |
| 9.0   | 1203.577820 | -0.001712 | <a href="#">EAQQRQAAMR</a>  |
| 8.4   | 1203.588394 | -0.012286 | <a href="#">LFGQETPEQR</a>  |
| 3.3   | 1203.588394 | -0.012286 | <a href="#">ADAAVWILSDR</a> |
| 2.9   | 1203.584351 | -0.008243 | <a href="#">SGSPISSEERR</a> |
| 0.6   | 1203.581848 | -0.005740 | <a href="#">ALCSAAQAAGR</a> |
| 0.1   | 1203.573090 | 0.003018  | <a href="#">ETAAAEEKER</a>  |

Mascot: <http://www.matrixscience.com/>

# MASCOT SEARCH RESULTS

## Peptide View

MS/MS Fragmentation of **FQEGQEEER**

Found in **F13A\_HUMAN**, Coagulation factor XIII A chain OS=Homo sapiens GN=F13A1 PE=1 SV=4

Match to Query 33728: 1461.661348 from(731.837950,2+) rtinseconds(1470) index(20778)

Title: Locus:1.1.1.2654.24 File:"2013-07-02 CLN FXIII 180 min 1st F 2.wiff"

Data file C:\Program Files (x86)\Matrix Science\Mascot Daemon\mgf\7 FXIII 180 min 1st\mascot\_daemon\_merge.mgf

Click mouse within plot area to zoom in by factor of two about that point

Or, Plot from  to  Da

Label all possible matches  Label matches used for scoring

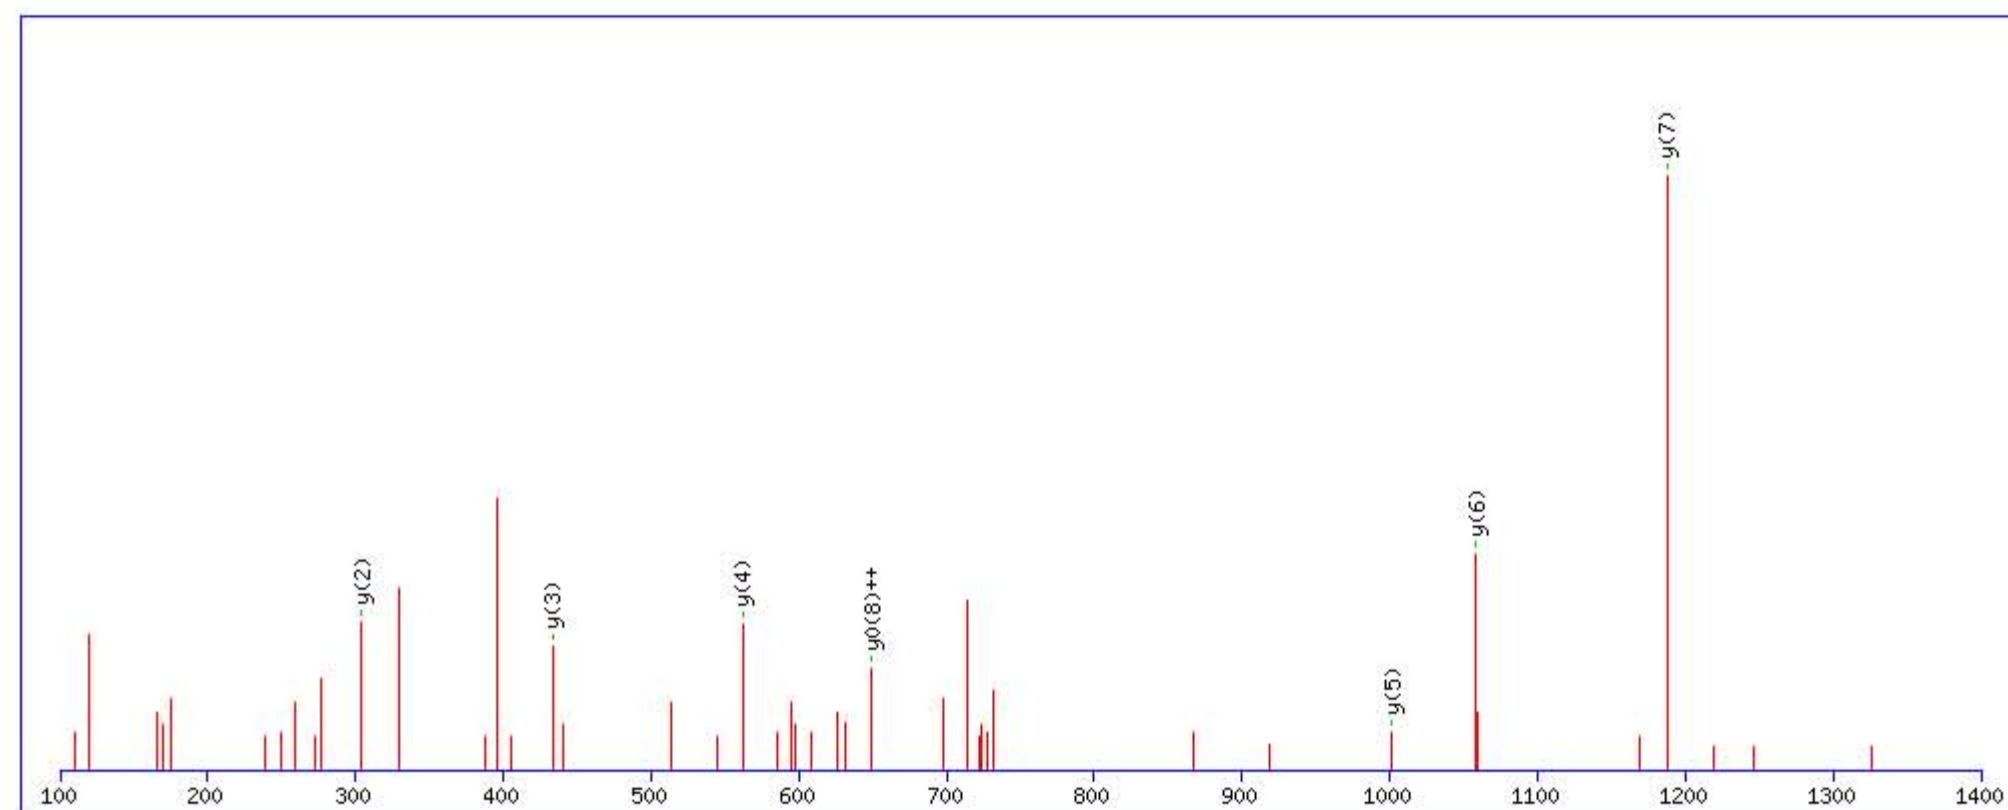

Monoisotopic mass of neutral peptide Mr(calc): 1461.655807

Fixed modifications: Carbamidomethyl (C) (apply to specified residues or termini only)

Variable modifications:

Q5 : Biotin:Thermo-21345 (Q)

Ions Score: 36 Expect: 0.0019

Matches : 7/88 fragment ions using 13 most intense peaks [\(help\)](#)

| # | b           | b <sup>++</sup> | b <sup>*</sup> | b <sup>*++</sup> | b <sup>0</sup> | b <sup>0++</sup> | Seq. | y           | y <sup>++</sup> | y <sup>*</sup> | y <sup>*++</sup> | y <sup>0</sup> | y <sup>0++</sup> | # |
|---|-------------|-----------------|----------------|------------------|----------------|------------------|------|-------------|-----------------|----------------|------------------|----------------|------------------|---|
| 1 | 148.075690  | 74.541483       |                |                  |                |                  | F    |             |                 |                |                  |                |                  | 9 |
| 2 | 276.134268  | 138.570772      | 259.107719     | 130.057497       |                |                  | Q    | 1315.594692 | 658.300984      | 1298.568143    | 649.787710       | 1297.584127    | 649.295702       | 8 |
| 3 | 405.176861  | 203.092068      | 388.150312     | 194.578794       | 387.166296     | 194.086786       | E    | 1187.536114 | 594.271695      | 1170.509565    | 585.758421       | 1169.525549    | 585.266413       | 7 |
| 4 | 462.198325  | 231.602800      | 445.171776     | 223.089526       | 444.187760     | 222.597518       | G    | 1058.493521 | 529.750399      | 1041.466972    | 521.237124       | 1040.482956    | 520.745116       | 6 |
| 5 | 901.423651  | 451.215464      | 884.397102     | 442.702189       | 883.413086     | 442.210181       | Q    | 1001.472057 | 501.239667      | 984.445508     | 492.726392       | 983.461492     | 492.234384       | 5 |
| 6 | 1030.466244 | 515.736760      | 1013.439695    | 507.223485       | 1012.455679    | 506.731477       | E    | 562.246731  | 281.627004      | 545.220182     | 273.113729       | 544.236166     | 272.621721       | 4 |
| 7 | 1159.508837 | 580.258057      | 1142.482288    | 571.744782       | 1141.498272    | 571.252774       | E    | 433.204138  | 217.105707      | 416.177589     | 208.592433       | 415.193573     | 208.100425       | 3 |
| 8 | 1288.551430 | 644.779353      | 1271.524881    | 636.266079       | 1270.540865    | 635.774071       | E    | 304.161545  | 152.584411      | 287.134996     | 144.071136       | 286.150980     | 143.579128       | 2 |
| 9 |             |                 |                |                  |                |                  | R    | 175.118952  | 88.063114       | 158.092403     | 79.549839        |                |                  | 1 |

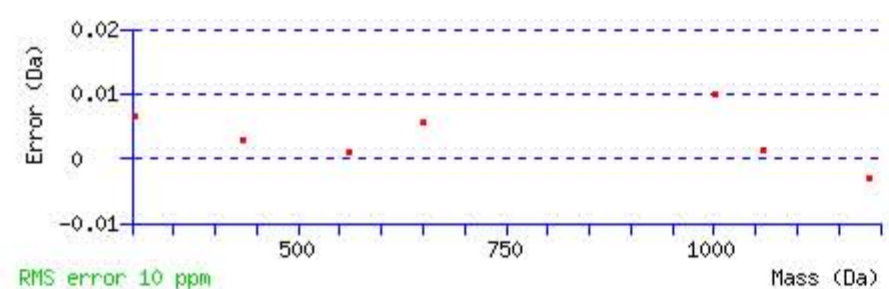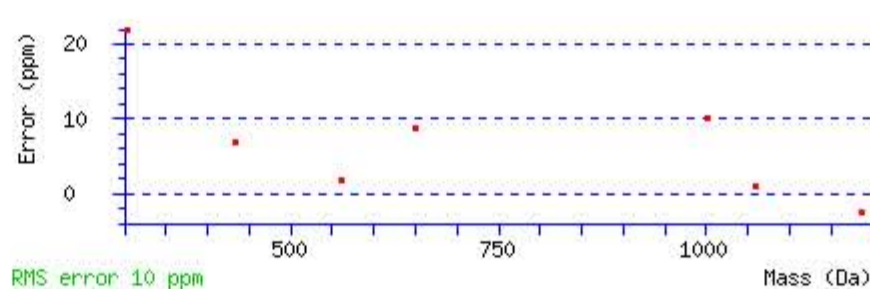

NCBI BLAST search of **FQEGQEEER**

(Parameters: blastp, nr protein database, expect=20000, no filter, PAM30)

Other BLAST [web gateways](#)

## All matches to this query

| Score | Mr(calc):   | Delta     | Sequence                       |
|-------|-------------|-----------|--------------------------------|
| 36.4  | 1461.655807 | 0.005541  | <a href="#">FQEGQEEER</a>      |
| 7.5   | 1461.640564 | 0.020784  | <a href="#">NSGTQSDGEEK</a>    |
| 2.8   | 1461.676956 | -0.015608 | <a href="#">MSGQVGDLSPSQEK</a> |
| 0.9   | 1461.640564 | 0.020784  | <a href="#">VMTDVAGNPEEER</a>  |
| 0.5   | 1461.655807 | 0.005541  | <a href="#">FQEGQEEER</a>      |
| 0.2   | 1461.648392 | 0.012956  | <a href="#">HREELSDYEER</a>    |

# MASCOT Search Results

## Peptide View

MS/MS Fragmentation of **HVYGELDVQIQR**

Found in **F13A\_HUMAN**, Coagulation factor XIII A chain OS=Homo sapiens GN=F13A1 PE=1 SV=4

Match to Query 44364: 1766.931928 from(884.473240,2+) rtinseconds(1922) index(24133)

Title: Locus:1.1.1.2811.21 File:"2013-07-02 CLN FXIII 180 min 1st F 2.wiff"

Data file C:\Program Files (x86)\Matrix Science\Mascot Daemon\mgf7 FXIII 180 min 1st\mascot\_daemon\_merge.mgf

Click mouse within plot area to zoom in by factor of two about that point

Or, Plot from  to  Da

Label all possible matches  Label matches used for scoring

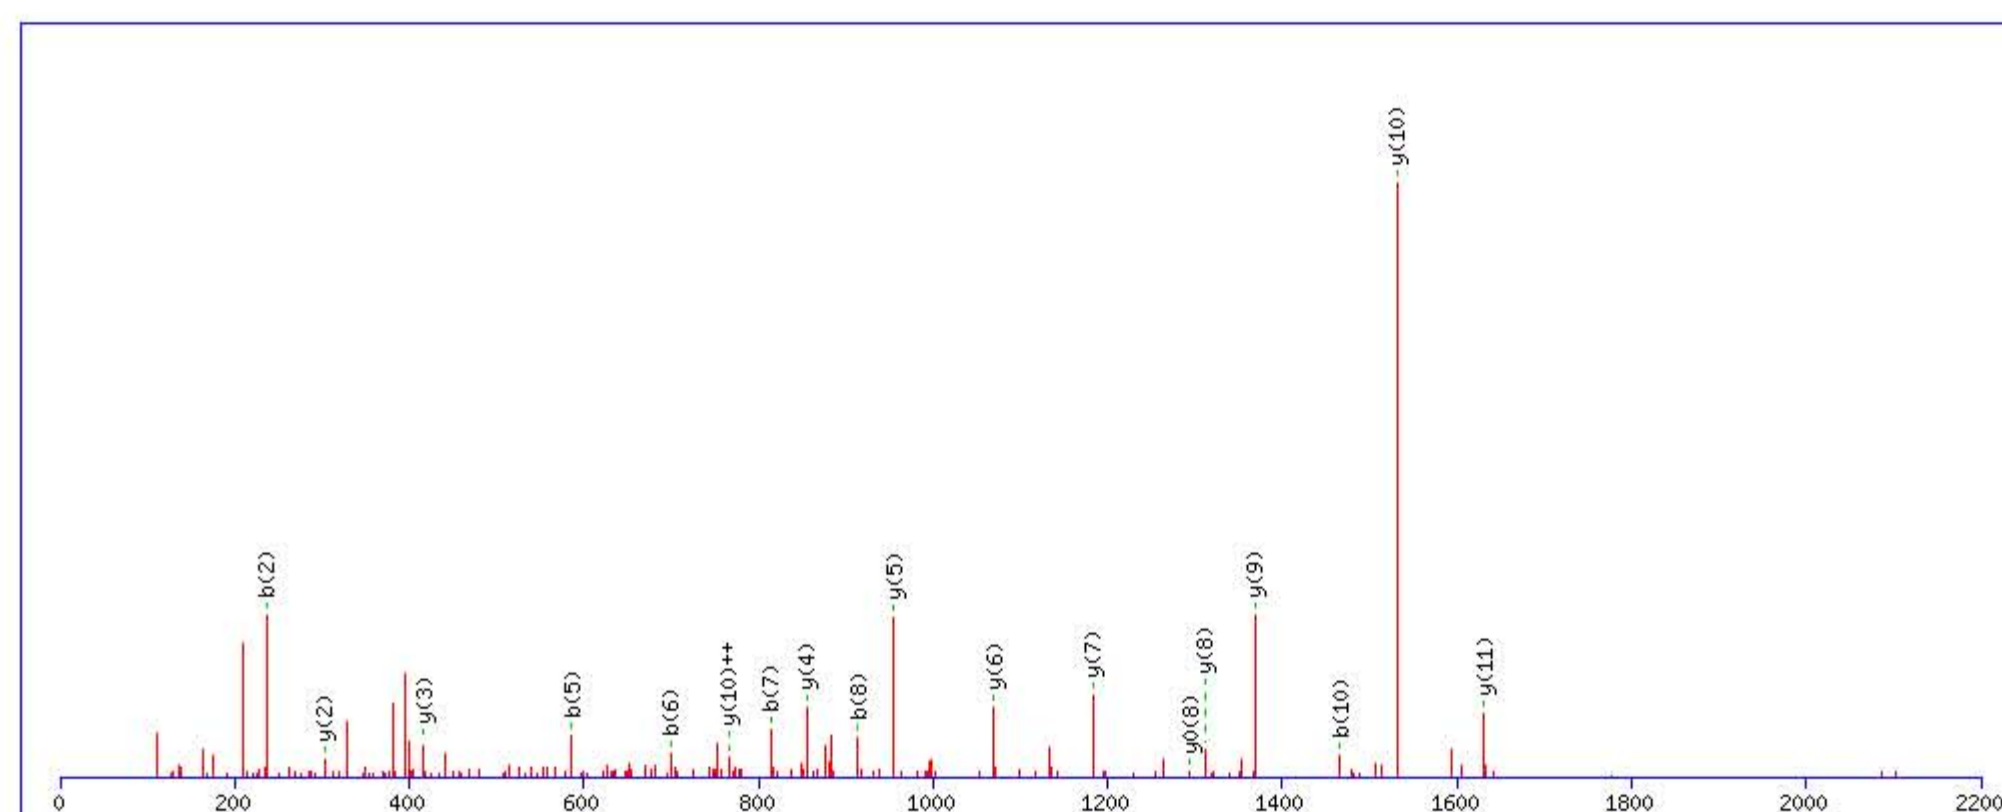

Monoisotopic mass of neutral peptide Mr(calc): 1766.913773

Fixed modifications: Carbamidomethyl (C) (apply to specified residues or termini only)

Variable modifications:

Q9 : Biotin:Thermo-21345 (Q)

Ions Score: 64 Expect: 1.2e-006

Matches : 18/98 fragment ions using 32 most intense peaks [\(help\)](#)

| #  | b                  | b <sup>++</sup> | b <sup>*</sup> | b <sup>*++</sup> | b <sup>0</sup> | b <sup>0++</sup> | Seq. | y                  | y <sup>++</sup>   | y <sup>*</sup> | y <sup>*++</sup> | y <sup>0</sup>     | y <sup>0++</sup> | #  |
|----|--------------------|-----------------|----------------|------------------|----------------|------------------|------|--------------------|-------------------|----------------|------------------|--------------------|------------------|----|
| 1  | 138.066188         | 69.536732       |                |                  |                |                  | H    |                    |                   |                |                  |                    |                  | 12 |
| 2  | <b>237.134602</b>  | 119.070939      |                |                  |                |                  | V    | <b>1630.862141</b> | 815.934708        | 1613.835592    | 807.421434       | 1612.851576        | 806.929426       | 11 |
| 3  | 400.197931         | 200.602603      |                |                  |                |                  | Y    | <b>1531.793727</b> | <b>766.400501</b> | 1514.767178    | 757.887227       | 1513.783162        | 757.395219       | 10 |
| 4  | 457.219395         | 229.113335      |                |                  |                |                  | G    | <b>1368.730398</b> | 684.868837        | 1351.703849    | 676.355563       | 1350.719833        | 675.863554       | 9  |
| 5  | <b>586.261988</b>  | 293.634632      |                |                  | 568.251423     | 284.629349       | E    | <b>1311.708934</b> | 656.358105        | 1294.682385    | 647.844830       | <b>1293.698369</b> | 647.352822       | 8  |
| 6  | <b>699.346052</b>  | 350.176664      |                |                  | 681.335487     | 341.171382       | L    | <b>1182.666341</b> | 591.836808        | 1165.639792    | 583.323534       | 1164.655776        | 582.831526       | 7  |
| 7  | <b>814.372995</b>  | 407.690136      |                |                  | 796.362430     | 398.684853       | D    | <b>1069.582277</b> | 535.294776        | 1052.555728    | 526.781502       | 1051.571712        | 526.289494       | 6  |
| 8  | <b>913.441409</b>  | 457.224342      |                |                  | 895.430844     | 448.219060       | V    | <b>954.555334</b>  | 477.781305        | 937.528785     | 469.268030       |                    |                  | 5  |
| 9  | 1352.666735        | 676.837006      | 1335.640186    | 668.323731       | 1334.656170    | 667.831723       | Q    | <b>855.486920</b>  | 428.247098        | 838.460371     | 419.733823       |                    |                  | 4  |
| 10 | <b>1465.750799</b> | 733.379037      | 1448.724250    | 724.865763       | 1447.740234    | 724.373755       | I    | <b>416.261594</b>  | 208.634435        | 399.235045     | 200.121160       |                    |                  | 3  |
| 11 | 1593.809377        | 797.408326      | 1576.782828    | 788.895052       | 1575.798812    | 788.403044       | Q    | <b>303.177530</b>  | 152.092403        | 286.150981     | 143.579128       |                    |                  | 2  |
| 12 |                    |                 |                |                  |                |                  | R    | 175.118952         | 88.063114         | 158.092403     | 79.549839        |                    |                  | 1  |

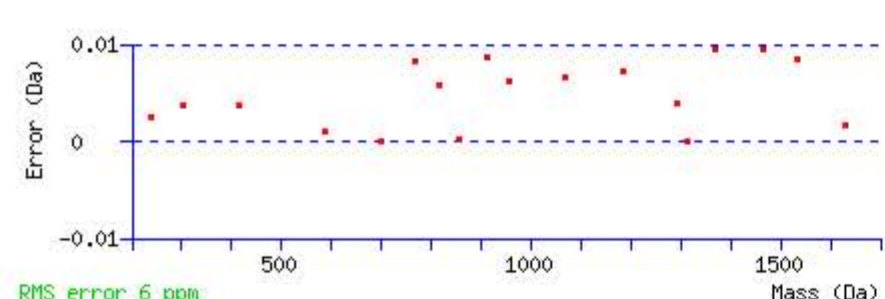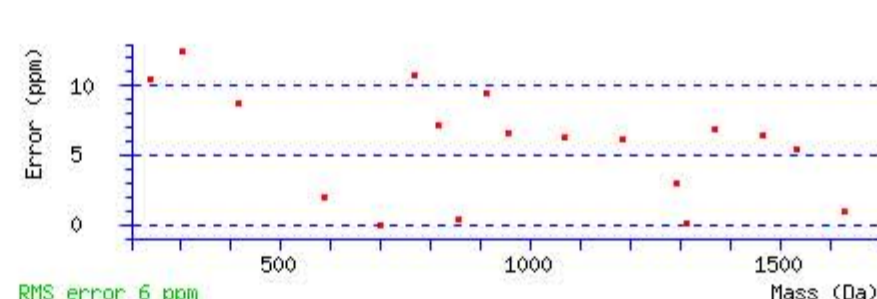

NCBI BLAST search of [HVYGELDVQIQR](#)

(Parameters: blastp, nr protein database, expect=20000, no filter, PAM30)

Other BLAST [web gateways](#)

### All matches to this query

| Score | Mr(calc):   | Delta     | Sequence                       |
|-------|-------------|-----------|--------------------------------|
| 64.2  | 1766.913773 | 0.018155  | <a href="#">HVYGELDVQIQR</a>   |
| 46.2  | 1766.913773 | 0.018155  | <a href="#">HVYGELDVQIQR</a>   |
| 0.9   | 1766.934906 | -0.002978 | <a href="#">QITSPVSGINGDIR</a> |



# MASCOT SEARCH RESULTS

## Peptide View

MS/MS Fragmentation of **FQEGQEEER**

Found in **F13A\_HUMAN**, Coagulation factor XIII A chain OS=Homo sapiens GN=F13A1 PE=1 SV=4

Match to Query 44584: 1772.835608 from(887.425080,2+) rtinseconds(1837) index(77711)

Title: Locus:1.1.1.1990.10 File:"2013-07-02 CLN FXIII 180 min 1st FT.wiff"

Data file C:\Program Files (x86)\Matrix Science\Mascot Daemon\mgf7 FXIII 180 min 1st\mascot\_daemon\_merge.mgf

Click mouse within plot area to zoom in by factor of two about that point

Or, Plot from  to  Da

Label all possible matches  Label matches used for scoring

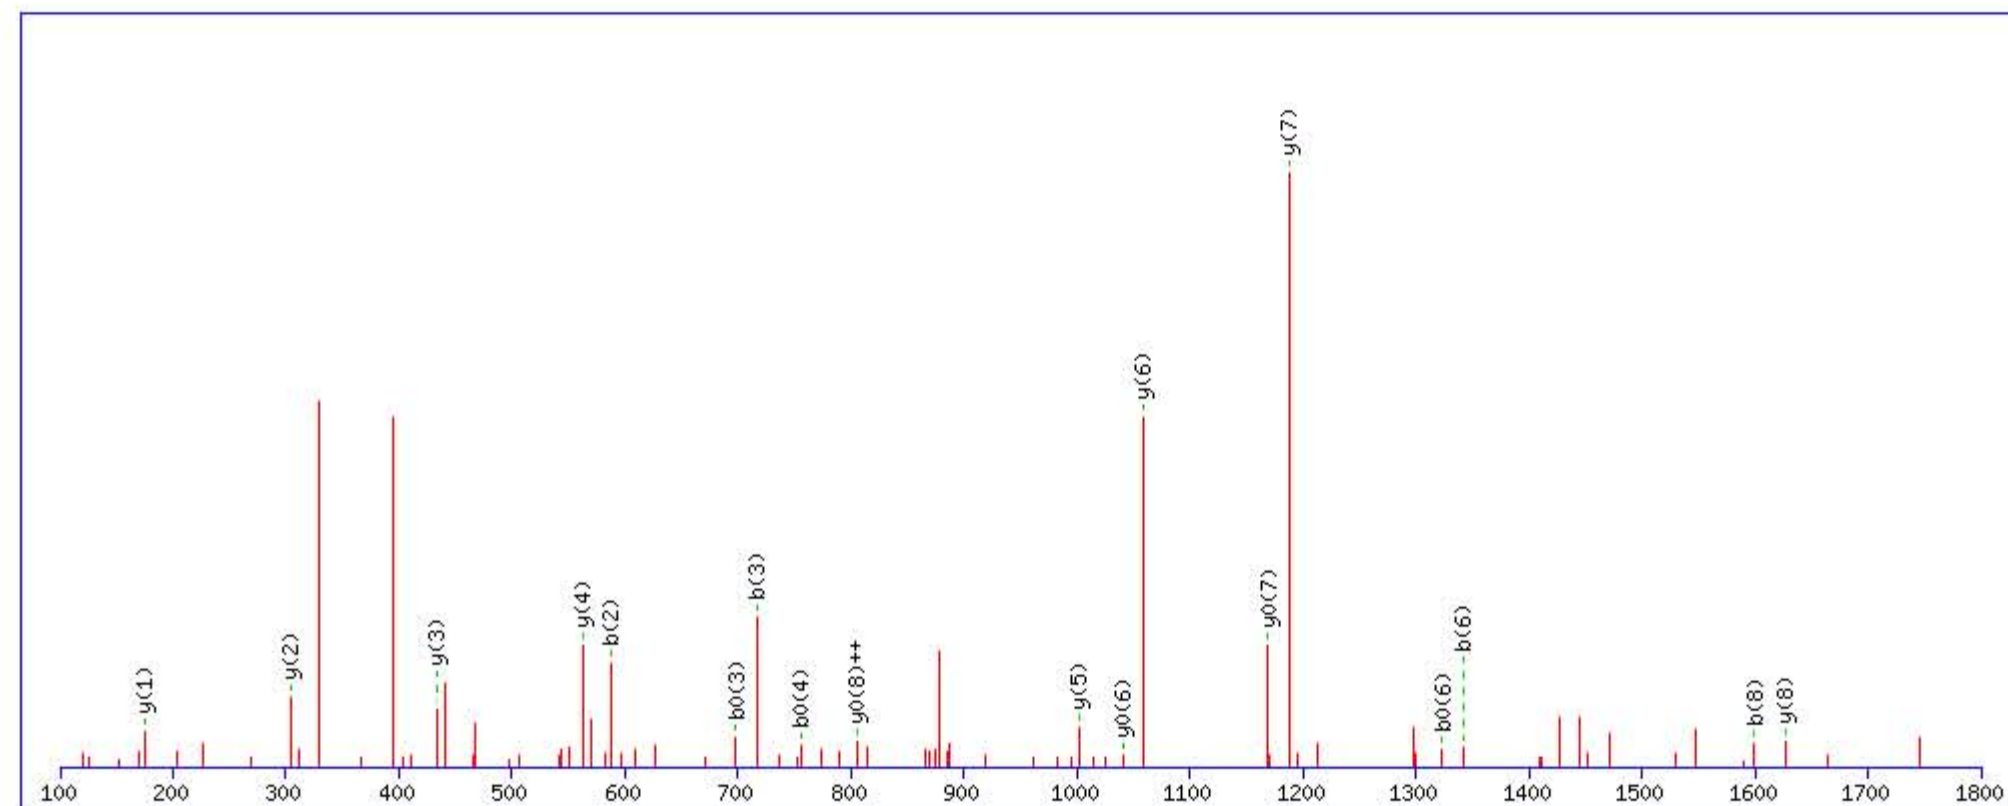

Monoisotopic mass of neutral peptide Mr(calc): 1772.822556

Fixed modifications: Carbamidomethyl (C) (apply to specified residues or termini only)

Variable modifications:

Q2 : Biotin:Thermo-21345 (Q)

Q5 : Biotin:Thermo-21345 (Q)

Ions Score: 48 Expect: 0.00013

Matches : 18/88 fragment ions using 33 most intense peaks [\(help\)](#)

| # | b                  | b <sup>++</sup> | b <sup>*</sup> | b <sup>*++</sup> | b <sup>0</sup>     | b <sup>0++</sup> | Seq. | y                  | y <sup>++</sup> | y <sup>*</sup> | y <sup>*++</sup> | y <sup>0</sup>     | y <sup>0++</sup>  | # |
|---|--------------------|-----------------|----------------|------------------|--------------------|------------------|------|--------------------|-----------------|----------------|------------------|--------------------|-------------------|---|
| 1 | 148.075690         | 74.541483       |                |                  |                    |                  | F    |                    |                 |                |                  |                    |                   | 9 |
| 2 | <b>587.301016</b>  | 294.154146      | 570.274467     | 285.640872       |                    |                  | Q    | <b>1626.761440</b> | 813.884358      | 1609.734891    | 805.371084       | 1608.750875        | <b>804.879076</b> | 8 |
| 3 | <b>716.343609</b>  | 358.675443      | 699.317060     | 350.162168       | <b>698.333044</b>  | 349.670160       | E    | <b>1187.536114</b> | 594.271695      | 1170.509565    | 585.758421       | <b>1169.525549</b> | 585.266413        | 7 |
| 4 | 773.365073         | 387.186175      | 756.338524     | 378.672900       | <b>755.354508</b>  | 378.180892       | G    | <b>1058.493521</b> | 529.750399      | 1041.466972    | 521.237124       | <b>1040.482956</b> | 520.745116        | 6 |
| 5 | 1212.590399        | 606.798837      | 1195.563850    | 598.285563       | 1194.579834        | 597.793555       | Q    | <b>1001.472057</b> | 501.239667      | 984.445508     | 492.726392       | 983.461492         | 492.234384        | 5 |
| 6 | <b>1341.632992</b> | 671.320134      | 1324.606443    | 662.806860       | <b>1323.622427</b> | 662.314852       | E    | <b>562.246731</b>  | 281.627004      | 545.220182     | 273.113729       | 544.236166         | 272.621721        | 4 |
| 7 | 1470.675585        | 735.841431      | 1453.649036    | 727.328156       | 1452.665020        | 726.836148       | E    | <b>433.204138</b>  | 217.105707      | 416.177589     | 208.592433       | 415.193573         | 208.100425        | 3 |
| 8 | <b>1599.718178</b> | 800.362727      | 1582.691629    | 791.849453       | 1581.707613        | 791.357445       | E    | <b>304.161545</b>  | 152.584411      | 287.134996     | 144.071136       | 286.150980         | 143.579128        | 2 |
| 9 |                    |                 |                |                  |                    |                  | R    | <b>175.118952</b>  | 88.063114       | 158.092403     | 79.549839        |                    |                   | 1 |

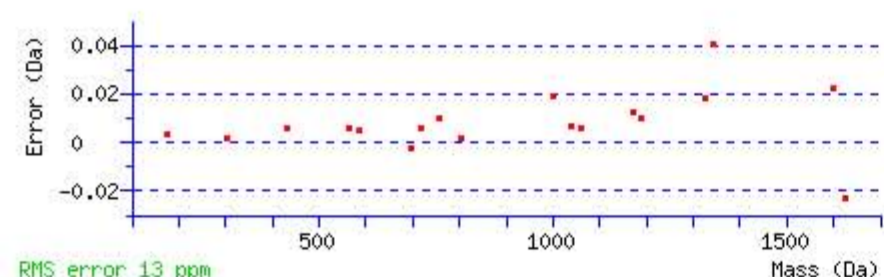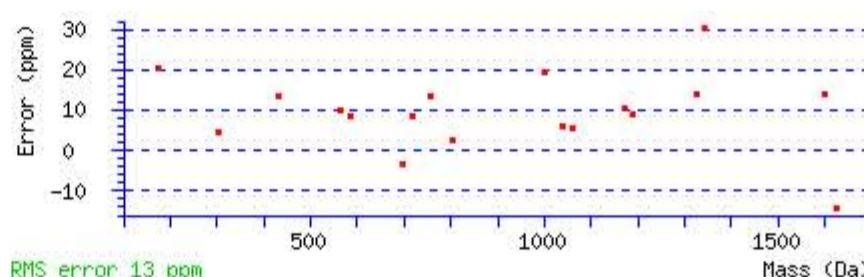

NCBI BLAST search of [FQEGQEEER](#)

(Parameters: blastp, nr protein database, expect=20000, no filter, PAM30)

Other BLAST [web gateways](#)

## All matches to this query

| Score | Mr(calc):   | Delta     | Sequence                            |
|-------|-------------|-----------|-------------------------------------|
| 48.1  | 1772.822556 | 0.013052  | <a href="#">FQEGQEEER</a>           |
| 6.2   | 1772.856262 | -0.020654 | <a href="#">CFRSRDHLALHMKR</a>      |
| 4.0   | 1772.842789 | -0.007181 | <a href="#">ESSPPEKEEAQEKTGK</a>    |
| 3.3   | 1772.828873 | 0.006735  | <a href="#">QAEQEATVAREEQER</a>     |
| 2.0   | 1772.836288 | -0.000680 | <a href="#">ADGSLTGGGLEAAAMAPER</a> |
| 1.2   | 1772.829727 | 0.005881  | <a href="#">QEEEEAMRRER</a>         |
| 0.4   | 1772.811798 | 0.023810  | <a href="#">YQTPPHQNFEDLER</a>      |

# MASCOT Search Results

## Peptide View

MS/MS Fragmentation of **GTYPVPIVSELQSGK**

Found in **F13A\_HUMAN**, Coagulation factor XIII A chain OS=Homo sapiens GN=F13A1 PE=1 SV=4

Match to Query 49905: 1998.104922 from(667.042250,3+) rtinseconds(2738) index(29715)

Title: Locus:1.1.1.3094.8 File:"2013-07-02 CLN FXIII 180 min 1st F 2.wiff"

Data file C:\Program Files (x86)\Matrix Science\Mascot Daemon\mgf\7 FXIII 180 min 1st\mascot\_daemon\_merge.mgf

Click mouse within plot area to zoom in by factor of two about that point

Or, Plot from  to  Da

Label all possible matches  Label matches used for scoring

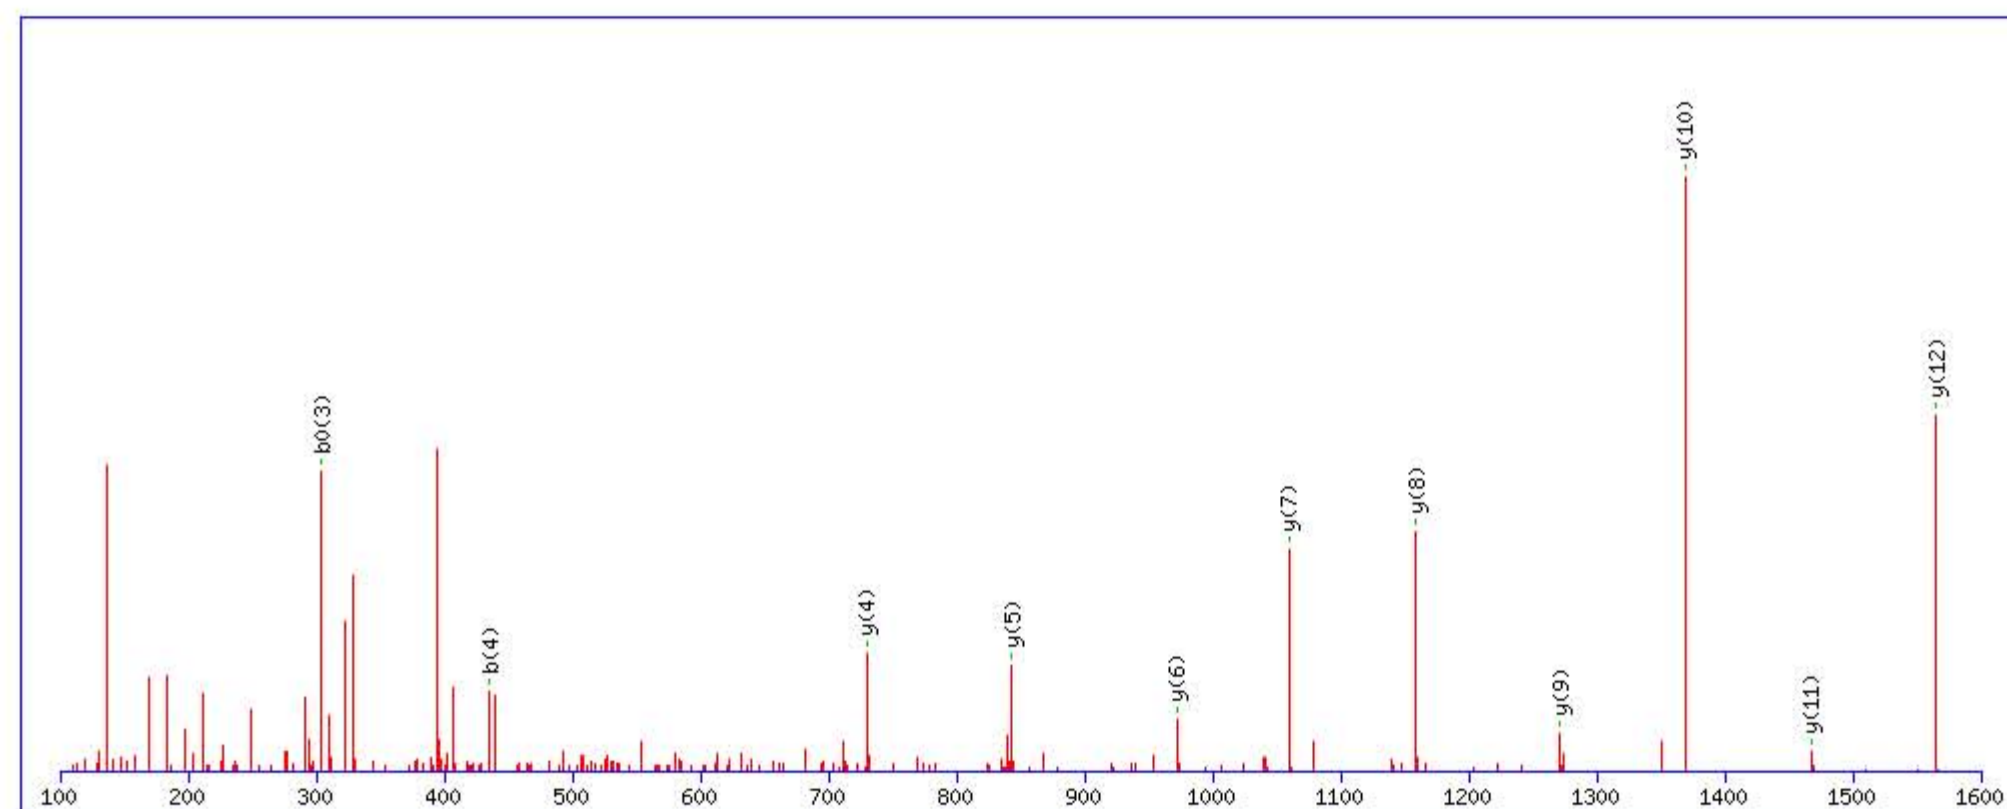

Monoisotopic mass of neutral peptide Mr(calc): 1998.085983

Fixed modifications: Carbamidomethyl (C) (apply to specified residues or termini only)

Variable modifications:

Q13 : Biotin:Thermo-21345 (Q)

Ions Score: 63 Expect: 3e-006

Matches : 11/150 fragment ions using 15 most intense peaks [\(help\)](#)

| #  | b           | b <sup>++</sup> | b <sup>*</sup> | b <sup>*++</sup> | b <sup>0</sup> | b <sup>0++</sup> | Seq. | y           | y <sup>++</sup> | y <sup>*</sup> | y <sup>*++</sup> | y <sup>0</sup> | y <sup>0++</sup> | #  |
|----|-------------|-----------------|----------------|------------------|----------------|------------------|------|-------------|-----------------|----------------|------------------|----------------|------------------|----|
| 1  | 58.028740   | 29.518008       |                |                  |                |                  | G    |             |                 |                |                  |                |                  | 16 |
| 2  | 159.076419  | 80.041847       |                |                  | 141.065854     | 71.036565        | T    | 1942.071799 | 971.539538      | 1925.045250    | 963.026263       | 1924.061234    | 962.534255       | 15 |
| 3  | 322.139748  | 161.573512      |                |                  | 304.129183     | 152.568230       | Y    | 1841.024120 | 921.015698      | 1823.997571    | 912.502424       | 1823.013555    | 912.010416       | 14 |
| 4  | 435.223812  | 218.115544      |                |                  | 417.213247     | 209.110262       | I    | 1677.960791 | 839.484034      | 1660.934242    | 830.970759       | 1659.950226    | 830.478751       | 13 |
| 5  | 532.276576  | 266.641926      |                |                  | 514.266011     | 257.636644       | P    | 1564.876727 | 782.942002      | 1547.850178    | 774.428727       | 1546.866162    | 773.936719       | 12 |
| 6  | 631.344990  | 316.176133      |                |                  | 613.334425     | 307.170851       | V    | 1467.823963 | 734.415620      | 1450.797414    | 725.902345       | 1449.813398    | 725.410337       | 11 |
| 7  | 728.397754  | 364.702515      |                |                  | 710.387189     | 355.697233       | P    | 1368.755549 | 684.881413      | 1351.729000    | 676.368138       | 1350.744984    | 675.876130       | 10 |
| 8  | 841.481818  | 421.244547      |                |                  | 823.471253     | 412.239265       | I    | 1271.702785 | 636.355031      | 1254.676236    | 627.841756       | 1253.692220    | 627.349748       | 9  |
| 9  | 940.550232  | 470.778754      |                |                  | 922.539667     | 461.773472       | V    | 1158.618721 | 579.812999      | 1141.592172    | 571.299724       | 1140.608156    | 570.807716       | 8  |
| 10 | 1027.582260 | 514.294768      |                |                  | 1009.571695    | 505.289486       | S    | 1059.550307 | 530.278792      | 1042.523758    | 521.765517       | 1041.539742    | 521.273509       | 7  |
| 11 | 1156.624853 | 578.816065      |                |                  | 1138.614288    | 569.810782       | E    | 972.518279  | 486.762777      | 955.491730     | 478.249503       | 954.507714     | 477.757495       | 6  |
| 12 | 1269.708917 | 635.358096      |                |                  | 1251.698352    | 626.352814       | L    | 843.475686  | 422.241481      | 826.449137     | 413.728207       | 825.465121     | 413.236199       | 5  |
| 13 | 1708.934243 | 854.970759      | 1691.907694    | 846.457485       | 1690.923678    | 845.965477       | Q    | 730.391622  | 365.699449      | 713.365073     | 357.186175       | 712.381057     | 356.694167       | 4  |
| 14 | 1795.966271 | 898.486774      | 1778.939722    | 889.973499       | 1777.955706    | 889.481491       | S    | 291.166296  | 146.086786      | 274.139747     | 137.573512       | 273.155731     | 137.081504       | 3  |
| 15 | 1852.987735 | 926.997505      | 1835.961186    | 918.484231       | 1834.977170    | 917.992223       | G    | 204.134268  | 102.570772      | 187.107719     | 94.057497        |                |                  | 2  |
| 16 |             |                 |                |                  |                |                  | K    | 147.112804  | 74.060040       | 130.086255     | 65.546765        |                |                  | 1  |

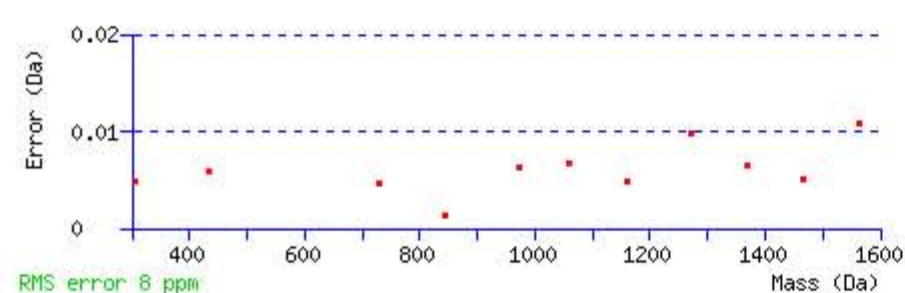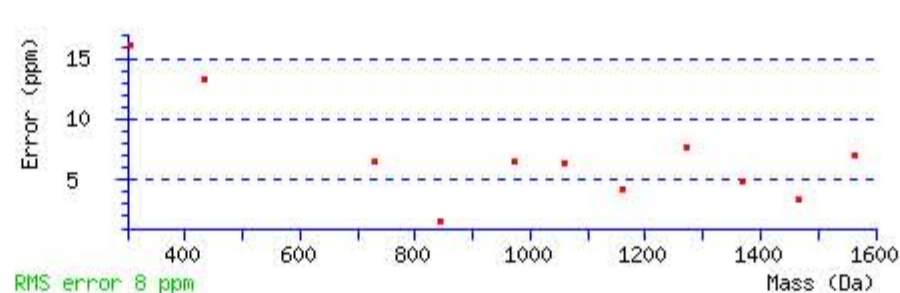

NCBI BLAST search of **GTYPVPIVSELQSGK**

(Parameters: blastp, nr protein database, expect=20000, no filter, PAM30)

Other BLAST [web gateways](#)

All matches to this query

| Score | Mr(calc):   | Delta    | Sequence                            |
|-------|-------------|----------|-------------------------------------|
| 62.6  | 1998.085983 | 0.018939 | <a href="#">GTYPVPIVSELQSGK</a>     |
| 3.7   | 1998.099731 | 0.005191 | <a href="#">GDEVVVELVENGKKVTVGK</a> |

Mascot: <http://www.matrixscience.com/>

# MASCOT Search Results

## Peptide View

MS/MS Fragmentation of **HVYGELDVQIQR**

Found in **F13A\_HUMAN**, Coagulation factor XIII A chain OS=Homo sapiens GN=F13A1 PE=1 SV=4

Match to Query 52658: 2078.101212 from(693.707680,3+) rtinseconds(2164) index(7569)

Title: Locus:1.1.1.3007.19 File:"2013-07-02 CLN FXIII 180 min 1st F 1.wiff"

Data file C:\Program Files (x86)\Matrix Science\Mascot Daemon\mgf\7 FXIII 180 min 1st\mascot\_daemon\_merge.mgf

Click mouse within plot area to zoom in by factor of two about that point

Or, Plot from  to  Da

Label all possible matches  Label matches used for scoring

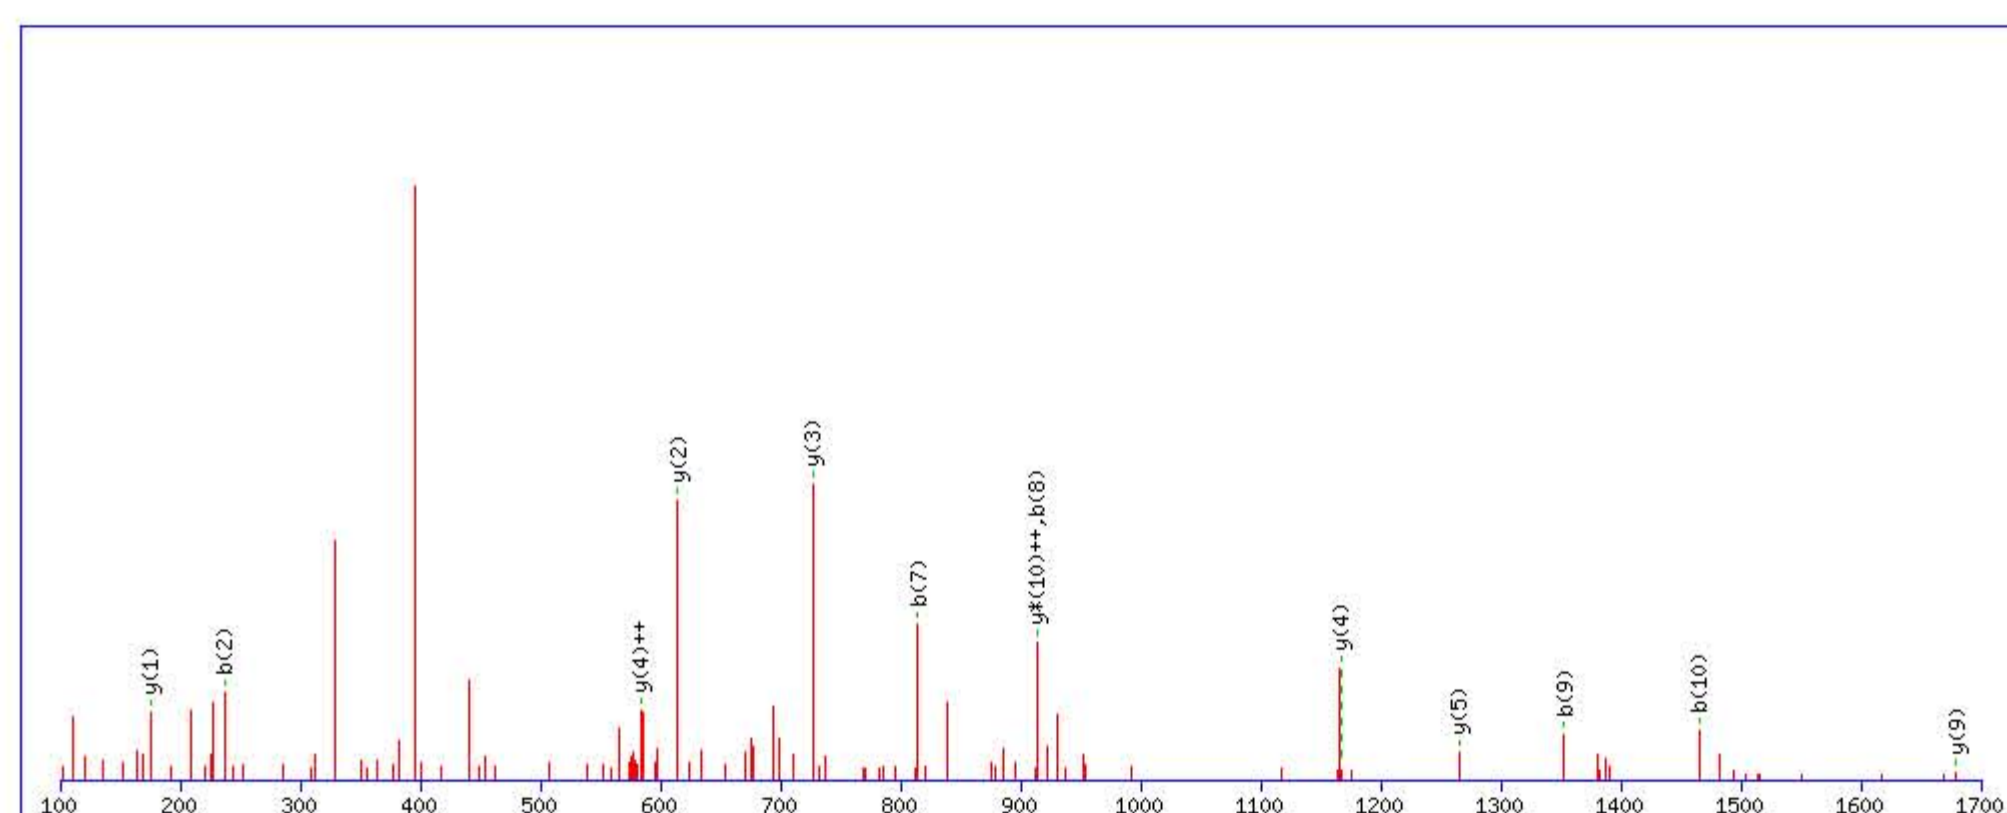

Monoisotopic mass of neutral peptide  $M_r(\text{calc})$ : 2078.080521

Fixed modifications: Carbamidomethyl (C) (apply to specified residues or termini only)

Variable modifications:

Q9 : Biotin:Thermo-21345 (Q)

Q11 : Biotin:Thermo-21345 (Q)

Ions Score: 41 Expect: 0.0018

Matches : 13/98 fragment ions using 15 most intense peaks [\(help\)](#)

| #  | b                  | b <sup>++</sup> | b <sup>*</sup> | b <sup>*++</sup> | b <sup>0</sup> | b <sup>0++</sup> | Seq. | y                  | y <sup>++</sup>   | y <sup>*</sup> | y <sup>*++</sup>  | y <sup>0</sup> | y <sup>0++</sup> | #  |
|----|--------------------|-----------------|----------------|------------------|----------------|------------------|------|--------------------|-------------------|----------------|-------------------|----------------|------------------|----|
| 1  | 138.066188         | 69.536732       |                |                  |                |                  | H    |                    |                   |                |                   |                |                  | 12 |
| 2  | <b>237.134602</b>  | 119.070939      |                |                  |                |                  | V    | 1942.028889        | 971.518082        | 1925.002340    | 963.004808        | 1924.018324    | 962.512800       | 11 |
| 3  | 400.197931         | 200.602603      |                |                  |                |                  | Y    | 1842.960475        | 921.983875        | 1825.933926    | <b>913.470601</b> | 1824.949910    | 912.978593       | 10 |
| 4  | 457.219395         | 229.113335      |                |                  |                |                  | G    | <b>1679.897146</b> | 840.452211        | 1662.870597    | 831.938937        | 1661.886581    | 831.446929       | 9  |
| 5  | 586.261988         | 293.634632      |                |                  | 568.251423     | 284.629349       | E    | 1622.875682        | 811.941479        | 1605.849133    | 803.428204        | 1604.865117    | 802.936196       | 8  |
| 6  | 699.346052         | 350.176664      |                |                  | 681.335487     | 341.171382       | L    | 1493.833089        | 747.420183        | 1476.806540    | 738.906908        | 1475.822524    | 738.414900       | 7  |
| 7  | <b>814.372995</b>  | 407.690136      |                |                  | 796.362430     | 398.684853       | D    | 1380.749025        | 690.878150        | 1363.722476    | 682.364876        | 1362.738460    | 681.872868       | 6  |
| 8  | <b>913.441409</b>  | 457.224342      |                |                  | 895.430844     | 448.219060       | V    | <b>1265.722082</b> | 633.364679        | 1248.695533    | 624.851405        |                |                  | 5  |
| 9  | <b>1352.666735</b> | 676.837006      | 1335.640186    | 668.323731       | 1334.656170    | 667.831723       | Q    | <b>1166.653668</b> | <b>583.830472</b> | 1149.627119    | 575.317198        |                |                  | 4  |
| 10 | <b>1465.750799</b> | 733.379037      | 1448.724250    | 724.865763       | 1447.740234    | 724.373755       | I    | <b>727.428342</b>  | 364.217809        | 710.401793     | 355.704534        |                |                  | 3  |
| 11 | 1904.976125        | 952.991700      | 1887.949576    | 944.478426       | 1886.965560    | 943.986418       | Q    | <b>614.344278</b>  | 307.675777        | 597.317729     | 299.162503        |                |                  | 2  |
| 12 |                    |                 |                |                  |                |                  | R    | <b>175.118952</b>  | 88.063114         | 158.092403     | 79.549839         |                |                  | 1  |

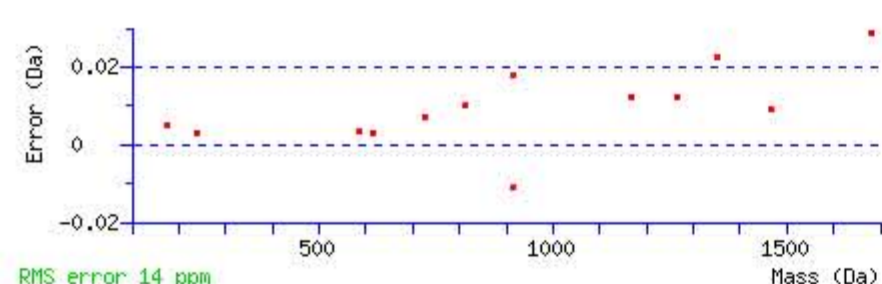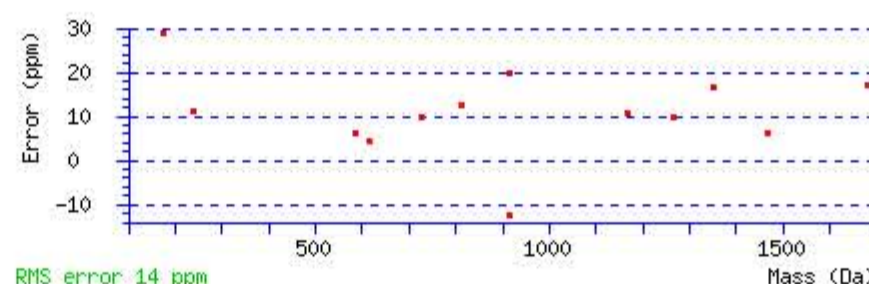

NCBI BLAST search of [HVYGELDVQIQR](#)

(Parameters: blastp, nr protein database, expect=20000, no filter, PAM30)

Other BLAST [web gateways](#)

## All matches to this query

| Score | $M_r(\text{calc})$ : | Delta     | Sequence                            |
|-------|----------------------|-----------|-------------------------------------|
| 41.2  | 2078.080521          | 0.020691  | <a href="#">HVYGELDVQIQR</a>        |
| 16.2  | 2078.116699          | -0.015487 | <a href="#">RPRGDVESRLDALQR</a>     |
| 12.5  | 2078.130615          | -0.029403 | <a href="#">VEAEGQLQQLREVLR</a>     |
| 11.9  | 2078.124084          | -0.022872 | <a href="#">SPQESRRLSIQR</a>        |
| 11.9  | 2078.090881          | 0.010331  | <a href="#">WIAQDLSSLAGLLDQHGVR</a> |
| 6.8   | 2078.128098          | -0.026886 | <a href="#">QLLRWKEAEQR</a>         |
| 4.8   | 2078.089493          | 0.011719  | <a href="#">EIKQDISSLRVELLEDK</a>   |
| 2.4   | 2078.101608          | -0.000396 | <a href="#">LSEAAALAGLQEQR</a>      |
| 1.3   | 2078.112839          | -0.011627 | <a href="#">AAALRATQEELQR</a>       |
| 1.3   | 2078.080505          | 0.020707  | <a href="#">AVWEAEQLGGLQR</a>       |

# MASCOT Search Results

## Peptide View

MS/MS Fragmentation of **GVNLQEFLNVTSVHLFK**  
 Found in **F13A\_HUMAN**, Coagulation factor XIII A chain OS=Homo sapiens GN=F13A1 PE=1 SV=4

Match to Query 56754: 2255.236692 from(752.752840,3+) rtinseconds(2970) index(31335)  
 Title: Locus:1.1.1.3174.9 File:"2013-07-02 CLN FXIII 180 min 1st F 2.wiff"  
 Data file C:\Program Files (x86)\Matrix Science\Mascot Daemon\mgf\7 FXIII 180 min 1st\mascot\_daemon\_merge.mgf

Click mouse within plot area to zoom in by factor of two about that point  
 Or, Plot from  to  Da   
 Label all possible matches  Label matches used for scoring

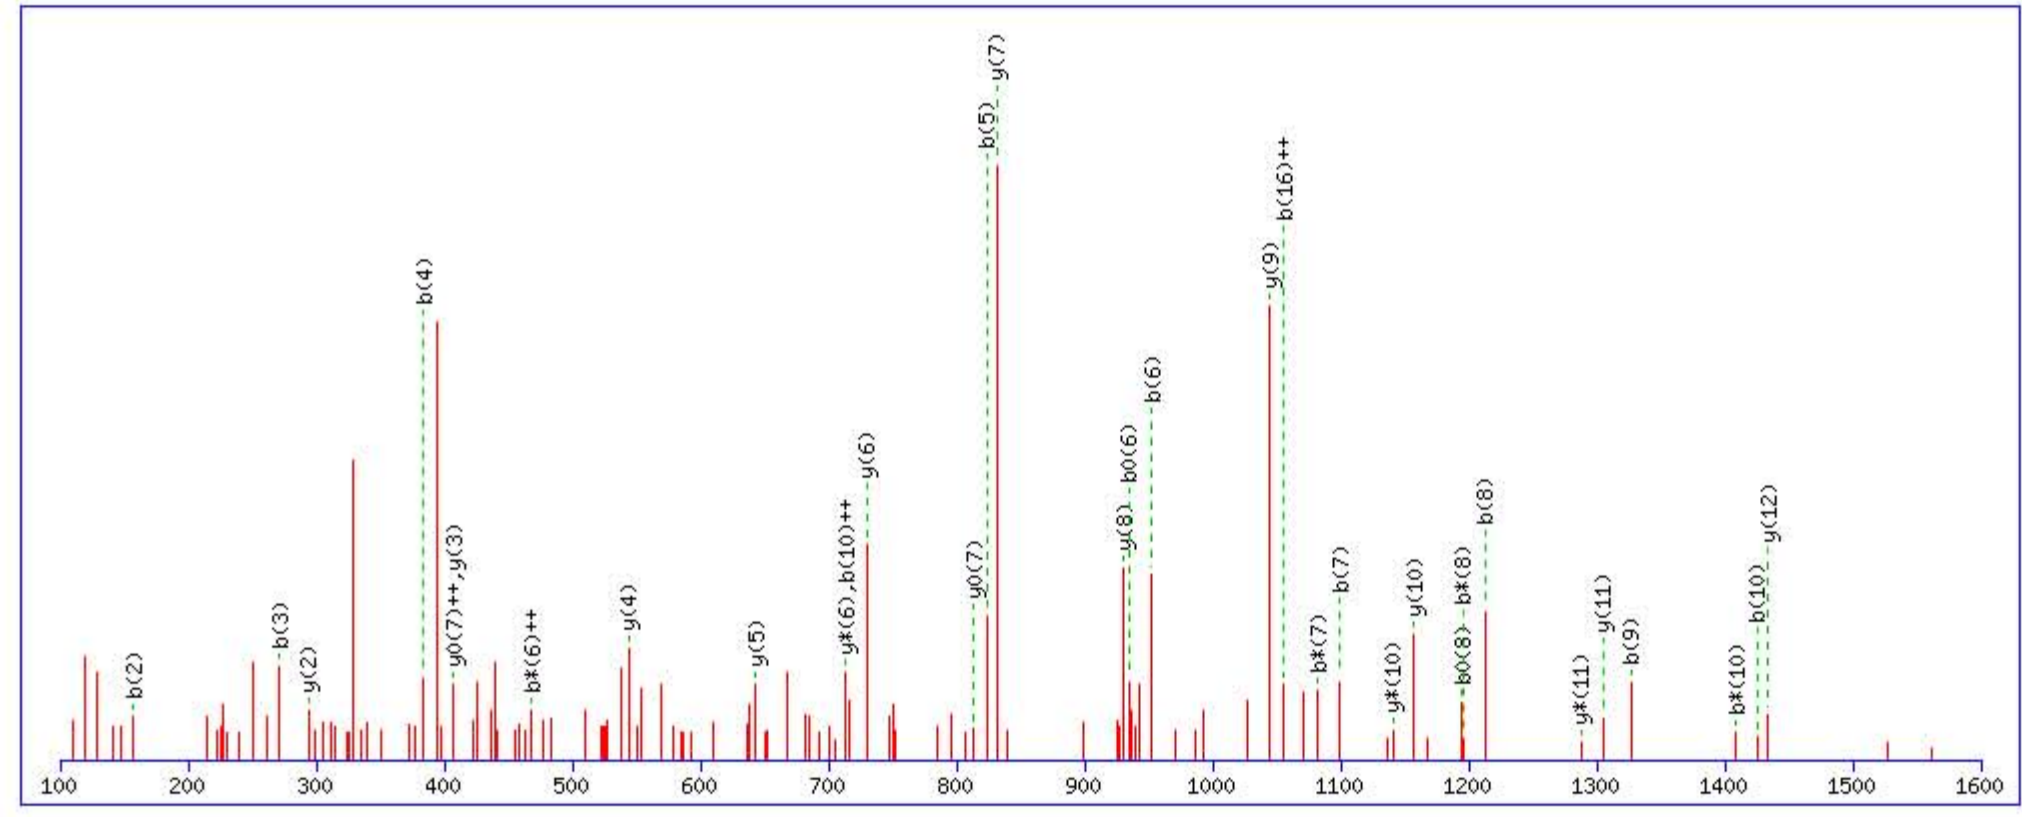

Monoisotopic mass of neutral peptide Mr(calc): 2255.213654  
 Fixed modifications: Carbamidomethyl (C) (apply to specified residues or termini only)  
 Variable modifications:  
 Q5 : Biotin:Thermo-21345 (Q)  
 Ions Score: 69 Expect: 2.3e-006  
 Matches : 33/168 fragment ions using 53 most intense peaks [\(help\)](#)

| #  | b                  | b <sup>++</sup>    | b <sup>*</sup>     | b <sup>*++</sup>  | b <sup>0</sup>     | b <sup>0++</sup> | Seq. | y                  | y <sup>++</sup> | y <sup>*</sup>     | y <sup>*++</sup> | y <sup>0</sup>    | y <sup>0++</sup>  | #  |
|----|--------------------|--------------------|--------------------|-------------------|--------------------|------------------|------|--------------------|-----------------|--------------------|------------------|-------------------|-------------------|----|
| 1  | 58.028740          | 29.518008          |                    |                   |                    |                  | G    |                    |                 |                    |                  |                   |                   | 17 |
| 2  | <b>157.097154</b>  | 79.052215          |                    |                   |                    |                  | V    | 2199.199458        | 1100.103367     | 2182.172909        | 1091.590092      | 2181.188893       | 1091.098084       | 16 |
| 3  | <b>271.140081</b>  | 136.073679         | 254.113532         | 127.560404        |                    |                  | N    | 2100.131044        | 1050.569160     | 2083.104495        | 1042.055885      | 2082.120479       | 1041.563877       | 15 |
| 4  | <b>384.224145</b>  | 192.615711         | 367.197596         | 184.102436        |                    |                  | L    | 1986.088117        | 993.547697      | 1969.061568        | 985.034422       | 1968.077552       | 984.542414        | 14 |
| 5  | <b>823.449471</b>  | 412.228374         | 806.422922         | 403.715099        |                    |                  | Q    | 1873.004053        | 937.005665      | 1855.977504        | 928.492390       | 1854.993488       | 928.000382        | 13 |
| 6  | <b>952.492064</b>  | 476.749670         | 935.465515         | <b>468.236396</b> | <b>934.481499</b>  | 467.744388       | E    | <b>1433.778727</b> | 717.393002      | 1416.752178        | 708.879727       | 1415.768162       | 708.387719        | 12 |
| 7  | <b>1099.560478</b> | 550.283877         | <b>1082.533929</b> | 541.770603        | 1081.549913        | 541.278595       | F    | <b>1304.736134</b> | 652.871705      | <b>1287.709585</b> | 644.358431       | 1286.725569       | 643.866423        | 11 |
| 8  | <b>1212.644542</b> | 606.825909         | <b>1195.617993</b> | 598.312635        | <b>1194.633977</b> | 597.820627       | L    | <b>1157.667720</b> | 579.337498      | <b>1140.641171</b> | 570.824224       | 1139.657155       | 570.332216        | 10 |
| 9  | <b>1326.687469</b> | 663.847373         | 1309.660920        | 655.334098        | 1308.676904        | 654.842090       | N    | <b>1044.583656</b> | 522.795466      | 1027.557107        | 514.282192       | 1026.573091       | 513.790184        | 9  |
| 10 | <b>1425.755883</b> | <b>713.381580</b>  | <b>1408.729334</b> | 704.868305        | 1407.745318        | 704.376297       | V    | <b>930.540729</b>  | 465.774003      | 913.514180         | 457.260728       | 912.530164        | 456.768720        | 8  |
| 11 | 1526.803562        | 763.905419         | 1509.777013        | 755.392145        | 1508.792997        | 754.900137       | T    | <b>831.472315</b>  | 416.239796      | 814.445766         | 407.726521       | <b>813.461750</b> | <b>407.234513</b> | 7  |
| 12 | 1613.835590        | 807.421433         | 1596.809041        | 798.908159        | 1595.825025        | 798.416151       | S    | <b>730.424636</b>  | 365.715956      | <b>713.398087</b>  | 357.202682       | 712.414071        | 356.710674        | 6  |
| 13 | 1712.904004        | 856.955640         | 1695.877455        | 848.442366        | 1694.893439        | 847.950358       | V    | <b>643.392608</b>  | 322.199942      | 626.366059         | 313.686668       |                   |                   | 5  |
| 14 | 1849.962916        | 925.485096         | 1832.936367        | 916.971822        | 1831.952351        | 916.479814       | H    | <b>544.324194</b>  | 272.665735      | 527.297645         | 264.152461       |                   |                   | 4  |
| 15 | 1963.046980        | 982.027128         | 1946.020431        | 973.513854        | 1945.036415        | 973.021846       | L    | <b>407.265282</b>  | 204.136279      | 390.238733         | 195.623004       |                   |                   | 3  |
| 16 | 2110.115394        | <b>1055.561335</b> | 2093.088845        | 1047.048060       | 2092.104829        | 1046.556052      | F    | <b>294.181218</b>  | 147.594247      | 277.154669         | 139.080973       |                   |                   | 2  |
| 17 |                    |                    |                    |                   |                    |                  | K    | 147.112804         | 74.060040       | 130.086255         | 65.546765        |                   |                   | 1  |

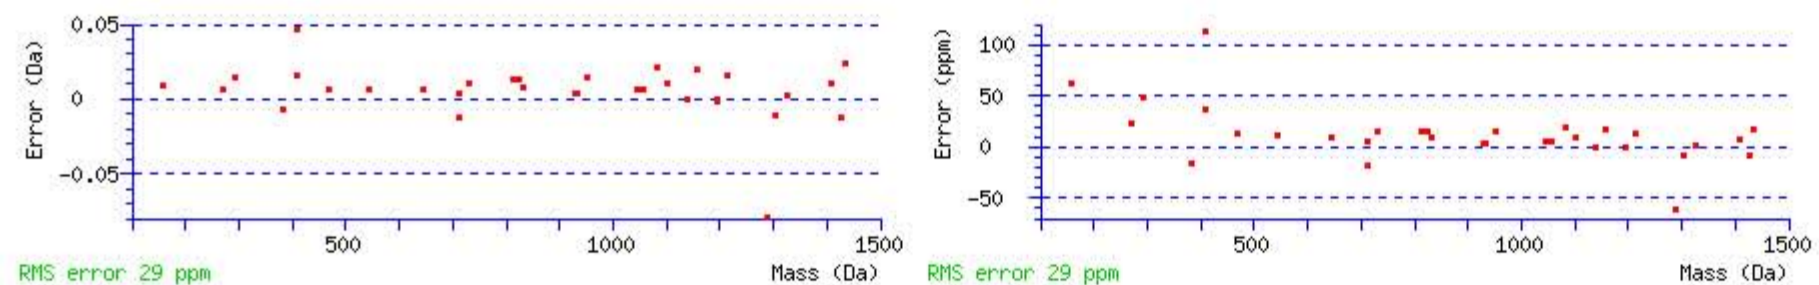

NCBI BLAST search of **GVNLQEFLNVTSVHLFK**  
 (Parameters: blastp, nr protein database, expect=20000, no filter, PAM30)  
 Other BLAST [web gateways](#)

### All matches to this query

| Score | Mr(calc):   | Delta    | Sequence                          |
|-------|-------------|----------|-----------------------------------|
| 68.5  | 2255.213654 | 0.023038 | <a href="#">GVNLQEFLNVTSVHLFK</a> |

*{MATRIX}*  
*{SCIENCE}* Mascot Search Results

Peptide View

MS/MS Fragmentation of AVPPNNSNAEDDLPTVELQGVVPR

Found in F13A\_HUMAN, Coagulation factor XIII A chain OS=Homo sapiens GN=F13A1 PE=1 SV=4

Match to Query 69217: 2912.491936 from(729.130260,4+) rtinseconds(2511) index(9842)

Title: Locus:1.1.1.3128.16 File:"2013-07-02 CLN FXIII 180 min 1st F 1.wiff"

Data file C:\Program Files (x86)\Matrix Science\Mascot Daemon\mgf7 FXIII 180 min 1st\mascot\_daemon\_merge.mgf

Click mouse within plot area to zoom in by factor of two about that point

Or, Plot from 100 to 1800 Da Full range

Label all possible matches Label matches used for scoring

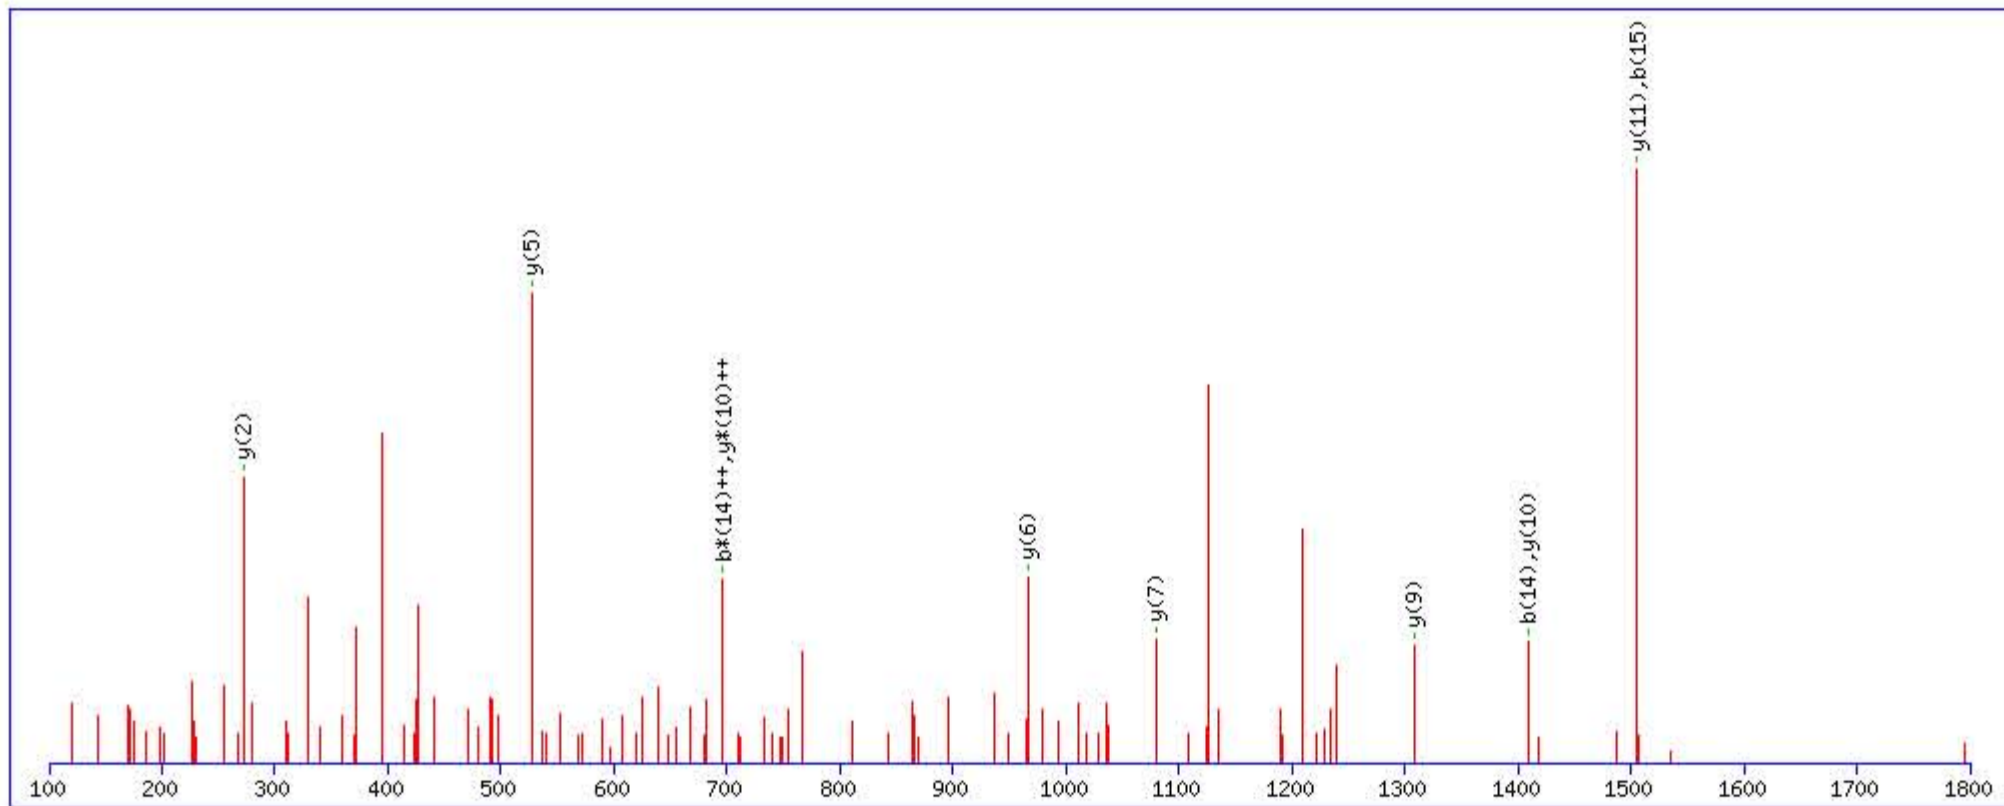

Monoisotopic mass of neutral peptide Mr(calcd): 2912.470200  
 Fixed modifications: Carbamidomethyl (C) (apply to specified residues or termini only)  
 Variable modifications:  
 Q20 : Biotin:Thermo-21345 (Q)  
 Ions Score: 32 Expect: 0.02  
 Matches : 11/254 fragment ions using 16 most intense peaks (help)

| #  | b                  | b <sup>++</sup> | b <sup>+</sup> | b <sup>*++</sup>  | b <sup>0</sup> | b <sup>0++</sup> | Seq. | y                  | y <sup>++</sup> | y <sup>*</sup> | y <sup>*++</sup>  | y <sup>0</sup> | y <sup>0++</sup> | #  |
|----|--------------------|-----------------|----------------|-------------------|----------------|------------------|------|--------------------|-----------------|----------------|-------------------|----------------|------------------|----|
| 1  | 72.044390          | 36.525833       |                |                   |                |                  | A    |                    |                 |                |                   |                |                  | 25 |
| 2  | 171.112804         | 86.060040       |                |                   |                |                  | V    | 2842.440370        | 1421.723823     | 2825.413821    | 1413.210548       | 2824.429805    | 1412.718540      | 24 |
| 3  | 268.165568         | 134.586422      |                |                   |                |                  | P    | 2743.371956        | 1372.189616     | 2726.345407    | 1363.676341       | 2725.361391    | 1363.184333      | 23 |
| 4  | 365.218332         | 183.112804      |                |                   |                |                  | P    | 2646.319192        | 1323.663234     | 2629.292643    | 1315.149959       | 2628.308627    | 1314.657951      | 22 |
| 5  | 479.261259         | 240.134267      | 462.234710     | 231.620993        |                |                  | N    | 2549.266428        | 1275.136852     | 2532.239879    | 1266.623577       | 2531.255863    | 1266.131569      | 21 |
| 6  | 593.304186         | 297.155731      | 576.277637     | 288.642457        |                |                  | N    | 2435.223501        | 1218.115388     | 2418.196952    | 1209.602114       | 2417.212936    | 1209.110106      | 20 |
| 7  | 680.336214         | 340.671745      | 663.309665     | 332.158471        | 662.325649     | 331.666463       | S    | 2321.180574        | 1161.093925     | 2304.154025    | 1152.580650       | 2303.170009    | 1152.088642      | 19 |
| 8  | 794.379141         | 397.693209      | 777.352592     | 389.179934        | 776.368576     | 388.687926       | N    | 2234.148546        | 1117.577911     | 2217.121997    | 1109.064636       | 2216.137981    | 1108.572628      | 18 |
| 9  | 865.416255         | 433.211766      | 848.389706     | 424.698491        | 847.405690     | 424.206483       | A    | 2120.105619        | 1060.556447     | 2103.079070    | 1052.043173       | 2102.095054    | 1051.551165      | 17 |
| 10 | 936.453369         | 468.730323      | 919.426820     | 460.217048        | 918.442804     | 459.725040       | A    | 2049.068505        | 1025.037890     | 2032.041956    | 1016.524616       | 2031.057940    | 1016.032608      | 16 |
| 11 | 1065.495962        | 533.251619      | 1048.469413    | 524.738345        | 1047.485397    | 524.246336       | E    | 1978.031391        | 989.519333      | 1961.004842    | 981.006059        | 1960.020826    | 980.514051       | 15 |
| 12 | 1180.522905        | 590.765091      | 1163.496356    | 582.251816        | 1162.512340    | 581.759808       | D    | 1848.988798        | 924.998037      | 1831.962249    | 916.484762        | 1830.978233    | 915.992754       | 14 |
| 13 | 1295.549848        | 648.278562      | 1278.523299    | 639.765288        | 1277.539283    | 639.273280       | D    | 1733.961855        | 867.484565      | 1716.935306    | 858.971291        | 1715.951290    | 858.479283       | 13 |
| 14 | <b>1408.633912</b> | 704.820594      | 1391.607363    | <b>696.307320</b> | 1390.623347    | 695.815312       | L    | 1618.934912        | 809.971094      | 1601.908363    | 801.457819        | 1600.924347    | 800.965811       | 12 |
| 15 | <b>1505.686676</b> | 753.346976      | 1488.660127    | 744.833702        | 1487.676111    | 744.341694       | P    | <b>1505.850848</b> | 753.429062      | 1488.824299    | 744.915787        | 1487.840283    | 744.423779       | 11 |
| 16 | 1606.734355        | 803.870816      | 1589.707806    | 795.357541        | 1588.723790    | 794.865533       | T    | <b>1408.798084</b> | 704.902680      | 1391.771535    | <b>696.389405</b> | 1390.787519    | 695.897397       | 10 |
| 17 | 1705.802769        | 853.405023      | 1688.776220    | 844.891748        | 1687.792204    | 844.399740       | V    | <b>1307.750405</b> | 654.378840      | 1290.723856    | 645.865566        | 1289.739840    | 645.373558       | 9  |
| 18 | 1834.845362        | 917.926319      | 1817.818813    | 909.413045        | 1816.834797    | 908.921037       | E    | 1208.681991        | 604.844633      | 1191.655442    | 596.331359        | 1190.671426    | 595.839351       | 8  |
| 19 | 1947.929426        | 974.468351      | 1930.902877    | 965.955077        | 1929.918861    | 965.463069       | L    | <b>1079.639398</b> | 540.323337      | 1062.612849    | 531.810062        |                |                  | 7  |
| 20 | 2387.154752        | 1194.081014     | 2370.128203    | 1185.567739       | 2369.144187    | 1185.075731      | Q    | <b>966.555334</b>  | 483.781305      | 949.528785     | 475.268030        |                |                  | 6  |
| 21 | 2444.176216        | 1222.591746     | 2427.149667    | 1214.078471       | 2426.165651    | 1213.586463      | G    | <b>527.330008</b>  | 264.168642      | 510.303459     | 255.655367        |                |                  | 5  |
| 22 | 2543.244630        | 1272.125953     | 2526.218081    | 1263.612678       | 2525.234065    | 1263.120670      | V    | 470.308544         | 235.657910      | 453.281995     | 227.144635        |                |                  | 4  |
| 23 | 2642.313044        | 1321.660160     | 2625.286495    | 1313.146885       | 2624.302479    | 1312.654877      | V    | 371.240130         | 186.123703      | 354.213581     | 177.610428        |                |                  | 3  |
| 24 | 2739.365808        | 1370.186542     | 2722.339259    | 1361.673267       | 2721.355243    | 1361.181259      | P    | <b>272.171716</b>  | 136.589496      | 255.145167     | 128.076221        |                |                  | 2  |
| 25 |                    |                 |                |                   |                |                  | R    | 175.118952         | 88.063114       | 158.092403     | 79.549839         |                |                  | 1  |

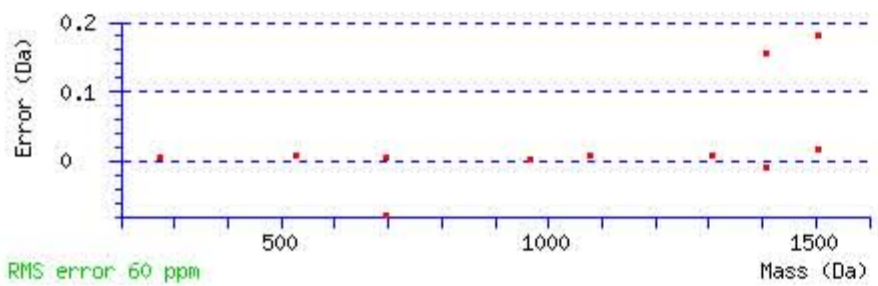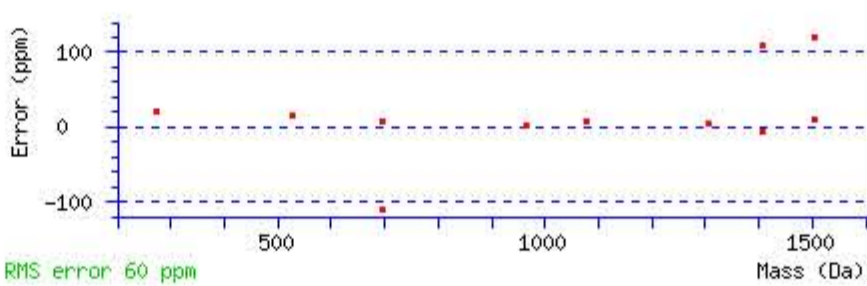

NCBI BLAST search of AVPPNNSNAEDDLPTVELQGVVPR  
 (Parameters: blastp, nr protein database, expect=20000, no filter, PAM30)  
 Other BLAST [web gateways](#)

All matches to this query

| Score | Mr(calcd):  | Delta    | Sequence                                 |
|-------|-------------|----------|------------------------------------------|
| 31.6  | 2912.470200 | 0.021736 | <a href="#">AVPPNNSNAEDDLPTVELQGVVPR</a> |

# MASCOT SCIENCE Mascot Search Results

## Peptide View

MS/MS Fragmentation of **QSTLSYQEPLR**

Found in **F13B\_HUMAN**, Coagulation factor XIII B chain OS=Homo sapiens GN=F13B PE=1 SV=3

Match to Query 40619: 1631.848688 from(816.931620,2+) rtinseconds(1929) index(78398)

Title: Locus:1.1.1.2022.22 File:"2013-07-02 CLN FXIII 180 min 1st FT.wiff"

Data file C:\Program Files (x86)\Matrix Science\Mascot Daemon\mgf\7 FXIII 180 min 1st\mascot\_daemon\_merge.mgf

Click mouse within plot area to zoom in by factor of two about that point

Or, Plot from  to  Da

Label all possible matches  Label matches used for scoring

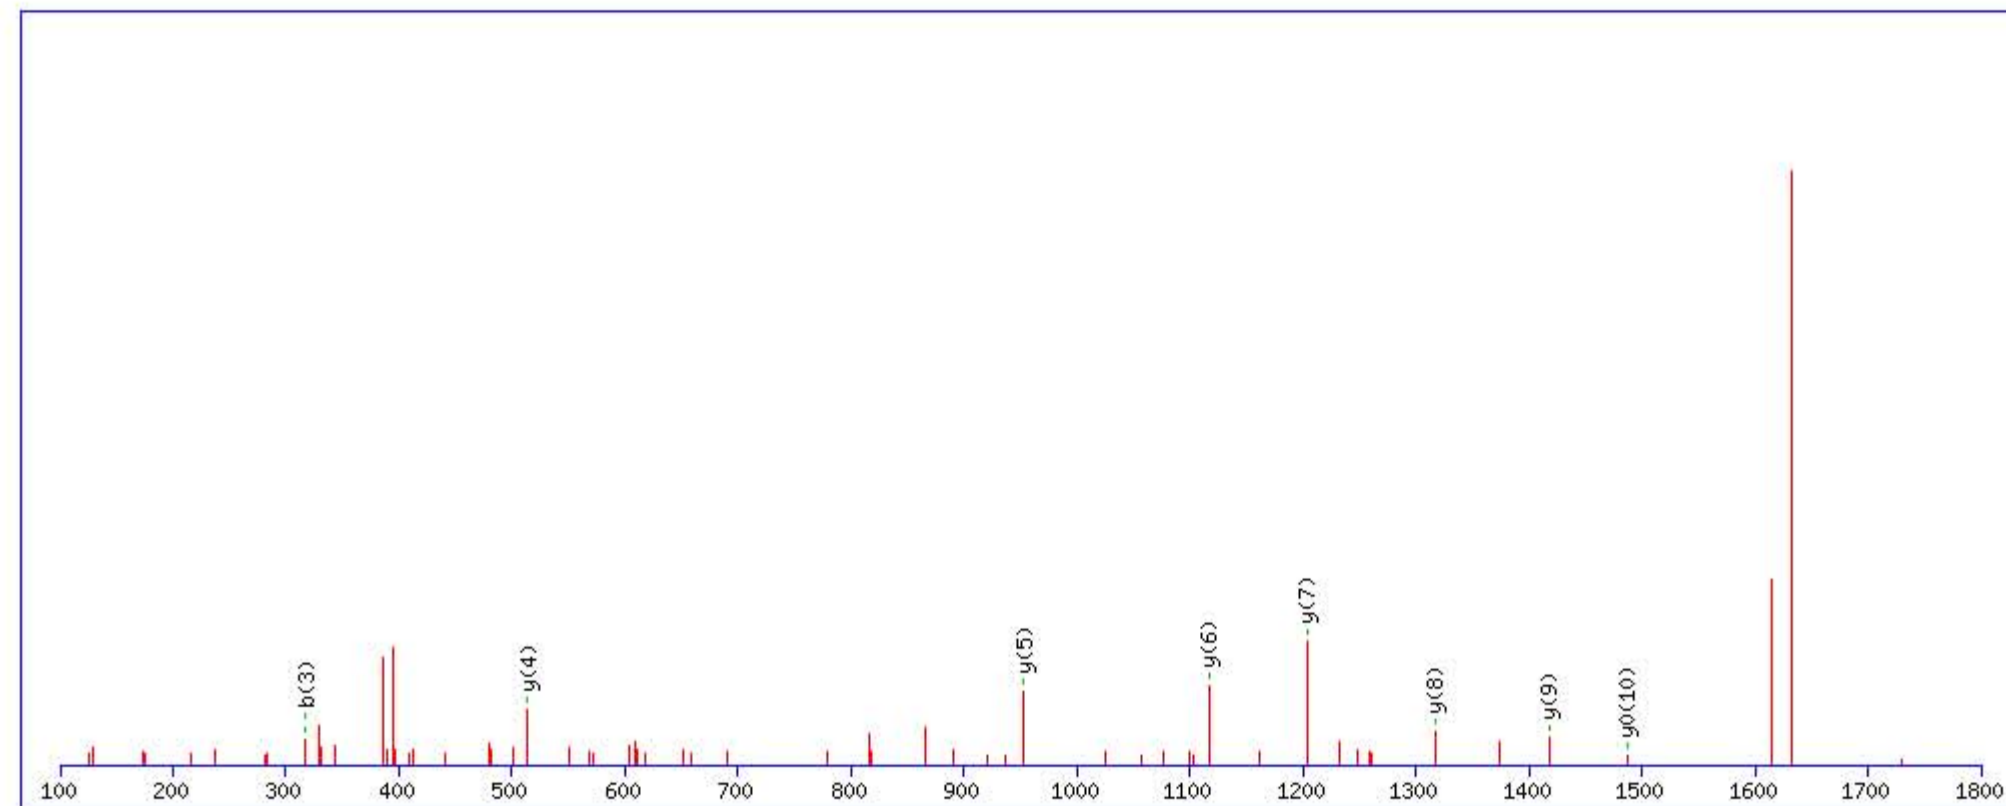

Monoisotopic mass of neutral peptide Mr(calc): 1631.834106

Fixed modifications: Carbamidomethyl (C) (apply to specified residues or termini only)

Variable modifications:

Q7 : Biotin:Thermo-21345 (Q)

Ions Score: 34 Expect: 0.0013

Matches : 8/112 fragment ions using 15 most intense peaks [\(help\)](#)

| #  | b           | b <sup>++</sup> | b <sup>+</sup> | b <sup>*++</sup> | b <sup>0</sup> | b <sup>0++</sup> | Seq. | y           | y <sup>++</sup> | y <sup>+</sup> | y <sup>*++</sup> | y <sup>0</sup> | y <sup>0++</sup> | #  |
|----|-------------|-----------------|----------------|------------------|----------------|------------------|------|-------------|-----------------|----------------|------------------|----------------|------------------|----|
| 1  | 129.065854  | 65.036565       | 112.039305     | 56.523291        |                |                  | Q    |             |                 |                |                  |                |                  | 11 |
| 2  | 216.097882  | 108.552579      | 199.071333     | 100.039305       | 198.087317     | 99.547296        | S    | 1504.782827 | 752.895052      | 1487.756278    | 744.381777       | 1486.772262    | 743.889769       | 10 |
| 3  | 317.145561  | 159.076418      | 300.119012     | 150.563144       | 299.134996     | 150.071136       | T    | 1417.750799 | 709.379038      | 1400.724250    | 700.865763       | 1399.740234    | 700.373755       | 9  |
| 4  | 430.229625  | 215.618450      | 413.203076     | 207.105176       | 412.219060     | 206.613168       | L    | 1316.703120 | 658.855198      | 1299.676571    | 650.341924       | 1298.692555    | 649.849916       | 8  |
| 5  | 517.261653  | 259.134465      | 500.235104     | 250.621190       | 499.251088     | 250.129182       | S    | 1203.619056 | 602.313166      | 1186.592507    | 593.799892       | 1185.608491    | 593.307884       | 7  |
| 6  | 680.324982  | 340.666129      | 663.298433     | 332.152855       | 662.314417     | 331.660847       | Y    | 1116.587028 | 558.797152      | 1099.560479    | 550.283878       | 1098.576463    | 549.791870       | 6  |
| 7  | 1119.550308 | 560.278792      | 1102.523759    | 551.765518       | 1101.539743    | 551.273510       | Q    | 953.523699  | 477.265488      | 936.497150     | 468.752213       | 935.513134     | 468.260205       | 5  |
| 8  | 1248.592901 | 624.800089      | 1231.566352    | 616.286814       | 1230.582336    | 615.794806       | E    | 514.298373  | 257.652825      | 497.271824     | 249.139550       | 496.287808     | 248.647542       | 4  |
| 9  | 1345.645665 | 673.326471      | 1328.619116    | 664.813196       | 1327.635100    | 664.321188       | P    | 385.255780  | 193.131528      | 368.229231     | 184.618253       |                |                  | 3  |
| 10 | 1458.729729 | 729.868503      | 1441.703180    | 721.355228       | 1440.719164    | 720.863220       | L    | 288.203016  | 144.605146      | 271.176467     | 136.091871       |                |                  | 2  |
| 11 |             |                 |                |                  |                |                  | R    | 175.118952  | 88.063114       | 158.092403     | 79.549839        |                |                  | 1  |

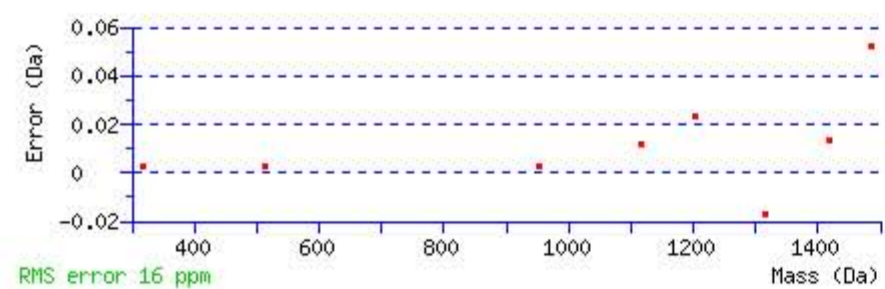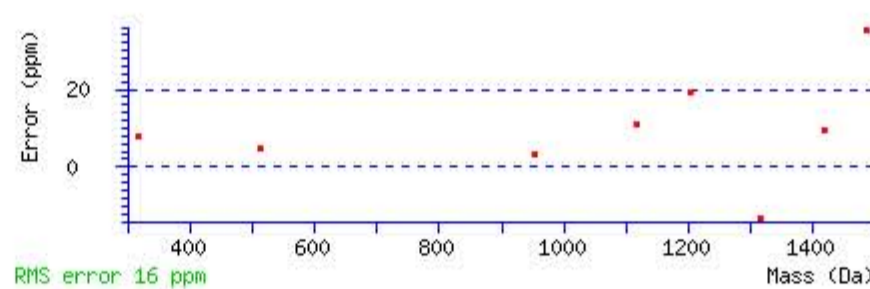

NCBI BLAST search of **QSTLSYQEPLR**

(Parameters: blastp, nr protein database, expect=20000, no filter, PAM30)

Other BLAST [web gateways](#)

All matches to this query

| Score | Mr(calc):   | Delta     | Sequence                       |
|-------|-------------|-----------|--------------------------------|
| 33.6  | 1631.834106 | 0.014582  | <a href="#">QSTLSYQEPLR</a>    |
| 2.8   | 1631.866440 | -0.017752 | <a href="#">ITEEERRMASVLAK</a> |
| 0.6   | 1631.826691 | 0.021997  | <a href="#">EADAVSYKISREHK</a> |
| 0.5   | 1631.832733 | 0.015955  | <a href="#">EELLLLEMEQLEK</a>  |
| 0.5   | 1631.855194 | -0.006506 | <a href="#">ELLEKENIMKQNK</a>  |

Mascot: <http://www.matrixscience.com/>

# MATRIX SCIENCE Mascot Search Results

## Peptide View

MS/MS Fragmentation of **TIAVLLDDILQR**

Found in **CC126\_HUMAN**, Coiled-coil domain-containing protein 126 OS=Homo sapiens GN=CCDC126 PE=2 SV=2

Match to Query 41986: 1679.983188 from(840.998870,2+) rtinseconds(3099) index(32066)

Title: Locus:1.1.1.3218.14 File:"2013-07-02 CLN FXIII 180 min 1st F 2.wiff"

Data file C:\Program Files (x86)\Matrix Science\Mascot Daemon\mgf7 FXIII 180 min 1st\mascot\_daemon\_merge.mgf

Click mouse within plot area to zoom in by factor of two about that point

Or, Plot from  to  Da

Label all possible matches  Label matches used for scoring

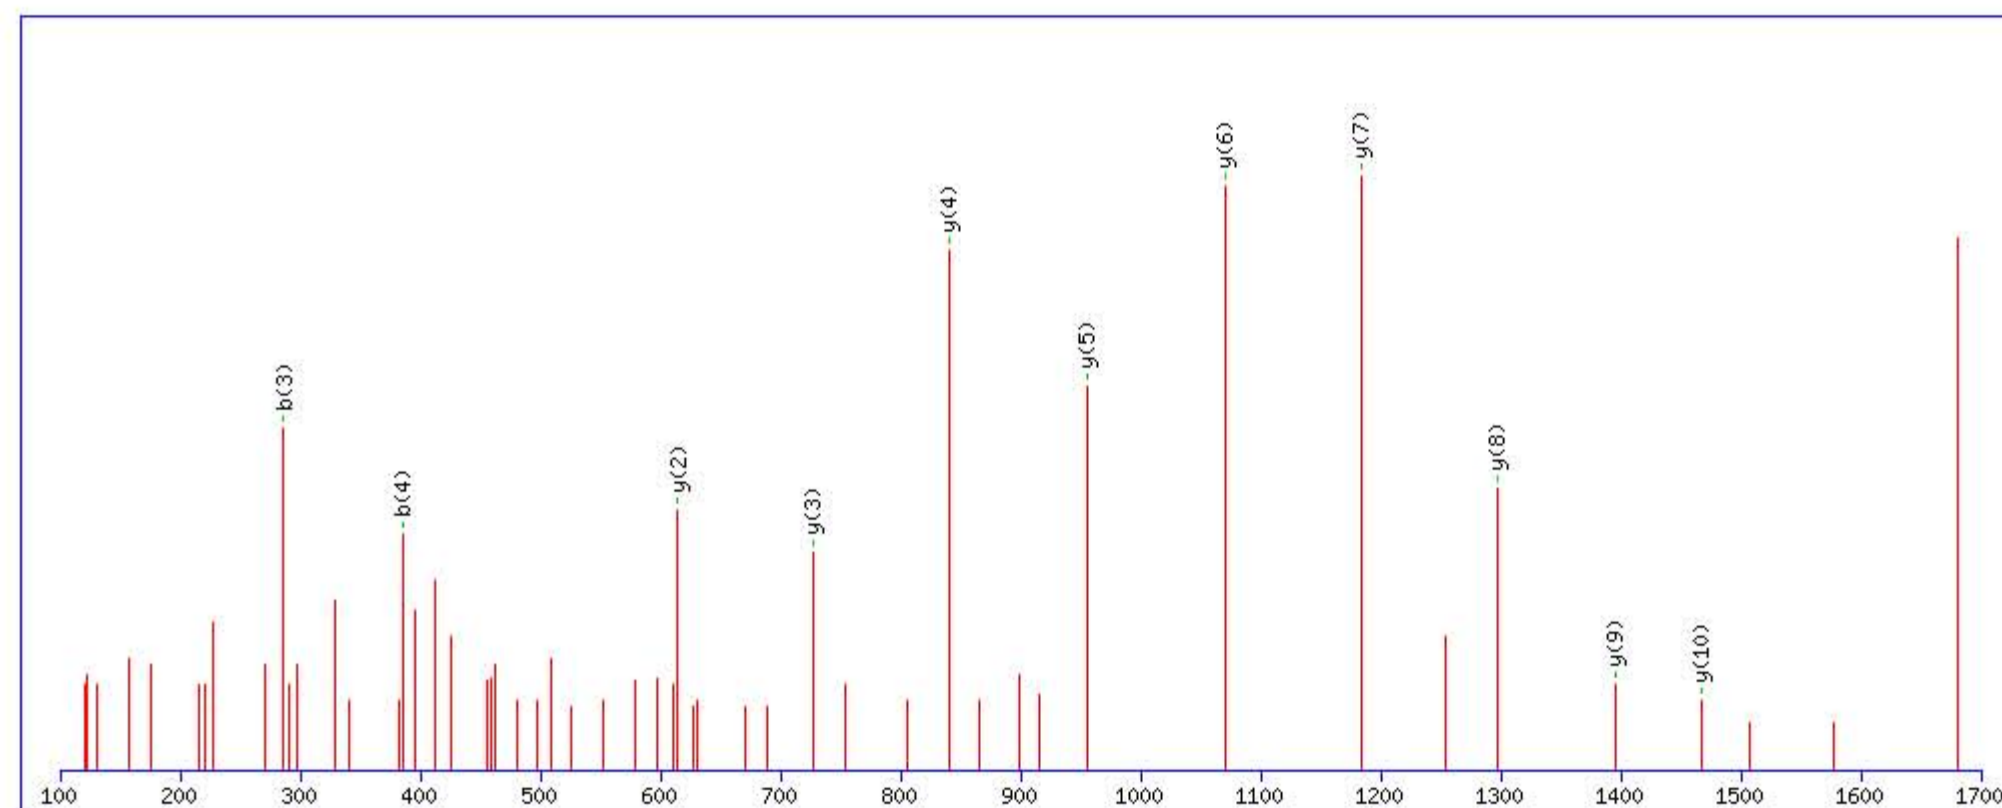

Monoisotopic mass of neutral peptide  $M_r(\text{calc})$ : 1679.964401

Fixed modifications: Carbamidomethyl (C) (apply to specified residues or termini only)

Variable modifications:

Q11 : Biotin:Thermo-21345 (Q)

Ions Score: 75 Expect: 2.3e-007

Matches : 11/104 fragment ions using 15 most intense peaks [\(help\)](#)

| #  | b                 | b <sup>++</sup> | b <sup>+</sup> | b <sup>*++</sup> | b <sup>0</sup> | b <sup>0++</sup> | Seq. | y                  | y <sup>++</sup> | y <sup>+</sup> | y <sup>*++</sup> | y <sup>0</sup> | y <sup>0++</sup> | #  |
|----|-------------------|-----------------|----------------|------------------|----------------|------------------|------|--------------------|-----------------|----------------|------------------|----------------|------------------|----|
| 1  | 102.054955        | 51.531116       |                |                  | 84.044390      | 42.525833        | T    |                    |                 |                |                  |                |                  | 12 |
| 2  | 215.139019        | 108.073147      |                |                  | 197.128454     | 99.067865        | I    | 1579.924012        | 790.465644      | 1562.897463    | 781.952370       | 1561.913447    | 781.460361       | 11 |
| 3  | <b>286.176133</b> | 143.591704      |                |                  | 268.165568     | 134.586422       | A    | <b>1466.839948</b> | 733.923612      | 1449.813399    | 725.410338       | 1448.829383    | 724.918330       | 10 |
| 4  | <b>385.244547</b> | 193.125912      |                |                  | 367.233982     | 184.120629       | V    | <b>1395.802834</b> | 698.405055      | 1378.776285    | 689.891780       | 1377.792269    | 689.399772       | 9  |
| 5  | 498.328611        | 249.667944      |                |                  | 480.318046     | 240.662661       | L    | <b>1296.734420</b> | 648.870848      | 1279.707871    | 640.357574       | 1278.723855    | 639.865566       | 8  |
| 6  | 611.412675        | 306.209976      |                |                  | 593.402110     | 297.204693       | L    | <b>1183.650356</b> | 592.328816      | 1166.623807    | 583.815541       | 1165.639791    | 583.323533       | 7  |
| 7  | 726.439618        | 363.723447      |                |                  | 708.429053     | 354.718165       | D    | <b>1070.566292</b> | 535.786784      | 1053.539743    | 527.273510       | 1052.555727    | 526.781501       | 6  |
| 8  | 841.466561        | 421.236919      |                |                  | 823.455996     | 412.231636       | D    | <b>955.539349</b>  | 478.273313      | 938.512800     | 469.760038       | 937.528784     | 469.268030       | 5  |
| 9  | 954.550625        | 477.778951      |                |                  | 936.540060     | 468.773668       | I    | <b>840.512406</b>  | 420.759841      | 823.485857     | 412.246567       |                |                  | 4  |
| 10 | 1067.634689       | 534.320983      |                |                  | 1049.624124    | 525.315700       | L    | <b>727.428342</b>  | 364.217809      | 710.401793     | 355.704535       |                |                  | 3  |
| 11 | 1506.860015       | 753.933646      | 1489.833466    | 745.420371       | 1488.849450    | 744.928363       | Q    | <b>614.344278</b>  | 307.675777      | 597.317729     | 299.162503       |                |                  | 2  |
| 12 |                   |                 |                |                  |                |                  | R    | 175.118952         | 88.063114       | 158.092403     | 79.549839        |                |                  | 1  |

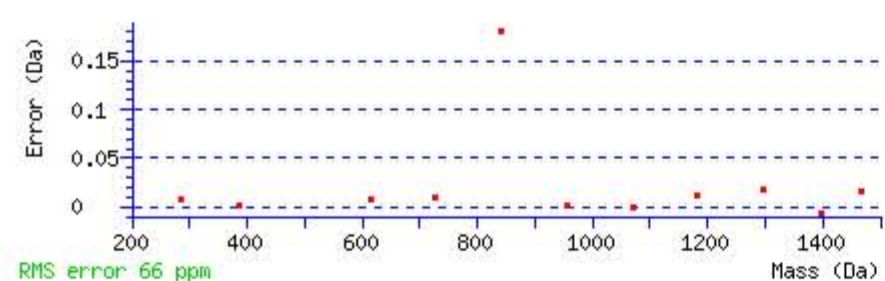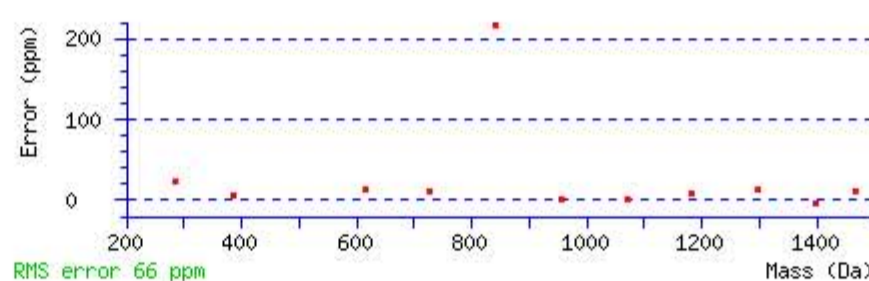

NCBI BLAST search of **TIAVLLDDILQR**

(Parameters: blastp, nr protein database, expect=20000, no filter, PAM30)

Other BLAST [web gateways](#)

All matches to this query

| Score | $M_r(\text{calc})$ : | Delta    | Sequence                     |
|-------|----------------------|----------|------------------------------|
| 74.8  | 1679.964401          | 0.018787 | <a href="#">TIAVLLDDILQR</a> |

Mascot: <http://www.matrixscience.com/>

# MASCOT SEARCH RESULTS

## Peptide View

MS/MS Fragmentation of **YADAQLSCQGR**

Found in **COL11\_HUMAN**, Collectin-11 OS=Homo sapiens GN=COLEC11 PE=1 SV=1

Match to Query 37571: 1578.749588 from(790.382070,2+) rtinseconds(1619) index(58129)

Title: Locus:1.1.1.2987.16 File:"2013-07-02 CLN FXIII 180 min 1st F 4.wiff"

Data file C:\Program Files (x86)\Matrix Science\Mascot Daemon\mgf\7 FXIII 180 min 1st\mascot\_daemon\_merge.mgf

Click mouse within plot area to zoom in by factor of two about that point

Or, Plot from  to  Da

Label all possible matches  Label matches used for scoring

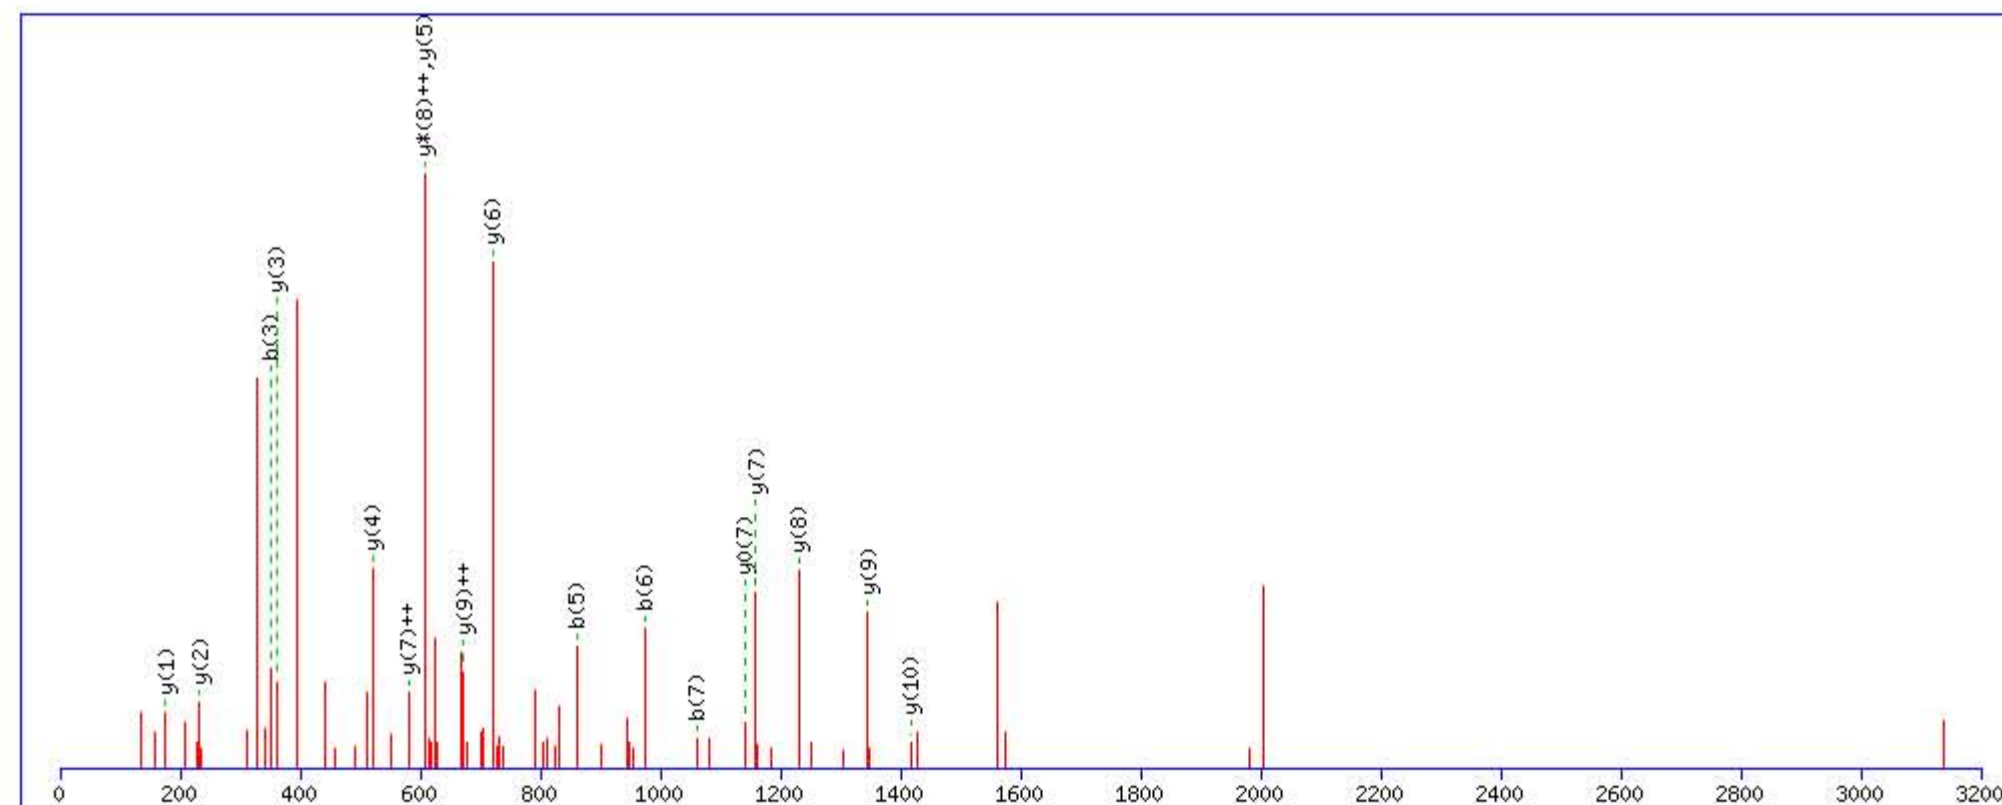

Monoisotopic mass of neutral peptide Mr(calc): 1578.728271

Fixed modifications: Carbamidomethyl (C) (apply to specified residues or termini only)

Variable modifications:

Q5 : Biotin:Thermo-21345 (Q)

Ions Score: 60 Expect: 1.8e-005

Matches : 18/100 fragment ions using 38 most intense peaks [\(help\)](#)

| #  | b           | b <sup>++</sup> | b <sup>*</sup> | b <sup>+++</sup> | b <sup>0</sup> | b <sup>0++</sup> | Seq. | y           | y <sup>++</sup> | y <sup>*</sup> | y <sup>+++</sup> | y <sup>0</sup> | y <sup>0++</sup> | #  |
|----|-------------|-----------------|----------------|------------------|----------------|------------------|------|-------------|-----------------|----------------|------------------|----------------|------------------|----|
| 1  | 164.070605  | 82.538940       |                |                  |                |                  | Y    |             |                 |                |                  |                |                  | 11 |
| 2  | 235.107719  | 118.057498      |                |                  |                |                  | A    | 1416.672232 | 708.839754      | 1399.645683    | 700.326480       | 1398.661667    | 699.834472       | 10 |
| 3  | 350.134662  | 175.570969      |                |                  | 332.124097     | 166.565687       | D    | 1345.635118 | 673.321197      | 1328.608569    | 664.807923       | 1327.624553    | 664.315915       | 9  |
| 4  | 421.171776  | 211.089526      |                |                  | 403.161211     | 202.084243       | A    | 1230.608175 | 615.807726      | 1213.581626    | 607.294451       | 1212.597610    | 606.802443       | 8  |
| 5  | 860.397102  | 430.702189      | 843.370553     | 422.188915       | 842.386537     | 421.696907       | Q    | 1159.571061 | 580.289169      | 1142.544512    | 571.775894       | 1141.560496    | 571.283886       | 7  |
| 6  | 973.481166  | 487.244221      | 956.454617     | 478.730947       | 955.470601     | 478.238939       | L    | 720.345735  | 360.676506      | 703.319186     | 352.163231       | 702.335170     | 351.671223       | 6  |
| 7  | 1060.513194 | 530.760235      | 1043.486645    | 522.246961       | 1042.502629    | 521.754953       | S    | 607.261671  | 304.134474      | 590.235122     | 295.621199       | 589.251106     | 295.129191       | 5  |
| 8  | 1220.543843 | 610.775560      | 1203.517294    | 602.262285       | 1202.533278    | 601.770277       | C    | 520.229643  | 260.618460      | 503.203094     | 252.105185       |                |                  | 4  |
| 9  | 1348.602421 | 674.804849      | 1331.575872    | 666.291574       | 1330.591856    | 665.799566       | Q    | 360.198994  | 180.603135      | 343.172445     | 172.089860       |                |                  | 3  |
| 10 | 1405.623885 | 703.315581      | 1388.597336    | 694.802306       | 1387.613320    | 694.310298       | G    | 232.140416  | 116.573846      | 215.113867     | 108.060571       |                |                  | 2  |
| 11 |             |                 |                |                  |                |                  | R    | 175.118952  | 88.063114       | 158.092403     | 79.549839        |                |                  | 1  |

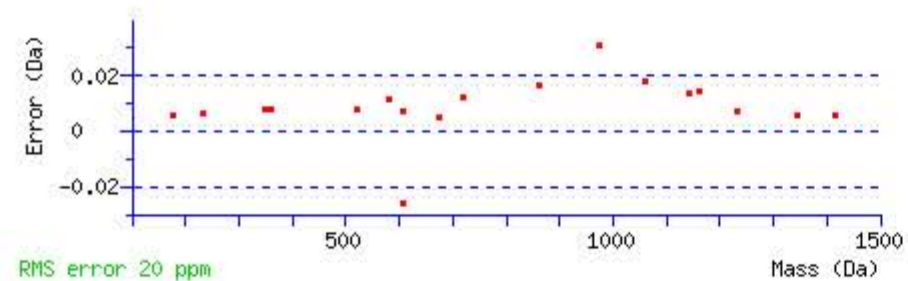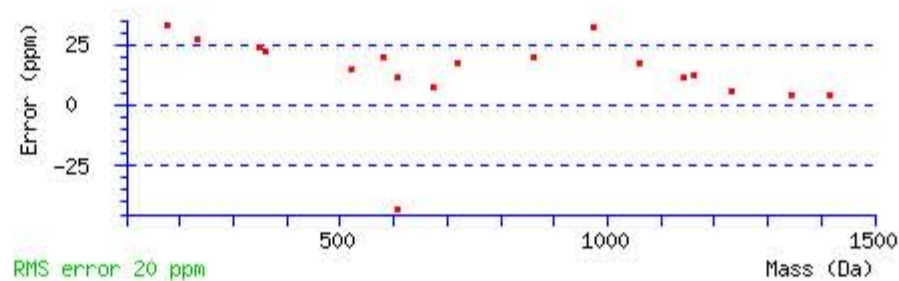

NCBI BLAST search of **YADAQLSCQGR**

(Parameters: blastp, nr protein database, expect=20000, no filter, PAM30)

Other BLAST [web gateways](#)

All matches to this query

| Score | Mr(calc):   | Delta     | Sequence                    |
|-------|-------------|-----------|-----------------------------|
| 59.5  | 1578.728271 | 0.021317  | <a href="#">YADAQLSCQGR</a> |
| 22.4  | 1578.728271 | 0.021317  | <a href="#">YADAQLSCQGR</a> |
| 8.9   | 1578.754776 | -0.005188 | <a href="#">FSWMGRQAGGR</a> |

Mascot: <http://www.matrixscience.com/>



# MASCOT Search Results

## Peptide View

MS/MS Fragmentation of **FCGQLGSPLGNPPGK**

Found in **C1R\_HUMAN**, Complement C1r subcomponent OS=Homo sapiens GN=C1R PE=1 SV=2

Match to Query 24456: 1838.934132 from(613.985320,3+) rtinseconds(2082) index(42783)

Title: Locus:1.1.1.3174.9 File:"2013-07-02 CLN FXIII 180 min 1st F 3.wiff"

Data file C:\Program Files (x86)\Matrix Science\Mascot Daemon\mgf\7 FXIII 180 min 1st\mascot\_daemon\_merge.mgf

Click mouse within plot area to zoom in by factor of two about that point

Or, Plot from  to  Da

Label all possible matches  Label matches used for scoring

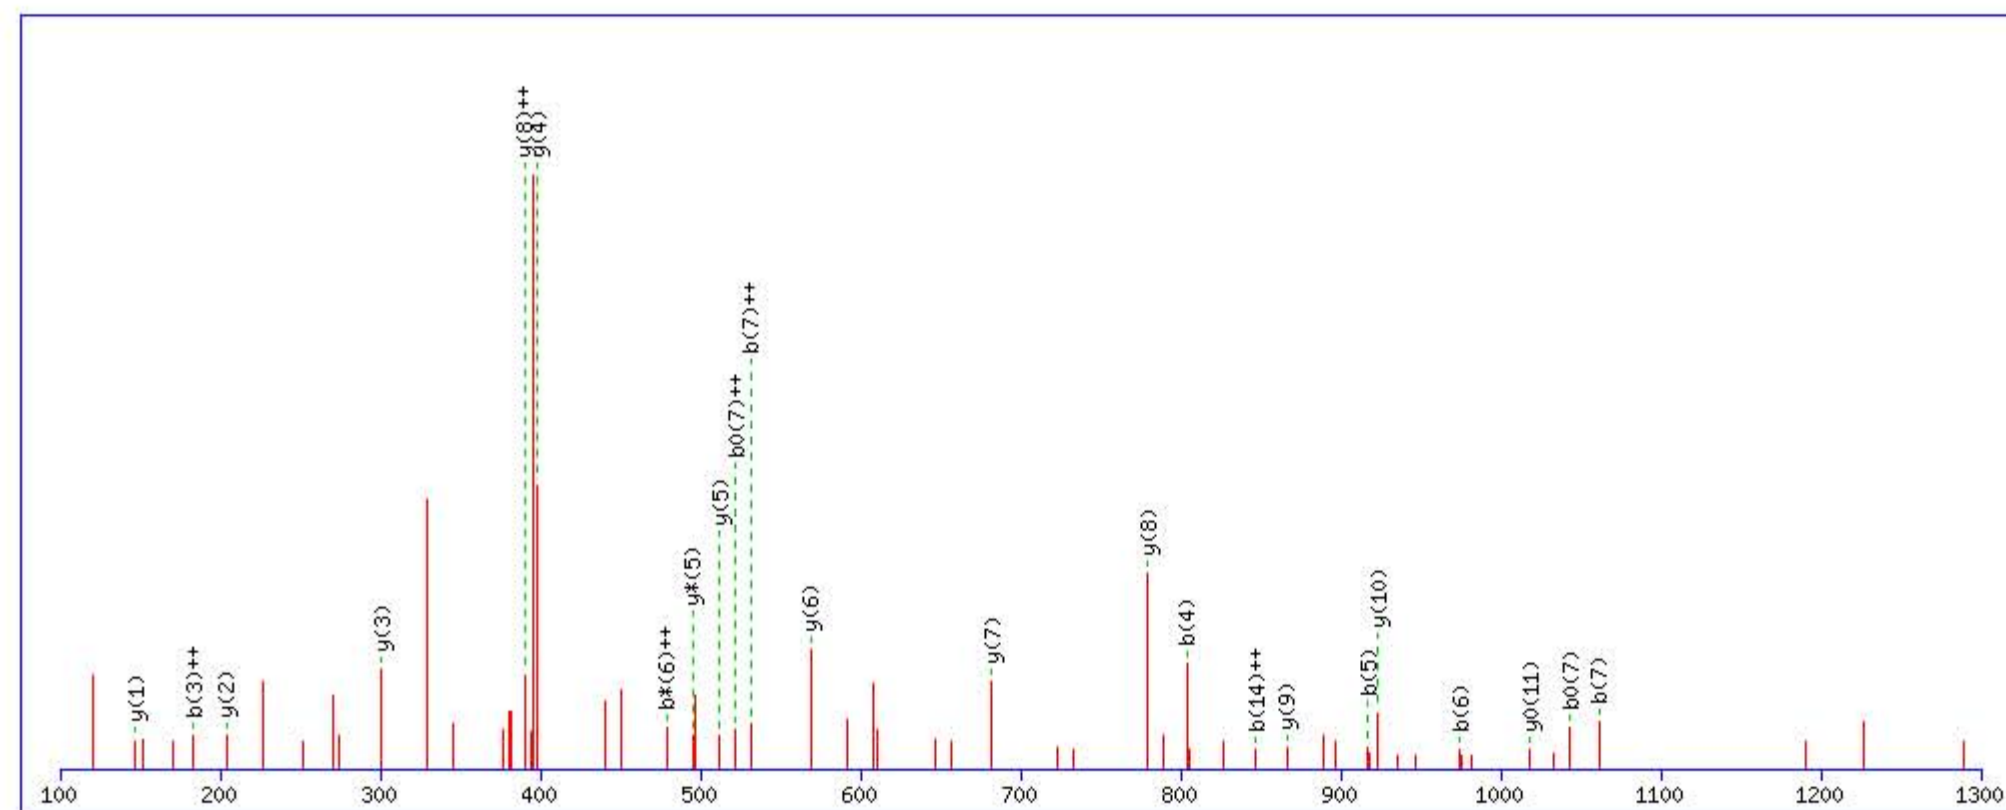

Monoisotopic mass of neutral peptide Mr(calc): 1838.917160

Fixed modifications: Carbamidomethyl (C) (apply to specified residues or termini only)

Variable modifications:

Q4 : Biotin:Thermo-21345 (Q)

Ions Score: 43 Expect: 0.0013

Matches : 23/134 fragment ions using 56 most intense peaks [\(help\)](#)

| #  | b                  | b <sup>++</sup>   | b <sup>+</sup> | b <sup>+++</sup>  | b <sup>0</sup>     | b <sup>0++</sup>  | Seq. | y                 | y <sup>++</sup>   | y <sup>+</sup>    | y <sup>+++</sup> | y <sup>0</sup>     | y <sup>0++</sup> | #  |
|----|--------------------|-------------------|----------------|-------------------|--------------------|-------------------|------|-------------------|-------------------|-------------------|------------------|--------------------|------------------|----|
| 1  | 148.075690         | 74.541483         |                |                   |                    |                   | F    |                   |                   |                   |                  |                    |                  | 15 |
| 2  | 308.106339         | 154.556807        |                |                   |                    |                   | C    | 1692.856010       | 846.931643        | 1675.829461       | 838.418369       | 1674.845445        | 837.926360       | 14 |
| 3  | 365.127803         | <b>183.067539</b> |                |                   |                    |                   | G    | 1532.825361       | 766.916318        | 1515.798812       | 758.403044       | 1514.814796        | 757.911036       | 13 |
| 4  | <b>804.353129</b>  | 402.680203        | 787.326580     | 394.166928        |                    |                   | Q    | 1475.803897       | 738.405587        | 1458.777348       | 729.892312       | 1457.793332        | 729.400304       | 12 |
| 5  | <b>917.437193</b>  | 459.222235        | 900.410644     | 450.708960        |                    |                   | L    | 1036.578571       | 518.792924        | 1019.552022       | 510.279649       | <b>1018.568006</b> | 509.787641       | 11 |
| 6  | <b>974.458657</b>  | 487.732967        | 957.432108     | <b>479.219692</b> |                    |                   | G    | <b>923.494507</b> | 462.250892        | 906.467958        | 453.737617       | 905.483942         | 453.245609       | 10 |
| 7  | <b>1061.490685</b> | <b>531.248981</b> | 1044.464136    | 522.735706        | <b>1043.480120</b> | <b>522.243698</b> | S    | <b>866.473043</b> | 433.740160        | 849.446494        | 425.226885       | 848.462478         | 424.734877       | 9  |
| 8  | 1158.543449        | 579.775363        | 1141.516900    | 571.262088        | 1140.532884        | 570.770080        | P    | <b>779.441015</b> | <b>390.224145</b> | 762.414466        | 381.710871       |                    |                  | 8  |
| 9  | 1271.627513        | 636.317395        | 1254.600964    | 627.804120        | 1253.616948        | 627.312112        | L    | <b>682.388251</b> | 341.697763        | 665.361702        | 333.184489       |                    |                  | 7  |
| 10 | 1328.648977        | 664.828127        | 1311.622428    | 656.314852        | 1310.638412        | 655.822844        | G    | <b>569.304187</b> | 285.155732        | 552.277638        | 276.642457       |                    |                  | 6  |
| 11 | 1442.691904        | 721.849590        | 1425.665355    | 713.336316        | 1424.681339        | 712.844308        | N    | <b>512.282723</b> | 256.645000        | <b>495.256174</b> | 248.131725       |                    |                  | 5  |
| 12 | 1539.744668        | 770.375972        | 1522.718119    | 761.862698        | 1521.734103        | 761.370690        | P    | <b>398.239796</b> | 199.623536        | 381.213247        | 191.110261       |                    |                  | 4  |
| 13 | 1636.797432        | 818.902354        | 1619.770883    | 810.389080        | 1618.786867        | 809.897072        | P    | <b>301.187032</b> | 151.097154        | 284.160483        | 142.583879       |                    |                  | 3  |
| 14 | 1693.818896        | <b>847.413086</b> | 1676.792347    | 838.899812        | 1675.808331        | 838.407804        | G    | <b>204.134268</b> | 102.570772        | 187.107719        | 94.057497        |                    |                  | 2  |
| 15 |                    |                   |                |                   |                    |                   | K    | <b>147.112804</b> | 74.060040         | 130.086255        | 65.546765        |                    |                  | 1  |

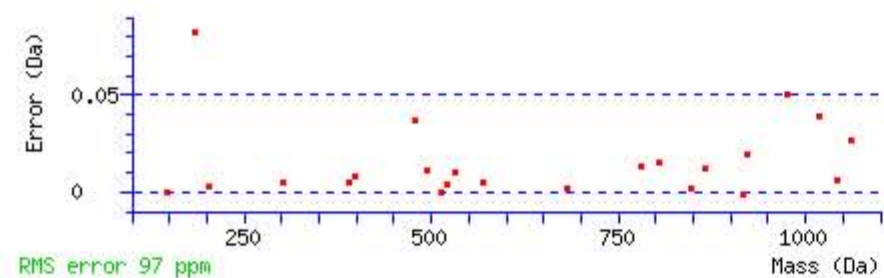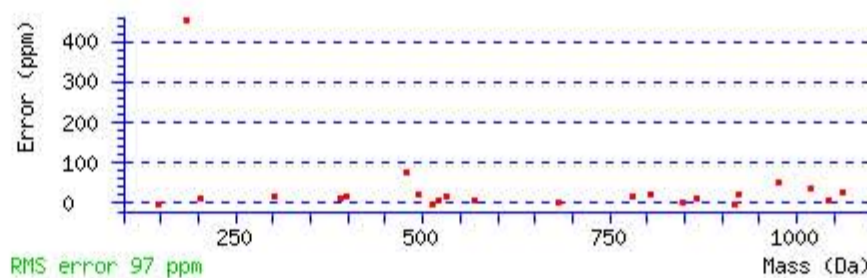

NCBI BLAST search of **FCGQLGSPLGNPPGK**

(Parameters: blastp, nr protein database, expect=20000, no filter, PAM30)

Other BLAST [web gateways](#)

All matches to this query

| Score | Mr(calc):   | Delta    | Sequence                        |
|-------|-------------|----------|---------------------------------|
| 43.1  | 1838.917160 | 0.016972 | <a href="#">FCGQLGSPLGNPPGK</a> |

Mascot: <http://www.matrixscience.com/>

# MASCOT SCIENCE Mascot Search Results

## Peptide View

MS/MS Fragmentation of **IQYYCHEPYVK**

Found in **C1R\_HUMAN**, Complement C1r subcomponent OS=Homo sapiens GN=C1R PE=1 SV=2

Match to Query 47052: 1873.869132 from(625.630320,3+) rtinseconds(1682) index(39942)

Title: Locus:1.1.1.3035.7 File:"2013-07-02 CLN FXIII 180 min 1st F 3.wiff"

Data file C:\Program Files (x86)\Matrix Science\Mascot Daemon\mgf7 FXIII 180 min 1st\mascot\_daemon\_merge.mgf

Click mouse within plot area to zoom in by factor of two about that point

Or, Plot from  to  Da

Label all possible matches  Label matches used for scoring

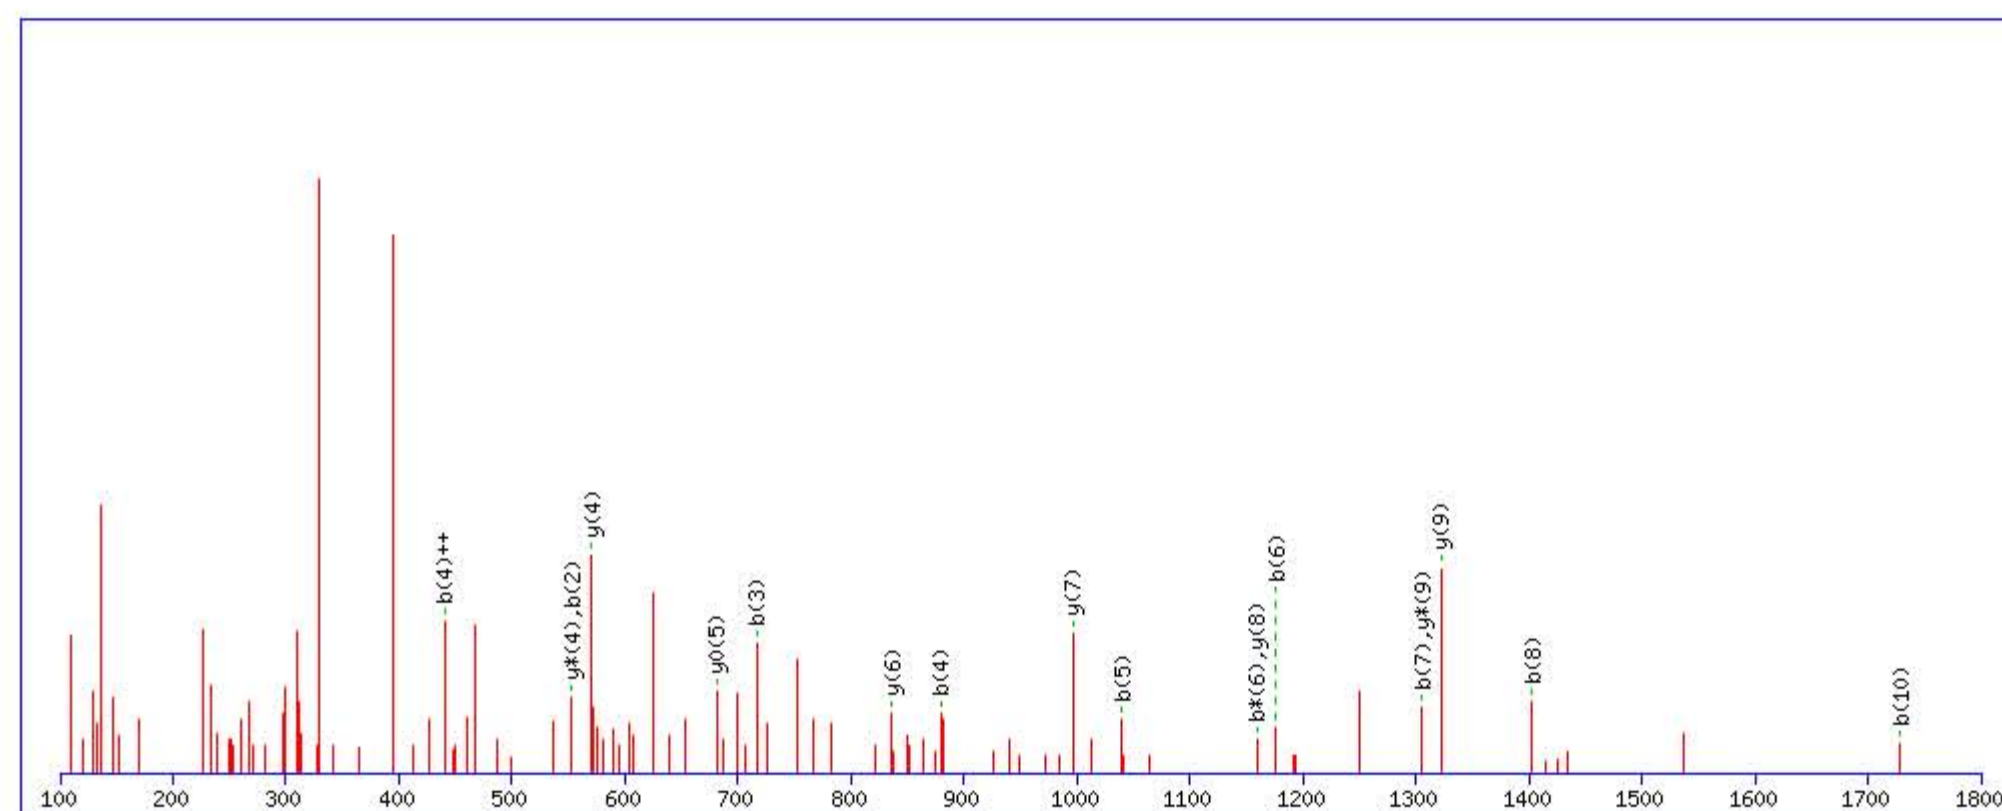

Monoisotopic mass of neutral peptide Mr(calc): 1873.853119

Fixed modifications: Carbamidomethyl (C) (apply to specified residues or termini only)

Variable modifications:

Q2 : Biotin:Thermo-21345 (Q)

Ions Score: 37 Expect: 0.00071

Matches : 18/98 fragment ions using 30 most intense peaks [\(help\)](#)

| #  | b                  | b <sup>++</sup>   | b <sup>+</sup>     | b <sup>+++</sup> | b <sup>0</sup> | b <sup>0++</sup> | Seq. | y                  | y <sup>++</sup> | y <sup>+</sup>     | y <sup>+++</sup> | y <sup>0</sup>    | y <sup>0++</sup> | #  |
|----|--------------------|-------------------|--------------------|------------------|----------------|------------------|------|--------------------|-----------------|--------------------|------------------|-------------------|------------------|----|
| 1  | 114.091340         | 57.549308         |                    |                  |                |                  | I    |                    |                 |                    |                  |                   |                  | 11 |
| 2  | <b>553.316666</b>  | 277.161971        | 536.290117         | 268.648697       |                |                  | Q    | 1761.776364        | 881.391820      | 1744.749815        | 872.878546       | 1743.765799       | 872.386538       | 10 |
| 3  | <b>716.379995</b>  | 358.693636        | 699.353446         | 350.180361       |                |                  | Y    | <b>1322.551038</b> | 661.779157      | <b>1305.524489</b> | 653.265883       | 1304.540473       | 652.773875       | 9  |
| 4  | <b>879.443324</b>  | <b>440.225300</b> | 862.416775         | 431.712026       |                |                  | Y    | <b>1159.487709</b> | 580.247493      | 1142.461160        | 571.734218       | 1141.477144       | 571.242210       | 8  |
| 5  | <b>1039.473973</b> | 520.240625        | 1022.447424        | 511.727350       |                |                  | C    | <b>996.424380</b>  | 498.715828      | 979.397831         | 490.202554       | 978.413815        | 489.710546       | 7  |
| 6  | <b>1176.532885</b> | 588.770081        | <b>1159.506336</b> | 580.256806       |                |                  | H    | <b>836.393731</b>  | 418.700504      | 819.367182         | 410.187229       | 818.383166        | 409.695221       | 6  |
| 7  | <b>1305.575478</b> | 653.291377        | 1288.548929        | 644.778103       | 1287.564913    | 644.286094       | E    | 699.334819         | 350.171048      | 682.308270         | 341.657773       | <b>681.324254</b> | 341.165765       | 5  |
| 8  | <b>1402.628242</b> | 701.817759        | 1385.601693        | 693.304485       | 1384.617677    | 692.812477       | P    | <b>570.292226</b>  | 285.649751      | <b>553.265677</b>  | 277.136477       |                   |                  | 4  |
| 9  | 1565.691571        | 783.349424        | 1548.665022        | 774.836149       | 1547.681006    | 774.344141       | Y    | 473.239462         | 237.123369      | 456.212913         | 228.610095       |                   |                  | 3  |
| 10 | <b>1728.754900</b> | 864.881088        | 1711.728351        | 856.367814       | 1710.744335    | 855.875806       | Y    | 310.176133         | 155.591705      | 293.149584         | 147.078430       |                   |                  | 2  |
| 11 |                    |                   |                    |                  |                |                  | K    | 147.112804         | 74.060040       | 130.086255         | 65.546765        |                   |                  | 1  |

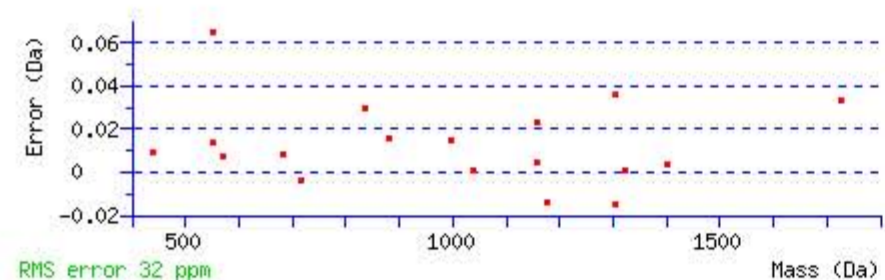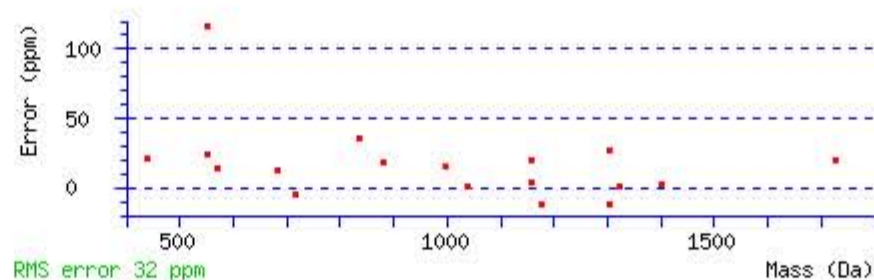

NCBI BLAST search of **IQYYCHEPYVK**

(Parameters: blastp, nr protein database, expect=20000, no filter, PAM30)

Other BLAST [web gateways](#)

All matches to this query

| Score | Mr(calc):   | Delta    | Sequence                         |
|-------|-------------|----------|----------------------------------|
| 37.0  | 1873.853119 | 0.016013 | <a href="#">IQYYCHEPYVK</a>      |
| 3.4   | 1873.862854 | 0.006278 | <a href="#">NTHSAELPPDPQSPCK</a> |

Mascot: <http://www.matrixscience.com/>

# MASCOT SCIENCE Mascot Search Results

## Peptide View

MS/MS Fragmentation of **QDACQGDSGGVFAVR**

Found in **C1R\_HUMAN**, Complement C1r subcomponent OS=Homo sapiens GN=C1R PE=1 SV=2

Match to Query 47104: 1876.873302 from(626.631710,3+) rtinseconds(1947) index(41833)

Title: Locus:1.1.1.3127.13 File:"2013-07-02 CLN FXIII 180 min 1st F 3.wiff"

Data file C:\Program Files (x86)\Matrix Science\Mascot Daemon\mgf\7 FXIII 180 min 1st\mascot\_daemon\_merge.mgf

Click mouse within plot area to zoom in by factor of two about that point

Or, Plot from  to  Da

Label all possible matches  Label matches used for scoring

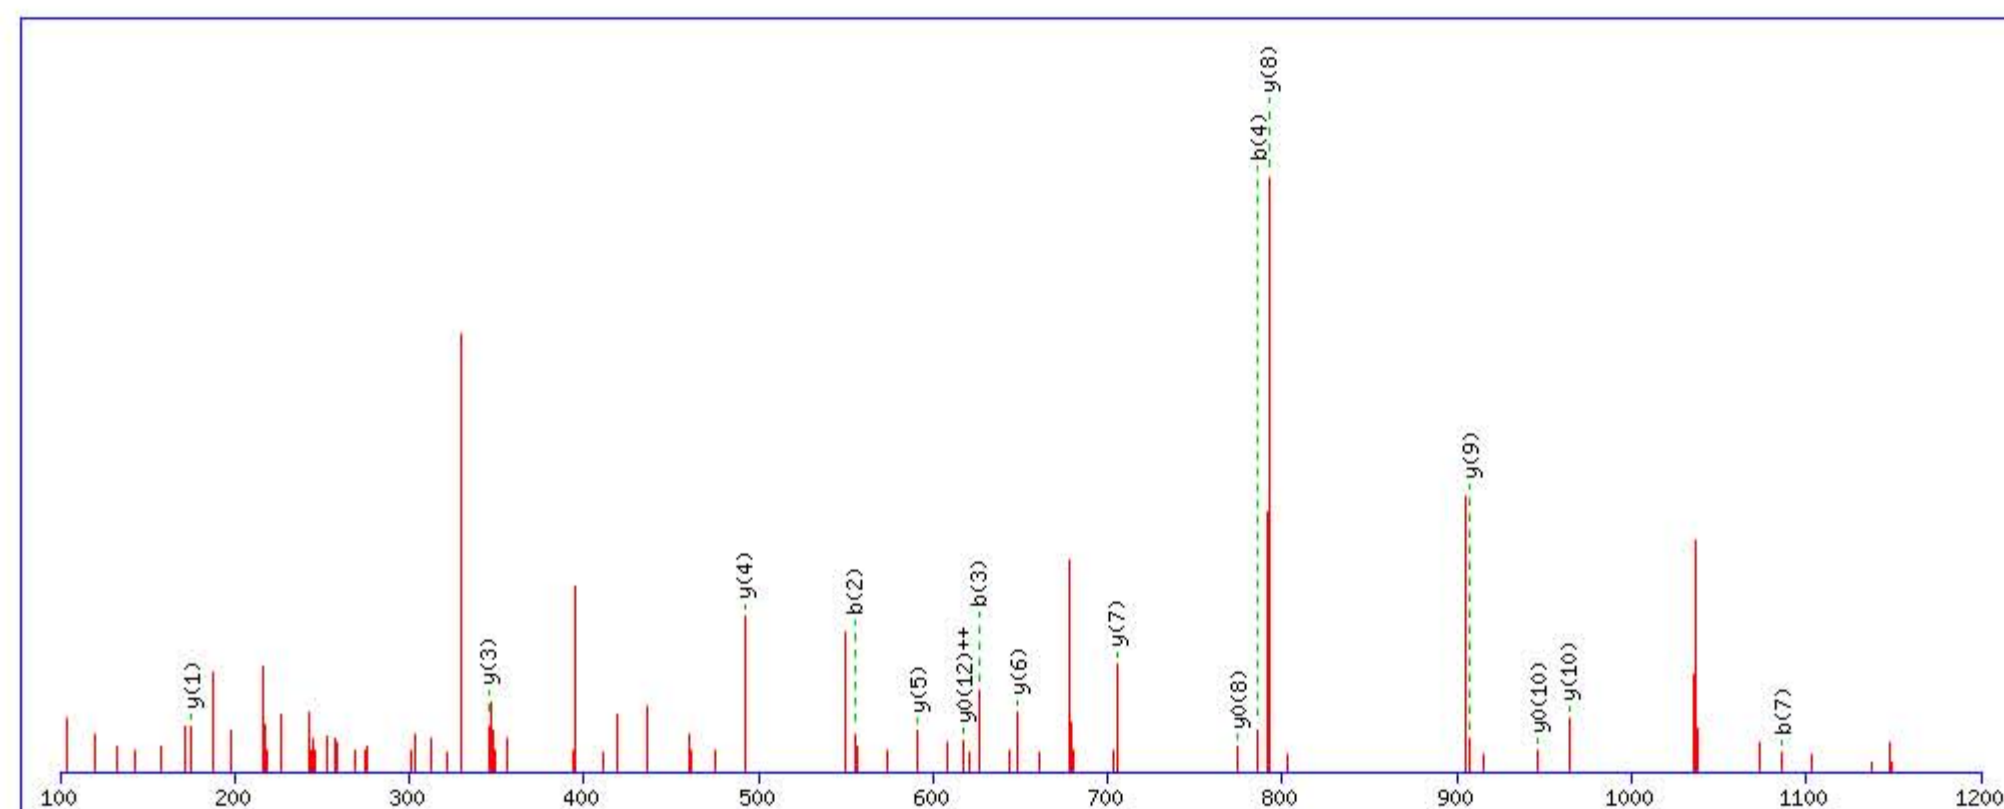

Monoisotopic mass of neutral peptide Mr(calc): 1876.856033

Fixed modifications: Carbamidomethyl (C) (apply to specified residues or termini only)

Variable modifications:

Q1 : Biotin:Thermo-21345 (Q)

Ions Score: 33 Expect: 0.0072

Matches : 16/152 fragment ions using 48 most intense peaks [\(help\)](#)

| #  | b                  | b <sup>++</sup> | b <sup>*</sup> | b <sup>+++</sup> | b <sup>0</sup> | b <sup>0++</sup> | Seq. | y                 | y <sup>++</sup> | y <sup>*</sup> | y <sup>+++</sup> | y <sup>0</sup>    | y <sup>0++</sup>  | #  |
|----|--------------------|-----------------|----------------|------------------|----------------|------------------|------|-------------------|-----------------|----------------|------------------|-------------------|-------------------|----|
| 1  | 440.232602         | 220.619939      | 423.206053     | 212.106664       |                |                  | Q    |                   |                 |                |                  |                   |                   | 15 |
| 2  | <b>555.259545</b>  | 278.133411      | 538.232996     | 269.620136       | 537.248980     | 269.128128       | D    | 1438.637955       | 719.822616      | 1421.611406    | 711.309341       | 1420.627390       | 710.817333        | 14 |
| 3  | <b>626.296659</b>  | 313.651968      | 609.270110     | 305.138693       | 608.286094     | 304.646685       | A    | 1323.611012       | 662.309144      | 1306.584463    | 653.795870       | 1305.600447       | 653.303862        | 13 |
| 4  | <b>786.327308</b>  | 393.667292      | 769.300759     | 385.154018       | 768.316743     | 384.662010       | C    | 1252.573898       | 626.790587      | 1235.547349    | 618.277313       | 1234.563333       | <b>617.785305</b> | 12 |
| 5  | 914.385886         | 457.696581      | 897.359337     | 449.183307       | 896.375321     | 448.691299       | Q    | 1092.543249       | 546.775263      | 1075.516700    | 538.261988       | 1074.532684       | 537.769980        | 11 |
| 6  | 971.407350         | 486.207313      | 954.380801     | 477.694039       | 953.396785     | 477.202031       | G    | <b>964.484671</b> | 482.745974      | 947.458122     | 474.232699       | <b>946.474106</b> | 473.740691        | 10 |
| 7  | <b>1086.434293</b> | 543.720785      | 1069.407744    | 535.207510       | 1068.423728    | 534.715502       | D    | <b>907.463207</b> | 454.235242      | 890.436658     | 445.721967       | 889.452642        | 445.229959        | 9  |
| 8  | 1173.466321        | 587.236799      | 1156.439772    | 578.723524       | 1155.455756    | 578.231516       | S    | <b>792.436264</b> | 396.721770      | 775.409715     | 388.208496       | <b>774.425699</b> | 387.716488        | 8  |
| 9  | 1230.487785        | 615.747531      | 1213.461236    | 607.234256       | 1212.477220    | 606.742248       | G    | <b>705.404236</b> | 353.205756      | 688.377687     | 344.692482       |                   |                   | 7  |
| 10 | 1287.509249        | 644.258263      | 1270.482700    | 635.744988       | 1269.498684    | 635.252980       | G    | <b>648.382772</b> | 324.695024      | 631.356223     | 316.181750       |                   |                   | 6  |
| 11 | 1386.577663        | 693.792470      | 1369.551114    | 685.279195       | 1368.567098    | 684.787187       | V    | <b>591.361308</b> | 296.184292      | 574.334759     | 287.671018       |                   |                   | 5  |
| 12 | 1533.646077        | 767.326677      | 1516.619528    | 758.813402       | 1515.635512    | 758.321394       | F    | <b>492.292894</b> | 246.650085      | 475.266345     | 238.136811       |                   |                   | 4  |
| 13 | 1604.683191        | 802.845234      | 1587.656642    | 794.331959       | 1586.672626    | 793.839951       | A    | <b>345.224480</b> | 173.115878      | 328.197931     | 164.602603       |                   |                   | 3  |
| 14 | 1703.751605        | 852.379441      | 1686.725056    | 843.866166       | 1685.741040    | 843.374158       | V    | 274.187366        | 137.597321      | 257.160817     | 129.084047       |                   |                   | 2  |
| 15 |                    |                 |                |                  |                |                  | R    | <b>175.118952</b> | 88.063114       | 158.092403     | 79.549839        |                   |                   | 1  |

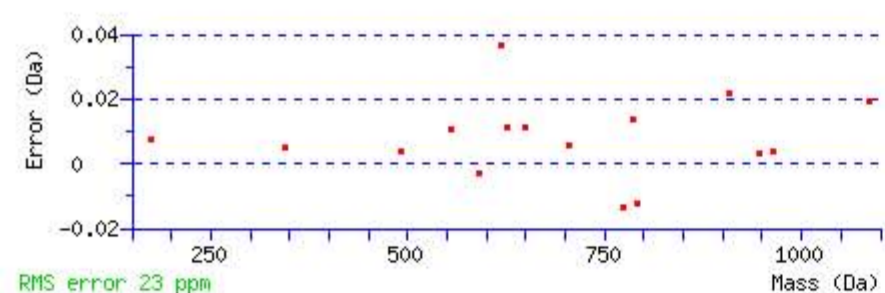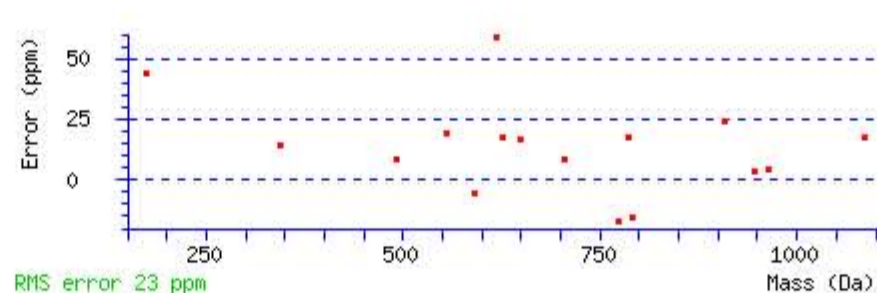

NCBI BLAST search of **QDACQGDSGGVFAVR**

(Parameters: blastp, nr protein database, expect=20000, no filter, PAM30)

Other BLAST [web gateways](#)

All matches to this query

| Score | Mr(calc):   | Delta    | Sequence                        |
|-------|-------------|----------|---------------------------------|
| 32.5  | 1876.856033 | 0.017269 | <a href="#">QDACQGDSGGVFAVR</a> |
| 26.1  | 1876.856033 | 0.017269 | <a href="#">QDACQGDSGGVFAVR</a> |

Mascot: <http://www.matrixscience.com/>

# MASCOT Search Results

## Peptide View

MS/MS Fragmentation of **LPVANPQACENWLR**

Found in **C1R\_HUMAN**, Complement C1r subcomponent OS=Homo sapiens GN=C1R PE=1 SV=2

Match to Query 49420: 1978.013472 from(660.345100,3+) rtinseconds(2243) index(43939)

Title: Locus:1.1.1.3230.8 File:"2013-07-02 CLN FXIII 180 min 1st F 3.wiff"

Data file C:\Program Files (x86)\Matrix Science\Mascot Daemon\mgf7 FXIII 180 min 1st\mascot\_daemon\_merge.mgf

Click mouse within plot area to zoom in by factor of two about that point

Or, Plot from  to  Da

Label all possible matches  Label matches used for scoring

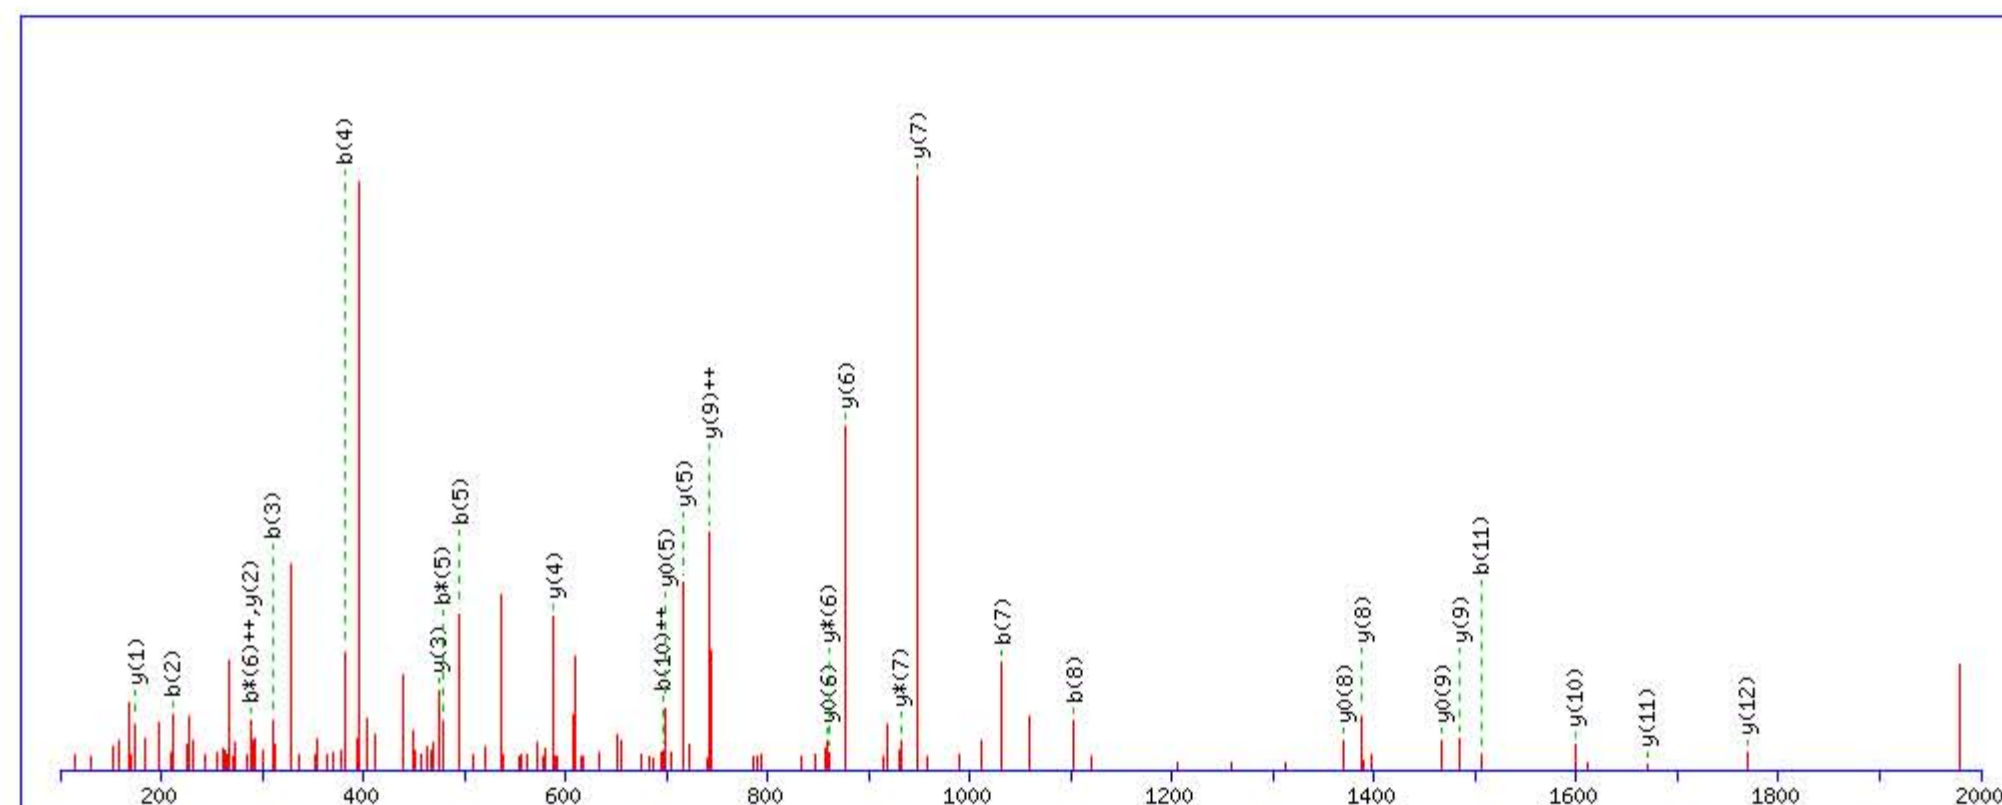

Monoisotopic mass of neutral peptide Mr(calc): 1977.991684

Fixed modifications: Carbamidomethyl (C) (apply to specified residues or termini only)

Variable modifications:

Q7 : Biotin:Thermo-21345 (Q)

Ions Score: 67 Expect: 5.1e-006

Matches : 29/122 fragment ions using 55 most intense peaks [\(help\)](#)

| #  | b                  | b <sup>++</sup>   | b <sup>*</sup>    | b <sup>*++</sup>  | b <sup>0</sup> | b <sup>0++</sup> | Seq. | y                  | y <sup>++</sup>   | y <sup>*</sup>    | y <sup>*++</sup> | y <sup>0</sup>     | y <sup>0++</sup> | #  |
|----|--------------------|-------------------|-------------------|-------------------|----------------|------------------|------|--------------------|-------------------|-------------------|------------------|--------------------|------------------|----|
| 1  | 114.091340         | 57.549308         |                   |                   |                |                  | L    |                    |                   |                   |                  |                    |                  | 14 |
| 2  | <b>211.144104</b>  | 106.075690        |                   |                   |                |                  | P    | 1865.914921        | 933.461099        | 1848.888372       | 924.947824       | 1847.904356        | 924.455816       | 13 |
| 3  | <b>310.212518</b>  | 155.609897        |                   |                   |                |                  | V    | <b>1768.862157</b> | 884.934717        | 1751.835608       | 876.421442       | 1750.851592        | 875.929434       | 12 |
| 4  | <b>381.249632</b>  | 191.128454        |                   |                   |                |                  | A    | <b>1669.793743</b> | 835.400510        | 1652.767194       | 826.887235       | 1651.783178        | 826.395227       | 11 |
| 5  | <b>495.292559</b>  | 248.149917        | <b>478.266010</b> | 239.636643        |                |                  | N    | <b>1598.756629</b> | 799.881953        | 1581.730080       | 791.368678       | 1580.746064        | 790.876670       | 10 |
| 6  | 592.345323         | 296.676300        | 575.318774        | <b>288.163025</b> |                |                  | P    | <b>1484.713702</b> | <b>742.860489</b> | 1467.687153       | 734.347215       | <b>1466.703137</b> | 733.855207       | 9  |
| 7  | <b>1031.570649</b> | 516.288963        | 1014.544100       | 507.775688        |                |                  | Q    | <b>1387.660938</b> | 694.334107        | 1370.634389       | 685.820833       | <b>1369.650373</b> | 685.328825       | 8  |
| 8  | <b>1102.607763</b> | 551.807520        | 1085.581214       | 543.294245        |                |                  | A    | <b>948.435612</b>  | 474.721444        | <b>931.409063</b> | 466.208170       | 930.425047         | 465.716162       | 7  |
| 9  | 1262.638412        | 631.822844        | 1245.611863       | 623.309570        |                |                  | C    | <b>877.398498</b>  | 439.202887        | <b>860.371949</b> | 430.689613       | <b>859.387933</b>  | 430.197605       | 6  |
| 10 | 1391.681005        | <b>696.344141</b> | 1374.654456       | 687.830866        | 1373.670440    | 687.338858       | E    | <b>717.367849</b>  | 359.187563        | 700.341300        | 350.674288       | <b>699.357284</b>  | 350.182280       | 5  |
| 11 | <b>1505.723932</b> | 753.365604        | 1488.697383       | 744.852330        | 1487.713367    | 744.360322       | N    | <b>588.325256</b>  | 294.666266        | 571.298707        | 286.152991       |                    |                  | 4  |
| 12 | 1691.803245        | 846.405261        | 1674.776696       | 837.891986        | 1673.792680    | 837.399978       | W    | <b>474.282329</b>  | 237.644802        | 457.255780        | 229.131528       |                    |                  | 3  |
| 13 | 1804.887309        | 902.947293        | 1787.860760       | 894.434018        | 1786.876744    | 893.942010       | L    | <b>288.203016</b>  | 144.605146        | 271.176467        | 136.091871       |                    |                  | 2  |
| 14 |                    |                   |                   |                   |                |                  | R    | <b>175.118952</b>  | 88.063114         | 158.092403        | 79.549839        |                    |                  | 1  |

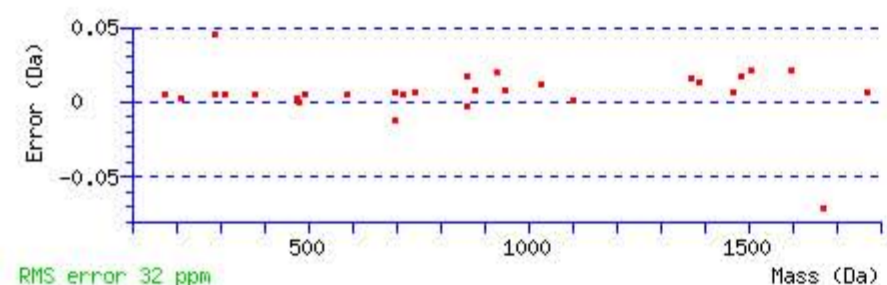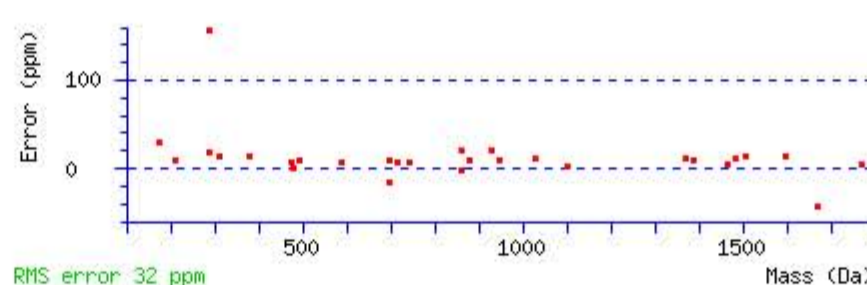

NCBI BLAST search of **LPVANPQACENWLR**

(Parameters: blastp, nr protein database, expect=20000, no filter, PAM30)

Other BLAST [web gateways](#)

All matches to this query

| Score | Mr(calc):   | Delta    | Sequence                       |
|-------|-------------|----------|--------------------------------|
| 67.0  | 1977.991684 | 0.021788 | <a href="#">LPVANPQACENWLR</a> |

Mascot: <http://www.matrixscience.com/>

# MASCOT SCIENCE Mascot Search Results

## Peptide View

MS/MS Fragmentation of **CLPVCGKPVNPVEQR**

Found in **C1R\_HUMAN**, Complement C1r subcomponent OS=Homo sapiens GN=C1R PE=1 SV=2

Match to Query 52417: 2063.077272 from(688.699700,3+) rtinseconds(1772) index(59157)

Title: Locus:1.1.1.3040.19 File:"2013-07-02 CLN FXIII 180 min 1st F 4.wiff"

Data file C:\Program Files (x86)\Matrix Science\Mascot Daemon\mgf\7 FXIII 180 min 1st\mascot\_daemon\_merge.mgf

Click mouse within plot area to zoom in by factor of two about that point

Or, Plot from  to  Da

Label all possible matches  Label matches used for scoring

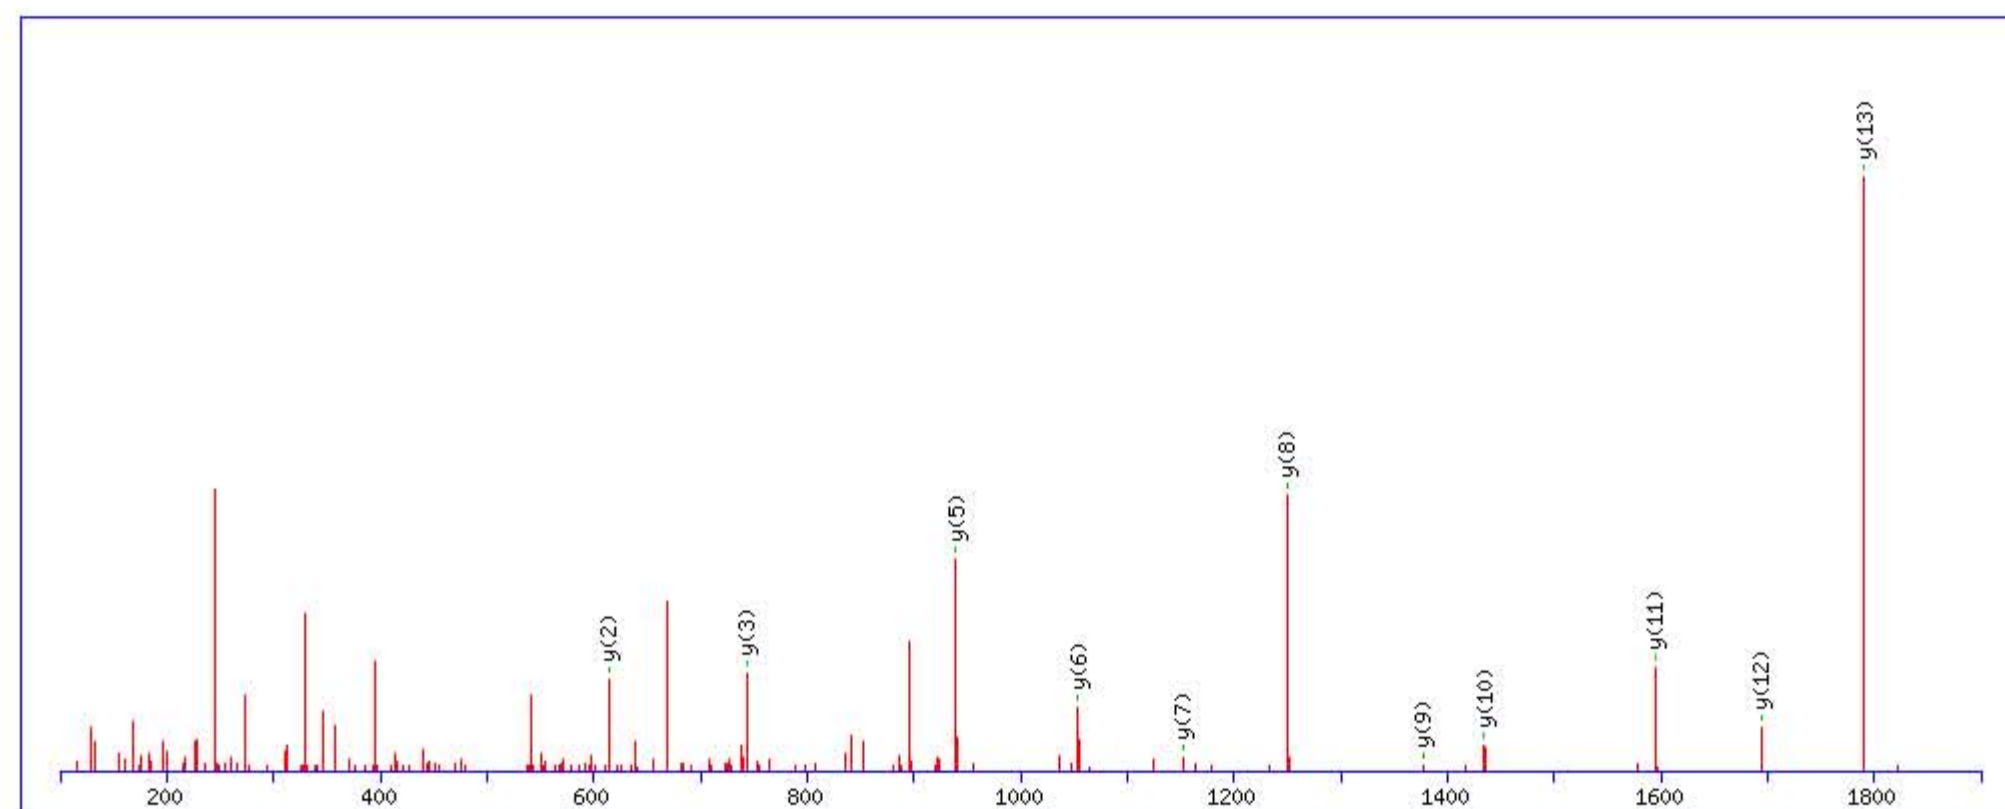

Monoisotopic mass of neutral peptide Mr(calc): 2063.047852

Fixed modifications: Carbamidomethyl (C) (apply to specified residues or termini only)

Variable modifications:

Q14 : Biotin:Thermo-21345 (Q)

Ions Score: 82 Expect: 3.2e-008

Matches : 11/128 fragment ions using 18 most intense peaks [\(help\)](#)

| #  | b           | b <sup>++</sup> | b <sup>*</sup> | b <sup>*++</sup> | b <sup>0</sup> | b <sup>0++</sup> | Seq. | y                  | y <sup>++</sup> | y <sup>*</sup> | y <sup>*++</sup> | y <sup>0</sup> | y <sup>0++</sup> | #  |
|----|-------------|-----------------|----------------|------------------|----------------|------------------|------|--------------------|-----------------|----------------|------------------|----------------|------------------|----|
| 1  | 161.037925  | 81.022600       |                |                  |                |                  | C    |                    |                 |                |                  |                |                  | 15 |
| 2  | 274.121989  | 137.564632      |                |                  |                |                  | L    | 1904.024472        | 952.515874      | 1886.997923    | 944.002600       | 1886.013907    | 943.510592       | 14 |
| 3  | 371.174753  | 186.091014      |                |                  |                |                  | P    | <b>1790.940408</b> | 895.973842      | 1773.913859    | 887.460568       | 1772.929843    | 886.968560       | 13 |
| 4  | 470.243167  | 235.625221      |                |                  |                |                  | V    | <b>1693.887644</b> | 847.447460      | 1676.861095    | 838.934186       | 1675.877079    | 838.442178       | 12 |
| 5  | 630.273816  | 315.640546      |                |                  |                |                  | C    | <b>1594.819230</b> | 797.913253      | 1577.792681    | 789.399979       | 1576.808665    | 788.907971       | 11 |
| 6  | 687.295280  | 344.151278      |                |                  |                |                  | G    | <b>1434.788581</b> | 717.897929      | 1417.762032    | 709.384654       | 1416.778016    | 708.892646       | 10 |
| 7  | 815.390243  | 408.198760      | 798.363694     | 399.685485       |                |                  | K    | <b>1377.767117</b> | 689.387197      | 1360.740568    | 680.873922       | 1359.756552    | 680.381914       | 9  |
| 8  | 912.443007  | 456.725142      | 895.416458     | 448.211867       |                |                  | P    | <b>1249.672154</b> | 625.339715      | 1232.645605    | 616.826441       | 1231.661589    | 616.334433       | 8  |
| 9  | 1011.511421 | 506.259349      | 994.484872     | 497.746074       |                |                  | V    | <b>1152.619390</b> | 576.813333      | 1135.592841    | 568.300059       | 1134.608825    | 567.808051       | 7  |
| 10 | 1125.554348 | 563.280812      | 1108.527799    | 554.767538       |                |                  | N    | <b>1053.550976</b> | 527.279126      | 1036.524427    | 518.765852       | 1035.540411    | 518.273844       | 6  |
| 11 | 1222.607112 | 611.807194      | 1205.580563    | 603.293920       |                |                  | P    | <b>939.508049</b>  | 470.257663      | 922.481500     | 461.744388       | 921.497484     | 461.252380       | 5  |
| 12 | 1321.675526 | 661.341401      | 1304.648977    | 652.828127       |                |                  | V    | 842.455285         | 421.731281      | 825.428736     | 413.218006       | 824.444720     | 412.725998       | 4  |
| 13 | 1450.718119 | 725.862698      | 1433.691570    | 717.349423       | 1432.707554    | 716.857415       | E    | <b>743.386871</b>  | 372.197074      | 726.360322     | 363.683799       | 725.376306     | 363.191791       | 3  |
| 14 | 1889.943445 | 945.475361      | 1872.916896    | 936.962086       | 1871.932880    | 936.470078       | Q    | <b>614.344278</b>  | 307.675777      | 597.317729     | 299.162503       |                |                  | 2  |
| 15 |             |                 |                |                  |                |                  | R    | 175.118952         | 88.063114       | 158.092403     | 79.549839        |                |                  | 1  |

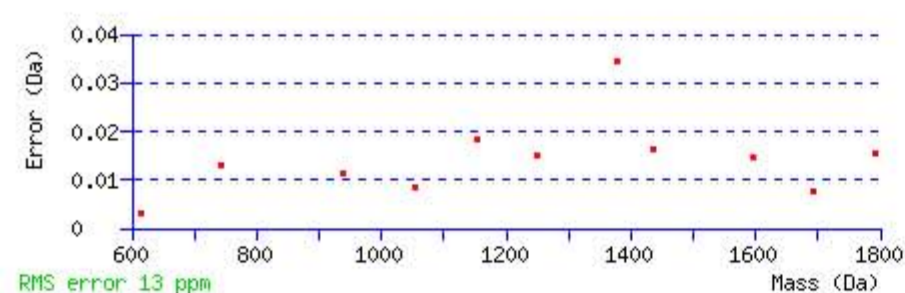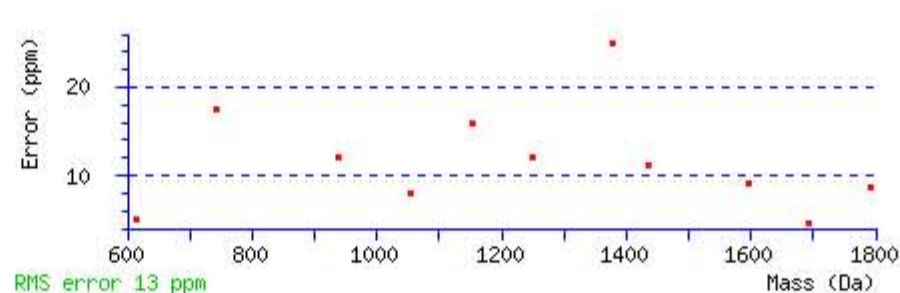

NCBI BLAST search of **CLPVCGKPVNPVEQR**

(Parameters: blastp, nr protein database, expect=20000, no filter, PAM30)

Other BLAST [web gateways](#)

All matches to this query

| Score | Mr(calc):   | Delta    | Sequence                              |
|-------|-------------|----------|---------------------------------------|
| 82.4  | 2063.047852 | 0.029420 | <a href="#">CLPVCGKPVNPVEQR</a>       |
| 2.3   | 2063.050781 | 0.026491 | <a href="#">AKVNSEAPAANAVKAGGTDHR</a> |
| 0.5   | 2063.046982 | 0.030290 | <a href="#">LVGCAIHHVNGDSPEEVVR</a>   |

Mascot: <http://www.matrixscience.com/>

# MASCOT Search Results

## Peptide View

MS/MS Fragmentation of **MGNFPWQVFTNIHGR**

Found in **C1R\_HUMAN**, Complement C1r subcomponent OS=Homo sapiens GN=C1R PE=1 SV=2

Match to Query 53409: 2114.065962 from(705.695930,3+) rtinseconds(2625) index(46465)

Title: Locus:1.1.1.3362.8 File:"2013-07-02 CLN FXIII 180 min 1st F 3.wiff"

Data file C:\Program Files (x86)\Matrix Science\Mascot Daemon\mgf\7 FXIII 180 min 1st\mascot\_daemon\_merge.mgf

Click mouse within plot area to zoom in by factor of two about that point

Or, Plot from  to  Da

Label all possible matches  Label matches used for scoring

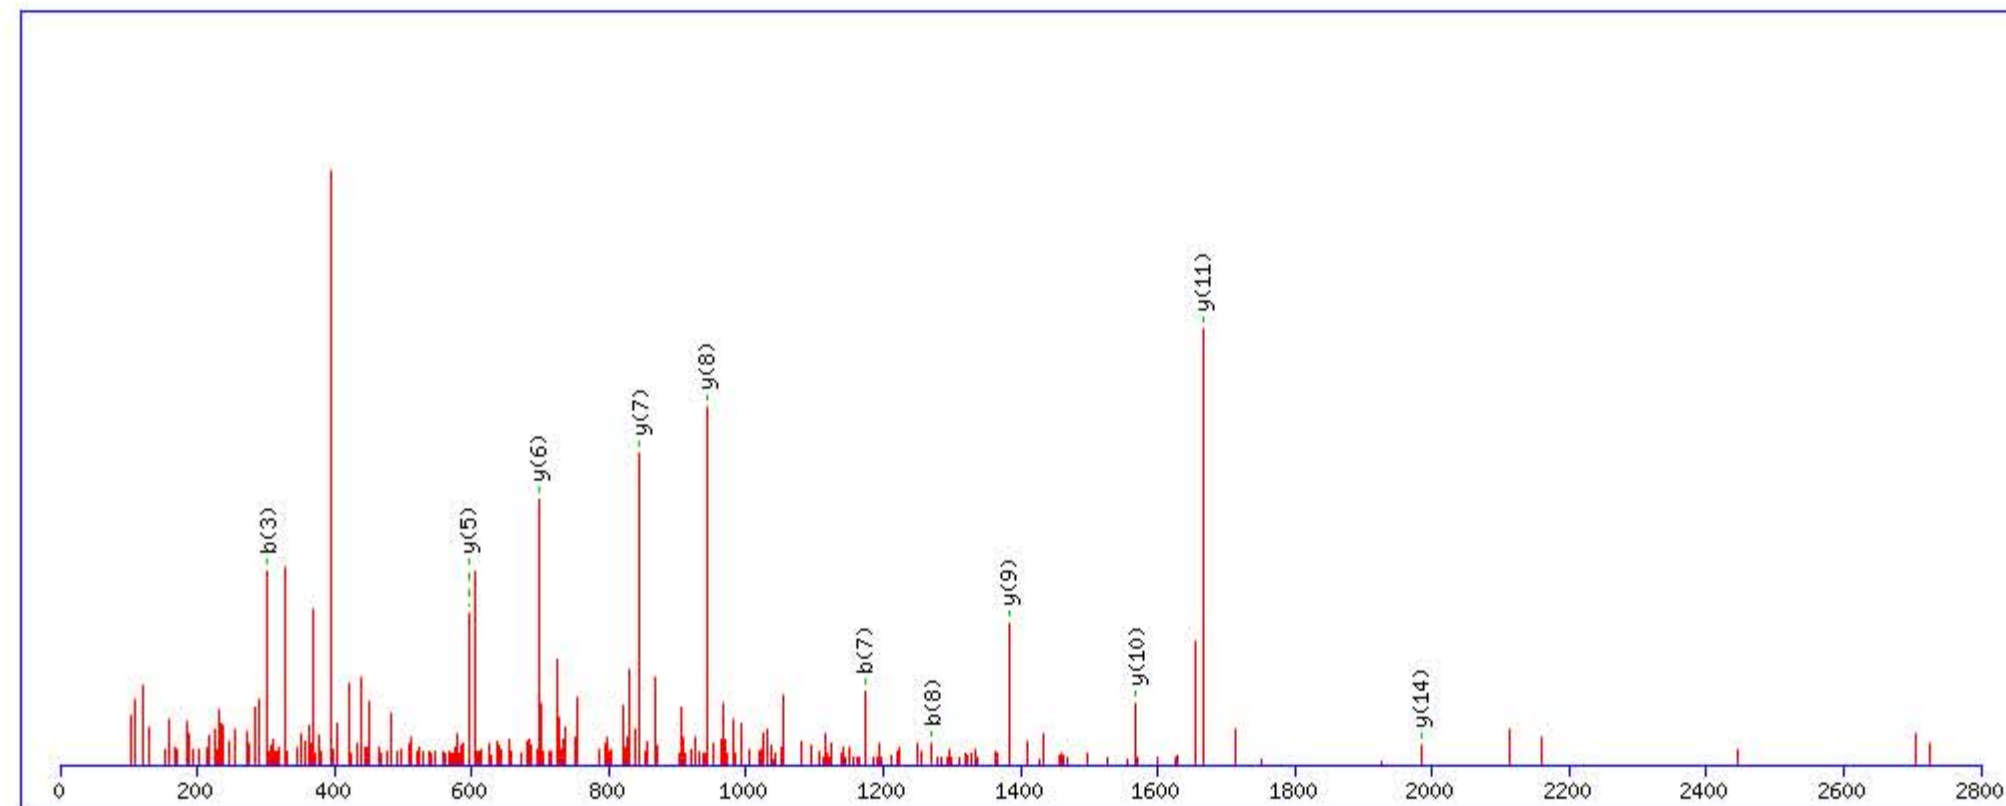

Monoisotopic mass of neutral peptide Mr(calc): 2114.034256

Fixed modifications: Carbamidomethyl (C) (apply to specified residues or termini only)

Variable modifications:

Q7 : Biotin:Thermo-21345 (Q)

Ions Score: 48 Expect: 0.00041

Matches : 11/136 fragment ions using 18 most intense peaks [\(help\)](#)

| #  | b                  | b <sup>++</sup> | b <sup>+</sup> | b <sup>+++</sup> | b <sup>0</sup> | b <sup>0++</sup> | Seq. | y                  | y <sup>++</sup> | y <sup>+</sup> | y <sup>+++</sup> | y <sup>0</sup> | y <sup>0++</sup> | #  |
|----|--------------------|-----------------|----------------|------------------|----------------|------------------|------|--------------------|-----------------|----------------|------------------|----------------|------------------|----|
| 1  | 132.047761         | 66.527518       |                |                  |                |                  | M    |                    |                 |                |                  |                |                  | 15 |
| 2  | 189.069225         | 95.038250       |                |                  |                |                  | G    | <b>1984.001034</b> | 992.504155      | 1966.974485    | 983.990881       | 1965.990469    | 983.498873       | 14 |
| 3  | <b>303.112152</b>  | 152.059714      | 286.085603     | 143.546439       |                |                  | N    | 1926.979570        | 963.993423      | 1909.953021    | 955.480149       | 1908.969005    | 954.988141       | 13 |
| 4  | 450.180566         | 225.593921      | 433.154017     | 217.080646       |                |                  | F    | 1812.936643        | 906.971960      | 1795.910094    | 898.458685       | 1794.926078    | 897.966677       | 12 |
| 5  | 547.233330         | 274.120303      | 530.206781     | 265.607029       |                |                  | P    | <b>1665.868229</b> | 833.437753      | 1648.841680    | 824.924478       | 1647.857664    | 824.432470       | 11 |
| 6  | 733.312643         | 367.159960      | 716.286094     | 358.646685       |                |                  | W    | <b>1568.815465</b> | 784.911371      | 1551.788916    | 776.398096       | 1550.804900    | 775.906088       | 10 |
| 7  | <b>1172.537969</b> | 586.772623      | 1155.511420    | 578.259348       |                |                  | Q    | <b>1382.736152</b> | 691.871714      | 1365.709603    | 683.358440       | 1364.725587    | 682.866432       | 9  |
| 8  | <b>1271.606383</b> | 636.306830      | 1254.579834    | 627.793555       |                |                  | V    | <b>943.510826</b>  | 472.259051      | 926.484277     | 463.745777       | 925.500261     | 463.253769       | 8  |
| 9  | 1418.674797        | 709.841037      | 1401.648248    | 701.327762       |                |                  | F    | <b>844.442412</b>  | 422.724844      | 827.415863     | 414.211570       | 826.431847     | 413.719562       | 7  |
| 10 | 1519.722476        | 760.364876      | 1502.695927    | 751.851602       | 1501.711911    | 751.359594       | T    | <b>697.373998</b>  | 349.190637      | 680.347449     | 340.677363       | 679.363433     | 340.185355       | 6  |
| 11 | 1633.765403        | 817.386340      | 1616.738854    | 808.873065       | 1615.754838    | 808.381057       | N    | <b>596.326319</b>  | 298.666798      | 579.299770     | 290.153523       |                |                  | 5  |
| 12 | 1746.849467        | 873.928372      | 1729.822918    | 865.415097       | 1728.838902    | 864.923089       | I    | 482.283392         | 241.645334      | 465.256843     | 233.132059       |                |                  | 4  |
| 13 | 1883.908379        | 942.457828      | 1866.881830    | 933.944553       | 1865.897814    | 933.452545       | H    | 369.199328         | 185.103302      | 352.172779     | 176.590028       |                |                  | 3  |
| 14 | 1940.929843        | 970.968559      | 1923.903294    | 962.455285       | 1922.919278    | 961.963277       | G    | 232.140416         | 116.573846      | 215.113867     | 108.060572       |                |                  | 2  |
| 15 |                    |                 |                |                  |                |                  | R    | 175.118952         | 88.063114       | 158.092403     | 79.549840        |                |                  | 1  |

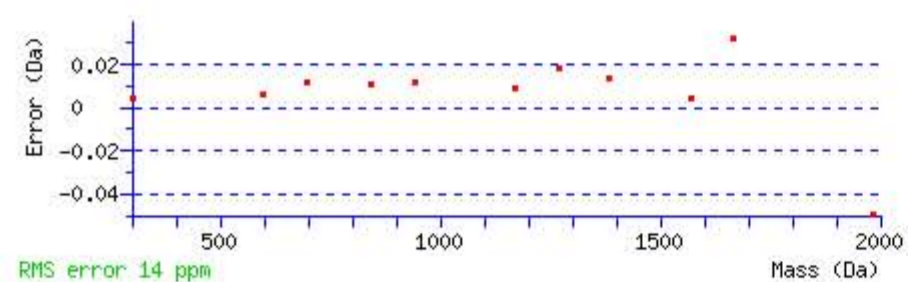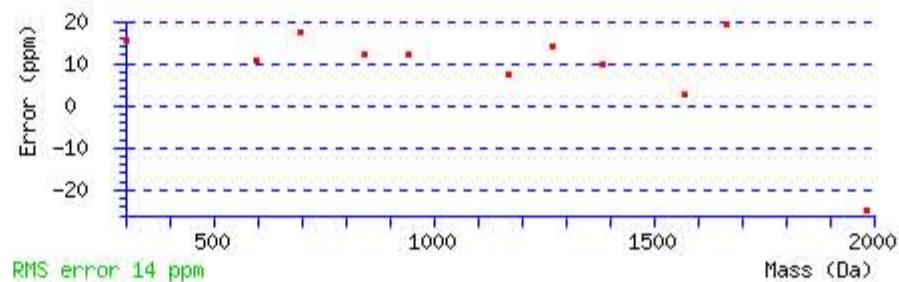

NCBI BLAST search of **MGNFPWQVFTNIHGR**

(Parameters: blastp, nr protein database, expect=20000, no filter, PAM30)

Other BLAST [web gateways](#)

All matches to this query

| Score | Mr(calc):   | Delta    | Sequence                        |
|-------|-------------|----------|---------------------------------|
| 48.5  | 2114.034256 | 0.031706 | <a href="#">MGNFPWQVFTNIHGR</a> |

Mascot: <http://www.matrixscience.com/>

# MASCOT Search Results

## Peptide View

MS/MS Fragmentation of **ESEQGVYTCTAQQGIWK**

Found in **C1R\_HUMAN**, Complement C1r subcomponent OS=Homo sapiens GN=C1R PE=1 SV=2

Match to Query 54565: 2167.035102 from(723.352310,3+) rtinseconds(2160) index(43334)

Title: Locus:1.1.1.3201.16 File:"2013-07-02 CLN FXIII 180 min 1st F 3.wiff"

Data file C:\Program Files (x86)\Matrix Science\Mascot Daemon\mgf\7 FXIII 180 min 1st\mascot\_daemon\_merge.mgf

Click mouse within plot area to zoom in by factor of two about that point

Or, Plot from  to  Da

Label all possible matches  Label matches used for scoring

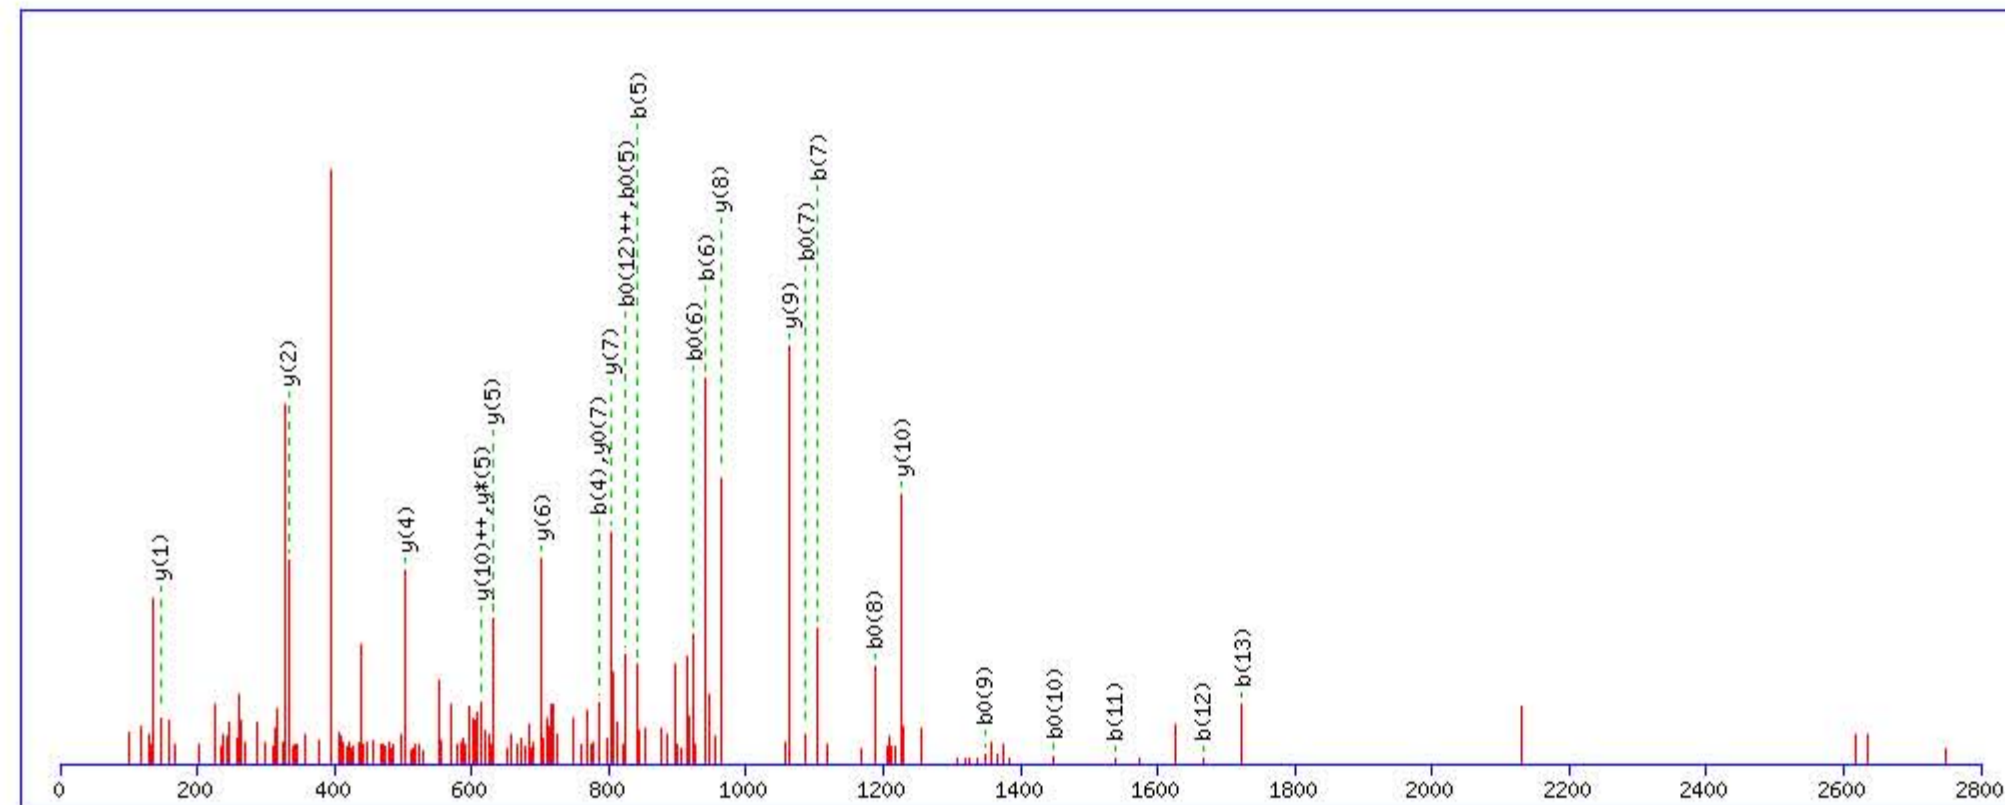

Monoisotopic mass of neutral peptide Mr(calc): 2167.007813

Fixed modifications: Carbamidomethyl (C) (apply to specified residues or termini only)

Variable modifications:

Q4 : Biotin:Thermo-21345 (Q)

Ions Score: 46 Expect: 0.00047

Matches : 26/162 fragment ions using 47 most intense peaks [\(help\)](#)

| #  | b                  | b <sup>++</sup> | b <sup>+</sup> | b <sup>+++</sup> | b <sup>0</sup>     | b <sup>0++</sup>  | Seq. | y                  | y <sup>++</sup>   | y <sup>+</sup>    | y <sup>+++</sup> | y <sup>0</sup>    | y <sup>0++</sup> | #  |
|----|--------------------|-----------------|----------------|------------------|--------------------|-------------------|------|--------------------|-------------------|-------------------|------------------|-------------------|------------------|----|
| 1  | 130.049869         | 65.528572       |                |                  | 112.039304         | 56.523290         | E    |                    |                   |                   |                  |                   |                  | 16 |
| 2  | 217.081897         | 109.044586      |                |                  | 199.071332         | 100.039304        | S    | 2038.972498        | 1019.989887       | 2021.945949       | 1011.476613      | 2020.961933       | 1010.984604      | 15 |
| 3  | 346.124490         | 173.565883      |                |                  | 328.113925         | 164.560600        | E    | 1951.940470        | 976.473873        | 1934.913921       | 967.960599       | 1933.929905       | 967.468591       | 14 |
| 4  | <b>785.349816</b>  | 393.178546      | 768.323267     | 384.665272       | 767.339251         | 384.173264        | Q    | 1822.897877        | 911.952577        | 1805.871328       | 903.439302       | 1804.887312       | 902.947294       | 13 |
| 5  | <b>842.371280</b>  | 421.689278      | 825.344731     | 413.176004       | <b>824.360715</b>  | 412.683996        | G    | 1383.672551        | 692.339913        | 1366.646002       | 683.826639       | 1365.661986       | 683.334631       | 12 |
| 6  | <b>941.439694</b>  | 471.223485      | 924.413145     | 462.710211       | <b>923.429129</b>  | 462.218203        | V    | 1326.651087        | 663.829182        | 1309.624538       | 655.315907       | 1308.640522       | 654.823899       | 11 |
| 7  | <b>1104.503023</b> | 552.755150      | 1087.476474    | 544.241875       | <b>1086.492458</b> | 543.749867        | Y    | <b>1227.582673</b> | <b>614.294975</b> | 1210.556124       | 605.781700       | 1209.572108       | 605.289692       | 10 |
| 8  | 1205.550702        | 603.278989      | 1188.524153    | 594.765715       | <b>1187.540137</b> | 594.273707        | T    | <b>1064.519344</b> | 532.763310        | 1047.492795       | 524.250036       | 1046.508779       | 523.758028       | 9  |
| 9  | 1365.581351        | 683.294314      | 1348.554802    | 674.781039       | <b>1347.570786</b> | 674.289031        | C    | <b>963.471665</b>  | 482.239471        | 946.445116        | 473.726196       | 945.461100        | 473.234188       | 8  |
| 10 | 1466.629030        | 733.818153      | 1449.602481    | 725.304879       | <b>1448.618465</b> | 724.812871        | T    | <b>803.441016</b>  | 402.224146        | 786.414467        | 393.710872       | <b>785.430451</b> | 393.218864       | 7  |
| 11 | <b>1537.666144</b> | 769.336710      | 1520.639595    | 760.823436       | 1519.655579        | 760.331428        | A    | <b>702.393337</b>  | 351.700307        | 685.366788        | 343.187032       |                   |                  | 6  |
| 12 | <b>1665.724722</b> | 833.365999      | 1648.698173    | 824.852725       | 1647.714157        | <b>824.360717</b> | Q    | <b>631.356223</b>  | 316.181750        | <b>614.329674</b> | 307.668475       |                   |                  | 5  |
| 13 | <b>1722.746186</b> | 861.876731      | 1705.719637    | 853.363457       | 1704.735621        | 852.871449        | G    | <b>503.297645</b>  | 252.152460        | 486.271096        | 243.639186       |                   |                  | 4  |
| 14 | 1835.830250        | 918.418763      | 1818.803701    | 909.905489       | 1817.819685        | 909.413480        | I    | 446.276181         | 223.641728        | 429.249632        | 215.128454       |                   |                  | 3  |
| 15 | 2021.909563        | 1011.458420     | 2004.883014    | 1002.945145      | 2003.898998        | 1002.453137       | W    | <b>333.192117</b>  | 167.099696        | 316.165568        | 158.586422       |                   |                  | 2  |
| 16 |                    |                 |                |                  |                    |                   | K    | <b>147.112804</b>  | 74.060040         | 130.086255        | 65.546765        |                   |                  | 1  |

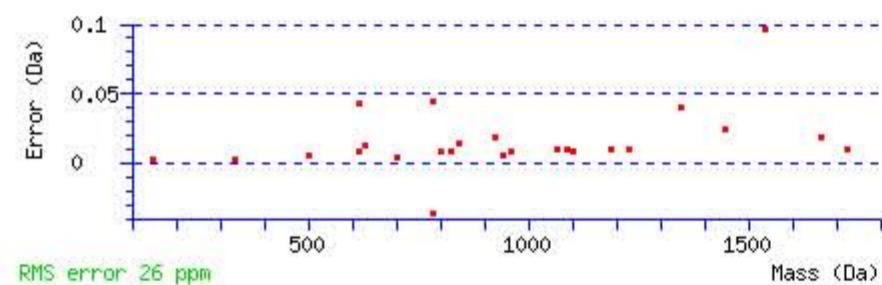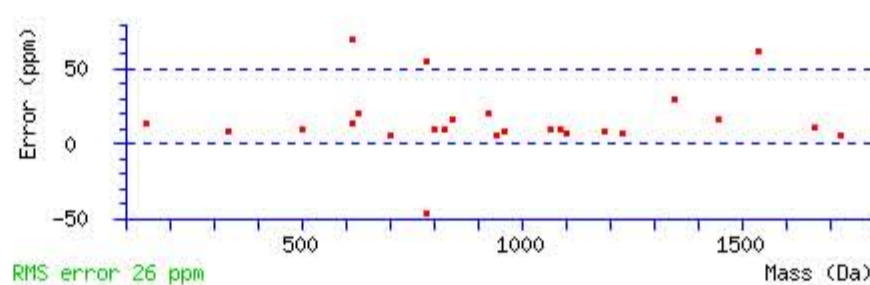

NCBI BLAST search of **ESEQGVYTCTAQQGIWK**

(Parameters: blastp, nr protein database, expect=20000, no filter, PAM30)

Other BLAST [web gateways](#)

All matches to this query

| Score | Mr(calc):   | Delta    | Sequence                          |
|-------|-------------|----------|-----------------------------------|
| 46.3  | 2167.007813 | 0.027289 | <a href="#">ESEQGVYTCTAQQGIWK</a> |

Mascot: <http://www.matrixscience.com/>

# **MASCOT** Mascot Search Results

## Peptide View

MS/MS Fragmentation of **EACNAWLQK**

Found in **C1RL\_HUMAN**, Complement C1r subcomponent-like protein OS=Homo sapiens GN=C1RL PE=1 SV=2

Match to Query 32628: 1429.694368 from(715.854460,2+) rtinseconds(1941) index(78499)

Title: Locus:1.1.1.2026.23 File:"2013-07-02 CLN FXIII 180 min 1st FT.wiff"

Data file C:\Program Files (x86)\Matrix Science\Mascot Daemon\mgf\7 FXIII 180 min 1st\mascot\_daemon\_merge.mgf

Click mouse within plot area to zoom in by factor of two about that point

Or, Plot from  to  Da

Label all possible matches  Label matches used for scoring

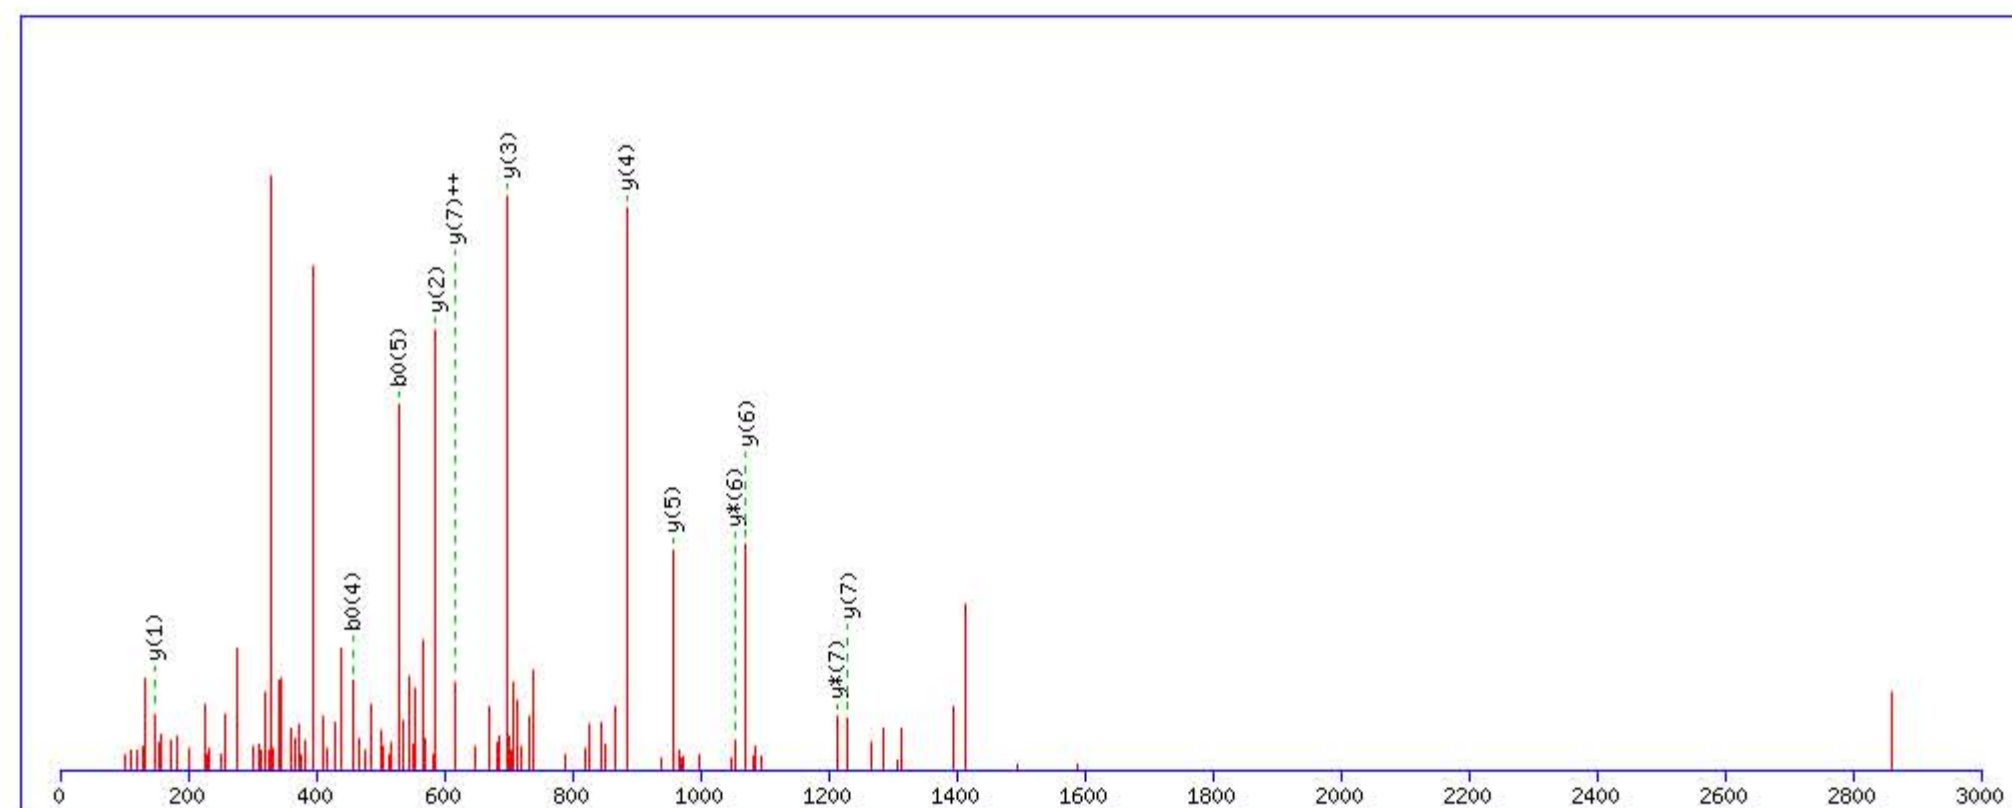

Monoisotopic mass of neutral peptide Mr(calc): 1429.684601

Fixed modifications: Carbamidomethyl (C) (apply to specified residues or termini only)

Variable modifications:

Q8 : Biotin:Thermo-21345 (Q)

Ions Score: 36 Expect: 0.0038

Matches : 12/74 fragment ions using 25 most intense peaks [\(help\)](#)

| # | b           | b <sup>++</sup> | b <sup>*</sup> | b <sup>*++</sup> | b <sup>0</sup>    | b <sup>0++</sup> | Seq. | y                  | y <sup>++</sup>   | y <sup>*</sup>     | y <sup>*++</sup> | # |
|---|-------------|-----------------|----------------|------------------|-------------------|------------------|------|--------------------|-------------------|--------------------|------------------|---|
| 1 | 130.049869  | 65.528572       |                |                  | 112.039304        | 56.523290        | E    |                    |                   |                    |                  | 9 |
| 2 | 201.086983  | 101.047130      |                |                  | 183.076418        | 92.041847        | A    | 1301.649311        | 651.328293        | 1284.622762        | 642.815019       | 8 |
| 3 | 361.117632  | 181.062454      |                |                  | 343.107067        | 172.057172       | C    | <b>1230.612197</b> | <b>615.809736</b> | <b>1213.585648</b> | 607.296462       | 7 |
| 4 | 475.160559  | 238.083918      | 458.134010     | 229.570643       | <b>457.149994</b> | 229.078635       | N    | <b>1070.581548</b> | 535.794412        | <b>1053.554999</b> | 527.281138       | 6 |
| 5 | 546.197673  | 273.602475      | 529.171124     | 265.089200       | <b>528.187108</b> | 264.597192       | A    | <b>956.538621</b>  | 478.772948        | 939.512072         | 470.259674       | 5 |
| 6 | 732.276986  | 366.642131      | 715.250437     | 358.128857       | 714.266421        | 357.636849       | W    | <b>885.501507</b>  | 443.254392        | 868.474958         | 434.741117       | 4 |
| 7 | 845.361050  | 423.184163      | 828.334501     | 414.670889       | 827.350485        | 414.178881       | L    | <b>699.422194</b>  | 350.214735        | 682.395645         | 341.701461       | 3 |
| 8 | 1284.586376 | 642.796826      | 1267.559827    | 634.283552       | 1266.575811       | 633.791543       | Q    | <b>586.338130</b>  | 293.672703        | 569.311581         | 285.159428       | 2 |
| 9 |             |                 |                |                  |                   |                  | K    | <b>147.112804</b>  | 74.060040         | 130.086255         | 65.546765        | 1 |

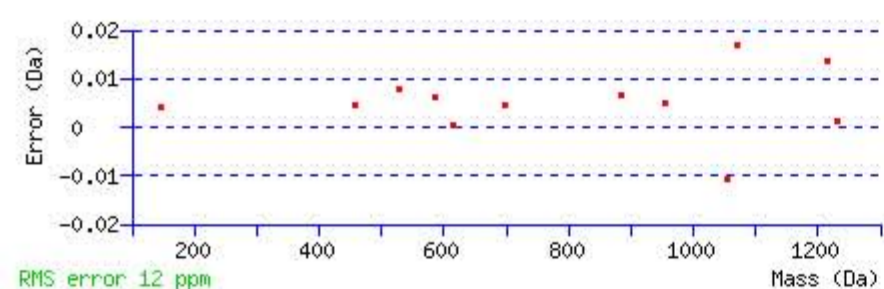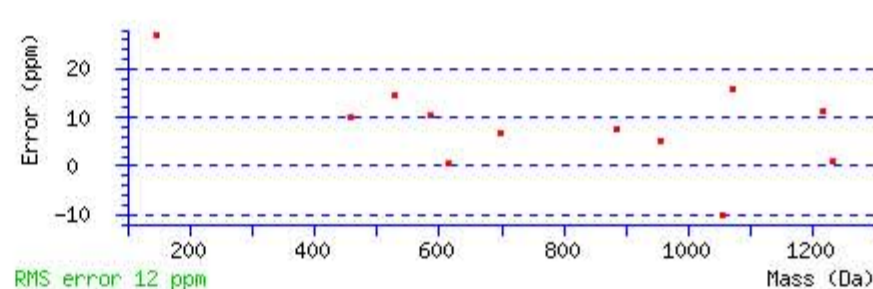

NCBI BLAST search of **EACNAWLQK**

(Parameters: blastp, nr protein database, expect=20000, no filter, PAM30)

Other BLAST [web gateways](#)

## All matches to this query

| Score | Mr(calc):   | Delta     | Sequence                       |
|-------|-------------|-----------|--------------------------------|
| 36.4  | 1429.684601 | 0.009767  | <a href="#">EACNAWLQK</a>      |
| 10.1  | 1429.680588 | 0.013780  | <a href="#">MRIHCLENVDK</a>    |
| 7.2   | 1429.679886 | 0.014482  | <a href="#">MDDKELIEYFK</a>    |
| 6.8   | 1429.687103 | 0.007265  | <a href="#">QSEADNNTLK</a>     |
| 5.4   | 1429.687988 | 0.006380  | <a href="#">CNTPAMGLQK</a>     |
| 5.1   | 1429.702362 | -0.007994 | <a href="#">LSNWESQQK</a>      |
| 5.1   | 1429.705719 | -0.011351 | <a href="#">EANALAMQQK</a>     |
| 4.7   | 1429.705734 | -0.011366 | <a href="#">MGAQGAQESIK</a>    |
| 4.3   | 1429.690918 | 0.003450  | <a href="#">AGDGERARAEAAEK</a> |
| 4.1   | 1429.705719 | -0.011351 | <a href="#">EANALAMQQK</a>     |



# MASCOT Search Results

## Peptide View

MS/MS Fragmentation of **TMQENSTPR**

Found in **C1S\_HUMAN**, Complement C1s subcomponent OS=Homo sapiens GN=C1S PE=1 SV=1

Match to Query 29703: 1373.655888 from(687.835220,2+) rtinseconds(1365) index(37778)

Title: Locus:1.1.1.2924.26 File:"2013-07-02 CLN FXIII 180 min 1st F 3.wiff"

Data file C:\Program Files (x86)\Matrix Science\Mascot Daemon\mgf\7 FXIII 180 min 1st\mascot\_daemon\_merge.mgf

Click mouse within plot area to zoom in by factor of two about that point

Or, Plot from  to  Da

Label all possible matches  Label matches used for scoring

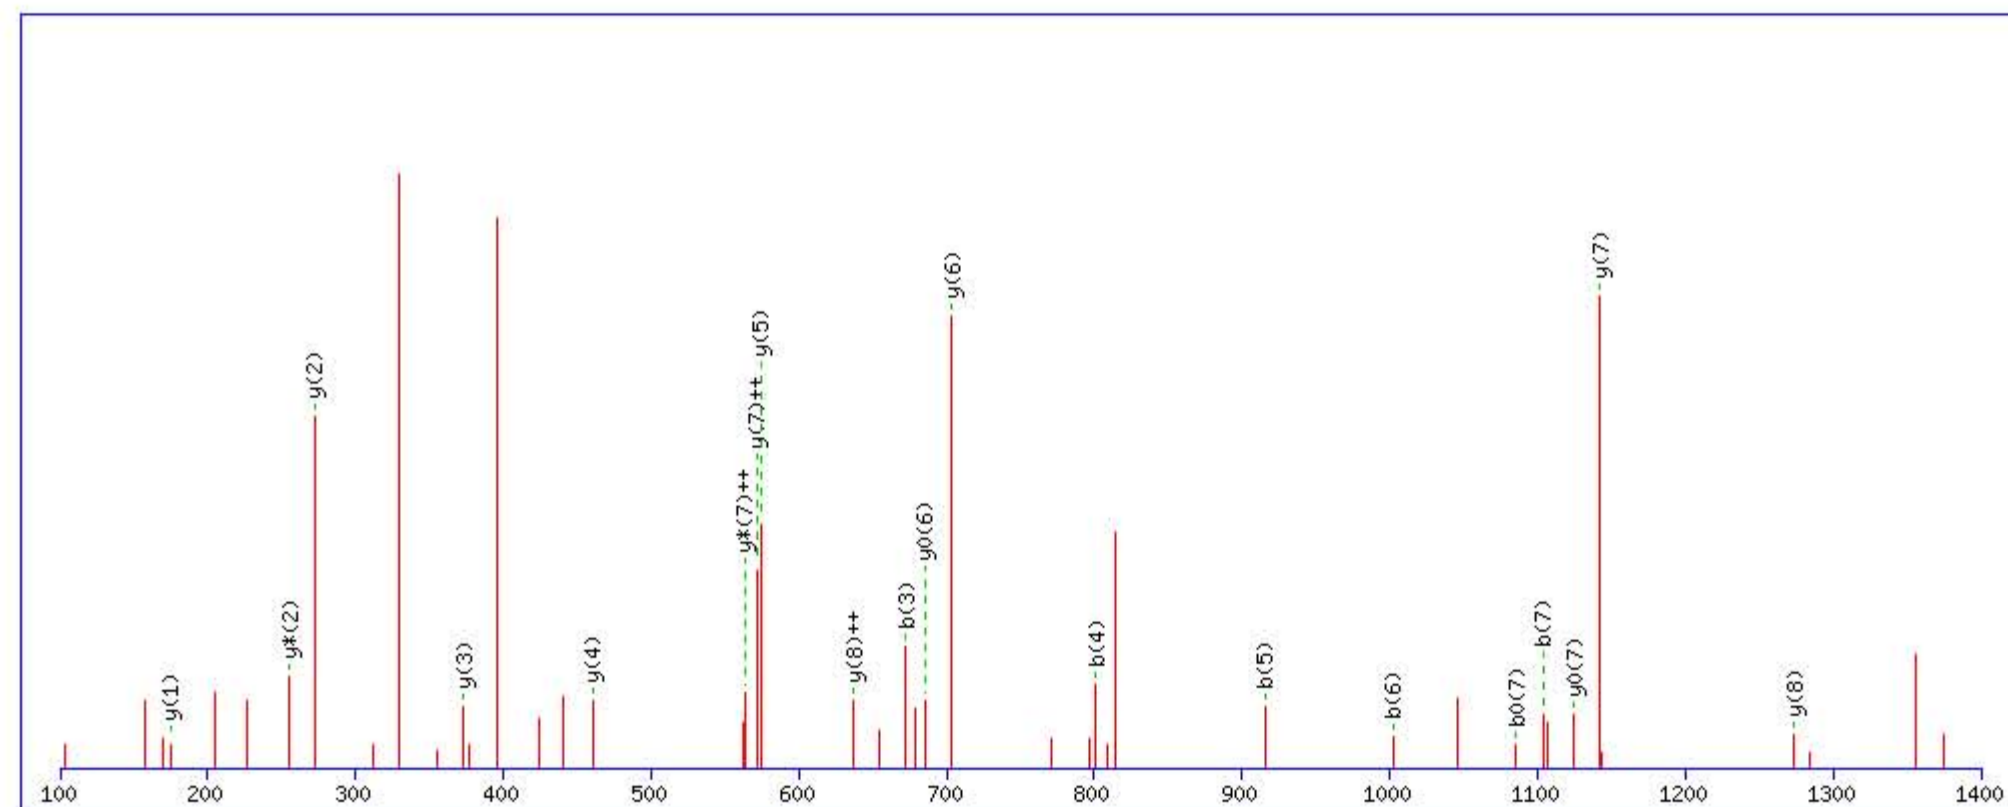

Monoisotopic mass of neutral peptide Mr(calc): 1373.643143

Fixed modifications: Carbamidomethyl (C) (apply to specified residues or termini only)

Variable modifications:

Q3 : Biotin:Thermo-21345 (Q)

Ions Score: 46 Expect: 0.00016

Matches : 20/88 fragment ions using 40 most intense peaks ([help](#))

| # | b           | b <sup>++</sup> | b <sup>*</sup> | b <sup>+++</sup> | b <sup>0</sup> | b <sup>0++</sup> | Seq. | y           | y <sup>++</sup> | y <sup>*</sup> | y <sup>+++</sup> | y <sup>0</sup> | y <sup>0++</sup> | # |
|---|-------------|-----------------|----------------|------------------|----------------|------------------|------|-------------|-----------------|----------------|------------------|----------------|------------------|---|
| 1 | 102.054955  | 51.531116       |                |                  | 84.044390      | 42.525833        | T    |             |                 |                |                  |                |                  | 9 |
| 2 | 233.095440  | 117.051358      |                |                  | 215.084875     | 108.046076       | M    | 1273.602754 | 637.305015      | 1256.576205    | 628.791741       | 1255.592189    | 628.299733       | 8 |
| 3 | 672.320766  | 336.664021      | 655.294217     | 328.150747       | 654.310201     | 327.658739       | Q    | 1142.562269 | 571.784773      | 1125.535720    | 563.271498       | 1124.551704    | 562.779490       | 7 |
| 4 | 801.363359  | 401.185318      | 784.336810     | 392.672043       | 783.352794     | 392.180035       | E    | 703.336943  | 352.172110      | 686.310394     | 343.658835       | 685.326378     | 343.166827       | 6 |
| 5 | 915.406286  | 458.206781      | 898.379737     | 449.693507       | 897.395721     | 449.201499       | N    | 574.294350  | 287.650813      | 557.267801     | 279.137539       | 556.283785     | 278.645531       | 5 |
| 6 | 1002.438314 | 501.722795      | 985.411765     | 493.209521       | 984.427749     | 492.717513       | S    | 460.251423  | 230.629349      | 443.224874     | 222.116075       | 442.240858     | 221.624067       | 4 |
| 7 | 1103.485993 | 552.246635      | 1086.459444    | 543.733360       | 1085.475428    | 543.241352       | T    | 373.219395  | 187.113335      | 356.192846     | 178.600061       | 355.208830     | 178.108053       | 3 |
| 8 | 1200.538757 | 600.773017      | 1183.512208    | 592.259742       | 1182.528192    | 591.767734       | P    | 272.171716  | 136.589496      | 255.145167     | 128.076221       |                |                  | 2 |
| 9 |             |                 |                |                  |                |                  | R    | 175.118952  | 88.063114       | 158.092403     | 79.549839        |                |                  | 1 |

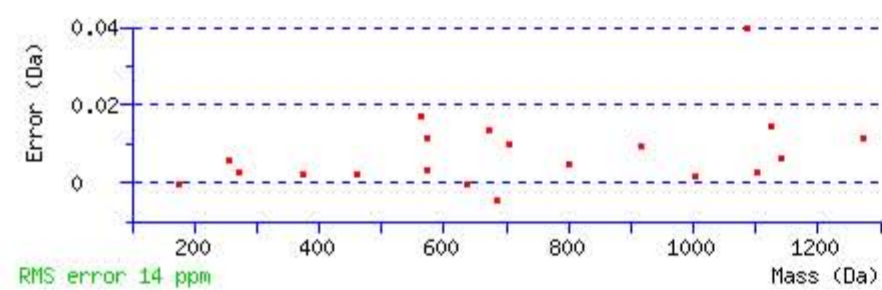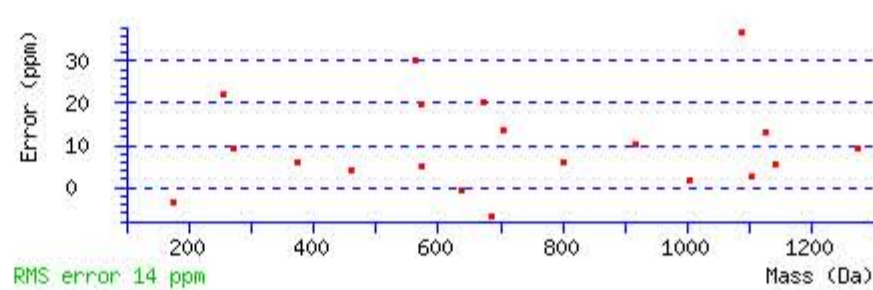

NCBI BLAST search of **TMQENSTPR**

(Parameters: blastp, nr protein database, expect=20000, no filter, PAM30)

Other BLAST [web gateways](#)

All matches to this query

| Score | Mr(calc):   | Delta    | Sequence                     |
|-------|-------------|----------|------------------------------|
| 46.0  | 1373.643143 | 0.012745 | <a href="#">TMQENSTPR</a>    |
| 5.7   | 1373.635742 | 0.020146 | <a href="#">DRGMPSDSPEKR</a> |

Mascot: <http://www.matrixscience.com/>

**MATRIX SCIENCE Mascot Search Results**

**Peptide View**

MS/MS Fragmentation of **EPTMYVGSTSVQTSR**  
 Found in **C1S\_HUMAN**, Complement C1s subcomponent OS=Homo sapiens GN=C1S PE=1 SV=1

Match to Query 48766: 1952.953002 from(651.991610,3+) rtinseconds(1872) index(41195)  
 Title: Locus:1.1.1.3101.25 File:"2013-07-02 CLN FXIII 180 min 1st F 3.wiff"  
 Data file C:\Program Files (x86)\Matrix Science\Mascot Daemon\mgf\7 FXIII 180 min 1st\mascot\_daemon\_merge.mgf

Click mouse within plot area to zoom in by factor of two about that point

Or, Plot from 100 to 2000 Da Full range  
 Label all possible matches  Label matches used for scoring

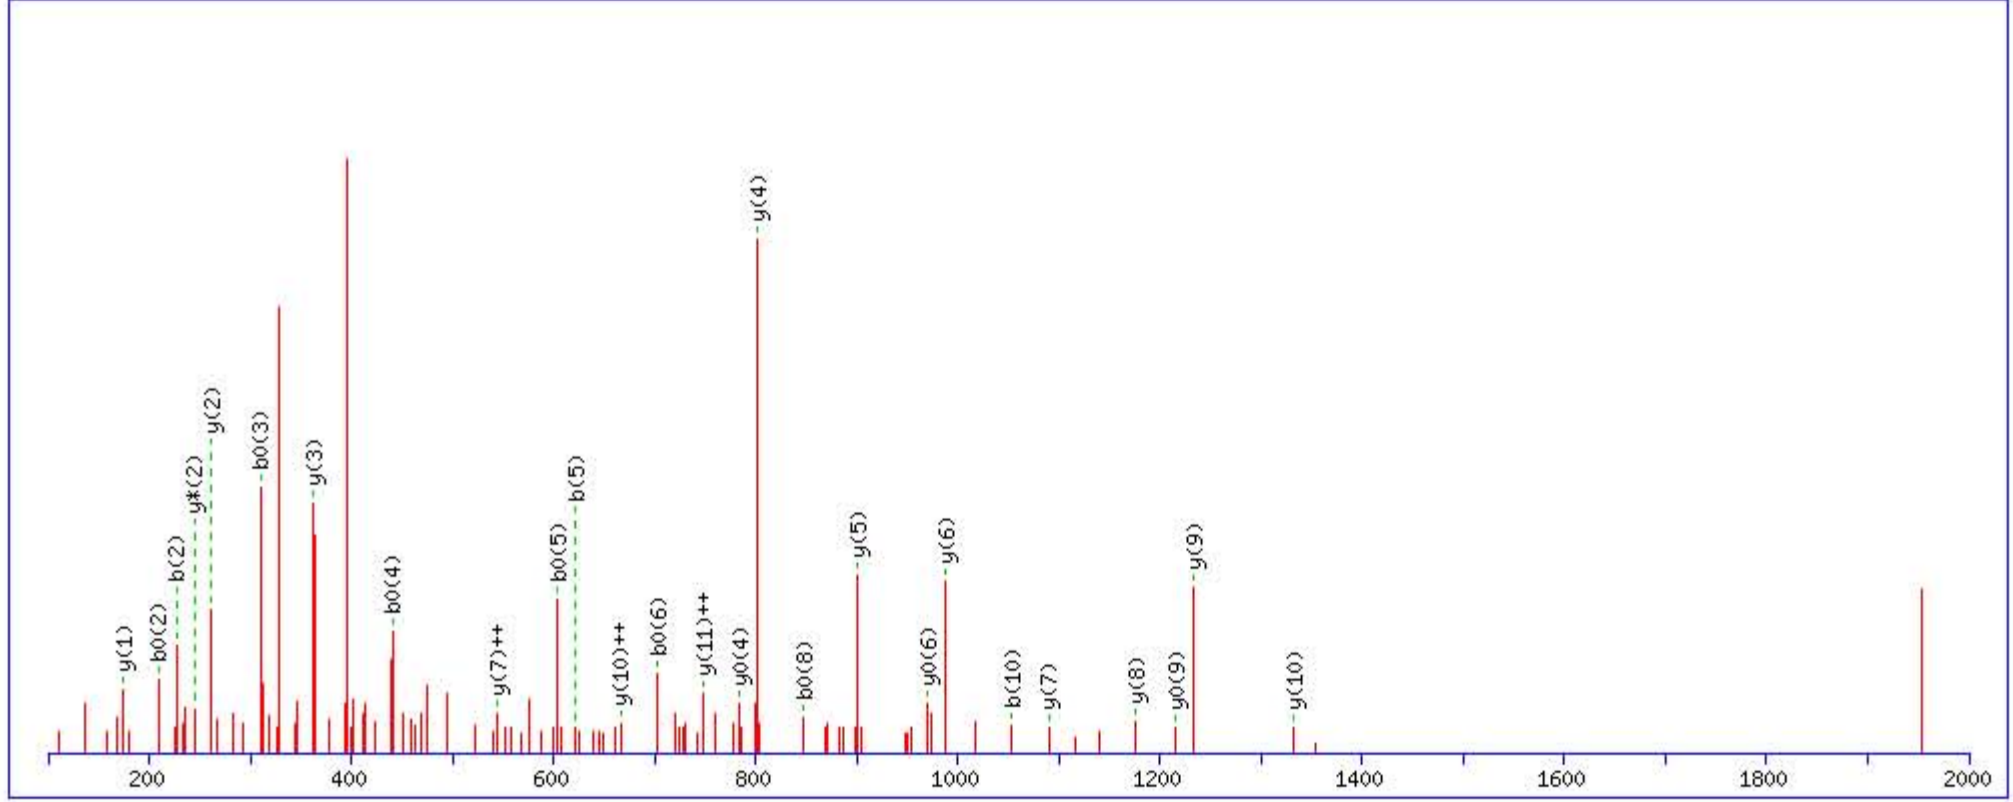

Monoisotopic mass of neutral peptide Mr(calc): 1952.933594  
 Fixed modifications: Carbamidomethyl (C) (apply to specified residues or termini only)  
 Variable modifications:  
 Q12 : Biotin:Thermo-21345 (Q)  
 Ions Score: 56 Expect: 9.3e-006  
 Matches : 26/144 fragment ions using 47 most intense peaks [\(help\)](#)

| #  | b                  | b <sup>++</sup> | b <sup>+</sup> | b <sup>+++</sup> | b <sup>0</sup>    | b <sup>0++</sup> | Seq. | y                  | y <sup>++</sup>   | y <sup>+</sup>    | y <sup>+++</sup> | y <sup>0</sup>     | y <sup>0++</sup> | #  |
|----|--------------------|-----------------|----------------|------------------|-------------------|------------------|------|--------------------|-------------------|-------------------|------------------|--------------------|------------------|----|
| 1  | 130.049869         | 65.528572       |                |                  | 112.039304        | 56.523290        | E    |                    |                   |                   |                  |                    |                  | 15 |
| 2  | <b>227.102633</b>  | 114.054954      |                |                  | <b>209.092068</b> | 105.049672       | P    | 1824.898269        | 912.952773        | 1807.871720       | 904.439498       | 1806.887704        | 903.947490       | 14 |
| 3  | 328.150312         | 164.578794      |                |                  | <b>310.139747</b> | 155.573512       | T    | 1727.845505        | 864.426391        | 1710.818956       | 855.913116       | 1709.834940        | 855.421108       | 13 |
| 4  | 459.190797         | 230.099036      |                |                  | <b>441.180232</b> | 221.093754       | M    | 1626.797826        | 813.902551        | 1609.771277       | 805.389277       | 1608.787261        | 804.897269       | 12 |
| 5  | <b>622.254126</b>  | 311.630701      |                |                  | <b>604.243561</b> | 302.625419       | Y    | 1495.757341        | <b>748.382309</b> | 1478.730792       | 739.869034       | 1477.746776        | 739.377026       | 11 |
| 6  | 721.322540         | 361.164908      |                |                  | <b>703.311975</b> | 352.159626       | V    | <b>1332.694012</b> | <b>666.850644</b> | 1315.667463       | 658.337370       | 1314.683447        | 657.845362       | 10 |
| 7  | 778.344004         | 389.675640      |                |                  | 760.333439        | 380.670358       | G    | <b>1233.625598</b> | 617.316437        | 1216.599049       | 608.803163       | <b>1215.615033</b> | 608.311155       | 9  |
| 8  | 865.376032         | 433.191654      |                |                  | <b>847.365467</b> | 424.186372       | S    | <b>1176.604134</b> | 588.805705        | 1159.577585       | 580.292431       | 1158.593569        | 579.800423       | 8  |
| 9  | 966.423711         | 483.715494      |                |                  | 948.413146        | 474.710211       | T    | <b>1089.572106</b> | <b>545.289691</b> | 1072.545557       | 536.776417       | 1071.561541        | 536.284409       | 7  |
| 10 | <b>1053.455739</b> | 527.231508      |                |                  | 1035.445174       | 518.226225       | S    | <b>988.524427</b>  | 494.765852        | 971.497878        | 486.252577       | <b>970.513862</b>  | 485.760569       | 6  |
| 11 | 1152.524153        | 576.765715      |                |                  | 1134.513588       | 567.760432       | V    | <b>901.492399</b>  | 451.249838        | 884.465850        | 442.736563       | 883.481834         | 442.244555       | 5  |
| 12 | 1591.749479        | 796.378378      | 1574.722930    | 787.865103       | 1573.738914       | 787.373095       | Q    | <b>802.423985</b>  | 401.715631        | 785.397436        | 393.202356       | <b>784.413420</b>  | 392.710348       | 4  |
| 13 | 1692.797158        | 846.902217      | 1675.770609    | 838.388943       | 1674.786593       | 837.896935       | T    | <b>363.198659</b>  | 182.102968        | 346.172110        | 173.589693       | 345.188094         | 173.097685       | 3  |
| 14 | 1779.829186        | 890.418231      | 1762.802637    | 881.904957       | 1761.818621       | 881.412949       | S    | <b>262.150980</b>  | 131.579128        | <b>245.124431</b> | 123.065854       | 244.140415         | 122.573846       | 2  |
| 15 |                    |                 |                |                  |                   |                  | R    | <b>175.118952</b>  | 88.063114         | 158.092403        | 79.549839        |                    |                  | 1  |

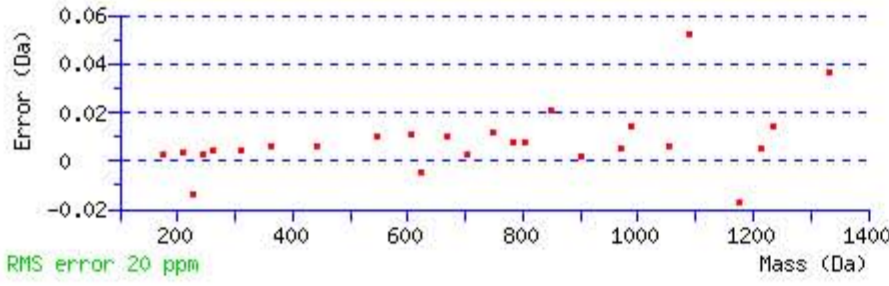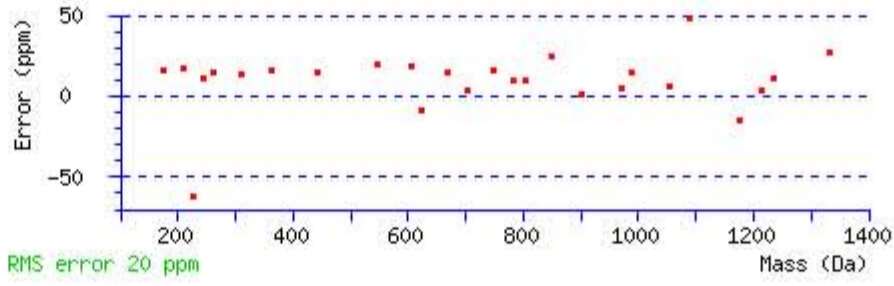

NCBI BLAST search of [EPTMYVGSTSVQTSR](#)  
 (Parameters: blastp, nr protein database, expect=20000, no filter, PAM30)  
 Other BLAST [web gateways](#)

**All matches to this query**

| Score | Mr(calc):   | Delta    | Sequence                        |
|-------|-------------|----------|---------------------------------|
| 56.2  | 1952.933594 | 0.019408 | <a href="#">EPTMYVGSTSVQTSR</a> |
| 2.5   | 1952.944794 | 0.008208 | <a href="#">MNVQTSKYANQSAGK</a> |

Mascot: <http://www.matrixscience.com/>

**MASCOT** Mascot Search Results

**Peptide View**

MS/MS Fragmentation of **SSNNPHSPIVEEFQVPYNK**  
 Found in **C1S\_HUMAN**, Complement C1s subcomponent OS=Homo sapiens GN=C1S PE=1 SV=1

Match to Query 63004: 2496.246582 from(833.089470,3+) rtinseconds(2094) index(42857)  
 Title: Locus:1.1.1.3178.14 File:"2013-07-02 CLN FXIII 180 min 1st F 3.wiff"  
 Data file C:\Program Files (x86)\Matrix Science\Mascot Daemon\mgf\7 FXIII 180 min 1st\mascot\_daemon\_merge.mgf

Click mouse within plot area to zoom in by factor of two about that point

Or, Plot from  to  Da   
 Label all possible matches  Label matches used for scoring

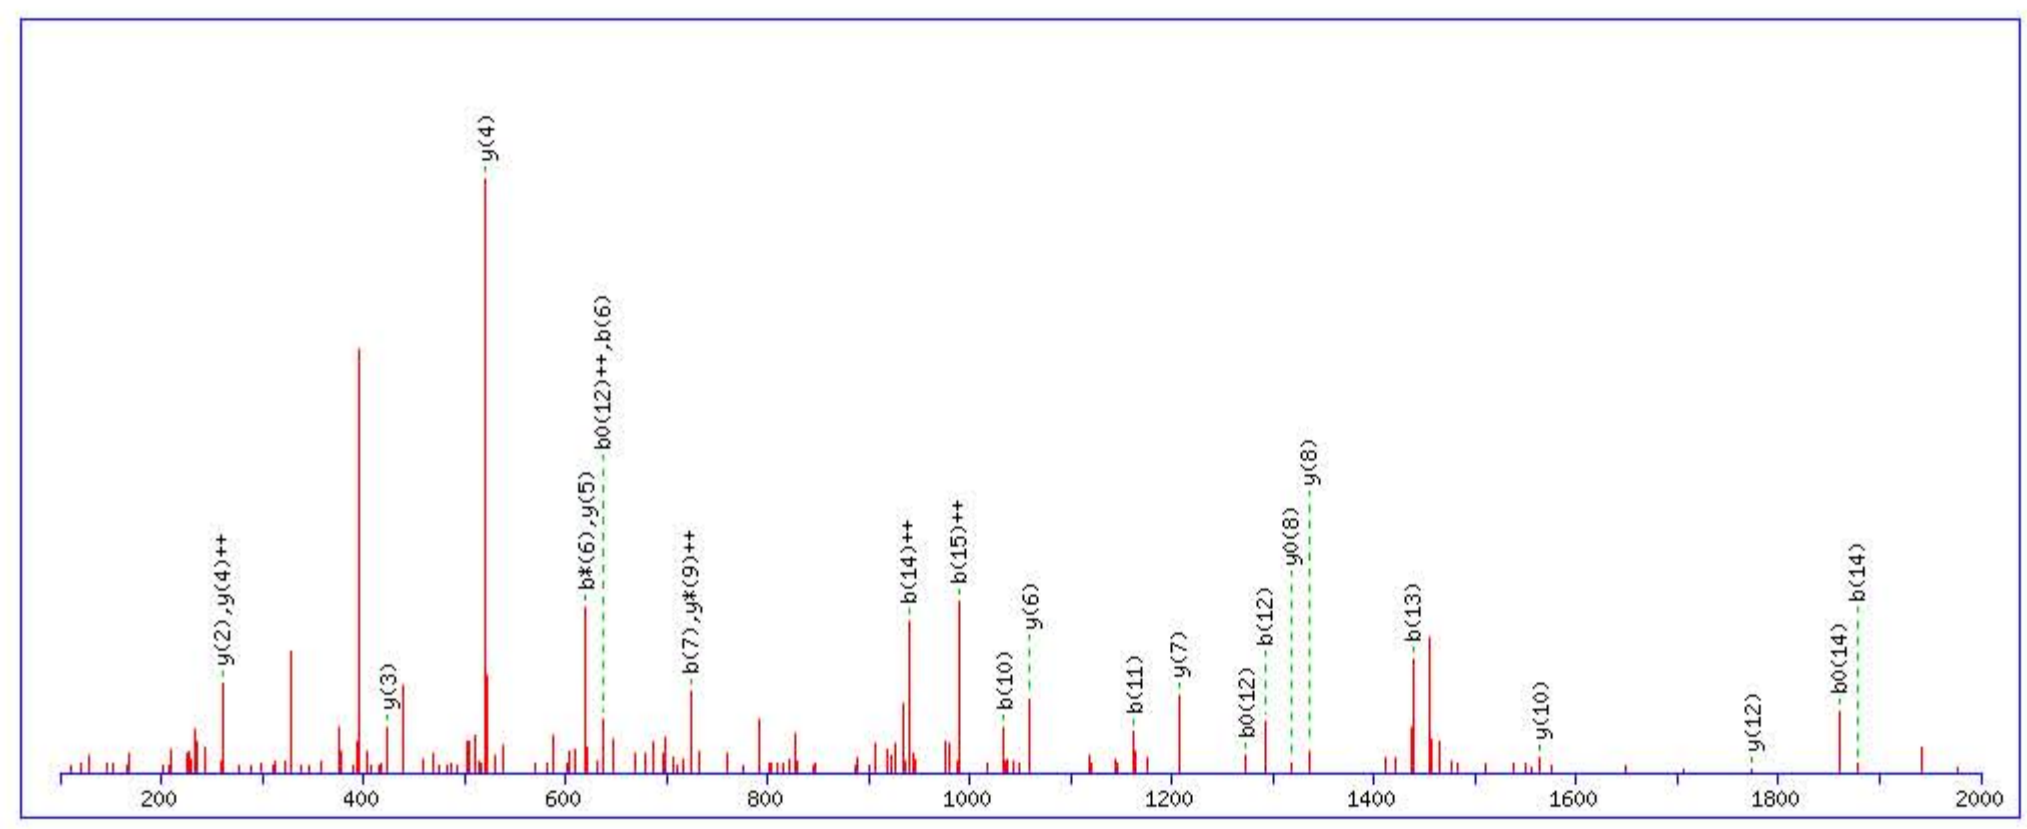

Monoisotopic mass of neutral peptide Mr(calc): 2496.210724  
 Fixed modifications: Carbamidomethyl (C) (apply to specified residues or termini only)  
 Variable modifications:  
 Q14 : Biotin:Thermo-21345 (Q)  
 Ions Score: 45 Expect: 5.7e-005  
 Matches : 25/198 fragment ions using 37 most intense peaks (help)

| #  | b           | b <sup>++</sup> | b <sup>*</sup> | b <sup>*++</sup> | b <sup>0</sup> | b <sup>0++</sup> | Seq. | y           | y <sup>++</sup> | y <sup>*</sup> | y <sup>*++</sup> | y <sup>0</sup> | y <sup>0++</sup> | #  |
|----|-------------|-----------------|----------------|------------------|----------------|------------------|------|-------------|-----------------|----------------|------------------|----------------|------------------|----|
| 1  | 88.039304   | 44.523290       |                |                  | 70.028739      | 35.518008        | S    |             |                 |                |                  |                |                  | 19 |
| 2  | 175.071332  | 88.039304       |                |                  | 157.060767     | 79.034021        | S    | 2410.185992 | 1205.596634     | 2393.159443    | 1197.083359      | 2392.175427    | 1196.591351      | 18 |
| 3  | 289.114259  | 145.060768      | 272.087710     | 136.547493       | 271.103694     | 136.055485       | N    | 2323.153964 | 1162.080620     | 2306.127415    | 1153.567345      | 2305.143399    | 1153.075337      | 17 |
| 4  | 403.157186  | 202.082231      | 386.130637     | 193.568957       | 385.146621     | 193.076949       | N    | 2209.111037 | 1105.059156     | 2192.084488    | 1096.545882      | 2191.100472    | 1096.053874      | 16 |
| 5  | 500.209950  | 250.608613      | 483.183401     | 242.095339       | 482.199385     | 241.603331       | P    | 2095.068110 | 1048.037693     | 2078.041561    | 1039.524418      | 2077.057545    | 1039.032410      | 15 |
| 6  | 637.268862  | 319.138069      | 620.242313     | 310.624795       | 619.258297     | 310.132787       | H    | 1998.015346 | 999.511311      | 1980.988797    | 990.998037       | 1980.004781    | 990.506028       | 14 |
| 7  | 724.300890  | 362.654083      | 707.274341     | 354.140808       | 706.290325     | 353.648800       | S    | 1860.956434 | 930.981855      | 1843.929885    | 922.468581       | 1842.945869    | 921.976572       | 13 |
| 8  | 821.353654  | 411.180465      | 804.327105     | 402.667191       | 803.343089     | 402.175183       | P    | 1773.924406 | 887.465841      | 1756.897857    | 878.952567       | 1755.913841    | 878.460559       | 12 |
| 9  | 934.437718  | 467.722497      | 917.411169     | 459.209223       | 916.427153     | 458.717215       | I    | 1676.871642 | 838.939459      | 1659.845093    | 830.426185       | 1658.861077    | 829.934177       | 11 |
| 10 | 1033.506132 | 517.256704      | 1016.479583    | 508.743429       | 1015.495567    | 508.251421       | V    | 1563.787578 | 782.397427      | 1546.761029    | 773.884153       | 1545.777013    | 773.392145       | 10 |
| 11 | 1162.548725 | 581.778000      | 1145.522176    | 573.264726       | 1144.538160    | 572.772718       | E    | 1464.719164 | 732.863220      | 1447.692615    | 724.349946       | 1446.708599    | 723.857938       | 9  |
| 12 | 1291.591318 | 646.299297      | 1274.564769    | 637.786023       | 1273.580753    | 637.294015       | E    | 1335.676571 | 668.341924      | 1318.650022    | 659.828649       | 1317.666006    | 659.336641       | 8  |
| 13 | 1438.659732 | 719.833504      | 1421.633183    | 711.320230       | 1420.649167    | 710.828222       | F    | 1206.633978 | 603.820627      | 1189.607429    | 595.307353       |                |                  | 7  |
| 14 | 1877.885058 | 939.446167      | 1860.858509    | 930.932893       | 1859.874493    | 930.440885       | Q    | 1059.565564 | 530.286420      | 1042.539015    | 521.773146       |                |                  | 6  |
| 15 | 1976.953472 | 988.980374      | 1959.926923    | 980.467100       | 1958.942907    | 979.975092       | V    | 620.340238  | 310.673757      | 603.313689     | 302.160483       |                |                  | 5  |
| 16 | 2074.006236 | 1037.506756     | 2056.979687    | 1028.993481      | 2055.995671    | 1028.501473      | P    | 521.271824  | 261.139550      | 504.245275     | 252.626275       |                |                  | 4  |
| 17 | 2237.069565 | 1119.038420     | 2220.043016    | 1110.525146      | 2219.059000    | 1110.033138      | Y    | 424.219060  | 212.613168      | 407.192511     | 204.099894       |                |                  | 3  |
| 18 | 2351.112492 | 1176.059884     | 2334.085943    | 1167.546609      | 2333.101927    | 1167.054601      | N    | 261.155731  | 131.081503      | 244.129182     | 122.568229       |                |                  | 2  |
| 19 |             |                 |                |                  |                |                  | K    | 147.112804  | 74.060040       | 130.086255     | 65.546765        |                |                  | 1  |

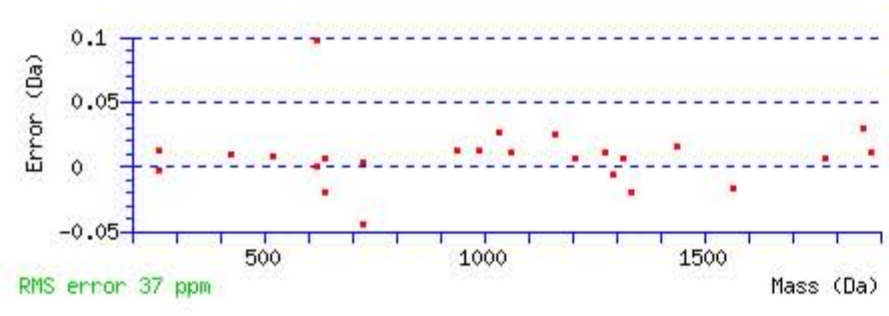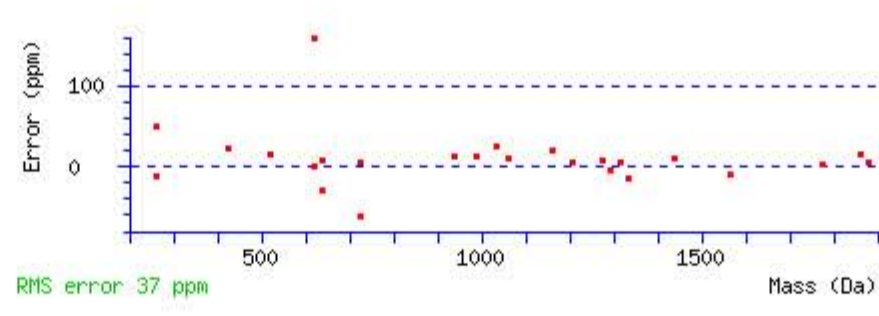

NCBI BLAST search of **SSNNPHSPIVEEFQVPYNK**  
 (Parameters: blastp, nr protein database, expect=20000, no filter, PAM30)  
 Other BLAST [web gateways](#)

**All matches to this query**

| Score | Mr(calc):   | Delta    | Sequence                   |
|-------|-------------|----------|----------------------------|
| 45.3  | 2496.210724 | 0.035858 | <b>SSNNPHSPIVEEFQVPYNK</b> |
| 0.1   | 2496.236603 | 0.009979 | <b>RPVFSHCQVPETQKTDTR</b>  |

# MASCOT Search Results

## Peptide View

MS/MS Fragmentation of **SSGQWQTPGATR**

Found in **CO2\_HUMAN**, Complement C2 OS=Homo sapiens GN=C2 PE=1 SV=2

Match to Query 38021: 1585.779268 from(793.896910,2+) rtinseconds(1723) index(77058)

Title: Locus:1.1.1.1951.8 File:"2013-07-02 CLN FXIII 180 min 1st FT.wiff"

Data file C:\Program Files (x86)\Matrix Science\Mascot Daemon\mgf\7 FXIII 180 min 1st\mascot\_daemon\_merge.mgf

Click mouse within plot area to zoom in by factor of two about that point

Or, Plot from  to  Da

Label all possible matches  Label matches used for scoring

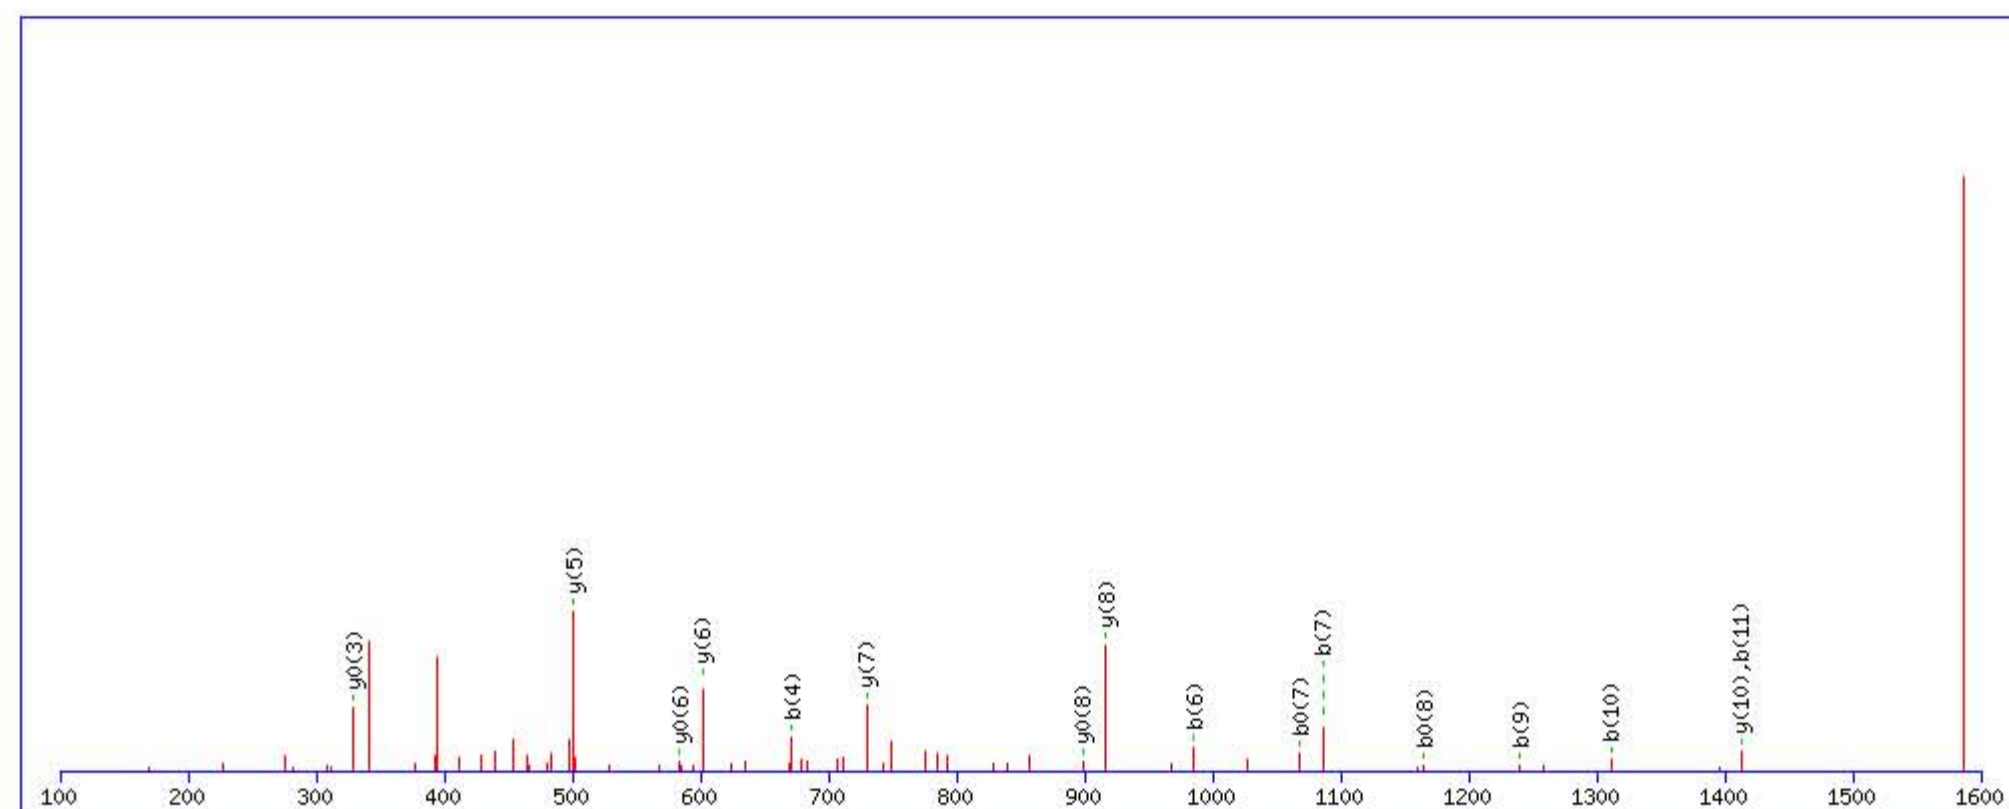

Monoisotopic mass of neutral peptide  $M_r(\text{calc})$ : 1585.767120

Fixed modifications: Carbamidomethyl (C) (apply to specified residues or termini only)

Variable modifications:

Q4 : Biotin:Thermo-21345 (Q)

Ions Score: 39 Expect: 0.00099

Matches : 16/124 fragment ions using 25 most intense peaks [\(help\)](#)

| #  | b                  | b <sup>++</sup> | b <sup>*</sup> | b <sup>+++</sup> | b <sup>0</sup>     | b <sup>0++</sup> | Seq. | y                  | y <sup>++</sup> | y <sup>*</sup> | y <sup>+++</sup> | y <sup>0</sup>    | y <sup>0++</sup> | #  |
|----|--------------------|-----------------|----------------|------------------|--------------------|------------------|------|--------------------|-----------------|----------------|------------------|-------------------|------------------|----|
| 1  | 88.039304          | 44.523290       |                |                  | 70.028739          | 35.518008        | S    |                    |                 |                |                  |                   |                  | 12 |
| 2  | 175.071332         | 88.039304       |                |                  | 157.060767         | 79.034021        | S    | 1499.742361        | 750.374818      | 1482.715812    | 741.861544       | 1481.731796       | 741.369536       | 11 |
| 3  | 232.092796         | 116.550036      |                |                  | 214.082231         | 107.544753       | G    | <b>1412.710333</b> | 706.858805      | 1395.683784    | 698.345530       | 1394.699768       | 697.853522       | 10 |
| 4  | <b>671.318122</b>  | 336.162699      | 654.291573     | 327.649425       | 653.307557         | 327.157417       | Q    | 1355.688869        | 678.348072      | 1338.662320    | 669.834798       | 1337.678304       | 669.342790       | 9  |
| 5  | 857.397435         | 429.202356      | 840.370886     | 420.689081       | 839.386870         | 420.197073       | W    | <b>916.463543</b>  | 458.735410      | 899.436994     | 450.222135       | <b>898.452978</b> | 449.730127       | 8  |
| 6  | <b>985.456013</b>  | 493.231645      | 968.429464     | 484.718370       | 967.445448         | 484.226362       | Q    | <b>730.384230</b>  | 365.695753      | 713.357681     | 357.182478       | 712.373665        | 356.690470       | 7  |
| 7  | <b>1086.503692</b> | 543.755484      | 1069.477143    | 535.242210       | <b>1068.493127</b> | 534.750202       | T    | <b>602.325652</b>  | 301.666464      | 585.299103     | 293.153189       | <b>584.315087</b> | 292.661181       | 6  |
| 8  | 1183.556456        | 592.281866      | 1166.529907    | 583.768592       | <b>1165.545891</b> | 583.276584       | P    | <b>501.277973</b>  | 251.142624      | 484.251424     | 242.629350       | 483.267408        | 242.137342       | 5  |
| 9  | <b>1240.577920</b> | 620.792598      | 1223.551371    | 612.279324       | 1222.567355        | 611.787315       | G    | 404.225209         | 202.616242      | 387.198660     | 194.102968       | 386.214644        | 193.610960       | 4  |
| 10 | <b>1311.615034</b> | 656.311155      | 1294.588485    | 647.797881       | 1293.604469        | 647.305872       | A    | 347.203745         | 174.105510      | 330.177196     | 165.592236       | <b>329.193180</b> | 165.100228       | 3  |
| 11 | <b>1412.662713</b> | 706.834994      | 1395.636164    | 698.321720       | 1394.652148        | 697.829712       | T    | 276.166631         | 138.586953      | 259.140082     | 130.073679       | 258.156066        | 129.581671       | 2  |
| 12 |                    |                 |                |                  |                    |                  | R    | 175.118952         | 88.063114       | 158.092403     | 79.549839        |                   |                  | 1  |

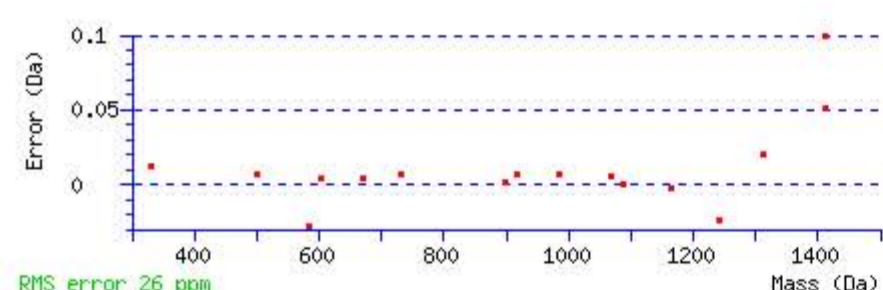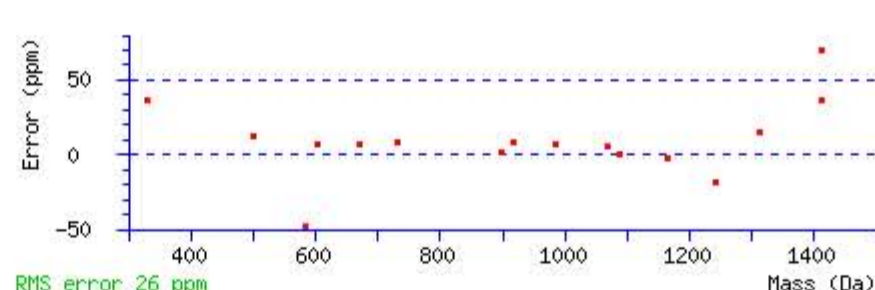

NCBI BLAST search of **SSGQWQTPGATR**

(Parameters: blastp, nr protein database, expect=20000, no filter, PAM30)

Other BLAST [web gateways](#)

### All matches to this query

| Score | $M_r(\text{calc})$ | Delta     | Sequence                          |
|-------|--------------------|-----------|-----------------------------------|
| 38.5  | 1585.767120        | 0.012148  | <a href="#">SSGQWQTPGATR</a>      |
| 20.4  | 1585.767120        | 0.012148  | <a href="#">SSGQWQTPGATR</a>      |
| 6.1   | 1585.769592        | 0.009676  | <a href="#">ETDHSLSLSSSPDKR</a>   |
| 5.4   | 1585.767075        | 0.012193  | <a href="#">AWENLGEQMGKAPR</a>    |
| 2.5   | 1585.765717        | 0.013551  | <a href="#">DLEEALPALEEAMR</a>    |
| 1.6   | 1585.796082        | -0.016814 | <a href="#">AGGSWDLAVQERAAR</a>   |
| 0.7   | 1585.769653        | 0.009615  | <a href="#">GDVGTAGSVGGTGEPLR</a> |

# Mascot Search Results

## Peptide View

MS/MS Fragmentation of **SGQSEDR**

Found in **CO3\_HUMAN**, Complement C3 OS=Homo sapiens GN=C3 PE=1 SV=2

Match to Query 18672: 1088.498388 from(545.256470,2+) rtinseconds(1127) index(36296)

Title: Locus:1.1.1.2841.14 File:"2013-07-02 CLN FXIII 180 min 1st F 3.wiff"

Data file C:\Program Files (x86)\Matrix Science\Mascot Daemon\mgf\7 FXIII 180 min 1st\mascot\_daemon\_merge.mgf

Click mouse within plot area to zoom in by factor of two about that point

Or, Plot from  to  Da

Label all possible matches  Label matches used for scoring

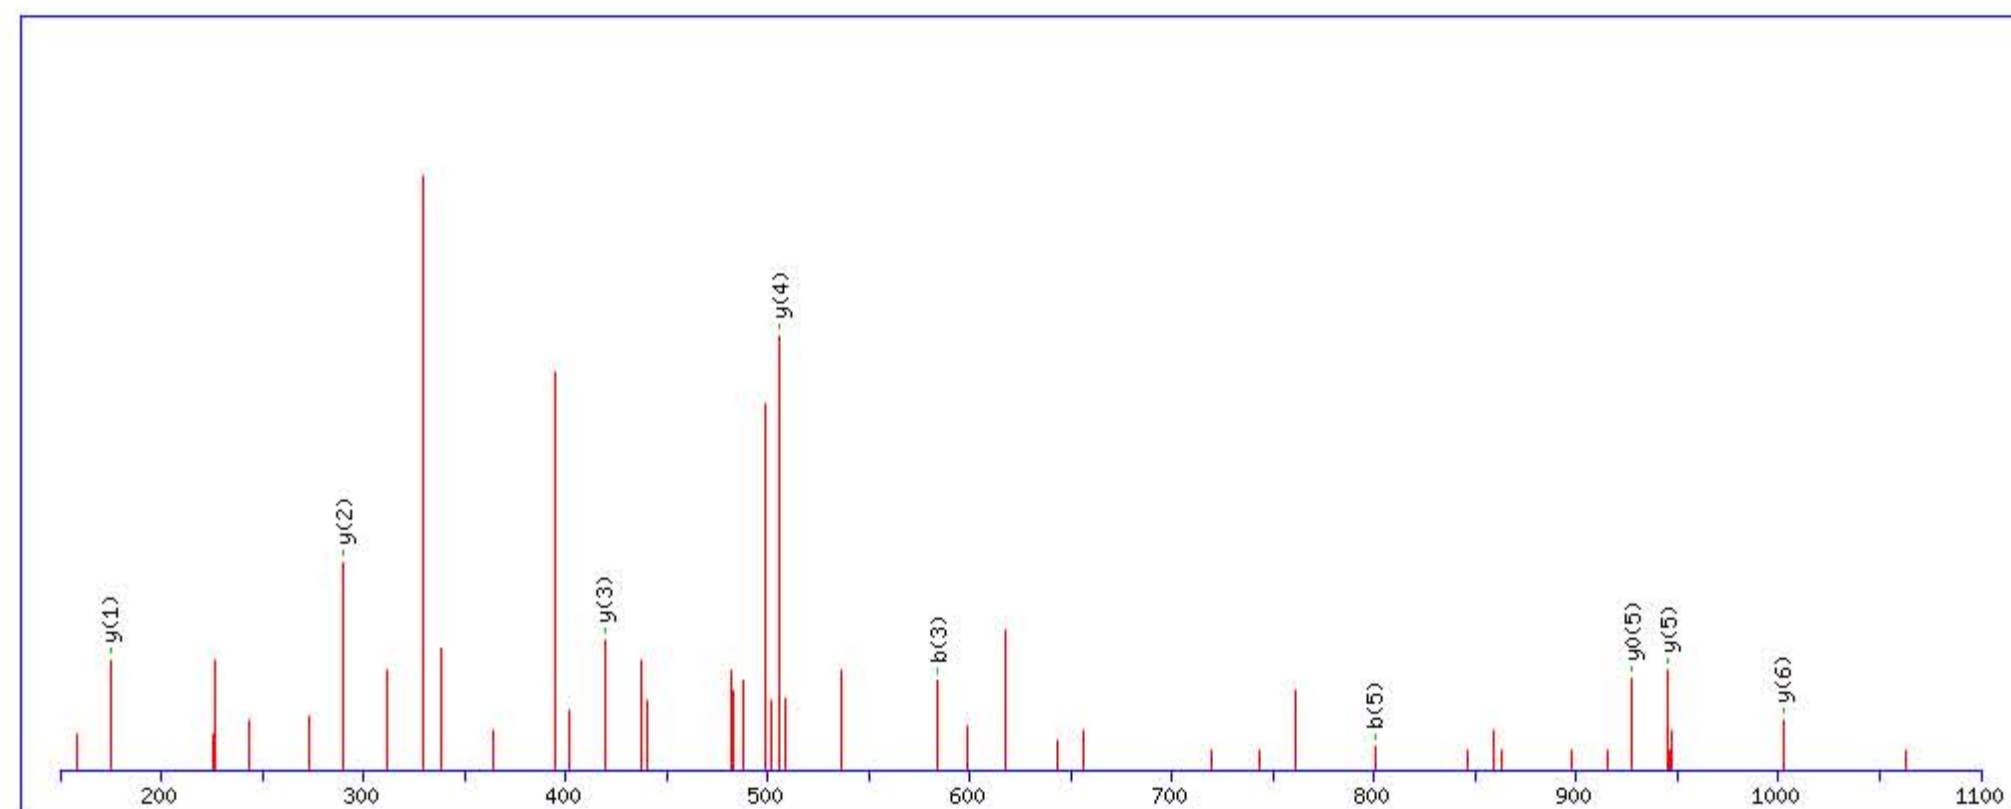

Monoisotopic mass of neutral peptide Mr(calc): 1088.492050

Fixed modifications: Carbamidomethyl (C) (apply to specified residues or termini only)

Variable modifications:

Q3 : Biotin:Thermo-21345 (Q)

Ions Score: 35 Expect: 0.0024

Matches : 9/66 fragment ions using 18 most intense peaks [\(help\)](#)

| # | b          | b <sup>++</sup> | b <sup>+</sup> | b <sup>*++</sup> | b <sup>0</sup> | b <sup>0++</sup> | Seq. | y           | y <sup>++</sup> | y <sup>+</sup> | y <sup>*++</sup> | y <sup>0</sup> | y <sup>0++</sup> | # |
|---|------------|-----------------|----------------|------------------|----------------|------------------|------|-------------|-----------------|----------------|------------------|----------------|------------------|---|
| 1 | 88.039304  | 44.523290       |                |                  | 70.028739      | 35.518008        | S    |             |                 |                |                  |                |                  | 7 |
| 2 | 145.060768 | 73.034022       |                |                  | 127.050203     | 64.028740        | G    | 1002.467306 | 501.737291      | 985.440757     | 493.224017       | 984.456741     | 492.732009       | 6 |
| 3 | 584.286094 | 292.646685      | 567.259545     | 284.133411       | 566.275529     | 283.641403       | Q    | 945.445842  | 473.226559      | 928.419293     | 464.713285       | 927.435277     | 464.221277       | 5 |
| 4 | 671.318122 | 336.162699      | 654.291573     | 327.649425       | 653.307557     | 327.157417       | S    | 506.220516  | 253.613896      | 489.193967     | 245.100621       | 488.209951     | 244.608613       | 4 |
| 5 | 800.360715 | 400.683996      | 783.334166     | 392.170721       | 782.350150     | 391.678713       | E    | 419.188488  | 210.097882      | 402.161939     | 201.584608       | 401.177923     | 201.092600       | 3 |
| 6 | 915.387658 | 458.197467      | 898.361109     | 449.684192       | 897.377093     | 449.192185       | D    | 290.145895  | 145.576585      | 273.119346     | 137.063311       | 272.135330     | 136.571303       | 2 |
| 7 |            |                 |                |                  |                |                  | R    | 175.118952  | 88.063114       | 158.092403     | 79.549840        |                |                  | 1 |

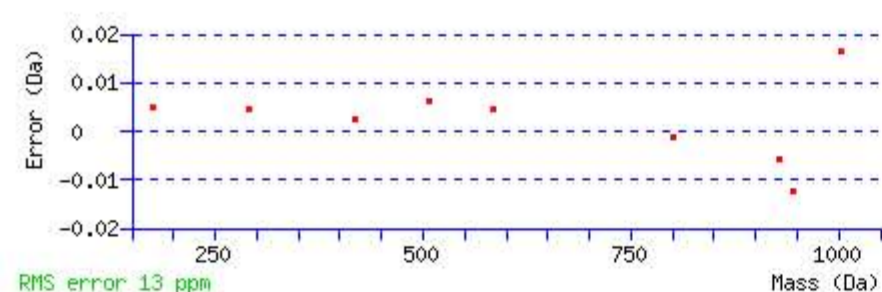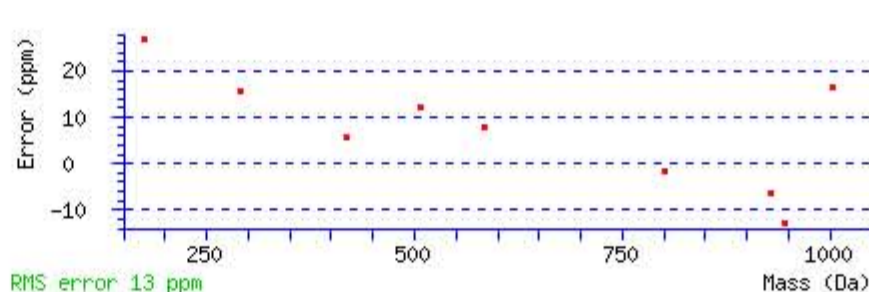

NCBI BLAST search of **SGQSEDR**

(Parameters: blastp, nr protein database, expect=20000, no filter, PAM30)

Other BLAST [web gateways](#)

All matches to this query

| Score | Mr(calc):   | Delta     | Sequence                    |
|-------|-------------|-----------|-----------------------------|
| 35.2  | 1088.492050 | 0.006338  | <a href="#">SGQSEDR</a>     |
| 9.7   | 1088.509811 | -0.011423 | <a href="#">GAEAGSVVDER</a> |
| 4.7   | 1088.509811 | -0.011423 | <a href="#">DAAPLTSSGDR</a> |
| 3.8   | 1088.492065 | 0.006323  | <a href="#">LSDPAVCGDR</a>  |
| 2.5   | 1088.499908 | -0.001520 | <a href="#">KNWGGQEDR</a>   |
| 1.6   | 1088.510681 | -0.012293 | <a href="#">ATMQGDR</a>     |

Mascot: <http://www.matrixscience.com/>

# MASCOT SEARCH RESULTS

## Peptide View

MS/MS Fragmentation of **SVQLTEK**

Found in **CO3\_HUMAN**, Complement C3 OS=Homo sapiens GN=C3 PE=1 SV=2

Match to Query 19864: 1114.614168 from(558.314360,2+) rtinseconds(1527) index(38977)

Title: Locus:1.1.1.2981.13 File:"2013-07-02 CLN FXIII 180 min 1st F 3.wiff"

Data file C:\Program Files (x86)\Matrix Science\Mascot Daemon\mgf\7 FXIII 180 min 1st\mascot\_daemon\_merge.mgf

Click mouse within plot area to zoom in by factor of two about that point

Or, Plot from  to  Da

Label all possible matches  Label matches used for scoring

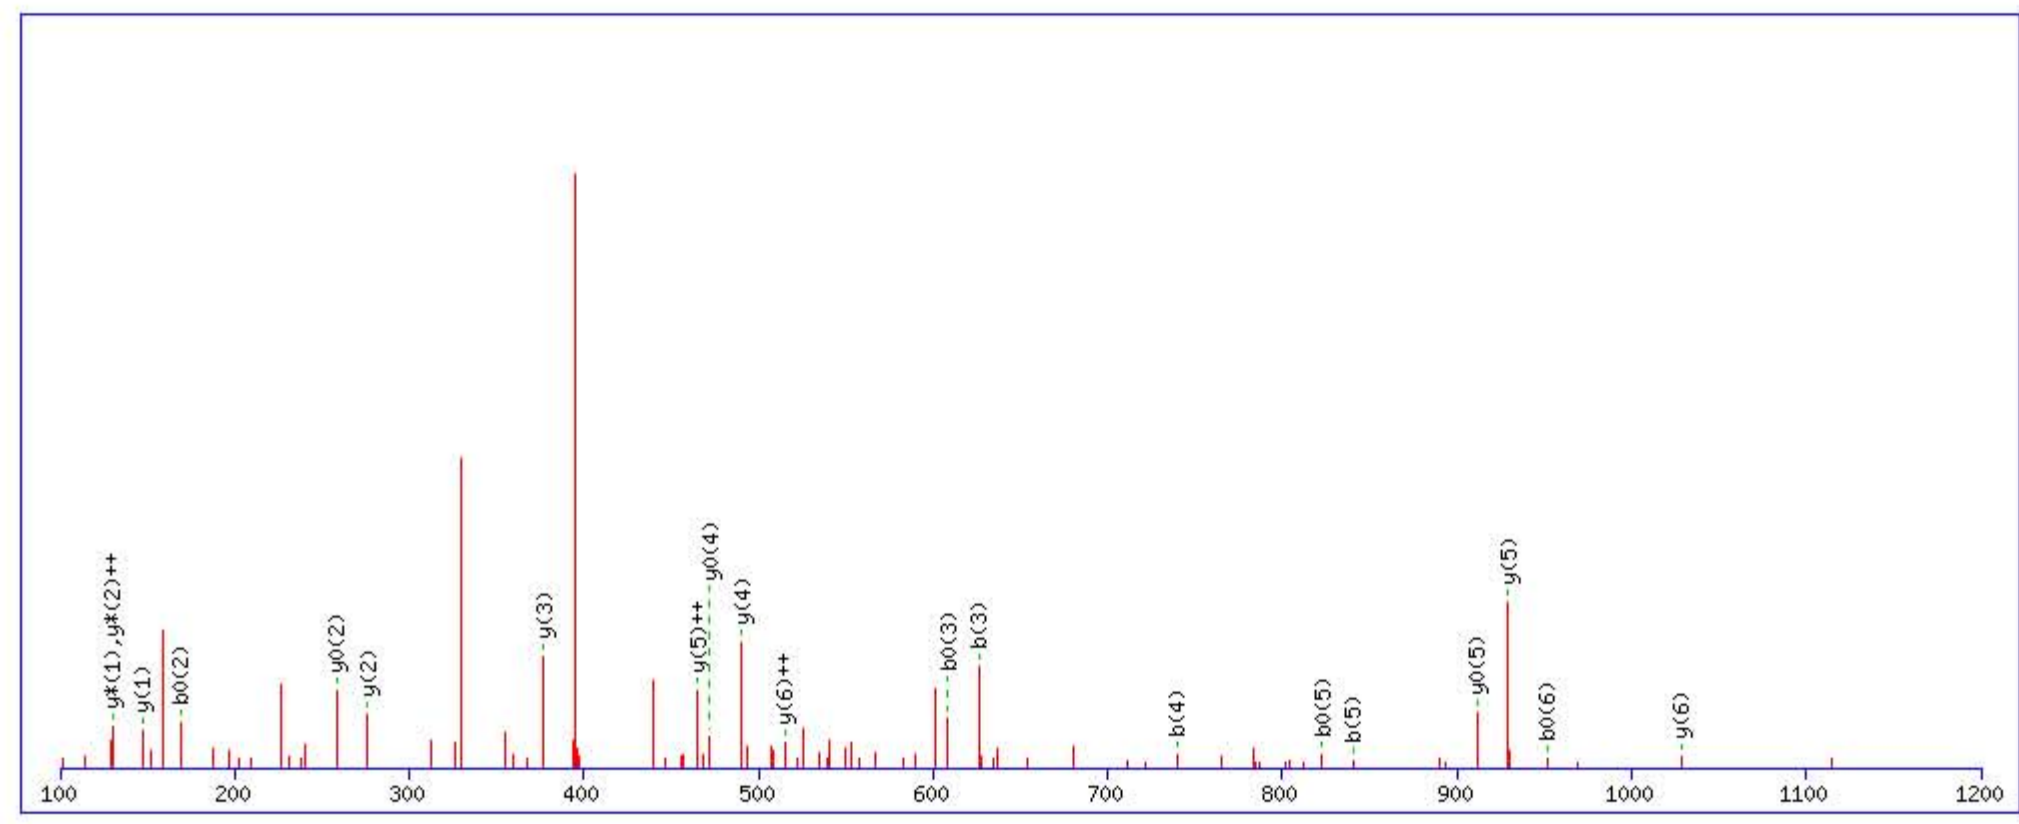

Monoisotopic mass of neutral peptide Mr(calc): 1114.605621

Fixed modifications: Carbamidomethyl (C) (apply to specified residues or termini only)

Variable modifications:

Q3 : Biotin:Thermo-21345 (Q)

Ions Score: 30 Expect: 0.024

Matches : 20/66 fragment ions using 37 most intense peaks [\(help\)](#)

| # | b          | b <sup>++</sup> | b <sup>*</sup> | b <sup>*++</sup> | b <sup>0</sup> | b <sup>0++</sup> | Seq. | y           | y <sup>++</sup> | y <sup>*</sup> | y <sup>*++</sup> | y <sup>0</sup> | y <sup>0++</sup> | # |
|---|------------|-----------------|----------------|------------------|----------------|------------------|------|-------------|-----------------|----------------|------------------|----------------|------------------|---|
| 1 | 88.039304  | 44.523290       |                |                  | 70.028739      | 35.518008        | S    |             |                 |                |                  |                |                  | 7 |
| 2 | 187.107718 | 94.057497       |                |                  | 169.097153     | 85.052214        | V    | 1028.580880 | 514.794078      | 1011.554331    | 506.280804       | 1010.570315    | 505.788796       | 6 |
| 3 | 626.333044 | 313.670160      | 609.306495     | 305.156885       | 608.322479     | 304.664877       | Q    | 929.512466  | 465.259871      | 912.485917     | 456.746597       | 911.501901     | 456.254589       | 5 |
| 4 | 739.417108 | 370.212192      | 722.390559     | 361.698917       | 721.406543     | 361.206909       | L    | 490.287140  | 245.647208      | 473.260591     | 237.133934       | 472.276575     | 236.641926       | 4 |
| 5 | 840.464787 | 420.736032      | 823.438238     | 412.222757       | 822.454222     | 411.730749       | T    | 377.203076  | 189.105176      | 360.176527     | 180.591902       | 359.192511     | 180.099894       | 3 |
| 6 | 969.507380 | 485.257328      | 952.480831     | 476.744054       | 951.496815     | 476.252046       | E    | 276.155397  | 138.581336      | 259.128848     | 130.068062       | 258.144832     | 129.576054       | 2 |
| 7 |            |                 |                |                  |                |                  | K    | 147.112804  | 74.060040       | 130.086255     | 65.546765        |                |                  | 1 |

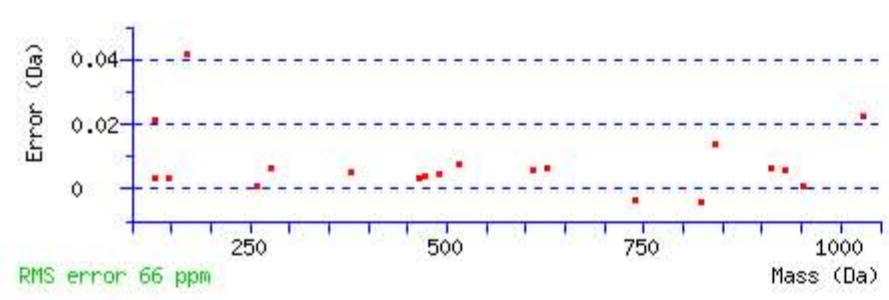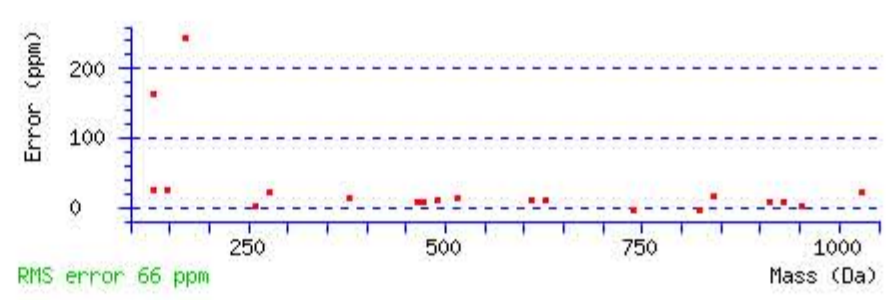

NCBI BLAST search of **SVQLTEK**

(Parameters: blastp, nr protein database, expect=20000, no filter, PAM30)

Other BLAST [web gateways](#)

All matches to this query

| Score | Mr(calc):   | Delta     | Sequence                    |
|-------|-------------|-----------|-----------------------------|
| 30.0  | 1114.605621 | 0.008547  | <a href="#">SVQLTEK</a>     |
| 13.8  | 1114.613480 | 0.000688  | <a href="#">SVFAKHGLEK</a>  |
| 11.8  | 1114.623367 | -0.009199 | <a href="#">SIQDAELLVK</a>  |
| 6.1   | 1114.623383 | -0.009215 | <a href="#">QVTEAVVIEK</a>  |
| 5.9   | 1114.609451 | 0.004717  | <a href="#">SVARLSPETR</a>  |
| 5.2   | 1114.623337 | -0.009169 | <a href="#">EKNLILEEK</a>   |
| 5.2   | 1114.623352 | -0.009184 | <a href="#">ILDAIKEADK</a>  |
| 5.0   | 1114.624695 | -0.010527 | <a href="#">EKHHNILPK</a>   |
| 4.9   | 1114.623367 | -0.009199 | <a href="#">ASVGLEVLAEK</a> |
| 3.6   | 1114.623352 | -0.009184 | <a href="#">LVEALAAATEK</a> |

# MASCOT Search Results

## Peptide View

MS/MS Fragmentation of **NEQVEIR**

Found in **CO3\_HUMAN**, Complement C3 OS=Homo sapiens GN=C3 PE=1 SV=2

Match to Query 23651: 1197.625528 from(599.820040,2+) rtinseconds(1623) index(39605)

Title: Locus:1.1.1.3014.11 File:"2013-07-02 CLN FXIII 180 min 1st F 3.wiff"

Data file C:\Program Files (x86)\Matrix Science\Mascot Daemon\mgf\7 FXIII 180 min 1st\mascot\_daemon\_merge.mgf

Click mouse within plot area to zoom in by factor of two about that point

Or, Plot from 0 to 2200 Da Full range

Label all possible matches  Label matches used for scoring

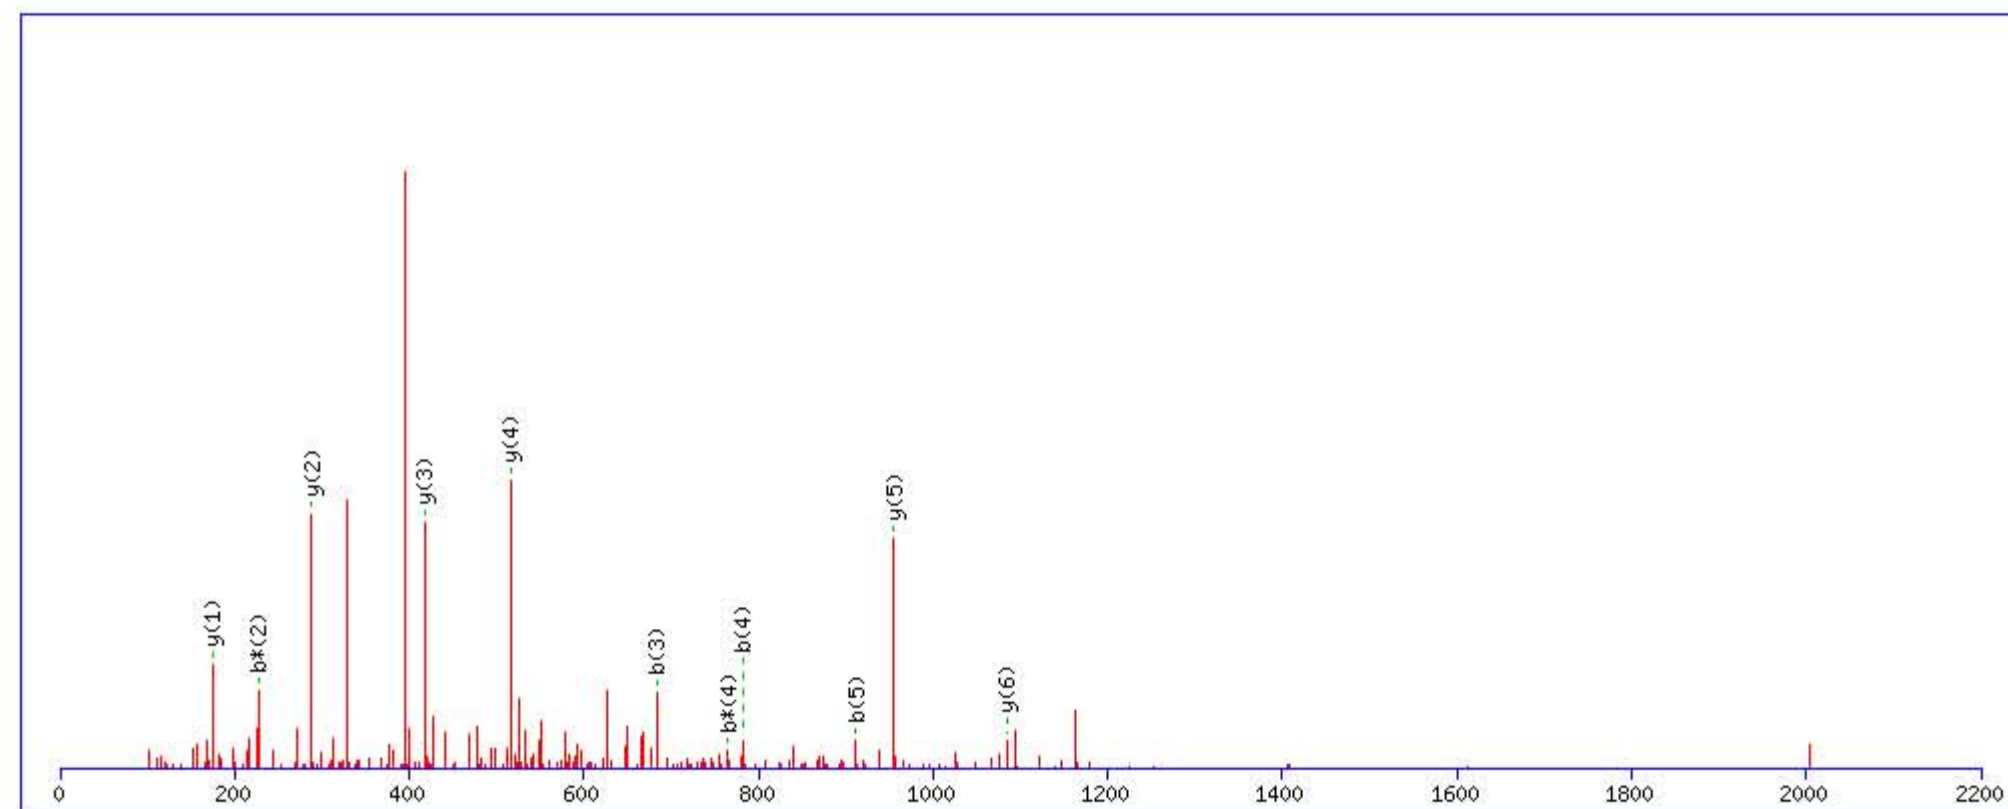

Monoisotopic mass of neutral peptide Mr(calc): 1197.617569

Fixed modifications: Carbamidomethyl (C) (apply to specified residues or termini only)

Variable modifications:

Q3 : Biotin:Thermo-21345 (Q)

Ions Score: 35 Expect: 0.0065

Matches : 11/66 fragment ions using 22 most intense peaks [\(help\)](#)

| # | b           | b <sup>++</sup> | b <sup>*</sup> | b <sup>*++</sup> | b <sup>0</sup> | b <sup>0++</sup> | Seq. | y           | y <sup>++</sup> | y <sup>*</sup> | y <sup>*++</sup> | y <sup>0</sup> | y <sup>0++</sup> | # |
|---|-------------|-----------------|----------------|------------------|----------------|------------------|------|-------------|-----------------|----------------|------------------|----------------|------------------|---|
| 1 | 115.050203  | 58.028740       | 98.023654      | 49.515465        |                |                  | N    |             |                 |                |                  |                |                  | 7 |
| 2 | 244.092796  | 122.550036      | 227.066247     | 114.036762       | 226.082231     | 113.544754       | E    | 1084.581942 | 542.794609      | 1067.555393    | 534.281335       | 1066.571377    | 533.789327       | 6 |
| 3 | 683.318122  | 342.162699      | 666.291573     | 333.649425       | 665.307557     | 333.157417       | Q    | 955.539349  | 478.273313      | 938.512800     | 469.760038       | 937.528784     | 469.268030       | 5 |
| 4 | 782.386536  | 391.696906      | 765.359987     | 383.183632       | 764.375971     | 382.691624       | V    | 516.314023  | 258.660650      | 499.287474     | 250.147375       | 498.303458     | 249.655367       | 4 |
| 5 | 911.429129  | 456.218203      | 894.402580     | 447.704928       | 893.418564     | 447.212920       | E    | 417.245609  | 209.126443      | 400.219060     | 200.613168       | 399.235044     | 200.121160       | 3 |
| 6 | 1024.513193 | 512.760235      | 1007.486644    | 504.246960       | 1006.502628    | 503.754952       | I    | 288.203016  | 144.605146      | 271.176467     | 136.091872       |                |                  | 2 |
| 7 |             |                 |                |                  |                |                  | R    | 175.118952  | 88.063114       | 158.092403     | 79.549840        |                |                  | 1 |

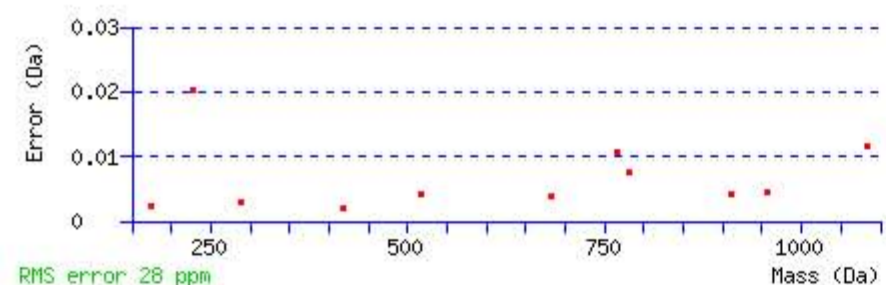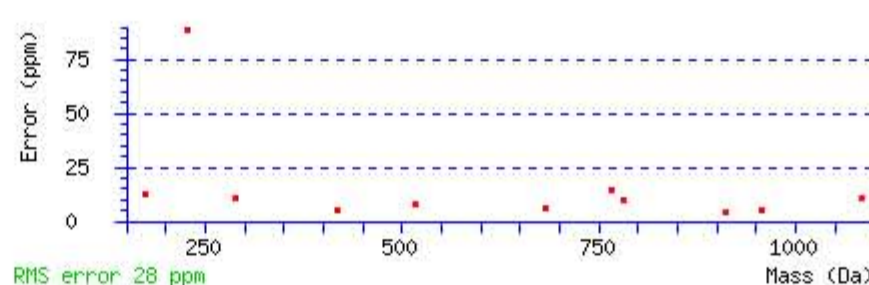

NCBI BLAST search of **NEQVEIR**

(Parameters: blastp, nr protein database, expect=20000, no filter, PAM30)

Other BLAST [web gateways](#)

All matches to this query

| Score | Mr(calc):   | Delta     | Sequence                   |
|-------|-------------|-----------|----------------------------|
| 35.0  | 1197.617569 | 0.007959  | <a href="#">NEQVEIR</a>    |
| 14.8  | 1197.636215 | -0.010687 | <a href="#">GVSQMPLR</a>   |
| 12.2  | 1197.617569 | 0.007959  | <a href="#">QEVNELR</a>    |
| 10.7  | 1197.617569 | 0.007959  | <a href="#">NQEDLLR</a>    |
| 8.3   | 1197.617569 | 0.007959  | <a href="#">LQDNELR</a>    |
| 6.9   | 1197.628815 | -0.003287 | <a href="#">QLSMQVHALR</a> |
| 6.4   | 1197.640045 | -0.014517 | <a href="#">QCQLQRPLR</a>  |
| 6.3   | 1197.621399 | 0.004129  | <a href="#">EKHSTQAKNR</a> |
| 4.4   | 1197.617584 | 0.007944  | <a href="#">QDLQDLR</a>    |
| 4.1   | 1197.640030 | -0.014502 | <a href="#">NKVMEHRLR</a>  |

Mascot: <http://www.matrixscience.com/>

# MASCOT Search Results

## Peptide View

MS/MS Fragmentation of **TGLQEVEVK**

Found in **CO3\_HUMAN**, Complement C3 OS=Homo sapiens GN=C3 PE=1 SV=2

Match to Query 27220: 1312.718308 from(657.366430,2+) rtinseconds(1800) index(40784)

Title: Locus:1.1.1.3076.20 File:"2013-07-02 CLN FXIII 180 min 1st F 3.wiff"

Data file C:\Program Files (x86)\Matrix Science\Mascot Daemon\mgf\7 FXIII 180 min 1st\mascot\_daemon\_merge.mgf

Click mouse within plot area to zoom in by factor of two about that point

Or, Plot from  to  Da

Label all possible matches  Label matches used for scoring

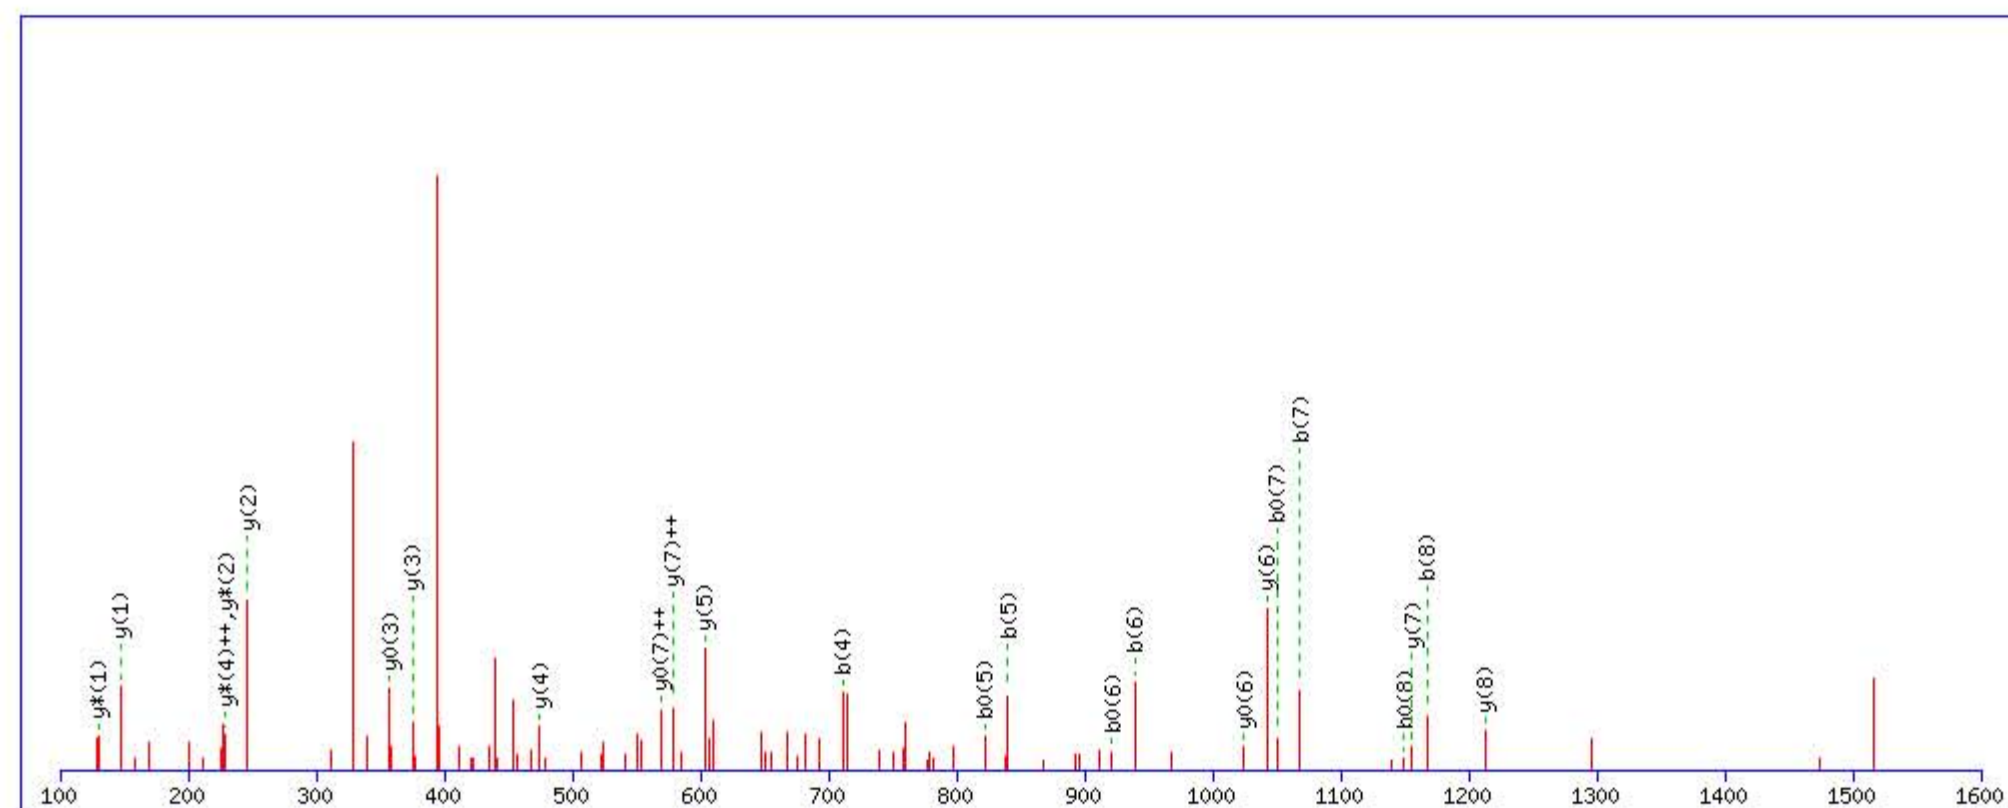

Monoisotopic mass of neutral peptide Mr(calc): 1312.706070

Fixed modifications: Carbamidomethyl (C) (apply to specified residues or termini only)

Variable modifications:

Q4 : Biotin:Thermo-21345 (Q)

Ions Score: 48 Expect: 0.00029

Matches : 24/86 fragment ions using 43 most intense peaks [\(help\)](#)

| # | b           | b <sup>++</sup> | b <sup>*</sup> | b <sup>*++</sup> | b <sup>0</sup> | b <sup>0++</sup> | Seq. | y           | y <sup>++</sup> | y <sup>*</sup> | y <sup>*++</sup> | y <sup>0</sup> | y <sup>0++</sup> | # |
|---|-------------|-----------------|----------------|------------------|----------------|------------------|------|-------------|-----------------|----------------|------------------|----------------|------------------|---|
| 1 | 102.054955  | 51.531116       |                |                  | 84.044390      | 42.525833        | T    |             |                 |                |                  |                |                  | 9 |
| 2 | 159.076419  | 80.041847       |                |                  | 141.065854     | 71.036565        | G    | 1212.665672 | 606.836474      | 1195.639123    | 598.323200       | 1194.655107    | 597.831192       | 8 |
| 3 | 272.160483  | 136.583879      |                |                  | 254.149918     | 127.578597       | L    | 1155.644208 | 578.325742      | 1138.617659    | 569.812468       | 1137.633643    | 569.320460       | 7 |
| 4 | 711.385809  | 356.196543      | 694.359260     | 347.683268       | 693.375244     | 347.191260       | Q    | 1042.560144 | 521.783710      | 1025.533595    | 513.270436       | 1024.549579    | 512.778428       | 6 |
| 5 | 840.428402  | 420.717839      | 823.401853     | 412.204565       | 822.417837     | 411.712557       | E    | 603.334818  | 302.171047      | 586.308269     | 293.657773       | 585.324253     | 293.165765       | 5 |
| 6 | 939.496816  | 470.252046      | 922.470267     | 461.738772       | 921.486251     | 461.246764       | V    | 474.292225  | 237.649751      | 457.265676     | 229.136476       | 456.281660     | 228.644468       | 4 |
| 7 | 1068.539409 | 534.773343      | 1051.512860    | 526.260068       | 1050.528844    | 525.768060       | E    | 375.223811  | 188.115544      | 358.197262     | 179.602269       | 357.213246     | 179.110261       | 3 |
| 8 | 1167.607823 | 584.307550      | 1150.581274    | 575.794275       | 1149.597258    | 575.302267       | V    | 246.181218  | 123.594247      | 229.154669     | 115.080973       |                |                  | 2 |
| 9 |             |                 |                |                  |                |                  | K    | 147.112804  | 74.060040       | 130.086255     | 65.546765        |                |                  | 1 |

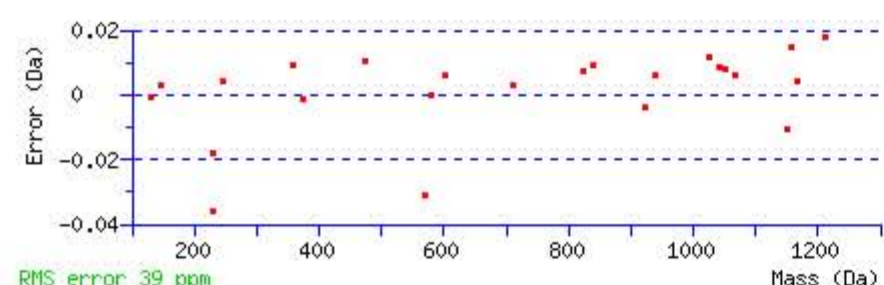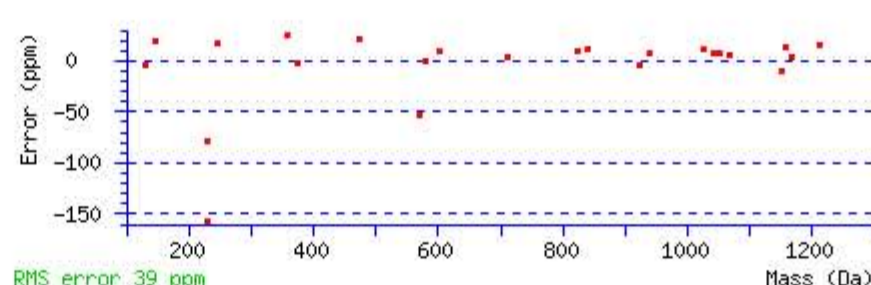

NCBI BLAST search of **TGLQEVEVK**

(Parameters: blastp, nr protein database, expect=20000, no filter, PAM30)

Other BLAST [web gateways](#)

All matches to this query

| Score | Mr(calc):   | Delta     | Sequence                       |
|-------|-------------|-----------|--------------------------------|
| 47.6  | 1312.706070 | 0.012238  | <a href="#">TGLQEVEVK</a>      |
| 9.3   | 1312.713913 | 0.004395  | <a href="#">KVFEKYTTAAR</a>    |
| 8.4   | 1312.699524 | 0.018784  | <a href="#">TIMHLMINNVK</a>    |
| 6.8   | 1312.728546 | -0.010238 | <a href="#">QGSRGTAIVK</a>     |
| 6.5   | 1312.721130 | -0.002822 | <a href="#">QVEVLTNQAR</a>     |
| 5.7   | 1312.735077 | -0.016769 | <a href="#">TSQGGAGVSPLLVK</a> |
| 5.2   | 1312.732346 | -0.014038 | <a href="#">EARQRVQSLAR</a>    |
| 4.2   | 1312.728516 | -0.010208 | <a href="#">KPQRGMPKVEK</a>    |
| 3.7   | 1312.702682 | 0.015626  | <a href="#">IQYSLGKYDVK</a>    |
| 3.1   | 1312.735046 | -0.016738 | <a href="#">DLKLDNVLLDR</a>    |

Mascot: <http://www.matrixscience.com/>



# MASCOT Search Results

## Peptide View

MS/MS Fragmentation of **VLLDGVQNPR**

Found in **CO3\_HUMAN**, Complement C3 OS=Homo sapiens GN=C3 PE=1 SV=2

Match to Query 32070: 1420.804348 from(711.409450,2+) rtinseconds(1974) index(42065)

Title: Locus:1.1.1.3136.20 File:"2013-07-02 CLN FXIII 180 min 1st F 3.wiff"

Data file C:\Program Files (x86)\Matrix Science\Mascot Daemon\mgf\7 FXIII 180 min 1st\mascot\_daemon\_merge.mgf

Click mouse within plot area to zoom in by factor of two about that point

Or, Plot from  to  Da

Label all possible matches  Label matches used for scoring

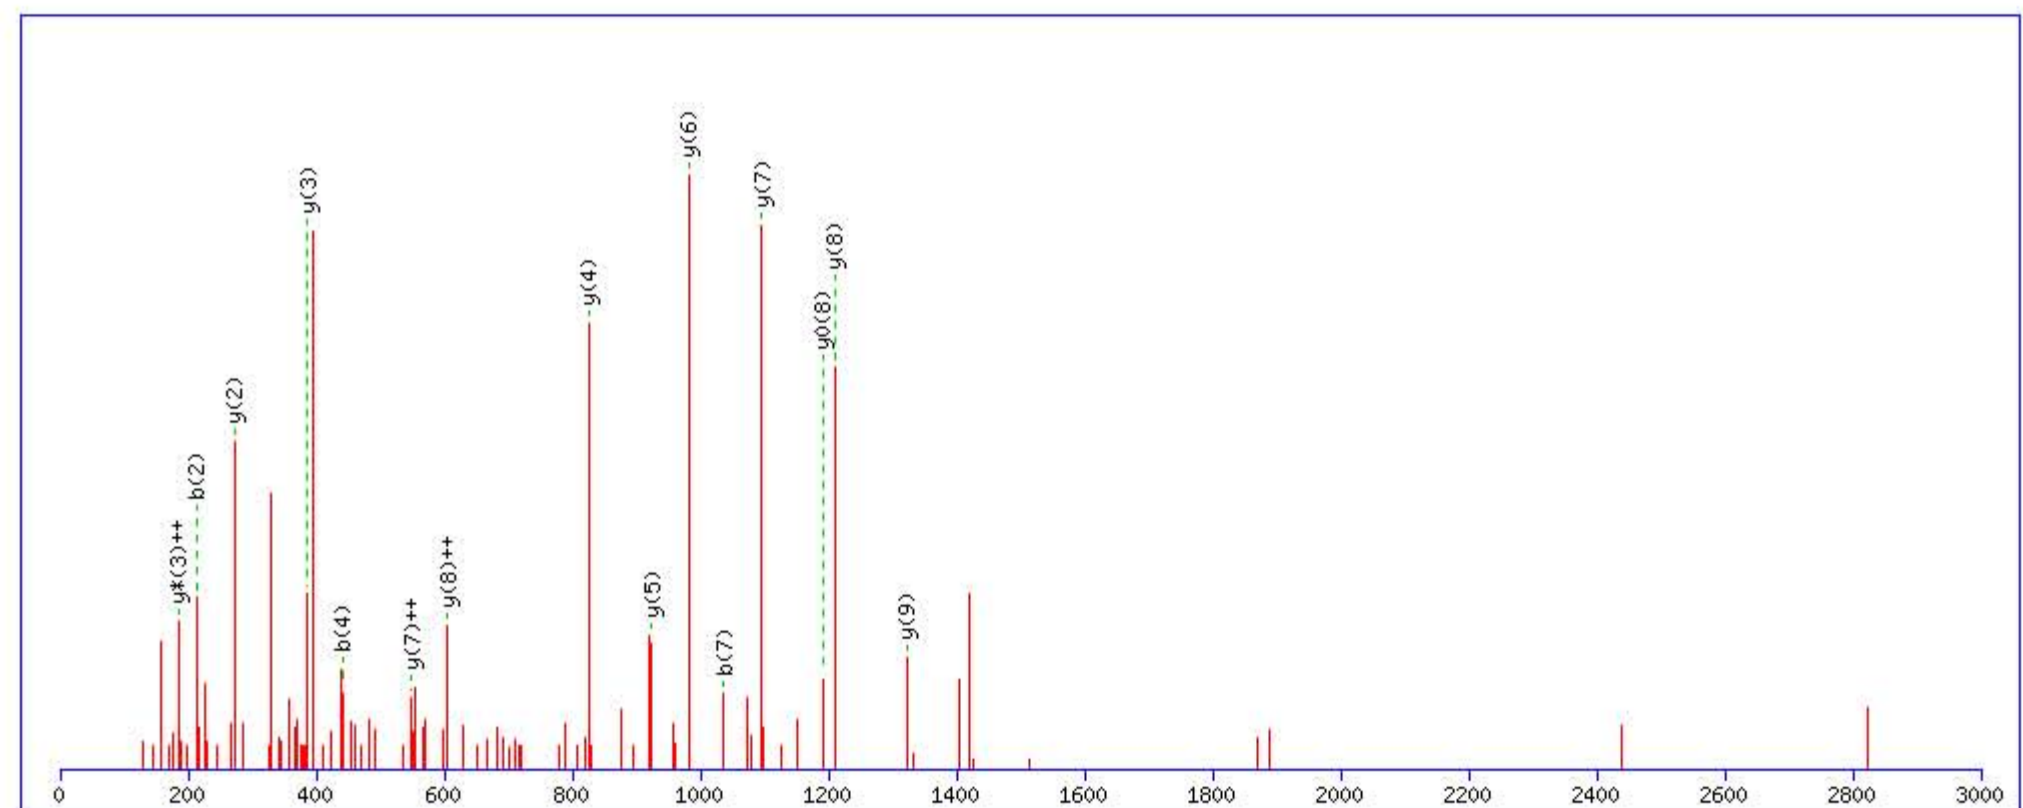

Monoisotopic mass of neutral peptide Mr(calc): 1420.786057

Fixed modifications: Carbamidomethyl (C) (apply to specified residues or termini only)

Variable modifications:

Q7 : Biotin:Thermo-21345 (Q)

Ions Score: 43 Expect: 9.7e-005

Matches : 15/78 fragment ions using 37 most intense peaks [\(help\)](#)

| #  | b                  | b <sup>++</sup> | b <sup>*</sup> | b <sup>*++</sup> | b <sup>0</sup> | b <sup>0++</sup> | Seq. | y                  | y <sup>++</sup>   | y <sup>*</sup> | y <sup>*++</sup>  | y <sup>0</sup>     | y <sup>0++</sup> | #  |
|----|--------------------|-----------------|----------------|------------------|----------------|------------------|------|--------------------|-------------------|----------------|-------------------|--------------------|------------------|----|
| 1  | 100.075690         | 50.541483       |                |                  |                |                  | V    |                    |                   |                |                   |                    |                  | 10 |
| 2  | <b>213.159754</b>  | 107.083515      |                |                  |                |                  | L    | <b>1322.724918</b> | 661.866097        | 1305.698369    | 653.352823        | 1304.714353        | 652.860814       | 9  |
| 3  | 326.243818         | 163.625547      |                |                  |                |                  | L    | <b>1209.640854</b> | <b>605.324065</b> | 1192.614305    | 596.810791        | <b>1191.630289</b> | 596.318783       | 8  |
| 4  | <b>441.270761</b>  | 221.139018      |                |                  | 423.260196     | 212.133736       | D    | <b>1096.556790</b> | <b>548.782033</b> | 1079.530241    | 540.268758        | 1078.546225        | 539.776750       | 7  |
| 5  | 498.292225         | 249.649750      |                |                  | 480.281660     | 240.644468       | G    | <b>981.529847</b>  | 491.268562        | 964.503298     | 482.755287        |                    |                  | 6  |
| 6  | 597.360639         | 299.183958      |                |                  | 579.350074     | 290.178675       | V    | <b>924.508383</b>  | 462.757830        | 907.481834     | 454.244555        |                    |                  | 5  |
| 7  | <b>1036.585965</b> | 518.796621      | 1019.559416    | 510.283346       | 1018.575400    | 509.791338       | Q    | <b>825.439969</b>  | 413.223623        | 808.413420     | 404.710348        |                    |                  | 4  |
| 8  | 1150.628892        | 575.818084      | 1133.602343    | 567.304810       | 1132.618327    | 566.812801       | N    | <b>386.214643</b>  | 193.610959        | 369.188094     | <b>185.097685</b> |                    |                  | 3  |
| 9  | 1247.681656        | 624.344466      | 1230.655107    | 615.831192       | 1229.671091    | 615.339183       | P    | <b>272.171716</b>  | 136.589496        | 255.145167     | 128.076221        |                    |                  | 2  |
| 10 |                    |                 |                |                  |                |                  | R    | 175.118952         | 88.063114         | 158.092403     | 79.549839         |                    |                  | 1  |

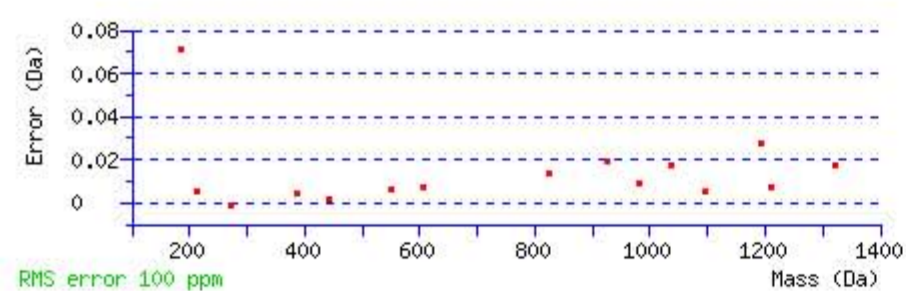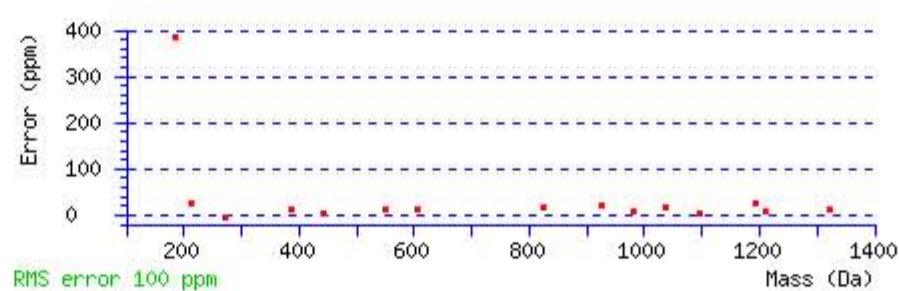

NCBI BLAST search of **VLLDGVQNPR**

(Parameters: blastp, nr protein database, expect=20000, no filter, PAM30)

Other BLAST [web gateways](#)

All matches to this query

| Score | Mr(calc):   | Delta    | Sequence                   |
|-------|-------------|----------|----------------------------|
| 43.0  | 1420.786057 | 0.018291 | <a href="#">VLLDGVQNPR</a> |
| 0.2   | 1420.786041 | 0.018307 | <a href="#">DPLSPAVRQK</a> |

# MASCOT SCIENCE Mascot Search Results

## Peptide View

MS/MS Fragmentation of **HQQTVTIPPK**

Found in **CO3\_HUMAN**, Complement C3 OS=Homo sapiens GN=C3 PE=1 SV=2

Match to Query 33668: 1458.808572 from(487.276800,3+) rtinseconds(1524) index(38949)

Title: Locus:1.1.1.2980.10 File:"2013-07-02 CLN FXIII 180 min 1st F 3.wiff"

Data file C:\Program Files (x86)\Matrix Science\Mascot Daemon\mgf\7 FXIII 180 min 1st\mascot\_daemon\_merge.mgf

Click mouse within plot area to zoom in by factor of two about that point

Or, Plot from  to  Da

Label all possible matches  Label matches used for scoring

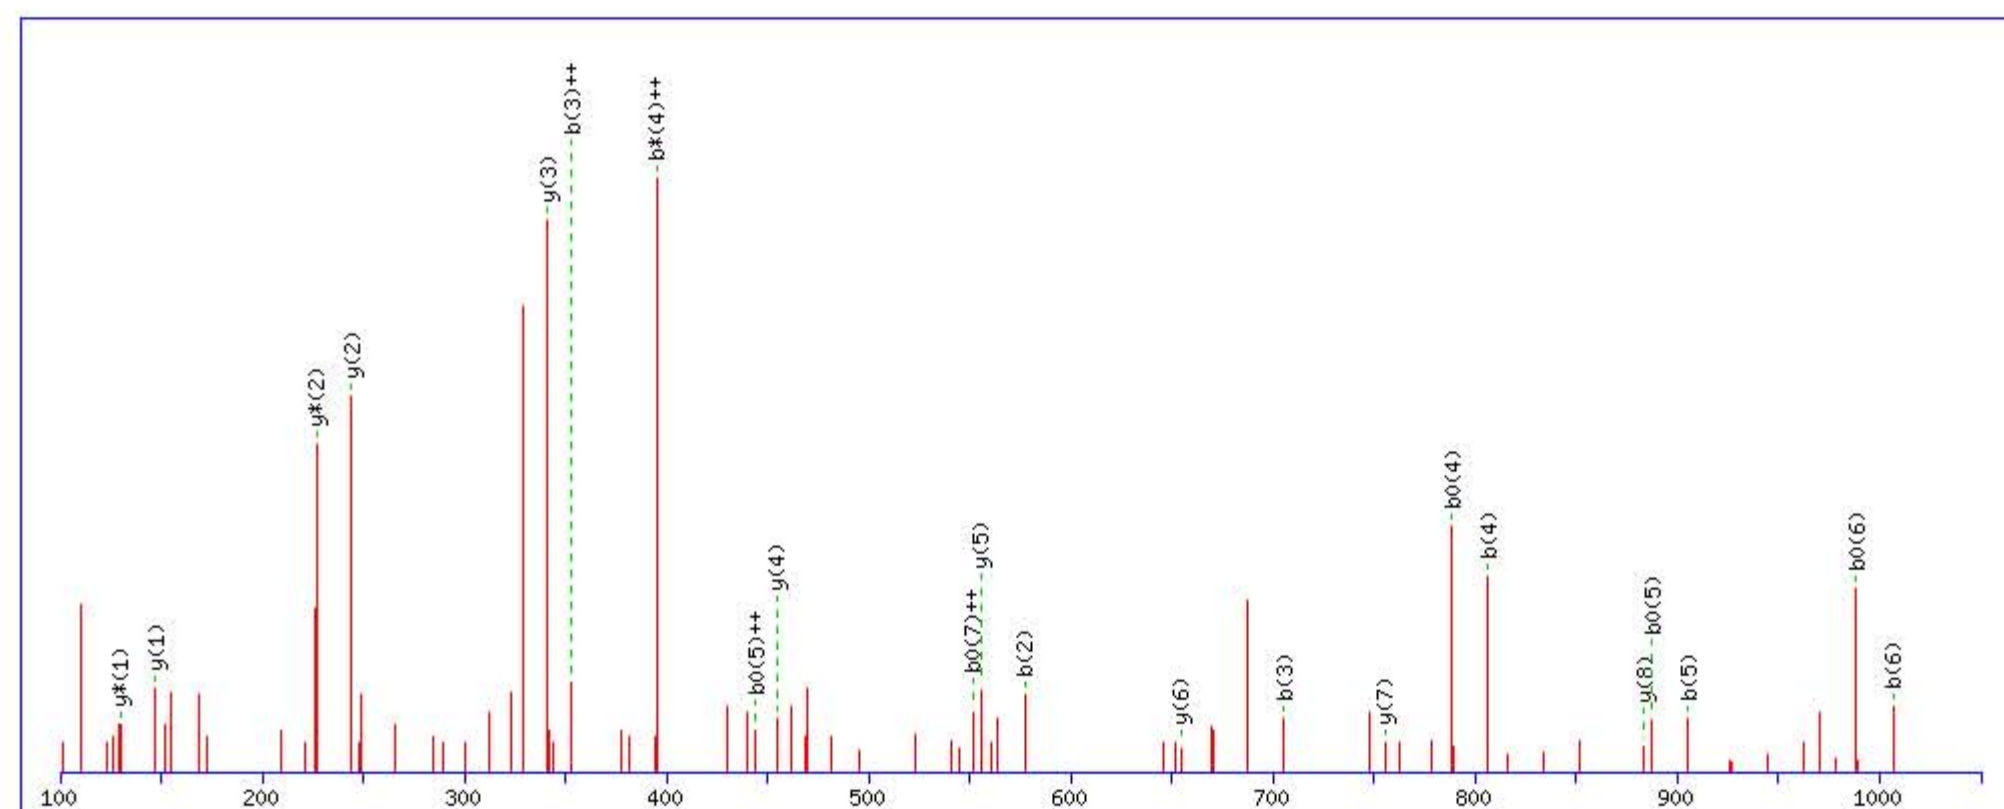

Monoisotopic mass of neutral peptide Mr(calc): 1458.801712

Fixed modifications: Carbamidomethyl (C) (apply to specified residues or termini only)

Variable modifications:

Q2 : Biotin:Thermo-21345 (Q)

Ions Score: 32 Expect: 0.0069

Matches : 22/92 fragment ions using 55 most intense peaks [\(help\)](#)

| #  | b                  | b <sup>++</sup>   | b <sup>*</sup> | b <sup>*++</sup>  | b <sup>0</sup>    | b <sup>0++</sup>  | Seq. | y                 | y <sup>++</sup> | y <sup>*</sup>    | y <sup>*++</sup> | y <sup>0</sup> | y <sup>0++</sup> | #  |
|----|--------------------|-------------------|----------------|-------------------|-------------------|-------------------|------|-------------------|-----------------|-------------------|------------------|----------------|------------------|----|
| 1  | 138.066188         | 69.536732         |                |                   |                   |                   | H    |                   |                 |                   |                  |                |                  | 10 |
| 2  | <b>577.291514</b>  | 289.149395        | 560.264965     | 280.636121        |                   |                   | Q    | 1322.750072       | 661.878674      | 1305.723523       | 653.365400       | 1304.739507    | 652.873392       | 9  |
| 3  | <b>705.350092</b>  | <b>353.178684</b> | 688.323543     | 344.665410        |                   |                   | Q    | <b>883.524746</b> | 442.266011      | 866.498197        | 433.752737       | 865.514181     | 433.260729       | 8  |
| 4  | <b>806.397771</b>  | 403.702524        | 789.371222     | <b>395.189249</b> | <b>788.387206</b> | 394.697241        | T    | <b>755.466168</b> | 378.236722      | 738.439619        | 369.723448       | 737.455603     | 369.231440       | 7  |
| 5  | <b>905.466185</b>  | 453.236731        | 888.439636     | 444.723456        | <b>887.455620</b> | <b>444.231448</b> | V    | <b>654.418489</b> | 327.712883      | 637.391940        | 319.199608       | 636.407924     | 318.707600       | 6  |
| 6  | <b>1006.513864</b> | 503.760570        | 989.487315     | 495.247296        | <b>988.503299</b> | 494.755288        | T    | <b>555.350075</b> | 278.178676      | 538.323526        | 269.665401       | 537.339510     | 269.173393       | 5  |
| 7  | 1119.597928        | 560.302602        | 1102.571379    | 551.789328        | 1101.587363       | <b>551.297319</b> | I    | <b>454.302396</b> | 227.654836      | 437.275847        | 219.141561       |                |                  | 4  |
| 8  | 1216.650692        | 608.828984        | 1199.624143    | 600.315710        | 1198.640127       | 599.823701        | P    | <b>341.218332</b> | 171.112804      | 324.191783        | 162.599530       |                |                  | 3  |
| 9  | 1313.703456        | 657.355366        | 1296.676907    | 648.842092        | 1295.692891       | 648.350083        | P    | <b>244.165568</b> | 122.586422      | <b>227.139019</b> | 114.073148       |                |                  | 2  |
| 10 |                    |                   |                |                   |                   |                   | K    | <b>147.112804</b> | 74.060040       | <b>130.086255</b> | 65.546765        |                |                  | 1  |

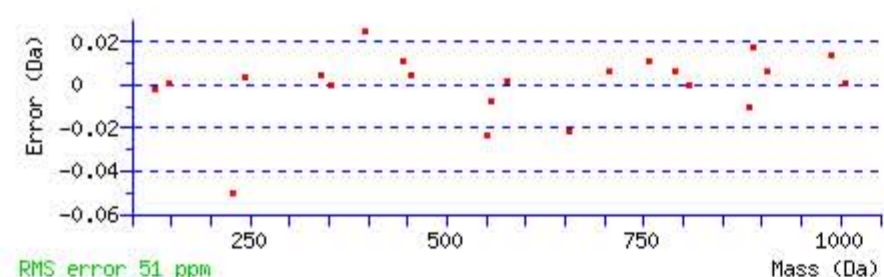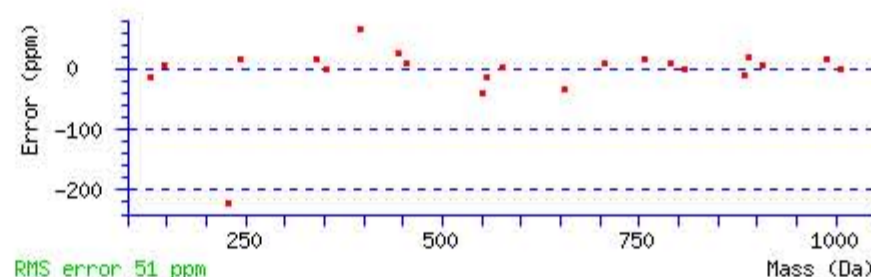

NCBI BLAST search of **HQQTVTIPPK**

(Parameters: blastp, nr protein database, expect=20000, no filter, PAM30)

Other BLAST [web gateways](#)

All matches to this query

| Score | Mr(calc):   | Delta     | Sequence                         |
|-------|-------------|-----------|----------------------------------|
| 32.4  | 1458.801712 | 0.006860  | <a href="#">HQQTVTIPPK</a>       |
| 25.1  | 1458.801712 | 0.006860  | <a href="#">HQQTVTIPPK</a>       |
| 8.8   | 1458.819473 | -0.010901 | <a href="#">GNVGIGGSAVPPPIIK</a> |
| 0.1   | 1458.805542 | 0.003030  | <a href="#">VPTSLRTSTWR</a>      |

# MASCOT SEARCH RESULTS

## Peptide View

MS/MS Fragmentation of **HQQTVTIPPK**

Found in **CO3\_HUMAN**, Complement C3 OS=Homo sapiens GN=C3 PE=1 SV=2

Match to Query 33673: 1458.809472 from(487.277100,3+) rtinseconds(1536) index(39036)

Title: Locus:1.1.1.2984.11 File:"2013-07-02 CLN FXIII 180 min 1st F 3.wiff"

Data file C:\Program Files (x86)\Matrix Science\Mascot Daemon\mgf7 FXIII 180 min 1st\mascot\_daemon\_merge.mgf

Click mouse within plot area to zoom in by factor of two about that point

Or, Plot from  to  Da

Label all possible matches  Label matches used for scoring

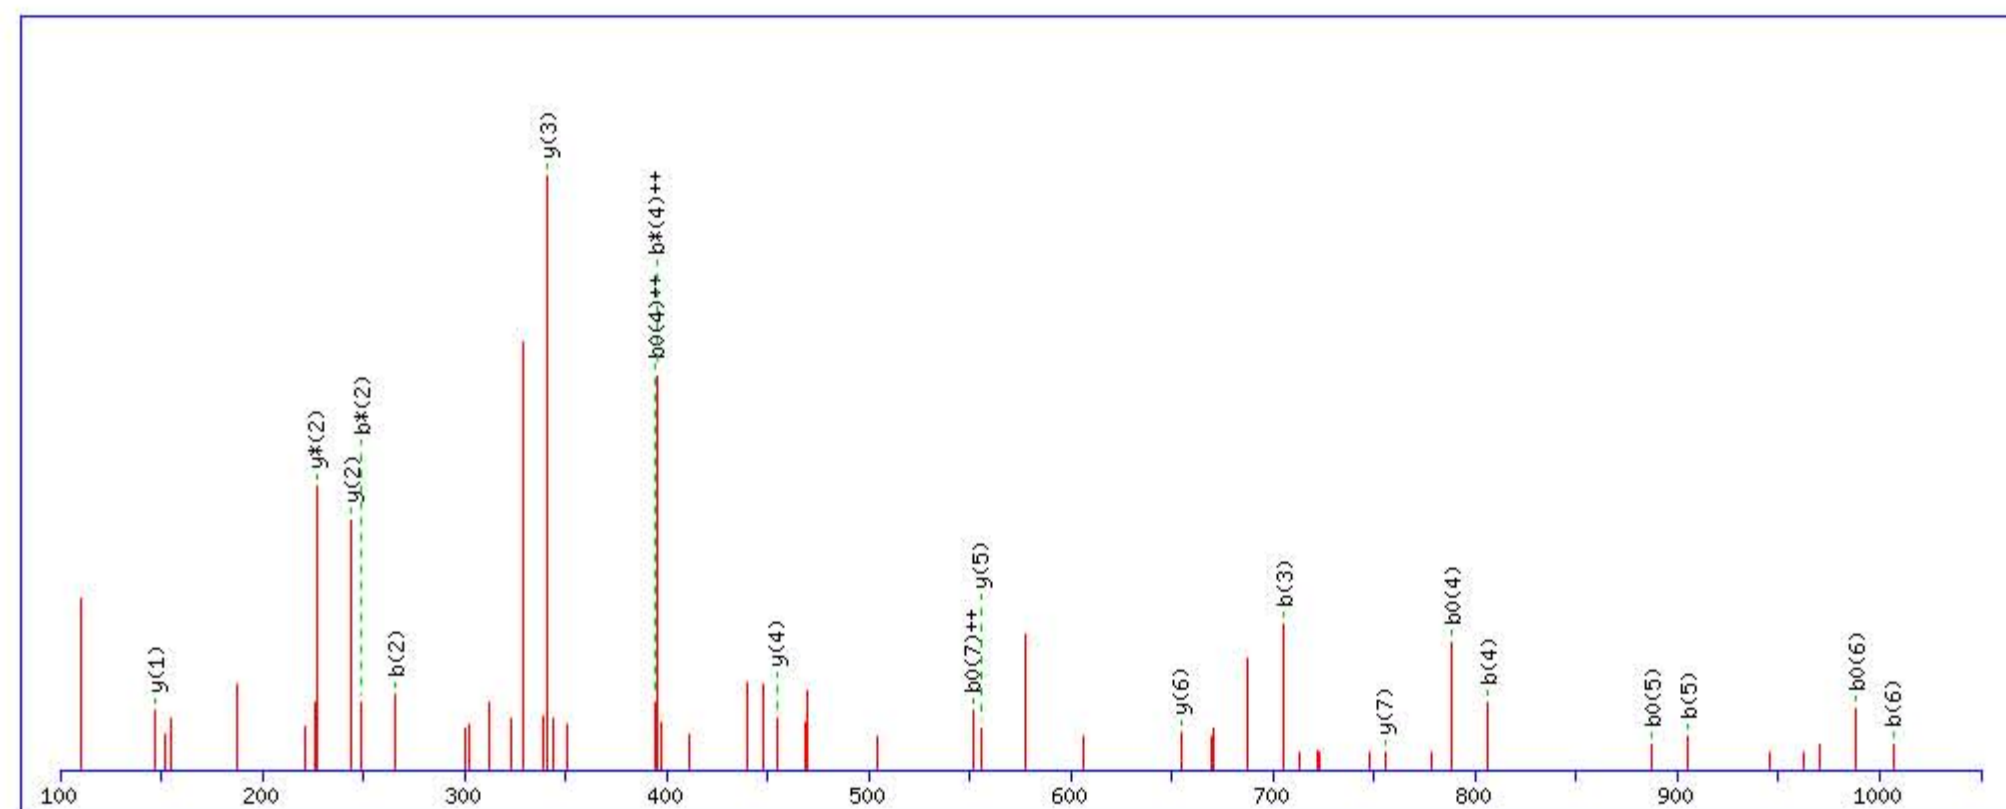

Monoisotopic mass of neutral peptide Mr(calc): 1458.801712

Fixed modifications: Carbamidomethyl (C) (apply to specified residues or termini only)

Variable modifications:

Q3 : Biotin:Thermo-21345 (Q)

Ions Score: 33 Expect: 0.0048

Matches : 20/92 fragment ions using 41 most intense peaks [\(help\)](#)

| #  | b                  | b <sup>++</sup> | b <sup>+</sup>    | b <sup>+++</sup>  | b <sup>0</sup>    | b <sup>0++</sup>  | Seq. | y                 | y <sup>++</sup> | y <sup>+</sup>    | y <sup>+++</sup> | y <sup>0</sup> | y <sup>0++</sup> | #  |
|----|--------------------|-----------------|-------------------|-------------------|-------------------|-------------------|------|-------------------|-----------------|-------------------|------------------|----------------|------------------|----|
| 1  | 138.066188         | 69.536732       |                   |                   |                   |                   | H    |                   |                 |                   |                  |                |                  | 10 |
| 2  | <b>266.124766</b>  | 133.566021      | <b>249.098217</b> | 125.052746        |                   |                   | Q    | 1322.750072       | 661.878674      | 1305.723523       | 653.365400       | 1304.739507    | 652.873392       | 9  |
| 3  | <b>705.350092</b>  | 353.178684      | 688.323543        | 344.665410        |                   |                   | Q    | 1194.691494       | 597.849385      | 1177.664945       | 589.336111       | 1176.680929    | 588.844102       | 8  |
| 4  | <b>806.397771</b>  | 403.702524      | 789.371222        | <b>395.189249</b> | <b>788.387206</b> | <b>394.697241</b> | T    | <b>755.466168</b> | 378.236722      | 738.439619        | 369.723448       | 737.455603     | 369.231440       | 7  |
| 5  | <b>905.466185</b>  | 453.236731      | 888.439636        | 444.723456        | <b>887.455620</b> | 444.231448        | V    | <b>654.418489</b> | 327.712883      | 637.391940        | 319.199608       | 636.407924     | 318.707600       | 6  |
| 6  | <b>1006.513864</b> | 503.760570      | 989.487315        | 495.247296        | <b>988.503299</b> | 494.755288        | T    | <b>555.350075</b> | 278.178676      | 538.323526        | 269.665401       | 537.339510     | 269.173393       | 5  |
| 7  | 1119.597928        | 560.302602      | 1102.571379       | 551.789328        | 1101.587363       | <b>551.297319</b> | I    | <b>454.302396</b> | 227.654836      | 437.275847        | 219.141561       |                |                  | 4  |
| 8  | 1216.650692        | 608.828984      | 1199.624143       | 600.315710        | 1198.640127       | 599.823701        | P    | <b>341.218332</b> | 171.112804      | 324.191783        | 162.599530       |                |                  | 3  |
| 9  | 1313.703456        | 657.355366      | 1296.676907       | 648.842092        | 1295.692891       | 648.350083        | P    | <b>244.165568</b> | 122.586422      | <b>227.139019</b> | 114.073148       |                |                  | 2  |
| 10 |                    |                 |                   |                   |                   |                   | K    | <b>147.112804</b> | 74.060040       | 130.086255        | 65.546765        |                |                  | 1  |

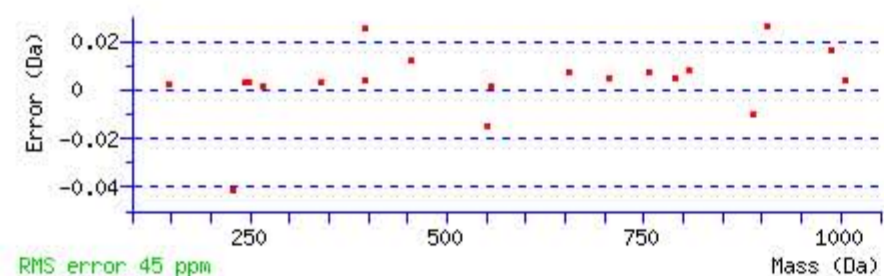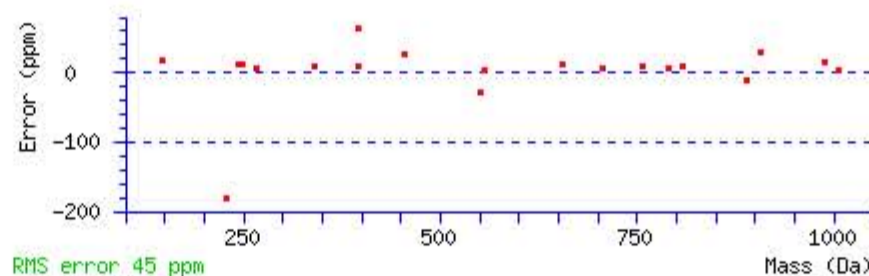

NCBI BLAST search of **HQQTVTIPPK**

(Parameters: blastp, nr protein database, expect=20000, no filter, PAM30)

Other BLAST [web gateways](#)

## All matches to this query

| Score | Mr(calc):   | Delta     | Sequence                         |
|-------|-------------|-----------|----------------------------------|
| 33.3  | 1458.801712 | 0.007760  | <a href="#">HQQTVTIPPK</a>       |
| 33.3  | 1458.801712 | 0.007760  | <a href="#">HQQTVTIPPK</a>       |
| 8.6   | 1458.819473 | -0.010001 | <a href="#">GNVGIGGSAVPPPIIK</a> |

Mascot: <http://www.matrixscience.com/>

# MASCOT Search Results

## Peptide View

MS/MS Fragmentation of **QELSEAEQATR**

Found in **CO3\_HUMAN**, Complement C3 OS=Homo sapiens GN=C3 PE=1 SV=2

Match to Query 37144: 1571.777308 from(786.895930,2+) rtinseconds(1539) index(39065)

Title: Locus:1.1.1.2985.15 File:"2013-07-02 CLN FXIII 180 min 1st F 3.wiff"

Data file C:\Program Files (x86)\Matrix Science\Mascot Daemon\mgf\7 FXIII 180 min 1st\mascot\_daemon\_merge.mgf

Click mouse within plot area to zoom in by factor of two about that point

Or, Plot from  to  Da

Label all possible matches  Label matches used for scoring

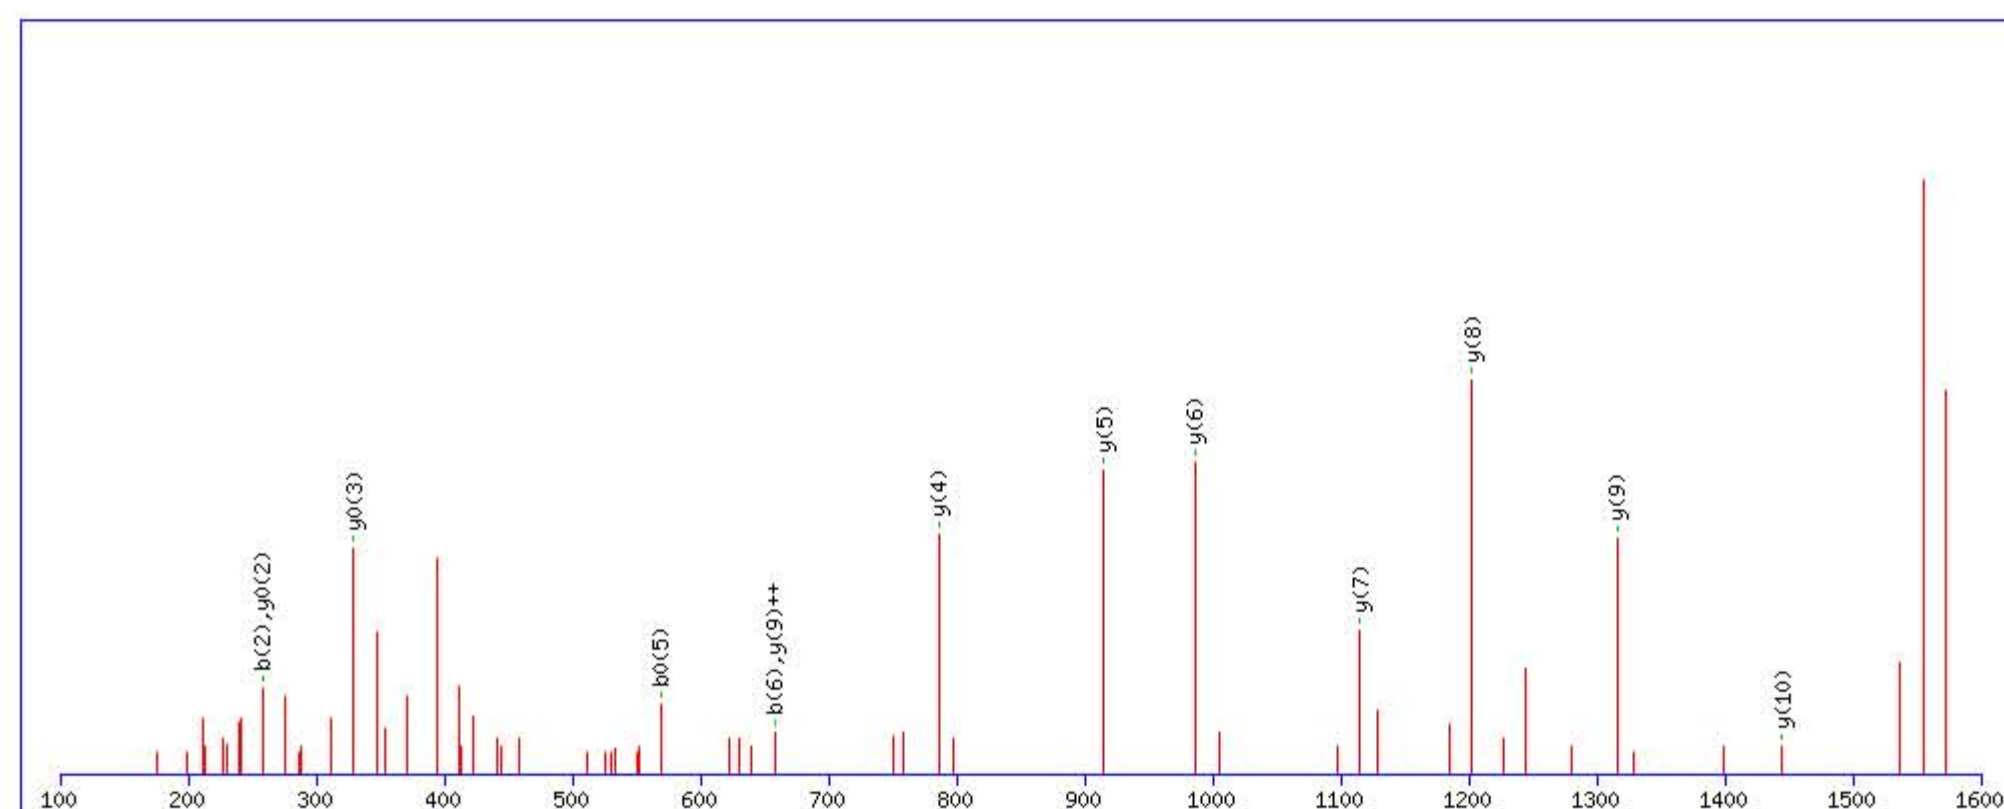

Monoisotopic mass of neutral peptide Mr(calc): 1571.761322

Fixed modifications: Carbamidomethyl (C) (apply to specified residues or termini only)

Variable modifications:

Q8 : Biotin:Thermo-21345 (Q)

Ions Score: 61 Expect: 2.4e-005

Matches : 13/116 fragment ions using 14 most intense peaks [\(help\)](#)

| #  | b                 | b <sup>++</sup> | b <sup>*</sup> | b <sup>+++</sup> | b <sup>0</sup>    | b <sup>0++</sup> | Seq. | y                  | y <sup>++</sup>   | y <sup>*</sup> | y <sup>+++</sup> | y <sup>0</sup>    | y <sup>0++</sup> | #  |
|----|-------------------|-----------------|----------------|------------------|-------------------|------------------|------|--------------------|-------------------|----------------|------------------|-------------------|------------------|----|
| 1  | 129.065854        | 65.036565       | 112.039305     | 56.523291        |                   |                  | Q    |                    |                   |                |                  |                   |                  | 11 |
| 2  | <b>258.108447</b> | 129.557862      | 241.081898     | 121.044587       | 240.097882        | 120.552579       | E    | <b>1444.710056</b> | 722.858666        | 1427.683507    | 714.345392       | 1426.699491       | 713.853384       | 10 |
| 3  | 371.192511        | 186.099894      | 354.165962     | 177.586619       | 353.181946        | 177.094611       | L    | <b>1315.667463</b> | <b>658.337370</b> | 1298.640914    | 649.824095       | 1297.656898       | 649.332087       | 9  |
| 4  | 458.224539        | 229.615907      | 441.197990     | 221.102633       | 440.213974        | 220.610625       | S    | <b>1202.583399</b> | 601.795337        | 1185.556850    | 593.282063       | 1184.572834       | 592.790055       | 8  |
| 5  | 587.267132        | 294.137204      | 570.240583     | 285.623930       | <b>569.256567</b> | 285.131922       | E    | <b>1115.551371</b> | 558.279324        | 1098.524822    | 549.766049       | 1097.540806       | 549.274041       | 7  |
| 6  | <b>658.304246</b> | 329.655761      | 641.277697     | 321.142487       | 640.293681        | 320.650479       | A    | <b>986.508778</b>  | 493.758027        | 969.482229     | 485.244753       | 968.498213        | 484.752745       | 6  |
| 7  | 787.346839        | 394.177058      | 770.320290     | 385.663783       | 769.336274        | 385.171775       | E    | <b>915.471664</b>  | 458.239470        | 898.445115     | 449.726196       | 897.461099        | 449.234188       | 5  |
| 8  | 1226.572165       | 613.789721      | 1209.545616    | 605.276446       | 1208.561600       | 604.784438       | Q    | <b>786.429071</b>  | 393.718174        | 769.402522     | 385.204899       | 768.418506        | 384.712891       | 4  |
| 9  | 1297.609279       | 649.308278      | 1280.582730    | 640.795003       | 1279.598714       | 640.302995       | A    | 347.203745         | 174.105510        | 330.177196     | 165.592236       | <b>329.193180</b> | 165.100228       | 3  |
| 10 | 1398.656958       | 699.832117      | 1381.630409    | 691.318843       | 1380.646393       | 690.826835       | T    | 276.166631         | 138.586953        | 259.140082     | 130.073679       | <b>258.156066</b> | 129.581671       | 2  |
| 11 |                   |                 |                |                  |                   |                  | R    | 175.118952         | 88.063114         | 158.092403     | 79.549839        |                   |                  | 1  |

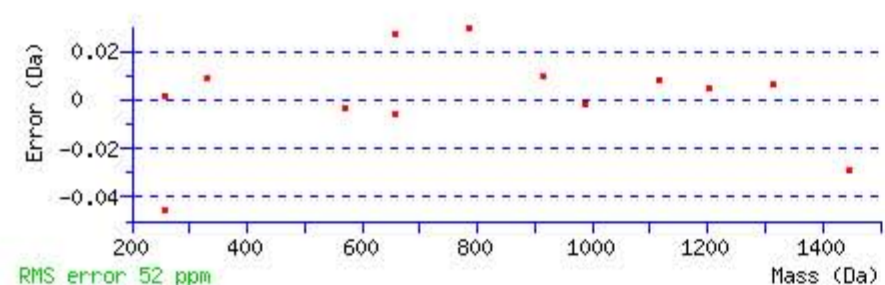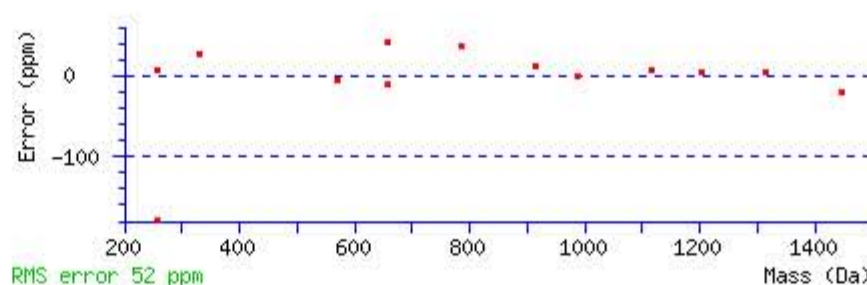

NCBI BLAST search of **QELSEAEQATR**

(Parameters: blastp, nr protein database, expect=20000, no filter, PAM30)

Other BLAST [web gateways](#)

## All matches to this query

| Score | Mr(calc):   | Delta     | Sequence                        |
|-------|-------------|-----------|---------------------------------|
| 60.5  | 1571.761322 | 0.015986  | <a href="#">QELSEAEQATR</a>     |
| 15.8  | 1571.753952 | 0.023356  | <a href="#">KQGGSPDEPDSKATR</a> |
| 9.5   | 1571.765366 | 0.011942  | <a href="#">QELAVFCSPEPPAK</a>  |
| 8.7   | 1571.790298 | -0.012990 | <a href="#">QEAQAEQKRDEK</a>    |
| 7.8   | 1571.797699 | -0.020391 | <a href="#">KELNIEPTDLMNR</a>   |
| 6.9   | 1571.791199 | -0.013891 | <a href="#">MQSLRPEQTR</a>      |
| 6.4   | 1571.797760 | -0.020452 | <a href="#">MASVAVDPQPSVVTR</a> |
| 5.9   | 1571.761322 | 0.015986  | <a href="#">QELSEAEQATR</a>     |
| 5.7   | 1571.757965 | 0.019343  | <a href="#">QEDDLANINQWVK</a>   |
| 5.3   | 1571.761337 | 0.015971  | <a href="#">EKADGTEQVER</a>     |

# MASCOT Search Results

## Peptide View

MS/MS Fragmentation of **SGSDEVQVGQQR**

Found in **CO3\_HUMAN**, Complement C3 OS=Homo sapiens GN=C3 PE=1 SV=2

Match to Query 38760: 1599.788328 from(800.901440,2+) rtinseconds(1539) index(39066)

Title: Locus:1.1.1.2985.16 File:"2013-07-02 CLN FXIII 180 min 1st F 3.wiff"

Data file C:\Program Files (x86)\Matrix Science\Mascot Daemon\mgf\7 FXIII 180 min 1st\mascot\_daemon\_merge.mgf

Click mouse within plot area to zoom in by factor of two about that point

Or, Plot from  to  Da

Label all possible matches  Label matches used for scoring

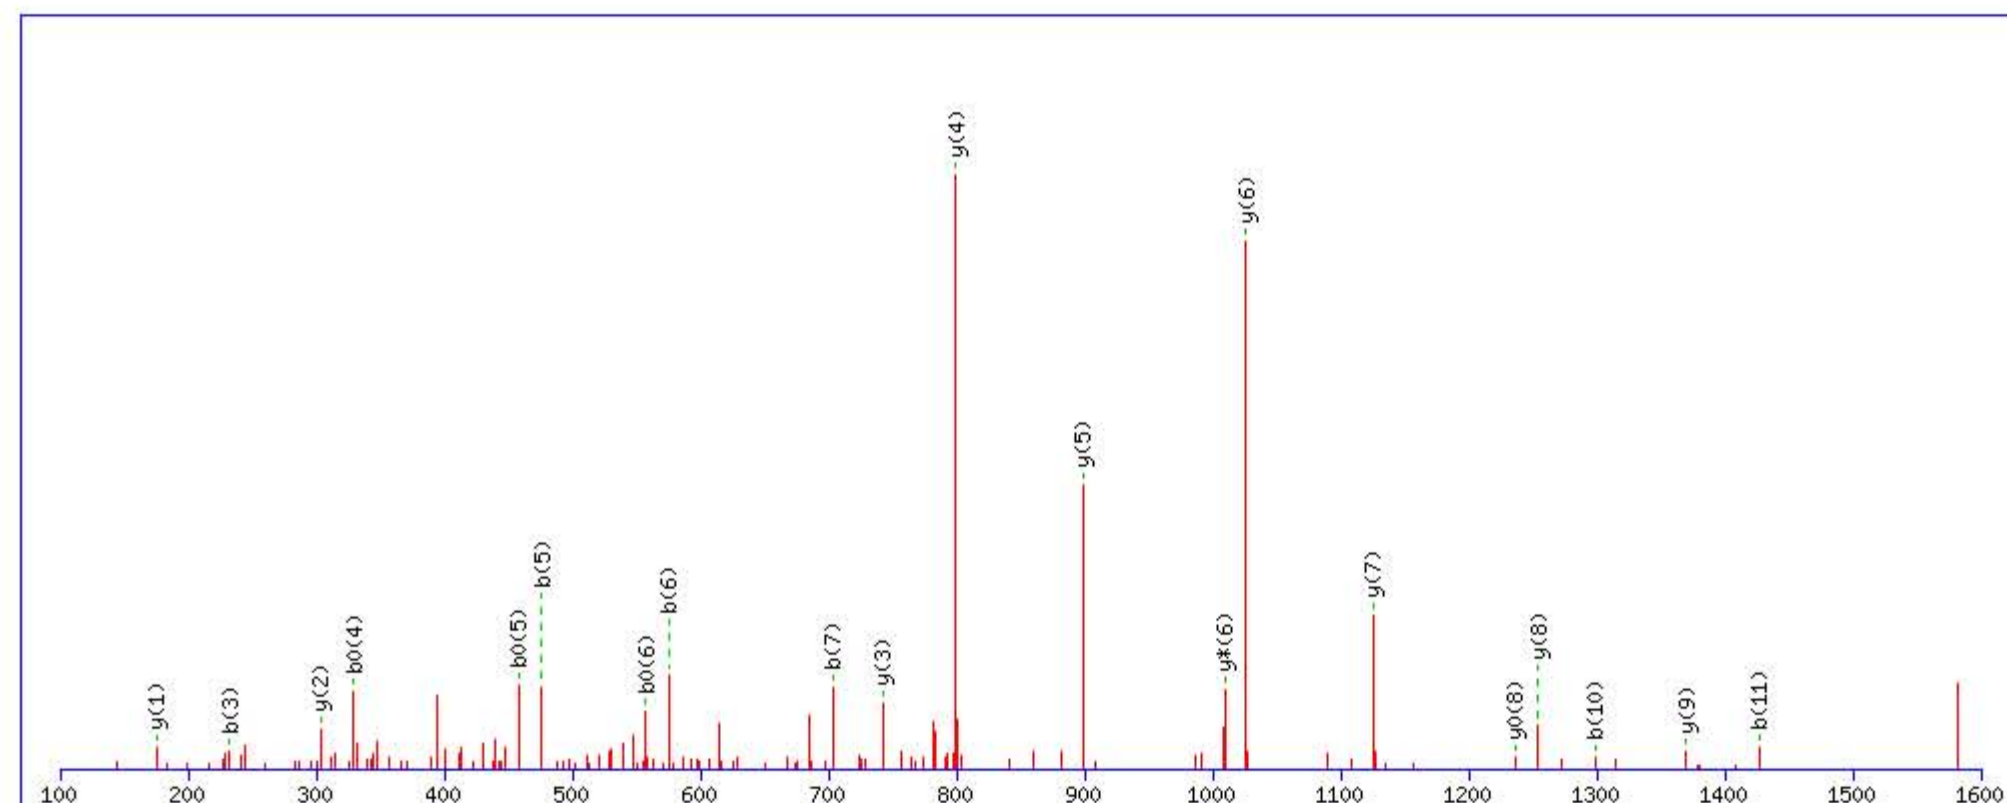

Monoisotopic mass of neutral peptide  $M_r(\text{calc})$ : 1599.767517

Fixed modifications: Carbamidomethyl (C) (apply to specified residues or termini only)

Variable modifications:

Q10 : Biotin:Thermo-21345 (Q)

Ions Score: 75 Expect: 6.6e-007

Matches : 20/106 fragment ions using 27 most intense peaks [\(help\)](#)

| #  | b                  | b <sup>++</sup> | b <sup>*</sup> | b <sup>+++</sup> | b <sup>0</sup>    | b <sup>0++</sup> | Seq. | y                  | y <sup>++</sup> | y <sup>*</sup>     | y <sup>+++</sup> | y <sup>0</sup>     | y <sup>0++</sup> | #  |
|----|--------------------|-----------------|----------------|------------------|-------------------|------------------|------|--------------------|-----------------|--------------------|------------------|--------------------|------------------|----|
| 1  | 88.039304          | 44.523290       |                |                  | 70.028739         | 35.518008        | S    |                    |                 |                    |                  |                    |                  | 12 |
| 2  | 145.060768         | 73.034022       |                |                  | 127.050203        | 64.028740        | G    | 1513.742754        | 757.375015      | 1496.716205        | 748.861741       | 1495.732189        | 748.369733       | 11 |
| 3  | <b>232.092796</b>  | 116.550036      |                |                  | 214.082231        | 107.544753       | S    | 1456.721290        | 728.864283      | 1439.694741        | 720.351009       | 1438.710725        | 719.859001       | 10 |
| 4  | 347.119739         | 174.063507      |                |                  | <b>329.109174</b> | 165.058225       | D    | <b>1369.689262</b> | 685.348269      | 1352.662713        | 676.834995       | 1351.678697        | 676.342987       | 9  |
| 5  | <b>476.162332</b>  | 238.584804      |                |                  | <b>458.151767</b> | 229.579522       | E    | <b>1254.662319</b> | 627.834798      | 1237.635770        | 619.321523       | <b>1236.651754</b> | 618.829515       | 8  |
| 6  | <b>575.230746</b>  | 288.119011      |                |                  | <b>557.220181</b> | 279.113729       | V    | <b>1125.619726</b> | 563.313501      | 1108.593177        | 554.800227       |                    |                  | 7  |
| 7  | <b>703.289324</b>  | 352.148300      | 686.262775     | 343.635026       | 685.278759        | 343.143018       | Q    | <b>1026.551312</b> | 513.779294      | <b>1009.524763</b> | 505.266020       |                    |                  | 6  |
| 8  | 802.357738         | 401.682507      | 785.331189     | 393.169233       | 784.347173        | 392.677225       | V    | <b>898.492734</b>  | 449.750005      | 881.466185         | 441.236731       |                    |                  | 5  |
| 9  | 859.379202         | 430.193239      | 842.352653     | 421.679965       | 841.368637        | 421.187957       | G    | <b>799.424320</b>  | 400.215798      | 782.397771         | 391.702524       |                    |                  | 4  |
| 10 | <b>1298.604528</b> | 649.805902      | 1281.577979    | 641.292628       | 1280.593963       | 640.800620       | Q    | <b>742.402856</b>  | 371.705066      | 725.376307         | 363.191792       |                    |                  | 3  |
| 11 | <b>1426.663106</b> | 713.835191      | 1409.636557    | 705.321917       | 1408.652541       | 704.829909       | Q    | <b>303.177530</b>  | 152.092403      | 286.150981         | 143.579129       |                    |                  | 2  |
| 12 |                    |                 |                |                  |                   |                  | R    | <b>175.118952</b>  | 88.063114       | 158.092403         | 79.549839        |                    |                  | 1  |

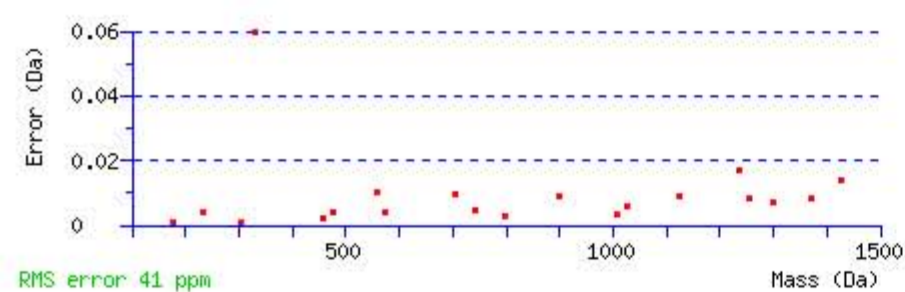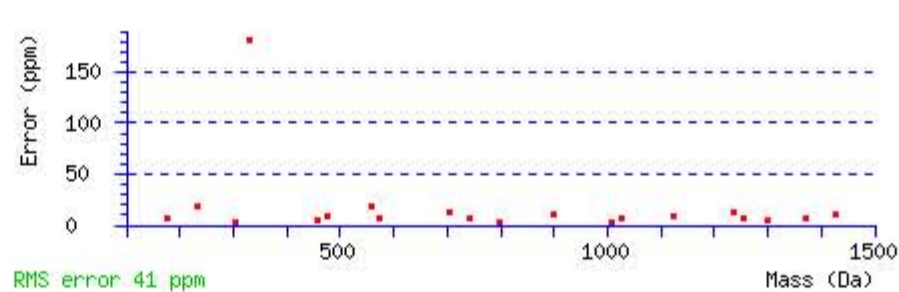

NCBI BLAST search of **SGSDEVQVGQQR**

(Parameters: blastp, nr protein database, expect=20000, no filter, PAM30)

Other BLAST [web gateways](#)

All matches to this query

| Score | $M_r(\text{calc})$ : | Delta     | Sequence                         |
|-------|----------------------|-----------|----------------------------------|
| 74.8  | 1599.767517          | 0.020811  | <a href="#">SGSDEVQVGQQR</a>     |
| 59.6  | 1599.767517          | 0.020811  | <a href="#">SGSDEVQVGQQR</a>     |
| 32.5  | 1599.767517          | 0.020811  | <a href="#">SGSDEVQVGQQR</a>     |
| 11.4  | 1599.767471          | 0.020857  | <a href="#">AMNAANLNIPPSDTR</a>  |
| 10.1  | 1599.796677          | -0.008349 | <a href="#">DINDNPPIFPMTVK</a>   |
| 8.3   | 1599.767502          | 0.020826  | <a href="#">LHMLSSVDLNGQDR</a>   |
| 4.8   | 1599.792648          | -0.004320 | <a href="#">SSAEVTPDLQSR</a>     |
| 3.3   | 1599.793976          | -0.005648 | <a href="#">QRSSGIWENGR</a>      |
| 3.3   | 1599.810394          | -0.022066 | <a href="#">SAAQPSTSPAEVQSLK</a> |
| 2.4   | 1599.779388          | 0.008940  | <a href="#">RFPDFSYITQNGR</a>    |

# MASCOT Search Results

## Peptide View

MS/MS Fragmentation of **CAEENCFIQK**

Found in **CO3\_HUMAN**, Complement C3 OS=Homo sapiens GN=C3 PE=1 SV=2

Match to Query 39073: 1608.719472 from(537.247100,3+) rtinseconds(1776) index(40615)

Title: Locus:1.1.1.3068.10 File:"2013-07-02 CLN FXIII 180 min 1st F 3.wiff"

Data file C:\Program Files (x86)\Matrix Science\Mascot Daemon\mgf\7 FXIII 180 min 1st\mascot\_daemon\_merge.mgf

Click mouse within plot area to zoom in by factor of two about that point

Or, Plot from  to  Da

Label all possible matches  Label matches used for scoring

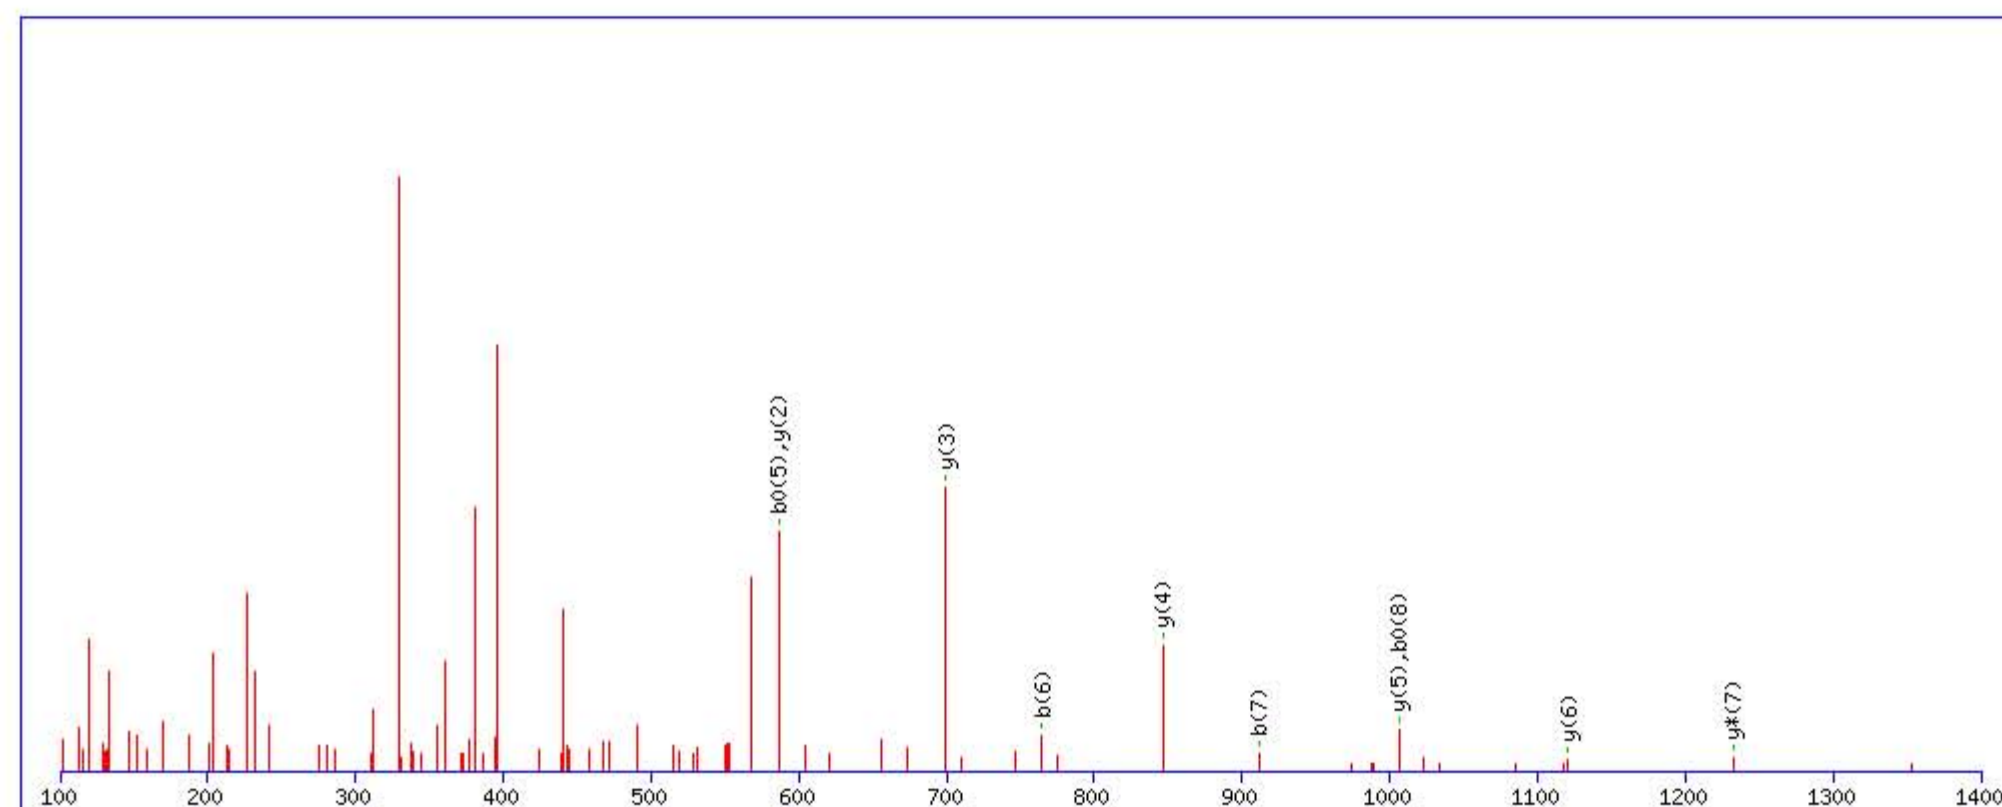

Monoisotopic mass of neutral peptide Mr(calc): 1608.709839

Fixed modifications: Carbamidomethyl (C) (apply to specified residues or termini only)

Variable modifications:

Q9 : Biotin:Thermo-21345 (Q)

Ions Score: 25 Expect: 0.025

Matches : 10/84 fragment ions using 13 most intense peaks [\(help\)](#)

| #  | b           | b <sup>++</sup> | b <sup>*</sup> | b <sup>*++</sup> | b <sup>0</sup> | b <sup>0++</sup> | Seq. | y           | y <sup>++</sup> | y <sup>*</sup> | y <sup>*++</sup> | y <sup>0</sup> | y <sup>0++</sup> | #  |
|----|-------------|-----------------|----------------|------------------|----------------|------------------|------|-------------|-----------------|----------------|------------------|----------------|------------------|----|
| 1  | 161.037925  | 81.022600       |                |                  |                |                  | C    |             |                 |                |                  |                |                  | 10 |
| 2  | 232.075039  | 116.541158      |                |                  |                |                  | A    | 1449.686484 | 725.346880      | 1432.659935    | 716.833606       | 1431.675919    | 716.341598       | 9  |
| 3  | 361.117632  | 181.062454      |                |                  | 343.107067     | 172.057172       | E    | 1378.649370 | 689.828323      | 1361.622821    | 681.315049       | 1360.638805    | 680.823041       | 8  |
| 4  | 490.160225  | 245.583751      |                |                  | 472.149660     | 236.578468       | E    | 1249.606777 | 625.307027      | 1232.580228    | 616.793752       | 1231.596212    | 616.301744       | 7  |
| 5  | 604.203152  | 302.605214      | 587.176603     | 294.091940       | 586.192587     | 293.599932       | N    | 1120.564184 | 560.785730      | 1103.537635    | 552.272456       |                |                  | 6  |
| 6  | 764.233801  | 382.620539      | 747.207252     | 374.107264       | 746.223236     | 373.615256       | C    | 1006.521257 | 503.764267      | 989.494708     | 495.250992       |                |                  | 5  |
| 7  | 911.302215  | 456.154746      | 894.275666     | 447.641471       | 893.291650     | 447.149463       | F    | 846.490608  | 423.748942      | 829.464059     | 415.235668       |                |                  | 4  |
| 8  | 1024.386279 | 512.696777      | 1007.359730    | 504.183503       | 1006.375714    | 503.691495       | I    | 699.422194  | 350.214735      | 682.395645     | 341.701461       |                |                  | 3  |
| 9  | 1463.611605 | 732.309441      | 1446.585056    | 723.796166       | 1445.601040    | 723.304158       | Q    | 586.338130  | 293.672703      | 569.311581     | 285.159429       |                |                  | 2  |
| 10 |             |                 |                |                  |                |                  | K    | 147.112804  | 74.060040       | 130.086255     | 65.546765        |                |                  | 1  |

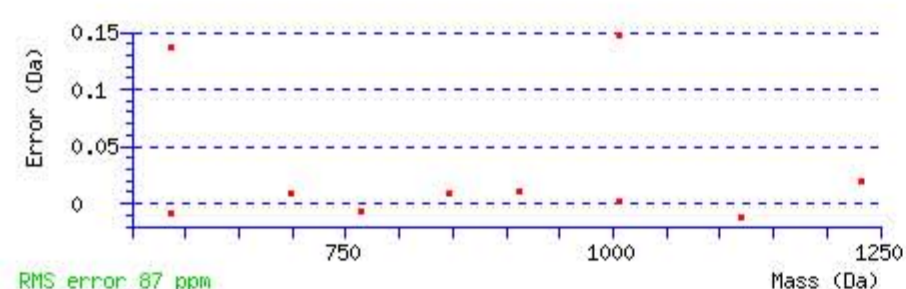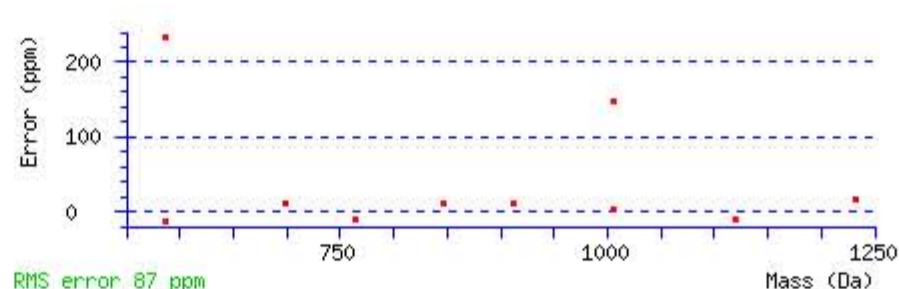

NCBI BLAST search of [CAEENCFIQK](#)

(Parameters: blastp, nr protein database, expect=20000, no filter, PAM30)

Other BLAST [web gateways](#)

## All matches to this query

| Score | Mr(calc):   | Delta    | Sequence                   |
|-------|-------------|----------|----------------------------|
| 25.1  | 1608.709839 | 0.009633 | <a href="#">CAEENCFIQK</a> |

Mascot: <http://www.matrixscience.com/>

# MASCOT Search Results

## Peptide View

MS/MS Fragmentation of **HQQTVTIPPK**

Found in **CO3\_HUMAN**, Complement C3 OS=Homo sapiens GN=C3 PE=1 SV=2

Match to Query 44506: 1769.983092 from(591.001640,3+) rtinseconds(1924) index(41637)

Title: Locus:1.1.1.3119.17 File:"2013-07-02 CLN FXIII 180 min 1st F 3.wiff"

Data file C:\Program Files (x86)\Matrix Science\Mascot Daemon\mgf\7 FXIII 180 min 1st\mascot\_daemon\_merge.mgf

Click mouse within plot area to zoom in by factor of two about that point

Or, Plot from  to  Da

Label all possible matches  Label matches used for scoring

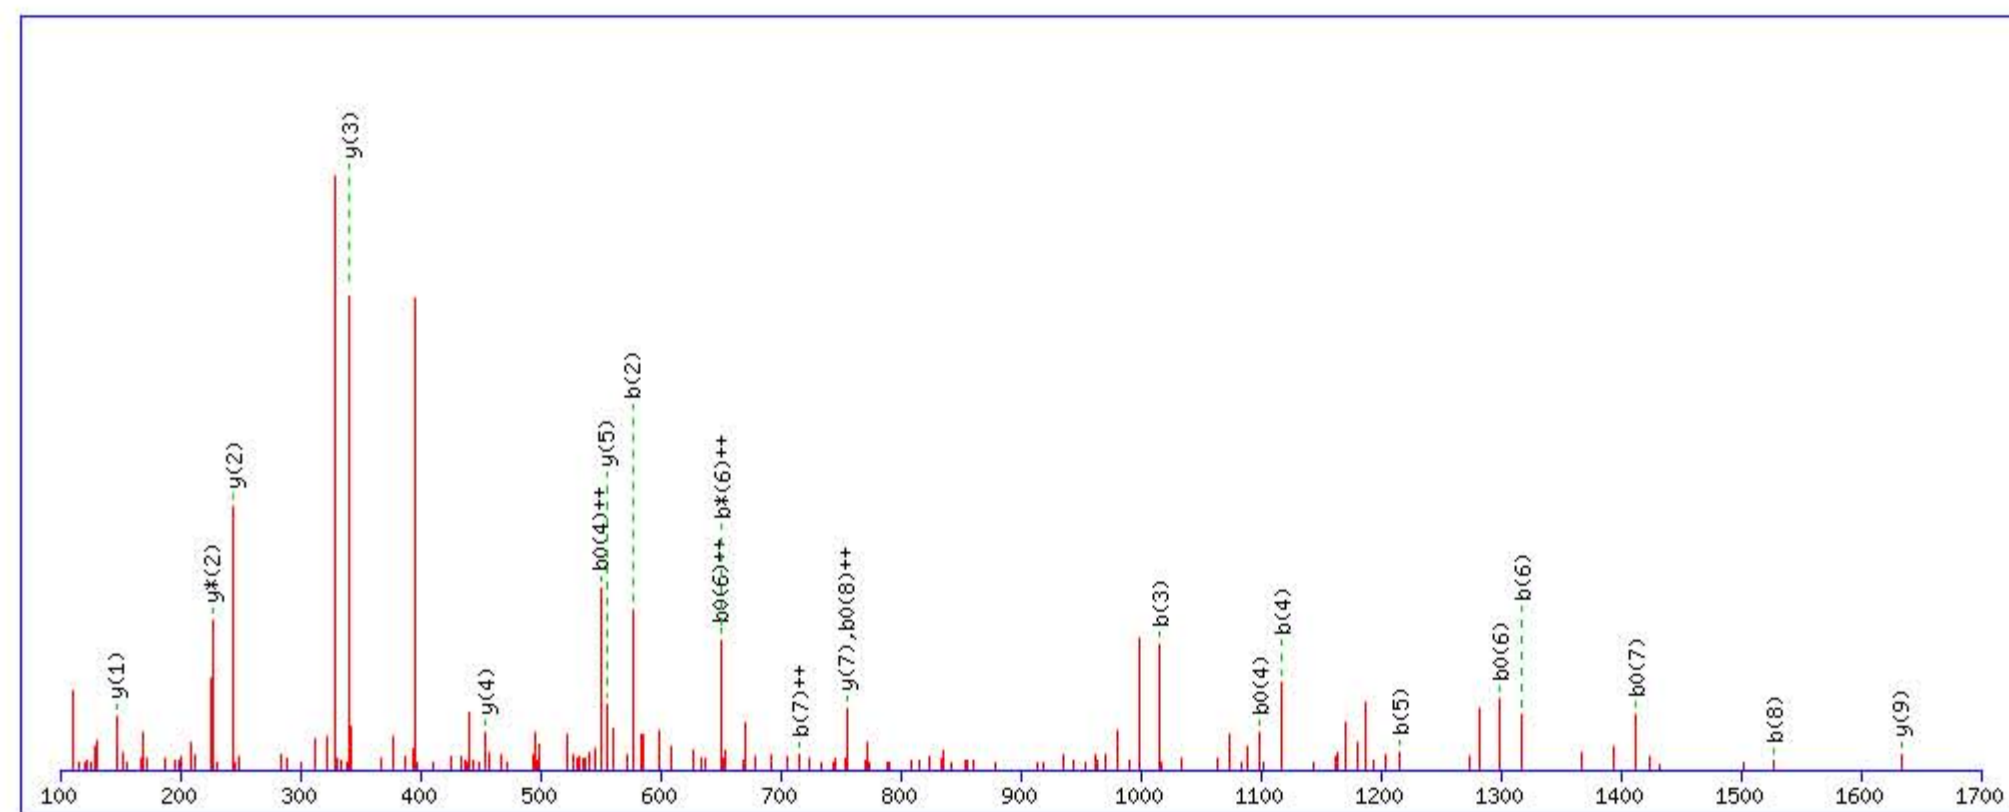

Monoisotopic mass of neutral peptide Mr(calc): 1769.968460

Fixed modifications: Carbamidomethyl (C) (apply to specified residues or termini only)

Variable modifications:

Q2 : Biotin:Thermo-21345 (Q)

Q3 : Biotin:Thermo-21345 (Q)

Ions Score: 32 Expect: 0.01

Matches : 22/92 fragment ions using 44 most intense peaks ([help](#))

| #  | b                  | b <sup>++</sup>   | b <sup>*</sup> | b <sup>*++</sup>  | b <sup>0</sup>     | b <sup>0++</sup>  | Seq. | y                  | y <sup>++</sup> | y <sup>*</sup>    | y <sup>*++</sup> | y <sup>0</sup> | y <sup>0++</sup> | #  |
|----|--------------------|-------------------|----------------|-------------------|--------------------|-------------------|------|--------------------|-----------------|-------------------|------------------|----------------|------------------|----|
| 1  | 138.066188         | 69.536732         |                |                   |                    |                   | H    |                    |                 |                   |                  |                |                  | 10 |
| 2  | <b>577.291514</b>  | 289.149395        | 560.264965     | 280.636121        |                    |                   | Q    | <b>1633.916820</b> | 817.462048      | 1616.890271       | 808.948774       | 1615.906255    | 808.456766       | 9  |
| 3  | <b>1016.516840</b> | 508.762058        | 999.490291     | 500.248784        |                    |                   | Q    | 1194.691494        | 597.849385      | 1177.664945       | 589.336111       | 1176.680929    | 588.844103       | 8  |
| 4  | <b>1117.564519</b> | 559.285898        | 1100.537970    | 550.772623        | <b>1099.553954</b> | <b>550.280615</b> | T    | <b>755.466168</b>  | 378.236722      | 738.439619        | 369.723448       | 737.455603     | 369.231440       | 7  |
| 5  | <b>1216.632933</b> | 608.820105        | 1199.606384    | 600.306830        | 1198.622368        | 599.814822        | V    | 654.418489         | 327.712883      | 637.391940        | 319.199608       | 636.407924     | 318.707600       | 6  |
| 6  | <b>1317.680612</b> | 659.343944        | 1300.654063    | <b>650.830670</b> | <b>1299.670047</b> | <b>650.338662</b> | T    | <b>555.350075</b>  | 278.178676      | 538.323526        | 269.665401       | 537.339510     | 269.173393       | 5  |
| 7  | 1430.764676        | <b>715.885976</b> | 1413.738127    | 707.372702        | <b>1412.754111</b> | 706.880694        | I    | <b>454.302396</b>  | 227.654836      | 437.275847        | 219.141561       |                |                  | 4  |
| 8  | <b>1527.817440</b> | 764.412358        | 1510.790891    | 755.899084        | 1509.806875        | <b>755.407076</b> | P    | <b>341.218332</b>  | 171.112804      | 324.191783        | 162.599530       |                |                  | 3  |
| 9  | 1624.870204        | 812.938740        | 1607.843655    | 804.425466        | 1606.859639        | 803.933458        | P    | <b>244.165568</b>  | 122.586422      | <b>227.139019</b> | 114.073148       |                |                  | 2  |
| 10 |                    |                   |                |                   |                    |                   | K    | <b>147.112804</b>  | 74.060040       | 130.086255        | 65.546765        |                |                  | 1  |

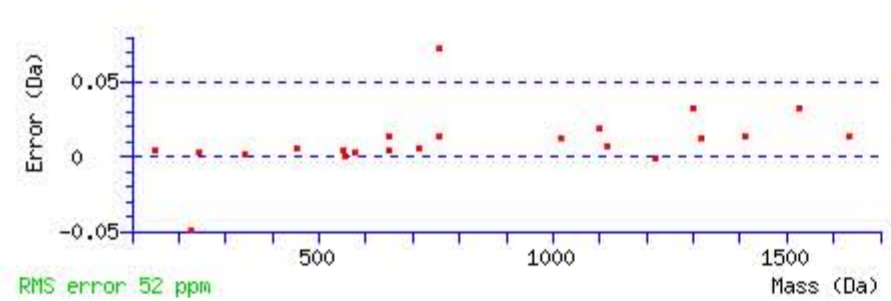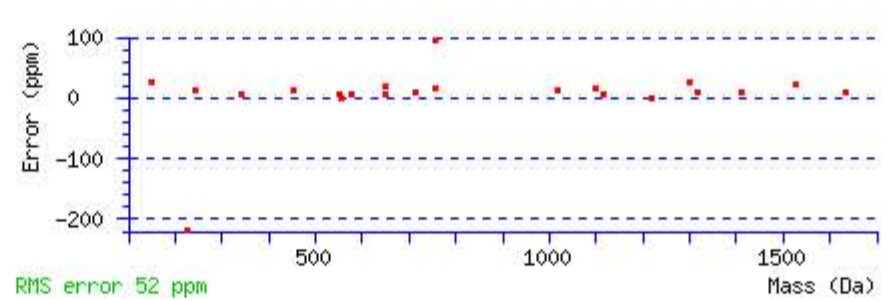

NCBI BLAST search of [HQQTVTIPPK](#)

(Parameters: blastp, nr protein database, expect=20000, no filter, PAM30)

Other BLAST [web gateways](#)

All matches to this query

| Score | Mr(calc):   | Delta    | Sequence                        |
|-------|-------------|----------|---------------------------------|
| 31.6  | 1769.968460 | 0.014632 | <a href="#">HQQTVTIPPK</a>      |
| 10.5  | 1769.961029 | 0.022063 | <a href="#">WMLSRDRASTLPLPK</a> |

# MASCOT Search Results

## Peptide View

MS/MS Fragmentation of **GQGILSVVTMYHAK**

Found in **CO3\_HUMAN**, Complement C3 OS=Homo sapiens GN=C3 PE=1 SV=2

Match to Query 45802: 1817.930922 from(606.984250,3+) rtinseconds(1794) index(40733)

Title: Locus:1.1.1.3074.11 File:"2013-07-02 CLN FXIII 180 min 1st F 3.wiff"

Data file C:\Program Files (x86)\Matrix Science\Mascot Daemon\mgf\7 FXIII 180 min 1st\mascot\_daemon\_merge.mgf

Click mouse within plot area to zoom in by factor of two about that point

Or, Plot from  to  Da

Label all possible matches  Label matches used for scoring

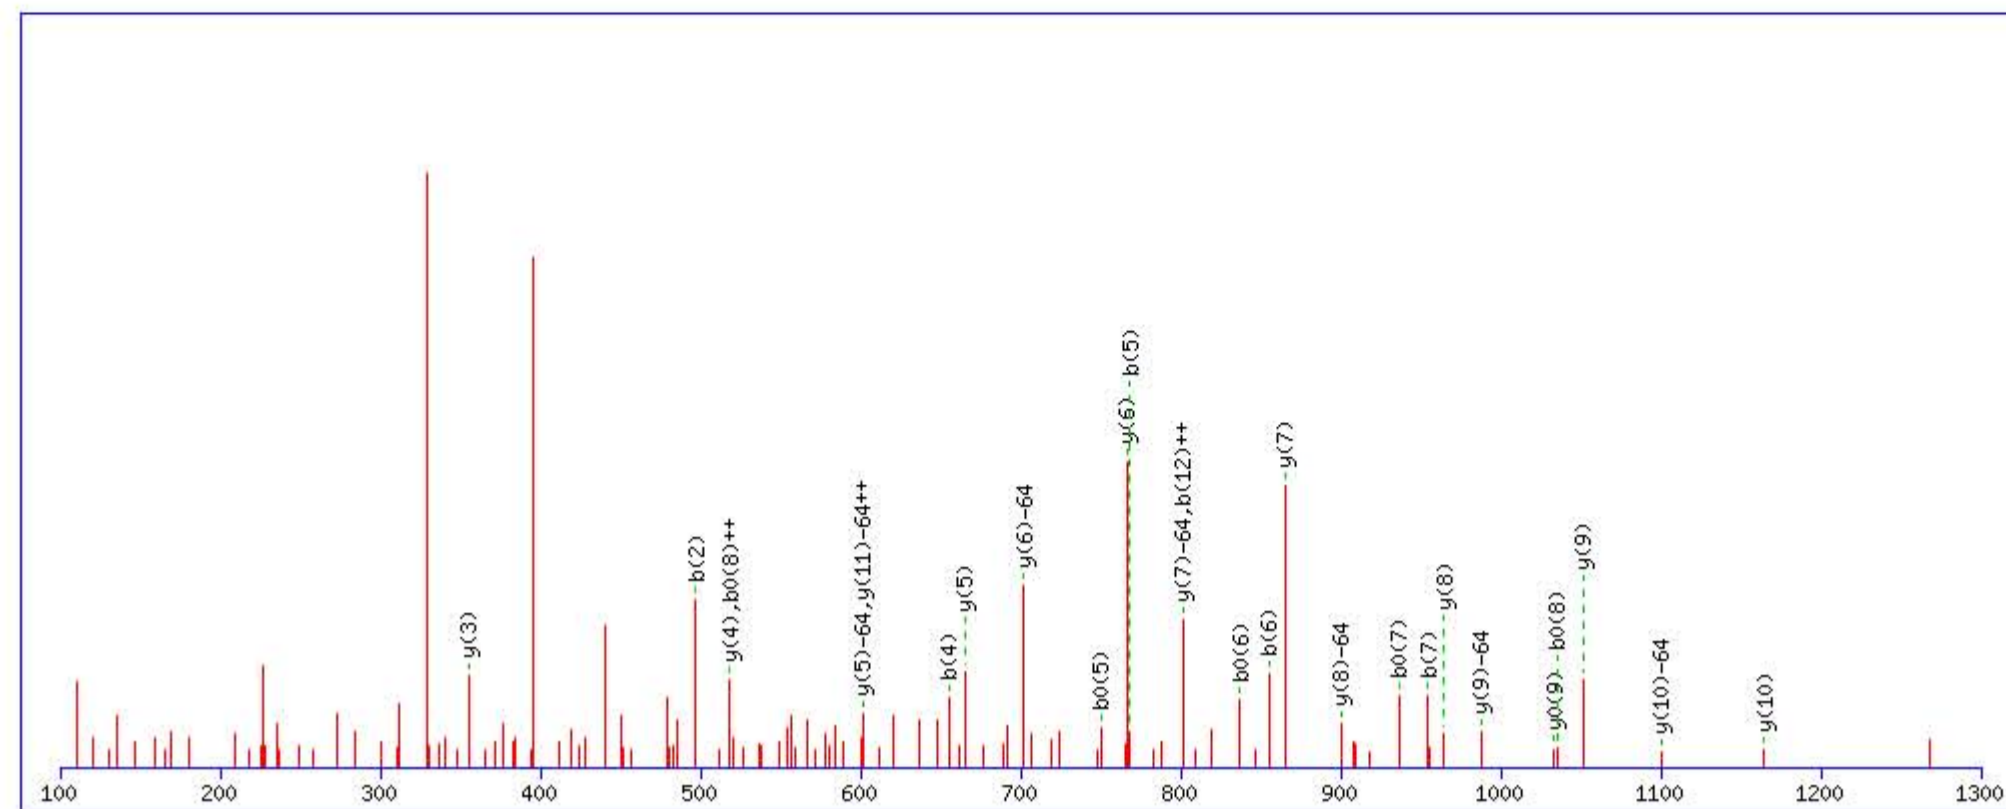

Monoisotopic mass of neutral peptide Mr(calc): 1817.916824

Fixed modifications: Carbamidomethyl (C) (apply to specified residues or termini only)

Variable modifications:

Q2 : Biotin:Thermo-21345 (Q)

M10 : Oxidation (M), with neutral losses 0.000000 (shown in table), 63.998285

Ions Score: 41 Expect: 0.0022

Matches : 27/214 fragment ions using 42 most intense peaks [\(help\)](#)

| #  | b                 | b <sup>++</sup>   | b <sup>*</sup> | b <sup>+++</sup> | b <sup>0</sup>     | b <sup>0++</sup>  | Seq. | y                  | y <sup>++</sup> | y <sup>*</sup> | y <sup>+++</sup> | y <sup>0</sup>     | y <sup>0++</sup> | #  |
|----|-------------------|-------------------|----------------|------------------|--------------------|-------------------|------|--------------------|-----------------|----------------|------------------|--------------------|------------------|----|
| 1  | 58.028740         | 29.518008         |                |                  |                    |                   | G    |                    |                 |                |                  |                    |                  | 14 |
| 2  | <b>497.254066</b> | 249.130671        | 480.227517     | 240.617397       |                    |                   | Q    | 1761.902627        | 881.454952      | 1744.876078    | 872.941677       | 1743.892062        | 872.449669       | 13 |
| 3  | 554.275530        | 277.641403        | 537.248981     | 269.128129       |                    |                   | G    | 1322.677301        | 661.842289      | 1305.650752    | 653.329014       | 1304.666736        | 652.837006       | 12 |
| 4  | <b>655.323209</b> | 328.165243        | 638.296660     | 319.651968       | 637.312644         | 319.159960        | T    | 1265.655837        | 633.331557      | 1248.629288    | 624.818282       | 1247.645272        | 624.326274       | 11 |
| 5  | <b>768.407273</b> | 384.707275        | 751.380724     | 376.194000       | <b>750.396708</b>  | 375.701992        | L    | <b>1164.608158</b> | 582.807717      | 1147.581609    | 574.294443       | 1146.597593        | 573.802435       | 10 |
| 6  | <b>855.439301</b> | 428.223289        | 838.412752     | 419.710014       | <b>837.428736</b>  | 419.218006        | S    | <b>1051.524094</b> | 526.265685      | 1034.497545    | 517.752411       | <b>1033.513529</b> | 517.260403       | 9  |
| 7  | <b>954.507715</b> | 477.757496        | 937.481166     | 469.244221       | <b>936.497150</b>  | 468.752213        | V    | <b>964.492066</b>  | 482.749671      | 947.465517     | 474.236397       | 946.481501         | 473.744389       | 8  |
| 8  | 1053.576129       | 527.291703        | 1036.549580    | 518.778428       | <b>1035.565564</b> | <b>518.286420</b> | V    | <b>865.423652</b>  | 433.215464      | 848.397103     | 424.702190       | 847.413087         | 424.210182       | 7  |
| 9  | 1154.623808       | 577.815542        | 1137.597259    | 569.302268       | 1136.613243        | 568.810260        | T    | <b>766.355238</b>  | 383.681257      | 749.328689     | 375.167983       | 748.344673         | 374.675975       | 6  |
| 10 | 1301.659208       | 651.333242        | 1284.632659    | 642.819968       | 1283.648643        | 642.327960        | M    | <b>665.307559</b>  | 333.157418      | 648.281010     | 324.644143       |                    |                  | 5  |
| 11 | 1464.722537       | 732.864907        | 1447.695988    | 724.351632       | 1446.711972        | 723.859624        | Y    | <b>518.272159</b>  | 259.639718      | 501.245610     | 251.126443       |                    |                  | 4  |
| 12 | 1601.781449       | <b>801.394363</b> | 1584.754900    | 792.881088       | 1583.770884        | 792.389080        | H    | <b>355.208830</b>  | 178.108053      | 338.182281     | 169.594778       |                    |                  | 3  |
| 13 | 1672.818563       | 836.912920        | 1655.792014    | 828.399645       | 1654.807998        | 827.907637        | A    | 218.149918         | 109.578597      | 201.123369     | 101.065322       |                    |                  | 2  |
| 14 |                   |                   |                |                  |                    |                   | K    | 147.112804         | 74.060040       | 130.086255     | 65.546765        |                    |                  | 1  |

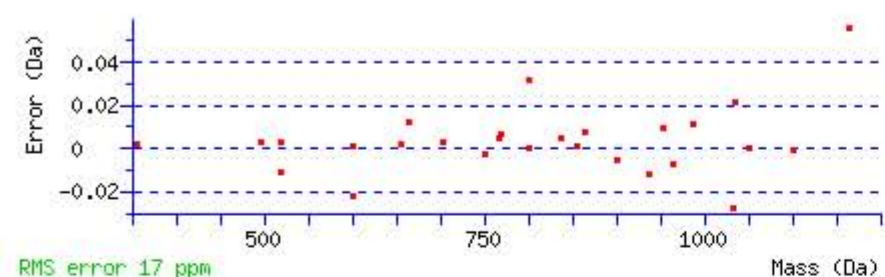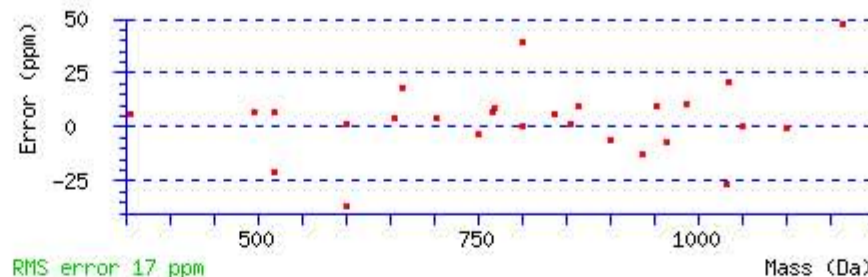

NCBI BLAST search of [GQGILSVVTMYHAK](#)

(Parameters: blastp, nr protein database, expect=20000, no filter, PAM30)

Other BLAST [web gateways](#)

All matches to this query

| Score | Mr(calc):   | Delta    | Sequence                       |
|-------|-------------|----------|--------------------------------|
| 41.1  | 1817.916824 | 0.014098 | <a href="#">GQGILSVVTMYHAK</a> |

Mascot: <http://www.matrixscience.com/>



# MASCOT SEARCH RESULTS

## Peptide View

MS/MS Fragmentation of **SGSDEVQVGQQR**

Found in **CO3\_HUMAN**, Complement C3 OS=Homo sapiens GN=C3 PE=1 SV=2

Match to Query 47805: 1910.953272 from(637.991700,3+) rtinseconds(1872) index(41194)

Title: Locus:1.1.1.3101.24 File:"2013-07-02 CLN FXIII 180 min 1st F 3.wiff"

Data file C:\Program Files (x86)\Matrix Science\Mascot Daemon\mgf7 FXIII 180 min 1st\mascot\_daemon\_merge.mgf

Click mouse within plot area to zoom in by factor of two about that point

Or, Plot from  to  Da

Label all possible matches  Label matches used for scoring

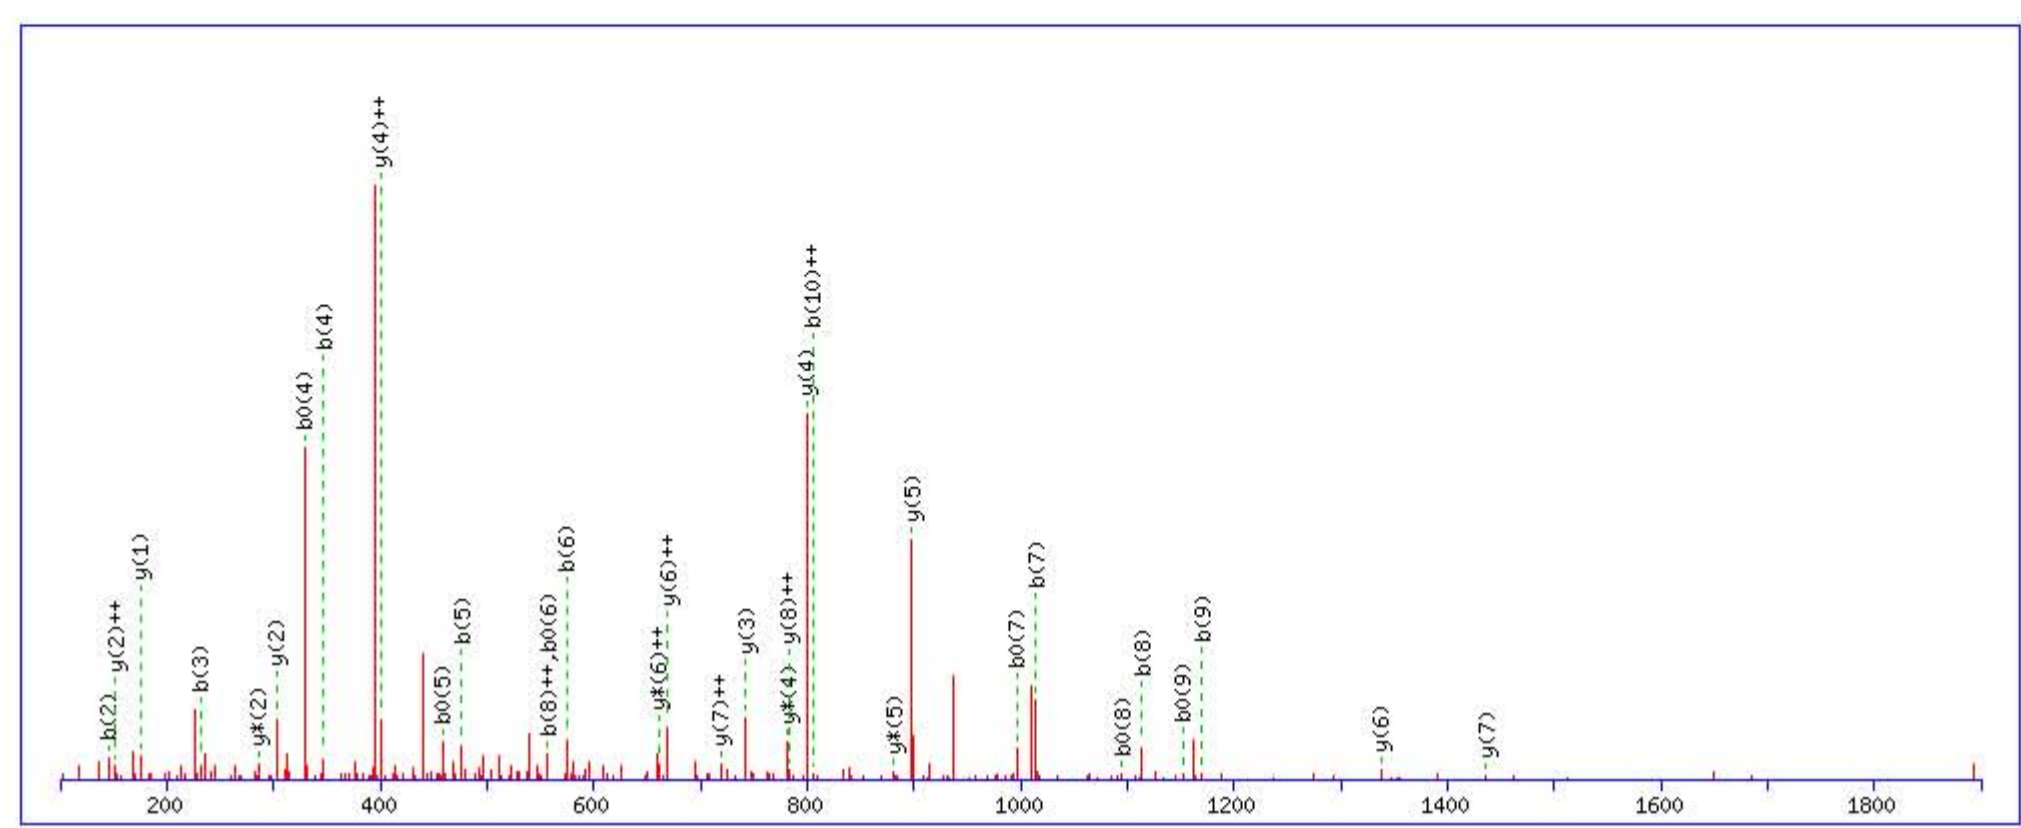

Monoisotopic mass of neutral peptide Mr(calc): 1910.934265

Fixed modifications: Carbamidomethyl (C) (apply to specified residues or termini only)

Variable modifications:

Q7 : Biotin:Thermo-21345 (Q)

Q10 : Biotin:Thermo-21345 (Q)

Ions Score: 26 Expect: 0.057

Matches : 32/106 fragment ions using 81 most intense peaks [\(help\)](#)

| #  | b                  | b <sup>++</sup>   | b <sup>*</sup> | b <sup>*++</sup> | b <sup>0</sup>     | b <sup>0++</sup> | Seq. | y                  | y <sup>++</sup>   | y <sup>*</sup>    | y <sup>*++</sup>  | y <sup>0</sup> | y <sup>0++</sup> | #  |
|----|--------------------|-------------------|----------------|------------------|--------------------|------------------|------|--------------------|-------------------|-------------------|-------------------|----------------|------------------|----|
| 1  | 88.039304          | 44.523290         |                |                  | 70.028739          | 35.518008        | S    |                    |                   |                   |                   |                |                  | 12 |
| 2  | <b>145.060768</b>  | 73.034022         |                |                  | 127.050203         | 64.028740        | G    | 1824.909502        | 912.958389        | 1807.882953       | 904.445115        | 1806.898937    | 903.953107       | 11 |
| 3  | <b>232.092796</b>  | 116.550036        |                |                  | 214.082231         | 107.544753       | S    | 1767.888038        | 884.447657        | 1750.861489       | 875.934383        | 1749.877473    | 875.442375       | 10 |
| 4  | <b>347.119739</b>  | 174.063507        |                |                  | <b>329.109174</b>  | 165.058225       | D    | 1680.856010        | 840.931643        | 1663.829461       | 832.418369        | 1662.845445    | 831.926361       | 9  |
| 5  | <b>476.162332</b>  | 238.584804        |                |                  | <b>458.151767</b>  | 229.579522       | E    | 1565.829067        | <b>783.418172</b> | 1548.802518       | 774.904897        | 1547.818502    | 774.412889       | 8  |
| 6  | <b>575.230746</b>  | 288.119011        |                |                  | <b>557.220181</b>  | 279.113729       | V    | <b>1436.786474</b> | <b>718.896875</b> | 1419.759925       | 710.383601        |                |                  | 7  |
| 7  | <b>1014.456072</b> | 507.731674        | 997.429523     | 499.218400       | <b>996.445507</b>  | 498.726392       | Q    | <b>1337.718060</b> | <b>669.362668</b> | 1320.691511       | <b>660.849394</b> |                |                  | 6  |
| 8  | <b>1113.524486</b> | <b>557.265881</b> | 1096.497937    | 548.752607       | <b>1095.513921</b> | 548.260599       | V    | <b>898.492734</b>  | 449.750005        | <b>881.466185</b> | 441.236731        |                |                  | 5  |
| 9  | <b>1170.545950</b> | 585.776613        | 1153.519401    | 577.263339       | <b>1152.535385</b> | 576.771330       | G    | <b>799.424320</b>  | <b>400.215798</b> | <b>782.397771</b> | 391.702524        |                |                  | 4  |
| 10 | 1609.771276        | <b>805.389276</b> | 1592.744727    | 796.876002       | 1591.760711        | 796.383994       | Q    | <b>742.402856</b>  | 371.705066        | 725.376307        | 363.191792        |                |                  | 3  |
| 11 | 1737.829854        | 869.418565        | 1720.803305    | 860.905291       | 1719.819289        | 860.413283       | Q    | <b>303.177530</b>  | <b>152.092403</b> | <b>286.150981</b> | 143.579129        |                |                  | 2  |
| 12 |                    |                   |                |                  |                    |                  | R    | <b>175.118952</b>  | 88.063114         | 158.092403        | 79.549839         |                |                  | 1  |

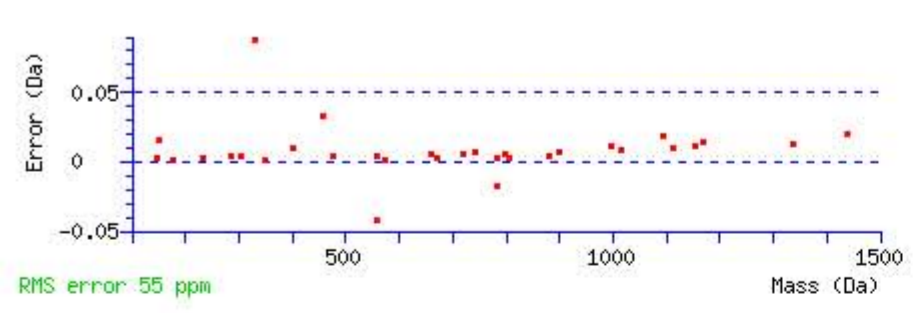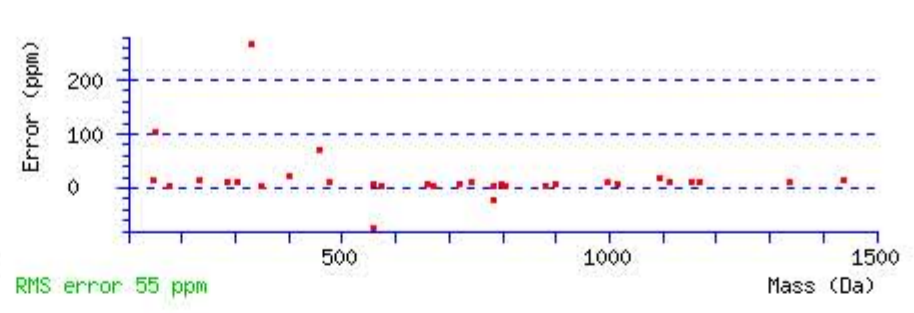

NCBI BLAST search of **SGSDEVQVGQQR**

(Parameters: blastp, nr protein database, expect=20000, no filter, PAM30)

Other BLAST [web gateways](#)

All matches to this query

| Score | Mr(calc):   | Delta    | Sequence                        |
|-------|-------------|----------|---------------------------------|
| 29.5  | 1910.938263 | 0.015009 | <a href="#">YVTSAPMPEPQAPGR</a> |
| 26.4  | 1910.934265 | 0.019007 | <a href="#">SGSDEVQVGQQR</a>    |
| 20.8  | 1910.934265 | 0.019007 | <a href="#">SGSDEVQVGQQR</a>    |

Mascot: <http://www.matrixscience.com/>

# MASCOT Search Results

## Peptide View

MS/MS Fragmentation of **SGSDEVQVGQQR**

Found in **CO3\_HUMAN**, Complement C3 OS=Homo sapiens GN=C3 PE=1 SV=2

Match to Query 47806: 1910.955072 from(637.992300,3+) rtinseconds(1924) index(41639)

Title: Locus:1.1.1.3119.19 File:"2013-07-02 CLN FXIII 180 min 1st F 3.wiff"

Data file C:\Program Files (x86)\Matrix Science\Mascot Daemon\mgf\7 FXIII 180 min 1st\mascot\_daemon\_merge.mgf

Click mouse within plot area to zoom in by factor of two about that point

Or, Plot from  to  Da

Label all possible matches  Label matches used for scoring

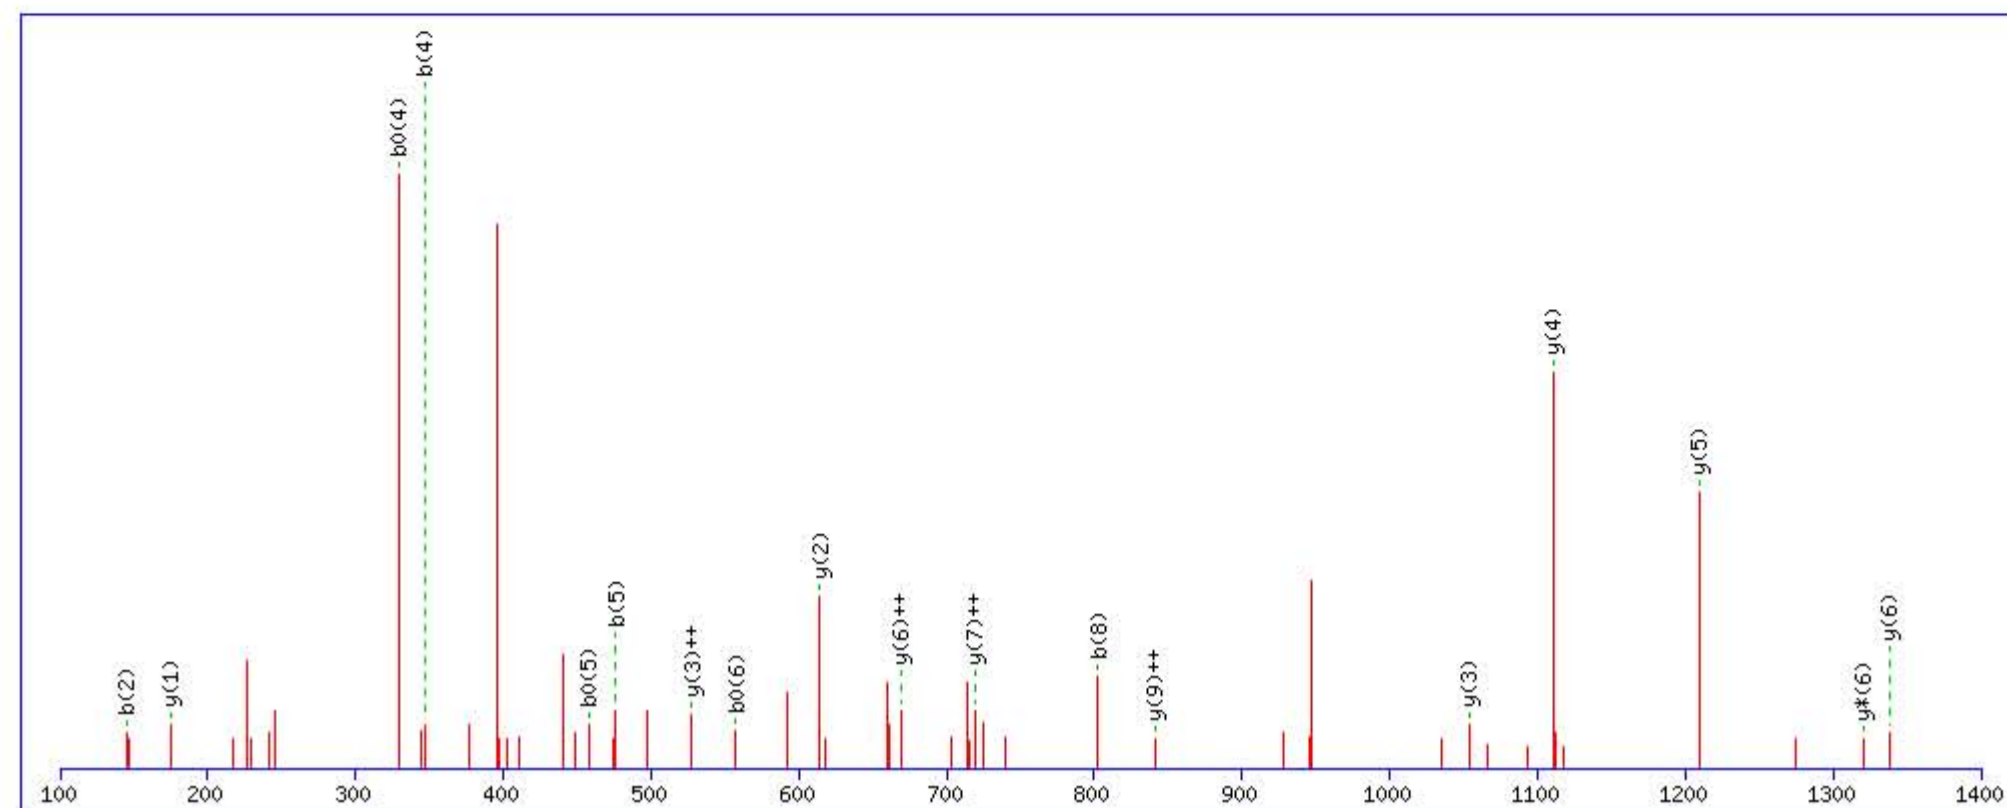

Monoisotopic mass of neutral peptide Mr(calc): 1910.934265

Fixed modifications: Carbamidomethyl (C) (apply to specified residues or termini only)

Variable modifications:

Q10 : Biotin:Thermo-21345 (Q)

Q11 : Biotin:Thermo-21345 (Q)

Ions Score: 28 Expect: 0.01

Matches : 18/106 fragment ions using 37 most intense peaks [\(help\)](#)

| #  | b                 | b <sup>++</sup> | b <sup>*</sup> | b <sup>*++</sup> | b <sup>0</sup>    | b <sup>0++</sup> | Seq. | y                  | y <sup>++</sup>   | y <sup>*</sup>     | y <sup>*++</sup> | y <sup>0</sup> | y <sup>0++</sup> | #  |
|----|-------------------|-----------------|----------------|------------------|-------------------|------------------|------|--------------------|-------------------|--------------------|------------------|----------------|------------------|----|
| 1  | 88.039304         | 44.523290       |                |                  | 70.028739         | 35.518008        | S    |                    |                   |                    |                  |                |                  | 12 |
| 2  | <b>145.060768</b> | 73.034022       |                |                  | 127.050203        | 64.028740        | G    | 1824.909502        | 912.958389        | 1807.882953        | 904.445115       | 1806.898937    | 903.953107       | 11 |
| 3  | 232.092796        | 116.550036      |                |                  | 214.082231        | 107.544753       | S    | 1767.888038        | 884.447657        | 1750.861489        | 875.934383       | 1749.877473    | 875.442375       | 10 |
| 4  | <b>347.119739</b> | 174.063507      |                |                  | <b>329.109174</b> | 165.058225       | D    | 1680.856010        | <b>840.931643</b> | 1663.829461        | 832.418369       | 1662.845445    | 831.926361       | 9  |
| 5  | <b>476.162332</b> | 238.584804      |                |                  | <b>458.151767</b> | 229.579522       | E    | 1565.829067        | 783.418172        | 1548.802518        | 774.904897       | 1547.818502    | 774.412889       | 8  |
| 6  | 575.230746        | 288.119011      |                |                  | <b>557.220181</b> | 279.113729       | V    | 1436.786474        | <b>718.896875</b> | 1419.759925        | 710.383601       |                |                  | 7  |
| 7  | 703.289324        | 352.148300      | 686.262775     | 343.635026       | 685.278759        | 343.143018       | Q    | <b>1337.718060</b> | <b>669.362668</b> | <b>1320.691511</b> | 660.849394       |                |                  | 6  |
| 8  | <b>802.357738</b> | 401.682507      | 785.331189     | 393.169233       | 784.347173        | 392.677225       | V    | <b>1209.659482</b> | 605.333379        | 1192.632933        | 596.820105       |                |                  | 5  |
| 9  | 859.379202        | 430.193239      | 842.352653     | 421.679965       | 841.368637        | 421.187957       | G    | <b>1110.591068</b> | 555.799172        | 1093.564519        | 547.285898       |                |                  | 4  |
| 10 | 1298.604528       | 649.805902      | 1281.577979    | 641.292628       | 1280.593963       | 640.800620       | Q    | <b>1053.569604</b> | <b>527.288440</b> | 1036.543055        | 518.775166       |                |                  | 3  |
| 11 | 1737.829854       | 869.418565      | 1720.803305    | 860.905291       | 1719.819289       | 860.413283       | Q    | <b>614.344278</b>  | 307.675777        | 597.317729         | 299.162503       |                |                  | 2  |
| 12 |                   |                 |                |                  |                   |                  | R    | <b>175.118952</b>  | 88.063114         | 158.092403         | 79.549839        |                |                  | 1  |

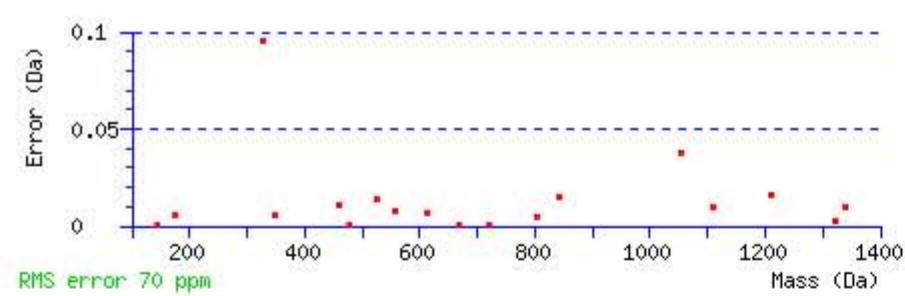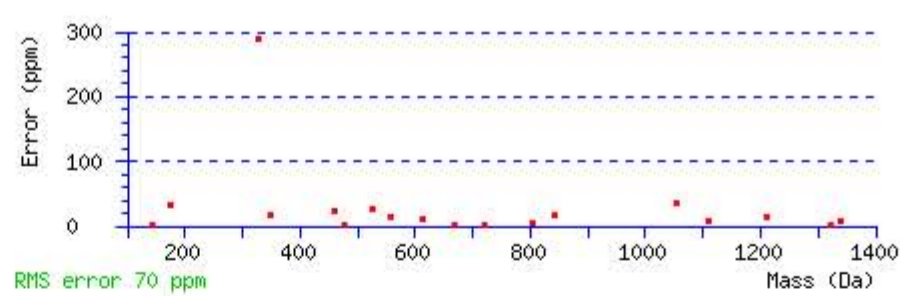

NCBI BLAST search of **SGSDEVQVGQQR**

(Parameters: blastp, nr protein database, expect=20000, no filter, PAM30)

Other BLAST [web gateways](#)

All matches to this query

| Score | Mr(calc):   | Delta     | Sequence                          |
|-------|-------------|-----------|-----------------------------------|
| 27.8  | 1910.934265 | 0.020807  | <a href="#">SGSDEVQVGQQR</a>      |
| 7.3   | 1910.934265 | 0.020807  | <a href="#">SGSDEVQVGQQR</a>      |
| 6.3   | 1910.958542 | -0.003470 | <a href="#">TDDYGRDLSSVQILLTK</a> |
| 3.8   | 1910.934265 | 0.020807  | <a href="#">SGSDEVQVGQQR</a>      |
| 0.5   | 1910.934891 | 0.020181  | <a href="#">KLSVEEFFMDLHNFR</a>   |
| 0.1   | 1910.960709 | -0.005637 | <a href="#">VGAPAWREAAQAMAR</a>   |

# MASCOT SCIENCE Mascot Search Results

## Peptide View

MS/MS Fragmentation of **SGIPIVTSPYQIHFTK**  
Found in **CO3\_HUMAN**, Complement C3 OS=Homo sapiens GN=C3 PE=1 SV=2

Match to Query 53079: 2098.158672 from(700.393500,3+) rtinseconds(2289) index(44200)  
Title: Locus:1.1.1.3246.13 File:"2013-07-02 CLN FXIII 180 min 1st F 3.wiff"  
Data file C:\Program Files (x86)\Matrix Science\Mascot Daemon\mgf\7 FXIII 180 min 1st\mascot\_daemon\_merge.mgf

Click mouse within plot area to zoom in by factor of two about that point  
Or,  Plot from  to  Da  Full range  
Label all possible matches  Label matches used for scoring

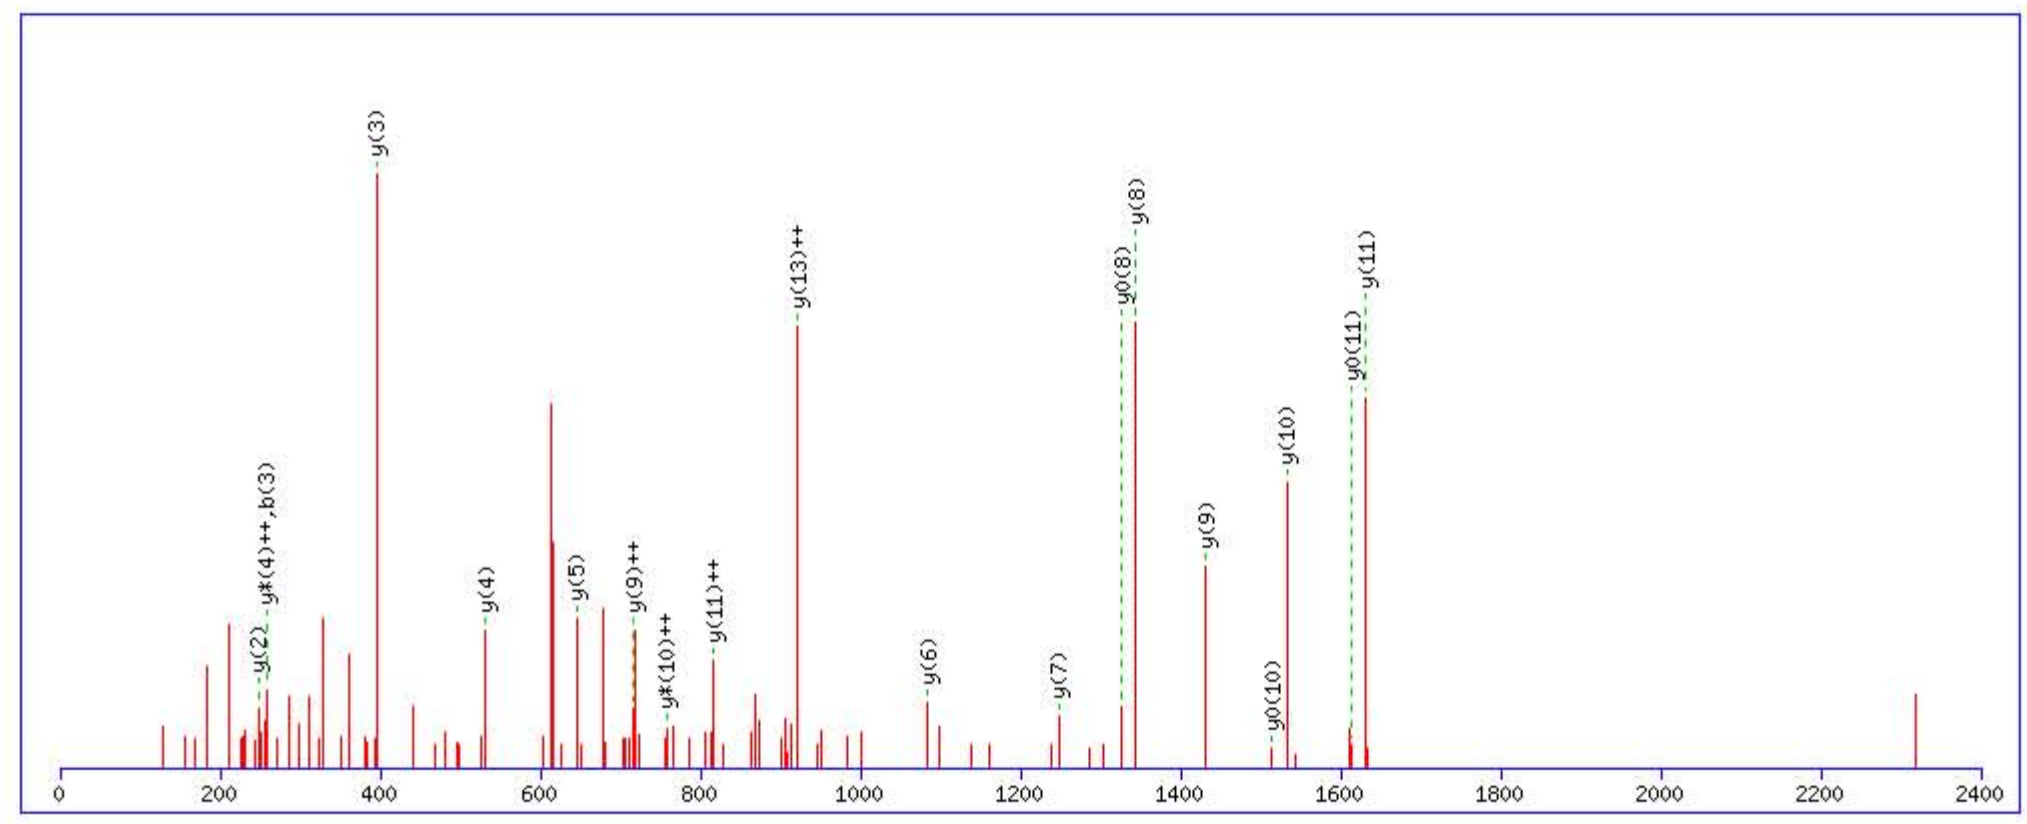

Monoisotopic mass of neutral peptide Mr(calc): 2098.128525  
Fixed modifications: Carbamidomethyl (C) (apply to specified residues or termini only)  
Variable modifications:  
Q11 : Biotin:Thermo-21345 (Q)  
Ions Score: 38 Expect: 0.0025  
Matches : 19/158 fragment ions using 53 most intense peaks [\(help\)](#)

| #  | b           | b <sup>++</sup> | b <sup>+</sup> | b <sup>+++</sup> | b <sup>0</sup> | b <sup>0++</sup> | Seq. | y           | y <sup>++</sup> | y <sup>+</sup> | y <sup>+++</sup> | y <sup>0</sup> | y <sup>0++</sup> | #  |
|----|-------------|-----------------|----------------|------------------|----------------|------------------|------|-------------|-----------------|----------------|------------------|----------------|------------------|----|
| 1  | 88.039304   | 44.523290       |                |                  | 70.028739      | 35.518008        | S    |             |                 |                |                  |                |                  | 16 |
| 2  | 145.060768  | 73.034022       |                |                  | 127.050203     | 64.028740        | G    | 2012.103769 | 1006.555523     | 1995.077220    | 998.042248       | 1994.093204    | 997.550240       | 15 |
| 3  | 258.144832  | 129.576054      |                |                  | 240.134267     | 120.570772       | I    | 1955.082305 | 978.044791      | 1938.055756    | 969.531516       | 1937.071740    | 969.039508       | 14 |
| 4  | 355.197596  | 178.102436      |                |                  | 337.187031     | 169.097154       | P    | 1841.998241 | 921.502759      | 1824.971692    | 912.989484       | 1823.987676    | 912.497476       | 13 |
| 5  | 468.281660  | 234.644468      |                |                  | 450.271095     | 225.639186       | I    | 1744.945477 | 872.976377      | 1727.918928    | 864.463102       | 1726.934912    | 863.971094       | 12 |
| 6  | 567.350074  | 284.178675      |                |                  | 549.339509     | 275.173393       | V    | 1631.861413 | 816.434345      | 1614.834864    | 807.921070       | 1613.850848    | 807.429062       | 11 |
| 7  | 668.397753  | 334.702515      |                |                  | 650.387188     | 325.697232       | T    | 1532.792999 | 766.900138      | 1515.766450    | 758.386863       | 1514.782434    | 757.894855       | 10 |
| 8  | 755.429781  | 378.218529      |                |                  | 737.419216     | 369.213246       | S    | 1431.745320 | 716.376298      | 1414.718771    | 707.863024       | 1413.734755    | 707.371016       | 9  |
| 9  | 852.482545  | 426.744911      |                |                  | 834.471980     | 417.739628       | P    | 1344.713292 | 672.860284      | 1327.686743    | 664.347010       | 1326.702727    | 663.855002       | 8  |
| 10 | 1015.545874 | 508.276575      |                |                  | 997.535309     | 499.271293       | Y    | 1247.660528 | 624.333902      | 1230.633979    | 615.820628       | 1229.649963    | 615.328620       | 7  |
| 11 | 1454.771200 | 727.889238      | 1437.744651    | 719.375964       | 1436.760635    | 718.883956       | Q    | 1084.597199 | 542.802238      | 1067.570650    | 534.288963       | 1066.586634    | 533.796955       | 6  |
| 12 | 1567.855264 | 784.431270      | 1550.828715    | 775.917996       | 1549.844699    | 775.425988       | I    | 645.371873  | 323.189574      | 628.345324     | 314.676300       | 627.361308     | 314.184292       | 5  |
| 13 | 1704.914176 | 852.960726      | 1687.887627    | 844.447452       | 1686.903611    | 843.955444       | H    | 532.287809  | 266.647542      | 515.261260     | 258.134268       | 514.277244     | 257.642260       | 4  |
| 14 | 1851.982590 | 926.494933      | 1834.956041    | 917.981659       | 1833.972025    | 917.489651       | F    | 395.228897  | 198.118086      | 378.202348     | 189.604812       | 377.218332     | 189.112804       | 3  |
| 15 | 1953.030269 | 977.018773      | 1936.003720    | 968.505498       | 1935.019704    | 968.013490       | T    | 248.160483  | 124.583879      | 231.133934     | 116.070605       | 230.149918     | 115.578597       | 2  |
| 16 |             |                 |                |                  |                |                  | K    | 147.112804  | 74.060040       | 130.086255     | 65.546765        |                |                  | 1  |

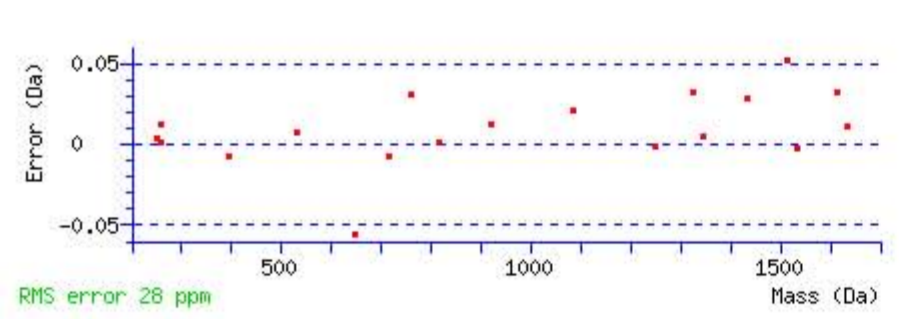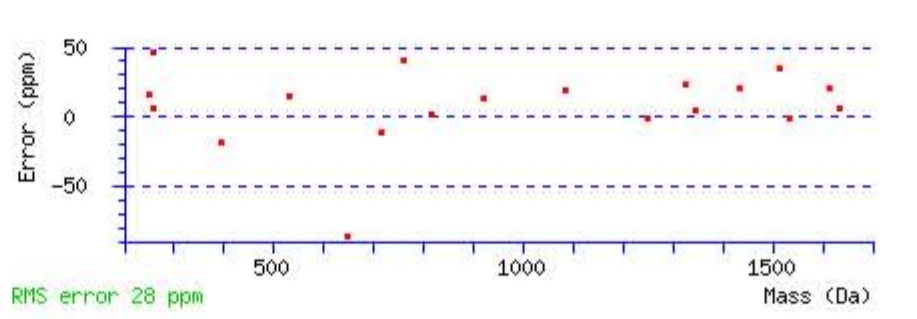

NCBI BLAST search of **SGIPIVTSPYQIHFTK**  
(Parameters: blastp, nr protein database, expect=20000, no filter, PAM30)  
Other BLAST [web gateways](#)

All matches to this query

| Score | Mr(calc):   | Delta    | Sequence                |
|-------|-------------|----------|-------------------------|
| 37.8  | 2098.128525 | 0.030147 | <b>SGIPIVTSPYQIHFTK</b> |

**MASCOT** Mascot Search Results

Peptide View

MS/MS Fragmentation of **LSINTHPSQKPLSITVR**

Found in **CO3\_HUMAN**, Complement C3 OS=Homo sapiens GN=C3 PE=1 SV=2

Match to Query 55408: 2201.253856 from(551.320740,4+) rtinseconds(1865) index(41134)

Title: Locus:1.1.1.3099.11 File:"2013-07-02 CLN FXIII 180 min 1st F 3.wiff"

Data file C:\Program Files (x86)\Matrix Science\Mascot Daemon\mgf\7 FXIII 180 min 1st\mascot\_daemon\_merge.mgf

Click mouse within plot area to zoom in by factor of two about that point

Or, Plot from  to  Da Full range

Label all possible matches  Label matches used for scoring

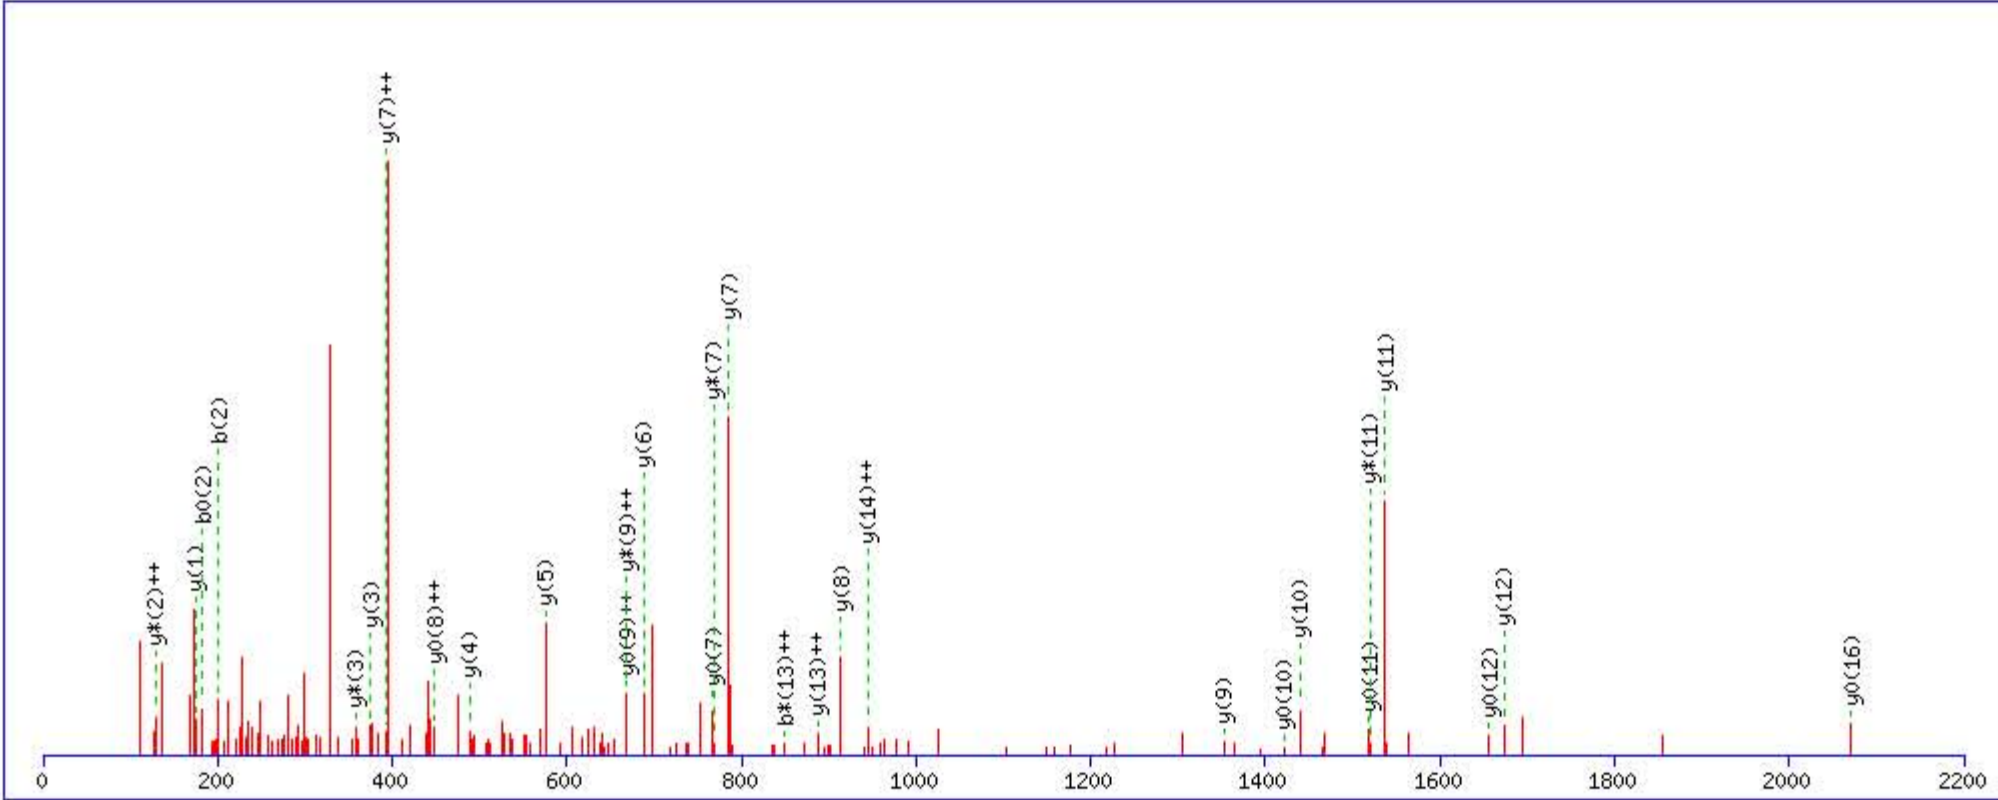

Monoisotopic mass of neutral peptide  $M_r(\text{calc})$ : 2201.235428

Fixed modifications: Carbamidomethyl (C) (apply to specified residues or termini only)

Variable modifications:

Q9 : Biotin:Thermo-21345 (Q)

Ions Score: 27 Expect: 0.014

Matches : 29/180 fragment ions using 97 most intense peaks ([help](#))

| #  | b                 | b <sup>++</sup> | b*          | b <sup>+++</sup>  | b <sup>0</sup> | b <sup>0++</sup> | Seq. | y                  | y <sup>++</sup>   | y*                 | y <sup>+++</sup>  | y <sup>0</sup>     | y <sup>0++</sup>  | #  |
|----|-------------------|-----------------|-------------|-------------------|----------------|------------------|------|--------------------|-------------------|--------------------|-------------------|--------------------|-------------------|----|
| 1  | 114.091340        | 57.549308       |             |                   |                |                  | L    |                    |                   |                    |                   |                    |                   | 17 |
| 2  | <b>201.123368</b> | 101.065322      |             |                   | 183.112803     | 92.060039        | S    | 2089.158656        | 1045.082966       | 2072.132107        | 1036.569691       | <b>2071.148091</b> | 1036.077683       | 16 |
| 3  | 314.207432        | 157.607354      |             |                   | 296.196867     | 148.602071       | I    | 2002.126628        | 1001.566952       | 1985.100079        | 993.053678        | 1984.116063        | 992.561669        | 15 |
| 4  | 428.250359        | 214.628818      | 411.223810  | 206.115543        | 410.239794     | 205.623535       | N    | 1889.042564        | <b>945.024920</b> | 1872.016015        | 936.511646        | 1871.031999        | 936.019638        | 14 |
| 5  | 529.298038        | 265.152657      | 512.271489  | 256.639383        | 511.287473     | 256.147375       | T    | 1774.999637        | <b>888.003456</b> | 1757.973088        | 879.490182        | 1756.989072        | 878.998174        | 13 |
| 6  | 666.356950        | 333.682113      | 649.330401  | 325.168838        | 648.346385     | 324.676830       | H    | <b>1673.951958</b> | 837.479617        | 1656.925409        | 828.966343        | <b>1655.941393</b> | 828.474334        | 12 |
| 7  | 763.409714        | 382.208495      | 746.383165  | 373.695221        | 745.399149     | 373.203213       | P    | <b>1536.893046</b> | 768.950161        | <b>1519.866497</b> | 760.436887        | <b>1518.882481</b> | 759.944878        | 11 |
| 8  | 850.441742        | 425.724509      | 833.415193  | 417.211234        | 832.431177     | 416.719226       | S    | <b>1439.840282</b> | 720.423779        | 1422.813733        | 711.910505        | <b>1421.829717</b> | 711.418496        | 10 |
| 9  | 1289.667068       | 645.337172      | 1272.640519 | 636.823898        | 1271.656503    | 636.331889       | Q    | <b>1352.808254</b> | 676.907765        | 1335.781705        | <b>668.394491</b> | 1334.797689        | <b>667.902483</b> | 9  |
| 10 | 1417.762031       | 709.384654      | 1400.735482 | 700.871379        | 1399.751466    | 700.379371       | K    | <b>913.582928</b>  | 457.295102        | 896.556379         | 448.781828        | 895.572363         | <b>448.289820</b> | 8  |
| 11 | 1514.814795       | 757.911036      | 1497.788246 | 749.397761        | 1496.804230    | 748.905753       | P    | <b>785.487965</b>  | <b>393.247621</b> | <b>768.461416</b>  | 384.734346        | <b>767.477400</b>  | 384.242338        | 7  |
| 12 | 1627.898859       | 814.453067      | 1610.872310 | 805.939793        | 1609.888294    | 805.447785       | L    | <b>688.435201</b>  | 344.721239        | 671.408652         | 336.207964        | 670.424636         | 335.715956        | 6  |
| 13 | 1714.930887       | 857.969082      | 1697.904338 | <b>849.455807</b> | 1696.920322    | 848.963799       | S    | <b>575.351137</b>  | 288.179207        | 558.324588         | 279.665932        | 557.340572         | 279.173924        | 5  |
| 14 | 1828.014951       | 914.511113      | 1810.988402 | 905.997839        | 1810.004386    | 905.505831       | I    | <b>488.319109</b>  | 244.663192        | 471.292560         | 236.149918        | 470.308544         | 235.657910        | 4  |
| 15 | 1929.062630       | 965.034953      | 1912.036081 | 956.521679        | 1911.052065    | 956.029670       | T    | <b>375.235045</b>  | 188.121161        | <b>358.208496</b>  | 179.607886        | 357.224480         | 179.115878        | 3  |
| 16 | 2028.131044       | 1014.569160     | 2011.104495 | 1006.055886       | 2010.120479    | 1005.563878      | V    | 274.187366         | 137.597321        | 257.160817         | <b>129.084047</b> |                    |                   | 2  |
| 17 |                   |                 |             |                   |                |                  | R    | <b>175.118952</b>  | 88.063114         | 158.092403         | 79.549839         |                    |                   | 1  |

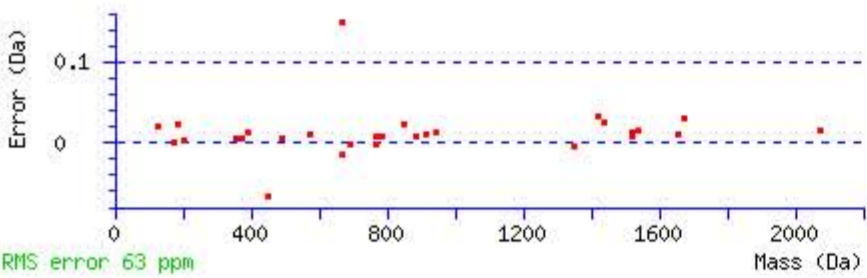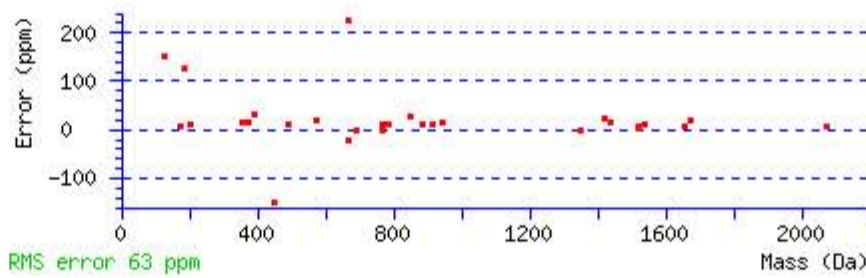

NCBI BLAST search of [LSINTHPSQKPLSITVR](#)

(Parameters: blastp, nr protein database, expect=20000, no filter, PAM30)

Other BLAST [web gateways](#)

All matches to this query

| Score | $M_r(\text{calc})$ | Delta    | Sequence                          |
|-------|--------------------|----------|-----------------------------------|
| 26.5  | 2201.235428        | 0.018428 | <a href="#">LSINTHPSQKPLSITVR</a> |

Mascot: <http://www.matrixscience.com/>

# *MATRIX* SCIENCE Mascot Search Results

## Peptide View

MS/MS Fragmentation of **SGSDEVQVGQQR**  
 Found in **CO3\_HUMAN**, Complement C3 OS=Homo sapiens GN=C3 PE=1 SV=2

Match to Query 56036: 2222.133702 from(741.718510,3+) rtinseconds(2109) index(42959)  
 Title: Locus:1.1.1.3183.17 File:"2013-07-02 CLN FXIII 180 min 1st F 3.wiff"  
 Data file C:\Program Files (x86)\Matrix Science\Mascot Daemon\mgf\7 FXIII 180 min 1st\mascot\_daemon\_merge.mgf

Click mouse within plot area to zoom in by factor of two about that point  
 Or, Plot from  to  Da   
 Label all possible matches  Label matches used for scoring

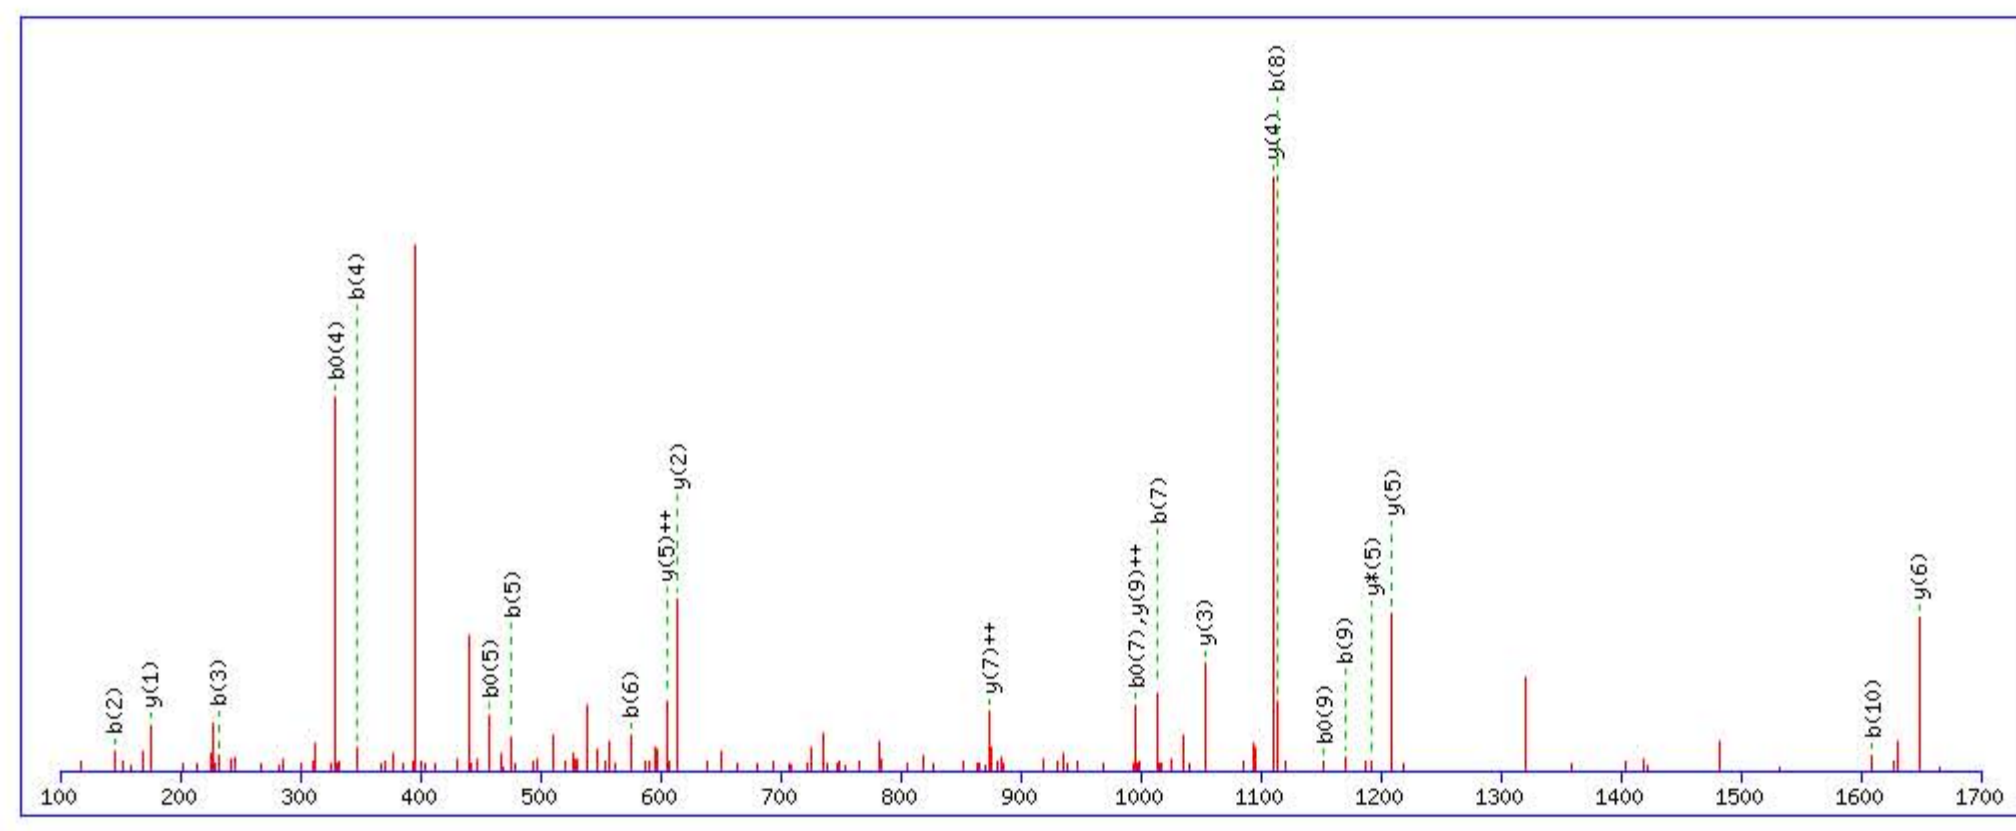

Monoisotopic mass of neutral peptide Mr(calc): 2222.101013  
 Fixed modifications: Carbamidomethyl (C) (apply to specified residues or termini only)  
 Variable modifications:  
 Q7 : Biotin:Thermo-21345 (Q)  
 Q10 : Biotin:Thermo-21345 (Q)  
 Q11 : Biotin:Thermo-21345 (Q)  
 Ions Score: 32 Expect: 0.0038  
 Matches : 23/106 fragment ions using 57 most intense peaks ([help](#))

| #  | b                  | b <sup>++</sup> | b <sup>*</sup> | b <sup>*++</sup> | b <sup>0</sup>     | b <sup>0++</sup> | Seq. | y                  | y <sup>++</sup>   | y <sup>*</sup>     | y <sup>*++</sup> | y <sup>0</sup> | y <sup>0++</sup> | #  |
|----|--------------------|-----------------|----------------|------------------|--------------------|------------------|------|--------------------|-------------------|--------------------|------------------|----------------|------------------|----|
| 1  | 88.039304          | 44.523290       |                |                  | 70.028739          | 35.518008        | S    |                    |                   |                    |                  |                |                  | 12 |
| 2  | <b>145.060768</b>  | 73.034022       |                |                  | 127.050203         | 64.028740        | G    | 2136.076250        | 1068.541763       | 2119.049701        | 1060.028488      | 2118.065685    | 1059.536480      | 11 |
| 3  | <b>232.092796</b>  | 116.550036      |                |                  | 214.082231         | 107.544753       | S    | 2079.054786        | 1040.031031       | 2062.028237        | 1031.517756      | 2061.044221    | 1031.025748      | 10 |
| 4  | <b>347.119739</b>  | 174.063507      |                |                  | <b>329.109174</b>  | 165.058225       | D    | 1992.022758        | <b>996.515017</b> | 1974.996209        | 988.001743       | 1974.012193    | 987.509735       | 9  |
| 5  | <b>476.162332</b>  | 238.584804      |                |                  | <b>458.151767</b>  | 229.579522       | E    | 1876.995815        | 939.001546        | 1859.969266        | 930.488271       | 1858.985250    | 929.996263       | 8  |
| 6  | <b>575.230746</b>  | 288.119011      |                |                  | 557.220181         | 279.113729       | V    | 1747.953222        | <b>874.480249</b> | 1730.926673        | 865.966975       |                |                  | 7  |
| 7  | <b>1014.456072</b> | 507.731674      | 997.429523     | 499.218400       | <b>996.445507</b>  | 498.726392       | Q    | <b>1648.884808</b> | 824.946042        | 1631.858259        | 816.432768       |                |                  | 6  |
| 8  | <b>1113.524486</b> | 557.265881      | 1096.497937    | 548.752607       | 1095.513921        | 548.260599       | V    | <b>1209.659482</b> | <b>605.333379</b> | <b>1192.632933</b> | 596.820105       |                |                  | 5  |
| 9  | <b>1170.545950</b> | 585.776613      | 1153.519401    | 577.263339       | <b>1152.535385</b> | 576.771330       | G    | <b>1110.591068</b> | 555.799172        | 1093.564519        | 547.285898       |                |                  | 4  |
| 10 | <b>1609.771276</b> | 805.389276      | 1592.744727    | 796.876002       | 1591.760711        | 796.383994       | Q    | <b>1053.569604</b> | 527.288440        | 1036.543055        | 518.775166       |                |                  | 3  |
| 11 | 2048.996602        | 1025.001939     | 2031.970053    | 1016.488665      | 2030.986037        | 1015.996657      | Q    | <b>614.344278</b>  | 307.675777        | 597.317729         | 299.162503       |                |                  | 2  |
| 12 |                    |                 |                |                  |                    |                  | R    | <b>175.118952</b>  | 88.063114         | 158.092403         | 79.549839        |                |                  | 1  |

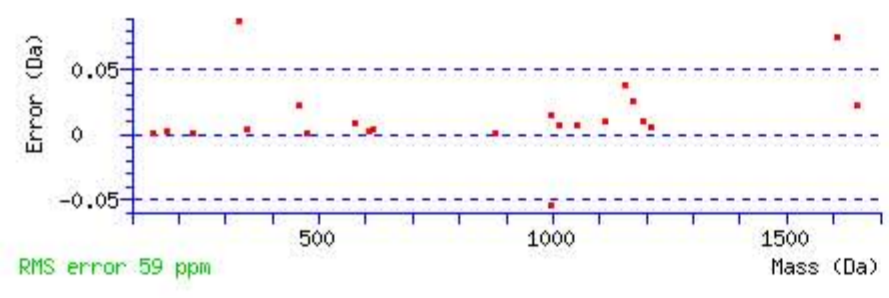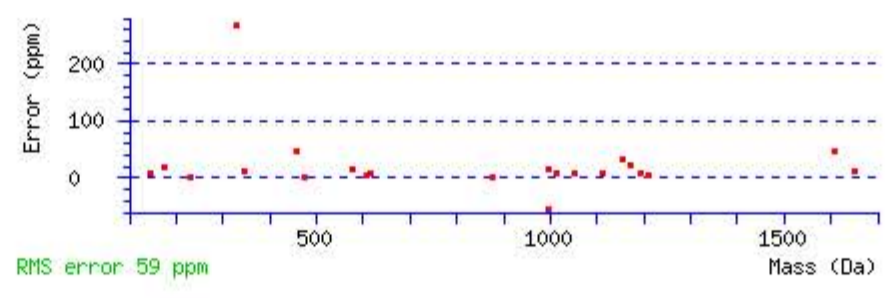

NCBI BLAST search of [SGSDEVQVGQQR](#)  
 (Parameters: blastp, nr protein database, expect=20000, no filter, PAM30)  
 Other BLAST [web gateways](#)

### All matches to this query

| Score | Mr(calc):   | Delta     | Sequence                            |
|-------|-------------|-----------|-------------------------------------|
| 31.5  | 2222.101013 | 0.032689  | <a href="#">SGSDEVQVGQQR</a>        |
| 5.4   | 2222.116058 | 0.017644  | <a href="#">GILSQMGRHSQSRSHSK</a>   |
| 4.3   | 2222.125290 | 0.008412  | <a href="#">TDDYGRDLSSVQTLTK</a>    |
| 3.0   | 2222.130417 | 0.003285  | <a href="#">YHEALSRTHNSRLPLADSR</a> |
| 1.6   | 2222.129944 | 0.003758  | <a href="#">EQQRQEELEKQR</a>        |
| 1.6   | 2222.129944 | 0.003758  | <a href="#">EQQRQEELEKQR</a>        |
| 1.6   | 2222.129944 | 0.003758  | <a href="#">EQQRQEELEKQR</a>        |
| 1.0   | 2222.152618 | -0.018916 | <a href="#">LIPMHHSIIQYMLQR</a>     |

# Mascot Search Results

## Peptide View

MS/MS Fragmentation of **DAPDHQELNLDVSLQLPSR**

Found in **CO3\_HUMAN**, Complement C3 OS=Homo sapiens GN=C3 PE=1 SV=2

Match to Query 61557: 2457.263656 from(615.323190,4+) rtinseconds(2503) index(45627)

Title: Locus:1.1.1.3320.11 File:"2013-07-02 CLN FXIII 180 min 1st F 3.wiff"

Data file C:\Program Files (x86)\Matrix Science\Mascot Daemon\mgf\7 FXIII 180 min 1st\mascot\_daemon\_merge.mgf

Click mouse within plot area to zoom in by factor of two about that point

Or, Plot from  to  Da

Label all possible matches  Label matches used for scoring

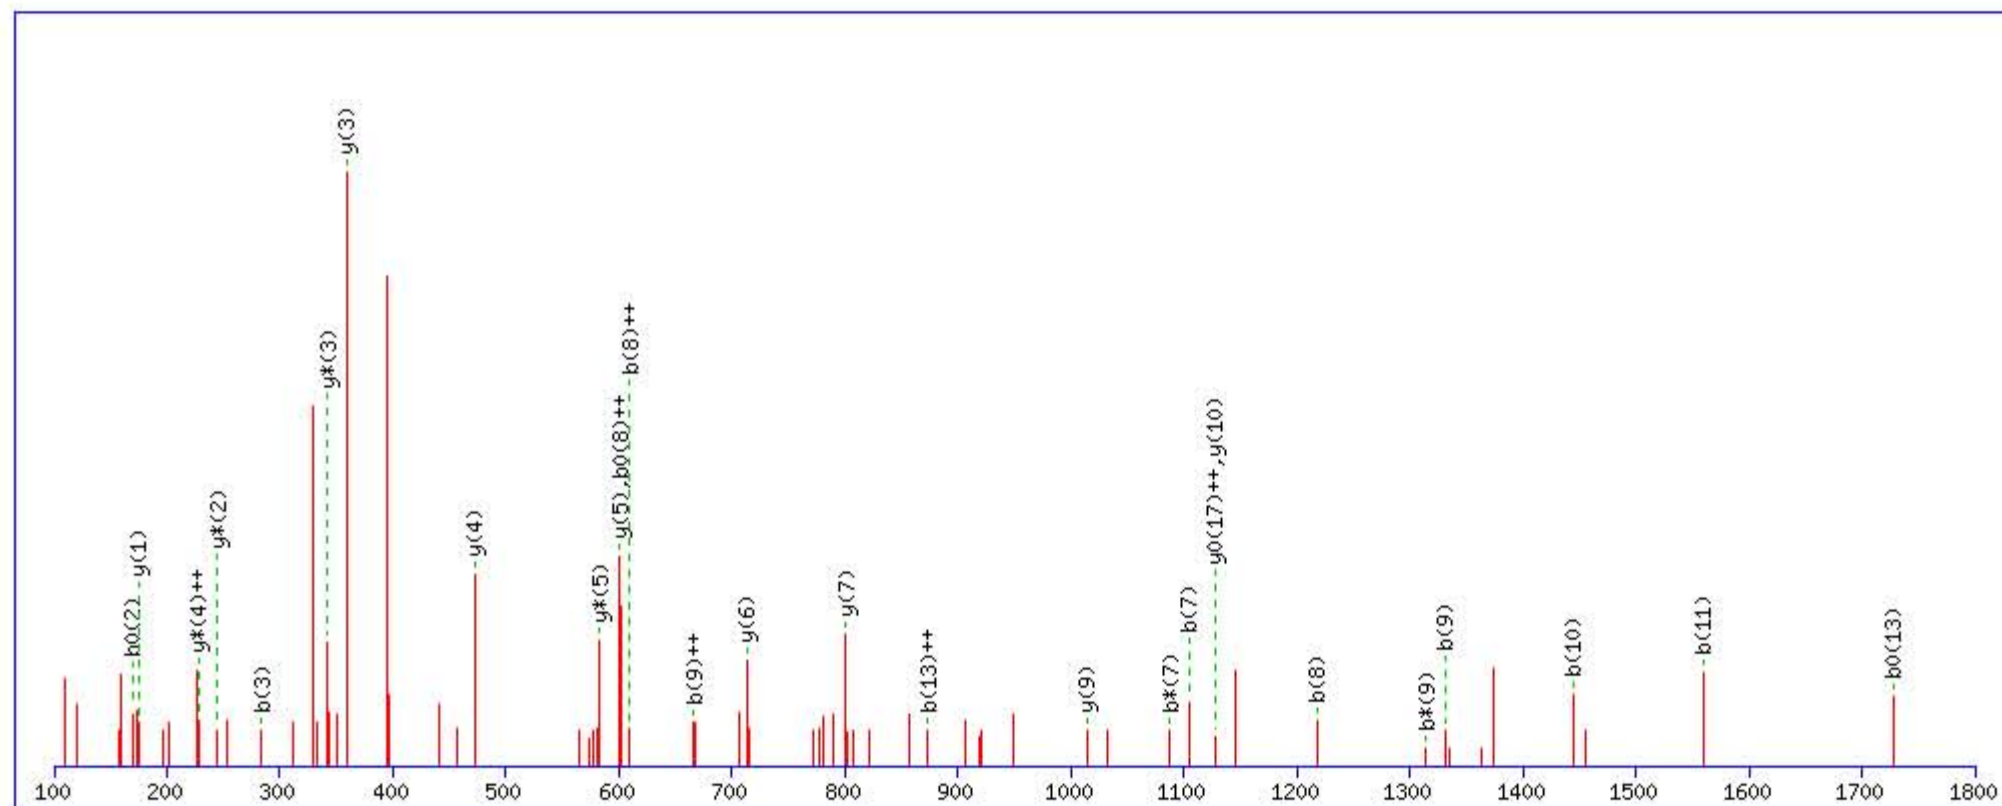

Monoisotopic mass of neutral peptide Mr(calc): 2457.232193

Fixed modifications: Carbamidomethyl (C) (apply to specified residues or termini only)

Variable modifications:

Q6 : Biotin:Thermo-21345 (Q)

Ions Score: 28 Expect: 0.007

Matches : 27/204 fragment ions using 66 most intense peaks [\(help\)](#)

| #  | b           | b <sup>++</sup> | b <sup>*</sup> | b <sup>+++</sup> | b <sup>0</sup> | b <sup>0++</sup> | Seq. | y           | y <sup>++</sup> | y <sup>*</sup> | y <sup>+++</sup> | y <sup>0</sup> | y <sup>0++</sup> | #  |
|----|-------------|-----------------|----------------|------------------|----------------|------------------|------|-------------|-----------------|----------------|------------------|----------------|------------------|----|
| 1  | 116.034219  | 58.520748       |                |                  | 98.023654      | 49.515465        | D    |             |                 |                |                  |                |                  | 19 |
| 2  | 187.071333  | 94.039304       |                |                  | 169.060768     | 85.034022        | A    | 2343.212542 | 1172.109909     | 2326.185993    | 1163.596634      | 2325.201977    | 1163.104626      | 18 |
| 3  | 284.124097  | 142.565686      |                |                  | 266.113532     | 133.560404       | P    | 2272.175428 | 1136.591352     | 2255.148879    | 1128.078077      | 2254.164863    | 1127.586069      | 17 |
| 4  | 399.151040  | 200.079158      |                |                  | 381.140475     | 191.073875       | D    | 2175.122664 | 1088.064970     | 2158.096115    | 1079.551695      | 2157.112099    | 1079.059687      | 16 |
| 5  | 536.209952  | 268.608614      |                |                  | 518.199387     | 259.603332       | H    | 2060.095721 | 1030.551498     | 2043.069172    | 1022.038224      | 2042.085156    | 1021.546216      | 15 |
| 6  | 975.435278  | 488.221277      | 958.408729     | 479.708003       | 957.424713     | 479.215995       | Q    | 1923.036809 | 962.022043      | 1906.010260    | 953.508768       | 1905.026244    | 953.016760       | 14 |
| 7  | 1104.477871 | 552.742574      | 1087.451322    | 544.229299       | 1086.467306    | 543.737291       | E    | 1483.811483 | 742.409380      | 1466.784934    | 733.896105       | 1465.800918    | 733.404097       | 13 |
| 8  | 1217.561935 | 609.284606      | 1200.535386    | 600.771331       | 1199.551370    | 600.279323       | L    | 1354.768890 | 677.888083      | 1337.742341    | 669.374809       | 1336.758325    | 668.882801       | 12 |
| 9  | 1331.604862 | 666.306069      | 1314.578313    | 657.792795       | 1313.594297    | 657.300786       | N    | 1241.684826 | 621.346051      | 1224.658277    | 612.832777       | 1223.674261    | 612.340769       | 11 |
| 10 | 1444.688926 | 722.848101      | 1427.662377    | 714.334826       | 1426.678361    | 713.842818       | L    | 1127.641899 | 564.324588      | 1110.615350    | 555.811313       | 1109.631334    | 555.319305       | 10 |
| 11 | 1559.715869 | 780.361572      | 1542.689320    | 771.848298       | 1541.705304    | 771.356290       | D    | 1014.557835 | 507.782556      | 997.531286     | 499.269281       | 996.547270     | 498.777273       | 9  |
| 12 | 1658.784283 | 829.895780      | 1641.757734    | 821.382505       | 1640.773718    | 820.890497       | V    | 899.530892  | 450.269084      | 882.504343     | 441.755810       | 881.520327     | 441.263802       | 8  |
| 13 | 1745.816311 | 873.411794      | 1728.789762    | 864.898519       | 1727.805746    | 864.406511       | S    | 800.462478  | 400.734877      | 783.435929     | 392.221603       | 782.451913     | 391.729595       | 7  |
| 14 | 1858.900375 | 929.953825      | 1841.873826    | 921.440551       | 1840.889810    | 920.948543       | L    | 713.430450  | 357.218863      | 696.403901     | 348.705589       | 695.419885     | 348.213581       | 6  |
| 15 | 1986.958953 | 993.983115      | 1969.932404    | 985.469840       | 1968.948388    | 984.977832       | Q    | 600.346386  | 300.676831      | 583.319837     | 292.163557       | 582.335821     | 291.671549       | 5  |
| 16 | 2100.043017 | 1050.525146     | 2083.016468    | 1042.011872      | 2082.032452    | 1041.519864      | L    | 472.287808  | 236.647542      | 455.261259     | 228.134268       | 454.277243     | 227.642260       | 4  |
| 17 | 2197.095781 | 1099.051528     | 2180.069232    | 1090.538254      | 2179.085216    | 1090.046246      | P    | 359.203744  | 180.105510      | 342.177195     | 171.592236       | 341.193179     | 171.100228       | 3  |
| 18 | 2284.127809 | 1142.567542     | 2267.101260    | 1134.054268      | 2266.117244    | 1133.562260      | S    | 262.150980  | 131.579128      | 245.124431     | 123.065854       | 244.140415     | 122.573846       | 2  |
| 19 |             |                 |                |                  |                |                  | R    | 175.118952  | 88.063114       | 158.092403     | 79.549839        |                |                  | 1  |

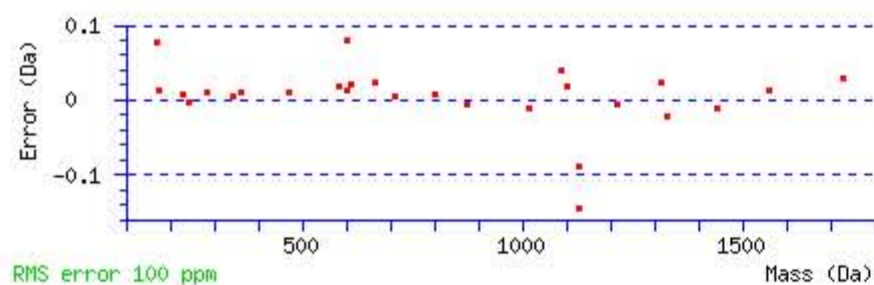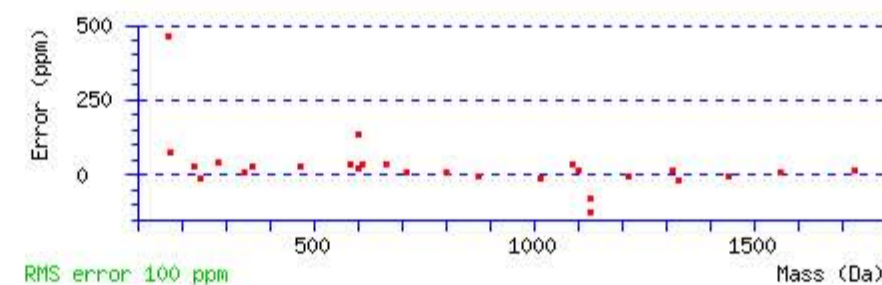

NCBI BLAST search of [DAPDHQELNLDVSLQLPSR](#)

(Parameters: blastp, nr protein database, expect=20000, no filter, PAM30)

Other BLAST [web gateways](#)

All matches to this query

| Score | Mr(calc):   | Delta    | Sequence                              |
|-------|-------------|----------|---------------------------------------|
| 27.5  | 2457.232193 | 0.031463 | <a href="#">DAPDHQELNLDVSLQLPSR</a>   |
| 4.6   | 2457.243423 | 0.020233 | <a href="#">TGLSDAFMILNPSDPVPSRRR</a> |

Mascot: <http://www.matrixscience.com/>







# Mascot Search Results

## Peptide View

MS/MS Fragmentation of **DTWVEHWPEEDECQDEENQK**  
Found in **CO3\_HUMAN**, Complement C3 OS=Homo sapiens GN=C3 PE=1 SV=2

Match to Query 69262: 2913.228612 from(972.083480,3+) rtinseconds(2115) index(42999)  
Title: Locus:1.1.1.3185.17 File:"2013-07-02 CLN FXIII 180 min 1st F 3.wiff"  
Data file C:\Program Files (x86)\Matrix Science\Mascot Daemon\mgf\7 FXIII 180 min 1st\mascot\_daemon\_merge.mgf

Click mouse within plot area to zoom in by factor of two about that point

Or, Plot from  to  Da   
Label all possible matches  Label matches used for scoring

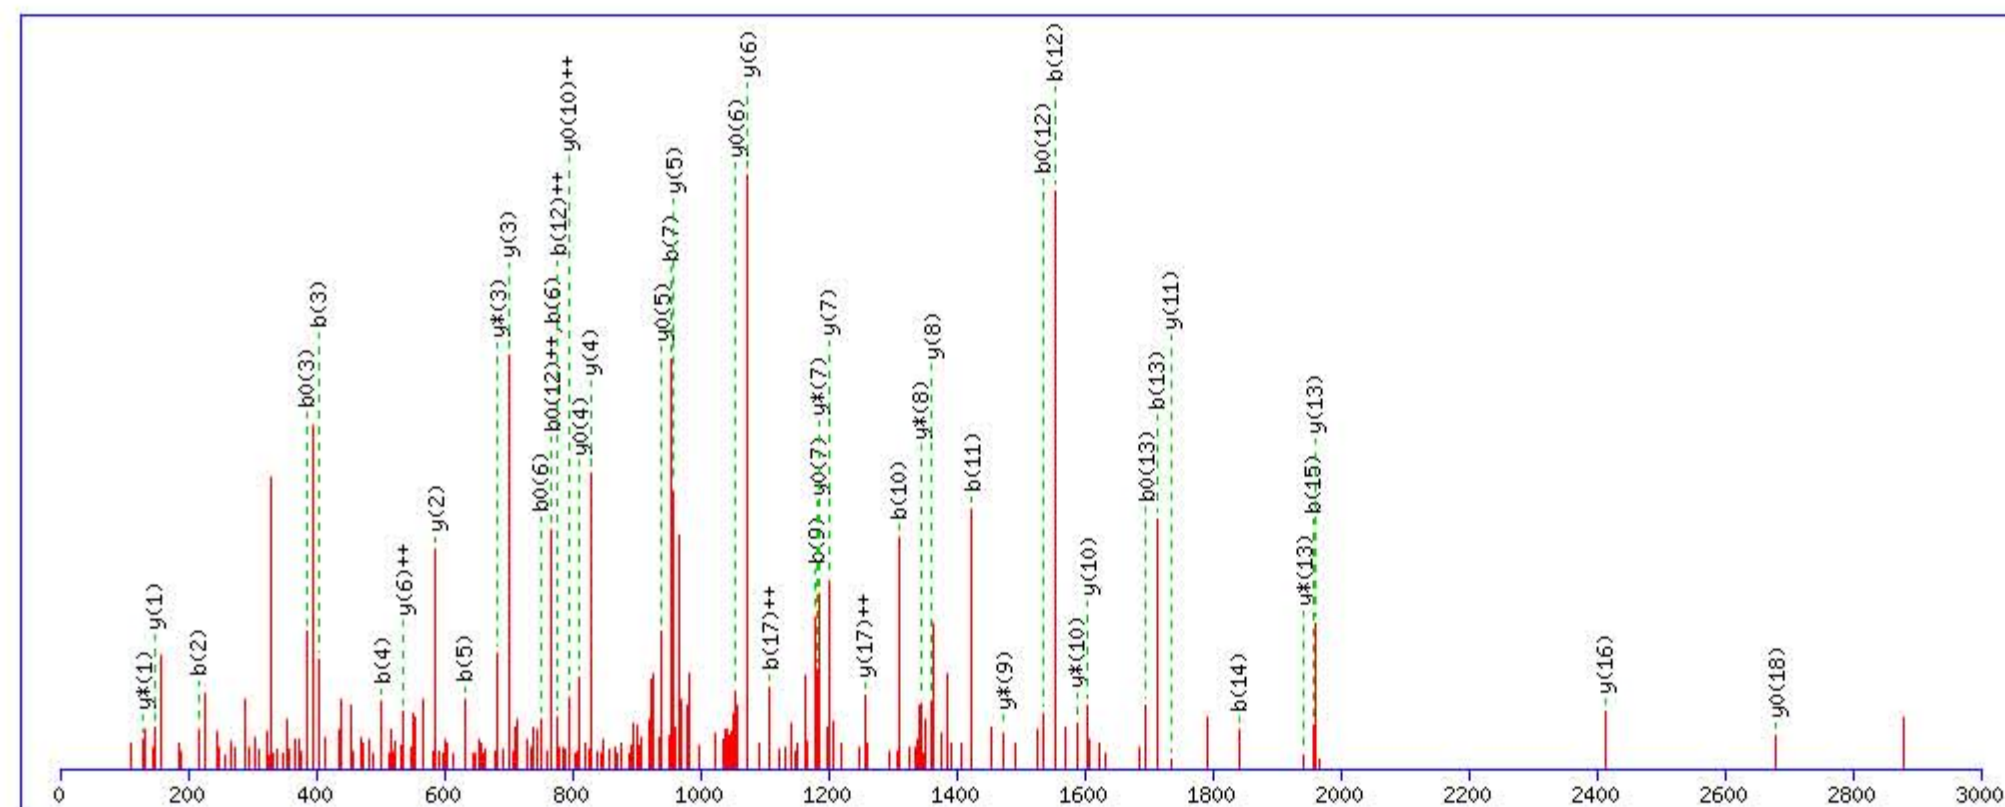

Monoisotopic mass of neutral peptide Mr(calc): 2913.185776  
Fixed modifications: Carbamidomethyl (C) (apply to specified residues or termini only)  
Variable modifications:  
Q19 : Biotin:Thermo-21345 (Q)  
Ions Score: 81 Expect: 2e-008  
Matches : 47/196 fragment ions using 76 most intense peaks ([help](#))

| #  | b                  | b <sup>++</sup>    | b <sup>*</sup> | b <sup>*++</sup> | b <sup>0</sup>     | b <sup>0++</sup>  | Seq. | y                  | y <sup>++</sup>    | y <sup>*</sup>     | y <sup>*++</sup> | y <sup>0</sup>     | y <sup>0++</sup>  | #  |
|----|--------------------|--------------------|----------------|------------------|--------------------|-------------------|------|--------------------|--------------------|--------------------|------------------|--------------------|-------------------|----|
| 1  | 116.034219         | 58.520748          |                |                  | 98.023654          | 49.515465         | D    |                    |                    |                    |                  |                    |                   | 20 |
| 2  | <b>217.081898</b>  | 109.044587         |                |                  | 199.071333         | 100.039304        | T    | 2799.166123        | 1400.086699        | 2782.139574        | 1391.573425      | 2781.155558        | 1391.081417       | 19 |
| 3  | <b>403.161211</b>  | 202.084244         |                |                  | <b>385.150646</b>  | 193.078961        | W    | 2698.118444        | 1349.562860        | 2681.091895        | 1341.049585      | <b>2680.107879</b> | 1340.557577       | 18 |
| 4  | <b>502.229625</b>  | 251.618451         |                |                  | 484.219060         | 242.613168        | V    | 2512.039131        | <b>1256.523203</b> | 2495.012582        | 1248.009929      | 2494.028566        | 1247.517921       | 17 |
| 5  | <b>631.272218</b>  | 316.139747         |                |                  | 613.261653         | 307.134465        | E    | <b>2412.970717</b> | 1206.988996        | 2395.944168        | 1198.475722      | 2394.960152        | 1197.983714       | 16 |
| 6  | <b>768.331130</b>  | 384.669203         |                |                  | <b>750.320565</b>  | 375.663921        | H    | 2283.928124        | 1142.467700        | 2266.901575        | 1133.954425      | 2265.917559        | 1133.462417       | 15 |
| 7  | <b>954.410443</b>  | 477.708860         |                |                  | 936.399878         | 468.703577        | W    | 2146.869212        | 1073.938244        | 2129.842663        | 1065.424969      | 2128.858647        | 1064.932961       | 14 |
| 8  | 1051.463207        | 526.235242         |                |                  | 1033.452642        | 517.229959        | P    | <b>1960.789899</b> | 980.898588         | <b>1943.763350</b> | 972.385313       | 1942.779334        | 971.893305        | 13 |
| 9  | <b>1180.505800</b> | 590.756538         |                |                  | 1162.495235        | 581.751256        | E    | 1863.737135        | 932.372206         | 1846.710586        | 923.858931       | 1845.726570        | 923.366923        | 12 |
| 10 | <b>1309.548393</b> | 655.277835         |                |                  | 1291.537828        | 646.272552        | E    | <b>1734.694542</b> | 867.850909         | 1717.667993        | 859.337635       | 1716.683977        | 858.845627        | 11 |
| 11 | <b>1424.575336</b> | 712.791306         |                |                  | 1406.564771        | 703.786024        | D    | <b>1605.651949</b> | 803.329613         | <b>1588.625400</b> | 794.816338       | 1587.641384        | <b>794.324330</b> | 10 |
| 12 | <b>1553.617929</b> | <b>777.312603</b>  |                |                  | <b>1535.607364</b> | <b>768.307320</b> | E    | 1490.625006        | 745.816141         | <b>1473.598457</b> | 737.302867       | 1472.614441        | 736.810859        | 9  |
| 13 | <b>1713.648578</b> | 857.327927         |                |                  | <b>1695.638013</b> | 848.322645        | C    | <b>1361.582413</b> | 681.294845         | <b>1344.555864</b> | 672.781570       | 1343.571848        | 672.289562        | 8  |
| 14 | <b>1841.707156</b> | 921.357216         | 1824.680607    | 912.843942       | 1823.696591        | 912.351934        | Q    | <b>1201.551764</b> | 601.279520         | <b>1184.525215</b> | 592.766246       | <b>1183.541199</b> | 592.274238        | 7  |
| 15 | <b>1956.734099</b> | 978.870688         | 1939.707550    | 970.357413       | 1938.723534        | 969.865405        | D    | <b>1073.493186</b> | <b>537.250231</b>  | 1056.466637        | 528.736957       | <b>1055.482621</b> | 528.244949        | 6  |
| 16 | 2085.776692        | 1043.391984        | 2068.750143    | 1034.878709      | 2067.766127        | 1034.386701       | E    | <b>958.466243</b>  | 479.736760         | 941.439694         | 471.223485       | <b>940.455678</b>  | 470.731477        | 5  |
| 17 | 2214.819285        | <b>1107.913280</b> | 2197.792736    | 1099.400006      | 2196.808720        | 1098.907998       | E    | <b>829.423650</b>  | 415.215463         | 812.397101         | 406.702189       | <b>811.413085</b>  | 406.210181        | 4  |
| 18 | 2328.862212        | 1164.934744        | 2311.835663    | 1156.421469      | 2310.851647        | 1155.929461       | N    | <b>700.381057</b>  | 350.694167         | <b>683.354508</b>  | 342.180892       |                    |                   | 3  |
| 19 | 2768.087538        | 1384.547407        | 2751.060989    | 1376.034132      | 2750.076973        | 1375.542125       | Q    | <b>586.338130</b>  | 293.672703         | 569.311581         | 285.159429       |                    |                   | 2  |
| 20 |                    |                    |                |                  |                    |                   | K    | <b>147.112804</b>  | 74.060040          | <b>130.086255</b>  | 65.546765        |                    |                   | 1  |

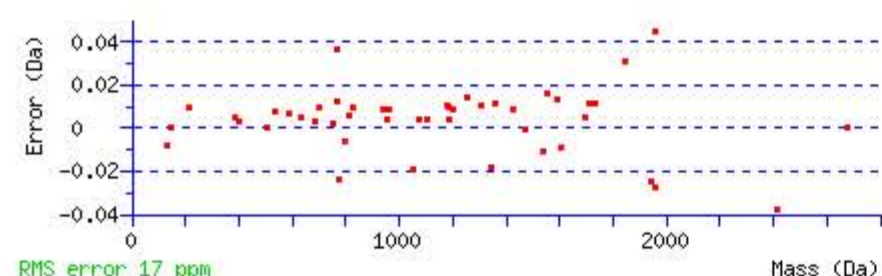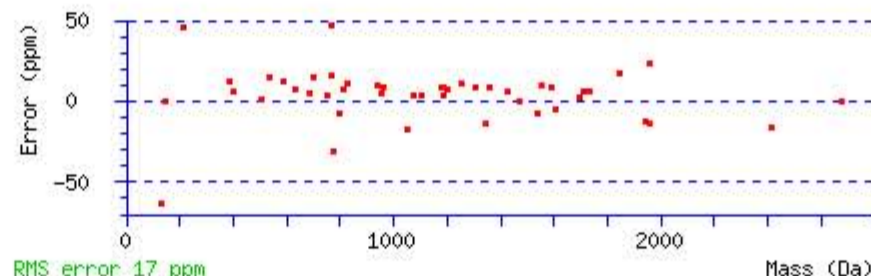

NCBI BLAST search of **DTWVEHWPEEDECQDEENQK**  
(Parameters: blastp, nr protein database, expect=20000, no filter, PAM30)  
Other BLAST [web gateways](#)

### All matches to this query

| Score | Mr(calc):   | Delta    | Sequence                             |
|-------|-------------|----------|--------------------------------------|
| 80.9  | 2913.185776 | 0.042836 | <a href="#">DTWVEHWPEEDECQDEENQK</a> |
| 34.9  | 2913.185776 | 0.042836 | <a href="#">DTWVEHWPEEDECQDEENQK</a> |

Mascot: <http://www.matrixscience.com/>

**MASCOT** SCIENCE Mascot Search Results

Peptide View

MS/MS Fragmentation of **AAANQMR**

Found in **CO4A\_HUMAN**, Complement C4-A OS=Homo sapiens GN=C4A PE=1 SV=2

Match to Query 18669: 1087.538228 from(544.776390,2+) rtinseconds(1115) index(54655)

Title: Locus:1.1.1.2811.17 File:"2013-07-02 CLN FXIII 180 min 1st F 4.wiff"

Data file C:\Program Files (x86)\Matrix Science\Mascot Daemon\mgf\7 FXIII 180 min 1st\mascot\_daemon\_merge.mgf

Click mouse within plot area to zoom in by factor of two about that point

Or, Plot from  to  Da

Label all possible matches  Label matches used for scoring

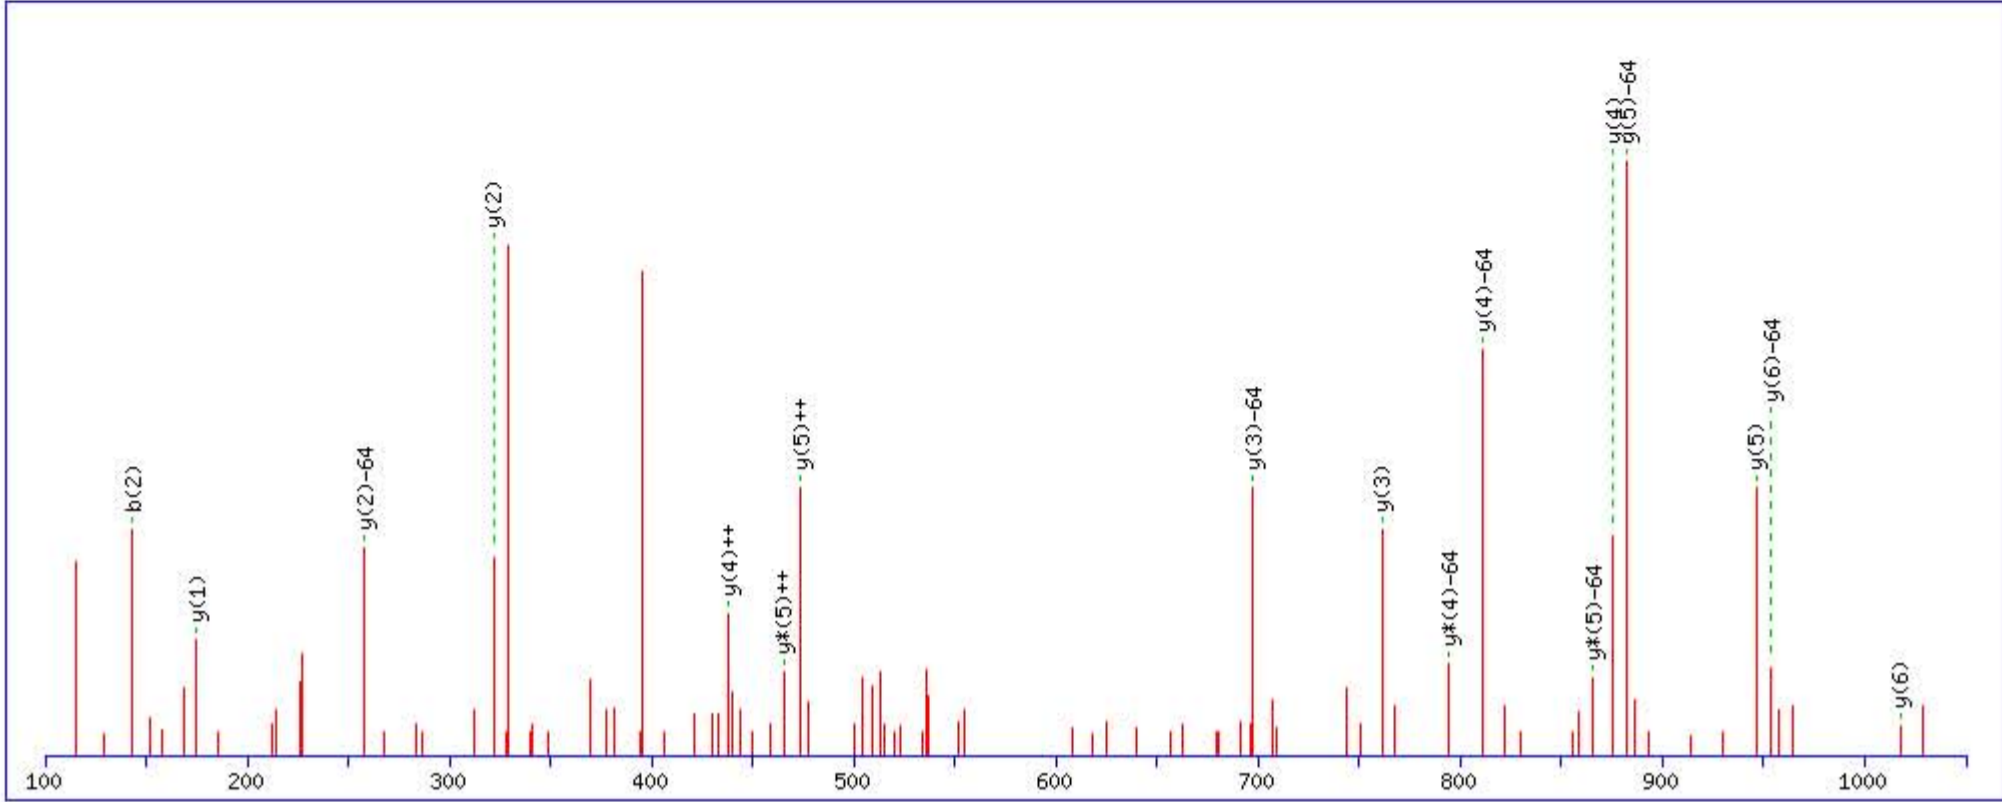

Monoisotopic mass of neutral peptide Mr(calc): 1087.526642

Fixed modifications: Carbamidomethyl (C) (apply to specified residues or termini only)

Variable modifications:

Q5 : Biotin:Thermo-21345 (Q)

M6 : Oxidation (M), with neutral losses 0.000000 (shown in table), 63.998285

Ions Score: 34 Expect: 0.0081

Matches : 17/66 fragment ions using 29 most intense peaks [\(help\)](#)

| # | b          | b <sup>++</sup> | b <sup>*</sup> | b <sup>*++</sup> | Seq. | y           | y <sup>++</sup> | y <sup>*</sup> | y <sup>*++</sup> | # |
|---|------------|-----------------|----------------|------------------|------|-------------|-----------------|----------------|------------------|---|
| 1 | 72.044390  | 36.525833       |                |                  | A    |             |                 |                |                  | 7 |
| 2 | 143.081504 | 72.044390       |                |                  | A    | 1017.496833 | 509.252055      | 1000.470284    | 500.738780       | 6 |
| 3 | 214.118618 | 107.562947      |                |                  | A    | 946.459719  | 473.733498      | 929.433170     | 465.220223       | 5 |
| 4 | 328.161545 | 164.584410      | 311.134996     | 156.071136       | N    | 875.422605  | 438.214941      | 858.396056     | 429.701666       | 4 |
| 5 | 767.386871 | 384.197074      | 750.360322     | 375.683799       | Q    | 761.379678  | 381.193477      | 744.353129     | 372.680203       | 3 |
| 6 | 914.422271 | 457.714774      | 897.395722     | 449.201499       | M    | 322.154352  | 161.580814      | 305.127803     | 153.067540       | 2 |
| 7 |            |                 |                |                  | R    | 175.118952  | 88.063114       | 158.092403     | 79.549840        | 1 |

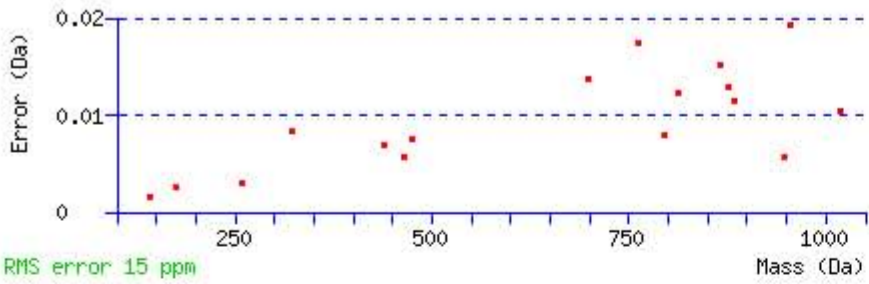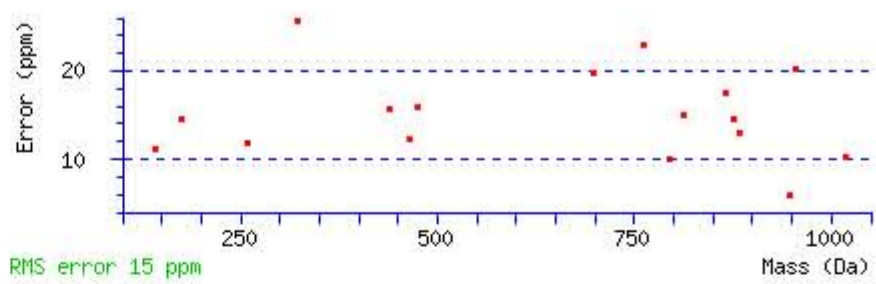

NCBI BLAST search of **AAANQMR**

(Parameters: blastp, nr protein database, expect=20000, no filter, PAM30)

Other BLAST [web gateways](#)

All matches to this query

| Score | Mr(calc):   | Delta    | Sequence                |
|-------|-------------|----------|-------------------------|
| 34.1  | 1087.526642 | 0.011586 | <a href="#">AAANQMR</a> |

# MASCOT SCIENCE Mascot Search Results

## Peptide View

MS/MS Fragmentation of **VQQPDCR**

Found in **CO4A\_HUMAN**, Complement C4-A OS=Homo sapiens GN=C4A PE=1 SV=2

Match to Query 24040: 1212.589348 from(607.301950,2+) rtinseconds(1279) index(55722)

Title: Locus:1.1.1.2868.23 File:"2013-07-02 CLN FXIII 180 min 1st F 4.wiff"

Data file C:\Program Files (x86)\Matrix Science\Mascot Daemon\mgf\7 FXIII 180 min 1st\mascot\_daemon\_merge.mgf

Click mouse within plot area to zoom in by factor of two about that point

Or, Plot from  to  Da

Label all possible matches  Label matches used for scoring

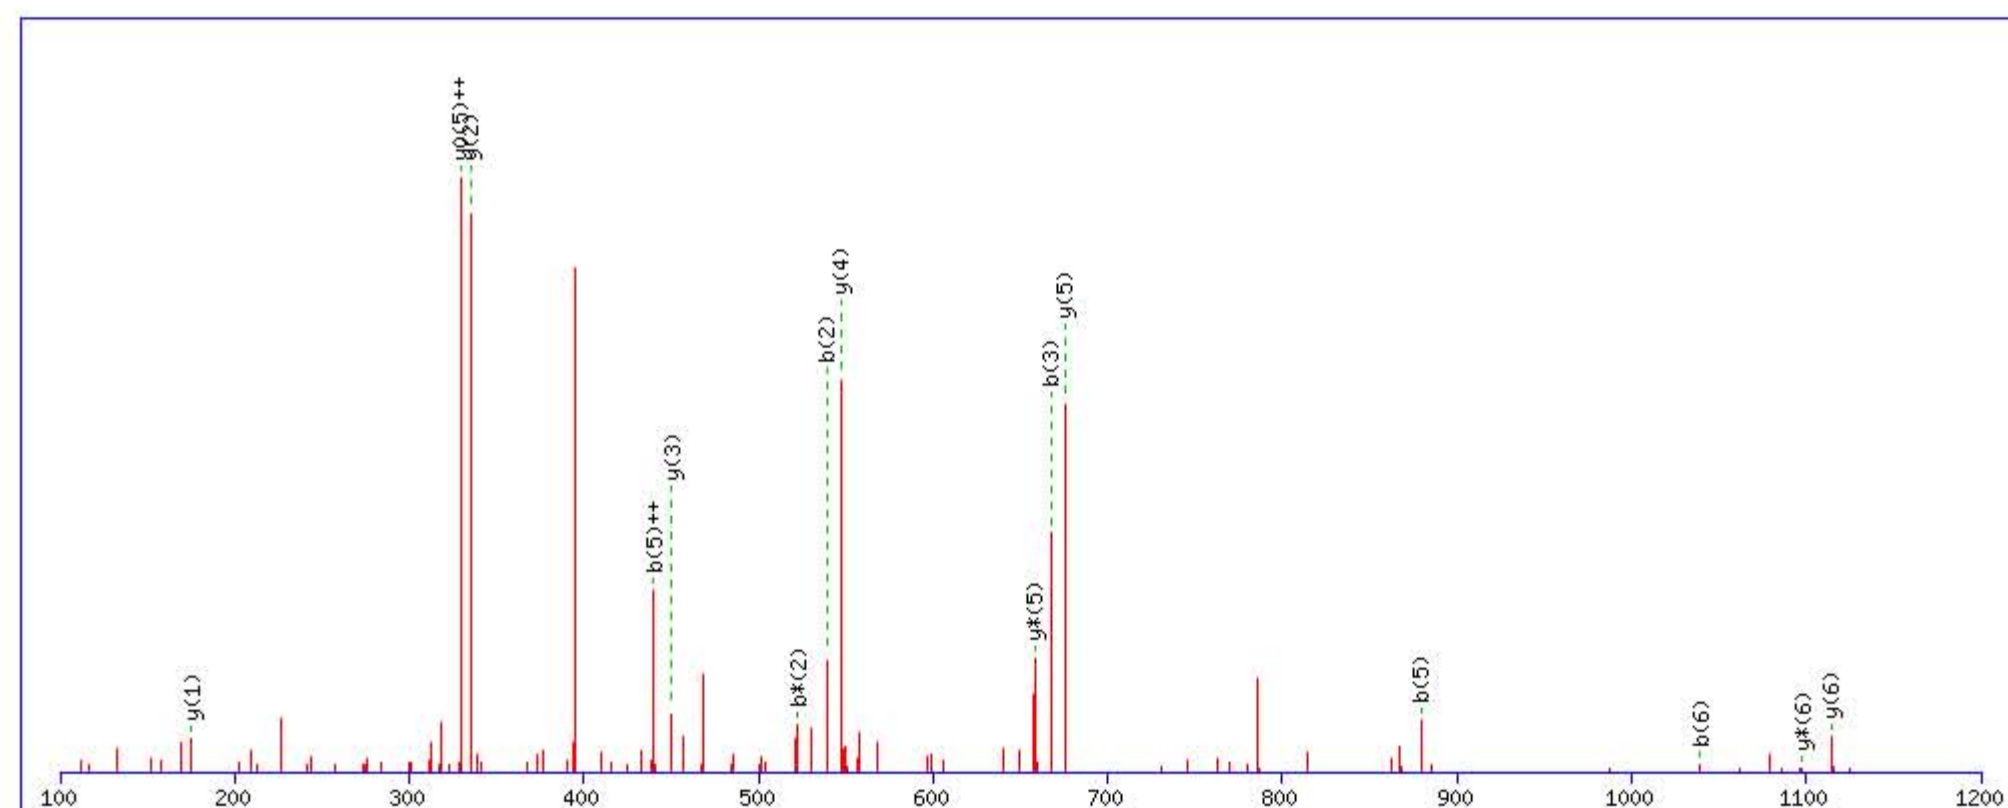

Monoisotopic mass of neutral peptide Mr(calc): 1212.574356

Fixed modifications: Carbamidomethyl (C) (apply to specified residues or termini only)

Variable modifications:

Q2 : Biotin:Thermo-21345 (Q)

Ions Score: 30 Expect: 0.0081

Matches : 15/58 fragment ions using 31 most intense peaks [\(help\)](#)

| # | b                  | b <sup>++</sup>   | b <sup>*</sup>    | b <sup>*++</sup> | b <sup>0</sup> | b <sup>0++</sup> | Seq. | y                  | y <sup>++</sup> | y <sup>*</sup>     | y <sup>*++</sup> | y <sup>0</sup> | y <sup>0++</sup>  | # |
|---|--------------------|-------------------|-------------------|------------------|----------------|------------------|------|--------------------|-----------------|--------------------|------------------|----------------|-------------------|---|
| 1 | 100.075690         | 50.541483         |                   |                  |                |                  | V    |                    |                 |                    |                  |                |                   | 7 |
| 2 | <b>539.301016</b>  | 270.154146        | <b>522.274467</b> | 261.640872       |                |                  | Q    | <b>1114.513212</b> | 557.760244      | <b>1097.486663</b> | 549.246970       | 1096.502647    | 548.754962        | 6 |
| 3 | <b>667.359594</b>  | 334.183435        | 650.333045        | 325.670161       |                |                  | Q    | <b>675.287886</b>  | 338.147581      | <b>658.261337</b>  | 329.634307       | 657.277321     | <b>329.142299</b> | 5 |
| 4 | 764.412358         | 382.709817        | 747.385809        | 374.196543       |                |                  | P    | <b>547.229308</b>  | 274.118292      | 530.202759         | 265.605018       | 529.218743     | 265.113010        | 4 |
| 5 | <b>879.439301</b>  | <b>440.223289</b> | 862.412752        | 431.710014       | 861.428736     | 431.218006       | D    | <b>450.176544</b>  | 225.591910      | 433.149995         | 217.078635       | 432.165979     | 216.586627        | 3 |
| 6 | <b>1039.469950</b> | 520.238613        | 1022.443401       | 511.725339       | 1021.459385    | 511.233331       | C    | <b>335.149601</b>  | 168.078438      | 318.123052         | 159.565164       |                |                   | 2 |
| 7 |                    |                   |                   |                  |                |                  | R    | <b>175.118952</b>  | 88.063114       | 158.092403         | 79.549839        |                |                   | 1 |

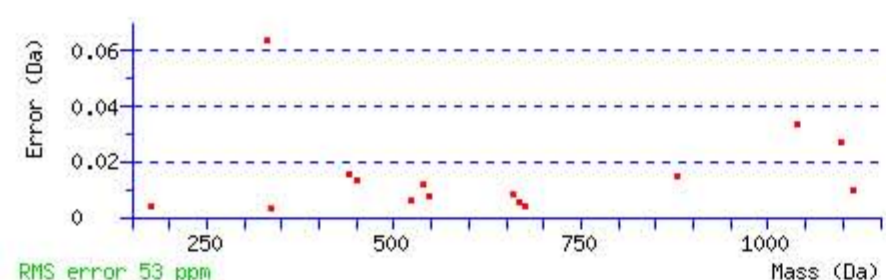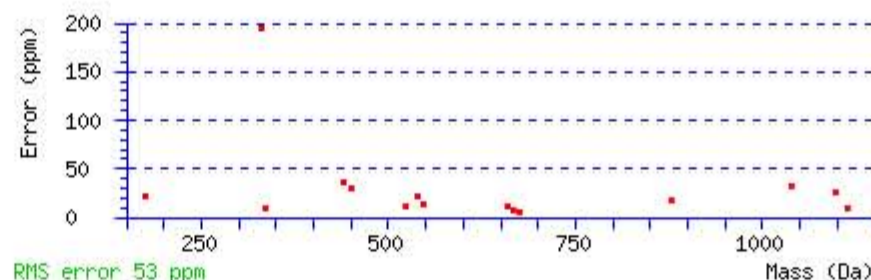

NCBI BLAST search of **VQQPDCR**

(Parameters: blastp, nr protein database, expect=20000, no filter, PAM30)

Other BLAST [web gateways](#)

All matches to this query

| Score | Mr(calc):   | Delta     | Sequence                    |
|-------|-------------|-----------|-----------------------------|
| 30.3  | 1212.574356 | 0.014992  | <a href="#">VQQPDCR</a>     |
| 13.9  | 1212.574356 | 0.014992  | <a href="#">VQQPDCR</a>     |
| 7.8   | 1212.592102 | -0.002754 | <a href="#">VQEDQQR</a>     |
| 7.1   | 1212.596115 | -0.006767 | <a href="#">YFVEAGAMAVR</a> |
| 4.7   | 1212.592758 | -0.003410 | <a href="#">IYYVDHFTR</a>   |

# MASCOT Search Results

## Peptide View

MS/MS Fragmentation of **VEYGFQVK**  
 Found in **CO4A\_HUMAN**, Complement C4-A OS=Homo sapiens GN=C4A PE=1 SV=2

Match to Query 26222: 1279.675648 from(640.845100,2+) rtinseconds(1967) index(42006)  
 Title: Locus:1.1.1.3134.11 File:"2013-07-02 CLN FXIII 180 min 1st F 3.wiff"  
 Data file C:\Program Files (x86)\Matrix Science\Mascot Daemon\mgf\7 FXIII 180 min 1st\mascot\_daemon\_merge.mgf

Click mouse within plot area to zoom in by factor of two about that point

Or, Plot from  to  Da

Label all possible matches  Label matches used for scoring

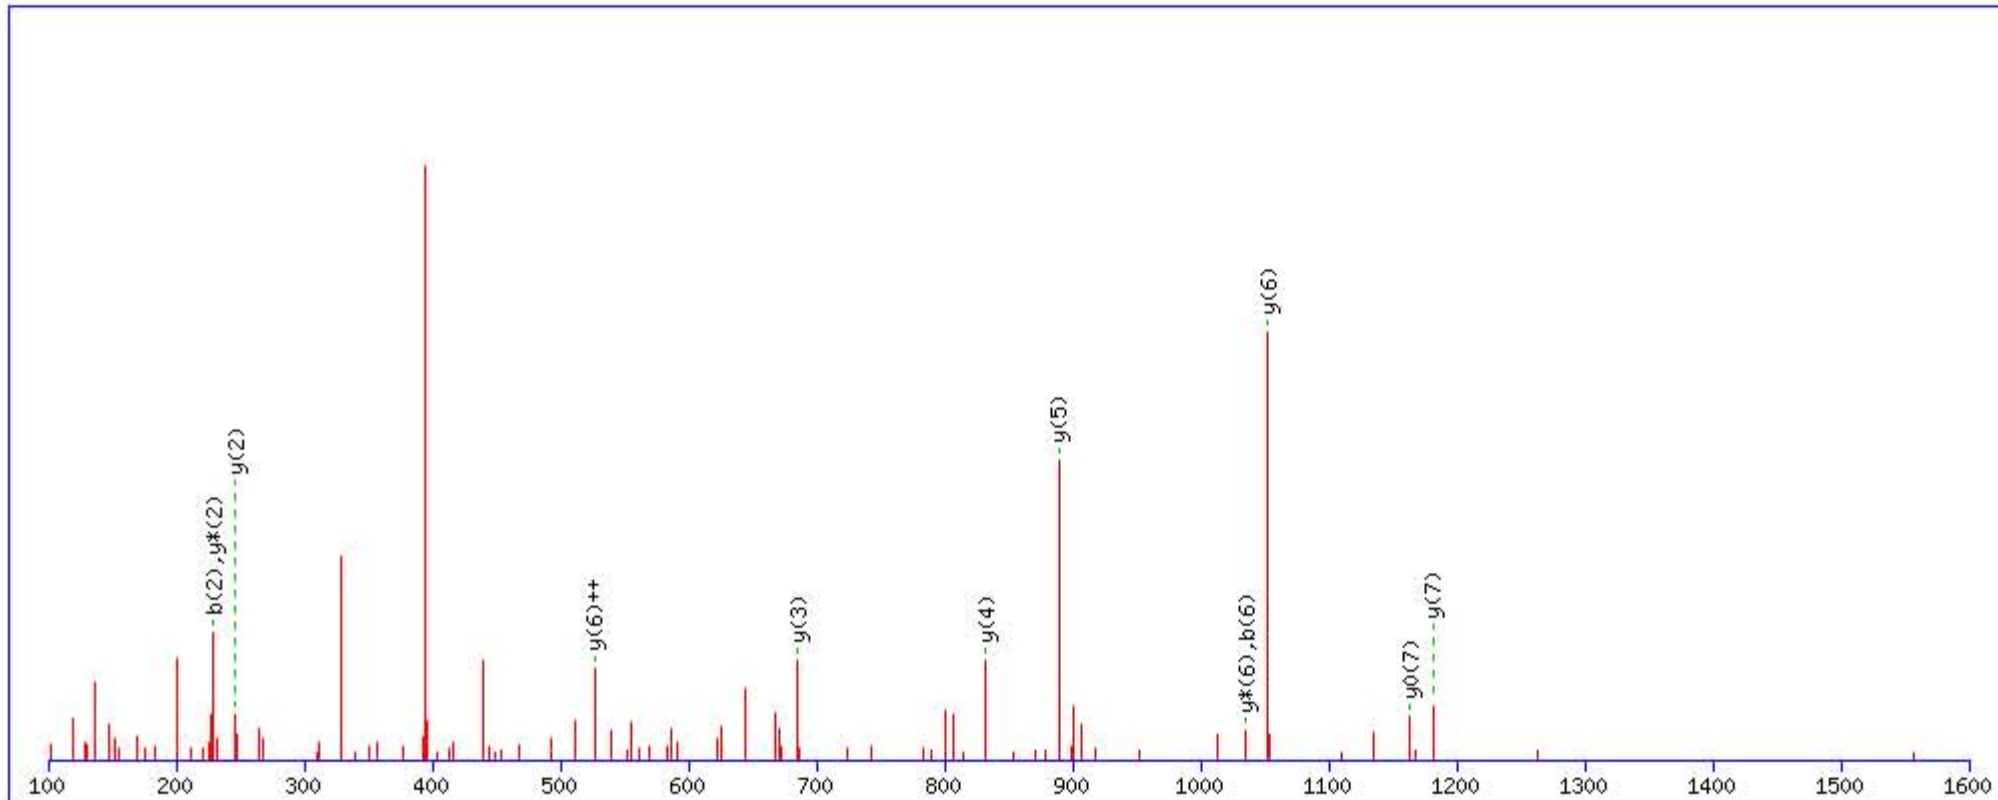

Monoisotopic mass of neutral peptide Mr(calc): 1279.663483  
 Fixed modifications: Carbamidomethyl (C) (apply to specified residues or termini only)  
 Variable modifications:  
 Q6 : Biotin:Thermo-21345 (Q)  
 Ions Score: 28 Expect: 0.0073  
 Matches : 12/60 fragment ions using 23 most intense peaks [\(help\)](#)

| # | b                  | b <sup>++</sup> | b <sup>*</sup> | b <sup>*++</sup> | b <sup>0</sup> | b <sup>0++</sup> | Seq. | y                  | y <sup>++</sup>   | y <sup>*</sup>     | y <sup>*++</sup> | y <sup>0</sup>     | y <sup>0++</sup> | # |
|---|--------------------|-----------------|----------------|------------------|----------------|------------------|------|--------------------|-------------------|--------------------|------------------|--------------------|------------------|---|
| 1 | 100.075690         | 50.541483       |                |                  |                |                  | V    |                    |                   |                    |                  |                    |                  | 8 |
| 2 | <b>229.118283</b>  | 115.062780      |                |                  | 211.107718     | 106.057497       | E    | <b>1181.602344</b> | 591.304810        | 1164.575795        | 582.791536       | <b>1163.591779</b> | 582.299528       | 7 |
| 3 | 392.181612         | 196.594444      |                |                  | 374.171047     | 187.589162       | Y    | <b>1052.559751</b> | <b>526.783514</b> | <b>1035.533202</b> | 518.270239       |                    |                  | 6 |
| 4 | 449.203076         | 225.105176      |                |                  | 431.192511     | 216.099894       | G    | <b>889.496422</b>  | 445.251849        | 872.469873         | 436.738575       |                    |                  | 5 |
| 5 | 596.271490         | 298.639383      |                |                  | 578.260925     | 289.634101       | F    | <b>832.474958</b>  | 416.741117        | 815.448409         | 408.227843       |                    |                  | 4 |
| 6 | <b>1035.496816</b> | 518.252046      | 1018.470267    | 509.738772       | 1017.486251    | 509.246764       | Q    | <b>685.406544</b>  | 343.206910        | 668.379995         | 334.693636       |                    |                  | 3 |
| 7 | 1134.565230        | 567.786253      | 1117.538681    | 559.272979       | 1116.554665    | 558.780971       | V    | <b>246.181218</b>  | 123.594247        | <b>229.154669</b>  | 115.080973       |                    |                  | 2 |
| 8 |                    |                 |                |                  |                |                  | K    | 147.112804         | 74.060040         | 130.086255         | 65.546765        |                    |                  | 1 |

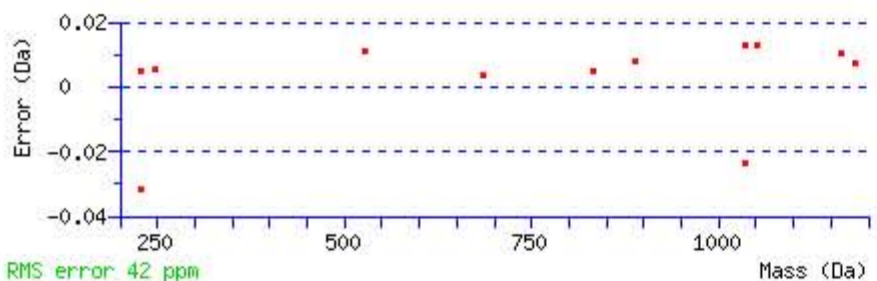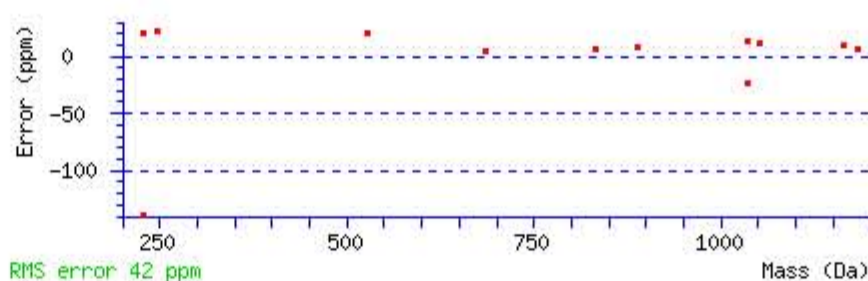

NCBI BLAST search of **VEYGFQVK**  
 (Parameters: blastp, nr protein database, expect=20000, no filter, PAM30)  
 Other BLAST [web gateways](#)

## All matches to this query

| Score | Mr(calc):   | Delta     | Sequence                     |
|-------|-------------|-----------|------------------------------|
| 28.5  | 1279.663483 | 0.012165  | <a href="#">VEYGFQVK</a>     |
| 5.3   | 1279.687958 | -0.012310 | <a href="#">LIKSMESVMVK</a>  |
| 4.1   | 1279.684601 | -0.008953 | <a href="#">TKPLMTEFSVK</a>  |
| 3.3   | 1279.681229 | -0.005581 | <a href="#">EVTVKEWYVK</a>   |
| 2.5   | 1279.684601 | -0.008953 | <a href="#">MSASAVFILDVK</a> |
| 2.2   | 1279.663483 | 0.012165  | <a href="#">QFVGYLDK</a>     |
| 0.4   | 1279.677216 | -0.001568 | <a href="#">VFKTEDIQGKK</a>  |

# MASCOT Search Results

## Peptide View

MS/MS Fragmentation of **VVEEQESR**  
 Found in **CO4A\_HUMAN**, Complement C4-A OS=Homo sapiens GN=C4A PE=1 SV=2

Match to Query 26583: 1285.650468 from(643.832510,2+) rtinseconds(1364) index(56276)  
 Title: Locus:1.1.1.2898.7 File:"2013-07-02 CLN FXIII 180 min 1st F 4.wiff"  
 Data file C:\Program Files (x86)\Matrix Science\Mascot Daemon\mgf\7 FXIII 180 min 1st\mascot\_daemon\_merge.mgf

Click mouse within plot area to zoom in by factor of two about that point  
 Or, Plot from  to  Da   
 Label all possible matches  Label matches used for scoring

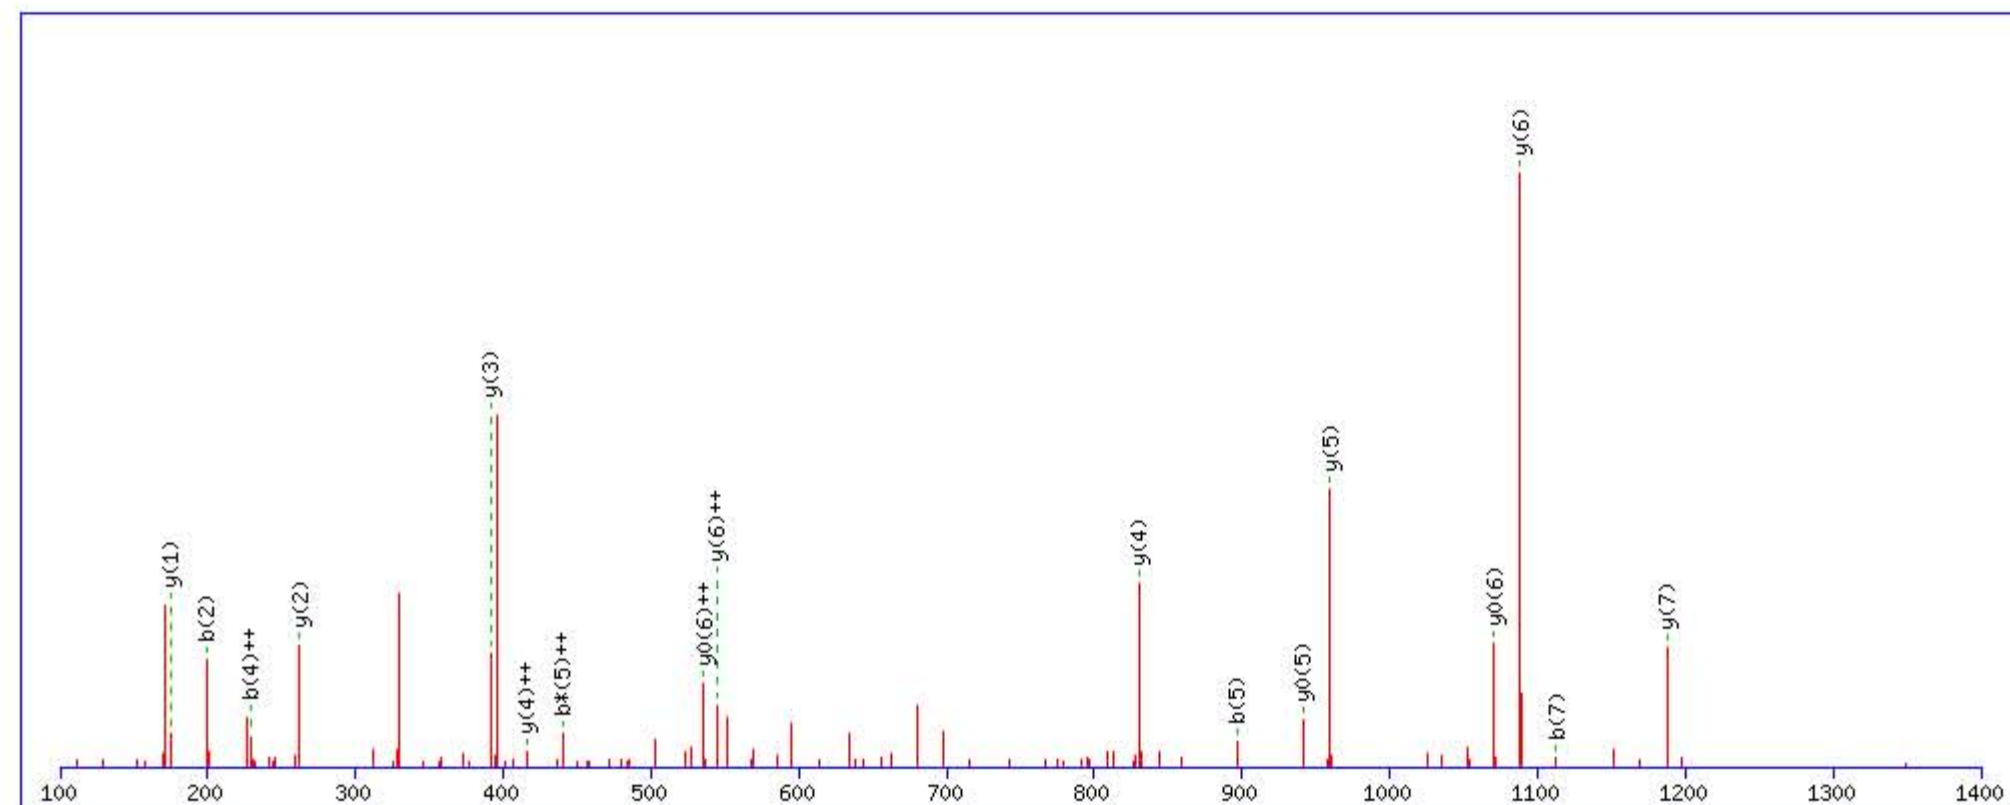

Monoisotopic mass of neutral peptide Mr(calc): 1285.633621  
 Fixed modifications: Carbamidomethyl (C) (apply to specified residues or termini only)  
 Variable modifications:  
 Q5 : Biotin:Thermo-21345 (Q)  
 Ions Score: 40 Expect: 0.00064  
 Matches : 17/70 fragment ions using 33 most intense peaks ([help](#))

| # | b                  | b <sup>++</sup>   | b <sup>+</sup> | b <sup>*++</sup>  | b <sup>0</sup> | b <sup>0++</sup> | Seq. | y                  | y <sup>++</sup>   | y <sup>+</sup> | y <sup>*++</sup> | y <sup>0</sup>     | y <sup>0++</sup>  | # |
|---|--------------------|-------------------|----------------|-------------------|----------------|------------------|------|--------------------|-------------------|----------------|------------------|--------------------|-------------------|---|
| 1 | 100.075690         | 50.541483         |                |                   |                |                  | V    |                    |                   |                |                  |                    |                   | 8 |
| 2 | <b>199.144104</b>  | 100.075690        |                |                   |                |                  | V    | <b>1187.572499</b> | 594.289888        | 1170.545950    | 585.776613       | 1169.561934        | 585.284605        | 7 |
| 3 | 328.186697         | 164.596987        |                |                   | 310.176132     | 155.591704       | E    | <b>1088.504085</b> | <b>544.755681</b> | 1071.477536    | 536.242406       | <b>1070.493520</b> | <b>535.750398</b> | 6 |
| 4 | 457.229290         | <b>229.118283</b> |                |                   | 439.218725     | 220.113001       | E    | <b>959.461492</b>  | 480.234384        | 942.434943     | 471.721110       | <b>941.450927</b>  | 471.229102        | 5 |
| 5 | <b>896.454616</b>  | 448.730946        | 879.428067     | <b>440.217672</b> | 878.444051     | 439.725664       | Q    | <b>830.418899</b>  | <b>415.713088</b> | 813.392350     | 407.199813       | 812.408334         | 406.707805        | 4 |
| 6 | 1025.497209        | 513.252243        | 1008.470660    | 504.738968        | 1007.486644    | 504.246960       | E    | <b>391.193573</b>  | 196.100425        | 374.167024     | 187.587150       | 373.183008         | 187.095142        | 3 |
| 7 | <b>1112.529237</b> | 556.768257        | 1095.502688    | 548.254982        | 1094.518672    | 547.762974       | S    | <b>262.150980</b>  | 131.579128        | 245.124431     | 123.065854       | 244.140415         | 122.573846        | 2 |
| 8 |                    |                   |                |                   |                |                  | R    | <b>175.118952</b>  | 88.063114         | 158.092403     | 79.549839        |                    |                   | 1 |

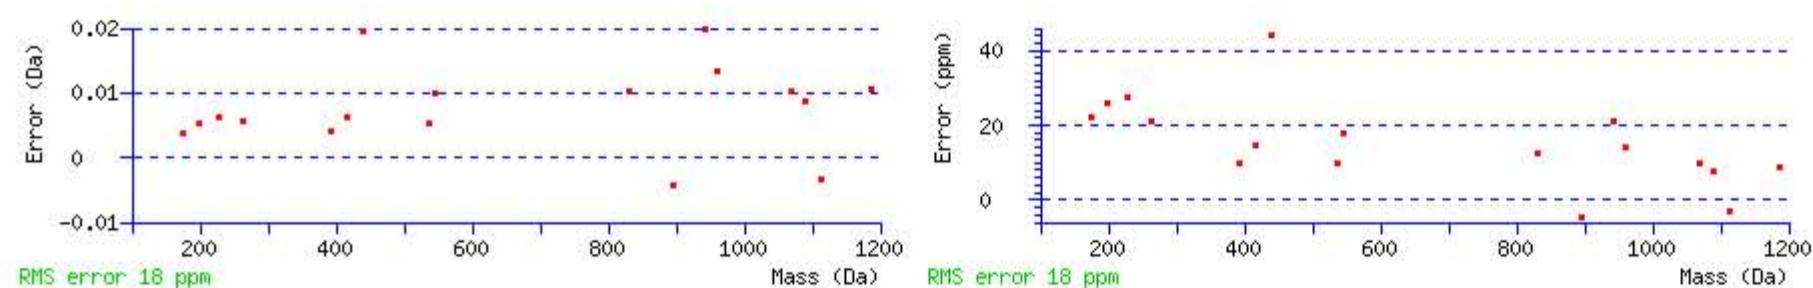

NCBI BLAST search of **VVEEQESR**  
 (Parameters: blastp, nr protein database, expect=20000, no filter, PAM30)  
 Other BLAST [web gateways](#)

### All matches to this query

| Score | Mr(calc):   | Delta     | Sequence                      |
|-------|-------------|-----------|-------------------------------|
| 39.8  | 1285.633621 | 0.016847  | <a href="#">VVEEQESR</a>      |
| 5.4   | 1285.662598 | -0.012130 | <a href="#">TPERLSLEGER</a>   |
| 3.3   | 1285.637451 | 0.013017  | <a href="#">TAPASGSAPRESR</a> |
| 2.3   | 1285.660126 | -0.009658 | <a href="#">QSNIGIFPGR</a>    |
| 1.2   | 1285.644867 | 0.005601  | <a href="#">DTLHSAMAVVSR</a>  |

# MASCOT SCIENCE Mascot Search Results

## Peptide View

MS/MS Fragmentation of **CCQDGVTR**

Found in **CO4A\_HUMAN**, Complement C4-A OS=Homo sapiens GN=C4A PE=1 SV=2

Match to Query 27051: 1305.577488 from(653.796020,2+) rtinseconds(1370) index(56305)

Title: Locus:1.1.1.2900.13 File:"2013-07-02 CLN FXIII 180 min 1st F 4.wiff"

Data file C:\Program Files (x86)\Matrix Science\Mascot Daemon\mgf\7 FXIII 180 min 1st\mascot\_daemon\_merge.mgf

Click mouse within plot area to zoom in by factor of two about that point

Or, Plot from  to  Da

Label all possible matches  Label matches used for scoring

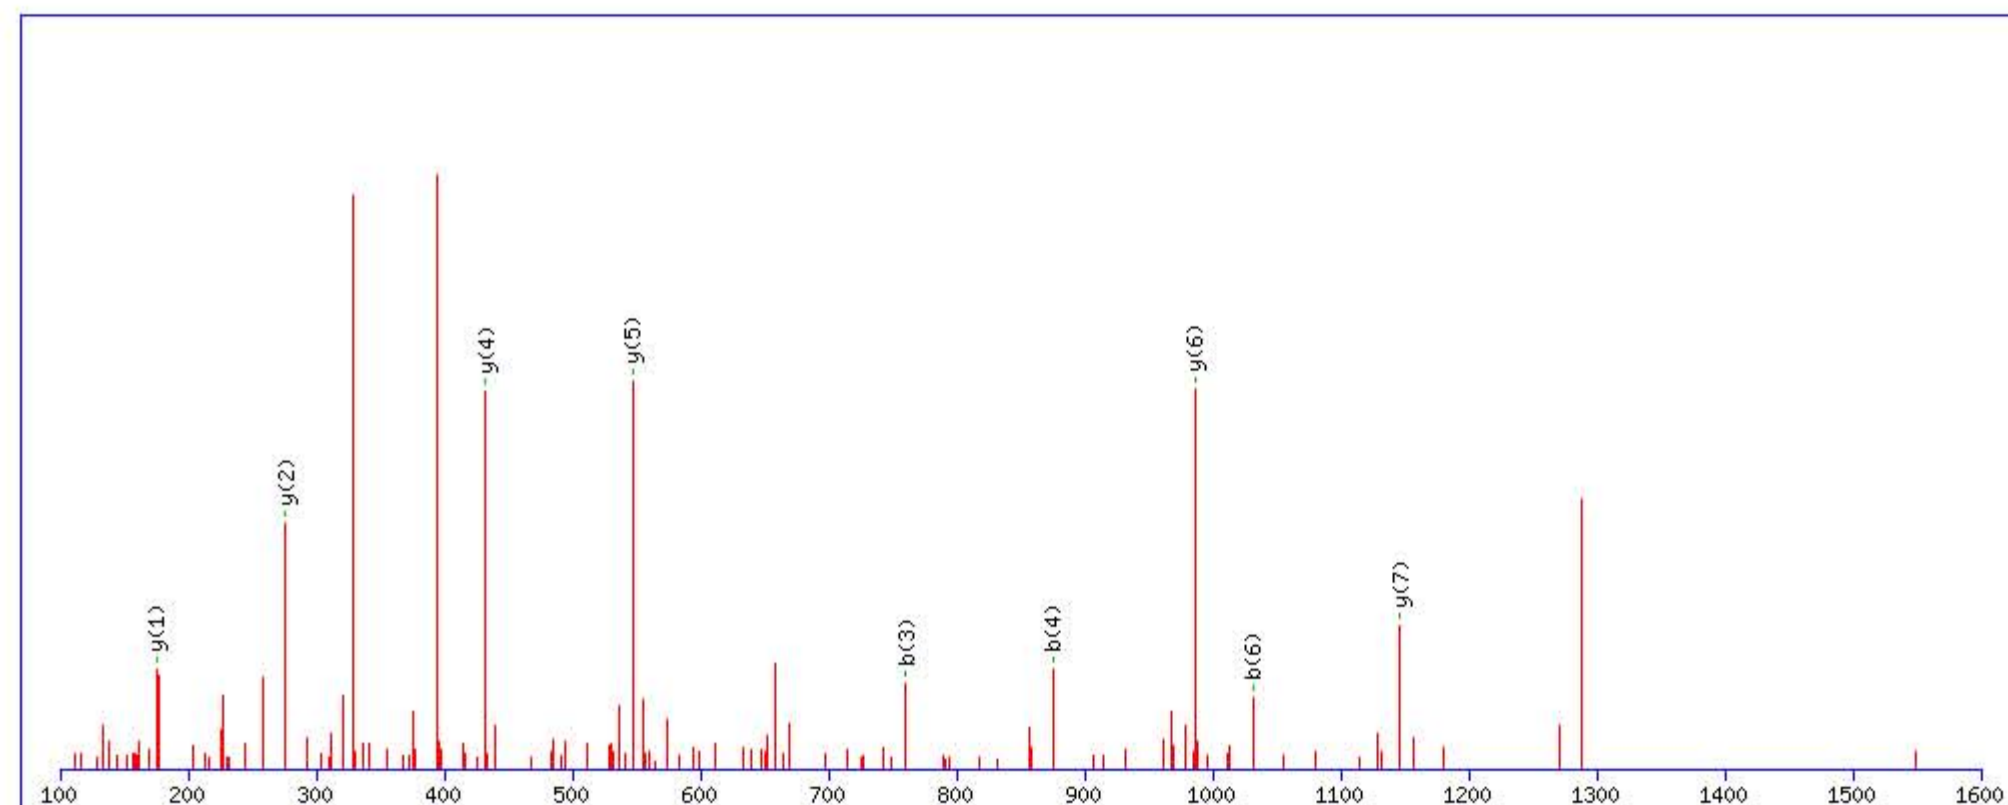

Monoisotopic mass of neutral peptide  $M_r(\text{calc})$ : 1305.562820

Fixed modifications: Carbamidomethyl (C) (apply to specified residues or termini only)

Variable modifications:

Q3 : Biotin:Thermo-21345 (Q)

Ions Score: 50 Expect: 0.00011

Matches : 9/72 fragment ions using 12 most intense peaks [\(help\)](#)

| # | b           | b <sup>++</sup> | b <sup>*</sup> | b <sup>*++</sup> | b <sup>0</sup> | b <sup>0++</sup> | Seq. | y           | y <sup>++</sup> | y <sup>*</sup> | y <sup>*++</sup> | y <sup>0</sup> | y <sup>0++</sup> | # |
|---|-------------|-----------------|----------------|------------------|----------------|------------------|------|-------------|-----------------|----------------|------------------|----------------|------------------|---|
| 1 | 161.037925  | 81.022600       |                |                  |                |                  | C    |             |                 |                |                  |                |                  | 8 |
| 2 | 321.068574  | 161.037925      |                |                  |                |                  | C    | 1146.539427 | 573.773352      | 1129.512878    | 565.260077       | 1128.528862    | 564.768069       | 7 |
| 3 | 760.293900  | 380.650588      | 743.267351     | 372.137314       |                |                  | Q    | 986.508778  | 493.758027      | 969.482229     | 485.244753       | 968.498213     | 484.752745       | 6 |
| 4 | 875.320843  | 438.164060      | 858.294294     | 429.650785       | 857.310278     | 429.158777       | D    | 547.283452  | 274.145364      | 530.256903     | 265.632090       | 529.272887     | 265.140082       | 5 |
| 5 | 932.342307  | 466.674792      | 915.315758     | 458.161517       | 914.331742     | 457.669509       | G    | 432.256509  | 216.631893      | 415.229960     | 208.118618       | 414.245944     | 207.626610       | 4 |
| 6 | 1031.410721 | 516.208999      | 1014.384172    | 507.695724       | 1013.400156    | 507.203716       | V    | 375.235045  | 188.121161      | 358.208496     | 179.607886       | 357.224480     | 179.115878       | 3 |
| 7 | 1132.458400 | 566.732838      | 1115.431851    | 558.219564       | 1114.447835    | 557.727556       | T    | 276.166631  | 138.586953      | 259.140082     | 130.073679       | 258.156066     | 129.581671       | 2 |
| 8 |             |                 |                |                  |                |                  | R    | 175.118952  | 88.063114       | 158.092403     | 79.549839        |                |                  | 1 |

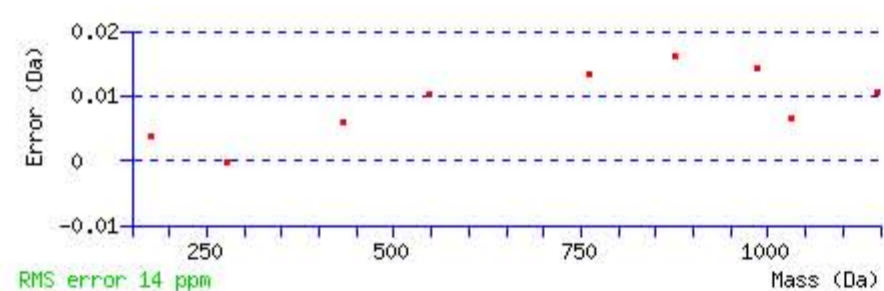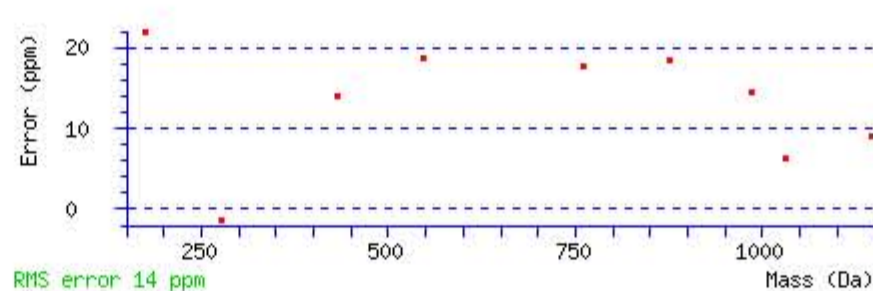

NCBI BLAST search of **CCQDGVTR**

(Parameters: blastp, nr protein database, expect=20000, no filter, PAM30)

Other BLAST [web gateways](#)

## All matches to this query

| Score | $M_r(\text{calc})$ : | Delta     | Sequence                     |
|-------|----------------------|-----------|------------------------------|
| 50.3  | 1305.562820          | 0.014668  | <a href="#">CCQDGVTR</a>     |
| 19.5  | 1305.588409          | -0.010921 | <a href="#">CRSSTPADAWR</a>  |
| 6.1   | 1305.577194          | 0.000294  | <a href="#">CDAGWLADGSVR</a> |
| 5.0   | 1305.562805          | 0.014683  | <a href="#">CCTSPSQR</a>     |

# Mascot Search Results

## Peptide View

MS/MS Fragmentation of **LGQYASPTAK**

Found in **CO4A\_HUMAN**, Complement C4-A OS=Homo sapiens GN=C4A PE=1 SV=2

Match to Query 28028: 1345.723388 from(673.868970,2+) rtinseconds(1585) index(57904)

Title: Locus:1.1.1.2975.15 File:"2013-07-02 CLN FXIII 180 min 1st F 4.wiff"

Data file C:\Program Files (x86)\Matrix Science\Mascot Daemon\mgf\7 FXIII 180 min 1st\mascot\_daemon\_merge.mgf

Click mouse within plot area to zoom in by factor of two about that point

Or, Plot from  to  Da

Label all possible matches  Label matches used for scoring

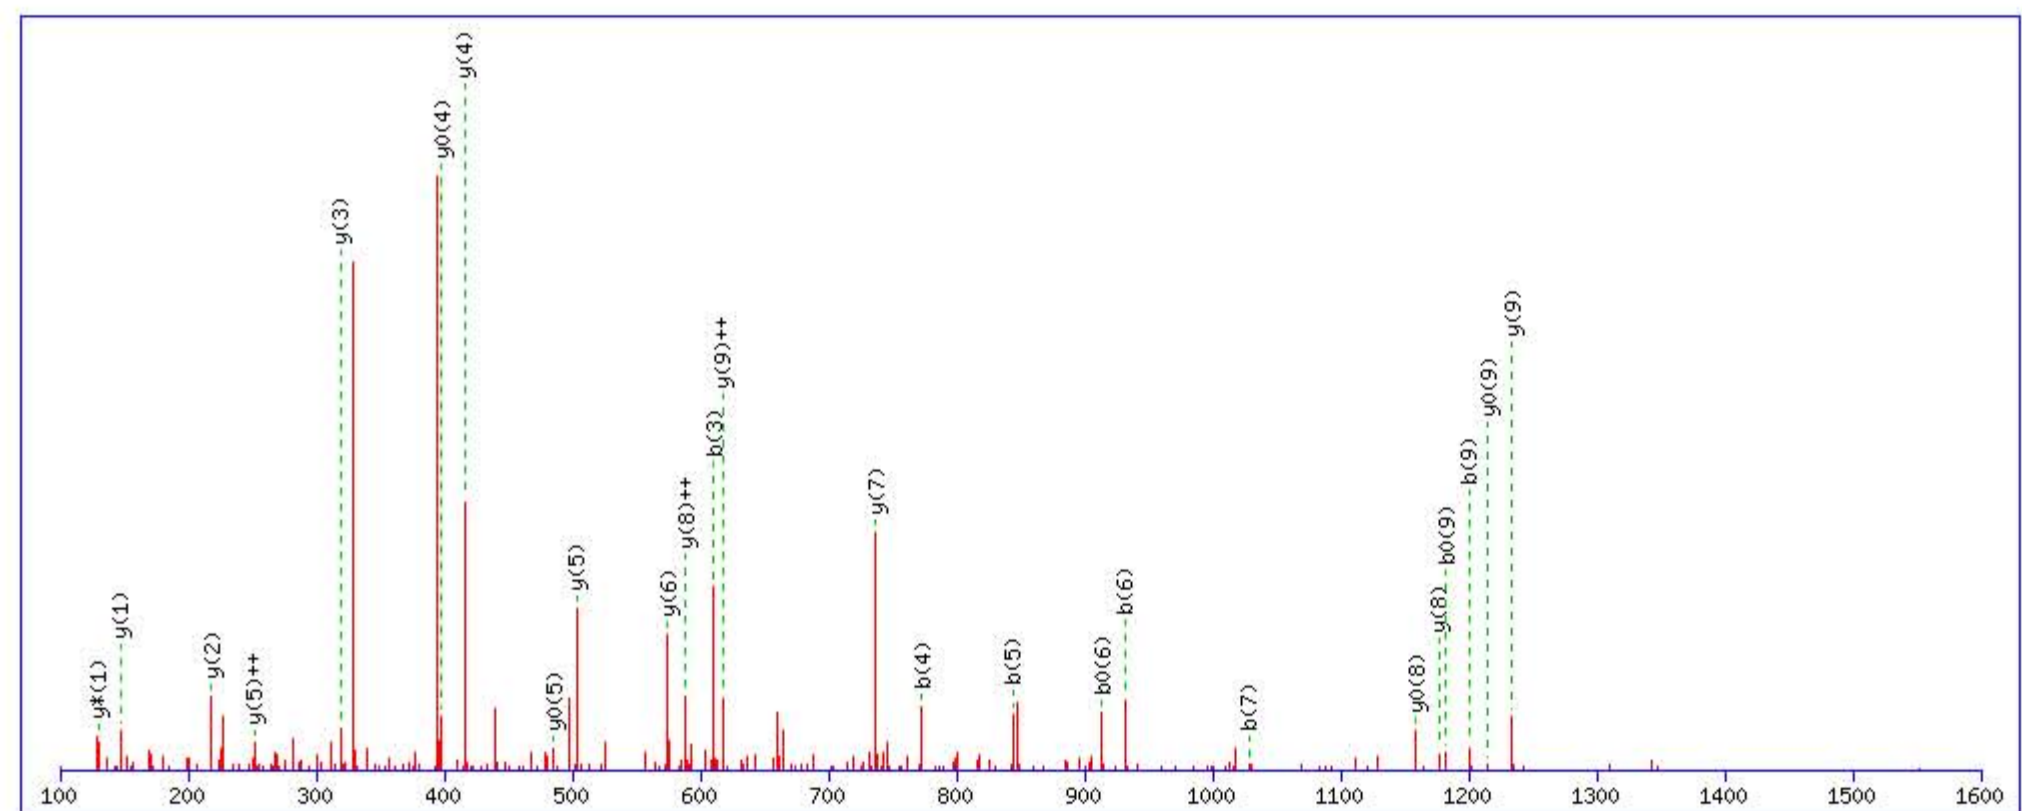

Monoisotopic mass of neutral peptide Mr(calc): 1345.706390

Fixed modifications: Carbamidomethyl (C) (apply to specified residues or termini only)

Variable modifications:

Q3 : Biotin:Thermo-21345 (Q)

Ions Score: 53 Expect: 0.00012

Matches : 25/90 fragment ions using 50 most intense peaks [\(help\)](#)

| #  | b           | b <sup>++</sup> | b <sup>+</sup> | b <sup>*++</sup> | b <sup>0</sup> | b <sup>0++</sup> | Seq. | y           | y <sup>++</sup> | y <sup>*</sup> | y <sup>*++</sup> | y <sup>0</sup> | y <sup>0++</sup> | #  |
|----|-------------|-----------------|----------------|------------------|----------------|------------------|------|-------------|-----------------|----------------|------------------|----------------|------------------|----|
| 1  | 114.091340  | 57.549308       |                |                  |                |                  | L    |             |                 |                |                  |                |                  | 10 |
| 2  | 171.112804  | 86.060040       |                |                  |                |                  | G    | 1233.629622 | 617.318449      | 1216.603073    | 608.805175       | 1215.619057    | 608.313167       | 9  |
| 3  | 610.338130  | 305.672703      | 593.311581     | 297.159429       |                |                  | Q    | 1176.608158 | 588.807717      | 1159.581609    | 580.294443       | 1158.597593    | 579.802435       | 8  |
| 4  | 773.401459  | 387.204368      | 756.374910     | 378.691093       |                |                  | Y    | 737.382832  | 369.195054      | 720.356283     | 360.681780       | 719.372267     | 360.189772       | 7  |
| 5  | 844.438573  | 422.722925      | 827.412024     | 414.209650       |                |                  | A    | 574.319503  | 287.663389      | 557.292954     | 279.150115       | 556.308938     | 278.658107       | 6  |
| 6  | 931.470601  | 466.238939      | 914.444052     | 457.725664       | 913.460036     | 457.233656       | S    | 503.282389  | 252.144832      | 486.255840     | 243.631558       | 485.271824     | 243.139550       | 5  |
| 7  | 1028.523365 | 514.765321      | 1011.496816    | 506.252046       | 1010.512800    | 505.760038       | P    | 416.250361  | 208.628818      | 399.223812     | 200.115544       | 398.239796     | 199.623536       | 4  |
| 8  | 1129.571044 | 565.289160      | 1112.544495    | 556.775886       | 1111.560479    | 556.283878       | T    | 319.197597  | 160.102436      | 302.171048     | 151.589162       | 301.187032     | 151.097154       | 3  |
| 9  | 1200.608158 | 600.807717      | 1183.581609    | 592.294443       | 1182.597593    | 591.802435       | A    | 218.149918  | 109.578597      | 201.123369     | 101.065322       |                |                  | 2  |
| 10 |             |                 |                |                  |                |                  | K    | 147.112804  | 74.060040       | 130.086255     | 65.546765        |                |                  | 1  |

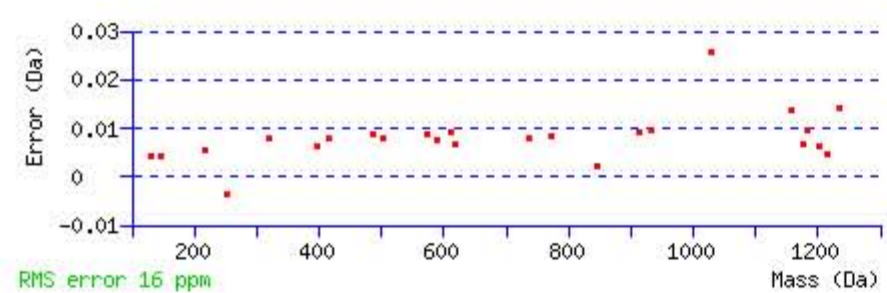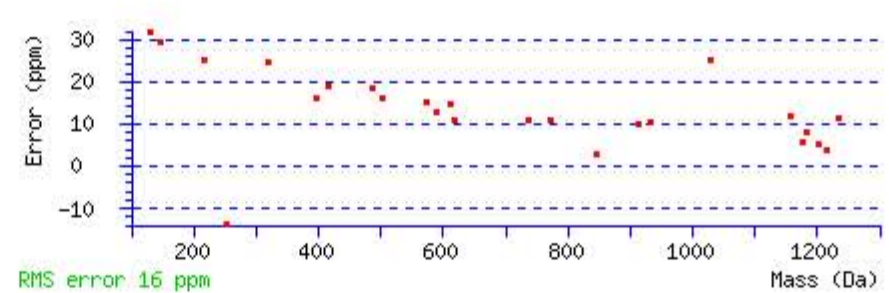

NCBI BLAST search of **LGQYASPTAK**

(Parameters: blastp, nr protein database, expect=20000, no filter, PAM30)

Other BLAST [web gateways](#)

## All matches to this query

| Score | Mr(calc):   | Delta     | Sequence                       |
|-------|-------------|-----------|--------------------------------|
| 53.2  | 1345.706390 | 0.016998  | <a href="#">LGQYASPTAK</a>     |
| 15.2  | 1345.724182 | -0.000794 | <a href="#">LGAVPATSGPTTFK</a> |
| 8.8   | 1345.706406 | 0.016982  | <a href="#">QGLYTPQTK</a>      |
| 8.8   | 1345.706390 | 0.016998  | <a href="#">LGQYDQALK</a>      |
| 8.0   | 1345.724152 | -0.000764 | <a href="#">QPLQTDIYGLAK</a>   |
| 7.7   | 1345.727509 | -0.004121 | <a href="#">LGLMDNEIKVAK</a>   |
| 3.6   | 1345.727509 | -0.004121 | <a href="#">DKLKMEVDQLK</a>    |
| 3.4   | 1345.713608 | 0.009780  | <a href="#">NGMLLTGGGKDRK</a>  |
| 3.1   | 1345.720993 | 0.002395  | <a href="#">QVGMICERLLK</a>    |
| 2.9   | 1345.738739 | -0.015351 | <a href="#">MLRDKIAQIDK</a>    |

Mascot: <http://www.matrixscience.com/>

# MASCOT Search Results

## Peptide View

MS/MS Fragmentation of **GLQDEDGYR**

Found in **CO4A\_HUMAN**, Complement C4-A OS=Homo sapiens GN=C4A PE=1 SV=2

Match to Query 29262: 1362.640488 from(682.327520,2+) rtinseconds(1716) index(58728)

Title: Locus:1.1.1.3021.6 File:"2013-07-02 CLN FXIII 180 min 1st F 4.wiff"

Data file C:\Program Files (x86)\Matrix Science\Mascot Daemon\mgf\7 FXIII 180 min 1st\mascot\_daemon\_merge.mgf

Click mouse within plot area to zoom in by factor of two about that point

Or, Plot from  to  Da

Label all possible matches  Label matches used for scoring

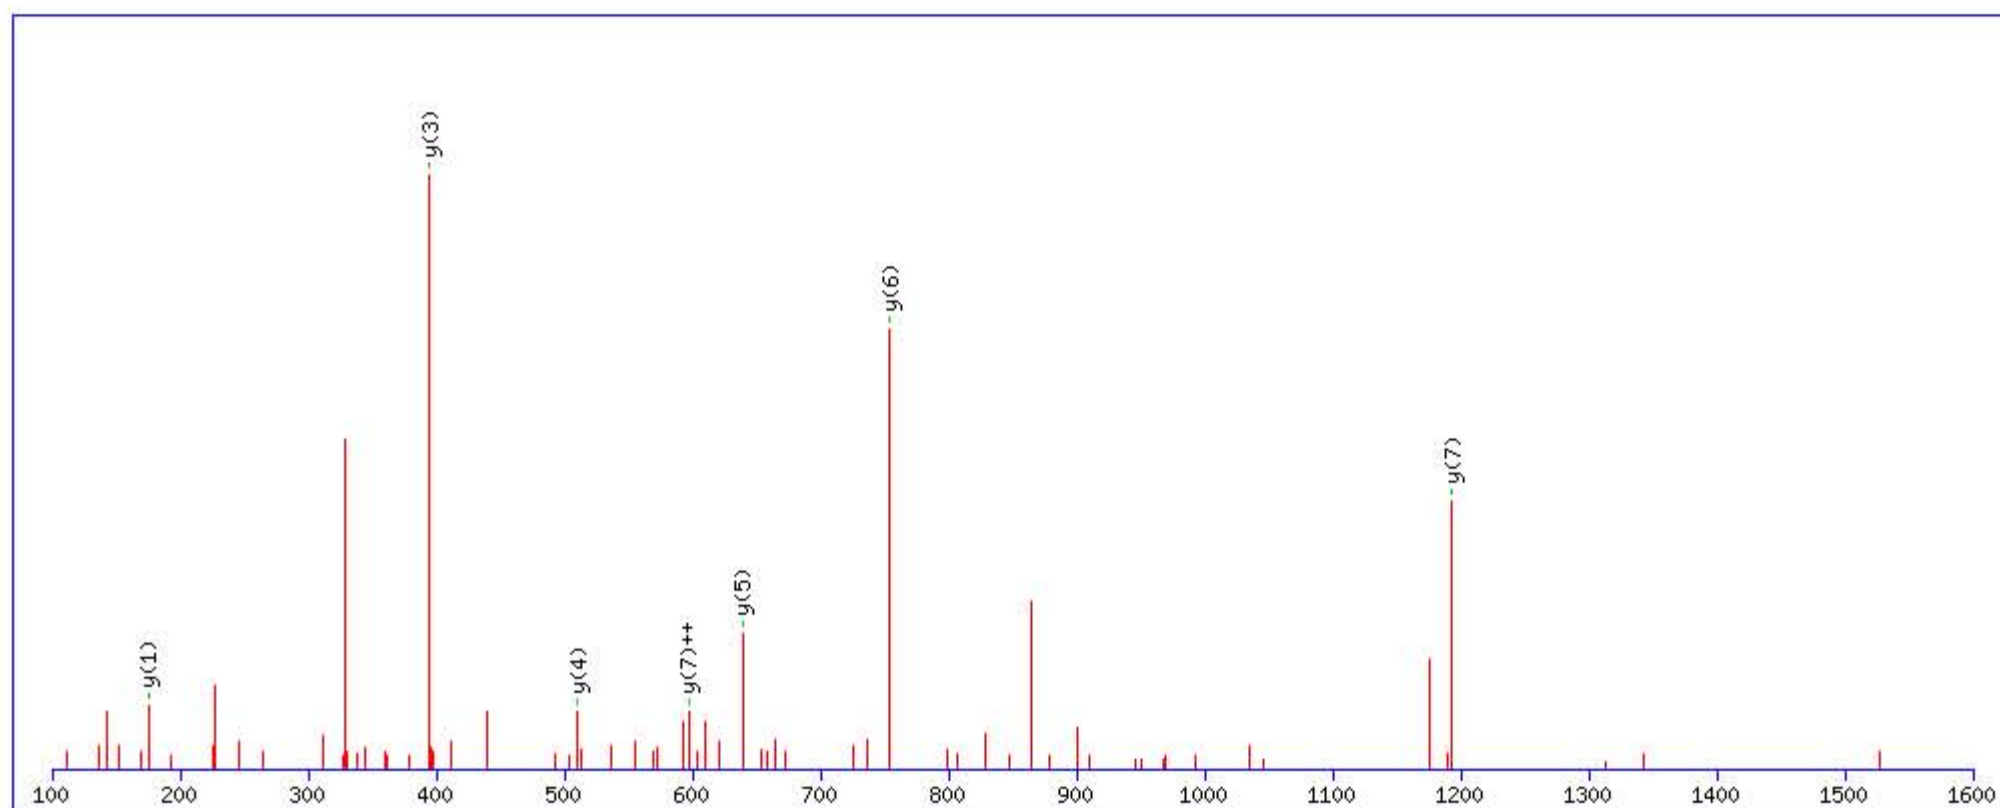

Monoisotopic mass of neutral peptide Mr(calc): 1362.623795

Fixed modifications: Carbamidomethyl (C) (apply to specified residues or termini only)

Variable modifications:

Q3 : Biotin:Thermo-21345 (Q)

Ions Score: 40 Expect: 0.0003

Matches : 7/80 fragment ions using 12 most intense peaks [\(help\)](#)

| # | b           | b <sup>++</sup> | b <sup>*</sup> | b <sup>*++</sup> | b <sup>0</sup> | b <sup>0++</sup> | Seq.     | y                  | y <sup>++</sup>   | y <sup>*</sup> | y <sup>*++</sup> | y <sup>0</sup> | y <sup>0++</sup> | #        |
|---|-------------|-----------------|----------------|------------------|----------------|------------------|----------|--------------------|-------------------|----------------|------------------|----------------|------------------|----------|
| 1 | 58.028740   | 29.518008       |                |                  |                |                  | <b>G</b> |                    |                   |                |                  |                |                  | <b>9</b> |
| 2 | 171.112804  | 86.060040       |                |                  |                |                  | <b>L</b> | 1306.609614        | 653.808445        | 1289.583065    | 645.295171       | 1288.599049    | 644.803163       | <b>8</b> |
| 3 | 610.338130  | 305.672703      | 593.311581     | 297.159429       |                |                  | <b>Q</b> | <b>1193.525550</b> | <b>597.266413</b> | 1176.499001    | 588.753139       | 1175.514985    | 588.261131       | <b>7</b> |
| 4 | 725.365073  | 363.186175      | 708.338524     | 354.672900       | 707.354508     | 354.180892       | <b>D</b> | <b>754.300224</b>  | 377.653750        | 737.273675     | 369.140476       | 736.289659     | 368.648468       | <b>6</b> |
| 5 | 854.407666  | 427.707471      | 837.381117     | 419.194197       | 836.397101     | 418.702189       | <b>E</b> | <b>639.273281</b>  | 320.140279        | 622.246732     | 311.627004       | 621.262716     | 311.134996       | <b>5</b> |
| 6 | 969.434609  | 485.220943      | 952.408060     | 476.707668       | 951.424044     | 476.215660       | <b>D</b> | <b>510.230688</b>  | 255.618982        | 493.204139     | 247.105707       | 492.220123     | 246.613700       | <b>4</b> |
| 7 | 1026.456073 | 513.731675      | 1009.429524    | 505.218400       | 1008.445508    | 504.726392       | <b>G</b> | <b>395.203745</b>  | 198.105511        | 378.177196     | 189.592236       |                |                  | <b>3</b> |
| 8 | 1189.519402 | 595.263339      | 1172.492853    | 586.750065       | 1171.508837    | 586.258057       | <b>Y</b> | 338.182281         | 169.594778        | 321.155732     | 161.081504       |                |                  | <b>2</b> |
| 9 |             |                 |                |                  |                |                  | <b>R</b> | <b>175.118952</b>  | 88.063114         | 158.092403     | 79.549839        |                |                  | <b>1</b> |

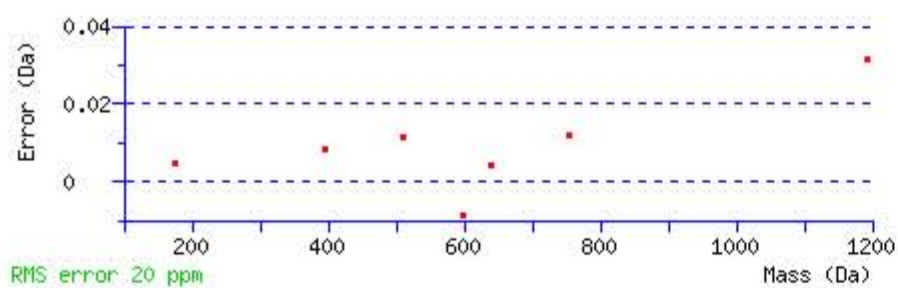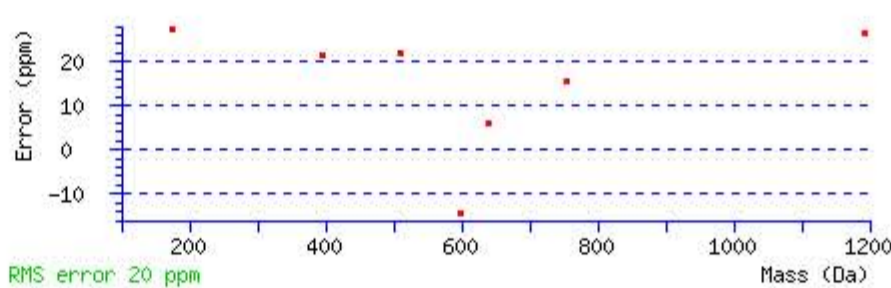

NCBI BLAST search of **GLQDEDGYR**

(Parameters: blastp, nr protein database, expect=20000, no filter, PAM30)

Other BLAST [web gateways](#)

All matches to this query

| Score | Mr(calc):   | Delta     | Sequence                     |
|-------|-------------|-----------|------------------------------|
| 40.1  | 1362.623795 | 0.016693  | <a href="#">GLQDEDGYR</a>    |
| 2.4   | 1362.623795 | 0.016693  | <a href="#">TGFLEIDEHMR</a>  |
| 0.2   | 1362.652756 | -0.012268 | <a href="#">GLAADERAEFER</a> |



# MASCOT Search Results

## Peptide View

MS/MS Fragmentation of **ITQVLHFTK**

Found in **CO4A\_HUMAN**, Complement C4-A OS=Homo sapiens GN=C4A PE=1 SV=2

Match to Query 30668: 1396.804962 from(466.608930,3+) rtinseconds(1929) index(60253)

Title: Locus:1.1.1.3095.4 File:"2013-07-02 CLN FXIII 180 min 1st F 4.wiff"

Data file C:\Program Files (x86)\Matrix Science\Mascot Daemon\mgf\7 FXIII 180 min 1st\mascot\_daemon\_merge.mgf

Click mouse within plot area to zoom in by factor of two about that point

Or, Plot from  to  Da

Label all possible matches  Label matches used for scoring

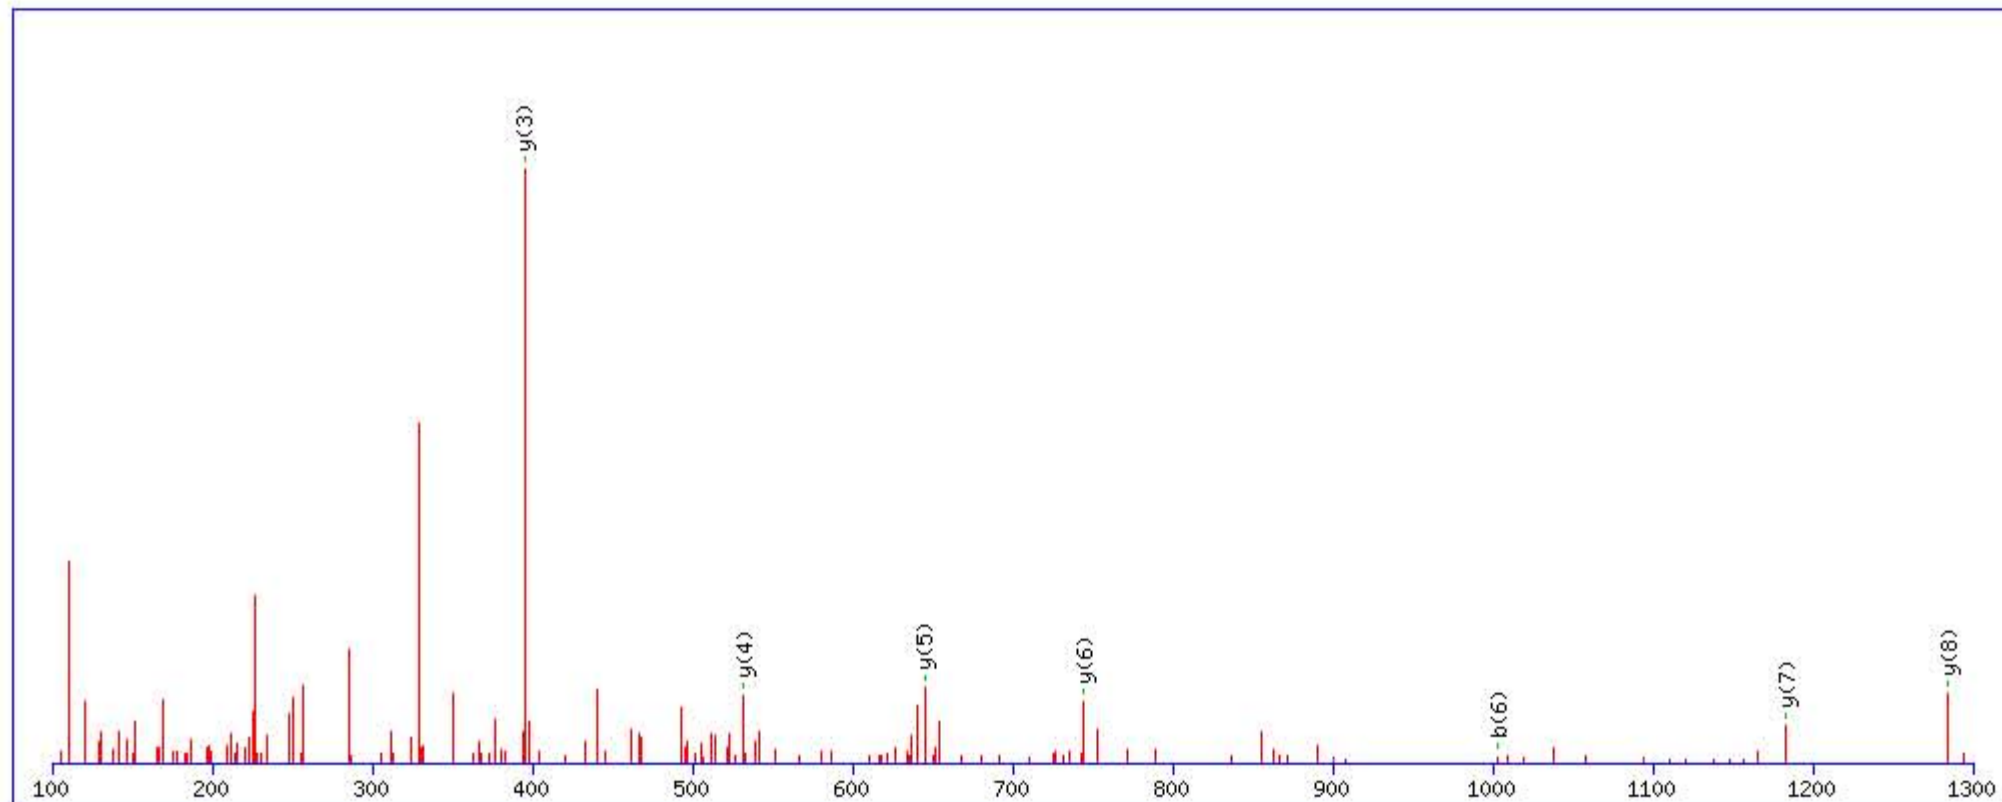

Monoisotopic mass of neutral peptide Mr(calc): 1396.790085

Fixed modifications: Carbamidomethyl (C) (apply to specified residues or termini only)

Variable modifications:

Q3 : Biotin:Thermo-21345 (Q)

Ions Score: 37 Expect: 0.00032

Matches : 7/88 fragment ions using 12 most intense peaks [\(help\)](#)

| # | b           | b <sup>++</sup> | b <sup>*</sup> | b <sup>+++</sup> | b <sup>0</sup> | b <sup>0++</sup> | Seq. | y           | y <sup>++</sup> | y <sup>*</sup> | y <sup>+++</sup> | y <sup>0</sup> | y <sup>0++</sup> | # |
|---|-------------|-----------------|----------------|------------------|----------------|------------------|------|-------------|-----------------|----------------|------------------|----------------|------------------|---|
| 1 | 114.091340  | 57.549308       |                |                  |                |                  | I    |             |                 |                |                  |                |                  | 9 |
| 2 | 215.139019  | 108.073147      |                |                  | 197.128454     | 99.067865        | T    | 1284.713292 | 642.860284      | 1267.686743    | 634.347010       | 1266.702727    | 633.855002       | 8 |
| 3 | 654.364345  | 327.685811      | 637.337796     | 319.172536       | 636.353780     | 318.680528       | Q    | 1183.665613 | 592.336445      | 1166.639064    | 583.823170       | 1165.655048    | 583.331162       | 7 |
| 4 | 753.432759  | 377.220018      | 736.406210     | 368.706743       | 735.422194     | 368.214735       | V    | 744.440287  | 372.723782      | 727.413738     | 364.210507       | 726.429722     | 363.718499       | 6 |
| 5 | 866.516823  | 433.762050      | 849.490274     | 425.248775       | 848.506258     | 424.756767       | L    | 645.371873  | 323.189575      | 628.345324     | 314.676300       | 627.361308     | 314.184292       | 5 |
| 6 | 1003.575735 | 502.291506      | 986.549186     | 493.778231       | 985.565170     | 493.286223       | H    | 532.287809  | 266.647543      | 515.261260     | 258.134268       | 514.277244     | 257.642260       | 4 |
| 7 | 1150.644149 | 575.825713      | 1133.617600    | 567.312438       | 1132.633584    | 566.820430       | F    | 395.228897  | 198.118086      | 378.202348     | 189.604812       | 377.218332     | 189.112804       | 3 |
| 8 | 1251.691828 | 626.349552      | 1234.665279    | 617.836278       | 1233.681263    | 617.344270       | T    | 248.160483  | 124.583879      | 231.133934     | 116.070605       | 230.149918     | 115.578597       | 2 |
| 9 |             |                 |                |                  |                |                  | K    | 147.112804  | 74.060040       | 130.086255     | 65.546765        |                |                  | 1 |

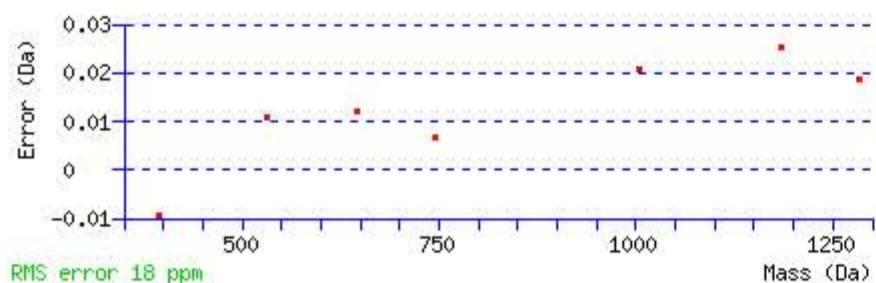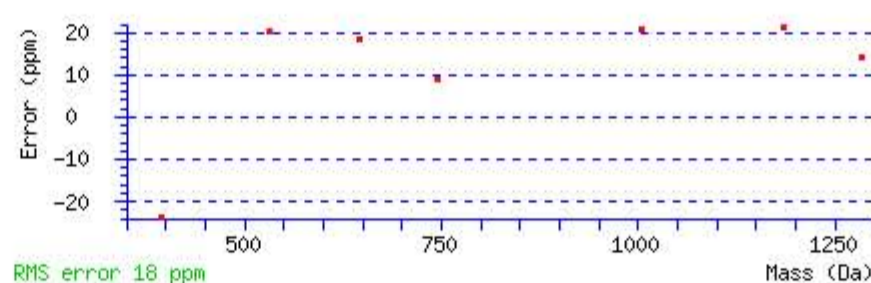

NCBI BLAST search of **ITQVLHFTK**

(Parameters: blastp, nr protein database, expect=20000, no filter, PAM30)

Other BLAST [web gateways](#)

All matches to this query

| Score | Mr(calc):   | Delta    | Sequence                    |
|-------|-------------|----------|-----------------------------|
| 37.4  | 1396.790085 | 0.014877 | <a href="#">ITQVLHFTK</a>   |
| 0.1   | 1396.792557 | 0.012405 | <a href="#">LLGELQEIVQK</a> |

Mascot: <http://www.matrixscience.com/>

# MASCOT Search Results

## Peptide View

MS/MS Fragmentation of **GLEEELQFSLGSK**

Found in **CO4A\_HUMAN**, Complement C4-A OS=Homo sapiens GN=C4A PE=1 SV=2

Match to Query 43800: 1746.906942 from(583.309590,3+) rtinseconds(2518) index(82303)

Title: Locus:1.1.1.2227.11 File:"2013-07-02 CLN FXIII 180 min 1st FT.wiff"

Data file C:\Program Files (x86)\Matrix Science\Mascot Daemon\mgf\7 FXIII 180 min 1st\mascot\_daemon\_merge.mgf

Click mouse within plot area to zoom in by factor of two about that point

Or, Plot from  to  Da

Label all possible matches  Label matches used for scoring

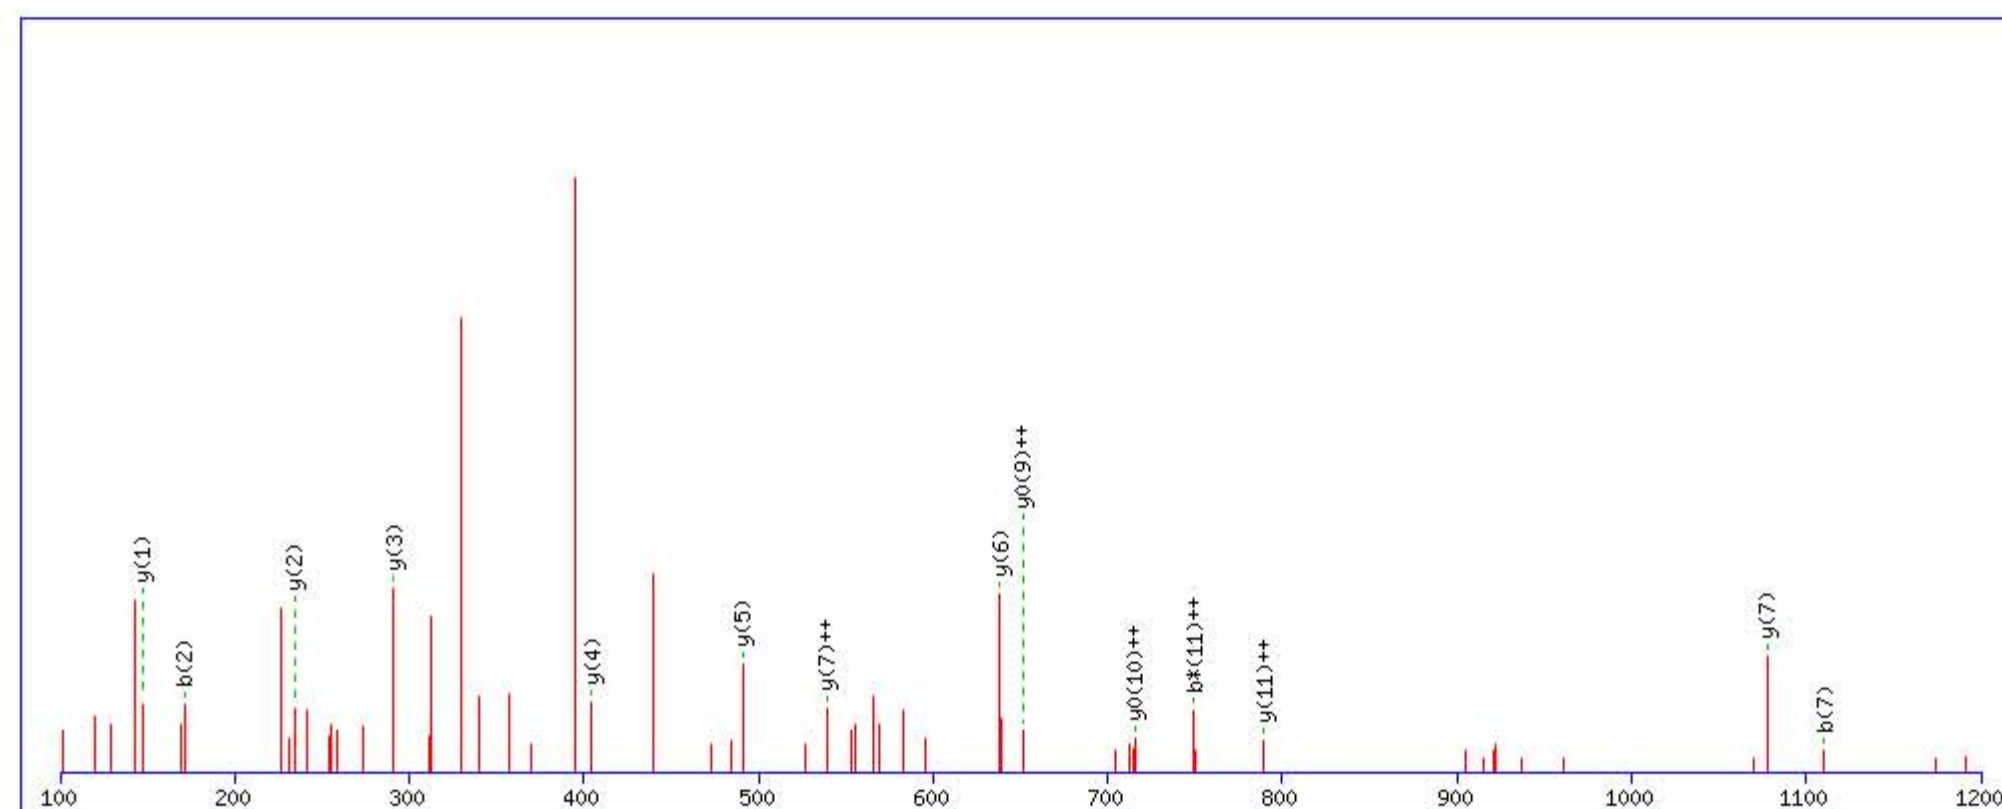

Monoisotopic mass of neutral peptide Mr(calc): 1746.886200

Fixed modifications: Carbamidomethyl (C) (apply to specified residues or termini only)

Variable modifications:

Q7 : Biotin:Thermo-21345 (Q)

Ions Score: 31 Expect: 0.02

Matches : 14/126 fragment ions using 29 most intense peaks [\(help\)](#)

| #  | b                  | b <sup>++</sup> | b <sup>*</sup> | b <sup>*++</sup>  | b <sup>0</sup> | b <sup>0++</sup> | Seq. | y                  | y <sup>++</sup>   | y <sup>*</sup> | y <sup>*++</sup> | y <sup>0</sup> | y <sup>0++</sup>  | #  |
|----|--------------------|-----------------|----------------|-------------------|----------------|------------------|------|--------------------|-------------------|----------------|------------------|----------------|-------------------|----|
| 1  | 58.028740          | 29.518008       |                |                   |                |                  | G    |                    |                   |                |                  |                |                   | 13 |
| 2  | <b>171.112804</b>  | 86.060040       |                |                   |                |                  | L    | 1690.872035        | 845.939656        | 1673.845486    | 837.426381       | 1672.861470    | 836.934373        | 12 |
| 3  | 300.155397         | 150.581336      |                |                   | 282.144832     | 141.576054       | E    | 1577.787971        | <b>789.397624</b> | 1560.761422    | 780.884349       | 1559.777406    | 780.392341        | 11 |
| 4  | 429.197990         | 215.102633      |                |                   | 411.187425     | 206.097351       | E    | 1448.745378        | 724.876327        | 1431.718829    | 716.363053       | 1430.734813    | <b>715.871045</b> | 10 |
| 5  | 558.240583         | 279.623930      |                |                   | 540.230018     | 270.618647       | E    | 1319.702785        | 660.355031        | 1302.676236    | 651.841756       | 1301.692220    | <b>651.349748</b> | 9  |
| 6  | 671.324647         | 336.165962      |                |                   | 653.314082     | 327.160679       | L    | 1190.660192        | 595.833734        | 1173.633643    | 587.320460       | 1172.649627    | 586.828452        | 8  |
| 7  | <b>1110.549973</b> | 555.778624      | 1093.523424    | 547.265350        | 1092.539408    | 546.773342       | Q    | <b>1077.576128</b> | <b>539.291702</b> | 1060.549579    | 530.778428       | 1059.565563    | 530.286419        | 7  |
| 8  | 1257.618387        | 629.312832      | 1240.591838    | 620.799557        | 1239.607822    | 620.307549       | F    | <b>638.350802</b>  | 319.679039        | 621.324253     | 311.165765       | 620.340237     | 310.673757        | 6  |
| 9  | 1344.650415        | 672.828846      | 1327.623866    | 664.315571        | 1326.639850    | 663.823563       | S    | <b>491.282388</b>  | 246.144832        | 474.255839     | 237.631557       | 473.271823     | 237.139549        | 5  |
| 10 | 1457.734479        | 729.370878      | 1440.707930    | 720.857603        | 1439.723914    | 720.365595       | L    | <b>404.250360</b>  | 202.628818        | 387.223811     | 194.115543       | 386.239795     | 193.623535        | 4  |
| 11 | 1514.755943        | 757.881609      | 1497.729394    | <b>749.368335</b> | 1496.745378    | 748.876327       | G    | <b>291.166296</b>  | 146.086786        | 274.139747     | 137.573512       | 273.155731     | 137.081504        | 3  |
| 12 | 1601.787971        | 801.397624      | 1584.761422    | 792.884349        | 1583.777406    | 792.392341       | S    | <b>234.144832</b>  | 117.576054        | 217.118283     | 109.062780       | 216.134267     | 108.570772        | 2  |
| 13 |                    |                 |                |                   |                |                  | K    | <b>147.112804</b>  | 74.060040         | 130.086255     | 65.546765        |                |                   | 1  |

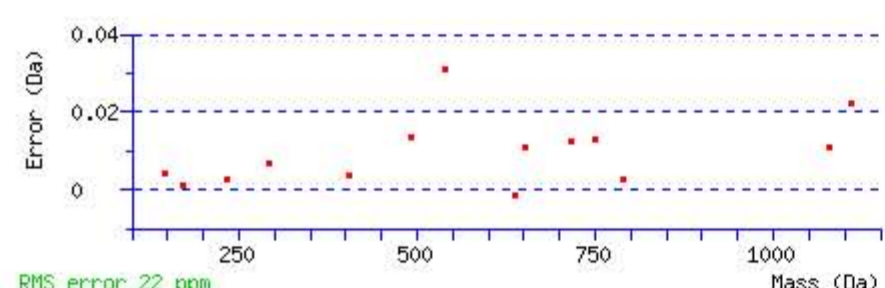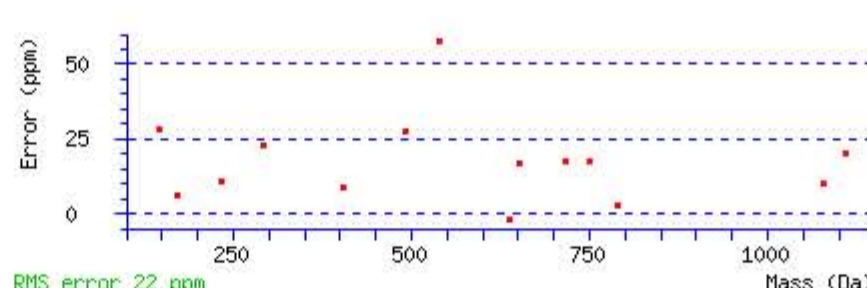

NCBI BLAST search of **GLEEELQFSLGSK**

(Parameters: blastp, nr protein database, expect=20000, no filter, PAM30)

Other BLAST [web gateways](#)

## All matches to this query

| Score | Mr(calc):   | Delta    | Sequence             |
|-------|-------------|----------|----------------------|
| 31.4  | 1746.886200 | 0.020742 | <b>GLEEELQFSLGSK</b> |

Mascot: <http://www.matrixscience.com/>

**MATRIX SCIENCE Mascot Search Results**

**Peptide View**

MS/MS Fragmentation of **LLATLCSAEVCQCAEGK**  
 Found in **CO4A\_HUMAN**, Complement C4-A OS=Homo sapiens GN=C4A PE=1 SV=2

Match to Query 55978: 2220.063222 from(741.028350,3+) rtinseconds(2096) index(79511)  
 Title: Locus:1.1.1.2080.16 File:"2013-07-02 CLN FXIII 180 min 1st FT.wiff"  
 Data file C:\Program Files (x86)\Matrix Science\Mascot Daemon\mgf\7 FXIII 180 min 1st\mascot\_daemon\_merge.mgf

Click mouse within plot area to zoom in by factor of two about that point  
 Or, Plot from  to  Da   
 Label all possible matches  Label matches used for scoring

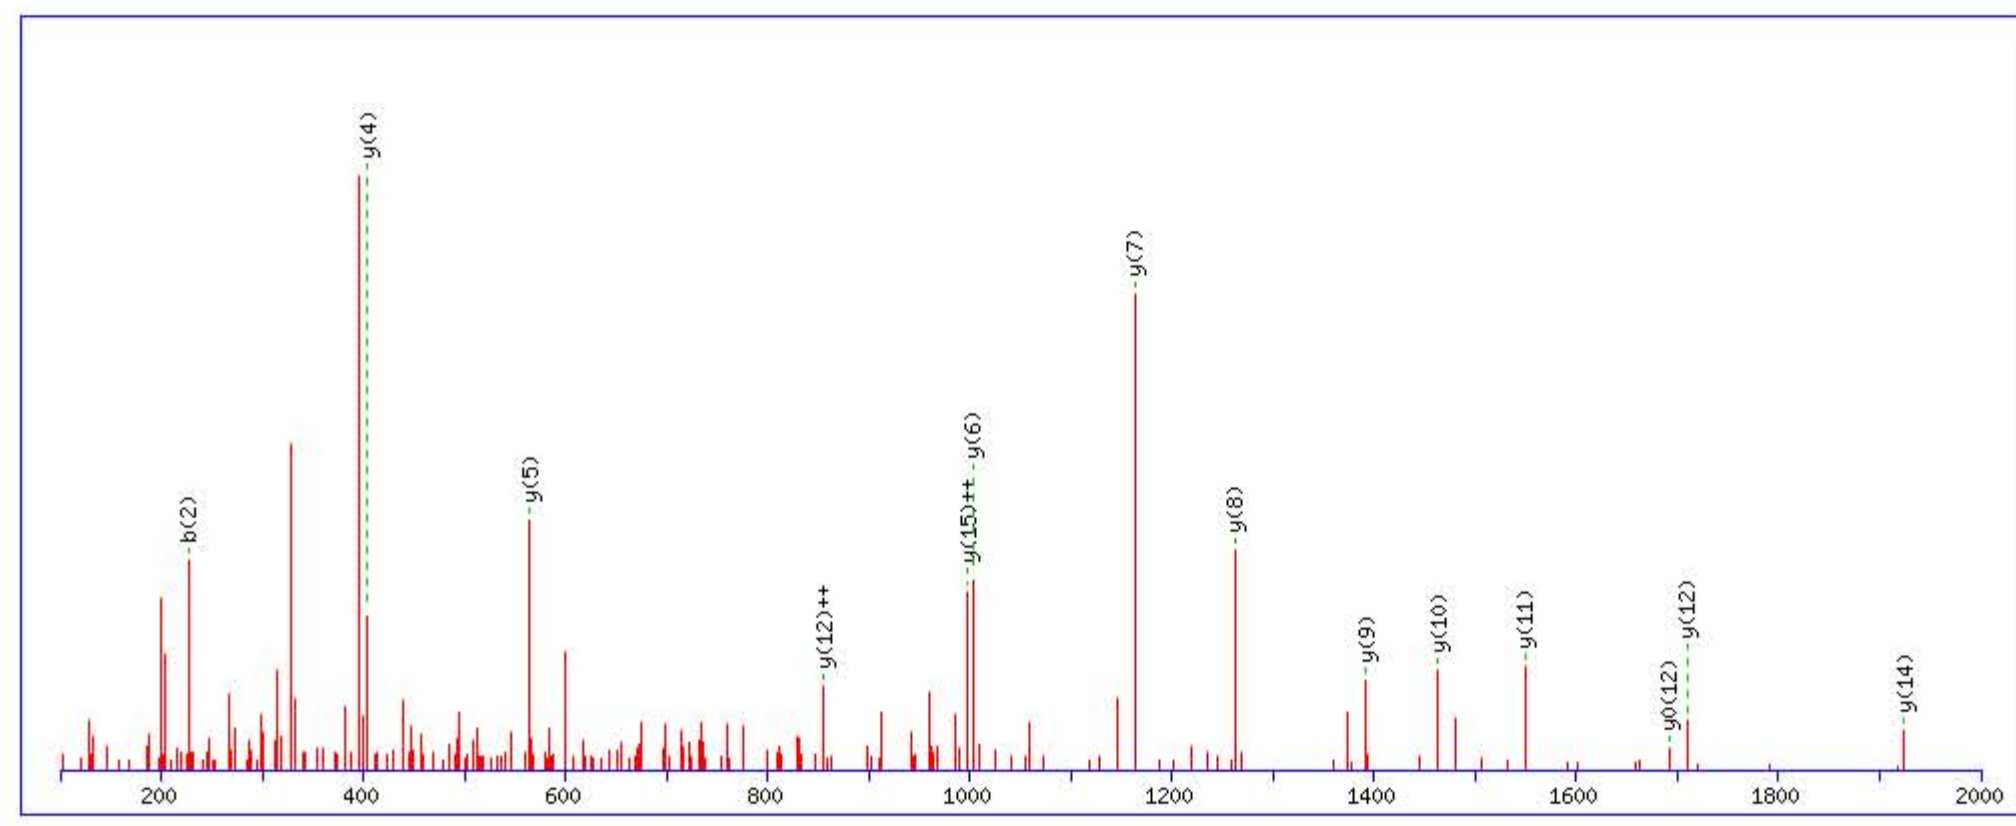

Monoisotopic mass of neutral peptide Mr(calc): 2220.041092  
 Fixed modifications: Carbamidomethyl (C) (apply to specified residues or termini only)  
 Variable modifications:  
 Q12 : Biotin:Thermo-21345 (Q)  
 Ions Score: 75 Expect: 1.1e-007  
 Matches : 14/160 fragment ions using 18 most intense peaks [\(help\)](#)

| #  | b           | b <sup>++</sup> | b <sup>*</sup> | b <sup>***</sup> | b <sup>0</sup> | b <sup>0++</sup> | Seq. | y           | y <sup>++</sup> | y <sup>*</sup> | y <sup>***</sup> | y <sup>0</sup> | y <sup>0++</sup> | #  |
|----|-------------|-----------------|----------------|------------------|----------------|------------------|------|-------------|-----------------|----------------|------------------|----------------|------------------|----|
| 1  | 114.091340  | 57.549308       |                |                  |                |                  | L    |             |                 |                |                  |                |                  | 17 |
| 2  | 227.175404  | 114.091340      |                |                  |                |                  | L    | 2107.964318 | 1054.485797     | 2090.937769    | 1045.972522      | 2089.953753    | 1045.480514      | 16 |
| 3  | 298.212518  | 149.609897      |                |                  |                |                  | A    | 1994.880254 | 997.943765      | 1977.853705    | 989.430491       | 1976.869689    | 988.938483       | 15 |
| 4  | 399.260197  | 200.133737      |                |                  | 381.249632     | 191.128454       | T    | 1923.843140 | 962.425208      | 1906.816591    | 953.911934       | 1905.832575    | 953.419926       | 14 |
| 5  | 512.344261  | 256.675769      |                |                  | 494.333696     | 247.670486       | L    | 1822.795461 | 911.901369      | 1805.768912    | 903.388094       | 1804.784896    | 902.896086       | 13 |
| 6  | 672.374910  | 336.691093      |                |                  | 654.364345     | 327.685811       | C    | 1709.711397 | 855.359337      | 1692.684848    | 846.846062       | 1691.700832    | 846.354054       | 12 |
| 7  | 759.406938  | 380.207107      |                |                  | 741.396373     | 371.201825       | S    | 1549.680748 | 775.344012      | 1532.654199    | 766.830738       | 1531.670183    | 766.338730       | 11 |
| 8  | 830.444052  | 415.725664      |                |                  | 812.433487     | 406.720382       | A    | 1462.648720 | 731.827998      | 1445.622171    | 723.314724       | 1444.638155    | 722.822716       | 10 |
| 9  | 959.486645  | 480.246961      |                |                  | 941.476080     | 471.241678       | E    | 1391.611606 | 696.309441      | 1374.585057    | 687.796167       | 1373.601041    | 687.304159       | 9  |
| 10 | 1058.555059 | 529.781168      |                |                  | 1040.544494    | 520.775885       | V    | 1262.569013 | 631.788145      | 1245.542464    | 623.274870       | 1244.558448    | 622.782862       | 8  |
| 11 | 1218.585708 | 609.796492      |                |                  | 1200.575143    | 600.791210       | C    | 1163.500599 | 582.253938      | 1146.474050    | 573.740663       | 1145.490034    | 573.248655       | 7  |
| 12 | 1657.811034 | 829.409155      | 1640.784485    | 820.895881       | 1639.800469    | 820.403873       | Q    | 1003.469950 | 502.238613      | 986.443401     | 493.725339       | 985.459385     | 493.233331       | 6  |
| 13 | 1817.841683 | 909.424480      | 1800.815134    | 900.911205       | 1799.831118    | 900.419197       | C    | 564.244624  | 282.625950      | 547.218075     | 274.112676       | 546.234059     | 273.620668       | 5  |
| 14 | 1888.878797 | 944.943037      | 1871.852248    | 936.429762       | 1870.868232    | 935.937754       | A    | 404.213975  | 202.610626      | 387.187426     | 194.097351       | 386.203410     | 193.605343       | 4  |
| 15 | 2017.921390 | 1009.464333     | 2000.894841    | 1000.951059      | 1999.910825    | 1000.459051      | E    | 333.176861  | 167.092069      | 316.150312     | 158.578794       | 315.166296     | 158.086786       | 3  |
| 16 | 2074.942854 | 1037.975065     | 2057.916305    | 1029.461790      | 2056.932289    | 1028.969782      | G    | 204.134268  | 102.570772      | 187.107719     | 94.057497        |                |                  | 2  |
| 17 |             |                 |                |                  |                |                  | K    | 147.112804  | 74.060040       | 130.086255     | 65.546765        |                |                  | 1  |

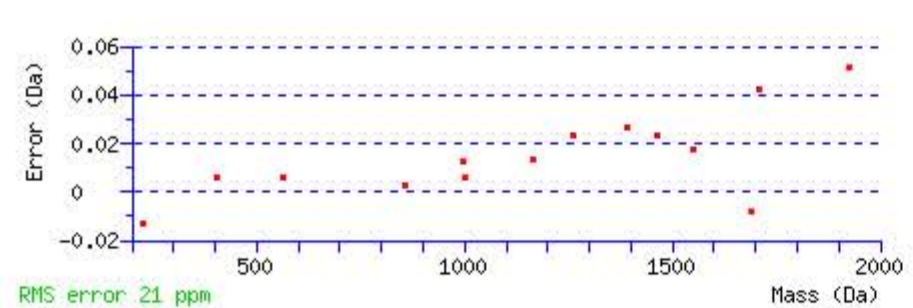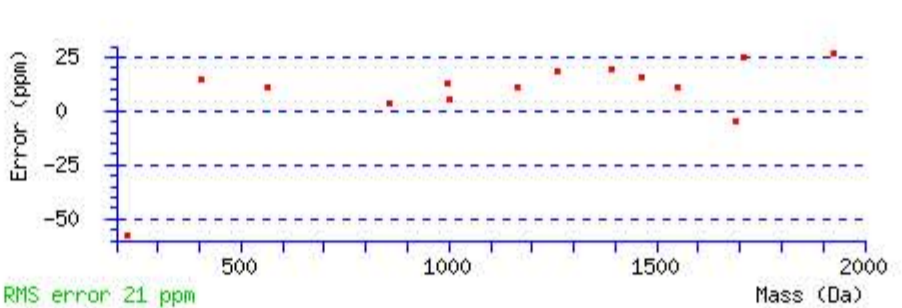

NCBI BLAST search of [LLATLCSAEVCQCAEGK](#)  
 (Parameters: blastp, nr protein database, expect=20000, no filter, PAM30)  
 Other BLAST [web gateways](#)

**All matches to this query**

| Score | Mr(calc):   | Delta    | Sequence                          |
|-------|-------------|----------|-----------------------------------|
| 75.0  | 2220.041092 | 0.022130 | <a href="#">LLATLCSAEVCQCAEGK</a> |
| 0.7   | 2220.048080 | 0.015142 | <a href="#">EPQEGALPEATGTTSHR</a> |

# MASCOT SCIENCE Mascot Search Results

## Peptide View

MS/MS Fragmentation of **GEQIQLK**

Found in **COS\_HUMAN**, Complement C5 OS=Homo sapiens GN=C5 PE=1 SV=4

Match to Query 20254: 1125.629968 from(563.822260,2+) rtinseconds(1733) index(40301)

Title: Locus:1.1.1.3053.8 File:"2013-07-02 CLN FXIII 180 min 1st F 3.wiff"

Data file C:\Program Files (x86)\Matrix Science\Mascot Daemon\mgf\7 FXIII 180 min 1st\mascot\_daemon\_merge.mgf

Click mouse within plot area to zoom in by factor of two about that point

Or, Plot from  to  Da

Label all possible matches  Label matches used for scoring

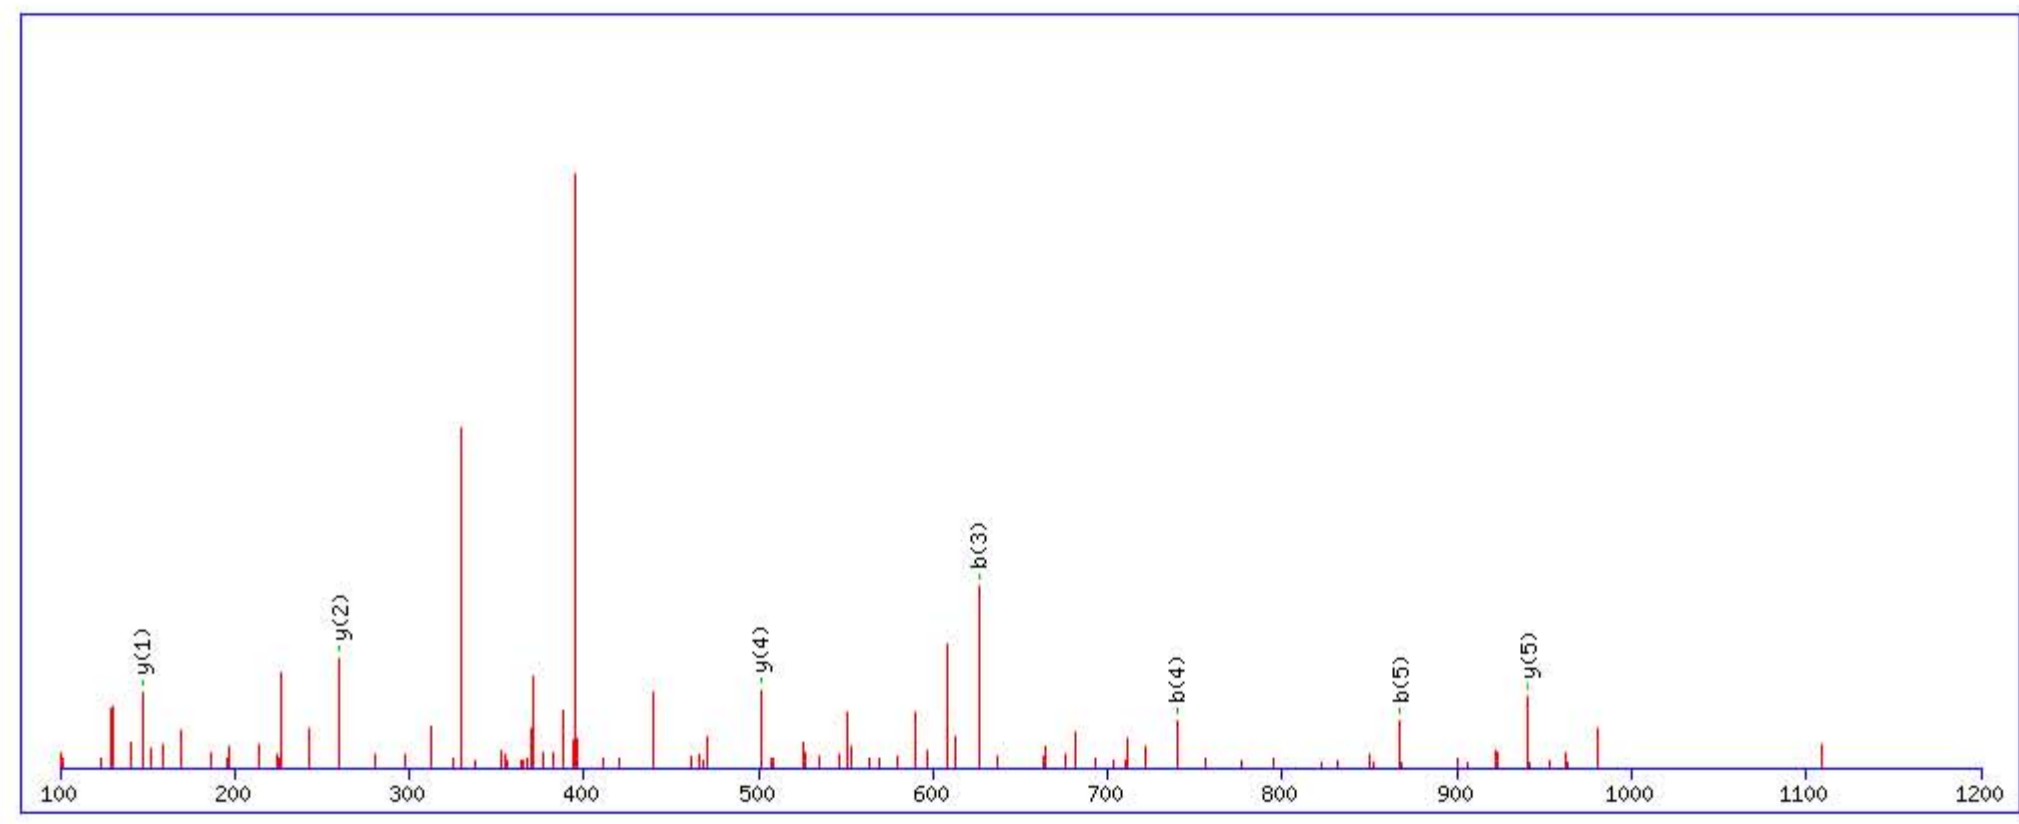

Monoisotopic mass of neutral peptide Mr(calc): 1125.621597

Fixed modifications: Carbamidomethyl (C) (apply to specified residues or termini only)

Variable modifications:

Q3 : Biotin:Thermo-21345 (Q)

Ions Score: 28 Expect: 0.033

Matches : 7/56 fragment ions using 10 most intense peaks [\(help\)](#)

| # | b                 | b <sup>++</sup> | b <sup>*</sup> | b <sup>*++</sup> | b <sup>0</sup> | b <sup>0++</sup> | Seq.     | y                 | y <sup>++</sup> | y <sup>*</sup> | y <sup>*++</sup> | y <sup>0</sup> | y <sup>0++</sup> | # |
|---|-------------------|-----------------|----------------|------------------|----------------|------------------|----------|-------------------|-----------------|----------------|------------------|----------------|------------------|---|
| 1 | 58.028740         | 29.518008       |                |                  |                |                  | <b>G</b> |                   |                 |                |                  |                |                  | 7 |
| 2 | 187.071333        | 94.039305       |                |                  | 169.060768     | 85.034022        | <b>E</b> | 1069.607429       | 535.307353      | 1052.580880    | 526.794078       | 1051.596864    | 526.302070       | 6 |
| 3 | <b>626.296659</b> | 313.651968      | 609.270110     | 305.138693       | 608.286094     | 304.646685       | <b>Q</b> | <b>940.564836</b> | 470.786056      | 923.538287     | 462.272782       |                |                  | 5 |
| 4 | <b>739.380723</b> | 370.194000      | 722.354174     | 361.680725       | 721.370158     | 361.188717       | <b>I</b> | <b>501.339510</b> | 251.173393      | 484.312961     | 242.660119       |                |                  | 4 |
| 5 | <b>867.439301</b> | 434.223289      | 850.412752     | 425.710014       | 849.428736     | 425.218006       | <b>Q</b> | 388.255446        | 194.631361      | 371.228897     | 186.118087       |                |                  | 3 |
| 6 | 980.523365        | 490.765321      | 963.496816     | 482.252046       | 962.512800     | 481.760038       | <b>L</b> | <b>260.196868</b> | 130.602072      | 243.170319     | 122.088798       |                |                  | 2 |
| 7 |                   |                 |                |                  |                |                  | <b>K</b> | <b>147.112804</b> | 74.060040       | 130.086255     | 65.546766        |                |                  | 1 |

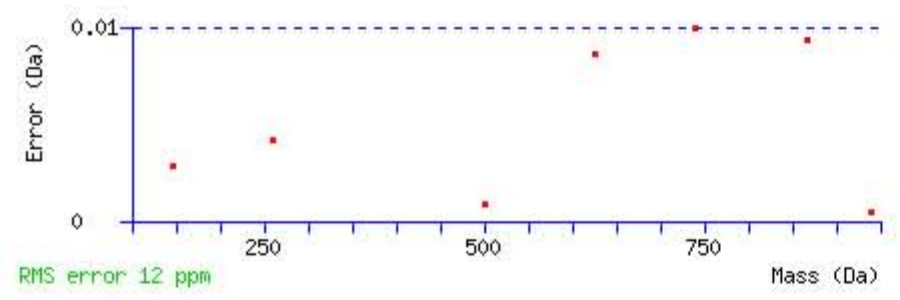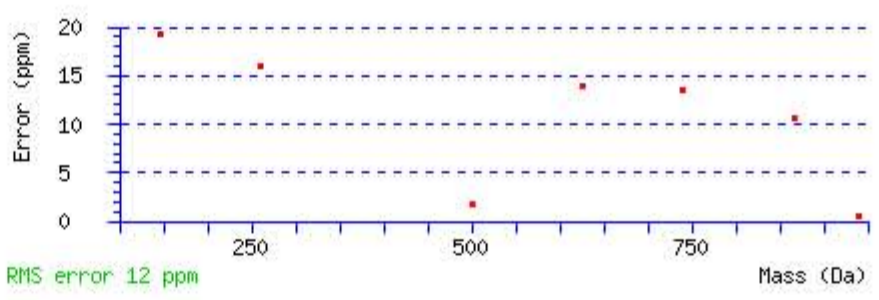

NCBI BLAST search of [GEQIQLK](#)

(Parameters: blastp, nr protein database, expect=20000, no filter, PAM30)

Other BLAST [web gateways](#)

### All matches to this query

| Score | Mr(calc):   | Delta     | Sequence                   |
|-------|-------------|-----------|----------------------------|
| 28.0  | 1125.621597 | 0.008371  | <a href="#">GEQIQLK</a>    |
| 12.4  | 1125.632828 | -0.002860 | <a href="#">KLCLSHLQK</a>  |
| 12.3  | 1125.621597 | 0.008371  | <a href="#">EQVAQLK</a>    |
| 12.2  | 1125.632813 | -0.002845 | <a href="#">EQAARLK</a>    |
| 9.7   | 1125.636856 | -0.006888 | <a href="#">WAAQVIK</a>    |
| 7.6   | 1125.629486 | 0.000482  | <a href="#">RVDGWVPLK</a>  |
| 7.1   | 1125.621597 | 0.008371  | <a href="#">GEQIQLK</a>    |
| 7.1   | 1125.633499 | -0.003531 | <a href="#">VSHFLPWIK</a>  |
| 6.3   | 1125.639359 | -0.009391 | <a href="#">LTNTAPPALK</a> |
| 6.2   | 1125.618240 | 0.011728  | <a href="#">GTNVFKGYLK</a> |

# **MASCOT** Mascot Search Results

## Peptide View

MS/MS Fragmentation of **QYLIMGK**

Found in **CO5\_HUMAN**, Complement C5 OS=Homo sapiens GN=C5 PE=1 SV=4

Match to Query 22316: 1162.636188 from(582.325370,2+) rtinseconds(2079) index(42769)

Title: Locus:1.1.1.3173.6 File:"2013-07-02 CLN FXIII 180 min 1st F 3.wiff"

Data file C:\Program Files (x86)\Matrix Science\Mascot Daemon\mgf\7 FXIII 180 min 1st\mascot\_daemon\_merge.mgf

Click mouse within plot area to zoom in by factor of two about that point

Or, Plot from  to  Da

Label all possible matches  Label matches used for scoring

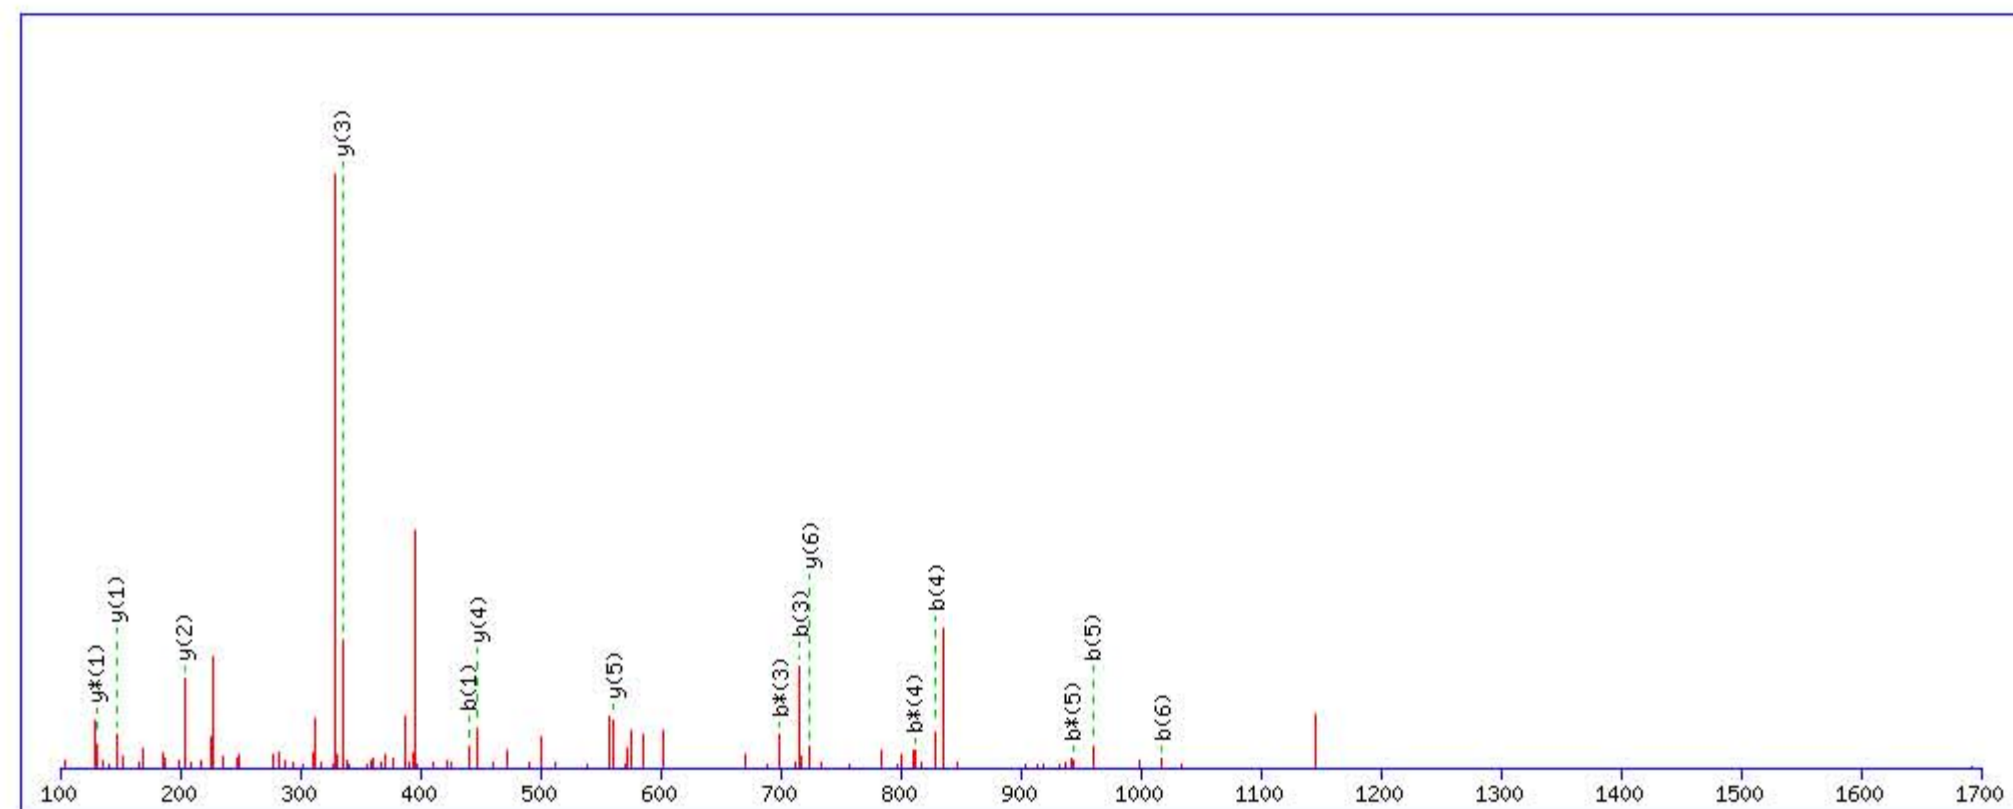

Monoisotopic mass of neutral peptide Mr(calc): 1162.624237

Fixed modifications: Carbamidomethyl (C) (apply to specified residues or termini only)

Variable modifications:

Q1 : Biotin:Thermo-21345 (Q)

Ions Score: 30 Expect: 0.015

Matches : 15/48 fragment ions using 30 most intense peaks [\(help\)](#)

| # | b                  | b <sup>++</sup> | b <sup>*</sup>    | b <sup>*++</sup> | Seq.     | y                 | y <sup>++</sup> | y <sup>*</sup>    | y <sup>*++</sup> | #        |
|---|--------------------|-----------------|-------------------|------------------|----------|-------------------|-----------------|-------------------|------------------|----------|
| 1 | <b>440.232602</b>  | 220.619939      | 423.206053        | 212.106664       | <b>Q</b> |                   |                 |                   |                  | <b>7</b> |
| 2 | 603.295931         | 302.151604      | 586.269382        | 293.638329       | <b>Y</b> | <b>724.406210</b> | 362.706743      | 707.379661        | 354.193469       | <b>6</b> |
| 3 | <b>716.379995</b>  | 358.693636      | <b>699.353446</b> | 350.180361       | <b>L</b> | <b>561.342881</b> | 281.175079      | 544.316332        | 272.661804       | <b>5</b> |
| 4 | <b>829.464059</b>  | 415.235668      | <b>812.437510</b> | 406.722393       | <b>I</b> | <b>448.258817</b> | 224.633046      | 431.232268        | 216.119772       | <b>4</b> |
| 5 | <b>960.504544</b>  | 480.755910      | <b>943.477995</b> | 472.242636       | <b>M</b> | <b>335.174753</b> | 168.091014      | 318.148204        | 159.577740       | <b>3</b> |
| 6 | <b>1017.526008</b> | 509.266642      | 1000.499459       | 500.753368       | <b>G</b> | <b>204.134268</b> | 102.570772      | 187.107719        | 94.057497        | <b>2</b> |
| 7 |                    |                 |                   |                  | <b>K</b> | <b>147.112804</b> | 74.060040       | <b>130.086255</b> | 65.546765        | <b>1</b> |

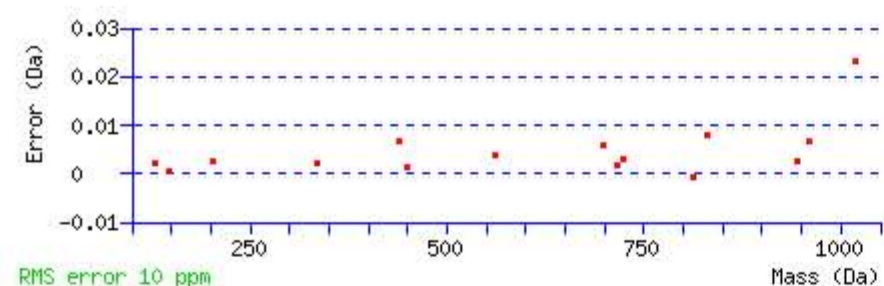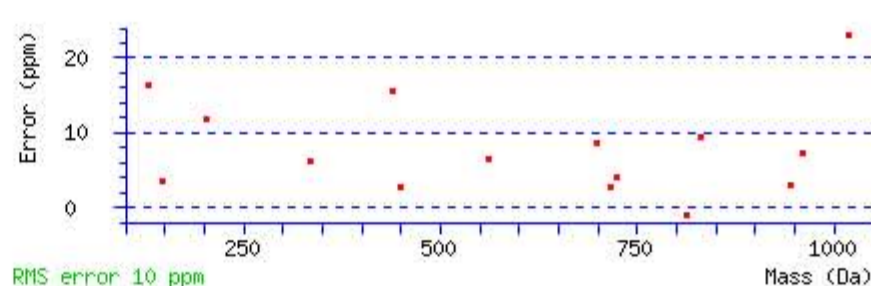

NCBI BLAST search of **QYLIMGK**

(Parameters: blastp, nr protein database, expect=20000, no filter, PAM30)

Other BLAST [web gateways](#)

## All matches to this query

| Score | Mr(calc):   | Delta     | Sequence                   |
|-------|-------------|-----------|----------------------------|
| 30.1  | 1162.624237 | 0.011951  | <a href="#">QYLIMGK</a>    |
| 13.1  | 1162.641998 | -0.005810 | <a href="#">QYLTSLK</a>    |
| 10.2  | 1162.626724 | 0.009464  | <a href="#">ESILKADMLK</a> |
| 8.3   | 1162.626740 | 0.009448  | <a href="#">EVLKMDTSIK</a> |
| 5.0   | 1162.623383 | 0.012805  | <a href="#">ELFGLDTLQK</a> |
| 4.0   | 1162.624069 | 0.012119  | <a href="#">VGRCRSLSTK</a> |
| 3.2   | 1162.639313 | -0.003125 | <a href="#">QRHLNGK</a>    |
| 2.9   | 1162.635956 | 0.000232  | <a href="#">WGGFLGRRSK</a> |
| 2.6   | 1162.649216 | -0.013028 | <a href="#">RVKTQMSLGK</a> |
| 1.5   | 1162.620697 | 0.015491  | <a href="#">QLSGQRFTAR</a> |

# MASCOT SEARCH RESULTS

## Peptide View

MS/MS Fragmentation of **WLSEEQR**

Found in **CO5\_HUMAN**, Complement C5 OS=Homo sapiens GN=C5 PE=1 SV=4

Match to Query 25488: 1257.628988 from(629.821770,2+) rtinseconds(1802) index(40800)

Title: Locus:1.1.1.3077.11 File:"2013-07-02 CLN FXIII 180 min 1st F 3.wiff"

Data file C:\Program Files (x86)\Matrix Science\Mascot Daemon\mgf\7 FXIII 180 min 1st\mascot\_daemon\_merge.mgf

Click mouse within plot area to zoom in by factor of two about that point

Or, Plot from  to  Da

Label all possible matches  Label matches used for scoring

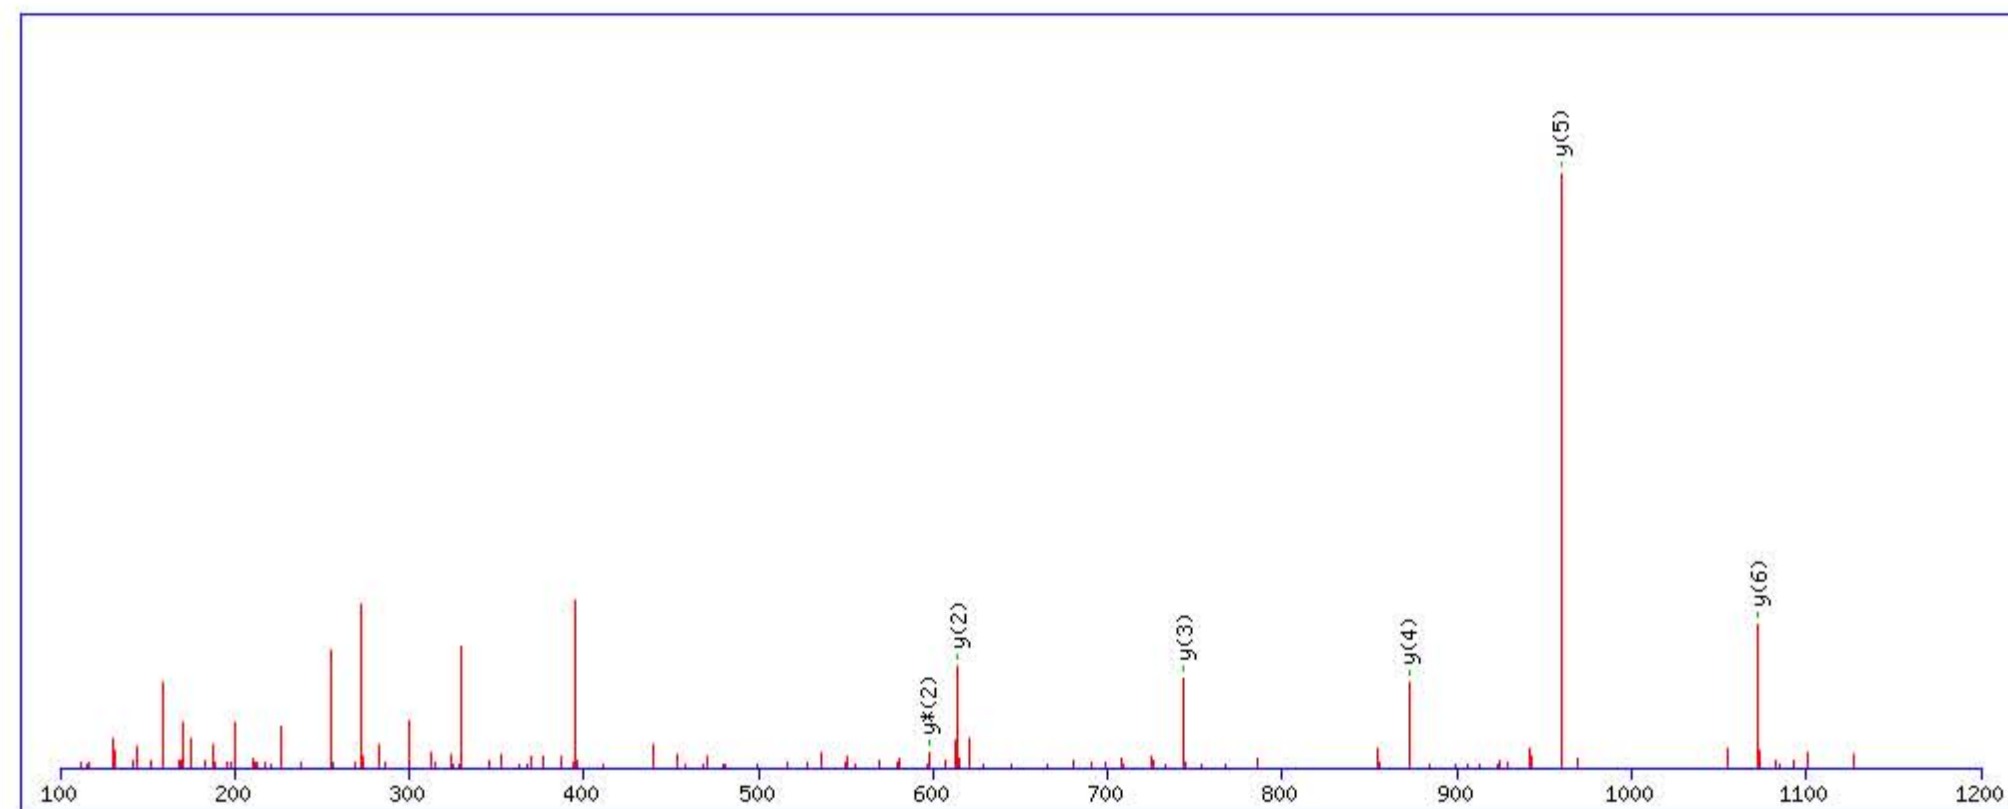

Monoisotopic mass of neutral peptide Mr(calc): 1257.617569

Fixed modifications: Carbamidomethyl (C) (apply to specified residues or termini only)

Variable modifications:

Q6 : Biotin:Thermo-21345 (Q)

Ions Score: 30 Expect: 0.022

Matches : 6/54 fragment ions using 11 most intense peaks [\(help\)](#)

| # | b           | b <sup>++</sup> | b <sup>*</sup> | b <sup>+++</sup> | b <sup>0</sup> | b <sup>0++</sup> | Seq. | y           | y <sup>++</sup> | y <sup>*</sup> | y <sup>+++</sup> | y <sup>0</sup> | y <sup>0++</sup> | # |
|---|-------------|-----------------|----------------|------------------|----------------|------------------|------|-------------|-----------------|----------------|------------------|----------------|------------------|---|
| 1 | 187.086589  | 94.046932       |                |                  |                |                  | W    |             |                 |                |                  |                |                  | 7 |
| 2 | 300.170653  | 150.588965      |                |                  |                |                  | L    | 1072.545556 | 536.776416      | 1055.519007    | 528.263142       | 1054.534991    | 527.771134       | 6 |
| 3 | 387.202681  | 194.104979      |                |                  | 369.192116     | 185.099696       | S    | 959.461492  | 480.234384      | 942.434943     | 471.721109       | 941.450927     | 471.229101       | 5 |
| 4 | 516.245274  | 258.626275      |                |                  | 498.234709     | 249.620993       | E    | 872.429464  | 436.718370      | 855.402915     | 428.205095       | 854.418899     | 427.713087       | 4 |
| 5 | 645.287867  | 323.147572      |                |                  | 627.277302     | 314.142289       | E    | 743.386871  | 372.197073      | 726.360322     | 363.683799       | 725.376306     | 363.191791       | 3 |
| 6 | 1084.513193 | 542.760235      | 1067.486644    | 534.246960       | 1066.502628    | 533.754952       | Q    | 614.344278  | 307.675777      | 597.317729     | 299.162502       |                |                  | 2 |
| 7 |             |                 |                |                  |                |                  | R    | 175.118952  | 88.063114       | 158.092403     | 79.549839        |                |                  | 1 |

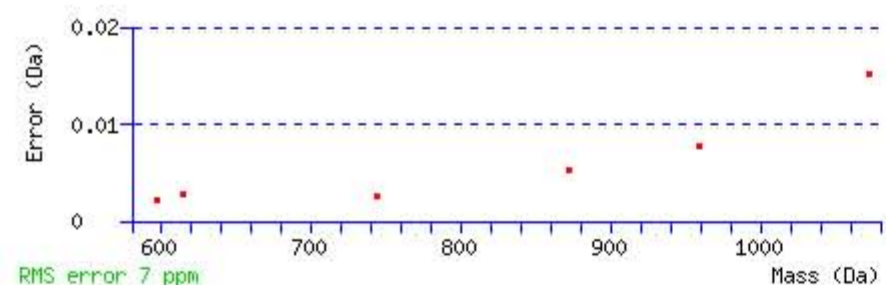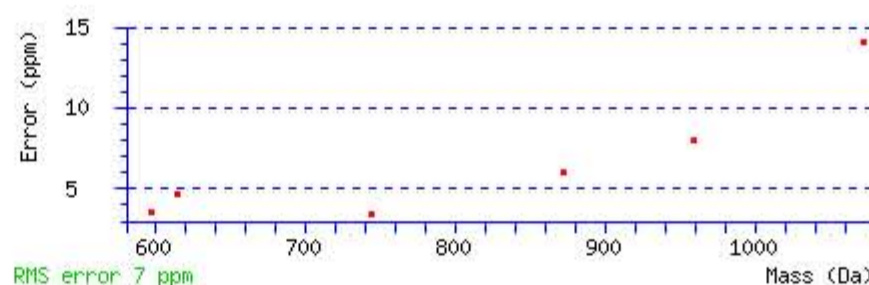

NCBI BLAST search of **WLSEEQR**

(Parameters: blastp, nr protein database, expect=20000, no filter, PAM30)

Other BLAST [web gateways](#)

## All matches to this query

| Score | Mr(calc):   | Delta     | Sequence                       |
|-------|-------------|-----------|--------------------------------|
| 29.8  | 1257.617569 | 0.011419  | <a href="#">WLSEEQR</a>        |
| 13.5  | 1257.621414 | 0.007574  | <a href="#">ASSNRSWTPPR</a>    |
| 6.7   | 1257.620071 | 0.008917  | <a href="#">EGLEEGDQILR</a>    |
| 3.2   | 1257.617599 | 0.011389  | <a href="#">QADVFPDR</a>       |
| 2.7   | 1257.631287 | -0.002299 | <a href="#">ADAEELKQQR</a>     |
| 2.6   | 1257.621445 | 0.007543  | <a href="#">GFRGETGPQGPR</a>   |
| 2.0   | 1257.638687 | -0.009699 | <a href="#">EGEMALLSKHK</a>    |
| 1.7   | 1257.617584 | 0.011404  | <a href="#">SVMEAPFPAPGR</a>   |
| 1.3   | 1257.617569 | 0.011419  | <a href="#">WEALPAMPTAR</a>    |
| 0.8   | 1257.613541 | 0.015447  | <a href="#">APGPATASAAAAMR</a> |

# MASCOT SCIENCE Mascot Search Results

## Peptide View

MS/MS Fragmentation of **AFTECCVVASQLR**

Found in **CO5\_HUMAN**, Complement C5 OS=Homo sapiens GN=C5 PE=1 SV=4

Match to Query 46488: 1850.895702 from(617.972510,3+) rtinseconds(2151) index(25760)

Title: Locus:1.1.1.2891.13 File:"2013-07-02 CLN FXIII 180 min 1st F 2.wiff"

Data file C:\Program Files (x86)\Matrix Science\Mascot Daemon\mgf\7 FXIII 180 min 1st\mascot\_daemon\_merge.mgf

Click mouse within plot area to zoom in by factor of two about that point

Or, Plot from  to  Da

Label all possible matches  Label matches used for scoring

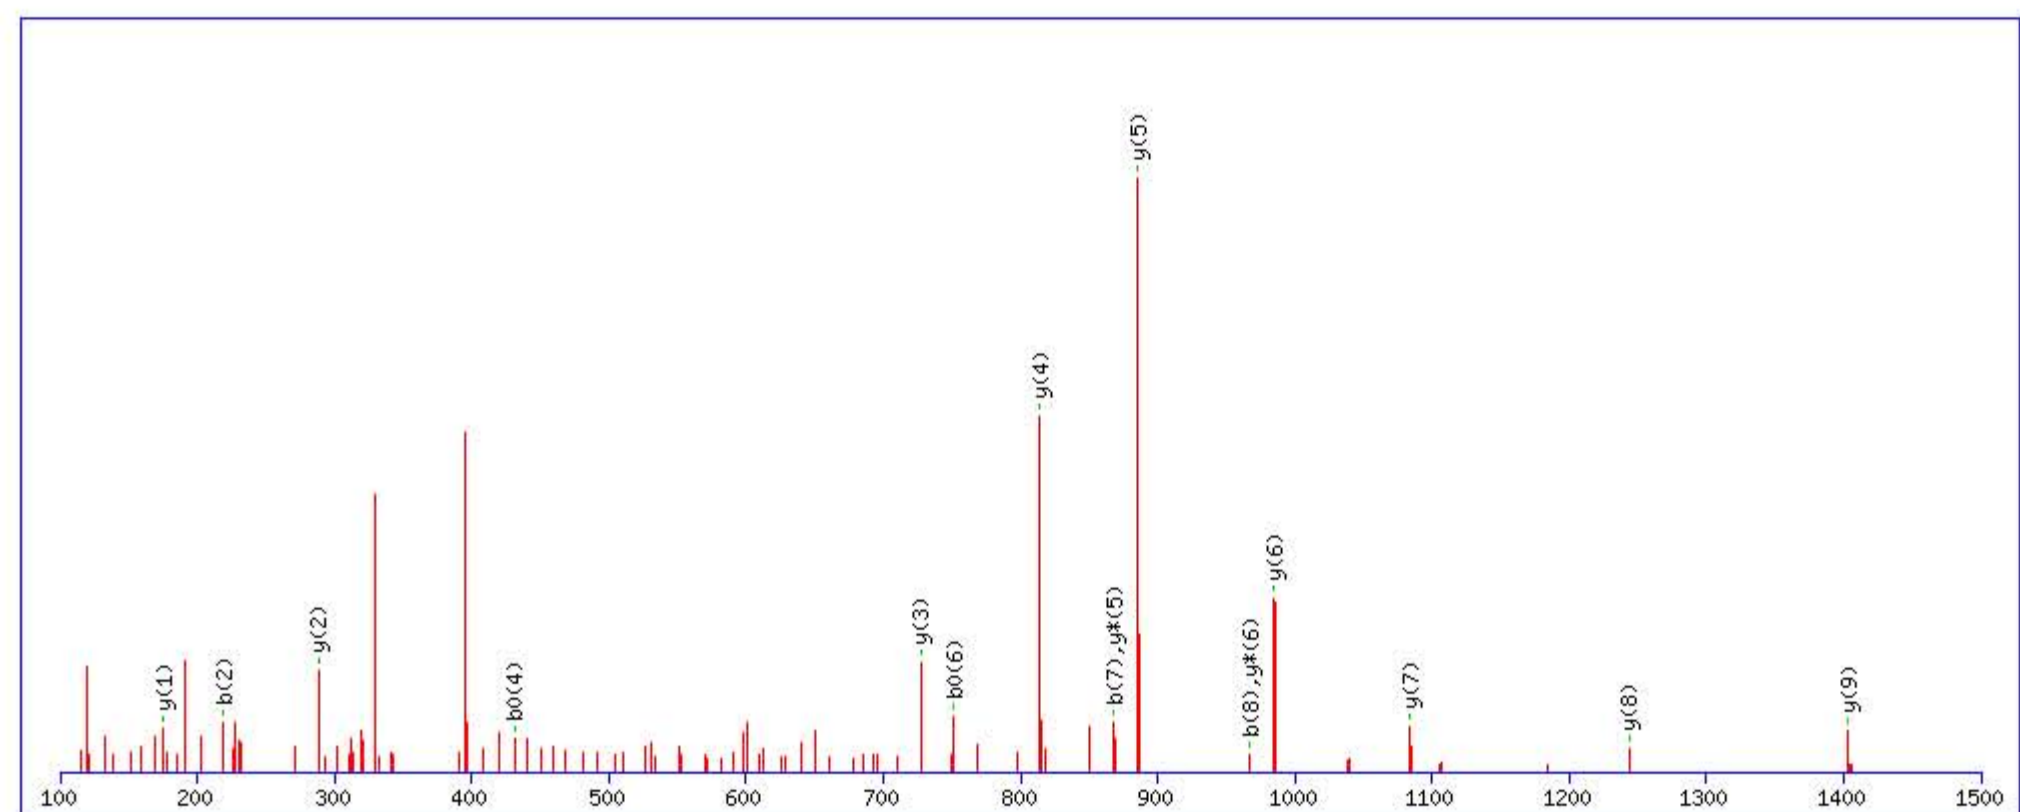

Monoisotopic mass of neutral peptide Mr(calc): 1850.884140

Fixed modifications: Carbamidomethyl (C) (apply to specified residues or termini only)

Variable modifications:

Q11 : Biotin:Thermo-21345 (Q)

Ions Score: 41 Expect: 0.002

Matches : 16/114 fragment ions using 36 most intense peaks [\(help\)](#)

| #  | b                 | b <sup>++</sup> | b <sup>*</sup> | b <sup>*++</sup> | b <sup>0</sup>    | b <sup>0++</sup> | Seq. | y                  | y <sup>++</sup> | y <sup>*</sup>    | y <sup>*++</sup> | y <sup>0</sup> | y <sup>0++</sup> | #  |
|----|-------------------|-----------------|----------------|------------------|-------------------|------------------|------|--------------------|-----------------|-------------------|------------------|----------------|------------------|----|
| 1  | 72.044390         | 36.525833       |                |                  |                   |                  | A    |                    |                 |                   |                  |                |                  | 13 |
| 2  | <b>219.112804</b> | 110.060040      |                |                  |                   |                  | F    | 1780.854296        | 890.930786      | 1763.827747       | 882.417512       | 1762.843731    | 881.925504       | 12 |
| 3  | 320.160483        | 160.583879      |                |                  | 302.149918        | 151.578597       | T    | 1633.785882        | 817.396579      | 1616.759333       | 808.883305       | 1615.775317    | 808.391297       | 11 |
| 4  | 449.203076        | 225.105176      |                |                  | <b>431.192511</b> | 216.099894       | E    | 1532.738203        | 766.872740      | 1515.711654       | 758.359465       | 1514.727638    | 757.867457       | 10 |
| 5  | 609.233725        | 305.120501      |                |                  | 591.223160        | 296.115218       | C    | <b>1403.695610</b> | 702.351443      | 1386.669061       | 693.838169       | 1385.685045    | 693.346161       | 9  |
| 6  | 769.264374        | 385.135825      |                |                  | <b>751.253809</b> | 376.130543       | C    | <b>1243.664961</b> | 622.336119      | 1226.638412       | 613.822844       | 1225.654396    | 613.330836       | 8  |
| 7  | <b>868.332788</b> | 434.670032      |                |                  | 850.322223        | 425.664750       | V    | <b>1083.634312</b> | 542.320794      | 1066.607763       | 533.807520       | 1065.623747    | 533.315512       | 7  |
| 8  | <b>967.401202</b> | 484.204239      |                |                  | 949.390637        | 475.198957       | V    | <b>984.565898</b>  | 492.786587      | <b>967.539349</b> | 484.273313       | 966.555333     | 483.781305       | 6  |
| 9  | 1038.438316       | 519.722796      |                |                  | 1020.427751       | 510.717514       | A    | <b>885.497484</b>  | 443.252380      | <b>868.470935</b> | 434.739106       | 867.486919     | 434.247098       | 5  |
| 10 | 1125.470344       | 563.238810      |                |                  | 1107.459779       | 554.233528       | S    | <b>814.460370</b>  | 407.733823      | 797.433821        | 399.220549       | 796.449805     | 398.728541       | 4  |
| 11 | 1564.695670       | 782.851473      | 1547.669121    | 774.338199       | 1546.685105       | 773.846191       | Q    | <b>727.428342</b>  | 364.217809      | 710.401793        | 355.704535       |                |                  | 3  |
| 12 | 1677.779734       | 839.393505      | 1660.753185    | 830.880231       | 1659.769169       | 830.388223       | L    | <b>288.203016</b>  | 144.605146      | 271.176467        | 136.091871       |                |                  | 2  |
| 13 |                   |                 |                |                  |                   |                  | R    | <b>175.118952</b>  | 88.063114       | 158.092403        | 79.549839        |                |                  | 1  |

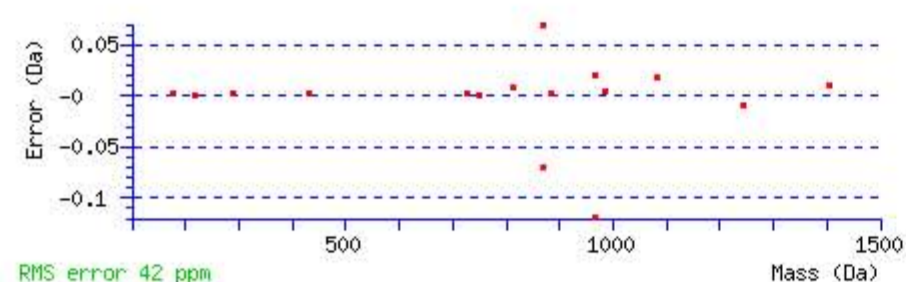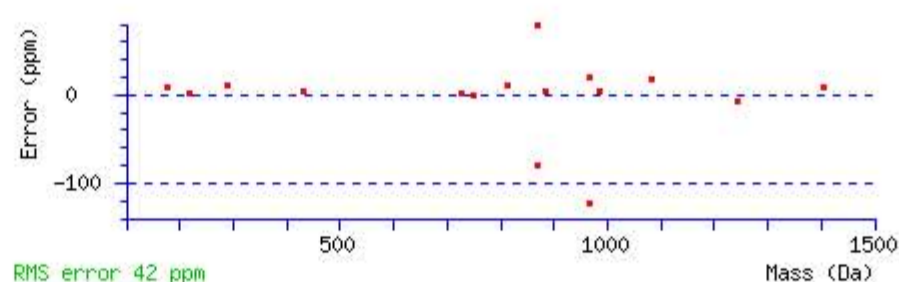

NCBI BLAST search of **AFTECCVVASQLR**

(Parameters: blastp, nr protein database, expect=20000, no filter, PAM30)

Other BLAST [web gateways](#)

All matches to this query

| Score | Mr(calc):   | Delta    | Sequence             |
|-------|-------------|----------|----------------------|
| 40.6  | 1850.884140 | 0.011562 | <b>AFTECCVVASQLR</b> |

Mascot: <http://www.matrixscience.com/>

# MASCOT Search Results

## Peptide View

MS/MS Fragmentation of **ALVEGVDQLFTDYQIK**  
Found in **CO5\_HUMAN**, Complement C5 OS=Homo sapiens GN=C5 PE=1 SV=4

Match to Query 54105: 2149.144902 from(717.388910,3+) rtinseconds(2812) index(47857)  
Title: Locus:1.1.1.3426.5 File:"2013-07-02 CLN FXIII 180 min 1st F 3.wiff"  
Data file C:\Program Files (x86)\Matrix Science\Mascot Daemon\mgf7 FXIII 180 min 1st\mascot\_daemon\_merge.mgf

Click mouse within plot area to zoom in by factor of two about that point  
Or, Plot from  to  Da   
Label all possible matches  Label matches used for scoring

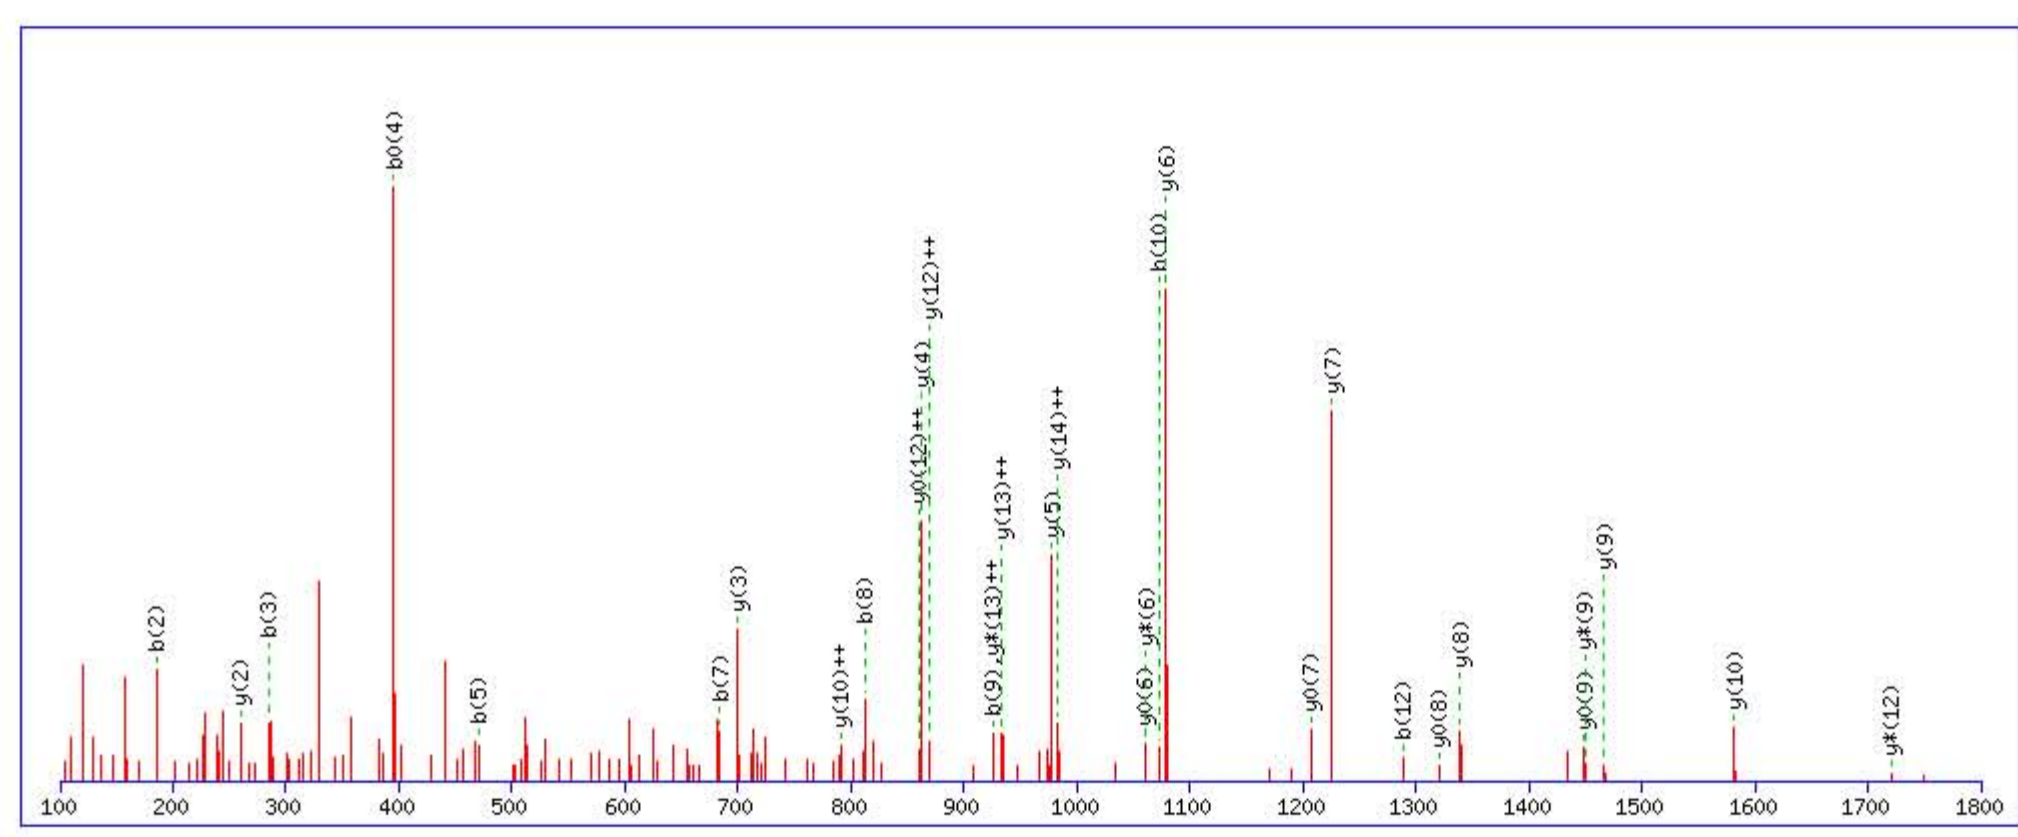

Monoisotopic mass of neutral peptide Mr(calc): 2149.112930  
Fixed modifications: Carbamidomethyl (C) (apply to specified residues or termini only)  
Variable modifications:  
Q14 : Biotin:Thermo-21345 (Q)  
Ions Score: 41 Expect: 0.00029  
Matches : 31/152 fragment ions using 67 most intense peaks ([help](#))

| #  | b           | b <sup>++</sup> | b <sup>*</sup> | b <sup>*++</sup> | b <sup>0</sup> | b <sup>0++</sup> | Seq. | y           | y <sup>++</sup> | y <sup>*</sup> | y <sup>*++</sup> | y <sup>0</sup> | y <sup>0++</sup> | #  |
|----|-------------|-----------------|----------------|------------------|----------------|------------------|------|-------------|-----------------|----------------|------------------|----------------|------------------|----|
| 1  | 72.044390   | 36.525833       |                |                  |                |                  | A    |             |                 |                |                  |                |                  | 16 |
| 2  | 185.128454  | 93.067865       |                |                  |                |                  | L    | 2079.083093 | 1040.045184     | 2062.056544    | 1031.531910      | 2061.072528    | 1031.039902      | 15 |
| 3  | 284.196868  | 142.602072      |                |                  |                |                  | V    | 1965.999029 | 983.503153      | 1948.972480    | 974.989878       | 1947.988464    | 974.497870       | 14 |
| 4  | 413.239461  | 207.123369      |                |                  | 395.228896     | 198.118086       | E    | 1866.930615 | 933.968946      | 1849.904066    | 925.455671       | 1848.920050    | 924.963663       | 13 |
| 5  | 470.260925  | 235.634100      |                |                  | 452.250360     | 226.628818       | G    | 1737.888022 | 869.447649      | 1720.861473    | 860.934375       | 1719.877457    | 860.442367       | 12 |
| 6  | 569.329339  | 285.168308      |                |                  | 551.318774     | 276.163025       | V    | 1680.866558 | 840.936917      | 1663.840009    | 832.423643       | 1662.855993    | 831.931635       | 11 |
| 7  | 684.356282  | 342.681779      |                |                  | 666.345717     | 333.676496       | D    | 1581.798144 | 791.402710      | 1564.771595    | 782.889436       | 1563.787579    | 782.397428       | 10 |
| 8  | 812.414860  | 406.711068      | 795.388311     | 398.197793       | 794.404295     | 397.705785       | Q    | 1466.771201 | 733.889239      | 1449.744652    | 725.375964       | 1448.760636    | 724.883956       | 9  |
| 9  | 925.498924  | 463.253100      | 908.472375     | 454.739825       | 907.488359     | 454.247818       | L    | 1338.712623 | 669.859950      | 1321.686074    | 661.346675       | 1320.702058    | 660.854667       | 8  |
| 10 | 1072.567338 | 536.787307      | 1055.540789    | 528.274033       | 1054.556773    | 527.782025       | F    | 1225.628559 | 613.317918      | 1208.602010    | 604.804643       | 1207.617994    | 604.312635       | 7  |
| 11 | 1173.615017 | 587.311147      | 1156.588468    | 578.797872       | 1155.604452    | 578.305864       | T    | 1078.560145 | 539.783711      | 1061.533596    | 531.270436       | 1060.549580    | 530.778428       | 6  |
| 12 | 1288.641960 | 644.824618      | 1271.615411    | 636.311344       | 1270.631395    | 635.819336       | D    | 977.512466  | 489.259871      | 960.485917     | 480.746597       | 959.501901     | 480.254589       | 5  |
| 13 | 1451.705289 | 726.356283      | 1434.678740    | 717.843008       | 1433.694724    | 717.351000       | Y    | 862.485523  | 431.746400      | 845.458974     | 423.233125       |                |                  | 4  |
| 14 | 1890.930615 | 945.968946      | 1873.904066    | 937.455671       | 1872.920050    | 936.963663       | Q    | 699.422194  | 350.214735      | 682.395645     | 341.701461       |                |                  | 3  |
| 15 | 2004.014679 | 1002.510978     | 1986.988130    | 993.997703       | 1986.004114    | 993.505695       | I    | 260.196868  | 130.602072      | 243.170319     | 122.088797       |                |                  | 2  |
| 16 |             |                 |                |                  |                |                  | K    | 147.112804  | 74.060040       | 130.086255     | 65.546765        |                |                  | 1  |

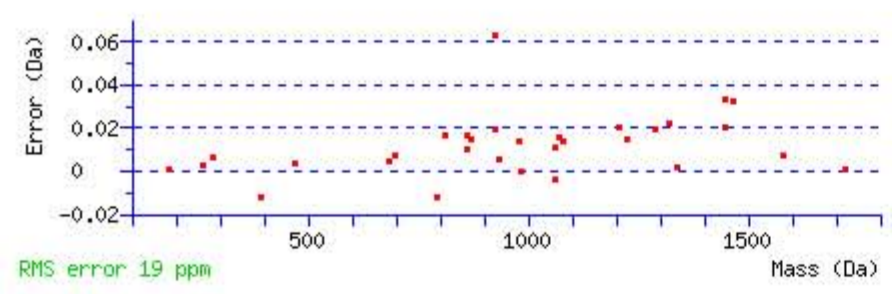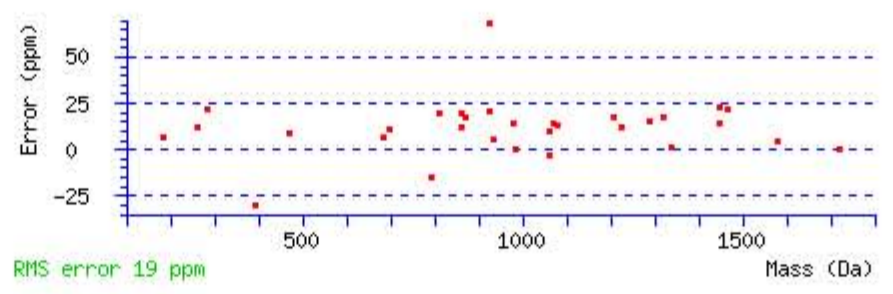

NCBI BLAST search of **ALVEGVDQLFTDYQIK**  
(Parameters: blastp, nr protein database, expect=20000, no filter, PAM30)  
Other BLAST [web gateways](#)

## All matches to this query

| Score | Mr(calc):   | Delta    | Sequence                         |
|-------|-------------|----------|----------------------------------|
| 40.7  | 2149.112930 | 0.031972 | <a href="#">ALVEGVDQLFTDYQIK</a> |
| 3.2   | 2149.112930 | 0.031972 | <a href="#">ALVEGVDQLFTDYQIK</a> |
| 3.0   | 2149.116257 | 0.028645 | <a href="#">QDEQLAMKLLTYELK</a>  |
| 2.7   | 2149.116257 | 0.028645 | <a href="#">QDEQLAMKLLTYELK</a>  |



# **MASCOT** Mascot Search Results

## Peptide View

MS/MS Fragmentation of **MSAVEGICTSESPVIDHQGTK**

Found in **CO5\_HUMAN**, Complement C5 OS=Homo sapiens GN=C5 PE=1 SV=4

Match to Query 63908: 2556.238212 from(853.086680,3+) rtinseconds(1936) index(41744)

Title: Locus:1.1.1.3123.24 File:"2013-07-02 CLN FXIII 180 min 1st F 3.wiff"

Data file C:\Program Files (x86)\Matrix Science\Mascot Daemon\mgf\7 FXIII 180 min 1st\mascot\_daemon\_merge.mgf

Click mouse within plot area to zoom in by factor of two about that point

Or, Plot from  to  Da

Label all possible matches  Label matches used for scoring

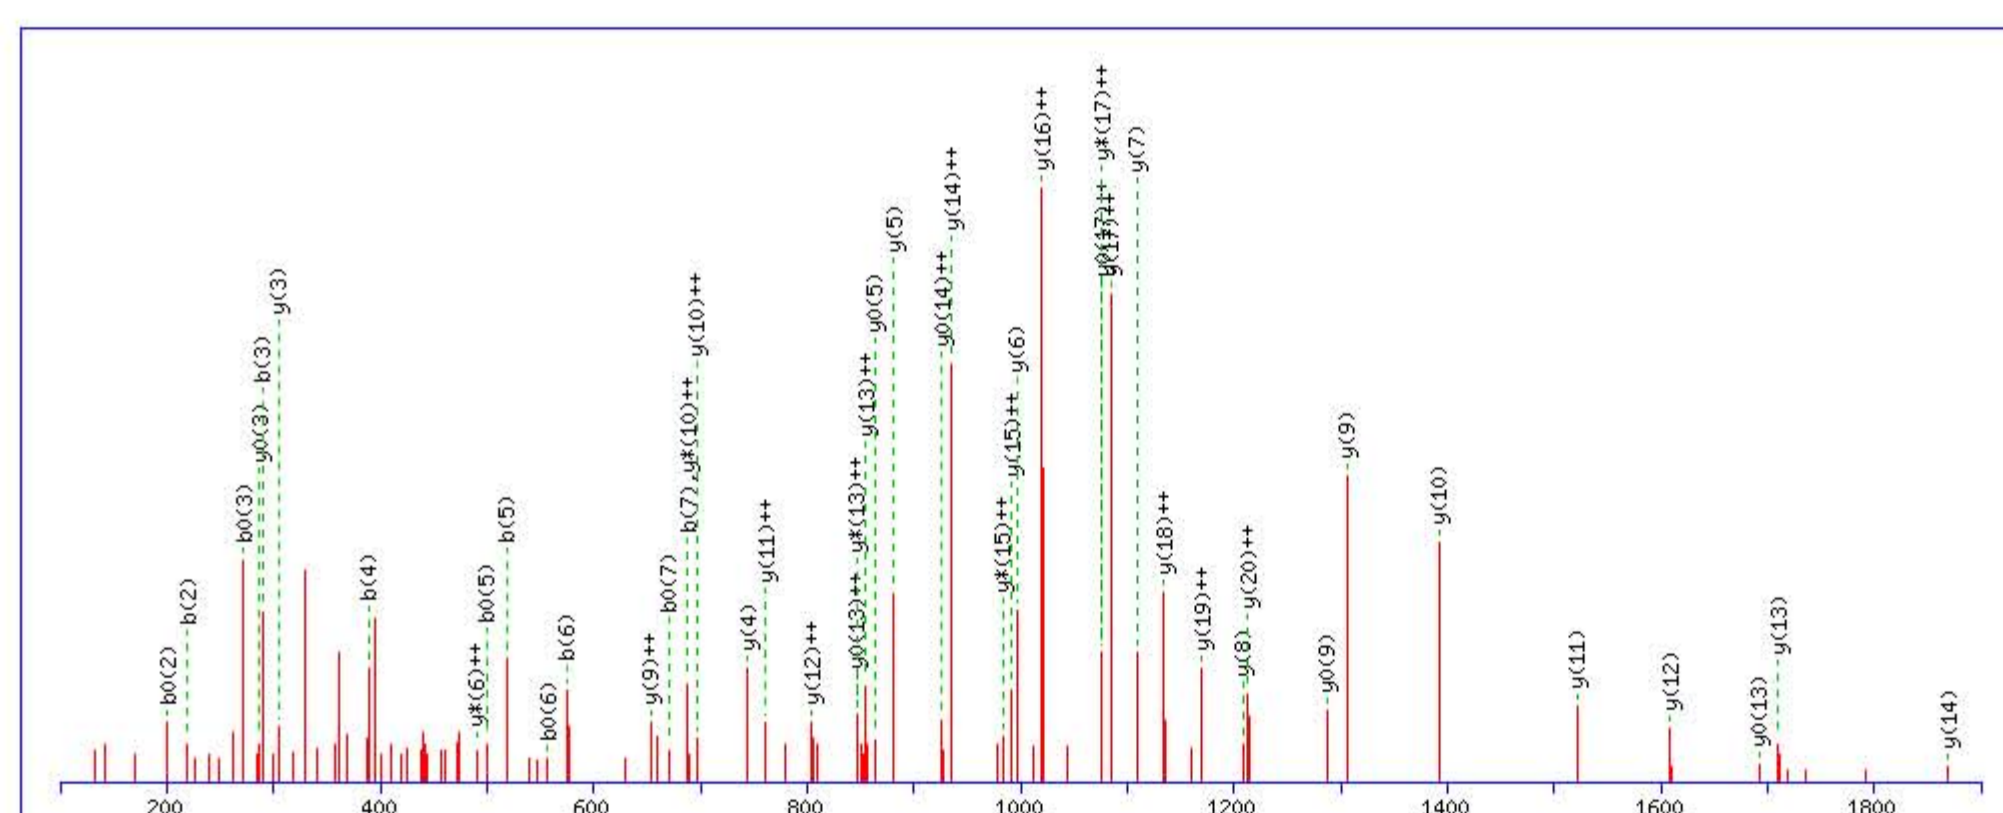

Monoisotopic mass of neutral peptide Mr(calc): 2556.202240

Fixed modifications: Carbamidomethyl (C) (apply to specified residues or termini only)

Variable modifications:

Q18 : Biotin:Thermo-21345 (Q)

Ions Score: 78 Expect: 4e-007

Matches : 47/202 fragment ions using 86 most intense peaks ([help](#))

| #  | b                 | b <sup>++</sup> | b <sup>*</sup> | b <sup>*++</sup> | b <sup>0</sup>    | b <sup>0++</sup> | Seq.     | y                  | y <sup>++</sup>    | y <sup>*</sup> | y <sup>*++</sup>   | y <sup>0</sup>     | y <sup>0++</sup>   | #  |
|----|-------------------|-----------------|----------------|------------------|-------------------|------------------|----------|--------------------|--------------------|----------------|--------------------|--------------------|--------------------|----|
| 1  | 132.047761        | 66.527518       |                |                  |                   |                  | <b>M</b> |                    |                    |                |                    |                    |                    | 21 |
| 2  | <b>219.079789</b> | 110.043532      |                |                  | 201.069224        | 101.038250       | <b>S</b> | 2426.169024        | <b>1213.588150</b> | 2409.142475    | 1205.074875        | 2408.158459        | 1204.582867        | 20 |
| 3  | <b>290.116903</b> | 145.562089      |                |                  | <b>272.106338</b> | 136.556807       | <b>A</b> | 2339.136996        | <b>1170.072136</b> | 2322.110447    | 1161.558861        | 2321.126431        | 1161.066853        | 19 |
| 4  | <b>389.185317</b> | 195.096296      |                |                  | 371.174752        | 186.091014       | <b>V</b> | 2268.099882        | <b>1134.553579</b> | 2251.073333    | 1126.040304        | 2250.089317        | 1125.548296        | 18 |
| 5  | <b>518.227910</b> | 259.617593      |                |                  | <b>500.217345</b> | 250.612311       | <b>E</b> | 2169.031468        | <b>1085.019372</b> | 2152.004919    | <b>1076.506097</b> | 2151.020903        | <b>1076.014089</b> | 17 |
| 6  | <b>575.249374</b> | 288.128325      |                |                  | <b>557.238809</b> | 279.123043       | <b>G</b> | 2039.988875        | <b>1020.498076</b> | 2022.962326    | 1011.984801        | 2021.978310        | 1011.492793        | 16 |
| 7  | <b>688.333438</b> | 344.670357      |                |                  | <b>670.322873</b> | 335.665075       | <b>I</b> | 1982.967411        | <b>991.987343</b>  | 1965.940862    | <b>983.474069</b>  | 1964.956846        | 982.982061         | 15 |
| 8  | 848.364087        | 424.685682      |                |                  | 830.353522        | 415.680399       | <b>C</b> | <b>1869.883347</b> | <b>935.445312</b>  | 1852.856798    | 926.932037         | 1851.872782        | <b>926.440029</b>  | 14 |
| 9  | 949.411766        | 475.209521      |                |                  | 931.401201        | 466.204239       | <b>T</b> | <b>1709.852698</b> | <b>855.429987</b>  | 1692.826149    | <b>846.916713</b>  | <b>1691.842133</b> | <b>846.424704</b>  | 13 |
| 10 | 1036.443794       | 518.725535      |                |                  | 1018.433229       | 509.720253       | <b>S</b> | <b>1608.805019</b> | <b>804.906147</b>  | 1591.778470    | 796.392873         | 1590.794454        | 795.900865         | 12 |
| 11 | 1165.486387       | 583.246832      |                |                  | 1147.475822       | 574.241549       | <b>E</b> | <b>1521.772991</b> | <b>761.390133</b>  | 1504.746442    | 752.876859         | 1503.762426        | 752.384851         | 11 |
| 12 | 1252.518415       | 626.762846      |                |                  | 1234.507850       | 617.757563       | <b>S</b> | <b>1392.730398</b> | <b>696.868837</b>  | 1375.703849    | <b>688.355563</b>  | 1374.719833        | 687.863554         | 10 |
| 13 | 1349.571179       | 675.289228      |                |                  | 1331.560614       | 666.283945       | <b>P</b> | <b>1305.698370</b> | <b>653.352823</b>  | 1288.671821    | 644.839548         | <b>1287.687805</b> | 644.347540         | 9  |
| 14 | 1448.639593       | 724.823435      |                |                  | 1430.629028       | 715.818152       | <b>V</b> | <b>1208.645606</b> | 604.826441         | 1191.619057    | 596.313166         | 1190.635041        | 595.821158         | 8  |
| 15 | 1561.723657       | 781.365467      |                |                  | 1543.713092       | 772.360184       | <b>I</b> | <b>1109.577192</b> | 555.292234         | 1092.550643    | 546.778959         | 1091.566627        | 546.286951         | 7  |
| 16 | 1676.750600       | 838.878938      |                |                  | 1658.740035       | 829.873656       | <b>D</b> | <b>996.493128</b>  | 498.750202         | 979.466579     | <b>490.236927</b>  | 978.482563         | 489.744919         | 6  |
| 17 | 1813.809512       | 907.408394      |                |                  | 1795.798947       | 898.403112       | <b>H</b> | <b>881.466185</b>  | 441.236730         | 864.439636     | 432.723456         | <b>863.455620</b>  | 432.231448         | 5  |
| 18 | 2253.034838       | 1127.021057     | 2236.008289    | 1118.507782      | 2235.024273       | 1118.015774      | <b>Q</b> | <b>744.407273</b>  | 372.707274         | 727.380724     | 364.194000         | 726.396708         | 363.701992         | 4  |
| 19 | 2310.056302       | 1155.531789     | 2293.029753    | 1147.018514      | 2292.045737       | 1146.526506      | <b>G</b> | <b>305.181947</b>  | 153.094611         | 288.155398     | 144.581337         | <b>287.171382</b>  | 144.089329         | 3  |
| 20 | 2411.103981       | 1206.055628     | 2394.077432    | 1197.542354      | 2393.093416       | 1197.050346      | <b>T</b> | 248.160483         | 124.583879         | 231.133934     | 116.070605         | 230.149918         | 115.578597         | 2  |
| 21 |                   |                 |                |                  |                   |                  | <b>K</b> | 147.112804         | 74.060040          | 130.086255     | 65.546765          |                    |                    | 1  |

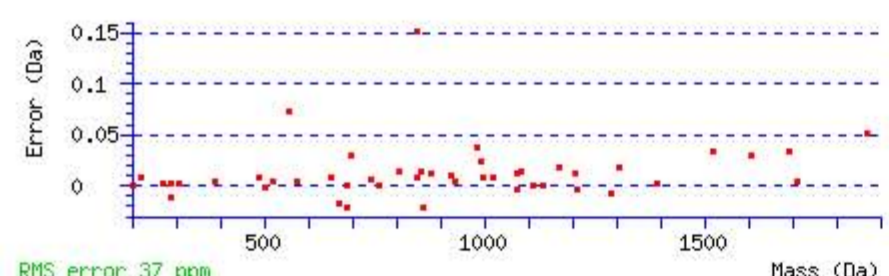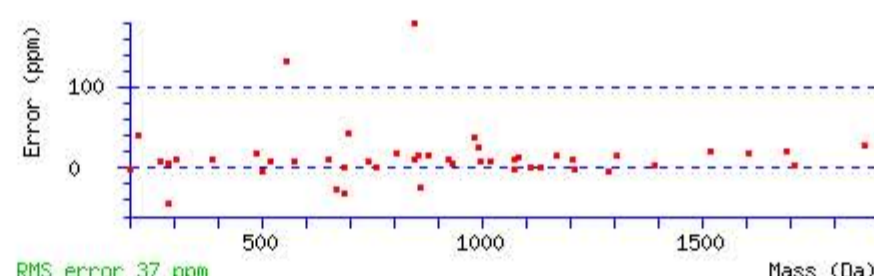

NCBI BLAST search of [MSAVEGICTSESPVIDHQGTK](#)

(Parameters: blastp, nr protein database, expect=20000, no filter, PAM30)

Other BLAST [web gateways](#)

All matches to this query

| Score | Mr(calc):   | Delta    | Sequence                              |
|-------|-------------|----------|---------------------------------------|
| 78.0  | 2556.202240 | 0.035972 | <a href="#">MSAVEGICTSESPVIDHQGTK</a> |

**Peptide View**

MS/MS Fragmentation of **KCCYDGACVNNDETCEQR**  
 Found in **CO5\_HUMAN**, Complement C5 OS=Homo sapiens GN=C5 PE=1 SV=4

Match to Query 64336: 2589.046032 from(864.022620,3+) rtinseconds(1422) index(38149)  
 Title: Locus:1.1.1.2944.26 File:"2013-07-02 CLN FXIII 180 min 1st F 3.wiff"  
 Data file C:\Program Files (x86)\Matrix Science\Mascot Daemon\mgf\7 FXIII 180 min 1st\mascot\_daemon\_merge.mgf

Click mouse within plot area to zoom in by factor of two about that point  
 Or, Plot from  to  Da   
 Label all possible matches  Label matches used for scoring

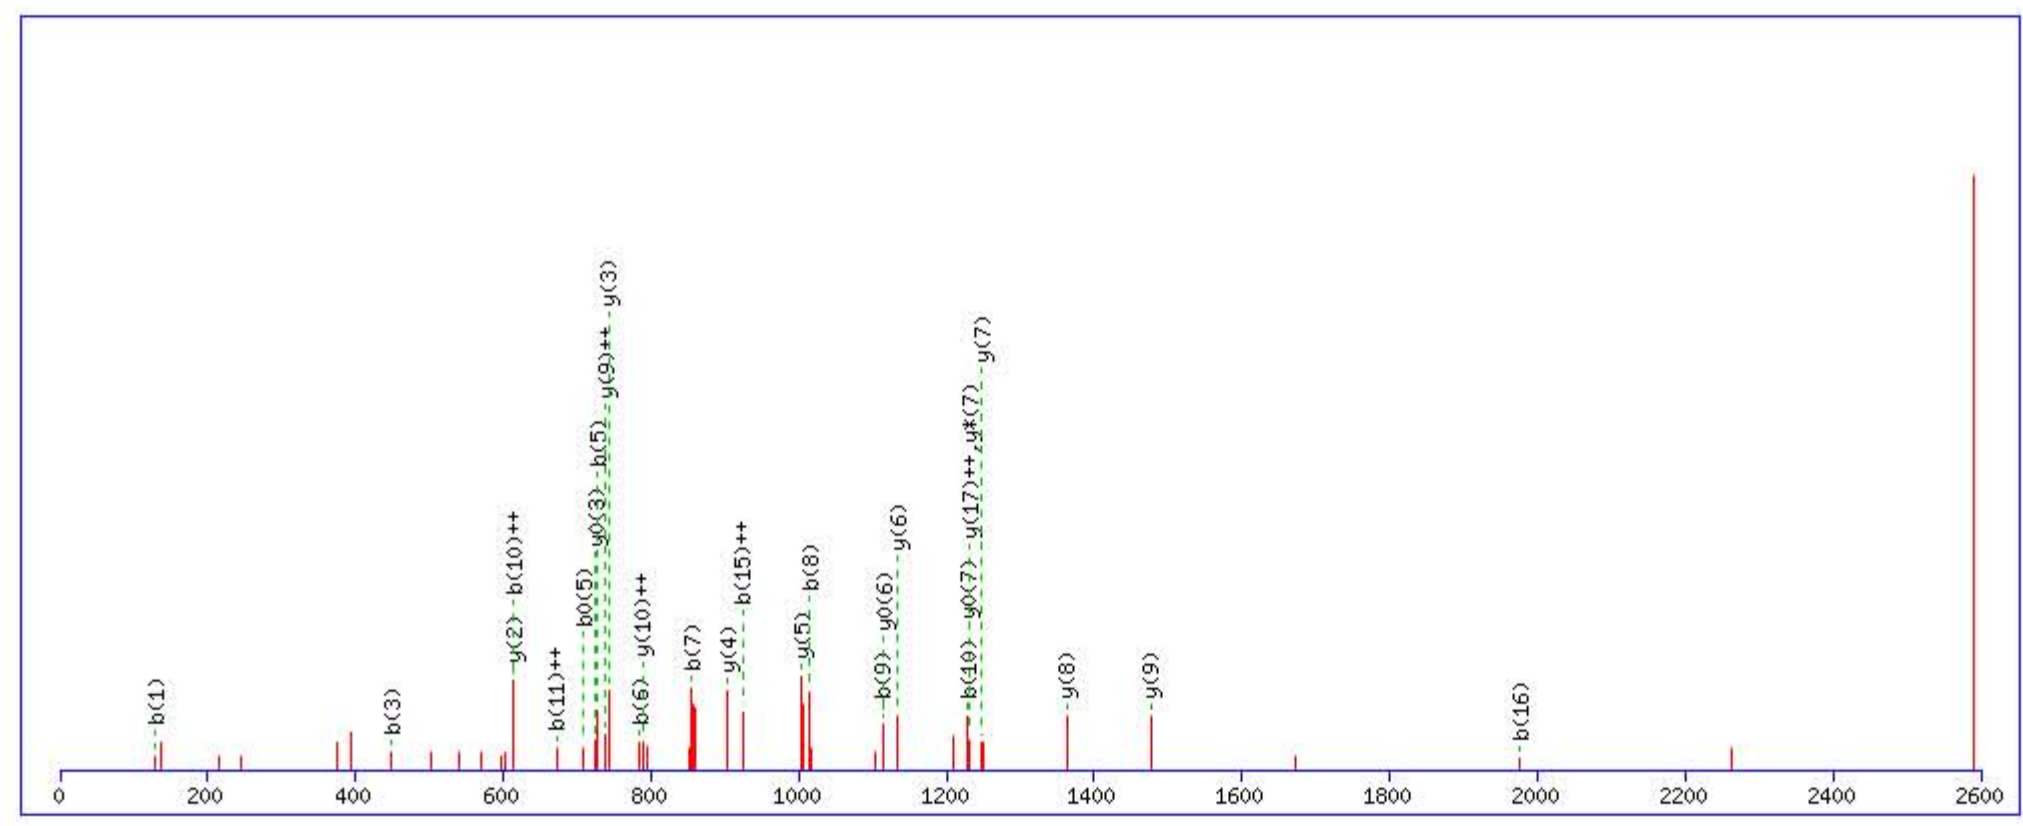

Monoisotopic mass of neutral peptide Mr(calc): 2589.017487  
 Fixed modifications: Carbamidomethyl (C) (apply to specified residues or termini only)  
 Variable modifications:  
 Q17 : Biotin:Thermo-21345 (Q)  
 Ions Score: 59 Expect: 1.1e-006  
 Matches : 28/192 fragment ions using 47 most intense peaks [\(help\)](#)

| #  | b           | b <sup>++</sup> | b <sup>*</sup> | b <sup>+++</sup> | b <sup>0</sup> | b <sup>0++</sup> | Seq. | y           | y <sup>++</sup> | y <sup>*</sup> | y <sup>+++</sup> | y <sup>0</sup> | y <sup>0++</sup> | #  |
|----|-------------|-----------------|----------------|------------------|----------------|------------------|------|-------------|-----------------|----------------|------------------|----------------|------------------|----|
| 1  | 129.102239  | 65.054757       | 112.075690     | 56.541483        |                |                  | K    |             |                 |                |                  |                |                  | 18 |
| 2  | 289.132888  | 145.070082      | 272.106339     | 136.556808       |                |                  | C    | 2461.929800 | 1231.468538     | 2444.903251    | 1222.955263      | 2443.919235    | 1222.463255      | 17 |
| 3  | 449.163537  | 225.085407      | 432.136988     | 216.572132       |                |                  | C    | 2301.899151 | 1151.453213     | 2284.872602    | 1142.939939      | 2283.888586    | 1142.447931      | 16 |
| 4  | 612.226866  | 306.617071      | 595.200317     | 298.103797       |                |                  | Y    | 2141.868502 | 1071.437889     | 2124.841953    | 1062.924614      | 2123.857937    | 1062.432606      | 15 |
| 5  | 727.253809  | 364.130543      | 710.227260     | 355.617268       | 709.243244     | 355.125260       | D    | 1978.805173 | 989.906225      | 1961.778624    | 981.392950       | 1960.794608    | 980.900942       | 14 |
| 6  | 784.275273  | 392.641275      | 767.248724     | 384.128000       | 766.264708     | 383.635992       | G    | 1863.778230 | 932.392753      | 1846.751681    | 923.879479       | 1845.767665    | 923.387471       | 13 |
| 7  | 855.312387  | 428.159832      | 838.285838     | 419.646557       | 837.301822     | 419.154549       | A    | 1806.756766 | 903.882021      | 1789.730217    | 895.368747       | 1788.746201    | 894.876739       | 12 |
| 8  | 1015.343036 | 508.175156      | 998.316487     | 499.661882       | 997.332471     | 499.169874       | C    | 1735.719652 | 868.363464      | 1718.693103    | 859.850190       | 1717.709087    | 859.358182       | 11 |
| 9  | 1114.411450 | 557.709363      | 1097.384901    | 549.196089       | 1096.400885    | 548.704081       | V    | 1575.689003 | 788.348140      | 1558.662454    | 779.834865       | 1557.678438    | 779.342857       | 10 |
| 10 | 1228.454377 | 614.730827      | 1211.427828    | 606.217552       | 1210.443812    | 605.725544       | N    | 1476.620589 | 738.813933      | 1459.594040    | 730.300658       | 1458.610024    | 729.808650       | 9  |
| 11 | 1342.497304 | 671.752290      | 1325.470755    | 663.239016       | 1324.486739    | 662.747008       | N    | 1362.577662 | 681.792469      | 1345.551113    | 673.279195       | 1344.567097    | 672.787187       | 8  |
| 12 | 1457.524247 | 729.265762      | 1440.497698    | 720.752487       | 1439.513682    | 720.260479       | D    | 1248.534735 | 624.771006      | 1231.508186    | 616.257731       | 1230.524170    | 615.765723       | 7  |
| 13 | 1586.566840 | 793.787058      | 1569.540291    | 785.273784       | 1568.556275    | 784.781776       | E    | 1133.507792 | 567.257534      | 1116.481243    | 558.744260       | 1115.497227    | 558.252252       | 6  |
| 14 | 1687.614519 | 844.310898      | 1670.587970    | 835.797623       | 1669.603954    | 835.305615       | T    | 1004.465199 | 502.736238      | 987.438650     | 494.222963       | 986.454634     | 493.730955       | 5  |
| 15 | 1847.645168 | 924.326222      | 1830.618619    | 915.812948       | 1829.634603    | 915.320940       | C    | 903.417520  | 452.212398      | 886.390971     | 443.699124       | 885.406955     | 443.207116       | 4  |
| 16 | 1976.687761 | 988.847519      | 1959.661212    | 980.334244       | 1958.677196    | 979.842236       | E    | 743.386871  | 372.197074      | 726.360322     | 363.683799       | 725.376306     | 363.191791       | 3  |
| 17 | 2415.913087 | 1208.460182     | 2398.886538    | 1199.946907      | 2397.902522    | 1199.454899      | Q    | 614.344278  | 307.675777      | 597.317729     | 299.162503       |                |                  | 2  |
| 18 |             |                 |                |                  |                |                  | R    | 175.118952  | 88.063114       | 158.092403     | 79.549839        |                |                  | 1  |

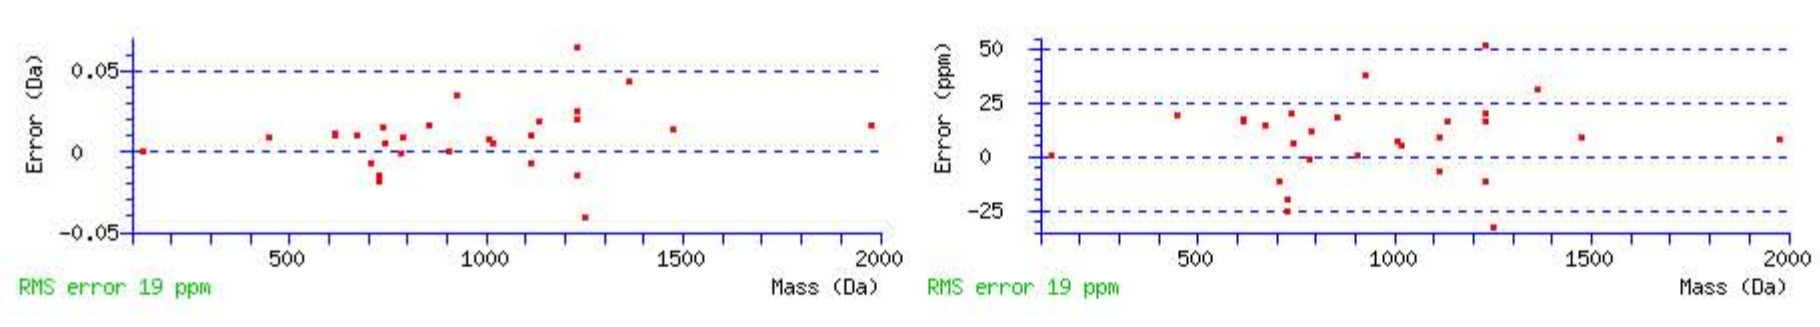

NCBI BLAST search of **KCCYDGACVNNDETCEQR**  
 (Parameters: blastp, nr protein database, expect=20000, no filter, PAM30)  
 Other BLAST [web gateways](#)

**All matches to this query**

| Score | Mr(calc):   | Delta    | Sequence                           |
|-------|-------------|----------|------------------------------------|
| 59.4  | 2589.017487 | 0.028545 | <a href="#">KCCYDGACVNNDETCEQR</a> |

# MASCOT SEARCH RESULTS

## Peptide View

MS/MS Fragmentation of **QGDVECQR**

Found in **CO6\_HUMAN**, Complement component C6 OS=Homo sapiens GN=C6 PE=1 SV=3

Match to Query 26972: 1301.587528 from(651.801040,2+) rtinseconds(1330) index(19715)

Title: Locus:1.1.1.2606.11 File:"2013-07-02 CLN FXIII 180 min 1st F 2.wiff"

Data file C:\Program Files (x86)\Matrix Science\Mascot Daemon\mgf7 FXIII 180 min 1st\mascot\_daemon\_merge.mgf

Click mouse within plot area to zoom in by factor of two about that point

Or, Plot from  to  Da

Label all possible matches  Label matches used for scoring

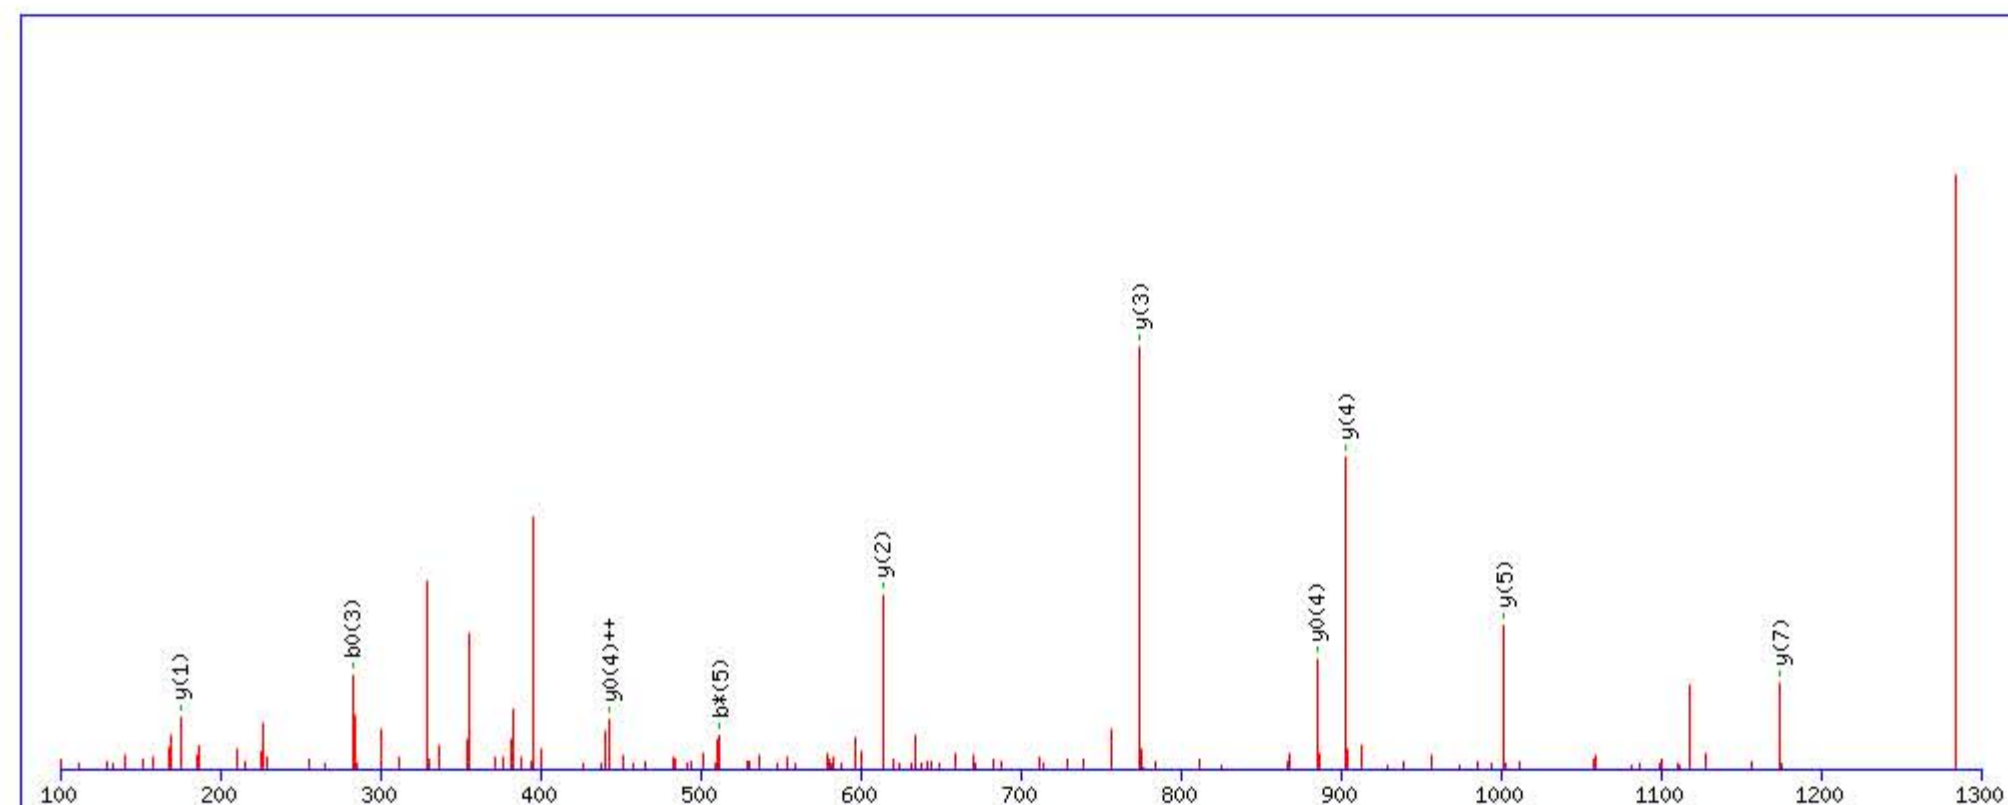

Monoisotopic mass of neutral peptide Mr(calc): 1301.585648

Fixed modifications: Carbamidomethyl (C) (apply to specified residues or termini only)

Variable modifications:

Q7 : Biotin:Thermo-21345 (Q)

Ions Score: 48 Expect: 7.8e-005

Matches : 10/74 fragment ions using 12 most intense peaks ([help](#))

| # | b           | b <sup>++</sup> | b <sup>+</sup>    | b <sup>+++</sup> | b <sup>0</sup>    | b <sup>0++</sup> | Seq. | y                  | y <sup>++</sup> | y <sup>+</sup> | y <sup>+++</sup> | y <sup>0</sup>    | y <sup>0++</sup>  | # |
|---|-------------|-----------------|-------------------|------------------|-------------------|------------------|------|--------------------|-----------------|----------------|------------------|-------------------|-------------------|---|
| 1 | 129.065854  | 65.036565       | 112.039305        | 56.523291        |                   |                  | Q    |                    |                 |                |                  |                   |                   | 8 |
| 2 | 186.087318  | 93.547297       | 169.060769        | 85.034023        |                   |                  | G    | <b>1174.534341</b> | 587.770809      | 1157.507792    | 579.257534       | 1156.523776       | 578.765526        | 7 |
| 3 | 301.114261  | 151.060768      | 284.087712        | 142.547494       | <b>283.103696</b> | 142.055486       | D    | 1117.512877        | 559.260077      | 1100.486328    | 550.746802       | 1099.502312       | 550.254794        | 6 |
| 4 | 400.182675  | 200.594976      | 383.156126        | 192.081701       | 382.172110        | 191.589693       | V    | <b>1002.485934</b> | 501.746605      | 985.459385     | 493.233331       | 984.475369        | 492.741323        | 5 |
| 5 | 529.225268  | 265.116272      | <b>512.198719</b> | 256.602998       | 511.214703        | 256.110990       | E    | <b>903.417520</b>  | 452.212398      | 886.390971     | 443.699124       | <b>885.406955</b> | <b>443.207116</b> | 4 |
| 6 | 689.255917  | 345.131597      | 672.229368        | 336.618322       | 671.245352        | 336.126314       | C    | <b>774.374927</b>  | 387.691102      | 757.348378     | 379.177827       |                   |                   | 3 |
| 7 | 1128.481243 | 564.744260      | 1111.454694       | 556.230985       | 1110.470678       | 555.738977       | Q    | <b>614.344278</b>  | 307.675777      | 597.317729     | 299.162503       |                   |                   | 2 |
| 8 |             |                 |                   |                  |                   |                  | R    | <b>175.118952</b>  | 88.063114       | 158.092403     | 79.549839        |                   |                   | 1 |

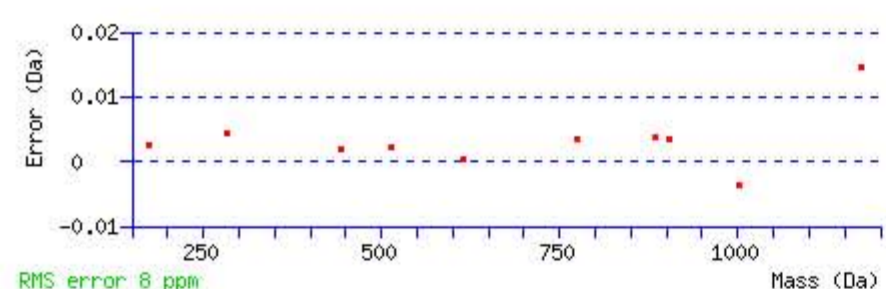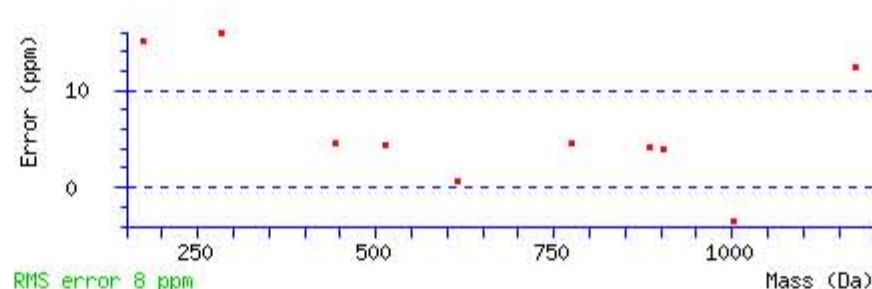

NCBI BLAST search of [QGDVECQR](#)

(Parameters: blastp, nr protein database, expect=20000, no filter, PAM30)

Other BLAST [web gateways](#)

All matches to this query

| Score | Mr(calc):   | Delta     | Sequence                      |
|-------|-------------|-----------|-------------------------------|
| 48.2  | 1301.585648 | 0.001880  | <a href="#">QGDVECQR</a>      |
| 7.8   | 1301.584747 | 0.002781  | <a href="#">QESPSQENIDR</a>   |
| 7.3   | 1301.584763 | 0.002765  | <a href="#">KATEDAEGGDGPR</a> |
| 6.1   | 1301.604721 | -0.017193 | <a href="#">QSSTYHRHMR</a>    |
| 5.2   | 1301.584747 | 0.002781  | <a href="#">ESENLASGDQPR</a>  |
| 3.1   | 1301.585617 | 0.001911  | <a href="#">ADNNMQGNK</a>     |
| 1.1   | 1301.604263 | -0.016735 | <a href="#">CPAAMTVMHLR</a>   |
| 0.5   | 1301.604263 | -0.016735 | <a href="#">CPAAMTVMHLR</a>   |

# MASCOT SEARCH RESULTS

## Peptide View

MS/MS Fragmentation of **TCNSGTQSR**

Found in **CO6\_HUMAN**, Complement component C6 OS=Homo sapiens GN=C6 PE=1 SV=3

Match to Query 27363: 1320.593288 from(661.303920,2+) rtinseconds(1062) index(18207)

Title: Locus:1.1.1.2512.14 File:"2013-07-02 CLN FXIII 180 min 1st F 2.wiff"

Data file C:\Program Files (x86)\Matrix Science\Mascot Daemon\mgf7 FXIII 180 min 1st\mascot\_daemon\_merge.mgf

Click mouse within plot area to zoom in by factor of two about that point

Or, Plot from  to  Da

Label all possible matches  Label matches used for scoring

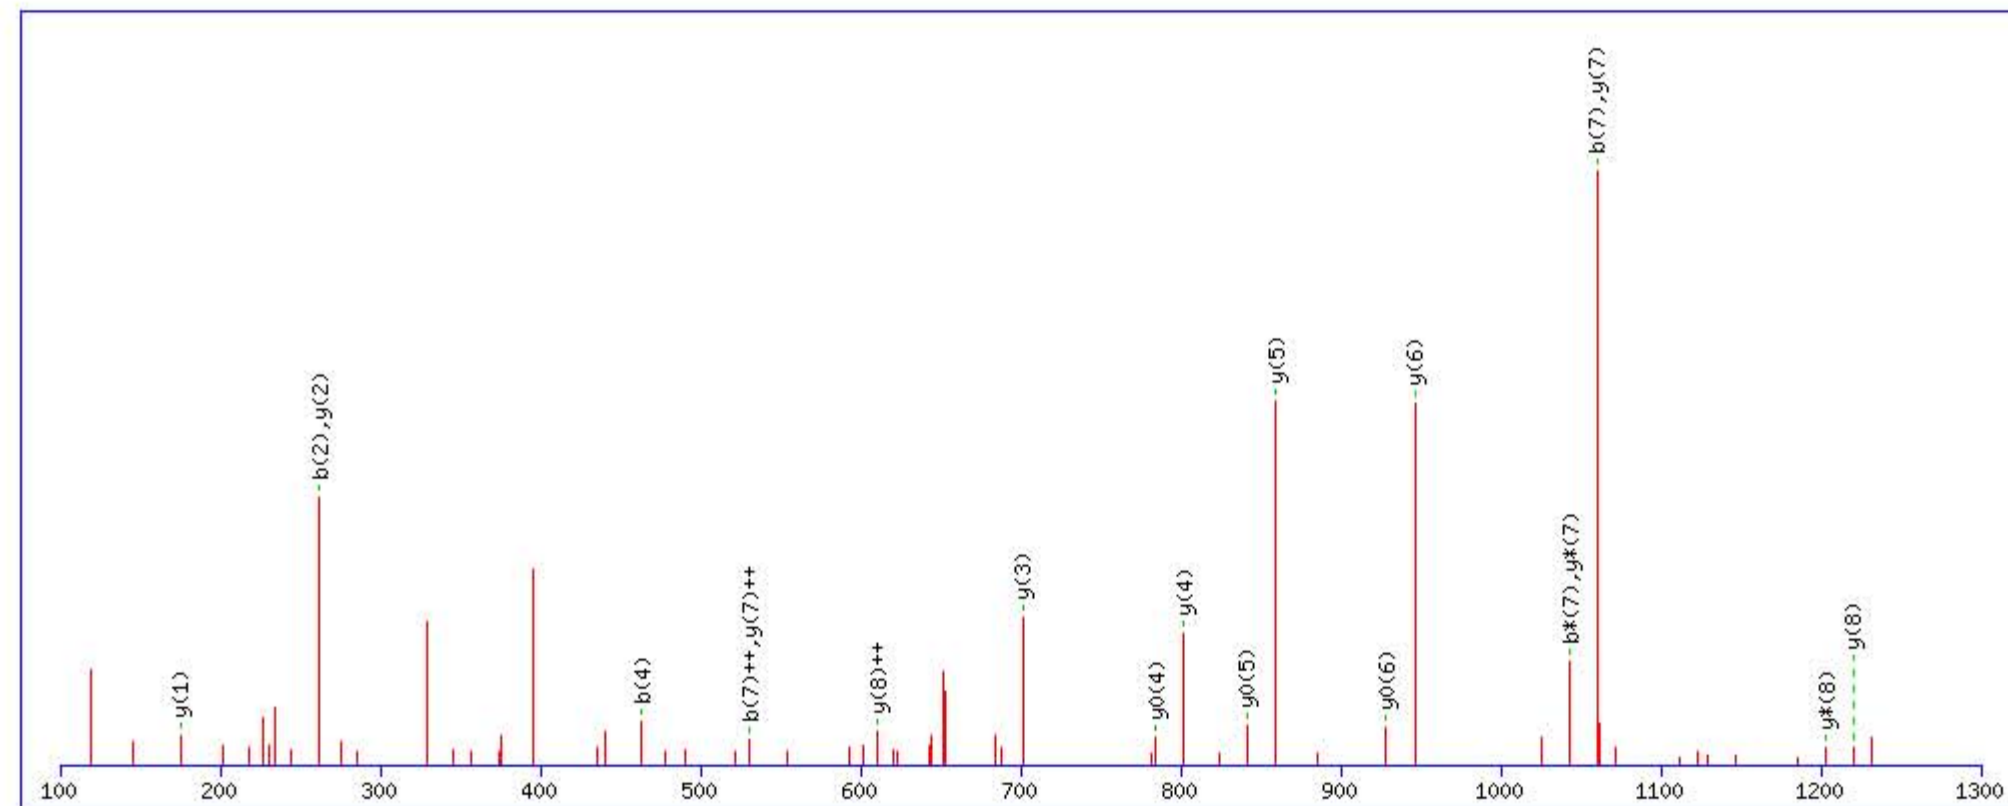

Monoisotopic mass of neutral peptide Mr(calc): 1320.591461

Fixed modifications: Carbamidomethyl (C) (apply to specified residues or termini only)

Variable modifications:

Q7 : Biotin:Thermo-21345 (Q)

Ions Score: 65 Expect: 2.3e-006

Matches : 20/90 fragment ions using 24 most intense peaks ([help](#))

| # | b                  | b <sup>++</sup>   | b <sup>+</sup>     | b <sup>+++</sup> | b <sup>0</sup> | b <sup>0++</sup> | Seq. | y                  | y <sup>++</sup>   | y <sup>+</sup>     | y <sup>+++</sup> | y <sup>0</sup>    | y <sup>0++</sup> | # |
|---|--------------------|-------------------|--------------------|------------------|----------------|------------------|------|--------------------|-------------------|--------------------|------------------|-------------------|------------------|---|
| 1 | 102.054955         | 51.531116         |                    |                  | 84.044390      | 42.525833        | T    |                    |                   |                    |                  |                   |                  | 9 |
| 2 | <b>262.085604</b>  | 131.546440        |                    |                  | 244.075039     | 122.541158       | C    | <b>1220.551053</b> | <b>610.779165</b> | <b>1203.524504</b> | 602.265890       | 1202.540488       | 601.773882       | 8 |
| 3 | 376.128531         | 188.567904        | 359.101982         | 180.054629       | 358.117966     | 179.562621       | N    | <b>1060.520404</b> | <b>530.763840</b> | <b>1043.493855</b> | 522.250566       | 1042.509839       | 521.758558       | 7 |
| 4 | <b>463.160559</b>  | 232.083917        | 446.134010         | 223.570643       | 445.149994     | 223.078635       | S    | <b>946.477477</b>  | 473.742377        | 929.450928         | 465.229102       | <b>928.466912</b> | 464.737094       | 6 |
| 5 | 520.182023         | 260.594650        | 503.155474         | 252.081375       | 502.171458     | 251.589367       | G    | <b>859.445449</b>  | 430.226363        | 842.418900         | 421.713088       | <b>841.434884</b> | 421.221080       | 5 |
| 6 | 621.229702         | 311.118489        | 604.203153         | 302.605215       | 603.219137     | 302.113207       | T    | <b>802.423985</b>  | 401.715631        | 785.397436         | 393.202356       | <b>784.413420</b> | 392.710348       | 4 |
| 7 | <b>1060.455028</b> | <b>530.731152</b> | <b>1043.428479</b> | 522.217878       | 1042.444463    | 521.725870       | Q    | <b>701.376306</b>  | 351.191791        | 684.349757         | 342.678517       | 683.365741        | 342.186509       | 3 |
| 8 | 1147.487056        | 574.247166        | 1130.460507        | 565.733892       | 1129.476491    | 565.241884       | S    | <b>262.150980</b>  | 131.579128        | 245.124431         | 123.065854       | 244.140415        | 122.573846       | 2 |
| 9 |                    |                   |                    |                  |                |                  | R    | <b>175.118952</b>  | 88.063114         | 158.092403         | 79.549839        |                   |                  | 1 |

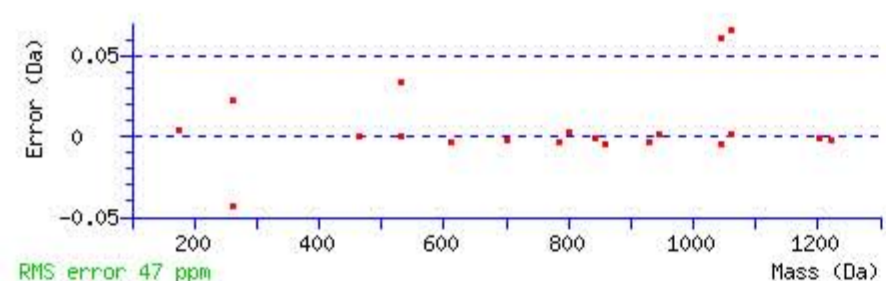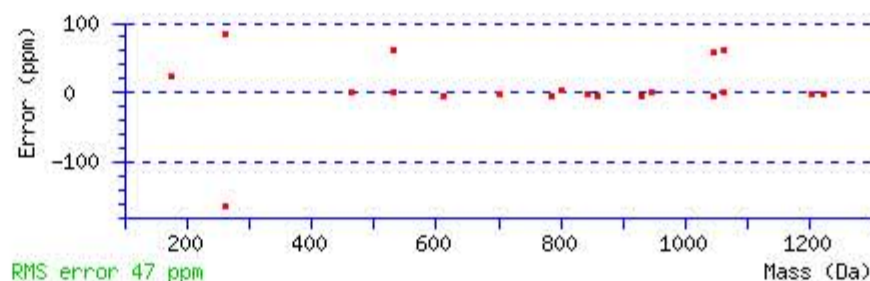

NCBI BLAST search of **TCNSGTQSR**

(Parameters: blastp, nr protein database, expect=20000, no filter, PAM30)

Other BLAST [web gateways](#)

All matches to this query

| Score | Mr(calc):   | Delta     | Sequence                      |
|-------|-------------|-----------|-------------------------------|
| 65.0  | 1320.591461 | 0.001827  | <a href="#">TCNSGTQSR</a>     |
| 14.0  | 1320.599289 | -0.006001 | <a href="#">NELPMHHN SSR</a>  |
| 5.8   | 1320.584045 | 0.009243  | <a href="#">SQGCSREASPSR</a>  |
| 5.4   | 1320.609192 | -0.015904 | <a href="#">MTSERAPSPSSR</a>  |
| 5.3   | 1320.597946 | -0.004658 | <a href="#">LMNTNDLEESR</a>   |
| 5.2   | 1320.605804 | -0.012516 | <a href="#">TSAHYEENKSR</a>   |
| 3.6   | 1320.588074 | 0.005214  | <a href="#">MNSAAGF SHLDR</a> |

Mascot: <http://www.matrixscience.com/>

# MASCOT SCIENCE Mascot Search Results

## Peptide View

MS/MS Fragmentation of **QLEWGLER**

Found in **CO6\_HUMAN**, Complement component C6 OS=Homo sapiens GN=C6 PE=1 SV=3

Match to Query 27869: 1340.698748 from(671.356650,2+) rtinseconds(2205) index(26192)

Title: Locus:1.1.1.2910.7 File:"2013-07-02 CLN FXIII 180 min 1st F 2.wiff"

Data file C:\Program Files (x86)\Matrix Science\Mascot Daemon\mgf\7 FXIII 180 min 1st\mascot\_daemon\_merge.mgf

Click mouse within plot area to zoom in by factor of two about that point

Or, Plot from  to  Da

Label all possible matches  Label matches used for scoring

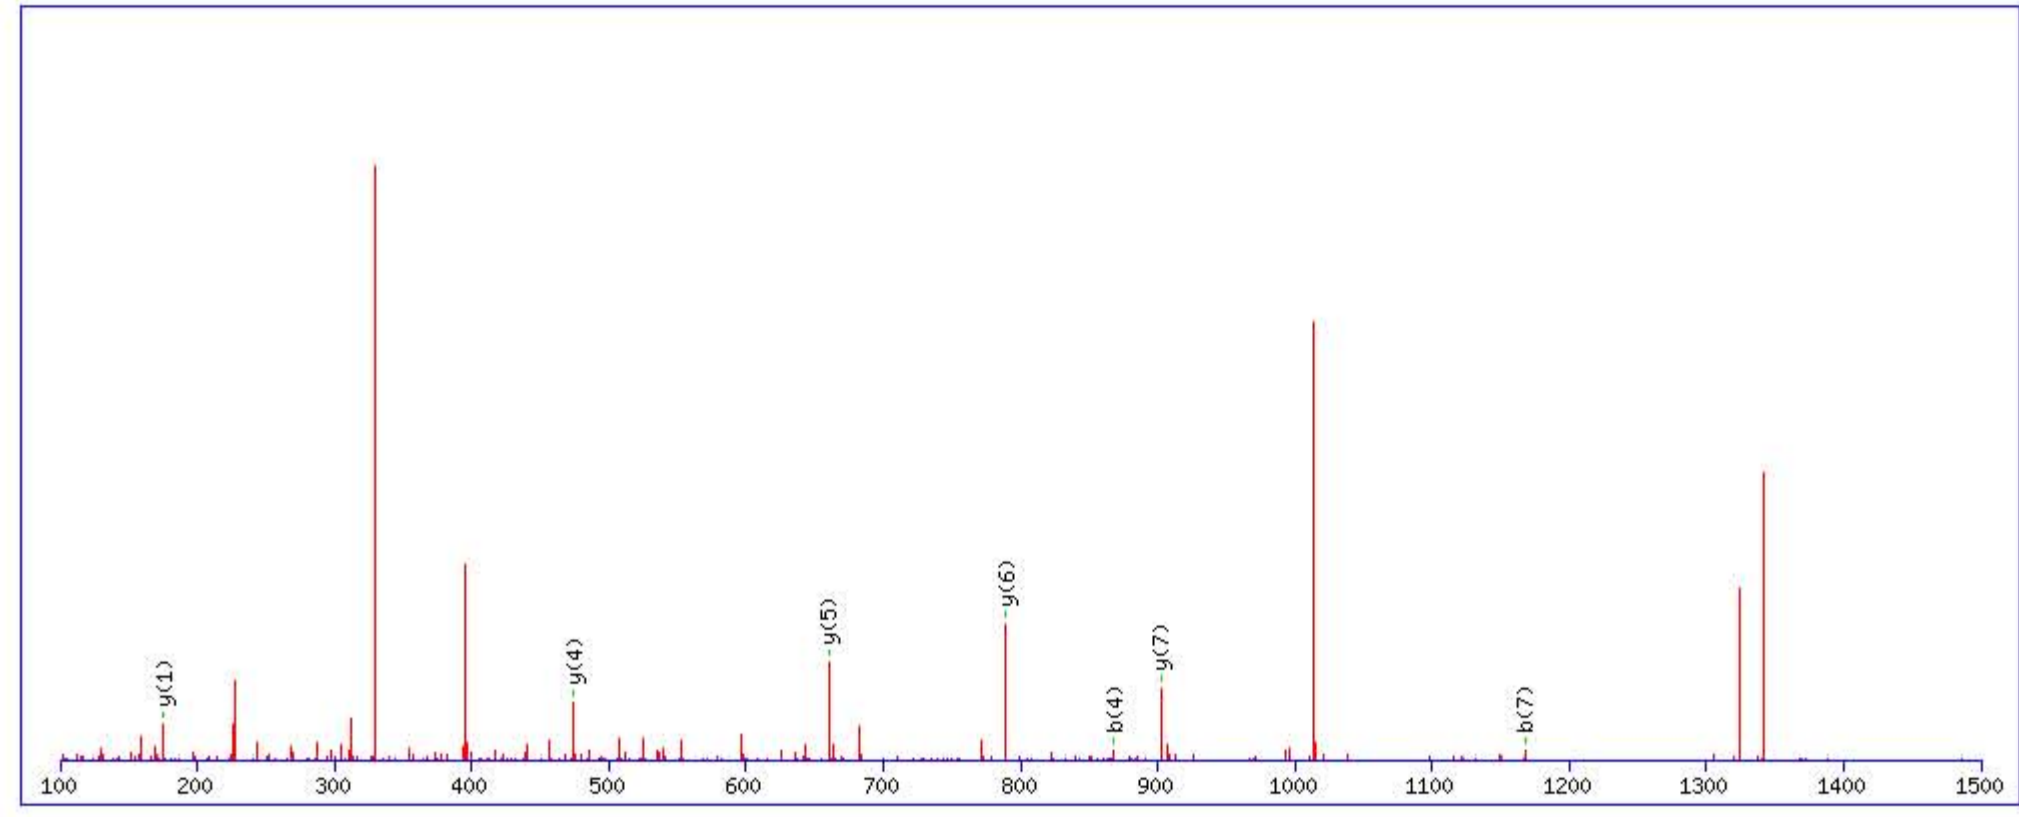

Monoisotopic mass of neutral peptide Mr(calc): 1340.691071

Fixed modifications: Carbamidomethyl (C) (apply to specified residues or termini only)

Variable modifications:

Q1 : Biotin:Thermo-21345 (Q)

Ions Score: 30 Expect: 0.026

Matches : 7/78 fragment ions using 12 most intense peaks [\(help\)](#)

| # | b           | b <sup>++</sup> | b <sup>*</sup> | b <sup>*++</sup> | b <sup>0</sup> | b <sup>0++</sup> | Seq. | y          | y <sup>++</sup> | y <sup>*</sup> | y <sup>*++</sup> | y <sup>0</sup> | y <sup>0++</sup> | # |
|---|-------------|-----------------|----------------|------------------|----------------|------------------|------|------------|-----------------|----------------|------------------|----------------|------------------|---|
| 1 | 440.232602  | 220.619939      | 423.206053     | 212.106664       |                |                  | Q    |            |                 |                |                  |                |                  | 8 |
| 2 | 553.316666  | 277.161971      | 536.290117     | 268.648697       |                |                  | L    | 902.473043 | 451.740160      | 885.446494     | 443.226885       | 884.462478     | 442.734877       | 7 |
| 3 | 682.359259  | 341.683268      | 665.332710     | 333.169993       | 664.348694     | 332.677985       | E    | 789.388979 | 395.198128      | 772.362430     | 386.684853       | 771.378414     | 386.192845       | 6 |
| 4 | 868.438572  | 434.722924      | 851.412023     | 426.209650       | 850.428007     | 425.717642       | W    | 660.346386 | 330.676831      | 643.319837     | 322.163556       | 642.335821     | 321.671548       | 5 |
| 5 | 925.460036  | 463.233656      | 908.433487     | 454.720382       | 907.449471     | 454.228374       | G    | 474.267073 | 237.637174      | 457.240524     | 229.123900       | 456.256508     | 228.631892       | 4 |
| 6 | 1038.544100 | 519.775688      | 1021.517551    | 511.262414       | 1020.533535    | 510.770406       | L    | 417.245609 | 209.126442      | 400.219060     | 200.613168       | 399.235044     | 200.121160       | 3 |
| 7 | 1167.586693 | 584.296985      | 1150.560144    | 575.783710       | 1149.576128    | 575.291702       | E    | 304.161545 | 152.584410      | 287.134996     | 144.071136       | 286.150980     | 143.579128       | 2 |
| 8 |             |                 |                |                  |                |                  | R    | 175.118952 | 88.063114       | 158.092403     | 79.549839        |                |                  | 1 |

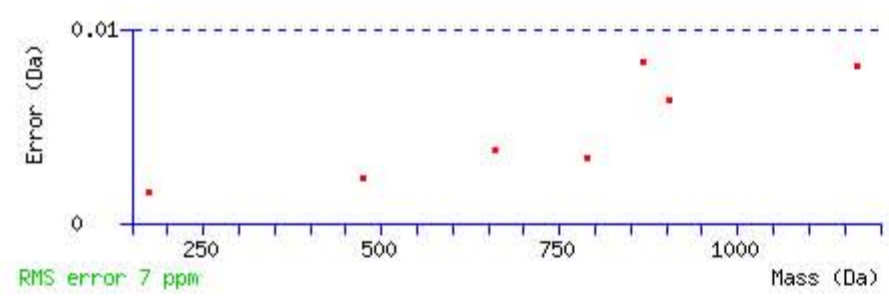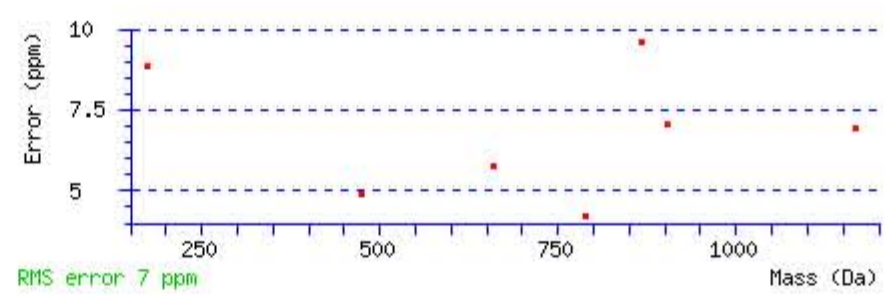

NCBI BLAST search of **QLEWGLER**

(Parameters: blastp, nr protein database, expect=20000, no filter, PAM30)

Other BLAST [web gateways](#)

### All matches to this query

| Score | Mr(calc):   | Delta     | Sequence                     |
|-------|-------------|-----------|------------------------------|
| 29.6  | 1340.691071 | 0.007677  | <a href="#">QLEWGLER</a>     |
| 22.9  | 1340.712204 | -0.013456 | <a href="#">QLDSSLGER</a>    |
| 11.2  | 1340.687042 | 0.011706  | <a href="#">QINDSANLR</a>    |
| 7.3   | 1340.687057 | 0.011691  | <a href="#">GSSPKQSPSR</a>   |
| 7.1   | 1340.713531 | -0.014783 | <a href="#">SAYIRQHR</a>     |
| 6.6   | 1340.691071 | 0.007677  | <a href="#">QWLEDALR</a>     |
| 6.2   | 1340.687042 | 0.011706  | <a href="#">ALGSAAADAQR</a>  |
| 6.2   | 1340.716019 | -0.017271 | <a href="#">EAKAQALQAQQR</a> |
| 6.0   | 1340.706146 | -0.007398 | <a href="#">IFNRNSGLHQR</a>  |
| 6.0   | 1340.683655 | 0.015093  | <a href="#">IYYLSQERNR</a>   |

# **MASCOT** Mascot Search Results

## Peptide View

MS/MS Fragmentation of **ECNNPAPQR**

Found in **CO6\_HUMAN**, Complement component C6 OS=Homo sapiens GN=C6 PE=1 SV=3

Match to Query 30627: 1395.643128 from(698.828840,2+) rtinseconds(1271) index(19364)

Title: Locus:1.1.1.2585.16 File:"2013-07-02 CLN FXIII 180 min 1st F 2.wiff"

Data file C:\Program Files (x86)\Matrix Science\Mascot Daemon\mgf\7 FXIII 180 min 1st\mascot\_daemon\_merge.mgf

Click mouse within plot area to zoom in by factor of two about that point

Or, Plot from  to  Da

Label all possible matches  Label matches used for scoring

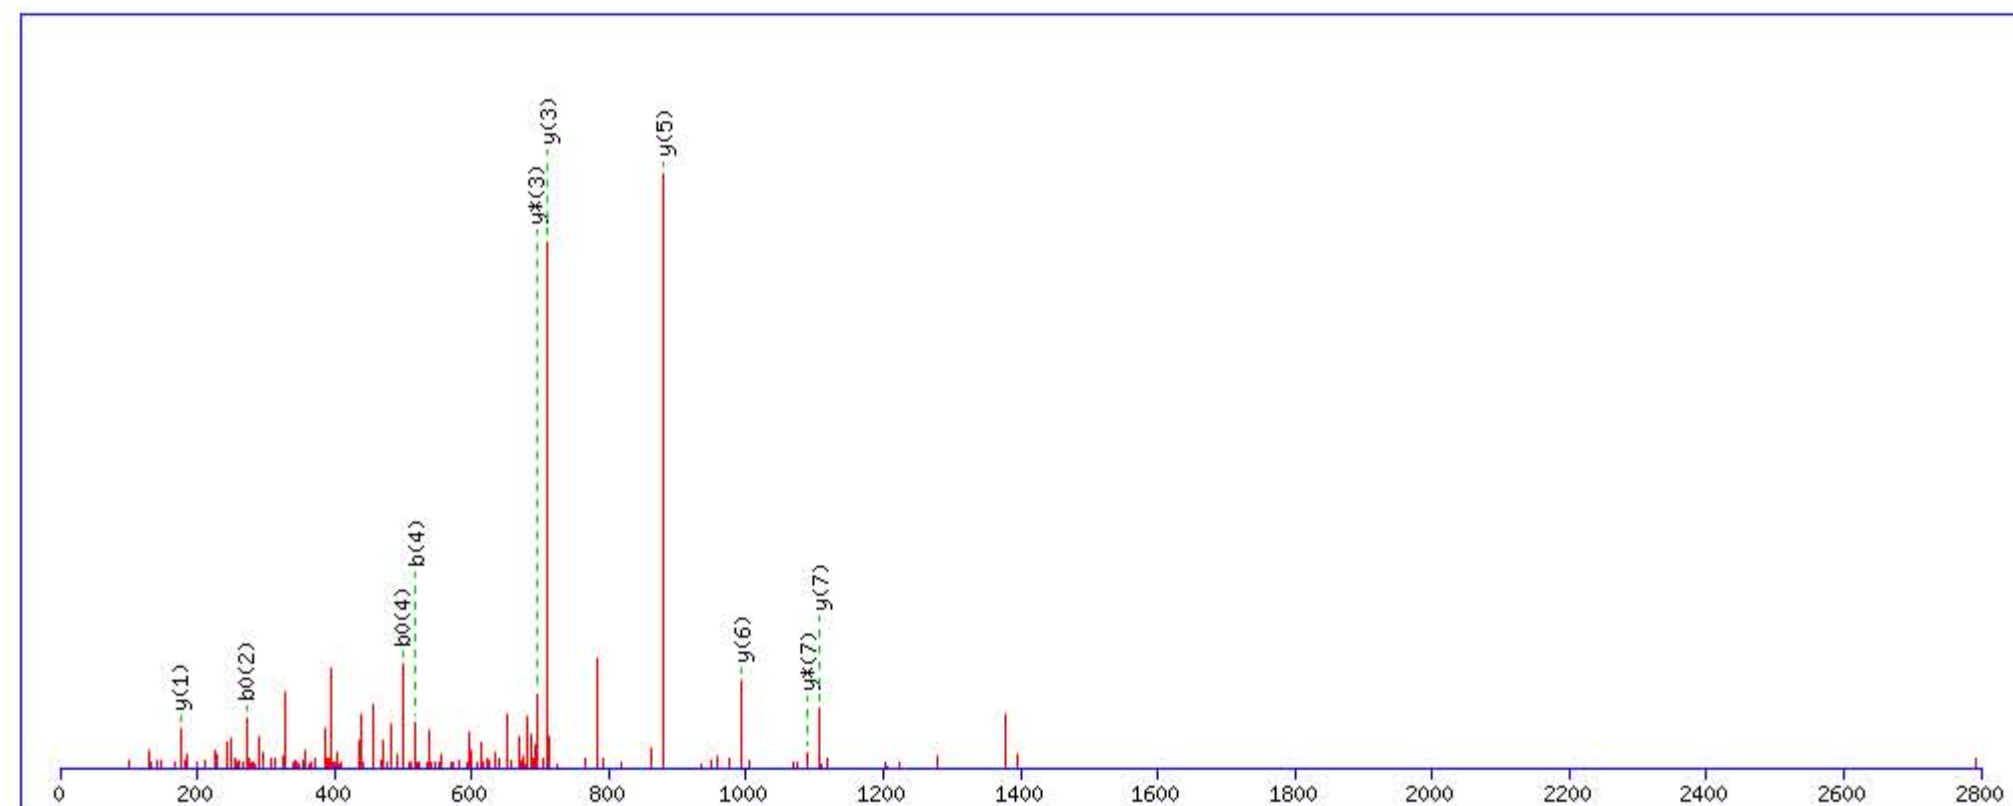

Monoisotopic mass of neutral peptide Mr(calc): 1395.638718

Fixed modifications: Carbamidomethyl (C) (apply to specified residues or termini only)

Variable modifications:

Q8 : Biotin:Thermo-21345 (Q)

Ions Score: 39 Expect: 0.00065

Matches : 10/76 fragment ions using 13 most intense peaks [\(help\)](#)

| # | b           | b <sup>++</sup> | b <sup>*</sup> | b <sup>*++</sup> | b <sup>0</sup> | b <sup>0++</sup> | Seq. | y           | y <sup>++</sup> | y <sup>*</sup> | y <sup>*++</sup> | # |
|---|-------------|-----------------|----------------|------------------|----------------|------------------|------|-------------|-----------------|----------------|------------------|---|
| 1 | 130.049869  | 65.528572       |                |                  | 112.039304     | 56.523290        | E    |             |                 |                |                  | 9 |
| 2 | 290.080518  | 145.543897      |                |                  | 272.069953     | 136.538615       | C    | 1267.603423 | 634.305350      | 1250.576874    | 625.792075       | 8 |
| 3 | 404.123445  | 202.565361      | 387.096896     | 194.052086       | 386.112880     | 193.560078       | N    | 1107.572774 | 554.290025      | 1090.546225    | 545.776751       | 7 |
| 4 | 518.166372  | 259.586824      | 501.139823     | 251.073550       | 500.155807     | 250.581542       | N    | 993.529847  | 497.268562      | 976.503298     | 488.755287       | 6 |
| 5 | 615.219136  | 308.113206      | 598.192587     | 299.599932       | 597.208571     | 299.107924       | P    | 879.486920  | 440.247098      | 862.460371     | 431.733824       | 5 |
| 6 | 686.256250  | 343.631763      | 669.229701     | 335.118489       | 668.245685     | 334.626481       | A    | 782.434156  | 391.720716      | 765.407607     | 383.207442       | 4 |
| 7 | 783.309014  | 392.158145      | 766.282465     | 383.644871       | 765.298449     | 383.152863       | P    | 711.397042  | 356.202159      | 694.370493     | 347.688885       | 3 |
| 8 | 1222.534340 | 611.770808      | 1205.507791    | 603.257534       | 1204.523775    | 602.765526       | Q    | 614.344278  | 307.675777      | 597.317729     | 299.162503       | 2 |
| 9 |             |                 |                |                  |                |                  | R    | 175.118952  | 88.063114       | 158.092403     | 79.549839        | 1 |

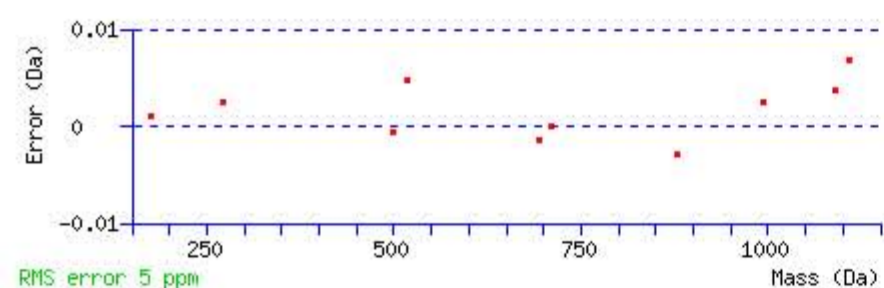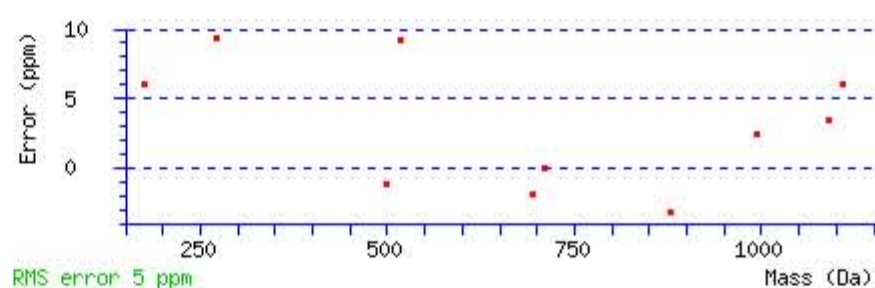

NCBI BLAST search of **ECNNPAPQR**

(Parameters: blastp, nr protein database, expect=20000, no filter, PAM30)

Other BLAST [web gateways](#)

## All matches to this query

| Score | Mr(calc):   | Delta     | Sequence                      |
|-------|-------------|-----------|-------------------------------|
| 39.4  | 1395.638718 | 0.004410  | <a href="#">ECNNPAPQR</a>     |
| 5.2   | 1395.663849 | -0.020721 | <a href="#">KMMEEAKFNPR</a>   |
| 4.9   | 1395.656494 | -0.013366 | <a href="#">SSPDNSPVHGMLR</a> |
| 4.0   | 1395.645264 | -0.002136 | <a href="#">LNKDFTCDVER</a>   |
| 2.7   | 1395.629974 | 0.013154  | <a href="#">NKSMSQAETEGAK</a> |
| 2.4   | 1395.631332 | 0.011796  | <a href="#">HLQENTQSHMR</a>   |
| 1.8   | 1395.663849 | -0.020721 | <a href="#">KMMEEAKFNPR</a>   |
| 0.5   | 1395.638733 | 0.004395  | <a href="#">DIVNMLMHHDR</a>   |

# MASCOT SEARCH RESULTS

## Peptide View

MS/MS Fragmentation of **YYQENFCEQICKS**

Found in **CO6\_HUMAN**, Complement component C6 OS=Homo sapiens GN=C6 PE=1 SV=3

Match to Query 52672: 2078.905422 from(693.975750,3+) rtinseconds(2027) index(24876)

Title: Locus:1.1.1.2848.6 File:"2013-07-02 CLN FXIII 180 min 1st F 2.wiff"

Data file C:\Program Files (x86)\Matrix Science\Mascot Daemon\mgf7 FXIII 180 min 1st\mascot\_daemon\_merge.mgf

Click mouse within plot area to zoom in by factor of two about that point

Or, Plot from  to  Da

Label all possible matches  Label matches used for scoring

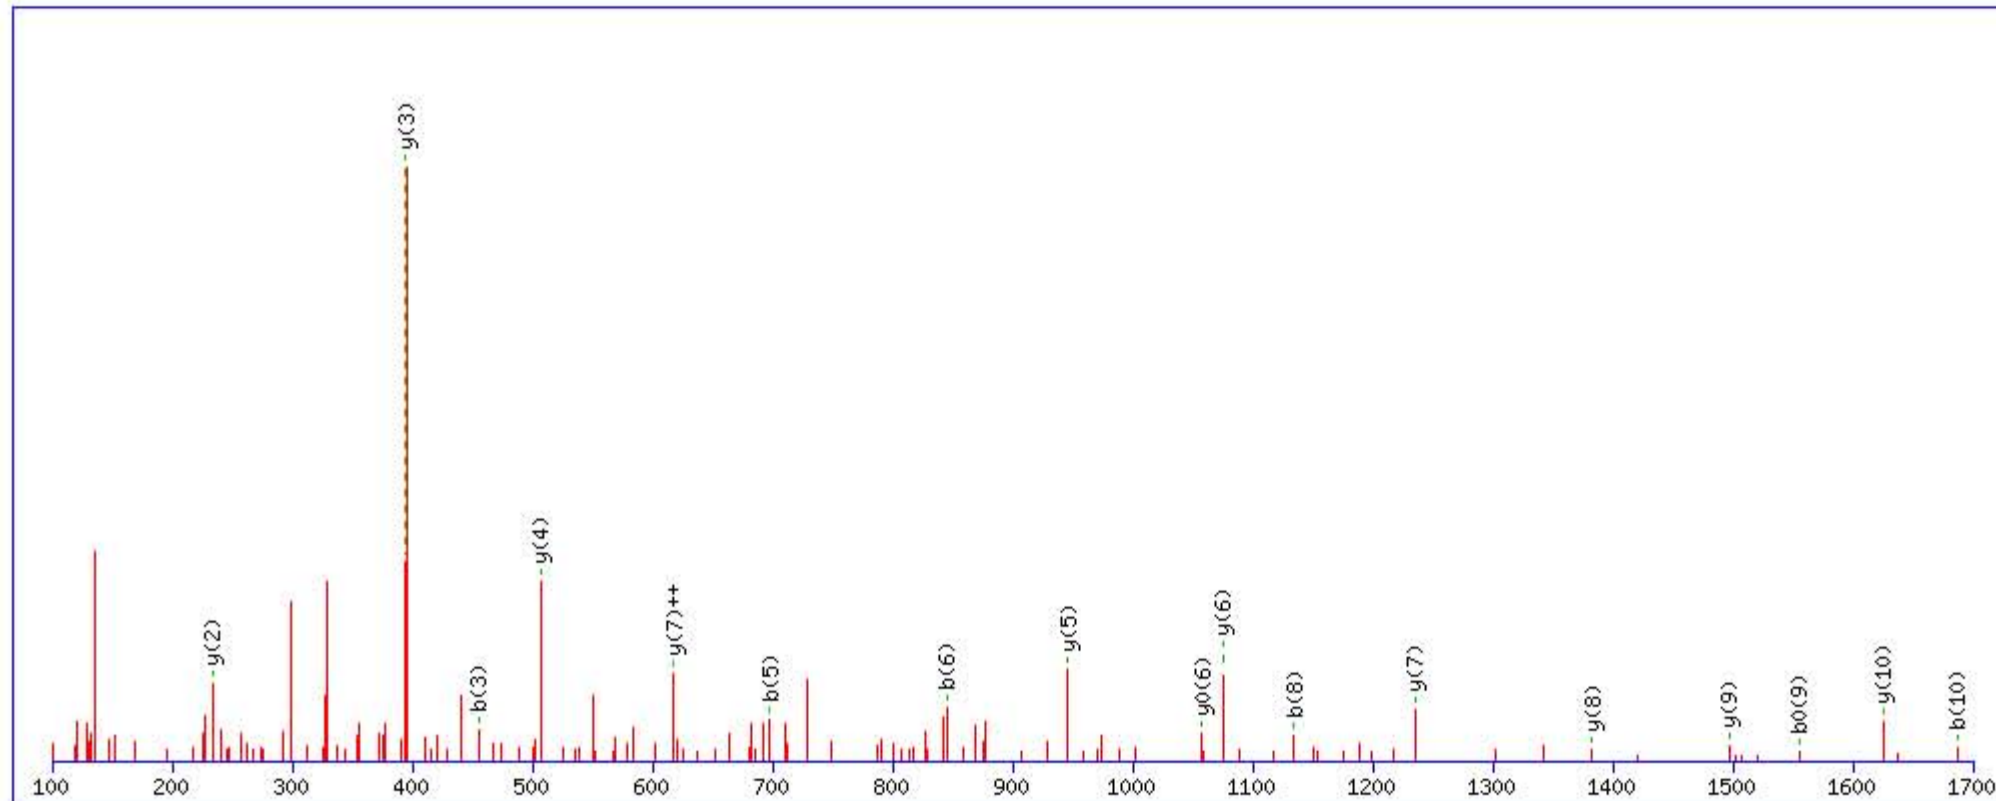

Monoisotopic mass of neutral peptide Mr(calc): 2078.889984

Fixed modifications: Carbamidomethyl (C) (apply to specified residues or termini only)

Variable modifications:

Q9 : Biotin:Thermo-21345 (Q)

Ions Score: 45 Expect: 0.00016

Matches : 17/132 fragment ions using 32 most intense peaks [\(help\)](#)

| #  | b                  | b <sup>++</sup> | b <sup>*</sup> | b <sup>*++</sup> | b <sup>0</sup>     | b <sup>0++</sup> | Seq. | y                  | y <sup>++</sup>   | y <sup>*</sup> | y <sup>*++</sup> | y <sup>0</sup>     | y <sup>0++</sup> | #  |
|----|--------------------|-----------------|----------------|------------------|--------------------|------------------|------|--------------------|-------------------|----------------|------------------|--------------------|------------------|----|
| 1  | 164.070605         | 82.538940       |                |                  |                    |                  | Y    |                    |                   |                |                  |                    |                  | 13 |
| 2  | 327.133934         | 164.070605      |                |                  |                    |                  | Y    | 1916.833954        | 958.920615        | 1899.807405    | 950.407341       | 1898.823389        | 949.915333       | 12 |
| 3  | <b>455.192512</b>  | 228.099894      | 438.165963     | 219.586620       |                    |                  | Q    | 1753.770625        | 877.388951        | 1736.744076    | 868.875676       | 1735.760060        | 868.383668       | 11 |
| 4  | 584.235105         | 292.621191      | 567.208556     | 284.107916       | 566.224540         | 283.615908       | E    | <b>1625.712047</b> | 813.359662        | 1608.685498    | 804.846387       | 1607.701482        | 804.354379       | 10 |
| 5  | <b>698.278032</b>  | 349.642654      | 681.251483     | 341.129380       | 680.267467         | 340.637372       | N    | <b>1496.669454</b> | 748.838365        | 1479.642905    | 740.325091       | 1478.658889        | 739.833083       | 9  |
| 6  | <b>845.346446</b>  | 423.176861      | 828.319897     | 414.663587       | 827.335881         | 414.171579       | F    | <b>1382.626527</b> | 691.816902        | 1365.599978    | 683.303627       | 1364.615962        | 682.811619       | 8  |
| 7  | 1005.377095        | 503.192186      | 988.350546     | 494.678911       | 987.366530         | 494.186903       | C    | <b>1235.558113</b> | <b>618.282695</b> | 1218.531564    | 609.769420       | 1217.547548        | 609.277412       | 7  |
| 8  | <b>1134.419688</b> | 567.713482      | 1117.393139    | 559.200208       | 1116.409123        | 558.708200       | E    | <b>1075.527464</b> | 538.267370        | 1058.500915    | 529.754096       | <b>1057.516899</b> | 529.262088       | 6  |
| 9  | 1573.645014        | 787.326145      | 1556.618465    | 778.812871       | <b>1555.634449</b> | 778.320863       | Q    | <b>946.484871</b>  | 473.746074        | 929.458322     | 465.232799       | 928.474306         | 464.740791       | 5  |
| 10 | <b>1686.729078</b> | 843.868177      | 1669.702529    | 835.354903       | 1668.718513        | 834.862895       | I    | <b>507.259545</b>  | 254.133411        | 490.232996     | 245.620136       | 489.248980         | 245.128128       | 4  |
| 11 | 1846.759727        | 923.883502      | 1829.733178    | 915.370227       | 1828.749162        | 914.878219       | C    | <b>394.175481</b>  | 197.591379        | 377.148932     | 189.078104       | 376.164916         | 188.586096       | 3  |
| 12 | 1933.791755        | 967.399516      | 1916.765206    | 958.886241       | 1915.781190        | 958.394233       | S    | <b>234.144832</b>  | 117.576054        | 217.118283     | 109.062780       | 216.134267         | 108.570772       | 2  |
| 13 |                    |                 |                |                  |                    |                  | K    | 147.112804         | 74.060040         | 130.086255     | 65.546765        |                    |                  | 1  |

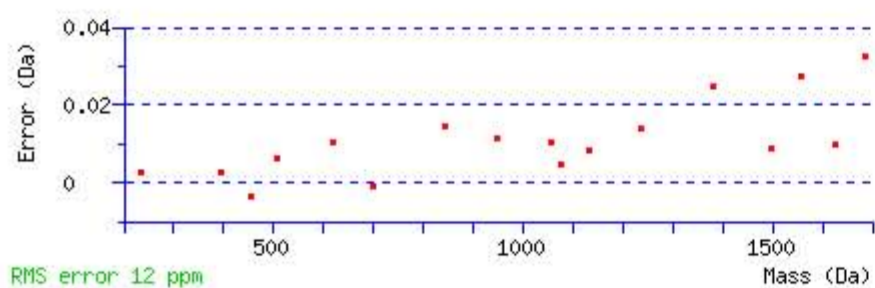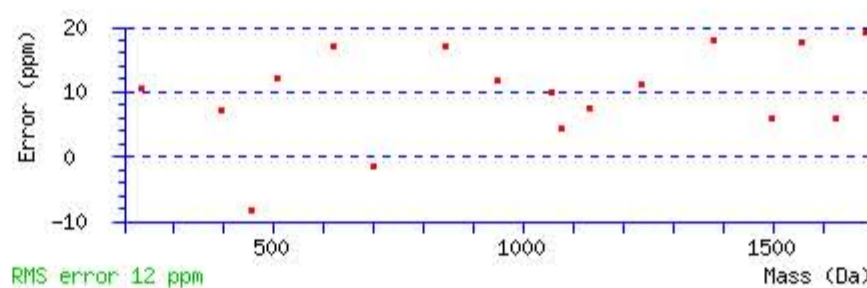

NCBI BLAST search of **YYQENFCEQICKS**

(Parameters: blastp, nr protein database, expect=20000, no filter, PAM30)

Other BLAST [web gateways](#)

All matches to this query

| Score | Mr(calc):   | Delta    | Sequence             |
|-------|-------------|----------|----------------------|
| 45.1  | 2078.889984 | 0.015438 | <b>YYQENFCEQICKS</b> |

Mascot: <http://www.matrixscience.com/>

# MASCOT Search Results

## Peptide View

MS/MS Fragmentation of **VPANLENVGFVQTAEDDLK**

Found in **CO6\_HUMAN**, Complement component C6 OS=Homo sapiens GN=C6 PE=1 SV=3

Match to Query 63051: 2498.268222 from(833.763350,3+) rtinseconds(2630) index(28875)

Title: Locus:1.1.1.3057.7 File:"2013-07-02 CLN FXIII 180 min 1st F 2.wiff"

Data file C:\Program Files (x86)\Matrix Science\Mascot Daemon\mgf\7 FXIII 180 min 1st\mascot\_daemon\_merge.mgf

Click mouse within plot area to zoom in by factor of two about that point

Or, Plot from  to  Da

Label all possible matches  Label matches used for scoring

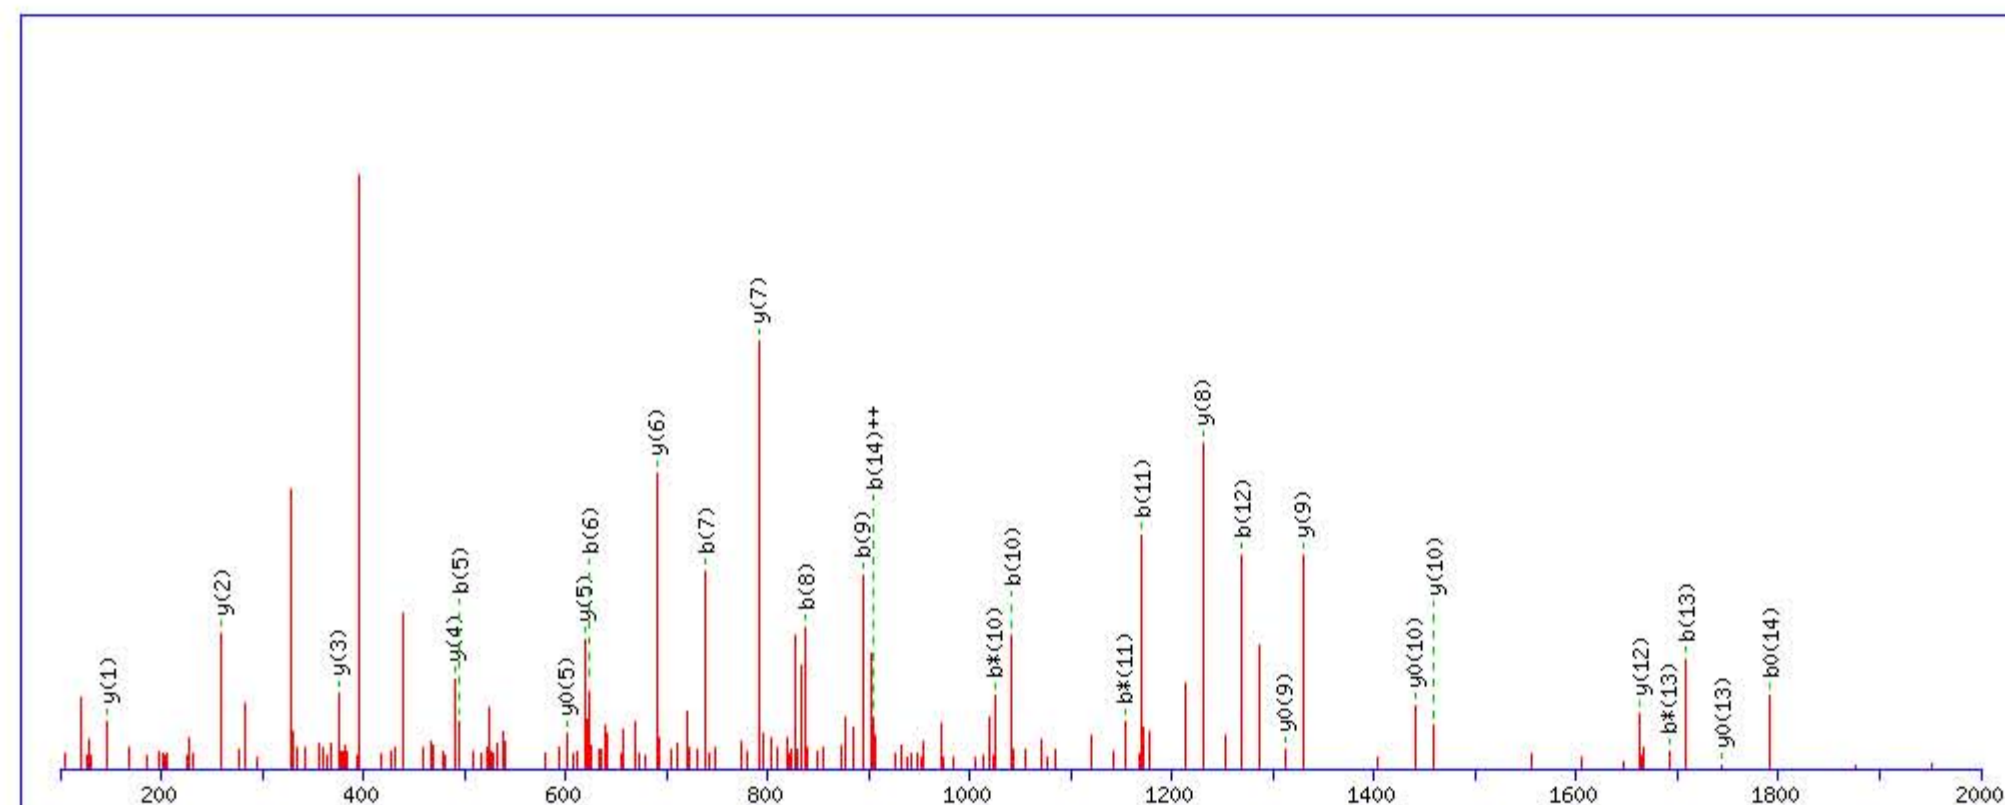

Monoisotopic mass of neutral peptide Mr(calc): 2498.236282

Fixed modifications: Carbamidomethyl (C) (apply to specified residues or termini only)

Variable modifications:

Q13 : Biotin:Thermo-21345 (Q)

Ions Score: 69 Expect: 3.6e-006

Matches : 29/208 fragment ions using 50 most intense peaks [\(help\)](#)

| #  | b                  | b <sup>++</sup>   | b <sup>*</sup>     | b <sup>*++</sup> | b <sup>0</sup>     | b <sup>0++</sup> | Seq. | y                  | y <sup>++</sup> | y <sup>*</sup> | y <sup>*++</sup> | y <sup>0</sup>     | y <sup>0++</sup> | #  |
|----|--------------------|-------------------|--------------------|------------------|--------------------|------------------|------|--------------------|-----------------|----------------|------------------|--------------------|------------------|----|
| 1  | 100.075690         | 50.541483         |                    |                  |                    |                  | V    |                    |                 |                |                  |                    |                  | 20 |
| 2  | 197.128454         | 99.067865         |                    |                  |                    |                  | P    | 2400.175154        | 1200.591215     | 2383.148605    | 1192.077940      | 2382.164589        | 1191.585932      | 19 |
| 3  | 268.165568         | 134.586422        |                    |                  |                    |                  | A    | 2303.122390        | 1152.064833     | 2286.095841    | 1143.551558      | 2285.111825        | 1143.059550      | 18 |
| 4  | 382.208495         | 191.607885        | 365.181946         | 183.094611       |                    |                  | N    | 2232.085276        | 1116.546276     | 2215.058727    | 1108.033001      | 2214.074711        | 1107.540993      | 17 |
| 5  | <b>495.292559</b>  | 248.149917        | 478.266010         | 239.636643       |                    |                  | L    | 2118.042349        | 1059.524812     | 2101.015800    | 1051.011538      | 2100.031784        | 1050.519530      | 16 |
| 6  | <b>624.335152</b>  | 312.671214        | 607.308603         | 304.157940       | 606.324587         | 303.665932       | E    | 2004.958285        | 1002.982781     | 1987.931736    | 994.469506       | 1986.947720        | 993.977498       | 15 |
| 7  | <b>738.378079</b>  | 369.692678        | 721.351530         | 361.179403       | 720.367514         | 360.687395       | N    | 1875.915692        | 938.461484      | 1858.889143    | 929.948210       | 1857.905127        | 929.456202       | 14 |
| 8  | <b>837.446493</b>  | 419.226885        | 820.419944         | 410.713610       | 819.435928         | 410.221602       | V    | 1761.872765        | 881.440021      | 1744.846216    | 872.926746       | <b>1743.862200</b> | 872.434738       | 13 |
| 9  | <b>894.467957</b>  | 447.737617        | 877.441408         | 439.224342       | 876.457392         | 438.732334       | G    | <b>1662.804351</b> | 831.905814      | 1645.777802    | 823.392539       | 1644.793786        | 822.900531       | 12 |
| 10 | <b>1041.536371</b> | 521.271824        | <b>1024.509822</b> | 512.758549       | 1023.525806        | 512.266541       | F    | 1605.782887        | 803.395082      | 1588.756338    | 794.881807       | 1587.772322        | 794.389799       | 11 |
| 11 | <b>1170.578964</b> | 585.793120        | <b>1153.552415</b> | 577.279846       | 1152.568399        | 576.787838       | E    | <b>1458.714473</b> | 729.860875      | 1441.687924    | 721.347600       | <b>1440.703908</b> | 720.855592       | 10 |
| 12 | <b>1269.647378</b> | 635.327327        | 1252.620829        | 626.814053       | 1251.636813        | 626.322045       | V    | <b>1329.671880</b> | 665.339578      | 1312.645331    | 656.826304       | <b>1311.661315</b> | 656.334296       | 9  |
| 13 | <b>1708.872704</b> | 854.939990        | <b>1691.846155</b> | 846.426716       | 1690.862139        | 845.934708       | Q    | <b>1230.603466</b> | 615.805371      | 1213.576917    | 607.292097       | 1212.592901        | 606.800089       | 8  |
| 14 | 1809.920383        | <b>905.463830</b> | 1792.893834        | 896.950555       | <b>1791.909818</b> | 896.458547       | T    | <b>791.378140</b>  | 396.192708      | 774.351591     | 387.679434       | 773.367575         | 387.187426       | 7  |
| 15 | 1880.957497        | 940.982387        | 1863.930948        | 932.469112       | 1862.946932        | 931.977104       | A    | <b>690.330461</b>  | 345.668869      | 673.303912     | 337.155594       | 672.319896         | 336.663586       | 6  |
| 16 | 2010.000090        | 1005.503683       | 1992.973541        | 996.990409       | 1991.989525        | 996.498401       | E    | <b>619.293347</b>  | 310.150312      | 602.266798     | 301.637037       | <b>601.282782</b>  | 301.145029       | 5  |
| 17 | 2125.027033        | 1063.017154       | 2108.000484        | 1054.503880      | 2107.016468        | 1054.011872      | D    | <b>490.250754</b>  | 245.629015      | 473.224205     | 237.115740       | 472.240189         | 236.623732       | 4  |
| 18 | 2240.053976        | 1120.530626       | 2223.027427        | 1112.017351      | 2222.043411        | 1111.525343      | D    | <b>375.223811</b>  | 188.115543      | 358.197262     | 179.602269       | 357.213246         | 179.110261       | 3  |
| 19 | 2353.138040        | 1177.072658       | 2336.111491        | 1168.559383      | 2335.127475        | 1168.067375      | L    | <b>260.196868</b>  | 130.602072      | 243.170319     | 122.088798       |                    |                  | 2  |
| 20 |                    |                   |                    |                  |                    |                  | K    | <b>147.112804</b>  | 74.060040       | 130.086255     | 65.546765        |                    |                  | 1  |

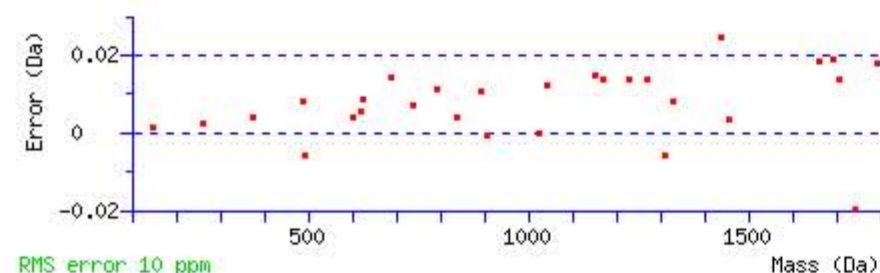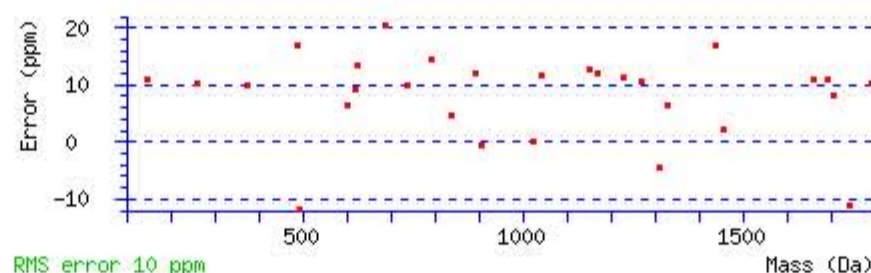

NCBI BLAST search of [VPANLENVGFVQTAEDDLK](#)

(Parameters: blastp, nr protein database, expect=20000, no filter, PAM30)

Other BLAST [web gateways](#)

All matches to this query

| Score | Mr(calc):   | Delta    | Sequence                            |
|-------|-------------|----------|-------------------------------------|
| 69.1  | 2498.236282 | 0.031940 | <a href="#">VPANLENVGFVQTAEDDLK</a> |



**MASCOT SCIENCE** Mascot Search Results

**Peptide View**

MS/MS Fragmentation of **CLNNQLHFLHIGSCQDGR**  
 Found in **CO6\_HUMAN**, Complement component C6 OS=Homo sapiens GN=C6 PE=1 SV=3

Match to Query 64623: 2607.238016 from(652.816780,4+) rtinseconds(1981) index(24548)  
 Title: Locus:1.1.1.2832.9 File:"2013-07-02 CLN FXIII 180 min 1st F 2.wiff"  
 Data file C:\Program Files (x86)\Matrix Science\Mascot Daemon\mgf\7 FXIII 180 min 1st\mascot\_daemon\_merge.mgf

Click mouse within plot area to zoom in by factor of two about that point  
 Or, Plot from  to  Da   
 Label all possible matches  Label matches used for scoring

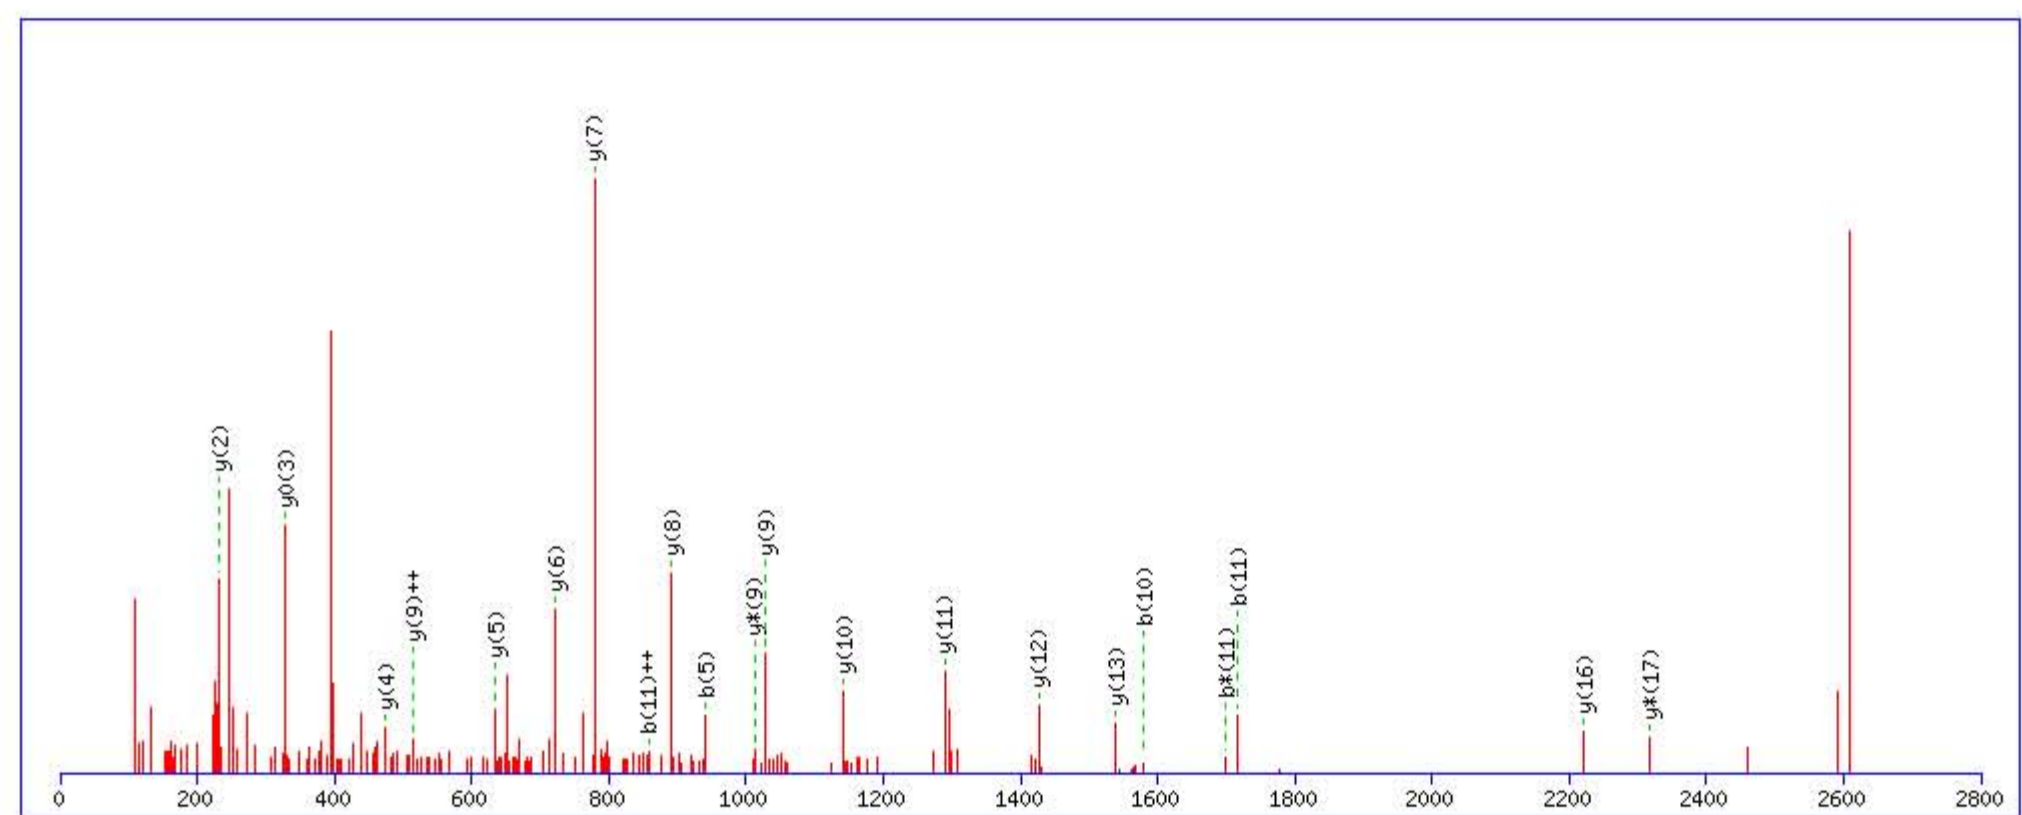

Monoisotopic mass of neutral peptide  $M_r(\text{calc})$ : 2607.225708  
 Fixed modifications: Carbamidomethyl (C) (apply to specified residues or termini only)  
 Variable modifications:  
 Q5 : Biotin:Thermo-21345 (Q)  
 Ions Score: 76 Expect: 9.7e-008  
 Matches : 21/182 fragment ions using 35 most intense peaks [\(help\)](#)

| #  | b                  | b <sup>++</sup>   | b <sup>*</sup>     | b <sup>*++</sup> | b <sup>0</sup> | b <sup>0++</sup> | Seq. | y                  | y <sup>++</sup>   | y <sup>*</sup>     | y <sup>*++</sup> | y <sup>0</sup>    | y <sup>0++</sup> | #  |
|----|--------------------|-------------------|--------------------|------------------|----------------|------------------|------|--------------------|-------------------|--------------------|------------------|-------------------|------------------|----|
| 1  | 161.037925         | 81.022600         |                    |                  |                |                  | C    |                    |                   |                    |                  |                   |                  | 19 |
| 2  | 274.121989         | 137.564632        |                    |                  |                |                  | L    | 2448.202330        | 1224.604803       | 2431.175781        | 1216.091528      | 2430.191765       | 1215.599520      | 18 |
| 3  | 388.164916         | 194.586096        | 371.138367         | 186.072822       |                |                  | N    | 2335.118266        | 1168.062771       | <b>2318.091717</b> | 1159.549496      | 2317.107701       | 1159.057488      | 17 |
| 4  | 502.207843         | 251.607560        | 485.181294         | 243.094285       |                |                  | N    | <b>2221.075339</b> | 1111.041307       | 2204.048790        | 1102.528033      | 2203.064774       | 1102.036025      | 16 |
| 5  | <b>941.433169</b>  | 471.220223        | 924.406620         | 462.706948       |                |                  | Q    | 2107.032412        | 1054.019844       | 2090.005863        | 1045.506569      | 2089.021847       | 1045.014561      | 15 |
| 6  | 1069.491747        | 535.249512        | 1052.465198        | 526.736237       |                |                  | Q    | 1667.807086        | 834.407181        | 1650.780537        | 825.893906       | 1649.796521       | 825.401898       | 14 |
| 7  | 1182.575811        | 591.791543        | 1165.549262        | 583.278269       |                |                  | L    | <b>1539.748508</b> | 770.377892        | 1522.721959        | 761.864617       | 1521.737943       | 761.372609       | 13 |
| 8  | 1319.634723        | 660.320999        | 1302.608174        | 651.807725       |                |                  | H    | <b>1426.664444</b> | 713.835860        | 1409.637895        | 705.322585       | 1408.653879       | 704.830577       | 12 |
| 9  | 1466.703137        | 733.855207        | 1449.676588        | 725.341932       |                |                  | F    | <b>1289.605532</b> | 645.306404        | 1272.578983        | 636.793129       | 1271.594967       | 636.301121       | 11 |
| 10 | <b>1579.787201</b> | 790.397238        | 1562.760652        | 781.883964       |                |                  | L    | <b>1142.537118</b> | 571.772197        | 1125.510569        | 563.258922       | 1124.526553       | 562.766914       | 10 |
| 11 | <b>1716.846113</b> | <b>858.926694</b> | <b>1699.819564</b> | 850.413420       |                |                  | H    | <b>1029.453054</b> | <b>515.230165</b> | <b>1012.426505</b> | 506.716890       | 1011.442489       | 506.224882       | 9  |
| 12 | 1829.930177        | 915.468726        | 1812.903628        | 906.955452       |                |                  | I    | <b>892.394142</b>  | 446.700709        | 875.367593         | 438.187434       | 874.383577        | 437.695426       | 8  |
| 13 | 1886.951641        | 943.979458        | 1869.925092        | 935.466184       |                |                  | G    | <b>779.310078</b>  | 390.158677        | 762.283529         | 381.645402       | 761.299513        | 381.153394       | 7  |
| 14 | 1973.983669        | 987.495472        | 1956.957120        | 978.982198       | 1955.973104    | 978.490190       | S    | <b>722.288614</b>  | 361.647945        | 705.262065         | 353.134671       | 704.278049        | 352.642663       | 6  |
| 15 | 2134.014318        | 1067.510797       | 2116.987769        | 1058.997522      | 2116.003753    | 1058.505514      | C    | <b>635.256586</b>  | 318.131931        | 618.230037         | 309.618656       | 617.246021        | 309.126648       | 5  |
| 16 | 2262.072896        | 1131.540086       | 2245.046347        | 1123.026811      | 2244.062331    | 1122.534803      | Q    | <b>475.225937</b>  | 238.116606        | 458.199388         | 229.603332       | 457.215372        | 229.111324       | 4  |
| 17 | 2377.099839        | 1189.053557       | 2360.073290        | 1180.540283      | 2359.089274    | 1180.048275      | D    | 347.167359         | 174.087317        | 330.140810         | 165.574043       | <b>329.156794</b> | 165.082035       | 3  |
| 18 | 2434.121303        | 1217.564289       | 2417.094754        | 1209.051015      | 2416.110738    | 1208.559007      | G    | <b>232.140416</b>  | 116.573846        | 215.113867         | 108.060571       |                   |                  | 2  |
| 19 |                    |                   |                    |                  |                |                  | R    | 175.118952         | 88.063114         | 158.092403         | 79.549839        |                   |                  | 1  |

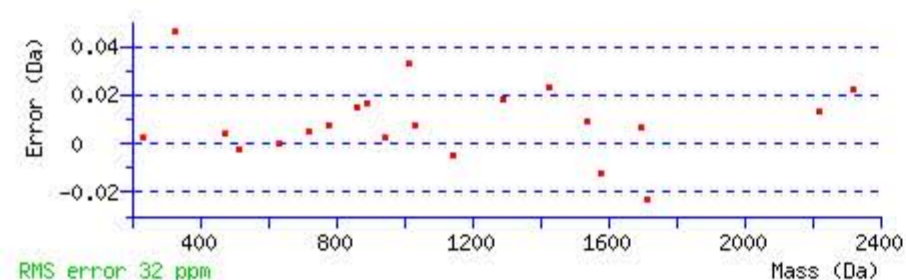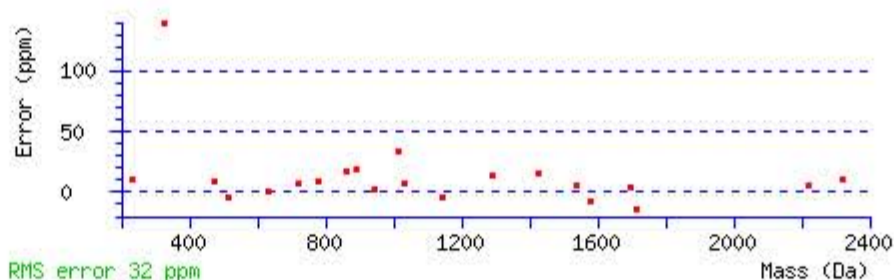

NCBI BLAST search of **CLNNQLHFLHIGSCQDGR**  
 (Parameters: blastp, nr protein database, expect=20000, no filter, PAM30)  
 Other BLAST [web gateways](#)

**All matches to this query**

| Score | $M_r(\text{calc})$ : | Delta    | Sequence                               |
|-------|----------------------|----------|----------------------------------------|
| 75.5  | 2607.225708          | 0.012308 | <a href="#">CLNNQLHFLHIGSCQDGR</a>     |
| 73.1  | 2607.225708          | 0.012308 | <a href="#">CLNNQLHFLHIGSCQDGR</a>     |
| 0.8   | 2607.235611          | 0.002405 | <a href="#">AQTTVTCMENGWSPTPRCIRVK</a> |

# {MATRIX} {SCIENCE} Mascot Search Results

## Peptide View

MS/MS Fragmentation of **SFGGQCR**

Found in **CO7\_HUMAN**, Complement component C7 OS=Homo sapiens GN=C7 PE=1 SV=2

Match to Query 20167: 1121.515008 from(561.764780,2+) rtinseconds(1514) index(3415)

Title: Locus:1.1.1.2781.12 File:"2013-07-02 CLN FXIII 180 min 1st F 1.wiff"

Data file C:\Program Files (x86)\Matrix Science\Mascot Daemon\mgf\7 FXIII 180 min 1st\mascot\_daemon\_merge.mgf

Click mouse within plot area to zoom in by factor of two about that point

Or, Plot from  to  Da

Label all possible matches  Label matches used for scoring

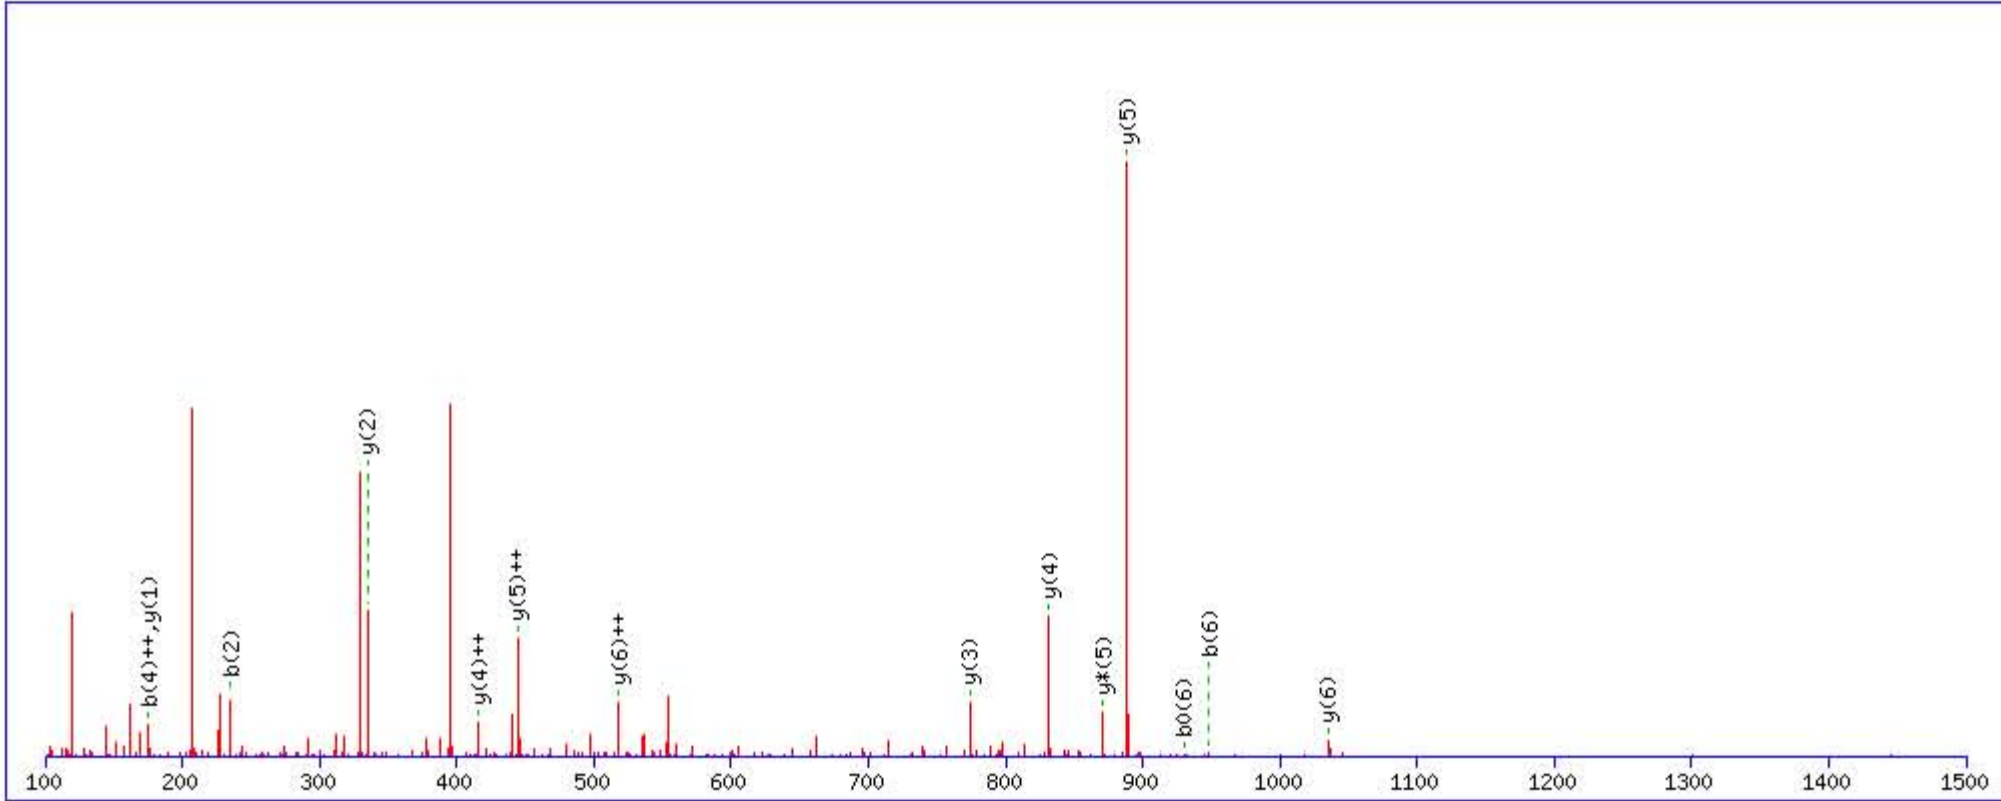

Monoisotopic mass of neutral peptide Mr(calc): 1121.511032

Fixed modifications: Carbamidomethyl (C) (apply to specified residues or termini only)

Variable modifications:

Q5 : Biotin:Thermo-21345 (Q)

Ions Score: 28 Expect: 0.0059

Matches : 14/52 fragment ions using 30 most intense peaks [\(help\)](#)

| # | b                 | b <sup>++</sup>   | b <sup>*</sup> | b <sup>*++</sup> | b <sup>0</sup>    | b <sup>0++</sup> | Seq. | y                  | y <sup>++</sup>   | y <sup>*</sup>    | y <sup>*++</sup> | # |
|---|-------------------|-------------------|----------------|------------------|-------------------|------------------|------|--------------------|-------------------|-------------------|------------------|---|
| 1 | 88.039304         | 44.523290         |                |                  | 70.028739         | 35.518008        | S    |                    |                   |                   |                  | 7 |
| 2 | <b>235.107718</b> | 118.057497        |                |                  | 217.097153        | 109.052214       | F    | <b>1035.486269</b> | <b>518.246773</b> | 1018.459720       | 509.733498       | 6 |
| 3 | 292.129182        | 146.568229        |                |                  | 274.118617        | 137.562946       | G    | <b>888.417855</b>  | <b>444.712566</b> | <b>871.391306</b> | 436.199291       | 5 |
| 4 | 349.150646        | <b>175.078961</b> |                |                  | 331.140081        | 166.073678       | G    | <b>831.396391</b>  | <b>416.201834</b> | 814.369842        | 407.688559       | 4 |
| 5 | 788.375972        | 394.691624        | 771.349423     | 386.178350       | 770.365407        | 385.686342       | Q    | <b>774.374927</b>  | 387.691102        | 757.348378        | 379.177827       | 3 |
| 6 | <b>948.406621</b> | 474.706949        | 931.380072     | 466.193674       | <b>930.396056</b> | 465.701666       | C    | <b>335.149601</b>  | 168.078438        | 318.123052        | 159.565164       | 2 |
| 7 |                   |                   |                |                  |                   |                  | R    | <b>175.118952</b>  | 88.063114         | 158.092403        | 79.549839        | 1 |

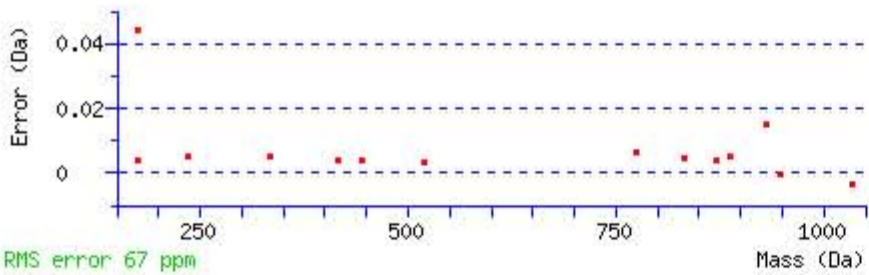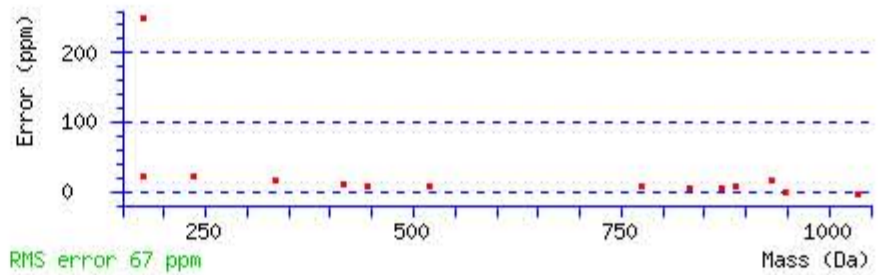

NCBI BLAST search of [SFGGQCR](#)

(Parameters: blastp, nr protein database, expect=20000, no filter, PAM30)

Other BLAST [web gateways](#)

All matches to this query

| Score | Mr(calc):   | Delta    | Sequence                  |
|-------|-------------|----------|---------------------------|
| 27.9  | 1121.511032 | 0.003976 | <a href="#">SFGGQCR</a>   |
| 4.0   | 1121.500259 | 0.014749 | <a href="#">HPGFHQEDR</a> |
| 1.5   | 1121.502274 | 0.012734 | <a href="#">MSVEEQIDR</a> |

# MASCOT Search Results

## Peptide View

MS/MS Fragmentation of **CFSGQCISK**

Found in **CO7\_HUMAN**, Complement component C7 OS=Homo sapiens GN=C7 PE=1 SV=2

Match to Query 30650: 1396.635748 from(699.325150,2+) rtinseconds(1644) index(4189)

Title: Locus:1.1.1.2826.11 File:"2013-07-02 CLN FXIII 180 min 1st F 1.wiff"

Data file C:\Program Files (x86)\Matrix Science\Mascot Daemon\mgf\7 FXIII 180 min 1st\mascot\_daemon\_merge.mgf

Click mouse within plot area to zoom in by factor of two about that point

Or, Plot from  to  Da

Label all possible matches  Label matches used for scoring

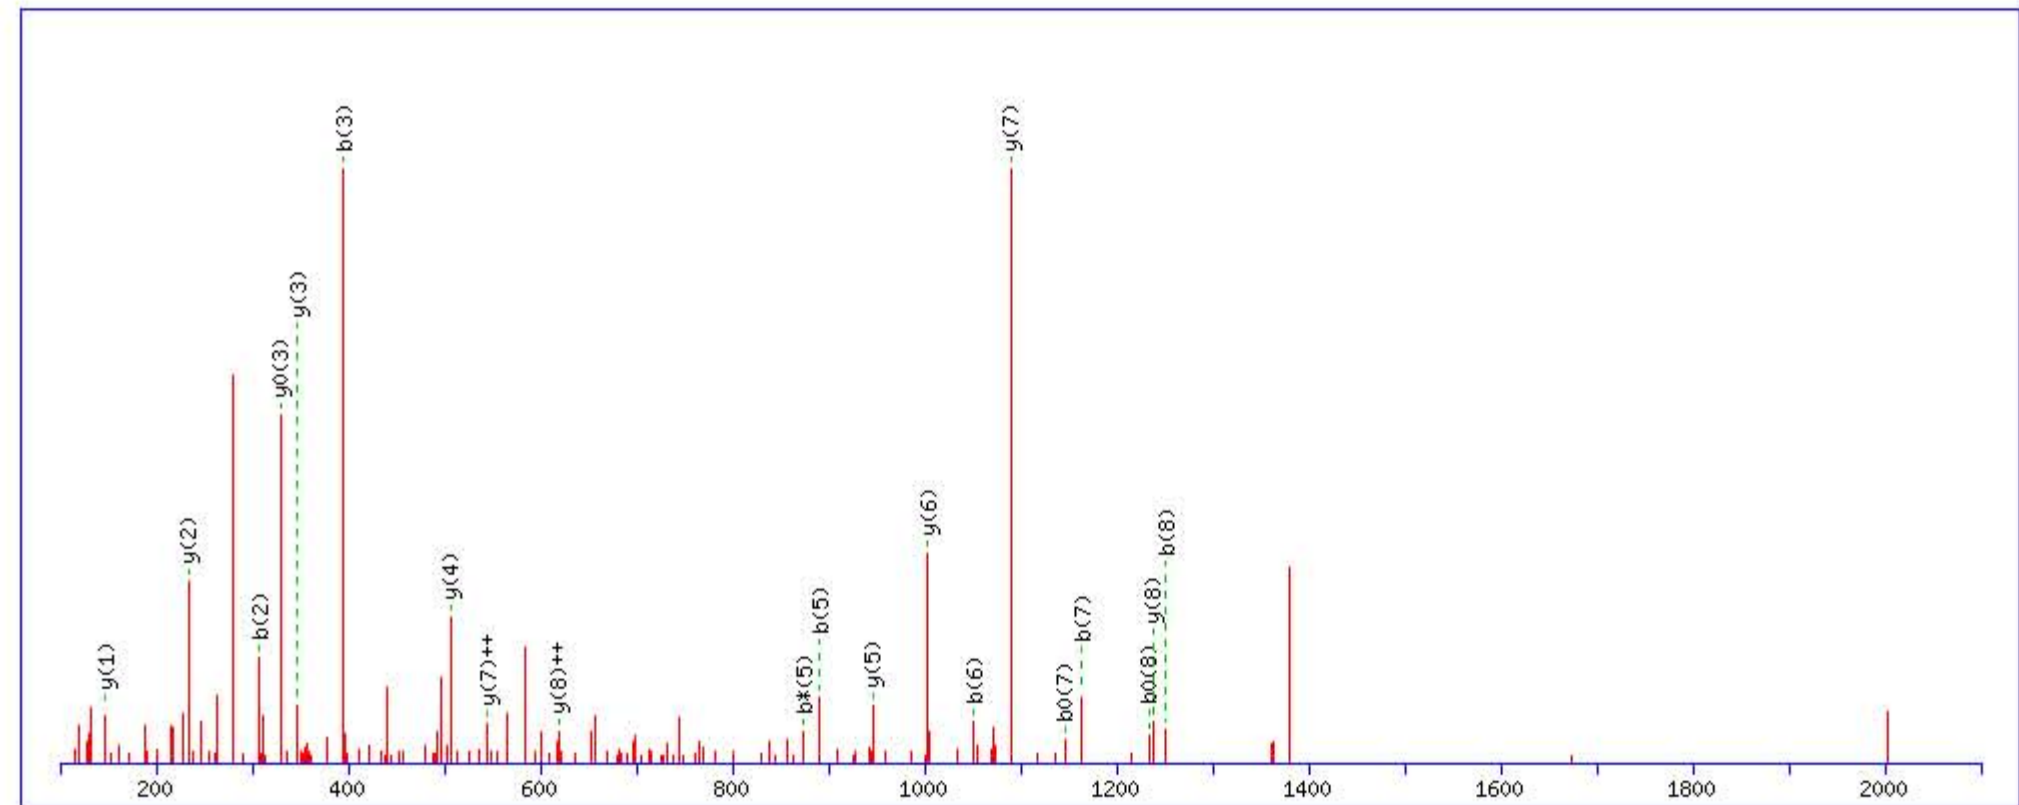

Monoisotopic mass of neutral peptide Mr(calc): 1396.630157

Fixed modifications: Carbamidomethyl (C) (apply to specified residues or termini only)

Variable modifications:

Q5 : Biotin:Thermo-21345 (Q)

Ions Score: 50 Expect: 8.6e-005

Matches : 20/82 fragment ions using 39 most intense peaks ([help](#))

| # | b                  | b <sup>++</sup> | b <sup>+</sup>    | b <sup>*++</sup> | b <sup>0</sup>     | b <sup>0++</sup> | Seq. | y                  | y <sup>++</sup>   | y <sup>+</sup> | y <sup>*++</sup> | y <sup>0</sup>    | y <sup>0++</sup> | # |
|---|--------------------|-----------------|-------------------|------------------|--------------------|------------------|------|--------------------|-------------------|----------------|------------------|-------------------|------------------|---|
| 1 | 161.037925         | 81.022600       |                   |                  |                    |                  | C    |                    |                   |                |                  |                   |                  | 9 |
| 2 | <b>308.106339</b>  | 154.556807      |                   |                  |                    |                  | F    | <b>1237.606777</b> | <b>619.307027</b> | 1220.580228    | 610.793752       | 1219.596212       | 610.301744       | 8 |
| 3 | <b>395.138367</b>  | 198.072821      |                   |                  | 377.127802         | 189.067539       | S    | <b>1090.538363</b> | <b>545.772819</b> | 1073.511814    | 537.259545       | 1072.527798       | 536.767537       | 7 |
| 4 | 452.159831         | 226.583553      |                   |                  | 434.149266         | 217.578271       | G    | <b>1003.506335</b> | 502.256806        | 986.479786     | 493.743531       | 985.495770        | 493.251523       | 6 |
| 5 | <b>891.385157</b>  | 446.196217      | <b>874.358608</b> | 437.682942       | 873.374592         | 437.190934       | Q    | <b>946.484871</b>  | 473.746074        | 929.458322     | 465.232799       | 928.474306        | 464.740791       | 5 |
| 6 | <b>1051.415806</b> | 526.211541      | 1034.389257       | 517.698267       | 1033.405241        | 517.206258       | C    | <b>507.259545</b>  | 254.133410        | 490.232996     | 245.620136       | 489.248980        | 245.128128       | 4 |
| 7 | <b>1164.499870</b> | 582.753573      | 1147.473321       | 574.240298       | <b>1146.489305</b> | 573.748290       | I    | <b>347.228896</b>  | 174.118086        | 330.202347     | 165.604811       | <b>329.218331</b> | 165.112803       | 3 |
| 8 | <b>1251.531898</b> | 626.269587      | 1234.505349       | 617.756313       | <b>1233.521333</b> | 617.264304       | S    | <b>234.144832</b>  | 117.576054        | 217.118283     | 109.062780       | 216.134267        | 108.570772       | 2 |
| 9 |                    |                 |                   |                  |                    |                  | K    | <b>147.112804</b>  | 74.060040         | 130.086255     | 65.546765        |                   |                  | 1 |

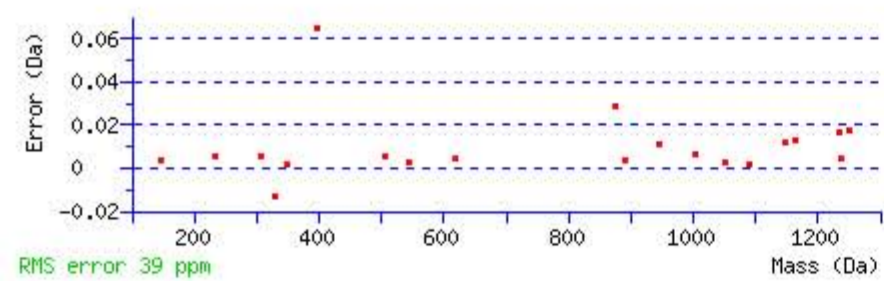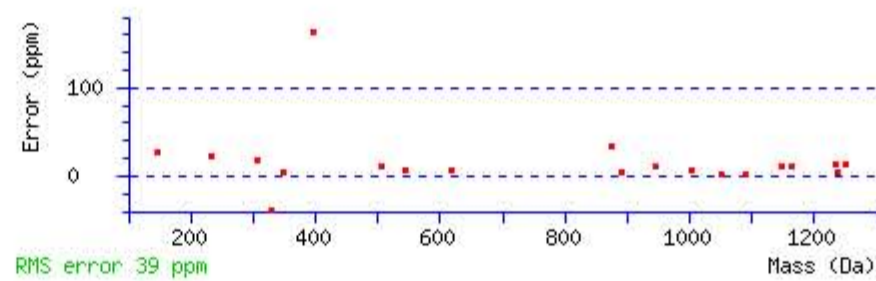

NCBI BLAST search of **CFSGQCISK**

(Parameters: blastp, nr protein database, expect=20000, no filter, PAM30)

Other BLAST [web gateways](#)

## All matches to this query

| Score | Mr(calc):   | Delta    | Sequence                      |
|-------|-------------|----------|-------------------------------|
| 50.1  | 1396.630157 | 0.005591 | <a href="#">CFSGQCISK</a>     |
| 15.9  | 1396.629272 | 0.006476 | <a href="#">QLSQA EATDFCK</a> |
| 2.5   | 1396.629257 | 0.006491 | <a href="#">CPSSYNILDNSK</a>  |
| 2.2   | 1396.629257 | 0.006491 | <a href="#">FDNLMNQKEDK</a>   |

**Peptide View**

MS/MS Fragmentation of **WLVGEMHCQK**  
 Found in **CO7\_HUMAN**, Complement component C7 OS=Homo sapiens GN=C7 PE=1 SV=2

Match to Query 39330: 1613.759232 from(538.927020,3+) rtinseconds(1652) index(4224)  
 Title: Locus:1.1.1.2829.8 File:"2013-07-02 CLN FXIII 180 min 1st F 1.wiff"  
 Data file C:\Program Files (x86)\Matrix Science\Mascot Daemon\mgf\7 FXIII 180 min 1st\mascot\_daemon\_merge.mgf

Click mouse within plot area to zoom in by factor of two about that point  
 Or, Plot from  to  Da   
 Label all possible matches  Label matches used for scoring

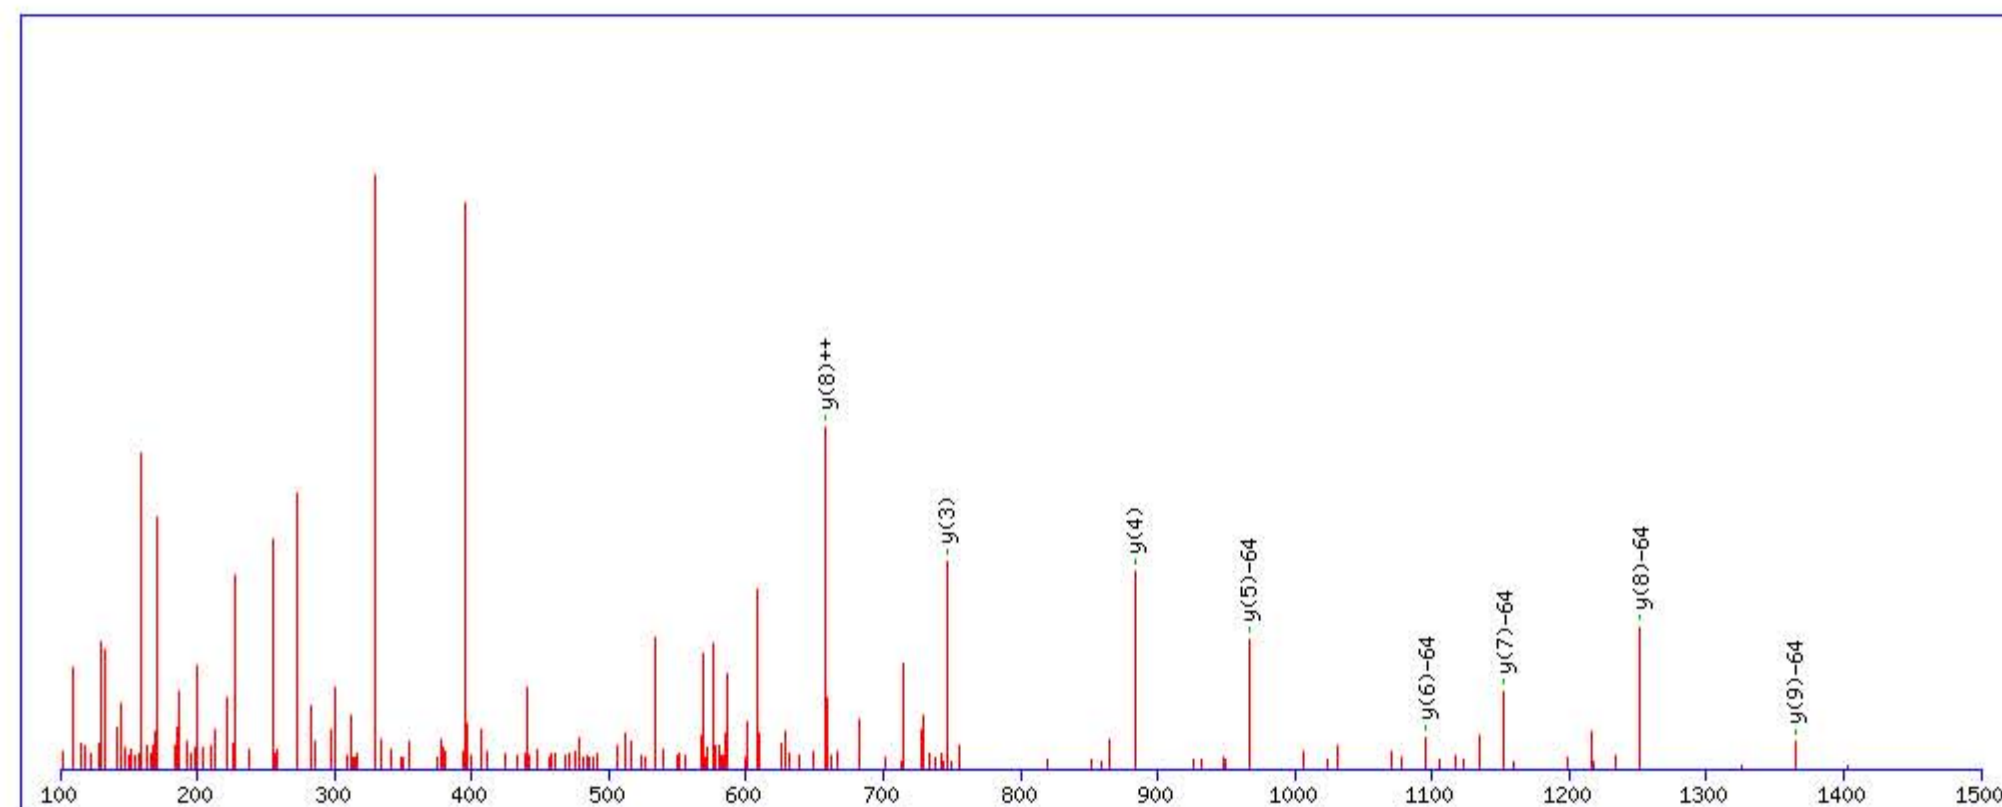

Monoisotopic mass of neutral peptide Mr(calc): 1613.751663  
 Fixed modifications: Carbamidomethyl (C) (apply to specified residues or termini only)  
 Variable modifications:  
 M6 : Oxidation (M), with neutral losses 63.998285 (shown in table), 0.000000  
 Q9 : Biotin:Thermo-21345 (Q)  
 Ions Score: 37 Expect: 0.003  
 Matches : 8/120 fragment ions using 14 most intense peaks ([help](#))

| #  | b           | b <sup>++</sup> | b <sup>*</sup> | b <sup>*++</sup> | b <sup>0</sup> | b <sup>0++</sup> | Seq. | y                  | y <sup>++</sup> | y <sup>*</sup> | y <sup>*++</sup> | y <sup>0</sup> | y <sup>0++</sup> | #  |
|----|-------------|-----------------|----------------|------------------|----------------|------------------|------|--------------------|-----------------|----------------|------------------|----------------|------------------|----|
| 1  | 187.086589  | 94.046932       |                |                  |                |                  | W    |                    |                 |                |                  |                |                  | 10 |
| 2  | 300.170653  | 150.588965      |                |                  |                |                  | L    | <b>1364.681341</b> | 682.844309      | 1347.654792    | 674.331034       | 1346.670776    | 673.839026       | 9  |
| 3  | 399.239067  | 200.123172      |                |                  |                |                  | V    | <b>1251.597277</b> | 626.302277      | 1234.570728    | 617.789002       | 1233.586712    | 617.296994       | 8  |
| 4  | 456.260531  | 228.633904      |                |                  |                |                  | G    | <b>1152.528863</b> | 576.768070      | 1135.502314    | 568.254795       | 1134.518298    | 567.762787       | 7  |
| 5  | 585.303124  | 293.155200      |                |                  | 567.292559     | 284.149918       | E    | <b>1095.507399</b> | 548.257338      | 1078.480850    | 539.744063       | 1077.496834    | 539.252055       | 6  |
| 6  | 668.340239  | 334.673758      |                |                  | 650.329674     | 325.668475       | M    | <b>966.464806</b>  | 483.736041      | 949.438257     | 475.222766       |                |                  | 5  |
| 7  | 805.399151  | 403.203214      |                |                  | 787.388586     | 394.197931       | H    | <b>883.427691</b>  | 442.217484      | 866.401142     | 433.704209       |                |                  | 4  |
| 8  | 965.429800  | 483.218538      |                |                  | 947.419235     | 474.213255       | C    | <b>746.368779</b>  | 373.688028      | 729.342230     | 365.174753       |                |                  | 3  |
| 9  | 1404.655126 | 702.831201      | 1387.628577    | 694.317927       | 1386.644561    | 693.825919       | Q    | 586.338130         | 293.672703      | 569.311581     | 285.159429       |                |                  | 2  |
| 10 |             |                 |                |                  |                |                  | K    | 147.112804         | 74.060040       | 130.086255     | 65.546765        |                |                  | 1  |

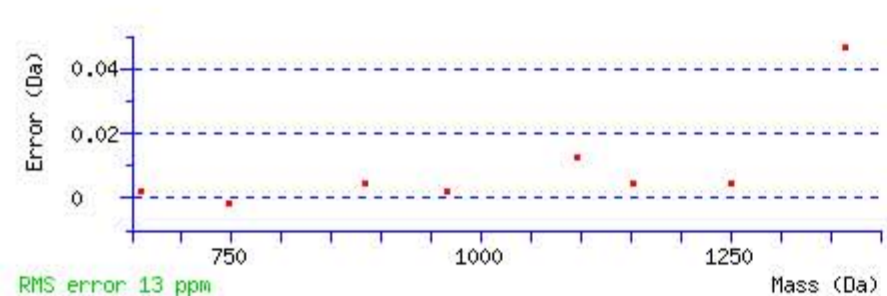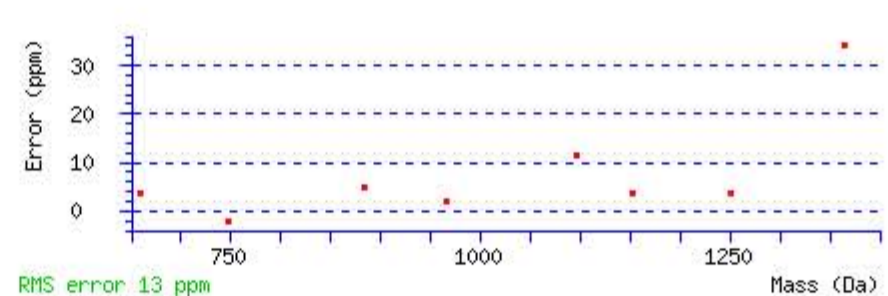

NCBI BLAST search of **WLVGEMHCQK**  
 (Parameters: blastp, nr protein database, expect=20000, no filter, PAM30)  
 Other BLAST [web gateways](#)

**All matches to this query**

| Score | Mr(calc):   | Delta    | Sequence                   |
|-------|-------------|----------|----------------------------|
| 37.0  | 1613.751663 | 0.007569 | <a href="#">WLVGEMHCQK</a> |

# MASCOT Search Results

## Peptide View

MS/MS Fragmentation of **LSGNVLSYTFQVK**

Found in **CO7\_HUMAN**, Complement component C7 OS=Homo sapiens GN=C7 PE=1 SV=2

Match to Query 44316: 1765.961682 from(589.661170,3+) rtinseconds(2461) index(9479)

Title: Locus:1.1.1.3111.6 File:"2013-07-02 CLN FXIII 180 min 1st F 1.wiff"

Data file C:\Program Files (x86)\Matrix Science\Mascot Daemon\mgf7 FXIII 180 min 1st\mascot\_daemon\_merge.mgf

Click mouse within plot area to zoom in by factor of two about that point

Or, Plot from  to  Da

Label all possible matches  Label matches used for scoring

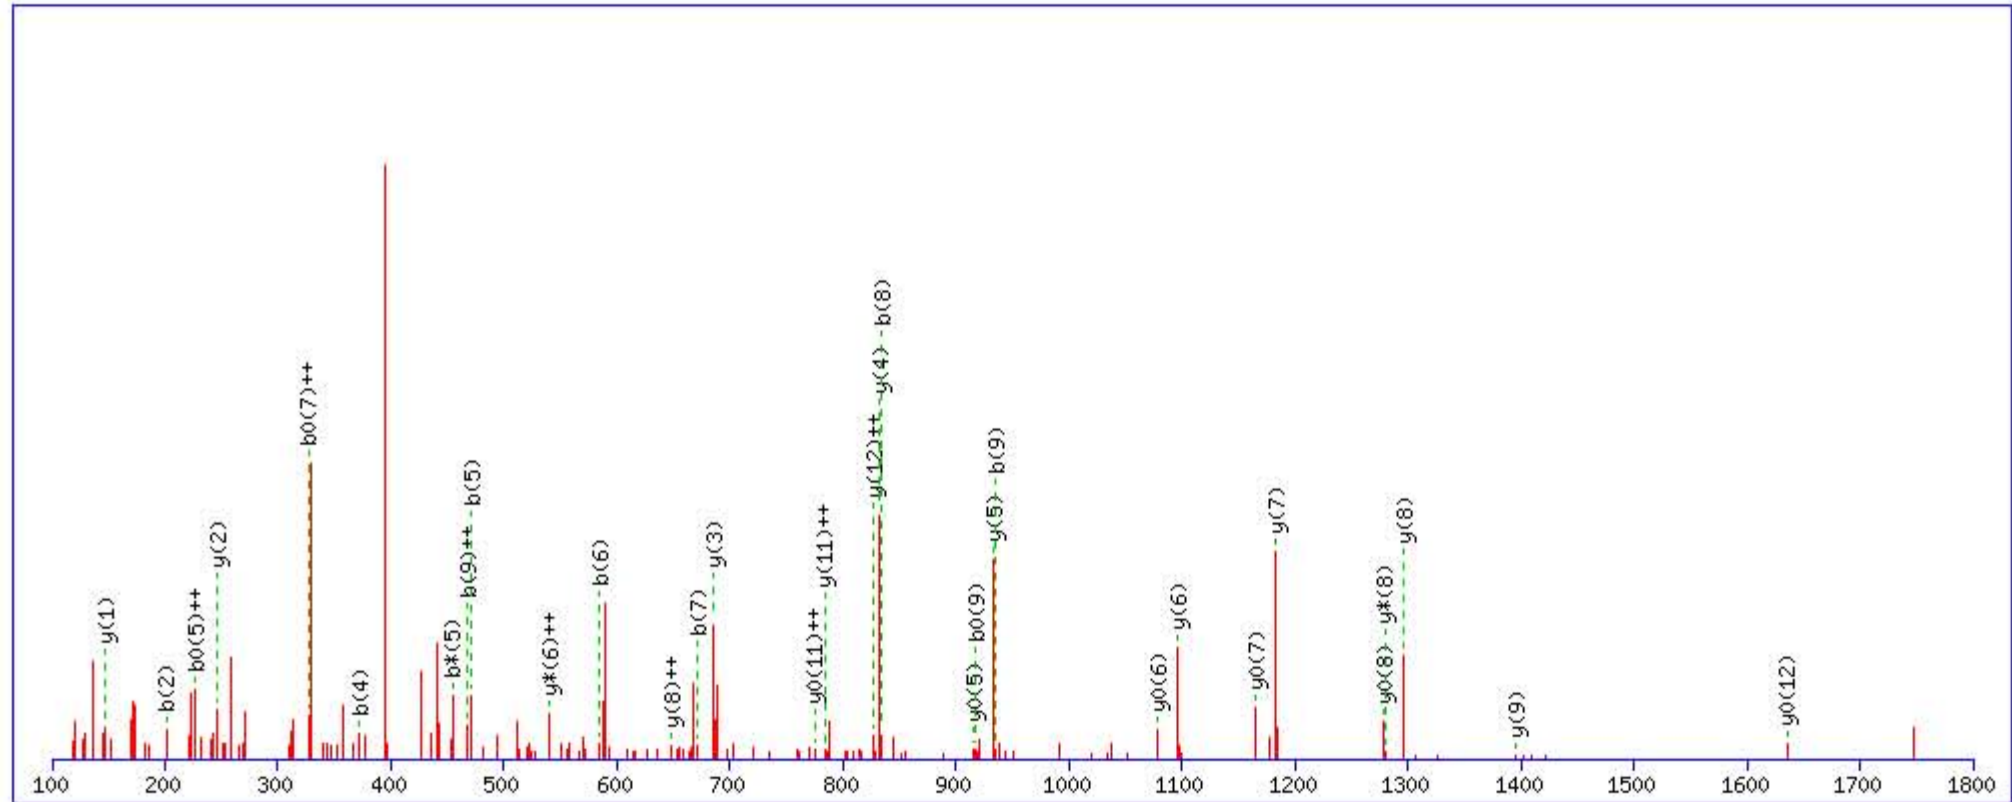

Monoisotopic mass of neutral peptide Mr(calc): 1765.943680

Fixed modifications: Carbamidomethyl (C) (apply to specified residues or termini only)

Variable modifications:

Q11 : Biotin:Thermo-21345 (Q)

Ions Score: 29 Expect: 0.006

Matches : 32/128 fragment ions using 85 most intense peaks [\(help\)](#)

| #  | b           | b <sup>++</sup> | b*          | b <sup>*++</sup> | b <sup>0</sup> | b <sup>0++</sup> | Seq. | y           | y <sup>++</sup> | y*          | y <sup>*++</sup> | y <sup>0</sup> | y <sup>0++</sup> | #  |
|----|-------------|-----------------|-------------|------------------|----------------|------------------|------|-------------|-----------------|-------------|------------------|----------------|------------------|----|
| 1  | 114.091340  | 57.549308       |             |                  |                |                  | L    |             |                 |             |                  |                |                  | 13 |
| 2  | 201.123368  | 101.065322      |             |                  | 183.112803     | 92.060039        | S    | 1653.866891 | 827.437084      | 1636.840342 | 818.923809       | 1635.856326    | 818.431801       | 12 |
| 3  | 258.144832  | 129.576054      |             |                  | 240.134267     | 120.570771       | G    | 1566.834863 | 783.921070      | 1549.808314 | 775.407795       | 1548.824298    | 774.915787       | 11 |
| 4  | 372.187759  | 186.597517      | 355.161210  | 178.084243       | 354.177194     | 177.592235       | N    | 1509.813399 | 755.410338      | 1492.786850 | 746.897063       | 1491.802834    | 746.405055       | 10 |
| 5  | 471.256173  | 236.131724      | 454.229624  | 227.618450       | 453.245608     | 227.126442       | V    | 1395.770472 | 698.388874      | 1378.743923 | 689.875600       | 1377.759907    | 689.383592       | 9  |
| 6  | 584.340237  | 292.673757      | 567.313688  | 284.160482       | 566.329672     | 283.668474       | L    | 1296.702058 | 648.854667      | 1279.675509 | 640.341393       | 1278.691493    | 639.849385       | 8  |
| 7  | 671.372265  | 336.189771      | 654.345716  | 327.676496       | 653.361700     | 327.184488       | S    | 1183.617994 | 592.312635      | 1166.591445 | 583.799361       | 1165.607429    | 583.307353       | 7  |
| 8  | 834.435594  | 417.721435      | 817.409045  | 409.208161       | 816.425029     | 408.716153       | Y    | 1096.585966 | 548.796621      | 1079.559417 | 540.283347       | 1078.575401    | 539.791339       | 6  |
| 9  | 935.483273  | 468.245275      | 918.456724  | 459.732000       | 917.472708     | 459.239992       | T    | 933.522637  | 467.264957      | 916.496088  | 458.751682       | 915.512072     | 458.259674       | 5  |
| 10 | 1082.551687 | 541.779482      | 1065.525138 | 533.266207       | 1064.541122    | 532.774199       | F    | 832.474958  | 416.741117      | 815.448409  | 408.227843       |                |                  | 4  |
| 11 | 1521.777013 | 761.392145      | 1504.750464 | 752.878870       | 1503.766448    | 752.386862       | Q    | 685.406544  | 343.206910      | 668.379995  | 334.693636       |                |                  | 3  |
| 12 | 1620.845427 | 810.926352      | 1603.818878 | 802.413077       | 1602.834862    | 801.921069       | V    | 246.181218  | 123.594247      | 229.154669  | 115.080973       |                |                  | 2  |
| 13 |             |                 |             |                  |                |                  | K    | 147.112804  | 74.060040       | 130.086255  | 65.546765        |                |                  | 1  |

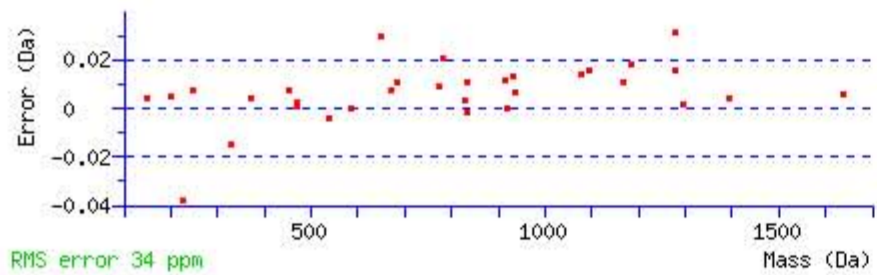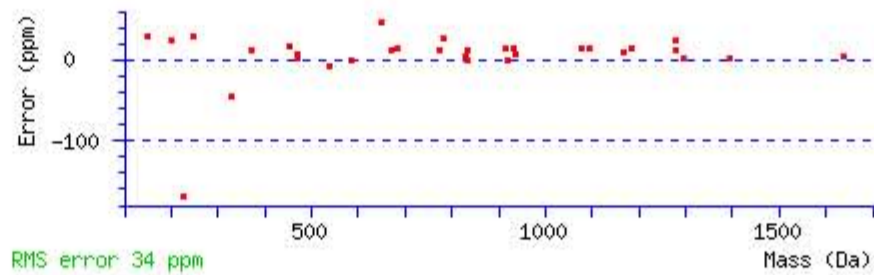

NCBI BLAST search of **LSGNVLSYTFQVK**

(Parameters: blastp, nr protein database, expect=20000, no filter, PAM30)

Other BLAST [web gateways](#)

All matches to this query

| Score | Mr(calc):   | Delta    | Sequence                         |
|-------|-------------|----------|----------------------------------|
| 28.9  | 1765.943680 | 0.018002 | <a href="#">LSGNVLSYTFQVK</a>    |
| 5.2   | 1765.950882 | 0.010800 | <a href="#">VTGNVSKKINYLVMGR</a> |

# MASCOT SEARCH RESULTS

## Peptide View

MS/MS Fragmentation of **EQTMSECEAGALR**

Found in **CO7\_HUMAN**, Complement component C7 OS=Homo sapiens GN=C7 PE=1 SV=2

Match to Query 45076: 1791.804882 from(598.275570,3+) rtinseconds(1743) index(4840)

Title: Locus:1.1.1.2861.10 File:"2013-07-02 CLN FXIII 180 min 1st F 1.wiff"

Data file C:\Program Files (x86)\Matrix Science\Mascot Daemon\mgf7 FXIII 180 min 1st\mascot\_daemon\_merge.mgf

Click mouse within plot area to zoom in by factor of two about that point

Or, Plot from  to  Da

Label all possible matches  Label matches used for scoring

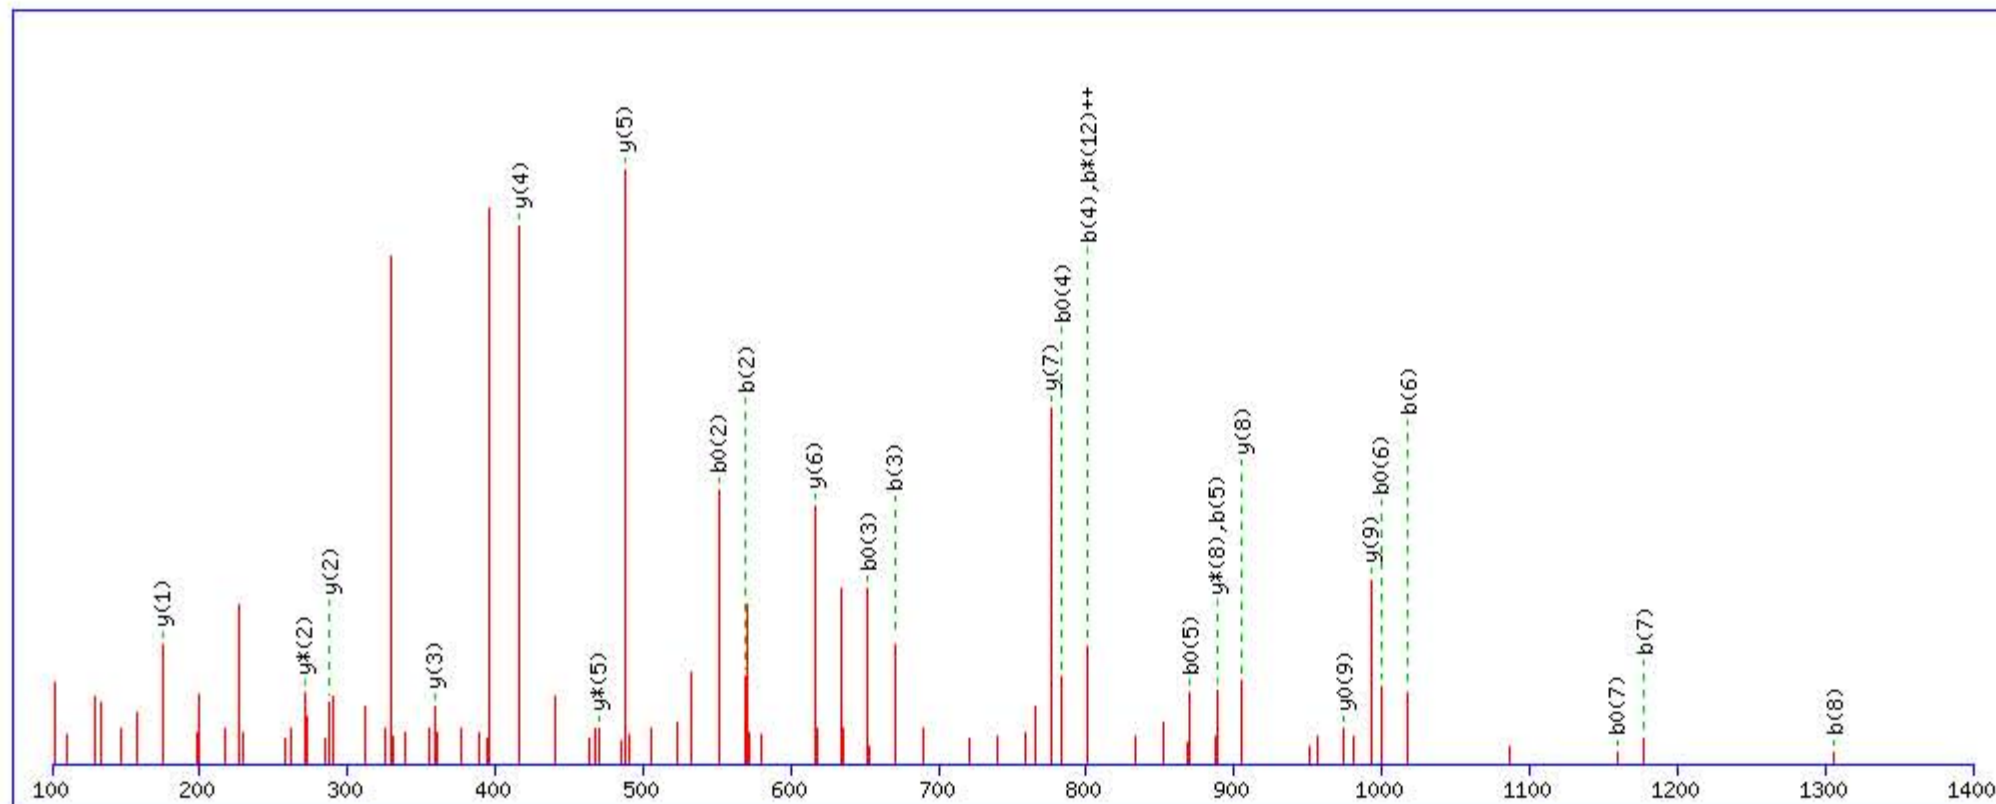

Monoisotopic mass of neutral peptide Mr(calc): 1791.795349

Fixed modifications: Carbamidomethyl (C) (apply to specified residues or termini only)

Variable modifications:

Q2 : Biotin:Thermo-21345 (Q)

Ions Score: 57 Expect: 2.1e-005

Matches : 27/132 fragment ions using 41 most intense peaks [\(help\)](#)

| #  | b                  | b <sup>++</sup> | b*          | b <sup>+++</sup>  | b <sup>0</sup>     | b <sup>0++</sup> | Seq. | y                 | y <sup>++</sup> | y*                | y <sup>+++</sup> | y <sup>0</sup>    | y <sup>0++</sup> | #  |
|----|--------------------|-----------------|-------------|-------------------|--------------------|------------------|------|-------------------|-----------------|-------------------|------------------|-------------------|------------------|----|
| 1  | 130.049869         | 65.528572       |             |                   | 112.039304         | 56.523290        | E    |                   |                 |                   |                  |                   |                  | 13 |
| 2  | <b>569.275195</b>  | 285.141236      | 552.248646  | 276.627961        | <b>551.264630</b>  | 276.135953       | Q    | 1663.760061       | 832.383668      | 1646.733512       | 823.870394       | 1645.749496       | 823.378386       | 12 |
| 3  | <b>670.322874</b>  | 335.665075      | 653.296325  | 327.151801        | <b>652.312309</b>  | 326.659793       | T    | 1224.534735       | 612.771005      | 1207.508186       | 604.257731       | 1206.524170       | 603.765723       | 11 |
| 4  | <b>801.363359</b>  | 401.185318      | 784.336810  | 392.672043        | <b>783.352794</b>  | 392.180035       | M    | 1123.487056       | 562.247166      | 1106.460507       | 553.733891       | 1105.476491       | 553.241883       | 10 |
| 5  | <b>888.395387</b>  | 444.701332      | 871.368838  | 436.188057        | <b>870.384822</b>  | 435.696049       | S    | <b>992.446571</b> | 496.726923      | 975.420022        | 488.213649       | <b>974.436006</b> | 487.721641       | 9  |
| 6  | <b>1017.437980</b> | 509.222628      | 1000.411431 | 500.709354        | <b>999.427415</b>  | 500.217346       | E    | <b>905.414543</b> | 453.210909      | <b>888.387994</b> | 444.697635       | 887.403978        | 444.205627       | 8  |
| 7  | <b>1177.468629</b> | 589.237953      | 1160.442080 | 580.724678        | <b>1159.458064</b> | 580.232670       | C    | <b>776.371950</b> | 388.689613      | 759.345401        | 380.176338       | 758.361385        | 379.684330       | 7  |
| 8  | <b>1306.511222</b> | 653.759249      | 1289.484673 | 645.245974        | 1288.500657        | 644.753966       | E    | <b>616.341301</b> | 308.674288      | 599.314752        | 300.161014       | 598.330736        | 299.669006       | 6  |
| 9  | 1377.548336        | 689.277806      | 1360.521787 | 680.764531        | 1359.537771        | 680.272523       | A    | <b>487.298708</b> | 244.152992      | <b>470.272159</b> | 235.639717       |                   |                  | 5  |
| 10 | 1434.569800        | 717.788538      | 1417.543251 | 709.275263        | 1416.559235        | 708.783255       | G    | <b>416.261594</b> | 208.634435      | 399.235045        | 200.121160       |                   |                  | 4  |
| 11 | 1505.606914        | 753.307095      | 1488.580365 | 744.793820        | 1487.596349        | 744.301812       | A    | <b>359.240130</b> | 180.123703      | 342.213581        | 171.610428       |                   |                  | 3  |
| 12 | 1618.690978        | 809.849127      | 1601.664429 | <b>801.335852</b> | 1600.680413        | 800.843844       | L    | <b>288.203016</b> | 144.605146      | <b>271.176467</b> | 136.091871       |                   |                  | 2  |
| 13 |                    |                 |             |                   |                    |                  | R    | <b>175.118952</b> | 88.063114       | 158.092403        | 79.549839        |                   |                  | 1  |

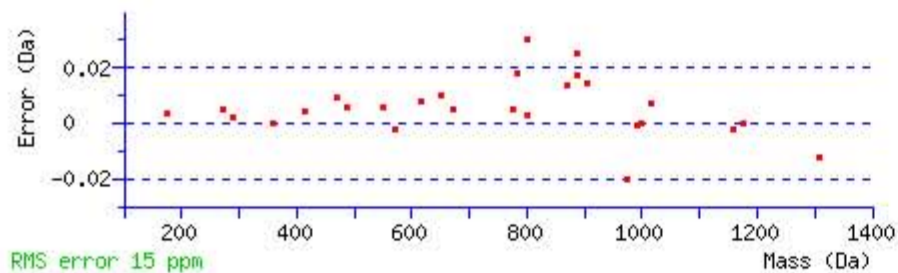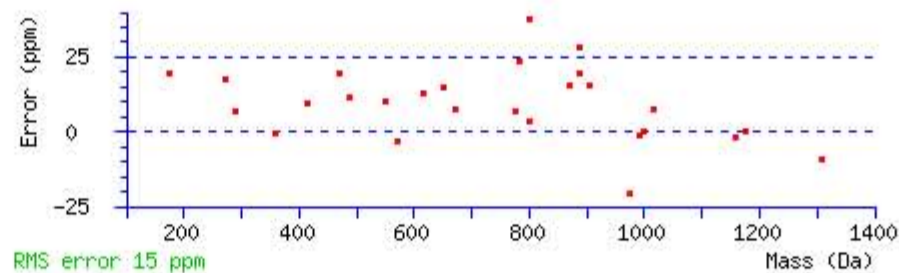

NCBI BLAST search of [EQTMSECEAGALR](#)

(Parameters: blastp, nr protein database, expect=20000, no filter, PAM30)

Other BLAST [web gateways](#)

All matches to this query

| Score | Mr(calc):   | Delta    | Sequence                      |
|-------|-------------|----------|-------------------------------|
| 56.7  | 1791.795349 | 0.009533 | <a href="#">EQTMSECEAGALR</a> |

**MASCOT** Mascot Search Results

Peptide View

MS/MS Fragmentation of **YSAWAESVTNLPQVIK**  
Found in **CO7\_HUMAN**, Complement component C7 OS=Homo sapiens GN=C7 PE=1 SV=2

Match to Query 53443: 2116.132128 from(1059.073340,2+) rtinseconds(2572) index(10181)  
Title: Locus:1.1.1.3149.26 File:"2013-07-02 CLN FXIII 180 min 1st F 1.wiff"  
Data file C:\Program Files (x86)\Matrix Science\Mascot Daemon\mgf\7 FXIII 180 min 1st\mascot\_daemon\_merge.mgf

Click mouse within plot area to zoom in by factor of two about that point

Or, Plot from 0 to 4200 Da Full range

Label all possible matches  Label matches used for scoring

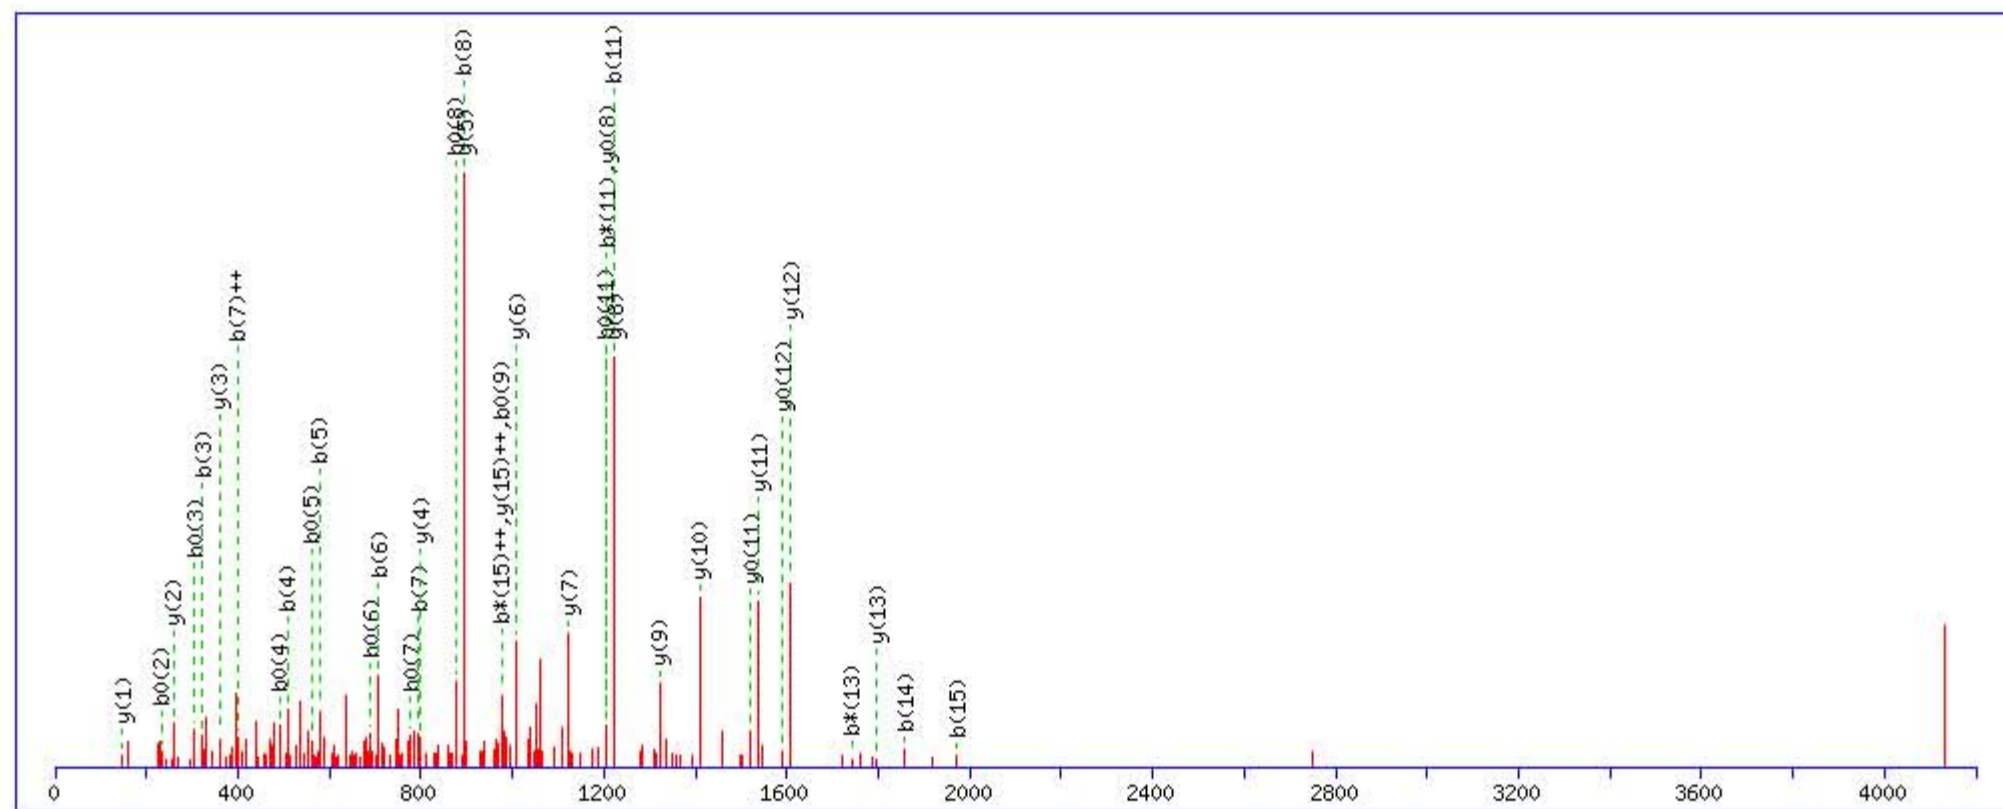

Monoisotopic mass of neutral peptide Mr(calc): 2116.102676  
Fixed modifications: Carbamidomethyl (C) (apply to specified residues or termini only)  
Variable modifications:  
Q13 : Biotin:Thermo-21345 (Q)  
Ions Score: 64 Expect: 1e-006  
Matches : 39/146 fragment ions using 82 most intense peaks [\(help\)](#)

| #  | b           | b <sup>++</sup> | b <sup>*</sup> | b <sup>*++</sup> | b <sup>0</sup> | b <sup>0++</sup> | Seq. | y           | y <sup>++</sup> | y <sup>*</sup> | y <sup>*++</sup> | y <sup>0</sup> | y <sup>0++</sup> | #  |
|----|-------------|-----------------|----------------|------------------|----------------|------------------|------|-------------|-----------------|----------------|------------------|----------------|------------------|----|
| 1  | 164.070605  | 82.538940       |                |                  |                |                  | Y    |             |                 |                |                  |                |                  | 16 |
| 2  | 251.102633  | 126.054954      |                |                  | 233.092068     | 117.049672       | S    | 1954.046646 | 977.526961      | 1937.020097    | 969.013687       | 1936.036081    | 968.521679       | 15 |
| 3  | 322.139747  | 161.573512      |                |                  | 304.129182     | 152.568229       | A    | 1867.014618 | 934.010947      | 1849.988069    | 925.497673       | 1849.004053    | 925.005665       | 14 |
| 4  | 508.219060  | 254.613168      |                |                  | 490.208495     | 245.607886       | W    | 1795.977504 | 898.492390      | 1778.950955    | 889.979116       | 1777.966939    | 889.487108       | 13 |
| 5  | 579.256174  | 290.131725      |                |                  | 561.245609     | 281.126443       | A    | 1609.898191 | 805.452734      | 1592.871642    | 796.939459       | 1591.887626    | 796.447451       | 12 |
| 6  | 708.298767  | 354.653022      |                |                  | 690.288202     | 345.647739       | E    | 1538.861077 | 769.934177      | 1521.834528    | 761.420902       | 1520.850512    | 760.928894       | 11 |
| 7  | 795.330795  | 398.169036      |                |                  | 777.320230     | 389.163753       | S    | 1409.818484 | 705.412880      | 1392.791935    | 696.899606       | 1391.807919    | 696.407598       | 10 |
| 8  | 894.399209  | 447.703243      |                |                  | 876.388644     | 438.697960       | V    | 1322.786456 | 661.896866      | 1305.759907    | 653.383592       | 1304.775891    | 652.891584       | 9  |
| 9  | 995.446888  | 498.227082      |                |                  | 977.436323     | 489.221800       | T    | 1223.718042 | 612.362659      | 1206.691493    | 603.849385       | 1205.707477    | 603.357377       | 8  |
| 10 | 1109.489815 | 555.248546      | 1092.463266    | 546.735271       | 1091.479250    | 546.243263       | N    | 1122.670363 | 561.838820      | 1105.643814    | 553.325545       |                |                  | 7  |
| 11 | 1222.573879 | 611.790578      | 1205.547330    | 603.277303       | 1204.563314    | 602.785295       | L    | 1008.627436 | 504.817356      | 991.600887     | 496.304082       |                |                  | 6  |
| 12 | 1319.626643 | 660.316960      | 1302.600094    | 651.803685       | 1301.616078    | 651.311677       | P    | 895.543372  | 448.275324      | 878.516823     | 439.762050       |                |                  | 5  |
| 13 | 1758.851969 | 879.929623      | 1741.825420    | 871.416348       | 1740.841404    | 870.924340       | Q    | 798.490608  | 399.748942      | 781.464059     | 391.235668       |                |                  | 4  |
| 14 | 1857.920383 | 929.463830      | 1840.893834    | 920.950555       | 1839.909818    | 920.458547       | V    | 359.265282  | 180.136279      | 342.238733     | 171.623004       |                |                  | 3  |
| 15 | 1971.004447 | 986.005862      | 1953.977898    | 977.492587       | 1952.993882    | 977.000579       | I    | 260.196868  | 130.602072      | 243.170319     | 122.088797       |                |                  | 2  |
| 16 |             |                 |                |                  |                |                  | K    | 147.112804  | 74.060040       | 130.086255     | 65.546765        |                |                  | 1  |

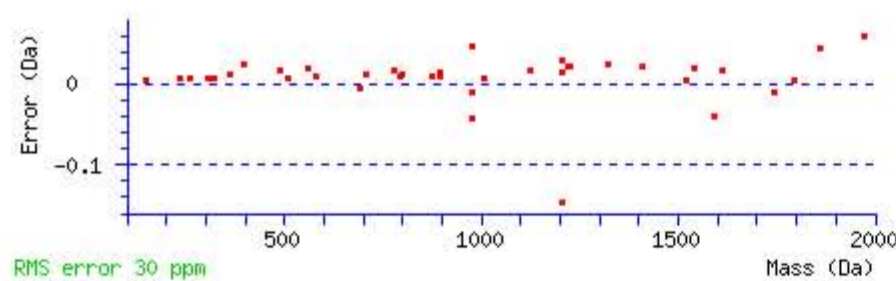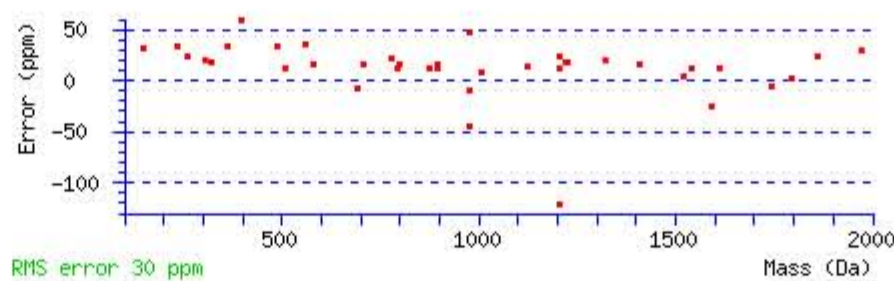

NCBI BLAST search of **YSAWAESVTNLPQVIK**  
(Parameters: blastp, nr protein database, expect=20000, no filter, PAM30)  
Other BLAST [web gateways](#)

All matches to this query

| Score | Mr(calc):   | Delta     | Sequence                             |
|-------|-------------|-----------|--------------------------------------|
| 64.0  | 2116.102676 | 0.029452  | <a href="#">YSAWAESVTNLPQVIK</a>     |
| 0.2   | 2116.145798 | -0.013670 | <a href="#">AGCPMLALEVL SKMPKVIK</a> |

**Peptide View**

MS/MS Fragmentation of **MPYECGPSLDVCAQDER**

Found in **CO7\_HUMAN**, Complement component C7 OS=Homo sapiens GN=C7 PE=1 SV=2

Match to Query 58913: 2337.018612 from(780.013480,3+) rtinseconds(2095) index(7095)

Title: Locus:1.1.1.2983.14 File:"2013-07-02 CLN FXIII 180 min 1st F 1.wiff"

Data file C:\Program Files (x86)\Matrix Science\Mascot Daemon\mgf\7 FXIII 180 min 1st\mascot\_daemon\_merge.mgf

Click mouse within plot area to zoom in by factor of two about that point

Or, Plot from  to  Da

Label all possible matches  Label matches used for scoring

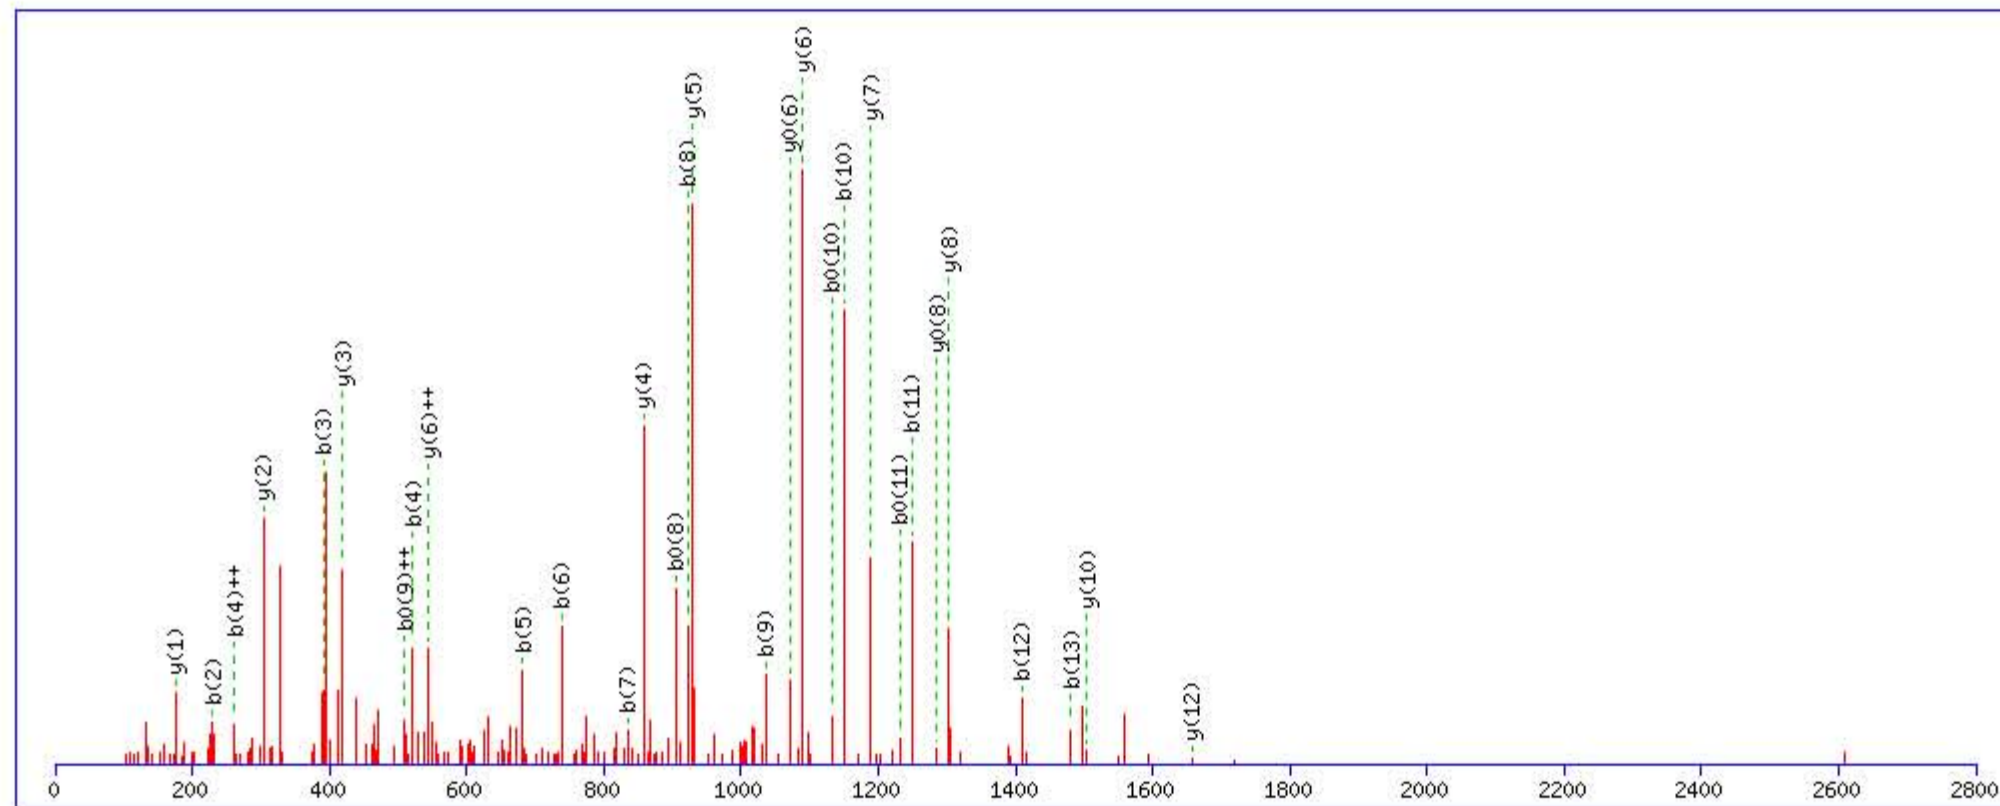

Monoisotopic mass of neutral peptide Mr(calc): 2336.989792

Fixed modifications: Carbamidomethyl (C) (apply to specified residues or termini only)

Variable modifications:

Q14 : Biotin:Thermo-21345 (Q)

Ions Score: 64 Expect: 1.7e-006

Matches : 30/158 fragment ions using 62 most intense peaks [\(help\)](#)

| #  | b           | b <sup>++</sup> | b*          | b <sup>+++</sup> | b <sup>0</sup> | b <sup>0++</sup> | Seq. | y           | y <sup>++</sup> | y*          | y <sup>+++</sup> | y <sup>0</sup> | y <sup>0++</sup> | #  |
|----|-------------|-----------------|-------------|------------------|----------------|------------------|------|-------------|-----------------|-------------|------------------|----------------|------------------|----|
| 1  | 132.047761  | 66.527518       |             |                  |                |                  | M    |             |                 |             |                  |                |                  | 17 |
| 2  | 229.100525  | 115.053900      |             |                  |                |                  | P    | 2206.956589 | 1103.981932     | 2189.930040 | 1095.468658      | 2188.946024    | 1094.976650      | 16 |
| 3  | 392.163854  | 196.585565      |             |                  |                |                  | Y    | 2109.903825 | 1055.455550     | 2092.877276 | 1046.942276      | 2091.893260    | 1046.450268      | 15 |
| 4  | 521.206447  | 261.106862      |             |                  | 503.195882     | 252.101579       | E    | 1946.840496 | 973.923886      | 1929.813947 | 965.410612       | 1928.829931    | 964.918604       | 14 |
| 5  | 681.237096  | 341.122186      |             |                  | 663.226531     | 332.116904       | C    | 1817.797903 | 909.402590      | 1800.771354 | 900.889315       | 1799.787338    | 900.397307       | 13 |
| 6  | 738.258560  | 369.632918      |             |                  | 720.247995     | 360.627636       | G    | 1657.767254 | 829.387265      | 1640.740705 | 820.873991       | 1639.756689    | 820.381983       | 12 |
| 7  | 835.311324  | 418.159300      |             |                  | 817.300759     | 409.154018       | P    | 1600.745790 | 800.876533      | 1583.719241 | 792.363259       | 1582.735225    | 791.871251       | 11 |
| 8  | 922.343352  | 461.675314      |             |                  | 904.332787     | 452.670032       | S    | 1503.693026 | 752.350151      | 1486.666477 | 743.836877       | 1485.682461    | 743.344869       | 10 |
| 9  | 1035.427416 | 518.217346      |             |                  | 1017.416851    | 509.212064       | L    | 1416.660998 | 708.834137      | 1399.634449 | 700.320863       | 1398.650433    | 699.828855       | 9  |
| 10 | 1150.454359 | 575.730818      |             |                  | 1132.443794    | 566.725535       | D    | 1303.576934 | 652.292105      | 1286.550385 | 643.778831       | 1285.566369    | 643.286823       | 8  |
| 11 | 1249.522773 | 625.265025      |             |                  | 1231.512208    | 616.259742       | V    | 1188.549991 | 594.778634      | 1171.523442 | 586.265359       | 1170.539426    | 585.773351       | 7  |
| 12 | 1409.553422 | 705.280349      |             |                  | 1391.542857    | 696.275067       | C    | 1089.481577 | 545.244427      | 1072.455028 | 536.731152       | 1071.471012    | 536.239144       | 6  |
| 13 | 1480.590536 | 740.798906      |             |                  | 1462.579971    | 731.793624       | A    | 929.450928  | 465.229102      | 912.424379  | 456.715827       | 911.440363     | 456.223819       | 5  |
| 14 | 1919.815862 | 960.411569      | 1902.789313 | 951.898295       | 1901.805297    | 951.406287       | Q    | 858.413814  | 429.710545      | 841.387265  | 421.197271       | 840.403249     | 420.705263       | 4  |
| 15 | 2034.842805 | 1017.925041     | 2017.816256 | 1009.411766      | 2016.832240    | 1008.919758      | D    | 419.188488  | 210.097882      | 402.161939  | 201.584607       | 401.177923     | 201.092599       | 3  |
| 16 | 2163.885398 | 1082.446337     | 2146.858849 | 1073.933062      | 2145.874833    | 1073.441054      | E    | 304.161545  | 152.584410      | 287.134996  | 144.071136       | 286.150980     | 143.579128       | 2  |
| 17 |             |                 |             |                  |                |                  | R    | 175.118952  | 88.063114       | 158.092403  | 79.549839        |                |                  | 1  |

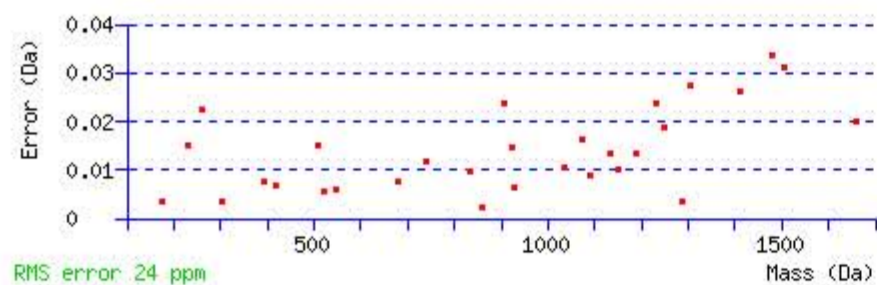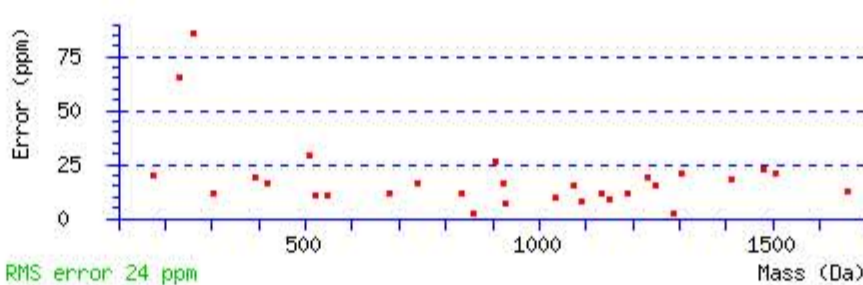

NCBI BLAST search of [MPYECGPSLDVCAQDER](#)  
(Parameters: blastp, nr protein database, expect=20000, no filter, PAM30)

Other BLAST [web gateways](#)

**All matches to this query**

| Score | Mr(calc):   | Delta    | Sequence                          |
|-------|-------------|----------|-----------------------------------|
| 64.4  | 2336.989792 | 0.028820 | <a href="#">MPYECGPSLDVCAQDER</a> |



**Peptide View**

MS/MS Fragmentation of **LIDQYGTHYLQSGSLGGEYR**

Found in **CO7\_HUMAN**, Complement component C7 OS=Homo sapiens GN=C7 PE=1 SV=2

Match to Query 64030: 2567.282172 from(856.768000,3+) rtinseconds(2104) index(7146)

Title: Locus:1.1.1.2986.16 File:"2013-07-02 CLN FXIII 180 min 1st F 1.wiff"

Data file C:\Program Files (x86)\Matrix Science\Mascot Daemon\mgf\7 FXIII 180 min 1st\mascot\_daemon\_merge.mgf

Click mouse within plot area to zoom in by factor of two about that point

Or, Plot from 0 to 2600 Da Full range

Label all possible matches  Label matches used for scoring

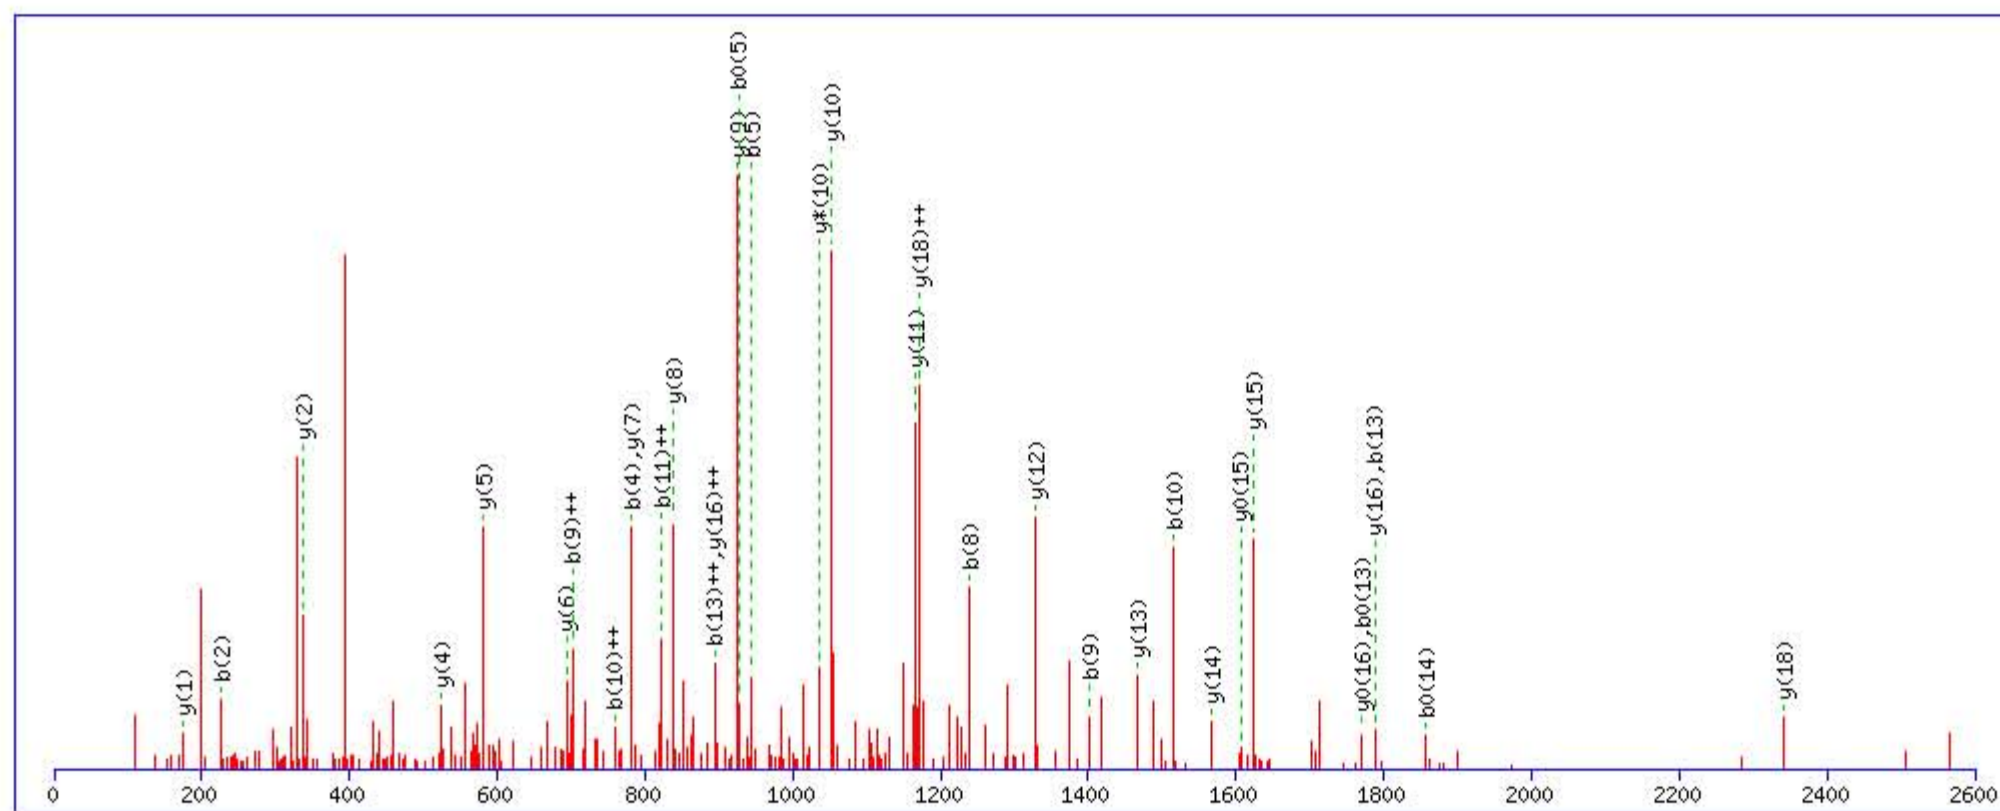

Monoisotopic mass of neutral peptide  $M_r(\text{calc})$ : 2567.247849  
 Fixed modifications: Carbamidomethyl (C) (apply to specified residues or termini only)  
 Variable modifications:  
 Q4 : Biotin:Thermo-21345 (Q)  
 Ions Score: 100 Expect: 3e-009  
 Matches : 35/214 fragment ions using 59 most intense peaks ([help](#))

| #  | b           | b <sup>++</sup> | b <sup>*</sup> | b <sup>*++</sup> | b <sup>0</sup> | b <sup>0++</sup> | Seq. | y           | y <sup>++</sup> | y <sup>*</sup> | y <sup>*++</sup> | y <sup>0</sup> | y <sup>0++</sup> | #  |
|----|-------------|-----------------|----------------|------------------|----------------|------------------|------|-------------|-----------------|----------------|------------------|----------------|------------------|----|
| 1  | 114.091340  | 57.549308       |                |                  |                |                  | L    |             |                 |                |                  |                |                  | 20 |
| 2  | 227.175404  | 114.091340      |                |                  |                |                  | I    | 2455.171074 | 1228.089175     | 2438.144525    | 1219.575900      | 2437.160509    | 1219.083892      | 19 |
| 3  | 342.202347  | 171.604811      |                |                  | 324.191782     | 162.599529       | D    | 2342.087010 | 1171.547143     | 2325.060461    | 1163.033868      | 2324.076445    | 1162.541860      | 18 |
| 4  | 781.427673  | 391.217475      | 764.401124     | 382.704200       | 763.417108     | 382.212192       | Q    | 2227.060067 | 1114.033671     | 2210.033518    | 1105.520397      | 2209.049502    | 1105.028389      | 17 |
| 5  | 944.491002  | 472.749139      | 927.464453     | 464.235864       | 926.480437     | 463.743856       | Y    | 1787.834741 | 894.421009      | 1770.808192    | 885.907734       | 1769.824176    | 885.415726       | 16 |
| 6  | 1001.512466 | 501.259871      | 984.485917     | 492.746597       | 983.501901     | 492.254589       | G    | 1624.771412 | 812.889344      | 1607.744863    | 804.376070       | 1606.760847    | 803.884062       | 15 |
| 7  | 1102.560145 | 551.783710      | 1085.533596    | 543.270436       | 1084.549580    | 542.778428       | T    | 1567.749948 | 784.378612      | 1550.723399    | 775.865338       | 1549.739383    | 775.373330       | 14 |
| 8  | 1239.619057 | 620.313166      | 1222.592508    | 611.799892       | 1221.608492    | 611.307884       | H    | 1466.702269 | 733.854773      | 1449.675720    | 725.341498       | 1448.691704    | 724.849490       | 13 |
| 9  | 1402.682386 | 701.844831      | 1385.655837    | 693.331557       | 1384.671821    | 692.839548       | Y    | 1329.643357 | 665.325317      | 1312.616808    | 656.812042       | 1311.632792    | 656.320034       | 12 |
| 10 | 1515.766450 | 758.386863      | 1498.739901    | 749.873588       | 1497.755885    | 749.381580       | L    | 1166.580028 | 583.793652      | 1149.553479    | 575.280378       | 1148.569463    | 574.788370       | 11 |
| 11 | 1643.825028 | 822.416152      | 1626.798479    | 813.902878       | 1625.814463    | 813.410869       | Q    | 1053.495964 | 527.251620      | 1036.469415    | 518.738346       | 1035.485399    | 518.246338       | 10 |
| 12 | 1730.857056 | 865.932166      | 1713.830507    | 857.418892       | 1712.846491    | 856.926884       | S    | 925.437386  | 463.222331      | 908.410837     | 454.709057       | 907.426821     | 454.217049       | 9  |
| 13 | 1787.878520 | 894.442898      | 1770.851971    | 885.929624       | 1769.867955    | 885.437615       | G    | 838.405358  | 419.706317      | 821.378809     | 411.193043       | 820.394793     | 410.701035       | 8  |
| 14 | 1874.910548 | 937.958912      | 1857.883999    | 929.445638       | 1856.899983    | 928.953630       | S    | 781.383894  | 391.195585      | 764.357345     | 382.682311       | 763.373329     | 382.190303       | 7  |
| 15 | 1987.994612 | 994.500944      | 1970.968063    | 985.987670       | 1969.984047    | 985.495661       | L    | 694.351866  | 347.679571      | 677.325317     | 339.166297       | 676.341301     | 338.674289       | 6  |
| 16 | 2045.016076 | 1023.011676     | 2027.989527    | 1014.498402      | 2027.005511    | 1014.006393      | G    | 581.267802  | 291.137539      | 564.241253     | 282.624265       | 563.257237     | 282.132257       | 5  |
| 17 | 2102.037540 | 1051.522408     | 2085.010991    | 1043.009133      | 2084.026975    | 1042.517125      | G    | 524.246338  | 262.626807      | 507.219789     | 254.113533       | 506.235773     | 253.621525       | 4  |
| 18 | 2231.080133 | 1116.043704     | 2214.053584    | 1107.530430      | 2213.069568    | 1107.038422      | E    | 467.224874  | 234.116075      | 450.198325     | 225.602801       | 449.214309     | 225.110793       | 3  |
| 19 | 2394.143462 | 1197.575369     | 2377.116913    | 1189.062094      | 2376.132897    | 1188.570086      | Y    | 338.182281  | 169.594778      | 321.155732     | 161.081504       |                |                  | 2  |
| 20 |             |                 |                |                  |                |                  | R    | 175.118952  | 88.063114       | 158.092403     | 79.549839        |                |                  | 1  |

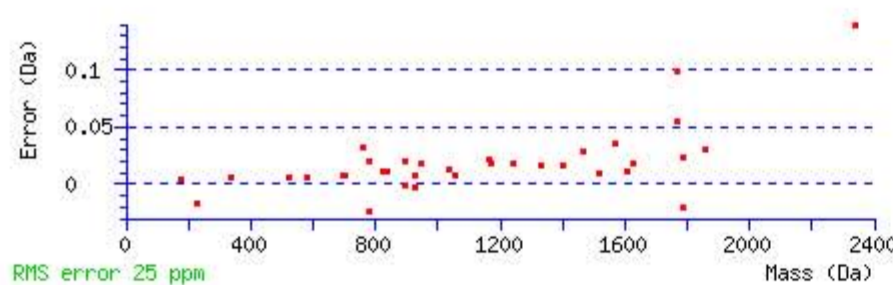

RMS error 25 ppm

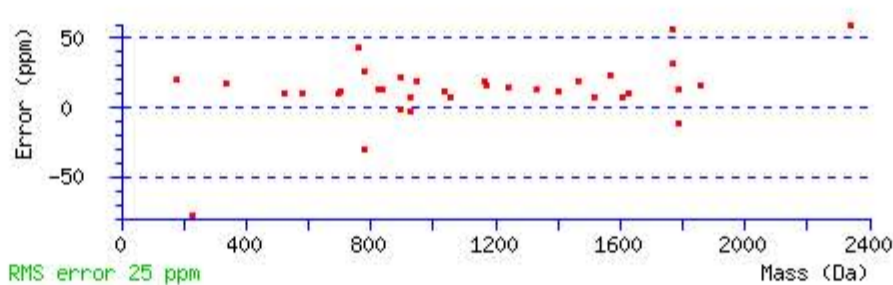

RMS error 25 ppm

NCBI BLAST search of **LIDQYGTHYLQSGSLGGEYR**

(Parameters: blastp, nr protein database, expect=20000, no filter, PAM30)

Other BLAST [web gateways](#)

All matches to this query

| Score | $M_r(\text{calc})$ : | Delta    | Sequence                             |
|-------|----------------------|----------|--------------------------------------|
| 99.9  | 2567.247849          | 0.034323 | <a href="#">LIDQYGTHYLQSGSLGGEYR</a> |
| 17.4  | 2567.247849          | 0.034323 | <a href="#">LIDQYGTHYLQSGSLGGEYR</a> |

# Mascot Search Results

## Peptide View

MS/MS Fragmentation of **SCVGETTESTQCEDEELEHLR**

Found in **CO7\_HUMAN**, Complement component C7 OS=Homo sapiens GN=C7 PE=1 SV=2

Match to Query 67441: 2819.232072 from(940.751300,3+) rtinseconds(1888) index(5741)

Title: Locus:1.1.1.2911.26 File:"2013-07-02 CLN FXIII 180 min 1st F 1.wiff"

Data file C:\Program Files (x86)\Matrix Science\Mascot Daemon\mgf\7 FXIII 180 min 1st\mascot\_daemon\_merge.mgf

Click mouse within plot area to zoom in by factor of two about that point

Or, Plot from  to  Da

Label all possible matches  Label matches used for scoring

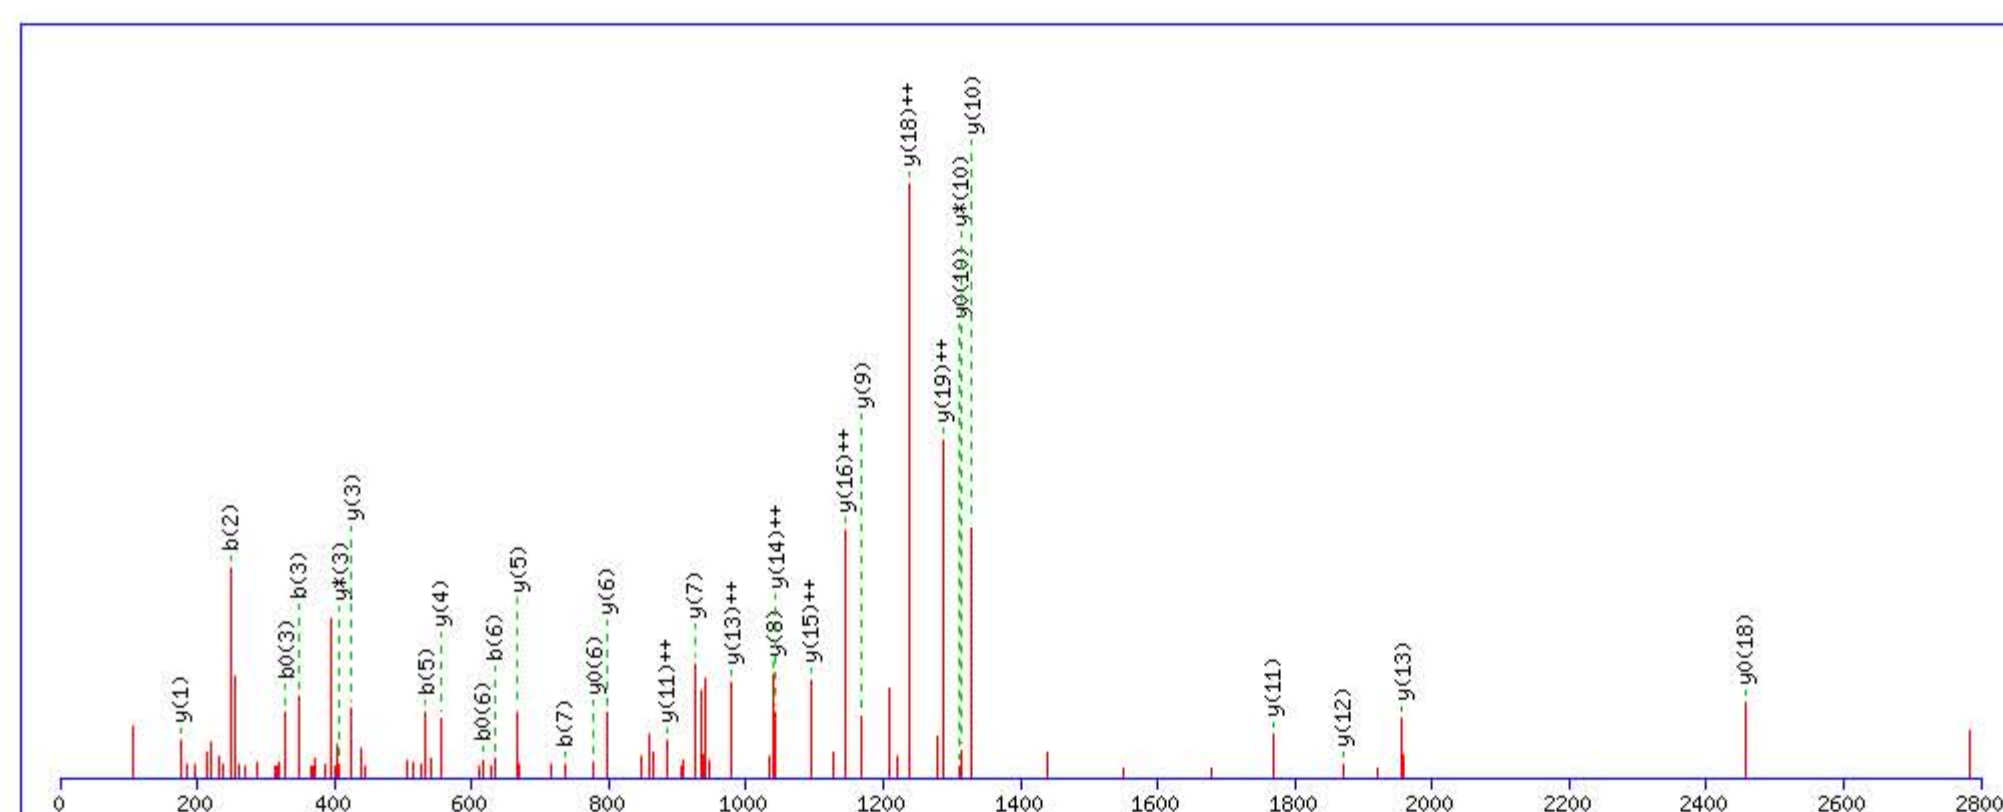

Monoisotopic mass of neutral peptide Mr(calc): 2819.204803

Fixed modifications: Carbamidomethyl (C) (apply to specified residues or termini only)

Variable modifications:

Q11 : Biotin:Thermo-21345 (Q)

Ions Score: 81 Expect: 4.5e-008

Matches : 31/214 fragment ions using 49 most intense peaks ([help](#))

| #  | b           | b <sup>++</sup> | b <sup>*</sup> | b <sup>++*</sup> | b <sup>0</sup> | b <sup>0++</sup> | Seq. | y           | y <sup>++</sup> | y <sup>*</sup> | y <sup>++*</sup> | y <sup>0</sup> | y <sup>0++</sup> | #  |
|----|-------------|-----------------|----------------|------------------|----------------|------------------|------|-------------|-----------------|----------------|------------------|----------------|------------------|----|
| 1  | 88.039304   | 44.523290       |                |                  | 70.028739      | 35.518008        | S    |             |                 |                |                  |                |                  | 21 |
| 2  | 248.069953  | 124.538614      |                |                  | 230.059388     | 115.533332       | C    | 2733.180060 | 1367.093668     | 2716.153511    | 1358.580393      | 2715.169495    | 1358.088385      | 20 |
| 3  | 347.138367  | 174.072822      |                |                  | 329.127802     | 165.067539       | V    | 2573.149411 | 1287.078343     | 2556.122862    | 1278.565069      | 2555.138846    | 1278.073061      | 19 |
| 4  | 404.159831  | 202.583553      |                |                  | 386.149266     | 193.578271       | G    | 2474.080997 | 1237.544136     | 2457.054448    | 1229.030862      | 2456.070432    | 1228.538854      | 18 |
| 5  | 533.202424  | 267.104850      |                |                  | 515.191859     | 258.099568       | E    | 2417.059533 | 1209.033404     | 2400.032984    | 1200.520130      | 2399.048968    | 1200.028122      | 17 |
| 6  | 634.250103  | 317.628690      |                |                  | 616.239538     | 308.623407       | T    | 2288.016940 | 1144.512108     | 2270.990391    | 1135.998833      | 2270.006375    | 1135.506825      | 16 |
| 7  | 735.297782  | 368.152529      |                |                  | 717.287217     | 359.147247       | T    | 2186.969261 | 1093.988268     | 2169.942712    | 1085.474994      | 2168.958696    | 1084.982986      | 15 |
| 8  | 864.340375  | 432.673826      |                |                  | 846.329810     | 423.668543       | E    | 2085.921582 | 1043.464429     | 2068.895033    | 1034.951154      | 2067.911017    | 1034.459146      | 14 |
| 9  | 951.372403  | 476.189840      |                |                  | 933.361838     | 467.184557       | S    | 1956.878989 | 978.943133      | 1939.852440    | 970.429858       | 1938.868424    | 969.937850       | 13 |
| 10 | 1052.420082 | 526.713679      |                |                  | 1034.409517    | 517.708397       | T    | 1869.846961 | 935.427119      | 1852.820412    | 926.913844       | 1851.836396    | 926.421836       | 12 |
| 11 | 1491.645408 | 746.326342      | 1474.618859    | 737.813068       | 1473.634843    | 737.321060       | Q    | 1768.799282 | 884.903279      | 1751.772733    | 876.390005       | 1750.788717    | 875.897997       | 11 |
| 12 | 1651.676057 | 826.341667      | 1634.649508    | 817.828392       | 1633.665492    | 817.336384       | C    | 1329.573956 | 665.290616      | 1312.547407    | 656.777342       | 1311.563391    | 656.285334       | 10 |
| 13 | 1780.718650 | 890.862963      | 1763.692101    | 882.349689       | 1762.708085    | 881.857681       | E    | 1169.543307 | 585.275292      | 1152.516758    | 576.762017       | 1151.532742    | 576.270009       | 9  |
| 14 | 1895.745593 | 948.376435      | 1878.719044    | 939.863160       | 1877.735028    | 939.371152       | D    | 1040.500714 | 520.753995      | 1023.474165    | 512.240721       | 1022.490149    | 511.748713       | 8  |
| 15 | 2024.788186 | 1012.897731     | 2007.761637    | 1004.384457      | 2006.777621    | 1003.892449      | E    | 925.473771  | 463.240524      | 908.447222     | 454.727249       | 907.463206     | 454.235241       | 7  |
| 16 | 2153.830779 | 1077.419027     | 2136.804230    | 1068.905753      | 2135.820214    | 1068.413745      | E    | 796.431178  | 398.719227      | 779.404629     | 390.205953       | 778.420613     | 389.713945       | 6  |
| 17 | 2266.914843 | 1133.961059     | 2249.888294    | 1125.447785      | 2248.904278    | 1124.955777      | L    | 667.388585  | 334.197931      | 650.362036     | 325.684656       | 649.378020     | 325.192648       | 5  |
| 18 | 2395.957436 | 1198.482356     | 2378.930887    | 1189.969081      | 2377.946871    | 1189.477074      | E    | 554.304521  | 277.655899      | 537.277972     | 269.142624       | 536.293956     | 268.650616       | 4  |
| 19 | 2533.016348 | 1267.011812     | 2515.989799    | 1258.498537      | 2515.005783    | 1258.006529      | H    | 425.261928  | 213.134602      | 408.235379     | 204.621328       |                |                  | 3  |
| 20 | 2646.100412 | 1323.553844     | 2629.073863    | 1315.040569      | 2628.089847    | 1314.548562      | L    | 288.203016  | 144.605146      | 271.176467     | 136.091872       |                |                  | 2  |
| 21 |             |                 |                |                  |                |                  | R    | 175.118952  | 88.063114       | 158.092403     | 79.549839        |                |                  | 1  |

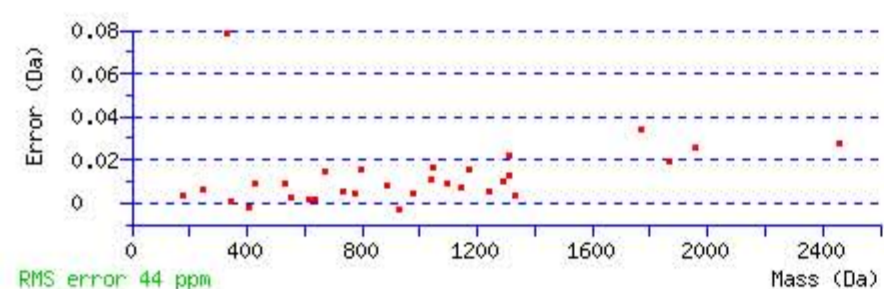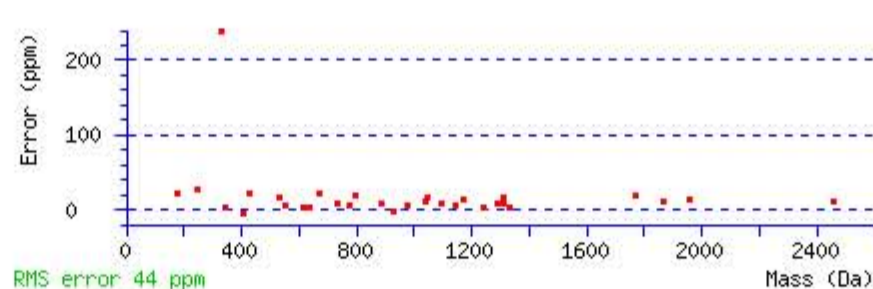

NCBI BLAST search of **SCVGETTESTQCEDEELEHLR**

(Parameters: blastp, nr protein database, expect=20000, no filter, PAM30)

Other BLAST [web gateways](#)

All matches to this query

| Score | Mr(calc):   | Delta    | Sequence                              |
|-------|-------------|----------|---------------------------------------|
| 80.6  | 2819.204803 | 0.027269 | <a href="#">SCVGETTESTQCEDEELEHLR</a> |

**Peptide View**

MS/MS Fragmentation of **IACVLPVLM DGIQSH PQKPFYTVGEK**  
 Found in **CO7\_HUMAN**, Complement component C7 OS=Homo sapiens GN=C7 PE=1 SV=2

Match to Query 74276: 3253.709816 from(814.434730,4+) rtinseconds(2371) index(8988)  
 Title: Locus:1.1.1.3079.19 File:"2013-07-02 CLN FXIII 180 min 1st F 1.wiff"  
 Data file C:\Program Files (x86)\Matrix Science\Mascot Daemon\mgf\7 FXIII 180 min 1st\mascot\_daemon\_merge.mgf

Click mouse within plot area to zoom in by factor of two about that point  
 Or, Plot from 0 to 3000 Da Full range  
 Label all possible matches  Label matches used for scoring

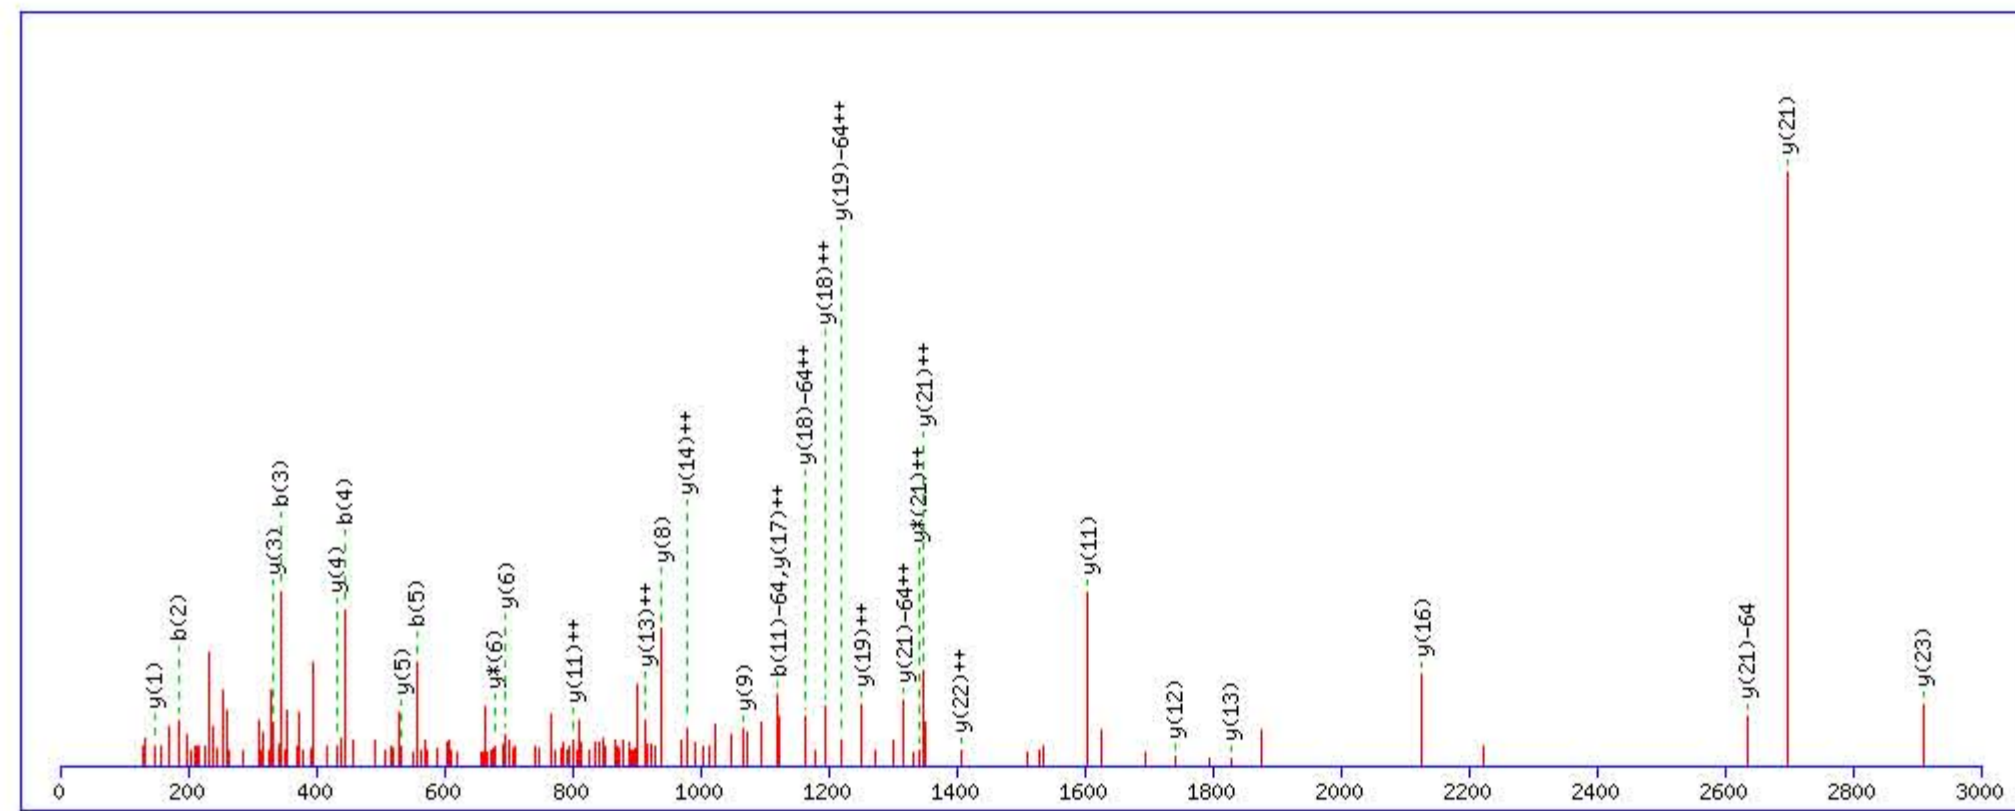

Monoisotopic mass of neutral peptide Mr(calc): 3253.670181  
 Fixed modifications: Carbamidomethyl (C) (apply to specified residues or termini only)  
 Variable modifications:  
 M9 : Oxidation (M), with neutral losses 0.000000 (shown in table), 63.998285  
 Q17 : Biotin:Thermo-21345 (Q)  
 Ions Score: 37 Expect: 0.0005  
 Matches : 32/396 fragment ions using 103 most intense peaks [\(help\)](#)

| #  | b                 | b <sup>++</sup> | b*          | b <sup>+++</sup> | b <sup>0</sup> | b <sup>0++</sup> | Seq. | y                  | y <sup>++</sup>    | y*                | y <sup>+++</sup>   | y <sup>0</sup> | y <sup>0++</sup> | #  |
|----|-------------------|-----------------|-------------|------------------|----------------|------------------|------|--------------------|--------------------|-------------------|--------------------|----------------|------------------|----|
| 1  | 114.091340        | 57.549308       |             |                  |                |                  | I    |                    |                    |                   |                    |                |                  | 26 |
| 2  | <b>185.128454</b> | 93.067865       |             |                  |                |                  | A    | 3141.593386        | 1571.300331        | 3124.566837       | 1562.787056        | 3123.582821    | 1562.295048      | 25 |
| 3  | <b>345.159103</b> | 173.083190      |             |                  |                |                  | C    | 3070.556272        | 1535.781774        | 3053.529723       | 1527.268499        | 3052.545707    | 1526.776491      | 24 |
| 4  | <b>444.227517</b> | 222.617397      |             |                  |                |                  | V    | <b>2910.525623</b> | 1455.766449        | 2893.499074       | 1447.253175        | 2892.515058    | 1446.761167      | 23 |
| 5  | <b>557.311581</b> | 279.159429      |             |                  |                |                  | L    | 2811.457209        | <b>1406.232242</b> | 2794.430660       | 1397.718968        | 2793.446644    | 1397.226960      | 22 |
| 6  | 654.364345        | 327.685811      |             |                  |                |                  | P    | <b>2698.373145</b> | <b>1349.690210</b> | 2681.346596       | <b>1341.176936</b> | 2680.362580    | 1340.684928      | 21 |
| 7  | 753.432759        | 377.220018      |             |                  |                |                  | V    | 2601.320381        | 1301.163828        | 2584.293832       | 1292.650554        | 2583.309816    | 1292.158546      | 20 |
| 8  | 866.516823        | 433.762050      |             |                  |                |                  | L    | 2502.251967        | <b>1251.629621</b> | 2485.225418       | 1243.116347        | 2484.241402    | 1242.624339      | 19 |
| 9  | 1013.552223       | 507.279750      |             |                  |                |                  | M    | 2389.167903        | <b>1195.087589</b> | 2372.141354       | 1186.574315        | 2371.157338    | 1186.082307      | 18 |
| 10 | 1128.579166       | 564.793221      |             |                  | 1110.568601    | 555.787939       | D    | 2242.132503        | <b>1121.569889</b> | 2225.105954       | 1113.056615        | 2224.121938    | 1112.564607      | 17 |
| 11 | 1185.600630       | 593.303953      |             |                  | 1167.590065    | 584.298670       | G    | <b>2127.105560</b> | 1064.056418        | 2110.079011       | 1055.543143        | 2109.094995    | 1055.051135      | 16 |
| 12 | 1298.684694       | 649.845985      |             |                  | 1280.674129    | 640.840702       | I    | 2070.084096        | 1035.545686        | 2053.057547       | 1027.032411        | 2052.073531    | 1026.540403      | 15 |
| 13 | 1426.743272       | 713.875274      | 1409.716723 | 705.362000       | 1408.732707    | 704.869991       | Q    | 1957.000032        | <b>979.003654</b>  | 1939.973483       | 970.490380         | 1938.989467    | 969.998372       | 14 |
| 14 | 1513.775300       | 757.391288      | 1496.748751 | 748.878014       | 1495.764735    | 748.386006       | S    | <b>1828.941454</b> | <b>914.974365</b>  | 1811.914905       | 906.461091         | 1810.930889    | 905.969083       | 13 |
| 15 | 1650.834212       | 825.920744      | 1633.807663 | 817.407470       | 1632.823647    | 816.915461       | H    | <b>1741.909426</b> | 871.458351         | 1724.882877       | 862.945077         | 1723.898861    | 862.453068       | 12 |
| 16 | 1747.886976       | 874.447126      | 1730.860427 | 865.933852       | 1729.876411    | 865.441844       | P    | <b>1604.850514</b> | <b>802.928895</b>  | 1587.823965       | 794.415621         | 1586.839949    | 793.923612       | 11 |
| 17 | 2187.112302       | 1094.059789     | 2170.085753 | 1085.546514      | 2169.101737    | 1085.054506      | Q    | 1507.797750        | 754.402513         | 1490.771201       | 745.889239         | 1489.787185    | 745.397230       | 10 |
| 18 | 2315.207265       | 1158.107270     | 2298.180716 | 1149.593996      | 2297.196700    | 1149.101988      | K    | <b>1068.572424</b> | 534.789850         | 1051.545875       | 526.276575         | 1050.561859    | 525.784567       | 9  |
| 19 | 2412.260029       | 1206.633652     | 2395.233480 | 1198.120378      | 2394.249464    | 1197.628370      | P    | <b>940.477461</b>  | 470.742368         | 923.450912        | 462.229094         | 922.466896     | 461.737086       | 8  |
| 20 | 2559.328443       | 1280.167859     | 2542.301894 | 1271.654585      | 2541.317878    | 1271.162577      | F    | 843.424697         | 422.215986         | 826.398148        | 413.702712         | 825.414132     | 413.210704       | 7  |
| 21 | 2722.391772       | 1361.699524     | 2705.365223 | 1353.186249      | 2704.381207    | 1352.694241      | Y    | <b>696.356283</b>  | 348.681779         | <b>679.329734</b> | 340.168505         | 678.345718     | 339.676497       | 6  |
| 22 | 2823.439451       | 1412.223363     | 2806.412902 | 1403.710089      | 2805.428886    | 1403.218081      | T    | <b>533.292954</b>  | 267.150115         | 516.266405        | 258.636840         | 515.282389     | 258.144832       | 5  |
| 23 | 2922.507865       | 1461.757570     | 2905.481316 | 1453.244296      | 2904.497300    | 1452.752288      | V    | <b>432.245275</b>  | 216.626275         | 415.218726        | 208.113001         | 414.234710     | 207.620993       | 4  |
| 24 | 2979.529329       | 1490.268302     | 2962.502780 | 1481.755028      | 2961.518764    | 1481.263020      | G    | <b>333.176861</b>  | 167.092069         | 316.150312        | 158.578794         | 315.166296     | 158.086786       | 3  |
| 25 | 3108.571922       | 1554.789599     | 3091.545373 | 1546.276324      | 3090.561357    | 1545.784316      | E    | 276.155397         | 138.581337         | 259.128848        | 130.068062         | 258.144832     | 129.576054       | 2  |
| 26 |                   |                 |             |                  |                |                  | K    | <b>147.112804</b>  | 74.060040          | 130.086255        | 65.546765          |                |                  | 1  |

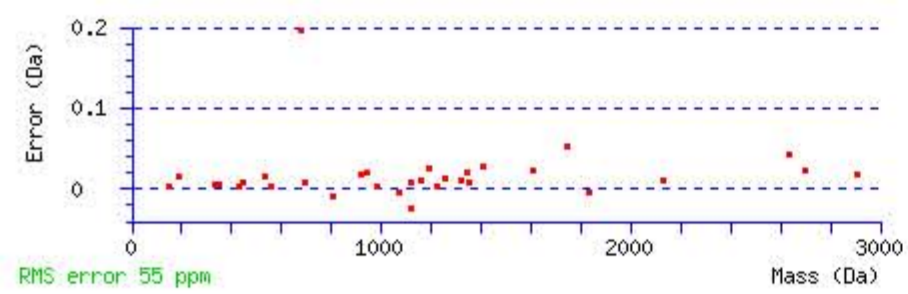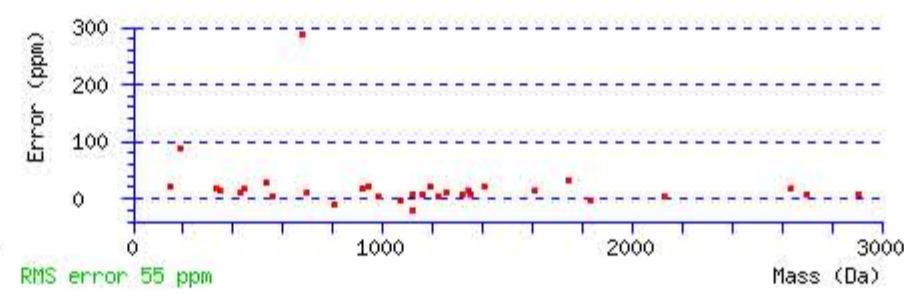

NCBI BLAST search of **IACVLPVLM DGIQSH PQKPFYTVGEK**  
 (Parameters: blastp, nr protein database, expect=20000, no filter, PAM30)  
 Other BLAST [web gateways](#)

**All matches to this query**

| Score | Mr(calc):   | Delta     | Sequence                                     |
|-------|-------------|-----------|----------------------------------------------|
| 37.0  | 3253.670181 | 0.039635  | <a href="#">IACVLPVLM DGIQSH PQKPFYTVGEK</a> |
| 19.4  | 3253.670181 | 0.039635  | <a href="#">IACVLPVLM DGIQSH PQKPFYTVGEK</a> |
| 1.8   | 3253.750809 | -0.040993 | <a href="#">LGHTVKNIIISQMNSFLCFFLFAVLIGR</a> |



# MASCOT SCIENCE Mascot Search Results

## Peptide View

MS/MS Fragmentation of **AGIQER**

Found in **CO8A\_HUMAN**, Complement component C8 alpha chain OS=Homo sapiens GN=C8A PE=1 SV=2

Match to Query 15344: 983.531128 from(492.772840,2+) rtinseconds(1413) index(56623)

Title: Locus:1.1.1.2915.13 File:"2013-07-02 CLN FXIII 180 min 1st F 4.wiff"

Data file C:\Program Files (x86)\Matrix Science\Mascot Daemon\mgf\7 FXIII 180 min 1st\mascot\_daemon\_merge.mgf

Click mouse within plot area to zoom in by factor of two about that point

Or, Plot from  to  Da

Label all possible matches  Label matches used for scoring

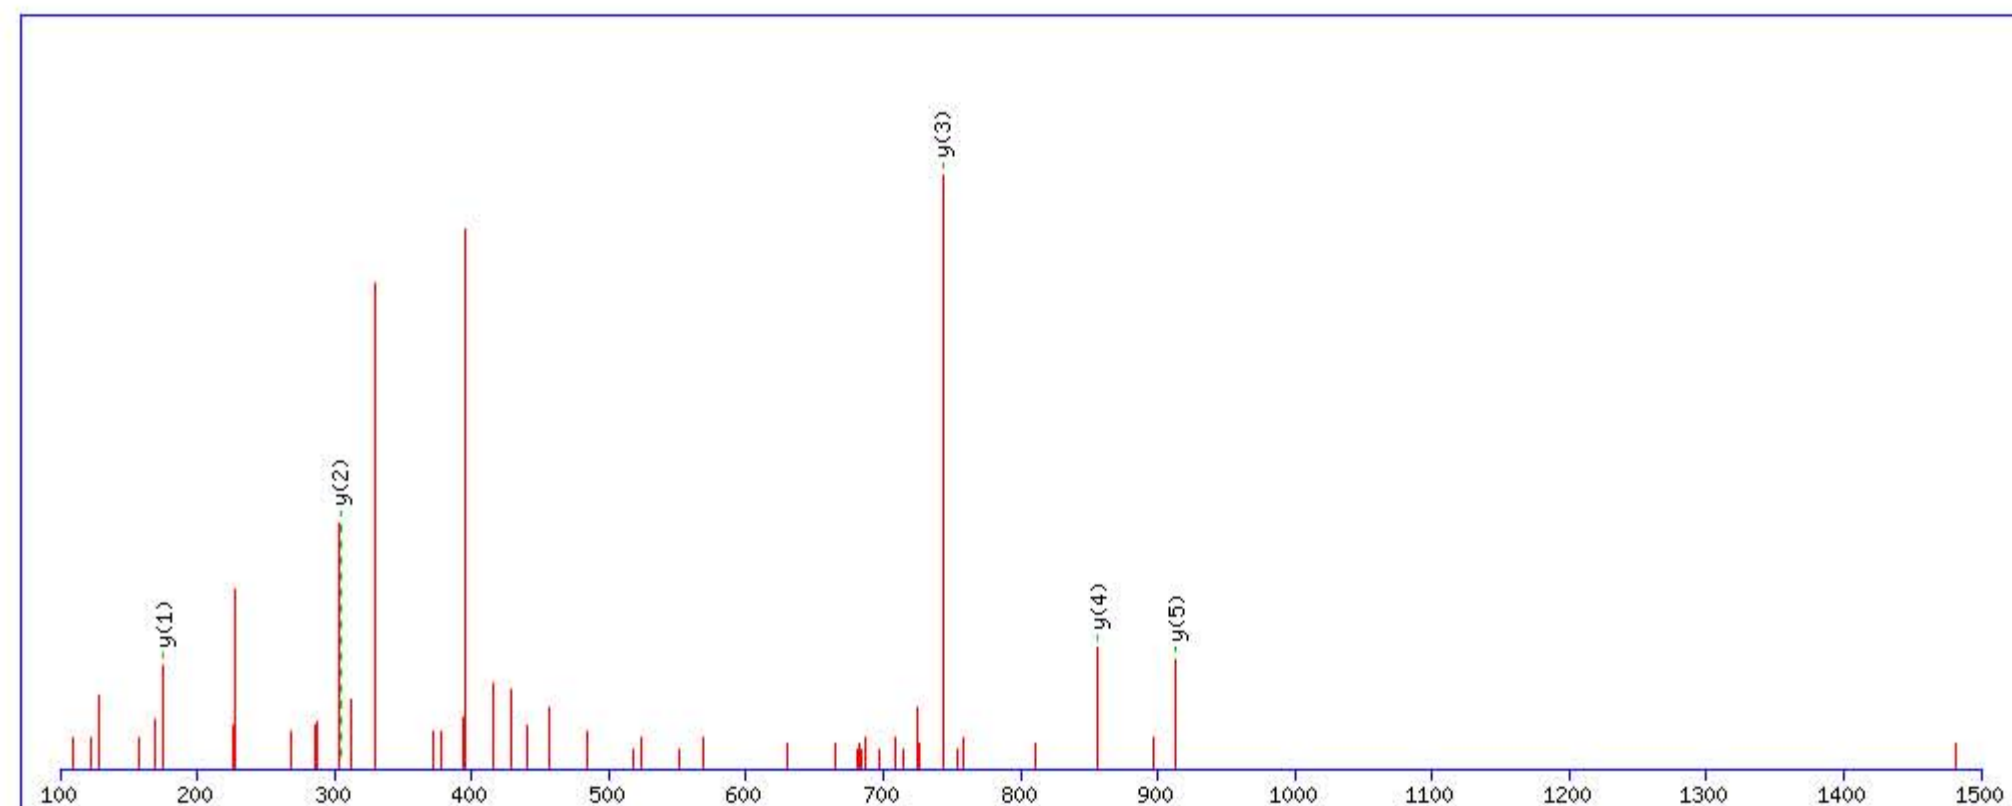

Monoisotopic mass of neutral peptide Mr(calc): 983.522217

Fixed modifications: Carbamidomethyl (C) (apply to specified residues or termini only)

Variable modifications:

Q4 : Biotin:Thermo-21345 (Q)

Ions Score: 34 Expect: 0.008

Matches : 5/44 fragment ions using 9 most intense peaks ([help](#))

| # | b          | b <sup>++</sup> | b <sup>*</sup> | b <sup>+++</sup> | b <sup>0</sup> | b <sup>0++</sup> | Seq. | y                 | y <sup>++</sup> | y <sup>*</sup> | y <sup>+++</sup> | y <sup>0</sup> | y <sup>0++</sup> | # |
|---|------------|-----------------|----------------|------------------|----------------|------------------|------|-------------------|-----------------|----------------|------------------|----------------|------------------|---|
| 1 | 72.044390  | 36.525833       |                |                  |                |                  | A    |                   |                 |                |                  |                |                  | 6 |
| 2 | 129.065854 | 65.036565       |                |                  |                |                  | G    | <b>913.492399</b> | 457.249838      | 896.465850     | 448.736563       | 895.481834     | 448.244555       | 5 |
| 3 | 242.149918 | 121.578597      |                |                  |                |                  | I    | <b>856.470935</b> | 428.739106      | 839.444386     | 420.225831       | 838.460370     | 419.733823       | 4 |
| 4 | 681.375244 | 341.191260      | 664.348695     | 332.677986       |                |                  | Q    | <b>743.386871</b> | 372.197074      | 726.360322     | 363.683799       | 725.376306     | 363.191791       | 3 |
| 5 | 810.417837 | 405.712557      | 793.391288     | 397.199282       | 792.407272     | 396.707274       | E    | <b>304.161545</b> | 152.584411      | 287.134996     | 144.071136       | 286.150980     | 143.579128       | 2 |
| 6 |            |                 |                |                  |                |                  | R    | <b>175.118952</b> | 88.063114       | 158.092403     | 79.549840        |                |                  | 1 |

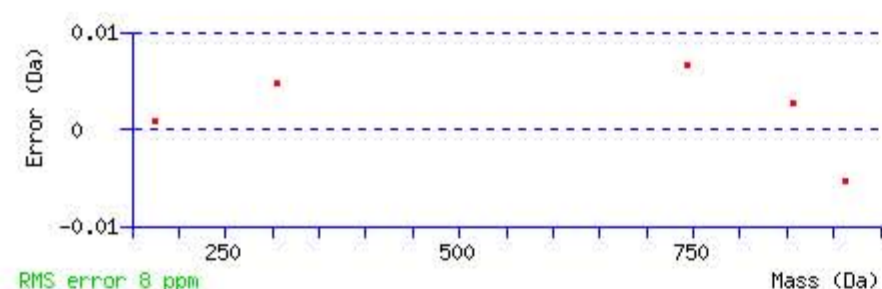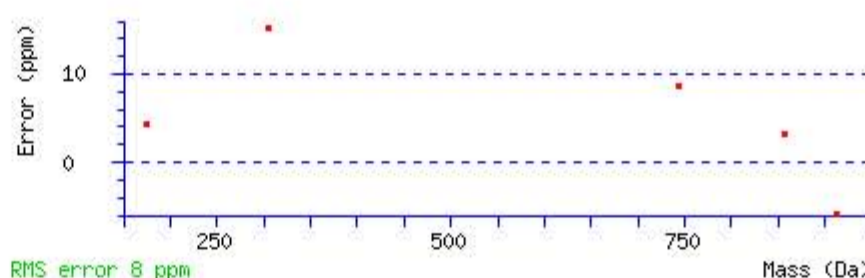

NCBI BLAST search of **AGIQER**

(Parameters: blastp, nr protein database, expect=20000, no filter, PAM30)

Other BLAST [web gateways](#)

## All matches to this query

| Score | Mr(calc):  | Delta    | Sequence                 |
|-------|------------|----------|--------------------------|
| 33.8  | 983.522217 | 0.008911 | <a href="#">AGIQER</a>   |
| 20.3  | 983.522217 | 0.008911 | <a href="#">QIQER</a>    |
| 20.3  | 983.522217 | 0.008911 | <a href="#">QLQER</a>    |
| 19.7  | 983.522217 | 0.008911 | <a href="#">AGLEQR</a>   |
| 9.4   | 983.522217 | 0.008911 | <a href="#">IQQER</a>    |
| 9.4   | 983.522217 | 0.008911 | <a href="#">LQQER</a>    |
| 8.8   | 983.522202 | 0.008926 | <a href="#">KLMENPPR</a> |
| 8.8   | 983.522217 | 0.008911 | <a href="#">QLEQR</a>    |
| 8.8   | 983.530090 | 0.001038 | <a href="#">QLLNHFGR</a> |
| 6.4   | 983.522217 | 0.008911 | <a href="#">QQLER</a>    |

Mascot: <http://www.matrixscience.com/>

# MASCOT Search Results

## Peptide View

MS/MS Fragmentation of **QAQCGQDFQCK**

Found in **CO8A\_HUMAN**, Complement component C8 alpha chain OS=Homo sapiens GN=C8A PE=1 SV=2

Match to Query 41959: 1679.726908 from(840.870730,2+) rtinseconds(1504) index(21018)

Title: Locus:1.1.1.2666.20 File:"2013-07-02 CLN FXIII 180 min 1st F 2.wiff"

Data file C:\Program Files (x86)\Matrix Science\Mascot Daemon\mgf\7 FXIII 180 min 1st\mascot\_daemon\_merge.mgf

Click mouse within plot area to zoom in by factor of two about that point

Or, Plot from  to  Da

Label all possible matches  Label matches used for scoring

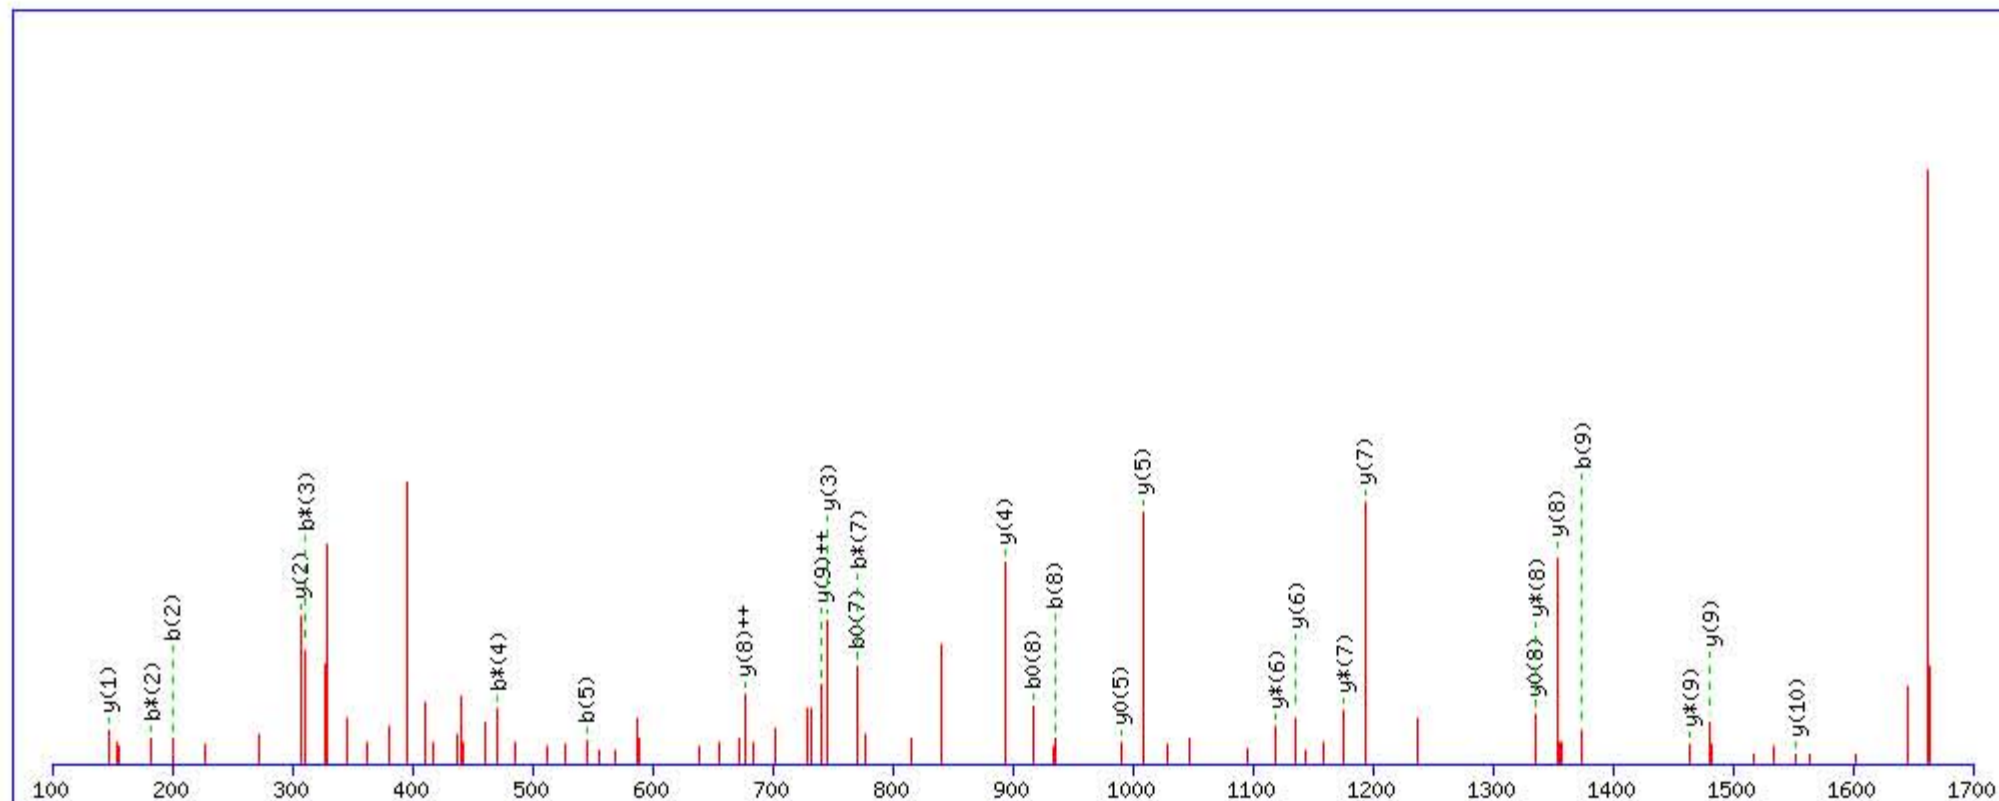

Monoisotopic mass of neutral peptide Mr(calc): 1679.721832

Fixed modifications: Carbamidomethyl (C) (apply to specified residues or termini only)

Variable modifications:

Q9 : Biotin:Thermo-21345 (Q)

Ions Score: 70 Expect: 4.8e-007

Matches : 28/100 fragment ions using 46 most intense peaks [\(help\)](#)

| #  | b                  | b <sup>++</sup> | b*                | b <sup>+++</sup> | b <sup>0</sup>    | b <sup>0++</sup> | Seq. | y                  | y <sup>++</sup>   | y*                 | y <sup>+++</sup> | y <sup>0</sup>     | y <sup>0++</sup> | #  |
|----|--------------------|-----------------|-------------------|------------------|-------------------|------------------|------|--------------------|-------------------|--------------------|------------------|--------------------|------------------|----|
| 1  | 129.065854         | 65.036565       | 112.039305        | 56.523291        |                   |                  | Q    |                    |                   |                    |                  |                    |                  | 11 |
| 2  | <b>200.102968</b>  | 100.555122      | <b>183.076419</b> | 92.041848        |                   |                  | A    | <b>1552.670519</b> | 776.838898        | 1535.643970        | 768.325623       | 1534.659954        | 767.833615       | 10 |
| 3  | 328.161546         | 164.584411      | <b>311.134997</b> | 156.071136       |                   |                  | Q    | <b>1481.633405</b> | <b>741.320341</b> | <b>1464.606856</b> | 732.807066       | 1463.622840        | 732.315058       | 9  |
| 4  | 488.192195         | 244.599736      | <b>471.165646</b> | 236.086461       |                   |                  | C    | <b>1353.574827</b> | <b>677.291052</b> | <b>1336.548278</b> | 668.777777       | <b>1335.564262</b> | 668.285769       | 8  |
| 5  | <b>545.213659</b>  | 273.110468      | 528.187110        | 264.597193       |                   |                  | G    | <b>1193.544178</b> | 597.275727        | <b>1176.517629</b> | 588.762453       | 1175.533613        | 588.270445       | 7  |
| 6  | 673.272237         | 337.139757      | 656.245688        | 328.626482       |                   |                  | Q    | <b>1136.522714</b> | 568.764995        | <b>1119.496165</b> | 560.251721       | 1118.512149        | 559.759713       | 6  |
| 7  | 788.299180         | 394.653228      | <b>771.272631</b> | 386.139954       | <b>770.288615</b> | 385.647946       | D    | <b>1008.464136</b> | 504.735706        | 991.437587         | 496.222432       | <b>990.453571</b>  | 495.730424       | 5  |
| 8  | <b>935.367594</b>  | 468.187435      | 918.341045        | 459.674161       | <b>917.357029</b> | 459.182153       | F    | <b>893.437193</b>  | 447.222235        | 876.410644         | 438.708960       |                    |                  | 4  |
| 9  | <b>1374.592920</b> | 687.800098      | 1357.566371       | 679.286824       | 1356.582355       | 678.794816       | Q    | <b>746.368779</b>  | 373.688028        | 729.342230         | 365.174753       |                    |                  | 3  |
| 10 | 1534.623569        | 767.815423      | 1517.597020       | 759.302148       | 1516.613004       | 758.810140       | C    | <b>307.143453</b>  | 154.075365        | 290.116904         | 145.562090       |                    |                  | 2  |
| 11 |                    |                 |                   |                  |                   |                  | K    | <b>147.112804</b>  | 74.060040         | 130.086255         | 65.546765        |                    |                  | 1  |

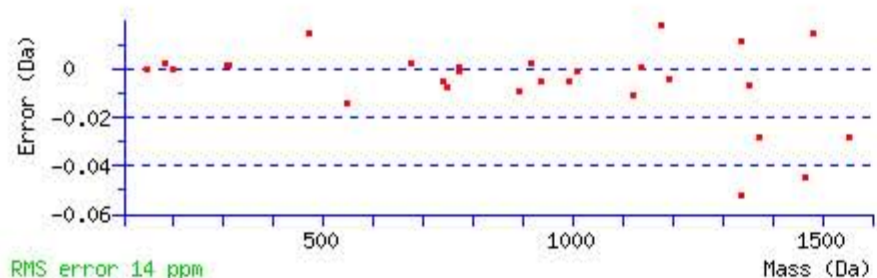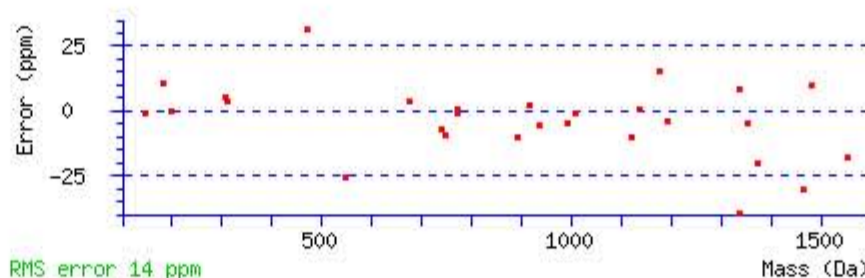

NCBI BLAST search of **QAQCGQDFQCK**

(Parameters: blastp, nr protein database, expect=20000, no filter, PAM30)

Other BLAST [web gateways](#)

All matches to this query

| Score | Mr(calc):   | Delta    | Sequence                    |
|-------|-------------|----------|-----------------------------|
| 69.8  | 1679.721832 | 0.005076 | <a href="#">QAQCGQDFQCK</a> |
| 29.6  | 1679.721832 | 0.005076 | <a href="#">QAQCGQDFQCK</a> |
| 4.2   | 1679.721832 | 0.005076 | <a href="#">QAQCGQDFQCK</a> |

# MASCOT Search Results

## Peptide View

MS/MS Fragmentation of **LGSLGAACEQTQTEGAK**

Found in **CO8A\_HUMAN**, Complement component C8 alpha chain OS=Homo sapiens GN=C8A PE=1 SV=2

Match to Query 51558: 2030.984832 from(678.002220,3+) rtinseconds(1689) index(22368)

Title: Locus:1.1.1.2731.6 File:"2013-07-02 CLN FXIII 180 min 1st F 2.wiff"

Data file C:\Program Files (x86)\Matrix Science\Mascot Daemon\mgf\7 FXIII 180 min 1st\mascot\_daemon\_merge.mgf

Click mouse within plot area to zoom in by factor of two about that point

Or, Plot from  to  Da

Label all possible matches  Label matches used for scoring

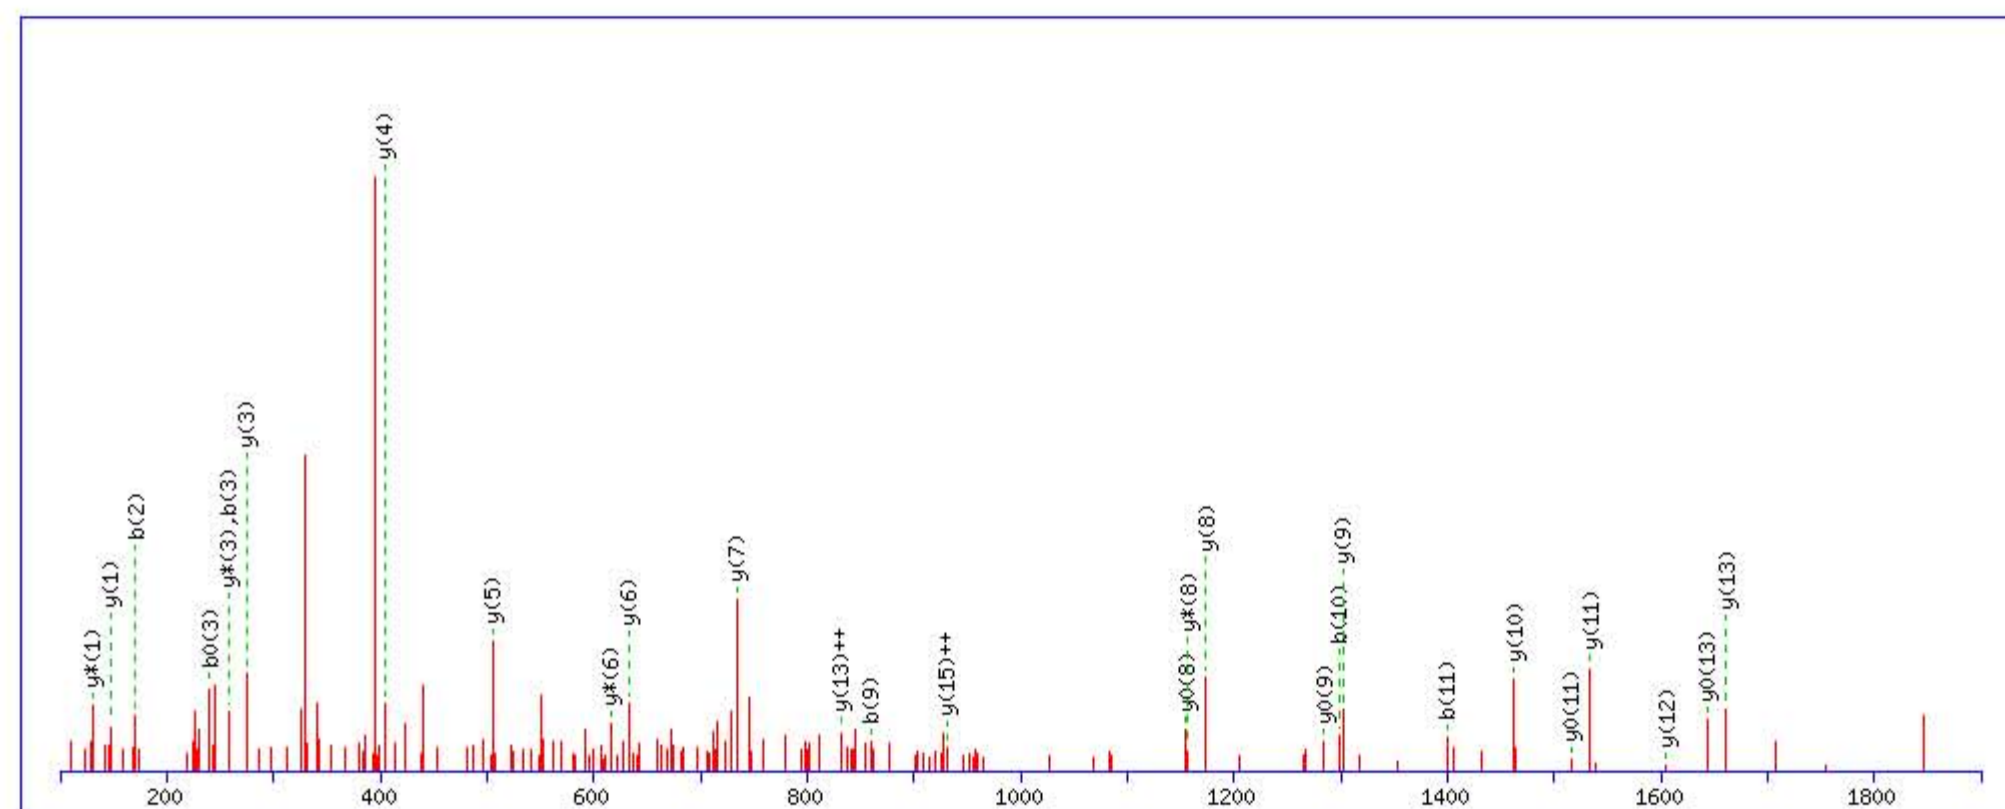

Monoisotopic mass of neutral peptide Mr(calc): 2030.976501

Fixed modifications: Carbamidomethyl (C) (apply to specified residues or termini only)

Variable modifications:

Q10 : Biotin:Thermo-21345 (Q)

Ions Score: 56 Expect: 6e-005

Matches : 28/164 fragment ions using 64 most intense peaks [\(help\)](#)

| #  | b                  | b <sup>++</sup> | b <sup>*</sup> | b <sup>*++</sup> | b <sup>0</sup>    | b <sup>0++</sup> | Seq. | y                  | y <sup>++</sup>   | y <sup>*</sup>     | y <sup>*++</sup> | y <sup>0</sup>     | y <sup>0++</sup> | #  |
|----|--------------------|-----------------|----------------|------------------|-------------------|------------------|------|--------------------|-------------------|--------------------|------------------|--------------------|------------------|----|
| 1  | 114.091340         | 57.549308       |                |                  |                   |                  | L    |                    |                   |                    |                  |                    |                  | 17 |
| 2  | <b>171.112804</b>  | 86.060040       |                |                  |                   |                  | G    | 1918.899727        | 959.953502        | 1901.873178        | 951.440227       | 1900.889162        | 950.948219       | 16 |
| 3  | <b>258.144832</b>  | 129.576054      |                |                  | <b>240.134267</b> | 120.570772       | S    | 1861.878263        | <b>931.442770</b> | 1844.851714        | 922.929495       | 1843.867698        | 922.437487       | 15 |
| 4  | 371.228896         | 186.118086      |                |                  | 353.218331        | 177.112804       | L    | 1774.846235        | 887.926756        | 1757.819686        | 879.413481       | 1756.835670        | 878.921473       | 14 |
| 5  | 428.250360         | 214.628818      |                |                  | 410.239795        | 205.623536       | G    | <b>1661.762171</b> | <b>831.384724</b> | 1644.735622        | 822.871449       | <b>1643.751606</b> | 822.379441       | 13 |
| 6  | 499.287474         | 250.147375      |                |                  | 481.276909        | 241.142093       | A    | <b>1604.740707</b> | 802.873992        | 1587.714158        | 794.360717       | 1586.730142        | 793.868709       | 12 |
| 7  | 570.324588         | 285.665932      |                |                  | 552.314023        | 276.660650       | A    | <b>1533.703593</b> | 767.355435        | 1516.677044        | 758.842160       | <b>1515.693028</b> | 758.350152       | 11 |
| 8  | 730.355237         | 365.681257      |                |                  | 712.344672        | 356.675974       | C    | <b>1462.666479</b> | 731.836878        | 1445.639930        | 723.323603       | 1444.655914        | 722.831595       | 10 |
| 9  | <b>859.397830</b>  | 430.202553      |                |                  | 841.387265        | 421.197271       | E    | <b>1302.635830</b> | 651.821553        | 1285.609281        | 643.308279       | <b>1284.625265</b> | 642.816270       | 9  |
| 10 | <b>1298.623156</b> | 649.815216      | 1281.596607    | 641.301942       | 1280.612591       | 640.809934       | Q    | <b>1173.593237</b> | 587.300257        | <b>1156.566688</b> | 578.786982       | <b>1155.582672</b> | 578.294974       | 8  |
| 11 | <b>1399.670835</b> | 700.339056      | 1382.644286    | 691.825781       | 1381.660270       | 691.333773       | T    | <b>734.367911</b>  | 367.687594        | 717.341362         | 359.174319       | 716.357346         | 358.682311       | 7  |
| 12 | 1527.729413        | 764.368345      | 1510.702864    | 755.855070       | 1509.718848       | 755.363062       | Q    | <b>633.320232</b>  | 317.163754        | <b>616.293683</b>  | 308.650480       | 615.309667         | 308.158472       | 6  |
| 13 | 1628.777092        | 814.892184      | 1611.750543    | 806.378910       | 1610.766527       | 805.886902       | T    | <b>505.261654</b>  | 253.134465        | 488.235105         | 244.621190       | 487.251089         | 244.129182       | 5  |
| 14 | 1757.819685        | 879.413481      | 1740.793136    | 870.900206       | 1739.809120       | 870.408198       | E    | <b>404.213975</b>  | 202.610625        | 387.187426         | 194.097351       | 386.203410         | 193.605343       | 4  |
| 15 | 1814.841149        | 907.924213      | 1797.814600    | 899.410938       | 1796.830584       | 898.918930       | G    | <b>275.171382</b>  | 138.089329        | <b>258.144833</b>  | 129.576054       |                    |                  | 3  |
| 16 | 1885.878263        | 943.442770      | 1868.851714    | 934.929495       | 1867.867698       | 934.437487       | A    | 218.149918         | 109.578597        | 201.123369         | 101.065322       |                    |                  | 2  |
| 17 |                    |                 |                |                  |                   |                  | K    | <b>147.112804</b>  | 74.060040         | <b>130.086255</b>  | 65.546765        |                    |                  | 1  |

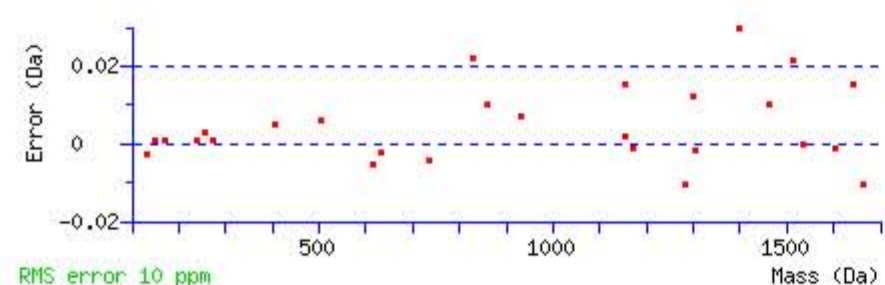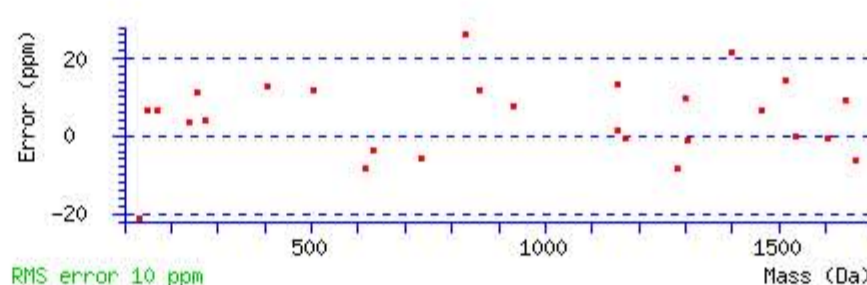

NCBI BLAST search of **LGSLGAACEQTQTEGAK**

(Parameters: blastp, nr protein database, expect=20000, no filter, PAM30)

Other BLAST [web gateways](#)

All matches to this query

| Score | Mr(calc):   | Delta    | Sequence                          |
|-------|-------------|----------|-----------------------------------|
| 56.1  | 2030.976501 | 0.008331 | <a href="#">LGSLGAACEQTQTEGAK</a> |
| 33.8  | 2030.976501 | 0.008331 | <a href="#">LGSLGAACEQTQTEGAK</a> |

# MASCOT Search Results

## Peptide View

MS/MS Fragmentation of **AIDEDCSQYEPPIGSQK**

Found in **CO8A\_HUMAN**, Complement component C8 alpha chain OS=Homo sapiens GN=C8A PE=1 SV=2

Match to Query 56552: 2247.035082 from(750.018970,3+) rtinseconds(1884) index(23844)

Title: Locus:1.1.1.2798.19 File:"2013-07-02 CLN FXIII 180 min 1st F 2.wiff"

Data file C:\Program Files (x86)\Matrix Science\Mascot Daemon\mgf\7 FXIII 180 min 1st\mascot\_daemon\_merge.mgf

Click mouse within plot area to zoom in by factor of two about that point

Or, Plot from  to  Da

Label all possible matches  Label matches used for scoring

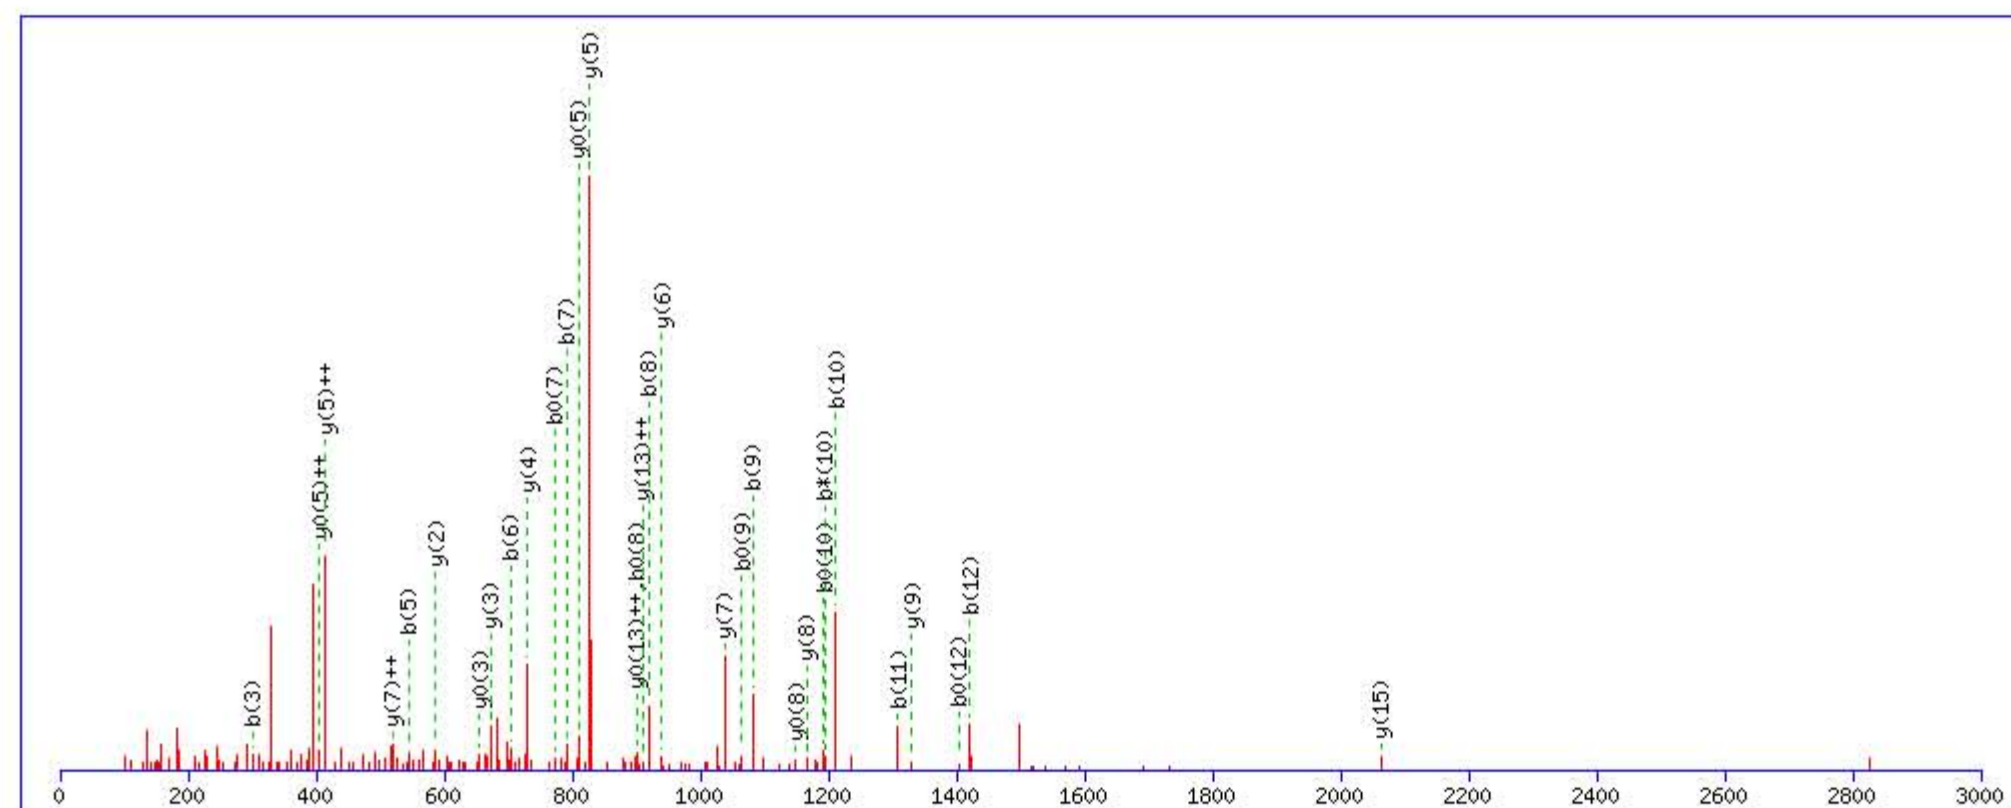

Monoisotopic mass of neutral peptide Mr(calc): 2247.018753

Fixed modifications: Carbamidomethyl (C) (apply to specified residues or termini only)

Variable modifications:

Q16 : Biotin:Thermo-21345 (Q)

Ions Score: 42 Expect: 0.00013

Matches : 32/170 fragment ions using 73 most intense peaks [\(help\)](#)

| #  | b                  | b <sup>++</sup> | b <sup>*</sup>     | b <sup>+++</sup> | b <sup>0</sup>     | b <sup>0++</sup> | Seq. | y                  | y <sup>++</sup>   | y <sup>*</sup> | y <sup>+++</sup> | y <sup>0</sup>     | y <sup>0++</sup>  | #  |
|----|--------------------|-----------------|--------------------|------------------|--------------------|------------------|------|--------------------|-------------------|----------------|------------------|--------------------|-------------------|----|
| 1  | 72.044390          | 36.525833       |                    |                  |                    |                  | A    |                    |                   |                |                  |                    |                   | 17 |
| 2  | 185.128454         | 93.067865       |                    |                  |                    |                  | I    | 2176.988934        | 1088.998105       | 2159.962385    | 1080.484830      | 2158.978369        | 1079.992822       | 16 |
| 3  | <b>300.155397</b>  | 150.581336      |                    |                  | 282.144832         | 141.576054       | D    | <b>2063.904870</b> | 1032.456073       | 2046.878321    | 1023.942798      | 2045.894305        | 1023.450790       | 15 |
| 4  | 429.197990         | 215.102633      |                    |                  | 411.187425         | 206.097351       | E    | 1948.877927        | 974.942602        | 1931.851378    | 966.429327       | 1930.867362        | 965.937319        | 14 |
| 5  | <b>544.224933</b>  | 272.616105      |                    |                  | 526.214368         | 263.610822       | D    | 1819.835334        | <b>910.421305</b> | 1802.808785    | 901.908031       | 1801.824769        | <b>901.416022</b> | 13 |
| 6  | <b>704.255582</b>  | 352.631429      |                    |                  | 686.245017         | 343.626147       | C    | 1704.808391        | 852.907833        | 1687.781842    | 844.394559       | 1686.797826        | 843.902551        | 12 |
| 7  | <b>791.287610</b>  | 396.147443      |                    |                  | <b>773.277045</b>  | 387.142161       | S    | 1544.777742        | 772.892509        | 1527.751193    | 764.379235       | 1526.767177        | 763.887227        | 11 |
| 8  | <b>919.346188</b>  | 460.176732      | 902.319639         | 451.663458       | <b>901.335623</b>  | 451.171450       | Q    | 1457.745714        | 729.376495        | 1440.719165    | 720.863221       | 1439.735149        | 720.371212        | 10 |
| 9  | <b>1082.409517</b> | 541.708397      | 1065.382968        | 533.195122       | <b>1064.398952</b> | 532.703114       | Y    | <b>1329.687136</b> | 665.347206        | 1312.660587    | 656.833931       | 1311.676571        | 656.341923        | 9  |
| 10 | <b>1211.452110</b> | 606.229693      | <b>1194.425561</b> | 597.716419       | <b>1193.441545</b> | 597.224410       | E    | <b>1166.623807</b> | 583.815541        | 1149.597258    | 575.302267       | <b>1148.613242</b> | 574.810259        | 8  |
| 11 | <b>1308.504874</b> | 654.756075      | 1291.478325        | 646.242801       | 1290.494309        | 645.750792       | P    | <b>1037.581214</b> | <b>519.294245</b> | 1020.554665    | 510.780971       | 1019.570649        | 510.288963        | 7  |
| 12 | <b>1421.588938</b> | 711.298107      | 1404.562389        | 702.784832       | <b>1403.578373</b> | 702.292824       | I    | <b>940.528450</b>  | 470.767863        | 923.501901     | 462.254589       | 922.517885         | 461.762581        | 6  |
| 13 | 1518.641702        | 759.824489      | 1501.615153        | 751.311215       | 1500.631137        | 750.819206       | P    | <b>827.444386</b>  | <b>414.225831</b> | 810.417837     | 405.712557       | <b>809.433821</b>  | <b>405.220549</b> | 5  |
| 14 | 1575.663166        | 788.335221      | 1558.636617        | 779.821946       | 1557.652601        | 779.329938       | G    | <b>730.391622</b>  | 365.699449        | 713.365073     | 357.186175       | 712.381057         | 356.694167        | 4  |
| 15 | 1662.695194        | 831.851235      | 1645.668645        | 823.337961       | 1644.684629        | 822.845952       | S    | <b>673.370158</b>  | 337.188717        | 656.343609     | 328.675443       | <b>655.359593</b>  | 328.183435        | 3  |
| 16 | 2101.920520        | 1051.463898     | 2084.893971        | 1042.950623      | 2083.909955        | 1042.458615      | Q    | <b>586.338130</b>  | 293.672703        | 569.311581     | 285.159429       |                    |                   | 2  |
| 17 |                    |                 |                    |                  |                    |                  | K    | 147.112804         | 74.060040         | 130.086255     | 65.546765        |                    |                   | 1  |

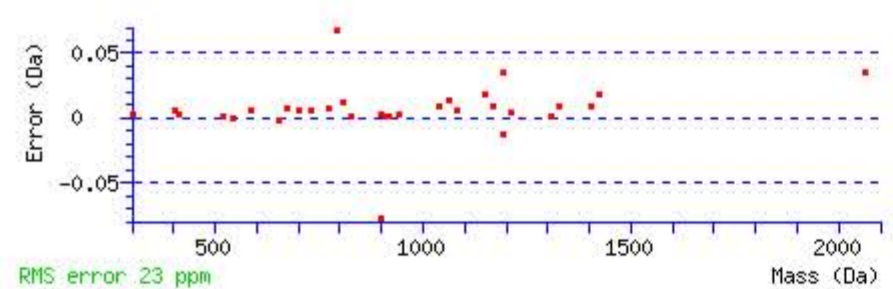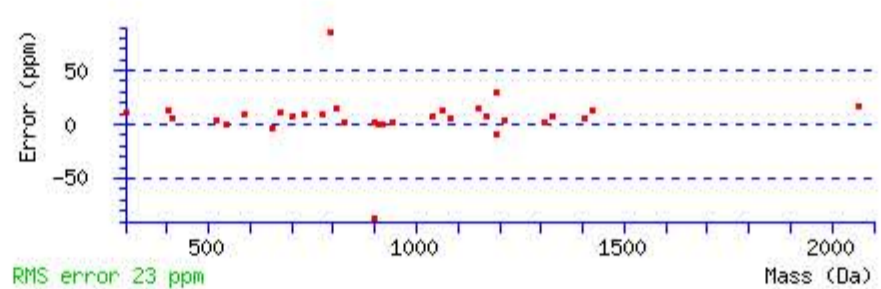

NCBI BLAST search of **AIDEDCSQYEPPIGSQK**  
 (Parameters: blastp, nr protein database, expect=20000, no filter, PAM30)  
 Other BLAST [web gateways](#)

### All matches to this query

| Score | Mr(calc):   | Delta     | Sequence                          |
|-------|-------------|-----------|-----------------------------------|
| 42.2  | 2247.018753 | 0.016329  | <a href="#">AIDEDCSQYEPPIGSQK</a> |
| 0.7   | 2247.063034 | -0.027952 | <a href="#">VTDANDNPPVFSQDVYR</a> |



# MASCOT Search Results

## Peptide View

MS/MS Fragmentation of **LGSLGAACEQTQTEGAK**

Found in **CO8A\_HUMAN**, Complement component C8 alpha chain OS=Homo sapiens GN=C8A PE=1 SV=2

Match to Query 58969: 2342.175522 from(781.732450,3+) rtinseconds(1999) index(42217)

Title: Locus:1.1.1.3145.14 File:"2013-07-02 CLN FXIII 180 min 1st F 3.wiff"

Data file C:\Program Files (x86)\Matrix Science\Mascot Daemon\mgf\7 FXIII 180 min 1st\mascot\_daemon\_merge.mgf

Click mouse within plot area to zoom in by factor of two about that point

Or, Plot from  to  Da

Label all possible matches  Label matches used for scoring

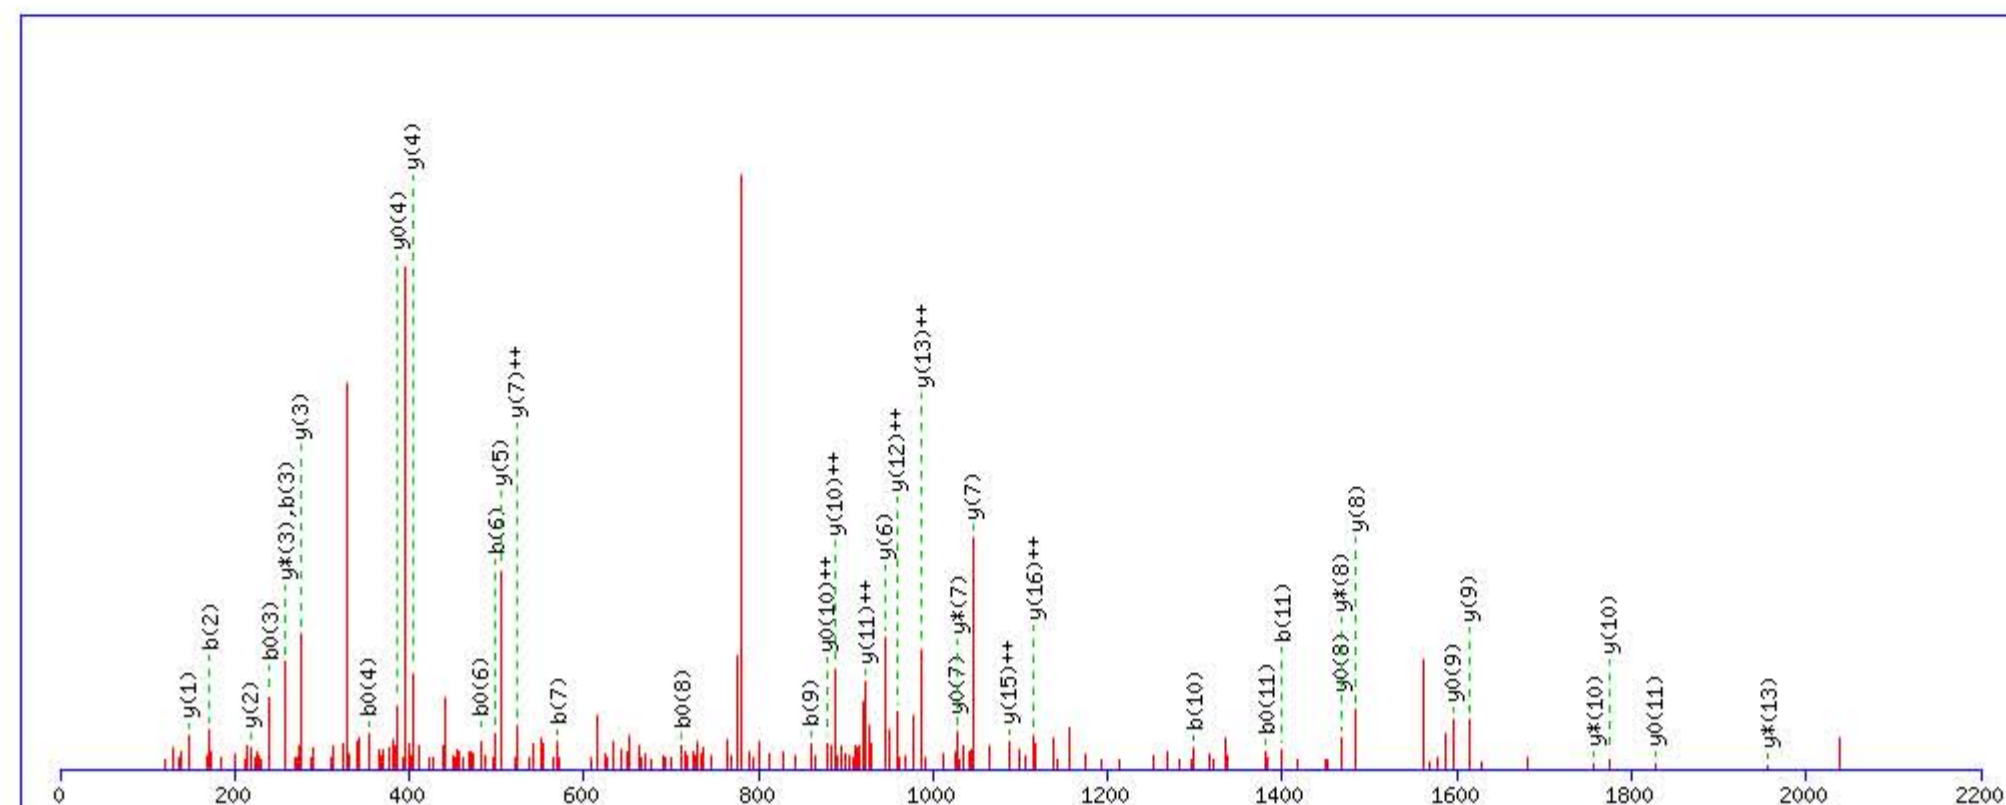

Monoisotopic mass of neutral peptide Mr(calc): 2342.143250

Fixed modifications: Carbamidomethyl (C) (apply to specified residues or termini only)

Variable modifications:

Q10 : Biotin:Thermo-21345 (Q)

Q12 : Biotin:Thermo-21345 (Q)

Ions Score: 47 Expect: 0.0006

Matches : 40/164 fragment ions using 82 most intense peaks ([help](#))

| #  | b                  | b <sup>++</sup> | b <sup>*</sup> | b <sup>+++</sup> | b <sup>0</sup>     | b <sup>0++</sup> | Seq. | y                  | y <sup>++</sup>    | y <sup>*</sup>     | y <sup>+++</sup> | y <sup>0</sup>     | y <sup>0++</sup>  | #  |
|----|--------------------|-----------------|----------------|------------------|--------------------|------------------|------|--------------------|--------------------|--------------------|------------------|--------------------|-------------------|----|
| 1  | 114.091340         | 57.549308       |                |                  |                    |                  | L    |                    |                    |                    |                  |                    |                   | 17 |
| 2  | <b>171.112804</b>  | 86.060040       |                |                  |                    |                  | G    | 2230.066475        | <b>1115.536875</b> | 2213.039926        | 1107.023601      | 2212.055910        | 1106.531593       | 16 |
| 3  | <b>258.144832</b>  | 129.576054      |                |                  | <b>240.134267</b>  | 120.570772       | S    | 2173.045011        | <b>1087.026143</b> | 2156.018462        | 1078.512869      | 2155.034446        | 1078.020861       | 15 |
| 4  | 371.228896         | 186.118086      |                |                  | <b>353.218331</b>  | 177.112804       | L    | 2086.012983        | 1043.510129        | 2068.986434        | 1034.996855      | 2068.002418        | 1034.504847       | 14 |
| 5  | 428.250360         | 214.628818      |                |                  | 410.239795         | 205.623536       | G    | 1972.928919        | <b>986.968098</b>  | <b>1955.902370</b> | 978.454823       | 1954.918354        | 977.962815        | 13 |
| 6  | <b>499.287474</b>  | 250.147375      |                |                  | <b>481.276909</b>  | 241.142093       | A    | 1915.907455        | <b>958.457366</b>  | 1898.880906        | 949.944091       | 1897.896890        | 949.452083        | 12 |
| 7  | <b>570.324588</b>  | 285.665932      |                |                  | 552.314023         | 276.660650       | A    | 1844.870341        | <b>922.938809</b>  | 1827.843792        | 914.425534       | <b>1826.859776</b> | 913.933526        | 11 |
| 8  | 730.355237         | 365.681257      |                |                  | <b>712.344672</b>  | 356.675974       | C    | <b>1773.833227</b> | <b>887.420252</b>  | <b>1756.806678</b> | 878.906977       | 1755.822662        | <b>878.414969</b> | 10 |
| 9  | <b>859.397830</b>  | 430.202553      |                |                  | 841.387265         | 421.197271       | E    | <b>1613.802578</b> | 807.404927         | 1596.776029        | 798.891653       | <b>1595.792013</b> | 798.399645        | 9  |
| 10 | <b>1298.623156</b> | 649.815216      | 1281.596607    | 641.301942       | 1280.612591        | 640.809934       | Q    | <b>1484.759985</b> | 742.883631         | <b>1467.733436</b> | 734.370356       | <b>1466.749420</b> | 733.878348        | 8  |
| 11 | <b>1399.670835</b> | 700.339056      | 1382.644286    | 691.825781       | <b>1381.660270</b> | 691.333773       | T    | <b>1045.534659</b> | <b>523.270968</b>  | <b>1028.508110</b> | 514.757693       | <b>1027.524094</b> | 514.265685        | 7  |
| 12 | 1838.896161        | 919.951719      | 1821.869612    | 911.438444       | 1820.885596        | 910.946436       | Q    | <b>944.486980</b>  | 472.747128         | 927.460431         | 464.233854       | 926.476415         | 463.741846        | 6  |
| 13 | 1939.943840        | 970.475558      | 1922.917291    | 961.962284       | 1921.933275        | 961.470276       | T    | <b>505.261654</b>  | 253.134465         | 488.235105         | 244.621191       | 487.251089         | 244.129183        | 5  |
| 14 | 2068.986433        | 1034.996854     | 2051.959884    | 1026.483580      | 2050.975868        | 1025.991572      | E    | <b>404.213975</b>  | 202.610626         | 387.187426         | 194.097351       | <b>386.203410</b>  | 193.605343        | 4  |
| 15 | 2126.007897        | 1063.507586     | 2108.981348    | 1054.994312      | 2107.997332        | 1054.502304      | G    | <b>275.171382</b>  | 138.089329         | <b>258.144833</b>  | 129.576055       |                    |                   | 3  |
| 16 | 2197.045011        | 1099.026144     | 2180.018462    | 1090.512869      | 2179.034446        | 1090.020861      | A    | <b>218.149918</b>  | 109.578597         | 201.123369         | 101.065323       |                    |                   | 2  |
| 17 |                    |                 |                |                  |                    |                  | K    | <b>147.112804</b>  | 74.060040          | 130.086255         | 65.546765        |                    |                   | 1  |

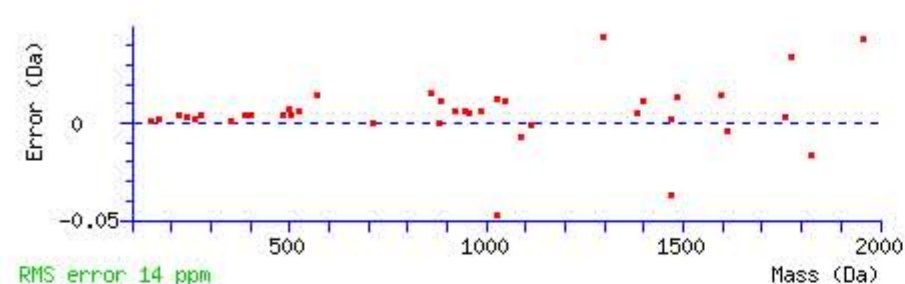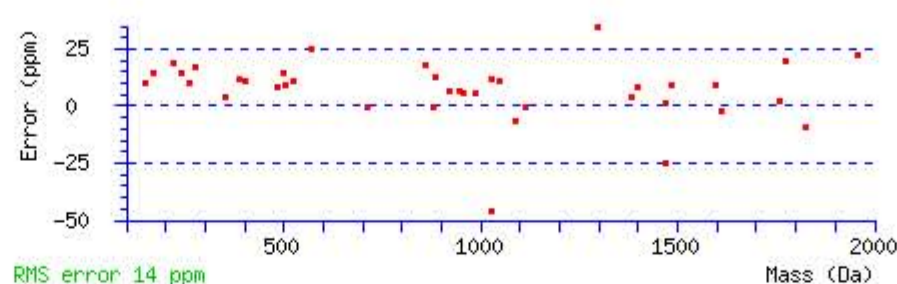

NCBI BLAST search of **LGSLGAACEQTQTEGAK**

(Parameters: blastp, nr protein database, expect=20000, no filter, PAM30)

Other BLAST [web gateways](#)

All matches to this query

| Score | Mr(calc):   | Delta    | Sequence                          |
|-------|-------------|----------|-----------------------------------|
| 47.1  | 2342.143250 | 0.032272 | <a href="#">LGSLGAACEQTQTEGAK</a> |

Mascot: <http://www.matrixscience.com/>

# MASCOT Search Results

## Peptide View

MS/MS Fragmentation of **QALEEFQK**

Found in **CO8B\_HUMAN**, Complement component C8 beta chain OS=Homo sapiens GN=C8B PE=1 SV=3

Match to Query 26994: 1302.670348 from(652.342450,2+) rtinseconds(1857) index(23620)

Title: Locus:1.1.1.2789.10 File:"2013-07-02 CLN FXIII 180 min 1st F 2.wiff"

Data file C:\Program Files (x86)\Matrix Science\Mascot Daemon\mgf7 FXIII 180 min 1st\mascot\_daemon\_merge.mgf

Click mouse within plot area to zoom in by factor of two about that point

Or, Plot from  to  Da

Label all possible matches  Label matches used for scoring

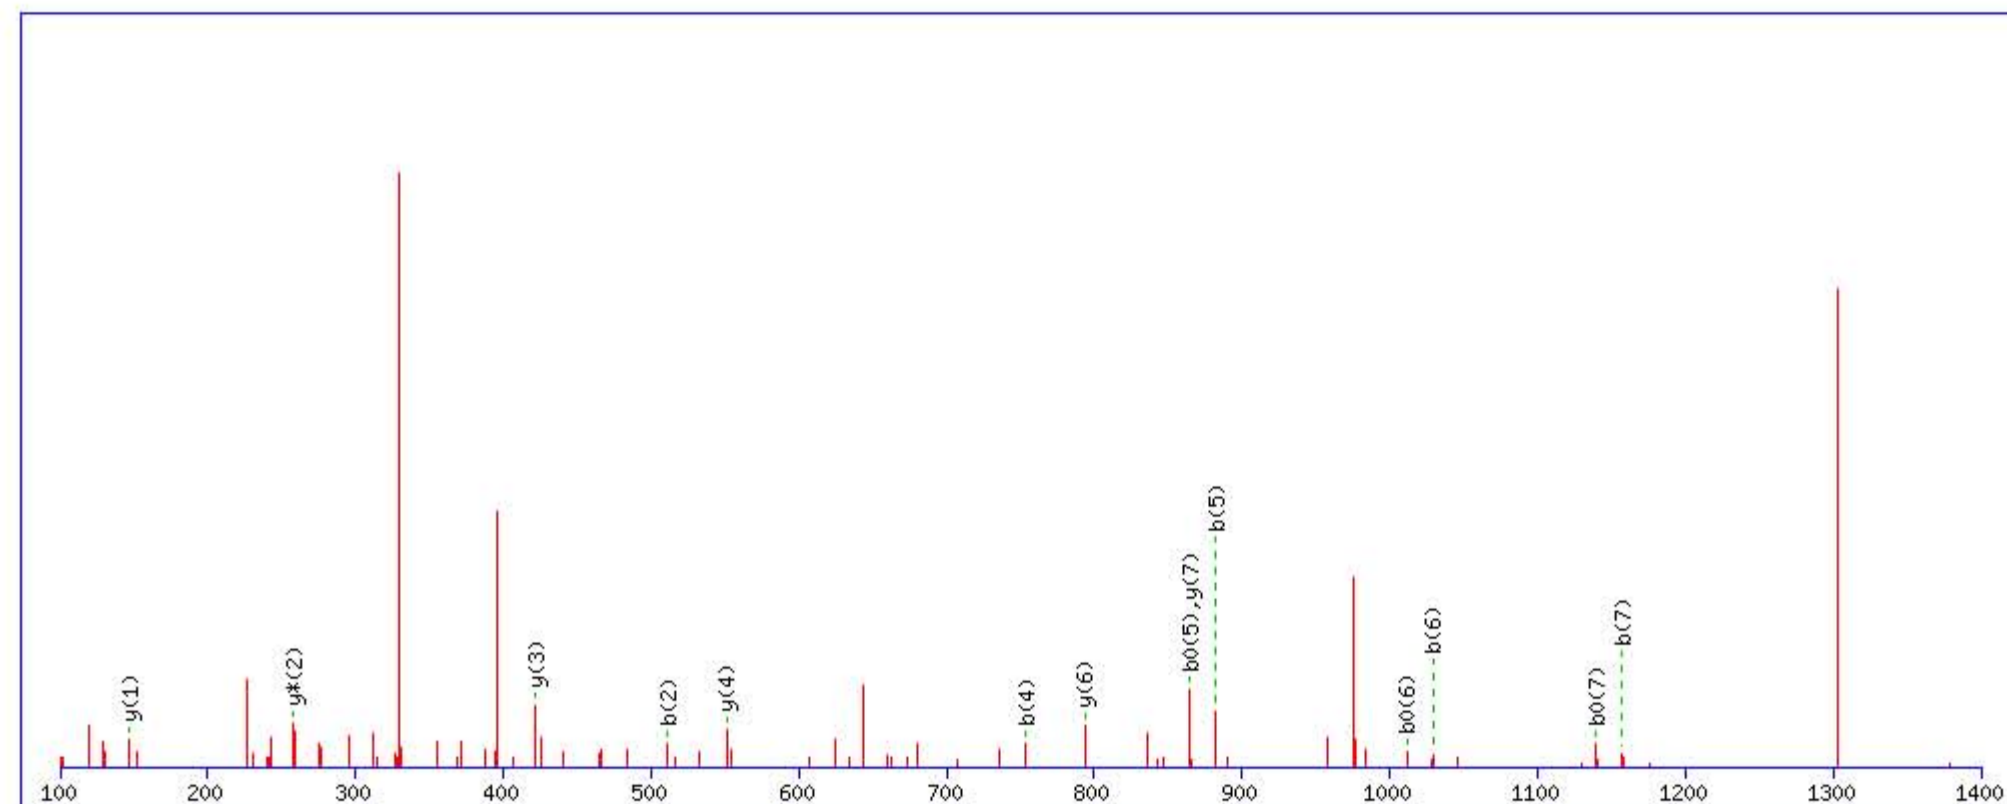

Monoisotopic mass of neutral peptide Mr(calc): 1302.664185

Fixed modifications: Carbamidomethyl (C) (apply to specified residues or termini only)

Variable modifications:

Q1 : Biotin:Thermo-21345 (Q)

Ions Score: 32 Expect: 0.017

Matches : 14/72 fragment ions using 22 most intense peaks [\(help\)](#)

| # | b                  | b <sup>++</sup> | b <sup>*</sup> | b <sup>*++</sup> | b <sup>0</sup>     | b <sup>0++</sup> | Seq. | y                 | y <sup>++</sup> | y <sup>*</sup>    | y <sup>*++</sup> | y <sup>0</sup> | y <sup>0++</sup> | # |
|---|--------------------|-----------------|----------------|------------------|--------------------|------------------|------|-------------------|-----------------|-------------------|------------------|----------------|------------------|---|
| 1 | 440.232602         | 220.619939      | 423.206053     | 212.106664       |                    |                  | Q    |                   |                 |                   |                  |                |                  | 8 |
| 2 | <b>511.269716</b>  | 256.138496      | 494.243167     | 247.625221       |                    |                  | A    | <b>864.446160</b> | 432.726718      | 847.419611        | 424.213443       | 846.435595     | 423.721435       | 7 |
| 3 | 624.353780         | 312.680528      | 607.327231     | 304.167254       |                    |                  | L    | <b>793.409046</b> | 397.208161      | 776.382497        | 388.694887       | 775.398481     | 388.202879       | 6 |
| 4 | <b>753.396373</b>  | 377.201825      | 736.369824     | 368.688550       | 735.385808         | 368.196542       | E    | 680.324982        | 340.666129      | 663.298433        | 332.152854       | 662.314417     | 331.660846       | 5 |
| 5 | <b>882.438966</b>  | 441.723121      | 865.412417     | 433.209847       | <b>864.428401</b>  | 432.717839       | E    | <b>551.282389</b> | 276.144833      | 534.255840        | 267.631558       | 533.271824     | 267.139550       | 4 |
| 6 | <b>1029.507380</b> | 515.257328      | 1012.480831    | 506.744054       | <b>1011.496815</b> | 506.252046       | F    | <b>422.239796</b> | 211.623536      | 405.213247        | 203.110261       |                |                  | 3 |
| 7 | <b>1157.565958</b> | 579.286617      | 1140.539409    | 570.773343       | <b>1139.555393</b> | 570.281334       | Q    | 275.171382        | 138.089329      | <b>258.144833</b> | 129.576054       |                |                  | 2 |
| 8 |                    |                 |                |                  |                    |                  | K    | <b>147.112804</b> | 74.060040       | 130.086255        | 65.546765        |                |                  | 1 |

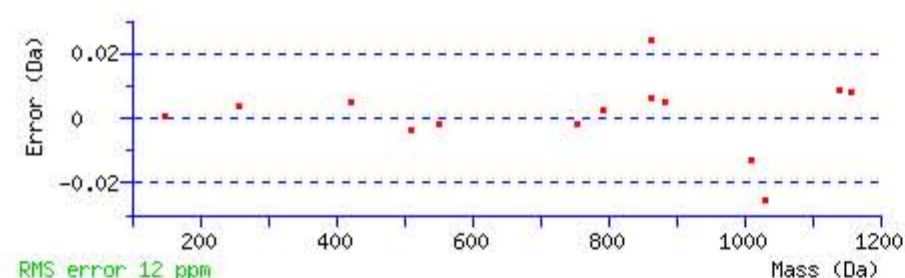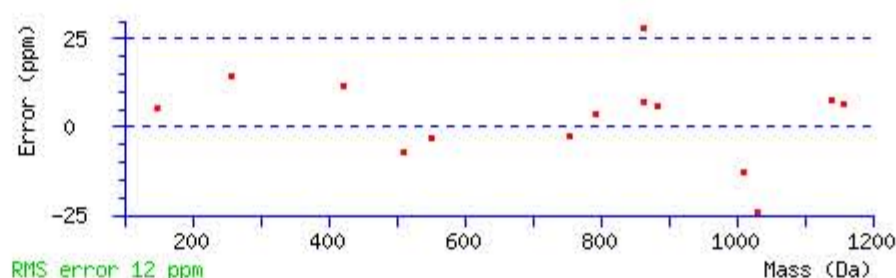

NCBI BLAST search of [QALEEFQK](#)

(Parameters: blastp, nr protein database, expect=20000, no filter, PAM30)

Other BLAST [web gateways](#)

All matches to this query

| Score | Mr(calc):   | Delta     | Sequence                       |
|-------|-------------|-----------|--------------------------------|
| 31.8  | 1302.664185 | 0.006163  | <a href="#">QALEEFQK</a>       |
| 19.4  | 1302.689133 | -0.018785 | <a href="#">KEAQKSQAASQK</a>   |
| 13.9  | 1302.667542 | 0.002806  | <a href="#">KEALMQEK</a>       |
| 13.1  | 1302.666641 | 0.003707  | <a href="#">EKEAELKEAEK</a>    |
| 8.4   | 1302.660156 | 0.010192  | <a href="#">QQELCADLKAK</a>    |
| 8.1   | 1302.660141 | 0.010207  | <a href="#">EAEGKLAAQMOK</a>   |
| 7.4   | 1302.668045 | 0.002303  | <a href="#">QPAGPASATPPGPR</a> |
| 7.3   | 1302.677917 | -0.007569 | <a href="#">SSATIQNTPKK</a>    |
| 6.8   | 1302.671387 | -0.001039 | <a href="#">EAQKQLAQMTR</a>    |
| 6.5   | 1302.656815 | 0.013533  | <a href="#">AQATAQDPVFQK</a>   |

# MASCOT SCIENCE Mascot Search Results

## Peptide View

MS/MS Fragmentation of **CEGFVCAQTGR**

Found in **CO8B\_HUMAN**, Complement component C8 beta chain OS=Homo sapiens GN=C8B PE=1 SV=3

Match to Query 38411: 1594.713028 from(798.363790,2+) rtinseconds(1751) index(22868)

Title: Locus:1.1.1.2752.9 File:"2013-07-02 CLN FXIII 180 min 1st F 2.wiff"

Data file C:\Program Files (x86)\Matrix Science\Mascot Daemon\mgf\7 FXIII 180 min 1st\mascot\_daemon\_merge.mgf

Click mouse within plot area to zoom in by factor of two about that point

Or, Plot from  to  Da

Label all possible matches  Label matches used for scoring

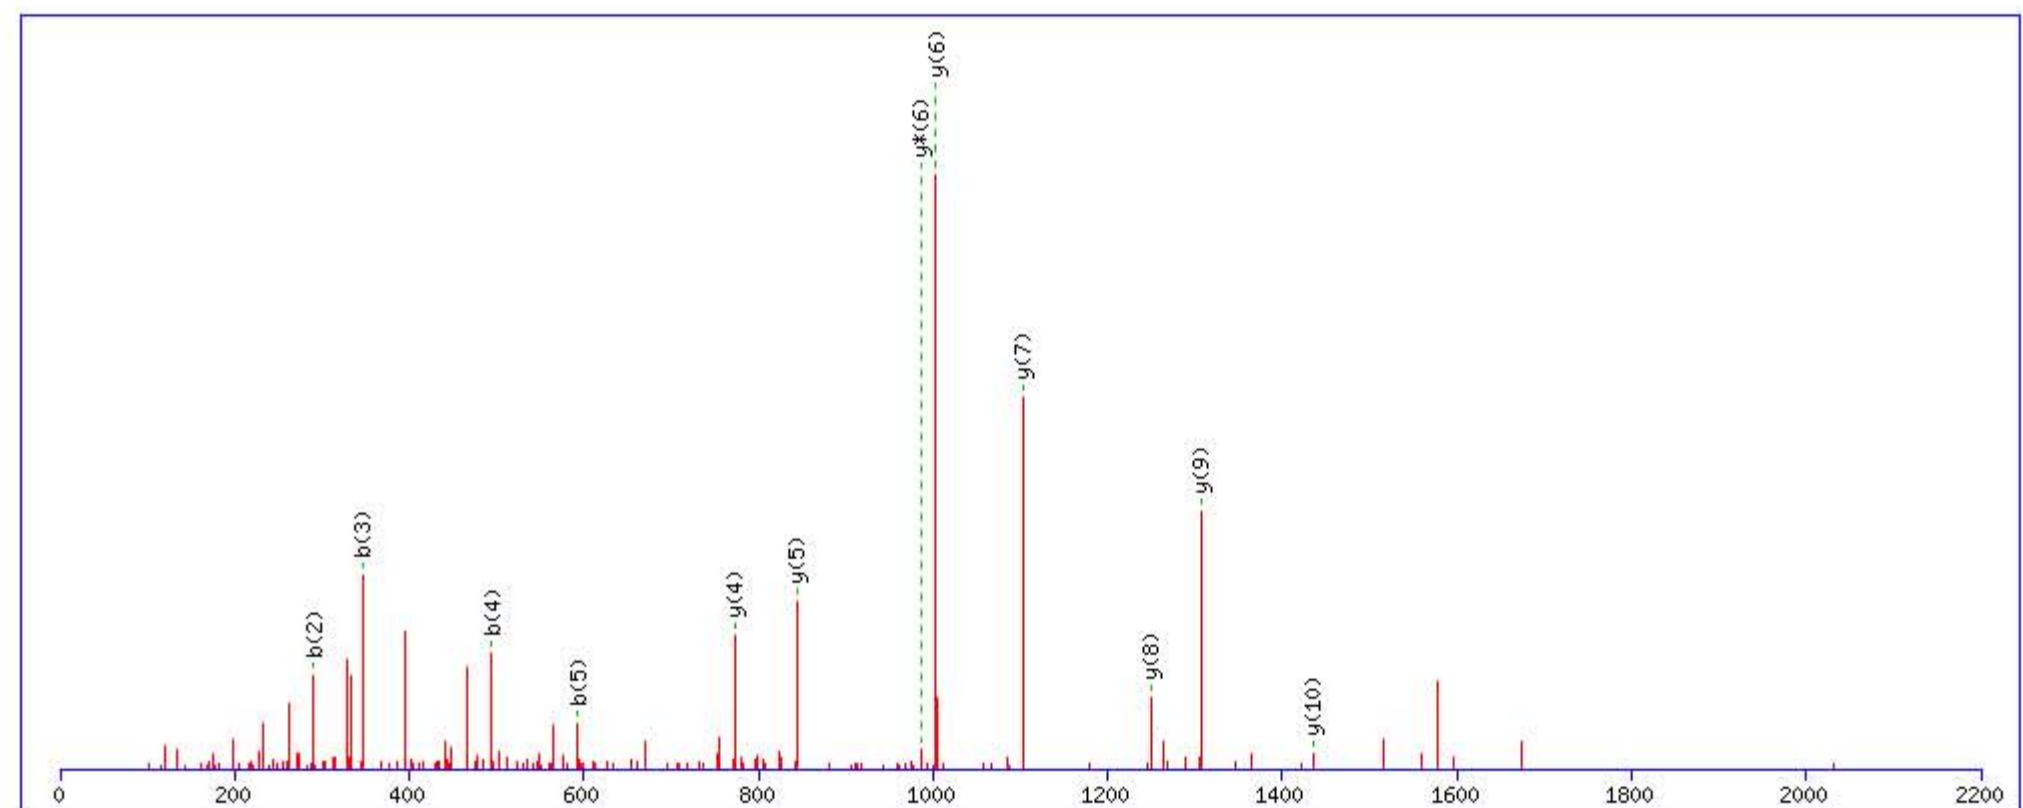

Monoisotopic mass of neutral peptide  $M_r(\text{calc})$ : 1594.705460

Fixed modifications: Carbamidomethyl (C) (apply to specified residues or termini only)

Variable modifications:

Q8 : Biotin:Thermo-21345 (Q)

Ions Score: 61 Expect: 6.1e-006

Matches : 12/100 fragment ions using 15 most intense peaks ([help](#))

| #  | b                 | b <sup>++</sup> | b <sup>*</sup> | b <sup>*++</sup> | b <sup>0</sup> | b <sup>0++</sup> | Seq. | y                  | y <sup>++</sup> | y <sup>*</sup>    | y <sup>*++</sup> | y <sup>0</sup> | y <sup>0++</sup> | #  |
|----|-------------------|-----------------|----------------|------------------|----------------|------------------|------|--------------------|-----------------|-------------------|------------------|----------------|------------------|----|
| 1  | 161.037925        | 81.022600       |                |                  |                |                  | C    |                    |                 |                   |                  |                |                  | 11 |
| 2  | <b>290.080518</b> | 145.543897      |                |                  | 272.069953     | 136.538615       | E    | <b>1435.682069</b> | 718.344673      | 1418.655520       | 709.831398       | 1417.671504    | 709.339390       | 10 |
| 3  | <b>347.101982</b> | 174.054629      |                |                  | 329.091417     | 165.049347       | G    | <b>1306.639476</b> | 653.823376      | 1289.612927       | 645.310102       | 1288.628911    | 644.818094       | 9  |
| 4  | <b>494.170396</b> | 247.588836      |                |                  | 476.159831     | 238.583554       | F    | <b>1249.618012</b> | 625.312644      | 1232.591463       | 616.799370       | 1231.607447    | 616.307361       | 8  |
| 5  | <b>593.238810</b> | 297.123043      |                |                  | 575.228245     | 288.117761       | V    | <b>1102.549598</b> | 551.778437      | 1085.523049       | 543.265162       | 1084.539033    | 542.773154       | 7  |
| 6  | 753.269459        | 377.138368      |                |                  | 735.258894     | 368.133085       | C    | <b>1003.481184</b> | 502.244230      | <b>986.454635</b> | 493.730955       | 985.470619     | 493.238947       | 6  |
| 7  | 824.306573        | 412.656925      |                |                  | 806.296008     | 403.651642       | A    | <b>843.450535</b>  | 422.228906      | 826.423986        | 413.715631       | 825.439970     | 413.223623       | 5  |
| 8  | 1263.531899       | 632.269588      | 1246.505350    | 623.756313       | 1245.521334    | 623.264305       | Q    | <b>772.413421</b>  | 386.710349      | 755.386872        | 378.197074       | 754.402856     | 377.705066       | 4  |
| 9  | 1364.579578       | 682.793427      | 1347.553029    | 674.280153       | 1346.569013    | 673.788145       | T    | 333.188095         | 167.097685      | 316.161546        | 158.584411       | 315.177530     | 158.092403       | 3  |
| 10 | 1421.601042       | 711.304159      | 1404.574493    | 702.790885       | 1403.590477    | 702.298877       | G    | 232.140416         | 116.573846      | 215.113867        | 108.060571       |                |                  | 2  |
| 11 |                   |                 |                |                  |                |                  | R    | 175.118952         | 88.063114       | 158.092403        | 79.549839        |                |                  | 1  |

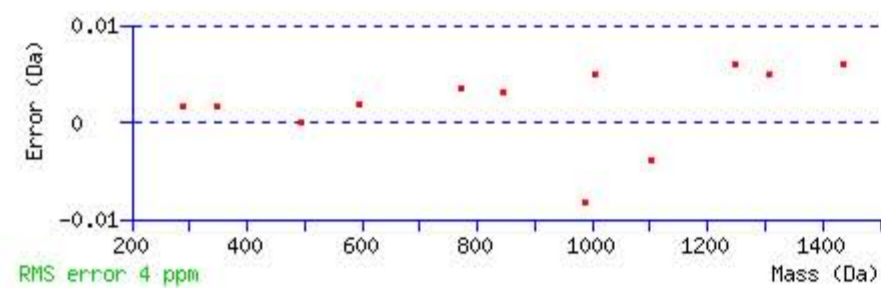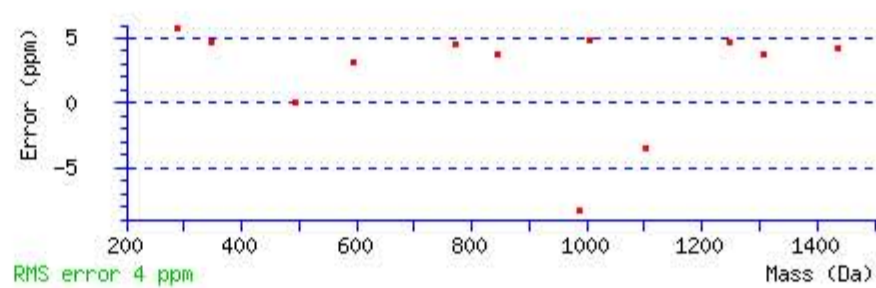

NCBI BLAST search of [CEGFVCAQTGR](#)

(Parameters: blastp, nr protein database, expect=20000, no filter, PAM30)

Other BLAST [web gateways](#)

All matches to this query

| Score | $M_r(\text{calc})$ : | Delta    | Sequence                    |
|-------|----------------------|----------|-----------------------------|
| 60.7  | 1594.705460          | 0.007568 | <a href="#">CEGFVCAQTGR</a> |

# MASCOT Search Results

## Peptide View

MS/MS Fragmentation of **IPGIFELGISSQSDR**

Found in **CO8B\_HUMAN**, Complement component C8 beta chain OS=Homo sapiens GN=C8B PE=1 SV=3

Match to Query 48204: 1929.027908 from(965.521230,2+) rtinseconds(2656) index(29030)

Title: Locus:1.1.1.3066.21 File:"2013-07-02 CLN FXIII 180 min 1st F 2.wiff"

Data file C:\Program Files (x86)\Matrix Science\Mascot Daemon\mgf\7 FXIII 180 min 1st\mascot\_daemon\_merge.mgf

Click mouse within plot area to zoom in by factor of two about that point

Or, Plot from  to  Da

Label all possible matches  Label matches used for scoring

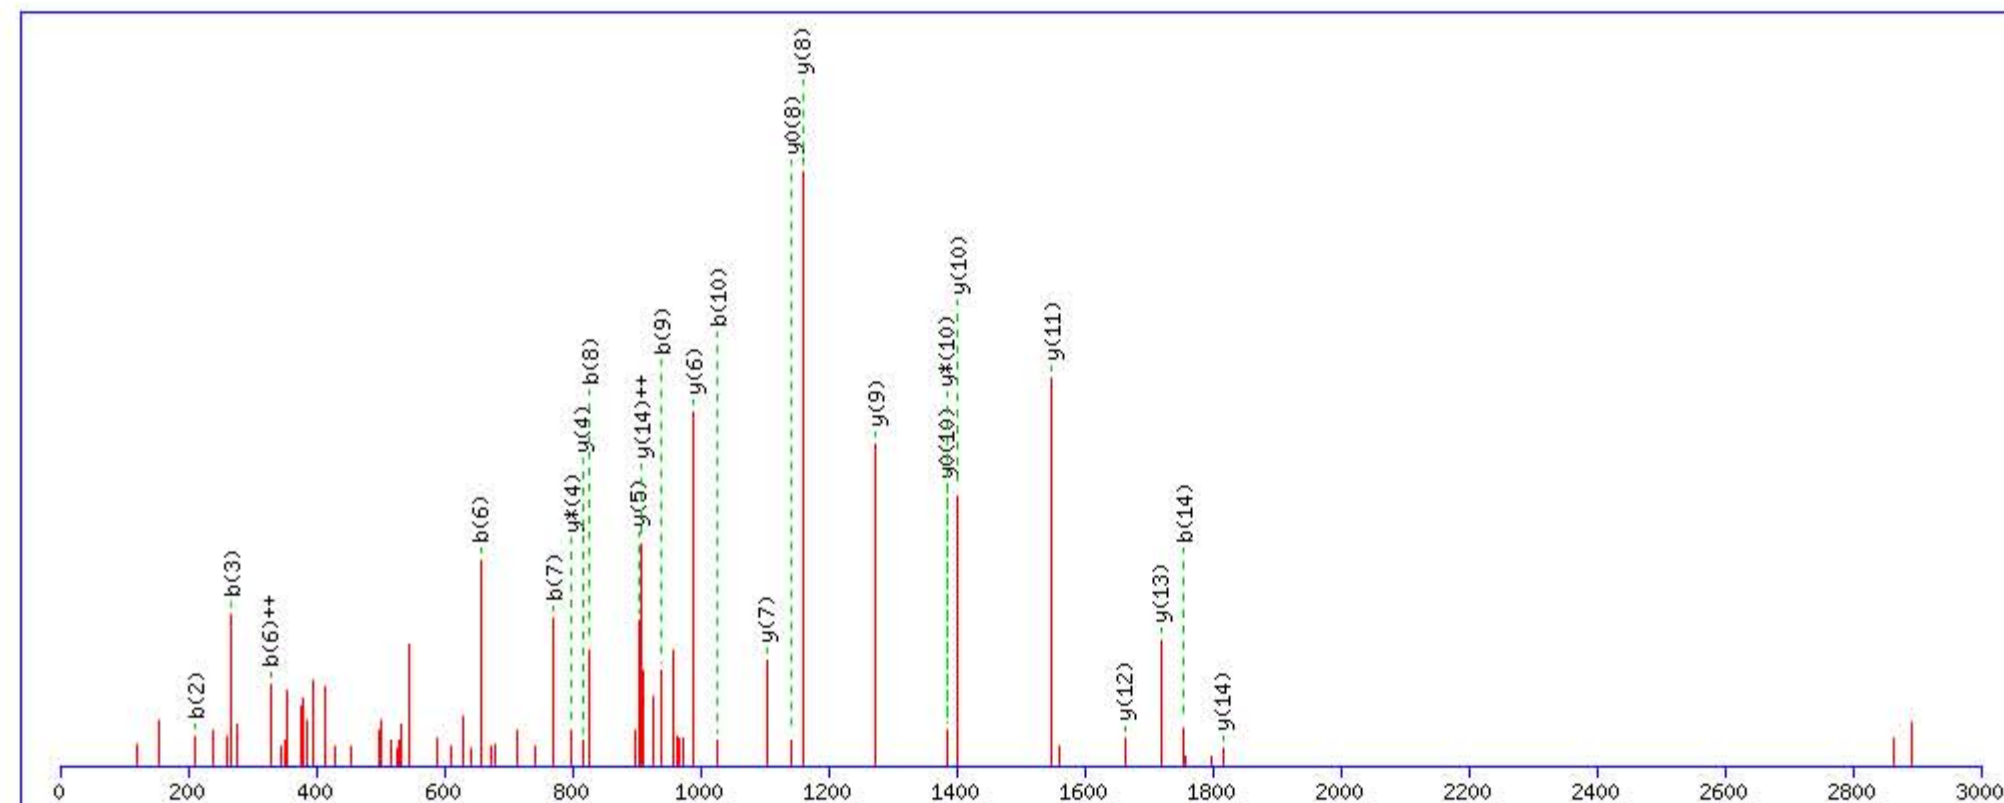

Monoisotopic mass of neutral peptide Mr(calc): 1929.002975

Fixed modifications: Carbamidomethyl (C) (apply to specified residues or termini only)

Variable modifications:

Q12 : Biotin:Thermo-21345 (Q)

Ions Score: 68 Expect: 2.1e-006

Matches : 25/134 fragment ions using 44 most intense peaks [\(help\)](#)

| #  | b                  | b <sup>++</sup>   | b <sup>+</sup> | b <sup>+++</sup> | b <sup>0</sup> | b <sup>0++</sup> | Seq. | y                  | y <sup>++</sup>   | y <sup>+</sup>     | y <sup>+++</sup> | y <sup>0</sup>     | y <sup>0++</sup> | #  |
|----|--------------------|-------------------|----------------|------------------|----------------|------------------|------|--------------------|-------------------|--------------------|------------------|--------------------|------------------|----|
| 1  | 114.091340         | 57.549308         |                |                  |                |                  | I    |                    |                   |                    |                  |                    |                  | 15 |
| 2  | <b>211.144104</b>  | 106.075690        |                |                  |                |                  | P    | <b>1816.926196</b> | <b>908.966736</b> | 1799.899647        | 900.453462       | 1798.915631        | 899.961454       | 14 |
| 3  | <b>268.165568</b>  | 134.586422        |                |                  |                |                  | G    | <b>1719.873432</b> | 860.440354        | 1702.846883        | 851.927080       | 1701.862867        | 851.435072       | 13 |
| 4  | 381.249632         | 191.128454        |                |                  |                |                  | I    | <b>1662.851968</b> | 831.929622        | 1645.825419        | 823.416348       | 1644.841403        | 822.924340       | 12 |
| 5  | 528.318046         | 264.662661        |                |                  |                |                  | F    | <b>1549.767904</b> | 775.387590        | 1532.741355        | 766.874316       | 1531.757339        | 766.382308       | 11 |
| 6  | <b>657.360639</b>  | <b>329.183958</b> |                |                  | 639.350074     | 320.178675       | E    | <b>1402.699490</b> | 701.853383        | <b>1385.672941</b> | 693.340109       | <b>1384.688925</b> | 692.848101       | 10 |
| 7  | <b>770.444703</b>  | 385.725990        |                |                  | 752.434138     | 376.720707       | L    | <b>1273.656897</b> | 637.332087        | 1256.630348        | 628.818812       | 1255.646332        | 628.326804       | 9  |
| 8  | <b>827.466167</b>  | 414.236722        |                |                  | 809.455602     | 405.231439       | G    | <b>1160.572833</b> | 580.790055        | 1143.546284        | 572.276780       | <b>1142.562268</b> | 571.784772       | 8  |
| 9  | <b>940.550231</b>  | 470.778754        |                |                  | 922.539666     | 461.773471       | I    | <b>1103.551369</b> | 552.279323        | 1086.524820        | 543.766048       | 1085.540804        | 543.274040       | 7  |
| 10 | <b>1027.582259</b> | 514.294768        |                |                  | 1009.571694    | 505.289485       | S    | <b>990.467305</b>  | 495.737291        | 973.440756         | 487.224016       | 972.456740         | 486.732008       | 6  |
| 11 | 1114.614287        | 557.810782        |                |                  | 1096.603722    | 548.805499       | S    | <b>903.435277</b>  | 452.221277        | 886.408728         | 443.708002       | 885.424712         | 443.215994       | 5  |
| 12 | 1553.839613        | 777.423445        | 1536.813064    | 768.910170       | 1535.829048    | 768.418162       | Q    | <b>816.403249</b>  | 408.705263        | <b>799.376700</b>  | 400.191988       | 798.392684         | 399.699980       | 4  |
| 13 | 1640.871641        | 820.939459        | 1623.845092    | 812.426184       | 1622.861076    | 811.934176       | S    | 377.177923         | 189.092600        | 360.151374         | 180.579325       | 359.167358         | 180.087317       | 3  |
| 14 | <b>1755.898584</b> | 878.452930        | 1738.872035    | 869.939656       | 1737.888019    | 869.447648       | D    | 290.145895         | 145.576585        | 273.119346         | 137.063311       | 272.135330         | 136.571303       | 2  |
| 15 |                    |                   |                |                  |                |                  | R    | 175.118952         | 88.063114         | 158.092403         | 79.549839        |                    |                  | 1  |

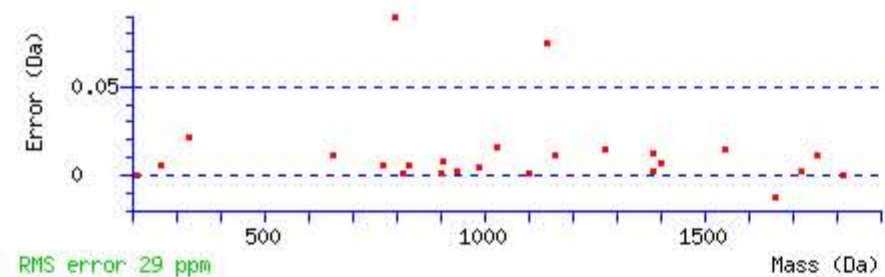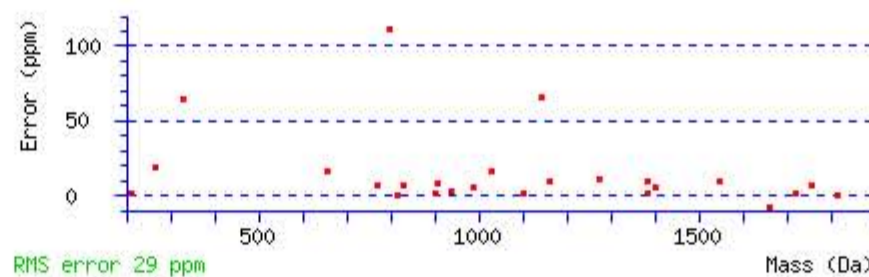

NCBI BLAST search of **IPGIFELGISSQSDR**

(Parameters: blastp, nr protein database, expect=20000, no filter, PAM30)

Other BLAST [web gateways](#)

## All matches to this query

| Score | Mr(calc):   | Delta     | Sequence                            |
|-------|-------------|-----------|-------------------------------------|
| 68.5  | 1929.002975 | 0.024933  | <a href="#">IPGIFELGISSQSDR</a>     |
| 7.4   | 1929.018219 | 0.009689  | <a href="#">LPEFLVQLYSYMRVR</a>     |
| 6.9   | 1929.020721 | 0.007187  | <a href="#">RELEELSVGSDGVLWK</a>    |
| 4.8   | 1929.041840 | -0.013932 | <a href="#">ADEVLAEVTVSAQASAKIK</a> |
| 0.6   | 1929.047211 | -0.019303 | <a href="#">QAHSKYGQFLVPSNLK</a>    |

# MASCOT Search Results

## Peptide View

MS/MS Fragmentation of **KPYNVESYTPQTQ GK**  
 Found in **CO8B\_HUMAN**, Complement component C8 beta chain OS=Homo sapiens GN=C8B PE=1 SV=3

Match to Query 52076: 2050.024932 from(684.348920,3+) rtinseconds(1615) index(21797)  
 Title: Locus:1.1.1.2705.12 File:"2013-07-02 CLN FXIII 180 min 1st F 2.wiff"  
 Data file C:\Program Files (x86)\Matrix Science\Mascot Daemon\mgf7 FXIII 180 min 1st\mascot\_daemon\_merge.mgf

Click mouse within plot area to zoom in by factor of two about that point

Or, Plot from  to  Da   
 Label all possible matches  Label matches used for scoring

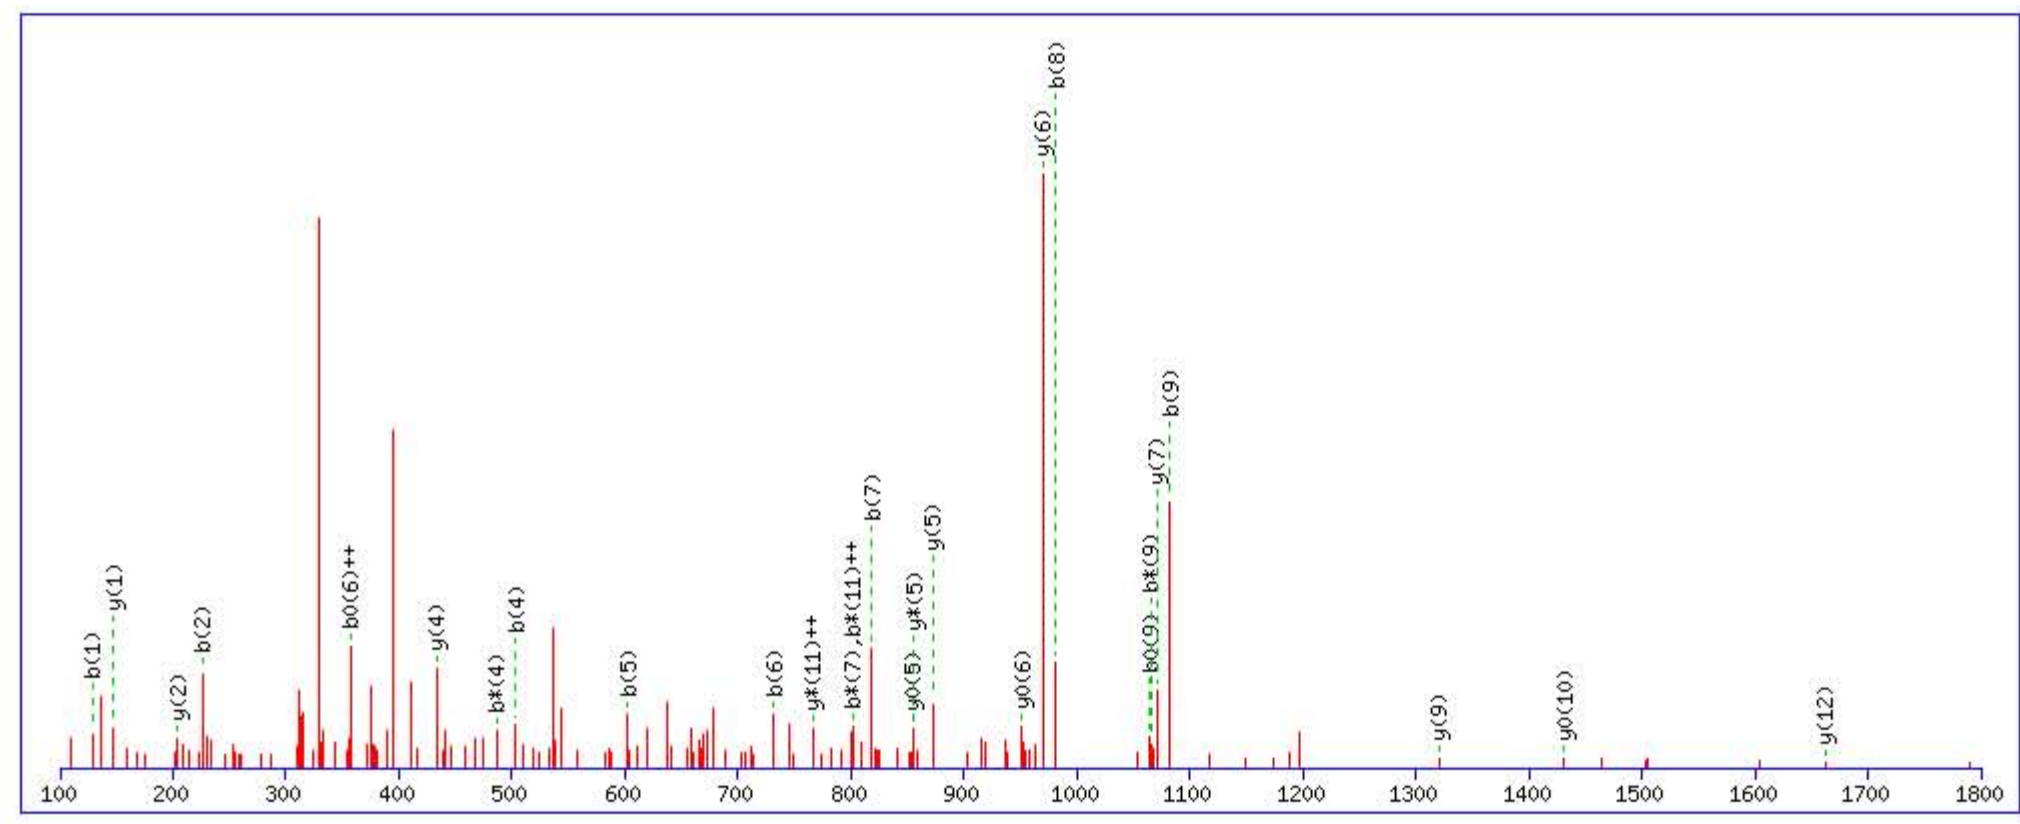

Monoisotopic mass of neutral peptide Mr(calc): 2050.019348  
 Fixed modifications: Carbamidomethyl (C) (apply to specified residues or termini only)  
 Variable modifications:  
 Q11 : Biotin:Thermo-21345 (Q)  
 Ions Score: 50 Expect: 0.00026  
 Matches : 27/152 fragment ions using 52 most intense peaks [\(help\)](#)

| #  | b                  | b <sup>++</sup> | b <sup>*</sup>     | b <sup>*++</sup>  | b <sup>0</sup>     | b <sup>0++</sup>  | Seq.     | y                  | y <sup>++</sup> | y <sup>*</sup>    | y <sup>*++</sup>  | y <sup>0</sup>     | y <sup>0++</sup> | #         |
|----|--------------------|-----------------|--------------------|-------------------|--------------------|-------------------|----------|--------------------|-----------------|-------------------|-------------------|--------------------|------------------|-----------|
| 1  | <b>129.102239</b>  | 65.054757       | 112.075690         | 56.541483         |                    |                   | <b>K</b> |                    |                 |                   |                   |                    |                  | <b>15</b> |
| 2  | <b>226.155003</b>  | 113.581139      | 209.128454         | 105.067865        |                    |                   | <b>P</b> | 1922.931678        | 961.969477      | 1905.905129       | 953.456203        | 1904.921113        | 952.964195       | <b>14</b> |
| 3  | 389.218332         | 195.112804      | 372.191783         | 186.599529        |                    |                   | <b>Y</b> | 1825.878914        | 913.443095      | 1808.852365       | 904.929821        | 1807.868349        | 904.437813       | <b>13</b> |
| 4  | <b>503.261259</b>  | 252.134267      | <b>486.234710</b>  | 243.620993        |                    |                   | <b>N</b> | <b>1662.815585</b> | 831.911431      | 1645.789036       | 823.398156        | 1644.805020        | 822.906148       | <b>12</b> |
| 5  | <b>602.329673</b>  | 301.668475      | 585.303124         | 293.155200        |                    |                   | <b>V</b> | 1548.772658        | 774.889967      | 1531.746109       | <b>766.376693</b> | 1530.762093        | 765.884685       | <b>11</b> |
| 6  | <b>731.372266</b>  | 366.189771      | 714.345717         | 357.676497        | 713.361701         | <b>357.184489</b> | <b>E</b> | 1449.704244        | 725.355760      | 1432.677695       | 716.842486        | <b>1431.693679</b> | 716.350478       | <b>10</b> |
| 7  | <b>818.404294</b>  | 409.705785      | <b>801.377745</b>  | 401.192511        | 800.393729         | 400.700503        | <b>S</b> | <b>1320.661651</b> | 660.834464      | 1303.635102       | 652.321189        | 1302.651086        | 651.829181       | <b>9</b>  |
| 8  | <b>981.467623</b>  | 491.237450      | 964.441074         | 482.724175        | 963.457058         | 482.232167        | <b>Y</b> | 1233.629623        | 617.318450      | 1216.603074       | 608.805175        | 1215.619058        | 608.313167       | <b>8</b>  |
| 9  | <b>1082.515302</b> | 541.761289      | <b>1065.488753</b> | 533.248015        | <b>1064.504737</b> | 532.756007        | <b>T</b> | <b>1070.566294</b> | 535.786785      | 1053.539745       | 527.273511        | 1052.555729        | 526.781503       | <b>7</b>  |
| 10 | 1179.568066        | 590.287671      | 1162.541517        | 581.774397        | 1161.557501        | 581.282389        | <b>P</b> | <b>969.518615</b>  | 485.262946      | 952.492066        | 476.749671        | <b>951.508050</b>  | 476.257663       | <b>6</b>  |
| 11 | 1618.793392        | 809.900334      | 1601.766843        | <b>801.387060</b> | 1600.782827        | 800.895052        | <b>Q</b> | <b>872.465851</b>  | 436.736564      | <b>855.439302</b> | 428.223289        | <b>854.455286</b>  | 427.731281       | <b>5</b>  |
| 12 | 1719.841071        | 860.424174      | 1702.814522        | 851.910899        | 1701.830506        | 851.418891        | <b>T</b> | <b>433.240525</b>  | 217.123900      | 416.213976        | 208.610626        | 415.229960         | 208.118618       | <b>4</b>  |
| 13 | 1847.899649        | 924.453463      | 1830.873100        | 915.940188        | 1829.889084        | 915.448180        | <b>Q</b> | 332.192846         | 166.600061      | 315.166297        | 158.086786        |                    |                  | <b>3</b>  |
| 14 | 1904.921113        | 952.964195      | 1887.894564        | 944.450920        | 1886.910548        | 943.958912        | <b>G</b> | <b>204.134268</b>  | 102.570772      | 187.107719        | 94.057497         |                    |                  | <b>2</b>  |
| 15 |                    |                 |                    |                   |                    |                   | <b>K</b> | <b>147.112804</b>  | 74.060040       | 130.086255        | 65.546765         |                    |                  | <b>1</b>  |

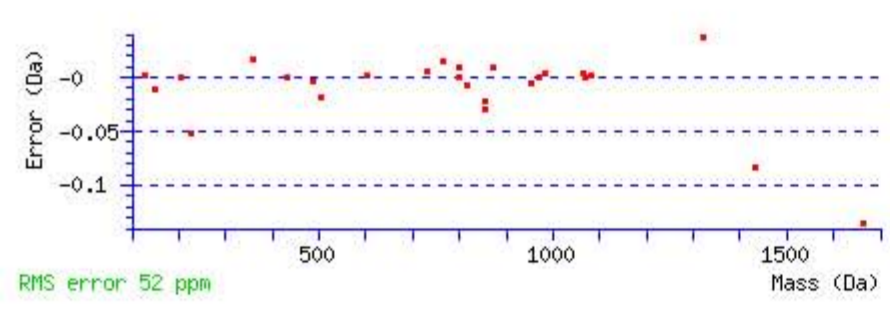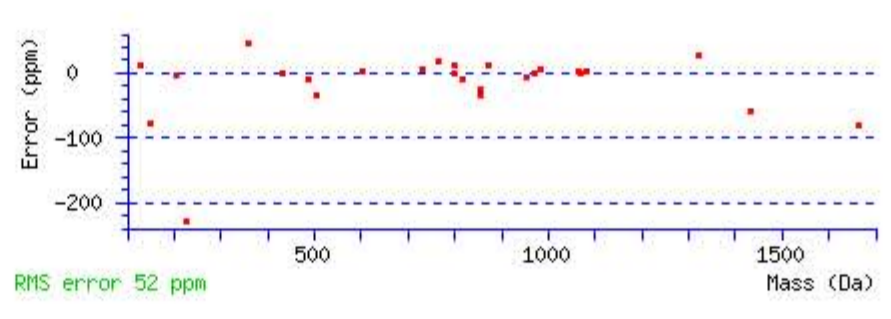

NCBI BLAST search of **KPYNVESYTPQTQ GK**  
 (Parameters: blastp, nr protein database, expect=20000, no filter, PAM30)  
 Other BLAST [web gateways](#)

### All matches to this query

| Score | Mr(calc):   | Delta    | Sequence                         |
|-------|-------------|----------|----------------------------------|
| 50.0  | 2050.019348 | 0.005584 | <a href="#">KPYNVESYTPQTQ GK</a> |
| 42.3  | 2050.019348 | 0.005584 | <a href="#">KPYNVESYTPQTQ GK</a> |

# MASCOT Search Results

## Peptide View

MS/MS Fragmentation of **KPYNVESYTPQTQ GK**

Found in **CO8B\_HUMAN**, Complement component C8 beta chain OS=Homo sapiens GN=C8B PE=1 SV=3

Match to Query 52077: 2050.025262 from(684.349030,3+) rtinseconds(1586) index(21647)

Title: Locus:1.1.1.2695.10 File:"2013-07-02 CLN FXIII 180 min 1st F 2.wiff"

Data file C:\Program Files (x86)\Matrix Science\Mascot Daemon\mgf\7 FXIII 180 min 1st\mascot\_daemon\_merge.mgf

Click mouse within plot area to zoom in by factor of two about that point

Or, Plot from 100 to 1500 Da Full range

Label all possible matches  Label matches used for scoring

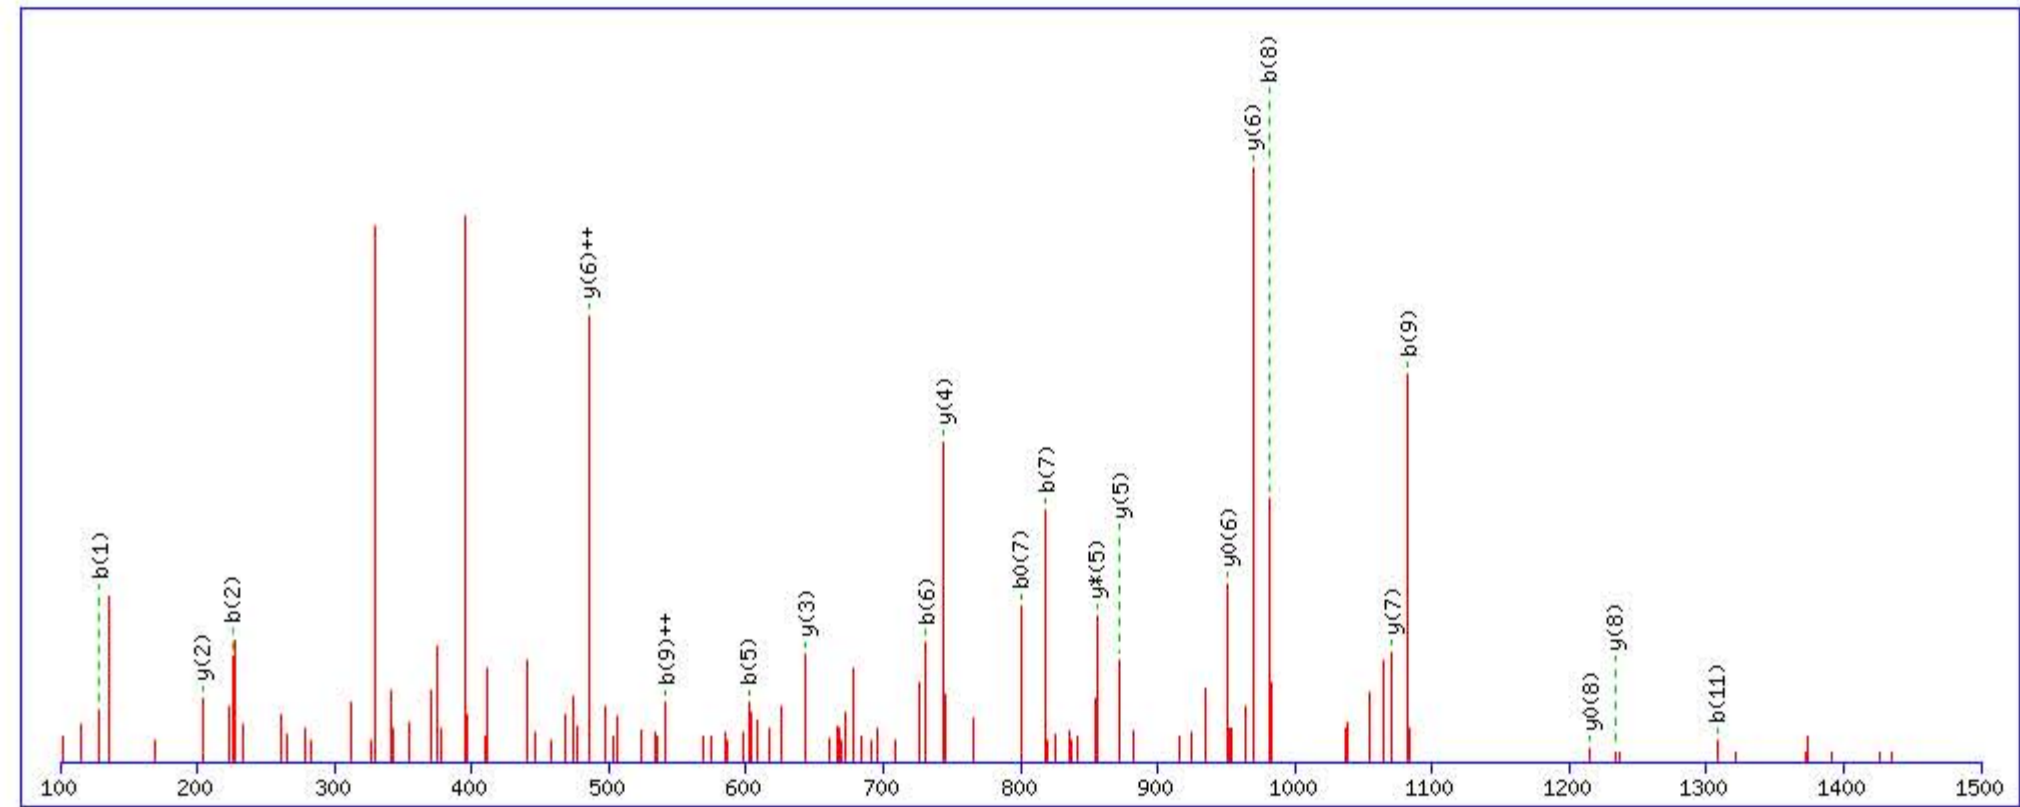

Monoisotopic mass of neutral peptide Mr(calc): 2050.019348

Fixed modifications: Carbamidomethyl (C) (apply to specified residues or termini only)

Variable modifications:

Q13 : Biotin:Thermo-21345 (Q)

Ions Score: 45 Expect: 9e-005

Matches : 21/152 fragment ions using 38 most intense peaks (help)

| #  | b           | b <sup>++</sup> | b <sup>*</sup> | b <sup>*++</sup> | b <sup>0</sup> | b <sup>0++</sup> | Seq. | y           | y <sup>++</sup> | y <sup>*</sup> | y <sup>*++</sup> | y <sup>0</sup> | y <sup>0++</sup> | #  |
|----|-------------|-----------------|----------------|------------------|----------------|------------------|------|-------------|-----------------|----------------|------------------|----------------|------------------|----|
| 1  | 129.102239  | 65.054757       | 112.075690     | 56.541483        |                |                  | K    |             |                 |                |                  |                |                  | 15 |
| 2  | 226.155003  | 113.581139      | 209.128454     | 105.067865       |                |                  | P    | 1922.931678 | 961.969477      | 1905.905129    | 953.456203       | 1904.921113    | 952.964195       | 14 |
| 3  | 389.218332  | 195.112804      | 372.191783     | 186.599529       |                |                  | Y    | 1825.878914 | 913.443095      | 1808.852365    | 904.929821       | 1807.868349    | 904.437813       | 13 |
| 4  | 503.261259  | 252.134267      | 486.234710     | 243.620993       |                |                  | N    | 1662.815585 | 831.911431      | 1645.789036    | 823.398156       | 1644.805020    | 822.906148       | 12 |
| 5  | 602.329673  | 301.668475      | 585.303124     | 293.155200       |                |                  | V    | 1548.772658 | 774.889967      | 1531.746109    | 766.376693       | 1530.762093    | 765.884685       | 11 |
| 6  | 731.372266  | 366.189771      | 714.345717     | 357.676497       | 713.361701     | 357.184489       | E    | 1449.704244 | 725.355760      | 1432.677695    | 716.842486       | 1431.693679    | 716.350478       | 10 |
| 7  | 818.404294  | 409.705785      | 801.377745     | 401.192511       | 800.393729     | 400.700503       | S    | 1320.661651 | 660.834464      | 1303.635102    | 652.321189       | 1302.651086    | 651.829181       | 9  |
| 8  | 981.467623  | 491.237450      | 964.441074     | 482.724175       | 963.457058     | 482.232167       | Y    | 1233.629623 | 617.318450      | 1216.603074    | 608.805175       | 1215.619058    | 608.313167       | 8  |
| 9  | 1082.515302 | 541.761289      | 1065.488753    | 533.248015       | 1064.504737    | 532.756007       | T    | 1070.566294 | 535.786785      | 1053.539745    | 527.273511       | 1052.555729    | 526.781503       | 7  |
| 10 | 1179.568066 | 590.287671      | 1162.541517    | 581.774397       | 1161.557501    | 581.282389       | P    | 969.518615  | 485.262946      | 952.492066     | 476.749671       | 951.508050     | 476.257663       | 6  |
| 11 | 1307.626644 | 654.316960      | 1290.600095    | 645.803686       | 1289.616079    | 645.311678       | Q    | 872.465851  | 436.736564      | 855.439302     | 428.223289       | 854.455286     | 427.731281       | 5  |
| 12 | 1408.674323 | 704.840800      | 1391.647774    | 696.327525       | 1390.663758    | 695.835517       | T    | 744.407273  | 372.707275      | 727.380724     | 364.194000       | 726.396708     | 363.701992       | 4  |
| 13 | 1847.899649 | 924.453463      | 1830.873100    | 915.940188       | 1829.889084    | 915.448180       | Q    | 643.359594  | 322.183435      | 626.333045     | 313.670161       |                |                  | 3  |
| 14 | 1904.921113 | 952.964195      | 1887.894564    | 944.450920       | 1886.910548    | 943.958912       | G    | 204.134268  | 102.570772      | 187.107719     | 94.057497        |                |                  | 2  |
| 15 |             |                 |                |                  |                |                  | K    | 147.112804  | 74.060040       | 130.086255     | 65.546765        |                |                  | 1  |

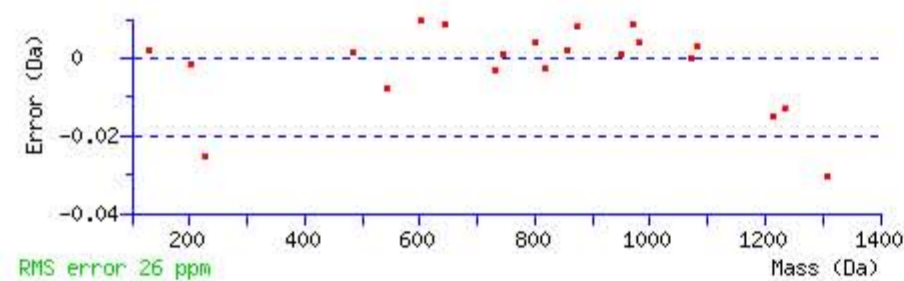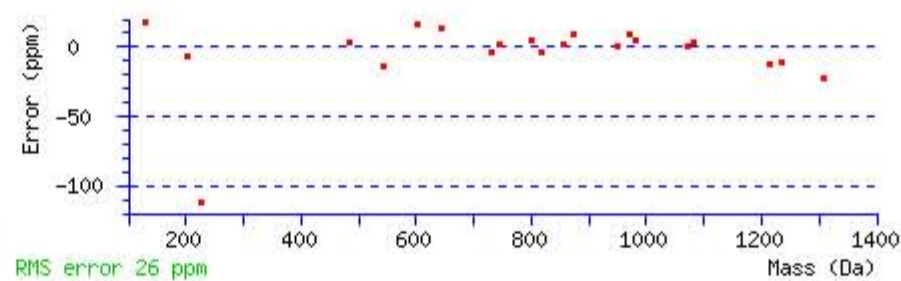

NCBI BLAST search of **KPYNVESYTPQTQ GK**

(Parameters: blastp, nr protein database, expect=20000, no filter, PAM30)

Other BLAST [web gateways](#)

## All matches to this query

| Score | Mr(calc):   | Delta     | Sequence                           |
|-------|-------------|-----------|------------------------------------|
| 45.2  | 2050.019348 | 0.005914  | <a href="#">KPYNVESYTPQTQ GK</a>   |
| 27.0  | 2050.019348 | 0.005914  | <a href="#">KPYNVESYTPQTQ GK</a>   |
| 2.0   | 2050.025192 | 0.000070  | <a href="#">LKISNDGLQMEKDESSLK</a> |
| 0.8   | 2050.026566 | -0.001304 | <a href="#">LFVGMMLNKQQSEDDVRR</a> |

# MASCOT Search Results

## Peptide View

MS/MS Fragmentation of **CDCICPVGSQGLACEVSYR**

Found in **CO8B\_HUMAN**, Complement component C8 beta chain OS=Homo sapiens GN=C8B PE=1 SV=3

Match to Query 63740: 2541.121152 from(848.047660,3+) rtinseconds(2141) index(25672)

Title: Locus:1.1.1.2887.25 File:"2013-07-02 CLN FXIII 180 min 1st F 2.wiff"

Data file C:\Program Files (x86)\Matrix Science\Mascot Daemon\mgf\7 FXIII 180 min 1st\mascot\_daemon\_merge.mgf

Click mouse within plot area to zoom in by factor of two about that point

Or, Plot from  to  Da

Label all possible matches  Label matches used for scoring

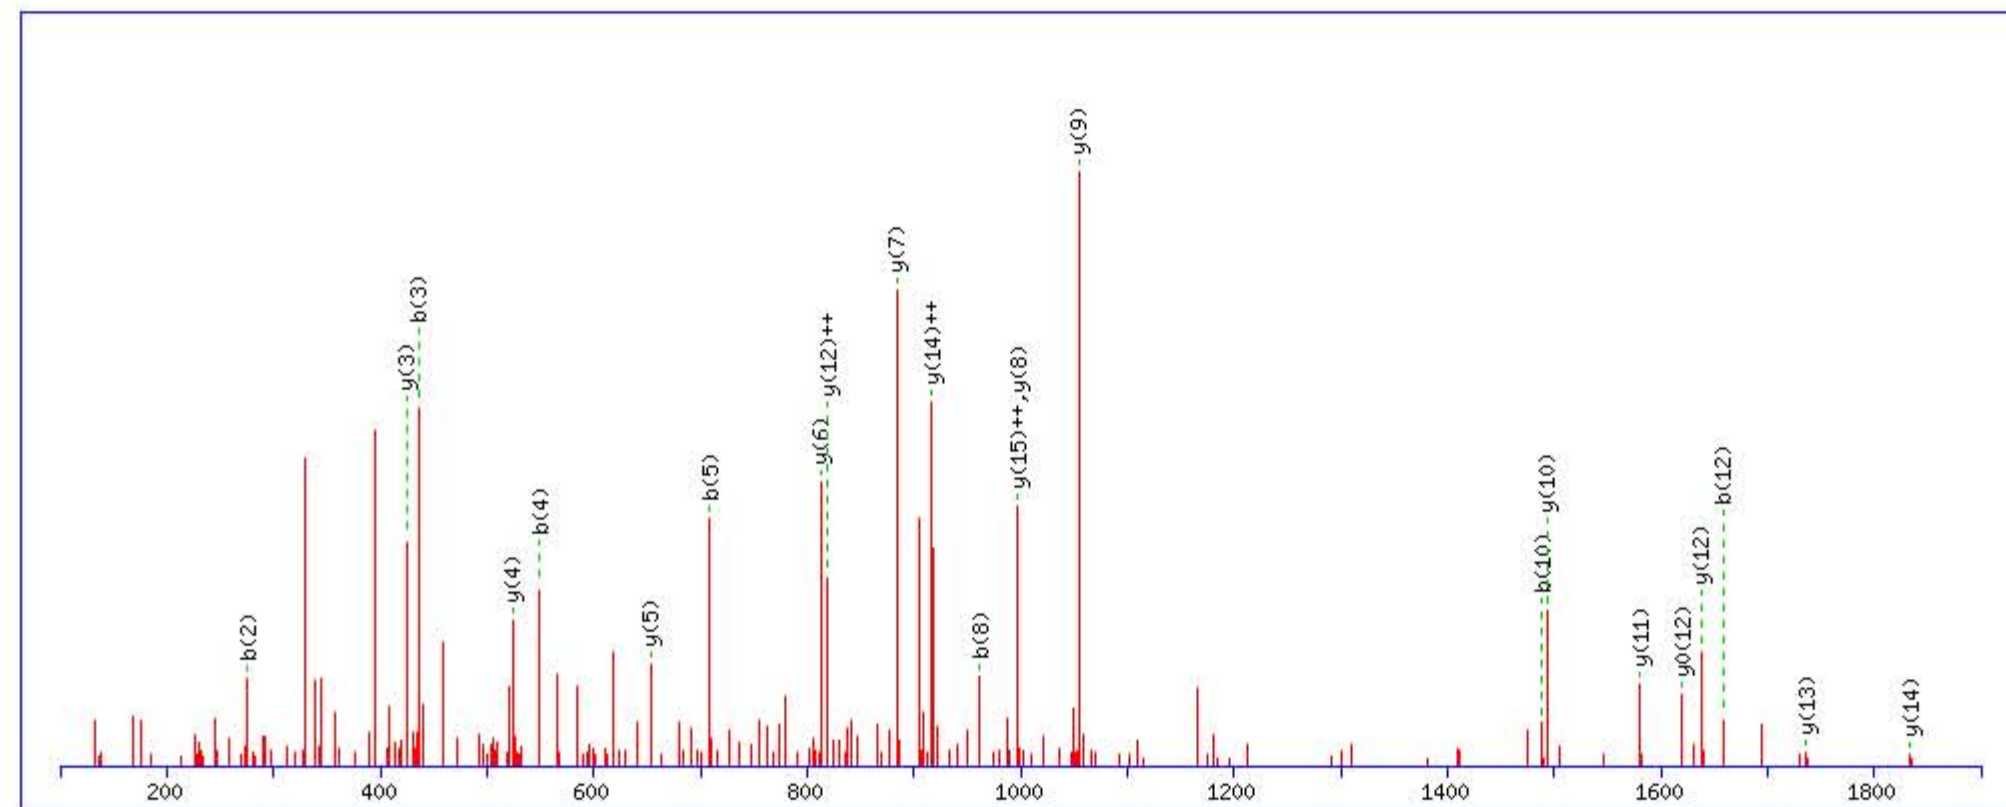

Monoisotopic mass of neutral peptide Mr(calc): 2541.094299

Fixed modifications: Carbamidomethyl (C) (apply to specified residues or termini only)

Variable modifications:

Q10 : Biotin:Thermo-21345 (Q)

Ions Score: 78 Expect: 1e-007

Matches : 23/192 fragment ions using 36 most intense peaks [\(help\)](#)

| #  | b                  | b <sup>++</sup> | b <sup>+</sup> | b <sup>+++</sup> | b <sup>0</sup> | b <sup>0++</sup> | Seq. | y                  | y <sup>++</sup>   | y <sup>+</sup> | y <sup>+++</sup> | y <sup>0</sup>     | y <sup>0++</sup> | #  |
|----|--------------------|-----------------|----------------|------------------|----------------|------------------|------|--------------------|-------------------|----------------|------------------|--------------------|------------------|----|
| 1  | 161.037925         | 81.022600       |                |                  |                |                  | C    |                    |                   |                |                  |                    |                  | 19 |
| 2  | <b>276.064868</b>  | 138.536072      |                |                  | 258.054303     | 129.530790       | D    | 2382.070908        | 1191.539092       | 2365.044359    | 1183.025817      | 2364.060343        | 1182.533809      | 18 |
| 3  | <b>436.095517</b>  | 218.551397      |                |                  | 418.084952     | 209.546114       | C    | 2267.043965        | 1134.025620       | 2250.017416    | 1125.512346      | 2249.033400        | 1125.020338      | 17 |
| 4  | <b>549.179581</b>  | 275.093429      |                |                  | 531.169016     | 266.088146       | I    | 2107.013316        | 1054.010296       | 2089.986767    | 1045.497021      | 2089.002751        | 1045.005013      | 16 |
| 5  | <b>709.210230</b>  | 355.108753      |                |                  | 691.199665     | 346.103471       | C    | 1993.929252        | <b>997.468264</b> | 1976.902703    | 988.954990       | 1975.918687        | 988.462982       | 15 |
| 6  | 806.262994         | 403.635135      |                |                  | 788.252429     | 394.629853       | P    | <b>1833.898603</b> | <b>917.452940</b> | 1816.872054    | 908.939665       | 1815.888038        | 908.447657       | 14 |
| 7  | 905.331408         | 453.169342      |                |                  | 887.320843     | 444.164060       | V    | <b>1736.845839</b> | 868.926558        | 1719.819290    | 860.413283       | 1718.835274        | 859.921275       | 13 |
| 8  | <b>962.352872</b>  | 481.680074      |                |                  | 944.342307     | 472.674792       | G    | <b>1637.777425</b> | <b>819.392351</b> | 1620.750876    | 810.879076       | <b>1619.766860</b> | 810.387068       | 12 |
| 9  | 1049.384900        | 525.196088      |                |                  | 1031.374335    | 516.190806       | S    | <b>1580.755961</b> | 790.881619        | 1563.729412    | 782.368344       | 1562.745396        | 781.876336       | 11 |
| 10 | <b>1488.610226</b> | 744.808751      | 1471.583677    | 736.295477       | 1470.599661    | 735.803469       | Q    | <b>1493.723933</b> | 747.365605        | 1476.697384    | 738.852330       | 1475.713368        | 738.360322       | 10 |
| 11 | 1545.631690        | 773.319483      | 1528.605141    | 764.806209       | 1527.621125    | 764.314201       | G    | <b>1054.498607</b> | 527.752941        | 1037.472058    | 519.239667       | 1036.488042        | 518.747659       | 9  |
| 12 | <b>1658.715754</b> | 829.861515      | 1641.689205    | 821.348241       | 1640.705189    | 820.856233       | L    | <b>997.477143</b>  | 499.242209        | 980.450594     | 490.728935       | 979.466578         | 490.236927       | 8  |
| 13 | 1729.752868        | 865.380072      | 1712.726319    | 856.866798       | 1711.742303    | 856.374790       | A    | <b>884.393079</b>  | 442.700178        | 867.366530     | 434.186903       | 866.382514         | 433.694895       | 7  |
| 14 | 1889.783517        | 945.395397      | 1872.756968    | 936.882122       | 1871.772952    | 936.390114       | C    | <b>813.355965</b>  | 407.181621        | 796.329416     | 398.668346       | 795.345400         | 398.176338       | 6  |
| 15 | 2018.826110        | 1009.916693     | 2001.799561    | 1001.403419      | 2000.815545    | 1000.911411      | E    | <b>653.325316</b>  | 327.166296        | 636.298767     | 318.653021       | 635.314751         | 318.161013       | 5  |
| 16 | 2117.894524        | 1059.450900     | 2100.867975    | 1050.937625      | 2099.883959    | 1050.445617      | V    | <b>524.282723</b>  | 262.645000        | 507.256174     | 254.131725       | 506.272158         | 253.639717       | 4  |
| 17 | 2204.926552        | 1102.966914     | 2187.900003    | 1094.453639      | 2186.915987    | 1093.961631      | S    | <b>425.214309</b>  | 213.110793        | 408.187760     | 204.597518       | 407.203744         | 204.105510       | 3  |
| 18 | 2367.989881        | 1184.498578     | 2350.963332    | 1175.985304      | 2349.979316    | 1175.493296      | Y    | 338.182281         | 169.594778        | 321.155732     | 161.081504       |                    |                  | 2  |
| 19 |                    |                 |                |                  |                |                  | R    | 175.118952         | 88.063114         | 158.092403     | 79.549839        |                    |                  | 1  |

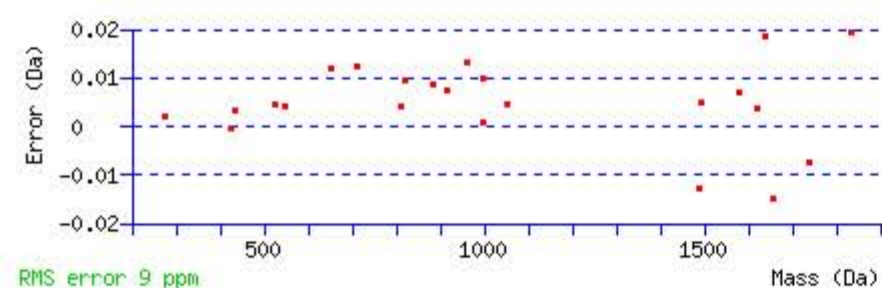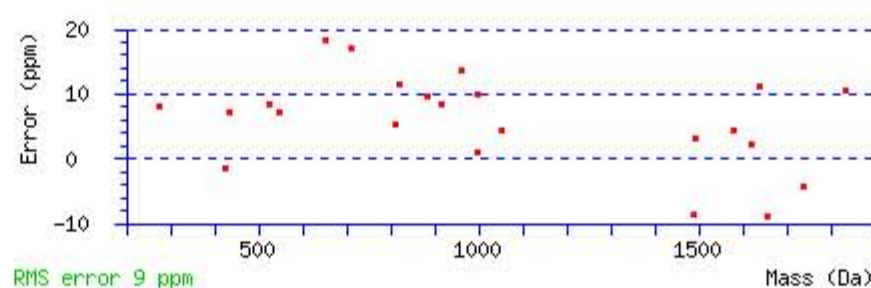

NCBI BLAST search of [CDCICPVGSQGLACEVSYR](#)

(Parameters: blastp, nr protein database, expect=20000, no filter, PAM30)

Other BLAST [web gateways](#)

All matches to this query

| Score | Mr(calc):   | Delta    | Sequence                            |
|-------|-------------|----------|-------------------------------------|
| 77.9  | 2541.094299 | 0.026853 | <a href="#">CDCICPVGSQGLACEVSYR</a> |

Mascot: <http://www.matrixscience.com/>

# MASCOT SCIENCE Mascot Search Results

## Peptide View

MS/MS Fragmentation of **FLQEQGHR**

Found in **CO8G\_HUMAN**, Complement component C8 gamma chain OS=Homo sapiens GN=C8G PE=1 SV=3

Match to Query 27481: 1324.684808 from(663.349680,2+) rtinseconds(1497) index(38756)

Title: Locus:1.1.1.2970.20 File:"2013-07-02 CLN FXIII 180 min 1st F 3.wiff"

Data file C:\Program Files (x86)\Matrix Science\Mascot Daemon\mgf\7 FXIII 180 min 1st\mascot\_daemon\_merge.mgf

Click mouse within plot area to zoom in by factor of two about that point

Or, Plot from  to  Da

Label all possible matches  Label matches used for scoring

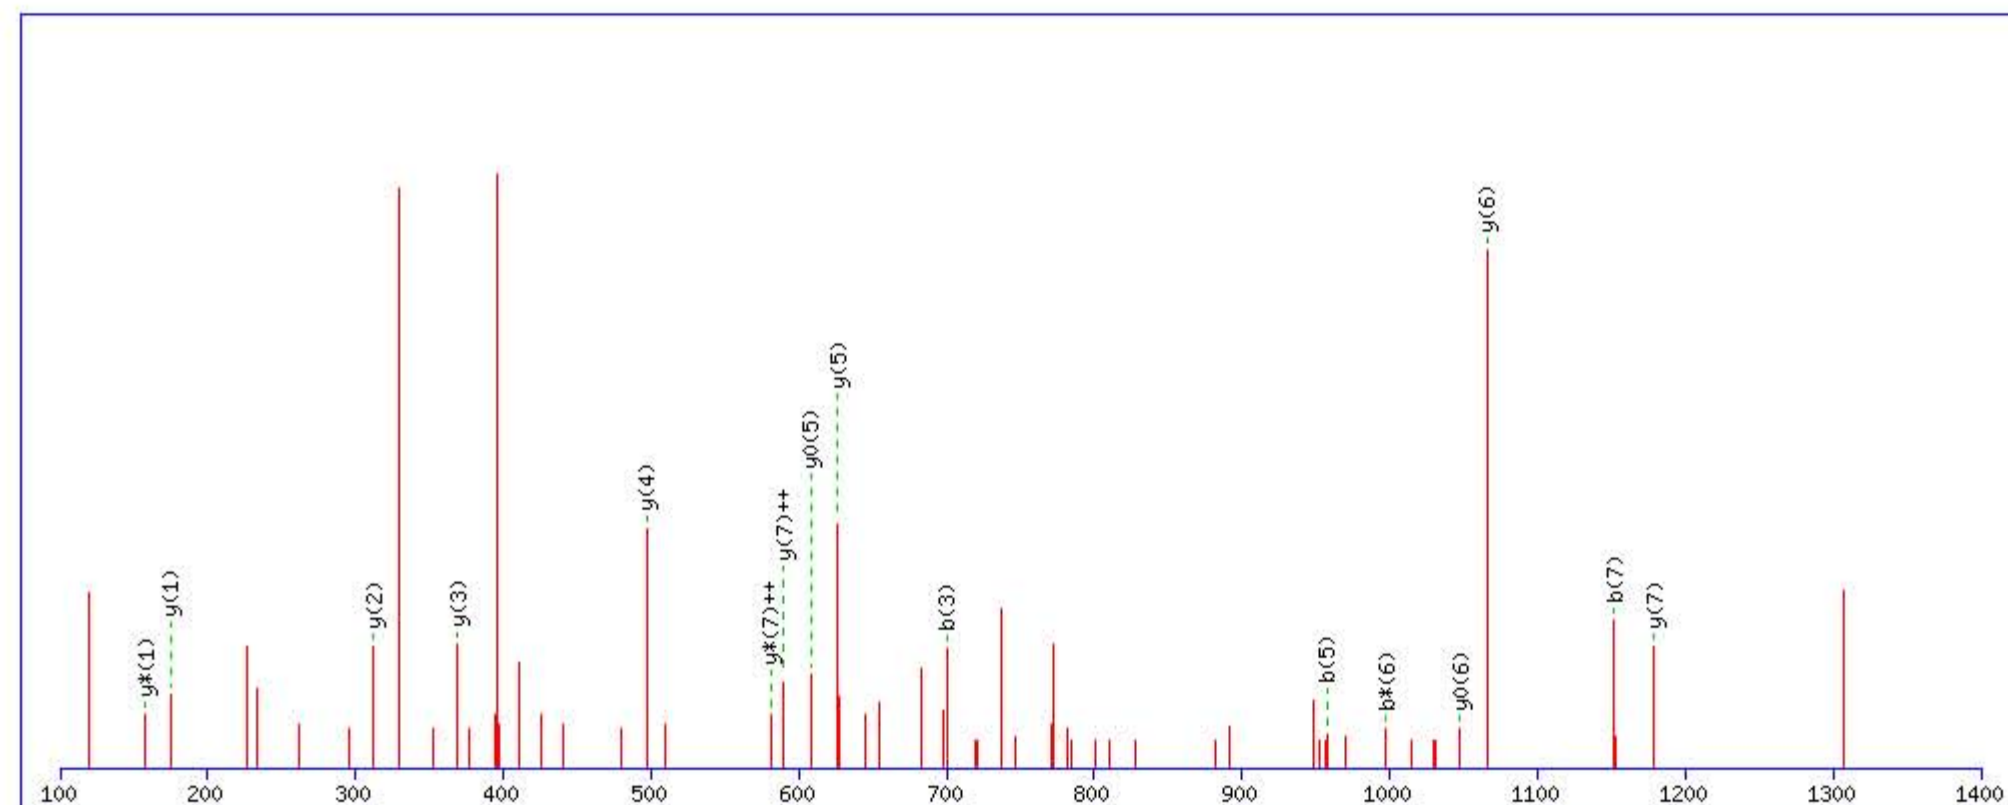

Monoisotopic mass of neutral peptide Mr(calc): 1324.671021

Fixed modifications: Carbamidomethyl (C) (apply to specified residues or termini only)

Variable modifications:

Q3 : Biotin:Thermo-21345 (Q)

Ions Score: 36 Expect: 0.0027

Matches : 16/66 fragment ions using 34 most intense peaks [\(help\)](#)

| # | b           | b <sup>++</sup> | b <sup>*</sup> | b <sup>*++</sup> | b <sup>0</sup> | b <sup>0++</sup> | Seq. | y           | y <sup>++</sup> | y <sup>*</sup> | y <sup>*++</sup> | y <sup>0</sup> | y <sup>0++</sup> | # |
|---|-------------|-----------------|----------------|------------------|----------------|------------------|------|-------------|-----------------|----------------|------------------|----------------|------------------|---|
| 1 | 148.075690  | 74.541483       |                |                  |                |                  | F    |             |                 |                |                  |                |                  | 8 |
| 2 | 261.159754  | 131.083515      |                |                  |                |                  | L    | 1178.609889 | 589.808583      | 1161.583340    | 581.295308       | 1160.599324    | 580.803300       | 7 |
| 3 | 700.385080  | 350.696178      | 683.358531     | 342.182904       |                |                  | Q    | 1065.525825 | 533.266551      | 1048.499276    | 524.753276       | 1047.515260    | 524.261268       | 6 |
| 4 | 829.427673  | 415.217475      | 812.401124     | 406.704200       | 811.417108     | 406.212192       | E    | 626.300499  | 313.653888      | 609.273950     | 305.140613       | 608.289934     | 304.648605       | 5 |
| 5 | 957.486251  | 479.246764      | 940.459702     | 470.733489       | 939.475686     | 470.241481       | Q    | 497.257906  | 249.132591      | 480.231357     | 240.619317       |                |                  | 4 |
| 6 | 1014.507715 | 507.757496      | 997.481166     | 499.244221       | 996.497150     | 498.752213       | G    | 369.199328  | 185.103302      | 352.172779     | 176.590028       |                |                  | 3 |
| 7 | 1151.566627 | 576.286952      | 1134.540078    | 567.773677       | 1133.556062    | 567.281669       | H    | 312.177864  | 156.592570      | 295.151315     | 148.079296       |                |                  | 2 |
| 8 |             |                 |                |                  |                |                  | R    | 175.118952  | 88.063114       | 158.092403     | 79.549839        |                |                  | 1 |

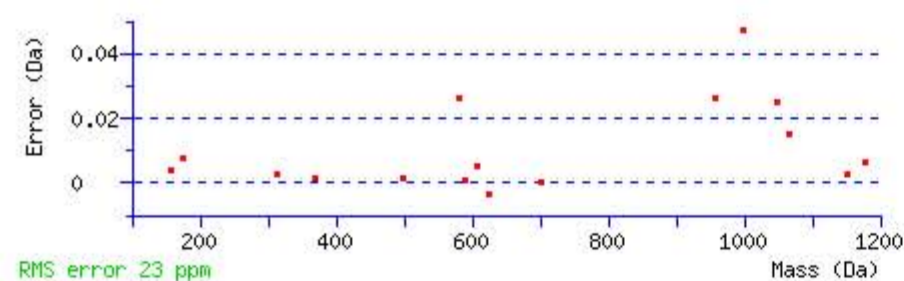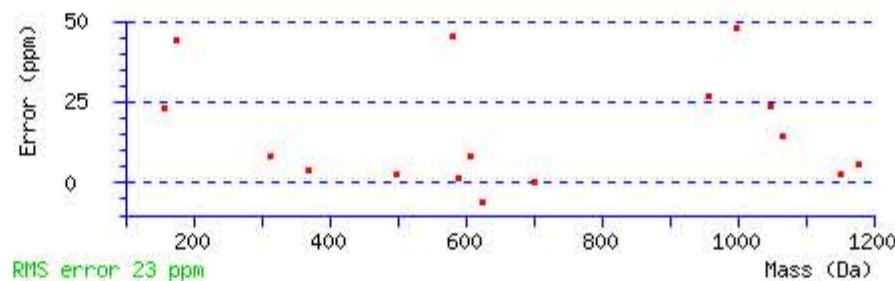

NCBI BLAST search of **FLQEQGHR**

(Parameters: blastp, nr protein database, expect=20000, no filter, PAM30)

Other BLAST [web gateways](#)

All matches to this query

| Score | Mr(calc):   | Delta     | Sequence                     |
|-------|-------------|-----------|------------------------------|
| 35.9  | 1324.671021 | 0.013787  | <a href="#">FLQEQGHR</a>     |
| 13.9  | 1324.671021 | 0.013787  | <a href="#">FLQEQGHR</a>     |
| 8.1   | 1324.669647 | 0.015161  | <a href="#">MKEIAEAYLGGK</a> |
| 5.2   | 1324.692795 | -0.007987 | <a href="#">YLDFSLFKHR</a>   |
| 4.4   | 1324.696182 | -0.011374 | <a href="#">FFGGLCLDIKR</a>  |
| 2.5   | 1324.682236 | 0.002572  | <a href="#">QWRANPSR</a>     |

Mascot: <http://www.matrixscience.com/>



# MASCOT Search Results

## Peptide View

MS/MS Fragmentation of **KLDGICWQVR**

Found in **CO8G\_HUMAN**, Complement component C8 gamma chain OS=Homo sapiens GN=C8G PE=1 SV=3

Match to Query 37982: 1584.840248 from(793.427400,2+) rtinseconds(2024) index(24858)

Title: Locus:1.1.1.2847.13 File:"2013-07-02 CLN FXIII 180 min 1st F 2.wiff"

Data file C:\Program Files (x86)\Matrix Science\Mascot Daemon\mgf\7 FXIII 180 min 1st\mascot\_daemon\_merge.mgf

Click mouse within plot area to zoom in by factor of two about that point

Or, Plot from  to  Da

Label all possible matches  Label matches used for scoring

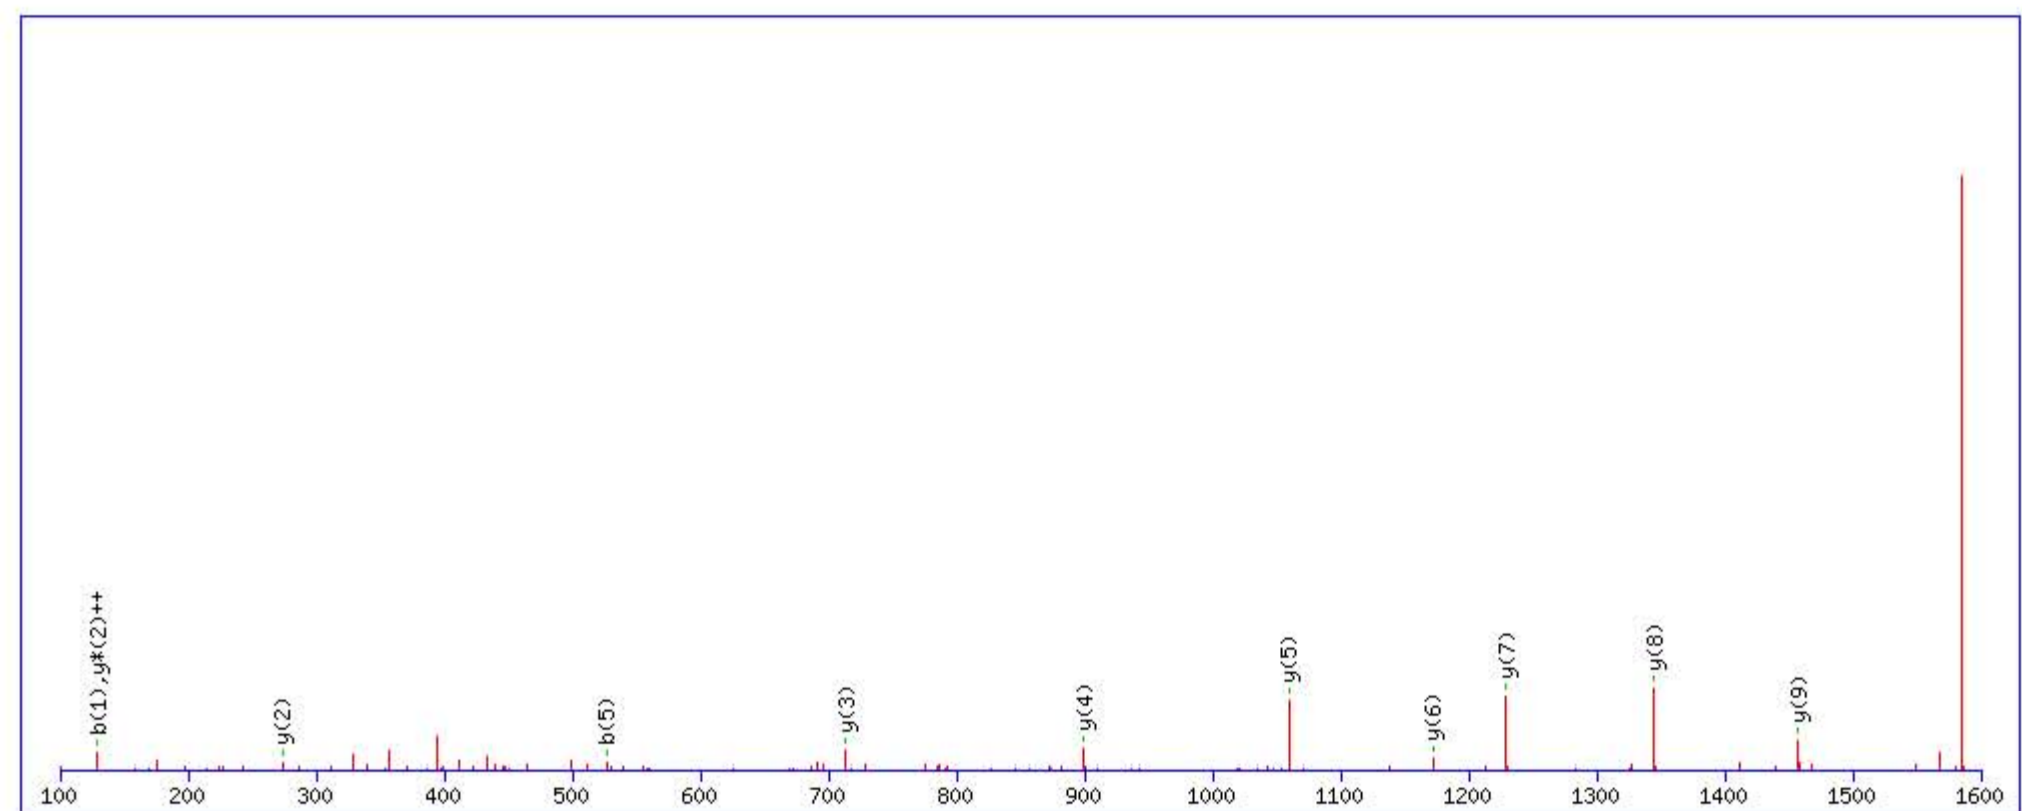

Monoisotopic mass of neutral peptide Mr(calc): 1584.826874

Fixed modifications: Carbamidomethyl (C) (apply to specified residues or termini only)

Variable modifications:

Q8 : Biotin:Thermo-21345 (Q)

Ions Score: 65 Expect: 9.2e-006

Matches : 11/90 fragment ions using 15 most intense peaks ([help](#))

| #  | b                 | b <sup>++</sup> | b <sup>*</sup> | b <sup>*++</sup> | b <sup>0</sup> | b <sup>0++</sup> | Seq.     | y                  | y <sup>++</sup> | y <sup>*</sup> | y <sup>*++</sup>  | y <sup>0</sup> | y <sup>0++</sup> | #         |
|----|-------------------|-----------------|----------------|------------------|----------------|------------------|----------|--------------------|-----------------|----------------|-------------------|----------------|------------------|-----------|
| 1  | <b>129.102239</b> | 65.054757       | 112.075690     | 56.541483        |                |                  | <b>K</b> |                    |                 |                |                   |                |                  | <b>10</b> |
| 2  | 242.186303        | 121.596790      | 225.159754     | 113.083515       |                |                  | <b>L</b> | <b>1457.739189</b> | 729.373233      | 1440.712640    | 720.859958        | 1439.728624    | 720.367950       | <b>9</b>  |
| 3  | 357.213246        | 179.110261      | 340.186697     | 170.596987       | 339.202681     | 170.104979       | <b>D</b> | <b>1344.655125</b> | 672.831201      | 1327.628576    | 664.317926        | 1326.644560    | 663.825918       | <b>8</b>  |
| 4  | 414.234710        | 207.620993      | 397.208161     | 199.107719       | 396.224145     | 198.615711       | <b>G</b> | <b>1229.628182</b> | 615.317729      | 1212.601633    | 606.804455        |                |                  | <b>7</b>  |
| 5  | <b>527.318774</b> | 264.163025      | 510.292225     | 255.649751       | 509.308209     | 255.157743       | <b>I</b> | <b>1172.606718</b> | 586.806997      | 1155.580169    | 578.293723        |                |                  | <b>6</b>  |
| 6  | 687.349423        | 344.178350      | 670.322874     | 335.665075       | 669.338858     | 335.173067       | <b>C</b> | <b>1059.522654</b> | 530.264965      | 1042.496105    | 521.751691        |                |                  | <b>5</b>  |
| 7  | 873.428736        | 437.218006      | 856.402187     | 428.704732       | 855.418171     | 428.212724       | <b>W</b> | <b>899.492005</b>  | 450.249641      | 882.465456     | 441.736366        |                |                  | <b>4</b>  |
| 8  | 1312.654062       | 656.830669      | 1295.627513    | 648.317395       | 1294.643497    | 647.825387       | <b>Q</b> | <b>713.412692</b>  | 357.209984      | 696.386143     | 348.696710        |                |                  | <b>3</b>  |
| 9  | 1411.722476       | 706.364876      | 1394.695927    | 697.851602       | 1393.711911    | 697.359594       | <b>V</b> | <b>274.187366</b>  | 137.597321      | 257.160817     | <b>129.084047</b> |                |                  | <b>2</b>  |
| 10 |                   |                 |                |                  |                |                  | <b>R</b> | 175.118952         | 88.063114       | 158.092403     | 79.549839         |                |                  | <b>1</b>  |

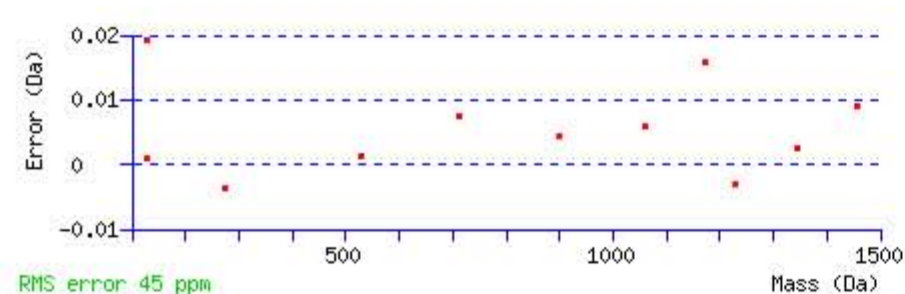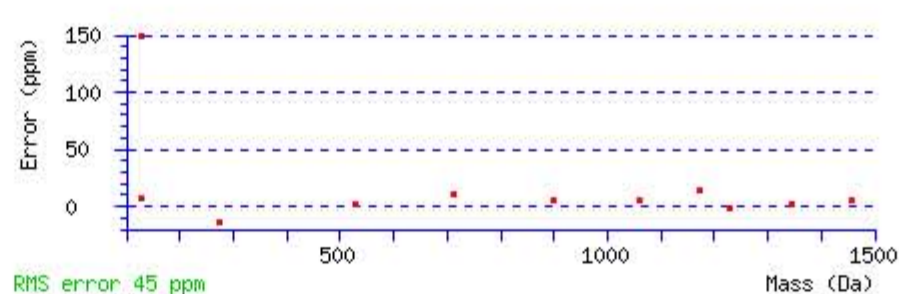

NCBI BLAST search of **KLDGICWQVR**

(Parameters: blastp, nr protein database, expect=20000, no filter, PAM30)

Other BLAST [web gateways](#)

## All matches to this query

| Score | Mr(calc):   | Delta     | Sequence                        |
|-------|-------------|-----------|---------------------------------|
| 64.8  | 1584.826874 | 0.013374  | <a href="#">KLDGICWQVR</a>      |
| 25.1  | 1584.858353 | -0.018105 | <a href="#">QLDGLAGLKGEGRGK</a> |
| 8.7   | 1584.822830 | 0.017418  | <a href="#">QLDQKCKQAR</a>      |
| 8.7   | 1584.822830 | 0.017418  | <a href="#">QLDQKCKQAR</a>      |
| 8.1   | 1584.858337 | -0.018089 | <a href="#">LKSNDGEERLAVVR</a>  |
| 5.8   | 1584.841278 | -0.001030 | <a href="#">QLAWVGDGVVVSIR</a>  |
| 5.1   | 1584.819458 | 0.020790  | <a href="#">QITRSWQEAR</a>      |
| 3.3   | 1584.830704 | 0.009544  | <a href="#">GAIRKACNAHGGVFK</a> |
| 2.1   | 1584.851822 | -0.011574 | <a href="#">SLTMARRGPAPVSSR</a> |
| 1.7   | 1584.848465 | -0.008217 | <a href="#">VKELGHSTQQFRR</a>   |

# MASCOT SCIENCE Mascot Search Results

## Peptide View

MS/MS Fragmentation of **SLPVSDSVLSGFQR**

Found in **CO8G\_HUMAN**, Complement component C8 gamma chain OS=Homo sapiens GN=C8G PE=1 SV=3

Match to Query 48228: 1931.002692 from(644.674840,3+) rtinseconds(2499) index(28042)

Title: Locus:1.1.1.3012.7 File:"2013-07-02 CLN FXIII 180 min 1st F 2.wiff"

Data file C:\Program Files (x86)\Matrix Science\Mascot Daemon\mgf\7 FXIII 180 min 1st\mascot\_daemon\_merge.mgf

Click mouse within plot area to zoom in by factor of two about that point

Or, Plot from  to  Da

Label all possible matches  Label matches used for scoring

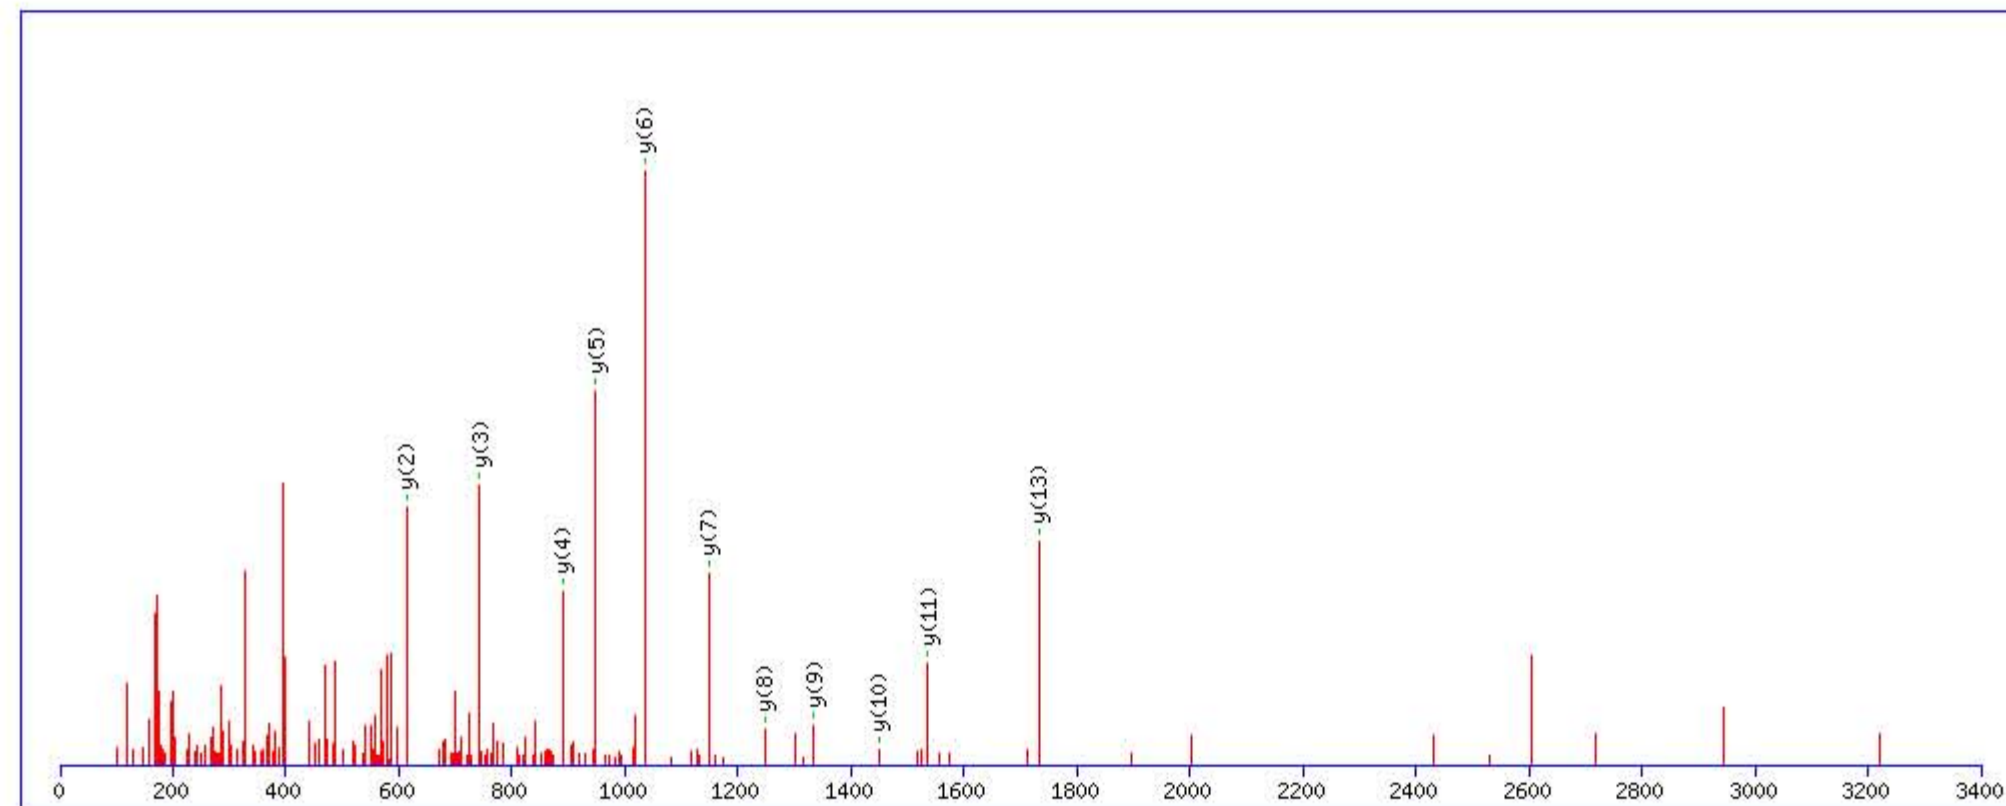

Monoisotopic mass of neutral peptide Mr(calc): 1930.982254

Fixed modifications: Carbamidomethyl (C) (apply to specified residues or termini only)

Variable modifications:

Q14 : Biotin:Thermo-21345 (Q)

Ions Score: 87 Expect: 5.5e-008

Matches : 11/138 fragment ions using 17 most intense peaks [\(help\)](#)

| #  | b           | b <sup>++</sup> | b <sup>*</sup> | b <sup>*++</sup> | b <sup>0</sup> | b <sup>0++</sup> | Seq. | y                  | y <sup>++</sup> | y <sup>*</sup> | y <sup>*++</sup> | y <sup>0</sup> | y <sup>0++</sup> | #  |
|----|-------------|-----------------|----------------|------------------|----------------|------------------|------|--------------------|-----------------|----------------|------------------|----------------|------------------|----|
| 1  | 88.039304   | 44.523290       |                |                  | 70.028739      | 35.518008        | S    |                    |                 |                |                  |                |                  | 15 |
| 2  | 201.123368  | 101.065322      |                |                  | 183.112803     | 92.060039        | L    | 1844.957496        | 922.982386      | 1827.930947    | 914.469112       | 1826.946931    | 913.977104       | 14 |
| 3  | 298.176132  | 149.591704      |                |                  | 280.165567     | 140.586422       | P    | <b>1731.873432</b> | 866.440354      | 1714.846883    | 857.927080       | 1713.862867    | 857.435072       | 13 |
| 4  | 397.244546  | 199.125911      |                |                  | 379.233981     | 190.120629       | V    | 1634.820668        | 817.913972      | 1617.794119    | 809.400698       | 1616.810103    | 808.908690       | 12 |
| 5  | 484.276574  | 242.641925      |                |                  | 466.266009     | 233.636643       | S    | <b>1535.752254</b> | 768.379765      | 1518.725705    | 759.866491       | 1517.741689    | 759.374483       | 11 |
| 6  | 599.303517  | 300.155397      |                |                  | 581.292952     | 291.150114       | D    | <b>1448.720226</b> | 724.863751      | 1431.693677    | 716.350477       | 1430.709661    | 715.858469       | 10 |
| 7  | 686.335545  | 343.671411      |                |                  | 668.324980     | 334.666128       | S    | <b>1333.693283</b> | 667.350280      | 1316.666734    | 658.837005       | 1315.682718    | 658.344997       | 9  |
| 8  | 785.403959  | 393.205618      |                |                  | 767.393394     | 384.200335       | V    | <b>1246.661255</b> | 623.834266      | 1229.634706    | 615.320991       | 1228.650690    | 614.828983       | 8  |
| 9  | 898.488023  | 449.747650      |                |                  | 880.477458     | 440.742367       | L    | <b>1147.592841</b> | 574.300059      | 1130.566292    | 565.786784       | 1129.582276    | 565.294776       | 7  |
| 10 | 985.520051  | 493.263664      |                |                  | 967.509486     | 484.258381       | S    | <b>1034.508777</b> | 517.758027      | 1017.482228    | 509.244752       | 1016.498212    | 508.752744       | 6  |
| 11 | 1042.541515 | 521.774395      |                |                  | 1024.530950    | 512.769113       | G    | <b>947.476749</b>  | 474.242013      | 930.450200     | 465.728738       | 929.466184     | 465.236730       | 5  |
| 12 | 1189.609929 | 595.308603      |                |                  | 1171.599364    | 586.303320       | F    | <b>890.455285</b>  | 445.731281      | 873.428736     | 437.218006       | 872.444720     | 436.725998       | 4  |
| 13 | 1318.652522 | 659.829899      |                |                  | 1300.641957    | 650.824617       | E    | <b>743.386871</b>  | 372.197074      | 726.360322     | 363.683799       | 725.376306     | 363.191791       | 3  |
| 14 | 1757.877848 | 879.442562      | 1740.851299    | 870.929288       | 1739.867283    | 870.437280       | Q    | <b>614.344278</b>  | 307.675777      | 597.317729     | 299.162503       |                |                  | 2  |
| 15 |             |                 |                |                  |                |                  | R    | 175.118952         | 88.063114       | 158.092403     | 79.549839        |                |                  | 1  |

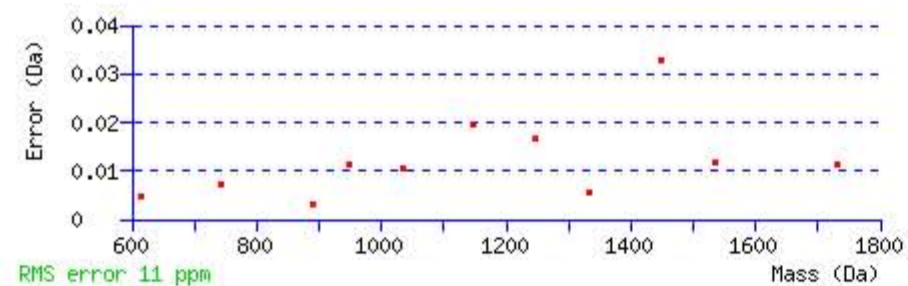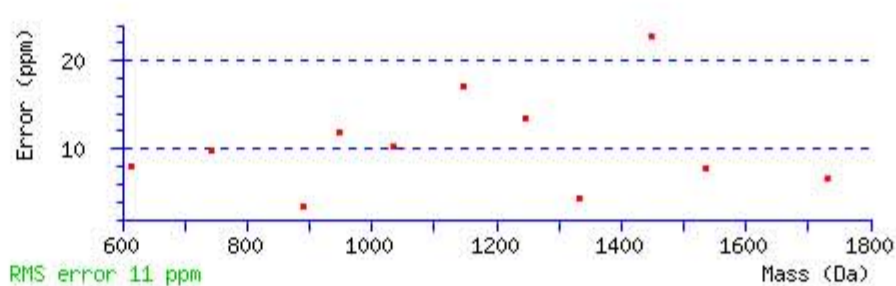

NCBI BLAST search of **SLPVSDSVLSGFQR**

(Parameters: blastp, nr protein database, expect=20000, no filter, PAM30)

Other BLAST [web gateways](#)

All matches to this query

| Score | Mr(calc):   | Delta    | Sequence                       |
|-------|-------------|----------|--------------------------------|
| 87.3  | 1930.982254 | 0.020438 | <a href="#">SLPVSDSVLSGFQR</a> |

Mascot: <http://www.matrixscience.com/>

# MASCOT Search Results

## Peptide View

MS/MS Fragmentation of **VQEAHLTEDQIFYFPK**

Found in **CO8G\_HUMAN**, Complement component C8 gamma chain OS=Homo sapiens GN=C8G PE=1 SV=3

Match to Query 57408: 2275.159482 from(759.393770,3+) rtinseconds(2365) index(27263)

Title: Locus:1.1.1.2965.22 File:"2013-07-02 CLN FXIII 180 min 1st F 2.wiff"

Data file C:\Program Files (x86)\Matrix Science\Mascot Daemon\mgf\7 FXIII 180 min 1st\mascot\_daemon\_merge.mgf

Click mouse within plot area to zoom in by factor of two about that point

Or, Plot from  to  Da

Label all possible matches  Label matches used for scoring

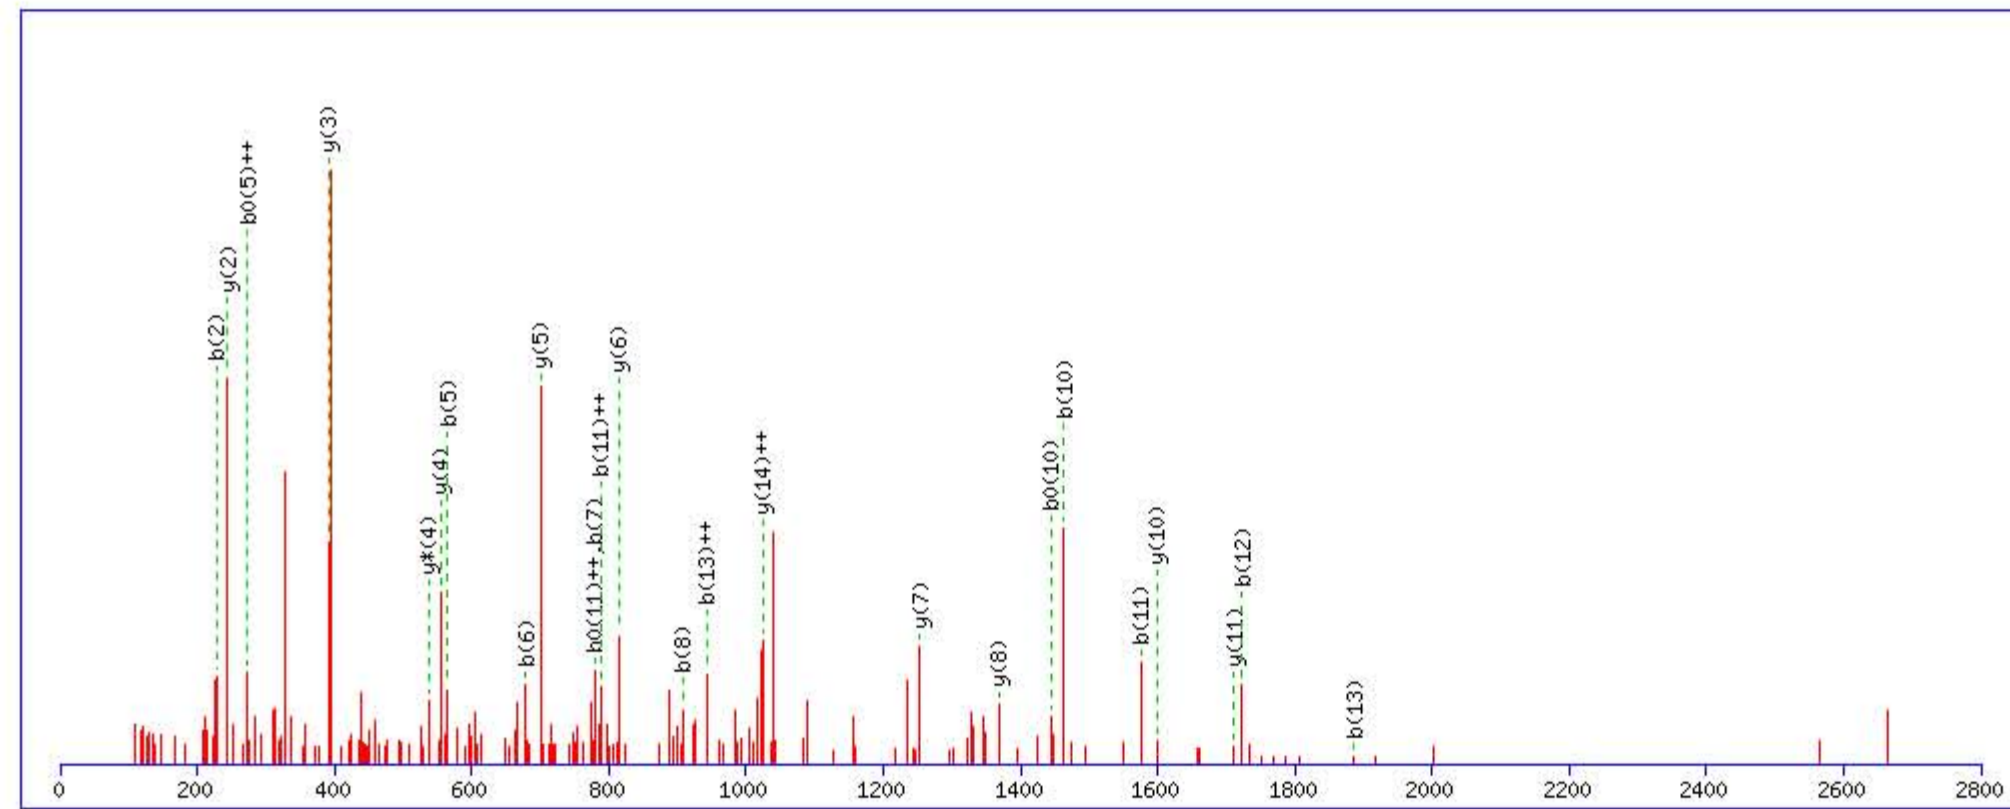

Monoisotopic mass of neutral peptide Mr(calc): 2275.134720

Fixed modifications: Carbamidomethyl (C) (apply to specified residues or termini only)

Variable modifications:

Q10 : Biotin:Thermo-21345 (Q)

Ions Score: 40 Expect: 0.003

Matches : 25/160 fragment ions using 53 most intense peaks [\(help\)](#)

| #  | b                  | b <sup>++</sup>   | b <sup>*</sup> | b <sup>*++</sup> | b <sup>0</sup>     | b <sup>0++</sup>  | Seq. | y                  | y <sup>++</sup>    | y <sup>*</sup>    | y <sup>*++</sup> | y <sup>0</sup> | y <sup>0++</sup> | #  |
|----|--------------------|-------------------|----------------|------------------|--------------------|-------------------|------|--------------------|--------------------|-------------------|------------------|----------------|------------------|----|
| 1  | 100.075690         | 50.541483         |                |                  |                    |                   | V    |                    |                    |                   |                  |                |                  | 16 |
| 2  | <b>228.134268</b>  | 114.570772        | 211.107719     | 106.057498       |                    |                   | Q    | 2177.073591        | 1089.040433        | 2160.047042       | 1080.527159      | 2159.063026    | 1080.035151      | 15 |
| 3  | 357.176861         | 179.092069        | 340.150312     | 170.578794       | 339.166296         | 170.086786        | E    | 2049.015013        | <b>1025.011144</b> | 2031.988464       | 1016.497870      | 2031.004448    | 1016.005862      | 14 |
| 4  | 428.213975         | 214.610626        | 411.187426     | 206.097351       | 410.203410         | 205.605343        | A    | 1919.972420        | 960.489848         | 1902.945871       | 951.976573       | 1901.961855    | 951.484565       | 13 |
| 5  | <b>565.272887</b>  | 283.140082        | 548.246338     | 274.626807       | 547.262322         | <b>274.134799</b> | H    | 1848.935306        | 924.971291         | 1831.908757       | 916.458016       | 1830.924741    | 915.966008       | 12 |
| 6  | <b>678.356951</b>  | 339.682114        | 661.330402     | 331.168839       | 660.346386         | 330.676831        | L    | <b>1711.876394</b> | 856.441835         | 1694.849845       | 847.928561       | 1693.865829    | 847.436552       | 11 |
| 7  | <b>779.404630</b>  | 390.205953        | 762.378081     | 381.692679       | 761.394065         | 381.200671        | T    | <b>1598.792330</b> | 799.899803         | 1581.765781       | 791.386529       | 1580.781765    | 790.894521       | 10 |
| 8  | <b>908.447223</b>  | 454.727250        | 891.420674     | 446.213975       | 890.436658         | 445.721967        | E    | 1497.744651        | 749.375963         | 1480.718102       | 740.862689       | 1479.734086    | 740.370681       | 9  |
| 9  | 1023.474166        | 512.240721        | 1006.447617    | 503.727447       | 1005.463601        | 503.235439        | D    | <b>1368.702058</b> | 684.854667         | 1351.675509       | 676.341392       | 1350.691493    | 675.849384       | 8  |
| 10 | <b>1462.699492</b> | 731.853384        | 1445.672943    | 723.340110       | <b>1444.688927</b> | 722.848101        | Q    | <b>1253.675115</b> | 627.341195         | 1236.648566       | 618.827921       |                |                  | 7  |
| 11 | <b>1575.783556</b> | <b>788.395416</b> | 1558.757007    | 779.882141       | 1557.772991        | <b>779.390133</b> | I    | <b>814.449789</b>  | 407.728533         | 797.423240        | 399.215258       |                |                  | 6  |
| 12 | <b>1722.851970</b> | 861.929623        | 1705.825421    | 853.416349       | 1704.841405        | 852.924340        | F    | <b>701.365725</b>  | 351.186501         | 684.339176        | 342.673226       |                |                  | 5  |
| 13 | <b>1885.915299</b> | <b>943.461288</b> | 1868.888750    | 934.948013       | 1867.904734        | 934.456005        | Y    | <b>554.297311</b>  | 277.652294         | <b>537.270762</b> | 269.139019       |                |                  | 4  |
| 14 | 2032.983713        | 1016.995495       | 2015.957164    | 1008.482220      | 2014.973148        | 1007.990212       | F    | <b>391.233982</b>  | 196.120629         | 374.207433        | 187.607354       |                |                  | 3  |
| 15 | 2130.036477        | 1065.521876       | 2113.009928    | 1057.008602      | 2112.025912        | 1056.516594       | P    | <b>244.165568</b>  | 122.586422         | 227.139019        | 114.073147       |                |                  | 2  |
| 16 |                    |                   |                |                  |                    |                   | K    | 147.112804         | 74.060040          | 130.086255        | 65.546765        |                |                  | 1  |

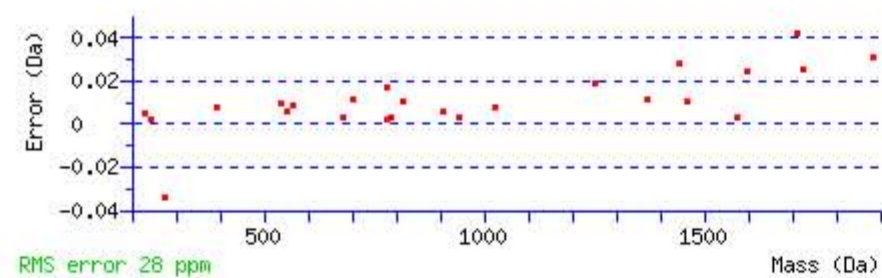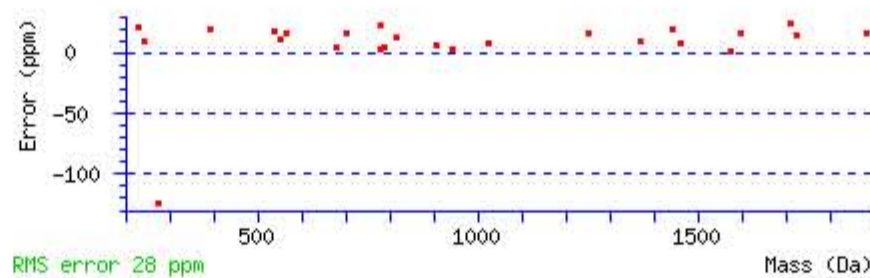

NCBI BLAST search of **VQEAHLTEDQIFYFPK**

(Parameters: blastp, nr protein database, expect=20000, no filter, PAM30)

Other BLAST [web gateways](#)

### All matches to this query

| Score | Mr(calc):   | Delta    | Sequence                         |
|-------|-------------|----------|----------------------------------|
| 40.1  | 2275.134720 | 0.024762 | <a href="#">VQEAHLTEDQIFYFPK</a> |
| 15.8  | 2275.134720 | 0.024762 | <a href="#">VQEAHLTEDQIFYFPK</a> |

Mascot: <http://www.matrixscience.com/>

# MASCOT Search Results

## Peptide View

MS/MS Fragmentation of **YGFCEAADQFHVLDEVR**

Found in **CO8G\_HUMAN**, Complement component C8 gamma chain OS=Homo sapiens GN=C8G PE=1 SV=3

Match to Query 59342: 2366.110392 from(789.710740,3+) rtinseconds(2540) index(28305)

Title: Locus:1.1.1.3026.9 File:"2013-07-02 CLN FXIII 180 min 1st F 2.wiff"

Data file C:\Program Files (x86)\Matrix Science\Mascot Daemon\mgf\7 FXIII 180 min 1st\mascot\_daemon\_merge.mgf

Click mouse within plot area to zoom in by factor of two about that point

Or, Plot from  to  Da

Label all possible matches  Label matches used for scoring

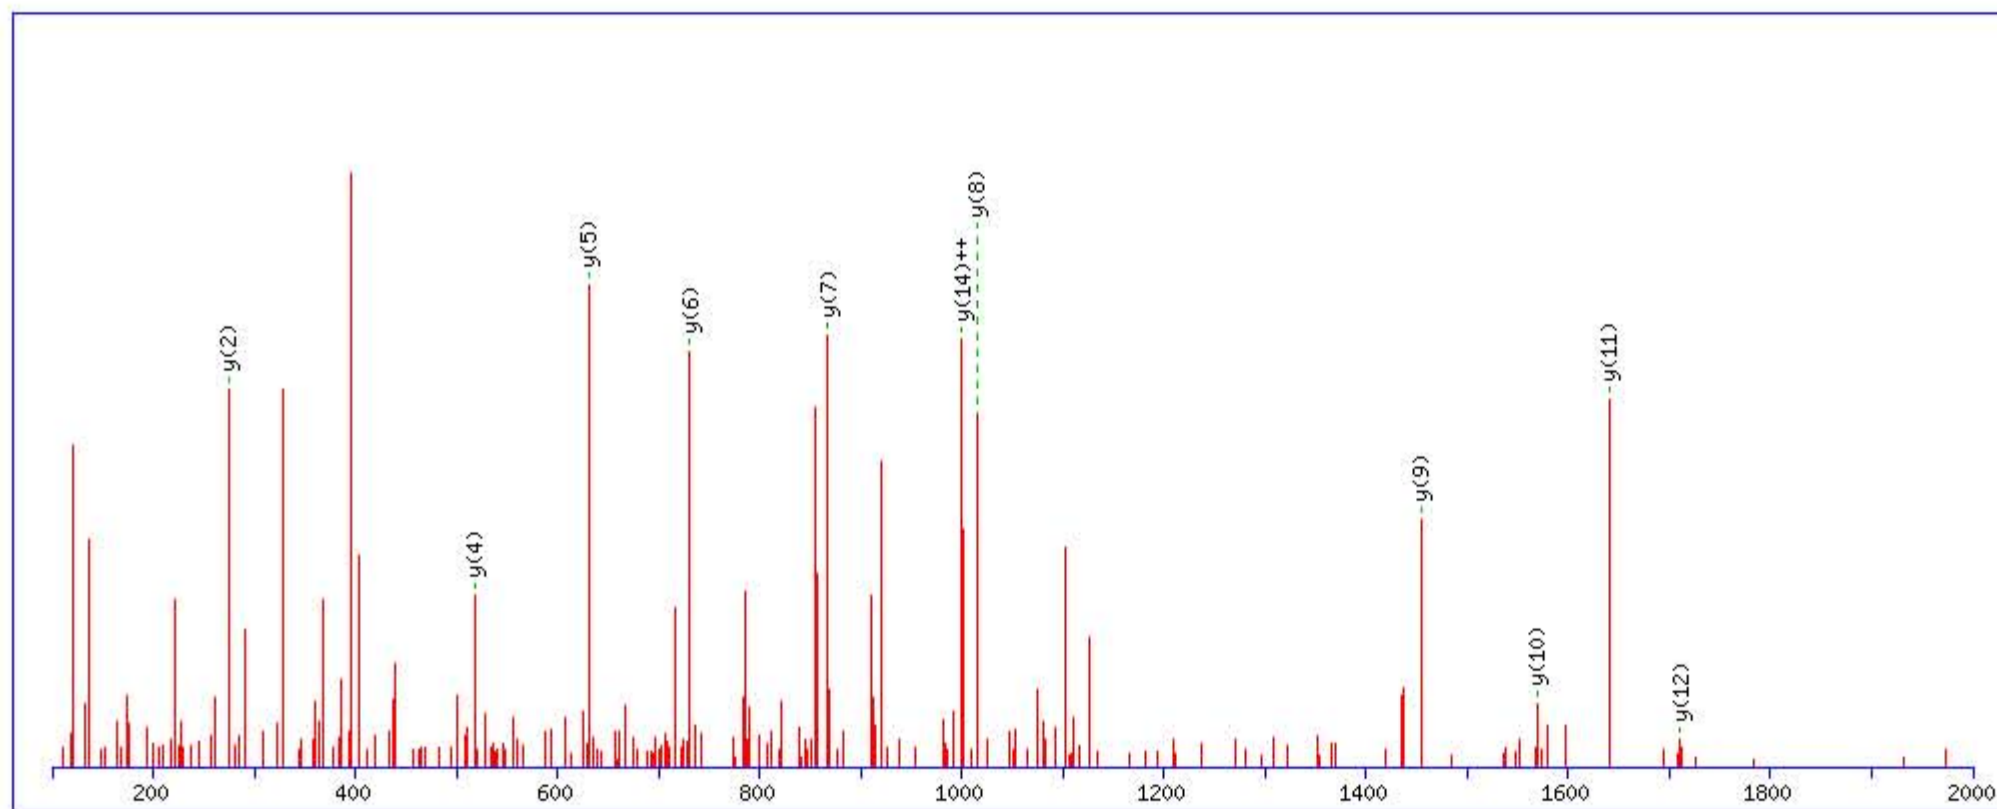

Monoisotopic mass of neutral peptide Mr(calc): 2366.082382

Fixed modifications: Carbamidomethyl (C) (apply to specified residues or termini only)

Variable modifications:

Q9 : Biotin:Thermo-21345 (Q)

Ions Score: 63 Expect: 9.7e-006

Matches : 11/164 fragment ions using 18 most intense peaks ([help](#))

| #  | b           | b <sup>++</sup> | b <sup>*</sup> | b <sup>+++</sup> | b <sup>0</sup> | b <sup>0++</sup> | Seq.     | y                  | y <sup>++</sup>    | y <sup>*</sup> | y <sup>+++</sup> | y <sup>0</sup> | y <sup>0++</sup> | #  |
|----|-------------|-----------------|----------------|------------------|----------------|------------------|----------|--------------------|--------------------|----------------|------------------|----------------|------------------|----|
| 1  | 164.070605  | 82.538940       |                |                  |                |                  | <b>Y</b> |                    |                    |                |                  |                |                  | 17 |
| 2  | 221.092069  | 111.049673      |                |                  |                |                  | <b>G</b> | 2204.026323        | 1102.516799        | 2186.999774    | 1094.003525      | 2186.015758    | 1093.511517      | 16 |
| 3  | 368.160483  | 184.583879      |                |                  |                |                  | <b>F</b> | 2147.004859        | 1074.006067        | 2129.978310    | 1065.492793      | 2128.994294    | 1065.000785      | 15 |
| 4  | 528.191132  | 264.599204      |                |                  |                |                  | <b>C</b> | 1999.936445        | <b>1000.471860</b> | 1982.909896    | 991.958586       | 1981.925880    | 991.466578       | 14 |
| 5  | 657.233725  | 329.120501      |                |                  | 639.223160     | 320.115218       | <b>E</b> | 1839.905796        | 920.456536         | 1822.879247    | 911.943261       | 1821.895231    | 911.451253       | 13 |
| 6  | 728.270839  | 364.639058      |                |                  | 710.260274     | 355.633775       | <b>A</b> | <b>1710.863203</b> | 855.935239         | 1693.836654    | 847.421965       | 1692.852638    | 846.929957       | 12 |
| 7  | 799.307953  | 400.157615      |                |                  | 781.297388     | 391.152332       | <b>A</b> | <b>1639.826089</b> | 820.416682         | 1622.799540    | 811.903408       | 1621.815524    | 811.411400       | 11 |
| 8  | 914.334896  | 457.671086      |                |                  | 896.324331     | 448.665803       | <b>D</b> | <b>1568.788975</b> | 784.898125         | 1551.762426    | 776.384851       | 1550.778410    | 775.892843       | 10 |
| 9  | 1353.560222 | 677.283749      | 1336.533673    | 668.770474       | 1335.549657    | 668.278466       | <b>Q</b> | <b>1453.762032</b> | 727.384654         | 1436.735483    | 718.871379       | 1435.751467    | 718.379371       | 9  |
| 10 | 1500.628636 | 750.817956      | 1483.602087    | 742.304682       | 1482.618071    | 741.812673       | <b>F</b> | <b>1014.536706</b> | 507.771991         | 997.510157     | 499.258717       | 996.526141     | 498.766709       | 8  |
| 11 | 1637.687548 | 819.347412      | 1620.660999    | 810.834138       | 1619.676983    | 810.342129       | <b>H</b> | <b>867.468292</b>  | 434.237784         | 850.441743     | 425.724510       | 849.457727     | 425.232502       | 7  |
| 12 | 1736.755962 | 868.881619      | 1719.729413    | 860.368345       | 1718.745397    | 859.876336       | <b>V</b> | <b>730.409380</b>  | 365.708328         | 713.382831     | 357.195054       | 712.398815     | 356.703046       | 6  |
| 13 | 1849.840026 | 925.423651      | 1832.813477    | 916.910376       | 1831.829461    | 916.418368       | <b>L</b> | <b>631.340966</b>  | 316.174121         | 614.314417     | 307.660846       | 613.330401     | 307.168838       | 5  |
| 14 | 1964.866969 | 982.937122      | 1947.840420    | 974.423848       | 1946.856404    | 973.931840       | <b>D</b> | <b>518.256902</b>  | 259.632089         | 501.230353     | 251.118815       | 500.246337     | 250.626807       | 4  |
| 15 | 2093.909562 | 1047.458419     | 2076.883013    | 1038.945144      | 2075.898997    | 1038.453136      | <b>E</b> | 403.229959         | 202.118617         | 386.203410     | 193.605343       | 385.219394     | 193.113335       | 3  |
| 16 | 2192.977976 | 1096.992626     | 2175.951427    | 1088.479351      | 2174.967411    | 1087.987343      | <b>V</b> | <b>274.187366</b>  | 137.597321         | 257.160817     | 129.084046       |                |                  | 2  |
| 17 |             |                 |                |                  |                |                  | <b>R</b> | 175.118952         | 88.063114          | 158.092403     | 79.549839        |                |                  | 1  |

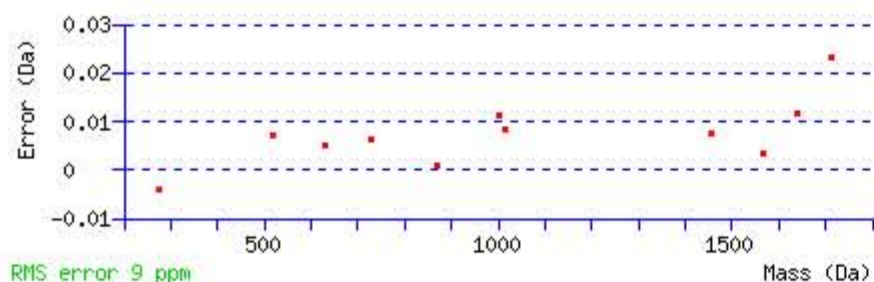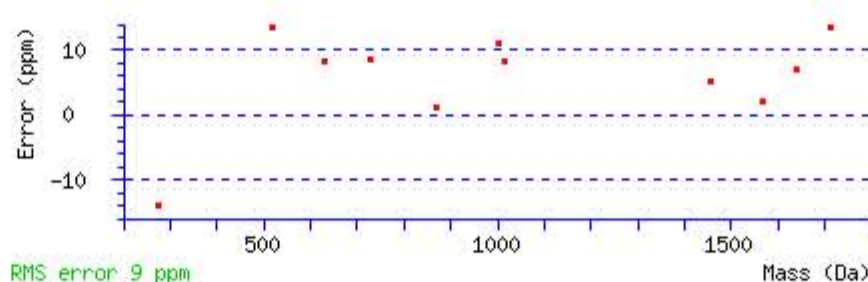

NCBI BLAST search of [YGFCEAADQFHVLDEVR](#)

(Parameters: blastp, nr protein database, expect=20000, no filter, PAM30)

Other BLAST [web gateways](#)

All matches to this query

| Score | Mr(calc):   | Delta    | Sequence                          |
|-------|-------------|----------|-----------------------------------|
| 62.8  | 2366.082382 | 0.028010 | <a href="#">YGFCEAADQFHVLDEVR</a> |

Mascot: <http://www.matrixscience.com/>

# Mascot Search Results

## Peptide View

MS/MS Fragmentation of **AEATTLHVAPQGTAMAVSTFR**

Found in **CO8G\_HUMAN**, Complement component C8 gamma chain OS=Homo sapiens GN=C8G PE=1 SV=3

Match to Query 61936: 2469.280152 from(824.100660,3+) rtinseconds(2100) index(25401)

Title: Locus:1.1.1.2873.25 File:"2013-07-02 CLN FXIII 180 min 1st F 2.wiff"

Data file C:\Program Files (x86)\Matrix Science\Mascot Daemon\mgf7 FXIII 180 min 1st\mascot\_daemon\_merge.mgf

Click mouse within plot area to zoom in by factor of two about that point

Or, Plot from  to  Da

Label all possible matches  Label matches used for scoring

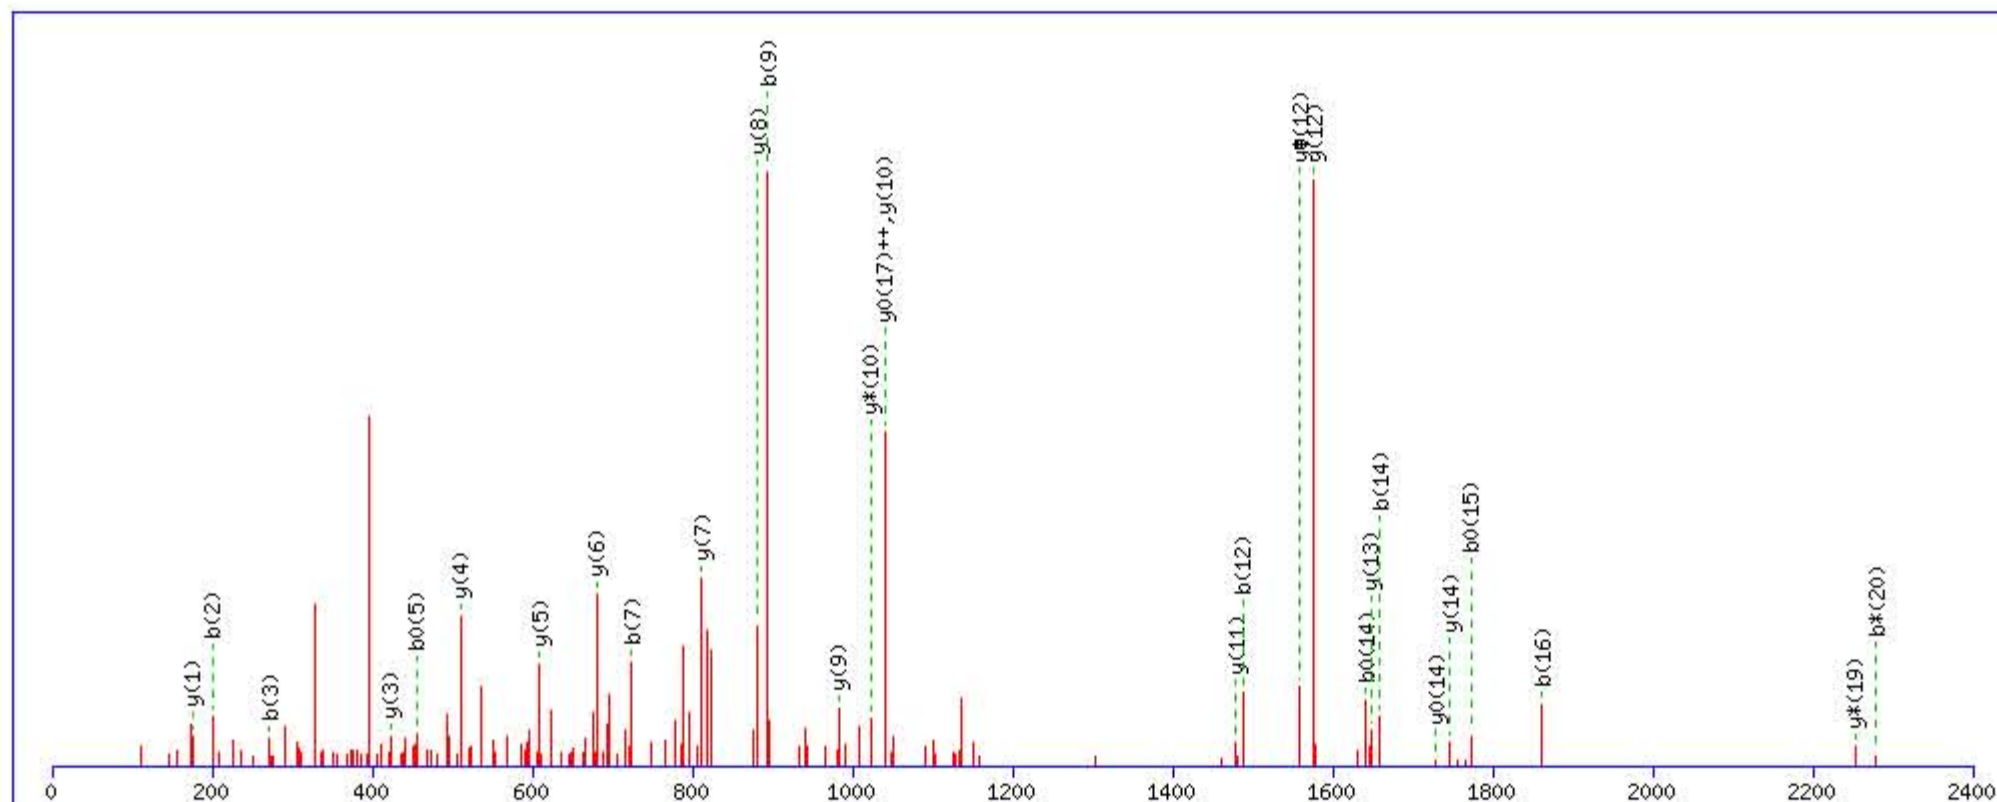

Monoisotopic mass of neutral peptide Mr(calc): 2469.250839

Fixed modifications: Carbamidomethyl (C) (apply to specified residues or termini only)

Variable modifications:

Q11 : Biotin:Thermo-21345 (Q)

Ions Score: 81 Expect: 2.5e-008

Matches : 30/214 fragment ions using 49 most intense peaks ([help](#))

| #  | b                  | b <sup>++</sup> | b <sup>*</sup>     | b <sup>*++</sup> | b <sup>0</sup>     | b <sup>0++</sup> | Seq. | y                  | y <sup>++</sup> | y <sup>*</sup>     | y <sup>*++</sup> | y <sup>0</sup>     | y <sup>0++</sup>   | #  |
|----|--------------------|-----------------|--------------------|------------------|--------------------|------------------|------|--------------------|-----------------|--------------------|------------------|--------------------|--------------------|----|
| 1  | 72.044390          | 36.525833       |                    |                  |                    |                  | A    |                    |                 |                    |                  |                    |                    | 21 |
| 2  | <b>201.086983</b>  | 101.047130      |                    |                  | 183.076418         | 92.041847        | E    | 2399.221002        | 1200.114139     | 2382.194453        | 1191.600864      | 2381.210437        | 1191.108856        | 20 |
| 3  | <b>272.124097</b>  | 136.565687      |                    |                  | 254.113532         | 127.560404       | A    | 2270.178409        | 1135.592842     | <b>2253.151860</b> | 1127.079568      | 2252.167844        | 1126.587560        | 19 |
| 4  | 373.171776         | 187.089526      |                    |                  | 355.161211         | 178.084244       | T    | 2199.141295        | 1100.074285     | 2182.114746        | 1091.561011      | 2181.130730        | 1091.069003        | 18 |
| 5  | 474.219455         | 237.613366      |                    |                  | <b>456.208890</b>  | 228.608083       | T    | 2098.093616        | 1049.550446     | 2081.067067        | 1041.037171      | 2080.083051        | <b>1040.545163</b> | 17 |
| 6  | 587.303519         | 294.155398      |                    |                  | 569.292954         | 285.150115       | L    | 1997.045937        | 999.026606      | 1980.019388        | 990.513332       | 1979.035372        | 990.021324         | 16 |
| 7  | <b>724.362431</b>  | 362.684854      |                    |                  | 706.351866         | 353.679571       | H    | 1883.961873        | 942.484574      | 1866.935324        | 933.971300       | 1865.951308        | 933.479292         | 15 |
| 8  | 823.430845         | 412.219061      |                    |                  | 805.420280         | 403.213778       | V    | <b>1746.902961</b> | 873.955118      | 1729.876412        | 865.441844       | <b>1728.892396</b> | 864.949836         | 14 |
| 9  | <b>894.467959</b>  | 447.737618      |                    |                  | 876.457394         | 438.732335       | A    | <b>1647.834547</b> | 824.420911      | 1630.807998        | 815.907637       | 1629.823982        | 815.415629         | 13 |
| 10 | 991.520723         | 496.264000      |                    |                  | 973.510158         | 487.258717       | P    | <b>1576.797433</b> | 788.902355      | <b>1559.770884</b> | 780.389080       | <b>1558.786868</b> | 779.897072         | 12 |
| 11 | 1430.746049        | 715.876663      | 1413.719500        | 707.363388       | 1412.735484        | 706.871380       | Q    | <b>1479.744669</b> | 740.375972      | 1462.718120        | 731.862698       | 1461.734104        | 731.370690         | 11 |
| 12 | <b>1487.767513</b> | 744.387395      | 1470.740964        | 735.874120       | 1469.756948        | 735.382112       | G    | <b>1040.519343</b> | 520.763309      | <b>1023.492794</b> | 512.250035       | 1022.508778        | 511.758027         | 10 |
| 13 | 1588.815192        | 794.911234      | 1571.788643        | 786.397960       | 1570.804627        | 785.905952       | T    | <b>983.497879</b>  | 492.252577      | 966.471330         | 483.739303       | 965.487314         | 483.247295         | 9  |
| 14 | <b>1659.852306</b> | 830.429791      | 1642.825757        | 821.916517       | <b>1641.841741</b> | 821.424509       | A    | <b>882.450200</b>  | 441.728738      | 865.423651         | 433.215463       | 864.439635         | 432.723455         | 8  |
| 15 | 1790.892791        | 895.950034      | 1773.866242        | 887.436759       | <b>1772.882226</b> | 886.944751       | M    | <b>811.413086</b>  | 406.210181      | 794.386537         | 397.696906       | 793.402521         | 397.204898         | 7  |
| 16 | <b>1861.929905</b> | 931.468591      | 1844.903356        | 922.955316       | 1843.919340        | 922.463308       | A    | <b>680.372601</b>  | 340.689938      | 663.346052         | 332.176664       | 662.362036         | 331.684656         | 6  |
| 17 | 1960.998319        | 981.002798      | 1943.971770        | 972.489523       | 1942.987754        | 971.997515       | V    | <b>609.335487</b>  | 305.171381      | 592.308938         | 296.658107       | 591.324922         | 296.166099         | 5  |
| 18 | 2048.030347        | 1024.518812     | 2031.003798        | 1016.005537      | 2030.019782        | 1015.513529      | S    | <b>510.267073</b>  | 255.637174      | 493.240524         | 247.123900       | 492.256508         | 246.631892         | 4  |
| 19 | 2149.078026        | 1075.042651     | 2132.051477        | 1066.529376      | 2131.067461        | 1066.037368      | T    | <b>423.235045</b>  | 212.121160      | 406.208496         | 203.607886       | 405.224480         | 203.115878         | 3  |
| 20 | 2296.146440        | 1148.576858     | <b>2279.119891</b> | 1140.063583      | 2278.135875        | 1139.571575      | F    | 322.187366         | 161.597321      | 305.160817         | 153.084046       |                    |                    | 2  |
| 21 |                    |                 |                    |                  |                    |                  | R    | <b>175.118952</b>  | 88.063114       | 158.092403         | 79.549839        |                    |                    | 1  |

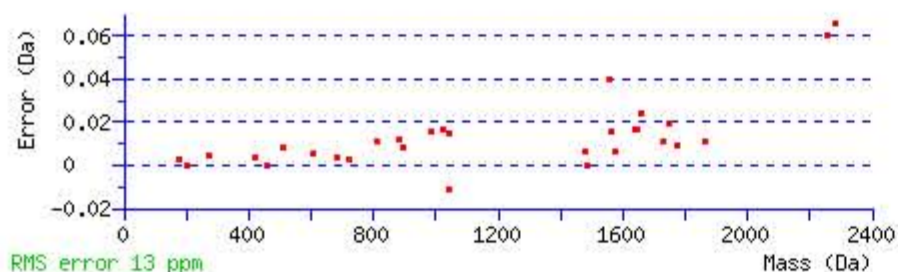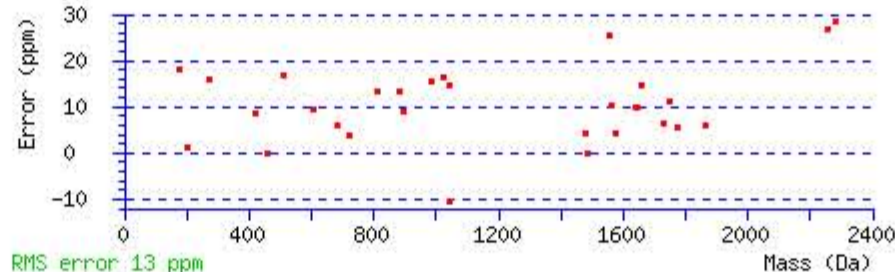

NCBI BLAST search of **AEATTLHVAPQGTAMAVSTFR**

(Parameters: blastp, nr protein database, expect=20000, no filter, PAM30)

Other BLAST [web gateways](#)

All matches to this query

| Score | Mr(calc):   | Delta    | Sequence                              |
|-------|-------------|----------|---------------------------------------|
| 81.2  | 2469.250839 | 0.029313 | <a href="#">AEATTLHVAPQGTAMAVSTFR</a> |
| 0.1   | 2469.246765 | 0.033387 | <a href="#">LSSQLVEHCQKLEEQMNKLR</a>  |

# MASCOT Search Results

## Peptide View

MS/MS Fragmentation of **TEHYEEQIEAFK**

Found in **CO9\_HUMAN**, Complement component C9 OS=Homo sapiens GN=C9 PE=1 SV=2

Match to Query 46105: 1833.881292 from(612.301040,3+) rtinseconds(1950) index(41861)

Title: Locus:1.1.1.3128.16 File:"2013-07-02 CLN FXIII 180 min 1st F 3.wiff"

Data file C:\Program Files (x86)\Matrix Science\Mascot Daemon\mgf7 FXIII 180 min 1st\mascot\_daemon\_merge.mgf

Click mouse within plot area to zoom in by factor of two about that point

Or, Plot from  to  Da

Label all possible matches  Label matches used for scoring

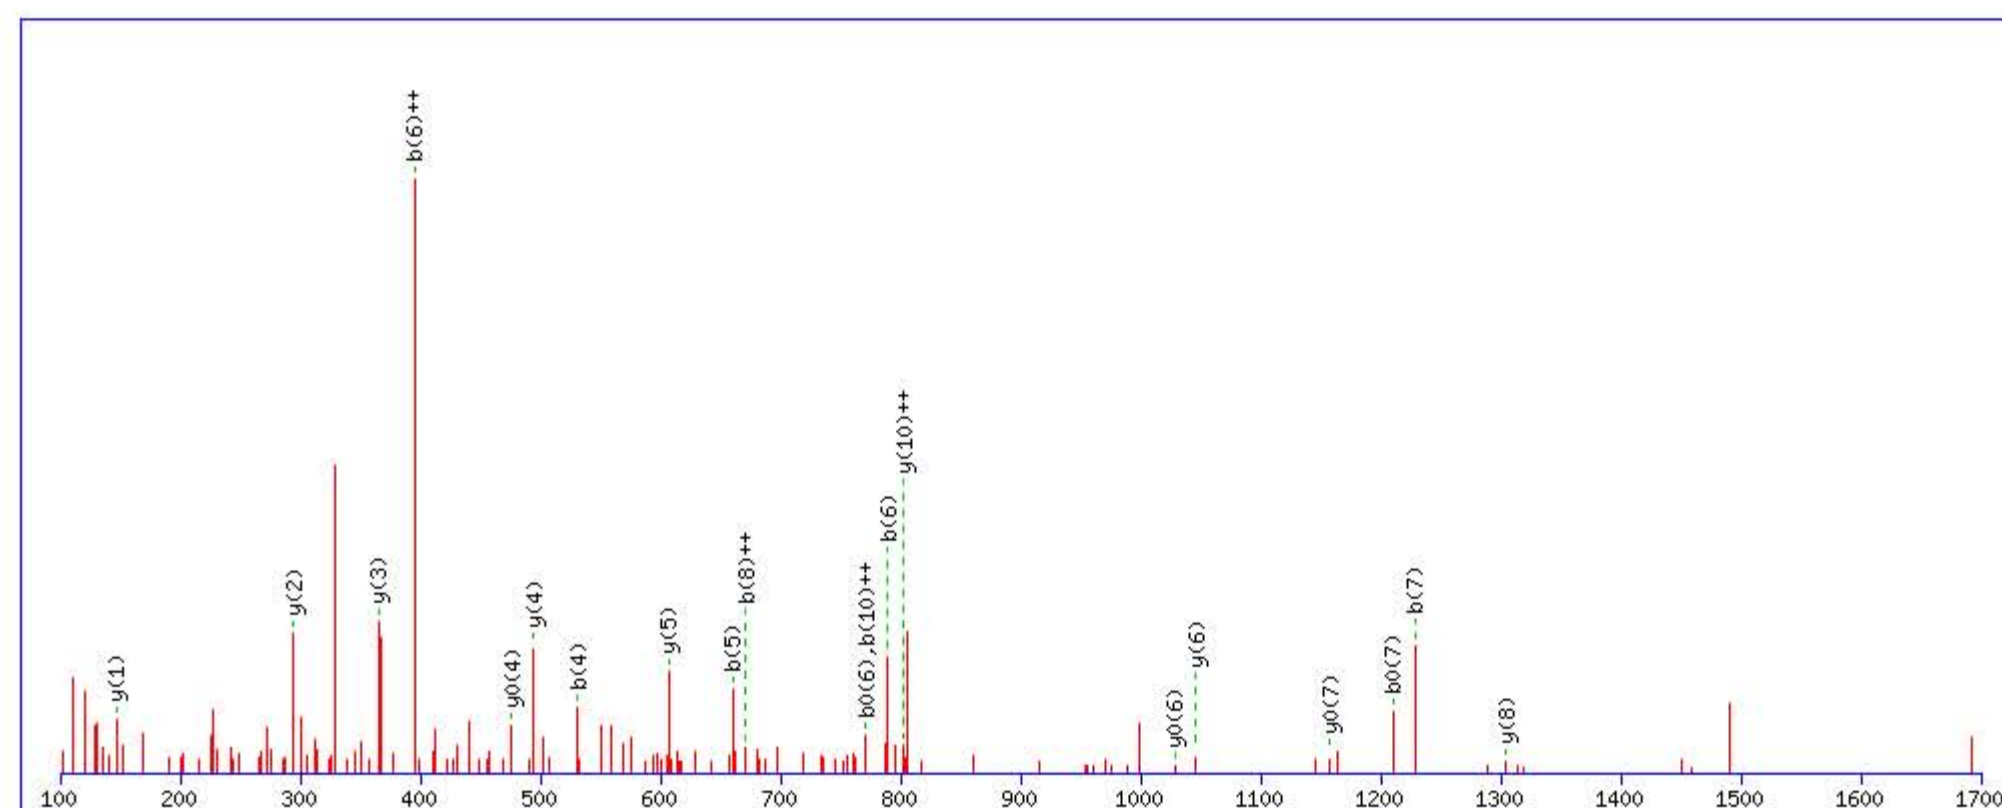

Monoisotopic mass of neutral peptide  $M_r(\text{calc})$ : 1833.860703

Fixed modifications: Carbamidomethyl (C) (apply to specified residues or termini only)

Variable modifications:

Q7 : Biotin:Thermo-21345 (Q)

Ions Score: 26 Expect: 0.055

Matches : 20/114 fragment ions using 42 most intense peaks [\(help\)](#)

| #  | b                  | b <sup>++</sup>   | b <sup>+</sup> | b <sup>*++</sup> | b <sup>0</sup>     | b <sup>0++</sup> | Seq. | y                  | y <sup>++</sup>   | y <sup>+</sup> | y <sup>*++</sup> | y <sup>0</sup>     | y <sup>0++</sup> | #  |
|----|--------------------|-------------------|----------------|------------------|--------------------|------------------|------|--------------------|-------------------|----------------|------------------|--------------------|------------------|----|
| 1  | 102.054955         | 51.531116         |                |                  | 84.044390          | 42.525833        | T    |                    |                   |                |                  |                    |                  | 12 |
| 2  | 231.097548         | 116.052412        |                |                  | 213.086983         | 107.047130       | E    | 1733.820335        | 867.413805        | 1716.793786    | 858.900531       | 1715.809770        | 858.408523       | 11 |
| 3  | 368.156460         | 184.581868        |                |                  | 350.145895         | 175.576585       | H    | 1604.777742        | <b>802.892509</b> | 1587.751193    | 794.379235       | 1586.767177        | 793.887227       | 10 |
| 4  | <b>531.219789</b>  | 266.113533        |                |                  | 513.209224         | 257.108250       | Y    | 1467.718830        | 734.363053        | 1450.692281    | 725.849779       | 1449.708265        | 725.357771       | 9  |
| 5  | <b>660.262382</b>  | 330.634829        |                |                  | 642.251817         | 321.629547       | E    | <b>1304.655501</b> | 652.831389        | 1287.628952    | 644.318114       | 1286.644936        | 643.826106       | 8  |
| 6  | <b>789.304975</b>  | <b>395.156126</b> |                |                  | <b>771.294410</b>  | 386.150843       | E    | 1175.612908        | 588.310092        | 1158.586359    | 579.796817       | <b>1157.602343</b> | 579.304809       | 7  |
| 7  | <b>1228.530301</b> | 614.768789        | 1211.503752    | 606.255514       | <b>1210.519736</b> | 605.763506       | Q    | <b>1046.570315</b> | 523.788795        | 1029.543766    | 515.275521       | <b>1028.559750</b> | 514.783513       | 6  |
| 8  | 1341.614365        | <b>671.310820</b> | 1324.587816    | 662.797546       | 1323.603800        | 662.305538       | I    | <b>607.344989</b>  | 304.176132        | 590.318440     | 295.662858       | 589.334424         | 295.170850       | 5  |
| 9  | 1470.656958        | 735.832117        | 1453.630409    | 727.318842       | 1452.646393        | 726.826834       | E    | <b>494.260925</b>  | 247.634100        | 477.234376     | 239.120826       | <b>476.250360</b>  | 238.628818       | 4  |
| 10 | 1541.694072        | <b>771.350674</b> | 1524.667523    | 762.837399       | 1523.683507        | 762.345391       | A    | <b>365.218332</b>  | 183.112804        | 348.191783     | 174.599530       |                    |                  | 3  |
| 11 | 1688.762486        | 844.884881        | 1671.735937    | 836.371606       | 1670.751921        | 835.879598       | F    | <b>294.181218</b>  | 147.594247        | 277.154669     | 139.080973       |                    |                  | 2  |
| 12 |                    |                   |                |                  |                    |                  | K    | <b>147.112804</b>  | 74.060040         | 130.086255     | 65.546765        |                    |                  | 1  |

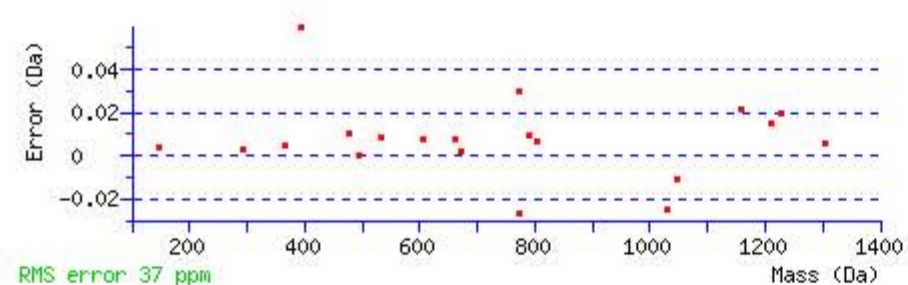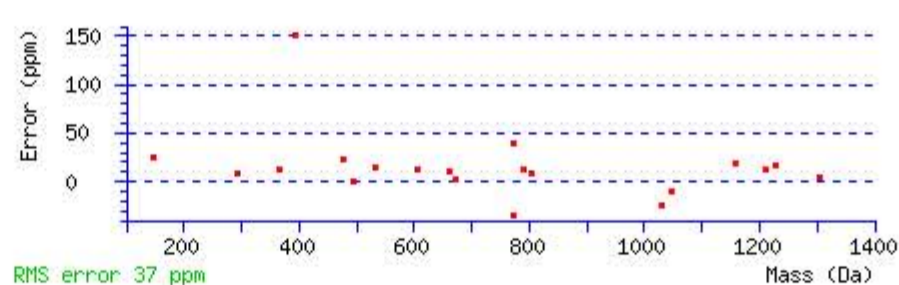

NCBI BLAST search of [TEHYEEQIEAFK](#)

(Parameters: blastp, nr protein database, expect=20000, no filter, PAM30)

Other BLAST [web gateways](#)

All matches to this query

| Score | $M_r(\text{calc})$ : | Delta    | Sequence                     |
|-------|----------------------|----------|------------------------------|
| 26.1  | 1833.860703          | 0.020589 | <a href="#">TEHYEEQIEAFK</a> |

Mascot: <http://www.matrixscience.com/>

# MASCOT Search Results

## Peptide View

MS/MS Fragmentation of **AEQCCEETASSISLHGK**  
 Found in **CO9\_HUMAN**, Complement component C9 OS=Homo sapiens GN=C9 PE=1 SV=2

Match to Query 55889: 2217.007872 from(740.009900,3+) rtinseconds(1570) index(39316)  
 Title: Locus:1.1.1.2996.14 File:"2013-07-02 CLN FXIII 180 min 1st F 3.wiff"  
 Data file C:\Program Files (x86)\Matrix Science\Mascot Daemon\mgf\7 FXIII 180 min 1st\mascot\_daemon\_merge.mgf

Click mouse within plot area to zoom in by factor of two about that point  
 Or, Plot from  to  Da   
 Label all possible matches  Label matches used for scoring

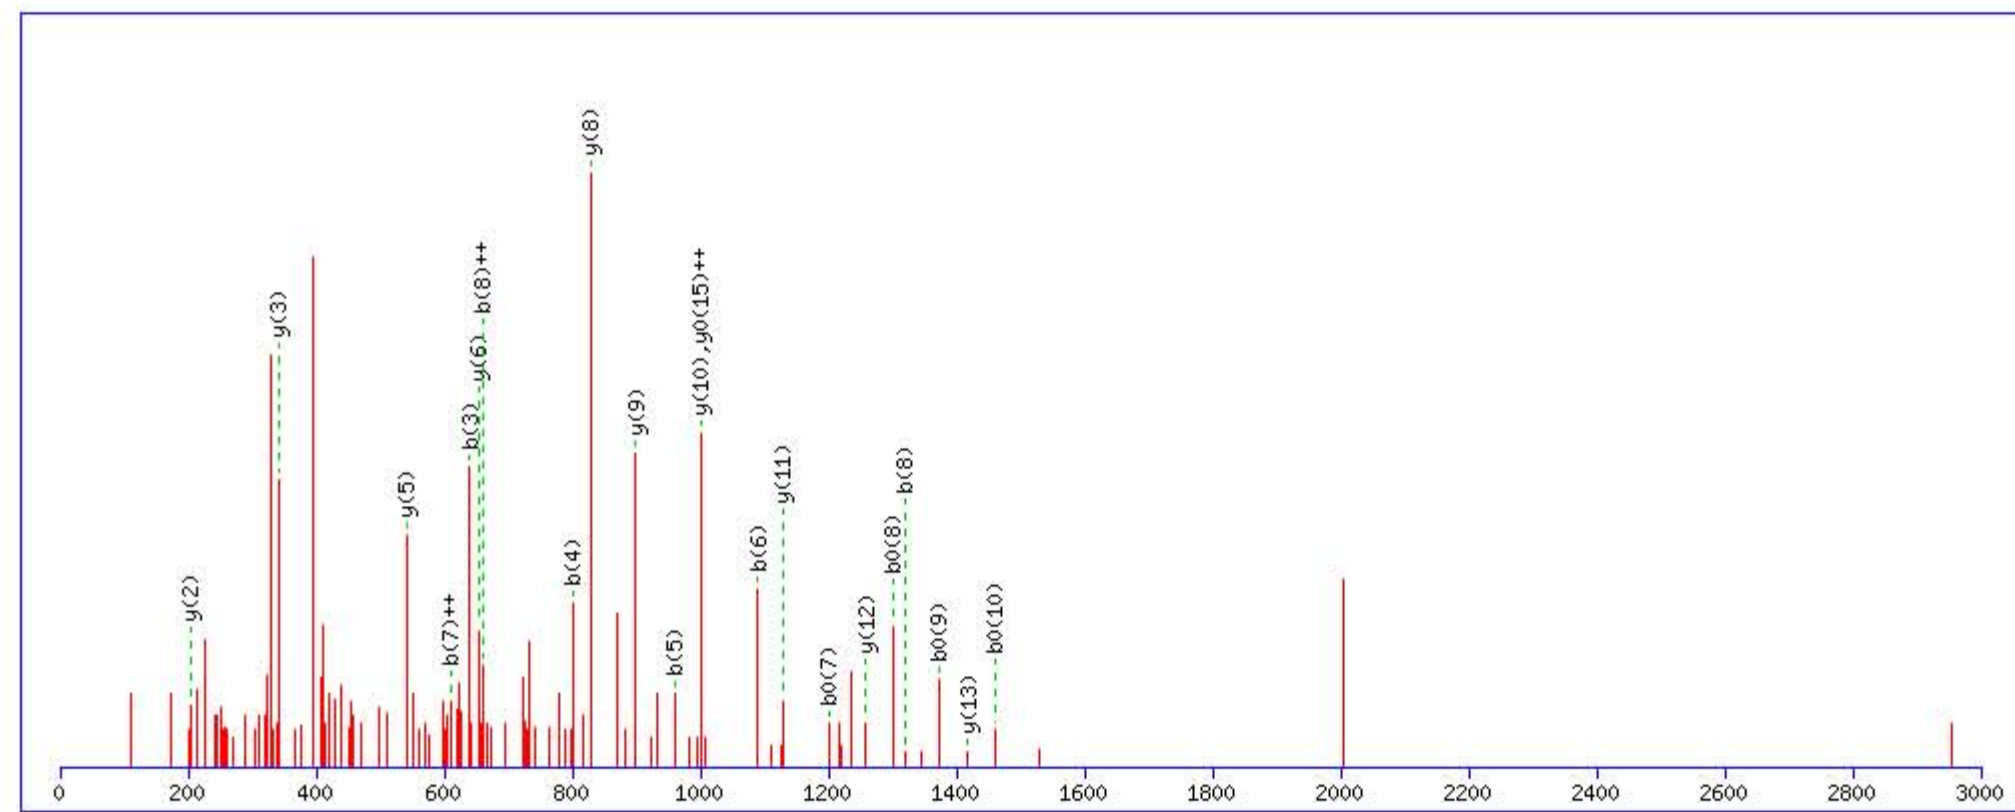

Monoisotopic mass of neutral peptide Mr(calc): 2216.986404  
 Fixed modifications: Carbamidomethyl (C) (apply to specified residues or termini only)  
 Variable modifications:  
 Q3 : Biotin:Thermo-21345 (Q)  
 Ions Score: 51 Expect: 0.00011  
 Matches : 22/178 fragment ions using 42 most intense peaks [\(help\)](#)

| #  | b                  | b <sup>++</sup>   | b <sup>*</sup> | b <sup>+++</sup> | b <sup>0</sup>     | b <sup>0++</sup> | Seq. | y                  | y <sup>++</sup> | y <sup>*</sup> | y <sup>+++</sup> | y <sup>0</sup> | y <sup>0++</sup>   | #  |
|----|--------------------|-------------------|----------------|------------------|--------------------|------------------|------|--------------------|-----------------|----------------|------------------|----------------|--------------------|----|
| 1  | 72.044390          | 36.525833         |                |                  |                    |                  | A    |                    |                 |                |                  |                |                    | 17 |
| 2  | 201.086983         | 101.047130        |                |                  | 183.076418         | 92.041847        | E    | 2146.956588        | 1073.981932     | 2129.930039    | 1065.468657      | 2128.946023    | 1064.976649        | 16 |
| 3  | <b>640.312309</b>  | 320.659793        | 623.285760     | 312.146518       | 622.301744         | 311.654510       | Q    | 2017.913995        | 1009.460636     | 2000.887446    | 1000.947361      | 1999.903430    | <b>1000.455353</b> | 15 |
| 4  | <b>800.342958</b>  | 400.675117        | 783.316409     | 392.161843       | 782.332393         | 391.669835       | C    | 1578.688669        | 789.847972      | 1561.662120    | 781.334698       | 1560.678104    | 780.842690         | 14 |
| 5  | <b>960.373607</b>  | 480.690442        | 943.347058     | 472.177167       | 942.363042         | 471.685159       | C    | <b>1418.658020</b> | 709.832648      | 1401.631471    | 701.319374       | 1400.647455    | 700.827366         | 13 |
| 6  | <b>1089.416200</b> | 545.211738        | 1072.389651    | 536.698464       | 1071.405635        | 536.206456       | E    | <b>1258.627371</b> | 629.817323      | 1241.600822    | 621.304049       | 1240.616806    | 620.812041         | 12 |
| 7  | 1218.458793        | <b>609.733035</b> | 1201.432244    | 601.219760       | <b>1200.448228</b> | 600.727752       | E    | <b>1129.584778</b> | 565.296027      | 1112.558229    | 556.782753       | 1111.574213    | 556.290744         | 11 |
| 8  | <b>1319.506472</b> | <b>660.256874</b> | 1302.479923    | 651.743600       | <b>1301.495907</b> | 651.251592       | T    | <b>1000.542185</b> | 500.774731      | 983.515636     | 492.261456       | 982.531620     | 491.769448         | 10 |
| 9  | 1390.543586        | 695.775431        | 1373.517037    | 687.262157       | <b>1372.533021</b> | 686.770149       | A    | <b>899.494506</b>  | 450.250891      | 882.467957     | 441.737617       | 881.483941     | 441.245609         | 9  |
| 10 | 1477.575614        | 739.291445        | 1460.549065    | 730.778171       | <b>1459.565049</b> | 730.286163       | S    | <b>828.457392</b>  | 414.732334      | 811.430843     | 406.219060       | 810.446827     | 405.727052         | 8  |
| 11 | 1564.607642        | 782.807459        | 1547.581093    | 774.294185       | 1546.597077        | 773.802177       | S    | 741.425364         | 371.216320      | 724.398815     | 362.703045       | 723.414799     | 362.211037         | 7  |
| 12 | 1677.691706        | 839.349491        | 1660.665157    | 830.836217       | 1659.681141        | 830.344209       | I    | <b>654.393336</b>  | 327.700306      | 637.366787     | 319.187031       | 636.382771     | 318.695023         | 6  |
| 13 | 1764.723734        | 882.865505        | 1747.697185    | 874.352231       | 1746.713169        | 873.860223       | S    | <b>541.309272</b>  | 271.158274      | 524.282723     | 262.644999       | 523.298707     | 262.152991         | 5  |
| 14 | 1877.807798        | 939.407537        | 1860.781249    | 930.894263       | 1859.797233        | 930.402255       | L    | 454.277244         | 227.642260      | 437.250695     | 219.128985       |                |                    | 4  |
| 15 | 2014.866710        | 1007.936993       | 1997.840161    | 999.423719       | 1996.856145        | 998.931711       | H    | <b>341.193180</b>  | 171.100228      | 324.166631     | 162.586953       |                |                    | 3  |
| 16 | 2071.888174        | 1036.447725       | 2054.861625    | 1027.934450      | 2053.877609        | 1027.442442      | G    | <b>204.134268</b>  | 102.570772      | 187.107719     | 94.057497        |                |                    | 2  |
| 17 |                    |                   |                |                  |                    |                  | K    | 147.112804         | 74.060040       | 130.086255     | 65.546765        |                |                    | 1  |

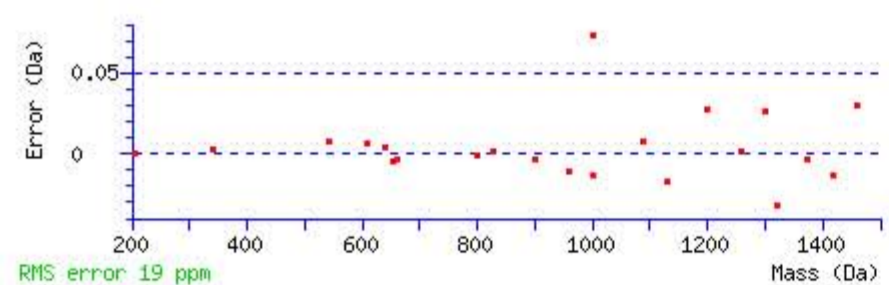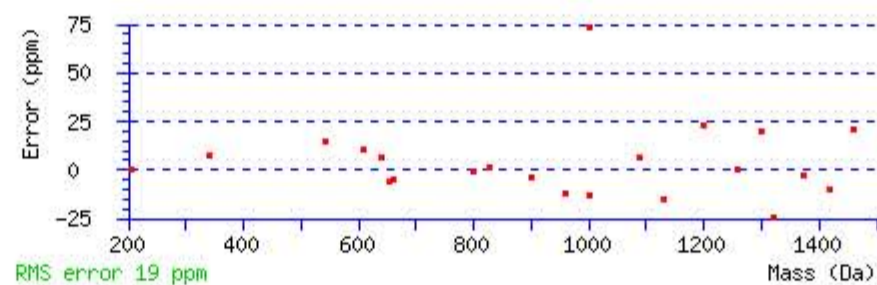

NCBI BLAST search of **AEQCCEETASSISLHGK**  
 (Parameters: blastp, nr protein database, expect=20000, no filter, PAM30)  
 Other BLAST [web gateways](#)

### All matches to this query

| Score | Mr(calc):   | Delta    | Sequence                          |
|-------|-------------|----------|-----------------------------------|
| 50.9  | 2216.986404 | 0.021468 | <a href="#">AEQCCEETASSISLHGK</a> |





# MASCOT Search Results

## Peptide View

### MS/MS Fragmentation of VGSQYR

Found in **CFAB\_HUMAN**, Complement factor B OS=Homo sapiens GN=CFB PE=1 SV=2

Match to Query 16512: 1019.527488 from(510.771020,2+) rtinseconds(1374) index(2387)

Title: Locus:1.1.1.2732.18 File:"2013-07-02 CLN FXIII 180 min 1st F 1.wiff"

Data file C:\Program Files (x86)\Matrix Science\Mascot Daemon\mgf\7 FXIII 180 min 1st\mascot\_daemon\_merge.mgf

Click mouse within plot area to zoom in by factor of two about that point

Or, Plot from  to  Da

Label all possible matches  Label matches used for scoring

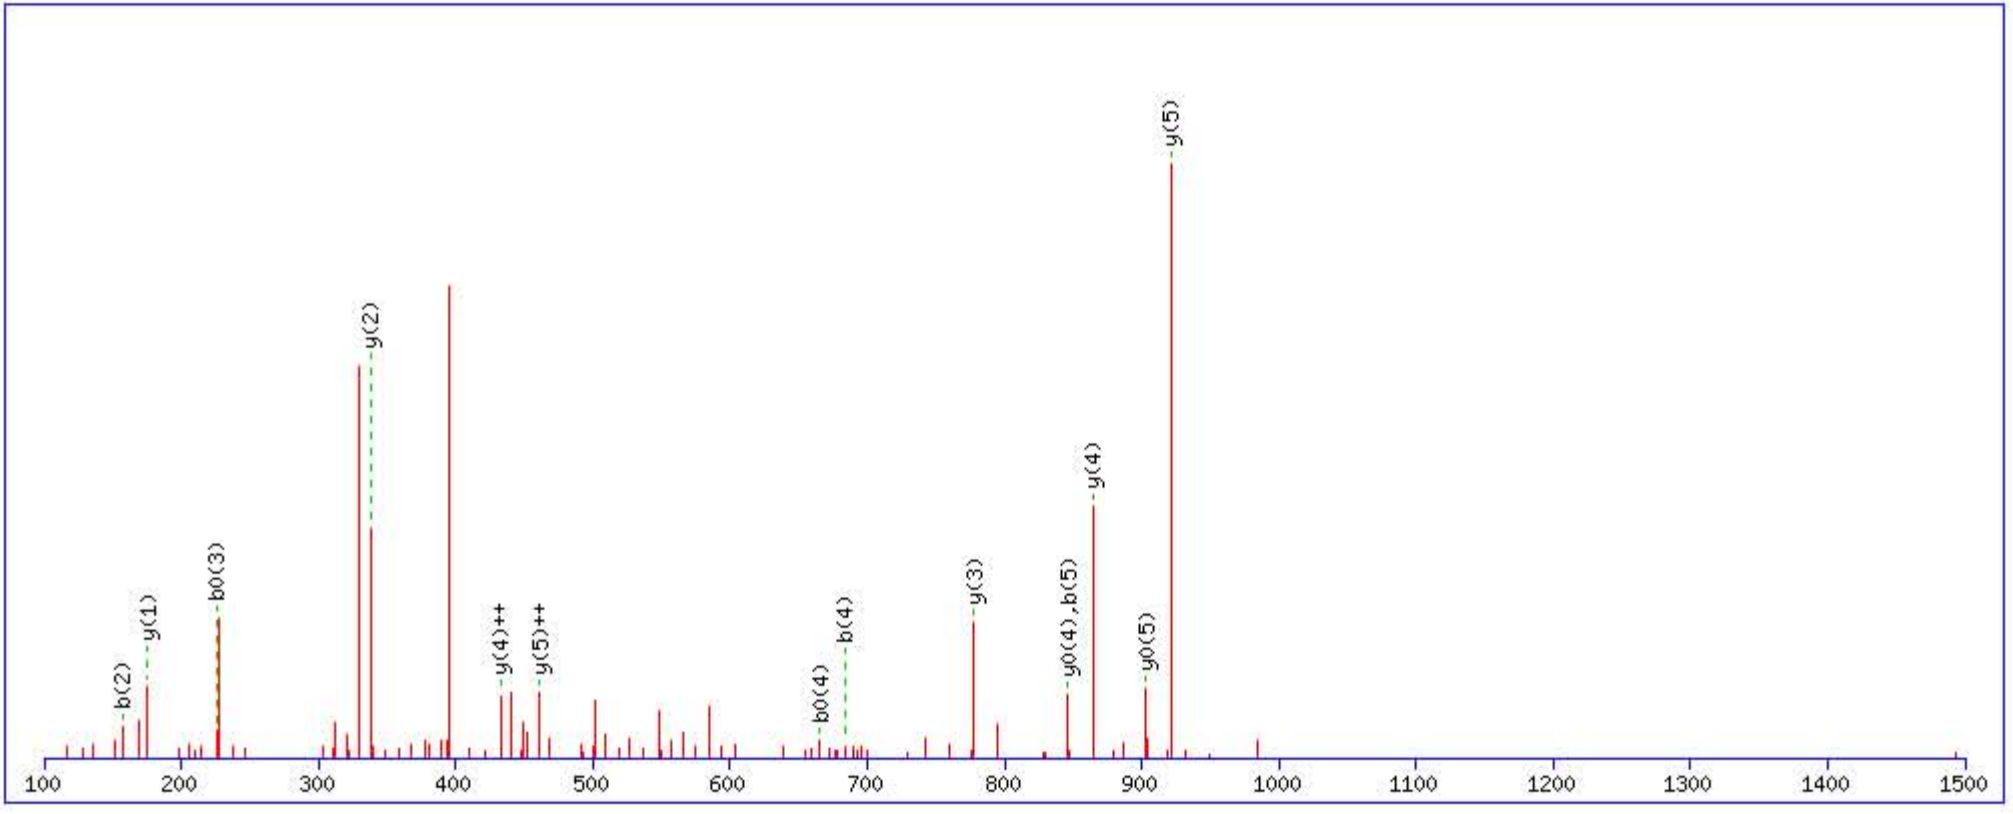

Monoisotopic mass of neutral peptide Mr(calc): 1019.522232

Fixed modifications: Carbamidomethyl (C) (apply to specified residues or termini only)

Variable modifications:

Q4 : Biotin:Thermo-21345 (Q)

Ions Score: 25 Expect: 0.063

Matches : 14/44 fragment ions using 27 most intense peaks [\(help\)](#)

| # | b          | b <sup>++</sup> | b <sup>*</sup> | b <sup>+++</sup> | b <sup>0</sup> | b <sup>0++</sup> | Seq. | y          | y <sup>++</sup> | y <sup>*</sup> | y <sup>+++</sup> | y <sup>0</sup> | y <sup>0++</sup> | # |
|---|------------|-----------------|----------------|------------------|----------------|------------------|------|------------|-----------------|----------------|------------------|----------------|------------------|---|
| 1 | 100.075690 | 50.541483       |                |                  |                |                  | V    |            |                 |                |                  |                |                  | 6 |
| 2 | 157.097154 | 79.052215       |                |                  |                |                  | G    | 921.461099 | 461.234188      | 904.434550     | 452.720913       | 903.450534     | 452.228905       | 5 |
| 3 | 244.129182 | 122.568229      |                |                  | 226.118617     | 113.562946       | S    | 864.439635 | 432.723456      | 847.413086     | 424.210181       | 846.429070     | 423.718173       | 4 |
| 4 | 683.354508 | 342.180892      | 666.327959     | 333.667618       | 665.343943     | 333.175610       | Q    | 777.407607 | 389.207442      | 760.381058     | 380.694167       |                |                  | 3 |
| 5 | 846.417837 | 423.712557      | 829.391288     | 415.199282       | 828.407272     | 414.707274       | Y    | 338.182281 | 169.594778      | 321.155732     | 161.081504       |                |                  | 2 |
| 6 |            |                 |                |                  |                |                  | R    | 175.118952 | 88.063114       | 158.092403     | 79.549839        |                |                  | 1 |

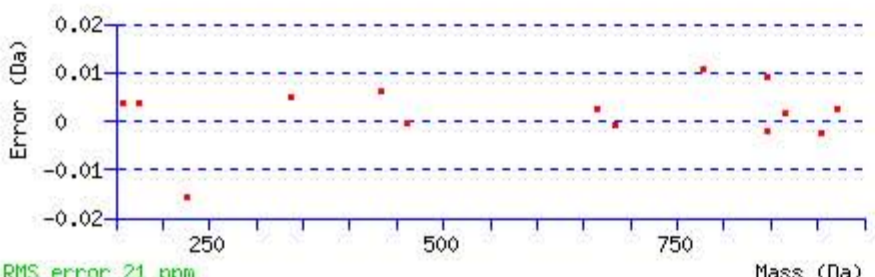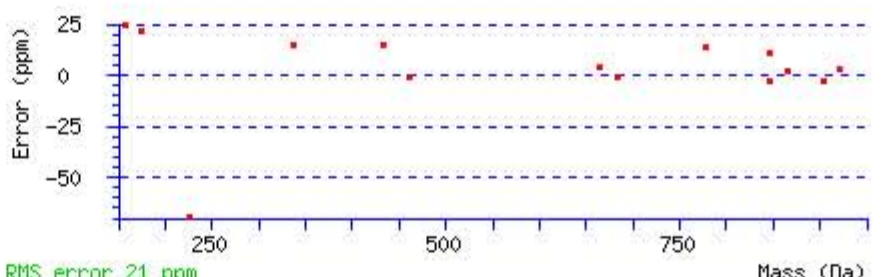

### NCBI BLAST search of VGSQYR

(Parameters: blastp, nr protein database, expect=20000, no filter, PAM30)

Other BLAST [web gateways](#)

### All matches to this query

| Score | Mr(calc):   | Delta     | Sequence                   |
|-------|-------------|-----------|----------------------------|
| 25.2  | 1019.522232 | 0.005256  | <a href="#">VGSQYR</a>     |
| 14.9  | 1019.539993 | -0.012505 | <a href="#">VGEAFALTGR</a> |
| 12.2  | 1019.533447 | -0.005959 | <a href="#">RSQYR</a>      |
| 4.5   | 1019.533447 | -0.005959 | <a href="#">QSRYR</a>      |
| 3.8   | 1019.539963 | -0.012475 | <a href="#">NVILENYR</a>   |
| 3.4   | 1019.533447 | -0.005959 | <a href="#">RQSYR</a>      |
| 3.2   | 1019.526047 | 0.001441  | <a href="#">SRERGPYR</a>   |
| 2.6   | 1019.525589 | 0.001899  | <a href="#">VMMEVQKR</a>   |
| 2.5   | 1019.539963 | -0.012475 | <a href="#">IIEAASNFR</a>  |
| 2.4   | 1019.529419 | -0.001931 | <a href="#">REGLMRSR</a>   |

# MASCOT SEARCH RESULTS

## Peptide View

MS/MS Fragmentation of **DAQYAPGYDK**

Found in **CFAB\_HUMAN**, Complement factor B OS=Homo sapiens GN=CFB PE=1 SV=2

Match to Query 32939: 1437.670128 from(719.842340,2+) rtinseconds(1649) index(4213)

Title: Locus:1.1.1.2828.13 File:"2013-07-02 CLN FXIII 180 min 1st F 1.wiff"

Data file C:\Program Files (x86)\Matrix Science\Mascot Daemon\mgf\7 FXIII 180 min 1st\mascot\_daemon\_merge.mgf

Click mouse within plot area to zoom in by factor of two about that point

Or, Plot from  to  Da

Label all possible matches  Label matches used for scoring

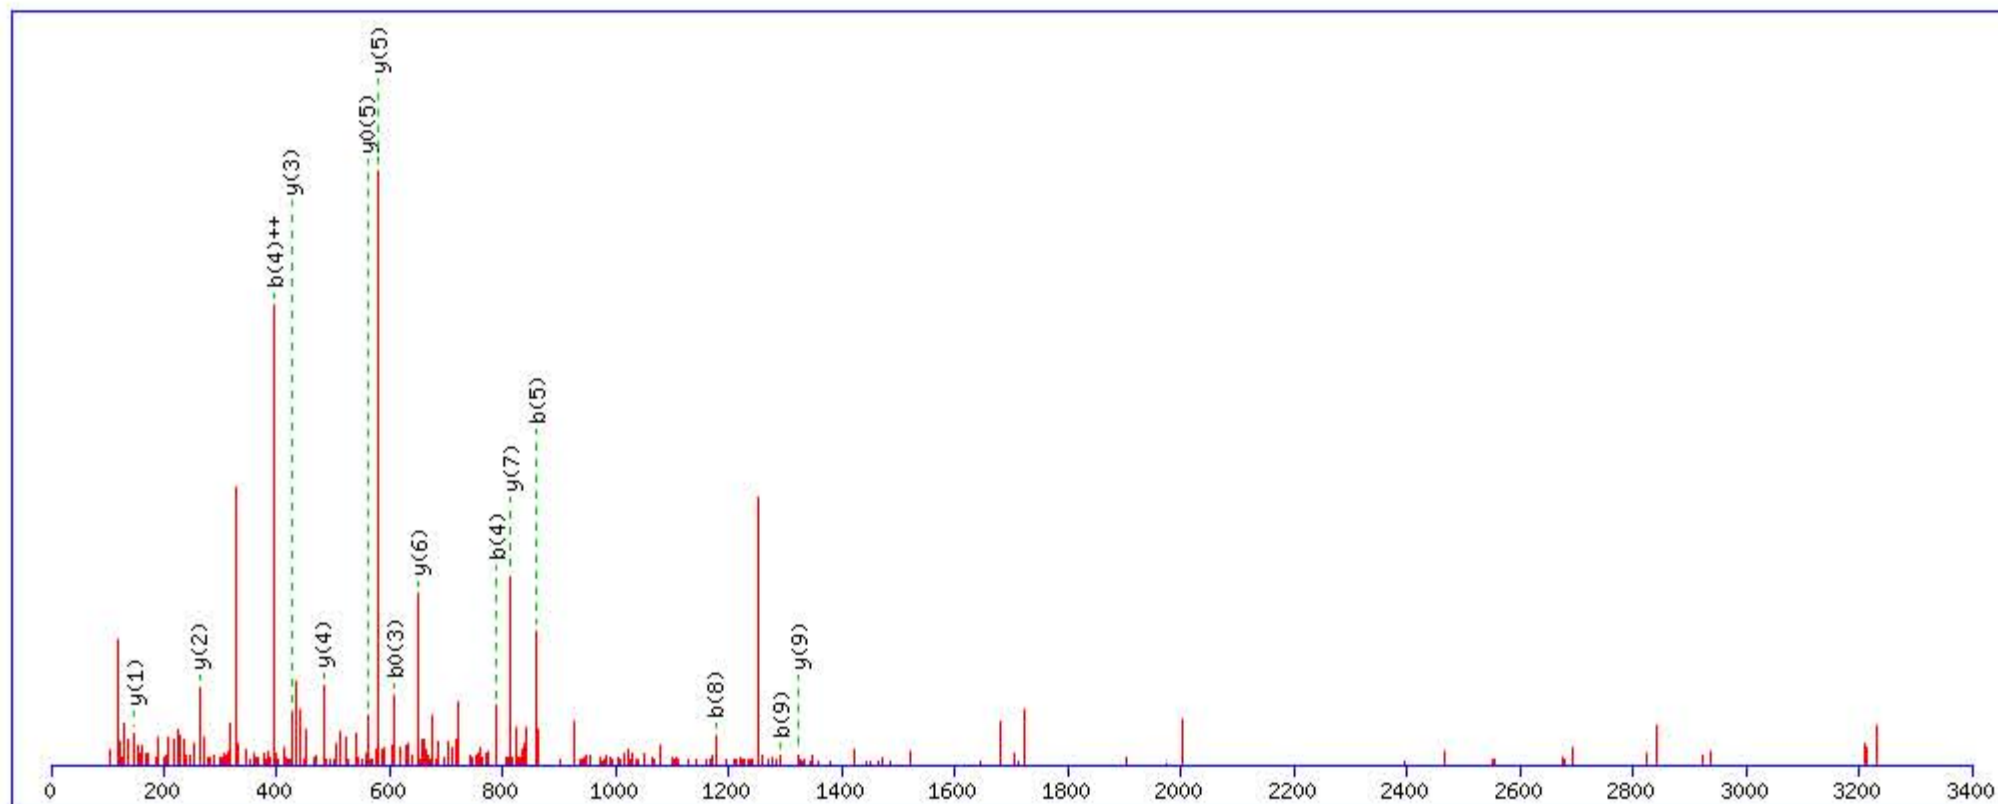

Monoisotopic mass of neutral peptide  $M_r(\text{calc})$ : 1437.659836

Fixed modifications: Carbamidomethyl (C) (apply to specified residues or termini only)

Variable modifications:

Q3 : Biotin:Thermo-21345 (Q)

Ions Score: 27 Expect: 0.015

Matches : 15/102 fragment ions using 54 most intense peaks [\(help\)](#)

| #  | b           | b <sup>++</sup> | b <sup>*</sup> | b <sup>*++</sup> | b <sup>0</sup> | b <sup>0++</sup> | Seq. | y           | y <sup>++</sup> | y <sup>*</sup> | y <sup>*++</sup> | y <sup>0</sup> | y <sup>0++</sup> | #  |
|----|-------------|-----------------|----------------|------------------|----------------|------------------|------|-------------|-----------------|----------------|------------------|----------------|------------------|----|
| 1  | 116.034219  | 58.520748       |                |                  | 98.023654      | 49.515465        | D    |             |                 |                |                  |                |                  | 10 |
| 2  | 187.071333  | 94.039304       |                |                  | 169.060768     | 85.034022        | A    | 1323.640187 | 662.323732      | 1306.613638    | 653.810457       | 1305.629622    | 653.318449       | 9  |
| 3  | 626.296659  | 313.651968      | 609.270110     | 305.138693       | 608.286094     | 304.646685       | Q    | 1252.603073 | 626.805175      | 1235.576524    | 618.291900       | 1234.592508    | 617.799892       | 8  |
| 4  | 789.359988  | 395.183632      | 772.333439     | 386.670358       | 771.349423     | 386.178350       | Y    | 813.377747  | 407.192512      | 796.351198     | 398.679237       | 795.367182     | 398.187229       | 7  |
| 5  | 860.397102  | 430.702189      | 843.370553     | 422.188915       | 842.386537     | 421.696907       | A    | 650.314418  | 325.660847      | 633.287869     | 317.147573       | 632.303853     | 316.655565       | 6  |
| 6  | 957.449866  | 479.228571      | 940.423317     | 470.715297       | 939.439301     | 470.223289       | P    | 579.277304  | 290.142290      | 562.250755     | 281.629016       | 561.266739     | 281.137008       | 5  |
| 7  | 1014.471330 | 507.739303      | 997.444781     | 499.226029       | 996.460765     | 498.734021       | G    | 482.224540  | 241.615908      | 465.197991     | 233.102634       | 464.213975     | 232.610626       | 4  |
| 8  | 1177.534659 | 589.270968      | 1160.508110    | 580.757693       | 1159.524094    | 580.265685       | Y    | 425.203076  | 213.105176      | 408.176527     | 204.591902       | 407.192511     | 204.099894       | 3  |
| 9  | 1292.561602 | 646.784439      | 1275.535053    | 638.271165       | 1274.551037    | 637.779157       | D    | 262.139747  | 131.573512      | 245.113198     | 123.060237       | 244.129182     | 122.568229       | 2  |
| 10 |             |                 |                |                  |                |                  | K    | 147.112804  | 74.060040       | 130.086255     | 65.546765        |                |                  | 1  |

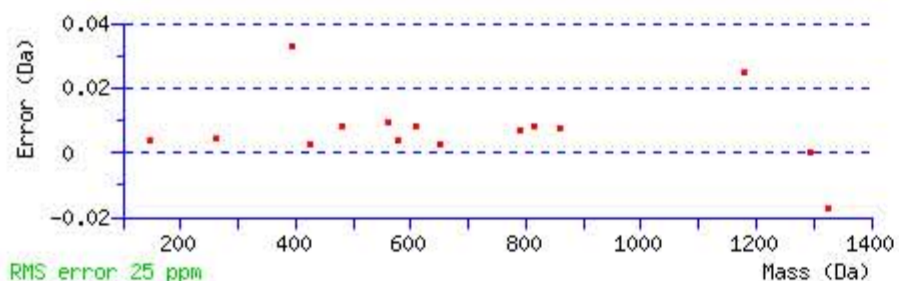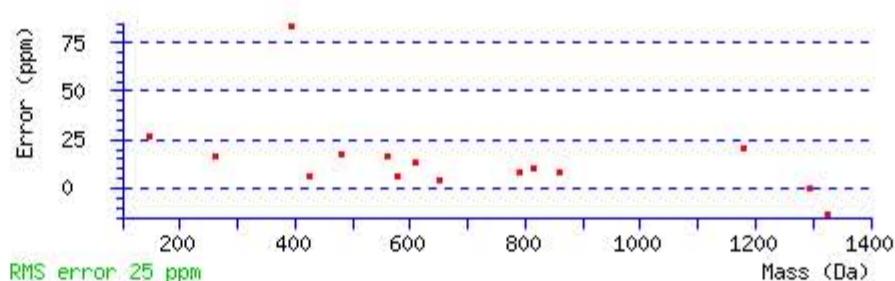

NCBI BLAST search of **DAQYAPGYDK**

(Parameters: blastp, nr protein database, expect=20000, no filter, PAM30)

Other BLAST [web gateways](#)

## All matches to this query

| Score | $M_r(\text{calc})$ : | Delta    | Sequence                      |
|-------|----------------------|----------|-------------------------------|
| 26.6  | 1437.659836          | 0.010292 | <a href="#">DAQYAPGYDK</a>    |
| 7.2   | 1437.659164          | 0.010964 | <a href="#">LAFAEQMALMGRS</a> |

# MASCOT Search Results

## Peptide View

MS/MS Fragmentation of **EELLPAQDIK**

Found in **CFAB\_HUMAN**, Complement factor B OS=Homo sapiens GN=CFB PE=1 SV=2

Match to Query 33896: 1465.798028 from(733.906290,2+) rtinseconds(2130) index(79719)

Title: Locus:1.1.1.2092.13 File:"2013-07-02 CLN FXIII 180 min 1st FT.wiff"

Data file C:\Program Files (x86)\Matrix Science\Mascot Daemon\mgf\7 FXIII 180 min 1st\mascot\_daemon\_merge.mgf

Click mouse within plot area to zoom in by factor of two about that point

Or, Plot from  to  Da

Label all possible matches  Label matches used for scoring

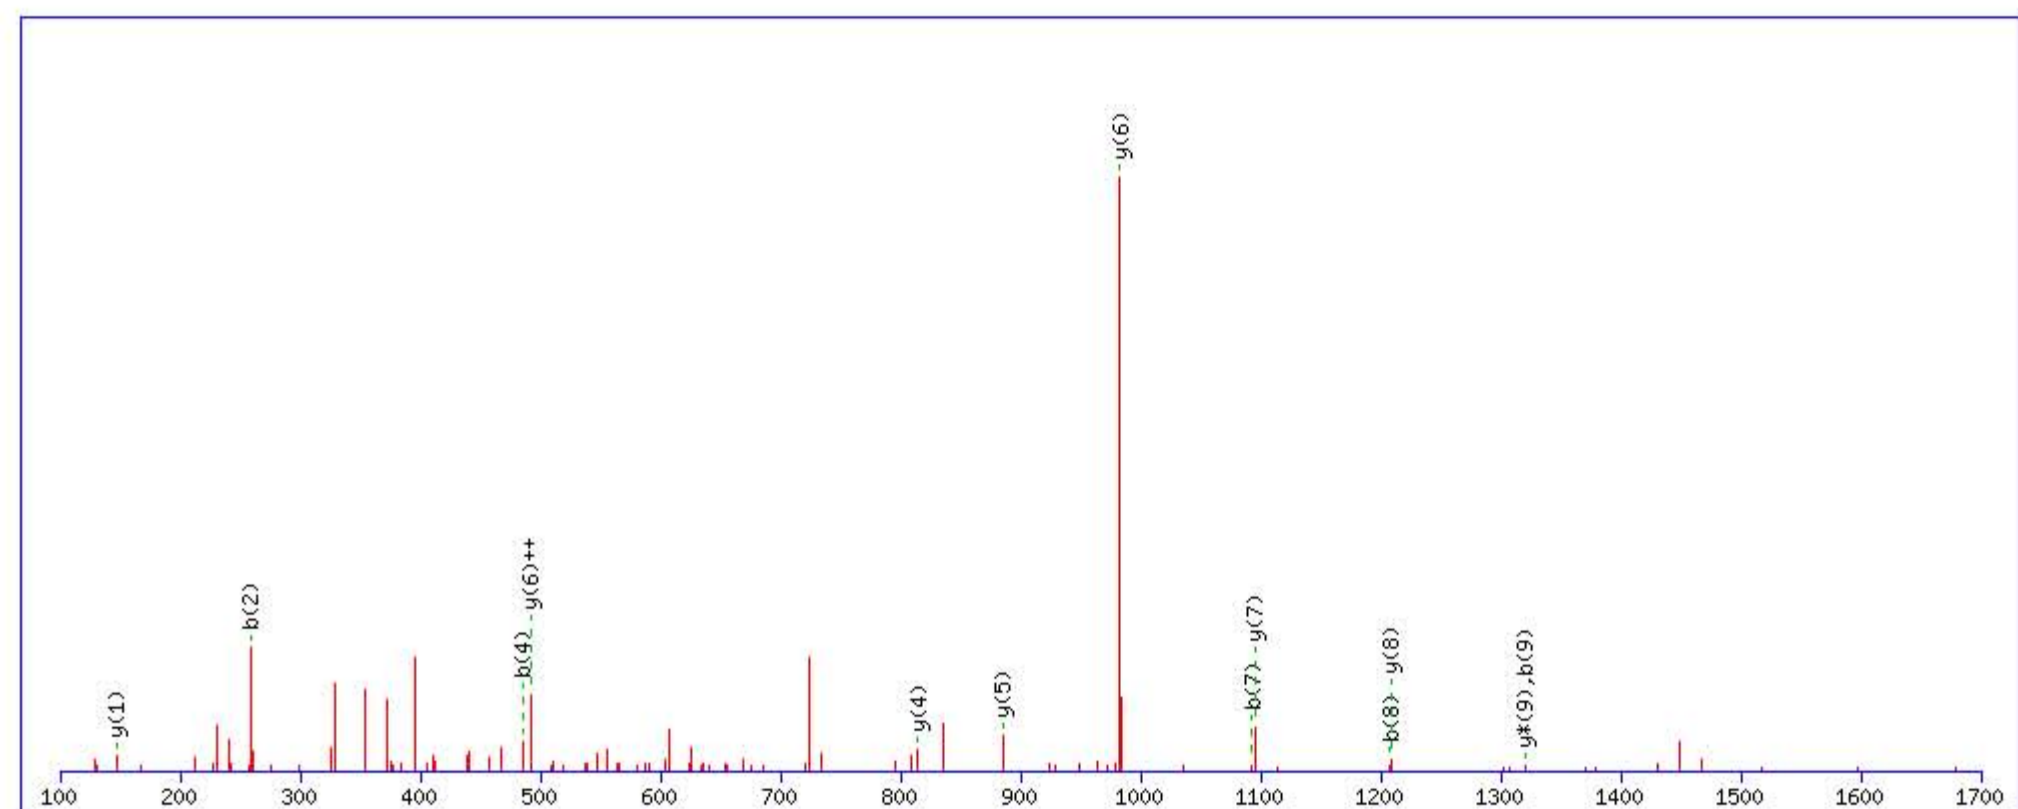

Monoisotopic mass of neutral peptide Mr(calc): 1465.785019

Fixed modifications: Carbamidomethyl (C) (apply to specified residues or termini only)

Variable modifications:

Q7 : Biotin:Thermo-21345 (Q)

Ions Score: 32 Expect: 0.0048

Matches : 13/92 fragment ions using 28 most intense peaks [\(help\)](#)

| #  | b                  | b <sup>++</sup> | b <sup>*</sup> | b <sup>*++</sup> | b <sup>0</sup> | b <sup>0++</sup> | Seq. | y                  | y <sup>++</sup>   | y <sup>*</sup>     | y <sup>*++</sup> | y <sup>0</sup> | y <sup>0++</sup> | #  |
|----|--------------------|-----------------|----------------|------------------|----------------|------------------|------|--------------------|-------------------|--------------------|------------------|----------------|------------------|----|
| 1  | 130.049869         | 65.528572       |                |                  | 112.039304     | 56.523290        | E    |                    |                   |                    |                  |                |                  | 10 |
| 2  | <b>259.092462</b>  | 130.049869      |                |                  | 241.081897     | 121.044587       | E    | 1337.749736        | 669.378506        | <b>1320.723187</b> | 660.865232       | 1319.739171    | 660.373223       | 9  |
| 3  | 372.176526         | 186.591901      |                |                  | 354.165961     | 177.586619       | L    | <b>1208.707143</b> | 604.857210        | 1191.680594        | 596.343935       | 1190.696578    | 595.851927       | 8  |
| 4  | <b>485.260590</b>  | 243.133933      |                |                  | 467.250025     | 234.128651       | L    | <b>1095.623079</b> | 548.315178        | 1078.596530        | 539.801903       | 1077.612514    | 539.309895       | 7  |
| 5  | 582.313354         | 291.660315      |                |                  | 564.302789     | 282.655033       | P    | <b>982.539015</b>  | <b>491.773146</b> | 965.512466         | 483.259871       | 964.528450     | 482.767863       | 6  |
| 6  | 653.350468         | 327.178872      |                |                  | 635.339903     | 318.173590       | A    | <b>885.486251</b>  | 443.246764        | 868.459702         | 434.733489       | 867.475686     | 434.241481       | 5  |
| 7  | <b>1092.575794</b> | 546.791535      | 1075.549245    | 538.278261       | 1074.565229    | 537.786253       | Q    | <b>814.449137</b>  | 407.728207        | 797.422588         | 399.214932       | 796.438572     | 398.722924       | 4  |
| 8  | <b>1207.602737</b> | 604.305007      | 1190.576188    | 595.791732       | 1189.592172    | 595.299724       | D    | 375.223811         | 188.115543        | 358.197262         | 179.602269       | 357.213246     | 179.110261       | 3  |
| 9  | <b>1320.686801</b> | 660.847039      | 1303.660252    | 652.333764       | 1302.676236    | 651.841756       | I    | 260.196868         | 130.602072        | 243.170319         | 122.088797       |                |                  | 2  |
| 10 |                    |                 |                |                  |                |                  | K    | <b>147.112804</b>  | 74.060040         | 130.086255         | 65.546765        |                |                  | 1  |

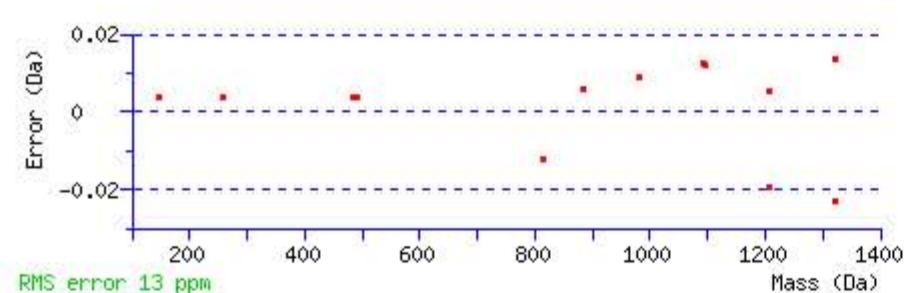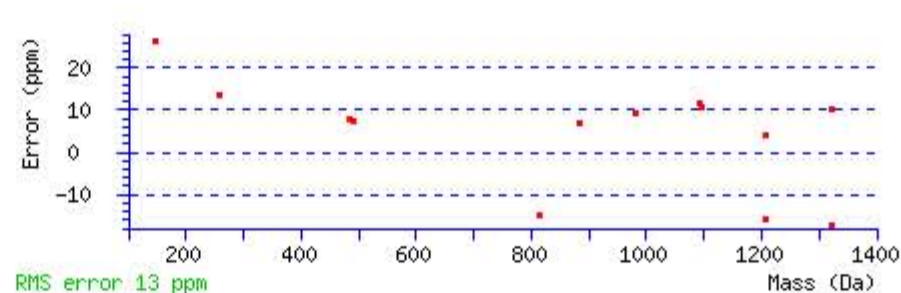

NCBI BLAST search of **EELLPAQDIK**

(Parameters: blastp, nr protein database, expect=20000, no filter, PAM30)

Other BLAST [web gateways](#)

## All matches to this query

| Score | Mr(calc):   | Delta     | Sequence                       |
|-------|-------------|-----------|--------------------------------|
| 31.8  | 1465.785019 | 0.013009  | <a href="#">EELLPAQDIK</a>     |
| 6.7   | 1465.814011 | -0.015983 | <a href="#">EPIAQDQPKILSK</a>  |
| 5.5   | 1465.813995 | -0.015967 | <a href="#">SQLKHEILELEK</a>   |
| 5.2   | 1465.804108 | -0.006080 | <a href="#">SRAFNFLNEIKK</a>   |
| 3.9   | 1465.794235 | 0.003793  | <a href="#">KWGIGYHLSLHR</a>   |
| 0.5   | 1465.788849 | 0.009179  | <a href="#">KQVEHQLEEAKK</a>   |
| 0.4   | 1465.800125 | -0.002097 | <a href="#">LAQDGAHVVVSSRK</a> |
| 0.4   | 1465.789734 | 0.008294  | <a href="#">TAAALGMHQKK</a>    |

# MASCOT SCIENCE Mascot Search Results

## Peptide View

MS/MS Fragmentation of **LPPTTTCQQQK**

Found in **CFAB\_HUMAN**, Complement factor B OS=Homo sapiens GN=CFB PE=1 SV=2

Match to Query 39275: 1611.815112 from(538.278980,3+) rtinseconds(1416) index(2668)

Title: Locus:1.1.1.2747.14 File:"2013-07-02 CLN FXIII 180 min 1st F 1.wiff"

Data file C:\Program Files (x86)\Matrix Science\Mascot Daemon\mgf\7 FXIII 180 min 1st\mascot\_daemon\_merge.mgf

Click mouse within plot area to zoom in by factor of two about that point

Or, Plot from  to  Da

Label all possible matches  Label matches used for scoring

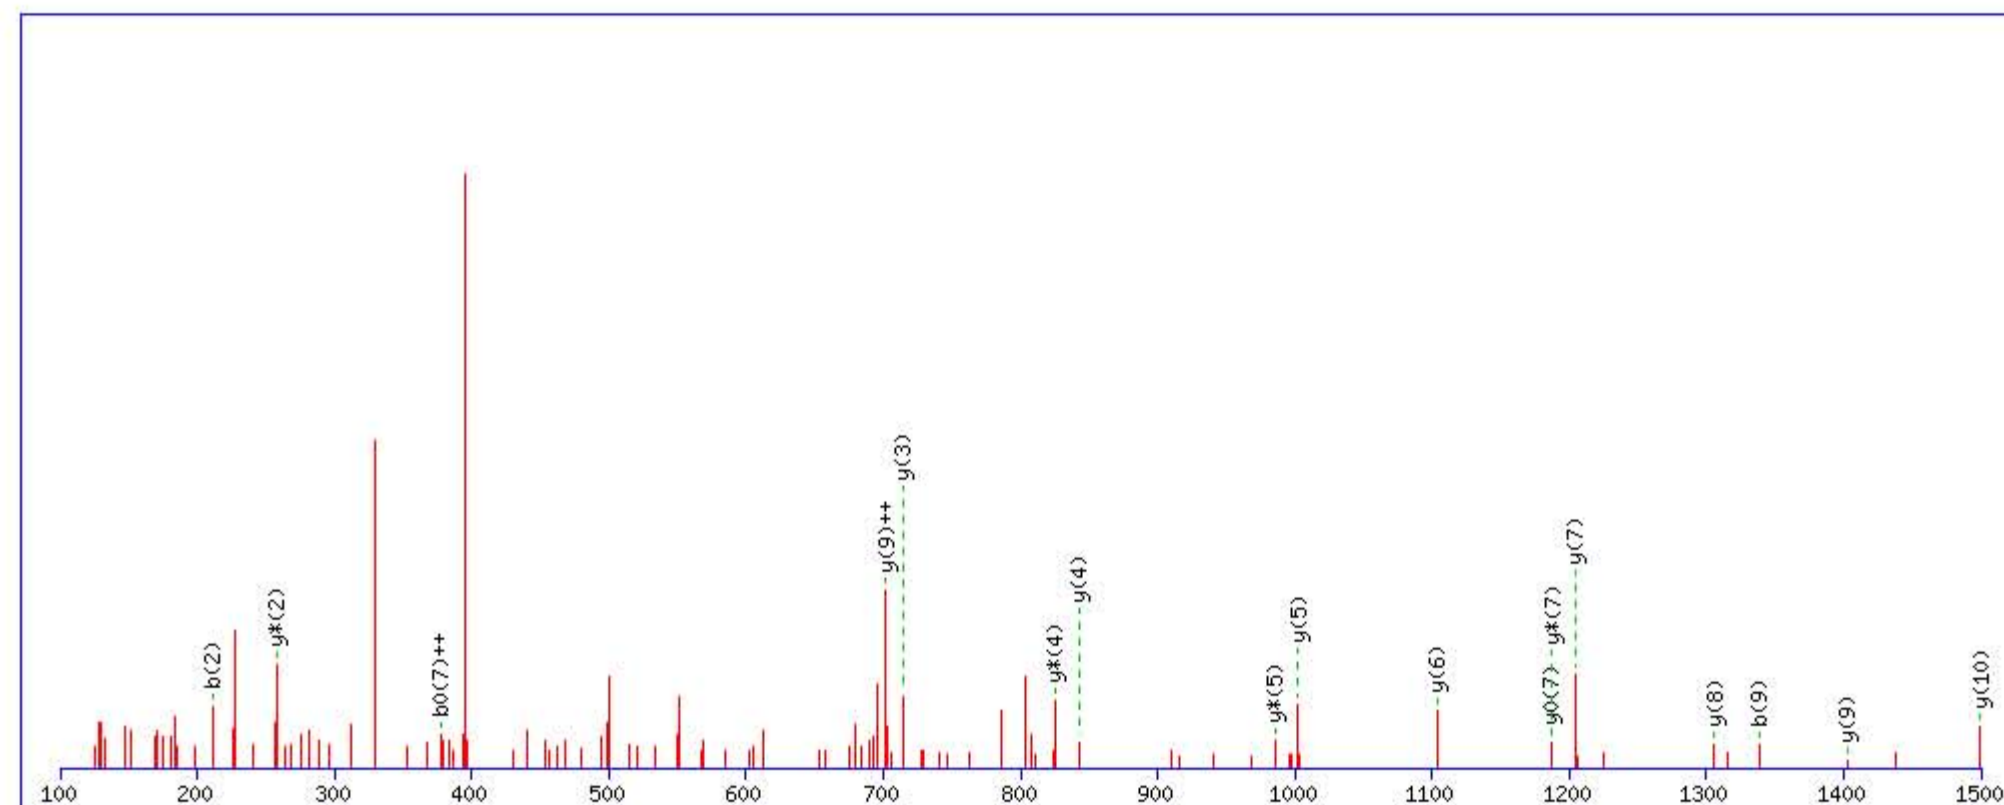

Monoisotopic mass of neutral peptide Mr(calc): 1611.811295

Fixed modifications: Carbamidomethyl (C) (apply to specified residues or termini only)

Variable modifications:

Q9 : Biotin:Thermo-21345 (Q)

Ions Score: 34 Expect: 0.01

Matches : 17/90 fragment ions using 38 most intense peaks [\(help\)](#)

| #  | b                  | b <sup>++</sup> | b <sup>*</sup> | b <sup>*++</sup> | b <sup>0</sup> | b <sup>0++</sup>  | Seq. | y                  | y <sup>++</sup>   | y <sup>*</sup>     | y <sup>*++</sup> | y <sup>0</sup>     | y <sup>0++</sup> | #  |
|----|--------------------|-----------------|----------------|------------------|----------------|-------------------|------|--------------------|-------------------|--------------------|------------------|--------------------|------------------|----|
| 1  | 114.091340         | 57.549308       |                |                  |                |                   | L    |                    |                   |                    |                  |                    |                  | 11 |
| 2  | <b>211.144104</b>  | 106.075690      |                |                  |                |                   | P    | <b>1499.734500</b> | 750.370888        | 1482.707951        | 741.857614       | 1481.723935        | 741.365606       | 10 |
| 3  | 308.196868         | 154.602072      |                |                  |                |                   | P    | <b>1402.681736</b> | <b>701.844506</b> | 1385.655187        | 693.331232       | 1384.671171        | 692.839224       | 9  |
| 4  | 409.244547         | 205.125911      |                |                  | 391.233982     | 196.120629        | T    | <b>1305.628972</b> | 653.318124        | 1288.602423        | 644.804850       | 1287.618407        | 644.312842       | 8  |
| 5  | 510.292226         | 255.649751      |                |                  | 492.281661     | 246.644468        | T    | <b>1204.581293</b> | 602.794285        | <b>1187.554744</b> | 594.281010       | <b>1186.570728</b> | 593.789002       | 7  |
| 6  | 611.339905         | 306.173591      |                |                  | 593.329340     | 297.168308        | T    | <b>1103.533614</b> | 552.270445        | 1086.507065        | 543.757171       | 1085.523049        | 543.265163       | 6  |
| 7  | 771.370554         | 386.188915      |                |                  | 753.359989     | <b>377.183633</b> | C    | <b>1002.485935</b> | 501.746606        | <b>985.459386</b>  | 493.233331       |                    |                  | 5  |
| 8  | 899.429132         | 450.218204      | 882.402583     | 441.704930       | 881.418567     | 441.212922        | Q    | <b>842.455286</b>  | 421.731281        | <b>825.428737</b>  | 413.218007       |                    |                  | 4  |
| 9  | <b>1338.654458</b> | 669.830867      | 1321.627909    | 661.317593       | 1320.643893    | 660.825585        | Q    | <b>714.396708</b>  | 357.701992        | 697.370159         | 349.188718       |                    |                  | 3  |
| 10 | 1466.713036        | 733.860156      | 1449.686487    | 725.346882       | 1448.702471    | 724.854874        | Q    | 275.171382         | 138.089329        | <b>258.144833</b>  | 129.576055       |                    |                  | 2  |
| 11 |                    |                 |                |                  |                |                   | K    | 147.112804         | 74.060040         | 130.086255         | 65.546765        |                    |                  | 1  |

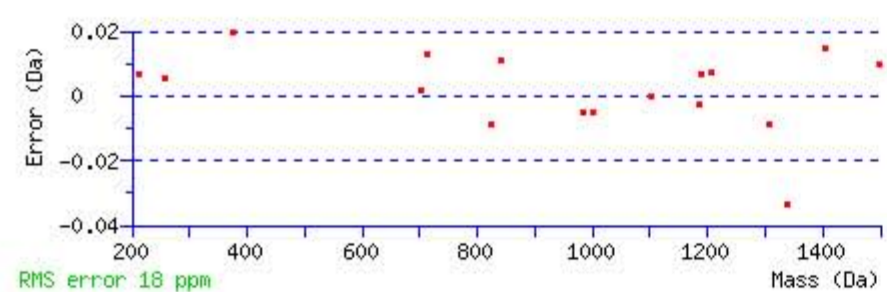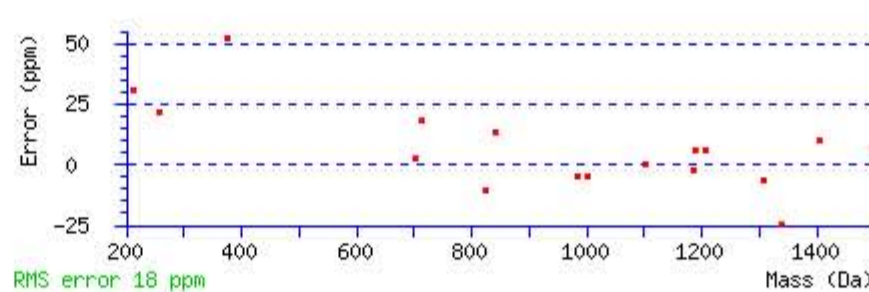

NCBI BLAST search of **LPPTTTCQQQK**

(Parameters: blastp, nr protein database, expect=20000, no filter, PAM30)

Other BLAST [web gateways](#)

All matches to this query

| Score | Mr(calc):   | Delta    | Sequence                    |
|-------|-------------|----------|-----------------------------|
| 34.0  | 1611.811295 | 0.003817 | <a href="#">LPPTTTCQQQK</a> |
| 34.0  | 1611.811295 | 0.003817 | <a href="#">LPPTTTCQQQK</a> |
| 31.1  | 1611.811295 | 0.003817 | <a href="#">LPPTTTCQQQK</a> |

Mascot: <http://www.matrixscience.com/>

# MASCOT SCIENCE Mascot Search Results

## Peptide View

MS/MS Fragmentation of **LPPTTTCQQQK**

Found in **CFAB\_HUMAN**, Complement factor B OS=Homo sapiens GN=CFB PE=1 SV=2

Match to Query 39279: 1611.819912 from(538.280580,3+) rtinseconds(1403) index(74984)

Title: Locus:1.1.1.1839.19 File:"2013-07-02 CLN FXIII 180 min 1st FT.wiff"

Data file C:\Program Files (x86)\Matrix Science\Mascot Daemon\mgf\7 FXIII 180 min 1st\mascot\_daemon\_merge.mgf

Click mouse within plot area to zoom in by factor of two about that point

Or, Plot from  to  Da

Label all possible matches  Label matches used for scoring

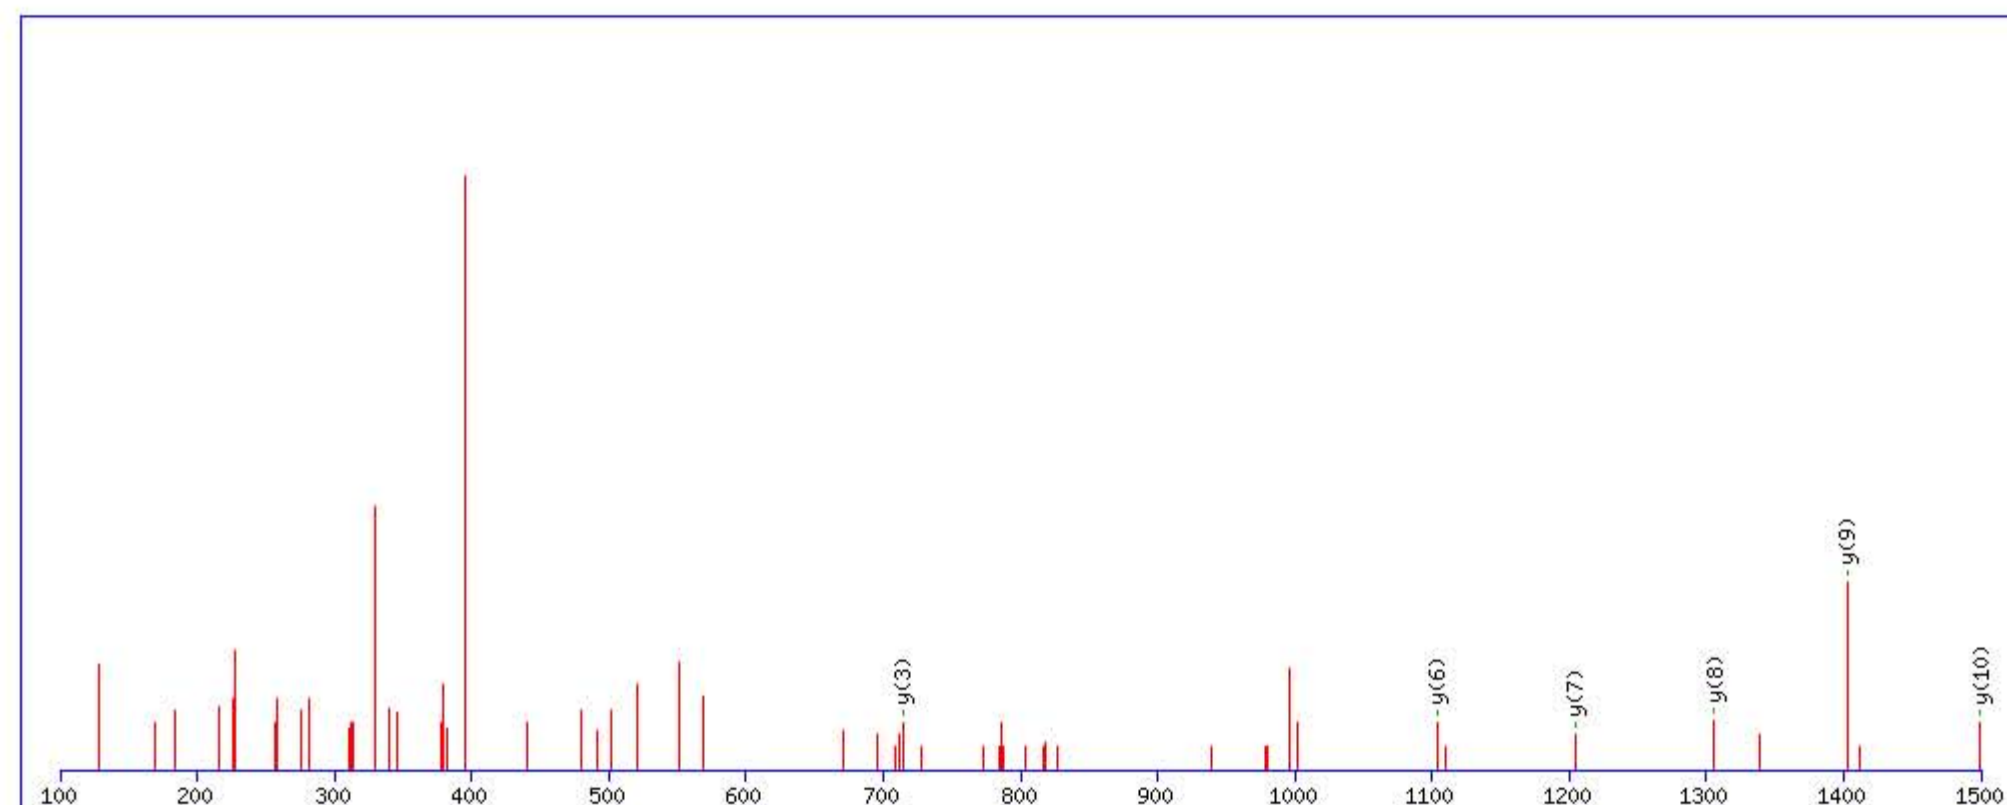

Monoisotopic mass of neutral peptide Mr(calc): 1611.811295

Fixed modifications: Carbamidomethyl (C) (apply to specified residues or termini only)

Variable modifications:

Q10 : Biotin:Thermo-21345 (Q)

Ions Score: 27 Expect: 0.0037

Matches : 6/90 fragment ions using 13 most intense peaks [\(help\)](#)

| #  | b           | b <sup>++</sup> | b <sup>*</sup> | b <sup>*++</sup> | b <sup>0</sup> | b <sup>0++</sup> | Seq. | y           | y <sup>++</sup> | y <sup>*</sup> | y <sup>*++</sup> | y <sup>0</sup> | y <sup>0++</sup> | #  |
|----|-------------|-----------------|----------------|------------------|----------------|------------------|------|-------------|-----------------|----------------|------------------|----------------|------------------|----|
| 1  | 114.091340  | 57.549308       |                |                  |                |                  | L    |             |                 |                |                  |                |                  | 11 |
| 2  | 211.144104  | 106.075690      |                |                  |                |                  | P    | 1499.734500 | 750.370888      | 1482.707951    | 741.857614       | 1481.723935    | 741.365606       | 10 |
| 3  | 308.196868  | 154.602072      |                |                  |                |                  | P    | 1402.681736 | 701.844506      | 1385.655187    | 693.331232       | 1384.671171    | 692.839224       | 9  |
| 4  | 409.244547  | 205.125911      |                |                  | 391.233982     | 196.120629       | T    | 1305.628972 | 653.318124      | 1288.602423    | 644.804850       | 1287.618407    | 644.312842       | 8  |
| 5  | 510.292226  | 255.649751      |                |                  | 492.281661     | 246.644468       | T    | 1204.581293 | 602.794285      | 1187.554744    | 594.281010       | 1186.570728    | 593.789002       | 7  |
| 6  | 611.339905  | 306.173591      |                |                  | 593.329340     | 297.168308       | T    | 1103.533614 | 552.270445      | 1086.507065    | 543.757171       | 1085.523049    | 543.265163       | 6  |
| 7  | 771.370554  | 386.188915      |                |                  | 753.359989     | 377.183633       | C    | 1002.485935 | 501.746606      | 985.459386     | 493.233331       |                |                  | 5  |
| 8  | 899.429132  | 450.218204      | 882.402583     | 441.704930       | 881.418567     | 441.212922       | Q    | 842.455286  | 421.731281      | 825.428737     | 413.218007       |                |                  | 4  |
| 9  | 1027.487710 | 514.247493      | 1010.461161    | 505.734219       | 1009.477145    | 505.242211       | Q    | 714.396708  | 357.701992      | 697.370159     | 349.188718       |                |                  | 3  |
| 10 | 1466.713036 | 733.860156      | 1449.686487    | 725.346882       | 1448.702471    | 724.854874       | Q    | 586.338130  | 293.672703      | 569.311581     | 285.159429       |                |                  | 2  |
| 11 |             |                 |                |                  |                |                  | K    | 147.112804  | 74.060040       | 130.086255     | 65.546765        |                |                  | 1  |

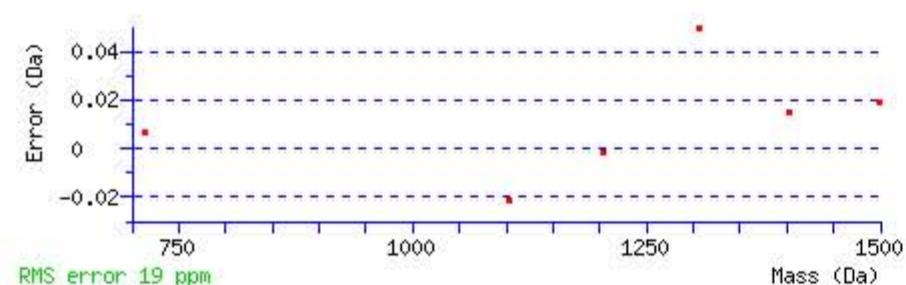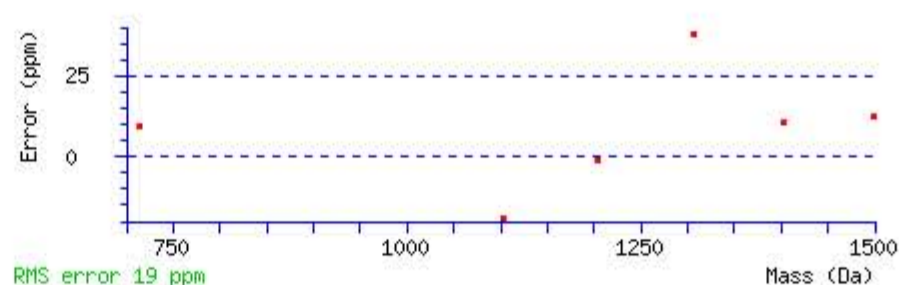

NCBI BLAST search of **LPPTTTCQQQK**

(Parameters: blastp, nr protein database, expect=20000, no filter, PAM30)

Other BLAST [web gateways](#)

All matches to this query

| Score | Mr(calc):   | Delta    | Sequence                      |
|-------|-------------|----------|-------------------------------|
| 26.8  | 1611.811295 | 0.008617 | <a href="#">LPPTTTCQQQK</a>   |
| 26.8  | 1611.811295 | 0.008617 | <a href="#">LPPTTTCQQQK</a>   |
| 17.3  | 1611.811295 | 0.008617 | <a href="#">LPPTTTCQQQK</a>   |
| 0.8   | 1611.803864 | 0.016048 | <a href="#">HQEMEDVIRLAQK</a> |

Mascot: <http://www.matrixscience.com/>

**Peptide View**

MS/MS Fragmentation of **YGQTI<sup>R</sup>RPICLPCTEGTTR**

Found in **CFAB\_HUMAN**, Complement factor B OS=Homo sapiens GN=CFB PE=1 SV=2

Match to Query 61039: 2433.216342 from(812.079390,3+) rtinseconds(2054) index(79229)

Title: Locus1.1.1.2065.25 File:"2013-07-02 CLN FXIII 180 min 1st FT.wiff"

Data file C:\Program Files (x86)\Matrix Science\Mascot Daemon\mgf\7 FXIII 180 min 1st\mascot\_daemon\_merge.mgf

Click mouse within plot area to zoom in by factor of two about that point

Or, Plot from 100 to 1800 Da Full range

Label all possible matches  Label matches used for scoring

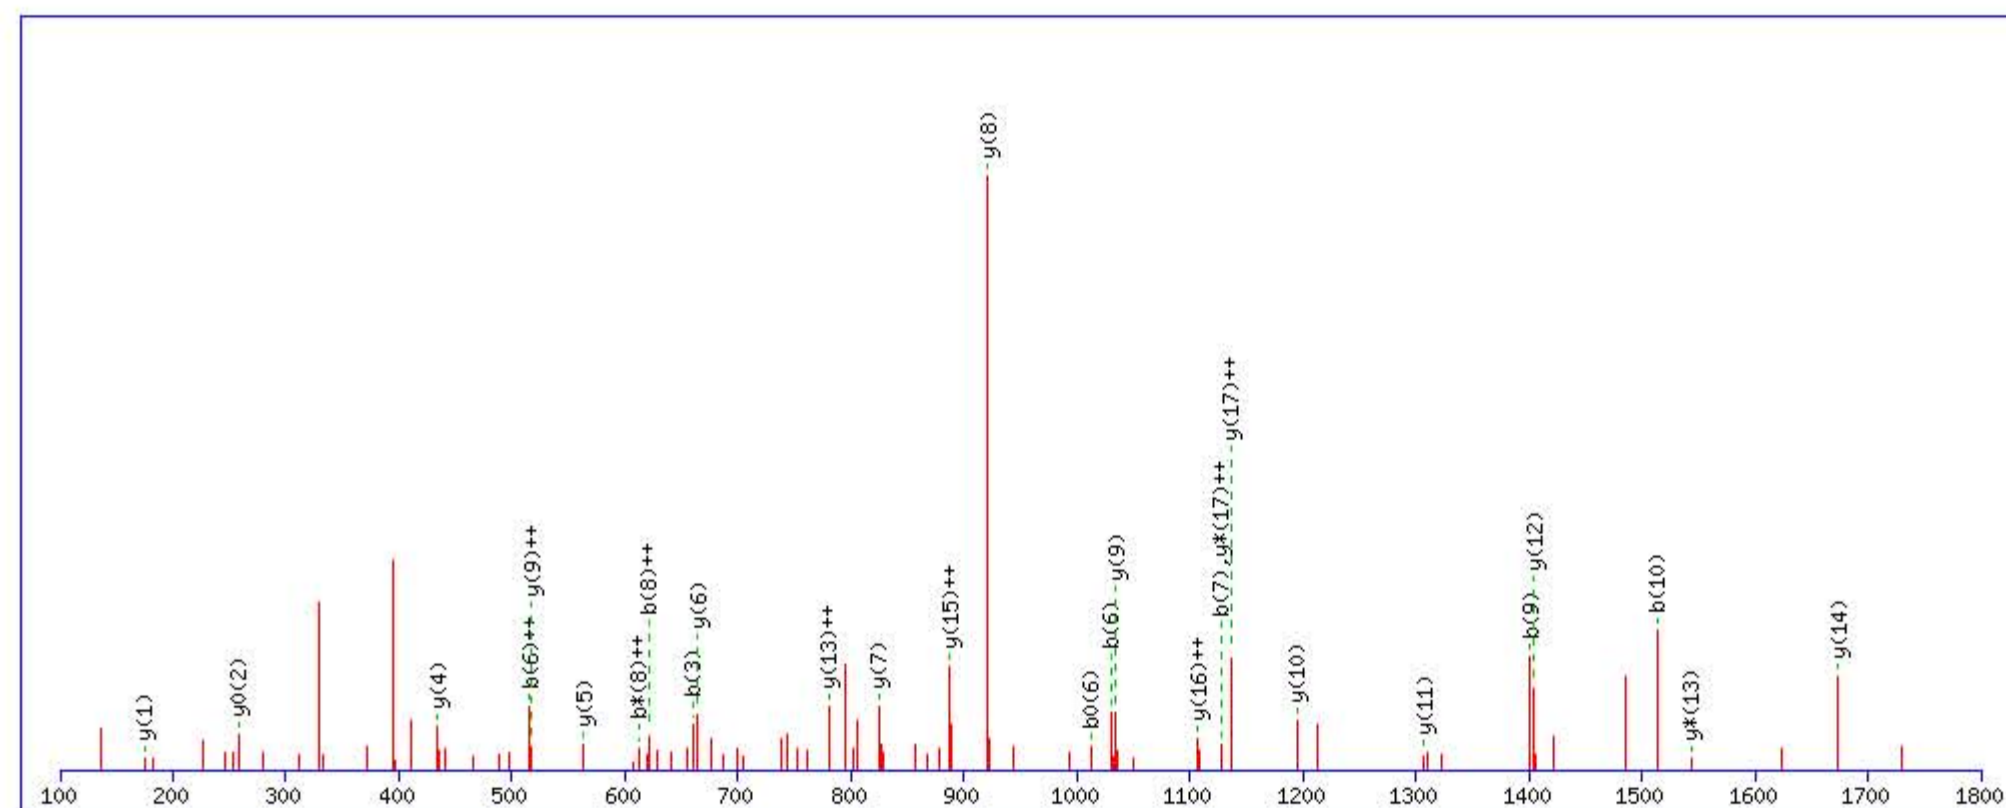

Monoisotopic mass of neutral peptide Mr(calc): 2433.196701

Fixed modifications: Carbamidomethyl (C) (apply to specified residues or termini only)

Variable modifications:

Q3 : Biotin:Thermo-21345 (Q)

Ions Score: 65 Expect: 9.2e-006

Matches : 28/192 fragment ions using 46 most intense peaks (help)

| #  | b                  | b <sup>++</sup>   | b <sup>*</sup> | b <sup>*++</sup>  | b <sup>0</sup>     | b <sup>0++</sup> | Seq. | y                  | y <sup>++</sup>    | y <sup>*</sup>     | y <sup>*++</sup> | y <sup>0</sup>    | y <sup>0++</sup> | #  |
|----|--------------------|-------------------|----------------|-------------------|--------------------|------------------|------|--------------------|--------------------|--------------------|------------------|-------------------|------------------|----|
| 1  | 164.070605         | 82.538940         |                |                   |                    |                  | Y    |                    |                    |                    |                  |                   |                  | 18 |
| 2  | 221.092069         | 111.049673        |                |                   |                    |                  | G    | 2271.140644        | 1136.073960        | 2254.114095        | 1127.560685      | 2253.130079       | 1127.068677      | 17 |
| 3  | <b>660.317395</b>  | 330.662336        | 643.290846     | 322.149061        |                    |                  | Q    | 2214.119180        | <b>1107.563228</b> | 2197.092631        | 1099.049953      | 2196.108615       | 1098.557945      | 16 |
| 4  | 761.365074         | 381.186175        | 744.338525     | 372.672901        | 743.354509         | 372.180893       | T    | 1774.893854        | <b>887.950565</b>  | 1757.867305        | 879.437290       | 1756.883289       | 878.945282       | 15 |
| 5  | 874.449138         | 437.728207        | 857.422589     | 429.214933        | 856.438573         | 428.722925       | I    | <b>1673.846175</b> | 837.426725         | 1656.819626        | 828.913451       | 1655.835610       | 828.421443       | 14 |
| 6  | <b>1030.550249</b> | <b>515.778763</b> | 1013.523700    | 507.265488        | <b>1012.539684</b> | 506.773480       | R    | 1560.762111        | <b>780.884693</b>  | <b>1543.735562</b> | 772.371419       | 1542.751546       | 771.879411       | 13 |
| 7  | <b>1127.603013</b> | 564.305145        | 1110.576464    | 555.791870        | 1109.592448        | 555.299862       | P    | <b>1404.661000</b> | 702.834138         | 1387.634451        | 694.320863       | 1386.650435       | 693.828855       | 12 |
| 8  | 1240.687077        | <b>620.847177</b> | 1223.660528    | <b>612.333902</b> | 1222.676512        | 611.841894       | I    | <b>1307.608236</b> | 654.307756         | 1290.581687        | 645.794481       | 1289.597671       | 645.302473       | 11 |
| 9  | <b>1400.717726</b> | 700.862501        | 1383.691177    | 692.349227        | 1382.707161        | 691.857219       | C    | <b>1194.524172</b> | 597.765724         | 1177.497623        | 589.252449       | 1176.513607       | 588.760441       | 10 |
| 10 | <b>1513.801790</b> | 757.404533        | 1496.775241    | 748.891259        | 1495.791225        | 748.399250       | L    | <b>1034.493523</b> | <b>517.750399</b>  | 1017.466974        | 509.237125       | 1016.482958       | 508.745117       | 9  |
| 11 | 1610.854554        | 805.930915        | 1593.828005    | 797.417641        | 1592.843989        | 796.925633       | P    | <b>921.409459</b>  | 461.208367         | 904.382910         | 452.695093       | 903.398894        | 452.203085       | 8  |
| 12 | 1770.885203        | 885.946240        | 1753.858654    | 877.432965        | 1752.874638        | 876.940957       | C    | <b>824.356695</b>  | 412.681985         | 807.330146         | 404.168711       | 806.346130        | 403.676703       | 7  |
| 13 | 1871.932882        | 936.470079        | 1854.906333    | 927.956805        | 1853.922317        | 927.464797       | T    | <b>664.326046</b>  | 332.666661         | 647.299497         | 324.153386       | 646.315481        | 323.661378       | 6  |
| 14 | 2000.975475        | 1000.991376       | 1983.948926    | 992.478101        | 1982.964910        | 991.986093       | E    | <b>563.278367</b>  | 282.142821         | 546.251818         | 273.629547       | 545.267802        | 273.137539       | 5  |
| 15 | 2057.996939        | 1029.502107       | 2040.970390    | 1020.988833       | 2039.986374        | 1020.496825      | G    | <b>434.235774</b>  | 217.621525         | 417.209225         | 209.108250       | 416.225209        | 208.616242       | 4  |
| 16 | 2159.044618        | 1080.025947       | 2142.018069    | 1071.512672       | 2141.034053        | 1071.020664      | T    | 377.214310         | 189.110793         | 360.187761         | 180.597518       | 359.203745        | 180.105510       | 3  |
| 17 | 2260.092297        | 1130.549786       | 2243.065748    | 1122.036512       | 2242.081732        | 1121.544504      | T    | 276.166631         | 138.586953         | 259.140082         | 130.073679       | <b>258.156066</b> | 129.581671       | 2  |
| 18 |                    |                   |                |                   |                    |                  | R    | <b>175.118952</b>  | 88.063114          | 158.092403         | 79.549839        |                   |                  | 1  |

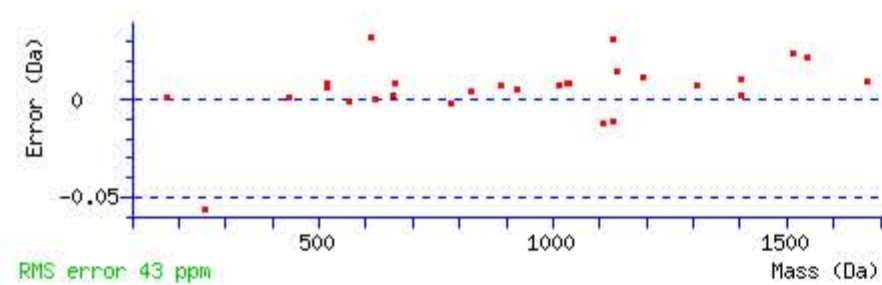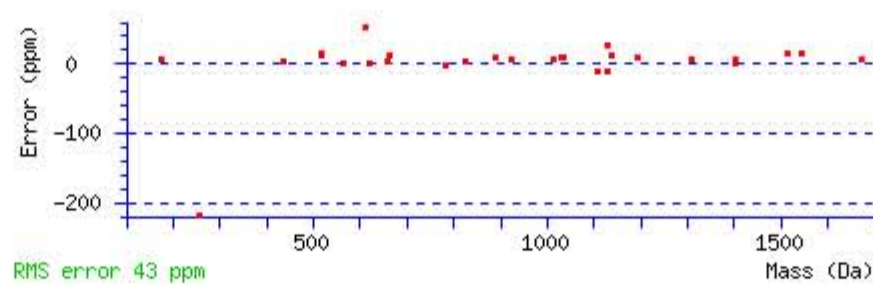

NCBI BLAST search of **YGQTI<sup>R</sup>RPICLPCTEGTTR**

(Parameters: blastp, nr protein database, expect=20000, no filter, PAM30)

Other BLAST [web gateways](#)

All matches to this query

| Score | Mr(calc):   | Delta    | Sequence                                       |
|-------|-------------|----------|------------------------------------------------|
| 65.1  | 2433.196701 | 0.019641 | <a href="#">YGQTI<sup>R</sup>RPICLPCTEGTTR</a> |

# MASCOT Search Results

## Peptide View

MS/MS Fragmentation of **RPDSLQHVLLPVLDR**

Found in **CFAD\_HUMAN**, Complement factor D OS=Homo sapiens GN=CFD PE=1 SV=5

Match to Query 52484: 2068.186812 from(690.402880,3+) rtinseconds(2352) index(27162)

Title: Locus:1.1.1.2961.6 File:"2013-07-02 CLN FXIII 180 min 1st F 2.wiff"

Data file C:\Program Files (x86)\Matrix Science\Mascot Daemon\mgf7 FXIII 180 min 1st\mascot\_daemon\_merge.mgf

Click mouse within plot area to zoom in by factor of two about that point

Or, Plot from 0 to 3400 Da Full range

Label all possible matches  Label matches used for scoring

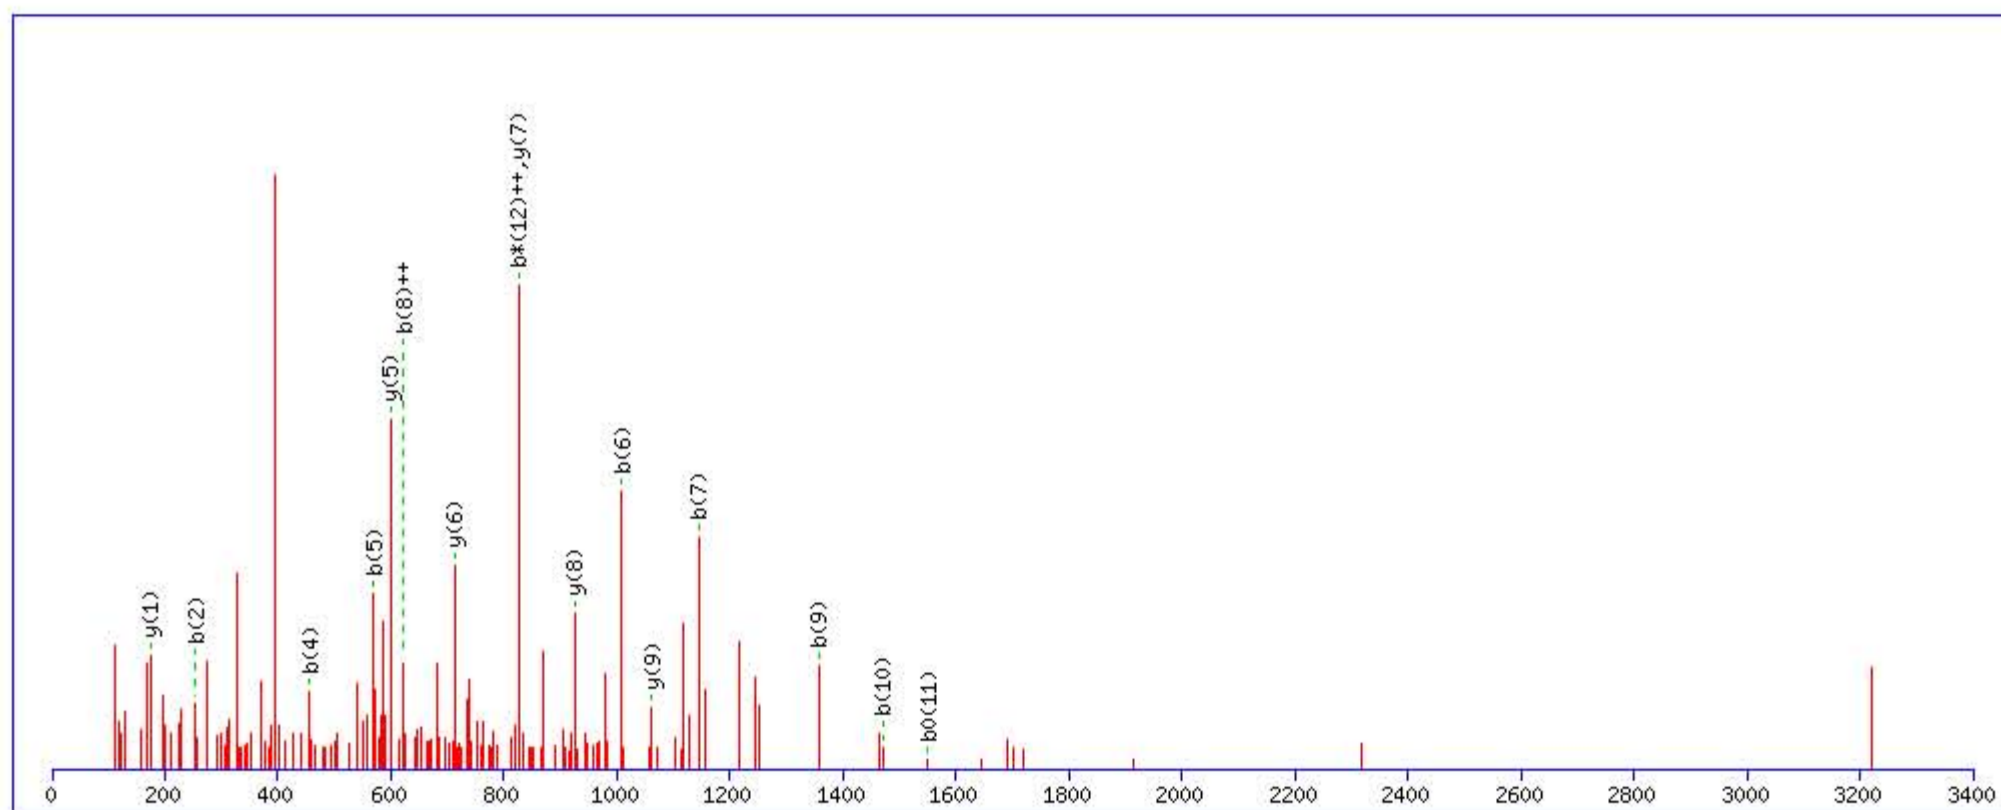

Monoisotopic mass of neutral peptide Mr(calc): 2068.161545

Fixed modifications: Carbamidomethyl (C) (apply to specified residues or termini only)

Variable modifications:

Q6 : Biotin:Thermo-21345 (Q)

Ions Score: 30 Expect: 0.0056

Matches : 16/162 fragment ions using 33 most intense peaks ([help](#))

| #  | b                  | b <sup>++</sup>   | b <sup>*</sup> | b <sup>*++</sup>  | b <sup>0</sup>     | b <sup>0++</sup> | Seq. | y                  | y <sup>++</sup> | y <sup>*</sup> | y <sup>*++</sup> | y <sup>0</sup> | y <sup>0++</sup> | #  |
|----|--------------------|-------------------|----------------|-------------------|--------------------|------------------|------|--------------------|-----------------|----------------|------------------|----------------|------------------|----|
| 1  | 157.108387         | 79.057831         | 140.081838     | 70.544557         |                    |                  | R    |                    |                 |                |                  |                |                  | 15 |
| 2  | <b>254.161151</b>  | 127.584213        | 237.134602     | 119.070939        |                    |                  | P    | 1913.067716        | 957.037496      | 1896.041167    | 948.524222       | 1895.057151    | 948.032214       | 14 |
| 3  | 369.188094         | 185.097685        | 352.161545     | 176.584410        | 351.177529         | 176.092402       | D    | 1816.014952        | 908.511114      | 1798.988403    | 899.997840       | 1798.004387    | 899.505832       | 13 |
| 4  | <b>456.220122</b>  | 228.613699        | 439.193573     | 220.100425        | 438.209557         | 219.608417       | S    | 1700.988009        | 850.997643      | 1683.961460    | 842.484368       | 1682.977444    | 841.992360       | 12 |
| 5  | <b>569.304186</b>  | 285.155731        | 552.277637     | 276.642457        | 551.293621         | 276.150449       | L    | 1613.955981        | 807.481629      | 1596.929432    | 798.968354       | 1595.945416    | 798.476346       | 11 |
| 6  | <b>1008.529512</b> | 504.768394        | 991.502963     | 496.255120        | 990.518947         | 495.763112       | Q    | 1500.871917        | 750.939597      | 1483.845368    | 742.426322       | 1482.861352    | 741.934314       | 10 |
| 7  | <b>1145.588424</b> | 573.297850        | 1128.561875    | 564.784576        | 1127.577859        | 564.292568       | H    | <b>1061.646591</b> | 531.326934      | 1044.620042    | 522.813659       | 1043.636026    | 522.321651       | 9  |
| 8  | 1244.656838        | <b>622.832057</b> | 1227.630289    | 614.318783        | 1226.646273        | 613.826775       | V    | <b>924.587679</b>  | 462.797478      | 907.561130     | 454.284203       | 906.577114     | 453.792195       | 8  |
| 9  | <b>1357.740902</b> | 679.374089        | 1340.714353    | 670.860815        | 1339.730337        | 670.368807       | L    | <b>825.519265</b>  | 413.263271      | 808.492716     | 404.749996       | 807.508700     | 404.257988       | 7  |
| 10 | <b>1470.824966</b> | 735.916121        | 1453.798417    | 727.402847        | 1452.814401        | 726.910838       | L    | <b>712.435201</b>  | 356.721239      | 695.408652     | 348.207964       | 694.424636     | 347.715956       | 6  |
| 11 | 1567.877730        | 784.442503        | 1550.851181    | 775.929229        | <b>1549.867165</b> | 775.437220       | P    | <b>599.351137</b>  | 300.179207      | 582.324588     | 291.665932       | 581.340572     | 291.173924       | 5  |
| 12 | 1666.946144        | 833.976710        | 1649.919595    | <b>825.463436</b> | 1648.935579        | 824.971428       | V    | 502.298373         | 251.652825      | 485.271824     | 243.139550       | 484.287808     | 242.647542       | 4  |
| 13 | 1780.030208        | 890.518742        | 1763.003659    | 882.005468        | 1762.019643        | 881.513459       | L    | 403.229959         | 202.118618      | 386.203410     | 193.605343       | 385.219394     | 193.113335       | 3  |
| 14 | 1895.057151        | 948.032214        | 1878.030602    | 939.518939        | 1877.046586        | 939.026931       | D    | 290.145895         | 145.576586      | 273.119346     | 137.063311       | 272.135330     | 136.571303       | 2  |
| 15 |                    |                   |                |                   |                    |                  | R    | <b>175.118952</b>  | 88.063114       | 158.092403     | 79.549840        |                |                  | 1  |

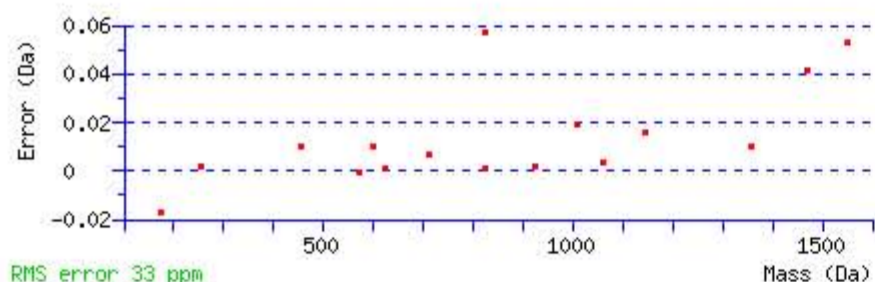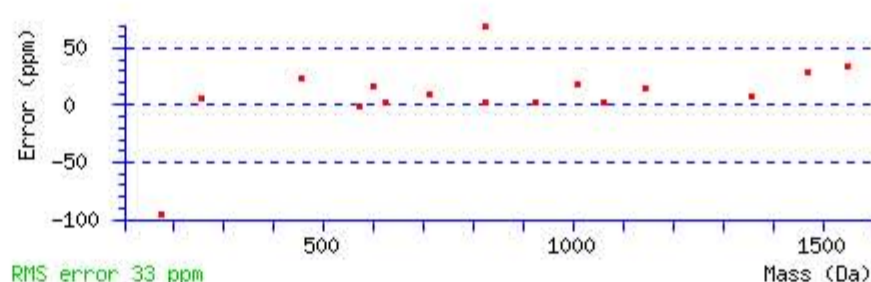

NCBI BLAST search of [RPDSLQHVLLPVLDR](#)

(Parameters: blastp, nr protein database, expect=20000, no filter, PAM30)

Other BLAST [web gateways](#)

All matches to this query

| Score | Mr(calc):   | Delta    | Sequence                        |
|-------|-------------|----------|---------------------------------|
| 30.3  | 2068.161545 | 0.025267 | <a href="#">RPDSLQHVLLPVLDR</a> |

Mascot: <http://www.matrixscience.com/>

# MASCOT Search Results

## Peptide View

MS/MS Fragmentation of **VQVLLGAHLSQPEPSK**

Found in **CFAD\_HUMAN**, Complement factor D OS=Homo sapiens GN=CFD PE=1 SV=5

Match to Query 53133: 2100.157302 from(701.059710,3+) rtinseconds(1955) index(78620)

Title: Locus:1.1.1.2031.19 File:"2013-07-02 CLN FXIII 180 min 1st FT.wiff"

Data file C:\Program Files (x86)\Matrix Science\Mascot Daemon\mgf7 FXIII 180 min 1st\mascot\_daemon\_merge.mgf

Click mouse within plot area to zoom in by factor of two about that point

Or, Plot from  to  Da

Label all possible matches  Label matches used for scoring

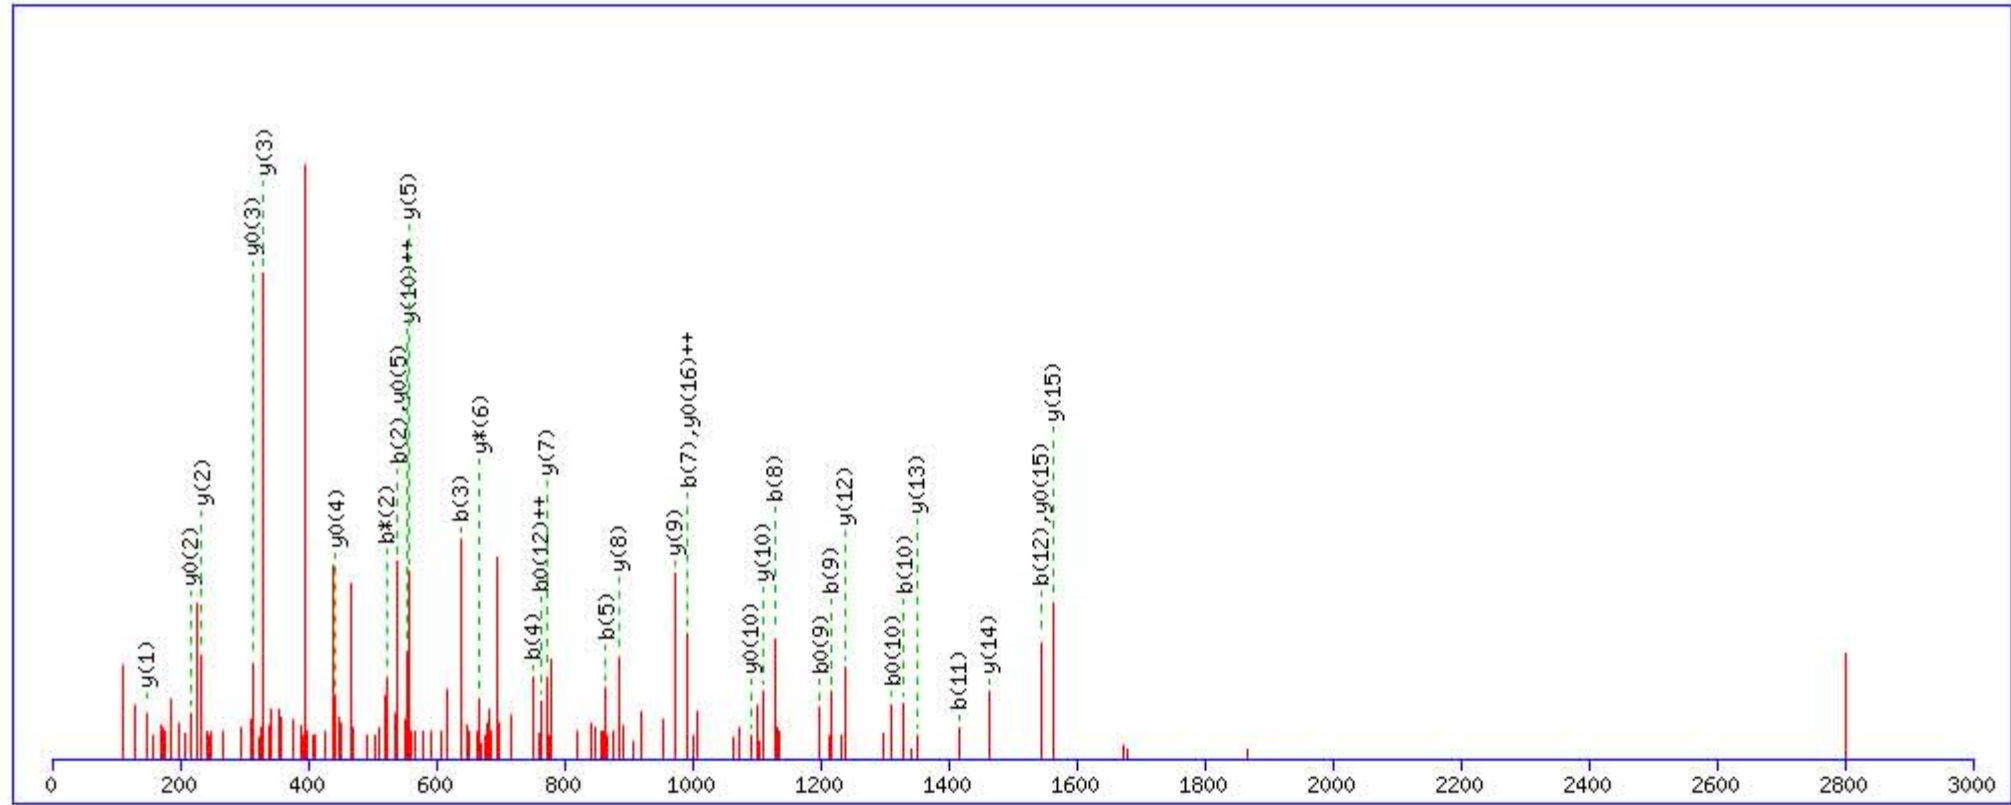

Monoisotopic mass of neutral peptide Mr(calc): 2100.140137

Fixed modifications: Carbamidomethyl (C) (apply to specified residues or termini only)

Variable modifications:

Q2 : Biotin:Thermo-21345 (Q)

Ions Score: 68 Expect: 2.5e-006

Matches : 35/172 fragment ions using 59 most intense peaks [\(help\)](#)

| #  | b           | b <sup>++</sup> | b <sup>*</sup> | b <sup>*++</sup> | b <sup>0</sup> | b <sup>0++</sup> | Seq. | y           | y <sup>++</sup> | y <sup>*</sup> | y <sup>*++</sup> | y <sup>0</sup> | y <sup>0++</sup> | #  |
|----|-------------|-----------------|----------------|------------------|----------------|------------------|------|-------------|-----------------|----------------|------------------|----------------|------------------|----|
| 1  | 100.075690  | 50.541483       |                |                  |                |                  | V    |             |                 |                |                  |                |                  | 17 |
| 2  | 539.301016  | 270.154146      | 522.274467     | 261.640872       |                |                  | Q    | 2002.079009 | 1001.543143     | 1985.052460    | 993.029868       | 1984.068444    | 992.537860       | 16 |
| 3  | 638.369430  | 319.688353      | 621.342881     | 311.175079       |                |                  | V    | 1562.853683 | 781.930480      | 1545.827134    | 773.417205       | 1544.843118    | 772.925197       | 15 |
| 4  | 751.453494  | 376.230385      | 734.426945     | 367.717111       |                |                  | L    | 1463.785269 | 732.396273      | 1446.758720    | 723.882998       | 1445.774704    | 723.390990       | 14 |
| 5  | 864.537558  | 432.772417      | 847.511009     | 424.259143       |                |                  | L    | 1350.701205 | 675.854241      | 1333.674656    | 667.340966       | 1332.690640    | 666.848958       | 13 |
| 6  | 921.559022  | 461.283149      | 904.532473     | 452.769875       |                |                  | G    | 1237.617141 | 619.312209      | 1220.590592    | 610.798934       | 1219.606576    | 610.306926       | 12 |
| 7  | 992.596136  | 496.801706      | 975.569587     | 488.288432       |                |                  | A    | 1180.595677 | 590.801477      | 1163.569128    | 582.288202       | 1162.585112    | 581.796194       | 11 |
| 8  | 1129.655048 | 565.331162      | 1112.628499    | 556.817888       |                |                  | H    | 1109.558563 | 555.282920      | 1092.532014    | 546.769645       | 1091.547998    | 546.277637       | 10 |
| 9  | 1216.687076 | 608.847176      | 1199.660527    | 600.333902       | 1198.676511    | 599.841894       | S    | 972.499651  | 486.753464      | 955.473102     | 478.240189       | 954.489086     | 477.748181       | 9  |
| 10 | 1329.771140 | 665.389208      | 1312.744591    | 656.875934       | 1311.760575    | 656.383926       | L    | 885.467623  | 443.237450      | 868.441074     | 434.724175       | 867.457058     | 434.232167       | 8  |
| 11 | 1416.803168 | 708.905222      | 1399.776619    | 700.391948       | 1398.792603    | 699.899940       | S    | 772.383559  | 386.695418      | 755.357010     | 378.182143       | 754.372994     | 377.690135       | 7  |
| 12 | 1544.861746 | 772.934511      | 1527.835197    | 764.421237       | 1526.851181    | 763.929229       | Q    | 685.351531  | 343.179404      | 668.324982     | 334.666129       | 667.340966     | 334.174121       | 6  |
| 13 | 1641.914510 | 821.460893      | 1624.887961    | 812.947619       | 1623.903945    | 812.455611       | P    | 557.292953  | 279.150115      | 540.266404     | 270.636840       | 539.282388     | 270.144832       | 5  |
| 14 | 1770.957103 | 885.982190      | 1753.930554    | 877.468915       | 1752.946538    | 876.976907       | E    | 460.240189  | 230.623733      | 443.213640     | 222.110458       | 442.229624     | 221.618450       | 4  |
| 15 | 1868.009867 | 934.508572      | 1850.983318    | 925.995297       | 1849.999302    | 925.503289       | P    | 331.197596  | 166.102436      | 314.171047     | 157.589162       | 313.187031     | 157.097154       | 3  |
| 16 | 1955.041895 | 978.024586      | 1938.015346    | 969.511311       | 1937.031330    | 969.019303       | S    | 234.144832  | 117.576054      | 217.118283     | 109.062780       | 216.134267     | 108.570772       | 2  |
| 17 |             |                 |                |                  |                |                  | K    | 147.112804  | 74.060040       | 130.086255     | 65.546765        |                |                  | 1  |

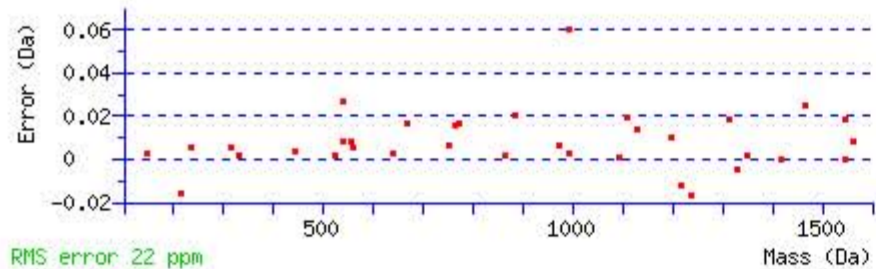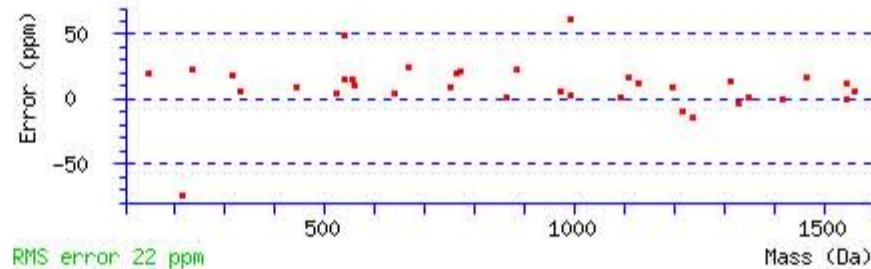

NCBI BLAST search of [VQVLLGAHLSQPEPSK](#)

(Parameters: blastp, nr protein database, expect=20000, no filter, PAM30)

Other BLAST [web gateways](#)

### All matches to this query

| Score | Mr(calc):   | Delta    | Sequence                         |
|-------|-------------|----------|----------------------------------|
| 67.8  | 2100.140137 | 0.017165 | <a href="#">VQVLLGAHLSQPEPSK</a> |

Mascot: <http://www.matrixscience.com/>



# MASCOT Search Results

## Peptide View

MS/MS Fragmentation of **SSQESYAHGTK**  
 Found in **CFAH\_HUMAN**, Complement factor H OS=Homo sapiens GN=CFH PE=1 SV=4

Match to Query 35083: 1504.705248 from(753.359900,2+) rtinseconds(1183) index(18862)  
 Title: Locus:1.1.1.2554.15 File:"2013-07-02 CLN FXIII 180 min 1st F 2.wiff"  
 Data file C:\Program Files (x86)\Matrix Science\Mascot Daemon\mgf\7 FXIII 180 min 1st\mascot\_daemon\_merge.mgf

Click mouse within plot area to zoom in by factor of two about that point  
 Or, Plot from  to  Da   
 Label all possible matches  Label matches used for scoring

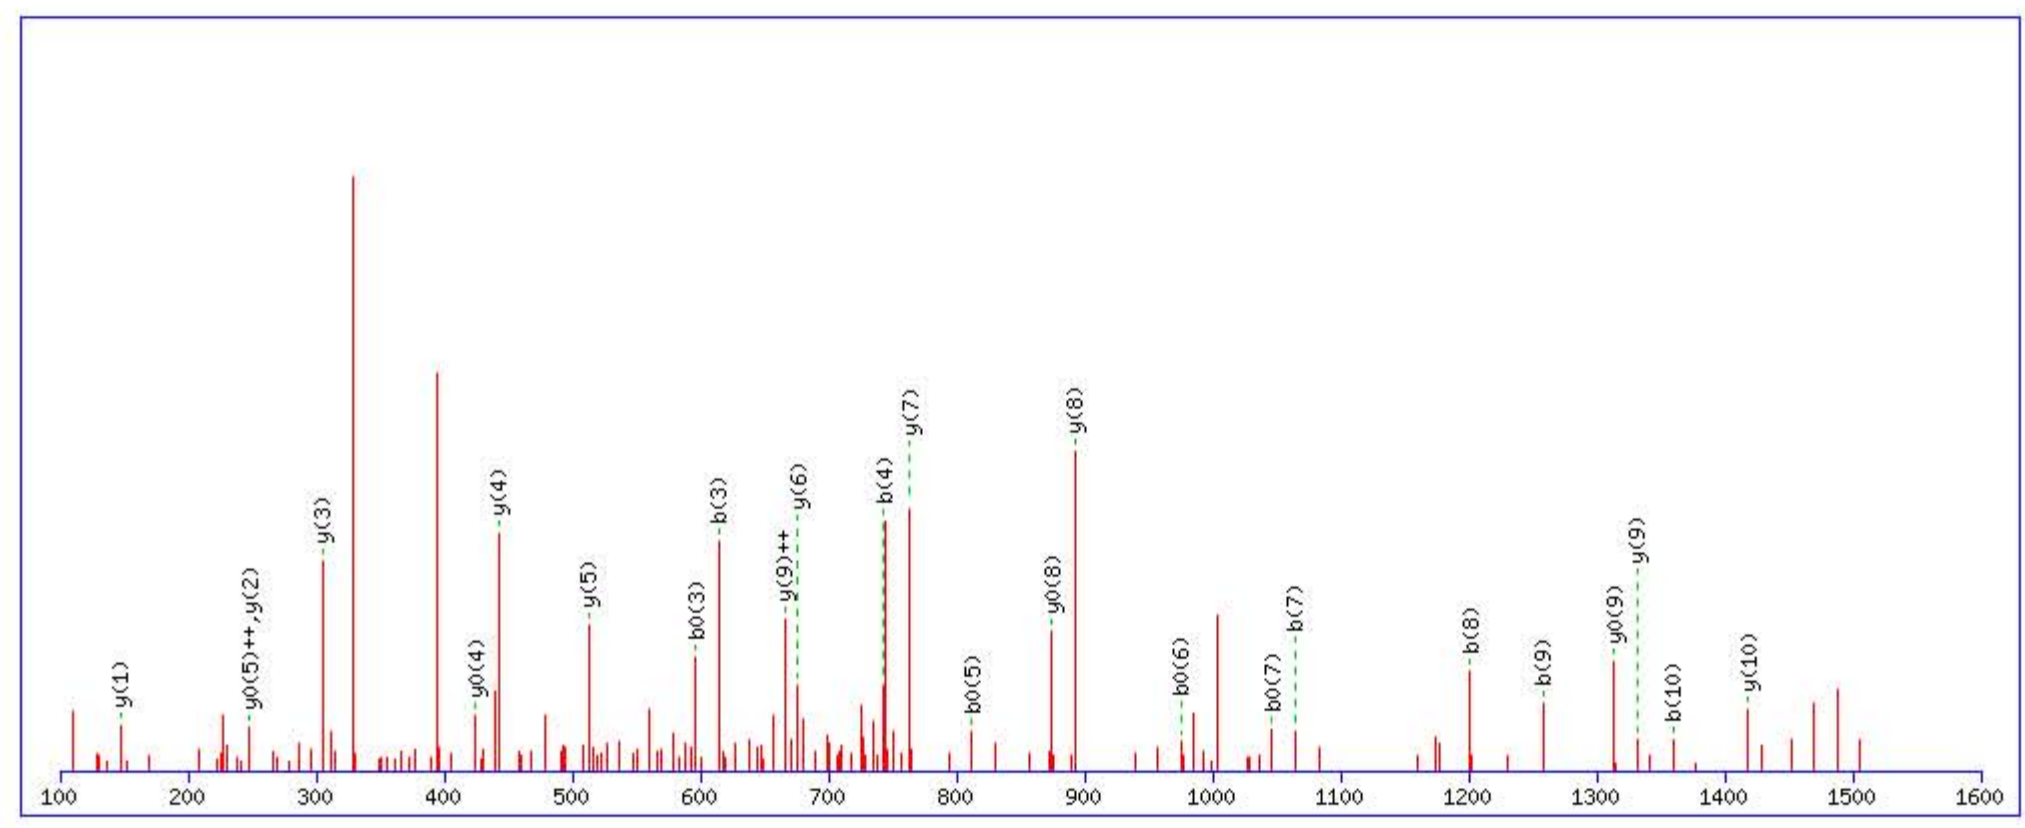

Monoisotopic mass of neutral peptide Mr(calc): 1504.698013  
 Fixed modifications: Carbamidomethyl (C) (apply to specified residues or termini only)  
 Variable modifications:  
 Q3 : Biotin:Thermo-21345 (Q)  
 Ions Score: 72 Expect: 1e-006  
 Matches : 25/114 fragment ions using 41 most intense peaks [\(help\)](#)

| #  | b           | b <sup>++</sup> | b <sup>*</sup> | b <sup>*++</sup> | b <sup>0</sup> | b <sup>0++</sup> | Seq. | y           | y <sup>++</sup> | y <sup>*</sup> | y <sup>*++</sup> | y <sup>0</sup> | y <sup>0++</sup> | #  |
|----|-------------|-----------------|----------------|------------------|----------------|------------------|------|-------------|-----------------|----------------|------------------|----------------|------------------|----|
| 1  | 88.039304   | 44.523290       |                |                  | 70.028739      | 35.518008        | S    |             |                 |                |                  |                |                  | 11 |
| 2  | 175.071332  | 88.039304       |                |                  | 157.060767     | 79.034021        | S    | 1418.673277 | 709.840276      | 1401.646728    | 701.327002       | 1400.662712    | 700.834994       | 10 |
| 3  | 614.296658  | 307.651967      | 597.270109     | 299.138692       | 596.286093     | 298.646684       | Q    | 1331.641249 | 666.324263      | 1314.614700    | 657.810988       | 1313.630684    | 657.318980       | 9  |
| 4  | 743.339251  | 372.173264      | 726.312702     | 363.659989       | 725.328686     | 363.167981       | E    | 892.415923  | 446.711600      | 875.389374     | 438.198325       | 874.405358     | 437.706317       | 8  |
| 5  | 830.371279  | 415.689278      | 813.344730     | 407.176003       | 812.360714     | 406.683995       | S    | 763.373330  | 382.190303      | 746.346781     | 373.677029       | 745.362765     | 373.185021       | 7  |
| 6  | 993.434608  | 497.220942      | 976.408059     | 488.707668       | 975.424043     | 488.215660       | Y    | 676.341302  | 338.674289      | 659.314753     | 330.161015       | 658.330737     | 329.669007       | 6  |
| 7  | 1064.471722 | 532.739499      | 1047.445173    | 524.226225       | 1046.461157    | 523.734217       | A    | 513.277973  | 257.142625      | 496.251424     | 248.629350       | 495.267408     | 248.137342       | 5  |
| 8  | 1201.530634 | 601.268955      | 1184.504085    | 592.755681       | 1183.520069    | 592.263672       | H    | 442.240859  | 221.624067      | 425.214310     | 213.110793       | 424.230294     | 212.618785       | 4  |
| 9  | 1258.552098 | 629.779687      | 1241.525549    | 621.266413       | 1240.541533    | 620.774404       | G    | 305.181947  | 153.094611      | 288.155398     | 144.581337       | 287.171382     | 144.089329       | 3  |
| 10 | 1359.599777 | 680.303526      | 1342.573228    | 671.790252       | 1341.589212    | 671.298244       | T    | 248.160483  | 124.583879      | 231.133934     | 116.070605       | 230.149918     | 115.578597       | 2  |
| 11 |             |                 |                |                  |                |                  | K    | 147.112804  | 74.060040       | 130.086255     | 65.546765        |                |                  | 1  |

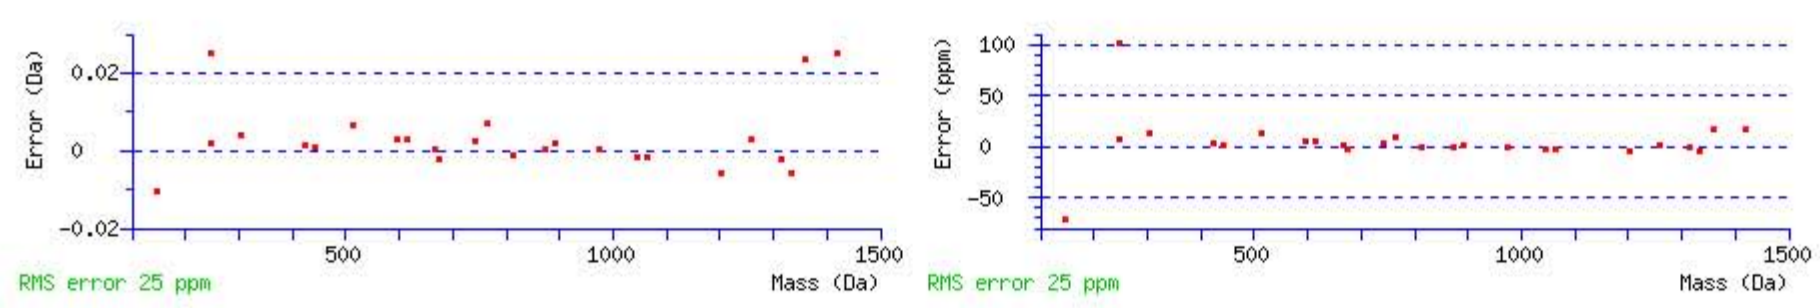

NCBI BLAST search of **SSQESYAHGTK**  
 (Parameters: blastp, nr protein database, expect=20000, no filter, PAM30)  
 Other BLAST [web gateways](#)

### All matches to this query

| Score | Mr(calc):   | Delta     | Sequence                       |
|-------|-------------|-----------|--------------------------------|
| 71.8  | 1504.698013 | 0.007235  | <a href="#">SSQESYAHGTK</a>    |
| 9.9   | 1504.701355 | 0.003893  | <a href="#">KLSMKECEHAEK</a>   |
| 5.9   | 1504.726532 | -0.021284 | <a href="#">AQELQTETMK</a>     |
| 4.7   | 1504.704544 | 0.000704  | <a href="#">EPSNSIFPVGSEDK</a> |
| 4.0   | 1504.720474 | -0.015226 | <a href="#">QYVSGLHMNRER</a>   |
| 3.4   | 1504.720474 | -0.015226 | <a href="#">NRATGNYDQR</a>     |
| 1.1   | 1504.704544 | 0.000704  | <a href="#">QVFEDGQELESPK</a>  |
| 0.2   | 1504.690140 | 0.015108  | <a href="#">ELQSMADQEK</a>     |

# MASCOT SCIENCE Mascot Search Results

## Peptide View

MS/MS Fragmentation of **TGDEITYQCR**

Found in **CFAH\_HUMAN**, Complement factor H OS=Homo sapiens GN=CFH PE=1 SV=4

Match to Query 36488: 1552.709848 from(777.362200,2+) rtinseconds(1673) index(22237)

Title: Locus:1.1.1.2725.17 File:"2013-07-02 CLN FXIII 180 min 1st F 2.wiff"

Data file C:\Program Files (x86)\Matrix Science\Mascot Daemon\mgf7 FXIII 180 min 1st\mascot\_daemon\_merge.mgf

Click mouse within plot area to zoom in by factor of two about that point

Or, Plot from  to  Da

Label all possible matches  Label matches used for scoring

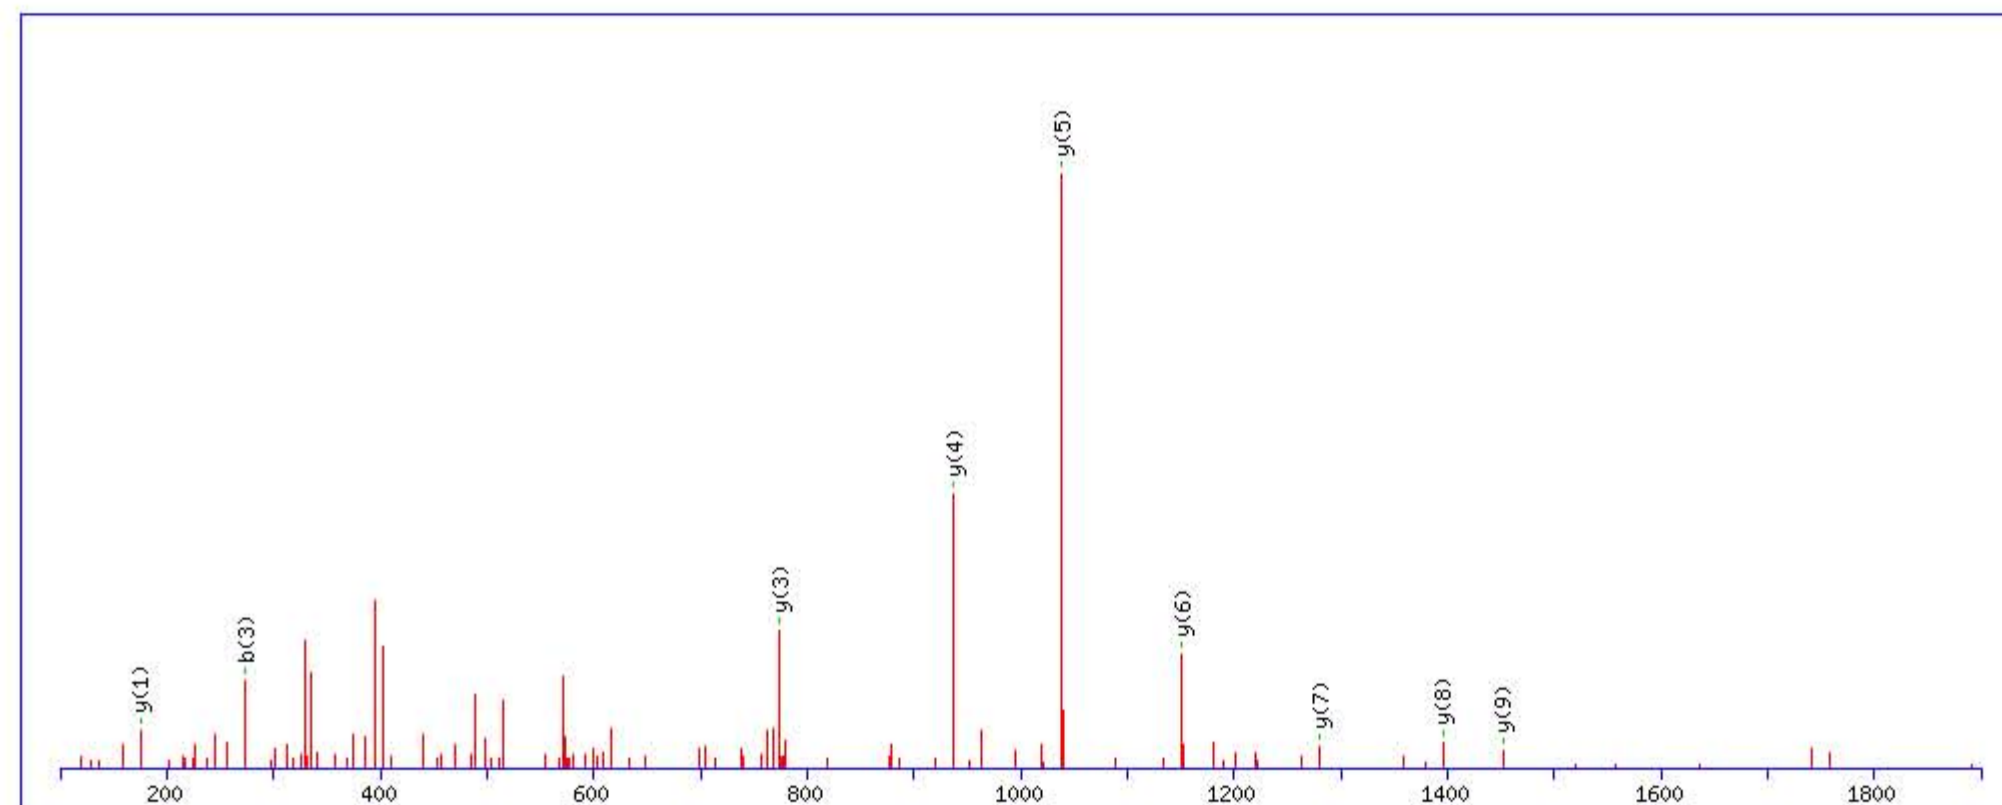

Monoisotopic mass of neutral peptide Mr(calc): 1552.701401

Fixed modifications: Carbamidomethyl (C) (apply to specified residues or termini only)

Variable modifications:

Q8 : Biotin:Thermo-21345 (Q)

Ions Score: 61 Expect: 8.3e-006

Matches : 9/86 fragment ions using 14 most intense peaks [\(help\)](#)

| #  | b           | b <sup>++</sup> | b <sup>*</sup> | b <sup>*++</sup> | b <sup>0</sup> | b <sup>0++</sup> | Seq. | y           | y <sup>++</sup> | y <sup>*</sup> | y <sup>*++</sup> | y <sup>0</sup> | y <sup>0++</sup> | #  |
|----|-------------|-----------------|----------------|------------------|----------------|------------------|------|-------------|-----------------|----------------|------------------|----------------|------------------|----|
| 1  | 102.054955  | 51.531116       |                |                  | 84.044390      | 42.525833        | T    |             |                 |                |                  |                |                  | 10 |
| 2  | 159.076419  | 80.041847       |                |                  | 141.065854     | 71.036565        | G    | 1452.660999 | 726.834138      | 1435.634450    | 718.320863       | 1434.650434    | 717.828855       | 9  |
| 3  | 274.103362  | 137.555319      |                |                  | 256.092797     | 128.550037       | D    | 1395.639535 | 698.323406      | 1378.612986    | 689.810131       | 1377.628970    | 689.318123       | 8  |
| 4  | 403.145955  | 202.076616      |                |                  | 385.135390     | 193.071333       | E    | 1280.612592 | 640.809934      | 1263.586043    | 632.296660       | 1262.602027    | 631.804652       | 7  |
| 5  | 516.230019  | 258.618648      |                |                  | 498.219454     | 249.613365       | I    | 1151.569999 | 576.288638      | 1134.543450    | 567.775363       | 1133.559434    | 567.283355       | 6  |
| 6  | 617.277698  | 309.142487      |                |                  | 599.267133     | 300.137205       | T    | 1038.485935 | 519.746606      | 1021.459386    | 511.233331       | 1020.475370    | 510.741323       | 5  |
| 7  | 780.341027  | 390.674152      |                |                  | 762.330462     | 381.668869       | Y    | 937.438256  | 469.222766      | 920.411707     | 460.709492       |                |                  | 4  |
| 8  | 1219.566353 | 610.286815      | 1202.539804    | 601.773540       | 1201.555788    | 601.281532       | Q    | 774.374927  | 387.691102      | 757.348378     | 379.177827       |                |                  | 3  |
| 9  | 1379.597002 | 690.302139      | 1362.570453    | 681.788865       | 1361.586437    | 681.296857       | C    | 335.149601  | 168.078438      | 318.123052     | 159.565164       |                |                  | 2  |
| 10 |             |                 |                |                  |                |                  | R    | 175.118952  | 88.063114       | 158.092403     | 79.549839        |                |                  | 1  |

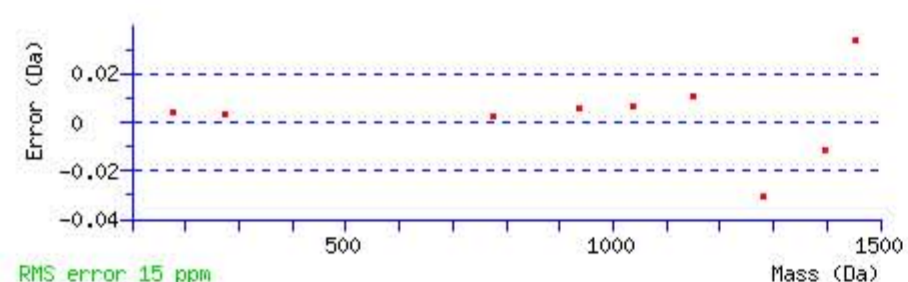

RMS error 15 ppm

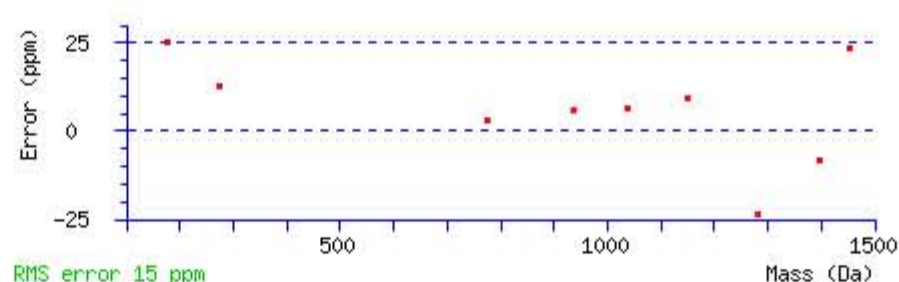

RMS error 15 ppm

NCBI BLAST search of [TGDEITYQCR](#)

(Parameters: blastp, nr protein database, expect=20000, no filter, PAM30)

Other BLAST [web gateways](#)

## All matches to this query

| Score | Mr(calc):   | Delta     | Sequence                        |
|-------|-------------|-----------|---------------------------------|
| 61.0  | 1552.701401 | 0.008447  | <a href="#">TGDEITYQCR</a>      |
| 6.9   | 1552.715149 | -0.005301 | <a href="#">LTNGSSSCSGTVEVR</a> |
| 6.1   | 1552.715820 | -0.005972 | <a href="#">AVFDALDGDGDGFVR</a> |
| 4.0   | 1552.712616 | -0.002768 | <a href="#">NVGMPVAHMESPER</a>  |

# MASCOT SEARCH RESULTS

## Peptide View

MS/MS Fragmentation of **WSSPPQCEGLPCK**

Found in **CFAH\_HUMAN**, Complement factor H OS=Homo sapiens GN=CFH PE=1 SV=4

Match to Query 46729: 1855.850862 from(619.624230,3+) rtinseconds(1880) index(23810)

Title: Locus:1.1.1.2797.10 File:"2013-07-02 CLN FXIII 180 min 1st F 2.wiff"

Data file C:\Program Files (x86)\Matrix Science\Mascot Daemon\mgf\7 FXIII 180 min 1st\mascot\_daemon\_merge.mgf

Click mouse within plot area to zoom in by factor of two about that point

Or, Plot from  to  Da

Label all possible matches  Label matches used for scoring

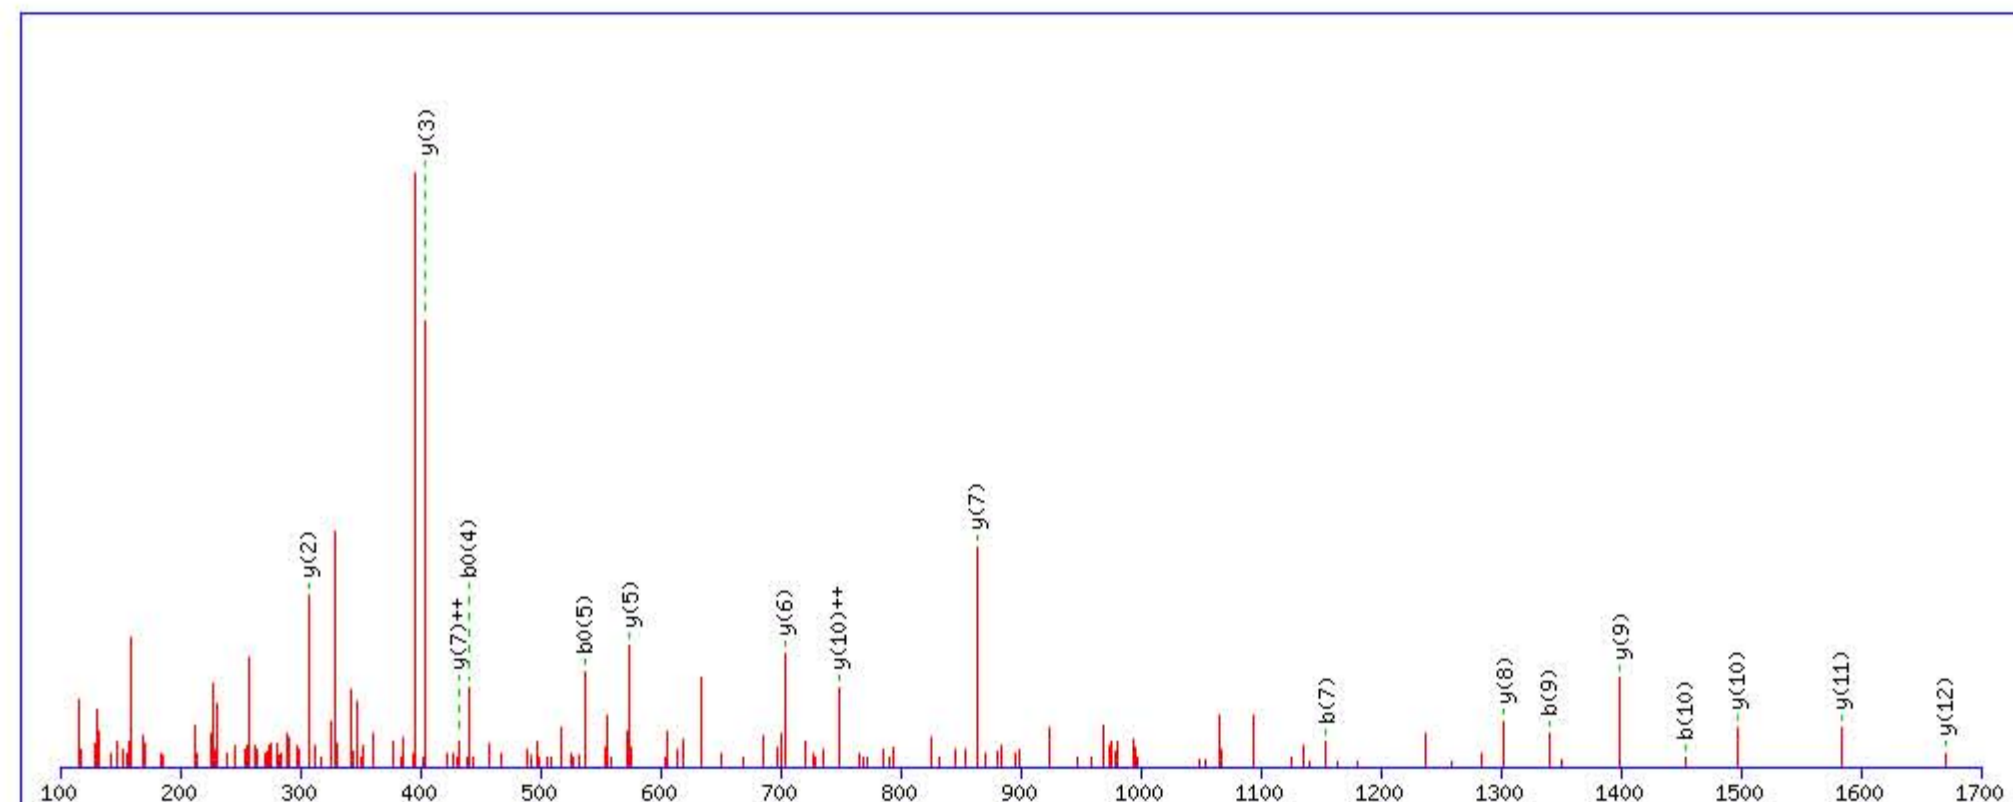

Monoisotopic mass of neutral peptide Mr(calc): 1855.841934

Fixed modifications: Carbamidomethyl (C) (apply to specified residues or termini only)

Variable modifications:

Q6 : Biotin:Thermo-21345 (Q)

Ions Score: 64 Expect: 1.5e-006

Matches : 17/122 fragment ions using 30 most intense peaks [\(help\)](#)

| #  | b                  | b <sup>++</sup> | b <sup>*</sup> | b <sup>*++</sup> | b <sup>0</sup>    | b <sup>0++</sup> | Seq. | y                  | y <sup>++</sup>   | y <sup>*</sup> | y <sup>*++</sup> | y <sup>0</sup> | y <sup>0++</sup> | #  |
|----|--------------------|-----------------|----------------|------------------|-------------------|------------------|------|--------------------|-------------------|----------------|------------------|----------------|------------------|----|
| 1  | 187.086589         | 94.046932       |                |                  |                   |                  | W    |                    |                   |                |                  |                |                  | 13 |
| 2  | 274.118617         | 137.562947      |                |                  | 256.108052        | 128.557664       | S    | <b>1670.769897</b> | 835.888587        | 1653.743348    | 827.375312       | 1652.759332    | 826.883304       | 12 |
| 3  | 361.150645         | 181.078960      |                |                  | 343.140080        | 172.073678       | S    | <b>1583.737869</b> | 792.372573        | 1566.711320    | 783.859298       | 1565.727304    | 783.367290       | 11 |
| 4  | 458.203409         | 229.605343      |                |                  | <b>440.192844</b> | 220.600060       | P    | <b>1496.705841</b> | <b>748.856559</b> | 1479.679292    | 740.343284       | 1478.695276    | 739.851276       | 10 |
| 5  | 555.256173         | 278.131725      |                |                  | <b>537.245608</b> | 269.126442       | P    | <b>1399.653077</b> | 700.330177        | 1382.626528    | 691.816902       | 1381.642512    | 691.324894       | 9  |
| 6  | 994.481499         | 497.744388      | 977.454950     | 489.231113       | 976.470934        | 488.739105       | Q    | <b>1302.600313</b> | 651.803795        | 1285.573764    | 643.290520       | 1284.589748    | 642.798512       | 8  |
| 7  | <b>1154.512148</b> | 577.759712      | 1137.485599    | 569.246438       | 1136.501583       | 568.754430       | C    | <b>863.374987</b>  | <b>432.191132</b> | 846.348438     | 423.677857       | 845.364422     | 423.185849       | 7  |
| 8  | 1283.554741        | 642.281009      | 1266.528192    | 633.767734       | 1265.544176       | 633.275726       | E    | <b>703.344338</b>  | 352.175807        | 686.317789     | 343.662533       | 685.333773     | 343.170525       | 6  |
| 9  | <b>1340.576205</b> | 670.791741      | 1323.549656    | 662.278466       | 1322.565640       | 661.786458       | G    | <b>574.301745</b>  | 287.654511        | 557.275196     | 279.141236       |                |                  | 5  |
| 10 | <b>1453.660269</b> | 727.333773      | 1436.633720    | 718.820498       | 1435.649704       | 718.328490       | L    | 517.280281         | 259.143779        | 500.253732     | 250.630504       |                |                  | 4  |
| 11 | 1550.713033        | 775.860155      | 1533.686484    | 767.346880       | 1532.702468       | 766.854872       | P    | <b>404.196217</b>  | 202.601747        | 387.169668     | 194.088472       |                |                  | 3  |
| 12 | 1710.743682        | 855.875479      | 1693.717133    | 847.362205       | 1692.733117       | 846.870197       | C    | <b>307.143453</b>  | 154.075365        | 290.116904     | 145.562090       |                |                  | 2  |
| 13 |                    |                 |                |                  |                   |                  | K    | 147.112804         | 74.060040         | 130.086255     | 65.546765        |                |                  | 1  |

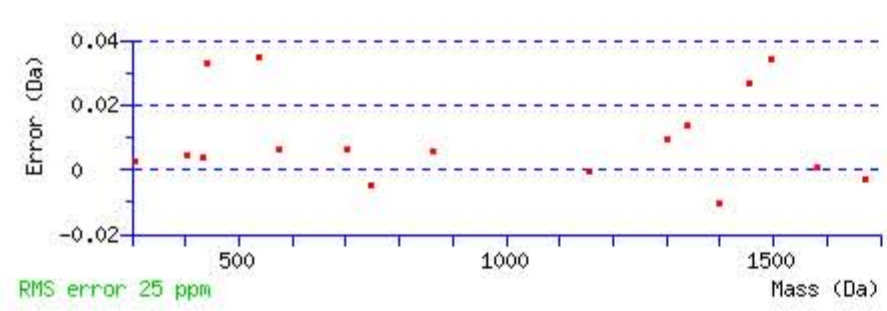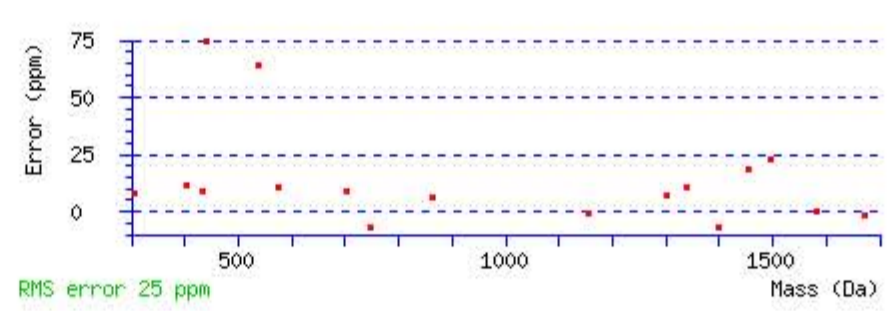

NCBI BLAST search of **WSSPPQCEGLPCK**

(Parameters: blastp, nr protein database, expect=20000, no filter, PAM30)

Other BLAST [web gateways](#)

All matches to this query

| Score | Mr(calc):   | Delta     | Sequence                      |
|-------|-------------|-----------|-------------------------------|
| 63.9  | 1855.841934 | 0.008928  | <a href="#">WSSPPQCEGLPCK</a> |
| 1.7   | 1855.869568 | -0.018706 | <a href="#">LMQDDEMNFNLTK</a> |

Mascot: <http://www.matrixscience.com/>

# MASCOT Search Results

## Peptide View

MS/MS Fragmentation of **AGEQVITYTCATYYK**

Found in **CFAH\_HUMAN**, Complement factor H OS=Homo sapiens GN=CFH PE=1 SV=4

Match to Query 49103: 1964.922208 from(983.468380,2+) rtinseconds(1864) index(23681)

Title: Locus:1.1.1.2791.21 File:"2013-07-02 CLN FXIII 180 min 1st F 2.wiff"

Data file C:\Program Files (x86)\Matrix Science\Mascot Daemon\mgf7 FXIII 180 min 1st\mascot\_daemon\_merge.mgf

Click mouse within plot area to zoom in by factor of two about that point

Or, Plot from  to  Da

Label all possible matches  Label matches used for scoring

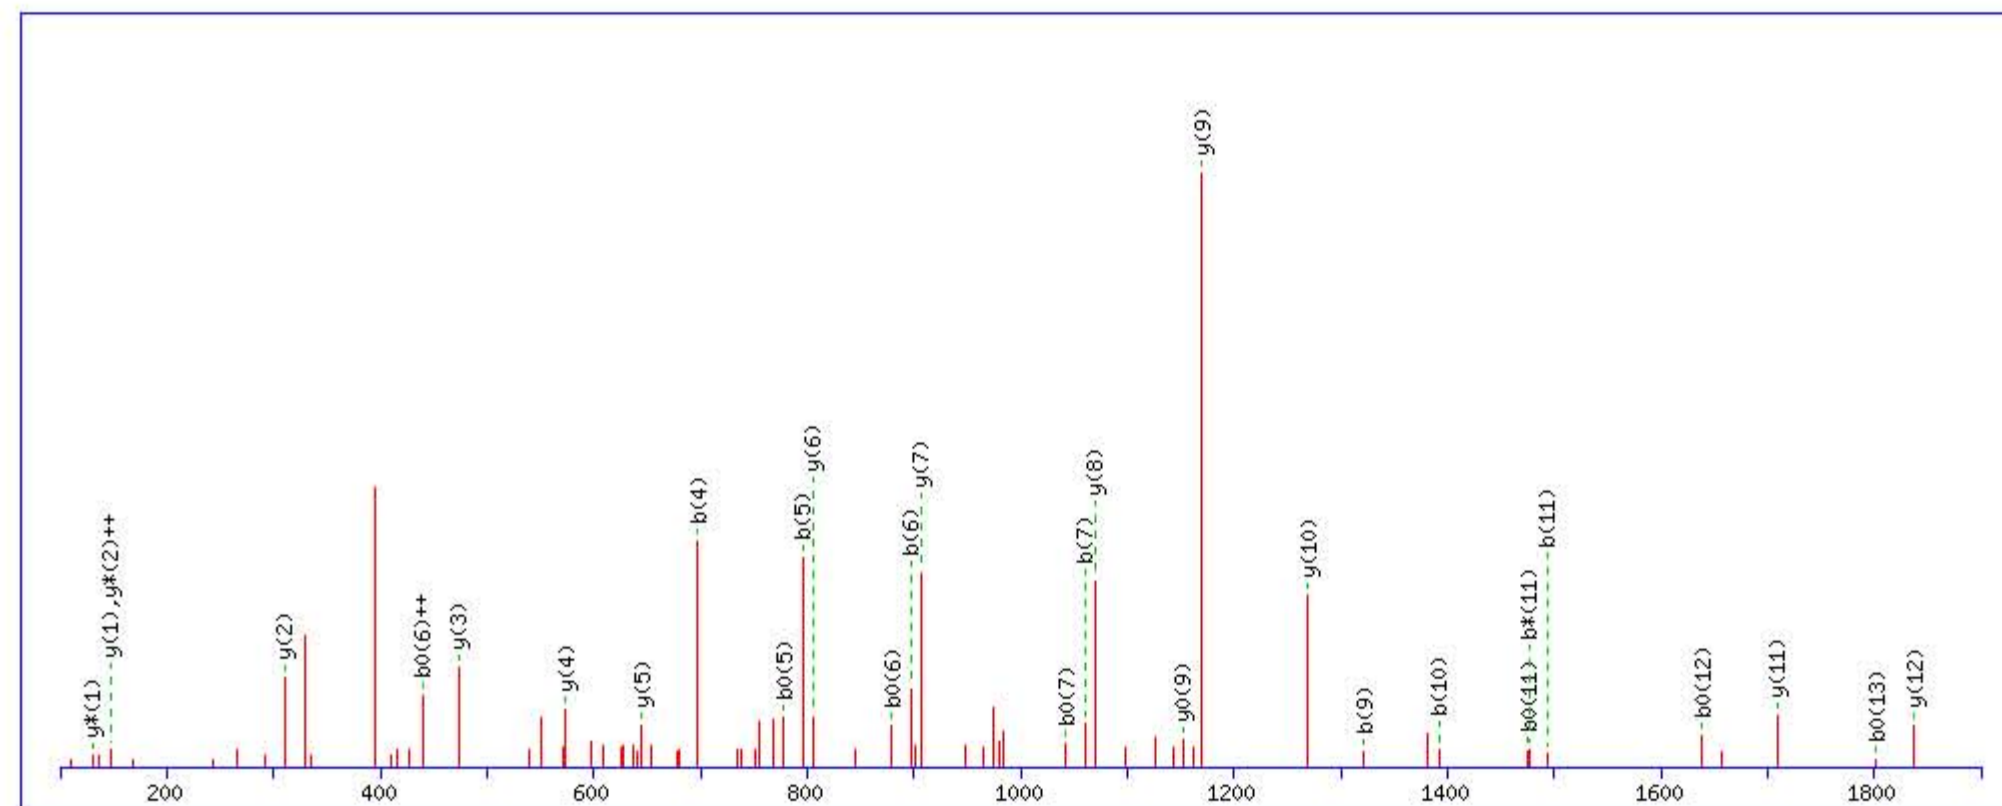

Monoisotopic mass of neutral peptide Mr(calc): 1964.901215

Fixed modifications: Carbamidomethyl (C) (apply to specified residues or termini only)

Variable modifications:

Q4 : Biotin:Thermo-21345 (Q)

Ions Score: 91 Expect: 1.3e-008

Matches : 30/140 fragment ions using 45 most intense peaks [\(help\)](#)

| #  | b                  | b <sup>++</sup> | b <sup>*</sup>     | b <sup>*++</sup> | b <sup>0</sup>     | b <sup>0++</sup>  | Seq. | y                  | y <sup>++</sup> | y <sup>*</sup>    | y <sup>*++</sup>  | y <sup>0</sup>     | y <sup>0++</sup> | #  |
|----|--------------------|-----------------|--------------------|------------------|--------------------|-------------------|------|--------------------|-----------------|-------------------|-------------------|--------------------|------------------|----|
| 1  | 72.044390          | 36.525833       |                    |                  |                    |                   | A    |                    |                 |                   |                   |                    |                  | 14 |
| 2  | 129.065854         | 65.036565       |                    |                  |                    |                   | G    | 1894.871388        | 947.939332      | 1877.844839       | 939.426058        | 1876.860823        | 938.934050       | 13 |
| 3  | 258.108447         | 129.557862      |                    |                  | 240.097882         | 120.552579        | E    | <b>1837.849924</b> | 919.428600      | 1820.823375       | 910.915326        | 1819.839359        | 910.423318       | 12 |
| 4  | <b>697.333773</b>  | 349.170525      | 680.307224         | 340.657250       | 679.323208         | 340.165242        | Q    | <b>1708.807331</b> | 854.907304      | 1691.780782       | 846.394029        | 1690.796766        | 845.902021       | 11 |
| 5  | <b>796.402187</b>  | 398.704732      | 779.375638         | 390.191457       | <b>778.391622</b>  | 389.699449        | V    | <b>1269.582005</b> | 635.294641      | 1252.555456       | 626.781366        | 1251.571440        | 626.289358       | 10 |
| 6  | <b>897.449866</b>  | 449.228571      | 880.423317         | 440.715297       | <b>879.439301</b>  | <b>440.223289</b> | T    | <b>1170.513591</b> | 585.760434      | 1153.487042       | 577.247159        | <b>1152.503026</b> | 576.755151       | 9  |
| 7  | <b>1060.513195</b> | 530.760236      | 1043.486646        | 522.246961       | <b>1042.502630</b> | 521.754953        | Y    | <b>1069.465912</b> | 535.236594      | 1052.439363       | 526.723320        | 1051.455347        | 526.231312       | 8  |
| 8  | 1161.560874        | 581.284075      | 1144.534325        | 572.770801       | 1143.550309        | 572.278793        | T    | <b>906.402583</b>  | 453.704930      | 889.376034        | 445.191655        | 888.392018         | 444.699647       | 7  |
| 9  | <b>1321.591523</b> | 661.299400      | 1304.564974        | 652.786125       | 1303.580958        | 652.294117        | C    | <b>805.354904</b>  | 403.181090      | 788.328355        | 394.667816        | 787.344339         | 394.175808       | 6  |
| 10 | <b>1392.628637</b> | 696.817957      | 1375.602088        | 688.304682       | 1374.618072        | 687.812674        | A    | <b>645.324255</b>  | 323.165766      | 628.297706        | 314.652491        | 627.313690         | 314.160483       | 5  |
| 11 | <b>1493.676316</b> | 747.341796      | <b>1476.649767</b> | 738.828522       | <b>1475.665751</b> | 738.336514        | T    | <b>574.287141</b>  | 287.647209      | 557.260592        | 279.133934        | 556.276576         | 278.641926       | 4  |
| 12 | 1656.739645        | 828.873461      | 1639.713096        | 820.360186       | <b>1638.729080</b> | 819.868178        | Y    | <b>473.239462</b>  | 237.123369      | 456.212913        | 228.610095        |                    |                  | 3  |
| 13 | 1819.802974        | 910.405125      | 1802.776425        | 901.891851       | <b>1801.792409</b> | 901.399843        | Y    | <b>310.176133</b>  | 155.591705      | 293.149584        | <b>147.078430</b> |                    |                  | 2  |
| 14 |                    |                 |                    |                  |                    |                   | K    | <b>147.112804</b>  | 74.060040       | <b>130.086255</b> | 65.546765         |                    |                  | 1  |

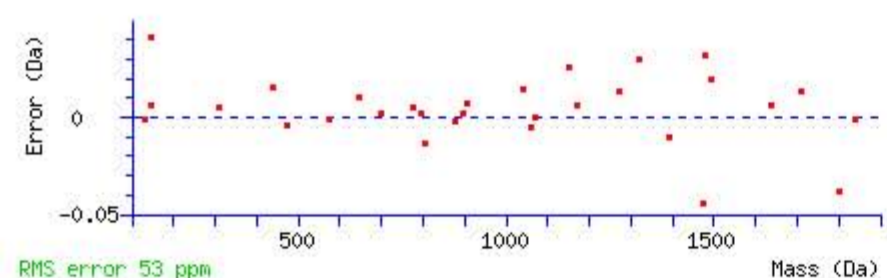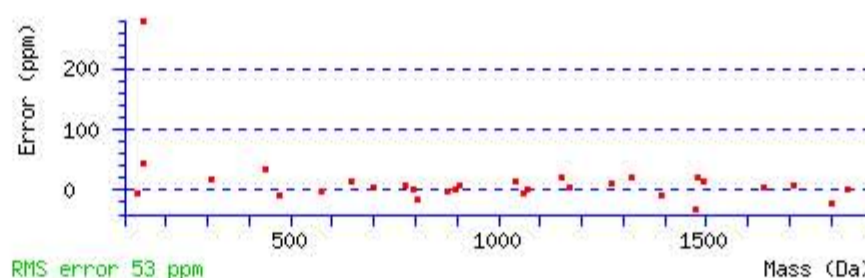

NCBI BLAST search of [AGEQVITYTCATYYK](#)

(Parameters: blastp, nr protein database, expect=20000, no filter, PAM30)

Other BLAST [web gateways](#)

All matches to this query

| Score | Mr(calc):   | Delta    | Sequence                        |
|-------|-------------|----------|---------------------------------|
| 90.8  | 1964.901215 | 0.020993 | <a href="#">AGEQVITYTCATYYK</a> |

Mascot: <http://www.matrixscience.com/>

# MASCOT SCIENCE Mascot Search Results

## Peptide View

MS/MS Fragmentation of **DTSCVNPPTVQNAYIVSR**  
 Found in **CFAH\_HUMAN**, Complement factor H OS=Homo sapiens GN=CFH PE=1 SV=4

Match to Query 58812: 2331.152382 from(778.058070,3+) rtinseconds(2100) index(25396)  
 Title: Locus:1.1.1.2873.20 File:"2013-07-02 CLN FXIII 180 min 1st F 2.wiff"  
 Data file C:\Program Files (x86)\Matrix Science\Mascot Daemon\mgf\7 FXIII 180 min 1st\mascot\_daemon\_merge.mgf

Click mouse within plot area to zoom in by factor of two about that point

Or, Plot from 100 to 2000 Da Full range

Label all possible matches  Label matches used for scoring

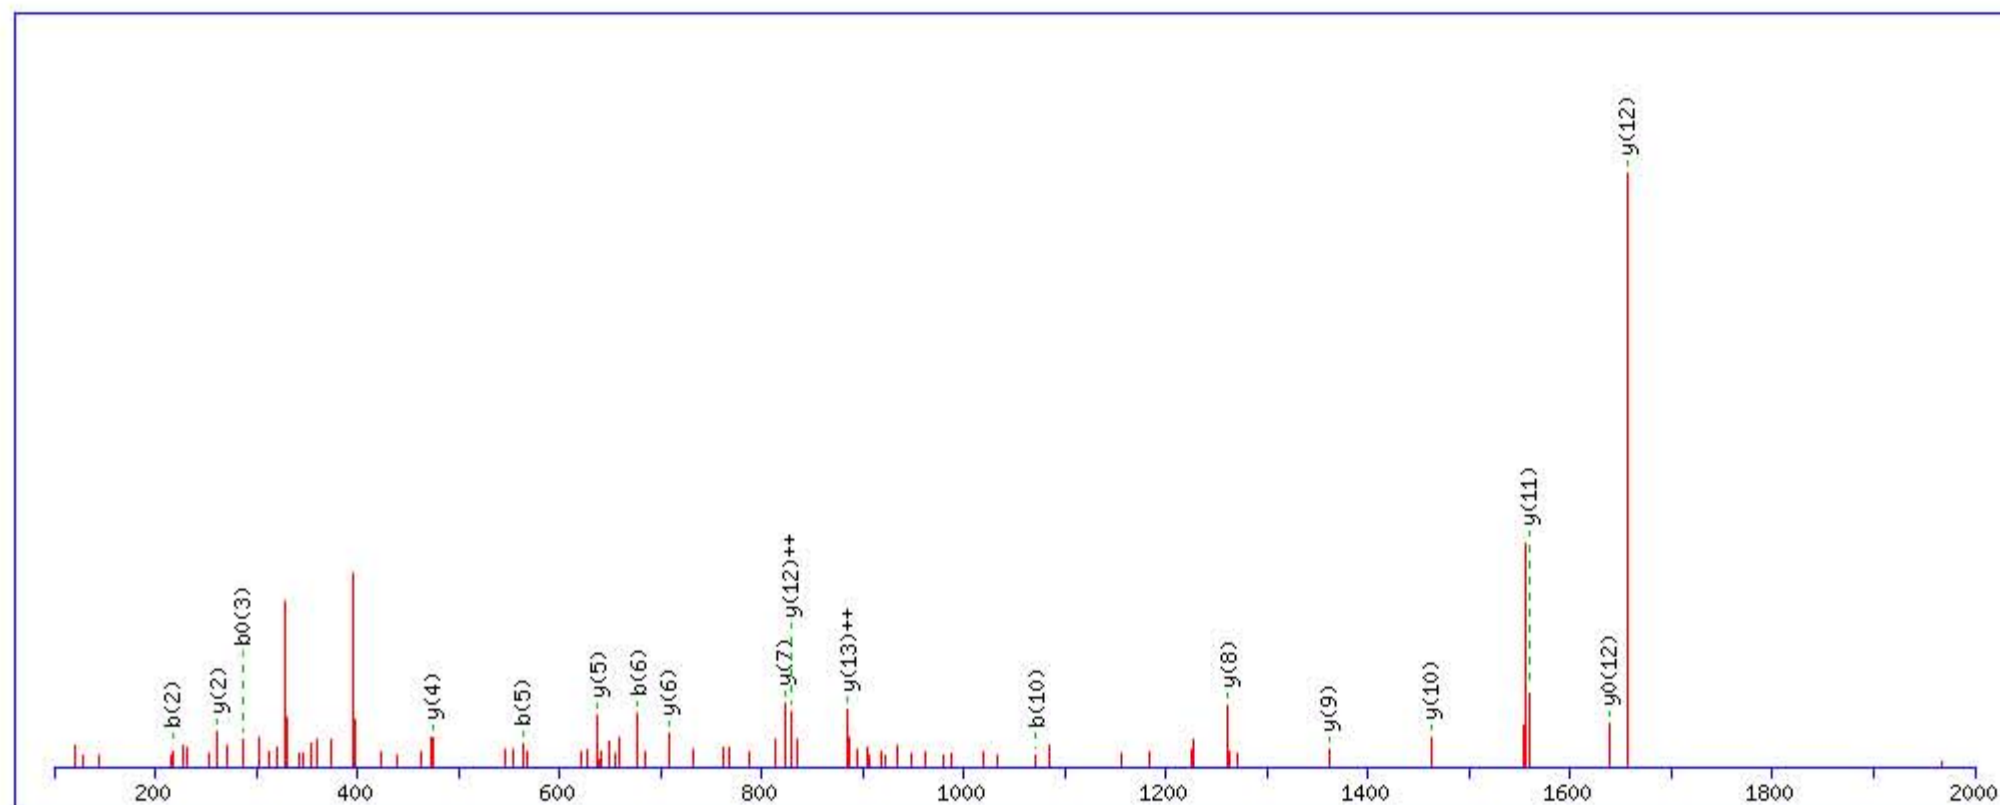

Monoisotopic mass of neutral peptide Mr(calc): 2331.135147  
 Fixed modifications: Carbamidomethyl (C) (apply to specified residues or termini only)

Variable modifications:  
 Q11 : Biotin:Thermo-21345 (Q)

Ions Score: 43 Expect: 0.0013

Matches : 18/192 fragment ions using 43 most intense peaks [\(help\)](#)

| #  | b                  | b <sup>++</sup> | b <sup>*</sup> | b <sup>*++</sup> | b <sup>0</sup>    | b <sup>0++</sup> | Seq. | y                  | y <sup>++</sup>   | y <sup>*</sup> | y <sup>*++</sup> | y <sup>0</sup>     | y <sup>0++</sup> | #  |
|----|--------------------|-----------------|----------------|------------------|-------------------|------------------|------|--------------------|-------------------|----------------|------------------|--------------------|------------------|----|
| 1  | 116.034219         | 58.520748       |                |                  | 98.023654         | 49.515465        | D    |                    |                   |                |                  |                    |                  | 18 |
| 2  | <b>217.081898</b>  | 109.044587      |                |                  | 199.071333        | 100.039304       | T    | 2217.115472        | 1109.061374       | 2200.088923    | 1100.548099      | 2199.104907        | 1100.056091      | 17 |
| 3  | 304.113926         | 152.560601      |                |                  | <b>286.103361</b> | 143.555319       | S    | 2116.067793        | 1058.537534       | 2099.041244    | 1050.024260      | 2098.057228        | 1049.532252      | 16 |
| 4  | 464.144575         | 232.575925      |                |                  | 446.134010        | 223.570643       | C    | 2029.035765        | 1015.021521       | 2012.009216    | 1006.508246      | 2011.025200        | 1006.016238      | 15 |
| 5  | <b>563.212989</b>  | 282.110133      |                |                  | 545.202424        | 273.104850       | V    | 1869.005116        | 935.006196        | 1851.978567    | 926.492922       | 1850.994551        | 926.000914       | 14 |
| 6  | <b>677.255916</b>  | 339.131596      | 660.229367     | 330.618321       | 659.245351        | 330.126313       | N    | 1769.936702        | <b>885.471989</b> | 1752.910153    | 876.958715       | 1751.926137        | 876.466707       | 13 |
| 7  | 774.308680         | 387.657978      | 757.282131     | 379.144703       | 756.298115        | 378.652695       | P    | <b>1655.893775</b> | <b>828.450526</b> | 1638.867226    | 819.937251       | <b>1637.883210</b> | 819.445243       | 12 |
| 8  | 871.361444         | 436.184360      | 854.334895     | 427.671086       | 853.350879        | 427.179078       | P    | <b>1558.841011</b> | 779.924144        | 1541.814462    | 771.410869       | 1540.830446        | 770.918861       | 11 |
| 9  | 972.409123         | 486.708200      | 955.382574     | 478.194925       | 954.398558        | 477.702917       | T    | <b>1461.788247</b> | 731.397762        | 1444.761698    | 722.884487       | 1443.777682        | 722.392479       | 10 |
| 10 | <b>1071.477537</b> | 536.242407      | 1054.450988    | 527.729132       | 1053.466972       | 527.237124       | V    | <b>1360.740568</b> | 680.873922        | 1343.714019    | 672.360648       | 1342.730003        | 671.868639       | 9  |
| 11 | 1510.702863        | 755.855070      | 1493.676314    | 747.341795       | 1492.692298       | 746.849787       | Q    | <b>1261.672154</b> | 631.339715        | 1244.645605    | 622.826441       | 1243.661589        | 622.334433       | 8  |
| 12 | 1624.745790        | 812.876533      | 1607.719241    | 804.363259       | 1606.735225       | 803.871251       | N    | <b>822.446828</b>  | 411.727052        | 805.420279     | 403.213777       | 804.436263         | 402.721769       | 7  |
| 13 | 1695.782904        | 848.395090      | 1678.756355    | 839.881816       | 1677.772339       | 839.389808       | A    | <b>708.403901</b>  | 354.705588        | 691.377352     | 346.192314       | 690.393336         | 345.700306       | 6  |
| 14 | 1858.846233        | 929.926755      | 1841.819684    | 921.413480       | 1840.835668       | 920.921472       | Y    | <b>637.366787</b>  | 319.187031        | 620.340238     | 310.673757       | 619.356222         | 310.181749       | 5  |
| 15 | 1971.930297        | 986.468787      | 1954.903748    | 977.955512       | 1953.919732       | 977.463504       | I    | <b>474.303458</b>  | 237.655367        | 457.276909     | 229.142092       | 456.292893         | 228.650084       | 4  |
| 16 | 2070.998711        | 1036.002993     | 2053.972162    | 1027.489719      | 2052.988146       | 1026.997711      | V    | 361.219394         | 181.113335        | 344.192845     | 172.600060       | 343.208829         | 172.108052       | 3  |
| 17 | 2158.030739        | 1079.519007     | 2141.004190    | 1071.005733      | 2140.020174       | 1070.513725      | S    | <b>262.150980</b>  | 131.579128        | 245.124431     | 123.065854       | 244.140415         | 122.573846       | 2  |
| 18 |                    |                 |                |                  |                   |                  | R    | 175.118952         | 88.063114         | 158.092403     | 79.549839        |                    |                  | 1  |

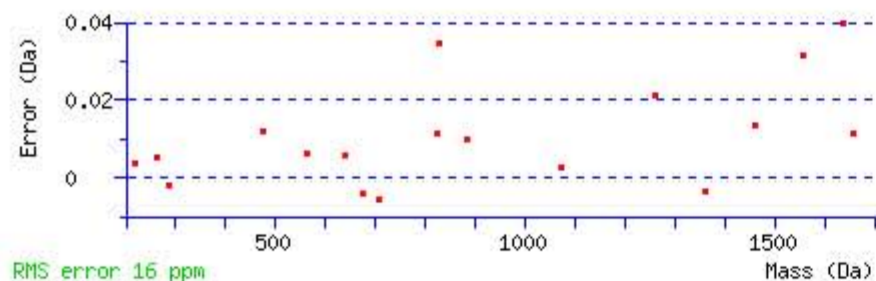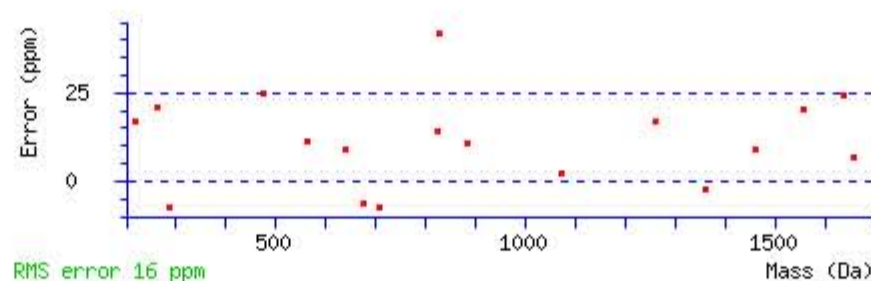

NCBI BLAST search of [DTSCVNPPTVQNAYIVSR](#)  
 (Parameters: blastp, nr protein database, expect=20000, no filter, PAM30)  
 Other BLAST [web gateways](#)

All matches to this query

| Score | Mr(calc):   | Delta    | Sequence                           |
|-------|-------------|----------|------------------------------------|
| 43.0  | 2331.135147 | 0.017235 | <a href="#">DTSCVNPPTVQNAYIVSR</a> |

# MASCOT Search Results

## Peptide View

MS/MS Fragmentation of **AVYTCNEGYQLLGEINYR**

Found in **CPAH\_HUMAN**, Complement factor H OS=Homo sapiens GN=CFH PE=1 SV=4

Match to Query 62074: 2473.207392 from(825.409740,3+) rtinseconds(2523) index(28242)

Title: Locus:1.1.1.3020.7 File:"2013-07-02 CLN FXIII 180 min 1st F 2.wiff"

Data file C:\Program Files (x86)\Matrix Science\Mascot Daemon\mgf\7 FXIII 180 min 1st\mascot\_daemon\_merge.mgf

Click mouse within plot area to zoom in by factor of two about that point

Or, Plot from  to  Da

Label all possible matches  Label matches used for scoring

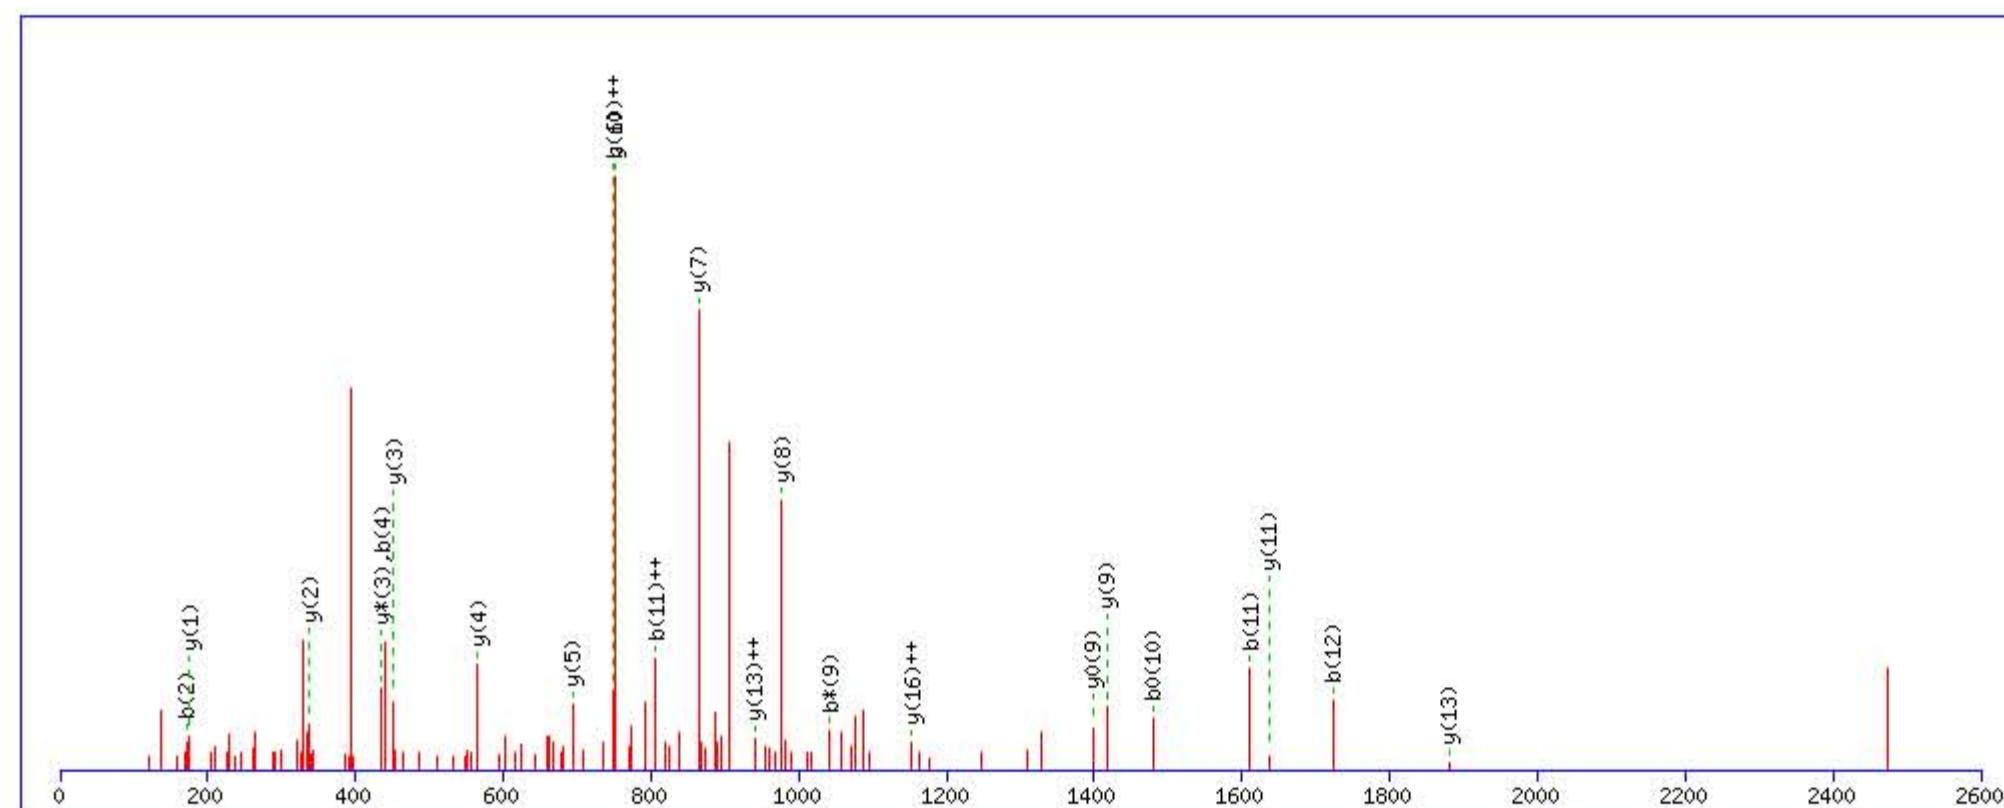

Monoisotopic mass of neutral peptide Mr(calc): 2473.176971

Fixed modifications: Carbamidomethyl (C) (apply to specified residues or termini only)

Variable modifications:

Q10 : Biotin:Thermo-21345 (Q)

Ions Score: 57 Expect: 5e-005

Matches : 23/180 fragment ions using 43 most intense peaks [\(help\)](#)

| #  | b                  | b <sup>++</sup>   | b <sup>*</sup>     | b <sup>*++</sup> | b <sup>0</sup>     | b <sup>0++</sup> | Seq. | y                  | y <sup>++</sup>    | y <sup>*</sup>    | y <sup>*++</sup> | y <sup>0</sup>     | y <sup>0++</sup> | #  |
|----|--------------------|-------------------|--------------------|------------------|--------------------|------------------|------|--------------------|--------------------|-------------------|------------------|--------------------|------------------|----|
| 1  | 72.044390          | 36.525833         |                    |                  |                    |                  | A    |                    |                    |                   |                  |                    |                  | 18 |
| 2  | <b>171.112804</b>  | 86.060040         |                    |                  |                    |                  | V    | 2403.147167        | 1202.077221        | 2386.120618       | 1193.563947      | 2385.136602        | 1193.071939      | 17 |
| 3  | 334.176133         | 167.591704        |                    |                  |                    |                  | Y    | 2304.078753        | <b>1152.543014</b> | 2287.052204       | 1144.029740      | 2286.068188        | 1143.537732      | 16 |
| 4  | <b>435.223812</b>  | 218.115544        |                    |                  | 417.213247         | 209.110262       | T    | 2141.015424        | 1071.011350        | 2123.988875       | 1062.498075      | 2123.004859        | 1062.006067      | 15 |
| 5  | 595.254461         | 298.130869        |                    |                  | 577.243896         | 289.125586       | C    | 2039.967745        | 1020.487511        | 2022.941196       | 1011.974236      | 2021.957180        | 1011.482228      | 14 |
| 6  | 709.297388         | 355.152332        | 692.270839         | 346.639058       | 691.286823         | 346.147050       | N    | <b>1879.937096</b> | <b>940.472186</b>  | 1862.910547       | 931.958912       | 1861.926531        | 931.466903       | 13 |
| 7  | 838.339981         | 419.673629        | 821.313432         | 411.160354       | 820.329416         | 410.668346       | E    | 1765.894169        | 883.450722         | 1748.867620       | 874.937448       | 1747.883604        | 874.445440       | 12 |
| 8  | 895.361445         | 448.184361        | 878.334896         | 439.671086       | 877.350880         | 439.179078       | G    | <b>1636.851576</b> | 818.929426         | 1619.825027       | 810.416152       | 1618.841011        | 809.924144       | 11 |
| 9  | 1058.424774        | 529.716025        | <b>1041.398225</b> | 521.202751       | 1040.414209        | 520.710743       | Y    | 1579.830112        | 790.418694         | 1562.803563       | 781.905419       | 1561.819547        | 781.413411       | 10 |
| 10 | 1497.650100        | <b>749.328688</b> | 1480.623551        | 740.815414       | <b>1479.639535</b> | 740.323406       | Q    | <b>1416.766783</b> | 708.887030         | 1399.740234       | 700.373755       | <b>1398.756218</b> | 699.881747       | 9  |
| 11 | <b>1610.734164</b> | <b>805.870720</b> | 1593.707615        | 797.357446       | 1592.723599        | 796.865437       | L    | <b>977.541457</b>  | 489.274367         | 960.514908        | 480.761092       | 959.530892         | 480.269084       | 8  |
| 12 | <b>1723.818228</b> | 862.412752        | 1706.791679        | 853.899477       | 1705.807663        | 853.407469       | L    | <b>864.457393</b>  | 432.732335         | 847.430844        | 424.219060       | 846.446828         | 423.727052       | 7  |
| 13 | 1780.839692        | 890.923484        | 1763.813143        | 882.410209       | 1762.829127        | 881.918201       | G    | <b>751.373329</b>  | 376.190303         | 734.346780        | 367.677028       | 733.362764         | 367.185020       | 6  |
| 14 | 1909.882285        | 955.444780        | 1892.855736        | 946.931506       | 1891.871720        | 946.439498       | E    | <b>694.351865</b>  | 347.679571         | 677.325316        | 339.166296       | 676.341300         | 338.674288       | 5  |
| 15 | 2022.966349        | 1011.986812       | 2005.939800        | 1003.473538      | 2004.955784        | 1002.981530      | I    | <b>565.309272</b>  | 283.158274         | 548.282723        | 274.645000       |                    |                  | 4  |
| 16 | 2137.009276        | 1069.008276       | 2119.982727        | 1060.495001      | 2118.998711        | 1060.002993      | N    | <b>452.225208</b>  | 226.616242         | <b>435.198659</b> | 218.102968       |                    |                  | 3  |
| 17 | 2300.072605        | 1150.539940       | 2283.046056        | 1142.026666      | 2282.062040        | 1141.534658      | Y    | <b>338.182281</b>  | 169.594778         | 321.155732        | 161.081504       |                    |                  | 2  |
| 18 |                    |                   |                    |                  |                    |                  | R    | <b>175.118952</b>  | 88.063114          | 158.092403        | 79.549839        |                    |                  | 1  |

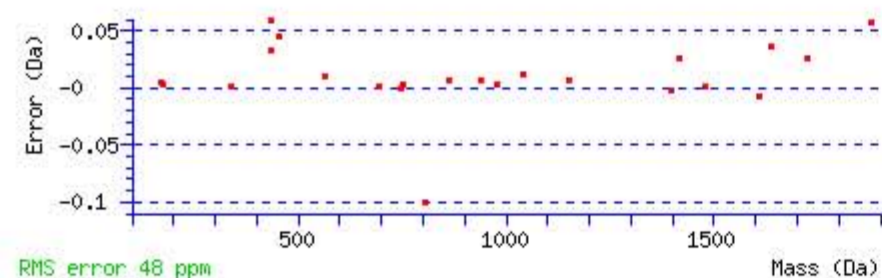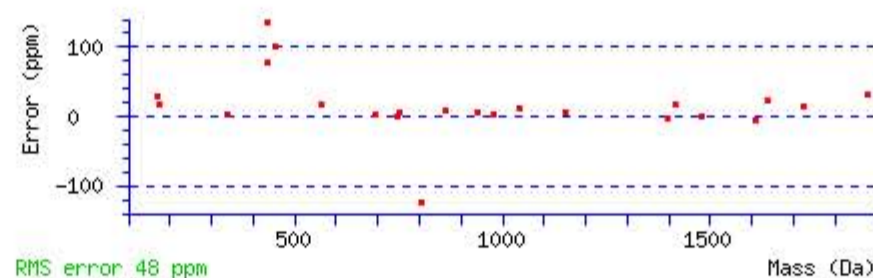

NCBI BLAST search of **AVYTCNEGYQLLGEINYR**

(Parameters: blastp, nr protein database, expect=20000, no filter, PAM30)

Other BLAST [web gateways](#)

### All matches to this query

| Score | Mr(calc):   | Delta    | Sequence                           |
|-------|-------------|----------|------------------------------------|
| 57.4  | 2473.176971 | 0.030421 | <a href="#">AVYTCNEGYQLLGEINYR</a> |

**MASCOT SCIENCE Mascot Search Results**

**Peptide View**

MS/MS Fragmentation of **IVSSAMEPDREYHFGQAVR**

Found in **CFAH\_HUMAN**, Complement factor H OS=Homo sapiens GN=CFH PE=1 SV=4

Match to Query 63438: 2518.213336 from(630.560610,4+) rtinseconds(1658) index(22114)

Title: Locus:1.1.1.2720.6 File:"2013-07-02 CLN FXIII 180 min 1st F 2.wiff"

Data file C:\Program Files (x86)\Matrix Science\Mascot Daemon\mgf\7 FXIII 180 min 1st\mascot\_daemon\_merge.mgf

Click mouse within plot area to zoom in by factor of two about that point

Or, Plot from  to  Da

Label all possible matches  Label matches used for scoring

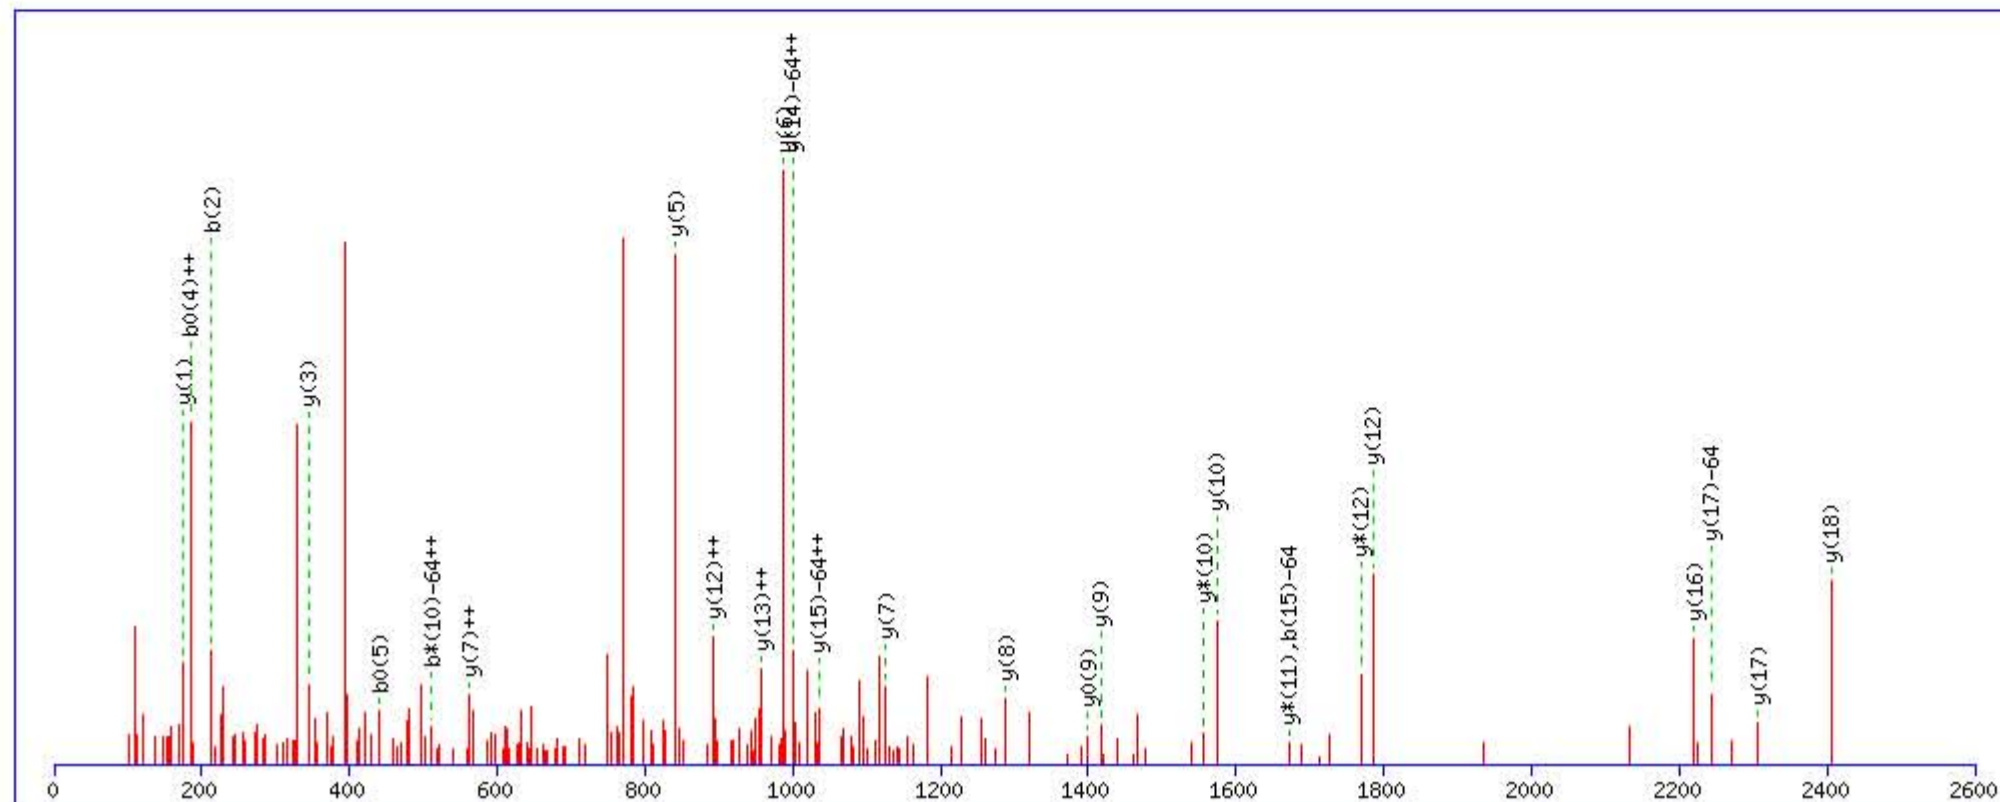

Monoisotopic mass of neutral peptide Mr(calc): 2518.209686

Fixed modifications: Carbamidomethyl (C) (apply to specified residues or termini only)

Variable modifications:

M6 : Oxidation (M), with neutral losses 0.000000 (shown in table), 63.998285

Q16 : Biotin:Thermo-21345 (Q)

Ions Score: 49 Expect: 0.00031

Matches : 27/278 fragment ions using 57 most intense peaks [\(help\)](#)

| #  | b                 | b <sup>++</sup> | b <sup>*</sup> | b <sup>*++</sup> | b <sup>0</sup>    | b <sup>0++</sup>  | Seq.     | y                  | y <sup>++</sup>   | y <sup>*</sup>     | y <sup>*++</sup> | y <sup>0</sup>     | y <sup>0++</sup> | #  |
|----|-------------------|-----------------|----------------|------------------|-------------------|-------------------|----------|--------------------|-------------------|--------------------|------------------|--------------------|------------------|----|
| 1  | 114.091340        | 57.549308       |                |                  |                   |                   | <b>I</b> |                    |                   |                    |                  |                    |                  | 19 |
| 2  | <b>213.159754</b> | 107.083515      |                |                  |                   |                   | <b>V</b> | <b>2406.132913</b> | 1203.570094       | 2389.106364        | 1195.056820      | 2388.122348        | 1194.564812      | 18 |
| 3  | 300.191782        | 150.599529      |                |                  | 282.181217        | 141.594247        | <b>S</b> | <b>2307.064499</b> | 1154.035887       | 2290.037950        | 1145.522613      | 2289.053934        | 1145.030605      | 17 |
| 4  | 387.223810        | 194.115543      |                |                  | 369.213245        | <b>185.110261</b> | <b>S</b> | <b>2220.032471</b> | 1110.519873       | 2203.005922        | 1102.006599      | 2202.021906        | 1101.514591      | 16 |
| 5  | 458.260924        | 229.634100      |                |                  | <b>440.250359</b> | 220.628818        | <b>A</b> | 2133.000443        | 1067.003859       | 2115.973894        | 1058.490585      | 2114.989878        | 1057.998577      | 15 |
| 6  | 605.296324        | 303.151800      |                |                  | 587.285759        | 294.146518        | <b>M</b> | 2061.963329        | 1031.485302       | 2044.936780        | 1022.972028      | 2043.952764        | 1022.480020      | 14 |
| 7  | 734.338917        | 367.673097      |                |                  | 716.328352        | 358.667814        | <b>E</b> | 1914.927929        | <b>957.967603</b> | 1897.901380        | 949.454328       | 1896.917364        | 948.962320       | 13 |
| 8  | 831.391681        | 416.199479      |                |                  | 813.381116        | 407.194196        | <b>P</b> | <b>1785.885336</b> | <b>893.446306</b> | <b>1768.858787</b> | 884.933032       | 1767.874771        | 884.441024       | 12 |
| 9  | 946.418624        | 473.712950      |                |                  | 928.408059        | 464.707668        | <b>D</b> | 1688.832572        | 844.919924        | <b>1671.806023</b> | 836.406650       | 1670.822007        | 835.914642       | 11 |
| 10 | 1102.519735       | 551.763506      | 1085.493186    | 543.250231       | 1084.509170       | 542.758223        | <b>R</b> | <b>1573.805629</b> | 787.406453        | <b>1556.779080</b> | 778.893178       | 1555.795064        | 778.401170       | 10 |
| 11 | 1231.562328       | 616.284802      | 1214.535779    | 607.771528       | 1213.551763       | 607.279520        | <b>E</b> | <b>1417.704518</b> | 709.355897        | 1400.677969        | 700.842623       | <b>1399.693953</b> | 700.350615       | 9  |
| 12 | 1394.625657       | 697.816467      | 1377.599108    | 689.303192       | 1376.615092       | 688.811184        | <b>Y</b> | <b>1288.661925</b> | 644.834601        | 1271.635376        | 636.321326       |                    |                  | 8  |
| 13 | 1531.684569       | 766.345923      | 1514.658020    | 757.832648       | 1513.674004       | 757.340640        | <b>H</b> | <b>1125.598596</b> | <b>563.302936</b> | 1108.572047        | 554.789662       |                    |                  | 7  |
| 14 | 1678.752983       | 839.880130      | 1661.726434    | 831.366855       | 1660.742418       | 830.874847        | <b>F</b> | <b>988.539684</b>  | 494.773480        | 971.513135         | 486.260206       |                    |                  | 6  |
| 15 | 1735.774447       | 868.390862      | 1718.747898    | 859.877587       | 1717.763882       | 859.385579        | <b>G</b> | <b>841.471270</b>  | 421.239273        | 824.444721         | 412.725999       |                    |                  | 5  |
| 16 | 2174.999773       | 1088.003524     | 2157.973224    | 1079.490250      | 2156.989208       | 1078.998242       | <b>Q</b> | 784.449806         | 392.728541        | 767.423257         | 384.215267       |                    |                  | 4  |
| 17 | 2246.036887       | 1123.522082     | 2229.010338    | 1115.008807      | 2228.026322       | 1114.516799       | <b>A</b> | <b>345.224480</b>  | 173.115878        | 328.197931         | 164.602603       |                    |                  | 3  |
| 18 | 2345.105301       | 1173.056288     | 2328.078752    | 1164.543014      | 2327.094736       | 1164.051006       | <b>V</b> | 274.187366         | 137.597321        | 257.160817         | 129.084046       |                    |                  | 2  |
| 19 |                   |                 |                |                  |                   |                   | <b>R</b> | <b>175.118952</b>  | 88.063114         | 158.092403         | 79.549839        |                    |                  | 1  |

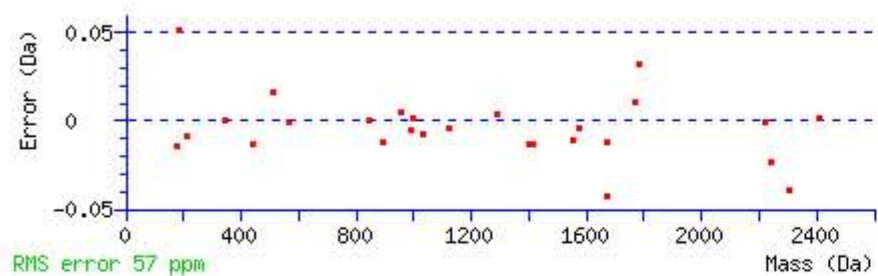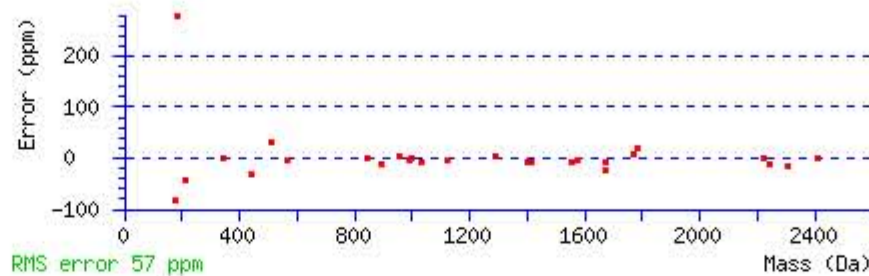

NCBI BLAST search of **IVSSAMEPDREYHFGQAVR**

(Parameters: blastp, nr protein database, expect=20000, no filter, PAM30)

Other BLAST [web gateways](#)

**All matches to this query**

| Score | Mr(calc):   | Delta    | Sequence                            |
|-------|-------------|----------|-------------------------------------|
| 49.0  | 2518.209686 | 0.003650 | <a href="#">IVSSAMEPDREYHFGQAVR</a> |

# MASCOT Search Results

## Peptide View

MS/MS Fragmentation of **SITCIHGVWTQLPQCVAIDK**  
 Found in **CFAH\_HUMAN**, Complement factor H OS=Homo sapiens GN=CFH PE=1 SV=4

Match to Query 64926: 2636.360772 from(879.794200,3+) rtinseconds(2339) index(27093)  
 Title: Locus:1.1.1.2956.21 File:"2013-07-02 CLN FXIII 180 min 1st F 2.wiff"  
 Data file C:\Program Files (x86)\Matrix Science\Mascot Daemon\mgf\7 FXIII 180 min 1st\mascot\_daemon\_merge.mgf

Click mouse within plot area to zoom in by factor of two about that point  
 Or, Plot from  to  Da   
 Label all possible matches  Label matches used for scoring

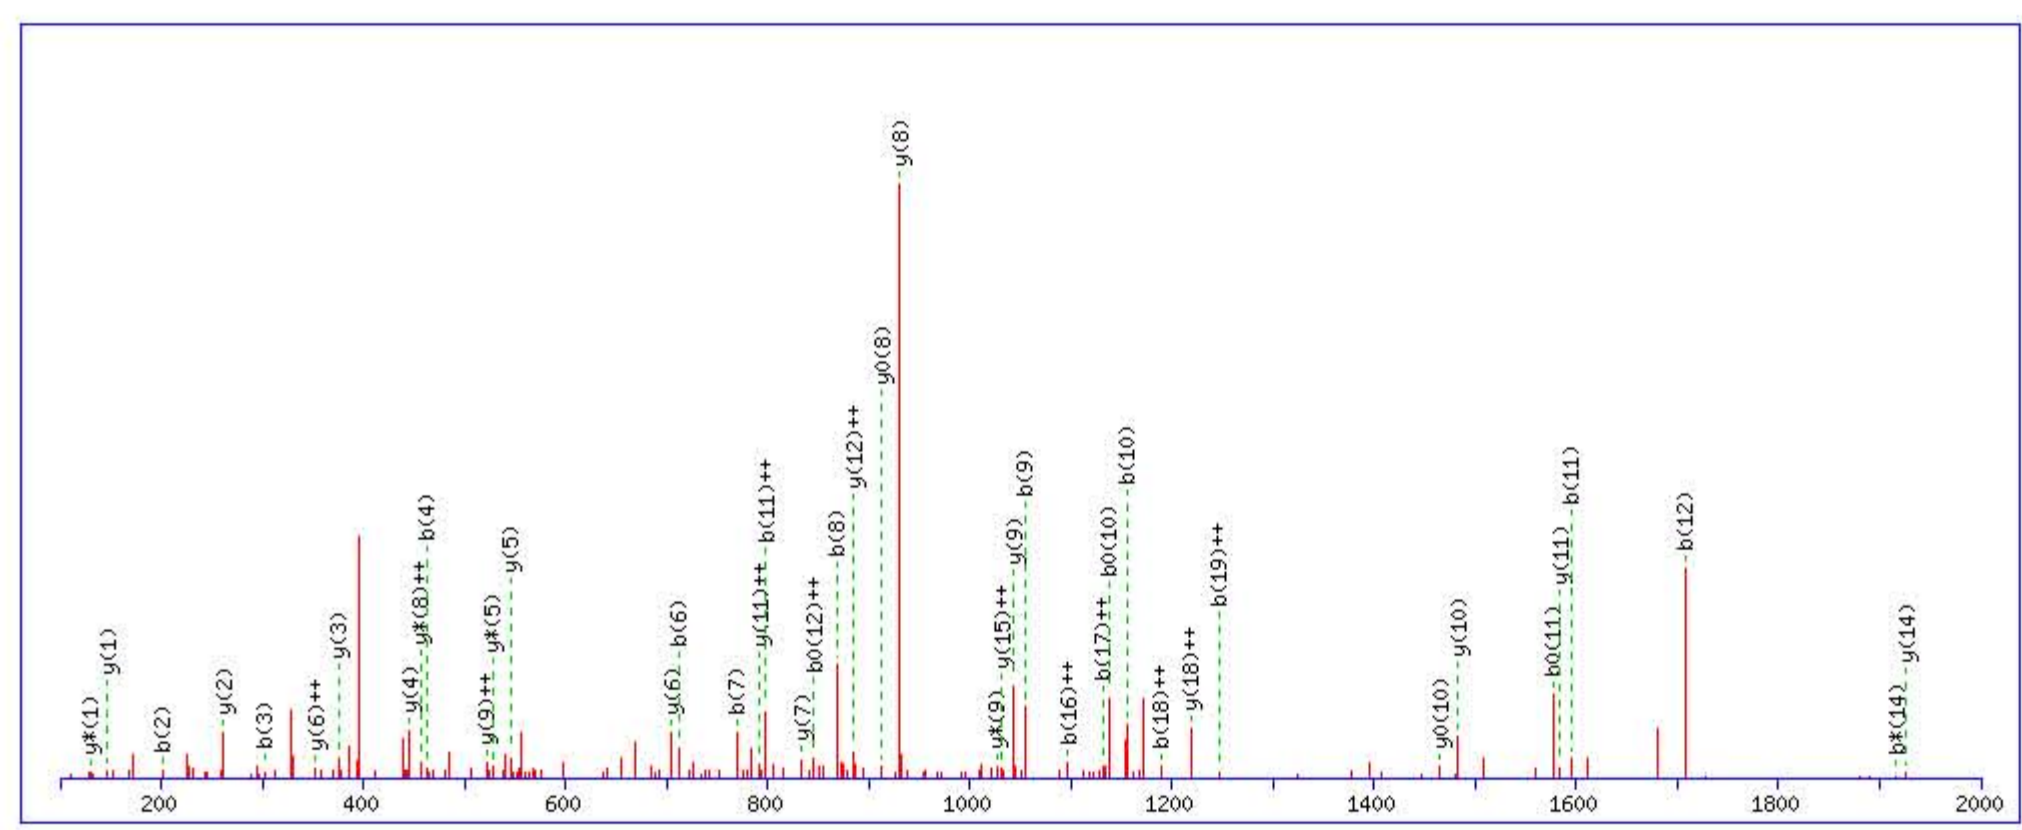

Monoisotopic mass of neutral peptide Mr(calc): 2636.327728  
 Fixed modifications: Carbamidomethyl (C) (apply to specified residues or termini only)  
 Variable modifications:  
 Q11 : Biotin:Thermo-21345 (Q)  
 Ions Score: 48 Expect: 4.4e-005  
 Matches : 43/206 fragment ions using 116 most intense peaks [\(help\)](#)

| #  | b                  | b <sup>++</sup>    | b <sup>*</sup>     | b <sup>*++</sup> | b <sup>0</sup>     | b <sup>0++</sup>  | Seq. | y                  | y <sup>++</sup>    | y <sup>*</sup>     | y <sup>*++</sup>  | y <sup>0</sup>     | y <sup>0++</sup> | #  |
|----|--------------------|--------------------|--------------------|------------------|--------------------|-------------------|------|--------------------|--------------------|--------------------|-------------------|--------------------|------------------|----|
| 1  | 88.039304          | 44.523290          |                    |                  | 70.028739          | 35.518008         | S    |                    |                    |                    |                   |                    |                  | 20 |
| 2  | <b>201.123368</b>  | 101.065322         |                    |                  | 183.112803         | 92.060039         | I    | 2550.302958        | 1275.655117        | 2533.276409        | 1267.141842       | 2532.292393        | 1266.649834      | 19 |
| 3  | <b>302.171047</b>  | 151.589161         |                    |                  | 284.160482         | 142.583879        | T    | 2437.218894        | <b>1219.113085</b> | 2420.192345        | 1210.599810       | 2419.208329        | 1210.107802      | 18 |
| 4  | <b>462.201696</b>  | 231.604486         |                    |                  | 444.191131         | 222.599204        | C    | 2336.171215        | 1168.589245        | 2319.144666        | 1160.075971       | 2318.160650        | 1159.583963      | 17 |
| 5  | 575.285760         | 288.146518         |                    |                  | 557.275195         | 279.141236        | I    | 2176.140566        | 1088.573921        | 2159.114017        | 1080.060646       | 2158.130001        | 1079.568638      | 16 |
| 6  | <b>712.344672</b>  | 356.675974         |                    |                  | 694.334107         | 347.670692        | H    | 2063.056502        | <b>1032.031889</b> | 2046.029953        | 1023.518614       | 2045.045937        | 1023.026606      | 15 |
| 7  | <b>769.366136</b>  | 385.186706         |                    |                  | 751.355571         | 376.181424        | G    | <b>1925.997590</b> | 963.502433         | 1908.971041        | 954.989159        | 1907.987025        | 954.497151       | 14 |
| 8  | <b>868.434550</b>  | 434.720913         |                    |                  | 850.423985         | 425.715631        | V    | 1868.976126        | 934.991701         | 1851.949577        | 926.478427        | 1850.965561        | 925.986419       | 13 |
| 9  | <b>1054.513863</b> | 527.760570         |                    |                  | 1036.503298        | 518.755287        | W    | 1769.907712        | <b>885.457494</b>  | 1752.881163        | 876.944220        | 1751.897147        | 876.452211       | 12 |
| 10 | <b>1155.561542</b> | 578.284409         |                    |                  | <b>1137.550977</b> | 569.279127        | T    | <b>1583.828399</b> | <b>792.417838</b>  | 1566.801850        | 783.904563        | 1565.817834        | 783.412555       | 11 |
| 11 | <b>1594.786868</b> | <b>797.897072</b>  | 1577.760319        | 789.383798       | <b>1576.776303</b> | 788.891790        | Q    | <b>1482.780720</b> | 741.893998         | 1465.754171        | 733.380724        | <b>1464.770155</b> | 732.888715       | 10 |
| 12 | <b>1707.870932</b> | 854.439104         | 1690.844383        | 845.925830       | 1689.860367        | <b>845.433822</b> | L    | <b>1043.555394</b> | <b>522.281335</b>  | <b>1026.528845</b> | 513.768060        | 1025.544829        | 513.276052       | 9  |
| 13 | 1804.923696        | 902.965486         | 1787.897147        | 894.452212       | 1786.913131        | 893.960204        | P    | <b>930.471330</b>  | 465.739303         | 913.444781         | <b>457.226028</b> | <b>912.460765</b>  | 456.734020       | 8  |
| 14 | 1932.982274        | 966.994775         | <b>1915.955725</b> | 958.481501       | 1914.971709        | 957.989493        | Q    | <b>833.418566</b>  | 417.212921         | 816.392017         | 408.699646        | 815.408001         | 408.207638       | 7  |
| 15 | 2093.012923        | 1047.010099        | 2075.986374        | 1038.496825      | 2075.002358        | 1038.004817       | C    | <b>705.359988</b>  | <b>353.183632</b>  | 688.333439         | 344.670357        | 687.349423         | 344.178349       | 6  |
| 16 | 2192.081337        | <b>1096.544306</b> | 2175.054788        | 1088.031032      | 2174.070772        | 1087.539024       | V    | <b>545.329339</b>  | 273.168308         | <b>528.302790</b>  | 264.655033        | 527.318774         | 264.163025       | 5  |
| 17 | 2263.118451        | <b>1132.062863</b> | 2246.091902        | 1123.549589      | 2245.107886        | 1123.057581       | A    | <b>446.260925</b>  | 223.634101         | 429.234376         | 215.120826        | 428.250360         | 214.628818       | 4  |
| 18 | 2376.202515        | <b>1188.604895</b> | 2359.175966        | 1180.091621      | 2358.191950        | 1179.599613       | I    | <b>375.223811</b>  | 188.115543         | 358.197262         | 179.602269        | 357.213246         | 179.110261       | 3  |
| 19 | 2491.229458        | <b>1246.118367</b> | 2474.202909        | 1237.605092      | 2473.218893        | 1237.113084       | D    | <b>262.139747</b>  | 131.573511         | 245.113198         | 123.060237        | 244.129182         | 122.568229       | 2  |
| 20 |                    |                    |                    |                  |                    |                   | K    | <b>147.112804</b>  | 74.060040          | <b>130.086255</b>  | 65.546765         |                    |                  | 1  |

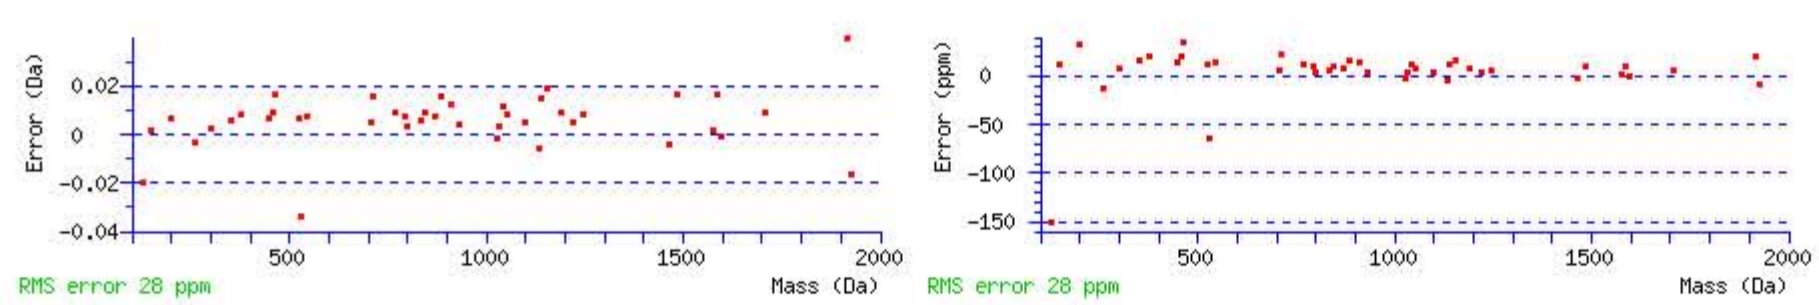

NCBI BLAST search of **SITCIHGVWTQLPQCVAIDK**  
 (Parameters: blastp, nr protein database, expect=20000, no filter, PAM30)  
 Other BLAST [web gateways](#)

### All matches to this query

| Score | Mr(calc):   | Delta    | Sequence                                 |
|-------|-------------|----------|------------------------------------------|
| 47.6  | 2636.327728 | 0.033044 | <a href="#">SITCIHGVWTQLPQCVAIDK</a>     |
| 20.1  | 2636.327728 | 0.033044 | <a href="#">SITCIHGVWTQLPQCVAIDK</a>     |
| 1.2   | 2636.344574 | 0.016198 | <a href="#">IEGWELTTEPSLTHNSSGLLSPLR</a> |



# MASCOT Search Results

## Peptide View

MS/MS Fragmentation of **SITCIHGVWTQLPQCVAIDK**

Found in **CFAH\_HUMAN**, Complement factor H OS=Homo sapiens GN=CFH PE=1 SV=4

Match to Query 64927: 2636.360772 from(879.794200,3+) rtinseconds(2365) index(27265)

Title: Locus:1.1.1.2965.24 File:"2013-07-02 CLN FXIII 180 min 1st F 2.wiff"

Data file C:\Program Files (x86)\Matrix Science\Mascot Daemon\mgf7 FXIII 180 min 1st\mascot\_daemon\_merge.mgf

Click mouse within plot area to zoom in by factor of two about that point

Or, Plot from  to  Da

Label all possible matches  Label matches used for scoring

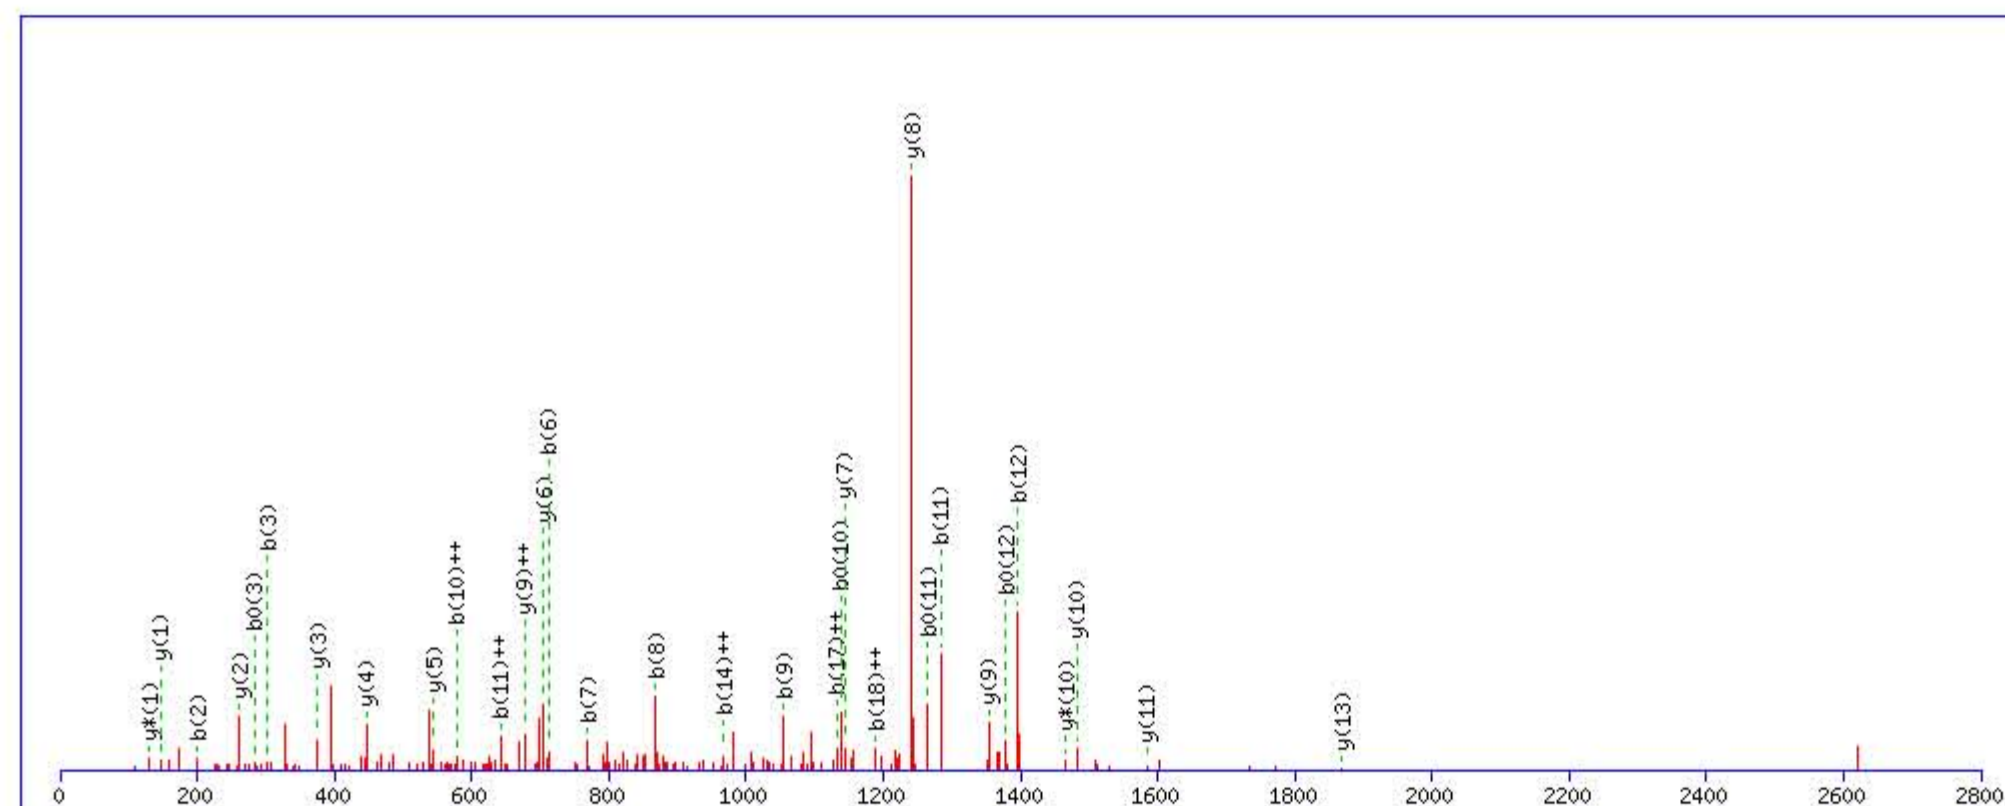

Monoisotopic mass of neutral peptide Mr(calc): 2636.327728

Fixed modifications: Carbamidomethyl (C) (apply to specified residues or termini only)

Variable modifications:

Q14 : Biotin:Thermo-21345 (Q)

Ions Score: 64 Expect: 1.1e-006

Matches : 32/206 fragment ions using 63 most intense peaks [\(help\)](#)

| #  | b                  | b <sup>++</sup>    | b <sup>*</sup> | b <sup>*++</sup> | b <sup>0</sup>     | b <sup>0++</sup> | Seq. | y                  | y <sup>++</sup>   | y <sup>*</sup>     | y <sup>*++</sup> | y <sup>0</sup> | y <sup>0++</sup> | #  |
|----|--------------------|--------------------|----------------|------------------|--------------------|------------------|------|--------------------|-------------------|--------------------|------------------|----------------|------------------|----|
| 1  | 88.039304          | 44.523290          |                |                  | 70.028739          | 35.518008        | S    |                    |                   |                    |                  |                |                  | 20 |
| 2  | <b>201.123368</b>  | 101.065322         |                |                  | 183.112803         | 92.060039        | I    | 2550.302958        | 1275.655117       | 2533.276409        | 1267.141842      | 2532.292393    | 1266.649834      | 19 |
| 3  | <b>302.171047</b>  | 151.589161         |                |                  | <b>284.160482</b>  | 142.583879       | T    | 2437.218894        | 1219.113085       | 2420.192345        | 1210.599810      | 2419.208329    | 1210.107802      | 18 |
| 4  | 462.201696         | 231.604486         |                |                  | 444.191131         | 222.599204       | C    | 2336.171215        | 1168.589245       | 2319.144666        | 1160.075971      | 2318.160650    | 1159.583963      | 17 |
| 5  | 575.285760         | 288.146518         |                |                  | 557.275195         | 279.141236       | I    | 2176.140566        | 1088.573921       | 2159.114017        | 1080.060646      | 2158.130001    | 1079.568638      | 16 |
| 6  | <b>712.344672</b>  | 356.675974         |                |                  | 694.334107         | 347.670692       | H    | 2063.056502        | 1032.031889       | 2046.029953        | 1023.518614      | 2045.045937    | 1023.026606      | 15 |
| 7  | <b>769.366136</b>  | 385.186706         |                |                  | 751.355571         | 376.181424       | G    | 1925.997590        | 963.502433        | 1908.971041        | 954.989159       | 1907.987025    | 954.497151       | 14 |
| 8  | <b>868.434550</b>  | 434.720913         |                |                  | 850.423985         | 425.715631       | V    | <b>1868.976126</b> | 934.991701        | 1851.949577        | 926.478427       | 1850.965561    | 925.986419       | 13 |
| 9  | <b>1054.513863</b> | 527.760570         |                |                  | 1036.503298        | 518.755287       | W    | 1769.907712        | 885.457494        | 1752.881163        | 876.944220       | 1751.897147    | 876.452211       | 12 |
| 10 | 1155.561542        | <b>578.284409</b>  |                |                  | <b>1137.550977</b> | 569.279127       | T    | <b>1583.828399</b> | 792.417838        | 1566.801850        | 783.904563       | 1565.817834    | 783.412555       | 11 |
| 11 | <b>1283.620120</b> | <b>642.313698</b>  | 1266.593571    | 633.800424       | <b>1265.609555</b> | 633.308416       | Q    | <b>1482.780720</b> | 741.893998        | <b>1465.754171</b> | 733.380724       | 1464.770155    | 732.888715       | 10 |
| 12 | <b>1396.704184</b> | 698.855730         | 1379.677635    | 690.342456       | <b>1378.693619</b> | 689.850448       | L    | <b>1354.722142</b> | <b>677.864709</b> | 1337.695593        | 669.351434       | 1336.711577    | 668.859426       | 9  |
| 13 | 1493.756948        | 747.382112         | 1476.730399    | 738.868838       | 1475.746383        | 738.376830       | P    | <b>1241.638078</b> | 621.322677        | 1224.611529        | 612.809403       | 1223.627513    | 612.317394       | 8  |
| 14 | 1932.982274        | <b>966.994775</b>  | 1915.955725    | 958.481501       | 1914.971709        | 957.989493       | Q    | <b>1144.585314</b> | 572.796295        | 1127.558765        | 564.283021       | 1126.574749    | 563.791012       | 7  |
| 15 | 2093.012923        | 1047.010099        | 2075.986374    | 1038.496825      | 2075.002358        | 1038.004817      | C    | <b>705.359988</b>  | 353.183632        | 688.333439         | 344.670357       | 687.349423     | 344.178349       | 6  |
| 16 | 2192.081337        | 1096.544306        | 2175.054788    | 1088.031032      | 2174.070772        | 1087.539024      | V    | <b>545.329339</b>  | 273.168308        | 528.302790         | 264.655033       | 527.318774     | 264.163025       | 5  |
| 17 | 2263.118451        | <b>1132.062863</b> | 2246.091902    | 1123.549589      | 2245.107886        | 1123.057581      | A    | <b>446.260925</b>  | 223.634101        | 429.234376         | 215.120826       | 428.250360     | 214.628818       | 4  |
| 18 | 2376.202515        | <b>1188.604895</b> | 2359.175966    | 1180.091621      | 2358.191950        | 1179.599613      | I    | <b>375.223811</b>  | 188.115543        | 358.197262         | 179.602269       | 357.213246     | 179.110261       | 3  |
| 19 | 2491.229458        | 1246.118367        | 2474.202909    | 1237.605092      | 2473.218893        | 1237.113084      | D    | <b>262.139747</b>  | 131.573511        | 245.113198         | 123.060237       | 244.129182     | 122.568229       | 2  |
| 20 |                    |                    |                |                  |                    |                  | K    | <b>147.112804</b>  | 74.060040         | <b>130.086255</b>  | 65.546765        |                |                  | 1  |

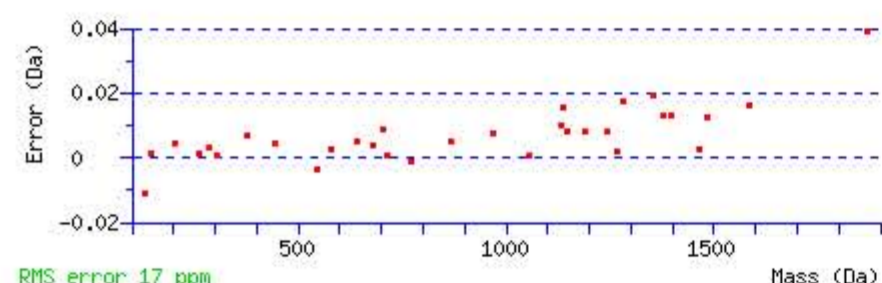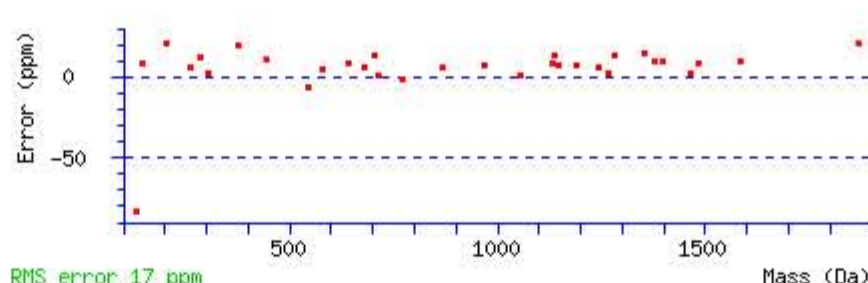

NCBI BLAST search of **SITCIHGVWTQLPQCVAIDK**

(Parameters: blastp, nr protein database, expect=20000, no filter, PAM30)

Other BLAST [web gateways](#)

All matches to this query

| Score | Mr(calc):   | Delta     | Sequence                               |
|-------|-------------|-----------|----------------------------------------|
| 64.2  | 2636.327728 | 0.033044  | <a href="#">SITCIHGVWTQLPQCVAIDK</a>   |
| 29.8  | 2636.327728 | 0.033044  | <a href="#">SITCIHGVWTQLPQCVAIDK</a>   |
| 0.7   | 2636.366592 | -0.005820 | <a href="#">ASKTTDLRIPASVCTMFNVLDK</a> |

# Mascot Search Results

## Peptide View

MS/MS Fragmentation of **VSVLCQENYLIQEGEEITCK**

Found in **CFAH\_HUMAN**, Complement factor H OS=Homo sapiens GN=CFH PE=1 SV=4

Match to Query 65998: 2722.335312 from(908.452380,3+) rtinseconds(2728) index(29632)

Title: Locus:1.1.1.3090.23 File:"2013-07-02 CLN FXIII 180 min 1st F 2.wiff"

Data file C:\Program Files (x86)\Matrix Science\Mascot Daemon\mgf7 FXIII 180 min 1st\mascot\_daemon\_merge.mgf

Click mouse within plot area to zoom in by factor of two about that point

Or, Plot from  to  Da

Label all possible matches  Label matches used for scoring

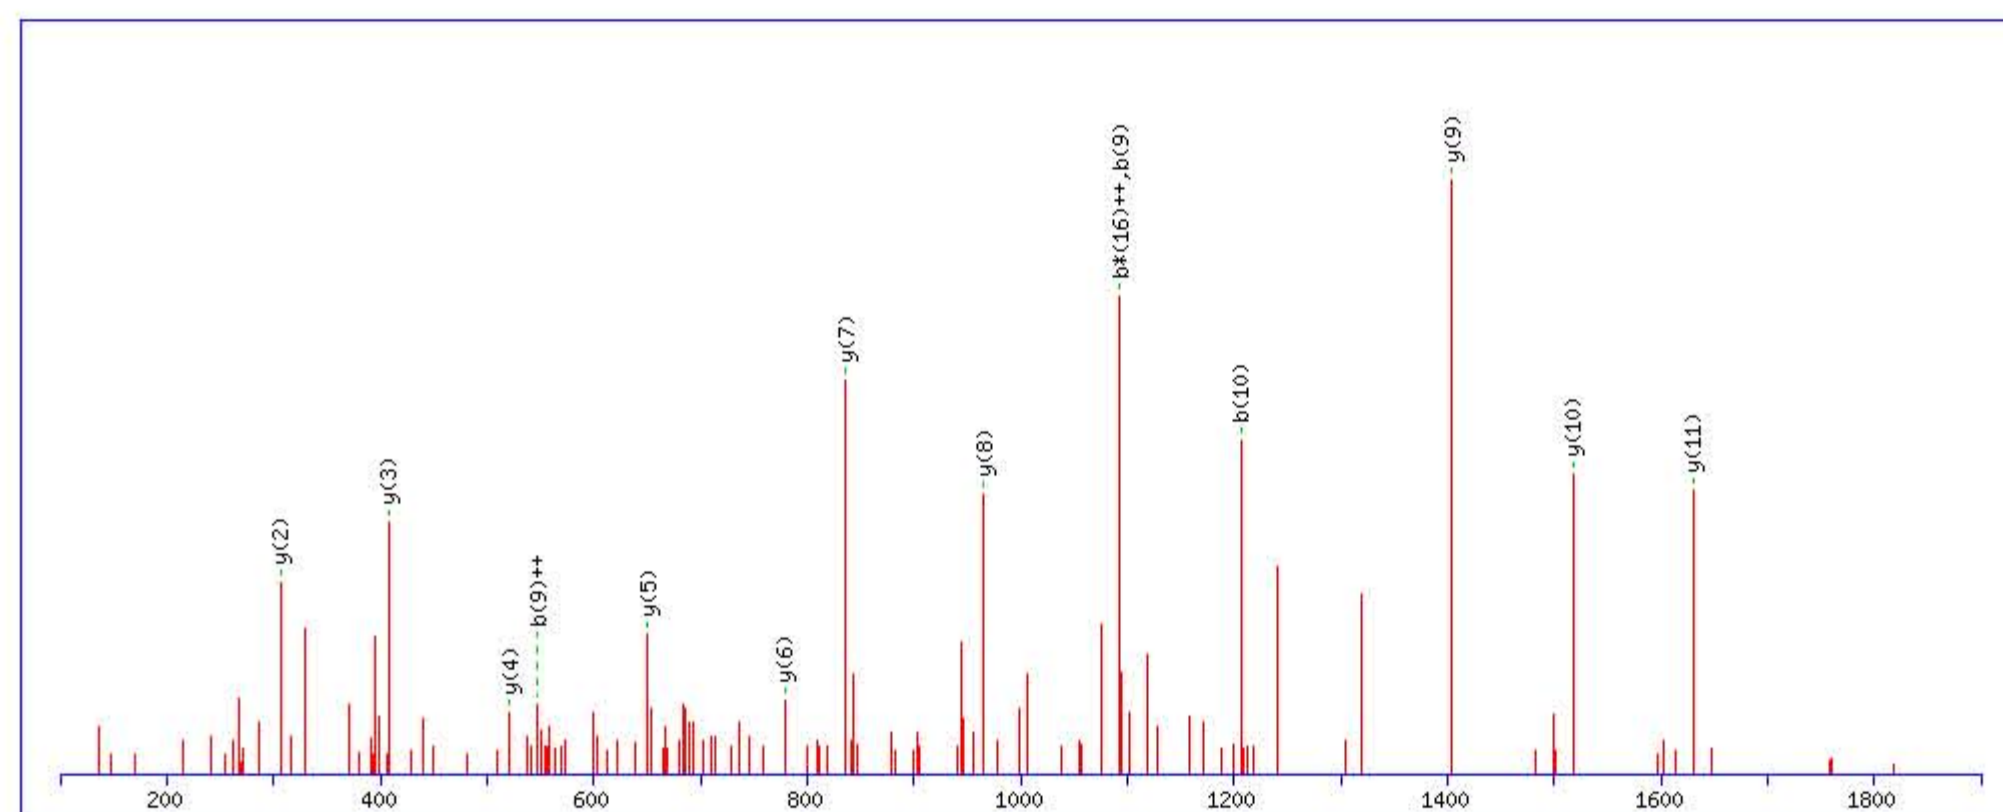

Monoisotopic mass of neutral peptide Mr(calc): 2722.301590

Fixed modifications: Carbamidomethyl (C) (apply to specified residues or termini only)

Variable modifications:

Q12 : Biotin:Thermo-21345 (Q)

Ions Score: 72 Expect: 1.8e-006

Matches : 14/212 fragment ions using 17 most intense peaks [\(help\)](#)

| #  | b                  | b <sup>++</sup>   | b <sup>*</sup> | b <sup>*++</sup>   | b <sup>0</sup> | b <sup>0++</sup> | Seq. | y                  | y <sup>++</sup> | y <sup>*</sup> | y <sup>*++</sup> | y <sup>0</sup> | y <sup>0++</sup> | #  |
|----|--------------------|-------------------|----------------|--------------------|----------------|------------------|------|--------------------|-----------------|----------------|------------------|----------------|------------------|----|
| 1  | 100.075690         | 50.541483         |                |                    |                |                  | V    |                    |                 |                |                  |                |                  | 20 |
| 2  | 187.107718         | 94.057497         |                |                    | 169.097153     | 85.052214        | S    | 2624.240475        | 1312.623875     | 2607.213926    | 1304.110601      | 2606.229910    | 1303.618593      | 19 |
| 3  | 286.176132         | 143.591704        |                |                    | 268.165567     | 134.586422       | V    | 2537.208447        | 1269.107861     | 2520.181898    | 1260.594587      | 2519.197882    | 1260.102579      | 18 |
| 4  | 399.260196         | 200.133736        |                |                    | 381.249631     | 191.128454       | L    | 2438.140033        | 1219.573654     | 2421.113484    | 1211.060380      | 2420.129468    | 1210.568372      | 17 |
| 5  | 559.290845         | 280.149061        |                |                    | 541.280280     | 271.143778       | C    | 2325.055969        | 1163.031622     | 2308.029420    | 1154.518348      | 2307.045404    | 1154.026340      | 16 |
| 6  | 687.349423         | 344.178350        | 670.322874     | 335.665075         | 669.338858     | 335.173067       | Q    | 2165.025320        | 1083.016298     | 2147.998771    | 1074.503023      | 2147.014755    | 1074.011015      | 15 |
| 7  | 816.392016         | 408.699646        | 799.365467     | 400.186372         | 798.381451     | 399.694364       | E    | 2036.966742        | 1018.987009     | 2019.940193    | 1010.473735      | 2018.956177    | 1009.981727      | 14 |
| 8  | 930.434943         | 465.721110        | 913.408394     | 457.207835         | 912.424378     | 456.715827       | N    | 1907.924149        | 954.465713      | 1890.897600    | 945.952438       | 1889.913584    | 945.460430       | 13 |
| 9  | <b>1093.498272</b> | <b>547.252774</b> | 1076.471723    | 538.739500         | 1075.487707    | 538.247492       | Y    | 1793.881222        | 897.444249      | 1776.854673    | 888.930975       | 1775.870657    | 888.438967       | 12 |
| 10 | <b>1206.582336</b> | 603.794806        | 1189.555787    | 595.281532         | 1188.571771    | 594.789523       | L    | <b>1630.817893</b> | 815.912585      | 1613.791344    | 807.399310       | 1612.807328    | 806.907302       | 11 |
| 11 | 1319.666400        | 660.336838        | 1302.639851    | 651.823563         | 1301.655835    | 651.331555       | I    | <b>1517.733829</b> | 759.370553      | 1500.707280    | 750.857278       | 1499.723264    | 750.365270       | 10 |
| 12 | 1758.891726        | 879.949501        | 1741.865177    | 871.436227         | 1740.881161    | 870.944219       | Q    | <b>1404.649765</b> | 702.828521      | 1387.623216    | 694.315246       | 1386.639200    | 693.823238       | 9  |
| 13 | 1887.934319        | 944.470798        | 1870.907770    | 935.957523         | 1869.923754    | 935.465515       | E    | <b>965.424439</b>  | 483.215858      | 948.397890     | 474.702583       | 947.413874     | 474.210575       | 8  |
| 14 | 1944.955783        | 972.981530        | 1927.929234    | 964.468255         | 1926.945218    | 963.976247       | G    | <b>836.381846</b>  | 418.694561      | 819.355297     | 410.181287       | 818.371281     | 409.689279       | 7  |
| 15 | 2073.998376        | 1037.502826       | 2056.971827    | 1028.989551        | 2055.987811    | 1028.497543      | E    | <b>779.360382</b>  | 390.183829      | 762.333833     | 381.670555       | 761.349817     | 381.178547       | 6  |
| 16 | 2203.040969        | 1102.024123       | 2186.014420    | <b>1093.510848</b> | 2185.030404    | 1093.018840      | E    | <b>650.317789</b>  | 325.662533      | 633.291240     | 317.149258       | 632.307224     | 316.657250       | 5  |
| 17 | 2316.125033        | 1158.566155       | 2299.098484    | 1150.052880        | 2298.114468    | 1149.560872      | I    | <b>521.275196</b>  | 261.141236      | 504.248647     | 252.627961       | 503.264631     | 252.135953       | 4  |
| 18 | 2417.172712        | 1209.089994       | 2400.146163    | 1200.576719        | 2399.162147    | 1200.084711      | T    | <b>408.191132</b>  | 204.599204      | 391.164583     | 196.085929       | 390.180567     | 195.593921       | 3  |
| 19 | 2577.203361        | 1289.105318       | 2560.176812    | 1280.592044        | 2559.192796    | 1280.100036      | C    | <b>307.143453</b>  | 154.075364      | 290.116904     | 145.562090       |                |                  | 2  |
| 20 |                    |                   |                |                    |                |                  | K    | 147.112804         | 74.060040       | 130.086255     | 65.546765        |                |                  | 1  |

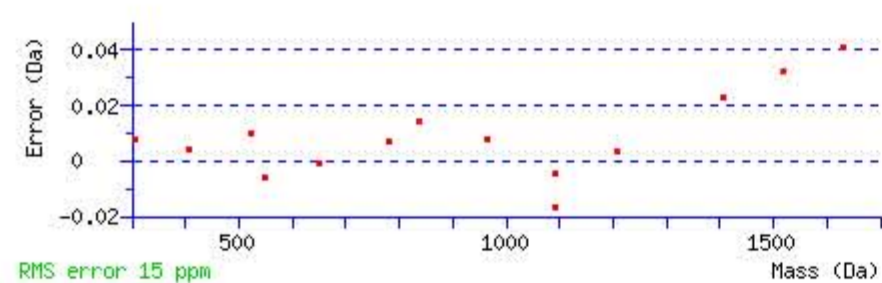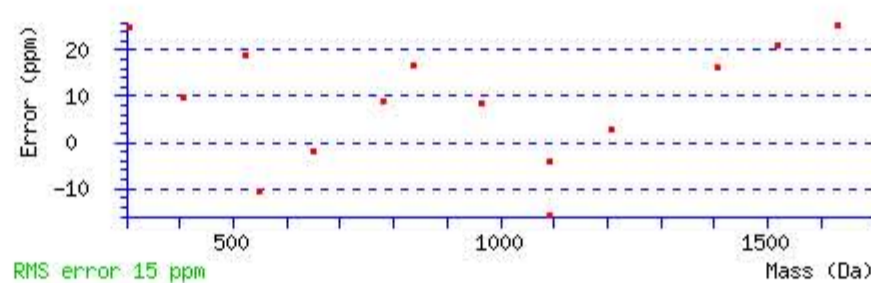

NCBI BLAST search of **VSVLCQENYLIQEGEEITCK**

(Parameters: blastp, nr protein database, expect=20000, no filter, PAM30)

Other BLAST [web gateways](#)

All matches to this query

| Score | Mr(calc):   | Delta     | Sequence                                |
|-------|-------------|-----------|-----------------------------------------|
| 71.7  | 2722.301590 | 0.033722  | <a href="#">VSVLCQENYLIQEGEEITCK</a>    |
| 65.8  | 2722.301590 | 0.033722  | <a href="#">VSVLCQENYLIQEGEEITCK</a>    |
| 11.6  | 2722.339783 | -0.004471 | <a href="#">QDREHLWKLIEGGAHIYVCGDAR</a> |
| 2.1   | 2722.358841 | -0.023529 | <a href="#">YEDVKPLETQPAEIAEKETLEYK</a> |

# MASCOT Search Results

## Peptide View

MS/MS Fragmentation of **VSVLCQENYLIQEGEEITCK**

Found in **CFAH\_HUMAN**, Complement factor H OS=Homo sapiens GN=CFH PE=1 SV=4

Match to Query 65999: 2722.335312 from(908.452380,3+) rtinseconds(2745) index(29764)

Title: Locus:1.1.1.3096.7 File:"2013-07-02 CLN FXIII 180 min 1st F 2.wiff"

Data file C:\Program Files (x86)\Matrix Science\Mascot Daemon\mgf7 FXIII 180 min 1st\mascot\_daemon\_merge.mgf

Click mouse within plot area to zoom in by factor of two about that point

Or, Plot from  to  Da

Label all possible matches  Label matches used for scoring

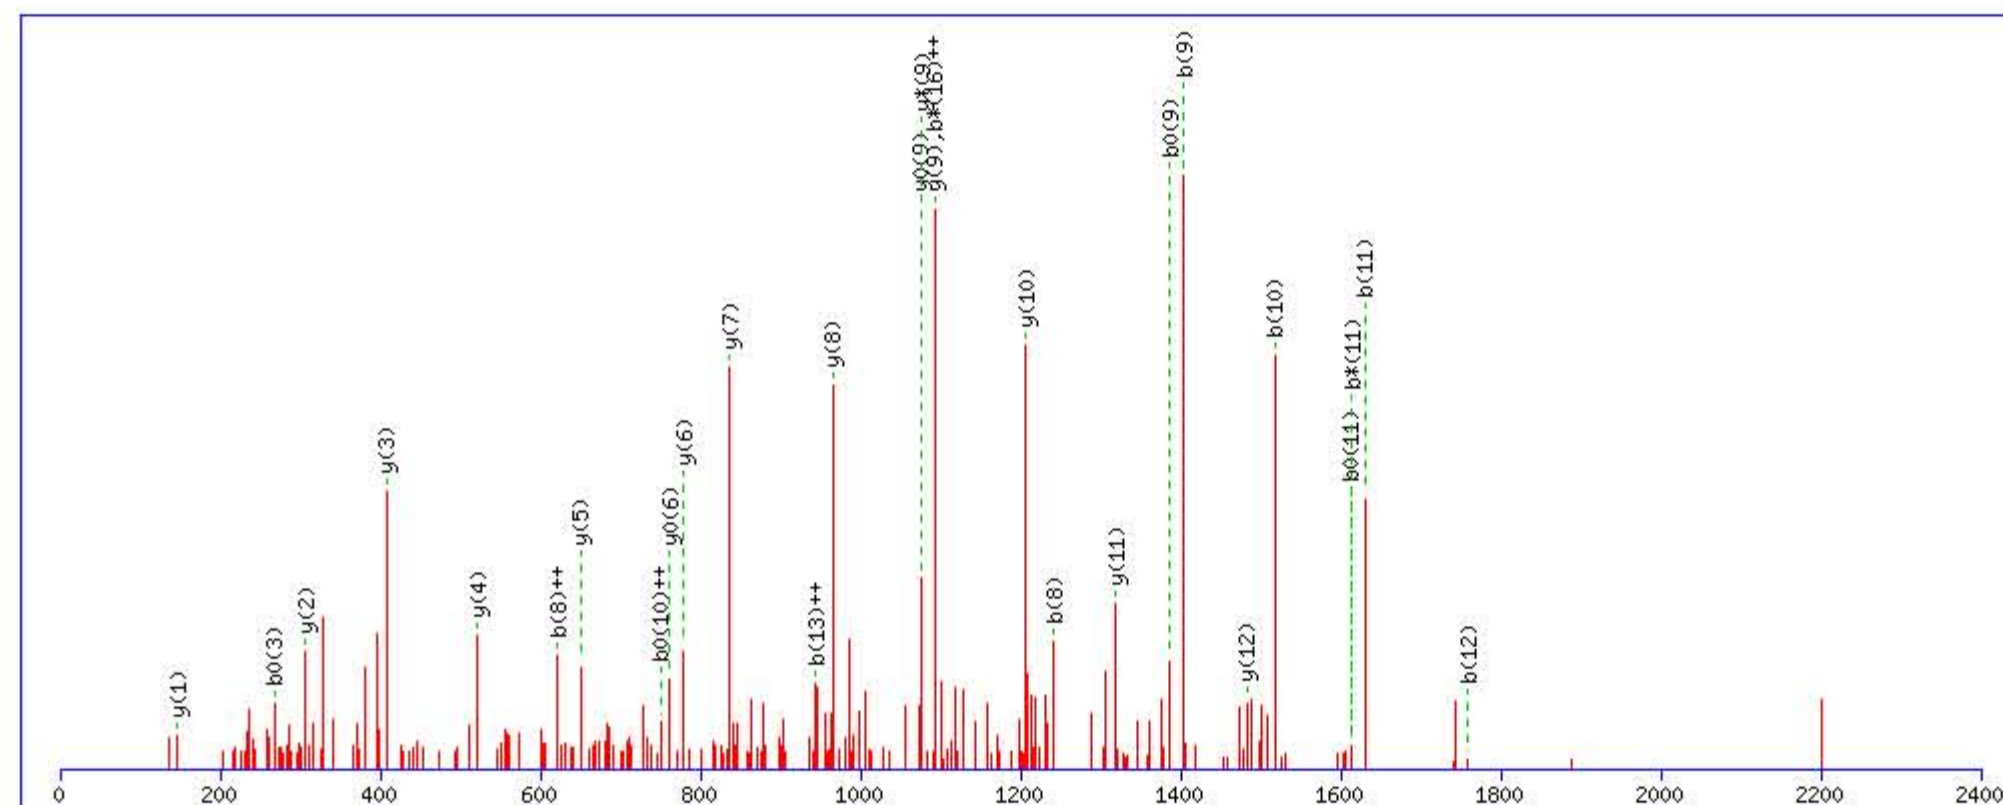

Monoisotopic mass of neutral peptide Mr(calc): 2722.301590

Fixed modifications: Carbamidomethyl (C) (apply to specified residues or termini only)

Variable modifications:

Q6 : Biotin:Thermo-21345 (Q)

Ions Score: 64 Expect: 1e-005

Matches : 28/212 fragment ions using 50 most intense peaks [\(help\)](#)

| #  | b           | b <sup>++</sup> | b <sup>*</sup> | b <sup>*++</sup> | b <sup>0</sup> | b <sup>0++</sup> | Seq. | y           | y <sup>++</sup> | y <sup>*</sup> | y <sup>*++</sup> | y <sup>0</sup> | y <sup>0++</sup> | #  |
|----|-------------|-----------------|----------------|------------------|----------------|------------------|------|-------------|-----------------|----------------|------------------|----------------|------------------|----|
| 1  | 100.075690  | 50.541483       |                |                  |                |                  | V    |             |                 |                |                  |                |                  | 20 |
| 2  | 187.107718  | 94.057497       |                |                  | 169.097153     | 85.052214        | S    | 2624.240475 | 1312.623875     | 2607.213926    | 1304.110601      | 2606.229910    | 1303.618593      | 19 |
| 3  | 286.176132  | 143.591704      |                |                  | 268.165567     | 134.586422       | V    | 2537.208447 | 1269.107861     | 2520.181898    | 1260.594587      | 2519.197882    | 1260.102579      | 18 |
| 4  | 399.260196  | 200.133736      |                |                  | 381.249631     | 191.128454       | L    | 2438.140033 | 1219.573654     | 2421.113484    | 1211.060380      | 2420.129468    | 1210.568372      | 17 |
| 5  | 559.290845  | 280.149061      |                |                  | 541.280280     | 271.143778       | C    | 2325.055969 | 1163.031622     | 2308.029420    | 1154.518348      | 2307.045404    | 1154.026340      | 16 |
| 6  | 998.516171  | 499.761724      | 981.489622     | 491.248449       | 980.505606     | 490.756441       | Q    | 2165.025320 | 1083.016298     | 2147.998771    | 1074.503023      | 2147.014755    | 1074.011015      | 15 |
| 7  | 1127.558764 | 564.283020      | 1110.532215    | 555.769746       | 1109.548199    | 555.277738       | E    | 1725.799994 | 863.403635      | 1708.773445    | 854.890361       | 1707.789429    | 854.398353       | 14 |
| 8  | 1241.601691 | 621.304484      | 1224.575142    | 612.791209       | 1223.591126    | 612.299201       | N    | 1596.757401 | 798.882339      | 1579.730852    | 790.369064       | 1578.746836    | 789.877056       | 13 |
| 9  | 1404.665020 | 702.836148      | 1387.638471    | 694.322874       | 1386.654455    | 693.830866       | Y    | 1482.714474 | 741.860875      | 1465.687925    | 733.347601       | 1464.703909    | 732.855593       | 12 |
| 10 | 1517.749084 | 759.378180      | 1500.722535    | 750.864906       | 1499.738519    | 750.372898       | L    | 1319.651145 | 660.329211      | 1302.624596    | 651.815936       | 1301.640580    | 651.323928       | 11 |
| 11 | 1630.833148 | 815.920212      | 1613.806599    | 807.406938       | 1612.822583    | 806.914929       | I    | 1206.567081 | 603.787179      | 1189.540532    | 595.273904       | 1188.556516    | 594.781896       | 10 |
| 12 | 1758.891726 | 879.949501      | 1741.865177    | 871.436227       | 1740.881161    | 870.944219       | Q    | 1093.483017 | 547.245147      | 1076.456468    | 538.731872       | 1075.472452    | 538.239864       | 9  |
| 13 | 1887.934319 | 944.470798      | 1870.907770    | 935.957523       | 1869.923754    | 935.465515       | E    | 965.424439  | 483.215858      | 948.397890     | 474.702583       | 947.413874     | 474.210575       | 8  |
| 14 | 1944.955783 | 972.981530      | 1927.929234    | 964.468255       | 1926.945218    | 963.976247       | G    | 836.381846  | 418.694561      | 819.355297     | 410.181287       | 818.371281     | 409.689279       | 7  |
| 15 | 2073.998376 | 1037.502826     | 2056.971827    | 1028.989551      | 2055.987811    | 1028.497543      | E    | 779.360382  | 390.183829      | 762.333833     | 381.670555       | 761.349817     | 381.178547       | 6  |
| 16 | 2203.040969 | 1102.024123     | 2186.014420    | 1093.510848      | 2185.030404    | 1093.018840      | E    | 650.317789  | 325.662533      | 633.291240     | 317.149258       | 632.307224     | 316.657250       | 5  |
| 17 | 2316.125033 | 1158.566155     | 2299.098484    | 1150.052880      | 2298.114468    | 1149.560872      | I    | 521.275196  | 261.141236      | 504.248647     | 252.627961       | 503.264631     | 252.135953       | 4  |
| 18 | 2417.172712 | 1209.089994     | 2400.146163    | 1200.576719      | 2399.162147    | 1200.084711      | T    | 408.191132  | 204.599204      | 391.164583     | 196.085929       | 390.180567     | 195.593921       | 3  |
| 19 | 2577.203361 | 1289.105318     | 2560.176812    | 1280.592044      | 2559.192796    | 1280.100036      | C    | 307.143453  | 154.075364      | 290.116904     | 145.562090       |                |                  | 2  |
| 20 |             |                 |                |                  |                |                  | K    | 147.112804  | 74.060040       | 130.086255     | 65.546765        |                |                  | 1  |

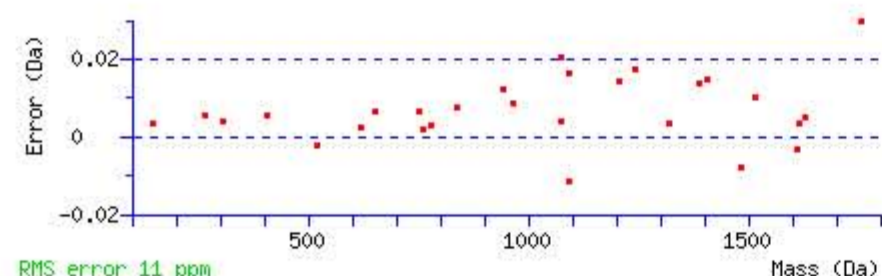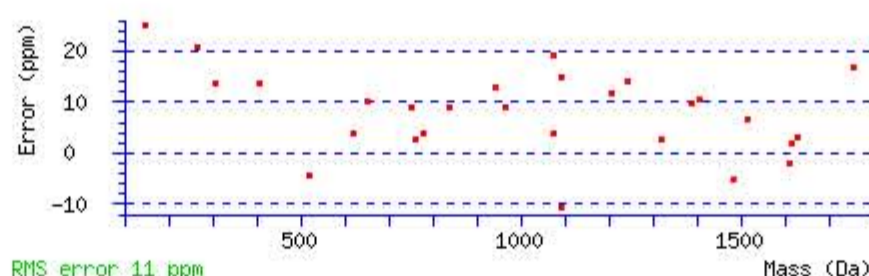

NCBI BLAST search of **VSVLCQENYLIQEGEEITCK**

(Parameters: blastp, nr protein database, expect=20000, no filter, PAM30)

Other BLAST [web gateways](#)

All matches to this query

| Score | Mr(calc):   | Delta     | Sequence                                |
|-------|-------------|-----------|-----------------------------------------|
| 64.0  | 2722.301590 | 0.033722  | <a href="#">VSVLCQENYLIQEGEEITCK</a>    |
| 58.2  | 2722.301590 | 0.033722  | <a href="#">VSVLCQENYLIQEGEEITCK</a>    |
| 16.1  | 2722.339783 | -0.004471 | <a href="#">QDREHLWKLIEGGAHIYVCGDAR</a> |

# Mascot Search Results

## Peptide View

MS/MS Fragmentation of **NTEILTGSWSDQTYPEGTQAIYK**

Found in **CFAH\_HUMAN**, Complement factor H OS=Homo sapiens GN=CFH PE=1 SV=4

Match to Query 69211: 2912.431062 from(971.817630,3+) rtinseconds(2374) index(27340)

Title: Locus:1.1.1.2968.24 File:"2013-07-02 CLN FXIII 180 min 1st F 2.wiff"

Data file C:\Program Files (x86)\Matrix Science\Mascot Daemon\mgf7 FXIII 180 min 1st\mascot\_daemon\_merge.mgf

Click mouse within plot area to zoom in by factor of two about that point

Or, Plot from  to  Da

Label all possible matches  Label matches used for scoring

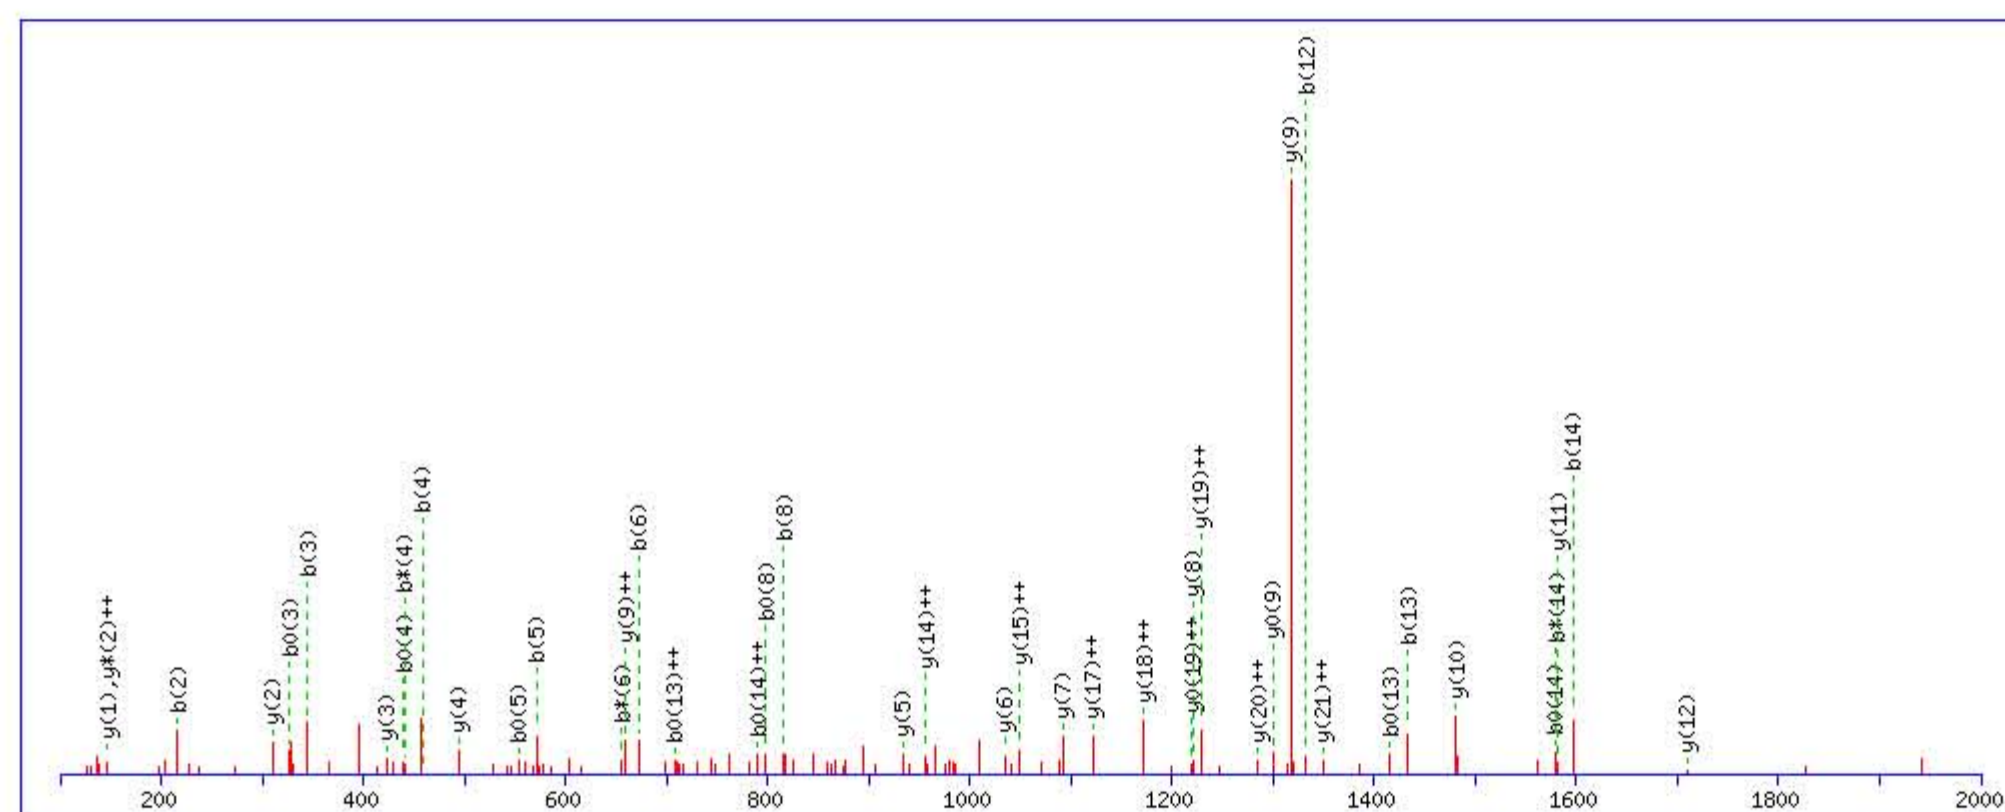

Monoisotopic mass of neutral peptide Mr(calc): 2912.390213

Fixed modifications: Carbamidomethyl (C) (apply to specified residues or termini only)

Variable modifications:

Q19 : Biotin:Thermo-21345 (Q)

Ions Score: 73 Expect: 1.3e-006

Matches : 43/252 fragment ions using 76 most intense peaks ([help](#))

| #  | b                  | b <sup>++</sup> | b <sup>+</sup>     | b <sup>*++</sup> | b <sup>0</sup>     | b <sup>0++</sup>  | Seq. | y                  | y <sup>++</sup>    | y <sup>+</sup> | y <sup>*++</sup>  | y <sup>0</sup>     | y <sup>0++</sup>   | #  |
|----|--------------------|-----------------|--------------------|------------------|--------------------|-------------------|------|--------------------|--------------------|----------------|-------------------|--------------------|--------------------|----|
| 1  | 115.050203         | 58.028740       | 98.023654          | 49.515465        |                    |                   | N    |                    |                    |                |                   |                    |                    | 23 |
| 2  | <b>216.097882</b>  | 108.552579      | 199.071333         | 100.039305       | 198.087317         | 99.547296         | T    | 2799.354578        | 1400.180927        | 2782.328029    | 1391.667652       | 2781.344013        | 1391.175644        | 22 |
| 3  | <b>345.140475</b>  | 173.073875      | 328.113926         | 164.560601       | <b>327.129910</b>  | 164.068593        | E    | 2698.306899        | <b>1349.657087</b> | 2681.280350    | 1341.143813       | 2680.296334        | 1340.651805        | 21 |
| 4  | <b>458.224539</b>  | 229.615907      | <b>441.197990</b>  | 221.102633       | <b>440.213974</b>  | 220.610625        | I    | 2569.264306        | <b>1285.135791</b> | 2552.237757    | 1276.622516       | 2551.253741        | 1276.130508        | 20 |
| 5  | <b>571.308603</b>  | 286.157940      | 554.282054         | 277.644665       | <b>553.298038</b>  | 277.152657        | L    | 2456.180242        | <b>1228.593759</b> | 2439.153693    | 1220.080484       | 2438.169677        | <b>1219.588476</b> | 19 |
| 6  | <b>672.356282</b>  | 336.681779      | <b>655.329733</b>  | 328.168505       | 654.345717         | 327.676497        | T    | 2343.096178        | <b>1172.051727</b> | 2326.069629    | 1163.538452       | 2325.085613        | 1163.046444        | 18 |
| 7  | 729.377746         | 365.192511      | 712.351197         | 356.679237       | 711.367181         | 356.187229        | G    | 2242.048499        | <b>1121.527887</b> | 2225.021950    | 1113.014613       | 2224.037934        | 1112.522605        | 17 |
| 8  | <b>816.409774</b>  | 408.708525      | 799.383225         | 400.195251       | <b>798.399209</b>  | 399.703243        | S    | 2185.027035        | 1093.017155        | 2168.000486    | 1084.503881       | 2167.016470        | 1084.011873        | 16 |
| 9  | 1002.489087        | 501.748182      | 985.462538         | 493.234907       | 984.478522         | 492.742899        | W    | 2097.995007        | <b>1049.501141</b> | 2080.968458    | 1040.987867       | 2079.984442        | 1040.495859        | 15 |
| 10 | 1089.521115        | 545.264196      | 1072.494566        | 536.750921       | 1071.510550        | 536.258913        | S    | 1911.915694        | <b>956.461485</b>  | 1894.889145    | 947.948211        | 1893.905129        | 947.456203         | 14 |
| 11 | 1204.548058        | 602.777667      | 1187.521509        | 594.264393       | 1186.537493        | 593.772385        | D    | 1824.883666        | 912.945471         | 1807.857117    | 904.432197        | 1806.873101        | 903.940189         | 13 |
| 12 | <b>1332.606636</b> | 666.806956      | 1315.580087        | 658.293682       | 1314.596071        | 657.801674        | Q    | <b>1709.856723</b> | 855.432000         | 1692.830174    | 846.918725        | 1691.846158        | 846.426717         | 12 |
| 13 | <b>1433.654315</b> | 717.330796      | 1416.627766        | 708.817521       | <b>1415.643750</b> | <b>708.325513</b> | T    | <b>1581.798145</b> | 791.402711         | 1564.771596    | 782.889436        | 1563.787580        | 782.397428         | 11 |
| 14 | <b>1596.717644</b> | 798.862460      | <b>1579.691095</b> | 790.349186       | <b>1578.707079</b> | <b>789.857178</b> | Y    | <b>1480.750466</b> | 740.878871         | 1463.723917    | 732.365597        | 1462.739901        | 731.873589         | 10 |
| 15 | 1693.770408        | 847.388842      | 1676.743859        | 838.875568       | 1675.759843        | 838.383560        | P    | <b>1317.687137</b> | <b>659.347207</b>  | 1300.660588    | 650.833932        | <b>1299.676572</b> | 650.341924         | 9  |
| 16 | 1822.813001        | 911.910139      | 1805.786452        | 903.396864       | 1804.802436        | 902.904856        | E    | <b>1220.634373</b> | 610.820825         | 1203.607824    | 602.307550        | 1202.623808        | 601.815542         | 8  |
| 17 | 1879.834465        | 940.420871      | 1862.807916        | 931.907596       | 1861.823900        | 931.415588        | G    | <b>1091.591780</b> | 546.299528         | 1074.565231    | 537.786254        | 1073.581215        | 537.294246         | 7  |
| 18 | 1980.882144        | 990.944710      | 1963.855595        | 982.431436       | 1962.871579        | 981.939428        | T    | <b>1034.570316</b> | 517.788796         | 1017.543767    | 509.275522        | 1016.559751        | 508.783514         | 6  |
| 19 | 2420.107470        | 1210.557373     | 2403.080921        | 1202.044098      | 2402.096905        | 1201.552090       | Q    | <b>933.522637</b>  | 467.264957         | 916.496088     | 458.751682        |                    |                    | 5  |
| 20 | 2491.144584        | 1246.075930     | 2474.118035        | 1237.562655      | 2473.134019        | 1237.070648       | A    | <b>494.297311</b>  | 247.652294         | 477.270762     | 239.139019        |                    |                    | 4  |
| 21 | 2604.228648        | 1302.617962     | 2587.202099        | 1294.104688      | 2586.218083        | 1293.612680       | I    | <b>423.260197</b>  | 212.133737         | 406.233648     | 203.620462        |                    |                    | 3  |
| 22 | 2767.291977        | 1384.149627     | 2750.265428        | 1375.636352      | 2749.281412        | 1375.144344       | Y    | <b>310.176133</b>  | 155.591705         | 293.149584     | <b>147.078430</b> |                    |                    | 2  |
| 23 |                    |                 |                    |                  |                    |                   | K    | <b>147.112804</b>  | 74.060040          | 130.086255     | 65.546765         |                    |                    | 1  |

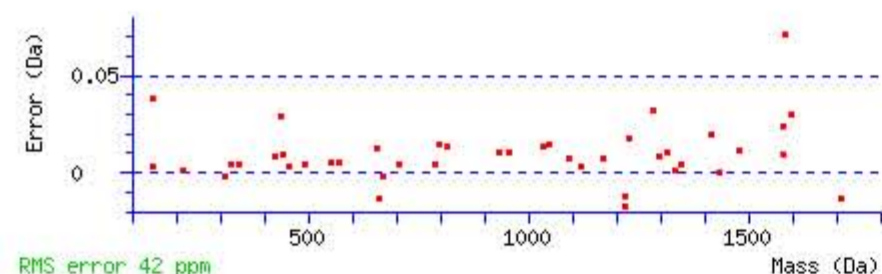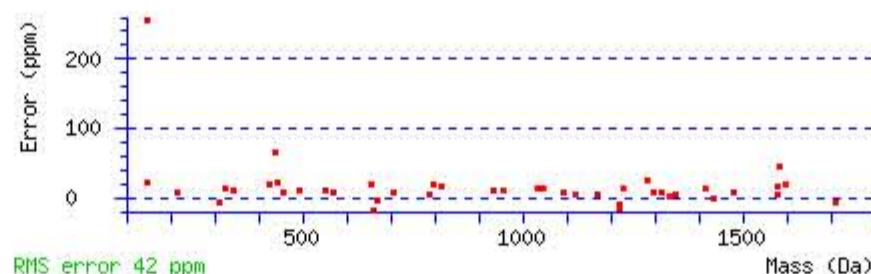

NCBI BLAST search of **NTEILTGSWSDQTYPEGTQAIYK**

(Parameters: blastp, nr protein database, expect=20000, no filter, PAM30)

Other BLAST [web gateways](#)

## All matches to this query

| Score | Mr(calc):   | Delta    | Sequence                                |
|-------|-------------|----------|-----------------------------------------|
| 73.4  | 2912.390213 | 0.040849 | <a href="#">NTEILTGSWSDQTYPEGTQAIYK</a> |
| 16.4  | 2912.390213 | 0.040849 | <a href="#">NTEILTGSWSDQTYPEGTQAIYK</a> |

# **MASCOT** Mascot Search Results

## Peptide View

MS/MS Fragmentation of **VFCQPWQR**

Found in **CFAL\_HUMAN**, Complement factor I OS=Homo sapiens GN=CFI PE=1 SV=2

Match to Query 32674: 1430.707748 from(716.361150,2+) rtinseconds(2015) index(78953)

Title: Locus:1.1.1.2052.9 File:"2013-07-02 CLN FXIII 180 min 1st FT.wiff"

Data file C:\Program Files (x86)\Matrix Science\Mascot Daemon\mgf\7 FXIII 180 min 1st\mascot\_daemon\_merge.mgf

Click mouse within plot area to zoom in by factor of two about that point

Or, Plot from  to  Da

Label all possible matches  Label matches used for scoring

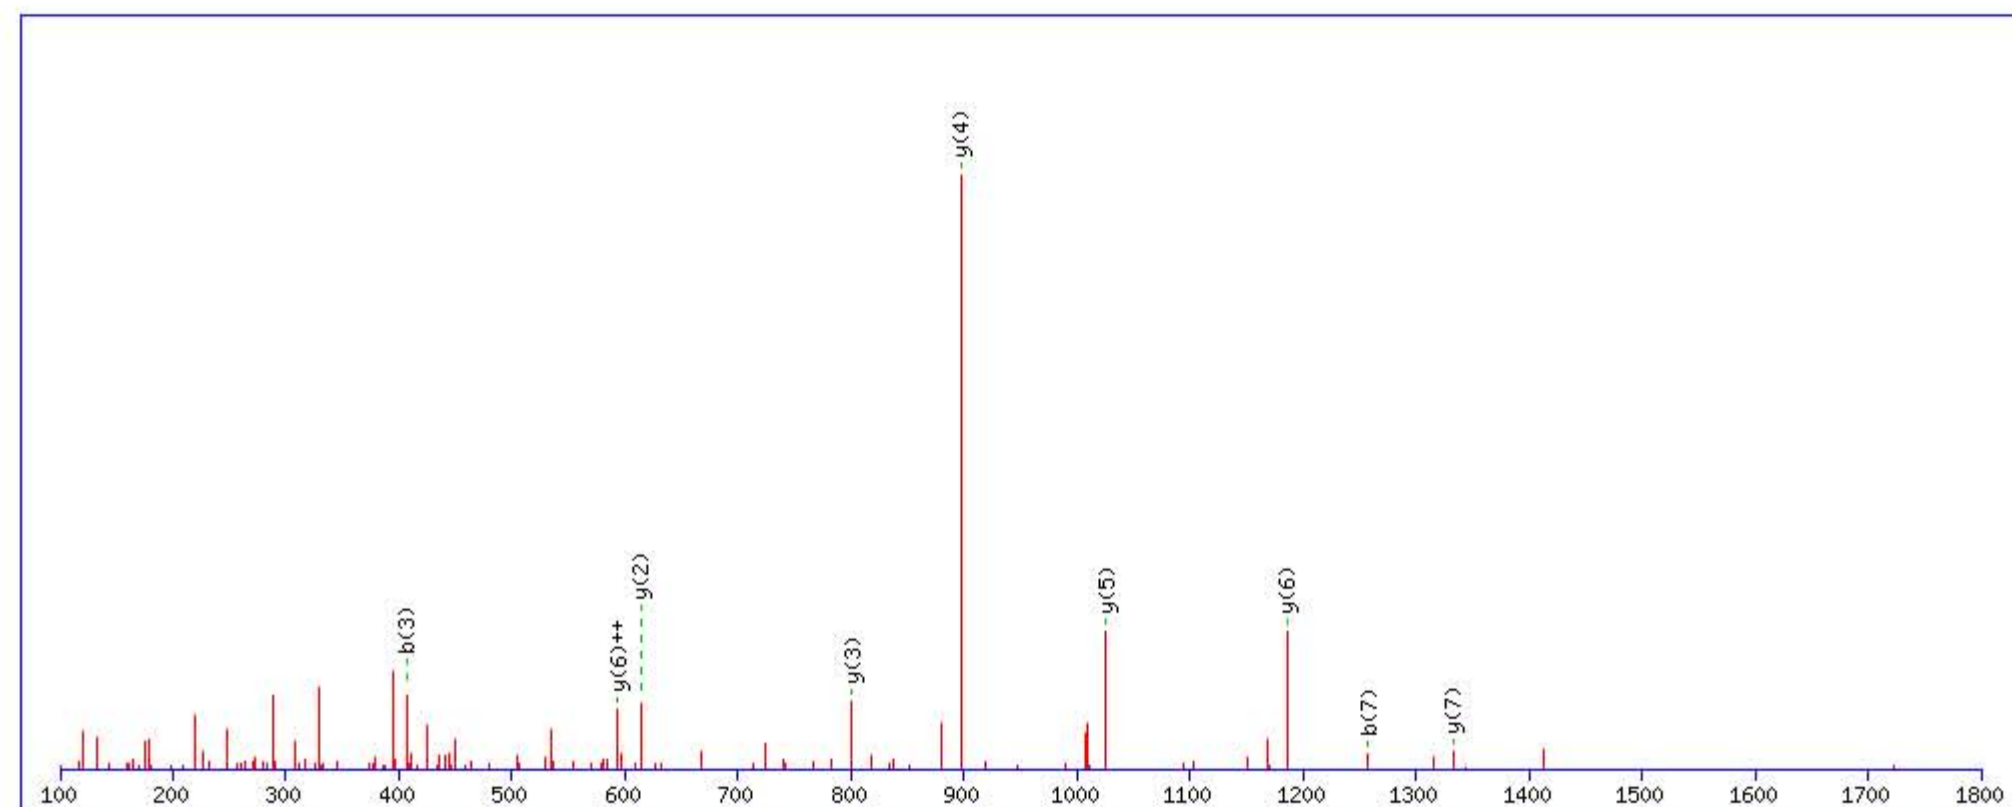

Monoisotopic mass of neutral peptide Mr(calc): 1430.695145

Fixed modifications: Carbamidomethyl (C) (apply to specified residues or termini only)

Variable modifications:

Q7 : Biotin:Thermo-21345 (Q)

Ions Score: 44 Expect: 0.00013

Matches : 9/50 fragment ions using 14 most intense peaks [\(help\)](#)

| # | b                  | b <sup>++</sup> | b <sup>*</sup> | b <sup>*++</sup> | Seq. | y                  | y <sup>++</sup>   | y <sup>*</sup> | y <sup>*++</sup> | # |
|---|--------------------|-----------------|----------------|------------------|------|--------------------|-------------------|----------------|------------------|---|
| 1 | 100.075690         | 50.541483       |                |                  | V    |                    |                   |                |                  | 8 |
| 2 | 247.144104         | 124.075690      |                |                  | F    | <b>1332.633996</b> | 666.820636        | 1315.607447    | 658.307362       | 7 |
| 3 | <b>407.174753</b>  | 204.091014      |                |                  | C    | <b>1185.565582</b> | <b>593.286429</b> | 1168.539033    | 584.773155       | 6 |
| 4 | 535.233331         | 268.120304      | 518.206782     | 259.607029       | Q    | <b>1025.534933</b> | 513.271105        | 1008.508384    | 504.757830       | 5 |
| 5 | 632.286095         | 316.646686      | 615.259546     | 308.133411       | P    | <b>897.476355</b>  | 449.241816        | 880.449806     | 440.728541       | 4 |
| 6 | 818.365408         | 409.686342      | 801.338859     | 401.173068       | W    | <b>800.423591</b>  | 400.715434        | 783.397042     | 392.202159       | 3 |
| 7 | <b>1257.590734</b> | 629.299005      | 1240.564185    | 620.785731       | Q    | <b>614.344278</b>  | 307.675777        | 597.317729     | 299.162503       | 2 |
| 8 |                    |                 |                |                  | R    | 175.118952         | 88.063114         | 158.092403     | 79.549839        | 1 |

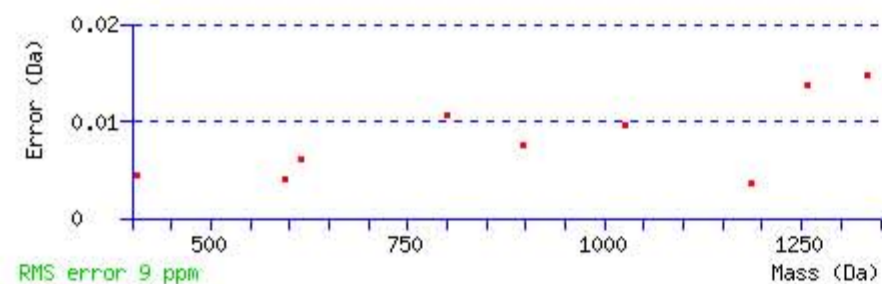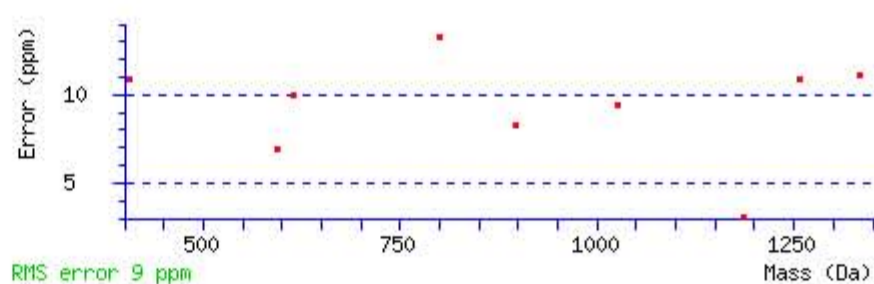

NCBI BLAST search of **VFCQPWQR**

(Parameters: blastp, nr protein database, expect=20000, no filter, PAM30)

Other BLAST [web gateways](#)

## All matches to this query

| Score | Mr(calc):   | Delta     | Sequence                       |
|-------|-------------|-----------|--------------------------------|
| 44.0  | 1430.695145 | 0.012603  | <a href="#">VFCQPWQR</a>       |
| 8.3   | 1430.695145 | 0.012603  | <a href="#">VFCQPWQR</a>       |
| 2.5   | 1430.693619 | 0.014129  | <a href="#">QLQTLSPGGGGNR</a>  |
| 1.4   | 1430.726822 | -0.019074 | <a href="#">VFDVYLCFLQK</a>    |
| 0.7   | 1430.711319 | -0.003571 | <a href="#">RAKAEDENETLR</a>   |
| 0.4   | 1430.722565 | -0.014817 | <a href="#">REAGEAGAATSKQR</a> |

Mascot: <http://www.matrixscience.com/>

# MASCOT Search Results

## Peptide View

MS/MS Fragmentation of **VTYTSQEDLVEK**

Found in **CFAI\_HUMAN**, Complement factor I OS=Homo sapiens GN=CFI PE=1 SV=2

Match to Query 43052: 1721.865822 from(574.962550,3+) rtinseconds(1870) index(77896)

Title: Locus:1.1.1.2002.14 File:"2013-07-02 CLN FXIII 180 min 1st FT.wiff"

Data file C:\Program Files (x86)\Matrix Science\Mascot Daemon\mgf\7 FXIII 180 min 1st\mascot\_daemon\_merge.mgf

Click mouse within plot area to zoom in by factor of two about that point

Or, Plot from  to  Da

Label all possible matches  Label matches used for scoring

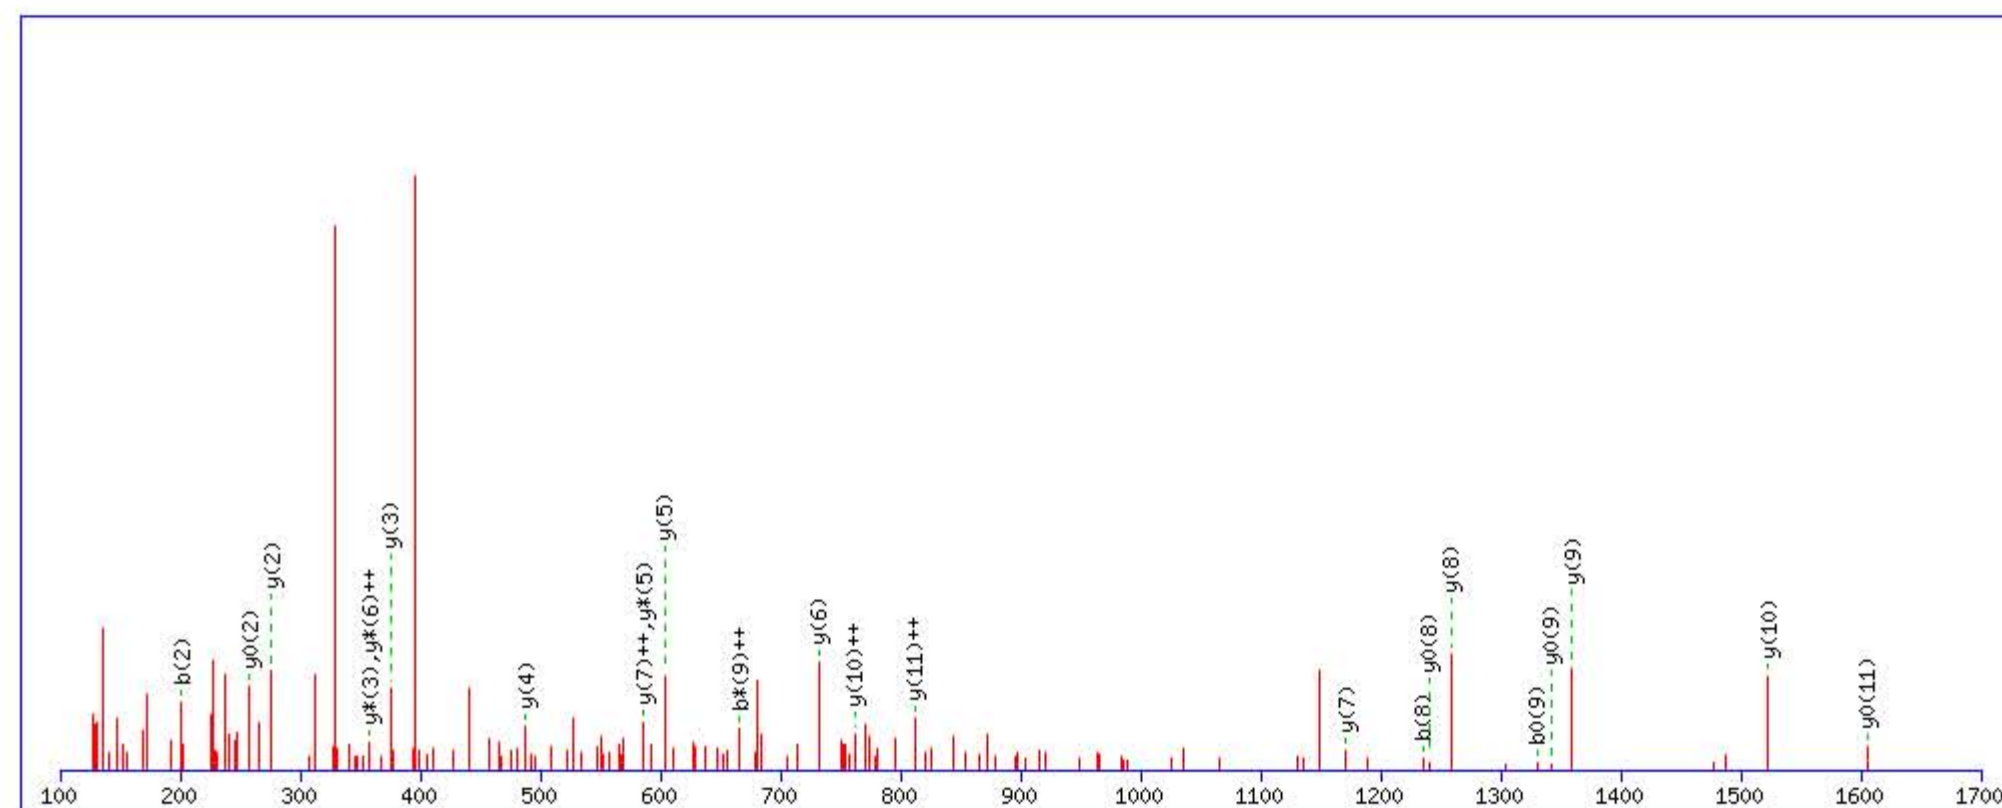

Monoisotopic mass of neutral peptide Mr(calc): 1721.854584

Fixed modifications: Carbamidomethyl (C) (apply to specified residues or termini only)

Variable modifications:

Q6 : Biotin:Thermo-21345 (Q)

Ions Score: 35 Expect: 0.0074

Matches : 23/118 fragment ions using 53 most intense peaks [\(help\)](#)

| #  | b                  | b <sup>++</sup> | b <sup>+</sup> | b <sup>*++</sup>  | b <sup>0</sup>     | b <sup>0++</sup> | Seq. | y                  | y <sup>++</sup>   | y <sup>+</sup>    | y <sup>*++</sup>  | y <sup>0</sup>     | y <sup>0++</sup> | #  |
|----|--------------------|-----------------|----------------|-------------------|--------------------|------------------|------|--------------------|-------------------|-------------------|-------------------|--------------------|------------------|----|
| 1  | 100.075690         | 50.541483       |                |                   |                    |                  | V    |                    |                   |                   |                   |                    |                  | 12 |
| 2  | <b>201.123369</b>  | 101.065322      |                |                   | 183.112804         | 92.060040        | T    | 1623.793452        | <b>812.400364</b> | 1606.766903       | 803.887090        | <b>1605.782887</b> | 803.395081       | 11 |
| 3  | 364.186698         | 182.596987      |                |                   | 346.176133         | 173.591705       | Y    | <b>1522.745773</b> | <b>761.876524</b> | 1505.719224       | 753.363250        | 1504.735208        | 752.871242       | 10 |
| 4  | 465.234377         | 233.120827      |                |                   | 447.223812         | 224.115544       | T    | <b>1359.682444</b> | 680.344860        | 1342.655895       | 671.831585        | <b>1341.671879</b> | 671.339577       | 9  |
| 5  | 552.266405         | 276.636841      |                |                   | 534.255840         | 267.631558       | S    | <b>1258.634765</b> | 629.821021        | 1241.608216       | 621.307746        | <b>1240.624200</b> | 620.815738       | 8  |
| 6  | 991.491731         | 496.249504      | 974.465182     | 487.736229        | 973.481166         | 487.244221       | Q    | <b>1171.602737</b> | <b>586.305006</b> | 1154.576188       | 577.791732        | 1153.592172        | 577.299724       | 7  |
| 7  | 1120.534324        | 560.770800      | 1103.507775    | 552.257526        | 1102.523759        | 551.765517       | E    | <b>732.377411</b>  | 366.692343        | 715.350862        | <b>358.179069</b> | 714.366846         | 357.687061       | 6  |
| 8  | <b>1235.561267</b> | 618.284272      | 1218.534718    | 609.770997        | 1217.550702        | 609.278989       | D    | <b>603.334818</b>  | 302.171047        | <b>586.308269</b> | 293.657773        | 585.324253         | 293.165765       | 5  |
| 9  | 1348.645331        | 674.826303      | 1331.618782    | <b>666.313029</b> | <b>1330.634766</b> | 665.821021       | L    | <b>488.307875</b>  | 244.657575        | 471.281326        | 236.144301        | 470.297310         | 235.652293       | 4  |
| 10 | 1447.713745        | 724.360511      | 1430.687196    | 715.847236        | 1429.703180        | 715.355228       | V    | <b>375.223811</b>  | 188.115543        | <b>358.197262</b> | 179.602269        | 357.213246         | 179.110261       | 3  |
| 11 | 1576.756338        | 788.881807      | 1559.729789    | 780.368533        | 1558.745773        | 779.876524       | E    | <b>276.155397</b>  | 138.581336        | 259.128848        | 130.068062        | <b>258.144832</b>  | 129.576054       | 2  |
| 12 |                    |                 |                |                   |                    |                  | K    | 147.112804         | 74.060040         | 130.086255        | 65.546765         |                    |                  | 1  |

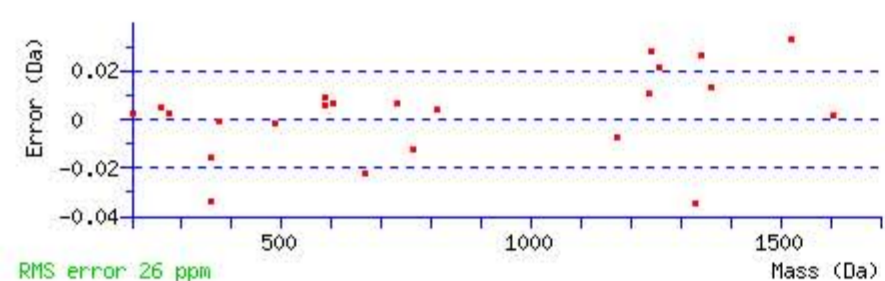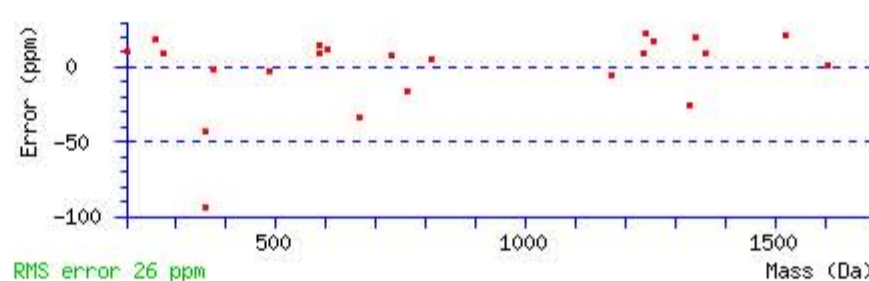

NCBI BLAST search of [VTYTSQEDLVEK](#)

(Parameters: blastp, nr protein database, expect=20000, no filter, PAM30)

Other BLAST [web gateways](#)

All matches to this query

| Score | Mr(calc):   | Delta    | Sequence                     |
|-------|-------------|----------|------------------------------|
| 35.3  | 1721.854584 | 0.011238 | <a href="#">VTYTSQEDLVEK</a> |

Mascot: <http://www.matrixscience.com/>

# MASCOT Search Results

## Peptide View

MS/MS Fragmentation of **AQLGDLPWQVAIK**

Found in **CFAL\_HUMAN**, Complement factor I OS=Homo sapiens GN=CFI PE=1 SV=2

Match to Query 43857: 1748.988508 from(875.501530,2+) rtinseconds(2632) index(82988)

Title: Locus:1.1.1.2266.9 File:"2013-07-02 CLN FXIII 180 min 1st FT.wiff"

Data file C:\Program Files (x86)\Matrix Science\Mascot Daemon\mgf\7 FXIII 180 min 1st\mascot\_daemon\_merge.mgf

Click mouse within plot area to zoom in by factor of two about that point

Or, Plot from 0 to 2600 Da Full range

Label all possible matches  Label matches used for scoring

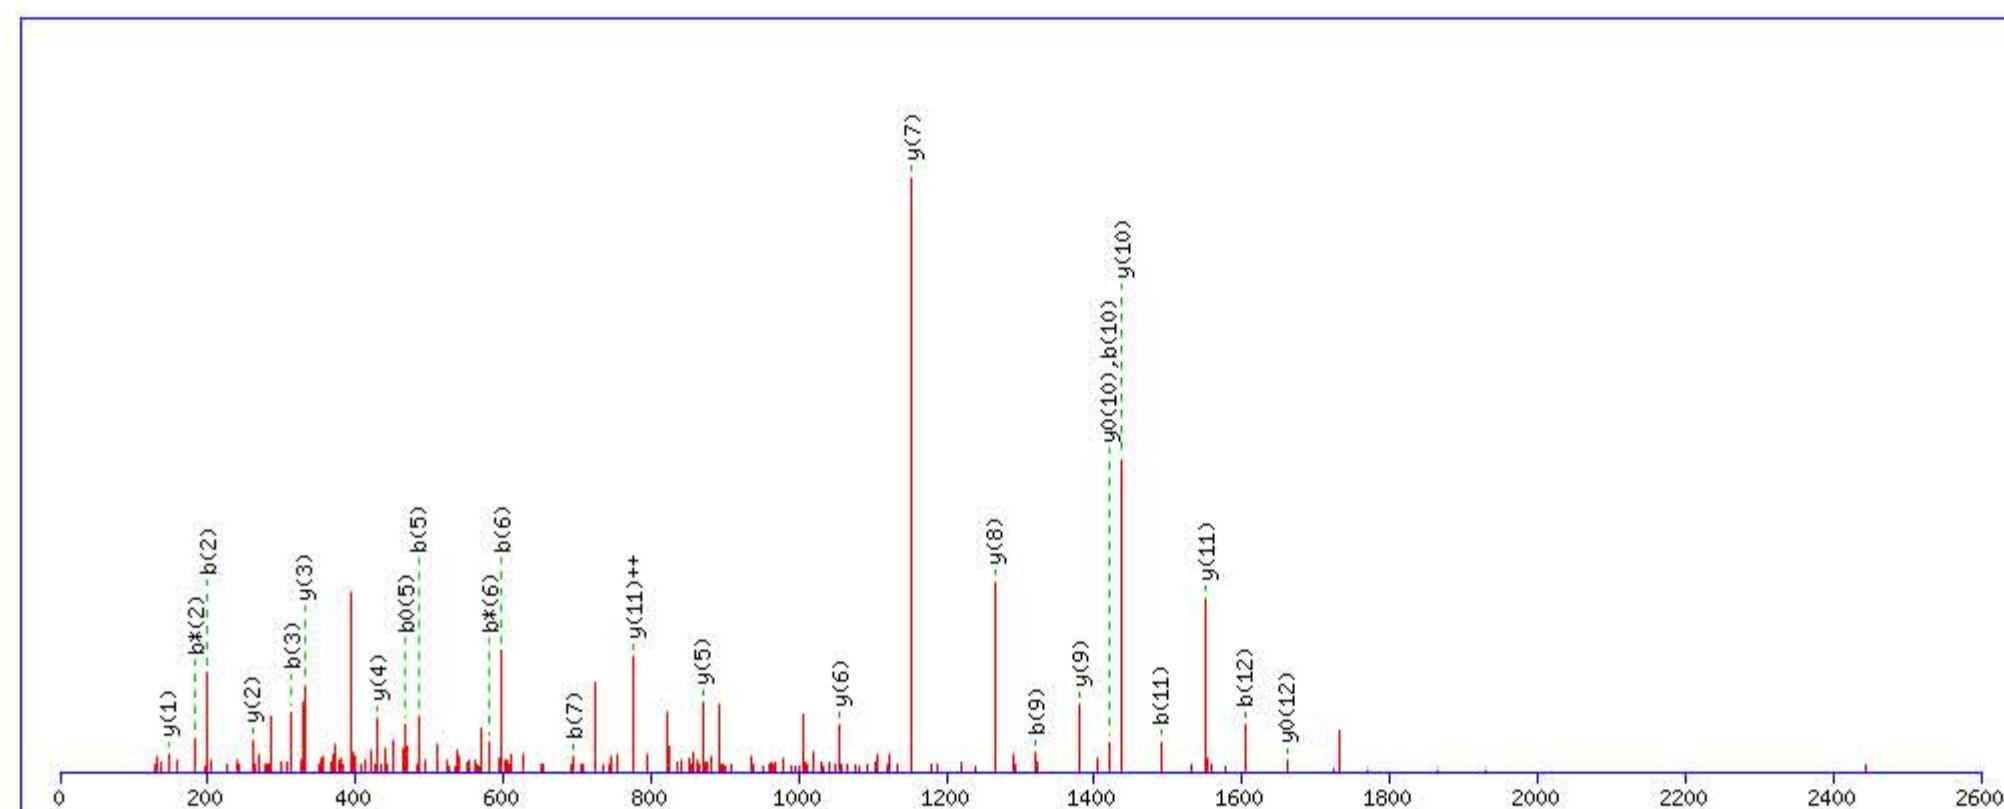

Monoisotopic mass of neutral peptide Mr(calc): 1748.964737

Fixed modifications: Carbamidomethyl (C) (apply to specified residues or termini only)

Variable modifications:

Q9 : Biotin:Thermo-21345 (Q)

Ions Score: 71 Expect: 3.3e-007

Matches : 26/118 fragment ions using 47 most intense peaks [\(help\)](#)

| #  | b                  | b <sup>++</sup> | b <sup>*</sup>    | b <sup>*++</sup> | b <sup>0</sup>    | b <sup>0++</sup> | Seq. | y                  | y <sup>++</sup>   | y <sup>*</sup> | y <sup>*++</sup> | y <sup>0</sup>     | y <sup>0++</sup> | #  |
|----|--------------------|-----------------|-------------------|------------------|-------------------|------------------|------|--------------------|-------------------|----------------|------------------|--------------------|------------------|----|
| 1  | 72.044390          | 36.525833       |                   |                  |                   |                  | A    |                    |                   |                |                  |                    |                  | 13 |
| 2  | <b>200.102968</b>  | 100.555122      | <b>183.076419</b> | 92.041848        |                   |                  | Q    | 1678.934912        | 839.971094        | 1661.908363    | 831.457820       | <b>1660.924347</b> | 830.965812       | 12 |
| 3  | <b>313.187032</b>  | 157.097154      | 296.160483        | 148.583879       |                   |                  | L    | <b>1550.876334</b> | <b>775.941805</b> | 1533.849785    | 767.428531       | 1532.865769        | 766.936523       | 11 |
| 4  | 370.208496         | 185.607886      | 353.181947        | 177.094611       |                   |                  | G    | <b>1437.792270</b> | 719.399773        | 1420.765721    | 710.886499       | <b>1419.781705</b> | 710.394491       | 10 |
| 5  | <b>485.235439</b>  | 243.121357      | 468.208890        | 234.608083       | <b>467.224874</b> | 234.116075       | D    | <b>1380.770806</b> | 690.889041        | 1363.744257    | 682.375767       | 1362.760241        | 681.883759       | 9  |
| 6  | <b>598.319503</b>  | 299.663390      | <b>581.292954</b> | 291.150115       | 580.308938        | 290.658107       | L    | <b>1265.743863</b> | 633.375570        | 1248.717314    | 624.862295       |                    |                  | 8  |
| 7  | <b>695.372267</b>  | 348.189772      | 678.345718        | 339.676497       | 677.361702        | 339.184489       | P    | <b>1152.659799</b> | 576.833538        | 1135.633250    | 568.320263       |                    |                  | 7  |
| 8  | 881.451580         | 441.229428      | 864.425031        | 432.716154       | 863.441015        | 432.224146       | W    | <b>1055.607035</b> | 528.307156        | 1038.580486    | 519.793881       |                    |                  | 6  |
| 9  | <b>1320.676906</b> | 660.842091      | 1303.650357       | 652.328817       | 1302.666341       | 651.836809       | Q    | <b>869.527722</b>  | 435.267499        | 852.501173     | 426.754225       |                    |                  | 5  |
| 10 | <b>1419.745320</b> | 710.376298      | 1402.718771       | 701.863024       | 1401.734755       | 701.371016       | V    | <b>430.302396</b>  | 215.654836        | 413.275847     | 207.141561       |                    |                  | 4  |
| 11 | <b>1490.782434</b> | 745.894855      | 1473.755885       | 737.381581       | 1472.771869       | 736.889573       | A    | <b>331.233982</b>  | 166.120629        | 314.207433     | 157.607354       |                    |                  | 3  |
| 12 | <b>1603.866498</b> | 802.436887      | 1586.839949       | 793.923613       | 1585.855933       | 793.431605       | I    | <b>260.196868</b>  | 130.602072        | 243.170319     | 122.088797       |                    |                  | 2  |
| 13 |                    |                 |                   |                  |                   |                  | K    | <b>147.112804</b>  | 74.060040         | 130.086255     | 65.546765        |                    |                  | 1  |

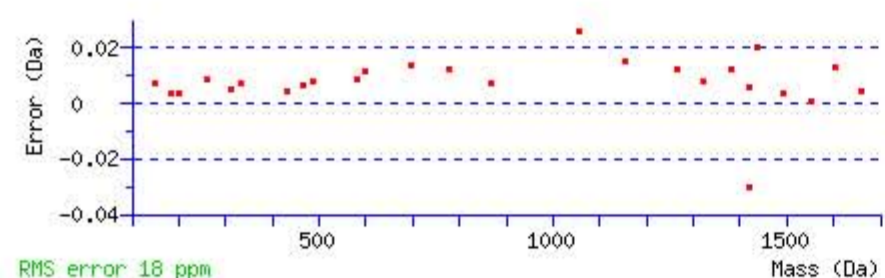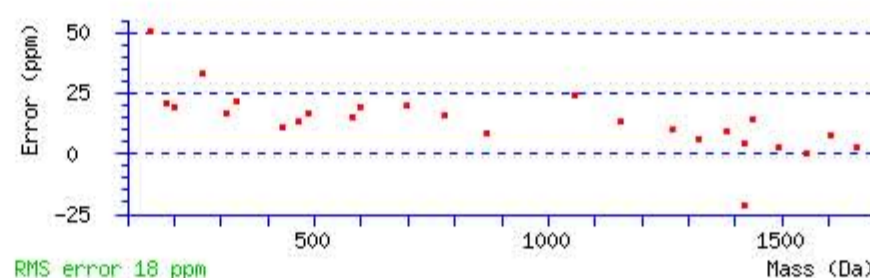

NCBI BLAST search of **AQLGDLPWQVAIK**

(Parameters: blastp, nr protein database, expect=20000, no filter, PAM30)

Other BLAST [web gateways](#)

All matches to this query

| Score | Mr(calc):   | Delta    | Sequence                           |
|-------|-------------|----------|------------------------------------|
| 71.0  | 1748.964737 | 0.023771 | <a href="#">AQLGDLPWQVAIK</a>      |
| 4.3   | 1748.964737 | 0.023771 | <a href="#">AQLGDLPWQVAIK</a>      |
| 1.7   | 1748.978439 | 0.010069 | <a href="#">YARKISGTTALQEALK</a>   |
| 0.1   | 1748.964523 | 0.023985 | <a href="#">AAAALSLAHRLLDGAGSR</a> |

Mascot: <http://www.matrixscience.com/>

# MASCOT Search Results

## Peptide View

MS/MS Fragmentation of **TMGYQDFADVVCYTQK**

Found in **CFAI\_HUMAN**, Complement factor I OS=Homo sapiens GN=CFI PE=1 SV=2

Match to Query 56325: 2236.024512 from(746.348780,3+) rtinseconds(2498) index(82131)

Title: Locus:1.1.1.2220.14 File:"2013-07-02 CLN FXIII 180 min 1st FT.wiff"

Data file C:\Program Files (x86)\Matrix Science\Mascot Daemon\mgf\7 FXIII 180 min 1st\mascot\_daemon\_merge.mgf

Click mouse within plot area to zoom in by factor of two about that point

Or, Plot from  to  Da

Label all possible matches  Label matches used for scoring

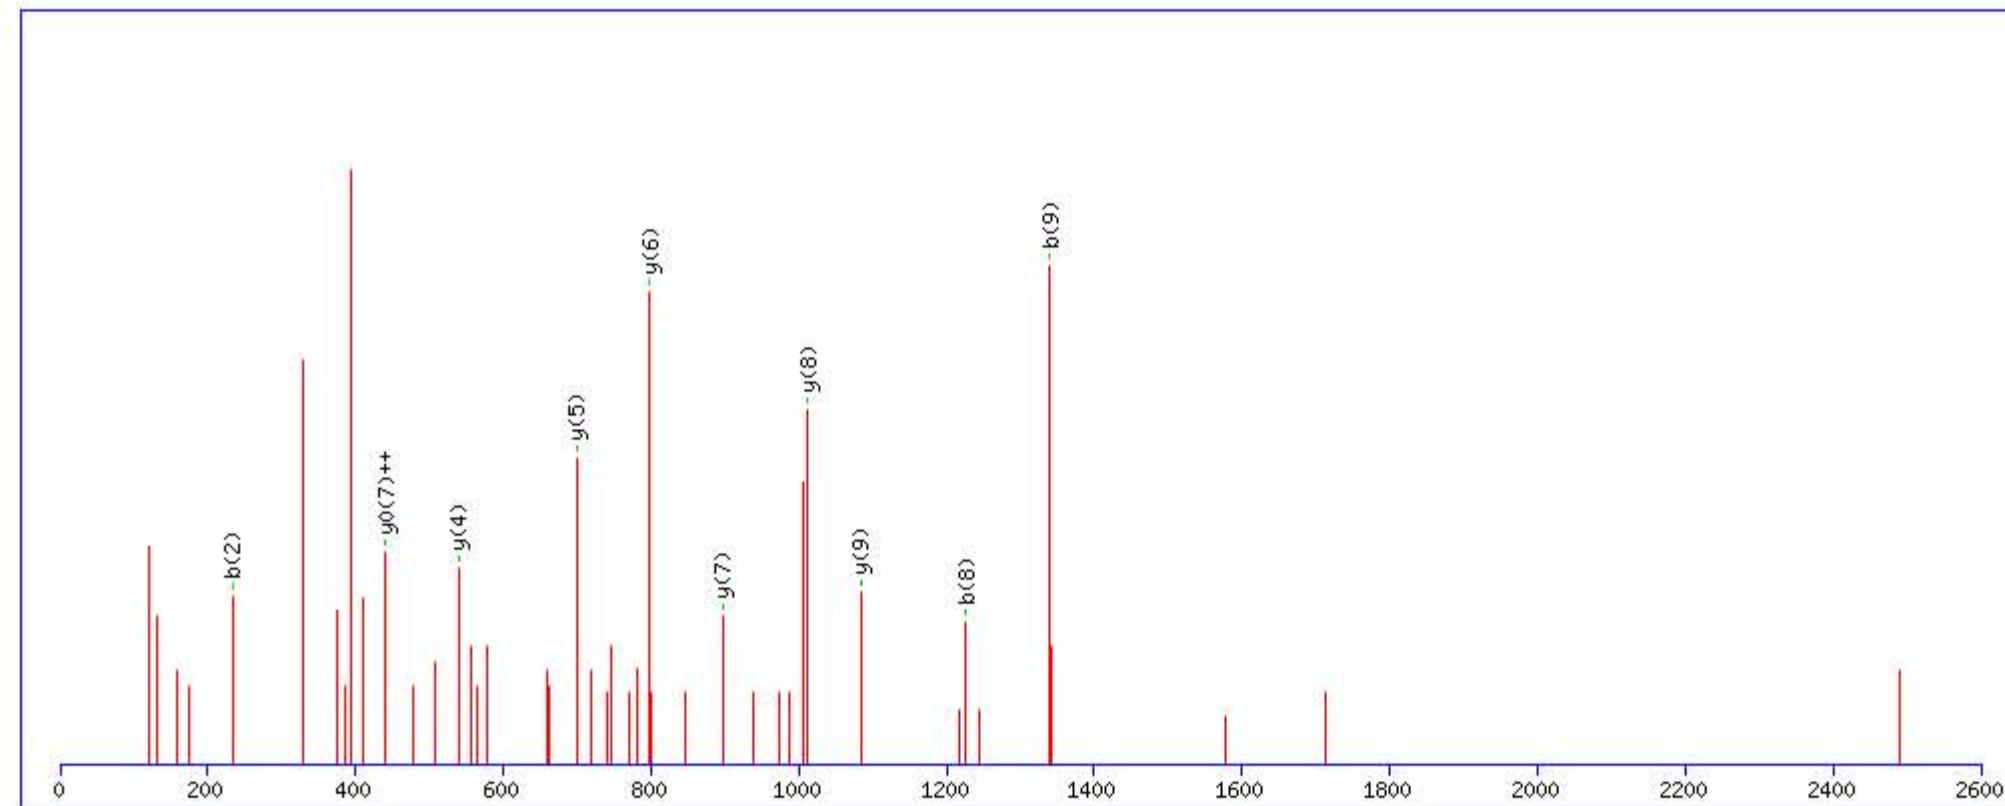

Monoisotopic mass of neutral peptide Mr(calc): 2236.000305

Fixed modifications: Carbamidomethyl (C) (apply to specified residues or termini only)

Variable modifications:

Q5 : Biotin:Thermo-21345 (Q)

Ions Score: 35 Expect: 0.004

Matches : 10/168 fragment ions using 15 most intense peaks [\(help\)](#)

| #  | b                  | b <sup>++</sup> | b <sup>*</sup> | b <sup>+++</sup> | b <sup>0</sup> | b <sup>0++</sup> | Seq. | y                  | y <sup>++</sup> | y <sup>*</sup> | y <sup>+++</sup> | y <sup>0</sup> | y <sup>0++</sup>  | #  |
|----|--------------------|-----------------|----------------|------------------|----------------|------------------|------|--------------------|-----------------|----------------|------------------|----------------|-------------------|----|
| 1  | 102.054955         | 51.531116       |                |                  | 84.044390      | 42.525833        | T    |                    |                 |                |                  |                |                   | 16 |
| 2  | <b>233.095440</b>  | 117.051358      |                |                  | 215.084875     | 108.046076       | M    | 2135.959885        | 1068.483580     | 2118.933336    | 1059.970306      | 2117.949320    | 1059.478298       | 15 |
| 3  | 290.116904         | 145.562090      |                |                  | 272.106339     | 136.556807       | G    | 2004.919400        | 1002.963338     | 1987.892851    | 994.450064       | 1986.908835    | 993.958056        | 14 |
| 4  | 453.180233         | 227.093754      |                |                  | 435.169668     | 218.088472       | Y    | 1947.897936        | 974.452606      | 1930.871387    | 965.939332       | 1929.887371    | 965.447324        | 13 |
| 5  | 892.405559         | 446.706418      | 875.379010     | 438.193143       | 874.394994     | 437.701135       | Q    | 1784.834607        | 892.920942      | 1767.808058    | 884.407667       | 1766.824042    | 883.915659        | 12 |
| 6  | 1007.432502        | 504.219889      | 990.405953     | 495.706615       | 989.421937     | 495.214607       | D    | 1345.609281        | 673.308279      | 1328.582732    | 664.795004       | 1327.598716    | 664.302996        | 11 |
| 7  | 1154.500916        | 577.754096      | 1137.474367    | 569.240822       | 1136.490351    | 568.748813       | F    | 1230.582338        | 615.794807      | 1213.555789    | 607.281533       | 1212.571773    | 606.789525        | 10 |
| 8  | <b>1225.538030</b> | 613.272653      | 1208.511481    | 604.759379       | 1207.527465    | 604.267370       | A    | <b>1083.513924</b> | 542.260600      | 1066.487375    | 533.747326       | 1065.503359    | 533.255318        | 9  |
| 9  | <b>1340.564973</b> | 670.786125      | 1323.538424    | 662.272850       | 1322.554408    | 661.780842       | D    | <b>1012.476810</b> | 506.742043      | 995.450261     | 498.228769       | 994.466245     | 497.736761        | 8  |
| 10 | 1439.633387        | 720.320332      | 1422.606838    | 711.807057       | 1421.622822    | 711.315049       | V    | <b>897.449867</b>  | 449.228572      | 880.423318     | 440.715297       | 879.439302     | <b>440.223289</b> | 7  |
| 11 | 1538.701801        | 769.854539      | 1521.675252    | 761.341264       | 1520.691236    | 760.849256       | V    | <b>798.381453</b>  | 399.694365      | 781.354904     | 391.181090       | 780.370888     | 390.689082        | 6  |
| 12 | 1698.732450        | 849.869863      | 1681.705901    | 841.356589       | 1680.721885    | 840.864581       | C    | <b>699.313039</b>  | 350.160158      | 682.286490     | 341.646883       | 681.302474     | 341.154875        | 5  |
| 13 | 1861.795779        | 931.401528      | 1844.769230    | 922.888253       | 1843.785214    | 922.396245       | Y    | <b>539.282390</b>  | 270.144833      | 522.255841     | 261.631559       | 521.271825     | 261.139551        | 4  |
| 14 | 1962.843458        | 981.925367      | 1945.816909    | 973.412093       | 1944.832893    | 972.920085       | T    | 376.219061         | 188.613168      | 359.192512     | 180.099894       | 358.208496     | 179.607886        | 3  |
| 15 | 2090.902036        | 1045.954656     | 2073.875487    | 1037.441381      | 2072.891471    | 1036.949373      | Q    | 275.171382         | 138.089329      | 258.144833     | 129.576054       |                |                   | 2  |
| 16 |                    |                 |                |                  |                |                  | K    | 147.112804         | 74.060040       | 130.086255     | 65.546765        |                |                   | 1  |

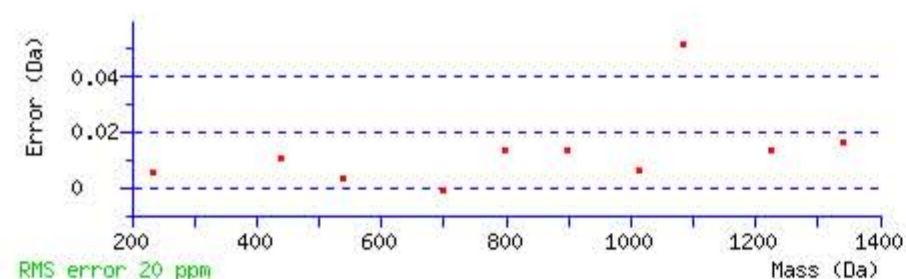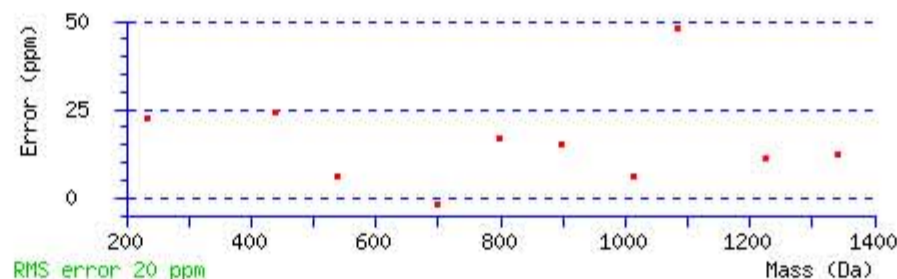

NCBI BLAST search of [TMGYQDFADVVCYTQK](#)

(Parameters: blastp, nr protein database, expect=20000, no filter, PAM30)

Other BLAST [web gateways](#)

## All matches to this query

| Score | Mr(calc):   | Delta    | Sequence                         |
|-------|-------------|----------|----------------------------------|
| 34.6  | 2236.000305 | 0.024207 | <a href="#">TMGYQDFADVVCYTQK</a> |

Mascot: <http://www.matrixscience.com/>







# Mascot Search Results

## Peptide View

### MS/MS Fragmentation of TLGDQLSLLGAR

Found in **MRC2\_HUMAN**, C-type mannose receptor 2 OS=Homo sapiens GN=MRC2 PE=1 SV=2

Match to Query 41637: 1666.965282 from(556.662370,3+) rtinseconds(2965) index(49124)

Title: Locus:1.1.1.3478.2 File:"2013-07-02 CLN FXIII 180 min 1st F 3.wiff"

Data file C:\Program Files (x86)\Matrix Science\Mascot Daemon\mgf\7 FXIII 180 min 1st\mascot\_daemon\_merge.mgf

Click mouse within plot area to zoom in by factor of two about that point

Or, Plot from  to  Da

Label all possible matches  Label matches used for scoring

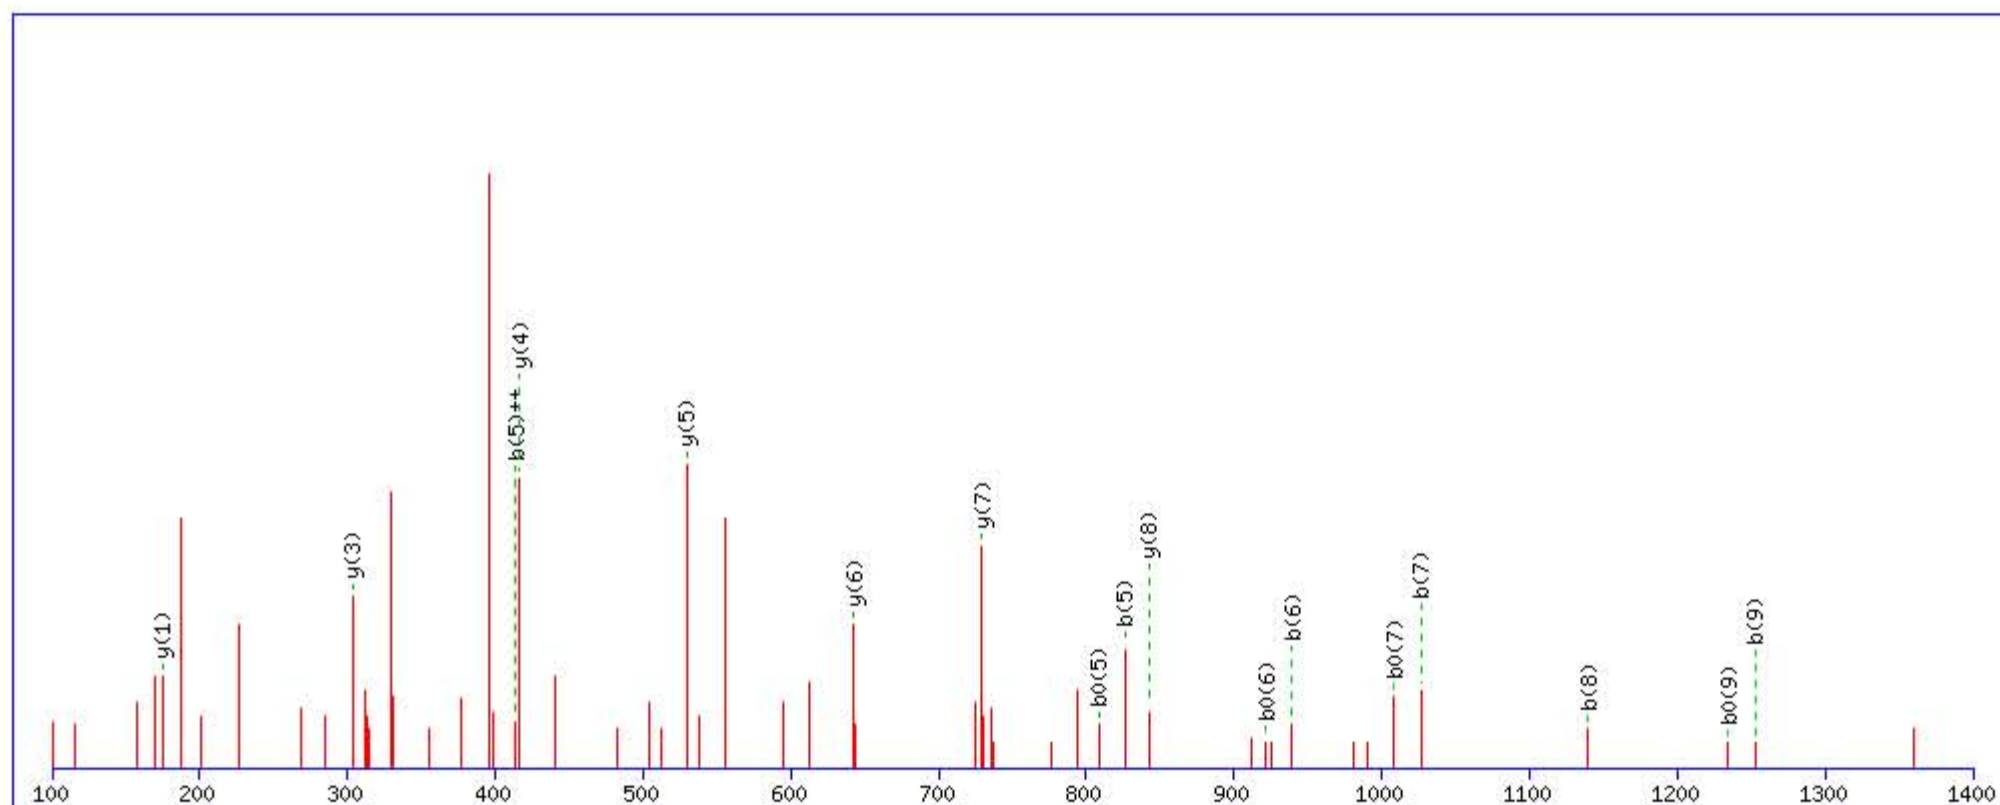

Monoisotopic mass of neutral peptide Mr(calc): 1666.944000

Fixed modifications: Carbamidomethyl (C) (apply to specified residues or termini only)

Variable modifications:

Q5 : Biotin:Thermo-21345 (Q)

Ions Score: 31 Expect: 0.006

Matches : 17/124 fragment ions using 33 most intense peaks ([help](#))

| #  | b                  | b <sup>++</sup>   | b <sup>+</sup> | b <sup>+++</sup> | b <sup>0</sup>     | b <sup>0++</sup> | Seq.     | y                 | y <sup>++</sup> | y <sup>+</sup> | y <sup>+++</sup> | y <sup>0</sup> | y <sup>0++</sup> | #         |
|----|--------------------|-------------------|----------------|------------------|--------------------|------------------|----------|-------------------|-----------------|----------------|------------------|----------------|------------------|-----------|
| 1  | 102.054955         | 51.531116         |                |                  | 84.044390          | 42.525833        | <b>T</b> |                   |                 |                |                  |                |                  | <b>13</b> |
| 2  | 215.139019         | 108.073147        |                |                  | 197.128454         | 99.067865        | <b>L</b> | 1566.903611       | 783.955443      | 1549.877062    | 775.442169       | 1548.893046    | 774.950161       | <b>12</b> |
| 3  | 272.160483         | 136.583879        |                |                  | 254.149918         | 127.578597       | <b>G</b> | 1453.819547       | 727.413411      | 1436.792998    | 718.900137       | 1435.808982    | 718.408129       | <b>11</b> |
| 4  | 387.187426         | 194.097351        |                |                  | 369.176861         | 185.092069       | <b>D</b> | 1396.798083       | 698.902679      | 1379.771534    | 690.389405       | 1378.787518    | 689.897397       | <b>10</b> |
| 5  | <b>826.412752</b>  | <b>413.710014</b> | 809.386203     | 405.196740       | <b>808.402187</b>  | 404.704732       | <b>Q</b> | 1281.771140       | 641.389208      | 1264.744591    | 632.875933       | 1263.760575    | 632.383925       | <b>9</b>  |
| 6  | <b>939.496816</b>  | 470.252046        | 922.470267     | 461.738772       | <b>921.486251</b>  | 461.246764       | <b>L</b> | <b>842.545814</b> | 421.776545      | 825.519265     | 413.263270       | 824.535249     | 412.771262       | <b>8</b>  |
| 7  | <b>1026.528844</b> | 513.768060        | 1009.502295    | 505.254786       | <b>1008.518279</b> | 504.762778       | <b>S</b> | <b>729.461750</b> | 365.234513      | 712.435201     | 356.721238       | 711.451185     | 356.229230       | <b>7</b>  |
| 8  | <b>1139.612908</b> | 570.310092        | 1122.586359    | 561.796818       | 1121.602343        | 561.304810       | <b>L</b> | <b>642.429722</b> | 321.718499      | 625.403173     | 313.205224       |                |                  | <b>6</b>  |
| 9  | <b>1252.696972</b> | 626.852124        | 1235.670423    | 618.338850       | <b>1234.686407</b> | 617.846841       | <b>L</b> | <b>529.345658</b> | 265.176467      | 512.319109     | 256.663192       |                |                  | <b>5</b>  |
| 10 | 1365.781036        | 683.394156        | 1348.754487    | 674.880881       | 1347.770471        | 674.388873       | <b>L</b> | <b>416.261594</b> | 208.634435      | 399.235045     | 200.121160       |                |                  | <b>4</b>  |
| 11 | 1422.802500        | 711.904888        | 1405.775951    | 703.391613       | 1404.791935        | 702.899605       | <b>G</b> | <b>303.177530</b> | 152.092403      | 286.150981     | 143.579128       |                |                  | <b>3</b>  |
| 12 | 1493.839614        | 747.423445        | 1476.813065    | 738.910170       | 1475.829049        | 738.418162       | <b>A</b> | 246.156066        | 123.581671      | 229.129517     | 115.068396       |                |                  | <b>2</b>  |
| 13 |                    |                   |                |                  |                    |                  | <b>R</b> | <b>175.118952</b> | 88.063114       | 158.092403     | 79.549839        |                |                  | <b>1</b>  |

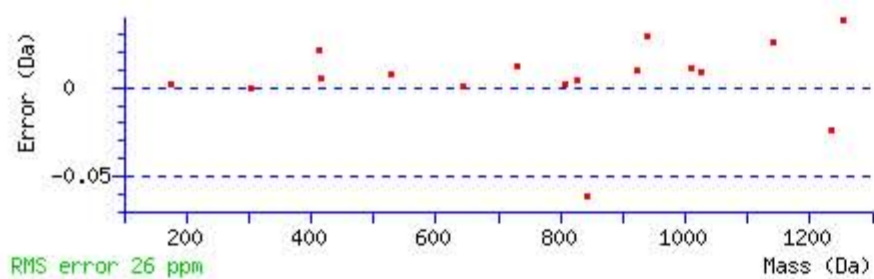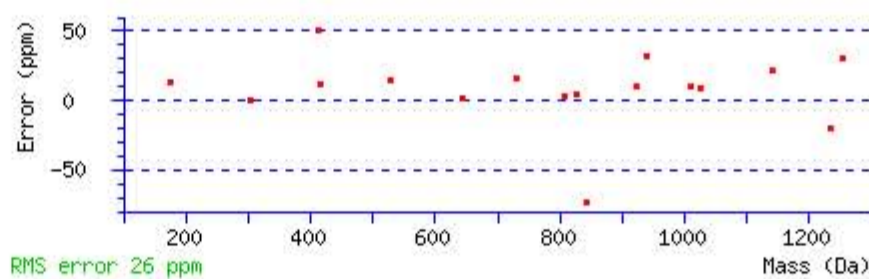

### NCBI BLAST search of TLGDQLSLLGAR

(Parameters: blastp, nr protein database, expect=20000, no filter, PAM30)

Other BLAST [web gateways](#)

### All matches to this query

| Score | Mr(calc):   | Delta     | Sequence                         |
|-------|-------------|-----------|----------------------------------|
| 31.5  | 1666.944000 | 0.021282  | <a href="#">TLGDQLSLLGAR</a>     |
| 7.4   | 1666.944016 | 0.021266  | <a href="#">LTNSPTVIVMVGLPAR</a> |
| 5.4   | 1666.955231 | 0.010051  | <a href="#">RLGIPECILLVTQR</a>   |
| 1.8   | 1666.981033 | -0.015751 | <a href="#">SYGTIFPIIFLLKR</a>   |

# MASCOT Search Results

## Peptide View

### MS/MS Fragmentation of **ADQVCINLR**

Found in **FBLN3\_HUMAN**, EGF-containing fibulin-like extracellular matrix protein 1 OS=Homo sapiens GN=EFEMP1 PE=1 SV=2

Match to Query 30721: 1398.711428 from(700.362990,2+) rtinseconds(1984) index(24575)

Title: Locus:1.1.1.2833.11 File:"2013-07-02 CLN FXIII 180 min 1st F 2.wiff"

Data file C:\Program Files (x86)\Matrix Science\Mascot Daemon\mgf7 FXIII 180 min 1st\mascot\_daemon\_merge.mgf

Click mouse within plot area to zoom in by factor of two about that point

Or, Plot from  to  Da

Label all possible matches  Label matches used for scoring

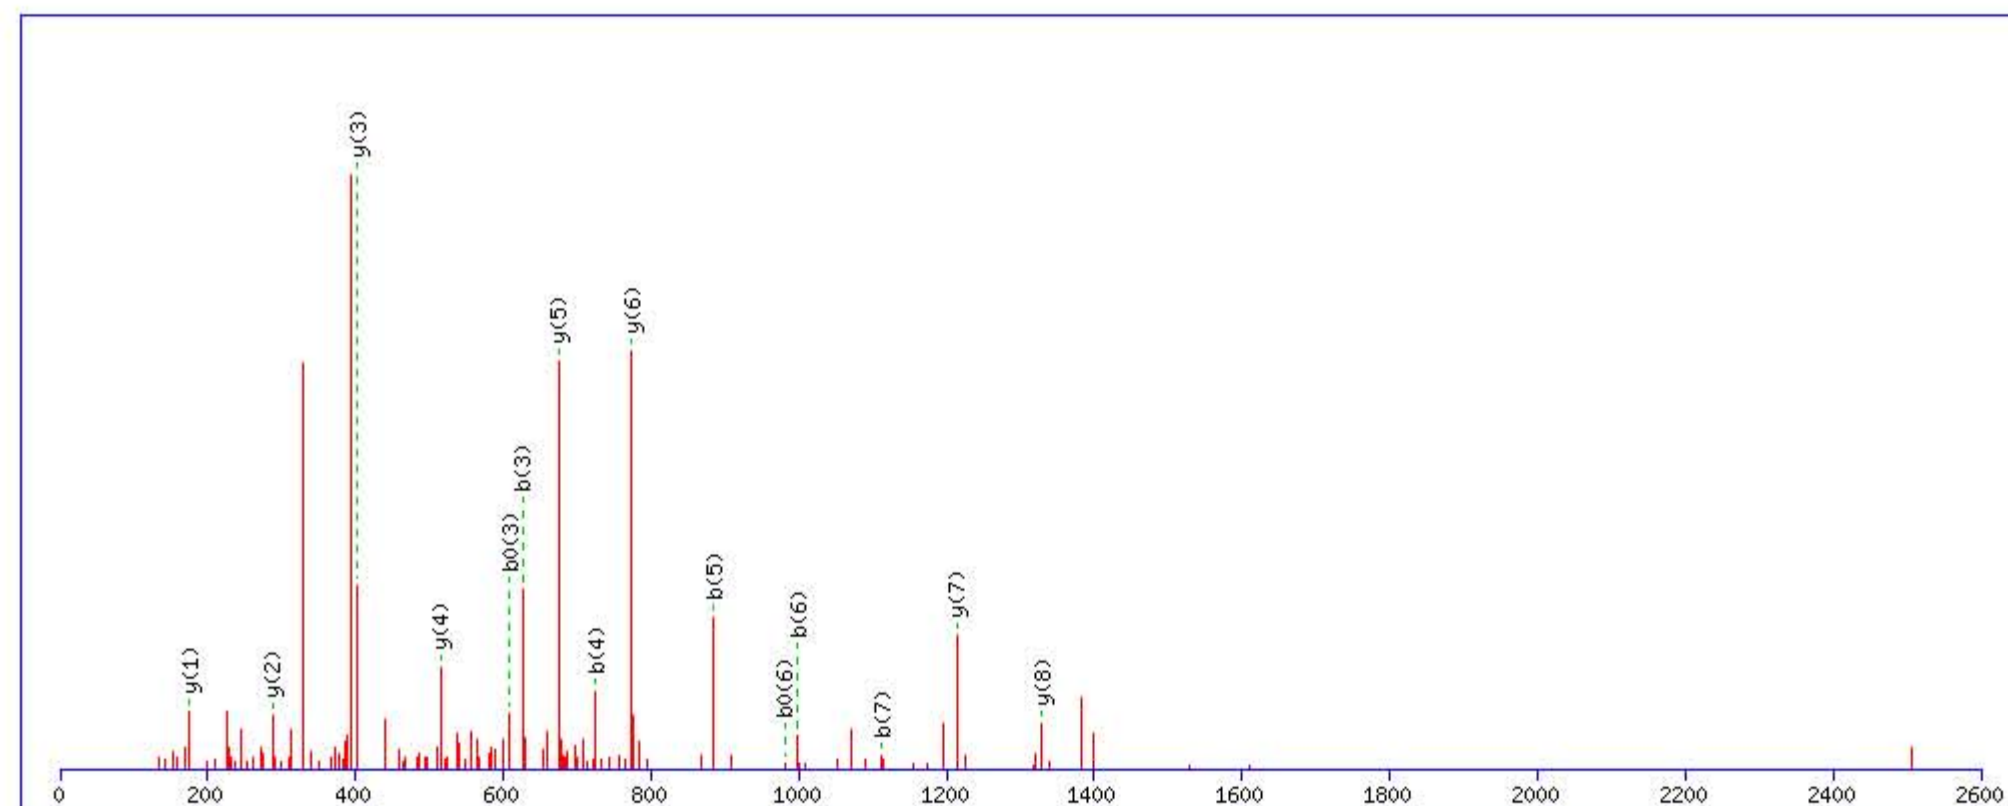

Monoisotopic mass of neutral peptide  $M_r(\text{calc})$ : 1398.711166

Fixed modifications: Carbamidomethyl (C) (apply to specified residues or termini only)

Variable modifications:

Q3 : Biotin:Thermo-21345 (Q)

Ions Score: 58 Expect: 3e-005

Matches : 15/76 fragment ions using 26 most intense peaks [\(help\)](#)

| # | b                  | b <sup>++</sup> | b*          | b <sup>+++</sup> | b <sup>0</sup>    | b <sup>0++</sup> | Seq. | y                  | y <sup>++</sup> | y*          | y <sup>+++</sup> | y <sup>0</sup> | y <sup>0++</sup> | # |
|---|--------------------|-----------------|-------------|------------------|-------------------|------------------|------|--------------------|-----------------|-------------|------------------|----------------|------------------|---|
| 1 | 72.044390          | 36.525833       |             |                  |                   |                  | A    |                    |                 |             |                  |                |                  | 9 |
| 2 | 187.071333         | 94.039304       |             |                  | 169.060768        | 85.034022        | D    | <b>1328.681339</b> | 664.844308      | 1311.654790 | 656.331033       | 1310.670774    | 655.839025       | 8 |
| 3 | <b>626.296659</b>  | 313.651968      | 609.270110  | 305.138693       | <b>608.286094</b> | 304.646685       | Q    | <b>1213.654396</b> | 607.330836      | 1196.627847 | 598.817562       |                |                  | 7 |
| 4 | <b>725.365073</b>  | 363.186175      | 708.338524  | 354.672900       | 707.354508        | 354.180892       | V    | <b>774.429070</b>  | 387.718173      | 757.402521  | 379.204898       |                |                  | 6 |
| 5 | <b>885.395722</b>  | 443.201499      | 868.369173  | 434.688225       | 867.385157        | 434.196217       | C    | <b>675.360656</b>  | 338.183966      | 658.334107  | 329.670691       |                |                  | 5 |
| 6 | <b>998.479786</b>  | 499.743531      | 981.453237  | 491.230257       | <b>980.469221</b> | 490.738249       | I    | <b>515.330007</b>  | 258.168641      | 498.303458  | 249.655367       |                |                  | 4 |
| 7 | <b>1112.522713</b> | 556.764995      | 1095.496164 | 548.251720       | 1094.512148       | 547.759712       | N    | <b>402.245943</b>  | 201.626609      | 385.219394  | 193.113335       |                |                  | 3 |
| 8 | 1225.606777        | 613.307027      | 1208.580228 | 604.793752       | 1207.596212       | 604.301744       | L    | <b>288.203016</b>  | 144.605146      | 271.176467  | 136.091871       |                |                  | 2 |
| 9 |                    |                 |             |                  |                   |                  | R    | <b>175.118952</b>  | 88.063114       | 158.092403  | 79.549839        |                |                  | 1 |

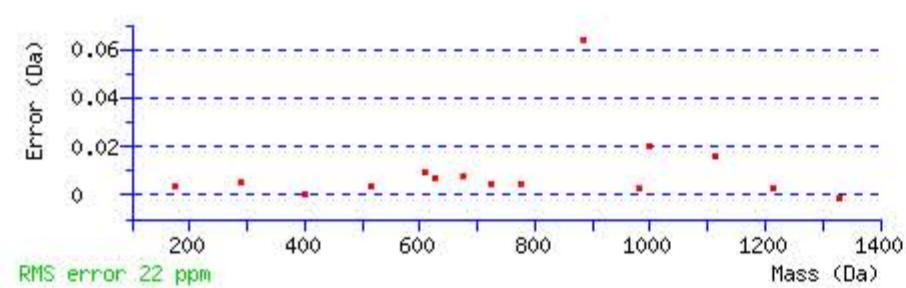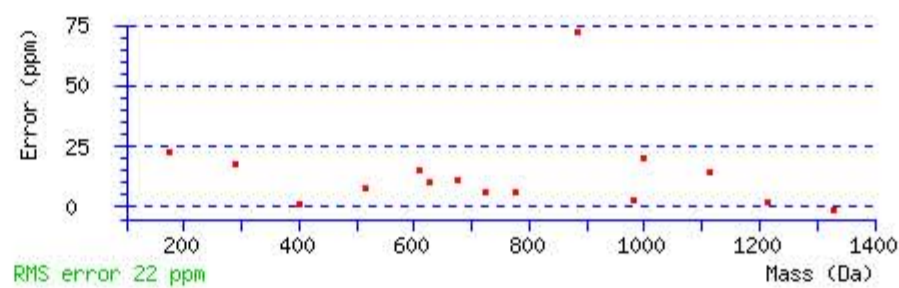

### NCBI BLAST search of **ADQVCINLR**

(Parameters: blastp, nr protein database, expect=20000, no filter, PAM30)

Other BLAST [web gateways](#)

### All matches to this query

| Score | $M_r(\text{calc})$ : | Delta     | Sequence                         |
|-------|----------------------|-----------|----------------------------------|
| 57.5  | 1398.711166          | 0.000262  | <a href="#">ADQVCINLR</a>        |
| 8.8   | 1398.703781          | 0.007647  | <a href="#">AVVHMNGKEVSGR</a>    |
| 8.6   | 1398.703766          | 0.007662  | <a href="#">GERMADGAPLAGVR</a>   |
| 6.5   | 1398.693878          | 0.017550  | <a href="#">TRHCTQAWAIR</a>      |
| 3.6   | 1398.703766          | 0.007662  | <a href="#">DQAIQSRDR</a>        |
| 3.0   | 1398.728912          | -0.017484 | <a href="#">QAEATAQTLR</a>       |
| 1.9   | 1398.726227          | -0.014799 | <a href="#">APGRASGRVCAAAR</a>   |
| 1.7   | 1398.721527          | -0.010099 | <a href="#">AATASAGAGGIDGKPR</a> |

Mascot: <http://www.matrixscience.com/>



# MASCOT SEARCH RESULTS

## Peptide View

MS/MS Fragmentation of **LLPAQLPAEK**

Found in **ECM1\_HUMAN**, Extracellular matrix protein 1 OS=Homo sapiens GN=ECM1 PE=1 SV=2

Match to Query 30324: 1389.812328 from(695.913440,2+) rtinseconds(1984) index(24574)

Title: Locus:1.1.1.2833.10 File:"2013-07-02 CLN FXIII 180 min 1st F 2.wiff"

Data file C:\Program Files (x86)\Matrix Science\Mascot Daemon\mgf\7 FXIII 180 min 1st\mascot\_daemon\_merge.mgf

Click mouse within plot area to zoom in by factor of two about that point

Or, Plot from 0 to 2800 Da Full range

Label all possible matches  Label matches used for scoring

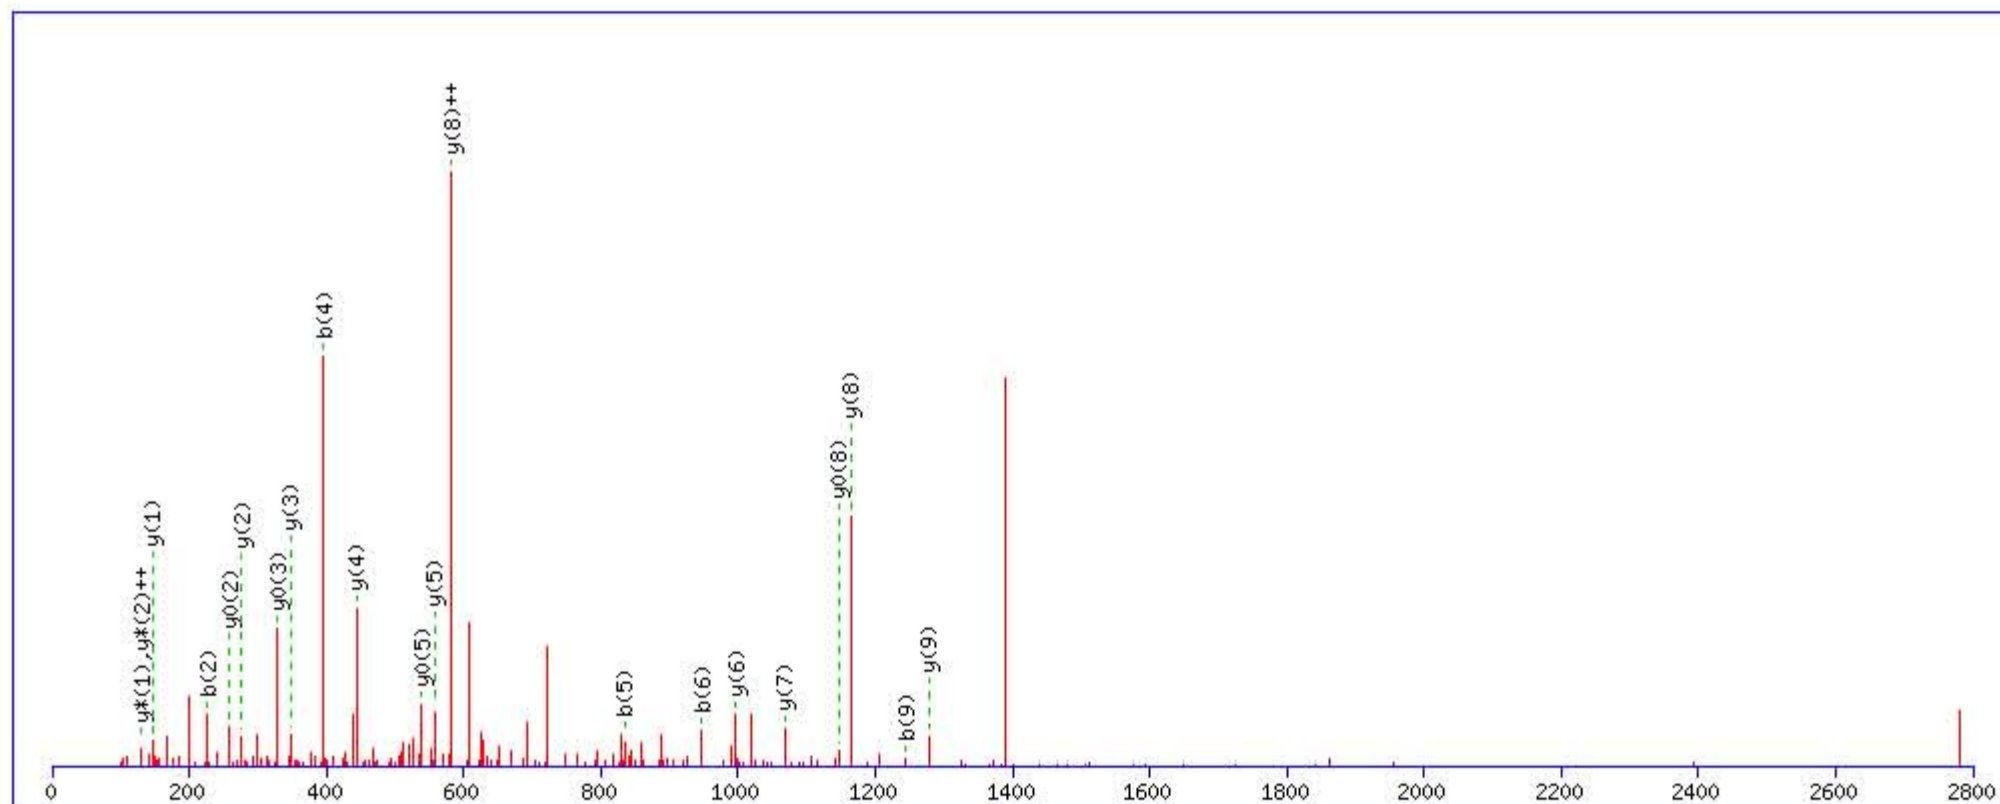

Monoisotopic mass of neutral peptide Mr(calc): 1389.805359

Fixed modifications: Carbamidomethyl (C) (apply to specified residues or termini only)

Variable modifications:

Q5 : Biotin:Thermo-21345 (Q)

Ions Score: 44 Expect: 0.00023

Matches : 21/82 fragment ions using 51 most intense peaks [\(help\)](#)

| #  | b           | b <sup>++</sup> | b <sup>*</sup> | b <sup>*++</sup> | b <sup>0</sup> | b <sup>0++</sup> | Seq. | y           | y <sup>++</sup> | y <sup>*</sup> | y <sup>*++</sup> | y <sup>0</sup> | y <sup>0++</sup> | #  |
|----|-------------|-----------------|----------------|------------------|----------------|------------------|------|-------------|-----------------|----------------|------------------|----------------|------------------|----|
| 1  | 114.091340  | 57.549308       |                |                  |                |                  | L    |             |                 |                |                  |                |                  | 10 |
| 2  | 227.175404  | 114.091340      |                |                  |                |                  | L    | 1277.728607 | 639.367942      | 1260.702058    | 630.854667       | 1259.718042    | 630.362659       | 9  |
| 3  | 324.228168  | 162.617722      |                |                  |                |                  | P    | 1164.644543 | 582.825909      | 1147.617994    | 574.312635       | 1146.633978    | 573.820627       | 8  |
| 4  | 395.265282  | 198.136279      |                |                  |                |                  | A    | 1067.591779 | 534.299527      | 1050.565230    | 525.786253       | 1049.581214    | 525.294245       | 7  |
| 5  | 834.490608  | 417.748942      | 817.464059     | 409.235668       |                |                  | Q    | 996.554665  | 498.780970      | 979.528116     | 490.267696       | 978.544100     | 489.775688       | 6  |
| 6  | 947.574672  | 474.290974      | 930.548123     | 465.777700       |                |                  | L    | 557.329339  | 279.168307      | 540.302790     | 270.655033       | 539.318774     | 270.163025       | 5  |
| 7  | 1044.627436 | 522.817356      | 1027.600887    | 514.304082       |                |                  | P    | 444.245275  | 222.626275      | 427.218726     | 214.113001       | 426.234710     | 213.620993       | 4  |
| 8  | 1115.664550 | 558.335913      | 1098.638001    | 549.822639       |                |                  | A    | 347.192511  | 174.099893      | 330.165962     | 165.586619       | 329.181946     | 165.094611       | 3  |
| 9  | 1244.707143 | 622.857209      | 1227.680594    | 614.343935       | 1226.696578    | 613.851927       | E    | 276.155397  | 138.581336      | 259.128848     | 130.068062       | 258.144832     | 129.576054       | 2  |
| 10 |             |                 |                |                  |                |                  | K    | 147.112804  | 74.060040       | 130.086255     | 65.546765        |                |                  | 1  |

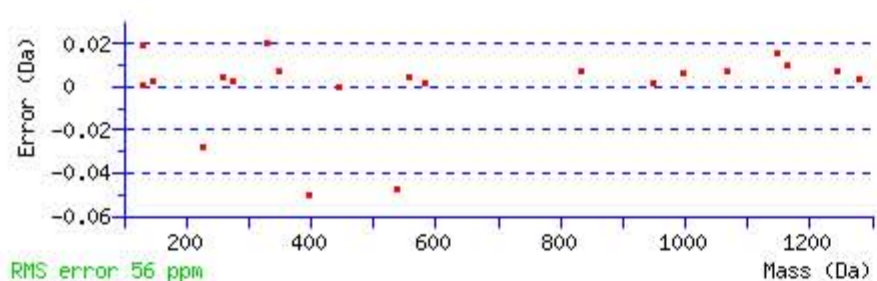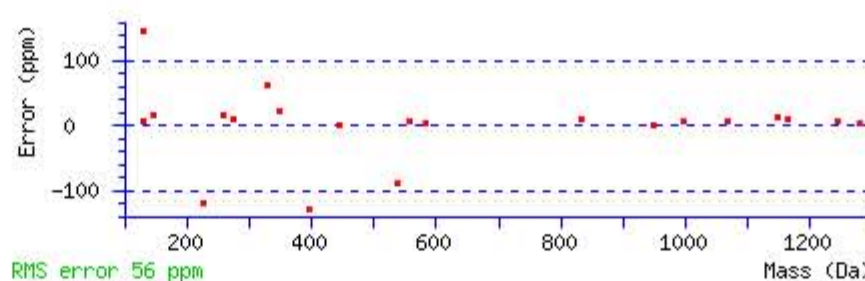

NCBI BLAST search of **LLPAQLPAEK**

(Parameters: blastp, nr protein database, expect=20000, no filter, PAM30)

Other BLAST [web gateways](#)

All matches to this query

| Score | Mr(calc):   | Delta     | Sequence                     |
|-------|-------------|-----------|------------------------------|
| 44.4  | 1389.805359 | 0.006969  | <a href="#">LLPAQLPAEK</a>   |
| 5.7   | 1389.805359 | 0.006969  | <a href="#">LLSSYLQKK</a>    |
| 5.4   | 1389.809189 | 0.003139  | <a href="#">LIKRLDLSYNR</a>  |
| 1.4   | 1389.809204 | 0.003124  | <a href="#">IARVPRLPPDEK</a> |
| 1.2   | 1389.820450 | -0.008122 | <a href="#">LINRTHATVPIR</a> |
| 0.8   | 1389.813232 | -0.000904 | <a href="#">LIQAPSKFAFLR</a> |
| 0.3   | 1389.797989 | 0.014339  | <a href="#">LLNLQSLFVTSR</a> |
| 0.3   | 1389.816605 | -0.004277 | <a href="#">ILGPLPKHMIQK</a> |
| 0.2   | 1389.823135 | -0.010807 | <a href="#">ILIVITDGQKYK</a> |

**MASCOT SCIENCE** Mascot Search Results

**Peptide View**

MS/MS Fragmentation of **NLPATDPLQR**

Found in **ECM1\_HUMAN**, Extracellular matrix protein 1 OS=Homo sapiens GN=ECM1 PE=1 SV=2

Match to Query 32873: 1434.775768 from(718.395160,2+) rtinseconds(1958) index(24410)

Title: Locus:1.1.1.2824.9 File:"2013-07-02 CLN FXIII 180 min 1st F 2.wiff"

Data file C:\Program Files (x86)\Matrix Science\Mascot Daemon\mgf\7 FXIII 180 min 1st\mascot\_daemon\_merge.mgf

Click mouse within plot area to zoom in by factor of two about that point

Or, Plot from  to  Da

Label all possible matches  Label matches used for scoring

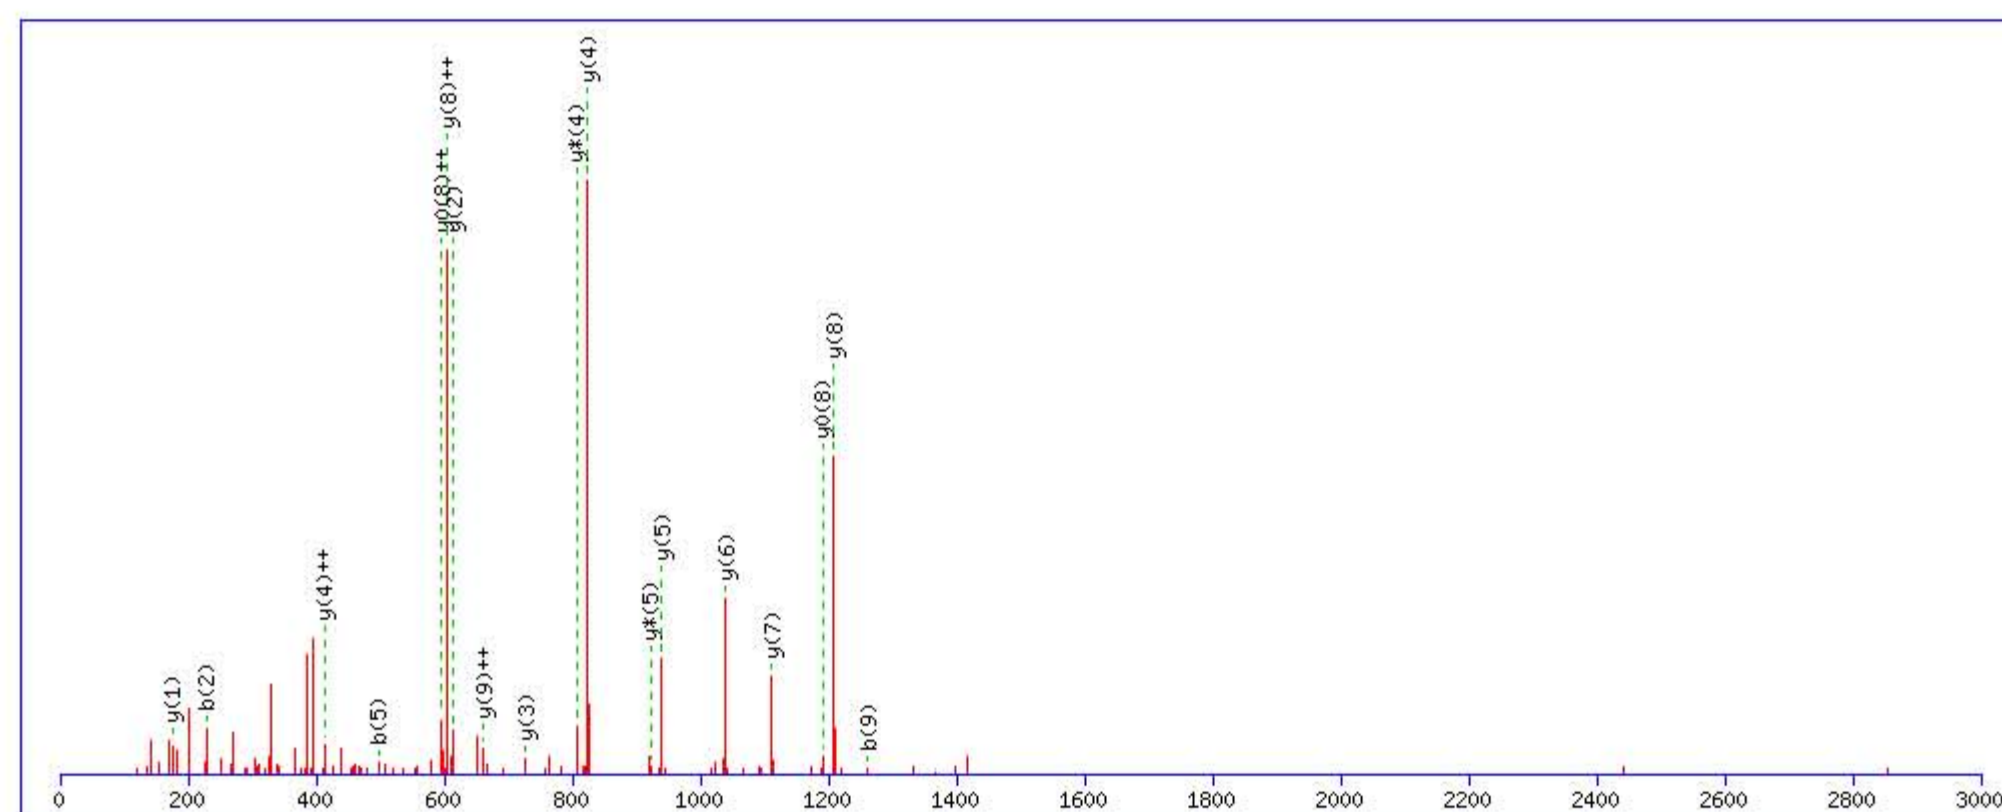

Monoisotopic mass of neutral peptide  $M_r(\text{calc})$ : 1434.765305

Fixed modifications: Carbamidomethyl (C) (apply to specified residues or termini only)

Variable modifications:

Q9 : Biotin:Thermo-21345 (Q)

Ions Score: 37 Expect: 0.0039

Matches : 18/92 fragment ions using 50 most intense peaks [\(help\)](#)

| #  | b                  | b <sup>++</sup> | b <sup>*</sup> | b <sup>*++</sup> | b <sup>0</sup> | b <sup>0++</sup> | Seq. | y                  | y <sup>++</sup>   | y <sup>*</sup>    | y <sup>*++</sup> | y <sup>0</sup>     | y <sup>0++</sup>  | #  |
|----|--------------------|-----------------|----------------|------------------|----------------|------------------|------|--------------------|-------------------|-------------------|------------------|--------------------|-------------------|----|
| 1  | 115.050203         | 58.028740       | 98.023654      | 49.515465        |                |                  | N    |                    |                   |                   |                  |                    |                   | 10 |
| 2  | <b>228.134267</b>  | 114.570771      | 211.107718     | 106.057497       |                |                  | L    | 1321.729670        | <b>661.368473</b> | 1304.703121       | 652.855199       | 1303.719105        | 652.363190        | 9  |
| 3  | 325.187031         | 163.097153      | 308.160482     | 154.583879       |                |                  | P    | <b>1208.645606</b> | <b>604.826441</b> | 1191.619057       | 596.313166       | <b>1190.635041</b> | <b>595.821158</b> | 8  |
| 4  | 396.224145         | 198.615710      | 379.197596     | 190.102436       |                |                  | A    | <b>1111.592842</b> | 556.300059        | 1094.566293       | 547.786784       | 1093.582277        | 547.294776        | 7  |
| 5  | <b>497.271824</b>  | 249.139550      | 480.245275     | 240.626275       | 479.261259     | 240.134267       | T    | <b>1040.555728</b> | 520.781502        | 1023.529179       | 512.268227       | 1022.545163        | 511.776220        | 6  |
| 6  | 612.298767         | 306.653022      | 595.272218     | 298.139747       | 594.288202     | 297.647739       | D    | <b>939.508049</b>  | 470.257662        | <b>922.481500</b> | 461.744388       | 921.497484         | 461.252380        | 5  |
| 7  | 709.351531         | 355.179404      | 692.324982     | 346.666129       | 691.340966     | 346.174121       | P    | <b>824.481106</b>  | <b>412.744191</b> | <b>807.454557</b> | 404.230916       |                    |                   | 4  |
| 8  | 822.435595         | 411.721436      | 805.409046     | 403.208161       | 804.425030     | 402.716153       | L    | <b>727.428342</b>  | 364.217809        | 710.401793        | 355.704534       |                    |                   | 3  |
| 9  | <b>1261.660921</b> | 631.334098      | 1244.634372    | 622.820824       | 1243.650356    | 622.328816       | Q    | <b>614.344278</b>  | 307.675777        | 597.317729        | 299.162502       |                    |                   | 2  |
| 10 |                    |                 |                |                  |                |                  | R    | <b>175.118952</b>  | 88.063114         | 158.092403        | 79.549839        |                    |                   | 1  |

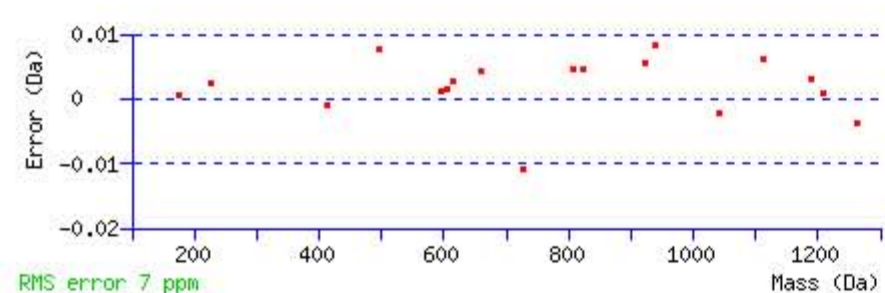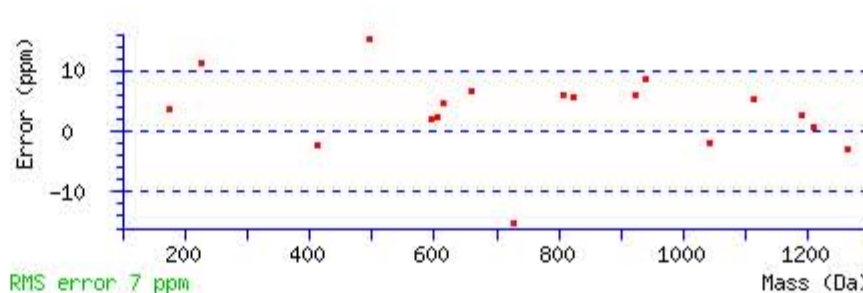

NCBI **BLAST** search of [NLPATDPLQR](#)

(Parameters: blastp, nr protein database, expect=20000, no filter, PAM30)

Other BLAST [web gateways](#)

**All matches to this query**

| Score | $M_r(\text{calc})$ : | Delta     | Sequence                      |
|-------|----------------------|-----------|-------------------------------|
| 36.8  | 1434.765305          | 0.010463  | <a href="#">NLPATDPLQR</a>    |
| 11.8  | 1434.757889          | 0.017879  | <a href="#">NLIRQISSGEYR</a>  |
| 5.5   | 1434.761932          | 0.013836  | <a href="#">NIFPSNLVSAAFR</a> |
| 5.1   | 1434.757919          | 0.017849  | <a href="#">VQQAELHTGSLPR</a> |
| 4.1   | 1434.769135          | 0.006633  | <a href="#">INKHVNNDVNLR</a>  |
| 1.6   | 1434.761932          | 0.013836  | <a href="#">NLDYPFGNVLRK</a>  |
| 0.8   | 1434.776520          | -0.000752 | <a href="#">ARAFLAEVKQMR</a>  |
| 0.5   | 1434.794296          | -0.018528 | <a href="#">LNHLVDSLQQLR</a>  |
| 0.3   | 1434.761948          | 0.013820  | <a href="#">VQILPSWKSSFR</a>  |

**MASCOT** SCIENCE Mascot Search Results

Peptide View

MS/MS Fragmentation of **ELLALIQLER**

Found in **ECM1\_HUMAN**, Extracellular matrix protein 1 OS=Homo sapiens GN=ECM1 PE=1 SV=2

Match to Query 35286: 1507.892088 from(754.953320,2+) rtinseconds(2725) index(11141)

Title: Locus:1.1.1.3202.18 File:"2013-07-02 CLN FXIII 180 min 1st F 1.wiff"

Data file C:\Program Files (x86)\Matrix Science\Mascot Daemon\mgf\7 FXIII 180 min 1st\mascot\_daemon\_merge.mgf

Click mouse within plot area to zoom in by factor of two about that point

Or, Plot from  to  Da

Label all possible matches  Label matches used for scoring

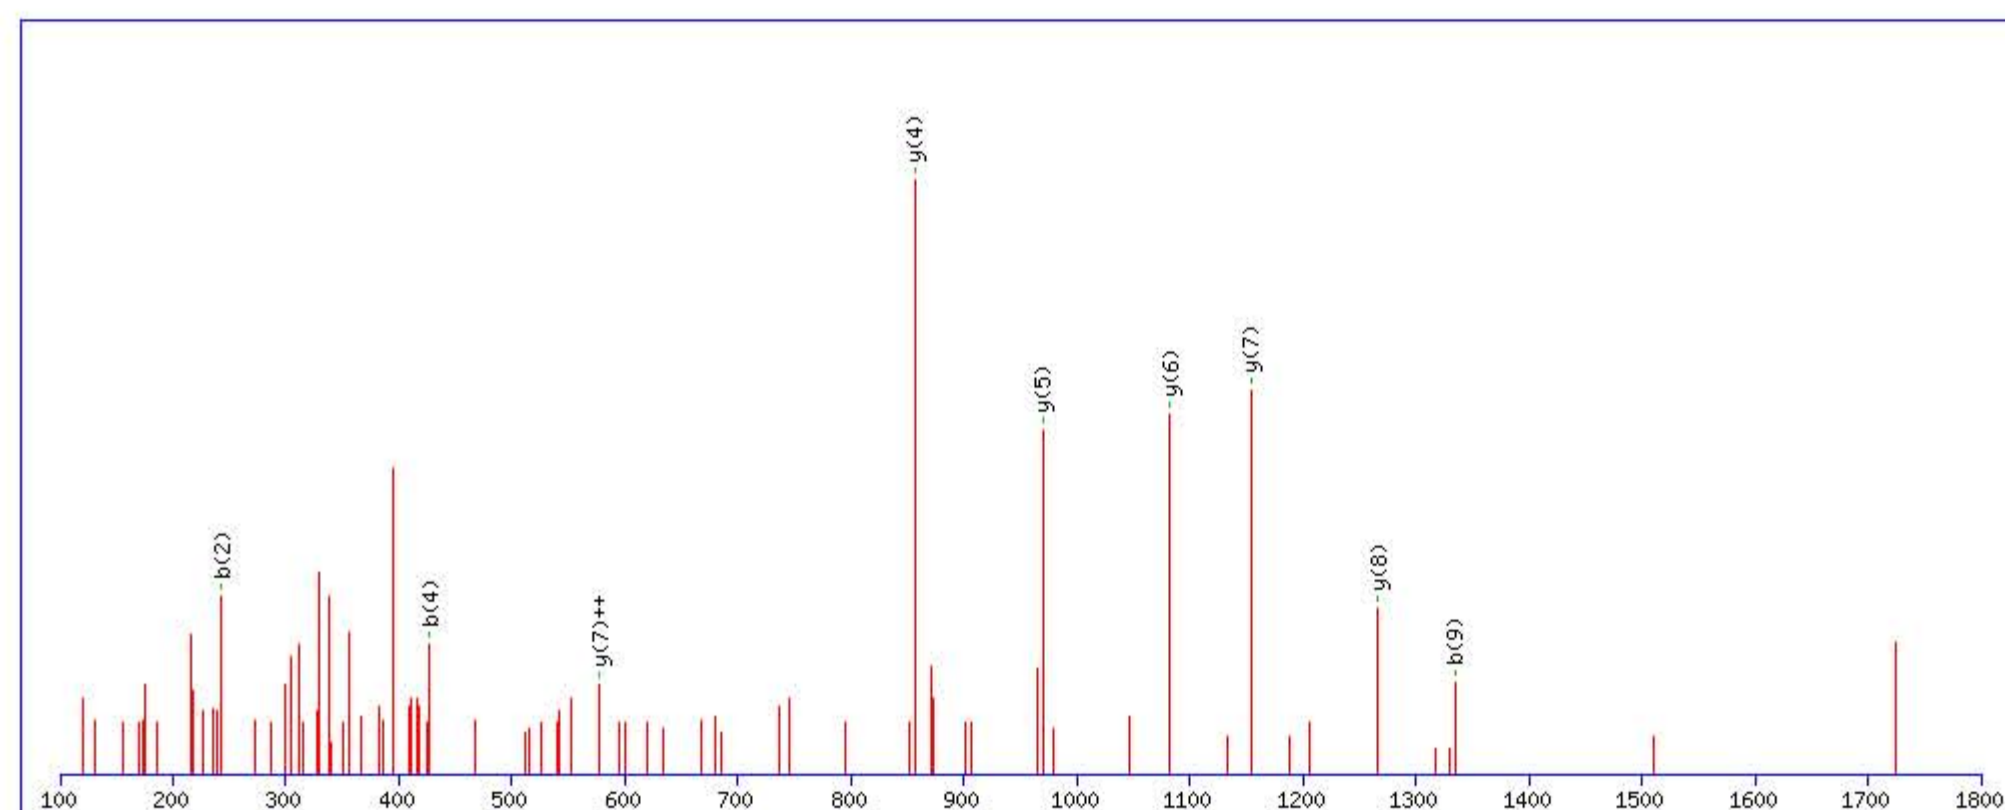

Monoisotopic mass of neutral peptide Mr(calc): 1507.879578

Fixed modifications: Carbamidomethyl (C) (apply to specified residues or termini only)

Variable modifications:

Q7 : Biotin:Thermo-21345 (Q)

Ions Score: 34 Expect: 0.0024

Matches : 9/94 fragment ions using 13 most intense peaks [\(help\)](#)

| #  | b                  | b <sup>++</sup> | b <sup>*</sup> | b <sup>*++</sup> | b <sup>0</sup> | b <sup>0++</sup> | Seq. | y                  | y <sup>++</sup>   | y <sup>*</sup> | y <sup>*++</sup> | y <sup>0</sup> | y <sup>0++</sup> | #  |
|----|--------------------|-----------------|----------------|------------------|----------------|------------------|------|--------------------|-------------------|----------------|------------------|----------------|------------------|----|
| 1  | 130.049869         | 65.528572       |                |                  | 112.039304     | 56.523290        | E    |                    |                   |                |                  |                |                  | 10 |
| 2  | <b>243.133933</b>  | 122.070605      |                |                  | 225.123368     | 113.065322       | L    | 1379.844305        | 690.425790        | 1362.817756    | 681.912516       | 1361.833740    | 681.420508       | 9  |
| 3  | 356.217997         | 178.612637      |                |                  | 338.207432     | 169.607354       | L    | <b>1266.760241</b> | 633.883759        | 1249.733692    | 625.370484       | 1248.749676    | 624.878476       | 8  |
| 4  | <b>427.255111</b>  | 214.131193      |                |                  | 409.244546     | 205.125911       | A    | <b>1153.676177</b> | <b>577.341727</b> | 1136.649628    | 568.828452       | 1135.665612    | 568.336444       | 7  |
| 5  | 540.339175         | 270.673226      |                |                  | 522.328610     | 261.667943       | L    | <b>1082.639063</b> | 541.823169        | 1065.612514    | 533.309895       | 1064.628498    | 532.817887       | 6  |
| 6  | 653.423239         | 327.215258      |                |                  | 635.412674     | 318.209975       | I    | <b>969.554999</b>  | 485.281138        | 952.528450     | 476.767863       | 951.544434     | 476.275855       | 5  |
| 7  | 1092.648565        | 546.827921      | 1075.622016    | 538.314646       | 1074.638000    | 537.822638       | Q    | <b>856.470935</b>  | 428.739105        | 839.444386     | 420.225831       | 838.460370     | 419.733823       | 4  |
| 8  | 1205.732629        | 603.369953      | 1188.706080    | 594.856678       | 1187.722064    | 594.364670       | L    | 417.245609         | 209.126442        | 400.219060     | 200.613168       | 399.235044     | 200.121160       | 3  |
| 9  | <b>1334.775222</b> | 667.891249      | 1317.748673    | 659.377975       | 1316.764657    | 658.885966       | E    | 304.161545         | 152.584410        | 287.134996     | 144.071136       | 286.150980     | 143.579128       | 2  |
| 10 |                    |                 |                |                  |                |                  | R    | 175.118952         | 88.063114         | 158.092403     | 79.549839        |                |                  | 1  |

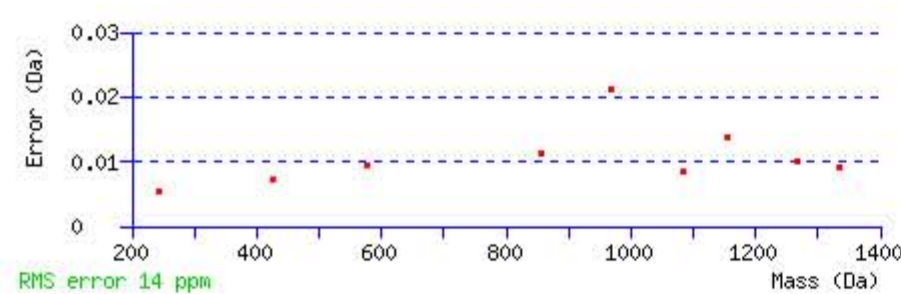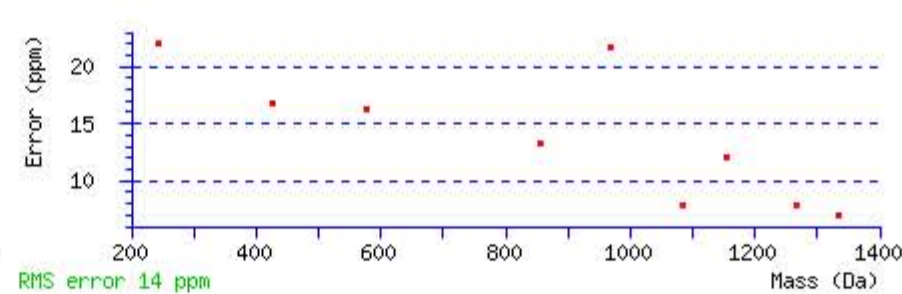

NCBI BLAST search of **ELLALIQLER**

(Parameters: blastp, nr protein database, expect=20000, no filter, PAM30)

Other BLAST [web gateways](#)

All matches to this query

| Score | Mr(calc):   | Delta    | Sequence                   |
|-------|-------------|----------|----------------------------|
| 34.1  | 1507.879578 | 0.012510 | <a href="#">ELLALIQLER</a> |



# MASCOT Search Results

## Peptide View

MS/MS Fragmentation of **ELPSLQHPNEQK**

Found in **ECM1\_HUMAN**, Extracellular matrix protein 1 OS=Homo sapiens GN=ECM1 PE=1 SV=2

Match to Query 43240: 1729.889922 from(577.637250,3+) rtinseconds(1623) index(4100)

Title: Locus:1.1.1.2819.6 File:"2013-07-02 CLN FXIII 180 min 1st F 1.wiff"

Data file C:\Program Files (x86)\Matrix Science\Mascot Daemon\mgf7 FXIII 180 min 1st\mascot\_daemon\_merge.mgf

Click mouse within plot area to zoom in by factor of two about that point

Or, Plot from  to  Da

Label all possible matches  Label matches used for scoring

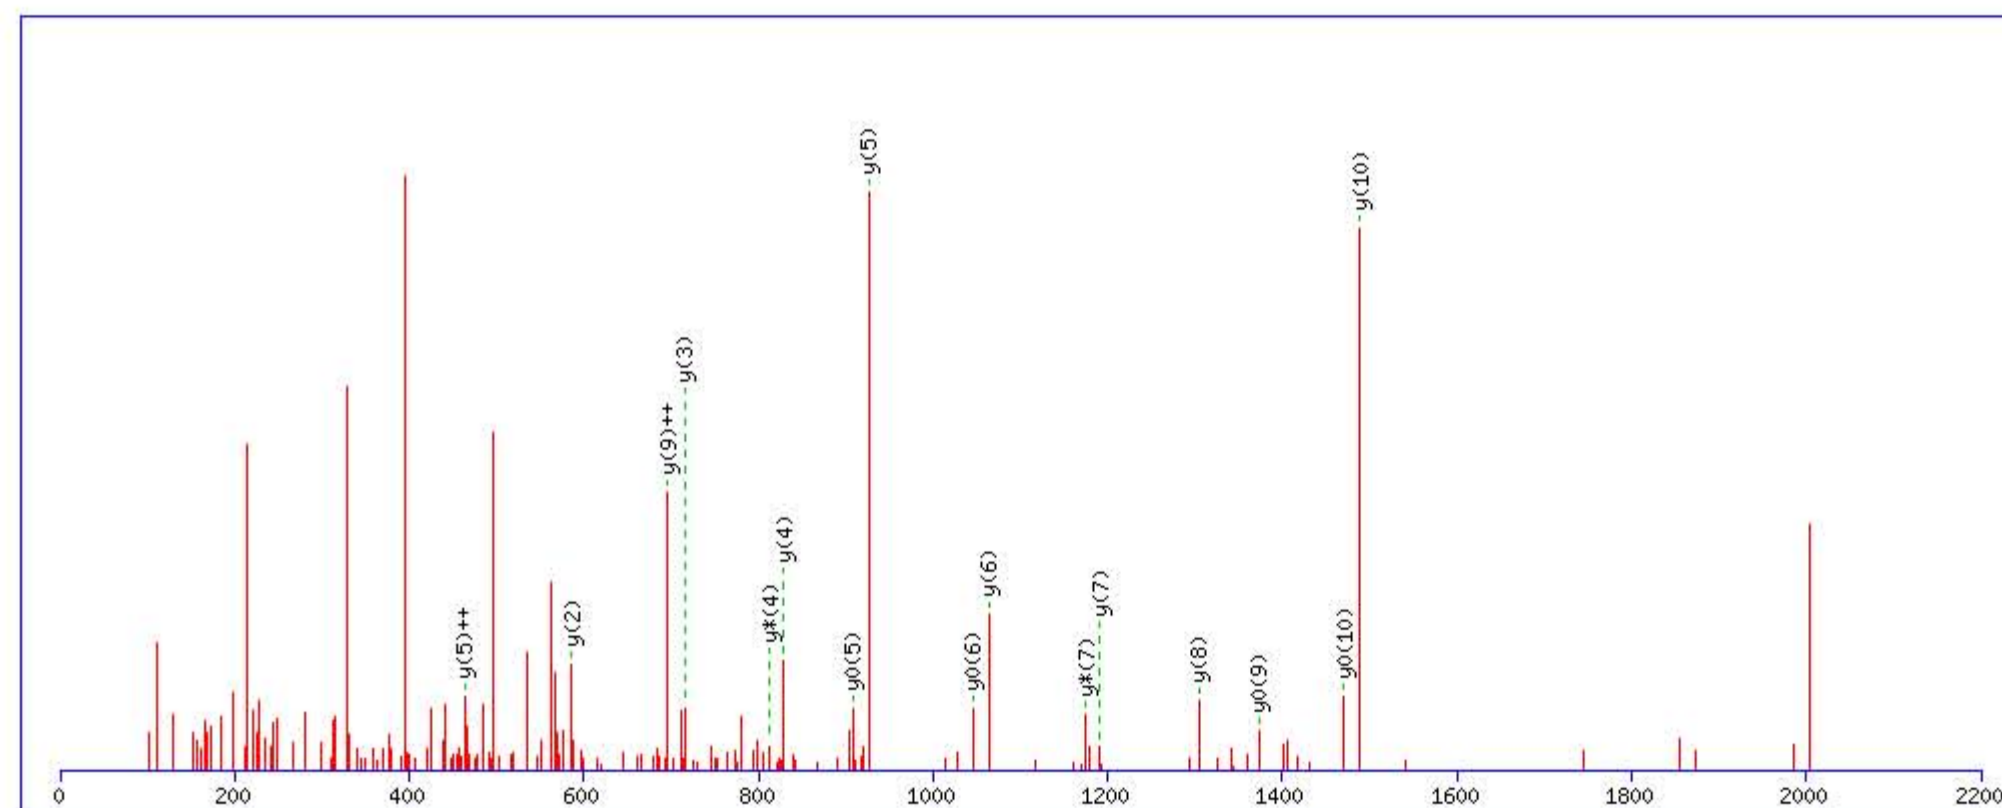

Monoisotopic mass of neutral peptide Mr(calc): 1729.882111

Fixed modifications: Carbamidomethyl (C) (apply to specified residues or termini only)

Variable modifications:

Q11 : Biotin:Thermo-21345 (Q)

Ions Score: 32 Expect: 0.019

Matches : 16/118 fragment ions using 41 most intense peaks [\(help\)](#)

| #  | b           | b <sup>++</sup> | b <sup>+</sup> | b <sup>*++</sup> | b <sup>0</sup> | b <sup>0++</sup> | Seq. | y                  | y <sup>++</sup>   | y <sup>+</sup>     | y <sup>*++</sup> | y <sup>0</sup>     | y <sup>0++</sup> | #  |
|----|-------------|-----------------|----------------|------------------|----------------|------------------|------|--------------------|-------------------|--------------------|------------------|--------------------|------------------|----|
| 1  | 130.049869  | 65.528572       |                |                  | 112.039304     | 56.523290        | E    |                    |                   |                    |                  |                    |                  | 12 |
| 2  | 243.133933  | 122.070605      |                |                  | 225.123368     | 113.065322       | L    | 1601.846824        | 801.427050        | 1584.820275        | 792.913776       | 1583.836259        | 792.421767       | 11 |
| 3  | 340.186697  | 170.596987      |                |                  | 322.176132     | 161.591704       | P    | <b>1488.762760</b> | 744.885018        | 1471.736211        | 736.371744       | <b>1470.752195</b> | 735.879736       | 10 |
| 4  | 427.218725  | 214.113001      |                |                  | 409.208160     | 205.107718       | S    | 1391.709996        | <b>696.358636</b> | 1374.683447        | 687.845362       | <b>1373.699431</b> | 687.353354       | 9  |
| 5  | 540.302789  | 270.655033      |                |                  | 522.292224     | 261.649750       | L    | <b>1304.677968</b> | 652.842622        | 1287.651419        | 644.329348       | 1286.667403        | 643.837340       | 8  |
| 6  | 668.361367  | 334.684322      | 651.334818     | 326.171047       | 650.350802     | 325.679039       | Q    | <b>1191.593904</b> | 596.300590        | <b>1174.567355</b> | 587.787316       | 1173.583339        | 587.295308       | 7  |
| 7  | 805.420279  | 403.213778      | 788.393730     | 394.700503       | 787.409714     | 394.208495       | H    | <b>1063.535326</b> | 532.271301        | 1046.508777        | 523.758027       | <b>1045.524761</b> | 523.266018       | 6  |
| 8  | 902.473043  | 451.740160      | 885.446494     | 443.226885       | 884.462478     | 442.734877       | P    | <b>926.476414</b>  | <b>463.741845</b> | 909.449865         | 455.228571       | <b>908.465849</b>  | 454.736563       | 5  |
| 9  | 1016.515970 | 508.761623      | 999.489421     | 500.248349       | 998.505405     | 499.756341       | N    | <b>829.423650</b>  | 415.215463        | <b>812.397101</b>  | 406.702189       | 811.413085         | 406.210181       | 4  |
| 10 | 1145.558563 | 573.282920      | 1128.532014    | 564.769645       | 1127.547998    | 564.277637       | E    | <b>715.380723</b>  | 358.194000        | 698.354174         | 349.680725       | 697.370158         | 349.188717       | 3  |
| 11 | 1584.783889 | 792.895583      | 1567.757340    | 784.382308       | 1566.773324    | 783.890300       | Q    | <b>586.338130</b>  | 293.672703        | 569.311581         | 285.159429       |                    |                  | 2  |
| 12 |             |                 |                |                  |                |                  | K    | 147.112804         | 74.060040         | 130.086255         | 65.546765        |                    |                  | 1  |

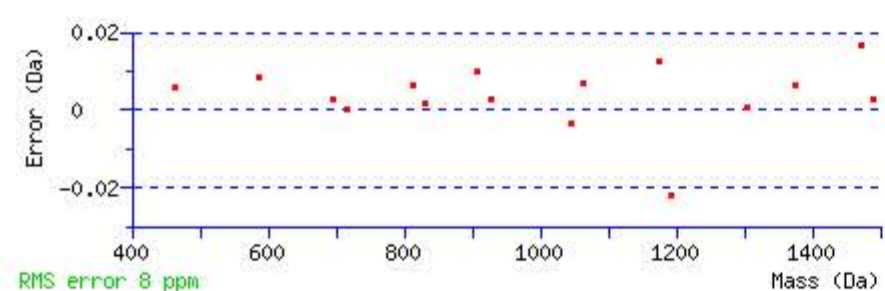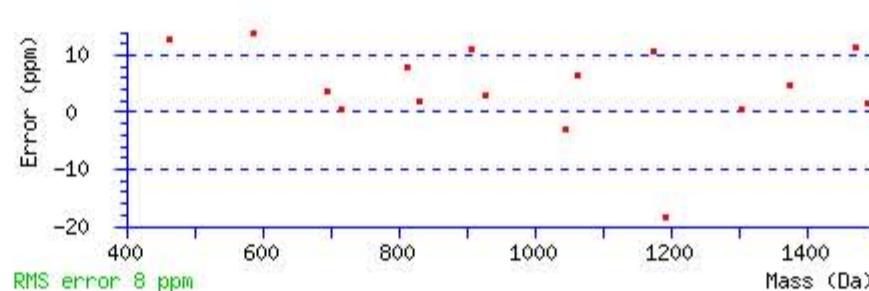

NCBI BLAST search of [ELPSLQHPNEQK](#)

(Parameters: blastp, nr protein database, expect=20000, no filter, PAM30)

Other BLAST [web gateways](#)

All matches to this query

| Score | Mr(calc):   | Delta    | Sequence                     |
|-------|-------------|----------|------------------------------|
| 31.8  | 1729.882111 | 0.007811 | <a href="#">ELPSLQHPNEQK</a> |

Mascot: <http://www.matrixscience.com/>

# MASCOT SEARCH RESULTS

## Peptide View

MS/MS Fragmentation of **VTPNLMGHLCGNQR**

Found in **ECM1\_HUMAN**, Extracellular matrix protein 1 OS=Homo sapiens GN=ECM1 PE=1 SV=2

Match to Query 47654: 1906.941792 from(636.654540,3+) rtinseconds(1865) index(23696)

Title: Locus:1.1.1.2792.11 File:"2013-07-02 CLN FXIII 180 min 1st F 2.wiff"

Data file C:\Program Files (x86)\Matrix Science\Mascot Daemon\mgf7 FXIII 180 min 1st\mascot\_daemon\_merge.mgf

Click mouse within plot area to zoom in by factor of two about that point

Or, Plot from  to  Da

Label all possible matches  Label matches used for scoring

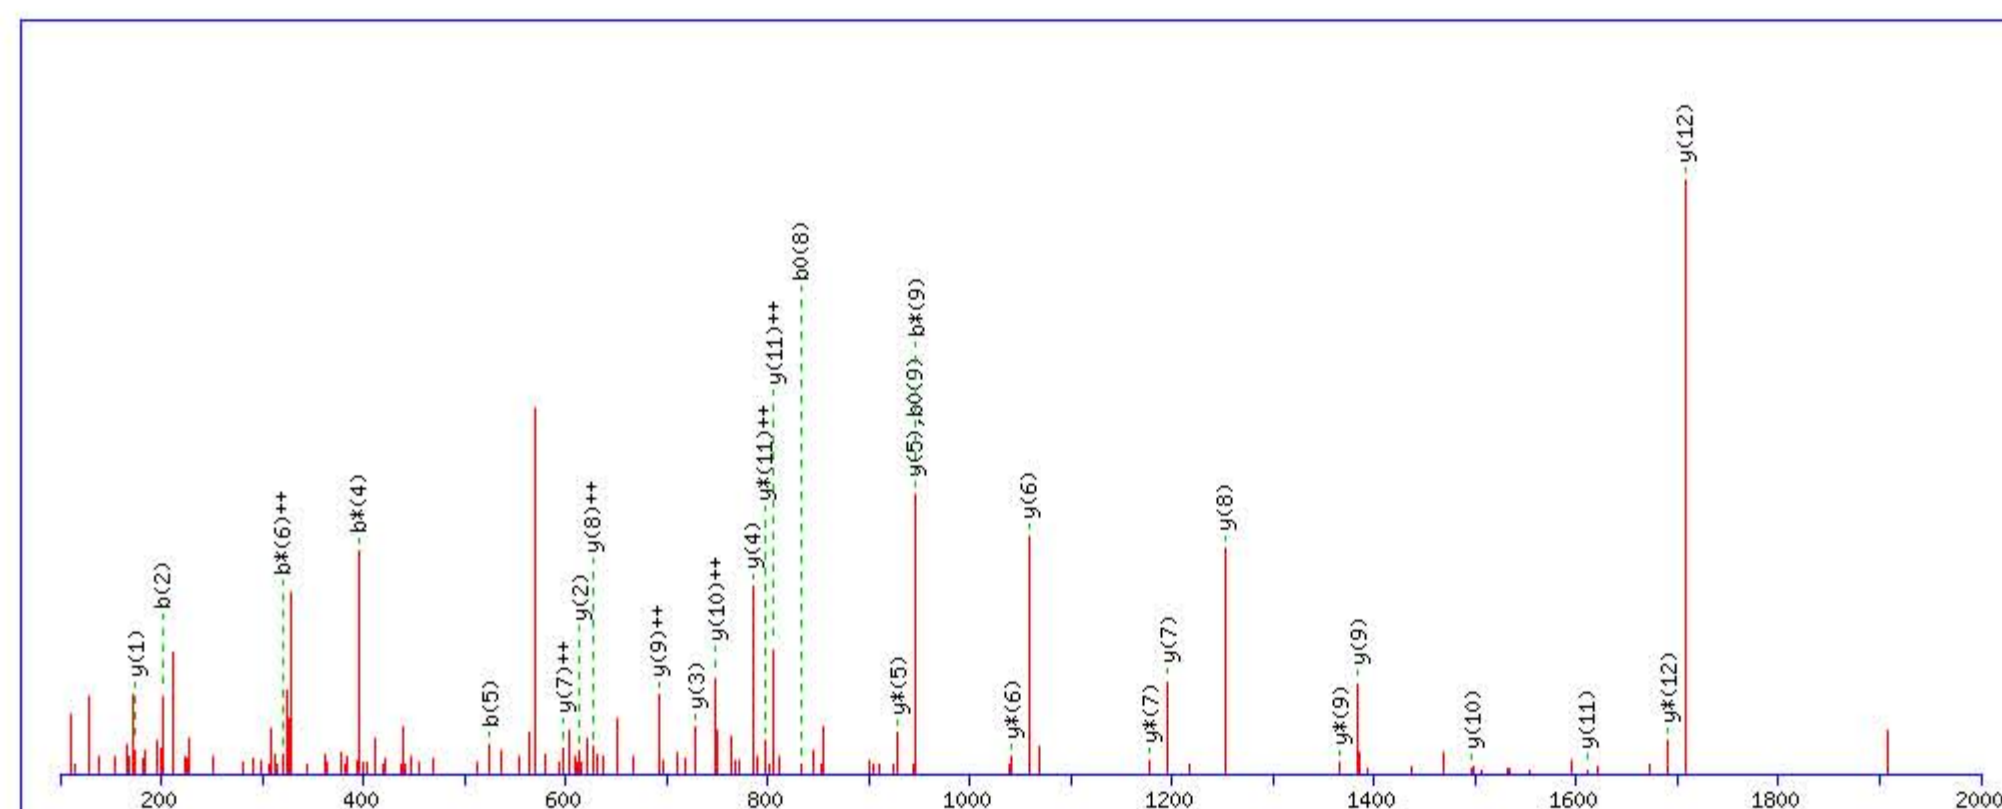

Monoisotopic mass of neutral peptide Mr(calc): 1906.932816

Fixed modifications: Carbamidomethyl (C) (apply to specified residues or termini only)

Variable modifications:

Q13 : Biotin:Thermo-21345 (Q)

Ions Score: 42 Expect: 0.0016

Matches : 30/124 fragment ions using 96 most intense peaks [\(help\)](#)

| #  | b                 | b <sup>++</sup> | b <sup>*</sup>    | b <sup>*++</sup>  | b <sup>0</sup>    | b <sup>0++</sup> | Seq. | y                  | y <sup>++</sup>   | y <sup>*</sup>     | y <sup>*++</sup>  | y <sup>0</sup> | y <sup>0++</sup> | #  |
|----|-------------------|-----------------|-------------------|-------------------|-------------------|------------------|------|--------------------|-------------------|--------------------|-------------------|----------------|------------------|----|
| 1  | 100.075690        | 50.541483       |                   |                   |                   |                  | V    |                    |                   |                    |                   |                |                  | 14 |
| 2  | <b>201.123369</b> | 101.065322      |                   |                   | 183.112804        | 92.060040        | T    | 1808.871677        | 904.939477        | 1791.845128        | 896.426202        | 1790.861112    | 895.934194       | 13 |
| 3  | 298.176133        | 149.591704      |                   |                   | 280.165568        | 140.586422       | P    | <b>1707.823998</b> | 854.415637        | <b>1690.797449</b> | 845.902363        |                |                  | 12 |
| 4  | 412.219060        | 206.613168      | <b>395.192511</b> | 198.099894        | 394.208495        | 197.607886       | N    | <b>1610.771234</b> | <b>805.889255</b> | 1593.744685        | <b>797.375981</b> |                |                  | 11 |
| 5  | <b>525.303124</b> | 263.155200      | 508.276575        | 254.641926        | 507.292559        | 254.149918       | L    | <b>1496.728307</b> | <b>748.867792</b> | 1479.701758        | 740.354517        |                |                  | 10 |
| 6  | 656.343609        | 328.675443      | 639.317060        | <b>320.162168</b> | 638.333044        | 319.670160       | M    | <b>1383.644243</b> | <b>692.325760</b> | <b>1366.617694</b> | 683.812485        |                |                  | 9  |
| 7  | 713.365073        | 357.186175      | 696.338524        | 348.672900        | 695.354508        | 348.180892       | G    | <b>1252.603758</b> | <b>626.805517</b> | 1235.577209        | 618.292243        |                |                  | 8  |
| 8  | 850.423985        | 425.715631      | 833.397436        | 417.202356        | <b>832.413420</b> | 416.710348       | H    | <b>1195.582294</b> | <b>598.294785</b> | <b>1178.555745</b> | 589.781511        |                |                  | 7  |
| 9  | 963.508049        | 482.257663      | <b>946.481500</b> | 473.744388        | <b>945.497484</b> | 473.252380       | L    | <b>1058.523382</b> | 529.765329        | <b>1041.496833</b> | 521.252055        |                |                  | 6  |
| 10 | 1123.538698       | 562.272987      | 1106.512149       | 553.759713        | 1105.528133       | 553.267705       | C    | <b>945.439318</b>  | 473.223297        | <b>928.412769</b>  | 464.710023        |                |                  | 5  |
| 11 | 1180.560162       | 590.783719      | 1163.533613       | 582.270445        | 1162.549597       | 581.778437       | G    | <b>785.408669</b>  | 393.207973        | 768.382120         | 384.694698        |                |                  | 4  |
| 12 | 1294.603089       | 647.805183      | 1277.576540       | 639.291908        | 1276.592524       | 638.799900       | N    | <b>728.387205</b>  | 364.697241        | 711.360656         | 356.183966        |                |                  | 3  |
| 13 | 1733.828415       | 867.417846      | 1716.801866       | 858.904571        | 1715.817850       | 858.412563       | Q    | <b>614.344278</b>  | 307.675777        | 597.317729         | 299.162503        |                |                  | 2  |
| 14 |                   |                 |                   |                   |                   |                  | R    | <b>175.118952</b>  | 88.063114         | 158.092403         | 79.549839         |                |                  | 1  |

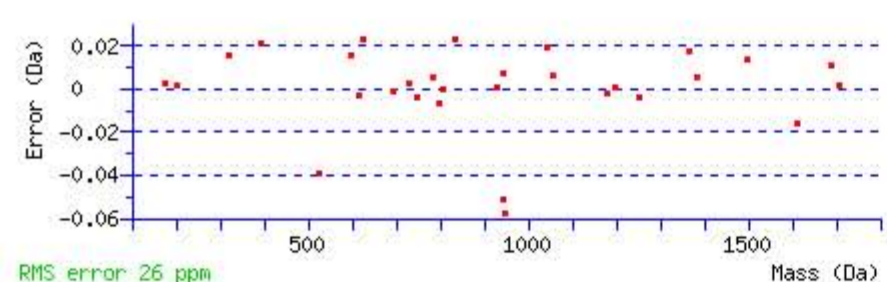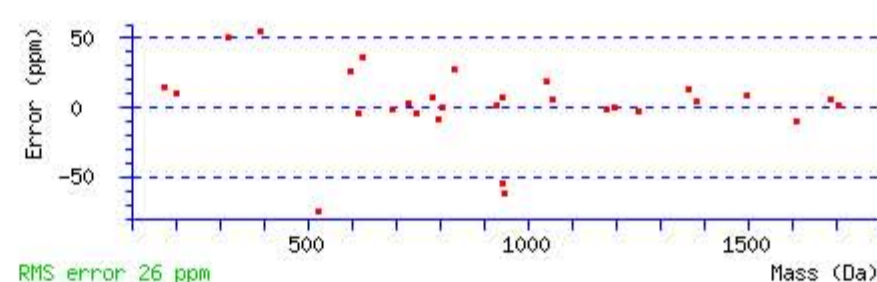

NCBI BLAST search of **VTPNLMGHLCGNQR**

(Parameters: blastp, nr protein database, expect=20000, no filter, PAM30)

Other BLAST [web gateways](#)

All matches to this query

| Score | Mr(calc):   | Delta    | Sequence                       |
|-------|-------------|----------|--------------------------------|
| 41.8  | 1906.932816 | 0.008976 | <a href="#">VTPNLMGHLCGNQR</a> |

Mascot: <http://www.matrixscience.com/>

**Peptide View**

MS/MS Fragmentation of **EVGPPLPQEAVPLQK**  
Found in **ECM1\_HUMAN**, Extracellular matrix protein 1 OS=Homo sapiens GN=ECM1 PE=1 SV=2

Match to Query 56058: 2223.241928 from(1112.628240,2+) rtinseconds(2426) index(9323)  
Title: Locus:1.1.1.3098.17 File:"2013-07-02 CLN FXIII 180 min 1st F 1.wiff"  
Data file C:\Program Files (x86)\Matrix Science\Mascot Daemon\mgf\7 FXIII 180 min 1st\mascot\_daemon\_merge.mgf

Click mouse within plot area to zoom in by factor of two about that point  
Or, Plot from  to  Da   
Label all possible matches  Label matches used for scoring

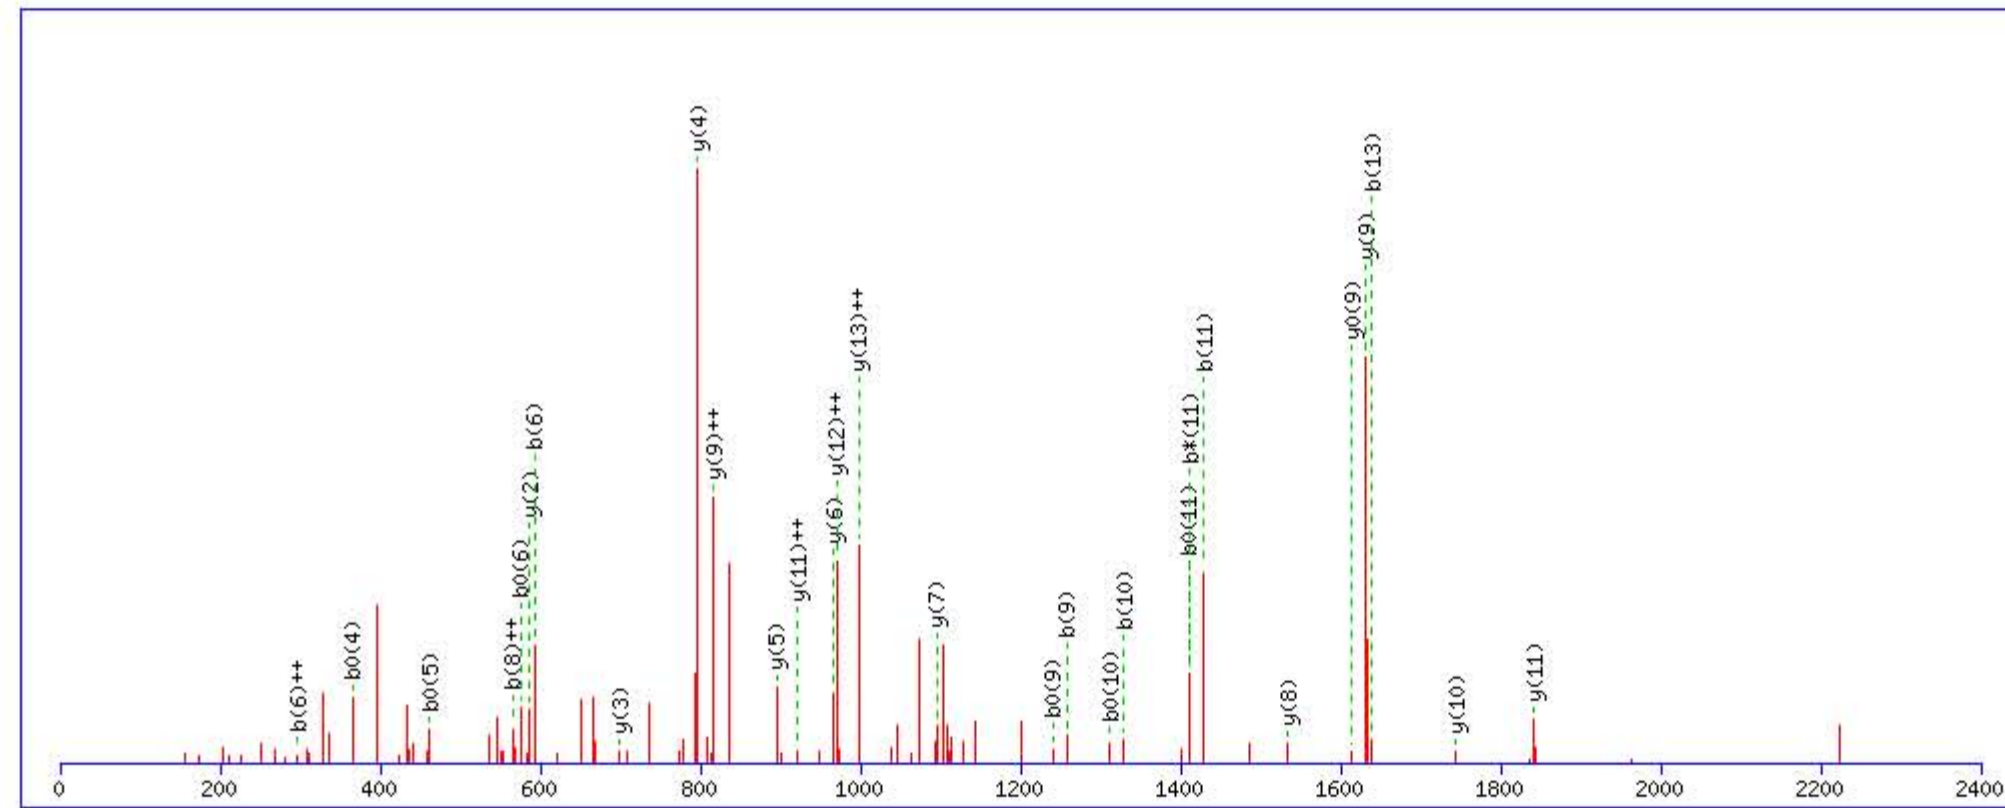

Monoisotopic mass of neutral peptide Mr(calc): 2223.215942  
Fixed modifications: Carbamidomethyl (C) (apply to specified residues or termini only)  
Variable modifications:  
Q8 : Biotin:Thermo-21345 (Q)  
Q14 : Biotin:Thermo-21345 (Q)  
Ions Score: 34 Expect: 0.0044  
Matches : 29/142 fragment ions using 80 most intense peaks (help)

| #  | b           | b <sup>++</sup> | b <sup>+</sup> | b <sup>+++</sup> | b <sup>0</sup> | b <sup>0++</sup> | Seq. | y           | y <sup>++</sup> | y <sup>+</sup> | y <sup>+++</sup> | y <sup>0</sup> | y <sup>0++</sup> | #  |
|----|-------------|-----------------|----------------|------------------|----------------|------------------|------|-------------|-----------------|----------------|------------------|----------------|------------------|----|
| 1  | 130.049869  | 65.528572       |                |                  | 112.039304     | 56.523290        | E    |             |                 |                |                  |                |                  | 15 |
| 2  | 229.118283  | 115.062780      |                |                  | 211.107718     | 106.057497       | V    | 2095.180639 | 1048.093957     | 2078.154090    | 1039.580683      | 2077.170074    | 1039.088675      | 14 |
| 3  | 286.139747  | 143.573512      |                |                  | 268.129182     | 134.568229       | G    | 1996.112225 | 998.559751      | 1979.085676    | 990.046476       | 1978.101660    | 989.554468       | 13 |
| 4  | 383.192511  | 192.099894      |                |                  | 365.181946     | 183.094611       | P    | 1939.090761 | 970.049019      | 1922.064212    | 961.535744       | 1921.080196    | 961.043736       | 12 |
| 5  | 480.245275  | 240.626276      |                |                  | 462.234710     | 231.620993       | P    | 1842.037997 | 921.522637      | 1825.011448    | 913.009362       | 1824.027432    | 912.517354       | 11 |
| 6  | 593.329339  | 297.168308      |                |                  | 575.318774     | 288.163025       | L    | 1744.985233 | 872.996255      | 1727.958684    | 864.482980       | 1726.974668    | 863.990972       | 10 |
| 7  | 690.382103  | 345.694690      |                |                  | 672.371538     | 336.689407       | P    | 1631.901169 | 816.454223      | 1614.874620    | 807.940948       | 1613.890604    | 807.448940       | 9  |
| 8  | 1129.607429 | 565.307353      | 1112.580880    | 556.794078       | 1111.596864    | 556.302070       | Q    | 1534.848405 | 767.927841      | 1517.821856    | 759.414566       | 1516.837840    | 758.922558       | 8  |
| 9  | 1258.650022 | 629.828649      | 1241.623473    | 621.315375       | 1240.639457    | 620.823367       | E    | 1095.623079 | 548.315178      | 1078.596530    | 539.801903       | 1077.612514    | 539.309895       | 7  |
| 10 | 1329.687136 | 665.347206      | 1312.660587    | 656.833932       | 1311.676571    | 656.341924       | A    | 966.580486  | 483.793881      | 949.553937     | 475.280607       |                |                  | 6  |
| 11 | 1428.755550 | 714.881413      | 1411.729001    | 706.368139       | 1410.744985    | 705.876131       | V    | 895.543372  | 448.275324      | 878.516823     | 439.762050       |                |                  | 5  |
| 12 | 1525.808314 | 763.407795      | 1508.781765    | 754.894521       | 1507.797749    | 754.402513       | P    | 796.474958  | 398.741117      | 779.448409     | 390.227843       |                |                  | 4  |
| 13 | 1638.892378 | 819.949827      | 1621.865829    | 811.436553       | 1620.881813    | 810.944545       | L    | 699.422194  | 350.214735      | 682.395645     | 341.701461       |                |                  | 3  |
| 14 | 2078.117704 | 1039.562490     | 2061.091155    | 1031.049215      | 2060.107139    | 1030.557207      | Q    | 586.338130  | 293.672703      | 569.311581     | 285.159429       |                |                  | 2  |
| 15 |             |                 |                |                  |                |                  | K    | 147.112804  | 74.060040       | 130.086255     | 65.546765        |                |                  | 1  |

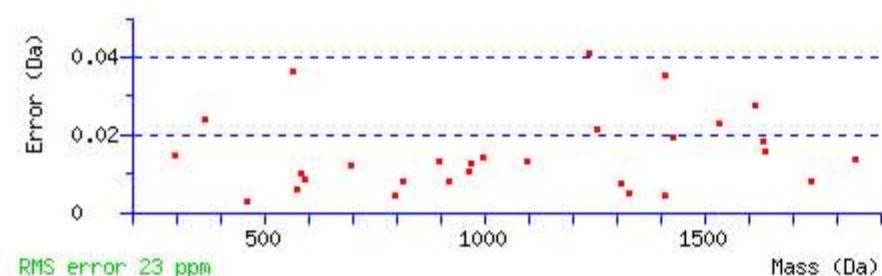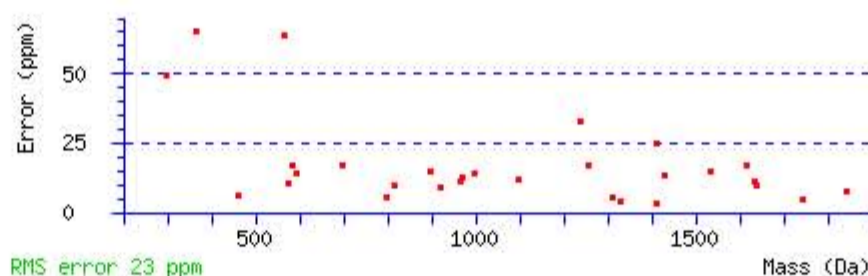

NCBI BLAST search of [EVGPPLPQEAVPLQK](#)  
(Parameters: blastp, nr protein database, expect=20000, no filter, PAM30)  
Other BLAST [web gateways](#)

**All matches to this query**

| Score | Mr(calc):   | Delta    | Sequence                        |
|-------|-------------|----------|---------------------------------|
| 33.9  | 2223.215942 | 0.025986 | <a href="#">EVGPPLPQEAVPLQK</a> |

# MASCOT Search Results

## Peptide View

MS/MS Fragmentation of **FSCFQEEAPQPHYQLR**  
 Found in **ECM1\_HUMAN**, Extracellular matrix protein 1 OS=Homo sapiens GN=ECM1 PE=1 SV=2

Match to Query 59029: 2347.102662 from(783.374830,3+) rtinseconds(1926) index(6066)  
 Title: Locus:1.1.1.2924.26 File:"2013-07-02 CLN FXIII 180 min 1st F 1.wiff"  
 Data file C:\Program Files (x86)\Matrix Science\Mascot Daemon\mgf\7 FXIII 180 min 1st\mascot\_daemon\_merge.mgf

Click mouse within plot area to zoom in by factor of two about that point

Or, Plot from  to  Da Full range

Label all possible matches  Label matches used for scoring

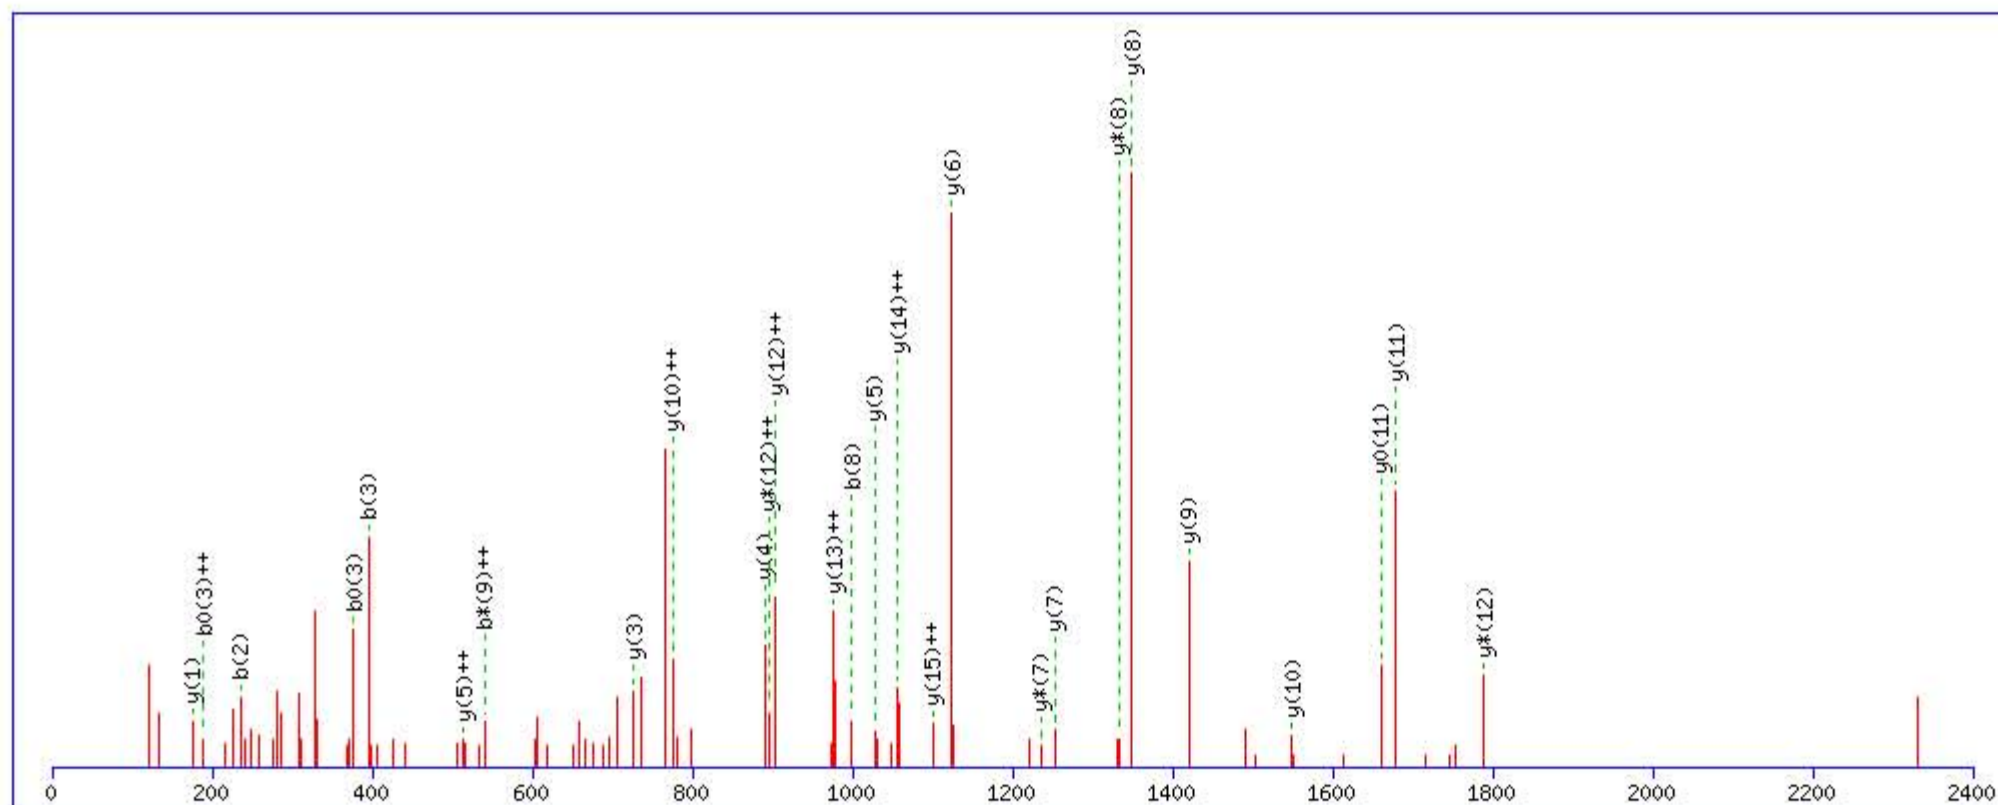

Monoisotopic mass of neutral peptide Mr(calc): 2347.087784  
 Fixed modifications: Carbamidomethyl (C) (apply to specified residues or termini only)  
 Variable modifications:  
 Q14 : Biotin:Thermo-21345 (Q)  
 Ions Score: 47 Expect: 4.1e-005  
 Matches : 27/152 fragment ions using 61 most intense peaks ([help](#))

| #  | b                 | b <sup>++</sup> | b <sup>*</sup> | b <sup>+++</sup>  | b <sup>0</sup>    | b <sup>0++</sup>  | Seq.     | y                  | y <sup>++</sup>    | y <sup>*</sup>     | y <sup>+++</sup>  | y <sup>0</sup>     | y <sup>0++</sup> | #  |
|----|-------------------|-----------------|----------------|-------------------|-------------------|-------------------|----------|--------------------|--------------------|--------------------|-------------------|--------------------|------------------|----|
| 1  | 148.075690        | 74.541483       |                |                   |                   |                   | <b>F</b> |                    |                    |                    |                   |                    |                  | 16 |
| 2  | <b>235.107718</b> | 118.057497      |                |                   | 217.097153        | 109.052214        | <b>S</b> | 2201.026658        | <b>1101.016967</b> | 2184.000109        | 1092.503692       | 2183.016093        | 1092.011684      | 15 |
| 3  | <b>395.138367</b> | 198.072821      |                |                   | <b>377.127802</b> | <b>189.067539</b> | <b>C</b> | 2113.994630        | <b>1057.500953</b> | 2096.968081        | 1048.987678       | 2095.984065        | 1048.495670      | 14 |
| 4  | 542.206781        | 271.607029      |                |                   | 524.196216        | 262.601746        | <b>F</b> | 1953.963981        | <b>977.485629</b>  | 1936.937432        | 968.972354        | 1935.953416        | 968.480346       | 13 |
| 5  | 670.265359        | 335.636318      | 653.238810     | 327.123043        | 652.254794        | 326.631035        | <b>Q</b> | 1806.895567        | <b>903.951422</b>  | <b>1789.869018</b> | <b>895.438147</b> | 1788.885002        | 894.946139       | 12 |
| 6  | 799.307952        | 400.157614      | 782.281403     | 391.644340        | 781.297387        | 391.152332        | <b>E</b> | <b>1678.836989</b> | 839.922133         | 1661.810440        | 831.408858        | <b>1660.826424</b> | 830.916850       | 11 |
| 7  | 928.350545        | 464.678911      | 911.323996     | 456.165636        | 910.339980        | 455.673628        | <b>E</b> | <b>1549.794396</b> | <b>775.400836</b>  | 1532.767847        | 766.887562        | 1531.783831        | 766.395554       | 10 |
| 8  | <b>999.387659</b> | 500.197468      | 982.361110     | 491.684193        | 981.377094        | 491.192185        | <b>A</b> | <b>1420.751803</b> | 710.879540         | 1403.725254        | 702.366265        |                    |                  | 9  |
| 9  | 1096.440423       | 548.723850      | 1079.413874    | <b>540.210575</b> | 1078.429858       | 539.718567        | <b>P</b> | <b>1349.714689</b> | 675.360983         | <b>1332.688140</b> | 666.847708        |                    |                  | 8  |
| 10 | 1224.499001       | 612.753138      | 1207.472452    | 604.239864        | 1206.488436       | 603.747856        | <b>Q</b> | <b>1252.661925</b> | 626.834601         | <b>1235.635376</b> | 618.321326        |                    |                  | 7  |
| 11 | 1321.551765       | 661.279520      | 1304.525216    | 652.766246        | 1303.541200       | 652.274238        | <b>P</b> | <b>1124.603347</b> | 562.805312         | 1107.576798        | 554.292037        |                    |                  | 6  |
| 12 | 1458.610677       | 729.808976      | 1441.584128    | 721.295702        | 1440.600112       | 720.803694        | <b>H</b> | <b>1027.550583</b> | <b>514.278930</b>  | 1010.524034        | 505.765655        |                    |                  | 5  |
| 13 | 1621.674006       | 811.340641      | 1604.647457    | 802.827367        | 1603.663441       | 802.335358        | <b>Y</b> | <b>890.491671</b>  | 445.749474         | 873.465122         | 437.236199        |                    |                  | 4  |
| 14 | 2060.899332       | 1030.953304     | 2043.872783    | 1022.440030       | 2042.888767       | 1021.948022       | <b>Q</b> | <b>727.428342</b>  | 364.217809         | 710.401793         | 355.704535        |                    |                  | 3  |
| 15 | 2173.983396       | 1087.495336     | 2156.956847    | 1078.982061       | 2155.972831       | 1078.490053       | <b>L</b> | 288.203016         | 144.605146         | 271.176467         | 136.091872        |                    |                  | 2  |
| 16 |                   |                 |                |                   |                   |                   | <b>R</b> | <b>175.118952</b>  | 88.063114          | 158.092403         | 79.549839         |                    |                  | 1  |

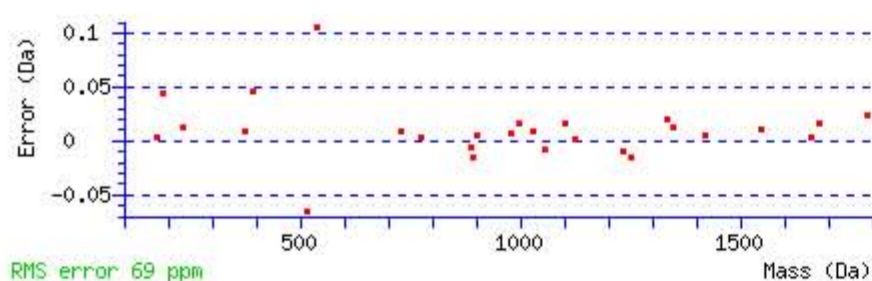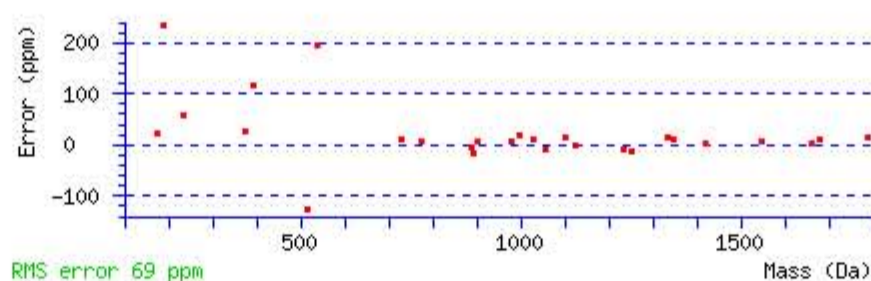

NCBI BLAST search of **FSCFQEEAPQPHYQLR**  
 (Parameters: blastp, nr protein database, expect=20000, no filter, PAM30)  
 Other BLAST [web gateways](#)

### All matches to this query

| Score | Mr(calc):   | Delta     | Sequence                          |
|-------|-------------|-----------|-----------------------------------|
| 47.2  | 2347.087784 | 0.014878  | <a href="#">FSCFQEEAPQPHYQLR</a>  |
| 24.7  | 2347.087784 | 0.014878  | <a href="#">FSCFQEEAPQPHYQLR</a>  |
| 0.4   | 2347.130905 | -0.028243 | <a href="#">LEQVMAGATLNQMLWCR</a> |

# MASCOT SCIENCE Mascot Search Results

## Peptide View

MS/MS Fragmentation of **IFFESVYGQCK**

Found in **FETUB\_HUMAN**, Fetuin-B OS=Homo sapiens GN=FETUB PE=1 SV=2

Match to Query 42175: 1687.829688 from(844.922120,2+) rtinseconds(2298) index(80905)

Title: Locus:1.1.1.2150.20 File:"2013-07-02 CLN FXIII 180 min 1st FT.wiff"

Data file C:\Program Files (x86)\Matrix Science\Mascot Daemon\mgf\7 FXIII 180 min 1st\mascot\_daemon\_merge.mgf

Click mouse within plot area to zoom in by factor of two about that point

Or, Plot from  to  Da

Label all possible matches  Label matches used for scoring

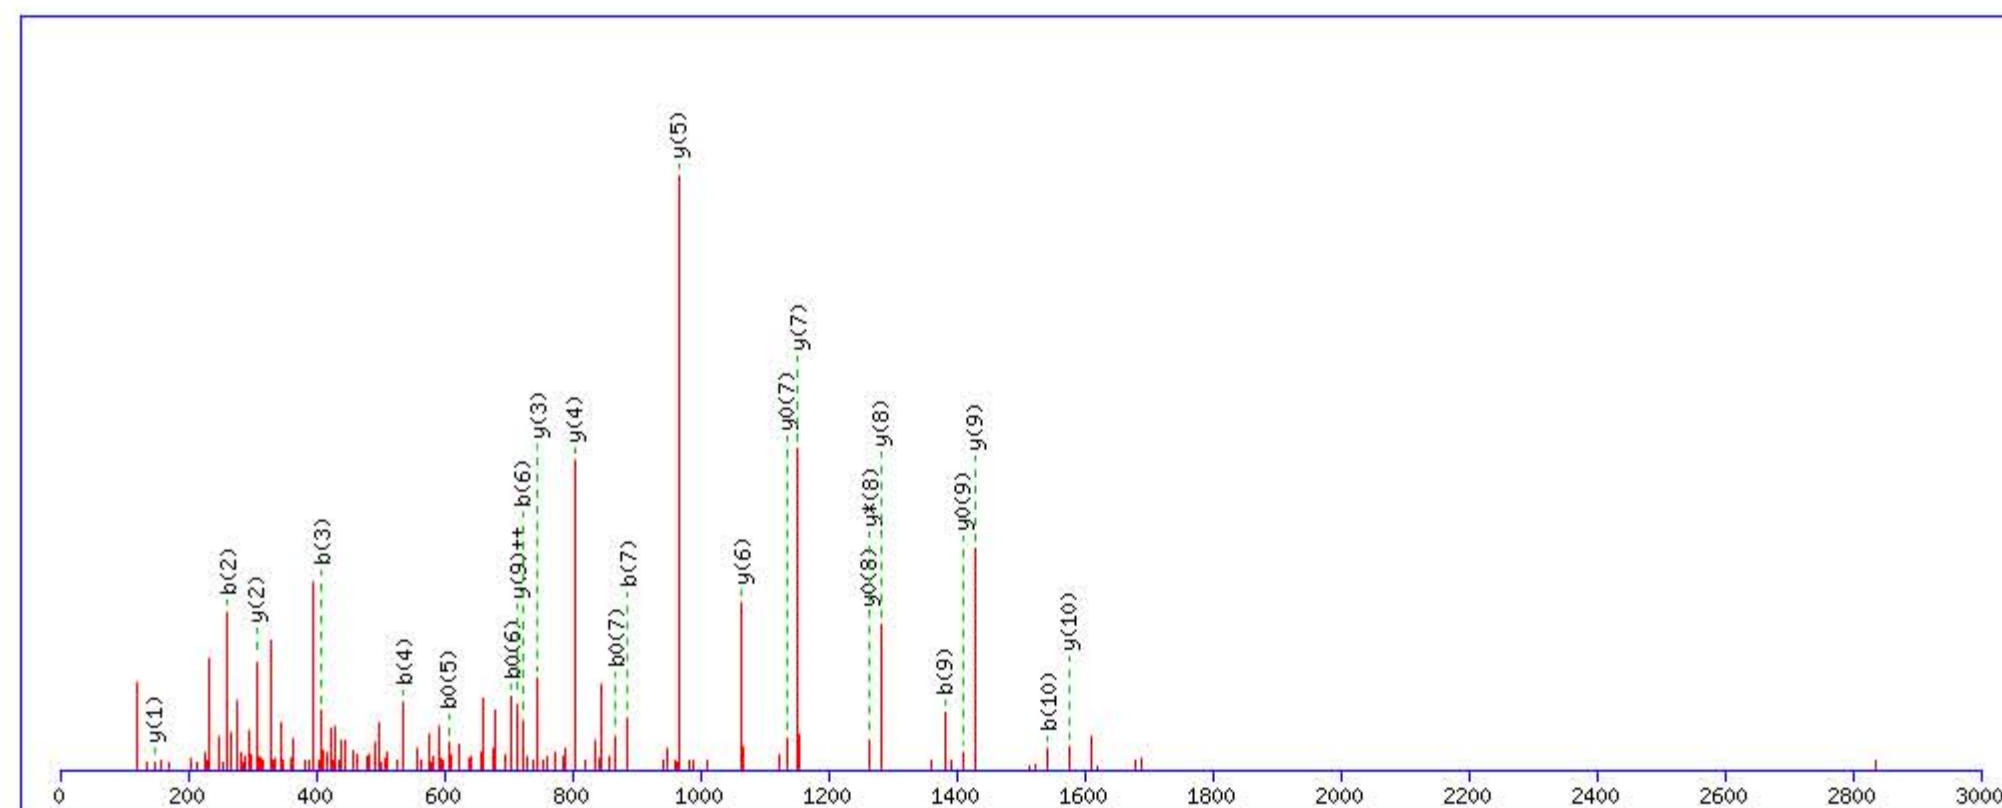

Monoisotopic mass of neutral peptide  $M_r(\text{calc})$ : 1687.810226

Fixed modifications: Carbamidomethyl (C) (apply to specified residues or termini only)

Variable modifications:

Q9 : Biotin:Thermo-21345 (Q)

Ions Score: 48 Expect: 6.5e-005

Matches : 25/86 fragment ions using 59 most intense peaks [\(help\)](#)

| #  | b                  | b <sup>++</sup> | b <sup>+</sup> | b <sup>*++</sup> | b <sup>0</sup>    | b <sup>0++</sup> | Seq. | y                  | y <sup>++</sup>   | y <sup>+</sup>     | y <sup>*++</sup> | y <sup>0</sup>     | y <sup>0++</sup> | #  |
|----|--------------------|-----------------|----------------|------------------|-------------------|------------------|------|--------------------|-------------------|--------------------|------------------|--------------------|------------------|----|
| 1  | 114.091340         | 57.549308       |                |                  |                   |                  | I    |                    |                   |                    |                  |                    |                  | 11 |
| 2  | <b>261.159754</b>  | 131.083515      |                |                  |                   |                  | F    | <b>1575.733435</b> | 788.370356        | 1558.706886        | 779.857081       | 1557.722870        | 779.365073       | 10 |
| 3  | <b>408.228168</b>  | 204.617722      |                |                  |                   |                  | F    | <b>1428.665021</b> | <b>714.836149</b> | 1411.638472        | 706.322874       | <b>1410.654456</b> | 705.830866       | 9  |
| 4  | <b>537.270761</b>  | 269.139019      |                |                  | 519.260196        | 260.133736       | E    | <b>1281.596607</b> | 641.301942        | <b>1264.570058</b> | 632.788667       | <b>1263.586042</b> | 632.296659       | 8  |
| 5  | 624.302789         | 312.655033      |                |                  | <b>606.292224</b> | 303.649750       | S    | <b>1152.554014</b> | 576.780645        | 1135.527465        | 568.267371       | <b>1134.543449</b> | 567.775363       | 7  |
| 6  | <b>723.371203</b>  | 362.189239      |                |                  | <b>705.360638</b> | 353.183957       | V    | <b>1065.521986</b> | 533.264631        | 1048.495437        | 524.751357       |                    |                  | 6  |
| 7  | <b>886.434532</b>  | 443.720904      |                |                  | <b>868.423967</b> | 434.715622       | Y    | <b>966.453572</b>  | 483.730424        | 949.427023         | 475.217150       |                    |                  | 5  |
| 8  | 943.455996         | 472.231636      |                |                  | 925.445431        | 463.226354       | G    | <b>803.390243</b>  | 402.198760        | 786.363694         | 393.685485       |                    |                  | 4  |
| 9  | <b>1382.681322</b> | 691.844299      | 1365.654773    | 683.331025       | 1364.670757       | 682.839017       | Q    | <b>746.368779</b>  | 373.688028        | 729.342230         | 365.174753       |                    |                  | 3  |
| 10 | <b>1542.711971</b> | 771.859624      | 1525.685422    | 763.346349       | 1524.701406       | 762.854341       | C    | <b>307.143453</b>  | 154.075365        | 290.116904         | 145.562090       |                    |                  | 2  |
| 11 |                    |                 |                |                  |                   |                  | K    | <b>147.112804</b>  | 74.060040         | 130.086255         | 65.546765        |                    |                  | 1  |

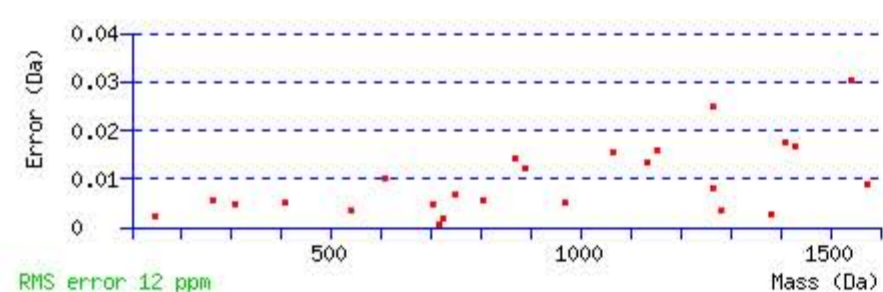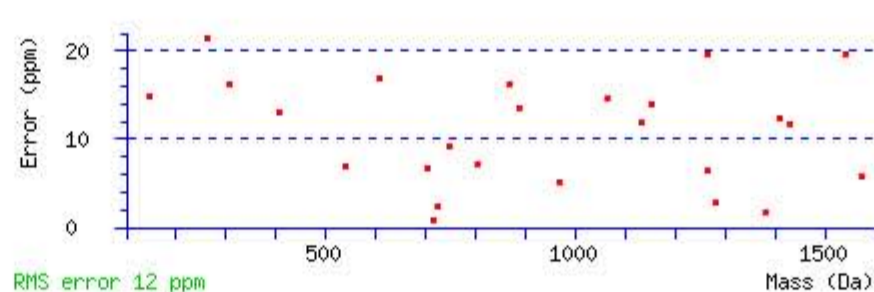

NCBI BLAST search of **IFFESVYGQCK**

(Parameters: blastp, nr protein database, expect=20000, no filter, PAM30)

Other BLAST [web gateways](#)

All matches to this query

| Score | $M_r(\text{calc})$ : | Delta     | Sequence                        |
|-------|----------------------|-----------|---------------------------------|
| 47.7  | 1687.810226          | 0.019462  | <a href="#">IFFESVYGQCK</a>     |
| 3.1   | 1687.831345          | -0.001657 | <a href="#">MIFSSPACLTASFLK</a> |

Mascot: <http://www.matrixscience.com/>



# **MASCOT** Mascot Search Results

## Peptide View

MS/MS Fragmentation of **DYEDQQK**

Found in **FIBA\_HUMAN**, Fibrinogen alpha chain OS=Homo sapiens GN=FGA PE=1 SV=2

Match to Query 24752: 1235.550948 from(618.782750,2+) rtinseconds(1409) index(20312)

Title: Locus:1.1.1.2633.18 File:"2013-07-02 CLN FXIII 180 min 1st F 2.wiff"

Data file C:\Program Files (x86)\Matrix Science\Mascot Daemon\mgf\7 FXIII 180 min 1st\mascot\_daemon\_merge.mgf

Click mouse within plot area to zoom in by factor of two about that point

Or, Plot from  to  Da

Label all possible matches  Label matches used for scoring

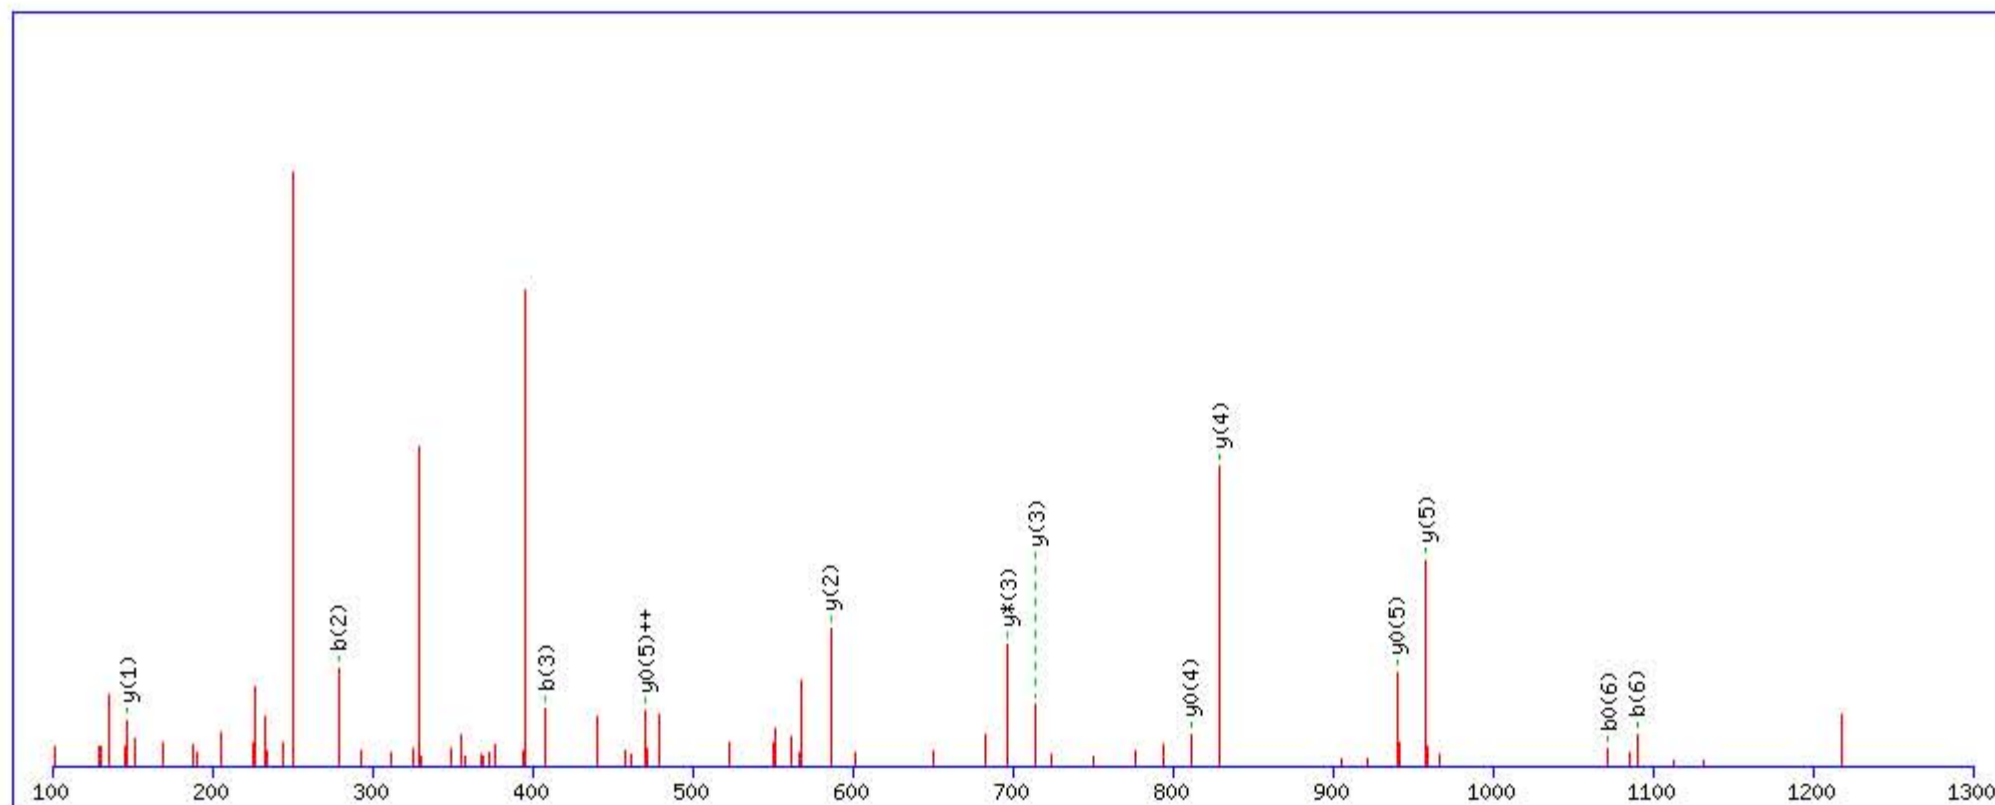

Monoisotopic mass of neutral peptide Mr(calc): 1235.549225

Fixed modifications: Carbamidomethyl (C) (apply to specified residues or termini only)

Variable modifications:

Q6 : Biotin:Thermo-21345 (Q)

Ions Score: 26 Expect: 0.0084

Matches : 13/58 fragment ions using 23 most intense peaks [\(help\)](#)

| # | b                  | b <sup>++</sup> | b <sup>*</sup> | b <sup>***</sup> | b <sup>0</sup>     | b <sup>0++</sup> | Seq. | y                 | y <sup>++</sup> | y <sup>*</sup>    | y <sup>***</sup> | y <sup>0</sup>    | y <sup>0++</sup>  | # |
|---|--------------------|-----------------|----------------|------------------|--------------------|------------------|------|-------------------|-----------------|-------------------|------------------|-------------------|-------------------|---|
| 1 | 116.034219         | 58.520748       |                |                  | 98.023654          | 49.515465        | D    |                   |                 |                   |                  |                   |                   | 7 |
| 2 | <b>279.097548</b>  | 140.052412      |                |                  | 261.086983         | 131.047130       | Y    | 1121.529573       | 561.268425      | 1104.503024       | 552.755150       | 1103.519008       | 552.263142        | 6 |
| 3 | <b>408.140141</b>  | 204.573709      |                |                  | 390.129576         | 195.568426       | E    | <b>958.466244</b> | 479.736760      | 941.439695        | 471.223486       | <b>940.455679</b> | <b>470.731478</b> | 5 |
| 4 | 523.167084         | 262.087180      |                |                  | 505.156519         | 253.081898       | D    | <b>829.423651</b> | 415.215464      | 812.397102        | 406.702189       | <b>811.413086</b> | 406.210181        | 4 |
| 5 | 651.225662         | 326.116469      | 634.199113     | 317.603195       | 633.215097         | 317.111187       | Q    | <b>714.396708</b> | 357.701992      | <b>697.370159</b> | 349.188718       |                   |                   | 3 |
| 6 | <b>1090.450988</b> | 545.729132      | 1073.424439    | 537.215858       | <b>1072.440423</b> | 536.723850       | Q    | <b>586.338130</b> | 293.672703      | 569.311581        | 285.159429       |                   |                   | 2 |
| 7 |                    |                 |                |                  |                    |                  | K    | <b>147.112804</b> | 74.060040       | 130.086255        | 65.546765        |                   |                   | 1 |

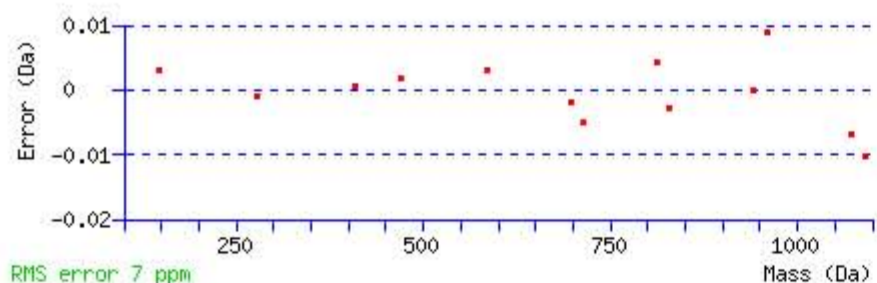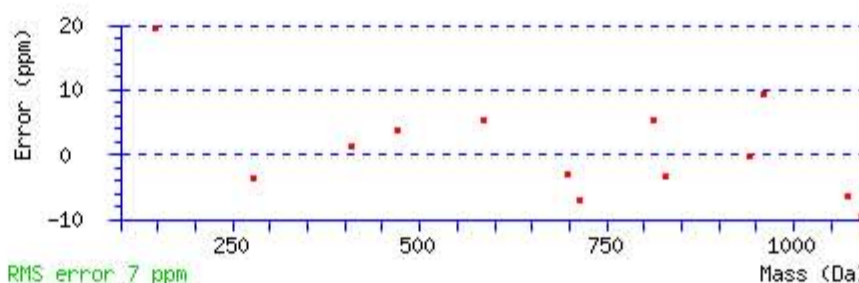

NCBI BLAST search of **DYEDQQK**

(Parameters: blastp, nr protein database, expect=20000, no filter, PAM30)

Other BLAST [web gateways](#)

### All matches to this query

| Score | Mr(calc):   | Delta     | Sequence                   |
|-------|-------------|-----------|----------------------------|
| 26.1  | 1235.549225 | 0.001723  | <a href="#">DYEDQQK</a>    |
| 16.0  | 1235.549225 | 0.001723  | <a href="#">DYEDQQK</a>    |
| 4.0   | 1235.557098 | -0.006150 | <a href="#">EGHFQETFNK</a> |

# MASCOT SCIENCE Mascot Search Results

## Peptide View

MS/MS Fragmentation of **QLEQVIAK**

Found in **FIBA\_HUMAN**, Fibrinogen alpha chain OS=Homo sapiens GN=FGA PE=1 SV=2

Match to Query 24840: 1238.698968 from(620.356760,2+) rtinseconds(1733) index(22740)

Title: Locus:1.1.1.2746.8 File:"2013-07-02 CLN FXIII 180 min 1st F 2.wiff"

Data file C:\Program Files (x86)\Matrix Science\Mascot Daemon\mgf\7 FXIII 180 min 1st\mascot\_daemon\_merge.mgf

Click mouse within plot area to zoom in by factor of two about that point

Or, Plot from  to  Da

Label all possible matches  Label matches used for scoring

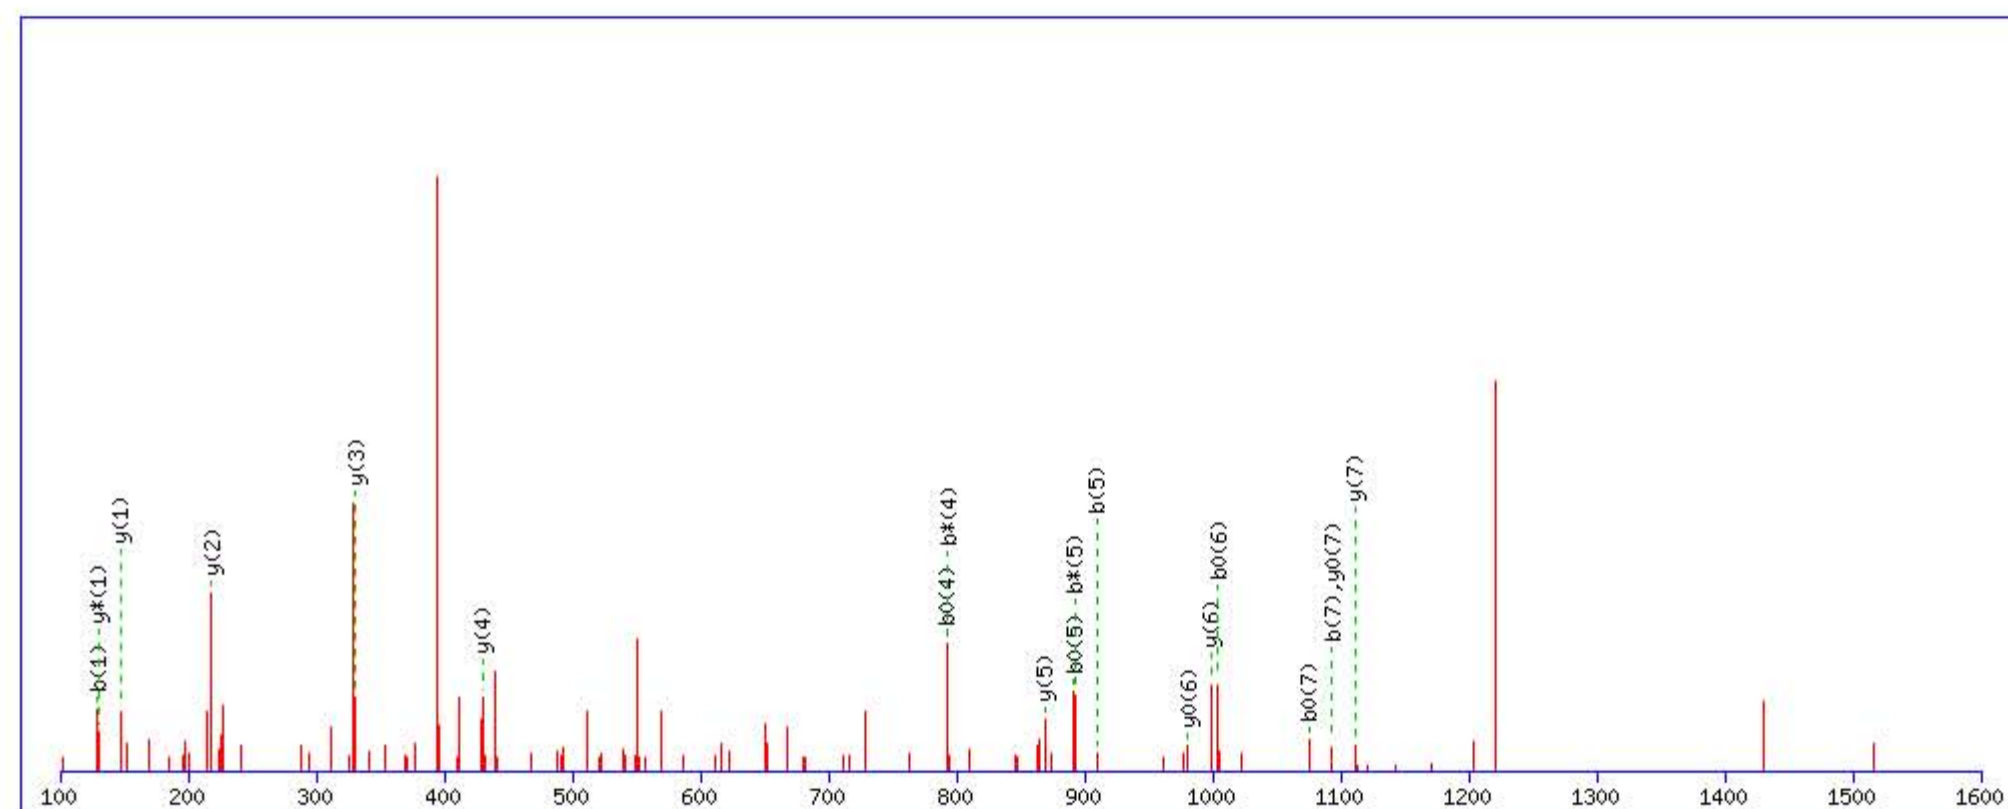

Monoisotopic mass of neutral peptide Mr(calc): 1238.705658

Fixed modifications: Carbamidomethyl (C) (apply to specified residues or termini only)

Variable modifications:

Q4 : Biotin:Thermo-21345 (Q)

Ions Score: 40 Expect: 0.0017

Matches : 19/70 fragment ions using 35 most intense peaks [\(help\)](#)

| # | b           | b <sup>++</sup> | b <sup>*</sup> | b <sup>+++</sup> | b <sup>0</sup> | b <sup>0++</sup> | Seq. | y           | y <sup>++</sup> | y <sup>*</sup> | y <sup>+++</sup> | y <sup>0</sup> | y <sup>0++</sup> | # |
|---|-------------|-----------------|----------------|------------------|----------------|------------------|------|-------------|-----------------|----------------|------------------|----------------|------------------|---|
| 1 | 129.065854  | 65.036565       | 112.039305     | 56.523291        |                |                  | Q    |             |                 |                |                  |                |                  | 8 |
| 2 | 242.149918  | 121.578597      | 225.123369     | 113.065323       |                |                  | L    | 1111.654379 | 556.330828      | 1094.627830    | 547.817553       | 1093.643814    | 547.325545       | 7 |
| 3 | 371.192511  | 186.099894      | 354.165962     | 177.586619       | 353.181946     | 177.094611       | E    | 998.570315  | 499.788796      | 981.543766     | 491.275521       | 980.559750     | 490.783513       | 6 |
| 4 | 810.417837  | 405.712557      | 793.391288     | 397.199282       | 792.407272     | 396.707274       | Q    | 869.527722  | 435.267499      | 852.501173     | 426.754225       |                |                  | 5 |
| 5 | 909.486251  | 455.246764      | 892.459702     | 446.733489       | 891.475686     | 446.241481       | V    | 430.302396  | 215.654836      | 413.275847     | 207.141562       |                |                  | 4 |
| 6 | 1022.570315 | 511.788796      | 1005.543766    | 503.275521       | 1004.559750    | 502.783513       | I    | 331.233982  | 166.120629      | 314.207433     | 157.607355       |                |                  | 3 |
| 7 | 1093.607429 | 547.307353      | 1076.580880    | 538.794078       | 1075.596864    | 538.302070       | A    | 218.149918  | 109.578597      | 201.123369     | 101.065323       |                |                  | 2 |
| 8 |             |                 |                |                  |                |                  | K    | 147.112804  | 74.060040       | 130.086255     | 65.546765        |                |                  | 1 |

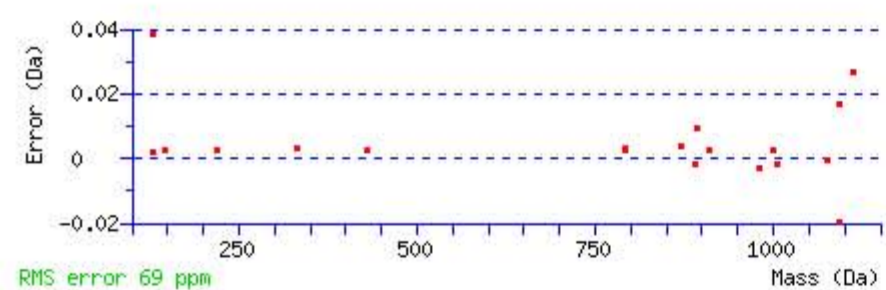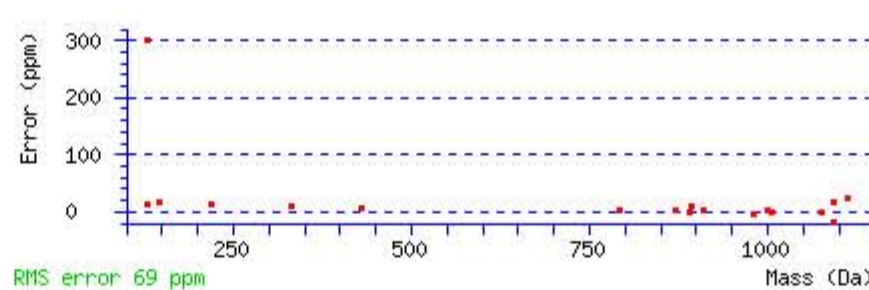

NCBI BLAST search of [QLEQVIAK](#)

(Parameters: blastp, nr protein database, expect=20000, no filter, PAM30)

Other BLAST [web gateways](#)

All matches to this query

| Score | Mr(calc):   | Delta     | Sequence                     |
|-------|-------------|-----------|------------------------------|
| 40.3  | 1238.705658 | -0.006690 | <a href="#">QLEQVIAK</a>     |
| 18.5  | 1238.687027 | 0.011941  | <a href="#">KEETQPPVALK</a>  |
| 12.3  | 1238.705658 | -0.006690 | <a href="#">QLEQVIAK</a>     |
| 10.7  | 1238.716904 | -0.017936 | <a href="#">DRVQVAIK</a>     |
| 10.5  | 1238.698257 | 0.000711  | <a href="#">IHADASSKVLAK</a> |
| 7.8   | 1238.716888 | -0.017920 | <a href="#">KRILCPLDPK</a>   |
| 7.2   | 1238.680511 | 0.018457  | <a href="#">EPGRTQIK</a>     |
| 5.2   | 1238.702301 | -0.003333 | <a href="#">DVFKKGFSLAK</a>  |
| 4.7   | 1238.680496 | 0.018472  | <a href="#">QEVAAAALR</a>    |
| 4.0   | 1238.691040 | 0.007928  | <a href="#">LYKEFIDLAK</a>   |



# MASCOT SEARCH RESULTS

## Peptide View

MS/MS Fragmentation of **NSLFYQK**

Found in **FIBA\_HUMAN**, Fibrinogen alpha chain OS=Homo sapiens GN=FGA PE=1 SV=2

Match to Query 27812: 1338.672928 from(670.343740,2+) rtinseconds(2030) index(24900)

Title: Locus:1.1.1.2849.7 File:"2013-07-02 CLN FXIII 180 min 1st F 2.wiff"

Data file C:\Program Files (x86)\Matrix Science\Mascot Daemon\mgf\7 FXIII 180 min 1st\mascot\_daemon\_merge.mgf

Click mouse within plot area to zoom in by factor of two about that point

Or, Plot from  to  Da

Label all possible matches  Label matches used for scoring

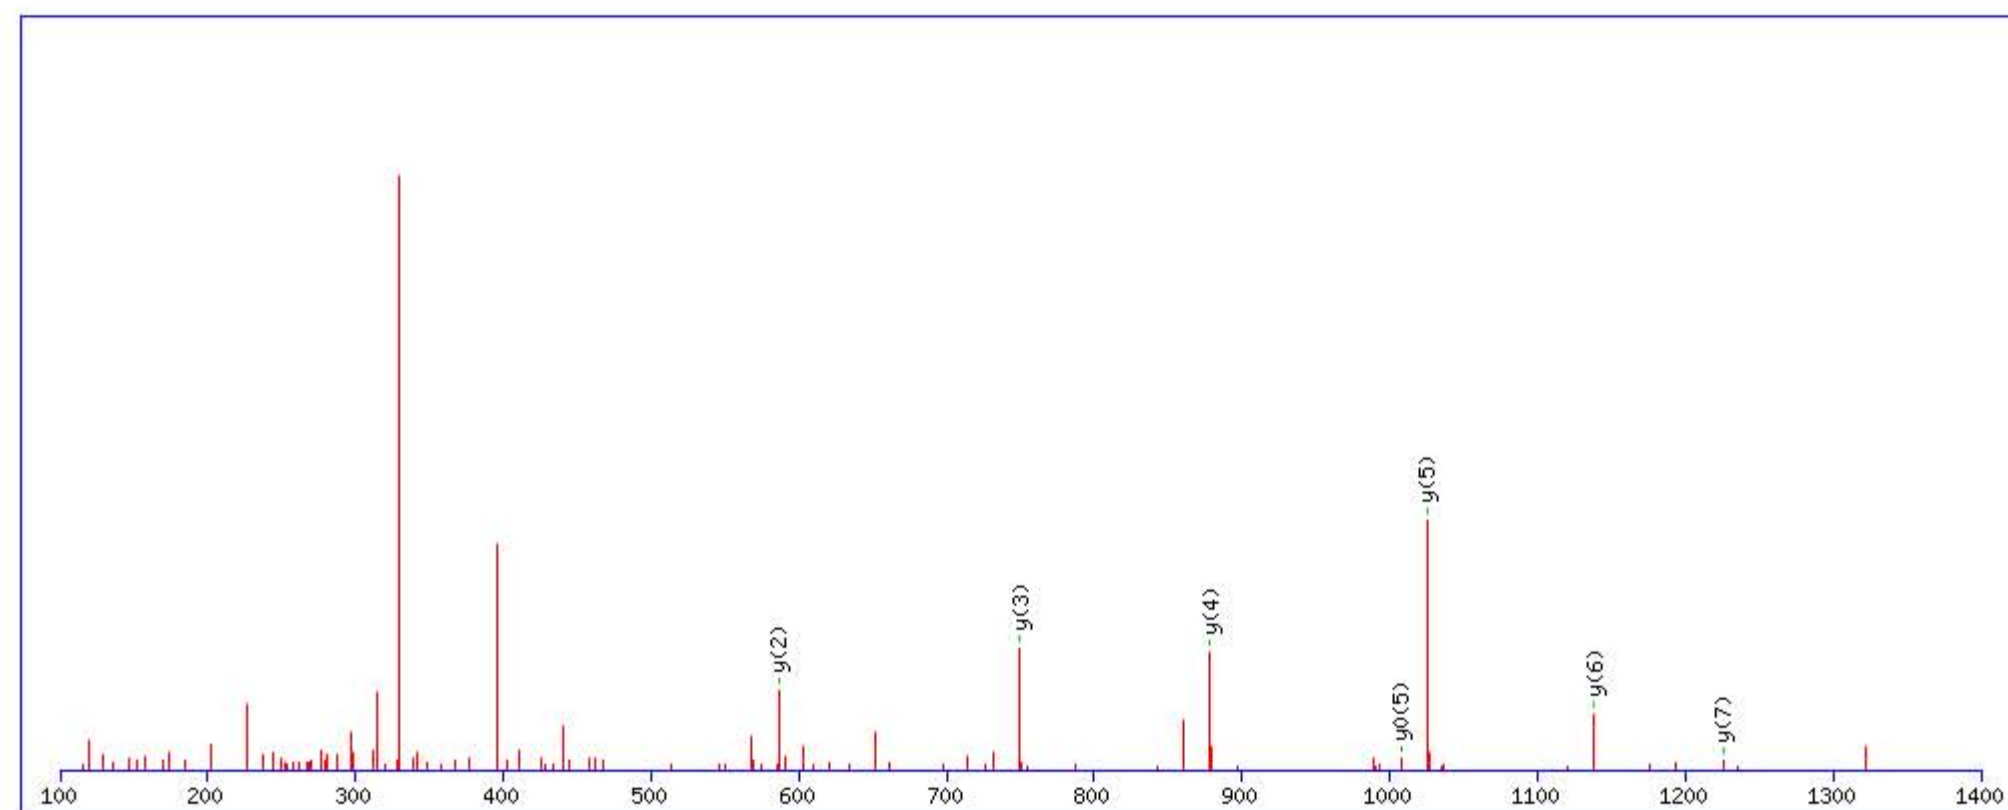

Monoisotopic mass of neutral peptide Mr(calc): 1338.664185

Fixed modifications: Carbamidomethyl (C) (apply to specified residues or termini only)

Variable modifications:

Q7 : Biotin:Thermo-21345 (Q)

Ions Score: 38 Expect: 0.0026

Matches : 7/76 fragment ions using 13 most intense peaks [\(help\)](#)

| # | b           | b <sup>++</sup> | b <sup>*</sup> | b <sup>*++</sup> | b <sup>0</sup> | b <sup>0++</sup> | Seq. | y                  | y <sup>++</sup> | y <sup>*</sup> | y <sup>*++</sup> | y <sup>0</sup>     | y <sup>0++</sup> | # |
|---|-------------|-----------------|----------------|------------------|----------------|------------------|------|--------------------|-----------------|----------------|------------------|--------------------|------------------|---|
| 1 | 115.050203  | 58.028740       | 98.023654      | 49.515465        |                |                  | N    |                    |                 |                |                  |                    |                  | 8 |
| 2 | 202.082231  | 101.544753      | 185.055682     | 93.031479        | 184.071666     | 92.539471        | S    | <b>1225.628558</b> | 613.317917      | 1208.602009    | 604.804643       | 1207.617993        | 604.312635       | 7 |
| 3 | 315.166295  | 158.086785      | 298.139746     | 149.573511       | 297.155730     | 149.081503       | L    | <b>1138.596530</b> | 569.801903      | 1121.569981    | 561.288629       | 1120.585965        | 560.796621       | 6 |
| 4 | 462.234709  | 231.620993      | 445.208160     | 223.107718       | 444.224144     | 222.615710       | F    | <b>1025.512466</b> | 513.259871      | 1008.485917    | 504.746597       | <b>1007.501901</b> | 504.254589       | 5 |
| 5 | 591.277302  | 296.142289      | 574.250753     | 287.629015       | 573.266737     | 287.137007       | E    | <b>878.444052</b>  | 439.725664      | 861.417503     | 431.212390       | 860.433487         | 430.720382       | 4 |
| 6 | 754.340631  | 377.673954      | 737.314082     | 369.160679       | 736.330066     | 368.668671       | Y    | <b>749.401459</b>  | 375.204368      | 732.374910     | 366.691093       |                    |                  | 3 |
| 7 | 1193.565957 | 597.286617      | 1176.539408    | 588.773342       | 1175.555392    | 588.281334       | Q    | <b>586.338130</b>  | 293.672703      | 569.311581     | 285.159429       |                    |                  | 2 |
| 8 |             |                 |                |                  |                |                  | K    | 147.112804         | 74.060040       | 130.086255     | 65.546765        |                    |                  | 1 |

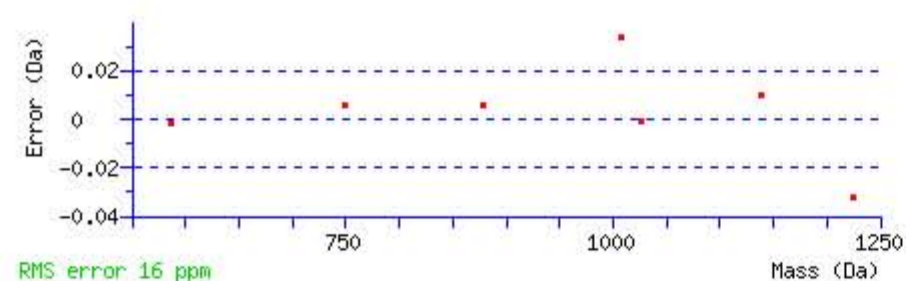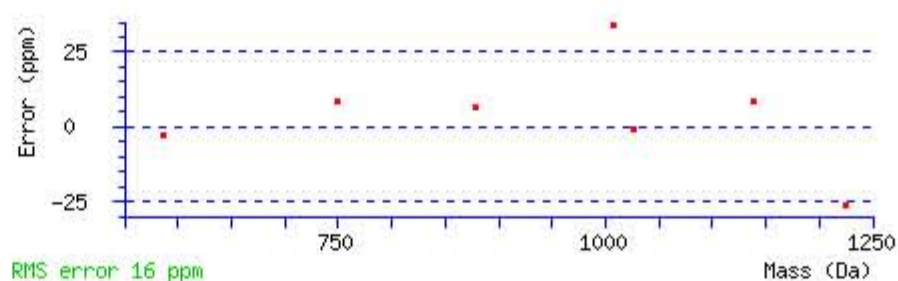

NCBI BLAST search of **NSLFYQK**

(Parameters: blastp, nr protein database, expect=20000, no filter, PAM30)

Other BLAST [web gateways](#)

All matches to this query

| Score | Mr(calc):   | Delta     | Sequence                      |
|-------|-------------|-----------|-------------------------------|
| 38.5  | 1338.664185 | 0.008743  | <a href="#">NSLFYQK</a>       |
| 15.9  | 1338.660172 | 0.012756  | <a href="#">NSMFTAGKGVAEK</a> |
| 5.8   | 1338.660172 | 0.012756  | <a href="#">BTVYLQMBSLR</a>   |
| 1.7   | 1338.682632 | -0.009704 | <a href="#">NLSRMQSRFGK</a>   |
| 0.9   | 1338.686188 | -0.013260 | <a href="#">TVKMMYQK</a>      |
| 0.7   | 1338.660156 | 0.012772  | <a href="#">KEFQKAMEGQK</a>   |
| 0.1   | 1338.671402 | 0.001526  | <a href="#">QGADPQREK</a>     |

Mascot: <http://www.matrixscience.com/>

# MASCOT Search Results

## Peptide View

MS/MS Fragmentation of **ALTDMPQMR**

Found in **FIBA\_HUMAN**, Fibrinogen alpha chain OS=Homo sapiens GN=FGA PE=1 SV=2

Match to Query 30181: 1388.665028 from(695.339790,2+) rtinseconds(1667) index(22192)

Title: Locus:1.1.1.2723.10 File:"2013-07-02 CLN FXIII 180 min 1st F 2.wiff"

Data file C:\Program Files (x86)\Matrix Science\Mascot Daemon\mgf\7 FXIII 180 min 1st\mascot\_daemon\_merge.mgf

Click mouse within plot area to zoom in by factor of two about that point

Or, Plot from  to  Da

Label all possible matches  Label matches used for scoring

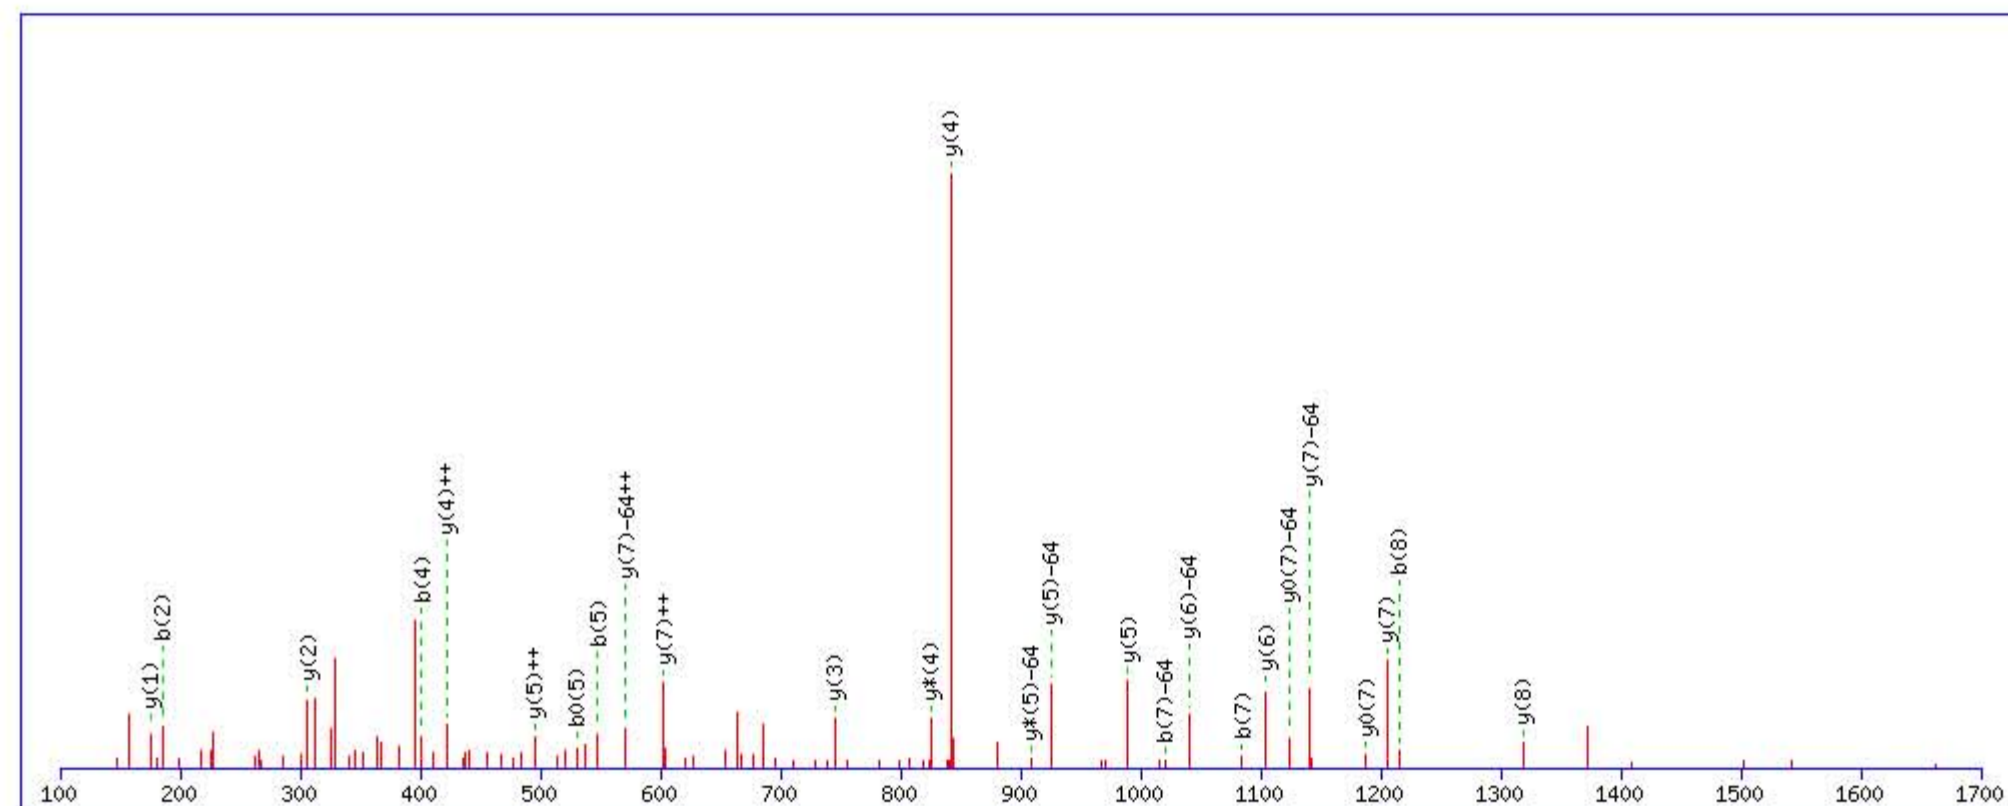

Monoisotopic mass of neutral peptide  $M_r(\text{calc})$ : 1388.661438

Fixed modifications: Carbamidomethyl (C) (apply to specified residues or termini only)

Variable modifications:

M5 : Oxidation (M), with neutral losses 0.000000 (shown in table), 63.998285

Q7 : Biotin:Thermo-21345 (Q)

Ions Score: 51 Expect: 3.2e-005

Matches : 26/112 fragment ions using 45 most intense peaks ([help](#))

| # | b                  | b <sup>++</sup> | b <sup>*</sup> | b <sup>+++</sup> | b <sup>0</sup>    | b <sup>0++</sup> | Seq. | y                  | y <sup>++</sup>   | y <sup>*</sup>    | y <sup>+++</sup> | y <sup>0</sup>     | y <sup>0++</sup> | # |
|---|--------------------|-----------------|----------------|------------------|-------------------|------------------|------|--------------------|-------------------|-------------------|------------------|--------------------|------------------|---|
| 1 | 72.044390          | 36.525833       |                |                  |                   |                  | A    |                    |                   |                   |                  |                    |                  | 9 |
| 2 | <b>185.128454</b>  | 93.067865       |                |                  |                   |                  | L    | <b>1318.631613</b> | 659.819445        | 1301.605064       | 651.306170       | 1300.621048        | 650.814162       | 8 |
| 3 | 286.176133         | 143.591704      |                |                  | 268.165568        | 134.586422       | T    | <b>1205.547549</b> | <b>603.277413</b> | 1188.521000       | 594.764138       | <b>1187.536984</b> | 594.272130       | 7 |
| 4 | <b>401.203076</b>  | 201.105176      |                |                  | 383.192511        | 192.099894       | D    | <b>1104.499870</b> | 552.753573        | 1087.473321       | 544.240298       | 1086.489305        | 543.748290       | 6 |
| 5 | <b>548.238476</b>  | 274.622876      |                |                  | <b>530.227911</b> | 265.617594       | M    | <b>989.472927</b>  | <b>495.240102</b> | 972.446378        | 486.726827       |                    |                  | 5 |
| 6 | 645.291240         | 323.149258      |                |                  | 627.280675        | 314.143976       | P    | <b>842.437527</b>  | <b>421.722402</b> | <b>825.410978</b> | 413.209127       |                    |                  | 4 |
| 7 | <b>1084.516566</b> | 542.761921      | 1067.490017    | 534.248647       | 1066.506001       | 533.756639       | Q    | <b>745.384763</b>  | 373.196020        | 728.358214        | 364.682745       |                    |                  | 3 |
| 8 | <b>1215.557051</b> | 608.282164      | 1198.530502    | 599.768889       | 1197.546486       | 599.276881       | M    | <b>306.159437</b>  | 153.583356        | 289.132888        | 145.070082       |                    |                  | 2 |
| 9 |                    |                 |                |                  |                   |                  | R    | <b>175.118952</b>  | 88.063114         | 158.092403        | 79.549839        |                    |                  | 1 |

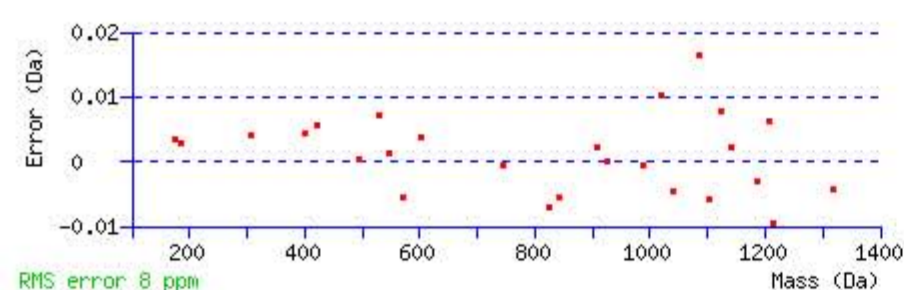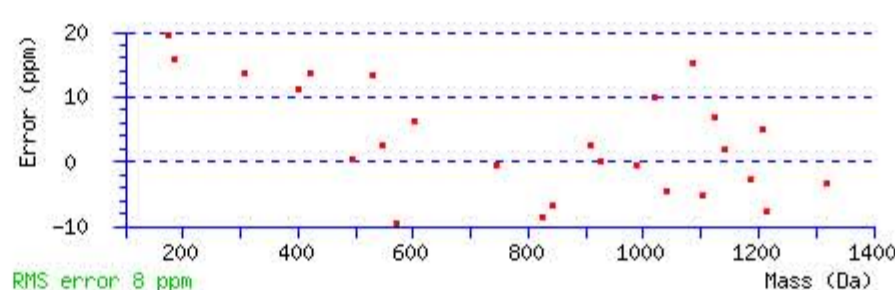

NCBI BLAST search of [ALTDMPQMR](#)

(Parameters: blastp, nr protein database, expect=20000, no filter, PAM30)

Other BLAST [web gateways](#)

## All matches to this query

| Score | $M_r(\text{calc})$ : | Delta    | Sequence                      |
|-------|----------------------|----------|-------------------------------|
| 50.8  | 1388.661438          | 0.003590 | <a href="#">ALTDMPQMR</a>     |
| 15.4  | 1388.661438          | 0.003590 | <a href="#">ALTDMPQMR</a>     |
| 2.8   | 1388.660568          | 0.004460 | <a href="#">SEMTASPLVGPGR</a> |
| 1.9   | 1388.646637          | 0.018391 | <a href="#">DREAGSMLPAGNR</a> |

# MASCOT Search Results

## Peptide View

MS/MS Fragmentation of **QFTSSTSYNR**

Found in **FIBA\_HUMAN**, Fibrinogen alpha chain OS=Homo sapiens GN=FGA PE=1 SV=2

Match to Query 34895: 1500.708348 from(751.361450,2+) rtinseconds(1612) index(21781)

Title: Locus:1.1.1.2704.5 File:"2013-07-02 CLN FXIII 180 min 1st F 2.wiff"

Data file C:\Program Files (x86)\Matrix Science\Mascot Daemon\mgf\7 FXIII 180 min 1st\mascot\_daemon\_merge.mgf

Click mouse within plot area to zoom in by factor of two about that point

Or, Plot from  to  Da

Label all possible matches  Label matches used for scoring

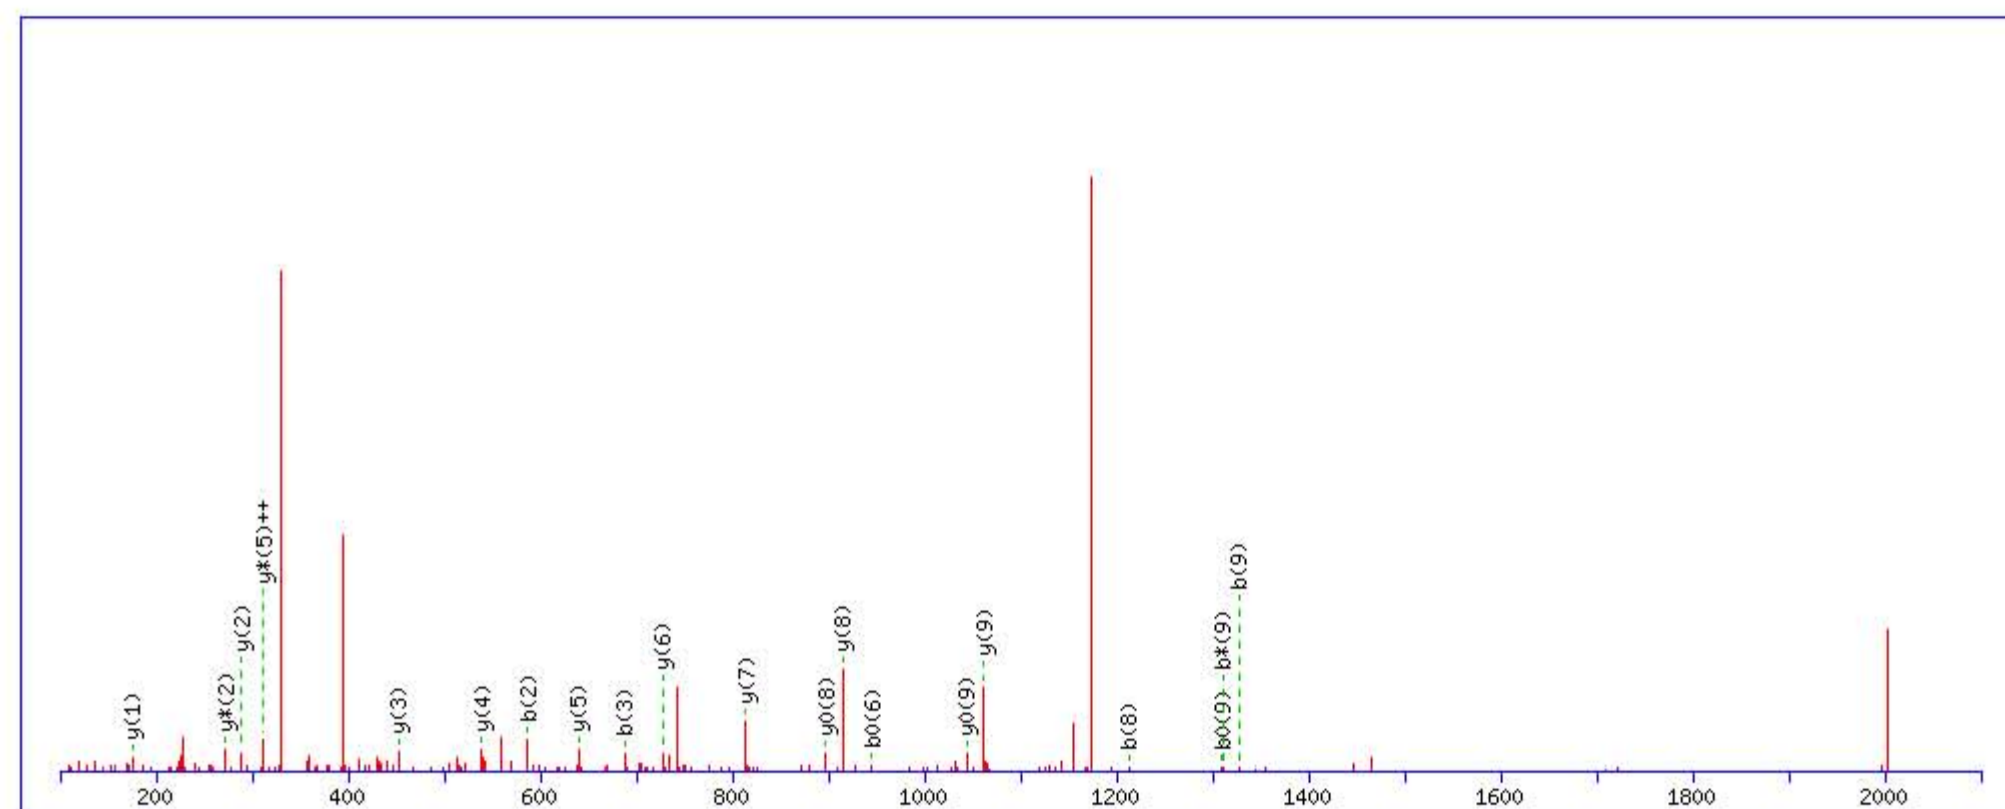

Monoisotopic mass of neutral peptide Mr(calc): 1500.703110

Fixed modifications: Carbamidomethyl (C) (apply to specified residues or termini only)

Variable modifications:

Q1 : Biotin:Thermo-21345 (Q)

Ions Score: 54 Expect: 4e-005

Matches : 20/98 fragment ions using 40 most intense peaks [\(help\)](#)

| #  | b                  | b <sup>++</sup> | b <sup>*</sup>     | b <sup>*++</sup> | b <sup>0</sup>     | b <sup>0++</sup> | Seq. | y                  | y <sup>++</sup> | y <sup>*</sup>    | y <sup>*++</sup>  | y <sup>0</sup>     | y <sup>0++</sup> | #  |
|----|--------------------|-----------------|--------------------|------------------|--------------------|------------------|------|--------------------|-----------------|-------------------|-------------------|--------------------|------------------|----|
| 1  | 440.232602         | 220.619939      | 423.206053         | 212.106664       |                    |                  | Q    |                    |                 |                   |                   |                    |                  | 10 |
| 2  | <b>587.301016</b>  | 294.154146      | 570.274467         | 285.640872       |                    |                  | F    | <b>1062.485064</b> | 531.746170      | 1045.458515       | 523.232896        | <b>1044.474499</b> | 522.740887       | 9  |
| 3  | <b>688.348695</b>  | 344.677986      | 671.322146         | 336.164711       | 670.338130         | 335.672703       | T    | <b>915.416650</b>  | 458.211963      | 898.390101        | 449.698689        | <b>897.406085</b>  | 449.206681       | 8  |
| 4  | 775.380723         | 388.194000      | 758.354174         | 379.680725       | 757.370158         | 379.188717       | S    | <b>814.368971</b>  | 407.688124      | 797.342422        | 399.174849        | 796.358406         | 398.682841       | 7  |
| 5  | 862.412751         | 431.710014      | 845.386202         | 423.196739       | 844.402186         | 422.704731       | S    | <b>727.336943</b>  | 364.172110      | 710.310394        | 355.658835        | 709.326378         | 355.166827       | 6  |
| 6  | 963.460430         | 482.233853      | 946.433881         | 473.720578       | <b>945.449865</b>  | 473.228570       | T    | <b>640.304915</b>  | 320.656096      | 623.278366        | <b>312.142821</b> | 622.294350         | 311.650813       | 5  |
| 7  | 1050.492458        | 525.749867      | 1033.465909        | 517.236593       | 1032.481893        | 516.744584       | S    | <b>539.257236</b>  | 270.132256      | 522.230687        | 261.618982        | 521.246671         | 261.126974       | 4  |
| 8  | <b>1213.555787</b> | 607.281532      | 1196.529238        | 598.768257       | 1195.545222        | 598.276249       | Y    | <b>452.225208</b>  | 226.616242      | 435.198659        | 218.102967        |                    |                  | 3  |
| 9  | <b>1327.598714</b> | 664.302995      | <b>1310.572165</b> | 655.789721       | <b>1309.588149</b> | 655.297712       | N    | <b>289.161879</b>  | 145.084577      | <b>272.135330</b> | 136.571303        |                    |                  | 2  |
| 10 |                    |                 |                    |                  |                    |                  | R    | <b>175.118952</b>  | 88.063114       | 158.092403        | 79.549839         |                    |                  | 1  |

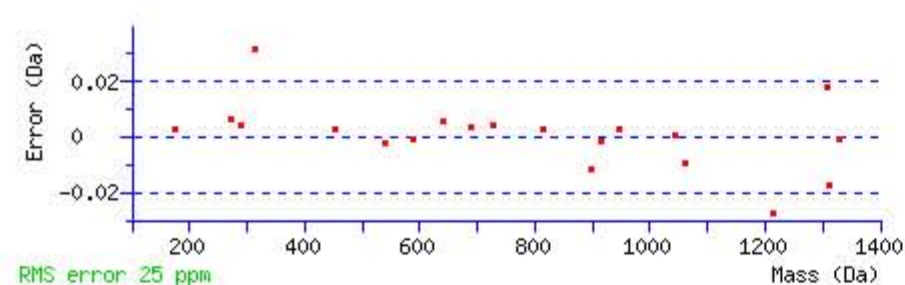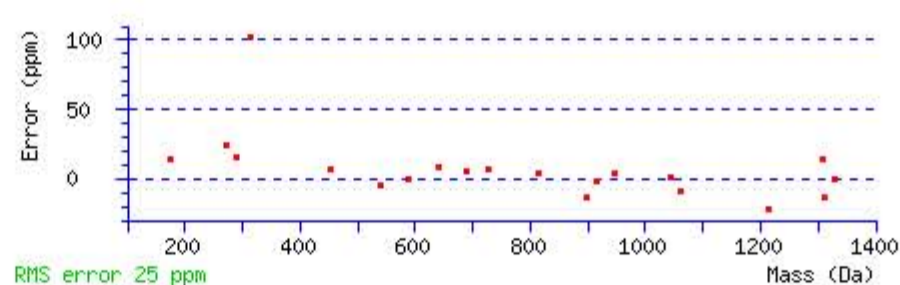

NCBI BLAST search of **QFTSSTSYNR**

(Parameters: blastp, nr protein database, expect=20000, no filter, PAM30)

Other BLAST [web gateways](#)

All matches to this query

| Score | Mr(calc):   | Delta     | Sequence                        |
|-------|-------------|-----------|---------------------------------|
| 54.0  | 1500.703110 | 0.005238  | <a href="#">QFTSSTSYNR</a>      |
| 6.8   | 1500.699768 | 0.008580  | <a href="#">AEAGSGGPGFTFTFR</a> |
| 6.4   | 1500.725571 | -0.017223 | <a href="#">HQSHTAEAGPR</a>     |
| 4.0   | 1500.724869 | -0.016521 | <a href="#">SKIEDYFPEFAR</a>    |
| 3.3   | 1500.728043 | -0.019695 | <a href="#">EEARTTPGREEAR</a>   |
| 1.6   | 1500.728256 | -0.019908 | <a href="#">MVDYYEVLGLQR</a>    |
| 1.3   | 1500.687851 | 0.020497  | <a href="#">MTVLSTAQSDYNR</a>   |
| 1.1   | 1500.725586 | -0.017238 | <a href="#">IGQICKNDFGGHR</a>   |





# MASCOT Search Results

## Peptide View

MS/MS Fragmentation of **ISQLTR**

Found in **FIBB\_HUMAN**, Fibrinogen beta chain OS=Homo sapiens GN=FGB PE=1 SV=2

Match to Query 16830: 1027.595308 from(514.804930,2+) rtinseconds(1590) index(57950)

Title: Locus:1.1.1.2977.11 File:"2013-07-02 CLN FXIII 180 min 1st F 4.wiff"

Data file C:\Program Files (x86)\Matrix Science\Mascot Daemon\mgf\7 FXIII 180 min 1st\mascot\_daemon\_merge.mgf

Click mouse within plot area to zoom in by factor of two about that point

Or, Plot from  to  Da

Label all possible matches  Label matches used for scoring

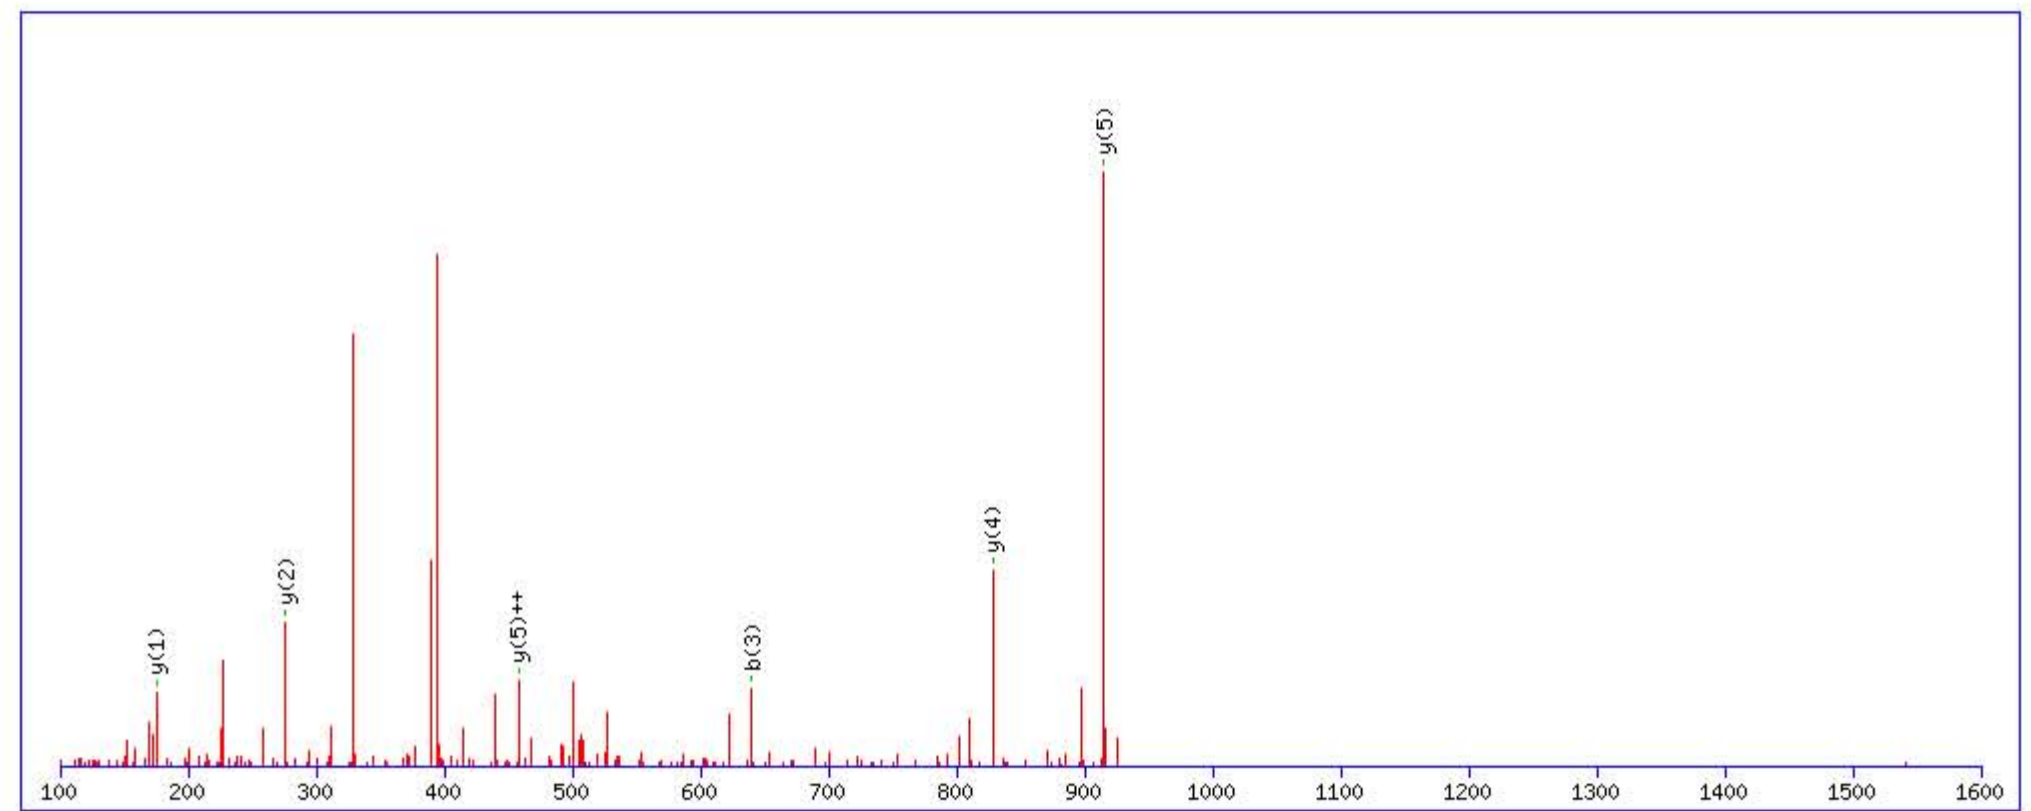

Monoisotopic mass of neutral peptide Mr(calc): 1027.584824

Fixed modifications: Carbamidomethyl (C) (apply to specified residues or termini only)

Variable modifications:

Q3 : Biotin:Thermo-21345 (Q)

Ions Score: 25 Expect: 0.05

Matches : 6/52 fragment ions using 9 most intense peaks [\(help\)](#)

| # | b          | b <sup>++</sup> | b <sup>*</sup> | b <sup>+++</sup> | b <sup>0</sup> | b <sup>0++</sup> | Seq. | y          | y <sup>++</sup> | y <sup>*</sup> | y <sup>+++</sup> | y <sup>0</sup> | y <sup>0++</sup> | # |
|---|------------|-----------------|----------------|------------------|----------------|------------------|------|------------|-----------------|----------------|------------------|----------------|------------------|---|
| 1 | 114.091340 | 57.549308       |                |                  |                |                  | I    |            |                 |                |                  |                |                  | 6 |
| 2 | 201.123368 | 101.065322      |                |                  | 183.112803     | 92.060039        | S    | 915.508049 | 458.257663      | 898.481500     | 449.744388       | 897.497484     | 449.252380       | 5 |
| 3 | 640.348694 | 320.677985      | 623.322145     | 312.164711       | 622.338129     | 311.672703       | Q    | 828.476021 | 414.741649      | 811.449472     | 406.228374       | 810.465456     | 405.736366       | 4 |
| 4 | 753.432758 | 377.220017      | 736.406209     | 368.706743       | 735.422193     | 368.214735       | L    | 389.250695 | 195.128986      | 372.224146     | 186.615711       | 371.240130     | 186.123703       | 3 |
| 5 | 854.480437 | 427.743857      | 837.453888     | 419.230582       | 836.469872     | 418.738574       | T    | 276.166631 | 138.586954      | 259.140082     | 130.073679       | 258.156066     | 129.581671       | 2 |
| 6 |            |                 |                |                  |                |                  | R    | 175.118952 | 88.063114       | 158.092403     | 79.549840        |                |                  | 1 |

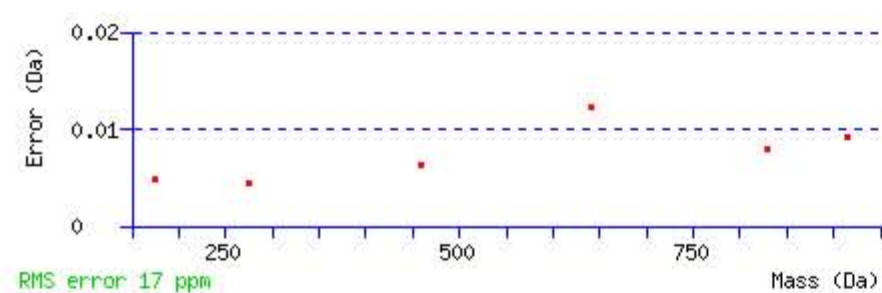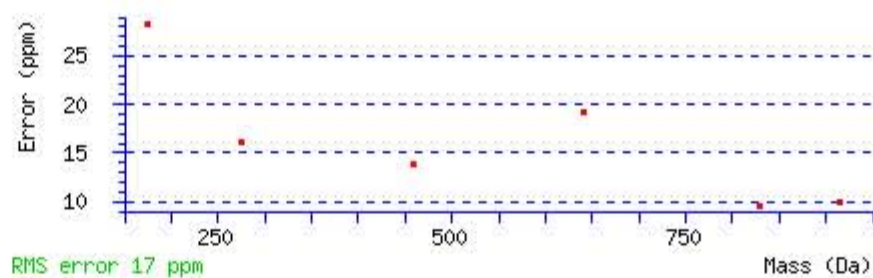

NCBI BLAST search of **ISQLTR**

(Parameters: blastp, nr protein database, expect=20000, no filter, PAM30)

Other BLAST [web gateways](#)

All matches to this query

| Score | Mr(calc):   | Delta     | Sequence                   |
|-------|-------------|-----------|----------------------------|
| 25.4  | 1027.584824 | 0.010484  | <a href="#">ISQLTR</a>     |
| 22.3  | 1027.602585 | -0.007277 | <a href="#">ISPLVKDTR</a>  |
| 22.1  | 1027.602570 | -0.007262 | <a href="#">LSAAADLIVR</a> |
| 10.7  | 1027.584824 | 0.010484  | <a href="#">ILSQTR</a>     |
| 10.7  | 1027.584839 | 0.010469  | <a href="#">LQTVTR</a>     |
| 10.7  | 1027.592682 | 0.002626  | <a href="#">LRLSWPTR</a>   |
| 10.6  | 1027.584808 | 0.010500  | <a href="#">LSKNQK</a>     |
| 9.3   | 1027.584839 | 0.010469  | <a href="#">VTQLTR</a>     |
| 8.7   | 1027.602570 | -0.007262 | <a href="#">IILQSEGLR</a>  |
| 8.2   | 1027.602554 | -0.007246 | <a href="#">ILIERQEK</a>   |

Mascot: <http://www.matrixscience.com/>

# MASCOT Search Results

## Peptide View

MS/MS Fragmentation of **YQISVNK**

Found in **FIBB\_HUMAN**, Fibrinogen beta chain OS=Homo sapiens GN=FGB PE=1 SV=2

Match to Query 22290: 1161.625748 from(581.820150,2+) rtinseconds(1677) index(4362)

Title: Locus:1.1.1.2838.7 File:"2013-07-02 CLN FXIII 180 min 1st F 1.wiff"

Data file C:\Program Files (x86)\Matrix Science\Mascot Daemon\mgf\7 FXIII 180 min 1st\mascot\_daemon\_merge.mgf

Click mouse within plot area to zoom in by factor of two about that point

Or, Plot from  to  Da

Label all possible matches  Label matches used for scoring

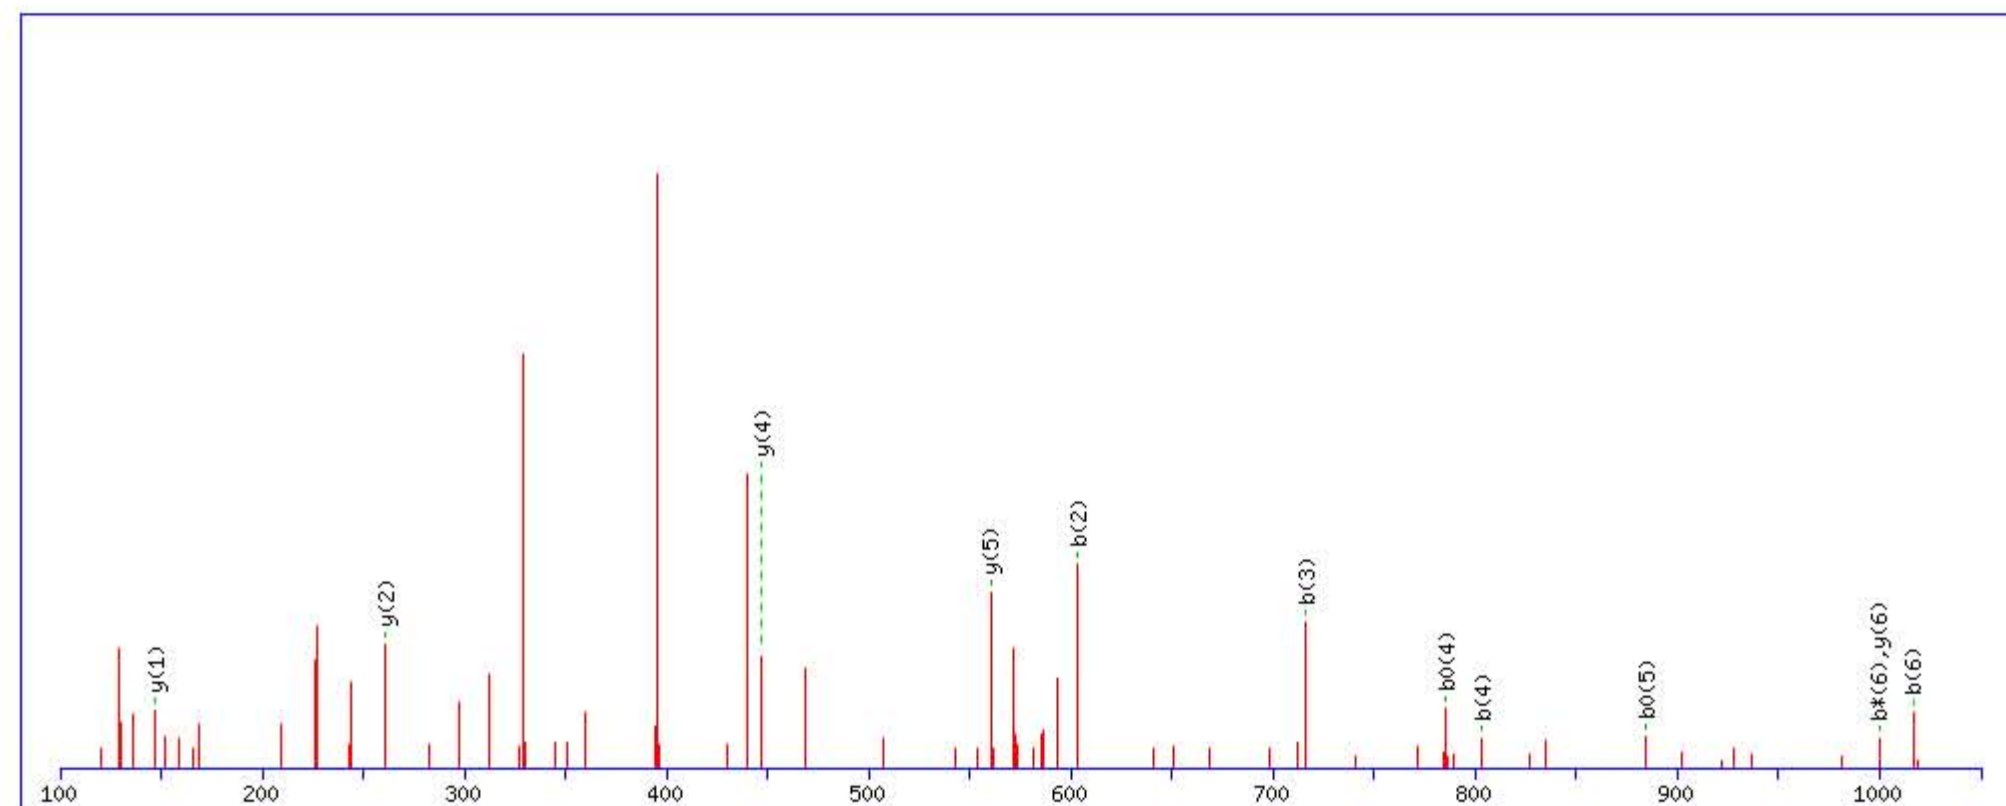

Monoisotopic mass of neutral peptide Mr(calc): 1161.621597

Fixed modifications: Carbamidomethyl (C) (apply to specified residues or termini only)

Variable modifications:

Q2 : Biotin:Thermo-21345 (Q)

Ions Score: 29 Expect: 0.024

Matches : 12/58 fragment ions using 18 most intense peaks [\(help\)](#)

| # | b                  | b <sup>++</sup> | b <sup>*</sup>    | b <sup>***</sup> | b <sup>0</sup>    | b <sup>0++</sup> | Seq. | y                 | y <sup>++</sup> | y <sup>*</sup> | y <sup>***</sup> | y <sup>0</sup> | y <sup>0++</sup> | # |
|---|--------------------|-----------------|-------------------|------------------|-------------------|------------------|------|-------------------|-----------------|----------------|------------------|----------------|------------------|---|
| 1 | 164.070605         | 82.538940       |                   |                  |                   |                  | Y    |                   |                 |                |                  |                |                  | 7 |
| 2 | <b>603.295931</b>  | 302.151604      | 586.269382        | 293.638329       |                   |                  | Q    | <b>999.565563</b> | 500.286419      | 982.539014     | 491.773145       | 981.554998     | 491.281137       | 6 |
| 3 | <b>716.379995</b>  | 358.693636      | 699.353446        | 350.180361       |                   |                  | I    | <b>560.340237</b> | 280.673756      | 543.313688     | 272.160482       | 542.329672     | 271.668474       | 5 |
| 4 | <b>803.412023</b>  | 402.209650      | 786.385474        | 393.696375       | <b>785.401458</b> | 393.204367       | S    | <b>447.256173</b> | 224.131724      | 430.229624     | 215.618450       | 429.245608     | 215.126442       | 4 |
| 5 | 902.480437         | 451.743857      | 885.453888        | 443.230582       | <b>884.469872</b> | 442.738574       | V    | 360.224145        | 180.615710      | 343.197596     | 172.102436       |                |                  | 3 |
| 6 | <b>1016.523364</b> | 508.765320      | <b>999.496815</b> | 500.252046       | 998.512799        | 499.760038       | N    | <b>261.155731</b> | 131.081503      | 244.129182     | 122.568229       |                |                  | 2 |
| 7 |                    |                 |                   |                  |                   |                  | K    | <b>147.112804</b> | 74.060040       | 130.086255     | 65.546765        |                |                  | 1 |

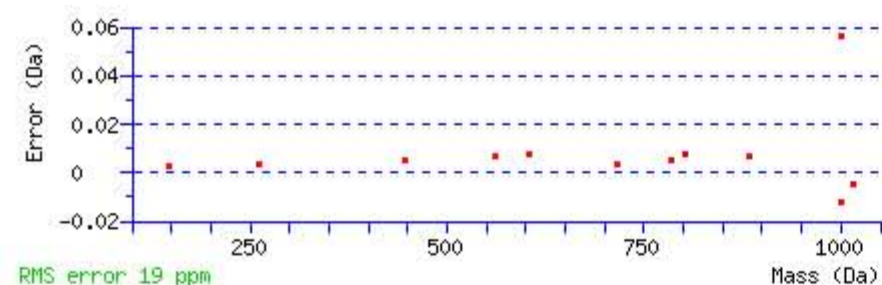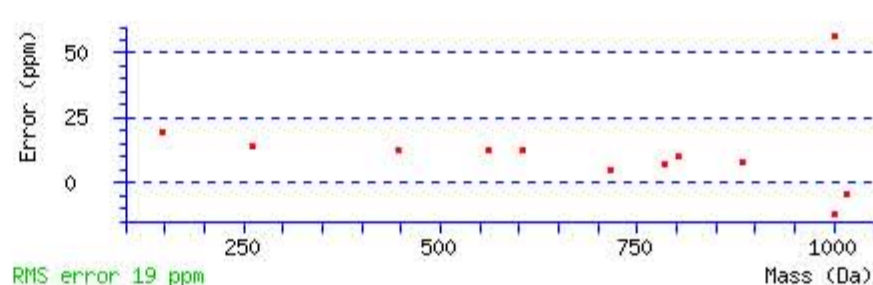

NCBI BLAST search of **YQISVNK**

(Parameters: blastp, nr protein database, expect=20000, no filter, PAM30)

Other BLAST [web gateways](#)

## All matches to this query

| Score | Mr(calc):   | Delta     | Sequence                   |
|-------|-------------|-----------|----------------------------|
| 29.2  | 1161.621597 | 0.004151  | <a href="#">YQISVNK</a>    |
| 23.4  | 1161.629456 | -0.003708 | <a href="#">DFALRLWNK</a>  |
| 6.3   | 1161.611694 | 0.014054  | <a href="#">WMIRNWIK</a>   |
| 4.5   | 1161.639359 | -0.013611 | <a href="#">FLDKDGLINK</a> |
| 3.9   | 1161.632843 | -0.007095 | <a href="#">QHLQTPK</a>    |
| 3.8   | 1161.618225 | 0.007523  | <a href="#">KISFPQWEK</a>  |
| 3.8   | 1161.617554 | 0.008194  | <a href="#">KLSRECEIK</a>  |
| 3.8   | 1161.642715 | -0.016967 | <a href="#">KSLIDPKMSK</a> |
| 3.5   | 1161.632843 | -0.007095 | <a href="#">QHLQTPK</a>    |
| 2.0   | 1161.621597 | 0.004151  | <a href="#">QKEAFTK</a>    |

# {MATRIX} {SCIENCE} Mascot Search Results

## Peptide View

MS/MS Fragmentation of **IRPFFPQQ**

Found in **FIBB\_HUMAN**, Fibrinogen beta chain OS=Homo sapiens GN=FGB PE=1 SV=2

Match to Query 27930: 1342.734748 from(672.374650,2+) rtinseconds(2251) index(8211)

Title: Locus:1.1.1.3038.6 File:"2013-07-02 CLN FXIII 180 min 1st F 1.wiff"

Data file C:\Program Files (x86)\Matrix Science\Mascot Daemon\mgf\7 FXIII 180 min 1st\mascot\_daemon\_merge.mgf

Click mouse within plot area to zoom in by factor of two about that point

Or, Plot from  to  Da

Label all possible matches  Label matches used for scoring

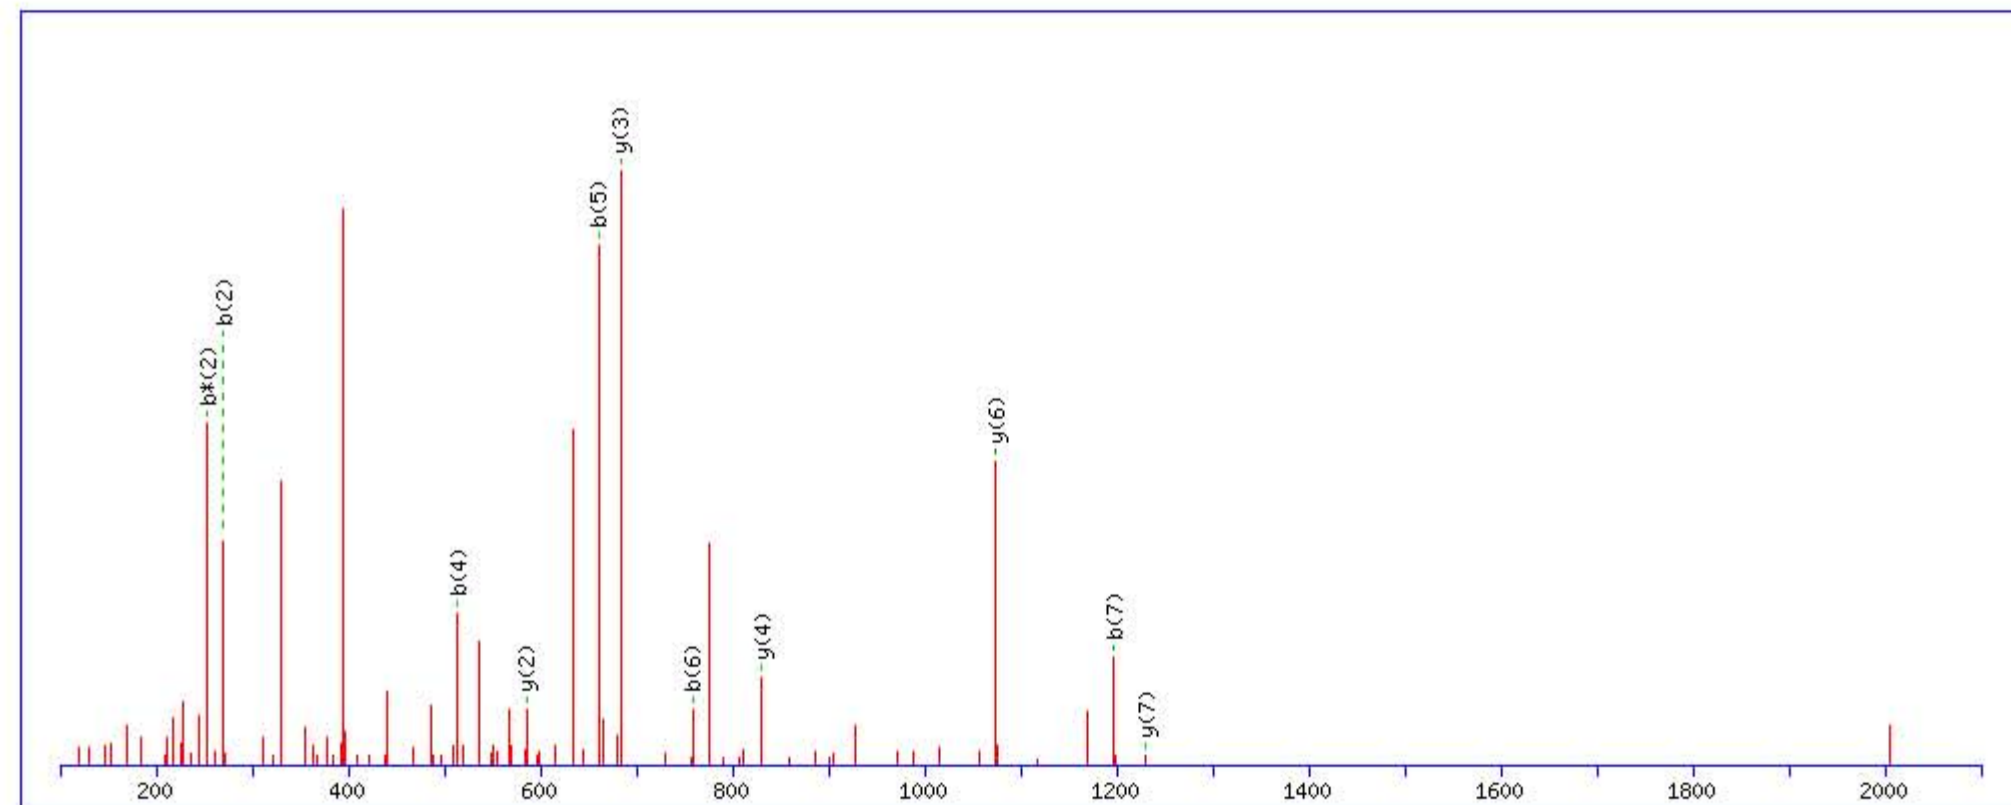

Monoisotopic mass of neutral peptide Mr(calc): 1342.722000

Fixed modifications: Carbamidomethyl (C) (apply to specified residues or termini only)

Variable modifications:

Q7 : Biotin:Thermo-21345 (Q)

Ions Score: 26 Expect: 0.018

Matches : 11/54 fragment ions using 23 most intense peaks [\(help\)](#)

| # | b                  | b <sup>++</sup> | b <sup>*</sup>    | b <sup>*++</sup> | Seq. | y                  | y <sup>++</sup> | y <sup>*</sup> | y <sup>*++</sup> | # |
|---|--------------------|-----------------|-------------------|------------------|------|--------------------|-----------------|----------------|------------------|---|
| 1 | 114.091340         | 57.549308       |                   |                  | I    |                    |                 |                |                  | 8 |
| 2 | <b>270.192451</b>  | 135.599864      | <b>253.165902</b> | 127.086589       | R    | <b>1230.645212</b> | 615.826244      | 1213.618663    | 607.312970       | 7 |
| 3 | 367.245215         | 184.126245      | 350.218666        | 175.612971       | P    | <b>1074.544101</b> | 537.775689      | 1057.517552    | 529.262414       | 6 |
| 4 | <b>514.313629</b>  | 257.660453      | 497.287080        | 249.147178       | F    | 977.491337         | 489.249307      | 960.464788     | 480.736032       | 5 |
| 5 | <b>661.382043</b>  | 331.194660      | 644.355494        | 322.681385       | F    | <b>830.422923</b>  | 415.715100      | 813.396374     | 407.201825       | 4 |
| 6 | <b>758.434807</b>  | 379.721042      | 741.408258        | 371.207767       | P    | <b>683.354509</b>  | 342.180893      | 666.327960     | 333.667618       | 3 |
| 7 | <b>1197.660133</b> | 599.333705      | 1180.633584       | 590.820430       | Q    | <b>586.301745</b>  | 293.654511      | 569.275196     | 285.141236       | 2 |
| 8 |                    |                 |                   |                  | Q    | 147.076419         | 74.041848       | 130.049870     | 65.528573        | 1 |

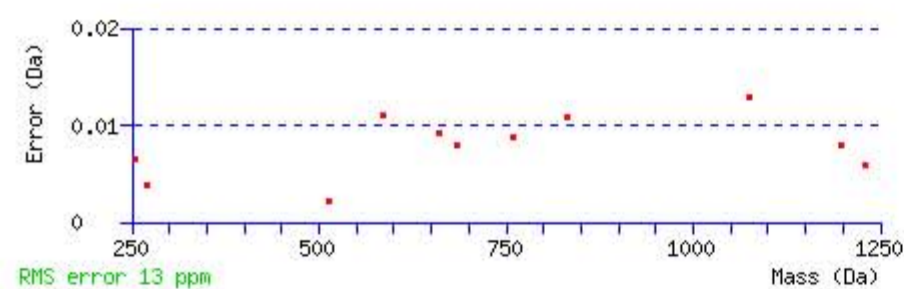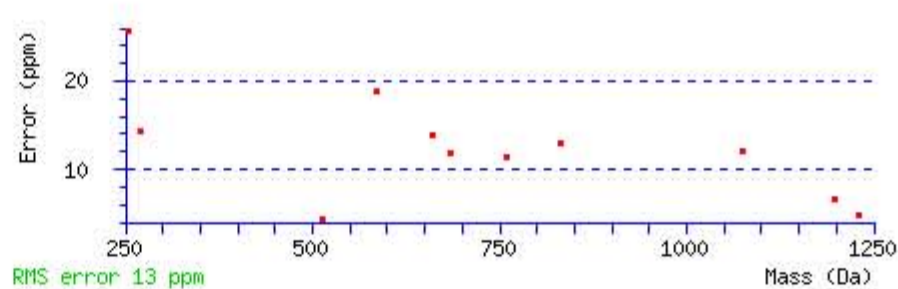

NCBI BLAST search of [IRPFFPQQ](#)

(Parameters: blastp, nr protein database, expect=20000, no filter, PAM30)

Other BLAST [web gateways](#)

All matches to this query

| Score | Mr(calc):   | Delta     | Sequence                     |
|-------|-------------|-----------|------------------------------|
| 26.2  | 1342.722000 | 0.012748  | <a href="#">IRPFFPQQ</a>     |
| 26.0  | 1342.722000 | 0.012748  | <a href="#">IRPFFPQQ</a>     |
| 7.2   | 1342.716629 | 0.018119  | <a href="#">LLSVTEDQK</a>    |
| 6.1   | 1342.729187 | 0.005561  | <a href="#">QPHRPIER</a>     |
| 4.9   | 1342.743103 | -0.008355 | <a href="#">IRYVPEQK</a>     |
| 3.5   | 1342.727859 | 0.006889  | <a href="#">ATPTSTAKQK</a>   |
| 2.3   | 1342.746918 | -0.012170 | <a href="#">RIYNNIPANLR</a>  |
| 0.0   | 1342.735718 | -0.000970 | <a href="#">EPVFIAAGDIRR</a> |



# MASCOT Search Results

## Peptide View

MS/MS Fragmentation of **AHYGGFTVQNEANK**

Found in **FIBB\_HUMAN**, Fibrinogen beta chain OS=Homo sapiens GN=FGB PE=1 SV=2

Match to Query 46380: 1845.904812 from(616.308880,3+) rtinseconds(1673) index(58399)

Title: Locus:1.1.1.3006.6 File:"2013-07-02 CLN FXIII 180 min 1st F 4.wiff"

Data file C:\Program Files (x86)\Matrix Science\Mascot Daemon\mgf7 FXIII 180 min 1st\mascot\_daemon\_merge.mgf

Click mouse within plot area to zoom in by factor of two about that point

Or, Plot from  to  Da

Label all possible matches  Label matches used for scoring

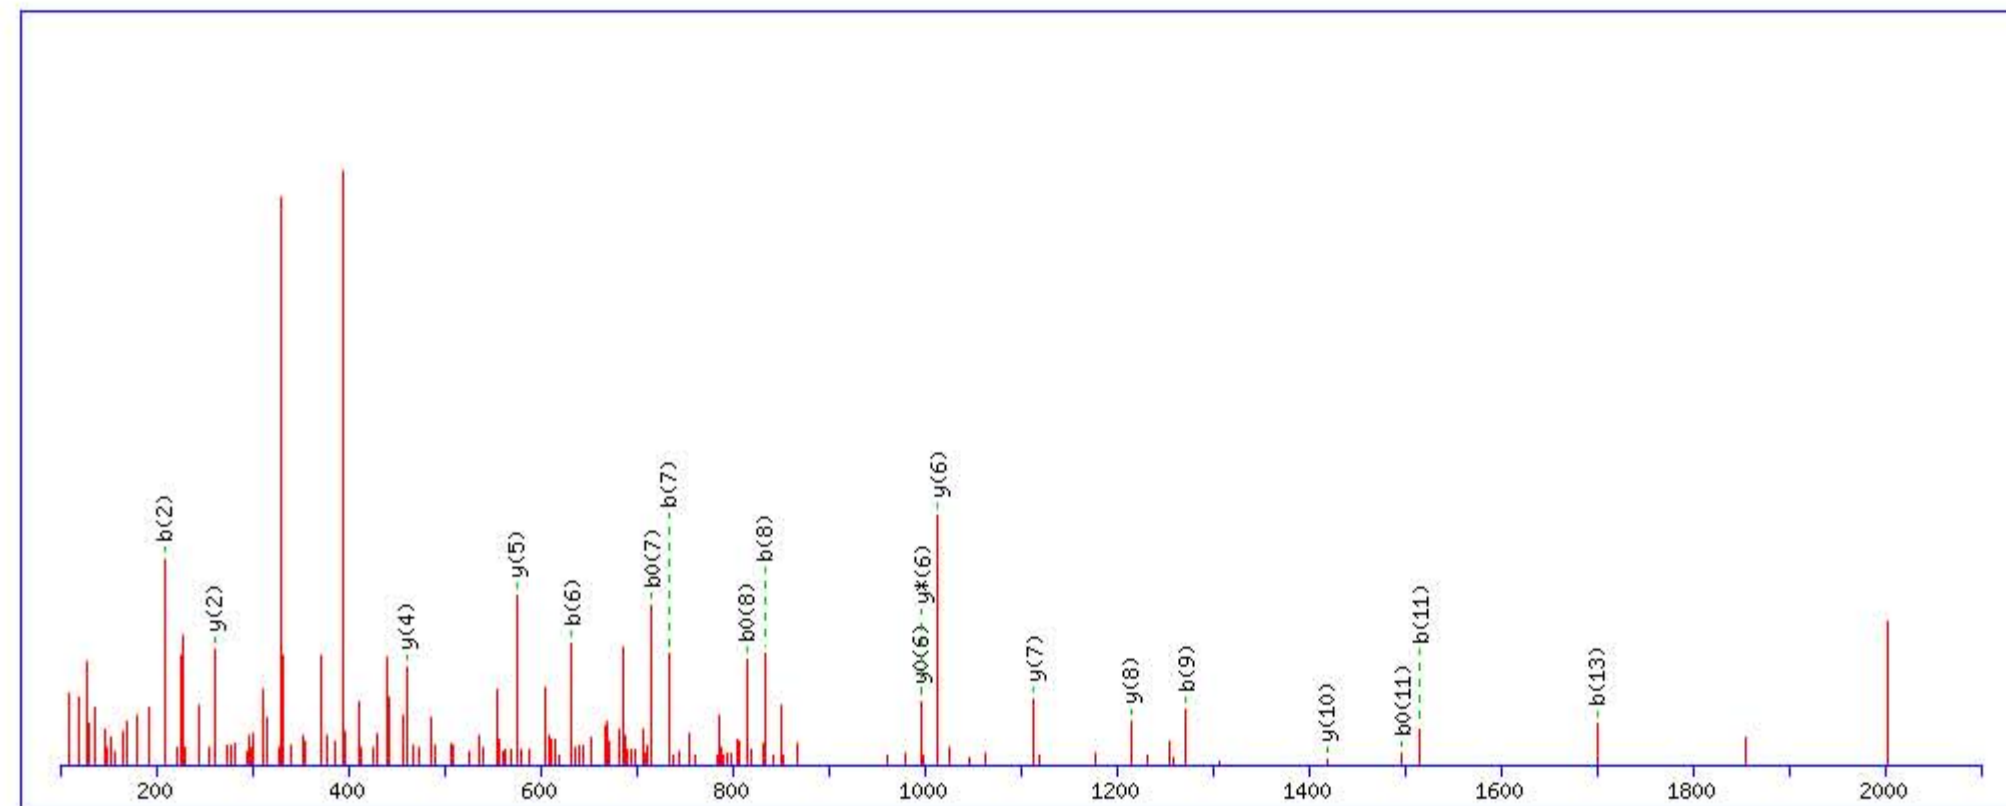

Monoisotopic mass of neutral peptide Mr(calc): 1845.883194

Fixed modifications: Carbamidomethyl (C) (apply to specified residues or termini only)

Variable modifications:

Q9 : Biotin:Thermo-21345 (Q)

Ions Score: 54 Expect: 9.8e-005

Matches : 19/122 fragment ions using 28 most intense peaks [\(help\)](#)

| #  | b                  | b <sup>++</sup> | b <sup>*</sup> | b <sup>*++</sup> | b <sup>0</sup>     | b <sup>0++</sup> | Seq. | y                  | y <sup>++</sup> | y <sup>*</sup>    | y <sup>*++</sup> | y <sup>0</sup>    | y <sup>0++</sup> | #  |
|----|--------------------|-----------------|----------------|------------------|--------------------|------------------|------|--------------------|-----------------|-------------------|------------------|-------------------|------------------|----|
| 1  | 72.044390          | 36.525833       |                |                  |                    |                  | A    |                    |                 |                   |                  |                   |                  | 14 |
| 2  | <b>209.103302</b>  | 105.055289      |                |                  |                    |                  | H    | 1775.853367        | 888.430321      | 1758.826818       | 879.917047       | 1757.842802       | 879.425039       | 13 |
| 3  | 372.166631         | 186.586953      |                |                  |                    |                  | Y    | 1638.794455        | 819.900866      | 1621.767906       | 811.387591       | 1620.783890       | 810.895583       | 12 |
| 4  | 429.188095         | 215.097685      |                |                  |                    |                  | G    | 1475.731126        | 738.369201      | 1458.704577       | 729.855927       | 1457.720561       | 729.363918       | 11 |
| 5  | 486.209559         | 243.608417      |                |                  |                    |                  | G    | <b>1418.709662</b> | 709.858469      | 1401.683113       | 701.345195       | 1400.699097       | 700.853186       | 10 |
| 6  | <b>633.277973</b>  | 317.142625      |                |                  |                    |                  | F    | 1361.688198        | 681.347737      | 1344.661649       | 672.834463       | 1343.677633       | 672.342455       | 9  |
| 7  | <b>734.325652</b>  | 367.666464      |                |                  | <b>716.315087</b>  | 358.661182       | T    | <b>1214.619784</b> | 607.813530      | 1197.593235       | 599.300256       | 1196.609219       | 598.808247       | 8  |
| 8  | <b>833.394066</b>  | 417.200671      |                |                  | <b>815.383501</b>  | 408.195388       | V    | <b>1113.572105</b> | 557.289691      | 1096.545556       | 548.776416       | 1095.561540       | 548.284408       | 7  |
| 9  | <b>1272.619392</b> | 636.813334      | 1255.592843    | 628.300059       | 1254.608827        | 627.808051       | Q    | <b>1014.503691</b> | 507.755484      | <b>997.477142</b> | 499.242209       | <b>996.493126</b> | 498.750201       | 6  |
| 10 | 1386.662319        | 693.834797      | 1369.635770    | 685.321523       | 1368.651754        | 684.829515       | N    | <b>575.278365</b>  | 288.142821      | 558.251816        | 279.629546       | 557.267800        | 279.137538       | 5  |
| 11 | <b>1515.704912</b> | 758.356094      | 1498.678363    | 749.842820       | <b>1497.694347</b> | 749.350811       | E    | <b>461.235438</b>  | 231.121357      | 444.208889        | 222.608083       | 443.224873        | 222.116075       | 4  |
| 12 | 1586.742026        | 793.874651      | 1569.715477    | 785.361377       | 1568.731461        | 784.869368       | A    | 332.192845         | 166.600060      | 315.166296        | 158.086786       |                   |                  | 3  |
| 13 | <b>1700.784953</b> | 850.896114      | 1683.758404    | 842.382840       | 1682.774388        | 841.890832       | N    | <b>261.155731</b>  | 131.081503      | 244.129182        | 122.568229       |                   |                  | 2  |
| 14 |                    |                 |                |                  |                    |                  | K    | 147.112804         | 74.060040       | 130.086255        | 65.546765        |                   |                  | 1  |

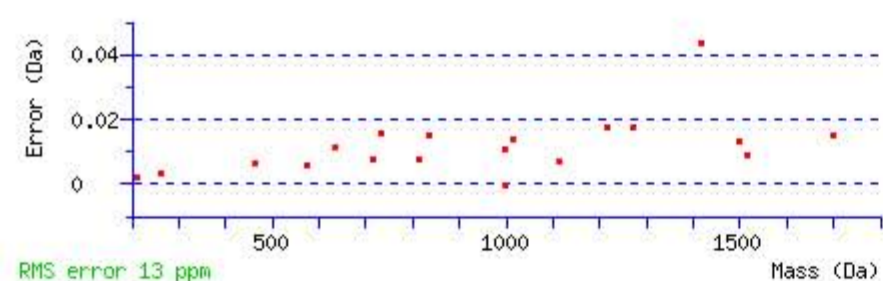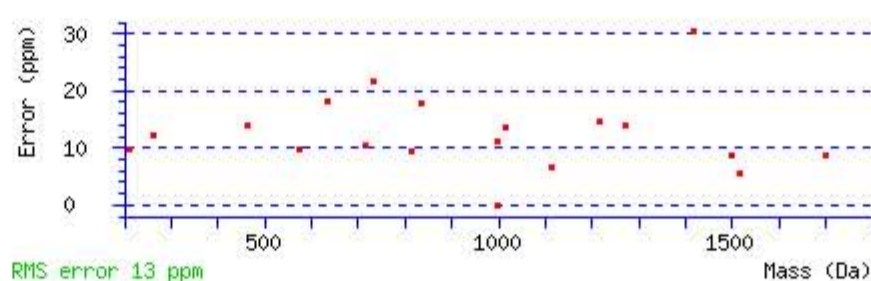

NCBI BLAST search of **AHYGGFTVQNEANK**

(Parameters: blastp, nr protein database, expect=20000, no filter, PAM30)

Other BLAST [web gateways](#)

All matches to this query

| Score | Mr(calc):   | Delta     | Sequence                       |
|-------|-------------|-----------|--------------------------------|
| 54.0  | 1845.883194 | 0.021618  | <a href="#">AHYGGFTVQNEANK</a> |
| 12.5  | 1845.918243 | -0.013431 | <a href="#">DSKEDQVPYVVEK</a>  |

Mascot: <http://www.matrixscience.com/>

**Peptide View**

MS/MS Fragmentation of **YLQEIYNSNNQK**

Found in **FIBG\_HUMAN**, Fibrinogen gamma chain OS=Homo sapiens GN=FGG PE=1 SV=3

Match to Query 45925: 1823.913732 from(608.978520,3+) rtinseconds(1837) index(59579)

Title: Locus:1.1.1.3063.7 File:"2013-07-02 CLN FXIII 180 min 1st F 4.wiff"

Data file C:\Program Files (x86)\Matrix Science\Mascot Daemon\mgf7 FXIII 180 min 1st\mascot\_daemon\_merge.mgf

Click mouse within plot area to zoom in by factor of two about that point

Or, Plot from  to  Da

Label all possible matches  Label matches used for scoring

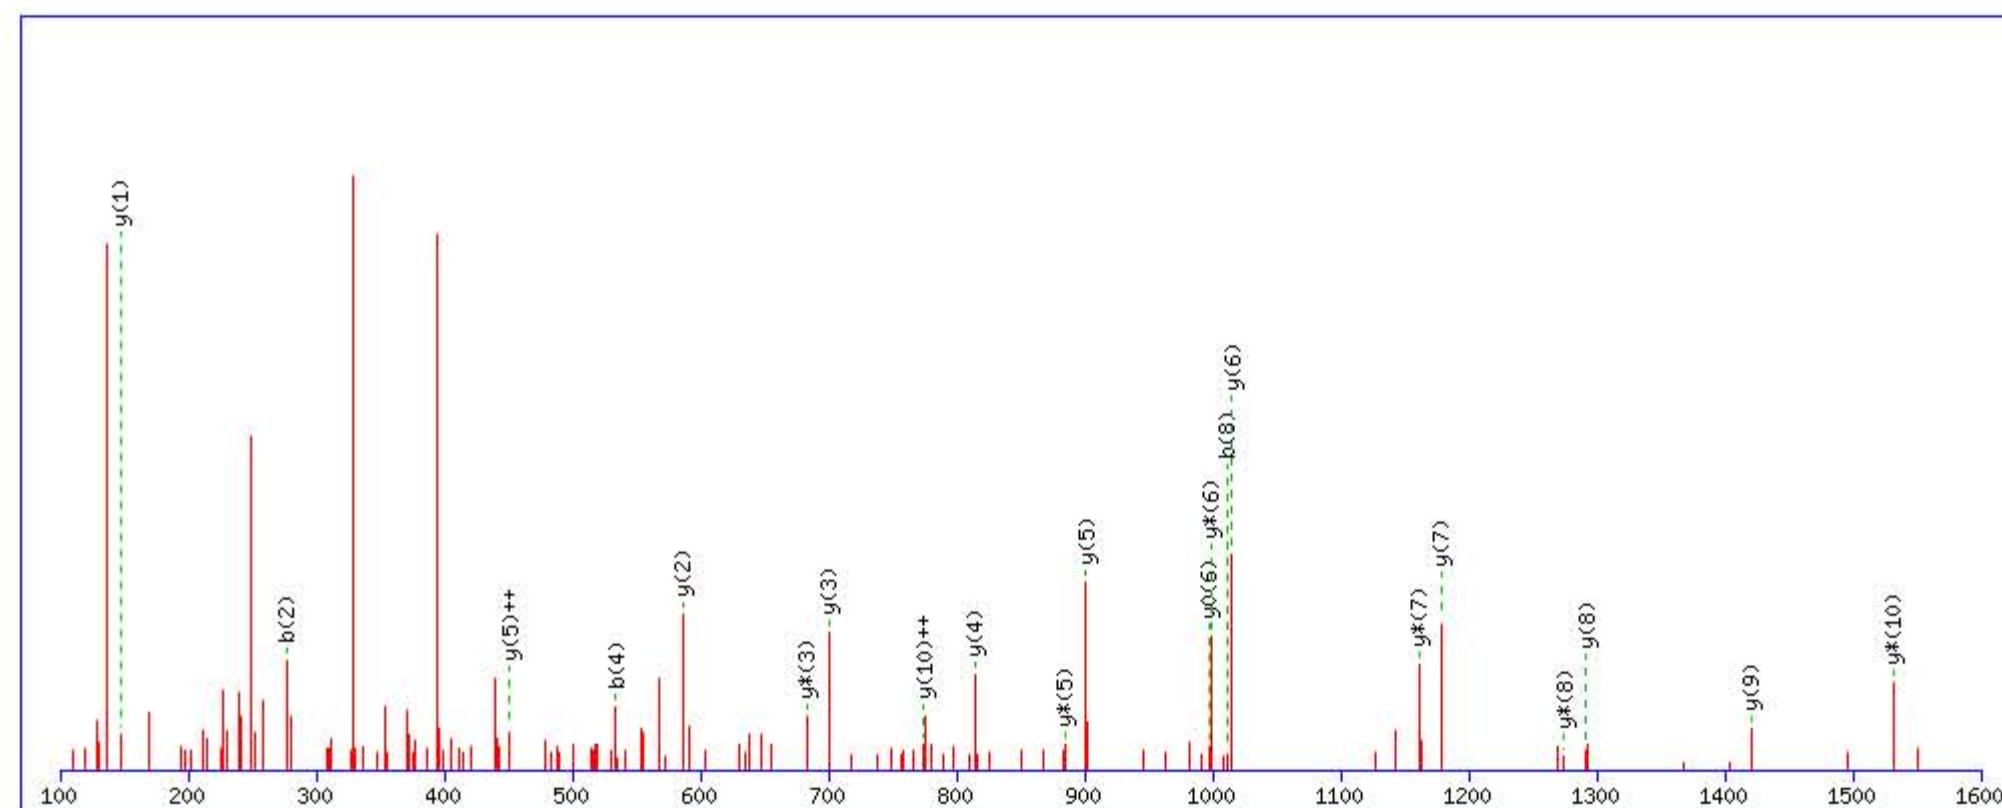

Monoisotopic mass of neutral peptide Mr(calc): 1823.887573

Fixed modifications: Carbamidomethyl (C) (apply to specified residues or termini only)

Variable modifications:

Q11 : Biotin:Thermo-21345 (Q)

Ions Score: 35 Expect: 0.0073

Matches : 21/114 fragment ions using 52 most intense peaks [\(help\)](#)

| #  | b                  | b <sup>++</sup> | b <sup>+</sup> | b <sup>*++</sup> | b <sup>0</sup> | b <sup>0++</sup> | Seq. | y                  | y <sup>++</sup>   | y <sup>+</sup>     | y <sup>*++</sup> | y <sup>0</sup>    | y <sup>0++</sup> | #  |
|----|--------------------|-----------------|----------------|------------------|----------------|------------------|------|--------------------|-------------------|--------------------|------------------|-------------------|------------------|----|
| 1  | 164.070605         | 82.538940       |                |                  |                |                  | Y    |                    |                   |                    |                  |                   |                  | 12 |
| 2  | <b>277.154669</b>  | 139.080973      |                |                  |                |                  | L    | 1661.831567        | 831.419422        | 1644.805018        | 822.906147       | 1643.821002       | 822.414139       | 11 |
| 3  | 405.213247         | 203.110262      | 388.186698     | 194.596987       |                |                  | Q    | 1548.747503        | <b>774.877390</b> | <b>1531.720954</b> | 766.364115       | 1530.736938       | 765.872107       | 10 |
| 4  | <b>534.255840</b>  | 267.631558      | 517.229291     | 259.118284       | 516.245275     | 258.626276       | E    | <b>1420.688925</b> | 710.848100        | 1403.662376        | 702.334826       | 1402.678360       | 701.842818       | 9  |
| 5  | 647.339904         | 324.173590      | 630.313355     | 315.660316       | 629.329339     | 315.168308       | I    | <b>1291.646332</b> | 646.326804        | <b>1274.619783</b> | 637.813530       | 1273.635767       | 637.321522       | 8  |
| 6  | 810.403233         | 405.705255      | 793.376684     | 397.191980       | 792.392668     | 396.699972       | Y    | <b>1178.562268</b> | 589.784772        | <b>1161.535719</b> | 581.271498       | 1160.551703       | 580.779489       | 7  |
| 7  | 924.446160         | 462.726718      | 907.419611     | 454.213443       | 906.435595     | 453.721435       | N    | <b>1015.498939</b> | 508.253108        | <b>998.472390</b>  | 499.739833       | <b>997.488374</b> | 499.247825       | 6  |
| 8  | <b>1011.478188</b> | 506.242732      | 994.451639     | 497.729457       | 993.467623     | 497.237449       | S    | <b>901.456012</b>  | <b>451.231644</b> | <b>884.429463</b>  | 442.718370       | 883.445447        | 442.226362       | 5  |
| 9  | 1125.521115        | 563.264196      | 1108.494566    | 554.750921       | 1107.510550    | 554.258913       | N    | <b>814.423984</b>  | 407.715630        | 797.397435         | 399.202356       |                   |                  | 4  |
| 10 | 1239.564042        | 620.285659      | 1222.537493    | 611.772385       | 1221.553477    | 611.280376       | N    | <b>700.381057</b>  | 350.694167        | <b>683.354508</b>  | 342.180892       |                   |                  | 3  |
| 11 | 1678.789368        | 839.898322      | 1661.762819    | 831.385048       | 1660.778803    | 830.893039       | Q    | <b>586.338130</b>  | 293.672703        | 569.311581         | 285.159429       |                   |                  | 2  |
| 12 |                    |                 |                |                  |                |                  | K    | <b>147.112804</b>  | 74.060040         | 130.086255         | 65.546765        |                   |                  | 1  |

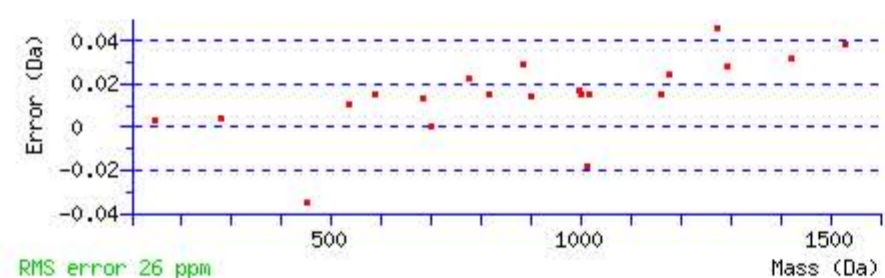

RMS error 26 ppm

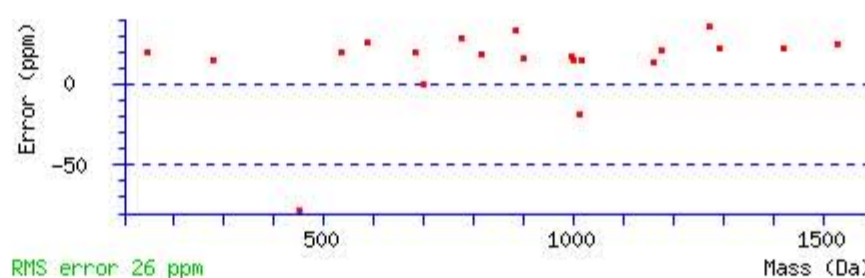

RMS error 26 ppm

NCBI BLAST search of [YLQEIYNSNNQK](#)

(Parameters: blastp, nr protein database, expect=20000, no filter, PAM30)

Other BLAST [web gateways](#)

All matches to this query

| Score | Mr(calc):   | Delta    | Sequence                     |
|-------|-------------|----------|------------------------------|
| 35.4  | 1823.887573 | 0.026159 | <a href="#">YLQEIYNSNNQK</a> |

# MASCOT Search Results

## Peptide View

MS/MS Fragmentation of **LTIGEGQQHHLGGAK**

Found in **FIBG\_HUMAN**, Fibrinogen gamma chain OS=Homo sapiens GN=FGG PE=1 SV=3

Match to Query 46738: 1855.975812 from(619.665880,3+) rtinseconds(1475) index(20825)

Title: Locus:1.1.1.2656.21 File:"2013-07-02 CLN FXIII 180 min 1st F 2.wiff"

Data file C:\Program Files (x86)\Matrix Science\Mascot Daemon\mgf\7 FXIII 180 min 1st\mascot\_daemon\_merge.mgf

Click mouse within plot area to zoom in by factor of two about that point

Or, Plot from  to  Da

Label all possible matches  Label matches used for scoring

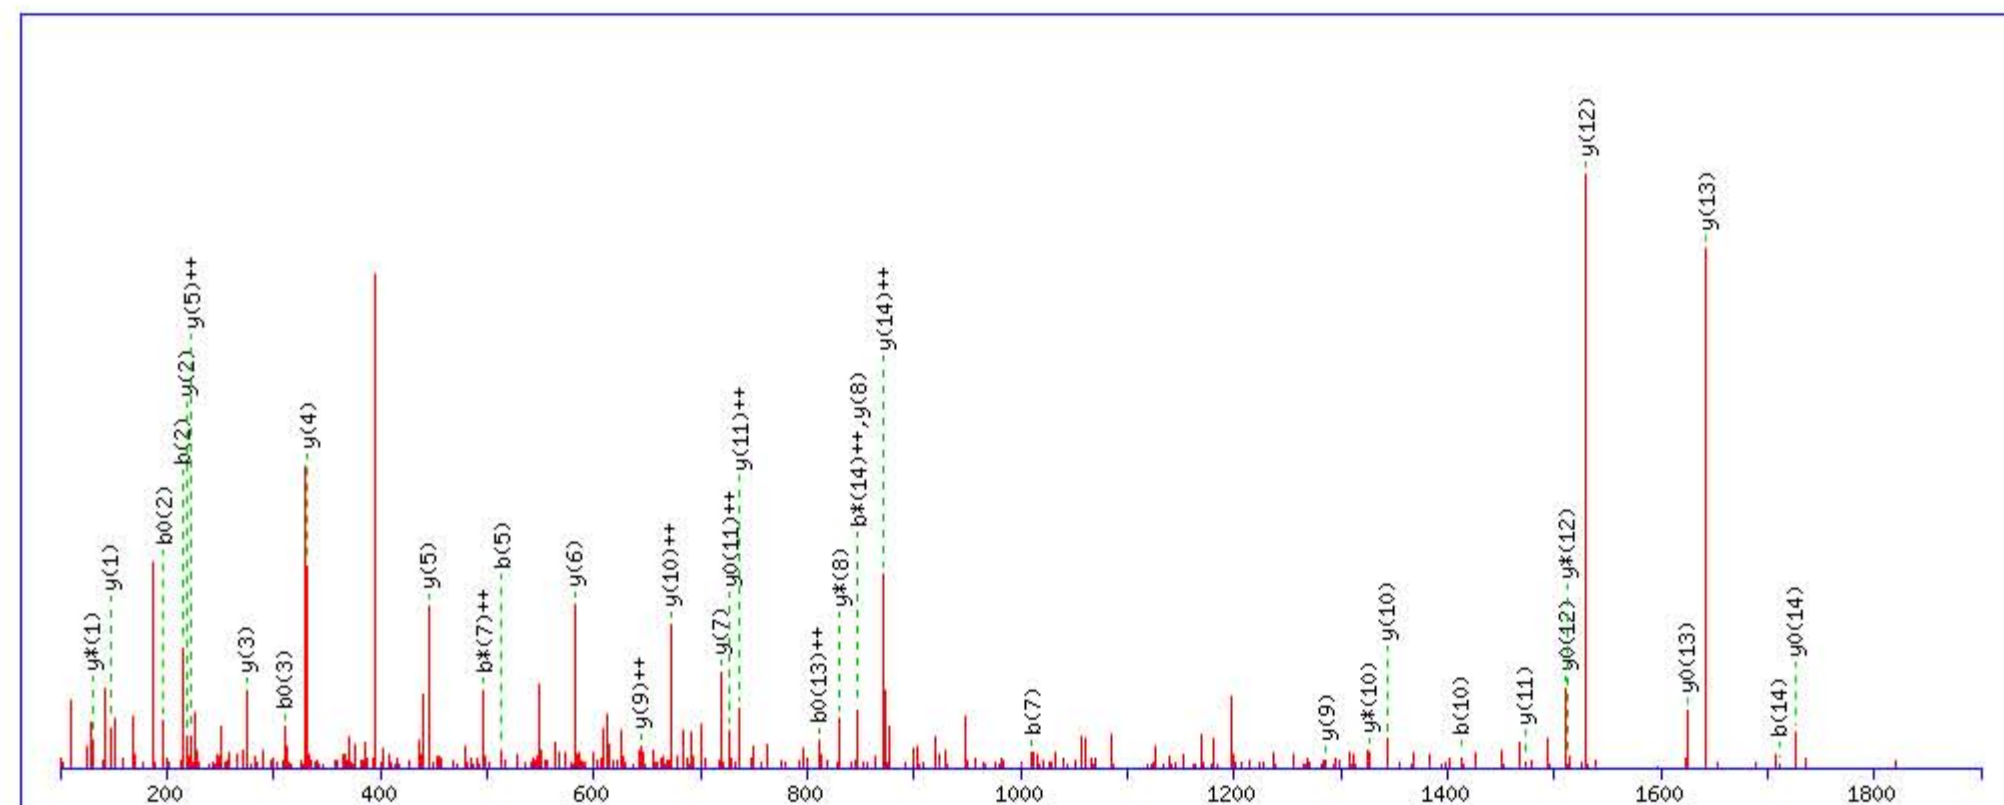

Monoisotopic mass of neutral peptide Mr(calc): 1855.972687

Fixed modifications: Carbamidomethyl (C) (apply to specified residues or termini only)

Variable modifications:

Q7 : Biotin:Thermo-21345 (Q)

Ions Score: 39 Expect: 0.0036

Matches : 36/134 fragment ions using 144 most intense peaks [\(help\)](#)

| #  | b                  | b <sup>++</sup> | b <sup>+</sup> | b <sup>+++</sup>  | b <sup>0</sup>    | b <sup>0++</sup>  | Seq. | y                  | y <sup>++</sup>   | y <sup>+</sup>     | y <sup>+++</sup> | y <sup>0</sup>     | y <sup>0++</sup>  | #  |
|----|--------------------|-----------------|----------------|-------------------|-------------------|-------------------|------|--------------------|-------------------|--------------------|------------------|--------------------|-------------------|----|
| 1  | 114.091340         | 57.549308       |                |                   |                   |                   | L    |                    |                   |                    |                  |                    |                   | 15 |
| 2  | <b>215.139019</b>  | 108.073147      |                |                   | <b>197.128454</b> | 99.067865         | T    | 1743.895902        | <b>872.451589</b> | 1726.869353        | 863.938314       | <b>1725.885337</b> | 863.446306        | 14 |
| 3  | 328.223083         | 164.615179      |                |                   | <b>310.212518</b> | 155.609897        | I    | <b>1642.848223</b> | 821.927749        | 1625.821674        | 813.414475       | <b>1624.837658</b> | 812.922467        | 13 |
| 4  | 385.244547         | 193.125911      |                |                   | 367.233982        | 184.120629        | G    | <b>1529.764159</b> | 765.385717        | <b>1512.737610</b> | 756.872443       | <b>1511.753594</b> | 756.380435        | 12 |
| 5  | <b>514.287140</b>  | 257.647208      |                |                   | 496.276575        | 248.641926        | E    | <b>1472.742695</b> | <b>736.874985</b> | 1455.716146        | 728.361711       | 1454.732130        | <b>727.869703</b> | 11 |
| 6  | 571.308604         | 286.157940      |                |                   | 553.298039        | 277.152658        | G    | <b>1343.700102</b> | <b>672.353689</b> | <b>1326.673553</b> | 663.840414       |                    |                   | 10 |
| 7  | <b>1010.533930</b> | 505.770603      | 993.507381     | <b>497.257329</b> | 992.523365        | 496.765321        | Q    | <b>1286.678638</b> | <b>643.842957</b> | 1269.652089        | 635.329682       |                    |                   | 9  |
| 8  | 1138.592508        | 569.799892      | 1121.565959    | 561.286618        | 1120.581943       | 560.794609        | Q    | <b>847.453312</b>  | 424.230294        | <b>830.426763</b>  | 415.717019       |                    |                   | 8  |
| 9  | 1275.651420        | 638.329348      | 1258.624871    | 629.816074        | 1257.640855       | 629.324065        | H    | <b>719.394734</b>  | 360.201005        | 702.368185         | 351.687730       |                    |                   | 7  |
| 10 | <b>1412.710332</b> | 706.858804      | 1395.683783    | 698.345530        | 1394.699767       | 697.853521        | H    | <b>582.335822</b>  | 291.671549        | 565.309273         | 283.158274       |                    |                   | 6  |
| 11 | 1525.794396        | 763.400836      | 1508.767847    | 754.887561        | 1507.783831       | 754.395553        | L    | <b>445.276910</b>  | <b>223.142093</b> | 428.250361         | 214.628818       |                    |                   | 5  |
| 12 | 1582.815860        | 791.911568      | 1565.789311    | 783.398293        | 1564.805295       | 782.906285        | G    | <b>332.192846</b>  | 166.600061        | 315.166297         | 158.086786       |                    |                   | 4  |
| 13 | 1639.837324        | 820.422300      | 1622.810775    | 811.909025        | 1621.826759       | <b>811.417017</b> | G    | <b>275.171382</b>  | 138.089329        | 258.144833         | 129.576054       |                    |                   | 3  |
| 14 | <b>1710.874438</b> | 855.940857      | 1693.847889    | <b>847.427582</b> | 1692.863873       | 846.935574        | A    | <b>218.149918</b>  | 109.578597        | 201.123369         | 101.065322       |                    |                   | 2  |
| 15 |                    |                 |                |                   |                   |                   | K    | <b>147.112804</b>  | 74.060040         | <b>130.086255</b>  | 65.546765        |                    |                   | 1  |

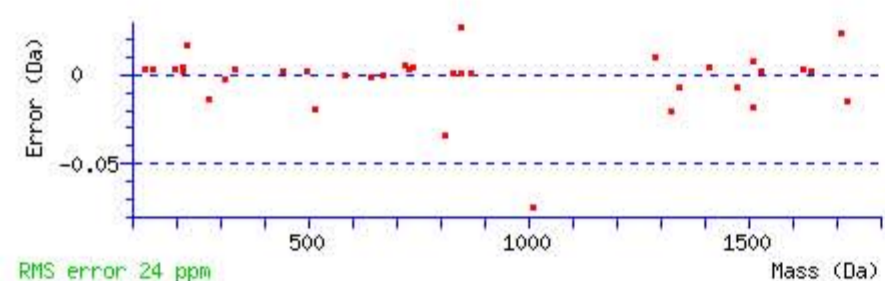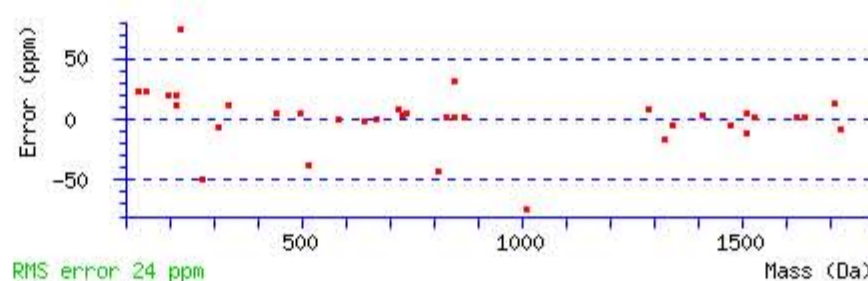

NCBI BLAST search of [LTIGEGQQHHLGGAK](#)

(Parameters: blastp, nr protein database, expect=20000, no filter, PAM30)

Other BLAST [web gateways](#)

All matches to this query

| Score | Mr(calc):   | Delta    | Sequence                        |
|-------|-------------|----------|---------------------------------|
| 38.7  | 1855.972687 | 0.003125 | <a href="#">LTIGEGQQHHLGGAK</a> |
| 29.4  | 1855.972687 | 0.003125 | <a href="#">LTIGEGQQHHLGGAK</a> |

Mascot: <http://www.matrixscience.com/>

# MASCOT SEARCH RESULTS

## Peptide View

MS/MS Fragmentation of **LTIGEGQQHHLGGAK**

Found in **FIBG\_HUMAN**, Fibrinogen gamma chain OS=Homo sapiens GN=FGG PE=1 SV=3

Match to Query 54604: 2167.141376 from(542.792620,4+) rtinseconds(1752) index(22875)

Title: Locus:1.1.1.2753.4 File:"2013-07-02 CLN FXIII 180 min 1st F 2.wiff"

Data file C:\Program Files (x86)\Matrix Science\Mascot Daemon\mgf\7 FXIII 180 min 1st\mascot\_daemon\_merge.mgf

Click mouse within plot area to zoom in by factor of two about that point

Or, Plot from  to  Da

Label all possible matches  Label matches used for scoring

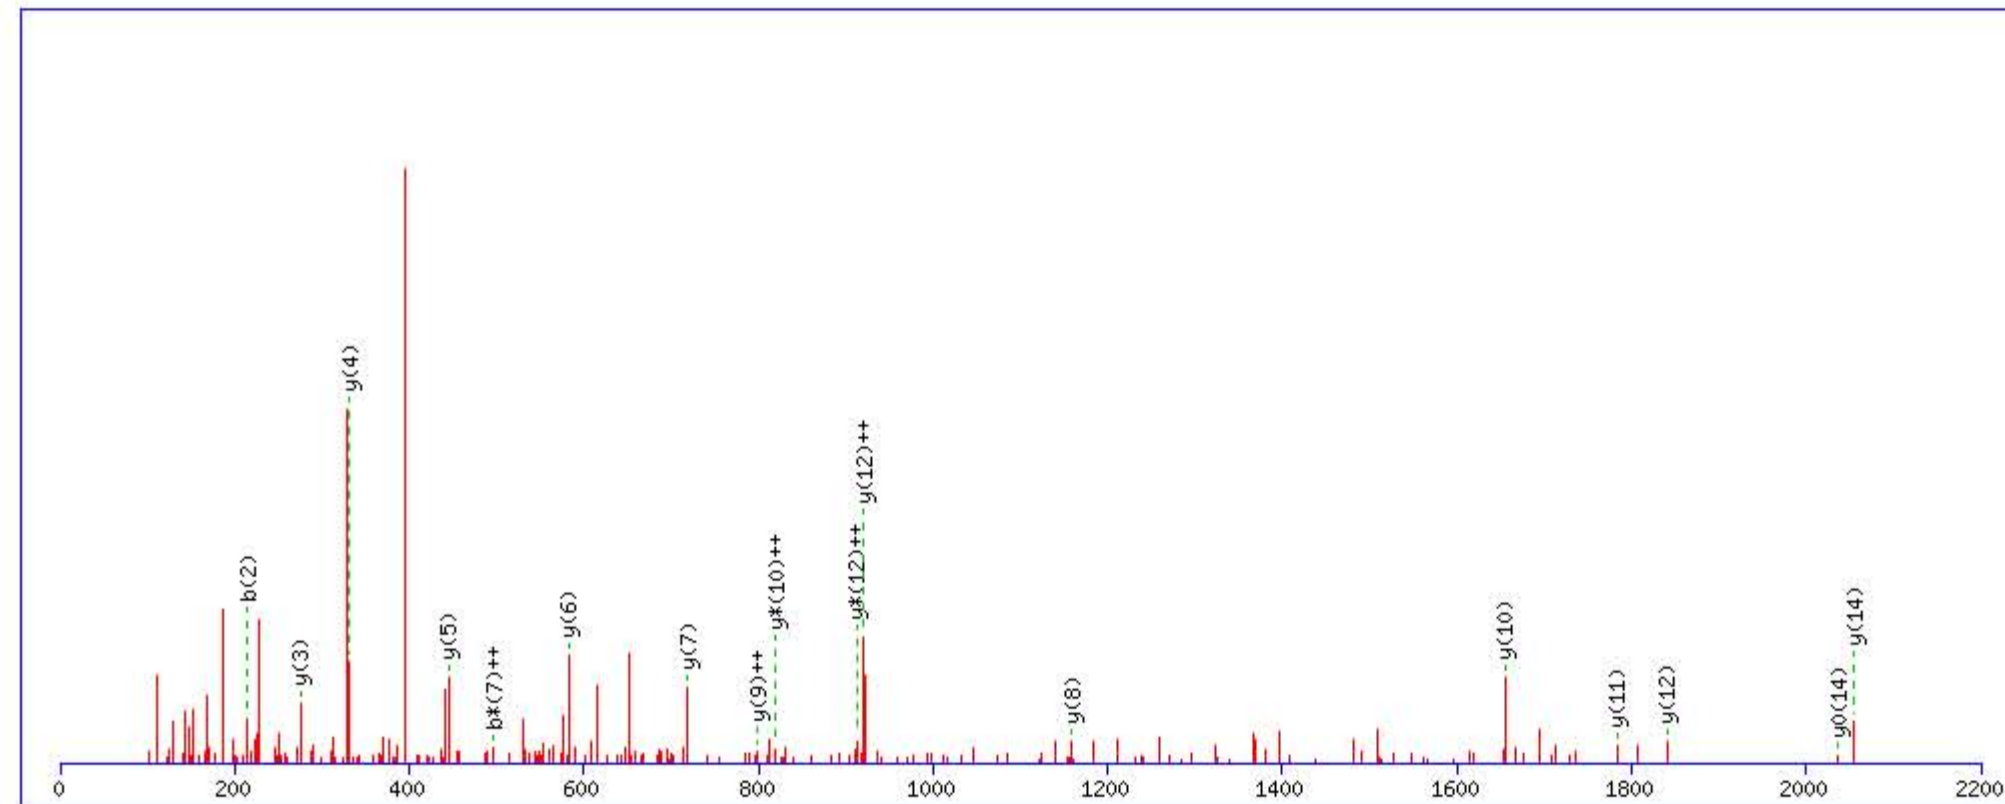

Monoisotopic mass of neutral peptide Mr(calc): 2167.139435

Fixed modifications: Carbamidomethyl (C) (apply to specified residues or termini only)

Variable modifications:

Q7 : Biotin:Thermo-21345 (Q)

Q8 : Biotin:Thermo-21345 (Q)

Ions Score: 29 Expect: 0.035

Matches : 17/134 fragment ions using 55 most intense peaks [\(help\)](#)

| #  | b                 | b <sup>++</sup> | b <sup>+</sup> | b <sup>+++</sup>  | b <sup>0</sup> | b <sup>0++</sup> | Seq. | y                  | y <sup>++</sup>   | y <sup>+</sup> | y <sup>+++</sup>  | y <sup>0</sup>     | y <sup>0++</sup> | #  |
|----|-------------------|-----------------|----------------|-------------------|----------------|------------------|------|--------------------|-------------------|----------------|-------------------|--------------------|------------------|----|
| 1  | 114.091340        | 57.549308       |                |                   |                |                  | L    |                    |                   |                |                   |                    |                  | 15 |
| 2  | <b>215.139019</b> | 108.073147      |                |                   | 197.128454     | 99.067865        | T    | <b>2055.062650</b> | 1028.034963       | 2038.036101    | 1019.521688       | <b>2037.052085</b> | 1019.029680      | 14 |
| 3  | 328.223083        | 164.615179      |                |                   | 310.212518     | 155.609897       | I    | 1954.014971        | 977.511123        | 1936.988422    | 968.997849        | 1936.004406        | 968.505841       | 13 |
| 4  | 385.244547        | 193.125911      |                |                   | 367.233982     | 184.120629       | G    | <b>1840.930907</b> | <b>920.969091</b> | 1823.904358    | <b>912.455817</b> | 1822.920342        | 911.963809       | 12 |
| 5  | 514.287140        | 257.647208      |                |                   | 496.276575     | 248.641926       | E    | <b>1783.909443</b> | 892.458359        | 1766.882894    | 883.945085        | 1765.898878        | 883.453077       | 11 |
| 6  | 571.308604        | 286.157940      |                |                   | 553.298039     | 277.152658       | G    | <b>1654.866850</b> | 827.937063        | 1637.840301    | <b>819.423788</b> |                    |                  | 10 |
| 7  | 1010.533930       | 505.770603      | 993.507381     | <b>497.257329</b> | 992.523365     | 496.765321       | Q    | 1597.845386        | <b>799.426331</b> | 1580.818837    | 790.913056        |                    |                  | 9  |
| 8  | 1449.759256       | 725.383266      | 1432.732707    | 716.869992        | 1431.748691    | 716.377984       | Q    | <b>1158.620060</b> | 579.813668        | 1141.593511    | 571.300393        |                    |                  | 8  |
| 9  | 1586.818168       | 793.912722      | 1569.791619    | 785.399448        | 1568.807603    | 784.907440       | H    | <b>719.394734</b>  | 360.201005        | 702.368185     | 351.687730        |                    |                  | 7  |
| 10 | 1723.877080       | 862.442178      | 1706.850531    | 853.928904        | 1705.866515    | 853.436895       | H    | <b>582.335822</b>  | 291.671549        | 565.309273     | 283.158274        |                    |                  | 6  |
| 11 | 1836.961144       | 918.984210      | 1819.934595    | 910.470936        | 1818.950579    | 909.978927       | L    | <b>445.276910</b>  | 223.142093        | 428.250361     | 214.628818        |                    |                  | 5  |
| 12 | 1893.982608       | 947.494942      | 1876.956059    | 938.981667        | 1875.972043    | 938.489659       | G    | <b>332.192846</b>  | 166.600061        | 315.166297     | 158.086786        |                    |                  | 4  |
| 13 | 1951.004072       | 976.005674      | 1933.977523    | 967.492399        | 1932.993507    | 967.000391       | G    | <b>275.171382</b>  | 138.089329        | 258.144833     | 129.576054        |                    |                  | 3  |
| 14 | 2022.041186       | 1011.524231     | 2005.014637    | 1003.010956       | 2004.030621    | 1002.518948      | A    | 218.149918         | 109.578597        | 201.123369     | 101.065322        |                    |                  | 2  |
| 15 |                   |                 |                |                   |                |                  | K    | 147.112804         | 74.060040         | 130.086255     | 65.546765         |                    |                  | 1  |

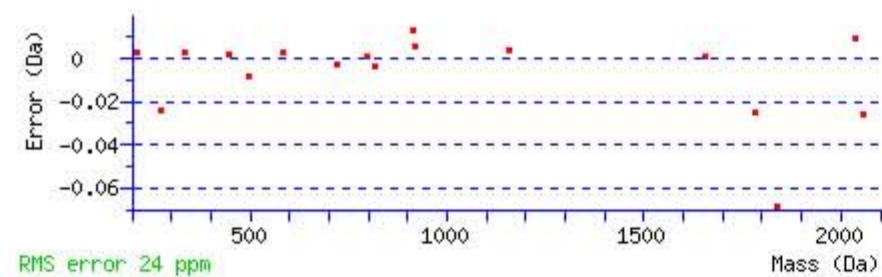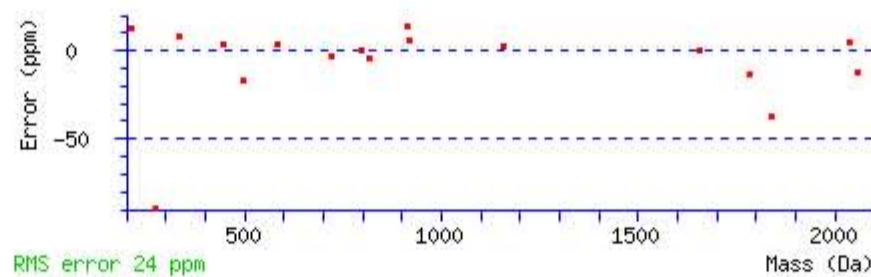

NCBI BLAST search of **LTIGEGQQHHLGGAK**

(Parameters: blastp, nr protein database, expect=20000, no filter, PAM30)

Other BLAST [web gateways](#)

All matches to this query

| Score | Mr(calc):   | Delta    | Sequence               |
|-------|-------------|----------|------------------------|
| 28.5  | 2167.139435 | 0.001941 | <b>LTIGEGQQHHLGGAK</b> |

Mascot: <http://www.matrixscience.com/>

# MASCOT Search Results

## Peptide View

MS/MS Fragmentation of **IGDQWDK**

Found in **FN1\_HUMAN**, Fibronectin OS=Homo sapiens GN=FN1 PE=1 SV=4

Match to Query 22667: 1171.578288 from(586.796420,2+) rtinseconds(1791) index(40714)

Title: Locus:1.1.1.3073.16 File:"2013-07-02 CLN FXIII 180 min 1st F 3.wiff"

Data file C:\Program Files (x86)\Matrix Science\Mascot Daemon\mgf\7 FXIII 180 min 1st\mascot\_daemon\_merge.mgf

Click mouse within plot area to zoom in by factor of two about that point

Or, Plot from  to  Da

Label all possible matches  Label matches used for scoring

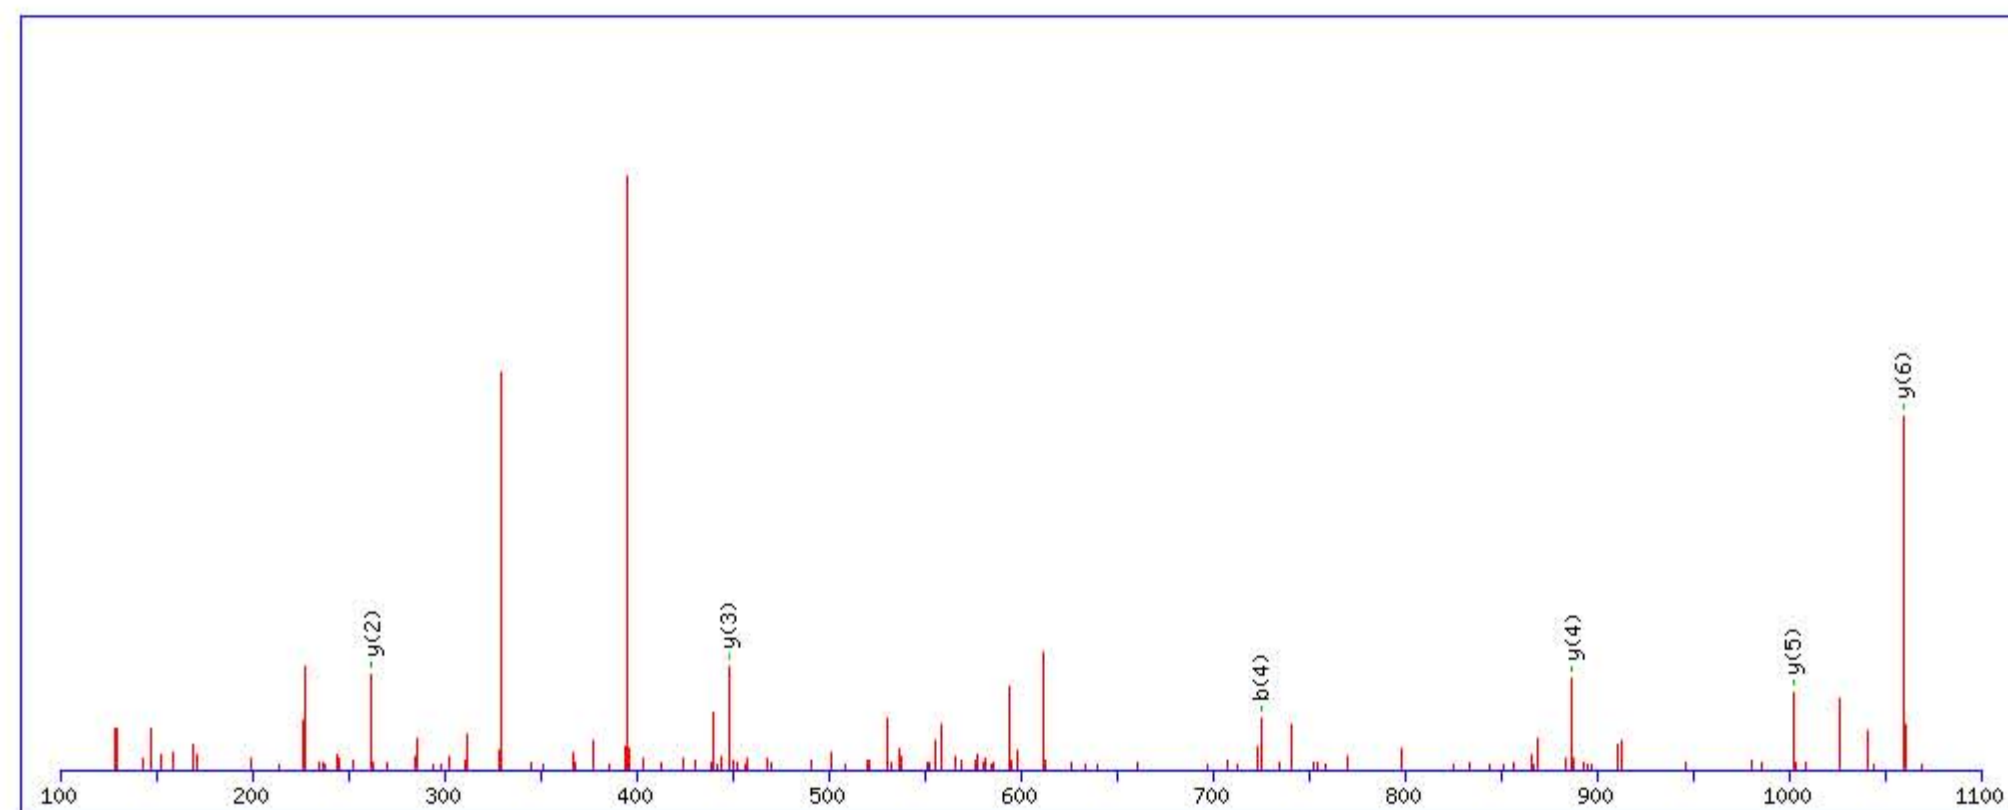

Monoisotopic mass of neutral peptide Mr(calc): 1171.569580

Fixed modifications: Carbamidomethyl (C) (apply to specified residues or termini only)

Variable modifications:

Q4 : Biotin:Thermo-21345 (Q)

Ions Score: 31 Expect: 0.0046

Matches : 6/60 fragment ions using 10 most intense peaks [\(help\)](#)

| # | b           | b <sup>++</sup> | b <sup>*</sup> | b <sup>*++</sup> | b <sup>0</sup> | b <sup>0++</sup> | Seq. | y           | y <sup>++</sup> | y <sup>*</sup> | y <sup>*++</sup> | y <sup>0</sup> | y <sup>0++</sup> | # |
|---|-------------|-----------------|----------------|------------------|----------------|------------------|------|-------------|-----------------|----------------|------------------|----------------|------------------|---|
| 1 | 114.091340  | 57.549308       |                |                  |                |                  | I    |             |                 |                |                  |                |                  | 7 |
| 2 | 171.112804  | 86.060040       |                |                  |                |                  | G    | 1059.492793 | 530.250035      | 1042.466244    | 521.736760       | 1041.482228    | 521.244752       | 6 |
| 3 | 286.139747  | 143.573512      |                |                  | 268.129182     | 134.568229       | D    | 1002.471329 | 501.739303      | 985.444780     | 493.226028       | 984.460764     | 492.734020       | 5 |
| 4 | 725.365073  | 363.186175      | 708.338524     | 354.672900       | 707.354508     | 354.180892       | Q    | 887.444386  | 444.225831      | 870.417837     | 435.712557       | 869.433821     | 435.220549       | 4 |
| 5 | 911.444386  | 456.225831      | 894.417837     | 447.712557       | 893.433821     | 447.220549       | W    | 448.219060  | 224.613168      | 431.192511     | 216.099894       | 430.208495     | 215.607886       | 3 |
| 6 | 1026.471329 | 513.739303      | 1009.444780    | 505.226028       | 1008.460764    | 504.734020       | D    | 262.139747  | 131.573512      | 245.113198     | 123.060237       | 244.129182     | 122.568229       | 2 |
| 7 |             |                 |                |                  |                |                  | K    | 147.112804  | 74.060040       | 130.086255     | 65.546765        |                |                  | 1 |

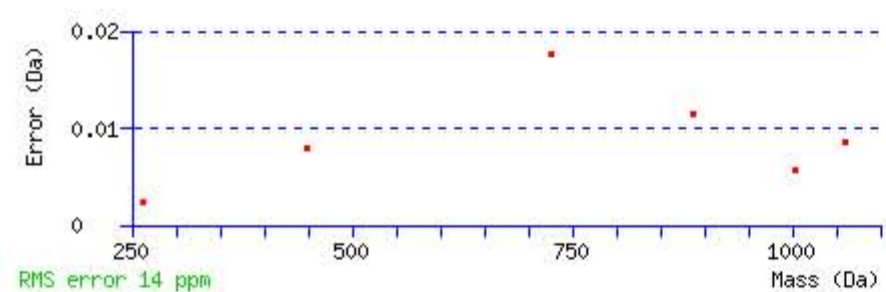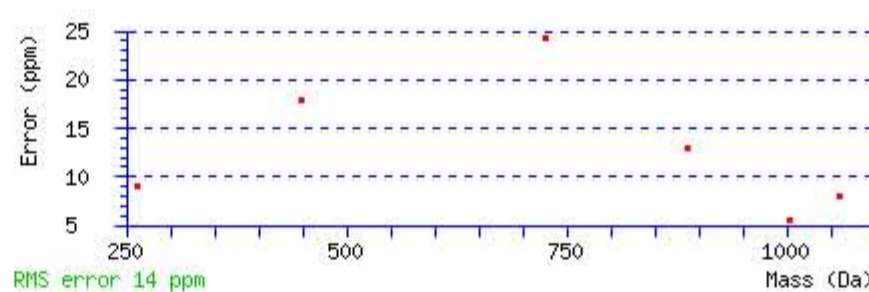

NCBI BLAST search of **IGDQWDK**

(Parameters: blastp, nr protein database, expect=20000, no filter, PAM30)

Other BLAST [web gateways](#)

All matches to this query

| Score | Mr(calc):   | Delta     | Sequence                     |
|-------|-------------|-----------|------------------------------|
| 30.7  | 1171.569580 | 0.008708  | <a href="#">IGDQWDK</a>      |
| 5.5   | 1171.583328 | -0.005040 | <a href="#">GEVGDPGQKGTK</a> |
| 5.3   | 1171.590714 | -0.012426 | <a href="#">GEVQVSDK</a>     |
| 5.0   | 1171.576096 | 0.002192  | <a href="#">LYFSDATLDK</a>   |
| 4.5   | 1171.590698 | -0.012410 | <a href="#">LPALSGQDMPK</a>  |
| 3.0   | 1171.569565 | 0.008723  | <a href="#">LGPEWSQPMK</a>   |
| 3.0   | 1171.572067 | 0.006221  | <a href="#">LGSGPDGAEIK</a>  |
| 2.9   | 1171.573410 | 0.004878  | <a href="#">RAPDPGFQER</a>   |

# {MATRIX} SCIENCE Mascot Search Results

## Peptide View

MS/MS Fragmentation of **QHDMGHMMR**

Found in **FINC\_HUMAN**, Fibronectin OS=Homo sapiens GN=FN1 PE=1 SV=4

Match to Query 33384: 1452.628496 from(364.164400,4+) rtinseconds(1397) index(37995)

Title: Locus:1.1.1.2936.2 File:"2013-07-02 CLN FXIII 180 min 1st F 3.wiff"

Data file C:\Program Files (x86)\Matrix Science\Mascot Daemon\mgf\7 FXIII 180 min 1st\mascot\_daemon\_merge.mgf

Click mouse within plot area to zoom in by factor of two about that point

Or, Plot from  to  Da

Label all possible matches  Label matches used for scoring

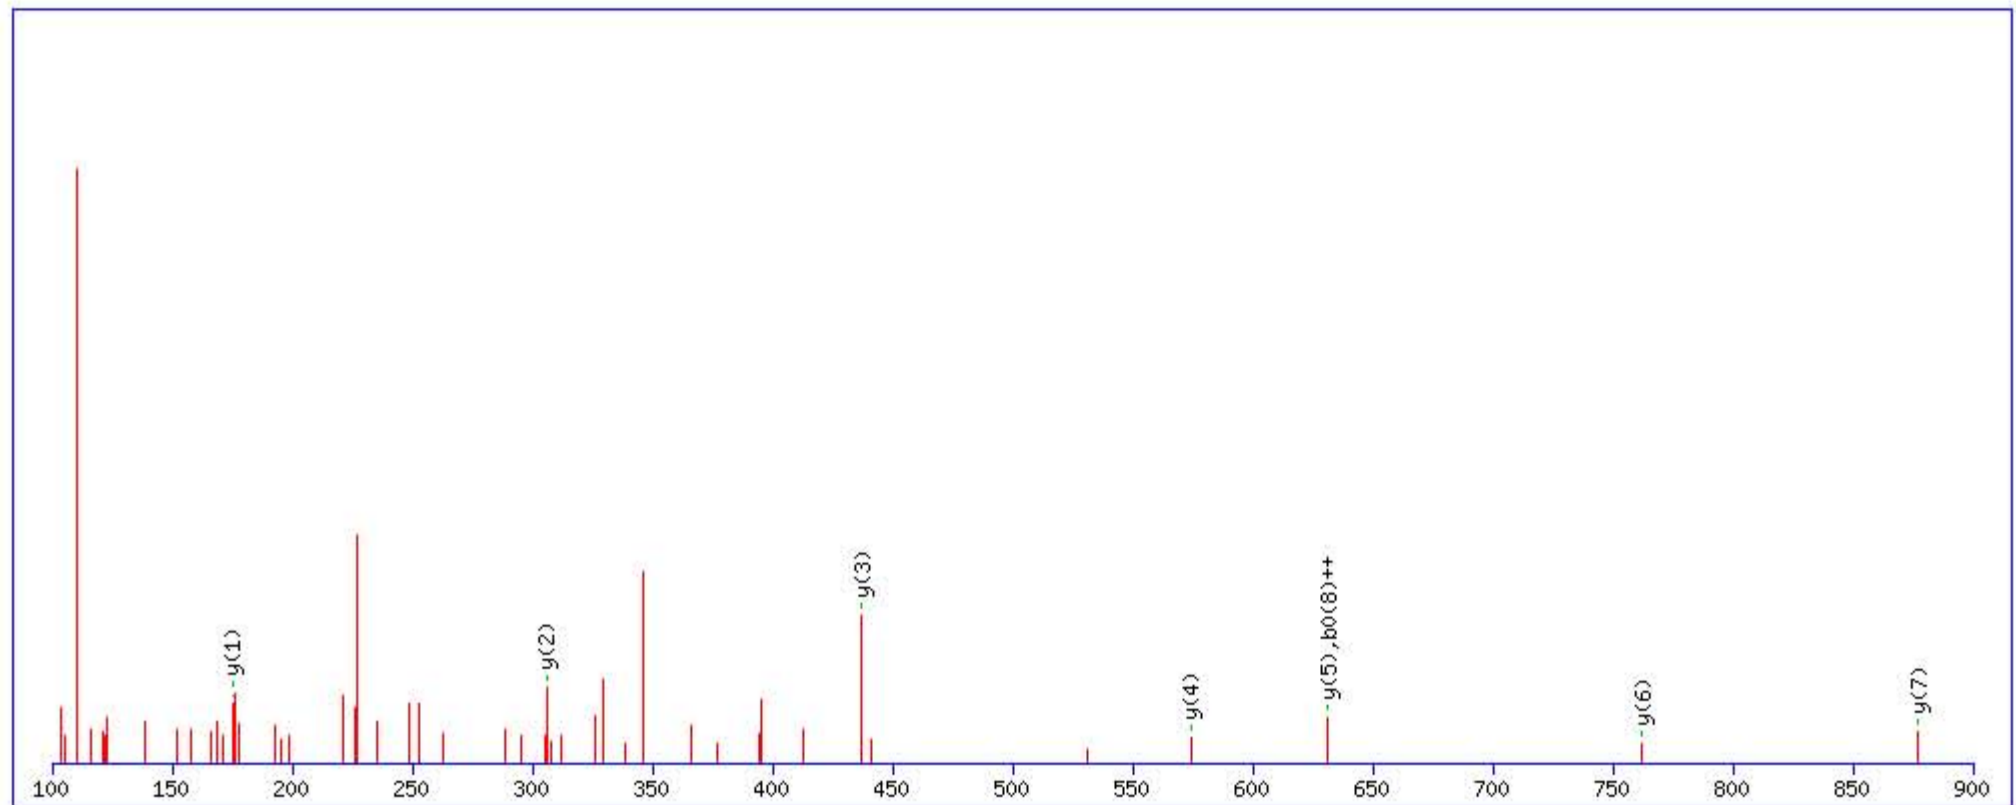

Monoisotopic mass of neutral peptide Mr(calc): 1452.624680

Fixed modifications: Carbamidomethyl (C) (apply to specified residues or termini only)

Variable modifications:

Q1 : Biotin:Thermo-21345 (Q)

Ions Score: 33 Expect: 0.0023

Matches : 8/80 fragment ions using 17 most intense peaks [\(help\)](#)

| # | b           | b <sup>++</sup> | b <sup>*</sup> | b <sup>*++</sup> | b <sup>0</sup> | b <sup>0++</sup> | Seq. | y           | y <sup>++</sup> | y <sup>*</sup> | y <sup>*++</sup> | y <sup>0</sup> | y <sup>0++</sup> | # |
|---|-------------|-----------------|----------------|------------------|----------------|------------------|------|-------------|-----------------|----------------|------------------|----------------|------------------|---|
| 1 | 440.232602  | 220.619939      | 423.206053     | 212.106664       |                |                  | Q    |             |                 |                |                  |                |                  | 9 |
| 2 | 577.291514  | 289.149395      | 560.264965     | 280.636121       |                |                  | H    | 1014.406638 | 507.706957      | 997.380089     | 499.193682       | 996.396073     | 498.701674       | 8 |
| 3 | 692.318457  | 346.662867      | 675.291908     | 338.149592       | 674.307892     | 337.657584       | D    | 877.347726  | 439.177501      | 860.321177     | 430.664226       | 859.337161     | 430.172218       | 7 |
| 4 | 823.358942  | 412.183109      | 806.332393     | 403.669834       | 805.348377     | 403.177826       | M    | 762.320783  | 381.664030      | 745.294234     | 373.150755       |                |                  | 6 |
| 5 | 880.380406  | 440.693841      | 863.353857     | 432.180567       | 862.369841     | 431.688559       | G    | 631.280298  | 316.143787      | 614.253749     | 307.630513       |                |                  | 5 |
| 6 | 1017.439318 | 509.223297      | 1000.412769    | 500.710022       | 999.428753     | 500.218014       | H    | 574.258834  | 287.633055      | 557.232285     | 279.119780       |                |                  | 4 |
| 7 | 1148.479803 | 574.743540      | 1131.453254    | 566.230265       | 1130.469238    | 565.738257       | M    | 437.199922  | 219.103599      | 420.173373     | 210.590324       |                |                  | 3 |
| 8 | 1279.520288 | 640.263782      | 1262.493739    | 631.750508       | 1261.509723    | 631.258499       | M    | 306.159437  | 153.583356      | 289.132888     | 145.070082       |                |                  | 2 |
| 9 |             |                 |                |                  |                |                  | R    | 175.118952  | 88.063114       | 158.092403     | 79.549839        |                |                  | 1 |

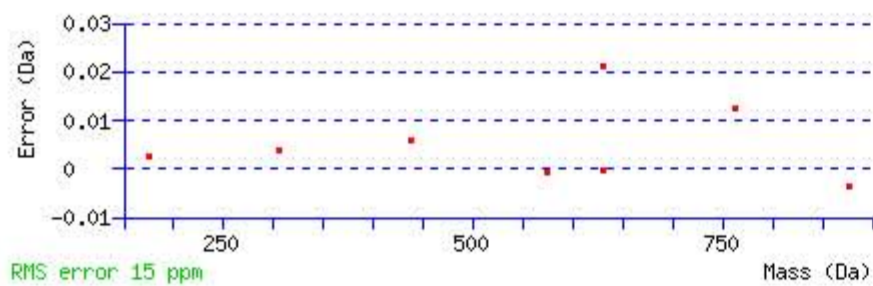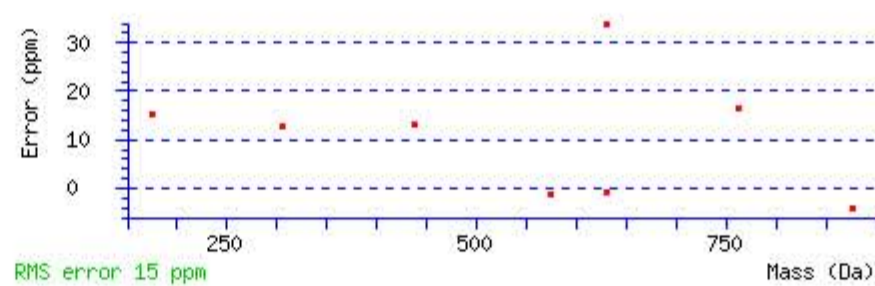

NCBI BLAST search of [QHDMGHMMR](#)

(Parameters: blastp, nr protein database, expect=20000, no filter, PAM30)

Other BLAST [web gateways](#)

All matches to this query

| Score | Mr(calc):   | Delta    | Sequence                  |
|-------|-------------|----------|---------------------------|
| 33.4  | 1452.624680 | 0.003816 | <a href="#">QHDMGHMMR</a> |

Mascot: <http://www.matrixscience.com/>

# MASCOT Search Results

## Peptide View

MS/MS Fragmentation of **HYQINQQWER**

Found in **FINC\_HUMAN**, Fibronectin OS=Homo sapiens GN=FN1 PE=1 SV=4

Match to Query 42792: 1711.850728 from(856.932640,2+) rtinseconds(1754) index(40466)

Title: Locus:1.1.1.3060.20 File:"2013-07-02 CLN FXIII 180 min 1st F 3.wiff"

Data file C:\Program Files (x86)\Matrix Science\Mascot Daemon\mgf\7 FXIII 180 min 1st\mascot\_daemon\_merge.mgf

Click mouse within plot area to zoom in by factor of two about that point

Or, Plot from  to  Da

Label all possible matches  Label matches used for scoring

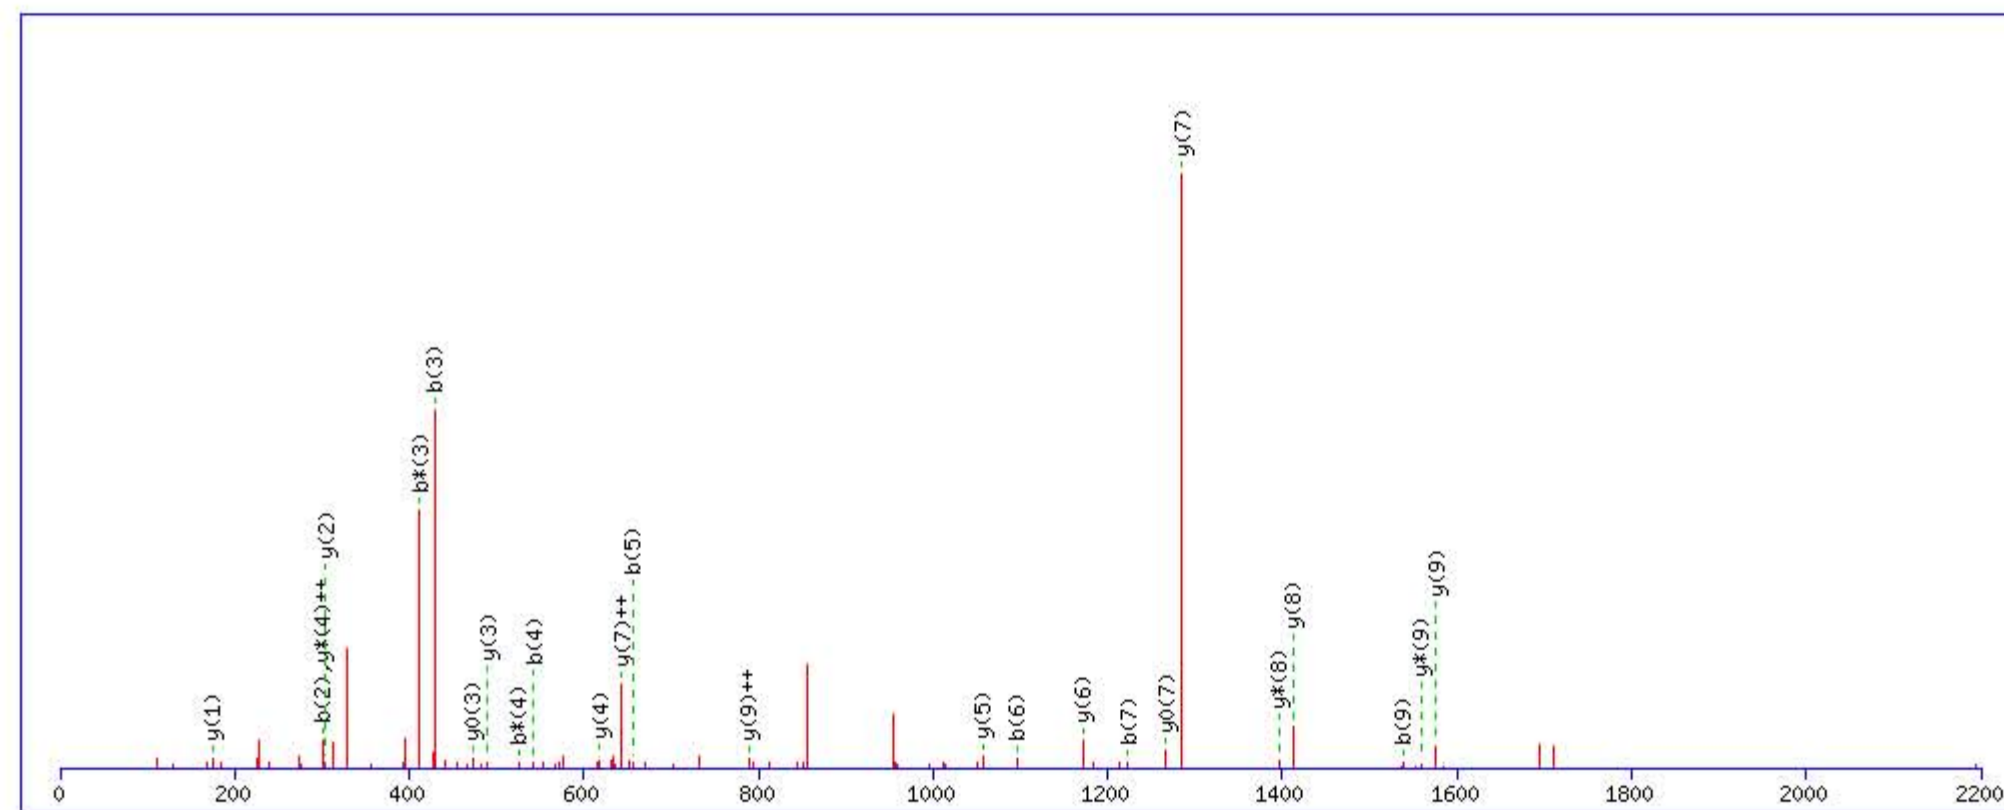

Monoisotopic mass of neutral peptide Mr(calc): 1711.825272

Fixed modifications: Carbamidomethyl (C) (apply to specified residues or termini only)

Variable modifications:

Q6 : Biotin:Thermo-21345 (Q)

Ions Score: 27 Expect: 0.0056

Matches : 25/86 fragment ions using 77 most intense peaks [\(help\)](#)

| #  | b                  | b <sup>++</sup> | b <sup>*</sup>    | b <sup>*++</sup> | b <sup>0</sup> | b <sup>0++</sup> | Seq. | y                  | y <sup>++</sup>   | y <sup>*</sup>     | y <sup>*++</sup>  | y <sup>0</sup>     | y <sup>0++</sup> | #  |
|----|--------------------|-----------------|-------------------|------------------|----------------|------------------|------|--------------------|-------------------|--------------------|-------------------|--------------------|------------------|----|
| 1  | 138.066188         | 69.536732       |                   |                  |                |                  | H    |                    |                   |                    |                   |                    |                  | 10 |
| 2  | <b>301.129517</b>  | 151.068397      |                   |                  |                |                  | Y    | <b>1575.773660</b> | <b>788.390468</b> | <b>1558.747111</b> | 779.877194        | 1557.763095        | 779.385186       | 9  |
| 3  | <b>429.188095</b>  | 215.097686      | <b>412.161546</b> | 206.584411       |                |                  | Q    | <b>1412.710331</b> | 706.858804        | <b>1395.683782</b> | 698.345529        | 1394.699766        | 697.853521       | 8  |
| 4  | <b>542.272159</b>  | 271.639718      | <b>525.245610</b> | 263.126443       |                |                  | I    | <b>1284.651753</b> | <b>642.829514</b> | 1267.625204        | 634.316240        | <b>1266.641188</b> | 633.824232       | 7  |
| 5  | <b>656.315086</b>  | 328.661181      | 639.288537        | 320.147907       |                |                  | N    | <b>1171.567689</b> | 586.287483        | 1154.541140        | 577.774208        | 1153.557124        | 577.282200       | 6  |
| 6  | <b>1095.540412</b> | 548.273844      | 1078.513863       | 539.760570       |                |                  | Q    | <b>1057.524762</b> | 529.266019        | 1040.498213        | 520.752745        | 1039.514197        | 520.260737       | 5  |
| 7  | <b>1223.598990</b> | 612.303133      | 1206.572441       | 603.789859       |                |                  | Q    | <b>618.299436</b>  | 309.653356        | 601.272887         | <b>301.140082</b> | 600.288871         | 300.648074       | 4  |
| 8  | 1409.678303        | 705.342790      | 1392.651754       | 696.829515       |                |                  | W    | <b>490.240858</b>  | 245.624067        | 473.214309         | 237.110792        | <b>472.230293</b>  | 236.618784       | 3  |
| 9  | <b>1538.720896</b> | 769.864086      | 1521.694347       | 761.350812       | 1520.710331    | 760.858804       | E    | <b>304.161545</b>  | 152.584410        | 287.134996         | 144.071136        | 286.150980         | 143.579128       | 2  |
| 10 |                    |                 |                   |                  |                |                  | R    | <b>175.118952</b>  | 88.063114         | 158.092403         | 79.549839         |                    |                  | 1  |

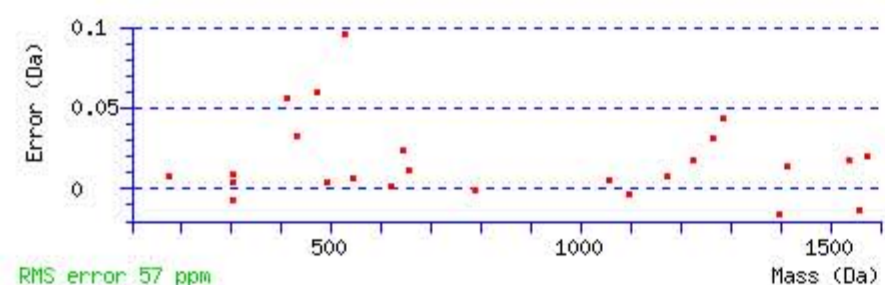

RMS error 57 ppm

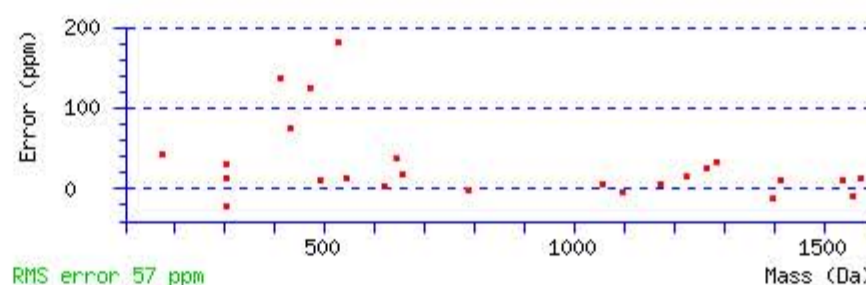

RMS error 57 ppm

NCBI BLAST search of **HYQINQQWER**

(Parameters: blastp, nr protein database, expect=20000, no filter, PAM30)

Other BLAST [web gateways](#)

## All matches to this query

| Score | Mr(calc):   | Delta     | Sequence                           |
|-------|-------------|-----------|------------------------------------|
| 26.9  | 1711.825272 | 0.025456  | <a href="#">HYQINQQWER</a>         |
| 23.0  | 1711.825272 | 0.025456  | <a href="#">HYQINQQWER</a>         |
| 2.7   | 1711.871368 | -0.020640 | <a href="#">AQTQEGAGARAGAQAVAR</a> |
| 2.0   | 1711.848938 | 0.001790  | <a href="#">TVTQVVP AEGQENGQR</a>  |
| 1.0   | 1711.825272 | 0.025456  | <a href="#">HYQINQQWER</a>         |
| 0.3   | 1711.856293 | -0.005565 | <a href="#">LLQGQEKDGEER</a>       |
| 0.1   | 1711.867538 | -0.016810 | <a href="#">QVMKDEDKPPDRVR</a>     |

Mascot: <http://www.matrixscience.com/>

# MASCOT Search Results

## Peptide View

MS/MS Fragmentation of **GEWTCIAYSQLR**

Found in **FINC\_HUMAN**, Fibronectin OS=Homo sapiens GN=FN1 PE=1 SV=4

Match to Query 45118: 1793.882652 from(598.968160,3+) rtinseconds(2349) index(44617)

Title: Locus:1.1.1.3267.9 File:"2013-07-02 CLN FXIII 180 min 1st F 3.wiff"

Data file C:\Program Files (x86)\Matrix Science\Mascot Daemon\mgf\7 FXIII 180 min 1st\mascot\_daemon\_merge.mgf

Click mouse within plot area to zoom in by factor of two about that point

Or, Plot from  to  Da

Label all possible matches  Label matches used for scoring

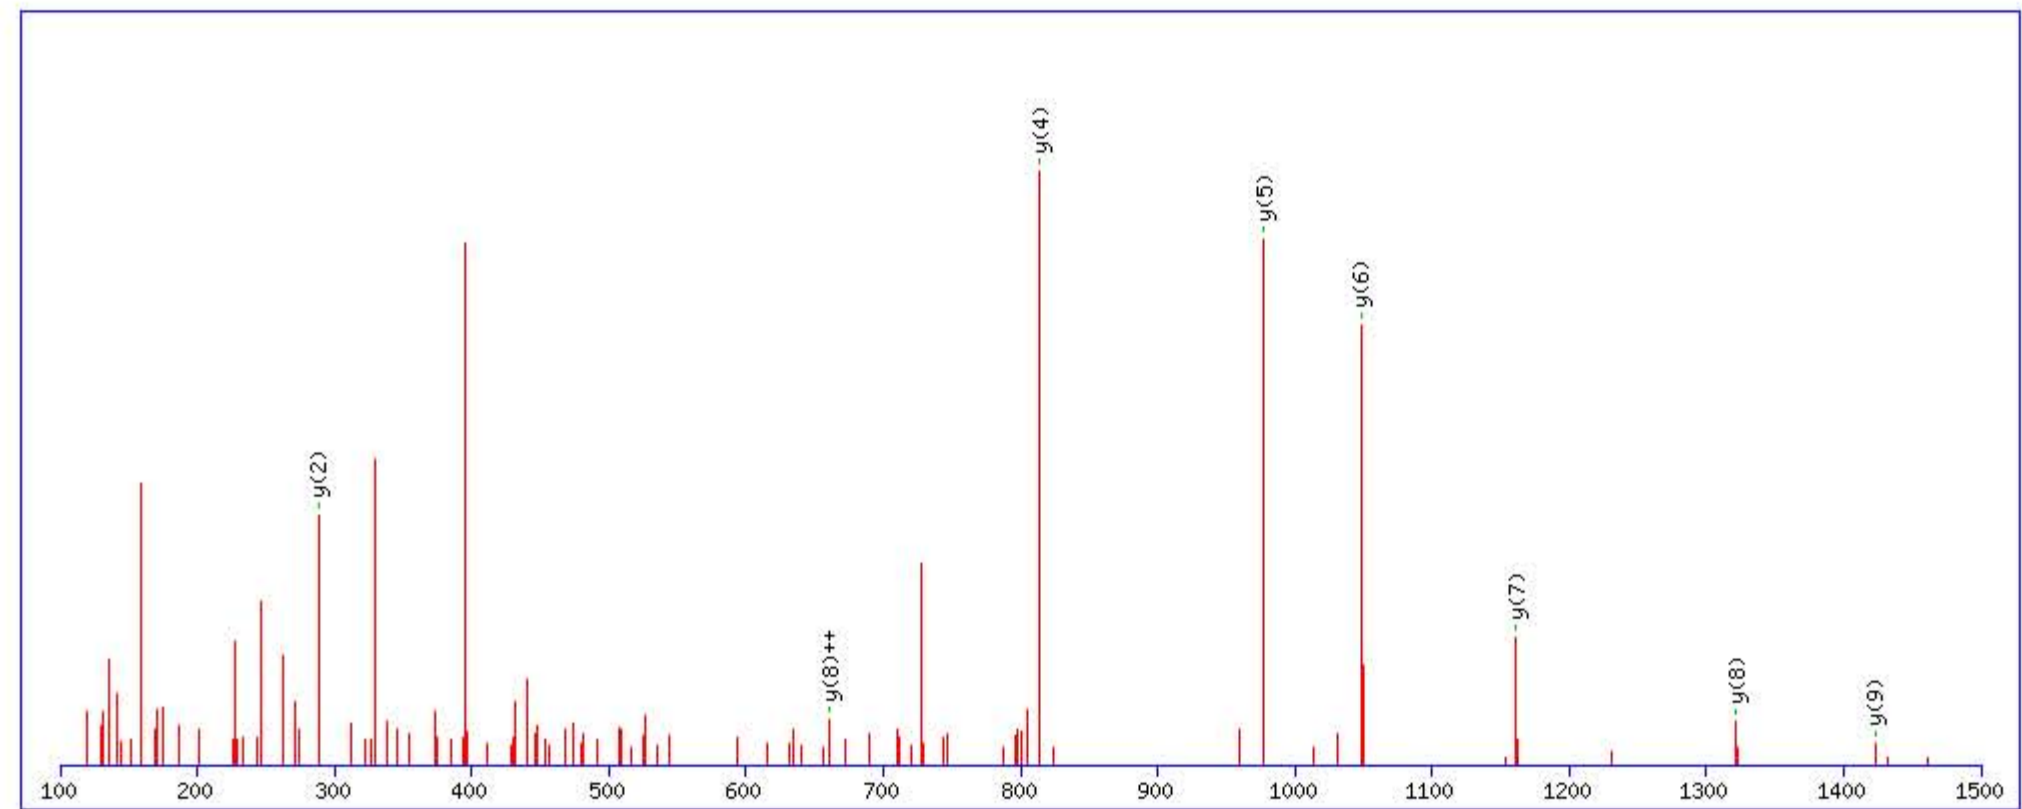

Monoisotopic mass of neutral peptide Mr(calc): 1793.859283

Fixed modifications: Carbamidomethyl (C) (apply to specified residues or termini only)

Variable modifications:

Q10 : Biotin:Thermo-21345 (Q)

Ions Score: 43 Expect: 0.00027

Matches : 8/106 fragment ions using 14 most intense peaks [\(help\)](#)

| #  | b           | b <sup>++</sup> | b <sup>+</sup> | b <sup>+++</sup> | b <sup>0</sup> | b <sup>0++</sup> | Seq.     | y                  | y <sup>++</sup>   | y <sup>+</sup> | y <sup>+++</sup> | y <sup>0</sup> | y <sup>0++</sup> | #  |
|----|-------------|-----------------|----------------|------------------|----------------|------------------|----------|--------------------|-------------------|----------------|------------------|----------------|------------------|----|
| 1  | 58.028740   | 29.518008       |                |                  |                |                  | <b>G</b> |                    |                   |                |                  |                |                  | 12 |
| 2  | 187.071333  | 94.039305       |                |                  | 169.060768     | 85.034022        | <b>E</b> | 1737.845111        | 869.426194        | 1720.818562    | 860.912919       | 1719.834546    | 860.420911       | 11 |
| 3  | 373.150646  | 187.078961      |                |                  | 355.140081     | 178.073679       | <b>W</b> | 1608.802518        | 804.904897        | 1591.775969    | 796.391623       | 1590.791953    | 795.899614       | 10 |
| 4  | 474.198325  | 237.602801      |                |                  | 456.187760     | 228.597518       | <b>T</b> | <b>1422.723205</b> | 711.865241        | 1405.696656    | 703.351966       | 1404.712640    | 702.859958       | 9  |
| 5  | 634.228974  | 317.618125      |                |                  | 616.218409     | 308.612843       | <b>C</b> | <b>1321.675526</b> | <b>661.341401</b> | 1304.648977    | 652.828127       | 1303.664961    | 652.336119       | 8  |
| 6  | 747.313038  | 374.160157      |                |                  | 729.302473     | 365.154875       | <b>I</b> | <b>1161.644877</b> | 581.326077        | 1144.618328    | 572.812802       | 1143.634312    | 572.320794       | 7  |
| 7  | 818.350152  | 409.678714      |                |                  | 800.339587     | 400.673432       | <b>A</b> | <b>1048.560813</b> | 524.784044        | 1031.534264    | 516.270770       | 1030.550248    | 515.778762       | 6  |
| 8  | 981.413481  | 491.210379      |                |                  | 963.402916     | 482.205096       | <b>Y</b> | <b>977.523699</b>  | 489.265488        | 960.497150     | 480.752213       | 959.513134     | 480.260205       | 5  |
| 9  | 1068.445509 | 534.726393      |                |                  | 1050.434944    | 525.721110       | <b>S</b> | <b>814.460370</b>  | 407.733823        | 797.433821     | 399.220549       | 796.449805     | 398.728541       | 4  |
| 10 | 1507.670835 | 754.339056      | 1490.644286    | 745.825781       | 1489.660270    | 745.333773       | <b>Q</b> | 727.428342         | 364.217809        | 710.401793     | 355.704534       |                |                  | 3  |
| 11 | 1620.754899 | 810.881088      | 1603.728350    | 802.367813       | 1602.744334    | 801.875805       | <b>L</b> | <b>288.203016</b>  | 144.605146        | 271.176467     | 136.091871       |                |                  | 2  |
| 12 |             |                 |                |                  |                |                  | <b>R</b> | 175.118952         | 88.063114         | 158.092403     | 79.549839        |                |                  | 1  |

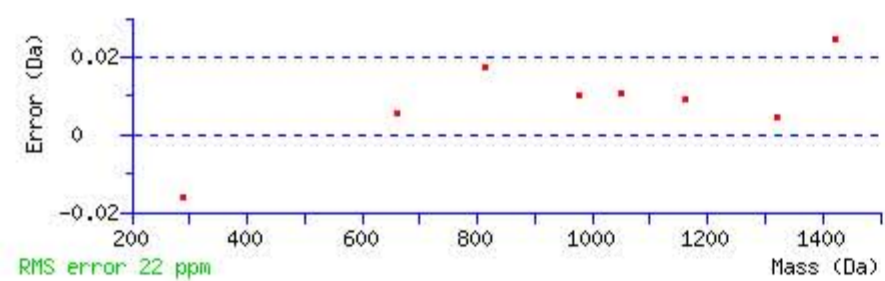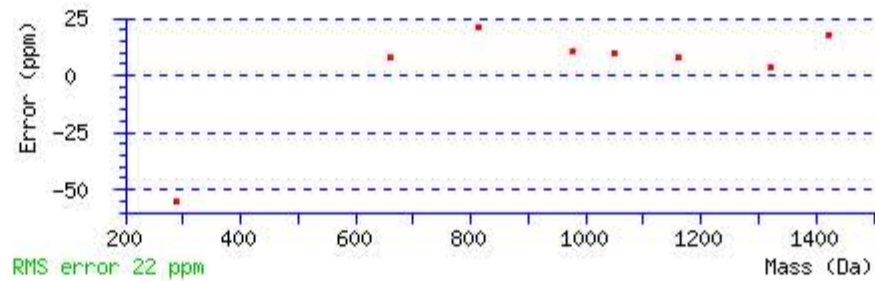

NCBI BLAST search of **GEWTCIAYSQLR**

(Parameters: blastp, nr protein database, expect=20000, no filter, PAM30)

Other BLAST [web gateways](#)

All matches to this query

| Score | Mr(calc):   | Delta    | Sequence                         |
|-------|-------------|----------|----------------------------------|
| 42.7  | 1793.859283 | 0.023369 | <a href="#">GEWTCIAYSQLR</a>     |
| 4.4   | 1793.865158 | 0.017494 | <a href="#">ACLECELTSKDVTLR</a>  |
| 2.8   | 1793.865158 | 0.017494 | <a href="#">EDVNLMMSSGQILGIR</a> |
| 1.4   | 1793.873016 | 0.009636 | <a href="#">DQKLFVSESRMPDSR</a>  |

Mascot: <http://www.matrixscience.com/>



# MASCOT SCIENCE Mascot Search Results

## Peptide View

MS/MS Fragmentation of **WCGTTQNYDADQK**

Found in **FINC\_HUMAN**, Fibronectin OS=Homo sapiens GN=FN1 PE=1 SV=4

Match to Query 47421: 1896.827862 from(633.283230,3+) rtinseconds(1665) index(39833)

Title: Locus:1.1.1.3029.13 File:"2013-07-02 CLN FXIII 180 min 1st F 3.wiff"

Data file C:\Program Files (x86)\Matrix Science\Mascot Daemon\mgf7 FXIII 180 min 1st\mascot\_daemon\_merge.mgf

Click mouse within plot area to zoom in by factor of two about that point

Or, Plot from  to  Da

Label all possible matches  Label matches used for scoring

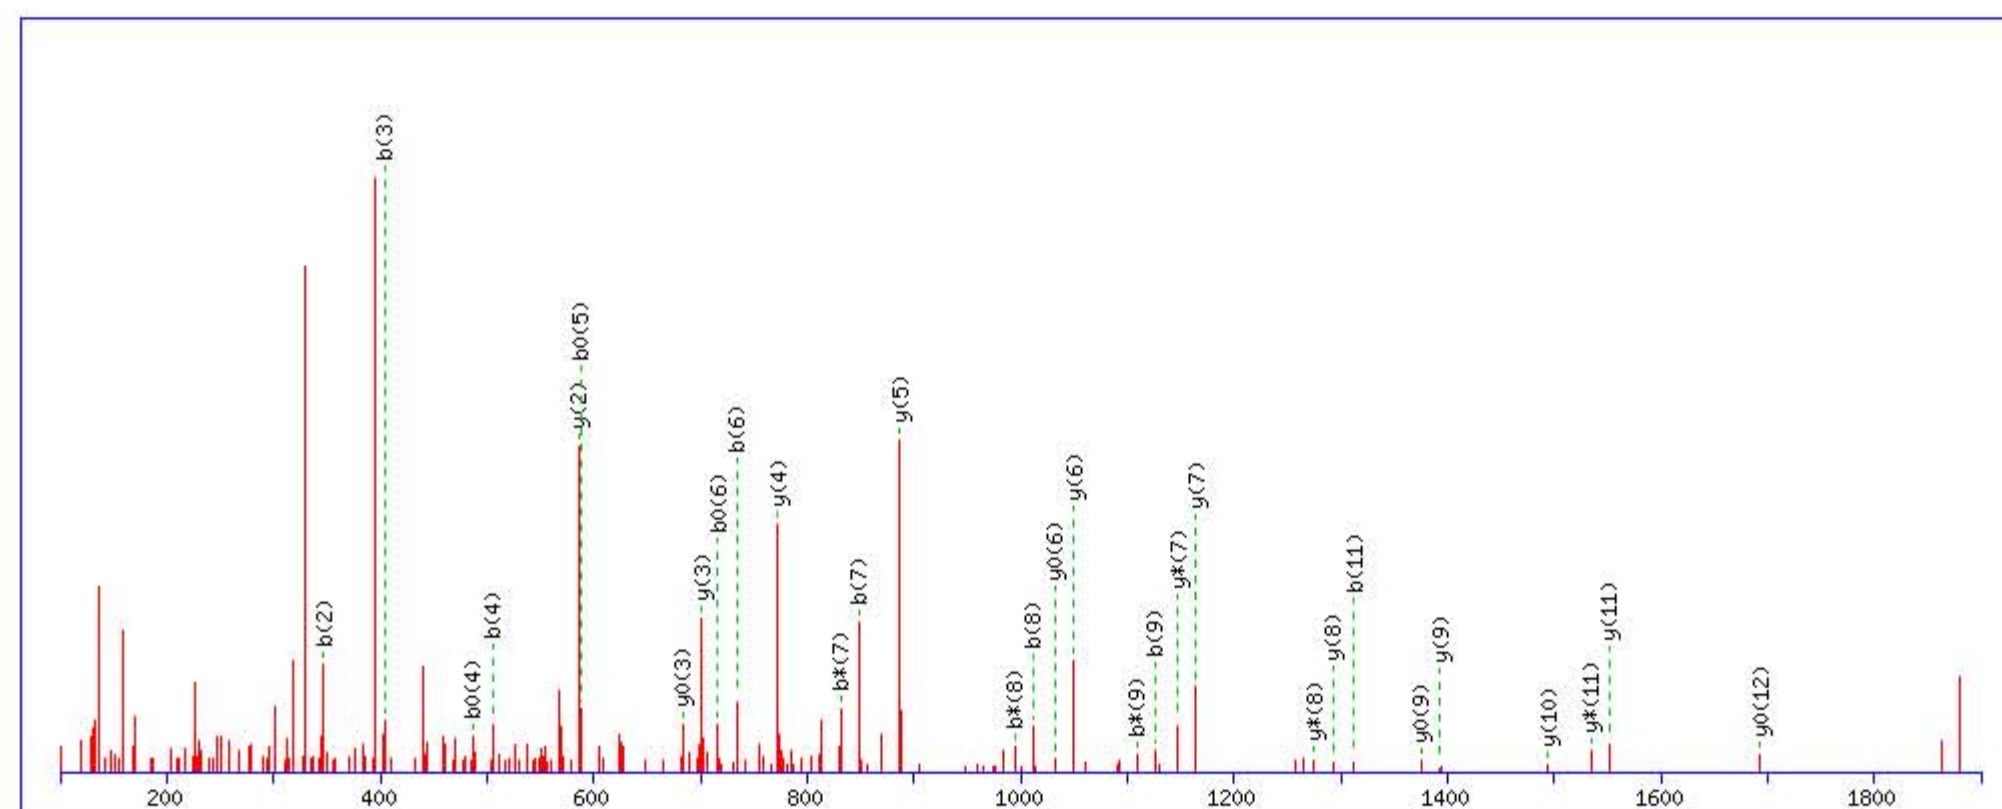

Monoisotopic mass of neutral peptide Mr(calc): 1896.813477

Fixed modifications: Carbamidomethyl (C) (apply to specified residues or termini only)

Variable modifications:

Q12 : Biotin:Thermo-21345 (Q)

Ions Score: 53 Expect: 2.2e-005

Matches : 31/124 fragment ions using 58 most intense peaks [\(help\)](#)

| #  | b                  | b <sup>++</sup> | b <sup>*</sup>     | b <sup>*++</sup> | b <sup>0</sup>    | b <sup>0++</sup> | Seq. | y                  | y <sup>++</sup> | y <sup>*</sup>     | y <sup>*++</sup> | y <sup>0</sup>     | y <sup>0++</sup> | #  |
|----|--------------------|-----------------|--------------------|------------------|-------------------|------------------|------|--------------------|-----------------|--------------------|------------------|--------------------|------------------|----|
| 1  | 187.086589         | 94.046932       |                    |                  |                   |                  | W    |                    |                 |                    |                  |                    |                  | 13 |
| 2  | <b>347.117238</b>  | 174.062257      |                    |                  |                   |                  | C    | 1711.741435        | 856.374356      | 1694.714886        | 847.861081       | <b>1693.730870</b> | 847.369073       | 12 |
| 3  | <b>404.138702</b>  | 202.572989      |                    |                  |                   |                  | G    | <b>1551.710786</b> | 776.359031      | <b>1534.684237</b> | 767.845757       | 1533.700221        | 767.353749       | 11 |
| 4  | <b>505.186381</b>  | 253.096828      |                    |                  | <b>487.175816</b> | 244.091546       | T    | <b>1494.689322</b> | 747.848299      | 1477.662773        | 739.335025       | 1476.678757        | 738.843017       | 10 |
| 5  | 606.234060         | 303.620668      |                    |                  | <b>588.223495</b> | 294.615386       | T    | <b>1393.641643</b> | 697.324460      | 1376.615094        | 688.811185       | <b>1375.631078</b> | 688.319177       | 9  |
| 6  | <b>734.292638</b>  | 367.649957      | 717.266089         | 359.136683       | <b>716.282073</b> | 358.644675       | Q    | <b>1292.593964</b> | 646.800620      | <b>1275.567415</b> | 638.287346       | 1274.583399        | 637.795338       | 8  |
| 7  | <b>848.335565</b>  | 424.671421      | <b>831.309016</b>  | 416.158146       | 830.325000        | 415.666138       | N    | <b>1164.535386</b> | 582.771331      | <b>1147.508837</b> | 574.258057       | 1146.524821        | 573.766049       | 7  |
| 8  | <b>1011.398894</b> | 506.203085      | <b>994.372345</b>  | 497.689810       | 993.388329        | 497.197802       | Y    | <b>1050.492459</b> | 525.749868      | 1033.465910        | 517.236593       | <b>1032.481894</b> | 516.744585       | 6  |
| 9  | <b>1126.425837</b> | 563.716557      | <b>1109.399288</b> | 555.203282       | 1108.415272       | 554.711274       | D    | <b>887.429130</b>  | 444.218203      | 870.402581         | 435.704929       | 869.418565         | 435.212921       | 5  |
| 10 | 1197.462951        | 599.235114      | 1180.436402        | 590.721839       | 1179.452386       | 590.229831       | A    | <b>772.402187</b>  | 386.704732      | 755.375638         | 378.191457       | 754.391622         | 377.699449       | 4  |
| 11 | <b>1312.489894</b> | 656.748585      | 1295.463345        | 648.235311       | 1294.479329       | 647.743303       | D    | <b>701.365073</b>  | 351.186175      | 684.338524         | 342.672900       | <b>683.354508</b>  | 342.180892       | 3  |
| 12 | 1751.715220        | 876.361248      | 1734.688671        | 867.847974       | 1733.704655       | 867.355966       | Q    | <b>586.338130</b>  | 293.672703      | 569.311581         | 285.159429       |                    |                  | 2  |
| 13 |                    |                 |                    |                  |                   |                  | K    | 147.112804         | 74.060040       | 130.086255         | 65.546765        |                    |                  | 1  |

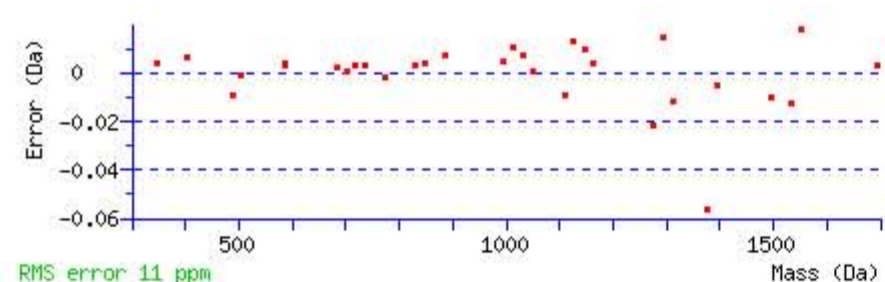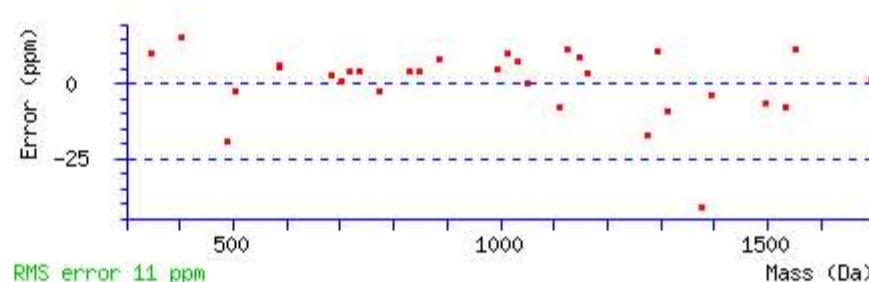

NCBI BLAST search of [WCGTTQNYDADQK](#)

(Parameters: blastp, nr protein database, expect=20000, no filter, PAM30)

Other BLAST [web gateways](#)

All matches to this query

| Score | Mr(calc):   | Delta    | Sequence                      |
|-------|-------------|----------|-------------------------------|
| 53.5  | 1896.813477 | 0.014385 | <a href="#">WCGTTQNYDADQK</a> |

Mascot: <http://www.matrixscience.com/>

# MASCOT SEARCH RESULTS

## Peptide View

MS/MS Fragmentation of **LLCQCLGFGSGHFR**

Found in **FINC\_HUMAN**, Fibronectin OS=Homo sapiens GN=FN1 PE=1 SV=4

Match to Query 48969: 1961.965182 from(654.995670,3+) rtinseconds(2154) index(43282)

Title: Locus:1.1.1.3199.14 File:"2013-07-02 CLN FXIII 180 min 1st F 3.wiff"

Data file C:\Program Files (x86)\Matrix Science\Mascot Daemon\mgf\7 FXIII 180 min 1st\mascot\_daemon\_merge.mgf

Click mouse within plot area to zoom in by factor of two about that point

Or, Plot from  to  Da

Label all possible matches  Label matches used for scoring

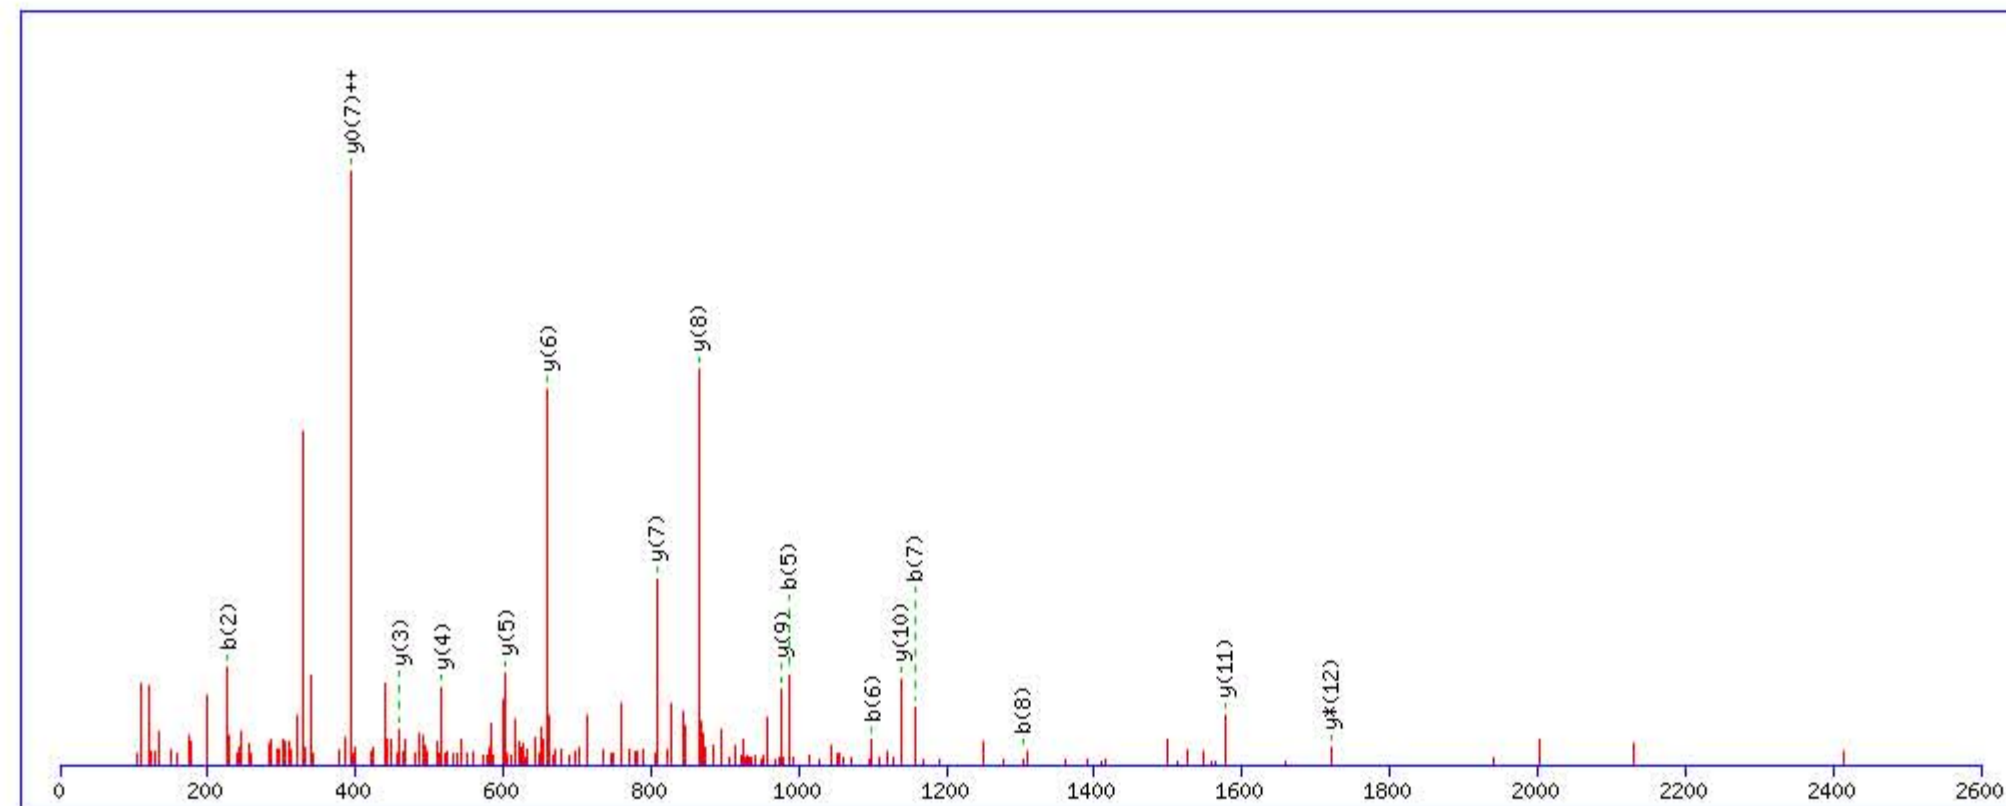

Monoisotopic mass of neutral peptide Mr(calc): 1961.942673

Fixed modifications: Carbamidomethyl (C) (apply to specified residues or termini only)

Variable modifications:

Q4 : Biotin:Thermo-21345 (Q)

Ions Score: 47 Expect: 3.6e-005

Matches : 16/124 fragment ions using 33 most intense peaks [\(help\)](#)

| #  | b                  | b <sup>++</sup> | b <sup>+</sup> | b <sup>+++</sup> | b <sup>0</sup> | b <sup>0++</sup> | Seq. | y                  | y <sup>++</sup> | y <sup>+</sup>     | y <sup>+++</sup> | y <sup>0</sup> | y <sup>0++</sup>  | #  |
|----|--------------------|-----------------|----------------|------------------|----------------|------------------|------|--------------------|-----------------|--------------------|------------------|----------------|-------------------|----|
| 1  | 114.091340         | 57.549308       |                |                  |                |                  | L    |                    |                 |                    |                  |                |                   | 14 |
| 2  | <b>227.175404</b>  | 114.091340      |                |                  |                |                  | L    | 1849.865864        | 925.436570      | 1832.839315        | 916.923296       | 1831.855299    | 916.431288        | 13 |
| 3  | 387.206053         | 194.106664      |                |                  |                |                  | C    | 1736.781800        | 868.894538      | <b>1719.755251</b> | 860.381264       | 1718.771235    | 859.889255        | 12 |
| 4  | 826.431379         | 413.719328      | 809.404830     | 405.206053       |                |                  | Q    | <b>1576.751151</b> | 788.879213      | 1559.724602        | 780.365939       | 1558.740586    | 779.873931        | 11 |
| 5  | <b>986.462028</b>  | 493.734652      | 969.435479     | 485.221378       |                |                  | C    | <b>1137.525825</b> | 569.266550      | 1120.499276        | 560.753276       | 1119.515260    | 560.261268        | 10 |
| 6  | <b>1099.546092</b> | 550.276684      | 1082.519543    | 541.763410       |                |                  | L    | <b>977.495176</b>  | 489.251226      | 960.468627         | 480.737952       | 959.484611     | 480.245944        | 9  |
| 7  | <b>1156.567556</b> | 578.787416      | 1139.541007    | 570.274142       |                |                  | G    | <b>864.411112</b>  | 432.709194      | 847.384563         | 424.195920       | 846.400547     | 423.703912        | 8  |
| 8  | <b>1303.635970</b> | 652.321623      | 1286.609421    | 643.808349       |                |                  | F    | <b>807.389648</b>  | 404.198462      | 790.363099         | 395.685188       | 789.379083     | <b>395.193180</b> | 7  |
| 9  | 1360.657434        | 680.832355      | 1343.630885    | 672.319081       |                |                  | G    | <b>660.321234</b>  | 330.664255      | 643.294685         | 322.150981       | 642.310669     | 321.658973        | 6  |
| 10 | 1447.689462        | 724.348369      | 1430.662913    | 715.835095       | 1429.678897    | 715.343087       | S    | <b>603.299770</b>  | 302.153523      | 586.273221         | 293.640249       | 585.289205     | 293.148241        | 5  |
| 11 | 1504.710926        | 752.859101      | 1487.684377    | 744.345827       | 1486.700361    | 743.853818       | G    | <b>516.267742</b>  | 258.637509      | 499.241193         | 250.124235       |                |                   | 4  |
| 12 | 1641.769838        | 821.388557      | 1624.743289    | 812.875283       | 1623.759273    | 812.383274       | H    | <b>459.246278</b>  | 230.126777      | 442.219729         | 221.613502       |                |                   | 3  |
| 13 | 1788.838252        | 894.922764      | 1771.811703    | 886.409490       | 1770.827687    | 885.917482       | F    | 322.187366         | 161.597321      | 305.160817         | 153.084047       |                |                   | 2  |
| 14 |                    |                 |                |                  |                |                  | R    | 175.118952         | 88.063114       | 158.092403         | 79.549839        |                |                   | 1  |

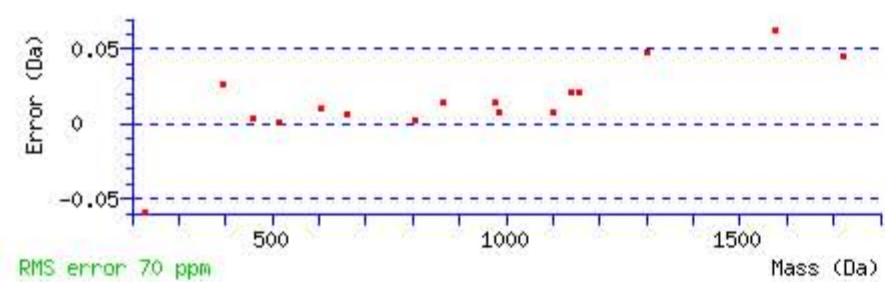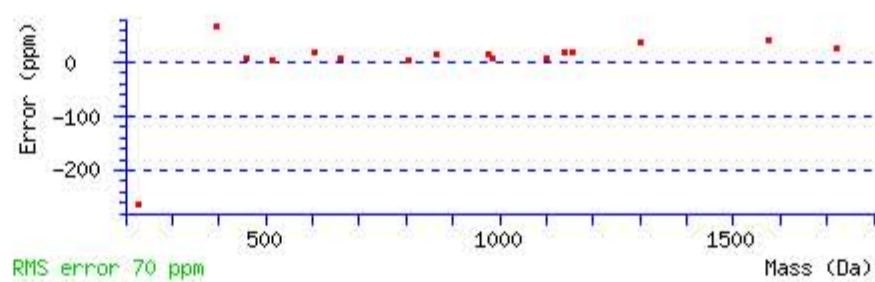

NCBI BLAST search of **LLCQCLGFGSGHFR**

(Parameters: blastp, nr protein database, expect=20000, no filter, PAM30)

Other BLAST [web gateways](#)

All matches to this query

| Score | Mr(calc):   | Delta     | Sequence                           |
|-------|-------------|-----------|------------------------------------|
| 47.4  | 1961.942673 | 0.022509  | <a href="#">LLCQCLGFGSGHFR</a>     |
| 0.0   | 1961.970779 | -0.005597 | <a href="#">DAGREGLRSDVFPGPSFR</a> |

Mascot: <http://www.matrixscience.com/>

# MASCOT SCIENCE Mascot Search Results

## Peptide View

MS/MS Fragmentation of **HYQINQQWER**

Found in **FN1\_HUMAN**, Fibronectin OS=Homo sapiens GN=FN1 PE=1 SV=4

Match to Query 51354: 2023.014132 from(675.345320,3+) rtinseconds(1993) index(42184)

Title: Locus:1.1.1.3143.10 File:"2013-07-02 CLN FXIII 180 min 1st F 3.wiff"

Data file C:\Program Files (x86)\Matrix Science\Mascot Daemon\mgf\7 FXIII 180 min 1st\mascot\_daemon\_merge.mgf

Click mouse within plot area to zoom in by factor of two about that point

Or, Plot from  to  Da

Label all possible matches  Label matches used for scoring

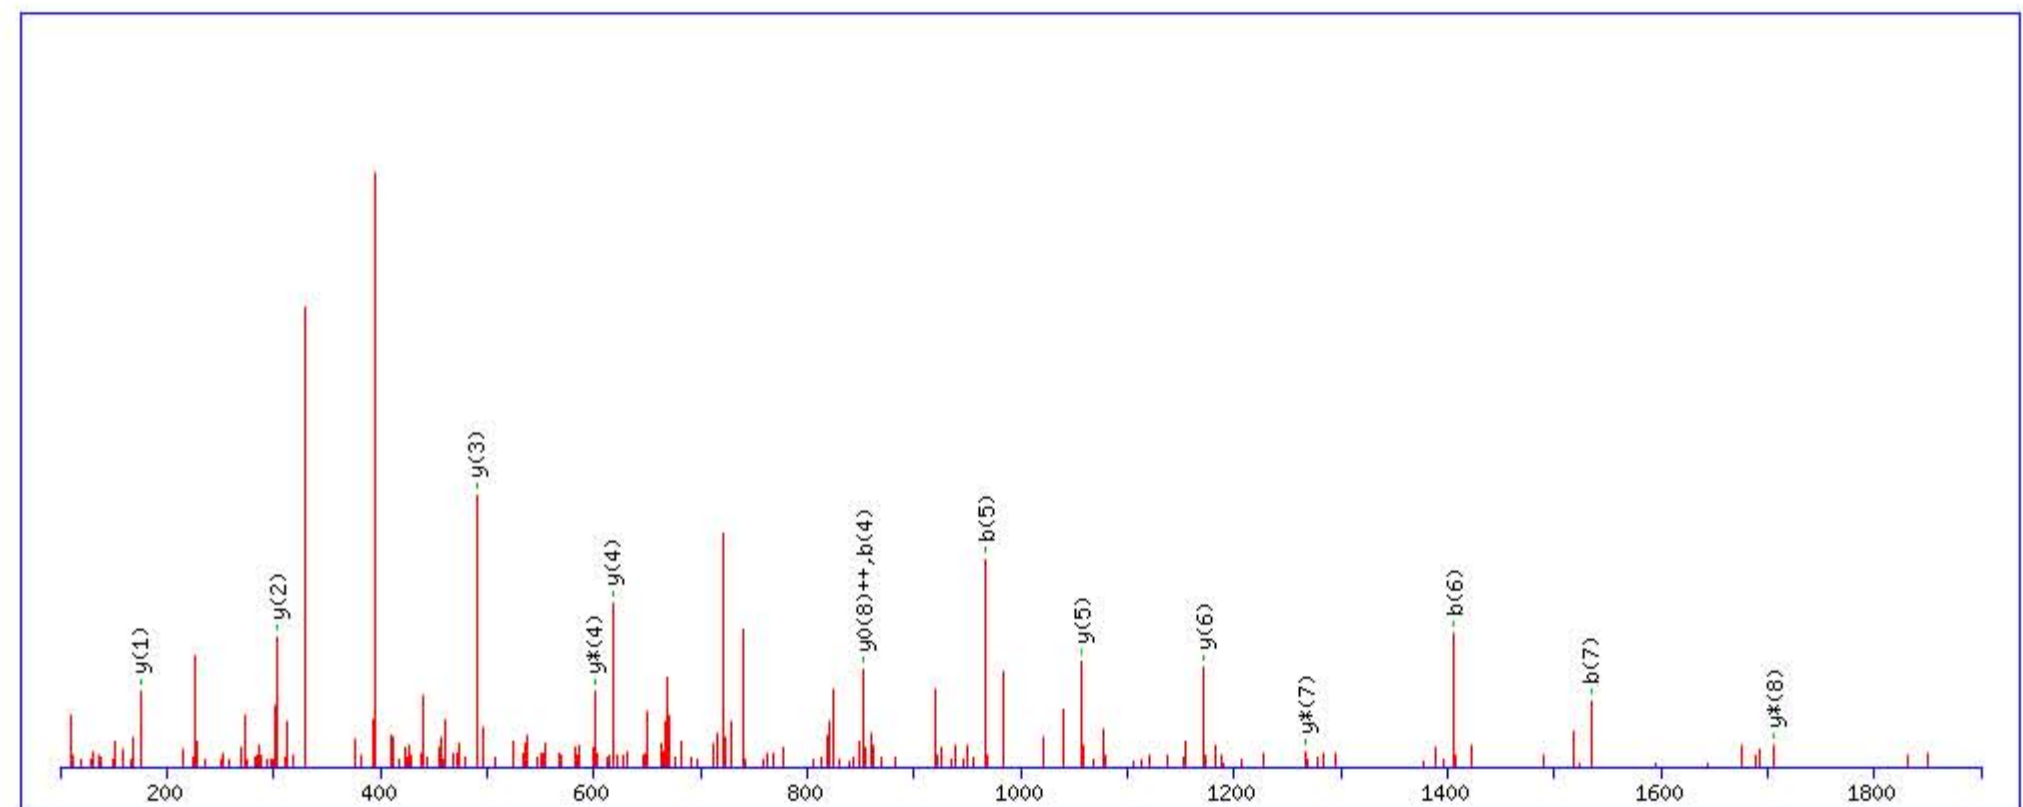

Monoisotopic mass of neutral peptide Mr(calc): 2022.992020

Fixed modifications: Carbamidomethyl (C) (apply to specified residues or termini only)

Variable modifications:

Q3 : Biotin:Thermo-21345 (Q)

Q6 : Biotin:Thermo-21345 (Q)

Ions Score: 37 Expect: 0.0017

Matches : 14/86 fragment ions using 17 most intense peaks [\(help\)](#)

| #  | b           | b <sup>++</sup> | b*          | b <sup>*++</sup> | b <sup>0</sup> | b <sup>0++</sup> | Seq. | y           | y <sup>++</sup> | y*          | y <sup>*++</sup> | y <sup>0</sup> | y <sup>0++</sup> | #  |
|----|-------------|-----------------|-------------|------------------|----------------|------------------|------|-------------|-----------------|-------------|------------------|----------------|------------------|----|
| 1  | 138.066188  | 69.536732       |             |                  |                |                  | H    |             |                 |             |                  |                |                  | 10 |
| 2  | 301.129517  | 151.068397      |             |                  |                |                  | Y    | 1886.940408 | 943.973842      | 1869.913859 | 935.460568       | 1868.929843    | 934.968560       | 9  |
| 3  | 740.354843  | 370.681060      | 723.328294  | 362.167785       |                |                  | Q    | 1723.877079 | 862.442178      | 1706.850530 | 853.928903       | 1705.866514    | 853.436895       | 8  |
| 4  | 853.438907  | 427.223092      | 836.412358  | 418.709817       |                |                  | I    | 1284.651753 | 642.829515      | 1267.625204 | 634.316240       | 1266.641188    | 633.824232       | 7  |
| 5  | 967.481834  | 484.244555      | 950.455285  | 475.731281       |                |                  | N    | 1171.567689 | 586.287483      | 1154.541140 | 577.774208       | 1153.557124    | 577.282200       | 6  |
| 6  | 1406.707160 | 703.857218      | 1389.680611 | 695.343944       |                |                  | Q    | 1057.524762 | 529.266019      | 1040.498213 | 520.752745       | 1039.514197    | 520.260737       | 5  |
| 7  | 1534.765738 | 767.886507      | 1517.739189 | 759.373233       |                |                  | Q    | 618.299436  | 309.653356      | 601.272887  | 301.140082       | 600.288871     | 300.648074       | 4  |
| 8  | 1720.845051 | 860.926164      | 1703.818502 | 852.412889       |                |                  | W    | 490.240858  | 245.624067      | 473.214309  | 237.110792       | 472.230293     | 236.618784       | 3  |
| 9  | 1849.887644 | 925.447460      | 1832.861095 | 916.934186       | 1831.877079    | 916.442178       | E    | 304.161545  | 152.584410      | 287.134996  | 144.071136       | 286.150980     | 143.579128       | 2  |
| 10 |             |                 |             |                  |                |                  | R    | 175.118952  | 88.063114       | 158.092403  | 79.549839        |                |                  | 1  |

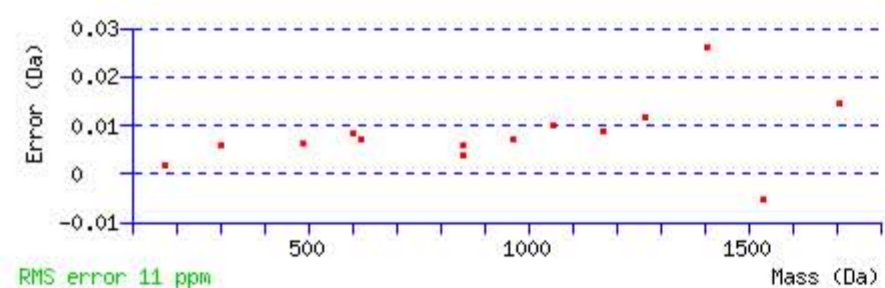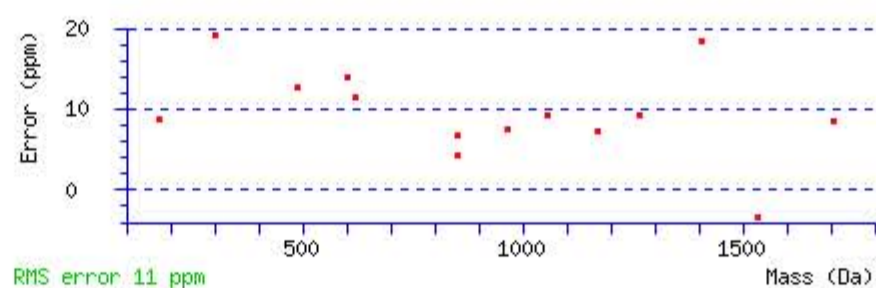

NCBI BLAST search of **HYQINQQWER**

(Parameters: blastp, nr protein database, expect=20000, no filter, PAM30)

Other BLAST [web gateways](#)

## All matches to this query

| Score | Mr(calc):   | Delta     | Sequence                       |
|-------|-------------|-----------|--------------------------------|
| 37.1  | 2022.992020 | 0.022112  | <a href="#">HYQINQQWER</a>     |
| 20.7  | 2022.992020 | 0.022112  | <a href="#">HYQINQQWER</a>     |
| 7.3   | 2023.023682 | -0.009550 | <a href="#">ILDQYLYKEGWER</a>  |
| 0.6   | 2023.038284 | -0.024152 | <a href="#">EVNKFQMAYSNLLR</a> |

# MASCOT SEARCH RESULTS

## Peptide View

MS/MS Fragmentation of **YSFCTDHTVLVQTR**

Found in **FINC\_HUMAN**, Fibronectin OS=Homo sapiens GN=FN1 PE=1 SV=4

Match to Query 51688: 2037.005142 from(680.008990,3+) rtinseconds(1999) index(42215)

Title: Locus:1.1.1.3145.12 File:"2013-07-02 CLN FXIII 180 min 1st F 3.wiff"

Data file C:\Program Files (x86)\Matrix Science\Mascot Daemon\mgf7 FXIII 180 min 1st\mascot\_daemon\_merge.mgf

Click mouse within plot area to zoom in by factor of two about that point

Or, Plot from  to  Da

Label all possible matches  Label matches used for scoring

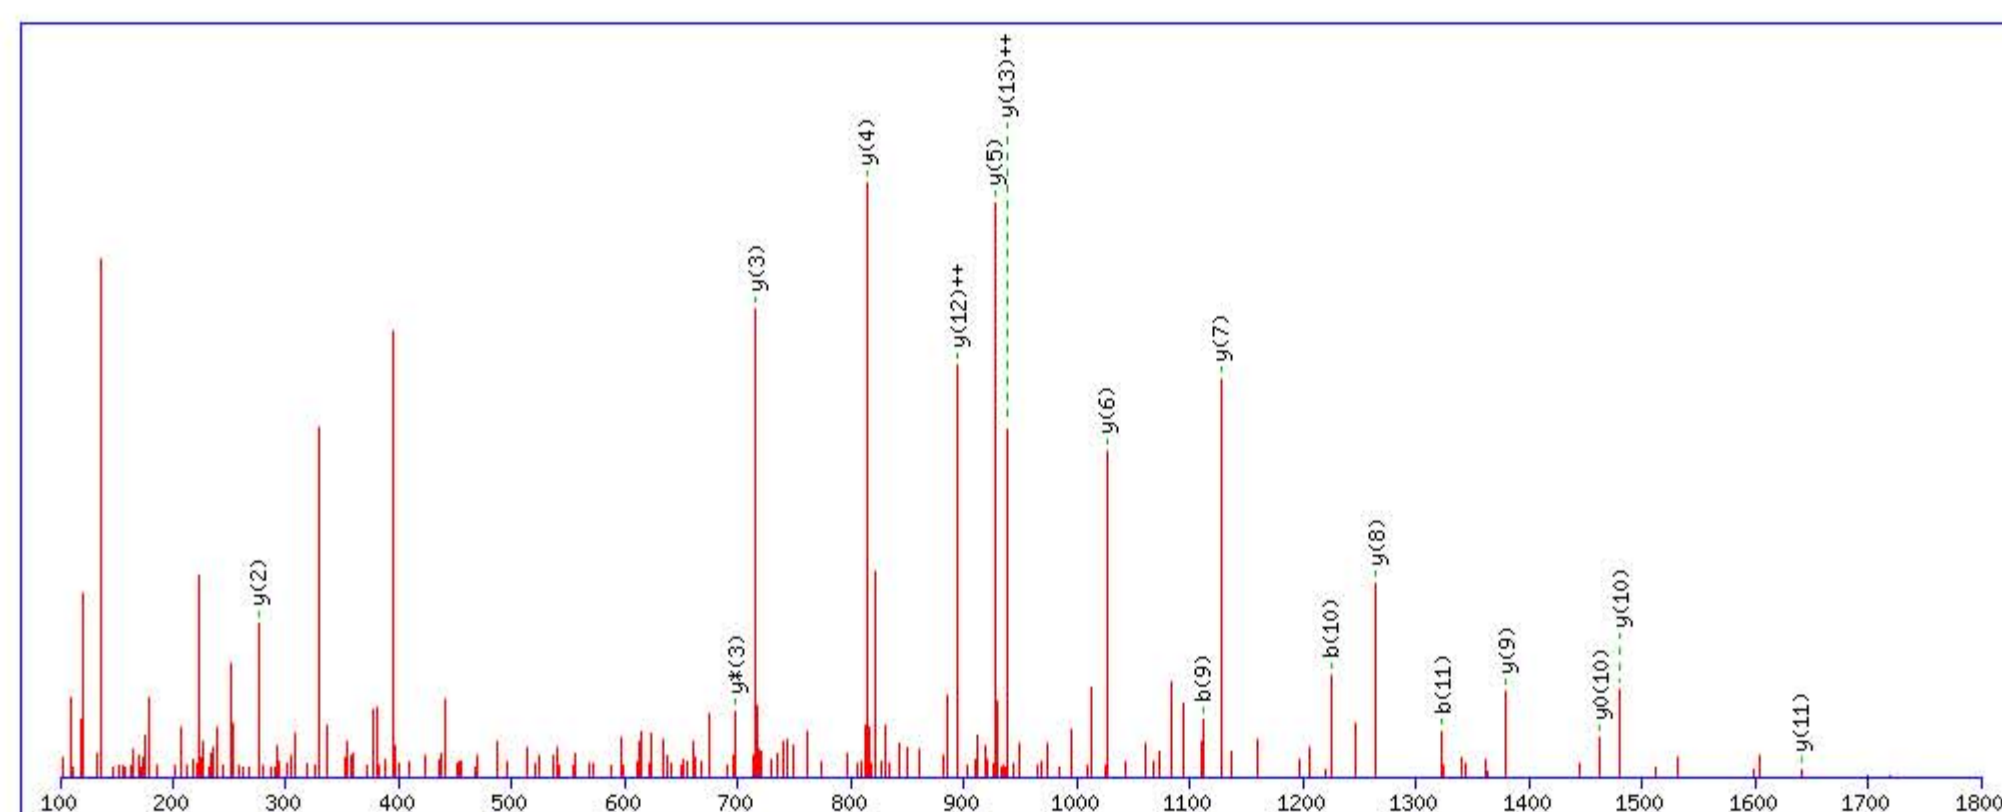

Monoisotopic mass of neutral peptide Mr(calc): 2036.981232

Fixed modifications: Carbamidomethyl (C) (apply to specified residues or termini only)

Variable modifications:

Q12 : Biotin:Thermo-21345 (Q)

Ions Score: 57 Expect: 4.6e-005

Matches : 17/130 fragment ions using 33 most intense peaks [\(help\)](#)

| #  | b           | b <sup>++</sup> | b <sup>*</sup> | b <sup>*++</sup> | b <sup>0</sup> | b <sup>0++</sup> | Seq. | y           | y <sup>++</sup> | y <sup>*</sup> | y <sup>*++</sup> | y <sup>0</sup> | y <sup>0++</sup> | #  |
|----|-------------|-----------------|----------------|------------------|----------------|------------------|------|-------------|-----------------|----------------|------------------|----------------|------------------|----|
| 1  | 164.070605  | 82.538940       |                |                  |                |                  | Y    |             |                 |                |                  |                |                  | 14 |
| 2  | 251.102633  | 126.054954      |                |                  | 233.092068     | 117.049672       | S    | 1874.925153 | 937.966215      | 1857.898604    | 929.452940       | 1856.914588    | 928.960932       | 13 |
| 3  | 398.171047  | 199.589161      |                |                  | 380.160482     | 190.583879       | F    | 1787.893125 | 894.450201      | 1770.866576    | 885.936926       | 1769.882560    | 885.444918       | 12 |
| 4  | 558.201696  | 279.604486      |                |                  | 540.191131     | 270.599204       | C    | 1640.824711 | 820.915994      | 1623.798162    | 812.402719       | 1622.814146    | 811.910711       | 11 |
| 5  | 659.249375  | 330.128326      |                |                  | 641.238810     | 321.123043       | T    | 1480.794062 | 740.900669      | 1463.767513    | 732.387395       | 1462.783497    | 731.895387       | 10 |
| 6  | 774.276318  | 387.641797      |                |                  | 756.265753     | 378.636515       | D    | 1379.746383 | 690.376830      | 1362.719834    | 681.863555       | 1361.735818    | 681.371547       | 9  |
| 7  | 911.335230  | 456.171253      |                |                  | 893.324665     | 447.165971       | H    | 1264.719440 | 632.863358      | 1247.692891    | 624.350084       | 1246.708875    | 623.858076       | 8  |
| 8  | 1012.382909 | 506.695093      |                |                  | 994.372344     | 497.689810       | T    | 1127.660528 | 564.333902      | 1110.633979    | 555.820628       | 1109.649963    | 555.328620       | 7  |
| 9  | 1111.451323 | 556.229300      |                |                  | 1093.440758    | 547.224017       | V    | 1026.612849 | 513.810063      | 1009.586300    | 505.296788       | 1008.602284    | 504.804780       | 6  |
| 10 | 1224.535387 | 612.771331      |                |                  | 1206.524822    | 603.766049       | L    | 927.544435  | 464.275856      | 910.517886     | 455.762581       | 909.533870     | 455.270573       | 5  |
| 11 | 1323.603801 | 662.305539      |                |                  | 1305.593236    | 653.300256       | V    | 814.460371  | 407.733824      | 797.433822     | 399.220549       | 796.449806     | 398.728541       | 4  |
| 12 | 1762.829127 | 881.918202      | 1745.802578    | 873.404927       | 1744.818562    | 872.912919       | Q    | 715.391957  | 358.199617      | 698.365408     | 349.686342       | 697.381392     | 349.194334       | 3  |
| 13 | 1863.876806 | 932.442041      | 1846.850257    | 923.928767       | 1845.866241    | 923.436759       | T    | 276.166631  | 138.586953      | 259.140082     | 130.073679       | 258.156066     | 129.581671       | 2  |
| 14 |             |                 |                |                  |                |                  | R    | 175.118952  | 88.063114       | 158.092403     | 79.549839        |                |                  | 1  |

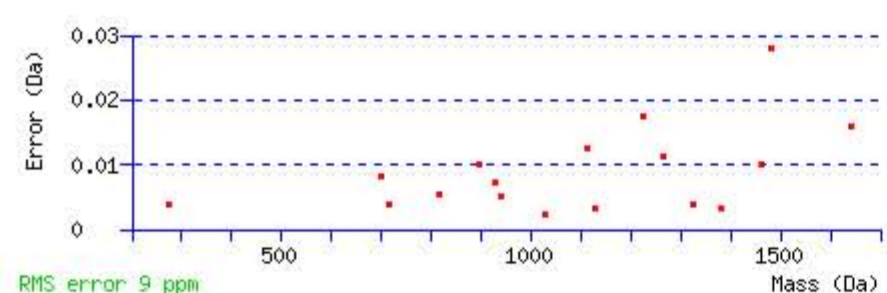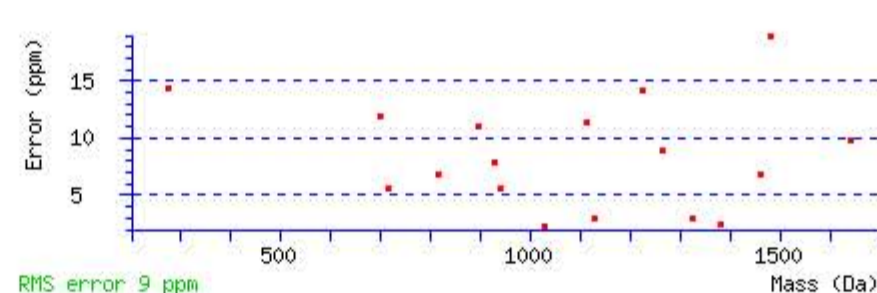

NCBI BLAST search of **YSFCTDHTVLVQTR**

(Parameters: blastp, nr protein database, expect=20000, no filter, PAM30)

Other BLAST [web gateways](#)

All matches to this query

| Score | Mr(calc):   | Delta    | Sequence                       |
|-------|-------------|----------|--------------------------------|
| 56.9  | 2036.981232 | 0.023910 | <a href="#">YSFCTDHTVLVQTR</a> |

Mascot: <http://www.matrixscience.com/>

# MASCOT Search Results

## Peptide View

MS/MS Fragmentation of **HTSVQTTSSGSGPFTDVR**  
 Found in **FINC\_HUMAN**, Fibronectin OS=Homo sapiens GN=FN1 PE=1 SV=4

Match to Query 54774: 2174.063862 from(725.695230,3+) rtinseconds(1674) index(39890)  
 Title: Locus:1.1.1.3032.16 File:"2013-07-02 CLN FXIII 180 min 1st F 3.wiff"  
 Data file C:\Program Files (x86)\Matrix Science\Mascot Daemon\mgf\7 FXIII 180 min 1st\mascot\_daemon\_merge.mgf

Click mouse within plot area to zoom in by factor of two about that point

Or, Plot from  to  Da

Label all possible matches  Label matches used for scoring

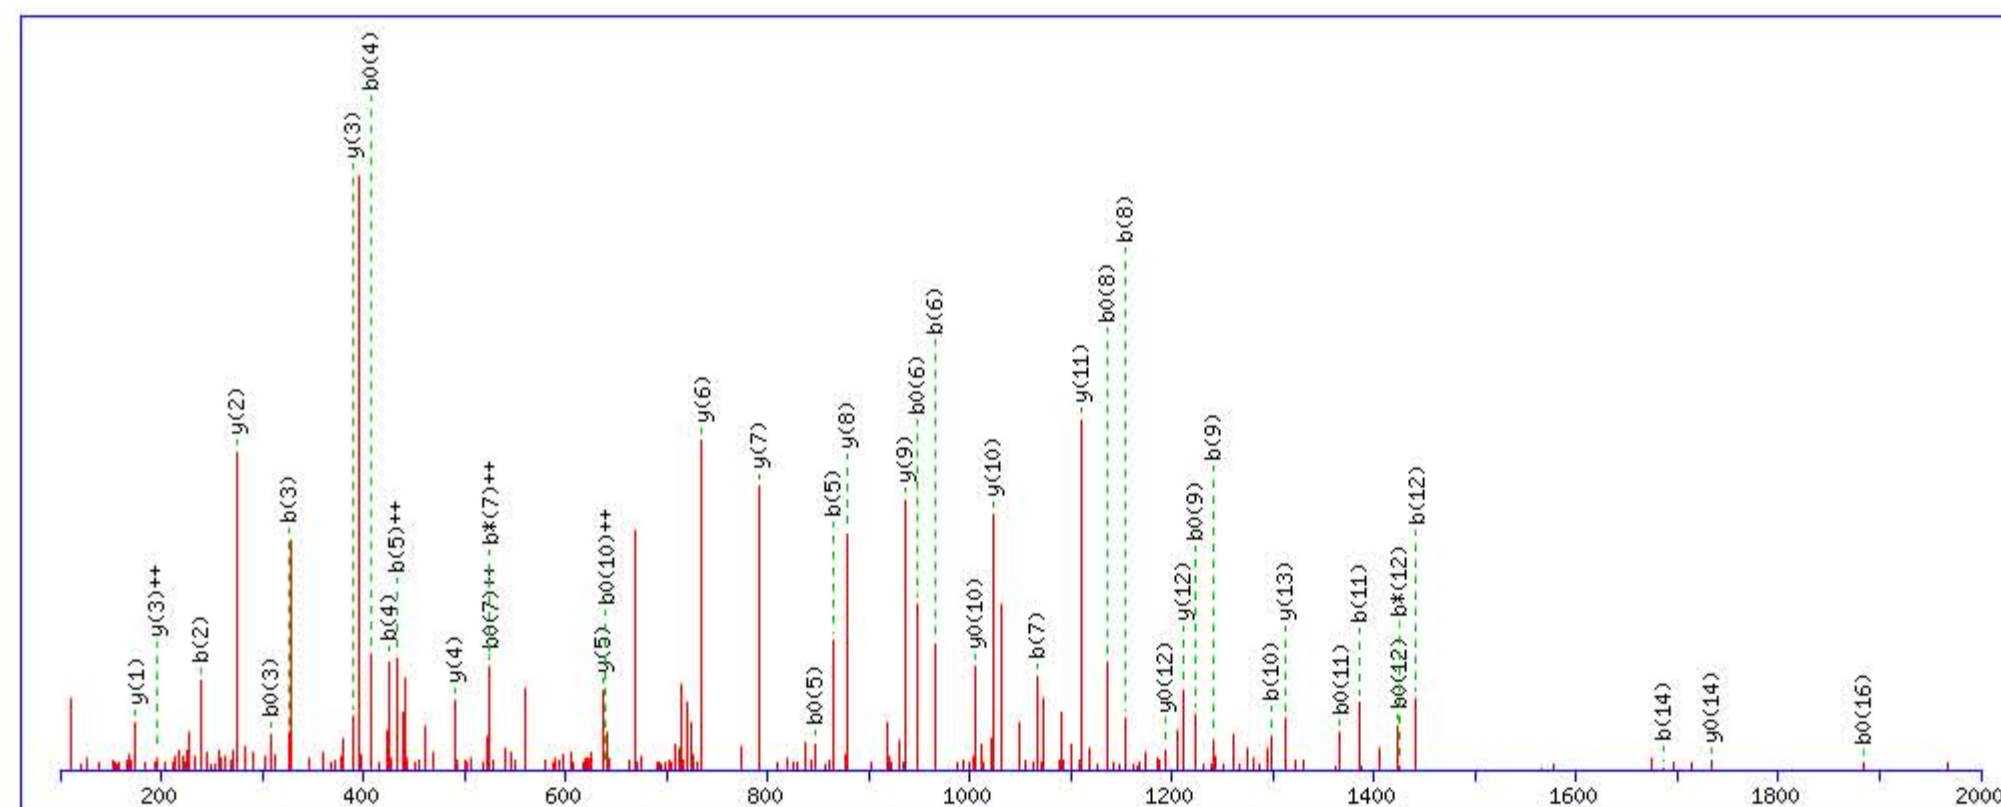

Monoisotopic mass of neutral peptide Mr(calc): 2174.042664  
 Fixed modifications: Carbamidomethyl (C) (apply to specified residues or termini only)  
 Variable modifications:  
 Q5 : Biotin:Thermo-21345 (Q)  
 Ions Score: 79 Expect: 7.5e-008  
 Matches : 43/190 fragment ions using 78 most intense peaks [\(help\)](#)

| #  | b                  | b <sup>++</sup>   | b <sup>+</sup>     | b <sup>+++</sup>  | b <sup>0</sup>     | b <sup>0++</sup>  | Seq. | y                  | y <sup>++</sup>   | y <sup>+</sup> | y <sup>+++</sup> | y <sup>0</sup>     | y <sup>0++</sup> | #  |
|----|--------------------|-------------------|--------------------|-------------------|--------------------|-------------------|------|--------------------|-------------------|----------------|------------------|--------------------|------------------|----|
| 1  | 138.066188         | 69.536732         |                    |                   |                    |                   | H    |                    |                   |                |                  |                    |                  | 18 |
| 2  | <b>239.113867</b>  | 120.060571        |                    |                   | 221.103302         | 111.055289        | T    | 2037.990983        | 1019.499130       | 2020.964434    | 1010.985855      | 2019.980418        | 1010.493847      | 17 |
| 3  | <b>326.145895</b>  | 163.576585        |                    |                   | <b>308.135330</b>  | 154.571303        | S    | 1936.943304        | 968.975290        | 1919.916755    | 960.462016       | 1918.932739        | 959.970008       | 16 |
| 4  | <b>425.214309</b>  | 213.110792        |                    |                   | <b>407.203744</b>  | 204.105510        | V    | 1849.911276        | 925.459276        | 1832.884727    | 916.946002       | 1831.900711        | 916.453994       | 15 |
| 5  | <b>864.439635</b>  | <b>432.723456</b> | 847.413086         | 424.210181        | <b>846.429070</b>  | 423.718173        | Q    | 1750.842862        | 875.925069        | 1733.816313    | 867.411795       | <b>1732.832297</b> | 866.919787       | 14 |
| 6  | <b>965.487314</b>  | 483.247295        | 948.460765         | 474.734021        | <b>947.476749</b>  | 474.242013        | T    | <b>1311.617536</b> | 656.312406        | 1294.590987    | 647.799132       | 1293.606971        | 647.307124       | 13 |
| 7  | <b>1066.534993</b> | 533.771135        | 1049.508444        | <b>525.257860</b> | 1048.524428        | <b>524.765852</b> | T    | <b>1210.569857</b> | 605.788567        | 1193.543308    | 597.275292       | <b>1192.559292</b> | 596.783284       | 12 |
| 8  | <b>1153.567021</b> | 577.287149        | 1136.540472        | 568.773874        | <b>1135.556456</b> | 568.281866        | S    | <b>1109.522178</b> | 555.264727        | 1092.495629    | 546.751453       | 1091.511613        | 546.259445       | 11 |
| 9  | <b>1240.599049</b> | 620.803163        | 1223.572500        | 612.289888        | <b>1222.588484</b> | 611.797880        | S    | <b>1022.490150</b> | 511.748713        | 1005.463601    | 503.235439       | <b>1004.479585</b> | 502.743431       | 10 |
| 10 | <b>1297.620513</b> | 649.313895        | 1280.593964        | 640.800620        | 1279.609948        | <b>640.308612</b> | G    | <b>935.458122</b>  | 468.232699        | 918.431573     | 459.719425       | 917.447557         | 459.227417       | 9  |
| 11 | <b>1384.652541</b> | 692.829909        | 1367.625992        | 684.316634        | <b>1366.641976</b> | 683.824626        | S    | <b>878.436658</b>  | 439.721967        | 861.410109     | 431.208693       | 860.426093         | 430.716685       | 8  |
| 12 | <b>1441.674005</b> | 721.340641        | <b>1424.647456</b> | 712.827366        | <b>1423.663440</b> | 712.335358        | G    | <b>791.404630</b>  | 396.205953        | 774.378081     | 387.692679       | 773.394065         | 387.200671       | 7  |
| 13 | 1538.726769        | 769.867023        | 1521.700220        | 761.353748        | 1520.716204        | 760.861740        | P    | <b>734.383166</b>  | 367.695221        | 717.356617     | 359.181947       | 716.372601         | 358.689939       | 6  |
| 14 | <b>1685.795183</b> | 843.401230        | 1668.768634        | 834.887955        | 1667.784618        | 834.395947        | F    | <b>637.330402</b>  | 319.168839        | 620.303853     | 310.655565       | 619.319837         | 310.163557       | 5  |
| 15 | 1786.842862        | 893.925069        | 1769.816313        | 885.411795        | 1768.832297        | 884.919787        | T    | <b>490.261988</b>  | 245.634632        | 473.235439     | 237.121358       | 472.251423         | 236.629350       | 4  |
| 16 | 1901.869805        | 951.438541        | 1884.843256        | 942.925266        | <b>1883.859240</b> | 942.433258        | D    | <b>389.214309</b>  | <b>195.110793</b> | 372.187760     | 186.597518       | 371.203744         | 186.105510       | 3  |
| 17 | 2000.938219        | 1000.972748       | 1983.911670        | 992.459473        | 1982.927654        | 991.967465        | V    | <b>274.187366</b>  | 137.597321        | 257.160817     | 129.084047       |                    |                  | 2  |
| 18 |                    |                   |                    |                   |                    |                   | R    | <b>175.118952</b>  | 88.063114         | 158.092403     | 79.549839        |                    |                  | 1  |

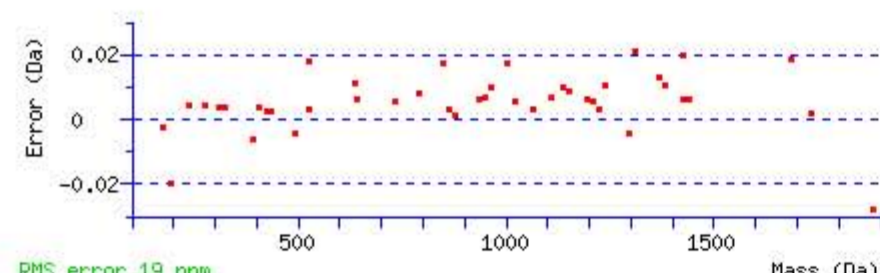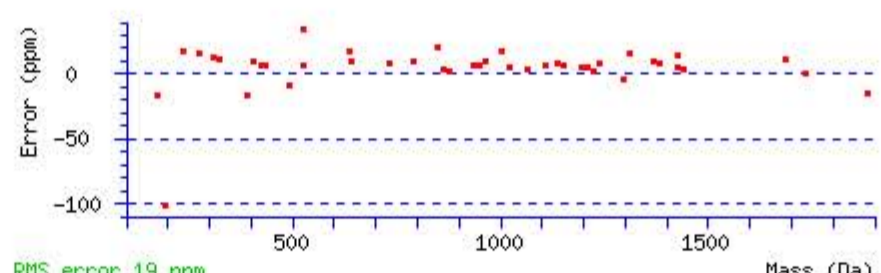

NCBI BLAST search of **HTSVQTTSSGSGPFTDVR**  
 (Parameters: blastp, nr protein database, expect=20000, no filter, PAM30)  
 Other BLAST [web gateways](#)

## All matches to this query

| Score | Mr(calc):   | Delta    | Sequence                           |
|-------|-------------|----------|------------------------------------|
| 78.8  | 2174.042664 | 0.021198 | <a href="#">HTSVQTTSSGSGPFTDVR</a> |
| 2.8   | 2174.034729 | 0.029133 | <a href="#">QNKAEGLGMVTEEGSGEK</a> |

# MASCOT Search Results

## Peptide View

MS/MS Fragmentation of **EYLGAICSCTCFGGQR**

Found in **FINC\_HUMAN**, Fibronectin OS=Homo sapiens GN=FN1 PE=1 SV=4

Match to Query 55128: 2188.981452 from(730.667760,3+) rtinseconds(2155) index(43286)

Title: Locus:1.1.1.3199.18 File:"2013-07-02 CLN FXIII 180 min 1st F 3.wiff"

Data file C:\Program Files (x86)\Matrix Science\Mascot Daemon\mgf7 FXIII 180 min 1st\mascot\_daemon\_merge.mgf

Click mouse within plot area to zoom in by factor of two about that point

Or, Plot from  to  Da

Label all possible matches  Label matches used for scoring

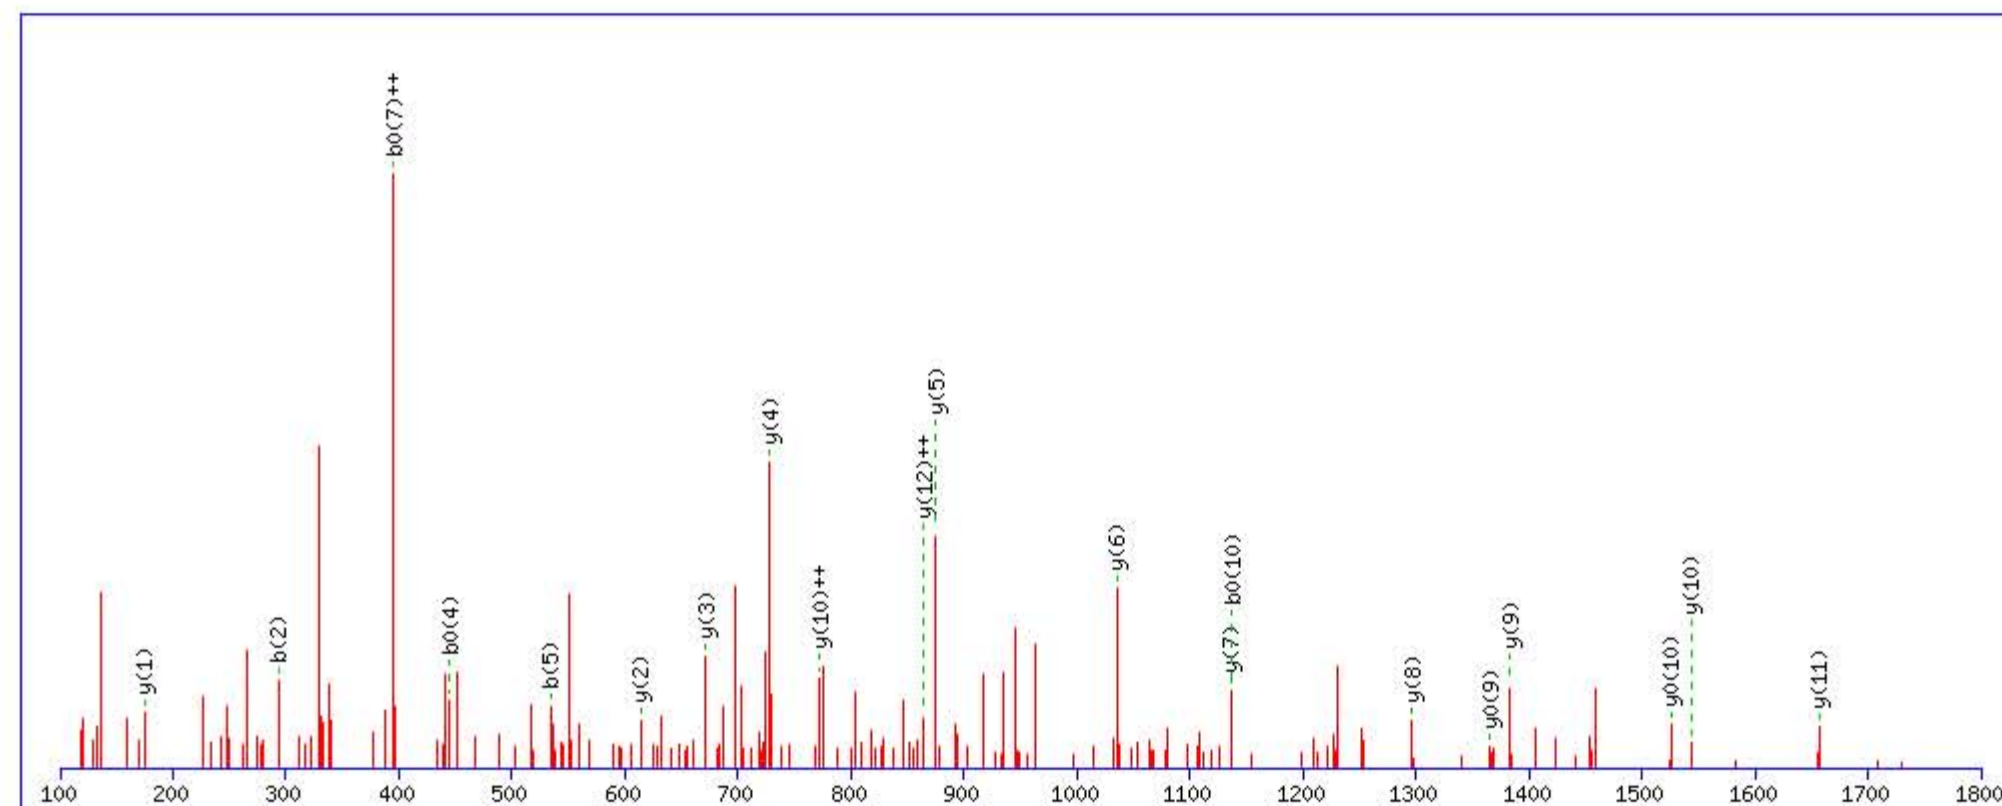

Monoisotopic mass of neutral peptide Mr(calc): 2188.952637

Fixed modifications: Carbamidomethyl (C) (apply to specified residues or termini only)

Variable modifications:

Q15 : Biotin:Thermo-21345 (Q)

Ions Score: 37 Expect: 0.0021

Matches : 20/140 fragment ions using 64 most intense peaks [\(help\)](#)

| #  | b                 | b <sup>++</sup> | b <sup>*</sup> | b <sup>+++</sup> | b <sup>0</sup>     | b <sup>0++</sup>  | Seq. | y                  | y <sup>++</sup>   | y <sup>*</sup> | y <sup>+++</sup> | y <sup>0</sup>     | y <sup>0++</sup> | #  |
|----|-------------------|-----------------|----------------|------------------|--------------------|-------------------|------|--------------------|-------------------|----------------|------------------|--------------------|------------------|----|
| 1  | 130.049869        | 65.528572       |                |                  | 112.039304         | 56.523290         | E    |                    |                   |                |                  |                    |                  | 16 |
| 2  | <b>293.113198</b> | 147.060237      |                |                  | 275.102633         | 138.054955        | Y    | 2060.917309        | 1030.962292       | 2043.890760    | 1022.449018      | 2042.906744        | 1021.957010      | 15 |
| 3  | 406.197262        | 203.602269      |                |                  | 388.186697         | 194.596987        | L    | 1897.853980        | 949.430628        | 1880.827431    | 940.917354       | 1879.843415        | 940.425346       | 14 |
| 4  | 463.218726        | 232.113001      |                |                  | <b>445.208161</b>  | 223.107719        | G    | 1784.769916        | 892.888596        | 1767.743367    | 884.375322       | 1766.759351        | 883.883314       | 13 |
| 5  | <b>534.255840</b> | 267.631558      |                |                  | 516.245275         | 258.626276        | A    | 1727.748452        | <b>864.377864</b> | 1710.721903    | 855.864590       | 1709.737887        | 855.372582       | 12 |
| 6  | 647.339904        | 324.173590      |                |                  | 629.329339         | 315.168308        | I    | <b>1656.711338</b> | 828.859307        | 1639.684789    | 820.346033       | 1638.700773        | 819.854025       | 11 |
| 7  | 807.370553        | 404.188915      |                |                  | 789.359988         | <b>395.183632</b> | C    | <b>1543.627274</b> | <b>772.317275</b> | 1526.600725    | 763.804001       | <b>1525.616709</b> | 763.311993       | 10 |
| 8  | 894.402581        | 447.704929      |                |                  | 876.392016         | 438.699646        | S    | <b>1383.596625</b> | 692.301951        | 1366.570076    | 683.788676       | <b>1365.586060</b> | 683.296668       | 9  |
| 9  | 1054.433230       | 527.720253      |                |                  | 1036.422665        | 518.714971        | C    | <b>1296.564597</b> | 648.785937        | 1279.538048    | 640.272662       | 1278.554032        | 639.780654       | 8  |
| 10 | 1155.480909       | 578.244093      |                |                  | <b>1137.470344</b> | 569.238810        | T    | <b>1136.533948</b> | 568.770612        | 1119.507399    | 560.257338       | 1118.523383        | 559.765330       | 7  |
| 11 | 1315.511558       | 658.259417      |                |                  | 1297.500993        | 649.254135        | C    | <b>1035.486269</b> | 518.246773        | 1018.459720    | 509.733498       |                    |                  | 6  |
| 12 | 1462.579972       | 731.793624      |                |                  | 1444.569407        | 722.788342        | F    | <b>875.455620</b>  | 438.231448        | 858.429071     | 429.718174       |                    |                  | 5  |
| 13 | 1519.601436       | 760.304356      |                |                  | 1501.590871        | 751.299074        | G    | <b>728.387206</b>  | 364.697241        | 711.360657     | 356.183967       |                    |                  | 4  |
| 14 | 1576.622900       | 788.815088      |                |                  | 1558.612335        | 779.809806        | G    | <b>671.365742</b>  | 336.186509        | 654.339193     | 327.673235       |                    |                  | 3  |
| 15 | 2015.848226       | 1008.427751     | 1998.821677    | 999.914477       | 1997.837661        | 999.422469        | Q    | <b>614.344278</b>  | 307.675777        | 597.317729     | 299.162503       |                    |                  | 2  |
| 16 |                   |                 |                |                  |                    |                   | R    | <b>175.118952</b>  | 88.063114         | 158.092403     | 79.549839        |                    |                  | 1  |

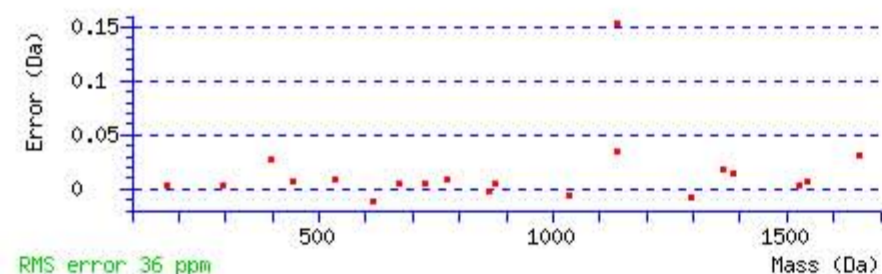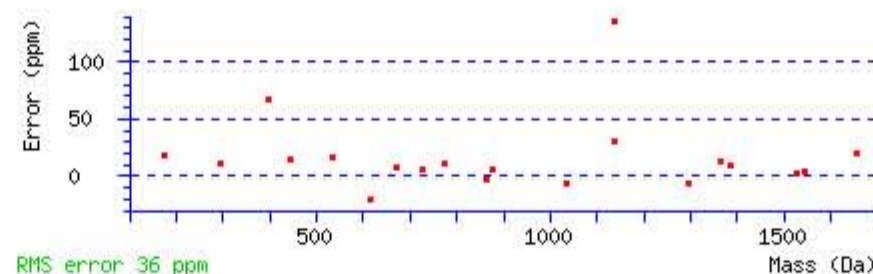

NCBI BLAST search of [EYLGAICSCTCFGGQR](#)

(Parameters: blastp, nr protein database, expect=20000, no filter, PAM30)

Other BLAST [web gateways](#)

All matches to this query

| Score | Mr(calc):   | Delta    | Sequence                         |
|-------|-------------|----------|----------------------------------|
| 36.7  | 2188.952637 | 0.028815 | <a href="#">EYLGAICSCTCFGGQR</a> |

Mascot: <http://www.matrixscience.com/>

# MASCOT Search Results

## Peptide View

MS/MS Fragmentation of **QDGHLWCSTTSNYEQDQK**

Found in **FINC\_HUMAN**, Fibronectin OS=Homo sapiens GN=FN1 PE=1 SV=4

Match to Query 63232: 2507.110016 from(627.784780,4+) rtinseconds(1763) index(40534)

Title: Locus:1.1.1.3063.16 File:"2013-07-02 CLN FXIII 180 min 1st F 3.wiff"

Data file C:\Program Files (x86)\Matrix Science\Mascot Daemon\mgf\7 FXIII 180 min 1st\mascot\_daemon\_merge.mgf

Click mouse within plot area to zoom in by factor of two about that point

Or, Plot from  to  Da

Label all possible matches  Label matches used for scoring

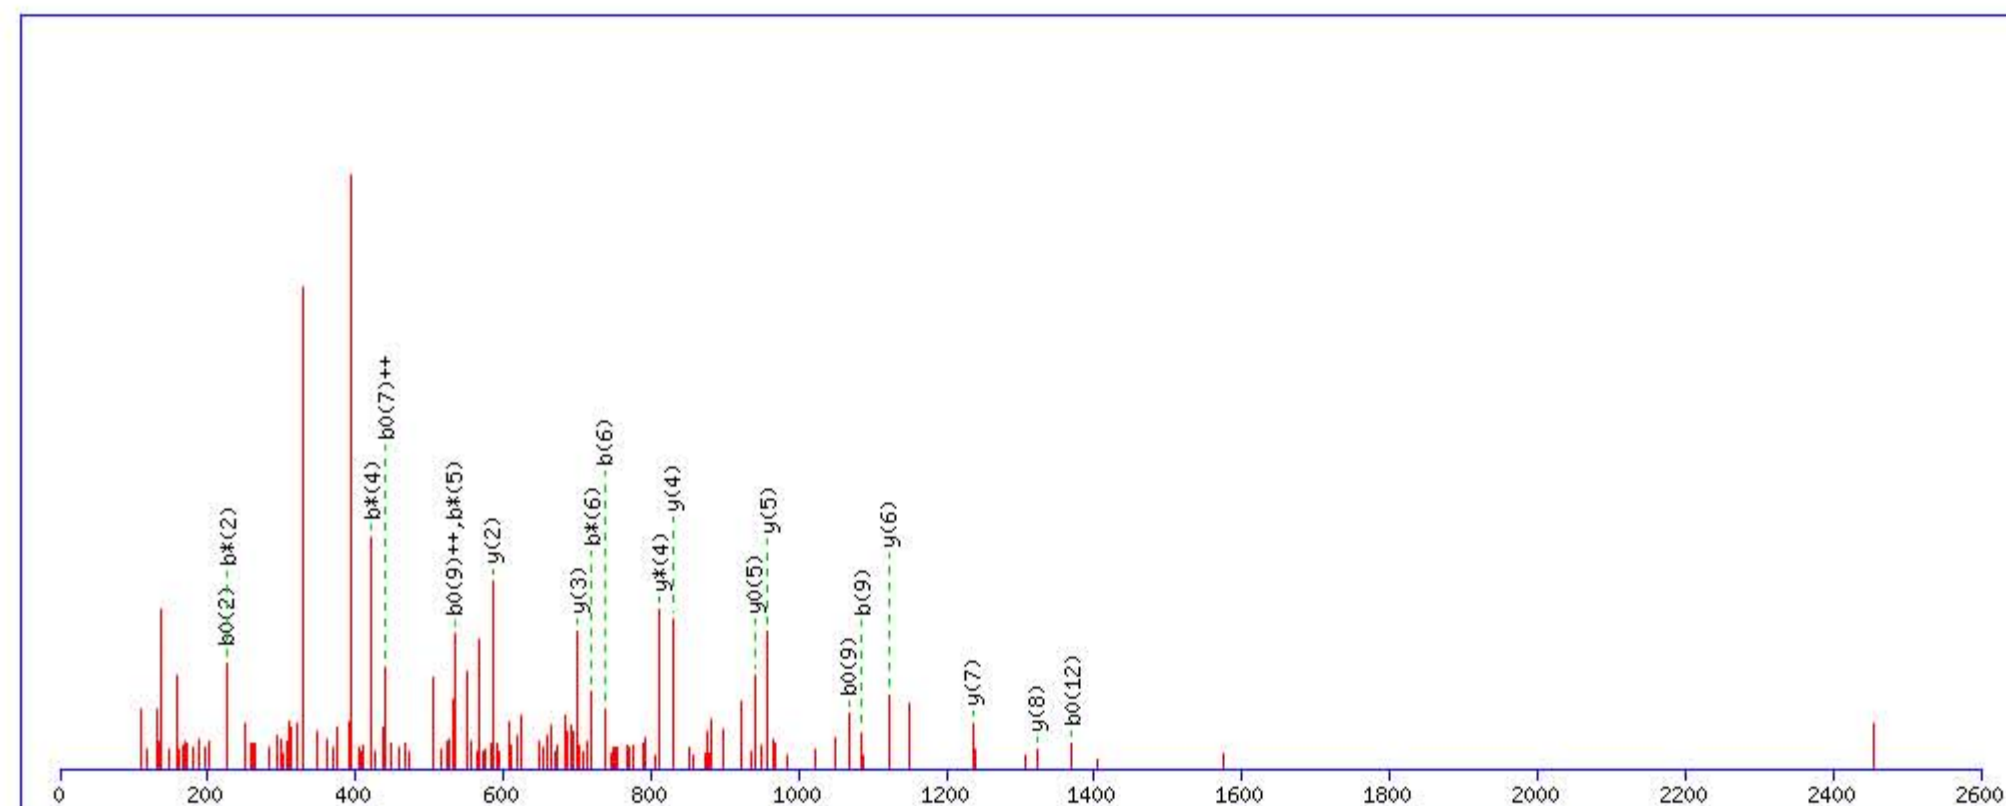

Monoisotopic mass of neutral peptide Mr(calc): 2507.084564

Fixed modifications: Carbamidomethyl (C) (apply to specified residues or termini only)

Variable modifications:

Q17 : Biotin:Thermo-21345 (Q)

Ions Score: 36 Expect: 0.0015

Matches : 20/198 fragment ions using 28 most intense peaks [\(help\)](#)

| #  | b           | b <sup>++</sup> | b <sup>+</sup> | b <sup>+++</sup> | b <sup>0</sup> | b <sup>0++</sup> | Seq. | y           | y <sup>++</sup> | y <sup>+</sup> | y <sup>+++</sup> | y <sup>0</sup> | y <sup>0++</sup> | #  |
|----|-------------|-----------------|----------------|------------------|----------------|------------------|------|-------------|-----------------|----------------|------------------|----------------|------------------|----|
| 1  | 129.065854  | 65.036565       | 112.039305     | 56.523291        |                |                  | Q    |             |                 |                |                  |                |                  | 18 |
| 2  | 244.092797  | 122.550037      | 227.066248     | 114.036762       | 226.082232     | 113.544754       | D    | 2380.033259 | 1190.520267     | 2363.006710    | 1182.006993      | 2362.022694    | 1181.514985      | 17 |
| 3  | 301.114261  | 151.060768      | 284.087712     | 142.547494       | 283.103696     | 142.055486       | G    | 2265.006316 | 1133.006796     | 2247.979767    | 1124.493521      | 2246.995751    | 1124.001513      | 16 |
| 4  | 438.173173  | 219.590224      | 421.146624     | 211.076950       | 420.162608     | 210.584942       | H    | 2207.984852 | 1104.496064     | 2190.958303    | 1095.982789      | 2189.974287    | 1095.490781      | 15 |
| 5  | 551.257237  | 276.132257      | 534.230688     | 267.618982       | 533.246672     | 267.126974       | L    | 2070.925940 | 1035.966608     | 2053.899391    | 1027.453333      | 2052.915375    | 1026.961325      | 14 |
| 6  | 737.336550  | 369.171913      | 720.310001     | 360.658639       | 719.325985     | 360.166631       | W    | 1957.841876 | 979.424576      | 1940.815327    | 970.911302       | 1939.831311    | 970.419294       | 13 |
| 7  | 897.367199  | 449.187238      | 880.340650     | 440.673963       | 879.356634     | 440.181955       | C    | 1771.762563 | 886.384920      | 1754.736014    | 877.871645       | 1753.751998    | 877.379637       | 12 |
| 8  | 984.399227  | 492.703252      | 967.372678     | 484.189977       | 966.388662     | 483.697969       | S    | 1611.731914 | 806.369595      | 1594.705365    | 797.856321       | 1593.721349    | 797.364313       | 11 |
| 9  | 1085.446906 | 543.227091      | 1068.420357    | 534.713817       | 1067.436341    | 534.221808       | T    | 1524.699886 | 762.853581      | 1507.673337    | 754.340307       | 1506.689321    | 753.848299       | 10 |
| 10 | 1186.494585 | 593.750930      | 1169.468036    | 585.237656       | 1168.484020    | 584.745648       | T    | 1423.652207 | 712.329742      | 1406.625658    | 703.816467       | 1405.641642    | 703.324459       | 9  |
| 11 | 1273.526613 | 637.266945      | 1256.500064    | 628.753670       | 1255.516048    | 628.261662       | S    | 1322.604528 | 661.805902      | 1305.577979    | 653.292628       | 1304.593963    | 652.800620       | 8  |
| 12 | 1387.569540 | 694.288408      | 1370.542991    | 685.775134       | 1369.558975    | 685.283125       | N    | 1235.572500 | 618.289888      | 1218.545951    | 609.776614       | 1217.561935    | 609.284606       | 7  |
| 13 | 1550.632869 | 775.820073      | 1533.606320    | 767.306798       | 1532.622304    | 766.814790       | Y    | 1121.529573 | 561.268425      | 1104.503024    | 552.755150       | 1103.519008    | 552.263142       | 6  |
| 14 | 1679.675462 | 840.341369      | 1662.648913    | 831.828095       | 1661.664897    | 831.336086       | E    | 958.466244  | 479.736760      | 941.439695     | 471.223486       | 940.455679     | 470.731478       | 5  |
| 15 | 1807.734040 | 904.370658      | 1790.707491    | 895.857384       | 1789.723475    | 895.365376       | Q    | 829.423651  | 415.215464      | 812.397102     | 406.702189       | 811.413086     | 406.210181       | 4  |
| 16 | 1922.760983 | 961.884130      | 1905.734434    | 953.370855       | 1904.750418    | 952.878847       | D    | 701.365073  | 351.186175      | 684.338524     | 342.672900       | 683.354508     | 342.180892       | 3  |
| 17 | 2361.986309 | 1181.496792     | 2344.959760    | 1172.983518      | 2343.975744    | 1172.491510      | Q    | 586.338130  | 293.672703      | 569.311581     | 285.159429       |                |                  | 2  |
| 18 |             |                 |                |                  |                |                  | K    | 147.112804  | 74.060040       | 130.086255     | 65.546765        |                |                  | 1  |

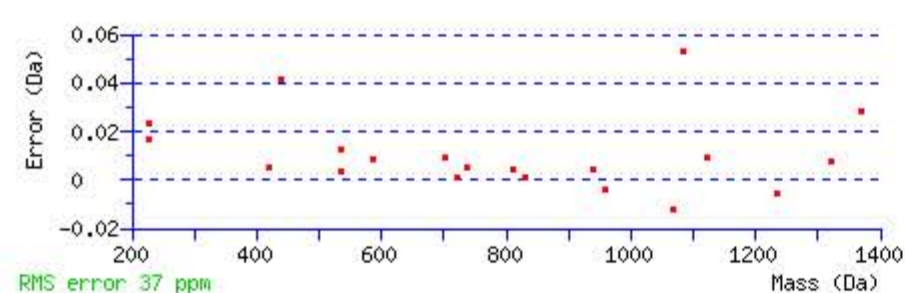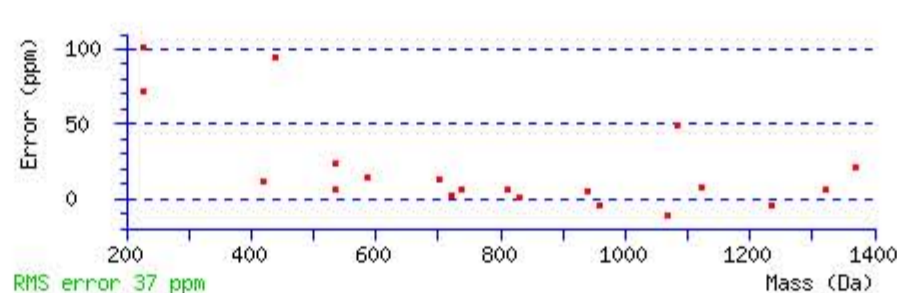

NCBI BLAST search of [QDGHLWCSTTSNYEQDQK](#)

(Parameters: blastp, nr protein database, expect=20000, no filter, PAM30)

Other BLAST [web gateways](#)

All matches to this query

| Score | Mr(calc):   | Delta    | Sequence                           |
|-------|-------------|----------|------------------------------------|
| 36.4  | 2507.084564 | 0.025452 | <a href="#">QDGHLWCSTTSNYEQDQK</a> |
| 20.9  | 2507.084564 | 0.025452 | <a href="#">QDGHLWCSTTSNYEQDQK</a> |

Mascot: <http://www.matrixscience.com/>

# MASCOT Search Results

## Peptide View

MS/MS Fragmentation of **RPGGEPSPGTTGQSYNQYSQR**  
 Found in **FINC\_HUMAN**, Fibronectin OS=Homo sapiens GN=FN1 PE=1 SV=4

Match to Query 65722: 2706.282312 from(903.101380,3+) rtinseconds(1516) index(38898)  
 Title: Locus:1.1.1.2977.17 File:"2013-07-02 CLN FXIII 180 min 1st F 3.wiff"  
 Data file C:\Program Files (x86)\Matrix Science\Mascot Daemon\mgf\7 FXIII 180 min 1st\mascot\_daemon\_merge.mgf

Click mouse within plot area to zoom in by factor of two about that point  
 Or, Plot from  to  Da   
 Label all possible matches  Label matches used for scoring

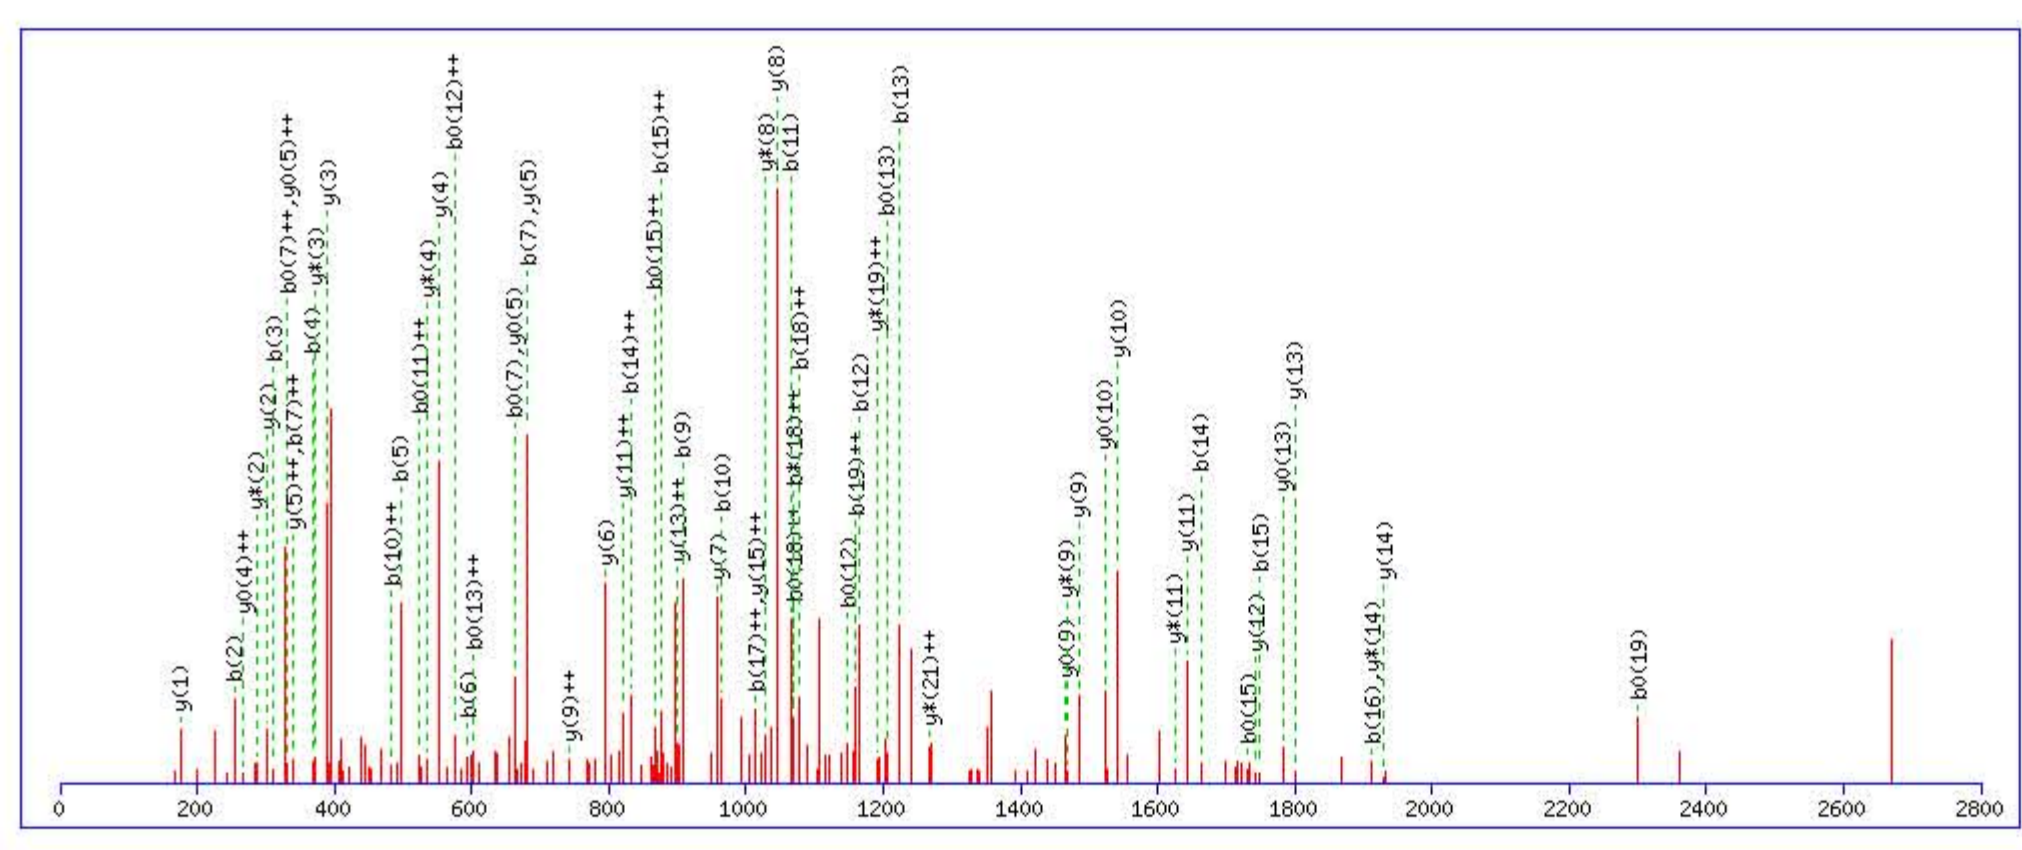

Monoisotopic mass of neutral peptide Mr(calc): 2706.245621  
 Fixed modifications: Carbamidomethyl (C) (apply to specified residues or termini only)  
 Variable modifications:  
 Q14 : Biotin:Thermo-21345 (Q)  
 Ions Score: 72 Expect: 1.3e-006  
 Matches : 67/240 fragment ions using 131 most intense peaks [\(help\)](#)

| #  | b                  | b <sup>++</sup>    | b <sup>*</sup> | b <sup>*++</sup>   | b <sup>0</sup>     | b <sup>0++</sup>   | Seq. | y                  | y <sup>++</sup>    | y <sup>*</sup>     | y <sup>*++</sup>   | y <sup>0</sup>     | y <sup>0++</sup>  | #  |
|----|--------------------|--------------------|----------------|--------------------|--------------------|--------------------|------|--------------------|--------------------|--------------------|--------------------|--------------------|-------------------|----|
| 1  | 157.108387         | 79.057831          | 140.081838     | 70.544557          |                    |                    | R    |                    |                    |                    |                    |                    |                   | 22 |
| 2  | <b>254.161151</b>  | 127.584213         | 237.134602     | 119.070939         |                    |                    | P    | 2551.151795        | 1276.079535        | 2534.125246        | <b>1267.566261</b> | 2533.141230        | 1267.074253       | 21 |
| 3  | <b>311.182615</b>  | 156.094945         | 294.156066     | 147.581671         |                    |                    | G    | 2454.099031        | 1227.553153        | 2437.072482        | 1219.039879        | 2436.088466        | 1218.547871       | 20 |
| 4  | <b>368.204079</b>  | 184.605677         | 351.177530     | 176.092403         |                    |                    | G    | 2397.077567        | 1199.042421        | 2380.051018        | <b>1190.529147</b> | 2379.067002        | 1190.037139       | 19 |
| 5  | <b>497.246672</b>  | 249.126974         | 480.220123     | 240.613700         | 479.236107         | 240.121692         | E    | 2340.056103        | 1170.531689        | 2323.029554        | 1162.018415        | 2322.045538        | 1161.526407       | 18 |
| 6  | <b>594.299436</b>  | 297.653356         | 577.272887     | 289.140082         | 576.288871         | 288.648074         | P    | 2211.013510        | 1106.010393        | 2193.986961        | 1097.497118        | 2193.002945        | 1097.005110       | 17 |
| 7  | <b>681.331464</b>  | <b>341.169370</b>  | 664.304915     | 332.656095         | <b>663.320899</b>  | <b>332.164087</b>  | S    | 2113.960746        | 1057.484011        | 2096.934197        | 1048.970736        | 2095.950181        | 1048.478728       | 16 |
| 8  | 778.384228         | 389.695752         | 761.357679     | 381.182478         | 760.373663         | 380.690470         | P    | 2026.928718        | <b>1013.967997</b> | 2009.902169        | 1005.454723        | 2008.918153        | 1004.962715       | 15 |
| 9  | <b>907.426821</b>  | 454.217049         | 890.400272     | 445.703774         | 889.416256         | 445.211766         | E    | <b>1929.875954</b> | 965.441615         | <b>1912.849405</b> | 956.928341         | 1911.865389        | 956.436333        | 14 |
| 10 | <b>964.448285</b>  | <b>482.727781</b>  | 947.421736     | 474.214506         | 946.437720         | 473.722498         | G    | <b>1800.833361</b> | <b>900.920319</b>  | 1783.806812        | 892.407044         | <b>1782.822796</b> | 891.915036        | 13 |
| 11 | <b>1065.495964</b> | 533.251620         | 1048.469415    | 524.738346         | 1047.485399        | <b>524.246337</b>  | T    | <b>1743.811897</b> | 872.409587         | 1726.785348        | 863.896312         | 1725.801332        | 863.404304        | 12 |
| 12 | <b>1166.543643</b> | 583.775460         | 1149.517094    | 575.262185         | <b>1148.533078</b> | <b>574.770177</b>  | T    | <b>1642.764218</b> | <b>821.885747</b>  | <b>1625.737669</b> | 813.372473         | 1624.753653        | 812.880465        | 11 |
| 13 | <b>1223.565107</b> | 612.286191         | 1206.538558    | 603.772917         | <b>1205.554542</b> | <b>603.280909</b>  | G    | <b>1541.716539</b> | 771.361908         | 1524.689990        | 762.848633         | <b>1523.705974</b> | 762.356625        | 10 |
| 14 | <b>1662.790433</b> | <b>831.898854</b>  | 1645.763884    | 823.385580         | 1644.779868        | 822.893572         | Q    | <b>1484.695075</b> | <b>742.851176</b>  | <b>1467.668526</b> | 734.337901         | <b>1466.684510</b> | 733.845893        | 9  |
| 15 | <b>1749.822461</b> | <b>875.414869</b>  | 1732.795912    | 866.901594         | <b>1731.811896</b> | <b>866.409586</b>  | S    | <b>1045.469749</b> | 523.238513         | <b>1028.443200</b> | 514.725238         | 1027.459184        | 514.233230        | 8  |
| 16 | <b>1912.885790</b> | 956.946533         | 1895.859241    | 948.433259         | 1894.875225        | 947.941251         | Y    | <b>958.437721</b>  | 479.722499         | 941.411172         | 471.209224         | 940.427156         | 470.717216        | 7  |
| 17 | 2026.928717        | <b>1013.967997</b> | 2009.902168    | 1005.454722        | 2008.918152        | 1004.962714        | N    | <b>795.374392</b>  | 398.190834         | 778.347843         | 389.677560         | 777.363827         | 389.185552        | 6  |
| 18 | 2154.987295        | <b>1077.997285</b> | 2137.960746    | <b>1069.484011</b> | 2136.976730        | <b>1068.992003</b> | Q    | <b>681.331465</b>  | <b>341.169371</b>  | 664.304916         | 332.656096         | <b>663.320900</b>  | <b>332.164088</b> | 5  |
| 19 | 2318.050624        | <b>1159.528950</b> | 2301.024075    | 1151.015675        | <b>2300.040059</b> | 1150.523667        | Y    | <b>553.272887</b>  | 277.140082         | <b>536.246338</b>  | 268.626807         | 535.262322         | <b>268.134799</b> | 4  |
| 20 | 2405.082652        | 1203.044964        | 2388.056103    | 1194.531689        | 2387.072087        | 1194.039681        | S    | <b>390.209558</b>  | 195.608417         | <b>373.183009</b>  | 187.095143         | 372.198993         | 186.603135        | 3  |
| 21 | 2533.141230        | 1267.074253        | 2516.114681    | 1258.560978        | 2515.130665        | 1258.068971        | Q    | <b>303.177530</b>  | 152.092403         | <b>286.150981</b>  | 143.579129         |                    |                   | 2  |
| 22 |                    |                    |                |                    |                    |                    | R    | <b>175.118952</b>  | 88.063114          | 158.092403         | 79.549839          |                    |                   | 1  |

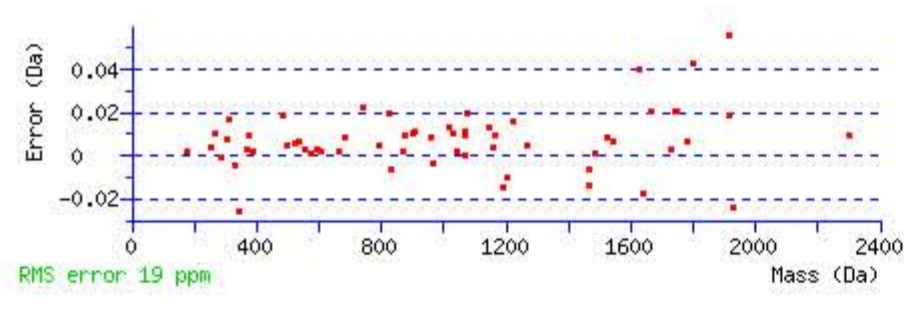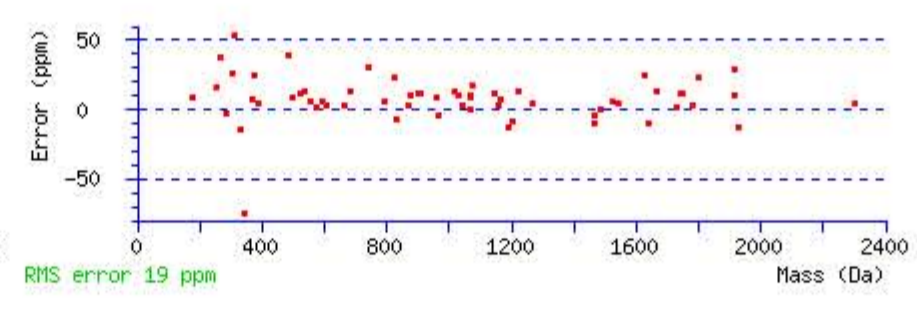

NCBI BLAST search of **RPGGEPSPGTTGQSYNQYSQR**  
 (Parameters: blastp, nr protein database, expect=20000, no filter, PAM30)  
 Other BLAST [web gateways](#)

### All matches to this query

| Score | Mr(calc):   | Delta    | Sequence                              |
|-------|-------------|----------|---------------------------------------|
| 71.7  | 2706.245621 | 0.036691 | <a href="#">RPGGEPSPGTTGQSYNQYSQR</a> |
| 71.6  | 2706.245621 | 0.036691 | <a href="#">RPGGEPSPGTTGQSYNQYSQR</a> |
| 43.2  | 2706.245621 | 0.036691 | <a href="#">RPGGEPSPGTTGQSYNQYSQR</a> |



# Mascot Search Results

## Peptide View

MS/MS Fragmentation of **TEIDKPSQM<sup>Q</sup>VTDVQDNSISVK**

Found in **FINC\_HUMAN**, Fibronectin OS=Homo sapiens GN=FN1 PE=1 SV=4

Match to Query 66716: 2772.399616 from(694.107180,4+) rtinseconds(1953) index(41890)

Title: Locus:1.1.1.3129.20 File:"2013-07-02 CLN FXIII 180 min 1st F 3.wiff"

Data file C:\Program Files (x86)\Matrix Science\Mascot Daemon\mgf\7 FXIII 180 min 1st\mascot\_daemon\_merge.mgf

Click mouse within plot area to zoom in by factor of two about that point

Or, Plot from  to  Da

Label all possible matches  Label matches used for scoring

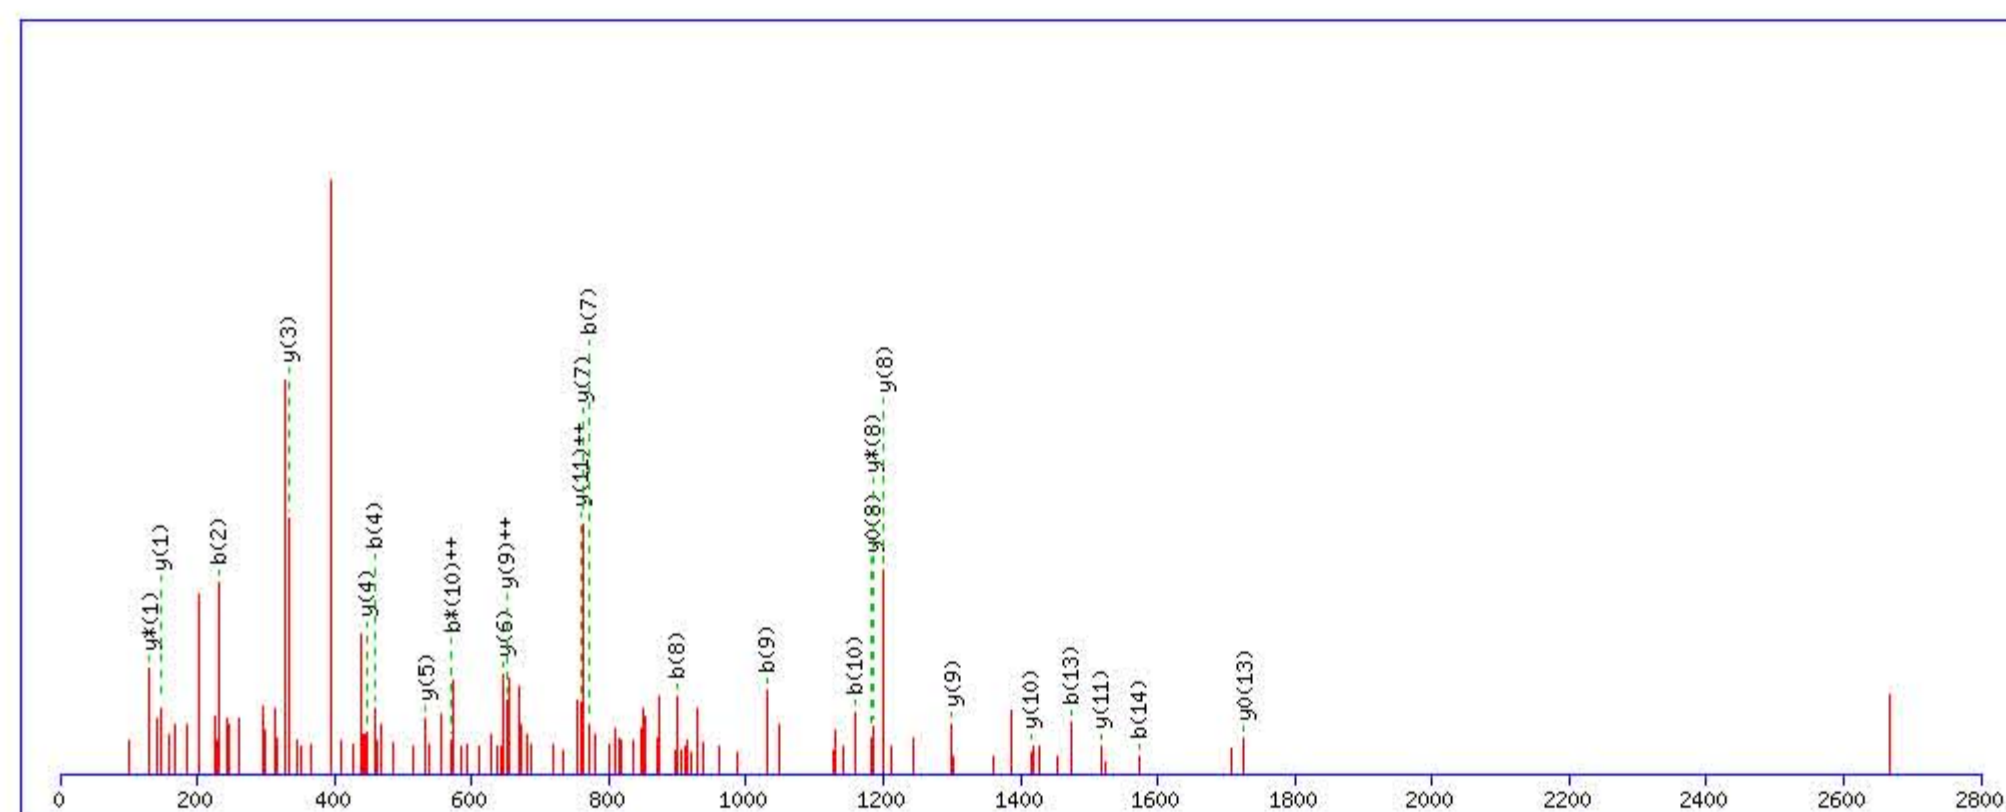

Monoisotopic mass of neutral peptide Mr(calc): 2772.367386

Fixed modifications: Carbamidomethyl (C) (apply to specified residues or termini only)

Variable modifications:

Q15 : Biotin:Thermo-21345 (Q)

Ions Score: 48 Expect: 0.00046

Matches : 25/240 fragment ions using 61 most intense peaks [\(help\)](#)

| #  | b                  | b <sup>++</sup> | b <sup>*</sup> | b <sup>+++</sup>  | b <sup>0</sup> | b <sup>0++</sup> | Seq. | y                  | y <sup>++</sup>   | y <sup>*</sup>     | y <sup>+++</sup> | y <sup>0</sup>     | y <sup>0++</sup> | #  |
|----|--------------------|-----------------|----------------|-------------------|----------------|------------------|------|--------------------|-------------------|--------------------|------------------|--------------------|------------------|----|
| 1  | 102.054955         | 51.531116       |                |                   | 84.044390      | 42.525833        | T    |                    |                   |                    |                  |                    |                  | 22 |
| 2  | <b>231.097548</b>  | 116.052412      |                |                   | 213.086983     | 107.047130       | E    | 2672.326980        | 1336.667128       | 2655.300431        | 1328.153854      | 2654.316415        | 1327.661846      | 21 |
| 3  | 344.181612         | 172.594444      |                |                   | 326.171047     | 163.589162       | I    | 2543.284387        | 1272.145832       | 2526.257838        | 1263.632557      | 2525.273822        | 1263.140549      | 20 |
| 4  | <b>459.208555</b>  | 230.107916      |                |                   | 441.197990     | 221.102633       | D    | 2430.200323        | 1215.603799       | 2413.173774        | 1207.090525      | 2412.189758        | 1206.598517      | 19 |
| 5  | 587.303518         | 294.155397      | 570.276969     | 285.642123        | 569.292953     | 285.150115       | K    | 2315.173380        | 1158.090328       | 2298.146831        | 1149.577053      | 2297.162815        | 1149.085046      | 18 |
| 6  | 684.356282         | 342.681779      | 667.329733     | 334.168505        | 666.345717     | 333.676497       | P    | 2187.078417        | 1094.042847       | 2170.051868        | 1085.529572      | 2169.067852        | 1085.037564      | 17 |
| 7  | <b>771.388310</b>  | 386.197793      | 754.361761     | 377.684519        | 753.377745     | 377.192511       | S    | 2090.025653        | 1045.516465       | 2072.999104        | 1037.003190      | 2072.015088        | 1036.511182      | 16 |
| 8  | <b>899.446888</b>  | 450.227082      | 882.420339     | 441.713808        | 881.436323     | 441.221800       | Q    | 2002.993625        | 1002.000451       | 1985.967076        | 993.487176       | 1984.983060        | 992.995168       | 15 |
| 9  | <b>1030.487373</b> | 515.747325      | 1013.460824    | 507.234050        | 1012.476808    | 506.742042       | M    | 1874.935047        | 937.971162        | 1857.908498        | 929.457887       | 1856.924482        | 928.965879       | 14 |
| 10 | <b>1158.545951</b> | 579.776614      | 1141.519402    | <b>571.263339</b> | 1140.535386    | 570.771331       | Q    | 1743.894562        | 872.450919        | 1726.868013        | 863.937645       | <b>1725.883997</b> | 863.445637       | 13 |
| 11 | 1257.614365        | 629.310821      | 1240.587816    | 620.797546        | 1239.603800    | 620.305538       | V    | 1615.835984        | 808.421630        | 1598.809435        | 799.908356       | 1597.825419        | 799.416348       | 12 |
| 12 | 1358.662044        | 679.834660      | 1341.635495    | 671.321386        | 1340.651479    | 670.829378       | T    | <b>1516.767570</b> | <b>758.887423</b> | 1499.741021        | 750.374149       | 1498.757005        | 749.882141       | 11 |
| 13 | <b>1473.688987</b> | 737.348132      | 1456.662438    | 728.834857        | 1455.678422    | 728.342849       | D    | <b>1415.719891</b> | 708.363584        | 1398.693342        | 699.850309       | 1397.709326        | 699.358301       | 10 |
| 14 | <b>1572.757401</b> | 786.882339      | 1555.730852    | 778.369064        | 1554.746836    | 777.877056       | V    | <b>1300.692948</b> | <b>650.850112</b> | 1283.666399        | 642.336838       | 1282.682383        | 641.844830       | 9  |
| 15 | 2011.982727        | 1006.495002     | 1994.956178    | 997.981727        | 1993.972162    | 997.489719       | Q    | <b>1201.624534</b> | 601.315905        | <b>1184.597985</b> | 592.802631       | <b>1183.613969</b> | 592.310623       | 8  |
| 16 | 2127.009670        | 1064.008473     | 2109.983121    | 1055.495199       | 2108.999105    | 1055.003191      | D    | <b>762.399208</b>  | 381.703242        | 745.372659         | 373.189968       | 744.388643         | 372.697960       | 7  |
| 17 | 2241.052597        | 1121.029937     | 2224.026048    | 1112.516662       | 2223.042032    | 1112.024654      | N    | <b>647.372265</b>  | 324.189771        | 630.345716         | 315.676496       | 629.361700         | 315.184488       | 6  |
| 18 | 2328.084625        | 1164.545951     | 2311.058076    | 1156.032676       | 2310.074060    | 1155.540668      | S    | <b>533.329338</b>  | 267.168307        | 516.302789         | 258.655033       | 515.318773         | 258.163025       | 5  |
| 19 | 2441.168689        | 1221.087983     | 2424.142140    | 1212.574708       | 2423.158124    | 1212.082700      | I    | <b>446.297310</b>  | 223.652293        | 429.270761         | 215.139019       | 428.286745         | 214.647011       | 4  |
| 20 | 2528.200717        | 1264.603997     | 2511.174168    | 1256.090722       | 2510.190152    | 1255.598714      | S    | <b>333.213246</b>  | 167.110261        | 316.186697         | 158.596986       | 315.202681         | 158.104978       | 3  |
| 21 | 2627.269131        | 1314.138204     | 2610.242582    | 1305.624929       | 2609.258566    | 1305.132921      | V    | 246.181218         | 123.594247        | 229.154669         | 115.080972       |                    |                  | 2  |
| 22 |                    |                 |                |                   |                |                  | K    | <b>147.112804</b>  | 74.060040         | <b>130.086255</b>  | 65.546765        |                    |                  | 1  |

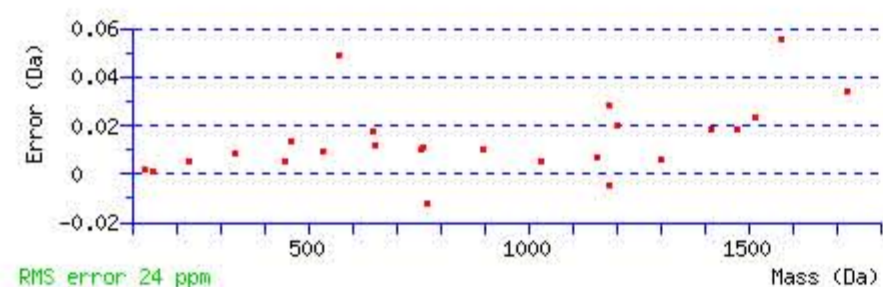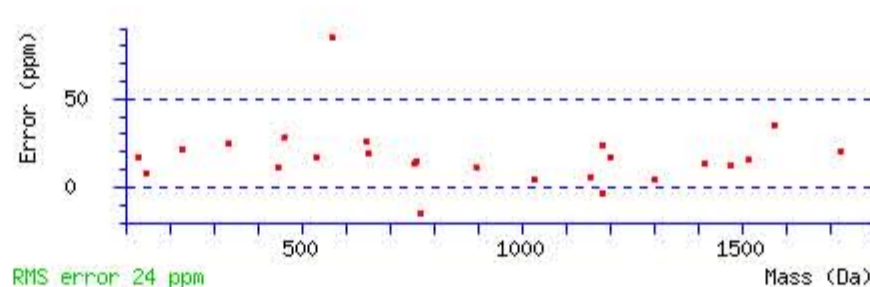

NCBI BLAST search of **TEIDKPSQM<sup>Q</sup>VTDVQDNSISVK**

(Parameters: blastp, nr protein database, expect=20000, no filter, PAM30)

Other BLAST [web gateways](#)

All matches to this query

| Score | Mr(calc):   | Delta    | Sequence                                          |
|-------|-------------|----------|---------------------------------------------------|
| 47.9  | 2772.367386 | 0.032230 | <a href="#">TEIDKPSQM<sup>Q</sup>VTDVQDNSISVK</a> |
| 10.2  | 2772.367386 | 0.032230 | <a href="#">TEIDKPSQM<sup>Q</sup>VTDVQDNSISVK</a> |

# Mascot Search Results

## Peptide View

MS/MS Fragmentation of **HRPRPYPPNVGEEIQIGHIPR**  
 Found in **FINC\_HUMAN**, Fibronectin OS=Homo sapiens GN=FN1 PE=1 SV=4

Match to Query 66722: 2772.499770 from(555.507230,5+) rtinseconds(1757) index(40481)  
 Title: Locus:1.1.1.3061.13 File:"2013-07-02 CLN FXIII 180 min 1st F 3.wiff"  
 Data file C:\Program Files (x86)\Matrix Science\Mascot Daemon\mgf\7 FXIII 180 min 1st\mascot\_daemon\_merge.mgf

Click mouse within plot area to zoom in by factor of two about that point  
 Or, Plot from  to  Da   
 Label all possible matches  Label matches used for scoring

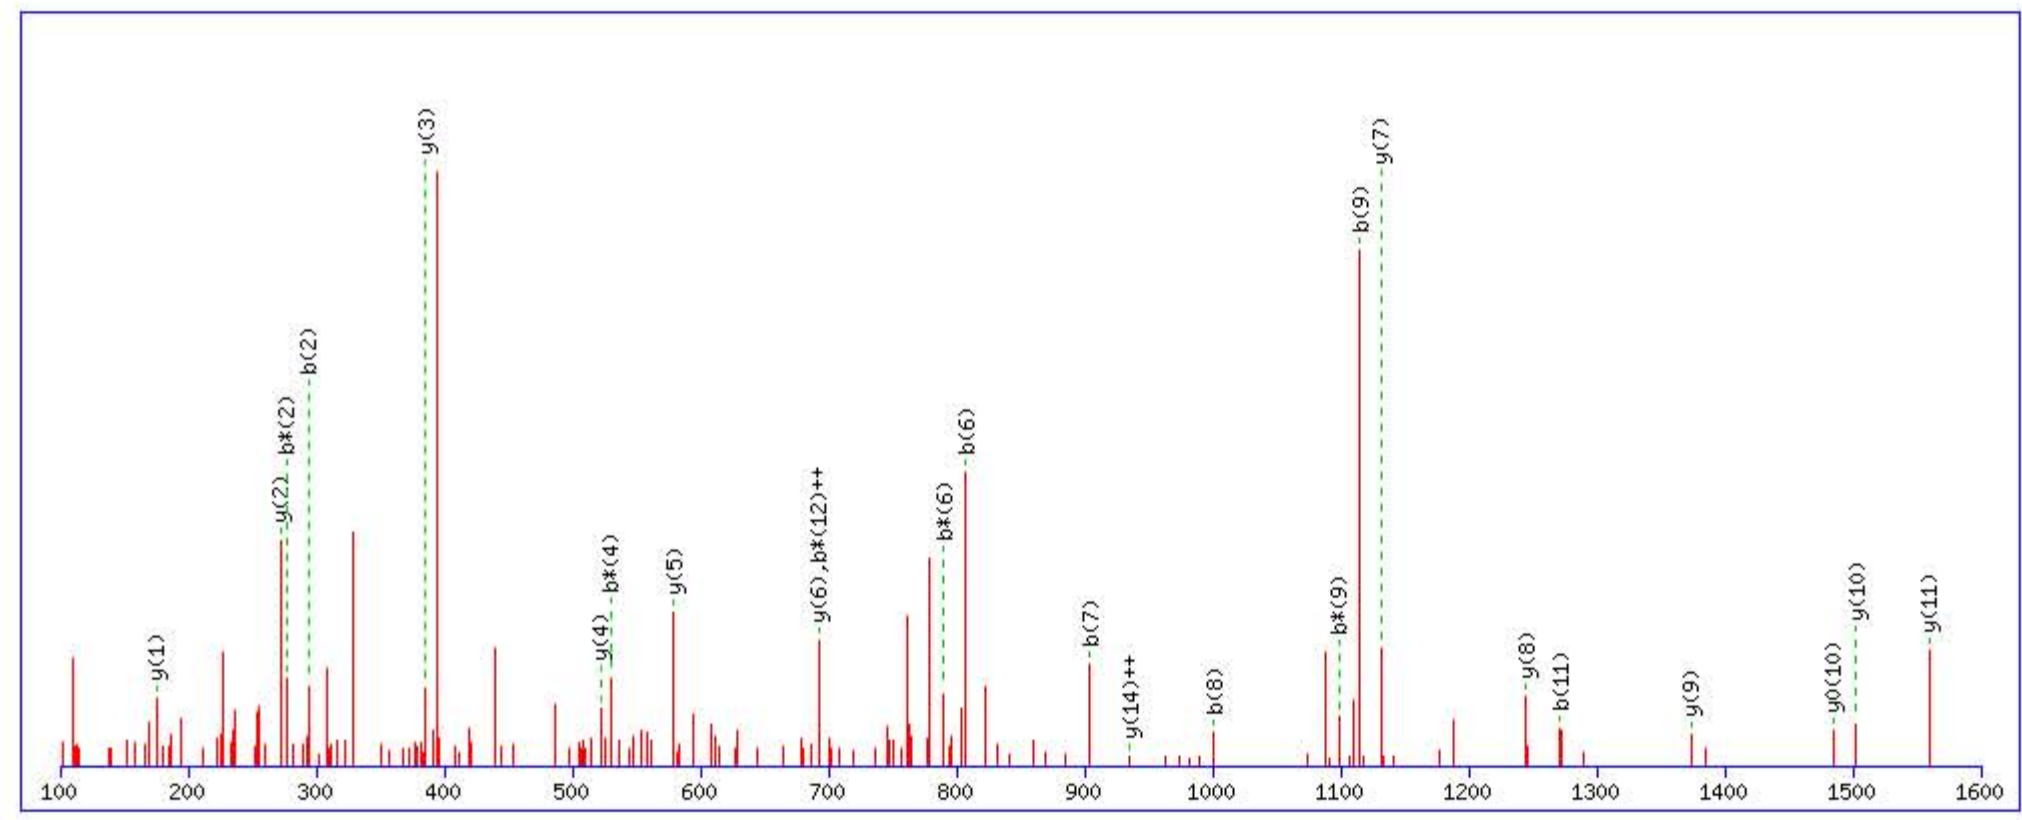

Monoisotopic mass of neutral peptide Mr(calc): 2772.475815  
 Fixed modifications: Carbamidomethyl (C) (apply to specified residues or termini only)  
 Variable modifications:  
 Q15 : Biotin:Thermo-21345 (Q)  
 Ions Score: 49 Expect: 0.00022  
 Matches : 24/200 fragment ions using 55 most intense peaks [\(help\)](#)

| #  | b                  | b <sup>++</sup> | b <sup>*</sup>     | b <sup>*++</sup>  | b <sup>0</sup> | b <sup>0++</sup> | Seq. | y                  | y <sup>++</sup>   | y <sup>*</sup> | y <sup>*++</sup> | y <sup>0</sup>     | y <sup>0++</sup> | #  |
|----|--------------------|-----------------|--------------------|-------------------|----------------|------------------|------|--------------------|-------------------|----------------|------------------|--------------------|------------------|----|
| 1  | 138.066188         | 69.536732       |                    |                   |                |                  | H    |                    |                   |                |                  |                    |                  | 21 |
| 2  | <b>294.167299</b>  | 147.587288      | <b>277.140750</b>  | 139.074013        |                |                  | R    | 2636.424208        | 1318.715742       | 2619.397659    | 1310.202467      | 2618.413643        | 1309.710459      | 20 |
| 3  | 391.220063         | 196.113670      | 374.193514         | 187.600395        |                |                  | P    | 2480.323097        | 1240.665186       | 2463.296548    | 1232.151912      | 2462.312532        | 1231.659904      | 19 |
| 4  | 547.321174         | 274.164225      | <b>530.294625</b>  | 265.650951        |                |                  | R    | 2383.270333        | 1192.138804       | 2366.243784    | 1183.625530      | 2365.259768        | 1183.133522      | 18 |
| 5  | 644.373938         | 322.690607      | 627.347389         | 314.177333        |                |                  | P    | 2227.169222        | 1114.088249       | 2210.142673    | 1105.574974      | 2209.158657        | 1105.082966      | 17 |
| 6  | <b>807.437267</b>  | 404.222272      | <b>790.410718</b>  | 395.708997        |                |                  | Y    | 2130.116458        | 1065.561867       | 2113.089909    | 1057.048592      | 2112.105893        | 1056.556584      | 16 |
| 7  | <b>904.490031</b>  | 452.748654      | 887.463482         | 444.235379        |                |                  | P    | 1967.053129        | 984.030203        | 1950.026580    | 975.516928       | 1949.042564        | 975.024920       | 15 |
| 8  | <b>1001.542795</b> | 501.275036      | 984.516246         | 492.761761        |                |                  | P    | 1870.000365        | <b>935.503821</b> | 1852.973816    | 926.990546       | 1851.989800        | 926.498538       | 14 |
| 9  | <b>1115.585722</b> | 558.296499      | <b>1098.559173</b> | 549.783225        |                |                  | N    | 1772.947601        | 886.977439        | 1755.921052    | 878.464164       | 1754.937036        | 877.972156       | 13 |
| 10 | 1214.654136        | 607.830706      | 1197.627587        | 599.317432        |                |                  | V    | 1658.904674        | 829.955975        | 1641.878125    | 821.442701       | 1640.894109        | 820.950693       | 12 |
| 11 | <b>1271.675600</b> | 636.341438      | 1254.649051        | 627.828164        |                |                  | G    | <b>1559.836260</b> | 780.421768        | 1542.809711    | 771.908494       | 1541.825695        | 771.416486       | 11 |
| 12 | 1400.718193        | 700.862735      | 1383.691644        | <b>692.349460</b> | 1382.707628    | 691.857452       | E    | <b>1502.814796</b> | 751.911036        | 1485.788247    | 743.397762       | <b>1484.804231</b> | 742.905754       | 10 |
| 13 | 1529.760786        | 765.384031      | 1512.734237        | 756.870757        | 1511.750221    | 756.378749       | E    | <b>1373.772203</b> | 687.389740        | 1356.745654    | 678.876465       | 1355.761638        | 678.384457       | 9  |
| 14 | 1642.844850        | 821.926063      | 1625.818301        | 813.412789        | 1624.834285    | 812.920781       | I    | <b>1244.729610</b> | 622.868443        | 1227.703061    | 614.355169       |                    |                  | 8  |
| 15 | 2082.070176        | 1041.538726     | 2065.043627        | 1033.025451       | 2064.059611    | 1032.533444      | Q    | <b>1131.645546</b> | 566.326411        | 1114.618997    | 557.813137       |                    |                  | 7  |
| 16 | 2195.154240        | 1098.080758     | 2178.127691        | 1089.567484       | 2177.143675    | 1089.075476      | I    | <b>692.420220</b>  | 346.713748        | 675.393671     | 338.200474       |                    |                  | 6  |
| 17 | 2252.175704        | 1126.591490     | 2235.149155        | 1118.078215       | 2234.165139    | 1117.586208      | G    | <b>579.336156</b>  | 290.171716        | 562.309607     | 281.658442       |                    |                  | 5  |
| 18 | 2389.234616        | 1195.120946     | 2372.208067        | 1186.607671       | 2371.224051    | 1186.115664      | H    | <b>522.314692</b>  | 261.660984        | 505.288143     | 253.147710       |                    |                  | 4  |
| 19 | 2502.318680        | 1251.662978     | 2485.292131        | 1243.149704       | 2484.308115    | 1242.657696      | I    | <b>385.255780</b>  | 193.131528        | 368.229231     | 184.618254       |                    |                  | 3  |
| 20 | 2599.371444        | 1300.189360     | 2582.344895        | 1291.676086       | 2581.360879    | 1291.184078      | P    | <b>272.171716</b>  | 136.589496        | 255.145167     | 128.076221       |                    |                  | 2  |
| 21 |                    |                 |                    |                   |                |                  | R    | <b>175.118952</b>  | 88.063114         | 158.092403     | 79.549839        |                    |                  | 1  |

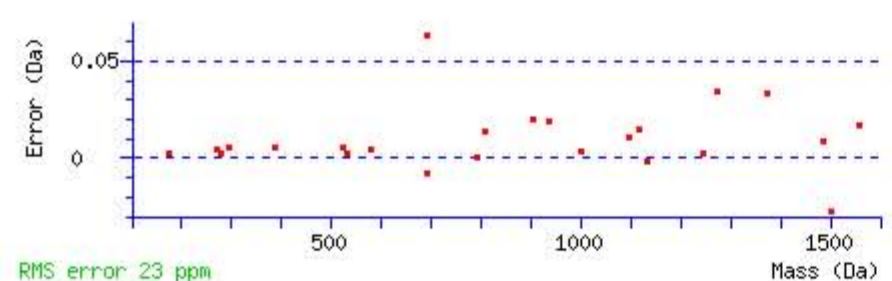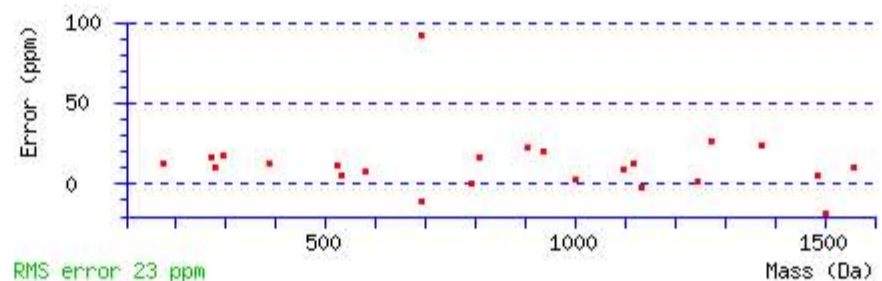

NCBI BLAST search of [HRPRPYPPNVGEEIQIGHIPR](#)  
 (Parameters: blastp, nr protein database, expect=20000, no filter, PAM30)  
 Other BLAST [web gateways](#)

### All matches to this query

| Score | Mr(calc):   | Delta    | Sequence                              |
|-------|-------------|----------|---------------------------------------|
| 48.5  | 2772.475815 | 0.023955 | <a href="#">HRPRPYPPNVGEEIQIGHIPR</a> |

**Mascot Search Results**

**Peptide View**

MS/MS Fragmentation of **RPGGEPSPGTTGQSYNQYSQR**  
 Found in **FINC\_HUMAN**, Fibronectin OS=Homo sapiens GN=FN1 PE=1 SV=4

Match to Query 70547: 3017.448856 from(755.369490,4+) rtinseconds(1795) index(40743)  
 Title: Locus:1.1.1.3074.21 File:"2013-07-02 CLN FXIII 180 min 1st F 3.wiff"  
 Data file C:\Program Files (x86)\Matrix Science\Mascot Daemon\mgf\7 FXIII 180 min 1st\mascot\_daemon\_merge.mgf

Click mouse within plot area to zoom in by factor of two about that point  
 Or, Plot from  to  Da   
 Label all possible matches  Label matches used for scoring

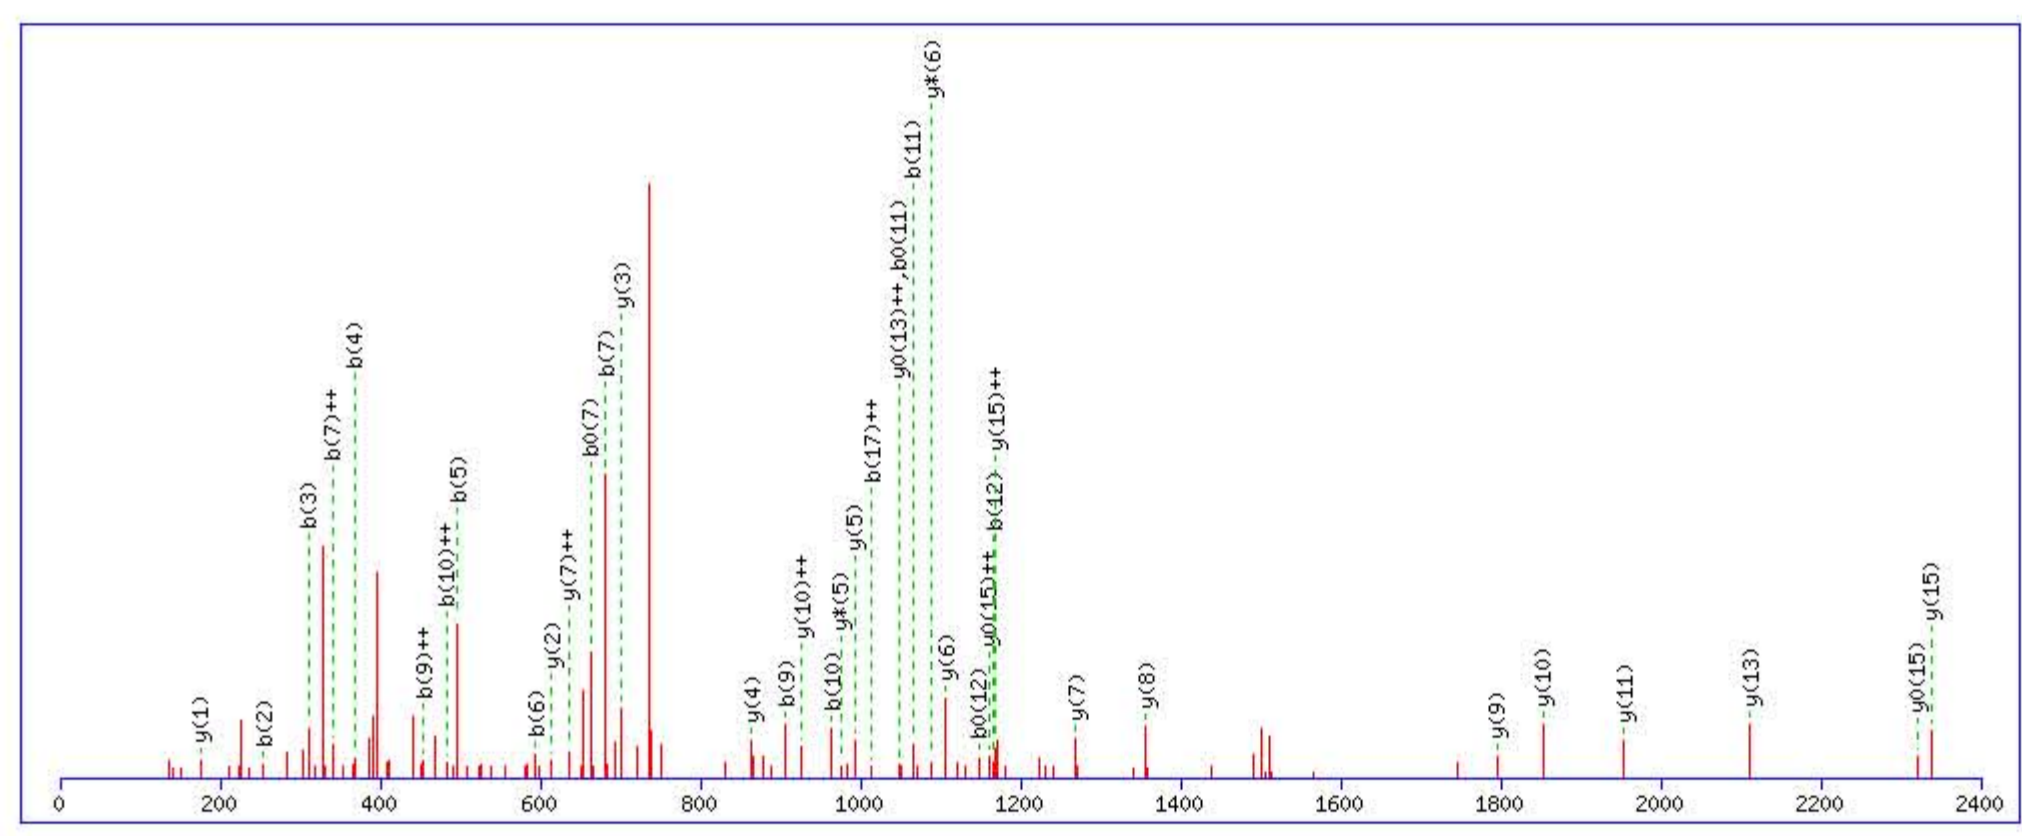

Monoisotopic mass of neutral peptide Mr(calc): 3017.412369  
 Fixed modifications: Carbamidomethyl (C) (apply to specified residues or termini only)  
 Variable modifications:  
 Q14 : Biotin:Thermo-21345 (Q)  
 Q21 : Biotin:Thermo-21345 (Q)  
 Ions Score: 65 Expect: 7.9e-006  
 Matches : 38/240 fragment ions using 87 most intense peaks [\(help\)](#)

| #  | b                  | b <sup>++</sup>    | b <sup>+</sup> | b <sup>*++</sup> | b <sup>0</sup>     | b <sup>0++</sup> | Seq. | y                  | y <sup>++</sup>    | y <sup>+</sup>     | y <sup>*++</sup> | y <sup>0</sup>     | y <sup>0++</sup>   | #  |
|----|--------------------|--------------------|----------------|------------------|--------------------|------------------|------|--------------------|--------------------|--------------------|------------------|--------------------|--------------------|----|
| 1  | 157.108387         | 79.057831          | 140.081838     | 70.544557        |                    |                  | R    |                    |                    |                    |                  |                    |                    | 22 |
| 2  | <b>254.161151</b>  | 127.584213         | 237.134602     | 119.070939       |                    |                  | P    | 2862.318543        | 1431.662909        | 2845.291994        | 1423.149635      | 2844.307978        | 1422.657627        | 21 |
| 3  | <b>311.182615</b>  | 156.094945         | 294.156066     | 147.581671       |                    |                  | G    | 2765.265779        | 1383.136527        | 2748.239230        | 1374.623253      | 2747.255214        | 1374.131245        | 20 |
| 4  | <b>368.204079</b>  | 184.605677         | 351.177530     | 176.092403       |                    |                  | G    | 2708.244315        | 1354.625795        | 2691.217766        | 1346.112521      | 2690.233750        | 1345.620513        | 19 |
| 5  | <b>497.246672</b>  | 249.126974         | 480.220123     | 240.613700       | 479.236107         | 240.121692       | E    | 2651.222851        | 1326.115063        | 2634.196302        | 1317.601789      | 2633.212286        | 1317.109781        | 18 |
| 6  | <b>594.299436</b>  | 297.653356         | 577.272887     | 289.140082       | 576.288871         | 288.648074       | P    | 2522.180258        | 1261.593767        | 2505.153709        | 1253.080492      | 2504.169693        | 1252.588484        | 17 |
| 7  | <b>681.331464</b>  | <b>341.169370</b>  | 664.304915     | 332.656095       | <b>663.320899</b>  | 332.164087       | S    | 2425.127494        | 1213.067385        | 2408.100945        | 1204.554110      | 2407.116929        | 1204.062102        | 16 |
| 8  | 778.384228         | 389.695752         | 761.357679     | 381.182478       | 760.373663         | 380.690470       | P    | <b>2338.095466</b> | <b>1169.551371</b> | 2321.068917        | 1161.038096      | <b>2320.084901</b> | <b>1160.546088</b> | 15 |
| 9  | <b>907.426821</b>  | <b>454.217049</b>  | 890.400272     | 445.703774       | 889.416256         | 445.211766       | E    | 2241.042702        | 1121.024989        | 2224.016153        | 1112.511714      | 2223.032137        | 1112.019706        | 14 |
| 10 | <b>964.448285</b>  | <b>482.727781</b>  | 947.421736     | 474.214506       | 946.437720         | 473.722498       | G    | <b>2112.000109</b> | 1056.503692        | 2094.973560        | 1047.990418      | 2093.989544        | <b>1047.498410</b> | 13 |
| 11 | <b>1065.495964</b> | 533.251620         | 1048.469415    | 524.738346       | <b>1047.485399</b> | 524.246337       | T    | 2054.978645        | 1027.992960        | 2037.952096        | 1019.479686      | 2036.968080        | 1018.987678        | 12 |
| 12 | <b>1166.543643</b> | 583.775460         | 1149.517094    | 575.262185       | <b>1148.533078</b> | 574.770177       | T    | <b>1953.930966</b> | 977.469121         | 1936.904417        | 968.955847       | 1935.920401        | 968.463839         | 11 |
| 13 | 1223.565107        | 612.286191         | 1206.538558    | 603.772917       | 1205.554542        | 603.280909       | G    | <b>1852.883287</b> | <b>926.945282</b>  | 1835.856738        | 918.432007       | 1834.872722        | 917.939999         | 10 |
| 14 | 1662.790433        | 831.898854         | 1645.763884    | 823.385580       | 1644.779868        | 822.893572       | Q    | <b>1795.861823</b> | 898.434550         | 1778.835274        | 889.921275       | 1777.851258        | 889.429267         | 9  |
| 15 | 1749.822461        | 875.414869         | 1732.795912    | 866.901594       | 1731.811896        | 866.409586       | S    | <b>1356.636497</b> | 678.821887         | 1339.609948        | 670.308612       | 1338.625932        | 669.816604         | 8  |
| 16 | 1912.885790        | 956.946533         | 1895.859241    | 948.433259       | 1894.875225        | 947.941251       | Y    | <b>1269.604469</b> | <b>635.305873</b>  | 1252.577920        | 626.792598       | 1251.593904        | 626.300590         | 7  |
| 17 | 2026.928717        | <b>1013.967997</b> | 2009.902168    | 1005.454722      | 2008.918152        | 1004.962714      | N    | <b>1106.541140</b> | 553.774208         | <b>1089.514591</b> | 545.260934       | 1088.530575        | 544.768926         | 6  |
| 18 | 2154.987295        | 1077.997285        | 2137.960746    | 1069.484011      | 2136.976730        | 1068.992003      | Q    | <b>992.498213</b>  | 496.752745         | <b>975.471664</b>  | 488.239470       | 974.487648         | 487.747462         | 5  |
| 19 | 2318.050624        | 1159.528950        | 2301.024075    | 1151.015675      | 2300.040059        | 1150.523667      | Y    | <b>864.439635</b>  | 432.723456         | 847.413086         | 424.210181       | 846.429070         | 423.718173         | 4  |
| 20 | 2405.082652        | 1203.044964        | 2388.056103    | 1194.531689      | 2387.072087        | 1194.039681      | S    | <b>701.376306</b>  | 351.191791         | 684.349757         | 342.678517       | 683.365741         | 342.186509         | 3  |
| 21 | 2844.307978        | 1422.657627        | 2827.281429    | 1414.144353      | 2826.297413        | 1413.652345      | Q    | <b>614.344278</b>  | 307.675777         | 597.317729         | 299.162503       |                    |                    | 2  |
| 22 |                    |                    |                |                  |                    |                  | R    | <b>175.118952</b>  | 88.063114          | 158.092403         | 79.549839        |                    |                    | 1  |

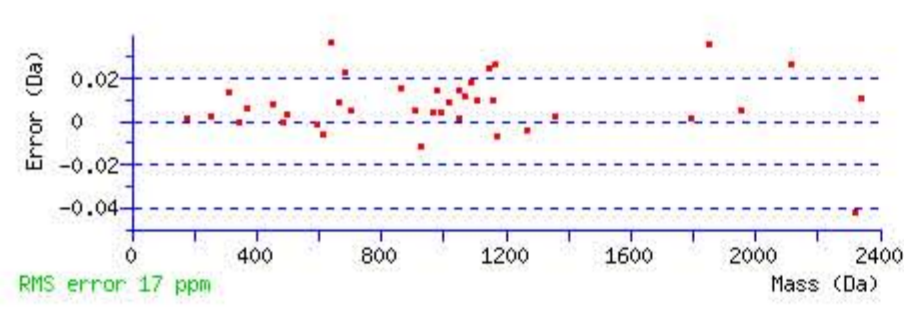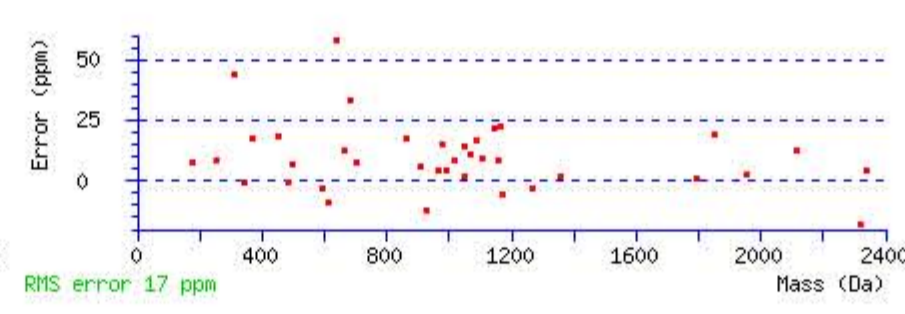

NCBI BLAST search of **RPGGEPSPGTTGQSYNQYSQR**  
 (Parameters: blastp, nr protein database, expect=20000, no filter, PAM30)  
 Other BLAST [web gateways](#)

**All matches to this query**

| Score | Mr(calc):   | Delta    | Sequence                              |
|-------|-------------|----------|---------------------------------------|
| 64.6  | 3017.412369 | 0.036487 | <a href="#">RPGGEPSPGTTGQSYNQYSQR</a> |
| 58.4  | 3017.412369 | 0.036487 | <a href="#">RPGGEPSPGTTGQSYNQYSQR</a> |
| 34.4  | 3017.412369 | 0.036487 | <a href="#">RPGGEPSPGTTGQSYNQYSQR</a> |

# MASCOT Search Results

## Peptide View

MS/MS Fragmentation of **GLKPGVVYEGQLISIQQYGHQEVTR**  
 Found in **FINC\_HUMAN**, Fibronectin OS=Homo sapiens GN=FN1 PE=1 SV=4

Match to Query 71423: 3109.681016 from(778.427530,4+) rtinseconds(2169) index(43413)  
 Title: Locus:1.1.1.3204.20 File:"2013-07-02 CLN FXIII 180 min 1st F 3.wiff"  
 Data file C:\Program Files (x86)\Matrix Science\Mascot Daemon\mgf7 FXIII 180 min 1st\mascot\_daemon\_merge.mgf

Click mouse within plot area to zoom in by factor of two about that point  
 Or, Plot from  to  Da   
 Label all possible matches  Label matches used for scoring

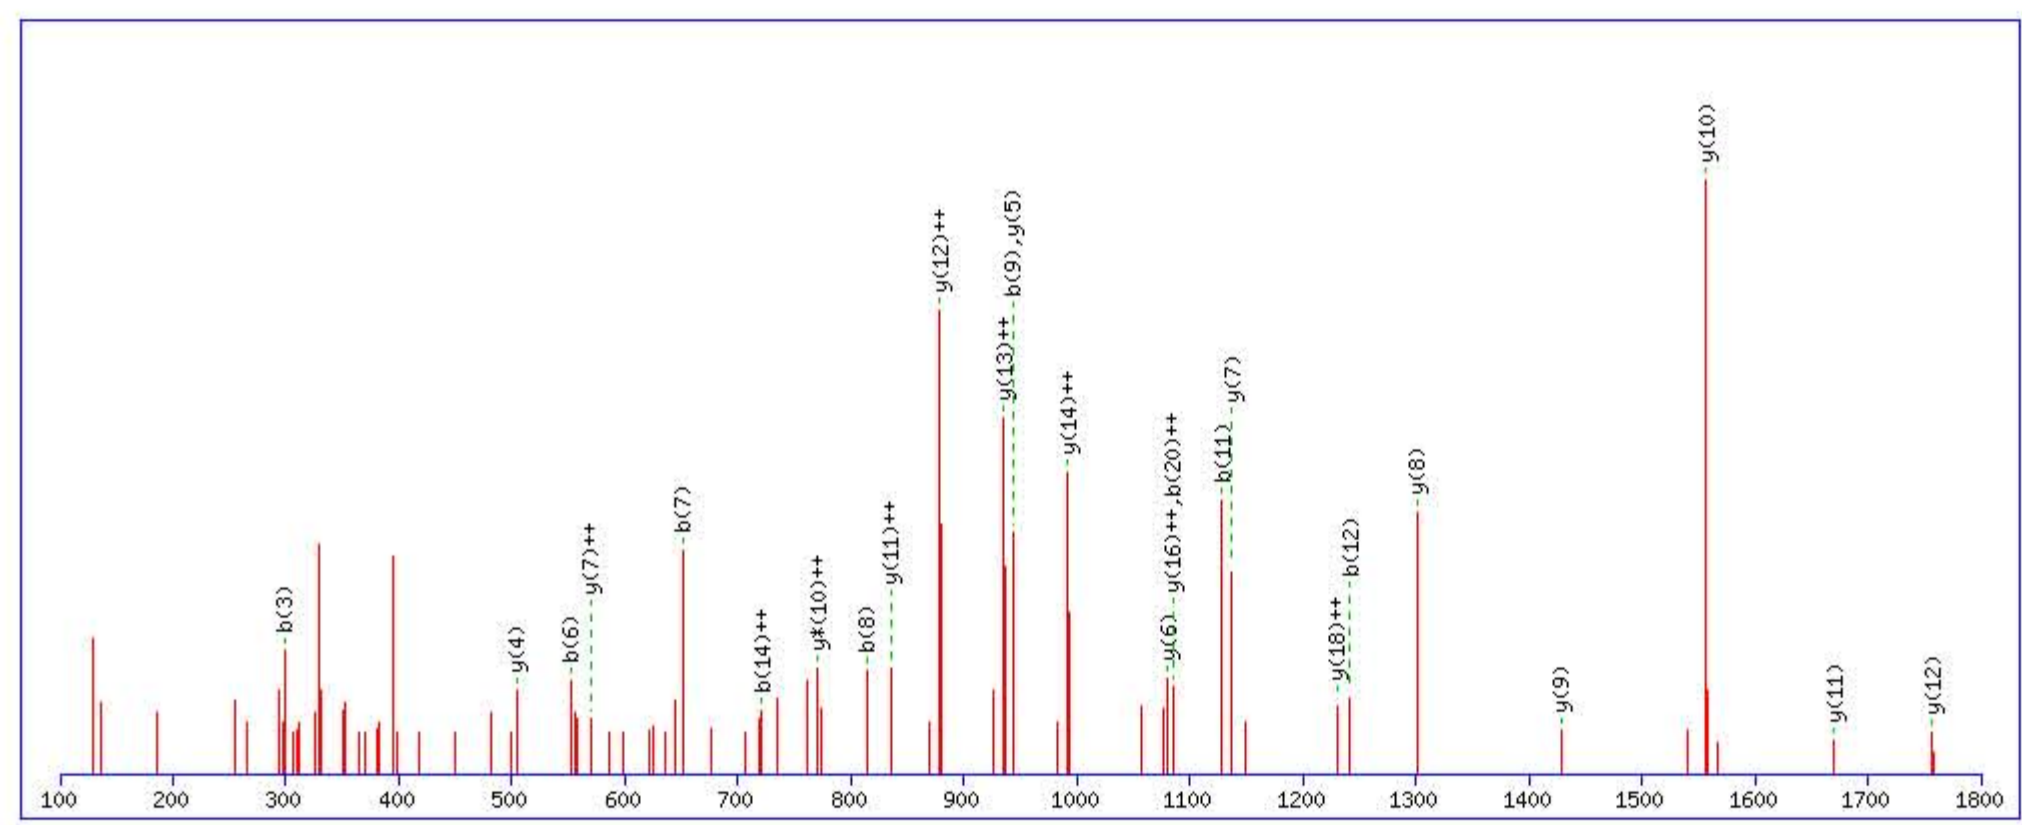

Monoisotopic mass of neutral peptide Mr(calc): 3109.638275  
 Fixed modifications: Carbamidomethyl (C) (apply to specified residues or termini only)  
 Variable modifications:  
 Q21 : Biotin:Thermo-21345 (Q)  
 Ions Score: 57 Expect: 2.8e-005  
 Matches : 26/266 fragment ions using 43 most intense peaks [\(help\)](#)

| #  | b                  | b <sup>++</sup>    | b <sup>+</sup> | b <sup>+++</sup> | b <sup>0</sup> | b <sup>0++</sup> | Seq. | y                  | y <sup>++</sup>    | y <sup>*</sup> | y <sup>+++</sup>  | y <sup>0</sup> | y <sup>0++</sup> | #  |
|----|--------------------|--------------------|----------------|------------------|----------------|------------------|------|--------------------|--------------------|----------------|-------------------|----------------|------------------|----|
| 1  | 58.028740          | 29.518008          |                |                  |                |                  | G    |                    |                    |                |                   |                |                  | 25 |
| 2  | 171.112804         | 86.060040          |                |                  |                |                  | L    | 3053.624092        | 1527.315684        | 3036.597543    | 1518.802409       | 3035.613527    | 1518.310401      | 24 |
| 3  | <b>299.207767</b>  | 150.107521         | 282.181218     | 141.594247       |                |                  | K    | 2940.540028        | 1470.773652        | 2923.513479    | 1462.260377       | 2922.529463    | 1461.768369      | 23 |
| 4  | 396.260531         | 198.633903         | 379.233982     | 190.120629       |                |                  | P    | 2812.445065        | 1406.726170        | 2795.418516    | 1398.212896       | 2794.434500    | 1397.720888      | 22 |
| 5  | 453.281995         | 227.144635         | 436.255446     | 218.631361       |                |                  | G    | 2715.392301        | 1358.199788        | 2698.365752    | 1349.686514       | 2697.381736    | 1349.194506      | 21 |
| 6  | <b>552.350409</b>  | 276.678843         | 535.323860     | 268.165568       |                |                  | V    | 2658.370837        | 1329.689056        | 2641.344288    | 1321.175782       | 2640.360272    | 1320.683774      | 20 |
| 7  | <b>651.418823</b>  | 326.213050         | 634.392274     | 317.699775       |                |                  | V    | 2559.302423        | 1280.154849        | 2542.275874    | 1271.641575       | 2541.291858    | 1271.149567      | 19 |
| 8  | <b>814.482152</b>  | 407.744714         | 797.455603     | 399.231440       |                |                  | Y    | 2460.234009        | <b>1230.620642</b> | 2443.207460    | 1222.107368       | 2442.223444    | 1221.615360      | 18 |
| 9  | <b>943.524745</b>  | 472.266011         | 926.498196     | 463.752736       | 925.514180     | 463.260728       | E    | 2297.170680        | 1149.088978        | 2280.144131    | 1140.575703       | 2279.160115    | 1140.083695      | 17 |
| 10 | 1000.546209        | 500.776743         | 983.519660     | 492.263468       | 982.535644     | 491.771460       | G    | 2168.128087        | <b>1084.567681</b> | 2151.101538    | 1076.054407       | 2150.117522    | 1075.562399      | 16 |
| 11 | <b>1128.604787</b> | 564.806032         | 1111.578238    | 556.292757       | 1110.594222    | 555.800749       | Q    | 2111.106623        | 1056.056949        | 2094.080074    | 1047.543675       | 2093.096058    | 1047.051667      | 15 |
| 12 | <b>1241.688851</b> | 621.348063         | 1224.662302    | 612.834789       | 1223.678286    | 612.342781       | L    | 1983.048045        | <b>992.027660</b>  | 1966.021496    | 983.514386        | 1965.037480    | 983.022378       | 14 |
| 13 | 1354.772915        | 677.890095         | 1337.746366    | 669.376821       | 1336.762350    | 668.884813       | I    | 1869.963981        | <b>935.485628</b>  | 1852.937432    | 926.972354        | 1851.953416    | 926.480346       | 13 |
| 14 | 1441.804943        | <b>721.406109</b>  | 1424.778394    | 712.892835       | 1423.794378    | 712.400827       | S    | <b>1756.879917</b> | <b>878.943597</b>  | 1739.853368    | 870.430322        | 1738.869352    | 869.938314       | 12 |
| 15 | 1554.889007        | 777.948141         | 1537.862458    | 769.434867       | 1536.878442    | 768.942859       | I    | <b>1669.847889</b> | <b>835.427582</b>  | 1652.821340    | 826.914308        | 1651.837324    | 826.422300       | 11 |
| 16 | 1682.947585        | 841.977430         | 1665.921036    | 833.464156       | 1664.937020    | 832.972148       | Q    | <b>1556.763825</b> | 778.885551         | 1539.737276    | <b>770.372276</b> | 1538.753260    | 769.880268       | 10 |
| 17 | 1811.006163        | 906.006719         | 1793.979614    | 897.493445       | 1792.995598    | 897.001437       | Q    | <b>1428.705247</b> | 714.856262         | 1411.678698    | 706.342987        | 1410.694682    | 705.850979       | 9  |
| 18 | 1974.069492        | 987.538384         | 1957.042943    | 979.025109       | 1956.058927    | 978.533101       | Y    | <b>1300.646669</b> | 650.826973         | 1283.620120    | 642.313698        | 1282.636104    | 641.821690       | 8  |
| 19 | 2031.090956        | 1016.049116        | 2014.064407    | 1007.535841      | 2013.080391    | 1007.043833      | G    | <b>1137.583340</b> | <b>569.295308</b>  | 1120.556791    | 560.782034        | 1119.572775    | 560.290025       | 7  |
| 20 | 2168.149868        | <b>1084.578572</b> | 2151.123319    | 1076.065297      | 2150.139303    | 1075.573289      | H    | <b>1080.561876</b> | 540.784576         | 1063.535327    | 532.271302        | 1062.551311    | 531.779293       | 6  |
| 21 | 2607.375194        | 1304.191235        | 2590.348645    | 1295.677960      | 2589.364629    | 1295.185952      | Q    | <b>943.502964</b>  | 472.255120         | 926.476415     | 463.741846        | 925.492399     | 463.249838       | 5  |
| 22 | 2736.417787        | 1368.712531        | 2719.391238    | 1360.199257      | 2718.407222    | 1359.707249      | E    | <b>504.277638</b>  | 252.642457         | 487.251089     | 244.129182        | 486.267073     | 243.637174       | 4  |
| 23 | 2835.486201        | 1418.246738        | 2818.459652    | 1409.733464      | 2817.475636    | 1409.241456      | V    | 375.235045         | 188.121160         | 358.208496     | 179.607886        | 357.224480     | 179.115878       | 3  |
| 24 | 2936.533880        | 1468.770578        | 2919.507331    | 1460.257303      | 2918.523315    | 1459.765295      | T    | 276.166631         | 138.586953         | 259.140082     | 130.073679        | 258.156066     | 129.581671       | 2  |
| 25 |                    |                    |                |                  |                |                  | R    | 175.118952         | 88.063114          | 158.092403     | 79.549839         |                |                  | 1  |

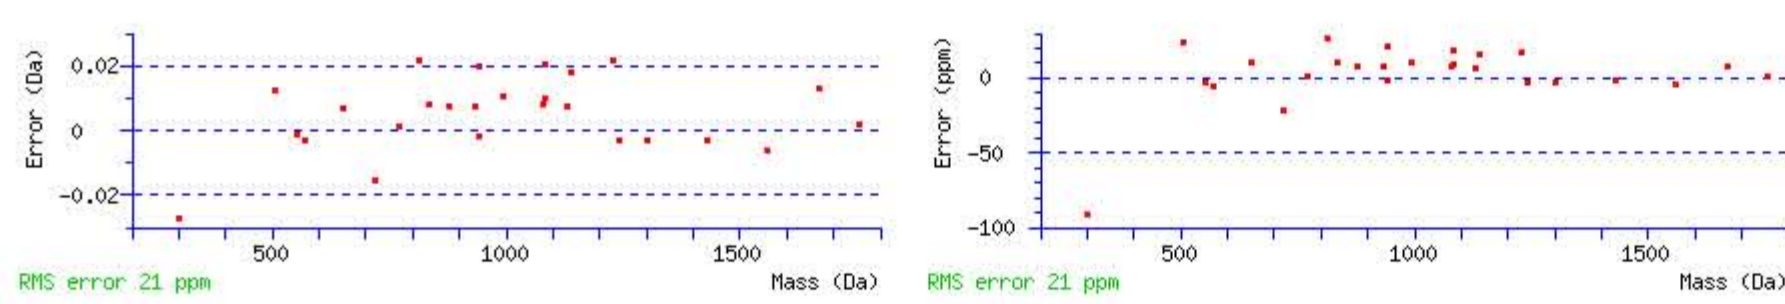

NCBI BLAST search of **GLKPGVVYEGQLISIQQYGHQEVTR**  
 (Parameters: blastp, nr protein database, expect=20000, no filter, PAM30)  
 Other BLAST [web gateways](#)

### All matches to this query

| Score | Mr(calc):   | Delta    | Sequence                                  |
|-------|-------------|----------|-------------------------------------------|
| 56.7  | 3109.638275 | 0.042741 | <a href="#">GLKPGVVYEGQLISIQQYGHQEVTR</a> |
| 29.9  | 3109.638275 | 0.042741 | <a href="#">GLKPGVVYEGQLISIQQYGHQEVTR</a> |
| 24.5  | 3109.638275 | 0.042741 | <a href="#">GLKPGVVYEGQLISIQQYGHQEVTR</a> |
| 0.3   | 3109.638275 | 0.042741 | <a href="#">GLKPGVVYEGQLISIQQYGHQEVTR</a> |

# MASCOT Search Results

## Peptide View

MS/MS Fragmentation of **RPGGEPSPGTTGQSYNQYSQR**

Found in **FINC\_HUMAN**, Fibronectin OS=Homo sapiens GN=FN1 PE=1 SV=4

Match to Query 75495: 3328.628616 from(833.164430,4+) rtinseconds(2009) index(42272)

Title: Locus:1.1.1.3148.16 File:"2013-07-02 CLN FXIII 180 min 1st F 3.wiff"

Data file C:\Program Files (x86)\Matrix Science\Mascot Daemon\mgf\7 FXIII 180 min 1st\mascot\_daemon\_merge.mgf

Click mouse within plot area to zoom in by factor of two about that point

Or, Plot from  to  Da

Label all possible matches  Label matches used for scoring

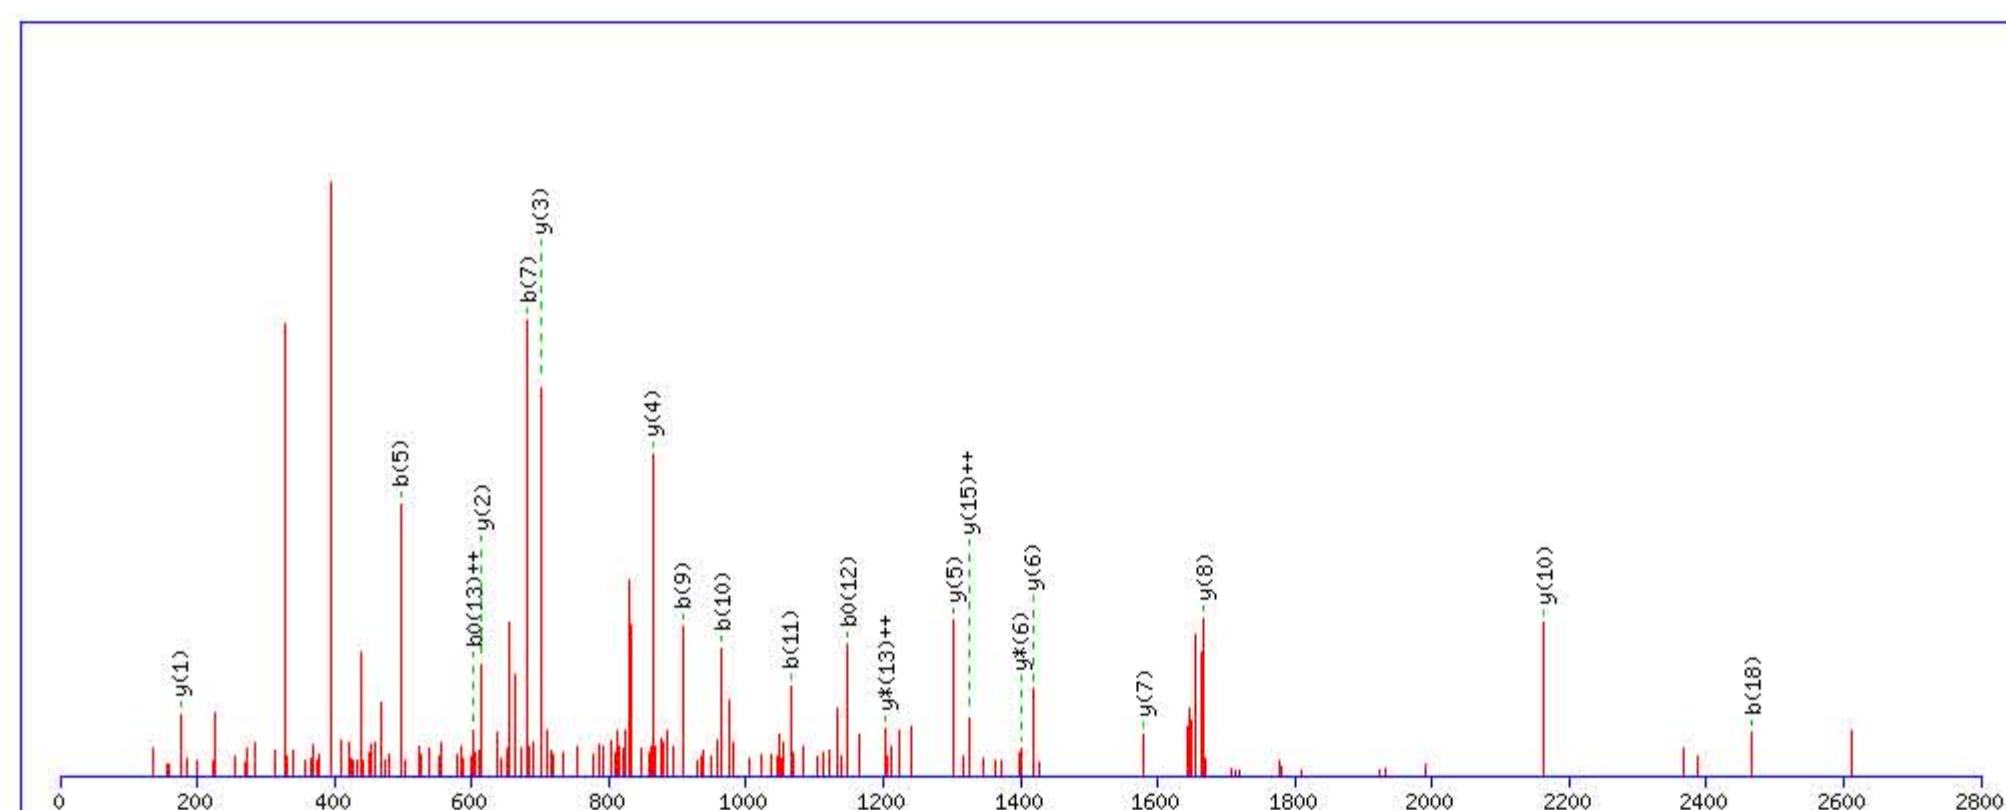

Monoisotopic mass of neutral peptide Mr(calc): 3328.579117

Fixed modifications: Carbamidomethyl (C) (apply to specified residues or termini only)

Variable modifications:

Q14 : Biotin:Thermo-21345 (Q)

Q18 : Biotin:Thermo-21345 (Q)

Q21 : Biotin:Thermo-21345 (Q)

Ions Score: 46 Expect: 0.00072

Matches : 20/240 fragment ions using 39 most intense peaks [\(help\)](#)

| #  | b                  | b <sup>++</sup> | b <sup>+</sup> | b <sup>*++</sup> | b <sup>0</sup>     | b <sup>0++</sup>  | Seq. | y                  | y <sup>++</sup>    | y <sup>*</sup>     | y <sup>*++</sup>   | y <sup>0</sup> | y <sup>0++</sup> | #  |
|----|--------------------|-----------------|----------------|------------------|--------------------|-------------------|------|--------------------|--------------------|--------------------|--------------------|----------------|------------------|----|
| 1  | 157.108387         | 79.057831       | 140.081838     | 70.544557        |                    |                   | R    |                    |                    |                    |                    |                |                  | 22 |
| 2  | 254.161151         | 127.584213      | 237.134602     | 119.070939       |                    |                   | P    | 3173.485291        | 1587.246283        | 3156.458742        | 1578.733009        | 3155.474726    | 1578.241001      | 21 |
| 3  | 311.182615         | 156.094945      | 294.156066     | 147.581671       |                    |                   | G    | 3076.432527        | 1538.719901        | 3059.405978        | 1530.206627        | 3058.421962    | 1529.714619      | 20 |
| 4  | 368.204079         | 184.605677      | 351.177530     | 176.092403       |                    |                   | G    | 3019.411063        | 1510.209169        | 3002.384514        | 1501.695895        | 3001.400498    | 1501.203887      | 19 |
| 5  | <b>497.246672</b>  | 249.126974      | 480.220123     | 240.613700       | 479.236107         | 240.121692        | E    | 2962.389599        | 1481.698438        | 2945.363050        | 1473.185163        | 2944.379034    | 1472.693155      | 18 |
| 6  | 594.299436         | 297.653356      | 577.272887     | 289.140082       | 576.288871         | 288.648074        | P    | 2833.347006        | 1417.177141        | 2816.320457        | 1408.663866        | 2815.336441    | 1408.171858      | 17 |
| 7  | <b>681.331464</b>  | 341.169370      | 664.304915     | 332.656095       | 663.320899         | 332.164087        | S    | 2736.294242        | 1368.650759        | 2719.267693        | 1360.137484        | 2718.283677    | 1359.645476      | 16 |
| 8  | 778.384228         | 389.695752      | 761.357679     | 381.182478       | 760.373663         | 380.690470        | P    | 2649.262214        | <b>1325.134745</b> | 2632.235665        | 1316.621470        | 2631.251649    | 1316.129462      | 15 |
| 9  | <b>907.426821</b>  | 454.217049      | 890.400272     | 445.703774       | 889.416256         | 445.211766        | E    | 2552.209450        | 1276.608363        | 2535.182901        | 1268.095088        | 2534.198885    | 1267.603080      | 14 |
| 10 | <b>964.448285</b>  | 482.727781      | 947.421736     | 474.214506       | 946.437720         | 473.722498        | G    | 2423.166857        | 1212.087066        | 2406.140308        | <b>1203.573792</b> | 2405.156292    | 1203.081784      | 13 |
| 11 | <b>1065.495964</b> | 533.251620      | 1048.469415    | 524.738346       | 1047.485399        | 524.246337        | T    | 2366.145393        | 1183.576334        | 2349.118844        | 1175.063060        | 2348.134828    | 1174.571052      | 12 |
| 12 | 1166.543643        | 583.775460      | 1149.517094    | 575.262185       | <b>1148.533078</b> | 574.770177        | T    | 2265.097714        | 1133.052495        | 2248.071165        | 1124.539220        | 2247.087149    | 1124.047212      | 11 |
| 13 | 1223.565107        | 612.286191      | 1206.538558    | 603.772917       | 1205.554542        | <b>603.280909</b> | G    | <b>2164.050035</b> | 1082.528655        | 2147.023486        | 1074.015381        | 2146.039470    | 1073.523373      | 10 |
| 14 | 1662.790433        | 831.898854      | 1645.763884    | 823.385580       | 1644.779868        | 822.893572        | Q    | 2107.028571        | 1054.017924        | 2090.002022        | 1045.504649        | 2089.018006    | 1045.012641      | 9  |
| 15 | 1749.822461        | 875.414869      | 1732.795912    | 866.901594       | 1731.811896        | 866.409586        | S    | <b>1667.803245</b> | 834.405261         | 1650.776696        | 825.891986         | 1649.792680    | 825.399978       | 8  |
| 16 | 1912.885790        | 956.946533      | 1895.859241    | 948.433259       | 1894.875225        | 947.941251        | Y    | <b>1580.771217</b> | 790.889247         | 1563.744668        | 782.375972         | 1562.760652    | 781.883964       | 7  |
| 17 | 2026.928717        | 1013.967997     | 2009.902168    | 1005.454722      | 2008.918152        | 1004.962714       | N    | <b>1417.707888</b> | 709.357582         | <b>1400.681339</b> | 700.844308         | 1399.697323    | 700.352300       | 6  |
| 18 | <b>2466.154043</b> | 1233.580659     | 2449.127494    | 1225.067385      | 2448.143478        | 1224.575377       | Q    | <b>1303.664961</b> | 652.336119         | 1286.638412        | 643.822844         | 1285.654396    | 643.330836       | 5  |
| 19 | 2629.217372        | 1315.112324     | 2612.190823    | 1306.599049      | 2611.206807        | 1306.107041       | Y    | <b>864.439635</b>  | 432.723456         | 847.413086         | 424.210181         | 846.429070     | 423.718173       | 4  |
| 20 | 2716.249400        | 1358.628338     | 2699.222851    | 1350.115063      | 2698.238835        | 1349.623056       | S    | <b>701.376306</b>  | 351.191791         | 684.349757         | 342.678517         | 683.365741     | 342.186509       | 3  |
| 21 | 3155.474726        | 1578.241001     | 3138.448177    | 1569.727727      | 3137.464161        | 1569.235719       | Q    | <b>614.344278</b>  | 307.675777         | 597.317729         | 299.162503         |                |                  | 2  |
| 22 |                    |                 |                |                  |                    |                   | R    | <b>175.118952</b>  | 88.063114          | 158.092403         | 79.549839          |                |                  | 1  |

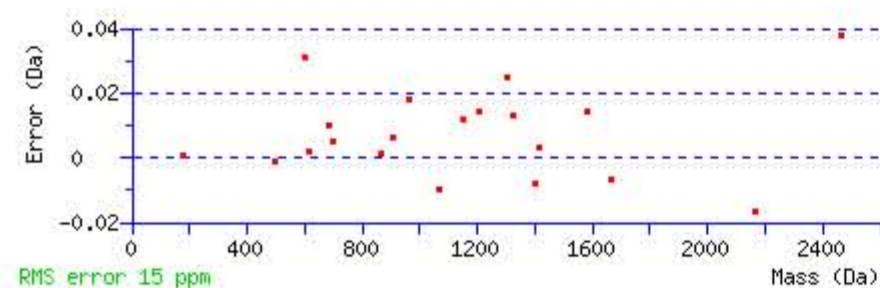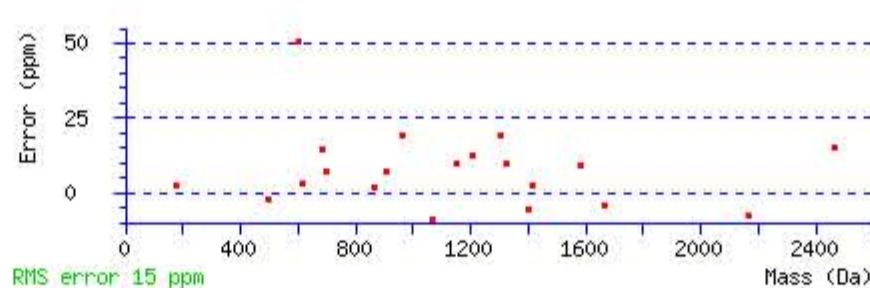

NCBI BLAST search of **RPGGEPSPGTTGQSYNQYSQR**

(Parameters: blastp, nr protein database, expect=20000, no filter, PAM30)

Other BLAST [web gateways](#)

All matches to this query

| Score | Mr(calc):   | Delta    | Sequence                     |
|-------|-------------|----------|------------------------------|
| 45.6  | 3328.579117 | 0.049499 | <b>RPGGEPSPGTTGQSYNQYSQR</b> |

Mascot: <http://www.matrixscience.com/>



# MASCOT Search Results

## Peptide View

MS/MS Fragmentation of **SAATLQQEK**

Found in **FBLN1\_HUMAN**, Fibulin-1 OS=Homo sapiens GN=FBLN1 PE=1 SV=4

Match to Query 26585: 1285.682228 from(643.848390,2+) rtinseconds(1488) index(38686)

Title: Locus:1.1.1.2967.24 File:"2013-07-02 CLN FXIII 180 min 1st F 3.wiff"

Data file C:\Program Files (x86)\Matrix Science\Mascot Daemon\mgf\7 FXIII 180 min 1st\mascot\_daemon\_merge.mgf

Click mouse within plot area to zoom in by factor of two about that point

Or, Plot from  to  Da

Label all possible matches  Label matches used for scoring

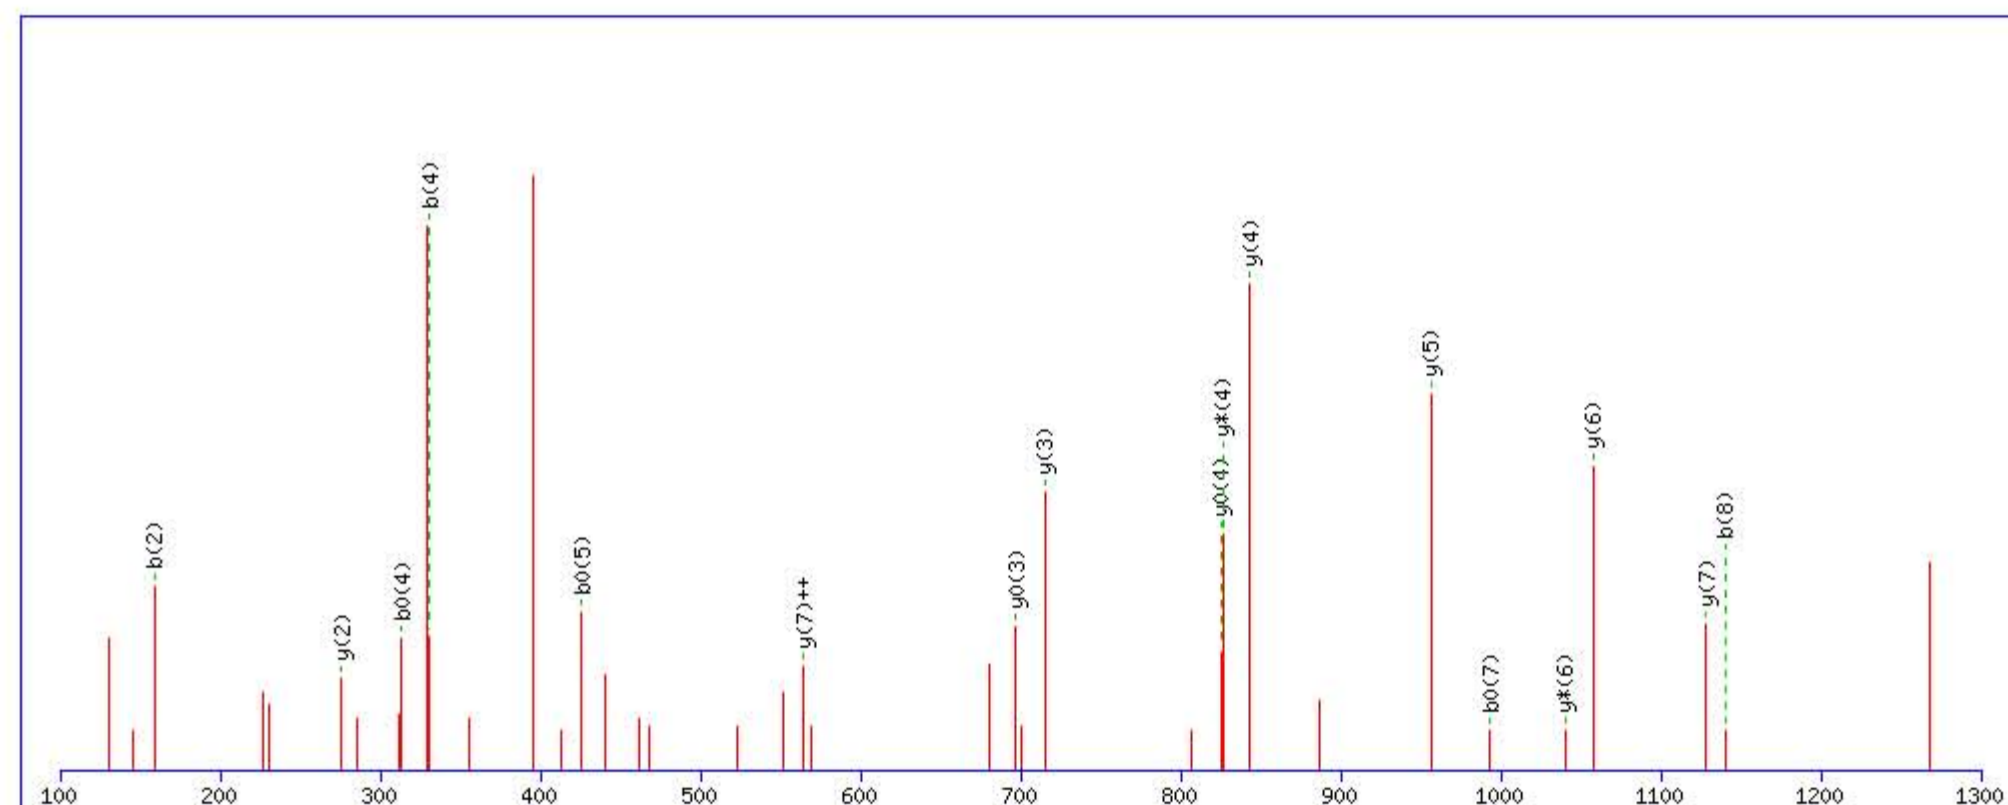

Monoisotopic mass of neutral peptide Mr(calc): 1285.669998

Fixed modifications: Carbamidomethyl (C) (apply to specified residues or termini only)

Variable modifications:

Q7 : Biotin:Thermo-21345 (Q)

Ions Score: 34 Expect: 0.0067

Matches : 17/84 fragment ions using 30 most intense peaks [\(help\)](#)

| # | b                  | b <sup>++</sup> | b <sup>*</sup> | b <sup>*++</sup> | b <sup>0</sup>    | b <sup>0++</sup> | Seq. | y                  | y <sup>++</sup>   | y <sup>*</sup>     | y <sup>*++</sup> | y <sup>0</sup>    | y <sup>0++</sup> | # |
|---|--------------------|-----------------|----------------|------------------|-------------------|------------------|------|--------------------|-------------------|--------------------|------------------|-------------------|------------------|---|
| 1 | 88.039304          | 44.523290       |                |                  | 70.028739         | 35.518008        | S    |                    |                   |                    |                  |                   |                  | 9 |
| 2 | <b>159.076418</b>  | 80.041847       |                |                  | 141.065853        | 71.036564        | A    | 1199.645272        | 600.326274        | 1182.618723        | 591.813000       | 1181.634707       | 591.320991       | 8 |
| 3 | 230.113532         | 115.560404      |                |                  | 212.102967        | 106.555121       | A    | <b>1128.608158</b> | <b>564.807717</b> | 1111.581609        | 556.294443       | 1110.597593       | 555.802435       | 7 |
| 4 | <b>331.161211</b>  | 166.084243      |                |                  | <b>313.150646</b> | 157.078961       | T    | <b>1057.571044</b> | 529.289160        | <b>1040.544495</b> | 520.775886       | 1039.560479       | 520.283878       | 6 |
| 5 | 444.245275         | 222.626275      |                |                  | <b>426.234710</b> | 213.620993       | L    | <b>956.523365</b>  | 478.765321        | 939.496816         | 470.252046       | 938.512800        | 469.760038       | 5 |
| 6 | 572.303853         | 286.655565      | 555.277304     | 278.142290       | 554.293288        | 277.650282       | Q    | <b>843.439301</b>  | 422.223289        | <b>826.412752</b>  | 413.710014       | <b>825.428736</b> | 413.218006       | 4 |
| 7 | 1011.529179        | 506.268228      | 994.502630     | 497.754953       | <b>993.518614</b> | 497.262945       | Q    | <b>715.380723</b>  | 358.194000        | 698.354174         | 349.680725       | <b>697.370158</b> | 349.188717       | 3 |
| 8 | <b>1140.571772</b> | 570.789524      | 1123.545223    | 562.276250       | 1122.561207       | 561.784242       | E    | <b>276.155397</b>  | 138.581336        | 259.128848         | 130.068062       | 258.144832        | 129.576054       | 2 |
| 9 |                    |                 |                |                  |                   |                  | K    | 147.112804         | 74.060040         | 130.086255         | 65.546765        |                   |                  | 1 |

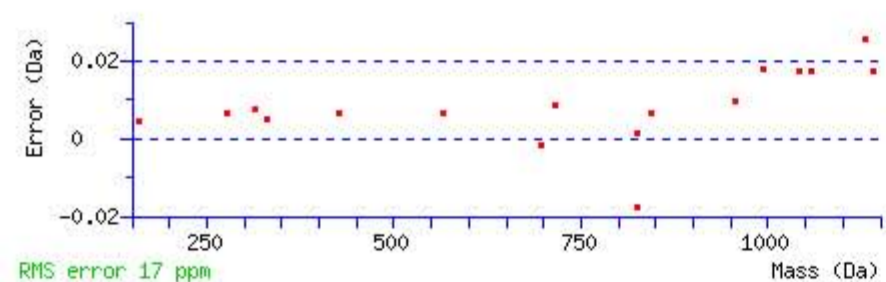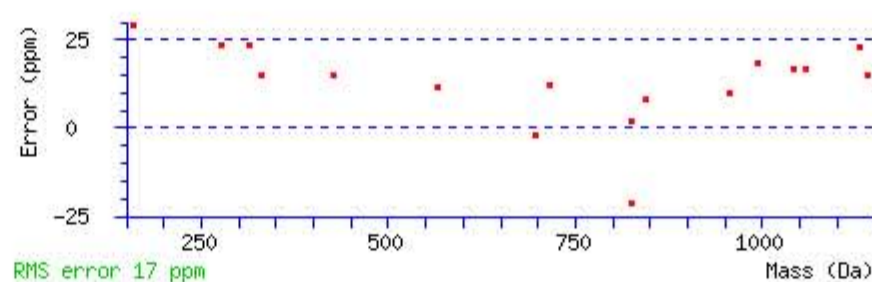

NCBI BLAST search of [SAATLQQEK](#)

(Parameters: blastp, nr protein database, expect=20000, no filter, PAM30)

Other BLAST [web gateways](#)

## All matches to this query

| Score | Mr(calc):   | Delta     | Sequence                  |
|-------|-------------|-----------|---------------------------|
| 33.9  | 1285.669998 | 0.012230  | <a href="#">SAATLQQEK</a> |
| 22.3  | 1285.669998 | 0.012230  | <a href="#">SAATLQQEK</a> |
| 10.3  | 1285.699860 | -0.017632 | <a href="#">RCSQLLAK</a>  |
| 8.3   | 1285.688614 | -0.006386 | <a href="#">SMANQLLAK</a> |
| 5.9   | 1285.669998 | 0.012230  | <a href="#">ASLDQGKEK</a> |
| 3.8   | 1285.681244 | 0.000984  | <a href="#">QEQSTRVK</a>  |

# MASCOT Search Results

## Peptide View

MS/MS Fragmentation of **MCVDVNECQR**

Found in **FBLN1\_HUMAN**, Fibulin-1 OS=Homo sapiens GN=FBLN1 PE=1 SV=4

Match to Query 39645: 1620.696702 from(541.239510,3+) rtinseconds(1719) index(40185)

Title: Locus:1.1.1.3048.13 File:"2013-07-02 CLN FXIII 180 min 1st F 3.wiff"

Data file C:\Program Files (x86)\Matrix Science\Mascot Daemon\mgf\7 FXIII 180 min 1st\mascot\_daemon\_merge.mgf

Click mouse within plot area to zoom in by factor of two about that point

Or, Plot from  to  Da

Label all possible matches  Label matches used for scoring

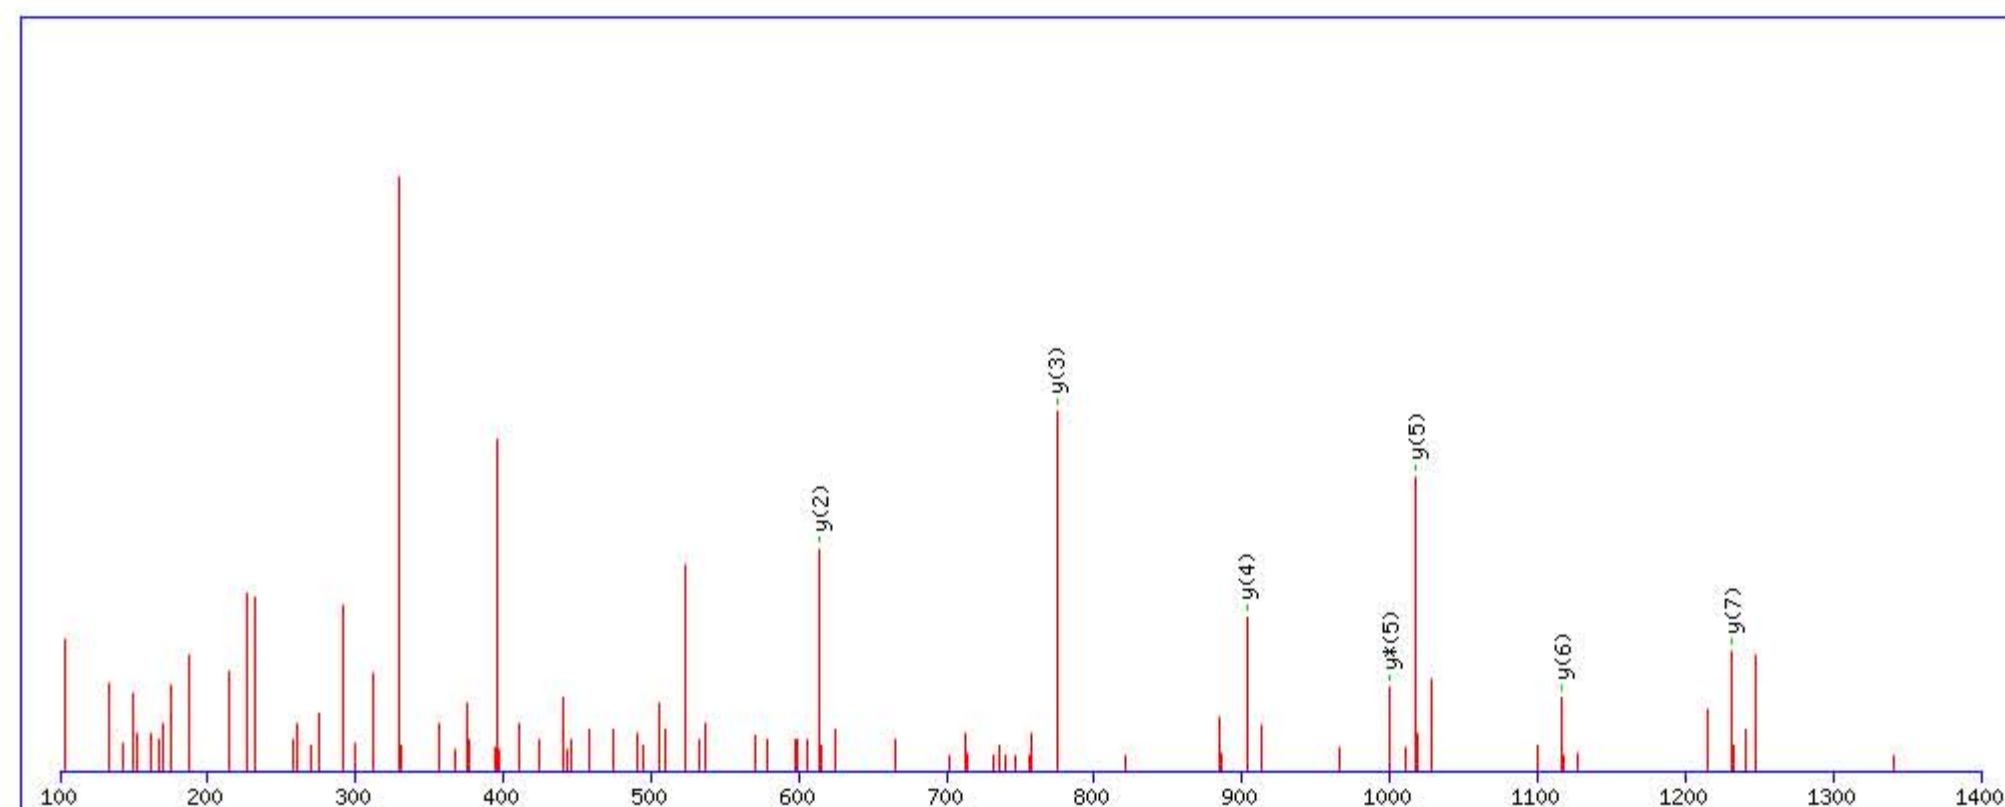

Monoisotopic mass of neutral peptide Mr(calc): 1620.688080

Fixed modifications: Carbamidomethyl (C) (apply to specified residues or termini only)

Variable modifications:

Q9 : Biotin:Thermo-21345 (Q)

Ions Score: 33 Expect: 0.0027

Matches : 7/86 fragment ions using 13 most intense peaks [\(help\)](#)

| #  | b           | b <sup>++</sup> | b <sup>*</sup> | b <sup>*++</sup> | b <sup>0</sup> | b <sup>0++</sup> | Seq. | y                  | y <sup>++</sup> | y <sup>*</sup>     | y <sup>*++</sup> | y <sup>0</sup> | y <sup>0++</sup> | #  |
|----|-------------|-----------------|----------------|------------------|----------------|------------------|------|--------------------|-----------------|--------------------|------------------|----------------|------------------|----|
| 1  | 132.047761  | 66.527518       |                |                  |                |                  | M    |                    |                 |                    |                  |                |                  | 10 |
| 2  | 292.078410  | 146.542843      |                |                  |                |                  | C    | 1490.654867        | 745.831072      | 1473.628318        | 737.317797       | 1472.644302    | 736.825789       | 9  |
| 3  | 391.146824  | 196.077050      |                |                  |                |                  | V    | 1330.624218        | 665.815747      | 1313.597669        | 657.302473       | 1312.613653    | 656.810464       | 8  |
| 4  | 506.173767  | 253.590522      |                |                  | 488.163202     | 244.585239       | D    | <b>1231.555804</b> | 616.281540      | 1214.529255        | 607.768265       | 1213.545239    | 607.276257       | 7  |
| 5  | 605.242181  | 303.124729      |                |                  | 587.231616     | 294.119446       | V    | <b>1116.528861</b> | 558.768069      | 1099.502312        | 550.254794       | 1098.518296    | 549.762786       | 6  |
| 6  | 719.285108  | 360.146192      | 702.258559     | 351.632918       | 701.274543     | 351.140910       | N    | <b>1017.460447</b> | 509.233861      | <b>1000.433898</b> | 500.720587       | 999.449882     | 500.228579       | 5  |
| 7  | 848.327701  | 424.667489      | 831.301152     | 416.154214       | 830.317136     | 415.662206       | E    | <b>903.417520</b>  | 452.212398      | 886.390971         | 443.699123       | 885.406955     | 443.207115       | 4  |
| 8  | 1008.358350 | 504.682813      | 991.331801     | 496.169539       | 990.347785     | 495.677531       | C    | <b>774.374927</b>  | 387.691102      | 757.348378         | 379.177827       |                |                  | 3  |
| 9  | 1447.583676 | 724.295476      | 1430.557127    | 715.782202       | 1429.573111    | 715.290193       | Q    | <b>614.344278</b>  | 307.675777      | 597.317729         | 299.162502       |                |                  | 2  |
| 10 |             |                 |                |                  |                |                  | R    | 175.118952         | 88.063114       | 158.092403         | 79.549839        |                |                  | 1  |

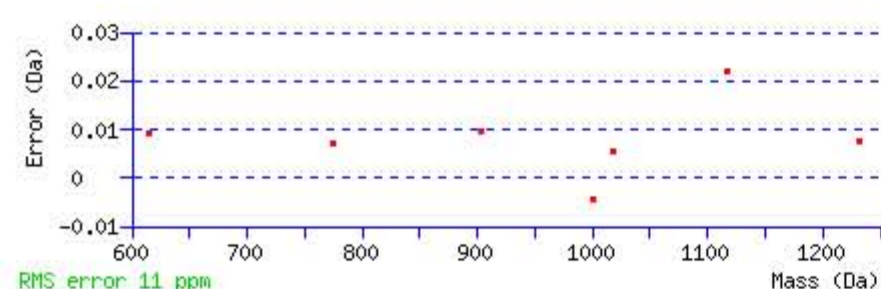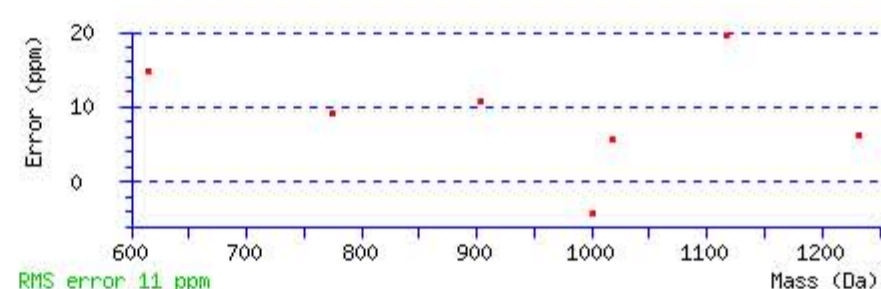

NCBI BLAST search of **MCVDVNECQR**

(Parameters: blastp, nr protein database, expect=20000, no filter, PAM30)

Other BLAST [web gateways](#)

All matches to this query

| Score | Mr(calc):   | Delta    | Sequence                   |
|-------|-------------|----------|----------------------------|
| 32.6  | 1620.688080 | 0.008622 | <a href="#">MCVDVNECQR</a> |

Mascot: <http://www.matrixscience.com/>



# MASCOT Search Results

## Peptide View

MS/MS Fragmentation of **SQETGDLVGGGLQETDK**

Found in **FBLN1\_HUMAN**, Fibulin-1 OS=Homo sapiens GN=FBLN1 PE=1 SV=4

Match to Query 53170: 2102.014448 from(1052.014500,2+) rtinseconds(2020) index(42349)

Title: Locus:1.1.1.3152.21 File:"2013-07-02 CLN FXIII 180 min 1st F 3.wiff"

Data file C:\Program Files (x86)\Matrix Science\Mascot Daemon\mgf\7 FXIII 180 min 1st\mascot\_daemon\_merge.mgf

Click mouse within plot area to zoom in by factor of two about that point

Or, Plot from  to  Da

Label all possible matches  Label matches used for scoring

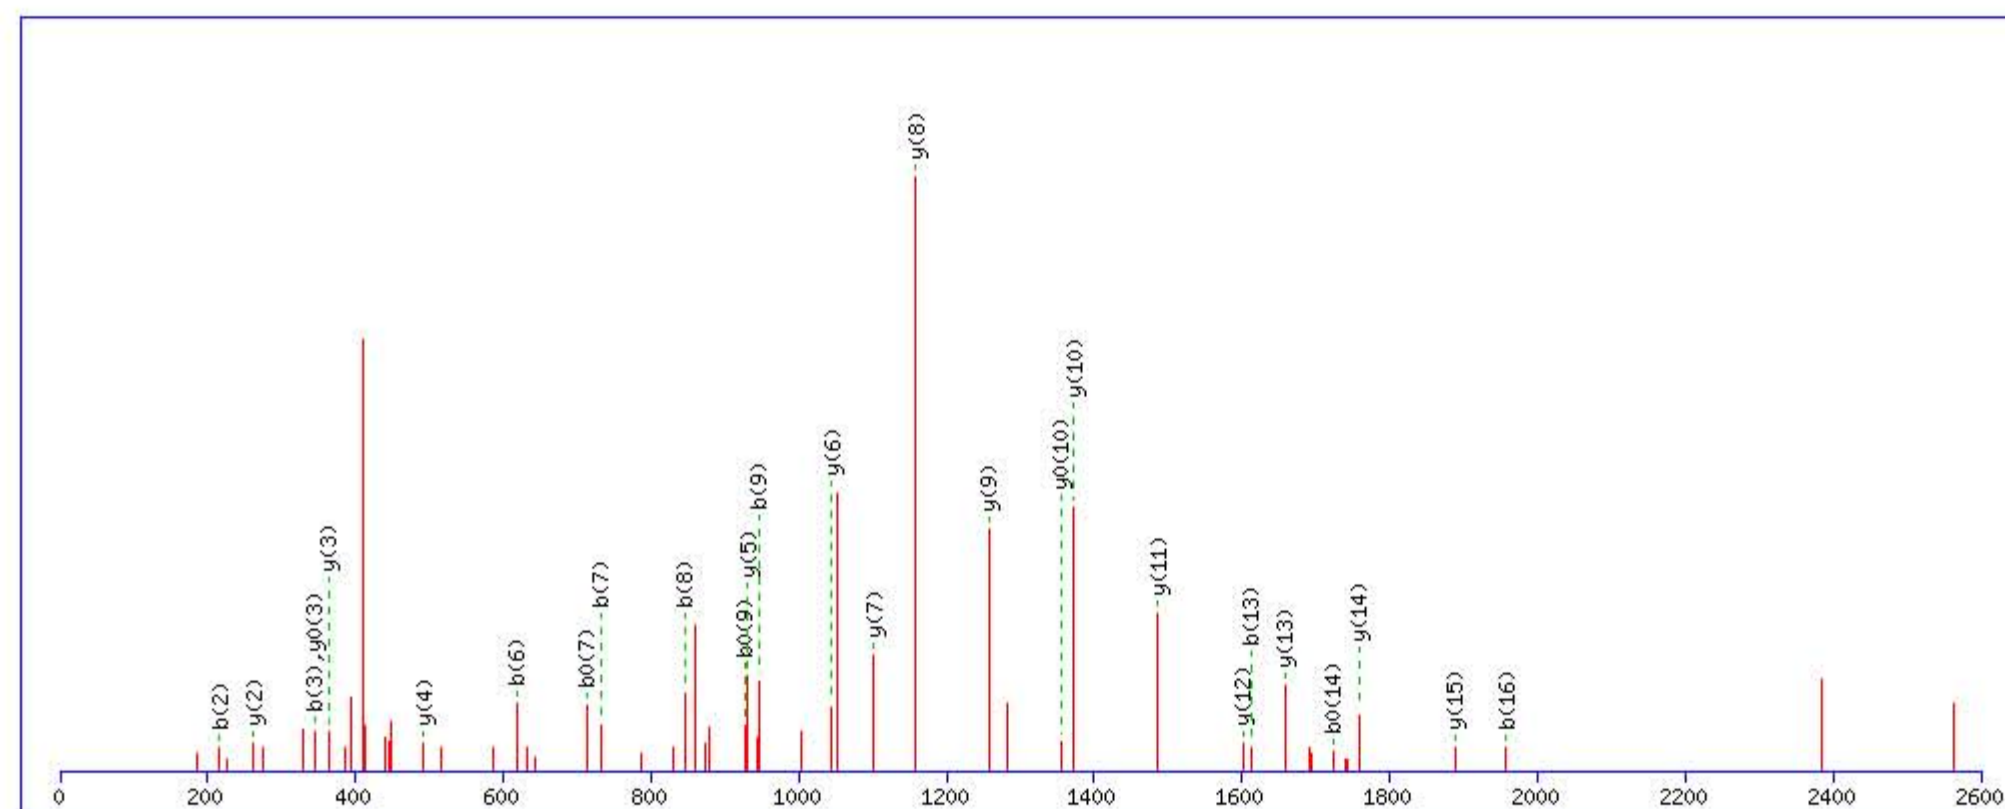

Monoisotopic mass of neutral peptide Mr(calc): 2101.983780

Fixed modifications: Carbamidomethyl (C) (apply to specified residues or termini only)

Variable modifications:

Q13 : Biotin:Thermo-21345 (Q)

Ions Score: 111 Expect: 4e-011

Matches : 27/188 fragment ions using 41 most intense peaks [\(help\)](#)

| #  | b                  | b <sup>++</sup> | b <sup>+</sup> | b <sup>+++</sup> | b <sup>0</sup>     | b <sup>0++</sup> | Seq. | y                  | y <sup>++</sup> | y <sup>+</sup> | y <sup>+++</sup> | y <sup>0</sup>     | y <sup>0++</sup> | #  |
|----|--------------------|-----------------|----------------|------------------|--------------------|------------------|------|--------------------|-----------------|----------------|------------------|--------------------|------------------|----|
| 1  | 88.039304          | 44.523290       |                |                  | 70.028739          | 35.518008        | S    |                    |                 |                |                  |                    |                  | 17 |
| 2  | <b>216.097882</b>  | 108.552579      | 199.071333     | 100.039305       | 198.087317         | 99.547296        | Q    | 2015.959015        | 1008.483146     | 1998.932466    | 999.969871       | 1997.948450        | 999.477863       | 16 |
| 3  | <b>345.140475</b>  | 173.073875      | 328.113926     | 164.560601       | 327.129910         | 164.068593       | E    | <b>1887.900437</b> | 944.453857      | 1870.873888    | 935.940582       | 1869.889872        | 935.448574       | 15 |
| 4  | 446.188154         | 223.597715      | 429.161605     | 215.084441       | 428.177589         | 214.592433       | T    | <b>1758.857844</b> | 879.932560      | 1741.831295    | 871.419286       | 1740.847279        | 870.927278       | 14 |
| 5  | 503.209618         | 252.108447      | 486.183069     | 243.595172       | 485.199053         | 243.103164       | G    | <b>1657.810165</b> | 829.408721      | 1640.783616    | 820.895446       | 1639.799600        | 820.403438       | 13 |
| 6  | <b>618.236561</b>  | 309.621919      | 601.210012     | 301.108644       | 600.225996         | 300.616636       | D    | <b>1600.788701</b> | 800.897989      | 1583.762152    | 792.384714       | 1582.778136        | 791.892706       | 12 |
| 7  | <b>731.320625</b>  | 366.163951      | 714.294076     | 357.650676       | <b>713.310060</b>  | 357.158668       | L    | <b>1485.761758</b> | 743.384517      | 1468.735209    | 734.871243       | 1467.751193        | 734.379235       | 11 |
| 8  | <b>846.347568</b>  | 423.677422      | 829.321019     | 415.164148       | 828.337003         | 414.672140       | D    | <b>1372.677694</b> | 686.842485      | 1355.651145    | 678.329211       | <b>1354.667129</b> | 677.837203       | 10 |
| 9  | <b>945.415982</b>  | 473.211629      | 928.389433     | 464.698354       | <b>927.405417</b>  | 464.206347       | V    | <b>1257.650751</b> | 629.329014      | 1240.624202    | 620.815739       | 1239.640186        | 620.323731       | 9  |
| 10 | 1002.437446        | 501.722361      | 985.410897     | 493.209087       | 984.426881         | 492.717079       | G    | <b>1158.582337</b> | 579.794807      | 1141.555788    | 571.281532       | 1140.571772        | 570.789524       | 8  |
| 11 | 1059.458910        | 530.233093      | 1042.432361    | 521.719819       | 1041.448345        | 521.227811       | G    | <b>1101.560873</b> | 551.284075      | 1084.534324    | 542.770800       | 1083.550308        | 542.278792       | 7  |
| 12 | 1172.542974        | 586.775125      | 1155.516425    | 578.261851       | 1154.532409        | 577.769842       | L    | <b>1044.539409</b> | 522.773343      | 1027.512860    | 514.260068       | 1026.528844        | 513.768060       | 6  |
| 13 | <b>1611.768300</b> | 806.387788      | 1594.741751    | 797.874514       | 1593.757735        | 797.382505       | Q    | <b>931.455345</b>  | 466.231311      | 914.428796     | 457.718036       | 913.444780         | 457.226028       | 5  |
| 14 | 1740.810893        | 870.909085      | 1723.784344    | 862.395810       | <b>1722.800328</b> | 861.903802       | E    | <b>492.230019</b>  | 246.618648      | 475.203470     | 238.105373       | 474.219454         | 237.613365       | 4  |
| 15 | 1841.858572        | 921.432924      | 1824.832023    | 912.919650       | 1823.848007        | 912.427642       | T    | <b>363.187426</b>  | 182.097351      | 346.160877     | 173.584077       | <b>345.176861</b>  | 173.092069       | 3  |
| 16 | <b>1956.885515</b> | 978.946396      | 1939.858966    | 970.433121       | 1938.874950        | 969.941113       | D    | <b>262.139747</b>  | 131.573512      | 245.113198     | 123.060237       | 244.129182         | 122.568229       | 2  |
| 17 |                    |                 |                |                  |                    |                  | K    | 147.112804         | 74.060040       | 130.086255     | 65.546765        |                    |                  | 1  |

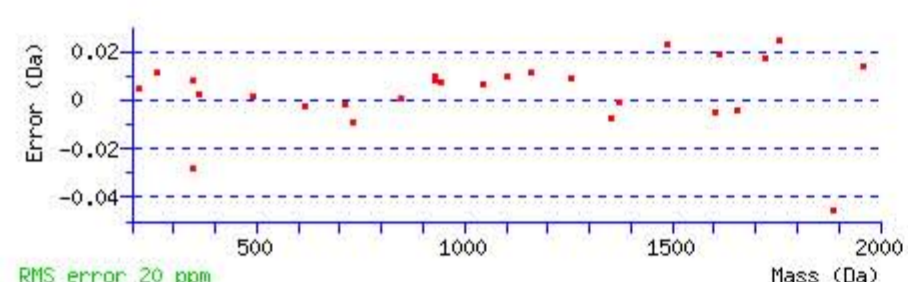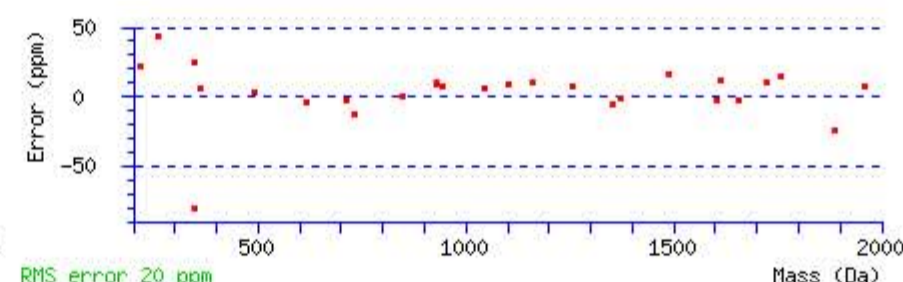

NCBI BLAST search of **SQETGDLVGGGLQETDK**

(Parameters: blastp, nr protein database, expect=20000, no filter, PAM30)

Other BLAST [web gateways](#)

All matches to this query

| Score | Mr(calc):   | Delta    | Sequence                          |
|-------|-------------|----------|-----------------------------------|
| 111.0 | 2101.983780 | 0.030668 | <a href="#">SQETGDLVGGGLQETDK</a> |
| 0.1   | 2101.988480 | 0.025968 | <a href="#">MQQVGGNSQTESSLPGR</a> |



# MASCOT Search Results

## Peptide View

MS/MS Fragmentation of **LLGEVDHYQLALGK**

Found in **FCN3\_HUMAN**, Ficolin-3 OS=Homo sapiens GN=FCN3 PE=1 SV=2

Match to Query 46900: 1866.025448 from(934.020000,2+) rtinseconds(2175) index(25962)

Title: Locus:1.1.1.2899.15 File:"2013-07-02 CLN FXIII 180 min 1st F 2.wiff"

Data file C:\Program Files (x86)\Matrix Science\Mascot Daemon\mgf\7 FXIII 180 min 1st\mascot\_daemon\_merge.mgf

Click mouse within plot area to zoom in by factor of two about that point

Or, Plot from  to  Da

Label all possible matches  Label matches used for scoring

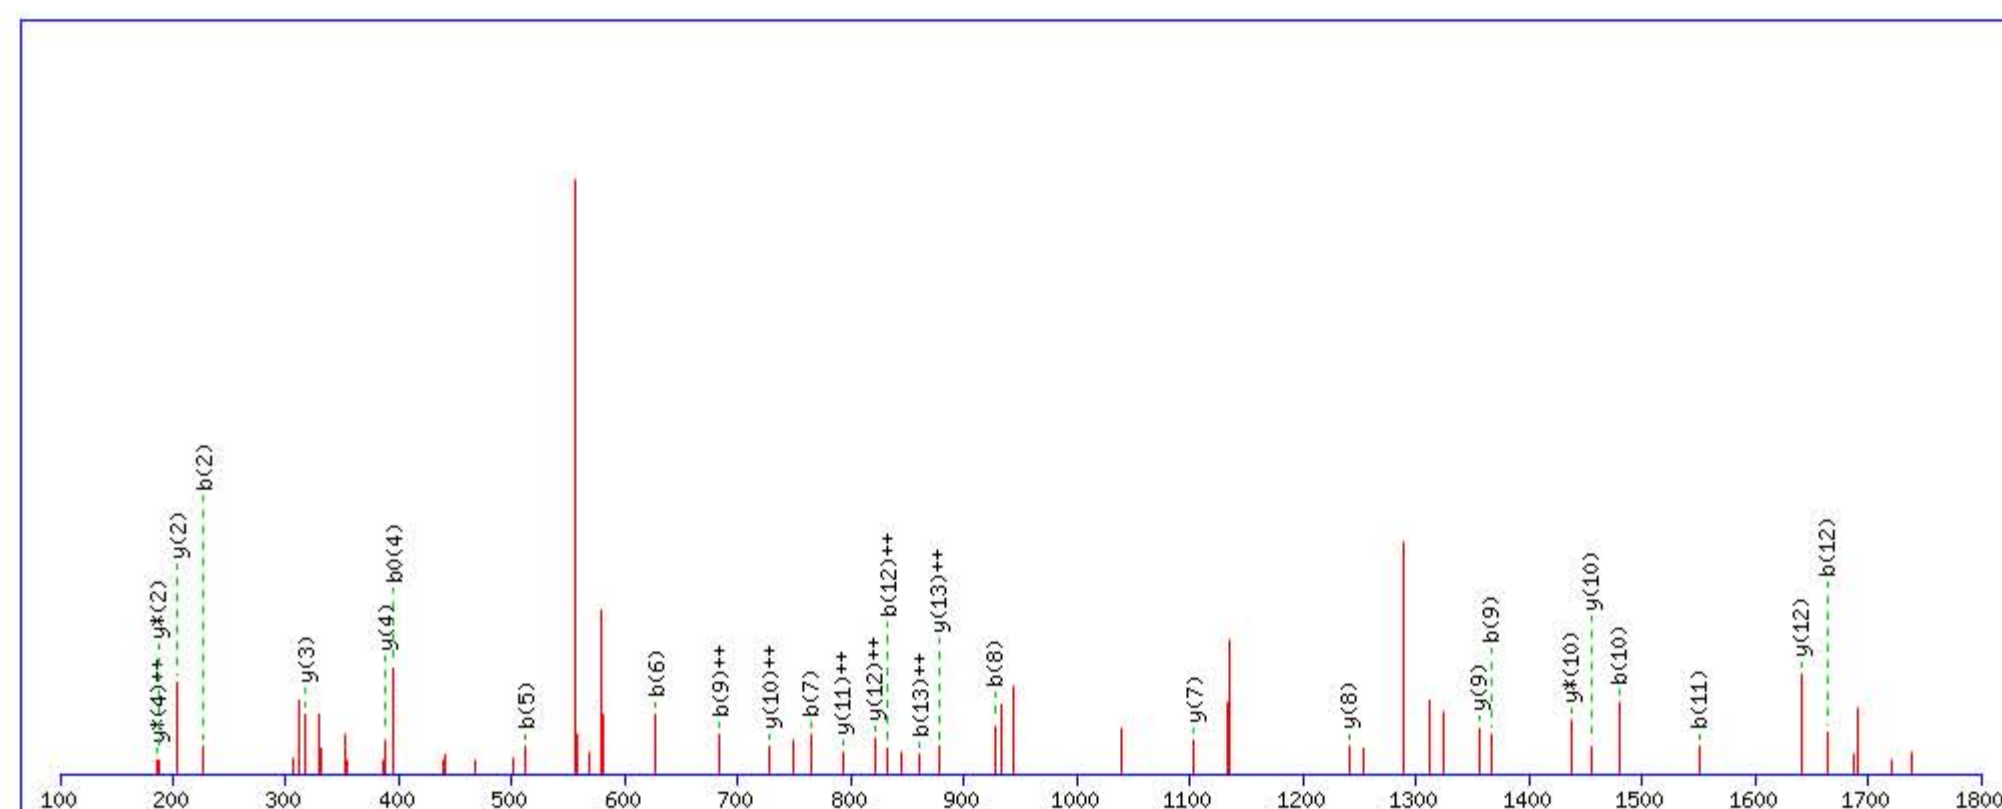

Monoisotopic mass of neutral peptide Mr(calc): 1866.007324

Fixed modifications: Carbamidomethyl (C) (apply to specified residues or termini only)

Variable modifications:

Q9 : Biotin:Thermo-21345 (Q)

Ions Score: 36 Expect: 0.004

Matches : 28/118 fragment ions using 64 most intense peaks [\(help\)](#)

| #  | b                  | b <sup>++</sup>   | b <sup>*</sup> | b <sup>*++</sup> | b <sup>0</sup>    | b <sup>0++</sup> | Seq. | y                  | y <sup>++</sup>   | y <sup>*</sup>     | y <sup>*++</sup>  | y <sup>0</sup> | y <sup>0++</sup> | #  |
|----|--------------------|-------------------|----------------|------------------|-------------------|------------------|------|--------------------|-------------------|--------------------|-------------------|----------------|------------------|----|
| 1  | 114.091340         | 57.549308         |                |                  |                   |                  | L    |                    |                   |                    |                   |                |                  | 14 |
| 2  | <b>227.175404</b>  | 114.091340        |                |                  |                   |                  | L    | 1753.930555        | <b>877.468916</b> | 1736.904006        | 868.955641        | 1735.919990    | 868.463633       | 13 |
| 3  | 284.196868         | 142.602072        |                |                  |                   |                  | G    | <b>1640.846491</b> | <b>820.926884</b> | 1623.819942        | 812.413609        | 1622.835926    | 811.921601       | 12 |
| 4  | 413.239461         | 207.123369        |                |                  | <b>395.228896</b> | 198.118086       | E    | 1583.825027        | <b>792.416152</b> | 1566.798478        | 783.902877        | 1565.814462    | 783.410869       | 11 |
| 5  | <b>512.307875</b>  | 256.657576        |                |                  | 494.297310        | 247.652293       | V    | <b>1454.782434</b> | <b>727.894855</b> | <b>1437.755885</b> | 719.381581        | 1436.771869    | 718.889572       | 10 |
| 6  | <b>627.334818</b>  | 314.171047        |                |                  | 609.324253        | 305.165765       | D    | <b>1355.714020</b> | 678.360648        | 1338.687471        | 669.847374        | 1337.703455    | 669.355366       | 9  |
| 7  | <b>764.393730</b>  | 382.700503        |                |                  | 746.383165        | 373.695221       | H    | <b>1240.687077</b> | 620.847177        | 1223.660528        | 612.333902        |                |                  | 8  |
| 8  | <b>927.457059</b>  | 464.232168        |                |                  | 909.446494        | 455.226885       | Y    | <b>1103.628165</b> | 552.317721        | 1086.601616        | 543.804446        |                |                  | 7  |
| 9  | <b>1366.682385</b> | <b>683.844831</b> | 1349.655836    | 675.331556       | 1348.671820       | 674.839548       | Q    | 940.564836         | 470.786056        | 923.538287         | 462.272782        |                |                  | 6  |
| 10 | <b>1479.766449</b> | 740.386863        | 1462.739900    | 731.873588       | 1461.755884       | 731.381580       | L    | 501.339510         | 251.173393        | 484.312961         | 242.660118        |                |                  | 5  |
| 11 | <b>1550.803563</b> | 775.905420        | 1533.777014    | 767.392145       | 1532.792998       | 766.900137       | A    | <b>388.255446</b>  | 194.631361        | 371.228897         | <b>186.118086</b> |                |                  | 4  |
| 12 | <b>1663.887627</b> | <b>832.447452</b> | 1646.861078    | 823.934177       | 1645.877062       | 823.442169       | L    | <b>317.218332</b>  | 159.112804        | 300.191783         | 150.599529        |                |                  | 3  |
| 13 | 1720.909091        | <b>860.958184</b> | 1703.882542    | 852.444909       | 1702.898526       | 851.952901       | G    | <b>204.134268</b>  | 102.570772        | <b>187.107719</b>  | 94.057497         |                |                  | 2  |
| 14 |                    |                   |                |                  |                   |                  | K    | 147.112804         | 74.060040         | 130.086255         | 65.546765         |                |                  | 1  |

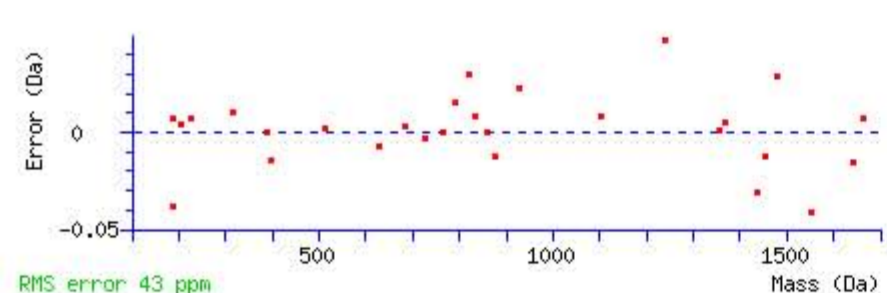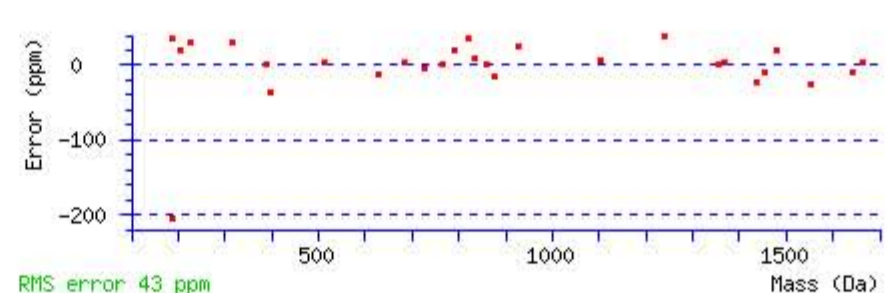

NCBI BLAST search of [LLGEVDHYQLALGK](#)

(Parameters: blastp, nr protein database, expect=20000, no filter, PAM30)

Other BLAST [web gateways](#)

### All matches to this query

| Score | Mr(calc):   | Delta    | Sequence                       |
|-------|-------------|----------|--------------------------------|
| 36.2  | 1866.007324 | 0.018124 | <a href="#">LLGEVDHYQLALGK</a> |

Mascot: <http://www.matrixscience.com/>

# MASCOT Search Results

## Peptide View

MS/MS Fragmentation of **SQLVYQSR**

Found in **LG3BP\_HUMAN**, Galectin-3-binding protein OS=Homo sapiens GN=LGALS3BP PE=1 SV=1

Match to Query 26728: 1290.675348 from(646.344950,2+) rtinseconds(1682) index(39943)

Title: Locus:1.1.1.3035.8 File:"2013-07-02 CLN FXIII 180 min 1st F 3.wiff"

Data file C:\Program Files (x86)\Matrix Science\Mascot Daemon\mgf\7 FXIII 180 min 1st\mascot\_daemon\_merge.mgf

Click mouse within plot area to zoom in by factor of two about that point

Or, Plot from  to  Da

Label all possible matches  Label matches used for scoring

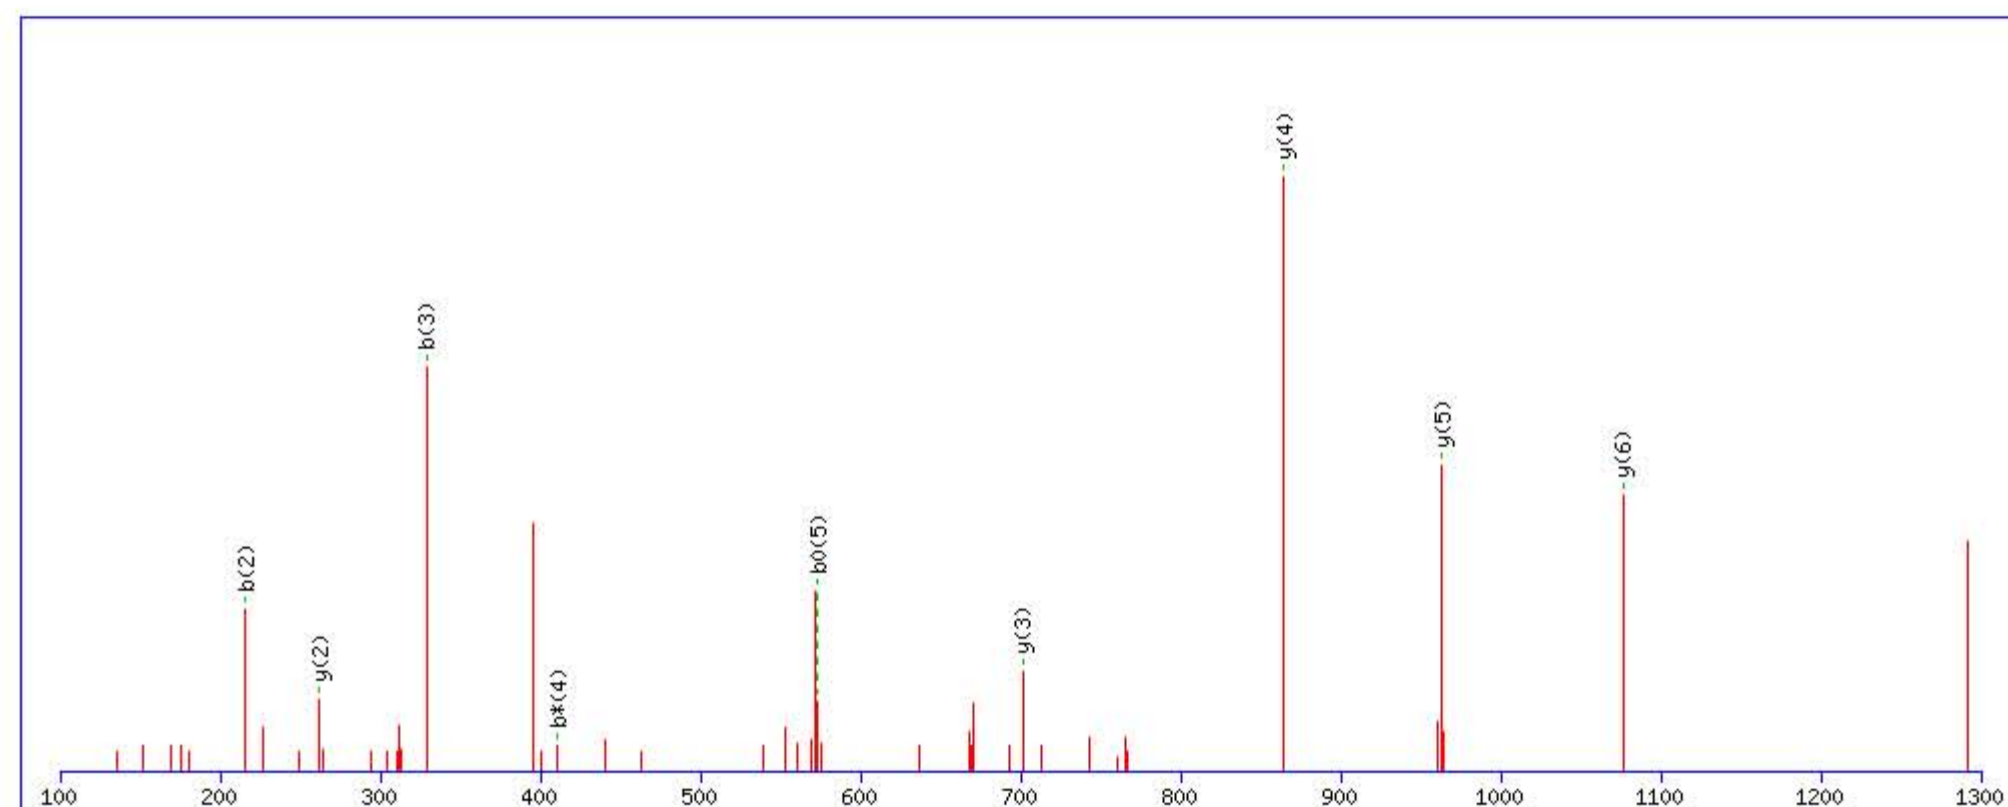

Monoisotopic mass of neutral peptide Mr(calc): 1290.675430

Fixed modifications: Carbamidomethyl (C) (apply to specified residues or termini only)

Variable modifications:

Q6 : Biotin:Thermo-21345 (Q)

Ions Score: 27 Expect: 0.0073

Matches : 9/80 fragment ions using 18 most intense peaks [\(help\)](#)

| # | b                 | b <sup>++</sup> | b <sup>*</sup>    | b <sup>***</sup> | b <sup>0</sup>    | b <sup>0++</sup> | Seq. | y                  | y <sup>++</sup> | y <sup>*</sup> | y <sup>***</sup> | y <sup>0</sup> | y <sup>0++</sup> | # |
|---|-------------------|-----------------|-------------------|------------------|-------------------|------------------|------|--------------------|-----------------|----------------|------------------|----------------|------------------|---|
| 1 | 88.039304         | 44.523290       |                   |                  | 70.028739         | 35.518008        | S    |                    |                 |                |                  |                |                  | 8 |
| 2 | <b>216.097882</b> | 108.552579      | 199.071333        | 100.039305       | 198.087317        | 99.547296        | Q    | 1204.650691        | 602.828984      | 1187.624142    | 594.315709       | 1186.640126    | 593.823701       | 7 |
| 3 | <b>329.181946</b> | 165.094611      | 312.155397        | 156.581336       | 311.171381        | 156.089328       | L    | <b>1076.592113</b> | 538.799695      | 1059.565564    | 530.286420       | 1058.581548    | 529.794412       | 6 |
| 4 | 428.250360        | 214.628818      | <b>411.223811</b> | 206.115544       | 410.239795        | 205.623536       | V    | <b>963.508049</b>  | 482.257663      | 946.481500     | 473.744388       | 945.497484     | 473.252380       | 5 |
| 5 | 591.313689        | 296.160483      | 574.287140        | 287.647208       | <b>573.303124</b> | 287.155200       | Y    | <b>864.439635</b>  | 432.723456      | 847.413086     | 424.210181       | 846.429070     | 423.718173       | 4 |
| 6 | 1030.539015       | 515.773146      | 1013.512466       | 507.259871       | 1012.528450       | 506.767863       | Q    | <b>701.376306</b>  | 351.191791      | 684.349757     | 342.678517       | 683.365741     | 342.186509       | 3 |
| 7 | 1117.571043       | 559.289160      | 1100.544494       | 550.775885       | 1099.560478       | 550.283877       | S    | <b>262.150980</b>  | 131.579128      | 245.124431     | 123.065854       | 244.140415     | 122.573846       | 2 |
| 8 |                   |                 |                   |                  |                   |                  | R    | 175.118952         | 88.063114       | 158.092403     | 79.549839        |                |                  | 1 |

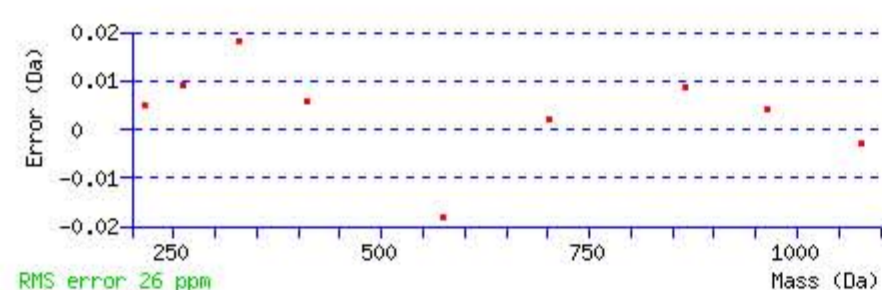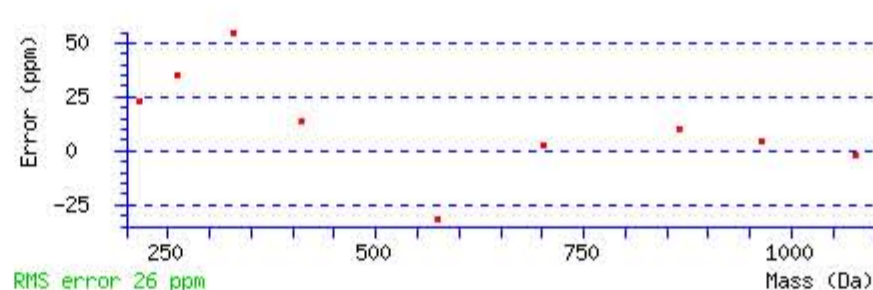

NCBI BLAST search of [SQLVYQSR](#)

(Parameters: blastp, nr protein database, expect=20000, no filter, PAM30)

Other BLAST [web gateways](#)

## All matches to this query

| Score | Mr(calc):   | Delta     | Sequence                     |
|-------|-------------|-----------|------------------------------|
| 26.8  | 1290.675430 | -0.000082 | <a href="#">SQLVYQSR</a>     |
| 4.0   | 1290.693176 | -0.017828 | <a href="#">EAVKVAIDAGYR</a> |
| 3.9   | 1290.685303 | -0.009955 | <a href="#">SQISELNLLMK</a>  |

Mascot: <http://www.matrixscience.com/>

# MASCOT SEARCH RESULTS

## Peptide View

MS/MS Fragmentation of **YSSDYFQAPSDYR**

Found in **LG3BP\_HUMAN**, Galectin-3-binding protein OS=Homo sapiens GN=LGALS3BP PE=1 SV=1

Match to Query 47714: 1908.858972 from(637.293600,3+) rtinseconds(2076) index(42755)

Title: Locus:1.1.1.3172.11 File:"2013-07-02 CLN FXIII 180 min 1st F 3.wiff"

Data file C:\Program Files (x86)\Matrix Science\Mascot Daemon\mgf\7 FXIII 180 min 1st\mascot\_daemon\_merge.mgf

Click mouse within plot area to zoom in by factor of two about that point

Or, Plot from  to  Da

Label all possible matches  Label matches used for scoring

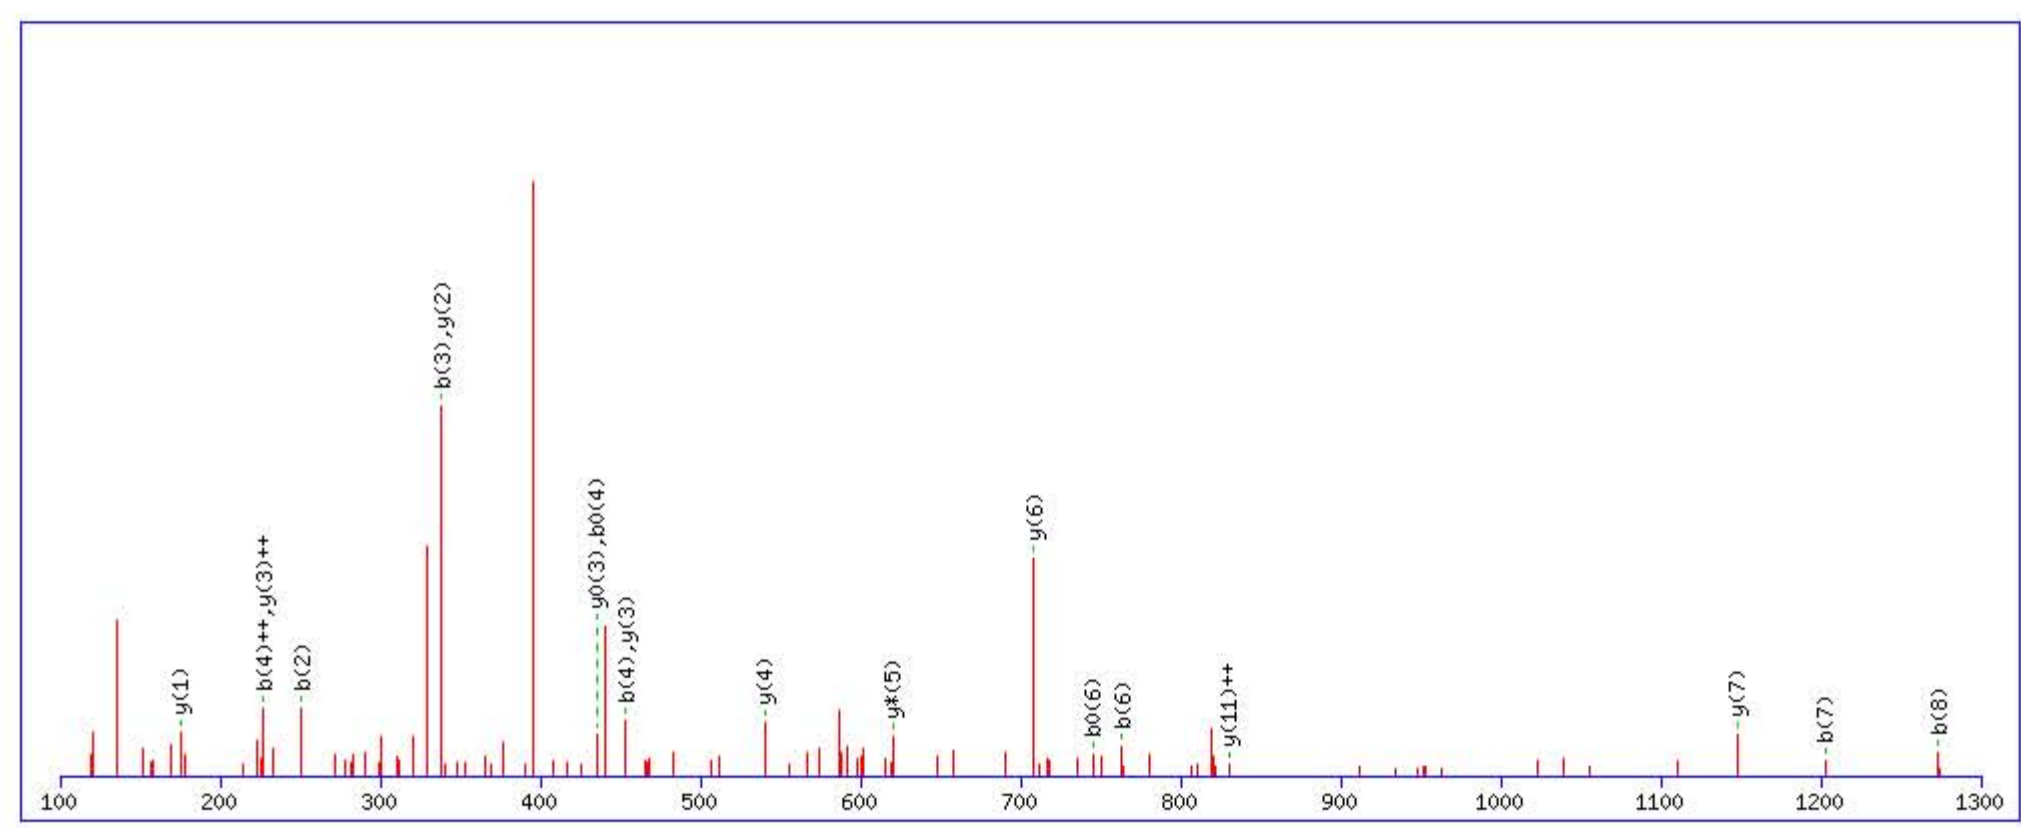

Monoisotopic mass of neutral peptide Mr(calc): 1908.835236

Fixed modifications: Carbamidomethyl (C) (apply to specified residues or termini only)

Variable modifications:

Q7 : Biotin:Thermo-21345 (Q)

Ions Score: 26 Expect: 0.022

Matches : 19/126 fragment ions using 34 most intense peaks [\(help\)](#)

| #  | b                  | b <sup>++</sup>   | b <sup>*</sup> | b <sup>*++</sup> | b <sup>0</sup>    | b <sup>0++</sup> | Seq. | y                  | y <sup>++</sup>   | y <sup>*</sup>    | y <sup>*++</sup> | y <sup>0</sup>    | y <sup>0++</sup> | #  |
|----|--------------------|-------------------|----------------|------------------|-------------------|------------------|------|--------------------|-------------------|-------------------|------------------|-------------------|------------------|----|
| 1  | 164.070605         | 82.538940         |                |                  |                   |                  | Y    |                    |                   |                   |                  |                   |                  | 13 |
| 2  | <b>251.102633</b>  | 126.054954        |                |                  | 233.092068        | 117.049672       | S    | 1746.779198        | 873.893237        | 1729.752649       | 865.379963       | 1728.768633       | 864.887955       | 12 |
| 3  | <b>338.134661</b>  | 169.570968        |                |                  | 320.124096        | 160.565686       | S    | 1659.747170        | <b>830.377223</b> | 1642.720621       | 821.863949       | 1641.736605       | 821.371941       | 11 |
| 4  | <b>453.161604</b>  | <b>227.084440</b> |                |                  | <b>435.151039</b> | 218.079158       | D    | 1572.715142        | 786.861209        | 1555.688593       | 778.347935       | 1554.704577       | 777.855927       | 10 |
| 5  | 616.224933         | 308.616105        |                |                  | 598.214368        | 299.610822       | Y    | 1457.688199        | 729.347738        | 1440.661650       | 720.834463       | 1439.677634       | 720.342455       | 9  |
| 6  | <b>763.293347</b>  | 382.150312        |                |                  | <b>745.282782</b> | 373.145029       | F    | 1294.624870        | 647.816073        | 1277.598321       | 639.302799       | 1276.614305       | 638.810791       | 8  |
| 7  | <b>1202.518673</b> | 601.762975        | 1185.492124    | 593.249700       | 1184.508108       | 592.757692       | Q    | <b>1147.556456</b> | 574.281866        | 1130.529907       | 565.768592       | 1129.545891       | 565.276584       | 7  |
| 8  | <b>1273.555787</b> | 637.281532        | 1256.529238    | 628.768257       | 1255.545222       | 628.276249       | A    | <b>708.331130</b>  | 354.669203        | 691.304581        | 346.155929       | 690.320565        | 345.663921       | 6  |
| 9  | 1370.608551        | 685.807914        | 1353.582002    | 677.294639       | 1352.597986       | 676.802631       | P    | 637.294016         | 319.150646        | <b>620.267467</b> | 310.637372       | 619.283451        | 310.145364       | 5  |
| 10 | 1457.640579        | 729.323928        | 1440.614030    | 720.810653       | 1439.630014       | 720.318645       | S    | <b>540.241252</b>  | 270.624264        | 523.214703        | 262.110990       | 522.230687        | 261.618982       | 4  |
| 11 | 1572.667522        | 786.837399        | 1555.640973    | 778.324125       | 1554.656957       | 777.832117       | D    | <b>453.209224</b>  | <b>227.108250</b> | 436.182675        | 218.594976       | <b>435.198659</b> | 218.102968       | 3  |
| 12 | 1735.730851        | 868.369064        | 1718.704302    | 859.855789       | 1717.720286       | 859.363781       | Y    | <b>338.182281</b>  | 169.594778        | 321.155732        | 161.081504       |                   |                  | 2  |
| 13 |                    |                   |                |                  |                   |                  | R    | <b>175.118952</b>  | 88.063114         | 158.092403        | 79.549839        |                   |                  | 1  |

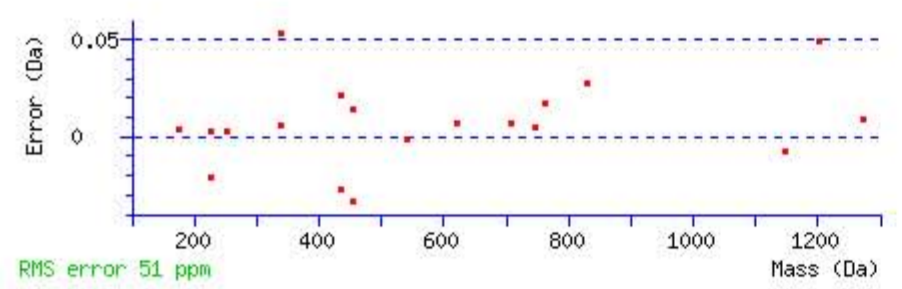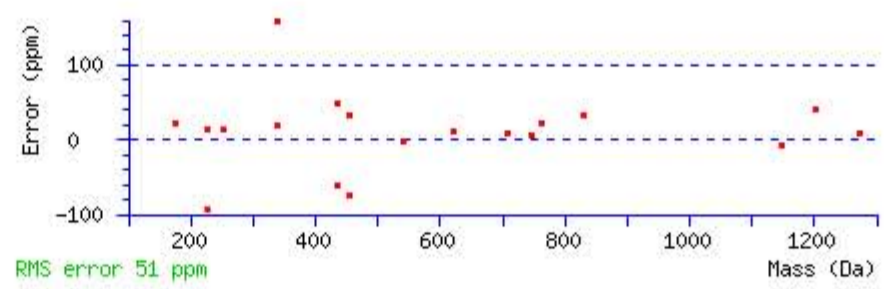

NCBI BLAST search of [YSSDYFQAPSDYR](#)

(Parameters: blastp, nr protein database, expect=20000, no filter, PAM30)

Other BLAST [web gateways](#)

All matches to this query

| Score | Mr(calc):   | Delta    | Sequence                      |
|-------|-------------|----------|-------------------------------|
| 26.2  | 1908.835236 | 0.023736 | <a href="#">YSSDYFQAPSDYR</a> |

# MASCOT Search Results

## Peptide View

MS/MS Fragmentation of **GASQAGAPQGR**

Found in **GELS\_HUMAN**, Gelsolin OS=Homo sapiens GN=GSN PE=1 SV=1

Match to Query 27154: 1309.662432 from(437.561420,3+) rtinseconds(1244) index(1558)

Title: Locus:1.1.1.2687.13 File:"2013-07-02 CLN FXIII 180 min 1st F 1.wiff"

Data file C:\Program Files (x86)\Matrix Science\Mascot Daemon\mgf\7 FXIII 180 min 1st\mascot\_daemon\_merge.mgf

Click mouse within plot area to zoom in by factor of two about that point

Or, Plot from  to  Da

Label all possible matches  Label matches used for scoring

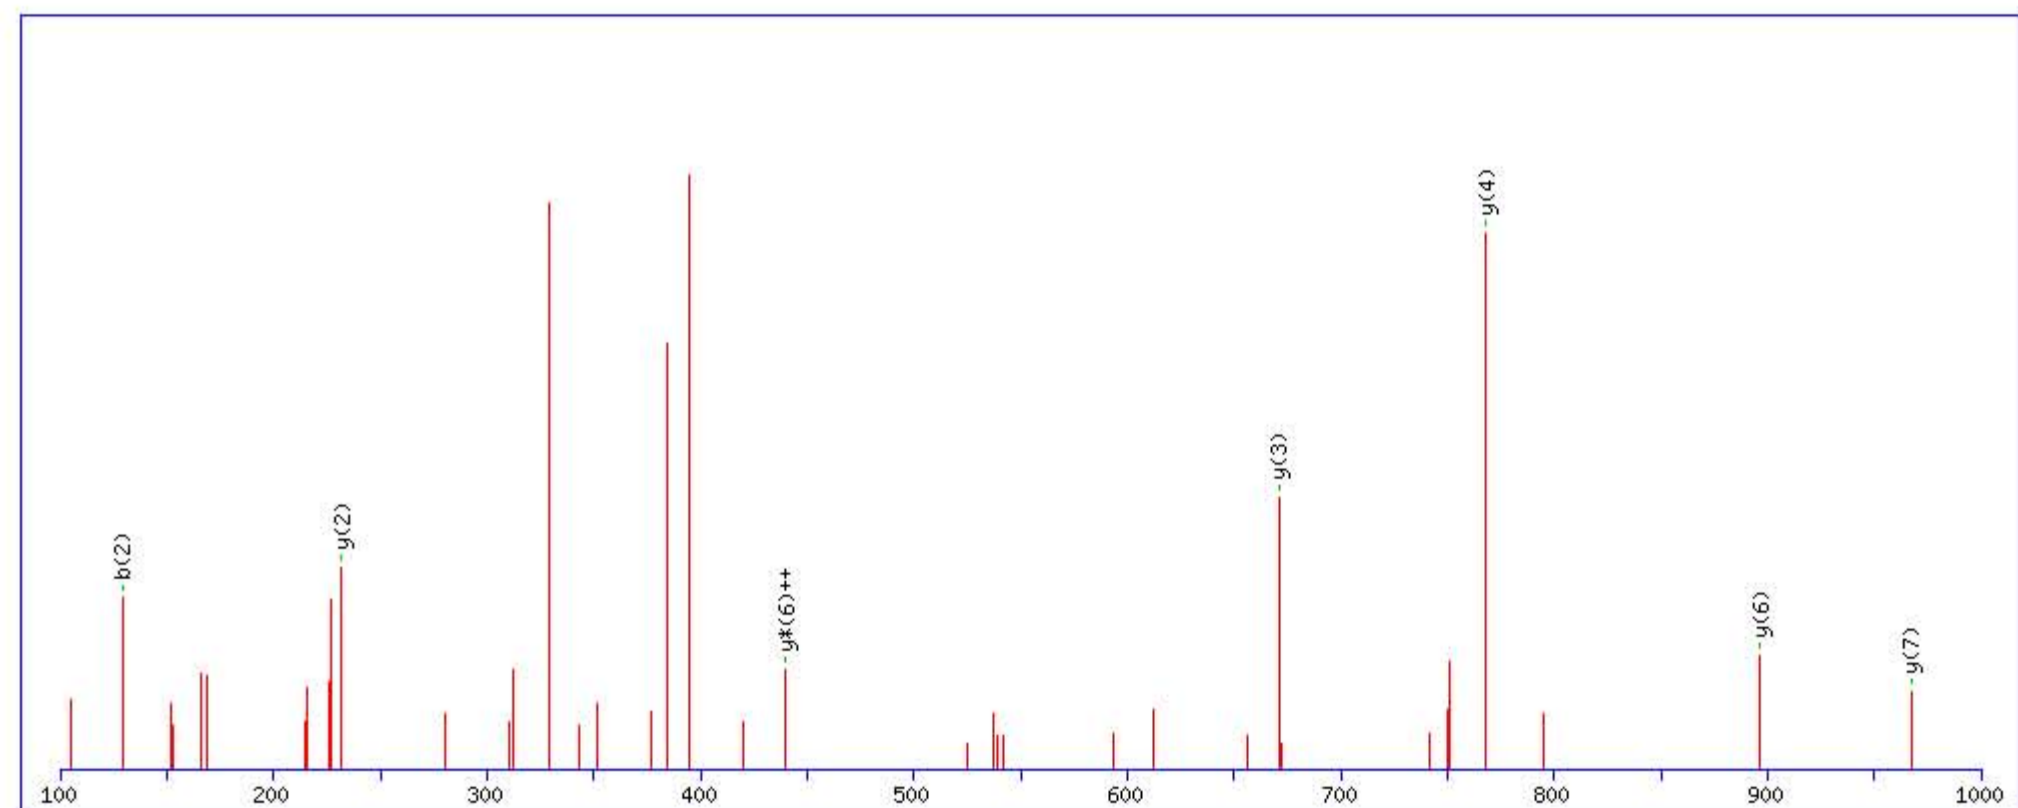

Monoisotopic mass of neutral peptide Mr(calc): 1309.656097

Fixed modifications: Carbamidomethyl (C) (apply to specified residues or termini only)

Variable modifications:

Q9 : Biotin:Thermo-21345 (Q)

Ions Score: 37 Expect: 0.0038

Matches : 7/94 fragment ions using 9 most intense peaks [\(help\)](#)

| #  | b                 | b <sup>++</sup> | b <sup>*</sup> | b <sup>*++</sup> | b <sup>0</sup> | b <sup>0++</sup> | Seq. | y                 | y <sup>++</sup> | y <sup>*</sup> | y <sup>*++</sup>  | y <sup>0</sup> | y <sup>0++</sup> | #  |
|----|-------------------|-----------------|----------------|------------------|----------------|------------------|------|-------------------|-----------------|----------------|-------------------|----------------|------------------|----|
| 1  | 58.028740         | 29.518008       |                |                  |                |                  | G    |                   |                 |                |                   |                |                  | 11 |
| 2  | <b>129.065854</b> | 65.036565       |                |                  |                |                  | A    | 1253.641918       | 627.324597      | 1236.615369    | 618.811323        | 1235.631353    | 618.319315       | 10 |
| 3  | 216.097882        | 108.552579      |                |                  | 198.087317     | 99.547296        | S    | 1182.604804       | 591.806040      | 1165.578255    | 583.292765        | 1164.594239    | 582.800757       | 9  |
| 4  | 344.156460        | 172.581868      | 327.129911     | 164.068593       | 326.145895     | 163.576585       | Q    | 1095.572776       | 548.290026      | 1078.546227    | 539.776752        |                |                  | 8  |
| 5  | 415.193574        | 208.100425      | 398.167025     | 199.587150       | 397.183009     | 199.095142       | A    | <b>967.514198</b> | 484.260737      | 950.487649     | 475.747462        |                |                  | 7  |
| 6  | 472.215038        | 236.611157      | 455.188489     | 228.097882       | 454.204473     | 227.605874       | G    | <b>896.477084</b> | 448.742180      | 879.450535     | <b>440.228906</b> |                |                  | 6  |
| 7  | 543.252152        | 272.129714      | 526.225603     | 263.616440       | 525.241587     | 263.124432       | A    | 839.455620        | 420.231448      | 822.429071     | 411.718173        |                |                  | 5  |
| 8  | 640.304916        | 320.656096      | 623.278367     | 312.142822       | 622.294351     | 311.650814       | P    | <b>768.418506</b> | 384.712891      | 751.391957     | 376.199616        |                |                  | 4  |
| 9  | 1079.530242       | 540.268759      | 1062.503693    | 531.755485       | 1061.519677    | 531.263477       | Q    | <b>671.365742</b> | 336.186509      | 654.339193     | 327.673234        |                |                  | 3  |
| 10 | 1136.551706       | 568.779491      | 1119.525157    | 560.266217       | 1118.541141    | 559.774208       | G    | <b>232.140416</b> | 116.573846      | 215.113867     | 108.060571        |                |                  | 2  |
| 11 |                   |                 |                |                  |                |                  | R    | 175.118952        | 88.063114       | 158.092403     | 79.549839         |                |                  | 1  |

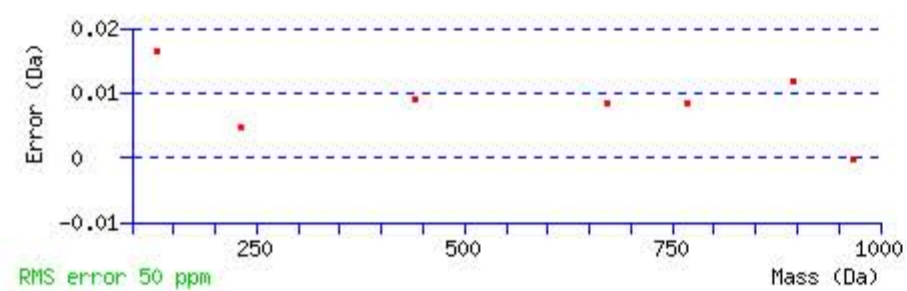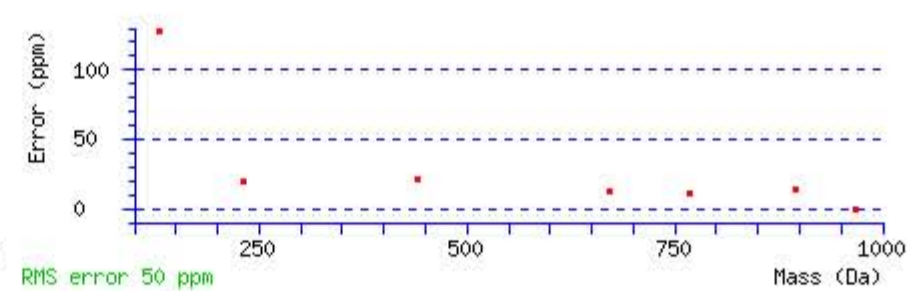

NCBI BLAST search of [GASQAGAPQGR](#)

(Parameters: blastp, nr protein database, expect=20000, no filter, PAM30)

Other BLAST [web gateways](#)

All matches to this query

| Score | Mr(calc):   | Delta    | Sequence                    |
|-------|-------------|----------|-----------------------------|
| 37.3  | 1309.656097 | 0.006335 | <a href="#">GASQAGAPQGR</a> |

Mascot: <http://www.matrixscience.com/>

# MASCOT Search Results

## Peptide View

MS/MS Fragmentation of **QTQVSVLPEGGETPLFK**  
 Found in **GELS\_HUMAN**, Gelsolin OS=Homo sapiens GN=GSN PE=1 SV=1

Match to Query 32558: 2140.137552 from(714.386460,3+) rtinseconds(2398) index(9164)  
 Title: Locus:1.1.1.3089.6 File:"2013-07-02 CLN FXIII 180 min 1st F 1.wiff"  
 Data file C:\Program Files (x86)\Matrix Science\Mascot Daemon\mgf\7 FXIII 180 min 1st\mascot\_daemon\_merge.mgf

Click mouse within plot area to zoom in by factor of two about that point

Or, Plot from  to  Da

Label all possible matches  Label matches used for scoring

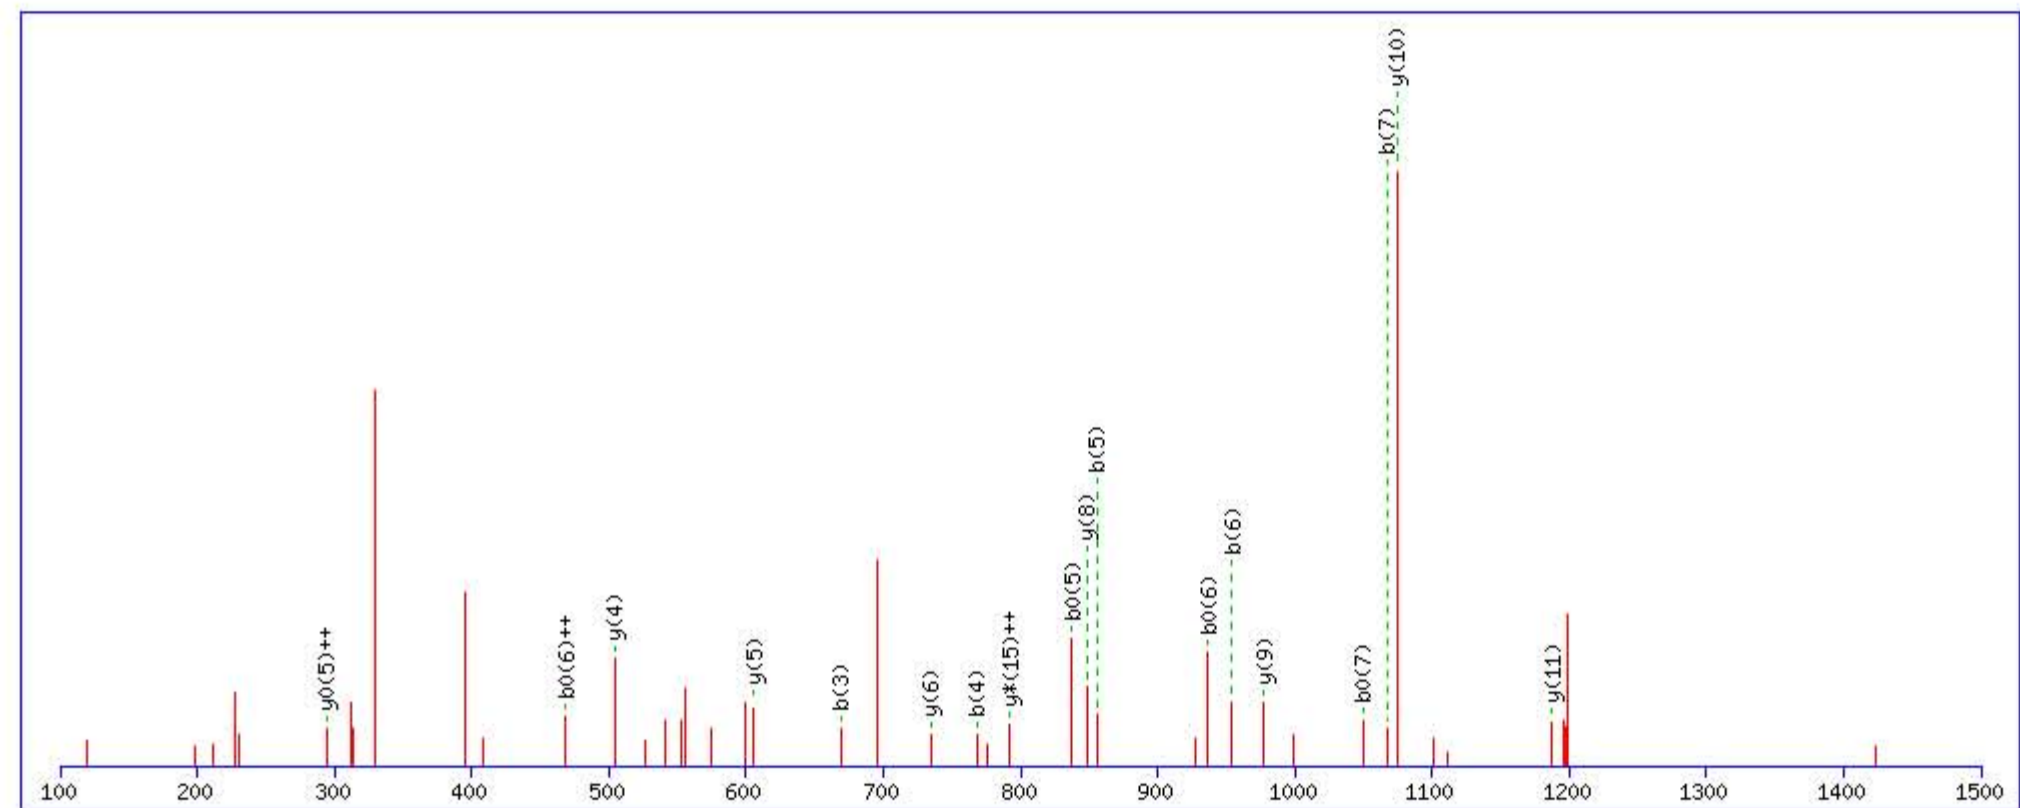

Monoisotopic mass of neutral peptide  $M_r(\text{calc})$ : 2140.123840  
 Fixed modifications: Carbamidomethyl (C) (apply to specified residues or termini only)  
 Variable modifications:  
 Q1 : Biotin:Thermo-21345 (Q)  
 Ions Score: 46 Expect: 0.0021  
 Matches : 19/182 fragment ions using 32 most intense peaks [\(help\)](#)

| #  | b                  | b <sup>++</sup> | b <sup>*</sup> | b <sup>+++</sup> | b <sup>0</sup>     | b <sup>0++</sup>  | Seq. | y                  | y <sup>++</sup> | y <sup>*</sup> | y <sup>+++</sup>  | y <sup>0</sup> | y <sup>0++</sup>  | #  |
|----|--------------------|-----------------|----------------|------------------|--------------------|-------------------|------|--------------------|-----------------|----------------|-------------------|----------------|-------------------|----|
| 1  | 440.232602         | 220.619939      | 423.206053     | 212.106664       |                    |                   | Q    |                    |                 |                |                   |                |                   | 17 |
| 2  | 541.280281         | 271.143779      | 524.253732     | 262.630504       | 523.269716         | 262.138496        | T    | 1701.905780        | 851.456528      | 1684.879231    | 842.943254        | 1683.895215    | 842.451246        | 16 |
| 3  | <b>669.338859</b>  | 335.173068      | 652.312310     | 326.659793       | 651.328294         | 326.167785        | Q    | 1600.858101        | 800.932689      | 1583.831552    | <b>792.419414</b> | 1582.847536    | 791.927406        | 15 |
| 4  | <b>768.407273</b>  | 384.707275      | 751.380724     | 376.194000       | 750.396708         | 375.701992        | V    | 1472.799523        | 736.903399      | 1455.772974    | 728.390125        | 1454.788958    | 727.898117        | 14 |
| 5  | <b>855.439301</b>  | 428.223289      | 838.412752     | 419.710014       | <b>837.428736</b>  | 419.218006        | S    | 1373.731109        | 687.369193      | 1356.704560    | 678.855918        | 1355.720544    | 678.363910        | 13 |
| 6  | <b>954.507715</b>  | 477.757496      | 937.481166     | 469.244221       | <b>936.497150</b>  | <b>468.752213</b> | V    | 1286.699081        | 643.853179      | 1269.672532    | 635.339904        | 1268.688516    | 634.847896        | 12 |
| 7  | <b>1067.591779</b> | 534.299527      | 1050.565230    | 525.786253       | <b>1049.581214</b> | 525.294245        | L    | <b>1187.630667</b> | 594.318972      | 1170.604118    | 585.805697        | 1169.620102    | 585.313689        | 11 |
| 8  | 1164.644543        | 582.825909      | 1147.617994    | 574.312635       | 1146.633978        | 573.820627        | P    | <b>1074.546603</b> | 537.776940      | 1057.520054    | 529.263665        | 1056.536038    | 528.771657        | 10 |
| 9  | 1293.687136        | 647.347206      | 1276.660587    | 638.833931       | 1275.676571        | 638.341923        | E    | <b>977.493839</b>  | 489.250558      | 960.467290     | 480.737283        | 959.483274     | 480.245275        | 9  |
| 10 | 1350.708600        | 675.857938      | 1333.682051    | 667.344663       | 1332.698035        | 666.852655        | G    | <b>848.451246</b>  | 424.729261      | 831.424697     | 416.215987        | 830.440681     | 415.723979        | 8  |
| 11 | 1407.730064        | 704.368670      | 1390.703515    | 695.855395       | 1389.719499        | 695.363387        | G    | 791.429782         | 396.218529      | 774.403233     | 387.705255        | 773.419217     | 387.213247        | 7  |
| 12 | 1536.772657        | 768.889966      | 1519.746108    | 760.376692       | 1518.762092        | 759.884684        | E    | <b>734.408318</b>  | 367.707797      | 717.381769     | 359.194523        | 716.397753     | 358.702515        | 6  |
| 13 | 1637.820336        | 819.413806      | 1620.793787    | 810.900531       | 1619.809771        | 810.408523        | T    | <b>605.365725</b>  | 303.186501      | 588.339176     | 294.673226        | 587.355160     | <b>294.181218</b> | 5  |
| 14 | 1734.873100        | 867.940188      | 1717.846551    | 859.426913       | 1716.862535        | 858.934905        | P    | <b>504.318046</b>  | 252.662661      | 487.291497     | 244.149387        |                |                   | 4  |
| 15 | 1847.957164        | 924.482220      | 1830.930615    | 915.968945       | 1829.946599        | 915.476937        | L    | 407.265282         | 204.136279      | 390.238733     | 195.623005        |                |                   | 3  |
| 16 | 1995.025578        | 998.016427      | 1977.999029    | 989.503152       | 1977.015013        | 989.011144        | F    | <b>294.181218</b>  | 147.594247      | 277.154669     | 139.080973        |                |                   | 2  |
| 17 |                    |                 |                |                  |                    |                   | K    | 147.112804         | 74.060040       | 130.086255     | 65.546766         |                |                   | 1  |

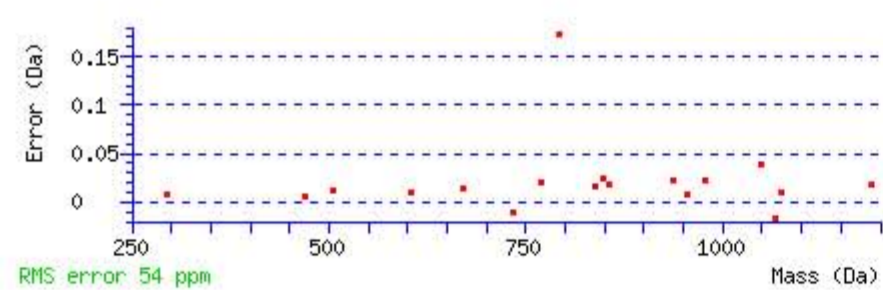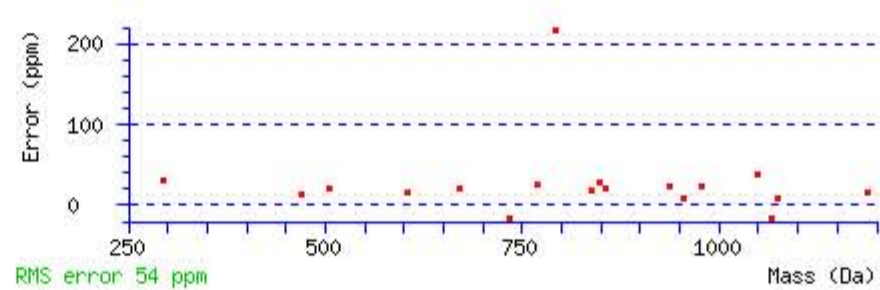

NCBI BLAST search of **QTQVSVLPEGGETPLFK**  
 (Parameters: blastp, nr protein database, expect=20000, no filter, PAM30)  
 Other BLAST [web gateways](#)

## All matches to this query

| Score | $M_r(\text{calc})$ : | Delta    | Sequence                          |
|-------|----------------------|----------|-----------------------------------|
| 45.5  | 2140.123840          | 0.013712 | <a href="#">QTQVSVLPEGGETPLFK</a> |
| 43.7  | 2140.123840          | 0.013712 | <a href="#">QTQVSVLPEGGETPLFK</a> |

# MASCOT SCIENCE Mascot Search Results

## Peptide View

MS/MS Fragmentation of **QTQVSVLPEGGETPLFK**

Found in **GELS\_HUMAN**, Gelsolin OS=Homo sapiens GN=GSN PE=1 SV=1

Match to Query 61423: 2451.321072 from(818.114300,3+) rtinseconds(2584) index(10260)

Title: Locus:1.1.1.3153.21 File:"2013-07-02 CLN FXIII 180 min 1st F 1.wiff"

Data file C:\Program Files (x86)\Matrix Science\Mascot Daemon\mgf\7 FXIII 180 min 1st\mascot\_daemon\_merge.mgf

Click mouse within plot area to zoom in by factor of two about that point

Or, Plot from  to  Da

Label all possible matches  Label matches used for scoring

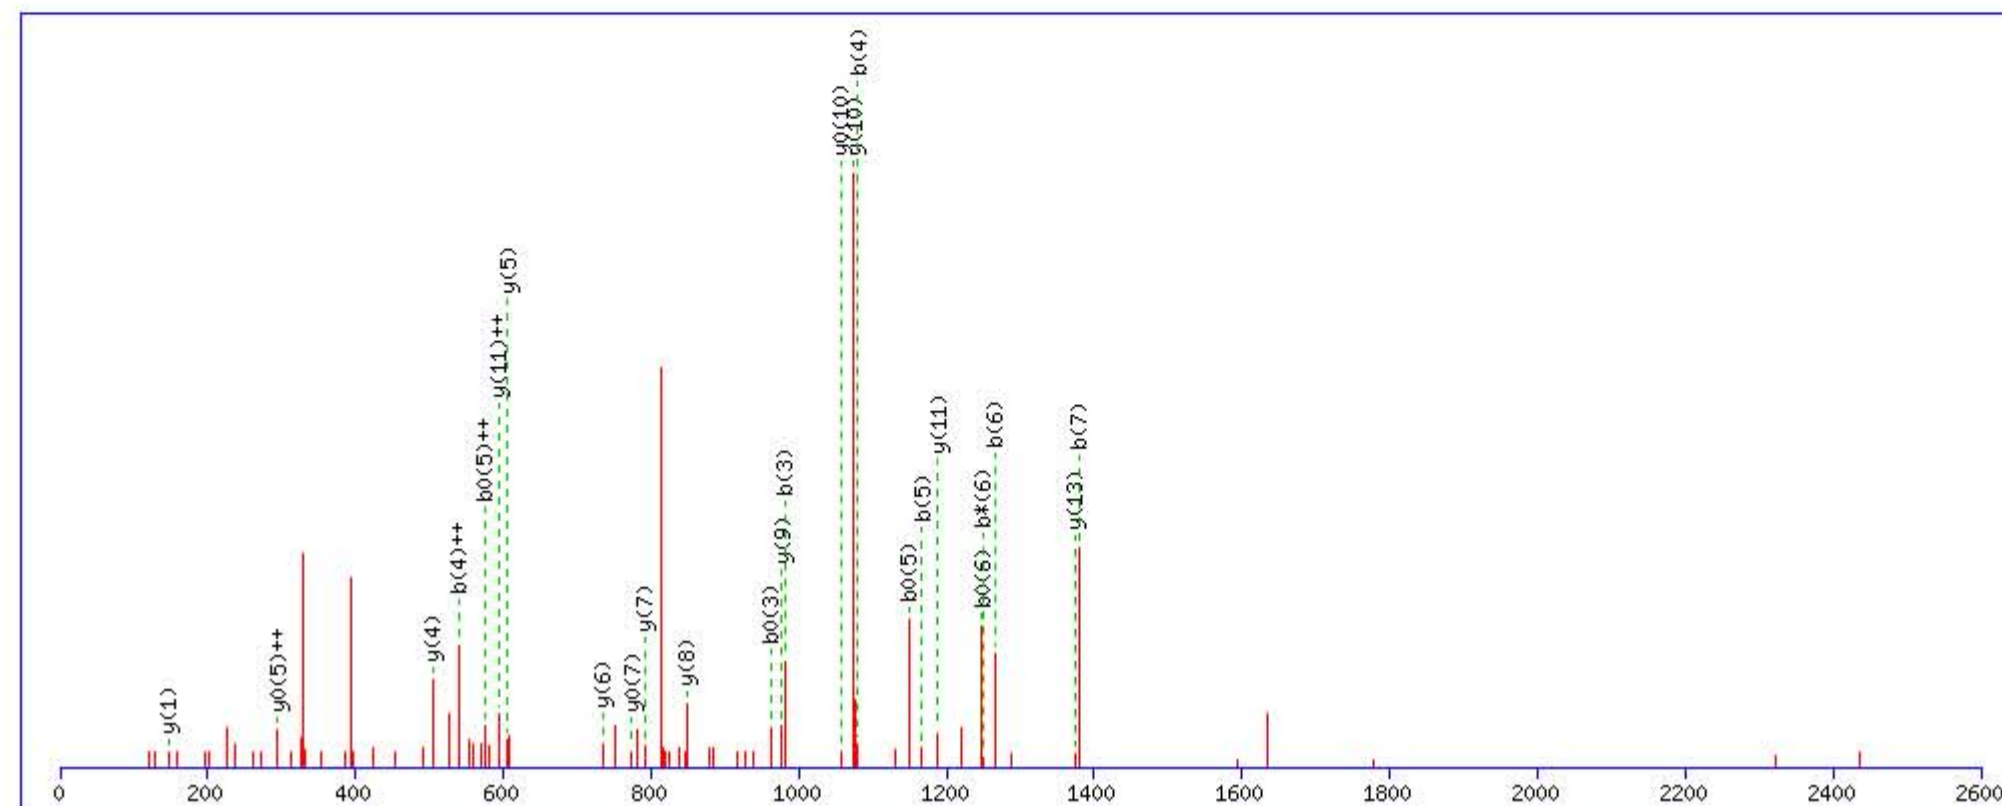

Monoisotopic mass of neutral peptide Mr(calc): 2451.290588

Fixed modifications: Carbamidomethyl (C) (apply to specified residues or termini only)

Variable modifications:

Q1 : Biotin:Thermo-21345 (Q)

Q3 : Biotin:Thermo-21345 (Q)

Ions Score: 36 Expect: 0.00047

Matches : 26/182 fragment ions using 71 most intense peaks [\(help\)](#)

| #  | b                  | b <sup>++</sup>   | b <sup>+</sup>     | b <sup>+++</sup> | b <sup>0</sup>     | b <sup>0++</sup>  | Seq. | y                  | y <sup>++</sup>   | y <sup>+</sup> | y <sup>+++</sup> | y <sup>0</sup>     | y <sup>0++</sup>  | #  |
|----|--------------------|-------------------|--------------------|------------------|--------------------|-------------------|------|--------------------|-------------------|----------------|------------------|--------------------|-------------------|----|
| 1  | 440.232602         | 220.619939        | 423.206053         | 212.106664       |                    |                   | Q    |                    |                   |                |                  |                    |                   | 17 |
| 2  | 541.280281         | 271.143779        | 524.253732         | 262.630504       | 523.269716         | 262.138496        | T    | 2013.072528        | 1007.039902       | 1996.045979    | 998.526628       | 1995.061963        | 998.034620        | 16 |
| 3  | <b>980.505607</b>  | 490.756442        | 963.479058         | 482.243167       | <b>962.495042</b>  | 481.751159        | Q    | 1912.024849        | 956.516063        | 1894.998300    | 948.002788       | 1894.014284        | 947.510780        | 15 |
| 4  | <b>1079.574021</b> | <b>540.290649</b> | 1062.547472        | 531.777374       | 1061.563456        | 531.285366        | V    | 1472.799523        | 736.903400        | 1455.772974    | 728.390125       | 1454.788958        | 727.898117        | 14 |
| 5  | <b>1166.606049</b> | 583.806663        | 1149.579500        | 575.293388       | <b>1148.595484</b> | <b>574.801380</b> | S    | <b>1373.731109</b> | 687.369193        | 1356.704560    | 678.855918       | 1355.720544        | 678.363910        | 13 |
| 6  | <b>1265.674463</b> | 633.340870        | <b>1248.647914</b> | 624.827595       | <b>1247.663898</b> | 624.335587        | V    | 1286.699081        | 643.853179        | 1269.672532    | 635.339904       | 1268.688516        | 634.847896        | 12 |
| 7  | <b>1378.758527</b> | 689.882902        | 1361.731978        | 681.369627       | 1360.747962        | 680.877619        | L    | <b>1187.630667</b> | <b>594.318971</b> | 1170.604118    | 585.805697       | 1169.620102        | 585.313689        | 11 |
| 8  | 1475.811291        | 738.409284        | 1458.784742        | 729.896009       | 1457.800726        | 729.404001        | P    | <b>1074.546603</b> | 537.776940        | 1057.520054    | 529.263665       | <b>1056.536038</b> | 528.771657        | 10 |
| 9  | 1604.853884        | 802.930580        | 1587.827335        | 794.417306       | 1586.843319        | 793.925298        | E    | <b>977.493839</b>  | 489.250558        | 960.467290     | 480.737283       | 959.483274         | 480.245275        | 9  |
| 10 | 1661.875348        | 831.441312        | 1644.848799        | 822.928038       | 1643.864783        | 822.436030        | G    | <b>848.451246</b>  | 424.729261        | 831.424697     | 416.215986       | 830.440681         | 415.723978        | 8  |
| 11 | 1718.896812        | 859.952044        | 1701.870263        | 851.438770       | 1700.886247        | 850.946762        | G    | <b>791.429782</b>  | 396.218529        | 774.403233     | 387.705254       | <b>773.419217</b>  | 387.213246        | 7  |
| 12 | 1847.939405        | 924.473341        | 1830.912856        | 915.960066       | 1829.928840        | 915.468058        | E    | <b>734.408318</b>  | 367.707797        | 717.381769     | 359.194523       | 716.397753         | 358.702515        | 6  |
| 13 | 1948.987084        | 974.997180        | 1931.960535        | 966.483906       | 1930.976519        | 965.991898        | T    | <b>605.365725</b>  | 303.186500        | 588.339176     | 294.673226       | 587.355160         | <b>294.181218</b> | 5  |
| 14 | 2046.039848        | 1023.523562       | 2029.013299        | 1015.010288      | 2028.029283        | 1014.518280       | P    | <b>504.318046</b>  | 252.662661        | 487.291497     | 244.149386       |                    |                   | 4  |
| 15 | 2159.123912        | 1080.065594       | 2142.097363        | 1071.552319      | 2141.113347        | 1071.060311       | L    | 407.265282         | 204.136279        | 390.238733     | 195.623004       |                    |                   | 3  |
| 16 | 2306.192326        | 1153.599801       | 2289.165777        | 1145.086526      | 2288.181761        | 1144.594518       | F    | <b>294.181218</b>  | 147.594247        | 277.154669     | 139.080972       |                    |                   | 2  |
| 17 |                    |                   |                    |                  |                    |                   | K    | <b>147.112804</b>  | 74.060040         | 130.086255     | 65.546765        |                    |                   | 1  |

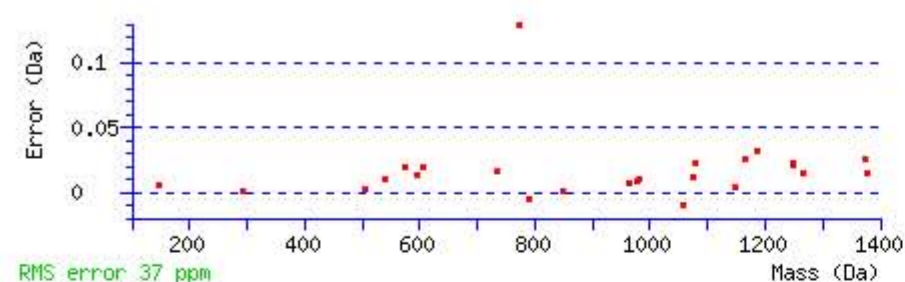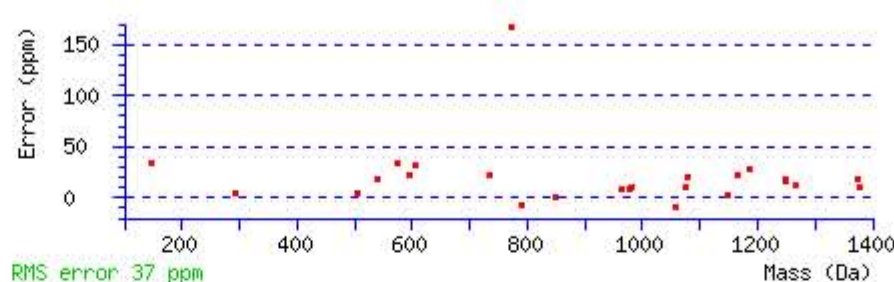

NCBI BLAST search of **QTQVSVLPEGGETPLFK**

(Parameters: blastp, nr protein database, expect=20000, no filter, PAM30)

Other BLAST [web gateways](#)

All matches to this query

| Score | Mr(calc):   | Delta     | Sequence                               |
|-------|-------------|-----------|----------------------------------------|
| 36.3  | 2451.290588 | 0.030484  | <a href="#">QTQVSVLPEGGETPLFK</a>      |
| 0.8   | 2451.301590 | 0.019482  | <a href="#">ATKRISHMPSRPELSAVATDLR</a> |
| 0.2   | 2451.357254 | -0.036182 | <a href="#">LLQLRHSLNGSILWIPAFMAR</a>  |

Mascot: <http://www.matrixscience.com/>



# MASCOT Search Results

## Peptide View

MS/MS Fragmentation of **VPFDAATLHTSTAMAAQHGMDDDDGTGQK**  
 Found in **GELS\_HUMAN**, Gelsolin OS=Homo sapiens GN=GSN PE=1 SV=1

Match to Query 72166: 3183.471816 from(796.875230,4+) rtinseconds(1946) index(6200)  
 Title: Locus:1.1.1.2931.13 File:"2013-07-02 CLN FXIII 180 min 1st F 1.wiff"  
 Data file C:\Program Files (x86)\Matrix Science\Mascot Daemon\mgf7 FXIII 180 min 1st\mascot\_daemon\_merge.mgf

Click mouse within plot area to zoom in by factor of two about that point

Or, Plot from  to  Da

Label all possible matches  Label matches used for scoring

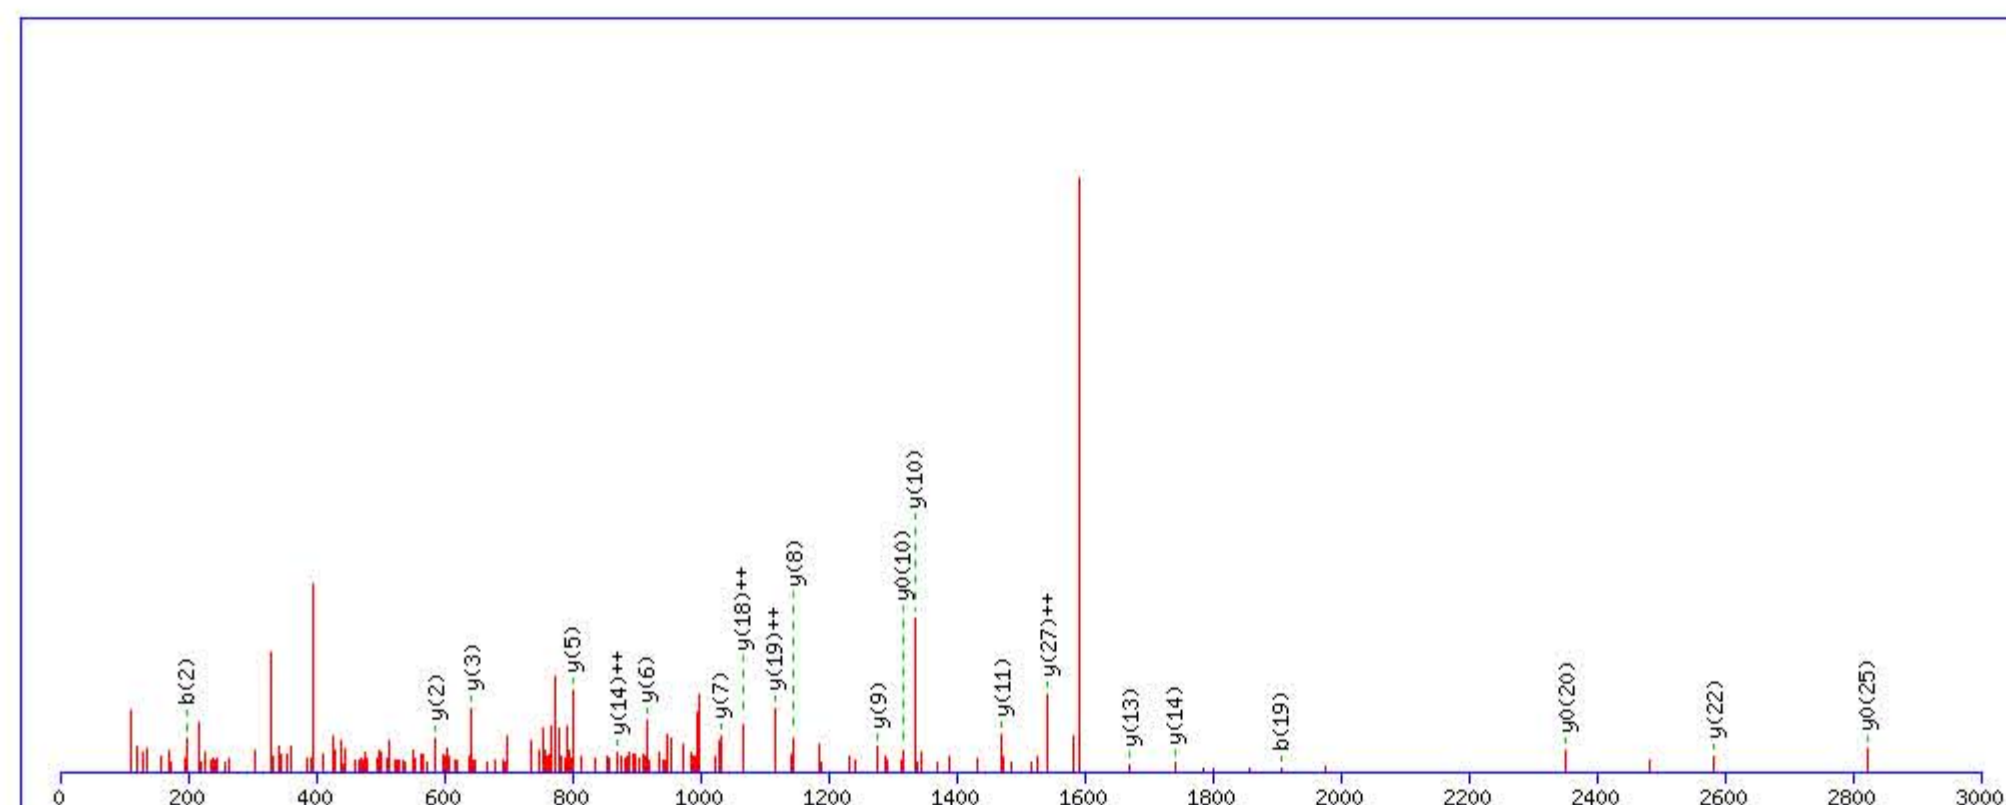

Monoisotopic mass of neutral peptide Mr(calc): 3183.442383  
 Fixed modifications: Carbamidomethyl (C) (apply to specified residues or termini only)  
 Variable modifications:  
 Q27 : Biotin:Thermo-21345 (Q)  
 Ions Score: 43 Expect: 0.00067  
 Matches : 21/280 fragment ions using 57 most intense peaks [\(help\)](#)

| #  | b                  | b <sup>++</sup> | b <sup>*</sup> | b <sup>+++</sup> | b <sup>0</sup> | b <sup>0++</sup> | Seq. | y                  | y <sup>++</sup>    | y <sup>*</sup> | y <sup>+++</sup> | y <sup>0</sup>     | y <sup>0++</sup> | #  |
|----|--------------------|-----------------|----------------|------------------|----------------|------------------|------|--------------------|--------------------|----------------|------------------|--------------------|------------------|----|
| 1  | 100.075690         | 50.541483       |                |                  |                |                  | V    |                    |                    |                |                  |                    |                  | 28 |
| 2  | <b>197.128454</b>  | 99.067865       |                |                  |                |                  | P    | 3085.381222        | <b>1543.194249</b> | 3068.354673    | 1534.680974      | 3067.370657        | 1534.188966      | 27 |
| 3  | 344.196868         | 172.602072      |                |                  |                |                  | F    | 2988.328458        | 1494.667867        | 2971.301909    | 1486.154592      | 2970.317893        | 1485.662584      | 26 |
| 4  | 459.223811         | 230.115543      |                |                  | 441.213246     | 221.110261       | D    | 2841.260044        | 1421.133660        | 2824.233495    | 1412.620385      | <b>2823.249479</b> | 1412.128377      | 25 |
| 5  | 530.260925         | 265.634101      |                |                  | 512.250360     | 256.628818       | A    | 2726.233101        | 1363.620188        | 2709.206552    | 1355.106914      | 2708.222536        | 1354.614906      | 24 |
| 6  | 601.298039         | 301.152658      |                |                  | 583.287474     | 292.147375       | A    | 2655.195987        | 1328.101631        | 2638.169438    | 1319.588357      | 2637.185422        | 1319.096349      | 23 |
| 7  | 702.345718         | 351.676497      |                |                  | 684.335153     | 342.671215       | T    | <b>2584.158873</b> | 1292.583074        | 2567.132324    | 1284.069800      | 2566.148308        | 1283.577792      | 22 |
| 8  | 815.429782         | 408.218529      |                |                  | 797.419217     | 399.213247       | L    | 2483.111194        | 1242.059235        | 2466.084645    | 1233.545960      | 2465.100629        | 1233.053952      | 21 |
| 9  | 952.488694         | 476.747985      |                |                  | 934.478129     | 467.742703       | H    | 2370.027130        | 1185.517203        | 2353.000581    | 1177.003928      | <b>2352.016565</b> | 1176.511920      | 20 |
| 10 | 1053.536373        | 527.271824      |                |                  | 1035.525808    | 518.266542       | T    | 2232.968218        | <b>1116.987747</b> | 2215.941669    | 1108.474472      | 2214.957653        | 1107.982464      | 19 |
| 11 | 1140.568401        | 570.787839      |                |                  | 1122.557836    | 561.782556       | S    | 2131.920539        | <b>1066.463907</b> | 2114.893990    | 1057.950633      | 2113.909974        | 1057.458625      | 18 |
| 12 | 1241.616080        | 621.311678      |                |                  | 1223.605515    | 612.306396       | T    | 2044.888511        | 1022.947893        | 2027.861962    | 1014.434619      | 2026.877946        | 1013.942611      | 17 |
| 13 | 1312.653194        | 656.830235      |                |                  | 1294.642629    | 647.824952       | A    | 1943.840832        | 972.424054         | 1926.814283    | 963.910779       | 1925.830267        | 963.418771       | 16 |
| 14 | 1443.693679        | 722.350478      |                |                  | 1425.683114    | 713.345195       | M    | 1872.803718        | 936.905497         | 1855.777169    | 928.392222       | 1854.793153        | 927.900214       | 15 |
| 15 | 1514.730793        | 757.869035      |                |                  | 1496.720228    | 748.863752       | A    | <b>1741.763233</b> | <b>871.385254</b>  | 1724.736684    | 862.871980       | 1723.752668        | 862.379972       | 14 |
| 16 | 1585.767907        | 793.387591      |                |                  | 1567.757342    | 784.382309       | A    | <b>1670.726119</b> | 835.866697         | 1653.699570    | 827.353423       | 1652.715554        | 826.861415       | 13 |
| 17 | 1713.826485        | 857.416880      | 1696.799936    | 848.903606       | 1695.815920    | 848.411598       | Q    | 1599.689005        | 800.348140         | 1582.662456    | 791.834866       | 1581.678440        | 791.342858       | 12 |
| 18 | 1850.885397        | 925.946336      | 1833.858848    | 917.433062       | 1832.874832    | 916.941054       | H    | <b>1471.630427</b> | 736.318851         | 1454.603878    | 727.805577       | 1453.619862        | 727.313569       | 11 |
| 19 | <b>1907.906861</b> | 954.457068      | 1890.880312    | 945.943794       | 1889.896296    | 945.451786       | G    | <b>1334.571515</b> | 667.789395         | 1317.544966    | 659.276121       | <b>1316.560950</b> | 658.784113       | 10 |
| 20 | 2038.947346        | 1019.977311     | 2021.920797    | 1011.464036      | 2020.936781    | 1010.972028      | M    | <b>1277.550051</b> | 639.278663         | 1260.523502    | 630.765389       | 1259.539486        | 630.273381       | 9  |
| 21 | 2153.974289        | 1077.490782     | 2136.947740    | 1068.977508      | 2135.963724    | 1068.485500      | D    | <b>1146.509566</b> | 573.758421         | 1129.483017    | 565.245146       | 1128.499001        | 564.753138       | 8  |
| 22 | 2269.001232        | 1135.004254     | 2251.974683    | 1126.490979      | 2250.990667    | 1125.998971      | D    | <b>1031.482623</b> | 516.244949         | 1014.456074    | 507.731675       | 1013.472058        | 507.239667       | 7  |
| 23 | 2384.028175        | 1192.517725     | 2367.001626    | 1184.004451      | 2366.017610    | 1183.512443      | D    | <b>916.455680</b>  | 458.731478         | 899.429131     | 450.218203       | 898.445115         | 449.726195       | 6  |
| 24 | 2441.049639        | 1221.028457     | 2424.023090    | 1212.515183      | 2423.039074    | 1212.023175      | G    | <b>801.428737</b>  | 401.218007         | 784.402188     | 392.704732       | 783.418172         | 392.212724       | 5  |
| 25 | 2542.097318        | 1271.552297     | 2525.070769    | 1263.039022      | 2524.086753    | 1262.547014      | T    | 744.407273         | 372.707275         | 727.380724     | 364.194000       | 726.396708         | 363.701992       | 4  |
| 26 | 2599.118782        | 1300.063029     | 2582.092233    | 1291.549754      | 2581.108217    | 1291.057746      | G    | <b>643.359594</b>  | 322.183435         | 626.333045     | 313.670161       |                    |                  | 3  |
| 27 | 3038.344108        | 1519.675692     | 3021.317559    | 1511.162417      | 3020.333543    | 1510.670409      | Q    | <b>586.338130</b>  | 293.672703         | 569.311581     | 285.159429       |                    |                  | 2  |
| 28 |                    |                 |                |                  |                |                  | K    | 147.112804         | 74.060040          | 130.086255     | 65.546765        |                    |                  | 1  |

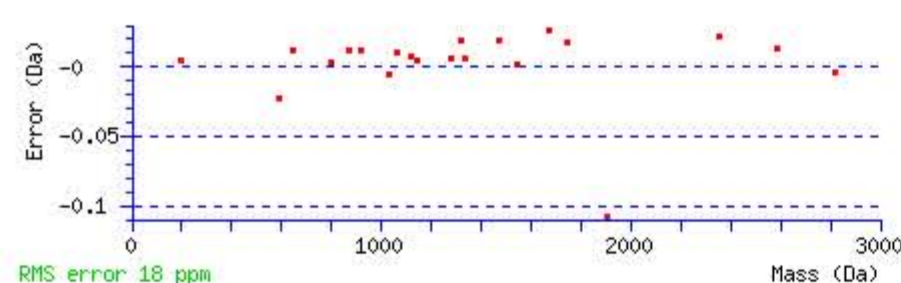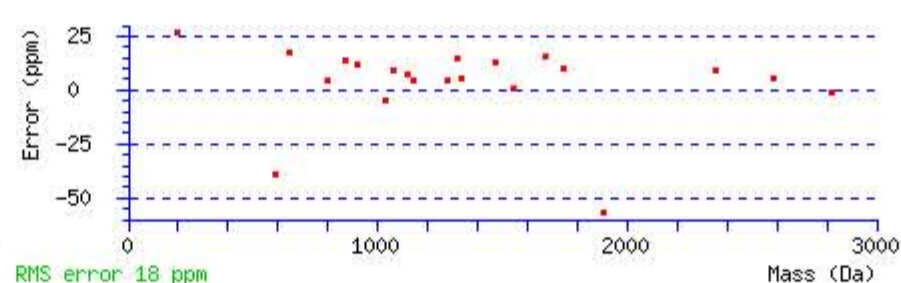

NCBI BLAST search of **VPFDAATLHTSTAMAAQHGMDDDDGTGQK**  
 (Parameters: blastp, nr protein database, expect=20000, no filter, PAM30)  
 Other BLAST [web gateways](#)

### All matches to this query

| Score | Mr(calc):   | Delta    | Sequence                                      |
|-------|-------------|----------|-----------------------------------------------|
| 43.3  | 3183.442383 | 0.029433 | <a href="#">VPFDAATLHTSTAMAAQHGMDDDDGTGQK</a> |
| 8.7   | 3183.442383 | 0.029433 | <a href="#">VPFDAATLHTSTAMAAQHGMDDDDGTGQK</a> |

# MASCOT Search Results

## Peptide View

MS/MS Fragmentation of **YVMLPVADQDQCIR**

Found in **HPT\_HUMAN**, Haptoglobin OS=Homo sapiens GN=HP PE=1 SV=1

Match to Query 51627: 2034.003828 from(1018.009190,2+) rtinseconds(2126) index(25573)

Title: Locus:1.1.1.2882.21 File:"2013-07-02 CLN FXIII 180 min 1st F 2.wiff"

Data file C:\Program Files (x86)\Matrix Science\Mascot Daemon\mgf\7 FXIII 180 min 1st\mascot\_daemon\_merge.mgf

Click mouse within plot area to zoom in by factor of two about that point

Or, Plot from  to  Da

Label all possible matches  Label matches used for scoring

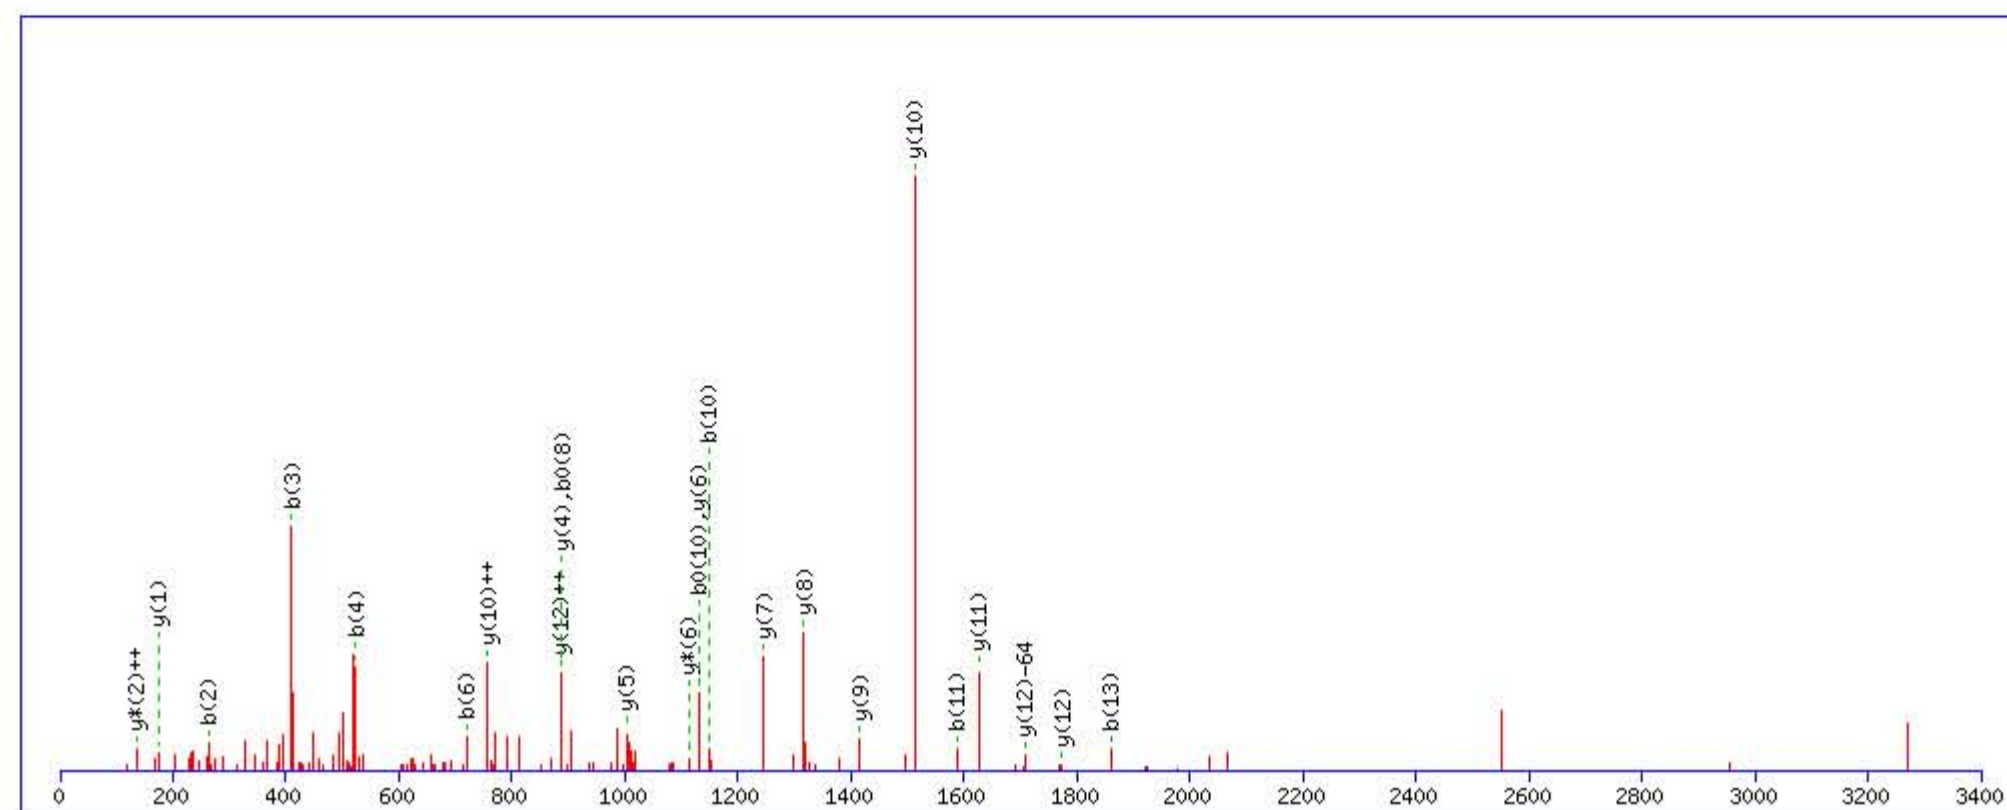

Monoisotopic mass of neutral peptide Mr(calc): 2033.973679

Fixed modifications: Carbamidomethyl (C) (apply to specified residues or termini only)

Variable modifications:

M3 : Oxidation (M), with neutral losses 0.000000 (shown in table), 63.998285

Q11 : Biotin:Thermo-21345 (Q)

Ions Score: 64 Expect: 1e-005

Matches : 24/174 fragment ions using 37 most intense peaks [\(help\)](#)

| #  | b                  | b <sup>++</sup> | b <sup>*</sup> | b <sup>+++</sup> | b <sup>0</sup>     | b <sup>0++</sup> | Seq. | y                  | y <sup>++</sup>   | y <sup>*</sup>     | y <sup>+++</sup>  | y <sup>0</sup> | y <sup>0++</sup> | #  |
|----|--------------------|-----------------|----------------|------------------|--------------------|------------------|------|--------------------|-------------------|--------------------|-------------------|----------------|------------------|----|
| 1  | 164.070605         | 82.538940       |                |                  |                    |                  | Y    |                    |                   |                    |                   |                |                  | 14 |
| 2  | <b>263.139019</b>  | 132.073148      |                |                  |                    |                  | V    | 1871.917625        | 936.462450        | 1854.891076        | 927.949176        | 1853.907060    | 927.457168       | 13 |
| 3  | <b>410.174419</b>  | 205.590848      |                |                  |                    |                  | M    | <b>1772.849211</b> | <b>886.928244</b> | 1755.822662        | 878.414969        | 1754.838646    | 877.922961       | 12 |
| 4  | <b>523.258483</b>  | 262.132880      |                |                  |                    |                  | L    | <b>1625.813811</b> | 813.410543        | 1608.787262        | 804.897269        | 1607.803246    | 804.405261       | 11 |
| 5  | 620.311247         | 310.659262      |                |                  |                    |                  | P    | <b>1512.729747</b> | <b>756.868511</b> | 1495.703198        | 748.355237        | 1494.719182    | 747.863229       | 10 |
| 6  | <b>719.379661</b>  | 360.193469      |                |                  |                    |                  | V    | <b>1415.676983</b> | 708.342129        | 1398.650434        | 699.828855        | 1397.666418    | 699.336847       | 9  |
| 7  | 790.416775         | 395.712026      |                |                  |                    |                  | A    | <b>1316.608569</b> | 658.807922        | 1299.582020        | 650.294648        | 1298.598004    | 649.802640       | 8  |
| 8  | 905.443718         | 453.225497      |                |                  | <b>887.433153</b>  | 444.220215       | D    | <b>1245.571455</b> | 623.289366        | 1228.544906        | 614.776091        | 1227.560890    | 614.284083       | 7  |
| 9  | 1033.502296        | 517.254786      | 1016.475747    | 508.741511       | 1015.491731        | 508.249503       | Q    | <b>1130.544512</b> | 565.775894        | <b>1113.517963</b> | 557.262620        | 1112.533947    | 556.770611       | 6  |
| 10 | <b>1148.529239</b> | 574.768258      | 1131.502690    | 566.254983       | <b>1130.518674</b> | 565.762975       | D    | <b>1002.485934</b> | 501.746605        | 985.459385         | 493.233331        | 984.475369     | 492.741323       | 5  |
| 11 | <b>1587.754565</b> | 794.380921      | 1570.728016    | 785.867646       | 1569.744000        | 785.375638       | Q    | <b>887.458991</b>  | 444.233134        | 870.432442         | 435.719859        |                |                  | 4  |
| 12 | 1747.785214        | 874.396245      | 1730.758665    | 865.882971       | 1729.774649        | 865.390963       | C    | 448.233665         | 224.620470        | 431.207116         | 216.107196        |                |                  | 3  |
| 13 | <b>1860.869278</b> | 930.938277      | 1843.842729    | 922.425003       | 1842.858713        | 921.932994       | I    | 288.203016         | 144.605146        | 271.176467         | <b>136.091871</b> |                |                  | 2  |
| 14 |                    |                 |                |                  |                    |                  | R    | <b>175.118952</b>  | 88.063114         | 158.092403         | 79.549839         |                |                  | 1  |

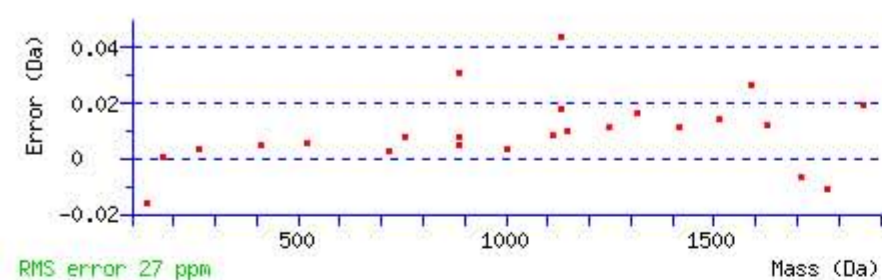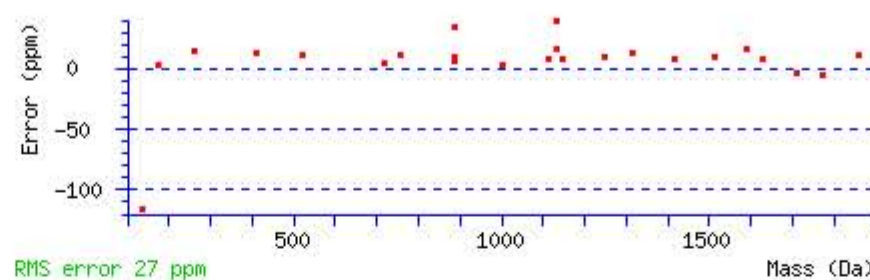

NCBI BLAST search of **YVMLPVADQDQCIR**

(Parameters: blastp, nr protein database, expect=20000, no filter, PAM30)

Other BLAST [web gateways](#)

All matches to this query

| Score | Mr(calc):   | Delta     | Sequence                           |
|-------|-------------|-----------|------------------------------------|
| 64.0  | 2033.973679 | 0.030149  | <a href="#">YVMLPVADQDQCIR</a>     |
| 47.0  | 2033.973679 | 0.030149  | <a href="#">YVMLPVADQDQCIR</a>     |
| 13.7  | 2034.006516 | -0.002688 | <a href="#">KGYDRVSVMRPQPGDTGR</a> |

Mascot: <http://www.matrixscience.com/>

# Mascot Search Results

## Peptide View

MS/MS Fragmentation of **YVMLPVADQYDCITHYEGSTCPK**

Found in **HPTR\_HUMAN**, Haptoglobin-related protein OS=Homo sapiens GN=HPR PE=1 SV=2

Match to Query 70931: 3057.411376 from(765.360120,4+) rtinseconds(2428) index(27601)

Title: Locus:1.1.1.2987.9 File:"2013-07-02 CLN FXIII 180 min 1st F 2.wiff"

Data file C:\Program Files (x86)\Matrix Science\Mascot Daemon\mgf7 FXIII 180 min 1st\mascot\_daemon\_merge.mgf

Click mouse within plot area to zoom in by factor of two about that point

Or, Plot from  to  Da

Label all possible matches  Label matches used for scoring

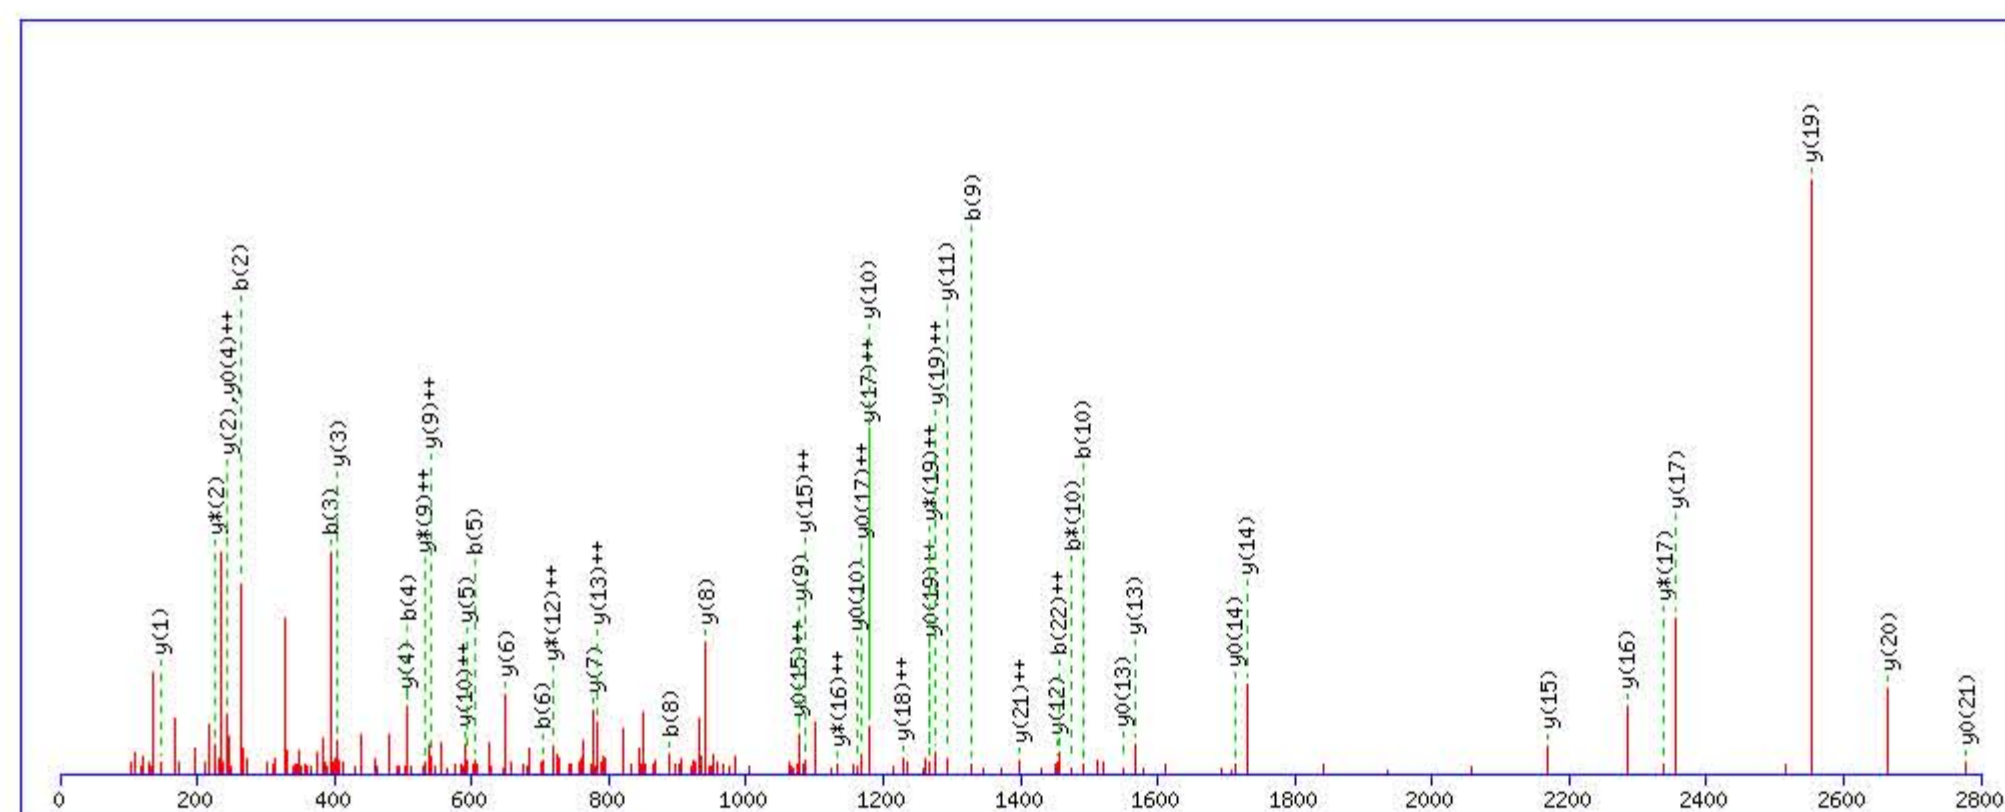

Monoisotopic mass of neutral peptide Mr(calc): 3057.374466

Fixed modifications: Carbamidomethyl (C) (apply to specified residues or termini only)

Variable modifications:

Q9 : Biotin:Thermo-21345 (Q)

Ions Score: 82 Expect: 1e-007

Matches : 51/228 fragment ions using 132 most intense peaks [\(help\)](#)

| #  | b                  | b <sup>++</sup>    | b <sup>*</sup>     | b <sup>*++</sup> | b <sup>0</sup> | b <sup>0++</sup> | Seq. | y                  | y <sup>++</sup>    | y <sup>*</sup>     | y <sup>*++</sup>   | y <sup>0</sup>     | y <sup>0++</sup>   | #  |
|----|--------------------|--------------------|--------------------|------------------|----------------|------------------|------|--------------------|--------------------|--------------------|--------------------|--------------------|--------------------|----|
| 1  | 164.070605         | 82.538940          |                    |                  |                |                  | Y    |                    |                    |                    |                    |                    |                    | 23 |
| 2  | <b>263.139019</b>  | 132.073148         |                    |                  |                |                  | V    | 2895.318410        | 1448.162843        | 2878.291861        | 1439.649568        | 2877.307845        | 1439.157560        | 22 |
| 3  | <b>394.179504</b>  | 197.593390         |                    |                  |                |                  | M    | 2796.249996        | <b>1398.628636</b> | 2779.223447        | 1390.115361        | <b>2778.239431</b> | 1389.623353        | 21 |
| 4  | <b>507.263568</b>  | 254.135422         |                    |                  |                |                  | L    | <b>2665.209511</b> | 1333.108393        | 2648.182962        | 1324.595119        | 2647.198946        | 1324.103111        | 20 |
| 5  | <b>604.316332</b>  | 302.661804         |                    |                  |                |                  | P    | <b>2552.125447</b> | <b>1276.566361</b> | 2535.098898        | <b>1268.053087</b> | 2534.114882        | <b>1267.561079</b> | 19 |
| 6  | <b>703.384746</b>  | 352.196011         |                    |                  |                |                  | V    | 2455.072683        | <b>1228.039979</b> | 2438.046134        | 1219.526705        | 2437.062118        | 1219.034697        | 18 |
| 7  | 774.421860         | 387.714568         |                    |                  |                |                  | A    | <b>2356.004269</b> | <b>1178.505772</b> | <b>2338.977720</b> | 1169.992498        | 2337.993704        | <b>1169.500490</b> | 17 |
| 8  | <b>889.448803</b>  | 445.228040         |                    |                  | 871.438238     | 436.222757       | D    | <b>2284.967155</b> | 1142.987215        | 2267.940606        | <b>1134.473941</b> | 2266.956590        | 1133.981933        | 16 |
| 9  | <b>1328.674129</b> | 664.840703         | 1311.647580        | 656.327428       | 1310.663564    | 655.835420       | Q    | <b>2169.940212</b> | <b>1085.473744</b> | 2152.913663        | 1076.960469        | 2151.929647        | <b>1076.468461</b> | 15 |
| 10 | <b>1491.737458</b> | 746.372367         | <b>1474.710909</b> | 737.859093       | 1473.726893    | 737.367085       | Y    | <b>1730.714886</b> | 865.861081         | 1713.688337        | 857.347807         | <b>1712.704321</b> | 856.855799         | 14 |
| 11 | 1606.764401        | 803.885839         | 1589.737852        | 795.372564       | 1588.753836    | 794.880556       | D    | <b>1567.651557</b> | <b>784.329417</b>  | 1550.625008        | 775.816142         | <b>1549.640992</b> | 775.324134         | 13 |
| 12 | 1766.795050        | 883.901163         | 1749.768501        | 875.387889       | 1748.784485    | 874.895881       | C    | <b>1452.624614</b> | 726.815945         | 1435.598065        | <b>718.302671</b>  | 1434.614049        | 717.810663         | 12 |
| 13 | 1879.879114        | 940.443195         | 1862.852565        | 931.929921       | 1861.868549    | 931.437913       | I    | <b>1292.593965</b> | 646.800621         | 1275.567416        | 638.287346         | 1274.583400        | 637.795338         | 11 |
| 14 | 1980.926793        | 990.967035         | 1963.900244        | 982.453760       | 1962.916228    | 981.961752       | T    | <b>1179.509901</b> | <b>590.258589</b>  | 1162.483352        | 581.745314         | <b>1161.499336</b> | 581.253306         | 10 |
| 15 | 2117.985705        | 1059.496490        | 2100.959156        | 1050.983216      | 2099.975140    | 1050.491208      | H    | <b>1078.462222</b> | <b>539.734749</b>  | 1061.435673        | <b>531.221475</b>  | 1060.451657        | 530.729467         | 9  |
| 16 | 2281.049034        | 1141.028155        | 2264.022485        | 1132.514880      | 2263.038469    | 1132.022872      | Y    | <b>941.403310</b>  | 471.205293         | 924.376761         | 462.692018         | 923.392745         | 462.200010         | 8  |
| 17 | 2410.091627        | 1205.549452        | 2393.065078        | 1197.036177      | 2392.081062    | 1196.544169      | E    | <b>778.339981</b>  | 389.673628         | 761.313432         | 381.160354         | 760.329416         | 380.668346         | 7  |
| 18 | 2467.113091        | 1234.060184        | 2450.086542        | 1225.546909      | 2449.102526    | 1225.054901      | G    | <b>649.297388</b>  | 325.152332         | 632.270839         | 316.639057         | 631.286823         | 316.147049         | 6  |
| 19 | 2554.145119        | 1277.576198        | 2537.118570        | 1269.062923      | 2536.134554    | 1268.570915      | S    | <b>592.275924</b>  | 296.641600         | 575.249375         | 288.128325         | 574.265359         | 287.636317         | 5  |
| 20 | 2655.192798        | 1328.100037        | 2638.166249        | 1319.586762      | 2637.182233    | 1319.094754      | T    | <b>505.243896</b>  | 253.125586         | 488.217347         | 244.612311         | 487.233331         | <b>244.120303</b>  | 4  |
| 21 | 2815.223447        | 1408.115361        | 2798.196898        | 1399.602087      | 2797.212882    | 1399.110079      | C    | <b>404.196217</b>  | 202.601746         | 387.169668         | 194.088472         |                    |                    | 3  |
| 22 | 2912.276211        | <b>1456.641743</b> | 2895.249662        | 1448.128469      | 2894.265646    | 1447.636461      | P    | <b>244.165568</b>  | 122.586422         | <b>227.139019</b>  | 114.073148         |                    |                    | 2  |
| 23 |                    |                    |                    |                  |                |                  | K    | <b>147.112804</b>  | 74.060040          | 130.086255         | 65.546765          |                    |                    | 1  |

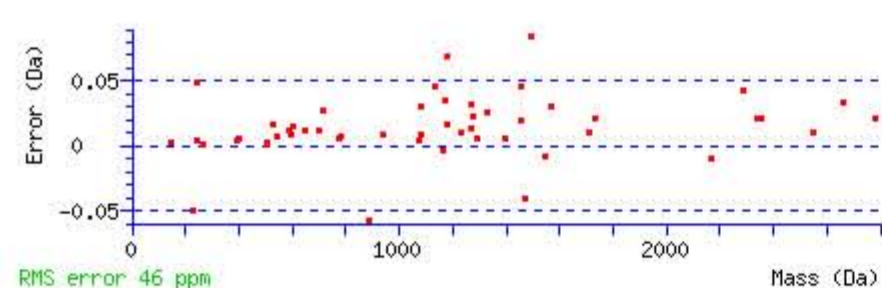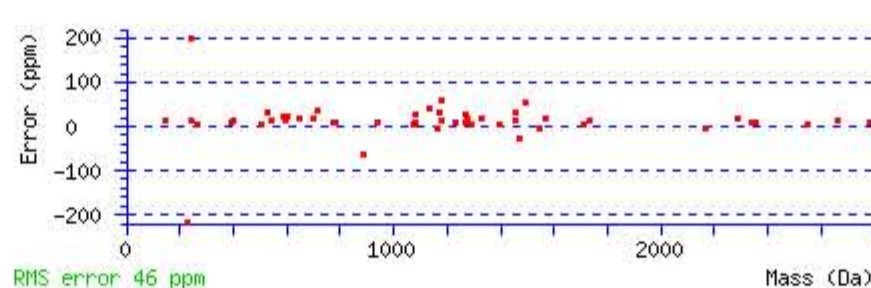

NCBI BLAST search of **YVMLPVADQYDCITHYEGSTCPK**  
 (Parameters: blastp, nr protein database, expect=20000, no filter, PAM30)  
 Other BLAST [web gateways](#)

### All matches to this query

| Score | Mr(calc):   | Delta    | Sequence                       |
|-------|-------------|----------|--------------------------------|
| 81.7  | 3057.374466 | 0.036910 | <b>YVMLPVADQYDCITHYEGSTCPK</b> |

# MASCOT SEARCH RESULTS

## Peptide View

MS/MS Fragmentation of **SQIHDIVLVGGSTR**

Found in **HSP7C\_HUMAN**, Heat shock cognate 71 kDa protein OS=Homo sapiens GN=HSPA8 PE=1 SV=1

Match to Query 45090: 1791.984282 from(598.335370,3+) rtinseconds(1987) index(78816)

Title: Locus:1.1.1.2042.10 File:"2013-07-02 CLN FXIII 180 min 1st FT.wiff"

Data file C:\Program Files (x86)\Matrix Science\Mascot Daemon\mgf7 FXIII 180 min 1st\mascot\_daemon\_merge.mgf

Click mouse within plot area to zoom in by factor of two about that point

Or, Plot from  to  Da

Label all possible matches  Label matches used for scoring

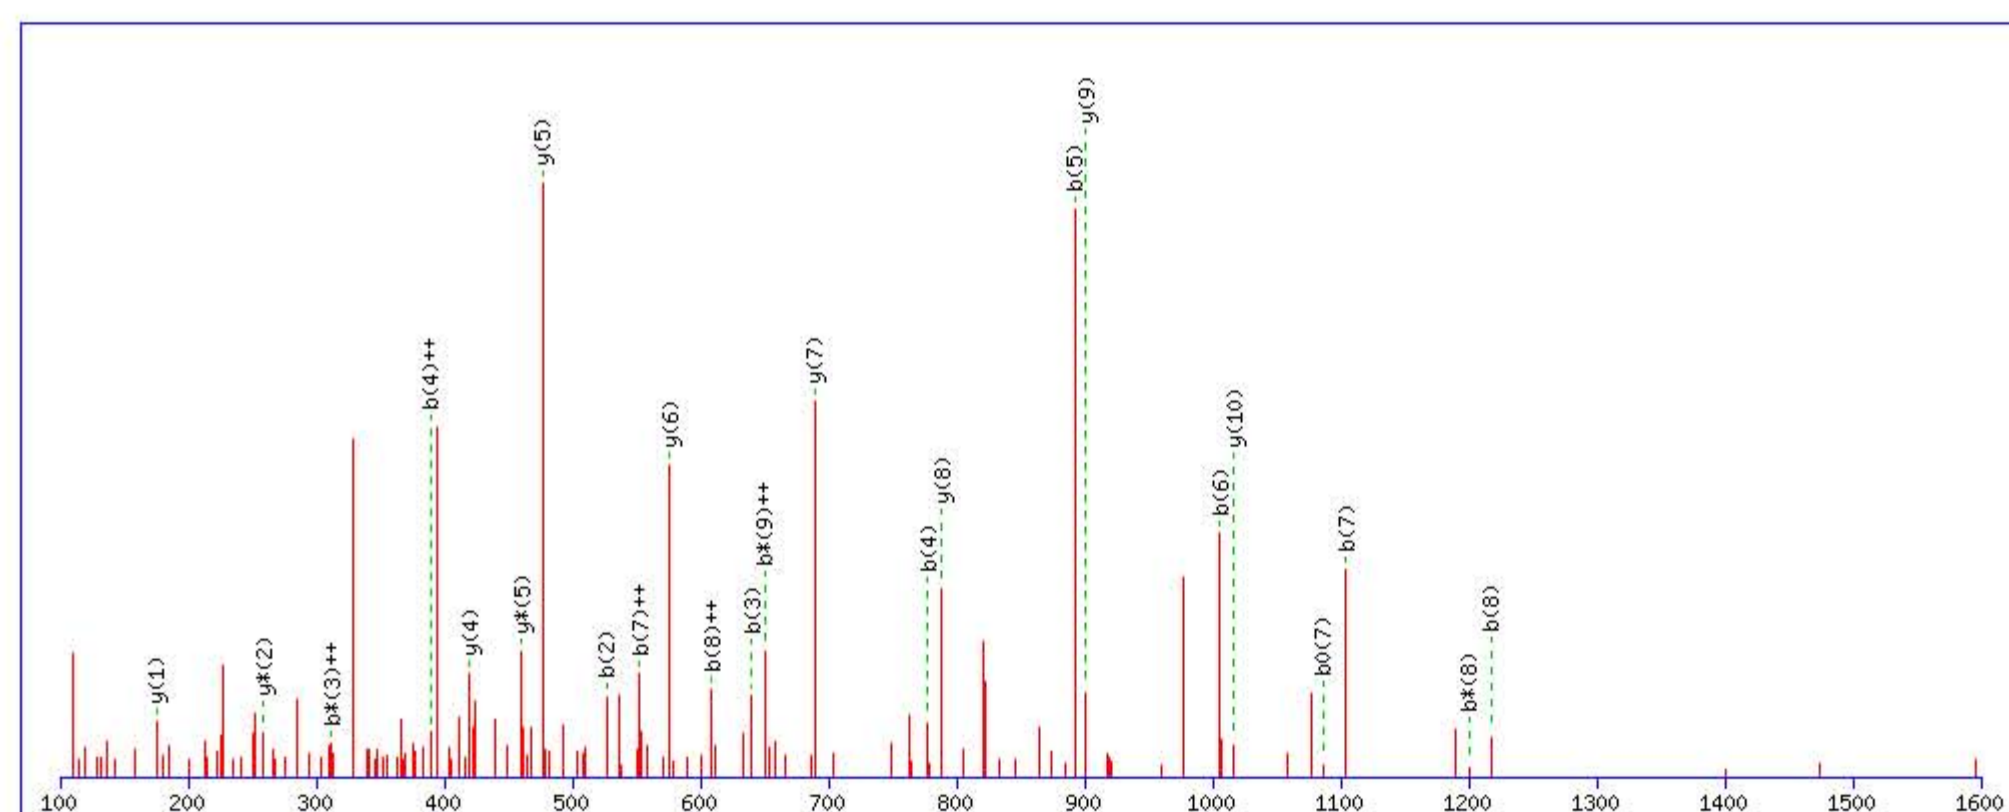

Monoisotopic mass of neutral peptide Mr(calc): 1791.966553

Fixed modifications: Carbamidomethyl (C) (apply to specified residues or termini only)

Variable modifications:

Q2 : Biotin:Thermo-21345 (Q)

Ions Score: 34 Expect: 0.0066

Matches : 24/152 fragment ions using 56 most intense peaks [\(help\)](#)

| #  | b                  | b <sup>++</sup>   | b <sup>*</sup>     | b <sup>***</sup>  | b <sup>0</sup>     | b <sup>0++</sup> | Seq. | y                  | y <sup>++</sup> | y <sup>*</sup>    | y <sup>***</sup> | y <sup>0</sup> | y <sup>0++</sup> | #  |
|----|--------------------|-------------------|--------------------|-------------------|--------------------|------------------|------|--------------------|-----------------|-------------------|------------------|----------------|------------------|----|
| 1  | 88.039304          | 44.523290         |                    |                   | 70.028739          | 35.518008        | S    |                    |                 |                   |                  |                |                  | 14 |
| 2  | <b>527.264630</b>  | 264.135953        | 510.238081         | 255.622679        | 509.254065         | 255.130671       | Q    | 1705.941788        | 853.474532      | 1688.915239       | 844.961257       | 1687.931223    | 844.469249       | 13 |
| 3  | <b>640.348694</b>  | 320.677985        | 623.322145         | <b>312.164711</b> | 622.338129         | 311.672703       | I    | 1266.716462        | 633.861869      | 1249.689913       | 625.348595       | 1248.705897    | 624.856587       | 12 |
| 4  | <b>777.407606</b>  | <b>389.207441</b> | 760.381057         | 380.694166        | 759.397041         | 380.202159       | H    | 1153.632398        | 577.319837      | 1136.605849       | 568.806563       | 1135.621833    | 568.314554       | 11 |
| 5  | <b>892.434549</b>  | 446.720913        | 875.408000         | 438.207638        | 874.423984         | 437.715630       | D    | <b>1016.573486</b> | 508.790381      | 999.546937        | 500.277107       | 998.562921     | 499.785099       | 10 |
| 6  | <b>1005.518613</b> | 503.262945        | 988.492064         | 494.749670        | 987.508048         | 494.257662       | I    | <b>901.546543</b>  | 451.276910      | 884.519994        | 442.763635       | 883.535978     | 442.271627       | 9  |
| 7  | <b>1104.587027</b> | <b>552.797152</b> | 1087.560478        | 544.283877        | <b>1086.576462</b> | 543.791869       | V    | <b>788.462479</b>  | 394.734878      | 771.435930        | 386.221603       | 770.451914     | 385.729595       | 8  |
| 8  | <b>1217.671091</b> | <b>609.339183</b> | <b>1200.644542</b> | 600.825909        | 1199.660526        | 600.333901       | L    | <b>689.394065</b>  | 345.200671      | 672.367516        | 336.687396       | 671.383500     | 336.195388       | 7  |
| 9  | 1316.739505        | 658.873391        | 1299.712956        | <b>650.360116</b> | 1298.728940        | 649.868108       | V    | <b>576.310001</b>  | 288.658639      | 559.283452        | 280.145364       | 558.299436     | 279.653356       | 6  |
| 10 | 1373.760969        | 687.384122        | 1356.734420        | 678.870848        | 1355.750404        | 678.378840       | G    | <b>477.241587</b>  | 239.124431      | <b>460.215038</b> | 230.611157       | 459.231022     | 230.119149       | 5  |
| 11 | 1430.782433        | 715.894854        | 1413.755884        | 707.381580        | 1412.771868        | 706.889572       | G    | <b>420.220123</b>  | 210.613699      | 403.193574        | 202.100425       | 402.209558     | 201.608417       | 4  |
| 12 | 1517.814461        | 759.410868        | 1500.787912        | 750.897594        | 1499.803896        | 750.405586       | S    | 363.198659         | 182.102968      | 346.172110        | 173.589693       | 345.188094     | 173.097685       | 3  |
| 13 | 1618.862140        | 809.934708        | 1601.835591        | 801.421434        | 1600.851575        | 800.929425       | T    | 276.166631         | 138.586953      | <b>259.140082</b> | 130.073679       | 258.156066     | 129.581671       | 2  |
| 14 |                    |                   |                    |                   |                    |                  | R    | <b>175.118952</b>  | 88.063114       | 158.092403        | 79.549839        |                |                  | 1  |

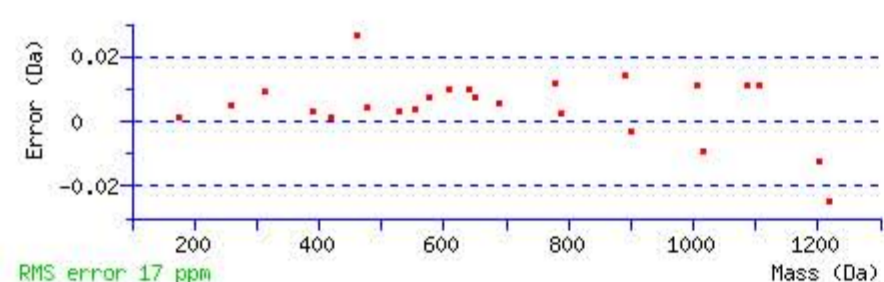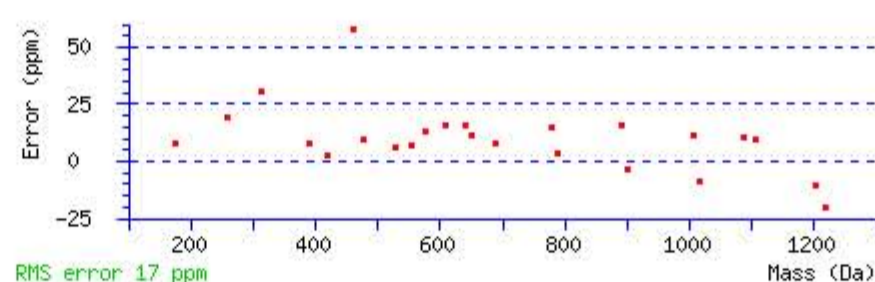

NCBI BLAST search of [SQIHDIVLVGGSTR](#)

(Parameters: blastp, nr protein database, expect=20000, no filter, PAM30)

Other BLAST [web gateways](#)

All matches to this query

| Score | Mr(calc):   | Delta    | Sequence                       |
|-------|-------------|----------|--------------------------------|
| 34.5  | 1791.966553 | 0.017729 | <a href="#">SQIHDIVLVGGSTR</a> |

Mascot: <http://www.matrixscience.com/>

# MASCOT Search Results

## Peptide View

MS/MS Fragmentation of **TYFPHFDSLHGSAQVK**  
 Found in **HBA\_HUMAN**, Hemoglobin subunit alpha OS=Homo sapiens GN=HBA1 PE=1 SV=2

Match to Query 54001: 2144.069536 from(537.024660,4+) rtinseconds(2056) index(6857)  
 Title: Locus:1.1.1.2970.8 File:"2013-07-02 CLN FXIII 180 min 1st F 1.wiff"  
 Data file C:\Program Files (x86)\Matrix Science\Mascot Daemon\mgf\7 FXIII 180 min 1st\mascot\_daemon\_merge.mgf

Click mouse within plot area to zoom in by factor of two about that point

Or, Plot from  to  Da   
 Label all possible matches  Label matches used for scoring

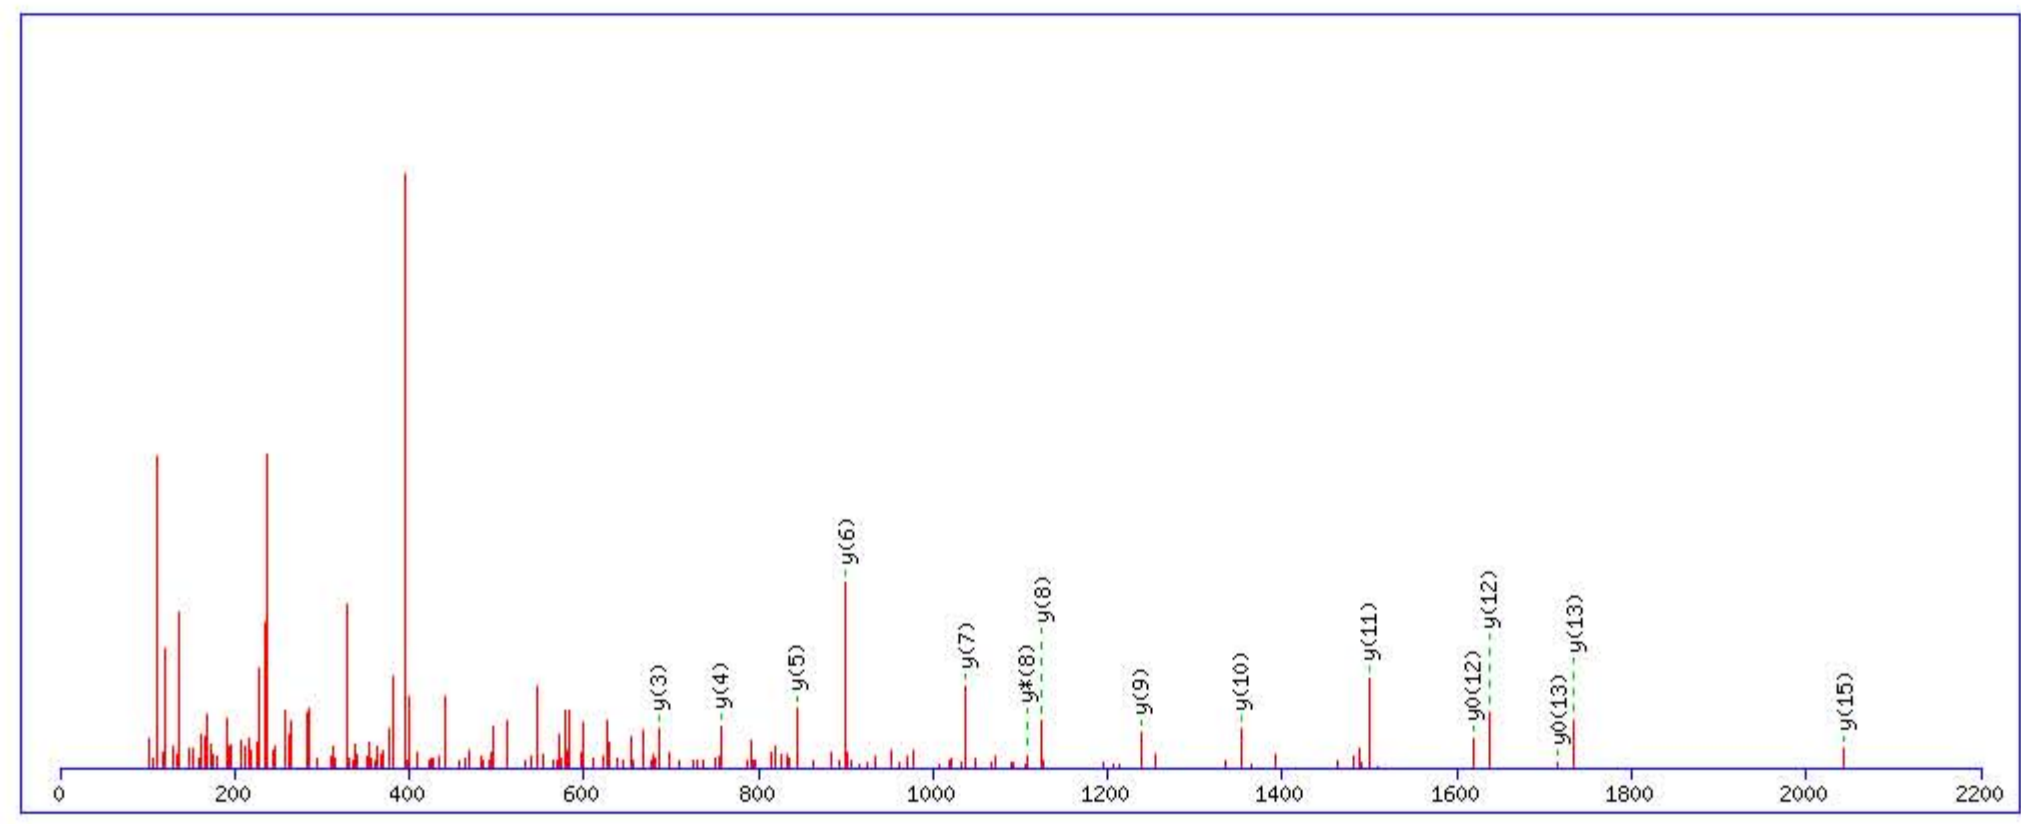

Monoisotopic mass of neutral peptide Mr(calc): 2144.051346  
 Fixed modifications: Carbamidomethyl (C) (apply to specified residues or termini only)  
 Variable modifications:  
 Q14 : Biotin:Thermo-21345 (Q)  
 Ions Score: 65 Expect: 9.3e-006  
 Matches : 15/146 fragment ions using 34 most intense peaks [\(help\)](#)

| #  | b           | b <sup>++</sup> | b <sup>*</sup> | b <sup>*++</sup> | b <sup>0</sup> | b <sup>0++</sup> | Seq. | y           | y <sup>++</sup> | y <sup>*</sup> | y <sup>*++</sup> | y <sup>0</sup> | y <sup>0++</sup> | #  |
|----|-------------|-----------------|----------------|------------------|----------------|------------------|------|-------------|-----------------|----------------|------------------|----------------|------------------|----|
| 1  | 102.054955  | 51.531116       |                |                  | 84.044390      | 42.525833        | T    |             |                 |                |                  |                |                  | 16 |
| 2  | 265.118284  | 133.062780      |                |                  | 247.107719     | 124.057498       | Y    | 2044.010930 | 1022.509103     | 2026.984381    | 1013.995829      | 2026.000365    | 1013.503821      | 15 |
| 3  | 412.186698  | 206.596987      |                |                  | 394.176133     | 197.591705       | F    | 1880.947601 | 940.977438      | 1863.921052    | 932.464164       | 1862.937036    | 931.972156       | 14 |
| 4  | 509.239462  | 255.123369      |                |                  | 491.228897     | 246.118087       | P    | 1733.879187 | 867.443231      | 1716.852638    | 858.929957       | 1715.868622    | 858.437949       | 13 |
| 5  | 646.298374  | 323.652825      |                |                  | 628.287809     | 314.647543       | H    | 1636.826423 | 818.916849      | 1619.799874    | 810.403575       | 1618.815858    | 809.911567       | 12 |
| 6  | 793.366788  | 397.187032      |                |                  | 775.356223     | 388.181750       | F    | 1499.767511 | 750.387393      | 1482.740962    | 741.874119       | 1481.756946    | 741.382111       | 11 |
| 7  | 908.393731  | 454.700504      |                |                  | 890.383166     | 445.695221       | D    | 1352.699097 | 676.853186      | 1335.672548    | 668.339912       | 1334.688532    | 667.847904       | 10 |
| 8  | 1021.477795 | 511.242536      |                |                  | 1003.467230    | 502.237253       | L    | 1237.672154 | 619.339715      | 1220.645605    | 610.826441       | 1219.661589    | 610.334433       | 9  |
| 9  | 1108.509823 | 554.758550      |                |                  | 1090.499258    | 545.753267       | S    | 1124.588090 | 562.797683      | 1107.561541    | 554.284409       | 1106.577525    | 553.792400       | 8  |
| 10 | 1245.568735 | 623.288006      |                |                  | 1227.558170    | 614.282723       | H    | 1037.556062 | 519.281669      | 1020.529513    | 510.768394       | 1019.545497    | 510.276386       | 7  |
| 11 | 1302.590199 | 651.798738      |                |                  | 1284.579634    | 642.793455       | G    | 900.497150  | 450.752213      | 883.470601     | 442.238938       | 882.486585     | 441.746930       | 6  |
| 12 | 1389.622227 | 695.314752      |                |                  | 1371.611662    | 686.309469       | S    | 843.475686  | 422.241481      | 826.449137     | 413.728207       | 825.465121     | 413.236199       | 5  |
| 13 | 1460.659341 | 730.833309      |                |                  | 1442.648776    | 721.828026       | A    | 756.443658  | 378.725467      | 739.417109     | 370.212192       |                |                  | 4  |
| 14 | 1899.884667 | 950.445972      | 1882.858118    | 941.932697       | 1881.874102    | 941.440689       | Q    | 685.406544  | 343.206910      | 668.379995     | 334.693635       |                |                  | 3  |
| 15 | 1998.953081 | 999.980179      | 1981.926532    | 991.466904       | 1980.942516    | 990.974896       | V    | 246.181218  | 123.594247      | 229.154669     | 115.080972       |                |                  | 2  |
| 16 |             |                 |                |                  |                |                  | K    | 147.112804  | 74.060040       | 130.086255     | 65.546765        |                |                  | 1  |

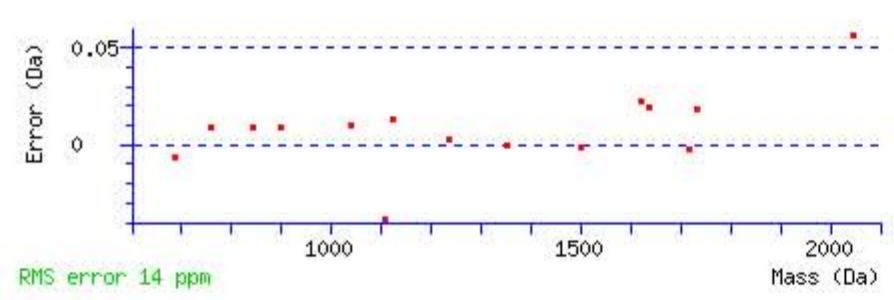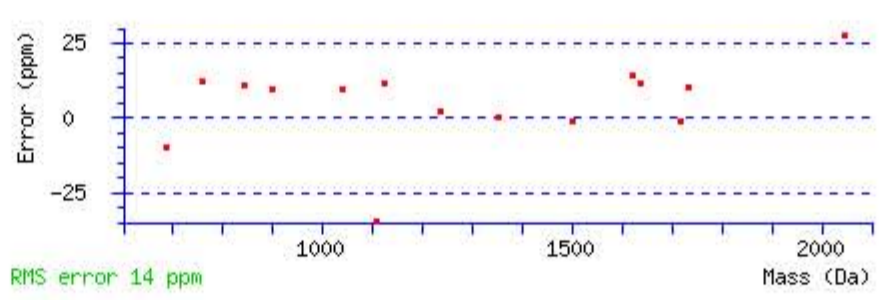

NCBI BLAST search of [TYFPHFDSLHGSAQVK](#)  
 (Parameters: blastp, nr protein database, expect=20000, no filter, PAM30)  
 Other BLAST [web gateways](#)

### All matches to this query

| Score | Mr(calc):   | Delta    | Sequence                         |
|-------|-------------|----------|----------------------------------|
| 64.7  | 2144.051346 | 0.018190 | <a href="#">TYFPHFDSLHGSAQVK</a> |

# MASCOT SCIENCE Mascot Search Results

## Peptide View

MS/MS Fragmentation of **EFTPPVQAAYQK**

Found in **HBB\_HUMAN**, Hemoglobin subunit beta OS=Homo sapiens GN=HBB PE=1 SV=2

Match to Query 42191: 1688.873952 from(563.965260,3+) rtinseconds(1984) index(6437)

Title: Locus:1.1.1.2945.5 File:"2013-07-02 CLN FXIII 180 min 1st F 1.wiff"

Data file C:\Program Files (x86)\Matrix Science\Mascot Daemon\mgf7 FXIII 180 min 1st\mascot\_daemon\_merge.mgf

Click mouse within plot area to zoom in by factor of two about that point

Or, Plot from  to  Da

Label all possible matches  Label matches used for scoring

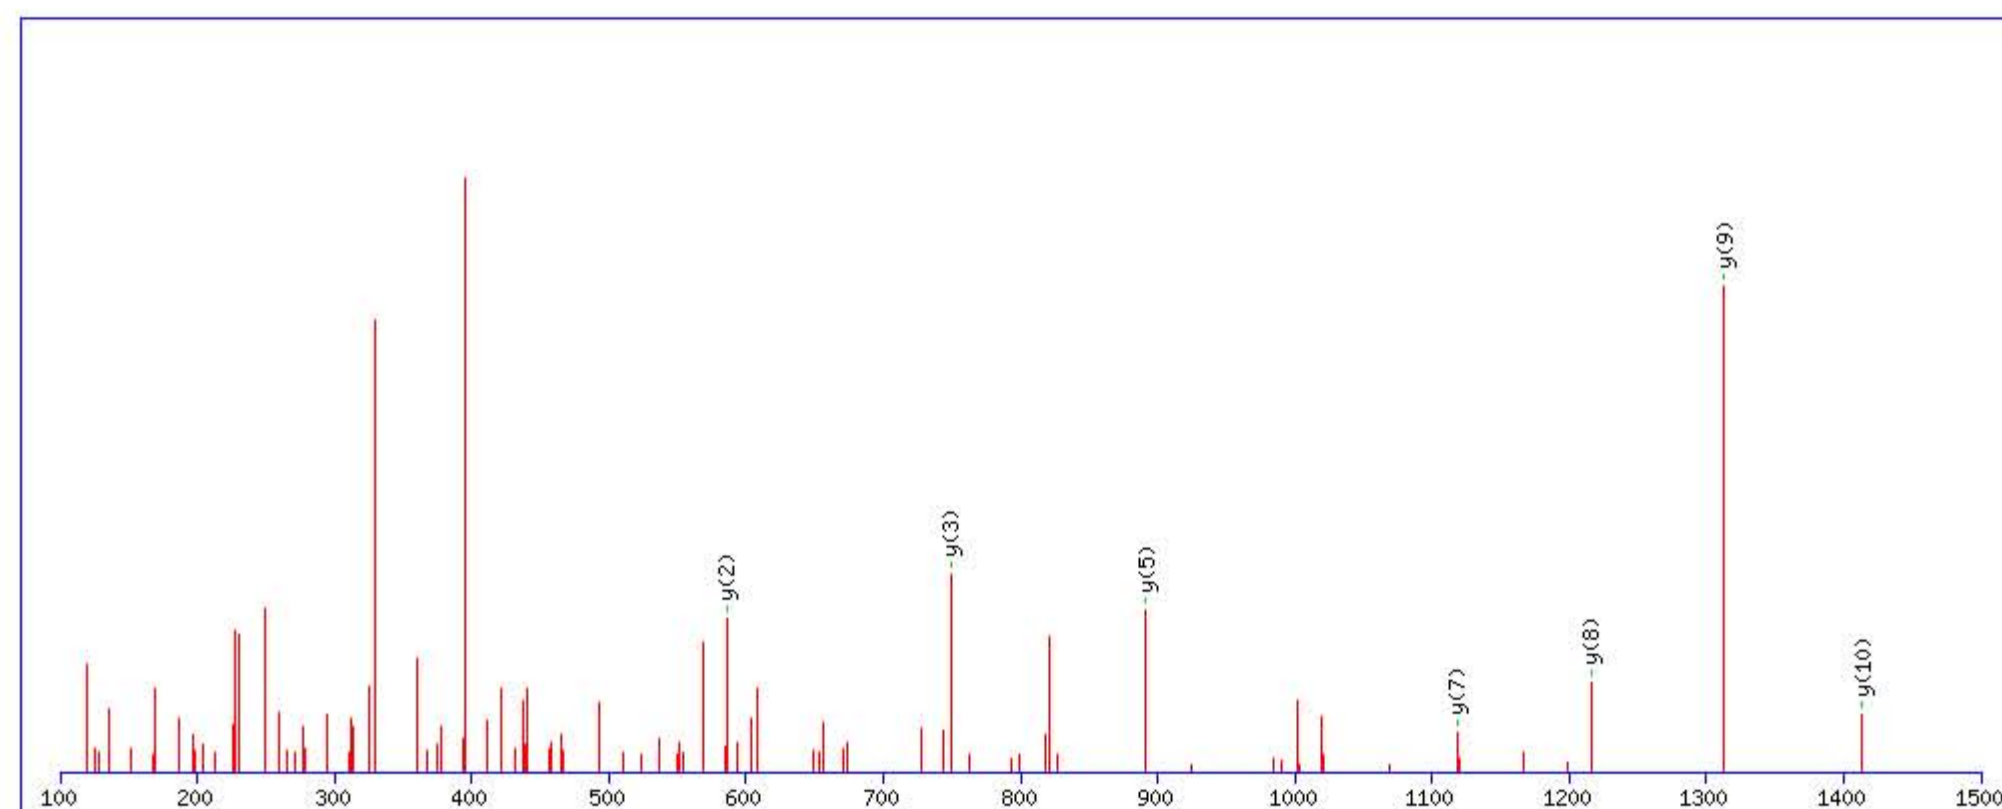

Monoisotopic mass of neutral peptide Mr(calc): 1688.859604

Fixed modifications: Carbamidomethyl (C) (apply to specified residues or termini only)

Variable modifications:

Q11 : Biotin:Thermo-21345 (Q)

Ions Score: 41 Expect: 0.002

Matches : 7/102 fragment ions using 13 most intense peaks [\(help\)](#)

| #  | b           | b <sup>++</sup> | b <sup>*</sup> | b <sup>*++</sup> | b <sup>0</sup> | b <sup>0++</sup> | Seq. | y                  | y <sup>++</sup> | y <sup>*</sup> | y <sup>*++</sup> | y <sup>0</sup> | y <sup>0++</sup> | #  |
|----|-------------|-----------------|----------------|------------------|----------------|------------------|------|--------------------|-----------------|----------------|------------------|----------------|------------------|----|
| 1  | 130.049869  | 65.528572       |                |                  | 112.039304     | 56.523290        | E    |                    |                 |                |                  |                |                  | 12 |
| 2  | 277.118283  | 139.062779      |                |                  | 259.107718     | 130.057497       | F    | 1560.824300        | 780.915788      | 1543.797751    | 772.402514       | 1542.813735    | 771.910506       | 11 |
| 3  | 378.165962  | 189.586619      |                |                  | 360.155397     | 180.581336       | T    | <b>1413.755886</b> | 707.381581      | 1396.729337    | 698.868307       | 1395.745321    | 698.376299       | 10 |
| 4  | 475.218726  | 238.113001      |                |                  | 457.208161     | 229.107719       | P    | <b>1312.708207</b> | 656.857742      | 1295.681658    | 648.344467       |                |                  | 9  |
| 5  | 572.271490  | 286.639383      |                |                  | 554.260925     | 277.634101       | P    | <b>1215.655443</b> | 608.331360      | 1198.628894    | 599.818085       |                |                  | 8  |
| 6  | 671.339904  | 336.173590      |                |                  | 653.329339     | 327.168308       | V    | <b>1118.602679</b> | 559.804978      | 1101.576130    | 551.291703       |                |                  | 7  |
| 7  | 799.398482  | 400.202879      | 782.371933     | 391.689605       | 781.387917     | 391.197597       | Q    | 1019.534265        | 510.270771      | 1002.507716    | 501.757496       |                |                  | 6  |
| 8  | 870.435596  | 435.721436      | 853.409047     | 427.208162       | 852.425031     | 426.716154       | A    | <b>891.475687</b>  | 446.241482      | 874.449138     | 437.728207       |                |                  | 5  |
| 9  | 941.472710  | 471.239993      | 924.446161     | 462.726719       | 923.462145     | 462.234711       | A    | 820.438573         | 410.722925      | 803.412024     | 402.209650       |                |                  | 4  |
| 10 | 1104.536039 | 552.771658      | 1087.509490    | 544.258383       | 1086.525474    | 543.766375       | Y    | <b>749.401459</b>  | 375.204368      | 732.374910     | 366.691093       |                |                  | 3  |
| 11 | 1543.761365 | 772.384321      | 1526.734816    | 763.871046       | 1525.750800    | 763.379038       | Q    | <b>586.338130</b>  | 293.672703      | 569.311581     | 285.159429       |                |                  | 2  |
| 12 |             |                 |                |                  |                |                  | K    | 147.112804         | 74.060040       | 130.086255     | 65.546765        |                |                  | 1  |

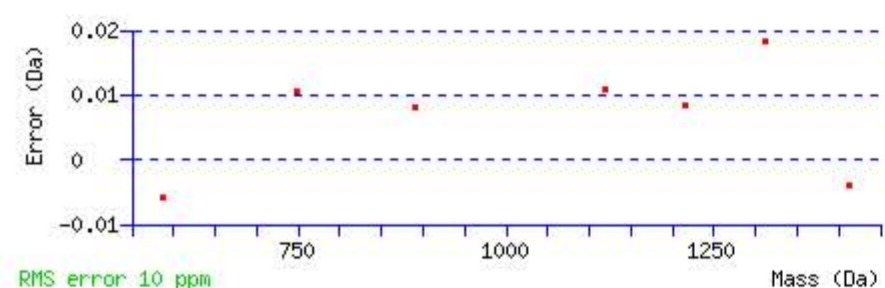

RMS error 10 ppm

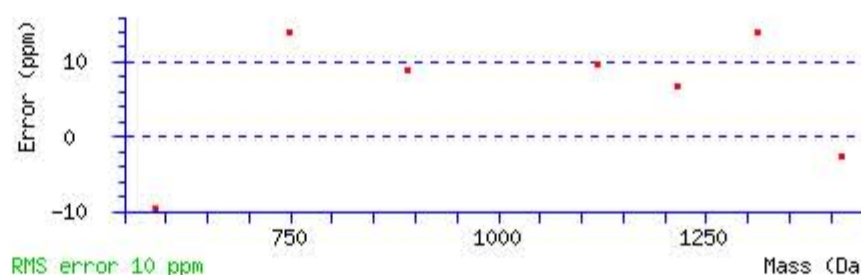

RMS error 10 ppm

NCBI BLAST search of [EFTPPVQAAYQK](#)

(Parameters: blastp, nr protein database, expect=20000, no filter, PAM30)

Other BLAST [web gateways](#)

All matches to this query

| Score | Mr(calc):   | Delta    | Sequence                     |
|-------|-------------|----------|------------------------------|
| 41.0  | 1688.859604 | 0.014348 | <a href="#">EFTPPVQAAYQK</a> |
| 10.4  | 1688.859604 | 0.014348 | <a href="#">EFTPPVQAAYQK</a> |

Mascot: <http://www.matrixscience.com/>

# MASCOT Search Results

## Peptide View

MS/MS Fragmentation of **GECQAEGVLFFQGDR**

Found in **HEMO\_HUMAN**, Hemopexin OS=Homo sapiens GN=HPX PE=1 SV=2

Match to Query 51349: 2022.953308 from(1012.483930,2+) rtinseconds(2384) index(81488)

Title: Locus:1.1.1.2180.11 File:"2013-07-02 CLN FXIII 180 min 1st FT.wiff"

Data file C:\Program Files (x86)\Matrix Science\Mascot Daemon\mgf\7 FXIII 180 min 1st\mascot\_daemon\_merge.mgf

Click mouse within plot area to zoom in by factor of two about that point

Or, Plot from  to  Da

Label all possible matches  Label matches used for scoring

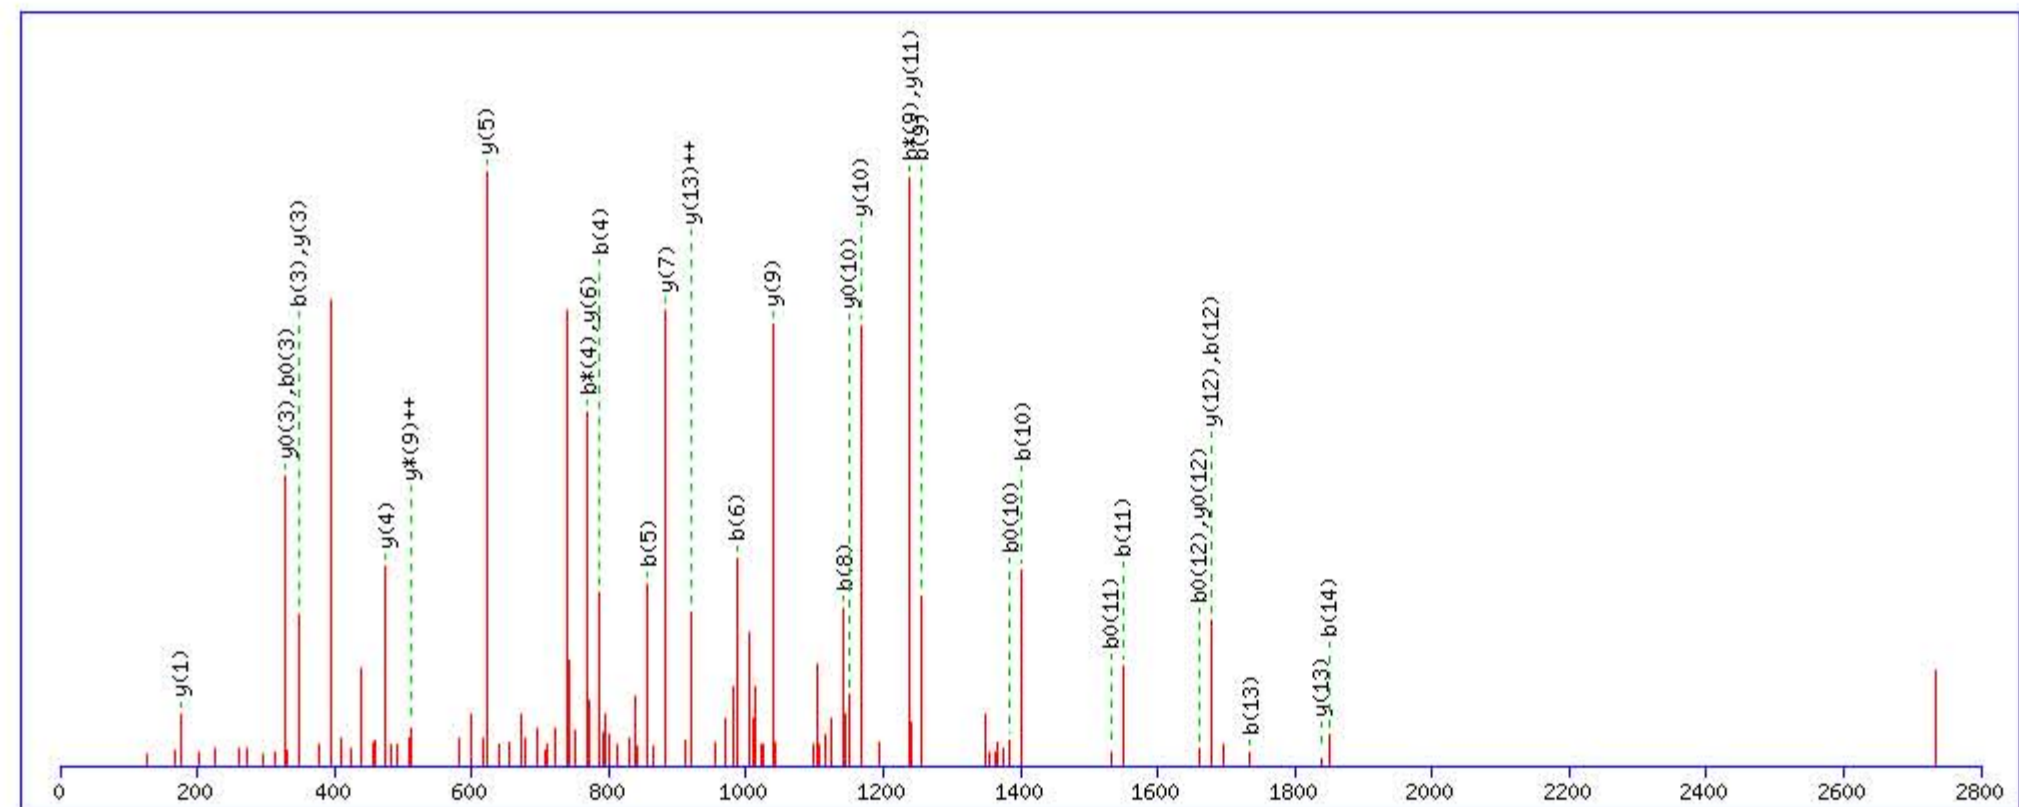

Monoisotopic mass of neutral peptide Mr(calc): 2022.929184

Fixed modifications: Carbamidomethyl (C) (apply to specified residues or termini only)

Variable modifications:

Q4 : Biotin:Thermo-21345 (Q)

Ions Score: 69 Expect: 1.7e-006

Matches : 33/158 fragment ions using 48 most intense peaks [\(help\)](#)

| #  | b                  | b <sup>++</sup> | b <sup>+</sup>     | b <sup>+++</sup> | b <sup>0</sup>     | b <sup>0++</sup> | Seq.     | y                  | y <sup>++</sup>   | y <sup>+</sup> | y <sup>+++</sup>  | y <sup>0</sup>     | y <sup>0++</sup> | #  |
|----|--------------------|-----------------|--------------------|------------------|--------------------|------------------|----------|--------------------|-------------------|----------------|-------------------|--------------------|------------------|----|
| 1  | 58.028740          | 29.518008       |                    |                  |                    |                  | <b>G</b> |                    |                   |                |                   |                    |                  | 15 |
| 2  | 187.071333         | 94.039305       |                    |                  | 169.060768         | 85.034022        | <b>E</b> | 1966.914982        | 983.961129        | 1949.888433    | 975.447855        | 1948.904417        | 974.955847       | 14 |
| 3  | <b>347.101982</b>  | 174.054629      |                    |                  | <b>329.091417</b>  | 165.049347       | <b>C</b> | <b>1837.872389</b> | <b>919.439833</b> | 1820.845840    | 910.926558        | 1819.861824        | 910.434550       | 13 |
| 4  | <b>786.327308</b>  | 393.667292      | <b>769.300759</b>  | 385.154018       | 768.316743         | 384.662010       | <b>Q</b> | <b>1677.841740</b> | 839.424508        | 1660.815191    | 830.911234        | <b>1659.831175</b> | 830.419226       | 12 |
| 5  | <b>857.364422</b>  | 429.185849      | 840.337873         | 420.672575       | 839.353857         | 420.180567       | <b>A</b> | <b>1238.616414</b> | 619.811845        | 1221.589865    | 611.298571        | 1220.605849        | 610.806563       | 11 |
| 6  | <b>986.407015</b>  | 493.707146      | 969.380466         | 485.193871       | 968.396450         | 484.701863       | <b>E</b> | <b>1167.579300</b> | 584.293288        | 1150.552751    | 575.780014        | <b>1149.568735</b> | 575.288006       | 10 |
| 7  | 1043.428479        | 522.217878      | 1026.401930        | 513.704603       | 1025.417914        | 513.212595       | <b>G</b> | <b>1038.536707</b> | 519.771992        | 1021.510158    | <b>511.258717</b> | 1020.526142        | 510.766709       | 9  |
| 8  | <b>1142.496893</b> | 571.752085      | 1125.470344        | 563.238810       | 1124.486328        | 562.746802       | <b>V</b> | 981.515243         | 491.261260        | 964.488694     | 482.747985        | 963.504678         | 482.255977       | 8  |
| 9  | <b>1255.580957</b> | 628.294117      | <b>1238.554408</b> | 619.780842       | 1237.570392        | 619.288834       | <b>L</b> | <b>882.446829</b>  | 441.727053        | 865.420280     | 433.213778        | 864.436264         | 432.721770       | 7  |
| 10 | <b>1402.649371</b> | 701.828324      | 1385.622822        | 693.315049       | <b>1384.638806</b> | 692.823041       | <b>F</b> | <b>769.362765</b>  | 385.185021        | 752.336216     | 376.671746        | 751.352200         | 376.179738       | 6  |
| 11 | <b>1549.717785</b> | 775.362531      | 1532.691236        | 766.849256       | <b>1531.707220</b> | 766.357248       | <b>F</b> | <b>622.294351</b>  | 311.650814        | 605.267802     | 303.137539        | 604.283786         | 302.645531       | 5  |
| 12 | <b>1677.776363</b> | 839.391820      | 1660.749814        | 830.878545       | <b>1659.765798</b> | 830.386537       | <b>Q</b> | <b>475.225937</b>  | 238.116606        | 458.199388     | 229.603332        | 457.215372         | 229.111324       | 4  |
| 13 | <b>1734.797827</b> | 867.902552      | 1717.771278        | 859.389277       | 1716.787262        | 858.897269       | <b>G</b> | <b>347.167359</b>  | 174.087317        | 330.140810     | 165.574043        | <b>329.156794</b>  | 165.082035       | 3  |
| 14 | <b>1849.824770</b> | 925.416023      | 1832.798221        | 916.902749       | 1831.814205        | 916.410741       | <b>D</b> | 290.145895         | 145.576585        | 273.119346     | 137.063311        | 272.135330         | 136.571303       | 2  |
| 15 |                    |                 |                    |                  |                    |                  | <b>R</b> | <b>175.118952</b>  | 88.063114         | 158.092403     | 79.549839         |                    |                  | 1  |

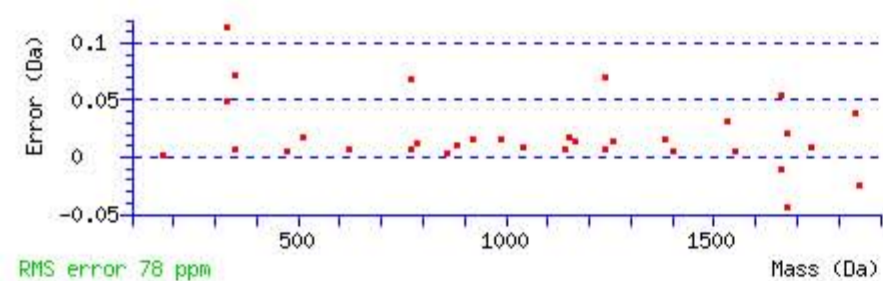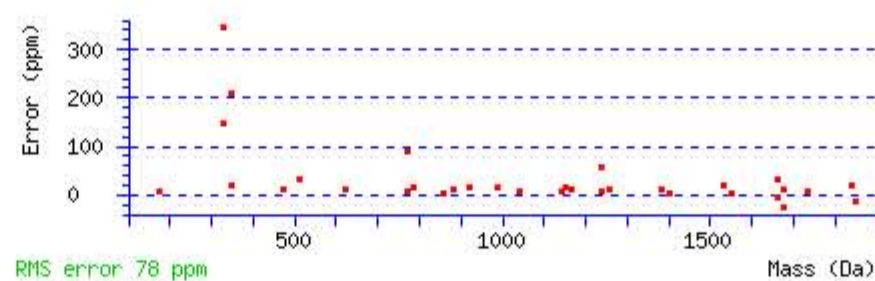

NCBI BLAST search of **GECQAEGVLFFQGDR**

(Parameters: blastp, nr protein database, expect=20000, no filter, PAM30)

Other BLAST [web gateways](#)

## All matches to this query

| Score | Mr(calc):   | Delta     | Sequence                        |
|-------|-------------|-----------|---------------------------------|
| 69.4  | 2022.929184 | 0.024124  | <a href="#">GECQAEGVLFFQGDR</a> |
| 18.3  | 2022.929184 | 0.024124  | <a href="#">GECQAEGVLFFQGDR</a> |
| 7.7   | 2022.950317 | 0.002991  | <a href="#">NMSFVNDLIVTQDGR</a> |
| 4.2   | 2022.980133 | -0.026825 | <a href="#">QHMEQKEQATAR</a>    |
| 0.4   | 2022.980133 | -0.026825 | <a href="#">QHMEQKEQATAR</a>    |

Mascot: <http://www.matrixscience.com/>

# MASCOT Search Results

## Peptide View

MS/MS Fragmentation of **SGAQATWTELPWPHEK**

Found in **HEMO\_HUMAN**, Hemopexin OS=Homo sapiens GN=HPX PE=1 SV=2

Match to Query 54072: 2148.068142 from(717.029990,3+) rtinseconds(2279) index(80802)

Title: Locus:1.1.1.2144.13 File:"2013-07-02 CLN FXIII 180 min 1st FT.wiff"

Data file C:\Program Files (x86)\Matrix Science\Mascot Daemon\mgf7 FXIII 180 min 1st\mascot\_daemon\_merge.mgf

Click mouse within plot area to zoom in by factor of two about that point

Or, Plot from  to  Da

Label all possible matches  Label matches used for scoring

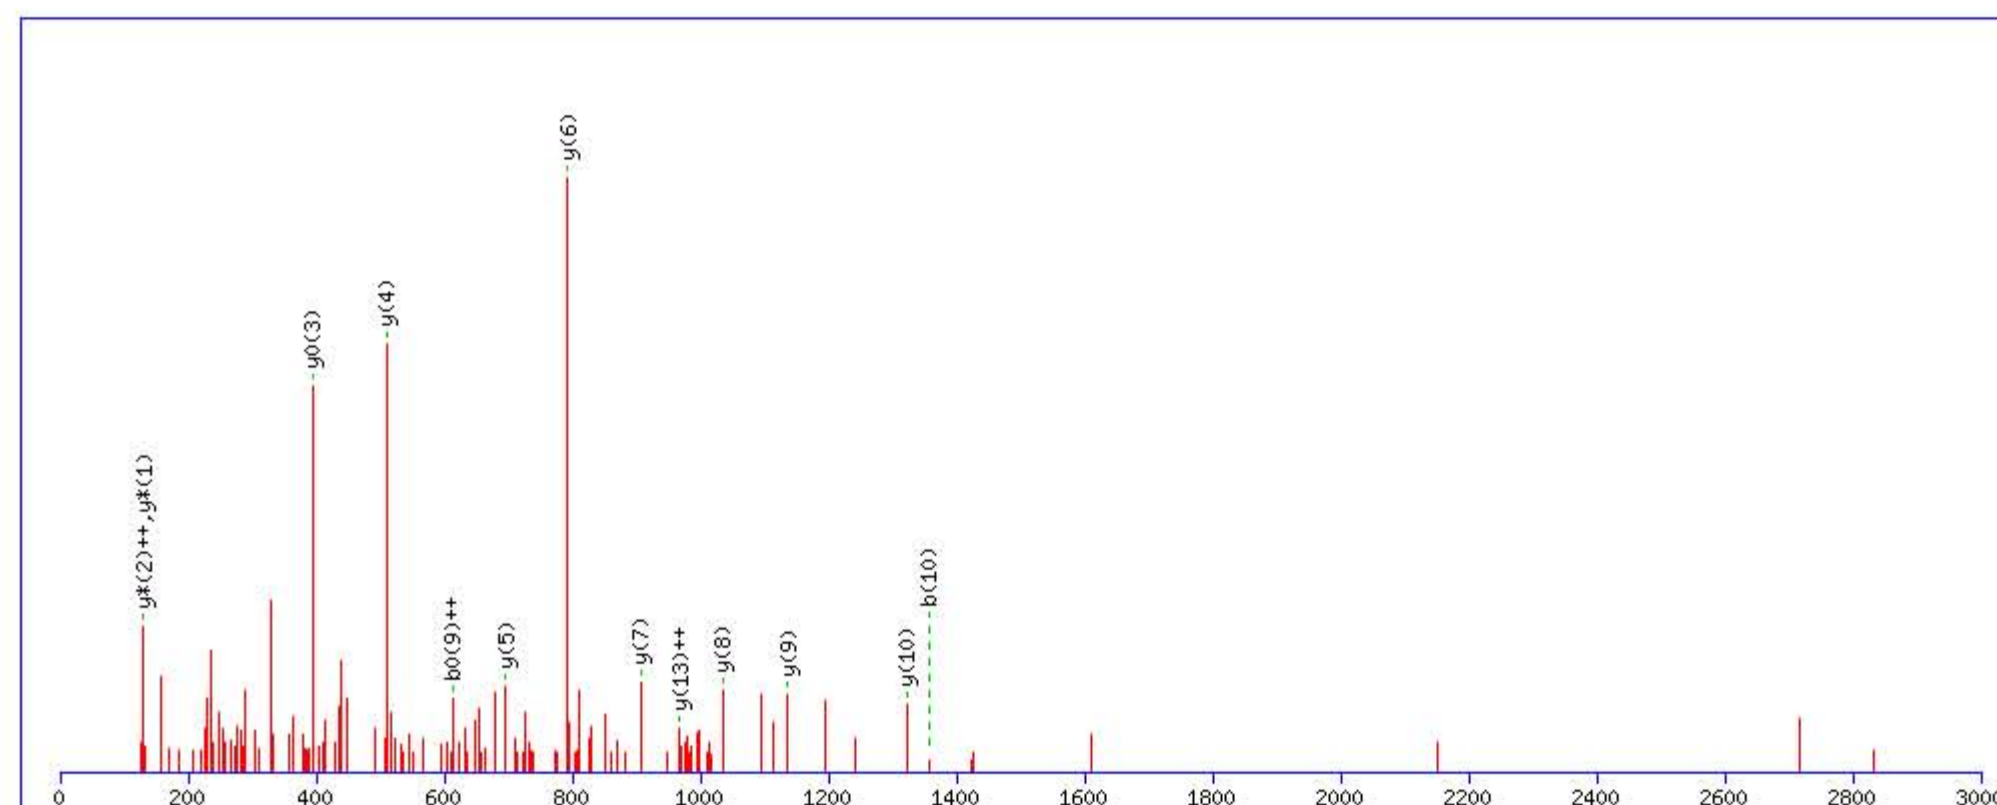

Monoisotopic mass of neutral peptide Mr(calc): 2148.046234

Fixed modifications: Carbamidomethyl (C) (apply to specified residues or termini only)

Variable modifications:

Q4 : Biotin:Thermo-21345 (Q)

Ions Score: 41 Expect: 0.0019

Matches : 13/172 fragment ions using 15 most intense peaks [\(help\)](#)

| #  | b           | b <sup>++</sup> | b <sup>*</sup> | b <sup>+++</sup> | b <sup>0</sup> | b <sup>0++</sup> | Seq. | y           | y <sup>++</sup> | y <sup>*</sup> | y <sup>+++</sup> | y <sup>0</sup> | y <sup>0++</sup> | #  |
|----|-------------|-----------------|----------------|------------------|----------------|------------------|------|-------------|-----------------|----------------|------------------|----------------|------------------|----|
| 1  | 88.039304   | 44.523290       |                |                  | 70.028739      | 35.518008        | S    |             |                 |                |                  |                |                  | 16 |
| 2  | 145.060768  | 73.034022       |                |                  | 127.050203     | 64.028740        | G    | 2062.021496 | 1031.514386     | 2044.994947    | 1023.001111      | 2044.010931    | 1022.509103      | 15 |
| 3  | 216.097882  | 108.552579      |                |                  | 198.087317     | 99.547296        | A    | 2005.000032 | 1003.003654     | 1987.973483    | 994.490380       | 1986.989467    | 993.998372       | 14 |
| 4  | 655.323208  | 328.165242      | 638.296659     | 319.651968       | 637.312643     | 319.159960       | Q    | 1933.962918 | 967.485097      | 1916.936369    | 958.971823       | 1915.952353    | 958.479815       | 13 |
| 5  | 726.360322  | 363.683799      | 709.333773     | 355.170525       | 708.349757     | 354.678517       | A    | 1494.737592 | 747.872434      | 1477.711043    | 739.359160       | 1476.727027    | 738.867152       | 12 |
| 6  | 827.408001  | 414.207639      | 810.381452     | 405.694364       | 809.397436     | 405.202356       | T    | 1423.700478 | 712.353877      | 1406.673929    | 703.840603       | 1405.689913    | 703.348595       | 11 |
| 7  | 1013.487314 | 507.247295      | 996.460765     | 498.734020       | 995.476749     | 498.242012       | W    | 1322.652799 | 661.830038      | 1305.626250    | 653.316763       | 1304.642234    | 652.824755       | 10 |
| 8  | 1114.534993 | 557.771135      | 1097.508444    | 549.257860       | 1096.524428    | 548.765852       | T    | 1136.573486 | 568.790381      | 1119.546937    | 560.277107       | 1118.562921    | 559.785099       | 9  |
| 9  | 1243.577586 | 622.292431      | 1226.551037    | 613.779157       | 1225.567021    | 613.287149       | E    | 1035.525807 | 518.266542      | 1018.499258    | 509.753267       | 1017.515242    | 509.261259       | 8  |
| 10 | 1356.661650 | 678.834463      | 1339.635101    | 670.321189       | 1338.651085    | 669.829181       | L    | 906.483214  | 453.745245      | 889.456665     | 445.231971       | 888.472649     | 444.739963       | 7  |
| 11 | 1453.714414 | 727.360845      | 1436.687865    | 718.847571       | 1435.703849    | 718.355563       | P    | 793.399150  | 397.203213      | 776.372601     | 388.689939       | 775.388585     | 388.197931       | 6  |
| 12 | 1639.793727 | 820.400502      | 1622.767178    | 811.887227       | 1621.783162    | 811.395219       | W    | 696.346386  | 348.676831      | 679.319837     | 340.163557       | 678.335821     | 339.671549       | 5  |
| 13 | 1736.846491 | 868.926884      | 1719.819942    | 860.413609       | 1718.835926    | 859.921601       | P    | 510.267073  | 255.637175      | 493.240524     | 247.123900       | 492.256508     | 246.631892       | 4  |
| 14 | 1873.905403 | 937.456340      | 1856.878854    | 928.943065       | 1855.894838    | 928.451057       | H    | 413.214309  | 207.110793      | 396.187760     | 198.597518       | 395.203744     | 198.105510       | 3  |
| 15 | 2002.947996 | 1001.977636     | 1985.921447    | 993.464362       | 1984.937431    | 992.972354       | E    | 276.155397  | 138.581337      | 259.128848     | 130.068062       | 258.144832     | 129.576054       | 2  |
| 16 |             |                 |                |                  |                |                  | K    | 147.112804  | 74.060040       | 130.086255     | 65.546765        |                |                  | 1  |

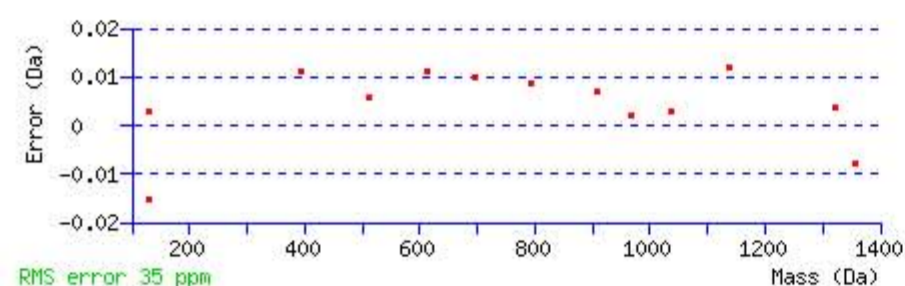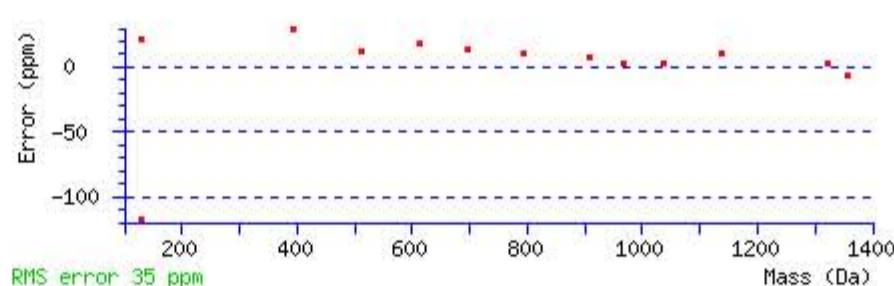

NCBI BLAST search of **SGAQATWTELPWPHEK**

(Parameters: blastp, nr protein database, expect=20000, no filter, PAM30)

Other BLAST [web gateways](#)

## All matches to this query

| Score | Mr(calc):   | Delta    | Sequence                         |
|-------|-------------|----------|----------------------------------|
| 41.4  | 2148.046234 | 0.021908 | <a href="#">SGAQATWTELPWPHEK</a> |

Mascot: <http://www.matrixscience.com/>



# MASCOT Search Results

## Peptide View

MS/MS Fragmentation of **LLQDEFPGIPSPLDAAVECHR**

Found in **HEMO\_HUMAN**, Hemopexin OS=Homo sapiens GN=HPX PE=1 SV=2

Match to Query 65413: 2674.355742 from(892.459190,3+) rtinseconds(2652) index(83080)

Title: Locus:1.1.1.2273.22 File:"2013-07-02 CLN FXIII 180 min 1st FT.wiff"

Data file C:\Program Files (x86)\Matrix Science\Mascot Daemon\mgf\7 FXIII 180 min 1st\mascot\_daemon\_merge.mgf

Click mouse within plot area to zoom in by factor of two about that point

Or, Plot from 100 to 1800 Da Full range

Label all possible matches  Label matches used for scoring

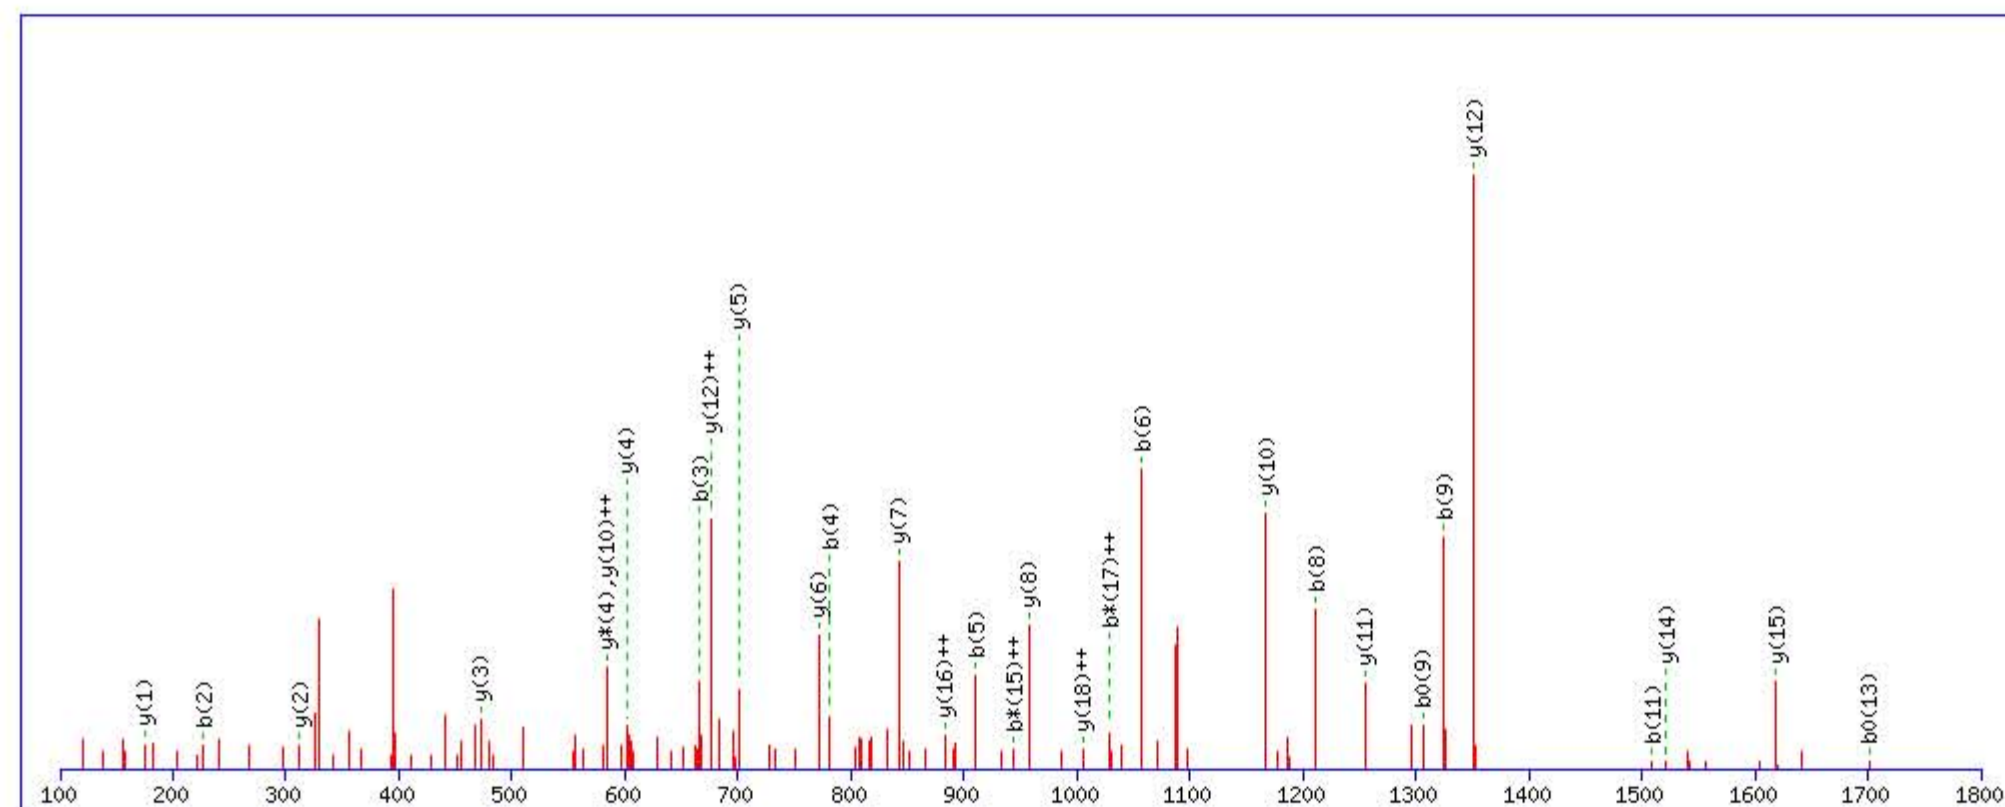

Monoisotopic mass of neutral peptide Mr(calc): 2674.324722

Fixed modifications: Carbamidomethyl (C) (apply to specified residues or termini only)

Variable modifications:

Q3 : Biotin:Thermo-21345 (Q)

Ions Score: 75 Expect: 9.1e-007

Matches : 30/224 fragment ions using 58 most intense peaks [\(help\)](#)

| #  | b                  | b <sup>++</sup> | b <sup>*</sup> | b <sup>*++</sup>   | b <sup>0</sup>     | b <sup>0++</sup> | Seq. | y                  | y <sup>++</sup>    | y <sup>*</sup>    | y <sup>*++</sup> | y <sup>0</sup> | y <sup>0++</sup> | #  |
|----|--------------------|-----------------|----------------|--------------------|--------------------|------------------|------|--------------------|--------------------|-------------------|------------------|----------------|------------------|----|
| 1  | 114.091340         | 57.549308       |                |                    |                    |                  | L    |                    |                    |                   |                  |                |                  | 21 |
| 2  | <b>227.175404</b>  | 114.091340      |                |                    |                    |                  | L    | 2562.247943        | 1281.627609        | 2545.221394       | 1273.114335      | 2544.237378    | 1272.622327      | 20 |
| 3  | <b>666.400730</b>  | 333.704003      | 649.374181     | 325.190729         |                    |                  | Q    | 2449.163879        | 1225.085577        | 2432.137330       | 1216.572303      | 2431.153314    | 1216.080295      | 19 |
| 4  | <b>781.427673</b>  | 391.217475      | 764.401124     | 382.704200         | 763.417108         | 382.212192       | D    | 2009.938553        | <b>1005.472914</b> | 1992.912004       | 996.959640       | 1991.927988    | 996.467632       | 18 |
| 5  | <b>910.470266</b>  | 455.738771      | 893.443717     | 447.225497         | 892.459701         | 446.733489       | E    | 1894.911610        | 947.959443         | 1877.885061       | 939.446169       | 1876.901045    | 938.954160       | 17 |
| 6  | <b>1057.538680</b> | 529.272978      | 1040.512131    | 520.759704         | 1039.528115        | 520.267696       | F    | 1765.869017        | <b>883.438146</b>  | 1748.842468       | 874.924872       | 1747.858452    | 874.432864       | 16 |
| 7  | 1154.591444        | 577.799360      | 1137.564895    | 569.286086         | 1136.580879        | 568.794078       | P    | <b>1618.800603</b> | 809.903939         | 1601.774054       | 801.390665       | 1600.790038    | 800.898657       | 15 |
| 8  | <b>1211.612908</b> | 606.310092      | 1194.586359    | 597.796818         | 1193.602343        | 597.304810       | G    | <b>1521.747839</b> | 761.377557         | 1504.721290       | 752.864283       | 1503.737274    | 752.372275       | 14 |
| 9  | <b>1324.696972</b> | 662.852124      | 1307.670423    | 654.338850         | <b>1306.686407</b> | 653.846841       | I    | 1464.726375        | 732.866825         | 1447.699826       | 724.353551       | 1446.715810    | 723.861543       | 13 |
| 10 | 1421.749736        | 711.378506      | 1404.723187    | 702.865232         | 1403.739171        | 702.373223       | P    | <b>1351.642311</b> | <b>676.324793</b>  | 1334.615762       | 667.811519       | 1333.631746    | 667.319511       | 12 |
| 11 | <b>1508.781764</b> | 754.894520      | 1491.755215    | 746.381246         | 1490.771199        | 745.889238       | S    | <b>1254.589547</b> | 627.798411         | 1237.562998       | 619.285137       | 1236.578982    | 618.793129       | 11 |
| 12 | 1605.834528        | 803.420902      | 1588.807979    | 794.907628         | 1587.823963        | 794.415620       | P    | <b>1167.557519</b> | <b>584.282397</b>  | 1150.530970       | 575.769123       | 1149.546954    | 575.277115       | 10 |
| 13 | 1718.918592        | 859.962934      | 1701.892043    | 851.449660         | <b>1700.908027</b> | 850.957652       | L    | 1070.504755        | 535.756015         | 1053.478206       | 527.242741       | 1052.494190    | 526.750733       | 9  |
| 14 | 1833.945535        | 917.476406      | 1816.918986    | 908.963131         | 1815.934970        | 908.471123       | D    | <b>957.420691</b>  | 479.213983         | 940.394142        | 470.700709       | 939.410126     | 470.208701       | 8  |
| 15 | 1904.982649        | 952.994963      | 1887.956100    | <b>944.481688</b>  | 1886.972084        | 943.989680       | A    | <b>842.393748</b>  | 421.700512         | 825.367199        | 413.187237       | 824.383183     | 412.695229       | 7  |
| 16 | 1976.019763        | 988.513520      | 1958.993214    | 980.000245         | 1958.009198        | 979.508237       | A    | <b>771.356634</b>  | 386.181955         | 754.330085        | 377.668680       | 753.346069     | 377.176672       | 6  |
| 17 | 2075.088177        | 1038.047726     | 2058.061628    | <b>1029.534452</b> | 2057.077612        | 1029.042444      | V    | <b>700.319520</b>  | 350.663398         | 683.292971        | 342.150123       | 682.308955     | 341.658115       | 5  |
| 18 | 2204.130770        | 1102.569023     | 2187.104221    | 1094.055748        | 2186.120205        | 1093.563740      | E    | <b>601.251106</b>  | 301.129191         | <b>584.224557</b> | 292.615916       | 583.240541     | 292.123908       | 4  |
| 19 | 2364.161419        | 1182.584347     | 2347.134870    | 1174.071073        | 2346.150854        | 1173.579065      | C    | <b>472.208513</b>  | 236.607894         | 455.181964        | 228.094620       |                |                  | 3  |
| 20 | 2501.220331        | 1251.113803     | 2484.193782    | 1242.600529        | 2483.209766        | 1242.108521      | H    | <b>312.177864</b>  | 156.592570         | 295.151315        | 148.079295       |                |                  | 2  |
| 21 |                    |                 |                |                    |                    |                  | R    | <b>175.118952</b>  | 88.063114          | 158.092403        | 79.549839        |                |                  | 1  |

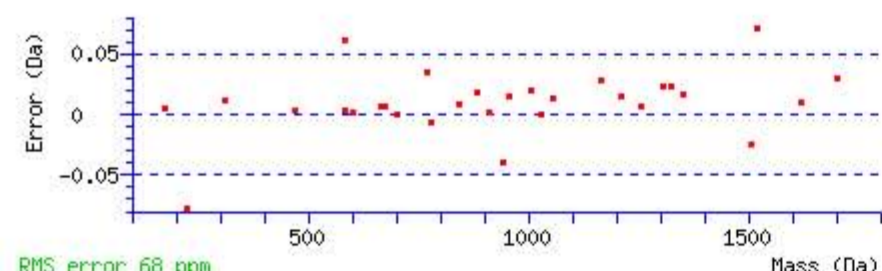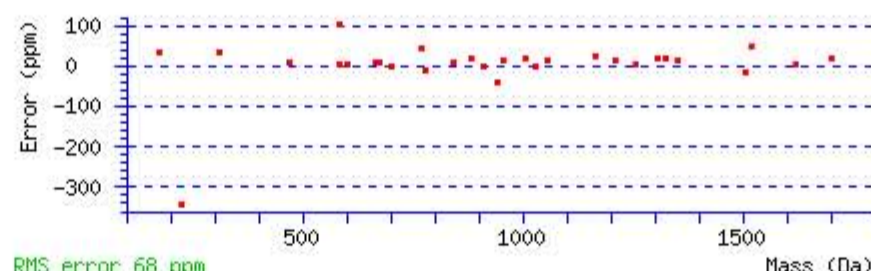

NCBI BLAST search of **LLQDEFPGIPSPLDAAVECHR**

(Parameters: blastp, nr protein database, expect=20000, no filter, PAM30)

Other BLAST [web gateways](#)

All matches to this query

| Score | Mr(calc):   | Delta    | Sequence                              |
|-------|-------------|----------|---------------------------------------|
| 75.0  | 2674.324722 | 0.031020 | <a href="#">LLQDEFPGIPSPLDAAVECHR</a> |

Mascot: <http://www.matrixscience.com/>

# MASCOT SEARCH RESULTS

## Peptide View

MS/MS Fragmentation of **GPLDQLEK**

Found in **HEP2\_HUMAN**, Heparin cofactor 2 OS=Homo sapiens GN=SERPIND1 PE=1 SV=3

Match to Query 23988: 1209.656308 from(605.835430,2+) rtinseconds(2076) index(42754)

Title: Locus:1.1.1.3172.10 File:"2013-07-02 CLN FXIII 180 min 1st F 3.wiff"

Data file C:\Program Files (x86)\Matrix Science\Mascot Daemon\mgf7 FXIII 180 min 1st\mascot\_daemon\_merge.mgf

Click mouse within plot area to zoom in by factor of two about that point

Or, Plot from  to  Da

Label all possible matches  Label matches used for scoring

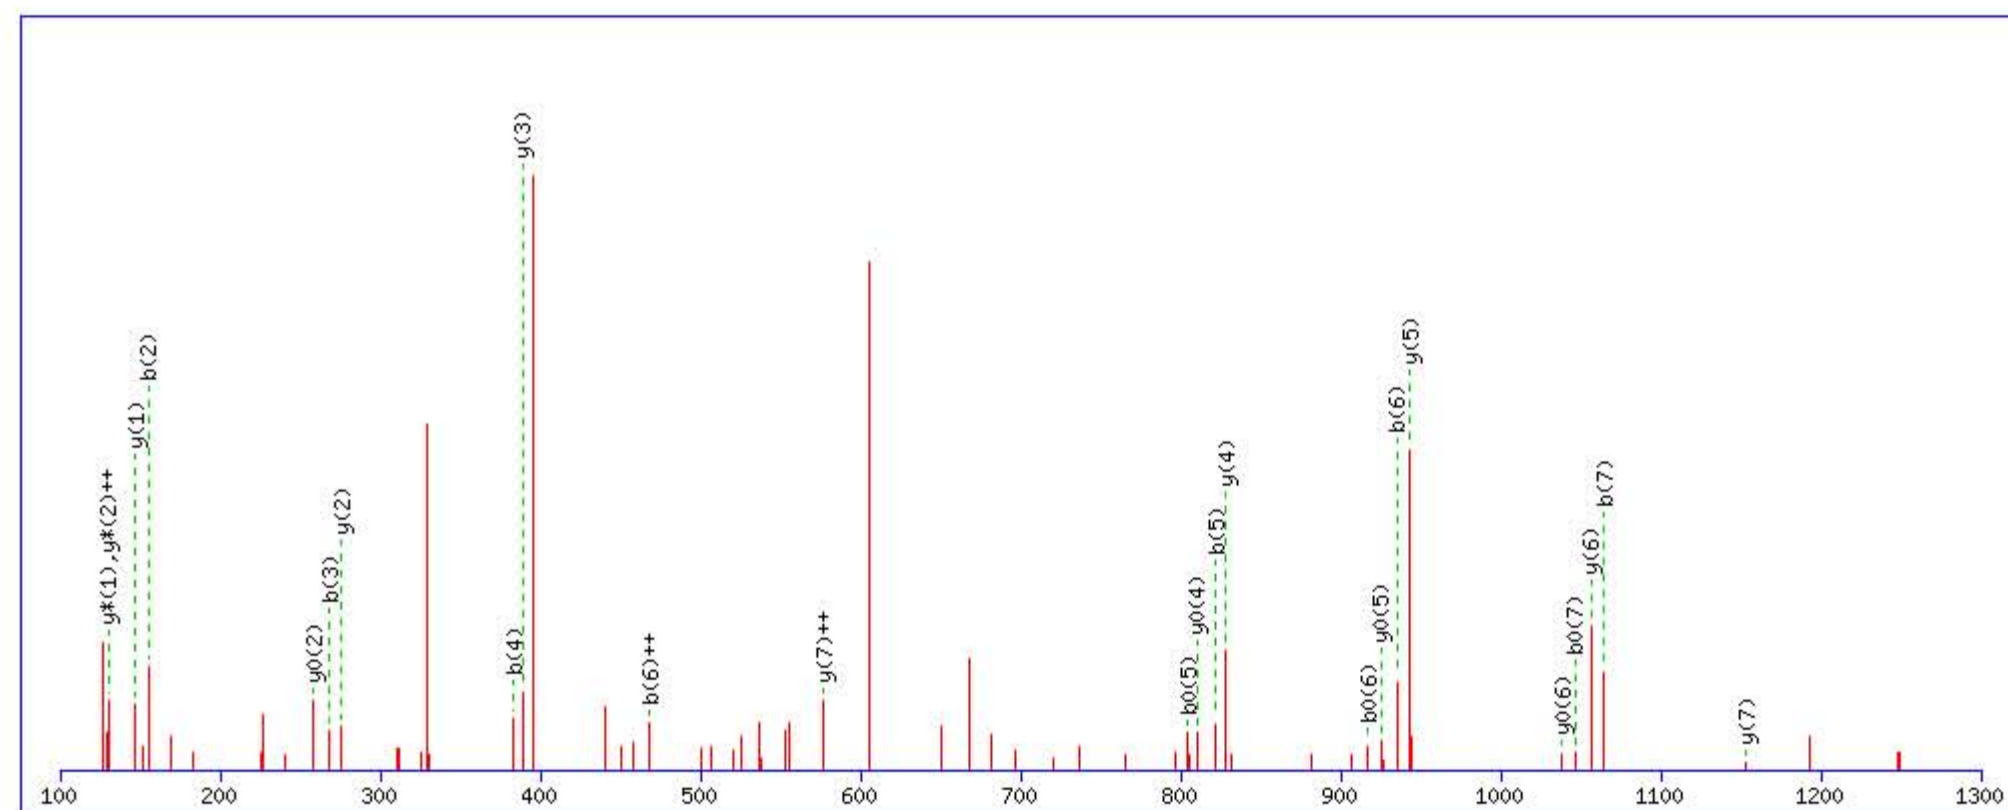

Monoisotopic mass of neutral peptide Mr(calc): 1209.642731

Fixed modifications: Carbamidomethyl (C) (apply to specified residues or termini only)

Variable modifications:

Q5 : Biotin:Thermo-21345 (Q)

Ions Score: 39 Expect: 0.0021

Matches : 24/68 fragment ions using 41 most intense peaks [\(help\)](#)

| # | b           | b <sup>++</sup> | b <sup>*</sup> | b <sup>*++</sup> | b <sup>0</sup> | b <sup>0++</sup> | Seq. | y           | y <sup>++</sup> | y <sup>*</sup> | y <sup>*++</sup> | y <sup>0</sup> | y <sup>0++</sup> | # |
|---|-------------|-----------------|----------------|------------------|----------------|------------------|------|-------------|-----------------|----------------|------------------|----------------|------------------|---|
| 1 | 58.028740   | 29.518008       |                |                  |                |                  | G    |             |                 |                |                  |                |                  | 8 |
| 2 | 155.081504  | 78.044390       |                |                  |                |                  | P    | 1153.628558 | 577.317917      | 1136.602009    | 568.804643       | 1135.617993    | 568.312635       | 7 |
| 3 | 268.165568  | 134.586422      |                |                  |                |                  | L    | 1056.575794 | 528.791535      | 1039.549245    | 520.278261       | 1038.565229    | 519.786253       | 6 |
| 4 | 383.192511  | 192.099894      |                |                  | 365.181946     | 183.094611       | D    | 943.491730  | 472.249503      | 926.465181     | 463.736228       | 925.481165     | 463.244220       | 5 |
| 5 | 822.417837  | 411.712557      | 805.391288     | 403.199282       | 804.407272     | 402.707274       | Q    | 828.464787  | 414.736032      | 811.438238     | 406.222757       | 810.454222     | 405.730749       | 4 |
| 6 | 935.501901  | 468.254589      | 918.475352     | 459.741314       | 917.491336     | 459.249306       | L    | 389.239461  | 195.123368      | 372.212912     | 186.610094       | 371.228896     | 186.118086       | 3 |
| 7 | 1064.544494 | 532.775885      | 1047.517945    | 524.262611       | 1046.533929    | 523.770603       | E    | 276.155397  | 138.581336      | 259.128848     | 130.068062       | 258.144832     | 129.576054       | 2 |
| 8 |             |                 |                |                  |                |                  | K    | 147.112804  | 74.060040       | 130.086255     | 65.546765        |                |                  | 1 |

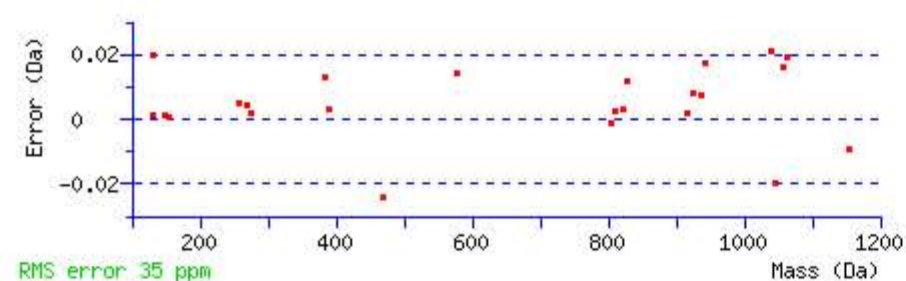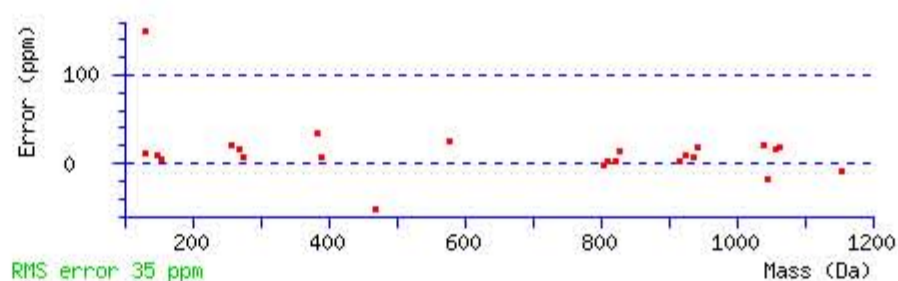

NCBI BLAST search of **GPLDQLEK**

(Parameters: blastp, nr protein database, expect=20000, no filter, PAM30)

Other BLAST [web gateways](#)

All matches to this query

| Score | Mr(calc):   | Delta     | Sequence                    |
|-------|-------------|-----------|-----------------------------|
| 38.7  | 1209.642731 | 0.013577  | <a href="#">GPLDQLEK</a>    |
| 13.3  | 1209.646545 | 0.009763  | <a href="#">EHNRLATELK</a>  |
| 4.3   | 1209.639343 | 0.016965  | <a href="#">AFAKGFLAEEK</a> |
| 4.2   | 1209.665192 | -0.008884 | <a href="#">GQGKPREK</a>    |
| 3.3   | 1209.642731 | 0.013577  | <a href="#">GTGEFIKALMK</a> |
| 2.3   | 1209.653976 | 0.002332  | <a href="#">GPDGLKGQK</a>   |
| 1.6   | 1209.642731 | 0.013577  | <a href="#">LQPSTPEK</a>    |

# MASCOT Search Results

## Peptide View

MS/MS Fragmentation of **TLEAQLTPR**

Found in **HEP2\_HUMAN**, Heparin cofactor 2 OS=Homo sapiens GN=SERPIND1 PE=1 SV=3

Match to Query 27821: 1338.748728 from(670.381640,2+) rtinseconds(1942) index(41791)

Title: Locus:1.1.1.3125.21 File:"2013-07-02 CLN FXIII 180 min 1st F 3.wiff"

Data file C:\Program Files (x86)\Matrix Science\Mascot Daemon\mgf\7 FXIII 180 min 1st\mascot\_daemon\_merge.mgf

Click mouse within plot area to zoom in by factor of two about that point

Or, Plot from  to  Da

Label all possible matches  Label matches used for scoring

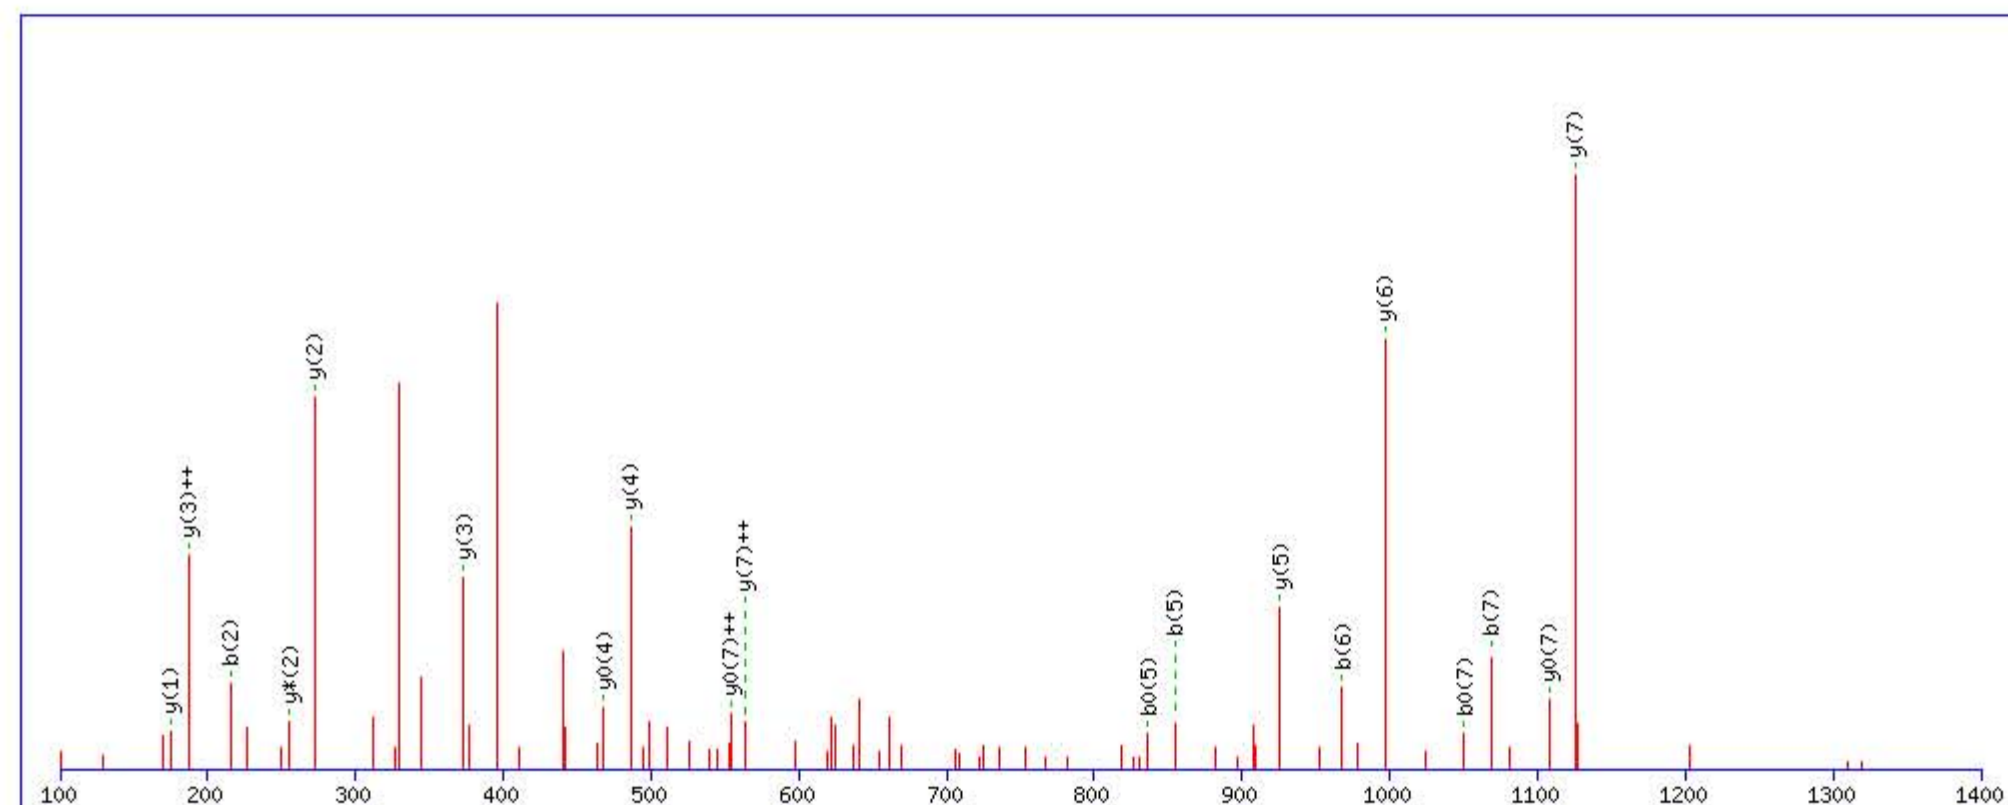

Monoisotopic mass of neutral peptide Mr(calc): 1338.732941

Fixed modifications: Carbamidomethyl (C) (apply to specified residues or termini only)

Variable modifications:

Q5 : Biotin:Thermo-21345 (Q)

Ions Score: 39 Expect: 0.0016

Matches : 19/84 fragment ions using 36 most intense peaks [\(help\)](#)

| # | b                  | b <sup>++</sup> | b <sup>*</sup> | b <sup>*++</sup> | b <sup>0</sup>     | b <sup>0++</sup> | Seq. | y                  | y <sup>++</sup>   | y <sup>*</sup>    | y <sup>*++</sup> | y <sup>0</sup>     | y <sup>0++</sup>  | # |
|---|--------------------|-----------------|----------------|------------------|--------------------|------------------|------|--------------------|-------------------|-------------------|------------------|--------------------|-------------------|---|
| 1 | 102.054955         | 51.531116       |                |                  | 84.044390          | 42.525833        | T    |                    |                   |                   |                  |                    |                   | 9 |
| 2 | <b>215.139019</b>  | 108.073147      |                |                  | 197.128454         | 99.067865        | L    | 1238.692556        | 619.849916        | 1221.666007       | 611.336642       | 1220.681991        | 610.844633        | 8 |
| 3 | 344.181612         | 172.594444      |                |                  | 326.171047         | 163.589162       | E    | <b>1125.608492</b> | <b>563.307884</b> | 1108.581943       | 554.794610       | <b>1107.597927</b> | <b>554.302602</b> | 7 |
| 4 | 415.218726         | 208.113001      |                |                  | 397.208161         | 199.107719       | A    | <b>996.565899</b>  | 498.786588        | 979.539350        | 490.273313       | 978.555334         | 489.781305        | 6 |
| 5 | <b>854.444052</b>  | 427.725664      | 837.417503     | 419.212390       | <b>836.433487</b>  | 418.720382       | Q    | <b>925.528785</b>  | 463.268031        | 908.502236        | 454.754756       | 907.518220         | 454.262748        | 5 |
| 6 | <b>967.528116</b>  | 484.267696      | 950.501567     | 475.754422       | 949.517551         | 475.262414       | L    | <b>486.303459</b>  | 243.655367        | 469.276910        | 235.142093       | <b>468.292894</b>  | 234.650085        | 4 |
| 7 | <b>1068.575795</b> | 534.791536      | 1051.549246    | 526.278261       | <b>1050.565230</b> | 525.786253       | T    | <b>373.219395</b>  | <b>187.113335</b> | 356.192846        | 178.600061       | 355.208830         | 178.108053        | 3 |
| 8 | 1165.628559        | 583.317918      | 1148.602010    | 574.804643       | 1147.617994        | 574.312635       | P    | <b>272.171716</b>  | 136.589496        | <b>255.145167</b> | 128.076221       |                    |                   | 2 |
| 9 |                    |                 |                |                  |                    |                  | R    | <b>175.118952</b>  | 88.063114         | 158.092403        | 79.549839        |                    |                   | 1 |

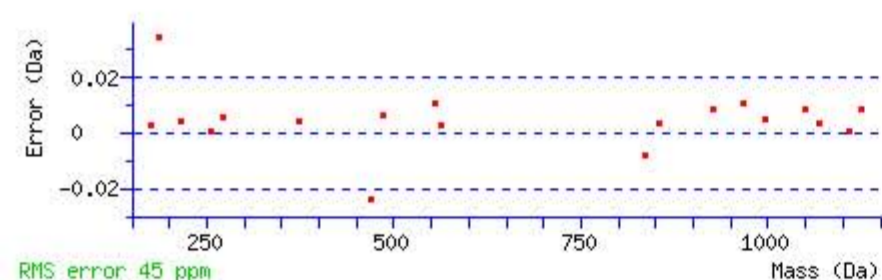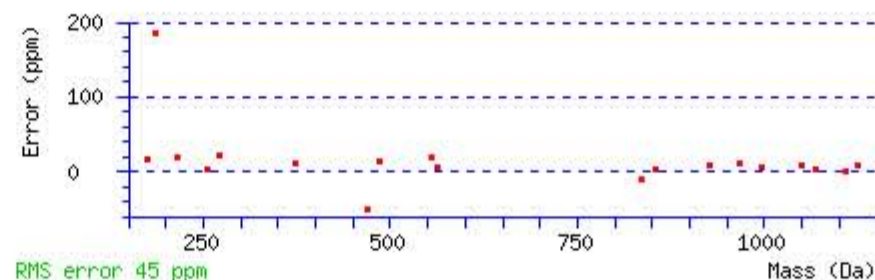

NCBI BLAST search of [TLEAQLTPR](#)

(Parameters: blastp, nr protein database, expect=20000, no filter, PAM30)

Other BLAST [web gateways](#)

All matches to this query

| Score | Mr(calc):   | Delta     | Sequence                    |
|-------|-------------|-----------|-----------------------------|
| 39.4  | 1338.732941 | 0.015787  | <a href="#">TLEAQLTPR</a>   |
| 9.1   | 1338.732956 | 0.015772  | <a href="#">VDLQSLPTR</a>   |
| 0.8   | 1338.761932 | -0.013204 | <a href="#">LTVLREDQIPR</a> |

# MASCOT SCIENCE Mascot Search Results

## Peptide View

MS/MS Fragmentation of **SVNDLYIQK**

Found in **HEP2\_HUMAN**, Heparin cofactor 2 OS=Homo sapiens GN=SERPIND1 PE=1 SV=3

Match to Query 30321: 1389.749008 from(695.881780,2+) rtinseconds(1951) index(41866)

Title: Locus:1.1.1.3128.21 File:"2013-07-02 CLN FXIII 180 min 1st F 3.wiff"

Data file C:\Program Files (x86)\Matrix Science\Mascot Daemon\mgf\7 FXIII 180 min 1st\mascot\_daemon\_merge.mgf

Click mouse within plot area to zoom in by factor of two about that point

Or, Plot from  to  Da

Label all possible matches  Label matches used for scoring

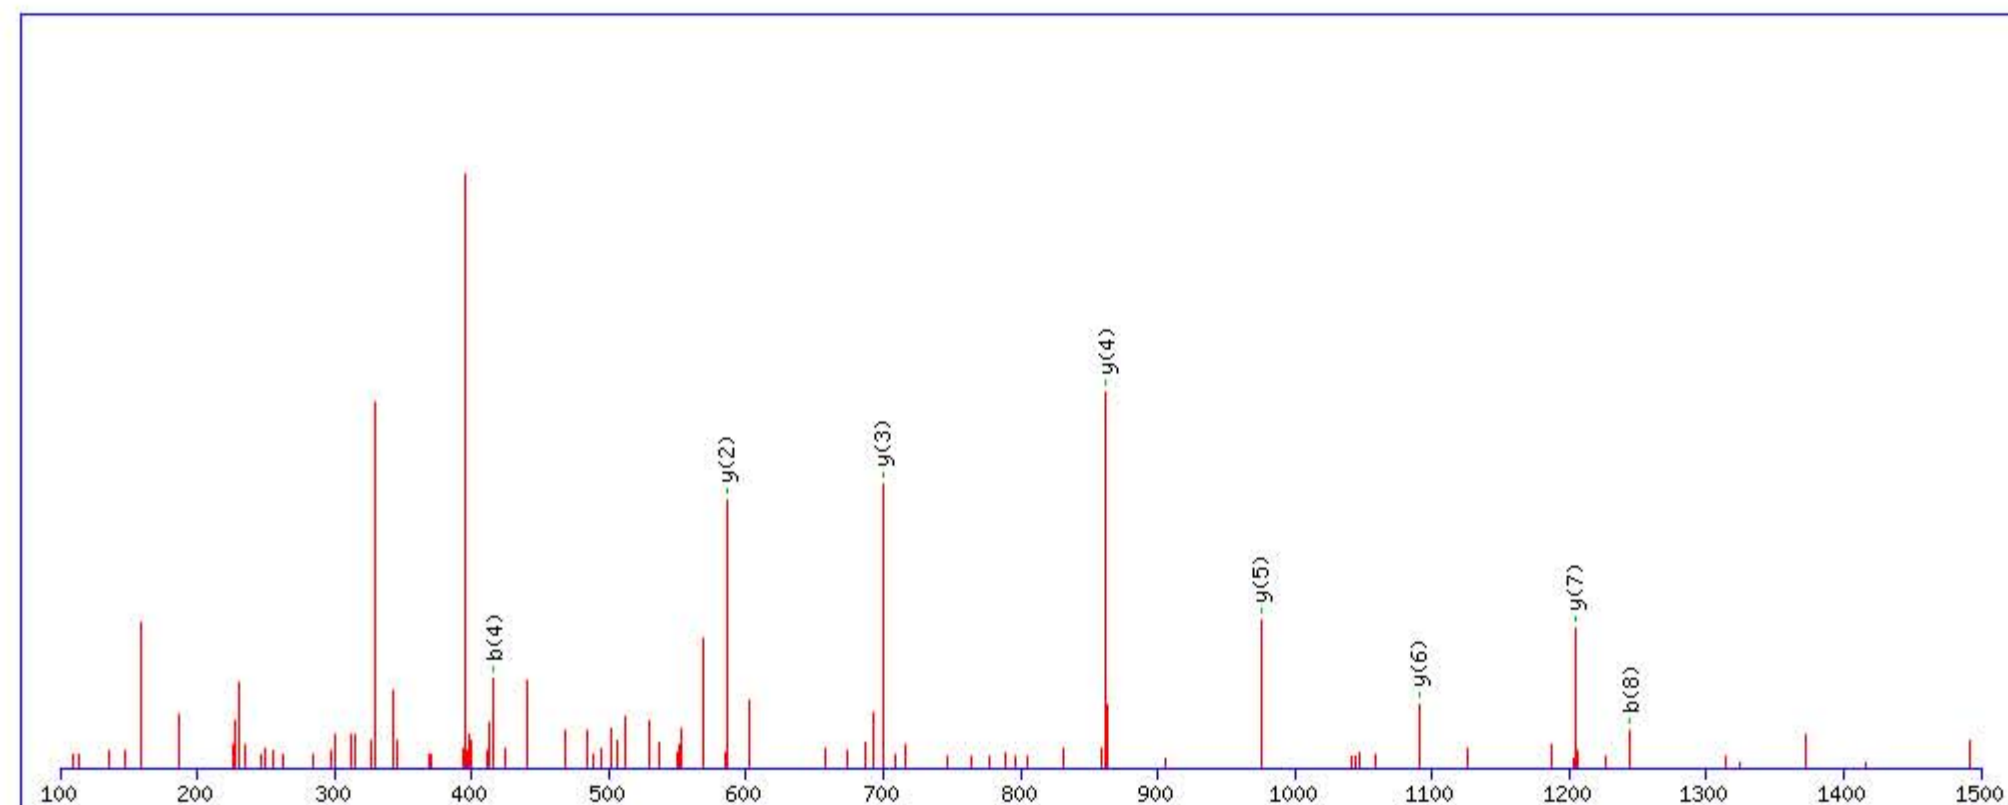

Monoisotopic mass of neutral peptide Mr(calc): 1389.732605

Fixed modifications: Carbamidomethyl (C) (apply to specified residues or termini only)

Variable modifications:

Q8 : Biotin:Thermo-21345 (Q)

Ions Score: 42 Expect: 0.00062

Matches : 8/82 fragment ions using 13 most intense peaks ([help](#))

| # | b                  | b <sup>++</sup> | b <sup>*</sup> | b <sup>*++</sup> | b <sup>0</sup> | b <sup>0++</sup> | Seq. | y                  | y <sup>++</sup> | y <sup>*</sup> | y <sup>*++</sup> | y <sup>0</sup> | y <sup>0++</sup> | # |
|---|--------------------|-----------------|----------------|------------------|----------------|------------------|------|--------------------|-----------------|----------------|------------------|----------------|------------------|---|
| 1 | 88.039304          | 44.523290       |                |                  | 70.028739      | 35.518008        | S    |                    |                 |                |                  |                |                  | 9 |
| 2 | 187.107718         | 94.057497       |                |                  | 169.097153     | 85.052214        | V    | 1303.707871        | 652.357573      | 1286.681322    | 643.844299       | 1285.697306    | 643.352291       | 8 |
| 3 | 301.150645         | 151.078960      | 284.124096     | 142.565686       | 283.140080     | 142.073678       | N    | <b>1204.639457</b> | 602.823367      | 1187.612908    | 594.310092       | 1186.628892    | 593.818084       | 7 |
| 4 | <b>416.177588</b>  | 208.592432      | 399.151039     | 200.079158       | 398.167023     | 199.587150       | D    | <b>1090.596530</b> | 545.801903      | 1073.569981    | 537.288629       | 1072.585965    | 536.796621       | 6 |
| 5 | 529.261652         | 265.134464      | 512.235103     | 256.621190       | 511.251087     | 256.129182       | L    | <b>975.569587</b>  | 488.288432      | 958.543038     | 479.775157       |                |                  | 5 |
| 6 | 692.324981         | 346.666129      | 675.298432     | 338.152854       | 674.314416     | 337.660846       | Y    | <b>862.485523</b>  | 431.746400      | 845.458974     | 423.233125       |                |                  | 4 |
| 7 | 805.409045         | 403.208161      | 788.382496     | 394.694886       | 787.398480     | 394.202878       | I    | <b>699.422194</b>  | 350.214735      | 682.395645     | 341.701461       |                |                  | 3 |
| 8 | <b>1244.634371</b> | 622.820823      | 1227.607822    | 614.307549       | 1226.623806    | 613.815541       | Q    | <b>586.338130</b>  | 293.672703      | 569.311581     | 285.159428       |                |                  | 2 |
| 9 |                    |                 |                |                  |                |                  | K    | 147.112804         | 74.060040       | 130.086255     | 65.546765        |                |                  | 1 |

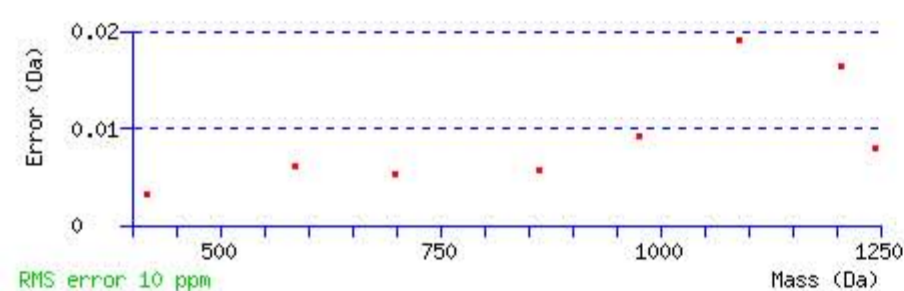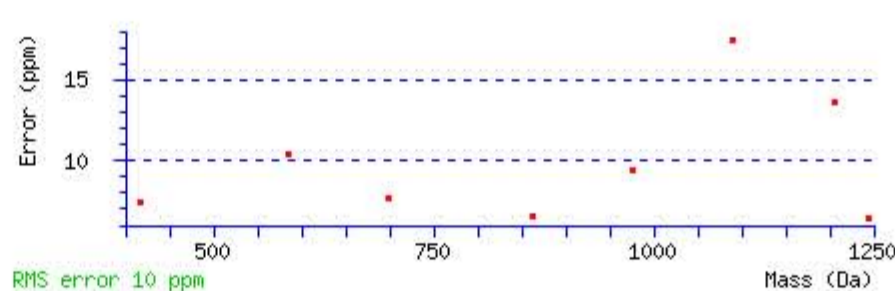

NCBI BLAST search of **SVNDLYIQK**

(Parameters: blastp, nr protein database, expect=20000, no filter, PAM30)

Other BLAST [web gateways](#)

All matches to this query

| Score | Mr(calc):   | Delta     | Sequence                      |
|-------|-------------|-----------|-------------------------------|
| 42.1  | 1389.732605 | 0.016403  | <a href="#">SVNDLYIQK</a>     |
| 7.6   | 1389.728577 | 0.020431  | <a href="#">NMLTESLVALQR</a>  |
| 5.0   | 1389.761612 | -0.012604 | <a href="#">SGVGNIFVKNLDK</a> |
| 4.4   | 1389.746307 | 0.002701  | <a href="#">SEKATSLQAKAEK</a> |
| 3.8   | 1389.735107 | 0.013901  | <a href="#">SQSILDSLETVAK</a> |

# MASCOT Search Results

## Peptide View

MS/MS Fragmentation of **GGETAQSADPQWEQLNKK**  
 Found in **HEP2\_HUMAN**, Heparin cofactor 2 OS=Homo sapiens GN=SERPIND1 PE=1 SV=3

Match to Query 57584: 2283.079122 from(762.033650,3+) rtinseconds(1919) index(41592)  
 Title: Locus:1.1.1.3117.22 File:"2013-07-02 CLN FXIII 180 min 1st F 3.wiff"  
 Data file C:\Program Files (x86)\Matrix Science\Mascot Daemon\mgf7 FXIII 180 min 1st\mascot\_daemon\_merge.mgf

Click mouse within plot area to zoom in by factor of two about that point  
 Or, Plot from  to  Da   
 Label all possible matches  Label matches used for scoring

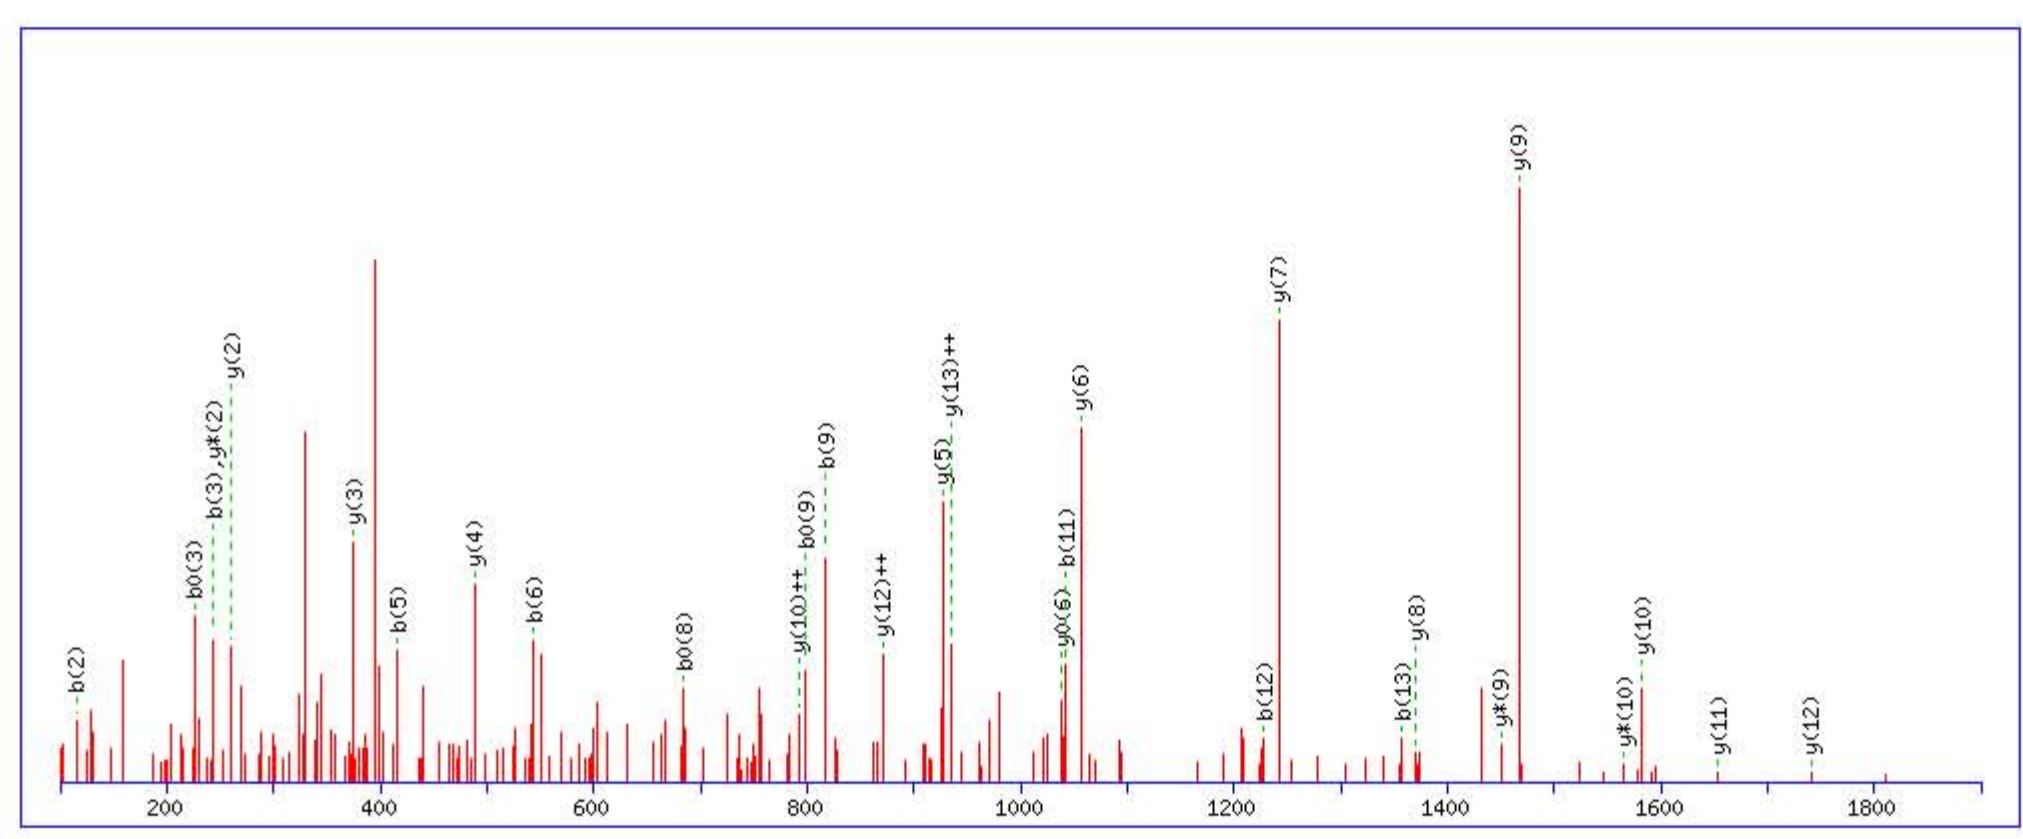

Monoisotopic mass of neutral peptide Mr(calc): 2283.058975  
 Fixed modifications: Carbamidomethyl (C) (apply to specified residues or termini only)  
 Variable modifications:  
 Q14 : Biotin:Thermo-21345 (Q)  
 Ions Score: 69 Expect: 2.3e-006  
 Matches : 29/180 fragment ions using 47 most intense peaks [\(help\)](#)

| #  | b                  | b <sup>++</sup> | b <sup>*</sup> | b <sup>*++</sup> | b <sup>0</sup>    | b <sup>0++</sup> | Seq. | y                  | y <sup>++</sup>   | y <sup>*</sup>     | y <sup>*++</sup> | y <sup>0</sup>     | y <sup>0++</sup> | #  |
|----|--------------------|-----------------|----------------|------------------|-------------------|------------------|------|--------------------|-------------------|--------------------|------------------|--------------------|------------------|----|
| 1  | 58.028740          | 29.518008       |                |                  |                   |                  | G    |                    |                   |                    |                  |                    |                  | 18 |
| 2  | <b>115.050204</b>  | 58.028740       |                |                  |                   |                  | G    | 2227.044809        | 1114.026042       | 2210.018260        | 1105.512768      | 2209.034244        | 1105.020760      | 17 |
| 3  | <b>244.092797</b>  | 122.550037      |                |                  | <b>226.082232</b> | 113.544754       | E    | 2170.023345        | 1085.515310       | 2152.996796        | 1077.002036      | 2152.012780        | 1076.510028      | 16 |
| 4  | 345.140476         | 173.073876      |                |                  | 327.129911        | 164.068594       | T    | 2040.980752        | 1020.994014       | 2023.954203        | 1012.480740      | 2022.970187        | 1011.988732      | 15 |
| 5  | <b>416.177590</b>  | 208.592433      |                |                  | 398.167025        | 199.587151       | A    | 1939.933073        | 970.470175        | 1922.906524        | 961.956900       | 1921.922508        | 961.464892       | 14 |
| 6  | <b>544.236168</b>  | 272.621722      | 527.209619     | 264.108448       | 526.225603        | 263.616440       | Q    | 1868.895959        | <b>934.951618</b> | 1851.869410        | 926.438343       | 1850.885394        | 925.946335       | 13 |
| 7  | 631.268196         | 316.137736      | 614.241647     | 307.624462       | 613.257631        | 307.132454       | S    | <b>1740.837381</b> | <b>870.922329</b> | 1723.810832        | 862.409054       | 1722.826816        | 861.917046       | 12 |
| 8  | 702.305310         | 351.656293      | 685.278761     | 343.143019       | <b>684.294745</b> | 342.651011       | A    | <b>1653.805353</b> | 827.406315        | 1636.778804        | 818.893040       | 1635.794788        | 818.401032       | 11 |
| 9  | <b>817.332253</b>  | 409.169765      | 800.305704     | 400.656490       | <b>799.321688</b> | 400.164482       | D    | <b>1582.768239</b> | <b>791.887758</b> | <b>1565.741690</b> | 783.374483       | 1564.757674        | 782.882475       | 10 |
| 10 | 914.385017         | 457.696147      | 897.358468     | 449.182872       | 896.374452        | 448.690864       | P    | <b>1467.741296</b> | 734.374286        | <b>1450.714747</b> | 725.861012       | 1449.730731        | 725.369004       | 9  |
| 11 | <b>1042.443595</b> | 521.725436      | 1025.417046    | 513.212161       | 1024.433030       | 512.720153       | Q    | <b>1370.688532</b> | 685.847904        | 1353.661983        | 677.334630       | 1352.677967        | 676.842622       | 8  |
| 12 | <b>1228.522908</b> | 614.765092      | 1211.496359    | 606.251818       | 1210.512343       | 605.759809       | W    | <b>1242.629954</b> | 621.818615        | 1225.603405        | 613.305341       | 1224.619389        | 612.813333       | 7  |
| 13 | <b>1357.565501</b> | 679.286388      | 1340.538952    | 670.773114       | 1339.554936       | 670.281106       | E    | <b>1056.550641</b> | 528.778959        | 1039.524092        | 520.265684       | <b>1038.540076</b> | 519.773676       | 6  |
| 14 | 1796.790827        | 898.899052      | 1779.764278    | 890.385777       | 1778.780262       | 889.893769       | Q    | <b>927.508048</b>  | 464.257662        | 910.481499         | 455.744388       |                    |                  | 5  |
| 15 | 1909.874891        | 955.441083      | 1892.848342    | 946.927809       | 1891.864326       | 946.435801       | L    | <b>488.282722</b>  | 244.644999        | 471.256173         | 236.131725       |                    |                  | 4  |
| 16 | 2023.917818        | 1012.462547     | 2006.891269    | 1003.949273      | 2005.907253       | 1003.457265      | N    | <b>375.198658</b>  | 188.102967        | 358.172109         | 179.589693       |                    |                  | 3  |
| 17 | 2137.960745        | 1069.484010     | 2120.934196    | 1060.970736      | 2119.950180       | 1060.478728      | N    | <b>261.155731</b>  | 131.081504        | <b>244.129182</b>  | 122.568229       |                    |                  | 2  |
| 18 |                    |                 |                |                  |                   |                  | K    | 147.112804         | 74.060040         | 130.086255         | 65.546765        |                    |                  | 1  |

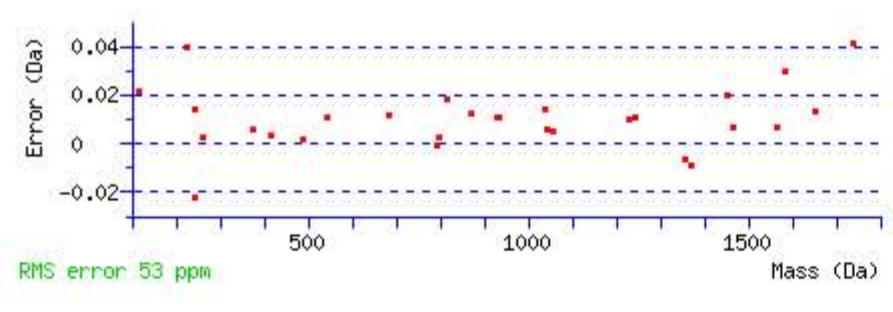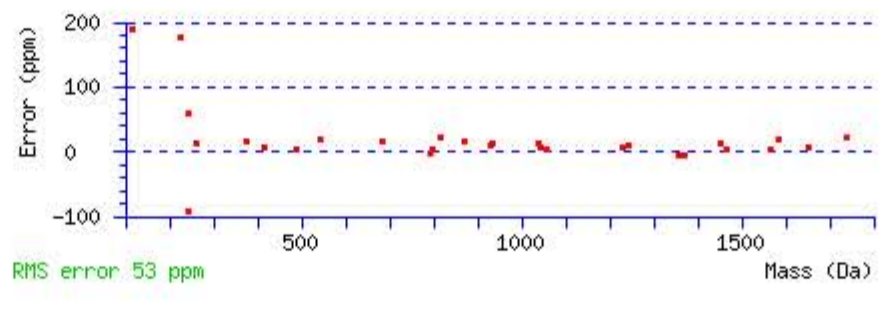

NCBI BLAST search of **GGETAQSADPQWEQLNKK**  
 (Parameters: blastp, nr protein database, expect=20000, no filter, PAM30)  
 Other BLAST [web gateways](#)

### All matches to this query

| Score | Mr(calc):   | Delta    | Sequence                           |
|-------|-------------|----------|------------------------------------|
| 68.7  | 2283.058975 | 0.020147 | <a href="#">GGETAQSADPQWEQLNKK</a> |
| 33.6  | 2283.058975 | 0.020147 | <a href="#">GGETAQSADPQWEQLNKK</a> |

# Mascot Search Results

## Peptide View

MS/MS Fragmentation of **GGETAQSADPQWEQLNKK**

Found in **HEP2\_HUMAN**, Heparin cofactor 2 OS=Homo sapiens GN=SERPIND1 PE=1 SV=3

Match to Query 57588: 2283.090162 from(762.037330,3+) rtinseconds(1896) index(41395)

Title: Locus:1.1.1.3109.25 File:"2013-07-02 CLN FXIII 180 min 1st F 3.wiff"

Data file C:\Program Files (x86)\Matrix Science\Mascot Daemon\mgf\7 FXIII 180 min 1st\mascot\_daemon\_merge.mgf

Click mouse within plot area to zoom in by factor of two about that point

Or, Plot from  to  Da

Label all possible matches  Label matches used for scoring

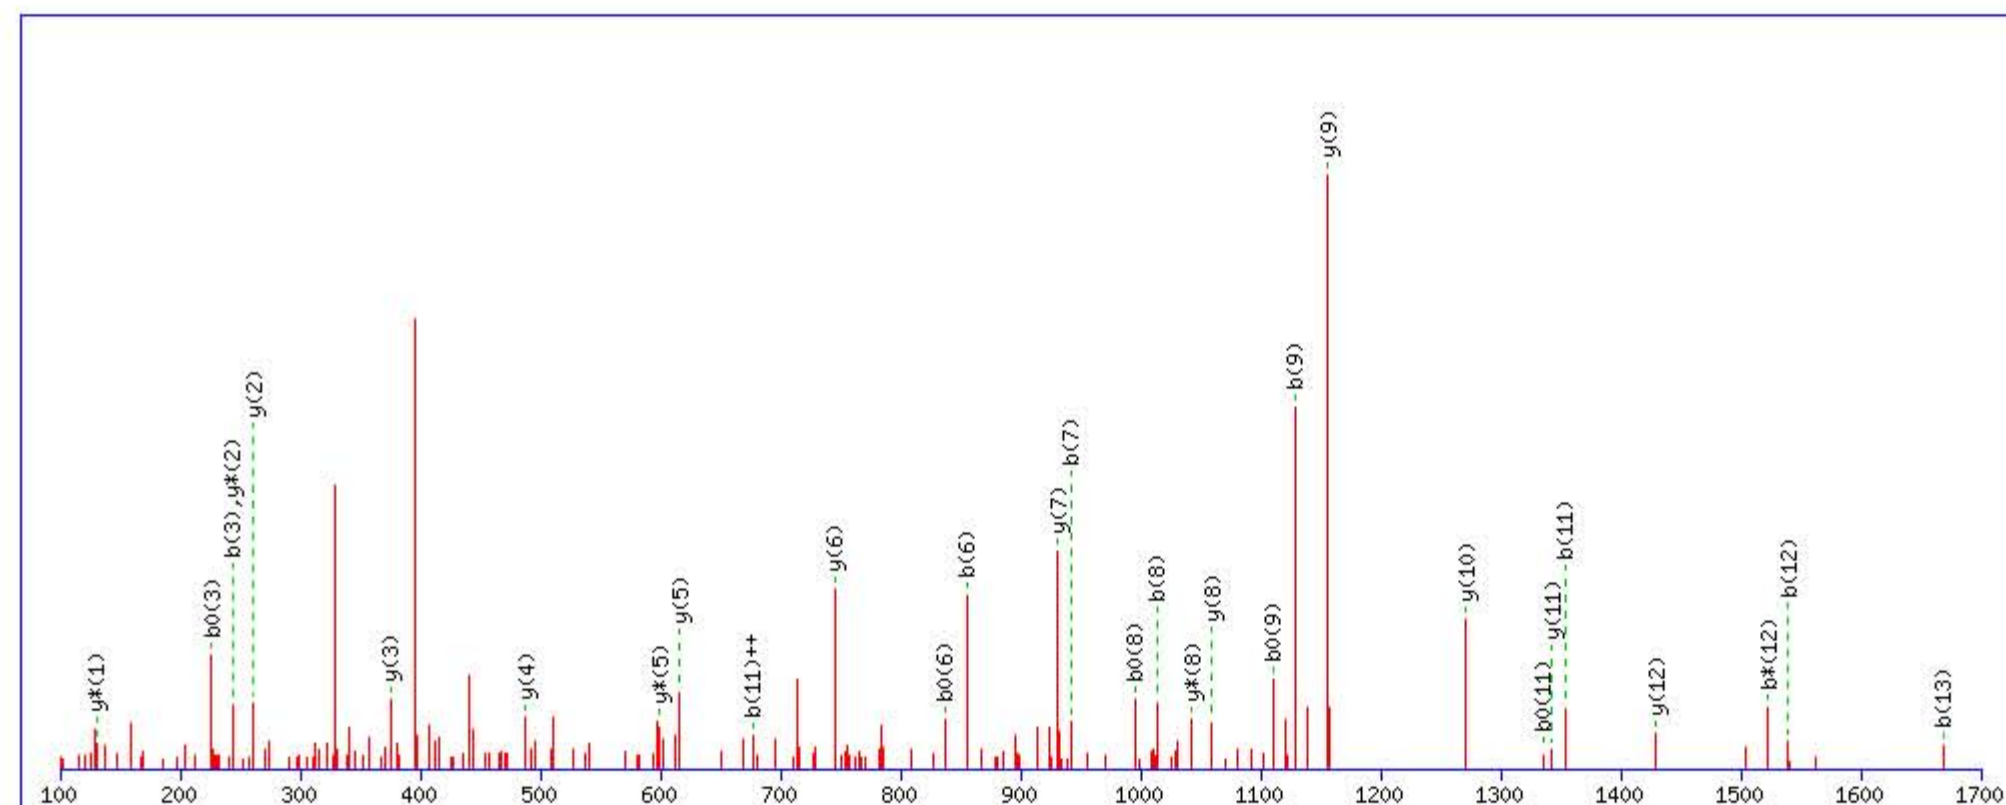

Monoisotopic mass of neutral peptide Mr(calc): 2283.058975

Fixed modifications: Carbamidomethyl (C) (apply to specified residues or termini only)

Variable modifications:

Q6 : Biotin:Thermo-21345 (Q)

Ions Score: 73 Expect: 2e-007

Matches : 30/180 fragment ions using 42 most intense peaks [\(help\)](#)

| #  | b                  | b <sup>++</sup>   | b <sup>*</sup>     | b <sup>*++</sup> | b <sup>0</sup>     | b <sup>0++</sup> | Seq. | y                  | y <sup>++</sup> | y <sup>*</sup>     | y <sup>*++</sup> | y <sup>0</sup> | y <sup>0++</sup> | #  |
|----|--------------------|-------------------|--------------------|------------------|--------------------|------------------|------|--------------------|-----------------|--------------------|------------------|----------------|------------------|----|
| 1  | 58.028740          | 29.518008         |                    |                  |                    |                  | G    |                    |                 |                    |                  |                |                  | 18 |
| 2  | 115.050204         | 58.028740         |                    |                  |                    |                  | G    | 2227.044809        | 1114.026042     | 2210.018260        | 1105.512768      | 2209.034244    | 1105.020760      | 17 |
| 3  | <b>244.092797</b>  | 122.550037        |                    |                  | <b>226.082232</b>  | 113.544754       | E    | 2170.023345        | 1085.515310     | 2152.996796        | 1077.002036      | 2152.012780    | 1076.510028      | 16 |
| 4  | 345.140476         | 173.073876        |                    |                  | 327.129911         | 164.068594       | T    | 2040.980752        | 1020.994014     | 2023.954203        | 1012.480740      | 2022.970187    | 1011.988732      | 15 |
| 5  | 416.177590         | 208.592433        |                    |                  | 398.167025         | 199.587151       | A    | 1939.933073        | 970.470175      | 1922.906524        | 961.956900       | 1921.922508    | 961.464892       | 14 |
| 6  | <b>855.402916</b>  | 428.205096        | 838.376367         | 419.691822       | <b>837.392351</b>  | 419.199814       | Q    | 1868.895959        | 934.951618      | 1851.869410        | 926.438343       | 1850.885394    | 925.946335       | 13 |
| 7  | <b>942.434944</b>  | 471.721110        | 925.408395         | 463.207836       | 924.424379         | 462.715828       | S    | <b>1429.670633</b> | 715.338955      | 1412.644084        | 706.825680       | 1411.660068    | 706.333672       | 12 |
| 8  | <b>1013.472058</b> | 507.239667        | 996.445509         | 498.726393       | <b>995.461493</b>  | 498.234385       | A    | <b>1342.638605</b> | 671.822941      | 1325.612056        | 663.309666       | 1324.628040    | 662.817658       | 11 |
| 9  | <b>1128.499001</b> | 564.753139        | 1111.472452        | 556.239864       | <b>1110.488436</b> | 555.747856       | D    | <b>1271.601491</b> | 636.304384      | 1254.574942        | 627.791109       | 1253.590926    | 627.299101       | 10 |
| 10 | 1225.551765        | 613.279521        | 1208.525216        | 604.766246       | 1207.541200        | 604.274238       | P    | <b>1156.574548</b> | 578.790912      | 1139.547999        | 570.277638       | 1138.563983    | 569.785630       | 9  |
| 11 | <b>1353.610343</b> | <b>677.308810</b> | 1336.583794        | 668.795535       | <b>1335.599778</b> | 668.303527       | Q    | <b>1059.521784</b> | 530.264530      | <b>1042.495235</b> | 521.751256       | 1041.511219    | 521.259248       | 8  |
| 12 | <b>1539.689656</b> | 770.348466        | <b>1522.663107</b> | 761.835192       | 1521.679091        | 761.343184       | W    | <b>931.463206</b>  | 466.235241      | 914.436657         | 457.721967       | 913.452641     | 457.229959       | 7  |
| 13 | <b>1668.732249</b> | 834.869762        | 1651.705700        | 826.356488       | 1650.721684        | 825.864480       | E    | <b>745.383893</b>  | 373.195585      | 728.357344         | 364.682310       | 727.373328     | 364.190302       | 6  |
| 14 | 1796.790827        | 898.899052        | 1779.764278        | 890.385777       | 1778.780262        | 889.893769       | Q    | <b>616.341300</b>  | 308.674288      | <b>599.314751</b>  | 300.161014       |                |                  | 5  |
| 15 | 1909.874891        | 955.441083        | 1892.848342        | 946.927809       | 1891.864326        | 946.435801       | L    | <b>488.282722</b>  | 244.644999      | 471.256173         | 236.131725       |                |                  | 4  |
| 16 | 2023.917818        | 1012.462547       | 2006.891269        | 1003.949273      | 2005.907253        | 1003.457265      | N    | <b>375.198658</b>  | 188.102967      | 358.172109         | 179.589693       |                |                  | 3  |
| 17 | 2137.960745        | 1069.484010       | 2120.934196        | 1060.970736      | 2119.950180        | 1060.478728      | N    | <b>261.155731</b>  | 131.081504      | <b>244.129182</b>  | 122.568229       |                |                  | 2  |
| 18 |                    |                   |                    |                  |                    |                  | K    | 147.112804         | 74.060040       | <b>130.086255</b>  | 65.546765        |                |                  | 1  |

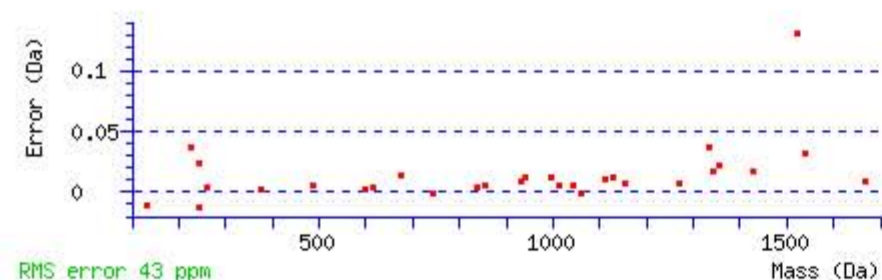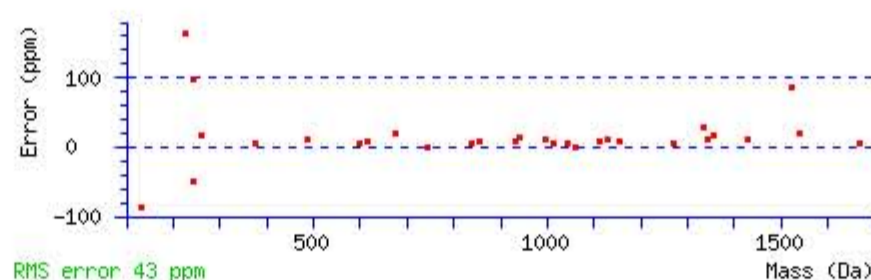

NCBI BLAST search of **GGETAQSADPQWEQLNKK**

(Parameters: blastp, nr protein database, expect=20000, no filter, PAM30)

Other BLAST [web gateways](#)

All matches to this query

| Score | Mr(calc):   | Delta    | Sequence                             |
|-------|-------------|----------|--------------------------------------|
| 72.5  | 2283.058975 | 0.031187 | <a href="#">GGETAQSADPQWEQLNKK</a>   |
| 14.7  | 2283.058975 | 0.031187 | <a href="#">GGETAQSADPQWEQLNKK</a>   |
| 1.1   | 2283.080109 | 0.010053 | <a href="#">RGVEKMVDPGEEQPTQENPK</a> |

# MASCOT Search Results

## Peptide View

MS/MS Fragmentation of **QGHVEQCECFGGR**

Found in **HGFA\_HUMAN**, Hepatocyte growth factor activator OS=Homo sapiens GN=HGFA PE=1 SV=1

Match to Query 47051: 1873.820172 from(625.614000,3+) rtinseconds(1494) index(38734)

Title: Locus:1.1.1.2969.23 File:"2013-07-02 CLN FXIII 180 min 1st F 3.wiff"

Data file C:\Program Files (x86)\Matrix Science\Mascot Daemon\mgf7 FXIII 180 min 1st\mascot\_daemon\_merge.mgf

Click mouse within plot area to zoom in by factor of two about that point

Or, Plot from  to  Da

Label all possible matches  Label matches used for scoring

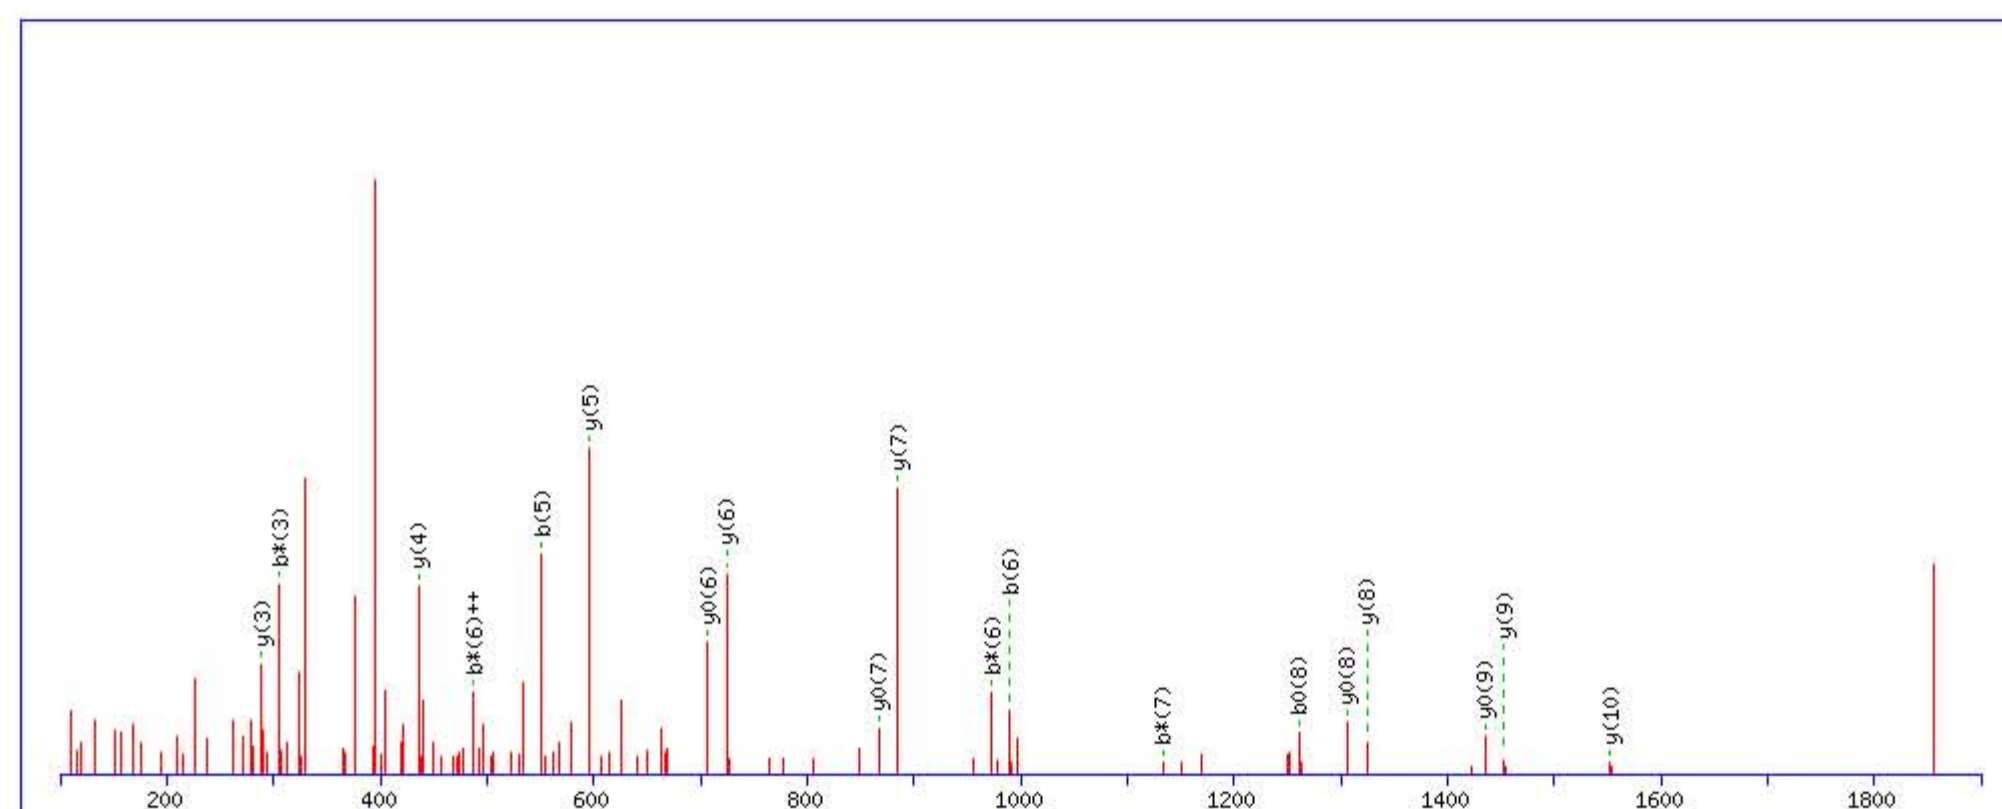

Monoisotopic mass of neutral peptide Mr(calc): 1873.802216

Fixed modifications: Carbamidomethyl (C) (apply to specified residues or termini only)

Variable modifications:

Q6 : Biotin:Thermo-21345 (Q)

Ions Score: 54 Expect: 2.2e-005

Matches : 19/126 fragment ions using 28 most intense peaks [\(help\)](#)

| #  | b           | b <sup>++</sup> | b <sup>*</sup> | b <sup>*++</sup> | b <sup>0</sup> | b <sup>0++</sup> | Seq. | y           | y <sup>++</sup> | y <sup>*</sup> | y <sup>*++</sup> | y <sup>0</sup> | y <sup>0++</sup> | #  |
|----|-------------|-----------------|----------------|------------------|----------------|------------------|------|-------------|-----------------|----------------|------------------|----------------|------------------|----|
| 1  | 129.065854  | 65.036565       | 112.039305     | 56.523291        |                |                  | Q    |             |                 |                |                  |                |                  | 13 |
| 2  | 186.087318  | 93.547297       | 169.060769     | 85.034023        |                |                  | G    | 1746.750894 | 873.879085      | 1729.724345    | 865.365811       | 1728.740329    | 864.873803       | 12 |
| 3  | 323.146230  | 162.076753      | 306.119681     | 153.563479       |                |                  | H    | 1689.729430 | 845.368353      | 1672.702881    | 836.855079       | 1671.718865    | 836.363071       | 11 |
| 4  | 422.214644  | 211.610960      | 405.188095     | 203.097686       |                |                  | V    | 1552.670518 | 776.838897      | 1535.643969    | 768.325623       | 1534.659953    | 767.833615       | 10 |
| 5  | 551.257237  | 276.132257      | 534.230688     | 267.618982       | 533.246672     | 267.126974       | E    | 1453.602104 | 727.304690      | 1436.575555    | 718.791416       | 1435.591539    | 718.299408       | 9  |
| 6  | 990.482563  | 495.744920      | 973.456014     | 487.231645       | 972.471998     | 486.739637       | Q    | 1324.559511 | 662.783394      | 1307.532962    | 654.270119       | 1306.548946    | 653.778111       | 8  |
| 7  | 1150.513212 | 575.760244      | 1133.486663    | 567.246970       | 1132.502647    | 566.754962       | C    | 885.334185  | 443.170731      | 868.307636     | 434.657456       | 867.323620     | 434.165448       | 7  |
| 8  | 1279.555805 | 640.281541      | 1262.529256    | 631.768266       | 1261.545240    | 631.276258       | E    | 725.303536  | 363.155406      | 708.276987     | 354.642132       | 707.292971     | 354.150124       | 6  |
| 9  | 1439.586454 | 720.296865      | 1422.559905    | 711.783591       | 1421.575889    | 711.291583       | C    | 596.260943  | 298.634110      | 579.234394     | 290.120835       |                |                  | 5  |
| 10 | 1586.654868 | 793.831072      | 1569.628319    | 785.317798       | 1568.644303    | 784.825790       | F    | 436.230294  | 218.618785      | 419.203745     | 210.105510       |                |                  | 4  |
| 11 | 1643.676332 | 822.341804      | 1626.649783    | 813.828530       | 1625.665767    | 813.336522       | G    | 289.161880  | 145.084578      | 272.135331     | 136.571303       |                |                  | 3  |
| 12 | 1700.697796 | 850.852536      | 1683.671247    | 842.339262       | 1682.687231    | 841.847254       | G    | 232.140416  | 116.573846      | 215.113867     | 108.060571       |                |                  | 2  |
| 13 |             |                 |                |                  |                |                  | R    | 175.118952  | 88.063114       | 158.092403     | 79.549839        |                |                  | 1  |

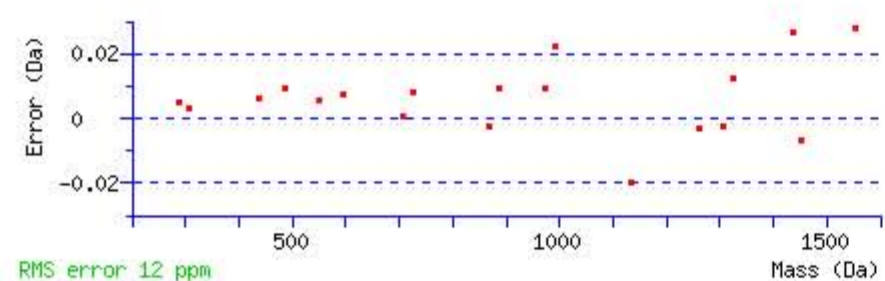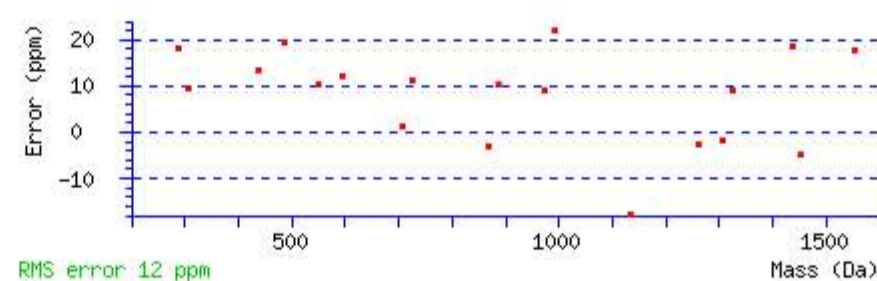

NCBI BLAST search of **QGHVEQCECFGGR**

(Parameters: blastp, nr protein database, expect=20000, no filter, PAM30)

Other BLAST [web gateways](#)

All matches to this query

| Score | Mr(calc):   | Delta    | Sequence                      |
|-------|-------------|----------|-------------------------------|
| 54.0  | 1873.802216 | 0.017956 | <a href="#">QGHVEQCECFGGR</a> |
| 20.1  | 1873.802216 | 0.017956 | <a href="#">QGHVEQCECFGGR</a> |

Mascot: <http://www.matrixscience.com/>

# MASCOT Search Results

## Peptide View

MS/MS Fragmentation of **VQLSPDLLATLPEPASPGR**  
 Found in **HGFA\_HUMAN**, Hepatocyte growth factor activator OS=Homo sapiens GN=HGFA PE=1 SV=1

Match to Query 57272: 2271.228522 from(758.083450,3+) rtinseconds(2660) index(46675)  
 Title: Locus:1.1.1.3374.21 File:"2013-07-02 CLN FXIII 180 min 1st F 3.wiff"  
 Data file C:\Program Files (x86)\Matrix Science\Mascot Daemon\mgf7 FXIII 180 min 1st\mascot\_daemon\_merge.mgf

Click mouse within plot area to zoom in by factor of two about that point  
 Or, Plot from  to  Da   
 Label all possible matches  Label matches used for scoring

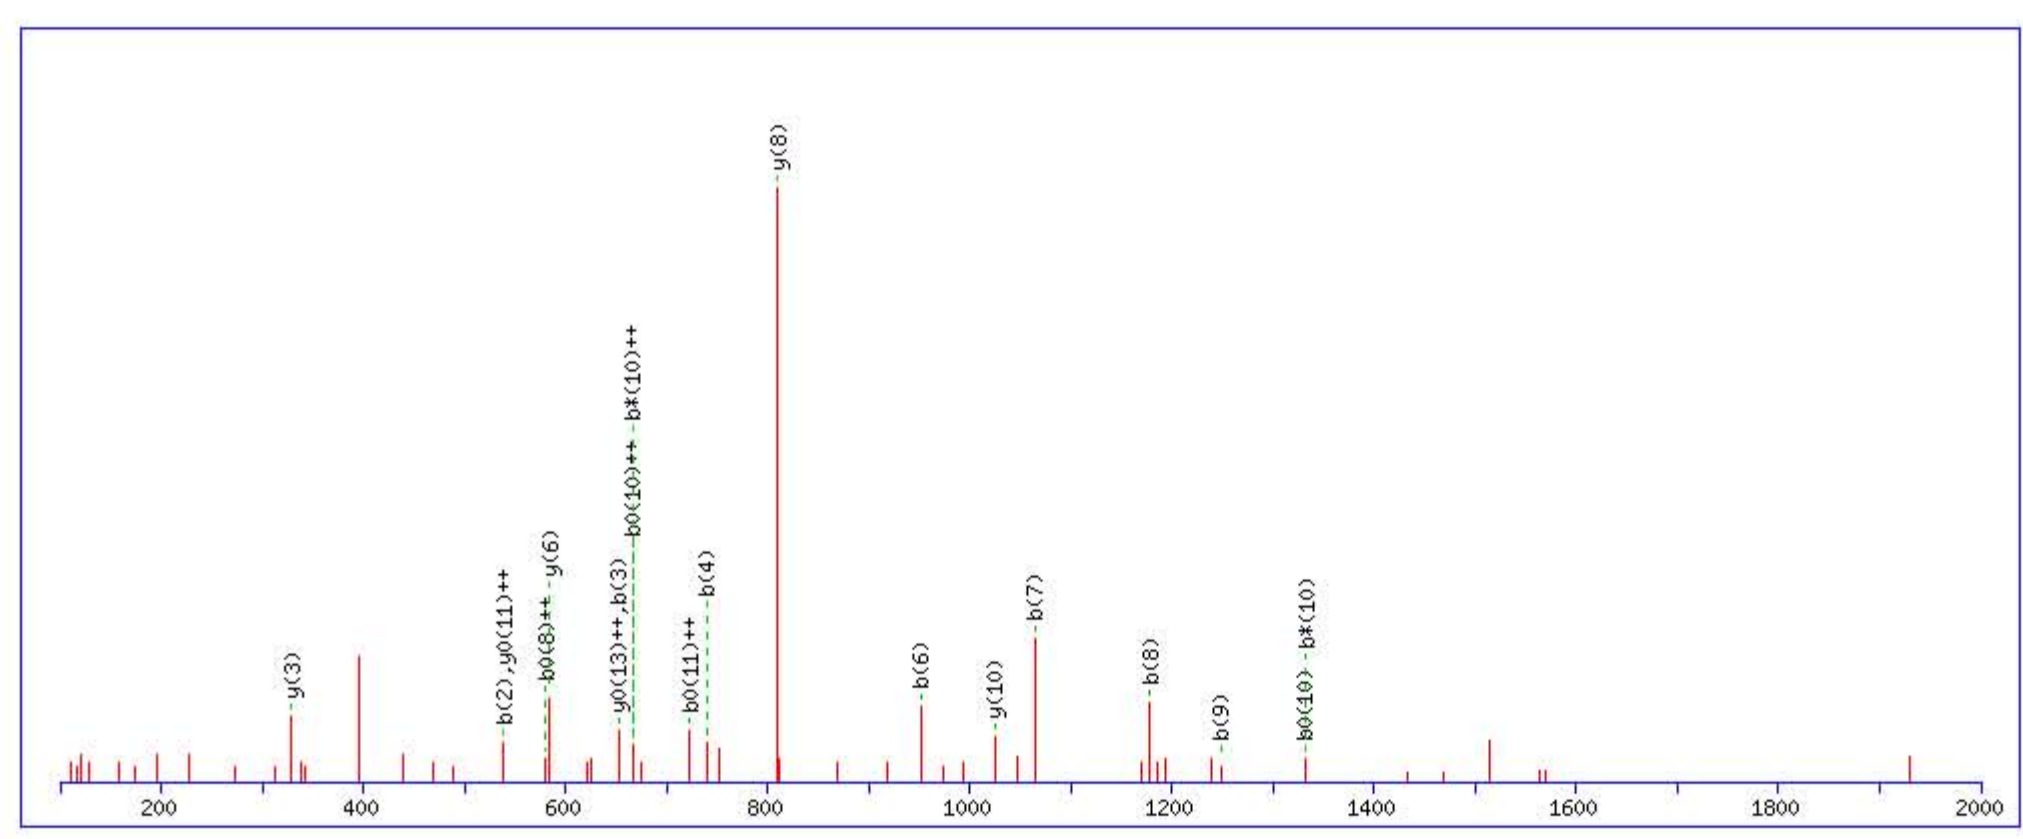

Monoisotopic mass of neutral peptide Mr(calc): 2271.229675  
 Fixed modifications: Carbamidomethyl (C) (apply to specified residues or termini only)  
 Variable modifications:  
 Q2 : Biotin:Thermo-21345 (Q)  
 Ions Score: 27 Expect: 0.043  
 Matches : 19/202 fragment ions using 42 most intense peaks [\(help\)](#)

| #  | b                  | b <sup>++</sup> | b <sup>*</sup>     | b <sup>*++</sup>  | b <sup>0</sup>     | b <sup>0++</sup>  | Seq. | y                  | y <sup>++</sup> | y <sup>*</sup> | y <sup>*++</sup> | y <sup>0</sup> | y <sup>0++</sup>  | #  |
|----|--------------------|-----------------|--------------------|-------------------|--------------------|-------------------|------|--------------------|-----------------|----------------|------------------|----------------|-------------------|----|
| 1  | 100.075690         | 50.541483       |                    |                   |                    |                   | V    |                    |                 |                |                  |                |                   | 19 |
| 2  | <b>539.301016</b>  | 270.154146      | 522.274467         | 261.640872        |                    |                   | Q    | 2173.168553        | 1087.087914     | 2156.142004    | 1078.574640      | 2155.157988    | 1078.082632       | 18 |
| 3  | <b>652.385080</b>  | 326.696178      | 635.358531         | 318.182904        |                    |                   | L    | 1733.943227        | 867.475252      | 1716.916678    | 858.961977       | 1715.932662    | 858.469969        | 17 |
| 4  | <b>739.417108</b>  | 370.212192      | 722.390559         | 361.698918        | 721.406543         | 361.206910        | S    | 1620.859163        | 810.933219      | 1603.832614    | 802.419945       | 1602.848598    | 801.927937        | 16 |
| 5  | 836.469872         | 418.738574      | 819.443323         | 410.225300        | 818.459307         | 409.733292        | P    | 1533.827135        | 767.417206      | 1516.800586    | 758.903931       | 1515.816570    | 758.411923        | 15 |
| 6  | <b>951.496815</b>  | 476.252046      | 934.470266         | 467.738771        | 933.486250         | 467.246763        | D    | 1436.774371        | 718.890824      | 1419.747822    | 710.377549       | 1418.763806    | 709.885541        | 14 |
| 7  | <b>1064.580879</b> | 532.794078      | 1047.554330        | 524.280803        | 1046.570314        | 523.788795        | L    | 1321.747428        | 661.377352      | 1304.720879    | 652.864078       | 1303.736863    | <b>652.372069</b> | 13 |
| 8  | <b>1177.664943</b> | 589.336110      | 1160.638394        | 580.822835        | 1159.654378        | <b>580.330827</b> | L    | 1208.663364        | 604.835320      | 1191.636815    | 596.322046       | 1190.652799    | 595.830038        | 12 |
| 9  | <b>1248.702057</b> | 624.854667      | 1231.675508        | 616.341392        | 1230.691492        | 615.849384        | A    | 1095.579300        | 548.293288      | 1078.552751    | 539.780014       | 1077.568735    | <b>539.288006</b> | 11 |
| 10 | 1349.749736        | 675.378506      | <b>1332.723187</b> | <b>666.865232</b> | <b>1331.739171</b> | <b>666.373223</b> | T    | <b>1024.542186</b> | 512.774731      | 1007.515637    | 504.261456       | 1006.531621    | 503.769448        | 10 |
| 11 | 1462.833800        | 731.920538      | 1445.807251        | 723.407264        | 1444.823235        | <b>722.915255</b> | L    | 923.494507         | 462.250892      | 906.467958     | 453.737617       | 905.483942     | 453.245609        | 9  |
| 12 | 1559.886564        | 780.446920      | 1542.860015        | 771.933646        | 1541.875999        | 771.441637        | P    | <b>810.410443</b>  | 405.708860      | 793.383894     | 397.195585       | 792.399878     | 396.703577        | 8  |
| 13 | 1688.929157        | 844.968216      | 1671.902608        | 836.454942        | 1670.918592        | 835.962934        | E    | 713.357679         | 357.182478      | 696.331130     | 348.669203       | 695.347114     | 348.177195        | 7  |
| 14 | 1785.981921        | 893.494598      | 1768.955372        | 884.981324        | 1767.971356        | 884.489316        | P    | <b>584.315086</b>  | 292.661181      | 567.288537     | 284.147907       | 566.304521     | 283.655899        | 6  |
| 15 | 1857.019035        | 929.013155      | 1839.992486        | 920.499881        | 1839.008470        | 920.007873        | A    | 487.262322         | 244.134799      | 470.235773     | 235.621525       | 469.251757     | 235.129517        | 5  |
| 16 | 1944.051063        | 972.529169      | 1927.024514        | 964.015895        | 1926.040498        | 963.523887        | S    | 416.225208         | 208.616242      | 399.198659     | 200.102968       | 398.214643     | 199.610960        | 4  |
| 17 | 2041.103827        | 1021.055552     | 2024.077278        | 1012.542277       | 2023.093262        | 1012.050269       | P    | <b>329.193180</b>  | 165.100228      | 312.166631     | 156.586954       |                |                   | 3  |
| 18 | 2098.125291        | 1049.566283     | 2081.098742        | 1041.053009       | 2080.114726        | 1040.561001       | G    | 232.140416         | 116.573846      | 215.113867     | 108.060572       |                |                   | 2  |
| 19 |                    |                 |                    |                   |                    |                   | R    | 175.118952         | 88.063114       | 158.092403     | 79.549839        |                |                   | 1  |

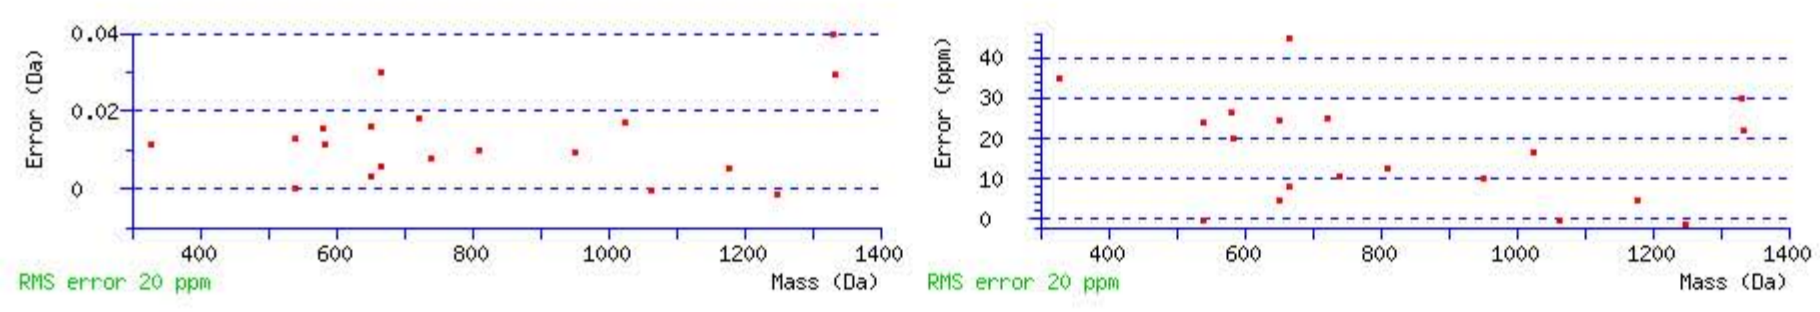

NCBI BLAST search of **VQLSPDLLATLPEPASPGR**  
 (Parameters: blastp, nr protein database, expect=20000, no filter, PAM30)  
 Other BLAST [web gateways](#)

### All matches to this query

| Score | Mr(calc):   | Delta     | Sequence                            |
|-------|-------------|-----------|-------------------------------------|
| 26.5  | 2271.229675 | -0.001153 | <a href="#">VQLSPDLLATLPEPASPGR</a> |



# {MATRIX} SCIENCE Mascot Search Results

## Peptide View

MS/MS Fragmentation of **AAFCYQIR**

Found in **HGFL\_HUMAN**, Hepatocyte growth factor-like protein OS=Homo sapiens GN=MST1 PE=1 SV=2

Match to Query 27811: 1338.668728 from(670.341640,2+) rtinseconds(2010) index(78923)

Title: Locus:1.1.1.2050.14 File:"2013-07-02 CLN FXIII 180 min 1st FT.wiff"

Data file C:\Program Files (x86)\Matrix Science\Mascot Daemon\mgf\7 FXIII 180 min 1st\mascot\_daemon\_merge.mgf

Click mouse within plot area to zoom in by factor of two about that point

Or, Plot from  to  Da

Label all possible matches  Label matches used for scoring

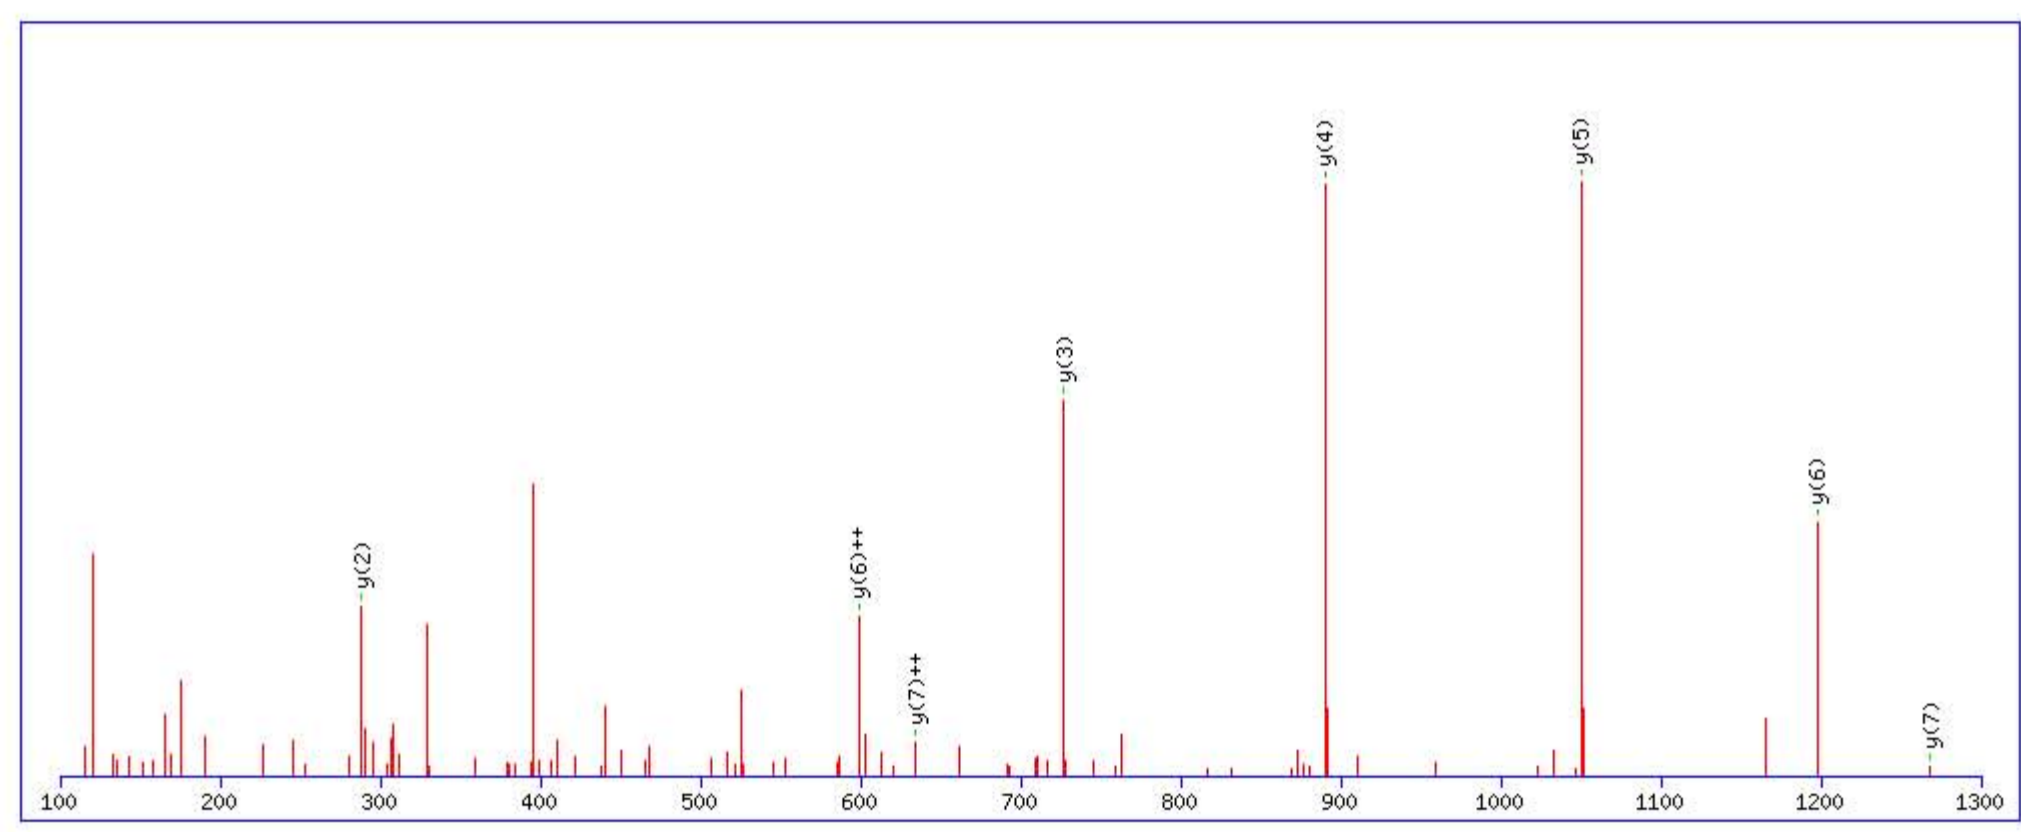

Monoisotopic mass of neutral peptide Mr(calc): 1338.657669

Fixed modifications: Carbamidomethyl (C) (apply to specified residues or termini only)

Variable modifications:

Q6 : Biotin:Thermo-21345 (Q)

Ions Score: 43 Expect: 0.00074

Matches : 8/46 fragment ions using 12 most intense peaks [\(help\)](#)

| # | b           | b <sup>++</sup> | b <sup>*</sup> | b <sup>*++</sup> | Seq. | y           | y <sup>++</sup> | y <sup>*</sup> | y <sup>*++</sup> | # |
|---|-------------|-----------------|----------------|------------------|------|-------------|-----------------|----------------|------------------|---|
| 1 | 72.044390   | 36.525833       |                |                  | A    |             |                 |                |                  | 8 |
| 2 | 143.081504  | 72.044390       |                |                  | A    | 1268.627848 | 634.817562      | 1251.601299    | 626.304288       | 7 |
| 3 | 290.149918  | 145.578597      |                |                  | F    | 1197.590734 | 599.299005      | 1180.564185    | 590.785731       | 6 |
| 4 | 450.180567  | 225.593922      |                |                  | C    | 1050.522320 | 525.764798      | 1033.495771    | 517.251524       | 5 |
| 5 | 613.243896  | 307.125586      |                |                  | Y    | 890.491671  | 445.749474      | 873.465122     | 437.236199       | 4 |
| 6 | 1052.469222 | 526.738249      | 1035.442673    | 518.224975       | Q    | 727.428342  | 364.217809      | 710.401793     | 355.704534       | 3 |
| 7 | 1165.553286 | 583.280281      | 1148.526737    | 574.767007       | I    | 288.203016  | 144.605146      | 271.176467     | 136.091871       | 2 |
| 8 |             |                 |                |                  | R    | 175.118952  | 88.063114       | 158.092403     | 79.549839        | 1 |

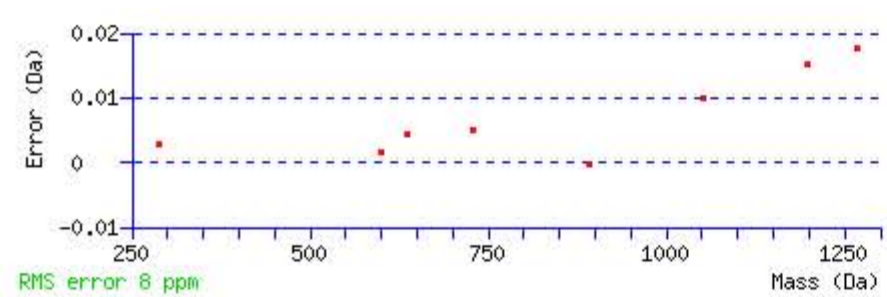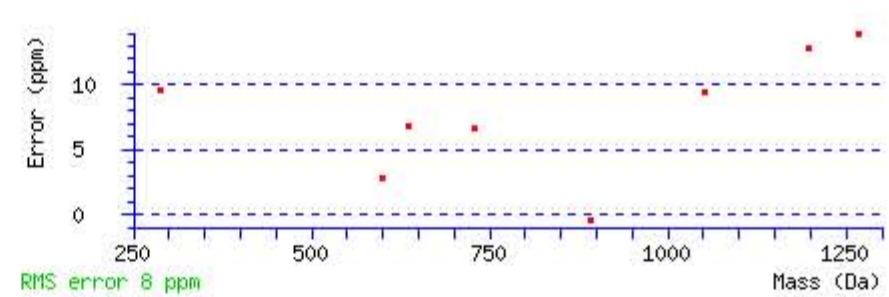

NCBI BLAST search of [AAFCYQIR](#)

(Parameters: blastp, nr protein database, expect=20000, no filter, PAM30)

Other BLAST [web gateways](#)

### All matches to this query

| Score | Mr(calc):   | Delta     | Sequence                    |
|-------|-------------|-----------|-----------------------------|
| 43.4  | 1338.657669 | 0.011059  | <a href="#">AAFCYQIR</a>    |
| 9.4   | 1338.657669 | 0.011059  | <a href="#">AAFLQYCR</a>    |
| 3.7   | 1338.656784 | 0.011944  | <a href="#">ATNYVESNWKK</a> |
| 3.6   | 1338.671402 | -0.002674 | <a href="#">AIQSNQPDR</a>   |
| 2.6   | 1338.678787 | -0.010059 | <a href="#">AEPPMSLQR</a>   |
| 1.6   | 1338.660156 | 0.008572  | <a href="#">AAEPPQQQK</a>   |
| 1.6   | 1338.660156 | 0.008572  | <a href="#">AAEPPQQQK</a>   |
| 1.6   | 1338.660156 | 0.008572  | <a href="#">AAEPPQQQK</a>   |

# MASCOT Search Results

## Peptide View

MS/MS Fragmentation of **SPLNDFQVLR**

Found in **HGFL\_HUMAN**, Hepatocyte growth factor-like protein OS=Homo sapiens GN=MST1 PE=1 SV=2

Match to Query 34860: 1498.811532 from(500.611120,3+) rtinseconds(2353) index(81273)

Title: Locus:1.1.1.2170.7 File:"2013-07-02 CLN FXIII 180 min 1st FT.wiff"

Data file C:\Program Files (x86)\Matrix Science\Mascot Daemon\mgf\7 FXIII 180 min 1st\mascot\_daemon\_merge.mgf

Click mouse within plot area to zoom in by factor of two about that point

Or, Plot from  to  Da

Label all possible matches  Label matches used for scoring

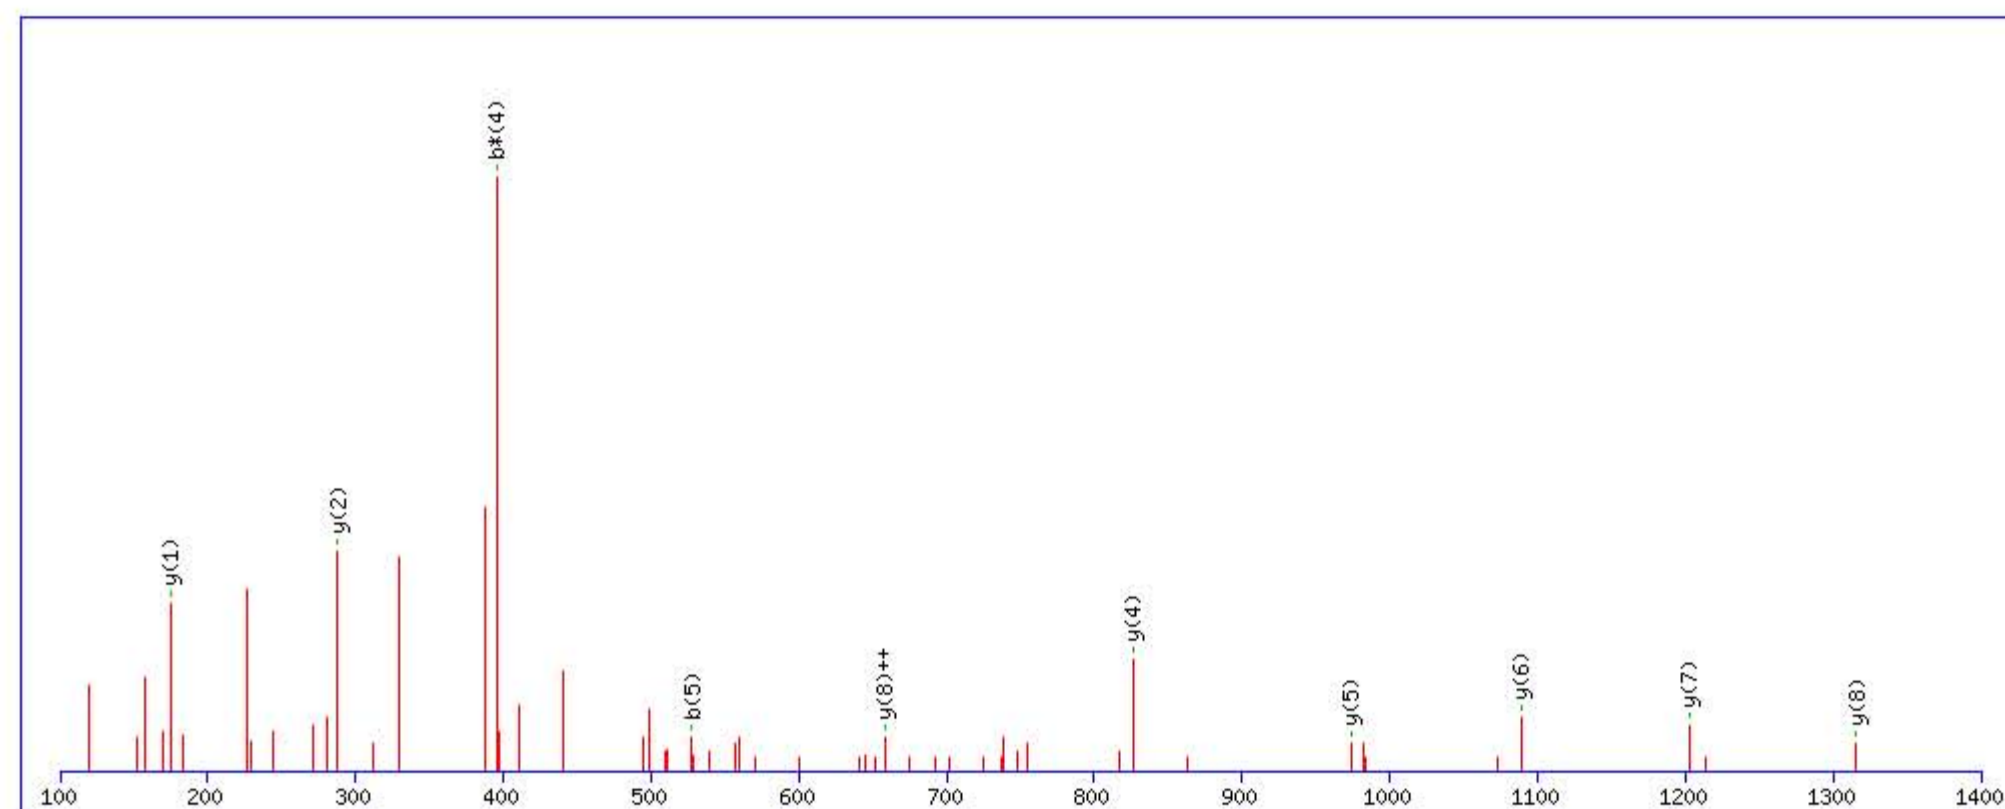

Monoisotopic mass of neutral peptide Mr(calc): 1498.796616

Fixed modifications: Carbamidomethyl (C) (apply to specified residues or termini only)

Variable modifications:

Q7 : Biotin:Thermo-21345 (Q)

Ions Score: 60 Expect: 2.2e-005

Matches : 10/92 fragment ions using 12 most intense peaks [\(help\)](#)

| #  | b                 | b <sup>++</sup> | b <sup>*</sup>    | b <sup>*++</sup> | b <sup>0</sup> | b <sup>0++</sup> | Seq. | y                  | y <sup>++</sup>   | y <sup>*</sup> | y <sup>*++</sup> | y <sup>0</sup> | y <sup>0++</sup> | #  |
|----|-------------------|-----------------|-------------------|------------------|----------------|------------------|------|--------------------|-------------------|----------------|------------------|----------------|------------------|----|
| 1  | 88.039304         | 44.523290       |                   |                  | 70.028739      | 35.518008        | S    |                    |                   |                |                  |                |                  | 10 |
| 2  | 185.092068        | 93.049672       |                   |                  | 167.081503     | 84.044389        | P    | 1412.771868        | 706.889572        | 1395.745319    | 698.376298       | 1394.761303    | 697.884290       | 9  |
| 3  | 298.176132        | 149.591704      |                   |                  | 280.165567     | 140.586422       | L    | <b>1315.719104</b> | <b>658.363190</b> | 1298.692555    | 649.849916       | 1297.708539    | 649.357908       | 8  |
| 4  | 412.219059        | 206.613168      | <b>395.192510</b> | 198.099893       | 394.208494     | 197.607885       | N    | <b>1202.635040</b> | 601.821158        | 1185.608491    | 593.307884       | 1184.624475    | 592.815876       | 7  |
| 5  | <b>527.246002</b> | 264.126639      | 510.219453        | 255.613365       | 509.235437     | 255.121357       | D    | <b>1088.592113</b> | 544.799695        | 1071.565564    | 536.286420       | 1070.581548    | 535.794412       | 6  |
| 6  | 674.314416        | 337.660846      | 657.287867        | 329.147572       | 656.303851     | 328.655564       | F    | <b>973.565170</b>  | 487.286223        | 956.538621     | 478.772949       |                |                  | 5  |
| 7  | 1113.539742       | 557.273509      | 1096.513193       | 548.760235       | 1095.529177    | 548.268227       | Q    | <b>826.496756</b>  | 413.752016        | 809.470207     | 405.238742       |                |                  | 4  |
| 8  | 1212.608156       | 606.807716      | 1195.581607       | 598.294442       | 1194.597591    | 597.802434       | V    | 387.271430         | 194.139353        | 370.244881     | 185.626078       |                |                  | 3  |
| 9  | 1325.692220       | 663.349748      | 1308.665671       | 654.836474       | 1307.681655    | 654.344466       | L    | <b>288.203016</b>  | 144.605146        | 271.176467     | 136.091871       |                |                  | 2  |
| 10 |                   |                 |                   |                  |                |                  | R    | <b>175.118952</b>  | 88.063114         | 158.092403     | 79.549839        |                |                  | 1  |

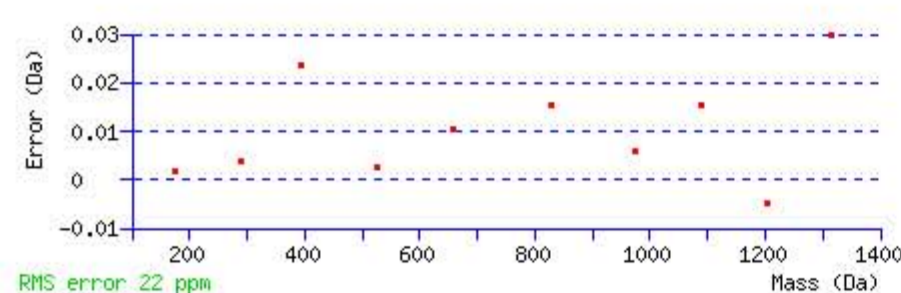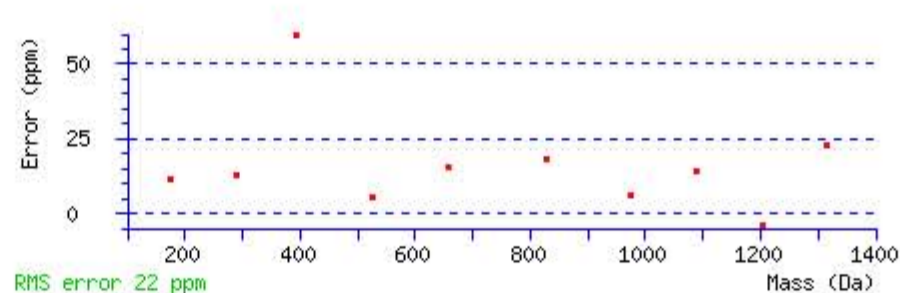

NCBI BLAST search of **SPLNDFQVLR**

(Parameters: blastp, nr protein database, expect=20000, no filter, PAM30)

Other BLAST [web gateways](#)

## All matches to this query

| Score | Mr(calc):   | Delta     | Sequence                        |
|-------|-------------|-----------|---------------------------------|
| 59.9  | 1498.796616 | 0.014916  | <a href="#">SPLNDFQVLR</a>      |
| 12.2  | 1498.792572 | 0.018960  | <a href="#">ALNITSLQMHSRLR</a>  |
| 4.3   | 1498.799103 | 0.012429  | <a href="#">ALLNLPQTQTSGEAK</a> |
| 2.9   | 1498.807831 | 0.003701  | <a href="#">MRSGLPAPWISLR</a>   |
| 2.8   | 1498.832993 | -0.021461 | <a href="#">QAFKPTDILR</a>      |
| 0.8   | 1498.817749 | -0.006217 | <a href="#">LQGLPIVAGTMDIR</a>  |
| 0.5   | 1498.832962 | -0.021430 | <a href="#">LRLDKYYMLIR</a>     |
| 0.0   | 1498.815674 | -0.004142 | <a href="#">YRYLPERPHLR</a>     |

# MASCOT Search Results

## Peptide View

MS/MS Fragmentation of **QEATTVSCFR**

Found in **HGFL\_HUMAN**, Hepatocyte growth factor-like protein OS=Homo sapiens GN=MST1 PE=1 SV=2

Match to Query 35329: 1508.723308 from(755.368930,2+) rtinseconds(1744) index(77200)

Title: Locus:1.1.1.1958.8 File:"2013-07-02 CLN FXIII 180 min 1st FT.wiff"

Data file C:\Program Files (x86)\Matrix Science\Mascot Daemon\mgf\7 FXIII 180 min 1st\mascot\_daemon\_merge.mgf

Click mouse within plot area to zoom in by factor of two about that point

Or, Plot from  to  Da

Label all possible matches  Label matches used for scoring

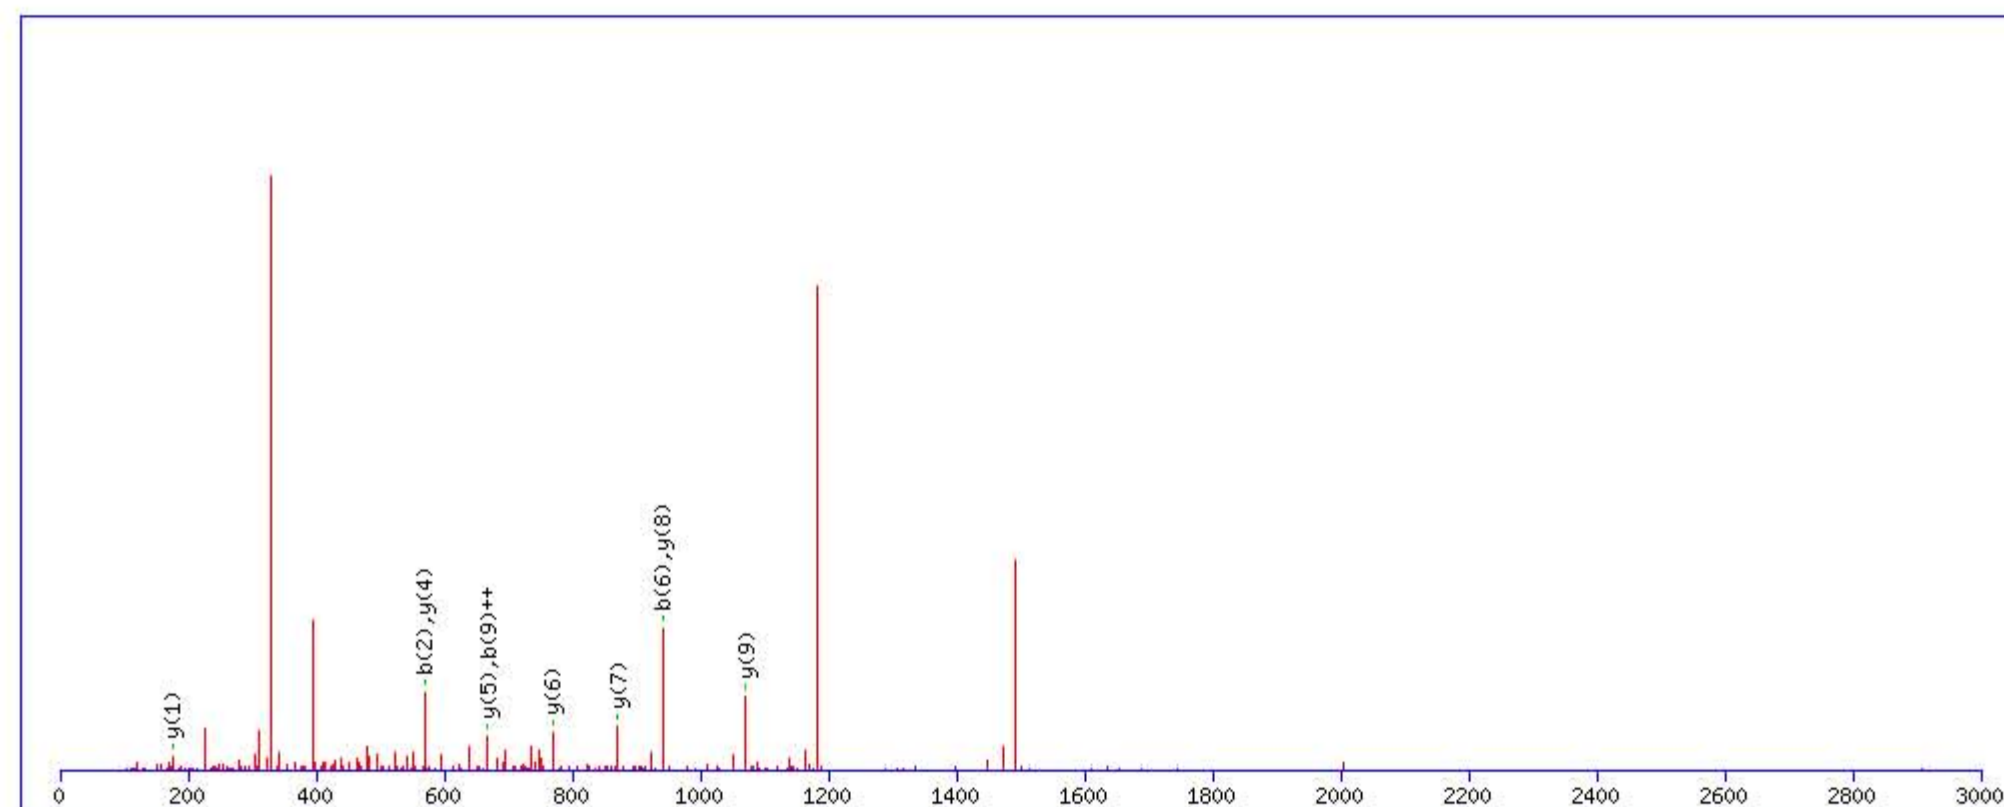

Monoisotopic mass of neutral peptide Mr(calc): 1508.711578

Fixed modifications: Carbamidomethyl (C) (apply to specified residues or termini only)

Variable modifications:

Q1 : Biotin:Thermo-21345 (Q)

Ions Score: 44 Expect: 0.00059

Matches : 10/100 fragment ions using 14 most intense peaks [\(help\)](#)

| #  | b                 | b <sup>++</sup>   | b <sup>+</sup> | b <sup>+++</sup> | b <sup>0</sup> | b <sup>0++</sup> | Seq. | y                  | y <sup>++</sup> | y <sup>+</sup> | y <sup>+++</sup> | y <sup>0</sup> | y <sup>0++</sup> | #  |
|----|-------------------|-------------------|----------------|------------------|----------------|------------------|------|--------------------|-----------------|----------------|------------------|----------------|------------------|----|
| 1  | 440.232602        | 220.619939        | 423.206053     | 212.106664       |                |                  | Q    |                    |                 |                |                  |                |                  | 10 |
| 2  | <b>569.275195</b> | 285.141236        | 552.248646     | 276.627961       | 551.264630     | 276.135953       | E    | <b>1070.493522</b> | 535.750399      | 1053.466973    | 527.237125       | 1052.482957    | 526.745117       | 9  |
| 3  | 640.312309        | 320.659793        | 623.285760     | 312.146518       | 622.301744     | 311.654510       | A    | <b>941.450929</b>  | 471.229103      | 924.424380     | 462.715828       | 923.440364     | 462.223820       | 8  |
| 4  | 741.359988        | 371.183632        | 724.333439     | 362.670358       | 723.349423     | 362.178350       | T    | <b>870.413815</b>  | 435.710546      | 853.387266     | 427.197271       | 852.403250     | 426.705263       | 7  |
| 5  | 842.407667        | 421.707472        | 825.381118     | 413.194197       | 824.397102     | 412.702189       | T    | <b>769.366136</b>  | 385.186706      | 752.339587     | 376.673432       | 751.355571     | 376.181424       | 6  |
| 6  | <b>941.476081</b> | 471.241679        | 924.449532     | 462.728404       | 923.465516     | 462.236396       | V    | <b>668.318457</b>  | 334.662867      | 651.291908     | 326.149592       | 650.307892     | 325.657584       | 5  |
| 7  | 1028.508109       | 514.757693        | 1011.481560    | 506.244418       | 1010.497544    | 505.752410       | S    | <b>569.250043</b>  | 285.128660      | 552.223494     | 276.615385       | 551.239478     | 276.123377       | 4  |
| 8  | 1188.538758       | 594.773017        | 1171.512209    | 586.259743       | 1170.528193    | 585.767735       | C    | 482.218015         | 241.612646      | 465.191466     | 233.099371       |                |                  | 3  |
| 9  | 1335.607172       | <b>668.307224</b> | 1318.580623    | 659.793950       | 1317.596607    | 659.301942       | F    | 322.187366         | 161.597321      | 305.160817     | 153.084047       |                |                  | 2  |
| 10 |                   |                   |                |                  |                |                  | R    | <b>175.118952</b>  | 88.063114       | 158.092403     | 79.549839        |                |                  | 1  |

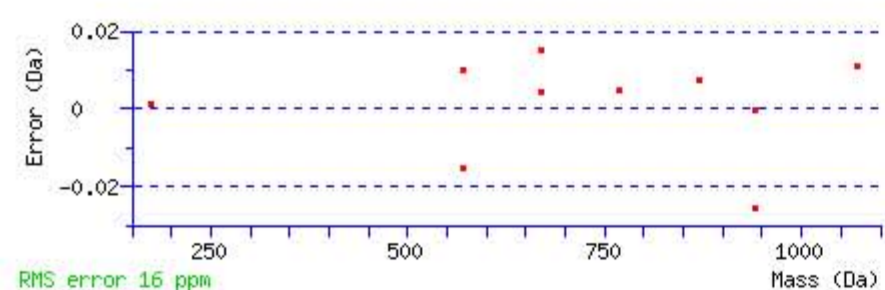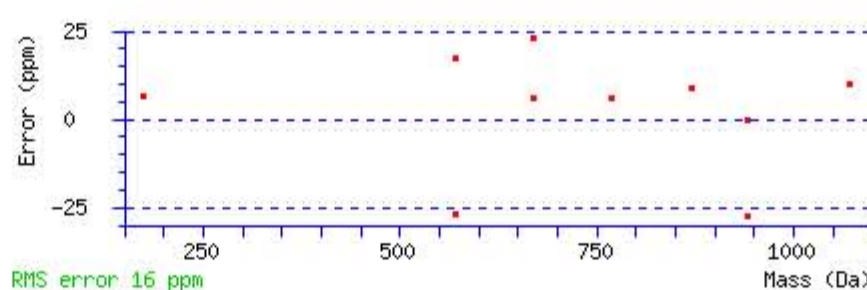

NCBI BLAST search of **QEATTVSCFR**

(Parameters: blastp, nr protein database, expect=20000, no filter, PAM30)

Other BLAST [web gateways](#)

## All matches to this query

| Score | Mr(calc):   | Delta     | Sequence                        |
|-------|-------------|-----------|---------------------------------|
| 44.2  | 1508.711578 | 0.011730  | <a href="#">QEATTVSCFR</a>      |
| 9.2   | 1508.711380 | 0.011928  | <a href="#">RTASGGRTEQGMSR</a>  |
| 7.2   | 1508.726624 | -0.003316 | <a href="#">RDGQLQRMNYGR</a>    |
| 5.7   | 1508.744385 | -0.021077 | <a href="#">VSNQQS NLAQHQR</a>  |
| 4.8   | 1508.733154 | -0.009846 | <a href="#">APGSRLSSGGTNYSR</a> |
| 2.7   | 1508.708191 | 0.015117  | <a href="#">EYGSMTVHLGPR</a>    |
| 2.1   | 1508.741180 | -0.017872 | <a href="#">SKLAYDPPHPYR</a>    |
| 2.1   | 1508.703461 | 0.019847  | <a href="#">LKSFTYEYEDSK</a>    |
| 1.8   | 1508.727295 | -0.003987 | <a href="#">ESSHKHTFFHPR</a>    |
| 1.5   | 1508.740540 | -0.017232 | <a href="#">EQHEDKSAVR</a>      |

# MASCOT SEARCH RESULTS

## Peptide View

MS/MS Fragmentation of **FLDQGLDDNYCR**

Found in **HGFL\_HUMAN**, Hepatocyte growth factor-like protein OS=Homo sapiens GN=MST1 PE=1 SV=2

Match to Query 45938: 1825.830628 from(913.922590,2+) rtinseconds(2145) index(79835)

Title: Locus:1.1.1.2097.25 File:"2013-07-02 CLN FXIII 180 min 1st FT.wiff"

Data file C:\Program Files (x86)\Matrix Science\Mascot Daemon\mgf\7 FXIII 180 min 1st\mascot\_daemon\_merge.mgf

Click mouse within plot area to zoom in by factor of two about that point

Or, Plot from  to  Da

Label all possible matches  Label matches used for scoring

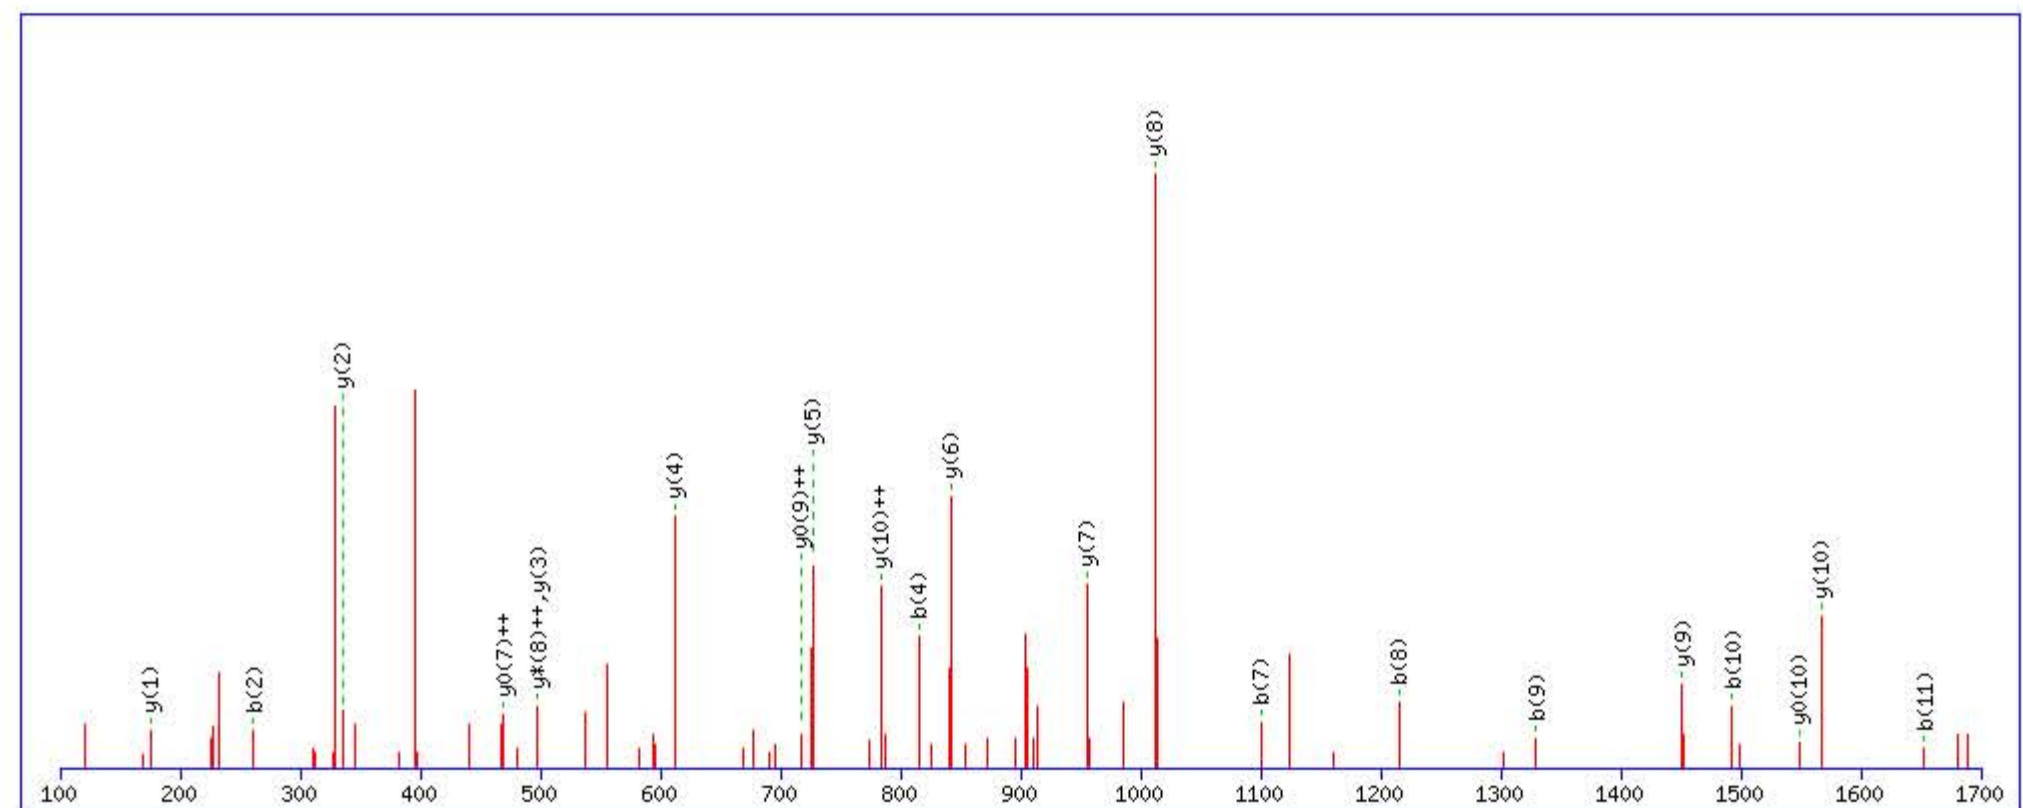

Monoisotopic mass of neutral peptide Mr(calc): 1825.812744

Fixed modifications: Carbamidomethyl (C) (apply to specified residues or termini only)

Variable modifications:

Q4 : Biotin:Thermo-21345 (Q)

Ions Score: 58 Expect: 3.7e-006

Matches : 22/114 fragment ions using 42 most intense peaks [\(help\)](#)

| #  | b                  | b <sup>++</sup> | b <sup>*</sup> | b <sup>*++</sup> | b <sup>0</sup> | b <sup>0++</sup> | Seq. | y                  | y <sup>++</sup>   | y <sup>*</sup> | y <sup>*++</sup>  | y <sup>0</sup>     | y <sup>0++</sup>  | #  |
|----|--------------------|-----------------|----------------|------------------|----------------|------------------|------|--------------------|-------------------|----------------|-------------------|--------------------|-------------------|----|
| 1  | 148.075690         | 74.541483       |                |                  |                |                  | F    |                    |                   |                |                   |                    |                   | 12 |
| 2  | <b>261.159754</b>  | 131.083515      |                |                  |                |                  | L    | 1679.751604        | 840.379440        | 1662.725055    | 831.866166        | 1661.741039        | 831.374158        | 11 |
| 3  | 376.186697         | 188.596986      |                |                  | 358.176132     | 179.591704       | D    | <b>1566.667540</b> | <b>783.837408</b> | 1549.640991    | 775.324134        | <b>1548.656975</b> | 774.832126        | 10 |
| 4  | <b>815.412023</b>  | 408.209650      | 798.385474     | 399.696375       | 797.401458     | 399.204367       | Q    | <b>1451.640597</b> | 726.323937        | 1434.614048    | 717.810662        | 1433.630032        | <b>717.318654</b> | 9  |
| 5  | 872.433487         | 436.720382      | 855.406938     | 428.207107       | 854.422922     | 427.715099       | G    | <b>1012.415271</b> | 506.711274        | 995.388722     | <b>498.197999</b> | 994.404706         | 497.705991        | 8  |
| 6  | 985.517551         | 493.262414      | 968.491002     | 484.749139       | 967.506986     | 484.257131       | L    | <b>955.393807</b>  | 478.200542        | 938.367258     | 469.687267        | 937.383242         | <b>469.195259</b> | 7  |
| 7  | <b>1100.544494</b> | 550.775885      | 1083.517945    | 542.262611       | 1082.533929    | 541.770603       | D    | <b>842.309743</b>  | 421.658510        | 825.283194     | 413.145235        | 824.299178         | 412.653227        | 6  |
| 8  | <b>1215.571437</b> | 608.289357      | 1198.544888    | 599.776082       | 1197.560872    | 599.284074       | D    | <b>727.282800</b>  | 364.145038        | 710.256251     | 355.631764        | 709.272235         | 355.139756        | 5  |
| 9  | <b>1329.614364</b> | 665.310820      | 1312.587815    | 656.797546       | 1311.603799    | 656.305538       | N    | <b>612.255857</b>  | 306.631567        | 595.229308     | 298.118292        |                    |                   | 4  |
| 10 | <b>1492.677693</b> | 746.842485      | 1475.651144    | 738.329210       | 1474.667128    | 737.837202       | Y    | <b>498.212930</b>  | 249.610103        | 481.186381     | 241.096829        |                    |                   | 3  |
| 11 | <b>1652.708342</b> | 826.857809      | 1635.681793    | 818.344535       | 1634.697777    | 817.852527       | C    | <b>335.149601</b>  | 168.078438        | 318.123052     | 159.565164        |                    |                   | 2  |
| 12 |                    |                 |                |                  |                |                  | R    | <b>175.118952</b>  | 88.063114         | 158.092403     | 79.549839         |                    |                   | 1  |

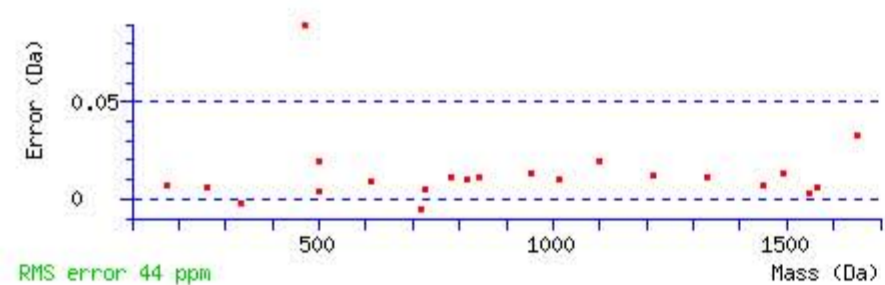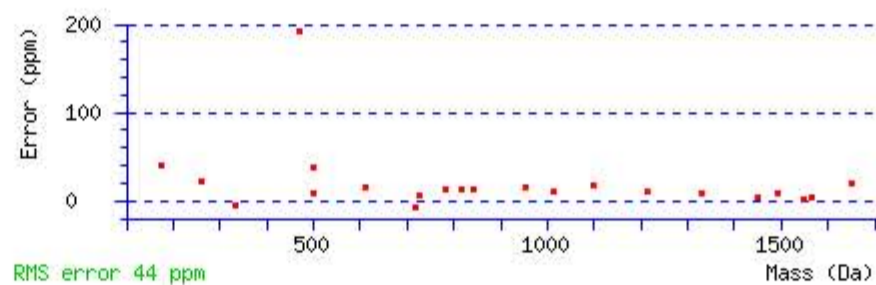

NCBI BLAST search of **FLDQGLDDNYCR**

(Parameters: blastp, nr protein database, expect=20000, no filter, PAM30)

Other BLAST [web gateways](#)

All matches to this query

| Score | Mr(calc):   | Delta    | Sequence                     |
|-------|-------------|----------|------------------------------|
| 58.0  | 1825.812744 | 0.017884 | <a href="#">FLDQGLDDNYCR</a> |
| 0.1   | 1825.823944 | 0.006684 | <a href="#">QNSWKGYSENMR</a> |

Mascot: <http://www.matrixscience.com/>

# MASCOT Search Results

## Peptide View

MS/MS Fragmentation of **NPDGSERPWCYTTDPQIER**

Found in **HGFL\_HUMAN**, Hepatocyte growth factor-like protein OS=Homo sapiens GN=MST1 PE=1 SV=2

Match to Query 64878: 2631.206262 from(878.076030,3+) rtinseconds(1999) index(78875)

Title: Locus:1.1.1.2046.12 File:"2013-07-02 CLN FXIII 180 min 1st FT.wiff"

Data file C:\Program Files (x86)\Matrix Science\Mascot Daemon\mgf\7 FXIII 180 min 1st\mascot\_daemon\_merge.mgf

Click mouse within plot area to zoom in by factor of two about that point

Or, Plot from  to  Da

Label all possible matches  Label matches used for scoring

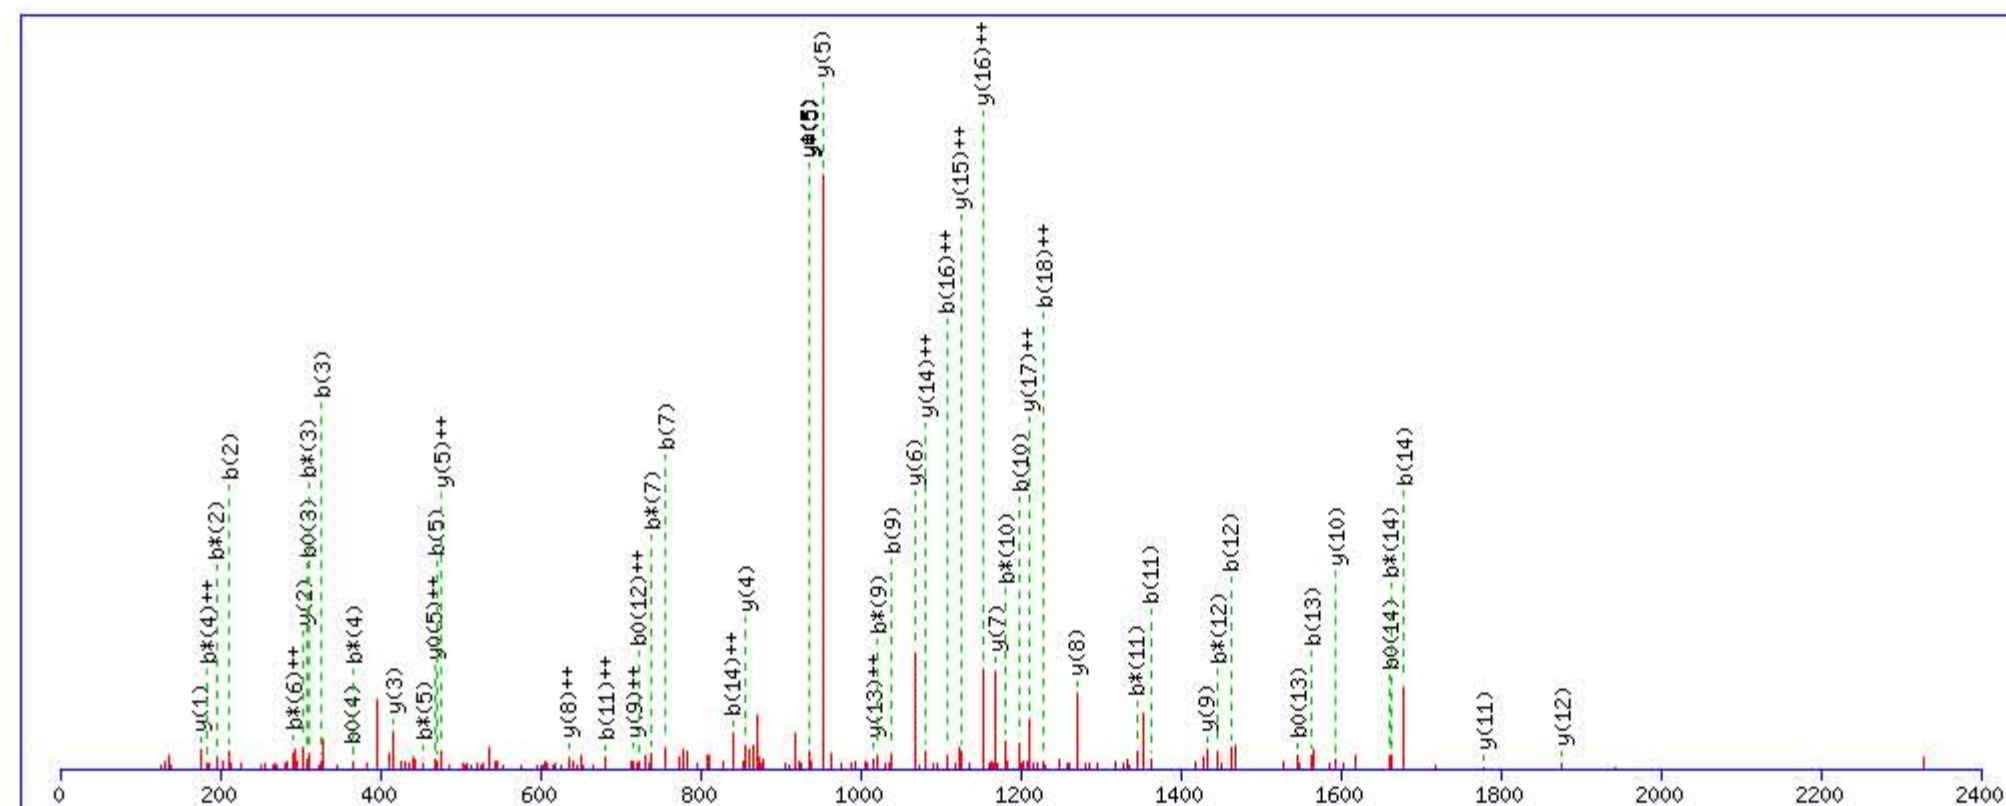

Monoisotopic mass of neutral peptide Mr(calc): 2631.184601

Fixed modifications: Carbamidomethyl (C) (apply to specified residues or termini only)

Variable modifications:

Q16 : Biotin:Thermo-21345 (Q)

Ions Score: 55 Expect: 4.1e-005

Matches : 54/210 fragment ions using 113 most intense peaks [\(help\)](#)

| #  | b                  | b <sup>++</sup>    | b <sup>+</sup>     | b <sup>+++</sup>  | b <sup>0</sup>     | b <sup>0++</sup> | Seq. | y                  | y <sup>++</sup>    | y <sup>+</sup>    | y <sup>+++</sup> | y <sup>0</sup>    | y <sup>0++</sup>  | #  |
|----|--------------------|--------------------|--------------------|-------------------|--------------------|------------------|------|--------------------|--------------------|-------------------|------------------|-------------------|-------------------|----|
| 1  | 115.050203         | 58.028740          | 98.023654          | 49.515465         |                    |                  | N    |                    |                    |                   |                  |                   |                   | 19 |
| 2  | <b>212.102967</b>  | 106.555121         | <b>195.076418</b>  | 98.041847         |                    |                  | P    | 2518.148958        | 1259.578117        | 2501.122409       | 1251.064842      | 2500.138393       | 1250.572834       | 18 |
| 3  | <b>327.129910</b>  | 164.068593         | <b>310.103361</b>  | 155.555319        | <b>309.119345</b>  | 155.063311       | D    | 2421.096194        | <b>1211.051735</b> | 2404.069645       | 1202.538460      | 2403.085629       | 1202.046452       | 17 |
| 4  | 384.151374         | 192.579325         | <b>367.124825</b>  | <b>184.066050</b> | <b>366.140809</b>  | 183.574042       | G    | 2306.069251        | <b>1153.538263</b> | 2289.042702       | 1145.024989      | 2288.058686       | 1144.532981       | 16 |
| 5  | <b>471.183402</b>  | 236.095339         | <b>454.156853</b>  | 227.582064        | 453.172837         | 227.090056       | S    | 2249.047787        | <b>1125.027531</b> | 2232.021238       | 1116.514257      | 2231.037222       | 1116.022249       | 15 |
| 6  | 600.225995         | 300.616636         | 583.199446         | <b>292.103361</b> | 582.215430         | 291.611353       | E    | 2162.015759        | <b>1081.511517</b> | 2144.989210       | 1072.998243      | 2144.005194       | 1072.506235       | 14 |
| 7  | <b>756.327106</b>  | 378.667191         | <b>739.300557</b>  | 370.153916        | 738.316541         | 369.661908       | R    | 2032.973166        | <b>1016.990221</b> | 2015.946617       | 1008.476947      | 2014.962601       | 1007.984939       | 13 |
| 8  | 853.379870         | 427.193573         | 836.353321         | 418.680298        | 835.369305         | 418.188290       | P    | <b>1876.872055</b> | 938.939666         | 1859.845506       | 930.426391       | 1858.861490       | 929.934383        | 12 |
| 9  | <b>1039.459183</b> | 520.233229         | <b>1022.432634</b> | 511.719955        | 1021.448618        | 511.227947       | W    | <b>1779.819291</b> | 890.413284         | 1762.792742       | 881.900009       | 1761.808726       | 881.408001        | 11 |
| 10 | <b>1199.489832</b> | 600.248554         | <b>1182.463283</b> | 591.735280        | 1181.479267        | 591.243271       | C    | <b>1593.739978</b> | 797.373627         | 1576.713429       | 788.860353       | 1575.729413       | 788.368345        | 10 |
| 11 | <b>1362.553161</b> | <b>681.780219</b>  | <b>1345.526612</b> | 673.266944        | 1344.542596        | 672.774936       | Y    | <b>1433.709329</b> | <b>717.358303</b>  | 1416.682780       | 708.845028       | 1415.698764       | 708.353020        | 9  |
| 12 | <b>1463.600840</b> | 732.304058         | <b>1446.574291</b> | 723.790784        | 1445.590275        | 723.298776       | T    | <b>1270.646000</b> | <b>635.826638</b>  | 1253.619451       | 627.313364       | 1252.635435       | 626.821356        | 8  |
| 13 | <b>1564.648519</b> | 782.827898         | 1547.621970        | 774.314623        | <b>1546.637954</b> | 773.822615       | T    | <b>1169.598321</b> | 585.302799         | 1152.571772       | 576.789524       | 1151.587756       | 576.297516        | 7  |
| 14 | <b>1679.675462</b> | <b>840.341369</b>  | <b>1662.648913</b> | 831.828095        | <b>1661.664897</b> | 831.336087       | D    | <b>1068.550642</b> | 534.778959         | 1051.524093       | 526.265685       | 1050.540077       | 525.773677        | 6  |
| 15 | 1776.728226        | 888.867751         | 1759.701677        | 880.354477        | 1758.717661        | 879.862469       | P    | <b>953.523699</b>  | <b>477.265488</b>  | <b>936.497150</b> | 468.752213       | <b>935.513134</b> | <b>468.260205</b> | 5  |
| 16 | 2215.953552        | <b>1108.480414</b> | 2198.927003        | 1099.967139       | 2197.942987        | 1099.475131      | Q    | <b>856.470935</b>  | 428.739106         | 839.444386        | 420.225831       | 838.460370        | 419.733823        | 4  |
| 17 | 2329.037616        | 1165.022446        | 2312.011067        | 1156.509171       | 2311.027051        | 1156.017163      | I    | <b>417.245609</b>  | 209.126443         | 400.219060        | 200.613168       | 399.235044        | 200.121160        | 3  |
| 18 | 2458.080209        | <b>1229.543743</b> | 2441.053660        | 1221.030468       | 2440.069644        | 1220.538460      | E    | <b>304.161545</b>  | 152.584411         | 287.134996        | 144.071136       | 286.150980        | 143.579128        | 2  |
| 19 |                    |                    |                    |                   |                    |                  | R    | <b>175.118952</b>  | 88.063114          | 158.092403        | 79.549839        |                   |                   | 1  |

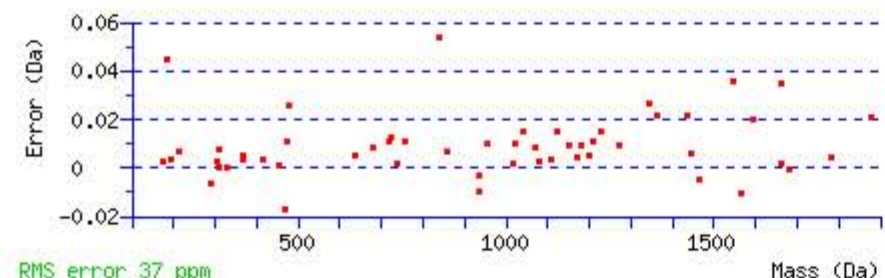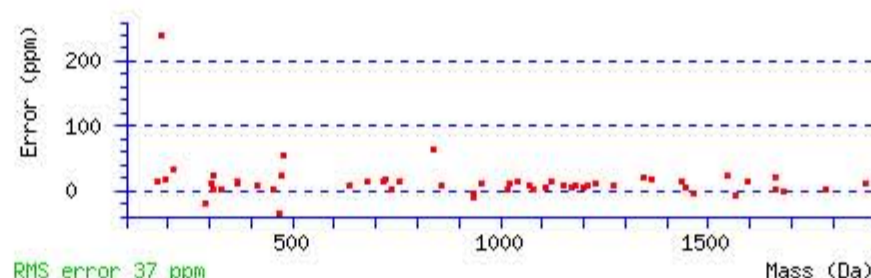

NCBI BLAST search of **NPDGSERPWCYTTDPQIER**

(Parameters: blastp, nr protein database, expect=20000, no filter, PAM30)

Other BLAST [web gateways](#)

All matches to this query

| Score | Mr(calc):   | Delta    | Sequence                            |
|-------|-------------|----------|-------------------------------------|
| 55.0  | 2631.184601 | 0.021661 | <a href="#">NPDGSERPWCYTTDPQIER</a> |

Mascot: <http://www.matrixscience.com/>

# MASCOT Search Results

## Peptide View

MS/MS Fragmentation of **GTELQHLLHAVVPGPWQEDVADAEECAGR**  
 Found in **HGFL\_HUMAN**, Hepatocyte growth factor-like protein OS=Homo sapiens GN=MST1 PE=1 SV=2

Match to Query 77303: 3494.708496 from(874.684400,4+) rtinseconds(2782) index(84141)  
 Title: Locus:1.1.1.2317.19 File:"2013-07-02 CLN FXIII 180 min 1st FT.wiff"  
 Data file C:\Program Files (x86)\Matrix Science\Mascot Daemon\mgf7 FXIII 180 min 1st\mascot\_daemon\_merge.mgf

Click mouse within plot area to zoom in by factor of two about that point

Or, Plot from  to  Da

Label all possible matches  Label matches used for scoring

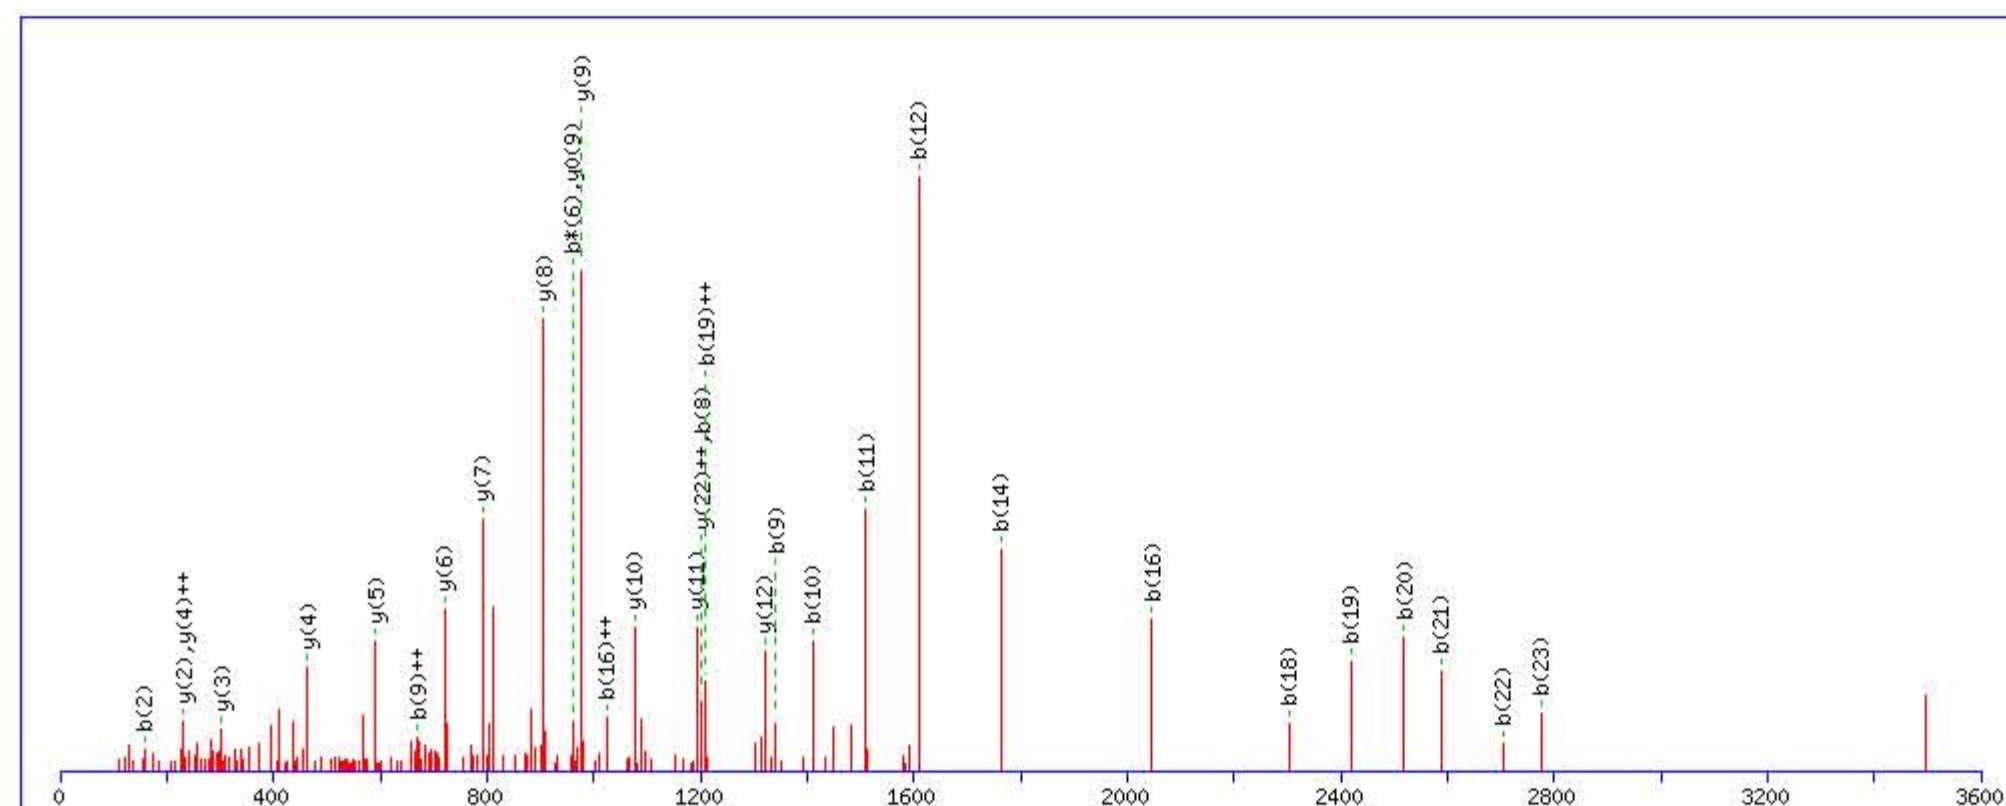

Monoisotopic mass of neutral peptide Mr(calc): 3494.671112  
 Fixed modifications: Carbamidomethyl (C) (apply to specified residues or termini only)  
 Variable modifications:  
 Q5 : Biotin:Thermo-21345 (Q)  
 Ions Score: 104 Expect: 1.8e-010  
 Matches : 32/318 fragment ions using 40 most intense peaks [\(help\)](#)

| #  | b                  | b <sup>++</sup>    | b <sup>*</sup>    | b <sup>+++</sup> | b <sup>0</sup> | b <sup>0++</sup> | Seq. | y                  | y <sup>++</sup>    | y <sup>*</sup> | y <sup>+++</sup> | y <sup>0</sup>    | y <sup>0++</sup> | #  |
|----|--------------------|--------------------|-------------------|------------------|----------------|------------------|------|--------------------|--------------------|----------------|------------------|-------------------|------------------|----|
| 1  | 58.028740          | 29.518008          |                   |                  |                |                  | G    |                    |                    |                |                  |                   |                  | 29 |
| 2  | <b>159.076419</b>  | 80.041847          |                   |                  | 141.065854     | 71.036565        | T    | 3438.656925        | 1719.832100        | 3421.630376    | 1711.318826      | 3420.646360       | 1710.826818      | 28 |
| 3  | 288.119012         | 144.563144         |                   |                  | 270.108447     | 135.557862       | E    | 3337.609246        | 1669.308261        | 3320.582697    | 1660.794986      | 3319.598681       | 1660.302978      | 27 |
| 4  | 401.203076         | 201.105176         |                   |                  | 383.192511     | 192.099894       | L    | 3208.566653        | 1604.786964        | 3191.540104    | 1596.273690      | 3190.556088       | 1595.781682      | 26 |
| 5  | 840.428402         | 420.717839         | 823.401853        | 412.204565       | 822.417837     | 411.712557       | Q    | 3095.482589        | 1548.244932        | 3078.456040    | 1539.731658      | 3077.472024       | 1539.239650      | 25 |
| 6  | 977.487314         | 489.247295         | <b>960.460765</b> | 480.734021       | 959.476749     | 480.242013       | H    | 2656.257263        | 1328.632269        | 2639.230714    | 1320.118995      | 2638.246698       | 1319.626987      | 24 |
| 7  | 1090.571378        | 545.789327         | 1073.544829       | 537.276053       | 1072.560813    | 536.784045       | L    | 2519.198351        | 1260.102813        | 2502.171802    | 1251.589539      | 2501.187786       | 1251.097531      | 23 |
| 8  | <b>1203.655442</b> | 602.331359         | 1186.628893       | 593.818085       | 1185.644877    | 593.326077       | L    | 2406.114287        | <b>1203.560781</b> | 2389.087738    | 1195.047507      | 2388.103722       | 1194.555499      | 22 |
| 9  | <b>1340.714354</b> | <b>670.860815</b>  | 1323.687805       | 662.347541       | 1322.703789    | 661.855532       | H    | 2293.030223        | 1147.018749        | 2276.003674    | 1138.505475      | 2275.019658       | 1138.013467      | 21 |
| 10 | <b>1411.751468</b> | 706.379372         | 1394.724919       | 697.866098       | 1393.740903    | 697.374089       | A    | 2155.971311        | 1078.489293        | 2138.944762    | 1069.976019      | 2137.960746       | 1069.484011      | 20 |
| 11 | <b>1510.819882</b> | 755.913579         | 1493.793333       | 747.400305       | 1492.809317    | 746.908297       | V    | 2084.934197        | 1042.970736        | 2067.907648    | 1034.457462      | 2066.923632       | 1033.965454      | 19 |
| 12 | <b>1609.888296</b> | 805.447786         | 1592.861747       | 796.934512       | 1591.877731    | 796.442504       | V    | 1985.865783        | 993.436530         | 1968.839234    | 984.923255       | 1967.855218       | 984.431247       | 18 |
| 13 | 1706.941060        | 853.974168         | 1689.914511       | 845.460894       | 1688.930495    | 844.968886       | P    | 1886.797369        | 943.902323         | 1869.770820    | 935.389048       | 1868.786804       | 934.897040       | 17 |
| 14 | <b>1763.962524</b> | 882.484900         | 1746.935975       | 873.971626       | 1745.951959    | 873.479618       | G    | 1789.744605        | 895.375941         | 1772.718056    | 886.862666       | 1771.734040       | 886.370658       | 16 |
| 15 | 1861.015288        | 931.011282         | 1843.988739       | 922.498008       | 1843.004723    | 922.006000       | P    | 1732.723141        | 866.865209         | 1715.696592    | 858.351934       | 1714.712576       | 857.859926       | 15 |
| 16 | <b>2047.094601</b> | <b>1024.050939</b> | 2030.068052       | 1015.537664      | 2029.084036    | 1015.045656      | W    | 1635.670377        | 818.338827         | 1618.643828    | 809.825552       | 1617.659812       | 809.333544       | 14 |
| 17 | 2175.153179        | 1088.080227        | 2158.126630       | 1079.566953      | 2157.142614    | 1079.074945      | Q    | 1449.591064        | 725.299170         | 1432.564515    | 716.785896       | 1431.580499       | 716.293888       | 13 |
| 18 | <b>2304.195772</b> | 1152.601524        | 2287.169223       | 1144.088249      | 2286.185207    | 1143.596241      | E    | <b>1321.532486</b> | 661.269881         | 1304.505937    | 652.756607       | 1303.521921       | 652.264599       | 12 |
| 19 | <b>2419.222715</b> | <b>1210.114995</b> | 2402.196166       | 1201.601721      | 2401.212150    | 1201.109713      | D    | <b>1192.489893</b> | 596.748585         | 1175.463344    | 588.235310       | 1174.479328       | 587.743302       | 11 |
| 20 | <b>2518.291129</b> | 1259.649202        | 2501.264580       | 1251.135928      | 2500.280564    | 1250.643920      | V    | <b>1077.462950</b> | 539.235113         | 1060.436401    | 530.721839       | 1059.452385       | 530.229831       | 10 |
| 21 | <b>2589.328243</b> | 1295.167759        | 2572.301694       | 1286.654485      | 2571.317678    | 1286.162477      | A    | <b>978.394536</b>  | 489.700906         | 961.367987     | 481.187632       | <b>960.383971</b> | 480.695624       | 9  |
| 22 | <b>2704.355186</b> | 1352.681231        | 2687.328637       | 1344.167956      | 2686.344621    | 1343.675948      | D    | <b>907.357422</b>  | 454.182349         | 890.330873     | 445.669075       | 889.346857        | 445.177067       | 8  |
| 23 | <b>2775.392300</b> | 1388.199788        | 2758.365751       | 1379.686513      | 2757.381735    | 1379.194505      | A    | <b>792.330479</b>  | 396.668878         | 775.303930     | 388.155603       | 774.319914        | 387.663595       | 7  |
| 24 | 2904.434893        | 1452.721085        | 2887.408344       | 1444.207810      | 2886.424328    | 1443.715802      | E    | <b>721.293365</b>  | 361.150321         | 704.266816     | 352.637046       | 703.282800        | 352.145038       | 6  |
| 25 | 3033.477486        | 1517.242381        | 3016.450937       | 1508.729106      | 3015.466921    | 1508.237099      | E    | <b>592.250772</b>  | 296.629024         | 575.224223     | 288.115750       | 574.240207        | 287.623742       | 5  |
| 26 | 3193.508135        | 1597.257705        | 3176.481586       | 1588.744431      | 3175.497570    | 1588.252423      | C    | <b>463.208179</b>  | <b>232.107727</b>  | 446.181630     | 223.594453       |                   |                  | 4  |
| 27 | 3264.545249        | 1632.776263        | 3247.518700       | 1624.262988      | 3246.534684    | 1623.770980      | A    | <b>303.177530</b>  | 152.092403         | 286.150981     | 143.579129       |                   |                  | 3  |
| 28 | 3321.566713        | 1661.286995        | 3304.540164       | 1652.773720      | 3303.556148    | 1652.281712      | G    | <b>232.140416</b>  | 116.573846         | 215.113867     | 108.060571       |                   |                  | 2  |
| 29 |                    |                    |                   |                  |                |                  | R    | 175.118952         | 88.063114          | 158.092403     | 79.549839        |                   |                  | 1  |

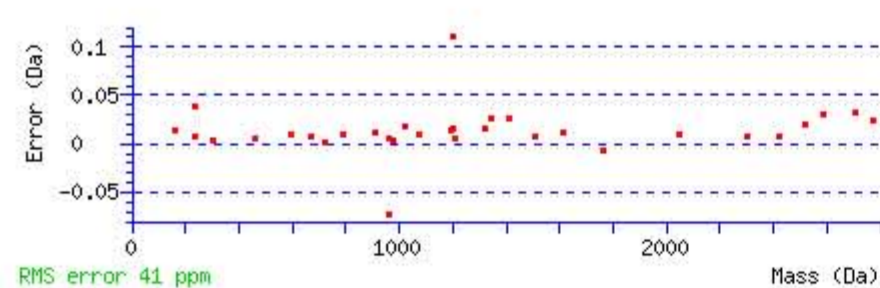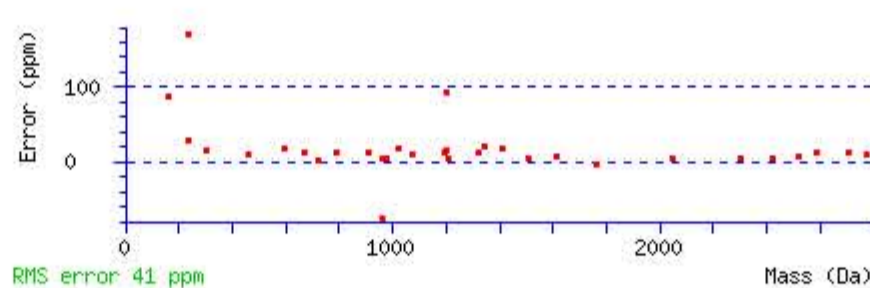

NCBI BLAST search of **GTELQHLLHAVVPGPWQEDVADAEECAGR**  
 (Parameters: blastp, nr protein database, expect=20000, no filter, PAM30)  
 Other BLAST [web gateways](#)

### All matches to this query

| Score | Mr(calc):   | Delta     | Sequence                                        |
|-------|-------------|-----------|-------------------------------------------------|
| 104.4 | 3494.671112 | 0.037384  | <a href="#">GTELQHLLHAVVPGPWQEDVADAEECAGR</a>   |
| 47.5  | 3494.671112 | 0.037384  | <a href="#">GTELQHLLHAVVPGPWQEDVADAEECAGR</a>   |
| 0.4   | 3494.727249 | -0.018753 | <a href="#">ETVAQLLKEMTNADSQNEGLLTMEQFNIVLK</a> |

# MASCOT Search Results

## Peptide View

MS/MS Fragmentation of **VVLGDQDLK**

Found in **HABP2\_HUMAN**, Hyaluronan-binding protein 2 OS=Homo sapiens GN=HABP2 PE=1 SV=1

Match to Query 26851: 1296.728928 from(649.371740,2+) rtinseconds(1954) index(60464)

Title: Locus:1.1.1.3103.15 File:"2013-07-02 CLN FXIII 180 min 1st F 4.wiff"

Data file C:\Program Files (x86)\Matrix Science\Mascot Daemon\mgf\7 FXIII 180 min 1st\mascot\_daemon\_merge.mgf

Click mouse within plot area to zoom in by factor of two about that point

Or, Plot from  to  Da

Label all possible matches  Label matches used for scoring

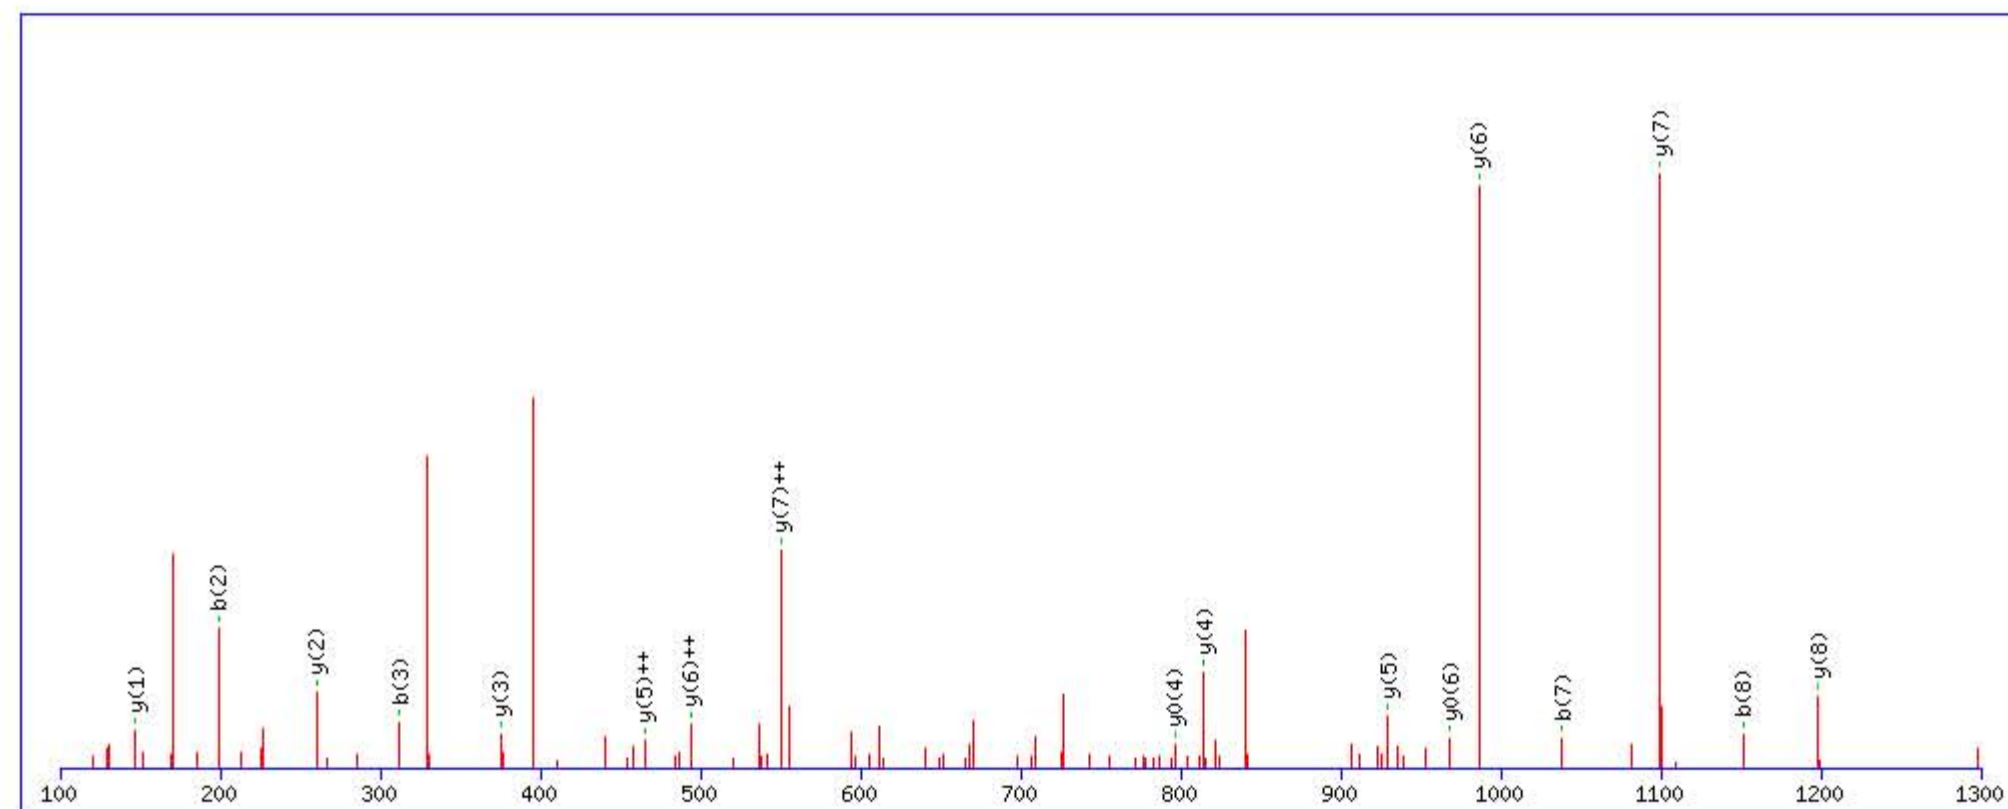

Monoisotopic mass of neutral peptide Mr(calc): 1296.711166

Fixed modifications: Carbamidomethyl (C) (apply to specified residues or termini only)

Variable modifications:

Q6 : Biotin:Thermo-21345 (Q)

Ions Score: 49 Expect: 0.00011

Matches : 17/74 fragment ions using 33 most intense peaks [\(help\)](#)

| # | b                  | b <sup>++</sup> | b <sup>*</sup> | b <sup>+++</sup> | b <sup>0</sup> | b <sup>0++</sup> | Seq. | y                  | y <sup>++</sup>   | y <sup>*</sup> | y <sup>+++</sup> | y <sup>0</sup>    | y <sup>0++</sup> | # |
|---|--------------------|-----------------|----------------|------------------|----------------|------------------|------|--------------------|-------------------|----------------|------------------|-------------------|------------------|---|
| 1 | 100.075690         | 50.541483       |                |                  |                |                  | V    |                    |                   |                |                  |                   |                  | 9 |
| 2 | <b>199.144104</b>  | 100.075690      |                |                  |                |                  | V    | <b>1198.650022</b> | 599.828649        | 1181.623473    | 591.315374       | 1180.639457       | 590.823366       | 8 |
| 3 | <b>312.228168</b>  | 156.617722      |                |                  |                |                  | L    | <b>1099.581608</b> | <b>550.294442</b> | 1082.555059    | 541.781168       | 1081.571043       | 541.289159       | 7 |
| 4 | 369.249632         | 185.128454      |                |                  |                |                  | G    | <b>986.497544</b>  | <b>493.752410</b> | 969.470995     | 485.239135       | <b>968.486979</b> | 484.747127       | 6 |
| 5 | 484.276575         | 242.641925      |                |                  | 466.266010     | 233.636643       | D    | <b>929.476080</b>  | <b>465.241678</b> | 912.449531     | 456.728403       | 911.465515        | 456.236395       | 5 |
| 6 | 923.501901         | 462.254589      | 906.475352     | 453.741314       | 905.491336     | 453.249306       | Q    | <b>814.449137</b>  | 407.728206        | 797.422588     | 399.214932       | <b>796.438572</b> | 398.722924       | 4 |
| 7 | <b>1038.528844</b> | 519.768060      | 1021.502295    | 511.254785       | 1020.518279    | 510.762777       | D    | <b>375.223811</b>  | 188.115543        | 358.197262     | 179.602269       | 357.213246        | 179.110261       | 3 |
| 8 | <b>1151.612908</b> | 576.310092      | 1134.586359    | 567.796817       | 1133.602343    | 567.304809       | L    | <b>260.196868</b>  | 130.602072        | 243.170319     | 122.088797       |                   |                  | 2 |
| 9 |                    |                 |                |                  |                |                  | K    | <b>147.112804</b>  | 74.060040         | 130.086255     | 65.546765        |                   |                  | 1 |

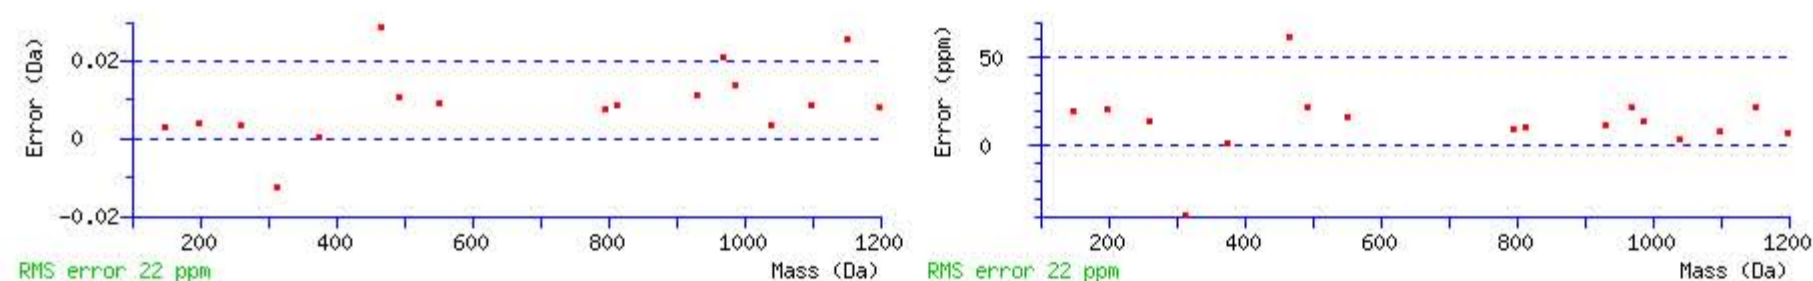

NCBI BLAST search of **VVLGDQDLK**

(Parameters: blastp, nr protein database, expect=20000, no filter, PAM30)

Other BLAST [web gateways](#)

## All matches to this query

| Score | Mr(calc):   | Delta     | Sequence                        |
|-------|-------------|-----------|---------------------------------|
| 49.2  | 1296.711166 | 0.017762  | <a href="#">VVLGDQDLK</a>       |
| 6.5   | 1296.711136 | 0.017792  | <a href="#">QEVQELLK</a>        |
| 6.3   | 1296.719025 | 0.009903  | <a href="#">VVSIHQDPKFK</a>     |
| 5.6   | 1296.747513 | -0.018585 | <a href="#">QDEKLLK</a>         |
| 2.8   | 1296.733612 | -0.004684 | <a href="#">QRIITGGNK</a>       |
| 2.8   | 1296.711136 | 0.017792  | <a href="#">ELCGLPIIASLK</a>    |
| 2.1   | 1296.714996 | 0.013932  | <a href="#">KPGSAGGPKVGGASK</a> |
| 1.9   | 1296.740112 | -0.011184 | <a href="#">QIIEATPERIK</a>     |

Mascot: <http://www.matrixscience.com/>

# MASCOT Search Results

## Peptide View

MS/MS Fragmentation of **FTCACPDQFK**

Found in **HABP2\_HUMAN**, Hyaluronan-binding protein 2 OS=Homo sapiens GN=HABP2 PE=1 SV=1

Match to Query 37912: 1583.713332 from(528.911720,3+) rtinseconds(1852) index(59645)

Title: Locus:1.1.1.3068.7 File:"2013-07-02 CLN FXIII 180 min 1st F 4.wiff"

Data file C:\Program Files (x86)\Matrix Science\Mascot Daemon\mgf\7 FXIII 180 min 1st\mascot\_daemon\_merge.mgf

Click mouse within plot area to zoom in by factor of two about that point

Or, Plot from  to  Da

Label all possible matches  Label matches used for scoring

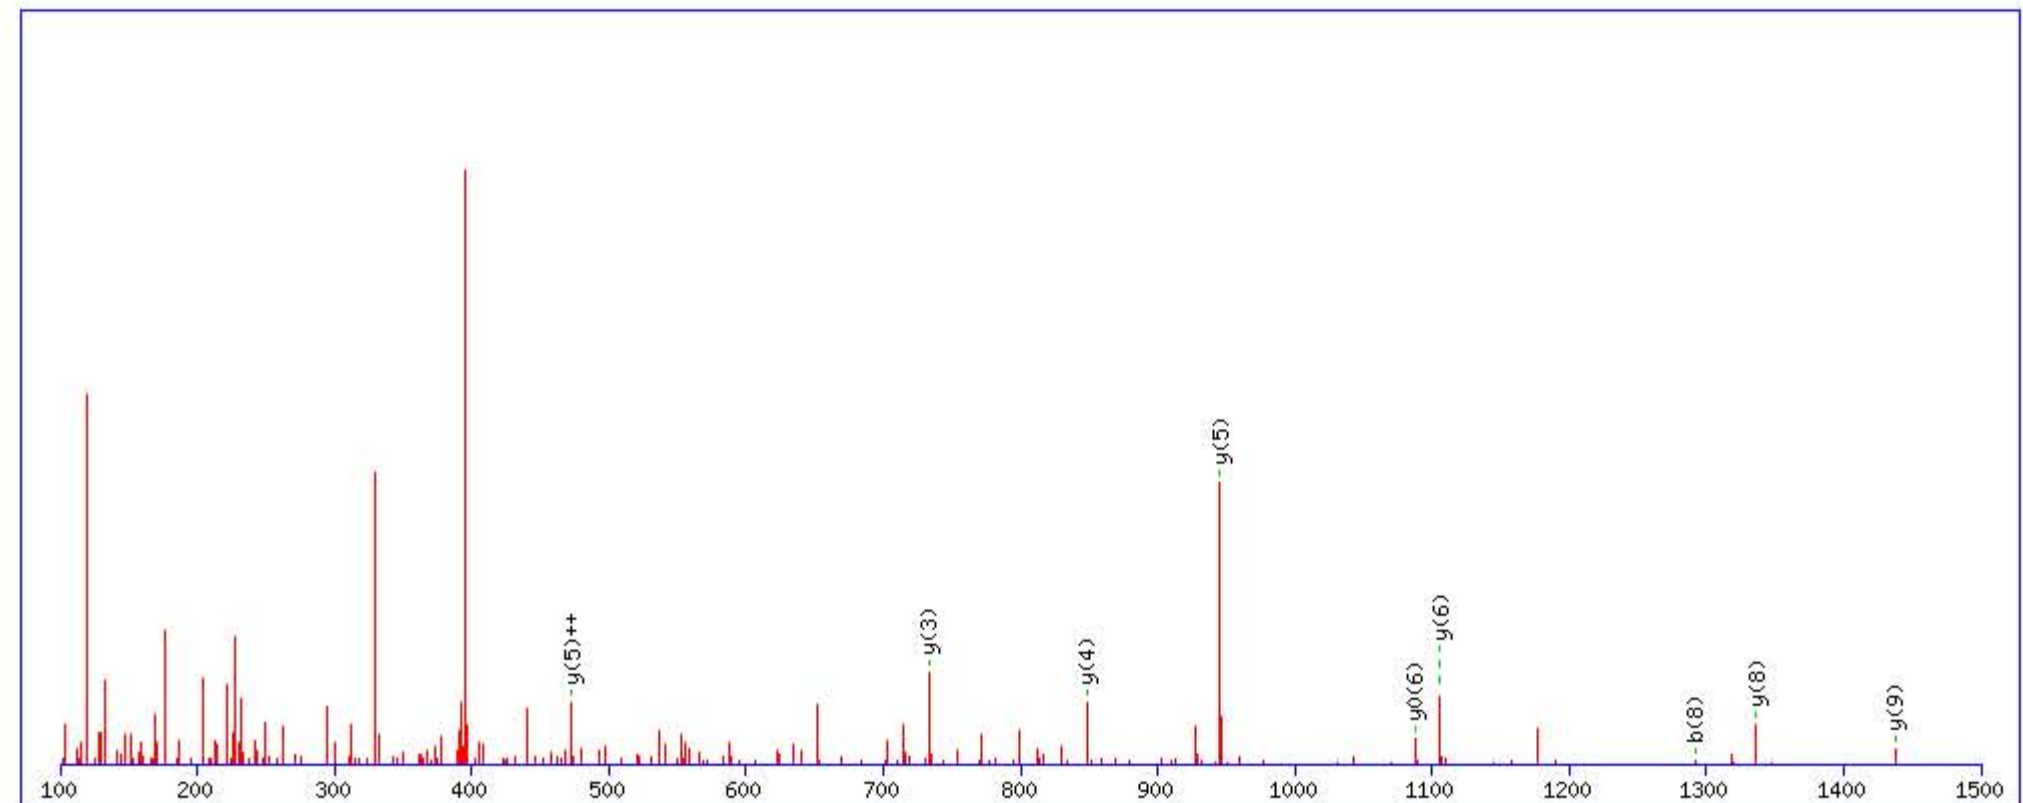

Monoisotopic mass of neutral peptide Mr(calc): 1583.693497

Fixed modifications: Carbamidomethyl (C) (apply to specified residues or termini only)

Variable modifications:

Q8 : Biotin:Thermo-21345 (Q)

Ions Score: 34 Expect: 0.0031

Matches : 9/86 fragment ions using 14 most intense peaks [\(help\)](#)

| #  | b           | b <sup>++</sup> | b <sup>*</sup> | b <sup>*++</sup> | b <sup>0</sup> | b <sup>0++</sup> | Seq. | y           | y <sup>++</sup> | y <sup>*</sup> | y <sup>*++</sup> | y <sup>0</sup> | y <sup>0++</sup> | #  |
|----|-------------|-----------------|----------------|------------------|----------------|------------------|------|-------------|-----------------|----------------|------------------|----------------|------------------|----|
| 1  | 148.075690  | 74.541483       |                |                  |                |                  | F    |             |                 |                |                  |                |                  | 10 |
| 2  | 249.123369  | 125.065322      |                |                  | 231.112804     | 116.060040       | T    | 1437.632342 | 719.319809      | 1420.605793    | 710.806535       | 1419.621777    | 710.314527       | 9  |
| 3  | 409.154018  | 205.080647      |                |                  | 391.143453     | 196.075365       | C    | 1336.584663 | 668.795970      | 1319.558114    | 660.282695       | 1318.574098    | 659.790687       | 8  |
| 4  | 480.191132  | 240.599204      |                |                  | 462.180567     | 231.593921       | A    | 1176.554014 | 588.780645      | 1159.527465    | 580.267371       | 1158.543449    | 579.775363       | 7  |
| 5  | 640.221781  | 320.614529      |                |                  | 622.211216     | 311.609246       | C    | 1105.516900 | 553.262088      | 1088.490351    | 544.748814       | 1087.506335    | 544.256806       | 6  |
| 6  | 737.274545  | 369.140911      |                |                  | 719.263980     | 360.135628       | P    | 945.486251  | 473.246764      | 928.459702     | 464.733489       | 927.475686     | 464.241481       | 5  |
| 7  | 852.301488  | 426.654382      |                |                  | 834.290923     | 417.649100       | D    | 848.433487  | 424.720382      | 831.406938     | 416.207107       | 830.422922     | 415.715099       | 4  |
| 8  | 1291.526814 | 646.267045      | 1274.500265    | 637.753771       | 1273.516249    | 637.261763       | Q    | 733.406544  | 367.206910      | 716.379995     | 358.693636       |                |                  | 3  |
| 9  | 1438.595228 | 719.801252      | 1421.568679    | 711.287978       | 1420.584663    | 710.795970       | F    | 294.181218  | 147.594247      | 277.154669     | 139.080973       |                |                  | 2  |
| 10 |             |                 |                |                  |                |                  | K    | 147.112804  | 74.060040       | 130.086255     | 65.546765        |                |                  | 1  |

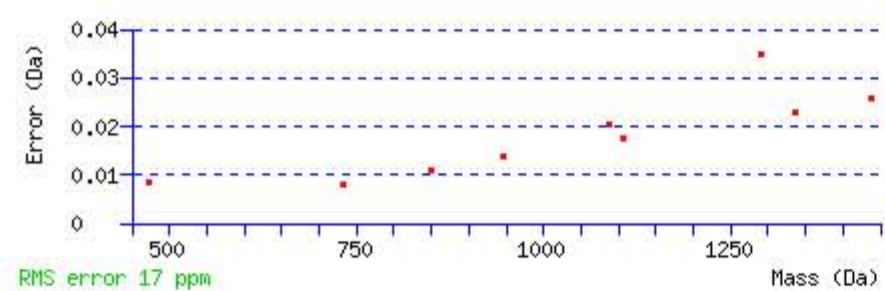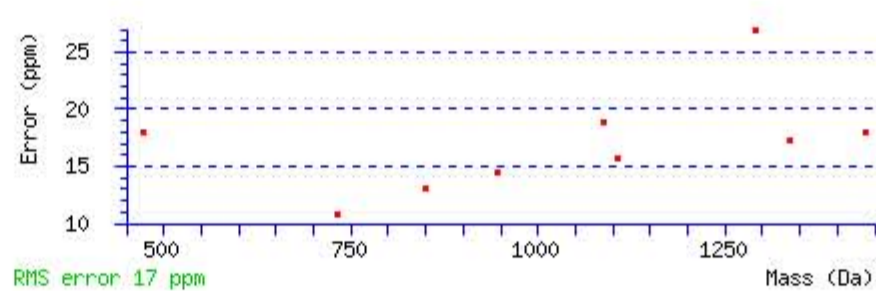

NCBI BLAST search of **FTCACPDQFK**

(Parameters: blastp, nr protein database, expect=20000, no filter, PAM30)

Other BLAST [web gateways](#)

All matches to this query

| Score | Mr(calc):   | Delta    | Sequence                   |
|-------|-------------|----------|----------------------------|
| 34.5  | 1583.693497 | 0.019835 | <a href="#">FTCACPDQFK</a> |

Mascot: <http://www.matrixscience.com/>



# MASCOT Search Results

## Peptide View

MS/MS Fragmentation of **KEEFHEQSFR**

Found in **HABP2\_HUMAN**, Hyaluronan-binding protein 2 OS=Homo sapiens GN=HABP2 PE=1 SV=1

Match to Query 41080: 1646.809662 from(549.943830,3+) rtinseconds(1502) index(57282)

Title: Locus:1.1.1.2946.14 File:"2013-07-02 CLN FXIII 180 min 1st F 4.wiff"

Data file C:\Program Files (x86)\Matrix Science\Mascot Daemon\mgf7 FXIII 180 min 1st\mascot\_daemon\_merge.mgf

Click mouse within plot area to zoom in by factor of two about that point

Or, Plot from  to  Da

Label all possible matches  Label matches used for scoring

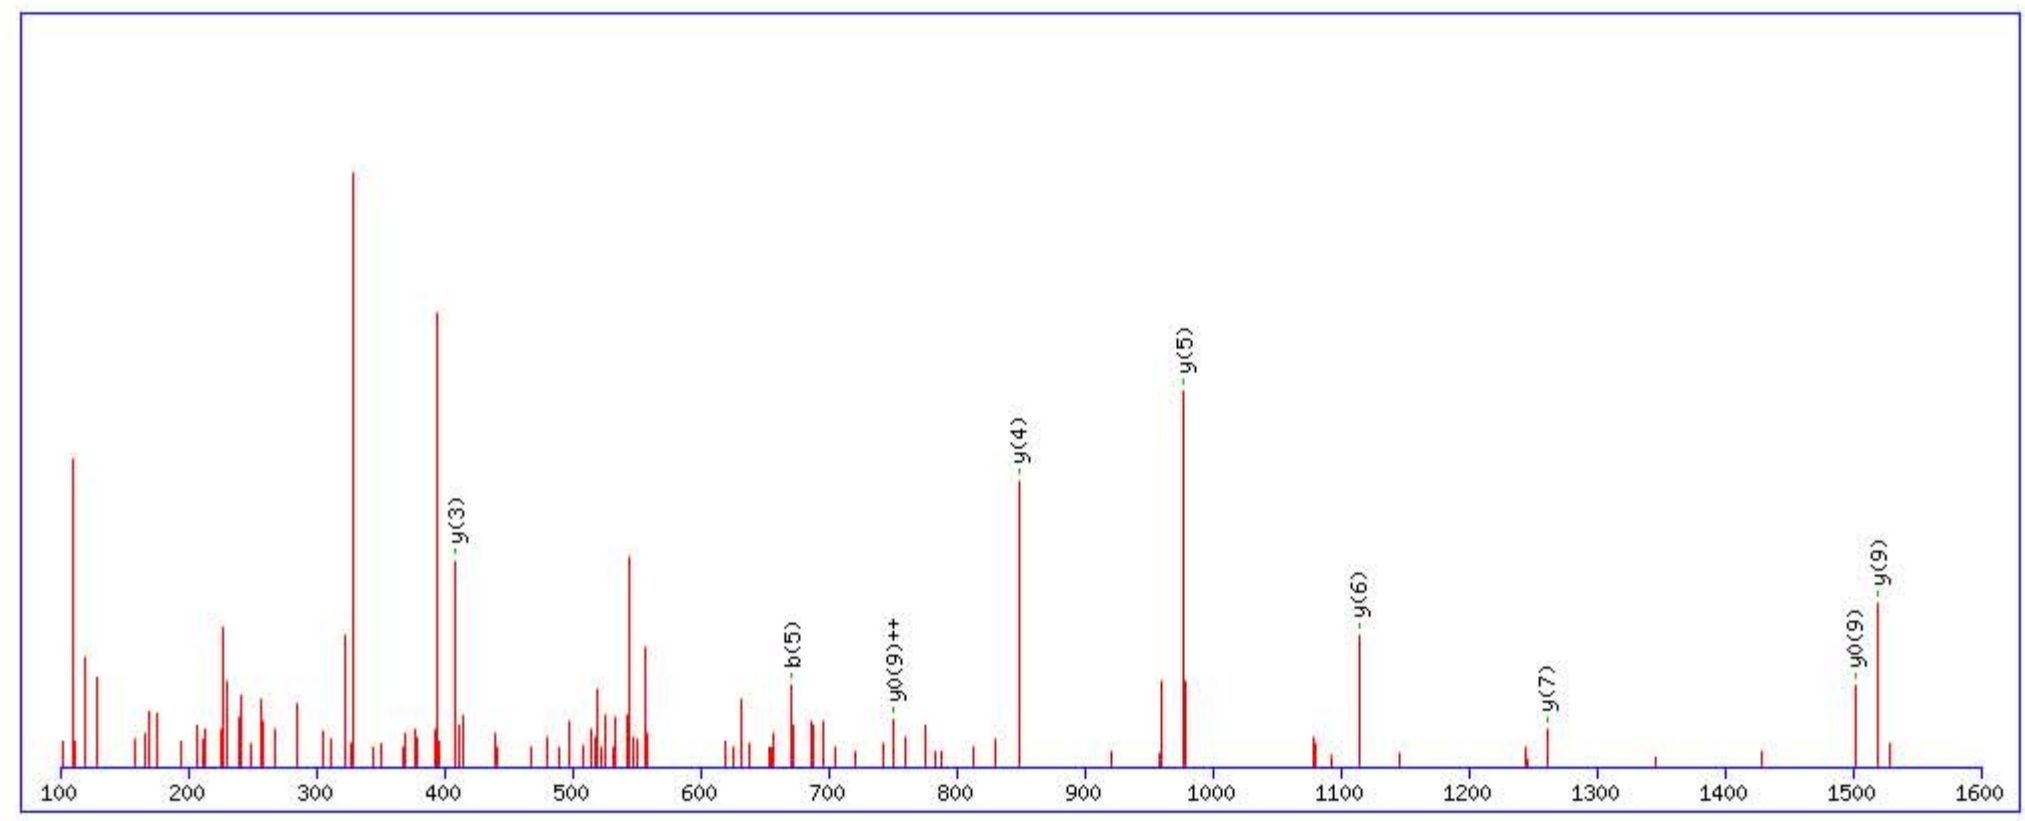

Monoisotopic mass of neutral peptide Mr(calc): 1646.787491

Fixed modifications: Carbamidomethyl (C) (apply to specified residues or termini only)

Variable modifications:

Q7 : Biotin:Thermo-21345 (Q)

Ions Score: 31 Expect: 0.011

Matches : 9/102 fragment ions using 15 most intense peaks [\(help\)](#)

| #  | b           | b <sup>++</sup> | b <sup>*</sup> | b <sup>*++</sup> | b <sup>0</sup> | b <sup>0++</sup> | Seq. | y           | y <sup>++</sup> | y <sup>*</sup> | y <sup>*++</sup> | y <sup>0</sup> | y <sup>0++</sup> | #  |
|----|-------------|-----------------|----------------|------------------|----------------|------------------|------|-------------|-----------------|----------------|------------------|----------------|------------------|----|
| 1  | 129.102239  | 65.054757       | 112.075690     | 56.541483        |                |                  | K    |             |                 |                |                  |                |                  | 10 |
| 2  | 258.144832  | 129.576054      | 241.118283     | 121.062780       | 240.134267     | 120.570772       | E    | 1519.699825 | 760.353551      | 1502.673276    | 751.840276       | 1501.689260    | 751.348268       | 9  |
| 3  | 387.187425  | 194.097351      | 370.160876     | 185.584076       | 369.176860     | 185.092068       | E    | 1390.657232 | 695.832254      | 1373.630683    | 687.318980       | 1372.646667    | 686.826972       | 8  |
| 4  | 534.255839  | 267.631558      | 517.229290     | 259.118283       | 516.245274     | 258.626275       | F    | 1261.614639 | 631.310958      | 1244.588090    | 622.797683       | 1243.604074    | 622.305675       | 7  |
| 5  | 671.314751  | 336.161014      | 654.288202     | 327.647739       | 653.304186     | 327.155731       | H    | 1114.546225 | 557.776751      | 1097.519676    | 549.263476       | 1096.535660    | 548.771468       | 6  |
| 6  | 800.357344  | 400.682310      | 783.330795     | 392.169036       | 782.346779     | 391.677028       | E    | 977.487313  | 489.247295      | 960.460764     | 480.734020       | 959.476748     | 480.242012       | 5  |
| 7  | 1239.582670 | 620.294973      | 1222.556121    | 611.781699       | 1221.572105    | 611.289691       | Q    | 848.444720  | 424.725998      | 831.418171     | 416.212724       | 830.434155     | 415.720716       | 4  |
| 8  | 1326.614698 | 663.810987      | 1309.588149    | 655.297713       | 1308.604133    | 654.805705       | S    | 409.219394  | 205.113335      | 392.192845     | 196.600061       | 391.208829     | 196.108053       | 3  |
| 9  | 1473.683112 | 737.345194      | 1456.656563    | 728.831920       | 1455.672547    | 728.339912       | F    | 322.187366  | 161.597321      | 305.160817     | 153.084047       |                |                  | 2  |
| 10 |             |                 |                |                  |                |                  | R    | 175.118952  | 88.063114       | 158.092403     | 79.549839        |                |                  | 1  |

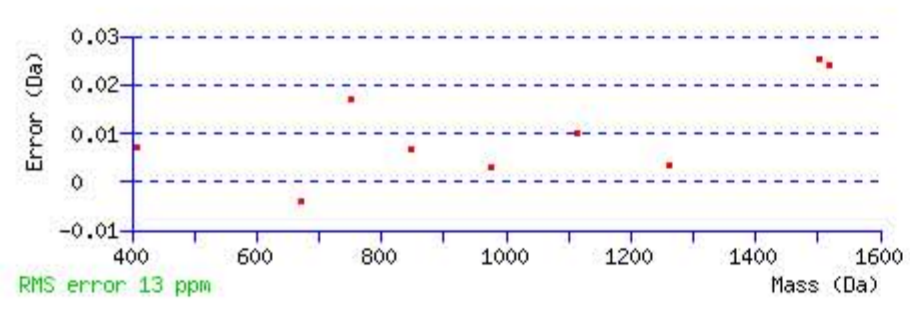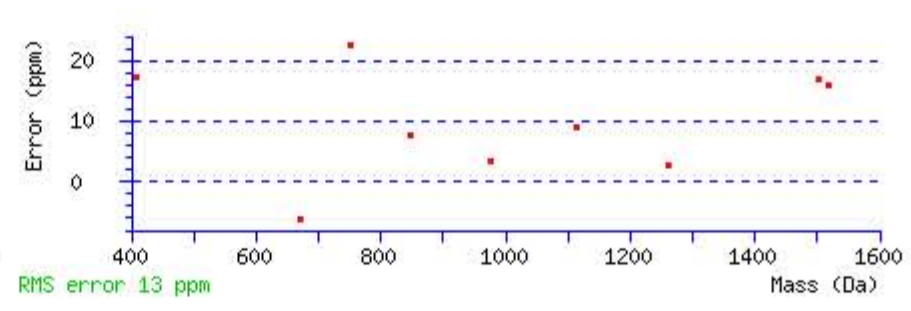

NCBI BLAST search of [KEEFHEQSFR](#)

(Parameters: blastp, nr protein database, expect=20000, no filter, PAM30)

Other BLAST [web gateways](#)

All matches to this query

| Score | Mr(calc):   | Delta     | Sequence                        |
|-------|-------------|-----------|---------------------------------|
| 31.5  | 1646.787491 | 0.022171  | <a href="#">KEEFHEQSFR</a>      |
| 10.2  | 1646.818497 | -0.008835 | <a href="#">QLDDAKEGEMALLSK</a> |
| 6.7   | 1646.812469 | -0.002807 | <a href="#">QEERLGRGGLDDFR</a>  |
| 6.5   | 1646.819824 | -0.010162 | <a href="#">QREEYERAQK</a>      |
| 1.6   | 1646.793365 | 0.016297  | <a href="#">GDQQDKLLESLNCK</a>  |

# MASCOT SEARCH RESULTS

## Peptide View

MS/MS Fragmentation of **WLQGSQELPR**

Found in **IGHA1\_HUMAN**, Ig alpha-1 chain C region OS=Homo sapiens GN=IGHA1 PE=1 SV=2

Match to Query 35837: 1523.813348 from(762.913950,2+) rtinseconds(2045) index(42531)

Title: Locus:1.1.1.3161.15 File:"2013-07-02 CLN FXIII 180 min 1st F 3.wiff"

Data file C:\Program Files (x86)\Matrix Science\Mascot Daemon\mgf\7 FXIII 180 min 1st\mascot\_daemon\_merge.mgf

Click mouse within plot area to zoom in by factor of two about that point

Or, Plot from  to  Da

Label all possible matches  Label matches used for scoring

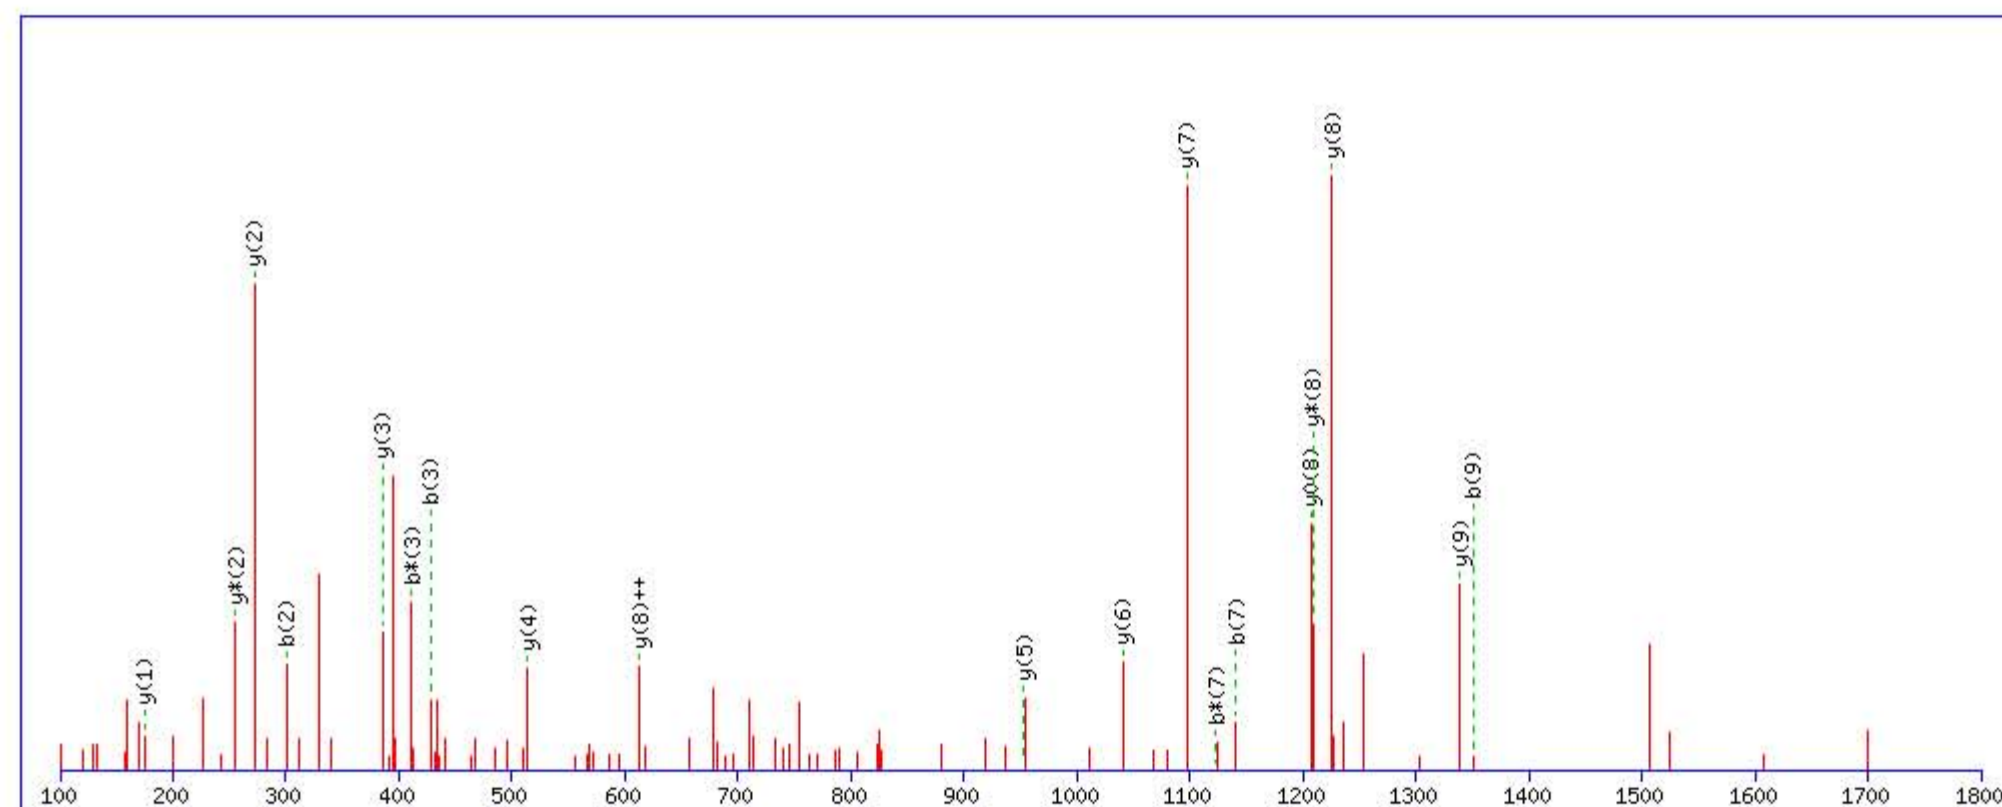

Monoisotopic mass of neutral peptide Mr(calc): 1523.791855

Fixed modifications: Carbamidomethyl (C) (apply to specified residues or termini only)

Variable modifications:

Q6 : Biotin:Thermo-21345 (Q)

Ions Score: 54 Expect: 0.00016

Matches : 19/90 fragment ions using 39 most intense peaks [\(help\)](#)

| #  | b                  | b <sup>++</sup> | b <sup>+</sup>     | b <sup>+++</sup> | b <sup>0</sup> | b <sup>0++</sup> | Seq. | y                  | y <sup>++</sup>   | y <sup>+</sup>     | y <sup>+++</sup> | y <sup>0</sup>     | y <sup>0++</sup> | #  |
|----|--------------------|-----------------|--------------------|------------------|----------------|------------------|------|--------------------|-------------------|--------------------|------------------|--------------------|------------------|----|
| 1  | 187.086589         | 94.046932       |                    |                  |                |                  | W    |                    |                   |                    |                  |                    |                  | 10 |
| 2  | <b>300.170653</b>  | 150.588965      |                    |                  |                |                  | L    | <b>1338.719833</b> | 669.863554        | 1321.693284        | 661.350280       | 1320.709268        | 660.858272       | 9  |
| 3  | <b>428.229231</b>  | 214.618254      | <b>411.202682</b>  | 206.104979       |                |                  | Q    | <b>1225.635769</b> | <b>613.321522</b> | <b>1208.609220</b> | 604.808248       | <b>1207.625204</b> | 604.316240       | 8  |
| 4  | 485.250695         | 243.128986      | 468.224146         | 234.615711       |                |                  | G    | <b>1097.577191</b> | 549.292233        | 1080.550642        | 540.778959       | 1079.566626        | 540.286951       | 7  |
| 5  | 572.282723         | 286.645000      | 555.256174         | 278.131725       | 554.272158     | 277.639717       | S    | <b>1040.555727</b> | 520.781501        | 1023.529178        | 512.268227       | 1022.545162        | 511.776219       | 6  |
| 6  | 1011.508049        | 506.257663      | 994.481500         | 497.744388       | 993.497484     | 497.252380       | Q    | <b>953.523699</b>  | 477.265487        | 936.497150         | 468.752213       | 935.513134         | 468.260205       | 5  |
| 7  | <b>1140.550642</b> | 570.778959      | <b>1123.524093</b> | 562.265685       | 1122.540077    | 561.773676       | E    | <b>514.298373</b>  | 257.652824        | 497.271824         | 249.139550       | 496.287808         | 248.647542       | 4  |
| 8  | 1253.634706        | 627.320991      | 1236.608157        | 618.807716       | 1235.624141    | 618.315708       | L    | <b>385.255780</b>  | 193.131528        | 368.229231         | 184.618253       |                    |                  | 3  |
| 9  | <b>1350.687470</b> | 675.847373      | 1333.660921        | 667.334098       | 1332.676905    | 666.842090       | P    | <b>272.171716</b>  | 136.589496        | <b>255.145167</b>  | 128.076221       |                    |                  | 2  |
| 10 |                    |                 |                    |                  |                |                  | R    | <b>175.118952</b>  | 88.063114         | 158.092403         | 79.549839        |                    |                  | 1  |

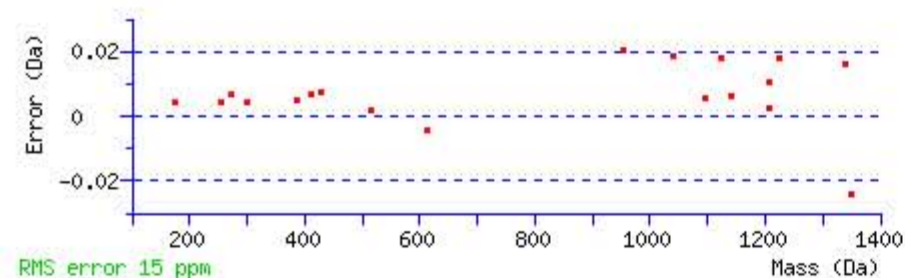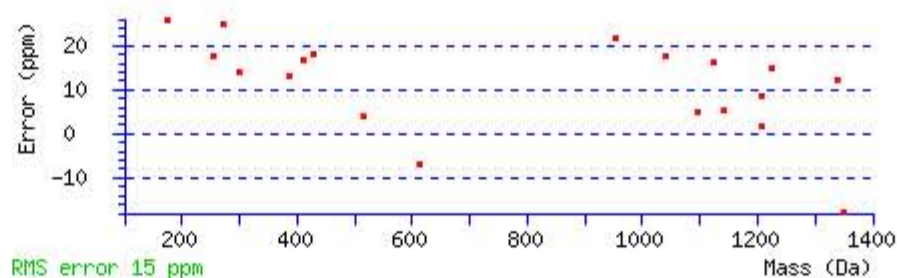

NCBI BLAST search of **WLQGSQELPR**

(Parameters: blastp, nr protein database, expect=20000, no filter, PAM30)

Other BLAST [web gateways](#)

## All matches to this query

| Score | Mr(calc):   | Delta     | Sequence                        |
|-------|-------------|-----------|---------------------------------|
| 54.2  | 1523.791855 | 0.021493  | <a href="#">WLQGSQELPR</a>      |
| 21.9  | 1523.791855 | 0.021493  | <a href="#">WLQGSQELPR</a>      |
| 12.9  | 1523.816833 | -0.003485 | <a href="#">KGLGEGVPSSQRGPR</a> |
| 4.0   | 1523.812988 | 0.000360  | <a href="#">EGQGIKTDIPR</a>     |
| 3.7   | 1523.795227 | 0.018121  | <a href="#">GAQMQPISLPR</a>     |
| 3.7   | 1523.795227 | 0.018121  | <a href="#">GAQMQPISLPR</a>     |
| 2.8   | 1523.824219 | -0.010871 | <a href="#">SVQIRTEAGPR</a>     |
| 2.1   | 1523.813644 | -0.000296 | <a href="#">WIPTSNPLPQPFK</a>   |
| 1.9   | 1523.820831 | -0.007483 | <a href="#">GNPAPELRASFLPR</a>  |
| 1.8   | 1523.805603 | 0.007745  | <a href="#">LSATLGGLLQDHGSR</a> |

# MASCOT SEARCH RESULTS

## Peptide View

MS/MS Fragmentation of **QEPSQGTTTFAVTSILR**

Found in **IGHA1\_HUMAN**, Ig alpha-1 chain C region OS=Homo sapiens GN=IGHA1 PE=1 SV=2

Match to Query 54025: 2146.131912 from(716.384580,3+) rtinseconds(2468) index(9537)

Title: Locus:1.1.1.3113.18 File:"2013-07-02 CLN FXIII 180 min 1st F 1.wiff"

Data file C:\Program Files (x86)\Matrix Science\Mascot Daemon\mgf\7 FXIII 180 min 1st\mascot\_daemon\_merge.mgf

Click mouse within plot area to zoom in by factor of two about that point

Or, Plot from 0 to 2600 Da Full range

Label all possible matches  Label matches used for scoring

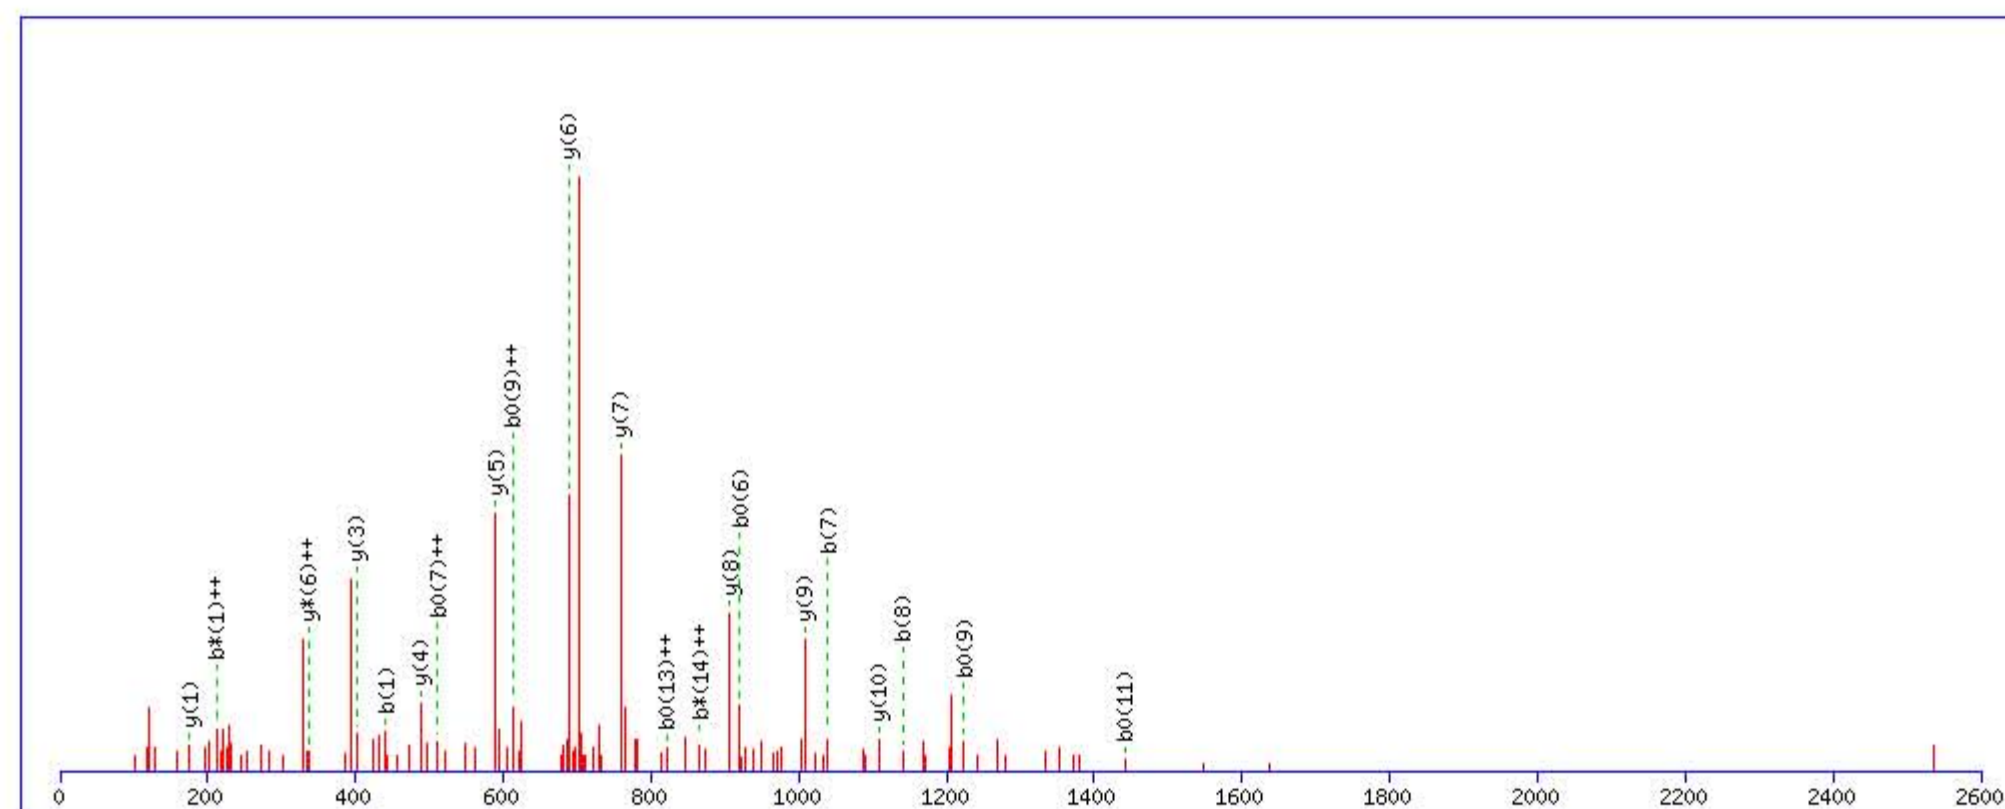

Monoisotopic mass of neutral peptide Mr(calc): 2146.109253

Fixed modifications: Carbamidomethyl (C) (apply to specified residues or termini only)

Variable modifications:

Q1 : Biotin:Thermo-21345 (Q)

Ions Score: 42 Expect: 0.0015

Matches : 21/184 fragment ions using 42 most intense peaks [\(help\)](#)

| #  | b           | b <sup>++</sup> | b <sup>*</sup> | b <sup>*++</sup> | b <sup>0</sup> | b <sup>0++</sup> | Seq. | y           | y <sup>++</sup> | y <sup>*</sup> | y <sup>*++</sup> | y <sup>0</sup> | y <sup>0++</sup> | #  |
|----|-------------|-----------------|----------------|------------------|----------------|------------------|------|-------------|-----------------|----------------|------------------|----------------|------------------|----|
| 1  | 440.232602  | 220.619939      | 423.206053     | 212.106664       |                |                  | Q    |             |                 |                |                  |                |                  | 17 |
| 2  | 569.275195  | 285.141236      | 552.248646     | 276.627961       | 551.264630     | 276.135953       | E    | 1707.891193 | 854.449235      | 1690.864644    | 845.935960       | 1689.880628    | 845.443952       | 16 |
| 3  | 666.327959  | 333.667618      | 649.301410     | 325.154343       | 648.317394     | 324.662335       | P    | 1578.848600 | 789.927938      | 1561.822051    | 781.414664       | 1560.838035    | 780.922656       | 15 |
| 4  | 753.359987  | 377.183632      | 736.333438     | 368.670357       | 735.349422     | 368.178349       | S    | 1481.795836 | 741.401556      | 1464.769287    | 732.888282       | 1463.785271    | 732.396274       | 14 |
| 5  | 881.418565  | 441.212921      | 864.392016     | 432.699646       | 863.408000     | 432.207638       | Q    | 1394.763808 | 697.885542      | 1377.737259    | 689.372268       | 1376.753243    | 688.880260       | 13 |
| 6  | 938.440029  | 469.723653      | 921.413480     | 461.210378       | 920.429464     | 460.718370       | G    | 1266.705230 | 633.856253      | 1249.678681    | 625.342979       | 1248.694665    | 624.850971       | 12 |
| 7  | 1039.487708 | 520.247492      | 1022.461159    | 511.734218       | 1021.477143    | 511.242210       | T    | 1209.683766 | 605.345521      | 1192.657217    | 596.832247       | 1191.673201    | 596.340239       | 11 |
| 8  | 1140.535387 | 570.771332      | 1123.508838    | 562.258057       | 1122.524822    | 561.766049       | T    | 1108.636087 | 554.821682      | 1091.609538    | 546.308407       | 1090.625522    | 545.816399       | 10 |
| 9  | 1241.583066 | 621.295171      | 1224.556517    | 612.781897       | 1223.572501    | 612.289889       | T    | 1007.588408 | 504.297842      | 990.561859     | 495.784568       | 989.577843     | 495.292560       | 9  |
| 10 | 1388.651480 | 694.829378      | 1371.624931    | 686.316104       | 1370.640915    | 685.824096       | F    | 906.540729  | 453.774003      | 889.514180     | 445.260728       | 888.530164     | 444.768720       | 8  |
| 11 | 1459.688594 | 730.347935      | 1442.662045    | 721.834661       | 1441.678029    | 721.342653       | A    | 759.472315  | 380.239796      | 742.445766     | 371.726521       | 741.461750     | 371.234513       | 7  |
| 12 | 1558.757008 | 779.882142      | 1541.730459    | 771.368868       | 1540.746443    | 770.876860       | V    | 688.435201  | 344.721239      | 671.408652     | 336.207964       | 670.424636     | 335.715956       | 6  |
| 13 | 1659.804687 | 830.405982      | 1642.778138    | 821.892707       | 1641.794122    | 821.400699       | T    | 589.366787  | 295.187032      | 572.340238     | 286.673757       | 571.356222     | 286.181749       | 5  |
| 14 | 1746.836715 | 873.921996      | 1729.810166    | 865.408721       | 1728.826150    | 864.916713       | S    | 488.319108  | 244.663192      | 471.292559     | 236.149918       | 470.308543     | 235.657910       | 4  |
| 15 | 1859.920779 | 930.464028      | 1842.894230    | 921.950753       | 1841.910214    | 921.458745       | I    | 401.287080  | 201.147178      | 384.260531     | 192.633903       |                |                  | 3  |
| 16 | 1973.004843 | 987.006060      | 1955.978294    | 978.492785       | 1954.994278    | 978.000777       | L    | 288.203016  | 144.605146      | 271.176467     | 136.091872       |                |                  | 2  |
| 17 |             |                 |                |                  |                |                  | R    | 175.118952  | 88.063114       | 158.092403     | 79.549840        |                |                  | 1  |

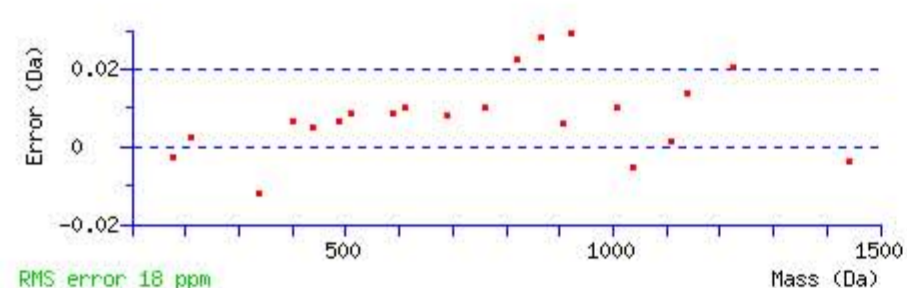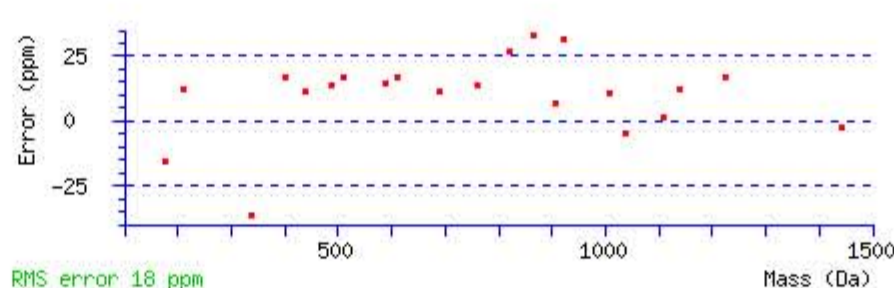

NCBI BLAST search of **QEPSQGTTTFAVTSILR**

(Parameters: blastp, nr protein database, expect=20000, no filter, PAM30)

Other BLAST [web gateways](#)

All matches to this query

| Score | Mr(calc):   | Delta    | Sequence                          |
|-------|-------------|----------|-----------------------------------|
| 42.1  | 2146.109253 | 0.022659 | <a href="#">QEPSQGTTTFAVTSILR</a> |
| 40.5  | 2146.109253 | 0.022659 | <a href="#">QEPSQGTTTFAVTSILR</a> |

Mascot: <http://www.matrixscience.com/>

# Mascot Search Results

## Peptide View

MS/MS Fragmentation of **QEPSQGTTTFAVTSILR**

Found in **IGHA1\_HUMAN**, Ig alpha-1 chain C region OS=Homo sapiens GN=IGHA1 PE=1 SV=2

Match to Query 54026: 2146.133352 from(716.385060,3+) rtinseconds(2483) index(82006)

Title: Locus:1.1.1.2215.14 File:"2013-07-02 CLN FXIII 180 min 1st FT.wiff"

Data file C:\Program Files (x86)\Matrix Science\Mascot Daemon\mgf\7 FXIII 180 min 1st\mascot\_daemon\_merge.mgf

Click mouse within plot area to zoom in by factor of two about that point

Or, Plot from  to  Da

Label all possible matches  Label matches used for scoring

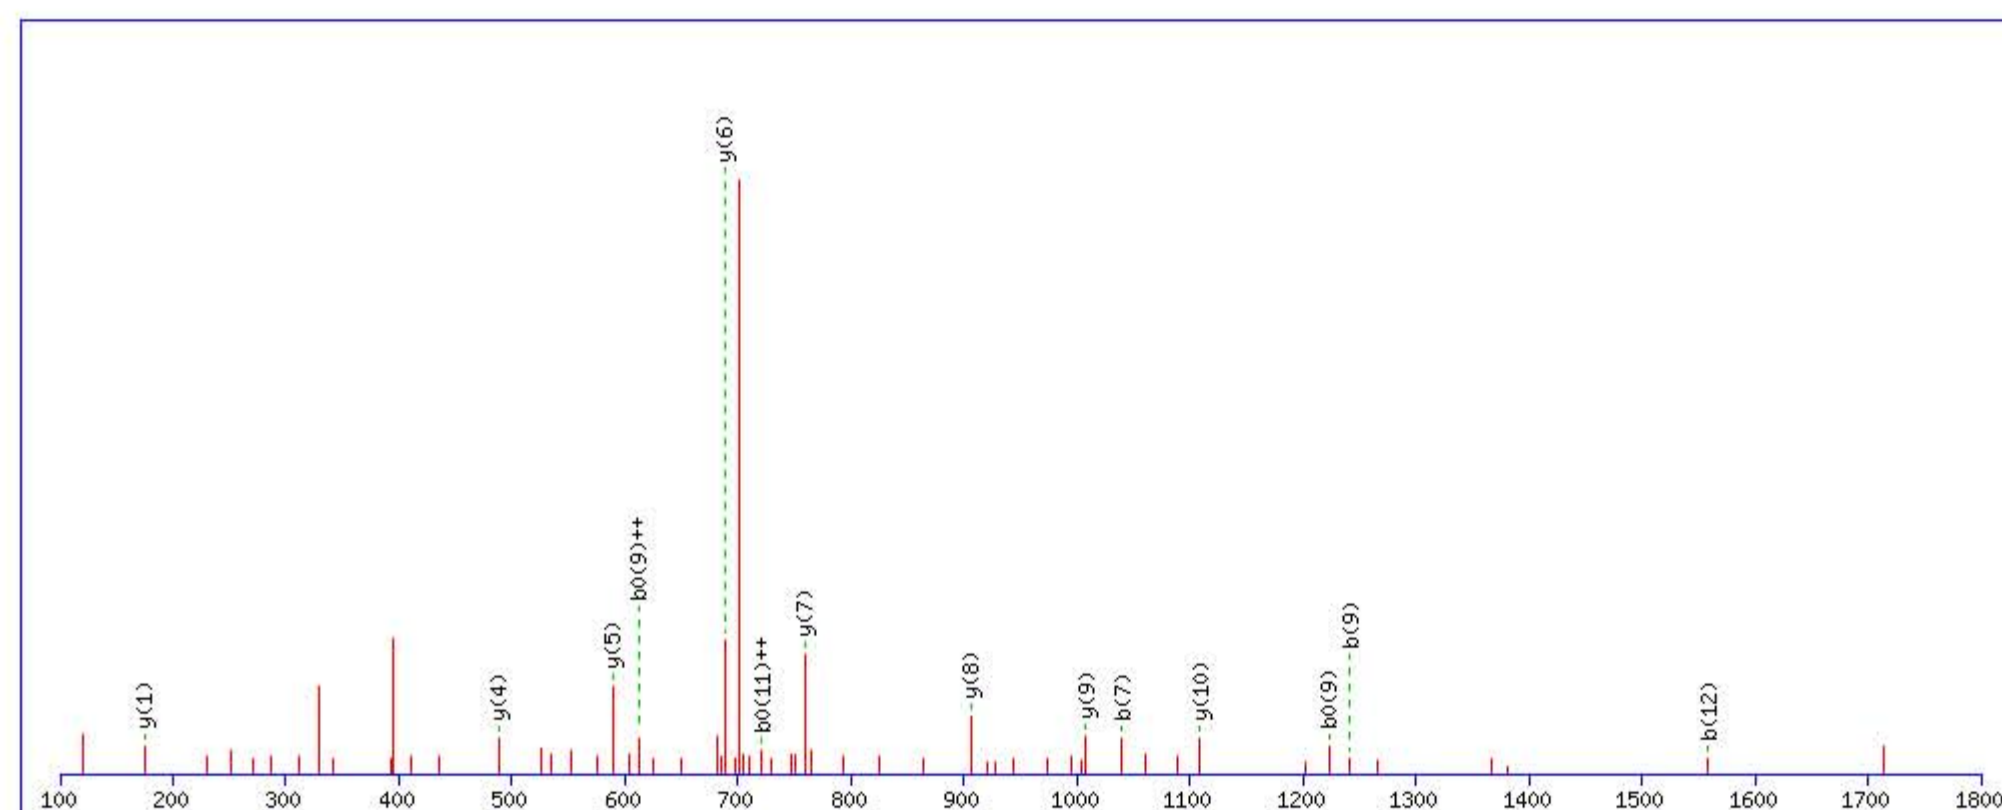

Monoisotopic mass of neutral peptide  $M_r(\text{calc})$ : 2146.109253

Fixed modifications: Carbamidomethyl (C) (apply to specified residues or termini only)

Variable modifications:

Q5 : Biotin:Thermo-21345 (Q)

Ions Score: 39 Expect: 0.00048

Matches : 14/184 fragment ions using 27 most intense peaks ([help](#))

| #  | b                  | b <sup>++</sup> | b <sup>*</sup> | b <sup>*++</sup> | b <sup>0</sup>     | b <sup>0++</sup>  | Seq. | y                  | y <sup>++</sup> | y <sup>*</sup> | y <sup>*++</sup> | y <sup>0</sup> | y <sup>0++</sup> | #  |
|----|--------------------|-----------------|----------------|------------------|--------------------|-------------------|------|--------------------|-----------------|----------------|------------------|----------------|------------------|----|
| 1  | 129.065854         | 65.036565       | 112.039305     | 56.523291        |                    |                   | Q    |                    |                 |                |                  |                |                  | 17 |
| 2  | 258.108447         | 129.557862      | 241.081898     | 121.044587       | 240.097882         | 120.552579        | E    | 2019.057941        | 1010.032609     | 2002.031392    | 1001.519334      | 2001.047376    | 1001.027326      | 16 |
| 3  | 355.161211         | 178.084244      | 338.134662     | 169.570969       | 337.150646         | 169.078961        | P    | 1890.015348        | 945.511312      | 1872.988799    | 936.998038       | 1872.004783    | 936.506030       | 15 |
| 4  | 442.193239         | 221.600258      | 425.166690     | 213.086983       | 424.182674         | 212.594975        | S    | 1792.962584        | 896.984930      | 1775.936035    | 888.471656       | 1774.952019    | 887.979648       | 14 |
| 5  | 881.418565         | 441.212921      | 864.392016     | 432.699646       | 863.408000         | 432.207638        | Q    | 1705.930556        | 853.468916      | 1688.904007    | 844.955642       | 1687.919991    | 844.463634       | 13 |
| 6  | 938.440029         | 469.723653      | 921.413480     | 461.210378       | 920.429464         | 460.718370        | G    | 1266.705230        | 633.856253      | 1249.678681    | 625.342979       | 1248.694665    | 624.850971       | 12 |
| 7  | <b>1039.487708</b> | 520.247492      | 1022.461159    | 511.734218       | 1021.477143        | 511.242210        | T    | 1209.683766        | 605.345521      | 1192.657217    | 596.832247       | 1191.673201    | 596.340239       | 11 |
| 8  | 1140.535387        | 570.771332      | 1123.508838    | 562.258057       | 1122.524822        | 561.766049        | T    | <b>1108.636087</b> | 554.821682      | 1091.609538    | 546.308407       | 1090.625522    | 545.816399       | 10 |
| 9  | <b>1241.583066</b> | 621.295171      | 1224.556517    | 612.781897       | <b>1223.572501</b> | <b>612.289889</b> | T    | <b>1007.588408</b> | 504.297842      | 990.561859     | 495.784568       | 989.577843     | 495.292560       | 9  |
| 10 | 1388.651480        | 694.829378      | 1371.624931    | 686.316104       | 1370.640915        | 685.824096        | F    | <b>906.540729</b>  | 453.774003      | 889.514180     | 445.260728       | 888.530164     | 444.768720       | 8  |
| 11 | 1459.688594        | 730.347935      | 1442.662045    | 721.834661       | 1441.678029        | <b>721.342653</b> | A    | <b>759.472315</b>  | 380.239796      | 742.445766     | 371.726521       | 741.461750     | 371.234513       | 7  |
| 12 | <b>1558.757008</b> | 779.882142      | 1541.730459    | 771.368868       | 1540.746443        | 770.876860        | V    | <b>688.435201</b>  | 344.721239      | 671.408652     | 336.207964       | 670.424636     | 335.715956       | 6  |
| 13 | 1659.804687        | 830.405982      | 1642.778138    | 821.892707       | 1641.794122        | 821.400699        | T    | <b>589.366787</b>  | 295.187032      | 572.340238     | 286.673757       | 571.356222     | 286.181749       | 5  |
| 14 | 1746.836715        | 873.921996      | 1729.810166    | 865.408721       | 1728.826150        | 864.916713        | S    | <b>488.319108</b>  | 244.663192      | 471.292559     | 236.149918       | 470.308543     | 235.657910       | 4  |
| 15 | 1859.920779        | 930.464028      | 1842.894230    | 921.950753       | 1841.910214        | 921.458745        | I    | 401.287080         | 201.147178      | 384.260531     | 192.633903       |                |                  | 3  |
| 16 | 1973.004843        | 987.006060      | 1955.978294    | 978.492785       | 1954.994278        | 978.000777        | L    | 288.203016         | 144.605146      | 271.176467     | 136.091872       |                |                  | 2  |
| 17 |                    |                 |                |                  |                    |                   | R    | <b>175.118952</b>  | 88.063114       | 158.092403     | 79.549840        |                |                  | 1  |

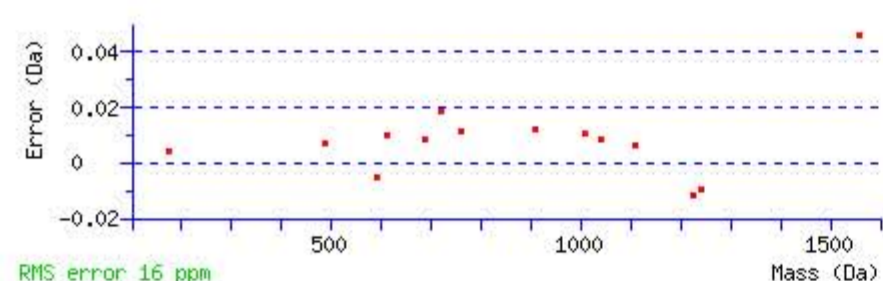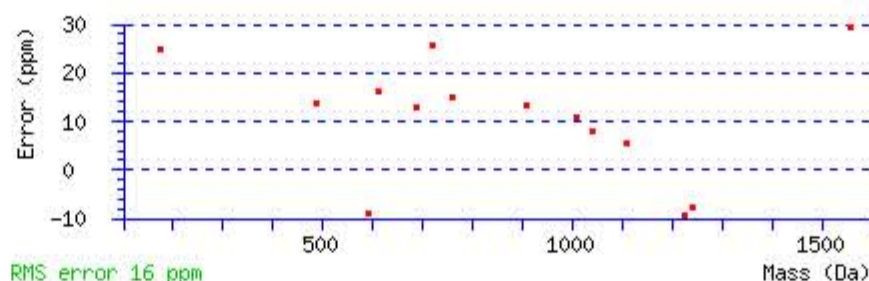

NCBI BLAST search of **QEPSQGTTTFAVTSILR**

(Parameters: blastp, nr protein database, expect=20000, no filter, PAM30)

Other BLAST [web gateways](#)

All matches to this query

| Score | $M_r(\text{calc})$ : | Delta     | Sequence                            |
|-------|----------------------|-----------|-------------------------------------|
| 39.4  | 2146.109253          | 0.024099  | <a href="#">QEPSQGTTTFAVTSILR</a>   |
| 39.4  | 2146.109253          | 0.024099  | <a href="#">QEPSQGTTTFAVTSILR</a>   |
| 3.9   | 2146.164688          | -0.031336 | <a href="#">VQEDILLRELHVNHYR</a>    |
| 2.5   | 2146.130997          | 0.002355  | <a href="#">VNFPENGFLSPDKLSLLEK</a> |

Mascot: <http://www.matrixscience.com/>

**MASCOT** Mascot Search Results

**Peptide View**

MS/MS Fragmentation of **KGDTFSCMVGHEALPLAFTQK**  
 Found in **IGHA1\_HUMAN**, Ig alpha-1 chain C region OS=Homo sapiens GN=IGHA1 PE=1 SV=2

Match to Query 65071: 2647.328202 from(883.450010,3+) rtinseconds(2335) index(81163)  
 Title: Locus:1.1.1.2163.16 File:"2013-07-02 CLN FXIII 180 min 1st FT.wiff"  
 Data file C:\Program Files (x86)\Matrix Science\Mascot Daemon\mgf\7 FXIII 180 min 1st\mascot\_daemon\_merge.mgf

Click mouse within plot area to zoom in by factor of two about that point  
 Or, Plot from 0 to 3400 Da Full range  
 Label all possible matches  Label matches used for scoring

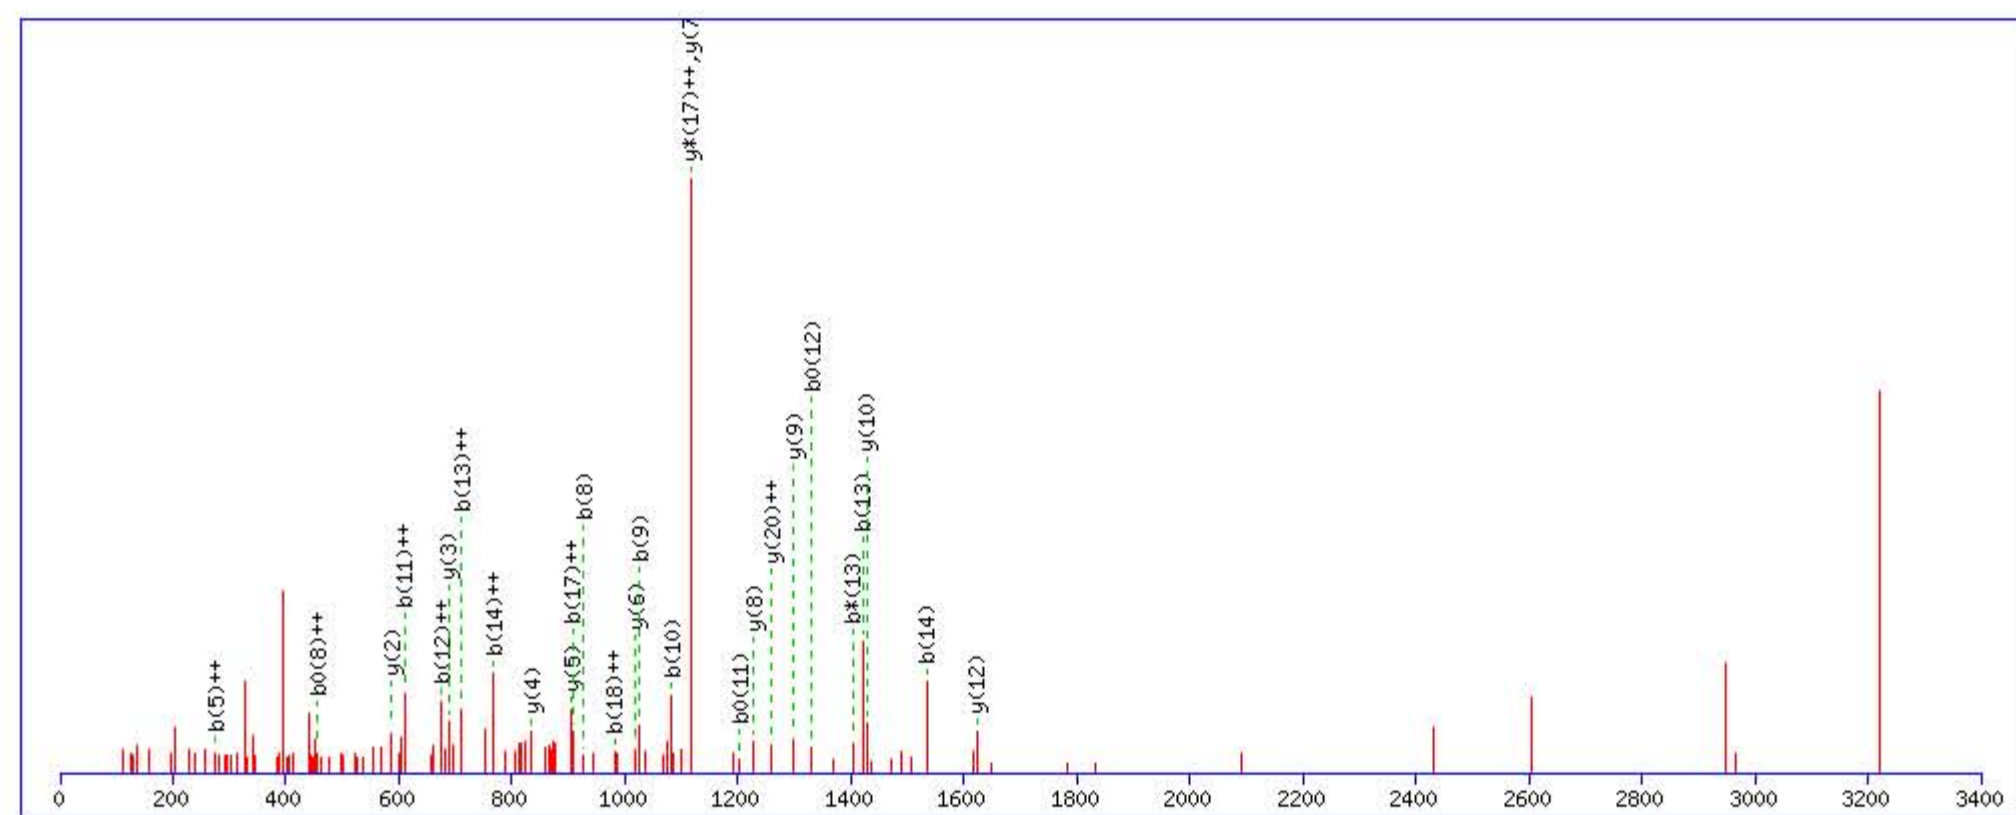

Monoisotopic mass of neutral peptide Mr(calc): 2647.296082  
 Fixed modifications: Carbamidomethyl (C) (apply to specified residues or termini only)  
 Variable modifications:  
 Q20 : Biotin:Thermo-21345 (Q)  
 Ions Score: 35 Expect: 0.011  
 Matches : 28/232 fragment ions using 64 most intense peaks [\(help\)](#)

| #  | b                  | b <sup>++</sup>   | b <sup>*</sup>     | b <sup>*++</sup> | b <sup>0</sup>     | b <sup>0++</sup>  | Seq.     | y                  | y <sup>++</sup>    | y <sup>*</sup> | y <sup>*++</sup>   | y <sup>0</sup> | y <sup>0++</sup> | #  |
|----|--------------------|-------------------|--------------------|------------------|--------------------|-------------------|----------|--------------------|--------------------|----------------|--------------------|----------------|------------------|----|
| 1  | 129.102239         | 65.054757         | 112.075690         | 56.541483        |                    |                   | <b>K</b> |                    |                    |                |                    |                |                  | 21 |
| 2  | 186.123703         | 93.565489         | 169.097154         | 85.052215        |                    |                   | <b>G</b> | 2520.208388        | <b>1260.607832</b> | 2503.181839    | 1252.094557        | 2502.197823    | 1251.602549      | 20 |
| 3  | 301.150646         | 151.078961        | 284.124097         | 142.565687       | 283.140081         | 142.073679        | <b>D</b> | 2463.186924        | 1232.097100        | 2446.160375    | 1223.583825        | 2445.176359    | 1223.091817      | 19 |
| 4  | 402.198325         | 201.602801        | 385.171776         | 193.089526       | 384.187760         | 192.597518        | <b>T</b> | 2348.159981        | 1174.583628        | 2331.133432    | 1166.070354        | 2330.149416    | 1165.578346      | 18 |
| 5  | 549.266739         | <b>275.137008</b> | 532.240190         | 266.623733       | 531.256174         | 266.131725        | <b>F</b> | 2247.112302        | 1124.059789        | 2230.085753    | <b>1115.546514</b> | 2229.101737    | 1115.054506      | 17 |
| 6  | 636.298767         | 318.653022        | 619.272218         | 310.139747       | 618.288202         | 309.647739        | <b>S</b> | 2100.043888        | 1050.525582        | 2083.017339    | 1042.012307        | 2082.033323    | 1041.520299      | 16 |
| 7  | 796.329416         | 398.668346        | 779.302867         | 390.155072       | 778.318851         | 389.663064        | <b>C</b> | 2013.011860        | 1007.009568        | 1995.985311    | 998.496294         | 1995.001295    | 998.004286       | 15 |
| 8  | <b>927.369901</b>  | 464.188589        | 910.343352         | 455.675314       | 909.359336         | <b>455.183306</b> | <b>M</b> | 1852.981211        | 926.994244         | 1835.954662    | 918.480969         | 1834.970646    | 917.988961       | 14 |
| 9  | <b>1026.438315</b> | 513.722796        | 1009.411766        | 505.209521       | 1008.427750        | 504.717513        | <b>V</b> | 1721.940726        | 861.474001         | 1704.914177    | 852.960727         | 1703.930161    | 852.468719       | 13 |
| 10 | <b>1083.459779</b> | 542.233528        | 1066.433230        | 533.720253       | 1065.449214        | 533.228245        | <b>G</b> | <b>1622.872312</b> | 811.939794         | 1605.845763    | 803.426520         | 1604.861747    | 802.934512       | 12 |
| 11 | 1220.518691        | <b>610.762984</b> | 1203.492142        | 602.249709       | <b>1202.508126</b> | 601.757701        | <b>H</b> | 1565.850848        | 783.429062         | 1548.824299    | 774.915788         | 1547.840283    | 774.423780       | 11 |
| 12 | 1349.561284        | <b>675.284280</b> | 1332.534735        | 666.771006       | <b>1331.550719</b> | 666.278998        | <b>E</b> | <b>1428.791936</b> | 714.899606         | 1411.765387    | 706.386332         | 1410.781371    | 705.894324       | 10 |
| 13 | <b>1420.598398</b> | <b>710.802837</b> | <b>1403.571849</b> | 702.289563       | 1402.587833        | 701.797555        | <b>A</b> | <b>1299.749343</b> | 650.378310         | 1282.722794    | 641.865035         | 1281.738778    | 641.373027       | 9  |
| 14 | <b>1533.682462</b> | <b>767.344869</b> | 1516.655913        | 758.831595       | 1515.671897        | 758.339587        | <b>L</b> | <b>1228.712229</b> | 614.859753         | 1211.685680    | 606.346478         | 1210.701664    | 605.854470       | 8  |
| 15 | 1630.735226        | 815.871251        | 1613.708677        | 807.357977       | 1612.724661        | 806.865969        | <b>P</b> | <b>1115.628165</b> | 558.317721         | 1098.601616    | 549.804446         | 1097.617600    | 549.312438       | 7  |
| 16 | 1743.819290        | 872.413283        | 1726.792741        | 863.900009       | 1725.808725        | 863.408000        | <b>L</b> | <b>1018.575401</b> | 509.791339         | 1001.548852    | 501.278064         | 1000.564836    | 500.786056       | 6  |
| 17 | 1814.856404        | <b>907.931840</b> | 1797.829855        | 899.418566       | 1796.845839        | 898.926557        | <b>A</b> | <b>905.491337</b>  | 453.249307         | 888.464788     | 444.736032         | 887.480772     | 444.244024       | 5  |
| 18 | 1961.924818        | <b>981.466047</b> | 1944.898269        | 972.952773       | 1943.914253        | 972.460764        | <b>F</b> | <b>834.454223</b>  | 417.730750         | 817.427674     | 409.217475         | 816.443658     | 408.725467       | 4  |
| 19 | 2062.972497        | 1031.989886       | 2045.945948        | 1023.476612      | 2044.961932        | 1022.984604       | <b>T</b> | <b>687.385809</b>  | 344.196543         | 670.359260     | 335.683268         | 669.375244     | 335.191260       | 3  |
| 20 | 2502.197823        | 1251.602549       | 2485.171274        | 1243.089275      | 2484.187258        | 1242.597267       | <b>Q</b> | <b>586.338130</b>  | 293.672703         | 569.311581     | 285.159429         |                |                  | 2  |
| 21 |                    |                   |                    |                  |                    |                   | <b>K</b> | 147.112804         | 74.060040          | 130.086255     | 65.546765          |                |                  | 1  |

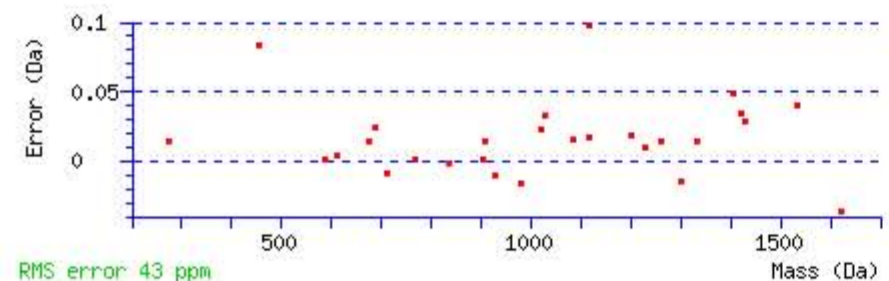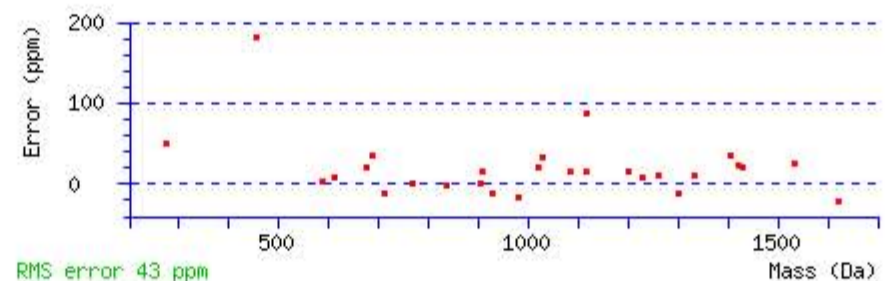

NCBI BLAST search of **KGDTFSCMVGHEALPLAFTQK**  
 (Parameters: blastp, nr protein database, expect=20000, no filter, PAM30)  
 Other BLAST [web gateways](#)

**All matches to this query**

| Score | Mr(calc):   | Delta    | Sequence                              |
|-------|-------------|----------|---------------------------------------|
| 34.7  | 2647.296082 | 0.032120 | <a href="#">KGDTFSCMVGHEALPLAFTQK</a> |

MATRIX SCIENCE Mascot Search Results

Peptide View

MS/MS Fragmentation of NFPPSQDASGDLYTTSSQLTLPATQCLAGK
Found in IGHA1\_HUMAN, Ig alpha-1 chain C region OS=Homo sapiens GN=IGHA1 PE=1 SV=2

Match to Query 77079: 3478.720136 from(870.687310,4+) rtinseconds(2486) index(9662)
Title: Locus:1.1.1.3119.11 File:"2013-07-02 CLN FXIII 180 min 1st F 1.wiff"
Data file C:\Program Files (x86)\Matrix Science\Mascot Daemon\mgf\7 FXIII 180 min 1st\mascot\_daemon\_merge.mgf

Click mouse within plot area to zoom in by factor of two about that point
Or, Plot from 0 to 2600 Da Full range
Label all possible matches Label matches used for scoring

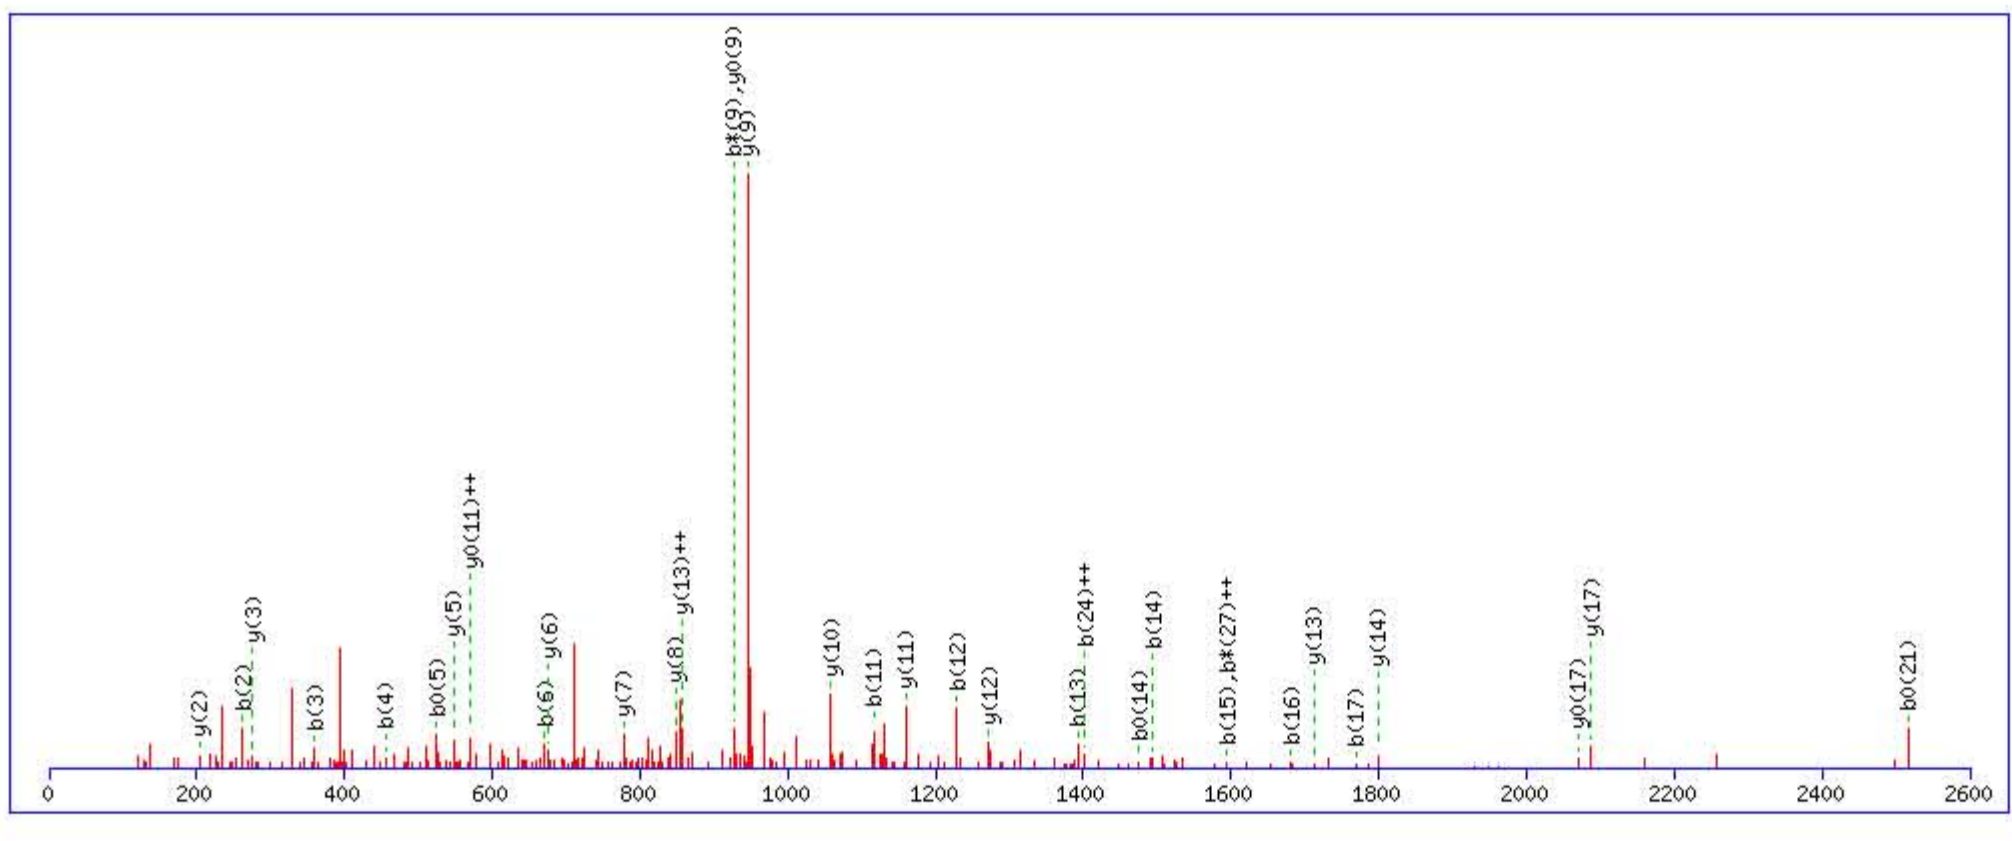

Monoisotopic mass of neutral peptide Mr(calc): 3478.674866
Fixed modifications: Carbamidomethyl (C) (apply to specified residues or termini only)
Variable modifications: Q18 : Biotin:Thermo-21345 (Q)
Ions Score: 53 Expect: 0.00013
Matches : 34/328 fragment ions using 94 most intense peaks (help)

Table with 13 columns: #, b, b++, b\*, b\*+, b0, b0++, Seq., y, y++, y\*, y\*+, y0, y0++, #. It lists 30 peptide fragments with their corresponding mass values and sequence labels.

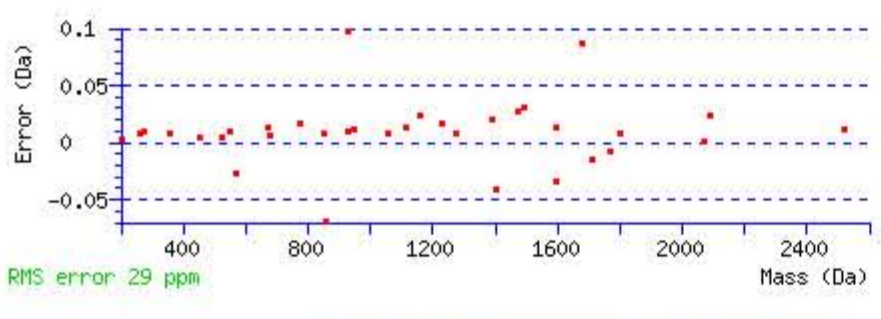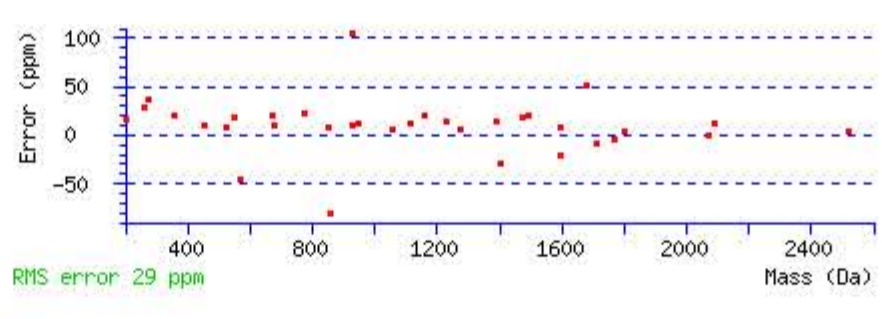

NCBI BLAST search of NFPPSQDASGDLYTTSSQLTLPATQCLAGK
(Parameters: blastp, nr protein database, expect=20000, no filter, PAM30)
Other BLAST web gateways

All matches to this query

Table with 4 columns: Score, Mr(calc):, Delta, Sequence. It shows three matches for the peptide sequence NFPPSQDASGDLYTTSSQLTLPATQCLAGK with scores of 53.1, 18.2, and 14.7.

# MASCOT Search Results

## Peptide View

MS/MS Fragmentation of **WLQGSQELPR**

Found in **IGHA1\_HUMAN**, Ig alpha-1 chain C region OS=Homo sapiens GN=IGHA1 PE=1 SV=2

Match to Query 35837: 1523.813348 from(762.913950,2+) rtinseconds(2045) index(42531)

Title: Locus:1.1.1.3161.15 File:"2013-07-02 CLN FXIII 180 min 1st F 3.wiff"

Data file C:\Program Files (x86)\Matrix Science\Mascot Daemon\mgf\7 FXIII 180 min 1st\mascot\_daemon\_merge.mgf

Click mouse within plot area to zoom in by factor of two about that point

Or, Plot from  to  Da

Label all possible matches  Label matches used for scoring

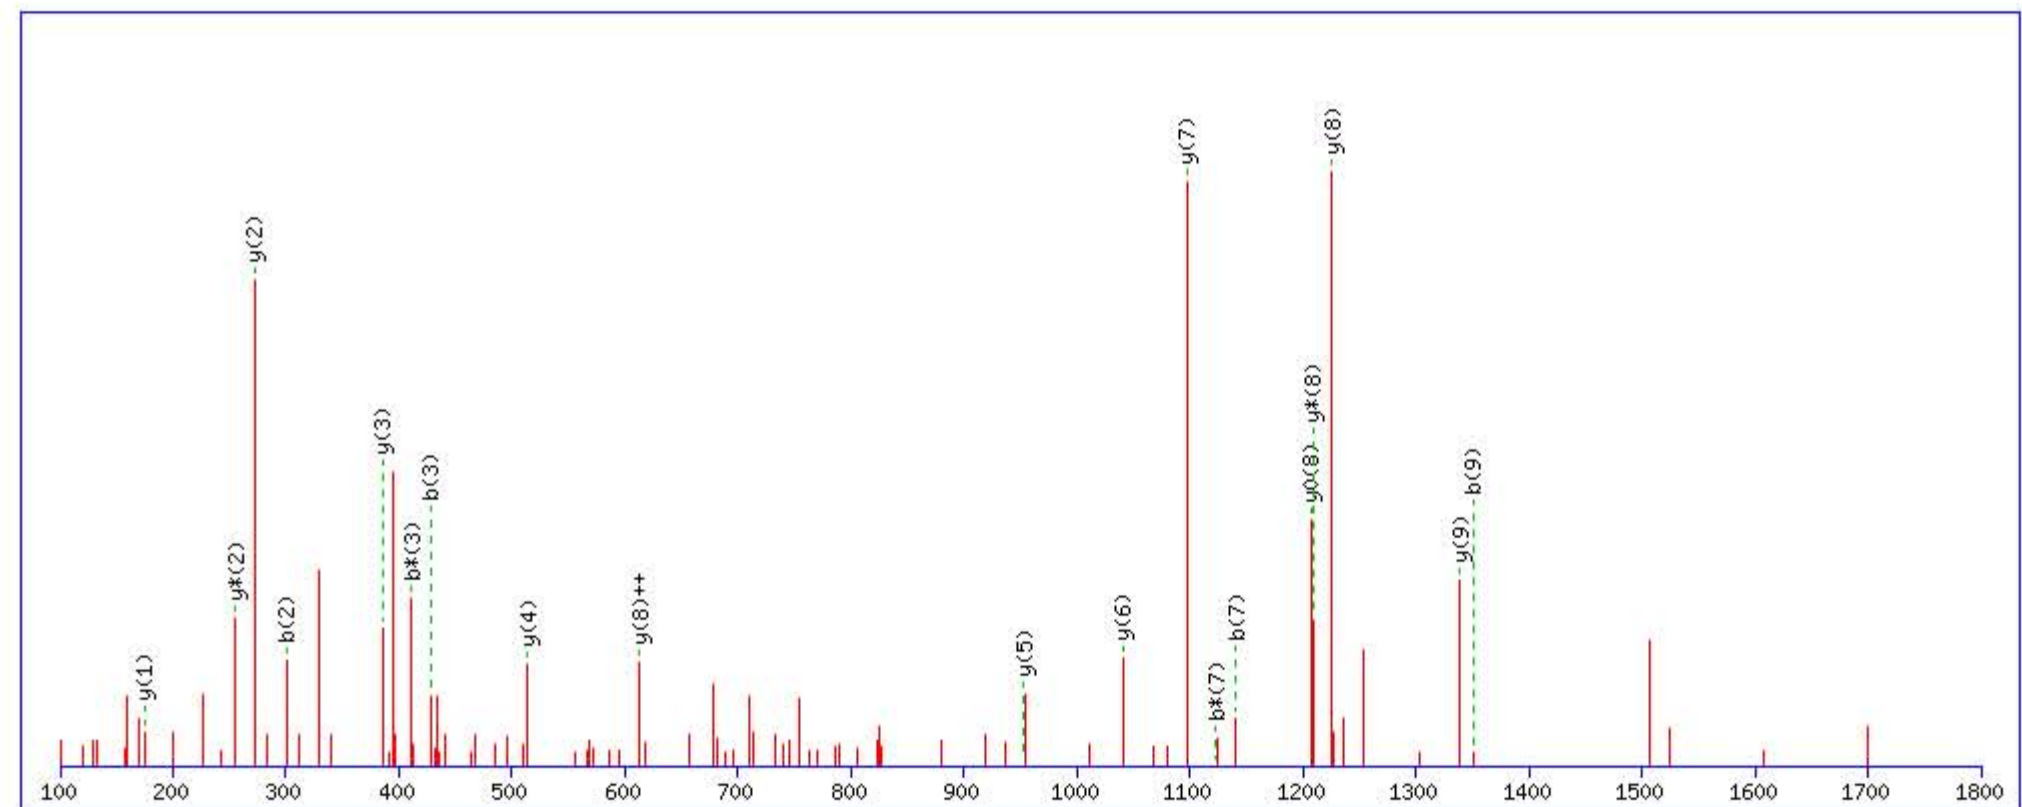

Monoisotopic mass of neutral peptide Mr(calc): 1523.791855

Fixed modifications: Carbamidomethyl (C) (apply to specified residues or termini only)

Variable modifications:

Q6 : Biotin:Thermo-21345 (Q)

Ions Score: 54 Expect: 0.00016

Matches : 19/90 fragment ions using 39 most intense peaks [\(help\)](#)

| #  | b                  | b <sup>++</sup> | b <sup>+</sup>     | b <sup>+++</sup> | b <sup>0</sup> | b <sup>0++</sup> | Seq. | y                  | y <sup>++</sup>   | y <sup>+</sup>     | y <sup>+++</sup> | y <sup>0</sup>     | y <sup>0++</sup> | #  |
|----|--------------------|-----------------|--------------------|------------------|----------------|------------------|------|--------------------|-------------------|--------------------|------------------|--------------------|------------------|----|
| 1  | 187.086589         | 94.046932       |                    |                  |                |                  | W    |                    |                   |                    |                  |                    |                  | 10 |
| 2  | <b>300.170653</b>  | 150.588965      |                    |                  |                |                  | L    | <b>1338.719833</b> | 669.863554        | 1321.693284        | 661.350280       | 1320.709268        | 660.858272       | 9  |
| 3  | <b>428.229231</b>  | 214.618254      | <b>411.202682</b>  | 206.104979       |                |                  | Q    | <b>1225.635769</b> | <b>613.321522</b> | <b>1208.609220</b> | 604.808248       | <b>1207.625204</b> | 604.316240       | 8  |
| 4  | 485.250695         | 243.128986      | 468.224146         | 234.615711       |                |                  | G    | <b>1097.577191</b> | 549.292233        | 1080.550642        | 540.778959       | 1079.566626        | 540.286951       | 7  |
| 5  | 572.282723         | 286.645000      | 555.256174         | 278.131725       | 554.272158     | 277.639717       | S    | <b>1040.555727</b> | 520.781501        | 1023.529178        | 512.268227       | 1022.545162        | 511.776219       | 6  |
| 6  | 1011.508049        | 506.257663      | 994.481500         | 497.744388       | 993.497484     | 497.252380       | Q    | <b>953.523699</b>  | 477.265487        | 936.497150         | 468.752213       | 935.513134         | 468.260205       | 5  |
| 7  | <b>1140.550642</b> | 570.778959      | <b>1123.524093</b> | 562.265685       | 1122.540077    | 561.773676       | E    | <b>514.298373</b>  | 257.652824        | 497.271824         | 249.139550       | 496.287808         | 248.647542       | 4  |
| 8  | 1253.634706        | 627.320991      | 1236.608157        | 618.807716       | 1235.624141    | 618.315708       | L    | <b>385.255780</b>  | 193.131528        | 368.229231         | 184.618253       |                    |                  | 3  |
| 9  | <b>1350.687470</b> | 675.847373      | 1333.660921        | 667.334098       | 1332.676905    | 666.842090       | P    | <b>272.171716</b>  | 136.589496        | <b>255.145167</b>  | 128.076221       |                    |                  | 2  |
| 10 |                    |                 |                    |                  |                |                  | R    | <b>175.118952</b>  | 88.063114         | 158.092403         | 79.549839        |                    |                  | 1  |

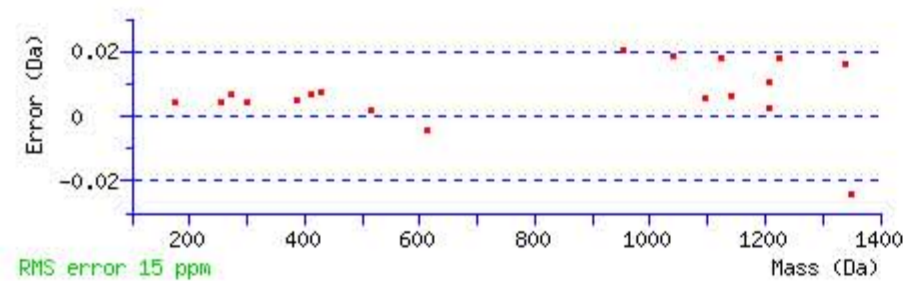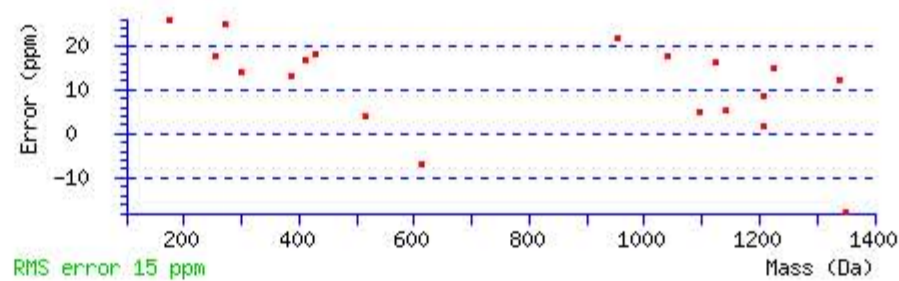

NCBI BLAST search of [WLQGSQELPR](#)

(Parameters: blastp, nr protein database, expect=20000, no filter, PAM30)

Other BLAST [web gateways](#)

All matches to this query

| Score | Mr(calc):   | Delta     | Sequence                        |
|-------|-------------|-----------|---------------------------------|
| 54.2  | 1523.791855 | 0.021493  | <a href="#">WLQGSQELPR</a>      |
| 21.9  | 1523.791855 | 0.021493  | <a href="#">WLQGSQELPR</a>      |
| 12.9  | 1523.816833 | -0.003485 | <a href="#">KGLGEGVPSSQRGPR</a> |
| 4.0   | 1523.812988 | 0.000360  | <a href="#">EGQGIKTDIPR</a>     |
| 3.7   | 1523.795227 | 0.018121  | <a href="#">GAQMQPISLPR</a>     |
| 3.7   | 1523.795227 | 0.018121  | <a href="#">GAQMQPISLPR</a>     |
| 2.8   | 1523.824219 | -0.010871 | <a href="#">SVQIRTEAGPR</a>     |
| 2.1   | 1523.813644 | -0.000296 | <a href="#">WIPTSNNLPQPFK</a>   |
| 1.9   | 1523.820831 | -0.007483 | <a href="#">GNPAPELRASFLPR</a>  |
| 1.8   | 1523.805603 | 0.007745  | <a href="#">LSATLGGLLQDHGSR</a> |

# MASCOT Search Results

## Peptide View

MS/MS Fragmentation of **QEPSQGTTTFAVTSILR**

Found in **IGHA1\_HUMAN**, Ig alpha-1 chain C region OS=Homo sapiens GN=IGHA1 PE=1 SV=2

Match to Query 54025: 2146.131912 from(716.384580,3+) rtinseconds(2468) index(9537)

Title: Locus:1.1.1.3113.18 File:"2013-07-02 CLN FXIII 180 min 1st F 1.wiff"

Data file C:\Program Files (x86)\Matrix Science\Mascot Daemon\mgf\7 FXIII 180 min 1st\mascot\_daemon\_merge.mgf

Click mouse within plot area to zoom in by factor of two about that point

Or, Plot from 0 to 2600 Da Full range

Label all possible matches  Label matches used for scoring

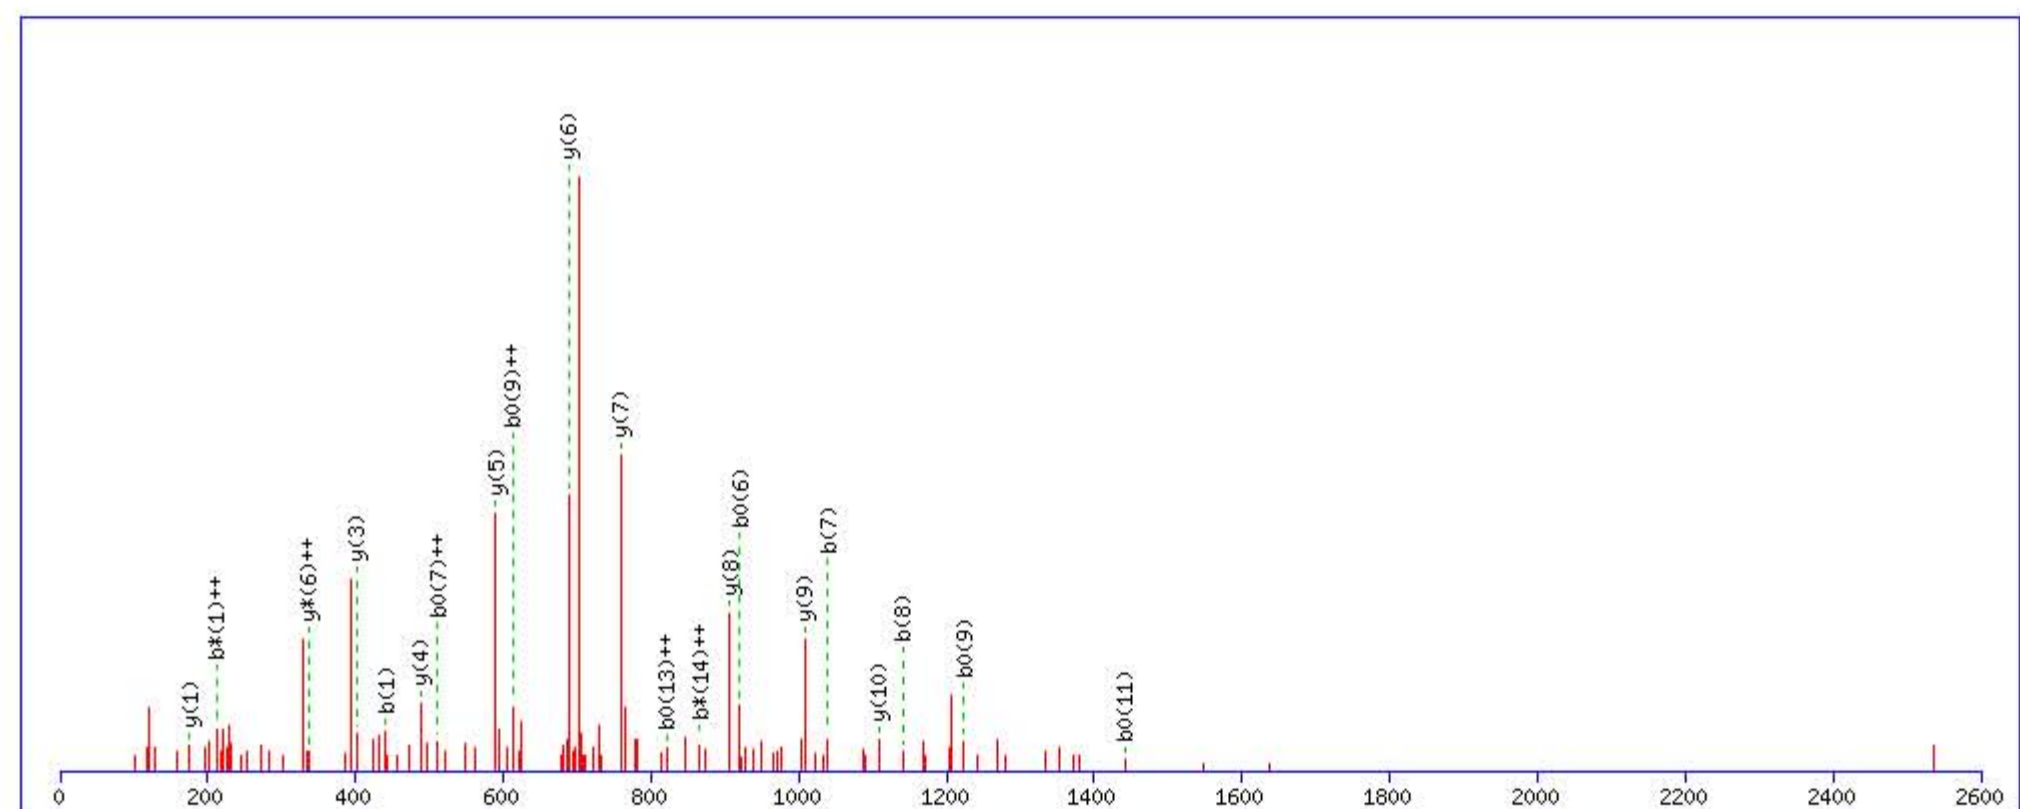

Monoisotopic mass of neutral peptide Mr(calc): 2146.109253

Fixed modifications: Carbamidomethyl (C) (apply to specified residues or termini only)

Variable modifications:

Q1 : Biotin:Thermo-21345 (Q)

Ions Score: 42 Expect: 0.0015

Matches : 21/184 fragment ions using 42 most intense peaks (help)

| #  | b           | b <sup>++</sup> | b <sup>*</sup> | b <sup>*++</sup> | b <sup>0</sup> | b <sup>0++</sup> | Seq. | y           | y <sup>++</sup> | y <sup>*</sup> | y <sup>*++</sup> | y <sup>0</sup> | y <sup>0++</sup> | #  |
|----|-------------|-----------------|----------------|------------------|----------------|------------------|------|-------------|-----------------|----------------|------------------|----------------|------------------|----|
| 1  | 440.232602  | 220.619939      | 423.206053     | 212.106664       |                |                  | Q    |             |                 |                |                  |                |                  | 17 |
| 2  | 569.275195  | 285.141236      | 552.248646     | 276.627961       | 551.264630     | 276.135953       | E    | 1707.891193 | 854.449235      | 1690.864644    | 845.935960       | 1689.880628    | 845.443952       | 16 |
| 3  | 666.327959  | 333.667618      | 649.301410     | 325.154343       | 648.317394     | 324.662335       | P    | 1578.848600 | 789.927938      | 1561.822051    | 781.414664       | 1560.838035    | 780.922656       | 15 |
| 4  | 753.359987  | 377.183632      | 736.333438     | 368.670357       | 735.349422     | 368.178349       | S    | 1481.795836 | 741.401556      | 1464.769287    | 732.888282       | 1463.785271    | 732.396274       | 14 |
| 5  | 881.418565  | 441.212921      | 864.392016     | 432.699646       | 863.408000     | 432.207638       | Q    | 1394.763808 | 697.885542      | 1377.737259    | 689.372268       | 1376.753243    | 688.880260       | 13 |
| 6  | 938.440029  | 469.723653      | 921.413480     | 461.210378       | 920.429464     | 460.718370       | G    | 1266.705230 | 633.856253      | 1249.678681    | 625.342979       | 1248.694665    | 624.850971       | 12 |
| 7  | 1039.487708 | 520.247492      | 1022.461159    | 511.734218       | 1021.477143    | 511.242210       | T    | 1209.683766 | 605.345521      | 1192.657217    | 596.832247       | 1191.673201    | 596.340239       | 11 |
| 8  | 1140.535387 | 570.771332      | 1123.508838    | 562.258057       | 1122.524822    | 561.766049       | T    | 1108.636087 | 554.821682      | 1091.609538    | 546.308407       | 1090.625522    | 545.816399       | 10 |
| 9  | 1241.583066 | 621.295171      | 1224.556517    | 612.781897       | 1223.572501    | 612.289889       | T    | 1007.588408 | 504.297842      | 990.561859     | 495.784568       | 989.577843     | 495.292560       | 9  |
| 10 | 1388.651480 | 694.829378      | 1371.624931    | 686.316104       | 1370.640915    | 685.824096       | F    | 906.540729  | 453.774003      | 889.514180     | 445.260728       | 888.530164     | 444.768720       | 8  |
| 11 | 1459.688594 | 730.347935      | 1442.662045    | 721.834661       | 1441.678029    | 721.342653       | A    | 759.472315  | 380.239796      | 742.445766     | 371.726521       | 741.461750     | 371.234513       | 7  |
| 12 | 1558.757008 | 779.882142      | 1541.730459    | 771.368868       | 1540.746443    | 770.876860       | V    | 688.435201  | 344.721239      | 671.408652     | 336.207964       | 670.424636     | 335.715956       | 6  |
| 13 | 1659.804687 | 830.405982      | 1642.778138    | 821.892707       | 1641.794122    | 821.400699       | T    | 589.366787  | 295.187032      | 572.340238     | 286.673757       | 571.356222     | 286.181749       | 5  |
| 14 | 1746.836715 | 873.921996      | 1729.810166    | 865.408721       | 1728.826150    | 864.916713       | S    | 488.319108  | 244.663192      | 471.292559     | 236.149918       | 470.308543     | 235.657910       | 4  |
| 15 | 1859.920779 | 930.464028      | 1842.894230    | 921.950753       | 1841.910214    | 921.458745       | I    | 401.287080  | 201.147178      | 384.260531     | 192.633903       |                |                  | 3  |
| 16 | 1973.004843 | 987.006060      | 1955.978294    | 978.492785       | 1954.994278    | 978.000777       | L    | 288.203016  | 144.605146      | 271.176467     | 136.091872       |                |                  | 2  |
| 17 |             |                 |                |                  |                |                  | R    | 175.118952  | 88.063114       | 158.092403     | 79.549840        |                |                  | 1  |

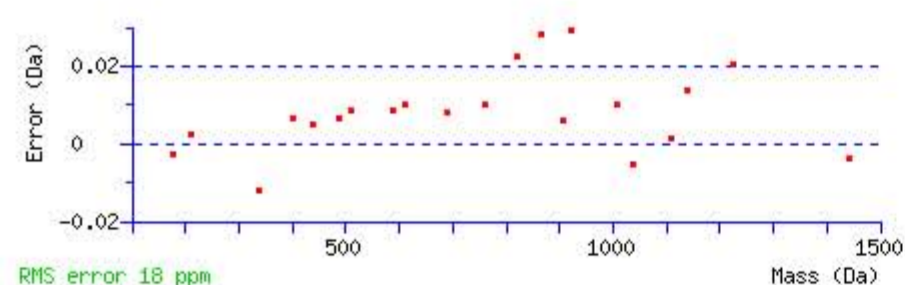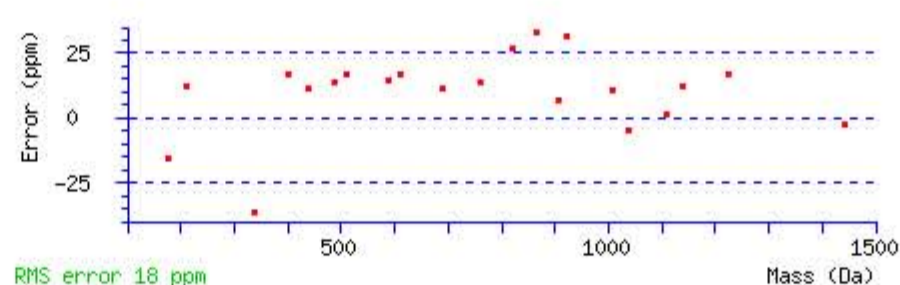

NCBI BLAST search of **QEPSQGTTTFAVTSILR**

(Parameters: blastp, nr protein database, expect=20000, no filter, PAM30)

Other BLAST [web gateways](#)

All matches to this query

| Score | Mr(calc):   | Delta    | Sequence                          |
|-------|-------------|----------|-----------------------------------|
| 42.1  | 2146.109253 | 0.022659 | <a href="#">QEPSQGTTTFAVTSILR</a> |
| 40.5  | 2146.109253 | 0.022659 | <a href="#">QEPSQGTTTFAVTSILR</a> |



# MASCOT Search Results

## Peptide View

MS/MS Fragmentation of **QEPSQGTTTFAVTSILR**

Found in **IGHA1\_HUMAN**, Ig alpha-1 chain C region OS=Homo sapiens GN=IGHA1 PE=1 SV=2

Match to Query 54026: 2146.133352 from(716.385060,3+) rtinseconds(2483) index(82006)

Title: Locus:1.1.1.2215.14 File:"2013-07-02 CLN FXIII 180 min 1st FT.wiff"

Data file C:\Program Files (x86)\Matrix Science\Mascot Daemon\mgf\7 FXIII 180 min 1st\mascot\_daemon\_merge.mgf

Click mouse within plot area to zoom in by factor of two about that point

Or, Plot from  to  Da

Label all possible matches  Label matches used for scoring

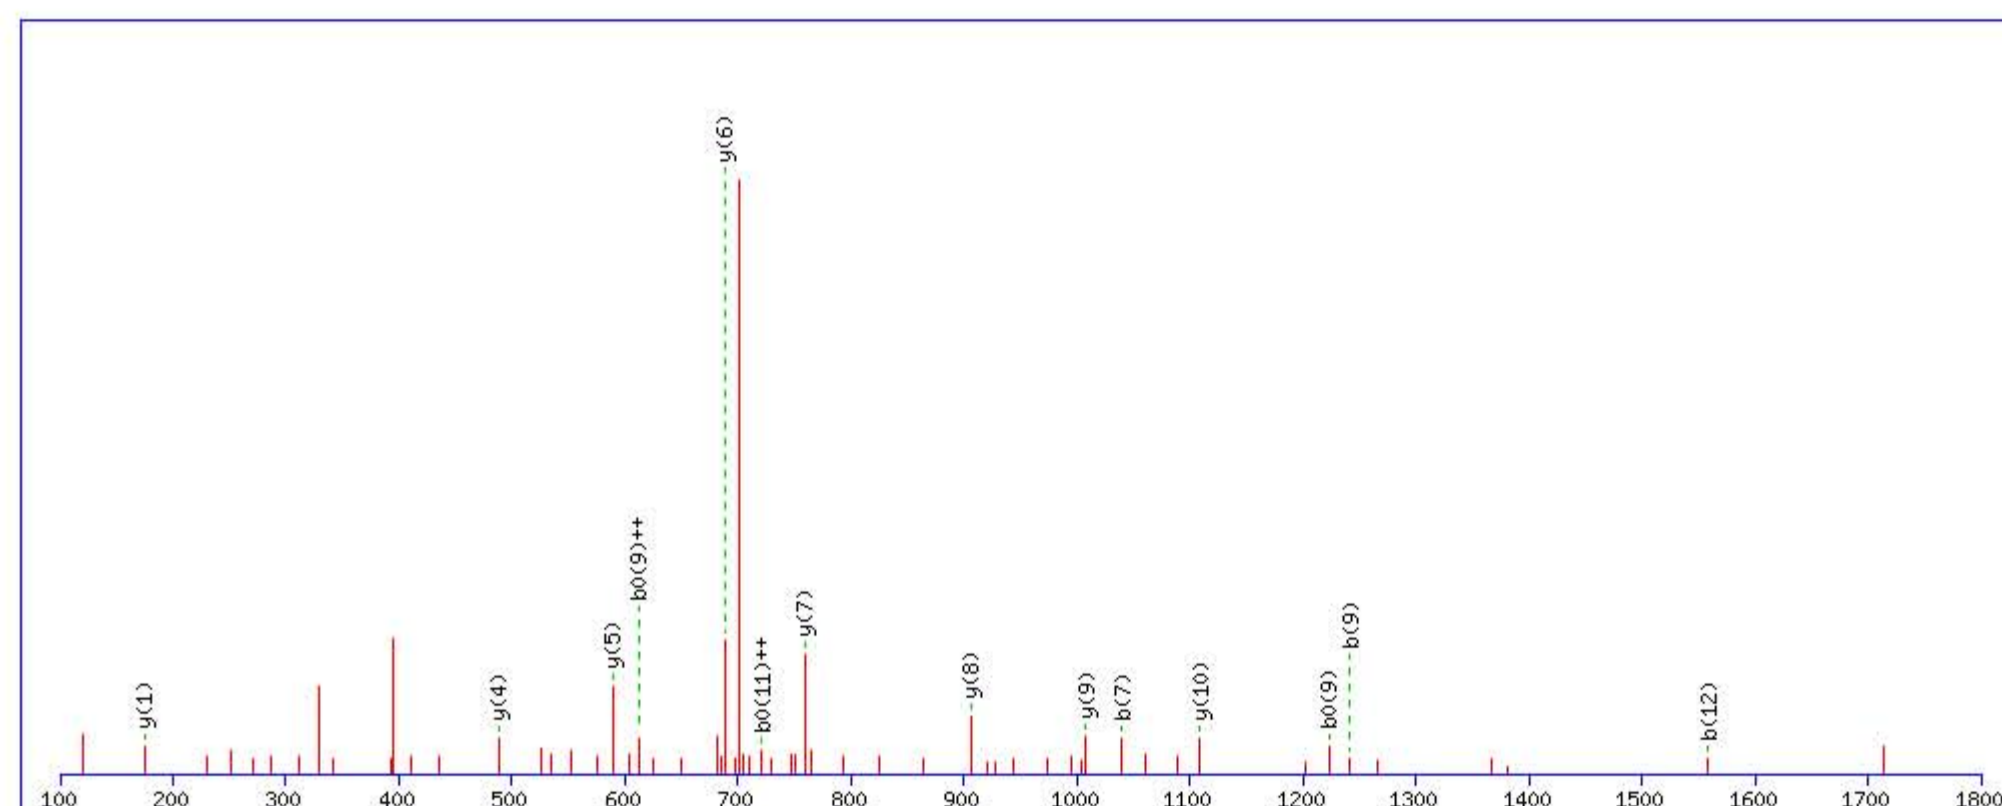

Monoisotopic mass of neutral peptide  $M_r(\text{calc})$ : 2146.109253

Fixed modifications: Carbamidomethyl (C) (apply to specified residues or termini only)

Variable modifications:

Q5 : Biotin:Thermo-21345 (Q)

Ions Score: 39 Expect: 0.00048

Matches : 14/184 fragment ions using 27 most intense peaks [\(help\)](#)

| #  | b                  | b <sup>++</sup> | b <sup>*</sup> | b <sup>+++</sup> | b <sup>0</sup>     | b <sup>0++</sup>  | Seq. | y                  | y <sup>++</sup> | y <sup>*</sup> | y <sup>+++</sup> | y <sup>0</sup> | y <sup>0++</sup> | #  |
|----|--------------------|-----------------|----------------|------------------|--------------------|-------------------|------|--------------------|-----------------|----------------|------------------|----------------|------------------|----|
| 1  | 129.065854         | 65.036565       | 112.039305     | 56.523291        |                    |                   | Q    |                    |                 |                |                  |                |                  | 17 |
| 2  | 258.108447         | 129.557862      | 241.081898     | 121.044587       | 240.097882         | 120.552579        | E    | 2019.057941        | 1010.032609     | 2002.031392    | 1001.519334      | 2001.047376    | 1001.027326      | 16 |
| 3  | 355.161211         | 178.084244      | 338.134662     | 169.570969       | 337.150646         | 169.078961        | P    | 1890.015348        | 945.511312      | 1872.988799    | 936.998038       | 1872.004783    | 936.506030       | 15 |
| 4  | 442.193239         | 221.600258      | 425.166690     | 213.086983       | 424.182674         | 212.594975        | S    | 1792.962584        | 896.984930      | 1775.936035    | 888.471656       | 1774.952019    | 887.979648       | 14 |
| 5  | 881.418565         | 441.212921      | 864.392016     | 432.699646       | 863.408000         | 432.207638        | Q    | 1705.930556        | 853.468916      | 1688.904007    | 844.955642       | 1687.919991    | 844.463634       | 13 |
| 6  | 938.440029         | 469.723653      | 921.413480     | 461.210378       | 920.429464         | 460.718370        | G    | 1266.705230        | 633.856253      | 1249.678681    | 625.342979       | 1248.694665    | 624.850971       | 12 |
| 7  | <b>1039.487708</b> | 520.247492      | 1022.461159    | 511.734218       | 1021.477143        | 511.242210        | T    | 1209.683766        | 605.345521      | 1192.657217    | 596.832247       | 1191.673201    | 596.340239       | 11 |
| 8  | 1140.535387        | 570.771332      | 1123.508838    | 562.258057       | 1122.524822        | 561.766049        | T    | <b>1108.636087</b> | 554.821682      | 1091.609538    | 546.308407       | 1090.625522    | 545.816399       | 10 |
| 9  | <b>1241.583066</b> | 621.295171      | 1224.556517    | 612.781897       | <b>1223.572501</b> | <b>612.289889</b> | T    | <b>1007.588408</b> | 504.297842      | 990.561859     | 495.784568       | 989.577843     | 495.292560       | 9  |
| 10 | 1388.651480        | 694.829378      | 1371.624931    | 686.316104       | 1370.640915        | 685.824096        | F    | <b>906.540729</b>  | 453.774003      | 889.514180     | 445.260728       | 888.530164     | 444.768720       | 8  |
| 11 | 1459.688594        | 730.347935      | 1442.662045    | 721.834661       | 1441.678029        | <b>721.342653</b> | A    | <b>759.472315</b>  | 380.239796      | 742.445766     | 371.726521       | 741.461750     | 371.234513       | 7  |
| 12 | <b>1558.757008</b> | 779.882142      | 1541.730459    | 771.368868       | 1540.746443        | 770.876860        | V    | <b>688.435201</b>  | 344.721239      | 671.408652     | 336.207964       | 670.424636     | 335.715956       | 6  |
| 13 | 1659.804687        | 830.405982      | 1642.778138    | 821.892707       | 1641.794122        | 821.400699        | T    | <b>589.366787</b>  | 295.187032      | 572.340238     | 286.673757       | 571.356222     | 286.181749       | 5  |
| 14 | 1746.836715        | 873.921996      | 1729.810166    | 865.408721       | 1728.826150        | 864.916713        | S    | <b>488.319108</b>  | 244.663192      | 471.292559     | 236.149918       | 470.308543     | 235.657910       | 4  |
| 15 | 1859.920779        | 930.464028      | 1842.894230    | 921.950753       | 1841.910214        | 921.458745        | I    | 401.287080         | 201.147178      | 384.260531     | 192.633903       |                |                  | 3  |
| 16 | 1973.004843        | 987.006060      | 1955.978294    | 978.492785       | 1954.994278        | 978.000777        | L    | 288.203016         | 144.605146      | 271.176467     | 136.091872       |                |                  | 2  |
| 17 |                    |                 |                |                  |                    |                   | R    | <b>175.118952</b>  | 88.063114       | 158.092403     | 79.549840        |                |                  | 1  |

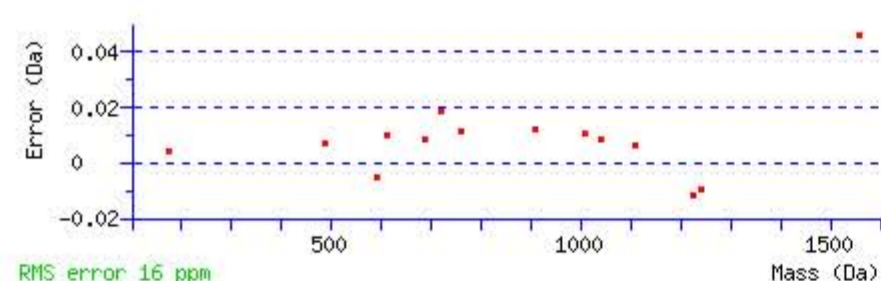

NCBI BLAST search of **QEPSQGTTTFAVTSILR**

(Parameters: blastp, nr protein database, expect=20000, no filter, PAM30)

Other BLAST [web gateways](#)

All matches to this query

| Score | $M_r(\text{calc})$ : | Delta     | Sequence                            |
|-------|----------------------|-----------|-------------------------------------|
| 39.4  | 2146.109253          | 0.024099  | <a href="#">QEPSQGTTTFAVTSILR</a>   |
| 39.4  | 2146.109253          | 0.024099  | <a href="#">QEPSQGTTTFAVTSILR</a>   |
| 3.9   | 2146.164688          | -0.031336 | <a href="#">VQEDILLRELHVNHYR</a>    |
| 2.5   | 2146.130997          | 0.002355  | <a href="#">VNFPEAGFLSPDKLSLLEK</a> |

# MASCOT Search Results

## Peptide View

MS/MS Fragmentation of **KGDTFSCMVGHEALPLAFTQK**  
Found in **IGHA1\_HUMAN**, Ig alpha-1 chain C region OS=Homo sapiens GN=IGHA1 PE=1 SV=2

Match to Query 65071: 2647.328202 from(883.450010,3+) rtinseconds(2335) index(81163)  
Title: Locus:1.1.1.2163.16 File:"2013-07-02 CLN FXIII 180 min 1st FT.wiff"  
Data file C:\Program Files (x86)\Matrix Science\Mascot Daemon\mgf\7 FXIII 180 min 1st\mascot\_daemon\_merge.mgf

Click mouse within plot area to zoom in by factor of two about that point

Or, Plot from 0 to 3400 Da Full range

Label all possible matches  Label matches used for scoring

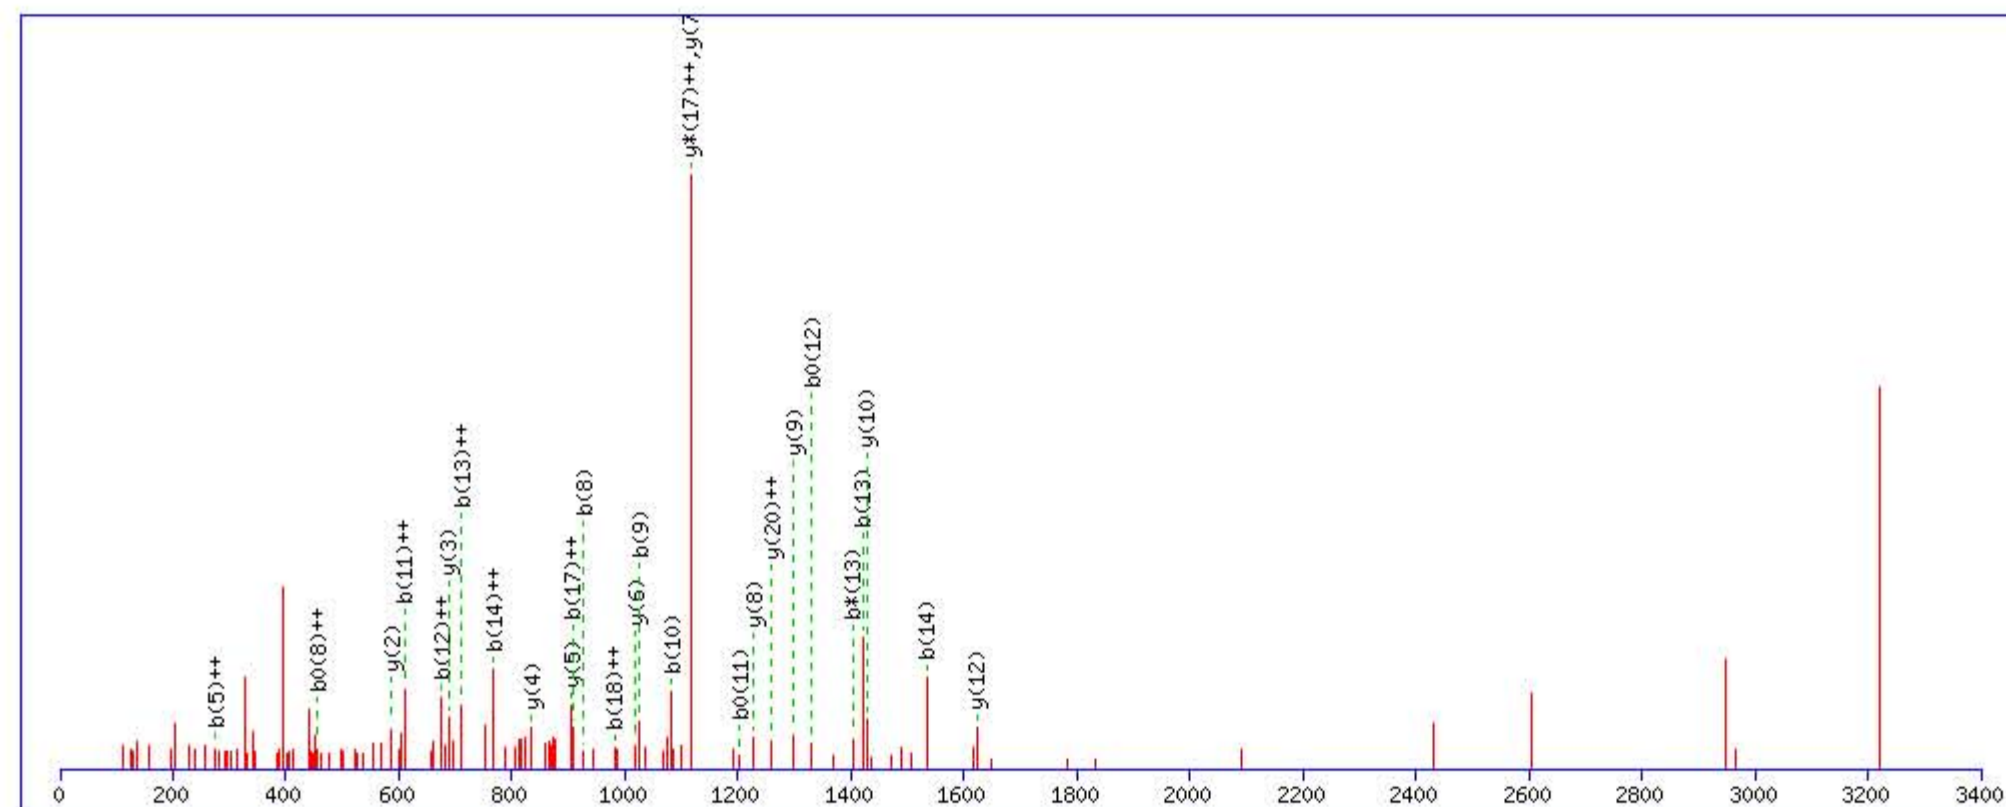

Monoisotopic mass of neutral peptide Mr(calc): 2647.296082  
Fixed modifications: Carbamidomethyl (C) (apply to specified residues or termini only)  
Variable modifications:  
Q20 : Biotin:Thermo-21345 (Q)  
Ions Score: 35 Expect: 0.011  
Matches : 28/232 fragment ions using 64 most intense peaks (help)

| #  | b                  | b <sup>++</sup>   | b <sup>*</sup>     | b <sup>*++</sup> | b <sup>0</sup>     | b <sup>0++</sup>  | Seq.     | y                  | y <sup>++</sup>    | y <sup>*</sup> | y <sup>*++</sup>   | y <sup>0</sup> | y <sup>0++</sup> | #  |
|----|--------------------|-------------------|--------------------|------------------|--------------------|-------------------|----------|--------------------|--------------------|----------------|--------------------|----------------|------------------|----|
| 1  | 129.102239         | 65.054757         | 112.075690         | 56.541483        |                    |                   | <b>K</b> |                    |                    |                |                    |                |                  | 21 |
| 2  | 186.123703         | 93.565489         | 169.097154         | 85.052215        |                    |                   | <b>G</b> | 2520.208388        | <b>1260.607832</b> | 2503.181839    | 1252.094557        | 2502.197823    | 1251.602549      | 20 |
| 3  | 301.150646         | 151.078961        | 284.124097         | 142.565687       | 283.140081         | 142.073679        | <b>D</b> | 2463.186924        | 1232.097100        | 2446.160375    | 1223.583825        | 2445.176359    | 1223.091817      | 19 |
| 4  | 402.198325         | 201.602801        | 385.171776         | 193.089526       | 384.187760         | 192.597518        | <b>T</b> | 2348.159981        | 1174.583628        | 2331.133432    | 1166.070354        | 2330.149416    | 1165.578346      | 18 |
| 5  | 549.266739         | <b>275.137008</b> | 532.240190         | 266.623733       | 531.256174         | 266.131725        | <b>F</b> | 2247.112302        | 1124.059789        | 2230.085753    | <b>1115.546514</b> | 2229.101737    | 1115.054506      | 17 |
| 6  | 636.298767         | 318.653022        | 619.272218         | 310.139747       | 618.288202         | 309.647739        | <b>S</b> | 2100.043888        | 1050.525582        | 2083.017339    | 1042.012307        | 2082.033323    | 1041.520299      | 16 |
| 7  | 796.329416         | 398.668346        | 779.302867         | 390.155072       | 778.318851         | 389.663064        | <b>C</b> | 2013.011860        | 1007.009568        | 1995.985311    | 998.496294         | 1995.001295    | 998.004286       | 15 |
| 8  | <b>927.369901</b>  | 464.188589        | 910.343352         | 455.675314       | 909.359336         | <b>455.183306</b> | <b>M</b> | 1852.981211        | 926.994244         | 1835.954662    | 918.480969         | 1834.970646    | 917.988961       | 14 |
| 9  | <b>1026.438315</b> | 513.722796        | 1009.411766        | 505.209521       | 1008.427750        | 504.717513        | <b>V</b> | 1721.940726        | 861.474001         | 1704.914177    | 852.960727         | 1703.930161    | 852.468719       | 13 |
| 10 | <b>1083.459779</b> | 542.233528        | 1066.433230        | 533.720253       | 1065.449214        | 533.228245        | <b>G</b> | <b>1622.872312</b> | 811.939794         | 1605.845763    | 803.426520         | 1604.861747    | 802.934512       | 12 |
| 11 | 1220.518691        | <b>610.762984</b> | 1203.492142        | 602.249709       | <b>1202.508126</b> | 601.757701        | <b>H</b> | 1565.850848        | 783.429062         | 1548.824299    | 774.915788         | 1547.840283    | 774.423780       | 11 |
| 12 | 1349.561284        | <b>675.284280</b> | 1332.534735        | 666.771006       | <b>1331.550719</b> | 666.278998        | <b>E</b> | <b>1428.791936</b> | 714.899606         | 1411.765387    | 706.386332         | 1410.781371    | 705.894324       | 10 |
| 13 | <b>1420.598398</b> | <b>710.802837</b> | <b>1403.571849</b> | 702.289563       | 1402.587833        | 701.797555        | <b>A</b> | <b>1299.749343</b> | 650.378310         | 1282.722794    | 641.865035         | 1281.738778    | 641.373027       | 9  |
| 14 | <b>1533.682462</b> | <b>767.344869</b> | 1516.655913        | 758.831595       | 1515.671897        | 758.339587        | <b>L</b> | <b>1228.712229</b> | 614.859753         | 1211.685680    | 606.346478         | 1210.701664    | 605.854470       | 8  |
| 15 | 1630.735226        | 815.871251        | 1613.708677        | 807.357977       | 1612.724661        | 806.865969        | <b>P</b> | <b>1115.628165</b> | 558.317721         | 1098.601616    | 549.804446         | 1097.617600    | 549.312438       | 7  |
| 16 | 1743.819290        | 872.413283        | 1726.792741        | 863.900009       | 1725.808725        | 863.408000        | <b>L</b> | <b>1018.575401</b> | 509.791339         | 1001.548852    | 501.278064         | 1000.564836    | 500.786056       | 6  |
| 17 | 1814.856404        | <b>907.931840</b> | 1797.829855        | 899.418566       | 1796.845839        | 898.926557        | <b>A</b> | <b>905.491337</b>  | 453.249307         | 888.464788     | 444.736032         | 887.480772     | 444.244024       | 5  |
| 18 | 1961.924818        | <b>981.466047</b> | 1944.898269        | 972.952773       | 1943.914253        | 972.460764        | <b>F</b> | <b>834.454223</b>  | 417.730750         | 817.427674     | 409.217475         | 816.443658     | 408.725467       | 4  |
| 19 | 2062.972497        | 1031.989886       | 2045.945948        | 1023.476612      | 2044.961932        | 1022.984604       | <b>T</b> | <b>687.385809</b>  | 344.196543         | 670.359260     | 335.683268         | 669.375244     | 335.191260       | 3  |
| 20 | 2502.197823        | 1251.602549       | 2485.171274        | 1243.089275      | 2484.187258        | 1242.597267       | <b>Q</b> | <b>586.338130</b>  | 293.672703         | 569.311581     | 285.159429         |                |                  | 2  |
| 21 |                    |                   |                    |                  |                    |                   | <b>K</b> | 147.112804         | 74.060040          | 130.086255     | 65.546765          |                |                  | 1  |

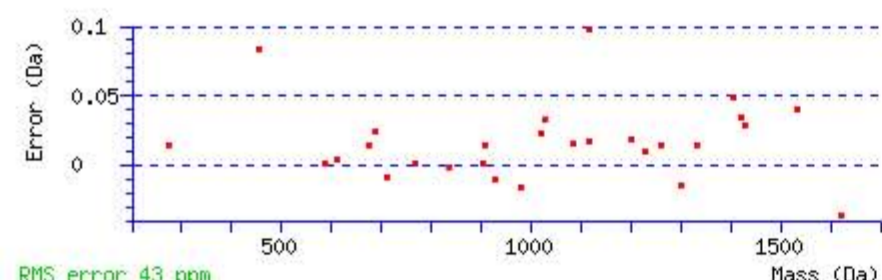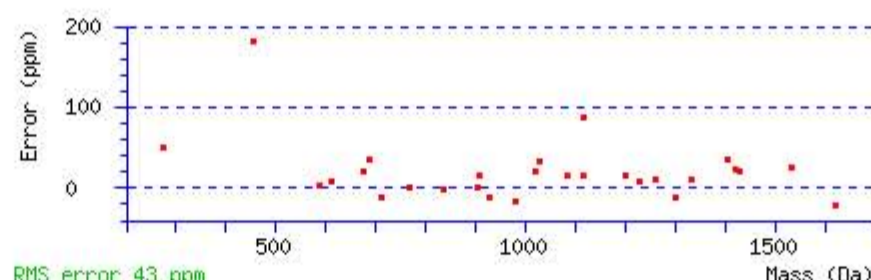

NCBI BLAST search of **KGDTFSCMVGHEALPLAFTQK**  
(Parameters: blastp, nr protein database, expect=20000, no filter, PAM30)  
Other BLAST [web gateways](#)

### All matches to this query

| Score | Mr(calc):   | Delta    | Sequence                              |
|-------|-------------|----------|---------------------------------------|
| 34.7  | 2647.296082 | 0.032120 | <a href="#">KGDTFSCMVGHEALPLAFTQK</a> |

# Mascot Search Results

## Peptide View

MS/MS Fragmentation of **HYTNPSQDVTVPCPVPPPPCCCHPR**

Found in **IGHA2\_HUMAN**, Ig alpha-2 chain C region OS=Homo sapiens GN=IGHA2 PE=1 SV=3

Match to Query 73087: 3219.509896 from(805.884750,4+) rtinseconds(1790) index(5160)

Title: Locus:1.1.1.2877.21 File:"2013-07-02 CLN FXIII 180 min 1st F 1.wiff"

Data file C:\Program Files (x86)\Matrix Science\Mascot Daemon\mgf7 FXIII 180 min 1st\mascot\_daemon\_merge.mgf

Click mouse within plot area to zoom in by factor of two about that point

Or, Plot from  to  Da

Label all possible matches  Label matches used for scoring

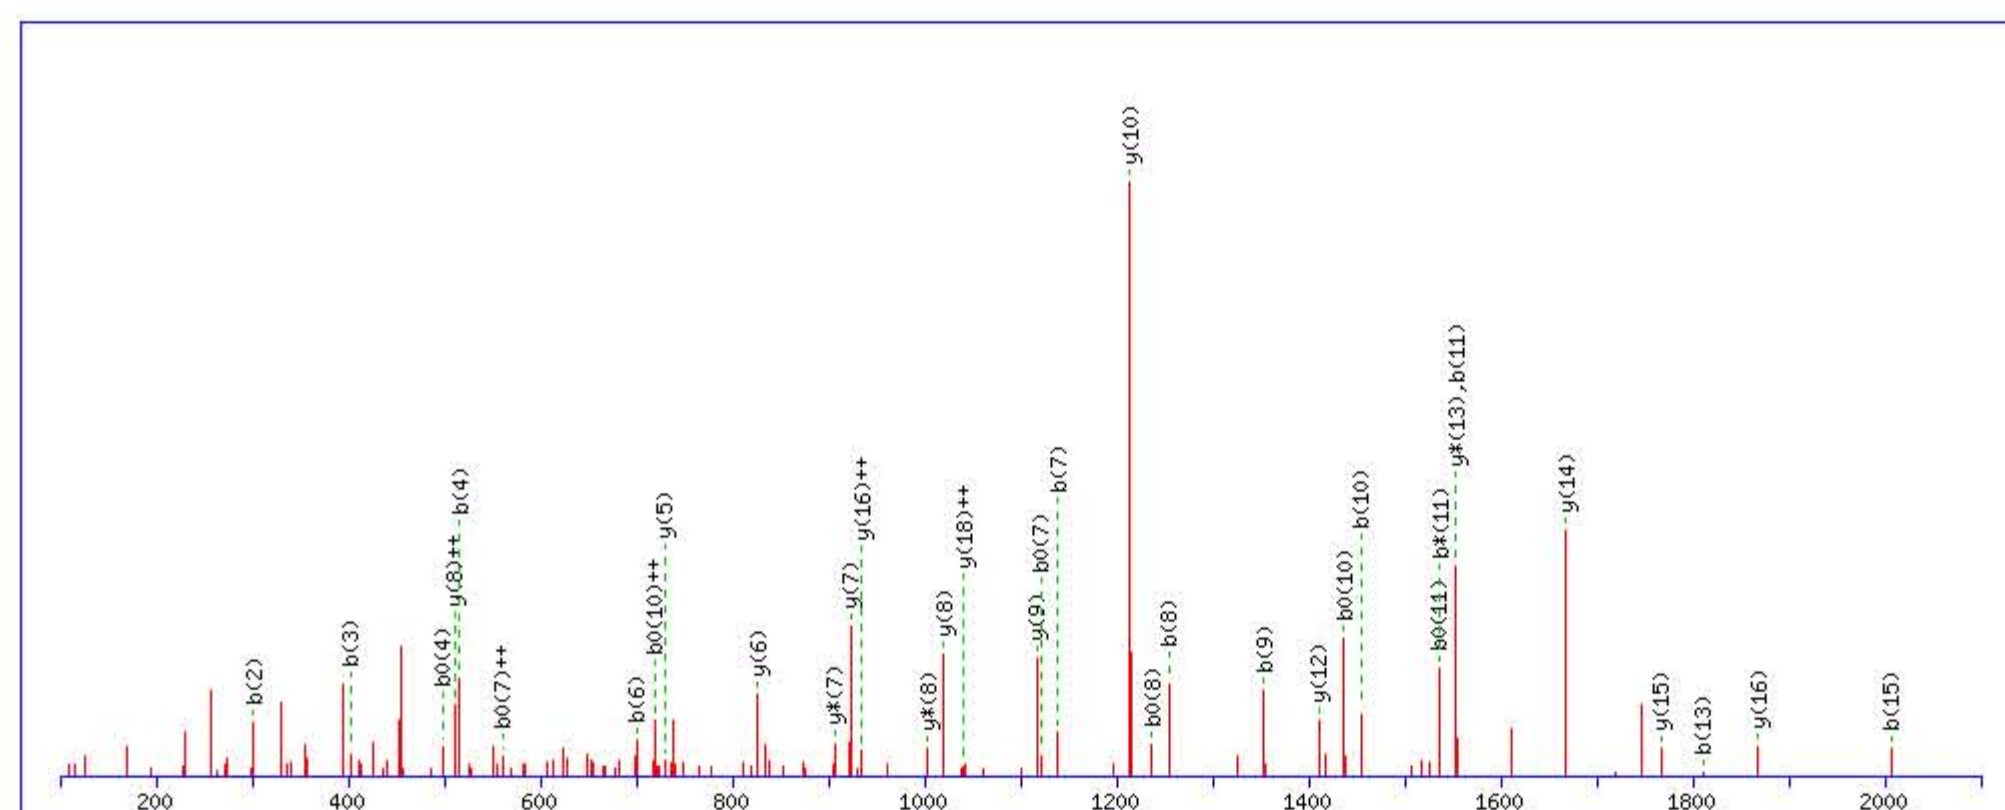

Monoisotopic mass of neutral peptide Mr(calc): 3219.487518

Fixed modifications: Carbamidomethyl (C) (apply to specified residues or termini only)

Variable modifications:

Q7 : Biotin:Thermo-21345 (Q)

Ions Score: 59 Expect: 2.5e-005

Matches : 35/248 fragment ions using 68 most intense peaks [\(help\)](#)

| #  | b                  | b <sup>++</sup> | b <sup>+</sup>     | b <sup>+++</sup> | b <sup>0</sup>     | b <sup>0++</sup>  | Seq. | y                  | y <sup>++</sup>    | y <sup>+</sup>     | y <sup>+++</sup> | y <sup>0</sup> | y <sup>0++</sup> | #  |
|----|--------------------|-----------------|--------------------|------------------|--------------------|-------------------|------|--------------------|--------------------|--------------------|------------------|----------------|------------------|----|
| 1  | 138.066188         | 69.536732       |                    |                  |                    |                   | H    |                    |                    |                    |                  |                |                  | 25 |
| 2  | <b>301.129517</b>  | 151.068397      |                    |                  |                    |                   | Y    | 3083.435840        | 1542.221558        | 3066.409291        | 1533.708283      | 3065.425275    | 1533.216275      | 24 |
| 3  | <b>402.177196</b>  | 201.592236      |                    |                  | 384.166631         | 192.586954        | T    | 2920.372511        | 1460.689893        | 2903.345962        | 1452.176619      | 2902.361946    | 1451.684611      | 23 |
| 4  | <b>516.220123</b>  | 258.613700      | 499.193574         | 250.100425       | <b>498.209558</b>  | 249.608417        | N    | 2819.324832        | 1410.166054        | 2802.298283        | 1401.652779      | 2801.314267    | 1401.160771      | 22 |
| 5  | 613.272887         | 307.140082      | 596.246338         | 298.626807       | 595.262322         | 298.134799        | P    | 2705.281905        | 1353.144590        | 2688.255356        | 1344.631316      | 2687.271340    | 1344.139308      | 21 |
| 6  | <b>700.304915</b>  | 350.656096      | 683.278366         | 342.142821       | 682.294350         | 341.650813        | S    | 2608.229141        | 1304.618208        | 2591.202592        | 1296.104934      | 2590.218576    | 1295.612926      | 20 |
| 7  | <b>1139.530241</b> | 570.268759      | 1122.503692        | 561.755484       | <b>1121.519676</b> | <b>561.263476</b> | Q    | 2521.197113        | 1261.102194        | 2504.170564        | 1252.588920      | 2503.186548    | 1252.096912      | 19 |
| 8  | <b>1254.557184</b> | 627.782230      | 1237.530635        | 619.268956       | <b>1236.546619</b> | 618.776948        | D    | 2081.971787        | <b>1041.489531</b> | 2064.945238        | 1032.976257      | 2063.961222    | 1032.484249      | 18 |
| 9  | <b>1353.625598</b> | 677.316437      | 1336.599049        | 668.803163       | 1335.615033        | 668.311155        | V    | 1966.944844        | 983.976060         | 1949.918295        | 975.462786       | 1948.934279    | 974.970778       | 17 |
| 10 | <b>1454.673277</b> | 727.840277      | 1437.646728        | 719.327002       | <b>1436.662712</b> | <b>718.834994</b> | T    | <b>1867.876430</b> | <b>934.441853</b>  | 1850.849881        | 925.928579       | 1849.865865    | 925.436571       | 16 |
| 11 | <b>1553.741691</b> | 777.374484      | <b>1536.715142</b> | 768.861209       | <b>1535.731126</b> | 768.369201        | V    | <b>1766.828751</b> | 883.918014         | 1749.802202        | 875.404739       |                |                  | 15 |
| 12 | 1650.794455        | 825.900866      | 1633.767906        | 817.387591       | 1632.783890        | 816.895583        | P    | <b>1667.760337</b> | 834.383806         | 1650.733788        | 825.870532       |                |                  | 14 |
| 13 | <b>1810.825104</b> | 905.916190      | 1793.798555        | 897.402916       | 1792.814539        | 896.910908        | C    | 1570.707573        | 785.857424         | <b>1553.681024</b> | 777.344150       |                |                  | 13 |
| 14 | 1907.877868        | 954.442572      | 1890.851319        | 945.929298       | 1889.867303        | 945.437290        | P    | <b>1410.676924</b> | 705.842100         | 1393.650375        | 697.328825       |                |                  | 12 |
| 15 | <b>2006.946282</b> | 1003.976779     | 1989.919733        | 995.463505       | 1988.935717        | 994.971497        | V    | 1313.624160        | 657.315718         | 1296.597611        | 648.802443       |                |                  | 11 |
| 16 | 2103.999046        | 1052.503161     | 2086.972497        | 1043.989887      | 2085.988481        | 1043.497879       | P    | <b>1214.555746</b> | 607.781511         | 1197.529197        | 599.268236       |                |                  | 10 |
| 17 | 2201.051810        | 1101.029543     | 2184.025261        | 1092.516269      | 2183.041245        | 1092.024261       | P    | <b>1117.502982</b> | 559.255129         | 1100.476433        | 550.741854       |                |                  | 9  |
| 18 | 2298.104574        | 1149.555925     | 2281.078025        | 1141.042651      | 2280.094009        | 1140.550643       | P    | <b>1020.450218</b> | <b>510.728747</b>  | <b>1003.423669</b> | 502.215472       |                |                  | 8  |
| 19 | 2395.157338        | 1198.082307     | 2378.130789        | 1189.569033      | 2377.146773        | 1189.077025       | P    | <b>923.397454</b>  | 462.202365         | <b>906.370905</b>  | 453.689090       |                |                  | 7  |
| 20 | 2492.210102        | 1246.608689     | 2475.183553        | 1238.095415      | 2474.199537        | 1237.603407       | P    | <b>826.344690</b>  | 413.675983         | 809.318141         | 405.162708       |                |                  | 6  |
| 21 | 2652.240751        | 1326.624014     | 2635.214202        | 1318.110739      | 2634.230186        | 1317.618731       | C    | <b>729.291926</b>  | 365.149601         | 712.265377         | 356.636326       |                |                  | 5  |
| 22 | 2812.271400        | 1406.639338     | 2795.244851        | 1398.126063      | 2794.260835        | 1397.634055       | C    | 569.261277         | 285.134276         | 552.234728         | 276.621002       |                |                  | 4  |
| 23 | 2949.330312        | 1475.168794     | 2932.303763        | 1466.655519      | 2931.319747        | 1466.163511       | H    | 409.230628         | 205.118952         | 392.204079         | 196.605677       |                |                  | 3  |
| 24 | 3046.383076        | 1523.695176     | 3029.356527        | 1515.181901      | 3028.372511        | 1514.689893       | P    | 272.171716         | 136.589496         | 255.145167         | 128.076221       |                |                  | 2  |
| 25 |                    |                 |                    |                  |                    |                   | R    | 175.118952         | 88.063114          | 158.092403         | 79.549839        |                |                  | 1  |

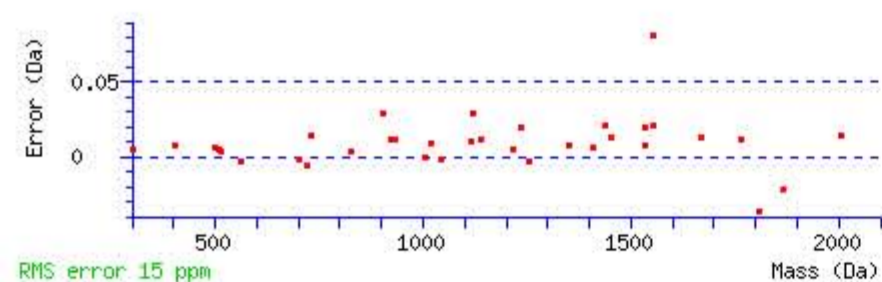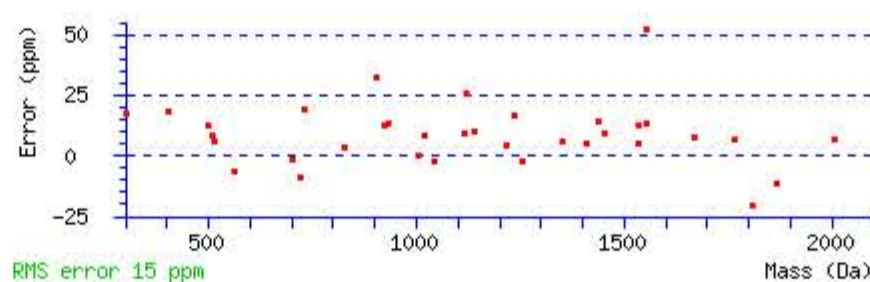

NCBI BLAST search of **HYTNPSQDVTVPCPVPPPPCCCHPR**

(Parameters: blastp, nr protein database, expect=20000, no filter, PAM30)

Other BLAST [web gateways](#)

All matches to this query

| Score | Mr(calc):   | Delta    | Sequence                                  |
|-------|-------------|----------|-------------------------------------------|
| 58.7  | 3219.487518 | 0.022378 | <a href="#">HYTNPSQDVTVPCPVPPPPCCCHPR</a> |

Mascot: <http://www.matrixscience.com/>

# MASCOT SCIENCE Mascot Search Results

## Peptide View

MS/MS Fragmentation of **TFPEIQR**

Found in **IGHD\_HUMAN**, Ig delta chain C region OS=Homo sapiens GN=IGHD PE=1 SV=2

Match to Query 23718: 1200.642488 from(601.328520,2+) rtinseconds(1961) index(78669)

Title: Locus:1.1.1.2033.18 File:"2013-07-02 CLN FXIII 180 min 1st FT.wiff"

Data file C:\Program Files (x86)\Matrix Science\Mascot Daemon\mgf\7 FXIII 180 min 1st\mascot\_daemon\_merge.mgf

Click mouse within plot area to zoom in by factor of two about that point

Or, Plot from  to  Da

Label all possible matches  Label matches used for scoring

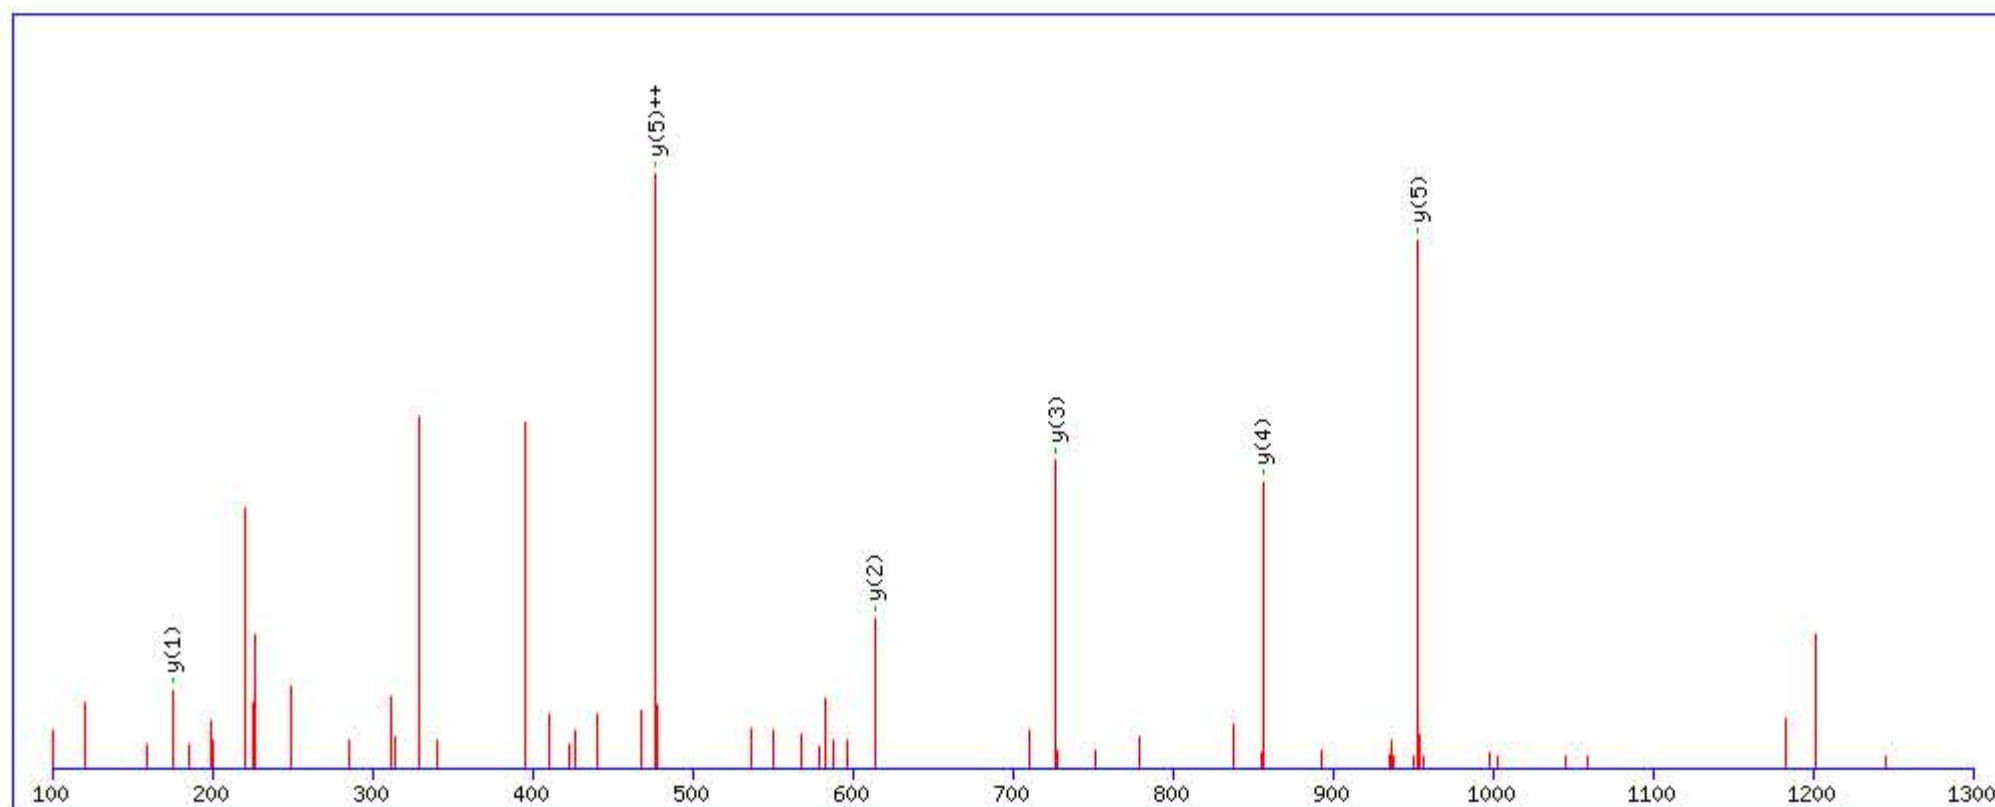

Monoisotopic mass of neutral peptide Mr(calc): 1200.632507

Fixed modifications: Carbamidomethyl (C) (apply to specified residues or termini only)

Variable modifications:

Q6 : Biotin:Thermo-21345 (Q)

Ions Score: 34 Expect: 0.0032

Matches : 6/56 fragment ions using 11 most intense peaks [\(help\)](#)

| # | b           | b <sup>++</sup> | b*          | b <sup>+++</sup> | b <sup>0</sup> | b <sup>0++</sup> | Seq. | y                 | y <sup>++</sup>   | y*          | y <sup>+++</sup> | y <sup>0</sup> | y <sup>0++</sup> | # |
|---|-------------|-----------------|-------------|------------------|----------------|------------------|------|-------------------|-------------------|-------------|------------------|----------------|------------------|---|
| 1 | 102.054955  | 51.531116       |             |                  | 84.044390      | 42.525833        | T    |                   |                   |             |                  |                |                  | 7 |
| 2 | 249.123369  | 125.065322      |             |                  | 231.112804     | 116.060040       | F    | 1100.592113       | 550.799695        | 1083.565564 | 542.286420       | 1082.581548    | 541.794412       | 6 |
| 3 | 346.176133  | 173.591704      |             |                  | 328.165568     | 164.586422       | P    | <b>953.523699</b> | <b>477.265488</b> | 936.497150  | 468.752213       | 935.513134     | 468.260205       | 5 |
| 4 | 475.218726  | 238.113001      |             |                  | 457.208161     | 229.107719       | E    | <b>856.470935</b> | 428.739106        | 839.444386  | 420.225831       | 838.460370     | 419.733823       | 4 |
| 5 | 588.302790  | 294.655033      |             |                  | 570.292225     | 285.649751       | I    | <b>727.428342</b> | 364.217809        | 710.401793  | 355.704535       |                |                  | 3 |
| 6 | 1027.528116 | 514.267696      | 1010.501567 | 505.754422       | 1009.517551    | 505.262414       | Q    | <b>614.344278</b> | 307.675777        | 597.317729  | 299.162503       |                |                  | 2 |
| 7 |             |                 |             |                  |                |                  | R    | <b>175.118952</b> | 88.063114         | 158.092403  | 79.549839        |                |                  | 1 |

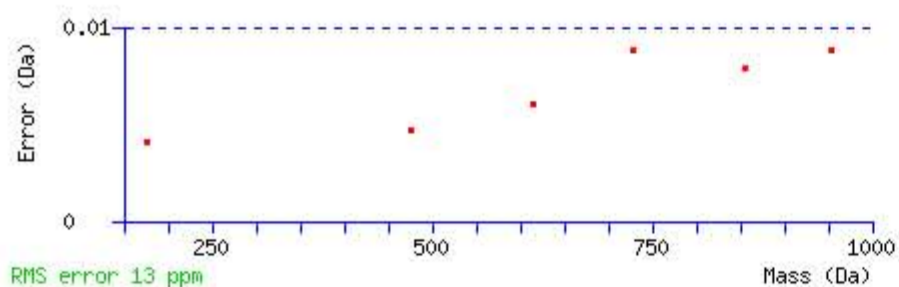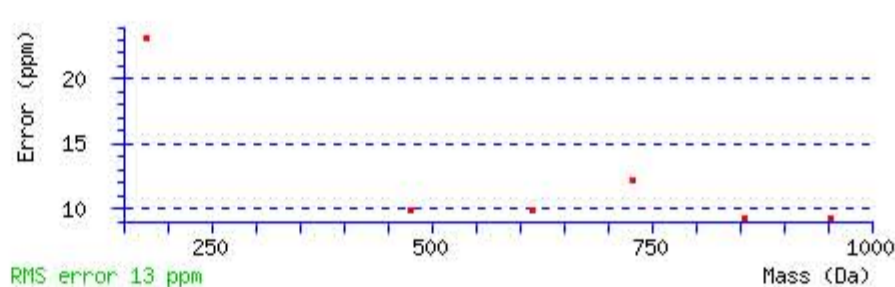

NCBI BLAST search of [TFPEIQR](#)

(Parameters: blastp, nr protein database, expect=20000, no filter, PAM30)

Other BLAST [web gateways](#)

## All matches to this query

| Score | Mr(calc):   | Delta     | Sequence                   |
|-------|-------------|-----------|----------------------------|
| 34.3  | 1200.632507 | 0.009981  | <a href="#">TFPEIQR</a>    |
| 7.4   | 1200.628464 | 0.014024  | <a href="#">LLQLQEMGNR</a> |
| 4.0   | 1200.636353 | 0.006135  | <a href="#">TFTQKGNLHR</a> |
| 2.6   | 1200.650269 | -0.007781 | <a href="#">ETDKPPFVIR</a> |

# MASCOT Search Results

## Peptide View

MS/MS Fragmentation of **EPAAQAPVK**

Found in **IGHD\_HUMAN**, Ig delta chain C region OS=Homo sapiens GN=IGHD PE=1 SV=2

Match to Query 24220: 1220.661148 from(611.337850,2+) rtinseconds(1428) index(20481)

Title: Locus:1.1.1.2640.12 File:"2013-07-02 CLN FXIII 180 min 1st F 2.wiff"

Data file C:\Program Files (x86)\Matrix Science\Mascot Daemon\mgf\7 FXIII 180 min 1st\mascot\_daemon\_merge.mgf

Click mouse within plot area to zoom in by factor of two about that point

Or, Plot from  to  Da

Label all possible matches  Label matches used for scoring

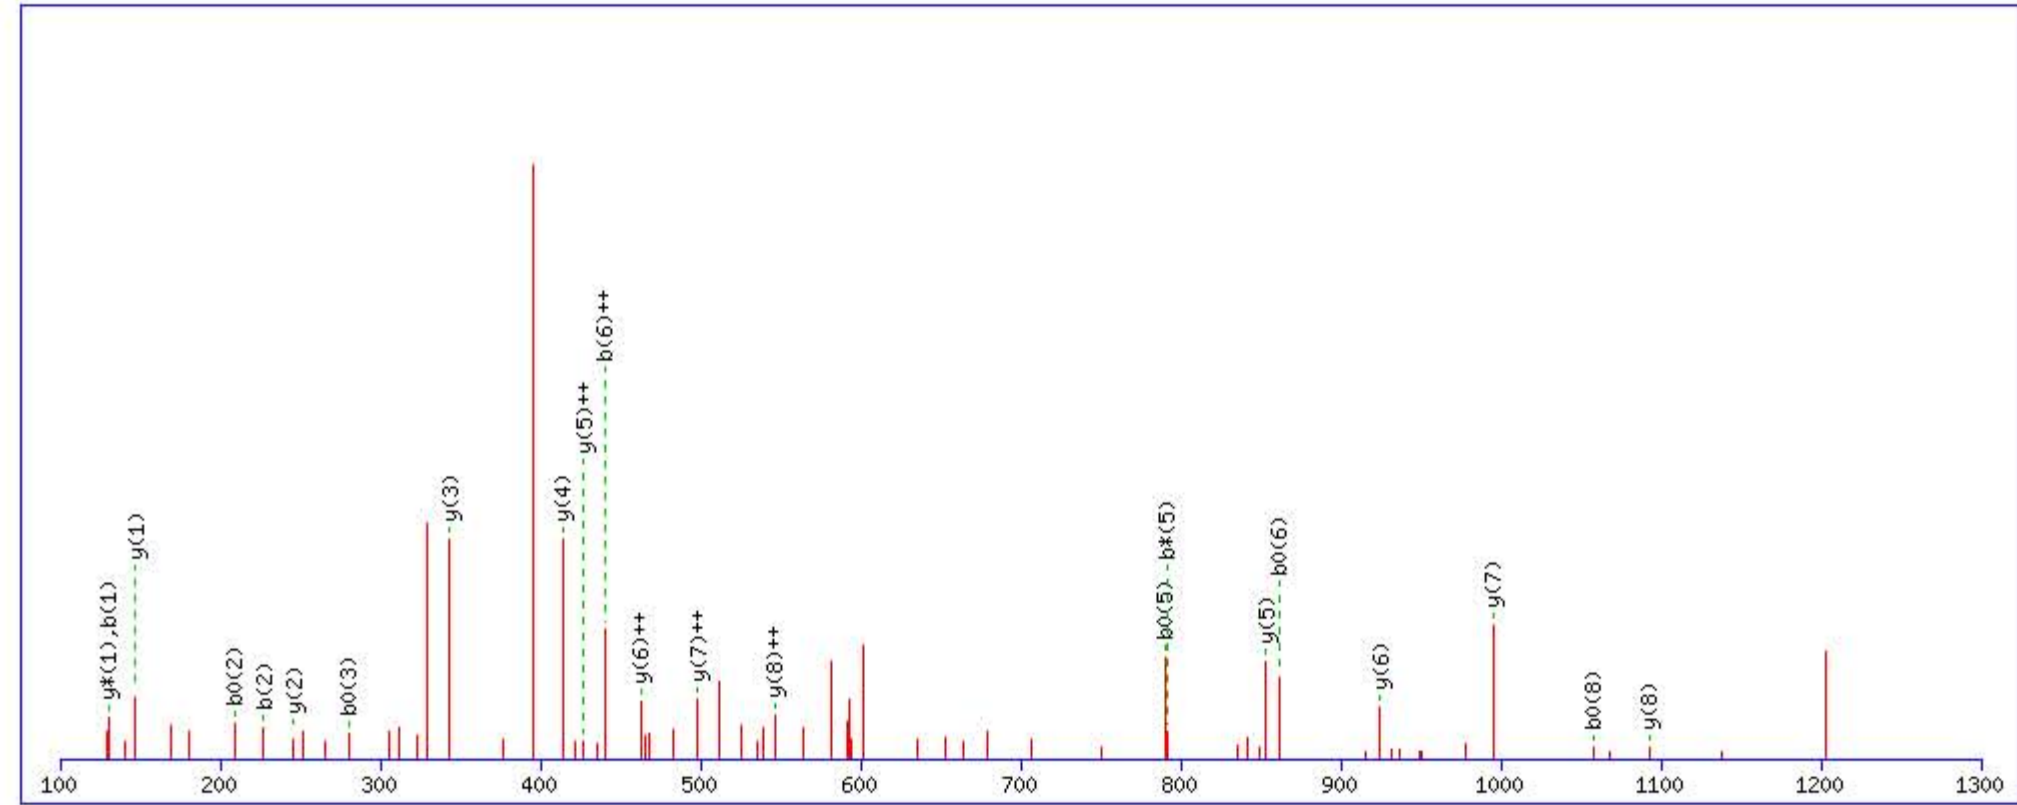

Monoisotopic mass of neutral peptide Mr(calc): 1220.658707

Fixed modifications: Carbamidomethyl (C) (apply to specified residues or termini only)

Variable modifications:

Q5 : Biotin:Thermo-21345 (Q)

Ions Score: 40 Expect: 0.0018

Matches : 22/72 fragment ions using 55 most intense peaks [\(help\)](#)

| # | b           | b <sup>++</sup> | b <sup>*</sup> | b <sup>*++</sup> | b <sup>0</sup> | b <sup>0++</sup> | Seq. | y           | y <sup>++</sup> | y <sup>*</sup> | y <sup>*++</sup> | # |
|---|-------------|-----------------|----------------|------------------|----------------|------------------|------|-------------|-----------------|----------------|------------------|---|
| 1 | 130.049869  | 65.528572       |                |                  | 112.039304     | 56.523290        | E    |             |                 |                |                  | 9 |
| 2 | 227.102633  | 114.054954      |                |                  | 209.092068     | 105.049672       | P    | 1092.623414 | 546.815345      | 1075.596865    | 538.302071       | 8 |
| 3 | 298.139747  | 149.573512      |                |                  | 280.129182     | 140.568229       | A    | 995.570650  | 498.288963      | 978.544101     | 489.775689       | 7 |
| 4 | 369.176861  | 185.092068      |                |                  | 351.166296     | 176.086786       | A    | 924.533536  | 462.770406      | 907.506987     | 454.257132       | 6 |
| 5 | 808.402187  | 404.704732      | 791.375638     | 396.191457       | 790.391622     | 395.699449       | Q    | 853.496422  | 427.251849      | 836.469873     | 418.738575       | 5 |
| 6 | 879.439301  | 440.223289      | 862.412752     | 431.710014       | 861.428736     | 431.218006       | A    | 414.271096  | 207.639186      | 397.244547     | 199.125911       | 4 |
| 7 | 976.492065  | 488.749671      | 959.465516     | 480.236396       | 958.481500     | 479.744388       | P    | 343.233982  | 172.120629      | 326.207433     | 163.607354       | 3 |
| 8 | 1075.560479 | 538.283878      | 1058.533930    | 529.770603       | 1057.549914    | 529.278595       | V    | 246.181218  | 123.594247      | 229.154669     | 115.080972       | 2 |
| 9 |             |                 |                |                  |                |                  | K    | 147.112804  | 74.060040       | 130.086255     | 65.546765        | 1 |

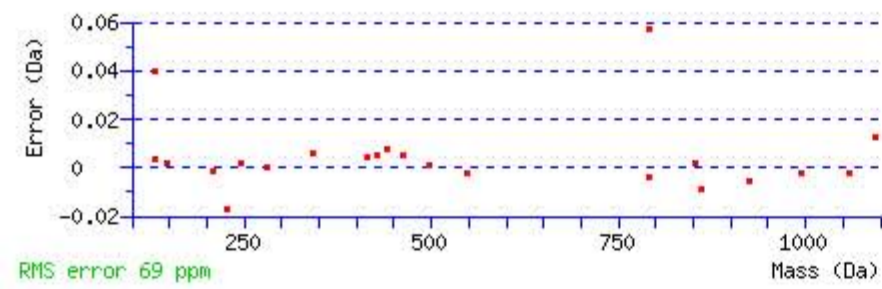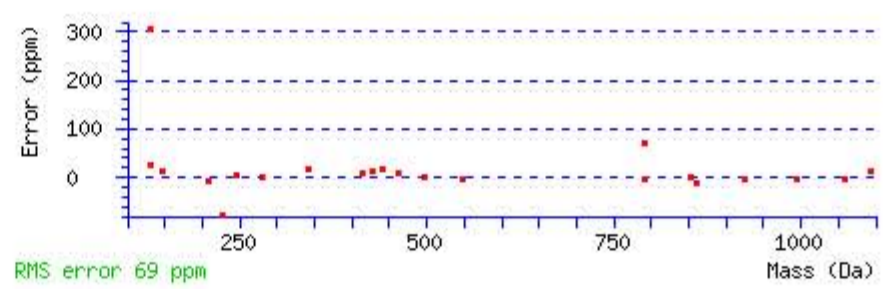

NCBI BLAST search of [EPAAQAPVK](#)

(Parameters: blastp, nr protein database, expect=20000, no filter, PAM30)

Other BLAST [web gateways](#)

## All matches to this query

| Score | Mr(calc):   | Delta     | Sequence                     |
|-------|-------------|-----------|------------------------------|
| 39.7  | 1220.658707 | 0.002441  | <a href="#">EPAAQAPVK</a>    |
| 9.8   | 1220.658722 | 0.002426  | <a href="#">EQNVVPVK</a>     |
| 7.1   | 1220.676468 | -0.015320 | <a href="#">EKAATVFNTLK</a>  |
| 4.8   | 1220.676468 | -0.015320 | <a href="#">AEPSPSKPTVAK</a> |
| 2.8   | 1220.669952 | -0.008804 | <a href="#">QTGKKPFKCK</a>   |
| 2.2   | 1220.669937 | -0.008789 | <a href="#">EQHLQKK</a>      |
| 1.5   | 1220.654663 | 0.006485  | <a href="#">QASKKTAMAAAK</a> |
| 1.0   | 1220.666580 | -0.005432 | <a href="#">EPAIVRFFSR</a>   |
| 1.0   | 1220.651306 | 0.009842  | <a href="#">ILSHTEEHKK</a>   |
| 0.6   | 1220.651321 | 0.009827  | <a href="#">GQVLIASSYGR</a>  |

**Peptide View**

MS/MS Fragmentation of **SLWNAGTSVTCTLNHPSLPPQR**

Found in **IGHD\_HUMAN**, Ig delta chain C region OS=Homo sapiens GN=IGHD PE=1 SV=2

Match to Query 66321: 2746.393272 from(916.471700,3+) rtinseconds(2229) index(80480)

Title: Locus:1.1.1.2126.25 File:"2013-07-02 CLN FXIII 180 min 1st FT.wiff"

Data file C:\Program Files (x86)\Matrix Science\Mascot Daemon\mgf\7 FXIII 180 min 1st\mascot\_daemon\_merge.mgf

Click mouse within plot area to zoom in by factor of two about that point

Or, Plot from  to  Da

Label all possible matches  Label matches used for scoring

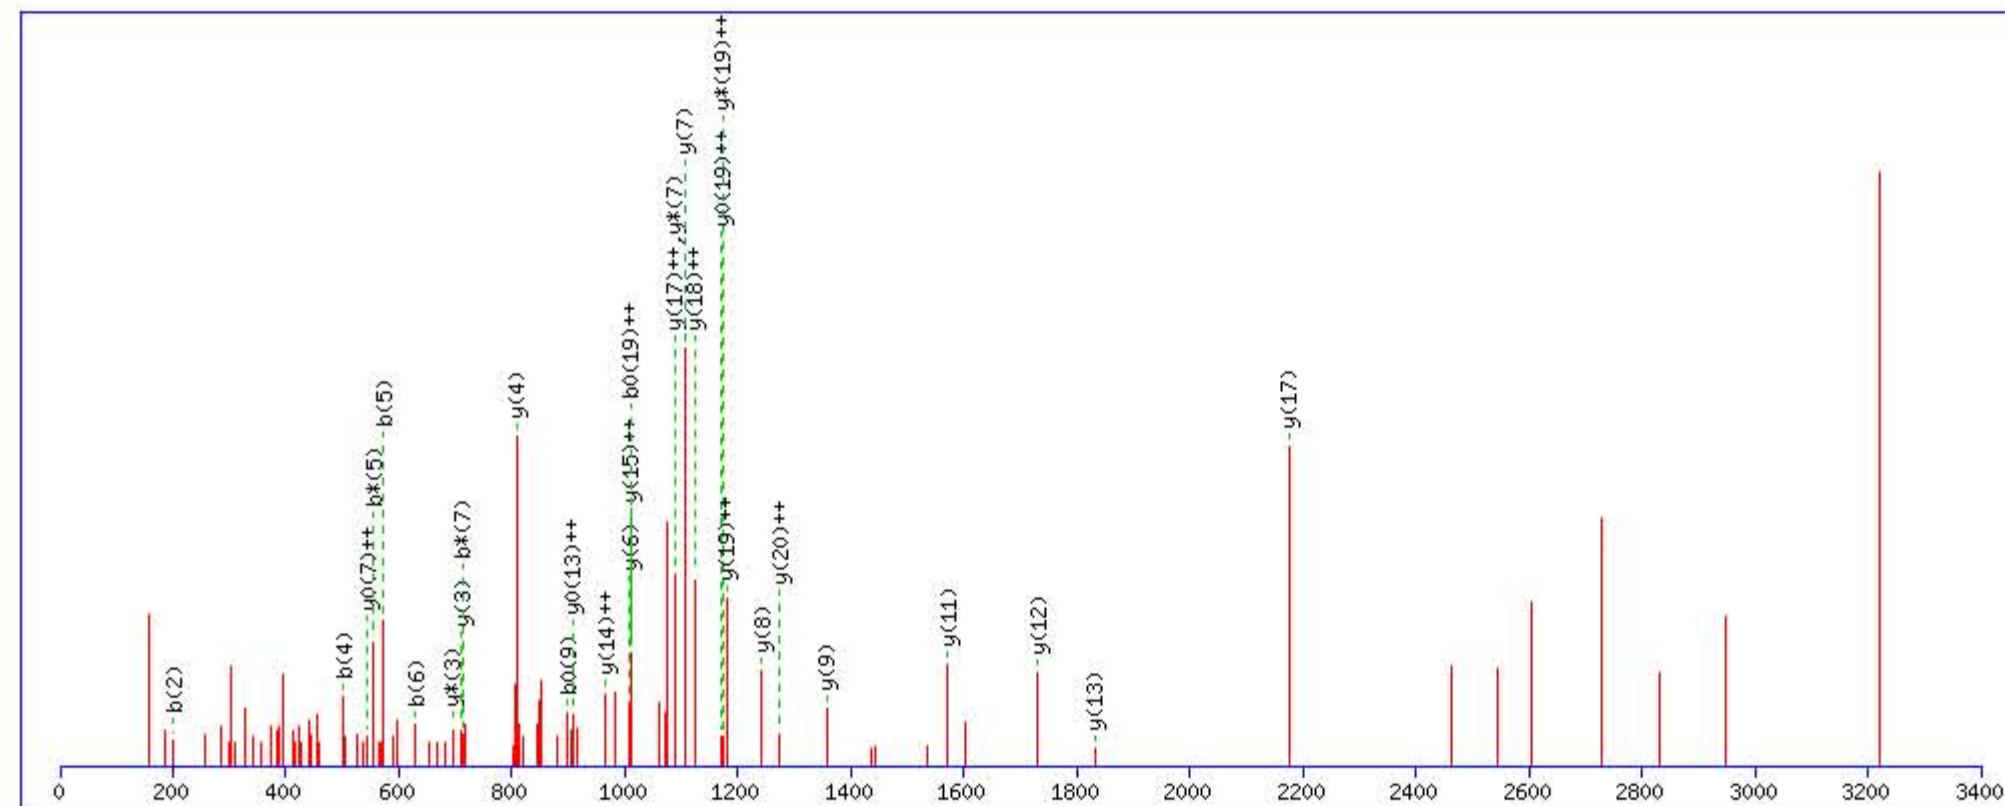

Monoisotopic mass of neutral peptide Mr(calc): 2746.368332

Fixed modifications: Carbamidomethyl (C) (apply to specified residues or termini only)

Variable modifications:

Q21 : Biotin:Thermo-21345 (Q)

Ions Score: 43 Expect: 0.0015

Matches : 30/236 fragment ions using 69 most intense peaks [\(help\)](#)

| #  | b                 | b <sup>++</sup> | b*                | b <sup>+++</sup> | b <sup>0</sup>    | b <sup>0++</sup>   | Seq. | y                  | y <sup>++</sup>    | y*                 | y <sup>+++</sup>   | y <sup>0</sup> | y <sup>0++</sup>   | #  |
|----|-------------------|-----------------|-------------------|------------------|-------------------|--------------------|------|--------------------|--------------------|--------------------|--------------------|----------------|--------------------|----|
| 1  | 88.039304         | 44.523290       |                   |                  | 70.028739         | 35.518008          | S    |                    |                    |                    |                    |                |                    | 22 |
| 2  | <b>201.123368</b> | 101.065322      |                   |                  | 183.112803        | 92.060039          | L    | 2660.343575        | 1330.675425        | 2643.317026        | 1322.162151        | 2642.333010    | 1321.670143        | 21 |
| 3  | 387.202681        | 194.104978      |                   |                  | 369.192116        | 185.099696         | W    | 2547.259511        | <b>1274.133393</b> | 2530.232962        | 1265.620119        | 2529.248946    | 1265.128111        | 20 |
| 4  | <b>501.245608</b> | 251.126442      | 484.219059        | 242.613168       | 483.235043        | 242.121160         | N    | 2361.180198        | <b>1181.093737</b> | 2344.153649        | <b>1172.580462</b> | 2343.169633    | <b>1172.088454</b> | 19 |
| 5  | <b>572.282722</b> | 286.644999      | <b>555.256173</b> | 278.131725       | 554.272157        | 277.639717         | A    | 2247.137271        | <b>1124.072273</b> | 2230.110722        | 1115.558999        | 2229.126706    | 1115.066991        | 18 |
| 6  | <b>629.304186</b> | 315.155731      | 612.277637        | 306.642457       | 611.293621        | 306.150449         | G    | <b>2176.100157</b> | <b>1088.553716</b> | 2159.073608        | 1080.040442        | 2158.089592    | 1079.548434        | 17 |
| 7  | 730.351865        | 365.679571      | <b>713.325316</b> | 357.166296       | 712.341300        | 356.674288         | T    | 2119.078693        | 1060.042984        | 2102.052144        | 1051.529710        | 2101.068128    | 1051.037702        | 16 |
| 8  | 817.383893        | 409.195585      | 800.357344        | 400.682310       | 799.373328        | 400.190302         | S    | 2018.031014        | <b>1009.519145</b> | 2001.004465        | 1001.005871        | 2000.020449    | 1000.513863        | 15 |
| 9  | 916.452307        | 458.729792      | 899.425758        | 450.216517       | <b>898.441742</b> | 449.724509         | V    | 1930.998986        | <b>966.003131</b>  | 1913.972437        | 957.489857         | 1912.988421    | 956.997849         | 14 |
| 10 | 1017.499986       | 509.253631      | 1000.473437       | 500.740357       | 999.489421        | 500.248349         | T    | <b>1831.930572</b> | 916.468924         | 1814.904023        | 907.955650         | 1813.920007    | <b>907.463642</b>  | 13 |
| 11 | 1177.530635       | 589.268956      | 1160.504086       | 580.755681       | 1159.520070       | 580.263673         | C    | <b>1730.882893</b> | 865.945085         | 1713.856344        | 857.431810         | 1712.872328    | 856.939802         | 12 |
| 12 | 1278.578314       | 639.792795      | 1261.551765       | 631.279521       | 1260.567749       | 630.787513         | T    | <b>1570.852244</b> | 785.929760         | 1553.825695        | 777.416486         | 1552.841679    | 776.924478         | 11 |
| 13 | 1391.662378       | 696.334827      | 1374.635829       | 687.821553       | 1373.651813       | 687.329545         | L    | 1469.804565        | 735.405921         | 1452.778016        | 726.892646         | 1451.794000    | 726.400638         | 10 |
| 14 | 1505.705305       | 753.356291      | 1488.678756       | 744.843016       | 1487.694740       | 744.351008         | N    | <b>1356.720501</b> | 678.863889         | 1339.693952        | 670.350614         | 1338.709936    | 669.858606         | 9  |
| 15 | 1642.764217       | 821.885746      | 1625.737668       | 813.372472       | 1624.753652       | 812.880464         | H    | <b>1242.677574</b> | 621.842425         | 1225.651025        | 613.329151         | 1224.667009    | 612.837143         | 8  |
| 16 | 1739.816981       | 870.412128      | 1722.790432       | 861.898854       | 1721.806416       | 861.406846         | P    | <b>1105.618662</b> | 553.312969         | <b>1088.592113</b> | 544.799695         | 1087.608097    | <b>544.307687</b>  | 7  |
| 17 | 1826.849009       | 913.928143      | 1809.822460       | 905.414868       | 1808.838444       | 904.922860         | S    | <b>1008.565898</b> | 504.786587         | 991.539349         | 496.273313         | 990.555333     | 495.781305         | 6  |
| 18 | 1939.933073       | 970.470174      | 1922.906524       | 961.956900       | 1921.922508       | 961.464892         | L    | 921.533870         | 461.270573         | 904.507321         | 452.757299         |                |                    | 5  |
| 19 | 2036.985837       | 1018.996557     | 2019.959288       | 1010.483282      | 2018.975272       | <b>1009.991274</b> | P    | <b>808.449806</b>  | 404.728541         | 791.423257         | 396.215267         |                |                    | 4  |
| 20 | 2134.038601       | 1067.522938     | 2117.012052       | 1059.009664      | 2116.028036       | 1058.517656        | P    | <b>711.397042</b>  | 356.202159         | <b>694.370493</b>  | 347.688885         |                |                    | 3  |
| 21 | 2573.263927       | 1287.135601     | 2556.237378       | 1278.622327      | 2555.253362       | 1278.130319        | Q    | 614.344278         | 307.675777         | 597.317729         | 299.162503         |                |                    | 2  |
| 22 |                   |                 |                   |                  |                   |                    | R    | 175.118952         | 88.063114          | 158.092403         | 79.549839          |                |                    | 1  |

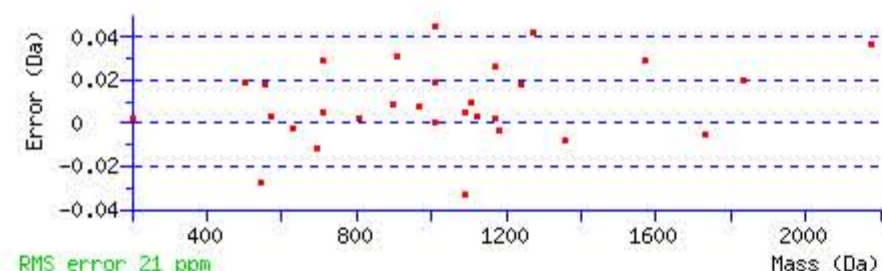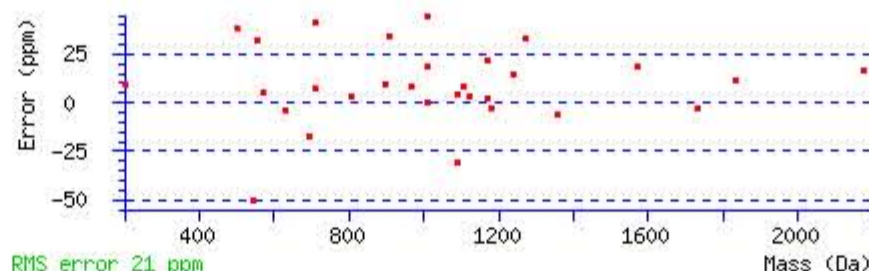

NCBI BLAST search of **SLWNAGTSVTCTLNHPSLPPQR**

(Parameters: blastp, nr protein database, expect=20000, no filter, PAM30)

Other BLAST [web gateways](#)

All matches to this query

| Score | Mr(calc):   | Delta    | Sequence                               |
|-------|-------------|----------|----------------------------------------|
| 42.9  | 2746.368332 | 0.024940 | <a href="#">SLWNAGTSVTCTLNHPSLPPQR</a> |

# MASCOT SEARCH RESULTS

## Peptide View

MS/MS Fragmentation of **NQVSLTCLVK**

Found in **IGHG1\_HUMAN**, Ig gamma-1 chain C region OS=Homo sapiens GN=IGHG1 PE=1 SV=1

Match to Query 34049: 1471.797908 from(736.906230,2+) rtinseconds(2210) index(80321)

Title: Locus:1.1.1.2120.10 File:"2013-07-02 CLN FXIII 180 min 1st FT.wiff"

Data file C:\Program Files (x86)\Matrix Science\Mascot Daemon\mgf\7 FXIII 180 min 1st\mascot\_daemon\_merge.mgf

Click mouse within plot area to zoom in by factor of two about that point

Or, Plot from  to  Da

Label all possible matches  Label matches used for scoring

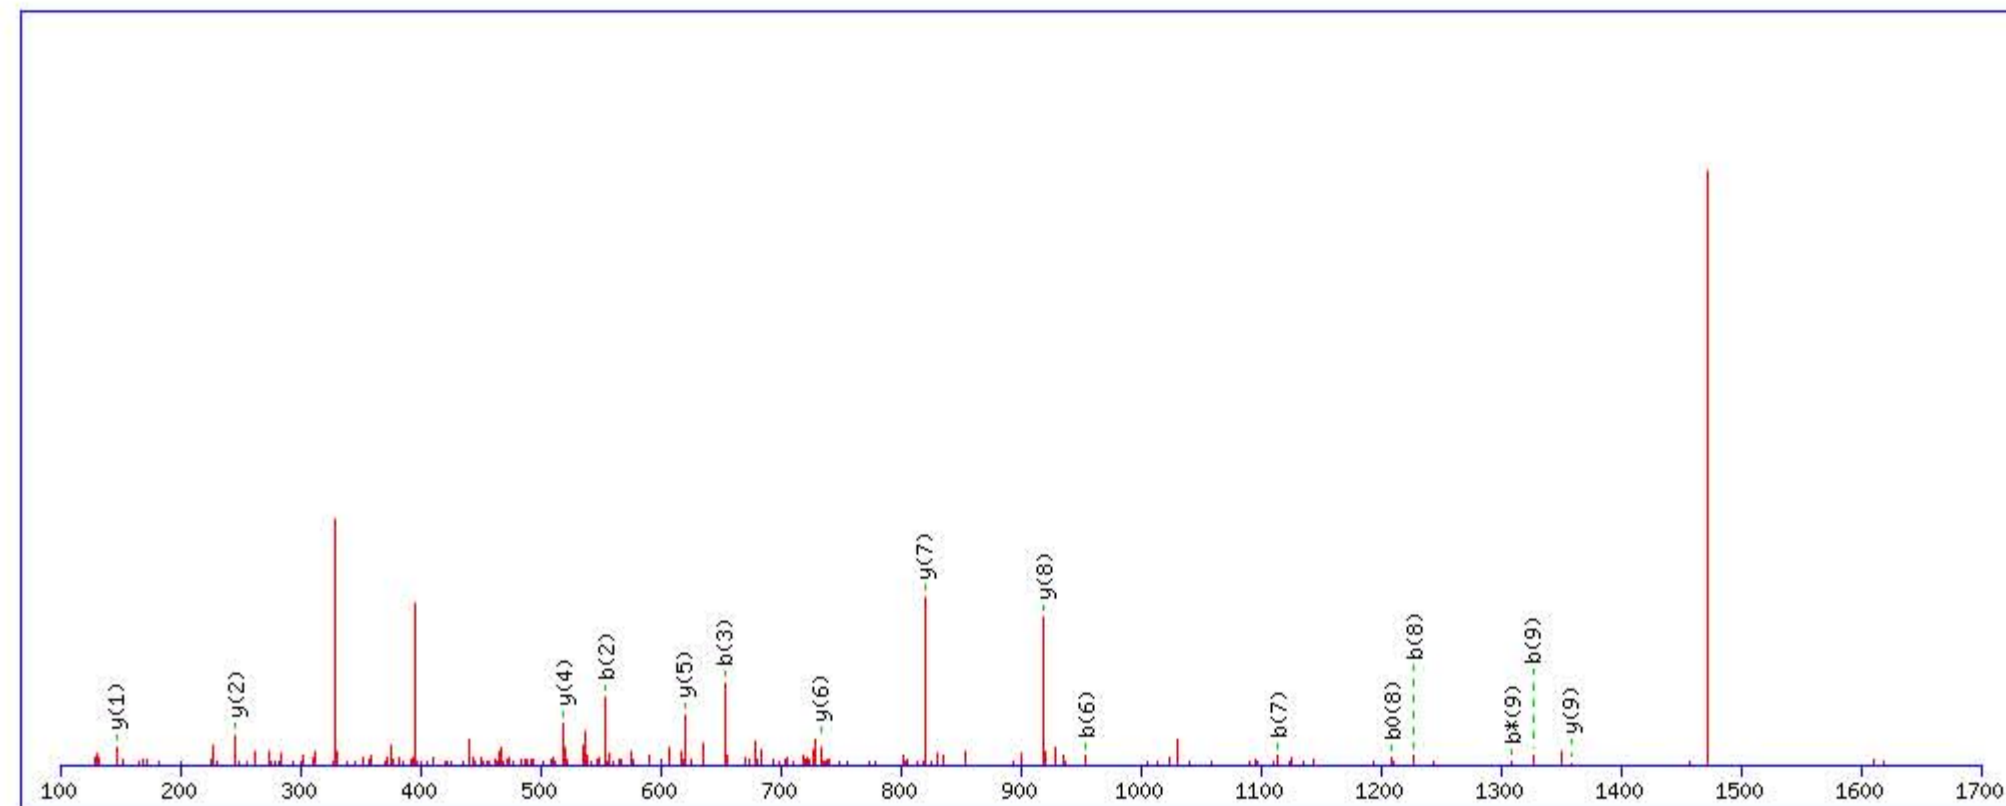

Monoisotopic mass of neutral peptide Mr(calc): 1471.789093

Fixed modifications: Carbamidomethyl (C) (apply to specified residues or termini only)

Variable modifications:

Q2 : Biotin:Thermo-21345 (Q)

Ions Score: 53 Expect: 3.2e-005

Matches : 16/94 fragment ions using 27 most intense peaks [\(help\)](#)

| #  | b                  | b <sup>++</sup> | b <sup>+</sup>     | b <sup>+++</sup> | b <sup>0</sup>     | b <sup>0++</sup> | Seq. | y                  | y <sup>++</sup> | y <sup>+</sup> | y <sup>+++</sup> | y <sup>0</sup> | y <sup>0++</sup> | #  |
|----|--------------------|-----------------|--------------------|------------------|--------------------|------------------|------|--------------------|-----------------|----------------|------------------|----------------|------------------|----|
| 1  | 115.050203         | 58.028740       | 98.023654          | 49.515465        |                    |                  | N    |                    |                 |                |                  |                |                  | 10 |
| 2  | <b>554.275529</b>  | 277.641403      | 537.248980         | 269.128128       |                    |                  | Q    | <b>1358.753442</b> | 679.880359      | 1341.726893    | 671.367085       | 1340.742877    | 670.875076       | 9  |
| 3  | <b>653.343943</b>  | 327.175610      | 636.317394         | 318.662335       |                    |                  | V    | <b>919.528116</b>  | 460.267696      | 902.501567     | 451.754421       | 901.517551     | 451.262413       | 8  |
| 4  | 740.375971         | 370.691623      | 723.349422         | 362.178349       | 722.365406         | 361.686341       | S    | <b>820.459702</b>  | 410.733489      | 803.433153     | 402.220215       | 802.449137     | 401.728207       | 7  |
| 5  | 853.460035         | 427.233656      | 836.433486         | 418.720381       | 835.449470         | 418.228373       | L    | <b>733.427674</b>  | 367.217475      | 716.401125     | 358.704201       | 715.417109     | 358.212193       | 6  |
| 6  | <b>954.507714</b>  | 477.757495      | 937.481165         | 469.244220       | 936.497149         | 468.752212       | T    | <b>620.343610</b>  | 310.675443      | 603.317061     | 302.162169       | 602.333045     | 301.670161       | 5  |
| 7  | <b>1114.538363</b> | 557.772819      | 1097.511814        | 549.259545       | 1096.527798        | 548.767537       | C    | <b>519.295931</b>  | 260.151604      | 502.269382     | 251.638329       |                |                  | 4  |
| 8  | <b>1227.622427</b> | 614.314851      | 1210.595878        | 605.801577       | <b>1209.611862</b> | 605.309569       | L    | 359.265282         | 180.136279      | 342.238733     | 171.623004       |                |                  | 3  |
| 9  | <b>1326.690841</b> | 663.849058      | <b>1309.664292</b> | 655.335784       | 1308.680276        | 654.843776       | V    | <b>246.181218</b>  | 123.594247      | 229.154669     | 115.080973       |                |                  | 2  |
| 10 |                    |                 |                    |                  |                    |                  | K    | <b>147.112804</b>  | 74.060040       | 130.086255     | 65.546765        |                |                  | 1  |

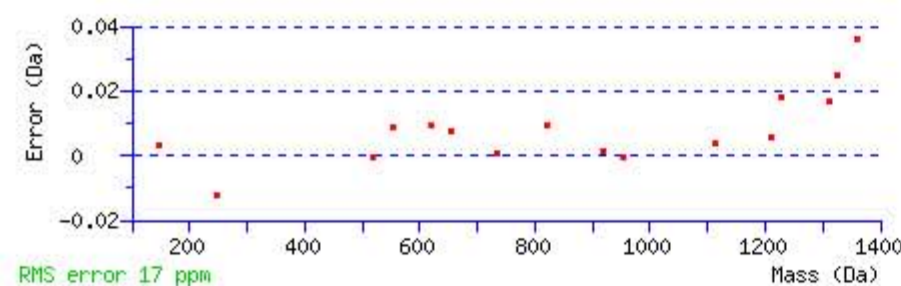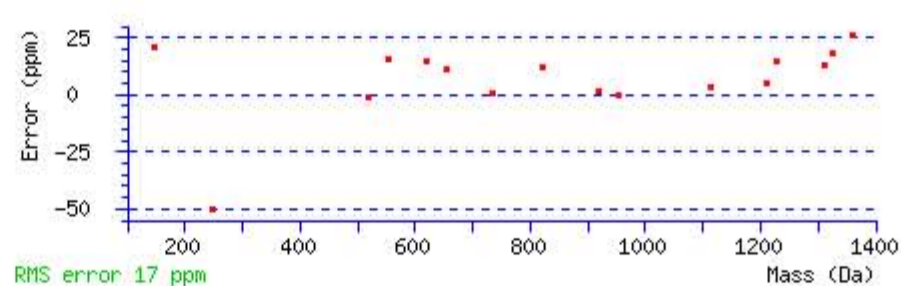

NCBI BLAST search of **NQVSLTCLVK**

(Parameters: blastp, nr protein database, expect=20000, no filter, PAM30)

Other BLAST [web gateways](#)

## All matches to this query

| Score | Mr(calc):   | Delta     | Sequence                     |
|-------|-------------|-----------|------------------------------|
| 53.1  | 1471.789093 | 0.008815  | <a href="#">NQVSLTCLVK</a>   |
| 4.9   | 1471.777847 | 0.020061  | <a href="#">QLDMELVSVK</a>   |
| 4.7   | 1471.806808 | -0.008900 | <a href="#">ESLLQIPRIEMK</a> |
| 3.6   | 1471.799438 | -0.001530 | <a href="#">EVELDRLRDTVK</a> |
| 0.8   | 1471.797592 | 0.000316  | <a href="#">KYFWDRAFLVK</a>  |
| 0.2   | 1471.792221 | 0.005687  | <a href="#">NESIPLSPFEVK</a> |

# MASCOT Search Results

## Peptide View

MS/MS Fragmentation of **EPQVYTLPPSR**

Found in **IGHG1\_HUMAN**, Ig gamma-1 chain C region OS=Homo sapiens GN=IGHG1 PE=1 SV=1

Match to Query 38657: 1596.846108 from(799.430330,2+) rtinseconds(1935) index(78451)

Title: Locus:1.1.1.2024.25 File:"2013-07-02 CLN FXIII 180 min 1st FT.wiff"

Data file C:\Program Files (x86)\Matrix Science\Mascot Daemon\mgf\7 FXIII 180 min 1st\mascot\_daemon\_merge.mgf

Click mouse within plot area to zoom in by factor of two about that point

Or, Plot from  to  Da

Label all possible matches  Label matches used for scoring

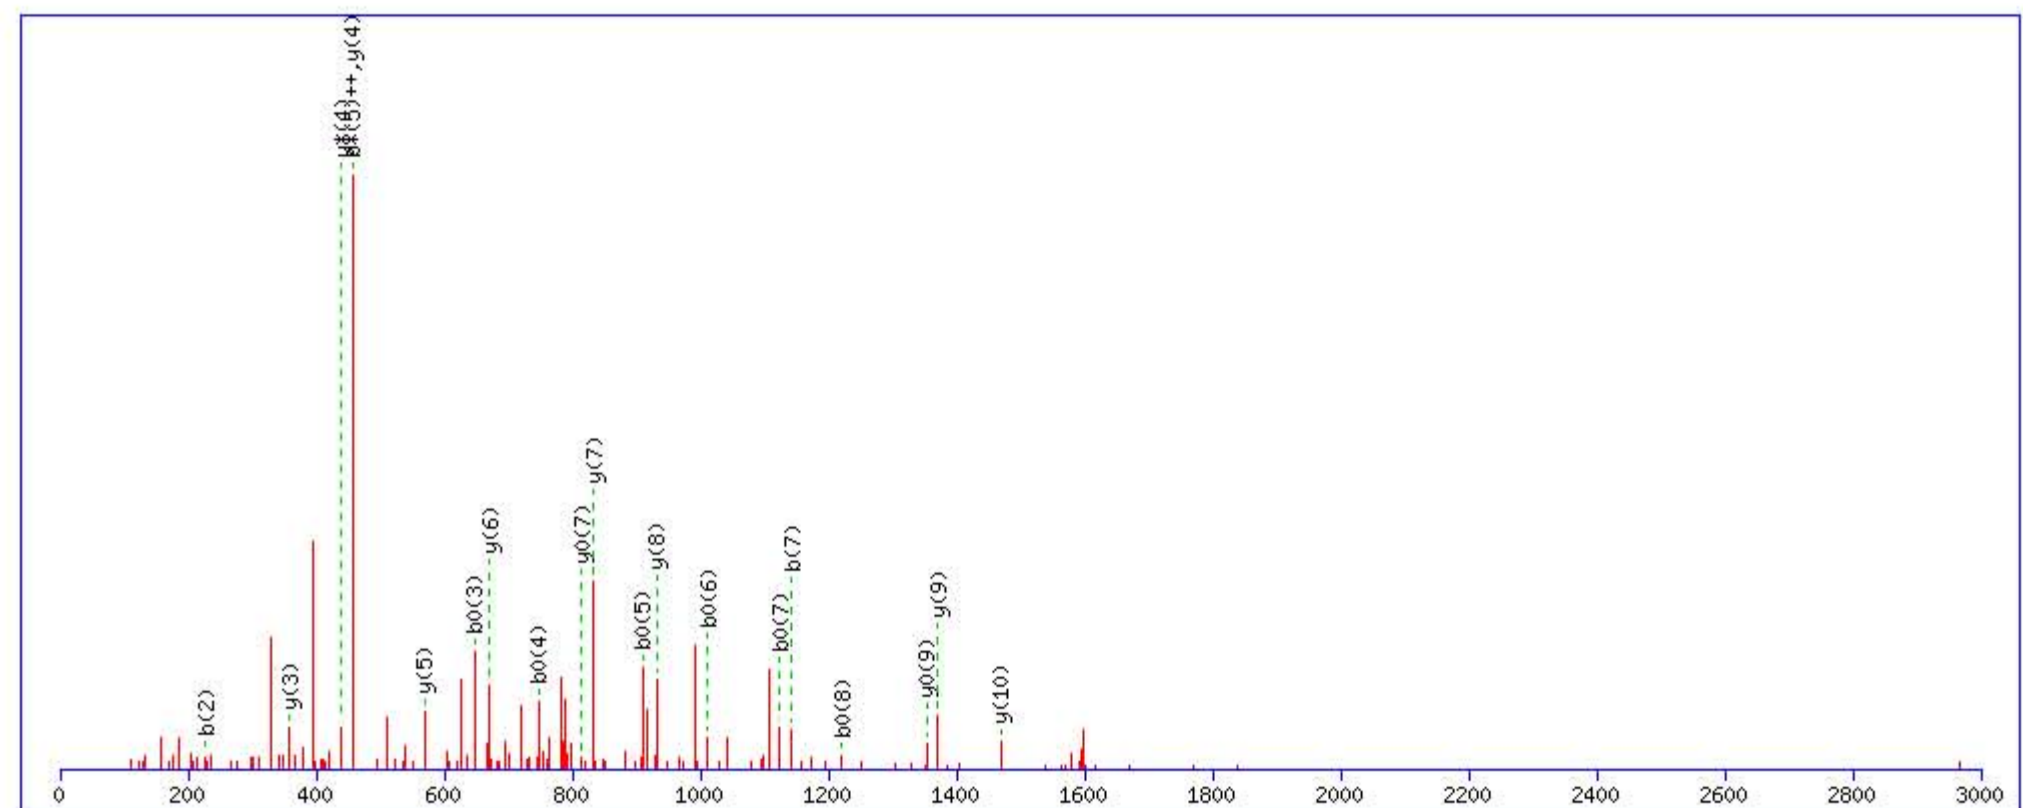

Monoisotopic mass of neutral peptide  $M_r(\text{calc})$ : 1596.833389

Fixed modifications: Carbamidomethyl (C) (apply to specified residues or termini only)

Variable modifications:

Q3 : Biotin:Thermo-21345 (Q)

Ions Score: 41 Expect: 0.0024

Matches : 20/114 fragment ions using 43 most intense peaks ([help](#))

| #  | b                  | b <sup>++</sup> | b <sup>*</sup> | b <sup>*++</sup>  | b <sup>0</sup>     | b <sup>0++</sup> | Seq. | y                  | y <sup>++</sup> | y <sup>*</sup>    | y <sup>*++</sup> | y <sup>0</sup>     | y <sup>0++</sup> | #  |
|----|--------------------|-----------------|----------------|-------------------|--------------------|------------------|------|--------------------|-----------------|-------------------|------------------|--------------------|------------------|----|
| 1  | 130.049869         | 65.528572       |                |                   | 112.039304         | 56.523290        | E    |                    |                 |                   |                  |                    |                  | 11 |
| 2  | <b>227.102633</b>  | 114.054954      |                |                   | 209.092068         | 105.049672       | P    | <b>1468.798084</b> | 734.902680      | 1451.771535       | 726.389406       | 1450.787519        | 725.897398       | 10 |
| 3  | 666.327959         | 333.667618      | 649.301410     | 325.154343        | <b>648.317394</b>  | 324.662335       | Q    | <b>1371.745320</b> | 686.376298      | 1354.718771       | 677.863024       | <b>1353.734755</b> | 677.371016       | 9  |
| 4  | 765.396373         | 383.201825      | 748.369824     | 374.688550        | <b>747.385808</b>  | 374.196542       | V    | <b>932.519994</b>  | 466.763635      | 915.493445        | 458.250361       | 914.509429         | 457.758353       | 8  |
| 5  | 928.459702         | 464.733489      | 911.433153     | <b>456.220215</b> | <b>910.449137</b>  | 455.728207       | Y    | <b>833.451580</b>  | 417.229428      | 816.425031        | 408.716154       | <b>815.441015</b>  | 408.224146       | 7  |
| 6  | 1029.507381        | 515.257329      | 1012.480832    | 506.744054        | <b>1011.496816</b> | 506.252046       | T    | <b>670.388251</b>  | 335.697764      | 653.361702        | 327.184489       | 652.377686         | 326.692481       | 6  |
| 7  | <b>1142.591445</b> | 571.799361      | 1125.564896    | 563.286086        | <b>1124.580880</b> | 562.794078       | L    | <b>569.340572</b>  | 285.173924      | 552.314023        | 276.660650       | 551.330007         | 276.168642       | 5  |
| 8  | 1239.644209        | 620.325743      | 1222.617660    | 611.812468        | <b>1221.633644</b> | 611.320460       | P    | <b>456.256508</b>  | 228.631892      | <b>439.229959</b> | 220.118618       | 438.245943         | 219.626610       | 4  |
| 9  | 1336.696973        | 668.852125      | 1319.670424    | 660.338850        | 1318.686408        | 659.846842       | P    | <b>359.203744</b>  | 180.105510      | 342.177195        | 171.592236       | 341.193179         | 171.100228       | 3  |
| 10 | 1423.729001        | 712.368139      | 1406.702452    | 703.854864        | 1405.718436        | 703.362856       | S    | 262.150980         | 131.579128      | 245.124431        | 123.065854       | 244.140415         | 122.573846       | 2  |
| 11 |                    |                 |                |                   |                    |                  | R    | 175.118952         | 88.063114       | 158.092403        | 79.549839        |                    |                  | 1  |

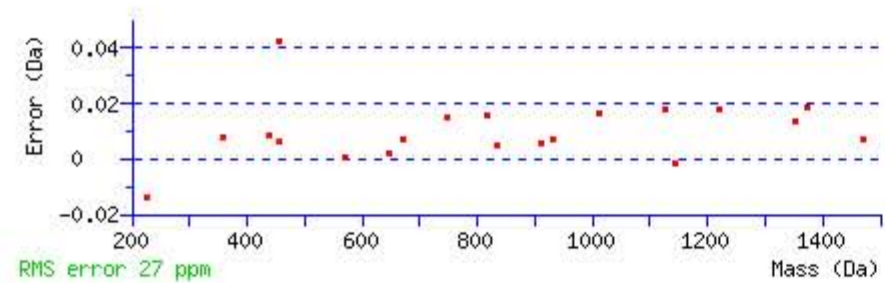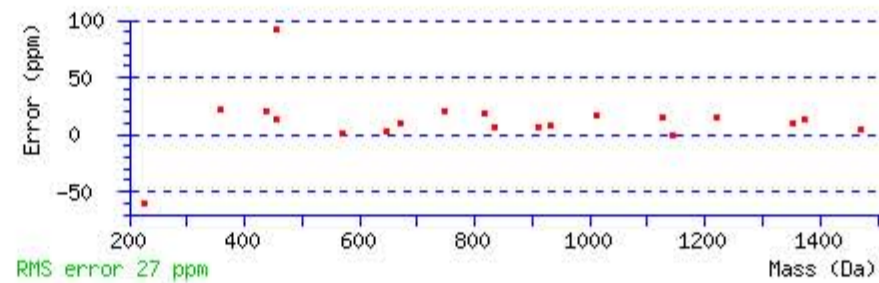

NCBI BLAST search of [EPQVYTLPPSR](#)

(Parameters: blastp, nr protein database, expect=20000, no filter, PAM30)

Other BLAST [web gateways](#)

All matches to this query

| Score | $M_r(\text{calc})$ : | Delta    | Sequence                    |
|-------|----------------------|----------|-----------------------------|
| 40.9  | 1596.833389          | 0.012719 | <a href="#">EPQVYTLPPSR</a> |

Mascot: <http://www.matrixscience.com/>



## Peptide View

MS/MS Fragmentation of **WQQGNVFSCSVMEALHNHYTQK**  
 Found in **IGHG1\_HUMAN**, Ig gamma-1 chain C region OS=Homo sapiens GN=IGHG1 PE=1 SV=1

Match to Query 71430: 3111.450670 from(623.297410,5+) rtinseconds(2026) index(79027)  
 Title: Locus:1.1.1.2056.7 File:"2013-07-02 CLN FXIII 180 min 1st FT.wiff"  
 Data file C:\Program Files (x86)\Matrix Science\Mascot Daemon\mgf7 FXIII 180 min 1st\mascot\_daemon\_merge.mgf

Click mouse within plot area to zoom in by factor of two about that point

Or, Plot from  to  Da

Label all possible matches  Label matches used for scoring

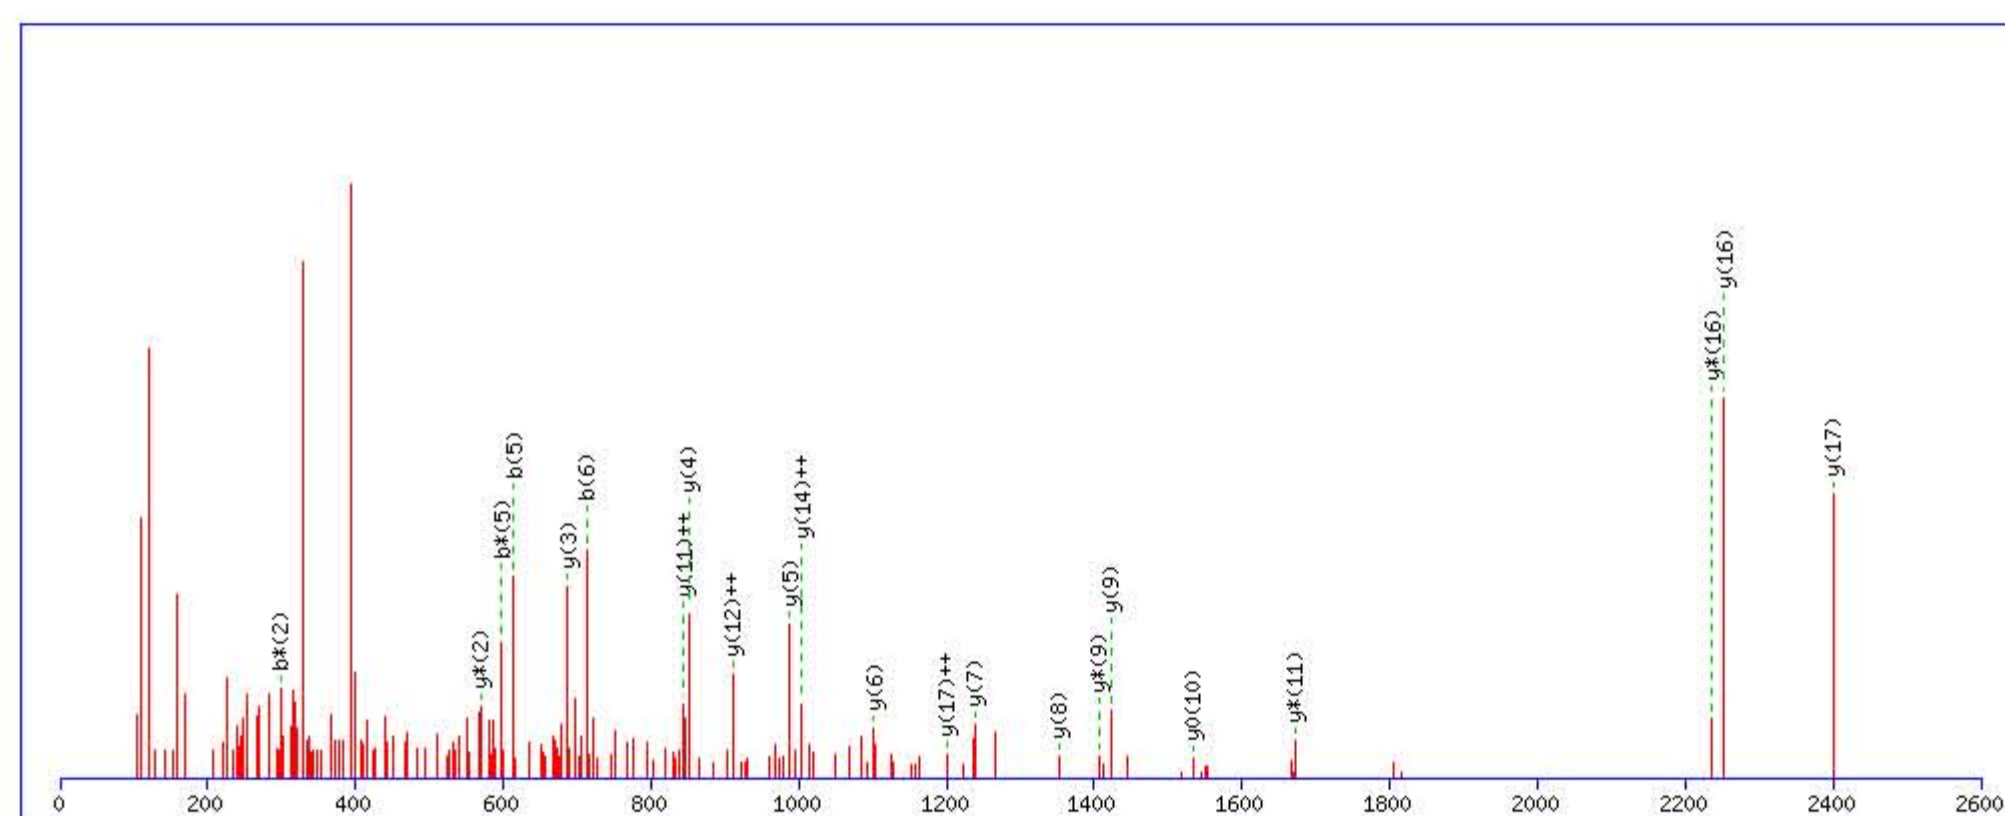

Monoisotopic mass of neutral peptide Mr(calc): 3111.426590  
 Fixed modifications: Carbamidomethyl (C) (apply to specified residues or termini only)  
 Variable modifications:  
 Q22 : Biotin:Thermo-21345 (Q)  
 Ions Score: 43 Expect: 0.00088  
 Matches : 22/244 fragment ions using 36 most intense peaks [\(help\)](#)

| #  | b           | b <sup>++</sup> | b <sup>*</sup> | b <sup>*++</sup> | b <sup>0</sup> | b <sup>0++</sup> | Seq. | y           | y <sup>++</sup> | y <sup>*</sup> | y <sup>*++</sup> | y <sup>0</sup> | y <sup>0++</sup> | #  |
|----|-------------|-----------------|----------------|------------------|----------------|------------------|------|-------------|-----------------|----------------|------------------|----------------|------------------|----|
| 1  | 187.086589  | 94.046932       |                |                  |                |                  | W    |             |                 |                |                  |                |                  | 23 |
| 2  | 315.145167  | 158.076222      | 298.118618     | 149.562947       |                |                  | Q    | 2926.354551 | 1463.680913     | 2909.328002    | 1455.167639      | 2908.343986    | 1454.675631      | 22 |
| 3  | 443.203745  | 222.105511      | 426.177196     | 213.592236       |                |                  | Q    | 2798.295973 | 1399.651624     | 2781.269424    | 1391.138350      | 2780.285408    | 1390.646342      | 21 |
| 4  | 500.225209  | 250.616243      | 483.198660     | 242.102968       |                |                  | G    | 2670.237395 | 1335.622335     | 2653.210846    | 1327.109061      | 2652.226830    | 1326.617053      | 20 |
| 5  | 614.268136  | 307.637706      | 597.241587     | 299.124432       |                |                  | N    | 2613.215931 | 1307.111603     | 2596.189382    | 1298.598329      | 2595.205366    | 1298.106321      | 19 |
| 6  | 713.336550  | 357.171913      | 696.310001     | 348.658639       |                |                  | V    | 2499.173004 | 1250.090140     | 2482.146455    | 1241.576865      | 2481.162439    | 1241.084857      | 18 |
| 7  | 860.404964  | 430.706120      | 843.378415     | 422.192845       |                |                  | F    | 2400.104590 | 1200.555933     | 2383.078041    | 1192.042658      | 2382.094025    | 1191.550650      | 17 |
| 8  | 947.436992  | 474.222134      | 930.410443     | 465.708859       | 929.426427     | 465.216851       | S    | 2253.036176 | 1127.021726     | 2236.009627    | 1118.508451      | 2235.025611    | 1118.016443      | 16 |
| 9  | 1107.467641 | 554.237459      | 1090.441092    | 545.724184       | 1089.457076    | 545.232176       | C    | 2166.004148 | 1083.505712     | 2148.977599    | 1074.992437      | 2147.993583    | 1074.500429      | 15 |
| 10 | 1194.499669 | 597.753473      | 1177.473120    | 589.240198       | 1176.489104    | 588.748190       | S    | 2005.973499 | 1003.490388     | 1988.946950    | 994.977113       | 1987.962934    | 994.485105       | 14 |
| 11 | 1293.568083 | 647.287680      | 1276.541534    | 638.774405       | 1275.557518    | 638.282397       | V    | 1918.941471 | 959.974373      | 1901.914922    | 951.461099       | 1900.930906    | 950.969091       | 13 |
| 12 | 1424.608568 | 712.807922      | 1407.582019    | 704.294648       | 1406.598003    | 703.802640       | M    | 1819.873057 | 910.440166      | 1802.846508    | 901.926892       | 1801.862492    | 901.434884       | 12 |
| 13 | 1561.667480 | 781.337378      | 1544.640931    | 772.824104       | 1543.656915    | 772.332096       | H    | 1688.832572 | 844.919924      | 1671.806023    | 836.406649       | 1670.822007    | 835.914641       | 11 |
| 14 | 1690.710073 | 845.858675      | 1673.683524    | 837.345400       | 1672.699508    | 836.853392       | E    | 1551.773660 | 776.390468      | 1534.747111    | 767.877193       | 1533.763095    | 767.385185       | 10 |
| 15 | 1761.747187 | 881.377231      | 1744.720638    | 872.863957       | 1743.736622    | 872.371949       | A    | 1422.731067 | 711.869171      | 1405.704518    | 703.355897       | 1404.720502    | 702.863889       | 9  |
| 16 | 1874.831251 | 937.919263      | 1857.804702    | 929.405989       | 1856.820686    | 928.913981       | L    | 1351.693953 | 676.350615      | 1334.667404    | 667.837340       | 1333.683388    | 667.345332       | 8  |
| 17 | 2011.890163 | 1006.448719     | 1994.863614    | 997.935445       | 1993.879598    | 997.443437       | H    | 1238.609889 | 619.808583      | 1221.583340    | 611.295308       | 1220.599324    | 610.803300       | 7  |
| 18 | 2125.933090 | 1063.470183     | 2108.906541    | 1054.956908      | 2107.922525    | 1054.464900      | N    | 1101.550977 | 551.279127      | 1084.524428    | 542.765852       | 1083.540412    | 542.273844       | 6  |
| 19 | 2262.992002 | 1131.999639     | 2245.965453    | 1123.486364      | 2244.981437    | 1122.994356      | H    | 987.508050  | 494.257663      | 970.481501     | 485.744389       | 969.497485     | 485.252381       | 5  |
| 20 | 2426.055331 | 1213.531303     | 2409.028782    | 1205.018029      | 2408.044766    | 1204.526021      | Y    | 850.449138  | 425.728207      | 833.422589     | 417.214933       | 832.438573     | 416.722925       | 4  |
| 21 | 2527.103010 | 1264.055143     | 2510.076461    | 1255.541868      | 2509.092445    | 1255.049860      | T    | 687.385809  | 344.196543      | 670.359260     | 335.683268       | 669.375244     | 335.191260       | 3  |
| 22 | 2966.328336 | 1483.667806     | 2949.301787    | 1475.154531      | 2948.317771    | 1474.662523      | Q    | 586.338130  | 293.672703      | 569.311581     | 285.159429       |                |                  | 2  |
| 23 |             |                 |                |                  |                |                  | K    | 147.112804  | 74.060040       | 130.086255     | 65.546765        |                |                  | 1  |

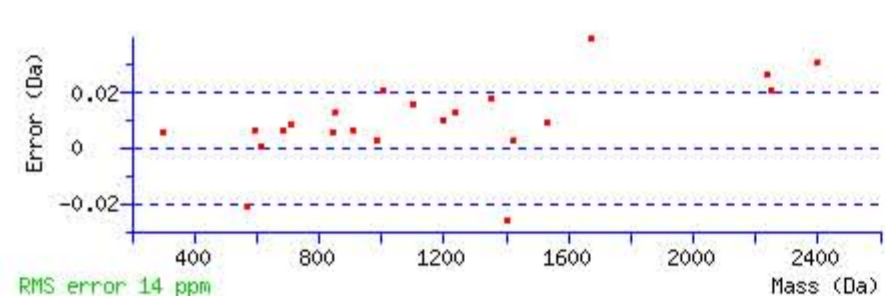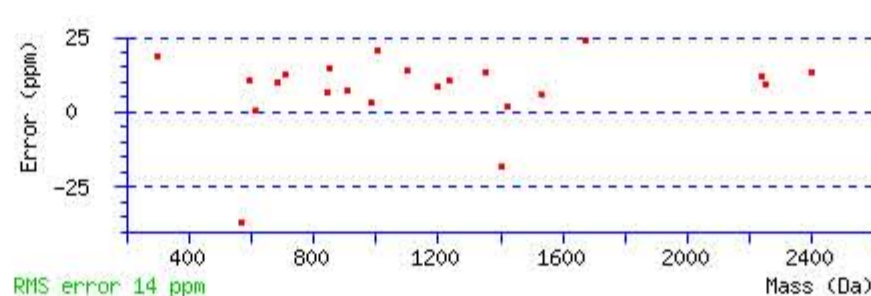

NCBI BLAST search of **WQQGNVFSCSVMEALHNHYTQK**  
 (Parameters: blastp, nr protein database, expect=20000, no filter, PAM30)  
 Other BLAST [web gateways](#)

### All matches to this query

| Score | Mr(calc):   | Delta    | Sequence                      |
|-------|-------------|----------|-------------------------------|
| 42.7  | 3111.426590 | 0.024080 | <b>WQQGNVFSCSVMEALHNHYTQK</b> |

# MASCOT SCIENCE Mascot Search Results

## Peptide View

MS/MS Fragmentation of **NQVSLTCLVK**

Found in **IGHG1\_HUMAN**, Ig gamma-1 chain C region OS=Homo sapiens GN=IGHG1 PE=1 SV=1

Match to Query 34049: 1471.797908 from(736.906230,2+) rtinseconds(2210) index(80321)

Title: Locus:1.1.1.2120.10 File:"2013-07-02 CLN FXIII 180 min 1st FT.wiff"

Data file C:\Program Files (x86)\Matrix Science\Mascot Daemon\mgf\7 FXIII 180 min 1st\mascot\_daemon\_merge.mgf

Click mouse within plot area to zoom in by factor of two about that point

Or, Plot from 100 to 1700 Da Full range

Label all possible matches  Label matches used for scoring

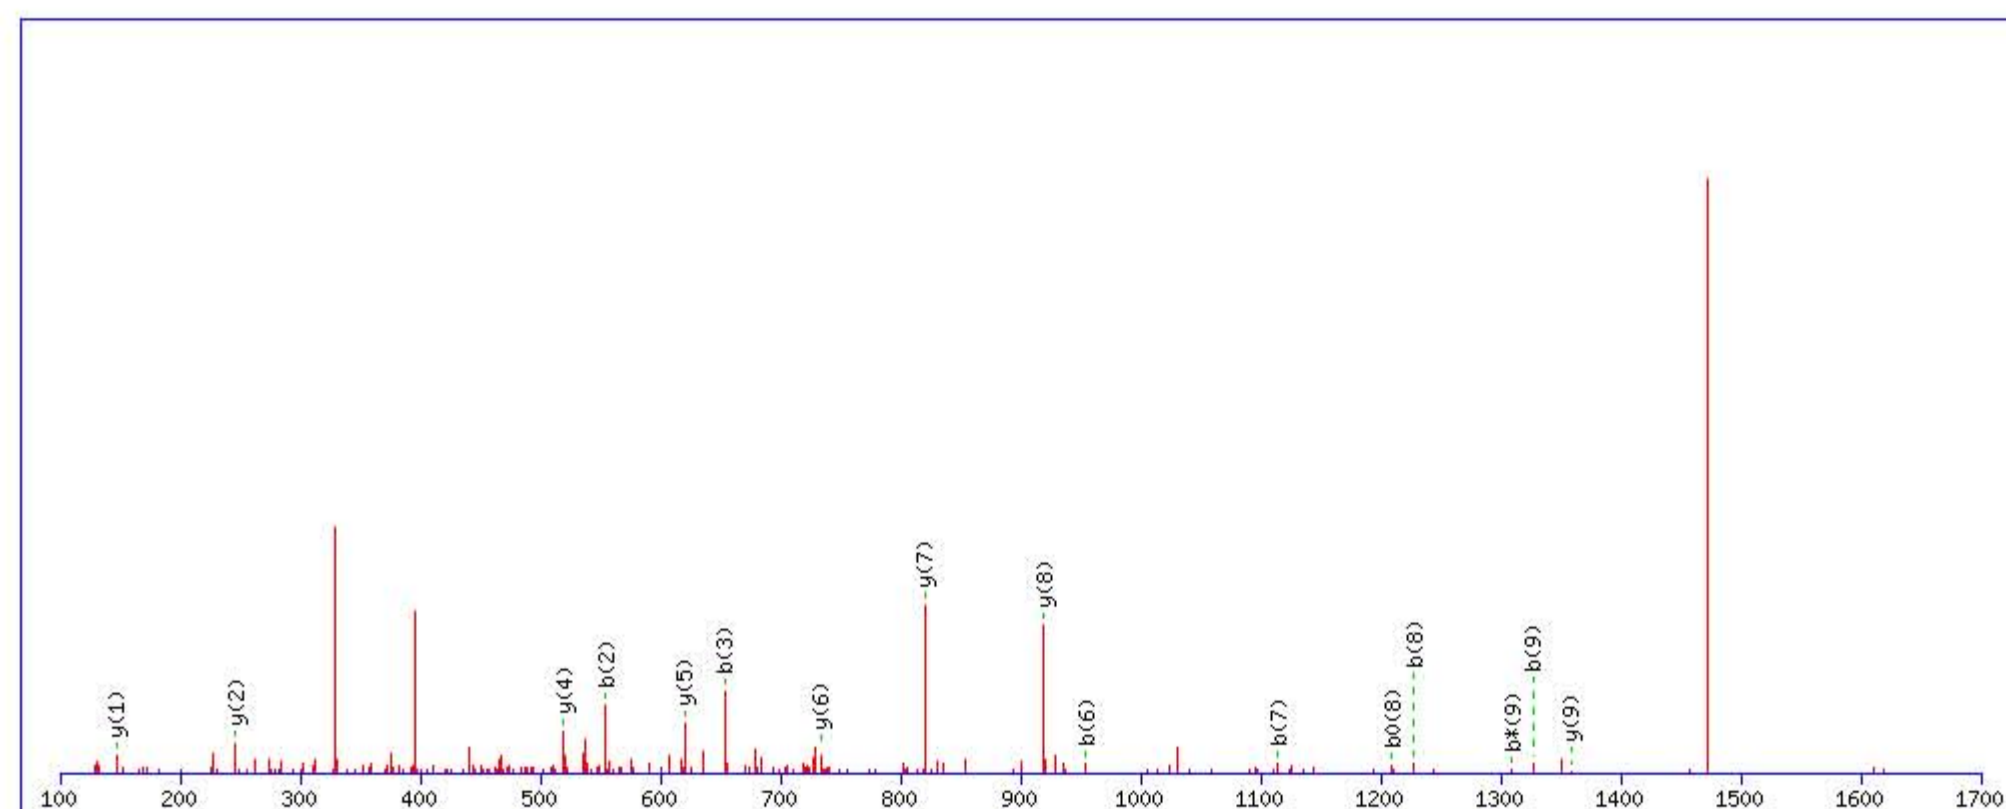

Monoisotopic mass of neutral peptide Mr(calc): 1471.789093

Fixed modifications: Carbamidomethyl (C) (apply to specified residues or termini only)

Variable modifications:

Q2 : Biotin:Thermo-21345 (Q)

Ions Score: 53 Expect: 3.2e-005

Matches : 16/94 fragment ions using 27 most intense peaks [\(help\)](#)

| #  | b                  | b <sup>++</sup> | b <sup>+</sup>     | b <sup>+++</sup> | b <sup>0</sup>     | b <sup>0++</sup> | Seq. | y                  | y <sup>++</sup> | y <sup>+</sup> | y <sup>+++</sup> | y <sup>0</sup> | y <sup>0++</sup> | #  |
|----|--------------------|-----------------|--------------------|------------------|--------------------|------------------|------|--------------------|-----------------|----------------|------------------|----------------|------------------|----|
| 1  | 115.050203         | 58.028740       | 98.023654          | 49.515465        |                    |                  | N    |                    |                 |                |                  |                |                  | 10 |
| 2  | <b>554.275529</b>  | 277.641403      | 537.248980         | 269.128128       |                    |                  | Q    | <b>1358.753442</b> | 679.880359      | 1341.726893    | 671.367085       | 1340.742877    | 670.875076       | 9  |
| 3  | <b>653.343943</b>  | 327.175610      | 636.317394         | 318.662335       |                    |                  | V    | <b>919.528116</b>  | 460.267696      | 902.501567     | 451.754421       | 901.517551     | 451.262413       | 8  |
| 4  | 740.375971         | 370.691623      | 723.349422         | 362.178349       | 722.365406         | 361.686341       | S    | <b>820.459702</b>  | 410.733489      | 803.433153     | 402.220215       | 802.449137     | 401.728207       | 7  |
| 5  | 853.460035         | 427.233656      | 836.433486         | 418.720381       | 835.449470         | 418.228373       | L    | <b>733.427674</b>  | 367.217475      | 716.401125     | 358.704201       | 715.417109     | 358.212193       | 6  |
| 6  | <b>954.507714</b>  | 477.757495      | 937.481165         | 469.244220       | 936.497149         | 468.752212       | T    | <b>620.343610</b>  | 310.675443      | 603.317061     | 302.162169       | 602.333045     | 301.670161       | 5  |
| 7  | <b>1114.538363</b> | 557.772819      | 1097.511814        | 549.259545       | 1096.527798        | 548.767537       | C    | <b>519.295931</b>  | 260.151604      | 502.269382     | 251.638329       |                |                  | 4  |
| 8  | <b>1227.622427</b> | 614.314851      | 1210.595878        | 605.801577       | <b>1209.611862</b> | 605.309569       | L    | 359.265282         | 180.136279      | 342.238733     | 171.623004       |                |                  | 3  |
| 9  | <b>1326.690841</b> | 663.849058      | <b>1309.664292</b> | 655.335784       | 1308.680276        | 654.843776       | V    | <b>246.181218</b>  | 123.594247      | 229.154669     | 115.080973       |                |                  | 2  |
| 10 |                    |                 |                    |                  |                    |                  | K    | <b>147.112804</b>  | 74.060040       | 130.086255     | 65.546765        |                |                  | 1  |

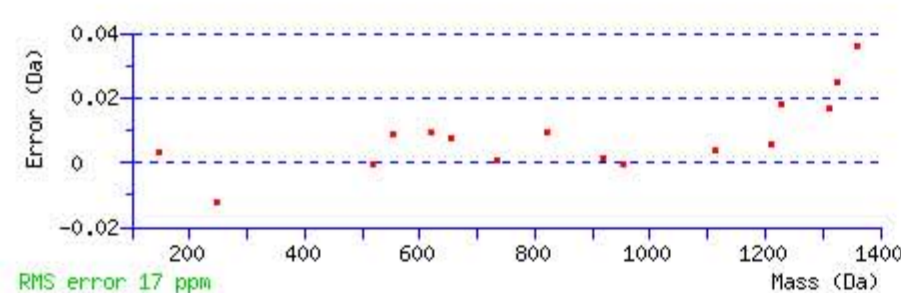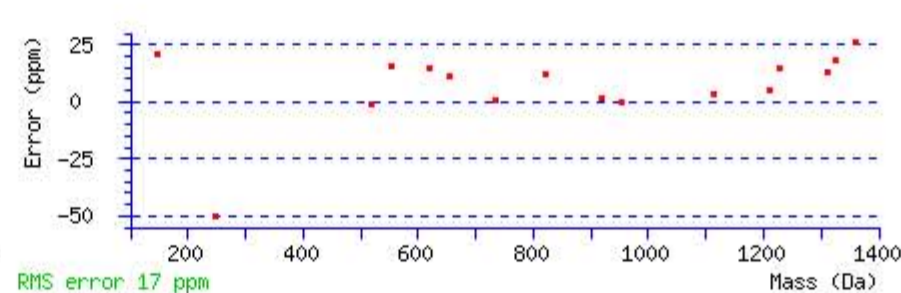

NCBI BLAST search of **NQVSLTCLVK**

(Parameters: blastp, nr protein database, expect=20000, no filter, PAM30)

Other BLAST [web gateways](#)

## All matches to this query

| Score | Mr(calc):   | Delta     | Sequence                     |
|-------|-------------|-----------|------------------------------|
| 53.1  | 1471.789093 | 0.008815  | <a href="#">NQVSLTCLVK</a>   |
| 4.9   | 1471.777847 | 0.020061  | <a href="#">QLDMELVSVK</a>   |
| 4.7   | 1471.806808 | -0.008900 | <a href="#">ESLLQIPRIEMK</a> |
| 3.6   | 1471.799438 | -0.001530 | <a href="#">EVELDRLRDTVK</a> |
| 0.8   | 1471.797592 | 0.000316  | <a href="#">KYFWDRAFLVK</a>  |
| 0.2   | 1471.792221 | 0.005687  | <a href="#">NESIPLSPFEVK</a> |

# MASCOT Search Results

## Peptide View

MS/MS Fragmentation of **EPQVYTLPPSR**

Found in **IGHG1\_HUMAN**, Ig gamma-1 chain C region OS=Homo sapiens GN=IGHG1 PE=1 SV=1

Match to Query 38657: 1596.846108 from(799.430330,2+) rtinseconds(1935) index(78451)

Title: Locus:1.1.1.2024.25 File:"2013-07-02 CLN FXIII 180 min 1st FT.wiff"

Data file C:\Program Files (x86)\Matrix Science\Mascot Daemon\mgf\7 FXIII 180 min 1st\mascot\_daemon\_merge.mgf

Click mouse within plot area to zoom in by factor of two about that point

Or, Plot from  to  Da

Label all possible matches  Label matches used for scoring

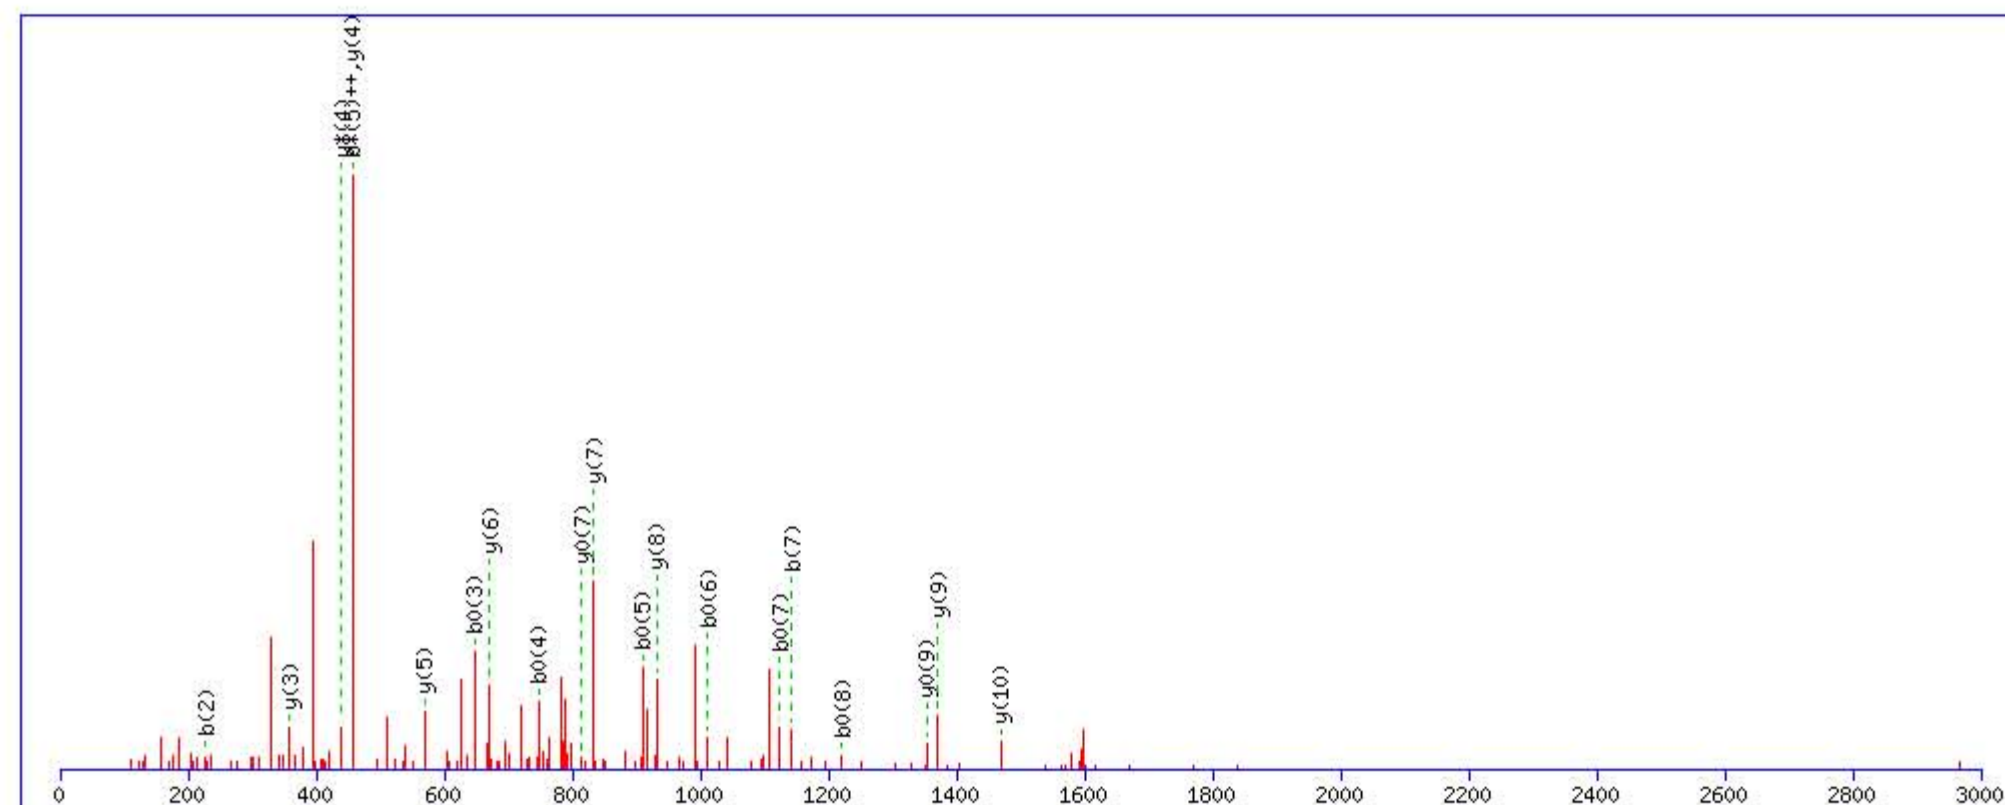

Monoisotopic mass of neutral peptide  $M_r(\text{calc})$ : 1596.833389

Fixed modifications: Carbamidomethyl (C) (apply to specified residues or termini only)

Variable modifications:

Q3 : Biotin:Thermo-21345 (Q)

Ions Score: 41 Expect: 0.0024

Matches : 20/114 fragment ions using 43 most intense peaks ([help](#))

| #  | b                  | b <sup>++</sup> | b <sup>*</sup> | b <sup>*++</sup>  | b <sup>0</sup>     | b <sup>0++</sup> | Seq. | y                  | y <sup>++</sup> | y <sup>*</sup>    | y <sup>*++</sup> | y <sup>0</sup>     | y <sup>0++</sup> | #  |
|----|--------------------|-----------------|----------------|-------------------|--------------------|------------------|------|--------------------|-----------------|-------------------|------------------|--------------------|------------------|----|
| 1  | 130.049869         | 65.528572       |                |                   | 112.039304         | 56.523290        | E    |                    |                 |                   |                  |                    |                  | 11 |
| 2  | <b>227.102633</b>  | 114.054954      |                |                   | 209.092068         | 105.049672       | P    | <b>1468.798084</b> | 734.902680      | 1451.771535       | 726.389406       | 1450.787519        | 725.897398       | 10 |
| 3  | 666.327959         | 333.667618      | 649.301410     | 325.154343        | <b>648.317394</b>  | 324.662335       | Q    | <b>1371.745320</b> | 686.376298      | 1354.718771       | 677.863024       | <b>1353.734755</b> | 677.371016       | 9  |
| 4  | 765.396373         | 383.201825      | 748.369824     | 374.688550        | <b>747.385808</b>  | 374.196542       | V    | <b>932.519994</b>  | 466.763635      | 915.493445        | 458.250361       | 914.509429         | 457.758353       | 8  |
| 5  | 928.459702         | 464.733489      | 911.433153     | <b>456.220215</b> | <b>910.449137</b>  | 455.728207       | Y    | <b>833.451580</b>  | 417.229428      | 816.425031        | 408.716154       | <b>815.441015</b>  | 408.224146       | 7  |
| 6  | 1029.507381        | 515.257329      | 1012.480832    | 506.744054        | <b>1011.496816</b> | 506.252046       | T    | <b>670.388251</b>  | 335.697764      | 653.361702        | 327.184489       | 652.377686         | 326.692481       | 6  |
| 7  | <b>1142.591445</b> | 571.799361      | 1125.564896    | 563.286086        | <b>1124.580880</b> | 562.794078       | L    | <b>569.340572</b>  | 285.173924      | 552.314023        | 276.660650       | 551.330007         | 276.168642       | 5  |
| 8  | 1239.644209        | 620.325743      | 1222.617660    | 611.812468        | <b>1221.633644</b> | 611.320460       | P    | <b>456.256508</b>  | 228.631892      | <b>439.229959</b> | 220.118618       | 438.245943         | 219.626610       | 4  |
| 9  | 1336.696973        | 668.852125      | 1319.670424    | 660.338850        | 1318.686408        | 659.846842       | P    | <b>359.203744</b>  | 180.105510      | 342.177195        | 171.592236       | 341.193179         | 171.100228       | 3  |
| 10 | 1423.729001        | 712.368139      | 1406.702452    | 703.854864        | 1405.718436        | 703.362856       | S    | 262.150980         | 131.579128      | 245.124431        | 123.065854       | 244.140415         | 122.573846       | 2  |
| 11 |                    |                 |                |                   |                    |                  | R    | 175.118952         | 88.063114       | 158.092403        | 79.549839        |                    |                  | 1  |

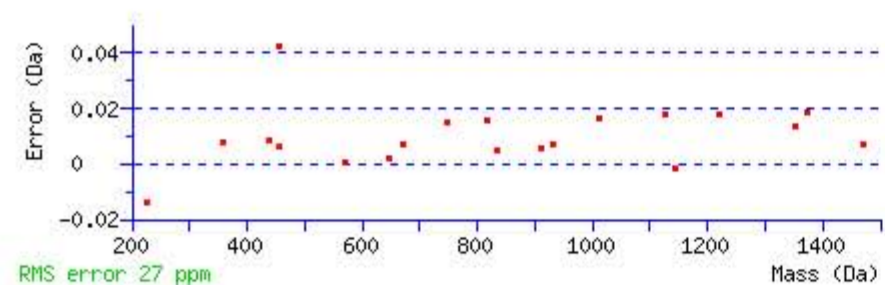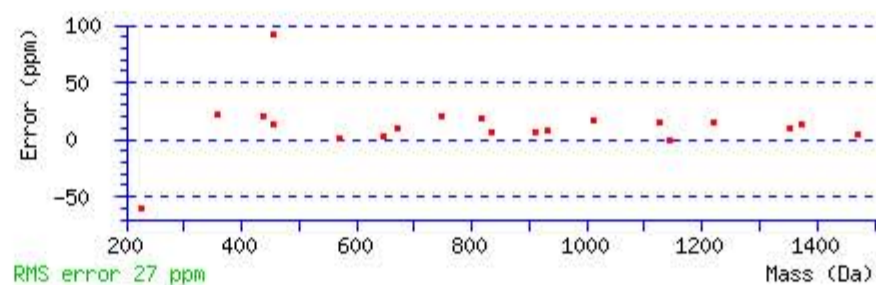

NCBI BLAST search of [EPQVYTLPPSR](#)

(Parameters: blastp, nr protein database, expect=20000, no filter, PAM30)

Other BLAST [web gateways](#)

All matches to this query

| Score | $M_r(\text{calc})$ : | Delta    | Sequence                    |
|-------|----------------------|----------|-----------------------------|
| 40.9  | 1596.833389          | 0.012719 | <a href="#">EPQVYTLPPSR</a> |

Mascot: <http://www.matrixscience.com/>

## Peptide View

MS/MS Fragmentation of **WQQGNVFSCSVMEALHNHYTQK**

Found in **IGHG1\_HUMAN**, Ig gamma-1 chain C region OS=Homo sapiens GN=IGHG1 PE=1 SV=1

Match to Query 71430: 3111.450670 from(623.297410,5+) rtinseconds(2026) index(79027)

Title: Locus:1.1.1.2056.7 File:"2013-07-02 CLN FXIII 180 min 1st FT.wiff"

Data file C:\Program Files (x86)\Matrix Science\Mascot Daemon\mgf\7 FXIII 180 min 1st\mascot\_daemon\_merge.mgf

Click mouse within plot area to zoom in by factor of two about that point

Or, Plot from  to  Da

Label all possible matches  Label matches used for scoring

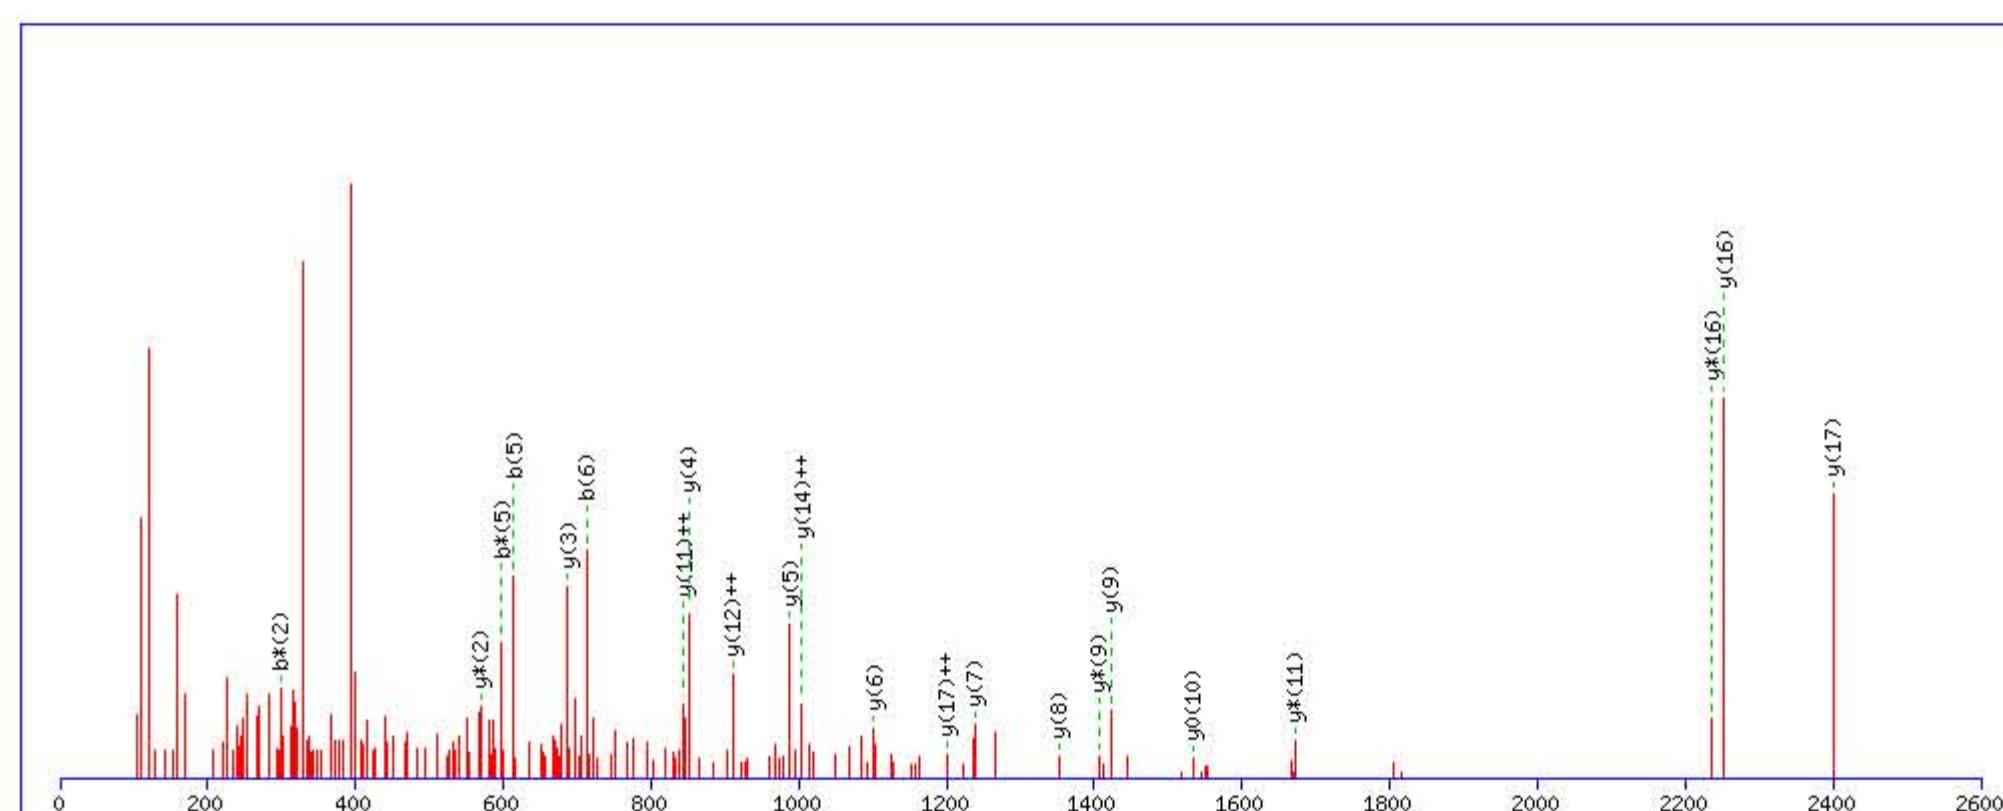

Monoisotopic mass of neutral peptide Mr(calc): 3111.426590

Fixed modifications: Carbamidomethyl (C) (apply to specified residues or termini only)

Variable modifications:

Q22 : Biotin:Thermo-21345 (Q)

Ions Score: 43 Expect: 0.00088

Matches : 22/244 fragment ions using 36 most intense peaks [\(help\)](#)

| #  | b           | b <sup>++</sup> | b*          | b <sup>+++</sup> | b <sup>0</sup> | b <sup>0++</sup> | Seq. | y           | y <sup>++</sup> | y*          | y <sup>+++</sup> | y <sup>0</sup> | y <sup>0++</sup> | #  |
|----|-------------|-----------------|-------------|------------------|----------------|------------------|------|-------------|-----------------|-------------|------------------|----------------|------------------|----|
| 1  | 187.086589  | 94.046932       |             |                  |                |                  | W    |             |                 |             |                  |                |                  | 23 |
| 2  | 315.145167  | 158.076222      | 298.118618  | 149.562947       |                |                  | Q    | 2926.354551 | 1463.680913     | 2909.328002 | 1455.167639      | 2908.343986    | 1454.675631      | 22 |
| 3  | 443.203745  | 222.105511      | 426.177196  | 213.592236       |                |                  | Q    | 2798.295973 | 1399.651624     | 2781.269424 | 1391.138350      | 2780.285408    | 1390.646342      | 21 |
| 4  | 500.225209  | 250.616243      | 483.198660  | 242.102968       |                |                  | G    | 2670.237395 | 1335.622335     | 2653.210846 | 1327.109061      | 2652.226830    | 1326.617053      | 20 |
| 5  | 614.268136  | 307.637706      | 597.241587  | 299.124432       |                |                  | N    | 2613.215931 | 1307.111603     | 2596.189382 | 1298.598329      | 2595.205366    | 1298.106321      | 19 |
| 6  | 713.336550  | 357.171913      | 696.310001  | 348.658639       |                |                  | V    | 2499.173004 | 1250.090140     | 2482.146455 | 1241.576865      | 2481.162439    | 1241.084857      | 18 |
| 7  | 860.404964  | 430.706120      | 843.378415  | 422.192845       |                |                  | F    | 2400.104590 | 1200.555933     | 2383.078041 | 1192.042658      | 2382.094025    | 1191.550650      | 17 |
| 8  | 947.436992  | 474.222134      | 930.410443  | 465.708859       | 929.426427     | 465.216851       | S    | 2253.036176 | 1127.021726     | 2236.009627 | 1118.508451      | 2235.025611    | 1118.016443      | 16 |
| 9  | 1107.467641 | 554.237459      | 1090.441092 | 545.724184       | 1089.457076    | 545.232176       | C    | 2166.004148 | 1083.505712     | 2148.977599 | 1074.992437      | 2147.993583    | 1074.500429      | 15 |
| 10 | 1194.499669 | 597.753473      | 1177.473120 | 589.240198       | 1176.489104    | 588.748190       | S    | 2005.973499 | 1003.490388     | 1988.946950 | 994.977113       | 1987.962934    | 994.485105       | 14 |
| 11 | 1293.568083 | 647.287680      | 1276.541534 | 638.774405       | 1275.557518    | 638.282397       | V    | 1918.941471 | 959.974373      | 1901.914922 | 951.461099       | 1900.930906    | 950.969091       | 13 |
| 12 | 1424.608568 | 712.807922      | 1407.582019 | 704.294648       | 1406.598003    | 703.802640       | M    | 1819.873057 | 910.440166      | 1802.846508 | 901.926892       | 1801.862492    | 901.434884       | 12 |
| 13 | 1561.667480 | 781.337378      | 1544.640931 | 772.824104       | 1543.656915    | 772.332096       | H    | 1688.832572 | 844.919924      | 1671.806023 | 836.406649       | 1670.822007    | 835.914641       | 11 |
| 14 | 1690.710073 | 845.858675      | 1673.683524 | 837.345400       | 1672.699508    | 836.853392       | E    | 1551.773660 | 776.390468      | 1534.747111 | 767.877193       | 1533.763095    | 767.385185       | 10 |
| 15 | 1761.747187 | 881.377231      | 1744.720638 | 872.863957       | 1743.736622    | 872.371949       | A    | 1422.731067 | 711.869171      | 1405.704518 | 703.355897       | 1404.720502    | 702.863889       | 9  |
| 16 | 1874.831251 | 937.919263      | 1857.804702 | 929.405989       | 1856.820686    | 928.913981       | L    | 1351.693953 | 676.350615      | 1334.667404 | 667.837340       | 1333.683388    | 667.345332       | 8  |
| 17 | 2011.890163 | 1006.448719     | 1994.863614 | 997.935445       | 1993.879598    | 997.443437       | H    | 1238.609889 | 619.808583      | 1221.583340 | 611.295308       | 1220.599324    | 610.803300       | 7  |
| 18 | 2125.933090 | 1063.470183     | 2108.906541 | 1054.956908      | 2107.922525    | 1054.464900      | N    | 1101.550977 | 551.279127      | 1084.524428 | 542.765852       | 1083.540412    | 542.273844       | 6  |
| 19 | 2262.992002 | 1131.999639     | 2245.965453 | 1123.486364      | 2244.981437    | 1122.994356      | H    | 987.508050  | 494.257663      | 970.481501  | 485.744389       | 969.497485     | 485.252381       | 5  |
| 20 | 2426.055331 | 1213.531303     | 2409.028782 | 1205.018029      | 2408.044766    | 1204.526021      | Y    | 850.449138  | 425.728207      | 833.422589  | 417.214933       | 832.438573     | 416.722925       | 4  |
| 21 | 2527.103010 | 1264.055143     | 2510.076461 | 1255.541868      | 2509.092445    | 1255.049860      | T    | 687.385809  | 344.196543      | 670.359260  | 335.683268       | 669.375244     | 335.191260       | 3  |
| 22 | 2966.328336 | 1483.667806     | 2949.301787 | 1475.154531      | 2948.317771    | 1474.662523      | Q    | 586.338130  | 293.672703      | 569.311581  | 285.159429       |                |                  | 2  |
| 23 |             |                 |             |                  |                |                  | K    | 147.112804  | 74.060040       | 130.086255  | 65.546765        |                |                  | 1  |

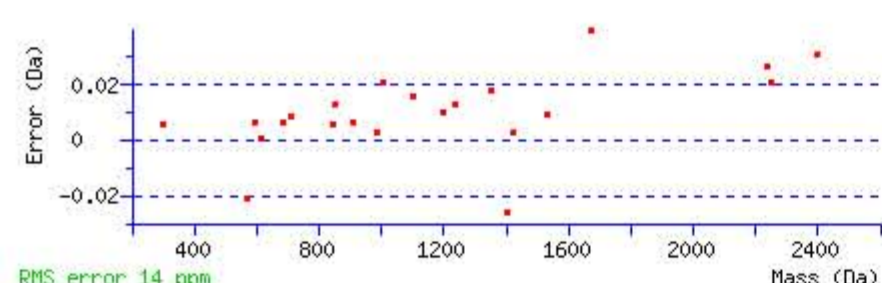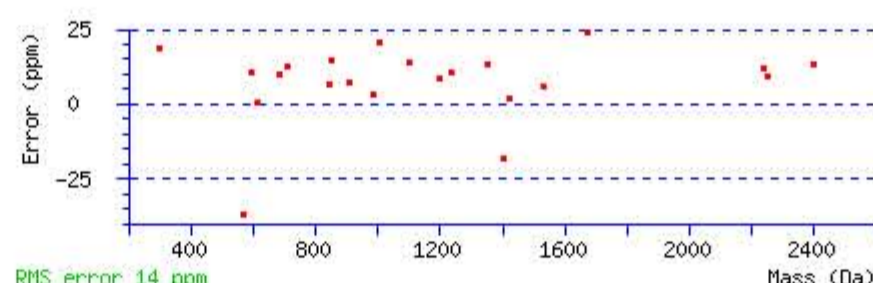

NCBI BLAST search of **WQQGNVFSCSVMEALHNHYTQK**

(Parameters: blastp, nr protein database, expect=20000, no filter, PAM30)

Other BLAST [web gateways](#)

All matches to this query

| Score | Mr(calc):   | Delta    | Sequence               |
|-------|-------------|----------|------------------------|
| 42.7  | 3111.426590 | 0.024080 | WQQGNVFSCSVMEALHNHYTQK |

# MASCOT SCIENCE Mascot Search Results

## Peptide View

MS/MS Fragmentation of **NQVSLTCLVK**

Found in **IGHG1\_HUMAN**, Ig gamma-1 chain C region OS=Homo sapiens GN=IGHG1 PE=1 SV=1

Match to Query 34049: 1471.797908 from(736.906230,2+) rtinseconds(2210) index(80321)

Title: Locus:1.1.1.2120.10 File:"2013-07-02 CLN FXIII 180 min 1st FT.wiff"

Data file C:\Program Files (x86)\Matrix Science\Mascot Daemon\mgf\7 FXIII 180 min 1st\mascot\_daemon\_merge.mgf

Click mouse within plot area to zoom in by factor of two about that point

Or, Plot from  to  Da

Label all possible matches  Label matches used for scoring

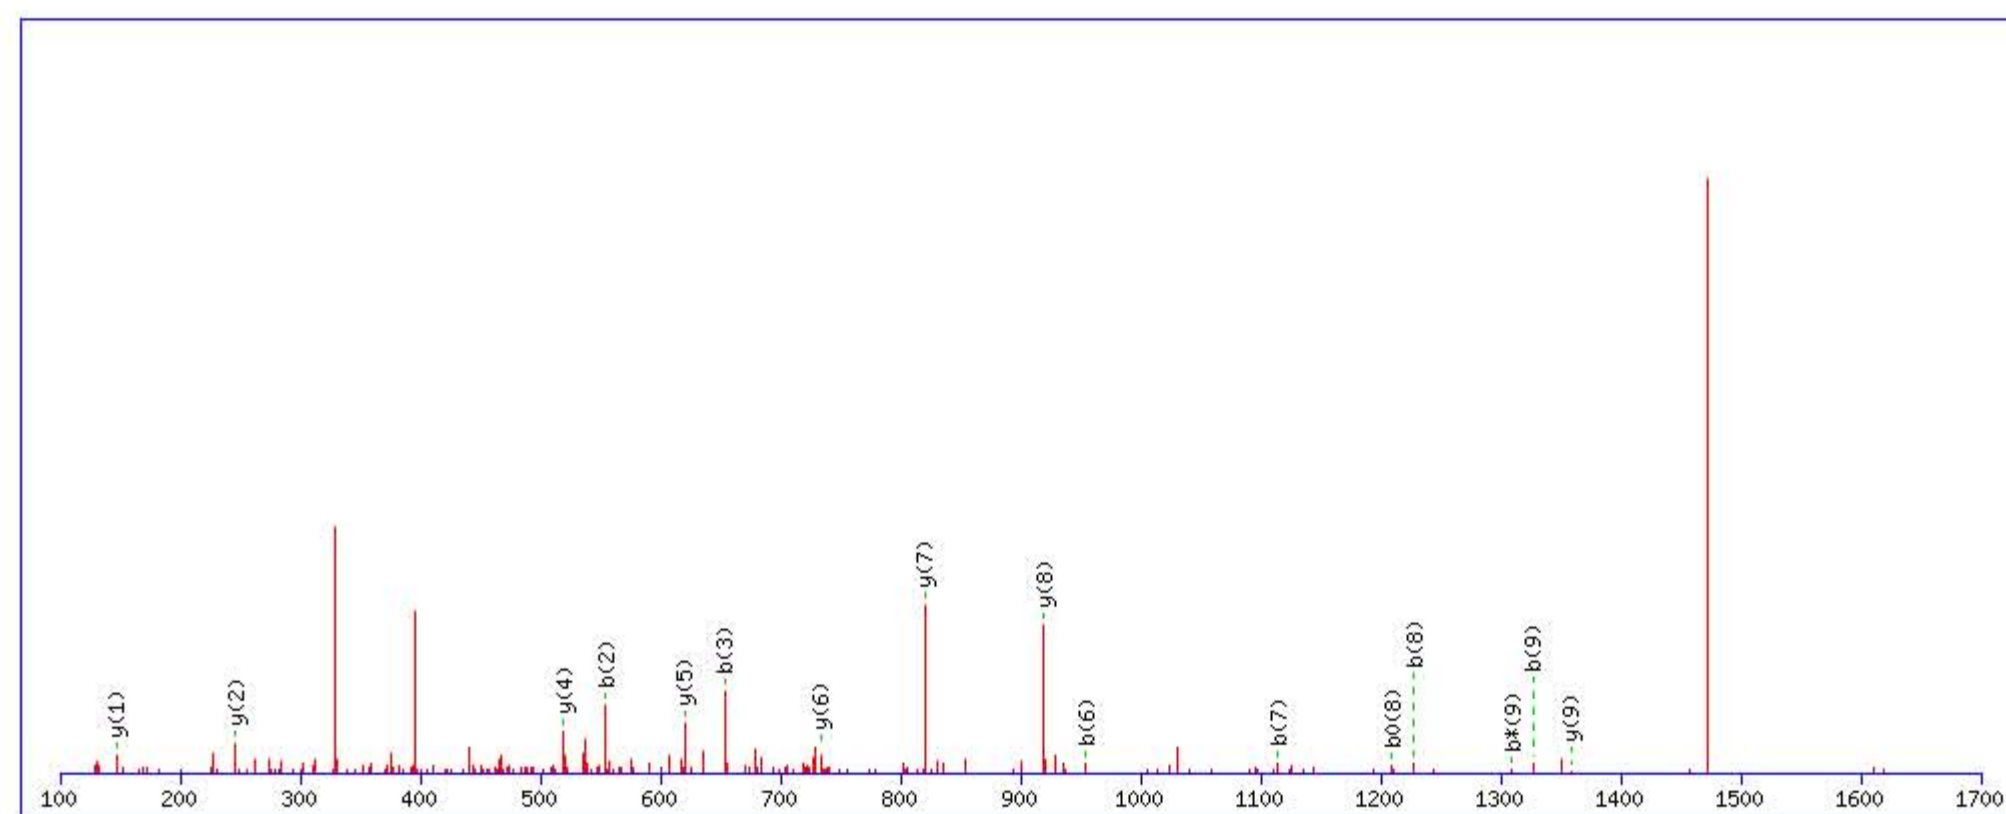

Monoisotopic mass of neutral peptide Mr(calc): 1471.789093

Fixed modifications: Carbamidomethyl (C) (apply to specified residues or termini only)

Variable modifications:

Q2 : Biotin:Thermo-21345 (Q)

Ions Score: 53 Expect: 3.2e-005

Matches : 16/94 fragment ions using 27 most intense peaks [\(help\)](#)

| #  | b                  | b <sup>++</sup> | b <sup>+</sup>     | b <sup>+++</sup> | b <sup>0</sup>     | b <sup>0++</sup> | Seq. | y                  | y <sup>++</sup> | y <sup>+</sup> | y <sup>+++</sup> | y <sup>0</sup> | y <sup>0++</sup> | #  |
|----|--------------------|-----------------|--------------------|------------------|--------------------|------------------|------|--------------------|-----------------|----------------|------------------|----------------|------------------|----|
| 1  | 115.050203         | 58.028740       | 98.023654          | 49.515465        |                    |                  | N    |                    |                 |                |                  |                |                  | 10 |
| 2  | <b>554.275529</b>  | 277.641403      | 537.248980         | 269.128128       |                    |                  | Q    | <b>1358.753442</b> | 679.880359      | 1341.726893    | 671.367085       | 1340.742877    | 670.875076       | 9  |
| 3  | <b>653.343943</b>  | 327.175610      | 636.317394         | 318.662335       |                    |                  | V    | <b>919.528116</b>  | 460.267696      | 902.501567     | 451.754421       | 901.517551     | 451.262413       | 8  |
| 4  | 740.375971         | 370.691623      | 723.349422         | 362.178349       | 722.365406         | 361.686341       | S    | <b>820.459702</b>  | 410.733489      | 803.433153     | 402.220215       | 802.449137     | 401.728207       | 7  |
| 5  | 853.460035         | 427.233656      | 836.433486         | 418.720381       | 835.449470         | 418.228373       | L    | <b>733.427674</b>  | 367.217475      | 716.401125     | 358.704201       | 715.417109     | 358.212193       | 6  |
| 6  | <b>954.507714</b>  | 477.757495      | 937.481165         | 469.244220       | 936.497149         | 468.752212       | T    | <b>620.343610</b>  | 310.675443      | 603.317061     | 302.162169       | 602.333045     | 301.670161       | 5  |
| 7  | <b>1114.538363</b> | 557.772819      | 1097.511814        | 549.259545       | 1096.527798        | 548.767537       | C    | <b>519.295931</b>  | 260.151604      | 502.269382     | 251.638329       |                |                  | 4  |
| 8  | <b>1227.622427</b> | 614.314851      | 1210.595878        | 605.801577       | <b>1209.611862</b> | 605.309569       | L    | 359.265282         | 180.136279      | 342.238733     | 171.623004       |                |                  | 3  |
| 9  | <b>1326.690841</b> | 663.849058      | <b>1309.664292</b> | 655.335784       | 1308.680276        | 654.843776       | V    | <b>246.181218</b>  | 123.594247      | 229.154669     | 115.080973       |                |                  | 2  |
| 10 |                    |                 |                    |                  |                    |                  | K    | <b>147.112804</b>  | 74.060040       | 130.086255     | 65.546765        |                |                  | 1  |

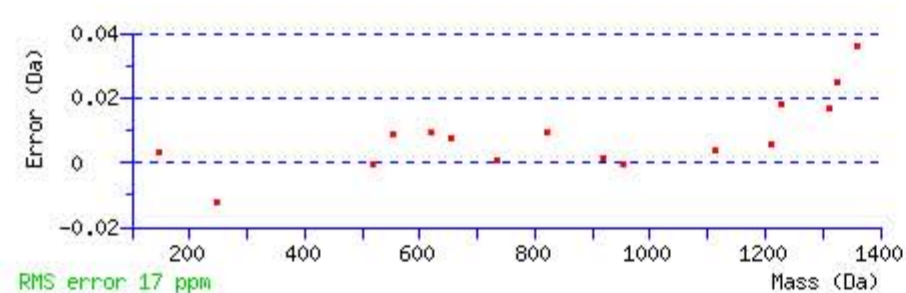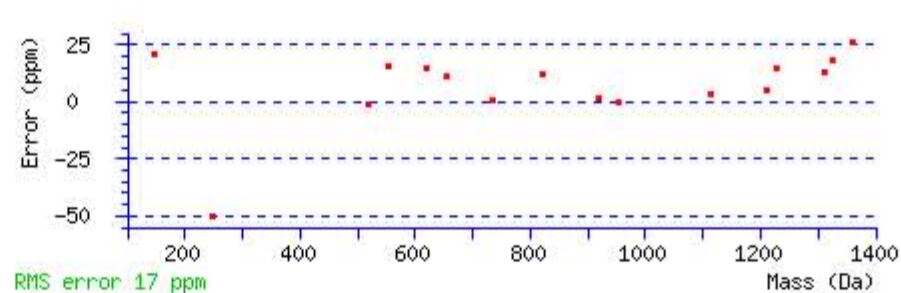

NCBI BLAST search of **NQVSLTCLVK**

(Parameters: blastp, nr protein database, expect=20000, no filter, PAM30)

Other BLAST [web gateways](#)

## All matches to this query

| Score | Mr(calc):   | Delta     | Sequence                     |
|-------|-------------|-----------|------------------------------|
| 53.1  | 1471.789093 | 0.008815  | <a href="#">NQVSLTCLVK</a>   |
| 4.9   | 1471.777847 | 0.020061  | <a href="#">QLDMELVSVK</a>   |
| 4.7   | 1471.806808 | -0.008900 | <a href="#">ESLLQIPRIEMK</a> |
| 3.6   | 1471.799438 | -0.001530 | <a href="#">EVELDRLRDTVK</a> |
| 0.8   | 1471.797592 | 0.000316  | <a href="#">KYFWDRAFLVK</a>  |
| 0.2   | 1471.792221 | 0.005687  | <a href="#">NESIPLSPFEVK</a> |

# MASCOT Search Results

## Peptide View

MS/MS Fragmentation of **EPQVYTLPPSR**

Found in **IGHG1\_HUMAN**, Ig gamma-1 chain C region OS=Homo sapiens GN=IGHG1 PE=1 SV=1

Match to Query 38657: 1596.846108 from(799.430330,2+) rtinseconds(1935) index(78451)

Title: Locus:1.1.1.2024.25 File:"2013-07-02 CLN FXIII 180 min 1st FT.wiff"

Data file C:\Program Files (x86)\Matrix Science\Mascot Daemon\mgf\7 FXIII 180 min 1st\mascot\_daemon\_merge.mgf

Click mouse within plot area to zoom in by factor of two about that point

Or, Plot from  to  Da

Label all possible matches  Label matches used for scoring

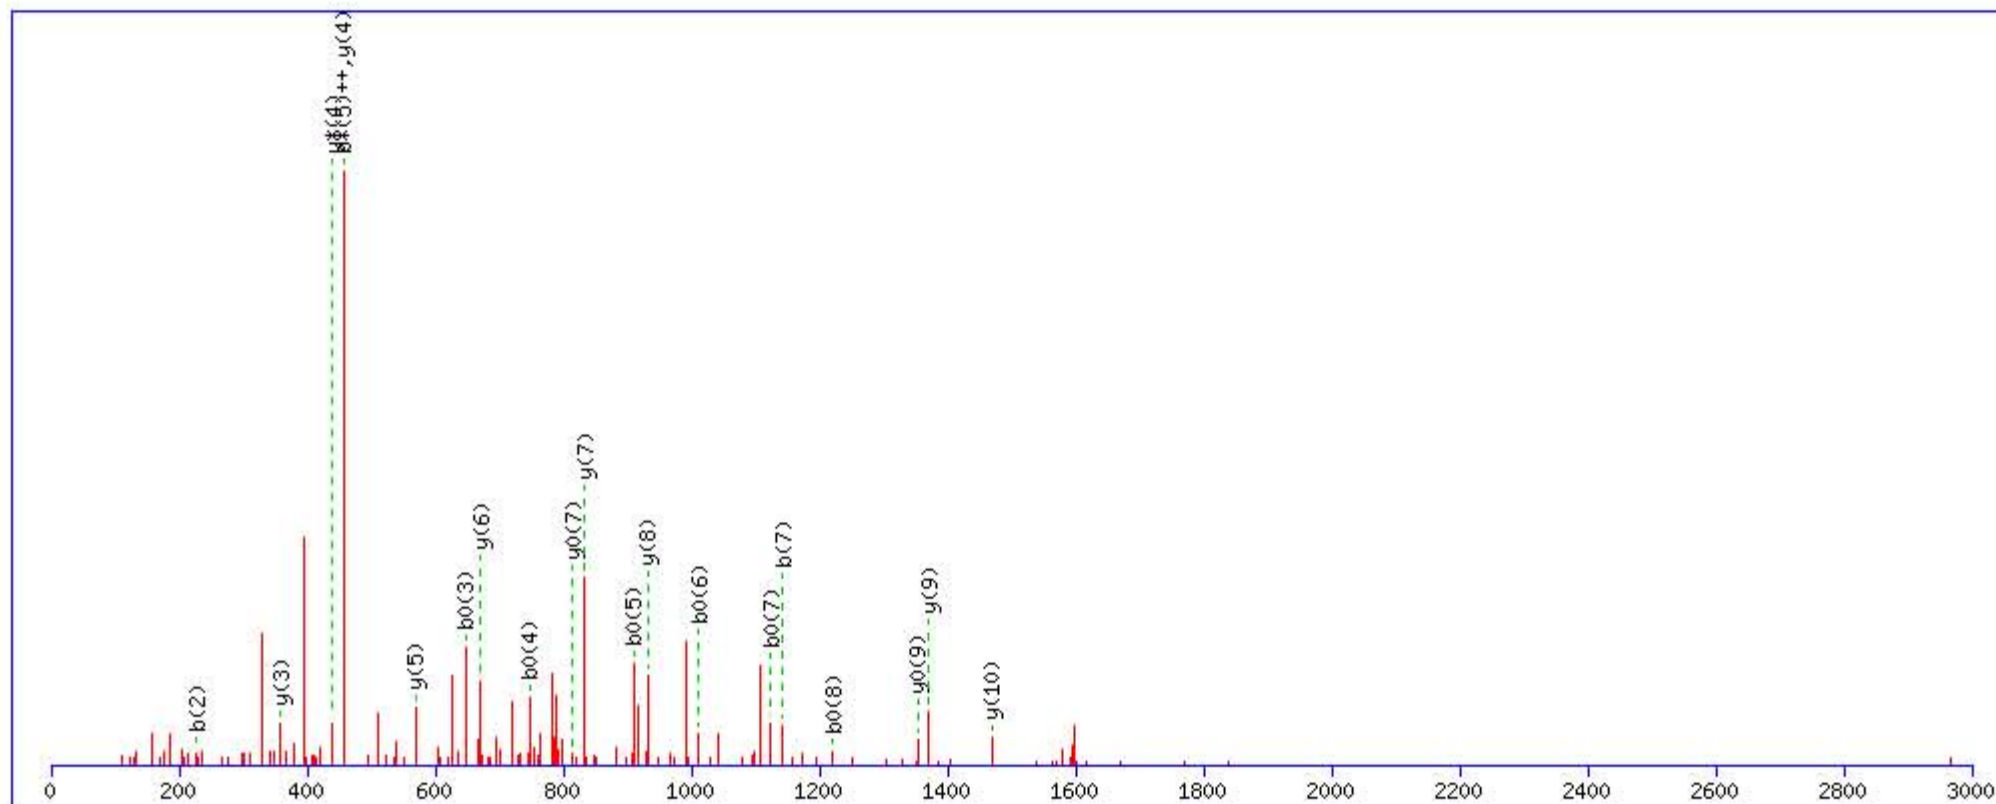

Monoisotopic mass of neutral peptide  $M_r(\text{calc})$ : 1596.833389

Fixed modifications: Carbamidomethyl (C) (apply to specified residues or termini only)

Variable modifications:

Q3 : Biotin:Thermo-21345 (Q)

Ions Score: 41 Expect: 0.0024

Matches : 20/114 fragment ions using 43 most intense peaks [\(help\)](#)

| #  | b                  | b <sup>++</sup> | b <sup>*</sup> | b <sup>*++</sup>  | b <sup>0</sup>     | b <sup>0++</sup> | Seq. | y                  | y <sup>++</sup> | y <sup>*</sup>    | y <sup>*++</sup> | y <sup>0</sup>     | y <sup>0++</sup> | #  |
|----|--------------------|-----------------|----------------|-------------------|--------------------|------------------|------|--------------------|-----------------|-------------------|------------------|--------------------|------------------|----|
| 1  | 130.049869         | 65.528572       |                |                   | 112.039304         | 56.523290        | E    |                    |                 |                   |                  |                    |                  | 11 |
| 2  | <b>227.102633</b>  | 114.054954      |                |                   | 209.092068         | 105.049672       | P    | <b>1468.798084</b> | 734.902680      | 1451.771535       | 726.389406       | 1450.787519        | 725.897398       | 10 |
| 3  | 666.327959         | 333.667618      | 649.301410     | 325.154343        | <b>648.317394</b>  | 324.662335       | Q    | <b>1371.745320</b> | 686.376298      | 1354.718771       | 677.863024       | <b>1353.734755</b> | 677.371016       | 9  |
| 4  | 765.396373         | 383.201825      | 748.369824     | 374.688550        | <b>747.385808</b>  | 374.196542       | V    | <b>932.519994</b>  | 466.763635      | 915.493445        | 458.250361       | 914.509429         | 457.758353       | 8  |
| 5  | 928.459702         | 464.733489      | 911.433153     | <b>456.220215</b> | <b>910.449137</b>  | 455.728207       | Y    | <b>833.451580</b>  | 417.229428      | 816.425031        | 408.716154       | <b>815.441015</b>  | 408.224146       | 7  |
| 6  | 1029.507381        | 515.257329      | 1012.480832    | 506.744054        | <b>1011.496816</b> | 506.252046       | T    | <b>670.388251</b>  | 335.697764      | 653.361702        | 327.184489       | 652.377686         | 326.692481       | 6  |
| 7  | <b>1142.591445</b> | 571.799361      | 1125.564896    | 563.286086        | <b>1124.580880</b> | 562.794078       | L    | <b>569.340572</b>  | 285.173924      | 552.314023        | 276.660650       | 551.330007         | 276.168642       | 5  |
| 8  | 1239.644209        | 620.325743      | 1222.617660    | 611.812468        | <b>1221.633644</b> | 611.320460       | P    | <b>456.256508</b>  | 228.631892      | <b>439.229959</b> | 220.118618       | 438.245943         | 219.626610       | 4  |
| 9  | 1336.696973        | 668.852125      | 1319.670424    | 660.338850        | 1318.686408        | 659.846842       | P    | <b>359.203744</b>  | 180.105510      | 342.177195        | 171.592236       | 341.193179         | 171.100228       | 3  |
| 10 | 1423.729001        | 712.368139      | 1406.702452    | 703.854864        | 1405.718436        | 703.362856       | S    | 262.150980         | 131.579128      | 245.124431        | 123.065854       | 244.140415         | 122.573846       | 2  |
| 11 |                    |                 |                |                   |                    |                  | R    | 175.118952         | 88.063114       | 158.092403        | 79.549839        |                    |                  | 1  |

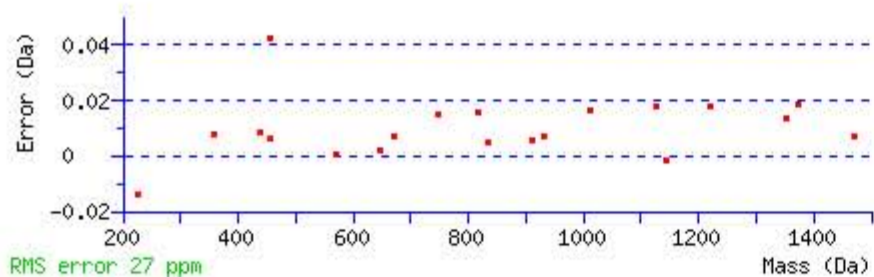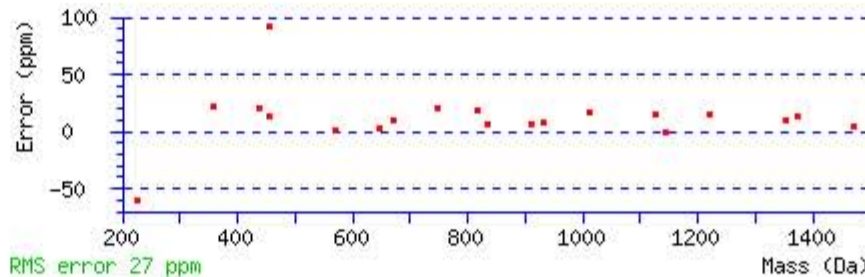

NCBI BLAST search of [EPQVYTLPPSR](#)

(Parameters: blastp, nr protein database, expect=20000, no filter, PAM30)

Other BLAST [web gateways](#)

All matches to this query

| Score | $M_r(\text{calc})$ | Delta    | Sequence                    |
|-------|--------------------|----------|-----------------------------|
| 40.9  | 1596.833389        | 0.012719 | <a href="#">EPQVYTLPPSR</a> |

Mascot: <http://www.matrixscience.com/>

# MASCOT Search Results

## Peptide View

MS/MS Fragmentation of **VYACEVTHQGLSSPVTK**

Found in **IGKC\_HUMAN**, Ig kappa chain C region OS=Homo sapiens GN=IGKC PE=1 SV=1

Match to Query 55072: 2186.101062 from(729.707630,3+) rtinseconds(1724) index(22668)

Title: Locus:1.1.1.2743.6 File:"2013-07-02 CLN FXIII 180 min 1st F 2.wiff"

Data file C:\Program Files (x86)\Matrix Science\Mascot Daemon\mgf\7 FXIII 180 min 1st\mascot\_daemon\_merge.mgf

Click mouse within plot area to zoom in by factor of two about that point

Or, Plot from  to  Da

Label all possible matches  Label matches used for scoring

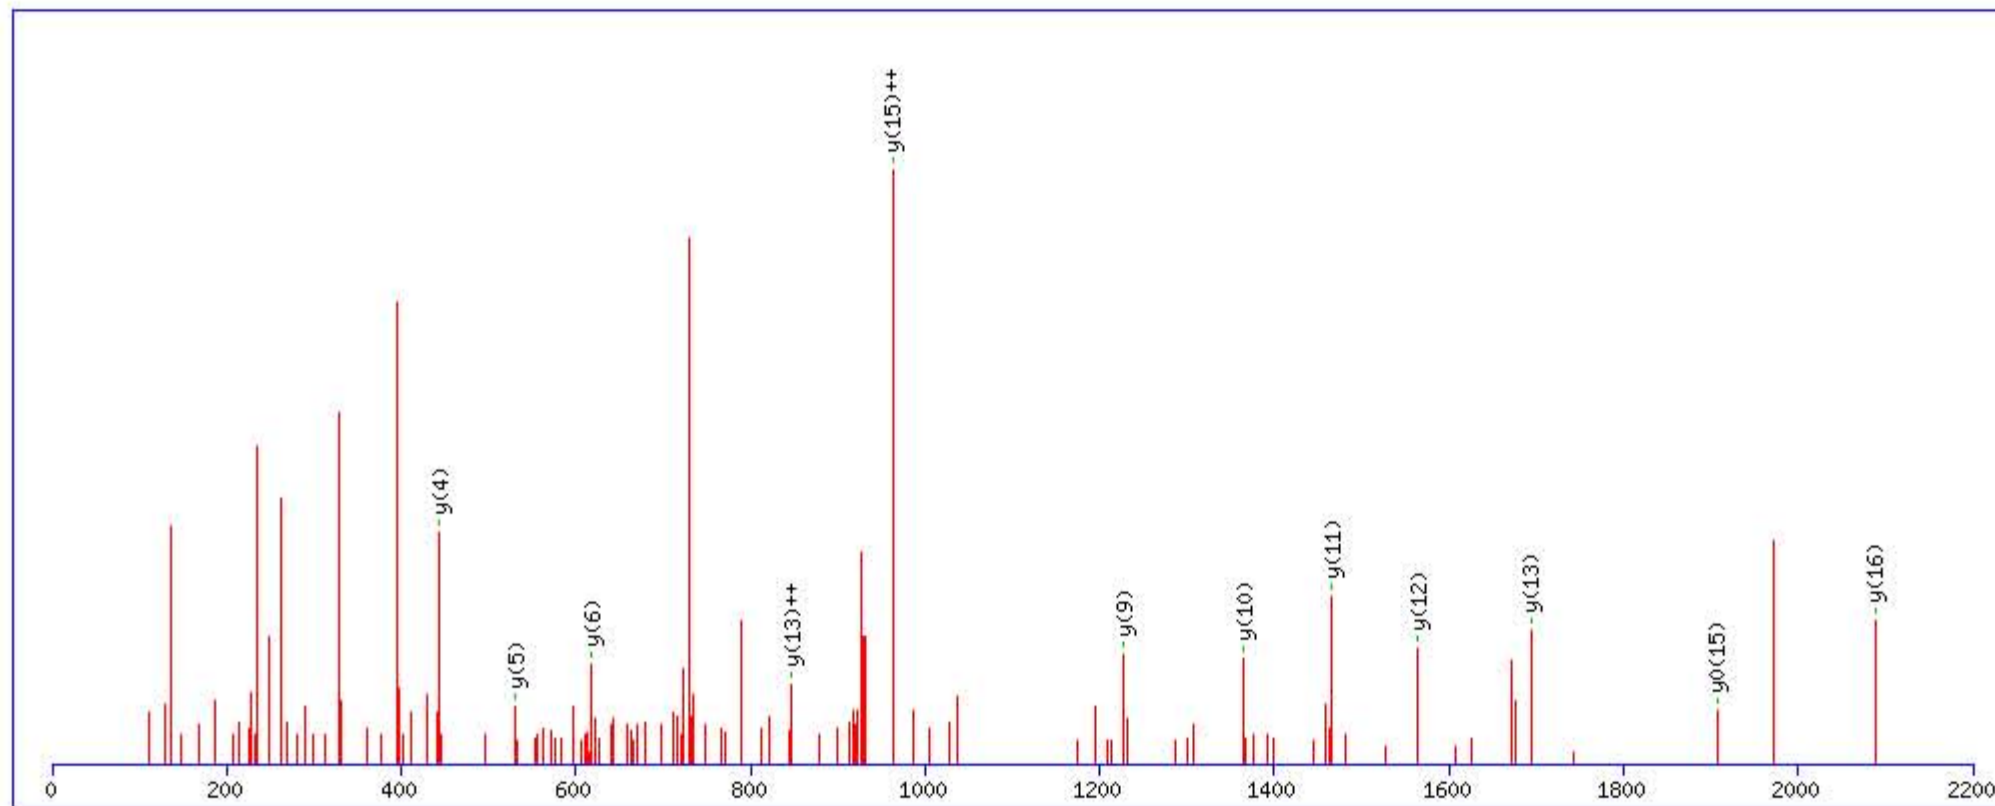

Monoisotopic mass of neutral peptide Mr(calc): 2186.086411

Fixed modifications: Carbamidomethyl (C) (apply to specified residues or termini only)

Variable modifications:

Q9 : Biotin:Thermo-21345 (Q)

Ions Score: 55 Expect: 8.8e-005

Matches : 12/166 fragment ions using 20 most intense peaks [\(help\)](#)

| #  | b           | b <sup>++</sup> | b*          | b <sup>+++</sup> | b <sup>0</sup> | b <sup>0++</sup> | Seq. | y                  | y <sup>++</sup>   | y*          | y <sup>+++</sup> | y <sup>0</sup>     | y <sup>0++</sup> | #  |
|----|-------------|-----------------|-------------|------------------|----------------|------------------|------|--------------------|-------------------|-------------|------------------|--------------------|------------------|----|
| 1  | 100.075690  | 50.541483       |             |                  |                |                  | V    |                    |                   |             |                  |                    |                  | 17 |
| 2  | 263.139019  | 132.073148      |             |                  |                |                  | Y    | <b>2088.025261</b> | 1044.516268       | 2070.998712 | 1036.002994      | 2070.014696        | 1035.510986      | 16 |
| 3  | 334.176133  | 167.591704      |             |                  |                |                  | A    | 1924.961932        | <b>962.984604</b> | 1907.935383 | 954.471330       | <b>1906.951367</b> | 953.979322       | 15 |
| 4  | 494.206782  | 247.607029      |             |                  |                |                  | C    | 1853.924818        | 927.466047        | 1836.898269 | 918.952773       | 1835.914253        | 918.460765       | 14 |
| 5  | 623.249375  | 312.128326      |             |                  | 605.238810     | 303.123043       | E    | <b>1693.894169</b> | <b>847.450723</b> | 1676.867620 | 838.937448       | 1675.883604        | 838.445440       | 13 |
| 6  | 722.317789  | 361.662533      |             |                  | 704.307224     | 352.657250       | V    | <b>1564.851576</b> | 782.929426        | 1547.825027 | 774.416152       | 1546.841011        | 773.924144       | 12 |
| 7  | 823.365468  | 412.186372      |             |                  | 805.354903     | 403.181090       | T    | <b>1465.783162</b> | 733.395219        | 1448.756613 | 724.881945       | 1447.772597        | 724.389937       | 11 |
| 8  | 960.424380  | 480.715828      |             |                  | 942.413815     | 471.710546       | H    | <b>1364.735483</b> | 682.871380        | 1347.708934 | 674.358105       | 1346.724918        | 673.866097       | 10 |
| 9  | 1399.649706 | 700.328491      | 1382.623157 | 691.815217       | 1381.639141    | 691.323208       | Q    | <b>1227.676571</b> | 614.341924        | 1210.650022 | 605.828649       | 1209.666006        | 605.336641       | 9  |
| 10 | 1456.671170 | 728.839223      | 1439.644621 | 720.325948       | 1438.660605    | 719.833940       | G    | 788.451245         | 394.729261        | 771.424696  | 386.215986       | 770.440680         | 385.723978       | 8  |
| 11 | 1569.755234 | 785.381255      | 1552.728685 | 776.867980       | 1551.744669    | 776.375972       | L    | 731.429781         | 366.218529        | 714.403232  | 357.705254       | 713.419216         | 357.213246       | 7  |
| 12 | 1656.787262 | 828.897269      | 1639.760713 | 820.383994       | 1638.776697    | 819.891986       | S    | <b>618.345717</b>  | 309.676497        | 601.319168  | 301.163222       | 600.335152         | 300.671214       | 6  |
| 13 | 1743.819290 | 872.413283      | 1726.792741 | 863.900009       | 1725.808725    | 863.408000       | S    | <b>531.313689</b>  | 266.160483        | 514.287140  | 257.647208       | 513.303124         | 257.155200       | 5  |
| 14 | 1840.872054 | 920.939665      | 1823.845505 | 912.426391       | 1822.861489    | 911.934382       | P    | <b>444.281661</b>  | 222.644469        | 427.255112  | 214.131194       | 426.271096         | 213.639186       | 4  |
| 15 | 1939.940468 | 970.473872      | 1922.913919 | 961.960598       | 1921.929903    | 961.468590       | V    | 347.228897         | 174.118087        | 330.202348  | 165.604812       | 329.218332         | 165.112804       | 3  |
| 16 | 2040.988147 | 1020.997712     | 2023.961598 | 1012.484437      | 2022.977582    | 1011.992429      | T    | 248.160483         | 124.583880        | 231.133934  | 116.070605       | 230.149918         | 115.578597       | 2  |
| 17 |             |                 |             |                  |                |                  | K    | 147.112804         | 74.060040         | 130.086255  | 65.546766        |                    |                  | 1  |

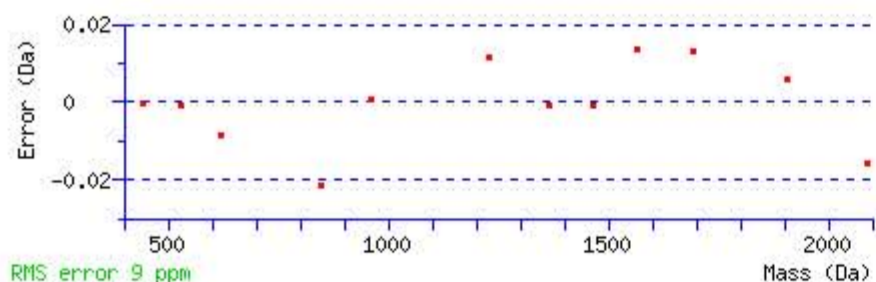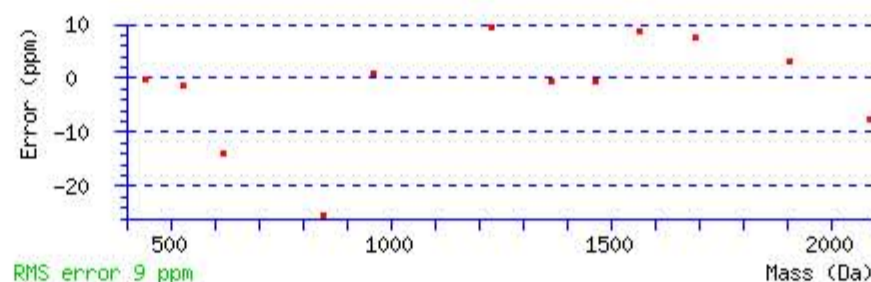

NCBI BLAST search of **VYACEVTHQGLSSPVTK**

(Parameters: blastp, nr protein database, expect=20000, no filter, PAM30)

Other BLAST [web gateways](#)

All matches to this query

| Score | Mr(calc):   | Delta    | Sequence                          |
|-------|-------------|----------|-----------------------------------|
| 55.1  | 2186.086411 | 0.014651 | <a href="#">VYACEVTHQGLSSPVTK</a> |

Mascot: <http://www.matrixscience.com/>

# MASCOT Search Results

## Peptide View

MS/MS Fragmentation of **TVAAPSVFIFPPSDEQLK**

Found in **IGKC\_HUMAN**, Ig kappa chain C region OS=Homo sapiens GN=IGKC PE=1 SV=1

Match to Query 56792: 2256.208692 from(753.076840,3+) rtinseconds(2709) index(29473)

Title: Locus:1.1.1.3084.14 File:"2013-07-02 CLN FXIII 180 min 1st F 2.wiff"

Data file C:\Program Files (x86)\Matrix Science\Mascot Daemon\mgf\7 FXIII 180 min 1st\mascot\_daemon\_merge.mgf

Click mouse within plot area to zoom in by factor of two about that point

Or, Plot from  to  Da

Label all possible matches  Label matches used for scoring

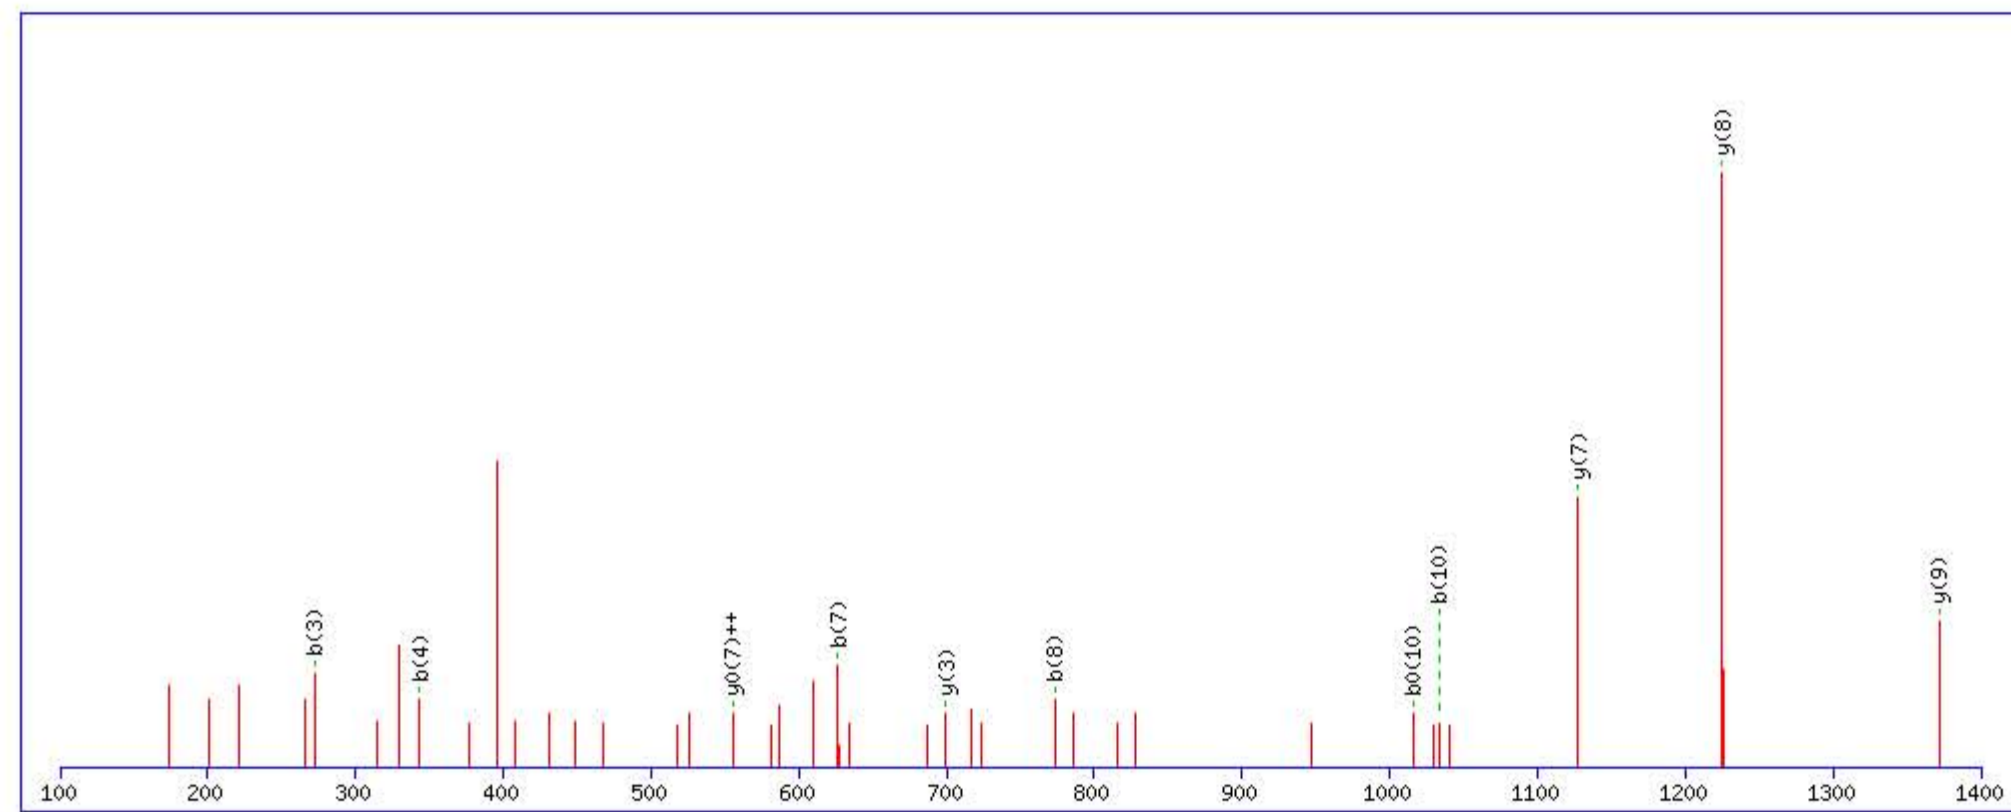

Monoisotopic mass of neutral peptide Mr(calc): 2256.186432  
 Fixed modifications: Carbamidomethyl (C) (apply to specified residues or termini only)  
 Variable modifications:  
 Q16 : Biotin:Thermo-21345 (Q)  
 Ions Score: 27 Expect: 0.045  
 Matches : 11/168 fragment ions using 21 most intense peaks [\(help\)](#)

| #  | b                  | b <sup>++</sup> | b*          | b <sup>+++</sup> | b <sup>0</sup>     | b <sup>0++</sup> | Seq. | y                  | y <sup>++</sup> | y*          | y <sup>+++</sup> | y <sup>0</sup> | y <sup>0++</sup>  | #  |
|----|--------------------|-----------------|-------------|------------------|--------------------|------------------|------|--------------------|-----------------|-------------|------------------|----------------|-------------------|----|
| 1  | 102.054955         | 51.531116       |             |                  | 84.044390          | 42.525833        | T    |                    |                 |             |                  |                |                   | 18 |
| 2  | 201.123369         | 101.065322      |             |                  | 183.112804         | 92.060040        | V    | 2156.146026        | 1078.576651     | 2139.119477 | 1070.063377      | 2138.135461    | 1069.571369       | 17 |
| 3  | <b>272.160483</b>  | 136.583879      |             |                  | 254.149918         | 127.578597       | A    | 2057.077612        | 1029.042444     | 2040.051063 | 1020.529170      | 2039.067047    | 1020.037162       | 16 |
| 4  | <b>343.197597</b>  | 172.102437      |             |                  | 325.187032         | 163.097154       | A    | 1986.040498        | 993.523887      | 1969.013949 | 985.010613       | 1968.029933    | 984.518605        | 15 |
| 5  | 440.250361         | 220.628819      |             |                  | 422.239796         | 211.623536       | P    | 1915.003384        | 958.005330      | 1897.976835 | 949.492056       | 1896.992819    | 949.000048        | 14 |
| 6  | 527.282389         | 264.144833      |             |                  | 509.271824         | 255.139550       | S    | 1817.950620        | 909.478948      | 1800.924071 | 900.965674       | 1799.940055    | 900.473666        | 13 |
| 7  | <b>626.350803</b>  | 313.679040      |             |                  | 608.340238         | 304.673757       | V    | 1730.918592        | 865.962934      | 1713.892043 | 857.449660       | 1712.908027    | 856.957652        | 12 |
| 8  | <b>773.419217</b>  | 387.213247      |             |                  | 755.408652         | 378.207964       | F    | 1631.850178        | 816.428727      | 1614.823629 | 807.915453       | 1613.839613    | 807.423445        | 11 |
| 9  | 886.503281         | 443.755279      |             |                  | 868.492716         | 434.749996       | I    | 1484.781764        | 742.894520      | 1467.755215 | 734.381246       | 1466.771199    | 733.889238        | 10 |
| 10 | <b>1033.571695</b> | 517.289486      |             |                  | <b>1015.561130</b> | 508.284203       | F    | <b>1371.697700</b> | 686.352488      | 1354.671151 | 677.839214       | 1353.687135    | 677.347206        | 9  |
| 11 | 1130.624459        | 565.815868      |             |                  | 1112.613894        | 556.810585       | P    | <b>1224.629286</b> | 612.818281      | 1207.602737 | 604.305007       | 1206.618721    | 603.812999        | 8  |
| 12 | 1227.677223        | 614.342250      |             |                  | 1209.666658        | 605.336967       | P    | <b>1127.576522</b> | 564.291899      | 1110.549973 | 555.778625       | 1109.565957    | <b>555.286617</b> | 7  |
| 13 | 1314.709251        | 657.858264      |             |                  | 1296.698686        | 648.852981       | S    | 1030.523758        | 515.765517      | 1013.497209 | 507.252243       | 1012.513193    | 506.760235        | 6  |
| 14 | 1429.736194        | 715.371735      |             |                  | 1411.725629        | 706.366453       | D    | 943.491730         | 472.249503      | 926.465181  | 463.736229       | 925.481165     | 463.244221        | 5  |
| 15 | 1558.778787        | 779.893032      |             |                  | 1540.768222        | 770.887749       | E    | 828.464787         | 414.736032      | 811.438238  | 406.222757       | 810.454222     | 405.730749        | 4  |
| 16 | 1998.004113        | 999.505695      | 1980.977564 | 990.992420       | 1979.993548        | 990.500412       | Q    | <b>699.422194</b>  | 350.214735      | 682.395645  | 341.701461       |                |                   | 3  |
| 17 | 2111.088177        | 1056.047727     | 2094.061628 | 1047.534452      | 2093.077612        | 1047.042444      | L    | 260.196868         | 130.602072      | 243.170319  | 122.088798       |                |                   | 2  |
| 18 |                    |                 |             |                  |                    |                  | K    | 147.112804         | 74.060040       | 130.086255  | 65.546765        |                |                   | 1  |

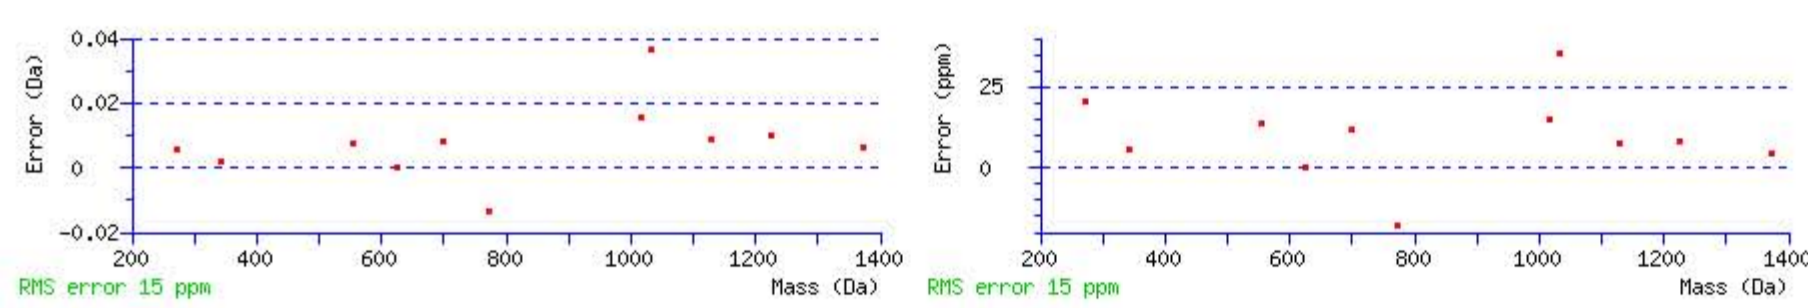

NCBI BLAST search of [TVAAPSVFIFPPSDEQLK](#)  
 (Parameters: blastp, nr protein database, expect=20000, no filter, PAM30)  
 Other BLAST [web gateways](#)

### All matches to this query

| Score | Mr(calc):   | Delta    | Sequence                           |
|-------|-------------|----------|------------------------------------|
| 26.8  | 2256.186432 | 0.022260 | <a href="#">TVAAPSVFIFPPSDEQLK</a> |



Peptide View

MS/MS Fragmentation of **EIVLTQSPGTLSPGER**  
 Found in **KV302\_HUMAN**, Ig kappa chain V-III region SIE OS=Homo sapiens PE=1 SV=1

Match to Query 55258: 2194.190352 from(732.404060,3+) rtinseconds(2317) index(81017)  
 Title: Locus:1.1.1.2157.15 File:"2013-07-02 CLN FXIII 180 min 1st FT.wiff"  
 Data file C:\Program Files (x86)\Matrix Science\Mascot Daemon\mgf\7 FXIII 180 min 1st\mascot\_daemon\_merge.mgf

Click mouse within plot area to zoom in by factor of two about that point  
 Or, Plot from 100 to 1700 Da Full range  
 Label all possible matches  Label matches used for scoring

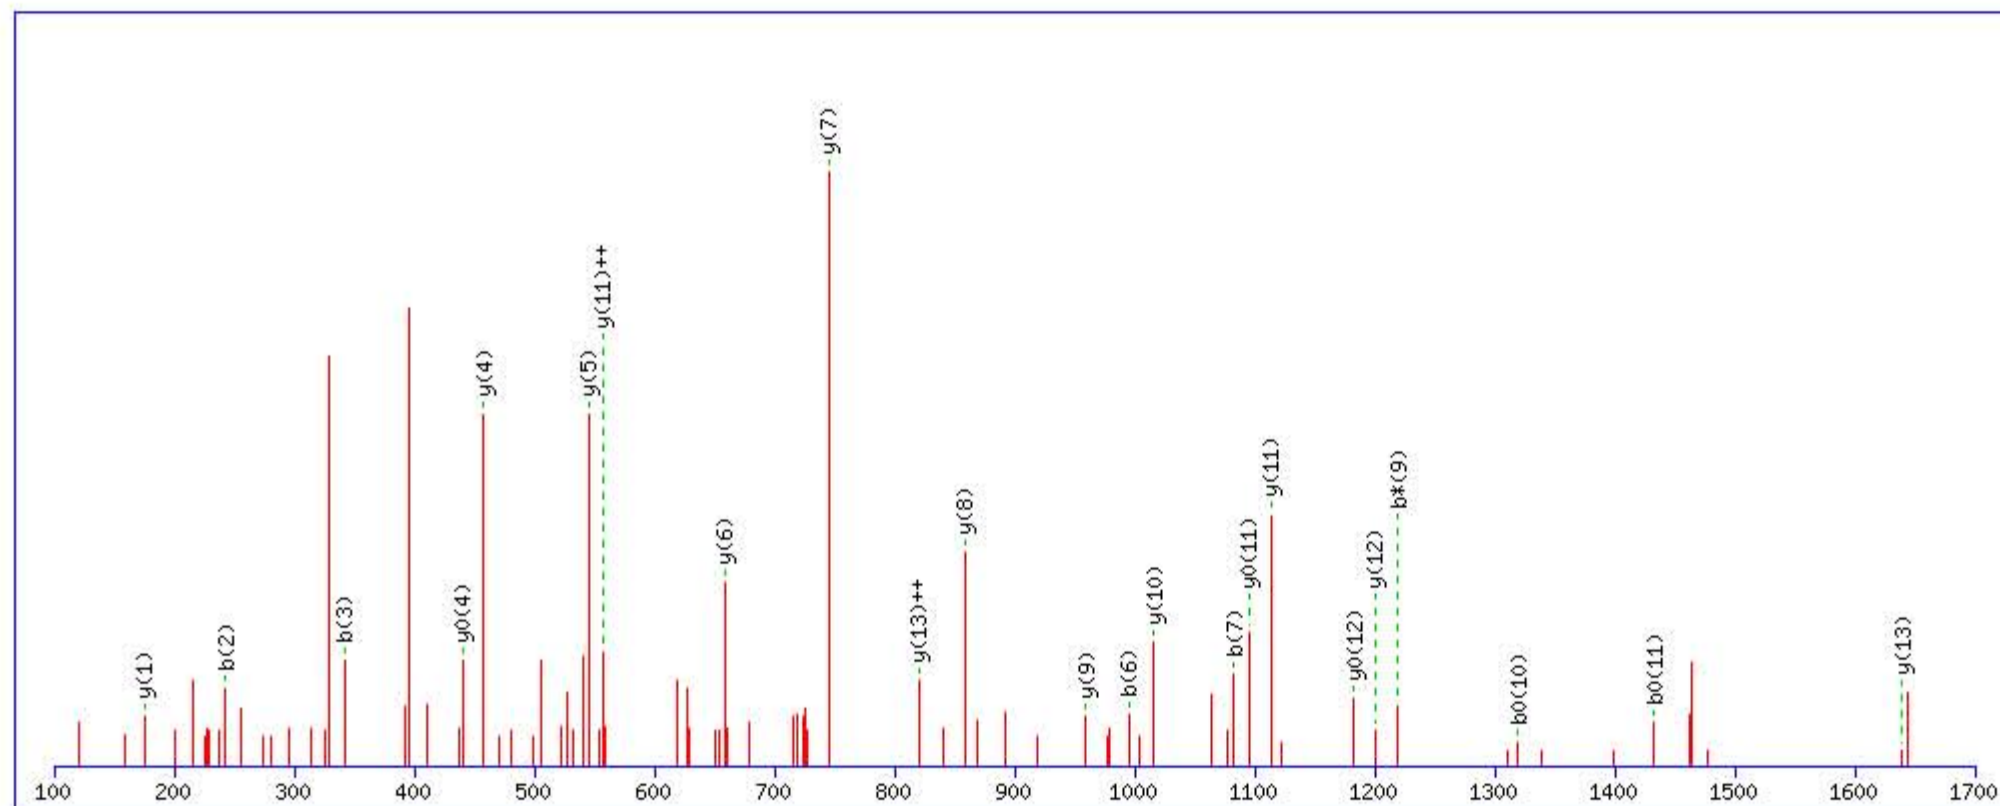

Monoisotopic mass of neutral peptide Mr(calc): 2194.166748  
 Fixed modifications: Carbamidomethyl (C) (apply to specified residues or termini only)  
 Variable modifications:  
 Q6 : Biotin:Thermo-21345 (Q)  
 Ions Score: 64 Expect: 7.7e-006  
 Matches : 23/192 fragment ions using 42 most intense peaks [\(help\)](#)

| #  | b           | b <sup>++</sup> | b <sup>*</sup> | b <sup>+++</sup> | b <sup>0</sup> | b <sup>0++</sup> | Seq. | y           | y <sup>++</sup> | y <sup>*</sup> | y <sup>+++</sup> | y <sup>0</sup> | y <sup>0++</sup> | #  |
|----|-------------|-----------------|----------------|------------------|----------------|------------------|------|-------------|-----------------|----------------|------------------|----------------|------------------|----|
| 1  | 130.049869  | 65.528572       |                |                  | 112.039304     | 56.523290        | E    |             |                 |                |                  |                |                  | 18 |
| 2  | 243.133933  | 122.070605      |                |                  | 225.123368     | 113.065322       | I    | 2066.131439 | 1033.569357     | 2049.104890    | 1025.056083      | 2048.120874    | 1024.564075      | 17 |
| 3  | 342.202347  | 171.604812      |                |                  | 324.191782     | 162.599529       | V    | 1953.047375 | 977.027326      | 1936.020826    | 968.514051       | 1935.036810    | 968.022043       | 16 |
| 4  | 455.286411  | 228.146844      |                |                  | 437.275846     | 219.141561       | L    | 1853.978961 | 927.493119      | 1836.952412    | 918.979844       | 1835.968396    | 918.487836       | 15 |
| 5  | 556.334090  | 278.670683      |                |                  | 538.323525     | 269.665401       | T    | 1740.894897 | 870.951087      | 1723.868348    | 862.437812       | 1722.884332    | 861.945804       | 14 |
| 6  | 995.559416  | 498.283346      | 978.532867     | 489.770072       | 977.548851     | 489.278064       | Q    | 1639.847218 | 820.427247      | 1622.820669    | 811.913973       | 1621.836653    | 811.421965       | 13 |
| 7  | 1082.591444 | 541.799360      | 1065.564895    | 533.286086       | 1064.580879    | 532.794078       | S    | 1200.621892 | 600.814584      | 1183.595343    | 592.301310       | 1182.611327    | 591.809302       | 12 |
| 8  | 1179.644208 | 590.325742      | 1162.617659    | 581.812468       | 1161.633643    | 581.320460       | P    | 1113.589864 | 557.298570      | 1096.563315    | 548.785296       | 1095.579299    | 548.293288       | 11 |
| 9  | 1236.665672 | 618.836474      | 1219.639123    | 610.323200       | 1218.655107    | 609.831192       | G    | 1016.537100 | 508.772188      | 999.510551     | 500.258914       | 998.526535     | 499.766906       | 10 |
| 10 | 1337.713351 | 669.360314      | 1320.686802    | 660.847039       | 1319.702786    | 660.355031       | T    | 959.515636  | 480.261456      | 942.489087     | 471.748182       | 941.505071     | 471.256174       | 9  |
| 11 | 1450.797415 | 725.902346      | 1433.770866    | 717.389071       | 1432.786850    | 716.897063       | L    | 858.467957  | 429.737617      | 841.441408     | 421.224342       | 840.457392     | 420.732334       | 8  |
| 12 | 1537.829443 | 769.418360      | 1520.802894    | 760.905085       | 1519.818878    | 760.413077       | S    | 745.383893  | 373.195585      | 728.357344     | 364.682310       | 727.373328     | 364.190302       | 7  |
| 13 | 1650.913507 | 825.960392      | 1633.886958    | 817.447117       | 1632.902942    | 816.955109       | L    | 658.351865  | 329.679571      | 641.325316     | 321.166296       | 640.341300     | 320.674288       | 6  |
| 14 | 1737.945535 | 869.476406      | 1720.918986    | 860.963131       | 1719.934970    | 860.471123       | S    | 545.267801  | 273.137539      | 528.241252     | 264.624264       | 527.257236     | 264.132256       | 5  |
| 15 | 1834.998299 | 918.002788      | 1817.971750    | 909.489513       | 1816.987734    | 908.997505       | P    | 458.235773  | 229.621524      | 441.209224     | 221.108250       | 440.225208     | 220.616242       | 4  |
| 16 | 1892.019763 | 946.513520      | 1874.993214    | 938.000245       | 1874.009198    | 937.508237       | G    | 361.183009  | 181.095142      | 344.156460     | 172.581868       | 343.172444     | 172.089860       | 3  |
| 17 | 2021.062356 | 1011.034816     | 2004.035807    | 1002.521542      | 2003.051791    | 1002.029534      | E    | 304.161545  | 152.584411      | 287.134996     | 144.071136       | 286.150980     | 143.579128       | 2  |
| 18 |             |                 |                |                  |                |                  | R    | 175.118952  | 88.063114       | 158.092403     | 79.549839        |                |                  | 1  |

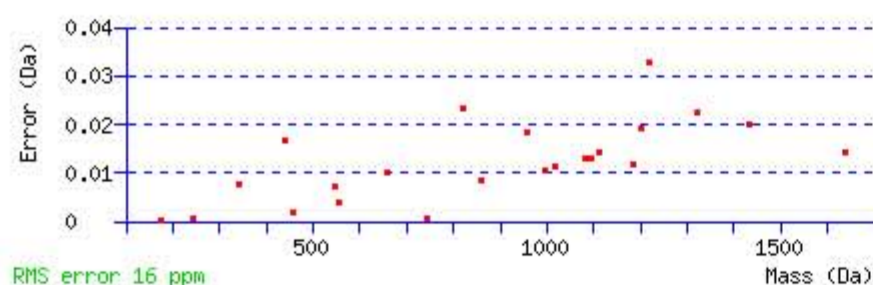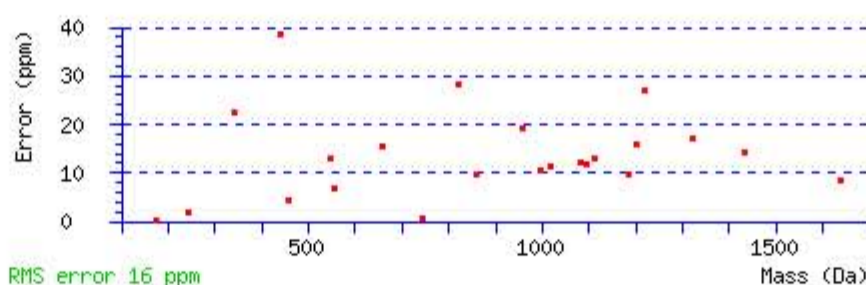

NCBI BLAST search of **EIVLTQSPGTLSPGER**  
 (Parameters: blastp, nr protein database, expect=20000, no filter, PAM30)  
 Other BLAST [web gateways](#)

All matches to this query

| Score | Mr(calc):   | Delta    | Sequence                         |
|-------|-------------|----------|----------------------------------|
| 64.3  | 2194.166748 | 0.023604 | <a href="#">EIVLTQSPGTLSPGER</a> |
| 64.3  | 2194.166748 | 0.023604 | <a href="#">ZIVLTZSPGTLSPGZR</a> |
| 47.9  | 2194.166748 | 0.023604 | <a href="#">ZIVLTZSPGTLSPGZR</a> |

# MASCOT SEARCH RESULTS

## Peptide View

MS/MS Fragmentation of **SYSCQVTHEGSTVEK**

Found in **IGLL5\_HUMAN**, Immunoglobulin lambda-like polypeptide 5 OS=Homo sapiens GN=IGLL5 PE=2 SV=2

Match to Query 51317: 2021.925162 from(674.982330,3+) rtinseconds(1397) index(20223)

Title: Locus:1.1.1.2629.11 File:"2013-07-02 CLN FXIII 180 min 1st F 2.wiff"

Data file C:\Program Files (x86)\Matrix Science\Mascot Daemon\mgf\7 FXIII 180 min 1st\mascot\_daemon\_merge.mgf

Click mouse within plot area to zoom in by factor of two about that point

Or, Plot from 100 to 1800 Da Full range

Label all possible matches  Label matches used for scoring

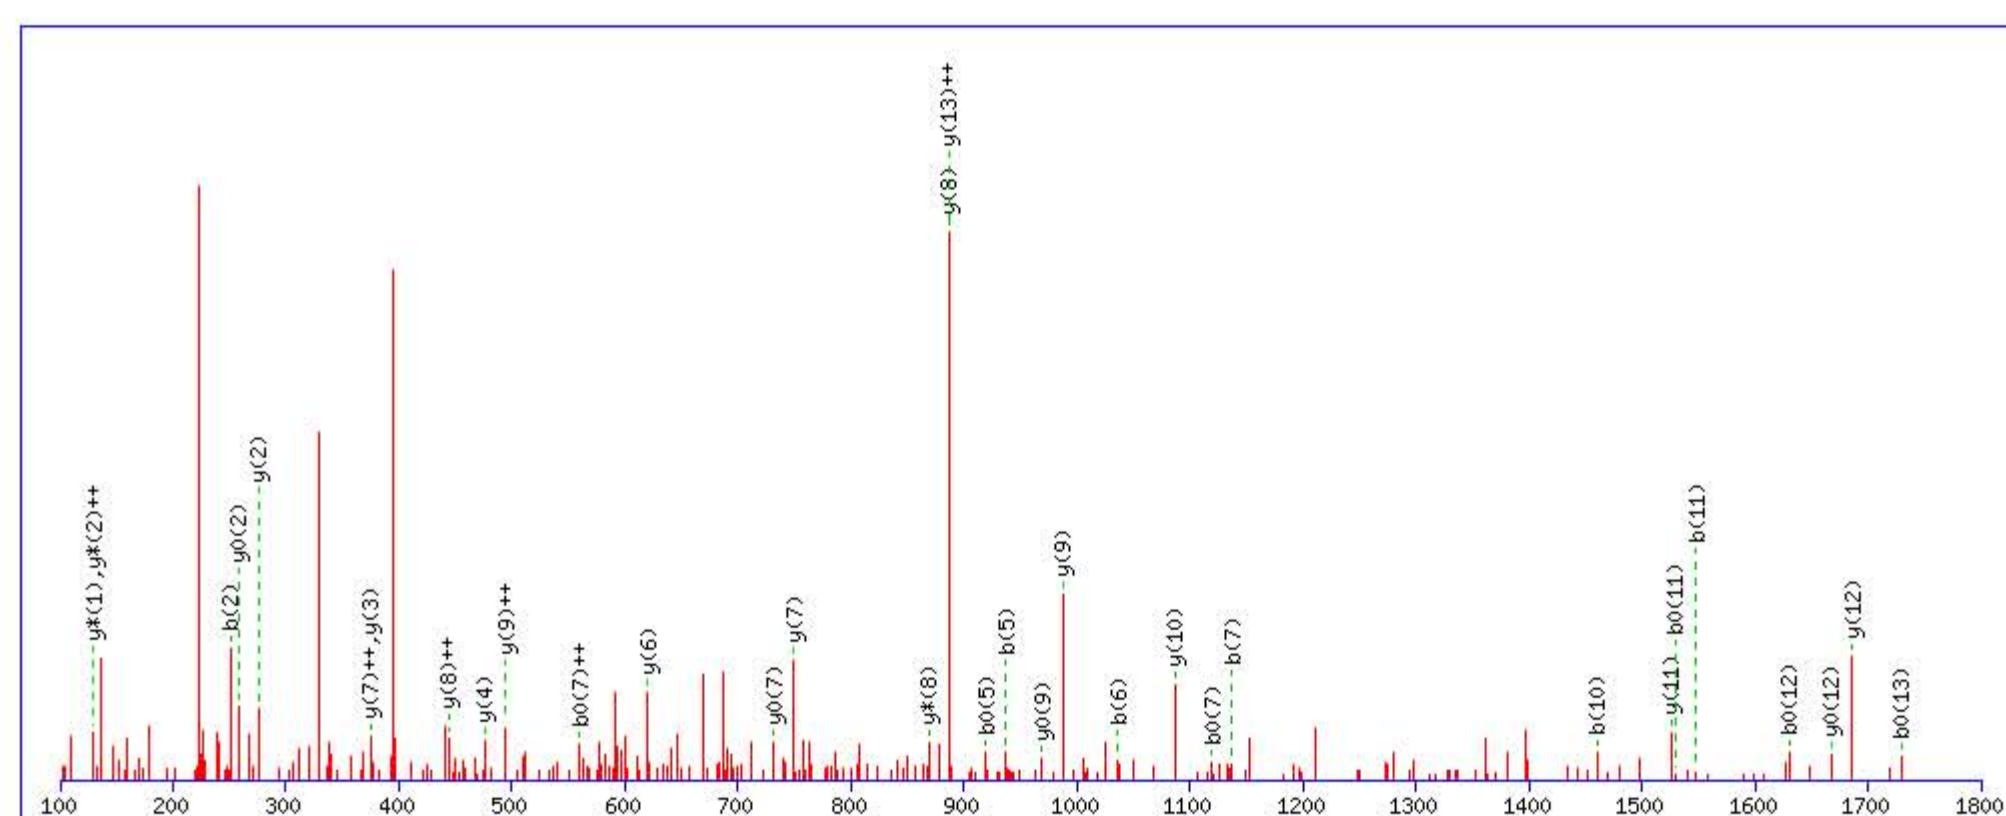

Monoisotopic mass of neutral peptide Mr(calc): 2021.918671

Fixed modifications: Carbamidomethyl (C) (apply to specified residues or termini only)

Variable modifications:

Q5 : Biotin:Thermo-21345 (Q)

Ions Score: 42 Expect: 0.00071

Matches : 33/158 fragment ions using 66 most intense peaks ([help](#))

| #  | b                  | b <sup>++</sup> | b <sup>+</sup> | b <sup>++</sup> | b <sup>0</sup>     | b <sup>0++</sup>  | Seq. | y                  | y <sup>++</sup>   | y <sup>+</sup>    | y <sup>++</sup>   | y <sup>0</sup>     | y <sup>0++</sup> | #  |
|----|--------------------|-----------------|----------------|-----------------|--------------------|-------------------|------|--------------------|-------------------|-------------------|-------------------|--------------------|------------------|----|
| 1  | 88.039304          | 44.523290       |                |                 | 70.028739          | 35.518008         | S    |                    |                   |                   |                   |                    |                  | 15 |
| 2  | <b>251.102633</b>  | 126.054954      |                |                 | 233.092068         | 117.049672        | Y    | 1935.893912        | 968.450594        | 1918.867363       | 959.937320        | 1917.883347        | 959.445312       | 14 |
| 3  | 338.134661         | 169.570968      |                |                 | 320.124096         | 160.565686        | S    | 1772.830583        | <b>886.918930</b> | 1755.804034       | 878.405655        | 1754.820018        | 877.913647       | 13 |
| 4  | 498.165310         | 249.586293      |                |                 | 480.154745         | 240.581011        | C    | <b>1685.798555</b> | 843.402916        | 1668.772006       | 834.889641        | <b>1667.787990</b> | 834.397633       | 12 |
| 5  | <b>937.390636</b>  | 469.198956      | 920.364087     | 460.685682      | <b>919.380071</b>  | 460.193674        | Q    | <b>1525.767906</b> | 763.387591        | 1508.741357       | 754.874317        | 1507.757341        | 754.382309       | 11 |
| 6  | <b>1036.459050</b> | 518.733163      | 1019.432501    | 510.219889      | 1018.448485        | 509.727881        | V    | <b>1086.542580</b> | 543.774928        | 1069.516031       | 535.261654        | 1068.532015        | 534.769646       | 10 |
| 7  | <b>1137.506729</b> | 569.257003      | 1120.480180    | 560.743728      | <b>1119.496164</b> | <b>560.251720</b> | T    | <b>987.474166</b>  | <b>494.240721</b> | 970.447617        | 485.727447        | <b>969.463601</b>  | 485.235439       | 9  |
| 8  | 1274.565641        | 637.786459      | 1257.539092    | 629.273184      | 1256.555076        | 628.781176        | H    | <b>886.426487</b>  | <b>443.716882</b> | <b>869.399938</b> | 435.203607        | 868.415922         | 434.711599       | 8  |
| 9  | 1403.608234        | 702.307755      | 1386.581685    | 693.794481      | 1385.597669        | 693.302473        | E    | <b>749.367575</b>  | <b>375.187426</b> | 732.341026        | 366.674151        | <b>731.357010</b>  | 366.182143       | 7  |
| 10 | <b>1460.629698</b> | 730.818487      | 1443.603149    | 722.305213      | 1442.619133        | 721.813204        | G    | <b>620.324982</b>  | 310.666129        | 603.298433        | 302.152855        | 602.314417         | 301.660847       | 6  |
| 11 | <b>1547.661726</b> | 774.334501      | 1530.635177    | 765.821227      | <b>1529.651161</b> | 765.329219        | S    | 563.303518         | 282.155397        | 546.276969        | 273.642123        | 545.292953         | 273.150115       | 5  |
| 12 | 1648.709405        | 824.858341      | 1631.682856    | 816.345066      | <b>1630.698840</b> | 815.853058        | T    | <b>476.271490</b>  | 238.639383        | 459.244941        | 230.126109        | 458.260925         | 229.634101       | 4  |
| 13 | 1747.777819        | 874.392548      | 1730.751270    | 865.879273      | <b>1729.767254</b> | 865.387265        | V    | <b>375.223811</b>  | 188.115544        | 358.197262        | 179.602269        | 357.213246         | 179.110261       | 3  |
| 14 | 1876.820412        | 938.913844      | 1859.793863    | 930.400570      | 1858.809847        | 929.908562        | E    | <b>276.155397</b>  | 138.581337        | 259.128848        | <b>130.068062</b> | <b>258.144832</b>  | 129.576054       | 2  |
| 15 |                    |                 |                |                 |                    |                   | K    | 147.112804         | 74.060040         | <b>130.086255</b> | 65.546765         |                    |                  | 1  |

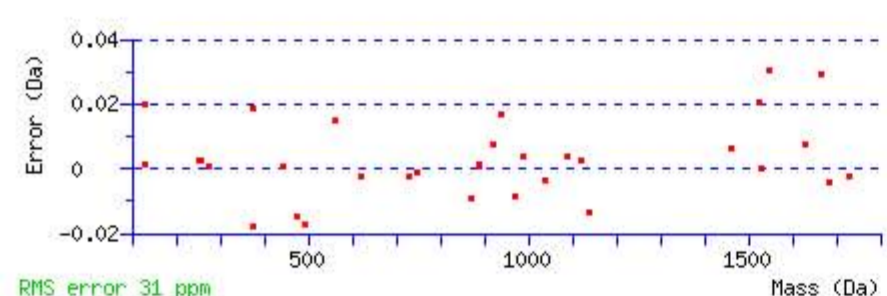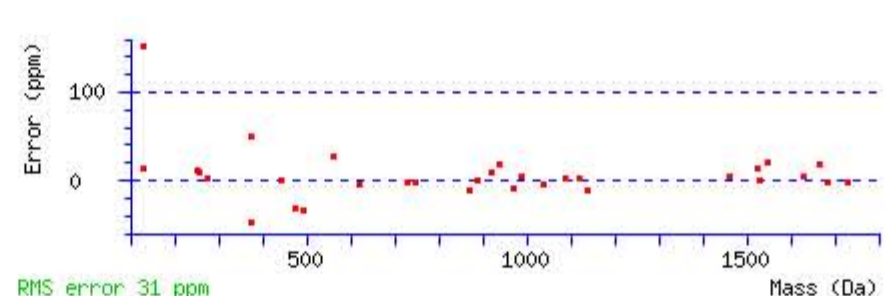

NCBI BLAST search of [SYSCQVTHEGSTVEK](#)

(Parameters: blastp, nr protein database, expect=20000, no filter, PAM30)

Other BLAST [web gateways](#)

All matches to this query

| Score | Mr(calc):   | Delta    | Sequence                        |
|-------|-------------|----------|---------------------------------|
| 42.5  | 2021.918671 | 0.006491 | <a href="#">SYSCQVTHEGSTVEK</a> |

Mascot: <http://www.matrixscience.com/>

# MASCOT SCIENCE Mascot Search Results

## Peptide View

### MS/MS Fragmentation of **QIQVSWLR**

Found in **IGHM\_HUMAN**, Ig mu chain C region OS=Homo sapiens GN=IGHM PE=1 SV=3

Match to Query 27849: 1339.761288 from(670.887920,2+) rtinseconds(2315) index(44368)

Title: Locus:1.1.1.3255.11 File:"2013-07-02 CLN FXIII 180 min 1st F 3.wiff"

Data file C:\Program Files (x86)\Matrix Science\Mascot Daemon\mgf\7 FXIII 180 min 1st\mascot\_daemon\_merge.mgf

Click mouse within plot area to zoom in by factor of two about that point

Or, Plot from  to  Da

Label all possible matches  Label matches used for scoring

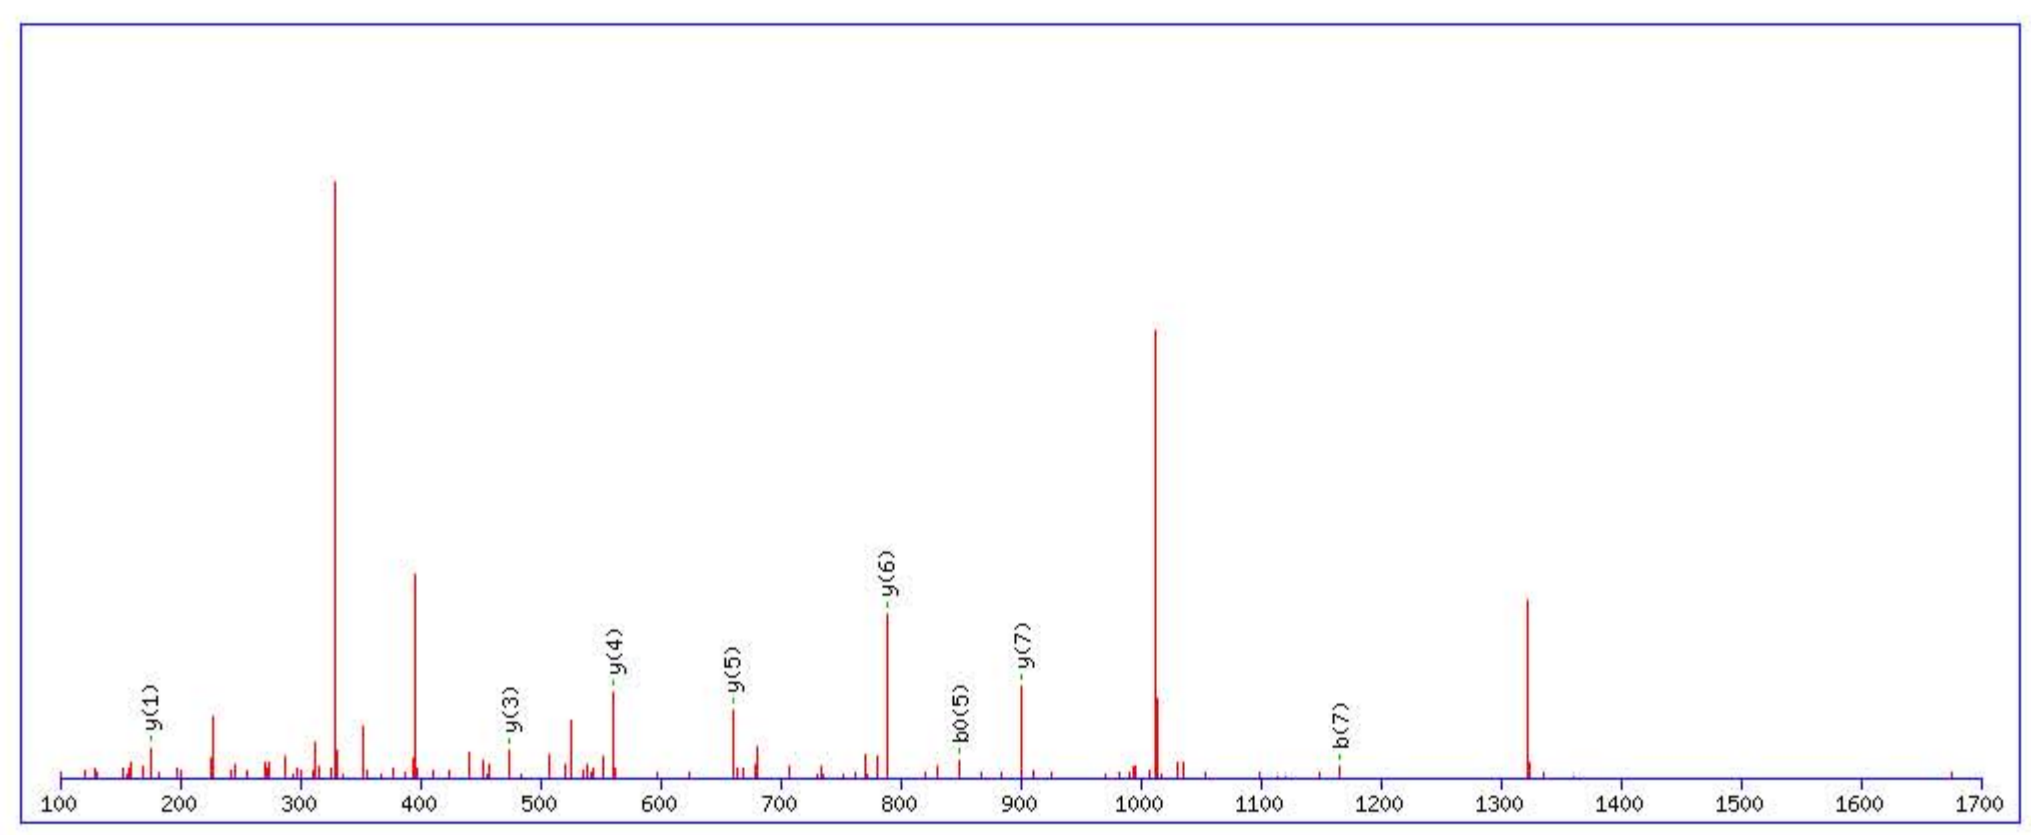

Monoisotopic mass of neutral peptide Mr(calc): 1339.743454

Fixed modifications: Carbamidomethyl (C) (apply to specified residues or termini only)

Variable modifications:

Q1 : Biotin:Thermo-21345 (Q)

Ions Score: 43 Expect: 0.00076

Matches : 8/70 fragment ions using 12 most intense peaks [\(help\)](#)

| # | b           | b <sup>++</sup> | b*          | b <sup>+++</sup> | b <sup>0</sup> | b <sup>0++</sup> | Seq. | y          | y <sup>++</sup> | y*         | y <sup>+++</sup> | y <sup>0</sup> | y <sup>0++</sup> | # |
|---|-------------|-----------------|-------------|------------------|----------------|------------------|------|------------|-----------------|------------|------------------|----------------|------------------|---|
| 1 | 440.232602  | 220.619939      | 423.206053  | 212.106664       |                |                  | Q    |            |                 |            |                  |                |                  | 8 |
| 2 | 553.316666  | 277.161971      | 536.290117  | 268.648697       |                |                  | I    | 901.525413 | 451.266344      | 884.498864 | 442.753070       | 883.514848     | 442.261062       | 7 |
| 3 | 681.375244  | 341.191260      | 664.348695  | 332.677986       |                |                  | Q    | 788.441349 | 394.724312      | 771.414800 | 386.211038       | 770.430784     | 385.719030       | 6 |
| 4 | 780.443658  | 390.725467      | 763.417109  | 382.212193       |                |                  | V    | 660.382771 | 330.695023      | 643.356222 | 322.181749       | 642.372206     | 321.689741       | 5 |
| 5 | 867.475686  | 434.241481      | 850.449137  | 425.728207       | 849.465121     | 425.236199       | S    | 561.314357 | 281.160816      | 544.287808 | 272.647542       | 543.303792     | 272.155534       | 4 |
| 6 | 1053.554999 | 527.281138      | 1036.528450 | 518.767863       | 1035.544434    | 518.275855       | W    | 474.282329 | 237.644802      | 457.255780 | 229.131528       |                |                  | 3 |
| 7 | 1166.639063 | 583.823169      | 1149.612514 | 575.309895       | 1148.628498    | 574.817887       | L    | 288.203016 | 144.605146      | 271.176467 | 136.091871       |                |                  | 2 |
| 8 |             |                 |             |                  |                |                  | R    | 175.118952 | 88.063114       | 158.092403 | 79.549839        |                |                  | 1 |

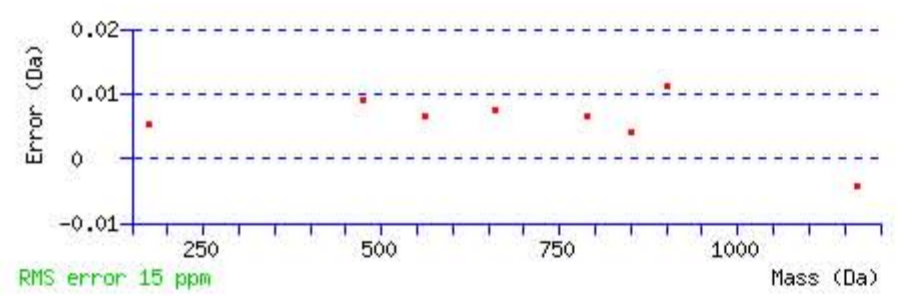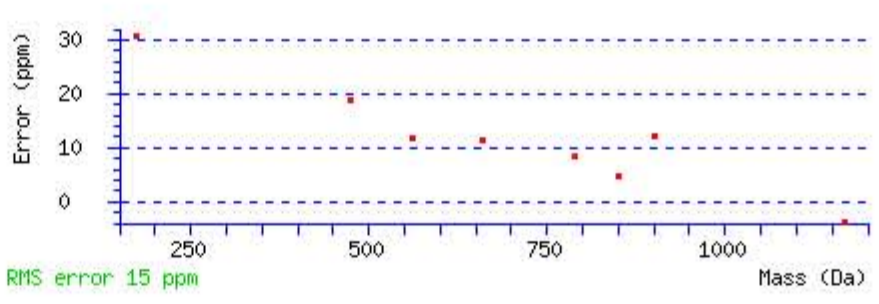

### NCBI BLAST search of **QIQVSWLR**

(Parameters: blastp, nr protein database, expect=20000, no filter, PAM30)

Other BLAST [web gateways](#)

### All matches to this query

| Score | Mr(calc):   | Delta     | Sequence                     |
|-------|-------------|-----------|------------------------------|
| 43.3  | 1339.743454 | 0.017834  | <a href="#">QIQVSWLR</a>     |
| 16.2  | 1339.743454 | 0.017834  | <a href="#">QIQVSWLR</a>     |
| 12.0  | 1339.765915 | -0.004627 | <a href="#">QRLRFGPR</a>     |
| 9.8   | 1339.753326 | 0.007962  | <a href="#">QLQISIAEK</a>    |
| 7.7   | 1339.764557 | -0.003269 | <a href="#">AKETIQALR</a>    |
| 6.3   | 1339.745941 | 0.015347  | <a href="#">QVTAPELNSIIR</a> |
| 6.2   | 1339.754669 | 0.006619  | <a href="#">QASIRLWR</a>     |
| 6.1   | 1339.775787 | -0.014499 | <a href="#">QLRSIEKR</a>     |
| 6.1   | 1339.743439 | 0.017849  | <a href="#">QLSWLINR</a>     |
| 6.1   | 1339.743454 | 0.017834  | <a href="#">QLTWLVNR</a>     |

# MASCOT SEARCH RESULTS

## Peptide View

MS/MS Fragmentation of **LICQATGFSPR**

Found in **IGHM\_HUMAN**, Ig mu chain C region OS=Homo sapiens GN=IGHM PE=1 SV=3

Match to Query 36675: 1559.816868 from(780.915710,2+) rtinseconds(1965) index(41990)

Title: Locus:1.1.1.3133.20 File:"2013-07-02 CLN FXIII 180 min 1st F 3.wiff"

Data file C:\Program Files (x86)\Matrix Science\Mascot Daemon\mgf\7 FXIII 180 min 1st\mascot\_daemon\_merge.mgf

Click mouse within plot area to zoom in by factor of two about that point

Or, Plot from  to  Da

Label all possible matches  Label matches used for scoring

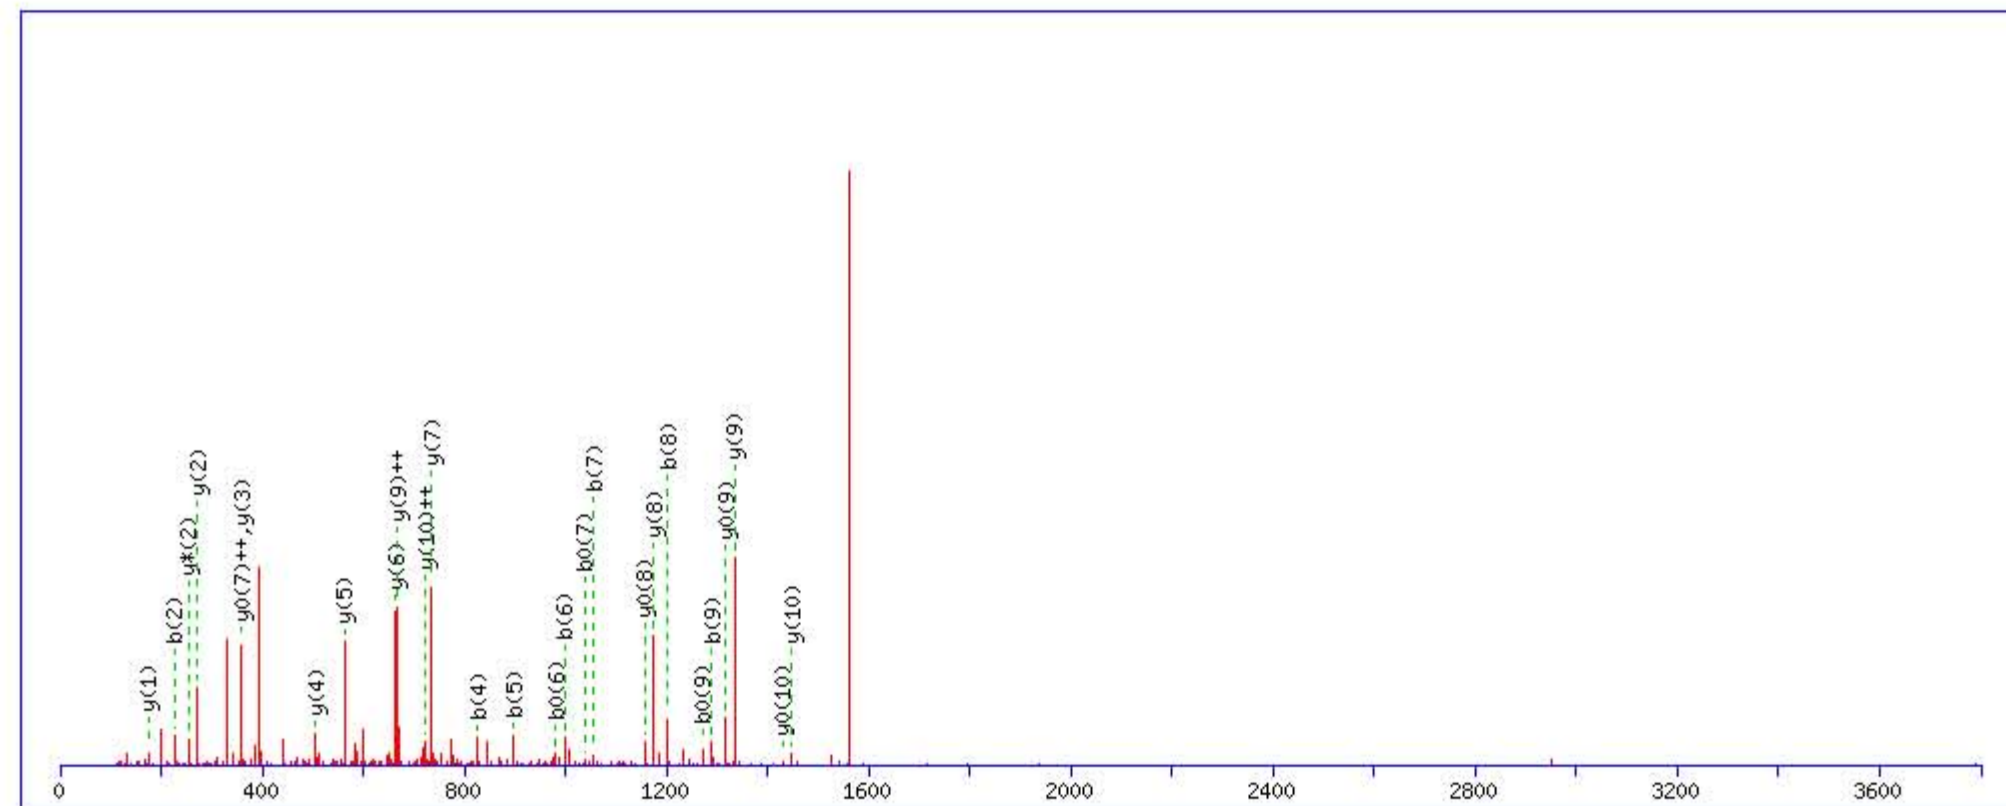

Monoisotopic mass of neutral peptide Mr(calc): 1559.795242

Fixed modifications: Carbamidomethyl (C) (apply to specified residues or termini only)

Variable modifications:

Q4 : Biotin:Thermo-21345 (Q)

Ions Score: 70 Expect: 2.7e-006

Matches : 27/100 fragment ions using 45 most intense peaks [\(help\)](#)

| #  | b                  | b <sup>++</sup> | b <sup>+</sup> | b <sup>+++</sup> | b <sup>0</sup>     | b <sup>0++</sup> | Seq. | y                  | y <sup>++</sup>   | y <sup>+</sup>    | y <sup>+++</sup> | y <sup>0</sup>     | y <sup>0++</sup>  | #  |
|----|--------------------|-----------------|----------------|------------------|--------------------|------------------|------|--------------------|-------------------|-------------------|------------------|--------------------|-------------------|----|
| 1  | 114.091340         | 57.549308       |                |                  |                    |                  | L    |                    |                   |                   |                  |                    |                   | 11 |
| 2  | <b>227.175404</b>  | 114.091340      |                |                  |                    |                  | I    | <b>1447.718454</b> | <b>724.362865</b> | 1430.691905       | 715.849591       | <b>1429.707889</b> | 715.357583        | 10 |
| 3  | 387.206053         | 194.106664      |                |                  |                    |                  | C    | <b>1334.634390</b> | <b>667.820833</b> | 1317.607841       | 659.307559       | <b>1316.623825</b> | 658.815551        | 9  |
| 4  | <b>826.431379</b>  | 413.719328      | 809.404830     | 405.206053       |                    |                  | Q    | <b>1174.603741</b> | 587.805509        | 1157.577192       | 579.292234       | <b>1156.593176</b> | 578.800226        | 8  |
| 5  | <b>897.468493</b>  | 449.237885      | 880.441944     | 440.724610       |                    |                  | A    | <b>735.378415</b>  | 368.192846        | 718.351866        | 359.679571       | 717.367850         | <b>359.187563</b> | 7  |
| 6  | <b>998.516172</b>  | 499.761724      | 981.489623     | 491.248449       | <b>980.505607</b>  | 490.756441       | T    | <b>664.341301</b>  | 332.674289        | 647.314752        | 324.161014       | 646.330736         | 323.669006        | 6  |
| 7  | <b>1055.537636</b> | 528.272456      | 1038.511087    | 519.759182       | <b>1037.527071</b> | 519.267174       | G    | <b>563.293622</b>  | 282.150449        | 546.267073        | 273.637175       | 545.283057         | 273.145167        | 5  |
| 8  | <b>1202.606050</b> | 601.806663      | 1185.579501    | 593.293389       | 1184.595485        | 592.801381       | F    | <b>506.272158</b>  | 253.639717        | 489.245609        | 245.126443       | 488.261593         | 244.634435        | 4  |
| 9  | <b>1289.638078</b> | 645.322677      | 1272.611529    | 636.809403       | <b>1271.627513</b> | 636.317395       | S    | <b>359.203744</b>  | 180.105510        | 342.177195        | 171.592236       | 341.193179         | 171.100228        | 3  |
| 10 | 1386.690842        | 693.849059      | 1369.664293    | 685.335785       | 1368.680277        | 684.843777       | P    | <b>272.171716</b>  | 136.589496        | <b>255.145167</b> | 128.076221       |                    |                   | 2  |
| 11 |                    |                 |                |                  |                    |                  | R    | <b>175.118952</b>  | 88.063114         | 158.092403        | 79.549839        |                    |                   | 1  |

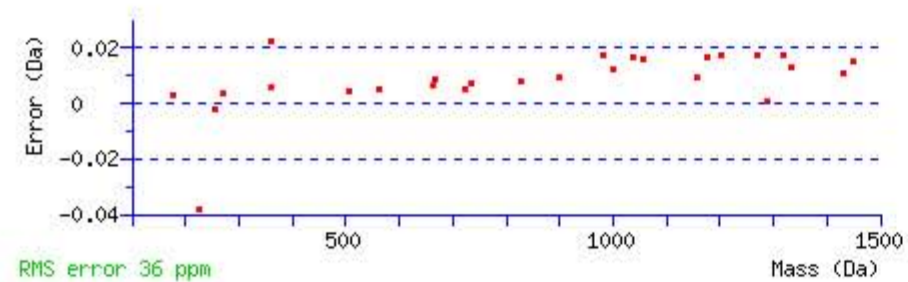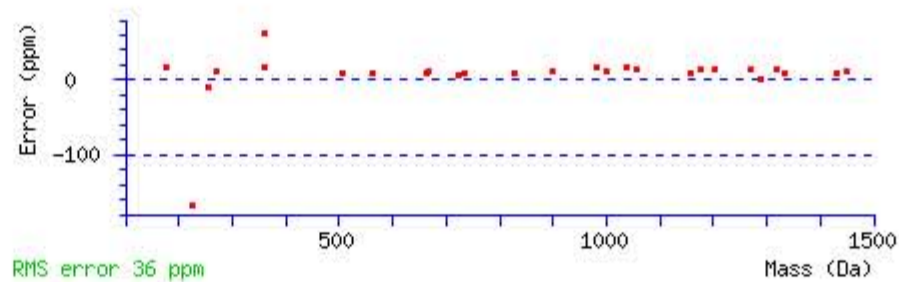

NCBI BLAST search of **LICQATGFSPR**

(Parameters: blastp, nr protein database, expect=20000, no filter, PAM30)

Other BLAST [web gateways](#)

All matches to this query

| Score | Mr(calc):   | Delta     | Sequence                       |
|-------|-------------|-----------|--------------------------------|
| 69.8  | 1559.795242 | 0.021626  | <a href="#">LICQATGFSPR</a>    |
| 10.0  | 1559.820190 | -0.003322 | <a href="#">MTRSATQAAKQVPR</a> |
| 5.1   | 1559.808960 | 0.007908  | <a href="#">LDRLSGLADQMVAR</a> |
| 3.7   | 1559.808975 | 0.007893  | <a href="#">LLDRDACDTRVK</a>   |
| 3.1   | 1559.838120 | -0.021252 | <a href="#">LILQYLDSEK</a>     |

# MASCOT Search Results

## Peptide View

MS/MS Fragmentation of **YAATSQVLLPSK**

Found in **IGHM\_HUMAN**, Ig mu chain C region OS=Homo sapiens GN=IGHM PE=1 SV=3

Match to Query 38104: 1587.859728 from(794.937140,2+) rtinseconds(1996) index(24664)

Title: Locus:1.1.1.2837.17 File:"2013-07-02 CLN FXIII 180 min 1st F 2.wiff"

Data file C:\Program Files (x86)\Matrix Science\Mascot Daemon\mgf\7 FXIII 180 min 1st\mascot\_daemon\_merge.mgf

Click mouse within plot area to zoom in by factor of two about that point

Or, Plot from  to  Da

Label all possible matches  Label matches used for scoring

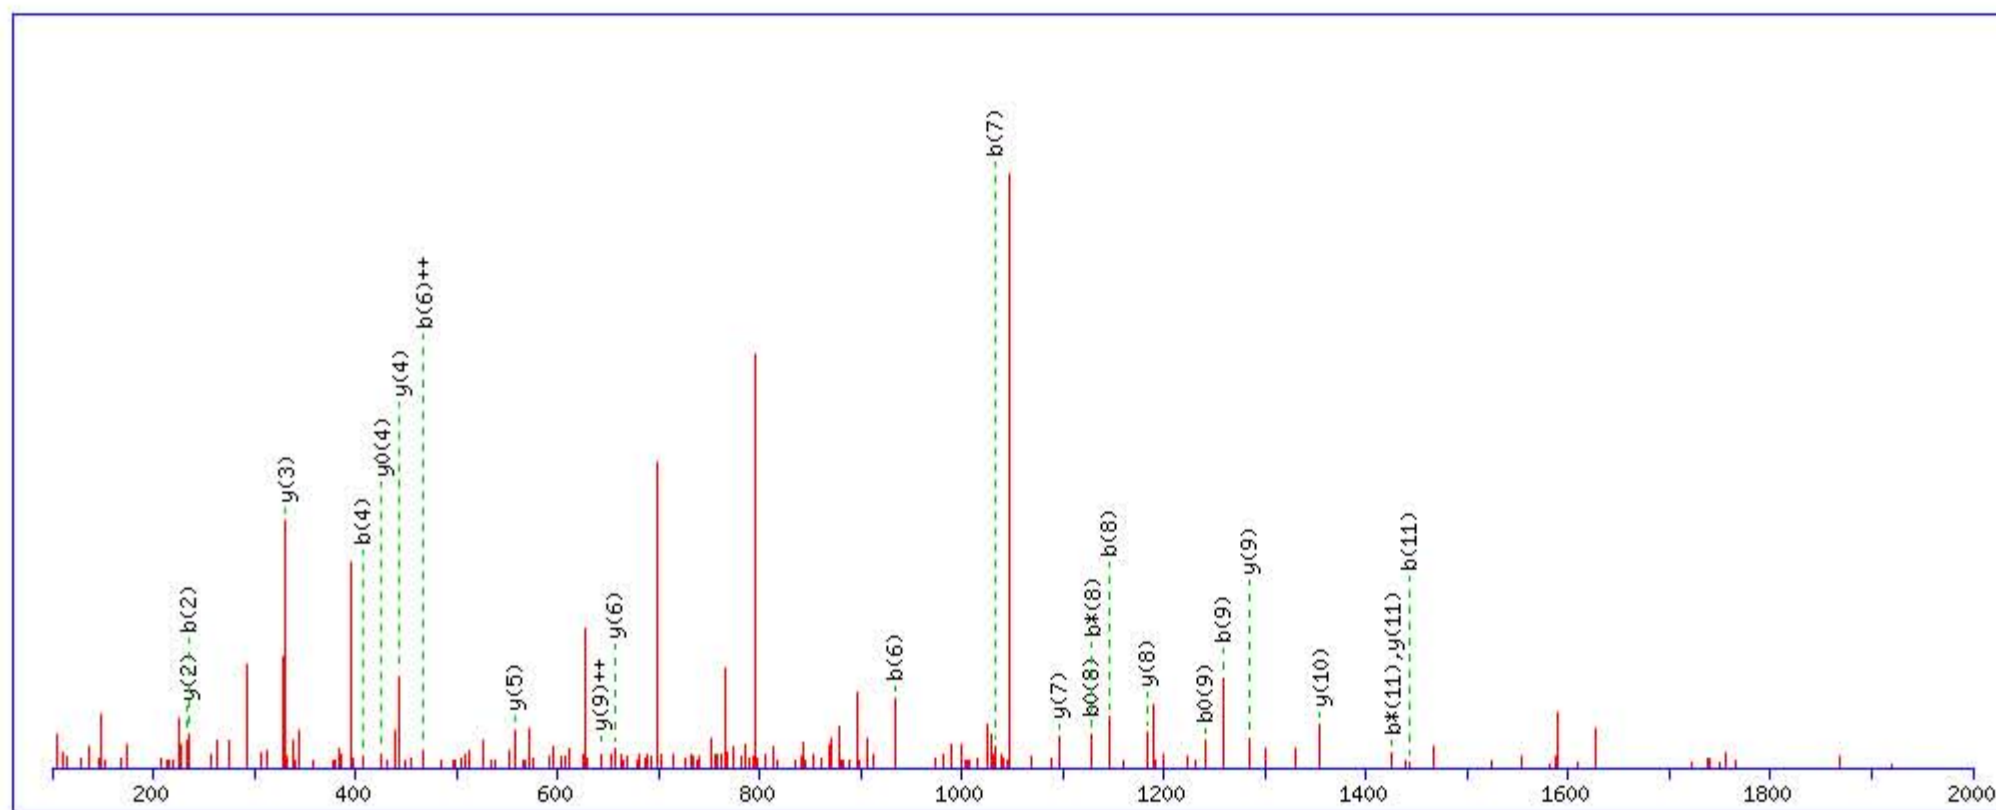

Monoisotopic mass of neutral peptide Mr(calc): 1587.869431

Fixed modifications: Carbamidomethyl (C) (apply to specified residues or termini only)

Variable modifications:

Q6 : Biotin:Thermo-21345 (Q)

Ions Score: 30 Expect: 0.026

Matches : 24/114 fragment ions using 81 most intense peaks [\(help\)](#)

| #  | b                  | b <sup>++</sup>   | b <sup>*</sup>     | b <sup>*++</sup> | b <sup>0</sup>     | b <sup>0++</sup> | Seq. | y                  | y <sup>++</sup>   | y <sup>*</sup> | y <sup>*++</sup> | y <sup>0</sup>    | y <sup>0++</sup> | #  |
|----|--------------------|-------------------|--------------------|------------------|--------------------|------------------|------|--------------------|-------------------|----------------|------------------|-------------------|------------------|----|
| 1  | 164.070605         | 82.538940         |                    |                  |                    |                  | Y    |                    |                   |                |                  |                   |                  | 12 |
| 2  | <b>235.107719</b>  | 118.057498        |                    |                  |                    |                  | A    | <b>1425.813399</b> | 713.410337        | 1408.786850    | 704.897063       | 1407.802834       | 704.405055       | 11 |
| 3  | 306.144833         | 153.576055        |                    |                  |                    |                  | A    | <b>1354.776285</b> | 677.891780        | 1337.749736    | 669.378506       | 1336.765720       | 668.886498       | 10 |
| 4  | <b>407.192512</b>  | 204.099894        |                    |                  | 389.181947         | 195.094612       | T    | <b>1283.739171</b> | <b>642.373223</b> | 1266.712622    | 633.859949       | 1265.728606       | 633.367941       | 9  |
| 5  | 494.224540         | 247.615908        |                    |                  | 476.213975         | 238.610626       | S    | <b>1182.691492</b> | 591.849384        | 1165.664943    | 583.336110       | 1164.680927       | 582.844101       | 8  |
| 6  | <b>933.449866</b>  | <b>467.228571</b> | 916.423317         | 458.715297       | 915.439301         | 458.223289       | Q    | <b>1095.659464</b> | 548.333370        | 1078.632915    | 539.820096       | 1077.648899       | 539.328088       | 7  |
| 7  | <b>1032.518280</b> | 516.762778        | 1015.491731        | 508.249504       | 1014.507715        | 507.757496       | V    | <b>656.434138</b>  | 328.720707        | 639.407589     | 320.207432       | 638.423573        | 319.715424       | 6  |
| 8  | <b>1145.602344</b> | 573.304810        | <b>1128.575795</b> | 564.791536       | <b>1127.591779</b> | 564.299527       | L    | <b>557.365724</b>  | 279.186500        | 540.339175     | 270.673226       | 539.355159        | 270.181218       | 5  |
| 9  | <b>1258.686408</b> | 629.846842        | 1241.659859        | 621.333567       | <b>1240.675843</b> | 620.841559       | L    | <b>444.281660</b>  | 222.644468        | 427.255111     | 214.131193       | <b>426.271095</b> | 213.639186       | 4  |
| 10 | 1355.739172        | 678.373224        | 1338.712623        | 669.859949       | 1337.728607        | 669.367941       | P    | <b>331.197596</b>  | 166.102436        | 314.171047     | 157.589162       | 313.187031        | 157.097154       | 3  |
| 11 | <b>1442.771200</b> | 721.889238        | <b>1425.744651</b> | 713.375964       | 1424.760635        | 712.883955       | S    | <b>234.144832</b>  | 117.576054        | 217.118283     | 109.062780       | 216.134267        | 108.570772       | 2  |
| 12 |                    |                   |                    |                  |                    |                  | K    | 147.112804         | 74.060040         | 130.086255     | 65.546765        |                   |                  | 1  |

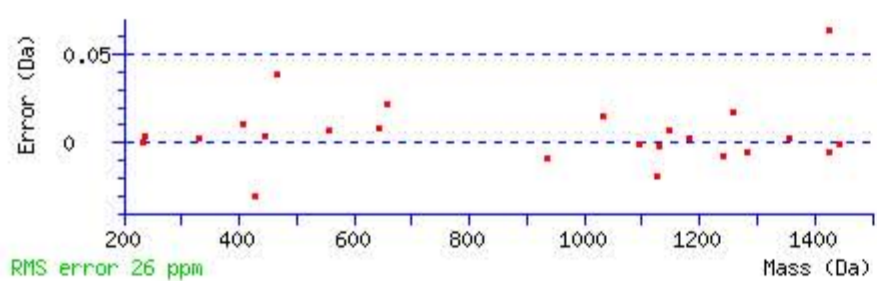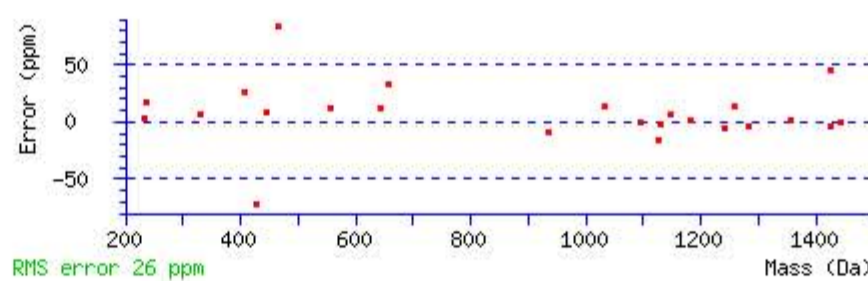

NCBI BLAST search of **YAATSQVLLPSK**

(Parameters: blastp, nr protein database, expect=20000, no filter, PAM30)

Other BLAST [web gateways](#)

All matches to this query

| Score | Mr(calc):   | Delta     | Sequence                        |
|-------|-------------|-----------|---------------------------------|
| 29.6  | 1587.869431 | -0.009703 | <a href="#">YAATSQVLLPSK</a>    |
| 13.1  | 1587.841599 | 0.018129  | <a href="#">QSTHLKDHRR</a>      |
| 4.1   | 1587.836884 | 0.022844  | <a href="#">NLESIDPQFTIRR</a>   |
| 3.6   | 1587.862045 | -0.002317 | <a href="#">VTGQNQEQLLLAK</a>   |
| 2.5   | 1587.840286 | 0.019442  | <a href="#">DATRVLQMVLGDGVR</a> |

Mascot: <http://www.matrixscience.com/>

# MATRIX SCIENCE Mascot Search Results

## Peptide View

MS/MS Fragmentation of **DVMQGTDEHVVCK**

Found in **IGHM\_HUMAN**, Ig mu chain C region OS=Homo sapiens GN=IGHM PE=1 SV=3

Match to Query 46002: 1827.844302 from(610.288710,3+) rtinseconds(1620) index(39592)

Title: Locus:1.1.1.3013.10 File:"2013-07-02 CLN FXIII 180 min 1st F 3.wiff"

Data file C:\Program Files (x86)\Matrix Science\Mascot Daemon\mgf\7 FXIII 180 min 1st\mascot\_daemon\_merge.mgf

Click mouse within plot area to zoom in by factor of two about that point

Or, Plot from  to  Da

Label all possible matches  Label matches used for scoring

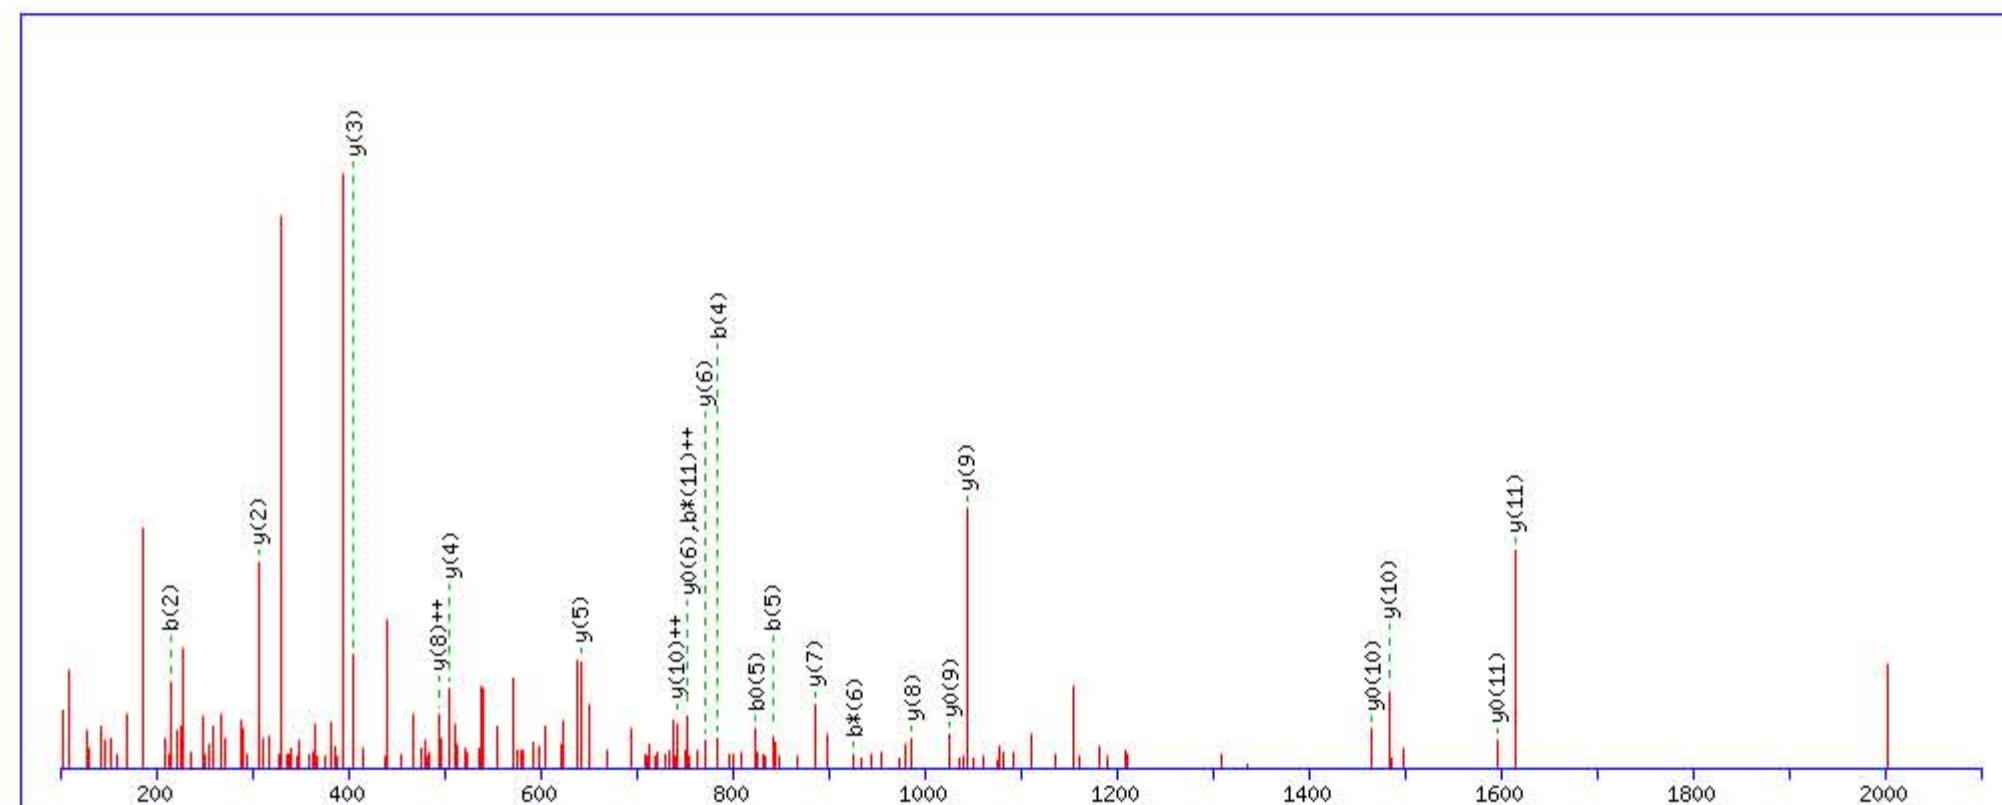

Monoisotopic mass of neutral peptide Mr(calc): 1827.831787

Fixed modifications: Carbamidomethyl (C) (apply to specified residues or termini only)

Variable modifications:

Q4 : Biotin:Thermo-21345 (Q)

Ions Score: 33 Expect: 0.0059

Matches : 22/128 fragment ions using 66 most intense peaks [\(help\)](#)

| #  | b                 | b <sup>++</sup> | b <sup>*</sup>    | b <sup>*++</sup>  | b <sup>0</sup>    | b <sup>0++</sup> | Seq. | y                  | y <sup>++</sup>   | y <sup>*</sup> | y <sup>*++</sup> | y <sup>0</sup>     | y <sup>0++</sup> | #  |
|----|-------------------|-----------------|-------------------|-------------------|-------------------|------------------|------|--------------------|-------------------|----------------|------------------|--------------------|------------------|----|
| 1  | 116.034219        | 58.520748       |                   |                   | 98.023654         | 49.515465        | D    |                    |                   |                |                  |                    |                  | 13 |
| 2  | <b>215.102633</b> | 108.054954      |                   |                   | 197.092068        | 99.049672        | V    | 1713.812097        | 857.409687        | 1696.785548    | 848.896412       | 1695.801532        | 848.404404       | 12 |
| 3  | 346.143118        | 173.575197      |                   |                   | 328.132553        | 164.569915       | M    | <b>1614.743683</b> | 807.875480        | 1597.717134    | 799.362205       | <b>1596.733118</b> | 798.870197       | 11 |
| 4  | <b>785.368444</b> | 393.187860      | 768.341895        | 384.674586        | 767.357879        | 384.182578       | Q    | <b>1483.703198</b> | <b>742.355237</b> | 1466.676649    | 733.841963       | <b>1465.692633</b> | 733.349955       | 10 |
| 5  | <b>842.389908</b> | 421.698592      | 825.363359        | 413.185318        | <b>824.379343</b> | 412.693310       | G    | <b>1044.477872</b> | 522.742574        | 1027.451323    | 514.229300       | <b>1026.467307</b> | 513.737292       | 9  |
| 6  | 943.437587        | 472.222432      | <b>926.411038</b> | 463.709157        | 925.427022        | 463.217149       | T    | <b>987.456408</b>  | <b>494.231842</b> | 970.429859     | 485.718568       | 969.445843         | 485.226560       | 8  |
| 7  | 1058.464530       | 529.735903      | 1041.437981       | 521.222629        | 1040.453965       | 520.730621       | D    | <b>886.408729</b>  | 443.708003        | 869.382180     | 435.194728       | 868.398164         | 434.702720       | 7  |
| 8  | 1187.507123       | 594.257200      | 1170.480574       | 585.743925        | 1169.496558       | 585.251917       | E    | <b>771.381786</b>  | 386.194531        | 754.355237     | 377.681257       | <b>753.371221</b>  | 377.189249       | 6  |
| 9  | 1324.566035       | 662.786656      | 1307.539486       | 654.273381        | 1306.555470       | 653.781373       | H    | <b>642.339193</b>  | 321.673235        | 625.312644     | 313.159960       |                    |                  | 5  |
| 10 | 1423.634449       | 712.320863      | 1406.607900       | 703.807588        | 1405.623884       | 703.315580       | V    | <b>505.280281</b>  | 253.143779        | 488.253732     | 244.630504       |                    |                  | 4  |
| 11 | 1522.702863       | 761.855070      | 1505.676314       | <b>753.341795</b> | 1504.692298       | 752.849787       | V    | <b>406.211867</b>  | 203.609572        | 389.185318     | 195.096297       |                    |                  | 3  |
| 12 | 1682.733512       | 841.870394      | 1665.706963       | 833.357120        | 1664.722947       | 832.865112       | C    | <b>307.143453</b>  | 154.075365        | 290.116904     | 145.562090       |                    |                  | 2  |
| 13 |                   |                 |                   |                   |                   |                  | K    | 147.112804         | 74.060040         | 130.086255     | 65.546765        |                    |                  | 1  |

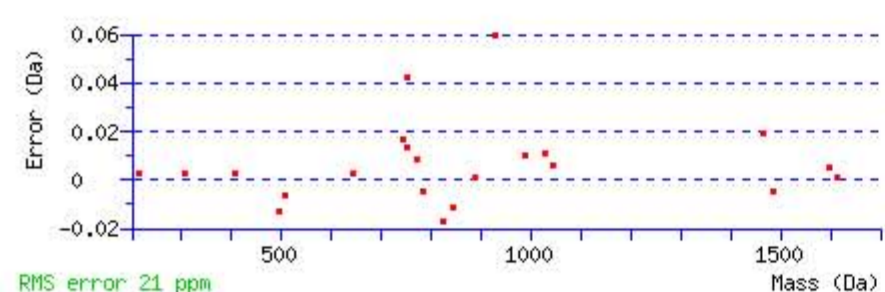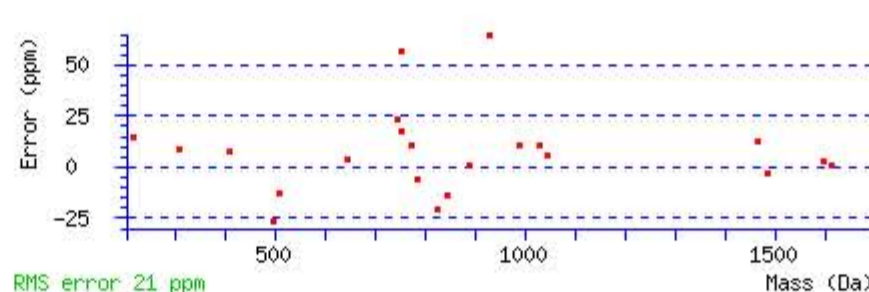

NCBI BLAST search of **DVMQGTDEHVVCK**

(Parameters: blastp, nr protein database, expect=20000, no filter, PAM30)

Other BLAST [web gateways](#)

## All matches to this query

| Score | Mr(calc):   | Delta    | Sequence             |
|-------|-------------|----------|----------------------|
| 33.3  | 1827.831787 | 0.012515 | <b>DVMQGTDEHVVCK</b> |

Mascot: <http://www.matrixscience.com/>

**MATRIX SCIENCE Mascot Search Results**

**Peptide View**

MS/MS Fragmentation of **YVTSAPMPEPQAPGR**

Found in **IGHM\_HUMAN**, Ig mu chain C region OS=Homo sapiens GN=IGHM PE=1 SV=3

Match to Query 47804: 1910.953272 from(637.991700,3+) rtinseconds(1863) index(41119)

Title: Locus:1.1.1.3098.20 File:"2013-07-02 CLN FXIII 180 min 1st F 3.wiff"

Data file C:\Program Files (x86)\Matrix Science\Mascot Daemon\mgf\7 FXIII 180 min 1st\mascot\_daemon\_merge.mgf

Click mouse within plot area to zoom in by factor of two about that point

Or, Plot from  to  Da

Label all possible matches  Label matches used for scoring

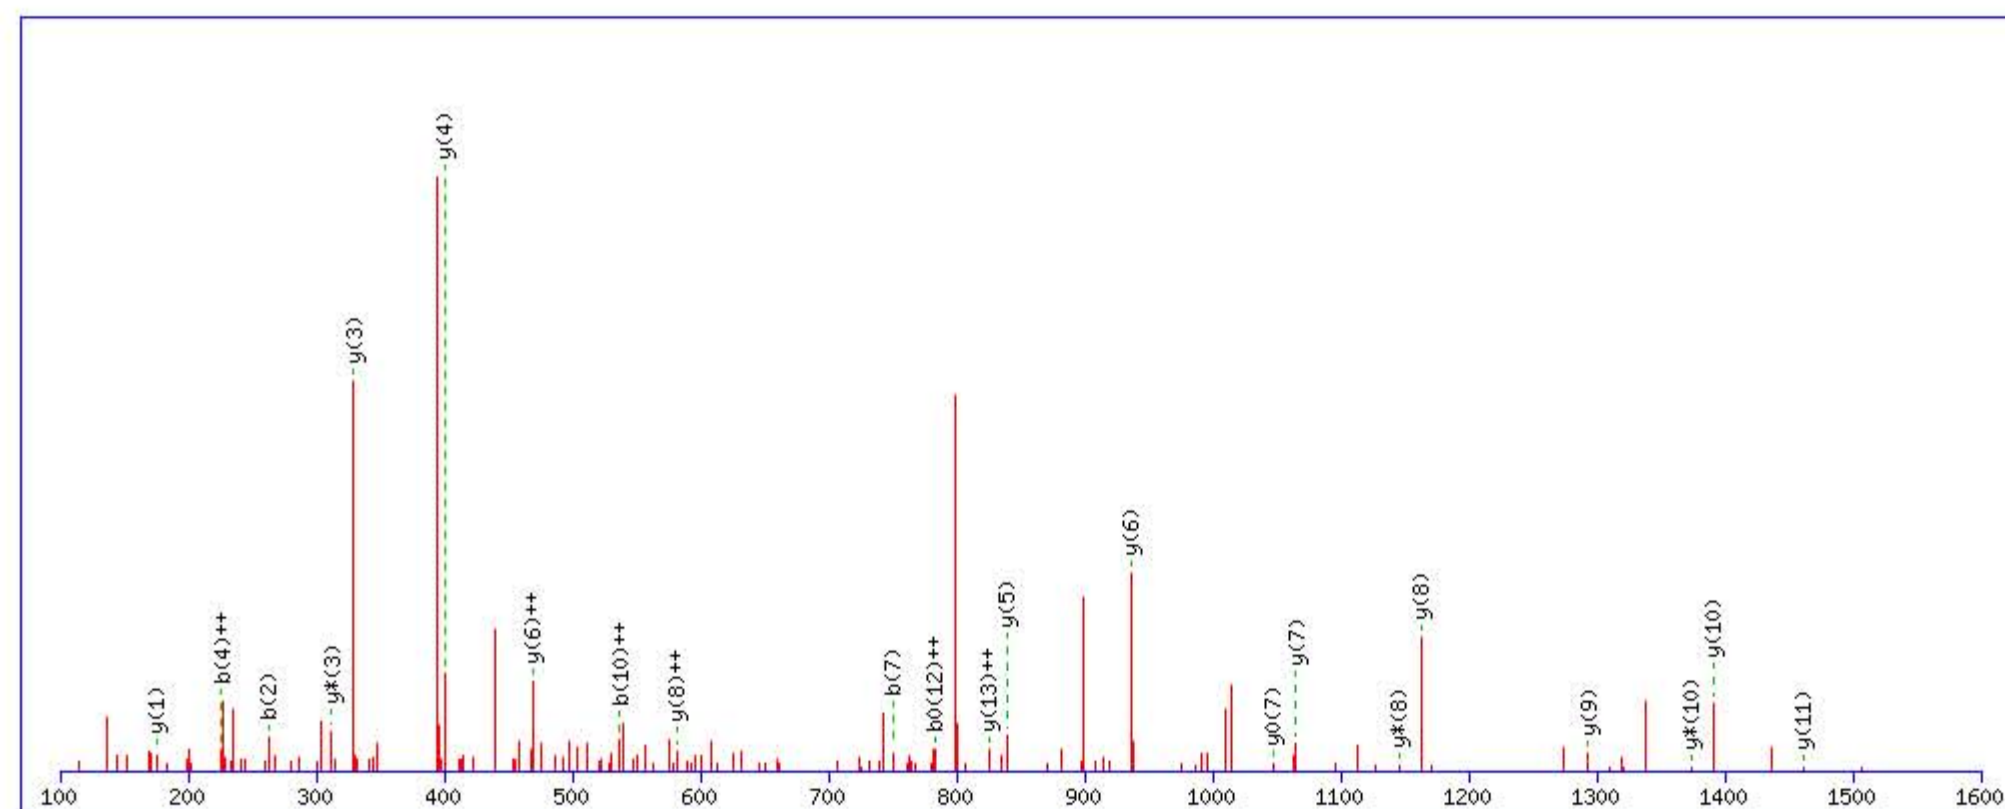

Monoisotopic mass of neutral peptide Mr(calc): 1910.938263

Fixed modifications: Carbamidomethyl (C) (apply to specified residues or termini only)

Variable modifications:

Q11 : Biotin:Thermo-21345 (Q)

Ions Score: 28 Expect: 0.039

Matches : 22/132 fragment ions using 76 most intense peaks [\(help\)](#)

| #  | b                 | b <sup>++</sup>   | b <sup>*</sup> | b <sup>*++</sup> | b <sup>0</sup> | b <sup>0++</sup>  | Seq. | y                  | y <sup>++</sup>   | y <sup>*</sup>     | y <sup>*++</sup> | y <sup>0</sup>     | y <sup>0++</sup> | #  |
|----|-------------------|-------------------|----------------|------------------|----------------|-------------------|------|--------------------|-------------------|--------------------|------------------|--------------------|------------------|----|
| 1  | 164.070605        | 82.538940         |                |                  |                |                   | Y    |                    |                   |                    |                  |                    |                  | 15 |
| 2  | <b>263.139019</b> | 132.073148        |                |                  |                |                   | V    | 1748.882225        | 874.944750        | 1731.855676        | 866.431476       | 1730.871660        | 865.939468       | 14 |
| 3  | 364.186698        | 182.596987        |                |                  | 346.176133     | 173.591705        | T    | 1649.813811        | <b>825.410543</b> | 1632.787262        | 816.897269       | 1631.803246        | 816.405261       | 13 |
| 4  | 451.218726        | <b>226.113001</b> |                |                  | 433.208161     | 217.107719        | S    | 1548.766132        | 774.886704        | 1531.739583        | 766.373430       | 1530.755567        | 765.881421       | 12 |
| 5  | 522.255840        | 261.631558        |                |                  | 504.245275     | 252.626276        | A    | <b>1461.734104</b> | 731.370690        | 1444.707555        | 722.857416       | 1443.723539        | 722.365407       | 11 |
| 6  | 619.308604        | 310.157940        |                |                  | 601.298039     | 301.152658        | P    | <b>1390.696990</b> | 695.852133        | <b>1373.670441</b> | 687.338859       | 1372.686425        | 686.846850       | 10 |
| 7  | <b>750.349089</b> | 375.678183        |                |                  | 732.338524     | 366.672900        | M    | <b>1293.644226</b> | 647.325751        | 1276.617677        | 638.812477       | 1275.633661        | 638.320468       | 9  |
| 8  | 847.401853        | 424.204565        |                |                  | 829.391288     | 415.199282        | P    | <b>1162.603741</b> | <b>581.805508</b> | <b>1145.577192</b> | 573.292234       | 1144.593176        | 572.800226       | 8  |
| 9  | 976.444446        | 488.725861        |                |                  | 958.433881     | 479.720579        | E    | <b>1065.550977</b> | 533.279126        | 1048.524428        | 524.765852       | <b>1047.540412</b> | 524.273844       | 7  |
| 10 | 1073.497210       | <b>537.252243</b> |                |                  | 1055.486645    | 528.246961        | P    | <b>936.508384</b>  | <b>468.757830</b> | 919.481835         | 460.244555       |                    |                  | 6  |
| 11 | 1512.722536       | 756.864906        | 1495.695987    | 748.351632       | 1494.711971    | 747.859624        | Q    | <b>839.455620</b>  | 420.231448        | 822.429071         | 411.718173       |                    |                  | 5  |
| 12 | 1583.759650       | 792.383463        | 1566.733101    | 783.870189       | 1565.749085    | <b>783.378180</b> | A    | <b>400.230294</b>  | 200.618785        | 383.203745         | 192.105510       |                    |                  | 4  |
| 13 | 1680.812414       | 840.909845        | 1663.785865    | 832.396571       | 1662.801849    | 831.904563        | P    | <b>329.193180</b>  | 165.100228        | <b>312.166631</b>  | 156.586953       |                    |                  | 3  |
| 14 | 1737.833878       | 869.420577        | 1720.807329    | 860.907303       | 1719.823313    | 860.415294        | G    | 232.140416         | 116.573846        | 215.113867         | 108.060571       |                    |                  | 2  |
| 15 |                   |                   |                |                  |                |                   | R    | <b>175.118952</b>  | 88.063114         | 158.092403         | 79.549839        |                    |                  | 1  |

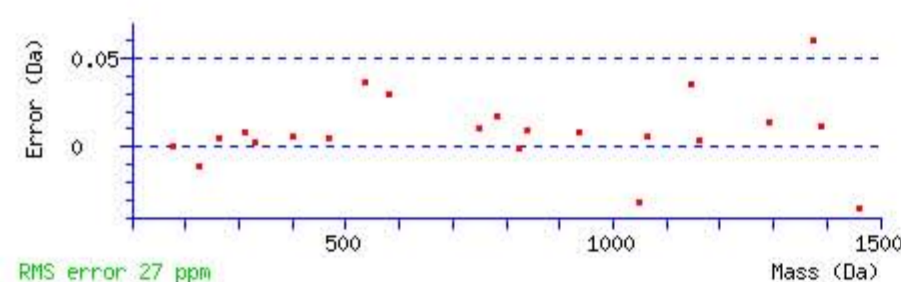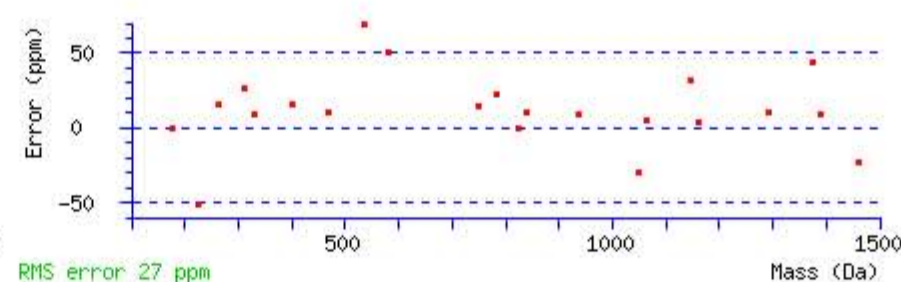

NCBI BLAST search of **YVTSAPMPEPQAPGR**

(Parameters: blastp, nr protein database, expect=20000, no filter, PAM30)

Other BLAST [web gateways](#)

**All matches to this query**

| Score | Mr(calc):   | Delta     | Sequence                          |
|-------|-------------|-----------|-----------------------------------|
| 28.1  | 1910.938263 | 0.015009  | <a href="#">YVTSAPMPEPQAPGR</a>   |
| 15.2  | 1910.934265 | 0.019007  | <a href="#">SGSDEVQVGQQR</a>      |
| 10.5  | 1910.934265 | 0.019007  | <a href="#">SGSDEVQVGQQR</a>      |
| 3.7   | 1910.971970 | -0.018698 | <a href="#">KAPMGTARFGHHMAVLR</a> |

# MASCOT SEARCH RESULTS

## Peptide View

MS/MS Fragmentation of **YVTSAPMPEPQAPGR**

Found in **IGHM\_HUMAN**, Ig mu chain C region OS=Homo sapiens GN=IGHM PE=1 SV=3

Match to Query 47805: 1910.953272 from(637.991700,3+) rtinseconds(1872) index(41194)

Title: Locus:1.1.1.3101.24 File:"2013-07-02 CLN FXIII 180 min 1st F 3.wiff"

Data file C:\Program Files (x86)\Matrix Science\Mascot Daemon\mgf\7 FXIII 180 min 1st\mascot\_daemon\_merge.mgf

Click mouse within plot area to zoom in by factor of two about that point

Or,  Plot from  100 to  1900 Da  Full range

Label all possible matches  Label matches used for scoring

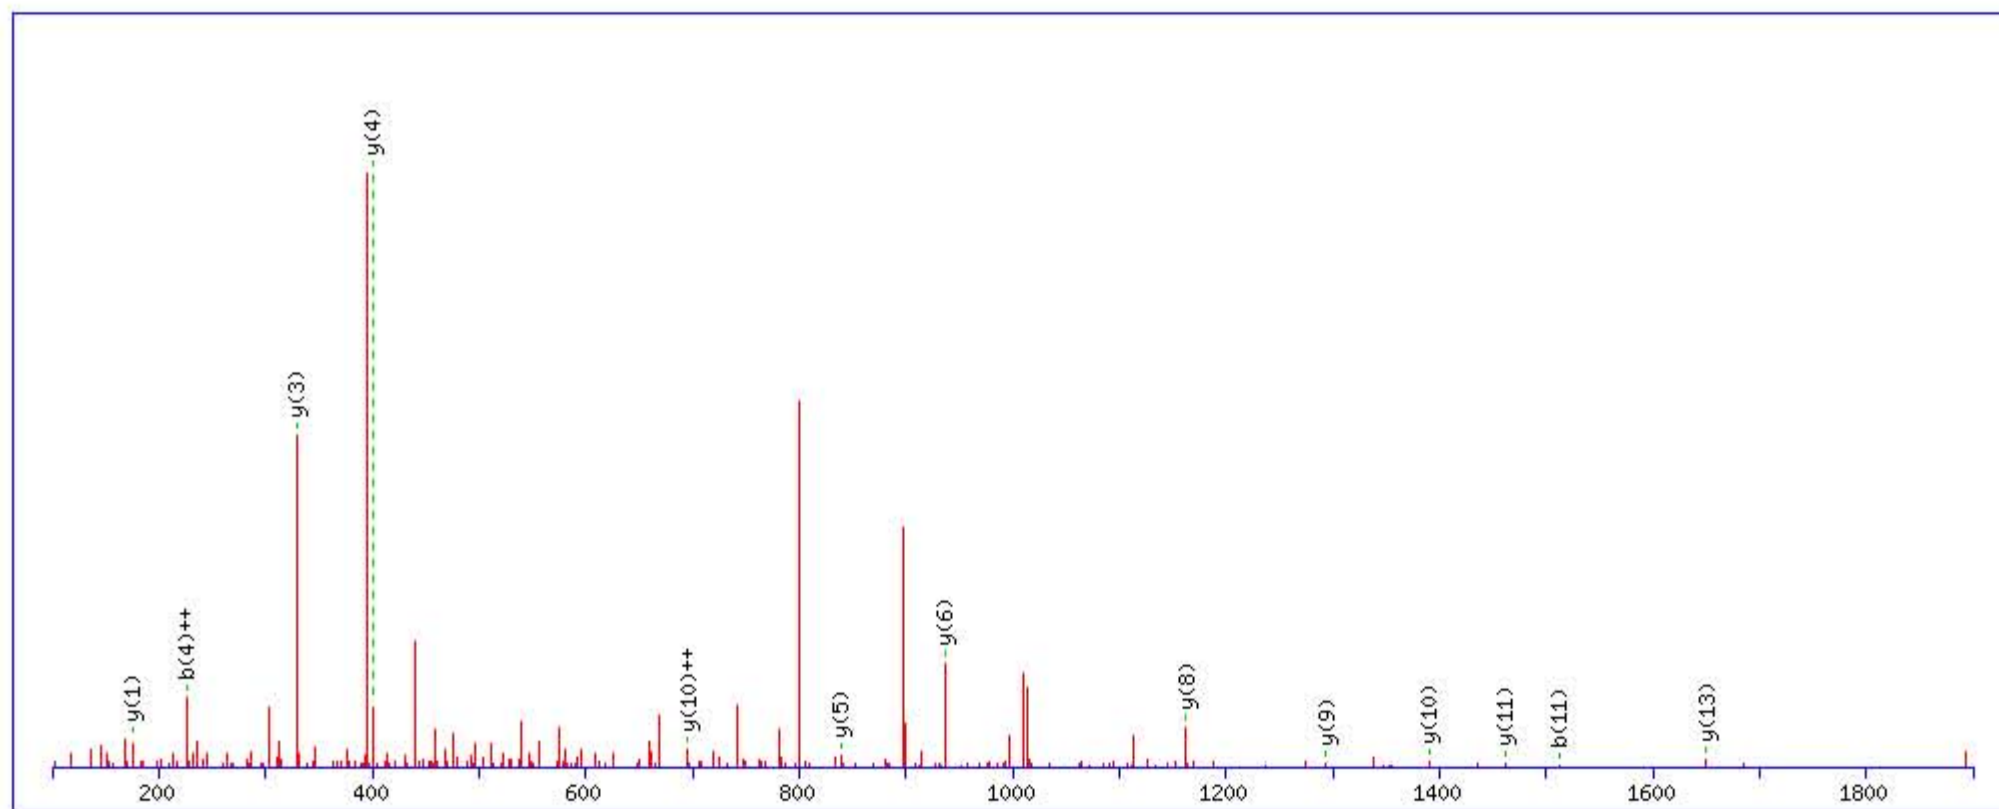

Monoisotopic mass of neutral peptide Mr(calc): 1910.938263

Fixed modifications: Carbamidomethyl (C) (apply to specified residues or termini only)

Variable modifications:

Q11 : Biotin:Thermo-21345 (Q)

Ions Score: 29 Expect: 0.028

Matches : 13/132 fragment ions using 45 most intense peaks [\(help\)](#)

| #  | b                  | b <sup>++</sup>   | b <sup>*</sup> | b <sup>*++</sup> | b <sup>0</sup> | b <sup>0++</sup> | Seq. | y                  | y <sup>++</sup>   | y <sup>*</sup> | y <sup>*++</sup> | y <sup>0</sup> | y <sup>0++</sup> | #  |
|----|--------------------|-------------------|----------------|------------------|----------------|------------------|------|--------------------|-------------------|----------------|------------------|----------------|------------------|----|
| 1  | 164.070605         | 82.538940         |                |                  |                |                  | Y    |                    |                   |                |                  |                |                  | 15 |
| 2  | 263.139019         | 132.073148        |                |                  |                |                  | V    | 1748.882225        | 874.944750        | 1731.855676    | 866.431476       | 1730.871660    | 865.939468       | 14 |
| 3  | 364.186698         | 182.596987        |                |                  | 346.176133     | 173.591705       | T    | <b>1649.813811</b> | 825.410543        | 1632.787262    | 816.897269       | 1631.803246    | 816.405261       | 13 |
| 4  | 451.218726         | <b>226.113001</b> |                |                  | 433.208161     | 217.107719       | S    | 1548.766132        | 774.886704        | 1531.739583    | 766.373430       | 1530.755567    | 765.881421       | 12 |
| 5  | 522.255840         | 261.631558        |                |                  | 504.245275     | 252.626276       | A    | <b>1461.734104</b> | 731.370690        | 1444.707555    | 722.857416       | 1443.723539    | 722.365407       | 11 |
| 6  | 619.308604         | 310.157940        |                |                  | 601.298039     | 301.152658       | P    | <b>1390.696990</b> | <b>695.852133</b> | 1373.670441    | 687.338859       | 1372.686425    | 686.846850       | 10 |
| 7  | 750.349089         | 375.678183        |                |                  | 732.338524     | 366.672900       | M    | <b>1293.644226</b> | 647.325751        | 1276.617677    | 638.812477       | 1275.633661    | 638.320468       | 9  |
| 8  | 847.401853         | 424.204565        |                |                  | 829.391288     | 415.199282       | P    | <b>1162.603741</b> | 581.805508        | 1145.577192    | 573.292234       | 1144.593176    | 572.800226       | 8  |
| 9  | 976.444446         | 488.725861        |                |                  | 958.433881     | 479.720579       | E    | 1065.550977        | 533.279126        | 1048.524428    | 524.765852       | 1047.540412    | 524.273844       | 7  |
| 10 | 1073.497210        | 537.252243        |                |                  | 1055.486645    | 528.246961       | P    | <b>936.508384</b>  | 468.757830        | 919.481835     | 460.244555       |                |                  | 6  |
| 11 | <b>1512.722536</b> | 756.864906        | 1495.695987    | 748.351632       | 1494.711971    | 747.859624       | Q    | <b>839.455620</b>  | 420.231448        | 822.429071     | 411.718173       |                |                  | 5  |
| 12 | 1583.759650        | 792.383463        | 1566.733101    | 783.870189       | 1565.749085    | 783.378180       | A    | <b>400.230294</b>  | 200.618785        | 383.203745     | 192.105510       |                |                  | 4  |
| 13 | 1680.812414        | 840.909845        | 1663.785865    | 832.396571       | 1662.801849    | 831.904563       | P    | <b>329.193180</b>  | 165.100228        | 312.166631     | 156.586953       |                |                  | 3  |
| 14 | 1737.833878        | 869.420577        | 1720.807329    | 860.907303       | 1719.823313    | 860.415294       | G    | 232.140416         | 116.573846        | 215.113867     | 108.060571       |                |                  | 2  |
| 15 |                    |                   |                |                  |                |                  | R    | <b>175.118952</b>  | 88.063114         | 158.092403     | 79.549839        |                |                  | 1  |

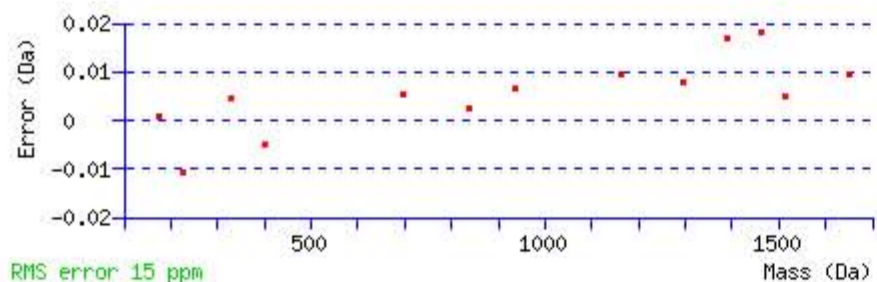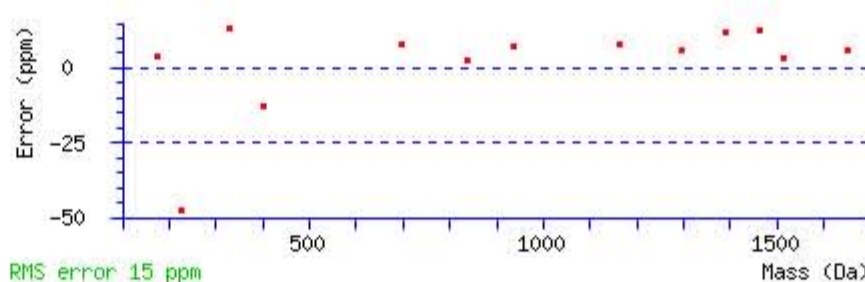

NCBI BLAST search of [YVTSAPMPEPQAPGR](#)

(Parameters: blastp, nr protein database, expect=20000, no filter, PAM30)

Other BLAST [web gateways](#)

## All matches to this query

| Score | Mr(calc):   | Delta    | Sequence                        |
|-------|-------------|----------|---------------------------------|
| 29.5  | 1910.938263 | 0.015009 | <a href="#">YVTSAPMPEPQAPGR</a> |
| 26.4  | 1910.934265 | 0.019007 | <a href="#">SGSDEVQVGQQR</a>    |
| 20.8  | 1910.934265 | 0.019007 | <a href="#">SGSDEVQVGQQR</a>    |



# MASCOT SCIENCE Mascot Search Results

## Peptide View

MS/MS Fragmentation of **LVDPQGPLK**

Found in **FCGBP\_HUMAN**, IgGFc-binding protein OS=Homo sapiens GN=FCGBP PE=1 SV=3

Match to Query 26132: 1276.733648 from(639.374100,2+) rtinseconds(1881) index(41266)

Title: Locus:1.1.1.3104.21 File:"2013-07-02 CLN FXIII 180 min 1st F 3.wiff"

Data file C:\Program Files (x86)\Matrix Science\Mascot Daemon\mgf\7 FXIII 180 min 1st\mascot\_daemon\_merge.mgf

Click mouse within plot area to zoom in by factor of two about that point

Or, Plot from  to  Da

Label all possible matches  Label matches used for scoring

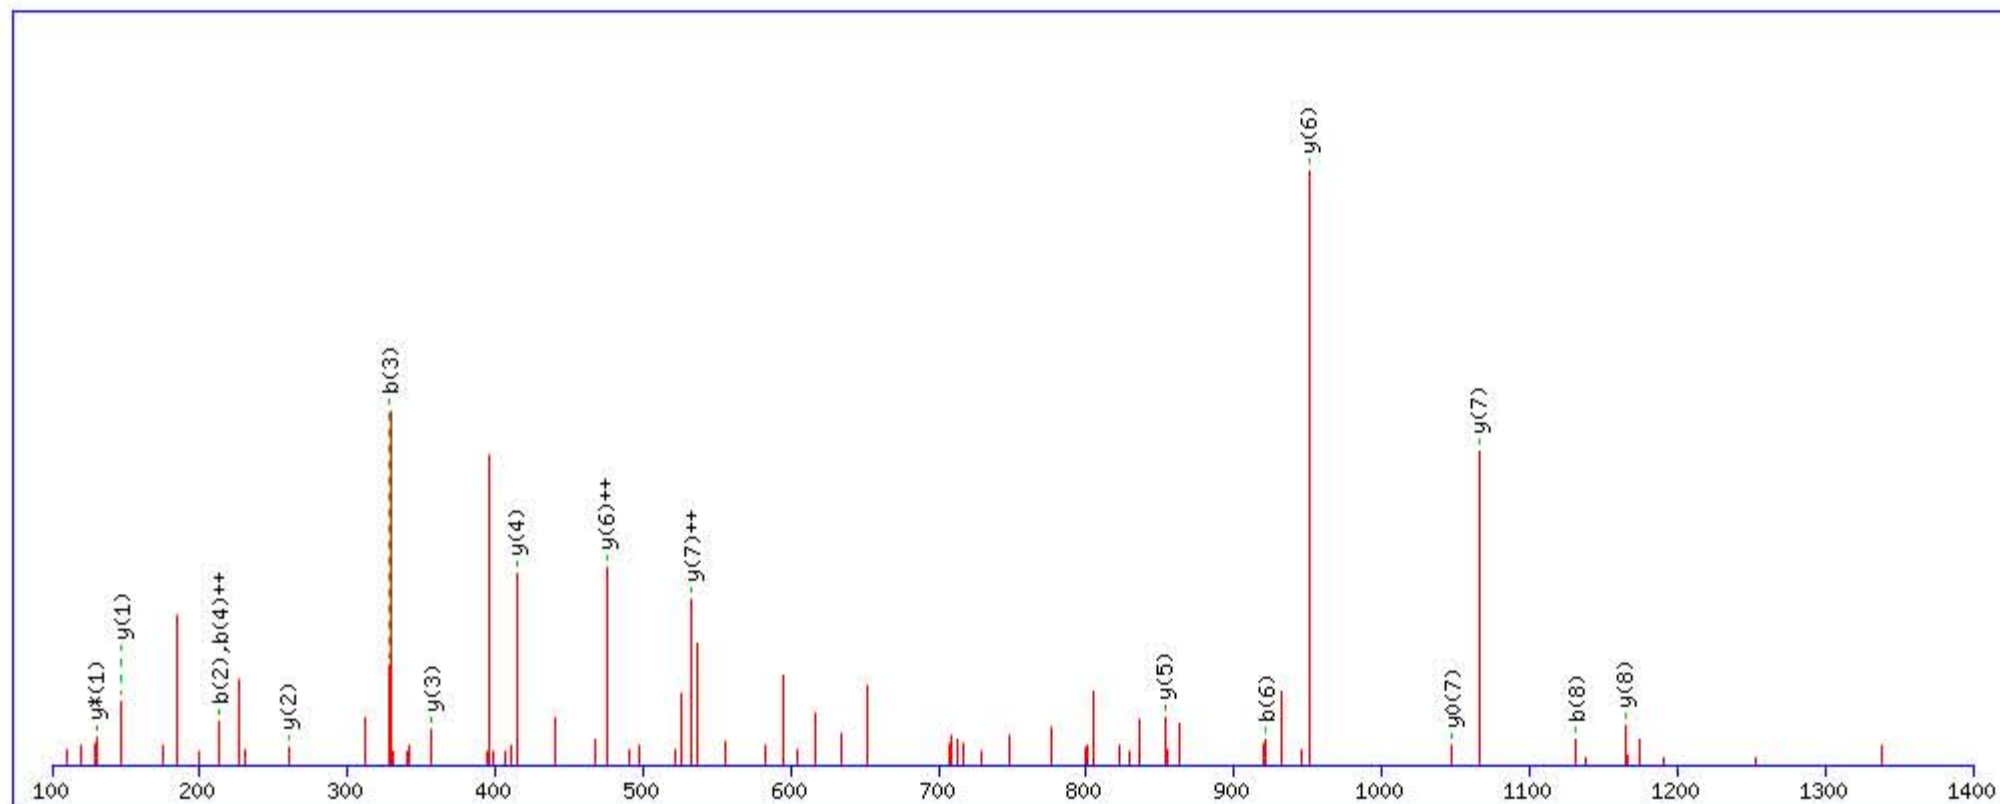

Monoisotopic mass of neutral peptide Mr(calc): 1276.721329

Fixed modifications: Carbamidomethyl (C) (apply to specified residues or termini only)

Variable modifications:

Q5 : Biotin:Thermo-21345 (Q)

Ions Score: 30 Expect: 0.0046

Matches : 17/72 fragment ions using 54 most intense peaks [\(help\)](#)

| # | b                  | b <sup>++</sup>   | b <sup>*</sup> | b <sup>*++</sup> | b <sup>0</sup> | b <sup>0++</sup> | Seq. | y                  | y <sup>++</sup>   | y <sup>*</sup>    | y <sup>*++</sup> | y <sup>0</sup>     | y <sup>0++</sup> | # |
|---|--------------------|-------------------|----------------|------------------|----------------|------------------|------|--------------------|-------------------|-------------------|------------------|--------------------|------------------|---|
| 1 | 114.091340         | 57.549308         |                |                  |                |                  | L    |                    |                   |                   |                  |                    |                  | 9 |
| 2 | <b>213.159754</b>  | 107.083515        |                |                  |                |                  | V    | <b>1164.644543</b> | 582.825910        | 1147.617994       | 574.312635       | 1146.633978        | 573.820627       | 8 |
| 3 | <b>328.186697</b>  | 164.596986        |                |                  | 310.176132     | 155.591704       | D    | <b>1065.576129</b> | <b>533.291703</b> | 1048.549580       | 524.778428       | <b>1047.565564</b> | 524.286420       | 7 |
| 4 | 425.239461         | <b>213.123368</b> |                |                  | 407.228896     | 204.118086       | P    | <b>950.549186</b>  | <b>475.778231</b> | 933.522637        | 467.264956       |                    |                  | 6 |
| 5 | 864.464787         | 432.736032        | 847.438238     | 424.222757       | 846.454222     | 423.730749       | Q    | <b>853.496422</b>  | 427.251849        | 836.469873        | 418.738575       |                    |                  | 5 |
| 6 | <b>921.486251</b>  | 461.246764        | 904.459702     | 452.733489       | 903.475686     | 452.241481       | G    | <b>414.271096</b>  | 207.639186        | 397.244547        | 199.125911       |                    |                  | 4 |
| 7 | 1018.539015        | 509.773146        | 1001.512466    | 501.259871       | 1000.528450    | 500.767863       | P    | <b>357.249632</b>  | 179.128454        | 340.223083        | 170.615179       |                    |                  | 3 |
| 8 | <b>1131.623079</b> | 566.315178        | 1114.596530    | 557.801903       | 1113.612514    | 557.309895       | L    | <b>260.196868</b>  | 130.602072        | 243.170319        | 122.088797       |                    |                  | 2 |
| 9 |                    |                   |                |                  |                |                  | K    | <b>147.112804</b>  | 74.060040         | <b>130.086255</b> | 65.546765        |                    |                  | 1 |

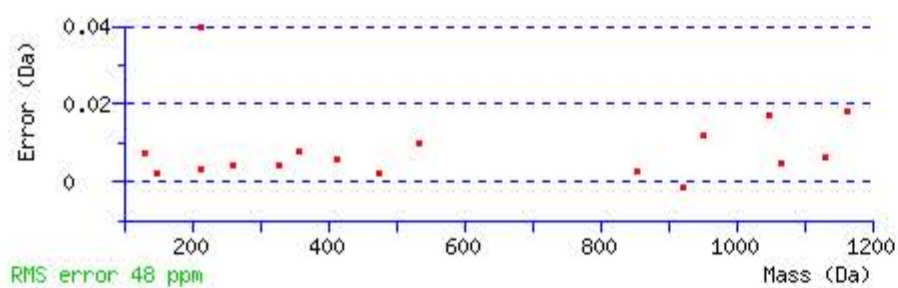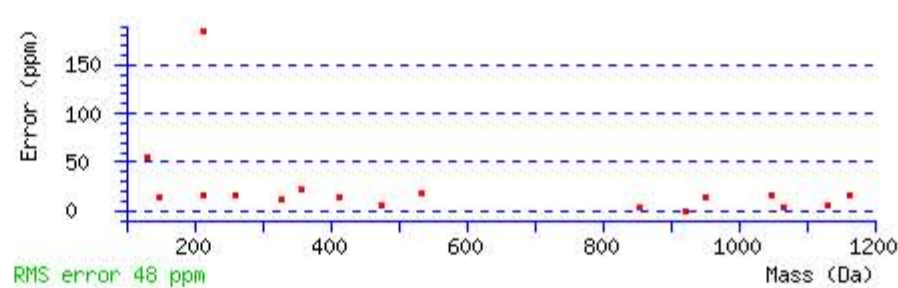

NCBI BLAST search of **LVDPQGPLK**

(Parameters: blastp, nr protein database, expect=20000, no filter, PAM30)

Other BLAST [web gateways](#)

All matches to this query

| Score | Mr(calc):   | Delta    | Sequence                    |
|-------|-------------|----------|-----------------------------|
| 29.5  | 1276.721329 | 0.012319 | <a href="#">LVDPQGPLK</a>   |
| 4.4   | 1276.725174 | 0.008474 | <a href="#">LVLGDQHQLVR</a> |
| 1.4   | 1276.717941 | 0.015707 | <a href="#">IHTVEKFKYK</a>  |

**MATRIX SCIENCE Mascot Search Results**

**Peptide View**

MS/MS Fragmentation of **LEDGVQACHATGCGR**

Found in **FCGBP\_HUMAN**, IgGfc-binding protein OS=Homo sapiens GN=FCGBP PE=1 SV=3

Match to Query 48492: 1940.884452 from(647.968760,3+) rtinseconds(1419) index(38119)

Title: Locus:1.1.1.2943.15 File:"2013-07-02 CLN FXIII 180 min 1st F 3.wiff"

Data file C:\Program Files (x86)\Matrix Science\Mascot Daemon\mgf\7 FXIII 180 min 1st\mascot\_daemon\_merge.mgf

Click mouse within plot area to zoom in by factor of two about that point

Or, Plot from  to  Da

Label all possible matches  Label matches used for scoring

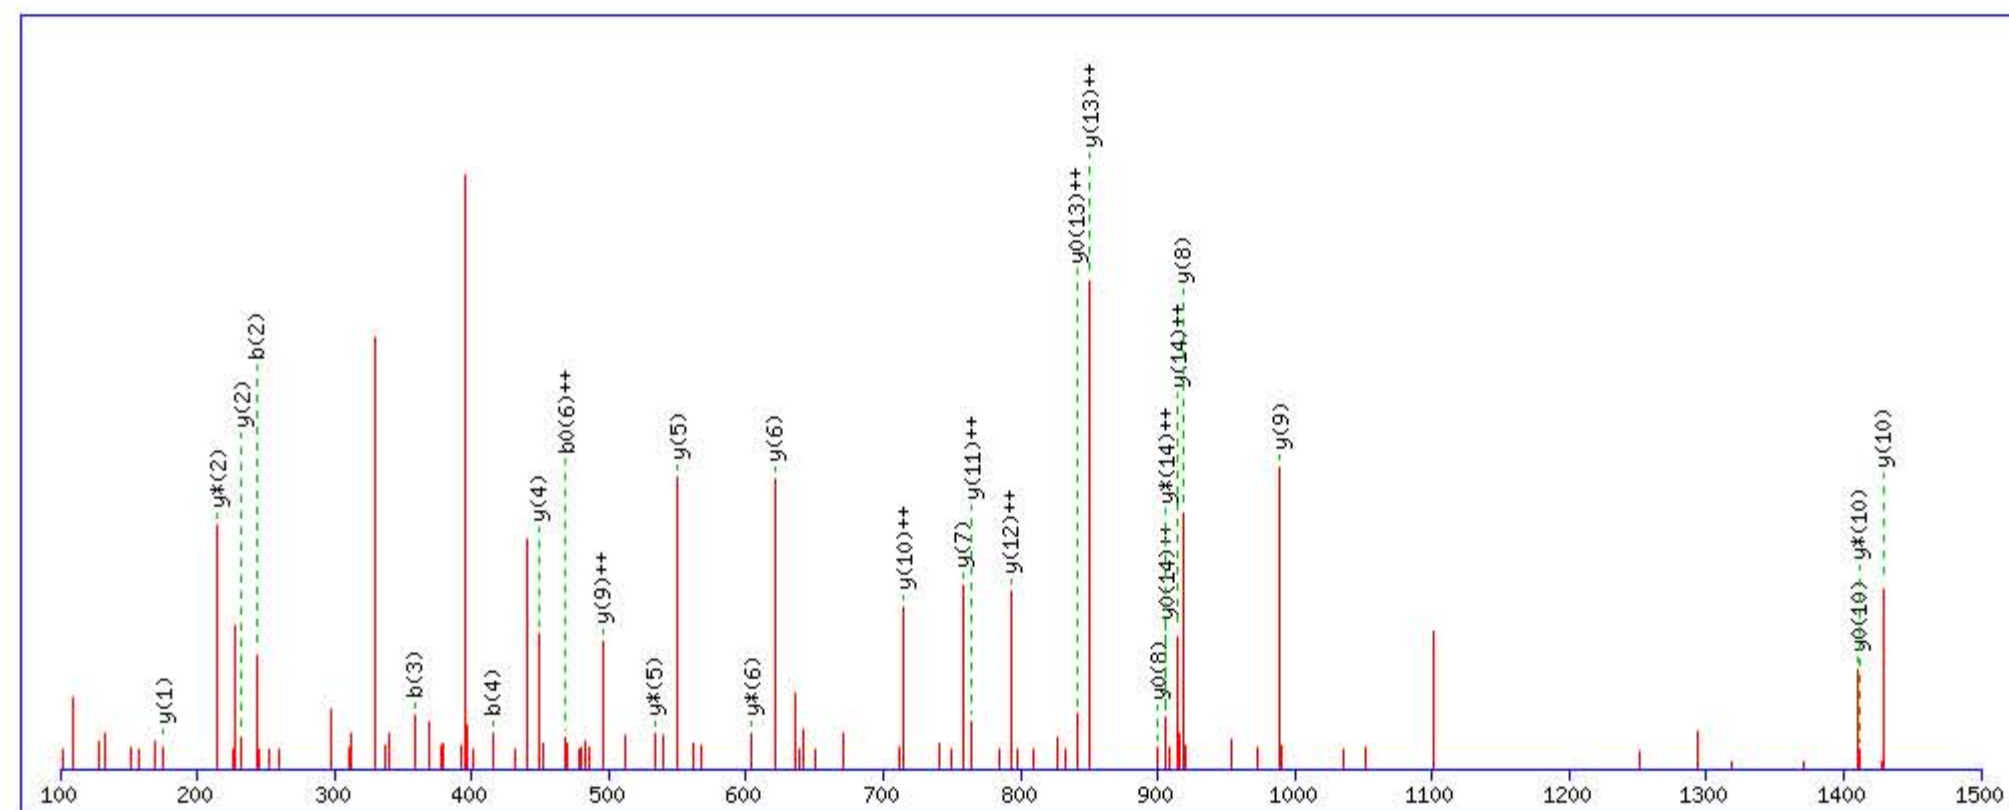

Monoisotopic mass of neutral peptide Mr(calc): 1940.865540

Fixed modifications: Carbamidomethyl (C) (apply to specified residues or termini only)

Variable modifications:

Q6 : Biotin:Thermo-21345 (Q)

Ions Score: 49 Expect: 0.00011

Matches : 28/148 fragment ions using 57 most intense peaks [\(help\)](#)

| #  | b                 | b <sup>++</sup> | b <sup>+</sup> | b <sup>*++</sup> | b <sup>0</sup> | b <sup>0++</sup> | Seq. | y           | y <sup>++</sup> | y <sup>+</sup> | y <sup>*++</sup> | y <sup>0</sup> | y <sup>0++</sup> | #  |
|----|-------------------|-----------------|----------------|------------------|----------------|------------------|------|-------------|-----------------|----------------|------------------|----------------|------------------|----|
| 1  | 114.091340        | 57.549308       |                |                  |                |                  | L    |             |                 |                |                  |                |                  | 15 |
| 2  | <b>243.133933</b> | 122.070605      |                |                  | 225.123368     | 113.065322       | E    | 1828.788737 | 914.898006      | 1811.762188    | 906.384732       | 1810.778172    | 905.892724       | 14 |
| 3  | <b>358.160876</b> | 179.584076      |                |                  | 340.150311     | 170.578794       | D    | 1699.746144 | 850.376710      | 1682.719595    | 841.863435       | 1681.735579    | 841.371427       | 13 |
| 4  | <b>415.182340</b> | 208.094808      |                |                  | 397.171775     | 199.089526       | G    | 1584.719201 | 792.863238      | 1567.692652    | 784.349964       | 1566.708636    | 783.857956       | 12 |
| 5  | 514.250754        | 257.629015      |                |                  | 496.240189     | 248.623733       | V    | 1527.697737 | 764.352506      | 1510.671188    | 755.839232       | 1509.687172    | 755.347224       | 11 |
| 6  | 953.476080        | 477.241678      | 936.449531     | 468.728404       | 935.465515     | 468.236396       | Q    | 1428.629323 | 714.818299      | 1411.602774    | 706.305025       | 1410.618758    | 705.813017       | 10 |
| 7  | 1024.513194       | 512.760235      | 1007.486645    | 504.246960       | 1006.502629    | 503.754952       | A    | 989.403997  | 495.205636      | 972.377448     | 486.692362       | 971.393432     | 486.200354       | 9  |
| 8  | 1184.543843       | 592.775559      | 1167.517294    | 584.262285       | 1166.533278    | 583.770277       | C    | 918.366883  | 459.687079      | 901.340334     | 451.173805       | 900.356318     | 450.681797       | 8  |
| 9  | 1321.602755       | 661.305015      | 1304.576206    | 652.791741       | 1303.592190    | 652.299733       | H    | 758.336234  | 379.671755      | 741.309685     | 371.158480       | 740.325669     | 370.666472       | 7  |
| 10 | 1392.639869       | 696.823572      | 1375.613320    | 688.310298       | 1374.629304    | 687.818290       | A    | 621.277322  | 311.142299      | 604.250773     | 302.629024       | 603.266757     | 302.137016       | 6  |
| 11 | 1493.687548       | 747.347412      | 1476.660999    | 738.834138       | 1475.676983    | 738.342129       | T    | 550.240208  | 275.623742      | 533.213659     | 267.110467       | 532.229643     | 266.618459       | 5  |
| 12 | 1550.709012       | 775.858144      | 1533.682463    | 767.344869       | 1532.698447    | 766.852861       | G    | 449.192529  | 225.099902      | 432.165980     | 216.586628       |                |                  | 4  |
| 13 | 1710.739661       | 855.873468      | 1693.713112    | 847.360194       | 1692.729096    | 846.868186       | C    | 392.171065  | 196.589170      | 375.144516     | 188.075896       |                |                  | 3  |
| 14 | 1767.761125       | 884.384200      | 1750.734576    | 875.870926       | 1749.750560    | 875.378918       | G    | 232.140416  | 116.573846      | 215.113867     | 108.060571       |                |                  | 2  |
| 15 |                   |                 |                |                  |                |                  | R    | 175.118952  | 88.063114       | 158.092403     | 79.549839        |                |                  | 1  |

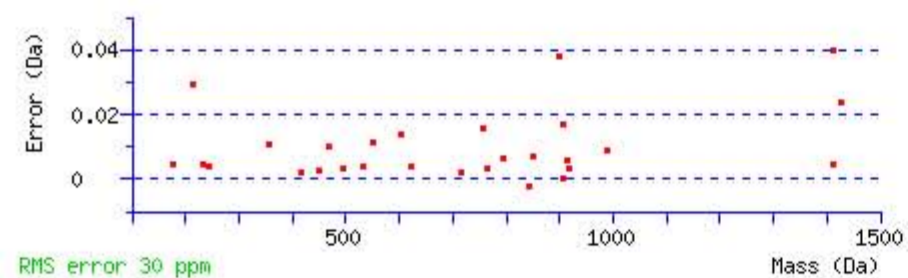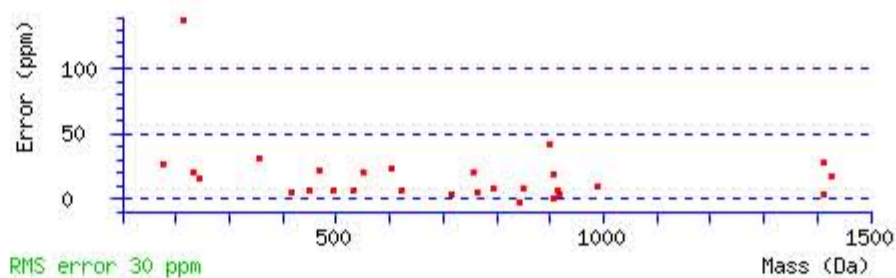

NCBI BLAST search of **LEDGVQACHATGCGR**

(Parameters: blastp, nr protein database, expect=20000, no filter, PAM30)

Other BLAST [web gateways](#)

All matches to this query

| Score | Mr(calc):   | Delta    | Sequence                        |
|-------|-------------|----------|---------------------------------|
| 49.1  | 1940.865540 | 0.018912 | <a href="#">LEDGVQACHATGCGR</a> |

Mascot: <http://www.matrixscience.com/>

# {MATRIX} SCIENCE Mascot Search Results

## Peptide View

MS/MS Fragmentation of **VVVCQEHSCCKPGQVCQPSGGILSCVTK**  
 Found in **FCGBP\_HUMAN**, IgGfC-binding protein OS=Homo sapiens GN=FCGBP PE=1 SV=3

Match to Query 78887: 3635.810816 from(909.959980,4+) rtinseconds(1977) index(42094)  
 Title: Locus:1.1.1.3137.24 File:"2013-07-02 CLN FXIII 180 min 1st F 3.wiff"  
 Data file C:\Program Files (x86)\Matrix Science\Mascot Daemon\mgf\7 FXIII 180 min 1st\mascot\_daemon\_merge.mgf

Click mouse within plot area to zoom in by factor of two about that point  
 Or, Plot from  to  Da   
 Label all possible matches  Label matches used for scoring

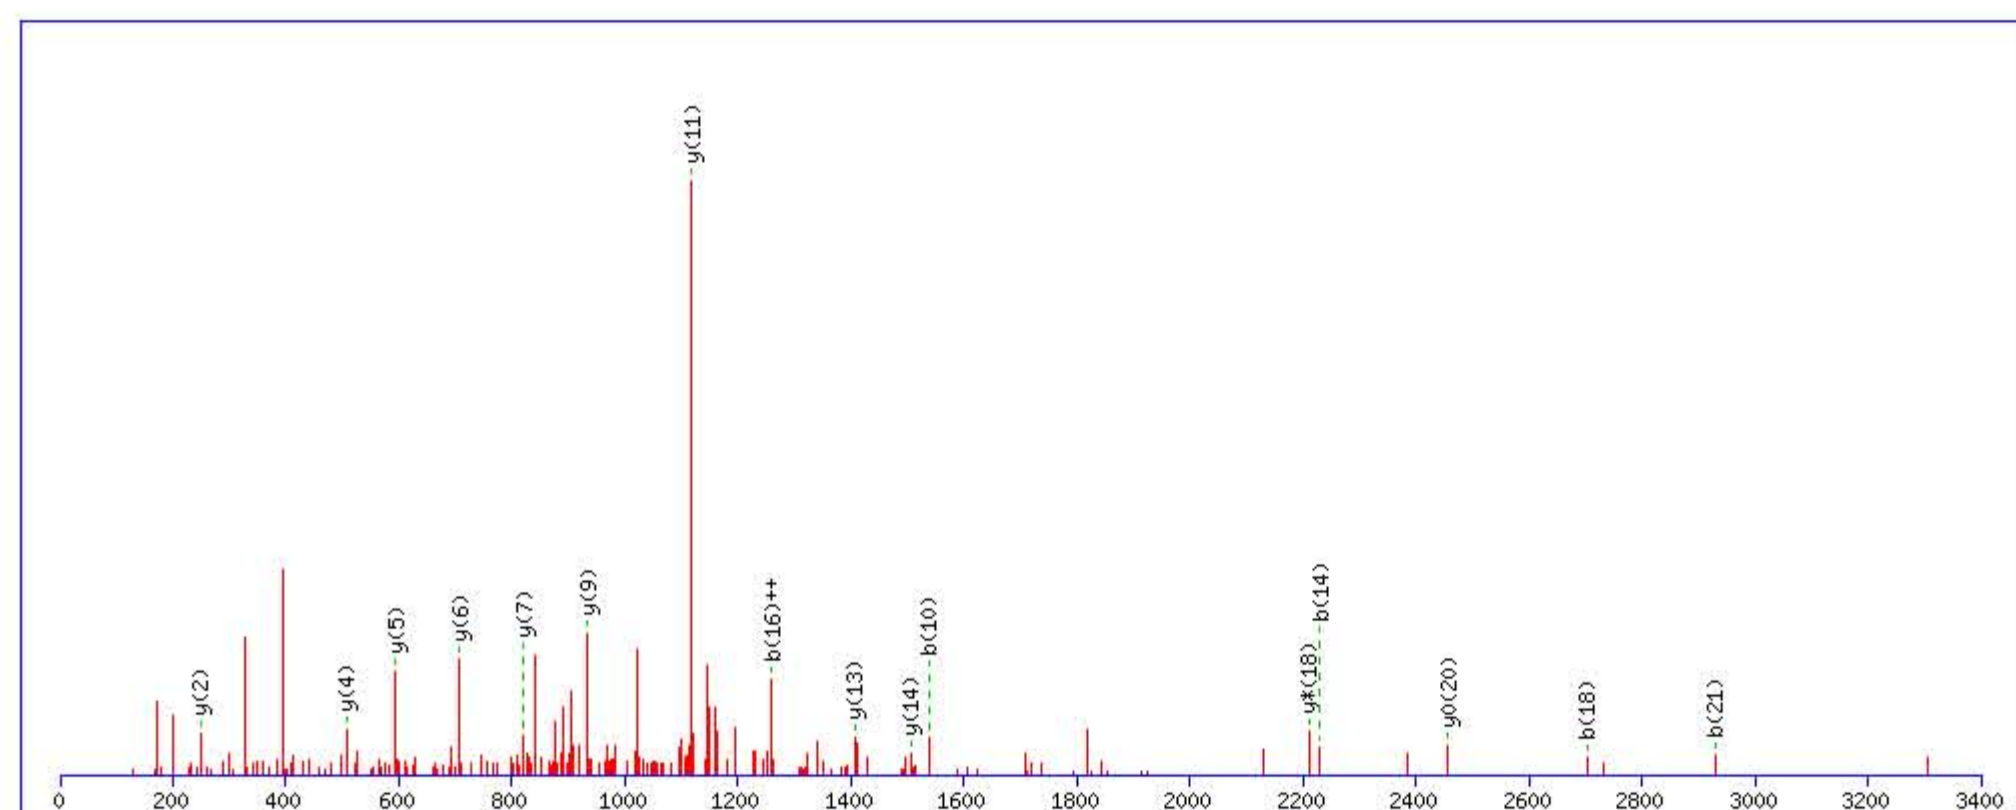

Monoisotopic mass of neutral peptide Mr(calc): 3635.757751  
 Fixed modifications: Carbamidomethyl (C) (apply to specified residues or termini only)  
 Variable modifications:  
 Q5 : Biotin:Thermo-21345 (Q)  
 Q13 : Biotin:Thermo-21345 (Q)  
 Ions Score: 43 Expect: 0.0013  
 Matches : 16/292 fragment ions using 26 most intense peaks [\(help\)](#)

| #  | b                  | b <sup>++</sup>    | b <sup>*</sup> | b <sup>*++</sup> | b <sup>0</sup> | b <sup>0++</sup> | Seq. | y                  | y <sup>++</sup> | y <sup>*</sup>     | y <sup>*++</sup> | y <sup>0</sup> | y <sup>0++</sup> | #  |
|----|--------------------|--------------------|----------------|------------------|----------------|------------------|------|--------------------|-----------------|--------------------|------------------|----------------|------------------|----|
| 1  | 100.075690         | 50.541483          |                |                  |                |                  | V    |                    |                 |                    |                  |                |                  | 27 |
| 2  | 199.144104         | 100.075690         |                |                  |                |                  | V    | 3537.696565        | 1769.351920     | 3520.670016        | 1760.838646      | 3519.686000    | 1760.346638      | 26 |
| 3  | 298.212518         | 149.609897         |                |                  |                |                  | V    | 3438.628151        | 1719.817713     | 3421.601602        | 1711.304439      | 3420.617586    | 1710.812431      | 25 |
| 4  | 458.243167         | 229.625222         |                |                  |                |                  | C    | 3339.559737        | 1670.283506     | 3322.533188        | 1661.770232      | 3321.549172    | 1661.278224      | 24 |
| 5  | 897.468493         | 449.237885         | 880.441944     | 440.724610       |                |                  | Q    | 3179.529088        | 1590.268182     | 3162.502539        | 1581.754907      | 3161.518523    | 1581.262899      | 23 |
| 6  | 1026.511086        | 513.759181         | 1009.484537    | 505.245907       | 1008.500521    | 504.753899       | E    | 2740.303762        | 1370.655519     | 2723.277213        | 1362.142244      | 2722.293197    | 1361.650236      | 22 |
| 7  | 1163.569998        | 582.288637         | 1146.543449    | 573.775363       | 1145.559433    | 573.283355       | H    | 2611.261169        | 1306.134222     | 2594.234620        | 1297.620948      | 2593.250604    | 1297.128940      | 21 |
| 8  | 1250.602026        | 625.804651         | 1233.575477    | 617.291377       | 1232.591461    | 616.799369       | S    | 2474.202257        | 1237.604766     | 2457.175708        | 1229.091492      | 2456.191692    | 1228.599484      | 20 |
| 9  | 1410.632675        | 705.819976         | 1393.606126    | 697.306701       | 1392.622110    | 696.814693       | C    | 2387.170229        | 1194.088752     | 2370.143680        | 1185.575478      | 2369.159664    | 1185.083470      | 19 |
| 10 | <b>1538.727638</b> | 769.867457         | 1521.701089    | 761.354183       | 1520.717073    | 760.862175       | K    | 2227.139580        | 1114.073428     | <b>2210.113031</b> | 1105.560153      | 2209.129015    | 1105.068145      | 18 |
| 11 | 1635.780402        | 818.393839         | 1618.753853    | 809.880565       | 1617.769837    | 809.388557       | P    | 2099.044617        | 1050.025946     | 2082.018068        | 1041.512672      | 2081.034052    | 1041.020664      | 17 |
| 12 | 1692.801866        | 846.904571         | 1675.775317    | 838.391297       | 1674.791301    | 837.899289       | G    | 2001.991853        | 1001.499564     | 1984.965304        | 992.986290       | 1983.981288    | 992.494282       | 16 |
| 13 | 2132.027192        | 1066.517234        | 2115.000643    | 1058.003959      | 2114.016627    | 1057.511951      | Q    | 1944.970389        | 972.988832      | 1927.943840        | 964.475558       | 1926.959824    | 963.983550       | 15 |
| 14 | <b>2231.095606</b> | 1116.051441        | 2214.069057    | 1107.538166      | 2213.085041    | 1107.046158      | V    | <b>1505.745063</b> | 753.376169      | 1488.718514        | 744.862895       | 1487.734498    | 744.370887       | 14 |
| 15 | 2391.126255        | 1196.066765        | 2374.099706    | 1187.553491      | 2373.115690    | 1187.061483      | C    | <b>1406.676649</b> | 703.841962      | 1389.650100        | 695.328688       | 1388.666084    | 694.836680       | 13 |
| 16 | 2519.184833        | <b>1260.096054</b> | 2502.158284    | 1251.582780      | 2501.174268    | 1251.090772      | Q    | 1246.646000        | 623.826638      | 1229.619451        | 615.313364       | 1228.635435    | 614.821355       | 12 |
| 17 | 2616.237597        | 1308.622436        | 2599.211048    | 1300.109162      | 2598.227032    | 1299.617154      | P    | <b>1118.587422</b> | 559.797349      | 1101.560873        | 551.284074       | 1100.576857    | 550.792066       | 11 |
| 18 | <b>2703.269625</b> | 1352.138450        | 2686.243076    | 1343.625176      | 2685.259060    | 1343.133168      | S    | 1021.534658        | 511.270967      | 1004.508109        | 502.757692       | 1003.524093    | 502.265684       | 10 |
| 19 | 2760.291089        | 1380.649182        | 2743.264540    | 1372.135908      | 2742.280524    | 1371.643900      | G    | <b>934.502630</b>  | 467.754953      | 917.476081         | 459.241678       | 916.492065     | 458.749670       | 9  |
| 20 | 2817.312553        | 1409.159914        | 2800.286004    | 1400.646640      | 2799.301988    | 1400.154632      | G    | 877.481166         | 439.244221      | 860.454617         | 430.730946       | 859.470601     | 430.238938       | 8  |
| 21 | <b>2930.396617</b> | 1465.701946        | 2913.370068    | 1457.188672      | 2912.386052    | 1456.696664      | I    | <b>820.459702</b>  | 410.733489      | 803.433153         | 402.220214       | 802.449137     | 401.728206       | 7  |
| 22 | 3043.480681        | 1522.243978        | 3026.454132    | 1513.730704      | 3025.470116    | 1513.238696      | L    | <b>707.375638</b>  | 354.191457      | 690.349089         | 345.678182       | 689.365073     | 345.186174       | 6  |
| 23 | 3130.512709        | 1565.759993        | 3113.486160    | 1557.246718      | 3112.502144    | 1556.754710      | S    | <b>594.291574</b>  | 297.649425      | 577.265025         | 289.136150       | 576.281009     | 288.644142       | 5  |
| 24 | 3290.543358        | 1645.775317        | 3273.516809    | 1637.262042      | 3272.532793    | 1636.770034      | C    | <b>507.259546</b>  | 254.133411      | 490.232997         | 245.620136       | 489.248981     | 245.128128       | 4  |
| 25 | 3389.611772        | 1695.309524        | 3372.585223    | 1686.796249      | 3371.601207    | 1686.304241      | V    | 347.228897         | 174.118086      | 330.202348         | 165.604812       | 329.218332     | 165.112804       | 3  |
| 26 | 3490.659451        | 1745.833363        | 3473.632902    | 1737.320089      | 3472.648886    | 1736.828081      | T    | <b>248.160483</b>  | 124.583879      | 231.133934         | 116.070605       | 230.149918     | 115.578597       | 2  |
| 27 |                    |                    |                |                  |                |                  | K    | 147.112804         | 74.060040       | 130.086255         | 65.546765        |                |                  | 1  |

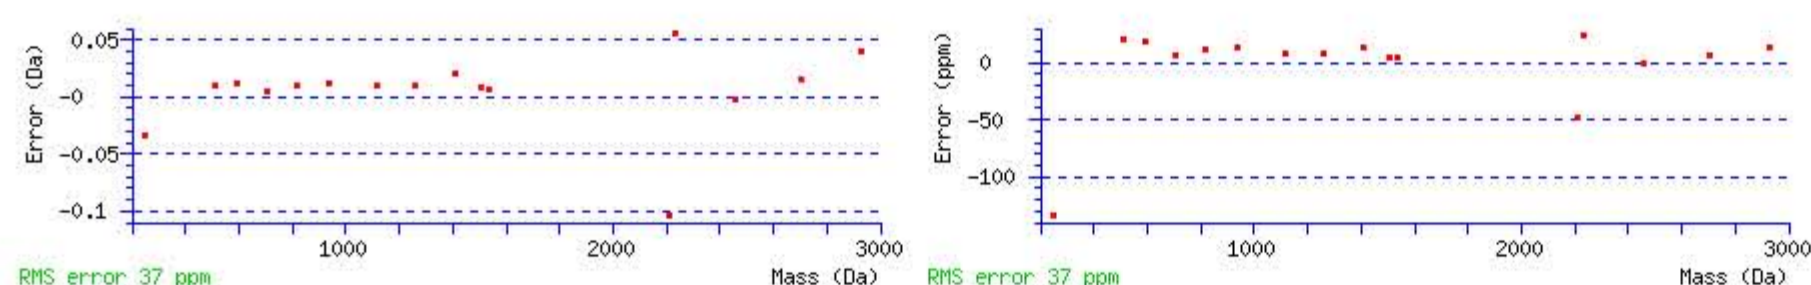

NCBI BLAST search of **VVVCQEHSCCKPGQVCQPSGGILSCVTK**  
 (Parameters: blastp, nr protein database, expect=20000, no filter, PAM30)  
 Other BLAST [web gateways](#)

## All matches to this query

| Score | Mr(calc):   | Delta    | Sequence                                     |
|-------|-------------|----------|----------------------------------------------|
| 42.9  | 3635.757751 | 0.053065 | <a href="#">VVVCQEHSCCKPGQVCQPSGGILSCVTK</a> |
| 23.3  | 3635.757751 | 0.053065 | <a href="#">VVVCQEHSCCKPGQVCQPSGGILSCVTK</a> |
| 19.5  | 3635.757751 | 0.053065 | <a href="#">VVVCQEHSCCKPGQVCQPSGGILSCVTK</a> |

# MASCOT Search Results

## Peptide View

MS/MS Fragmentation of **DFALQNPSAVPR**

Found in **ALS\_HUMAN**, Insulin-like growth factor-binding protein complex acid labile subunit OS=Homo sapiens GN=IGFALS PE=1 SV=1

Match to Query 39930: 1624.860348 from(813.437450,2+) rtinseconds(2155) index(43290)

Title: Locus:1.1.1.3199.22 File:"2013-07-02 CLN FXIII 180 min 1st F 3.wiff"

Data file C:\Program Files (x86)\Matrix Science\Mascot Daemon\mgf7 FXIII 180 min 1st\mascot\_daemon\_merge.mgf

Click mouse within plot area to zoom in by factor of two about that point

Or, Plot from  to  Da

Label all possible matches  Label matches used for scoring

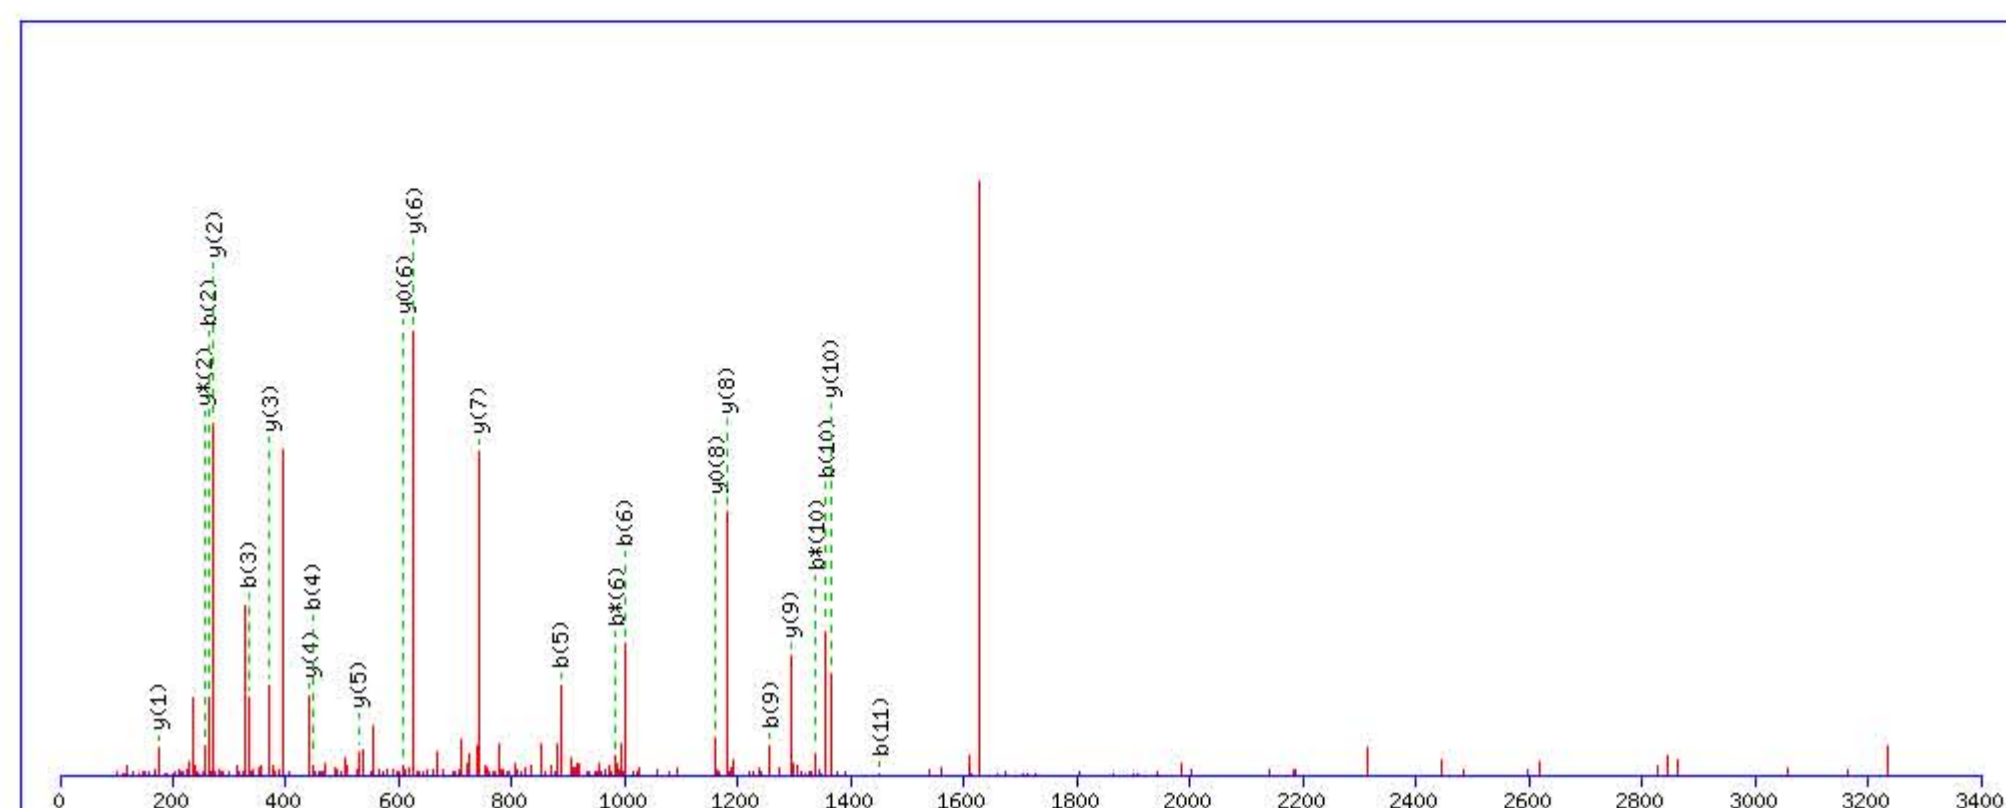

Monoisotopic mass of neutral peptide Mr(calc): 1624.839539

Fixed modifications: Carbamidomethyl (C) (apply to specified residues or termini only)

Variable modifications:

Q5 : Biotin:Thermo-21345 (Q)

Ions Score: 48 Expect: 0.00035

Matches : 23/116 fragment ions using 59 most intense peaks ([help](#))

| #  | b                  | b <sup>++</sup> | b*                 | b <sup>+++</sup> | b <sup>0</sup> | b <sup>0++</sup> | Seq.     | y                  | y <sup>++</sup> | y*                | y <sup>+++</sup> | y <sup>0</sup>     | y <sup>0++</sup> | #  |
|----|--------------------|-----------------|--------------------|------------------|----------------|------------------|----------|--------------------|-----------------|-------------------|------------------|--------------------|------------------|----|
| 1  | 116.034219         | 58.520748       |                    |                  | 98.023654      | 49.515465        | <b>D</b> |                    |                 |                   |                  |                    |                  | 12 |
| 2  | <b>263.102633</b>  | 132.054954      |                    |                  | 245.092068     | 123.049672       | <b>F</b> | 1510.819881        | 755.913579      | 1493.793332       | 747.400304       | 1492.809316        | 746.908296       | 11 |
| 3  | <b>334.139747</b>  | 167.573512      |                    |                  | 316.129182     | 158.568229       | <b>A</b> | <b>1363.751467</b> | 682.379372      | 1346.724918       | 673.866097       | 1345.740902        | 673.374089       | 10 |
| 4  | <b>447.223811</b>  | 224.115544      |                    |                  | 429.213246     | 215.110261       | <b>L</b> | <b>1292.714353</b> | 646.860815      | 1275.687804       | 638.347540       | 1274.703788        | 637.855532       | 9  |
| 5  | <b>886.449137</b>  | 443.728207      | 869.422588         | 435.214932       | 868.438572     | 434.722924       | <b>Q</b> | <b>1179.630289</b> | 590.318783      | 1162.603740       | 581.805508       | <b>1161.619724</b> | 581.313500       | 8  |
| 6  | <b>1000.492064</b> | 500.749670      | <b>983.465515</b>  | 492.236396       | 982.481499     | 491.744388       | <b>N</b> | <b>740.404963</b>  | 370.706120      | 723.378414        | 362.192845       | 722.394398         | 361.700837       | 7  |
| 7  | 1097.544828        | 549.276052      | 1080.518279        | 540.762778       | 1079.534263    | 540.270770       | <b>P</b> | <b>626.362036</b>  | 313.684656      | 609.335487        | 305.171382       | <b>608.351471</b>  | 304.679374       | 6  |
| 8  | 1184.576856        | 592.792066      | 1167.550307        | 584.278792       | 1166.566291    | 583.786784       | <b>S</b> | <b>529.309272</b>  | 265.158274      | 512.282723        | 256.645000       | 511.298707         | 256.152992       | 5  |
| 9  | <b>1255.613970</b> | 628.310623      | 1238.587421        | 619.797349       | 1237.603405    | 619.305341       | <b>A</b> | <b>442.277244</b>  | 221.642260      | 425.250695        | 213.128986       |                    |                  | 4  |
| 10 | <b>1354.682384</b> | 677.844830      | <b>1337.655835</b> | 669.331556       | 1336.671819    | 668.839548       | <b>V</b> | <b>371.240130</b>  | 186.123703      | 354.213581        | 177.610429       |                    |                  | 3  |
| 11 | <b>1451.735148</b> | 726.371212      | 1434.708599        | 717.857938       | 1433.724583    | 717.365930       | <b>P</b> | <b>272.171716</b>  | 136.589496      | <b>255.145167</b> | 128.076221       |                    |                  | 2  |
| 12 |                    |                 |                    |                  |                |                  | <b>R</b> | <b>175.118952</b>  | 88.063114       | 158.092403        | 79.549839        |                    |                  | 1  |

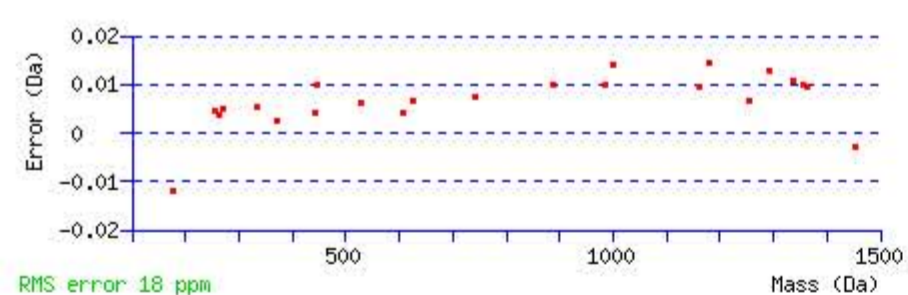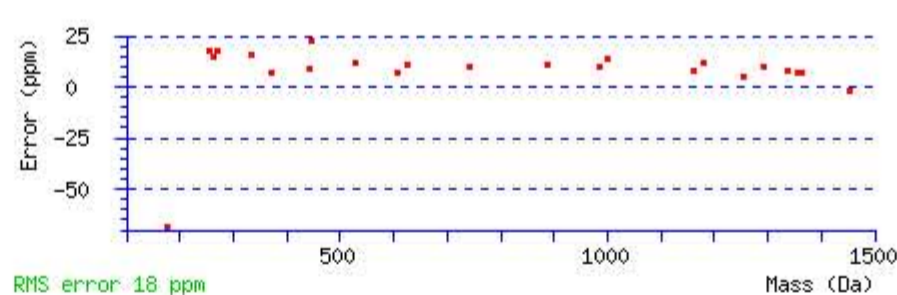

NCBI BLAST search of **DFALQNPSAVPR**

(Parameters: blastp, nr protein database, expect=20000, no filter, PAM30)

Other BLAST [web gateways](#)

All matches to this query

| Score | Mr(calc):   | Delta     | Sequence                         |
|-------|-------------|-----------|----------------------------------|
| 48.5  | 1624.839539 | 0.020809  | <a href="#">DFALQNPSAVPR</a>     |
| 19.5  | 1624.860672 | -0.000324 | <a href="#">VGDCVHIENPLIQR</a>   |
| 14.9  | 1624.853271 | 0.007077  | <a href="#">ASDPVRTGSEGLALPR</a> |
| 8.6   | 1624.864471 | -0.004123 | <a href="#">RELRSQETPEKPR</a>    |
| 8.6   | 1624.871887 | -0.011539 | <a href="#">RTSSEQAVALPR</a>     |
| 6.6   | 1624.875916 | -0.015568 | <a href="#">QWLEATIQLGR</a>      |
| 2.0   | 1624.850784 | 0.009564  | <a href="#">FCSFLQTSKVRPR</a>    |
| 1.9   | 1624.879745 | -0.019397 | <a href="#">YLAIVHATNSQRPR</a>   |
| 1.3   | 1624.854813 | 0.005535  | <a href="#">QWVAAGGHITFK</a>     |
| 0.5   | 1624.850769 | 0.009579  | <a href="#">QPTWSRSSLPR</a>      |

Mascot: <http://www.matrixscience.com/>

# MASCOT Search Results

## Peptide View

MS/MS Fragmentation of **LAELPADALGPLQR**

Found in **ALS\_HUMAN**, Insulin-like growth factor-binding protein complex acid labile subunit OS=Homo sapiens GN=IGFALS PE=1 SV=1

Match to Query 44651: 1774.000512 from(592.340780,3+) rtinseconds(2430) index(27610)

Title: Locus:1.1.1.2988.6 File:"2013-07-02 CLN FXIII 180 min 1st F 2.wiff"

Data file C:\Program Files (x86)\Matrix Science\Mascot Daemon\mgf\7 FXIII 180 min 1st\mascot\_daemon\_merge.mgf

Click mouse within plot area to zoom in by factor of two about that point

Or, Plot from  to  Da

Label all possible matches  Label matches used for scoring

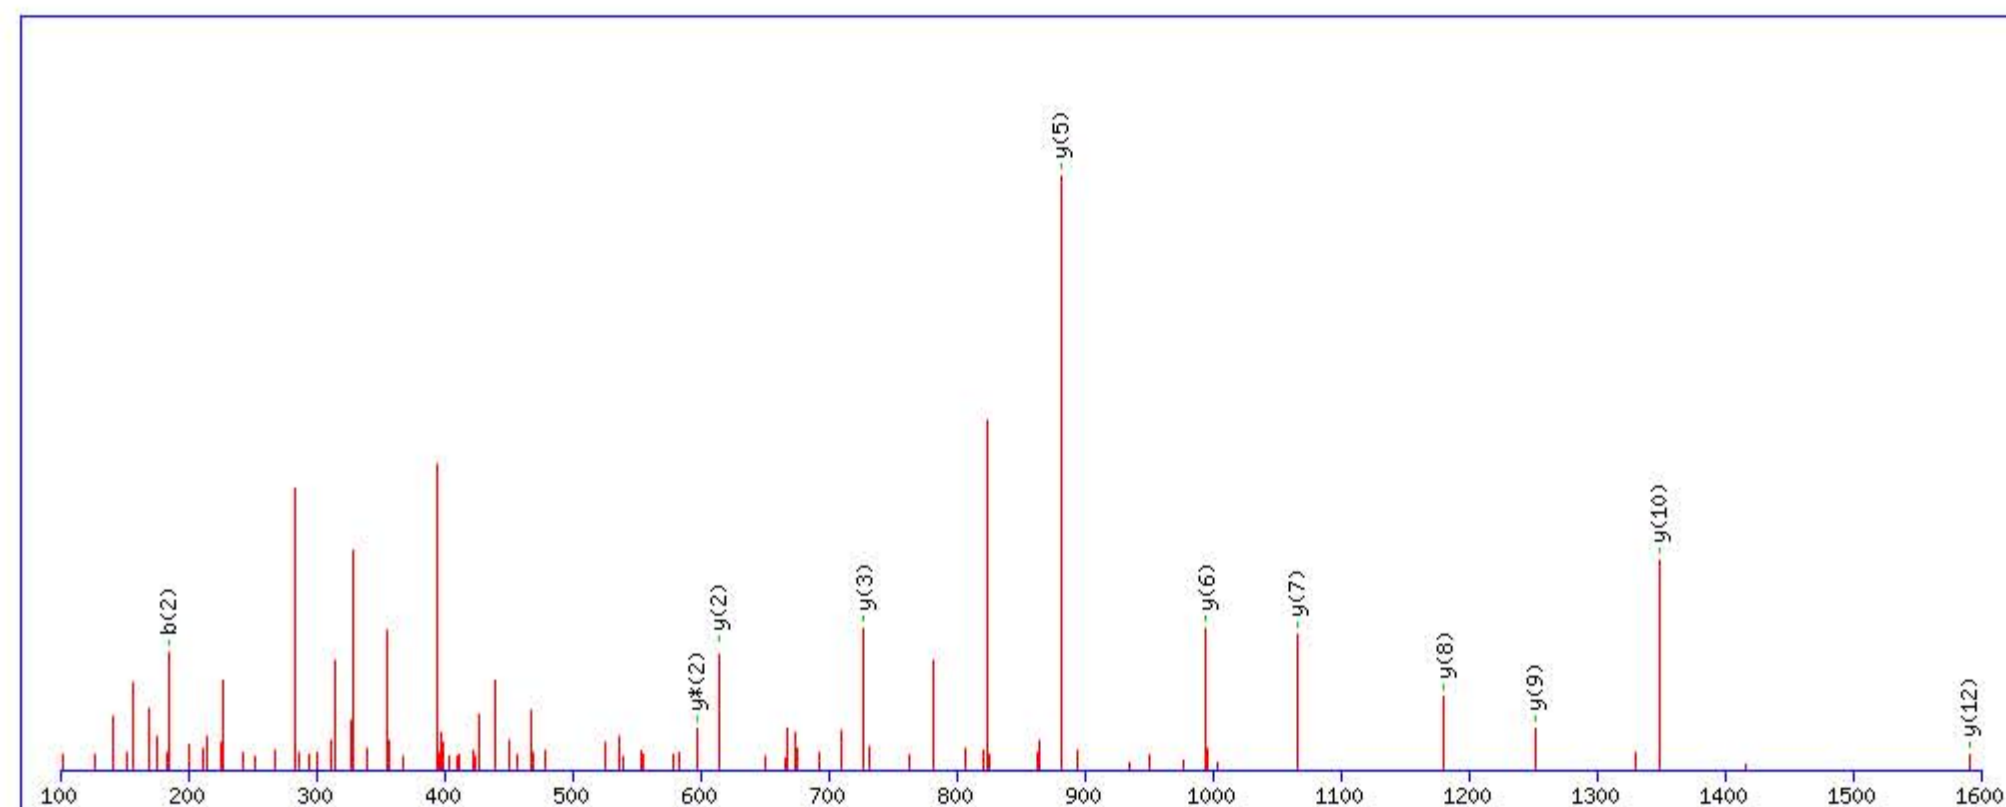

Monoisotopic mass of neutral peptide Mr(calc): 1773.981094

Fixed modifications: Carbamidomethyl (C) (apply to specified residues or termini only)

Variable modifications:

Q13 : Biotin:Thermo-21345 (Q)

Ions Score: 69 Expect: 1.3e-006

Matches : 11/114 fragment ions using 15 most intense peaks [\(help\)](#)

| #  | b           | b <sup>++</sup> | b <sup>+</sup> | b <sup>+++</sup> | b <sup>0</sup> | b <sup>0++</sup> | Seq. | y           | y <sup>++</sup> | y <sup>+</sup> | y <sup>+++</sup> | y <sup>0</sup> | y <sup>0++</sup> | #  |
|----|-------------|-----------------|----------------|------------------|----------------|------------------|------|-------------|-----------------|----------------|------------------|----------------|------------------|----|
| 1  | 114.091340  | 57.549308       |                |                  |                |                  | L    |             |                 |                |                  |                |                  | 14 |
| 2  | 185.128454  | 93.067865       |                |                  |                |                  | A    | 1661.904340 | 831.455808      | 1644.877791    | 822.942534       | 1643.893775    | 822.450526       | 13 |
| 3  | 314.171047  | 157.589161      |                |                  | 296.160482     | 148.583879       | E    | 1590.867226 | 795.937251      | 1573.840677    | 787.423977       | 1572.856661    | 786.931969       | 12 |
| 4  | 427.255111  | 214.131193      |                |                  | 409.244546     | 205.125911       | L    | 1461.824633 | 731.415955      | 1444.798084    | 722.902680       | 1443.814068    | 722.410672       | 11 |
| 5  | 524.307875  | 262.657576      |                |                  | 506.297310     | 253.652293       | P    | 1348.740569 | 674.873922      | 1331.714020    | 666.360648       | 1330.730004    | 665.868640       | 10 |
| 6  | 595.344989  | 298.176133      |                |                  | 577.334424     | 289.170850       | A    | 1251.687805 | 626.347540      | 1234.661256    | 617.834266       | 1233.677240    | 617.342258       | 9  |
| 7  | 710.371932  | 355.689604      |                |                  | 692.361367     | 346.684322       | D    | 1180.650691 | 590.828984      | 1163.624142    | 582.315709       | 1162.640126    | 581.823701       | 8  |
| 8  | 781.409046  | 391.208161      |                |                  | 763.398481     | 382.202879       | A    | 1065.623748 | 533.315512      | 1048.597199    | 524.802238       |                |                  | 7  |
| 9  | 894.493110  | 447.750193      |                |                  | 876.482545     | 438.744911       | L    | 994.586634  | 497.796955      | 977.560085     | 489.283681       |                |                  | 6  |
| 10 | 951.514574  | 476.260925      |                |                  | 933.504009     | 467.255643       | G    | 881.502570  | 441.254923      | 864.476021     | 432.741649       |                |                  | 5  |
| 11 | 1048.567338 | 524.787307      |                |                  | 1030.556773    | 515.782025       | P    | 824.481106  | 412.744191      | 807.454557     | 404.230916       |                |                  | 4  |
| 12 | 1161.651402 | 581.329339      |                |                  | 1143.640837    | 572.324056       | L    | 727.428342  | 364.217809      | 710.401793     | 355.704534       |                |                  | 3  |
| 13 | 1600.876728 | 800.942002      | 1583.850179    | 792.428728       | 1582.866163    | 791.936719       | Q    | 614.344278  | 307.675777      | 597.317729     | 299.162503       |                |                  | 2  |
| 14 |             |                 |                |                  |                |                  | R    | 175.118952  | 88.063114       | 158.092403     | 79.549839        |                |                  | 1  |

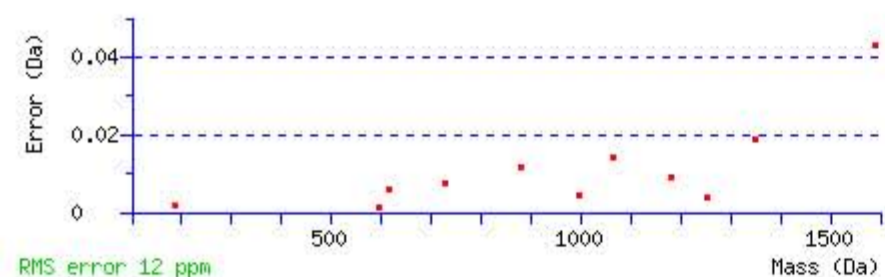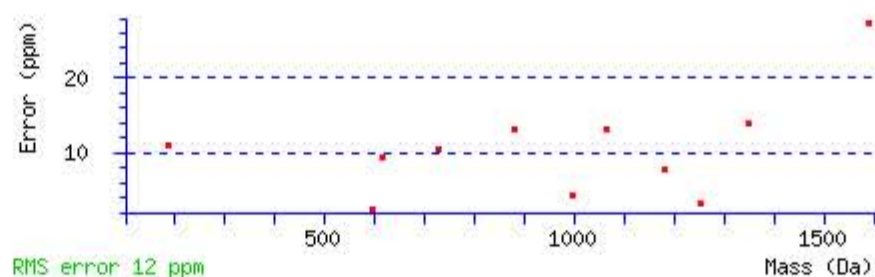

NCBI BLAST search of [LAELPADALGPLQR](#)

(Parameters: blastp, nr protein database, expect=20000, no filter, PAM30)

Other BLAST [web gateways](#)

All matches to this query

| Score | Mr(calc):   | Delta     | Sequence                         |
|-------|-------------|-----------|----------------------------------|
| 69.2  | 1773.981094 | 0.019418  | <a href="#">LAELPADALGPLQR</a>   |
| 7.8   | 1774.014099 | -0.013587 | <a href="#">LLLQEALWPEGKLLHK</a> |

Mascot: <http://www.matrixscience.com/>

# Mascot Search Results

## Peptide View

MS/MS Fragmentation of **SFEGLGQLEVLTLTDHNQLQEVK**

Found in **ALS\_HUMAN**, Insulin-like growth factor-binding protein complex acid labile subunit OS=Homo sapiens GN=IGFALS PE=1 SV=1

Match to Query 67246: 2807.491692 from(936.837840,3+) rtinseconds(2686) index(29281)

Title: Locus:1.1.1.3076.22 File:"2013-07-02 CLN FXIII 180 min 1st F 2.wiff"

Data file C:\Program Files (x86)\Matrix Science\Mascot Daemon\mgf7 FXIII 180 min 1st\mascot\_daemon\_merge.mgf

Click mouse within plot area to zoom in by factor of two about that point

Or, Plot from 0 to 2600 Da Full range

Label all possible matches  Label matches used for scoring

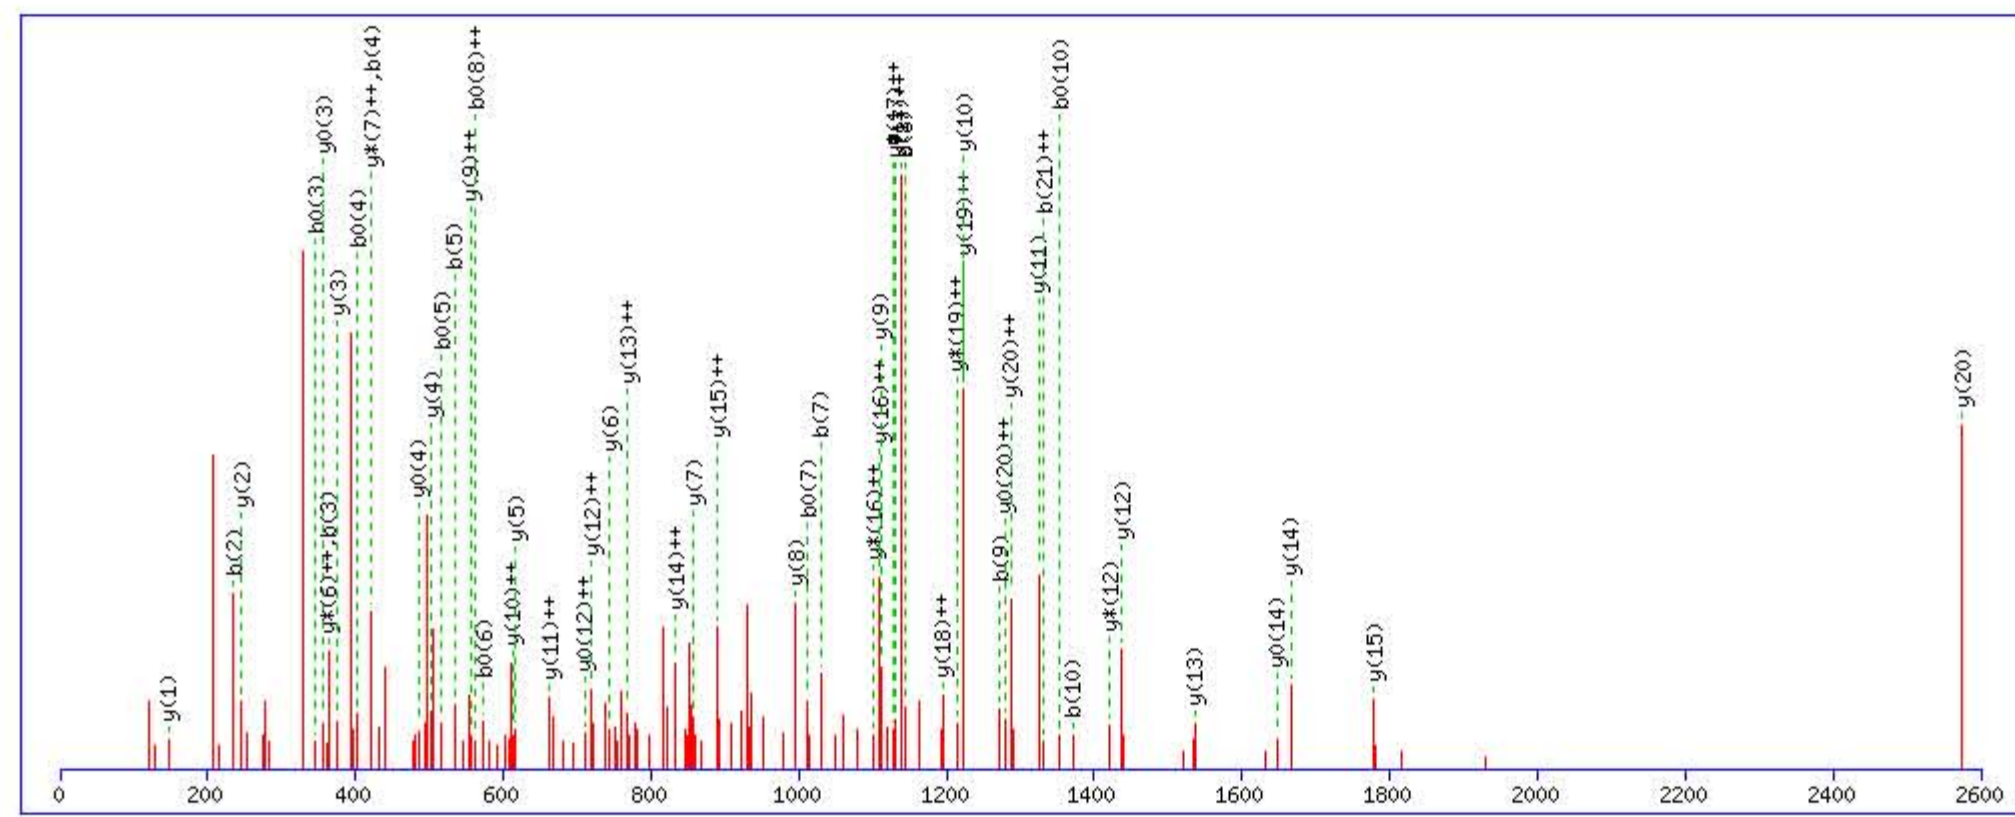

Monoisotopic mass of neutral peptide Mr(calc): 2807.452759  
 Fixed modifications: Carbamidomethyl (C) (apply to specified residues or termini only)  
 Variable modifications:  
 Q7 : Biotin:Thermo-21345 (Q)  
 Ions Score: 70 Expect: 1.8e-006  
 Matches : 56/236 fragment ions using 124 most intense peaks [\(help\)](#)

| #  | b                  | b <sup>++</sup>    | b <sup>*</sup> | b <sup>*++</sup> | b <sup>0</sup>     | b <sup>0++</sup>  | Seq. | y                  | y <sup>++</sup>    | y <sup>*</sup>     | y <sup>*++</sup>   | y <sup>0</sup>     | y <sup>0++</sup>   | #  |
|----|--------------------|--------------------|----------------|------------------|--------------------|-------------------|------|--------------------|--------------------|--------------------|--------------------|--------------------|--------------------|----|
| 1  | 88.039304          | 44.523290          |                |                  | 70.028739          | 35.518008         | S    |                    |                    |                    |                    |                    |                    | 22 |
| 2  | <b>235.107718</b>  | 118.057497         |                |                  | 217.097153         | 109.052214        | F    | 2721.428016        | 1361.217646        | 2704.401467        | 1352.704371        | 2703.417451        | 1352.212363        | 21 |
| 3  | <b>364.150311</b>  | 182.578793         |                |                  | <b>346.139746</b>  | 173.573511        | E    | <b>2574.359602</b> | <b>1287.683439</b> | 2557.333053        | 1279.170164        | 2556.349037        | <b>1278.678156</b> | 20 |
| 4  | <b>421.171775</b>  | 211.089525         |                |                  | <b>403.161210</b>  | 202.084243        | G    | 2445.317009        | <b>1223.162142</b> | 2428.290460        | <b>1214.648868</b> | 2427.306444        | 1214.156860        | 19 |
| 5  | <b>534.255839</b>  | 267.631558         |                |                  | <b>516.245274</b>  | 258.626275        | L    | 2388.295545        | <b>1194.651410</b> | 2371.268996        | 1186.138136        | 2370.284980        | 1185.646128        | 18 |
| 6  | 591.277303         | 296.142290         |                |                  | <b>573.266738</b>  | 287.137007        | G    | 2275.211481        | <b>1138.109378</b> | 2258.184932        | <b>1129.596104</b> | 2257.200916        | <b>1129.104096</b> | 17 |
| 7  | <b>1030.502629</b> | 515.754953         | 1013.476080    | 507.241678       | <b>1012.492064</b> | 506.749670        | Q    | 2218.190017        | <b>1109.598646</b> | 2201.163468        | <b>1101.085372</b> | 2200.179452        | 1100.593364        | 16 |
| 8  | <b>1143.586693</b> | 572.296985         | 1126.560144    | 563.783710       | 1125.576128        | <b>563.291702</b> | L    | <b>1778.964691</b> | <b>889.985984</b>  | 1761.938142        | 881.472709         | 1760.954126        | 880.980701         | 15 |
| 9  | <b>1272.629286</b> | 636.818281         | 1255.602737    | 628.305007       | 1254.618721        | 627.812999        | E    | <b>1665.880627</b> | <b>833.443952</b>  | 1648.854078        | 824.930677         | <b>1647.870062</b> | 824.438669         | 14 |
| 10 | <b>1371.697700</b> | 686.352488         | 1354.671151    | 677.839214       | <b>1353.687135</b> | 677.347206        | V    | <b>1536.838034</b> | <b>768.922655</b>  | 1519.811485        | 760.409381         | 1518.827469        | 759.917373         | 13 |
| 11 | 1484.781764        | 742.894520         | 1467.755215    | 734.381246       | 1466.771199        | 733.889238        | L    | <b>1437.769620</b> | <b>719.388448</b>  | <b>1420.743071</b> | 710.875174         | 1419.759055        | <b>710.383166</b>  | 12 |
| 12 | 1585.829443        | 793.418360         | 1568.802894    | 784.905085       | 1567.818878        | 784.413077        | T    | <b>1324.685556</b> | <b>662.846416</b>  | 1307.659007        | 654.333142         | 1306.674991        | 653.841134         | 11 |
| 13 | 1698.913507        | 849.960392         | 1681.886958    | 841.447117       | 1680.902942        | 840.955109        | L    | <b>1223.637877</b> | <b>612.322577</b>  | 1206.611328        | 603.809302         | 1205.627312        | 603.317294         | 10 |
| 14 | 1813.940450        | 907.473863         | 1796.913901    | 898.960589       | 1795.929885        | 898.468581        | D    | <b>1110.553813</b> | <b>555.780545</b>  | 1093.527264        | 547.267270         | 1092.543248        | 546.775262         | 9  |
| 15 | 1950.999362        | 976.003319         | 1933.972813    | 967.490045       | 1932.988797        | 966.998037        | H    | <b>995.526870</b>  | 498.267073         | 978.500321         | 489.753799         | 977.516305         | 489.261791         | 8  |
| 16 | 2065.042289        | 1033.024782        | 2048.015740    | 1024.511508      | 2047.031724        | 1024.019500       | N    | <b>858.467958</b>  | 429.737617         | 841.441409         | <b>421.224343</b>  | 840.457393         | 420.732335         | 7  |
| 17 | 2193.100867        | 1097.054072        | 2176.074318    | 1088.540797      | 2175.090302        | 1088.048789       | Q    | <b>744.425031</b>  | 372.716154         | 727.398482         | <b>364.202879</b>  | 726.414466         | 363.710871         | 6  |
| 18 | 2306.184931        | 1153.596104        | 2289.158382    | 1145.082829      | 2288.174366        | 1144.590821       | L    | <b>616.366453</b>  | 308.686865         | 599.339904         | 300.173590         | 598.355888         | 299.681582         | 5  |
| 19 | 2434.243509        | 1217.625393        | 2417.216960    | 1209.112118      | 2416.232944        | 1208.620110       | Q    | <b>503.282389</b>  | 252.144833         | 486.255840         | 243.631558         | <b>485.271824</b>  | 243.139550         | 4  |
| 20 | 2563.286102        | 1282.146689        | 2546.259553    | 1273.633415      | 2545.275537        | 1273.141407       | E    | <b>375.223811</b>  | 188.115543         | 358.197262         | 179.602269         | <b>357.213246</b>  | 179.110261         | 3  |
| 21 | 2662.354516        | <b>1331.680896</b> | 2645.327967    | 1323.167622      | 2644.343951        | 1322.675614       | V    | <b>246.181218</b>  | 123.594247         | 229.154669         | 115.080972         |                    |                    | 2  |
| 22 |                    |                    |                |                  |                    |                   | K    | <b>147.112804</b>  | 74.060040          | 130.086255         | 65.546765          |                    |                    | 1  |

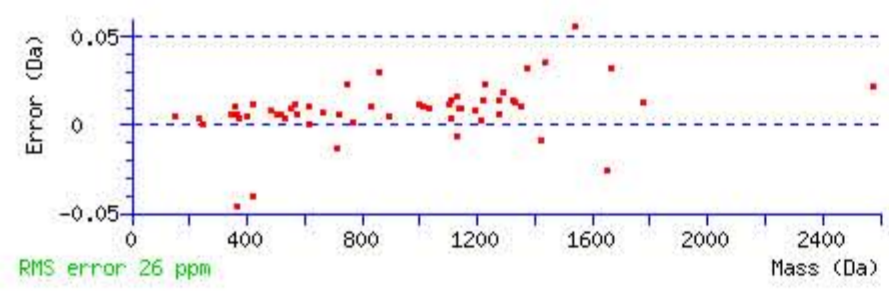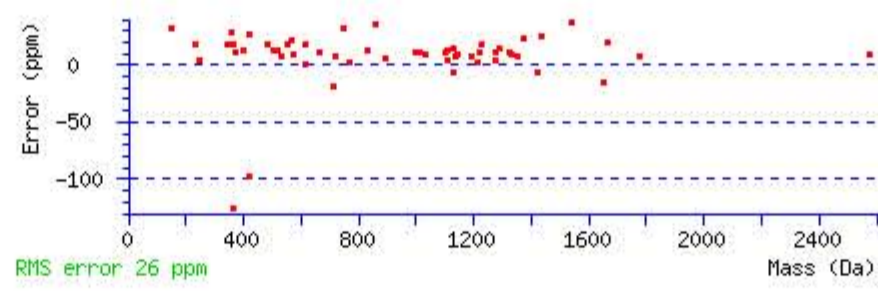

NCBI BLAST search of [SFEGLGQLEVLTLTDHNQLQEVK](#)  
 (Parameters: blastp, nr protein database, expect=20000, no filter, PAM30)  
 Other BLAST [web gateways](#)

### All matches to this query

| Score | Mr(calc):   | Delta    | Sequence                                |
|-------|-------------|----------|-----------------------------------------|
| 70.4  | 2807.452759 | 0.038933 | <a href="#">SFEGLGQLEVLTLTDHNQLQEVK</a> |
| 9.3   | 2807.452759 | 0.038933 | <a href="#">SFEGLGQLEVLTLTDHNQLQEVK</a> |
| 5.2   | 2807.452759 | 0.038933 | <a href="#">SFEGLGQLEVLTLTDHNQLQEVK</a> |

# MASCOT SEARCH RESULTS

## Peptide View

MS/MS Fragmentation of **ELAAQTIK**

Found in **ITIH1\_HUMAN**, Inter-alpha-trypsin inhibitor heavy chain H1 OS=Homo sapiens GN=ITIH1 PE=1 SV=3

Match to Query 23223: 1183.678548 from(592.846550,2+) rtinseconds(1733) index(58861)

Title: Locus:1.1.1.3027.7 File:"2013-07-02 CLN FXIII 180 min 1st F 4.wiff"

Data file C:\Program Files (x86)\Matrix Science\Mascot Daemon\mgf\7 FXIII 180 min 1st\mascot\_daemon\_merge.mgf

Click mouse within plot area to zoom in by factor of two about that point

Or, Plot from  to  Da

Label all possible matches  Label matches used for scoring

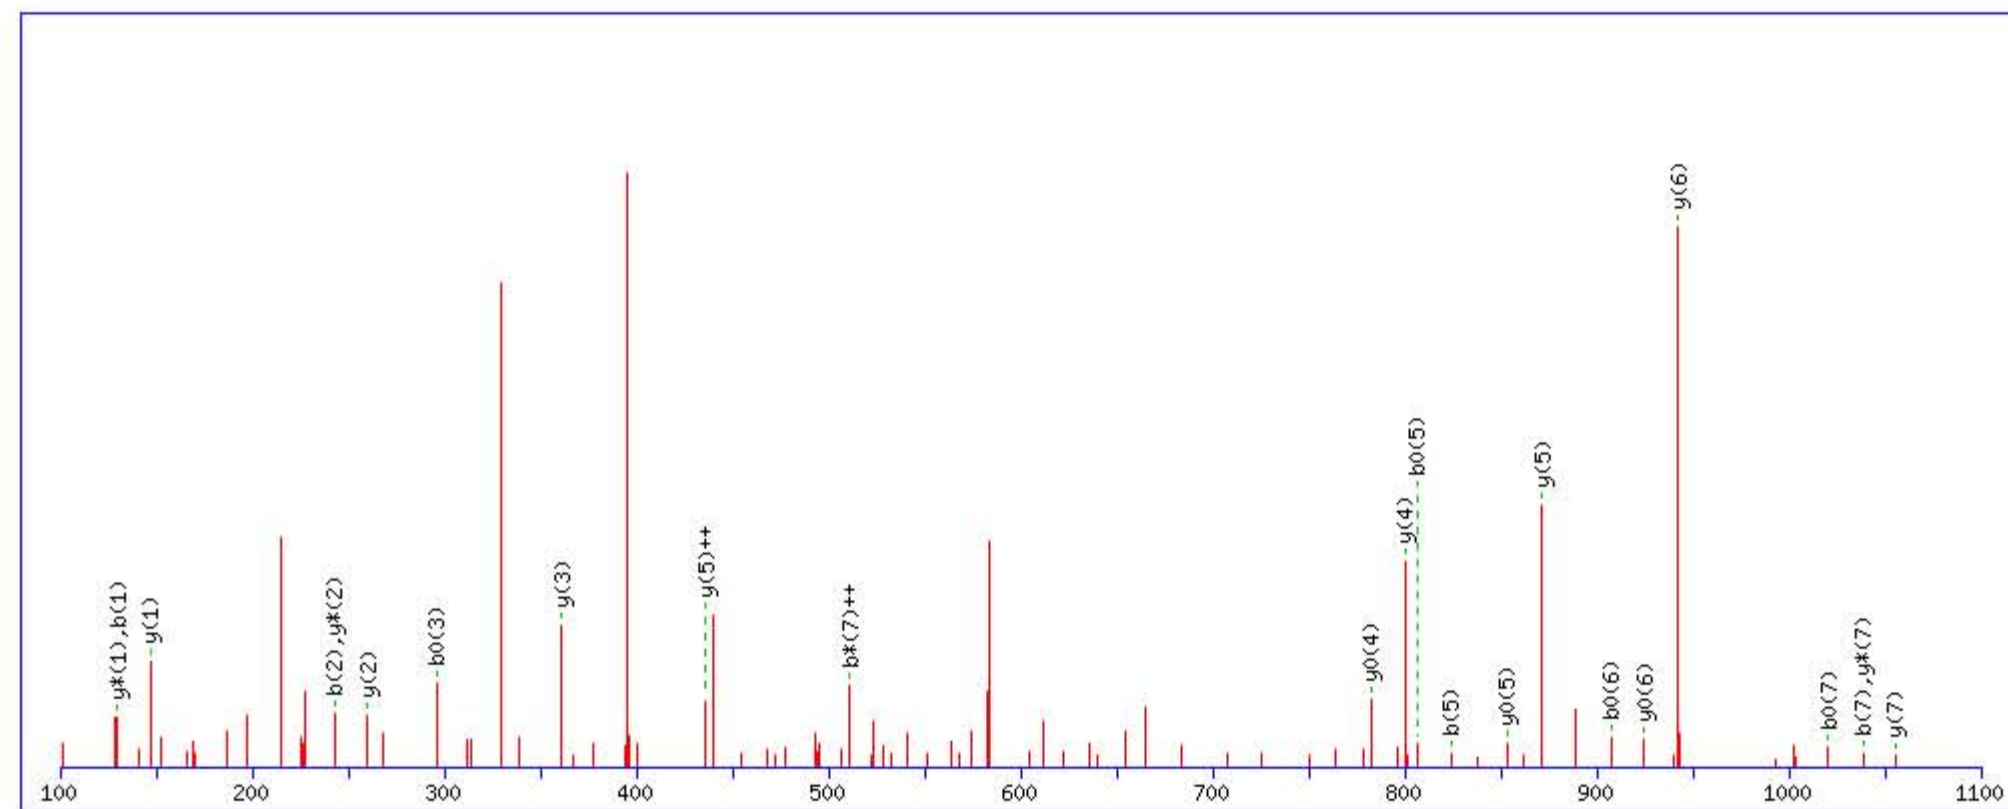

Monoisotopic mass of neutral peptide Mr(calc): 1183.663452

Fixed modifications: Carbamidomethyl (C) (apply to specified residues or termini only)

Variable modifications:

Q5 : Biotin:Thermo-21345 (Q)

Ions Score: 31 Expect: 0.014

Matches : 23/72 fragment ions using 50 most intense peaks [\(help\)](#)

| # | b           | b <sup>++</sup> | b <sup>*</sup> | b <sup>*++</sup> | b <sup>0</sup> | b <sup>0++</sup> | Seq. | y           | y <sup>++</sup> | y <sup>*</sup> | y <sup>*++</sup> | y <sup>0</sup> | y <sup>0++</sup> | # |
|---|-------------|-----------------|----------------|------------------|----------------|------------------|------|-------------|-----------------|----------------|------------------|----------------|------------------|---|
| 1 | 130.049869  | 65.528572       |                |                  | 112.039304     | 56.523290        | E    |             |                 |                |                  |                |                  | 8 |
| 2 | 243.133933  | 122.070605      |                |                  | 225.123368     | 113.065322       | L    | 1055.628165 | 528.317720      | 1038.601616    | 519.804446       | 1037.617600    | 519.312438       | 7 |
| 3 | 314.171047  | 157.589161      |                |                  | 296.160482     | 148.583879       | A    | 942.544101  | 471.775689      | 925.517552     | 463.262414       | 924.533536     | 462.770406       | 6 |
| 4 | 385.208161  | 193.107718      |                |                  | 367.197596     | 184.102436       | A    | 871.506987  | 436.257132      | 854.480438     | 427.743857       | 853.496422     | 427.251849       | 5 |
| 5 | 824.433487  | 412.720382      | 807.406938     | 404.207107       | 806.422922     | 403.715099       | Q    | 800.469873  | 400.738575      | 783.443324     | 392.225300       | 782.459308     | 391.733292       | 4 |
| 6 | 925.481166  | 463.244221      | 908.454617     | 454.730947       | 907.470601     | 454.238939       | T    | 361.244547  | 181.125911      | 344.217998     | 172.612637       | 343.233982     | 172.120629       | 3 |
| 7 | 1038.565230 | 519.786253      | 1021.538681    | 511.272978       | 1020.554665    | 510.780970       | I    | 260.196868  | 130.602072      | 243.170319     | 122.088797       |                |                  | 2 |
| 8 |             |                 |                |                  |                |                  | K    | 147.112804  | 74.060040       | 130.086255     | 65.546765        |                |                  | 1 |

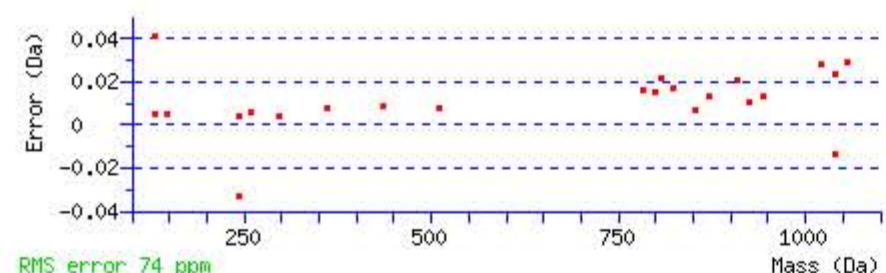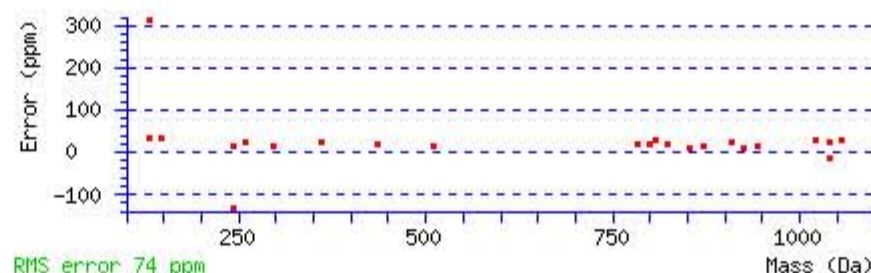

NCBI BLAST search of [ELAAQTIK](#)

(Parameters: blastp, nr protein database, expect=20000, no filter, PAM30)

Other BLAST [web gateways](#)

All matches to this query

| Score | Mr(calc):   | Delta     | Sequence                     |
|-------|-------------|-----------|------------------------------|
| 31.2  | 1183.663452 | 0.015096  | <a href="#">ELAAQTIK</a>     |
| 25.1  | 1183.663452 | 0.015096  | <a href="#">ELAAQTIK</a>     |
| 8.8   | 1183.692429 | -0.013881 | <a href="#">LEARLNVLEK</a>   |
| 8.5   | 1183.681198 | -0.002650 | <a href="#">LEALLEAAGIGK</a> |
| 7.3   | 1183.667282 | 0.011266  | <a href="#">GKQASEPALRK</a>  |
| 6.5   | 1183.663467 | 0.015081  | <a href="#">TQLSPSIK</a>     |
| 6.3   | 1183.667297 | 0.011251  | <a href="#">EPTGRVEIRK</a>   |
| 6.2   | 1183.663452 | 0.015096  | <a href="#">LEQAATLK</a>     |
| 5.7   | 1183.674698 | 0.003850  | <a href="#">TQVRELK</a>      |
| 5.3   | 1183.692459 | -0.013911 | <a href="#">TLGLQLNQK</a>    |

# Mascot Search Results

## Peptide View

MS/MS Fragmentation of **GSLVQASEANLQAAQDFVR**

Found in **ITIH1\_HUMAN**, Inter-alpha-trypsin inhibitor heavy chain H1 OS=Homo sapiens GN=ITIH1 PE=1 SV=3

Match to Query 58356: 2314.197312 from(772.406380,3+) rtinseconds(2513) index(82263)

Title: Locus:1.1.1.2225.21 File:"2013-07-02 CLN FXIII 180 min 1st FT.wiff"

Data file C:\Program Files (x86)\Matrix Science\Mascot Daemon\mgf\7 FXIII 180 min 1st\mascot\_daemon\_merge.mgf

Click mouse within plot area to zoom in by factor of two about that point

Or, Plot from  to  Da

Label all possible matches  Label matches used for scoring

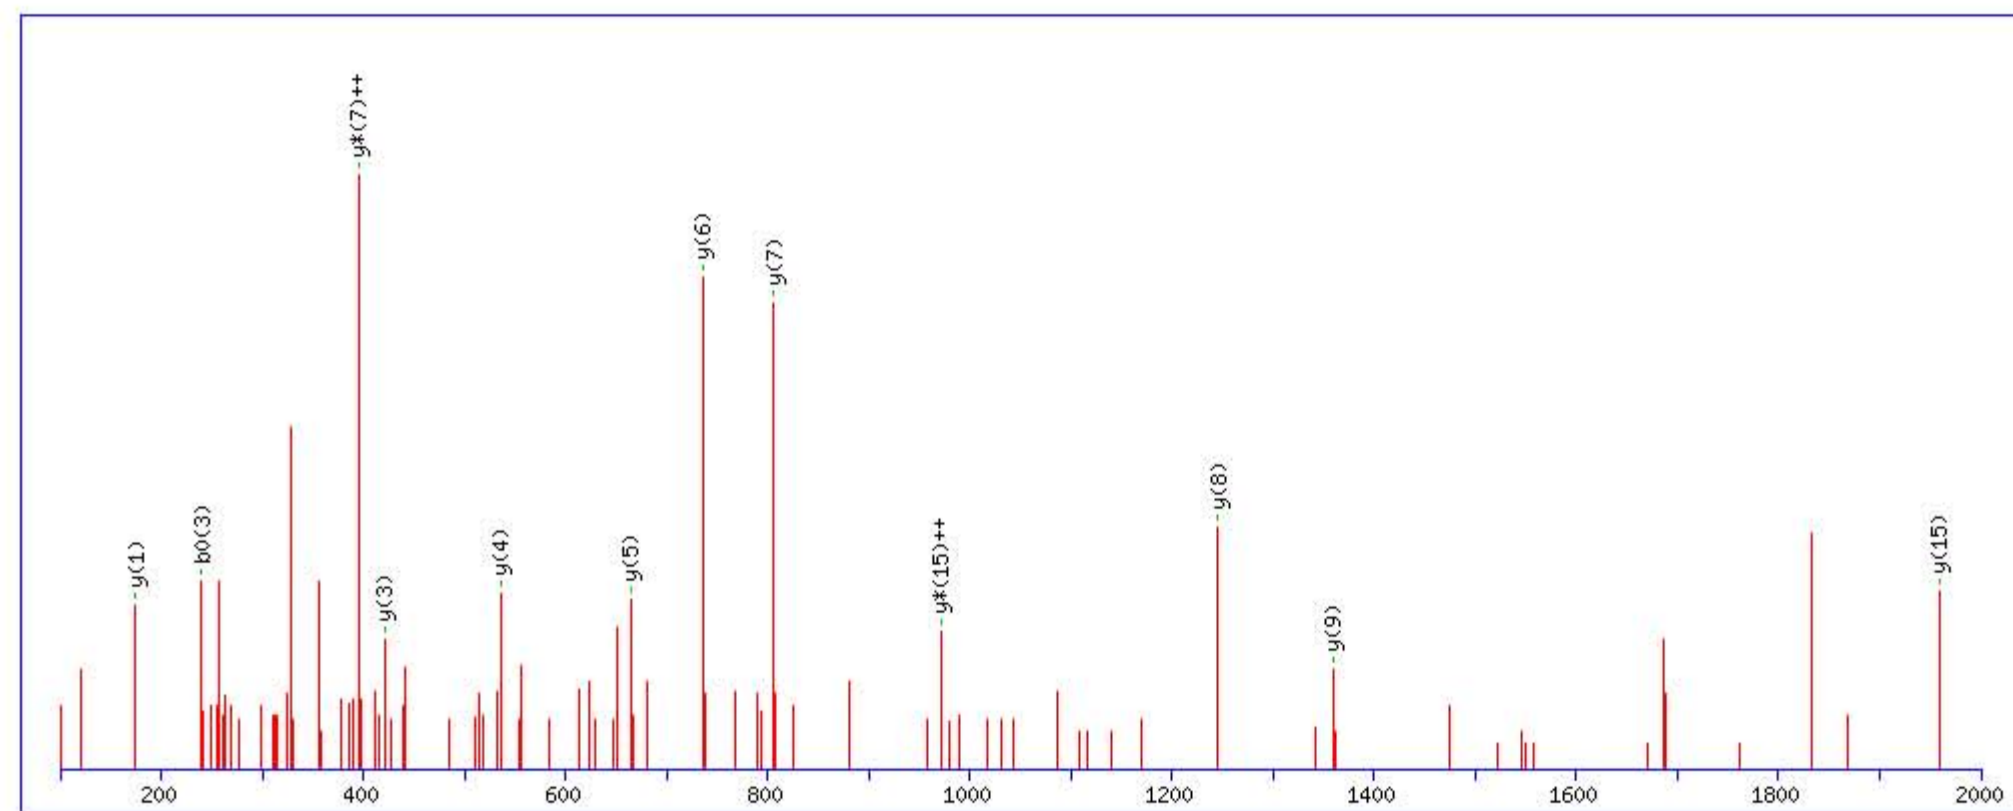

Monoisotopic mass of neutral peptide Mr(calc): 2314.173950  
 Fixed modifications: Carbamidomethyl (C) (apply to specified residues or termini only)  
 Variable modifications:  
 Q12 : Biotin:Thermo-21345 (Q)  
 Ions Score: 56 Expect: 7.3e-005  
 Matches : 12/200 fragment ions using 19 most intense peaks ([help](#))

| #  | b           | b <sup>++</sup> | b <sup>*</sup> | b <sup>*++</sup> | b <sup>0</sup>    | b <sup>0++</sup> | Seq.     | y                  | y <sup>++</sup> | y <sup>*</sup> | y <sup>*++</sup>  | y <sup>0</sup> | y <sup>0++</sup> | #         |
|----|-------------|-----------------|----------------|------------------|-------------------|------------------|----------|--------------------|-----------------|----------------|-------------------|----------------|------------------|-----------|
| 1  | 58.028740   | 29.518008       |                |                  |                   |                  | <b>G</b> |                    |                 |                |                   |                |                  | <b>19</b> |
| 2  | 145.060768  | 73.034022       |                |                  | 127.050203        | 64.028740        | <b>S</b> | 2258.159779        | 1129.583527     | 2241.133230    | 1121.070253       | 2240.149214    | 1120.578245      | <b>18</b> |
| 3  | 258.144832  | 129.576054      |                |                  | <b>240.134267</b> | 120.570772       | <b>L</b> | 2171.127751        | 1086.067513     | 2154.101202    | 1077.554239       | 2153.117186    | 1077.062231      | <b>17</b> |
| 4  | 357.213246  | 179.110261      |                |                  | 339.202681        | 170.104979       | <b>V</b> | 2058.043687        | 1029.525481     | 2041.017138    | 1021.012207       | 2040.033122    | 1020.520199      | <b>16</b> |
| 5  | 485.271824  | 243.139550      | 468.245275     | 234.626276       | 467.261259        | 234.134268       | <b>Q</b> | <b>1958.975273</b> | 979.991275      | 1941.948724    | <b>971.478000</b> | 1940.964708    | 970.985992       | <b>15</b> |
| 6  | 556.308938  | 278.658107      | 539.282389     | 270.144833       | 538.298373        | 269.652825       | <b>A</b> | 1830.916695        | 915.961986      | 1813.890146    | 907.448711        | 1812.906130    | 906.956703       | <b>14</b> |
| 7  | 643.340966  | 322.174121      | 626.314417     | 313.660847       | 625.330401        | 313.168839       | <b>S</b> | 1759.879581        | 880.443429      | 1742.853032    | 871.930154        | 1741.869016    | 871.438146       | <b>13</b> |
| 8  | 772.383559  | 386.695418      | 755.357010     | 378.182143       | 754.372994        | 377.690135       | <b>E</b> | 1672.847553        | 836.927415      | 1655.821004    | 828.414140        | 1654.836988    | 827.922132       | <b>12</b> |
| 9  | 843.420673  | 422.213975      | 826.394124     | 413.700700       | 825.410108        | 413.208692       | <b>A</b> | 1543.804960        | 772.406118      | 1526.778411    | 763.892844        | 1525.794395    | 763.400836       | <b>11</b> |
| 10 | 957.463600  | 479.235438      | 940.437051     | 470.722164       | 939.453035        | 470.230156       | <b>N</b> | 1472.767846        | 736.887561      | 1455.741297    | 728.374287        | 1454.757281    | 727.882279       | <b>10</b> |
| 11 | 1070.547664 | 535.777470      | 1053.521115    | 527.264196       | 1052.537099       | 526.772187       | <b>L</b> | <b>1358.724919</b> | 679.866098      | 1341.698370    | 671.352823        | 1340.714354    | 670.860815       | <b>9</b>  |
| 12 | 1509.772990 | 755.390133      | 1492.746441    | 746.876859       | 1491.762425       | 746.384851       | <b>Q</b> | <b>1245.640855</b> | 623.324066      | 1228.614306    | 614.810791        | 1227.630290    | 614.318783       | <b>8</b>  |
| 13 | 1580.810104 | 790.908690      | 1563.783555    | 782.395416       | 1562.799539       | 781.903408       | <b>A</b> | <b>806.415529</b>  | 403.711403      | 789.388980     | <b>395.198128</b> | 788.404964     | 394.706120       | <b>7</b>  |
| 14 | 1651.847218 | 826.427247      | 1634.820669    | 817.913973       | 1633.836653       | 817.421965       | <b>A</b> | <b>735.378415</b>  | 368.192846      | 718.351866     | 359.679571        | 717.367850     | 359.187563       | <b>6</b>  |
| 15 | 1779.905796 | 890.456536      | 1762.879247    | 881.943262       | 1761.895231       | 881.451254       | <b>Q</b> | <b>664.341301</b>  | 332.674289      | 647.314752     | 324.161014        | 646.330736     | 323.669006       | <b>5</b>  |
| 16 | 1894.932739 | 947.970008      | 1877.906190    | 939.456733       | 1876.922174       | 938.964725       | <b>D</b> | <b>536.282723</b>  | 268.645000      | 519.256174     | 260.131725        | 518.272158     | 259.639717       | <b>4</b>  |
| 17 | 2042.001153 | 1021.504215     | 2024.974604    | 1012.990940      | 2023.990588       | 1012.498932      | <b>F</b> | <b>421.255780</b>  | 211.131528      | 404.229231     | 202.618253        |                |                  | <b>3</b>  |
| 18 | 2141.069567 | 1071.038421     | 2124.043018    | 1062.525147      | 2123.059002       | 1062.033139      | <b>V</b> | 274.187366         | 137.597321      | 257.160817     | 129.084046        |                |                  | <b>2</b>  |
| 19 |             |                 |                |                  |                   |                  | <b>R</b> | <b>175.118952</b>  | 88.063114       | 158.092403     | 79.549839         |                |                  | <b>1</b>  |

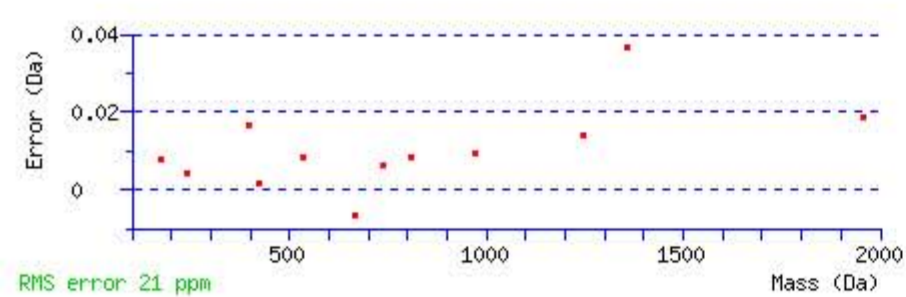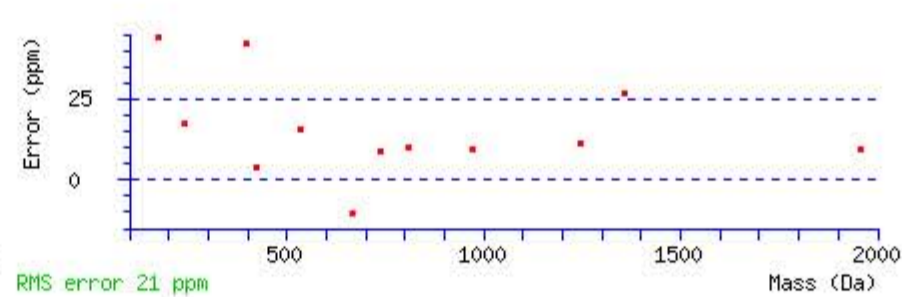

NCBI BLAST search of **GSLVQASEANLQAAQDFVR**  
 (Parameters: blastp, nr protein database, expect=20000, no filter, PAM30)  
 Other BLAST [web gateways](#)

### All matches to this query

| Score | Mr(calc):   | Delta    | Sequence                            |
|-------|-------------|----------|-------------------------------------|
| 55.9  | 2314.173950 | 0.023362 | <a href="#">GSLVQASEANLQAAQDFVR</a> |
| 32.4  | 2314.173950 | 0.023362 | <a href="#">GSLVQASEANLQAAQDFVR</a> |
| 18.0  | 2314.173950 | 0.023362 | <a href="#">GSLVQASEANLQAAQDFVR</a> |



# MASCOT Search Results

## Peptide View

MS/MS Fragmentation of **FAHYVVTSQVVNTANEAR**

Found in **ITIH1\_HUMAN**, Inter-alpha-trypsin inhibitor heavy chain H1 OS=Homo sapiens GN=ITIH1 PE=1 SV=3

Match to Query 58409: 2316.194616 from(580.055930,4+) rtinseconds(1927) index(60233)

Title: Locus:1.1.1.3094.9 File:"2013-07-02 CLN FXIII 180 min 1st F 4.wiff"

Data file C:\Program Files (x86)\Matrix Science\Mascot Daemon\mgf\7 FXIII 180 min 1st\mascot\_daemon\_merge.mgf

Click mouse within plot area to zoom in by factor of two about that point

Or, Plot from  to  Da

Label all possible matches  Label matches used for scoring

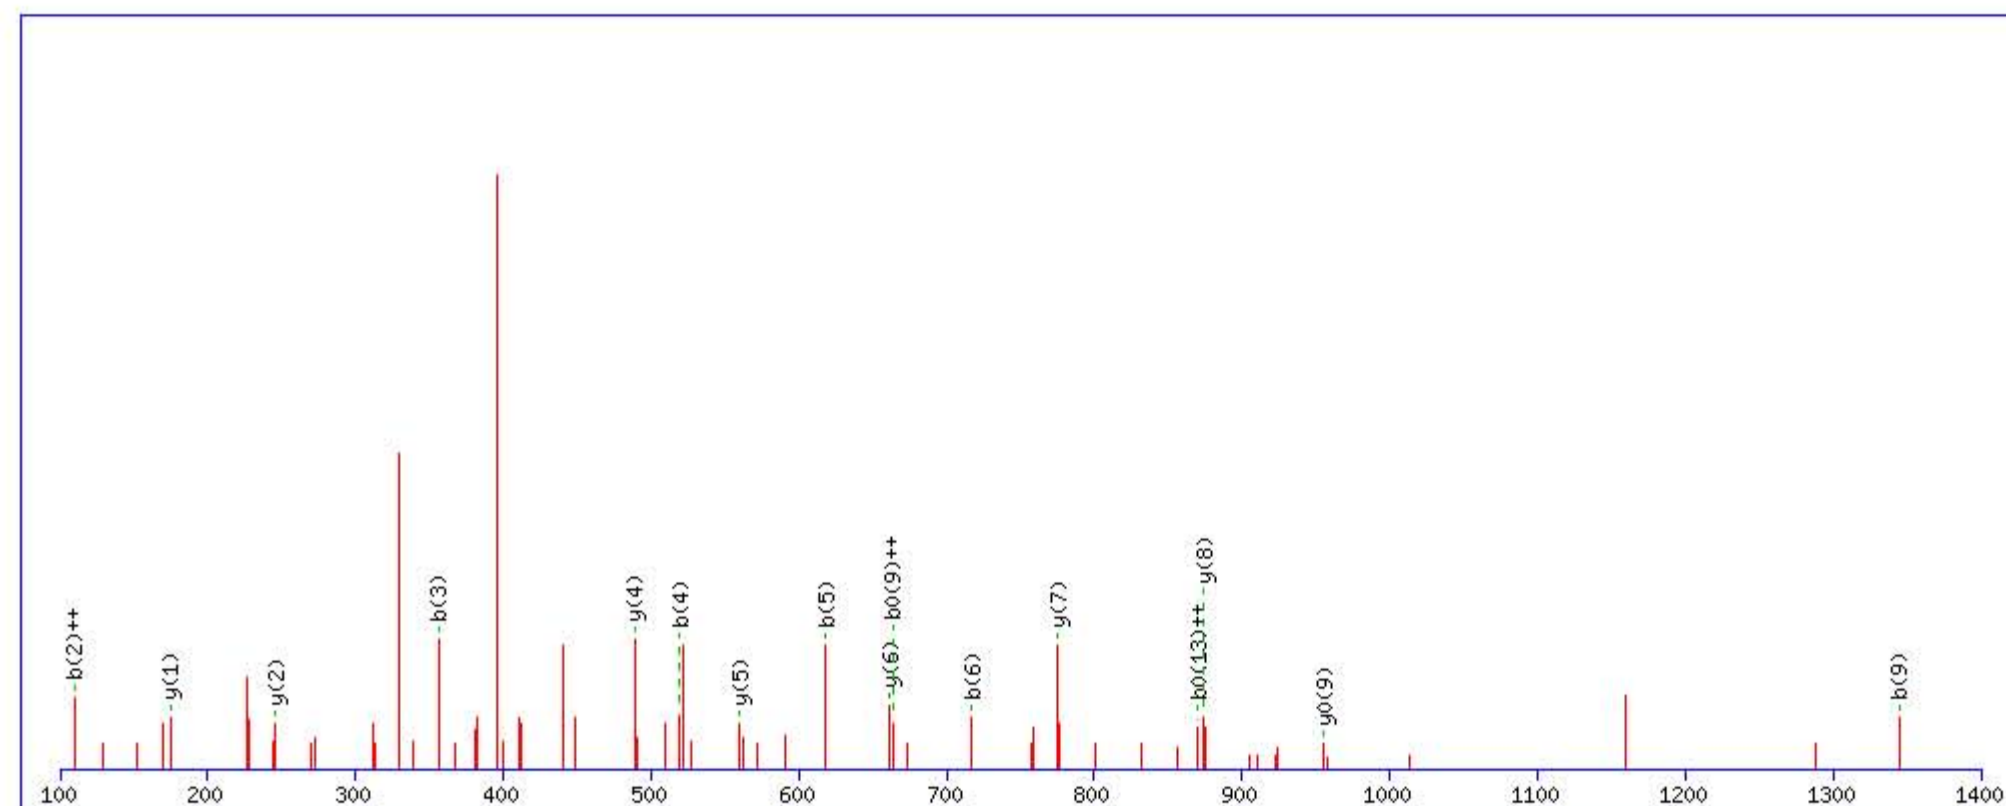

Monoisotopic mass of neutral peptide Mr(calc): 2316.168488

Fixed modifications: Carbamidomethyl (C) (apply to specified residues or termini only)

Variable modifications:

Q9 : Biotin:Thermo-21345 (Q)

Ions Score: 39 Expect: 0.00065

Matches : 16/172 fragment ions using 31 most intense peaks [\(help\)](#)

| #  | b           | b <sup>++</sup> | b <sup>*</sup> | b <sup>*++</sup> | b <sup>0</sup> | b <sup>0++</sup> | Seq. | y           | y <sup>++</sup> | y <sup>*</sup> | y <sup>*++</sup> | y <sup>0</sup> | y <sup>0++</sup> | #  |
|----|-------------|-----------------|----------------|------------------|----------------|------------------|------|-------------|-----------------|----------------|------------------|----------------|------------------|----|
| 1  | 148.075690  | 74.541483       |                |                  |                |                  | F    |             |                 |                |                  |                |                  | 18 |
| 2  | 219.112804  | 110.060040      |                |                  |                |                  | A    | 2170.107350 | 1085.557313     | 2153.080801    | 1077.044038      | 2152.096785    | 1076.552030      | 17 |
| 3  | 356.171716  | 178.589496      |                |                  |                |                  | H    | 2099.070236 | 1050.038756     | 2082.043687    | 1041.525481      | 2081.059671    | 1041.033473      | 16 |
| 4  | 519.235045  | 260.121161      |                |                  |                |                  | Y    | 1962.011324 | 981.509300      | 1944.984775    | 972.996026       | 1944.000759    | 972.504018       | 15 |
| 5  | 618.303459  | 309.655368      |                |                  |                |                  | V    | 1798.947995 | 899.977636      | 1781.921446    | 891.464361       | 1780.937430    | 890.972353       | 14 |
| 6  | 717.371873  | 359.189575      |                |                  |                |                  | V    | 1699.879581 | 850.443429      | 1682.853032    | 841.930154       | 1681.869016    | 841.438146       | 13 |
| 7  | 818.419552  | 409.713414      |                |                  | 800.408987     | 400.708132       | T    | 1600.811167 | 800.909222      | 1583.784618    | 792.395947       | 1582.800602    | 791.903939       | 12 |
| 8  | 905.451580  | 453.229428      |                |                  | 887.441015     | 444.224146       | S    | 1499.763488 | 750.385382      | 1482.736939    | 741.872108       | 1481.752923    | 741.380100       | 11 |
| 9  | 1344.676906 | 672.842091      | 1327.650357    | 664.328817       | 1326.666341    | 663.836808       | Q    | 1412.731460 | 706.869368      | 1395.704911    | 698.356094       | 1394.720895    | 697.864086       | 10 |
| 10 | 1443.745320 | 722.376298      | 1426.718771    | 713.863024       | 1425.734755    | 713.371016       | V    | 973.506134  | 487.256705      | 956.479585     | 478.743431       | 955.495569     | 478.251423       | 9  |
| 11 | 1542.813734 | 771.910505      | 1525.787185    | 763.397231       | 1524.803169    | 762.905223       | V    | 874.437720  | 437.722498      | 857.411171     | 429.209224       | 856.427155     | 428.717216       | 8  |
| 12 | 1656.856661 | 828.931969      | 1639.830112    | 820.418694       | 1638.846096    | 819.926686       | N    | 775.369306  | 388.188291      | 758.342757     | 379.675017       | 757.358741     | 379.183009       | 7  |
| 13 | 1757.904340 | 879.455808      | 1740.877791    | 870.942534       | 1739.893775    | 870.450526       | T    | 661.326379  | 331.166828      | 644.299830     | 322.653553       | 643.315814     | 322.161545       | 6  |
| 14 | 1828.941454 | 914.974365      | 1811.914905    | 906.461091       | 1810.930889    | 905.969083       | A    | 560.278700  | 280.642988      | 543.252151     | 272.129714       | 542.268135     | 271.637706       | 5  |
| 15 | 1942.984381 | 971.995829      | 1925.957832    | 963.482554       | 1924.973816    | 962.990546       | N    | 489.241586  | 245.124431      | 472.215037     | 236.611157       | 471.231021     | 236.119149       | 4  |
| 16 | 2072.026974 | 1036.517125     | 2055.000425    | 1028.003850      | 2054.016409    | 1027.511842      | E    | 375.198659  | 188.102968      | 358.172110     | 179.589693       | 357.188094     | 179.097685       | 3  |
| 17 | 2143.064088 | 1072.035682     | 2126.037539    | 1063.522407      | 2125.053523    | 1063.030399      | A    | 246.156066  | 123.581671      | 229.129517     | 115.068397       |                |                  | 2  |
| 18 |             |                 |                |                  |                |                  | R    | 175.118952  | 88.063114       | 158.092403     | 79.549839        |                |                  | 1  |

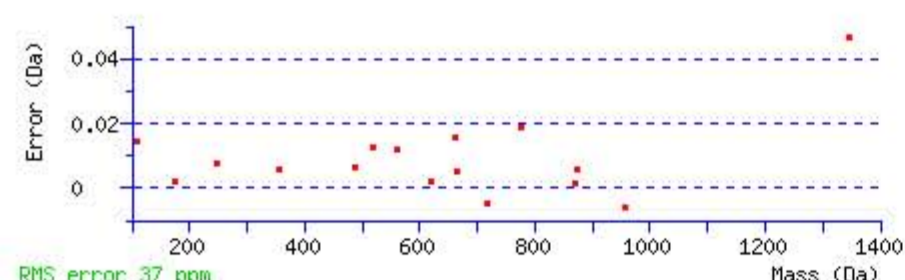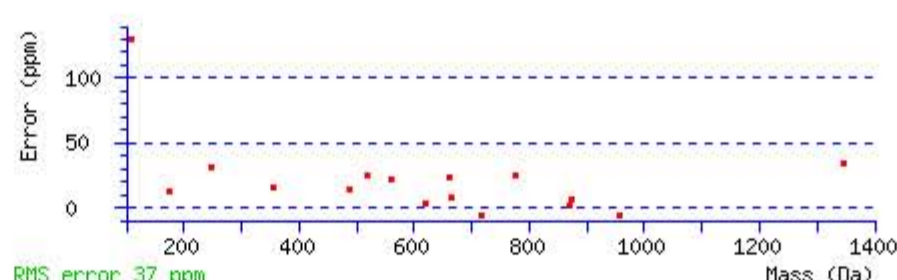

NCBI BLAST search of [FAHYVVTSQVVNTANEAR](#)

(Parameters: blastp, nr protein database, expect=20000, no filter, PAM30)

Other BLAST [web gateways](#)

All matches to this query

| Score | Mr(calc):   | Delta     | Sequence                             |
|-------|-------------|-----------|--------------------------------------|
| 39.4  | 2316.168488 | 0.026128  | <a href="#">FAHYVVTSQVVNTANEAR</a>   |
| 5.4   | 2316.201050 | -0.006434 | <a href="#">ILGKINQFFVAVFTGECVMK</a> |

Mascot: <http://www.matrixscience.com/>

# Mascot Search Results

## Peptide View

MS/MS Fragmentation of **GSLVQASEANLQAAQDFVR**

Found in **ITIH1\_HUMAN**, Inter-alpha-trypsin inhibitor heavy chain H1 OS=Homo sapiens GN=ITIH1 PE=1 SV=3

Match to Query 64811: 2625.308022 from(876.109950,3+) rtinseconds(2710) index(65470)

Title: Locus:1.1.1.3365.22 File:"2013-07-02 CLN FXIII 180 min 1st F 4.wiff"

Data file C:\Program Files (x86)\Matrix Science\Mascot Daemon\mgf\7 FXIII 180 min 1st\mascot\_daemon\_merge.mgf

Click mouse within plot area to zoom in by factor of two about that point

Or, Plot from  to  Da

Label all possible matches  Label matches used for scoring

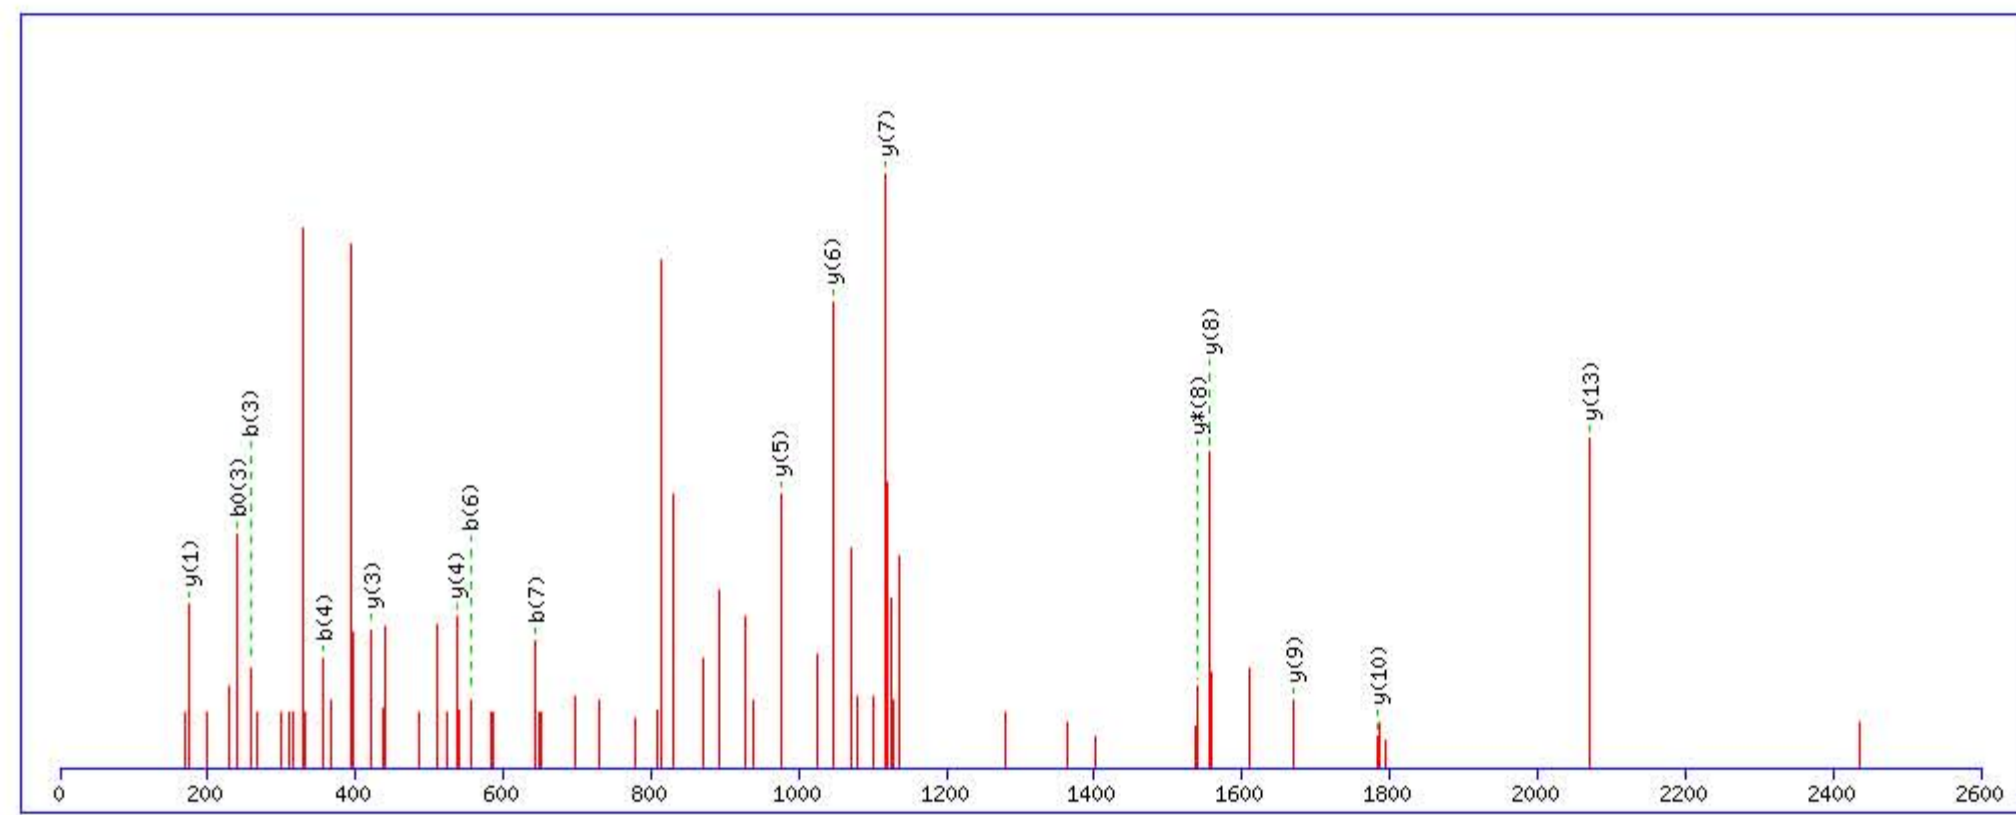

Monoisotopic mass of neutral peptide Mr(calc): 2625.340698

Fixed modifications: Carbamidomethyl (C) (apply to specified residues or termini only)

Variable modifications:

Q12 : Biotin:Thermo-21345 (Q)

Q15 : Biotin:Thermo-21345 (Q)

Ions Score: 37 Expect: 0.0063

Matches : 16/200 fragment ions using 43 most intense peaks ([help](#))

| #  | b                 | b <sup>++</sup> | b <sup>*</sup> | b <sup>*++</sup> | b <sup>0</sup>    | b <sup>0++</sup> | Seq.     | y                  | y <sup>++</sup> | y <sup>*</sup>     | y <sup>*++</sup> | y <sup>0</sup> | y <sup>0++</sup> | #  |
|----|-------------------|-----------------|----------------|------------------|-------------------|------------------|----------|--------------------|-----------------|--------------------|------------------|----------------|------------------|----|
| 1  | 58.028740         | 29.518008       |                |                  |                   |                  | <b>G</b> |                    |                 |                    |                  |                |                  | 19 |
| 2  | 145.060768        | 73.034022       |                |                  | 127.050203        | 64.028740        | <b>S</b> | 2569.326527        | 1285.166901     | 2552.299978        | 1276.653627      | 2551.315962    | 1276.161619      | 18 |
| 3  | <b>258.144832</b> | 129.576054      |                |                  | <b>240.134267</b> | 120.570772       | <b>L</b> | 2482.294499        | 1241.650887     | 2465.267950        | 1233.137613      | 2464.283934    | 1232.645605      | 17 |
| 4  | <b>357.213246</b> | 179.110261      |                |                  | 339.202681        | 170.104979       | <b>V</b> | 2369.210435        | 1185.108855     | 2352.183886        | 1176.595581      | 2351.199870    | 1176.103573      | 16 |
| 5  | 485.271824        | 243.139550      | 468.245275     | 234.626276       | 467.261259        | 234.134268       | <b>Q</b> | 2270.142021        | 1135.574648     | 2253.115472        | 1127.061374      | 2252.131456    | 1126.569366      | 15 |
| 6  | <b>556.308938</b> | 278.658107      | 539.282389     | 270.144833       | 538.298373        | 269.652825       | <b>A</b> | 2142.083443        | 1071.545359     | 2125.056894        | 1063.032085      | 2124.072878    | 1062.540077      | 14 |
| 7  | <b>643.340966</b> | 322.174121      | 626.314417     | 313.660847       | 625.330401        | 313.168839       | <b>S</b> | <b>2071.046329</b> | 1036.026802     | 2054.019780        | 1027.513528      | 2053.035764    | 1027.021520      | 13 |
| 8  | 772.383559        | 386.695418      | 755.357010     | 378.182143       | 754.372994        | 377.690135       | <b>E</b> | 1984.014301        | 992.510788      | 1966.987752        | 983.997514       | 1966.003736    | 983.505506       | 12 |
| 9  | 843.420673        | 422.213975      | 826.394124     | 413.700700       | 825.410108        | 413.208692       | <b>A</b> | 1854.971708        | 927.989492      | 1837.945159        | 919.476217       | 1836.961143    | 918.984209       | 11 |
| 10 | 957.463600        | 479.235438      | 940.437051     | 470.722164       | 939.453035        | 470.230156       | <b>N</b> | <b>1783.934594</b> | 892.470935      | 1766.908045        | 883.957660       | 1765.924029    | 883.465652       | 10 |
| 11 | 1070.547664       | 535.777470      | 1053.521115    | 527.264196       | 1052.537099       | 526.772187       | <b>L</b> | <b>1669.891667</b> | 835.449471      | 1652.865118        | 826.936197       | 1651.881102    | 826.444189       | 9  |
| 12 | 1509.772990       | 755.390133      | 1492.746441    | 746.876859       | 1491.762425       | 746.384851       | <b>Q</b> | <b>1556.807603</b> | 778.907440      | <b>1539.781054</b> | 770.394165       | 1538.797038    | 769.902157       | 8  |
| 13 | 1580.810104       | 790.908690      | 1563.783555    | 782.395416       | 1562.799539       | 781.903408       | <b>A</b> | <b>1117.582277</b> | 559.294776      | 1100.555728        | 550.781502       | 1099.571712    | 550.289494       | 7  |
| 14 | 1651.847218       | 826.427247      | 1634.820669    | 817.913973       | 1633.836653       | 817.421965       | <b>A</b> | <b>1046.545163</b> | 523.776219      | 1029.518614        | 515.262945       | 1028.534598    | 514.770937       | 6  |
| 15 | 2091.072544       | 1046.039910     | 2074.045995    | 1037.526635      | 2073.061979       | 1037.034627      | <b>Q</b> | <b>975.508049</b>  | 488.257662      | 958.481500         | 479.744388       | 957.497484     | 479.252380       | 5  |
| 16 | 2206.099487       | 1103.553381     | 2189.072938    | 1095.040107      | 2188.088922       | 1094.548099      | <b>D</b> | <b>536.282723</b>  | 268.644999      | 519.256174         | 260.131725       | 518.272158     | 259.639717       | 4  |
| 17 | 2353.167901       | 1177.087588     | 2336.141352    | 1168.574314      | 2335.157336       | 1168.082306      | <b>F</b> | <b>421.255780</b>  | 211.131528      | 404.229231         | 202.618253       |                |                  | 3  |
| 18 | 2452.236315       | 1226.621795     | 2435.209766    | 1218.108521      | 2434.225750       | 1217.616513      | <b>V</b> | 274.187366         | 137.597321      | 257.160817         | 129.084046       |                |                  | 2  |
| 19 |                   |                 |                |                  |                   |                  | <b>R</b> | <b>175.118952</b>  | 88.063114       | 158.092403         | 79.549839        |                |                  | 1  |

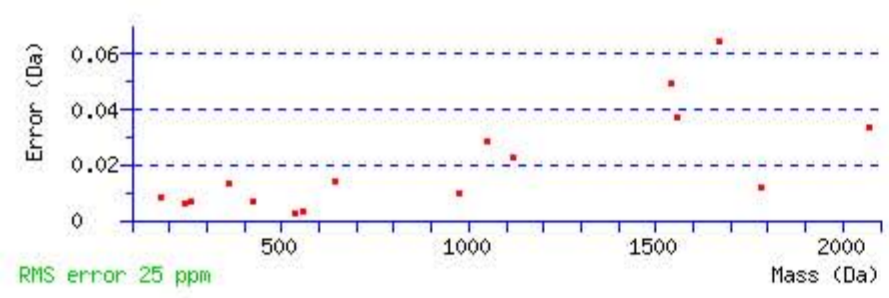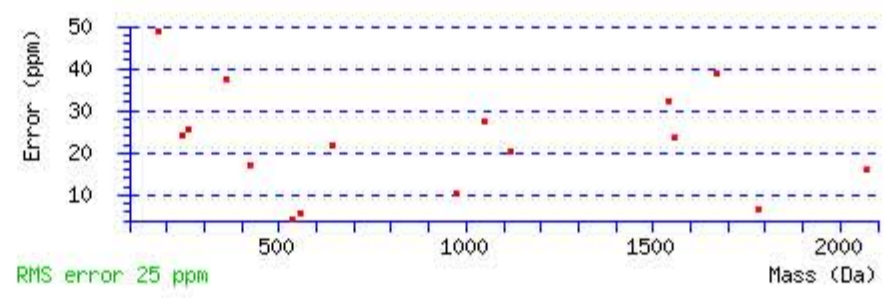

NCBI BLAST search of [GSLVQASEANLQAAQDFVR](#)

(Parameters: blastp, nr protein database, expect=20000, no filter, PAM30)

Other BLAST [web gateways](#)

All matches to this query

| Score | Mr(calc):   | Delta     | Sequence                            |
|-------|-------------|-----------|-------------------------------------|
| 36.9  | 2625.340698 | -0.032676 | <a href="#">GSLVQASEANLQAAQDFVR</a> |
| 3.7   | 2625.340698 | -0.032676 | <a href="#">GSLVQASEANLQAAQDFVR</a> |

**MASCOT** Mascot Search Results

Peptide View

MS/MS Fragmentation of **KGHVLFRTVSQQQSCPTCSTSLNNGHFK**  
 Found in **ITIH1\_HUMAN**, Inter-alpha-trypsin inhibitor heavy chain H1 OS=Homo sapiens GN=ITIH1 PE=1 SV=3

Match to Query 78799: 3624.861270 from(725.979530,5+) rtinseconds(1806) index(59398)  
 Title: Locus:1.1.1.3052.14 File:"2013-07-02 CLN FXIII 180 min 1st F 4.wiff"  
 Data file C:\Program Files (x86)\Matrix Science\Mascot Daemon\mgf\7 FXIII 180 min 1st\mascot\_daemon\_merge.mgf

Click mouse within plot area to zoom in by factor of two about that point  
 Or, Plot from  to  Da   
 Label all possible matches  Label matches used for scoring

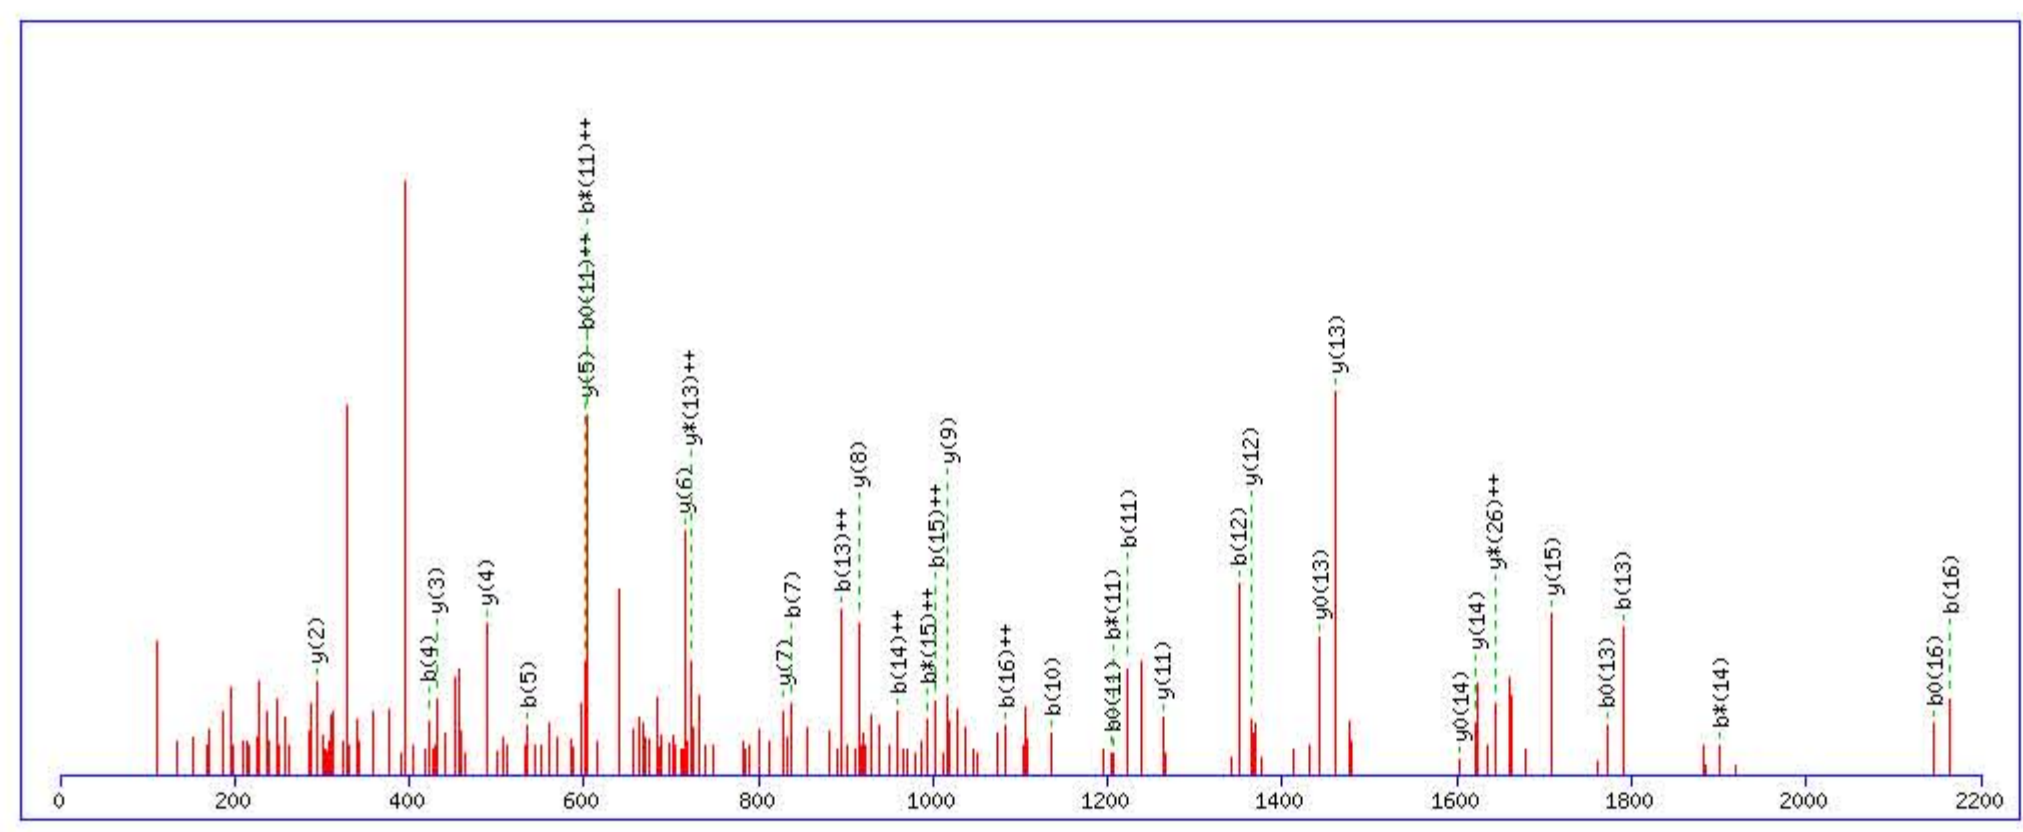

Monoisotopic mass of neutral peptide Mr(calc): 3624.811615  
 Fixed modifications: Carbamidomethyl (C) (apply to specified residues or termini only)  
 Variable modifications:  
 Q13 : Biotin:Thermo-21345 (Q)  
 Ions Score: 48 Expect: 0.00037  
 Matches : 37/306 fragment ions using 97 most intense peaks [\(help\)](#)

| #  | b                  | b <sup>++</sup>    | b <sup>*</sup>     | b <sup>*++</sup>  | b <sup>0</sup>     | b <sup>0++</sup>  | Seq.     | y                  | y <sup>++</sup> | y <sup>*</sup> | y <sup>*++</sup>   | y <sup>0</sup>     | y <sup>0++</sup> | #  |
|----|--------------------|--------------------|--------------------|-------------------|--------------------|-------------------|----------|--------------------|-----------------|----------------|--------------------|--------------------|------------------|----|
| 1  | 129.102239         | 65.054757          | 112.075690         | 56.541483         |                    |                   | <b>K</b> |                    |                 |                |                    |                    |                  | 29 |
| 2  | 186.123703         | 93.565489          | 169.097154         | 85.052215         |                    |                   | <b>G</b> | 3497.723899        | 1749.365587     | 3480.697350    | 1740.852313        | 3479.713334        | 1740.360305      | 28 |
| 3  | 323.182615         | 162.094945         | 306.156066         | 153.581671        |                    |                   | <b>H</b> | 3440.702435        | 1720.854855     | 3423.675886    | 1712.341581        | 3422.691870        | 1711.849573      | 27 |
| 4  | <b>422.251029</b>  | 211.629153         | 405.224480         | 203.115878        |                    |                   | <b>V</b> | 3303.643523        | 1652.325399     | 3286.616974    | <b>1643.812125</b> | 3285.632958        | 1643.320117      | 26 |
| 5  | <b>535.335093</b>  | 268.171185         | 518.308544         | 259.657910        |                    |                   | <b>L</b> | 3204.575109        | 1602.791192     | 3187.548560    | 1594.277918        | 3186.564544        | 1593.785910      | 25 |
| 6  | 682.403507         | 341.705392         | 665.376958         | 333.192117        |                    |                   | <b>F</b> | 3091.491045        | 1546.249160     | 3074.464496    | 1537.735886        | 3073.480480        | 1537.243878      | 24 |
| 7  | <b>838.504618</b>  | 419.755947         | 821.478069         | 411.242672        |                    |                   | <b>R</b> | 2944.422631        | 1472.714953     | 2927.396082    | 1464.201679        | 2926.412066        | 1463.709671      | 23 |
| 8  | 935.557382         | 468.282329         | 918.530833         | 459.769054        |                    |                   | <b>P</b> | 2788.321520        | 1394.664398     | 2771.294971    | 1386.151123        | 2770.310955        | 1385.659115      | 22 |
| 9  | 1036.605061        | 518.806169         | 1019.578512        | 510.292894        | 1018.594496        | 509.800886        | <b>T</b> | 2691.268756        | 1346.138016     | 2674.242207    | 1337.624741        | 2673.258191        | 1337.132733      | 21 |
| 10 | <b>1135.673475</b> | 568.340376         | 1118.646926        | 559.827101        | 1117.662910        | 559.335093        | <b>V</b> | 2590.221077        | 1295.614176     | 2573.194528    | 1287.100902        | 2572.210512        | 1286.608894      | 20 |
| 11 | <b>1222.705503</b> | 611.856390         | <b>1205.678954</b> | <b>603.343115</b> | <b>1204.694938</b> | <b>602.851107</b> | <b>S</b> | 2491.152663        | 1246.079969     | 2474.126114    | 1237.566695        | 2473.142098        | 1237.074687      | 19 |
| 12 | <b>1350.764081</b> | 675.885679         | 1333.737532        | 667.372404        | 1332.753516        | 666.880396        | <b>Q</b> | 2404.120635        | 1202.563955     | 2387.094086    | 1194.050681        | 2386.110070        | 1193.558673      | 18 |
| 13 | <b>1789.989407</b> | <b>895.498342</b>  | 1772.962858        | 886.985067        | <b>1771.978842</b> | 886.493059        | <b>Q</b> | 2276.062057        | 1138.534666     | 2259.035508    | 1130.021392        | 2258.051492        | 1129.529384      | 17 |
| 14 | 1918.047985        | <b>959.527631</b>  | <b>1901.021436</b> | 951.014356        | 1900.037420        | 950.522348        | <b>Q</b> | 1836.836731        | 918.922003      | 1819.810182    | 910.408729         | 1818.826166        | 909.916721       | 16 |
| 15 | 2005.080013        | <b>1003.043645</b> | 1988.053464        | <b>994.530370</b> | 1987.069448        | 994.038362        | <b>S</b> | <b>1708.778153</b> | 854.892714      | 1691.751604    | 846.379440         | 1690.767588        | 845.887432       | 15 |
| 16 | <b>2165.110662</b> | <b>1083.058969</b> | 2148.084113        | 1074.545694       | <b>2147.100097</b> | 1074.053686       | <b>C</b> | <b>1621.746125</b> | 811.376700      | 1604.719576    | 802.863426         | <b>1603.735560</b> | 802.371418       | 14 |
| 17 | 2262.163426        | 1131.585351        | 2245.136877        | 1123.072076       | 2244.152861        | 1122.580068       | <b>P</b> | <b>1461.715476</b> | 731.361376      | 1444.688927    | <b>722.848101</b>  | <b>1443.704911</b> | 722.356093       | 13 |
| 18 | 2363.211105        | 1182.109190        | 2346.184556        | 1173.595916       | 2345.200540        | 1173.103908       | <b>T</b> | <b>1364.662712</b> | 682.834994      | 1347.636163    | 674.321719         | 1346.652147        | 673.829711       | 12 |
| 19 | 2523.241754        | 1262.124515        | 2506.215205        | 1253.611240       | 2505.231189        | 1253.119232       | <b>C</b> | <b>1263.615033</b> | 632.311154      | 1246.588484    | 623.797880         | 1245.604468        | 623.305872       | 11 |
| 20 | 2610.273782        | 1305.640529        | 2593.247233        | 1297.127254       | 2592.263217        | 1296.635246       | <b>S</b> | 1103.584384        | 552.295830      | 1086.557835    | 543.782556         | 1085.573819        | 543.290548       | 10 |
| 21 | 2711.321461        | 1356.164368        | 2694.294912        | 1347.651094       | 2693.310896        | 1347.159086       | <b>T</b> | <b>1016.552356</b> | 508.779816      | 999.525807     | 500.266541         | 998.541791         | 499.774533       | 9  |
| 22 | 2798.353489        | 1399.680382        | 2781.326940        | 1391.167108       | 2780.342924        | 1390.675100       | <b>S</b> | <b>915.504677</b>  | 458.255977      | 898.478128     | 449.742702         | 897.494112         | 449.250694       | 8  |
| 23 | 2911.437553        | 1456.222414        | 2894.411004        | 1447.709140       | 2893.426988        | 1447.217132       | <b>L</b> | <b>828.472649</b>  | 414.739963      | 811.446100     | 406.226688         |                    |                  | 7  |
| 24 | 3024.521617        | 1512.764446        | 3007.495068        | 1504.251172       | 3006.511052        | 1503.759164       | <b>L</b> | <b>715.388585</b>  | 358.197930      | 698.362036     | 349.684656         |                    |                  | 6  |
| 25 | 3138.564544        | 1569.785910        | 3121.537995        | 1561.272635       | 3120.553979        | 1560.780627       | <b>N</b> | <b>602.304521</b>  | 301.655898      | 585.277972     | 293.142624         |                    |                  | 5  |
| 26 | 3195.586008        | 1598.296642        | 3178.559459        | 1589.783367       | 3177.575443        | 1589.291359       | <b>G</b> | <b>488.261594</b>  | 244.634435      | 471.235045     | 236.121160         |                    |                  | 4  |
| 27 | 3332.644920        | 1666.826098        | 3315.618371        | 1658.312823       | 3314.634355        | 1657.820815       | <b>H</b> | <b>431.240130</b>  | 216.123703      | 414.213581     | 207.610428         |                    |                  | 3  |
| 28 | 3479.713334        | 1740.360305        | 3462.686785        | 1731.847030       | 3461.702769        | 1731.355022       | <b>F</b> | <b>294.181218</b>  | 147.594247      | 277.154669     | 139.080972         |                    |                  | 2  |
| 29 |                    |                    |                    |                   |                    |                   | <b>K</b> | 147.112804         | 74.060040       | 130.086255     | 65.546765          |                    |                  | 1  |

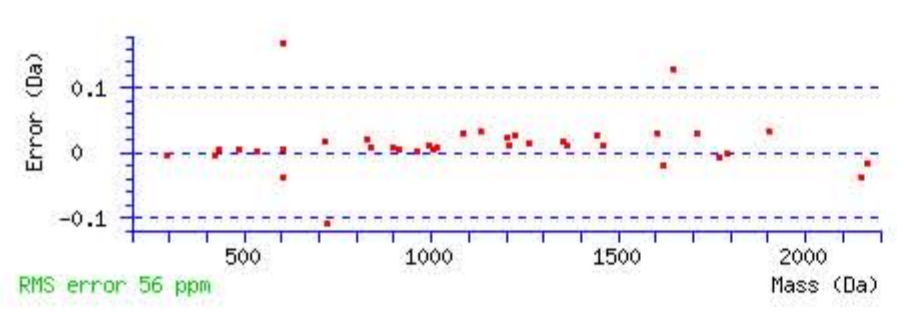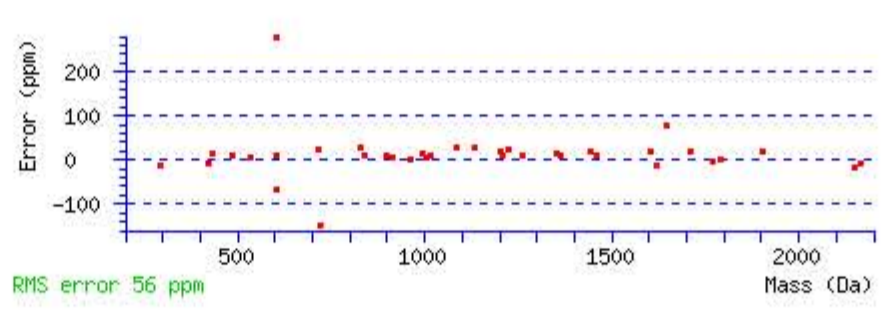

NCBI BLAST search of **KGHVLFRTVSQQQSCPTCSTSLNNGHFK**  
 (Parameters: blastp, nr protein database, expect=20000, no filter, PAM30)  
 Other BLAST [web gateways](#)

All matches to this query

| Score | Mr(calc):   | Delta    | Sequence                                     |
|-------|-------------|----------|----------------------------------------------|
| 48.5  | 3624.811615 | 0.049655 | <a href="#">KGHVLFRTVSQQQSCPTCSTSLNNGHFK</a> |
| 48.3  | 3624.811615 | 0.049655 | <a href="#">KGHVLFRTVSQQQSCPTCSTSLNNGHFK</a> |
| 46.0  | 3624.811615 | 0.049655 | <a href="#">KGHVLFRTVSQQQSCPTCSTSLNNGHFK</a> |

# MASCOT SCIENCE Mascot Search Results

## Peptide View

### MS/MS Fragmentation of TQVADAK

Found in **ITIH2\_HUMAN**, Inter-alpha-trypsin inhibitor heavy chain H2 OS=Homo sapiens GN=ITIH2 PE=1 SV=2

Match to Query 17318: 1042.553188 from(522.283870,2+) rtinseconds(1284) index(37232)

Title: Locus:1.1.1.2896.13 File:"2013-07-02 CLN FXIII 180 min 1st F 3.wiff"

Data file C:\Program Files (x86)\Matrix Science\Mascot Daemon\mgf\7 FXIII 180 min 1st\mascot\_daemon\_merge.mgf

Click mouse within plot area to zoom in by factor of two about that point

Or, Plot from  to  Da

Label all possible matches  Label matches used for scoring

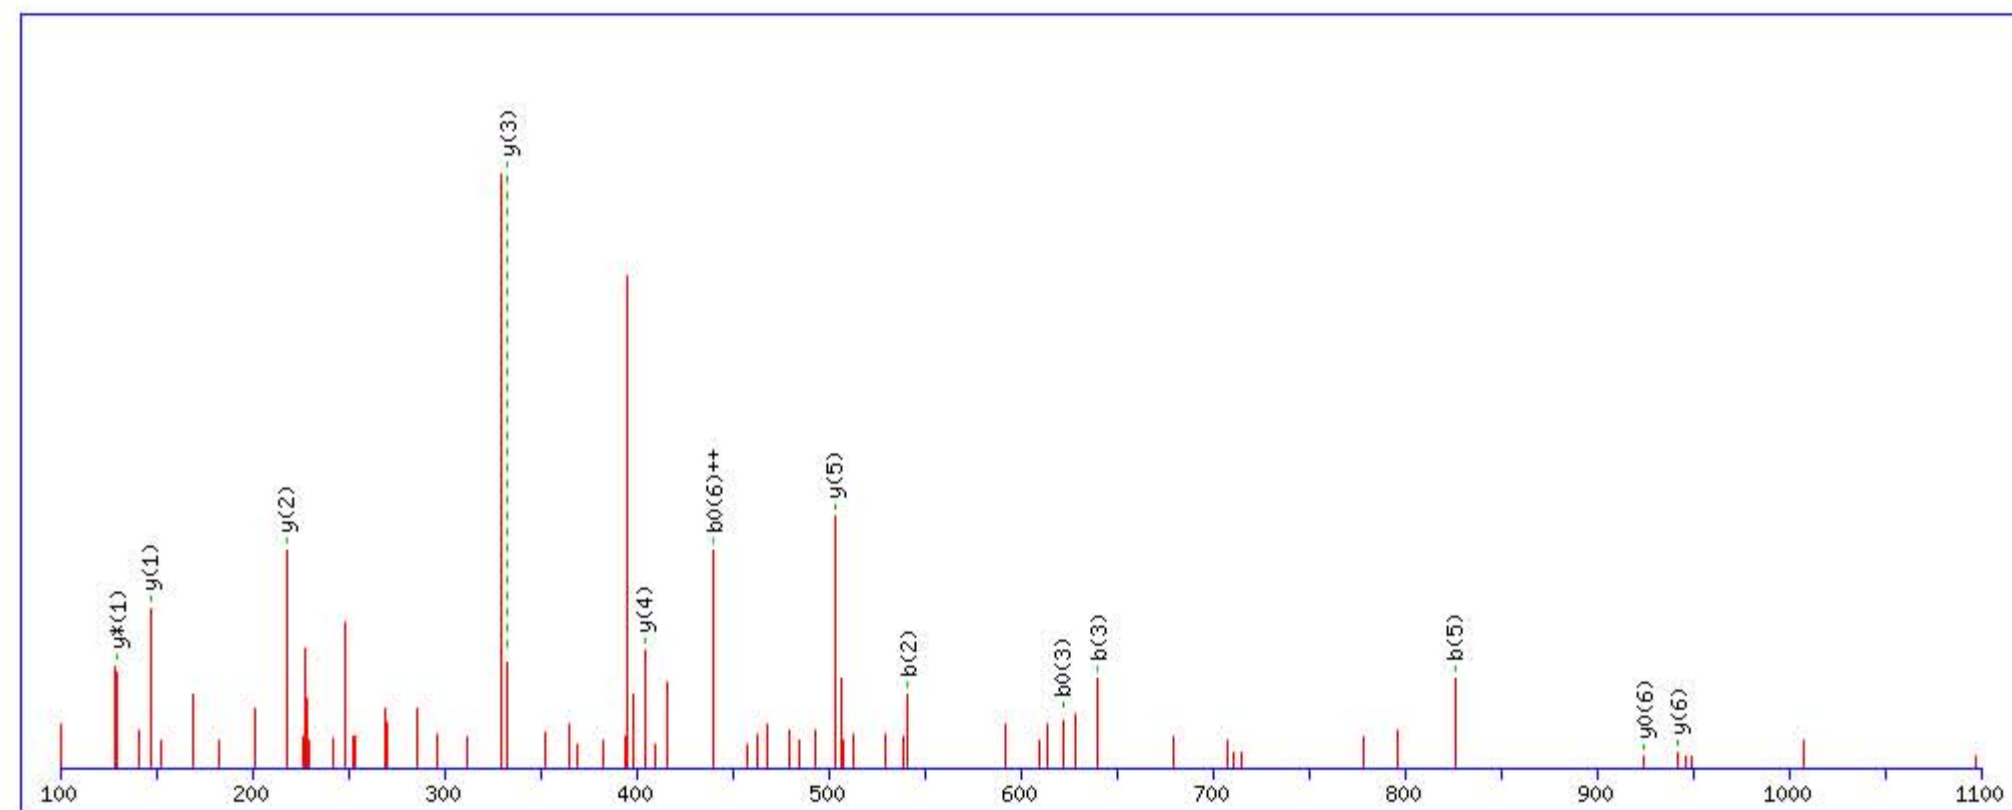

Monoisotopic mass of neutral peptide Mr(calc): 1042.548111

Fixed modifications: Carbamidomethyl (C) (apply to specified residues or termini only)

Variable modifications:

Q2 : Biotin:Thermo-21345 (Q)

Ions Score: 34 Expect: 0.0081

Matches : 13/66 fragment ions using 26 most intense peaks [\(help\)](#)

| # | b                 | b <sup>++</sup> | b <sup>*</sup> | b <sup>*++</sup> | b <sup>0</sup>    | b <sup>0++</sup>  | Seq. | y                 | y <sup>++</sup> | y <sup>*</sup>    | y <sup>*++</sup> | y <sup>0</sup>    | y <sup>0++</sup> | # |
|---|-------------------|-----------------|----------------|------------------|-------------------|-------------------|------|-------------------|-----------------|-------------------|------------------|-------------------|------------------|---|
| 1 | 102.054955        | 51.531116       |                |                  | 84.044390         | 42.525833         | T    |                   |                 |                   |                  |                   |                  | 7 |
| 2 | <b>541.280281</b> | 271.143779      | 524.253732     | 262.630504       | 523.269716        | 262.138496        | Q    | <b>942.507715</b> | 471.757496      | 925.481166        | 463.244221       | <b>924.497150</b> | 462.752213       | 6 |
| 3 | <b>640.348695</b> | 320.677986      | 623.322146     | 312.164711       | <b>622.338130</b> | 311.672703        | V    | <b>503.282389</b> | 252.144832      | 486.255840        | 243.631558       | 485.271824        | 243.139550       | 5 |
| 4 | 711.385809        | 356.196543      | 694.359260     | 347.683268       | 693.375244        | 347.191260        | A    | <b>404.213975</b> | 202.610625      | 387.187426        | 194.097351       | 386.203410        | 193.605343       | 4 |
| 5 | <b>826.412752</b> | 413.710014      | 809.386203     | 405.196739       | 808.402187        | 404.704731        | D    | <b>333.176861</b> | 167.092068      | 316.150312        | 158.578794       | 315.166296        | 158.086786       | 3 |
| 6 | 897.449866        | 449.228571      | 880.423317     | 440.715296       | 879.439301        | <b>440.223288</b> | A    | <b>218.149918</b> | 109.578597      | 201.123369        | 101.065322       |                   |                  | 2 |
| 7 |                   |                 |                |                  |                   |                   | K    | <b>147.112804</b> | 74.060040       | <b>130.086255</b> | 65.546765        |                   |                  | 1 |

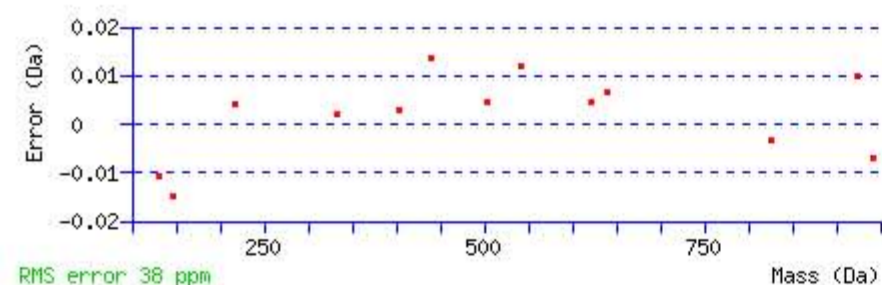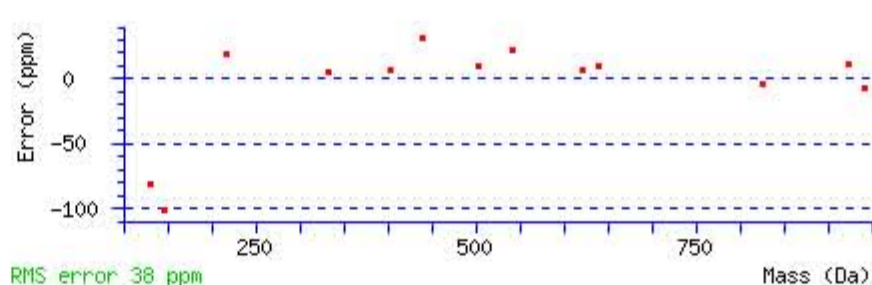

### NCBI BLAST search of TQVADAK

(Parameters: blastp, nr protein database, expect=20000, no filter, PAM30)

Other BLAST [web gateways](#)

### All matches to this query

| Score | Mr(calc):   | Delta    | Sequence                   |
|-------|-------------|----------|----------------------------|
| 34.3  | 1042.548111 | 0.005077 | <a href="#">TQVADAK</a>    |
| 11.3  | 1042.540680 | 0.012508 | <a href="#">TPEERAAAAK</a> |
| 11.2  | 1042.548096 | 0.005092 | <a href="#">SLQADAK</a>    |
| 9.6   | 1042.540710 | 0.012478 | <a href="#">SLKSPPGSDR</a> |
| 7.6   | 1042.548080 | 0.005108 | <a href="#">EKEQAK</a>     |
| 6.6   | 1042.540726 | 0.012462 | <a href="#">KPVSEVGDGR</a> |
| 6.2   | 1042.540680 | 0.012508 | <a href="#">EAEKRPADK</a>  |
| 6.1   | 1042.548080 | 0.005108 | <a href="#">KEQEAK</a>     |
| 6.1   | 1042.548080 | 0.005108 | <a href="#">KQEEAK</a>     |
| 6.1   | 1042.540695 | 0.012493 | <a href="#">NPREVTEAK</a>  |

# MASCOT SCIENCE Mascot Search Results

## Peptide View

MS/MS Fragmentation of **ALYAQAR**

Found in **ITIH2\_HUMAN**, Inter-alpha-trypsin inhibitor heavy chain H2 OS=Homo sapiens GN=ITIH2 PE=1 SV=2

Match to Query 18980: 1102.608208 from(552.311380,2+) rtinseconds(1641) index(58232)

Title: Locus:1.1.1.2995.7 File:"2013-07-02 CLN FXIII 180 min 1st F 4.wiff"

Data file C:\Program Files (x86)\Matrix Science\Mascot Daemon\mgf\7 FXIII 180 min 1st\mascot\_daemon\_merge.mgf

Click mouse within plot area to zoom in by factor of two about that point

Or, Plot from  to  Da

Label all possible matches  Label matches used for scoring

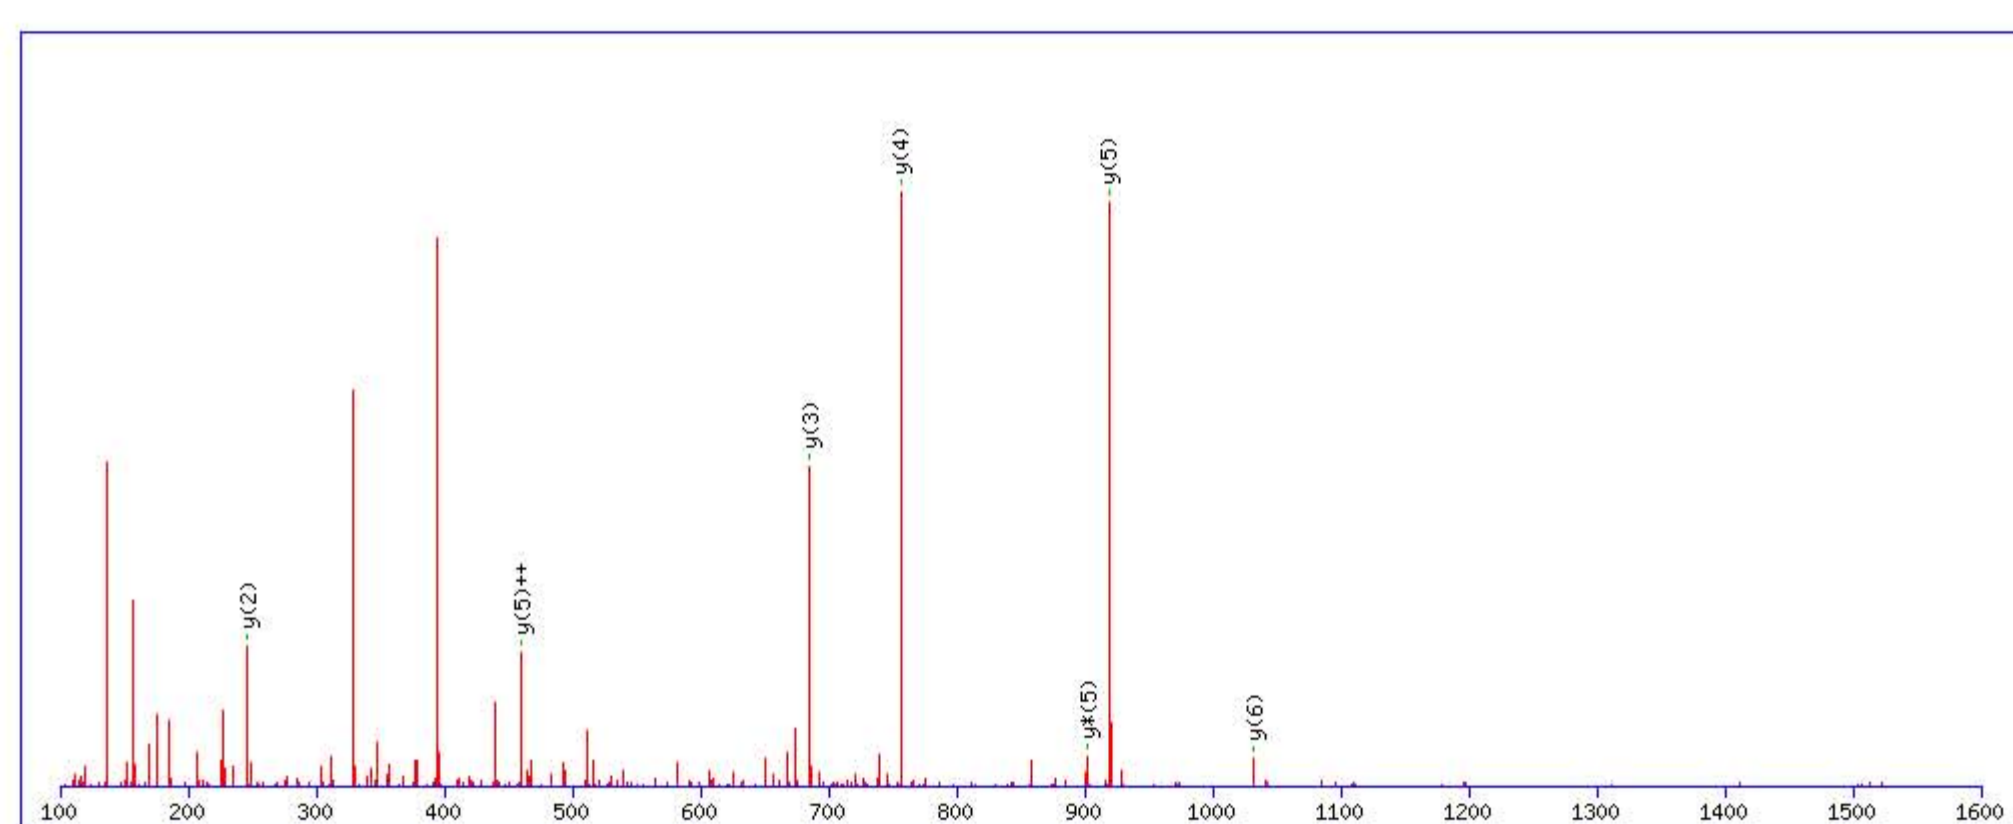

Monoisotopic mass of neutral peptide Mr(calc): 1102.595703

Fixed modifications: Carbamidomethyl (C) (apply to specified residues or termini only)

Variable modifications:

Q5 : Biotin:Thermo-21345 (Q)

Ions Score: 37 Expect: 0.0034

Matches : 7/40 fragment ions using 10 most intense peaks [\(help\)](#)

| # | b          | b <sup>++</sup> | b <sup>*</sup> | b <sup>*++</sup> | Seq. | y                  | y <sup>++</sup>   | y <sup>*</sup>    | y <sup>*++</sup> | # |
|---|------------|-----------------|----------------|------------------|------|--------------------|-------------------|-------------------|------------------|---|
| 1 | 72.044390  | 36.525833       |                |                  | A    |                    |                   |                   |                  | 7 |
| 2 | 185.128454 | 93.067865       |                |                  | L    | <b>1032.565899</b> | 516.786588        | 1015.539350       | 508.273313       | 6 |
| 3 | 348.191783 | 174.599529      |                |                  | Y    | <b>919.481835</b>  | <b>460.244556</b> | <b>902.455286</b> | 451.731281       | 5 |
| 4 | 419.228897 | 210.118087      |                |                  | A    | <b>756.418506</b>  | 378.712891        | 739.391957        | 370.199617       | 4 |
| 5 | 858.454223 | 429.730750      | 841.427674     | 421.217475       | Q    | <b>685.381392</b>  | 343.194334        | 668.354843        | 334.681060       | 3 |
| 6 | 929.491337 | 465.249307      | 912.464788     | 456.736032       | A    | <b>246.156066</b>  | 123.581671        | 229.129517        | 115.068397       | 2 |
| 7 |            |                 |                |                  | R    | 175.118952         | 88.063114         | 158.092403        | 79.549840        | 1 |

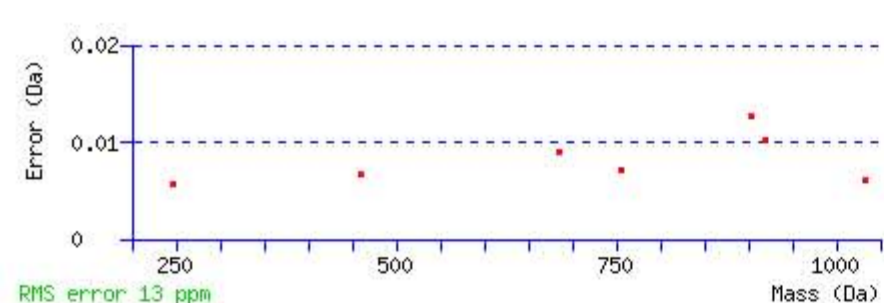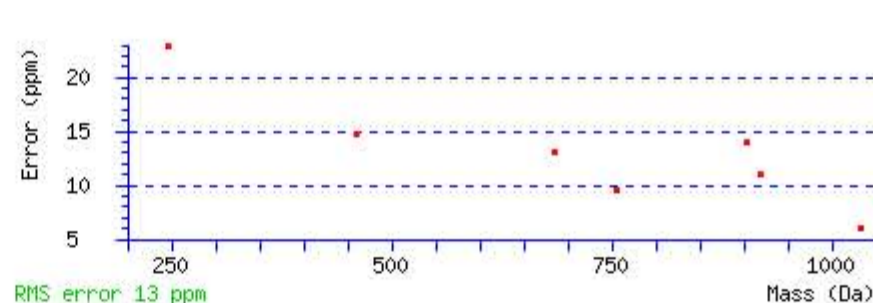

NCBI BLAST search of **ALYAQAR**

(Parameters: blastp, nr protein database, expect=20000, no filter, PAM30)

Other BLAST [web gateways](#)

## All matches to this query

| Score | Mr(calc):   | Delta     | Sequence                   |
|-------|-------------|-----------|----------------------------|
| 37.3  | 1102.595703 | 0.012505  | <a href="#">ALYAQAR</a>    |
| 10.3  | 1102.602234 | 0.005974  | <a href="#">AIELGYNPVK</a> |
| 4.3   | 1102.613464 | -0.005256 | <a href="#">AIPEKYGAVR</a> |
| 3.8   | 1102.598221 | 0.009987  | <a href="#">DDLKATLTAR</a> |
| 3.8   | 1102.591690 | 0.016518  | <a href="#">NMEVSLVRR</a>  |
| 3.0   | 1102.610321 | -0.002113 | <a href="#">ALGMMGLVRR</a> |
| 2.4   | 1102.613495 | -0.005287 | <a href="#">SFIAPVPTNR</a> |
| 1.9   | 1102.613495 | -0.005287 | <a href="#">ALTQGPLTFR</a> |
| 1.5   | 1102.602249 | 0.005959  | <a href="#">AIVLFNPDSK</a> |
| 0.7   | 1102.591690 | 0.016518  | <a href="#">LRCSVLEAR</a>  |

# MASCOT SCIENCE Mascot Search Results

## Peptide View

MS/MS Fragmentation of **VQSTITSR**

Found in **ITIH2\_HUMAN**, Inter-alpha-trypsin inhibitor heavy chain H2 OS=Homo sapiens GN=ITIH2 PE=1 SV=2

Match to Query 23733: 1201.663928 from(601.839240,2+) rtinseconds(1470) index(57058)

Title: Locus:1.1.1.2935.11 File:"2013-07-02 CLN FXIII 180 min 1st F 4.wiff"

Data file C:\Program Files (x86)\Matrix Science\Mascot Daemon\mgf\7 FXIII 180 min 1st\mascot\_daemon\_merge.mgf

Click mouse within plot area to zoom in by factor of two about that point

Or, Plot from  to  Da

Label all possible matches  Label matches used for scoring

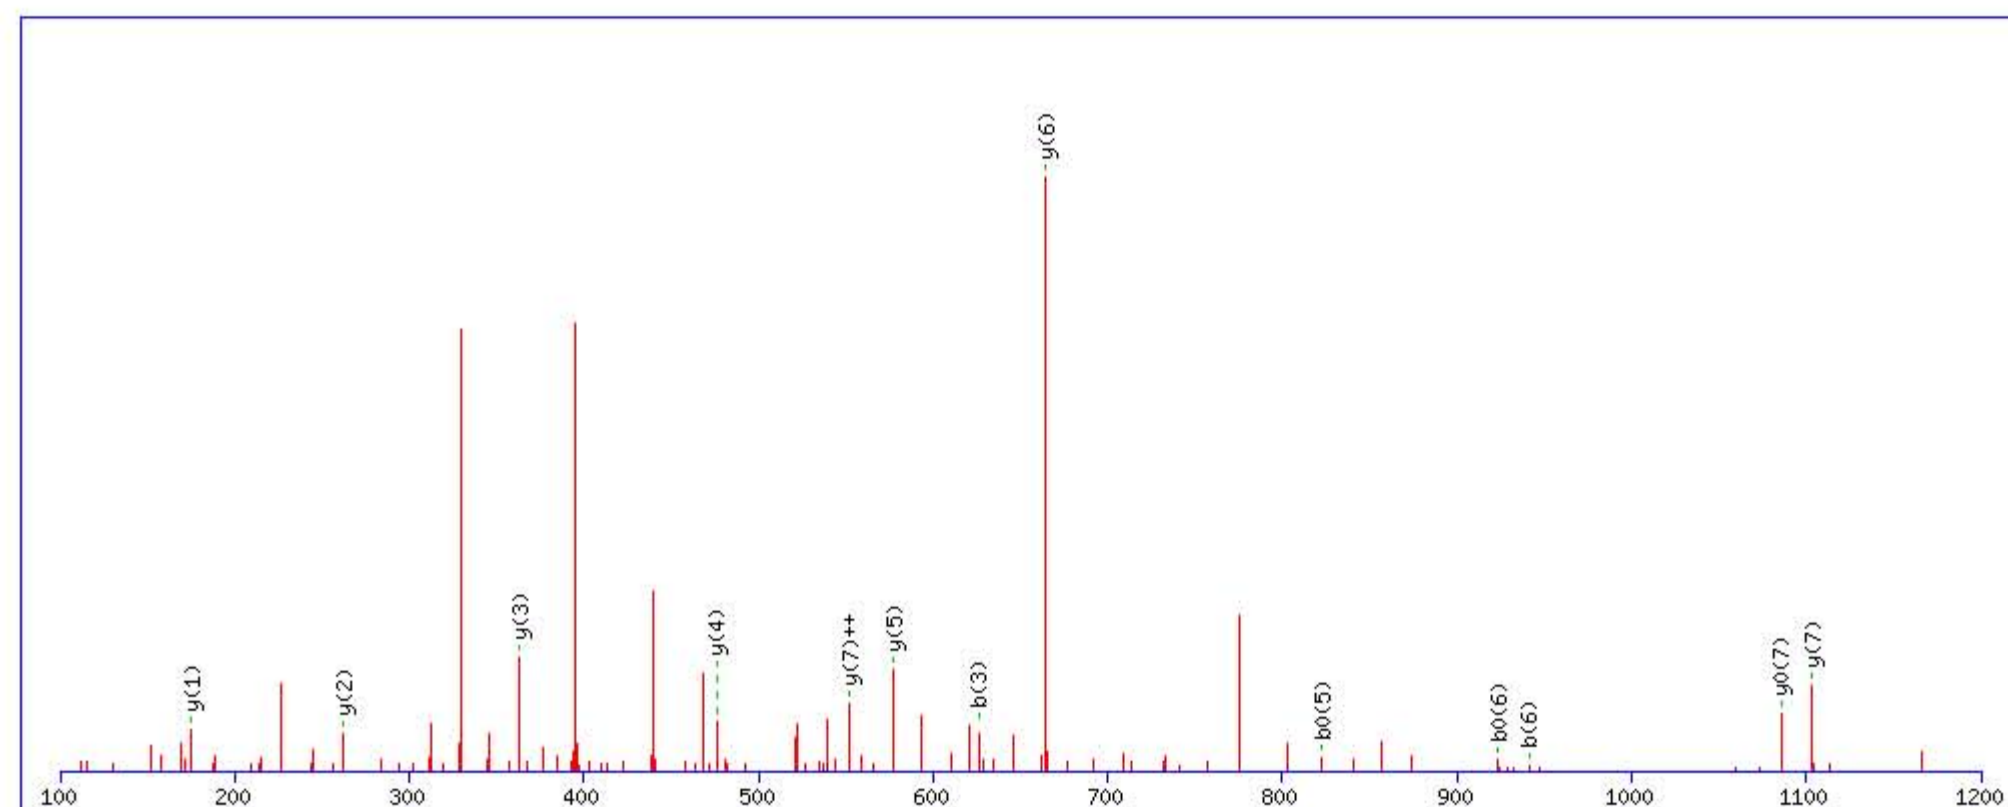

Monoisotopic mass of neutral peptide Mr(calc): 1201.648895

Fixed modifications: Carbamidomethyl (C) (apply to specified residues or termini only)

Variable modifications:

Q2 : Biotin:Thermo-21345 (Q)

Ions Score: 36 Expect: 0.0055

Matches : 13/76 fragment ions using 32 most intense peaks ([help](#))

| # | b           | b <sup>++</sup> | b <sup>*</sup> | b <sup>+++</sup> | b <sup>0</sup> | b <sup>0++</sup> | Seq. | y           | y <sup>++</sup> | y <sup>*</sup> | y <sup>+++</sup> | y <sup>0</sup> | y <sup>0++</sup> | # |
|---|-------------|-----------------|----------------|------------------|----------------|------------------|------|-------------|-----------------|----------------|------------------|----------------|------------------|---|
| 1 | 100.075690  | 50.541483       |                |                  |                |                  | V    |             |                 |                |                  |                |                  | 8 |
| 2 | 539.301016  | 270.154146      | 522.274467     | 261.640872       |                |                  | Q    | 1103.587756 | 552.297516      | 1086.561207    | 543.784242       | 1085.577191    | 543.292234       | 7 |
| 3 | 626.333044  | 313.670160      | 609.306495     | 305.156886       | 608.322479     | 304.664878       | S    | 664.362430  | 332.684853      | 647.335881     | 324.171579       | 646.351865     | 323.679571       | 6 |
| 4 | 727.380723  | 364.194000      | 710.354174     | 355.680725       | 709.370158     | 355.188717       | T    | 577.330402  | 289.168839      | 560.303853     | 280.655565       | 559.319837     | 280.163557       | 5 |
| 5 | 840.464787  | 420.736032      | 823.438238     | 412.222757       | 822.454222     | 411.730749       | I    | 476.282723  | 238.645000      | 459.256174     | 230.131725       | 458.272158     | 229.639717       | 4 |
| 6 | 941.512466  | 471.259871      | 924.485917     | 462.746597       | 923.501901     | 462.254589       | T    | 363.198659  | 182.102968      | 346.172110     | 173.589693       | 345.188094     | 173.097685       | 3 |
| 7 | 1028.544494 | 514.775885      | 1011.517945    | 506.262611       | 1010.533929    | 505.770603       | S    | 262.150980  | 131.579128      | 245.124431     | 123.065854       | 244.140415     | 122.573846       | 2 |
| 8 |             |                 |                |                  |                |                  | R    | 175.118952  | 88.063114       | 158.092403     | 79.549839        |                |                  | 1 |

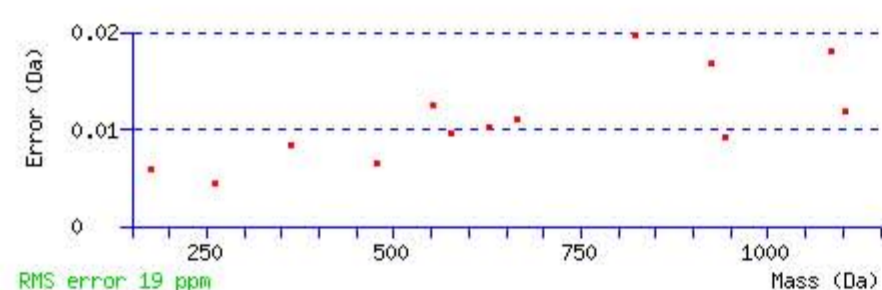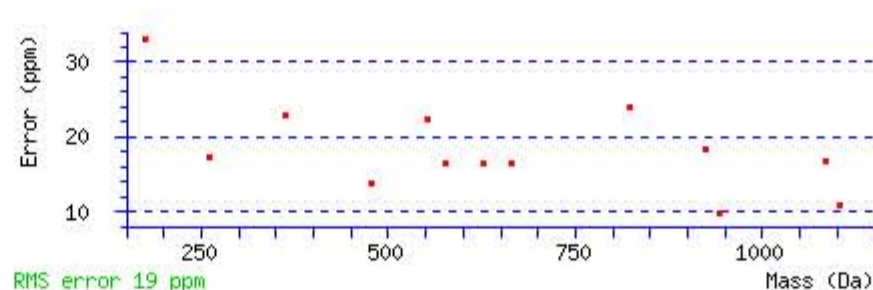

NCBI BLAST search of **VQSTITSR**

(Parameters: blastp, nr protein database, expect=20000, no filter, PAM30)

Other BLAST [web gateways](#)

All matches to this query

| Score | Mr(calc):   | Delta     | Sequence                    |
|-------|-------------|-----------|-----------------------------|
| 35.9  | 1201.648895 | 0.015033  | <a href="#">VQSTITSR</a>    |
| 13.7  | 1201.677856 | -0.013928 | <a href="#">VEKLRSDLR</a>   |
| 0.4   | 1201.656769 | 0.007159  | <a href="#">RVSSFTGPVPR</a> |

Mascot: <http://www.matrixscience.com/>

# MASCOT Search Results

## Peptide View

MS/MS Fragmentation of **MATTMIQSK**

Found in **ITIH2\_HUMAN**, Inter-alpha-trypsin inhibitor heavy chain H2 OS=Homo sapiens GN=ITIH2 PE=1 SV=2

Match to Query 27761: 1336.674148 from(669.344350,2+) rtinseconds(1513) index(57350)

Title: Locus:1.1.1.2950.14 File:"2013-07-02 CLN FXIII 180 min 1st F 4.wiff"

Data file C:\Program Files (x86)\Matrix Science\Mascot Daemon\mgf7 FXIII 180 min 1st\mascot\_daemon\_merge.mgf

Click mouse within plot area to zoom in by factor of two about that point

Or, Plot from  to  Da

Label all possible matches  Label matches used for scoring

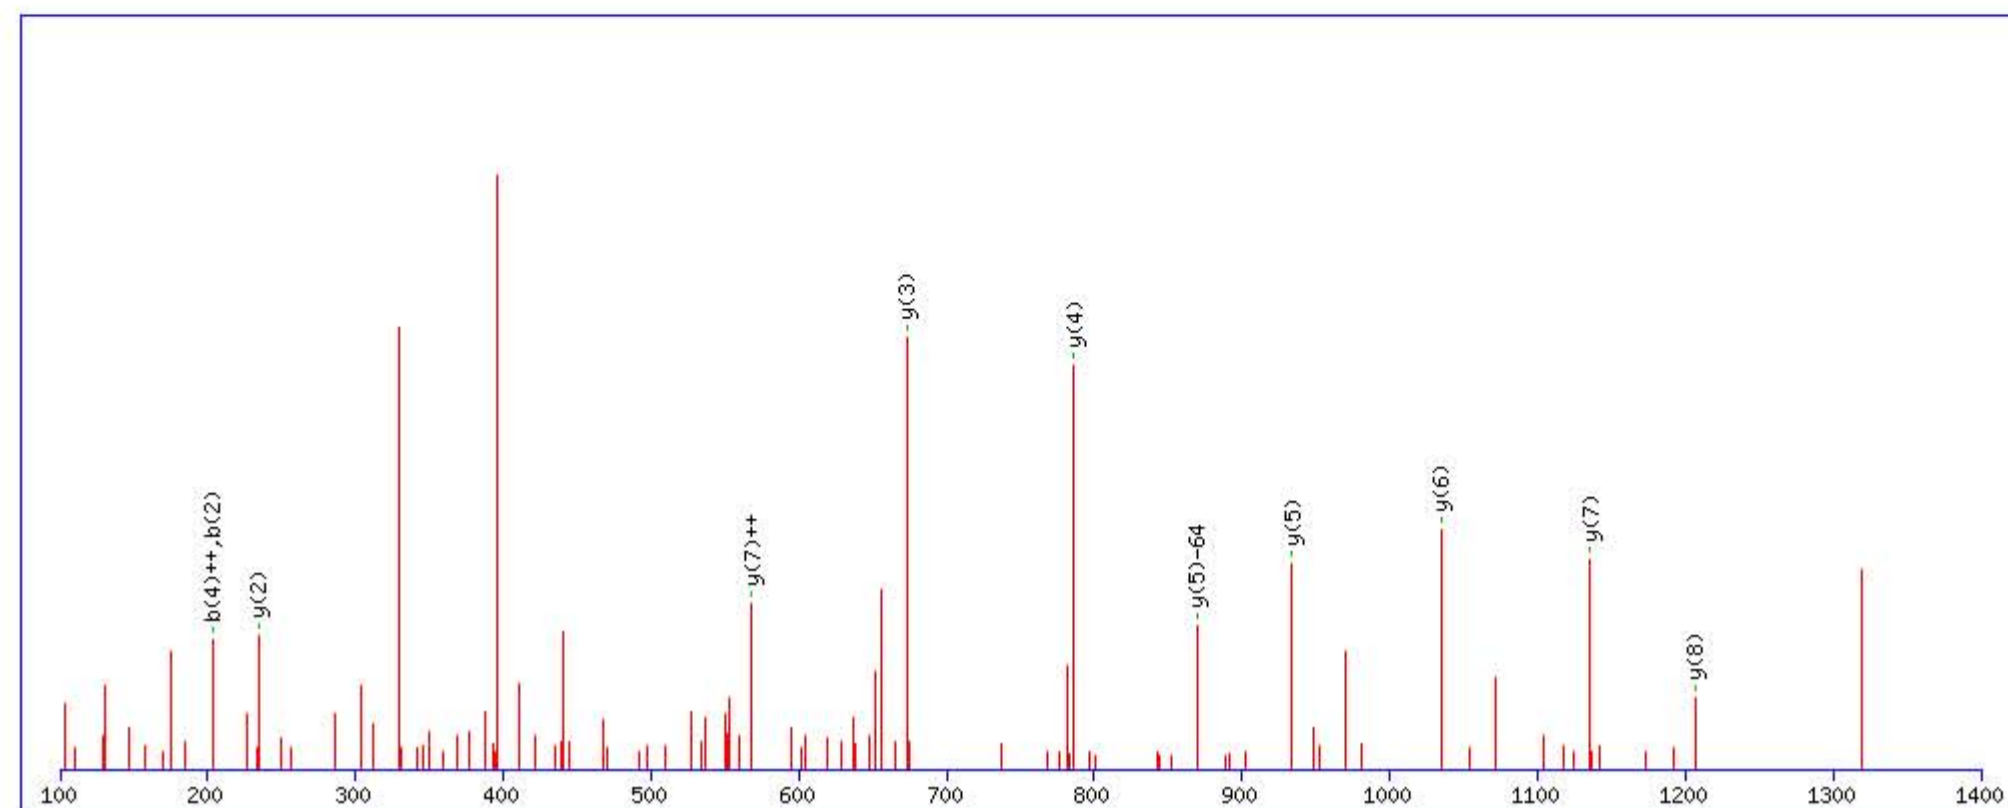

Monoisotopic mass of neutral peptide Mr(calc): 1336.655289

Fixed modifications: Carbamidomethyl (C) (apply to specified residues or termini only)

Variable modifications:

M5 : Oxidation (M), with neutral losses 0.000000 (shown in table), 63.998285

Q7 : Biotin:Thermo-21345 (Q)

Ions Score: 61 Expect: 8.6e-006

Matches : 11/122 fragment ions using 13 most intense peaks [\(help\)](#)

| # | b                 | b <sup>++</sup>   | b <sup>*</sup> | b <sup>+++</sup> | b <sup>0</sup> | b <sup>0++</sup> | Seq. | y                  | y <sup>++</sup>   | y <sup>*</sup> | y <sup>+++</sup> | y <sup>0</sup> | y <sup>0++</sup> | # |
|---|-------------------|-------------------|----------------|------------------|----------------|------------------|------|--------------------|-------------------|----------------|------------------|----------------|------------------|---|
| 1 | 132.047761        | 66.527518         |                |                  |                |                  | M    |                    |                   |                |                  |                |                  | 9 |
| 2 | <b>203.084875</b> | 102.046075        |                |                  |                |                  | A    | <b>1206.622094</b> | 603.814685        | 1189.595545    | 595.301411       | 1188.611529    | 594.809403       | 8 |
| 3 | 304.132554        | 152.569915        |                |                  | 286.121989     | 143.564632       | T    | <b>1135.584980</b> | <b>568.296128</b> | 1118.558431    | 559.782854       | 1117.574415    | 559.290846       | 7 |
| 4 | 405.180233        | <b>203.093754</b> |                |                  | 387.169668     | 194.088472       | T    | <b>1034.537301</b> | 517.772289        | 1017.510752    | 509.259014       | 1016.526736    | 508.767006       | 6 |
| 5 | 552.215633        | 276.611455        |                |                  | 534.205068     | 267.606172       | M    | <b>933.489622</b>  | 467.248449        | 916.463073     | 458.735175       | 915.479057     | 458.243167       | 5 |
| 6 | 665.299697        | 333.153487        |                |                  | 647.289132     | 324.148204       | I    | <b>786.454222</b>  | 393.730749        | 769.427673     | 385.217475       | 768.443657     | 384.725467       | 4 |
| 7 | 1104.525023       | 552.766149        | 1087.498474    | 544.252875       | 1086.514458    | 543.760867       | Q    | <b>673.370158</b>  | 337.188717        | 656.343609     | 328.675443       | 655.359593     | 328.183435       | 3 |
| 8 | 1191.557051       | 596.282164        | 1174.530502    | 587.768889       | 1173.546486    | 587.276881       | S    | <b>234.144832</b>  | 117.576054        | 217.118283     | 109.062780       | 216.134267     | 108.570772       | 2 |
| 9 |                   |                   |                |                  |                |                  | K    | 147.112804         | 74.060040         | 130.086255     | 65.546765        |                |                  | 1 |

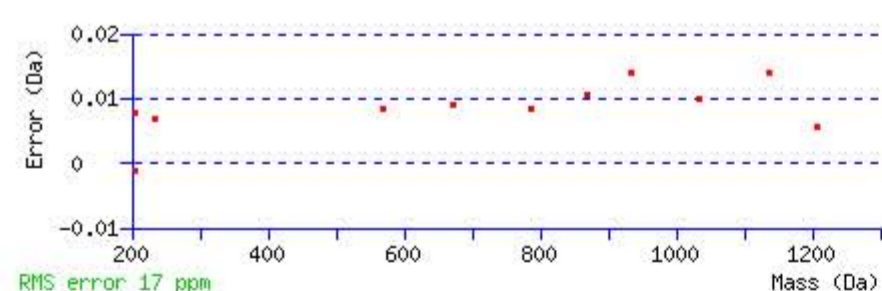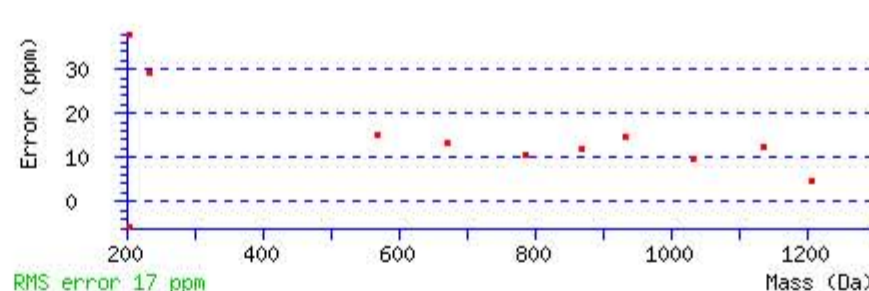

NCBI BLAST search of [MATTMIQSK](#)

(Parameters: blastp, nr protein database, expect=20000, no filter, PAM30)

Other BLAST [web gateways](#)

## All matches to this query

| Score | Mr(calc):   | Delta     | Sequence                      |
|-------|-------------|-----------|-------------------------------|
| 61.0  | 1336.655289 | 0.018859  | <a href="#">MATTMIQSK</a>     |
| 6.7   | 1336.692795 | -0.018647 | <a href="#">RFTYKFNFSK</a>    |
| 4.1   | 1336.662247 | 0.011901  | <a href="#">KAEELQATYER</a>   |
| 3.8   | 1336.662308 | 0.011840  | <a href="#">KDTWGVVSSGSSK</a> |
| 3.8   | 1336.655289 | 0.018859  | <a href="#">MATTMIQSK</a>     |
| 3.8   | 1336.690781 | -0.016633 | <a href="#">MTASAASELILSK</a> |
| 2.5   | 1336.684937 | -0.010789 | <a href="#">QFFEIQSK</a>      |
| 2.1   | 1336.684753 | -0.010605 | <a href="#">GRPSGTTKSAGYR</a> |

# MASCOT Search Results

## Peptide View

MS/MS Fragmentation of **LSNENHGIAQR**

Found in **ITIH2\_HUMAN**, Inter-alpha-trypsin inhibitor heavy chain H2 OS=Homo sapiens GN=ITIH2 PE=1 SV=2

Match to Query 36420: 1548.795582 from(517.272470,3+) rtinseconds(1364) index(37770)

Title: Locus:1.1.1.2924.18 File:"2013-07-02 CLN FXIII 180 min 1st F 3.wiff"

Data file C:\Program Files (x86)\Matrix Science\Mascot Daemon\mgf\7 FXIII 180 min 1st\mascot\_daemon\_merge.mgf

Click mouse within plot area to zoom in by factor of two about that point

Or, Plot from  to  Da

Label all possible matches  Label matches used for scoring

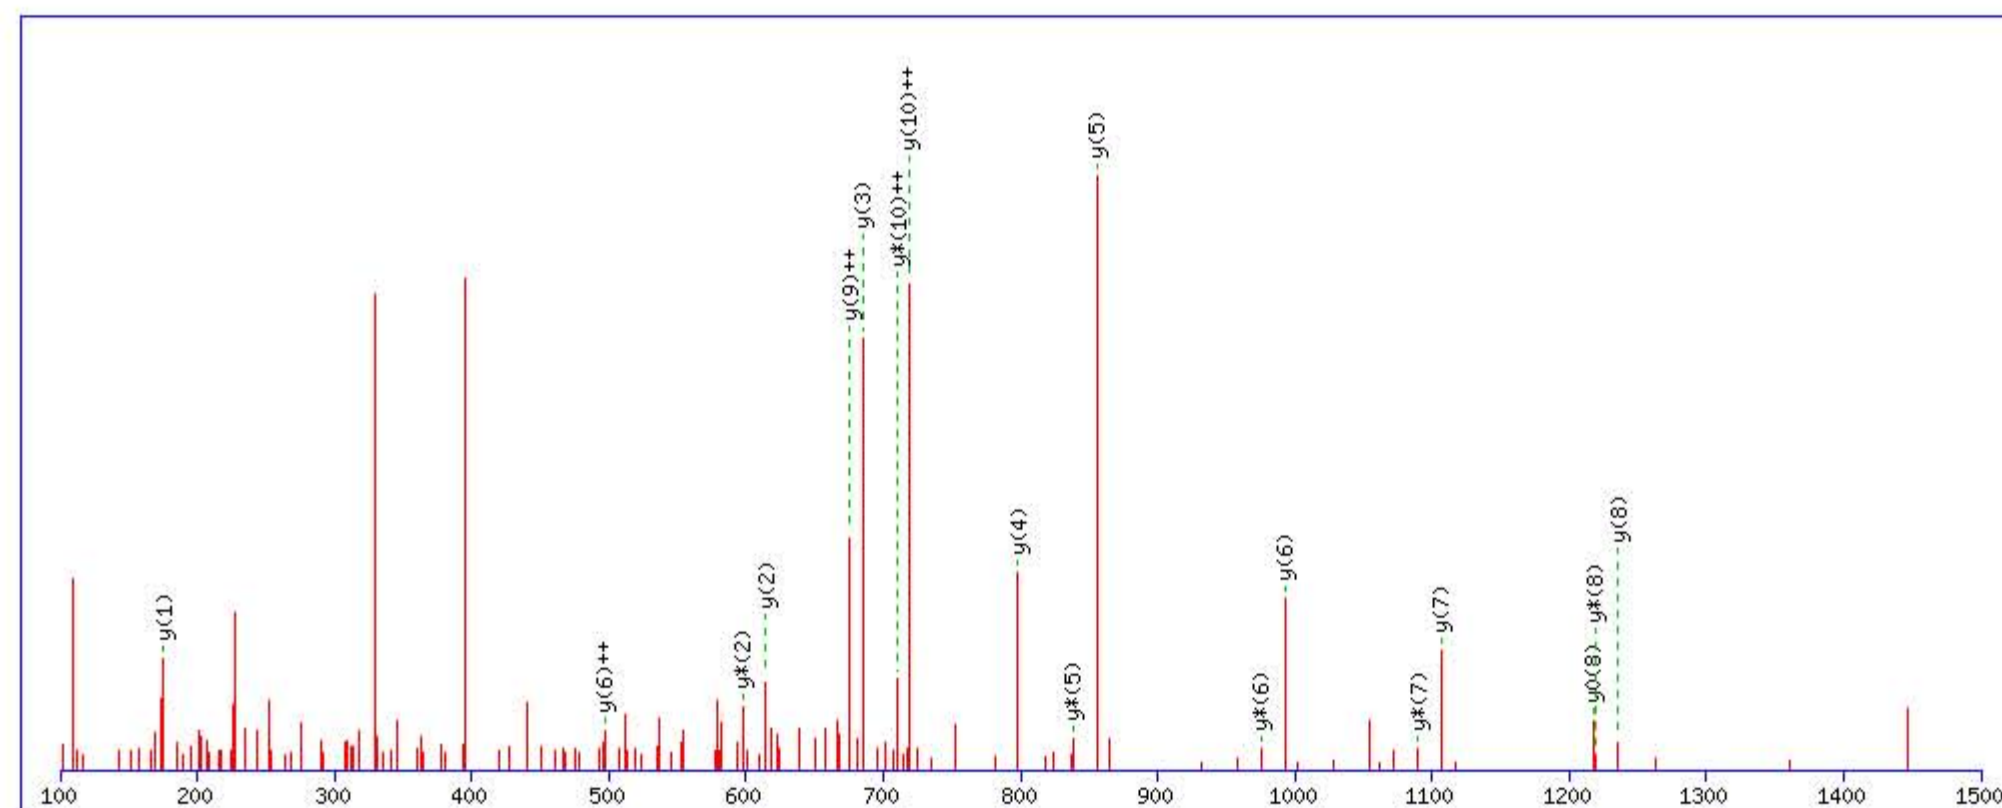

Monoisotopic mass of neutral peptide  $M_r(\text{calc})$ : 1548.783066

Fixed modifications: Carbamidomethyl (C) (apply to specified residues or termini only)

Variable modifications:

Q10 : Biotin:Thermo-21345 (Q)

Ions Score: 42 Expect: 0.0005

Matches : 18/100 fragment ions using 37 most intense peaks [\(help\)](#)

| #  | b           | b <sup>++</sup> | b <sup>+</sup> | b <sup>*++</sup> | b <sup>0</sup> | b <sup>0++</sup> | Seq. | y           | y <sup>++</sup> | y <sup>+</sup> | y <sup>*++</sup> | y <sup>0</sup> | y <sup>0++</sup> | #  |
|----|-------------|-----------------|----------------|------------------|----------------|------------------|------|-------------|-----------------|----------------|------------------|----------------|------------------|----|
| 1  | 114.091340  | 57.549308       |                |                  |                |                  | L    |             |                 |                |                  |                |                  | 11 |
| 2  | 201.123368  | 101.065322      |                |                  | 183.112803     | 92.060039        | S    | 1436.706307 | 718.856792      | 1419.679758    | 710.343517       | 1418.695742    | 709.851509       | 10 |
| 3  | 315.166295  | 158.086785      | 298.139746     | 149.573511       | 297.155730     | 149.081503       | N    | 1349.674279 | 675.340778      | 1332.647730    | 666.827503       | 1331.663714    | 666.335495       | 9  |
| 4  | 444.208888  | 222.608082      | 427.182339     | 214.094808       | 426.198323     | 213.602800       | E    | 1235.631352 | 618.319314      | 1218.604803    | 609.806040       | 1217.620787    | 609.314032       | 8  |
| 5  | 558.251815  | 279.629546      | 541.225266     | 271.116271       | 540.241250     | 270.624263       | N    | 1106.588759 | 553.798018      | 1089.562210    | 545.284743       |                |                  | 7  |
| 6  | 695.310727  | 348.159002      | 678.284178     | 339.645727       | 677.300162     | 339.153719       | H    | 992.545832  | 496.776554      | 975.519283     | 488.263280       |                |                  | 6  |
| 7  | 752.332191  | 376.669734      | 735.305642     | 368.156459       | 734.321626     | 367.664451       | G    | 855.486920  | 428.247098      | 838.460371     | 419.733824       |                |                  | 5  |
| 8  | 865.416255  | 433.211766      | 848.389706     | 424.698491       | 847.405690     | 424.206483       | I    | 798.465456  | 399.736366      | 781.438907     | 391.223092       |                |                  | 4  |
| 9  | 936.453369  | 468.730323      | 919.426820     | 460.217048       | 918.442804     | 459.725040       | A    | 685.381392  | 343.194334      | 668.354843     | 334.681060       |                |                  | 3  |
| 10 | 1375.678695 | 688.342986      | 1358.652146    | 679.829711       | 1357.668130    | 679.337703       | Q    | 614.344278  | 307.675777      | 597.317729     | 299.162503       |                |                  | 2  |
| 11 |             |                 |                |                  |                |                  | R    | 175.118952  | 88.063114       | 158.092403     | 79.549839        |                |                  | 1  |

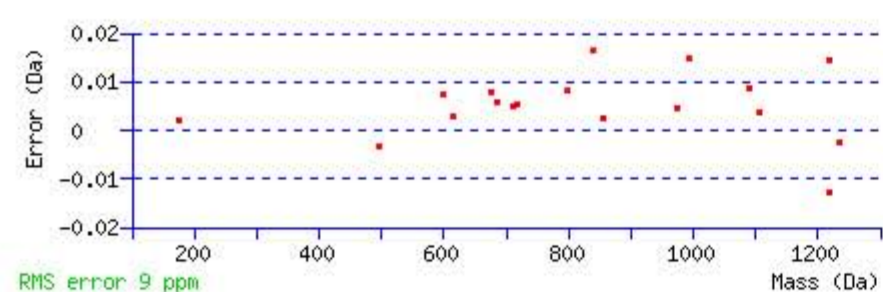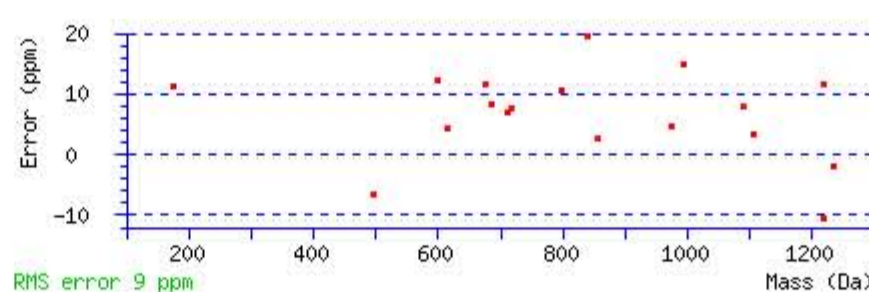

NCBI BLAST search of **LSNENHGIAQR**

(Parameters: blastp, nr protein database, expect=20000, no filter, PAM30)

Other BLAST [web gateways](#)

All matches to this query

| Score | $M_r(\text{calc})$ : | Delta     | Sequence                         |
|-------|----------------------|-----------|----------------------------------|
| 42.2  | 1548.783066          | 0.012516  | <a href="#">LSNENHGIAQR</a>      |
| 6.9   | 1548.800842          | -0.005260 | <a href="#">KGEPGEPGPKGGIGNR</a> |

Mascot: <http://www.matrixscience.com/>



# MASCOT Search Results

## Peptide View

MS/MS Fragmentation of **FYNQVSTPLLR**

Found in **ITIH2\_HUMAN**, Inter-alpha-trypsin inhibitor heavy chain H2 OS=Homo sapiens GN=ITIH2 PE=1 SV=2

Match to Query 41112: 1647.902488 from(824.958520,2+) rtinseconds(2248) index(43972)

Title: Locus:1.1.1.3231.19 File:"2013-07-02 CLN FXIII 180 min 1st F 3.wiff"

Data file C:\Program Files (x86)\Matrix Science\Mascot Daemon\mgf\7 FXIII 180 min 1st\mascot\_daemon\_merge.mgf

Click mouse within plot area to zoom in by factor of two about that point

Or, Plot from  to  Da

Label all possible matches  Label matches used for scoring

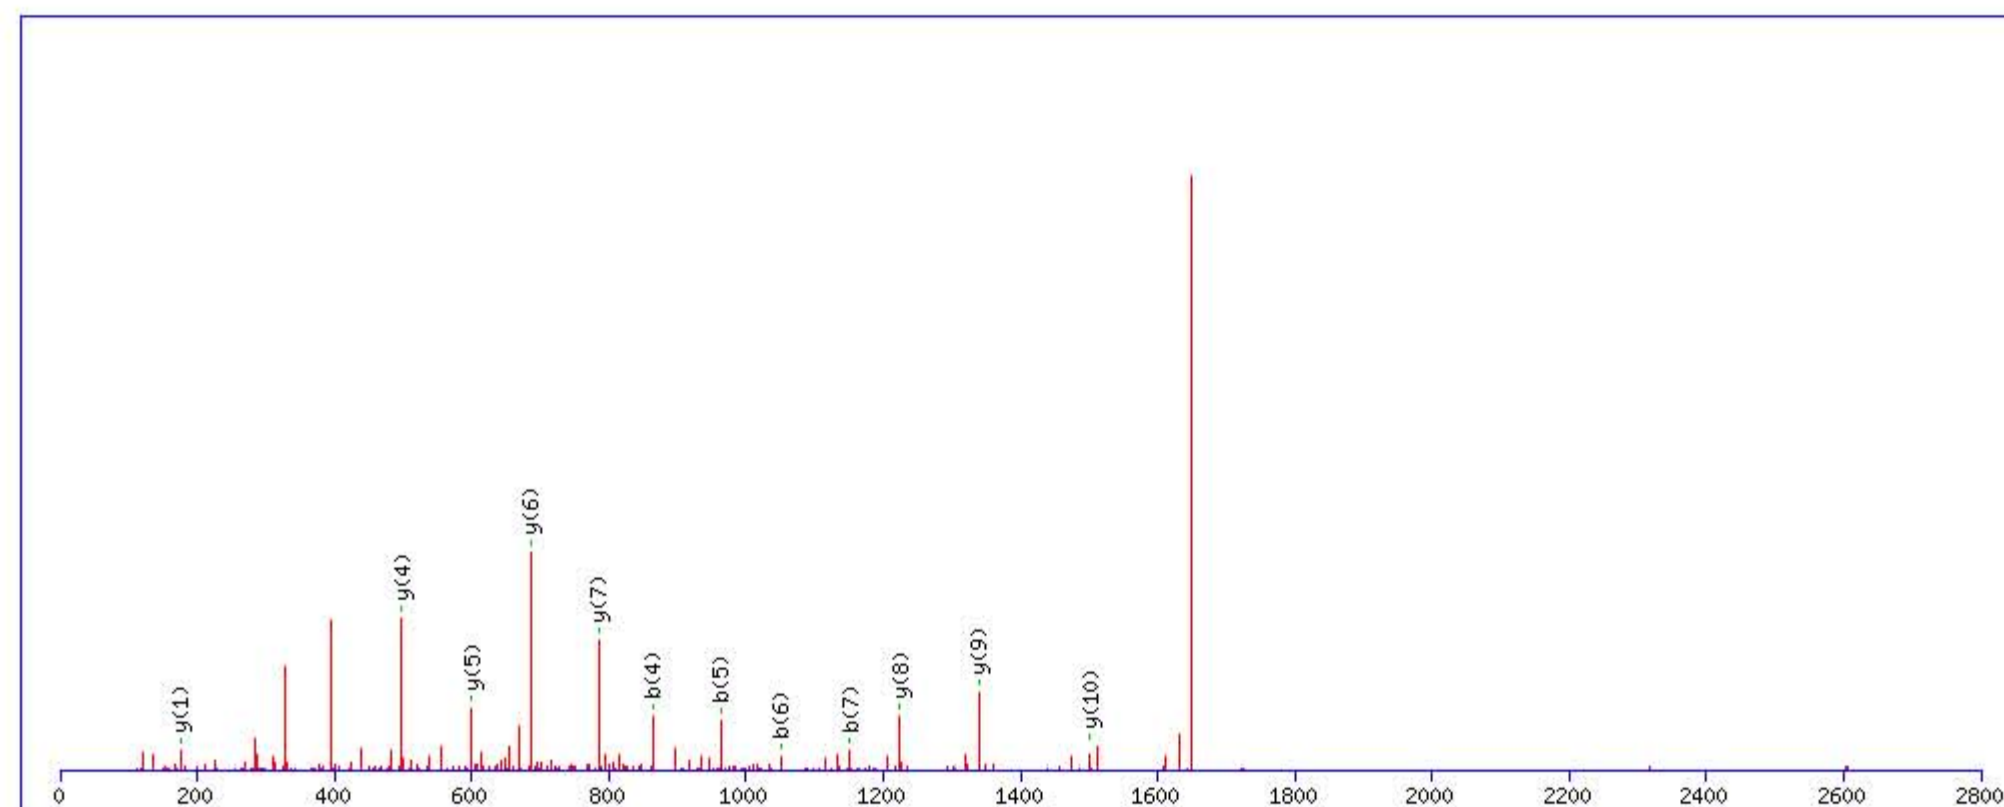

Monoisotopic mass of neutral peptide Mr(calc): 1647.880676

Fixed modifications: Carbamidomethyl (C) (apply to specified residues or termini only)

Variable modifications:

Q4 : Biotin:Thermo-21345 (Q)

Ions Score: 68 Expect: 2.7e-006

Matches : 12/98 fragment ions using 16 most intense peaks [\(help\)](#)

| #  | b           | b <sup>++</sup> | b <sup>+</sup> | b <sup>+++</sup> | b <sup>0</sup> | b <sup>0++</sup> | Seq. | y           | y <sup>++</sup> | y <sup>+</sup> | y <sup>+++</sup> | y <sup>0</sup> | y <sup>0++</sup> | #  |
|----|-------------|-----------------|----------------|------------------|----------------|------------------|------|-------------|-----------------|----------------|------------------|----------------|------------------|----|
| 1  | 148.075690  | 74.541483       |                |                  |                |                  | F    |             |                 |                |                  |                |                  | 11 |
| 2  | 311.139019  | 156.073148      |                |                  |                |                  | Y    | 1501.819547 | 751.413411      | 1484.792998    | 742.900137       | 1483.808982    | 742.408129       | 10 |
| 3  | 425.181946  | 213.094611      | 408.155397     | 204.581337       |                |                  | N    | 1338.756218 | 669.881747      | 1321.729669    | 661.368472       | 1320.745653    | 660.876464       | 9  |
| 4  | 864.407272  | 432.707274      | 847.380723     | 424.194000       |                |                  | Q    | 1224.713291 | 612.860283      | 1207.686742    | 604.347009       | 1206.702726    | 603.855001       | 8  |
| 5  | 963.475686  | 482.241481      | 946.449137     | 473.728207       |                |                  | V    | 785.487965  | 393.247620      | 768.461416     | 384.734346       | 767.477400     | 384.242338       | 7  |
| 6  | 1050.507714 | 525.757495      | 1033.481165    | 517.244221       | 1032.497149    | 516.752213       | S    | 686.419551  | 343.713414      | 669.393002     | 335.200139       | 668.408986     | 334.708131       | 6  |
| 7  | 1151.555393 | 576.281335      | 1134.528844    | 567.768060       | 1133.544828    | 567.276052       | T    | 599.387523  | 300.197399      | 582.360974     | 291.684125       | 581.376958     | 291.192117       | 5  |
| 8  | 1248.608157 | 624.807717      | 1231.581608    | 616.294442       | 1230.597592    | 615.802434       | P    | 498.339844  | 249.673560      | 481.313295     | 241.160285       |                |                  | 4  |
| 9  | 1361.692221 | 681.349749      | 1344.665672    | 672.836474       | 1343.681656    | 672.344466       | L    | 401.287080  | 201.147178      | 384.260531     | 192.633903       |                |                  | 3  |
| 10 | 1474.776285 | 737.891780      | 1457.749736    | 729.378506       | 1456.765720    | 728.886498       | L    | 288.203016  | 144.605146      | 271.176467     | 136.091871       |                |                  | 2  |
| 11 |             |                 |                |                  |                |                  | R    | 175.118952  | 88.063114       | 158.092403     | 79.549839        |                |                  | 1  |

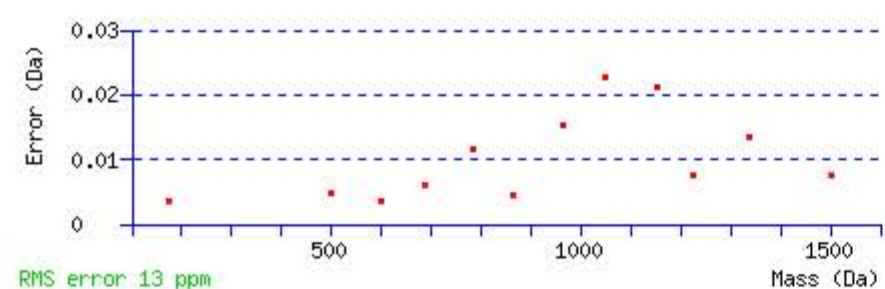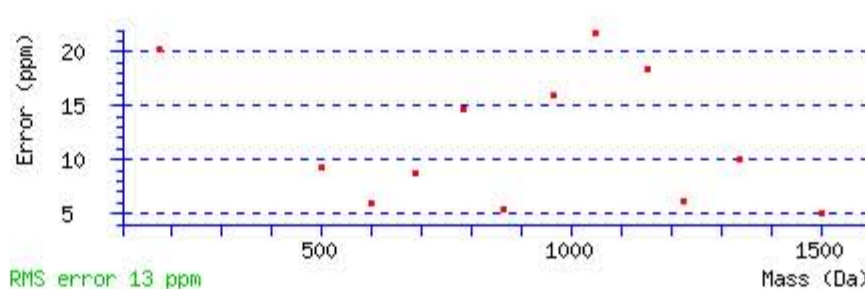

NCBI BLAST search of **FYNQVSTPLLR**

(Parameters: blastp, nr protein database, expect=20000, no filter, PAM30)

Other BLAST [web gateways](#)

All matches to this query

| Score | Mr(calc):   | Delta     | Sequence                        |
|-------|-------------|-----------|---------------------------------|
| 68.0  | 1647.880676 | 0.021812  | <a href="#">FYNQVSTPLLR</a>     |
| 10.7  | 1647.895264 | 0.007224  | <a href="#">MKPILLQGHER</a>     |
| 6.0   | 1647.903137 | -0.000649 | <a href="#">EVRIMRWFGLVSR</a>   |
| 5.9   | 1647.887878 | 0.014610  | <a href="#">TLNQQLTNHIR</a>     |
| 4.5   | 1647.887878 | 0.014610  | <a href="#">TLNQQLTNHIR</a>     |
| 3.1   | 1647.905609 | -0.003121 | <a href="#">YLRELSGSGLERLR</a>  |
| 2.8   | 1647.910339 | -0.007851 | <a href="#">LMRPRREGGPPGGLR</a> |
| 2.5   | 1647.923569 | -0.021081 | <a href="#">KPSLIFLSETWSLK</a>  |
| 2.1   | 1647.913040 | -0.010552 | <a href="#">CIANGVTSKVFLAIR</a> |

# MASCOT Search Results

## Peptide View

MS/MS Fragmentation of **IYGNQDTSSQLK**

Found in **ITIH2\_HUMAN**, Inter-alpha-trypsin inhibitor heavy chain H2 OS=Homo sapiens GN=ITIH2 PE=1 SV=2

Match to Query 41580: 1663.845108 from(832.929830,2+) rtinseconds(1646) index(39712)

Title: Locus:1.1.1.3022.18 File:"2013-07-02 CLN FXIII 180 min 1st F 3.wiff"

Data file C:\Program Files (x86)\Matrix Science\Mascot Daemon\mgf\7 FXIII 180 min 1st\mascot\_daemon\_merge.mgf

Click mouse within plot area to zoom in by factor of two about that point

Or, Plot from  to  Da

Label all possible matches  Label matches used for scoring

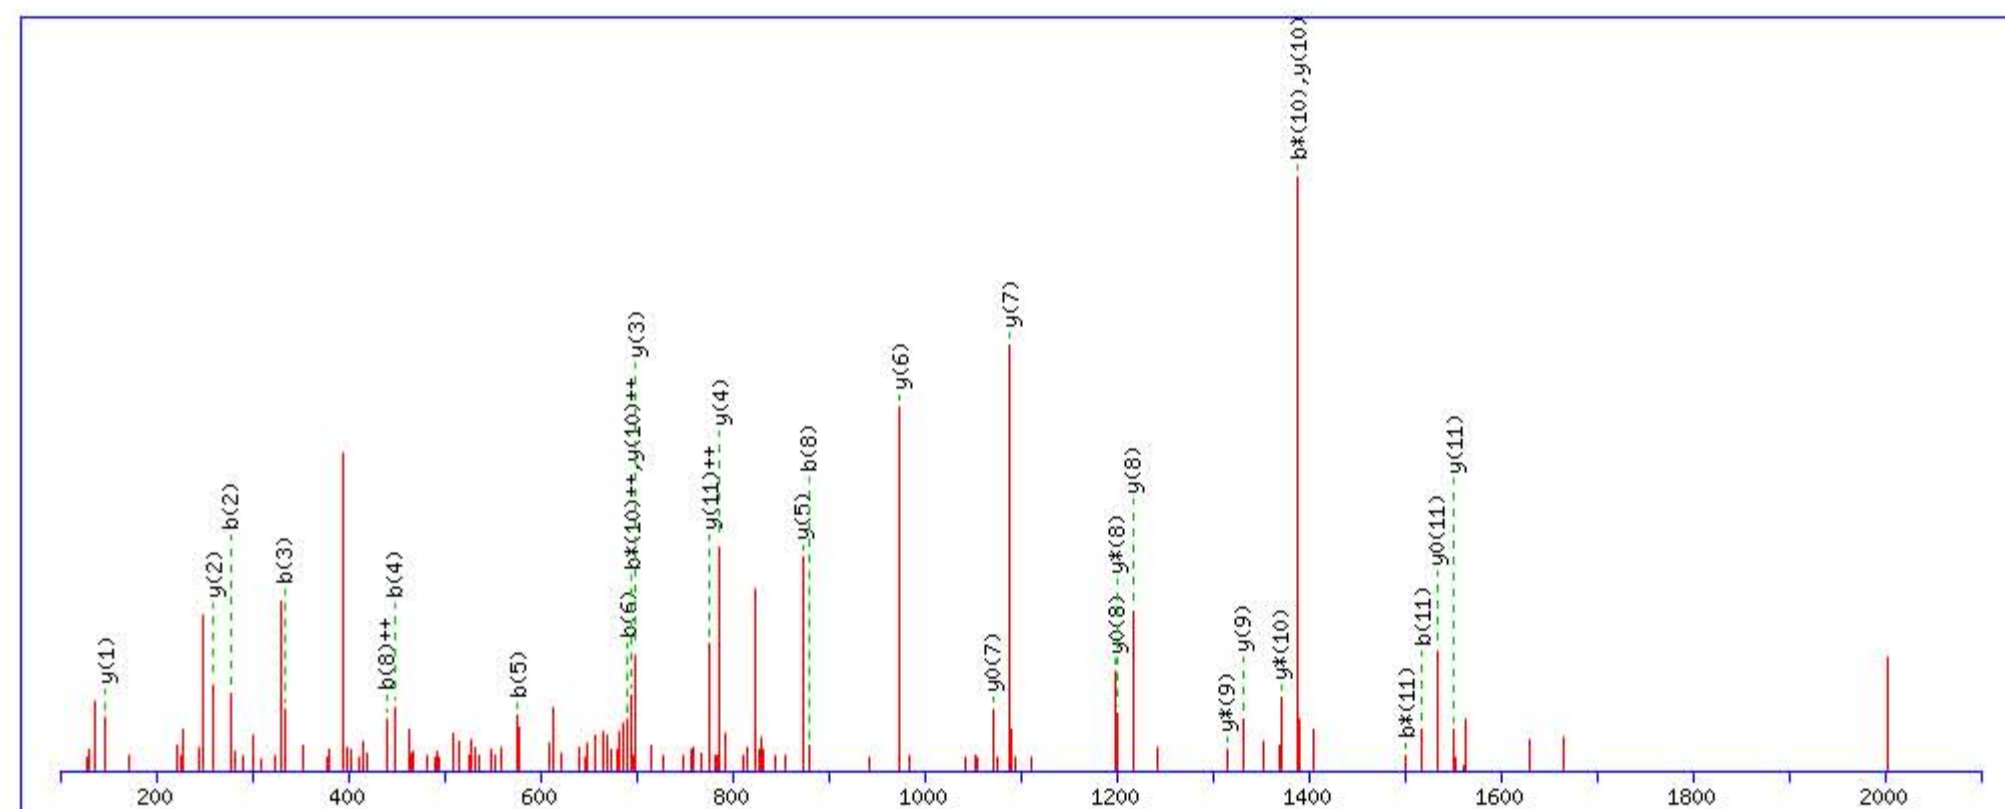

Monoisotopic mass of neutral peptide Mr(calc): 1663.823944

Fixed modifications: Carbamidomethyl (C) (apply to specified residues or termini only)

Variable modifications:

Q10 : Biotin:Thermo-21345 (Q)

Ions Score: 83 Expect: 7.9e-008

Matches : 30/110 fragment ions using 44 most intense peaks [\(help\)](#)

| #  | b           | b <sup>++</sup> | b <sup>*</sup> | b <sup>*++</sup> | b <sup>0</sup> | b <sup>0++</sup> | Seq. | y           | y <sup>++</sup> | y <sup>*</sup> | y <sup>*++</sup> | y <sup>0</sup> | y <sup>0++</sup> | #  |
|----|-------------|-----------------|----------------|------------------|----------------|------------------|------|-------------|-----------------|----------------|------------------|----------------|------------------|----|
| 1  | 114.091340  | 57.549308       |                |                  |                |                  | I    |             |                 |                |                  |                |                  | 12 |
| 2  | 277.154669  | 139.080973      |                |                  |                |                  | Y    | 1551.747170 | 776.377223      | 1534.720621    | 767.863948       | 1533.736605    | 767.371940       | 11 |
| 3  | 334.176133  | 167.591704      |                |                  |                |                  | G    | 1388.683841 | 694.845558      | 1371.657292    | 686.332284       | 1370.673276    | 685.840276       | 10 |
| 4  | 448.219060  | 224.613168      | 431.192511     | 216.099894       |                |                  | N    | 1331.662377 | 666.334826      | 1314.635828    | 657.821552       | 1313.651812    | 657.329544       | 9  |
| 5  | 576.277638  | 288.642457      | 559.251089     | 280.129183       |                |                  | Q    | 1217.619450 | 609.313363      | 1200.592901    | 600.800088       | 1199.608885    | 600.308080       | 8  |
| 6  | 691.304581  | 346.155929      | 674.278032     | 337.642654       | 673.294016     | 337.150646       | D    | 1089.560872 | 545.284074      | 1072.534323    | 536.770799       | 1071.550307    | 536.278791       | 7  |
| 7  | 792.352260  | 396.679768      | 775.325711     | 388.166494       | 774.341695     | 387.674486       | T    | 974.533929  | 487.770602      | 957.507380     | 479.257328       | 956.523364     | 478.765320       | 6  |
| 8  | 879.384288  | 440.195782      | 862.357739     | 431.682507       | 861.373723     | 431.190499       | S    | 873.486250  | 437.246763      | 856.459701     | 428.733488       | 855.475685     | 428.241480       | 5  |
| 9  | 966.416316  | 483.711796      | 949.389767     | 475.198521       | 948.405751     | 474.706513       | S    | 786.454222  | 393.730749      | 769.427673     | 385.217474       | 768.443657     | 384.725466       | 4  |
| 10 | 1405.641642 | 703.324459      | 1388.615093    | 694.811184       | 1387.631077    | 694.319176       | Q    | 699.422194  | 350.214735      | 682.395645     | 341.701460       |                |                  | 3  |
| 11 | 1518.725706 | 759.866491      | 1501.699157    | 751.353216       | 1500.715141    | 750.861208       | L    | 260.196868  | 130.602072      | 243.170319     | 122.088797       |                |                  | 2  |
| 12 |             |                 |                |                  |                |                  | K    | 147.112804  | 74.060040       | 130.086255     | 65.546765        |                |                  | 1  |

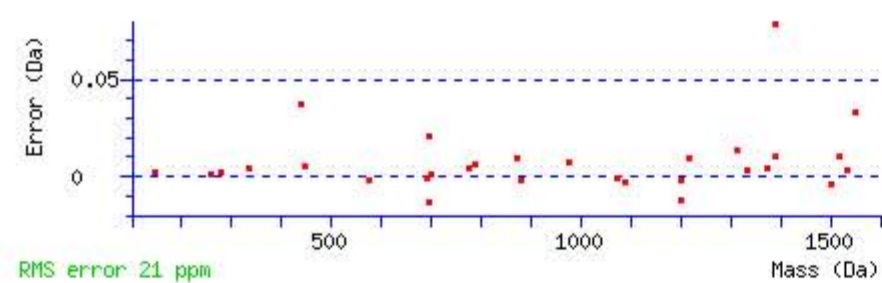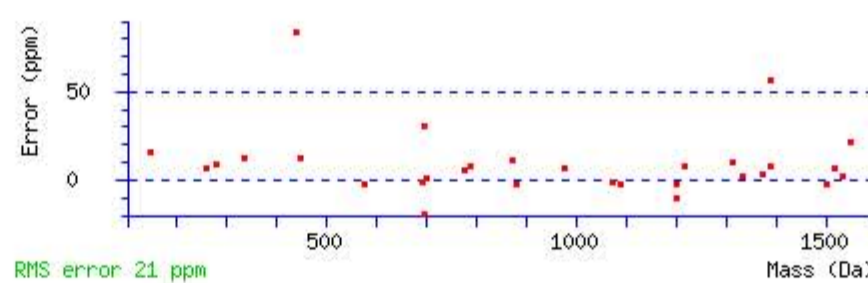

NCBI BLAST search of **IYGNQDTSSQLK**

(Parameters: blastp, nr protein database, expect=20000, no filter, PAM30)

Other BLAST [web gateways](#)

All matches to this query

| Score | Mr(calc):   | Delta     | Sequence                         |
|-------|-------------|-----------|----------------------------------|
| 82.9  | 1663.823944 | 0.021164  | <a href="#">IYGNQDTSSQLK</a>     |
| 20.4  | 1663.823944 | 0.021164  | <a href="#">IYGNQDTSSQLK</a>     |
| 6.7   | 1663.863663 | -0.018555 | <a href="#">EAQKEMQKIMTSLK</a>   |
| 5.5   | 1663.821442 | 0.023666  | <a href="#">LYGCFLRVYMQSK</a>    |
| 1.2   | 1663.845078 | 0.000030  | <a href="#">LMSGVENSQKVDISTK</a> |
| 0.8   | 1663.867722 | -0.022614 | <a href="#">VEMPSFKMPKVDLK</a>   |

Mascot: <http://www.matrixscience.com/>

# MASCOT SEARCH RESULTS

## Peptide View

MS/MS Fragmentation of **AHVSFKPTVAQQR**

Found in **ITIH2\_HUMAN**, Inter-alpha-trypsin inhibitor heavy chain H2 OS=Homo sapiens GN=ITIH2 PE=1 SV=2

Match to Query 44746: 1778.976522 from(593.999450,3+) rtinseconds(1491) index(38704)

Title: Locus:1.1.1.2968.17 File:"2013-07-02 CLN FXIII 180 min 1st F 3.wiff"

Data file C:\Program Files (x86)\Matrix Science\Mascot Daemon\mgf\7 FXIII 180 min 1st\mascot\_daemon\_merge.mgf

Click mouse within plot area to zoom in by factor of two about that point

Or, Plot from  to  Da

Label all possible matches  Label matches used for scoring

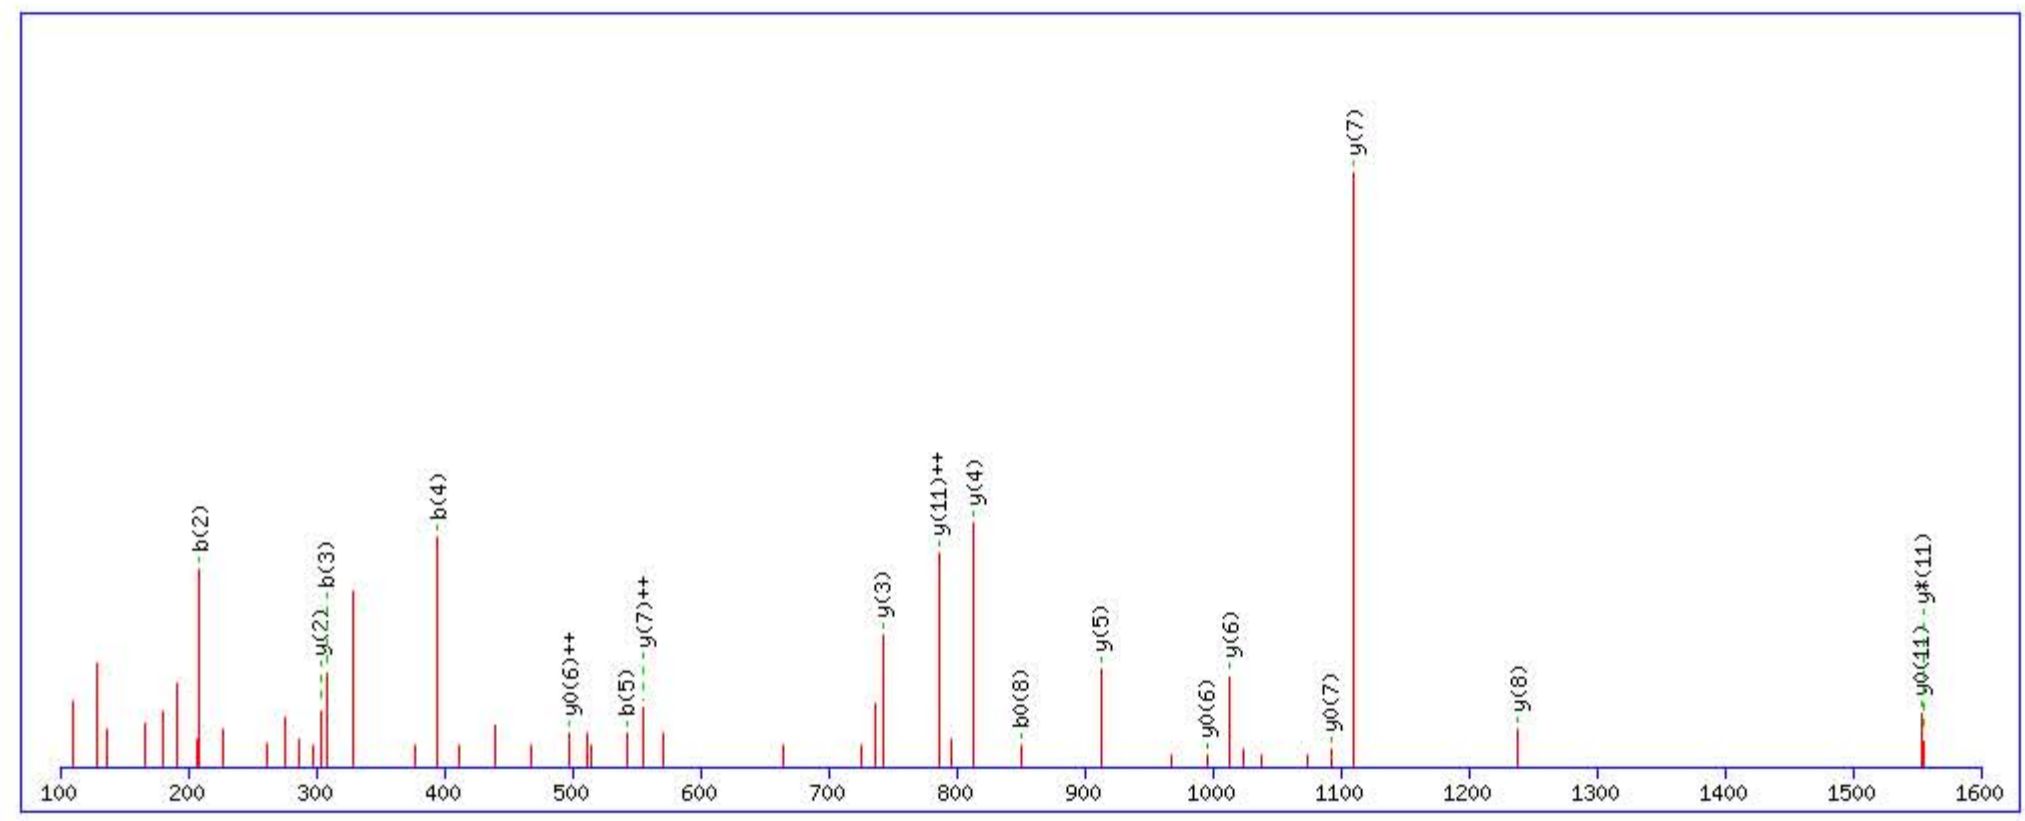

Monoisotopic mass of neutral peptide Mr(calc): 1778.961395

Fixed modifications: Carbamidomethyl (C) (apply to specified residues or termini only)

Variable modifications:

Q11 : Biotin:Thermo-21345 (Q)

Ions Score: 59 Expect: 2.4e-005

Matches : 19/118 fragment ions using 23 most intense peaks [\(help\)](#)

| #  | b                 | b <sup>++</sup> | b <sup>*</sup> | b <sup>*++</sup> | b <sup>0</sup>    | b <sup>0++</sup> | Seq. | y                  | y <sup>++</sup>   | y <sup>*</sup>     | y <sup>*++</sup> | y <sup>0</sup>     | y <sup>0++</sup>  | #  |
|----|-------------------|-----------------|----------------|------------------|-------------------|------------------|------|--------------------|-------------------|--------------------|------------------|--------------------|-------------------|----|
| 1  | 72.044390         | 36.525833       |                |                  |                   |                  | A    |                    |                   |                    |                  |                    |                   | 13 |
| 2  | <b>209.103302</b> | 105.055289      |                |                  |                   |                  | H    | 1708.931558        | 854.969417        | 1691.905009        | 846.456143       | 1690.920993        | 845.964135        | 12 |
| 3  | <b>308.171716</b> | 154.589496      |                |                  |                   |                  | V    | 1571.872646        | <b>786.439961</b> | <b>1554.846097</b> | 777.926687       | <b>1553.862081</b> | 777.434679        | 11 |
| 4  | <b>395.203744</b> | 198.105510      |                |                  | 377.193179        | 189.100227       | S    | 1472.804232        | 736.905754        | 1455.777683        | 728.392480       | 1454.793667        | 727.900472        | 10 |
| 5  | <b>542.272158</b> | 271.639717      |                |                  | 524.261593        | 262.634435       | F    | 1385.772204        | 693.389740        | 1368.745655        | 684.876466       | 1367.761639        | 684.384458        | 9  |
| 6  | 670.367121        | 335.687199      | 653.340572     | 327.173924       | 652.356556        | 326.681916       | K    | <b>1238.703790</b> | 619.855533        | 1221.677241        | 611.342259       | 1220.693225        | 610.850251        | 8  |
| 7  | 767.419885        | 384.213581      | 750.393336     | 375.700306       | 749.409320        | 375.208298       | P    | <b>1110.608827</b> | <b>555.808052</b> | 1093.582278        | 547.294777       | <b>1092.598262</b> | 546.802769        | 7  |
| 8  | 868.467564        | 434.737420      | 851.441015     | 426.224146       | <b>850.456999</b> | 425.732138       | T    | <b>1013.556063</b> | 507.281670        | 996.529514         | 498.768395       | <b>995.545498</b>  | <b>498.276387</b> | 6  |
| 9  | 967.535978        | 484.271627      | 950.509429     | 475.758353       | 949.525413        | 475.266345       | V    | <b>912.508384</b>  | 456.757830        | 895.481835         | 448.244556       |                    |                   | 5  |
| 10 | 1038.573092       | 519.790184      | 1021.546543    | 511.276910       | 1020.562527       | 510.784902       | A    | <b>813.439970</b>  | 407.223623        | 796.413421         | 398.710349       |                    |                   | 4  |
| 11 | 1477.798418       | 739.402847      | 1460.771869    | 730.889573       | 1459.787853       | 730.397565       | Q    | <b>742.402856</b>  | 371.705066        | 725.376307         | 363.191792       |                    |                   | 3  |
| 12 | 1605.856996       | 803.432136      | 1588.830447    | 794.918862       | 1587.846431       | 794.426854       | Q    | <b>303.177530</b>  | 152.092403        | 286.150981         | 143.579129       |                    |                   | 2  |
| 13 |                   |                 |                |                  |                   |                  | R    | 175.118952         | 88.063114         | 158.092403         | 79.549839        |                    |                   | 1  |

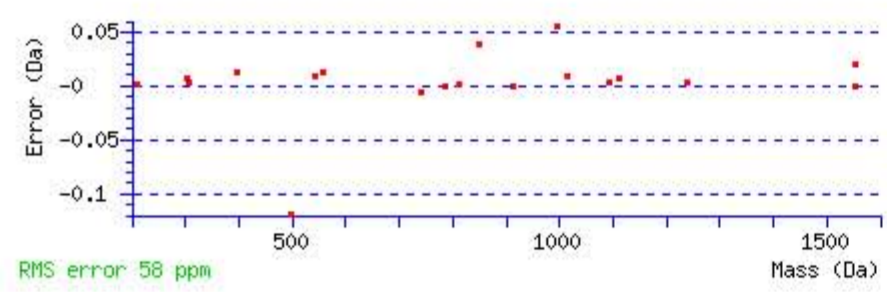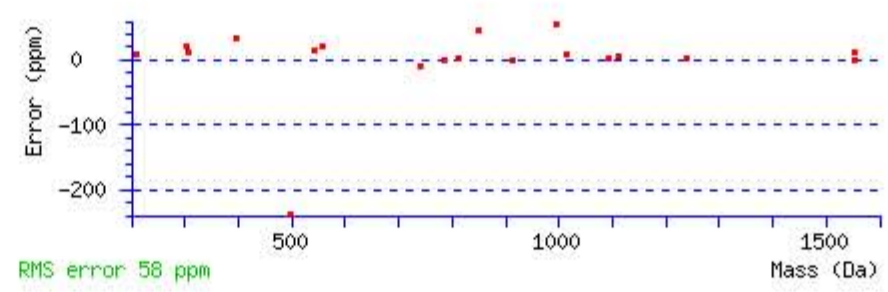

NCBI BLAST search of **AHVSFKPTVAQQR**

(Parameters: blastp, nr protein database, expect=20000, no filter, PAM30)

Other BLAST [web gateways](#)

All matches to this query

| Score | Mr(calc):   | Delta    | Sequence                      |
|-------|-------------|----------|-------------------------------|
| 58.7  | 1778.961395 | 0.015127 | <a href="#">AHVSFKPTVAQQR</a> |
| 48.1  | 1778.961395 | 0.015127 | <a href="#">AHVSFKPTVAQQR</a> |

# MASCOT Search Results

## Peptide View

MS/MS Fragmentation of **AHVSFKPTVAQQR**

Found in **ITIH2\_HUMAN**, Inter-alpha-trypsin inhibitor heavy chain H2 OS=Homo sapiens GN=ITIH2 PE=1 SV=2

Match to Query 44749: 1778.981016 from(445.752530,4+) rtinseconds(1512) index(57342)

Title: Locus:1.1.1.2950.6 File:"2013-07-02 CLN FXIII 180 min 1st F 4.wiff"

Data file C:\Program Files (x86)\Matrix Science\Mascot Daemon\mgf\7 FXIII 180 min 1st\mascot\_daemon\_merge.mgf

Click mouse within plot area to zoom in by factor of two about that point

Or, Plot from  to  Da

Label all possible matches  Label matches used for scoring

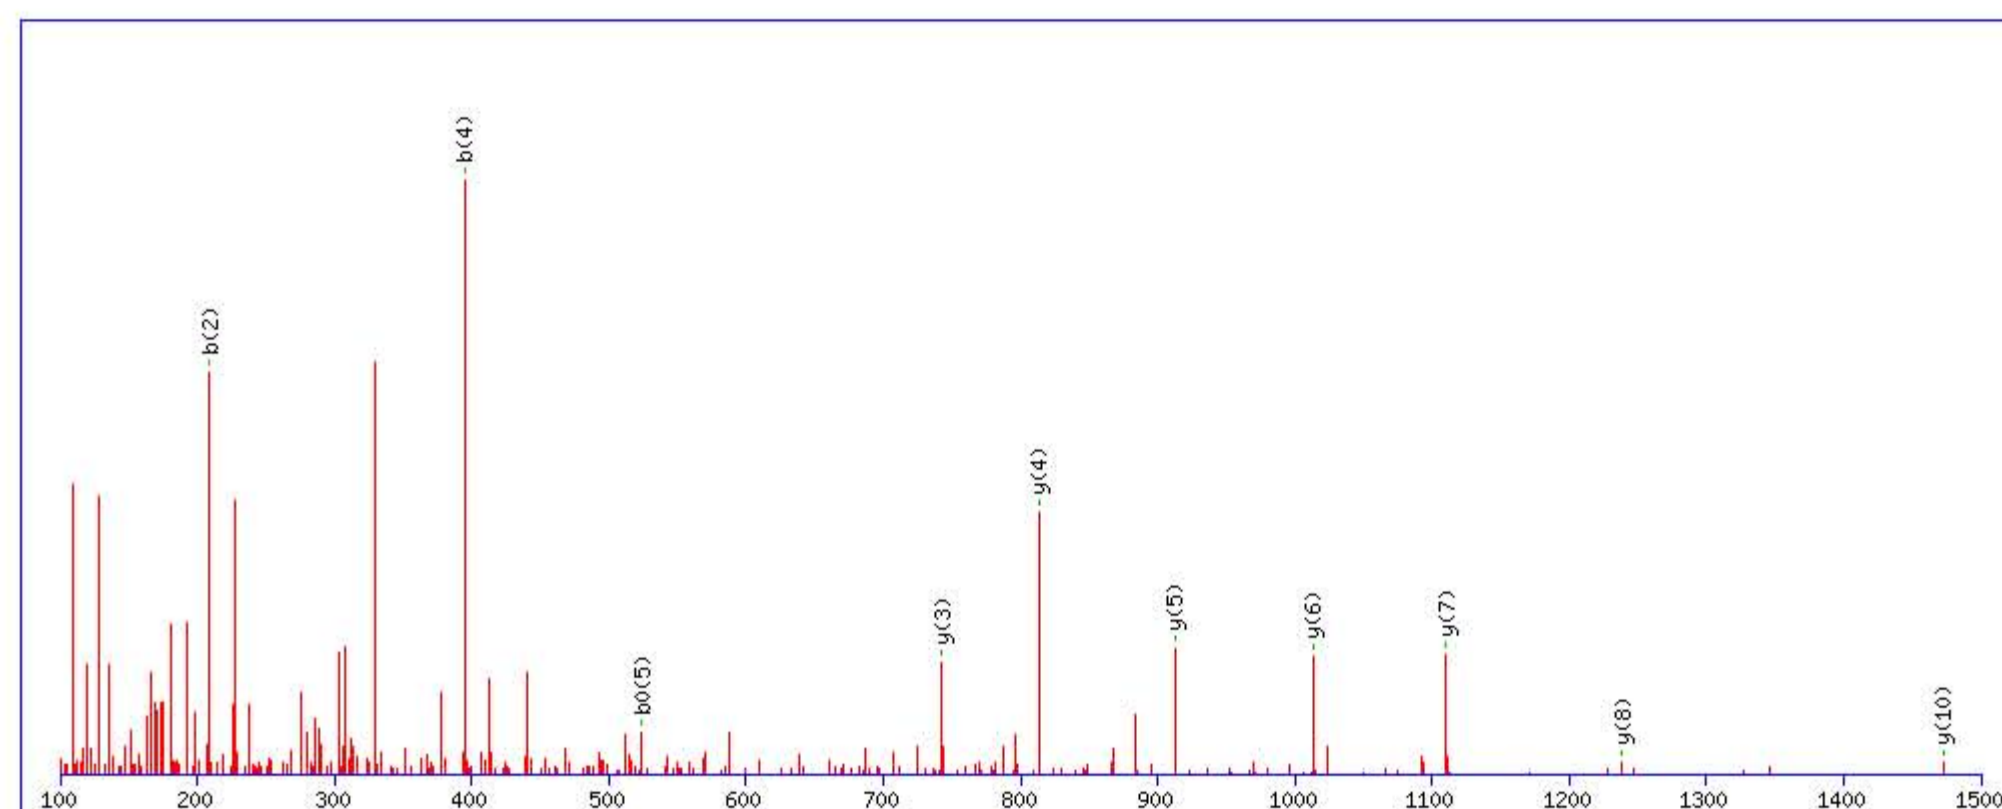

Monoisotopic mass of neutral peptide Mr(calc): 1778.961395

Fixed modifications: Carbamidomethyl (C) (apply to specified residues or termini only)

Variable modifications:

Q12 : Biotin:Thermo-21345 (Q)

Ions Score: 49 Expect: 0.00021

Matches : 10/118 fragment ions using 14 most intense peaks [\(help\)](#)

| #  | b                 | b <sup>++</sup> | b <sup>*</sup> | b <sup>*++</sup> | b <sup>0</sup>    | b <sup>0++</sup> | Seq. | y                  | y <sup>++</sup> | y <sup>*</sup> | y <sup>*++</sup> | y <sup>0</sup> | y <sup>0++</sup> | #  |
|----|-------------------|-----------------|----------------|------------------|-------------------|------------------|------|--------------------|-----------------|----------------|------------------|----------------|------------------|----|
| 1  | 72.044390         | 36.525833       |                |                  |                   |                  | A    |                    |                 |                |                  |                |                  | 13 |
| 2  | <b>209.103302</b> | 105.055289      |                |                  |                   |                  | H    | 1708.931558        | 854.969417      | 1691.905009    | 846.456143       | 1690.920993    | 845.964135       | 12 |
| 3  | 308.171716        | 154.589496      |                |                  |                   |                  | V    | 1571.872646        | 786.439961      | 1554.846097    | 777.926687       | 1553.862081    | 777.434679       | 11 |
| 4  | <b>395.203744</b> | 198.105510      |                |                  | 377.193179        | 189.100227       | S    | <b>1472.804232</b> | 736.905754      | 1455.777683    | 728.392480       | 1454.793667    | 727.900472       | 10 |
| 5  | 542.272158        | 271.639717      |                |                  | <b>524.261593</b> | 262.634435       | F    | 1385.772204        | 693.389740      | 1368.745655    | 684.876466       | 1367.761639    | 684.384458       | 9  |
| 6  | 670.367121        | 335.687199      | 653.340572     | 327.173924       | 652.356556        | 326.681916       | K    | <b>1238.703790</b> | 619.855533      | 1221.677241    | 611.342259       | 1220.693225    | 610.850251       | 8  |
| 7  | 767.419885        | 384.213581      | 750.393336     | 375.700306       | 749.409320        | 375.208298       | P    | <b>1110.608827</b> | 555.808052      | 1093.582278    | 547.294777       | 1092.598262    | 546.802769       | 7  |
| 8  | 868.467564        | 434.737420      | 851.441015     | 426.224146       | 850.456999        | 425.732138       | T    | <b>1013.556063</b> | 507.281670      | 996.529514     | 498.768395       | 995.545498     | 498.276387       | 6  |
| 9  | 967.535978        | 484.271627      | 950.509429     | 475.758353       | 949.525413        | 475.266345       | V    | <b>912.508384</b>  | 456.757830      | 895.481835     | 448.244556       |                |                  | 5  |
| 10 | 1038.573092       | 519.790184      | 1021.546543    | 511.276910       | 1020.562527       | 510.784902       | A    | <b>813.439970</b>  | 407.223623      | 796.413421     | 398.710349       |                |                  | 4  |
| 11 | 1166.631670       | 583.819473      | 1149.605121    | 575.306199       | 1148.621105       | 574.814191       | Q    | <b>742.402856</b>  | 371.705066      | 725.376307     | 363.191792       |                |                  | 3  |
| 12 | 1605.856996       | 803.432136      | 1588.830447    | 794.918862       | 1587.846431       | 794.426854       | Q    | 614.344278         | 307.675777      | 597.317729     | 299.162503       |                |                  | 2  |
| 13 |                   |                 |                |                  |                   |                  | R    | 175.118952         | 88.063114       | 158.092403     | 79.549839        |                |                  | 1  |

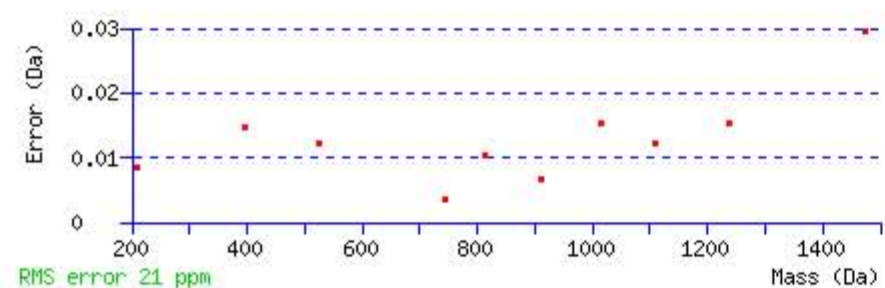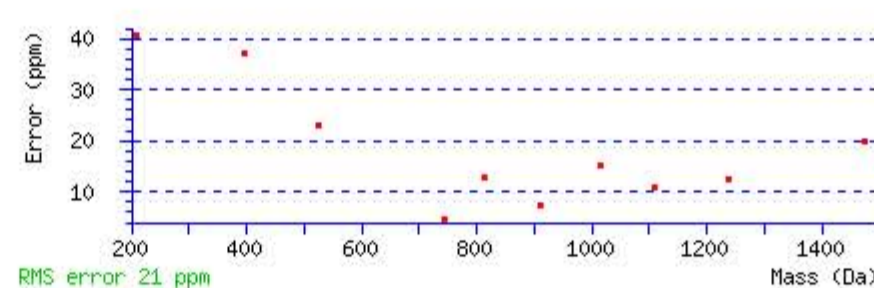

NCBI BLAST search of **AHVSFKPTVAQQR**

(Parameters: blastp, nr protein database, expect=20000, no filter, PAM30)

Other BLAST [web gateways](#)

All matches to this query

| Score | Mr(calc):   | Delta    | Sequence                      |
|-------|-------------|----------|-------------------------------|
| 48.7  | 1778.961395 | 0.019621 | <a href="#">AHVSFKPTVAQQR</a> |
| 48.7  | 1778.961395 | 0.019621 | <a href="#">AHVSFKPTVAQQR</a> |

Mascot: <http://www.matrixscience.com/>

# MASCOT SEARCH RESULTS

## Peptide View

MS/MS Fragmentation of **AHVSFKPTVAQQR**

Found in **ITIH2\_HUMAN**, Inter-alpha-trypsin inhibitor heavy chain H2 OS=Homo sapiens GN=ITIH2 PE=1 SV=2

Match to Query 52933: 2090.153976 from(523.545770,4+) rtinseconds(1762) index(59069)

Title: Locus:1.1.1.3037.6 File:"2013-07-02 CLN FXIII 180 min 1st F 4.wiff"

Data file C:\Program Files (x86)\Matrix Science\Mascot Daemon\mgf7 FXIII 180 min 1st\mascot\_daemon\_merge.mgf

Click mouse within plot area to zoom in by factor of two about that point

Or, Plot from  to  Da

Label all possible matches  Label matches used for scoring

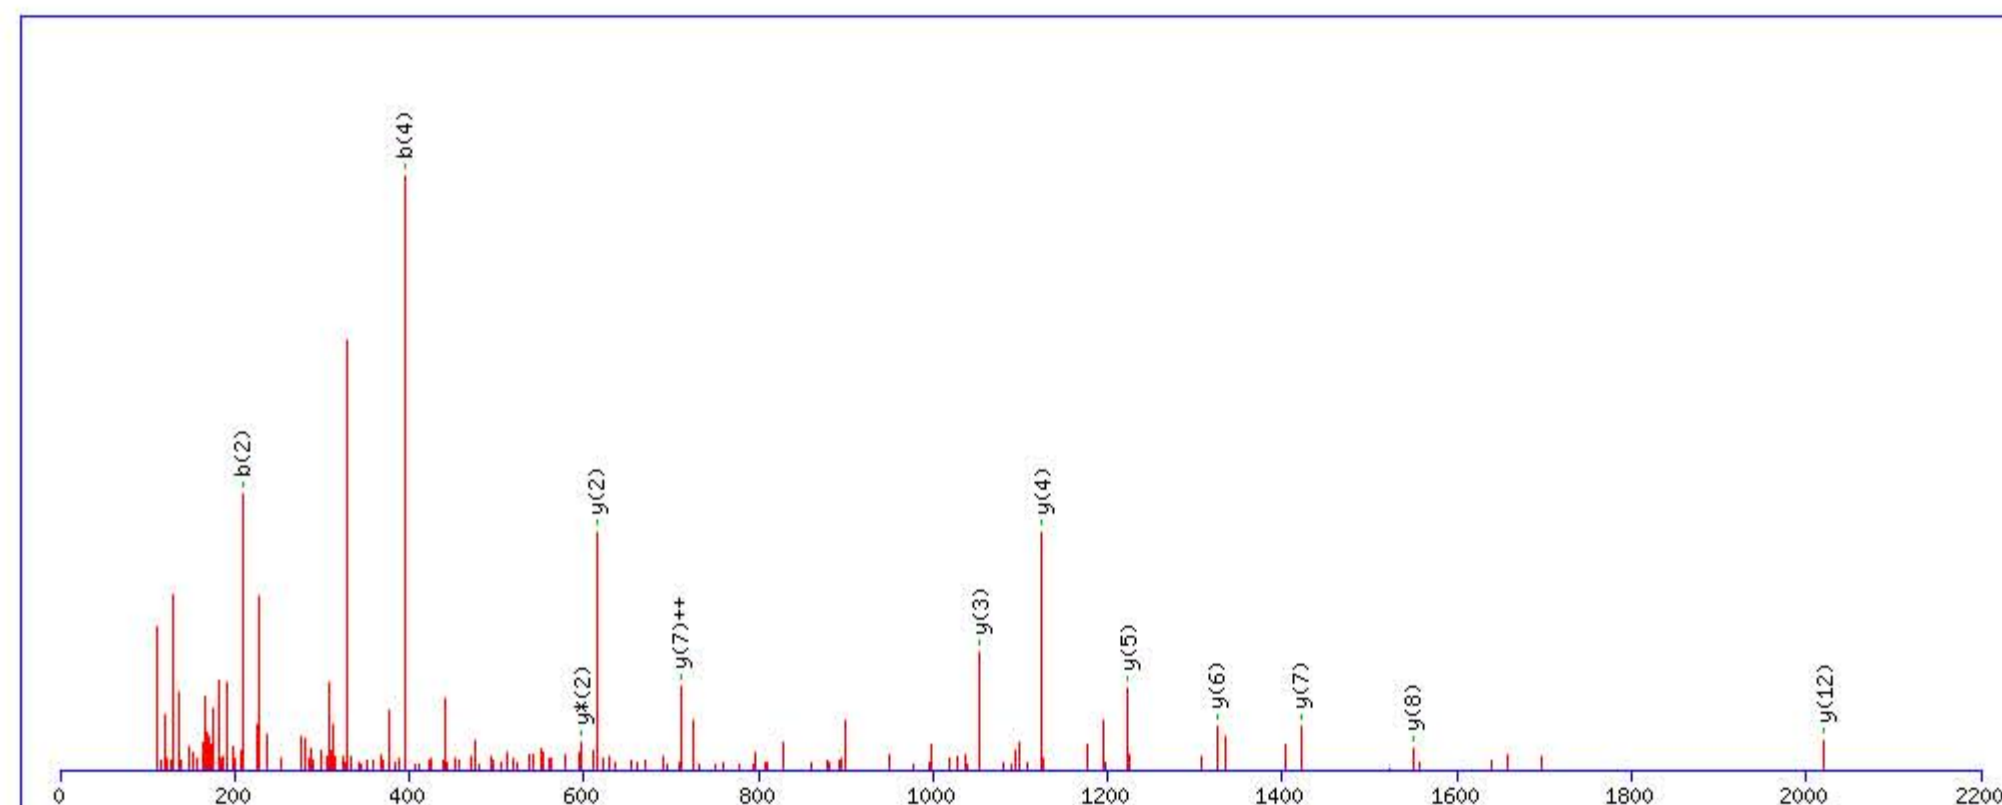

Monoisotopic mass of neutral peptide Mr(calc): 2090.128143

Fixed modifications: Carbamidomethyl (C) (apply to specified residues or termini only)

Variable modifications:

Q11 : Biotin:Thermo-21345 (Q)

Q12 : Biotin:Thermo-21345 (Q)

Ions Score: 53 Expect: 7.1e-005

Matches : 12/118 fragment ions using 17 most intense peaks [\(help\)](#)

| #  | b                 | b <sup>++</sup> | b <sup>*</sup> | b <sup>+++</sup> | b <sup>0</sup> | b <sup>0++</sup> | Seq. | y                  | y <sup>++</sup>   | y <sup>*</sup>    | y <sup>+++</sup> | y <sup>0</sup> | y <sup>0++</sup> | #  |
|----|-------------------|-----------------|----------------|------------------|----------------|------------------|------|--------------------|-------------------|-------------------|------------------|----------------|------------------|----|
| 1  | 72.044390         | 36.525833       |                |                  |                |                  | A    |                    |                   |                   |                  |                |                  | 13 |
| 2  | <b>209.103302</b> | 105.055289      |                |                  |                |                  | H    | <b>2020.098306</b> | 1010.552791       | 2003.071757       | 1002.039517      | 2002.087741    | 1001.547509      | 12 |
| 3  | 308.171716        | 154.589496      |                |                  |                |                  | V    | 1883.039394        | 942.023335        | 1866.012845       | 933.510061       | 1865.028829    | 933.018053       | 11 |
| 4  | <b>395.203744</b> | 198.105510      |                |                  | 377.193179     | 189.100227       | S    | 1783.970980        | 892.489128        | 1766.944431       | 883.975854       | 1765.960415    | 883.483846       | 10 |
| 5  | 542.272158        | 271.639717      |                |                  | 524.261593     | 262.634435       | F    | 1696.938952        | 848.973114        | 1679.912403       | 840.459840       | 1678.928387    | 839.967832       | 9  |
| 6  | 670.367121        | 335.687199      | 653.340572     | 327.173924       | 652.356556     | 326.681916       | K    | <b>1549.870538</b> | 775.438907        | 1532.843989       | 766.925633       | 1531.859973    | 766.433625       | 8  |
| 7  | 767.419885        | 384.213581      | 750.393336     | 375.700306       | 749.409320     | 375.208298       | P    | <b>1421.775575</b> | <b>711.391426</b> | 1404.749026       | 702.878151       | 1403.765010    | 702.386143       | 7  |
| 8  | 868.467564        | 434.737420      | 851.441015     | 426.224146       | 850.456999     | 425.732138       | T    | <b>1324.722811</b> | 662.865044        | 1307.696262       | 654.351769       | 1306.712246    | 653.859761       | 6  |
| 9  | 967.535978        | 484.271627      | 950.509429     | 475.758353       | 949.525413     | 475.266345       | V    | <b>1223.675132</b> | 612.341204        | 1206.648583       | 603.827930       |                |                  | 5  |
| 10 | 1038.573092       | 519.790184      | 1021.546543    | 511.276910       | 1020.562527    | 510.784902       | A    | <b>1124.606718</b> | 562.806997        | 1107.580169       | 554.293723       |                |                  | 4  |
| 11 | 1477.798418       | 739.402847      | 1460.771869    | 730.889573       | 1459.787853    | 730.397565       | Q    | <b>1053.569604</b> | 527.288440        | 1036.543055       | 518.775166       |                |                  | 3  |
| 12 | 1917.023744       | 959.015510      | 1899.997195    | 950.502236       | 1899.013179    | 950.010228       | Q    | <b>614.344278</b>  | 307.675777        | <b>597.317729</b> | 299.162503       |                |                  | 2  |
| 13 |                   |                 |                |                  |                |                  | R    | 175.118952         | 88.063114         | 158.092403        | 79.549839        |                |                  | 1  |

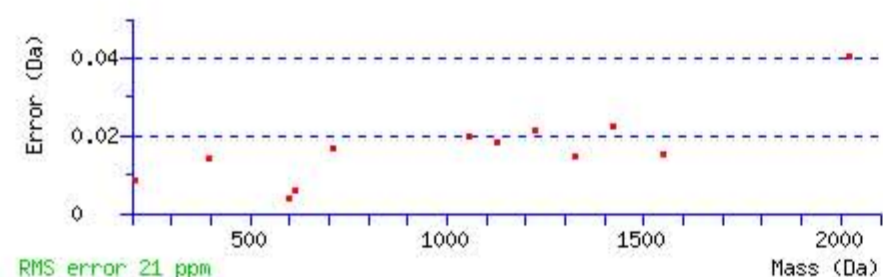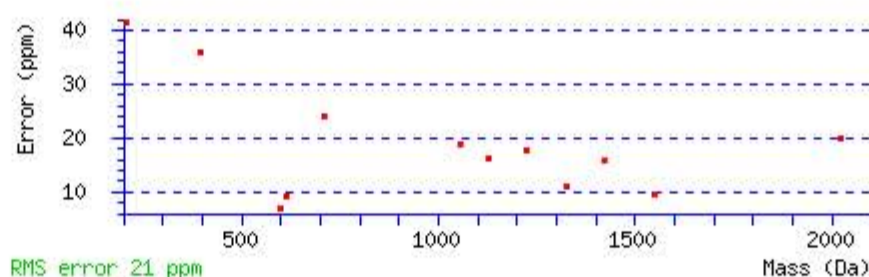

NCBI BLAST search of **AHVSFKPTVAQQR**

(Parameters: blastp, nr protein database, expect=20000, no filter, PAM30)

Other BLAST [web gateways](#)

All matches to this query

| Score | Mr(calc):   | Delta    | Sequence                      |
|-------|-------------|----------|-------------------------------|
| 52.9  | 2090.128143 | 0.025833 | <a href="#">AHVSFKPTVAQQR</a> |

Mascot: <http://www.matrixscience.com/>

# MASCOT Search Results

## Peptide View

MS/MS Fragmentation of **AEDHFSVIDFNQIR**

Found in **ITIH2\_HUMAN**, Inter-alpha-trypsin inhibitor heavy chain H2 OS=Homo sapiens GN=ITIH2 PE=1 SV=2

Match to Query 53416: 2115.044742 from(706.022190,3+) rtinseconds(2249) index(43982)

Title: Locus:1.1.1.3232.11 File:"2013-07-02 CLN FXIII 180 min 1st F 3.wiff"

Data file C:\Program Files (x86)\Matrix Science\Mascot Daemon\mgf\7 FXIII 180 min 1st\mascot\_daemon\_merge.mgf

Click mouse within plot area to zoom in by factor of two about that point

Or, Plot from  to  Da

Label all possible matches  Label matches used for scoring

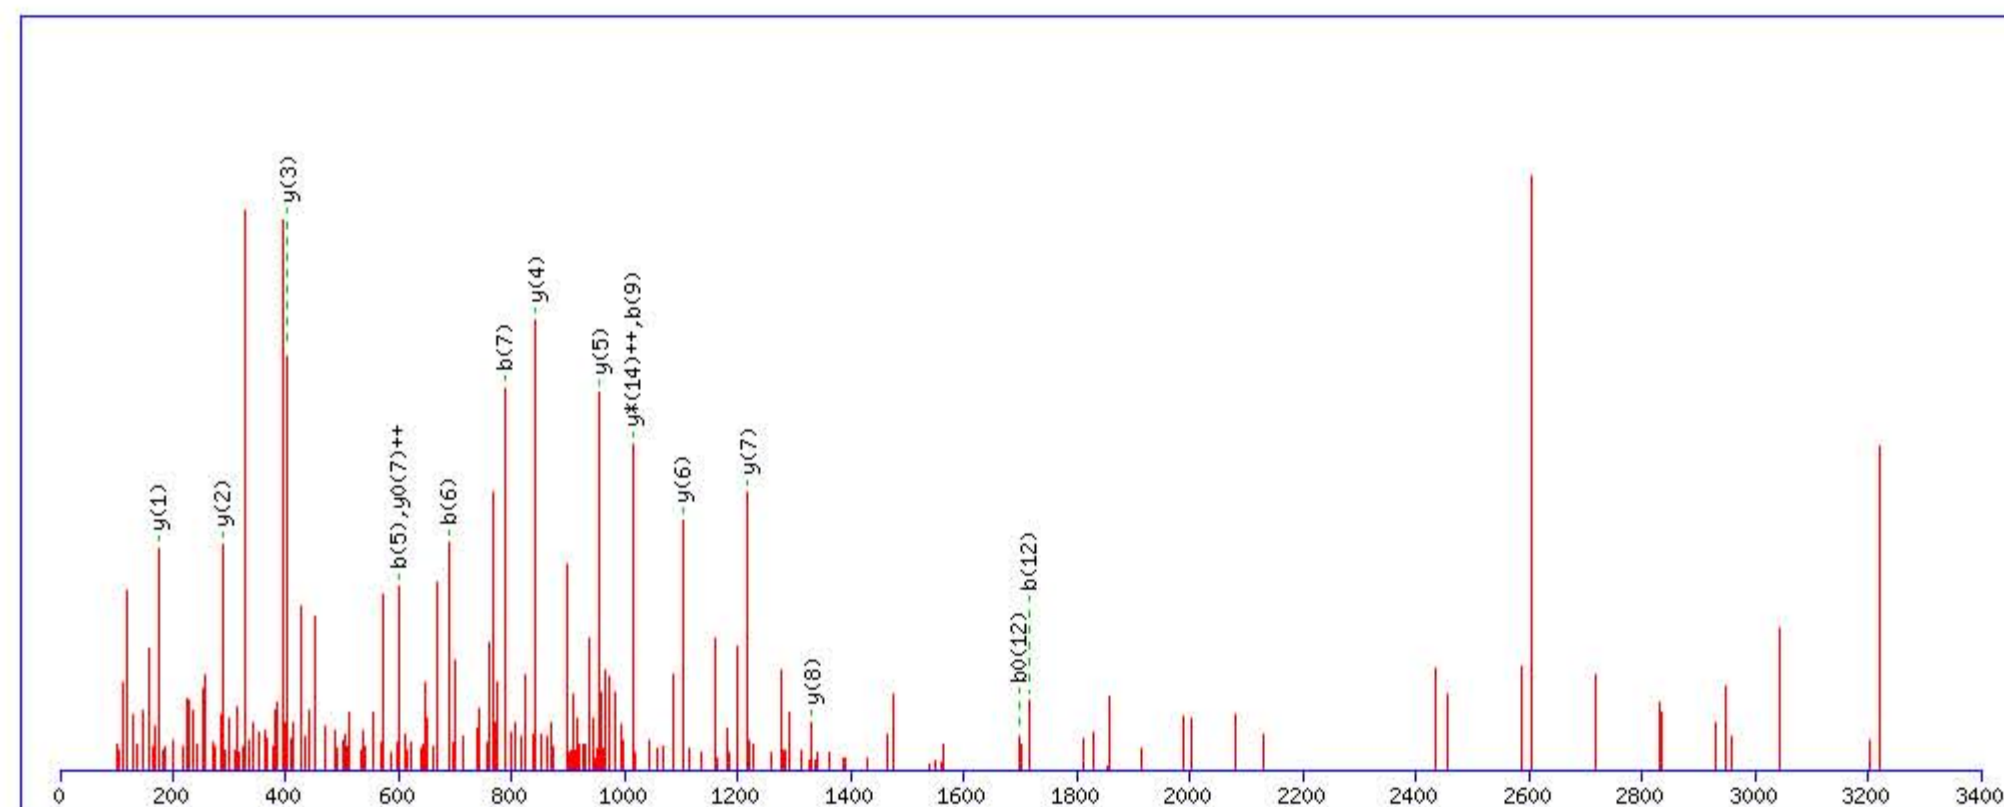

Monoisotopic mass of neutral peptide  $M_r(\text{calc})$ : 2115.020752

Fixed modifications: Carbamidomethyl (C) (apply to specified residues or termini only)

Variable modifications:

Q12 : Biotin:Thermo-21345 (Q)

Ions Score: 56 Expect: 8.2e-006

Matches : 16/134 fragment ions using 20 most intense peaks ([help](#))

| #  | b           | b <sup>++</sup> | b*          | b <sup>*++</sup> | b <sup>0</sup> | b <sup>0++</sup> | Seq. | y           | y <sup>++</sup> | y*          | y <sup>*++</sup> | y <sup>0</sup> | y <sup>0++</sup> | #  |
|----|-------------|-----------------|-------------|------------------|----------------|------------------|------|-------------|-----------------|-------------|------------------|----------------|------------------|----|
| 1  | 72.044390   | 36.525833       |             |                  |                |                  | A    |             |                 |             |                  |                |                  | 15 |
| 2  | 201.086983  | 101.047130      |             |                  | 183.076418     | 92.041847        | E    | 2044.990921 | 1022.999099     | 2027.964372 | 1014.485824      | 2026.980356    | 1013.993816      | 14 |
| 3  | 316.113926  | 158.560601      |             |                  | 298.103361     | 149.555319       | D    | 1915.948328 | 958.477802      | 1898.921779 | 949.964528       | 1897.937763    | 949.472519       | 13 |
| 4  | 453.172838  | 227.090057      |             |                  | 435.162273     | 218.084775       | H    | 1800.921385 | 900.964331      | 1783.894836 | 892.451056       | 1782.910820    | 891.959048       | 12 |
| 5  | 600.241252  | 300.624264      |             |                  | 582.230687     | 291.618982       | F    | 1663.862473 | 832.434874      | 1646.835924 | 823.921600       | 1645.851908    | 823.429592       | 11 |
| 6  | 687.273280  | 344.140278      |             |                  | 669.262715     | 335.134996       | S    | 1516.794059 | 758.900668      | 1499.767510 | 750.387393       | 1498.783494    | 749.895385       | 10 |
| 7  | 786.341694  | 393.674485      |             |                  | 768.331129     | 384.669202       | V    | 1429.762031 | 715.384654      | 1412.735482 | 706.871379       | 1411.751466    | 706.379371       | 9  |
| 8  | 899.425758  | 450.216517      |             |                  | 881.415193     | 441.211234       | I    | 1330.693617 | 665.850447      | 1313.667068 | 657.337172       | 1312.683052    | 656.845164       | 8  |
| 9  | 1014.452701 | 507.729988      |             |                  | 996.442136     | 498.724706       | D    | 1217.609553 | 609.308415      | 1200.583004 | 600.795140       | 1199.598988    | 600.303132       | 7  |
| 10 | 1161.521115 | 581.264196      |             |                  | 1143.510550    | 572.258913       | F    | 1102.582610 | 551.794943      | 1085.556061 | 543.281669       |                |                  | 6  |
| 11 | 1275.564042 | 638.285659      | 1258.537493 | 629.772385       | 1257.553477    | 629.280376       | N    | 955.514196  | 478.260736      | 938.487647  | 469.747462       |                |                  | 5  |
| 12 | 1714.789368 | 857.898322      | 1697.762819 | 849.385048       | 1696.778803    | 848.893039       | Q    | 841.471269  | 421.239273      | 824.444720  | 412.725998       |                |                  | 4  |
| 13 | 1828.832295 | 914.919785      | 1811.805746 | 906.406511       | 1810.821730    | 905.914503       | N    | 402.245943  | 201.626610      | 385.219394  | 193.113335       |                |                  | 3  |
| 14 | 1941.916359 | 971.461817      | 1924.889810 | 962.948543       | 1923.905794    | 962.456535       | I    | 288.203016  | 144.605146      | 271.176467  | 136.091872       |                |                  | 2  |
| 15 |             |                 |             |                  |                |                  | R    | 175.118952  | 88.063114       | 158.092403  | 79.549840        |                |                  | 1  |

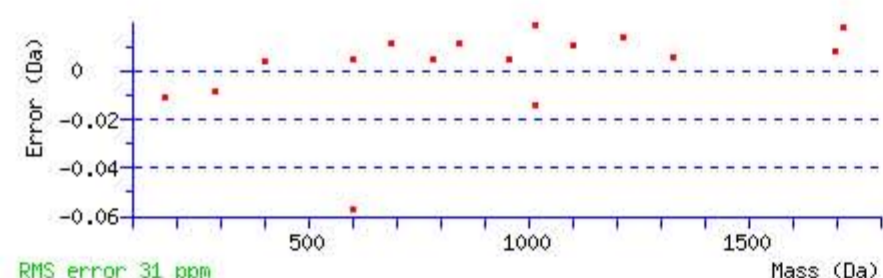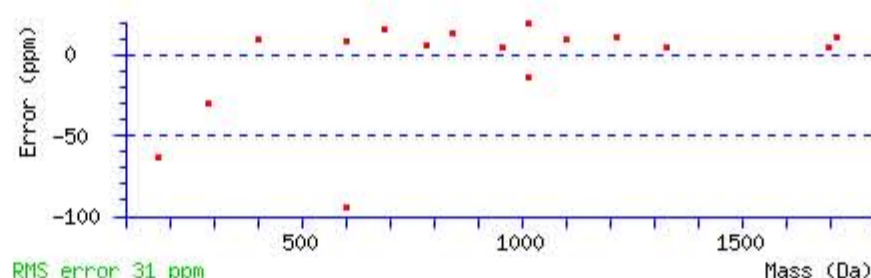

NCBI BLAST search of **AEDHFSVIDFNQIR**

(Parameters: blastp, nr protein database, expect=20000, no filter, PAM30)

Other BLAST [web gateways](#)

All matches to this query

| Score | $M_r(\text{calc})$ : | Delta     | Sequence                         |
|-------|----------------------|-----------|----------------------------------|
| 56.1  | 2115.020752          | 0.023990  | <a href="#">AEDHFSVIDFNQIR</a>   |
| 1.8   | 2115.033981          | 0.010761  | <a href="#">ESADRQVLMQEEIHK</a>  |
| 0.4   | 2115.067032          | -0.022290 | <a href="#">DFEVDLLEIGGSQNLK</a> |

Mascot: <http://www.matrixscience.com/>

# MASCOT Search Results

## Peptide View

MS/MS Fragmentation of **NVQFNYPHTSVIDVTQNNFHNYFGGSEIVVAGK**  
Found in **ITIH2\_HUMAN**, Inter-alpha-trypsin inhibitor heavy chain H2 OS=Homo sapiens GN=ITIH2 PE=1 SV=2

Match to Query 81125: 3993.963616 from(999.498180,4+) rtinseconds(2350) index(81242)  
Title: Locus:1.1.1.2168.22 File:"2013-07-02 CLN FXIII 180 min 1st FT.wiff"  
Data file C:\Program Files (x86)\Matrix Science\Mascot Daemon\mgf\7 FXIII 180 min 1st\mascot\_daemon\_merge.mgf

Click mouse within plot area to zoom in by factor of two about that point

Or, Plot from  to  Da

Label all possible matches  Label matches used for scoring

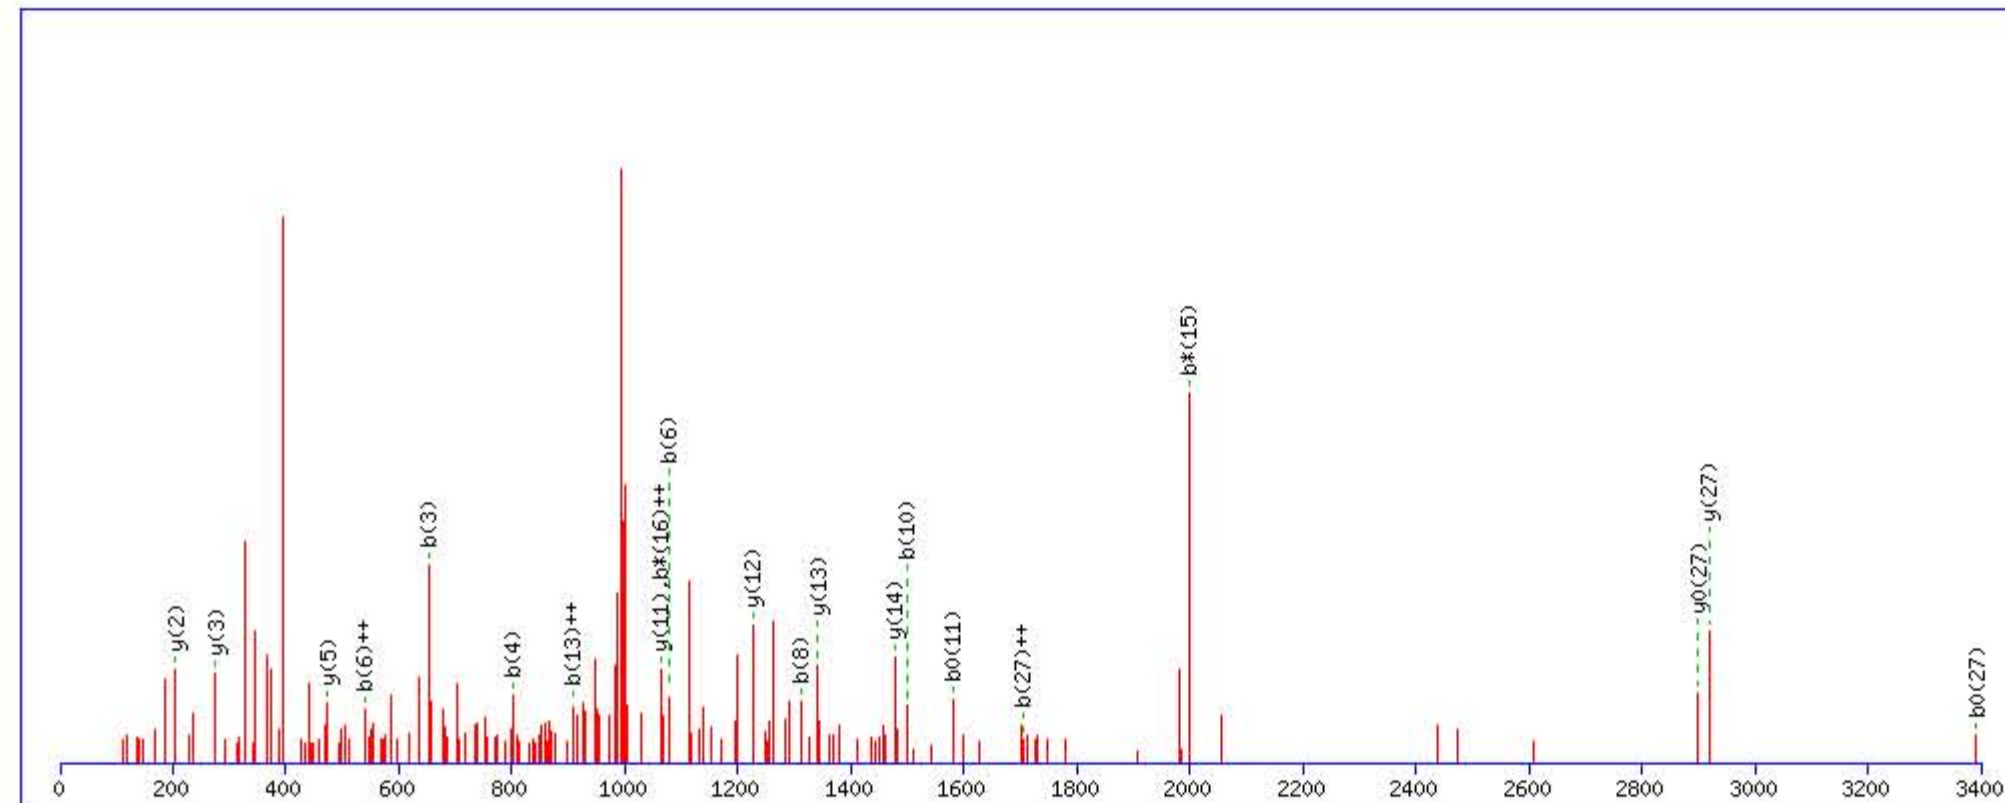

Monoisotopic mass of neutral peptide Mr(calc): 3993.910858  
Fixed modifications: Carbamidomethyl (C) (apply to specified residues or termini only)  
Variable modifications:  
Q3 : Biotin:Thermo-21345 (Q)  
Ions Score: 26 Expect: 0.061  
Matches : 21/356 fragment ions using 44 most intense peaks [\(help\)](#)

| #  | b                  | b <sup>++</sup>    | b*                 | b <sup>+++</sup>   | b <sup>0</sup>     | b <sup>0++</sup> | Seq. | y                  | y <sup>++</sup> | y*          | y <sup>+++</sup> | y <sup>0</sup>     | y <sup>0++</sup> | #  |
|----|--------------------|--------------------|--------------------|--------------------|--------------------|------------------|------|--------------------|-----------------|-------------|------------------|--------------------|------------------|----|
| 1  | 115.050203         | 58.028740          | 98.023654          | 49.515465          |                    |                  | N    |                    |                 |             |                  |                    |                  | 33 |
| 2  | 214.118617         | 107.562947         | 197.092068         | 99.049672          |                    |                  | V    | 3880.875173        | 1940.941224     | 3863.848624 | 1932.427950      | 3862.864608        | 1931.935942      | 32 |
| 3  | <b>653.343943</b>  | 327.175610         | 636.317394         | 318.662335         |                    |                  | Q    | 3781.806759        | 1891.407017     | 3764.780210 | 1882.893743      | 3763.796194        | 1882.401735      | 31 |
| 4  | <b>800.412357</b>  | 400.709817         | 783.385808         | 392.196542         |                    |                  | F    | 3342.581433        | 1671.794354     | 3325.554884 | 1663.281080      | 3324.570868        | 1662.789072      | 30 |
| 5  | 914.455284         | 457.731280         | 897.428735         | 449.218006         |                    |                  | N    | 3195.513019        | 1598.260147     | 3178.486470 | 1589.746873      | 3177.502454        | 1589.254865      | 29 |
| 6  | <b>1077.518613</b> | <b>539.262945</b>  | 1060.492064        | 530.749670         |                    |                  | Y    | 3081.470092        | 1541.238684     | 3064.443543 | 1532.725409      | 3063.459527        | 1532.233401      | 28 |
| 7  | 1174.571377        | 587.789327         | 1157.544828        | 579.276052         |                    |                  | P    | <b>2918.406763</b> | 1459.707019     | 2901.380214 | 1451.193745      | <b>2900.396198</b> | 1450.701737      | 27 |
| 8  | <b>1311.630289</b> | 656.318783         | 1294.603740        | 647.805508         |                    |                  | H    | 2821.353999        | 1411.180637     | 2804.327450 | 1402.667363      | 2803.343434        | 1402.175355      | 26 |
| 9  | 1412.677968        | 706.842622         | 1395.651419        | 698.329348         | 1394.667403        | 697.837339       | T    | 2684.295087        | 1342.651181     | 2667.268538 | 1334.137907      | 2666.284522        | 1333.645899      | 25 |
| 10 | <b>1499.709996</b> | 750.358636         | 1482.683447        | 741.845362         | 1481.699431        | 741.353354       | S    | 2583.247408        | 1292.127342     | 2566.220859 | 1283.614067      | 2565.236843        | 1283.122059      | 24 |
| 11 | 1598.778410        | 799.892843         | 1581.751861        | 791.379569         | <b>1580.767845</b> | 790.887561       | V    | 2496.215380        | 1248.611328     | 2479.188831 | 1240.098053      | 2478.204815        | 1239.606045      | 23 |
| 12 | 1699.826089        | 850.416683         | 1682.799540        | 841.903408         | 1681.815524        | 841.411400       | T    | 2397.146966        | 1199.077121     | 2380.120417 | 1190.563846      | 2379.136401        | 1190.071838      | 22 |
| 13 | 1814.853032        | <b>907.930154</b>  | 1797.826483        | 899.416880         | 1796.842467        | 898.924872       | D    | 2296.099287        | 1148.553281     | 2279.072738 | 1140.040007      | 2278.088722        | 1139.547999      | 21 |
| 14 | 1913.921446        | 957.464361         | 1896.894897        | 948.951087         | 1895.910881        | 948.459079       | V    | 2181.072344        | 1091.039810     | 2164.045795 | 1082.526535      | 2163.061779        | 1082.034527      | 20 |
| 15 | 2014.969125        | 1007.988201        | <b>1997.942576</b> | 999.474926         | 1996.958560        | 998.982918       | T    | 2082.003930        | 1041.505603     | 2064.977381 | 1032.992328      | 2063.993365        | 1032.500320      | 19 |
| 16 | 2143.027703        | 1072.017490        | 2126.001154        | <b>1063.504215</b> | 2125.017138        | 1063.012207      | Q    | 1980.956251        | 990.981763      | 1963.929702 | 982.468489       | 1962.945686        | 981.976481       | 18 |
| 17 | 2257.070630        | 1129.038953        | 2240.044081        | 1120.525678        | 2239.060065        | 1120.033671      | N    | 1852.897673        | 926.952474      | 1835.871124 | 918.439200       | 1834.887108        | 917.947192       | 17 |
| 18 | 2371.113557        | 1186.060417        | 2354.087008        | 1177.547142        | 2353.102992        | 1177.055134      | N    | 1738.854746        | 869.931011      | 1721.828197 | 861.417736       | 1720.844181        | 860.925728       | 16 |
| 19 | 2518.181971        | 1259.594623        | 2501.155422        | 1251.081349        | 2500.171406        | 1250.589341      | F    | 1624.811819        | 812.909547      | 1607.785270 | 804.396273       | 1606.801254        | 803.904265       | 15 |
| 20 | 2655.240883        | 1328.124079        | 2638.214334        | 1319.610805        | 2637.230318        | 1319.118797      | H    | <b>1477.743405</b> | 739.375340      | 1460.716856 | 730.862066       | 1459.732840        | 730.370058       | 14 |
| 21 | 2769.283810        | 1385.145543        | 2752.257261        | 1376.632268        | 2751.273245        | 1376.140260      | N    | <b>1340.684493</b> | 670.845885      | 1323.657944 | 662.332610       | 1322.673928        | 661.840602       | 13 |
| 22 | 2932.347139        | 1466.677207        | 2915.320590        | 1458.163933        | 2914.336574        | 1457.671925      | Y    | <b>1226.641566</b> | 613.824421      | 1209.615017 | 605.311147       | 1208.631001        | 604.819139       | 12 |
| 23 | 3079.415553        | 1540.211414        | 3062.389004        | 1531.698140        | 3061.404988        | 1531.206132      | F    | <b>1063.578237</b> | 532.292757      | 1046.551688 | 523.779482       | 1045.567672        | 523.287474       | 11 |
| 24 | 3136.437017        | 1568.722146        | 3119.410468        | 1560.208872        | 3118.426452        | 1559.716864      | G    | 916.509823         | 458.758550      | 899.483274  | 450.245275       | 898.499258         | 449.753267       | 10 |
| 25 | 3193.458481        | 1597.232878        | 3176.431932        | 1588.719604        | 3175.447916        | 1588.227596      | G    | 859.488359         | 430.247818      | 842.461810  | 421.734543       | 841.477794         | 421.242535       | 9  |
| 26 | 3280.490509        | 1640.748892        | 3263.463960        | 1632.235618        | 3262.479944        | 1631.743610      | S    | 802.466895         | 401.737086      | 785.440346  | 393.223811       | 784.456330         | 392.731803       | 8  |
| 27 | 3409.533102        | <b>1705.270189</b> | 3392.506553        | 1696.756914        | <b>3391.522537</b> | 1696.264906      | E    | 715.434867         | 358.221072      | 698.408318  | 349.707797       | 697.424302         | 349.215789       | 7  |
| 28 | 3522.617166        | 1761.812221        | 3505.590617        | 1753.298946        | 3504.606601        | 1752.806938      | I    | 586.392274         | 293.699775      | 569.365725  | 285.186501       |                    |                  | 6  |
| 29 | 3621.685580        | 1811.346428        | 3604.659031        | 1802.833153        | 3603.675015        | 1802.341145      | V    | <b>473.308210</b>  | 237.157743      | 456.281661  | 228.644468       |                    |                  | 5  |
| 30 | 3720.753994        | 1860.880635        | 3703.727445        | 1852.367360        | 3702.743429        | 1851.875352      | V    | 374.239796         | 187.623536      | 357.213247  | 179.110261       |                    |                  | 4  |
| 31 | 3791.791108        | 1896.399192        | 3774.764559        | 1887.885917        | 3773.780543        | 1887.393909      | A    | <b>275.171382</b>  | 138.089329      | 258.144833  | 129.576055       |                    |                  | 3  |
| 32 | 3848.812572        | 1924.909924        | 3831.786023        | 1916.396649        | 3830.802007        | 1915.904641      | G    | <b>204.134268</b>  | 102.570772      | 187.107719  | 94.057497        |                    |                  | 2  |
| 33 |                    |                    |                    |                    |                    |                  | K    | 147.112804         | 74.060040       | 130.086255  | 65.546765        |                    |                  | 1  |

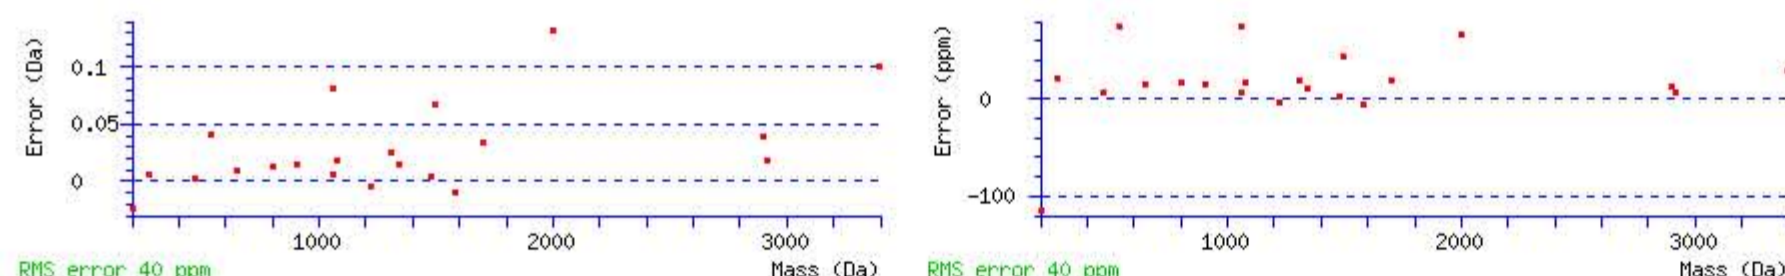

NCBI BLAST search of **NVQFNYPHTSVIDVTQNNFHNYFGGSEIVVAGK**  
(Parameters: blastp, nr protein database, expect=20000, no filter, PAM30)  
Other BLAST [web gateways](#)

## All matches to this query

| Score | Mr(calc):   | Delta    | Sequence                                          |
|-------|-------------|----------|---------------------------------------------------|
| 25.9  | 3993.910858 | 0.052758 | <a href="#">NVQFNYPHTSVIDVTQNNFHNYFGGSEIVVAGK</a> |
| 2.5   | 3993.910858 | 0.052758 | <a href="#">NVQFNYPHTSVIDVTQNNFHNYFGGSEIVVAGK</a> |

# MASCOT SEARCH RESULTS

## Peptide View

MS/MS Fragmentation of **GHVSFKPSLDQQR**

Found in **ITIH3\_HUMAN**, Inter-alpha-trypsin inhibitor heavy chain H3 OS=Homo sapiens GN=ITIH3 PE=1 SV=2

Match to Query 45521: 1808.956212 from(603.992680,3+) rtinseconds(1588) index(57930)

Title: Locus:1.1.1.2976.16 File:"2013-07-02 CLN FXIII 180 min 1st F 4.wiff"

Data file C:\Program Files (x86)\Matrix Science\Mascot Daemon\mgf\7 FXIII 180 min 1st\mascot\_daemon\_merge.mgf

Click mouse within plot area to zoom in by factor of two about that point

Or, Plot from  to  Da

Label all possible matches  Label matches used for scoring

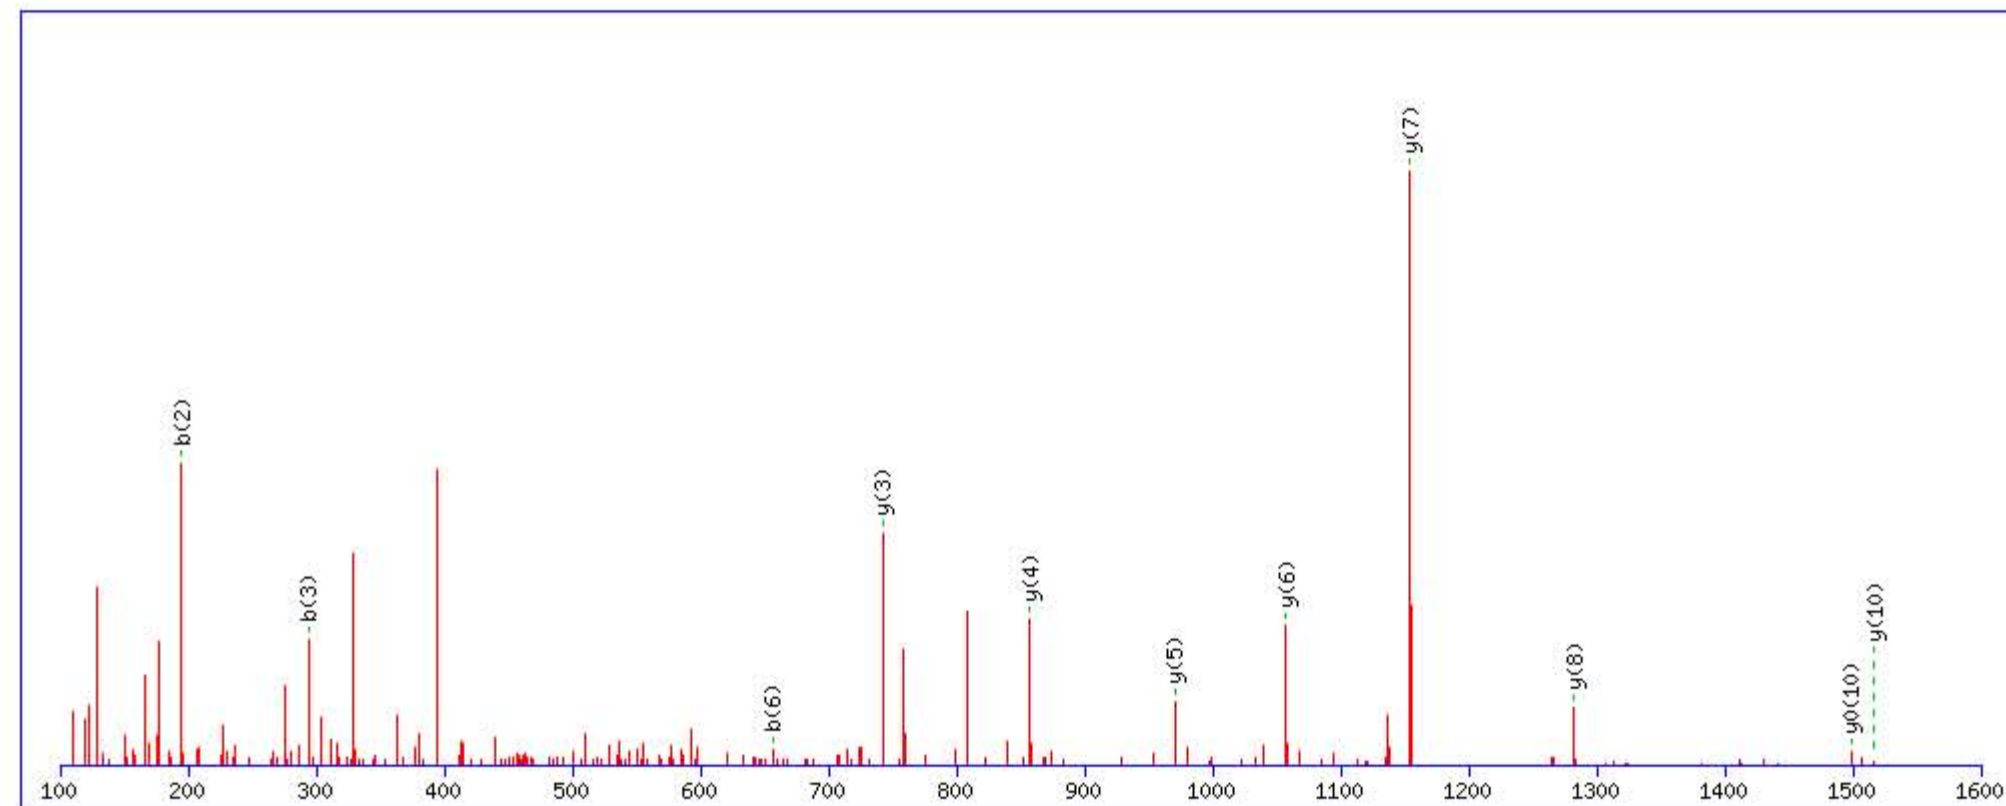

Monoisotopic mass of neutral peptide Mr(calc): 1808.935577

Fixed modifications: Carbamidomethyl (C) (apply to specified residues or termini only)

Variable modifications:

Q12 : Biotin:Thermo-21345 (Q)

Ions Score: 50 Expect: 2.3e-005

Matches : 11/122 fragment ions using 15 most intense peaks [\(help\)](#)

| #  | b                 | b <sup>++</sup> | b <sup>+</sup> | b <sup>+++</sup> | b <sup>0</sup> | b <sup>0++</sup> | Seq. | y                  | y <sup>++</sup> | y <sup>+</sup> | y <sup>+++</sup> | y <sup>0</sup>     | y <sup>0++</sup> | #  |
|----|-------------------|-----------------|----------------|------------------|----------------|------------------|------|--------------------|-----------------|----------------|------------------|--------------------|------------------|----|
| 1  | 58.028740         | 29.518008       |                |                  |                |                  | G    |                    |                 |                |                  |                    |                  | 13 |
| 2  | <b>195.087652</b> | 98.047464       |                |                  |                |                  | H    | 1752.921386        | 876.964331      | 1735.894837    | 868.451057       | 1734.910821        | 867.959049       | 12 |
| 3  | <b>294.156066</b> | 147.581671      |                |                  |                |                  | V    | 1615.862474        | 808.434875      | 1598.835925    | 799.921601       | 1597.851909        | 799.429593       | 11 |
| 4  | 381.188094        | 191.097685      |                |                  | 363.177529     | 182.092403       | S    | <b>1516.794060</b> | 758.900668      | 1499.767511    | 750.387394       | <b>1498.783495</b> | 749.895386       | 10 |
| 5  | 528.256508        | 264.631892      |                |                  | 510.245943     | 255.626610       | F    | 1429.762032        | 715.384654      | 1412.735483    | 706.871380       | 1411.751467        | 706.379372       | 9  |
| 6  | <b>656.351471</b> | 328.679374      | 639.324922     | 320.166099       | 638.340906     | 319.674091       | K    | <b>1282.693618</b> | 641.850447      | 1265.667069    | 633.337173       | 1264.683053        | 632.845165       | 8  |
| 7  | 753.404235        | 377.205756      | 736.377686     | 368.692481       | 735.393670     | 368.200473       | P    | <b>1154.598655</b> | 577.802966      | 1137.572106    | 569.289691       | 1136.588090        | 568.797683       | 7  |
| 8  | 840.436263        | 420.721770      | 823.409714     | 412.208495       | 822.425698     | 411.716487       | S    | <b>1057.545891</b> | 529.276584      | 1040.519342    | 520.763309       | 1039.535326        | 520.271301       | 6  |
| 9  | 953.520327        | 477.263802      | 936.493778     | 468.750527       | 935.509762     | 468.258519       | L    | <b>970.513863</b>  | 485.760570      | 953.487314     | 477.247295       | 952.503298         | 476.755287       | 5  |
| 10 | 1068.547270       | 534.777273      | 1051.520721    | 526.263999       | 1050.536705    | 525.771991       | D    | <b>857.429799</b>  | 429.218538      | 840.403250     | 420.705263       | 839.419234         | 420.213255       | 4  |
| 11 | 1196.605848       | 598.806562      | 1179.579299    | 590.293288       | 1178.595283    | 589.801279       | Q    | <b>742.402856</b>  | 371.705066      | 725.376307     | 363.191792       |                    |                  | 3  |
| 12 | 1635.831174       | 818.419225      | 1618.804625    | 809.905951       | 1617.820609    | 809.413943       | Q    | 614.344278         | 307.675777      | 597.317729     | 299.162503       |                    |                  | 2  |
| 13 |                   |                 |                |                  |                |                  | R    | 175.118952         | 88.063114       | 158.092403     | 79.549839        |                    |                  | 1  |

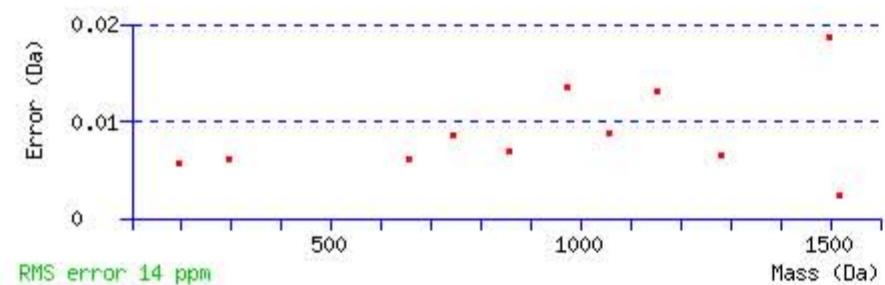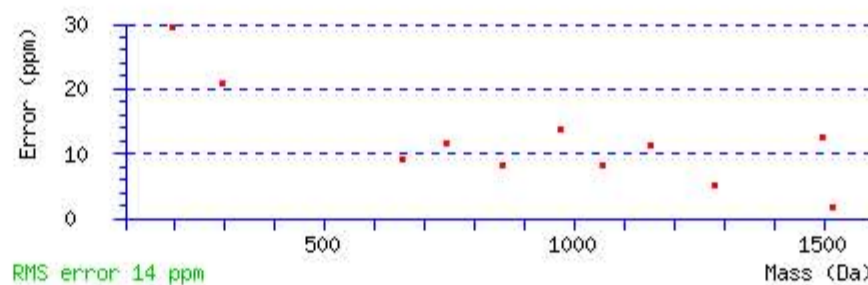

NCBI BLAST search of **GHVSFKPSLDQQR**

(Parameters: blastp, nr protein database, expect=20000, no filter, PAM30)

Other BLAST [web gateways](#)

All matches to this query

| Score | Mr(calc):   | Delta    | Sequence                      |
|-------|-------------|----------|-------------------------------|
| 49.8  | 1808.935577 | 0.020635 | <a href="#">GHVSFKPSLDQQR</a> |
| 49.8  | 1808.935577 | 0.020635 | <a href="#">GHVSFKPSLDQQR</a> |
| 0.3   | 1808.946793 | 0.009419 | <a href="#">IFRQNSDLVNRH</a>  |



# MASCOT Search Results

## Peptide View

MS/MS Fragmentation of **KGHVSFKPSLDQQR**

Found in **ITIH3\_HUMAN**, Inter-alpha-trypsin inhibitor heavy chain H3 OS=Homo sapiens GN=ITIH3 PE=1 SV=2

Match to Query 48421: 1937.052496 from(485.270400,4+) rtinseconds(1475) index(57083)

Title: Locus:1.1.1.2937.5 File:"2013-07-02 CLN FXIII 180 min 1st F 4.wiff"

Data file C:\Program Files (x86)\Matrix Science\Mascot Daemon\mgf\7 FXIII 180 min 1st\mascot\_daemon\_merge.mgf

Click mouse within plot area to zoom in by factor of two about that point

Or, Plot from  to  Da

Label all possible matches  Label matches used for scoring

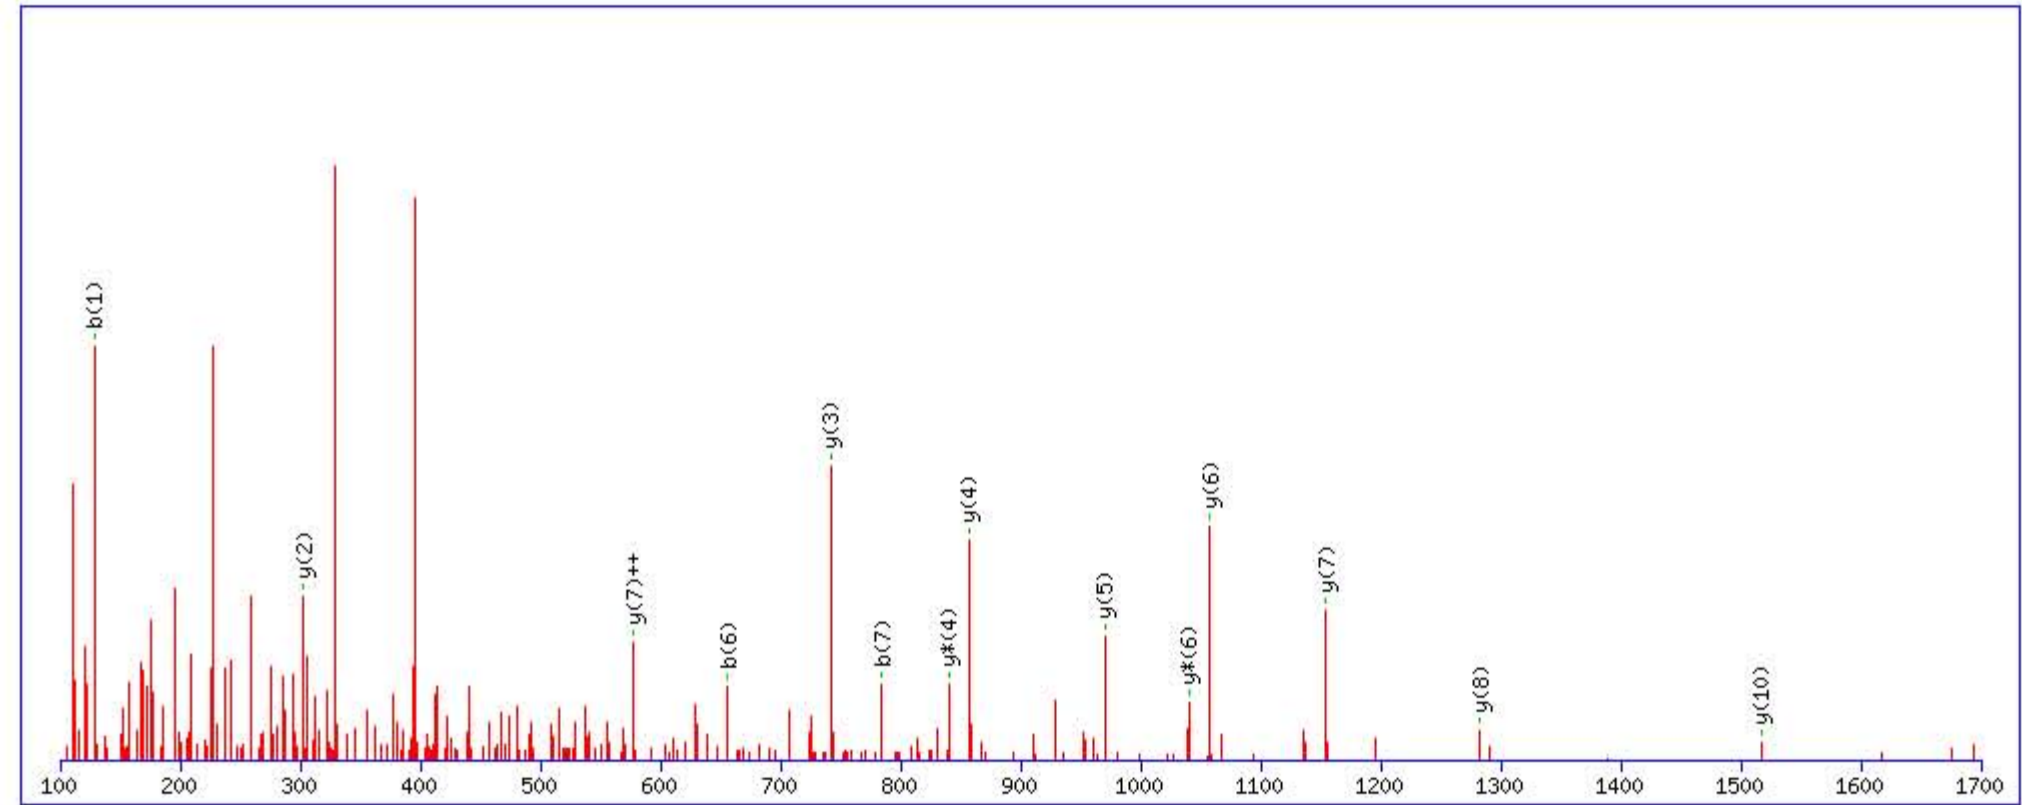

Monoisotopic mass of neutral peptide Mr(calc): 1937.030533

Fixed modifications: Carbamidomethyl (C) (apply to specified residues or termini only)

Variable modifications:

Q12 : Biotin:Thermo-21345 (Q)

Ions Score: 37 Expect: 0.00047

Matches : 14/142 fragment ions using 28 most intense peaks [\(help\)](#)

| #  | b                 | b <sup>++</sup> | b <sup>*</sup> | b <sup>*++</sup> | b <sup>0</sup> | b <sup>0++</sup> | Seq.     | y                  | y <sup>++</sup>   | y <sup>*</sup>     | y <sup>*++</sup> | y <sup>0</sup> | y <sup>0++</sup> | #         |
|----|-------------------|-----------------|----------------|------------------|----------------|------------------|----------|--------------------|-------------------|--------------------|------------------|----------------|------------------|-----------|
| 1  | <b>129.102239</b> | 65.054757       | 112.075690     | 56.541483        |                |                  | <b>K</b> |                    |                   |                    |                  |                |                  | <b>14</b> |
| 2  | 186.123703        | 93.565489       | 169.097154     | 85.052215        |                |                  | <b>G</b> | 1809.942850        | 905.475063        | 1792.916301        | 896.961789       | 1791.932285    | 896.469781       | <b>13</b> |
| 3  | 323.182615        | 162.094945      | 306.156066     | 153.581671       |                |                  | <b>H</b> | 1752.921386        | 876.964331        | 1735.894837        | 868.451057       | 1734.910821    | 867.959049       | <b>12</b> |
| 4  | 422.251029        | 211.629153      | 405.224480     | 203.115878       |                |                  | <b>V</b> | 1615.862474        | 808.434875        | 1598.835925        | 799.921601       | 1597.851909    | 799.429593       | <b>11</b> |
| 5  | 509.283057        | 255.145167      | 492.256508     | 246.631892       | 491.272492     | 246.139884       | <b>S</b> | <b>1516.794060</b> | 758.900668        | 1499.767511        | 750.387394       | 1498.783495    | 749.895386       | <b>10</b> |
| 6  | <b>656.351471</b> | 328.679374      | 639.324922     | 320.166099       | 638.340906     | 319.674091       | <b>F</b> | 1429.762032        | 715.384654        | 1412.735483        | 706.871380       | 1411.751467    | 706.379372       | <b>9</b>  |
| 7  | <b>784.446434</b> | 392.726855      | 767.419885     | 384.213581       | 766.435869     | 383.721573       | <b>K</b> | <b>1282.693618</b> | 641.850447        | 1265.667069        | 633.337173       | 1264.683053    | 632.845165       | <b>8</b>  |
| 8  | 881.499198        | 441.253237      | 864.472649     | 432.739963       | 863.488633     | 432.247955       | <b>P</b> | <b>1154.598655</b> | <b>577.802966</b> | 1137.572106        | 569.289691       | 1136.588090    | 568.797683       | <b>7</b>  |
| 9  | 968.531226        | 484.769251      | 951.504677     | 476.255977       | 950.520661     | 475.763969       | <b>S</b> | <b>1057.545891</b> | 529.276584        | <b>1040.519342</b> | 520.763309       | 1039.535326    | 520.271301       | <b>6</b>  |
| 10 | 1081.615290       | 541.311283      | 1064.588741    | 532.798009       | 1063.604725    | 532.306000       | <b>L</b> | <b>970.513863</b>  | 485.760570        | 953.487314         | 477.247295       | 952.503298     | 476.755287       | <b>5</b>  |
| 11 | 1196.642233       | 598.824755      | 1179.615684    | 590.311480       | 1178.631668    | 589.819472       | <b>D</b> | <b>857.429799</b>  | 429.218538        | <b>840.403250</b>  | 420.705263       | 839.419234     | 420.213255       | <b>4</b>  |
| 12 | 1635.867559       | 818.437418      | 1618.841010    | 809.924143       | 1617.856994    | 809.432135       | <b>Q</b> | <b>742.402856</b>  | 371.705066        | 725.376307         | 363.191792       |                |                  | <b>3</b>  |
| 13 | 1763.926137       | 882.466707      | 1746.899588    | 873.953432       | 1745.915572    | 873.461424       | <b>Q</b> | <b>303.177530</b>  | 152.092403        | 286.150981         | 143.579129       |                |                  | <b>2</b>  |
| 14 |                   |                 |                |                  |                |                  | <b>R</b> | 175.118952         | 88.063114         | 158.092403         | 79.549839        |                |                  | <b>1</b>  |

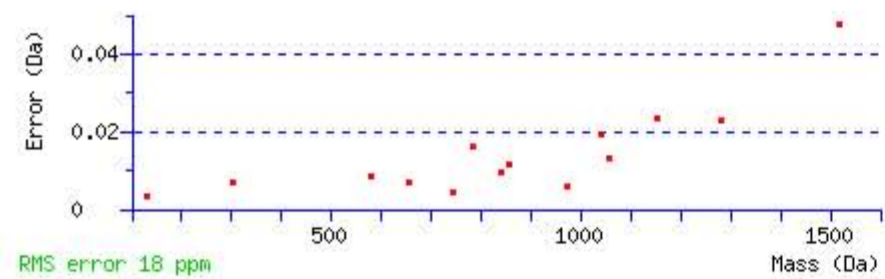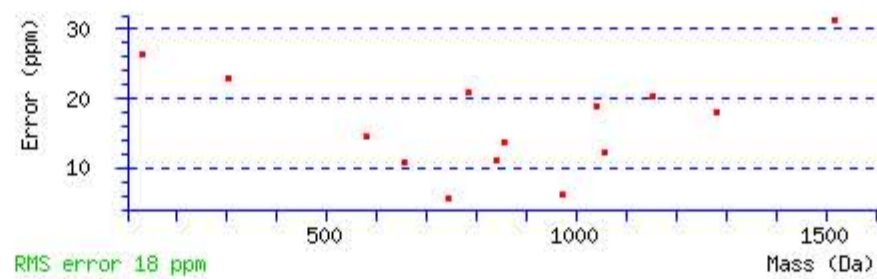

NCBI BLAST search of **KGHVSFKPSLDQQR**

(Parameters: blastp, nr protein database, expect=20000, no filter, PAM30)

Other BLAST [web gateways](#)

All matches to this query

| Score | Mr(calc):   | Delta     | Sequence                          |
|-------|-------------|-----------|-----------------------------------|
| 37.3  | 1937.030533 | 0.021963  | <a href="#">KGHVSFKPSLDQQR</a>    |
| 28.8  | 1937.030533 | 0.021963  | <a href="#">KGHVSFKPSLDQQR</a>    |
| 1.7   | 1937.062180 | -0.009684 | <a href="#">LLDAKSLGLKVFEDYAR</a> |

Mascot: <http://www.matrixscience.com/>

# MASCOT Search Results

## Peptide View

MS/MS Fragmentation of **GHVSFKPSLDQQR**

Found in **ITIH3\_HUMAN**, Inter-alpha-trypsin inhibitor heavy chain H3 OS=Homo sapiens GN=ITIH3 PE=1 SV=2

Match to Query 53497: 2120.129616 from(531.039680,4+) rtinseconds(1869) index(59758)

Title: Locus:1.1.1.3074.12 File:"2013-07-02 CLN FXIII 180 min 1st F 4.wiff"

Data file C:\Program Files (x86)\Matrix Science\Mascot Daemon\mgf7 FXIII 180 min 1st\mascot\_daemon\_merge.mgf

Click mouse within plot area to zoom in by factor of two about that point

Or, Plot from  to  Da

Label all possible matches  Label matches used for scoring

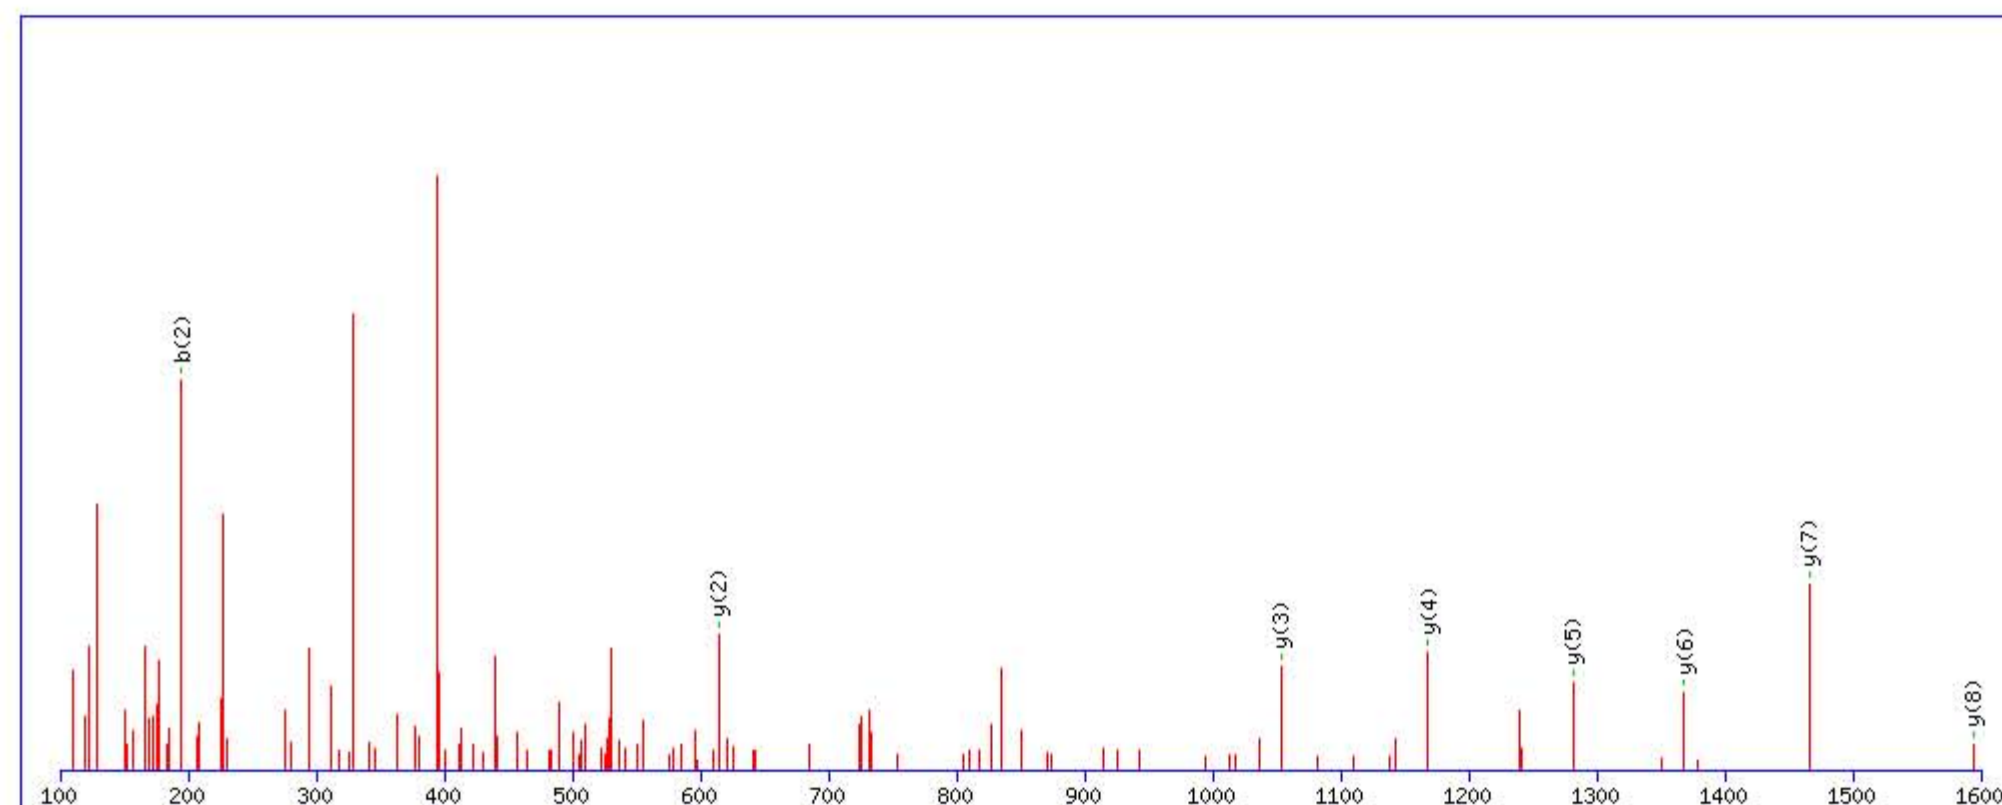

Monoisotopic mass of neutral peptide Mr(calc): 2120.102325

Fixed modifications: Carbamidomethyl (C) (apply to specified residues or termini only)

Variable modifications:

Q11 : Biotin:Thermo-21345 (Q)

Q12 : Biotin:Thermo-21345 (Q)

Ions Score: 33 Expect: 0.013

Matches : 8/122 fragment ions using 15 most intense peaks ([help](#))

| #  | b                 | b <sup>++</sup> | b <sup>*</sup> | b <sup>+++</sup> | b <sup>0</sup> | b <sup>0++</sup> | Seq.     | y                  | y <sup>++</sup> | y <sup>*</sup> | y <sup>+++</sup> | y <sup>0</sup> | y <sup>0++</sup> | #  |
|----|-------------------|-----------------|----------------|------------------|----------------|------------------|----------|--------------------|-----------------|----------------|------------------|----------------|------------------|----|
| 1  | 58.028740         | 29.518008       |                |                  |                |                  | <b>G</b> |                    |                 |                |                  |                |                  | 13 |
| 2  | <b>195.087652</b> | 98.047464       |                |                  |                |                  | <b>H</b> | 2064.088134        | 1032.547705     | 2047.061585    | 1024.034430      | 2046.077569    | 1023.542422      | 12 |
| 3  | 294.156066        | 147.581671      |                |                  |                |                  | <b>V</b> | 1927.029222        | 964.018249      | 1910.002673    | 955.504975       | 1909.018657    | 955.012967       | 11 |
| 4  | 381.188094        | 191.097685      |                |                  | 363.177529     | 182.092403       | <b>S</b> | 1827.960808        | 914.484042      | 1810.934259    | 905.970768       | 1809.950243    | 905.478760       | 10 |
| 5  | 528.256508        | 264.631892      |                |                  | 510.245943     | 255.626610       | <b>F</b> | 1740.928780        | 870.968028      | 1723.902231    | 862.454754       | 1722.918215    | 861.962746       | 9  |
| 6  | 656.351471        | 328.679374      | 639.324922     | 320.166099       | 638.340906     | 319.674091       | <b>K</b> | <b>1593.860366</b> | 797.433821      | 1576.833817    | 788.920547       | 1575.849801    | 788.428539       | 8  |
| 7  | 753.404235        | 377.205756      | 736.377686     | 368.692481       | 735.393670     | 368.200473       | <b>P</b> | <b>1465.765403</b> | 733.386340      | 1448.738854    | 724.873065       | 1447.754838    | 724.381057       | 7  |
| 8  | 840.436263        | 420.721770      | 823.409714     | 412.208495       | 822.425698     | 411.716487       | <b>S</b> | <b>1368.712639</b> | 684.859958      | 1351.686090    | 676.346683       | 1350.702074    | 675.854675       | 6  |
| 9  | 953.520327        | 477.263802      | 936.493778     | 468.750527       | 935.509762     | 468.258519       | <b>L</b> | <b>1281.680611</b> | 641.343944      | 1264.654062    | 632.830669       | 1263.670046    | 632.338661       | 5  |
| 10 | 1068.547270       | 534.777273      | 1051.520721    | 526.263999       | 1050.536705    | 525.771991       | <b>D</b> | <b>1168.596547</b> | 584.801912      | 1151.569998    | 576.288637       | 1150.585982    | 575.796629       | 4  |
| 11 | 1507.772596       | 754.389936      | 1490.746047    | 745.876662       | 1489.762031    | 745.384654       | <b>Q</b> | <b>1053.569604</b> | 527.288440      | 1036.543055    | 518.775166       |                |                  | 3  |
| 12 | 1946.997922       | 974.002599      | 1929.971373    | 965.489325       | 1928.987357    | 964.997317       | <b>Q</b> | <b>614.344278</b>  | 307.675777      | 597.317729     | 299.162503       |                |                  | 2  |
| 13 |                   |                 |                |                  |                |                  | <b>R</b> | 175.118952         | 88.063114       | 158.092403     | 79.549839        |                |                  | 1  |

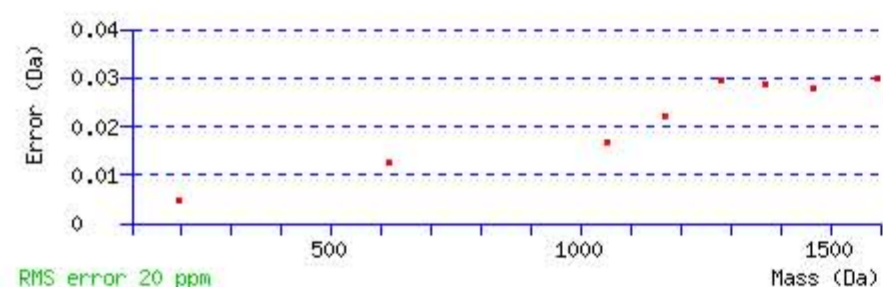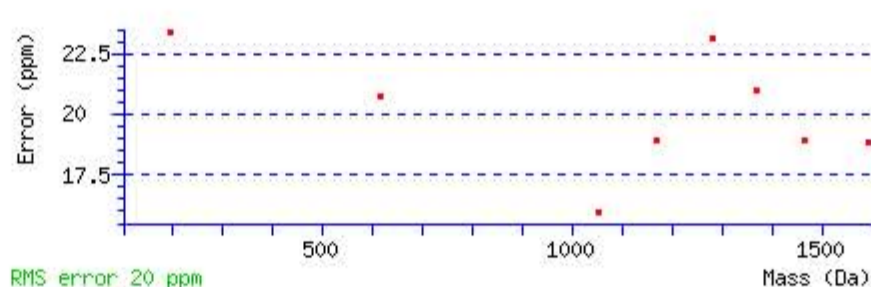

NCBI BLAST search of [GHVSFKPSLDQQR](#)

(Parameters: blastp, nr protein database, expect=20000, no filter, PAM30)

Other BLAST [web gateways](#)

All matches to this query

| Score | Mr(calc):   | Delta    | Sequence                      |
|-------|-------------|----------|-------------------------------|
| 32.7  | 2120.102325 | 0.027291 | <a href="#">GHVSFKPSLDQQR</a> |

Mascot: <http://www.matrixscience.com/>

**MASCOT** Mascot Search Results

Peptide View

MS/MS Fragmentation of **AEAQAQYSAAVAK**

Found in **ITIH4\_HUMAN**, Inter-alpha-trypsin inhibitor heavy chain H4 OS=Homo sapiens GN=ITIH4 PE=1 SV=4

Match to Query 39577: 1617.817928 from(809.916240,2+) rtinseconds(1575) index(21574)

Title: Locus:1.1.1.2691.12 File:"2013-07-02 CLN FXIII 180 min 1st F 2.wiff"

Data file C:\Program Files (x86)\Matrix Science\Mascot Daemon\mgf\7 FXIII 180 min 1st\mascot\_daemon\_merge.mgf

Click mouse within plot area to zoom in by factor of two about that point

Or, Plot from  to  Da

Label all possible matches  Label matches used for scoring

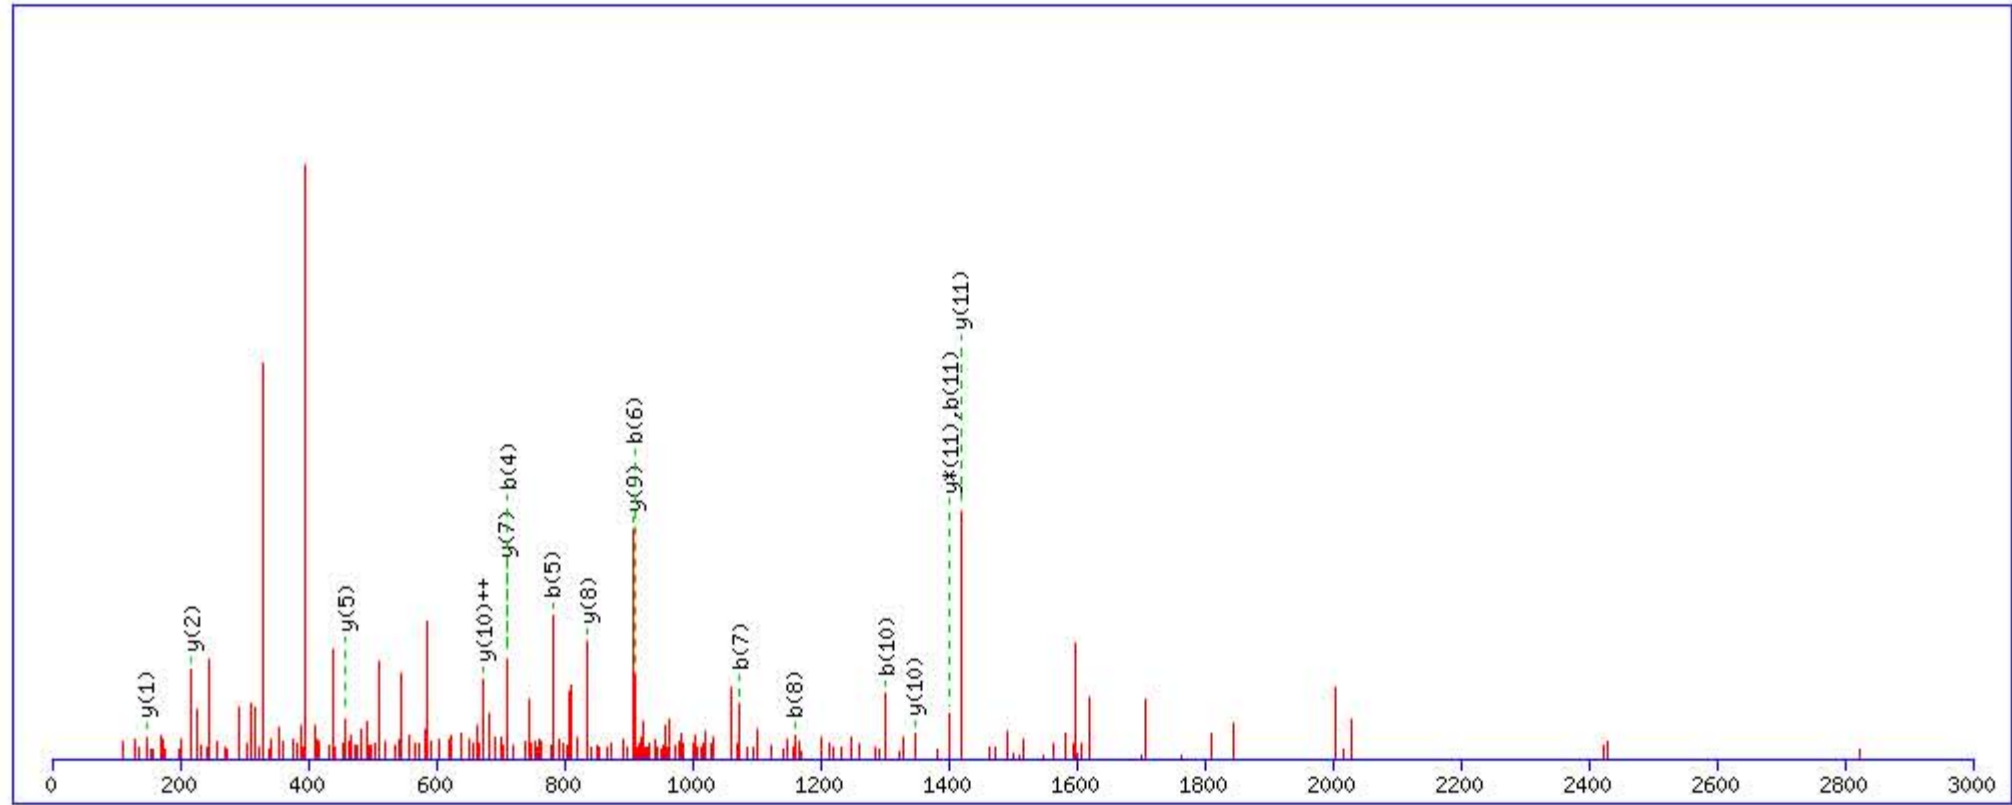

Monoisotopic mass of neutral peptide Mr(calc): 1617.818436

Fixed modifications: Carbamidomethyl (C) (apply to specified residues or termini only)

Variable modifications:

Q4 : Biotin:Thermo-21345 (Q)

Ions Score: 49 Expect: 0.0003

Matches : 17/126 fragment ions using 30 most intense peaks [\(help\)](#)

| #  | b                  | b <sup>++</sup> | b <sup>*</sup> | b <sup>*++</sup> | b <sup>0</sup> | b <sup>0++</sup> | Seq. | y                  | y <sup>++</sup>   | y <sup>*</sup>     | y <sup>*++</sup> | y <sup>0</sup> | y <sup>0++</sup> | #  |
|----|--------------------|-----------------|----------------|------------------|----------------|------------------|------|--------------------|-------------------|--------------------|------------------|----------------|------------------|----|
| 1  | 72.044390          | 36.525833       |                |                  |                |                  | A    |                    |                   |                    |                  |                |                  | 13 |
| 2  | 201.086983         | 101.047130      |                |                  | 183.076418     | 92.041847        | E    | 1547.788642        | 774.397959        | 1530.762093        | 765.884685       | 1529.778077    | 765.392677       | 12 |
| 3  | 272.124097         | 136.565687      |                |                  | 254.113532     | 127.560404       | A    | <b>1418.746049</b> | 709.876663        | <b>1401.719500</b> | 701.363388       | 1400.735484    | 700.871380       | 11 |
| 4  | <b>711.349423</b>  | 356.178350      | 694.322874     | 347.665075       | 693.338858     | 347.173067       | Q    | <b>1347.708935</b> | <b>674.358106</b> | 1330.682386        | 665.844831       | 1329.698370    | 665.352823       | 10 |
| 5  | <b>782.386537</b>  | 391.696907      | 765.359988     | 383.183632       | 764.375972     | 382.691624       | A    | <b>908.483609</b>  | 454.745443        | 891.457060         | 446.232168       | 890.473044     | 445.740160       | 9  |
| 6  | <b>910.445115</b>  | 455.726196      | 893.418566     | 447.212921       | 892.434550     | 446.720913       | Q    | <b>837.446495</b>  | 419.226886        | 820.419946         | 410.713611       | 819.435930     | 410.221603       | 8  |
| 7  | <b>1073.508444</b> | 537.257860      | 1056.481895    | 528.744586       | 1055.497879    | 528.252578       | Y    | <b>709.387917</b>  | 355.197597        | 692.361368         | 346.684322       | 691.377352     | 346.192314       | 7  |
| 8  | <b>1160.540472</b> | 580.773874      | 1143.513923    | 572.260600       | 1142.529907    | 571.768592       | S    | 546.324588         | 273.665932        | 529.298039         | 265.152658       | 528.314023     | 264.660650       | 6  |
| 9  | 1231.577586        | 616.292431      | 1214.551037    | 607.779157       | 1213.567021    | 607.287149       | A    | <b>459.292560</b>  | 230.149918        | 442.266011         | 221.636643       |                |                  | 5  |
| 10 | <b>1302.614700</b> | 651.810988      | 1285.588151    | 643.297714       | 1284.604135    | 642.805706       | A    | 388.255446         | 194.631361        | 371.228897         | 186.118087       |                |                  | 4  |
| 11 | <b>1401.683114</b> | 701.345195      | 1384.656565    | 692.831921       | 1383.672549    | 692.339913       | V    | 317.218332         | 159.112804        | 300.191783         | 150.599530       |                |                  | 3  |
| 12 | 1472.720228        | 736.863752      | 1455.693679    | 728.350478       | 1454.709663    | 727.858470       | A    | <b>218.149918</b>  | 109.578597        | 201.123369         | 101.065322       |                |                  | 2  |
| 13 |                    |                 |                |                  |                |                  | K    | <b>147.112804</b>  | 74.060040         | 130.086255         | 65.546765        |                |                  | 1  |

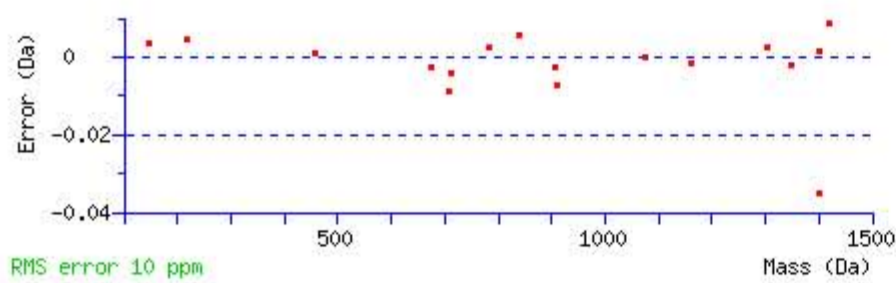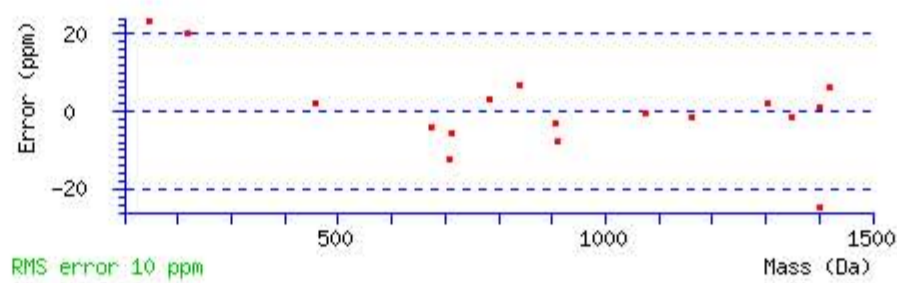

NCBI BLAST search of **AEAQAQYSAAVAK**

(Parameters: blastp, nr protein database, expect=20000, no filter, PAM30)

Other BLAST [web gateways](#)

All matches to this query

| Score | Mr(calc):   | Delta     | Sequence                       |
|-------|-------------|-----------|--------------------------------|
| 49.4  | 1617.818436 | -0.000508 | <a href="#">AEAQAQYSAAVAK</a>  |
| 37.3  | 1617.818436 | -0.000508 | <a href="#">AEAQAQYSAAVAK</a>  |
| 12.1  | 1617.800690 | 0.017238  | <a href="#">EAAQAIFPSMAR</a>   |
| 6.2   | 1617.823639 | -0.005711 | <a href="#">GLHSWQKAAHGDRR</a> |
| 0.3   | 1617.800720 | 0.017208  | <a href="#">TVAPMPPAQDHK</a>   |

# MASCOT Search Results

## Peptide View

MS/MS Fragmentation of **AEAQAQYSAAVAK**

Found in **ITIH4\_HUMAN**, Inter-alpha-trypsin inhibitor heavy chain H4 OS=Homo sapiens GN=ITIH4 PE=1 SV=4

Match to Query 39579: 1617.821728 from(809.918140,2+) rtinseconds(1549) index(21393)

Title: Locus:1.1.1.2682.12 File:"2013-07-02 CLN FXIII 180 min 1st F 2.wiff"

Data file C:\Program Files (x86)\Matrix Science\Mascot Daemon\mgf7 FXIII 180 min 1st\mascot\_daemon\_merge.mgf

Click mouse within plot area to zoom in by factor of two about that point

Or, Plot from 0 to 4200 Da Full range

Label all possible matches  Label matches used for scoring

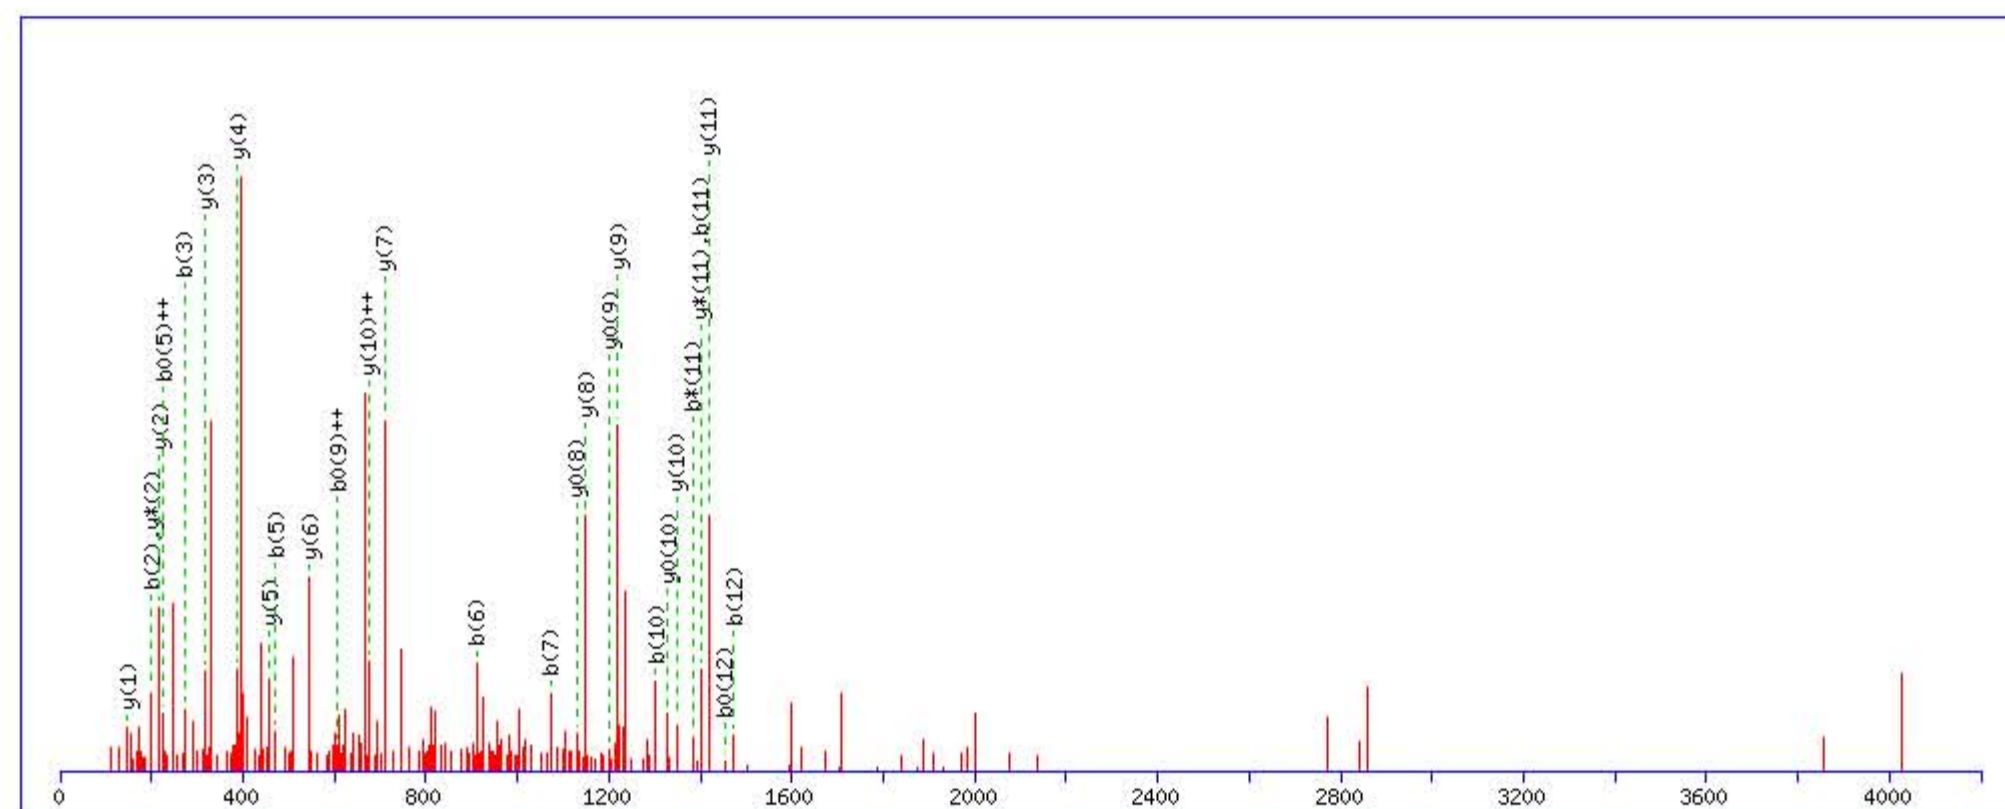

Monoisotopic mass of neutral peptide  $M_r(\text{calc})$ : 1617.818436

Fixed modifications: Carbamidomethyl (C) (apply to specified residues or termini only)

Variable modifications:

Q6 : Biotin:Thermo-21345 (Q)

Ions Score: 61 Expect: 1.3e-005

Matches : 29/126 fragment ions using 58 most intense peaks [\(help\)](#)

| #  | b                  | b <sup>++</sup> | b <sup>*</sup>     | b <sup>*++</sup> | b <sup>0</sup>     | b <sup>0++</sup>  | Seq. | y                  | y <sup>++</sup>   | y <sup>*</sup>     | y <sup>*++</sup> | y <sup>0</sup>     | y <sup>0++</sup> | #  |
|----|--------------------|-----------------|--------------------|------------------|--------------------|-------------------|------|--------------------|-------------------|--------------------|------------------|--------------------|------------------|----|
| 1  | 72.044390          | 36.525833       |                    |                  |                    |                   | A    |                    |                   |                    |                  |                    |                  | 13 |
| 2  | <b>201.086983</b>  | 101.047130      |                    |                  | 183.076418         | 92.041847         | E    | 1547.788642        | 774.397959        | 1530.762093        | 765.884685       | 1529.778077        | 765.392677       | 12 |
| 3  | <b>272.124097</b>  | 136.565687      |                    |                  | 254.113532         | 127.560404        | A    | <b>1418.746049</b> | 709.876663        | <b>1401.719500</b> | 701.363388       | 1400.735484        | 700.871380       | 11 |
| 4  | 400.182675         | 200.594976      | 383.156126         | 192.081701       | 382.172110         | 191.589693        | Q    | <b>1347.708935</b> | <b>674.358106</b> | 1330.682386        | 665.844831       | <b>1329.698370</b> | 665.352823       | 10 |
| 5  | <b>471.219789</b>  | 236.113533      | 454.193240         | 227.600258       | 453.209224         | <b>227.108250</b> | A    | <b>1219.650357</b> | 610.328817        | 1202.623808        | 601.815542       | <b>1201.639792</b> | 601.323534       | 9  |
| 6  | <b>910.445115</b>  | 455.726196      | 893.418566         | 447.212921       | 892.434550         | 446.720913        | Q    | <b>1148.613243</b> | 574.810260        | 1131.586694        | 566.296985       | <b>1130.602678</b> | 565.804977       | 8  |
| 7  | <b>1073.508444</b> | 537.257860      | 1056.481895        | 528.744586       | 1055.497879        | 528.252578        | Y    | <b>709.387917</b>  | 355.197597        | 692.361368         | 346.684322       | 691.377352         | 346.192314       | 7  |
| 8  | 1160.540472        | 580.773874      | 1143.513923        | 572.260600       | 1142.529907        | 571.768592        | S    | <b>546.324588</b>  | 273.665932        | 529.298039         | 265.152658       | 528.314023         | 264.660650       | 6  |
| 9  | 1231.577586        | 616.292431      | 1214.551037        | 607.779157       | 1213.567021        | <b>607.287149</b> | A    | <b>459.292560</b>  | 230.149918        | 442.266011         | 221.636643       |                    |                  | 5  |
| 10 | <b>1302.614700</b> | 651.810988      | 1285.588151        | 643.297714       | 1284.604135        | 642.805706        | A    | <b>388.255446</b>  | 194.631361        | 371.228897         | 186.118087       |                    |                  | 4  |
| 11 | <b>1401.683114</b> | 701.345195      | <b>1384.656565</b> | 692.831921       | 1383.672549        | 692.339913        | V    | <b>317.218332</b>  | 159.112804        | 300.191783         | 150.599530       |                    |                  | 3  |
| 12 | <b>1472.720228</b> | 736.863752      | 1455.693679        | 728.350478       | <b>1454.709663</b> | 727.858470        | A    | <b>218.149918</b>  | 109.578597        | <b>201.123369</b>  | 101.065322       |                    |                  | 2  |
| 13 |                    |                 |                    |                  |                    |                   | K    | <b>147.112804</b>  | 74.060040         | 130.086255         | 65.546765        |                    |                  | 1  |

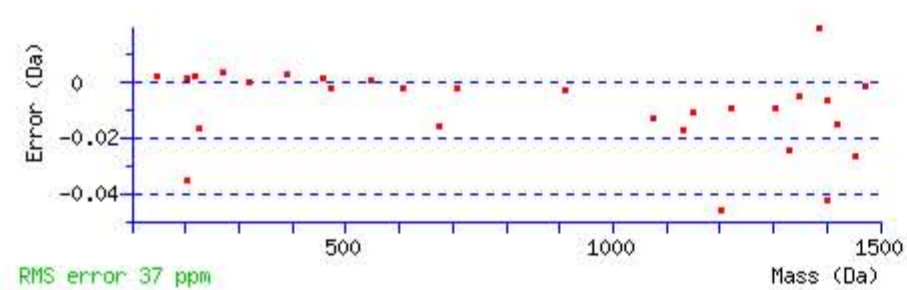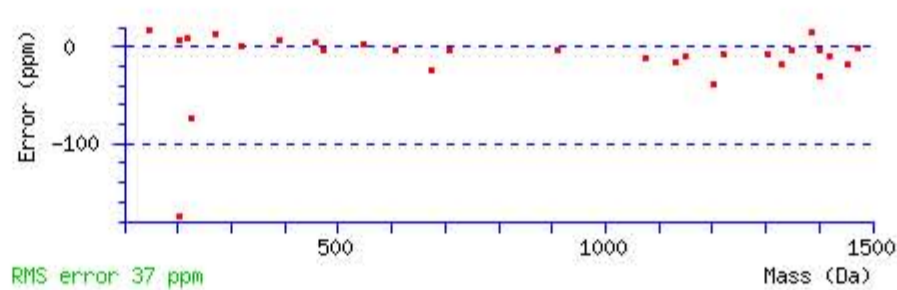

NCBI BLAST search of **AEAQAQYSAAVAK**

(Parameters: blastp, nr protein database, expect=20000, no filter, PAM30)

Other BLAST [web gateways](#)

All matches to this query

| Score | $M_r(\text{calc})$ : | Delta     | Sequence                       |
|-------|----------------------|-----------|--------------------------------|
| 61.1  | 1617.818436          | 0.003292  | <a href="#">AEAQAQYSAAVAK</a>  |
| 36.5  | 1617.818436          | 0.003292  | <a href="#">AEAQAQYSAAVAK</a>  |
| 8.6   | 1617.829681          | -0.007953 | <a href="#">NDVMIRKEAYVHK</a>  |
| 3.8   | 1617.823166          | -0.001438 | <a href="#">QLRLHNDMHK</a>     |
| 3.7   | 1617.843613          | -0.021885 | <a href="#">SLMESPFAPGKTIK</a> |
| 2.7   | 1617.800720          | 0.021008  | <a href="#">TVAPMPPAQDHK</a>   |

# MASCOT Search Results

## Peptide View

MS/MS Fragmentation of **EKAEAAQYSAAVAK**

Found in **ITIH4\_HUMAN**, Inter-alpha-trypsin inhibitor heavy chain H4 OS=Homo sapiens GN=ITIH4 PE=1 SV=4

Match to Query 47085: 1874.960712 from(625.994180,3+) rtinseconds(1464) index(20728)

Title: Locus:1.1.1.2652.24 File:"2013-07-02 CLN FXIII 180 min 1st F 2.wiff"

Data file C:\Program Files (x86)\Matrix Science\Mascot Daemon\mgf7 FXIII 180 min 1st\mascot\_daemon\_merge.mgf

Click mouse within plot area to zoom in by factor of two about that point

Or, Plot from 100 to 1700 Da Full range

Label all possible matches  Label matches used for scoring

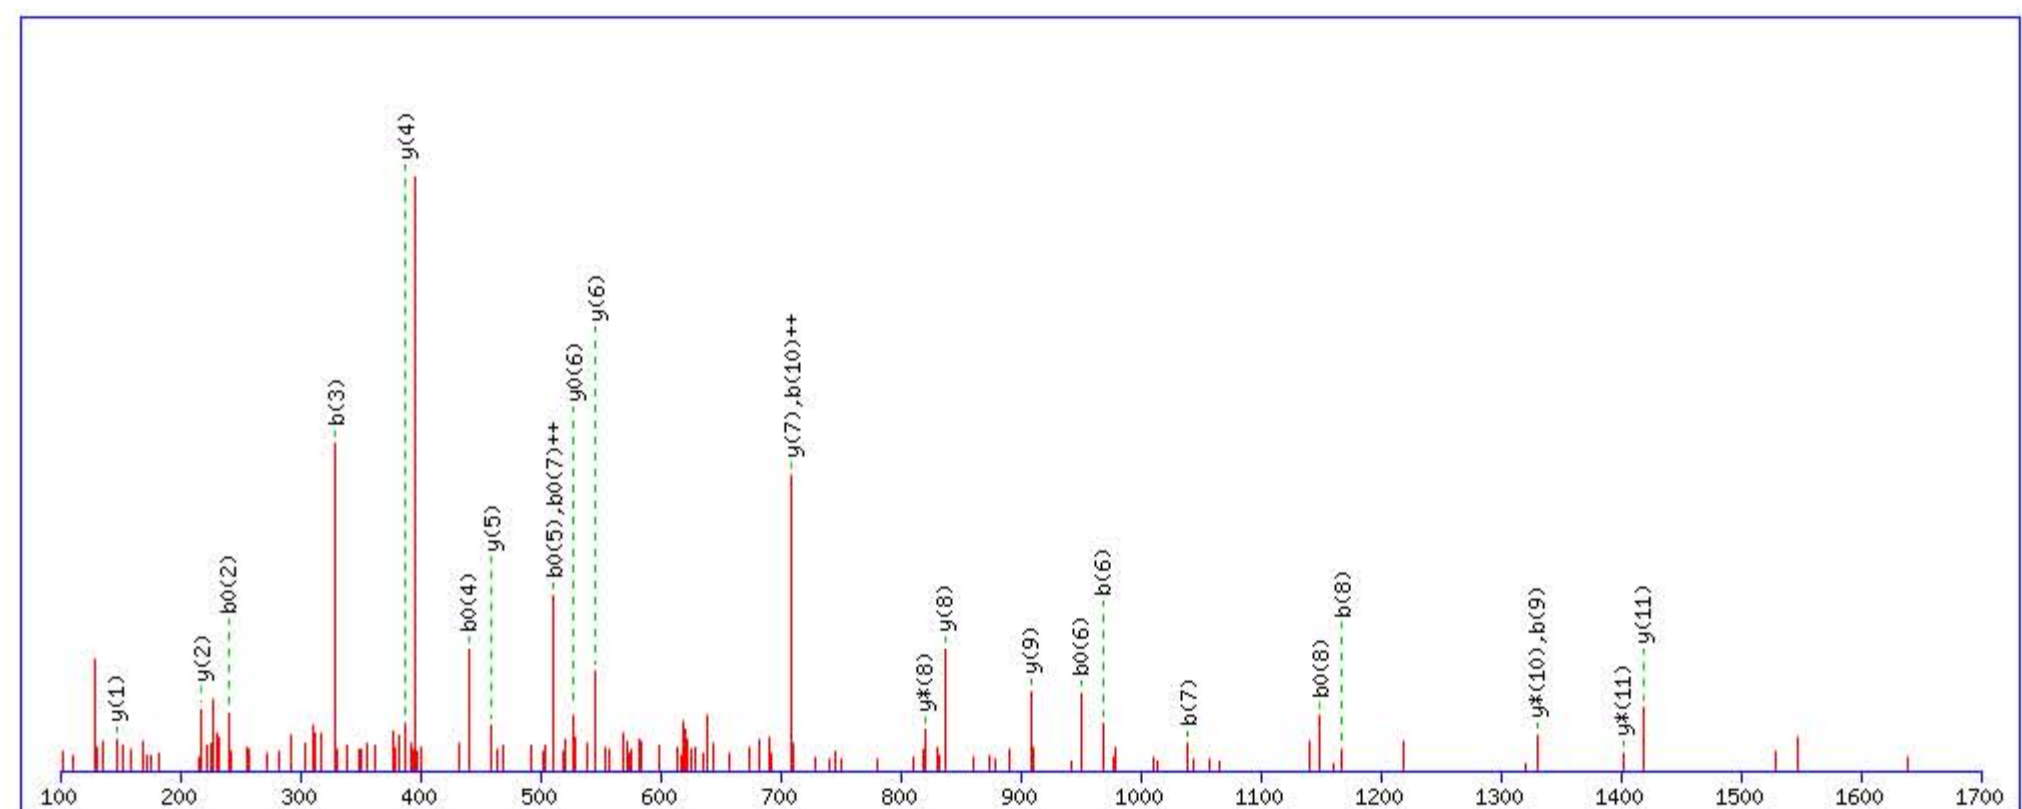

Monoisotopic mass of neutral peptide Mr(calc): 1874.955978

Fixed modifications: Carbamidomethyl (C) (apply to specified residues or termini only)

Variable modifications:

Q6 : Biotin:Thermo-21345 (Q)

Ions Score: 49 Expect: 0.00013

Matches : 25/156 fragment ions using 41 most intense peaks (help)

| #  | b           | b <sup>++</sup> | b <sup>*</sup> | b <sup>*++</sup> | b <sup>0</sup> | b <sup>0++</sup> | Seq. | y           | y <sup>++</sup> | y <sup>*</sup> | y <sup>*++</sup> | y <sup>0</sup> | y <sup>0++</sup> | #  |
|----|-------------|-----------------|----------------|------------------|----------------|------------------|------|-------------|-----------------|----------------|------------------|----------------|------------------|----|
| 1  | 130.049869  | 65.528572       |                |                  | 112.039304     | 56.523290        | E    |             |                 |                |                  |                |                  | 15 |
| 2  | 258.144832  | 129.576054      | 241.118283     | 121.062780       | 240.134267     | 120.570772       | K    | 1746.920719 | 873.963998      | 1729.894170    | 865.450723       | 1728.910154    | 864.958715       | 14 |
| 3  | 329.181946  | 165.094611      | 312.155397     | 156.581336       | 311.171381     | 156.089328       | A    | 1618.825756 | 809.916516      | 1601.799207    | 801.403242       | 1600.815191    | 800.911233       | 13 |
| 4  | 458.224539  | 229.615907      | 441.197990     | 221.102633       | 440.213974     | 220.610625       | E    | 1547.788642 | 774.397959      | 1530.762093    | 765.884685       | 1529.778077    | 765.392677       | 12 |
| 5  | 529.261653  | 265.134465      | 512.235104     | 256.621190       | 511.251088     | 256.129182       | A    | 1418.746049 | 709.876663      | 1401.719500    | 701.363388       | 1400.735484    | 700.871380       | 11 |
| 6  | 968.486979  | 484.747128      | 951.460430     | 476.233853       | 950.476414     | 475.741845       | Q    | 1347.708935 | 674.358106      | 1330.682386    | 665.844831       | 1329.698370    | 665.352823       | 10 |
| 7  | 1039.524093 | 520.265685      | 1022.497544    | 511.752410       | 1021.513528    | 511.260402       | A    | 908.483609  | 454.745443      | 891.457060     | 446.232168       | 890.473044     | 445.740160       | 9  |
| 8  | 1167.582671 | 584.294973      | 1150.556122    | 575.781699       | 1149.572106    | 575.289691       | Q    | 837.446495  | 419.226886      | 820.419946     | 410.713611       | 819.435930     | 410.221603       | 8  |
| 9  | 1330.646000 | 665.826638      | 1313.619451    | 657.313364       | 1312.635435    | 656.821355       | Y    | 709.387917  | 355.197597      | 692.361368     | 346.684322       | 691.377352     | 346.192314       | 7  |
| 10 | 1417.678028 | 709.342652      | 1400.651479    | 700.829378       | 1399.667463    | 700.337370       | S    | 546.324588  | 273.665932      | 529.298039     | 265.152658       | 528.314023     | 264.660650       | 6  |
| 11 | 1488.715142 | 744.861209      | 1471.688593    | 736.347935       | 1470.704577    | 735.855927       | A    | 459.292560  | 230.149918      | 442.266011     | 221.636643       |                |                  | 5  |
| 12 | 1559.752256 | 780.379766      | 1542.725707    | 771.866492       | 1541.741691    | 771.374484       | A    | 388.255446  | 194.631361      | 371.228897     | 186.118087       |                |                  | 4  |
| 13 | 1658.820670 | 829.913973      | 1641.794121    | 821.400699       | 1640.810105    | 820.908691       | V    | 317.218332  | 159.112804      | 300.191783     | 150.599530       |                |                  | 3  |
| 14 | 1729.857784 | 865.432530      | 1712.831235    | 856.919256       | 1711.847219    | 856.427248       | A    | 218.149918  | 109.578597      | 201.123369     | 101.065322       |                |                  | 2  |
| 15 |             |                 |                |                  |                |                  | K    | 147.112804  | 74.060040       | 130.086255     | 65.546765        |                |                  | 1  |

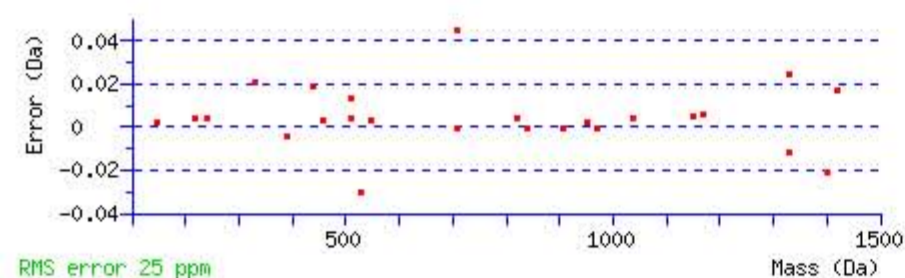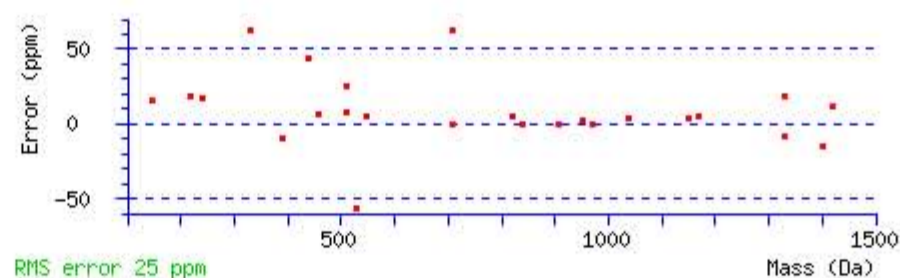

NCBI BLAST search of **EKAEAAQYSAAVAK**

(Parameters: blastp, nr protein database, expect=20000, no filter, PAM30)

Other BLAST [web gateways](#)

### All matches to this query

| Score | Mr(calc):   | Delta     | Sequence                          |
|-------|-------------|-----------|-----------------------------------|
| 48.8  | 1874.955978 | 0.004734  | <a href="#">EKAEAAQYSAAVAK</a>    |
| 39.3  | 1874.955978 | 0.004734  | <a href="#">EKAEAAQYSAAVAK</a>    |
| 7.2   | 1874.940750 | 0.019962  | <a href="#">LRSKGPATVEEMPSETK</a> |
| 4.7   | 1874.964783 | -0.004071 | <a href="#">AQQHWGSGVGVK</a>      |

# MASCOT Search Results

## Peptide View

MS/MS Fragmentation of **SPEQQETVLDGNLIIR**

Found in **ITIH4\_HUMAN**, Inter-alpha-trypsin inhibitor heavy chain H4 OS=Homo sapiens GN=ITIH4 PE=1 SV=4

Match to Query 53547: 2122.134432 from(708.385420,3+) rtinseconds(2344) index(8817)

Title: Locus:1.1.1.3070.17 File:"2013-07-02 CLN FXIII 180 min 1st F 1.wiff"

Data file C:\Program Files (x86)\Matrix Science\Mascot Daemon\mgf\7 FXIII 180 min 1st\mascot\_daemon\_merge.mgf

Click mouse within plot area to zoom in by factor of two about that point

Or, Plot from  to  Da

Label all possible matches  Label matches used for scoring

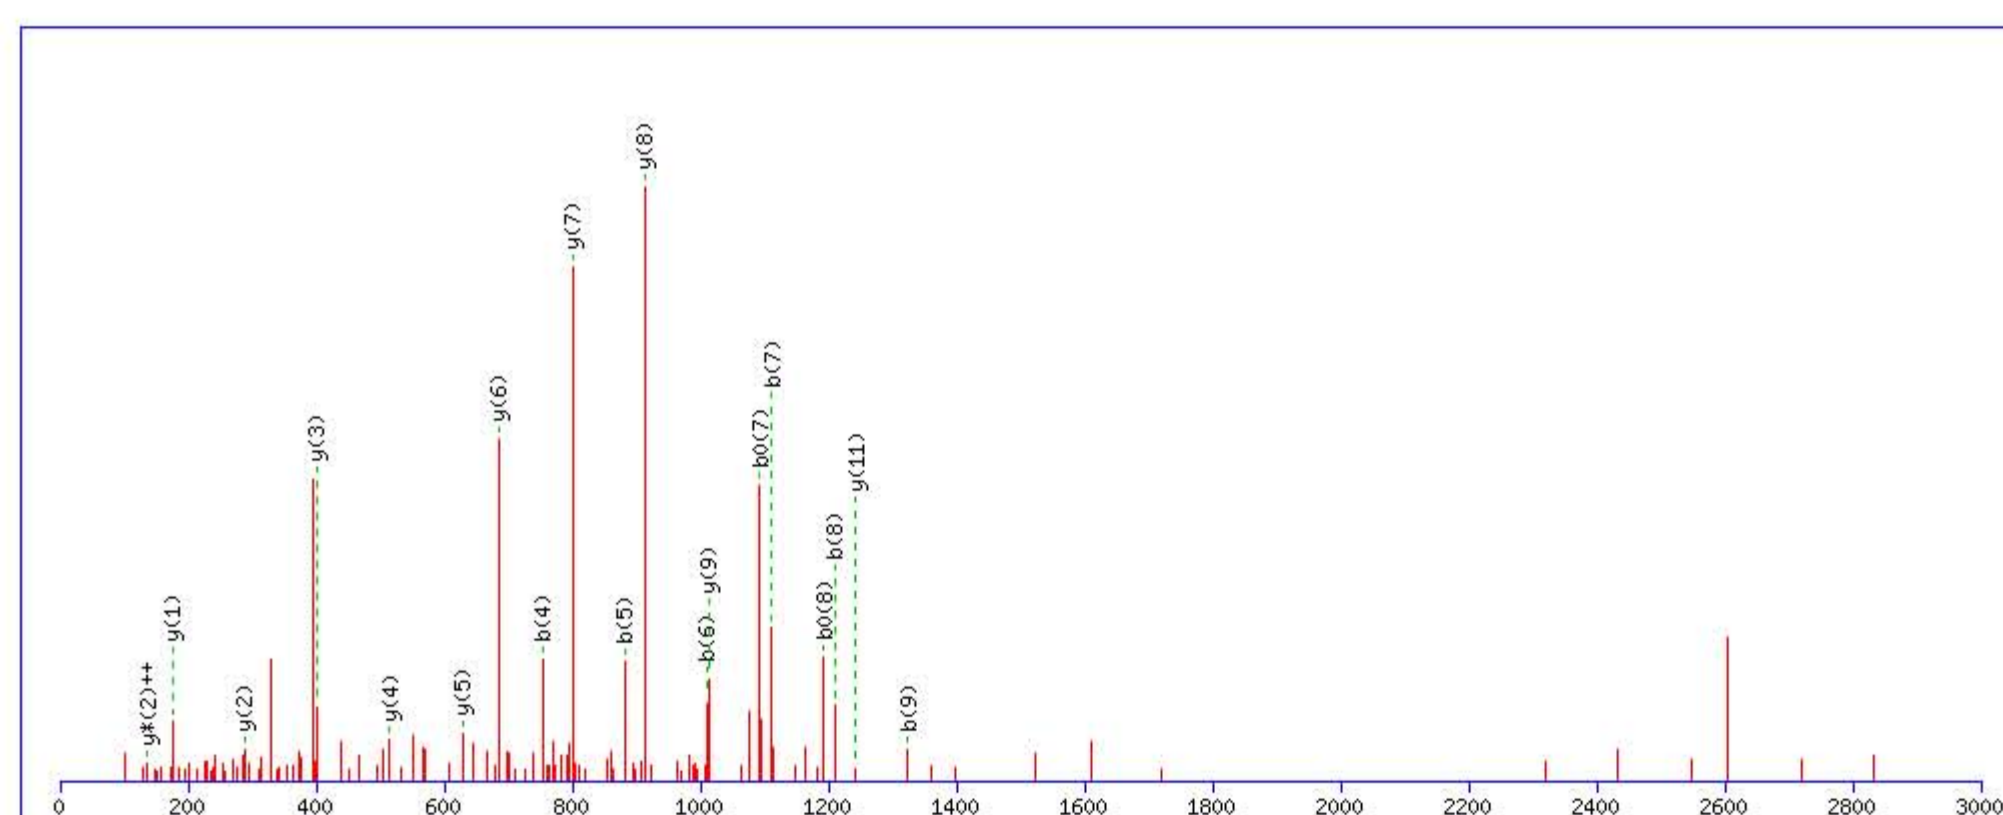

Monoisotopic mass of neutral peptide  $M_r(\text{calc})$ : 2122.109222

Fixed modifications: Carbamidomethyl (C) (apply to specified residues or termini only)

Variable modifications:

Q4 : Biotin:Thermo-21345 (Q)

Ions Score: 48 Expect: 5.4e-005

Matches : 19/162 fragment ions using 43 most intense peaks ([help](#))

| #  | b                  | b <sup>++</sup> | b <sup>*</sup> | b <sup>*++</sup> | b <sup>0</sup>     | b <sup>0++</sup> | Seq. | y                  | y <sup>++</sup> | y <sup>*</sup> | y <sup>*++</sup>  | y <sup>0</sup> | y <sup>0++</sup> | #  |
|----|--------------------|-----------------|----------------|------------------|--------------------|------------------|------|--------------------|-----------------|----------------|-------------------|----------------|------------------|----|
| 1  | 88.039304          | 44.523290       |                |                  | 70.028739          | 35.518008        | S    |                    |                 |                |                   |                |                  | 16 |
| 2  | 185.092068         | 93.049672       |                |                  | 167.081503         | 84.044389        | P    | 2036.084489        | 1018.545882     | 2019.057940    | 1010.032608       | 2018.073924    | 1009.540600      | 15 |
| 3  | 314.134661         | 157.570968      |                |                  | 296.124096         | 148.565686       | E    | 1939.031725        | 970.019500      | 1922.005176    | 961.506226        | 1921.021160    | 961.014218       | 14 |
| 4  | <b>753.359987</b>  | 377.183632      | 736.333438     | 368.670357       | 735.349422         | 368.178349       | Q    | 1809.989132        | 905.498204      | 1792.962583    | 896.984929        | 1791.978567    | 896.492921       | 13 |
| 5  | <b>881.418565</b>  | 441.212921      | 864.392016     | 432.699646       | 863.408000         | 432.207638       | Q    | 1370.763806        | 685.885541      | 1353.737257    | 677.372266        | 1352.753241    | 676.880258       | 12 |
| 6  | <b>1010.461158</b> | 505.734217      | 993.434609     | 497.220943       | 992.450593         | 496.728935       | E    | <b>1242.705228</b> | 621.856252      | 1225.678679    | 613.342977        | 1224.694663    | 612.850969       | 11 |
| 7  | <b>1111.508837</b> | 556.258057      | 1094.482288    | 547.744782       | <b>1093.498272</b> | 547.252774       | T    | 1113.662635        | 557.334955      | 1096.636086    | 548.821681        | 1095.652070    | 548.329673       | 10 |
| 8  | <b>1210.577251</b> | 605.792264      | 1193.550702    | 597.278989       | <b>1192.566686</b> | 596.786981       | V    | <b>1012.614956</b> | 506.811116      | 995.588407     | 498.297841        | 994.604391     | 497.805833       | 9  |
| 9  | <b>1323.661315</b> | 662.334296      | 1306.634766    | 653.821021       | 1305.650750        | 653.329013       | L    | <b>913.546542</b>  | 457.276909      | 896.519993     | 448.763634        | 895.535977     | 448.271626       | 8  |
| 10 | 1438.688258        | 719.847767      | 1421.661709    | 711.334493       | 1420.677693        | 710.842485       | D    | <b>800.462478</b>  | 400.734877      | 783.435929     | 392.221602        | 782.451913     | 391.729594       | 7  |
| 11 | 1495.709722        | 748.358499      | 1478.683173    | 739.845225       | 1477.699157        | 739.353217       | G    | <b>685.435535</b>  | 343.221405      | 668.408986     | 334.708131        |                |                  | 6  |
| 12 | 1609.752649        | 805.379963      | 1592.726100    | 796.866688       | 1591.742084        | 796.374680       | N    | <b>628.414071</b>  | 314.710673      | 611.387522     | 306.197399        |                |                  | 5  |
| 13 | 1722.836713        | 861.921994      | 1705.810164    | 853.408720       | 1704.826148        | 852.916712       | L    | <b>514.371144</b>  | 257.689210      | 497.344595     | 249.175935        |                |                  | 4  |
| 14 | 1835.920777        | 918.464026      | 1818.894228    | 909.950752       | 1817.910212        | 909.458744       | I    | <b>401.287080</b>  | 201.147178      | 384.260531     | 192.633903        |                |                  | 3  |
| 15 | 1949.004841        | 975.006058      | 1931.978292    | 966.492784       | 1930.994276        | 966.000776       | I    | <b>288.203016</b>  | 144.605146      | 271.176467     | <b>136.091871</b> |                |                  | 2  |
| 16 |                    |                 |                |                  |                    |                  | R    | <b>175.118952</b>  | 88.063114       | 158.092403     | 79.549839         |                |                  | 1  |

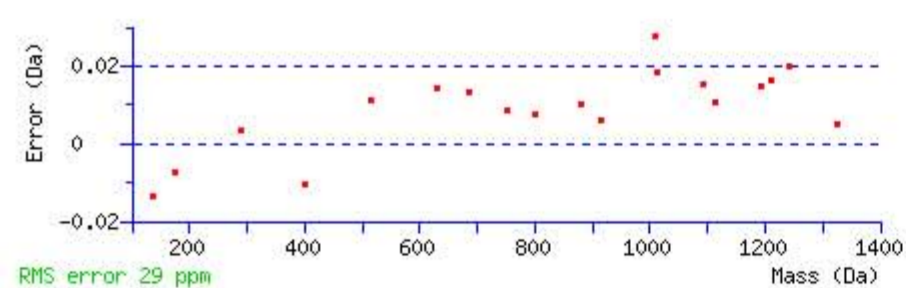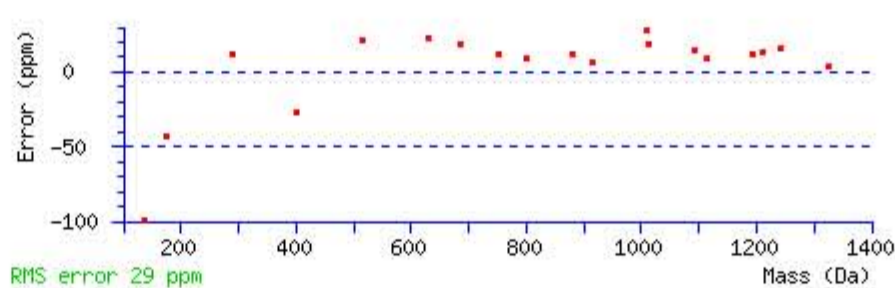

NCBI BLAST search of [SPEQQETVLDGNLIIR](#)

(Parameters: blastp, nr protein database, expect=20000, no filter, PAM30)

Other BLAST [web gateways](#)

## All matches to this query

| Score | $M_r(\text{calc})$ | Delta     | Sequence                          |
|-------|--------------------|-----------|-----------------------------------|
| 47.8  | 2122.109222        | 0.025210  | <a href="#">SPEQQETVLDGNLIIR</a>  |
| 46.0  | 2122.109222        | 0.025210  | <a href="#">SPEQQETVLDGNLIIR</a>  |
| 2.2   | 2122.156799        | -0.022367 | <a href="#">AERAALEELVKLQGER</a>  |
| 1.6   | 2122.139053        | -0.004621 | <a href="#">RRVYDALNVLAMNIISK</a> |
| 1.6   | 2122.139053        | -0.004621 | <a href="#">RRVYDALNVLAMNIISK</a> |
| 0.6   | 2122.143112        | -0.008680 | <a href="#">LYQFLLGLLTRGDMR</a>   |

**Peptide View**

MS/MS Fragmentation of **QLGLPGPPDVPDHAAYHPFR**  
 Found in **ITIH4\_HUMAN**, Inter-alpha-trypsin inhibitor heavy chain H4 OS=Homo sapiens GN=ITIH4 PE=1 SV=4

Match to Query 62930: 2494.264936 from(624.573510,4+) rtinseconds(2142) index(25685)  
 Title: Locus:1.1.1.2888.13 File:"2013-07-02 CLN FXIII 180 min 1st F 2.wiff"  
 Data file C:\Program Files (x86)\Matrix Science\Mascot Daemon\mgf\7 FXIII 180 min 1st\mascot\_daemon\_merge.mgf

Click mouse within plot area to zoom in by factor of two about that point

Or, Plot from  to  Da

Label all possible matches  Label matches used for scoring

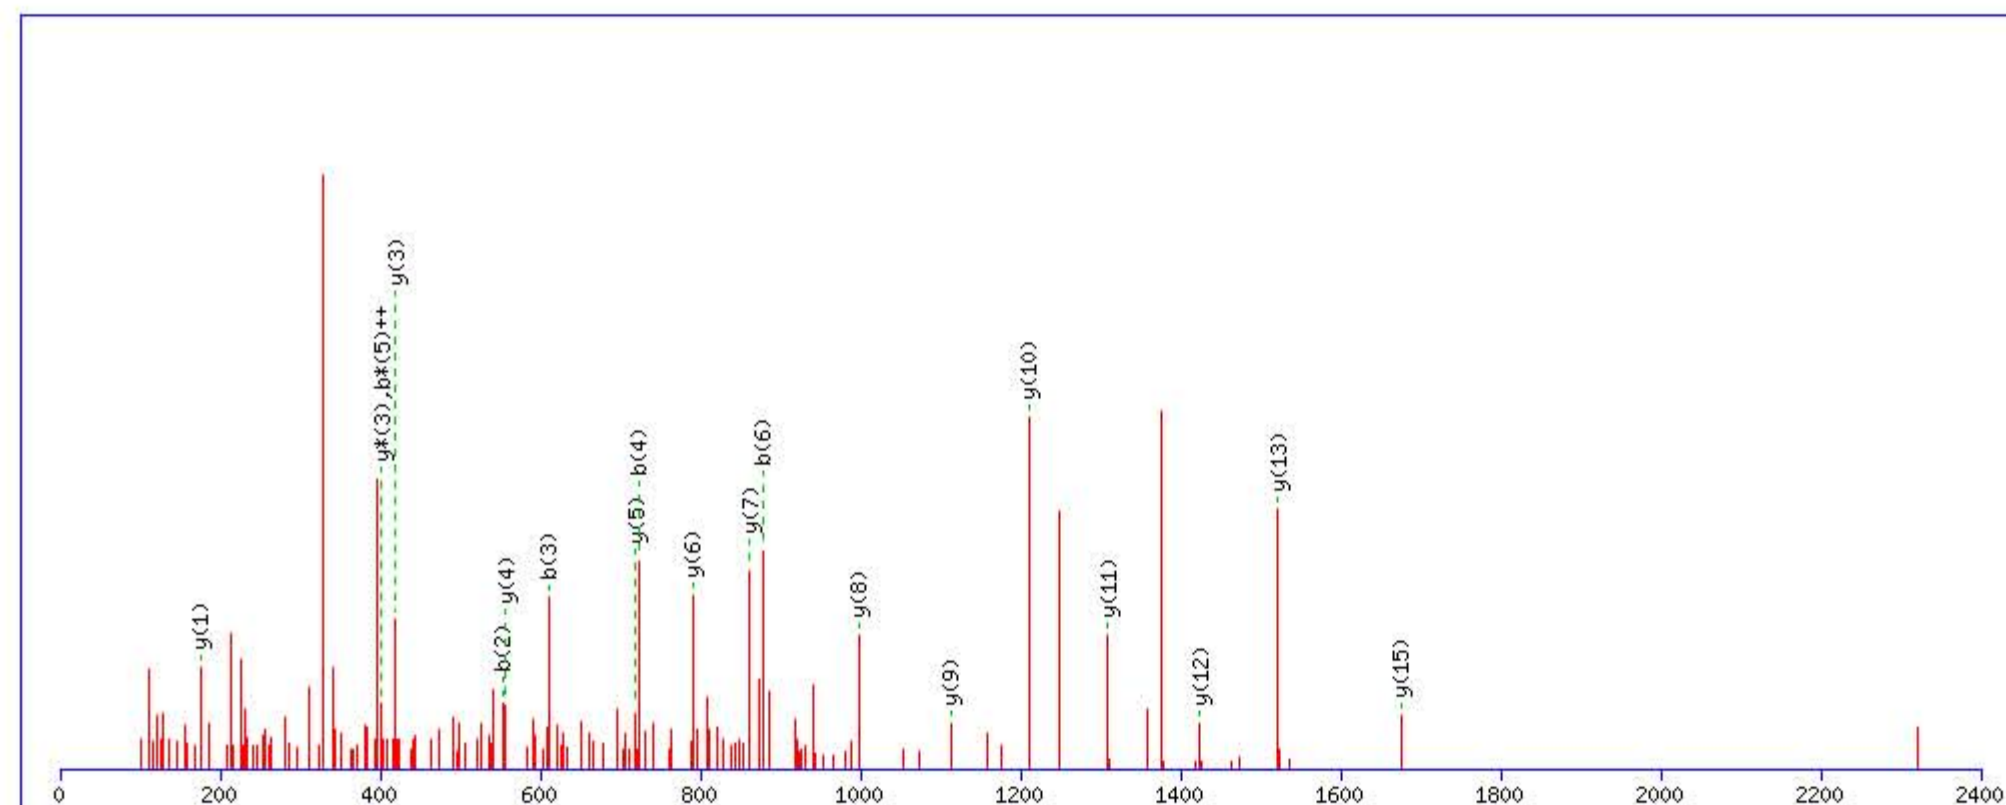

Monoisotopic mass of neutral peptide Mr(calc): 2494.257980  
 Fixed modifications: Carbamidomethyl (C) (apply to specified residues or termini only)  
 Variable modifications:  
 Q1 : Biotin:Thermo-21345 (Q)  
 Ions Score: 62 Expect: 1.7e-005  
 Matches : 19/196 fragment ions using 46 most intense peaks [\(help\)](#)

| #  | b                 | b <sup>++</sup> | b <sup>*</sup> | b <sup>+++</sup>  | b <sup>0</sup> | b <sup>0++</sup> | Seq. | y                  | y <sup>++</sup> | y <sup>*</sup>    | y <sup>+++</sup> | y <sup>0</sup> | y <sup>0++</sup> | #  |
|----|-------------------|-----------------|----------------|-------------------|----------------|------------------|------|--------------------|-----------------|-------------------|------------------|----------------|------------------|----|
| 1  | 440.232602        | 220.619939      | 423.206053     | 212.106664        |                |                  | Q    |                    |                 |                   |                  |                |                  | 20 |
| 2  | <b>553.316666</b> | 277.161971      | 536.290117     | 268.648697        |                |                  | L    | 2056.039923        | 1028.523599     | 2039.013374       | 1020.010325      | 2038.029358    | 1019.518317      | 19 |
| 3  | <b>610.338130</b> | 305.672703      | 593.311581     | 297.159429        |                |                  | G    | 1942.955859        | 971.981568      | 1925.929310       | 963.468293       | 1924.945294    | 962.976285       | 18 |
| 4  | <b>723.422194</b> | 362.214735      | 706.395645     | 353.701461        |                |                  | L    | 1885.934395        | 943.470836      | 1868.907846       | 934.957561       | 1867.923830    | 934.465553       | 17 |
| 5  | 820.474958        | 410.741117      | 803.448409     | <b>402.227843</b> |                |                  | P    | 1772.850331        | 886.928804      | 1755.823782       | 878.415529       | 1754.839766    | 877.923521       | 16 |
| 6  | <b>877.496422</b> | 439.251849      | 860.469873     | 430.738575        |                |                  | G    | <b>1675.797567</b> | 838.402422      | 1658.771018       | 829.889147       | 1657.787002    | 829.397139       | 15 |
| 7  | 974.549186        | 487.778231      | 957.522637     | 479.264957        |                |                  | P    | 1618.776103        | 809.891690      | 1601.749554       | 801.378415       | 1600.765538    | 800.886407       | 14 |
| 8  | 1071.601950       | 536.304613      | 1054.575401    | 527.791339        |                |                  | P    | <b>1521.723339</b> | 761.365308      | 1504.696790       | 752.852033       | 1503.712774    | 752.360025       | 13 |
| 9  | 1186.628893       | 593.818085      | 1169.602344    | 585.304810        | 1168.618328    | 584.812802       | D    | <b>1424.670575</b> | 712.838926      | 1407.644026       | 704.325651       | 1406.660010    | 703.833643       | 12 |
| 10 | 1285.697307       | 643.352292      | 1268.670758    | 634.839017        | 1267.686742    | 634.347009       | V    | <b>1309.643632</b> | 655.325454      | 1292.617083       | 646.812180       | 1291.633067    | 646.320172       | 11 |
| 11 | 1382.750071       | 691.878674      | 1365.723522    | 683.365399        | 1364.739506    | 682.873391       | P    | <b>1210.575218</b> | 605.791247      | 1193.548669       | 597.277973       | 1192.564653    | 596.785964       | 10 |
| 12 | 1497.777014       | 749.392145      | 1480.750465    | 740.878871        | 1479.766449    | 740.386863       | D    | <b>1113.522454</b> | 557.264865      | 1096.495905       | 548.751591       | 1095.511889    | 548.259582       | 9  |
| 13 | 1634.835926       | 817.921601      | 1617.809377    | 809.408327        | 1616.825361    | 808.916319       | H    | <b>998.495511</b>  | 499.751393      | 981.468962        | 491.238119       |                |                  | 8  |
| 14 | 1705.873040       | 853.440158      | 1688.846491    | 844.926884        | 1687.862475    | 844.434876       | A    | <b>861.436599</b>  | 431.221937      | 844.410050        | 422.708663       |                |                  | 7  |
| 15 | 1776.910154       | 888.958715      | 1759.883605    | 880.445441        | 1758.899589    | 879.953433       | A    | <b>790.399485</b>  | 395.703380      | 773.372936        | 387.190106       |                |                  | 6  |
| 16 | 1939.973483       | 970.490380      | 1922.946934    | 961.977105        | 1921.962918    | 961.485097       | Y    | <b>719.362371</b>  | 360.184823      | 702.335822        | 351.671549       |                |                  | 5  |
| 17 | 2077.032395       | 1039.019836     | 2060.005846    | 1030.506561       | 2059.021830    | 1030.014553      | H    | <b>556.299042</b>  | 278.653159      | 539.272493        | 270.139884       |                |                  | 4  |
| 18 | 2174.085159       | 1087.546218     | 2157.058610    | 1079.032943       | 2156.074594    | 1078.540935      | P    | <b>419.240130</b>  | 210.123703      | <b>402.213581</b> | 201.610428       |                |                  | 3  |
| 19 | 2321.153573       | 1161.080424     | 2304.127024    | 1152.567150       | 2303.143008    | 1152.075142      | F    | 322.187366         | 161.597321      | 305.160817        | 153.084046       |                |                  | 2  |
| 20 |                   |                 |                |                   |                |                  | R    | <b>175.118952</b>  | 88.063114       | 158.092403        | 79.549839        |                |                  | 1  |

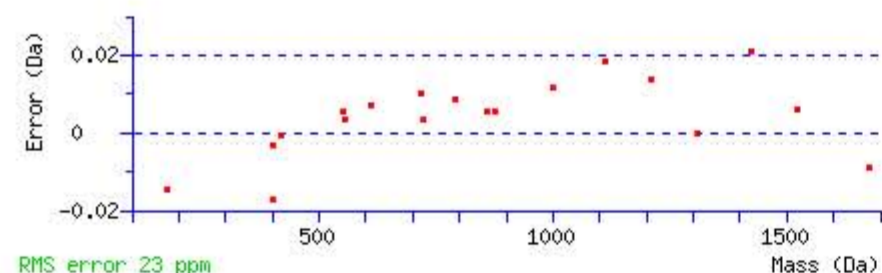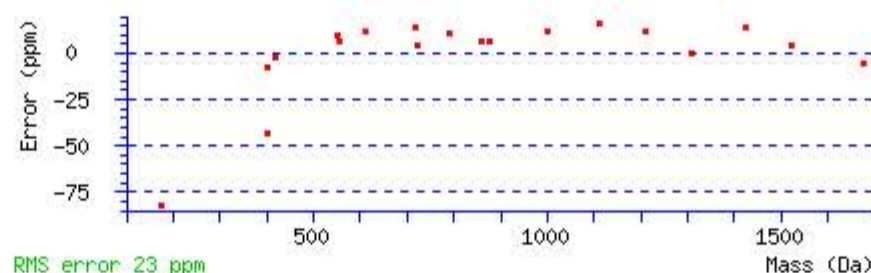

NCBI BLAST search of **QLGLPGPPDVPDHAAYHPFR**  
 (Parameters: blastp, nr protein database, expect=20000, no filter, PAM30)  
 Other BLAST [web gateways](#)

**All matches to this query**

| Score | Mr(calc):   | Delta    | Sequence                             |
|-------|-------------|----------|--------------------------------------|
| 62.2  | 2494.257980 | 0.006956 | <a href="#">QLGLPGPPDVPDHAAYHPFR</a> |

# Mascot Search Results

## Peptide View

MS/MS Fragmentation of **QGPVNLLSDPEQGVEVTGQYER**

Found in **ITIH4\_HUMAN**, Inter-alpha-trypsin inhibitor heavy chain H4 OS=Homo sapiens GN=ITIH4 PE=1 SV=4

Match to Query 66071: 2725.359252 from(909.460360,3+) rtinseconds(2367) index(81389)

Title: Locus:1.1.1.2174.23 File:"2013-07-02 CLN FXIII 180 min 1st FT.wiff"

Data file C:\Program Files (x86)\Matrix Science\Mascot Daemon\mgf7 FXIII 180 min 1st\mascot\_daemon\_merge.mgf

Click mouse within plot area to zoom in by factor of two about that point

Or, Plot from  to  Da

Label all possible matches  Label matches used for scoring

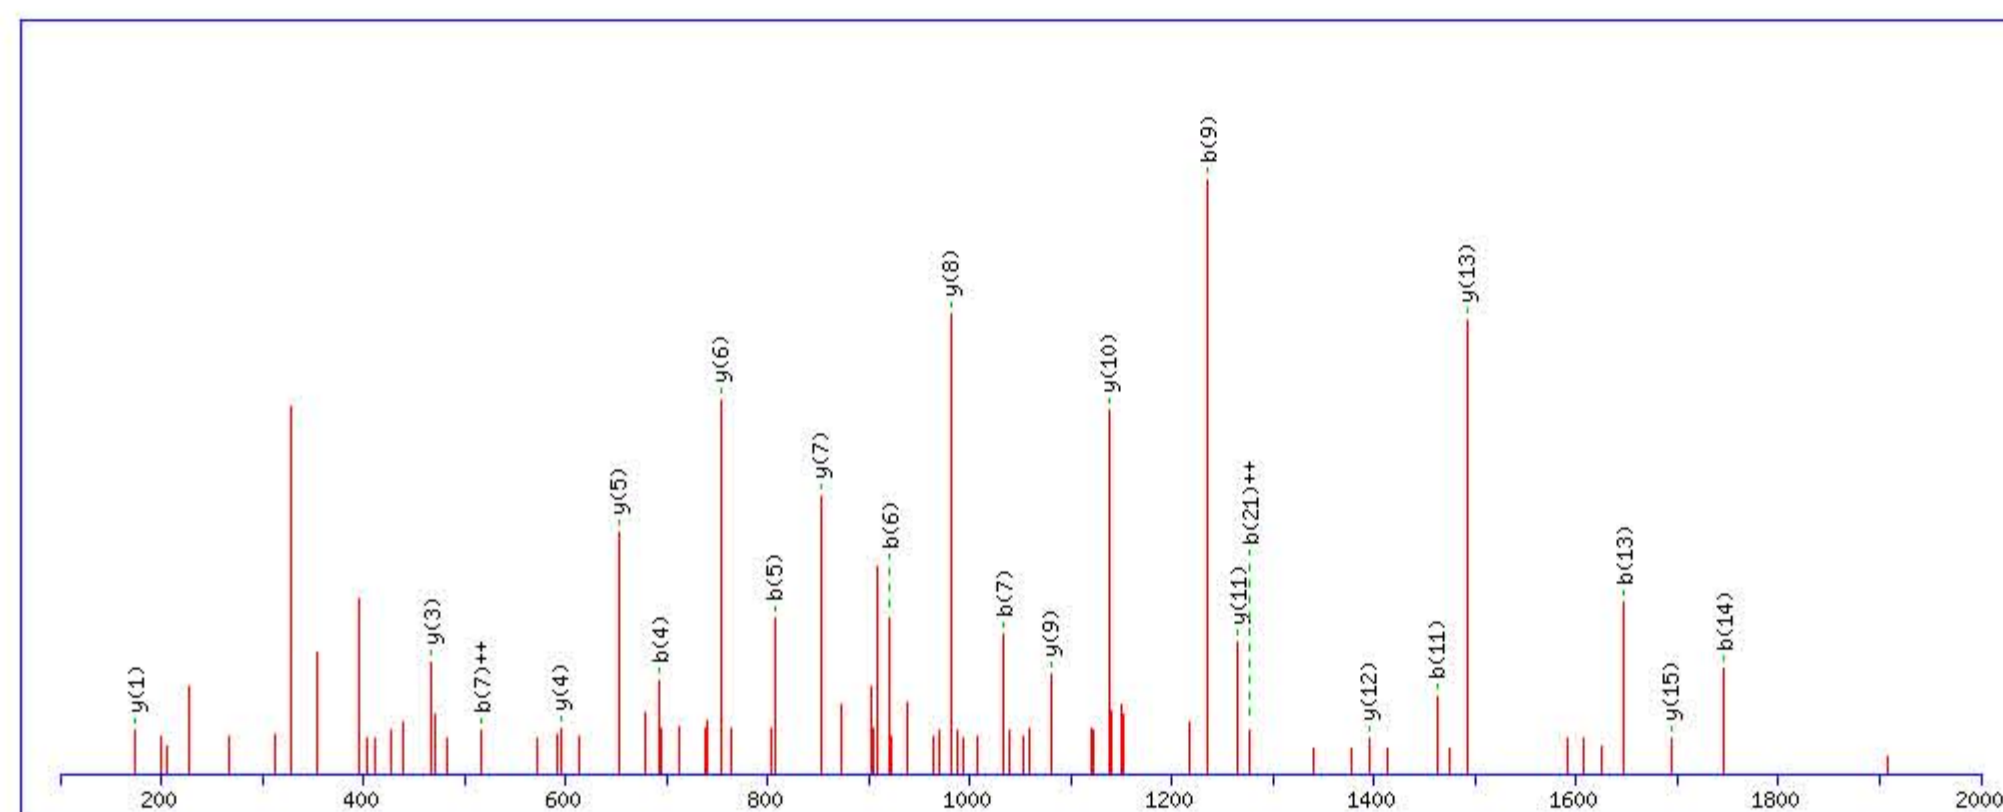

Monoisotopic mass of neutral peptide Mr(calc): 2725.338135

Fixed modifications: Carbamidomethyl (C) (apply to specified residues or termini only)

Variable modifications:

Q1 : Biotin:Thermo-21345 (Q)

Ions Score: 98 Expect: 4.6e-009

Matches : 23/236 fragment ions using 32 most intense peaks [\(help\)](#)

| #  | b                  | b <sup>++</sup>    | b <sup>*</sup> | b <sup>*++</sup> | b <sup>0</sup> | b <sup>0++</sup> | Seq. | y                  | y <sup>++</sup> | y <sup>*</sup> | y <sup>*++</sup> | y <sup>0</sup> | y <sup>0++</sup> | #  |
|----|--------------------|--------------------|----------------|------------------|----------------|------------------|------|--------------------|-----------------|----------------|------------------|----------------|------------------|----|
| 1  | 440.232602         | 220.619939         | 423.206053     | 212.106664       |                |                  | Q    |                    |                 |                |                  |                |                  | 22 |
| 2  | 497.254066         | 249.130671         | 480.227517     | 240.617396       |                |                  | G    | 2287.120083        | 1144.063679     | 2270.093534    | 1135.550405      | 2269.109518    | 1135.058397      | 21 |
| 3  | 594.306830         | 297.657053         | 577.280281     | 289.143779       |                |                  | P    | 2230.098619        | 1115.552947     | 2213.072070    | 1107.039673      | 2212.088054    | 1106.547665      | 20 |
| 4  | <b>693.375244</b>  | 347.191260         | 676.348695     | 338.677985       |                |                  | V    | 2133.045855        | 1067.026565     | 2116.019306    | 1058.513291      | 2115.035290    | 1058.021283      | 19 |
| 5  | <b>807.418171</b>  | 404.212723         | 790.391622     | 395.699449       |                |                  | N    | 2033.977441        | 1017.492359     | 2016.950892    | 1008.979084      | 2015.966876    | 1008.487076      | 18 |
| 6  | <b>920.502235</b>  | 460.754755         | 903.475686     | 452.241481       |                |                  | L    | 1919.934514        | 960.470895      | 1902.907965    | 951.957621       | 1901.923949    | 951.465613       | 17 |
| 7  | <b>1033.586299</b> | <b>517.296787</b>  | 1016.559750    | 508.783513       |                |                  | L    | 1806.850450        | 903.928863      | 1789.823901    | 895.415589       | 1788.839885    | 894.923581       | 16 |
| 8  | 1120.618327        | 560.812801         | 1103.591778    | 552.299527       | 1102.607762    | 551.807519       | S    | <b>1693.766386</b> | 847.386831      | 1676.739837    | 838.873557       | 1675.755821    | 838.381549       | 15 |
| 9  | <b>1235.645270</b> | 618.326273         | 1218.618721    | 609.812999       | 1217.634705    | 609.320990       | D    | 1606.734358        | 803.870817      | 1589.707809    | 795.357543       | 1588.723793    | 794.865535       | 14 |
| 10 | 1332.698034        | 666.852655         | 1315.671485    | 658.339381       | 1314.687469    | 657.847373       | P    | <b>1491.707415</b> | 746.357346      | 1474.680866    | 737.844071       | 1473.696850    | 737.352063       | 13 |
| 11 | <b>1461.740627</b> | 731.373951         | 1444.714078    | 722.860677       | 1443.730062    | 722.368669       | E    | <b>1394.654651</b> | 697.830964      | 1377.628102    | 689.317689       | 1376.644086    | 688.825681       | 12 |
| 12 | 1589.799205        | 795.403241         | 1572.772656    | 786.889966       | 1571.788640    | 786.397958       | Q    | <b>1265.612058</b> | 633.309667      | 1248.585509    | 624.796393       | 1247.601493    | 624.304385       | 11 |
| 13 | <b>1646.820669</b> | 823.913973         | 1629.794120    | 815.400698       | 1628.810104    | 814.908690       | G    | <b>1137.553480</b> | 569.280378      | 1120.526931    | 560.767104       | 1119.542915    | 560.275096       | 10 |
| 14 | <b>1745.889083</b> | 873.448180         | 1728.862534    | 864.934905       | 1727.878518    | 864.442897       | V    | <b>1080.532016</b> | 540.769646      | 1063.505467    | 532.256372       | 1062.521451    | 531.764364       | 9  |
| 15 | 1874.931676        | 937.969476         | 1857.905127    | 929.456202       | 1856.921111    | 928.964193       | E    | <b>981.463602</b>  | 491.235439      | 964.437053     | 482.722165       | 963.453037     | 482.230157       | 8  |
| 16 | 1974.000090        | 987.503683         | 1956.973541    | 978.990409       | 1955.989525    | 978.498401       | V    | <b>852.421009</b>  | 426.714143      | 835.394460     | 418.200868       | 834.410444     | 417.708860       | 7  |
| 17 | 2075.047769        | 1038.027522        | 2058.021220    | 1029.514248      | 2057.037204    | 1029.022240      | T    | <b>753.352595</b>  | 377.179936      | 736.326046     | 368.666661       | 735.342030     | 368.174653       | 6  |
| 18 | 2132.069233        | 1066.538254        | 2115.042684    | 1058.024980      | 2114.058668    | 1057.532972      | G    | <b>652.304916</b>  | 326.656096      | 635.278367     | 318.142822       | 634.294351     | 317.650814       | 5  |
| 19 | 2260.127811        | 1130.567543        | 2243.101262    | 1122.054269      | 2242.117246    | 1121.562261      | Q    | <b>595.283452</b>  | 298.145364      | 578.256903     | 289.632090       | 577.272887     | 289.140082       | 4  |
| 20 | 2423.191140        | 1212.099208        | 2406.164591    | 1203.585933      | 2405.180575    | 1203.093925      | Y    | <b>467.224874</b>  | 234.116075      | 450.198325     | 225.602801       | 449.214309     | 225.110793       | 3  |
| 21 | 2552.233733        | <b>1276.620504</b> | 2535.207184    | 1268.107230      | 2534.223168    | 1267.615222      | E    | 304.161545         | 152.584411      | 287.134996     | 144.071136       | 286.150980     | 143.579128       | 2  |
| 22 |                    |                    |                |                  |                |                  | R    | <b>175.118952</b>  | 88.063114       | 158.092403     | 79.549839        |                |                  | 1  |

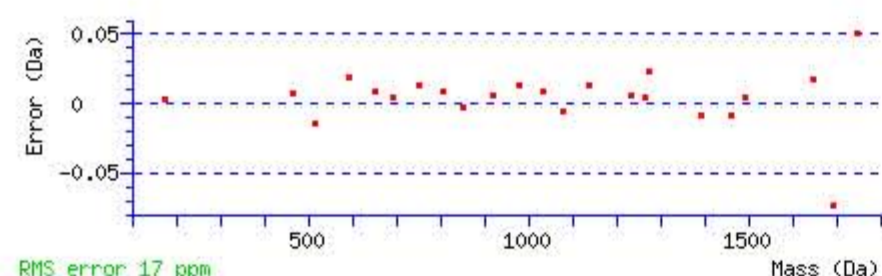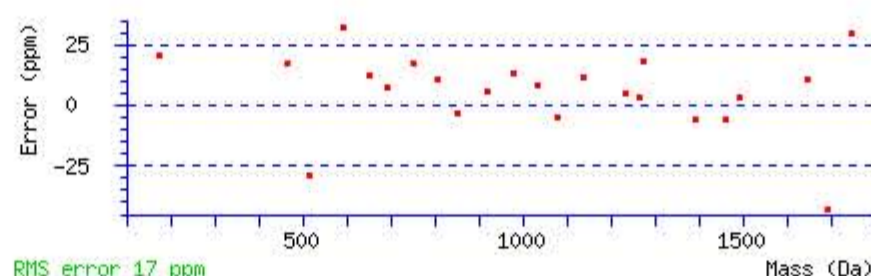

NCBI BLAST search of **QGPVNLLSDPEQGVEVTGQYER**

(Parameters: blastp, nr protein database, expect=20000, no filter, PAM30)

Other BLAST [web gateways](#)

## All matches to this query

| Score | Mr(calc):   | Delta    | Sequence                               |
|-------|-------------|----------|----------------------------------------|
| 98.0  | 2725.338135 | 0.021117 | <a href="#">QGPVNLLSDPEQGVEVTGQYER</a> |
| 31.5  | 2725.338135 | 0.021117 | <a href="#">QGPVNLLSDPEQGVEVTGQYER</a> |



# MASCOT Search Results

## Peptide View

MS/MS Fragmentation of **QVILTLQPTLVAVGK**

Found in **ICAM2\_HUMAN**, Intercellular adhesion molecule 2 OS=Homo sapiens GN=ICAM2 PE=1 SV=2

Match to Query 47323: 1890.158728 from(946.086640,2+) rtinseconds(2618) index(10440)

Title: Locus:1.1.1.3165.8 File:"2013-07-02 CLN FXIII 180 min 1st F 1.wiff"

Data file C:\Program Files (x86)\Matrix Science\Mascot Daemon\mgf\7 FXIII 180 min 1st\mascot\_daemon\_merge.mgf

Click mouse within plot area to zoom in by factor of two about that point

Or, Plot from  to  Da

Label all possible matches  Label matches used for scoring

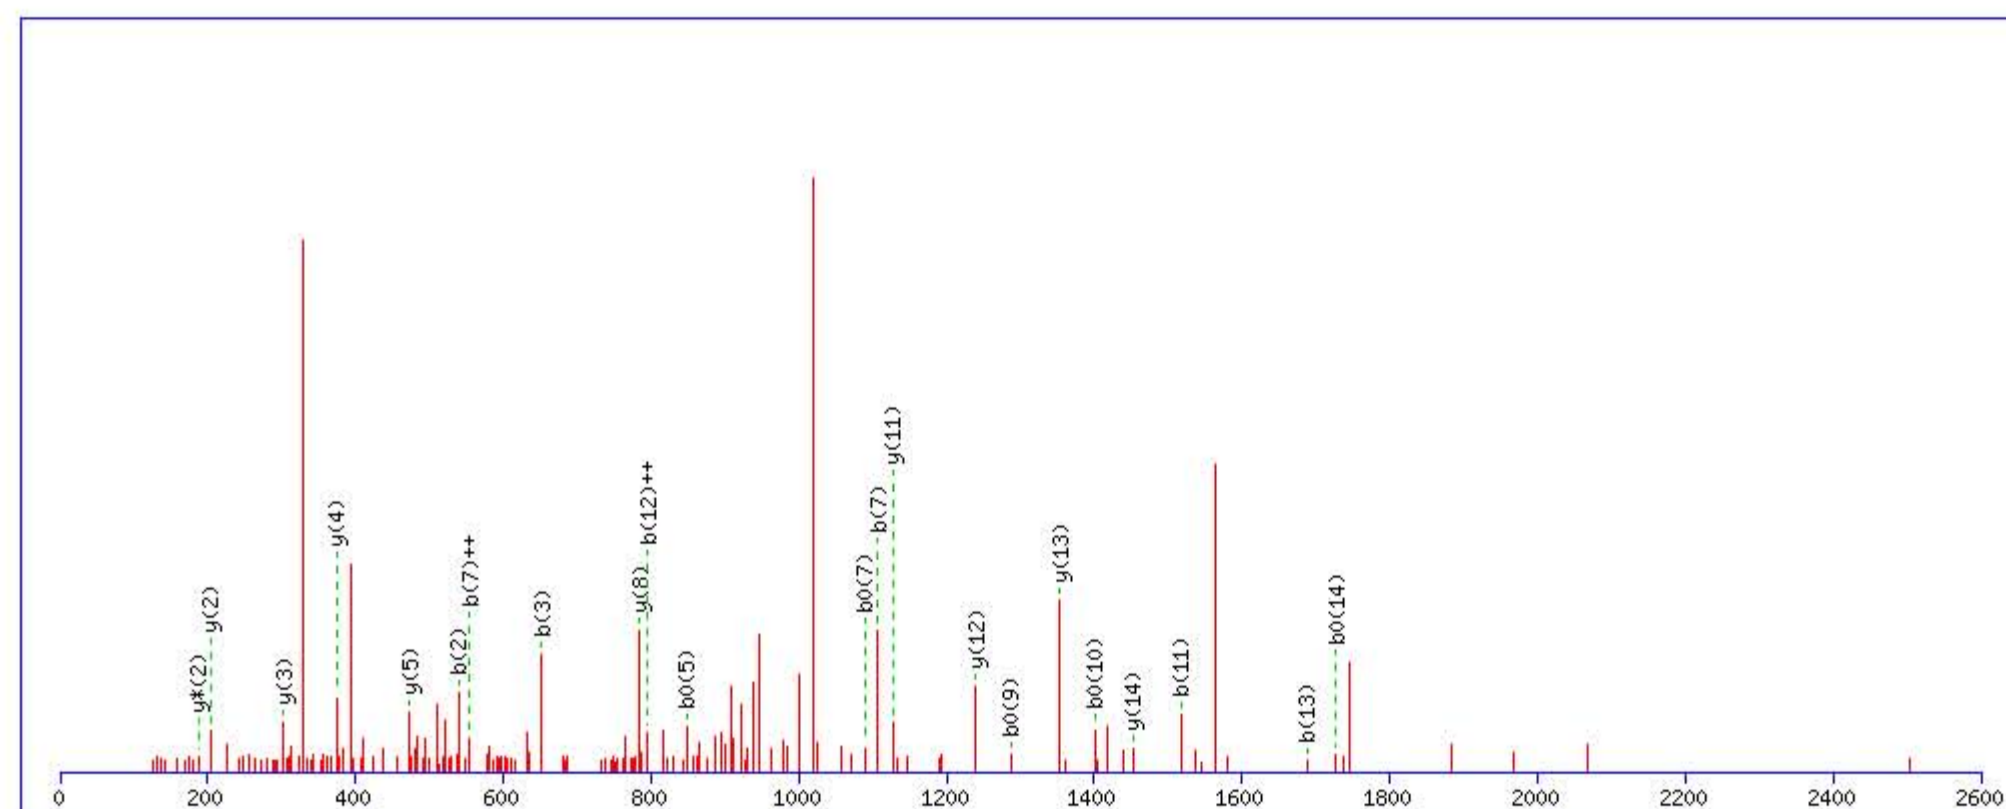

Monoisotopic mass of neutral peptide Mr(calc): 1890.137634

Fixed modifications: Carbamidomethyl (C) (apply to specified residues or termini only)

Variable modifications:

Q1 : Biotin:Thermo-21345 (Q)

Ions Score: 37 Expect: 0.00019

Matches : 22/148 fragment ions using 49 most intense peaks [\(help\)](#)

| #  | b                  | b <sup>++</sup>   | b <sup>*</sup> | b <sup>+++</sup> | b <sup>0</sup>     | b <sup>0++</sup> | Seq. | y                  | y <sup>++</sup> | y <sup>*</sup>    | y <sup>+++</sup> | y <sup>0</sup> | y <sup>0++</sup> | #  |
|----|--------------------|-------------------|----------------|------------------|--------------------|------------------|------|--------------------|-----------------|-------------------|------------------|----------------|------------------|----|
| 1  | 440.232602         | 220.619939        | 423.206053     | 212.106664       |                    |                  | Q    |                    |                 |                   |                  |                |                  | 15 |
| 2  | <b>539.301016</b>  | 270.154146        | 522.274467     | 261.640872       |                    |                  | V    | <b>1451.919580</b> | 726.463428      | 1434.893031       | 717.950154       | 1433.909015    | 717.458146       | 14 |
| 3  | <b>652.385080</b>  | 326.696178        | 635.358531     | 318.182904       |                    |                  | I    | <b>1352.851166</b> | 676.929221      | 1335.824617       | 668.415947       | 1334.840601    | 667.923939       | 13 |
| 4  | 765.469144         | 383.238210        | 748.442595     | 374.724936       |                    |                  | L    | <b>1239.767102</b> | 620.387189      | 1222.740553       | 611.873915       | 1221.756537    | 611.381907       | 12 |
| 5  | 866.516823         | 433.762050        | 849.490274     | 425.248775       | <b>848.506258</b>  | 424.756767       | T    | <b>1126.683038</b> | 563.845157      | 1109.656489       | 555.331883       | 1108.672473    | 554.839874       | 11 |
| 6  | 979.600887         | 490.304082        | 962.574338     | 481.790807       | 961.590322         | 481.298799       | L    | 1025.635359        | 513.321318      | 1008.608810       | 504.808043       | 1007.624794    | 504.316035       | 10 |
| 7  | <b>1107.659465</b> | <b>554.333371</b> | 1090.632916    | 545.820096       | <b>1089.648900</b> | 545.328088       | Q    | 912.551295         | 456.779286      | 895.524746        | 448.266011       | 894.540730     | 447.774003       | 9  |
| 8  | 1204.712229        | 602.859753        | 1187.685680    | 594.346478       | 1186.701664        | 593.854470       | P    | <b>784.492717</b>  | 392.749997      | 767.466168        | 384.236722       | 766.482152     | 383.744714       | 8  |
| 9  | 1305.759908        | 653.383592        | 1288.733359    | 644.870318       | <b>1287.749343</b> | 644.378310       | T    | 687.439953         | 344.223615      | 670.413404        | 335.710340       | 669.429388     | 335.218332       | 7  |
| 10 | 1418.843972        | 709.925624        | 1401.817423    | 701.412350       | <b>1400.833407</b> | 700.920341       | L    | 586.392274         | 293.699775      | 569.365725        | 285.186501       |                |                  | 6  |
| 11 | <b>1517.912386</b> | 759.459831        | 1500.885837    | 750.946557       | 1499.901821        | 750.454548       | V    | <b>473.308210</b>  | 237.157743      | 456.281661        | 228.644469       |                |                  | 5  |
| 12 | 1588.949500        | <b>794.978388</b> | 1571.922951    | 786.465114       | 1570.938935        | 785.973105       | A    | <b>374.239796</b>  | 187.623536      | 357.213247        | 179.110261       |                |                  | 4  |
| 13 | <b>1688.017914</b> | 844.512595        | 1670.991365    | 835.999321       | 1670.007349        | 835.507313       | V    | <b>303.202682</b>  | 152.104979      | 286.176133        | 143.591704       |                |                  | 3  |
| 14 | 1745.039378        | 873.023327        | 1728.012829    | 864.510053       | <b>1727.028813</b> | 864.018044       | G    | <b>204.134268</b>  | 102.570772      | <b>187.107719</b> | 94.057497        |                |                  | 2  |
| 15 |                    |                   |                |                  |                    |                  | K    | 147.112804         | 74.060040       | 130.086255        | 65.546765        |                |                  | 1  |

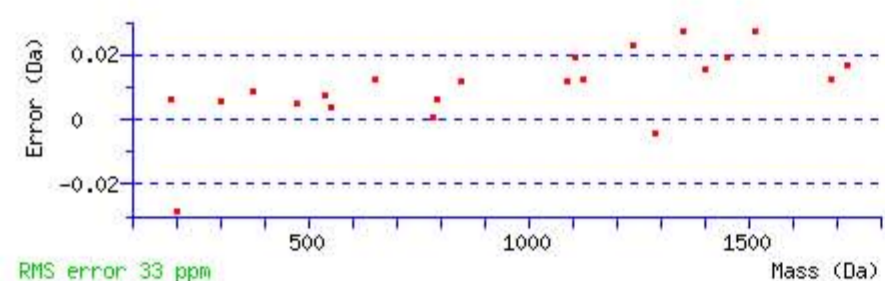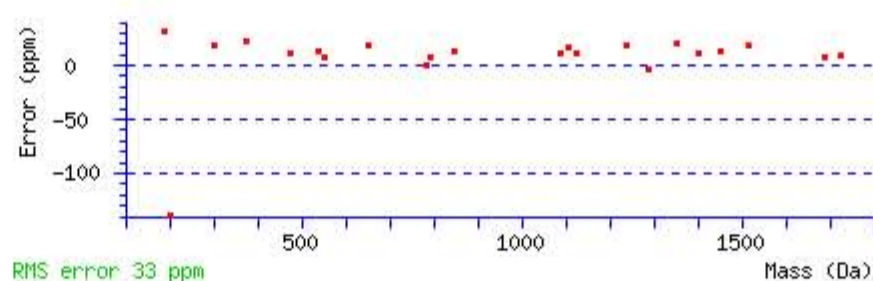

NCBI BLAST search of **QVILTLQPTLVAVGK**

(Parameters: blastp, nr protein database, expect=20000, no filter, PAM30)

Other BLAST [web gateways](#)

All matches to this query

| Score | Mr(calc):   | Delta    | Sequence                        |
|-------|-------------|----------|---------------------------------|
| 37.3  | 1890.137634 | 0.021094 | <a href="#">QVILTLQPTLVAVGK</a> |
| 5.8   | 1890.137634 | 0.021094 | <a href="#">QVILTLQPTLVAVGK</a> |

# MASCOT Search Results

## Peptide View

MS/MS Fragmentation of **QVVAGLNFR**

Found in **KNG1\_HUMAN**, Kininogen-1 OS=Homo sapiens GN=KNG1 PE=1 SV=2

Match to Query 27240: 1313.740728 from(657.877640,2+) rtinseconds(2195) index(43589)

Title: Locus:1.1.1.3213.8 File:"2013-07-02 CLN FXIII 180 min 1st F 3.wiff"

Data file C:\Program Files (x86)\Matrix Science\Mascot Daemon\mgf7 FXIII 180 min 1st\mascot\_daemon\_merge.mgf

Click mouse within plot area to zoom in by factor of two about that point

Or, Plot from  to  Da

Label all possible matches  Label matches used for scoring

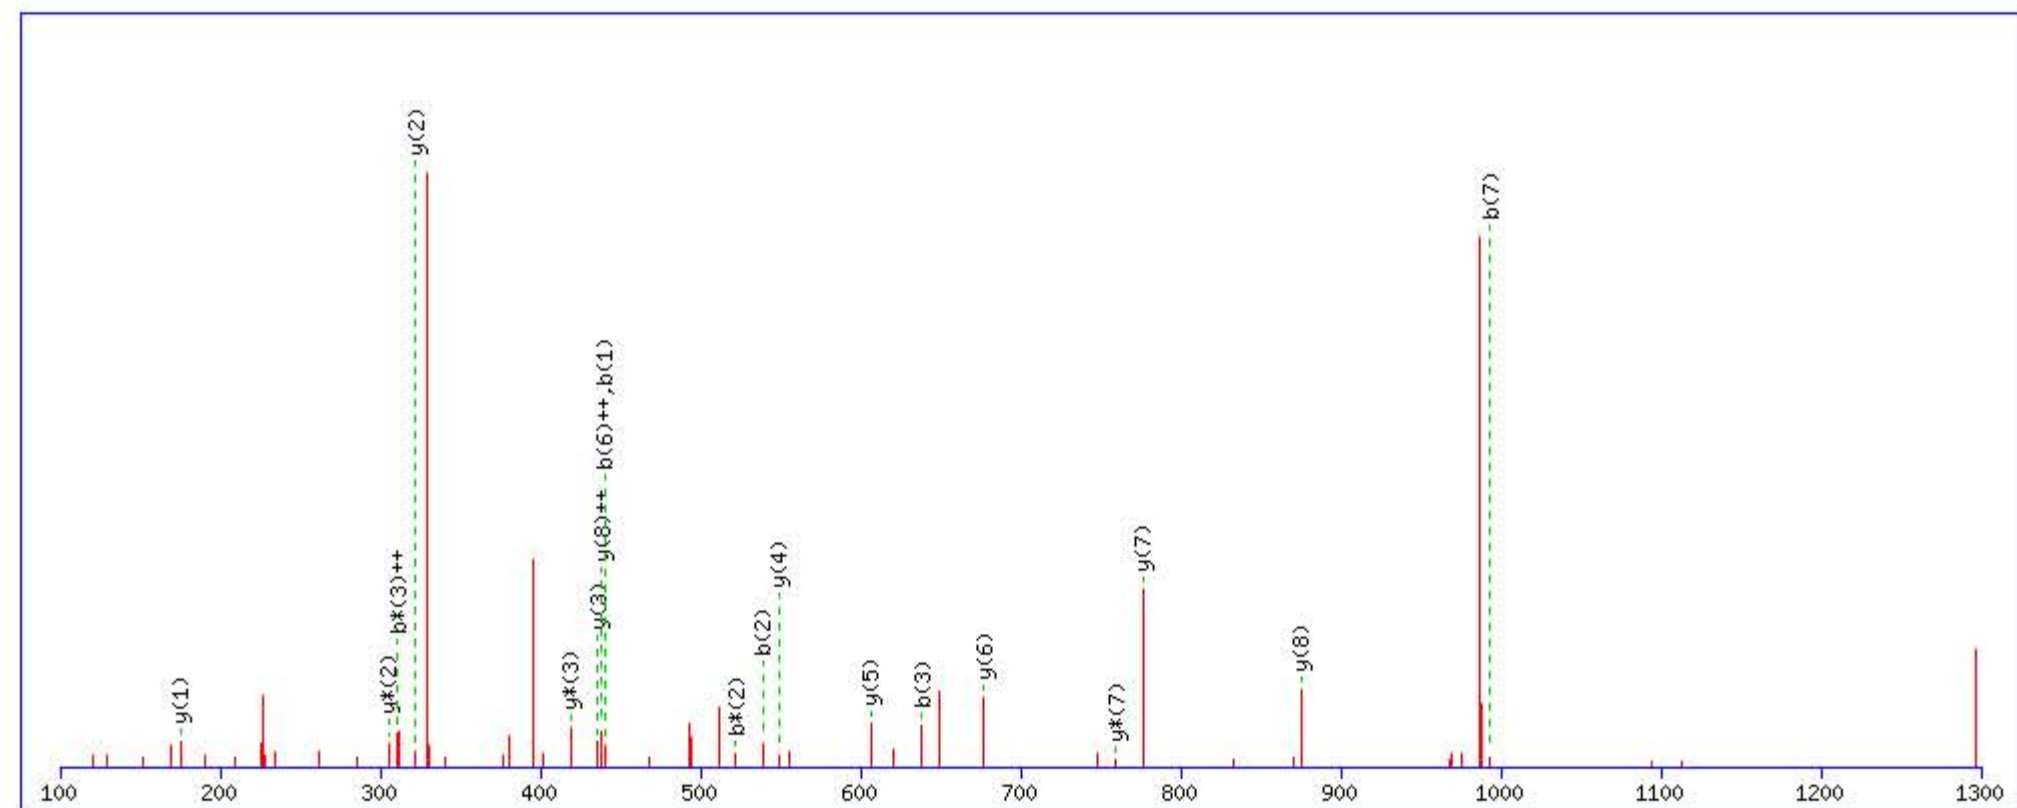

Monoisotopic mass of neutral peptide  $M_r(\text{calc})$ : 1313.727814

Fixed modifications: Carbamidomethyl (C) (apply to specified residues or termini only)

Variable modifications:

Q1 : Biotin:Thermo-21345 (Q)

Ions Score: 34 Expect: 0.0064

Matches : 19/64 fragment ions using 50 most intense peaks [\(help\)](#)

| # | b           | b <sup>++</sup> | b*          | b <sup>*++</sup> | Seq. | y          | y <sup>++</sup> | y*         | y <sup>*++</sup> | # |
|---|-------------|-----------------|-------------|------------------|------|------------|-----------------|------------|------------------|---|
| 1 | 440.232602  | 220.619939      | 423.206053  | 212.106664       | Q    |            |                 |            |                  | 9 |
| 2 | 539.301016  | 270.154146      | 522.274467  | 261.640872       | V    | 875.509763 | 438.258520      | 858.483214 | 429.745245       | 8 |
| 3 | 638.369430  | 319.688353      | 621.342881  | 311.175078       | V    | 776.441349 | 388.724313      | 759.414800 | 380.211038       | 7 |
| 4 | 709.406544  | 355.206910      | 692.379995  | 346.693635       | A    | 677.372935 | 339.190106      | 660.346386 | 330.676831       | 6 |
| 5 | 766.428008  | 383.717642      | 749.401459  | 375.204367       | G    | 606.335821 | 303.671549      | 589.309272 | 295.158274       | 5 |
| 6 | 879.512072  | 440.259674      | 862.485523  | 431.746400       | L    | 549.314357 | 275.160817      | 532.287808 | 266.647542       | 4 |
| 7 | 993.554999  | 497.281138      | 976.528450  | 488.767863       | N    | 436.230293 | 218.618784      | 419.203744 | 210.105510       | 3 |
| 8 | 1140.623413 | 570.815345      | 1123.596864 | 562.302070       | F    | 322.187366 | 161.597321      | 305.160817 | 153.084047       | 2 |
| 9 |             |                 |             |                  | R    | 175.118952 | 88.063114       | 158.092403 | 79.549839        | 1 |

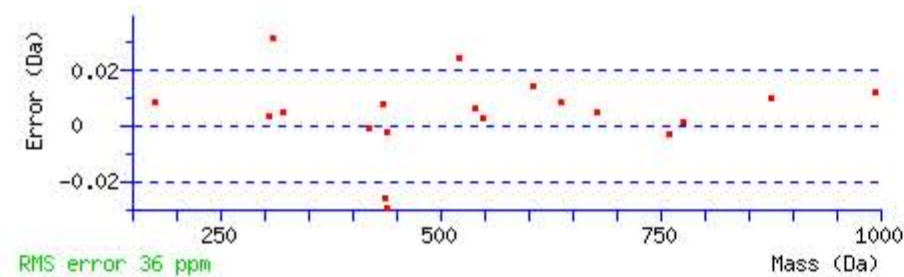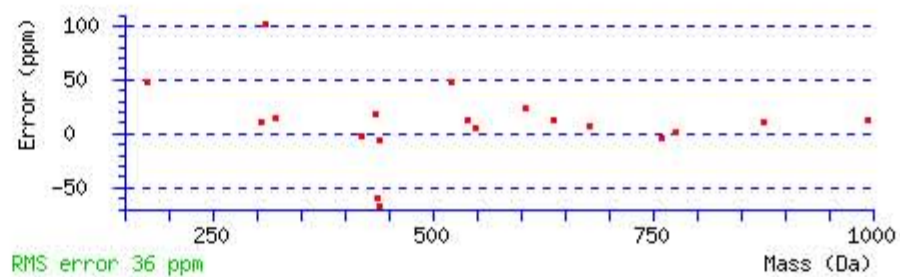

NCBI BLAST search of **QVVAGLNFR**

(Parameters: blastp, nr protein database, expect=20000, no filter, PAM30)

Other BLAST [web gateways](#)

### All matches to this query

| Score | $M_r(\text{calc})$ : | Delta     | Sequence                      |
|-------|----------------------|-----------|-------------------------------|
| 34.3  | 1313.727814          | 0.012914  | <a href="#">QVVAGLNFR</a>     |
| 11.2  | 1313.756805          | -0.016077 | <a href="#">KTVTHQFAVKR</a>   |
| 3.1   | 1313.723755          | 0.016973  | <a href="#">SSVKHRLAAMSK</a>  |
| 3.0   | 1313.730286          | 0.010442  | <a href="#">AKEDVLQKEVR</a>   |
| 3.0   | 1313.731644          | 0.009084  | <a href="#">GEPPPPVRPGR</a>   |
| 3.0   | 1313.745575          | -0.004847 | <a href="#">GSLALQPFLVGGR</a> |
| 3.0   | 1313.727798          | 0.012930  | <a href="#">KLSLVWQR</a>      |
| 3.0   | 1313.730301          | 0.010427  | <a href="#">LSQTLQVQLER</a>   |
| 3.0   | 1313.741516          | -0.000788 | <a href="#">NLTRLDSLNR</a>    |
| 3.0   | 1313.730286          | 0.010442  | <a href="#">QVTKEEGLALAR</a>  |

Mascot: <http://www.matrixscience.com/>

# MASCOT Search Results

## Peptide View

MS/MS Fragmentation of **EGDCPVQSGK**

Found in **KNG1\_HUMAN**, Kininogen-1 OS=Homo sapiens GN=KNG1 PE=1 SV=2

Match to Query 30115: 1386.631888 from(694.323220,2+) rtinseconds(1354) index(19900)

Title: Locus:1.1.1.2614.22 File:"2013-07-02 CLN FXIII 180 min 1st F 2.wiff"

Data file C:\Program Files (x86)\Matrix Science\Mascot Daemon\mgf\7 FXIII 180 min 1st\mascot\_daemon\_merge.mgf

Click mouse within plot area to zoom in by factor of two about that point

Or, Plot from  to  Da

Label all possible matches  Label matches used for scoring

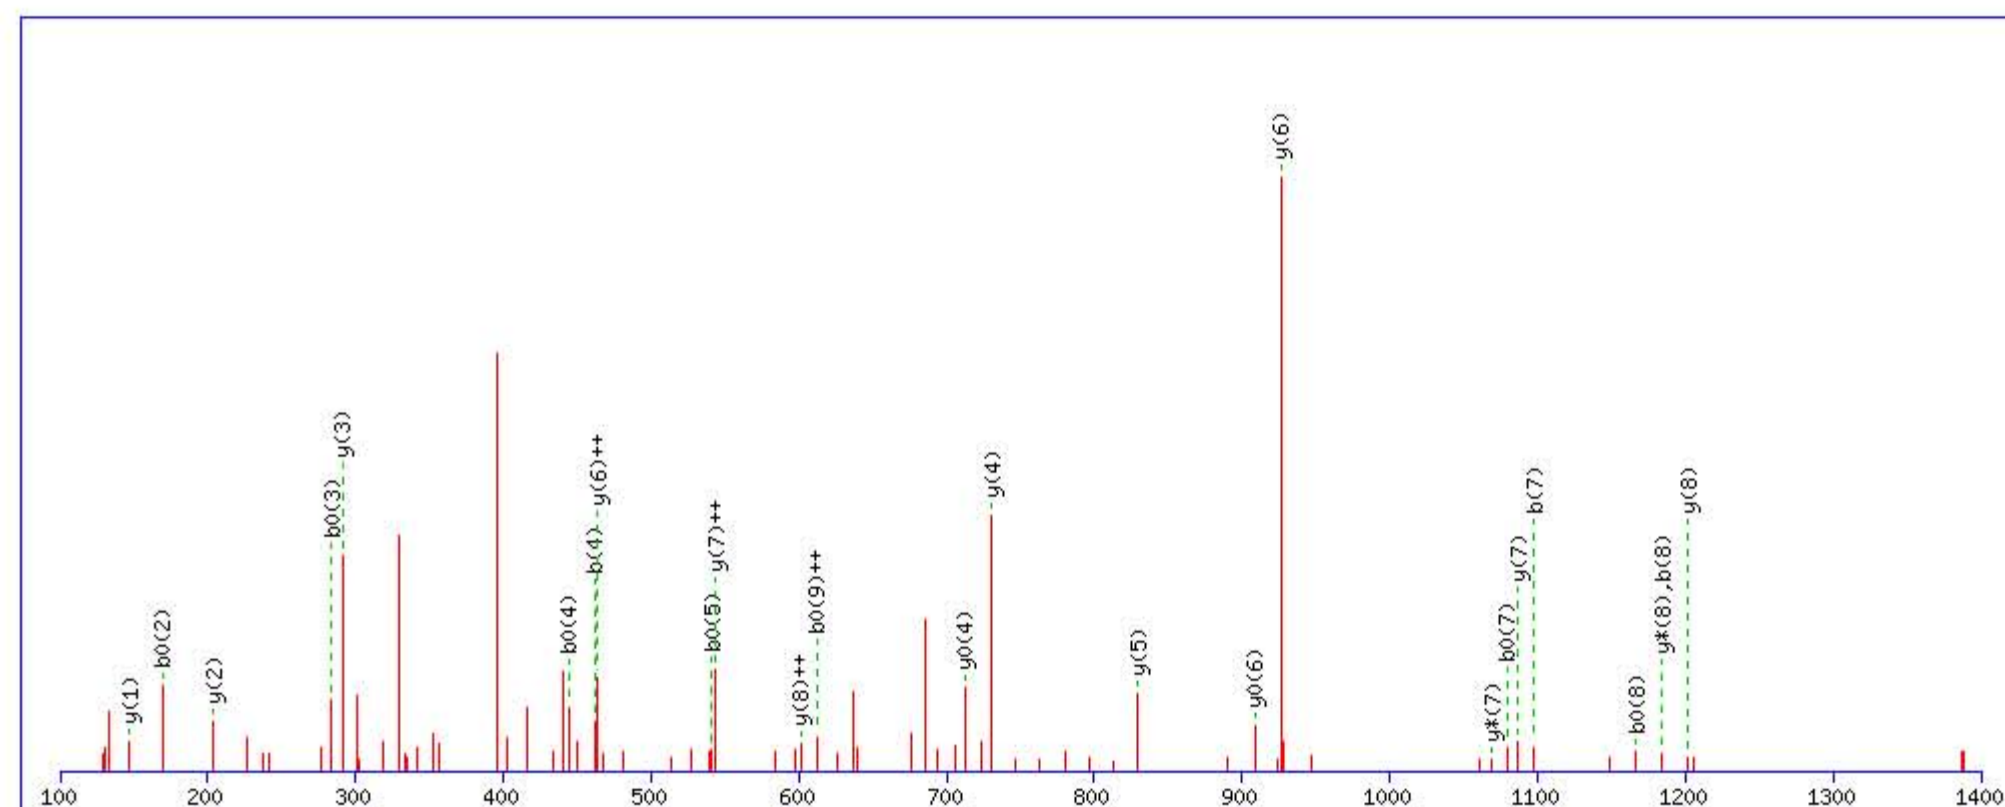

Monoisotopic mass of neutral peptide Mr(calc): 1386.627182

Fixed modifications: Carbamidomethyl (C) (apply to specified residues or termini only)

Variable modifications:

Q7 : Biotin:Thermo-21345 (Q)

Ions Score: 42 Expect: 0.00048

Matches : 25/92 fragment ions using 51 most intense peaks [\(help\)](#)

| #  | b           | b <sup>++</sup> | b <sup>*</sup> | b <sup>*++</sup> | b <sup>0</sup> | b <sup>0++</sup> | Seq. | y           | y <sup>++</sup> | y <sup>*</sup> | y <sup>*++</sup> | y <sup>0</sup> | y <sup>0++</sup> | #  |
|----|-------------|-----------------|----------------|------------------|----------------|------------------|------|-------------|-----------------|----------------|------------------|----------------|------------------|----|
| 1  | 130.049869  | 65.528572       |                |                  | 112.039304     | 56.523290        | E    |             |                 |                |                  |                |                  | 10 |
| 2  | 187.071333  | 94.039305       |                |                  | 169.060768     | 85.034022        | G    | 1258.591856 | 629.799566      | 1241.565307    | 621.286292       | 1240.581291    | 620.794284       | 9  |
| 3  | 302.098276  | 151.552776      |                |                  | 284.087711     | 142.547494       | D    | 1201.570392 | 601.288834      | 1184.543843    | 592.775560       | 1183.559827    | 592.283552       | 8  |
| 4  | 462.128925  | 231.568101      |                |                  | 444.118360     | 222.562818       | C    | 1086.543449 | 543.775363      | 1069.516900    | 535.262088       | 1068.532884    | 534.770080       | 7  |
| 5  | 559.181689  | 280.094483      |                |                  | 541.171124     | 271.089200       | P    | 926.512800  | 463.760038      | 909.486251     | 455.246764       | 908.502235     | 454.754756       | 6  |
| 6  | 658.250103  | 329.628690      |                |                  | 640.239538     | 320.623407       | V    | 829.460036  | 415.233656      | 812.433487     | 406.720382       | 811.449471     | 406.228374       | 5  |
| 7  | 1097.475429 | 549.241353      | 1080.448880    | 540.728078       | 1079.464864    | 540.236070       | Q    | 730.391622  | 365.699449      | 713.365073     | 357.186175       | 712.381057     | 356.694167       | 4  |
| 8  | 1184.507457 | 592.757367      | 1167.480908    | 584.244092       | 1166.496892    | 583.752084       | S    | 291.166296  | 146.086786      | 274.139747     | 137.573512       | 273.155731     | 137.081504       | 3  |
| 9  | 1241.528921 | 621.268099      | 1224.502372    | 612.754824       | 1223.518356    | 612.262816       | G    | 204.134268  | 102.570772      | 187.107719     | 94.057497        |                |                  | 2  |
| 10 |             |                 |                |                  |                |                  | K    | 147.112804  | 74.060040       | 130.086255     | 65.546765        |                |                  | 1  |

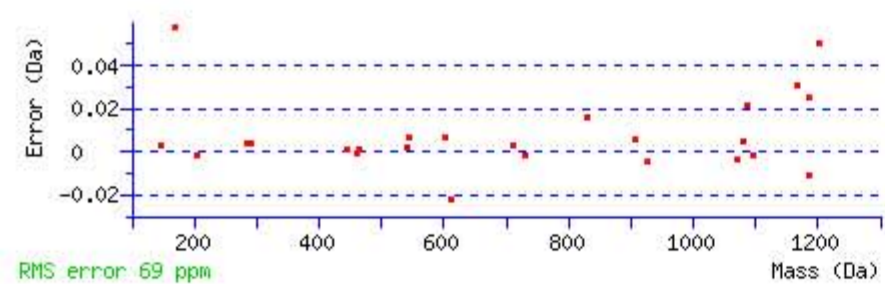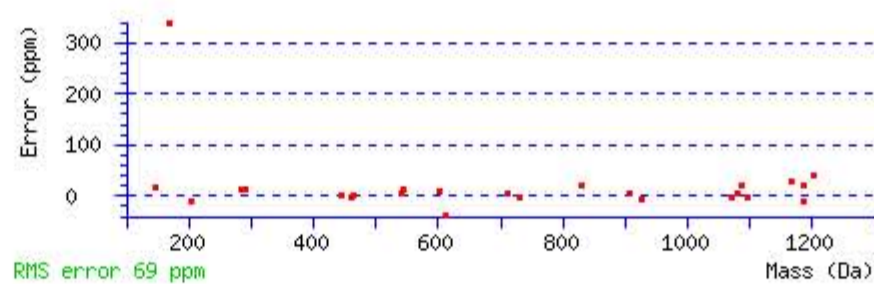

NCBI BLAST search of **EGDCPVQSGK**

(Parameters: blastp, nr protein database, expect=20000, no filter, PAM30)

Other BLAST [web gateways](#)

All matches to this query

| Score | Mr(calc):   | Delta    | Sequence                   |
|-------|-------------|----------|----------------------------|
| 42.3  | 1386.627182 | 0.004706 | <a href="#">EGDCPVQSGK</a> |

Mascot: <http://www.matrixscience.com/>

# Mascot Search Results

## Peptide View

MS/MS Fragmentation of **TWQDCEYK**

Found in **KNG1\_HUMAN**, Kininogen-1 OS=Homo sapiens GN=KNG1 PE=1 SV=2

Match to Query 32988: 1439.626908 from(720.820730,2+) rtinseconds(1745) index(22830)

Title: Locus:1.1.1.2750.15 File:"2013-07-02 CLN FXIII 180 min 1st F 2.wiff"

Data file C:\Program Files (x86)\Matrix Science\Mascot Daemon\mgf\7 FXIII 180 min 1st\mascot\_daemon\_merge.mgf

Click mouse within plot area to zoom in by factor of two about that point

Or, Plot from  to  Da

Label all possible matches  Label matches used for scoring

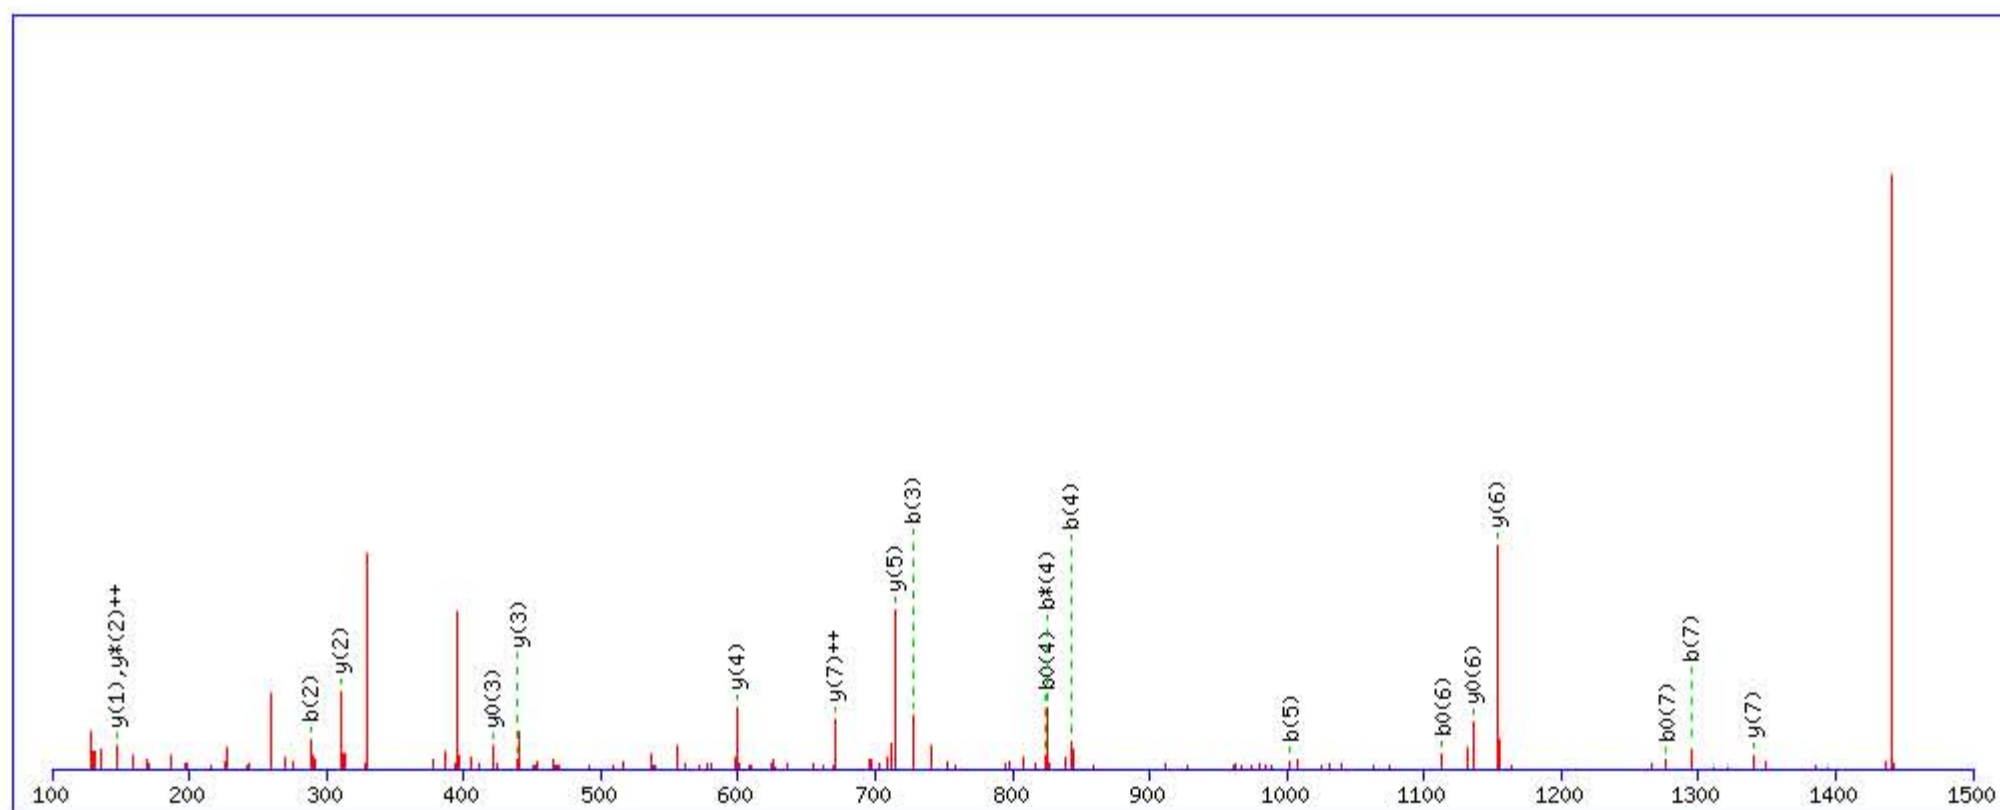

Monoisotopic mass of neutral peptide Mr(calc): 1439.621353

Fixed modifications: Carbamidomethyl (C) (apply to specified residues or termini only)

Variable modifications:

Q3 : Biotin:Thermo-21345 (Q)

Ions Score: 32 Expect: 0.0029

Matches : 20/76 fragment ions using 40 most intense peaks ([help](#))

| # | b                  | b <sup>++</sup> | b <sup>+</sup>    | b <sup>+++</sup> | b <sup>0</sup>     | b <sup>0++</sup> | Seq. | y                  | y <sup>++</sup>   | y <sup>+</sup> | y <sup>+++</sup>  | y <sup>0</sup>     | y <sup>0++</sup> | # |
|---|--------------------|-----------------|-------------------|------------------|--------------------|------------------|------|--------------------|-------------------|----------------|-------------------|--------------------|------------------|---|
| 1 | 102.054955         | 51.531116       |                   |                  | 84.044390          | 42.525833        | T    |                    |                   |                |                   |                    |                  | 8 |
| 2 | <b>288.134268</b>  | 144.570772      |                   |                  | 270.123703         | 135.565490       | W    | <b>1339.580957</b> | <b>670.294117</b> | 1322.554408    | 661.780842        | 1321.570392        | 661.288834       | 7 |
| 3 | <b>727.359594</b>  | 364.183435      | 710.333045        | 355.670161       | 709.349029         | 355.178153       | Q    | <b>1153.501644</b> | 577.254460        | 1136.475095    | 568.741186        | <b>1135.491079</b> | 568.249178       | 6 |
| 4 | <b>842.386537</b>  | 421.696907      | <b>825.359988</b> | 413.183632       | <b>824.375972</b>  | 412.691624       | D    | <b>714.276318</b>  | 357.641797        | 697.249769     | 349.128523        | 696.265753         | 348.636515       | 5 |
| 5 | <b>1002.417186</b> | 501.712231      | 985.390637        | 493.198957       | 984.406621         | 492.706949       | C    | <b>599.249375</b>  | 300.128326        | 582.222826     | 291.615051        | 581.238810         | 291.123043       | 4 |
| 6 | 1131.459779        | 566.233528      | 1114.433230       | 557.720253       | <b>1113.449214</b> | 557.228245       | E    | <b>439.218726</b>  | 220.113001        | 422.192177     | 211.599727        | <b>421.208161</b>  | 211.107719       | 3 |
| 7 | <b>1294.523108</b> | 647.765192      | 1277.496559       | 639.251918       | <b>1276.512543</b> | 638.759910       | Y    | <b>310.176133</b>  | 155.591705        | 293.149584     | <b>147.078430</b> |                    |                  | 2 |
| 8 |                    |                 |                   |                  |                    |                  | K    | <b>147.112804</b>  | 74.060040         | 130.086255     | 65.546765         |                    |                  | 1 |

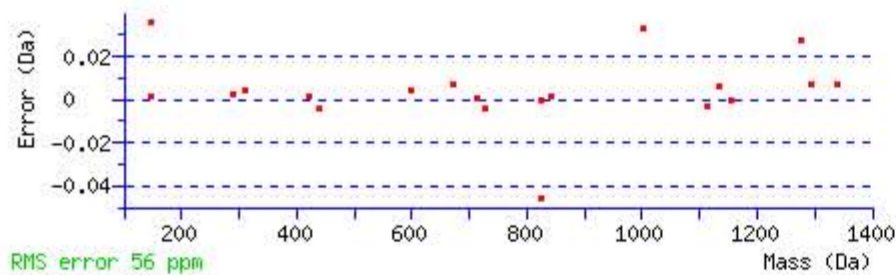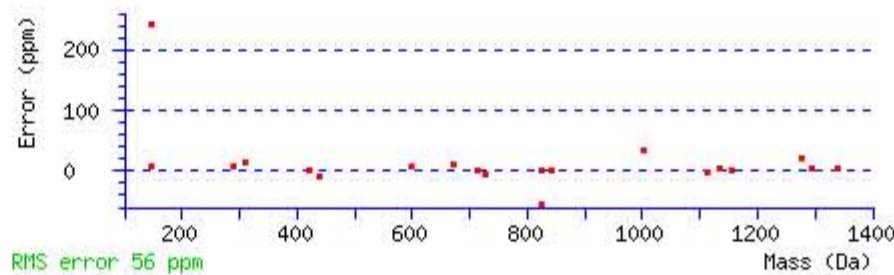

NCBI BLAST search of [TWQDCEYK](#)

(Parameters: blastp, nr protein database, expect=20000, no filter, PAM30)

Other BLAST [web gateways](#)

All matches to this query

| Score | Mr(calc):   | Delta    | Sequence                 |
|-------|-------------|----------|--------------------------|
| 31.9  | 1439.621353 | 0.005555 | <a href="#">TWQDCEYK</a> |

Mascot: <http://www.matrixscience.com/>

# MASCOT Search Results

## Peptide View

MS/MS Fragmentation of **SVSEINPTTQMK**

Found in **KNG1\_HUMAN**, Kininogen-1 OS=Homo sapiens GN=KNG1 PE=1 SV=2

Match to Query 41042: 1644.843568 from(823.429060,2+) rtinseconds(1829) index(40936)

Title: Locus:1.1.1.3086.14 File:"2013-07-02 CLN FXIII 180 min 1st F 3.wiff"

Data file C:\Program Files (x86)\Matrix Science\Mascot Daemon\mgf\7 FXIII 180 min 1st\mascot\_daemon\_merge.mgf

Click mouse within plot area to zoom in by factor of two about that point

Or, Plot from  to  Da

Label all possible matches  Label matches used for scoring

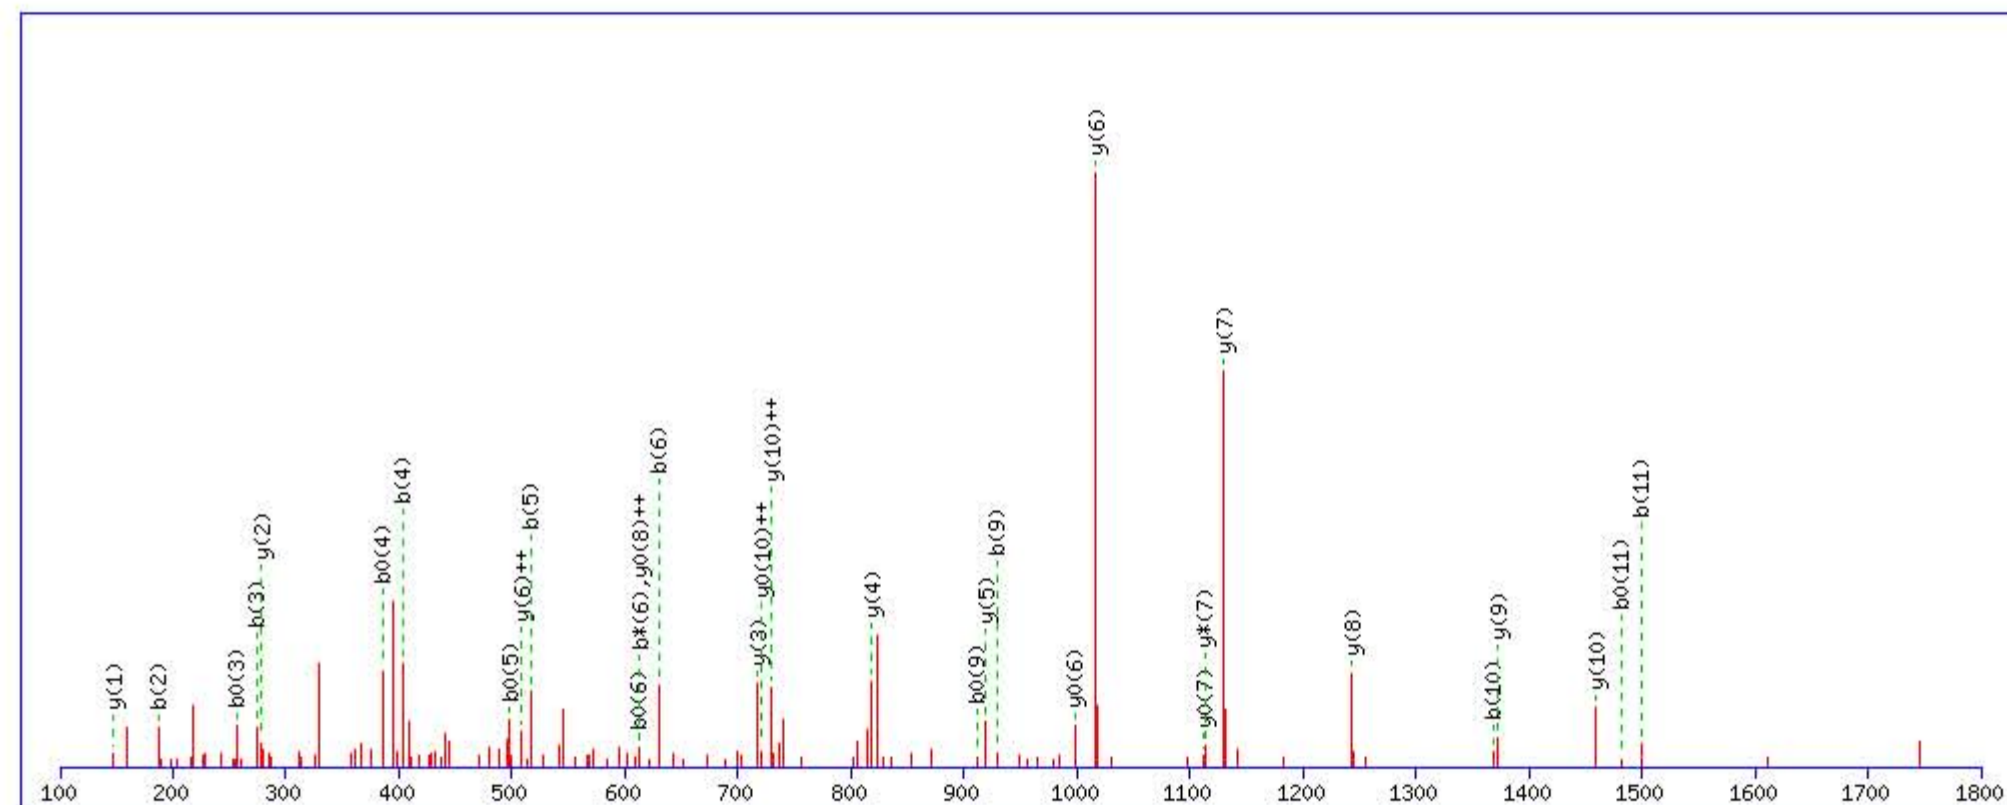

Monoisotopic mass of neutral peptide Mr(calc): 1644.821503

Fixed modifications: Carbamidomethyl (C) (apply to specified residues or termini only)

Variable modifications:

Q10 : Biotin:Thermo-21345 (Q)

Ions Score: 60 Expect: 1.5e-005

Matches : 32/116 fragment ions using 61 most intense peaks [\(help\)](#)

| #  | b                  | b <sup>++</sup> | b <sup>*</sup>    | b <sup>*++</sup> | b <sup>0</sup>     | b <sup>0++</sup> | Seq. | y                  | y <sup>++</sup>   | y <sup>*</sup>     | y <sup>*++</sup> | y <sup>0</sup>     | y <sup>0++</sup>  | #  |
|----|--------------------|-----------------|-------------------|------------------|--------------------|------------------|------|--------------------|-------------------|--------------------|------------------|--------------------|-------------------|----|
| 1  | 88.039304          | 44.523290       |                   |                  | 70.028739          | 35.518008        | S    |                    |                   |                    |                  |                    |                   | 12 |
| 2  | <b>187.107718</b>  | 94.057497       |                   |                  | 169.097153         | 85.052214        | V    | 1558.796763        | 779.902020        | 1541.770214        | 771.388745       | 1540.786198        | 770.896737        | 11 |
| 3  | <b>274.139746</b>  | 137.573511      |                   |                  | <b>256.129181</b>  | 128.568229       | S    | <b>1459.728349</b> | <b>730.367813</b> | 1442.701800        | 721.854538       | 1441.717784        | <b>721.362530</b> | 10 |
| 4  | <b>403.182339</b>  | 202.094808      |                   |                  | <b>385.171774</b>  | 193.089525       | E    | <b>1372.696321</b> | 686.851799        | 1355.669772        | 678.338524       | 1354.685756        | 677.846516        | 9  |
| 5  | <b>516.266403</b>  | 258.636840      |                   |                  | <b>498.255838</b>  | 249.631557       | I    | <b>1243.653728</b> | 622.330502        | 1226.627179        | 613.817228       | 1225.643163        | <b>613.325220</b> | 8  |
| 6  | <b>630.309330</b>  | 315.658303      | <b>613.282781</b> | 307.145029       | <b>612.298765</b>  | 306.653021       | N    | <b>1130.569664</b> | 565.788470        | <b>1113.543115</b> | 557.275196       | <b>1112.559099</b> | 556.783188        | 7  |
| 7  | 727.362094         | 364.184685      | 710.335545        | 355.671411       | 709.351529         | 355.179403       | P    | <b>1016.526737</b> | <b>508.767007</b> | 999.500188         | 500.253732       | <b>998.516172</b>  | 499.761724        | 6  |
| 8  | 828.409773         | 414.708525      | 811.383224        | 406.195250       | 810.399208         | 405.703242       | T    | <b>919.473973</b>  | 460.240625        | 902.447424         | 451.727350       | 901.463408         | 451.235342        | 5  |
| 9  | <b>929.457452</b>  | 465.232364      | 912.430903        | 456.719090       | <b>911.446887</b>  | 456.227082       | T    | <b>818.426294</b>  | 409.716785        | 801.399745         | 401.203511       | 800.415729         | 400.711503        | 4  |
| 10 | <b>1368.682778</b> | 684.845027      | 1351.656229       | 676.331753       | 1350.672213        | 675.839745       | Q    | <b>717.378615</b>  | 359.192946        | 700.352066         | 350.679671       |                    |                   | 3  |
| 11 | <b>1499.723263</b> | 750.365270      | 1482.696714       | 741.851995       | <b>1481.712698</b> | 741.359987       | M    | <b>278.153289</b>  | 139.580282        | 261.126740         | 131.067008       |                    |                   | 2  |
| 12 |                    |                 |                   |                  |                    |                  | K    | <b>147.112804</b>  | 74.060040         | 130.086255         | 65.546765        |                    |                   | 1  |

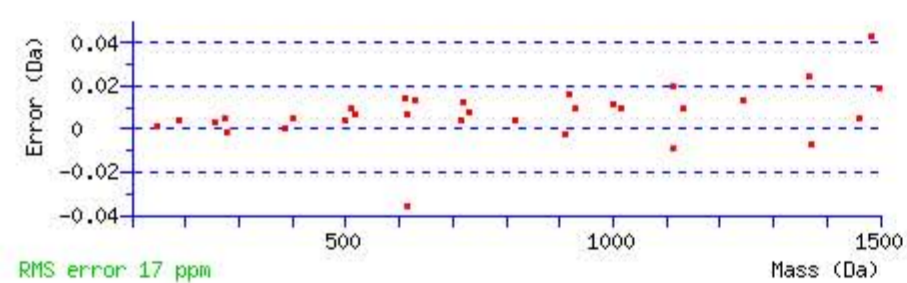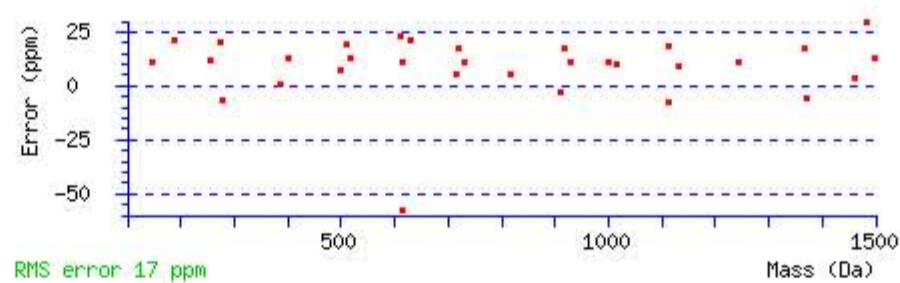

NCBI BLAST search of **SVSEINPTTQMK**

(Parameters: blastp, nr protein database, expect=20000, no filter, PAM30)

Other BLAST [web gateways](#)

All matches to this query

| Score | Mr(calc):   | Delta     | Sequence                         |
|-------|-------------|-----------|----------------------------------|
| 60.2  | 1644.821503 | 0.022065  | <a href="#">SVSEINPTTQMK</a>     |
| 8.3   | 1644.861710 | -0.018142 | <a href="#">VRESSCLALNDLLR</a>   |
| 4.3   | 1644.850510 | -0.006942 | <a href="#">TDGIPVSGTICAKQAK</a> |
| 2.9   | 1644.854523 | -0.010955 | <a href="#">CVWSPLASPSTSILK</a>  |
| 1.3   | 1644.840607 | 0.002961  | <a href="#">ESGRQFCIAVTHLK</a>   |
| 0.2   | 1644.861710 | -0.018142 | <a href="#">QRETSDTPIMRALK</a>   |

# MASCOT Search Results

## Peptide View

MS/MS Fragmentation of **IASFSQNCDIYPGK**

Found in **KNG1\_HUMAN**, Kininogen-1 OS=Homo sapiens GN=KNG1 PE=1 SV=2

Match to Query 47783: 1909.924788 from(955.969670,2+) rtinseconds(2042) index(24997)  
 Title: Locus:1.1.1.2853.18 File:"2013-07-02 CLN FXIII 180 min 1st F 2.wiff"

Data file C:\Program Files (x86)\Matrix Science\Mascot Daemon\mgf7 FXIII 180 min 1st\mascot\_daemon\_merge.mgf

Click mouse within plot area to zoom in by factor of two about that point

Or, Plot from  to  Da

Label all possible matches  Label matches used for scoring

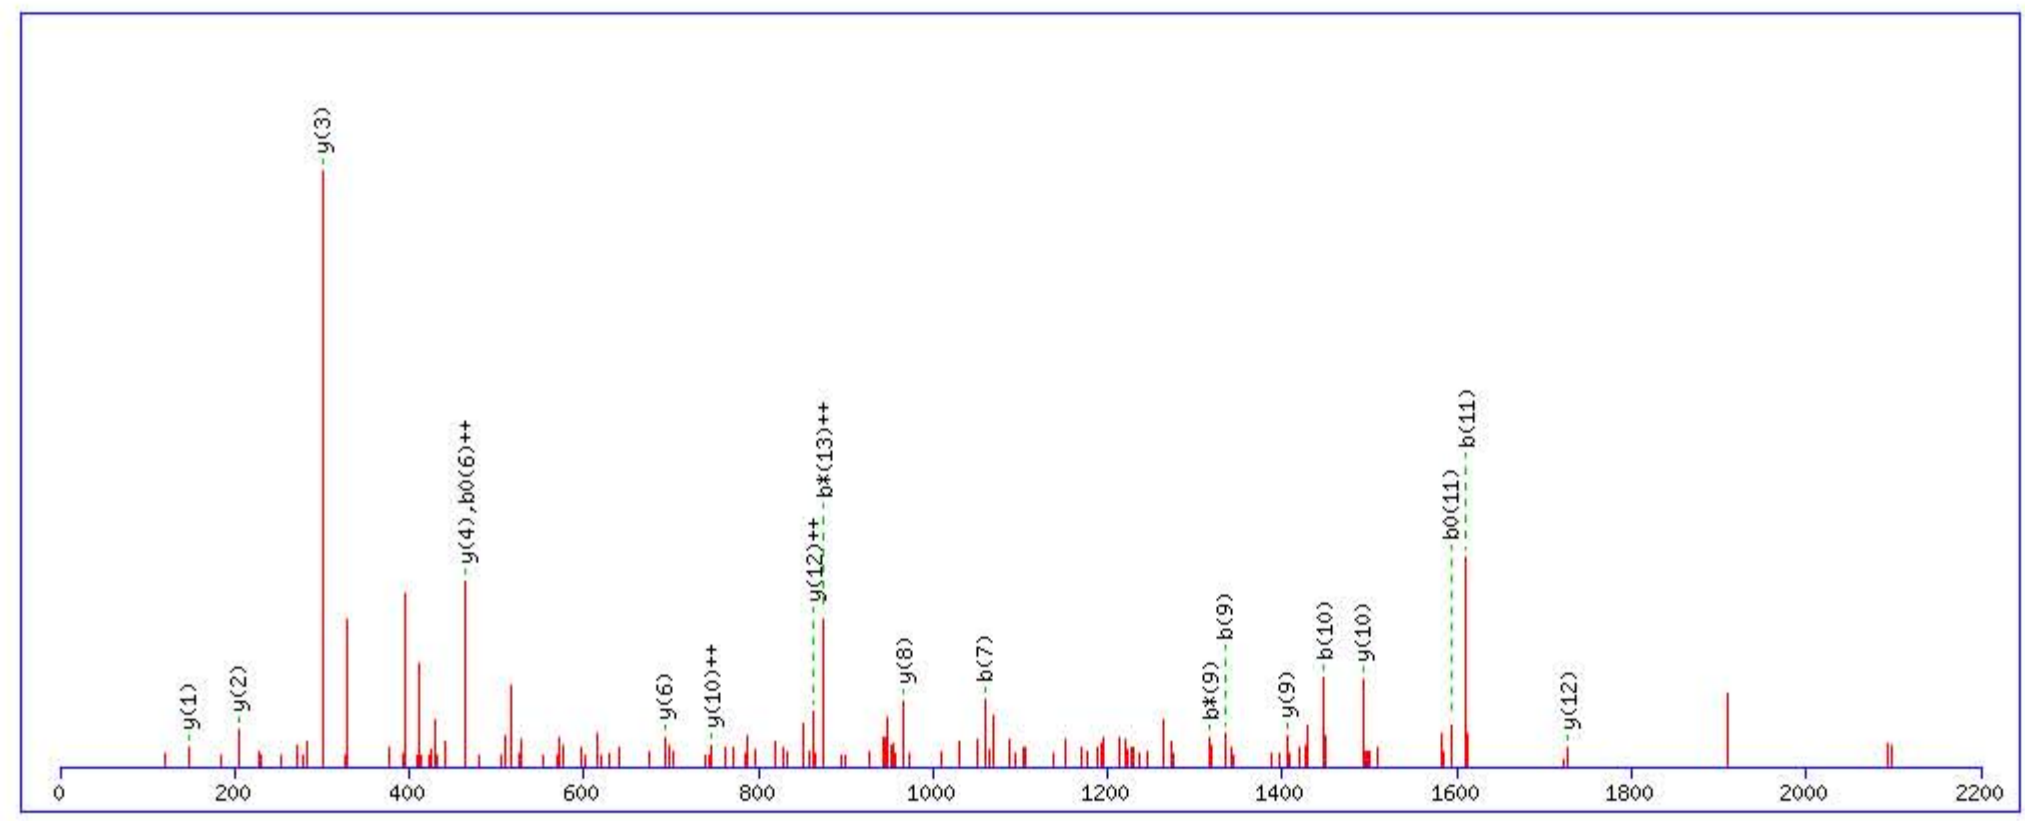

Monoisotopic mass of neutral peptide Mr(calc): 1909.906631

Fixed modifications: Carbamidomethyl (C) (apply to specified residues or termini only)

Variable modifications:

Q6 : Biotin:Thermo-21345 (Q)

Ions Score: 54 Expect: 8.3e-005

Matches : 19/132 fragment ions using 32 most intense peaks [\(help\)](#)

| #  | b                  | b <sup>++</sup> | b <sup>*</sup>     | b <sup>*++</sup>  | b <sup>0</sup>     | b <sup>0++</sup>  | Seq. | y                  | y <sup>++</sup>   | y <sup>*</sup> | y <sup>*++</sup> | y <sup>0</sup> | y <sup>0++</sup> | #  |
|----|--------------------|-----------------|--------------------|-------------------|--------------------|-------------------|------|--------------------|-------------------|----------------|------------------|----------------|------------------|----|
| 1  | 114.091340         | 57.549308       |                    |                   |                    |                   | I    |                    |                   |                |                  |                |                  | 14 |
| 2  | 185.128454         | 93.067865       |                    |                   |                    |                   | A    | 1797.829854        | 899.418565        | 1780.803305    | 890.905291       | 1779.819289    | 890.413283       | 13 |
| 3  | 272.160482         | 136.583879      |                    |                   | 254.149917         | 127.578596        | S    | <b>1726.792740</b> | <b>863.900008</b> | 1709.766191    | 855.386734       | 1708.782175    | 854.894726       | 12 |
| 4  | 419.228896         | 210.118086      |                    |                   | 401.218331         | 201.112803        | F    | 1639.760712        | 820.383994        | 1622.734163    | 811.870720       | 1621.750147    | 811.378712       | 11 |
| 5  | 506.260924         | 253.634100      |                    |                   | 488.250359         | 244.628817        | S    | <b>1492.692298</b> | <b>746.849787</b> | 1475.665749    | 738.336513       | 1474.681733    | 737.844505       | 10 |
| 6  | 945.486250         | 473.246763      | 928.459701         | 464.733488        | 927.475685         | <b>464.241480</b> | Q    | <b>1405.660270</b> | 703.333773        | 1388.633721    | 694.820499       | 1387.649705    | 694.328491       | 9  |
| 7  | <b>1059.529177</b> | 530.268226      | 1042.502628        | 521.754952        | 1041.518612        | 521.262944        | N    | <b>966.434944</b>  | 483.721110        | 949.408395     | 475.207836       | 948.424379     | 474.715828       | 8  |
| 8  | 1219.559826        | 610.283551      | 1202.533277        | 601.770277        | 1201.549261        | 601.278268        | C    | 852.392017         | 426.699647        | 835.365468     | 418.186372       | 834.381452     | 417.694364       | 7  |
| 9  | <b>1334.586769</b> | 667.797023      | <b>1317.560220</b> | 659.283748        | 1316.576204        | 658.791740        | D    | <b>692.361368</b>  | 346.684322        | 675.334819     | 338.171048       | 674.350803     | 337.679040       | 6  |
| 10 | <b>1447.670833</b> | 724.339054      | 1430.644284        | 715.825780        | 1429.660268        | 715.333772        | I    | 577.334425         | 289.170851        | 560.307876     | 280.657576       |                |                  | 5  |
| 11 | <b>1610.734162</b> | 805.870719      | 1593.707613        | 797.357445        | <b>1592.723597</b> | 796.865436        | Y    | <b>464.250361</b>  | 232.628818        | 447.223812     | 224.115544       |                |                  | 4  |
| 12 | 1707.786926        | 854.397101      | 1690.760377        | 845.883827        | 1689.776361        | 845.391819        | P    | <b>301.187032</b>  | 151.097154        | 284.160483     | 142.583879       |                |                  | 3  |
| 13 | 1764.808390        | 882.907833      | 1747.781841        | <b>874.394559</b> | 1746.797825        | 873.902550        | G    | <b>204.134268</b>  | 102.570772        | 187.107719     | 94.057497        |                |                  | 2  |
| 14 |                    |                 |                    |                   |                    |                   | K    | <b>147.112804</b>  | 74.060040         | 130.086255     | 65.546765        |                |                  | 1  |

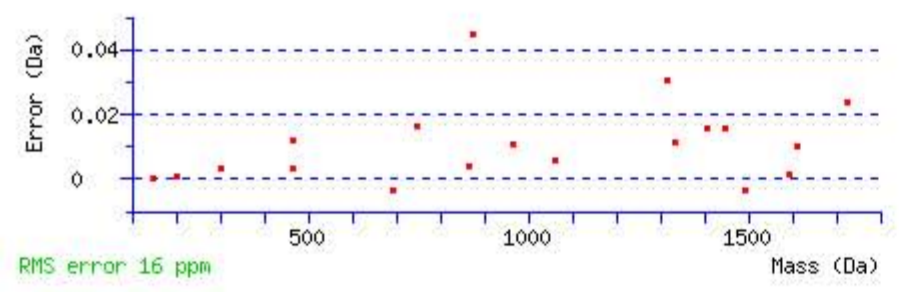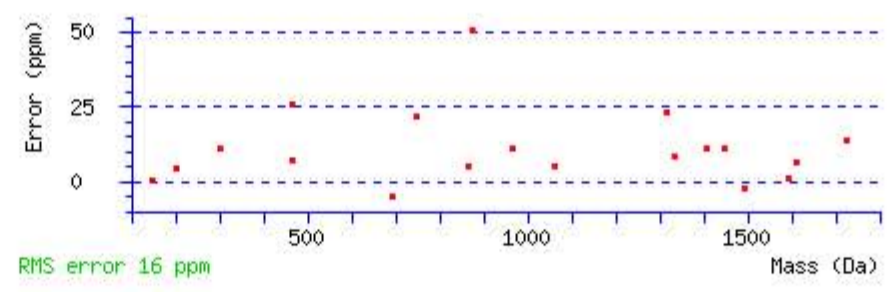

NCBI BLAST search of **IASFSQNCDIYPGK**

(Parameters: blastp, nr protein database, expect=20000, no filter, PAM30)

Other BLAST [web gateways](#)

### All matches to this query

| Score | Mr(calc):   | Delta    | Sequence                       |
|-------|-------------|----------|--------------------------------|
| 54.1  | 1909.906631 | 0.018157 | <a href="#">IASFSQNCDIYPGK</a> |

# MASCOT Search Results

## Peptide View

MS/MS Fragmentation of **YNSQNQSNNQFVLYR**

Found in **KNG1\_HUMAN**, Kininogen-1 OS=Homo sapiens GN=KNG1 PE=1 SV=2

Match to Query 55039: 2185.057692 from(729.359840,3+) rtinseconds(2099) index(25392)

Title: Locus:1.1.1.2873.16 File:"2013-07-02 CLN FXIII 180 min 1st F 2.wiff"

Data file C:\Program Files (x86)\Matrix Science\Mascot Daemon\mgf\7 FXIII 180 min 1st\mascot\_daemon\_merge.mgf

Click mouse within plot area to zoom in by factor of two about that point

Or, Plot from  to  Da

Label all possible matches  Label matches used for scoring

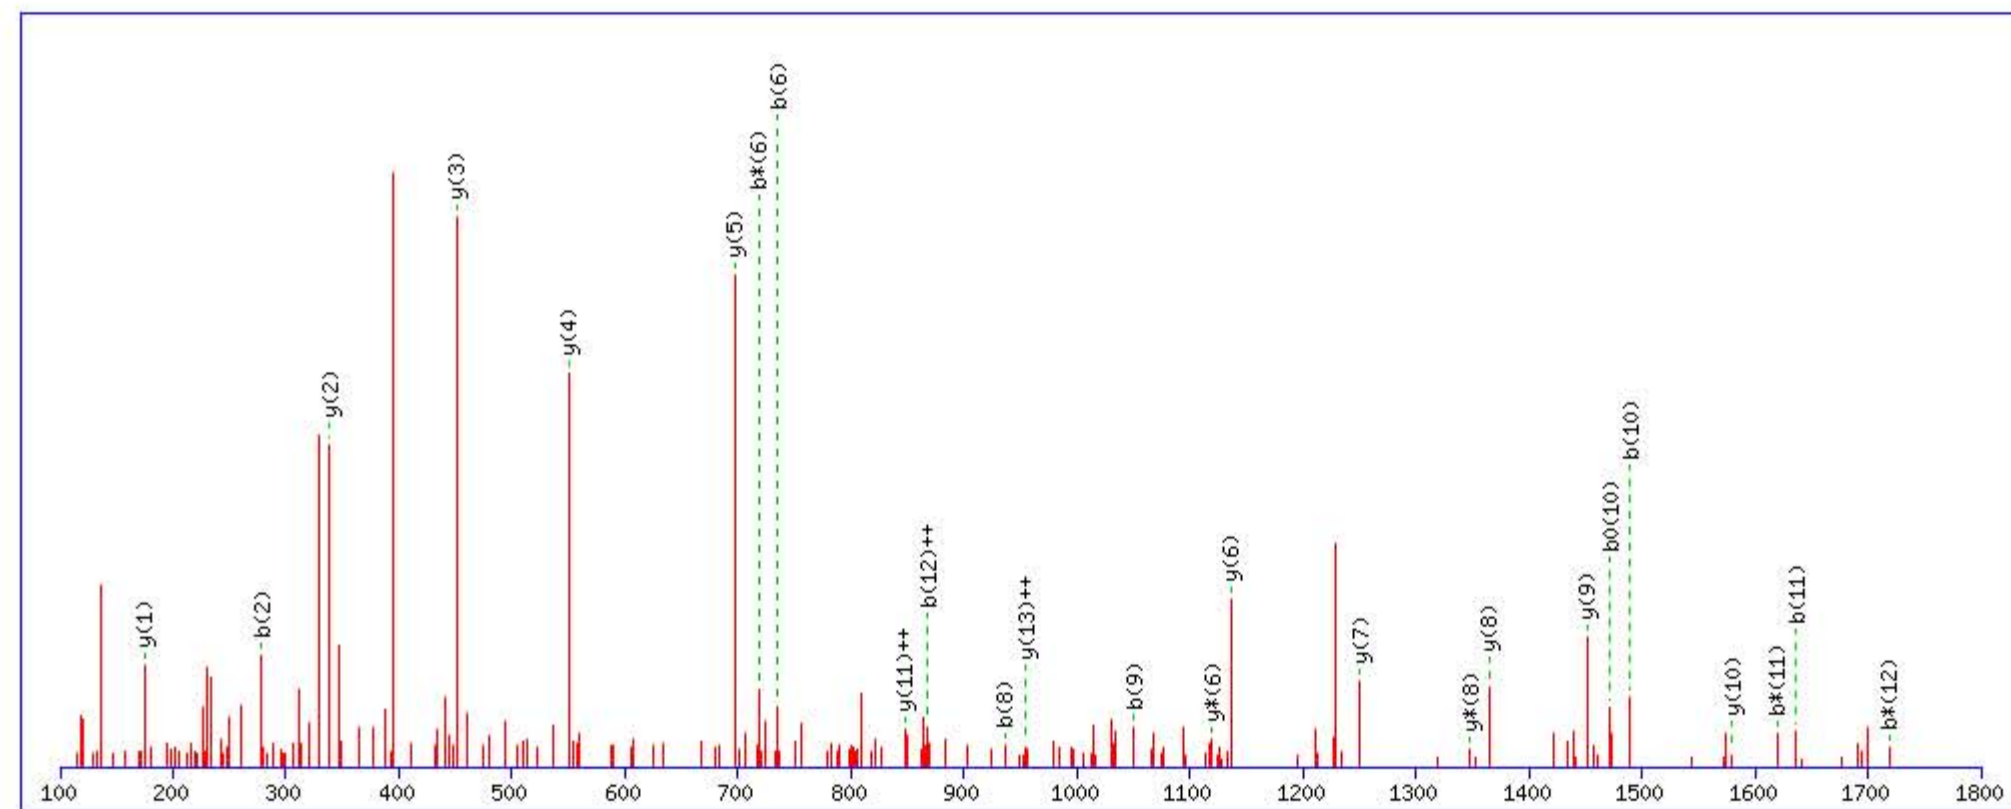

Monoisotopic mass of neutral peptide Mr(calc): 2185.037445

Fixed modifications: Carbamidomethyl (C) (apply to specified residues or termini only)

Variable modifications:

Q10 : Biotin:Thermo-21345 (Q)

Ions Score: 48 Expect: 0.00034

Matches : 25/146 fragment ions using 49 most intense peaks [\(help\)](#)

| #  | b                  | b <sup>++</sup>   | b <sup>*</sup>     | b <sup>*++</sup> | b <sup>0</sup>     | b <sup>0++</sup> | Seq. | y                  | y <sup>++</sup>   | y <sup>*</sup>     | y <sup>*++</sup> | y <sup>0</sup> | y <sup>0++</sup> | #  |
|----|--------------------|-------------------|--------------------|------------------|--------------------|------------------|------|--------------------|-------------------|--------------------|------------------|----------------|------------------|----|
| 1  | 164.070605         | 82.538940         |                    |                  |                    |                  | Y    |                    |                   |                    |                  |                |                  | 15 |
| 2  | <b>278.113532</b>  | 139.560404        | 261.086983         | 131.047130       |                    |                  | N    | 2022.981419        | 1011.994348       | 2005.954870        | 1003.481073      | 2004.970854    | 1002.989065      | 14 |
| 3  | 365.145560         | 183.076418        | 348.119011         | 174.563144       | 347.134995         | 174.071136       | S    | 1908.938492        | <b>954.972884</b> | 1891.911943        | 946.459610       | 1890.927927    | 945.967602       | 13 |
| 4  | 493.204138         | 247.105707        | 476.177589         | 238.592433       | 475.193573         | 238.100425       | Q    | 1821.906464        | 911.456870        | 1804.879915        | 902.943596       | 1803.895899    | 902.451588       | 12 |
| 5  | 607.247065         | 304.127171        | 590.220516         | 295.613896       | 589.236500         | 295.121888       | N    | 1693.847886        | <b>847.427581</b> | 1676.821337        | 838.914307       | 1675.837321    | 838.422299       | 11 |
| 6  | <b>735.305643</b>  | 368.156460        | <b>718.279094</b>  | 359.643185       | 717.295078         | 359.151177       | Q    | <b>1579.804959</b> | 790.406118        | 1562.778410        | 781.892843       | 1561.794394    | 781.400835       | 10 |
| 7  | 822.337671         | 411.672474        | 805.311122         | 403.159199       | 804.327106         | 402.667191       | S    | <b>1451.746381</b> | 726.376829        | 1434.719832        | 717.863554       | 1433.735816    | 717.371546       | 9  |
| 8  | <b>936.380598</b>  | 468.693937        | 919.354049         | 460.180662       | 918.370033         | 459.688654       | N    | <b>1364.714353</b> | 682.860815        | <b>1347.687804</b> | 674.347540       |                |                  | 8  |
| 9  | <b>1050.423525</b> | 525.715400        | 1033.396976        | 517.202126       | 1032.412960        | 516.710118       | N    | <b>1250.671426</b> | 625.839351        | 1233.644877        | 617.326077       |                |                  | 7  |
| 10 | <b>1489.648851</b> | 745.328064        | 1472.622302        | 736.814789       | <b>1471.638286</b> | 736.322781       | Q    | <b>1136.628499</b> | 568.817888        | <b>1119.601950</b> | 560.304613       |                |                  | 6  |
| 11 | <b>1636.717265</b> | 818.862271        | <b>1619.690716</b> | 810.348996       | 1618.706700        | 809.856988       | F    | <b>697.403173</b>  | 349.205225        | 680.376624         | 340.691950       |                |                  | 5  |
| 12 | 1735.785679        | <b>868.396478</b> | <b>1718.759130</b> | 859.883203       | 1717.775114        | 859.391195       | V    | <b>550.334759</b>  | 275.671018        | 533.308210         | 267.157743       |                |                  | 4  |
| 13 | 1848.869743        | 924.938510        | 1831.843194        | 916.425235       | 1830.859178        | 915.933227       | L    | <b>451.266345</b>  | 226.136811        | 434.239796         | 217.623536       |                |                  | 3  |
| 14 | 2011.933072        | 1006.470174       | 1994.906523        | 997.956900       | 1993.922507        | 997.464892       | Y    | <b>338.182281</b>  | 169.594779        | 321.155732         | 161.081504       |                |                  | 2  |
| 15 |                    |                   |                    |                  |                    |                  | R    | <b>175.118952</b>  | 88.063114         | 158.092403         | 79.549840        |                |                  | 1  |

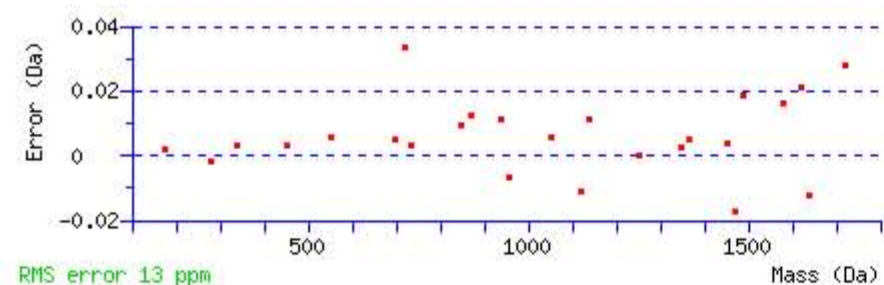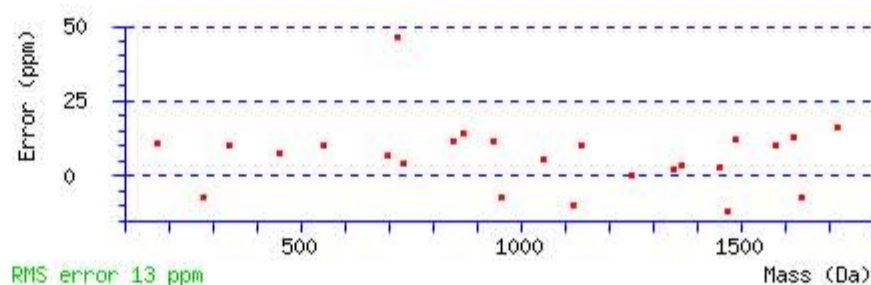

NCBI BLAST search of **YNSQNQSNNQFVLYR**

(Parameters: blastp, nr protein database, expect=20000, no filter, PAM30)

Other BLAST [web gateways](#)

### All matches to this query

| Score | Mr(calc):   | Delta    | Sequence                        |
|-------|-------------|----------|---------------------------------|
| 47.8  | 2185.037445 | 0.020247 | <a href="#">YNSQNQSNNQFVLYR</a> |
| 10.8  | 2185.037445 | 0.020247 | <a href="#">YNSQNQSNNQFVLYR</a> |
| 7.1   | 2185.037445 | 0.020247 | <a href="#">YNSQNQSNNQFVLYR</a> |

**MASCOT SCIENCE Mascot Search Results**

**Peptide View**

MS/MS Fragmentation of **LDDDLHQGGHVLDPHGK**  
 Found in **KNG1\_HUMAN**, Kininogen-1 OS=Homo sapiens GN=KNG1 PE=1 SV=2

Match to Query 58836: 2332.127502 from(778.383110,3+) rtinseconds(1520) index(38923)  
 Title: Locus:1.1.1.2978.22 File:"2013-07-02 CLN FXIII 180 min 1st F 3.wiff"  
 Data file C:\Program Files (x86)\Matrix Science\Mascot Daemon\mgf\7 FXIII 180 min 1st\mascot\_daemon\_merge.mgf

Click mouse within plot area to zoom in by factor of two about that point  
 Or, Plot from [0] to [2200] Da Full range  
 Label all possible matches  Label matches used for scoring

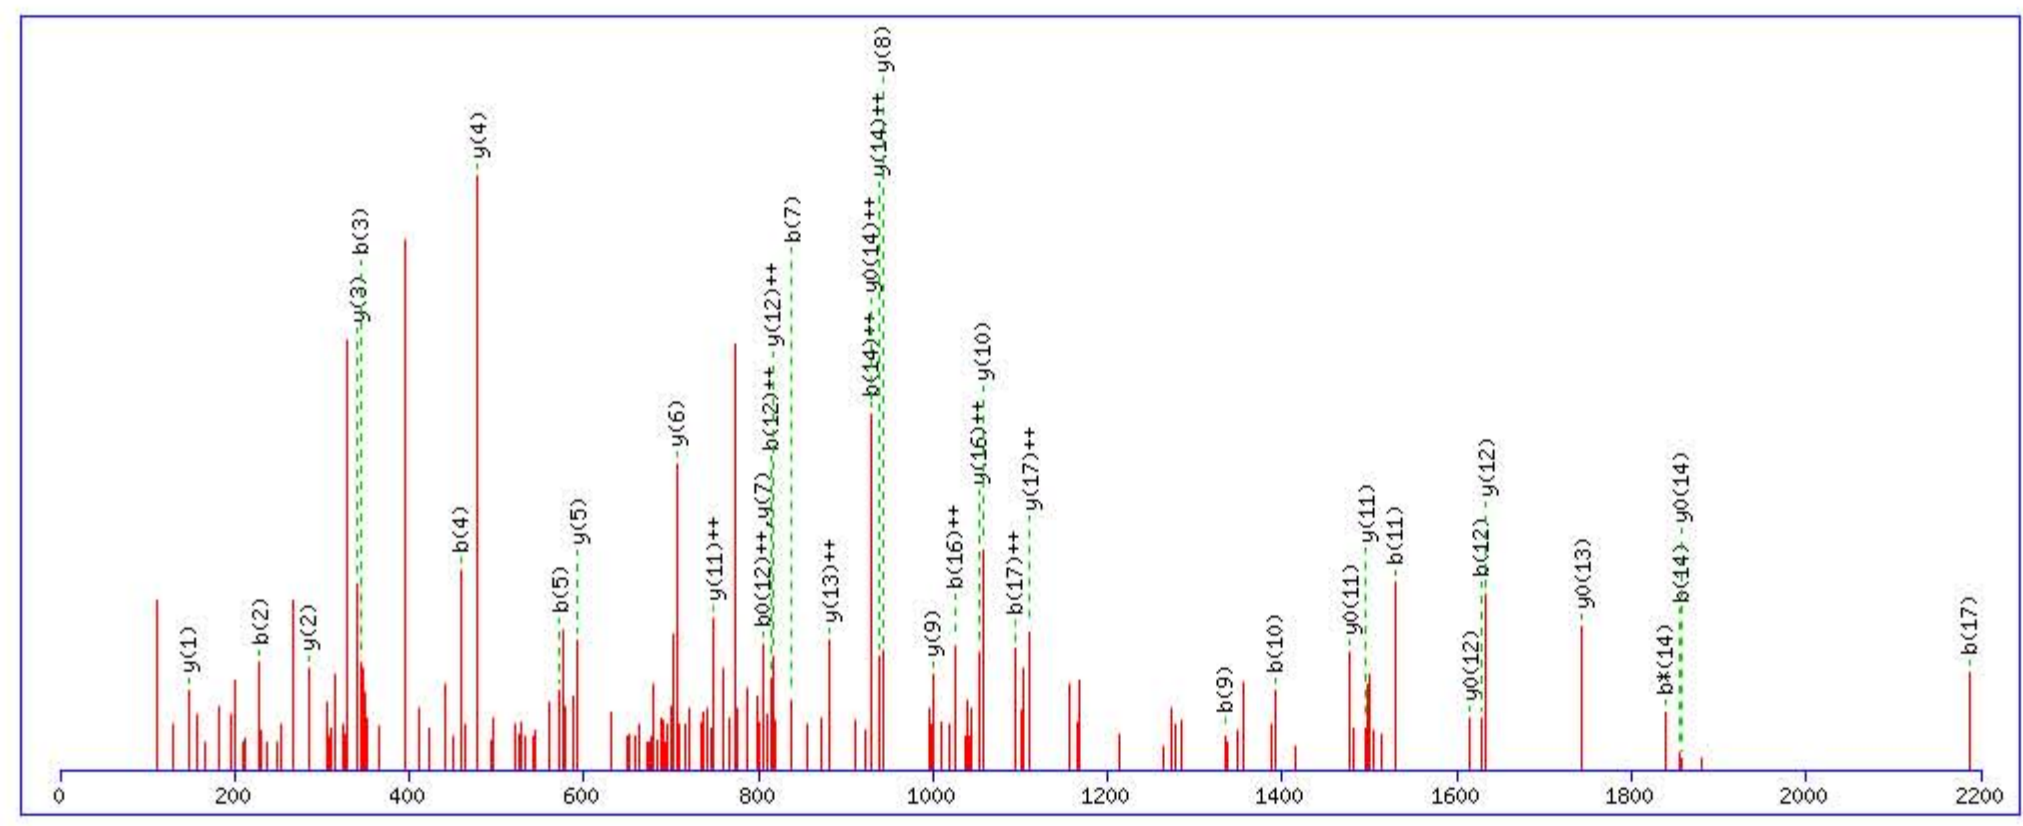

Monoisotopic mass of neutral peptide Mr(calc): 2332.101883  
 Fixed modifications: Carbamidomethyl (C) (apply to specified residues or termini only)  
 Variable modifications:  
 Q8 : Biotin:Thermo-21345 (Q)  
 Ions Score: 61 Expect: 1.6e-005  
 Matches : 40/180 fragment ions using 85 most intense peaks [\(help\)](#)

| #  | b           | b <sup>++</sup> | b <sup>*</sup> | b <sup>+++</sup> | b <sup>0</sup> | b <sup>0++</sup> | Seq. | y           | y <sup>++</sup> | y <sup>*</sup> | y <sup>+++</sup> | y <sup>0</sup> | y <sup>0++</sup> | #  |
|----|-------------|-----------------|----------------|------------------|----------------|------------------|------|-------------|-----------------|----------------|------------------|----------------|------------------|----|
| 1  | 114.091340  | 57.549308       |                |                  |                |                  | L    |             |                 |                |                  |                |                  | 18 |
| 2  | 229.118283  | 115.062779      |                |                  | 211.107718     | 106.057497       | D    | 2220.025077 | 1110.516176     | 2202.998528    | 1102.002902      | 2202.014512    | 1101.510894      | 17 |
| 3  | 344.145226  | 172.576251      |                |                  | 326.134661     | 163.570968       | D    | 2104.998134 | 1053.002705     | 2087.971585    | 1044.489430      | 2086.987569    | 1043.997422      | 16 |
| 4  | 459.172169  | 230.089722      |                |                  | 441.161604     | 221.084440       | D    | 1989.971191 | 995.489234      | 1972.944642    | 986.975959       | 1971.960626    | 986.483951       | 15 |
| 5  | 572.256233  | 286.631755      |                |                  | 554.245668     | 277.626472       | L    | 1874.944248 | 937.975762      | 1857.917699    | 929.462488       | 1856.933683    | 928.970480       | 14 |
| 6  | 701.298826  | 351.153051      |                |                  | 683.288261     | 342.147769       | E    | 1761.860184 | 881.433730      | 1744.833635    | 872.920456       | 1743.849619    | 872.428448       | 13 |
| 7  | 838.357738  | 419.682507      |                |                  | 820.347173     | 410.677225       | H    | 1632.817591 | 816.912434      | 1615.791042    | 808.399159       | 1614.807026    | 807.907151       | 12 |
| 8  | 1277.583064 | 639.295170      | 1260.556515    | 630.781896       | 1259.572499    | 630.289888       | Q    | 1495.758679 | 748.382978      | 1478.732130    | 739.869703       | 1477.748114    | 739.377695       | 11 |
| 9  | 1334.604528 | 667.805902      | 1317.577979    | 659.292628       | 1316.593963    | 658.800620       | G    | 1056.533353 | 528.770315      | 1039.506804    | 520.257040       | 1038.522788    | 519.765032       | 10 |
| 10 | 1391.625992 | 696.316634      | 1374.599443    | 687.803360       | 1373.615427    | 687.311352       | G    | 999.511889  | 500.259583      | 982.485340     | 491.746308       | 981.501324     | 491.254300       | 9  |
| 11 | 1528.684904 | 764.846090      | 1511.658355    | 756.332816       | 1510.674339    | 755.840807       | H    | 942.490425  | 471.748851      | 925.463876     | 463.235576       | 924.479860     | 462.743568       | 8  |
| 12 | 1627.753318 | 814.380297      | 1610.726769    | 805.867023       | 1609.742753    | 805.375015       | V    | 805.431513  | 403.219395      | 788.404964     | 394.706120       | 787.420948     | 394.214112       | 7  |
| 13 | 1740.837382 | 870.922329      | 1723.810833    | 862.409055       | 1722.826817    | 861.917046       | L    | 706.363099  | 353.685188      | 689.336550     | 345.171913       | 688.352534     | 344.679905       | 6  |
| 14 | 1855.864325 | 928.435801      | 1838.837776    | 919.922526       | 1837.853760    | 919.430518       | D    | 593.279035  | 297.143156      | 576.252486     | 288.629881       | 575.268470     | 288.137873       | 5  |
| 15 | 1992.923237 | 996.965257      | 1975.896688    | 988.451982       | 1974.912672    | 987.959974       | H    | 478.252092  | 239.629684      | 461.225543     | 231.116410       |                |                  | 4  |
| 16 | 2049.944701 | 1025.475988     | 2032.918152    | 1016.962714      | 2031.934136    | 1016.470706      | G    | 341.193180  | 171.100228      | 324.166631     | 162.586954       |                |                  | 3  |
| 17 | 2187.003613 | 1094.005444     | 2169.977064    | 1085.492170      | 2168.993048    | 1085.000162      | H    | 284.171716  | 142.589496      | 267.145167     | 134.076221       |                |                  | 2  |
| 18 |             |                 |                |                  |                |                  | K    | 147.112804  | 74.060040       | 130.086255     | 65.546765        |                |                  | 1  |

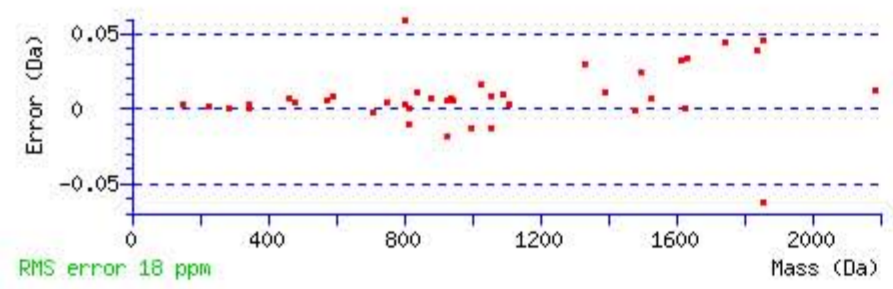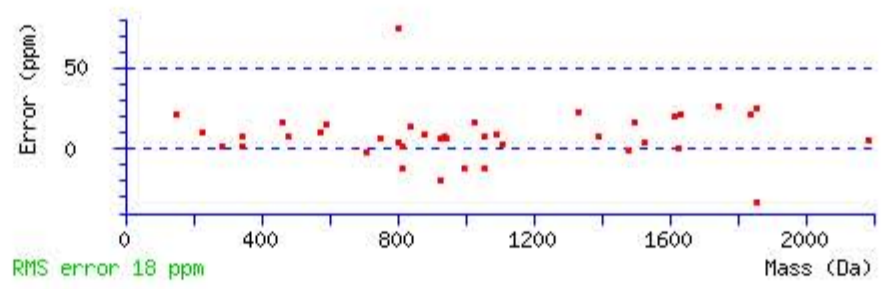

NCBI BLAST search of **LDDDLHQGGHVLDPHGK**  
 (Parameters: blastp, nr protein database, expect=20000, no filter, PAM30)  
 Other BLAST [web gateways](#)

**All matches to this query**

| Score | Mr(calc):   | Delta    | Sequence                          |
|-------|-------------|----------|-----------------------------------|
| 61.3  | 2332.101883 | 0.025619 | <a href="#">LDDDLHQGGHVLDPHGK</a> |



# MASCOT Search Results

## Peptide View

MS/MS Fragmentation of **LGQSLDCNAEVYVVPWEK**

Found in **KNG1\_HUMAN**, Kininogen-1 OS=Homo sapiens GN=KNG1 PE=1 SV=2

Match to Query 60493: 2417.211432 from(806.744420,3+) rtinseconds(2542) index(28312)

Title: Locus:1.1.1.3027.4 File:"2013-07-02 CLN FXIII 180 min 1st F 2.wiff"

Data file C:\Program Files (x86)\Matrix Science\Mascot Daemon\mgf\7 FXIII 180 min 1st\mascot\_daemon\_merge.mgf

Click mouse within plot area to zoom in by factor of two about that point

Or, Plot from  to  Da

Label all possible matches  Label matches used for scoring

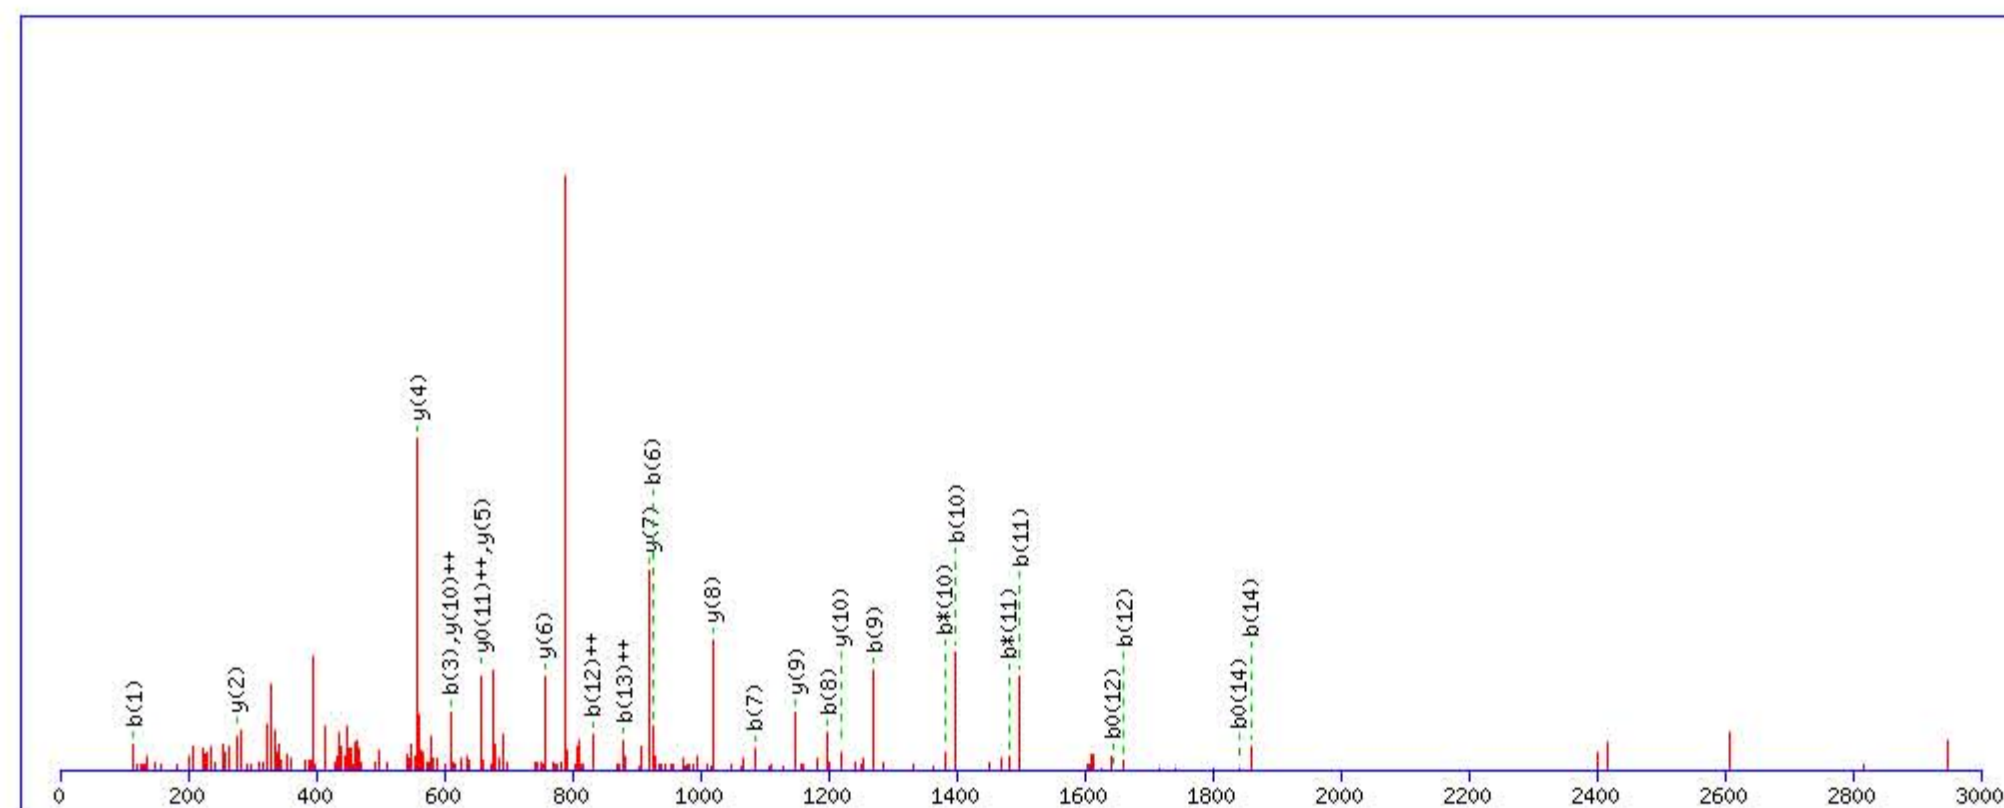

Monoisotopic mass of neutral peptide Mr(calc): 2417.175934

Fixed modifications: Carbamidomethyl (C) (apply to specified residues or termini only)

Variable modifications:

Q3 : Biotin:Thermo-21345 (Q)

Ions Score: 63 Expect: 1.7e-005

Matches : 26/192 fragment ions using 37 most intense peaks [\(help\)](#)

| #  | b                  | b <sup>++</sup>   | b <sup>*</sup>     | b <sup>*++</sup> | b <sup>0</sup>     | b <sup>0++</sup> | Seq. | y                  | y <sup>++</sup>   | y <sup>*</sup> | y <sup>*++</sup> | y <sup>0</sup> | y <sup>0++</sup>  | #  |
|----|--------------------|-------------------|--------------------|------------------|--------------------|------------------|------|--------------------|-------------------|----------------|------------------|----------------|-------------------|----|
| 1  | <b>114.091340</b>  | 57.549308         |                    |                  |                    |                  | L    |                    |                   |                |                  |                |                   | 18 |
| 2  | 171.112804         | 86.060040         |                    |                  |                    |                  | G    | 2305.099153        | 1153.053214       | 2288.072604    | 1144.539940      | 2287.088588    | 1144.047932       | 17 |
| 3  | <b>610.338130</b>  | 305.672703        | 593.311581         | 297.159429       |                    |                  | Q    | 2248.077689        | 1124.542482       | 2231.051140    | 1116.029208      | 2230.067124    | 1115.537200       | 16 |
| 4  | 697.370158         | 349.188717        | 680.343609         | 340.675443       | 679.359593         | 340.183435       | S    | 1808.852363        | 904.929820        | 1791.825814    | 896.416545       | 1790.841798    | 895.924537        | 15 |
| 5  | 810.454222         | 405.730749        | 793.427673         | 397.217475       | 792.443657         | 396.725467       | L    | 1721.820335        | 861.413806        | 1704.793786    | 852.900531       | 1703.809770    | 852.408523        | 14 |
| 6  | <b>925.481165</b>  | 463.244221        | 908.454616         | 454.730946       | 907.470600         | 454.238938       | D    | 1608.736271        | 804.871774        | 1591.709722    | 796.358499       | 1590.725706    | 795.866491        | 13 |
| 7  | <b>1085.511814</b> | 543.259545        | 1068.485265        | 534.746271       | 1067.501249        | 534.254262       | C    | 1493.709328        | 747.358302        | 1476.682779    | 738.845028       | 1475.698763    | 738.353020        | 12 |
| 8  | <b>1199.554741</b> | 600.281008        | 1182.528192        | 591.767734       | 1181.544176        | 591.275726       | N    | 1333.678679        | 667.342978        | 1316.652130    | 658.829703       | 1315.668114    | <b>658.337695</b> | 11 |
| 9  | <b>1270.591855</b> | 635.799565        | 1253.565306        | 627.286291       | 1252.581290        | 626.794283       | A    | <b>1219.635752</b> | <b>610.321514</b> | 1202.609203    | 601.808240       | 1201.625187    | 601.316232        | 10 |
| 10 | <b>1399.634448</b> | 700.320862        | <b>1382.607899</b> | 691.807588       | 1381.623883        | 691.315580       | E    | <b>1148.598638</b> | 574.802957        | 1131.572089    | 566.289683       | 1130.588073    | 565.797675        | 9  |
| 11 | <b>1498.702862</b> | 749.855069        | <b>1481.676313</b> | 741.341795       | 1480.692297        | 740.849787       | V    | <b>1019.556045</b> | 510.281661        | 1002.529496    | 501.768386       | 1001.545480    | 501.276378        | 8  |
| 12 | <b>1661.766191</b> | <b>831.386734</b> | 1644.739642        | 822.873459       | <b>1643.755626</b> | 822.381451       | Y    | <b>920.487631</b>  | 460.747454        | 903.461082     | 452.234179       | 902.477066     | 451.742171        | 7  |
| 13 | 1760.834605        | <b>880.920941</b> | 1743.808056        | 872.407666       | 1742.824040        | 871.915658       | V    | <b>757.424302</b>  | 379.215789        | 740.397753     | 370.702515       | 739.413737     | 370.210507        | 6  |
| 14 | <b>1859.903019</b> | 930.455148        | 1842.876470        | 921.941873       | <b>1841.892454</b> | 921.449865       | V    | <b>658.355888</b>  | 329.681582        | 641.329339     | 321.168308       | 640.345323     | 320.676300        | 5  |
| 15 | 1956.955783        | 978.981530        | 1939.929234        | 970.468255       | 1938.945218        | 969.976247       | P    | <b>559.287474</b>  | 280.147375        | 542.260925     | 271.634101       | 541.276909     | 271.142093        | 4  |
| 16 | 2143.035096        | 1072.021186       | 2126.008547        | 1063.507911      | 2125.024531        | 1063.015903      | W    | 462.234710         | 231.620993        | 445.208161     | 223.107719       | 444.224145     | 222.615711        | 3  |
| 17 | 2272.077689        | 1136.542483       | 2255.051140        | 1128.029208      | 2254.067124        | 1127.537200      | E    | <b>276.155397</b>  | 138.581337        | 259.128848     | 130.068062       | 258.144832     | 129.576054        | 2  |
| 18 |                    |                   |                    |                  |                    |                  | K    | 147.112804         | 74.060040         | 130.086255     | 65.546765        |                |                   | 1  |

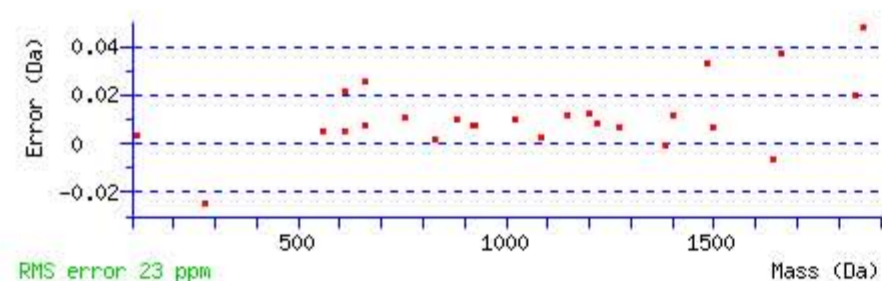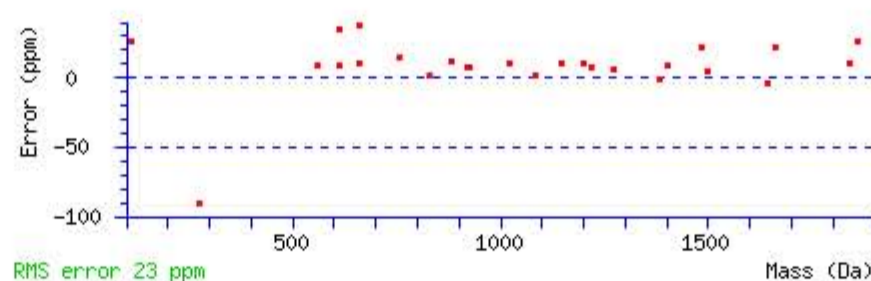

NCBI BLAST search of **LGQSLDCNAEVYVVPWEK**

(Parameters: blastp, nr protein database, expect=20000, no filter, PAM30)

Other BLAST [web gateways](#)

All matches to this query

| Score | Mr(calc):   | Delta    | Sequence                           |
|-------|-------------|----------|------------------------------------|
| 62.7  | 2417.175934 | 0.035498 | <a href="#">LGQSLDCNAEVYVVPWEK</a> |

Mascot: <http://www.matrixscience.com/>

# MASCOT Search Results

## Peptide View

MS/MS Fragmentation of **KLQSLDCNAEVYVVPWEK**  
 Found in **KNG1\_HUMAN**, Kininogen-1 OS=Homo sapiens GN=KNG1 PE=1 SV=2

Match to Query 63830: 2545.289652 from(849.437160,3+) rtinseconds(2385) index(27412)  
 Title: Locus:1.1.1.2972.9 File:"2013-07-02 CLN FXIII 180 min 1st F 2.wiff"  
 Data file C:\Program Files (x86)\Matrix Science\Mascot Daemon\mgf\7 FXIII 180 min 1st\mascot\_daemon\_merge.mgf

Click mouse within plot area to zoom in by factor of two about that point  
 Or, Plot from  to  Da   
 Label all possible matches  Label matches used for scoring

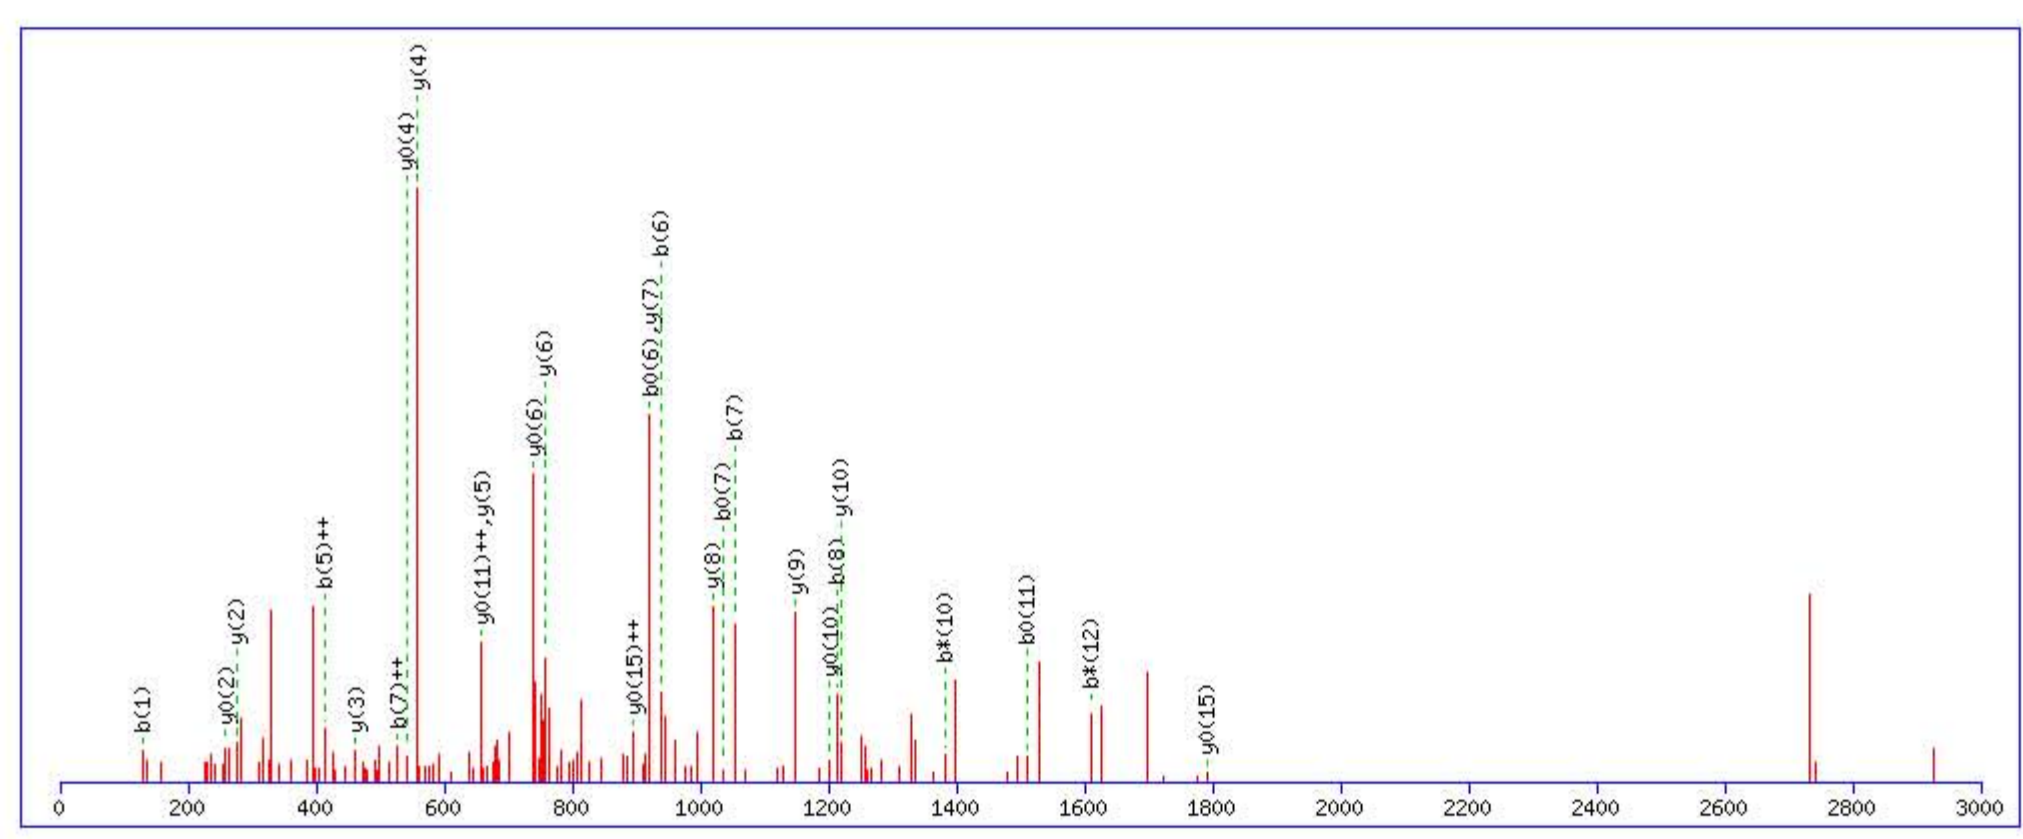

Monoisotopic mass of neutral peptide Mr(calc): 2545.270889  
 Fixed modifications: Carbamidomethyl (C) (apply to specified residues or termini only)  
 Variable modifications:  
 Q4 : Biotin:Thermo-21345 (Q)  
 Ions Score: 32 Expect: 0.02  
 Matches : 27/206 fragment ions using 64 most intense peaks [\(help\)](#)

| #  | b                  | b <sup>++</sup>   | b <sup>*</sup>     | b <sup>*++</sup> | b <sup>0</sup>     | b <sup>0++</sup> | Seq.     | y                  | y <sup>++</sup> | y <sup>*</sup> | y <sup>*++</sup> | y <sup>0</sup>     | y <sup>0++</sup>  | #  |
|----|--------------------|-------------------|--------------------|------------------|--------------------|------------------|----------|--------------------|-----------------|----------------|------------------|--------------------|-------------------|----|
| 1  | <b>129.102239</b>  | 65.054757         | 112.075690         | 56.541483        |                    |                  | <b>K</b> |                    |                 |                |                  |                    |                   | 19 |
| 2  | 242.186303         | 121.596790        | 225.159754         | 113.083515       |                    |                  | <b>L</b> | 2418.183217        | 1209.595246     | 2401.156668    | 1201.081972      | 2400.172652        | 1200.589964       | 18 |
| 3  | 299.207767         | 150.107521        | 282.181218         | 141.594247       |                    |                  | <b>G</b> | 2305.099153        | 1153.053214     | 2288.072604    | 1144.539940      | 2287.088588        | 1144.047932       | 17 |
| 4  | 738.433093         | 369.720185        | 721.406544         | 361.206910       |                    |                  | <b>Q</b> | 2248.077689        | 1124.542482     | 2231.051140    | 1116.029208      | 2230.067124        | 1115.537200       | 16 |
| 5  | 825.465121         | <b>413.236199</b> | 808.438572         | 404.722924       | 807.454556         | 404.230916       | <b>S</b> | 1808.852363        | 904.929820      | 1791.825814    | 896.416545       | <b>1790.841798</b> | <b>895.924537</b> | 15 |
| 6  | <b>938.549185</b>  | 469.778231        | 921.522636         | 461.264956       | <b>920.538620</b>  | 460.772948       | <b>L</b> | 1721.820335        | 861.413806      | 1704.793786    | 852.900531       | 1703.809770        | 852.408523        | 14 |
| 7  | <b>1053.576128</b> | <b>527.291702</b> | 1036.549579        | 518.778428       | <b>1035.565563</b> | 518.286420       | <b>D</b> | 1608.736271        | 804.871774      | 1591.709722    | 796.358499       | 1590.725706        | 795.866491        | 13 |
| 8  | <b>1213.606777</b> | 607.307027        | 1196.580228        | 598.793752       | 1195.596212        | 598.301744       | <b>C</b> | 1493.709328        | 747.358302      | 1476.682779    | 738.845028       | 1475.698763        | 738.353020        | 12 |
| 9  | 1327.649704        | 664.328490        | 1310.623155        | 655.815216       | 1309.639139        | 655.323208       | <b>N</b> | 1333.678679        | 667.342978      | 1316.652130    | 658.829703       | 1315.668114        | <b>658.337695</b> | 11 |
| 10 | 1398.686818        | 699.847047        | <b>1381.660269</b> | 691.333773       | 1380.676253        | 690.841765       | <b>A</b> | <b>1219.635752</b> | 610.321514      | 1202.609203    | 601.808240       | <b>1201.625187</b> | 601.316232        | 10 |
| 11 | 1527.729411        | 764.368344        | 1510.702862        | 755.855069       | <b>1509.718846</b> | 755.363061       | <b>E</b> | <b>1148.598638</b> | 574.802957      | 1131.572089    | 566.289683       | 1130.588073        | 565.797675        | 9  |
| 12 | 1626.797825        | 813.902551        | <b>1609.771276</b> | 805.389276       | 1608.787260        | 804.897268       | <b>V</b> | <b>1019.556045</b> | 510.281661      | 1002.529496    | 501.768386       | 1001.545480        | 501.276378        | 8  |
| 13 | 1789.861154        | 895.434215        | 1772.834605        | 886.920941       | 1771.850589        | 886.428933       | <b>Y</b> | <b>920.487631</b>  | 460.747454      | 903.461082     | 452.234179       | 902.477066         | 451.742171        | 7  |
| 14 | 1888.929568        | 944.968422        | 1871.903019        | 936.455148       | 1870.919003        | 935.963140       | <b>V</b> | <b>757.424302</b>  | 379.215789      | 740.397753     | 370.702515       | <b>739.413737</b>  | 370.210507        | 6  |
| 15 | 1987.997982        | 994.502629        | 1970.971433        | 985.989355       | 1969.987417        | 985.497347       | <b>V</b> | <b>658.355888</b>  | 329.681582      | 641.329339     | 321.168308       | 640.345323         | 320.676300        | 5  |
| 16 | 2085.050746        | 1043.029011       | 2068.024197        | 1034.515736      | 2067.040181        | 1034.023728      | <b>P</b> | <b>559.287474</b>  | 280.147375      | 542.260925     | 271.634101       | <b>541.276909</b>  | 271.142093        | 4  |
| 17 | 2271.130059        | 1136.068667       | 2254.103510        | 1127.555393      | 2253.119494        | 1127.063385      | <b>W</b> | <b>462.234710</b>  | 231.620993      | 445.208161     | 223.107719       | 444.224145         | 222.615711        | 3  |
| 18 | 2400.172652        | 1200.589964       | 2383.146103        | 1192.076689      | 2382.162087        | 1191.584682      | <b>E</b> | <b>276.155397</b>  | 138.581337      | 259.128848     | 130.068062       | <b>258.144832</b>  | 129.576054        | 2  |
| 19 |                    |                   |                    |                  |                    |                  | <b>K</b> | 147.112804         | 74.060040       | 130.086255     | 65.546765        |                    |                   | 1  |

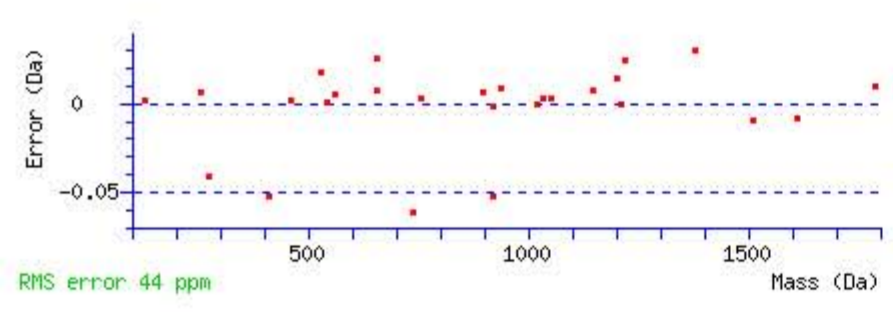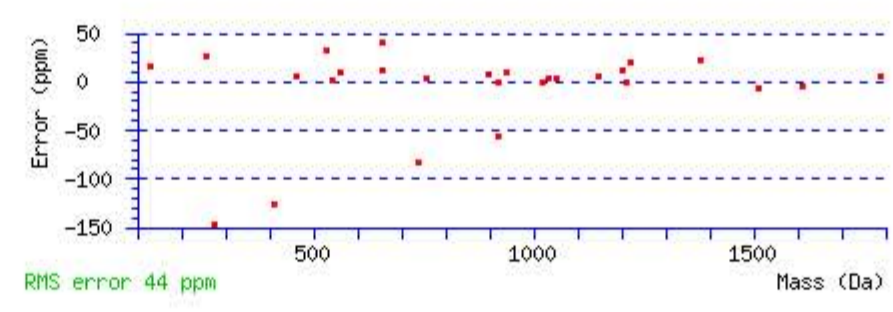

NCBI BLAST search of **KLQSLDCNAEVYVVPWEK**  
 (Parameters: blastp, nr protein database, expect=20000, no filter, PAM30)  
 Other BLAST [web gateways](#)

### All matches to this query

| Score | Mr(calc):   | Delta    | Sequence                           |
|-------|-------------|----------|------------------------------------|
| 31.5  | 2545.270889 | 0.018763 | <a href="#">KLQSLDCNAEVYVVPWEK</a> |

**Mascot Search Results**

**Peptide View**

MS/MS Fragmentation of **FSVATQTCQITPAEGPVVTAQYDCLGCVHPISTQSPDLEPILR**  
 Found in **KNG1\_HUMAN**, Kininogen-1 OS=Homo sapiens GN=KNG1 PE=1 SV=2

Match to Query 87839: 5066.538470 from(1014.314970,5+) rtinseconds(2651) index(28979)  
 Title: Locus:1.1.1.3064.20 File:"2013-07-02 CLN FXIII 180 min 1st F 2.wiff"  
 Data file C:\Program Files (x86)\Matrix Science\Mascot Daemon\mgf\7 FXIII 180 min 1st\mascot\_daemon\_merge.mgf

Click mouse within plot area to zoom in by factor of two about that point  
 Or, Plot from 0 to 3000 Da Full range  
 Label all possible matches  Label matches used for scoring

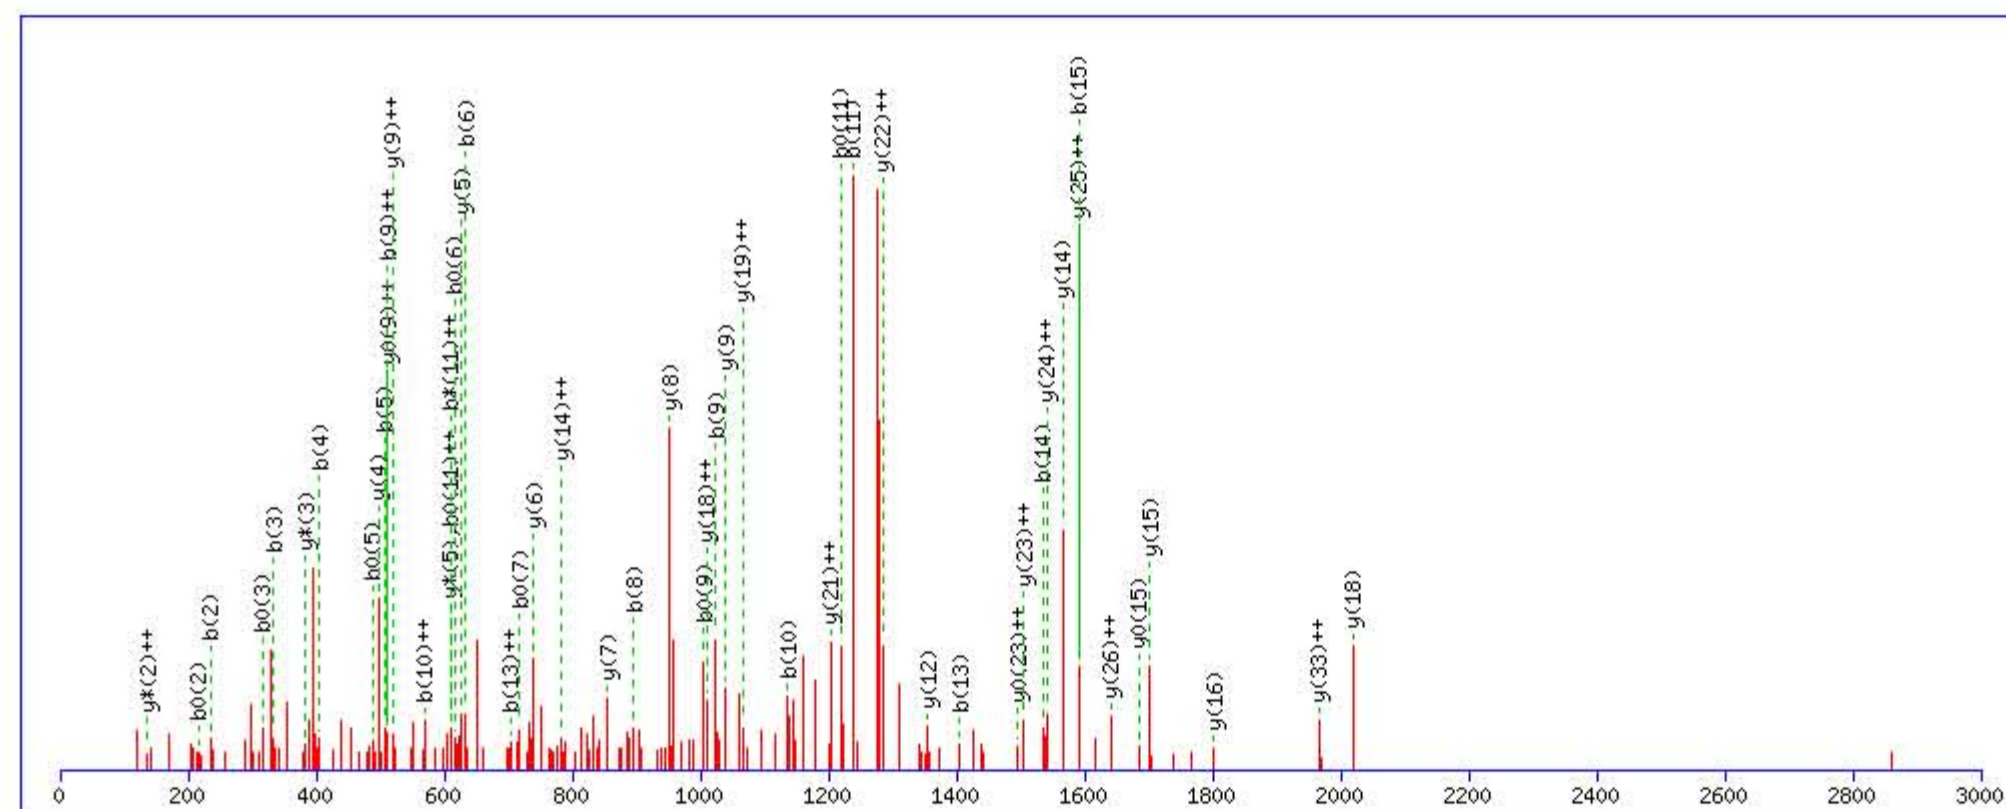

Monoisotopic mass of neutral peptide Mr(calc): 5066.465057  
 Fixed modifications: Carbamidomethyl (C) (apply to specified residues or termini only)  
 Variable modifications:  
 Q21 : Biotin:Thermo-21345 (Q)  
 Ions Score: 54 Expect: 6.9e-005  
 Matches : 52/484 fragment ions using 131 most intense peaks (help)

| #  | b                  | b <sup>++</sup>   | b*          | b <sup>++</sup> | b <sup>0</sup> | b <sup>0++</sup> | Seq. | y                  | y <sup>++</sup>    | y*                | y <sup>++</sup>   | y <sup>0</sup>     | y <sup>0++</sup>  | #  |
|----|--------------------|-------------------|-------------|-----------------|----------------|------------------|------|--------------------|--------------------|-------------------|-------------------|--------------------|-------------------|----|
| 1  | 148.075690         | 74.541483         |             |                 |                |                  | F    |                    |                    |                   |                   |                    |                   | 43 |
| 2  | <b>235.107718</b>  | 118.057497        |             |                 | 217.097153     | 109.052214       | S    | 4920.403881        | 2460.705578        | 4903.377332       | 2452.192304       | 4902.393316        | 2451.700296       | 42 |
| 3  | <b>334.176132</b>  | 167.591704        |             |                 | 316.165567     | 158.586422       | V    | 4833.371853        | 2417.189565        | 4816.345304       | 2408.676290       | 4815.361288        | 2408.184282       | 41 |
| 4  | <b>405.213246</b>  | 203.110261        |             |                 | 387.202681     | 194.104978       | A    | 4734.303439        | 2367.655357        | 4717.276890       | 2359.142083       | 4716.292874        | 2358.650075       | 40 |
| 5  | <b>506.260925</b>  | 253.634100        |             |                 | 488.250360     | 244.628818       | T    | 4663.266325        | 2332.136800        | 4646.239776       | 2323.623526       | 4645.255760        | 2323.131518       | 39 |
| 6  | <b>634.319503</b>  | 317.663390        | 617.292954  | 309.150115      | 616.308938     | 308.658107       | Q    | 4562.218646        | 2281.612961        | 4545.192097       | 2273.099686       | 4544.208081        | 2272.607679       | 38 |
| 7  | 735.367182         | 368.187229        | 718.340633  | 359.673955      | 717.356617     | 359.181947       | T    | 4434.160068        | 2217.583672        | 4417.133519       | 2209.070397       | 4416.149503        | 2208.578390       | 37 |
| 8  | <b>895.397831</b>  | 448.202554        | 878.371282  | 439.689279      | 877.387266     | 439.197271       | C    | 4333.112389        | 2167.059833        | 4316.085840       | 2158.546558       | 4315.101824        | 2158.054550       | 36 |
| 9  | <b>1023.456409</b> | <b>512.231843</b> | 1006.429860 | 503.718568      | 1005.445844    | 503.226560       | Q    | 4173.081740        | 2087.044508        | 4156.055191       | 2078.531233       | 4155.071175        | 2078.039226       | 35 |
| 10 | <b>1136.540473</b> | <b>568.773875</b> | 1119.513924 | 560.260600      | 1118.529908    | 559.768592       | I    | 4045.023162        | 2023.015219        | 4027.996613       | 2014.501944       | 4027.012597        | 2014.009936       | 34 |
| 11 | <b>1237.588152</b> | 619.297714        | 1220.561603 | 610.784440      | 1219.577587    | 610.292432       | T    | 3931.939098        | 1966.473187        | 3914.912549       | 1957.959912       | 3913.928533        | 1957.467904       | 33 |
| 12 | 1334.640916        | 667.824096        | 1317.614367 | 659.310822      | 1316.630351    | 658.818814       | P    | 3830.891419        | 1915.949347        | 3813.864870       | 1907.436073       | 3812.880854        | 1906.944065       | 32 |
| 13 | <b>1405.678030</b> | <b>703.342653</b> | 1388.651481 | 694.829379      | 1387.667465    | 694.337371       | A    | 3733.838655        | 1867.422965        | 3716.812106       | 1858.909691       | 3715.828090        | 1858.417683       | 31 |
| 14 | <b>1534.720623</b> | 767.863949        | 1517.694074 | 759.350675      | 1516.710058    | 758.858667       | E    | 3662.801541        | 1831.904408        | 3645.774992       | 1823.391134       | 3644.790976        | 1822.899126       | 30 |
| 15 | <b>1591.742087</b> | 796.374681        | 1574.715538 | 787.861407      | 1573.731522    | 787.369399       | G    | 3533.758948        | 1767.383112        | 3516.732399       | 1758.869837       | 3515.748383        | 1758.377829       | 29 |
| 16 | 1688.794851        | 844.901063        | 1671.768302 | 836.387789      | 1670.784286    | 835.895781       | P    | 3476.737484        | 1738.872380        | 3459.710935       | 1730.359105       | 3458.726919        | 1729.867097       | 28 |
| 17 | 1787.863265        | 894.435271        | 1770.836716 | 885.921996      | 1769.852700    | 885.429988       | V    | 3379.684720        | 1690.345998        | 3362.658171       | 1681.832723       | 3361.674155        | 1681.340715       | 27 |
| 18 | 1886.931679        | 943.969478        | 1869.905130 | 935.456203      | 1868.921114    | 934.964195       | V    | 3280.616306        | 1640.811791        | 3263.589757       | 1632.298516       | 3262.605741        | 1631.806508       | 26 |
| 19 | 1987.979358        | 994.493317        | 1970.952809 | 985.980043      | 1969.968793    | 985.488035       | T    | 3181.547892        | 1591.277584        | 3164.521343       | 1582.764309       | 3163.537327        | 1582.272301       | 25 |
| 20 | 2059.016472        | 1030.011874       | 2041.989923 | 1021.498600     | 2041.005907    | 1021.006591      | A    | 3080.500213        | 1540.753744        | 3063.473664       | 1532.240470       | 3062.489648        | 1531.748462       | 24 |
| 21 | 2498.241798        | 1249.624537       | 2481.215249 | 1241.111262     | 2480.231233    | 1240.619254      | Q    | 3009.463099        | 1505.235187        | 2992.436550       | 1496.721913       | 2991.452534        | 1496.229905       | 23 |
| 22 | 2661.305127        | 1331.156202       | 2644.278578 | 1322.642927     | 2643.294562    | 1322.150919      | Y    | 2570.237773        | 1285.622524        | 2553.211224       | 1277.109250       | 2552.227208        | 1276.617242       | 22 |
| 23 | 2776.332070        | 1388.669673       | 2759.305521 | 1380.156398     | 2758.321505    | 1379.664390      | D    | 2407.174444        | 1204.090860        | 2390.147895       | 1195.577585       | 2389.163879        | 1195.085577       | 21 |
| 24 | 2936.362719        | 1468.684997       | 2919.336170 | 1460.171723     | 2918.352154    | 1459.679715      | C    | 2292.147501        | 1146.577388        | 2275.120952       | 1138.064114       | 2274.136936        | 1137.572106       | 20 |
| 25 | 3049.446783        | 1525.227029       | 3032.420234 | 1516.713755     | 3031.436218    | 1516.221747      | L    | 2132.116852        | 1066.562064        | 2115.090303       | 1058.048789       | 2114.106287        | 1057.556781       | 19 |
| 26 | 3106.468247        | 1553.737761       | 3089.441698 | 1545.224487     | 3088.457682    | 1544.732479      | G    | <b>2019.032788</b> | <b>1010.020032</b> | 2002.006239       | 1001.506757       | 2001.022223        | 1001.014749       | 18 |
| 27 | 3266.498896        | 1633.753086       | 3249.472347 | 1625.239811     | 3248.488331    | 1624.747803      | C    | 1962.011324        | 981.509300         | 1944.984775       | 972.996025        | 1944.000759        | 972.504017        | 17 |
| 28 | 3365.567310        | 1683.287293       | 3348.540761 | 1674.774018     | 3347.556745    | 1674.282010      | V    | <b>1801.980675</b> | 901.493975         | 1784.954126       | 892.980701        | 1783.970110        | 892.488693        | 16 |
| 29 | 3502.626222        | 1751.816749       | 3485.599673 | 1743.303474     | 3484.615657    | 1742.811466      | H    | <b>1702.912261</b> | 851.959768         | 1685.885712       | 843.446494        | <b>1684.901696</b> | 842.954486        | 15 |
| 30 | 3599.678986        | 1800.343131       | 3582.652437 | 1791.829856     | 3581.668421    | 1791.337848      | P    | <b>1565.853349</b> | <b>783.430312</b>  | 1548.826800       | 774.917038        | 1547.842784        | 774.425030        | 14 |
| 31 | 3712.763050        | 1856.885163       | 3695.736501 | 1848.371888     | 3694.752485    | 1847.879880      | I    | 1468.800585        | 734.903930         | 1451.774036       | 726.390656        | 1450.790020        | 725.898648        | 13 |
| 32 | 3799.795078        | 1900.401177       | 3782.768529 | 1891.887902     | 3781.784513    | 1891.395894      | S    | <b>1355.716521</b> | 678.361898         | 1338.689972       | 669.848624        | 1337.705956        | 669.356616        | 12 |
| 33 | 3900.842757        | 1950.925016       | 3883.816208 | 1942.411742     | 3882.832192    | 1941.919734      | T    | 1268.684493        | 634.845884         | 1251.657944       | 626.332610        | 1250.673928        | 625.840602        | 11 |
| 34 | 4028.901335        | 2014.954305       | 4011.874786 | 2006.441031     | 4010.890770    | 2005.949023      | Q    | 1167.636814        | 584.322045         | 1150.610265       | 575.808770        | 1149.626249        | 575.316762        | 10 |
| 35 | 4115.933363        | 2058.470320       | 4098.906814 | 2049.957045     | 4097.922798    | 2049.465037      | S    | <b>1039.578236</b> | <b>520.292756</b>  | 1022.551687       | 511.779481        | 1021.567671        | <b>511.287473</b> | 9  |
| 36 | 4212.986127        | 2106.996702       | 4195.959578 | 2098.483427     | 4194.975562    | 2097.991419      | P    | <b>952.546208</b>  | 476.776742         | 935.519659        | 468.263467        | 934.535643         | 467.771459        | 8  |
| 37 | 4328.013070        | 2164.510173       | 4310.986521 | 2155.996899     | 4310.002505    | 2155.504891      | D    | <b>855.493444</b>  | 428.250360         | 838.466895        | 419.737085        | 837.482879         | 419.245077        | 7  |
| 38 | 4441.097134        | 2221.052205       | 4424.070585 | 2212.538930     | 4423.086569    | 2212.046923      | L    | <b>740.466501</b>  | 370.736888         | 723.439952        | 362.223614        | 722.455936         | 361.731606        | 6  |
| 39 | 4570.139727        | 2285.573502       | 4553.113178 | 2277.060227     | 4552.129162    | 2276.568219      | E    | <b>627.382437</b>  | 314.194856         | <b>610.355888</b> | 305.681582        | 609.371872         | 305.189574        | 5  |
| 40 | 4667.192491        | 2334.099884       | 4650.165942 | 2325.586609     | 4649.181926    | 2325.094601      | P    | <b>498.339844</b>  | 249.673560         | 481.313295        | 241.160285        |                    |                   | 4  |
| 41 | 4780.276555        | 2390.641915       | 4763.250006 | 2382.128641     | 4762.265990    | 2381.636633      | I    | 401.287080         | 201.147178         | <b>384.260531</b> | 192.633903        |                    |                   | 3  |
| 42 | 4893.360619        | 2447.183947       | 4876.334070 | 2438.670673     | 4875.350054    | 2438.178665      | L    | 288.203016         | 144.605146         | 271.176467        | <b>136.091871</b> |                    |                   | 2  |
| 43 |                    |                   |             |                 |                |                  | R    | 175.118952         | 88.063114          | 158.092403        | 79.549839         |                    |                   | 1  |

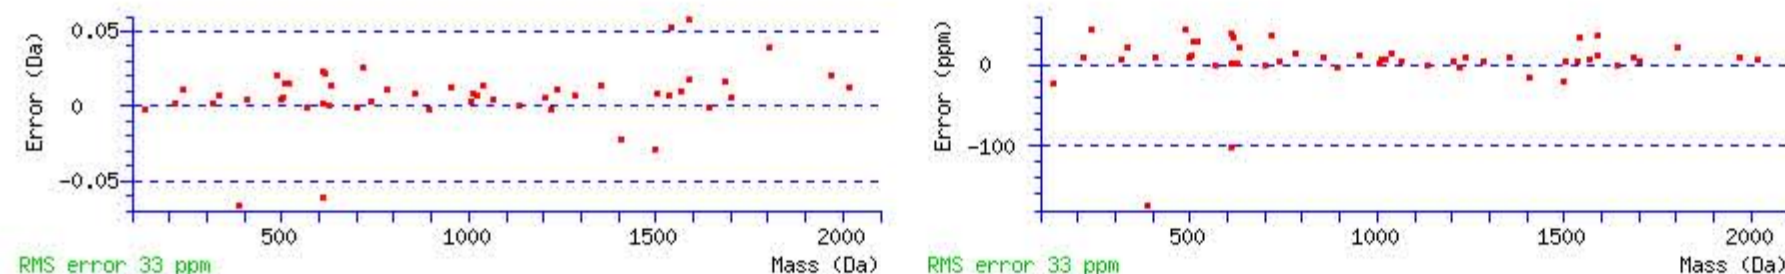

NCBI BLAST search of **FSVATQTCQITPAEGPVVTAQYDCLGCVHPISTQSPDLEPILR**  
 (Parameters: blastp, nr protein database, expect=20000, no filter, PAM30)  
 Other BLAST [web gateways](#)

**All matches to this query**

| Score | Mr(calc):   | Delta    | Sequence                                                    |
|-------|-------------|----------|-------------------------------------------------------------|
| 54.4  | 5066.465057 | 0.073413 | <a href="#">FSVATQTCQITPAEGPVVTAQYDCLGCVHPISTQSPDLEPILR</a> |
| 34.0  | 5066.465057 | 0.073413 | <a href="#">FSVATQTCQITPAEGPVVTAQYDCLGCVHPISTQSPDLEPILR</a> |
| 34.0  | 5066.465057 | 0.073413 | <a href="#">FSVATQTCQITPAEGPVVTAQYDCLGCVHPISTQSPDLEPILR</a> |
| 24.3  | 5066.465057 | 0.073413 | <a href="#">FSVATQTCQITPAEGPVVTAQYDCLGCVHPISTQSPDLEPILR</a> |

# MASCOT Search Results

## Peptide View

MS/MS Fragmentation of **VLSIAQAHSPAFSCEQVR**

Found in **CD14\_HUMAN**, Monocyte differentiation antigen CD14 OS=Homo sapiens GN=CD14 PE=1 SV=2

Match to Query 58277: 2310.169536 from(578.549660,4+) rtinseconds(1949) index(24350)

Title: Locus:1.1.1.2821.5 File:"2013-07-02 CLN FXIII 180 min 1st F 2.wiff"

Data file C:\Program Files (x86)\Matrix Science\Mascot Daemon\mgf\7 FXIII 180 min 1st\mascot\_daemon\_merge.mgf

Click mouse within plot area to zoom in by factor of two about that point

Or, Plot from  to  Da

Label all possible matches  Label matches used for scoring

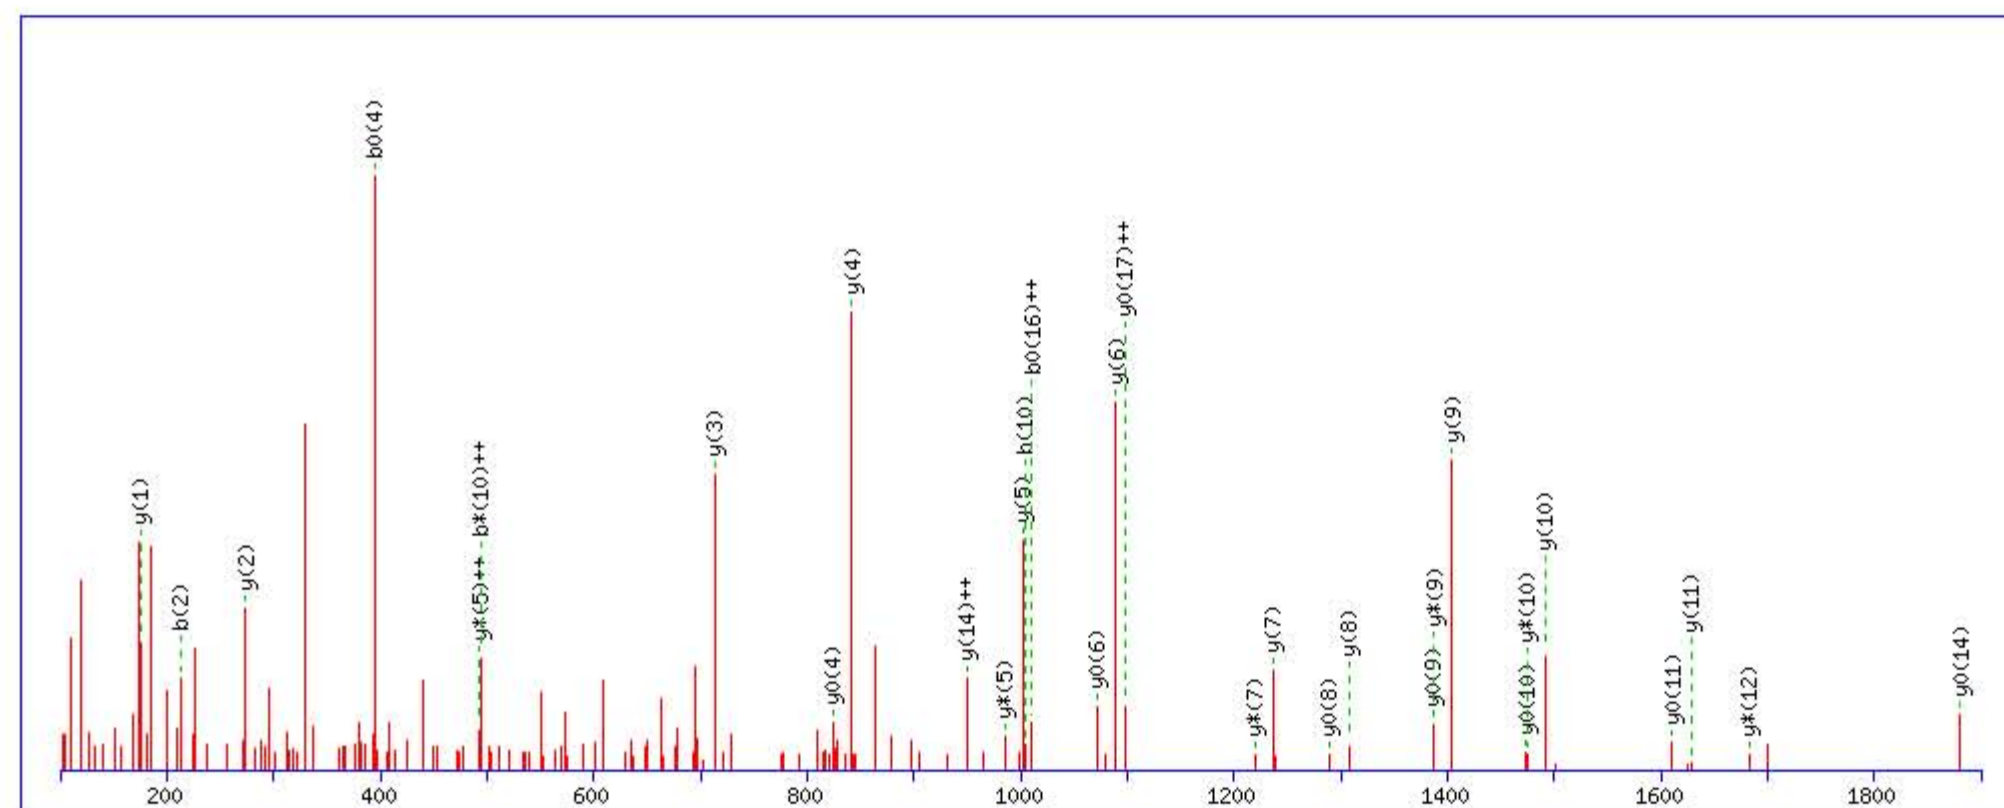

Monoisotopic mass of neutral peptide Mr(calc): 2310.161285

Fixed modifications: Carbamidomethyl (C) (apply to specified residues or termini only)

Variable modifications:

Q16 : Biotin:Thermo-21345 (Q)

Ions Score: 46 Expect: 0.0008

Matches : 31/184 fragment ions using 70 most intense peaks [\(help\)](#)

| #  | b                  | b <sup>++</sup> | b <sup>*</sup> | b <sup>*++</sup>  | b <sup>0</sup>    | b <sup>0++</sup>   | Seq. | y                  | y <sup>++</sup>   | y <sup>*</sup>     | y <sup>*++</sup>  | y <sup>0</sup>     | y <sup>0++</sup>   | #  |
|----|--------------------|-----------------|----------------|-------------------|-------------------|--------------------|------|--------------------|-------------------|--------------------|-------------------|--------------------|--------------------|----|
| 1  | 100.075690         | 50.541483       |                |                   |                   |                    | V    |                    |                   |                    |                   |                    |                    | 18 |
| 2  | <b>213.159754</b>  | 107.083515      |                |                   |                   |                    | L    | 2212.100156        | 1106.553716       | 2195.073607        | 1098.040441       | 2194.089591        | <b>1097.548433</b> | 17 |
| 3  | 300.191782         | 150.599529      |                |                   | 282.181217        | 141.594247         | S    | 2099.016092        | 1050.011684       | 2081.989543        | 1041.498409       | 2081.005527        | 1041.006401        | 16 |
| 4  | 413.275846         | 207.141561      |                |                   | <b>395.265281</b> | 198.136279         | I    | 2011.984064        | 1006.495670       | 1994.957515        | 997.982396        | 1993.973499        | 997.490388         | 15 |
| 5  | 484.312960         | 242.660118      |                |                   | 466.302395        | 233.654836         | A    | 1898.900000        | <b>949.953638</b> | 1881.873451        | 941.440364        | <b>1880.889435</b> | 940.948356         | 14 |
| 6  | 612.371538         | 306.689407      | 595.344989     | 298.176133        | 594.360973        | 297.684125         | Q    | 1827.862886        | 914.435081        | 1810.836337        | 905.921807        | 1809.852321        | 905.429799         | 13 |
| 7  | 683.408652         | 342.207964      | 666.382103     | 333.694690        | 665.398087        | 333.202682         | A    | 1699.804308        | 850.405792        | <b>1682.777759</b> | 841.892518        | 1681.793743        | 841.400510         | 12 |
| 8  | 820.467564         | 410.737420      | 803.441015     | 402.224146        | 802.456999        | 401.732138         | H    | <b>1628.767194</b> | 814.887235        | 1611.740645        | 806.373961        | <b>1610.756629</b> | 805.881953         | 11 |
| 9  | 907.499592         | 454.253434      | 890.473043     | 445.740160        | 889.489027        | 445.248152         | S    | <b>1491.708282</b> | 746.357779        | <b>1474.681733</b> | 737.844505        | <b>1473.697717</b> | 737.352497         | 10 |
| 10 | <b>1004.552356</b> | 502.779816      | 987.525807     | <b>494.266542</b> | 986.541791        | 493.774534         | P    | <b>1404.676254</b> | 702.841765        | <b>1387.649705</b> | 694.328491        | <b>1386.665689</b> | 693.836483         | 9  |
| 11 | 1075.589470        | 538.298373      | 1058.562921    | 529.785099        | 1057.578905       | 529.293091         | A    | <b>1307.623490</b> | 654.315383        | 1290.596941        | 645.802109        | <b>1289.612925</b> | 645.310101         | 8  |
| 12 | 1222.657884        | 611.832580      | 1205.631335    | 603.319306        | 1204.647319       | 602.827298         | F    | <b>1236.586376</b> | 618.796826        | <b>1219.559827</b> | 610.283552        | 1218.575811        | 609.791544         | 7  |
| 13 | 1309.689912        | 655.348594      | 1292.663363    | 646.835320        | 1291.679347       | 646.343312         | S    | <b>1089.517962</b> | 545.262619        | 1072.491413        | 536.749345        | <b>1071.507397</b> | 536.257337         | 6  |
| 14 | 1469.720561        | 735.363919      | 1452.694012    | 726.850644        | 1451.709996       | 726.358636         | C    | <b>1002.485934</b> | 501.746605        | <b>985.459385</b>  | <b>493.233331</b> | 984.475369         | 492.741323         | 5  |
| 15 | 1598.763154        | 799.885215      | 1581.736605    | 791.371941        | 1580.752589       | 790.879933         | E    | <b>842.455285</b>  | 421.731281        | 825.428736         | 413.218006        | <b>824.444720</b>  | 412.725998         | 4  |
| 16 | 2037.988480        | 1019.497878     | 2020.961931    | 1010.984604       | 2019.977915       | <b>1010.492596</b> | Q    | <b>713.412692</b>  | 357.209984        | 696.386143         | 348.696710        |                    |                    | 3  |
| 17 | 2137.056894        | 1069.032085     | 2120.030345    | 1060.518811       | 2119.046329       | 1060.026803        | V    | <b>274.187366</b>  | 137.597321        | 257.160817         | 129.084046        |                    |                    | 2  |
| 18 |                    |                 |                |                   |                   |                    | R    | <b>175.118952</b>  | 88.063114         | 158.092403         | 79.549839         |                    |                    | 1  |

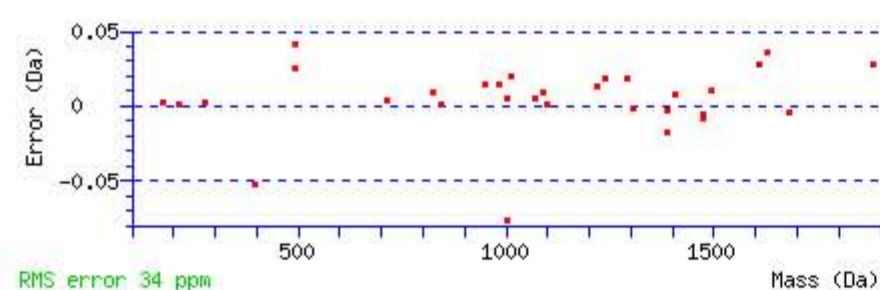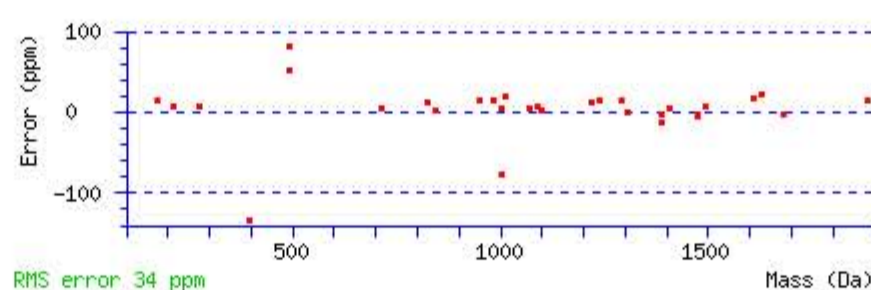

NCBI BLAST search of **VLSIAQAHSPAFSCEQVR**

(Parameters: blastp, nr protein database, expect=20000, no filter, PAM30)

Other BLAST [web gateways](#)

All matches to this query

| Score | Mr(calc):   | Delta    | Sequence                           |
|-------|-------------|----------|------------------------------------|
| 45.5  | 2310.161285 | 0.008251 | <a href="#">VLSIAQAHSPAFSCEQVR</a> |

Mascot: <http://www.matrixscience.com/>

# Mascot Search Results

## Peptide View

MS/MS Fragmentation of **GSQTQSHPD LGTEGCWDQLSAPR**

Found in **PGRP2\_HUMAN**, N-acetylmuramoyl-L-alanine amidase OS=Homo sapiens GN=PGLYRP2 PE=1 SV=1

Match to Query 67766: 2837.312472 from(946.778100,3+) rtinseconds(2045) index(79163)

Title: Locus:1.1.1.2062.25 File:"2013-07-02 CLN FXIII 180 min 1st FT.wiff"

Data file C:\Program Files (x86)\Matrix Science\Mascot Daemon\mgf7 FXIII 180 min 1st\mascot\_daemon\_merge.mgf

Click mouse within plot area to zoom in by factor of two about that point

Or, Plot from  to  Da

Label all possible matches  Label matches used for scoring

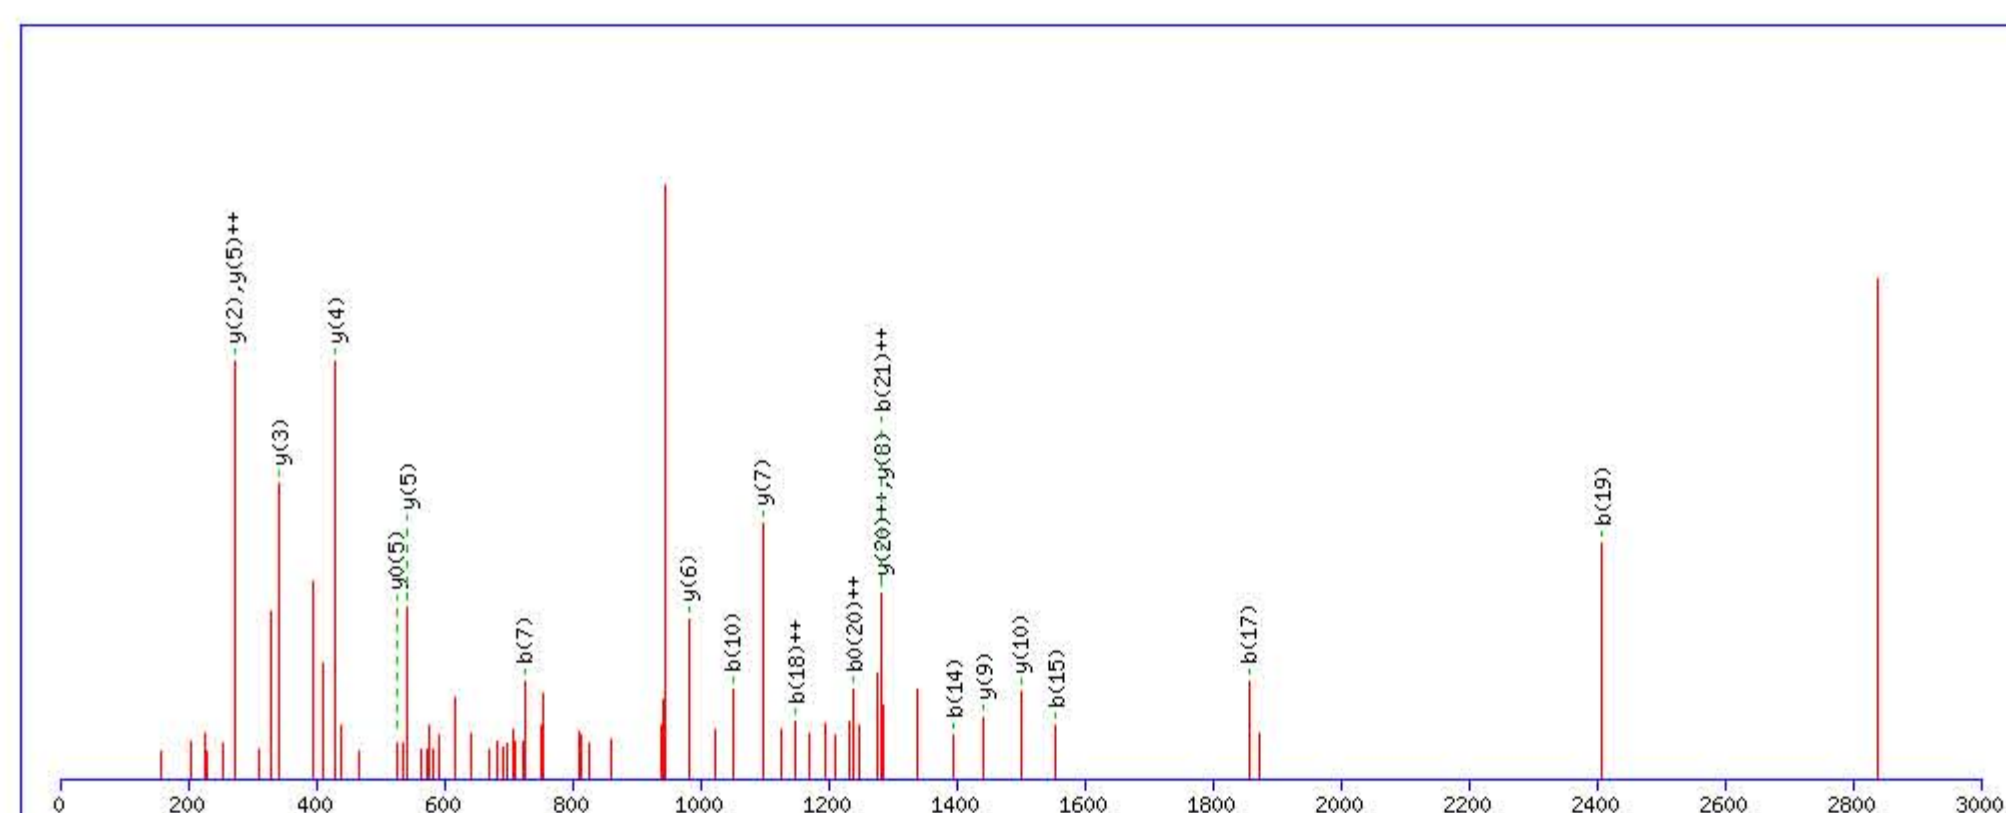

Monoisotopic mass of neutral peptide Mr(calc): 2837.286133

Fixed modifications: Carbamidomethyl (C) (apply to specified residues or termini only)

Variable modifications:

Q18 : Biotin:Thermo-21345 (Q)

Ions Score: 47 Expect: 0.00026

Matches : 21/252 fragment ions using 32 most intense peaks [\(help\)](#)

| #  | b                  | b <sup>++</sup>    | b <sup>+</sup> | b <sup>+++</sup> | b <sup>0</sup> | b <sup>0++</sup> | Seq. | y                  | y <sup>++</sup>    | y <sup>+</sup> | y <sup>+++</sup> | y <sup>0</sup>    | y <sup>0++</sup> | #  |
|----|--------------------|--------------------|----------------|------------------|----------------|------------------|------|--------------------|--------------------|----------------|------------------|-------------------|------------------|----|
| 1  | 58.028740          | 29.518008          |                |                  |                |                  | G    |                    |                    |                |                  |                   |                  | 23 |
| 2  | 145.060768         | 73.034022          |                |                  | 127.050203     | 64.028740        | S    | 2781.271927        | 1391.139601        | 2764.245378    | 1382.626327      | 2763.261362       | 1382.134319      | 22 |
| 3  | 273.119346         | 137.063311         | 256.092797     | 128.550037       | 255.108781     | 128.058029       | Q    | 2694.239899        | 1347.623587        | 2677.213350    | 1339.110313      | 2676.229334       | 1338.618305      | 21 |
| 4  | 374.167025         | 187.587151         | 357.140476     | 179.073876       | 356.156460     | 178.581868       | T    | 2566.181321        | <b>1283.594298</b> | 2549.154772    | 1275.081024      | 2548.170756       | 1274.589016      | 20 |
| 5  | 502.225603         | 251.616440         | 485.199054     | 243.103165       | 484.215038     | 242.611157       | Q    | 2465.133642        | 1233.070459        | 2448.107093    | 1224.557184      | 2447.123077       | 1224.065176      | 19 |
| 6  | 589.257631         | 295.132454         | 572.231082     | 286.619179       | 571.247066     | 286.127171       | S    | 2337.075064        | 1169.041170        | 2320.048515    | 1160.527895      | 2319.064499       | 1160.035887      | 18 |
| 7  | <b>726.316543</b>  | 363.661910         | 709.289994     | 355.148635       | 708.305978     | 354.656627       | H    | 2250.043036        | 1125.525156        | 2233.016487    | 1117.011881      | 2232.032471       | 1116.519873      | 17 |
| 8  | 823.369307         | 412.188292         | 806.342758     | 403.675017       | 805.358742     | 403.183009       | P    | 2112.984124        | 1056.995700        | 2095.957575    | 1048.482425      | 2094.973559       | 1047.990417      | 16 |
| 9  | 938.396250         | 469.701763         | 921.369701     | 461.188489       | 920.385685     | 460.696481       | D    | 2015.931360        | 1008.469318        | 1998.904811    | 999.956044       | 1997.920795       | 999.464036       | 15 |
| 10 | <b>1051.480314</b> | 526.243795         | 1034.453765    | 517.730521       | 1033.469749    | 517.238512       | L    | 1900.904417        | 950.955847         | 1883.877868    | 942.442572       | 1882.893852       | 941.950564       | 14 |
| 11 | 1108.501778        | 554.754527         | 1091.475229    | 546.241252       | 1090.491213    | 545.749244       | G    | 1787.820353        | 894.413815         | 1770.793804    | 885.900540       | 1769.809788       | 885.408532       | 13 |
| 12 | 1209.549457        | 605.278366         | 1192.522908    | 596.765092       | 1191.538892    | 596.273084       | T    | 1730.798889        | 865.903083         | 1713.772340    | 857.389808       | 1712.788324       | 856.897800       | 12 |
| 13 | 1338.592050        | 669.799663         | 1321.565501    | 661.286389       | 1320.581485    | 660.794380       | E    | 1629.751210        | 815.379243         | 1612.724661    | 806.865969       | 1611.740645       | 806.373961       | 11 |
| 14 | <b>1395.613514</b> | 698.310395         | 1378.586965    | 689.797121       | 1377.602949    | 689.305112       | G    | <b>1500.708617</b> | 750.857947         | 1483.682068    | 742.344672       | 1482.698052       | 741.852664       | 10 |
| 15 | <b>1555.644163</b> | 778.325719         | 1538.617614    | 769.812445       | 1537.633598    | 769.320437       | C    | <b>1443.687153</b> | 722.347215         | 1426.660604    | 713.833940       | 1425.676588       | 713.341932       | 9  |
| 16 | 1741.723476        | 871.365376         | 1724.696927    | 862.852102       | 1723.712911    | 862.360093       | W    | <b>1283.656504</b> | 642.331890         | 1266.629955    | 633.818616       | 1265.645939       | 633.326608       | 8  |
| 17 | <b>1856.750419</b> | 928.878848         | 1839.723870    | 920.365573       | 1838.739854    | 919.873565       | D    | <b>1097.577191</b> | 549.292234         | 1080.550642    | 540.778959       | 1079.566626       | 540.286951       | 7  |
| 18 | 2295.975745        | <b>1148.491510</b> | 2278.949196    | 1139.978236      | 2277.965180    | 1139.486228      | Q    | <b>982.550248</b>  | 491.778762         | 965.523699     | 483.265488       | 964.539683        | 482.773480       | 6  |
| 19 | <b>2409.059809</b> | 1205.033542        | 2392.033260    | 1196.520268      | 2391.049244    | 1196.028260      | L    | <b>543.324922</b>  | <b>272.166099</b>  | 526.298373     | 263.652825       | <b>525.314357</b> | 263.160817       | 5  |
| 20 | 2496.091837        | 1248.549556        | 2479.065288    | 1240.036282      | 2478.081272    | 1239.544274      | S    | <b>430.240858</b>  | 215.624067         | 413.214309     | 207.110793       | 412.230293        | 206.618785       | 4  |
| 21 | 2567.128951        | <b>1284.068114</b> | 2550.102402    | 1275.554839      | 2549.118386    | 1275.062831      | A    | <b>343.208830</b>  | 172.108053         | 326.182281     | 163.594779       |                   |                  | 3  |
| 22 | 2664.181715        | 1332.594496        | 2647.155166    | 1324.081221      | 2646.171150    | 1323.589213      | P    | <b>272.171716</b>  | 136.589496         | 255.145167     | 128.076221       |                   |                  | 2  |
| 23 |                    |                    |                |                  |                |                  | R    | 175.118952         | 88.063114          | 158.092403     | 79.549839        |                   |                  | 1  |

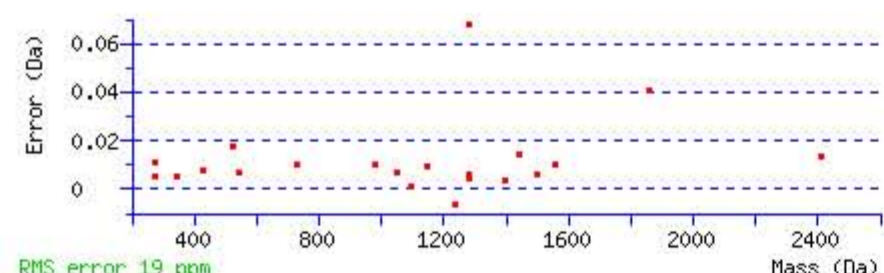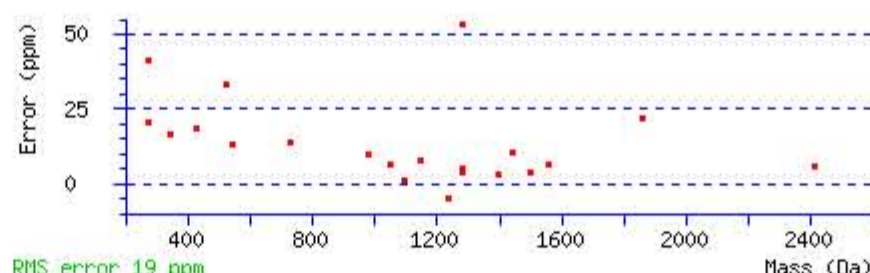

NCBI BLAST search of **GSQTQSHPD LGTEGCWDQLSAPR**

(Parameters: blastp, nr protein database, expect=20000, no filter, PAM30)

Other BLAST [web gateways](#)

## All matches to this query

| Score | Mr(calc):   | Delta    | Sequence                                 |
|-------|-------------|----------|------------------------------------------|
| 47.2  | 2837.286133 | 0.026339 | <a href="#">GSQTQSHPD LGTEGCWDQLSAPR</a> |
| 2.3   | 2837.286133 | 0.026339 | <a href="#">GSQTQSHPD LGTEGCWDQLSAPR</a> |
| 1.9   | 2837.286133 | 0.026339 | <a href="#">GSQTQSHPD LGTEGCWDQLSAPR</a> |

# MASCOT Search Results

## Peptide View

MS/MS Fragmentation of **GSQTQSHPD LGTEGCWDQLSAPR**

Found in **PGRP2\_HUMAN**, N-acetylmuramoyl-L-alanine amidase OS=Homo sapiens GN=PGLYRP2 PE=1 SV=1

Match to Query 67768: 2837.316672 from(946.779500,3+) rtinseconds(1989) index(6468)

Title: Locus:1.1.1.2946.20 File:"2013-07-02 CLN FXIII 180 min 1st F 1.wiff"

Data file C:\Program Files (x86)\Matrix Science\Mascot Daemon\mgf7 FXIII 180 min 1st\mascot\_daemon\_merge.mgf

Click mouse within plot area to zoom in by factor of two about that point

Or, Plot from  to  Da

Label all possible matches  Label matches used for scoring

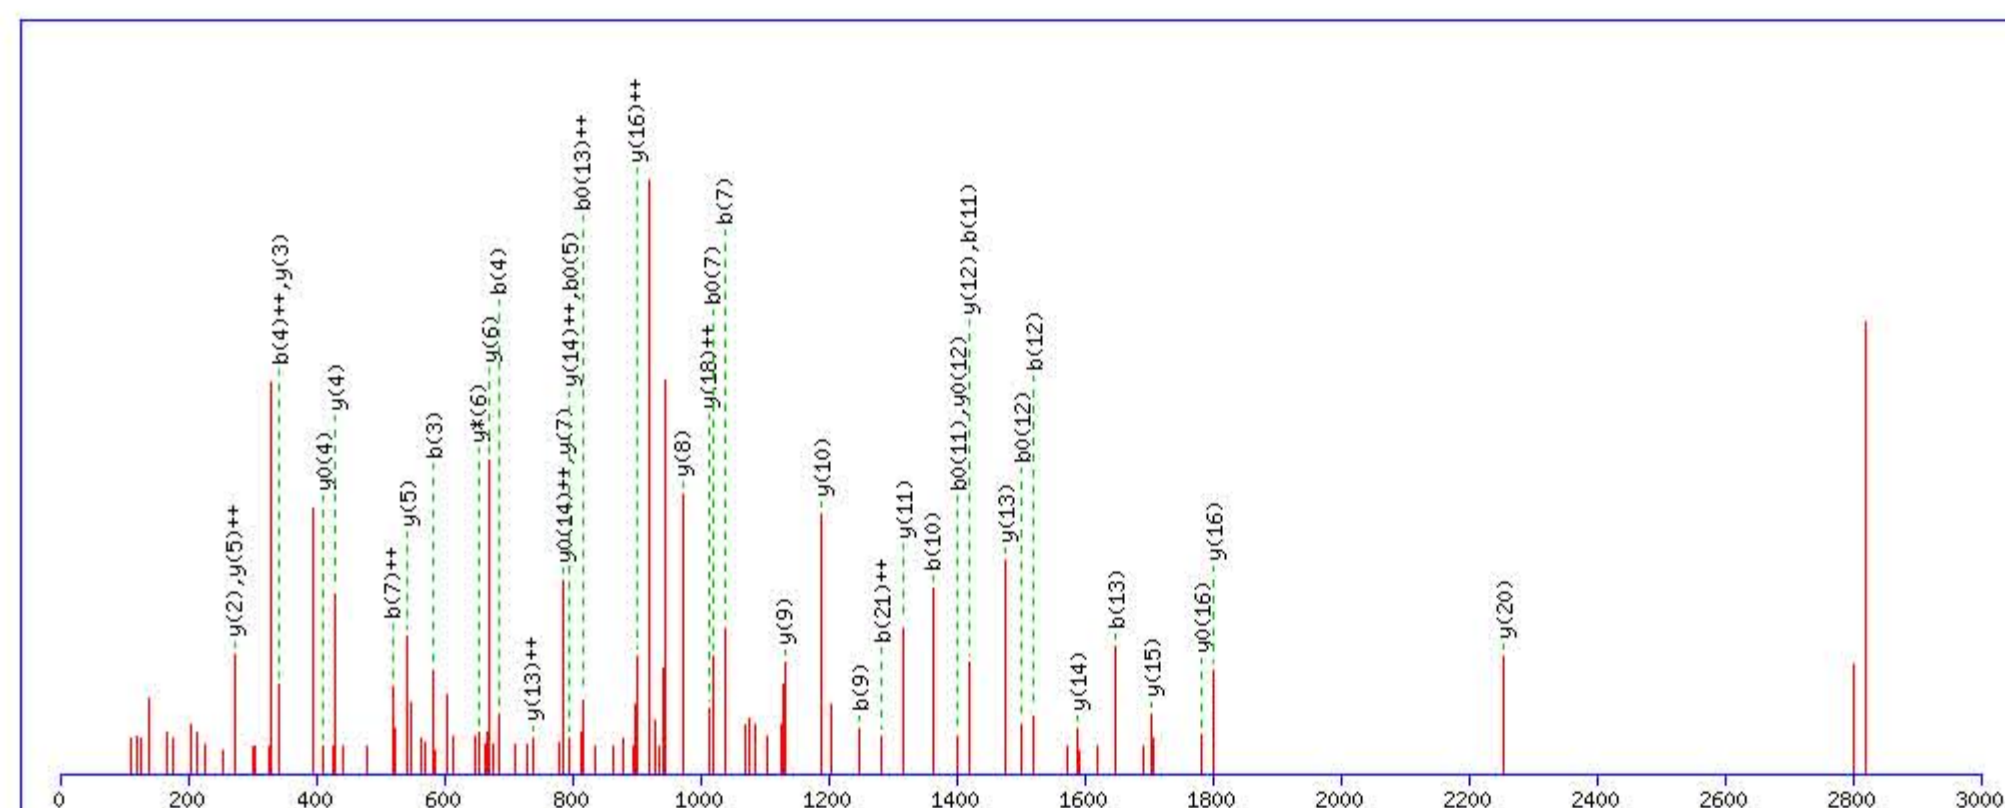

Monoisotopic mass of neutral peptide Mr(calc): 2837.286133

Fixed modifications: Carbamidomethyl (C) (apply to specified residues or termini only)

Variable modifications:

Q3 : Biotin:Thermo-21345 (Q)

Ions Score: 116 Expect: 3.3e-011

Matches : 42/252 fragment ions using 54 most intense peaks [\(help\)](#)

| #  | b                  | b <sup>++</sup>    | b <sup>*</sup> | b <sup>*++</sup> | b <sup>0</sup>     | b <sup>0++</sup> | Seq. | y                  | y <sup>++</sup>    | y <sup>*</sup>    | y <sup>*++</sup> | y <sup>0</sup>     | y <sup>0++</sup>  | #  |
|----|--------------------|--------------------|----------------|------------------|--------------------|------------------|------|--------------------|--------------------|-------------------|------------------|--------------------|-------------------|----|
| 1  | 58.028740          | 29.518008          |                |                  |                    |                  | G    |                    |                    |                   |                  |                    |                   | 23 |
| 2  | 145.060768         | 73.034022          |                |                  | 127.050203         | 64.028740        | S    | 2781.271927        | 1391.139601        | 2764.245378       | 1382.626327      | 2763.261362        | 1382.134319       | 22 |
| 3  | <b>584.286094</b>  | 292.646685         | 567.259545     | 284.133411       | 566.275529         | 283.641403       | Q    | 2694.239899        | 1347.623587        | 2677.213350       | 1339.110313      | 2676.229334        | 1338.618305       | 21 |
| 4  | <b>685.333773</b>  | <b>343.170525</b>  | 668.307224     | 334.657250       | 667.323208         | 334.165242       | T    | <b>2255.014573</b> | 1128.010924        | 2237.988024       | 1119.497650      | 2237.004008        | 1119.005642       | 20 |
| 5  | 813.392351         | 407.199814         | 796.365802     | 398.686539       | <b>795.381786</b>  | 398.194531       | Q    | 2153.966894        | 1077.487085        | 2136.940345       | 1068.973810      | 2135.956329        | 1068.481802       | 19 |
| 6  | 900.424379         | 450.715828         | 883.397830     | 442.202553       | 882.413814         | 441.710545       | S    | 2025.908316        | <b>1013.457796</b> | 2008.881767       | 1004.944522      | 2007.897751        | 1004.452514       | 18 |
| 7  | <b>1037.483291</b> | <b>519.245284</b>  | 1020.456742    | 510.732009       | <b>1019.472726</b> | 510.240001       | H    | 1938.876288        | 969.941782         | 1921.849739       | 961.428508       | 1920.865723        | 960.936500        | 17 |
| 8  | 1134.536055        | 567.771666         | 1117.509506    | 559.258391       | 1116.525490        | 558.766383       | P    | <b>1801.817376</b> | <b>901.412326</b>  | 1784.790827       | 892.899052       | <b>1783.806811</b> | 892.407044        | 16 |
| 9  | <b>1249.562998</b> | 625.285137         | 1232.536449    | 616.771863       | 1231.552433        | 616.279855       | D    | <b>1704.764612</b> | 852.885944         | 1687.738063       | 844.372670       | 1686.754047        | 843.880662        | 15 |
| 10 | <b>1362.647062</b> | 681.827169         | 1345.620513    | 673.313895       | 1344.636497        | 672.821887       | L    | <b>1589.737669</b> | <b>795.372473</b>  | 1572.711120       | 786.859198       | 1571.727104        | <b>786.367190</b> | 14 |
| 11 | <b>1419.668526</b> | 710.337901         | 1402.641977    | 701.824627       | <b>1401.657961</b> | 701.332618       | G    | <b>1476.653605</b> | <b>738.830441</b>  | 1459.627056       | 730.317166       | 1458.643040        | 729.825158        | 13 |
| 12 | <b>1520.716205</b> | 760.861741         | 1503.689656    | 752.348466       | <b>1502.705640</b> | 751.856458       | T    | <b>1419.632141</b> | 710.319709         | 1402.605592       | 701.806434       | <b>1401.621576</b> | 701.314426        | 12 |
| 13 | <b>1649.758798</b> | 825.383037         | 1632.732249    | 816.869763       | 1631.748233        | 816.377755       | E    | <b>1318.584462</b> | 659.795869         | 1301.557913       | 651.282595       | 1300.573897        | 650.790587        | 11 |
| 14 | 1706.780262        | 853.893769         | 1689.753713    | 845.380495       | 1688.769697        | 844.888487       | G    | <b>1189.541869</b> | 595.274573         | 1172.515320       | 586.761298       | 1171.531304        | 586.269290        | 10 |
| 15 | 1866.810911        | 933.909094         | 1849.784362    | 925.395819       | 1848.800346        | 924.903811       | C    | <b>1132.520405</b> | 566.763841         | 1115.493856       | 558.250566       | 1114.509840        | 557.758558        | 9  |
| 16 | 2052.890224        | 1026.948750        | 2035.863675    | 1018.435475      | 2034.879659        | 1017.943467      | W    | <b>972.489756</b>  | 486.748516         | 955.463207        | 478.235242       | 954.479191         | 477.743234        | 8  |
| 17 | 2167.917167        | 1084.462221        | 2150.890618    | 1075.948947      | 2149.906602        | 1075.456939      | D    | <b>786.410443</b>  | 393.708860         | 769.383894        | 385.195585       | 768.399878         | 384.703577        | 7  |
| 18 | 2295.975745        | 1148.491510        | 2278.949196    | 1139.978236      | 2277.965180        | 1139.486228      | Q    | <b>671.383500</b>  | 336.195388         | <b>654.356951</b> | 327.682114       | 653.372935         | 327.190106        | 6  |
| 19 | 2409.059809        | 1205.033542        | 2392.033260    | 1196.520268      | 2391.049244        | 1196.028260      | L    | <b>543.324922</b>  | <b>272.166099</b>  | 526.298373        | 263.652825       | 525.314357         | 263.160817        | 5  |
| 20 | 2496.091837        | 1248.549556        | 2479.065288    | 1240.036282      | 2478.081272        | 1239.544274      | S    | <b>430.240858</b>  | 215.624067         | 413.214309        | 207.110793       | <b>412.230293</b>  | 206.618785        | 4  |
| 21 | 2567.128951        | <b>1284.068114</b> | 2550.102402    | 1275.554839      | 2549.118386        | 1275.062831      | A    | <b>343.208830</b>  | 172.108053         | 326.182281        | 163.594779       |                    |                   | 3  |
| 22 | 2664.181715        | 1332.594496        | 2647.155166    | 1324.081221      | 2646.171150        | 1323.589213      | P    | <b>272.171716</b>  | 136.589496         | 255.145167        | 128.076221       |                    |                   | 2  |
| 23 |                    |                    |                |                  |                    |                  | R    | 175.118952         | 88.063114          | 158.092403        | 79.549839        |                    |                   | 1  |

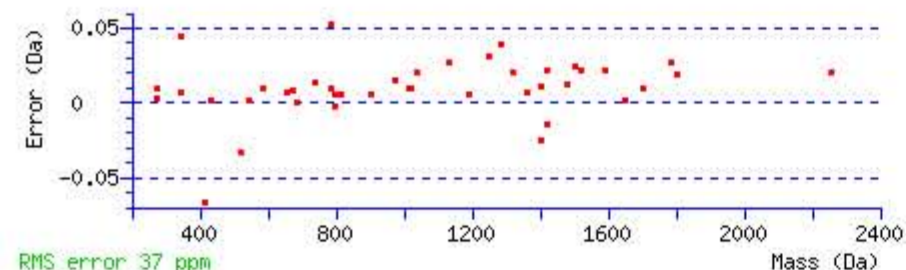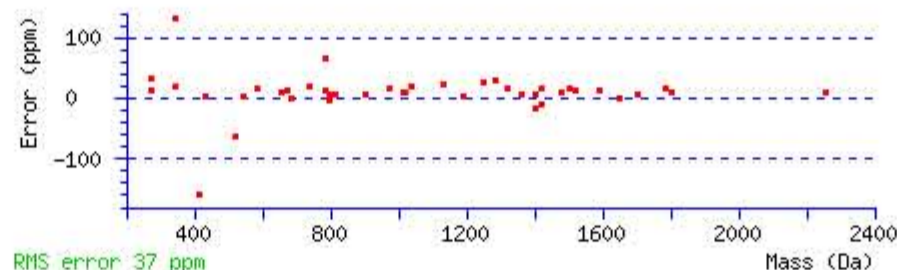

NCBI BLAST search of **GSQTQSHPD LGTEGCWDQLSAPR**  
(Parameters: blastp, nr protein database, expect=20000, no filter, PAM30)

Other BLAST [web gateways](#)

All matches to this query

| Score | Mr(calc):   | Delta    | Sequence                                 |
|-------|-------------|----------|------------------------------------------|
| 116.2 | 2837.286133 | 0.030539 | <a href="#">GSQTQSHPD LGTEGCWDQLSAPR</a> |
| 98.7  | 2837.286133 | 0.030539 | <a href="#">GSQTQSHPD LGTEGCWDQLSAPR</a> |

Mascot: <http://www.matrixscience.com/>

# Mascot Search Results

## Peptide View

MS/MS Fragmentation of **RPYQEGTPCSQCPSGYHCK**

Found in **PII6\_HUMAN**, Peptidase inhibitor 16 OS=Homo sapiens GN=PII6 PE=1 SV=1

Match to Query 64775: 2622.147296 from(656.544100,4+) rtinseconds(1325) index(37477)

Title: Locus:1.1.1.2910.12 File:"2013-07-02 CLN FXIII 180 min 1st F 3.wiff"

Data file C:\Program Files (x86)\Matrix Science\Mascot Daemon\mgf\7 FXIII 180 min 1st\mascot\_daemon\_merge.mgf

Click mouse within plot area to zoom in by factor of two about that point

Or, Plot from  to  Da

Label all possible matches  Label matches used for scoring

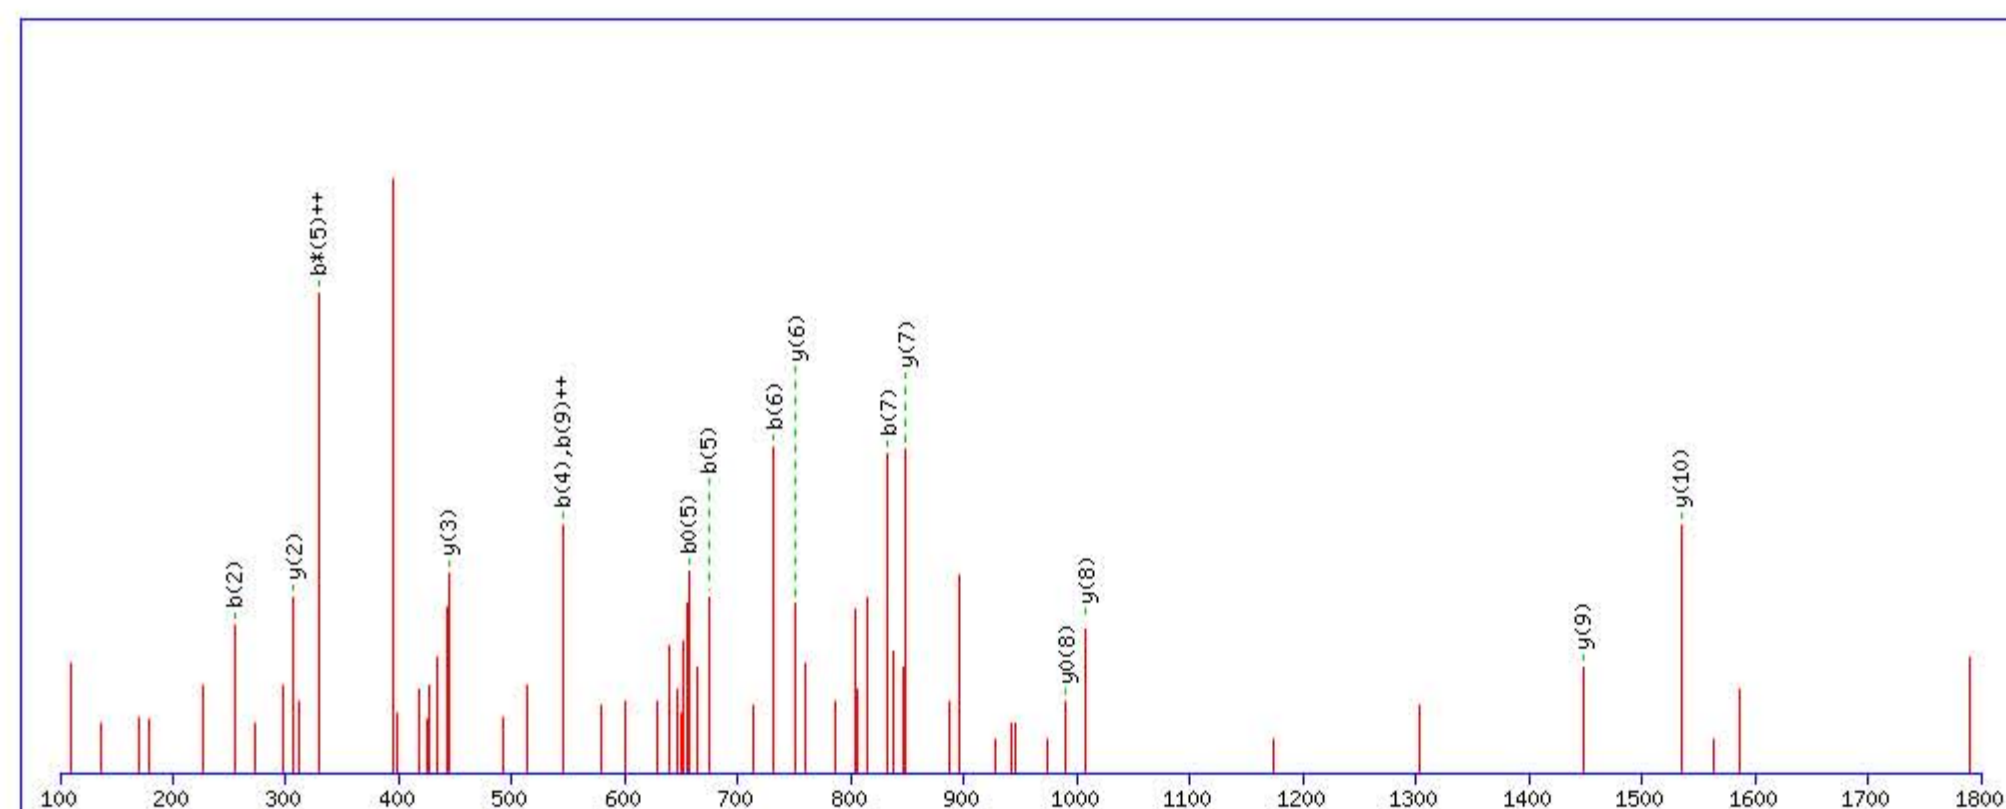

Monoisotopic mass of neutral peptide Mr(calc): 2622.123611

Fixed modifications: Carbamidomethyl (C) (apply to specified residues or termini only)

Variable modifications:

Q11 : Biotin:Thermo-21345 (Q)

Ions Score: 46 Expect: 0.00016

Matches : 16/198 fragment ions using 24 most intense peaks [\(help\)](#)

| #  | b                 | b <sup>++</sup>   | b <sup>*</sup> | b <sup>*++</sup>  | b <sup>0</sup>    | b <sup>0++</sup> | Seq. | y                  | y <sup>++</sup> | y <sup>*</sup> | y <sup>*++</sup> | y <sup>0</sup>    | y <sup>0++</sup> | #  |
|----|-------------------|-------------------|----------------|-------------------|-------------------|------------------|------|--------------------|-----------------|----------------|------------------|-------------------|------------------|----|
| 1  | 157.108387        | 79.057831         | 140.081838     | 70.544557         |                   |                  | R    |                    |                 |                |                  |                   |                  | 19 |
| 2  | <b>254.161151</b> | 127.584213        | 237.134602     | 119.070939        |                   |                  | P    | 2467.029773        | 1234.018524     | 2450.003224    | 1225.505250      | 2449.019208       | 1225.013242      | 18 |
| 3  | 417.224480        | 209.115878        | 400.197931     | 200.602604        |                   |                  | Y    | 2369.977009        | 1185.492142     | 2352.950460    | 1176.978868      | 2351.966444       | 1176.486860      | 17 |
| 4  | <b>545.283058</b> | 273.145167        | 528.256509     | 264.631893        |                   |                  | Q    | 2206.913680        | 1103.960478     | 2189.887131    | 1095.447203      | 2188.903115       | 1094.955195      | 16 |
| 5  | <b>674.325651</b> | 337.666464        | 657.299102     | <b>329.153189</b> | <b>656.315086</b> | 328.661181       | E    | 2078.855102        | 1039.931189     | 2061.828553    | 1031.417914      | 2060.844537       | 1030.925906      | 15 |
| 6  | <b>731.347115</b> | 366.177196        | 714.320566     | 357.663921        | 713.336550        | 357.171913       | G    | 1949.812509        | 975.409892      | 1932.785960    | 966.896618       | 1931.801944       | 966.404610       | 14 |
| 7  | <b>832.394794</b> | 416.701035        | 815.368245     | 408.187761        | 814.384229        | 407.695753       | T    | 1892.791045        | 946.899160      | 1875.764496    | 938.385886       | 1874.780480       | 937.893878       | 13 |
| 8  | 929.447558        | 465.227417        | 912.421009     | 456.714143        | 911.436993        | 456.222135       | P    | 1791.743366        | 896.375321      | 1774.716817    | 887.862047       | 1773.732801       | 887.370038       | 12 |
| 9  | 1089.478207       | <b>545.242742</b> | 1072.451658    | 536.729467        | 1071.467642       | 536.237459       | C    | 1694.690602        | 847.848939      | 1677.664053    | 839.335665       | 1676.680037       | 838.843656       | 11 |
| 10 | 1176.510235       | 588.758756        | 1159.483686    | 580.245481        | 1158.499670       | 579.753473       | S    | <b>1534.659953</b> | 767.833614      | 1517.633404    | 759.320340       | 1516.649388       | 758.828332       | 10 |
| 11 | 1615.735561       | 808.371419        | 1598.709012    | 799.858144        | 1597.724996       | 799.366136       | Q    | <b>1447.627925</b> | 724.317600      | 1430.601376    | 715.804326       | 1429.617360       | 715.312318       | 9  |
| 12 | 1775.766210       | 888.386743        | 1758.739661    | 879.873469        | 1757.755645       | 879.381461       | C    | <b>1008.402599</b> | 504.704937      | 991.376050     | 496.191663       | <b>990.392034</b> | 495.699655       | 8  |
| 13 | 1872.818974       | 936.913125        | 1855.792425    | 928.399851        | 1854.808409       | 927.907843       | P    | <b>848.371950</b>  | 424.689613      | 831.345401     | 416.176338       | 830.361385        | 415.684330       | 7  |
| 14 | 1959.851002       | 980.429139        | 1942.824453    | 971.915865        | 1941.840437       | 971.423857       | S    | <b>751.319186</b>  | 376.163231      | 734.292637     | 367.649956       | 733.308621        | 367.157948       | 6  |
| 15 | 2016.872466       | 1008.939871       | 1999.845917    | 1000.426597       | 1998.861901       | 999.934589       | G    | 664.287158         | 332.647217      | 647.260609     | 324.133942       |                   |                  | 5  |
| 16 | 2179.935795       | 1090.471535       | 2162.909246    | 1081.958261       | 2161.925230       | 1081.466253      | Y    | 607.265694         | 304.136485      | 590.239145     | 295.623210       |                   |                  | 4  |
| 17 | 2316.994707       | 1159.000991       | 2299.968158    | 1150.487717       | 2298.984142       | 1149.995709      | H    | <b>444.202365</b>  | 222.604820      | 427.175816     | 214.091546       |                   |                  | 3  |
| 18 | 2477.025356       | 1239.016316       | 2459.998807    | 1230.503041       | 2459.014791       | 1230.011033      | C    | <b>307.143453</b>  | 154.075364      | 290.116904     | 145.562090       |                   |                  | 2  |
| 19 |                   |                   |                |                   |                   |                  | K    | 147.112804         | 74.060040       | 130.086255     | 65.546765        |                   |                  | 1  |

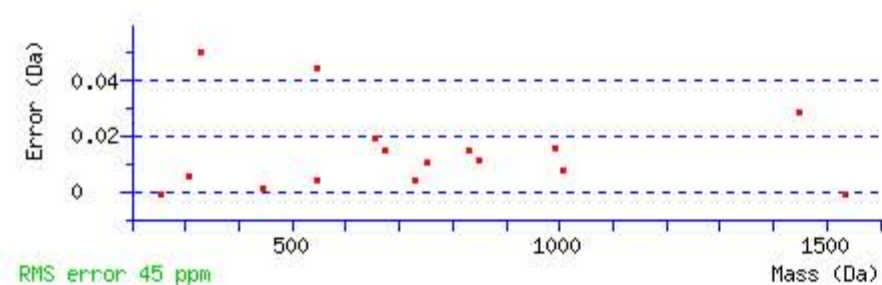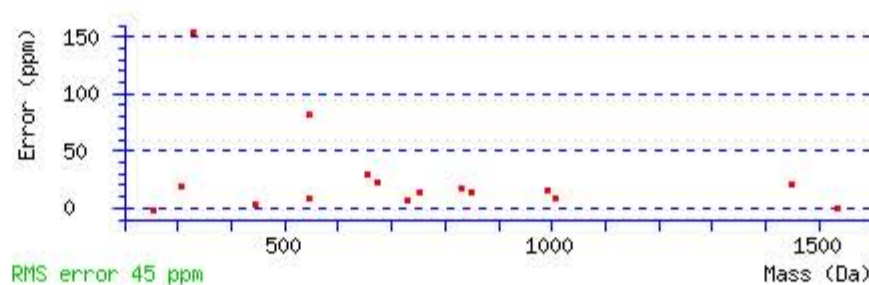

NCBI BLAST search of **RPYQEGTPCSQCPSGYHCK**

(Parameters: blastp, nr protein database, expect=20000, no filter, PAM30)

Other BLAST [web gateways](#)

All matches to this query

| Score | Mr(calc):   | Delta    | Sequence                            |
|-------|-------------|----------|-------------------------------------|
| 45.5  | 2622.123611 | 0.023685 | <a href="#">RPYQEGTPCSQCPSGYHCK</a> |
| 3.8   | 2622.123611 | 0.023685 | <a href="#">RPYQEGTPCSQCPSGYHCK</a> |

Mascot: <http://www.matrixscience.com/>

**Peptide View**

MS/MS Fragmentation of **RPYQEGTPCSQCPSGYHCK**

Found in **PI16\_HUMAN**, Peptidase inhibitor 16 OS=Homo sapiens GN=PI16 PE=1 SV=1

Match to Query 69551: 2933.316216 from(734.336330,4+) rtinseconds(1554) index(39188)

Title: Locus:1.1.1.2990.22 File:"2013-07-02 CLN FXIII 180 min 1st F 3.wiff"

Data file C:\Program Files (x86)\Matrix Science\Mascot Daemon\mgf\7 FXIII 180 min 1st\mascot\_daemon\_merge.mgf

Click mouse within plot area to zoom in by factor of two about that point

Or, Plot from  to  Da

Label all possible matches  Label matches used for scoring

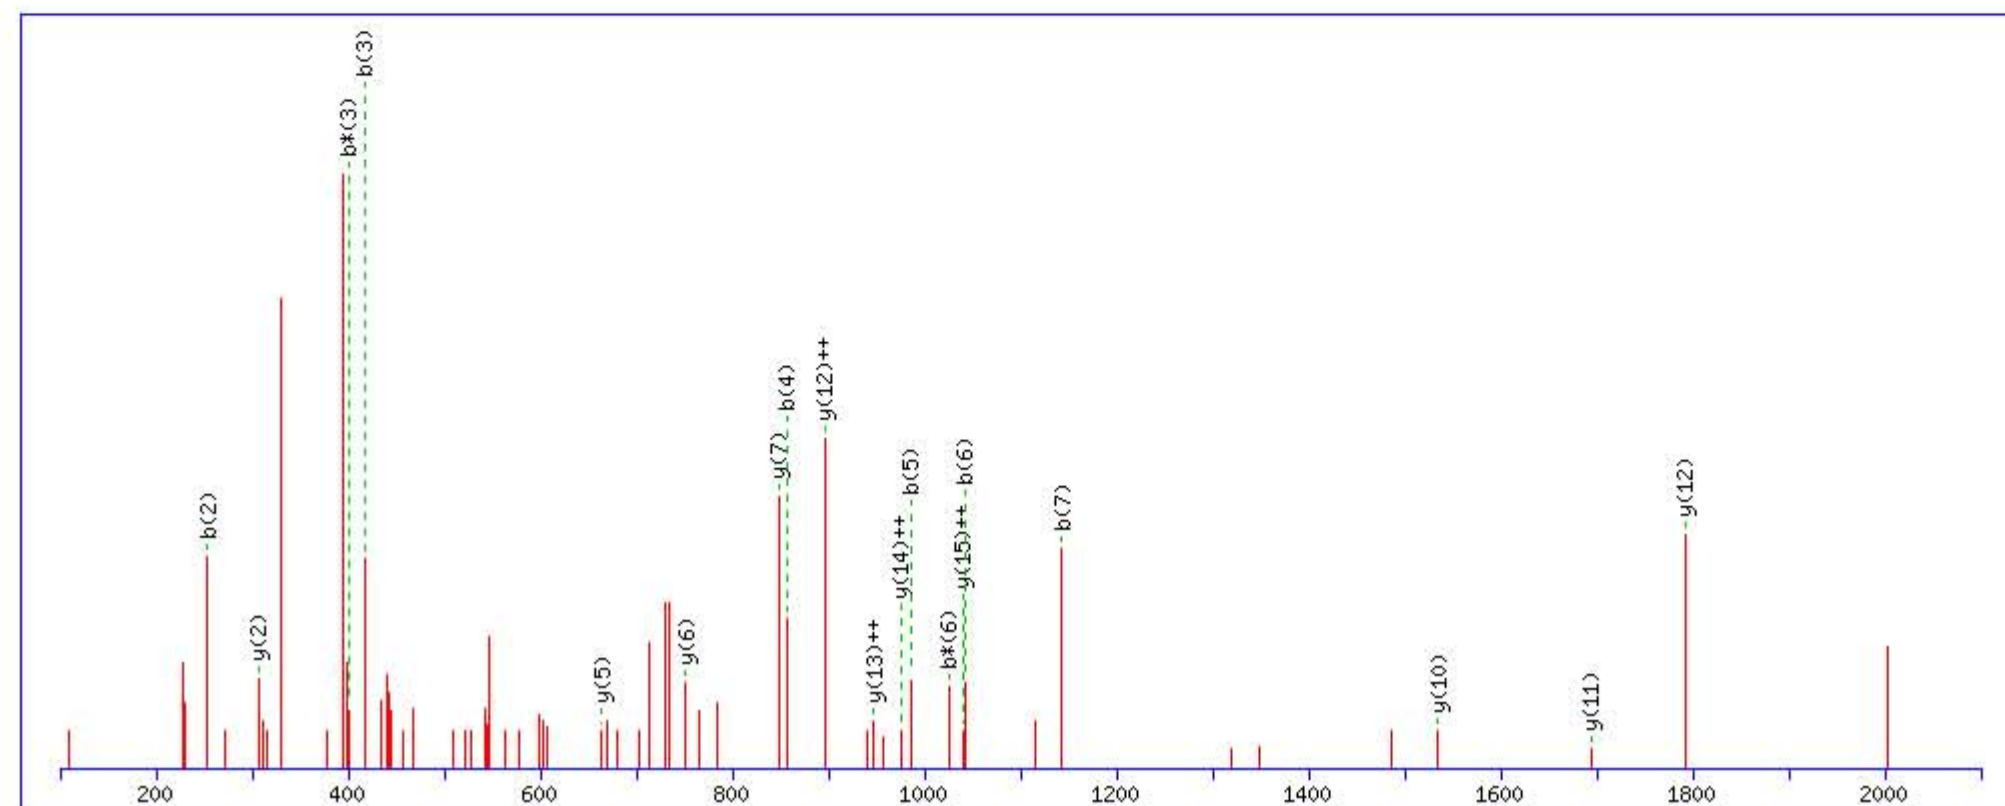

Monoisotopic mass of neutral peptide Mr(calc): 2933.290359

Fixed modifications: Carbamidomethyl (C) (apply to specified residues or termini only)

Variable modifications:

Q4 : Biotin:Thermo-21345 (Q)

Q11 : Biotin:Thermo-21345 (Q)

Ions Score: 29 Expect: 0.012

Matches : 19/198 fragment ions using 46 most intense peaks [\(help\)](#)

| #  | b                  | b <sup>++</sup> | b <sup>+</sup>     | b <sup>+++</sup> | b <sup>0</sup> | b <sup>0++</sup> | Seq. | y                  | y <sup>++</sup>    | y <sup>+</sup> | y <sup>+++</sup> | y <sup>0</sup> | y <sup>0++</sup> | #  |
|----|--------------------|-----------------|--------------------|------------------|----------------|------------------|------|--------------------|--------------------|----------------|------------------|----------------|------------------|----|
| 1  | 157.108387         | 79.057831       | 140.081838         | 70.544557        |                |                  | R    |                    |                    |                |                  |                |                  | 19 |
| 2  | <b>254.161151</b>  | 127.584213      | 237.134602         | 119.070939       |                |                  | P    | 2778.196521        | 1389.601898        | 2761.169972    | 1381.088624      | 2760.185956    | 1380.596616      | 18 |
| 3  | <b>417.224480</b>  | 209.115878      | <b>400.197931</b>  | 200.602604       |                |                  | Y    | 2681.143757        | 1341.075516        | 2664.117208    | 1332.562242      | 2663.133192    | 1332.070234      | 17 |
| 4  | <b>856.449806</b>  | 428.728541      | 839.423257         | 420.215267       |                |                  | Q    | 2518.080428        | 1259.543852        | 2501.053879    | 1251.030577      | 2500.069863    | 1250.538569      | 16 |
| 5  | <b>985.492399</b>  | 493.249838      | 968.465850         | 484.736563       | 967.481834     | 484.244555       | E    | 2078.855102        | <b>1039.931189</b> | 2061.828553    | 1031.417914      | 2060.844537    | 1030.925906      | 15 |
| 6  | <b>1042.513863</b> | 521.760570      | <b>1025.487314</b> | 513.247295       | 1024.503298    | 512.755287       | G    | 1949.812509        | <b>975.409893</b>  | 1932.785960    | 966.896618       | 1931.801944    | 966.404610       | 14 |
| 7  | <b>1143.561542</b> | 572.284409      | 1126.534993        | 563.771135       | 1125.550977    | 563.279127       | T    | 1892.791045        | <b>946.899160</b>  | 1875.764496    | 938.385886       | 1874.780480    | 937.893878       | 13 |
| 8  | 1240.614306        | 620.810791      | 1223.587757        | 612.297517       | 1222.603741    | 611.805509       | P    | <b>1791.743366</b> | <b>896.375321</b>  | 1774.716817    | 887.862047       | 1773.732801    | 887.370038       | 12 |
| 9  | 1400.644955        | 700.826116      | 1383.618406        | 692.312841       | 1382.634390    | 691.820833       | C    | <b>1694.690602</b> | 847.848939         | 1677.664053    | 839.335665       | 1676.680037    | 838.843656       | 11 |
| 10 | 1487.676983        | 744.342130      | 1470.650434        | 735.828855       | 1469.666418    | 735.336847       | S    | <b>1534.659953</b> | 767.833614         | 1517.633404    | 759.320340       | 1516.649388    | 758.828332       | 10 |
| 11 | 1926.902309        | 963.954793      | 1909.875760        | 955.441518       | 1908.891744    | 954.949510       | Q    | 1447.627925        | 724.317600         | 1430.601376    | 715.804326       | 1429.617360    | 715.312318       | 9  |
| 12 | 2086.932958        | 1043.970117     | 2069.906409        | 1035.456842      | 2068.922393    | 1034.964834      | C    | 1008.402599        | 504.704937         | 991.376050     | 496.191663       | 990.392034     | 495.699655       | 8  |
| 13 | 2183.985722        | 1092.496499     | 2166.959173        | 1083.983224      | 2165.975157    | 1083.491216      | P    | <b>848.371950</b>  | 424.689613         | 831.345401     | 416.176338       | 830.361385     | 415.684330       | 7  |
| 14 | 2271.017750        | 1136.012513     | 2253.991201        | 1127.499238      | 2253.007185    | 1127.007230      | S    | <b>751.319186</b>  | 376.163231         | 734.292637     | 367.649956       | 733.308621     | 367.157948       | 6  |
| 15 | 2328.039214        | 1164.523245     | 2311.012665        | 1156.009970      | 2310.028649    | 1155.517962      | G    | <b>664.287158</b>  | 332.647217         | 647.260609     | 324.133942       |                |                  | 5  |
| 16 | 2491.102543        | 1246.054909     | 2474.075994        | 1237.541635      | 2473.091978    | 1237.049627      | Y    | 607.265694         | 304.136485         | 590.239145     | 295.623210       |                |                  | 4  |
| 17 | 2628.161455        | 1314.584365     | 2611.134906        | 1306.071091      | 2610.150890    | 1305.579083      | H    | 444.202365         | 222.604820         | 427.175816     | 214.091546       |                |                  | 3  |
| 18 | 2788.192104        | 1394.599690     | 2771.165555        | 1386.086415      | 2770.181539    | 1385.594407      | C    | <b>307.143453</b>  | 154.075364         | 290.116904     | 145.562090       |                |                  | 2  |
| 19 |                    |                 |                    |                  |                |                  | K    | 147.112804         | 74.060040          | 130.086255     | 65.546765        |                |                  | 1  |

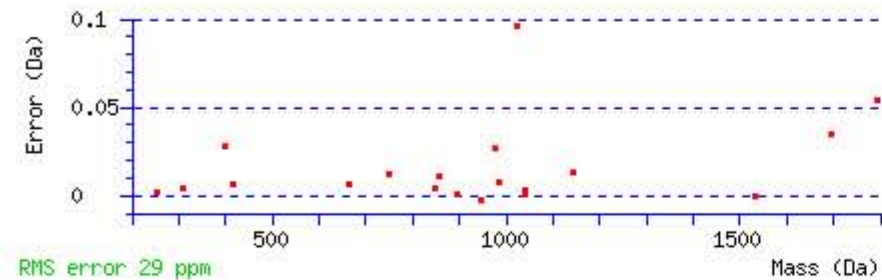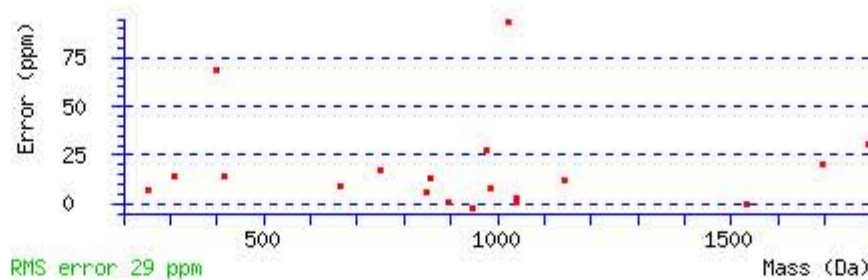

NCBI BLAST search of **RPYQEGTPCSQCPSGYHCK**

(Parameters: blastp, nr protein database, expect=20000, no filter, PAM30)

Other BLAST [web gateways](#)

All matches to this query

| Score | Mr(calc):   | Delta    | Sequence                            |
|-------|-------------|----------|-------------------------------------|
| 28.9  | 2933.290359 | 0.025857 | <a href="#">RPYQEGTPCSQCPSGYHCK</a> |



# MASCOT Search Results

## Peptide View

MS/MS Fragmentation of **TMFIGGSQLSQK**

Found in **PHLD\_HUMAN**, Phosphatidylinositol-glycan-specific phospholipase D OS=Homo sapiens GN=GPLD1 PE=1 SV=3

Match to Query 38994: 1606.844548 from(804.429550,2+) rtinseconds(2112) index(42979)

Title: Locus:1.1.1.3184.15 File:"2013-07-02 CLN FXIII 180 min 1st F 3.wiff"

Data file C:\Program Files (x86)\Matrix Science\Mascot Daemon\mgf7 FXIII 180 min 1st\mascot\_daemon\_merge.mgf

Click mouse within plot area to zoom in by factor of two about that point

Or, Plot from  to  Da

Label all possible matches  Label matches used for scoring

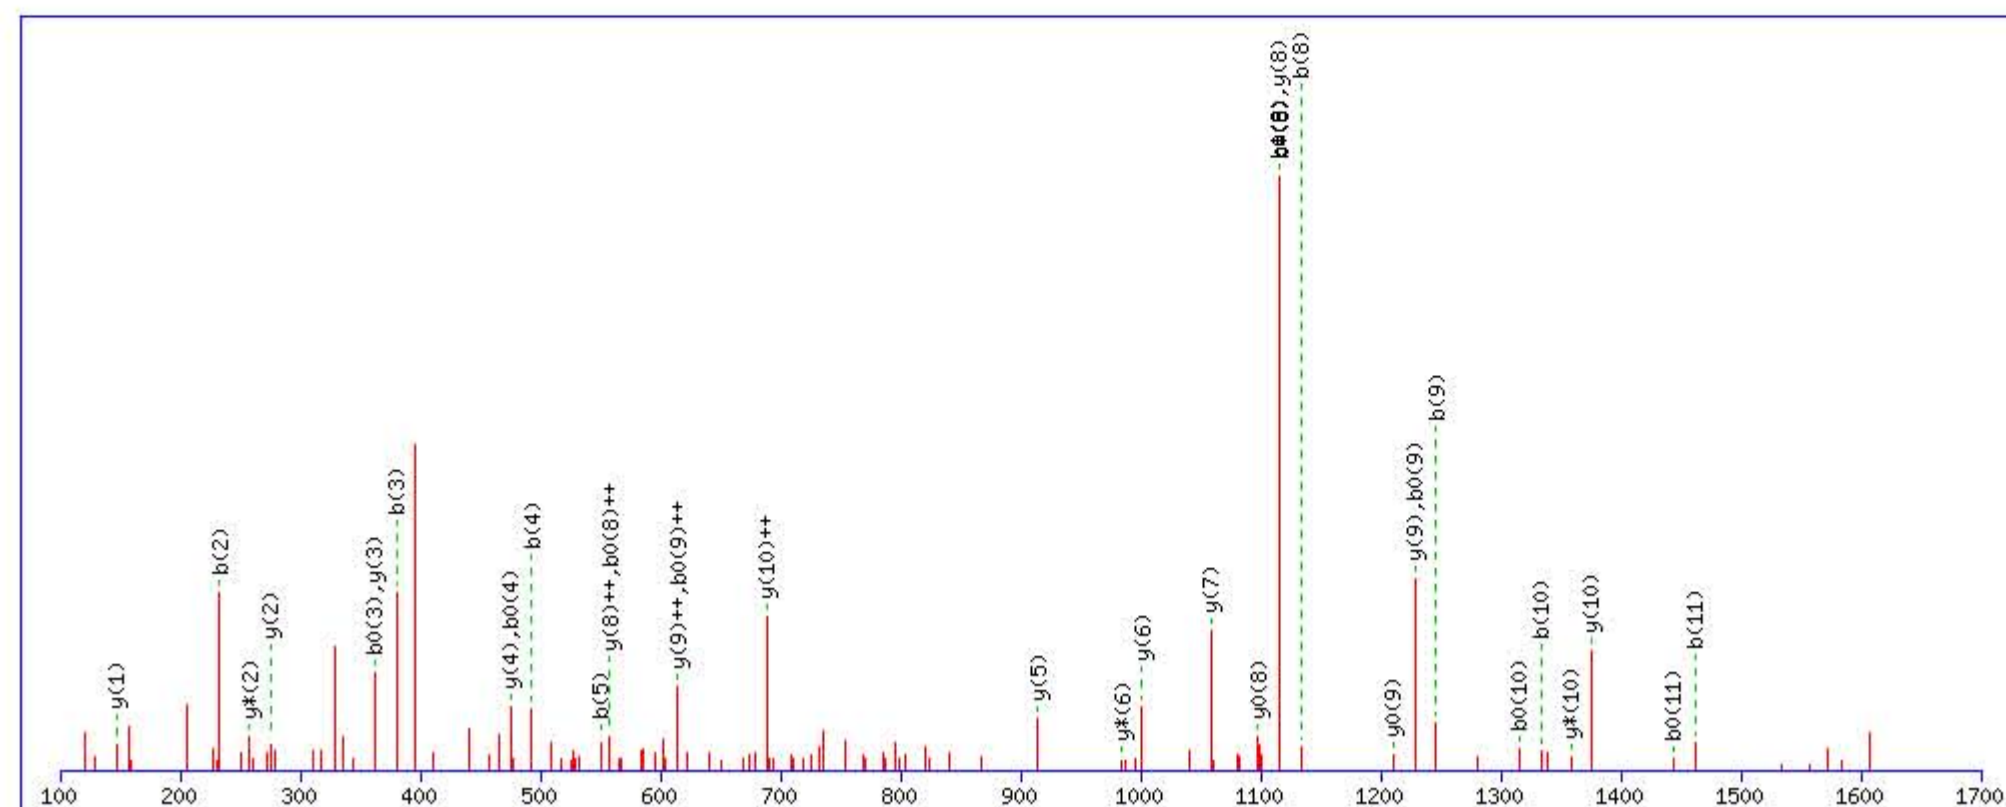

Monoisotopic mass of neutral peptide  $M_r(\text{calc})$ : 1606.821121

Fixed modifications: Carbamidomethyl (C) (apply to specified residues or termini only)

Variable modifications:

Q8 : Biotin:Thermo-21345 (Q)

Ions Score: 60 Expect: 2.3e-005

Matches : 35/114 fragment ions using 56 most intense peaks ([help](#))

| #  | b           | b <sup>++</sup> | b <sup>*</sup> | b <sup>***</sup> | b <sup>0</sup> | b <sup>0++</sup> | Seq. | y           | y <sup>++</sup> | y <sup>*</sup> | y <sup>***</sup> | y <sup>0</sup> | y <sup>0++</sup> | #  |
|----|-------------|-----------------|----------------|------------------|----------------|------------------|------|-------------|-----------------|----------------|------------------|----------------|------------------|----|
| 1  | 102.054955  | 51.531116       |                |                  | 84.044390      | 42.525833        | T    |             |                 |                |                  |                |                  | 12 |
| 2  | 233.095440  | 117.051358      |                |                  | 215.084875     | 108.046076       | M    | 1506.780719 | 753.893997      | 1489.754170    | 745.380723       | 1488.770154    | 744.888715       | 11 |
| 3  | 380.163854  | 190.585565      |                |                  | 362.153289     | 181.580282       | F    | 1375.740234 | 688.373755      | 1358.713685    | 679.860480       | 1357.729669    | 679.368472       | 10 |
| 4  | 493.247918  | 247.127597      |                |                  | 475.237353     | 238.122314       | I    | 1228.671820 | 614.839548      | 1211.645271    | 606.326273       | 1210.661255    | 605.834265       | 9  |
| 5  | 550.269382  | 275.638329      |                |                  | 532.258817     | 266.633047       | G    | 1115.587756 | 558.297516      | 1098.561207    | 549.784242       | 1097.577191    | 549.292233       | 8  |
| 6  | 607.290846  | 304.149061      |                |                  | 589.280281     | 295.143779       | G    | 1058.566292 | 529.786784      | 1041.539743    | 521.273509       | 1040.555727    | 520.781501       | 7  |
| 7  | 694.322874  | 347.665075      |                |                  | 676.312309     | 338.659793       | S    | 1001.544828 | 501.276052      | 984.518279     | 492.762777       | 983.534263     | 492.270769       | 6  |
| 8  | 1133.548200 | 567.277738      | 1116.521651    | 558.764464       | 1115.537635    | 558.272455       | Q    | 914.512800  | 457.760038      | 897.486251     | 449.246763       | 896.502235     | 448.754755       | 5  |
| 9  | 1246.632264 | 623.819770      | 1229.605715    | 615.306495       | 1228.621699    | 614.814487       | L    | 475.287474  | 238.147375      | 458.260925     | 229.634100       | 457.276909     | 229.142092       | 4  |
| 10 | 1333.664292 | 667.335784      | 1316.637743    | 658.822510       | 1315.653727    | 658.330501       | S    | 362.203410  | 181.605343      | 345.176861     | 173.092068       | 344.192845     | 172.600060       | 3  |
| 11 | 1461.722870 | 731.365073      | 1444.696321    | 722.851798       | 1443.712305    | 722.359790       | Q    | 275.171382  | 138.089329      | 258.144833     | 129.576054       |                |                  | 2  |
| 12 |             |                 |                |                  |                |                  | K    | 147.112804  | 74.060040       | 130.086255     | 65.546765        |                |                  | 1  |

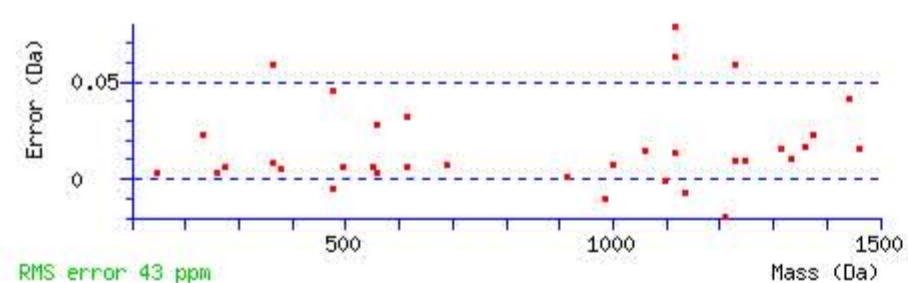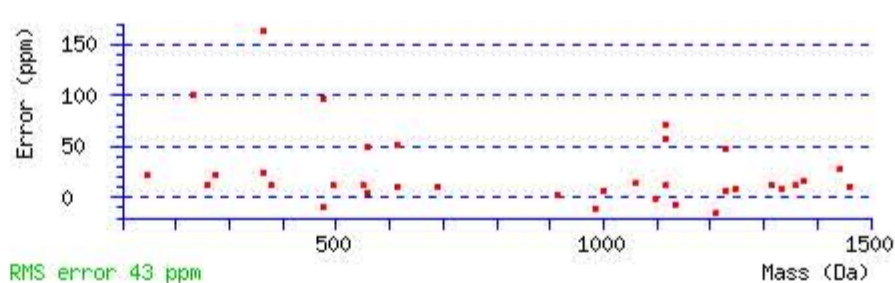

NCBI BLAST search of **TMFIGGSQLSQK**

(Parameters: blastp, nr protein database, expect=20000, no filter, PAM30)

Other BLAST [web gateways](#)

All matches to this query

| Score | $M_r(\text{calc})$ | Delta     | Sequence                          |
|-------|--------------------|-----------|-----------------------------------|
| 60.0  | 1606.821121        | 0.023427  | <a href="#">TMFIGGSQLSQK</a>      |
| 40.9  | 1606.821121        | 0.023427  | <a href="#">TMFIGGSQLSQK</a>      |
| 18.0  | 1606.859970        | -0.015422 | <a href="#">TMLES LIADKSGS KK</a> |
| 7.9   | 1606.842239        | 0.002309  | <a href="#">ITLMSQSSTGKK</a>      |
| 5.2   | 1606.838852        | 0.005696  | <a href="#">GSYSLVEAQKSK</a>      |
| 4.7   | 1606.838852        | 0.005696  | <a href="#">QAVSMFLGAVEEAKK</a>   |
| 3.5   | 1606.856628        | -0.012080 | <a href="#">TVKALEFVQTESQK</a>    |
| 2.8   | 1606.831451        | 0.013097  | <a href="#">RELQVLSEQYSQK</a>     |
| 2.4   | 1606.850082        | -0.005534 | <a href="#">KEQHVAEQISK</a>       |
| 2.0   | 1606.850082        | -0.005534 | <a href="#">GHEAVESLQAKK</a>      |

# MASCOT SCIENCE Mascot Search Results

## Peptide View

MS/MS Fragmentation of **TMFIGGSQLSQK**

Found in **PHLD\_HUMAN**, Phosphatidylinositol-glycan-specific phospholipase D OS=Homo sapiens GN=GPLD1 PE=1 SV=3

Match to Query 38995: 1606.844708 from(804.429630,2+) rtinseconds(2101) index(42901)

Title: Locus:1.1.1.3180.25 File:"2013-07-02 CLN FXIII 180 min 1st F 3.wiff"

Data file C:\Program Files (x86)\Matrix Science\Mascot Daemon\mgf7 FXIII 180 min 1st\mascot\_daemon\_merge.mgf

Click mouse within plot area to zoom in by factor of two about that point

Or, Plot from  to  Da

Label all possible matches  Label matches used for scoring

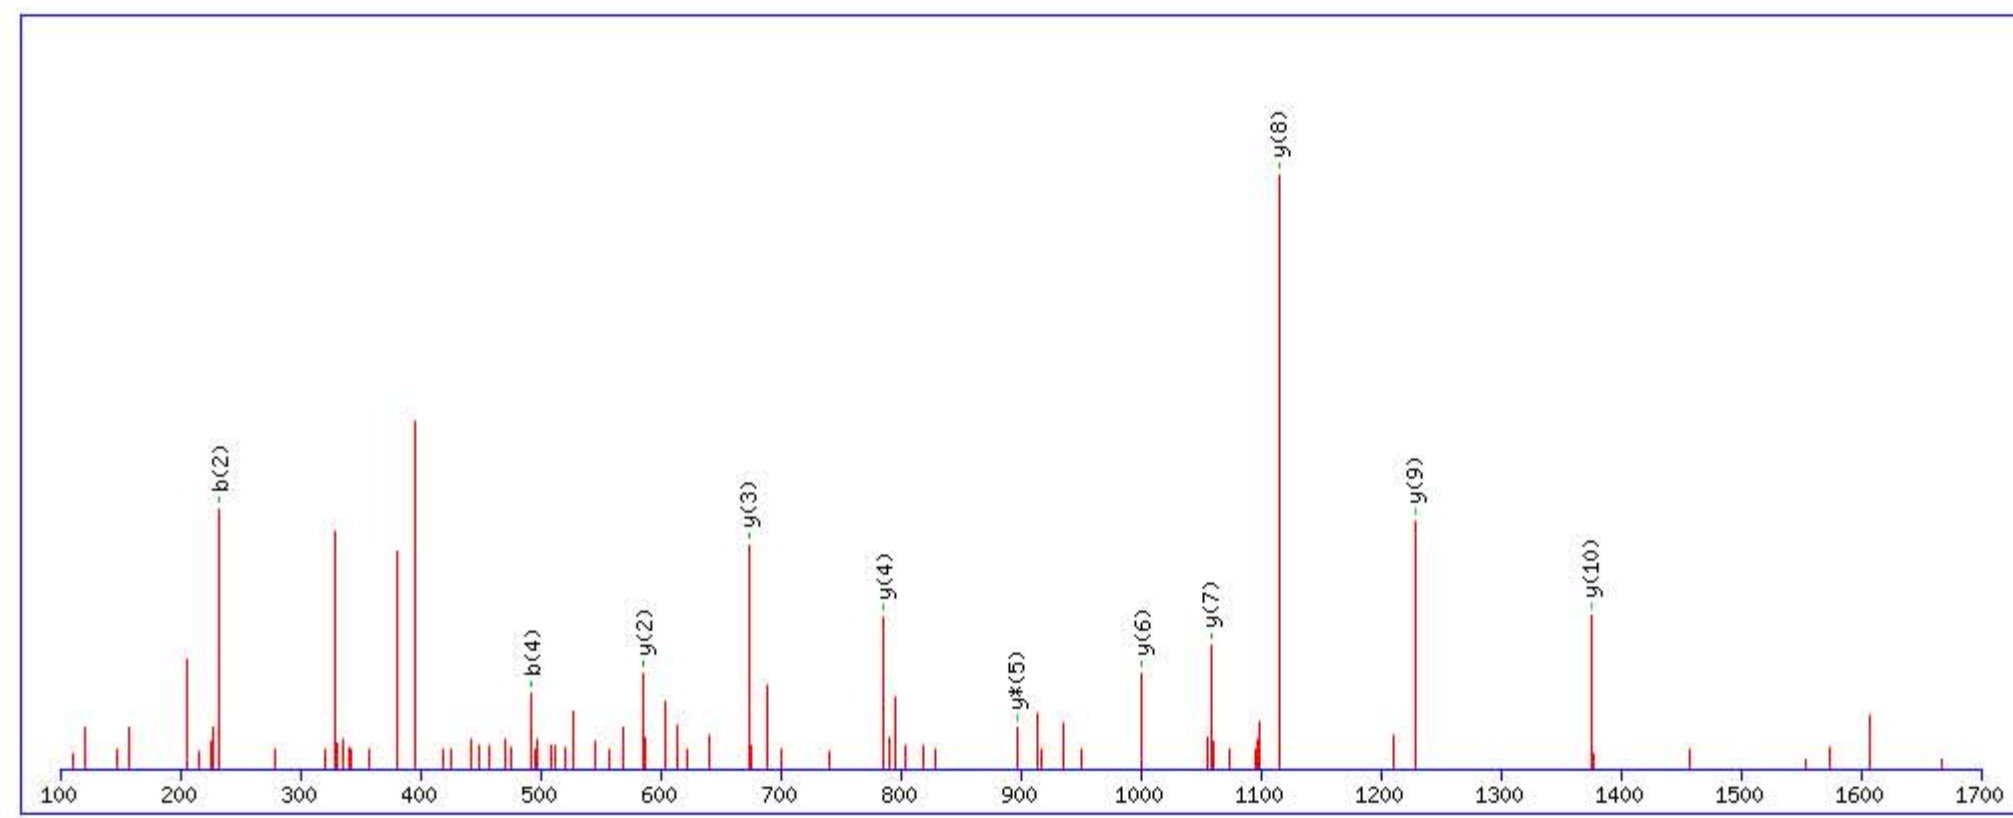

Monoisotopic mass of neutral peptide Mr(calc): 1606.821121

Fixed modifications: Carbamidomethyl (C) (apply to specified residues or termini only)

Variable modifications:

Q11 : Biotin:Thermo-21345 (Q)

Ions Score: 64 Expect: 9.7e-006

Matches : 11/114 fragment ions using 15 most intense peaks [\(help\)](#)

| #  | b                 | b <sup>++</sup> | b <sup>*</sup> | b <sup>*++</sup> | b <sup>0</sup> | b <sup>0++</sup> | Seq. | y                  | y <sup>++</sup> | y <sup>*</sup>    | y <sup>*++</sup> | y <sup>0</sup> | y <sup>0++</sup> | #  |
|----|-------------------|-----------------|----------------|------------------|----------------|------------------|------|--------------------|-----------------|-------------------|------------------|----------------|------------------|----|
| 1  | 102.054955        | 51.531116       |                |                  | 84.044390      | 42.525833        | T    |                    |                 |                   |                  |                |                  | 12 |
| 2  | <b>233.095440</b> | 117.051358      |                |                  | 215.084875     | 108.046076       | M    | 1506.780719        | 753.893998      | 1489.754170       | 745.380723       | 1488.770154    | 744.888715       | 11 |
| 3  | 380.163854        | 190.585565      |                |                  | 362.153289     | 181.580282       | F    | <b>1375.740234</b> | 688.373755      | 1358.713685       | 679.860481       | 1357.729669    | 679.368473       | 10 |
| 4  | <b>493.247918</b> | 247.127597      |                |                  | 475.237353     | 238.122314       | I    | <b>1228.671820</b> | 614.839548      | 1211.645271       | 606.326274       | 1210.661255    | 605.834266       | 9  |
| 5  | 550.269382        | 275.638329      |                |                  | 532.258817     | 266.633047       | G    | <b>1115.587756</b> | 558.297516      | 1098.561207       | 549.784242       | 1097.577191    | 549.292234       | 8  |
| 6  | 607.290846        | 304.149061      |                |                  | 589.280281     | 295.143779       | G    | <b>1058.566292</b> | 529.786784      | 1041.539743       | 521.273510       | 1040.555727    | 520.781502       | 7  |
| 7  | 694.322874        | 347.665075      |                |                  | 676.312309     | 338.659793       | S    | <b>1001.544828</b> | 501.276052      | 984.518279        | 492.762778       | 983.534263     | 492.270770       | 6  |
| 8  | 822.381452        | 411.694364      | 805.354903     | 403.181090       | 804.370887     | 402.689082       | Q    | 914.512800         | 457.760038      | <b>897.486251</b> | 449.246764       | 896.502235     | 448.754756       | 5  |
| 9  | 935.465516        | 468.236396      | 918.438967     | 459.723122       | 917.454951     | 459.231114       | L    | <b>786.454222</b>  | 393.730749      | 769.427673        | 385.217475       | 768.443657     | 384.725467       | 4  |
| 10 | 1022.497544       | 511.752410      | 1005.470995    | 503.239136       | 1004.486979    | 502.747128       | S    | <b>673.370158</b>  | 337.188717      | 656.343609        | 328.675443       | 655.359593     | 328.183435       | 3  |
| 11 | 1461.722870       | 731.365073      | 1444.696321    | 722.851799       | 1443.712305    | 722.359791       | Q    | <b>586.338130</b>  | 293.672703      | 569.311581        | 285.159429       |                |                  | 2  |
| 12 |                   |                 |                |                  |                |                  | K    | 147.112804         | 74.060040       | 130.086255        | 65.546765        |                |                  | 1  |

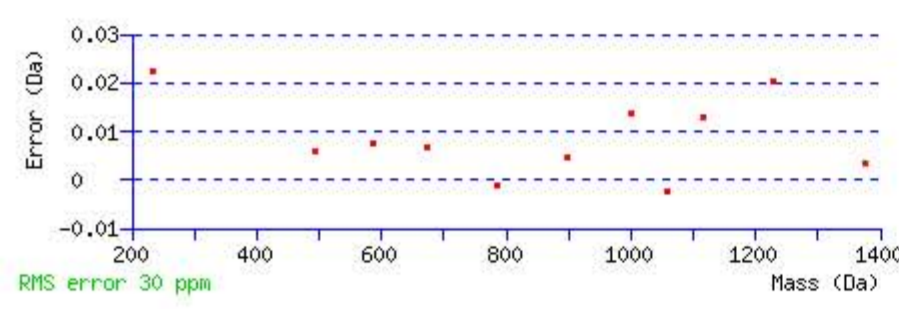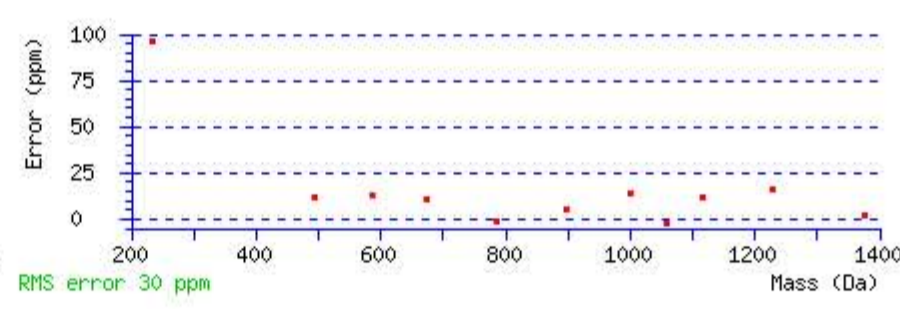

NCBI BLAST search of **TMFIGGSQLSQK**

(Parameters: blastp, nr protein database, expect=20000, no filter, PAM30)

Other BLAST [web gateways](#)

## All matches to this query

| Score | Mr(calc):   | Delta    | Sequence                     |
|-------|-------------|----------|------------------------------|
| 64.0  | 1606.821121 | 0.023587 | <a href="#">TMFIGGSQLSQK</a> |
| 27.0  | 1606.821121 | 0.023587 | <a href="#">TMFIGGSQLSQK</a> |

# Mascot Search Results

## Peptide View

MS/MS Fragmentation of **VSSVEECQK**

Found in **KLKB1\_HUMAN**, Plasma kallikrein OS=Homo sapiens GN=KLKB1 PE=1 SV=1

Match to Query 29762: 1375.646952 from(459.556260,3+) rtinseconds(1374) index(20065)

Title: Locus:1.1.1.2621.14 File:"2013-07-02 CLN FXIII 180 min 1st F 2.wiff"

Data file C:\Program Files (x86)\Matrix Science\Mascot Daemon\mgf\7 FXIII 180 min 1st\mascot\_daemon\_merge.mgf

Click mouse within plot area to zoom in by factor of two about that point

Or, Plot from  to  Da

Label all possible matches  Label matches used for scoring

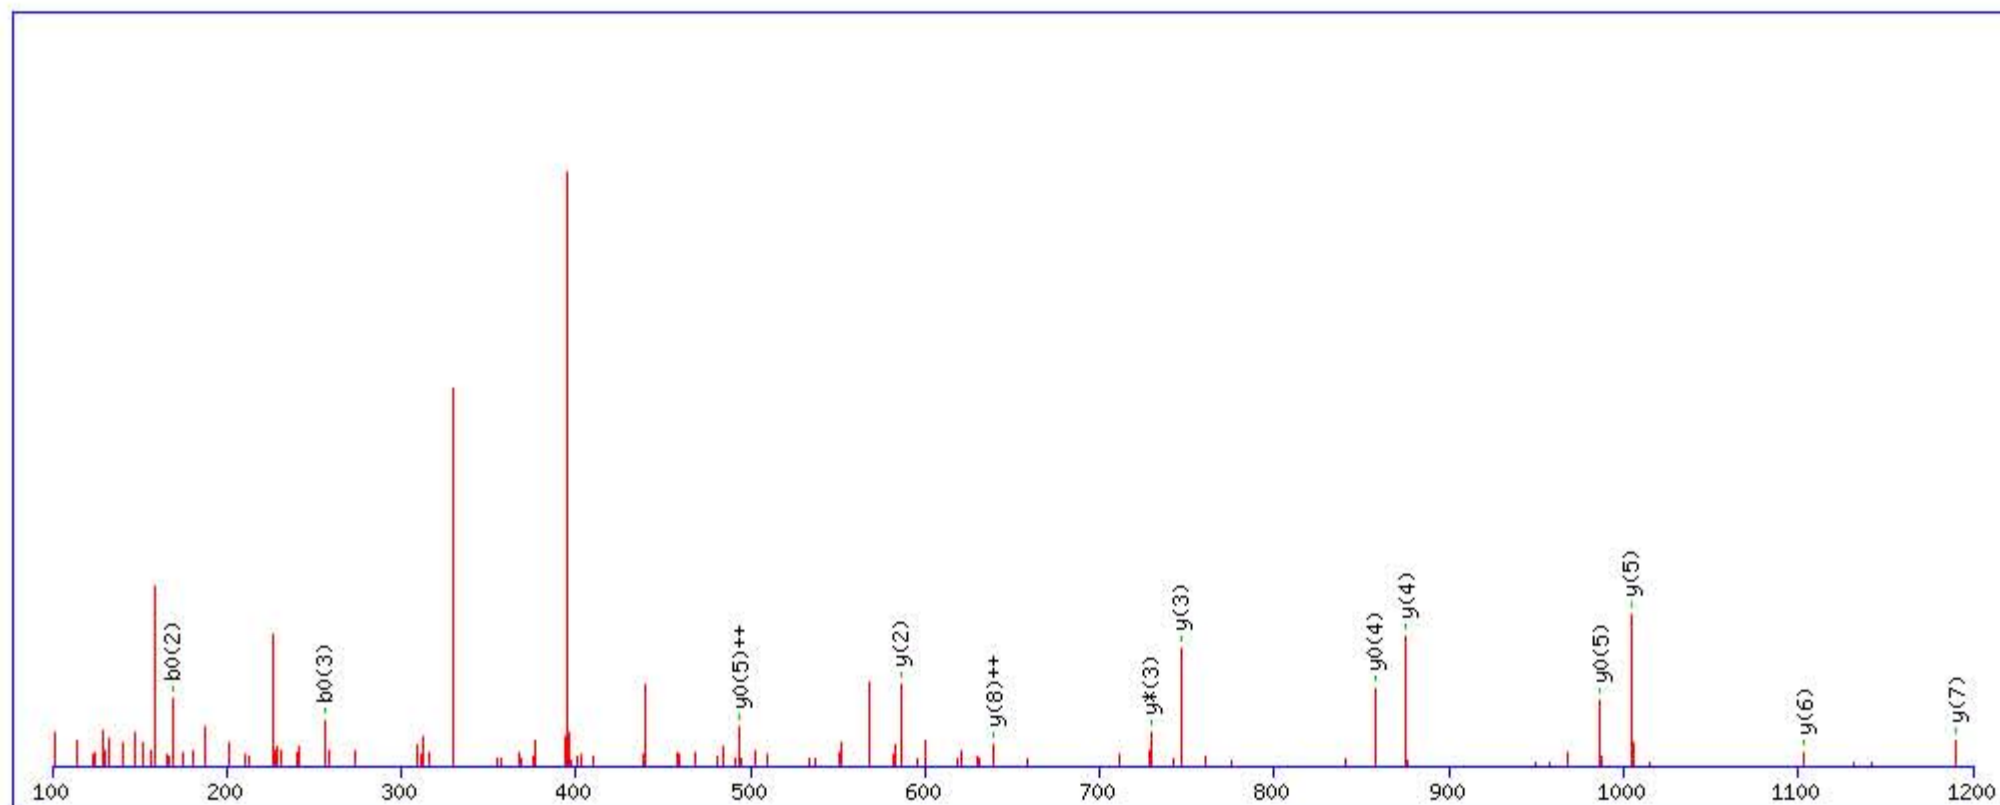

Monoisotopic mass of neutral peptide Mr(calc): 1375.647568

Fixed modifications: Carbamidomethyl (C) (apply to specified residues or termini only)

Variable modifications:

Q8 : Biotin:Thermo-21345 (Q)

Ions Score: 28 Expect: 0.025

Matches : 13/74 fragment ions using 22 most intense peaks [\(help\)](#)

| # | b           | b <sup>++</sup> | b <sup>*</sup> | b <sup>*++</sup> | b <sup>0</sup> | b <sup>0++</sup> | Seq. | y           | y <sup>++</sup> | y <sup>*</sup> | y <sup>*++</sup> | y <sup>0</sup> | y <sup>0++</sup> | # |
|---|-------------|-----------------|----------------|------------------|----------------|------------------|------|-------------|-----------------|----------------|------------------|----------------|------------------|---|
| 1 | 100.075690  | 50.541483       |                |                  |                |                  | V    |             |                 |                |                  |                |                  | 9 |
| 2 | 187.107718  | 94.057497       |                |                  | 169.097153     | 85.052214        | S    | 1277.586435 | 639.296856      | 1260.559886    | 630.783581       | 1259.575870    | 630.291573       | 8 |
| 3 | 274.139746  | 137.573511      |                |                  | 256.129181     | 128.568229       | S    | 1190.554407 | 595.780842      | 1173.527858    | 587.267567       | 1172.543842    | 586.775559       | 7 |
| 4 | 373.208160  | 187.107718      |                |                  | 355.197595     | 178.102436       | V    | 1103.522379 | 552.264828      | 1086.495830    | 543.751553       | 1085.511814    | 543.259545       | 6 |
| 5 | 502.250753  | 251.629015      |                |                  | 484.240188     | 242.623732       | E    | 1004.453965 | 502.730621      | 987.427416     | 494.217346       | 986.443400     | 493.725338       | 5 |
| 6 | 631.293346  | 316.150311      |                |                  | 613.282781     | 307.145029       | E    | 875.411372  | 438.209324      | 858.384823     | 429.696050       | 857.400807     | 429.204042       | 4 |
| 7 | 791.323995  | 396.165636      |                |                  | 773.313430     | 387.160353       | C    | 746.368779  | 373.688028      | 729.342230     | 365.174753       |                |                  | 3 |
| 8 | 1230.549321 | 615.778299      | 1213.522772    | 607.265024       | 1212.538756    | 606.773016       | Q    | 586.338130  | 293.672703      | 569.311581     | 285.159429       |                |                  | 2 |
| 9 |             |                 |                |                  |                |                  | K    | 147.112804  | 74.060040       | 130.086255     | 65.546765        |                |                  | 1 |

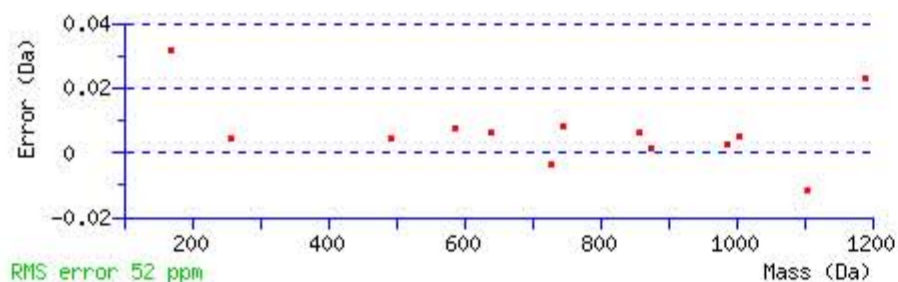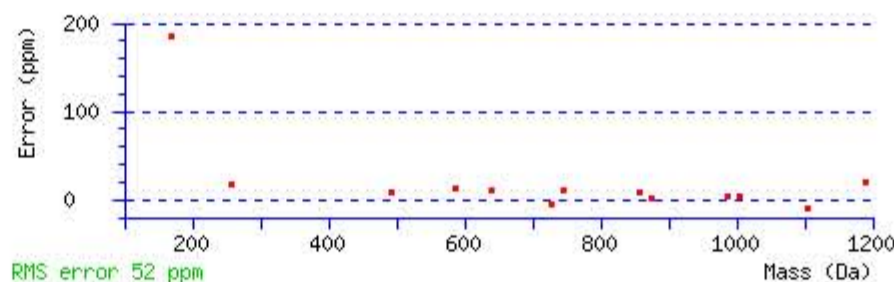

NCBI BLAST search of **VSSVEECQK**

(Parameters: blastp, nr protein database, expect=20000, no filter, PAM30)

Other BLAST [web gateways](#)

All matches to this query

| Score | Mr(calc):   | Delta     | Sequence                  |
|-------|-------------|-----------|---------------------------|
| 27.6  | 1375.647568 | -0.000616 | <a href="#">VSSVEECQK</a> |

Mascot: <http://www.matrixscience.com/>

# MASCOT SEARCH RESULTS

## Peptide View

MS/MS Fragmentation of **GVNVCQETCTK**

Found in **KLKB1\_HUMAN**, Plasma kallikrein OS=Homo sapiens GN=KLKB1 PE=1 SV=1

Match to Query 38959: 1605.733868 from(803.874210,2+) rtinseconds(1514) index(21100)

Title: Locus:1.1.1.2670.11 File:"2013-07-02 CLN FXIII 180 min 1st F 2.wiff"

Data file C:\Program Files (x86)\Matrix Science\Mascot Daemon\mgf7 FXIII 180 min 1st\mascot\_daemon\_merge.mgf

Click mouse within plot area to zoom in by factor of two about that point

Or, Plot from  to  Da

Label all possible matches  Label matches used for scoring

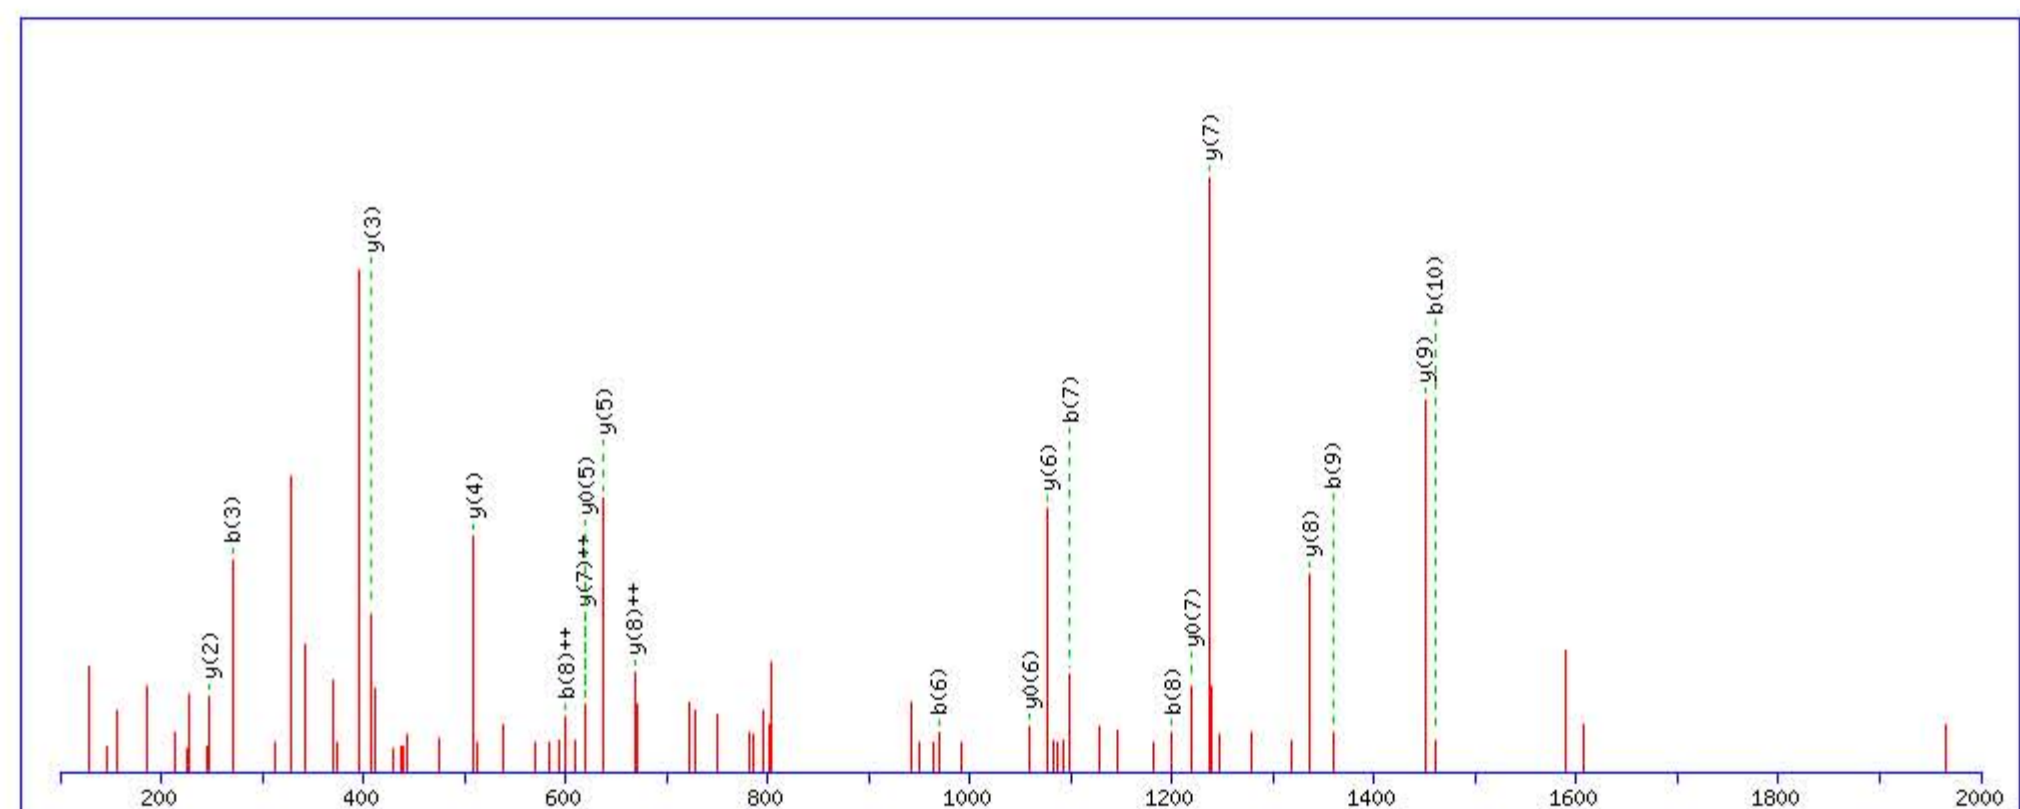

Monoisotopic mass of neutral peptide Mr(calc): 1605.731339

Fixed modifications: Carbamidomethyl (C) (apply to specified residues or termini only)

Variable modifications:

Q6 : Biotin:Thermo-21345 (Q)

Ions Score: 44 Expect: 0.00021

Matches : 20/102 fragment ions using 39 most intense peaks [\(help\)](#)

| #  | b                  | b <sup>++</sup>   | b <sup>*</sup> | b <sup>***</sup> | b <sup>0</sup> | b <sup>0++</sup> | Seq. | y                  | y <sup>++</sup>   | y <sup>*</sup> | y <sup>***</sup> | y <sup>0</sup>     | y <sup>0++</sup> | #  |
|----|--------------------|-------------------|----------------|------------------|----------------|------------------|------|--------------------|-------------------|----------------|------------------|--------------------|------------------|----|
| 1  | 58.028740          | 29.518008         |                |                  |                |                  | G    |                    |                   |                |                  |                    |                  | 11 |
| 2  | 157.097154         | 79.052215         |                |                  |                |                  | V    | 1549.717134        | 775.362205        | 1532.690585    | 766.848931       | 1531.706569        | 766.356923       | 10 |
| 3  | <b>271.140081</b>  | 136.073679        | 254.113532     | 127.560404       |                |                  | N    | <b>1450.648720</b> | 725.827998        | 1433.622171    | 717.314724       | 1432.638155        | 716.822716       | 9  |
| 4  | 370.208495         | 185.607886        | 353.181946     | 177.094611       |                |                  | V    | <b>1336.605793</b> | <b>668.806535</b> | 1319.579244    | 660.293260       | 1318.595228        | 659.801252       | 8  |
| 5  | 530.239144         | 265.623210        | 513.212595     | 257.109936       |                |                  | C    | <b>1237.537379</b> | <b>619.272328</b> | 1220.510830    | 610.759053       | <b>1219.526814</b> | 610.267045       | 7  |
| 6  | <b>969.464470</b>  | 485.235873        | 952.437921     | 476.722599       |                |                  | Q    | <b>1077.506730</b> | 539.257003        | 1060.480181    | 530.743729       | <b>1059.496165</b> | 530.251721       | 6  |
| 7  | <b>1098.507063</b> | 549.757170        | 1081.480514    | 541.243895       | 1080.496498    | 540.751887       | E    | <b>638.281404</b>  | 319.644340        | 621.254855     | 311.131066       | <b>620.270839</b>  | 310.639058       | 5  |
| 8  | <b>1199.554742</b> | <b>600.281009</b> | 1182.528193    | 591.767735       | 1181.544177    | 591.275727       | T    | <b>509.238811</b>  | 255.123044        | 492.212262     | 246.609769       | 491.228246         | 246.117761       | 4  |
| 9  | <b>1359.585391</b> | 680.296334        | 1342.558842    | 671.783059       | 1341.574826    | 671.291051       | C    | <b>408.191132</b>  | 204.599204        | 391.164583     | 196.085930       | 390.180567         | 195.593922       | 3  |
| 10 | <b>1460.633070</b> | 730.820173        | 1443.606521    | 722.306899       | 1442.622505    | 721.814891       | T    | <b>248.160483</b>  | 124.583879        | 231.133934     | 116.070605       | 230.149918         | 115.578597       | 2  |
| 11 |                    |                   |                |                  |                |                  | K    | 147.112804         | 74.060040         | 130.086255     | 65.546765        |                    |                  | 1  |

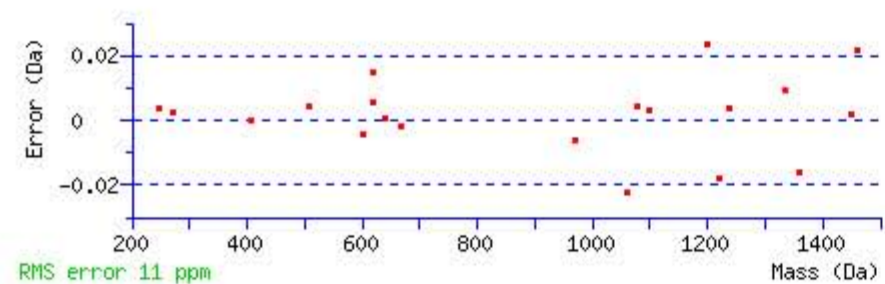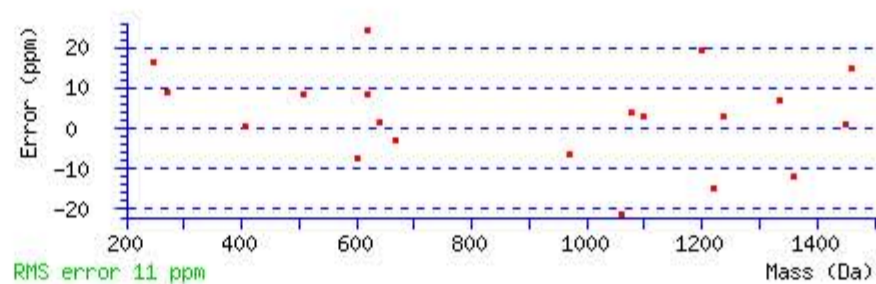

NCBI BLAST search of **GVNVCQETCTK**

(Parameters: blastp, nr protein database, expect=20000, no filter, PAM30)

Other BLAST [web gateways](#)

All matches to this query

| Score | Mr(calc):   | Delta    | Sequence                      |
|-------|-------------|----------|-------------------------------|
| 43.7  | 1605.731339 | 0.002529 | <a href="#">GVNVCQETCTK</a>   |
| 4.4   | 1605.724121 | 0.009747 | <a href="#">MVFFLEDVMACKT</a> |
| 0.4   | 1605.724121 | 0.009747 | <a href="#">MVFFLEDVMACKT</a> |

Mascot: <http://www.matrixscience.com/>

# MASCOT Search Results

## Peptide View

MS/MS Fragmentation of **EKGEIQNILQK**  
 Found in **KLKB1\_HUMAN**, Plasma kallikrein OS=Homo sapiens GN=KLKB1 PE=1 SV=1

Match to Query 39160: 1609.893128 from(805.953840,2+) rtinseconds(1865) index(77858)  
 Title: Locus:1.1.1.2000.21 File:"2013-07-02 CLN FXIII 180 min 1st FT.wiff"  
 Data file C:\Program Files (x86)\Matrix Science\Mascot Daemon\mgf\7 FXIII 180 min 1st\mascot\_daemon\_merge.mgf

Click mouse within plot area to zoom in by factor of two about that point

Or, Plot from 100 to 1800 Da Full range

Label all possible matches  Label matches used for scoring

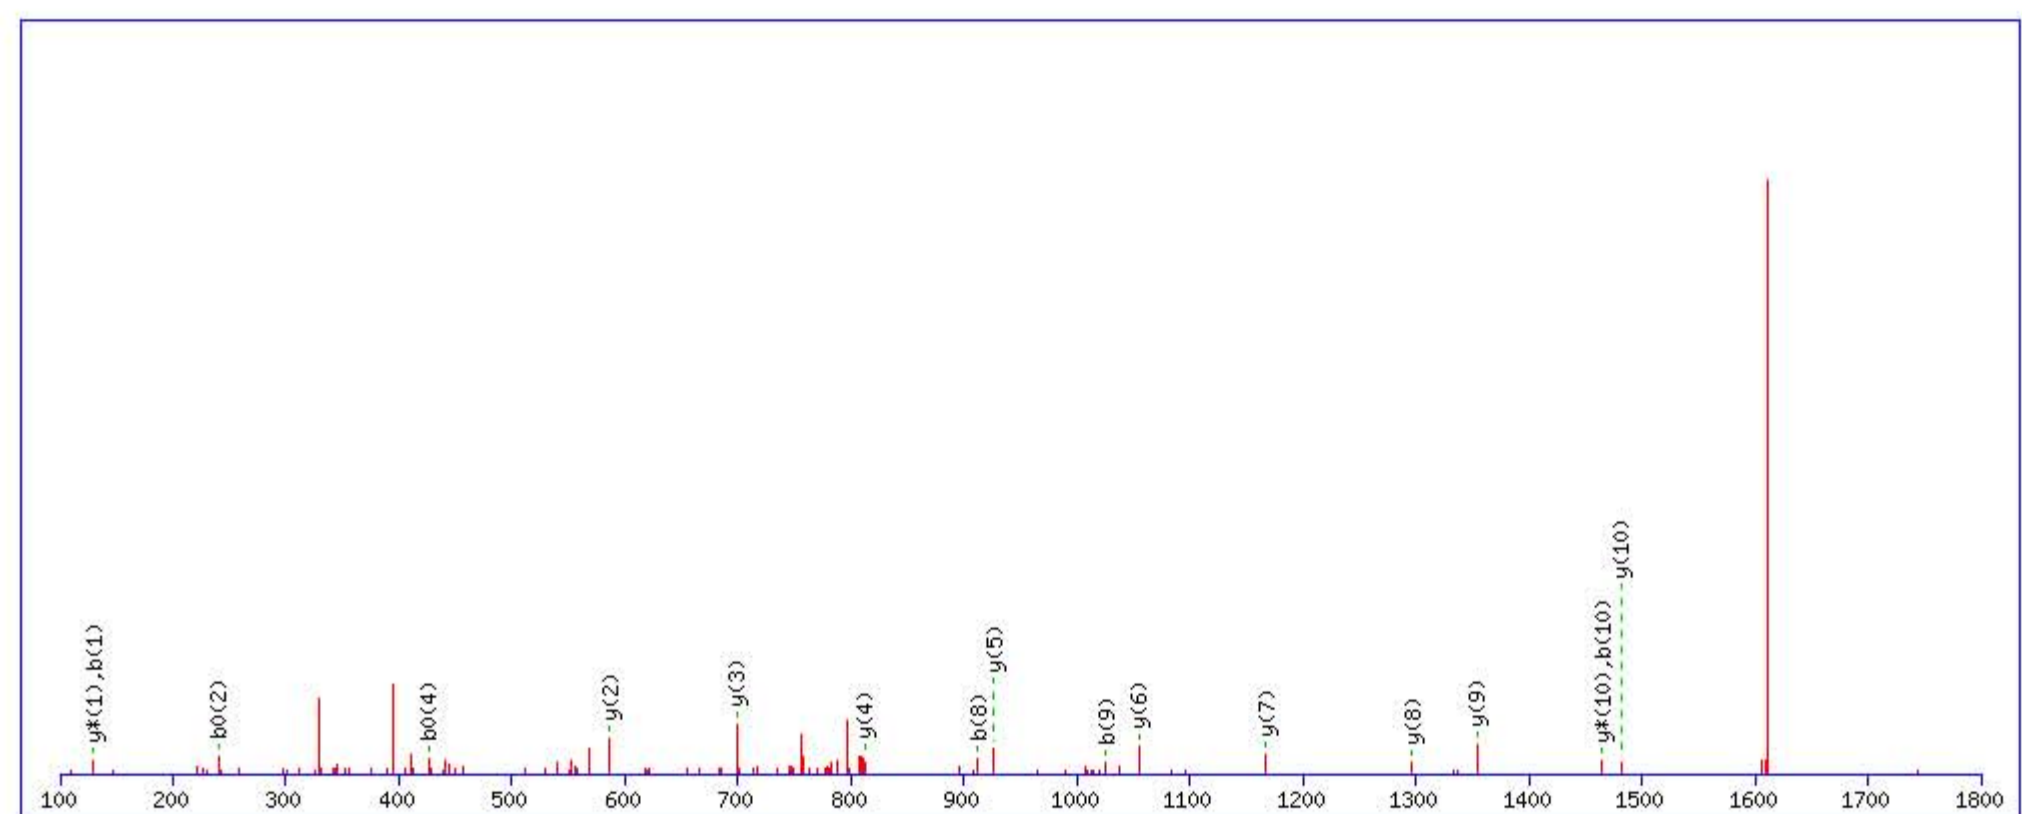

Monoisotopic mass of neutral peptide Mr(calc): 1609.886124  
 Fixed modifications: Carbamidomethyl (C) (apply to specified residues or termini only)  
 Variable modifications:  
 Q10 : Biotin:Thermo-21345 (Q)  
 Ions Score: 60 Expect: 6.6e-006  
 Matches : 17/104 fragment ions using 27 most intense peaks [\(help\)](#)

| #  | b                  | b <sup>++</sup> | b <sup>*</sup> | b <sup>+++</sup> | b <sup>0</sup>    | b <sup>0++</sup> | Seq. | y                  | y <sup>++</sup> | y <sup>*</sup>     | y <sup>+++</sup> | y <sup>0</sup> | y <sup>0++</sup> | #  |
|----|--------------------|-----------------|----------------|------------------|-------------------|------------------|------|--------------------|-----------------|--------------------|------------------|----------------|------------------|----|
| 1  | <b>130.049869</b>  | 65.528572       |                |                  | 112.039304        | 56.523290        | E    |                    |                 |                    |                  |                |                  | 11 |
| 2  | 258.144832         | 129.576054      | 241.118283     | 121.062780       | <b>240.134267</b> | 120.570772       | K    | <b>1481.850847</b> | 741.429061      | <b>1464.824298</b> | 732.915787       | 1463.840282    | 732.423779       | 10 |
| 3  | 315.166296         | 158.086786      | 298.139747     | 149.573512       | 297.155731        | 149.081504       | G    | <b>1353.755884</b> | 677.381580      | 1336.729335        | 668.868306       | 1335.745319    | 668.376297       | 9  |
| 4  | 444.208889         | 222.608082      | 427.182340     | 214.094808       | <b>426.198324</b> | 213.602800       | E    | <b>1296.734420</b> | 648.870848      | 1279.707871        | 640.357574       | 1278.723855    | 639.865566       | 8  |
| 5  | 557.292953         | 279.150115      | 540.266404     | 270.636840       | 539.282388        | 270.144832       | I    | <b>1167.691827</b> | 584.349552      | 1150.665278        | 575.836277       |                |                  | 7  |
| 6  | 685.351531         | 343.179404      | 668.324982     | 334.666129       | 667.340966        | 334.174121       | Q    | <b>1054.607763</b> | 527.807520      | 1037.581214        | 519.294245       |                |                  | 6  |
| 7  | 799.394458         | 400.200867      | 782.367909     | 391.687592       | 781.383893        | 391.195585       | N    | <b>926.549185</b>  | 463.778231      | 909.522636         | 455.264956       |                |                  | 5  |
| 8  | <b>912.478522</b>  | 456.742899      | 895.451973     | 448.229625       | 894.467957        | 447.737617       | I    | <b>812.506258</b>  | 406.756767      | 795.479709         | 398.243493       |                |                  | 4  |
| 9  | <b>1025.562586</b> | 513.284931      | 1008.536037    | 504.771657       | 1007.552021       | 504.279649       | L    | <b>699.422194</b>  | 350.214735      | 682.395645         | 341.701461       |                |                  | 3  |
| 10 | <b>1464.787912</b> | 732.897594      | 1447.761363    | 724.384320       | 1446.777347       | 723.892312       | Q    | <b>586.338130</b>  | 293.672703      | 569.311581         | 285.159429       |                |                  | 2  |
| 11 |                    |                 |                |                  |                   |                  | K    | 147.112804         | 74.060040       | <b>130.086255</b>  | 65.546765        |                |                  | 1  |

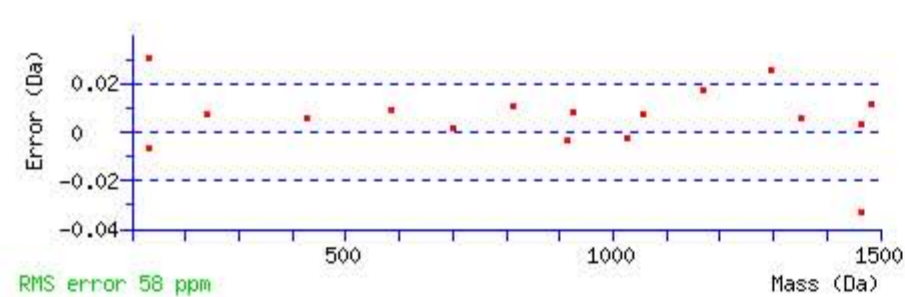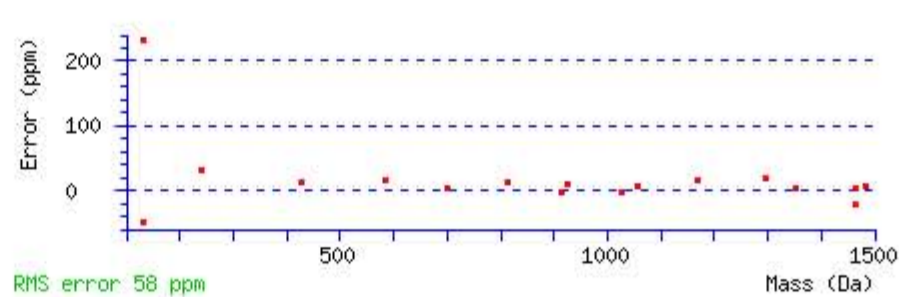

NCBI BLAST search of **EKGEIQNILQK**  
 (Parameters: blastp, nr protein database, expect=20000, no filter, PAM30)  
 Other BLAST [web gateways](#)

### All matches to this query

| Score | Mr(calc):   | Delta     | Sequence                        |
|-------|-------------|-----------|---------------------------------|
| 59.6  | 1609.886124 | 0.007004  | <a href="#">EKGEIQNILQK</a>     |
| 14.1  | 1609.886124 | 0.007004  | <a href="#">EKGEIQNILQK</a>     |
| 4.1   | 1609.872208 | 0.020920  | <a href="#">QEHGLLSLRKNGMK</a>  |
| 3.8   | 1609.871521 | 0.021607  | <a href="#">QESFSSILAYKIPK</a>  |
| 3.4   | 1609.897354 | -0.004226 | <a href="#">ESAAINQILGRK</a>    |
| 2.5   | 1609.897354 | -0.004226 | <a href="#">EQELLRQKQK</a>      |
| 2.2   | 1609.889969 | 0.003159  | <a href="#">QENLSLRTAVHKSK</a>  |
| 1.2   | 1609.911285 | -0.018157 | <a href="#">LLTQMLPPSVAEALK</a> |
| 1.0   | 1609.872192 | 0.020936  | <a href="#">QEAERALKQAR</a>     |
| 0.9   | 1609.897400 | -0.004272 | <a href="#">TNLRIVDVGQK</a>     |

# MASCOT Search Results

## Peptide View

MS/MS Fragmentation of **IAYGTQGSSGYSLR**

Found in **KLKB1\_HUMAN**, Plasma kallikrein OS=Homo sapiens GN=KLKB1 PE=1 SV=1

Match to Query 44473: 1769.879682 from(590.967170,3+) rtinseconds(1872) index(23739)

Title: Locus:1.1.1.2794.14 File:"2013-07-02 CLN FXIII 180 min 1st F 2.wiff"

Data file C:\Program Files (x86)\Matrix Science\Mascot Daemon\mgf\7 FXIII 180 min 1st\mascot\_daemon\_merge.mgf

Click mouse within plot area to zoom in by factor of two about that point

Or, Plot from  to  Da

Label all possible matches  Label matches used for scoring

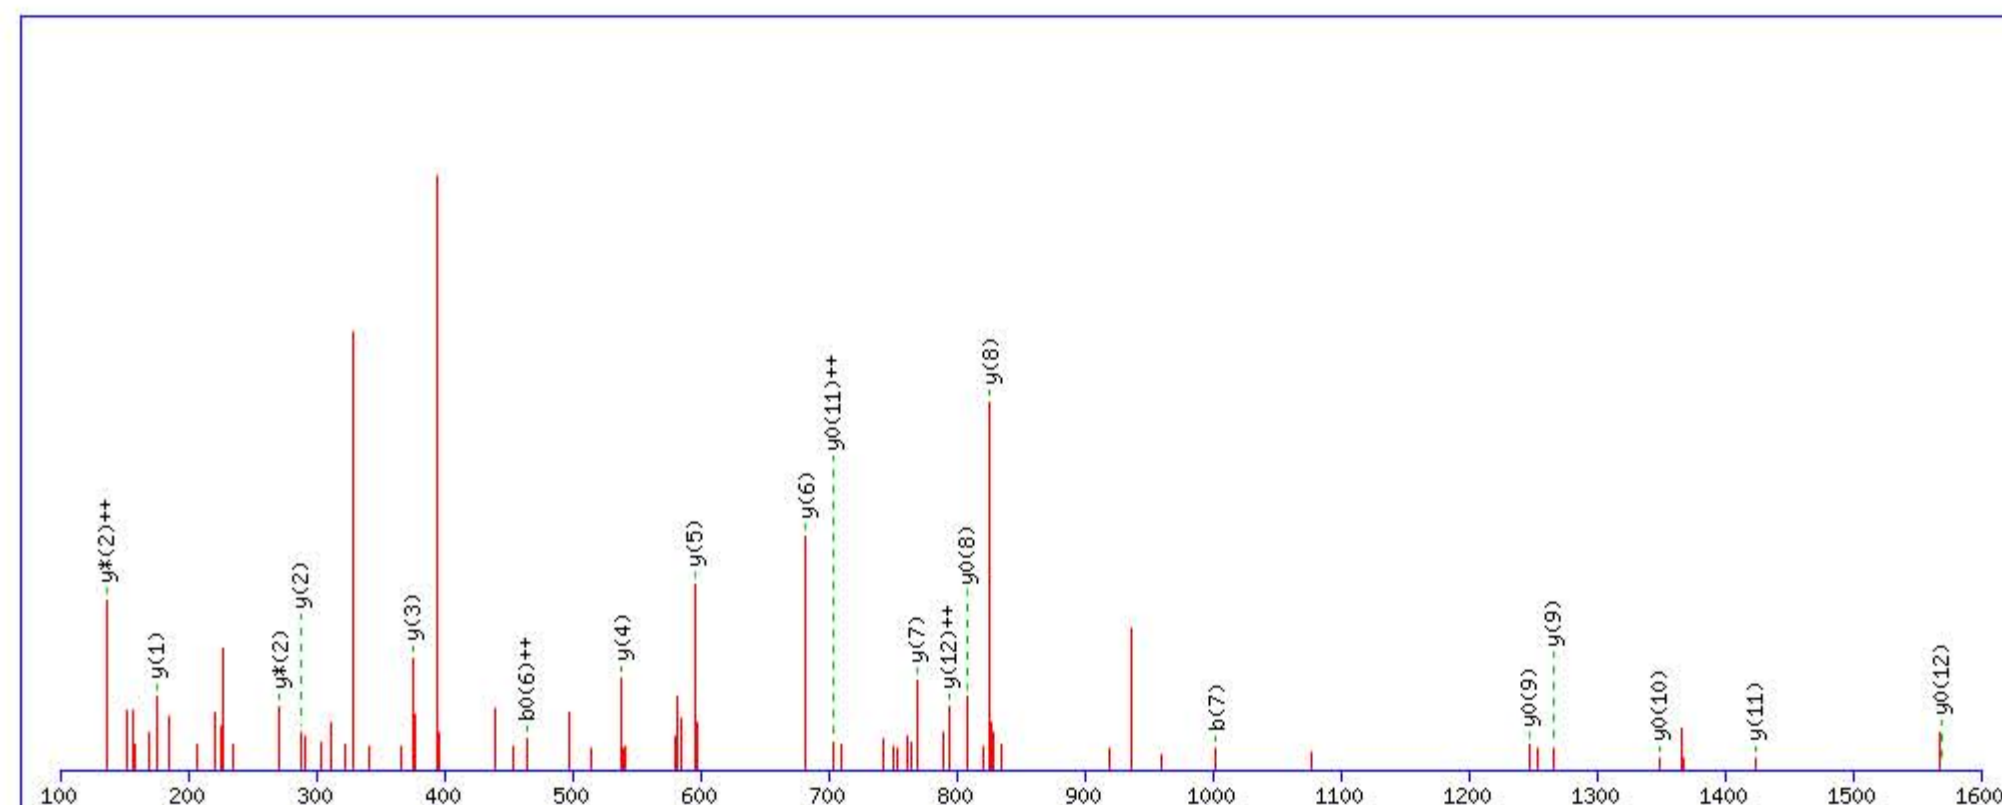

Monoisotopic mass of neutral peptide Mr(calc): 1769.877045

Fixed modifications: Carbamidomethyl (C) (apply to specified residues or termini only)

Variable modifications:

Q6 : Biotin:Thermo-21345 (Q)

Ions Score: 52 Expect: 0.00017

Matches : 20/134 fragment ions using 40 most intense peaks [\(help\)](#)

| #  | b           | b <sup>++</sup> | b <sup>*</sup> | b <sup>*++</sup> | b <sup>0</sup> | b <sup>0++</sup> | Seq. | y           | y <sup>++</sup> | y <sup>*</sup> | y <sup>*++</sup> | y <sup>0</sup> | y <sup>0++</sup> | #  |
|----|-------------|-----------------|----------------|------------------|----------------|------------------|------|-------------|-----------------|----------------|------------------|----------------|------------------|----|
| 1  | 114.091340  | 57.549308       |                |                  |                |                  | I    |             |                 |                |                  |                |                  | 14 |
| 2  | 185.128454  | 93.067865       |                |                  |                |                  | A    | 1657.800269 | 829.403773      | 1640.773720    | 820.890498       | 1639.789704    | 820.398490       | 13 |
| 3  | 348.191783  | 174.599529      |                |                  |                |                  | Y    | 1586.763155 | 793.885216      | 1569.736606    | 785.371941       | 1568.752590    | 784.879933       | 12 |
| 4  | 405.213247  | 203.110261      |                |                  |                |                  | G    | 1423.699826 | 712.353551      | 1406.673277    | 703.840277       | 1405.689261    | 703.348269       | 11 |
| 5  | 506.260926  | 253.634101      |                |                  | 488.250361     | 244.628818       | T    | 1366.678362 | 683.842819      | 1349.651813    | 675.329545       | 1348.667797    | 674.837537       | 10 |
| 6  | 945.486252  | 473.246764      | 928.459703     | 464.733490       | 927.475687     | 464.241482       | Q    | 1265.630683 | 633.318980      | 1248.604134    | 624.805705       | 1247.620118    | 624.313697       | 9  |
| 7  | 1002.507716 | 501.757496      | 985.481167     | 493.244222       | 984.497151     | 492.752214       | G    | 826.405357  | 413.706317      | 809.378808     | 405.193042       | 808.394792     | 404.701034       | 8  |
| 8  | 1089.539744 | 545.273510      | 1072.513195    | 536.760236       | 1071.529179    | 536.268228       | S    | 769.383893  | 385.195585      | 752.357344     | 376.682310       | 751.373328     | 376.190302       | 7  |
| 9  | 1176.571772 | 588.789524      | 1159.545223    | 580.276250       | 1158.561207    | 579.784242       | S    | 682.351865  | 341.679571      | 665.325316     | 333.166296       | 664.341300     | 332.674288       | 6  |
| 10 | 1233.593236 | 617.300256      | 1216.566687    | 608.786982       | 1215.582671    | 608.294974       | G    | 595.319837  | 298.163557      | 578.293288     | 289.650282       | 577.309272     | 289.158274       | 5  |
| 11 | 1396.656565 | 698.831921      | 1379.630016    | 690.318646       | 1378.646000    | 689.826638       | Y    | 538.298373  | 269.652825      | 521.271824     | 261.139550       | 520.287808     | 260.647542       | 4  |
| 12 | 1483.688593 | 742.347935      | 1466.662044    | 733.834660       | 1465.678028    | 733.342652       | S    | 375.235044  | 188.121160      | 358.208495     | 179.607885       | 357.224479     | 179.115877       | 3  |
| 13 | 1596.772657 | 798.889967      | 1579.746108    | 790.376692       | 1578.762092    | 789.884684       | L    | 288.203016  | 144.605146      | 271.176467     | 136.091871       |                |                  | 2  |
| 14 |             |                 |                |                  |                |                  | R    | 175.118952  | 88.063114       | 158.092403     | 79.549839        |                |                  | 1  |

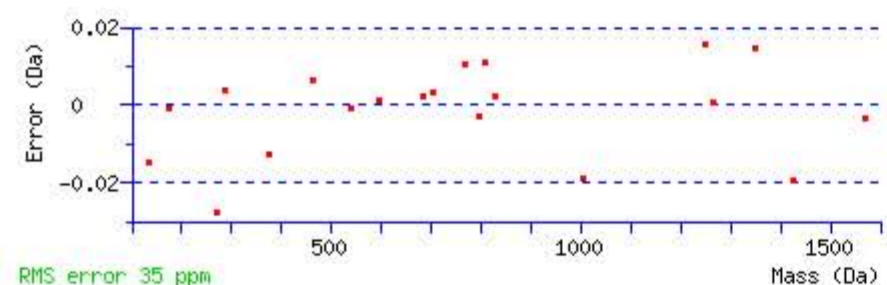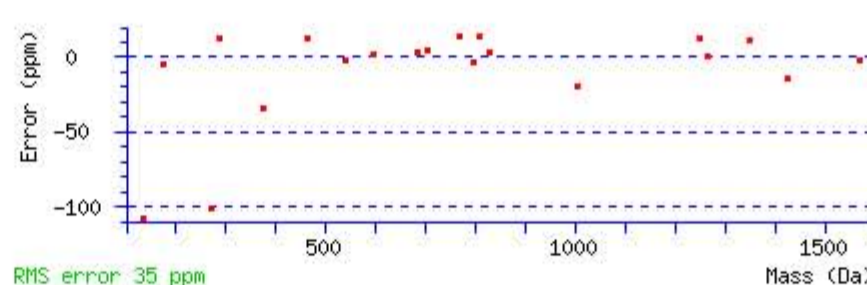

NCBI BLAST search of **IAYGTQGSSGYSLR**

(Parameters: blastp, nr protein database, expect=20000, no filter, PAM30)

Other BLAST [web gateways](#)

All matches to this query

| Score | Mr(calc):   | Delta    | Sequence                       |
|-------|-------------|----------|--------------------------------|
| 52.2  | 1769.877045 | 0.002637 | <a href="#">IAYGTQGSSGYSLR</a> |

Mascot: <http://www.matrixscience.com/>

# MASCOT SEARCH RESULTS

## Peptide View

MS/MS Fragmentation of **VNIPLVTNEECQK**

Found in **KLKB1\_HUMAN**, Plasma kallikrein OS=Homo sapiens GN=KLKB1 PE=1 SV=1

Match to Query 46667: 1853.951292 from(618.991040,3+) rtinseconds(2105) index(25443)

Title: Locus:1.1.1.2875.17 File:"2013-07-02 CLN FXIII 180 min 1st F 2.wiff"

Data file C:\Program Files (x86)\Matrix Science\Mascot Daemon\mgf\7 FXIII 180 min 1st\mascot\_daemon\_merge.mgf

Click mouse within plot area to zoom in by factor of two about that point

Or, Plot from  to  Da

Label all possible matches  Label matches used for scoring

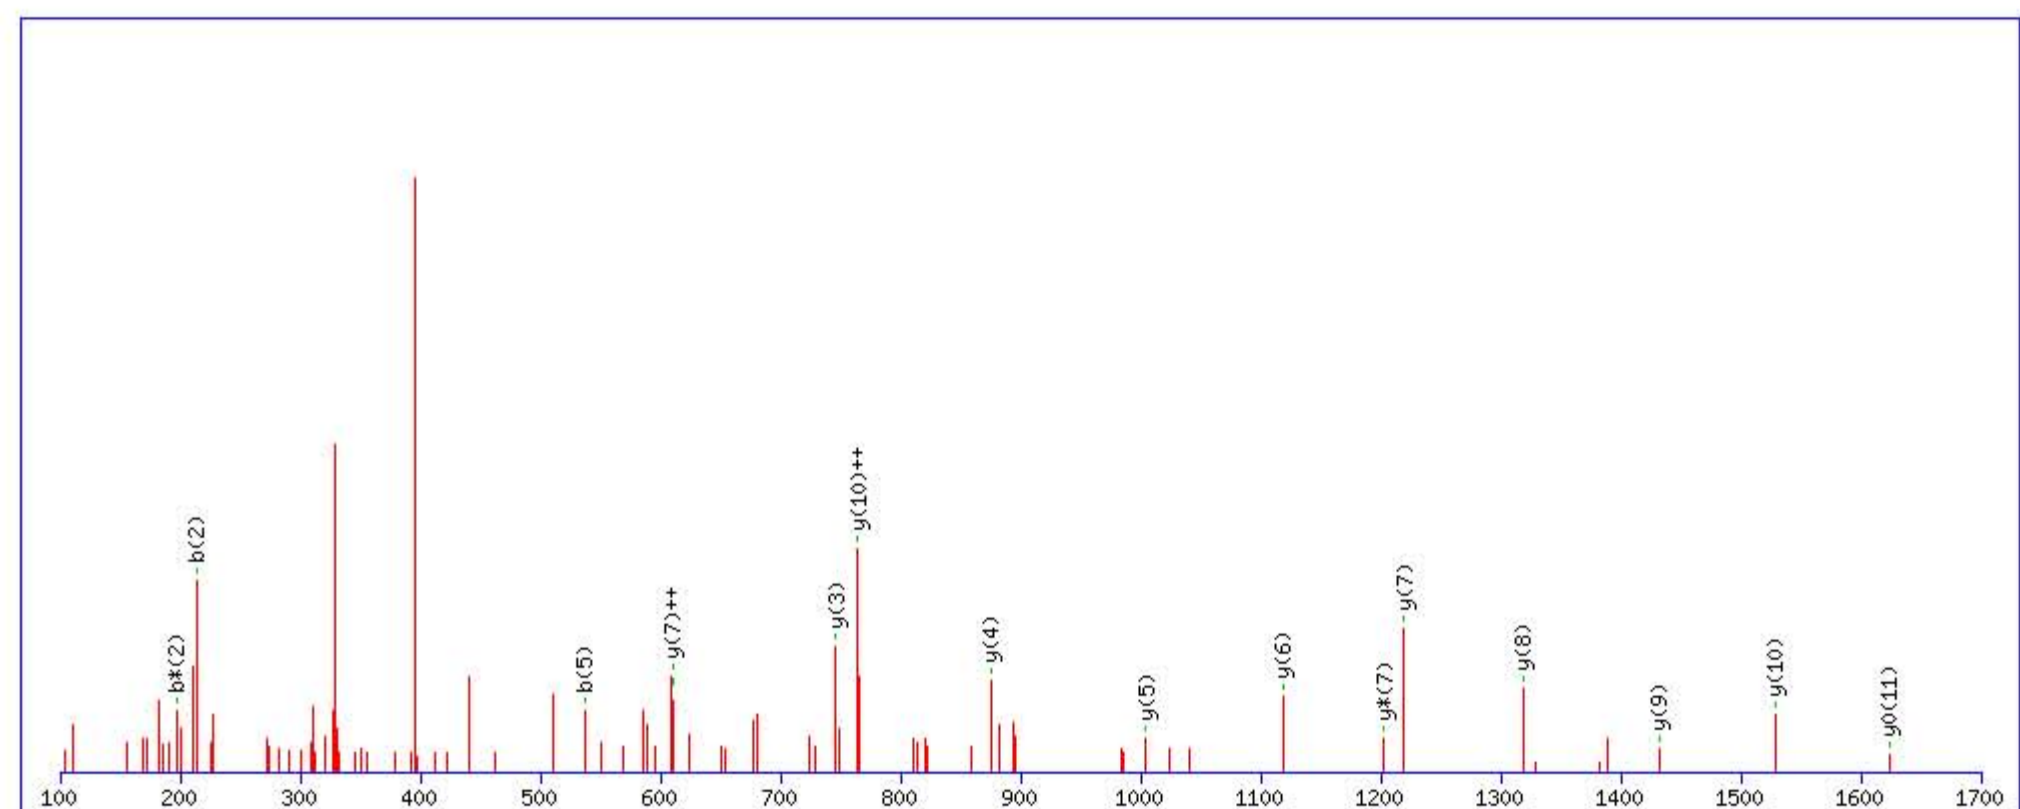

Monoisotopic mass of neutral peptide Mr(calc): 1853.937927

Fixed modifications: Carbamidomethyl (C) (apply to specified residues or termini only)

Variable modifications:

Q12 : Biotin:Thermo-21345 (Q)

Ions Score: 43 Expect: 0.0014

Matches : 15/124 fragment ions using 28 most intense peaks [\(help\)](#)

| #  | b                 | b <sup>++</sup> | b <sup>*</sup>    | b <sup>*++</sup> | b <sup>0</sup> | b <sup>0++</sup> | Seq. | y                  | y <sup>++</sup>   | y <sup>*</sup>     | y <sup>*++</sup> | y <sup>0</sup>     | y <sup>0++</sup> | #  |
|----|-------------------|-----------------|-------------------|------------------|----------------|------------------|------|--------------------|-------------------|--------------------|------------------|--------------------|------------------|----|
| 1  | 100.075690        | 50.541483       |                   |                  |                |                  | V    |                    |                   |                    |                  |                    |                  | 13 |
| 2  | <b>214.118617</b> | 107.562947      | <b>197.092068</b> | 99.049672        |                |                  | N    | 1755.876804        | 878.442040        | 1738.850255        | 869.928766       | 1737.866239        | 869.436758       | 12 |
| 3  | 327.202681        | 164.104978      | 310.176132        | 155.591704       |                |                  | I    | 1641.833877        | 821.420577        | 1624.807328        | 812.907302       | <b>1623.823312</b> | 812.415294       | 11 |
| 4  | 424.255445        | 212.631360      | 407.228896        | 204.118086       |                |                  | P    | <b>1528.749813</b> | <b>764.878545</b> | 1511.723264        | 756.365270       | 1510.739248        | 755.873262       | 10 |
| 5  | <b>537.339509</b> | 269.173393      | 520.312960        | 260.660118       |                |                  | L    | <b>1431.697049</b> | 716.352163        | 1414.670500        | 707.838888       | 1413.686484        | 707.346880       | 9  |
| 6  | 636.407923        | 318.707600      | 619.381374        | 310.194325       |                |                  | V    | <b>1318.612985</b> | 659.810131        | 1301.586436        | 651.296856       | 1300.602420        | 650.804848       | 8  |
| 7  | 737.455602        | 369.231439      | 720.429053        | 360.718165       | 719.445037     | 360.226157       | T    | <b>1219.544571</b> | <b>610.275924</b> | <b>1202.518022</b> | 601.762649       | 1201.534006        | 601.270641       | 7  |
| 8  | 851.498529        | 426.252903      | 834.471980        | 417.739628       | 833.487964     | 417.247620       | N    | <b>1118.496892</b> | 559.752084        | 1101.470343        | 551.238810       | 1100.486327        | 550.746802       | 6  |
| 9  | 980.541122        | 490.774199      | 963.514573        | 482.260924       | 962.530557     | 481.768916       | E    | <b>1004.453965</b> | 502.730621        | 987.427416         | 494.217346       | 986.443400         | 493.725338       | 5  |
| 10 | 1109.583715       | 555.295496      | 1092.557166       | 546.782221       | 1091.573150    | 546.290213       | E    | <b>875.411372</b>  | 438.209324        | 858.384823         | 429.696050       | 857.400807         | 429.204042       | 4  |
| 11 | 1269.614364       | 635.310820      | 1252.587815       | 626.797546       | 1251.603799    | 626.305538       | C    | <b>746.368779</b>  | 373.688028        | 729.342230         | 365.174753       |                    |                  | 3  |
| 12 | 1708.839690       | 854.923483      | 1691.813141       | 846.410209       | 1690.829125    | 845.918201       | Q    | 586.338130         | 293.672703        | 569.311581         | 285.159429       |                    |                  | 2  |
| 13 |                   |                 |                   |                  |                |                  | K    | 147.112804         | 74.060040         | 130.086255         | 65.546765        |                    |                  | 1  |

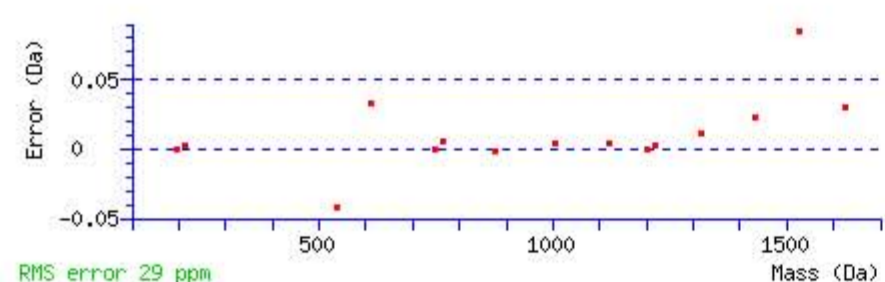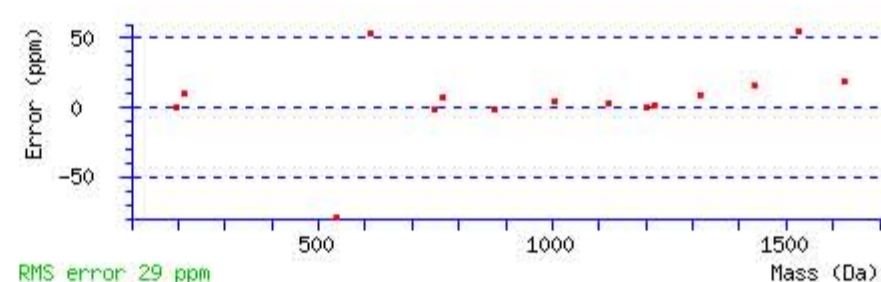

NCBI BLAST search of **VNIPLVTNEECQK**

(Parameters: blastp, nr protein database, expect=20000, no filter, PAM30)

Other BLAST [web gateways](#)

All matches to this query

| Score | Mr(calc):   | Delta    | Sequence             |
|-------|-------------|----------|----------------------|
| 42.5  | 1853.937927 | 0.013365 | <b>VNIPLVTNEECQK</b> |

Mascot: <http://www.matrixscience.com/>

# MASCOT Search Results

## Peptide View

MS/MS Fragmentation of **QCGHQISACHR**

Found in **KLKB1\_HUMAN**, Plasma kallikrein OS=Homo sapiens GN=KLKB1 PE=1 SV=1

Match to Query 49353: 1974.915776 from(494.736220,4+) rtinseconds(1437) index(20524)

Title: Locus:1.1.1.2643.12 File:"2013-07-02 CLN FXIII 180 min 1st F 2.wiff"

Data file C:\Program Files (x86)\Matrix Science\Mascot Daemon\mgf7 FXIII 180 min 1st\mascot\_daemon\_merge.mgf

Click mouse within plot area to zoom in by factor of two about that point

Or, Plot from  to  Da

Label all possible matches  Label matches used for scoring

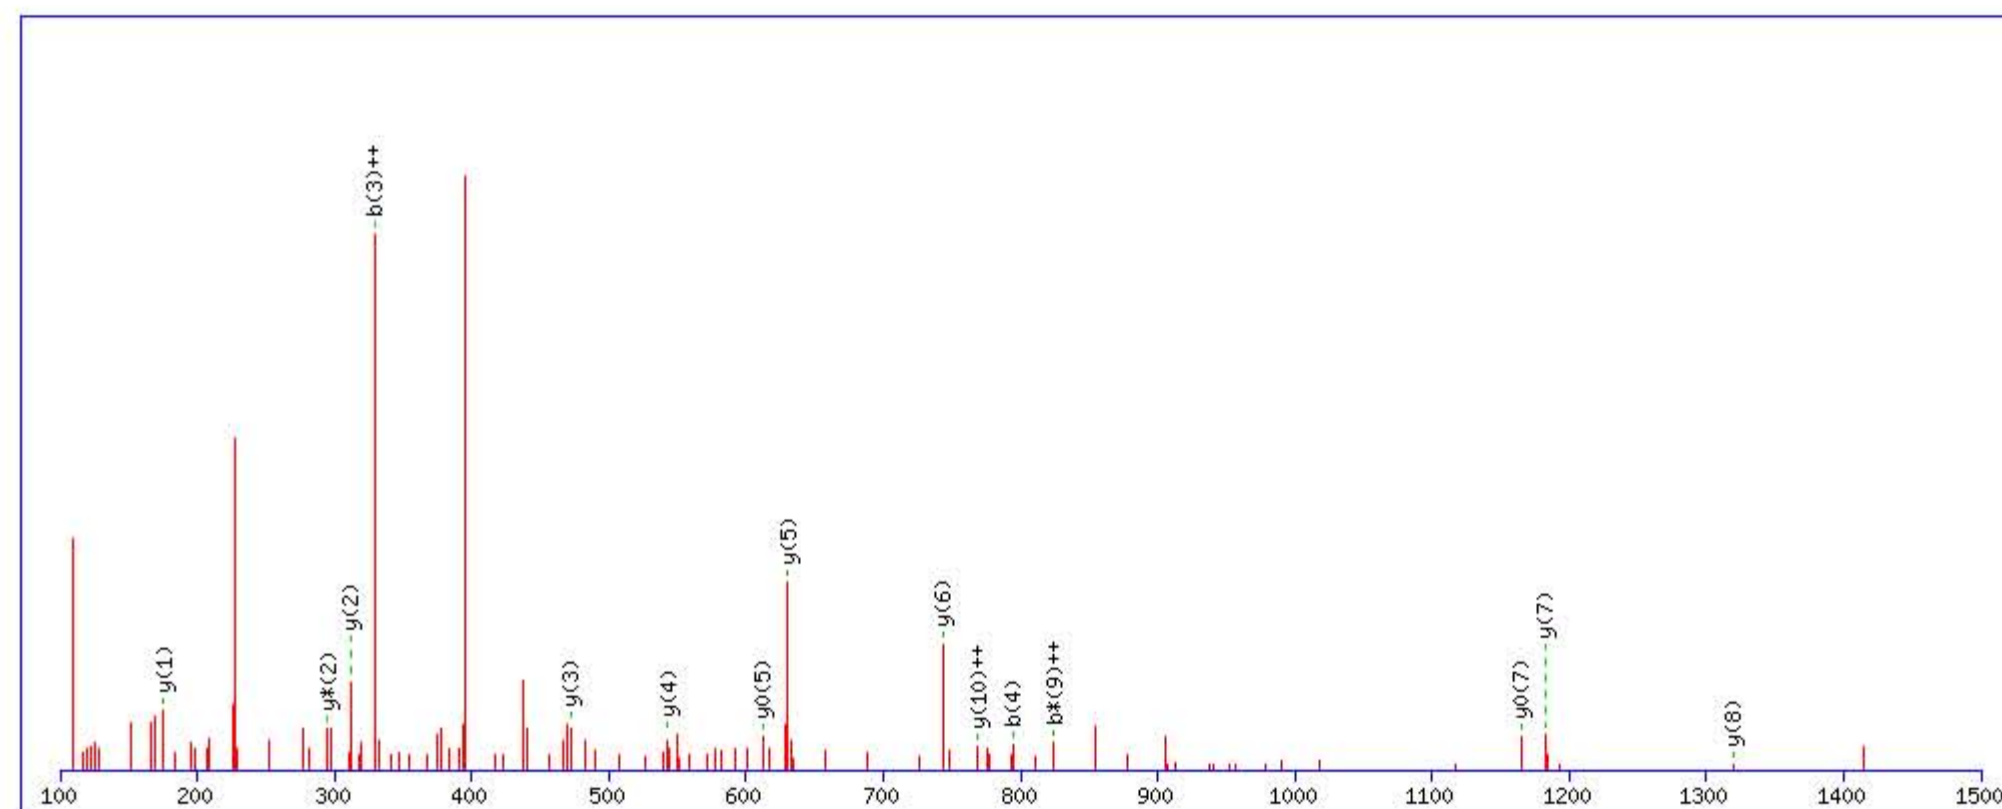

Monoisotopic mass of neutral peptide **Mr(calc): 1974.916122**

Fixed modifications: Carbamidomethyl (C) (apply to specified residues or termini only)

Variable modifications:

Q1 : Biotin:Thermo-21345 (Q)

Q5 : Biotin:Thermo-21345 (Q)

Ions Score: 29 Expect: 0.017

Matches : 15/100 fragment ions using 33 most intense peaks ([help](#))

| #  | b           | b <sup>++</sup> | b <sup>*</sup> | b <sup>*++</sup> | b <sup>0</sup> | b <sup>0++</sup> | Seq. | y           | y <sup>++</sup> | y <sup>*</sup> | y <sup>*++</sup> | y <sup>0</sup> | y <sup>0++</sup> | #  |
|----|-------------|-----------------|----------------|------------------|----------------|------------------|------|-------------|-----------------|----------------|------------------|----------------|------------------|----|
| 1  | 440.232602  | 220.619939      | 423.206053     | 212.106664       |                |                  | Q    |             |                 |                |                  |                |                  | 11 |
| 2  | 600.263251  | 300.635264      | 583.236702     | 292.121989       |                |                  | C    | 1536.698070 | 768.852673      | 1519.671521    | 760.339399       | 1518.687505    | 759.847391       | 10 |
| 3  | 657.284715  | 329.145996      | 640.258166     | 320.632721       |                |                  | G    | 1376.667421 | 688.837349      | 1359.640872    | 680.324074       | 1358.656856    | 679.832066       | 9  |
| 4  | 794.343627  | 397.675452      | 777.317078     | 389.162177       |                |                  | H    | 1319.645957 | 660.326617      | 1302.619408    | 651.813342       | 1301.635392    | 651.321334       | 8  |
| 5  | 1233.568953 | 617.288115      | 1216.542404    | 608.774840       |                |                  | Q    | 1182.587045 | 591.797161      | 1165.560496    | 583.283886       | 1164.576480    | 582.791878       | 7  |
| 6  | 1346.653017 | 673.830147      | 1329.626468    | 665.316872       |                |                  | I    | 743.361719  | 372.184498      | 726.335170     | 363.671223       | 725.351154     | 363.179215       | 6  |
| 7  | 1433.685045 | 717.346161      | 1416.658496    | 708.832886       | 1415.674480    | 708.340878       | S    | 630.277655  | 315.642466      | 613.251106     | 307.129191       | 612.267090     | 306.637183       | 5  |
| 8  | 1504.722159 | 752.864718      | 1487.695610    | 744.351443       | 1486.711594    | 743.859435       | A    | 543.245627  | 272.126452      | 526.219078     | 263.613177       |                |                  | 4  |
| 9  | 1664.752808 | 832.880042      | 1647.726259    | 824.366768       | 1646.742243    | 823.874760       | C    | 472.208513  | 236.607894      | 455.181964     | 228.094620       |                |                  | 3  |
| 10 | 1801.811720 | 901.409498      | 1784.785171    | 892.896224       | 1783.801155    | 892.404216       | H    | 312.177864  | 156.592570      | 295.151315     | 148.079295       |                |                  | 2  |
| 11 |             |                 |                |                  |                |                  | R    | 175.118952  | 88.063114       | 158.092403     | 79.549839        |                |                  | 1  |

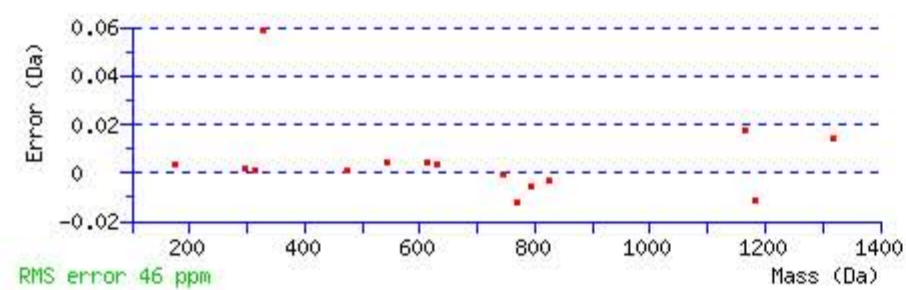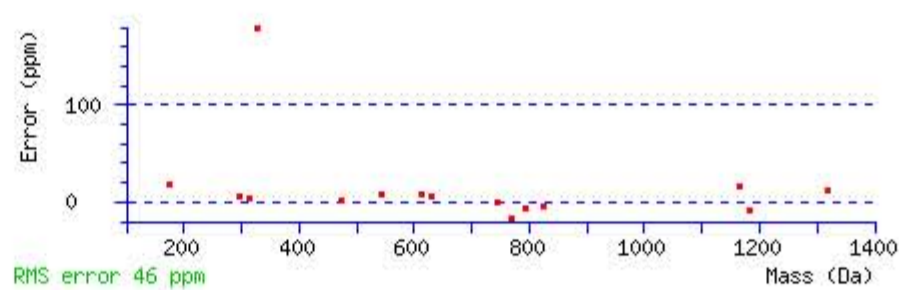

NCBI BLAST search of **QCGHQISACHR**

(Parameters: blastp, nr protein database, expect=20000, no filter, PAM30)

Other BLAST [web gateways](#)

All matches to this query

| Score | Mr(calc):   | Delta     | Sequence                    |
|-------|-------------|-----------|-----------------------------|
| 28.8  | 1974.916122 | -0.000346 | <a href="#">QCGHQISACHR</a> |

Mascot: <http://www.matrixscience.com/>



# Mascot Search Results

## Peptide View

MS/MS Fragmentation of **GGDVASMYTPNAQYCQMR**  
 Found in **KLKB1\_HUMAN**, Plasma kallikrein OS=Homo sapiens GN=KLKB1 PE=1 SV=1

Match to Query 59245: 2359.046862 from(787.356230,3+) rtinseconds(2050) index(79199)  
 Title: Locus:1.1.1.2064.18 File:"2013-07-02 CLN FXIII 180 min 1st FT.wiff"  
 Data file C:\Program Files (x86)\Matrix Science\Mascot Daemon\mgf\7 FXIII 180 min 1st\mascot\_daemon\_merge.mgf

Click mouse within plot area to zoom in by factor of two about that point  
 Or, Plot from  to  Da   
 Label all possible matches  Label matches used for scoring

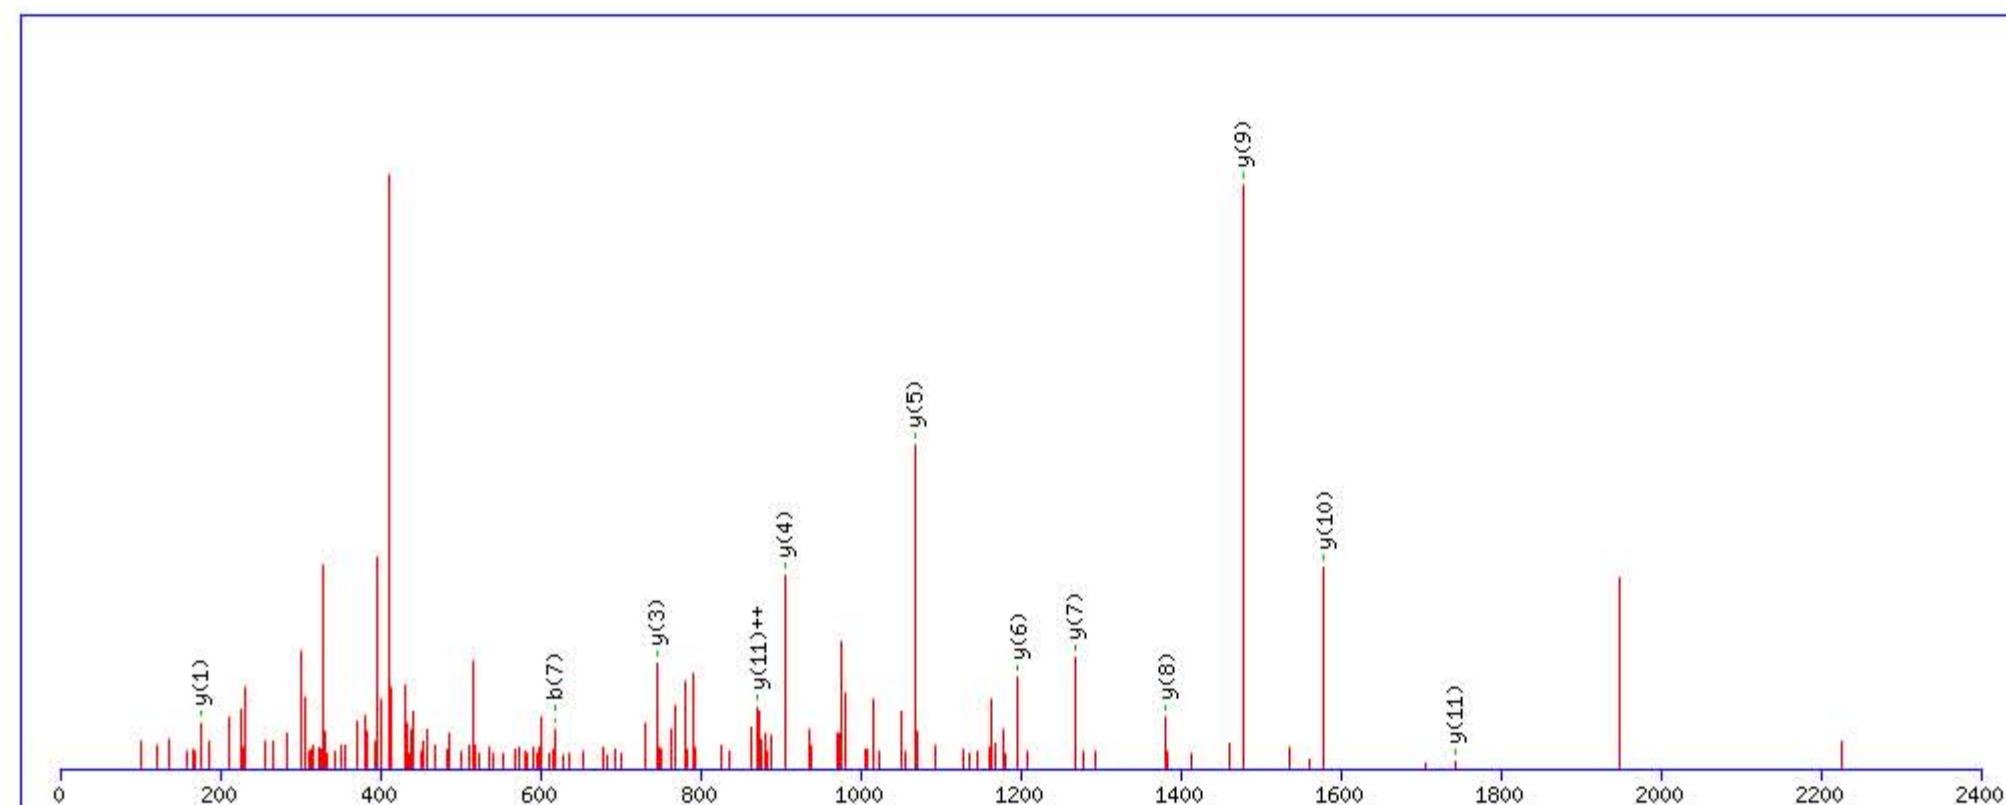

Monoisotopic mass of neutral peptide  $M_r(\text{calc})$ : 2359.021759  
 Fixed modifications: Carbamidomethyl (C) (apply to specified residues or termini only)  
 Variable modifications:  
 Q16 : Biotin:Thermo-21345 (Q)  
 Ions Score: 63 Expect: 3.9e-006  
 Matches : 12/162 fragment ions using 18 most intense peaks ([help](#))

| #  | b                 | b <sup>++</sup> | b <sup>*</sup> | b <sup>*++</sup> | b <sup>0</sup> | b <sup>0++</sup> | Seq.     | y                  | y <sup>++</sup>   | y <sup>*</sup> | y <sup>*++</sup> | y <sup>0</sup> | y <sup>0++</sup> | #  |
|----|-------------------|-----------------|----------------|------------------|----------------|------------------|----------|--------------------|-------------------|----------------|------------------|----------------|------------------|----|
| 1  | 58.028740         | 29.518008       |                |                  |                |                  | <b>G</b> |                    |                   |                |                  |                |                  | 18 |
| 2  | 115.050204        | 58.028740       |                |                  |                |                  | <b>G</b> | 2303.007580        | 1152.007428       | 2285.981031    | 1143.494153      | 2284.997015    | 1143.002145      | 17 |
| 3  | 230.077147        | 115.542211      |                |                  | 212.066582     | 106.536929       | <b>D</b> | 2245.986116        | 1123.496696       | 2228.959567    | 1114.983421      | 2227.975551    | 1114.491413      | 16 |
| 4  | 329.145561        | 165.076418      |                |                  | 311.134996     | 156.071136       | <b>V</b> | 2130.959173        | 1065.983224       | 2113.932624    | 1057.469950      | 2112.948608    | 1056.977942      | 15 |
| 5  | 400.182675        | 200.594975      |                |                  | 382.172110     | 191.589693       | <b>A</b> | 2031.890759        | 1016.449018       | 2014.864210    | 1007.935743      | 2013.880194    | 1007.443735      | 14 |
| 6  | 487.214703        | 244.110989      |                |                  | 469.204138     | 235.105707       | <b>S</b> | 1960.853645        | 980.930461        | 1943.827096    | 972.417186       | 1942.843080    | 971.925178       | 13 |
| 7  | <b>618.255188</b> | 309.631232      |                |                  | 600.244623     | 300.625949       | <b>M</b> | 1873.821617        | 937.414447        | 1856.795068    | 928.901172       | 1855.811052    | 928.409164       | 12 |
| 8  | 781.318517        | 391.162896      |                |                  | 763.307952     | 382.157614       | <b>Y</b> | <b>1742.781132</b> | <b>871.894204</b> | 1725.754583    | 863.380930       | 1724.770567    | 862.888922       | 11 |
| 9  | 882.366196        | 441.686736      |                |                  | 864.355631     | 432.681453       | <b>T</b> | <b>1579.717803</b> | 790.362540        | 1562.691254    | 781.849265       | 1561.707238    | 781.357257       | 10 |
| 10 | 979.418960        | 490.213118      |                |                  | 961.408395     | 481.207835       | <b>P</b> | <b>1478.670124</b> | 739.838700        | 1461.643575    | 731.325426       |                |                  | 9  |
| 11 | 1093.461887       | 547.234581      | 1076.435338    | 538.721307       | 1075.451322    | 538.229299       | <b>N</b> | <b>1381.617360</b> | 691.312318        | 1364.590811    | 682.799044       |                |                  | 8  |
| 12 | 1164.499001       | 582.753138      | 1147.472452    | 574.239864       | 1146.488436    | 573.747856       | <b>A</b> | <b>1267.574433</b> | 634.290855        | 1250.547884    | 625.777580       |                |                  | 7  |
| 13 | 1292.557579       | 646.782428      | 1275.531030    | 638.269153       | 1274.547014    | 637.777145       | <b>Q</b> | <b>1196.537319</b> | 598.772298        | 1179.510770    | 590.259023       |                |                  | 6  |
| 14 | 1455.620908       | 728.314092      | 1438.594359    | 719.800818       | 1437.610343    | 719.308810       | <b>Y</b> | <b>1068.478741</b> | 534.743009        | 1051.452192    | 526.229734       |                |                  | 5  |
| 15 | 1615.651557       | 808.329417      | 1598.625008    | 799.816142       | 1597.640992    | 799.324134       | <b>C</b> | <b>905.415412</b>  | 453.211344        | 888.388863     | 444.698070       |                |                  | 4  |
| 16 | 2054.876883       | 1027.942079     | 2037.850334    | 1019.428805      | 2036.866318    | 1018.936797      | <b>Q</b> | <b>745.384763</b>  | 373.196020        | 728.358214     | 364.682745       |                |                  | 3  |
| 17 | 2185.917368       | 1093.462322     | 2168.890819    | 1084.949047      | 2167.906803    | 1084.457039      | <b>M</b> | 306.159437         | 153.583356        | 289.132888     | 145.070082       |                |                  | 2  |
| 18 |                   |                 |                |                  |                |                  | <b>R</b> | <b>175.118952</b>  | 88.063114         | 158.092403     | 79.549839        |                |                  | 1  |

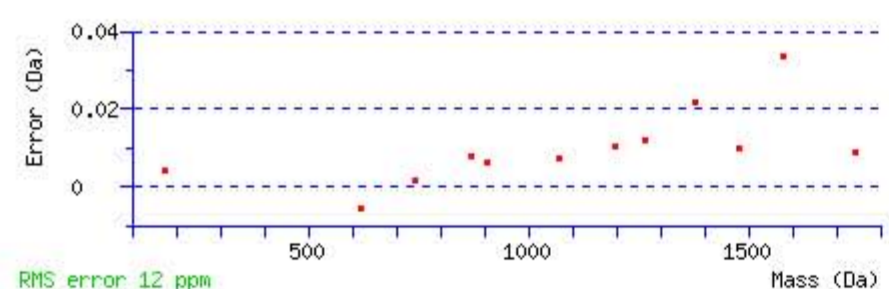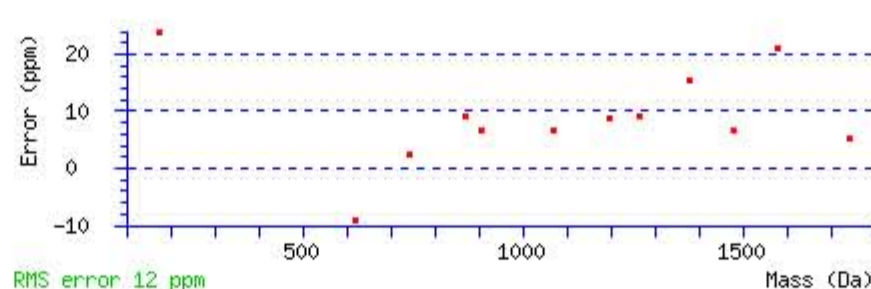

NCBI BLAST search of **GGDVASMYTPNAQYCQMR**  
 (Parameters: blastp, nr protein database, expect=20000, no filter, PAM30)  
 Other BLAST [web gateways](#)

## All matches to this query

| Score | $M_r(\text{calc})$ : | Delta     | Sequence                              |
|-------|----------------------|-----------|---------------------------------------|
| 62.5  | 2359.021759          | 0.025103  | <a href="#">GGDVASMYTPNAQYCQMR</a>    |
| 26.1  | 2359.021759          | 0.025103  | <a href="#">GGDVASMYTPNAQYCQMR</a>    |
| 5.0   | 2359.079300          | -0.032438 | <a href="#">TPMSVLQQAGGSMMMDGPGPR</a> |

# MASCOT SEARCH RESULTS

## Peptide View

### MS/MS Fragmentation of **DFTCVHQALK**

Found in **IC1\_HUMAN**, Plasma protease C1 inhibitor OS=Homo sapiens GN=SERPING1 PE=1 SV=2

Match to Query 35927: 1528.771128 from(765.392840,2+) rtinseconds(1803) index(40807)

Title: Locus:1.1.1.3077.18 File:"2013-07-02 CLN FXIII 180 min 1st F 3.wiff"

Data file C:\Program Files (x86)\Matrix Science\Mascot Daemon\mgf\7 FXIII 180 min 1st\mascot\_daemon\_merge.mgf

Click mouse within plot area to zoom in by factor of two about that point

Or, Plot from  to  Da

Label all possible matches  Label matches used for scoring

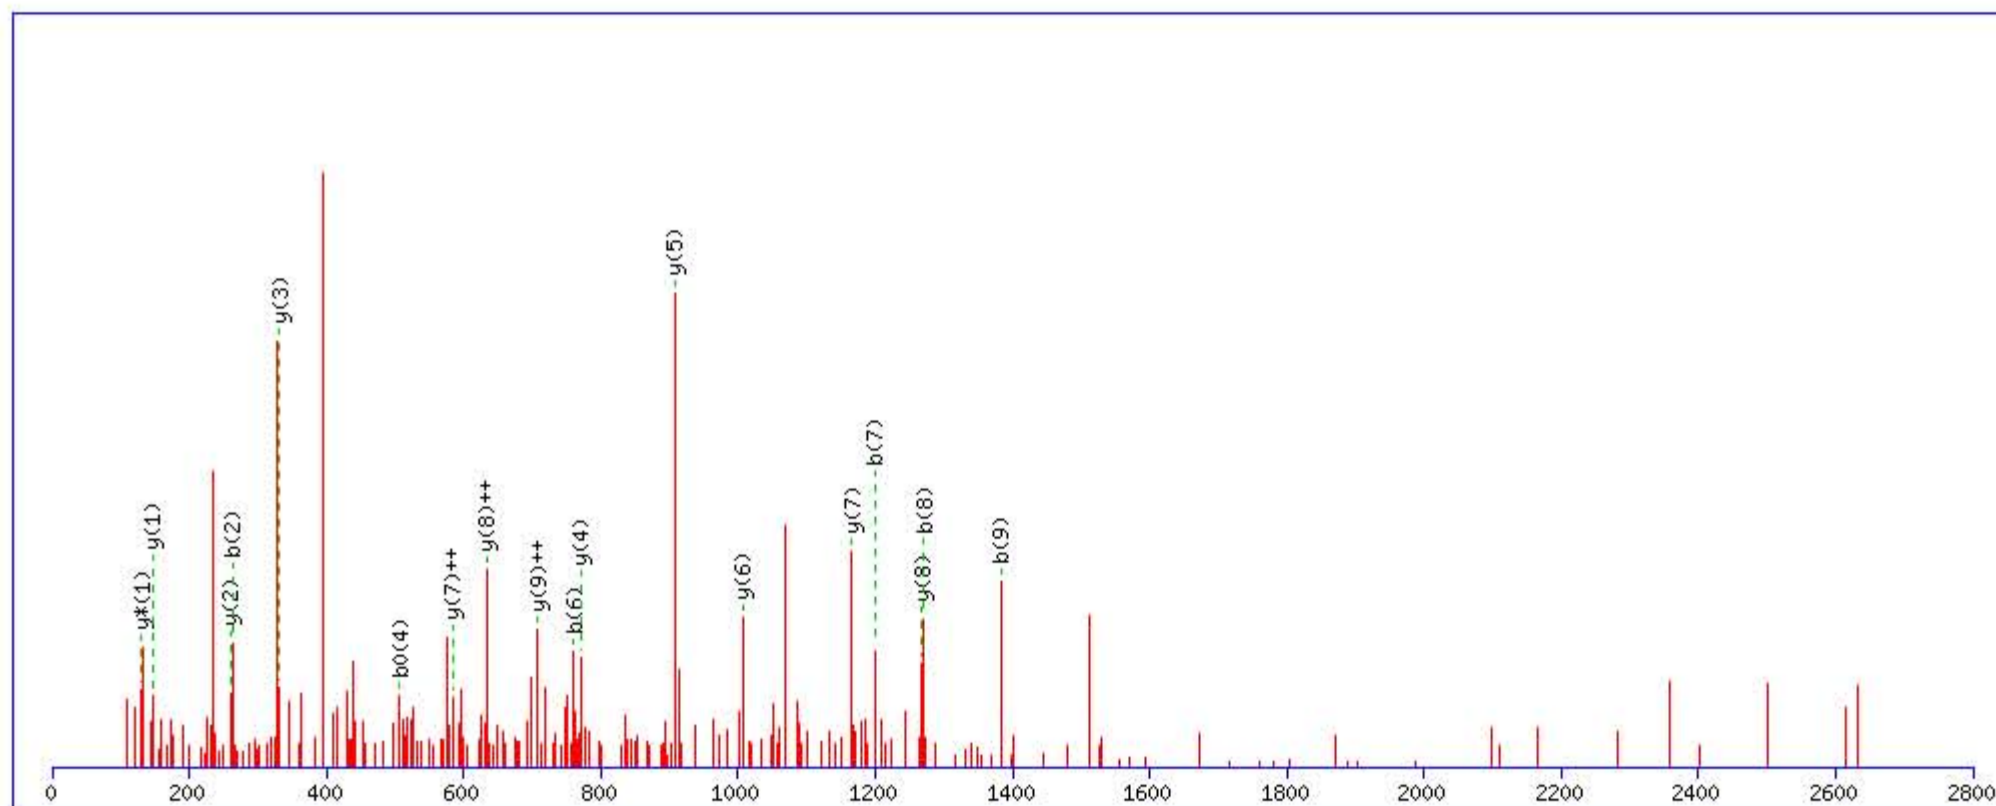

Monoisotopic mass of neutral peptide Mr(calc): 1528.753052

Fixed modifications: Carbamidomethyl (C) (apply to specified residues or termini only)

Variable modifications:

Q7 : Biotin:Thermo-21345 (Q)

Ions Score: 35 Expect: 0.0015

Matches : 18/82 fragment ions using 45 most intense peaks [\(help\)](#)

| #  | b                  | b <sup>++</sup> | b <sup>*</sup> | b <sup>*++</sup> | b <sup>0</sup>    | b <sup>0++</sup> | Seq. | y                  | y <sup>++</sup>   | y <sup>*</sup>    | y <sup>*++</sup> | y <sup>0</sup> | y <sup>0++</sup> | #  |
|----|--------------------|-----------------|----------------|------------------|-------------------|------------------|------|--------------------|-------------------|-------------------|------------------|----------------|------------------|----|
| 1  | 116.034219         | 58.520748       |                |                  | 98.023654         | 49.515465        | D    |                    |                   |                   |                  |                |                  | 10 |
| 2  | <b>263.102633</b>  | 132.054954      |                |                  | 245.092068        | 123.049672       | F    | 1414.733376        | <b>707.870326</b> | 1397.706827       | 699.357051       | 1396.722811    | 698.865043       | 9  |
| 3  | 364.150312         | 182.578794      |                |                  | 346.139747        | 173.573512       | T    | <b>1267.664962</b> | <b>634.336119</b> | 1250.638413       | 625.822844       | 1249.654397    | 625.330836       | 8  |
| 4  | 524.180961         | 262.594119      |                |                  | <b>506.170396</b> | 253.588836       | C    | <b>1166.617283</b> | <b>583.812279</b> | 1149.590734       | 575.299005       |                |                  | 7  |
| 5  | 623.249375         | 312.128326      |                |                  | 605.238810        | 303.123043       | V    | <b>1006.586634</b> | 503.796955        | 989.560085        | 495.283680       |                |                  | 6  |
| 6  | <b>760.308287</b>  | 380.657782      |                |                  | 742.297722        | 371.652499       | H    | <b>907.518220</b>  | 454.262748        | 890.491671        | 445.749473       |                |                  | 5  |
| 7  | <b>1199.533613</b> | 600.270444      | 1182.507064    | 591.757170       | 1181.523048       | 591.265162       | Q    | <b>770.459308</b>  | 385.733292        | 753.432759        | 377.220017       |                |                  | 4  |
| 8  | <b>1270.570727</b> | 635.789001      | 1253.544178    | 627.275727       | 1252.560162       | 626.783719       | A    | <b>331.233982</b>  | 166.120629        | 314.207433        | 157.607354       |                |                  | 3  |
| 9  | <b>1383.654791</b> | 692.331033      | 1366.628242    | 683.817759       | 1365.644226       | 683.325751       | L    | <b>260.196868</b>  | 130.602072        | 243.170319        | 122.088797       |                |                  | 2  |
| 10 |                    |                 |                |                  |                   |                  | K    | <b>147.112804</b>  | 74.060040         | <b>130.086255</b> | 65.546765        |                |                  | 1  |

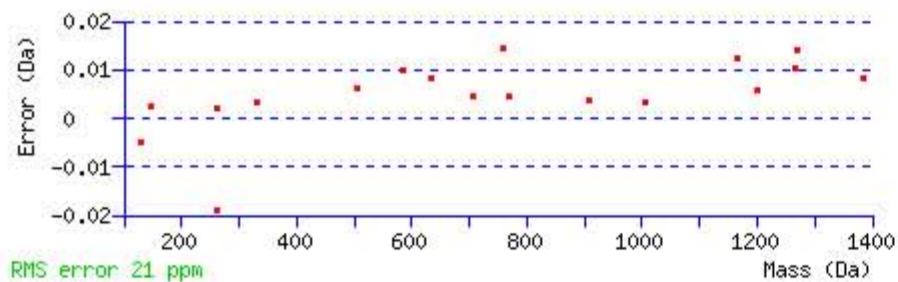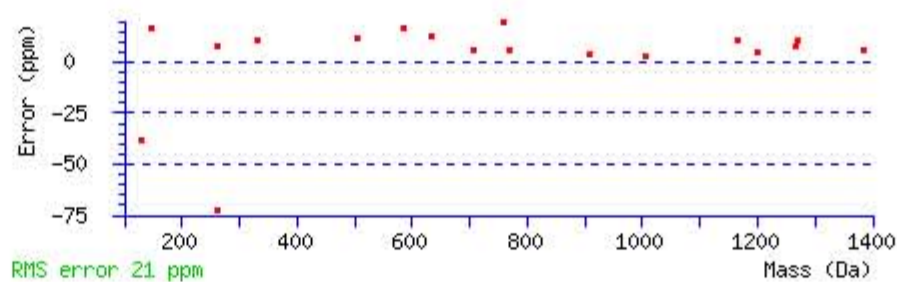

### NCBI BLAST search of **DFTCVHQALK**

(Parameters: blastp, nr protein database, expect=20000, no filter, PAM30)

Other BLAST [web gateways](#)

### All matches to this query

| Score | Mr(calc):   | Delta     | Sequence                      |
|-------|-------------|-----------|-------------------------------|
| 34.6  | 1528.753052 | 0.018076  | <a href="#">DFTCVHQALK</a>    |
| 4.4   | 1528.788528 | -0.017400 | <a href="#">EEQHQLAVTAYLK</a> |
| 2.4   | 1528.780685 | -0.009557 | <a href="#">EVLDDQGTEISK</a>  |
| 2.4   | 1528.763367 | 0.007761  | <a href="#">EDQWRGLNEAAIK</a> |
| 1.1   | 1528.780670 | -0.009542 | <a href="#">EIQTLEETK</a>     |

# MASCOT SEARCH RESULTS

## Peptide View

MS/MS Fragmentation of **VTTSQDMLSIMEK**

Found in **IC1\_HUMAN**, Plasma protease C1 inhibitor OS=Homo sapiens GN=SERPING1 PE=1 SV=2

Match to Query 45097: 1792.895022 from(598.638950,3+) rtinseconds(2375) index(44830)

Title: Locus:1.1.1.3276.9 File:"2013-07-02 CLN FXIII 180 min 1st F 3.wiff"

Data file C:\Program Files (x86)\Matrix Science\Mascot Daemon\mgf\7 FXIII 180 min 1st\mascot\_daemon\_merge.mgf

Click mouse within plot area to zoom in by factor of two about that point

Or, Plot from  to  Da

Label all possible matches  Label matches used for scoring

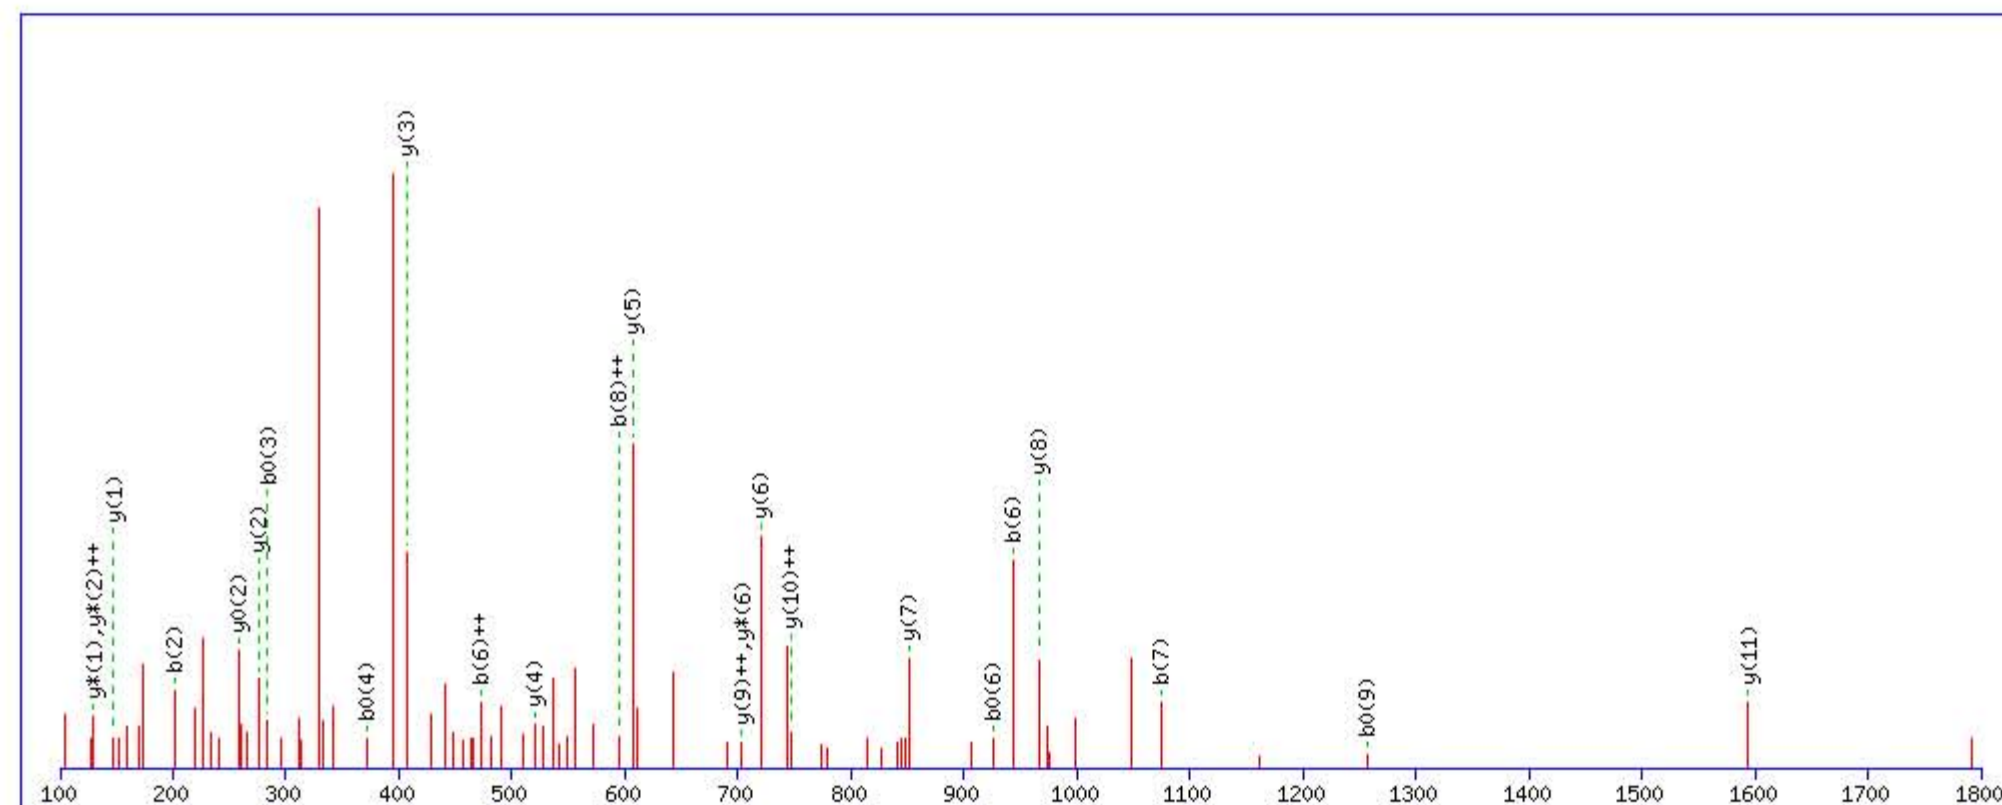

Monoisotopic mass of neutral peptide Mr(calc): 1792.877304

Fixed modifications: Carbamidomethyl (C) (apply to specified residues or termini only)

Variable modifications:

Q5 : Biotin:Thermo-21345 (Q)

Ions Score: 27 Expect: 0.047

Matches : 24/132 fragment ions using 69 most intense peaks [\(help\)](#)

| #  | b                  | b <sup>++</sup>   | b <sup>*</sup> | b <sup>*++</sup> | b <sup>0</sup>     | b <sup>0++</sup> | Seq. | y                  | y <sup>++</sup>   | y <sup>*</sup>    | y <sup>*++</sup>  | y <sup>0</sup>    | y <sup>0++</sup> | #  |
|----|--------------------|-------------------|----------------|------------------|--------------------|------------------|------|--------------------|-------------------|-------------------|-------------------|-------------------|------------------|----|
| 1  | 100.075690         | 50.541483         |                |                  |                    |                  | V    |                    |                   |                   |                   |                   |                  | 13 |
| 2  | <b>201.123369</b>  | 101.065322        |                |                  | 183.112804         | 92.060040        | T    | 1694.816178        | 847.911727        | 1677.789629       | 839.398453        | 1676.805613       | 838.906445       | 12 |
| 3  | 302.171048         | 151.589162        |                |                  | <b>284.160483</b>  | 142.583879       | T    | <b>1593.768499</b> | 797.387888        | 1576.741950       | 788.874613        | 1575.757934       | 788.382605       | 11 |
| 4  | 389.203076         | 195.105176        |                |                  | <b>371.192511</b>  | 186.099893       | S    | 1492.720820        | <b>746.864048</b> | 1475.694271       | 738.350774        | 1474.710255       | 737.858766       | 10 |
| 5  | 828.428402         | 414.717839        | 811.401853     | 406.204565       | 810.417837         | 405.712557       | Q    | 1405.688792        | <b>703.348034</b> | 1388.662243       | 694.834760        | 1387.678227       | 694.342752       | 9  |
| 6  | <b>943.455345</b>  | <b>472.231311</b> | 926.428796     | 463.718036       | <b>925.444780</b>  | 463.226028       | D    | <b>966.463466</b>  | 483.735371        | 949.436917        | 475.222097        | 948.452901        | 474.730089       | 8  |
| 7  | <b>1074.495830</b> | 537.751553        | 1057.469281    | 529.238279       | 1056.485265        | 528.746271       | M    | <b>851.436523</b>  | 426.221900        | 834.409974        | 417.708625        | 833.425958        | 417.216617       | 7  |
| 8  | 1187.579894        | <b>594.293585</b> | 1170.553345    | 585.780311       | 1169.569329        | 585.288302       | L    | <b>720.396038</b>  | 360.701657        | <b>703.369489</b> | 352.188383        | 702.385473        | 351.696375       | 6  |
| 9  | 1274.611922        | 637.809599        | 1257.585373    | 629.296325       | <b>1256.601357</b> | 628.804317       | S    | <b>607.311974</b>  | 304.159625        | 590.285425        | 295.646351        | 589.301409        | 295.154343       | 5  |
| 10 | 1387.695986        | 694.351631        | 1370.669437    | 685.838357       | 1369.685421        | 685.346348       | I    | <b>520.279946</b>  | 260.643611        | 503.253397        | 252.130337        | 502.269381        | 251.638329       | 4  |
| 11 | 1518.736471        | 759.871873        | 1501.709922    | 751.358599       | 1500.725906        | 750.866591       | M    | <b>407.195882</b>  | 204.101579        | 390.169333        | 195.588305        | 389.185317        | 195.096297       | 3  |
| 12 | 1647.779064        | 824.393170        | 1630.752515    | 815.879896       | 1629.768499        | 815.387888       | E    | <b>276.155397</b>  | 138.581337        | 259.128848        | <b>130.068062</b> | <b>258.144832</b> | 129.576054       | 2  |
| 13 |                    |                   |                |                  |                    |                  | K    | <b>147.112804</b>  | 74.060040         | <b>130.086255</b> | 65.546765         |                   |                  | 1  |

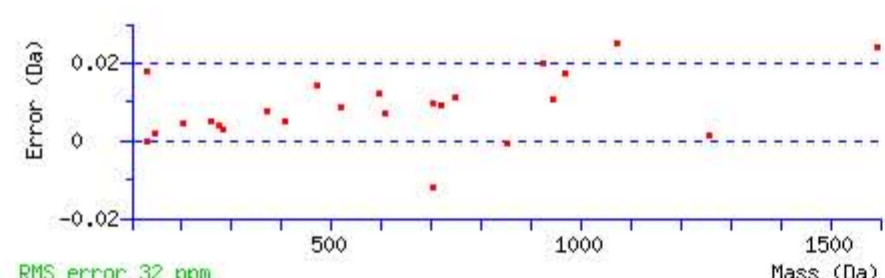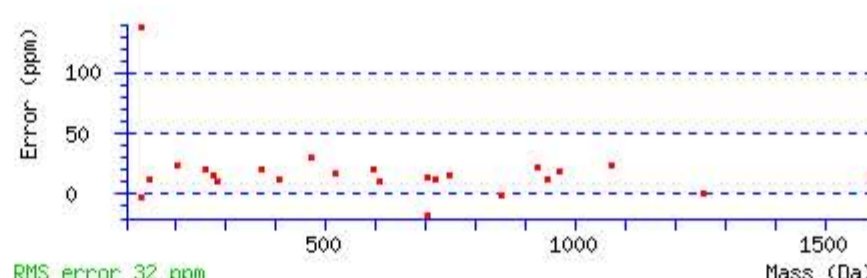

NCBI BLAST search of **VTTSQDMLSIMEK**

(Parameters: blastp, nr protein database, expect=20000, no filter, PAM30)

Other BLAST [web gateways](#)

All matches to this query

| Score | Mr(calc):   | Delta    | Sequence             |
|-------|-------------|----------|----------------------|
| 27.1  | 1792.877304 | 0.017718 | <b>VTTSQDMLSIMEK</b> |

Mascot: <http://www.matrixscience.com/>

# MASCOT SEARCH RESULTS

## Peptide View

MS/MS Fragmentation of **KYPVAHFIDQTLK**

Found in **IC1\_HUMAN**, Plasma protease C1 inhibitor OS=Homo sapiens GN=SERPING1 PE=1 SV=2

Match to Query 46972: 1870.036632 from(624.352820,3+) rtinseconds(2011) index(42282)  
 Title: Locus:1.1.1.3149.10 File:"2013-07-02 CLN FXIII 180 min 1st F 3.wiff"

Data file C:\Program Files (x86)\Matrix Science\Mascot Daemon\mgf7 FXIII 180 min 1st\mascot\_daemon\_merge.mgf

Click mouse within plot area to zoom in by factor of two about that point

Or, Plot from  to  Da

Label all possible matches  Label matches used for scoring

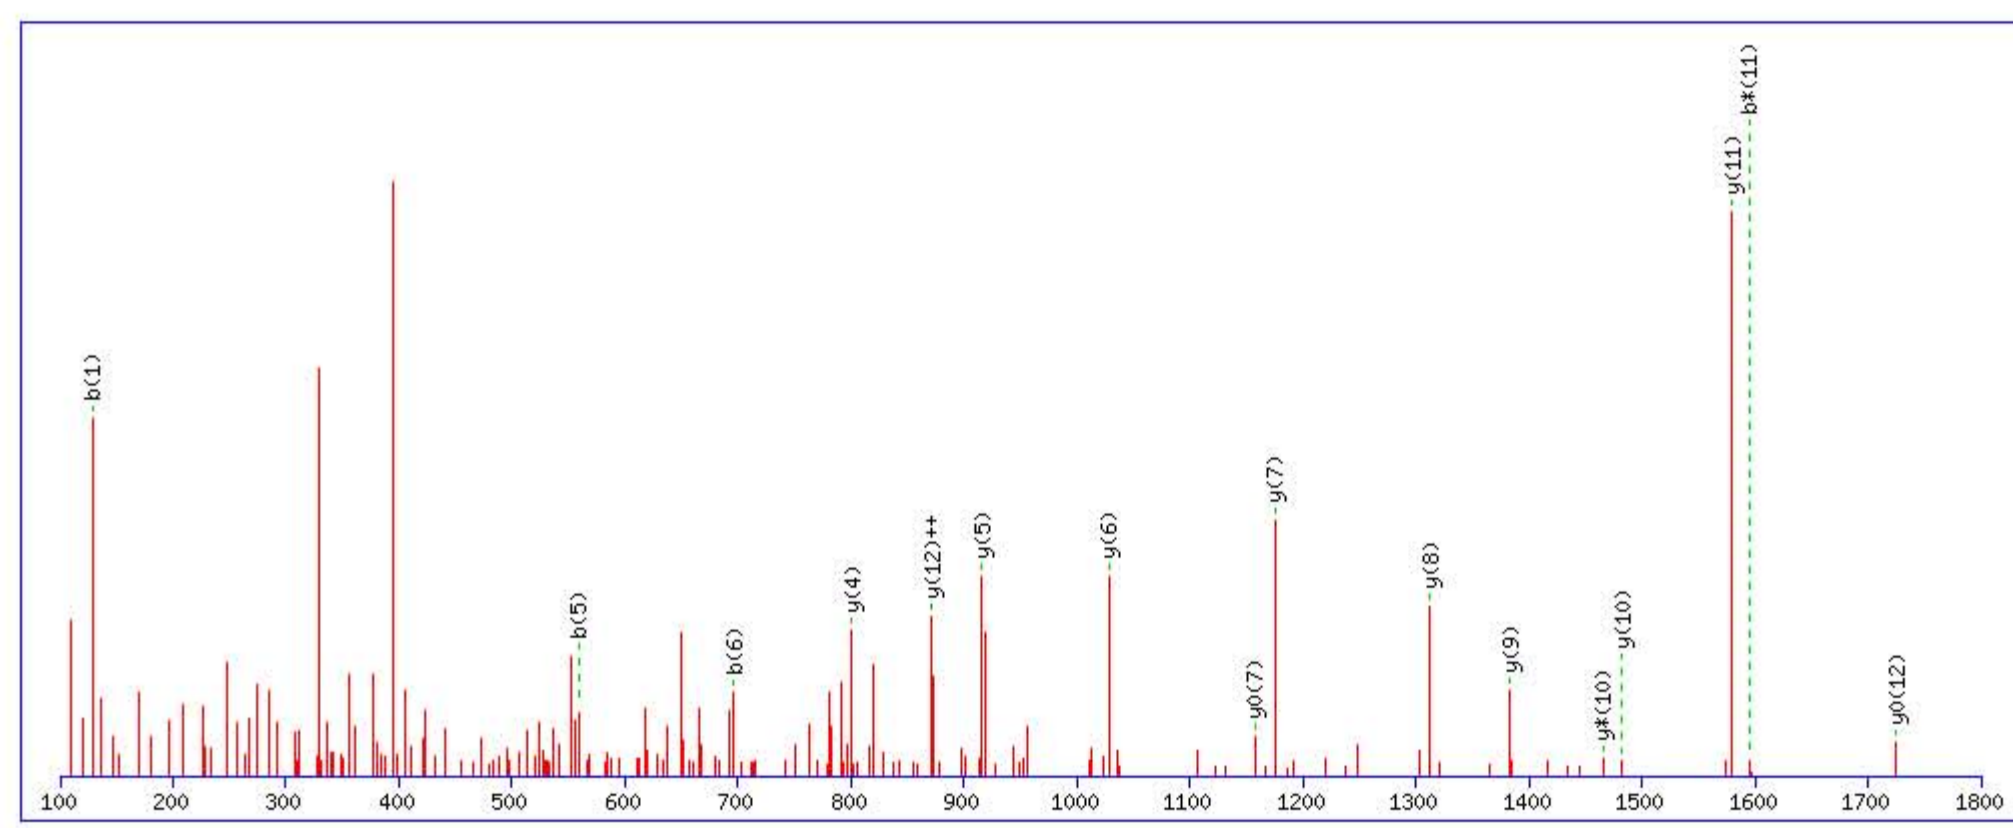

Monoisotopic mass of neutral peptide  $M_r(\text{calc})$ : 1870.017502  
 Fixed modifications: Carbamidomethyl (C) (apply to specified residues or termini only)  
 Variable modifications:  
 Q10 : Biotin:Thermo-21345 (Q)  
 Ions Score: 39 Expect: 0.0019  
 Matches : 17/124 fragment ions using 31 most intense peaks ([help](#))

| #  | b           | b <sup>++</sup> | b <sup>*</sup> | b <sup>*++</sup> | b <sup>0</sup> | b <sup>0++</sup> | Seq. | y           | y <sup>++</sup> | y <sup>*</sup> | y <sup>*++</sup> | y <sup>0</sup> | y <sup>0++</sup> | #  |
|----|-------------|-----------------|----------------|------------------|----------------|------------------|------|-------------|-----------------|----------------|------------------|----------------|------------------|----|
| 1  | 129.102239  | 65.054757       | 112.075690     | 56.541483        |                |                  | K    |             |                 |                |                  |                |                  | 13 |
| 2  | 292.165568  | 146.586422      | 275.139019     | 138.073148       |                |                  | Y    | 1742.929827 | 871.968552      | 1725.903278    | 863.455277       | 1724.919262    | 862.963269       | 12 |
| 3  | 389.218332  | 195.112804      | 372.191783     | 186.599529       |                |                  | P    | 1579.866498 | 790.436887      | 1562.839949    | 781.923613       | 1561.855933    | 781.431605       | 11 |
| 4  | 488.286746  | 244.647011      | 471.260197     | 236.133737       |                |                  | V    | 1482.813734 | 741.910505      | 1465.787185    | 733.397231       | 1464.803169    | 732.905223       | 10 |
| 5  | 559.323860  | 280.165568      | 542.297311     | 271.652294       |                |                  | A    | 1383.745320 | 692.376298      | 1366.718771    | 683.863024       | 1365.734755    | 683.371016       | 9  |
| 6  | 696.382772  | 348.695024      | 679.356223     | 340.181750       |                |                  | H    | 1312.708206 | 656.857741      | 1295.681657    | 648.344467       | 1294.697641    | 647.852459       | 8  |
| 7  | 843.451186  | 422.229231      | 826.424637     | 413.715957       |                |                  | F    | 1175.649294 | 588.328285      | 1158.622745    | 579.815011       | 1157.638729    | 579.323003       | 7  |
| 8  | 956.535250  | 478.771263      | 939.508701     | 470.257989       |                |                  | I    | 1028.580880 | 514.794078      | 1011.554331    | 506.280804       | 1010.570315    | 505.788796       | 6  |
| 9  | 1071.562193 | 536.284735      | 1054.535644    | 527.771460       | 1053.551628    | 527.279452       | D    | 915.496816  | 458.252046      | 898.470267     | 449.738772       | 897.486251     | 449.246764       | 5  |
| 10 | 1510.787519 | 755.897398      | 1493.760970    | 747.384123       | 1492.776954    | 746.892115       | Q    | 800.469873  | 400.738575      | 783.443324     | 392.225300       | 782.459308     | 391.733292       | 4  |
| 11 | 1611.835198 | 806.421237      | 1594.808649    | 797.907963       | 1593.824633    | 797.415955       | T    | 361.244547  | 181.125911      | 344.217998     | 172.612637       | 343.233982     | 172.120629       | 3  |
| 12 | 1724.919262 | 862.963269      | 1707.892713    | 854.449995       | 1706.908697    | 853.957987       | L    | 260.196868  | 130.602072      | 243.170319     | 122.088797       |                |                  | 2  |
| 13 |             |                 |                |                  |                |                  | K    | 147.112804  | 74.060040       | 130.086255     | 65.546765        |                |                  | 1  |

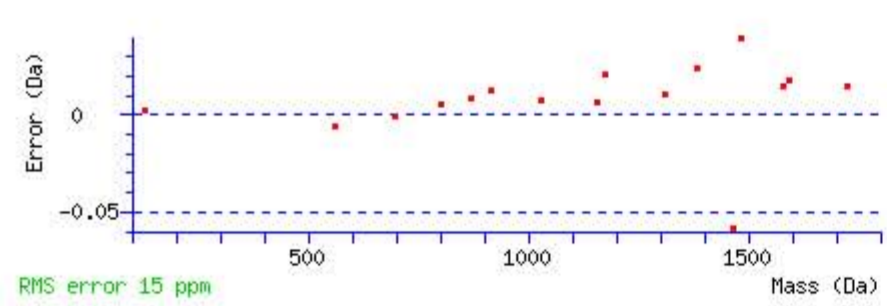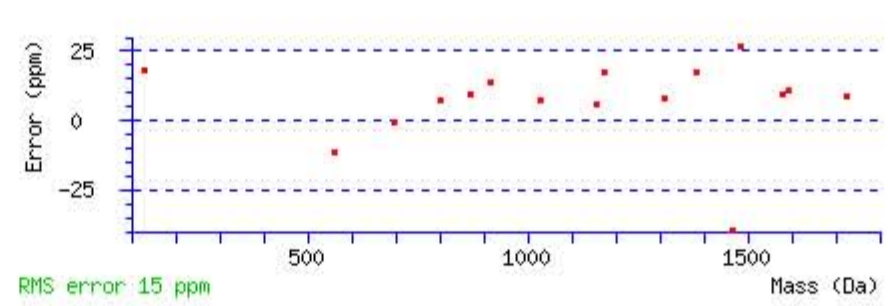

NCBI BLAST search of **KYPVAHFIDQTLK**  
 (Parameters: blastp, nr protein database, expect=20000, no filter, PAM30)  
 Other BLAST [web gateways](#)

### All matches to this query

| Score | $M_r(\text{calc})$ : | Delta    | Sequence             |
|-------|----------------------|----------|----------------------|
| 38.9  | 1870.017502          | 0.019130 | <b>KYPVAHFIDQTLK</b> |

# MASCOT Search Results

## Peptide View

MS/MS Fragmentation of **LEDMEQALSPSVFK**

Found in **IC1\_HUMAN**, Plasma protease C1 inhibitor OS=Homo sapiens GN=SERPING1 PE=1 SV=2

Match to Query 47546: 1903.966362 from(635.662730,3+) rtinseconds(2430) index(45160)

Title: Locus:1.1.1.3295.8 File:"2013-07-02 CLN FXIII 180 min 1st F 3.wiff"

Data file C:\Program Files (x86)\Matrix Science\Mascot Daemon\mgf7 FXIII 180 min 1st\mascot\_daemon\_merge.mgf

Click mouse within plot area to zoom in by factor of two about that point

Or, Plot from  to  Da

Label all possible matches  Label matches used for scoring

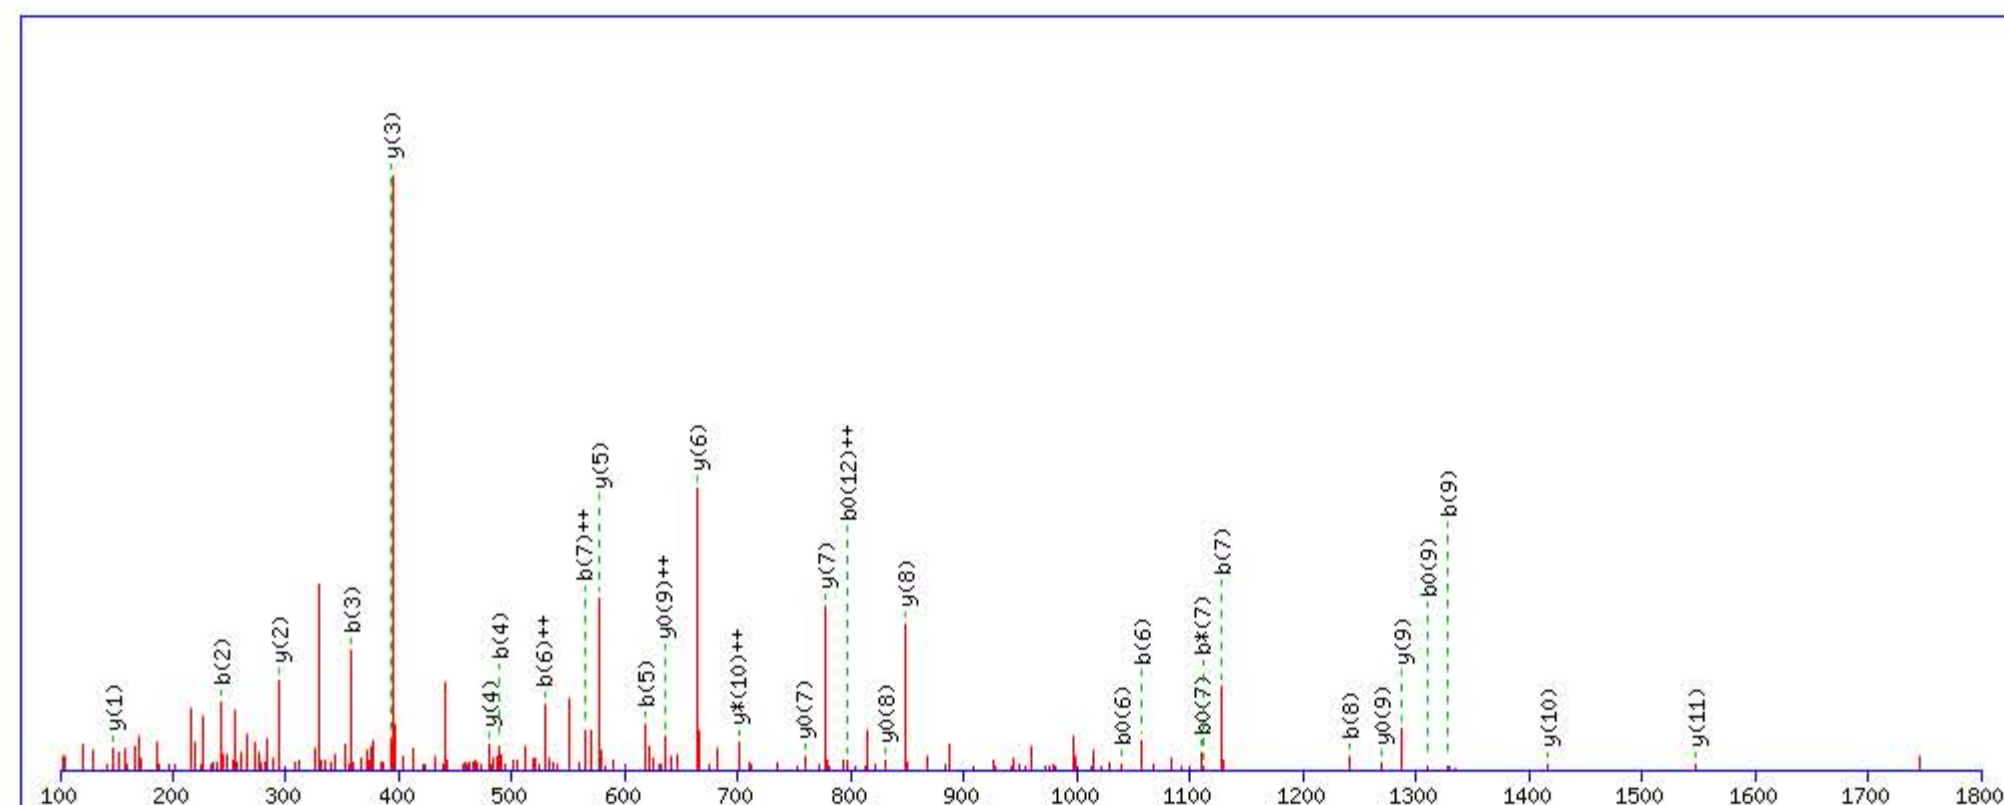

Monoisotopic mass of neutral peptide Mr(calc): 1903.942337

Fixed modifications: Carbamidomethyl (C) (apply to specified residues or termini only)

Variable modifications:

Q6 : Biotin:Thermo-21345 (Q)

Ions Score: 56 Expect: 6.7e-005

Matches : 31/138 fragment ions using 64 most intense peaks [\(help\)](#)

| #  | b                  | b <sup>++</sup>   | b <sup>*</sup>     | b <sup>*++</sup> | b <sup>0</sup>     | b <sup>0++</sup>  | Seq. | y                  | y <sup>++</sup> | y <sup>*</sup> | y <sup>*++</sup>  | y <sup>0</sup>     | y <sup>0++</sup>  | #  |
|----|--------------------|-------------------|--------------------|------------------|--------------------|-------------------|------|--------------------|-----------------|----------------|-------------------|--------------------|-------------------|----|
| 1  | 114.091340         | 57.549308         |                    |                  |                    |                   | L    |                    |                 |                |                   |                    |                   | 14 |
| 2  | <b>243.133933</b>  | 122.070605        |                    |                  | 225.123368         | 113.065322        | E    | 1791.865570        | 896.436423      | 1774.839021    | 887.923149        | 1773.855005        | 887.431141        | 13 |
| 3  | <b>358.160876</b>  | 179.584076        |                    |                  | 340.150311         | 170.578794        | D    | 1662.822977        | 831.915127      | 1645.796428    | 823.401852        | 1644.812412        | 822.909844        | 12 |
| 4  | <b>489.201361</b>  | 245.104319        |                    |                  | 471.190796         | 236.099036        | M    | <b>1547.796034</b> | 774.401655      | 1530.769485    | 765.888381        | 1529.785469        | 765.396373        | 11 |
| 5  | <b>618.243954</b>  | 309.625615        |                    |                  | 600.233389         | 300.620333        | E    | <b>1416.755549</b> | 708.881413      | 1399.729000    | <b>700.368138</b> | 1398.744984        | 699.876130        | 10 |
| 6  | <b>1057.469280</b> | <b>529.238278</b> | 1040.442731        | 520.725004       | <b>1039.458715</b> | 520.232996        | Q    | <b>1287.712956</b> | 644.360116      | 1270.686407    | 635.846842        | <b>1269.702391</b> | <b>635.354834</b> | 9  |
| 7  | <b>1128.506394</b> | <b>564.756835</b> | <b>1111.479845</b> | 556.243561       | <b>1110.495829</b> | 555.751553        | A    | <b>848.487630</b>  | 424.747453      | 831.461081     | 416.234179        | <b>830.477065</b>  | 415.742171        | 8  |
| 8  | <b>1241.590458</b> | 621.298867        | 1224.563909        | 612.785593       | 1223.579893        | 612.293584        | L    | <b>777.450516</b>  | 389.228896      | 760.423967     | 380.715622        | <b>759.439951</b>  | 380.223614        | 7  |
| 9  | <b>1328.622486</b> | 664.814881        | 1311.595937        | 656.301607       | <b>1310.611921</b> | 655.809598        | S    | <b>664.366452</b>  | 332.686864      | 647.339903     | 324.173590        | 646.355887         | 323.681582        | 6  |
| 10 | 1425.675250        | 713.341263        | 1408.648701        | 704.827989       | 1407.664685        | 704.335981        | P    | <b>577.334424</b>  | 289.170850      | 560.307875     | 280.657576        | 559.323859         | 280.165568        | 5  |
| 11 | 1512.707278        | 756.857277        | 1495.680729        | 748.344003       | 1494.696713        | 747.851995        | S    | <b>480.281660</b>  | 240.644468      | 463.255111     | 232.131194        | 462.271095         | 231.639186        | 4  |
| 12 | 1611.775692        | 806.391484        | 1594.749143        | 797.878210       | 1593.765127        | <b>797.386202</b> | V    | <b>393.249632</b>  | 197.128454      | 376.223083     | 188.615180        |                    |                   | 3  |
| 13 | 1758.844106        | 879.925691        | 1741.817557        | 871.412417       | 1740.833541        | 870.920409        | F    | <b>294.181218</b>  | 147.594247      | 277.154669     | 139.080973        |                    |                   | 2  |
| 14 |                    |                   |                    |                  |                    |                   | K    | <b>147.112804</b>  | 74.060040       | 130.086255     | 65.546765         |                    |                   | 1  |

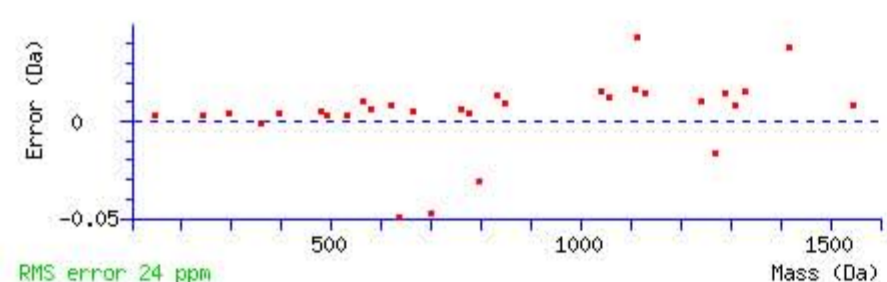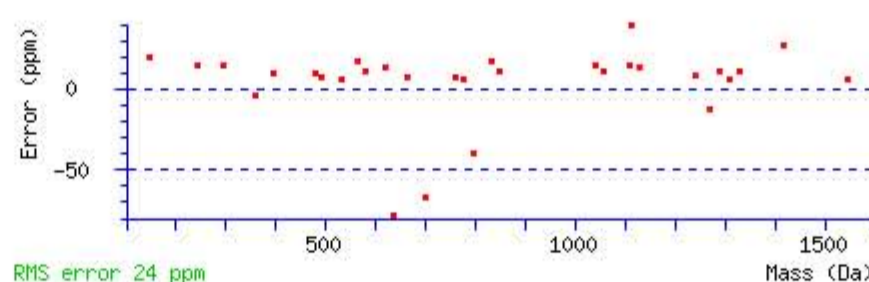

NCBI BLAST search of **LEDMEQALSPSVFK**

(Parameters: blastp, nr protein database, expect=20000, no filter, PAM30)

Other BLAST [web gateways](#)

All matches to this query

| Score | Mr(calc):   | Delta    | Sequence                       |
|-------|-------------|----------|--------------------------------|
| 56.5  | 1903.942337 | 0.024025 | <a href="#">LEDMEQALSPSVFK</a> |

Mascot: <http://www.matrixscience.com/>

# MASCOT Search Results

## Peptide View

MS/MS Fragmentation of **GVTSVVSQIFHSPDLAIR**

Found in **IC1\_HUMAN**, Plasma protease C1 inhibitor OS=Homo sapiens GN=SERPING1 PE=1 SV=2

Match to Query 53897: 2137.166862 from(713.396230,3+) rtinseconds(2344) index(44573)

Title: Locus:1.1.1.3265.15 File:"2013-07-02 CLN FXIII 180 min 1st F 3.wiff"

Data file C:\Program Files (x86)\Matrix Science\Mascot Daemon\mgf\7 FXIII 180 min 1st\mascot\_daemon\_merge.mgf

Click mouse within plot area to zoom in by factor of two about that point

Or, Plot from  to  Da

Label all possible matches  Label matches used for scoring

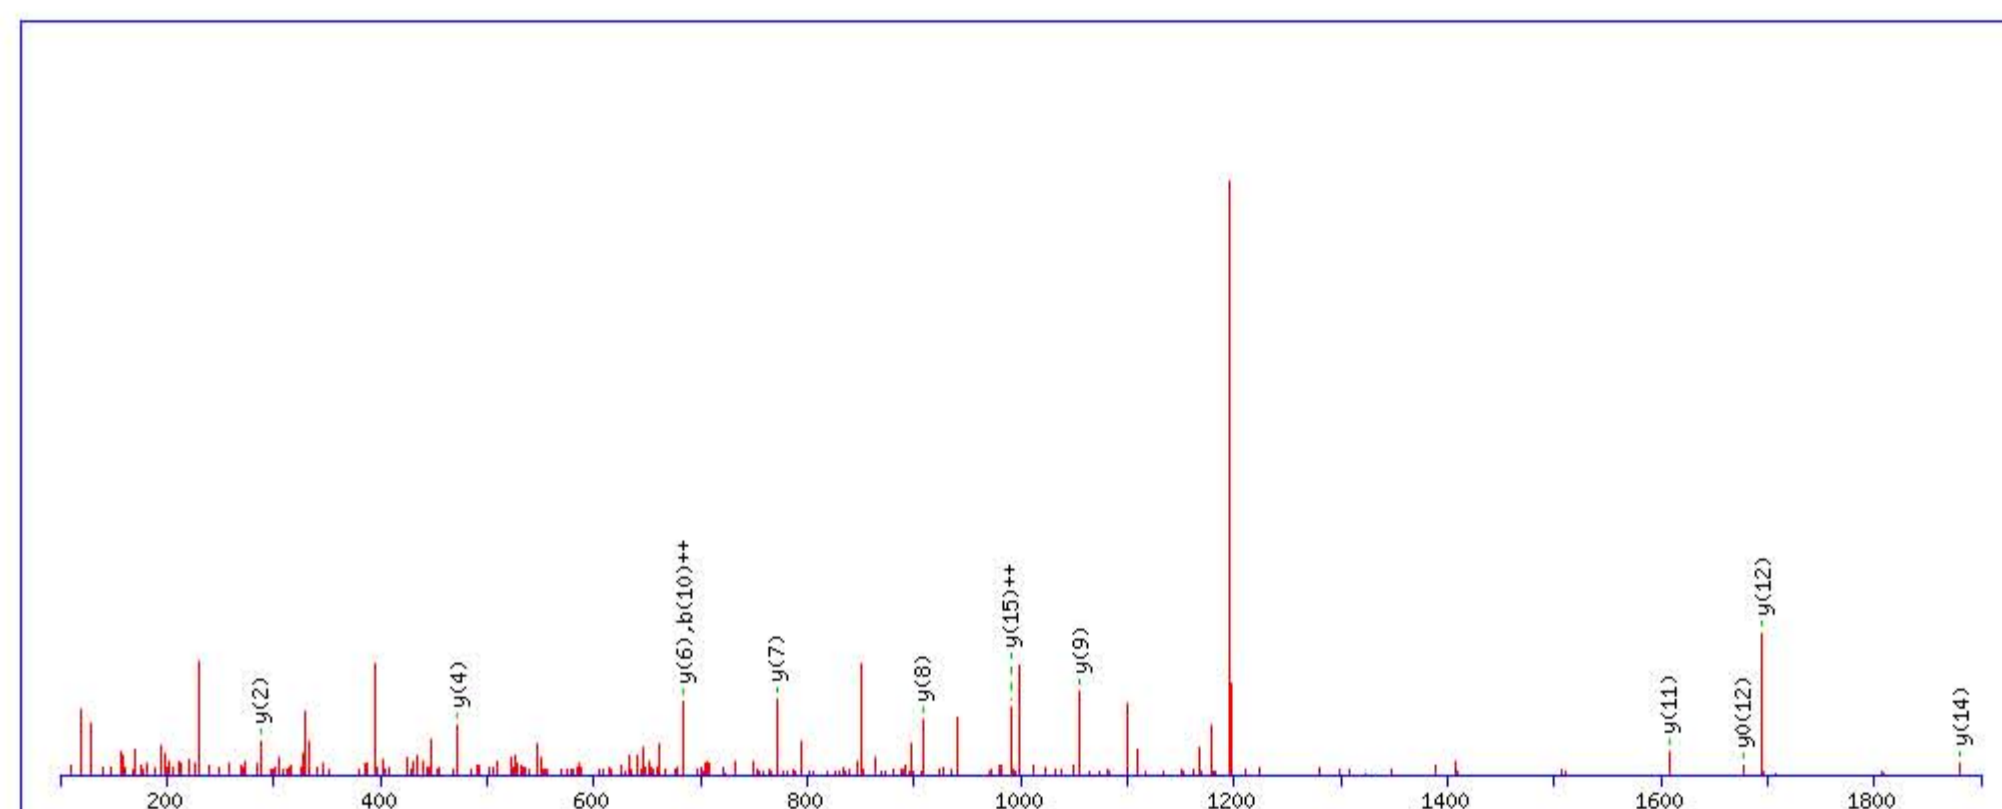

Monoisotopic mass of neutral peptide  $M_r(\text{calc})$ : 2137.135406

Fixed modifications: Carbamidomethyl (C) (apply to specified residues or termini only)

Variable modifications:

Q7 : Biotin:Thermo-21345 (Q)

Ions Score: 29 Expect: 0.023

Matches : 12/168 fragment ions using 34 most intense peaks ([help](#))

| #  | b           | b <sup>++</sup> | b <sup>*</sup> | b <sup>*++</sup> | b <sup>0</sup> | b <sup>0++</sup> | Seq. | y           | y <sup>++</sup> | y <sup>*</sup> | y <sup>*++</sup> | y <sup>0</sup> | y <sup>0++</sup> | #  |
|----|-------------|-----------------|----------------|------------------|----------------|------------------|------|-------------|-----------------|----------------|------------------|----------------|------------------|----|
| 1  | 58.028740   | 29.518008       |                |                  |                |                  | G    |             |                 |                |                  |                |                  | 17 |
| 2  | 157.097154  | 79.052215       |                |                  |                |                  | V    | 2081.121208 | 1041.064242     | 2064.094659    | 1032.550967      | 2063.110643    | 1032.058959      | 16 |
| 3  | 258.144833  | 129.576055      |                |                  | 240.134268     | 120.570772       | T    | 1982.052794 | 991.530035      | 1965.026245    | 983.016761       | 1964.042229    | 982.524753       | 15 |
| 4  | 345.176861  | 173.092068      |                |                  | 327.166296     | 164.086786       | S    | 1881.005115 | 941.006196      | 1863.978566    | 932.492921       | 1862.994550    | 932.000913       | 14 |
| 5  | 444.245275  | 222.626275      |                |                  | 426.234710     | 213.620993       | V    | 1793.973087 | 897.490182      | 1776.946538    | 888.976907       | 1775.962522    | 888.484899       | 13 |
| 6  | 531.277303  | 266.142290      |                |                  | 513.266738     | 257.137007       | S    | 1694.904673 | 847.955975      | 1677.878124    | 839.442700       | 1676.894108    | 838.950692       | 12 |
| 7  | 970.502629  | 485.754953      | 953.476080     | 477.241678       | 952.492064     | 476.749670       | Q    | 1607.872645 | 804.439961      | 1590.846096    | 795.926686       | 1589.862080    | 795.434678       | 11 |
| 8  | 1083.586693 | 542.296985      | 1066.560144    | 533.783710       | 1065.576128    | 533.291702       | I    | 1168.647319 | 584.827298      | 1151.620770    | 576.314023       | 1150.636754    | 575.822015       | 10 |
| 9  | 1230.655107 | 615.831192      | 1213.628558    | 607.317917       | 1212.644542    | 606.825909       | F    | 1055.563255 | 528.285266      | 1038.536706    | 519.771991       | 1037.552690    | 519.279983       | 9  |
| 10 | 1367.714019 | 684.360648      | 1350.687470    | 675.847373       | 1349.703454    | 675.355365       | H    | 908.494841  | 454.751059      | 891.468292     | 446.237784       | 890.484276     | 445.745776       | 8  |
| 11 | 1454.746047 | 727.876662      | 1437.719498    | 719.363387       | 1436.735482    | 718.871379       | S    | 771.435929  | 386.221603      | 754.409380     | 377.708328       | 753.425364     | 377.216320       | 7  |
| 12 | 1551.798811 | 776.403044      | 1534.772262    | 767.889769       | 1533.788246    | 767.397761       | P    | 684.403901  | 342.705589      | 667.377352     | 334.192314       | 666.393336     | 333.700306       | 6  |
| 13 | 1666.825754 | 833.916515      | 1649.799205    | 825.403241       | 1648.815189    | 824.911233       | D    | 587.351137  | 294.179207      | 570.324588     | 285.665932       | 569.340572     | 285.173924       | 5  |
| 14 | 1779.909818 | 890.458547      | 1762.883269    | 881.945273       | 1761.899253    | 881.453265       | L    | 472.324194  | 236.665735      | 455.297645     | 228.152460       |                |                  | 4  |
| 15 | 1850.946932 | 925.977104      | 1833.920383    | 917.463830       | 1832.936367    | 916.971822       | A    | 359.240130  | 180.123703      | 342.213581     | 171.610429       |                |                  | 3  |
| 16 | 1964.030996 | 982.519136      | 1947.004447    | 974.005862       | 1946.020431    | 973.513853       | I    | 288.203016  | 144.605146      | 271.176467     | 136.091872       |                |                  | 2  |
| 17 |             |                 |                |                  |                |                  | R    | 175.118952  | 88.063114       | 158.092403     | 79.549840        |                |                  | 1  |

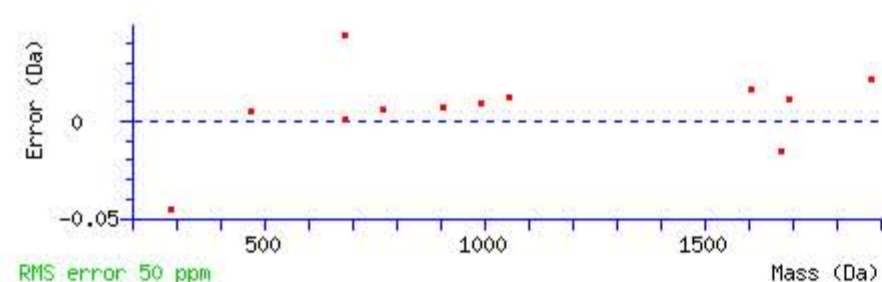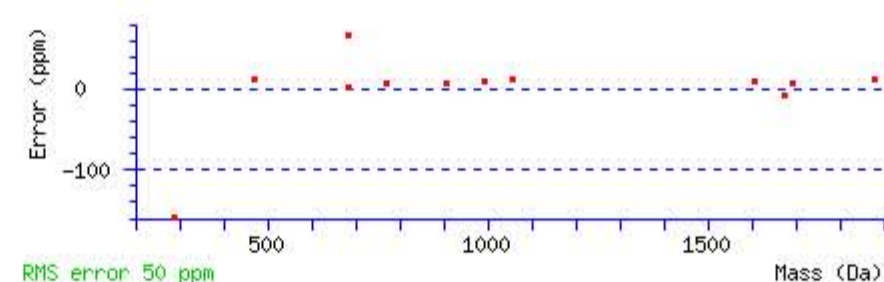

NCBI BLAST search of [GVTSVVSQIFHSPDLAIR](#)

(Parameters: blastp, nr protein database, expect=20000, no filter, PAM30)

Other BLAST [web gateways](#)

## All matches to this query

| Score | $M_r(\text{calc})$ : | Delta    | Sequence                           |
|-------|----------------------|----------|------------------------------------|
| 28.7  | 2137.135406          | 0.031456 | <a href="#">GVTSVVSQIFHSPDLAIR</a> |

Mascot: <http://www.matrixscience.com/>

# MASCOT Search Results

## Peptide View

MS/MS Fragmentation of **EAQLPVIENK**  
 Found in **PLMN\_HUMAN**, Plasminogen OS=Homo sapiens GN=PLG PE=1 SV=2

Match to Query 33371: 1450.798368 from(726.406460,2+) rtinseconds(1957) index(6278)  
 Title: Locus:1.1.1.2935.19 File:"2013-07-02 CLN FXIII 180 min 1st F 1.wiff"  
 Data file C:\Program Files (x86)\Matrix Science\Mascot Daemon\mgf\7 FXIII 180 min 1st\mascot\_daemon\_merge.mgf

Click mouse within plot area to zoom in by factor of two about that point  
 Or, Plot from  to  Da   
 Label all possible matches  Label matches used for scoring

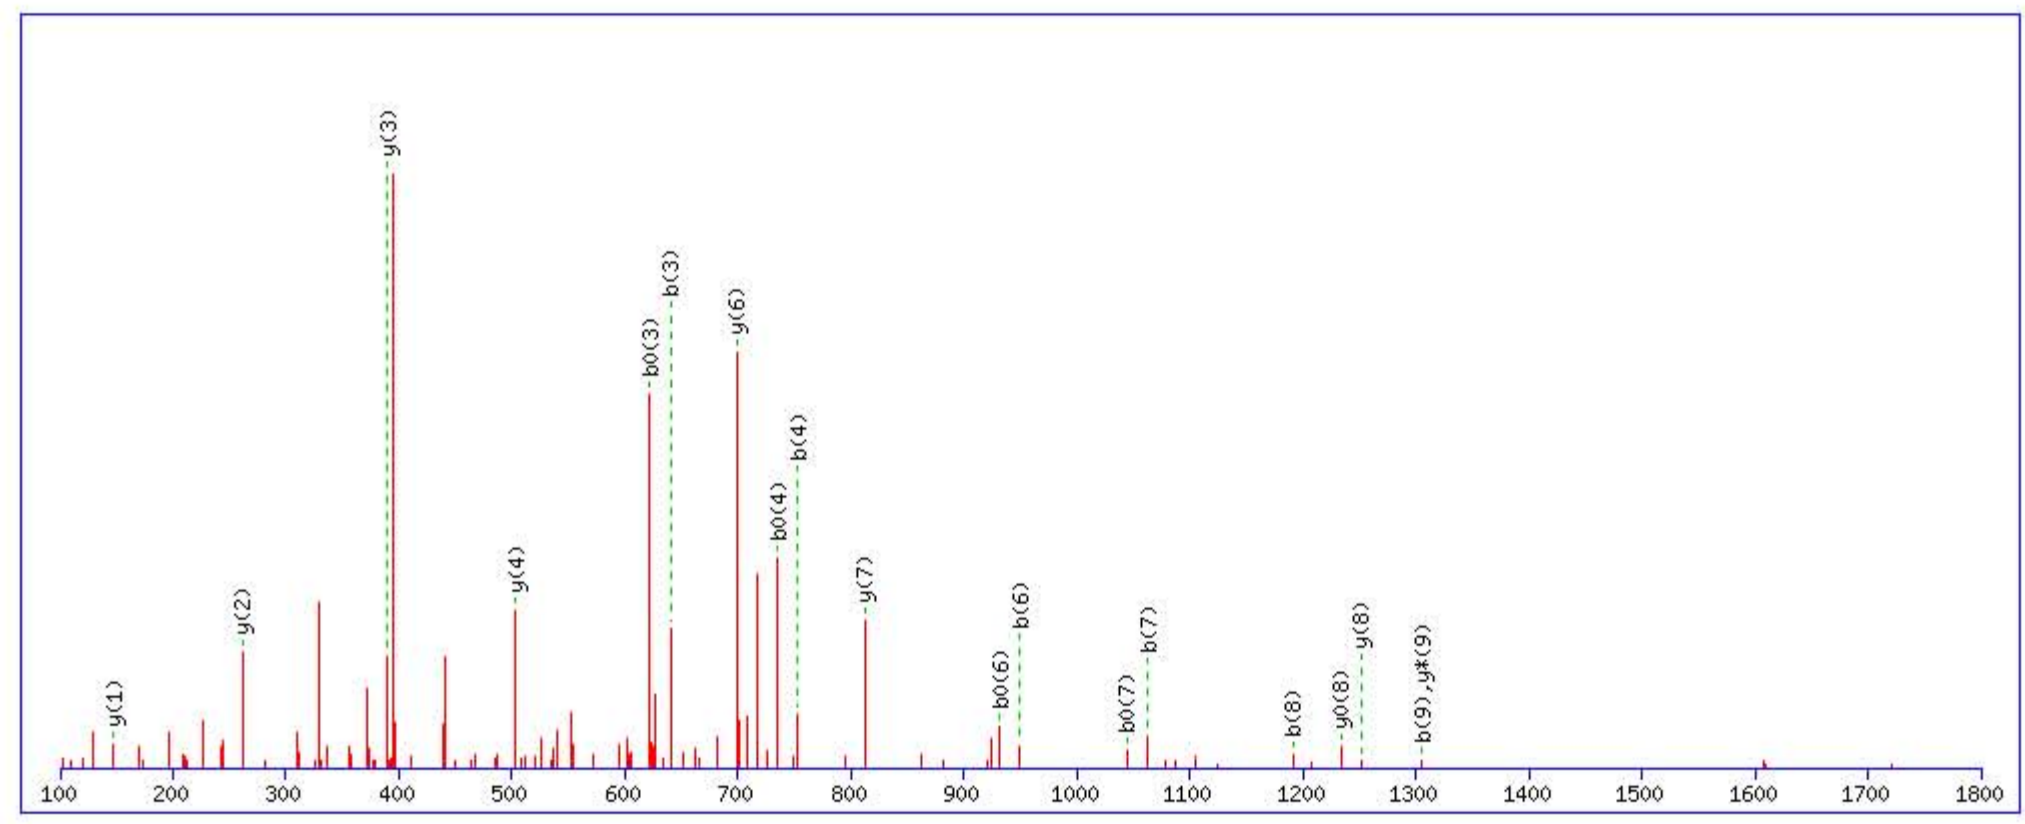

Monoisotopic mass of neutral peptide Mr(calc): 1450.785355  
 Fixed modifications: Carbamidomethyl (C) (apply to specified residues or termini only)  
 Variable modifications:  
 Q3 : Biotin:Thermo-21345 (Q)  
 Ions Score: 35 Expect: 0.0018  
 Matches : 19/100 fragment ions using 37 most intense peaks [\(help\)](#)

| #  | b           | b <sup>++</sup> | b <sup>+</sup> | b <sup>+++</sup> | b <sup>0</sup> | b <sup>0++</sup> | Seq. | y           | y <sup>++</sup> | y <sup>+</sup> | y <sup>+++</sup> | y <sup>0</sup> | y <sup>0++</sup> | #  |
|----|-------------|-----------------|----------------|------------------|----------------|------------------|------|-------------|-----------------|----------------|------------------|----------------|------------------|----|
| 1  | 130.049869  | 65.528572       |                |                  | 112.039304     | 56.523290        | E    |             |                 |                |                  |                |                  | 10 |
| 2  | 201.086983  | 101.047130      |                |                  | 183.076418     | 92.041847        | A    | 1322.750070 | 661.878673      | 1305.723521    | 653.365398       | 1304.739505    | 652.873390       | 9  |
| 3  | 640.312309  | 320.659793      | 623.285760     | 312.146518       | 622.301744     | 311.654510       | Q    | 1251.712956 | 626.360116      | 1234.686407    | 617.846841       | 1233.702391    | 617.354833       | 8  |
| 4  | 753.396373  | 377.201825      | 736.369824     | 368.688550       | 735.385808     | 368.196542       | L    | 812.487630  | 406.747453      | 795.461081     | 398.234178       | 794.477065     | 397.742170       | 7  |
| 5  | 850.449137  | 425.728207      | 833.422588     | 417.214932       | 832.438572     | 416.722924       | P    | 699.403566  | 350.205421      | 682.377017     | 341.692146       | 681.393001     | 341.200138       | 6  |
| 6  | 949.517551  | 475.262414      | 932.491002     | 466.749139       | 931.506986     | 466.257131       | V    | 602.350802  | 301.679039      | 585.324253     | 293.165764       | 584.340237     | 292.673756       | 5  |
| 7  | 1062.601615 | 531.804446      | 1045.575066    | 523.291171       | 1044.591050    | 522.799163       | I    | 503.282388  | 252.144832      | 486.255839     | 243.631557       | 485.271823     | 243.139549       | 4  |
| 8  | 1191.644208 | 596.325742      | 1174.617659    | 587.812468       | 1173.633643    | 587.320459       | E    | 390.198324  | 195.602800      | 373.171775     | 187.089525       | 372.187759     | 186.597517       | 3  |
| 9  | 1305.687135 | 653.347205      | 1288.660586    | 644.833931       | 1287.676570    | 644.341923       | N    | 261.155731  | 131.081503      | 244.129182     | 122.568229       |                |                  | 2  |
| 10 |             |                 |                |                  |                |                  | K    | 147.112804  | 74.060040       | 130.086255     | 65.546765        |                |                  | 1  |

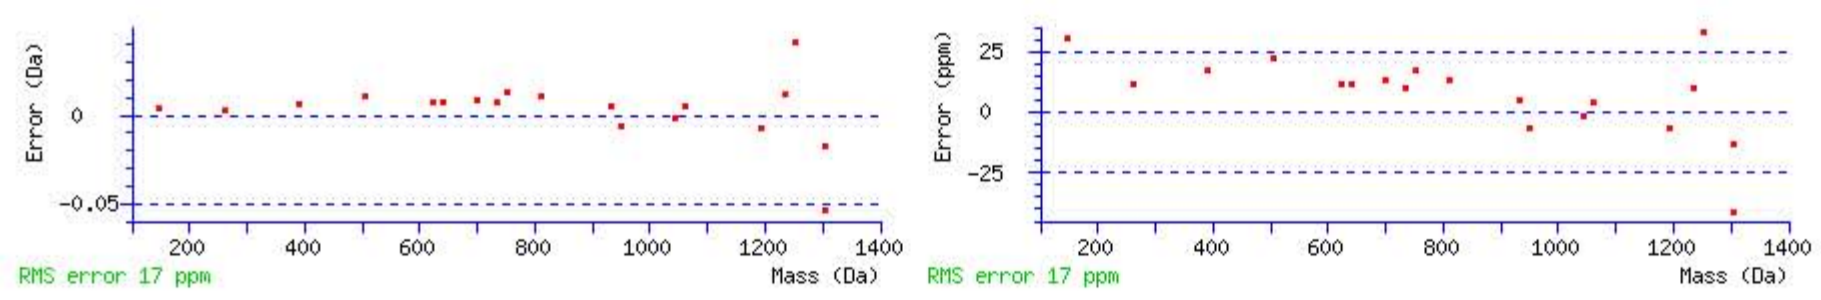

NCBI BLAST search of **EAQLPVIENK**  
 (Parameters: blastp, nr protein database, expect=20000, no filter, PAM30)  
 Other BLAST [web gateways](#)

### All matches to this query

| Score | Mr(calc):   | Delta     | Sequence                      |
|-------|-------------|-----------|-------------------------------|
| 35.2  | 1450.785355 | 0.013013  | <a href="#">EAQLPVIENK</a>    |
| 5.5   | 1450.790527 | 0.007841  | <a href="#">QNIWRHNRLSK</a>   |
| 5.2   | 1450.777985 | 0.020383  | <a href="#">TVKGGFSETRIEK</a> |
| 4.0   | 1450.803986 | -0.005618 | <a href="#">QLAEQIK</a>       |
| 4.0   | 1450.796600 | 0.001768  | <a href="#">QISAVHKETK</a>    |
| 0.3   | 1450.796585 | 0.001783  | <a href="#">TKNMFLTRALEK</a>  |
| 0.2   | 1450.785355 | 0.013013  | <a href="#">TLQIFNIEMKSK</a>  |

# MASCOT SEARCH RESULTS

## Peptide View

MS/MS Fragmentation of **EQQCHEMAENR**

Found in **PLGB\_HUMAN**, Plasminogen-like protein B OS=Homo sapiens GN=PLGLB1 PE=1 SV=1

Match to Query 42170: 1687.793502 from(563.605110,3+) rtinseconds(1798) index(77540)

Title: Locus:1.1.1.1977.8 File:"2013-07-02 CLN FXIII 180 min 1st FT.wiff"

Data file C:\Program Files (x86)\Matrix Science\Mascot Daemon\mgf\7 FXIII 180 min 1st\mascot\_daemon\_merge.mgf

Click mouse within plot area to zoom in by factor of two about that point

Or, Plot from  to  Da

Label all possible matches  Label matches used for scoring

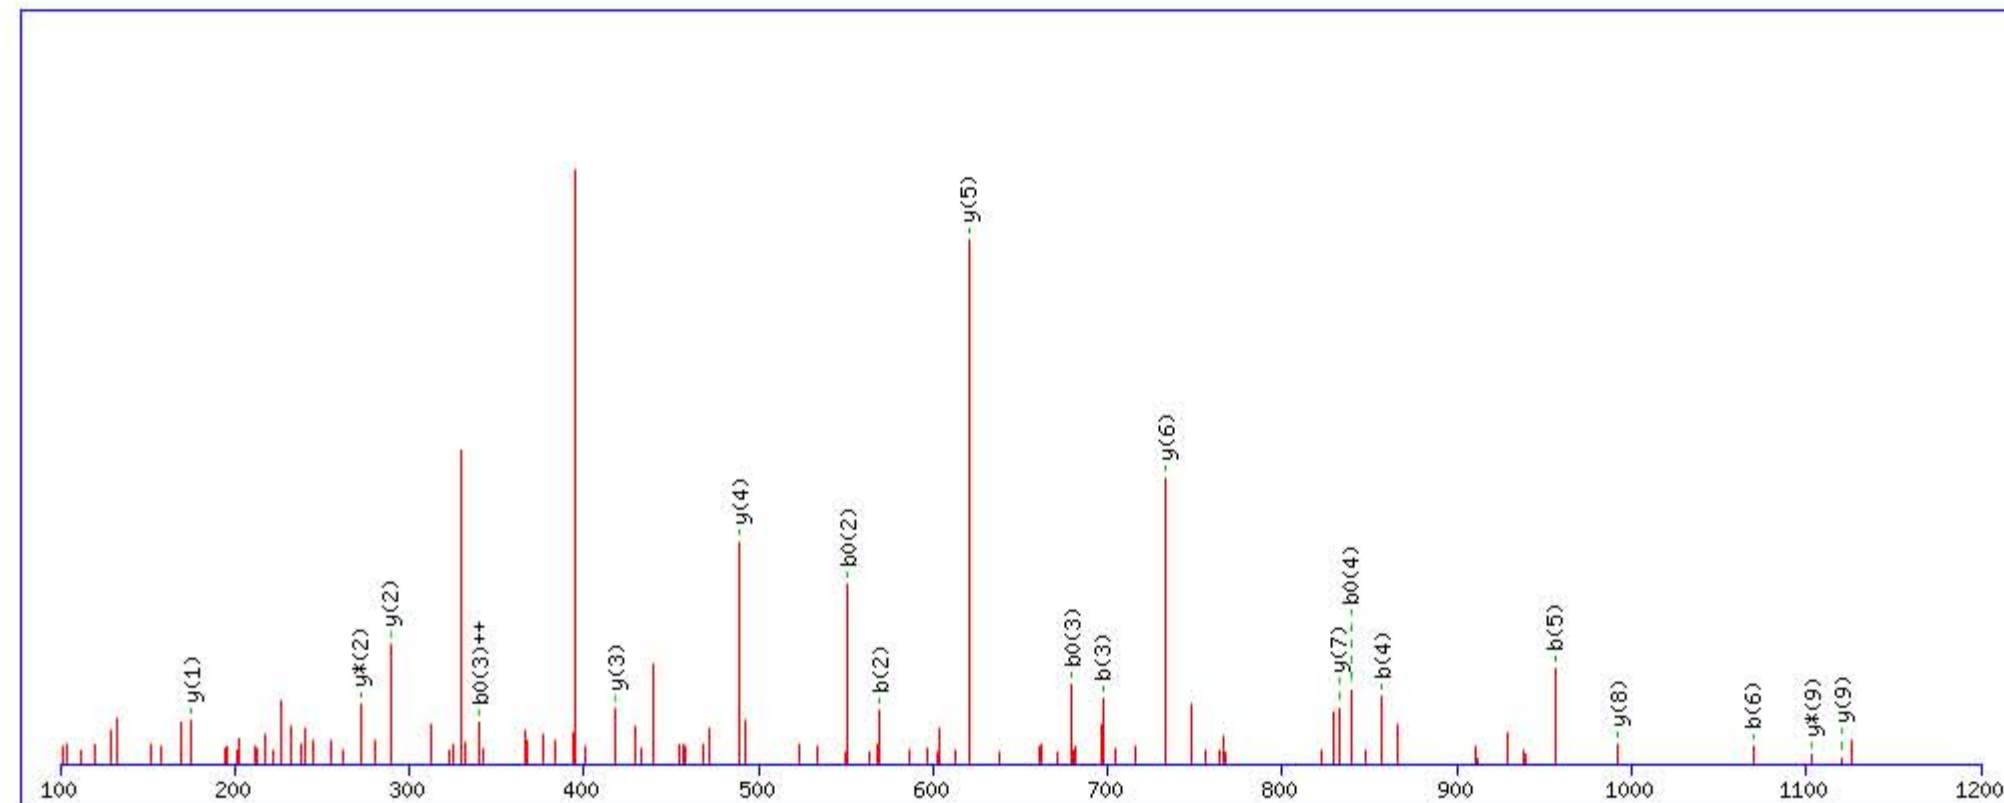

Monoisotopic mass of neutral peptide Mr(calc): 1687.784393

Fixed modifications: Carbamidomethyl (C) (apply to specified residues or termini only)

Variable modifications:

Q2 : Biotin:Thermo-21345 (Q)

Ions Score: 61 Expect: 6.7e-006

Matches : 20/114 fragment ions using 31 most intense peaks [\(help\)](#)

| #  | b                  | b <sup>++</sup> | b <sup>*</sup> | b <sup>*++</sup> | b <sup>0</sup>    | b <sup>0++</sup>  | Seq. | y                  | y <sup>++</sup> | y <sup>*</sup>     | y <sup>*++</sup> | y <sup>0</sup> | y <sup>0++</sup> | #  |
|----|--------------------|-----------------|----------------|------------------|-------------------|-------------------|------|--------------------|-----------------|--------------------|------------------|----------------|------------------|----|
| 1  | 130.049869         | 65.528572       |                |                  | 112.039304        | 56.523290         | E    |                    |                 |                    |                  |                |                  | 11 |
| 2  | <b>569.275195</b>  | 285.141236      | 552.248646     | 276.627961       | <b>551.264630</b> | 276.135953        | Q    | 1559.749102        | 780.378189      | 1542.722553        | 771.864915       | 1541.738537    | 771.372907       | 10 |
| 3  | <b>697.333773</b>  | 349.170525      | 680.307224     | 340.657250       | <b>679.323208</b> | <b>340.165242</b> | Q    | <b>1120.523776</b> | 560.765526      | <b>1103.497227</b> | 552.252252       | 1102.513211    | 551.760244       | 9  |
| 4  | <b>857.364422</b>  | 429.185849      | 840.337873     | 420.672575       | <b>839.353857</b> | 420.180567        | C    | <b>992.465198</b>  | 496.736237      | 975.438649         | 488.222963       | 974.454633     | 487.730955       | 8  |
| 5  | <b>956.432836</b>  | 478.720056      | 939.406287     | 470.206782       | 938.422271        | 469.714774        | V    | <b>832.434549</b>  | 416.720913      | 815.408000         | 408.207638       | 814.423984     | 407.715630       | 7  |
| 6  | <b>1069.516900</b> | 535.262088      | 1052.490351    | 526.748814       | 1051.506335       | 526.256806        | I    | <b>733.366135</b>  | 367.186706      | 716.339586         | 358.673431       | 715.355570     | 358.181423       | 6  |
| 7  | 1200.557385        | 600.782331      | 1183.530836    | 592.269056       | 1182.546820       | 591.777048        | M    | <b>620.282071</b>  | 310.644674      | 603.255522         | 302.131399       | 602.271506     | 301.639391       | 5  |
| 8  | 1271.594499        | 636.300888      | 1254.567950    | 627.787613       | 1253.583934       | 627.295605        | A    | <b>489.241586</b>  | 245.124431      | 472.215037         | 236.611156       | 471.231021     | 236.119148       | 4  |
| 9  | 1400.637092        | 700.822184      | 1383.610543    | 692.308910       | 1382.626527       | 691.816902        | E    | <b>418.204472</b>  | 209.605874      | 401.177923         | 201.092600       | 400.193907     | 200.600592       | 3  |
| 10 | 1514.680019        | 757.843648      | 1497.653470    | 749.330373       | 1496.669454       | 748.838365        | N    | <b>289.161879</b>  | 145.084577      | <b>272.135330</b>  | 136.571303       |                |                  | 2  |
| 11 |                    |                 |                |                  |                   |                   | R    | <b>175.118952</b>  | 88.063114       | 158.092403         | 79.549839        |                |                  | 1  |

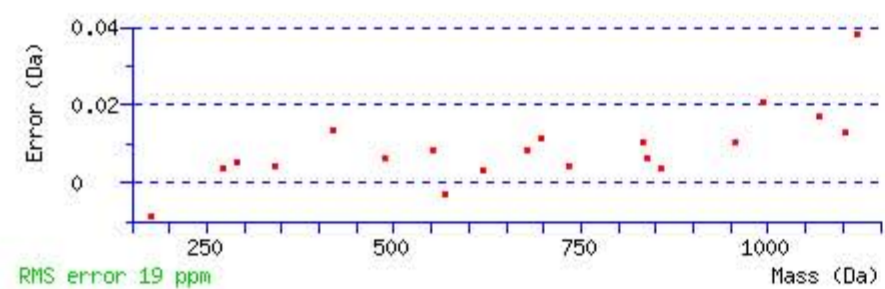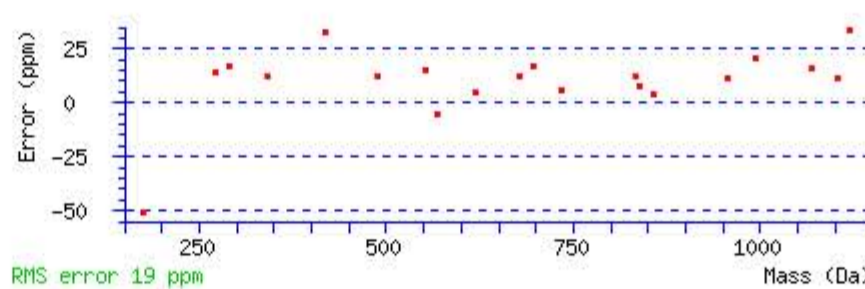

NCBI BLAST search of **EQQCHEMAENR**

(Parameters: blastp, nr protein database, expect=20000, no filter, PAM30)

Other BLAST [web gateways](#)

## All matches to this query

| Score | Mr(calc):   | Delta    | Sequence                        |
|-------|-------------|----------|---------------------------------|
| 61.0  | 1687.784393 | 0.009109 | <a href="#">EQQCHEMAENR</a>     |
| 42.9  | 1687.784393 | 0.009109 | <a href="#">EQQCHEMAENR</a>     |
| 5.5   | 1687.781006 | 0.012496 | <a href="#">ELMAWNQAENR</a>     |
| 1.0   | 1687.787552 | 0.005950 | <a href="#">GASEDGEYFLMIRGK</a> |

Mascot: <http://www.matrixscience.com/>



# MASCOT Search Results

## Peptide View

MS/MS Fragmentation of **APWCHTTNSQVR**

Found in **PLMN\_HUMAN**, Plasminogen OS=Homo sapiens GN=PLG PE=1 SV=2

Match to Query 44343: 1766.836662 from(589.952830,3+) rtinseconds(1495) index(20948)

Title: Locus:1.1.1.2663.13 File:"2013-07-02 CLN FXIII 180 min 1st F 2.wiff"

Data file C:\Program Files (x86)\Matrix Science\Mascot Daemon\mgf7 FXIII 180 min 1st\mascot\_daemon\_merge.mgf

Click mouse within plot area to zoom in by factor of two about that point

Or, Plot from  to  Da

Label all possible matches  Label matches used for scoring

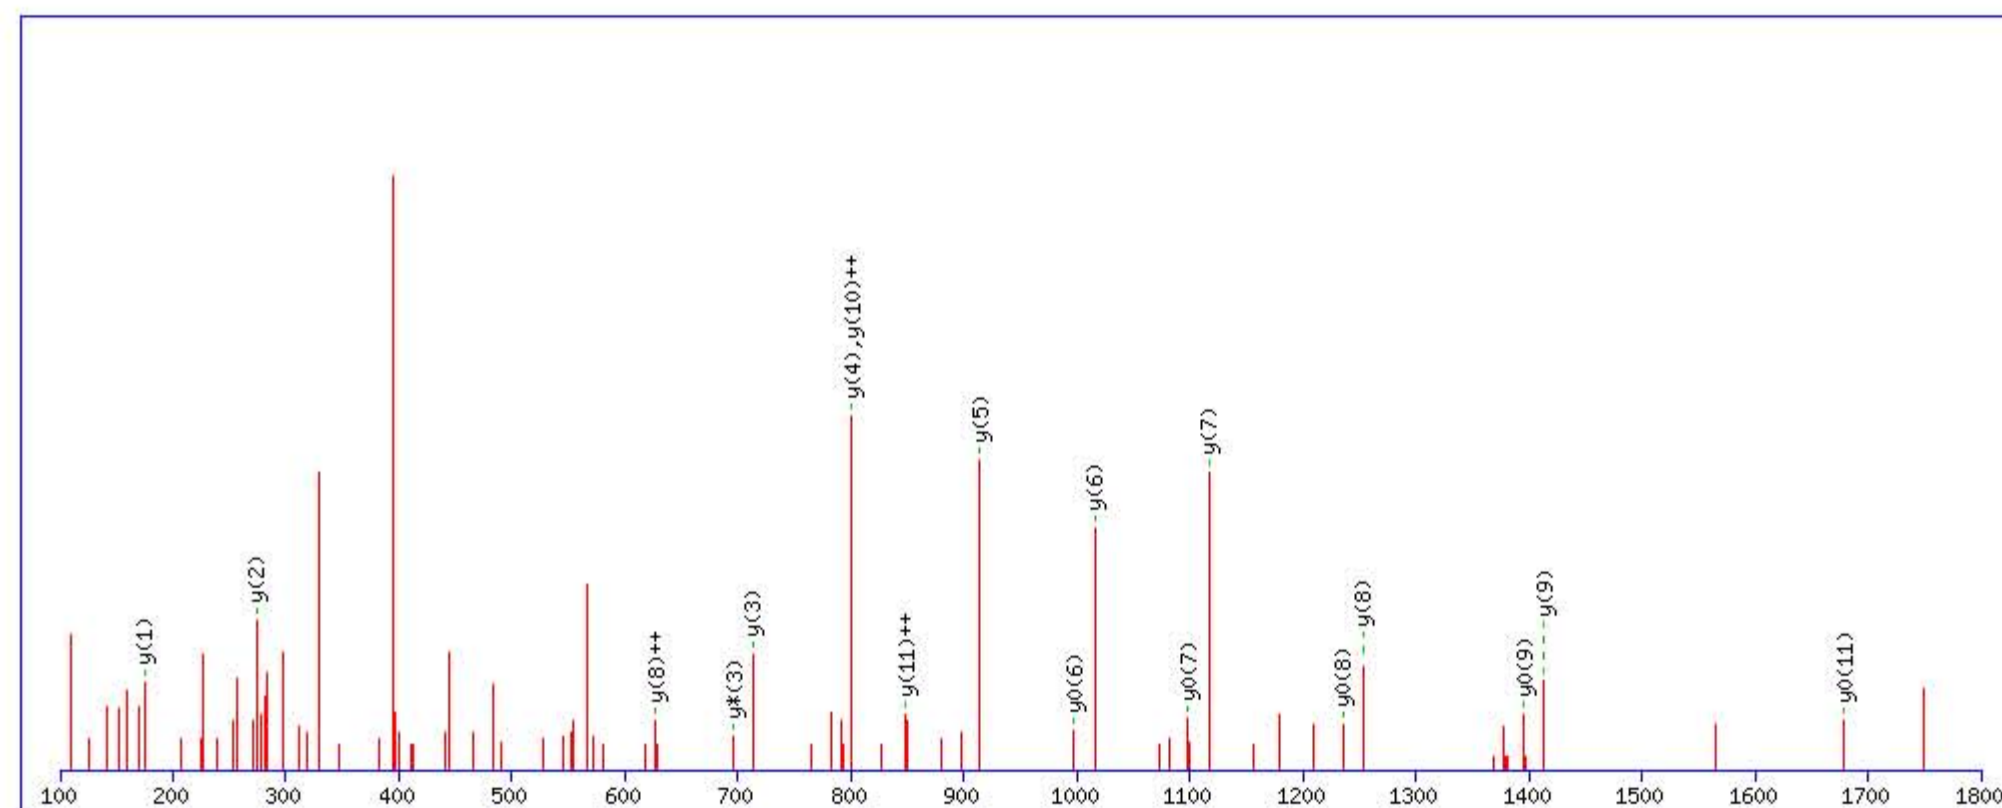

Monoisotopic mass of neutral peptide  $M_r(\text{calc})$ : 1766.834488

Fixed modifications: Carbamidomethyl (C) (apply to specified residues or termini only)

Variable modifications:

Q10 : Biotin:Thermo-21345 (Q)

Ions Score: 58 Expect: 2.9e-005

Matches : 18/102 fragment ions using 30 most intense peaks ([help](#))

| #  | b           | b <sup>++</sup> | b <sup>+</sup> | b <sup>*++</sup> | b <sup>0</sup> | b <sup>0++</sup> | Seq. | y           | y <sup>++</sup> | y <sup>+</sup> | y <sup>*++</sup> | y <sup>0</sup> | y <sup>0++</sup> | #  |
|----|-------------|-----------------|----------------|------------------|----------------|------------------|------|-------------|-----------------|----------------|------------------|----------------|------------------|----|
| 1  | 72.044390   | 36.525833       |                |                  |                |                  | A    |             |                 |                |                  |                |                  | 12 |
| 2  | 169.097154  | 85.052215       |                |                  |                |                  | P    | 1696.804643 | 848.905960      | 1679.778094    | 840.392685       | 1678.794078    | 839.900677       | 11 |
| 3  | 355.176467  | 178.091872      |                |                  |                |                  | W    | 1599.751879 | 800.379578      | 1582.725330    | 791.866303       | 1581.741314    | 791.374295       | 10 |
| 4  | 515.207116  | 258.107196      |                |                  |                |                  | C    | 1413.672566 | 707.339921      | 1396.646017    | 698.826647       | 1395.662001    | 698.334639       | 9  |
| 5  | 652.266028  | 326.636652      |                |                  |                |                  | H    | 1253.641917 | 627.324597      | 1236.615368    | 618.811322       | 1235.631352    | 618.319314       | 8  |
| 6  | 753.313707  | 377.160492      |                |                  | 735.303142     | 368.155209       | T    | 1116.583005 | 558.795141      | 1099.556456    | 550.281866       | 1098.572440    | 549.789858       | 7  |
| 7  | 854.361386  | 427.684331      |                |                  | 836.350821     | 418.679049       | T    | 1015.535326 | 508.271301      | 998.508777     | 499.758027       | 997.524761     | 499.266019       | 6  |
| 8  | 968.404313  | 484.705795      | 951.377764     | 476.192520       | 950.393748     | 475.700512       | N    | 914.487647  | 457.747462      | 897.461098     | 449.234187       | 896.477082     | 448.742179       | 5  |
| 9  | 1055.436341 | 528.221809      | 1038.409792    | 519.708534       | 1037.425776    | 519.216526       | S    | 800.444720  | 400.725998      | 783.418171     | 392.212724       | 782.434155     | 391.720716       | 4  |
| 10 | 1494.661667 | 747.834472      | 1477.635118    | 739.321197       | 1476.651102    | 738.829189       | Q    | 713.412692  | 357.209984      | 696.386143     | 348.696710       |                |                  | 3  |
| 11 | 1593.730081 | 797.368679      | 1576.703532    | 788.855404       | 1575.719516    | 788.363396       | V    | 274.187366  | 137.597321      | 257.160817     | 129.084047       |                |                  | 2  |
| 12 |             |                 |                |                  |                |                  | R    | 175.118952  | 88.063114       | 158.092403     | 79.549839        |                |                  | 1  |

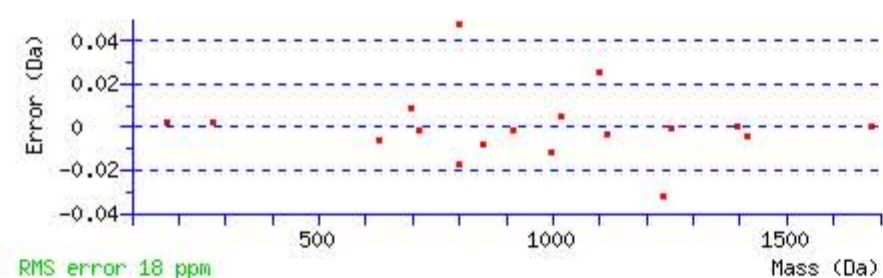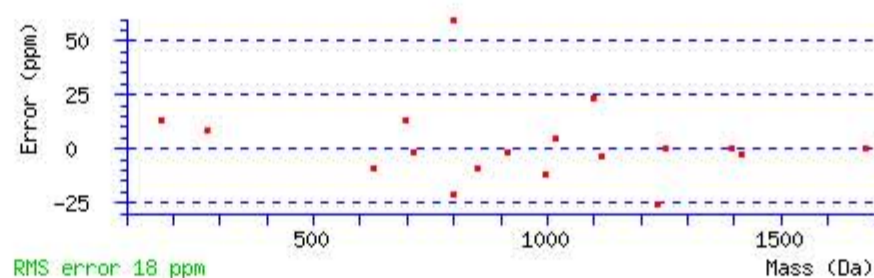

NCBI BLAST search of **APWCHTTNSQVR**

(Parameters: blastp, nr protein database, expect=20000, no filter, PAM30)

Other BLAST [web gateways](#)

All matches to this query

| Score | $M_r(\text{calc})$ : | Delta    | Sequence                     |
|-------|----------------------|----------|------------------------------|
| 57.7  | 1766.834488          | 0.002174 | <a href="#">APWCHTTNSQVR</a> |

Mascot: <http://www.matrixscience.com/>

# MASCOT SEARCH RESULTS

## Peptide View

MS/MS Fragmentation of **EQQCVIMAENR**

Found in **PLGB\_HUMAN**, Plasminogen-like protein B OS=Homo sapiens GN=PLGLB1 PE=1 SV=1

Match to Query 49935: 1998.969612 from(667.330480,3+) rtinseconds(2104) index(79569)

Title: Locus:1.1.1.2083.18 File:"2013-07-02 CLN FXIII 180 min 1st FT.wiff"

Data file C:\Program Files (x86)\Matrix Science\Mascot Daemon\mgf\7 FXIII 180 min 1st\mascot\_daemon\_merge.mgf

Click mouse within plot area to zoom in by factor of two about that point

Or, Plot from  to  Da

Label all possible matches  Label matches used for scoring

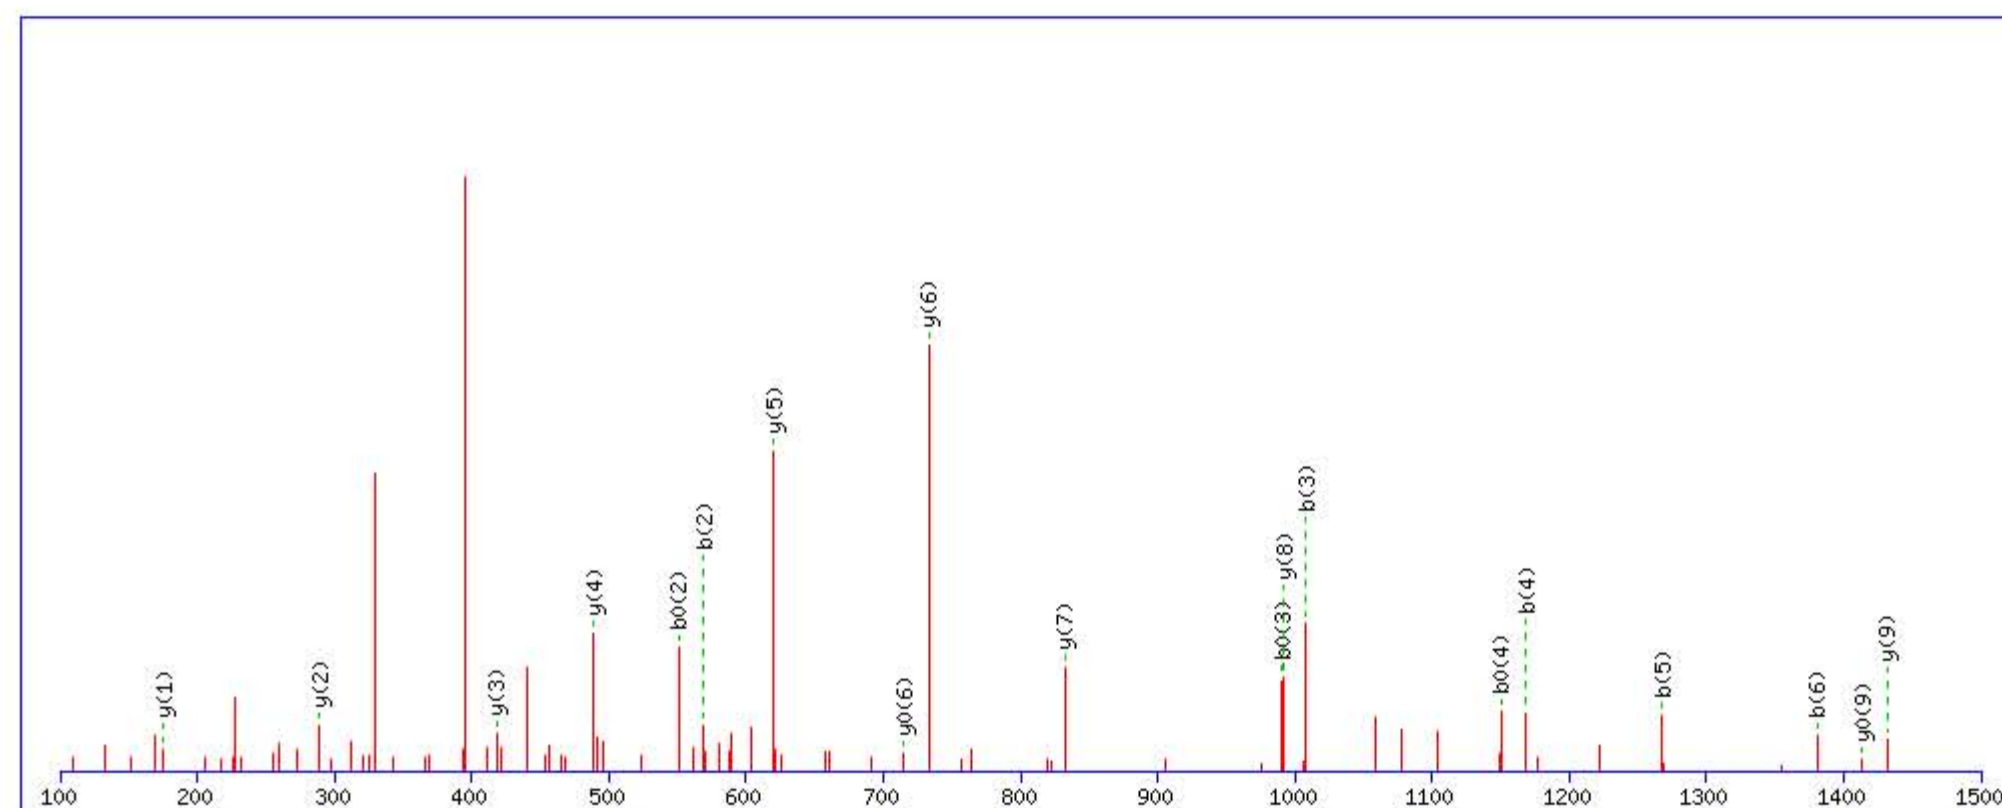

Monoisotopic mass of neutral peptide Mr(calc): 1998.951141

Fixed modifications: Carbamidomethyl (C) (apply to specified residues or termini only)

Variable modifications:

Q2 : Biotin:Thermo-21345 (Q)

Q3 : Biotin:Thermo-21345 (Q)

Ions Score: 43 Expect: 0.00013

Matches : 19/114 fragment ions using 40 most intense peaks [\(help\)](#)

| #  | b                  | b <sup>++</sup> | b <sup>*</sup> | b <sup>*++</sup> | b <sup>0</sup>     | b <sup>0++</sup> | Seq. | y                  | y <sup>++</sup> | y <sup>*</sup> | y <sup>*++</sup> | y <sup>0</sup>     | y <sup>0++</sup> | #  |
|----|--------------------|-----------------|----------------|------------------|--------------------|------------------|------|--------------------|-----------------|----------------|------------------|--------------------|------------------|----|
| 1  | 130.049869         | 65.528572       |                |                  | 112.039304         | 56.523290        | E    |                    |                 |                |                  |                    |                  | 11 |
| 2  | <b>569.275195</b>  | 285.141236      | 552.248646     | 276.627961       | <b>551.264630</b>  | 276.135953       | Q    | 1870.915850        | 935.961563      | 1853.889301    | 927.448288       | 1852.905285        | 926.956280       | 10 |
| 3  | <b>1008.500521</b> | 504.753899      | 991.473972     | 496.240624       | <b>990.489956</b>  | 495.748616       | Q    | <b>1431.690524</b> | 716.348900      | 1414.663975    | 707.835625       | <b>1413.679959</b> | 707.343617       | 9  |
| 4  | <b>1168.531170</b> | 584.769223      | 1151.504621    | 576.255949       | <b>1150.520605</b> | 575.763940       | C    | <b>992.465198</b>  | 496.736237      | 975.438649     | 488.222962       | 974.454633         | 487.730954       | 8  |
| 5  | <b>1267.599584</b> | 634.303430      | 1250.573035    | 625.790156       | 1249.589019        | 625.298148       | V    | <b>832.434549</b>  | 416.720912      | 815.408000     | 408.207638       | 814.423984         | 407.715630       | 7  |
| 6  | <b>1380.683648</b> | 690.845462      | 1363.657099    | 682.332188       | 1362.673083        | 681.840179       | I    | <b>733.366135</b>  | 367.186705      | 716.339586     | 358.673431       | <b>715.355570</b>  | 358.181423       | 6  |
| 7  | 1511.724133        | 756.365704      | 1494.697584    | 747.852430       | 1493.713568        | 747.360422       | M    | <b>620.282071</b>  | 310.644673      | 603.255522     | 302.131399       | 602.271506         | 301.639391       | 5  |
| 8  | 1582.761247        | 791.884261      | 1565.734698    | 783.370987       | 1564.750682        | 782.878979       | A    | <b>489.241586</b>  | 245.124431      | 472.215037     | 236.611156       | 471.231021         | 236.119148       | 4  |
| 9  | 1711.803840        | 856.405558      | 1694.777291    | 847.892283       | 1693.793275        | 847.400275       | E    | <b>418.204472</b>  | 209.605874      | 401.177923     | 201.092599       | 400.193907         | 200.600591       | 3  |
| 10 | 1825.846767        | 913.427021      | 1808.820218    | 904.913747       | 1807.836202        | 904.421739       | N    | <b>289.161879</b>  | 145.084577      | 272.135330     | 136.571303       |                    |                  | 2  |
| 11 |                    |                 |                |                  |                    |                  | R    | <b>175.118952</b>  | 88.063114       | 158.092403     | 79.549839        |                    |                  | 1  |

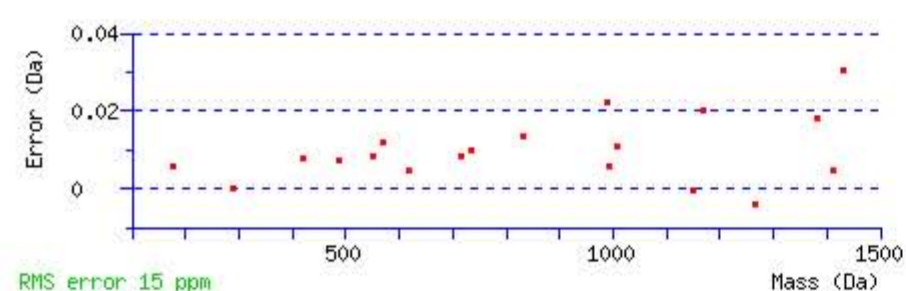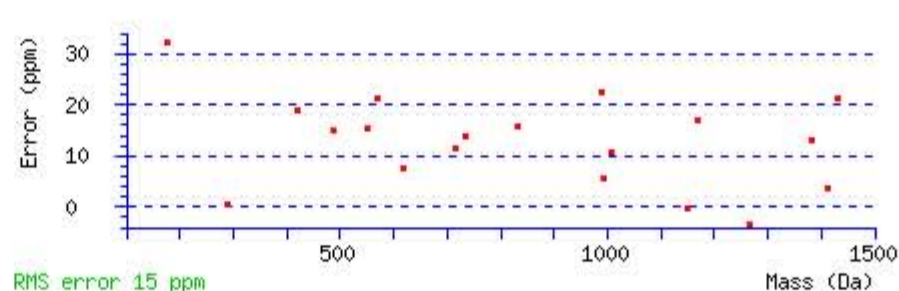

NCBI BLAST search of [EQQCVIMAENR](#)

(Parameters: blastp, nr protein database, expect=20000, no filter, PAM30)

Other BLAST [web gateways](#)

All matches to this query

| Score | Mr(calc):   | Delta    | Sequence                          |
|-------|-------------|----------|-----------------------------------|
| 43.2  | 1998.951141 | 0.018471 | <a href="#">EQQCVIMAENR</a>       |
| 1.7   | 1998.942841 | 0.026771 | <a href="#">QQEEAQAAAAAESAESR</a> |

# MASCOT Search Results

## Peptide View

MS/MS Fragmentation of **CTTPPPSSGPTYQCLK**

Found in **PLMN\_HUMAN**, Plasminogen OS=Homo sapiens GN=PLG PE=1 SV=2

Match to Query 53270: 2103.991722 from(702.337850,3+) rtinseconds(1747) index(77216)

Title: Locus:1.1.1.1959.14 File:"2013-07-02 CLN FXIII 180 min 1st FT.wiff"

Data file C:\Program Files (x86)\Matrix Science\Mascot Daemon\mgf\7 FXIII 180 min 1st\mascot\_daemon\_merge.mgf

Click mouse within plot area to zoom in by factor of two about that point

Or, Plot from  to  Da

Label all possible matches  Label matches used for scoring

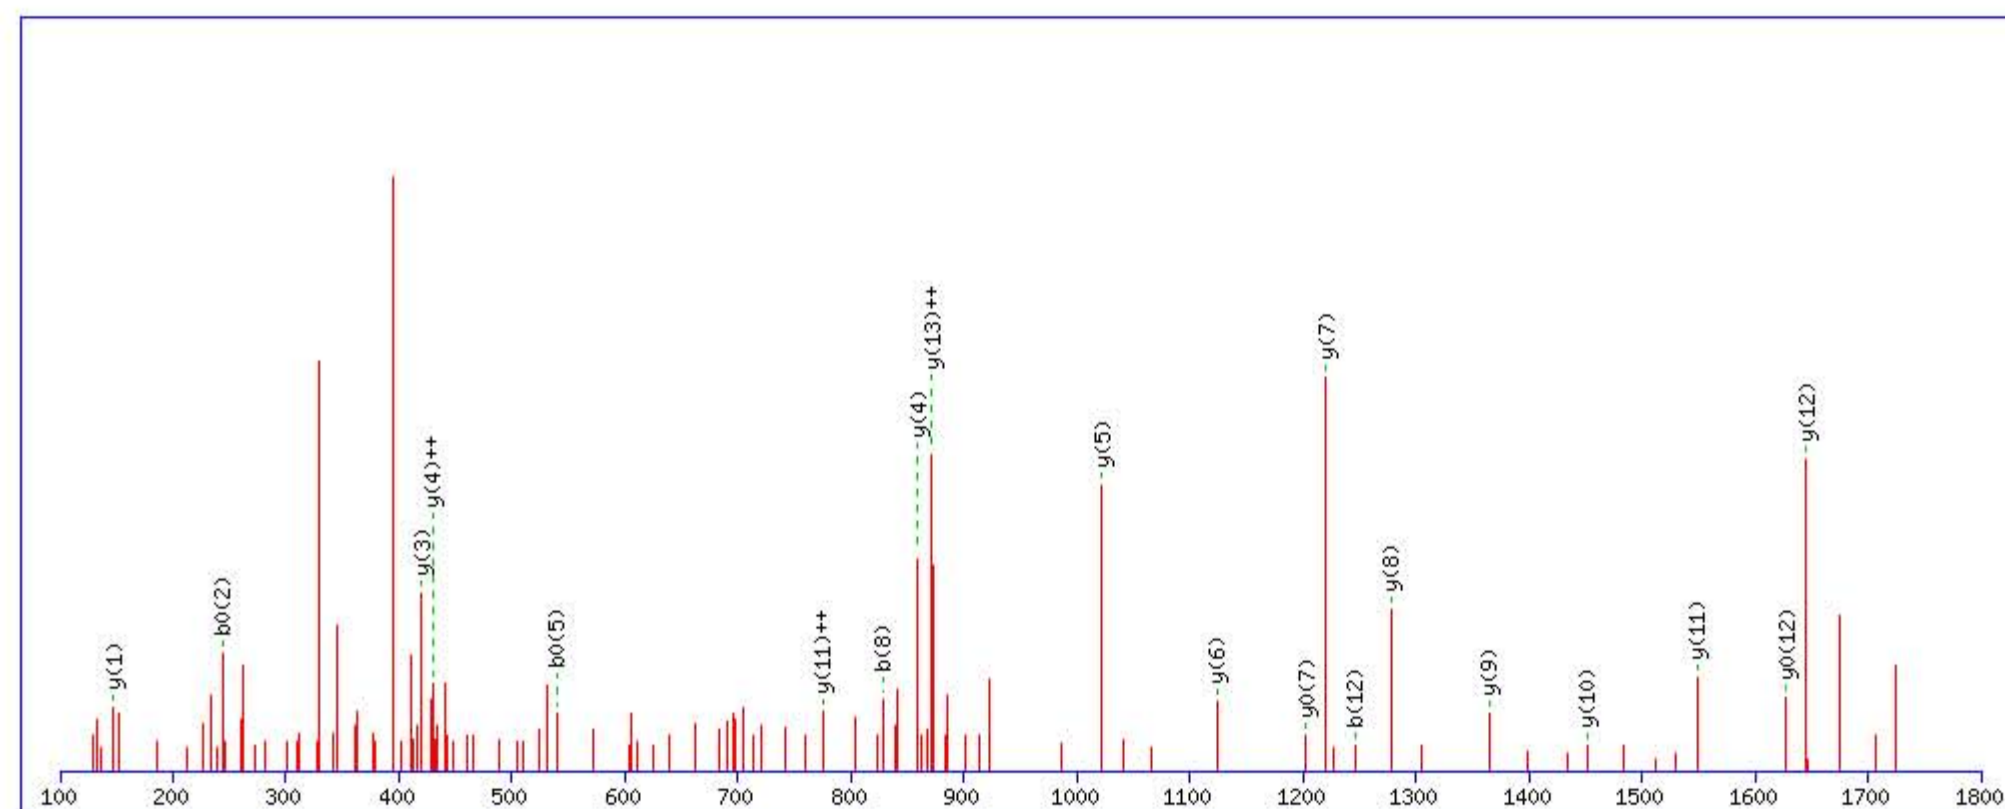

Monoisotopic mass of neutral peptide Mr(calc): 2103.979172

Fixed modifications: Carbamidomethyl (C) (apply to specified residues or termini only)

Variable modifications:

Q13 : Biotin:Thermo-21345 (Q)

Ions Score: 75 Expect: 5.6e-007

Matches : 20/144 fragment ions using 32 most intense peaks [\(help\)](#)

| #  | b           | b <sup>++</sup> | b <sup>*</sup> | b <sup>*++</sup> | b <sup>0</sup> | b <sup>0++</sup> | Seq. | y           | y <sup>++</sup> | y <sup>*</sup> | y <sup>*++</sup> | y <sup>0</sup> | y <sup>0++</sup> | #  |
|----|-------------|-----------------|----------------|------------------|----------------|------------------|------|-------------|-----------------|----------------|------------------|----------------|------------------|----|
| 1  | 161.037925  | 81.022600       |                |                  |                |                  | C    |             |                 |                |                  |                |                  | 16 |
| 2  | 262.085604  | 131.546440      |                |                  | 244.075039     | 122.541158       | T    | 1944.955785 | 972.981531      | 1927.929236    | 964.468256       | 1926.945220    | 963.976248       | 15 |
| 3  | 363.133283  | 182.070280      |                |                  | 345.122718     | 173.064997       | T    | 1843.908106 | 922.457691      | 1826.881557    | 913.944417       | 1825.897541    | 913.452409       | 14 |
| 4  | 460.186047  | 230.596661      |                |                  | 442.175482     | 221.591379       | P    | 1742.860427 | 871.933852      | 1725.833878    | 863.420577       | 1724.849862    | 862.928569       | 13 |
| 5  | 557.238811  | 279.123044      |                |                  | 539.228246     | 270.117761       | P    | 1645.807663 | 823.407470      | 1628.781114    | 814.894195       | 1627.797098    | 814.402187       | 12 |
| 6  | 654.291575  | 327.649426      |                |                  | 636.281010     | 318.644143       | P    | 1548.754899 | 774.881088      | 1531.728350    | 766.367813       | 1530.744334    | 765.875805       | 11 |
| 7  | 741.323603  | 371.165440      |                |                  | 723.313038     | 362.160157       | S    | 1451.702135 | 726.354706      | 1434.675586    | 717.841431       | 1433.691570    | 717.349423       | 10 |
| 8  | 828.355631  | 414.681454      |                |                  | 810.345066     | 405.676171       | S    | 1364.670107 | 682.838692      | 1347.643558    | 674.325417       | 1346.659542    | 673.833409       | 9  |
| 9  | 885.377095  | 443.192186      |                |                  | 867.366530     | 434.186903       | G    | 1277.638079 | 639.322678      | 1260.611530    | 630.809403       | 1259.627514    | 630.317395       | 8  |
| 10 | 982.429859  | 491.718568      |                |                  | 964.419294     | 482.713285       | P    | 1220.616615 | 610.811946      | 1203.590066    | 602.298671       | 1202.606050    | 601.806663       | 7  |
| 11 | 1083.477538 | 542.242407      |                |                  | 1065.466973    | 533.237125       | T    | 1123.563851 | 562.285564      | 1106.537302    | 553.772289       | 1105.553286    | 553.280281       | 6  |
| 12 | 1246.540867 | 623.774072      |                |                  | 1228.530302    | 614.768789       | Y    | 1022.516172 | 511.761724      | 1005.489623    | 503.248450       |                |                  | 5  |
| 13 | 1685.766193 | 843.386735      | 1668.739644    | 834.873460       | 1667.755628    | 834.381452       | Q    | 859.452843  | 430.230060      | 842.426294     | 421.716785       |                |                  | 4  |
| 14 | 1845.796842 | 923.402059      | 1828.770293    | 914.888785       | 1827.786277    | 914.396777       | C    | 420.227517  | 210.617396      | 403.200968     | 202.104122       |                |                  | 3  |
| 15 | 1958.880906 | 979.944091      | 1941.854357    | 971.430817       | 1940.870341    | 970.938809       | L    | 260.196868  | 130.602072      | 243.170319     | 122.088797       |                |                  | 2  |
| 16 |             |                 |                |                  |                |                  | K    | 147.112804  | 74.060040       | 130.086255     | 65.546765        |                |                  | 1  |

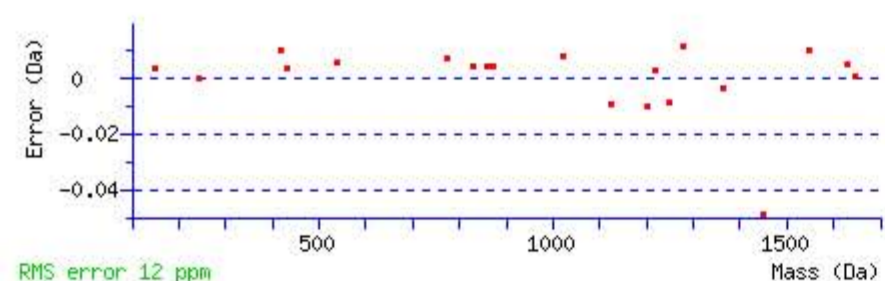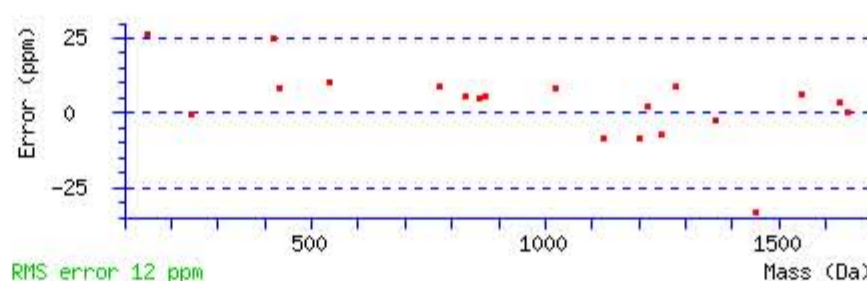

NCBI BLAST search of [CTTPPPSSGPTYQCLK](#)

(Parameters: blastp, nr protein database, expect=20000, no filter, PAM30)

Other BLAST [web gateways](#)

### All matches to this query

| Score | Mr(calc):   | Delta    | Sequence                           |
|-------|-------------|----------|------------------------------------|
| 75.2  | 2103.979172 | 0.012550 | <a href="#">CTTPPPSSGPTYQCLK</a>   |
| 12.2  | 2103.964554 | 0.027168 | <a href="#">TAADTPAIMNWDLFFTMK</a> |
| 0.6   | 2103.975754 | 0.015968 | <a href="#">AEVEQMHWSYQELK</a>     |

# Mascot Search Results

## Peptide View

MS/MS Fragmentation of **ATTVTGTPCQDWAAQEPHR**

Found in **PLMN\_HUMAN**, Plasminogen OS=Homo sapiens GN=PLG PE=1 SV=2

Match to Query 61092: 2436.150016 from(610.044780,4+) rtinseconds(1844) index(77741)

Title: Locus:1.1.1.1993.6 File:"2013-07-02 CLN FXIII 180 min 1st FT.wiff"

Data file C:\Program Files (x86)\Matrix Science\Mascot Daemon\mgf\7 FXIII 180 min 1st\mascot\_daemon\_merge.mgf

Click mouse within plot area to zoom in by factor of two about that point

Or, Plot from  to  Da

Label all possible matches  Label matches used for scoring

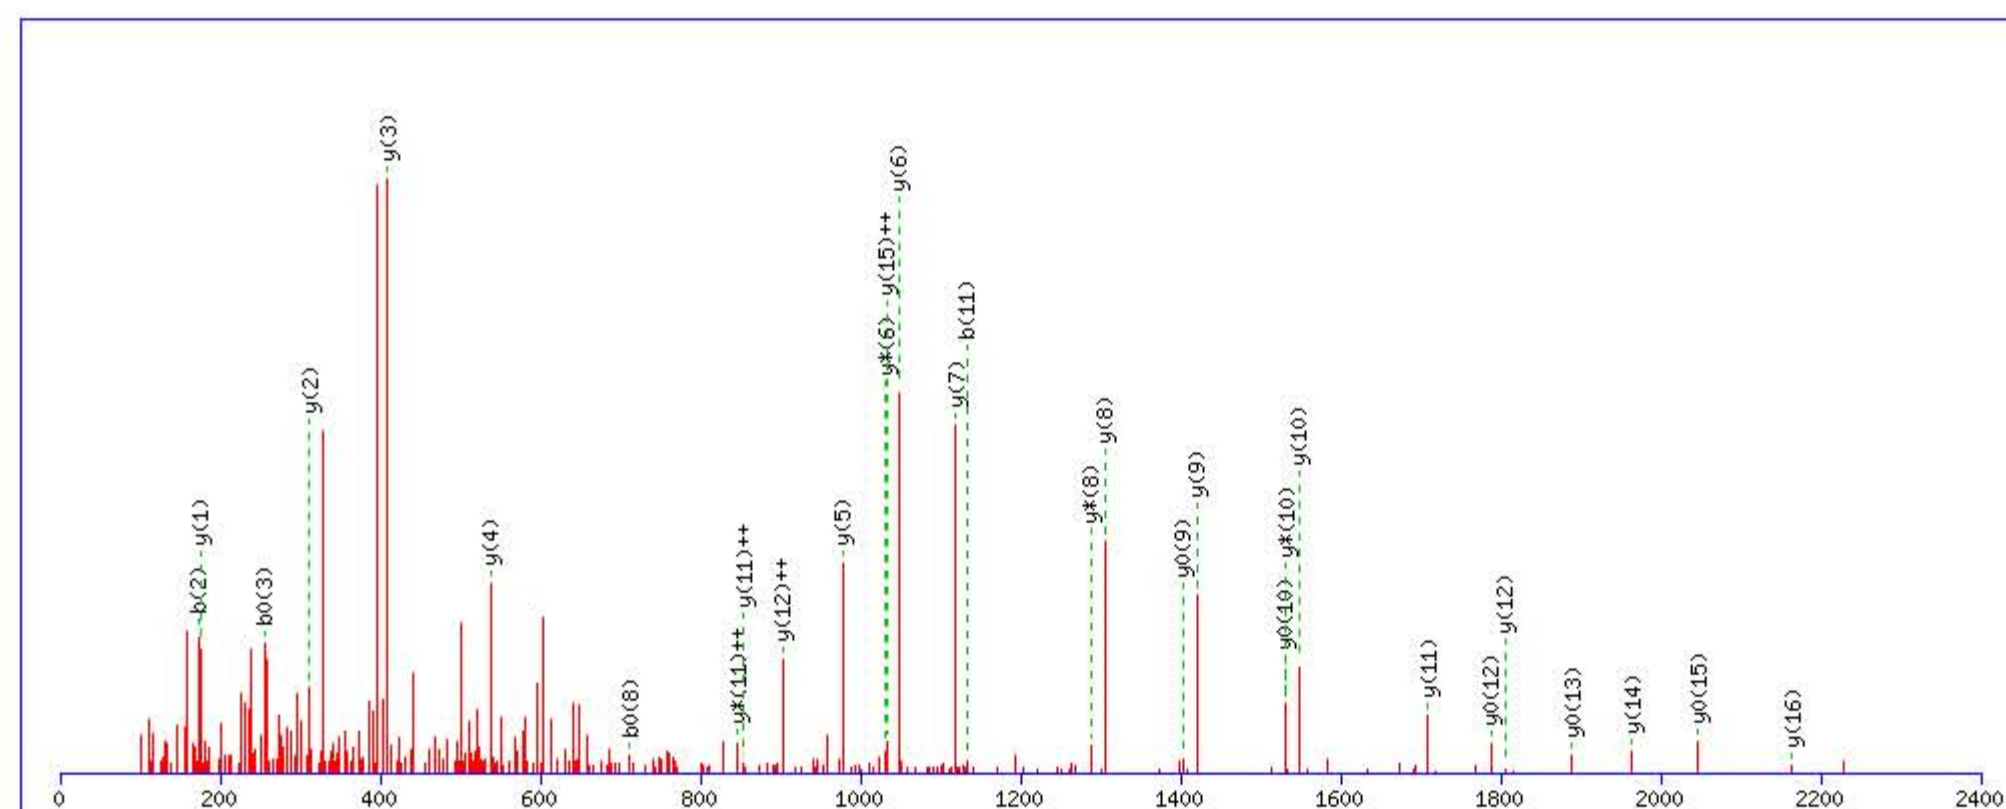

Monoisotopic mass of neutral peptide Mr(calc): 2436.131470

Fixed modifications: Carbamidomethyl (C) (apply to specified residues or termini only)

Variable modifications:

Q15 : Biotin:Thermo-21345 (Q)

Ions Score: 82 Expect: 1.1e-007

Matches : 30/190 fragment ions using 58 most intense peaks [\(help\)](#)

| #  | b                  | b <sup>++</sup> | b <sup>*</sup> | b <sup>+++</sup> | b <sup>0</sup>    | b <sup>0++</sup> | Seq. | y                  | y <sup>++</sup>    | y <sup>*</sup>     | y <sup>+++</sup>  | y <sup>0</sup>     | y <sup>0++</sup> | #  |
|----|--------------------|-----------------|----------------|------------------|-------------------|------------------|------|--------------------|--------------------|--------------------|-------------------|--------------------|------------------|----|
| 1  | 72.044390          | 36.525833       |                |                  |                   |                  | A    |                    |                    |                    |                   |                    |                  | 19 |
| 2  | <b>173.092069</b>  | 87.049672       |                |                  | 155.081504        | 78.044390        | T    | 2366.101616        | 1183.554446        | 2349.075067        | 1175.041171       | 2348.091051        | 1174.549163      | 18 |
| 3  | 274.139748         | 137.573512      |                |                  | <b>256.129183</b> | 128.568230       | T    | 2265.053937        | 1133.030606        | 2248.027388        | 1124.517332       | 2247.043372        | 1124.025324      | 17 |
| 4  | 373.208162         | 187.107719      |                |                  | 355.197597        | 178.102437       | V    | <b>2164.006258</b> | 1082.506767        | 2146.979709        | 1073.993492       | 2145.995693        | 1073.501484      | 16 |
| 5  | 474.255841         | 237.631559      |                |                  | 456.245276        | 228.626276       | T    | 2064.937844        | <b>1032.972560</b> | 2047.911295        | 1024.459285       | <b>2046.927279</b> | 1023.967277      | 15 |
| 6  | 531.277305         | 266.142291      |                |                  | 513.266740        | 257.137008       | G    | <b>1963.890165</b> | 982.448721         | 1946.863616        | 973.935446        | 1945.879600        | 973.443438       | 14 |
| 7  | 632.324984         | 316.666130      |                |                  | 614.314419        | 307.660848       | T    | 1906.868701        | 953.937989         | 1889.842152        | 945.424714        | <b>1888.858136</b> | 944.932706       | 13 |
| 8  | 729.377748         | 365.192512      |                |                  | <b>711.367183</b> | 356.187230       | P    | <b>1805.821022</b> | <b>903.414149</b>  | 1788.794473        | 894.900875        | <b>1787.810457</b> | 894.408867       | 12 |
| 9  | 889.408397         | 445.207837      |                |                  | 871.397832        | 436.202554       | C    | <b>1708.768258</b> | <b>854.887767</b>  | 1691.741709        | <b>846.374493</b> | 1690.757693        | 845.882485       | 11 |
| 10 | 1017.466975        | 509.237126      | 1000.440426    | 500.723851       | 999.456410        | 500.231843       | Q    | <b>1548.737609</b> | 774.872443         | <b>1531.711060</b> | 766.359168        | <b>1530.727044</b> | 765.867160       | 10 |
| 11 | <b>1132.493918</b> | 566.750597      | 1115.467369    | 558.237323       | 1114.483353       | 557.745315       | D    | <b>1420.679031</b> | 710.843154         | 1403.652482        | 702.329879        | <b>1402.668466</b> | 701.837871       | 9  |
| 12 | 1318.573231        | 659.790254      | 1301.546682    | 651.276979       | 1300.562666       | 650.784971       | W    | <b>1305.652088</b> | 653.329682         | <b>1288.625539</b> | 644.816408        | 1287.641523        | 644.324400       | 8  |
| 13 | 1389.610345        | 695.308811      | 1372.583796    | 686.795536       | 1371.599780       | 686.303528       | A    | <b>1119.572775</b> | 560.290026         | 1102.546226        | 551.776751        | 1101.562210        | 551.284743       | 7  |
| 14 | 1460.647459        | 730.827368      | 1443.620910    | 722.314093       | 1442.636894       | 721.822085       | A    | <b>1048.535661</b> | 524.771469         | <b>1031.509112</b> | 516.258194        | 1030.525096        | 515.766186       | 6  |
| 15 | 1899.872785        | 950.440031      | 1882.846236    | 941.926756       | 1881.862220       | 941.434748       | Q    | <b>977.498547</b>  | 489.252912         | 960.471998         | 480.739637        | 959.487982         | 480.247629       | 5  |
| 16 | 2028.915378        | 1014.961327     | 2011.888829    | 1006.448053      | 2010.904813       | 1005.956045      | E    | <b>538.273221</b>  | 269.640249         | 521.246672         | 261.126974        | 520.262656         | 260.634966       | 4  |
| 17 | 2125.968142        | 1063.487709     | 2108.941593    | 1054.974434      | 2107.957577       | 1054.482427      | P    | <b>409.230628</b>  | 205.118952         | 392.204079         | 196.605677        |                    |                  | 3  |
| 18 | 2263.027054        | 1132.017165     | 2246.000505    | 1123.503890      | 2245.016489       | 1123.011883      | H    | <b>312.177864</b>  | 156.592570         | 295.151315         | 148.079295        |                    |                  | 2  |
| 19 |                    |                 |                |                  |                   |                  | R    | <b>175.118952</b>  | 88.063114          | 158.092403         | 79.549839         |                    |                  | 1  |

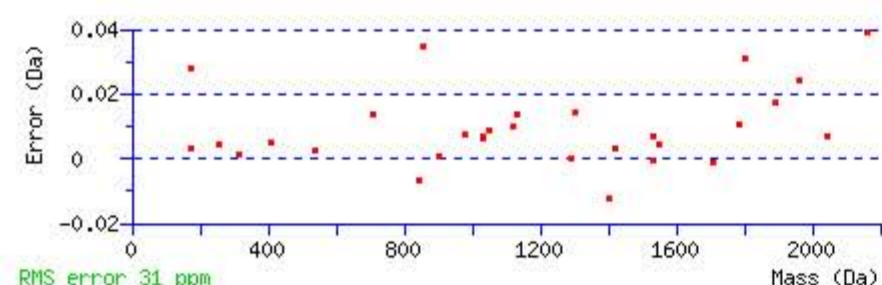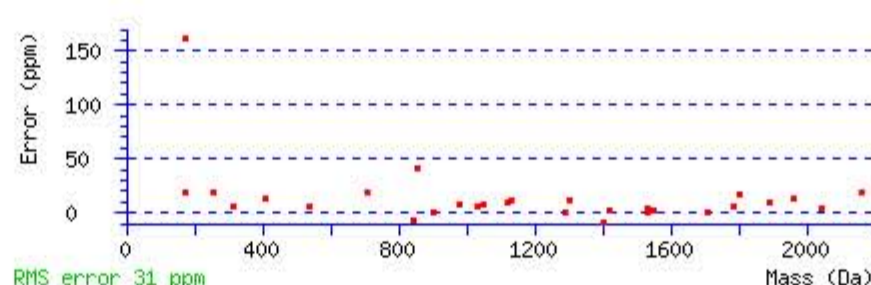

NCBI BLAST search of [ATTVTGTPCQDWAAQEPHR](#)

(Parameters: blastp, nr protein database, expect=20000, no filter, PAM30)

Other BLAST [web gateways](#)

All matches to this query

| Score | Mr(calc):   | Delta    | Sequence                            |
|-------|-------------|----------|-------------------------------------|
| 81.9  | 2436.131470 | 0.018546 | <a href="#">ATTVTGTPCQDWAAQEPHR</a> |
| 23.8  | 2436.131470 | 0.018546 | <a href="#">ATTVTGTPCQDWAAQEPHR</a> |

# MASCOT Search Results

## Peptide View

MS/MS Fragmentation of **NPDNDPQGPWCYTIDPEK**

Found in **PLMN\_HUMAN**, Plasminogen OS=Homo sapiens GN=PLG PE=1 SV=2

Match to Query 61283: 2444.063802 from(815.695210,3+) rtinseconds(2088) index(79459)

Title: Locus:1.1.1.2077.24 File:"2013-07-02 CLN FXIII 180 min 1st FT.wiff"

Data file C:\Program Files (x86)\Matrix Science\Mascot Daemon\mgf\7 FXIII 180 min 1st\mascot\_daemon\_merge.mgf

Click mouse within plot area to zoom in by factor of two about that point

Or, Plot from  to  Da

Label all possible matches  Label matches used for scoring

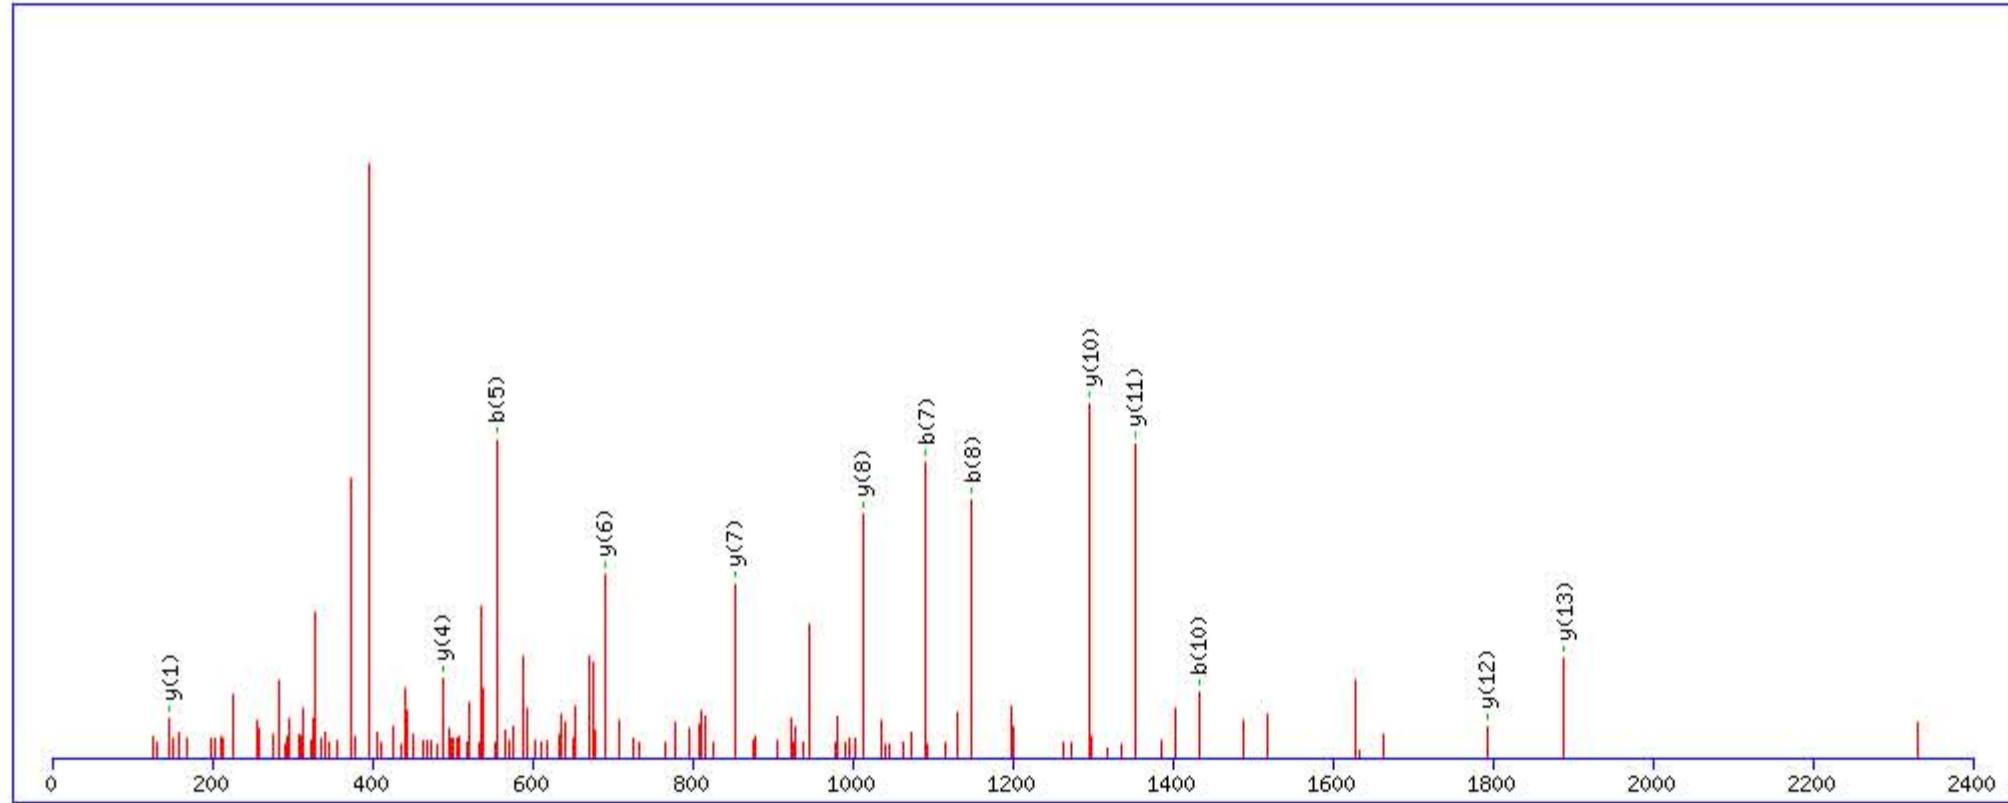

Monoisotopic mass of neutral peptide Mr(calc): 2444.041306

Fixed modifications: Carbamidomethyl (C) (apply to specified residues or termini only)

Variable modifications:

Q7 : Biotin:Thermo-21345 (Q)

Ions Score: 63 Expect: 2.3e-006

Matches : 13/198 fragment ions using 18 most intense peaks [\(help\)](#)

| #  | b                  | b <sup>++</sup> | b <sup>*</sup> | b <sup>+++</sup> | b <sup>0</sup> | b <sup>0++</sup> | Seq. | y                  | y <sup>++</sup> | y <sup>*</sup> | y <sup>+++</sup> | y <sup>0</sup> | y <sup>0++</sup> | #  |
|----|--------------------|-----------------|----------------|------------------|----------------|------------------|------|--------------------|-----------------|----------------|------------------|----------------|------------------|----|
| 1  | 115.050203         | 58.028740       | 98.023654      | 49.515465        |                |                  | N    |                    |                 |                |                  |                |                  | 18 |
| 2  | 212.102967         | 106.555121      | 195.076418     | 98.041847        |                |                  | P    | 2331.005648        | 1166.006462     | 2313.979099    | 1157.493187      | 2312.995083    | 1157.001179      | 17 |
| 3  | 327.129910         | 164.068593      | 310.103361     | 155.555319       | 309.119345     | 155.063311       | D    | 2233.952884        | 1117.480080     | 2216.926335    | 1108.966805      | 2215.942319    | 1108.474797      | 16 |
| 4  | 441.172837         | 221.090057      | 424.146288     | 212.576782       | 423.162272     | 212.084774       | N    | 2118.925941        | 1059.966608     | 2101.899392    | 1051.453334      | 2100.915376    | 1050.961326      | 15 |
| 5  | <b>556.199780</b>  | 278.603528      | 539.173231     | 270.090254       | 538.189215     | 269.598246       | D    | 2004.883014        | 1002.945145     | 1987.856465    | 994.431871       | 1986.872449    | 993.939863       | 14 |
| 6  | 653.252544         | 327.129910      | 636.225995     | 318.616636       | 635.241979     | 318.124628       | P    | <b>1889.856071</b> | 945.431673      | 1872.829522    | 936.918399       | 1871.845506    | 936.426391       | 13 |
| 7  | <b>1092.477870</b> | 546.742573      | 1075.451321    | 538.229299       | 1074.467305    | 537.737290       | Q    | <b>1792.803307</b> | 896.905291      | 1775.776758    | 888.392017       | 1774.792742    | 887.900009       | 12 |
| 8  | <b>1149.499334</b> | 575.253305      | 1132.472785    | 566.740030       | 1131.488769    | 566.248022       | G    | <b>1353.577981</b> | 677.292629      | 1336.551432    | 668.779354       | 1335.567416    | 668.287346       | 11 |
| 9  | 1246.552098        | 623.779687      | 1229.525549    | 615.266413       | 1228.541533    | 614.774404       | P    | <b>1296.556517</b> | 648.781897      | 1279.529968    | 640.268622       | 1278.545952    | 639.776614       | 10 |
| 10 | <b>1432.631411</b> | 716.819343      | 1415.604862    | 708.306069       | 1414.620846    | 707.814061       | W    | 1199.503753        | 600.255515      | 1182.477204    | 591.742240       | 1181.493188    | 591.250232       | 9  |
| 11 | 1592.662060        | 796.834668      | 1575.635511    | 788.321394       | 1574.651495    | 787.829385       | C    | <b>1013.424440</b> | 507.215858      | 996.397891     | 498.702584       | 995.413875     | 498.210576       | 8  |
| 12 | 1755.725389        | 878.366333      | 1738.698840    | 869.853058       | 1737.714824    | 869.361050       | Y    | <b>853.393791</b>  | 427.200534      | 836.367242     | 418.687259       | 835.383226     | 418.195251       | 7  |
| 13 | 1856.773068        | 928.890172      | 1839.746519    | 920.376898       | 1838.762503    | 919.884889       | T    | <b>690.330462</b>  | 345.668869      | 673.303913     | 337.155595       | 672.319897     | 336.663587       | 6  |
| 14 | 1957.820747        | 979.414012      | 1940.794198    | 970.900737       | 1939.810182    | 970.408729       | T    | 589.282783         | 295.145030      | 572.256234     | 286.631755       | 571.272218     | 286.139747       | 5  |
| 15 | 2072.847690        | 1036.927483     | 2055.821141    | 1028.414208      | 2054.837125    | 1027.922200      | D    | <b>488.235104</b>  | 244.621190      | 471.208555     | 236.107915       | 470.224539     | 235.615907       | 4  |
| 16 | 2169.900454        | 1085.453865     | 2152.873905    | 1076.940590      | 2151.889889    | 1076.448582      | P    | 373.208161         | 187.107719      | 356.181612     | 178.594444       | 355.197596     | 178.102436       | 3  |
| 17 | 2298.943047        | 1149.975161     | 2281.916498    | 1141.461887      | 2280.932482    | 1140.969879      | E    | 276.155397         | 138.581337      | 259.128848     | 130.068062       | 258.144832     | 129.576054       | 2  |
| 18 |                    |                 |                |                  |                |                  | K    | <b>147.112804</b>  | 74.060040       | 130.086255     | 65.546765        |                |                  | 1  |

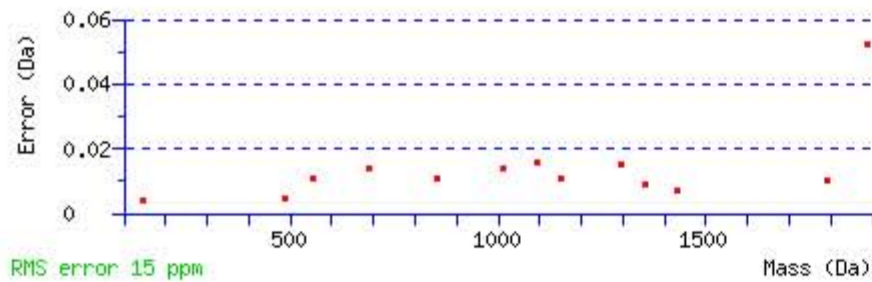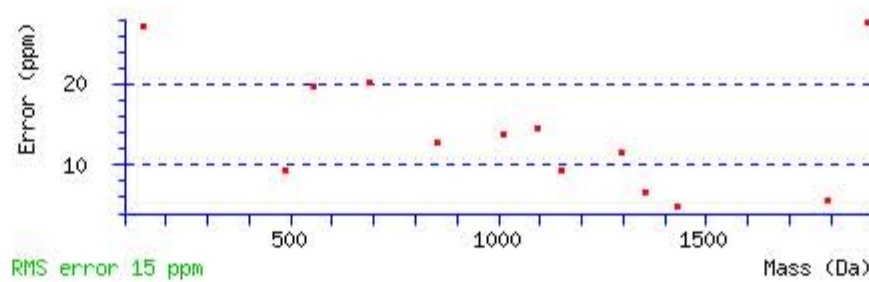

NCBI BLAST search of [NPDNDPQGPWCYTIDPEK](#)

(Parameters: blastp, nr protein database, expect=20000, no filter, PAM30)

Other BLAST [web gateways](#)

All matches to this query

| Score | Mr(calc):   | Delta    | Sequence                           |
|-------|-------------|----------|------------------------------------|
| 62.7  | 2444.041306 | 0.022496 | <a href="#">NPDNDPQGPWCYTIDPEK</a> |

Mascot: <http://www.matrixscience.com/>

# MASCOT Search Results

## Peptide View

MS/MS Fragmentation of **VVGGCVAHPHSWPWQVSLR**

Found in **PLMN\_HUMAN**, Plasminogen OS=Homo sapiens GN=PLG PE=1 SV=2

Match to Query 62389: 2482.270856 from(621.574990,4+) rtinseconds(2156) index(79925)

Title: Locus:1.1.1.2101.15 File:"2013-07-02 CLN FXIII 180 min 1st FT.wiff"

Data file C:\Program Files (x86)\Matrix Science\Mascot Daemon\mgf\7 FXIII 180 min 1st\mascot\_daemon\_merge.mgf

Click mouse within plot area to zoom in by factor of two about that point

Or, Plot from  to  Da

Label all possible matches  Label matches used for scoring

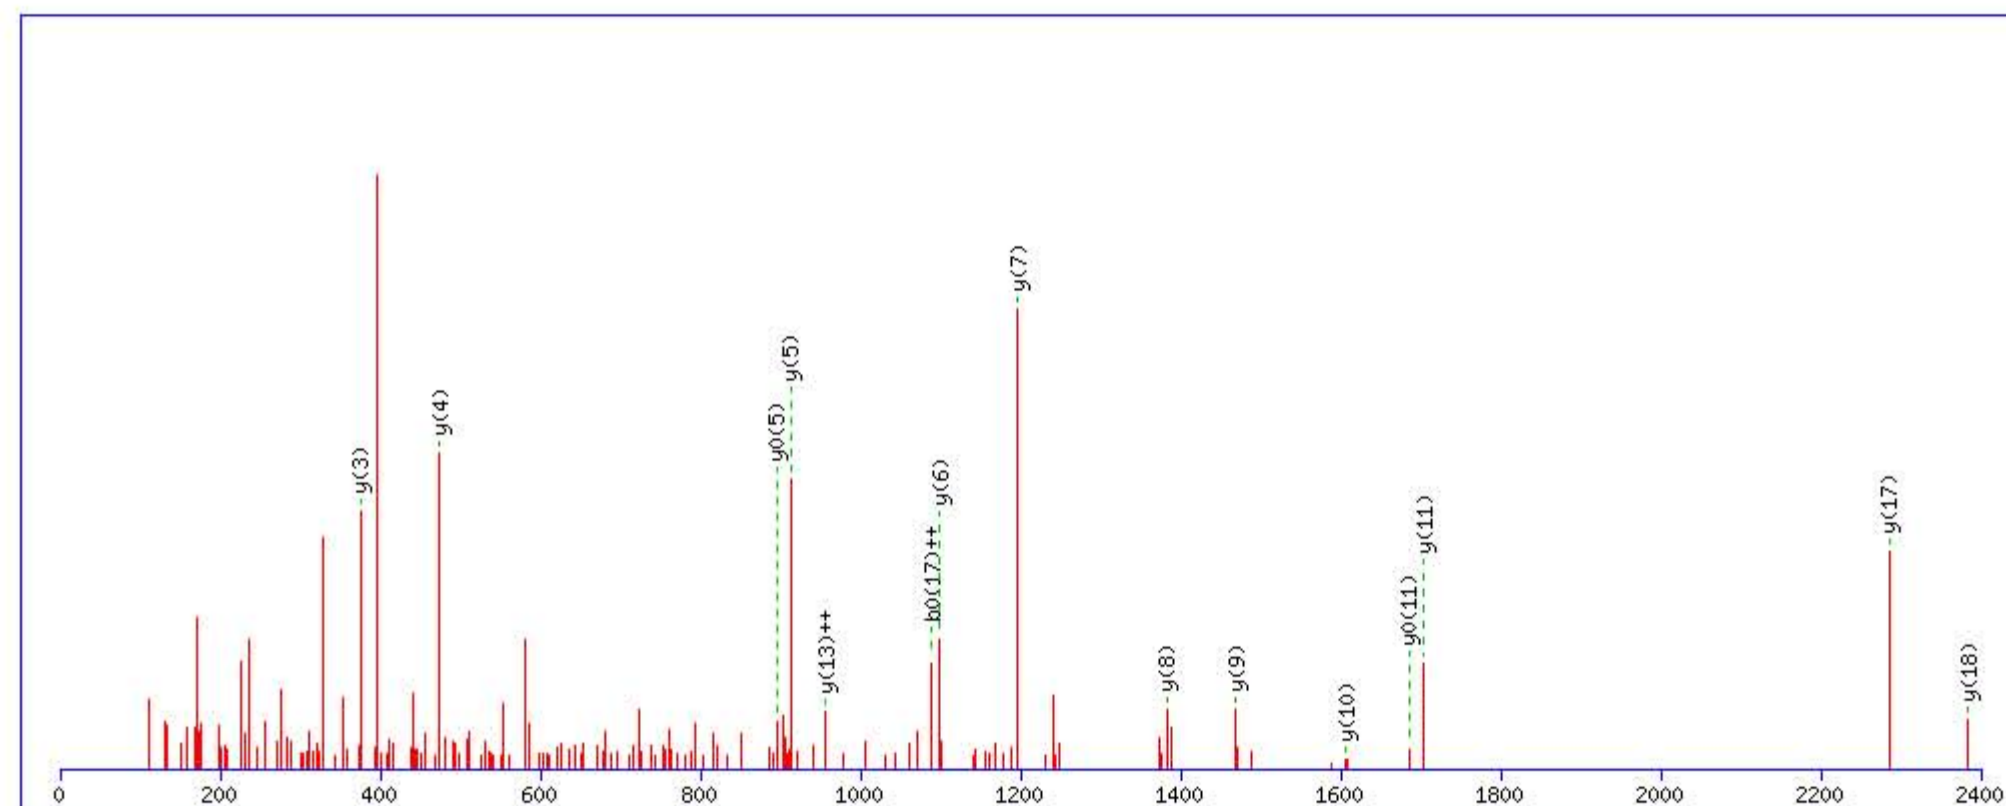

Monoisotopic mass of neutral peptide Mr(calc): 2482.251480

Fixed modifications: Carbamidomethyl (C) (apply to specified residues or termini only)

Variable modifications:

Q15 : Biotin:Thermo-21345 (Q)

Ions Score: 50 Expect: 0.0003

Matches : 15/164 fragment ions using 34 most intense peaks [\(help\)](#)

| #  | b           | b <sup>++</sup> | b <sup>+</sup> | b <sup>+++</sup> | b <sup>0</sup> | b <sup>0++</sup>   | Seq. | y                  | y <sup>++</sup>   | y <sup>+</sup> | y <sup>+++</sup> | y <sup>0</sup>     | y <sup>0++</sup> | #  |
|----|-------------|-----------------|----------------|------------------|----------------|--------------------|------|--------------------|-------------------|----------------|------------------|--------------------|------------------|----|
| 1  | 100.075690  | 50.541483       |                |                  |                |                    | V    |                    |                   |                |                  |                    |                  | 19 |
| 2  | 199.144104  | 100.075690      |                |                  |                |                    | V    | <b>2384.190309</b> | 1192.598792       | 2367.163760    | 1184.085518      | 2366.179744        | 1183.593510      | 18 |
| 3  | 256.165568  | 128.586422      |                |                  |                |                    | G    | <b>2285.121895</b> | 1143.064585       | 2268.095346    | 1134.551311      | 2267.111330        | 1134.059303      | 17 |
| 4  | 313.187032  | 157.097154      |                |                  |                |                    | G    | 2228.100431        | 1114.553853       | 2211.073882    | 1106.040579      | 2210.089866        | 1105.548571      | 16 |
| 5  | 473.217681  | 237.112479      |                |                  |                |                    | C    | 2171.078967        | 1086.043121       | 2154.052418    | 1077.529847      | 2153.068402        | 1077.037839      | 15 |
| 6  | 572.286095  | 286.646686      |                |                  |                |                    | V    | 2011.048318        | 1006.027797       | 1994.021769    | 997.514523       | 1993.037753        | 997.022515       | 14 |
| 7  | 643.323209  | 322.165243      |                |                  |                |                    | A    | 1911.979904        | <b>956.493590</b> | 1894.953355    | 947.980316       | 1893.969339        | 947.488308       | 13 |
| 8  | 780.382121  | 390.694699      |                |                  |                |                    | H    | 1840.942790        | 920.975033        | 1823.916241    | 912.461759       | 1822.932225        | 911.969751       | 12 |
| 9  | 877.434885  | 439.221081      |                |                  |                |                    | P    | <b>1703.883878</b> | 852.445577        | 1686.857329    | 843.932303       | <b>1685.873313</b> | 843.440295       | 11 |
| 10 | 1014.493797 | 507.750537      |                |                  |                |                    | H    | <b>1606.831114</b> | 803.919195        | 1589.804565    | 795.405921       | 1588.820549        | 794.913913       | 10 |
| 11 | 1101.525825 | 551.266550      |                |                  | 1083.515260    | 542.261268         | S    | <b>1469.772202</b> | 735.389739        | 1452.745653    | 726.876465       | 1451.761637        | 726.384457       | 9  |
| 12 | 1287.605138 | 644.306207      |                |                  | 1269.594573    | 635.300924         | W    | <b>1382.740174</b> | 691.873725        | 1365.713625    | 683.360451       | 1364.729609        | 682.868443       | 8  |
| 13 | 1384.657902 | 692.832589      |                |                  | 1366.647337    | 683.827306         | P    | <b>1196.660861</b> | 598.834069        | 1179.634312    | 590.320794       | 1178.650296        | 589.828786       | 7  |
| 14 | 1570.737215 | 785.872245      |                |                  | 1552.726650    | 776.866963         | W    | <b>1099.608097</b> | 550.307687        | 1082.581548    | 541.794412       | 1081.597532        | 541.302404       | 6  |
| 15 | 2009.962541 | 1005.484909     | 1992.935992    | 996.971634       | 1991.951976    | 996.479626         | Q    | <b>913.528784</b>  | 457.268030        | 896.502235     | 448.754756       | <b>895.518219</b>  | 448.262748       | 5  |
| 16 | 2109.030955 | 1055.019115     | 2092.004406    | 1046.505841      | 2091.020390    | 1046.013833        | V    | <b>474.303458</b>  | 237.655367        | 457.276909     | 229.142092       | 456.292893         | 228.650084       | 4  |
| 17 | 2196.062983 | 1098.535129     | 2179.036434    | 1090.021855      | 2178.052418    | <b>1089.529847</b> | S    | <b>375.235044</b>  | 188.121160        | 358.208495     | 179.607886       | 357.224479         | 179.115878       | 3  |
| 18 | 2309.147047 | 1155.077161     | 2292.120498    | 1146.563887      | 2291.136482    | 1146.071879        | L    | 288.203016         | 144.605146        | 271.176467     | 136.091872       |                    |                  | 2  |
| 19 |             |                 |                |                  |                |                    | R    | 175.118952         | 88.063114         | 158.092403     | 79.549839        |                    |                  | 1  |

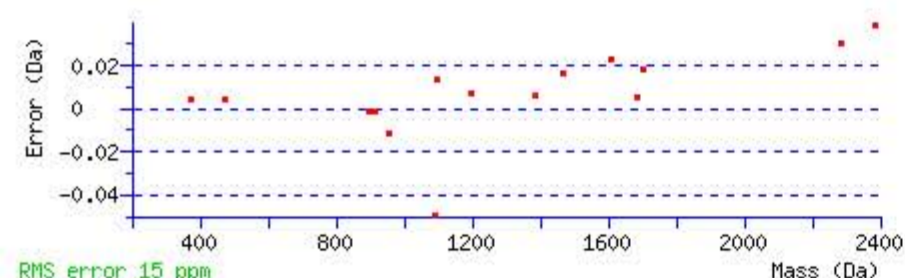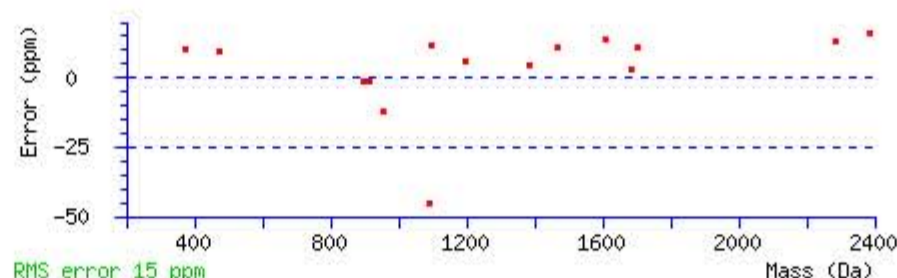

NCBI BLAST search of **VVGGCVAHPHSWPWQVSLR**

(Parameters: blastp, nr protein database, expect=20000, no filter, PAM30)

Other BLAST [web gateways](#)

All matches to this query

| Score | Mr(calc):   | Delta    | Sequence                   |
|-------|-------------|----------|----------------------------|
| 50.1  | 2482.251480 | 0.019376 | <b>VVGGCVAHPHSWPWQVSLR</b> |

Mascot: <http://www.matrixscience.com/>

# MASCOT Search Results

## Peptide View

MS/MS Fragmentation of **VILGAHQEVNLEPHVQEIIVSR**  
 Found in **PLMN\_HUMAN**, Plasminogen OS=Homo sapiens GN=PLG PE=1 SV=2

Match to Query 67237: 2806.500856 from(702.632490,4+) rtinseconds(2070) index(79339)  
 Title: Locus:1.1.1.2071.17 File:"2013-07-02 CLN FXIII 180 min 1st FT.wiff"  
 Data file C:\Program Files (x86)\Matrix Science\Mascot Daemon\mgf\7 FXIII 180 min 1st\mascot\_daemon\_merge.mgf

Click mouse within plot area to zoom in by factor of two about that point  
 Or, Plot from  to  Da   
 Label all possible matches  Label matches used for scoring

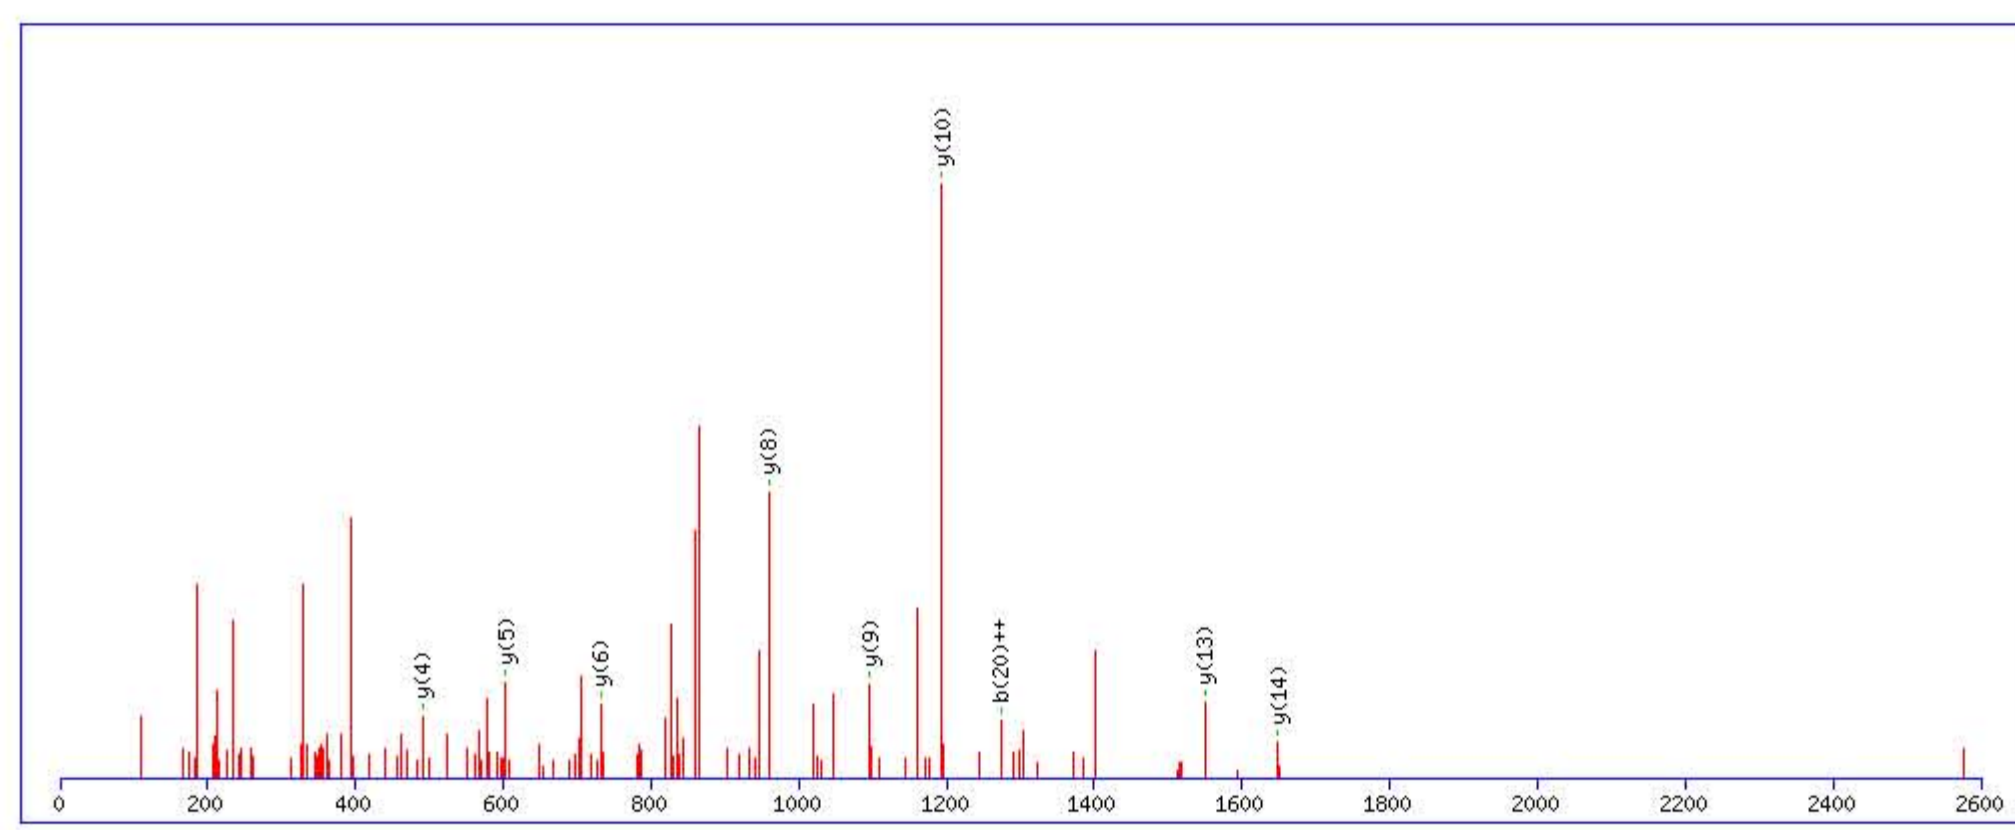

Monoisotopic mass of neutral peptide Mr(calc): 2806.479965  
 Fixed modifications: Carbamidomethyl (C) (apply to specified residues or termini only)  
 Variable modifications:  
 Q7 : Biotin:Thermo-21345 (Q)  
 Ions Score: 39 Expect: 0.0025  
 Matches : 9/224 fragment ions using 16 most intense peaks [\(help\)](#)

| #  | b           | b <sup>++</sup>    | b <sup>*</sup> | b <sup>*++</sup> | b <sup>0</sup> | b <sup>0++</sup> | Seq. | y                  | y <sup>++</sup> | y <sup>*</sup> | y <sup>*++</sup> | y <sup>0</sup> | y <sup>0++</sup> | #  |
|----|-------------|--------------------|----------------|------------------|----------------|------------------|------|--------------------|-----------------|----------------|------------------|----------------|------------------|----|
| 1  | 100.075690  | 50.541483          |                |                  |                |                  | V    |                    |                 |                |                  |                |                  | 22 |
| 2  | 213.159754  | 107.083515         |                |                  |                |                  | I    | 2708.418847        | 1354.713061     | 2691.392298    | 1346.199787      | 2690.408282    | 1345.707779      | 21 |
| 3  | 326.243818  | 163.625547         |                |                  |                |                  | L    | 2595.334783        | 1298.171029     | 2578.308234    | 1289.657755      | 2577.324218    | 1289.165747      | 20 |
| 4  | 383.265282  | 192.136279         |                |                  |                |                  | G    | 2482.250719        | 1241.628997     | 2465.224170    | 1233.115723      | 2464.240154    | 1232.623715      | 19 |
| 5  | 454.302396  | 227.654836         |                |                  |                |                  | A    | 2425.229255        | 1213.118265     | 2408.202706    | 1204.604991      | 2407.218690    | 1204.112983      | 18 |
| 6  | 591.361308  | 296.184292         |                |                  |                |                  | H    | 2354.192141        | 1177.599708     | 2337.165592    | 1169.086434      | 2336.181576    | 1168.594426      | 17 |
| 7  | 1030.586634 | 515.796955         | 1013.560085    | 507.283681       |                |                  | Q    | 2217.133229        | 1109.070252     | 2200.106680    | 1100.556978      | 2199.122664    | 1100.064970      | 16 |
| 8  | 1159.629227 | 580.318252         | 1142.602678    | 571.804977       | 1141.618662    | 571.312969       | E    | 1777.907903        | 889.457590      | 1760.881354    | 880.944315       | 1759.897338    | 880.452307       | 15 |
| 9  | 1258.697641 | 629.852459         | 1241.671092    | 621.339184       | 1240.687076    | 620.847176       | V    | <b>1648.865310</b> | 824.936293      | 1631.838761    | 816.423019       | 1630.854745    | 815.931011       | 14 |
| 10 | 1372.740568 | 686.873922         | 1355.714019    | 678.360648       | 1354.730003    | 677.868640       | N    | <b>1549.796896</b> | 775.402086      | 1532.770347    | 766.888812       | 1531.786331    | 766.396804       | 13 |
| 11 | 1485.824632 | 743.415954         | 1468.798083    | 734.902680       | 1467.814067    | 734.410672       | L    | 1435.753969        | 718.380623      | 1418.727420    | 709.867348       | 1417.743404    | 709.375340       | 12 |
| 12 | 1614.867225 | 807.937251         | 1597.840676    | 799.423976       | 1596.856660    | 798.931968       | E    | 1322.669905        | 661.838591      | 1305.643356    | 653.325316       | 1304.659340    | 652.833308       | 11 |
| 13 | 1711.919989 | 856.463633         | 1694.893440    | 847.950358       | 1693.909424    | 847.458350       | P    | <b>1193.627312</b> | 597.317294      | 1176.600763    | 588.804020       | 1175.616747    | 588.312012       | 10 |
| 14 | 1848.978901 | 924.993089         | 1831.952352    | 916.479814       | 1830.968336    | 915.987806       | H    | <b>1096.574548</b> | 548.790912      | 1079.547999    | 540.277638       | 1078.563983    | 539.785630       | 9  |
| 15 | 1948.047315 | 974.527296         | 1931.020766    | 966.014021       | 1930.036750    | 965.522013       | V    | <b>959.515636</b>  | 480.261456      | 942.489087     | 471.748182       | 941.505071     | 471.256174       | 8  |
| 16 | 2076.105893 | 1038.556584        | 2059.079344    | 1030.043310      | 2058.095328    | 1029.551302      | Q    | 860.447222         | 430.727249      | 843.420673     | 422.213975       | 842.436657     | 421.721967       | 7  |
| 17 | 2205.148486 | 1103.077881        | 2188.121937    | 1094.564606      | 2187.137921    | 1094.072598      | E    | <b>732.388644</b>  | 366.697960      | 715.362095     | 358.184686       | 714.378079     | 357.692678       | 6  |
| 18 | 2318.232550 | 1159.619913        | 2301.206001    | 1151.106638      | 2300.221985    | 1150.614631      | I    | <b>603.346051</b>  | 302.176664      | 586.319502     | 293.663389       | 585.335486     | 293.171381       | 5  |
| 19 | 2447.275143 | 1224.141210        | 2430.248594    | 1215.627935      | 2429.264578    | 1215.135927      | E    | <b>490.261987</b>  | 245.634631      | 473.235438     | 237.121357       | 472.251422     | 236.629349       | 4  |
| 20 | 2546.343557 | <b>1273.675417</b> | 2529.317008    | 1265.162142      | 2528.332992    | 1264.670134      | V    | 361.219394         | 181.113335      | 344.192845     | 172.600060       | 343.208829     | 172.108052       | 3  |
| 21 | 2633.375585 | 1317.191431        | 2616.349036    | 1308.678156      | 2615.365020    | 1308.186148      | S    | 262.150980         | 131.579128      | 245.124431     | 123.065854       | 244.140415     | 122.573846       | 2  |
| 22 |             |                    |                |                  |                |                  | R    | 175.118952         | 88.063114       | 158.092403     | 79.549839        |                |                  | 1  |

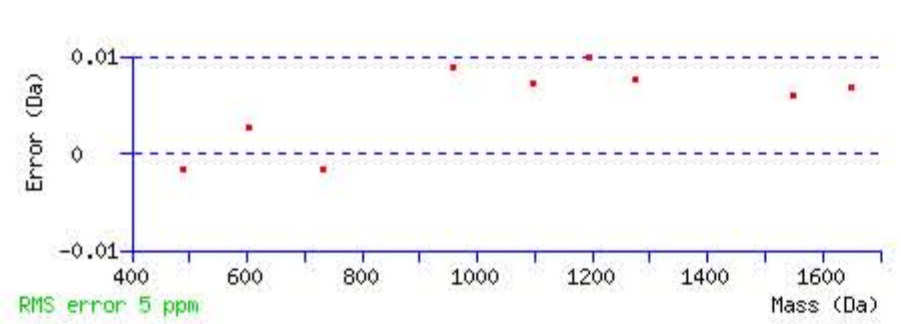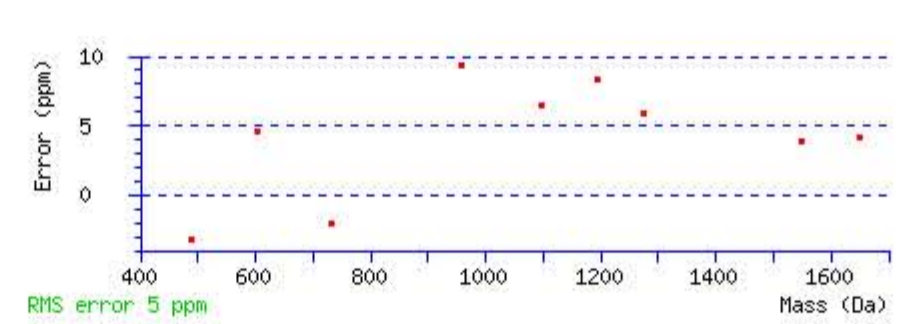

NCBI BLAST search of **VILGAHQEVNLEPHVQEIIVSR**  
 (Parameters: blastp, nr protein database, expect=20000, no filter, PAM30)  
 Other BLAST [web gateways](#)

### All matches to this query

| Score | Mr(calc):   | Delta    | Sequence                      |
|-------|-------------|----------|-------------------------------|
| 38.7  | 2806.479965 | 0.020891 | <b>VILGAHQEVNLEPHVQEIIVSR</b> |

# MASCOT Search Results

## Peptide View

MS/MS Fragmentation of **VILGAHQEVNLEPHVQEIEVSR**  
 Found in **PLMN\_HUMAN**, Plasminogen OS=Homo sapiens GN=PLG PE=1 SV=2

Match to Query 67239: 2806.501896 from(702.632750,4+) rtinseconds(2046) index(79175)  
 Title: Locus:1.1.1.2063.12 File:"2013-07-02 CLN FXIII 180 min 1st FT.wiff"  
 Data file C:\Program Files (x86)\Matrix Science\Mascot Daemon\mgf\7 FXIII 180 min 1st\mascot\_daemon\_merge.mgf

Click mouse within plot area to zoom in by factor of two about that point

Or, Plot from  to  Da

Label all possible matches  Label matches used for scoring

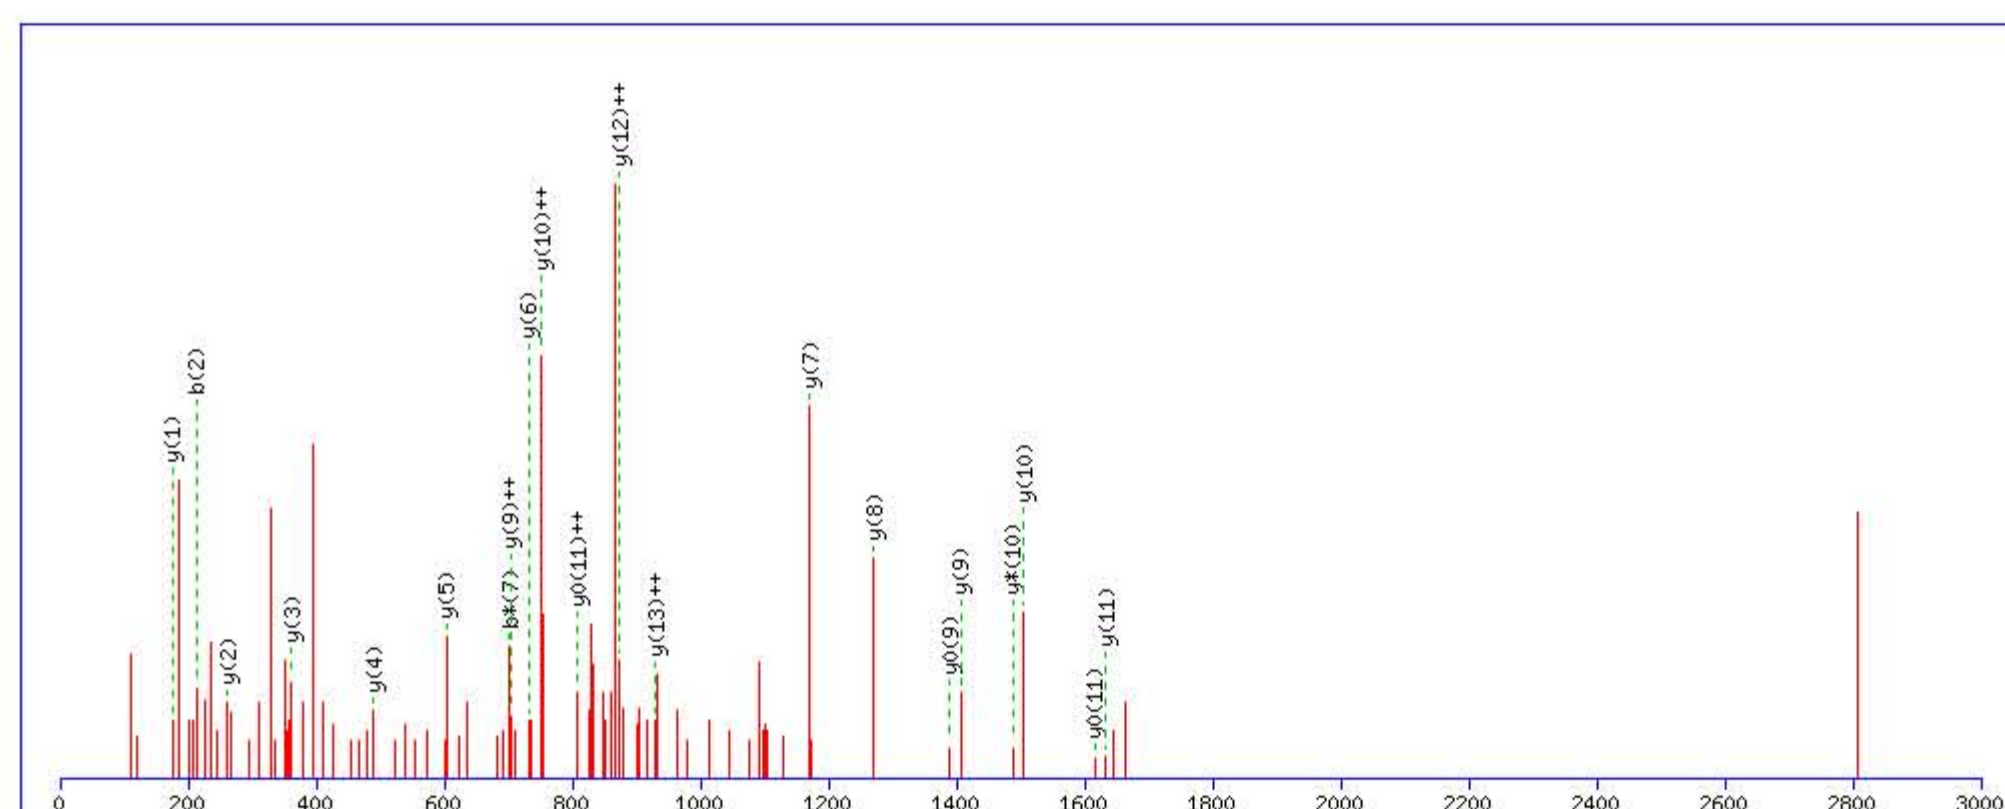

Monoisotopic mass of neutral peptide Mr(calc): 2806.479965  
 Fixed modifications: Carbamidomethyl (C) (apply to specified residues or termini only)  
 Variable modifications:  
 Q16 : Biotin:Thermo-21345 (Q)  
 Ions Score: 31 Expect: 0.015  
 Matches : 21/224 fragment ions using 62 most intense peaks [\(help\)](#)

| #  | b           | b <sup>++</sup> | b*          | b <sup>+++</sup> | b <sup>0</sup> | b <sup>0++</sup> | Seq. | y           | y <sup>++</sup> | y*          | y <sup>+++</sup> | y <sup>0</sup> | y <sup>0++</sup> | #  |
|----|-------------|-----------------|-------------|------------------|----------------|------------------|------|-------------|-----------------|-------------|------------------|----------------|------------------|----|
| 1  | 100.075690  | 50.541483       |             |                  |                |                  | V    |             |                 |             |                  |                |                  | 22 |
| 2  | 213.159754  | 107.083515      |             |                  |                |                  | I    | 2708.418847 | 1354.713061     | 2691.392298 | 1346.199787      | 2690.408282    | 1345.707779      | 21 |
| 3  | 326.243818  | 163.625547      |             |                  |                |                  | L    | 2595.334783 | 1298.171029     | 2578.308234 | 1289.657755      | 2577.324218    | 1289.165747      | 20 |
| 4  | 383.265282  | 192.136279      |             |                  |                |                  | G    | 2482.250719 | 1241.628997     | 2465.224170 | 1233.115723      | 2464.240154    | 1232.623715      | 19 |
| 5  | 454.302396  | 227.654836      |             |                  |                |                  | A    | 2425.229255 | 1213.118265     | 2408.202706 | 1204.604991      | 2407.218690    | 1204.112983      | 18 |
| 6  | 591.361308  | 296.184292      |             |                  |                |                  | H    | 2354.192141 | 1177.599708     | 2337.165592 | 1169.086434      | 2336.181576    | 1168.594426      | 17 |
| 7  | 719.419886  | 360.213581      | 702.393337  | 351.700307       |                |                  | Q    | 2217.133229 | 1109.070252     | 2200.106680 | 1100.556978      | 2199.122664    | 1100.064970      | 16 |
| 8  | 848.462479  | 424.734878      | 831.435930  | 416.221603       | 830.451914     | 415.729595       | E    | 2089.074651 | 1045.040963     | 2072.048102 | 1036.527689      | 2071.064086    | 1036.035681      | 15 |
| 9  | 947.530893  | 474.269085      | 930.504344  | 465.755810       | 929.520328     | 465.263802       | V    | 1960.032058 | 980.519667      | 1943.005509 | 972.006393       | 1942.021493    | 971.514385       | 14 |
| 10 | 1061.573820 | 531.290548      | 1044.547271 | 522.777274       | 1043.563255    | 522.285266       | N    | 1860.963644 | 930.985460      | 1843.937095 | 922.472186       | 1842.953079    | 921.980178       | 13 |
| 11 | 1174.657884 | 587.832580      | 1157.631335 | 579.319306       | 1156.647319    | 578.827297       | L    | 1746.920717 | 873.963997      | 1729.894168 | 865.450722       | 1728.910152    | 864.958714       | 12 |
| 12 | 1303.700477 | 652.353877      | 1286.673928 | 643.840602       | 1285.689912    | 643.348594       | E    | 1633.836653 | 817.421965      | 1616.810104 | 808.908690       | 1615.826088    | 808.416682       | 11 |
| 13 | 1400.753241 | 700.880259      | 1383.726692 | 692.366984       | 1382.742676    | 691.874976       | P    | 1504.794060 | 752.900668      | 1487.767511 | 744.387394       | 1486.783495    | 743.895386       | 10 |
| 14 | 1537.812153 | 769.409715      | 1520.785604 | 760.896440       | 1519.801588    | 760.404432       | H    | 1407.741296 | 704.374286      | 1390.714747 | 695.861012       | 1389.730731    | 695.369004       | 9  |
| 15 | 1636.880567 | 818.943922      | 1619.854018 | 810.430647       | 1618.870002    | 809.938639       | V    | 1270.682384 | 635.844830      | 1253.655835 | 627.331556       | 1252.671819    | 626.839548       | 8  |
| 16 | 2076.105893 | 1038.556584     | 2059.079344 | 1030.043310      | 2058.095328    | 1029.551302      | Q    | 1171.613970 | 586.310623      | 1154.587421 | 577.797349       | 1153.603405    | 577.305341       | 7  |
| 17 | 2205.148486 | 1103.077881     | 2188.121937 | 1094.564606      | 2187.137921    | 1094.072598      | E    | 732.388644  | 366.697960      | 715.362095  | 358.184686       | 714.378079     | 357.692678       | 6  |
| 18 | 2318.232550 | 1159.619913     | 2301.206001 | 1151.106638      | 2300.221985    | 1150.614631      | I    | 603.346051  | 302.176664      | 586.319502  | 293.663389       | 585.335486     | 293.171381       | 5  |
| 19 | 2447.275143 | 1224.141210     | 2430.248594 | 1215.627935      | 2429.264578    | 1215.135927      | E    | 490.261987  | 245.634631      | 473.235438  | 237.121357       | 472.251422     | 236.629349       | 4  |
| 20 | 2546.343557 | 1273.675417     | 2529.317008 | 1265.162142      | 2528.332992    | 1264.670134      | V    | 361.219394  | 181.113335      | 344.192845  | 172.600060       | 343.208829     | 172.108052       | 3  |
| 21 | 2633.375585 | 1317.191431     | 2616.349036 | 1308.678156      | 2615.365020    | 1308.186148      | S    | 262.150980  | 131.579128      | 245.124431  | 123.065854       | 244.140415     | 122.573846       | 2  |
| 22 |             |                 |             |                  |                |                  | R    | 175.118952  | 88.063114       | 158.092403  | 79.549839        |                |                  | 1  |

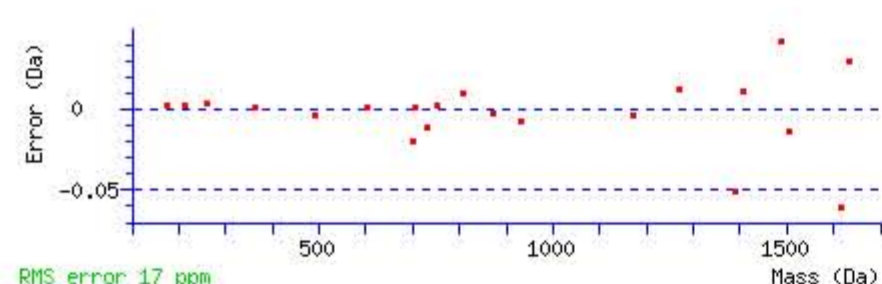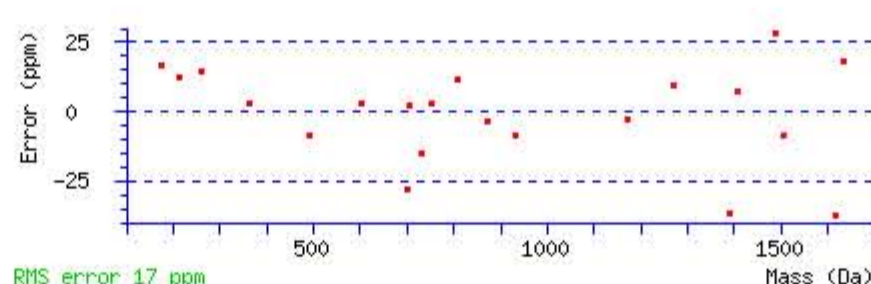

NCBI BLAST search of **VILGAHQEVNLEPHVQEIEVSR**  
 (Parameters: blastp, nr protein database, expect=20000, no filter, PAM30)  
 Other BLAST [web gateways](#)

## All matches to this query

| Score | Mr(calc):   | Delta    | Sequence                      |
|-------|-------------|----------|-------------------------------|
| 30.8  | 2806.479965 | 0.021931 | <b>VILGAHQEVNLEPHVQEIEVSR</b> |



# Mascot Search Results

## Peptide View

MS/MS Fragmentation of **TMSGLECAWDSQSPHAHGYIPSK**  
Found in **PLMN\_HUMAN**, Plasminogen OS=Homo sapiens GN=PLG PE=1 SV=2

Match to Query 70338: 2997.385816 from(750.353730,4+) rtinseconds(1947) index(78551)  
Title: Locus:1.1.1.2028.25 File:"2013-07-02 CLN FXIII 180 min 1st FT.wiff"  
Data file C:\Program Files (x86)\Matrix Science\Mascot Daemon\mgf7 FXIII 180 min 1st\mascot\_daemon\_merge.mgf

Click mouse within plot area to zoom in by factor of two about that point  
Or, Plot from  to  Da   
Label all possible matches  Label matches used for scoring

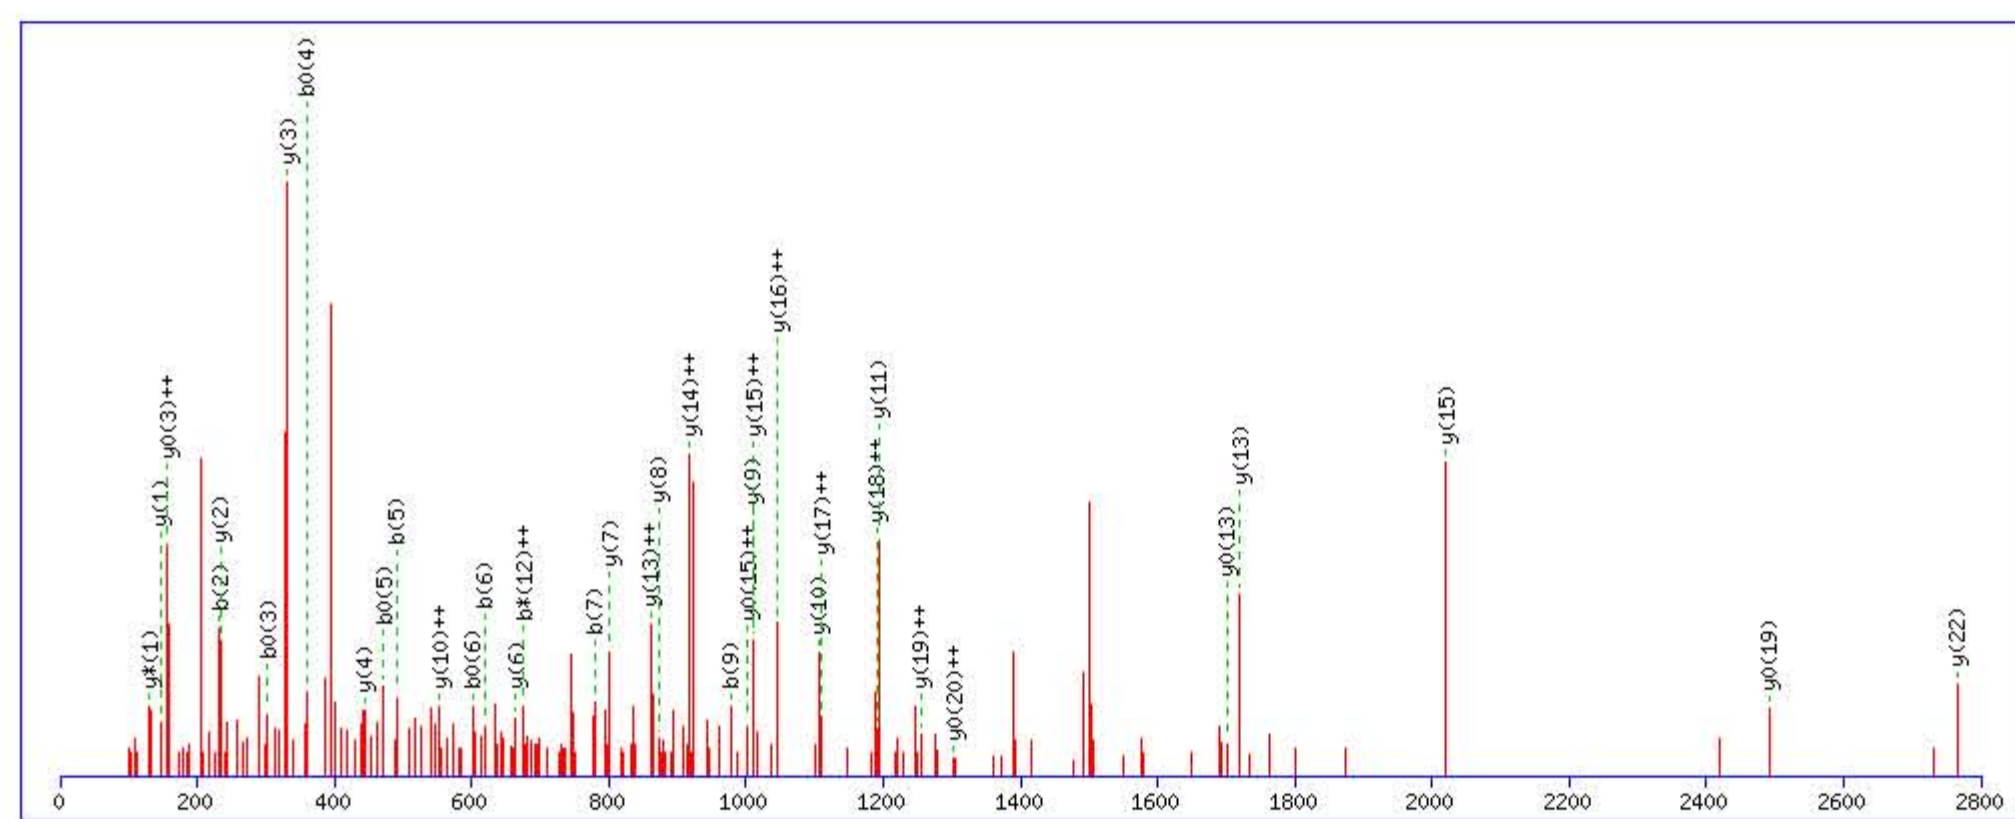

Monoisotopic mass of neutral peptide Mr(calc): 2997.357162  
Fixed modifications: Carbamidomethyl (C) (apply to specified residues or termini only)  
Variable modifications:  
Q13 : Biotin:Thermo-21345 (Q)  
Ions Score: 41 Expect: 0.0012  
Matches : 37/260 fragment ions using 115 most intense peaks [\(help\)](#)

| #  | b                 | b <sup>++</sup> | b <sup>+</sup> | b <sup>+++</sup>  | b <sup>0</sup>    | b <sup>0++</sup> | Seq. | y                  | y <sup>++</sup>    | y <sup>+</sup>    | y <sup>+++</sup> | y <sup>0</sup>     | y <sup>0++</sup>   | #  |
|----|-------------------|-----------------|----------------|-------------------|-------------------|------------------|------|--------------------|--------------------|-------------------|------------------|--------------------|--------------------|----|
| 1  | 102.054955        | 51.531116       |                |                   | 84.044390         | 42.525833        | T    |                    |                    |                   |                  |                    |                    | 24 |
| 2  | <b>233.095440</b> | 117.051358      |                |                   | 215.084875        | 108.046076       | M    | 2897.316768        | 1449.162022        | 2880.290219       | 1440.648748      | 2879.306203        | 1440.156740        | 23 |
| 3  | 320.127468        | 160.567372      |                |                   | <b>302.116903</b> | 151.562089       | S    | <b>2766.276283</b> | 1383.641780        | 2749.249734       | 1375.128505      | 2748.265718        | 1374.636497        | 22 |
| 4  | 377.148932        | 189.078104      |                |                   | <b>359.138367</b> | 180.072821       | G    | 2679.244255        | 1340.125766        | 2662.217706       | 1331.612491      | 2661.233690        | 1331.120483        | 21 |
| 5  | <b>490.232996</b> | 245.620136      |                |                   | <b>472.222431</b> | 236.614853       | L    | 2622.222791        | 1311.615034        | 2605.196242       | 1303.101759      | 2604.212226        | <b>1302.609751</b> | 20 |
| 6  | <b>619.275589</b> | 310.141433      |                |                   | <b>601.265024</b> | 301.136150       | E    | 2509.138727        | <b>1255.073002</b> | 2492.112178       | 1246.559727      | <b>2491.128162</b> | 1246.067719        | 19 |
| 7  | <b>779.306238</b> | 390.156757      |                |                   | 761.295673        | 381.151475       | C    | 2380.096134        | <b>1190.551705</b> | 2363.069585       | 1182.038431      | 2362.085569        | 1181.546423        | 18 |
| 8  | 907.364816        | 454.186046      | 890.338267     | 445.672772        | 889.354251        | 445.180764       | Q    | 2220.065485        | <b>1110.536381</b> | 2203.038936       | 1102.023106      | 2202.054920        | 1101.531098        | 17 |
| 9  | <b>978.401930</b> | 489.704603      | 961.375381     | 481.191329        | 960.391365        | 480.699321       | A    | 2092.006907        | <b>1046.507092</b> | 2074.980358       | 1037.993817      | 2073.996342        | 1037.501809        | 16 |
| 10 | 1164.481243       | 582.744260      | 1147.454694    | 574.230985        | 1146.470678       | 573.738977       | W    | <b>2020.969793</b> | <b>1010.988535</b> | 2003.943244       | 1002.475260      | 2002.959228        | <b>1001.983252</b> | 15 |
| 11 | 1279.508186       | 640.257731      | 1262.481637    | 631.744457        | 1261.497621       | 631.252449       | D    | 1834.890480        | <b>917.948878</b>  | 1817.863931       | 909.435604       | 1816.879915        | 908.943596         | 14 |
| 12 | 1366.540214       | 683.773745      | 1349.513665    | <b>675.260471</b> | 1348.529649       | 674.768463       | S    | <b>1719.863537</b> | <b>860.435407</b>  | 1702.836988       | 851.922132       | <b>1701.852972</b> | 851.430124         | 13 |
| 13 | 1805.765540       | 903.386408      | 1788.738991    | 894.873134        | 1787.754975       | 894.381126       | Q    | 1632.831509        | 816.919393         | 1615.804960       | 808.406118       | 1614.820944        | 807.914110         | 12 |
| 14 | 1892.797568       | 946.902422      | 1875.771019    | 938.389148        | 1874.787003       | 937.897140       | S    | <b>1193.606183</b> | 597.306730         | 1176.579634       | 588.793455       | 1175.595618        | 588.301447         | 11 |
| 15 | 1989.850332       | 995.428804      | 1972.823783    | 986.915530        | 1971.839767       | 986.423522       | P    | <b>1106.574155</b> | <b>553.790716</b>  | 1089.547606       | 545.277441       | 1088.563590        | 544.785433         | 10 |
| 16 | 2126.909244       | 1063.958260     | 2109.882695    | 1055.444986       | 2108.898679       | 1054.952978      | H    | <b>1009.521391</b> | 505.264334         | 992.494842        | 496.751059       | 991.510826         | 496.259051         | 9  |
| 17 | 2197.946358       | 1099.476817     | 2180.919809    | 1090.963543       | 2179.935793       | 1090.471535      | A    | <b>872.462479</b>  | 436.734878         | 855.435930        | 428.221603       | 854.451914         | 427.729595         | 8  |
| 18 | 2335.005270       | 1168.006273     | 2317.978721    | 1159.492999       | 2316.994705       | 1159.000991      | H    | <b>801.425365</b>  | 401.216321         | 784.398816        | 392.703046       | 783.414800         | 392.211038         | 7  |
| 19 | 2392.026734       | 1196.517005     | 2375.000185    | 1188.003731       | 2374.016169       | 1187.511723      | G    | <b>664.366453</b>  | 332.686865         | 647.339904        | 324.173590       | 646.355888         | 323.681582         | 6  |
| 20 | 2555.090063       | 1278.048670     | 2538.063514    | 1269.535395       | 2537.079498       | 1269.043387      | Y    | 607.344989         | 304.176133         | 590.318440        | 295.662858       | 589.334424         | 295.170850         | 5  |
| 21 | 2668.174127       | 1334.590702     | 2651.147578    | 1326.077427       | 2650.163562       | 1325.585419      | I    | <b>444.281660</b>  | 222.644468         | 427.255111        | 214.131194       | 426.271095         | 213.639186         | 4  |
| 22 | 2765.226891       | 1383.117084     | 2748.200342    | 1374.603809       | 2747.216326       | 1374.111801      | P    | <b>331.197596</b>  | 166.102436         | 314.171047        | 157.589162       | 313.187031         | <b>157.097154</b>  | 3  |
| 23 | 2852.258919       | 1426.633098     | 2835.232370    | 1418.119823       | 2834.248354       | 1417.627815      | S    | <b>234.144832</b>  | 117.576054         | 217.118283        | 109.062780       | 216.134267         | 108.570772         | 2  |
| 24 |                   |                 |                |                   |                   |                  | K    | <b>147.112804</b>  | 74.060040          | <b>130.086255</b> | 65.546765        |                    |                    | 1  |

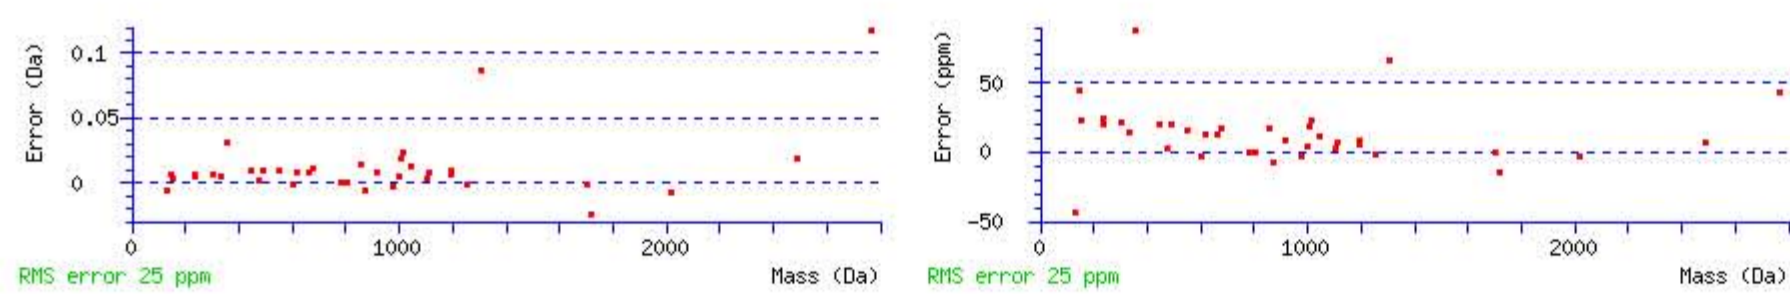

NCBI BLAST search of **TMSGLECAWDSQSPHAHGYIPSK**  
(Parameters: blastp, nr protein database, expect=20000, no filter, PAM30)  
Other BLAST [web gateways](#)

### All matches to this query

| Score | Mr(calc):   | Delta    | Sequence                                |
|-------|-------------|----------|-----------------------------------------|
| 40.8  | 2997.357162 | 0.028654 | <a href="#">TMSGLECAWDSQSPHAHGYIPSK</a> |
| 20.5  | 2997.357162 | 0.028654 | <a href="#">TMSGLECAWDSQSPHAHGYIPSK</a> |

# Mascot Search Results

## Peptide View

MS/MS Fragmentation of **GNVAVTVSGHTCQHWSAQTPHTHNR**  
 Found in **PLMN\_HUMAN**, Plasminogen OS=Homo sapiens GN=PLG PE=1 SV=2

Match to Query 71292: 3092.478320 from(619.502940,5+) rtinseconds(1389) index(74877)  
 Title: Locus:1.1.1.1834.19 File:"2013-07-02 CLN FXIII 180 min 1st FT.wiff"  
 Data file C:\Program Files (x86)\Matrix Science\Mascot Daemon\mgf7 FXIII 180 min 1st\mascot\_daemon\_merge.mgf

Click mouse within plot area to zoom in by factor of two about that point

Or, Plot from  to  Da

Label all possible matches  Label matches used for scoring

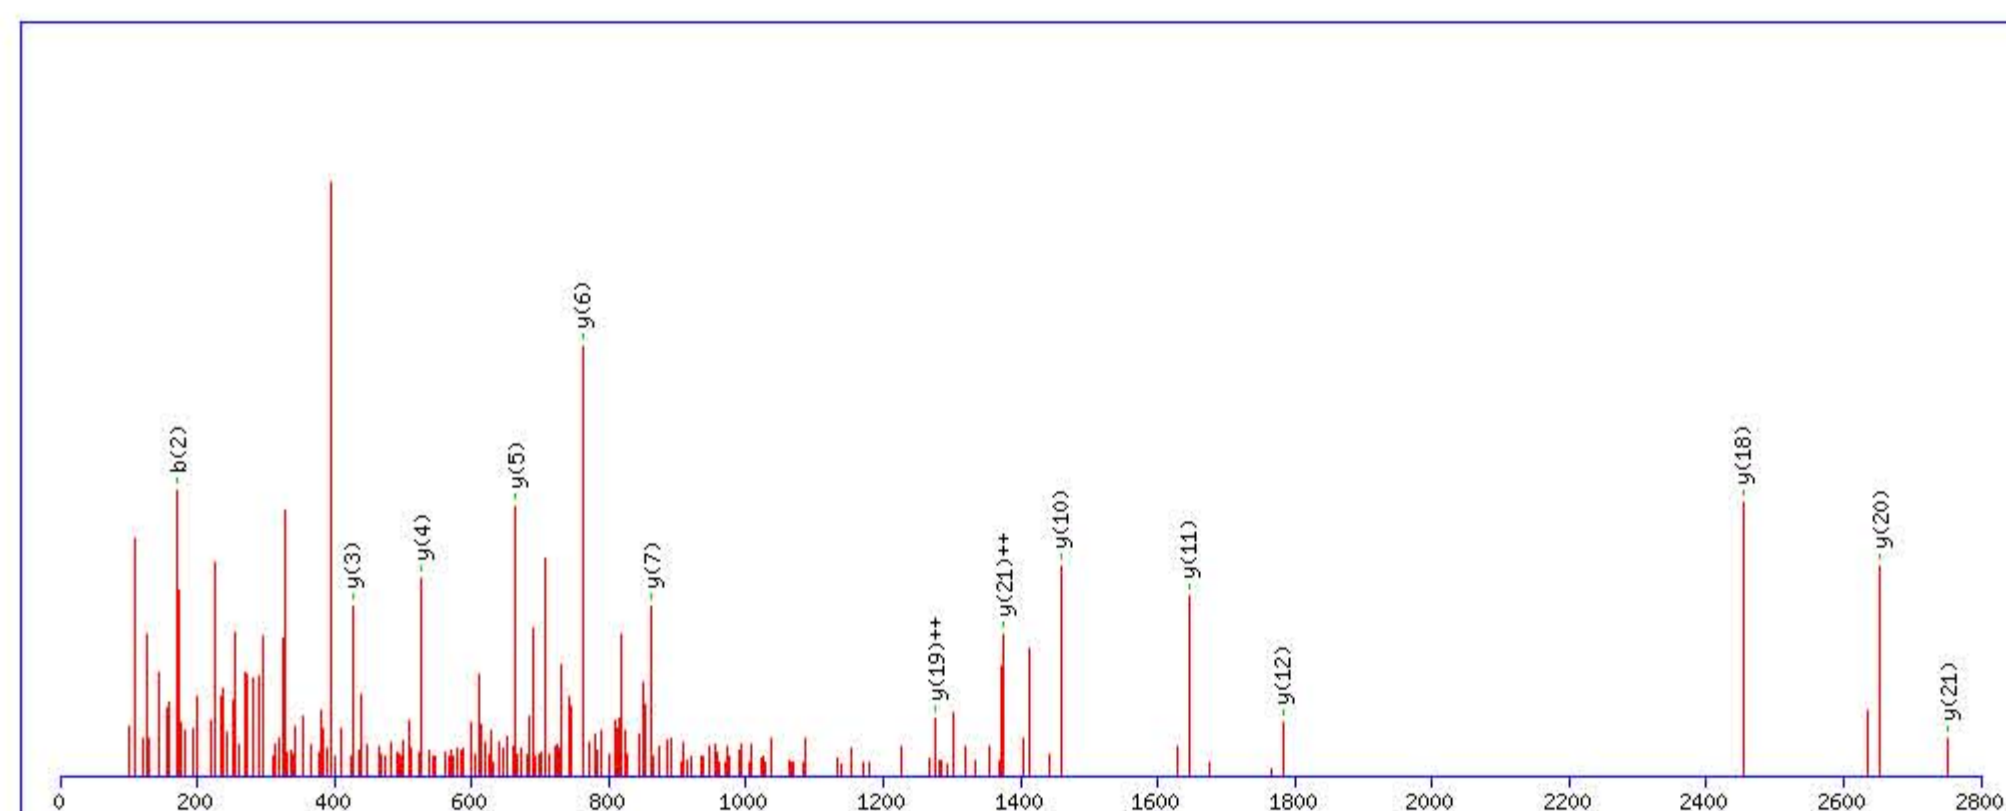

Monoisotopic mass of neutral peptide Mr(calc): 3092.457016  
 Fixed modifications: Carbamidomethyl (C) (apply to specified residues or termini only)  
 Variable modifications:  
 Q18 : Biotin:Thermo-21345 (Q)  
 Ions Score: 74 Expect: 8.2e-007  
 Matches : 14/270 fragment ions using 19 most intense peaks [\(help\)](#)

| #  | b           | b <sup>++</sup> | b <sup>+</sup> | b <sup>*++</sup> | b <sup>0</sup> | b <sup>0++</sup> | Seq. | y           | y <sup>++</sup> | y <sup>+</sup> | y <sup>*++</sup> | y <sup>0</sup> | y <sup>0++</sup> | #  |
|----|-------------|-----------------|----------------|------------------|----------------|------------------|------|-------------|-----------------|----------------|------------------|----------------|------------------|----|
| 1  | 58.028740   | 29.518008       |                |                  |                |                  | G    |             |                 |                |                  |                |                  | 25 |
| 2  | 172.071667  | 86.539471       | 155.045118     | 78.026197        |                |                  | N    | 3036.442790 | 1518.725033     | 3019.416241    | 1510.211758      | 3018.432225    | 1509.719750      | 24 |
| 3  | 271.140081  | 136.073679      | 254.113532     | 127.560404       |                |                  | V    | 2922.399863 | 1461.703569     | 2905.373314    | 1453.190295      | 2904.389298    | 1452.698287      | 23 |
| 4  | 342.177195  | 171.592236      | 325.150646     | 163.078961       |                |                  | A    | 2823.331449 | 1412.169362     | 2806.304900    | 1403.656088      | 2805.320884    | 1403.164080      | 22 |
| 5  | 441.245609  | 221.126443      | 424.219060     | 212.613168       |                |                  | V    | 2752.294335 | 1376.650805     | 2735.267786    | 1368.137531      | 2734.283770    | 1367.645523      | 21 |
| 6  | 542.293288  | 271.650282      | 525.266739     | 263.137008       | 524.282723     | 262.645000       | T    | 2653.225921 | 1327.116598     | 2636.199372    | 1318.603324      | 2635.215356    | 1318.111316      | 20 |
| 7  | 641.361702  | 321.184489      | 624.335153     | 312.671215       | 623.351137     | 312.179207       | V    | 2552.178242 | 1276.592759     | 2535.151693    | 1268.079484      | 2534.167677    | 1267.587476      | 19 |
| 8  | 728.393730  | 364.700503      | 711.367181     | 356.187229       | 710.383165     | 355.695221       | S    | 2453.109828 | 1227.058552     | 2436.083279    | 1218.545277      | 2435.099263    | 1218.053269      | 18 |
| 9  | 785.415194  | 393.211235      | 768.388645     | 384.697961       | 767.404629     | 384.205953       | G    | 2366.077800 | 1183.542538     | 2349.051251    | 1175.029263      | 2348.067235    | 1174.537255      | 17 |
| 10 | 922.474106  | 461.740691      | 905.447557     | 453.227417       | 904.463541     | 452.735409       | H    | 2309.056336 | 1155.031806     | 2292.029787    | 1146.518531      | 2291.045771    | 1146.026523      | 16 |
| 11 | 1023.521785 | 512.264530      | 1006.495236    | 503.751256       | 1005.511220    | 503.259248       | T    | 2171.997424 | 1086.502350     | 2154.970875    | 1077.989075      | 2153.986859    | 1077.497067      | 15 |
| 12 | 1183.552434 | 592.279855      | 1166.525885    | 583.766581       | 1165.541869    | 583.274572       | C    | 2070.949745 | 1035.978510     | 2053.923196    | 1027.465236      | 2052.939180    | 1026.973228      | 14 |
| 13 | 1311.611012 | 656.309144      | 1294.584463    | 647.795870       | 1293.600447    | 647.303862       | Q    | 1910.919096 | 955.963186      | 1893.892547    | 947.449911       | 1892.908531    | 946.957903       | 13 |
| 14 | 1448.669924 | 724.838600      | 1431.643375    | 716.325326       | 1430.659359    | 715.833318       | H    | 1782.860518 | 891.933897      | 1765.833969    | 883.420622       | 1764.849953    | 882.928614       | 12 |
| 15 | 1634.749237 | 817.878257      | 1617.722688    | 809.364982       | 1616.738672    | 808.872974       | W    | 1645.801606 | 823.404441      | 1628.775057    | 814.891166       | 1627.791041    | 814.399158       | 11 |
| 16 | 1721.781265 | 861.394271      | 1704.754716    | 852.880996       | 1703.770700    | 852.388988       | S    | 1459.722293 | 730.364784      | 1442.695744    | 721.851510       | 1441.711728    | 721.359502       | 10 |
| 17 | 1792.818379 | 896.912828      | 1775.791830    | 888.399553       | 1774.807814    | 887.907545       | A    | 1372.690265 | 686.848770      | 1355.663716    | 678.335496       | 1354.679700    | 677.843488       | 9  |
| 18 | 2232.043705 | 1116.525490     | 2215.017156    | 1108.012216      | 2214.033140    | 1107.520208      | Q    | 1301.653151 | 651.330213      | 1284.626602    | 642.816939       | 1283.642586    | 642.324931       | 8  |
| 19 | 2333.091384 | 1167.049330     | 2316.064835    | 1158.536055      | 2315.080819    | 1158.044047      | T    | 862.427825  | 431.717550      | 845.401276     | 423.204276       | 844.417260     | 422.712268       | 7  |
| 20 | 2430.144148 | 1215.575712     | 2413.117599    | 1207.062437      | 2412.133583    | 1206.570429      | P    | 761.380146  | 381.193711      | 744.353597     | 372.680436       | 743.369581     | 372.188428       | 6  |
| 21 | 2567.203060 | 1284.105168     | 2550.176511    | 1275.591893      | 2549.192495    | 1275.099885      | H    | 664.327382  | 332.667329      | 647.300833     | 324.154054       | 646.316817     | 323.662046       | 5  |
| 22 | 2668.250739 | 1334.629007     | 2651.224190    | 1326.115733      | 2650.240174    | 1325.623725      | T    | 527.268470  | 264.137873      | 510.241921     | 255.624598       | 509.257905     | 255.132590       | 4  |
| 23 | 2805.309651 | 1403.158463     | 2788.283102    | 1394.645189      | 2787.299086    | 1394.153181      | H    | 426.220791  | 213.614033      | 409.194242     | 205.100759       |                |                  | 3  |
| 24 | 2919.352578 | 1460.179927     | 2902.326029    | 1451.666652      | 2901.342013    | 1451.174644      | N    | 289.161879  | 145.084577      | 272.135330     | 136.571303       |                |                  | 2  |
| 25 |             |                 |                |                  |                |                  | R    | 175.118952  | 88.063114       | 158.092403     | 79.549839        |                |                  | 1  |

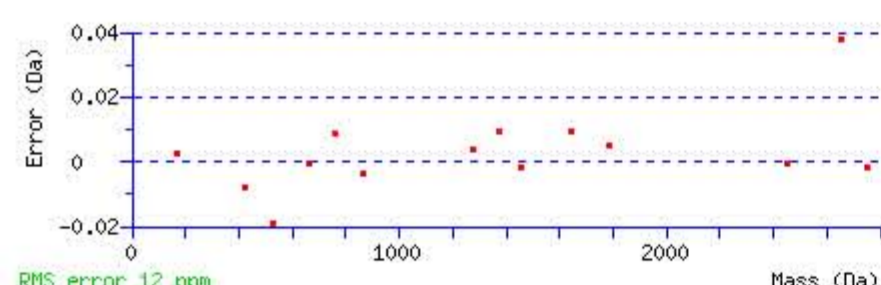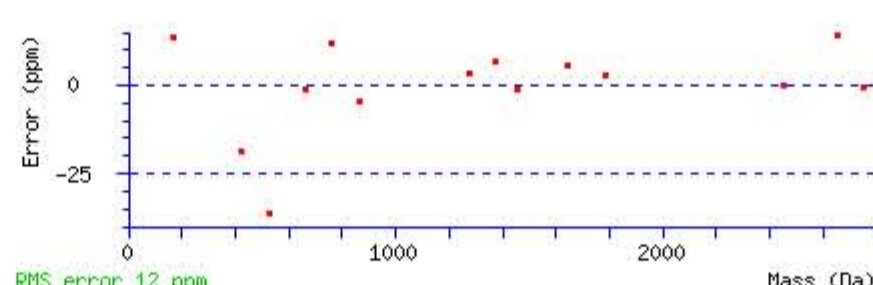

NCBI BLAST search of [GNVAVTVSGHTCQHWSAQTPHTHNR](#)  
 (Parameters: blastp, nr protein database, expect=20000, no filter, PAM30)  
 Other BLAST [web gateways](#)

## All matches to this query

| Score | Mr(calc):   | Delta    | Sequence                                  |
|-------|-------------|----------|-------------------------------------------|
| 74.5  | 3092.457016 | 0.021304 | <a href="#">GNVAVTVSGHTCQHWSAQTPHTHNR</a> |
| 37.2  | 3092.457016 | 0.021304 | <a href="#">GNVAVTVSGHTCQHWSAQTPHTHNR</a> |

# MASCOT Search Results

## Peptide View

MS/MS Fragmentation of **VILGAHQEVNLEPHVQEIIVSR**  
 Found in **PLMN\_HUMAN**, Plasminogen OS=Homo sapiens GN=PLG PE=1 SV=2

Match to Query 71449: 3117.674336 from(780.425860,4+) rtinseconds(2210) index(80324)  
 Title: Locus:1.1.1.2120.13 File:"2013-07-02 CLN FXIII 180 min 1st FT.wiff"  
 Data file C:\Program Files (x86)\Matrix Science\Mascot Daemon\mgf7 FXIII 180 min 1st\mascot\_daemon\_merge.mgf

Click mouse within plot area to zoom in by factor of two about that point

Or, Plot from  to  Da

Label all possible matches  Label matches used for scoring

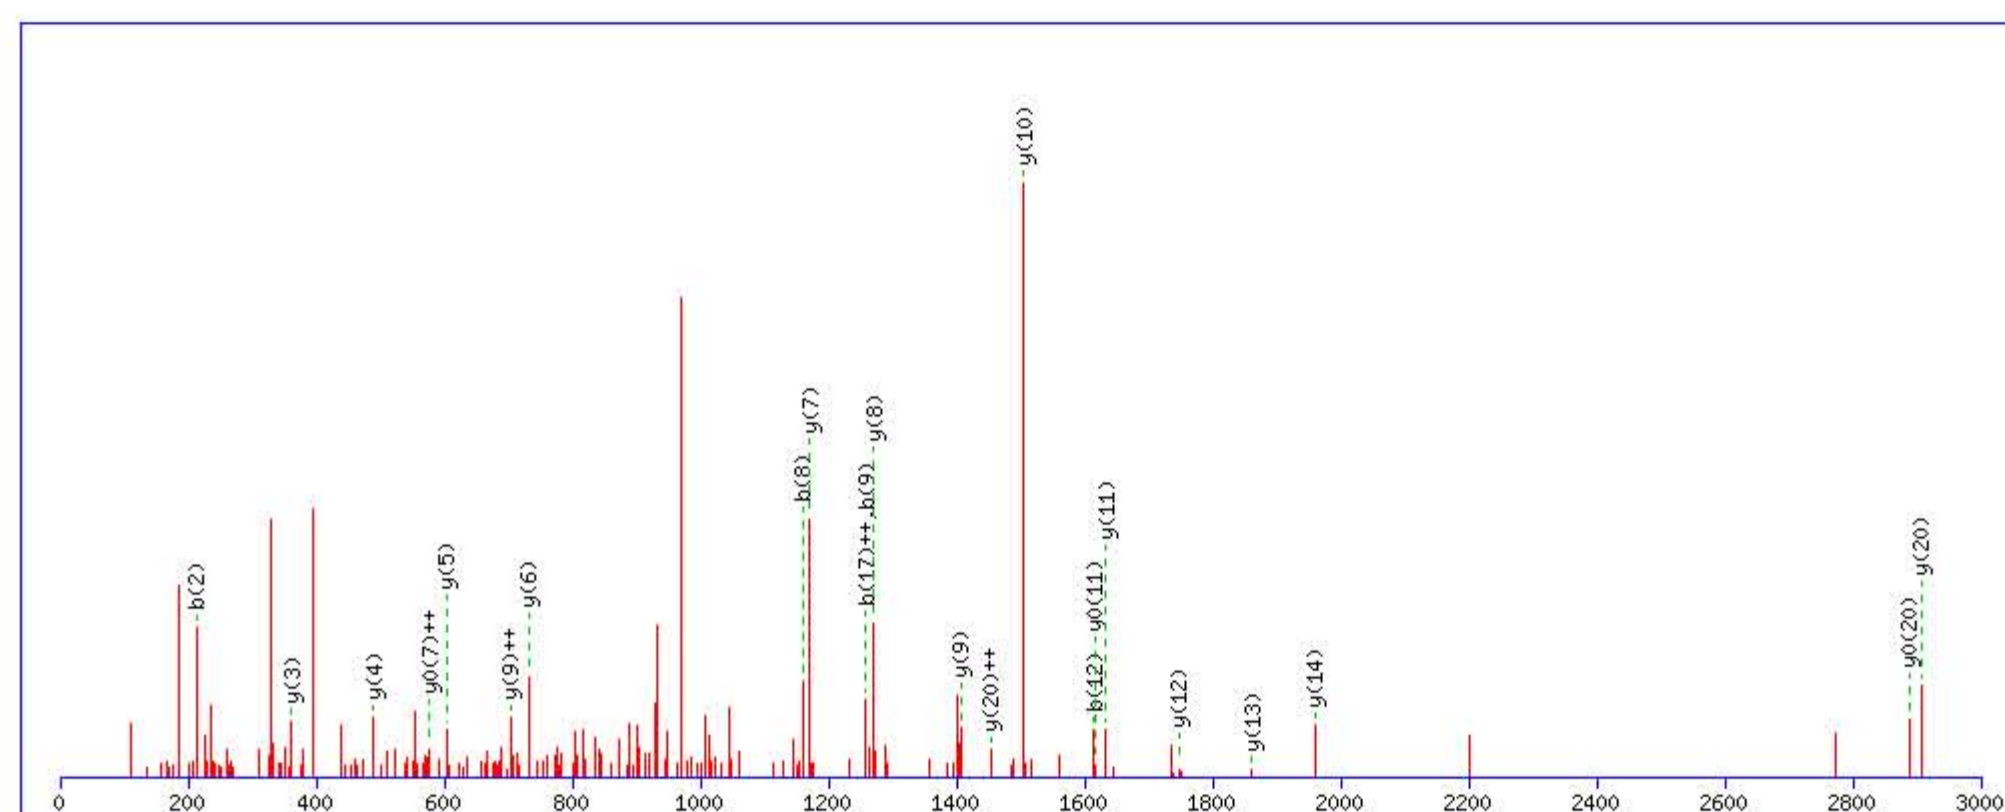

Monoisotopic mass of neutral peptide Mr(calc): 3117.646713  
 Fixed modifications: Carbamidomethyl (C) (apply to specified residues or termini only)  
 Variable modifications:  
 Q7 : Biotin:Thermo-21345 (Q)  
 Q16 : Biotin:Thermo-21345 (Q)  
 Ions Score: 52 Expect: 8.4e-005  
 Matches : 23/224 fragment ions using 56 most intense peaks [\(help\)](#)

| #  | b                  | b <sup>++</sup>    | b <sup>*</sup> | b <sup>*++</sup> | b <sup>0</sup> | b <sup>0++</sup> | Seq. | y                  | y <sup>++</sup>    | y <sup>*</sup> | y <sup>*++</sup> | y <sup>0</sup>     | y <sup>0++</sup>  | #  |
|----|--------------------|--------------------|----------------|------------------|----------------|------------------|------|--------------------|--------------------|----------------|------------------|--------------------|-------------------|----|
| 1  | 100.075690         | 50.541483          |                |                  |                |                  | V    |                    |                    |                |                  |                    |                   | 22 |
| 2  | <b>213.159754</b>  | 107.083515         |                |                  |                |                  | I    | 3019.585595        | 1510.296435        | 3002.559046    | 1501.783161      | 3001.575030        | 1501.291153       | 21 |
| 3  | 326.243818         | 163.625547         |                |                  |                |                  | L    | <b>2906.501531</b> | <b>1453.754403</b> | 2889.474982    | 1445.241129      | <b>2888.490966</b> | 1444.749121       | 20 |
| 4  | 383.265282         | 192.136279         |                |                  |                |                  | G    | 2793.417467        | 1397.212371        | 2776.390918    | 1388.699097      | 2775.406902        | 1388.207089       | 19 |
| 5  | 454.302396         | 227.654836         |                |                  |                |                  | A    | 2736.396003        | 1368.701639        | 2719.369454    | 1360.188365      | 2718.385438        | 1359.696357       | 18 |
| 6  | 591.361308         | 296.184292         |                |                  |                |                  | H    | 2665.358889        | 1333.183082        | 2648.332340    | 1324.669808      | 2647.348324        | 1324.177800       | 17 |
| 7  | 1030.586634        | 515.796955         | 1013.560085    | 507.283681       |                |                  | Q    | 2528.299977        | 1264.653627        | 2511.273428    | 1256.140352      | 2510.289412        | 1255.648344       | 16 |
| 8  | <b>1159.629227</b> | 580.318252         | 1142.602678    | 571.804977       | 1141.618662    | 571.312969       | E    | 2089.074651        | 1045.040963        | 2072.048102    | 1036.527689      | 2071.064086        | 1036.035681       | 15 |
| 9  | <b>1258.697641</b> | 629.852459         | 1241.671092    | 621.339184       | 1240.687076    | 620.847176       | V    | <b>1960.032058</b> | 980.519667         | 1943.005509    | 972.006393       | 1942.021493        | 971.514385        | 14 |
| 10 | 1372.740568        | 686.873922         | 1355.714019    | 678.360648       | 1354.730003    | 677.868640       | N    | <b>1860.963644</b> | 930.985460         | 1843.937095    | 922.472186       | 1842.953079        | 921.980178        | 13 |
| 11 | 1485.824632        | 743.415954         | 1468.798083    | 734.902680       | 1467.814067    | 734.410672       | L    | <b>1746.920717</b> | 873.963997         | 1729.894168    | 865.450722       | 1728.910152        | 864.958714        | 12 |
| 12 | <b>1614.867225</b> | 807.937251         | 1597.840676    | 799.423976       | 1596.856660    | 798.931968       | E    | <b>1633.836653</b> | 817.421965         | 1616.810104    | 808.908690       | <b>1615.826088</b> | 808.416682        | 11 |
| 13 | 1711.919989        | 856.463633         | 1694.893440    | 847.950358       | 1693.909424    | 847.458350       | P    | <b>1504.794060</b> | 752.900668         | 1487.767511    | 744.387394       | 1486.783495        | 743.895386        | 10 |
| 14 | 1848.978901        | 924.993089         | 1831.952352    | 916.479814       | 1830.968336    | 915.987806       | H    | <b>1407.741296</b> | <b>704.374286</b>  | 1390.714747    | 695.861012       | 1389.730731        | 695.369004        | 9  |
| 15 | 1948.047315        | 974.527296         | 1931.020766    | 966.014021       | 1930.036750    | 965.522013       | V    | <b>1270.682384</b> | 635.844830         | 1253.655835    | 627.331556       | 1252.671819        | 626.839548        | 8  |
| 16 | 2387.272641        | 1194.139958        | 2370.246092    | 1185.626684      | 2369.262076    | 1185.134676      | Q    | <b>1171.613970</b> | 586.310623         | 1154.587421    | 577.797349       | 1153.603405        | <b>577.305341</b> | 7  |
| 17 | 2516.315234        | <b>1258.661255</b> | 2499.288685    | 1250.147980      | 2498.304669    | 1249.655973      | E    | <b>732.388644</b>  | 366.697960         | 715.362095     | 358.184686       | 714.378079         | 357.692678        | 6  |
| 18 | 2629.399298        | 1315.203287        | 2612.372749    | 1306.690013      | 2611.388733    | 1306.198005      | I    | <b>603.346051</b>  | 302.176664         | 586.319502     | 293.663389       | 585.335486         | 293.171381        | 5  |
| 19 | 2758.441891        | 1379.724584        | 2741.415342    | 1371.211309      | 2740.431326    | 1370.719301      | E    | <b>490.261987</b>  | 245.634631         | 473.235438     | 237.121357       | 472.251422         | 236.629349        | 4  |
| 20 | 2857.510305        | 1429.258791        | 2840.483756    | 1420.745516      | 2839.499740    | 1420.253508      | V    | <b>361.219394</b>  | 181.113335         | 344.192845     | 172.600060       | 343.208829         | 172.108052        | 3  |
| 21 | 2944.542333        | 1472.774805        | 2927.515784    | 1464.261530      | 2926.531768    | 1463.769522      | S    | 262.150980         | 131.579128         | 245.124431     | 123.065854       | 244.140415         | 122.573846        | 2  |
| 22 |                    |                    |                |                  |                |                  | R    | 175.118952         | 88.063114          | 158.092403     | 79.549839        |                    |                   | 1  |

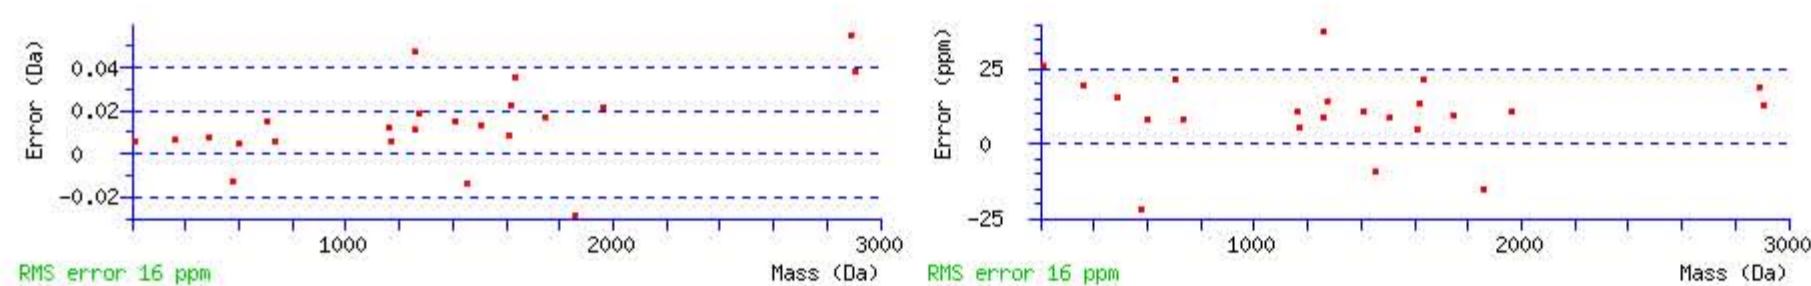

NCBI BLAST search of **VILGAHQEVNLEPHVQEIIVSR**  
 (Parameters: blastp, nr protein database, expect=20000, no filter, PAM30)  
 Other BLAST [web gateways](#)

### All matches to this query

| Score | Mr(calc):   | Delta    | Sequence                               |
|-------|-------------|----------|----------------------------------------|
| 52.4  | 3117.646713 | 0.027623 | <a href="#">VILGAHQEVNLEPHVQEIIVSR</a> |

# MASCOT Search Results

## Peptide View

MS/MS Fragmentation of **LYDYCDVPQCAAPSFDCGKQPVEPK**

Found in **PLMN\_HUMAN**, Plasminogen OS=Homo sapiens GN=PLG PE=1 SV=2

Match to Query 74290: 3254.483472 from(1085.835100,3+) rtinseconds(2033) index(79087)  
 Title: Locus:1.1.1.2058.23 File:"2013-07-02 CLN FXIII 180 min 1st FT.wiff"  
 Data file C:\Program Files (x86)\Matrix Science\Mascot Daemon\mgf7 FXIII 180 min 1st\mascot\_daemon\_merge.mgf

Click mouse within plot area to zoom in by factor of two about that point

Or, Plot from  to  Da

Label all possible matches  Label matches used for scoring

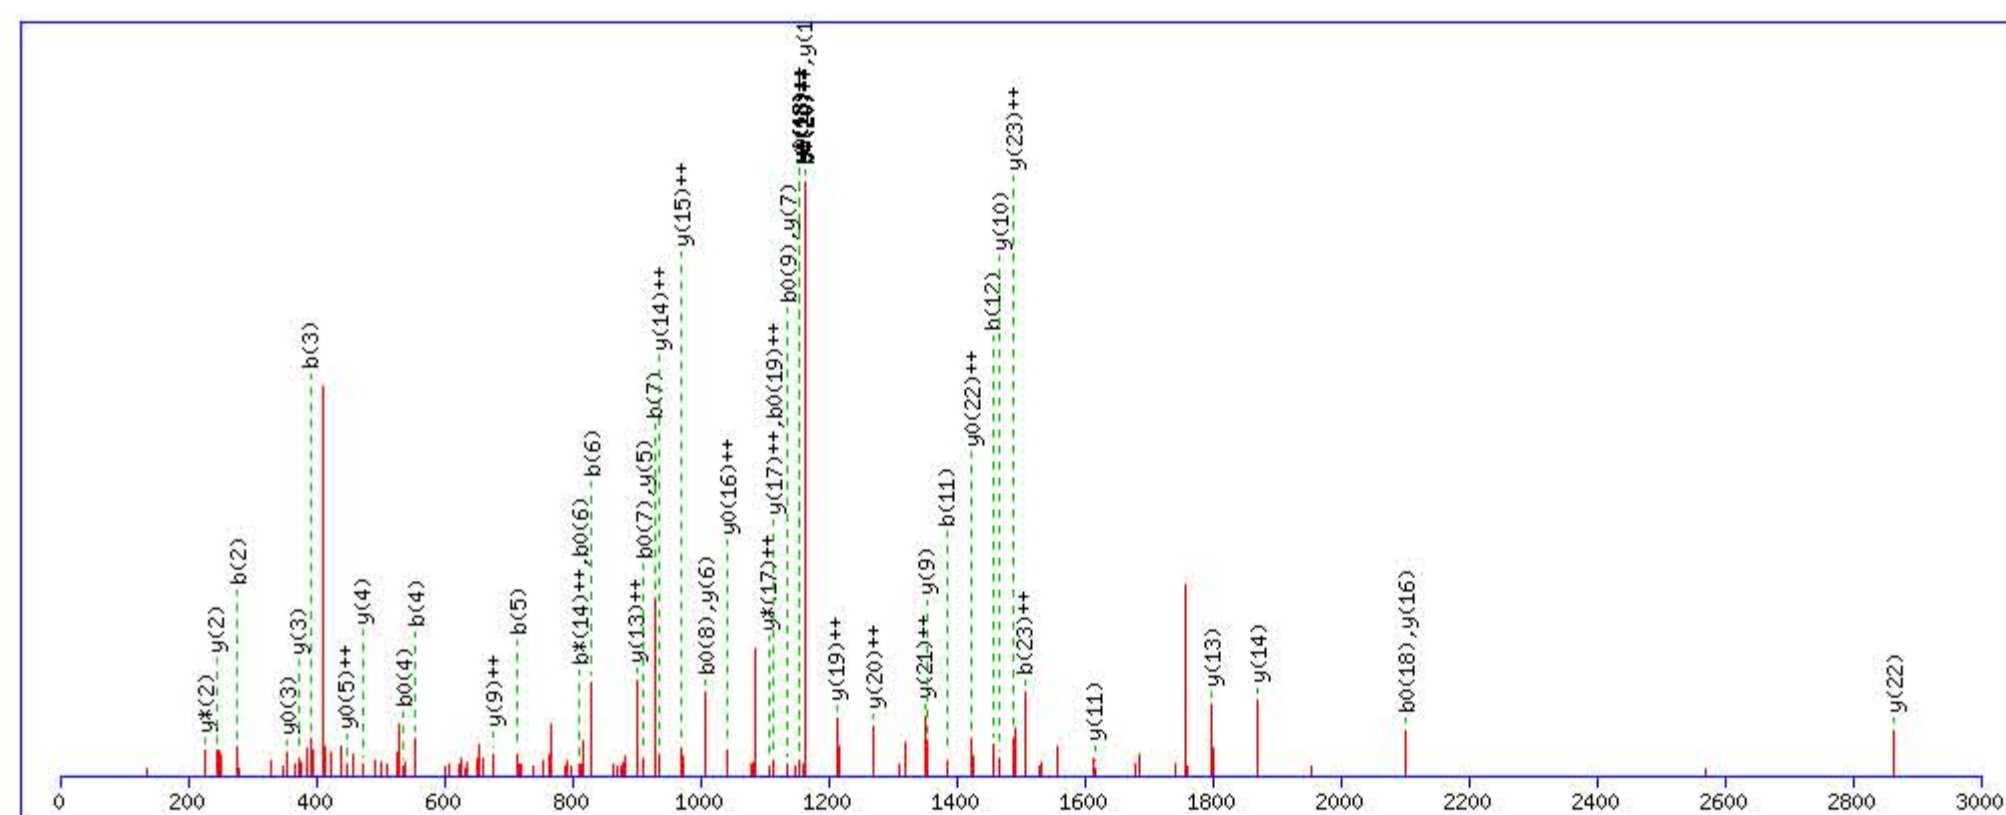

Monoisotopic mass of neutral peptide Mr(calc): 3254.454514  
 Fixed modifications: Carbamidomethyl (C) (apply to specified residues or termini only)  
 Variable modifications:  
 Q21 : Biotin:Thermo-21345 (Q)  
 Ions Score: 43 Expect: 0.00063  
 Matches : 50/264 fragment ions using 134 most intense peaks [\(help\)](#)

| #  | b                  | b <sup>++</sup>    | b <sup>+</sup> | b <sup>*++</sup>   | b <sup>0</sup>     | b <sup>0++</sup>   | Seq. | y                  | y <sup>++</sup>    | y <sup>+</sup>    | y <sup>*++</sup>   | y <sup>0</sup>    | y <sup>0++</sup>   | #  |
|----|--------------------|--------------------|----------------|--------------------|--------------------|--------------------|------|--------------------|--------------------|-------------------|--------------------|-------------------|--------------------|----|
| 1  | 114.091340         | 57.549308          |                |                    |                    |                    | L    |                    |                    |                   |                    |                   |                    | 25 |
| 2  | <b>277.154669</b>  | 139.080973         |                |                    |                    |                    | Y    | 3142.377716        | 1571.692496        | 3125.351167       | 1563.179221        | 3124.367151       | 1562.687213        | 24 |
| 3  | <b>392.181612</b>  | 196.594444         |                |                    | 374.171047         | 187.589162         | D    | 2979.314387        | <b>1490.160831</b> | 2962.287838       | 1481.647557        | 2961.303822       | 1481.155549        | 23 |
| 4  | <b>555.244941</b>  | 278.126109         |                |                    | <b>537.234376</b>  | 269.120826         | Y    | <b>2864.287444</b> | 1432.647360        | 2847.260895       | 1424.134085        | 2846.276879       | <b>1423.642077</b> | 22 |
| 5  | <b>715.275590</b>  | 358.141433         |                |                    | 697.265025         | 349.136151         | C    | 2701.224115        | <b>1351.115695</b> | 2684.197566       | 1342.602421        | 2683.213550       | 1342.110413        | 21 |
| 6  | <b>830.302533</b>  | 415.654905         |                |                    | <b>812.291968</b>  | 406.649622         | D    | 2541.193466        | <b>1271.100371</b> | 2524.166917       | 1262.587096        | 2523.182901       | 1262.095089        | 20 |
| 7  | <b>929.370947</b>  | 465.189112         |                |                    | <b>911.360382</b>  | 456.183829         | V    | 2426.166523        | <b>1213.586899</b> | 2409.139974       | 1205.073625        | 2408.155958       | 1204.581617        | 19 |
| 8  | 1026.423711        | 513.715494         |                |                    | <b>1008.413146</b> | 504.710211         | P    | 2327.098109        | <b>1164.052692</b> | 2310.071560       | <b>1155.539418</b> | 2309.087544       | <b>1155.047410</b> | 18 |
| 9  | 1154.482289        | 577.744783         | 1137.455740    | 569.231508         | <b>1136.471724</b> | 568.739500         | Q    | 2230.045345        | <b>1115.526310</b> | 2213.018796       | <b>1107.013036</b> | 2212.034780       | 1106.521028        | 17 |
| 10 | 1314.512938        | 657.760107         | 1297.486389    | 649.246833         | 1296.502373        | 648.754825         | C    | <b>2101.986767</b> | 1051.497021        | 2084.960218       | 1042.983747        | 2083.976202       | <b>1042.491739</b> | 16 |
| 11 | <b>1385.550052</b> | 693.278664         | 1368.523503    | 684.765390         | 1367.539487        | 684.273382         | A    | 1941.956118        | <b>971.481697</b>  | 1924.929569       | 962.968423         | 1923.945553       | 962.476415         | 15 |
| 12 | <b>1456.587166</b> | 728.797221         | 1439.560617    | 720.283947         | 1438.576601        | 719.791939         | A    | <b>1870.919004</b> | <b>935.963140</b>  | 1853.892455       | 927.449866         | 1852.908439       | 926.957858         | 14 |
| 13 | 1553.639930        | 777.323603         | 1536.613381    | 768.810329         | 1535.629365        | 768.318321         | P    | <b>1799.881890</b> | <b>900.444583</b>  | 1782.855341       | 891.931309         | 1781.871325       | 891.439301         | 13 |
| 14 | 1640.671958        | 820.839617         | 1623.645409    | <b>812.326343</b>  | 1622.661393        | 811.834335         | S    | 1702.829126        | 851.918201         | 1685.802577       | 843.404927         | 1684.818561       | 842.912919         | 12 |
| 15 | 1787.740372        | 894.373824         | 1770.713823    | 885.860550         | 1769.729807        | 885.368542         | F    | <b>1615.797098</b> | 808.402187         | 1598.770549       | 799.888913         | 1597.786533       | 799.396905         | 11 |
| 16 | 1902.767315        | 951.887296         | 1885.740766    | 943.374021         | 1884.756750        | 942.882013         | D    | <b>1468.728684</b> | 734.867980         | 1451.702135       | 726.354706         | 1450.718119       | 725.862698         | 10 |
| 17 | 2062.797964        | 1031.902620        | 2045.771415    | 1023.389346        | 2044.787399        | 1022.897338        | C    | <b>1353.701741</b> | <b>677.354509</b>  | 1336.675192       | 668.841234         | 1335.691176       | 668.349226         | 9  |
| 18 | 2119.819428        | 1060.413352        | 2102.792879    | 1051.900078        | <b>2101.808863</b> | 1051.408070        | G    | 1193.671092        | 597.339184         | 1176.644543       | 588.825910         | 1175.660527       | 588.333902         | 8  |
| 19 | 2247.914391        | 1124.460834        | 2230.887842    | 1115.947559        | 2229.903826        | <b>1115.455551</b> | K    | <b>1136.649628</b> | 568.828452         | 1119.623079       | 560.315178         | 1118.639063       | 559.823170         | 7  |
| 20 | 2344.967155        | 1172.987216        | 2327.940606    | <b>1164.473941</b> | 2326.956590        | <b>1163.981933</b> | P    | <b>1008.554665</b> | 504.780971         | 991.528116        | 496.267696         | 990.544100        | 495.775688         | 6  |
| 21 | 2784.192481        | 1392.599879        | 2767.165932    | 1384.086604        | 2766.181916        | 1383.594596        | Q    | <b>911.501901</b>  | 456.254589         | 894.475352        | 447.741314         | 893.491336        | <b>447.249306</b>  | 5  |
| 22 | 2883.260895        | 1442.134086        | 2866.234346    | 1433.620811        | 2865.250330        | 1433.128803        | V    | <b>472.276575</b>  | 236.641925         | 455.250026        | 228.128651         | 454.266010        | 227.636643         | 4  |
| 23 | 3012.303488        | <b>1506.655382</b> | 2995.276939    | 1498.142108        | 2994.292923        | 1497.650100        | E    | <b>373.208161</b>  | 187.107719         | 356.181612        | 178.594444         | <b>355.197596</b> | 178.102436         | 3  |
| 24 | 3109.356252        | 1555.181764        | 3092.329703    | 1546.668490        | 3091.345687        | 1546.176482        | P    | <b>244.165568</b>  | 122.586422         | <b>227.139019</b> | 114.073148         |                   |                    | 2  |
| 25 |                    |                    |                |                    |                    |                    | K    | 147.112804         | 74.060040          | 130.086255        | 65.546765          |                   |                    | 1  |

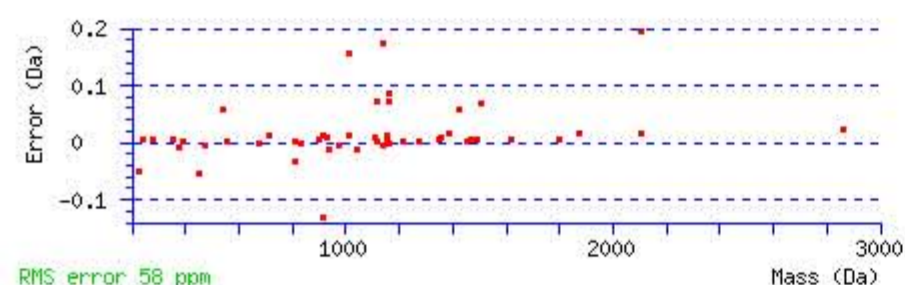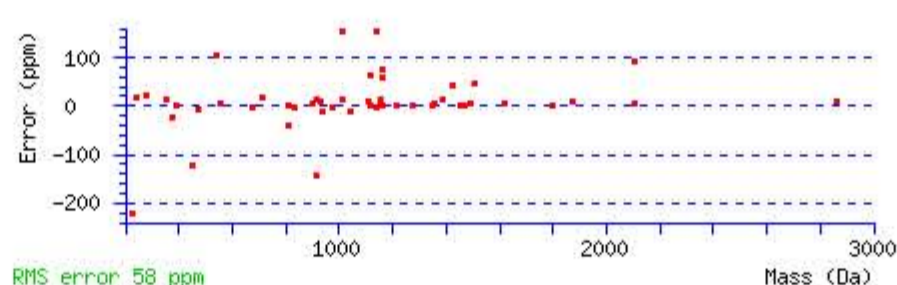

NCBI BLAST search of **LYDYCDVPQCAAPSFDCGKQPVEPK**  
 (Parameters: blastp, nr protein database, expect=20000, no filter, PAM30)  
 Other BLAST [web gateways](#)

## All matches to this query

| Score | Mr(calc):   | Delta    | Sequence                                  |
|-------|-------------|----------|-------------------------------------------|
| 42.8  | 3254.454514 | 0.028958 | <a href="#">LYDYCDVPQCAAPSFDCGKQPVEPK</a> |
| 13.3  | 3254.454514 | 0.028958 | <a href="#">LYDYCDVPQCAAPSFDCGKQPVEPK</a> |

**MASCOT** Mascot Search Results

Peptide View

MS/MS Fragmentation of **KLYDYCDVPQCAAPSFDCGKQPVEPK**  
 Found in **PLMN\_HUMAN**, Plasminogen OS=Homo sapiens GN=PLG PE=1 SV=2

Match to Query 75900: 3382.583816 from(846.653230,4+) rtinseconds(1953) index(78600)  
 Title: Locus:1.1.1.2030.24 File:"2013-07-02 CLN FXIII 180 min 1st FT.wiff"  
 Data file C:\Program Files (x86)\Matrix Science\Mascot Daemon\mgf7 FXIII 180 min 1st\mascot\_daemon\_merge.mgf

Click mouse within plot area to zoom in by factor of two about that point  
 Or, Plot from  to  Da   
 Label all possible matches  Label matches used for scoring

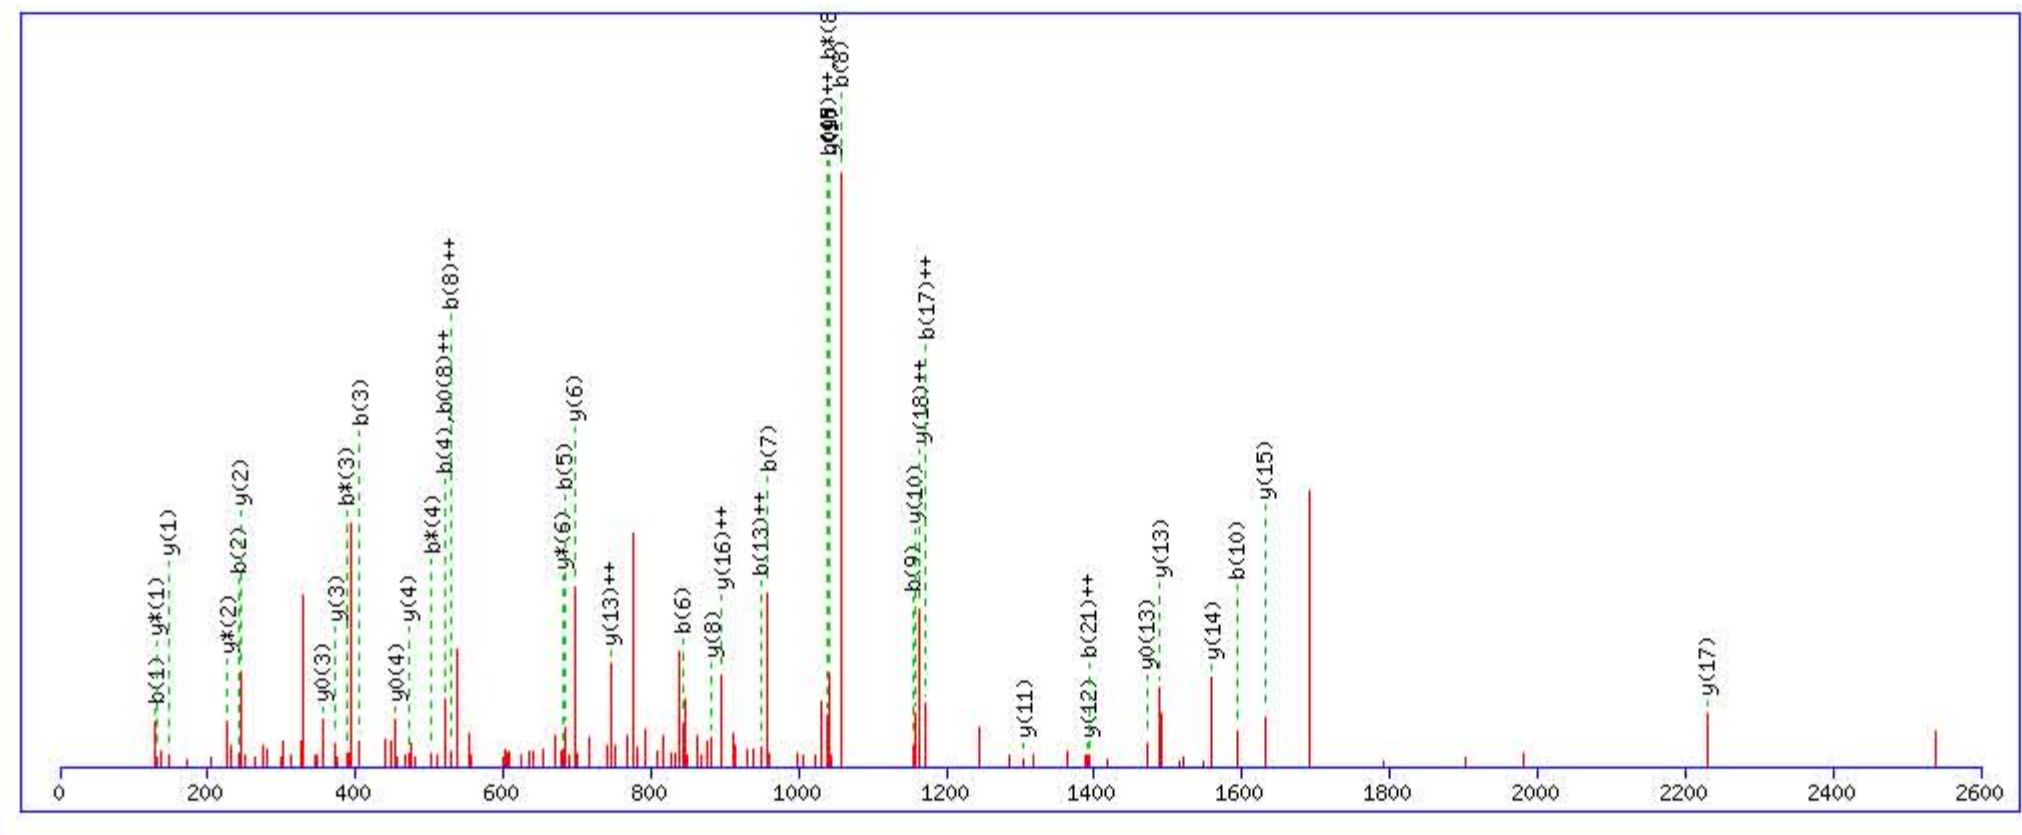

Monoisotopic mass of neutral peptide Mr(calc): 3382.549469  
 Fixed modifications: Carbamidomethyl (C) (apply to specified residues or termini only)  
 Variable modifications:  
 Q10 : Biotin:Thermo-21345 (Q)  
 Ions Score: 64 Expect: 1.4e-006  
 Matches : 43/290 fragment ions using 113 most intense peaks [\(help\)](#)

| #  | b           | b <sup>++</sup> | b <sup>*</sup> | b <sup>+++</sup> | b <sup>0</sup> | b <sup>0++</sup> | Seq. | y           | y <sup>++</sup> | y <sup>*</sup> | y <sup>+++</sup> | y <sup>0</sup> | y <sup>0++</sup> | #  |
|----|-------------|-----------------|----------------|------------------|----------------|------------------|------|-------------|-----------------|----------------|------------------|----------------|------------------|----|
| 1  | 129.102239  | 65.054757       | 112.075690     | 56.541483        |                |                  | K    |             |                 |                |                  |                |                  | 26 |
| 2  | 242.186303  | 121.596790      | 225.159754     | 113.083515       |                |                  | L    | 3255.461780 | 1628.234528     | 3238.435231    | 1619.721253      | 3237.451215    | 1619.229245      | 25 |
| 3  | 405.249632  | 203.128454      | 388.223083     | 194.615180       |                |                  | Y    | 3142.377716 | 1571.692496     | 3125.351167    | 1563.179221      | 3124.367151    | 1562.687213      | 24 |
| 4  | 520.276575  | 260.641926      | 503.250026     | 252.128651       | 502.266010     | 251.636643       | D    | 2979.314387 | 1490.160831     | 2962.287838    | 1481.647557      | 2961.303822    | 1481.155549      | 23 |
| 5  | 683.339904  | 342.173590      | 666.313355     | 333.660316       | 665.329339     | 333.168308       | Y    | 2864.287444 | 1432.647360     | 2847.260895    | 1424.134085      | 2846.276879    | 1423.642077      | 22 |
| 6  | 843.370553  | 422.188915      | 826.344004     | 413.675640       | 825.359988     | 413.183632       | C    | 2701.224115 | 1351.115695     | 2684.197566    | 1342.602421      | 2683.213550    | 1342.110413      | 21 |
| 7  | 958.397496  | 479.702386      | 941.370947     | 471.189112       | 940.386931     | 470.697104       | D    | 2541.193466 | 1271.100371     | 2524.166917    | 1262.587096      | 2523.182901    | 1262.095088      | 20 |
| 8  | 1057.465910 | 529.236593      | 1040.439361    | 520.723319       | 1039.455345    | 520.231311       | V    | 2426.166523 | 1213.586899     | 2409.139974    | 1205.073625      | 2408.155958    | 1204.581617      | 19 |
| 9  | 1154.518674 | 577.762975      | 1137.492125    | 569.249701       | 1136.508109    | 568.757693       | P    | 2327.098109 | 1164.052692     | 2310.071560    | 1155.539418      | 2309.087544    | 1155.047410      | 18 |
| 10 | 1593.744000 | 797.375638      | 1576.717451    | 788.862364       | 1575.733435    | 788.370356       | Q    | 2230.045345 | 1115.526310     | 2213.018796    | 1107.013036      | 2212.034780    | 1106.521028      | 17 |
| 11 | 1753.774649 | 877.390963      | 1736.748100    | 868.877688       | 1735.764084    | 868.385680       | C    | 1790.820019 | 895.913647      | 1773.793470    | 887.400373       | 1772.809454    | 886.908365       | 16 |
| 12 | 1824.811763 | 912.909520      | 1807.785214    | 904.396245       | 1806.801198    | 903.904237       | A    | 1630.789370 | 815.898323      | 1613.762821    | 807.385048       | 1612.778805    | 806.893040       | 15 |
| 13 | 1895.848877 | 948.428077      | 1878.822328    | 939.914802       | 1877.838312    | 939.422794       | A    | 1559.752256 | 780.379766      | 1542.725707    | 771.866491       | 1541.741691    | 771.374483       | 14 |
| 14 | 1992.901641 | 996.954459      | 1975.875092    | 988.441184       | 1974.891076    | 987.949176       | P    | 1488.715142 | 744.861209      | 1471.688593    | 736.347934       | 1470.704577    | 735.855926       | 13 |
| 15 | 2079.933669 | 1040.470472     | 2062.907120    | 1031.957198      | 2061.923104    | 1031.465190      | S    | 1391.662378 | 696.334827      | 1374.635829    | 687.821552       | 1373.651813    | 687.329544       | 12 |
| 16 | 2227.002083 | 1114.004679     | 2209.975534    | 1105.491405      | 2208.991518    | 1104.999397      | F    | 1304.630350 | 652.818813      | 1287.603801    | 644.305538       | 1286.619785    | 643.813530       | 11 |
| 17 | 2342.029026 | 1171.518151     | 2325.002477    | 1163.004876      | 2324.018461    | 1162.512868      | D    | 1157.561936 | 579.284606      | 1140.535387    | 570.771331       | 1139.551371    | 570.279323       | 10 |
| 18 | 2502.059675 | 1251.533475     | 2485.033126    | 1243.020201      | 2484.049110    | 1242.528193      | C    | 1042.534993 | 521.771135      | 1025.508444    | 513.257860       | 1024.524428    | 512.765852       | 9  |
| 19 | 2559.081139 | 1280.044207     | 2542.054590    | 1271.530933      | 2541.070574    | 1271.038925      | G    | 882.504344  | 441.755810      | 865.477795     | 433.242536       | 864.493779     | 432.750528       | 8  |
| 20 | 2687.176102 | 1344.091689     | 2670.149553    | 1335.578414      | 2669.165537    | 1335.086406      | K    | 825.482880  | 413.245078      | 808.456331     | 404.731804       | 807.472315     | 404.239796       | 7  |
| 21 | 2784.228866 | 1392.618071     | 2767.202317    | 1384.104796      | 2766.218301    | 1383.612788      | P    | 697.387917  | 349.197597      | 680.361368     | 340.684322       | 679.377352     | 340.192314       | 6  |
| 22 | 2912.287444 | 1456.647360     | 2895.260895    | 1448.134085      | 2894.276879    | 1447.642077      | Q    | 600.335153  | 300.671215      | 583.308604     | 292.157940       | 582.324588     | 291.665932       | 5  |
| 23 | 3011.355858 | 1506.181567     | 2994.329309    | 1497.668292      | 2993.345293    | 1497.176284      | V    | 472.276575  | 236.641925      | 455.250026     | 228.128651       | 454.266010     | 227.636643       | 4  |
| 24 | 3140.398451 | 1570.702863     | 3123.371902    | 1562.189589      | 3122.387886    | 1561.697581      | E    | 373.208161  | 187.107719      | 356.181612     | 178.594444       | 355.197596     | 178.102436       | 3  |
| 25 | 3237.451215 | 1619.229245     | 3220.424666    | 1610.715971      | 3219.440650    | 1610.223963      | P    | 244.165568  | 122.586422      | 227.139019     | 114.073148       |                |                  | 2  |
| 26 |             |                 |                |                  |                |                  | K    | 147.112804  | 74.060040       | 130.086255     | 65.546765        |                |                  | 1  |

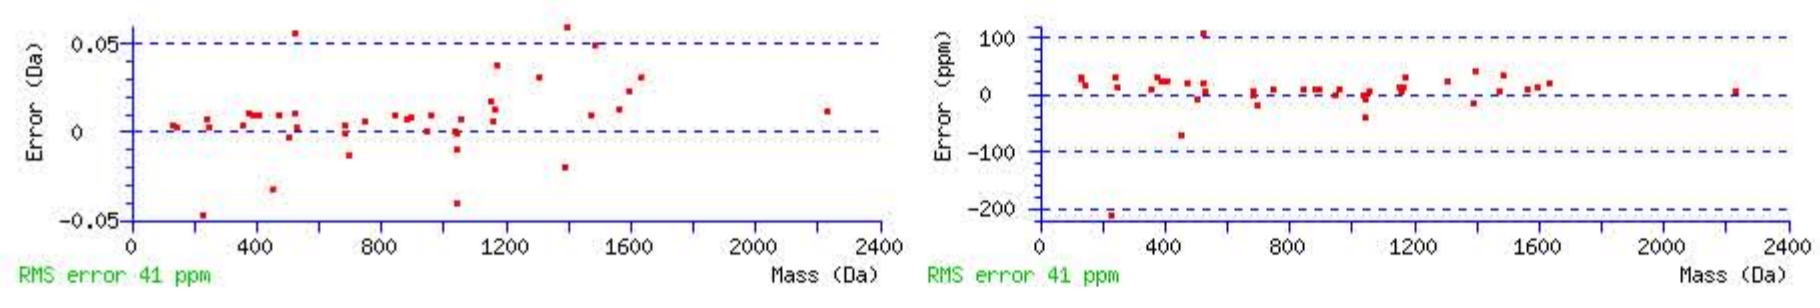

NCBI BLAST search of **KLYDYCDVPQCAAPSFDCGKQPVEPK**  
 (Parameters: blastp, nr protein database, expect=20000, no filter, PAM30)  
 Other BLAST [web gateways](#)

All matches to this query

| Score | Mr(calc):   | Delta    | Sequence                                    |
|-------|-------------|----------|---------------------------------------------|
| 64.2  | 3382.549469 | 0.034347 | <a href="#">KLYDYCDVPQCAAPSFDCGKQPVEPK</a>  |
| 9.3   | 3382.549469 | 0.034347 | <a href="#">KLYDYCDVPQCAAPSFDCGKQPVEPK</a>  |
| 1.8   | 3382.580414 | 0.003402 | <a href="#">HLYPNTPYAYTFWTYMMNARSKNVGWR</a> |
| 1.8   | 3382.580414 | 0.003402 | <a href="#">HLYPNTPYAYTFWTYMMNARSKNVGWR</a> |

# MASCOT Search Results

## Peptide View

MS/MS Fragmentation of **GNVAVTVSGHTCQHWSAQTPHTHNR**

Found in **PLMN\_HUMAN**, Plasminogen OS=Homo sapiens GN=PLG PE=1 SV=2

Match to Query 76232: 3403.631170 from(681.733510,5+) rtinseconds(1635) index(76543)

Title: Locus:1.1.1.1920.10 File:"2013-07-02 CLN FXIII 180 min 1st FT.wiff"

Data file C:\Program Files (x86)\Matrix Science\Mascot Daemon\mgf7 FXIII 180 min 1st\mascot\_daemon\_merge.mgf

Click mouse within plot area to zoom in by factor of two about that point

Or, Plot from  to  Da

Label all possible matches  Label matches used for scoring

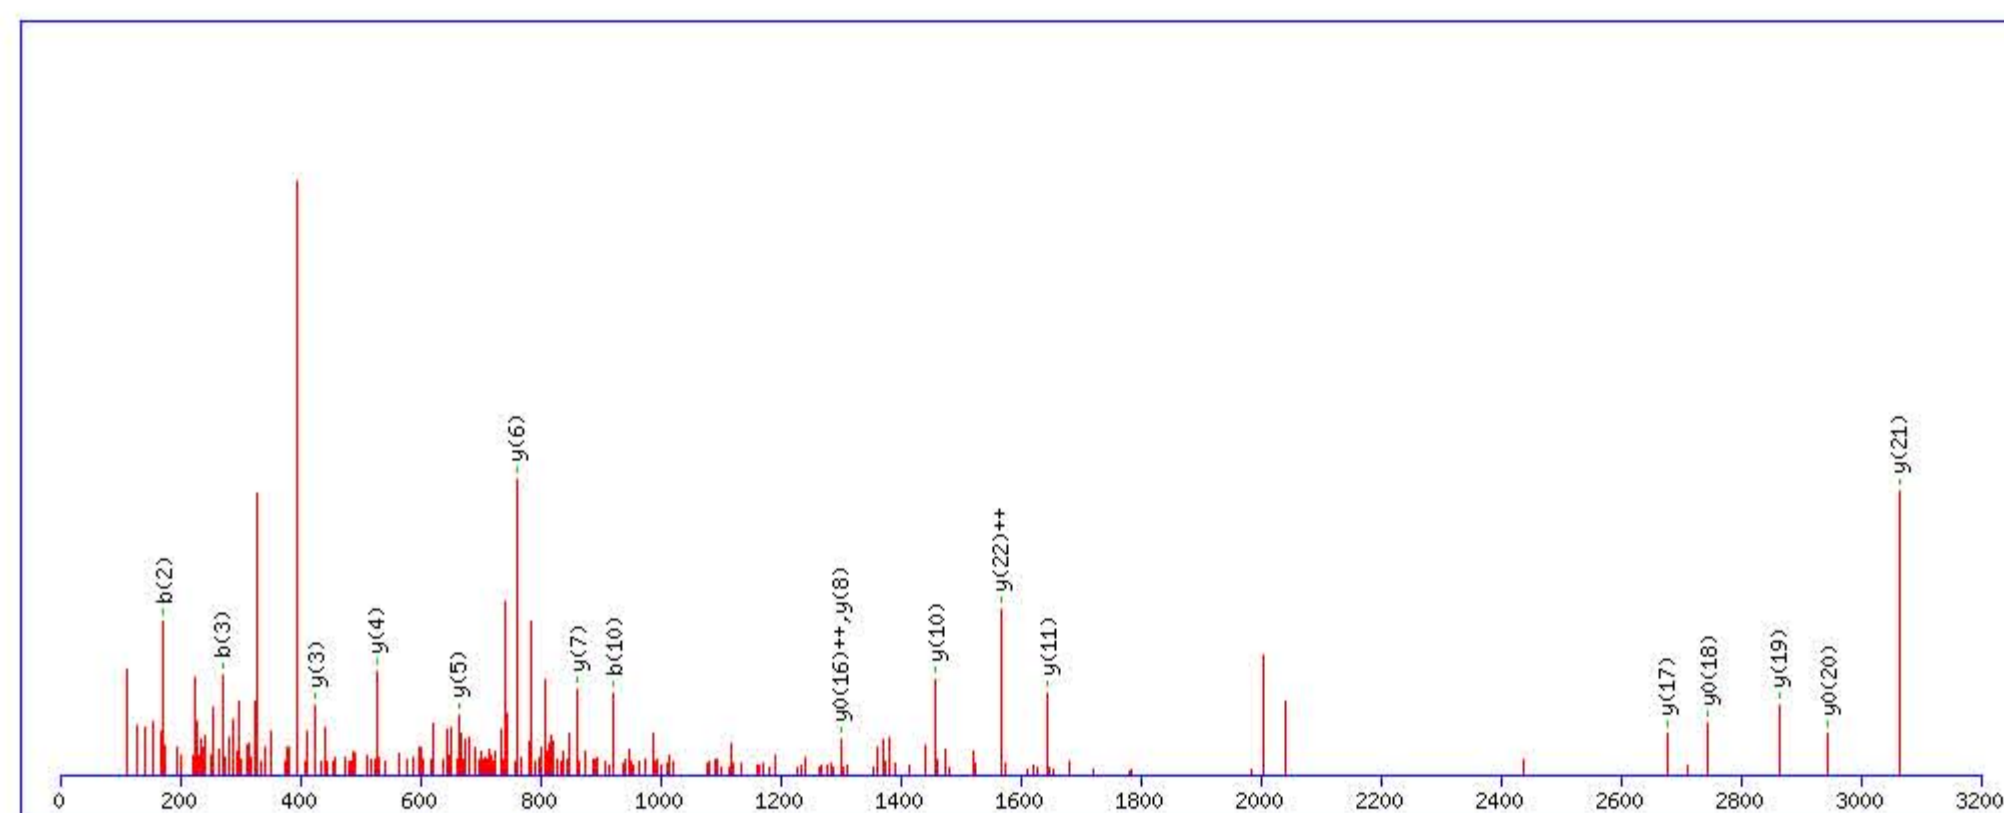

Monoisotopic mass of neutral peptide Mr(calc): 3403.623764

Fixed modifications: Carbamidomethyl (C) (apply to specified residues or termini only)

Variable modifications:

Q13 : Biotin:Thermo-21345 (Q)

Q18 : Biotin:Thermo-21345 (Q)

Ions Score: 65 Expect: 7.2e-006

Matches : 18/270 fragment ions using 25 most intense peaks [\(help\)](#)

| #  | b           | b <sup>++</sup> | b <sup>+</sup> | b <sup>+++</sup> | b <sup>0</sup> | b <sup>0++</sup> | Seq. | y           | y <sup>++</sup> | y <sup>+</sup> | y <sup>+++</sup> | y <sup>0</sup> | y <sup>0++</sup> | #  |
|----|-------------|-----------------|----------------|------------------|----------------|------------------|------|-------------|-----------------|----------------|------------------|----------------|------------------|----|
| 1  | 58.028740   | 29.518008       |                |                  |                |                  | G    |             |                 |                |                  |                |                  | 25 |
| 2  | 172.071667  | 86.539471       | 155.045118     | 78.026197        |                |                  | N    | 3347.609538 | 1674.308407     | 3330.582989    | 1665.795132      | 3329.598973    | 1665.303124      | 24 |
| 3  | 271.140081  | 136.073679      | 254.113532     | 127.560404       |                |                  | V    | 3233.566611 | 1617.286943     | 3216.540062    | 1608.773669      | 3215.556046    | 1608.281661      | 23 |
| 4  | 342.177195  | 171.592236      | 325.150646     | 163.078961       |                |                  | A    | 3134.498197 | 1567.752736     | 3117.471648    | 1559.239462      | 3116.487632    | 1558.747454      | 22 |
| 5  | 441.245609  | 221.126443      | 424.219060     | 212.613168       |                |                  | V    | 3063.461083 | 1532.234179     | 3046.434534    | 1523.720905      | 3045.450518    | 1523.228897      | 21 |
| 6  | 542.293288  | 271.650282      | 525.266739     | 263.137008       | 524.282723     | 262.645000       | T    | 2964.392669 | 1482.699972     | 2947.366120    | 1474.186698      | 2946.382104    | 1473.694690      | 20 |
| 7  | 641.361702  | 321.184489      | 624.335153     | 312.671215       | 623.351137     | 312.179207       | V    | 2863.344990 | 1432.176133     | 2846.318441    | 1423.662858      | 2845.334425    | 1423.170850      | 19 |
| 8  | 728.393730  | 364.700503      | 711.367181     | 356.187229       | 710.383165     | 355.695221       | S    | 2764.276576 | 1382.641926     | 2747.250027    | 1374.128651      | 2746.266011    | 1373.636643      | 18 |
| 9  | 785.415194  | 393.211235      | 768.388645     | 384.697961       | 767.404629     | 384.205953       | G    | 2677.244548 | 1339.125912     | 2660.217999    | 1330.612637      | 2659.233983    | 1330.120629      | 17 |
| 10 | 922.474106  | 461.740691      | 905.447557     | 453.227417       | 904.463541     | 452.735409       | H    | 2620.223084 | 1310.615180     | 2603.196535    | 1302.101905      | 2602.212519    | 1301.609897      | 16 |
| 11 | 1023.521785 | 512.264530      | 1006.495236    | 503.751256       | 1005.511220    | 503.259248       | T    | 2483.164172 | 1242.085724     | 2466.137623    | 1233.572449      | 2465.153607    | 1233.080441      | 15 |
| 12 | 1183.552434 | 592.279855      | 1166.525885    | 583.766581       | 1165.541869    | 583.274572       | C    | 2382.116493 | 1191.561884     | 2365.089944    | 1183.048610      | 2364.105928    | 1182.556602      | 14 |
| 13 | 1622.777760 | 811.892518      | 1605.751211    | 803.379244       | 1604.767195    | 802.887236       | Q    | 2222.085844 | 1111.546560     | 2205.059295    | 1103.033285      | 2204.075279    | 1102.541277      | 13 |
| 14 | 1759.836672 | 880.421974      | 1742.810123    | 871.908700       | 1741.826107    | 871.416692       | H    | 1782.860518 | 891.933897      | 1765.833969    | 883.420622       | 1764.849953    | 882.928614       | 12 |
| 15 | 1945.915985 | 973.461631      | 1928.889436    | 964.948356       | 1927.905420    | 964.456348       | W    | 1645.801606 | 823.404441      | 1628.775057    | 814.891166       | 1627.791041    | 814.399158       | 11 |
| 16 | 2032.948013 | 1016.977645     | 2015.921464    | 1008.464370      | 2014.937448    | 1007.972362      | S    | 1459.722293 | 730.364784      | 1442.695744    | 721.851510       | 1441.711728    | 721.359502       | 10 |
| 17 | 2103.985127 | 1052.496201     | 2086.958578    | 1043.982927      | 2085.974562    | 1043.490919      | A    | 1372.690265 | 686.848770      | 1355.663716    | 678.335496       | 1354.679700    | 677.843488       | 9  |
| 18 | 2543.210453 | 1272.108865     | 2526.183904    | 1263.595590      | 2525.199888    | 1263.103582      | Q    | 1301.653151 | 651.330213      | 1284.626602    | 642.816939       | 1283.642586    | 642.324931       | 8  |
| 19 | 2644.258132 | 1322.632704     | 2627.231583    | 1314.119429      | 2626.247567    | 1313.627421      | T    | 862.427825  | 431.717550      | 845.401276     | 423.204276       | 844.417260     | 422.712268       | 7  |
| 20 | 2741.310896 | 1371.159086     | 2724.284347    | 1362.645811      | 2723.300331    | 1362.153803      | P    | 761.380146  | 381.193711      | 744.353597     | 372.680436       | 743.369581     | 372.188428       | 6  |
| 21 | 2878.369808 | 1439.688542     | 2861.343259    | 1431.175267      | 2860.359243    | 1430.683259      | H    | 664.327382  | 332.667329      | 647.300833     | 324.154054       | 646.316817     | 323.662046       | 5  |
| 22 | 2979.417487 | 1490.212381     | 2962.390938    | 1481.699107      | 2961.406922    | 1481.207099      | T    | 527.268470  | 264.137873      | 510.241921     | 255.624598       | 509.257905     | 255.132590       | 4  |
| 23 | 3116.476399 | 1558.741837     | 3099.449850    | 1550.228563      | 3098.465834    | 1549.736555      | H    | 426.220791  | 213.614033      | 409.194242     | 205.100759       |                |                  | 3  |
| 24 | 3230.519326 | 1615.763301     | 3213.492777    | 1607.250026      | 3212.508761    | 1606.758018      | N    | 289.161879  | 145.084577      | 272.135330     | 136.571303       |                |                  | 2  |
| 25 |             |                 |                |                  |                |                  | R    | 175.118952  | 88.063114       | 158.092403     | 79.549839        |                |                  | 1  |

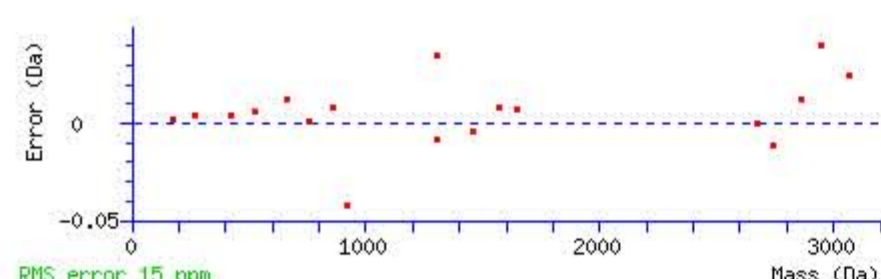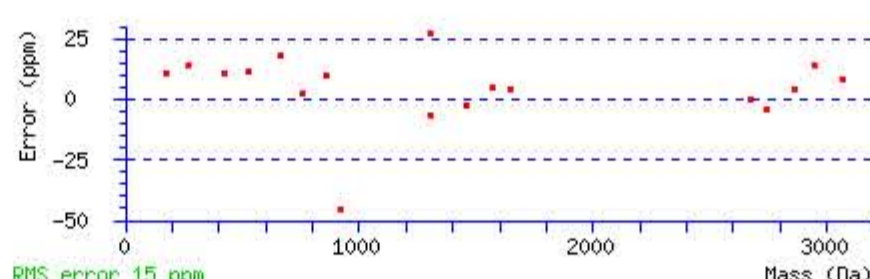

NCBI BLAST search of **GNVAVTVSGHTCQHWSAQTPHTHNR**

(Parameters: blastp, nr protein database, expect=20000, no filter, PAM30)

Other BLAST [web gateways](#)

All matches to this query

| Score | Mr(calc):   | Delta    | Sequence                                  |
|-------|-------------|----------|-------------------------------------------|
| 65.4  | 3403.623764 | 0.007406 | <a href="#">GNVAVTVSGHTCQHWSAQTPHTHNR</a> |

# MASCOT SEARCH RESULTS

## Peptide View

MS/MS Fragmentation of **VQSTELCAGHLAGGTDSCQGDSSGGPLVCFEK**  
 Found in **PLMN\_HUMAN**, Plasminogen OS=Homo sapiens GN=PLG PE=1 SV=2

Match to Query 77947: 3547.620536 from(887.912410,4+) rtinseconds(2145) index(79834)  
 Title: Locus:1.1.1.2097.24 File:"2013-07-02 CLN FXIII 180 min 1st FT.wiff"  
 Data file C:\Program Files (x86)\Matrix Science\Mascot Daemon\mgf\7 FXIII 180 min 1st\mascot\_daemon\_merge.mgf

Click mouse within plot area to zoom in by factor of two about that point  
 Or, Plot from  to  Da   
 Label all possible matches  Label matches used for scoring

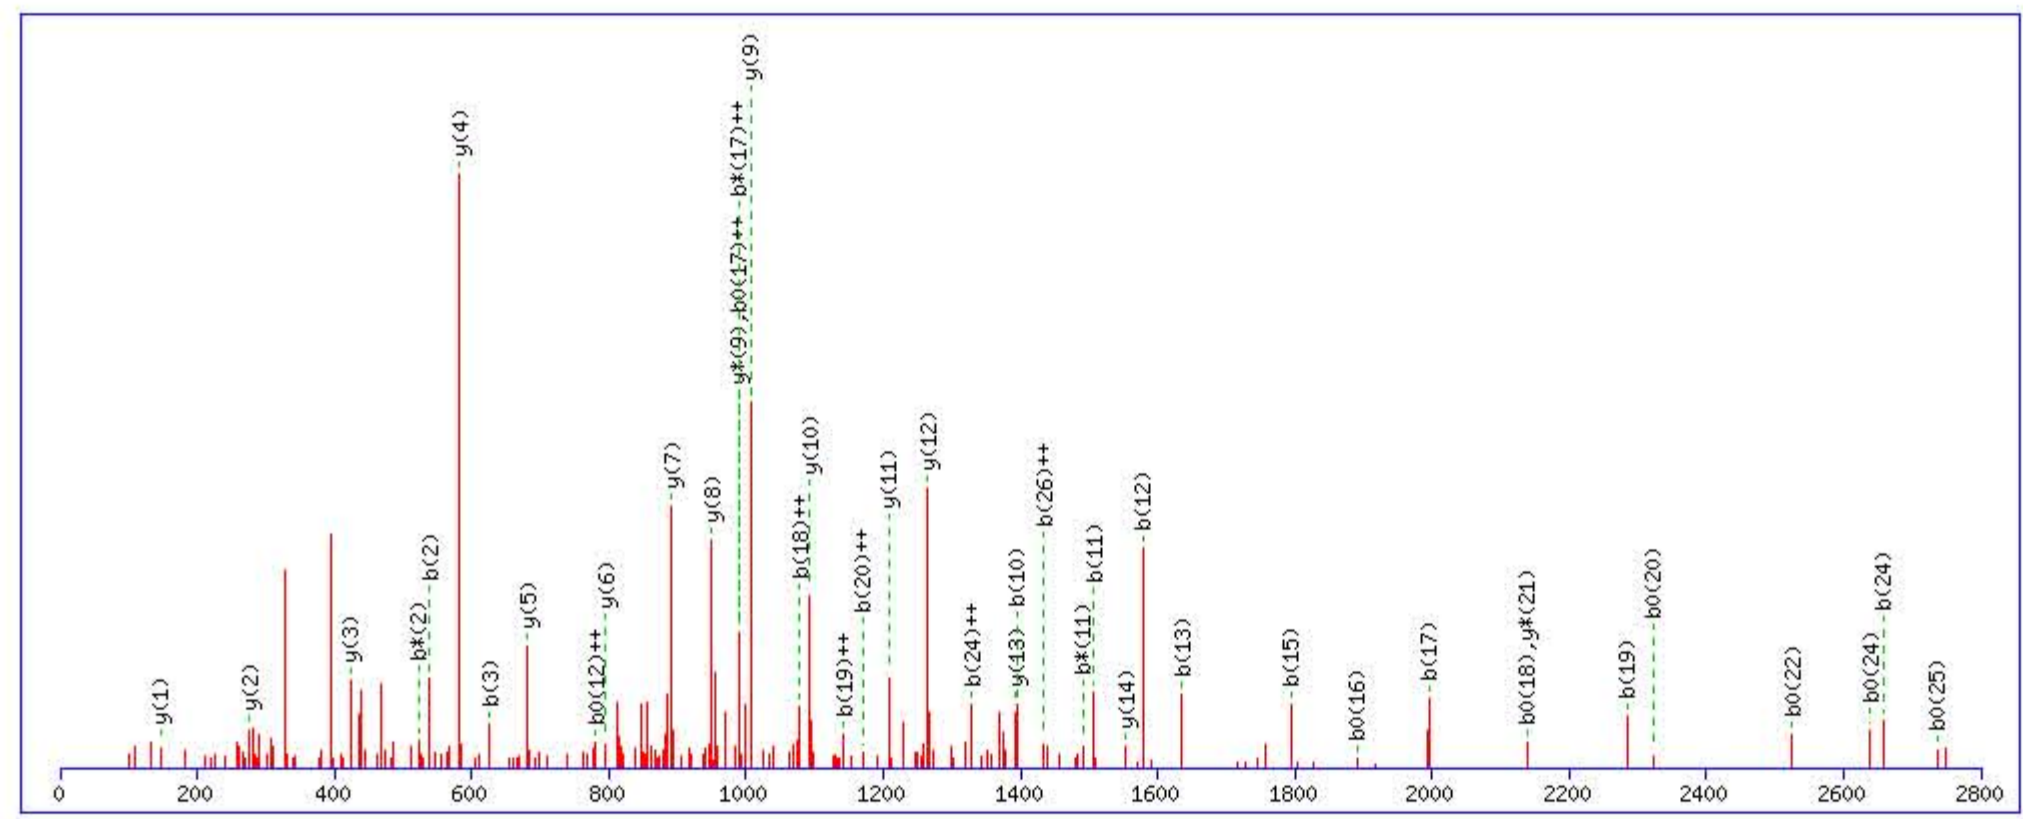

Monoisotopic mass of neutral peptide Mr(calc): 3547.584061  
 Fixed modifications: Carbamidomethyl (C) (apply to specified residues or termini only)  
 Variable modifications:  
 Q2 : Biotin:Thermo-21345 (Q)  
 Ions Score: 99 Expect: 1.5e-009  
 Matches : 42/352 fragment ions using 63 most intense peaks ([help](#))

| #  | b                  | b <sup>++</sup>    | b <sup>*</sup>     | b <sup>*++</sup>  | b <sup>0</sup>     | b <sup>0++</sup>  | Seq. | y                  | y <sup>++</sup> | y <sup>*</sup>     | y <sup>*++</sup> | y <sup>0</sup> | y <sup>0++</sup> | #  |
|----|--------------------|--------------------|--------------------|-------------------|--------------------|-------------------|------|--------------------|-----------------|--------------------|------------------|----------------|------------------|----|
| 1  | 100.075690         | 50.541483          |                    |                   |                    |                   | V    |                    |                 |                    |                  |                |                  | 31 |
| 2  | <b>539.301016</b>  | 270.154146         | <b>522.274467</b>  | 261.640872        |                    |                   | Q    | 3449.522877        | 1725.265076     | 3432.496328        | 1716.751802      | 3431.512312    | 1716.259794      | 30 |
| 3  | <b>626.333044</b>  | 313.670160         | 609.306495         | 305.156886        | 608.322479         | 304.664878        | S    | 3010.297551        | 1505.652413     | 2993.271002        | 1497.139139      | 2992.286986    | 1496.647131      | 29 |
| 4  | 727.380723         | 364.194000         | 710.354174         | 355.680725        | 709.370158         | 355.188717        | T    | 2923.265523        | 1462.136399     | 2906.238974        | 1453.623125      | 2905.254958    | 1453.131117      | 28 |
| 5  | 856.423316         | 428.715296         | 839.396767         | 420.202022        | 838.412751         | 419.710014        | E    | 2822.217844        | 1411.612560     | 2805.191295        | 1403.099285      | 2804.207279    | 1402.607277      | 27 |
| 6  | 969.507380         | 485.257328         | 952.480831         | 476.744054        | 951.496815         | 476.252046        | L    | 2693.175251        | 1347.091263     | 2676.148702        | 1338.577989      | 2675.164686    | 1338.085981      | 26 |
| 7  | 1129.538029        | 565.272653         | 1112.511480        | 556.759378        | 1111.527464        | 556.267370        | C    | 2580.091187        | 1290.549231     | 2563.064638        | 1282.035957      | 2562.080622    | 1281.543949      | 25 |
| 8  | 1200.575143        | 600.791210         | 1183.548594        | 592.277935        | 1182.564578        | 591.785927        | A    | 2420.060538        | 1210.533907     | 2403.033989        | 1202.020632      | 2402.049973    | 1201.528624      | 24 |
| 9  | 1257.596607        | 629.301942         | 1240.570058        | 620.788667        | 1239.586042        | 620.296659        | G    | 2349.023424        | 1175.015350     | 2331.996875        | 1166.502075      | 2331.012859    | 1166.010067      | 23 |
| 10 | <b>1394.655519</b> | 697.831397         | 1377.628970        | 689.318123        | 1376.644954        | 688.826115        | H    | 2292.001960        | 1146.504618     | 2274.975411        | 1137.991343      | 2273.991395    | 1137.499335      | 22 |
| 11 | <b>1507.739583</b> | 754.373429         | <b>1490.713034</b> | 745.860155        | 1489.729018        | 745.368147        | L    | 2154.943048        | 1077.975162     | <b>2137.916499</b> | 1069.461887      | 2136.932483    | 1068.969879      | 21 |
| 12 | <b>1578.776697</b> | 789.891986         | 1561.750148        | 781.378712        | 1560.766132        | <b>780.886704</b> | A    | 2041.858984        | 1021.433130     | 2024.832435        | 1012.919855      | 2023.848419    | 1012.427847      | 20 |
| 13 | <b>1635.798161</b> | 818.402718         | 1618.771612        | 809.889444        | 1617.787596        | 809.397436        | G    | 1970.821870        | 985.914573      | 1953.795321        | 977.401298       | 1952.811305    | 976.909290       | 19 |
| 14 | 1692.819625        | 846.913450         | 1675.793076        | 838.400176        | 1674.809060        | 837.908168        | G    | 1913.800406        | 957.403841      | 1896.773857        | 948.890566       | 1895.789841    | 948.398558       | 18 |
| 15 | <b>1793.867304</b> | 897.437290         | 1776.840755        | 888.924015        | 1775.856739        | 888.432007        | T    | 1856.778942        | 928.893109      | 1839.752393        | 920.379835       | 1838.768377    | 919.887826       | 17 |
| 16 | 1908.894247        | 954.950761         | 1891.867698        | 946.437487        | <b>1890.883682</b> | 945.945479        | D    | 1755.731263        | 878.369269      | 1738.704714        | 869.855995       | 1737.720698    | 869.363987       | 16 |
| 17 | <b>1995.926275</b> | 998.466775         | 1978.899726        | <b>989.953501</b> | 1977.915710        | <b>989.461493</b> | S    | 1640.704320        | 820.855798      | 1623.677771        | 812.342523       | 1622.693755    | 811.850515       | 15 |
| 18 | 2155.956924        | <b>1078.482100</b> | 2138.930375        | 1069.968825       | <b>2137.946359</b> | 1069.476817       | C    | <b>1553.672292</b> | 777.339784      | 1536.645743        | 768.826509       | 1535.661727    | 768.334501       | 14 |
| 19 | <b>2284.015502</b> | <b>1142.511389</b> | 2266.988953        | 1133.998114       | 2266.004937        | 1133.506106       | Q    | <b>1393.641643</b> | 697.324459      | 1376.615094        | 688.811185       | 1375.631078    | 688.319177       | 13 |
| 20 | 2341.036966        | <b>1171.022121</b> | 2324.010417        | 1162.508846       | <b>2323.026401</b> | 1162.016838       | G    | <b>1265.583065</b> | 633.295170      | 1248.556516        | 624.781896       | 1247.572500    | 624.289888       | 12 |
| 21 | 2456.063909        | 1228.535592        | 2439.037360        | 1220.022318       | 2438.053344        | 1219.530310       | D    | <b>1208.561601</b> | 604.784438      | 1191.535052        | 596.271164       | 1190.551036    | 595.779156       | 11 |
| 22 | 2543.095937        | 1272.051606        | 2526.069388        | 1263.538332       | <b>2525.085372</b> | 1263.046324       | S    | <b>1093.534658</b> | 547.270967      | 1076.508109        | 538.757692       | 1075.524093    | 538.265684       | 10 |
| 23 | 2600.117401        | 1300.562338        | 2583.090852        | 1292.049064       | 2582.106836        | 1291.557056       | G    | <b>1006.502630</b> | 503.754953      | <b>989.476081</b>  | 495.241678       | 988.492065     | 494.749670       | 9  |
| 24 | <b>2657.138865</b> | <b>1329.073070</b> | 2640.112316        | 1320.559796       | <b>2639.128300</b> | 1320.067788       | G    | <b>949.481166</b>  | 475.244221      | 932.454617         | 466.730946       | 931.470601     | 466.238938       | 8  |
| 25 | 2754.191629        | 1377.599452        | 2737.165080        | 1369.086178       | <b>2736.181064</b> | 1368.594170       | P    | <b>892.459702</b>  | 446.733489      | 875.433153         | 438.220214       | 874.449137     | 437.728206       | 7  |
| 26 | 2867.275693        | <b>1434.141484</b> | 2850.249144        | 1425.628210       | 2849.265128        | 1425.136202       | L    | <b>795.406938</b>  | 398.207107      | 778.380389         | 389.693832       | 777.396373     | 389.201824       | 6  |
| 27 | 2966.344107        | 1483.675691        | 2949.317558        | 1475.162417       | 2948.333542        | 1474.670409       | V    | <b>682.322874</b>  | 341.665075      | 665.296325         | 333.151800       | 664.312309     | 332.659792       | 5  |
| 28 | 3126.374756        | 1563.691016        | 3109.348207        | 1555.177741       | 3108.364191        | 1554.685733       | C    | <b>583.254460</b>  | 292.130868      | 566.227911         | 283.617593       | 565.243895     | 283.125585       | 4  |
| 29 | 3273.443170        | 1637.225223        | 3256.416621        | 1628.711948       | 3255.432605        | 1628.219940       | F    | <b>423.223811</b>  | 212.115543      | 406.197262         | 203.602269       | 405.213246     | 203.110261       | 3  |
| 30 | 3402.485763        | 1701.746519        | 3385.459214        | 1693.233245       | 3384.475198        | 1692.741237       | E    | <b>276.155397</b>  | 138.581337      | 259.128848         | 130.068062       | 258.144832     | 129.576054       | 2  |
| 31 |                    |                    |                    |                   |                    |                   | K    | <b>147.112804</b>  | 74.060040       | 130.086255         | 65.546765        |                |                  | 1  |

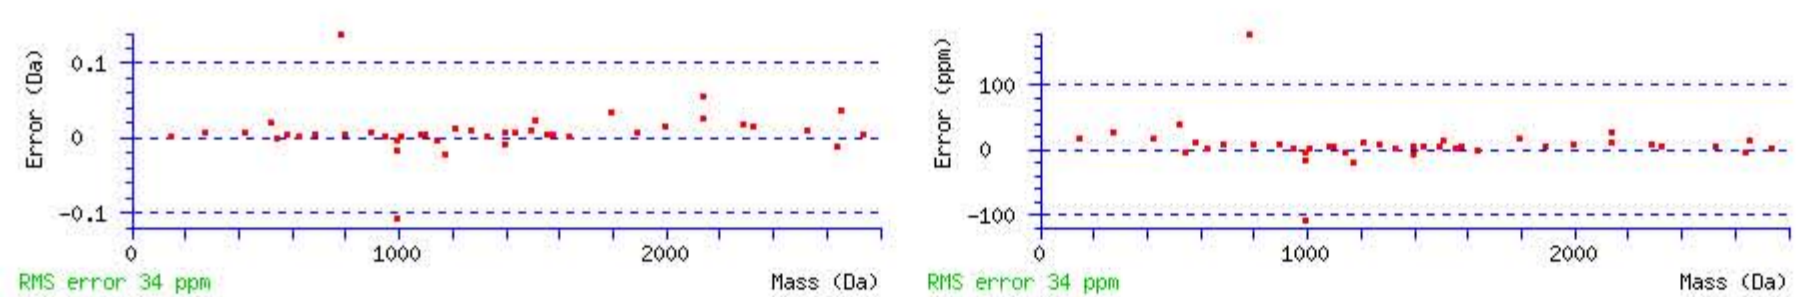

NCBI BLAST search of **VQSTELCAGHLAGGTDSCQGDSSGGPLVCFEK**  
 (Parameters: blastp, nr protein database, expect=20000, no filter, PAM30)  
 Other BLAST [web gateways](#)

### All matches to this query

| Score | Mr(calc):   | Delta    | Sequence                                         |
|-------|-------------|----------|--------------------------------------------------|
| 98.8  | 3547.584061 | 0.036475 | <a href="#">VQSTELCAGHLAGGTDSCQGDSSGGPLVCFEK</a> |
| 40.8  | 3547.584061 | 0.036475 | <a href="#">VQSTELCAGHLAGGTDSCQGDSSGGPLVCFEK</a> |

# Mascot Search Results

## Peptide View

MS/MS Fragmentation of **TCNHPVPQHGGPFCAGDATR**  
Found in **PROP\_HUMAN**, Properdin OS=Homo sapiens GN=CFP PE=1 SV=2

Match to Query 24971: 2489.109096 from(623.284550,4+) rtinseconds(1491) index(3265)  
Title: Locus:1.1.1.2773.8 File:"2013-07-02 CLN FXIII 180 min 1st F 1.wiff"  
Data file C:\Program Files (x86)\Matrix Science\Mascot Daemon\mgf\7 FXIII 180 min 1st\mascot\_daemon\_merge.mgf

Click mouse within plot area to zoom in by factor of two about that point

Or, Plot from  to  Da

Label all possible matches  Label matches used for scoring

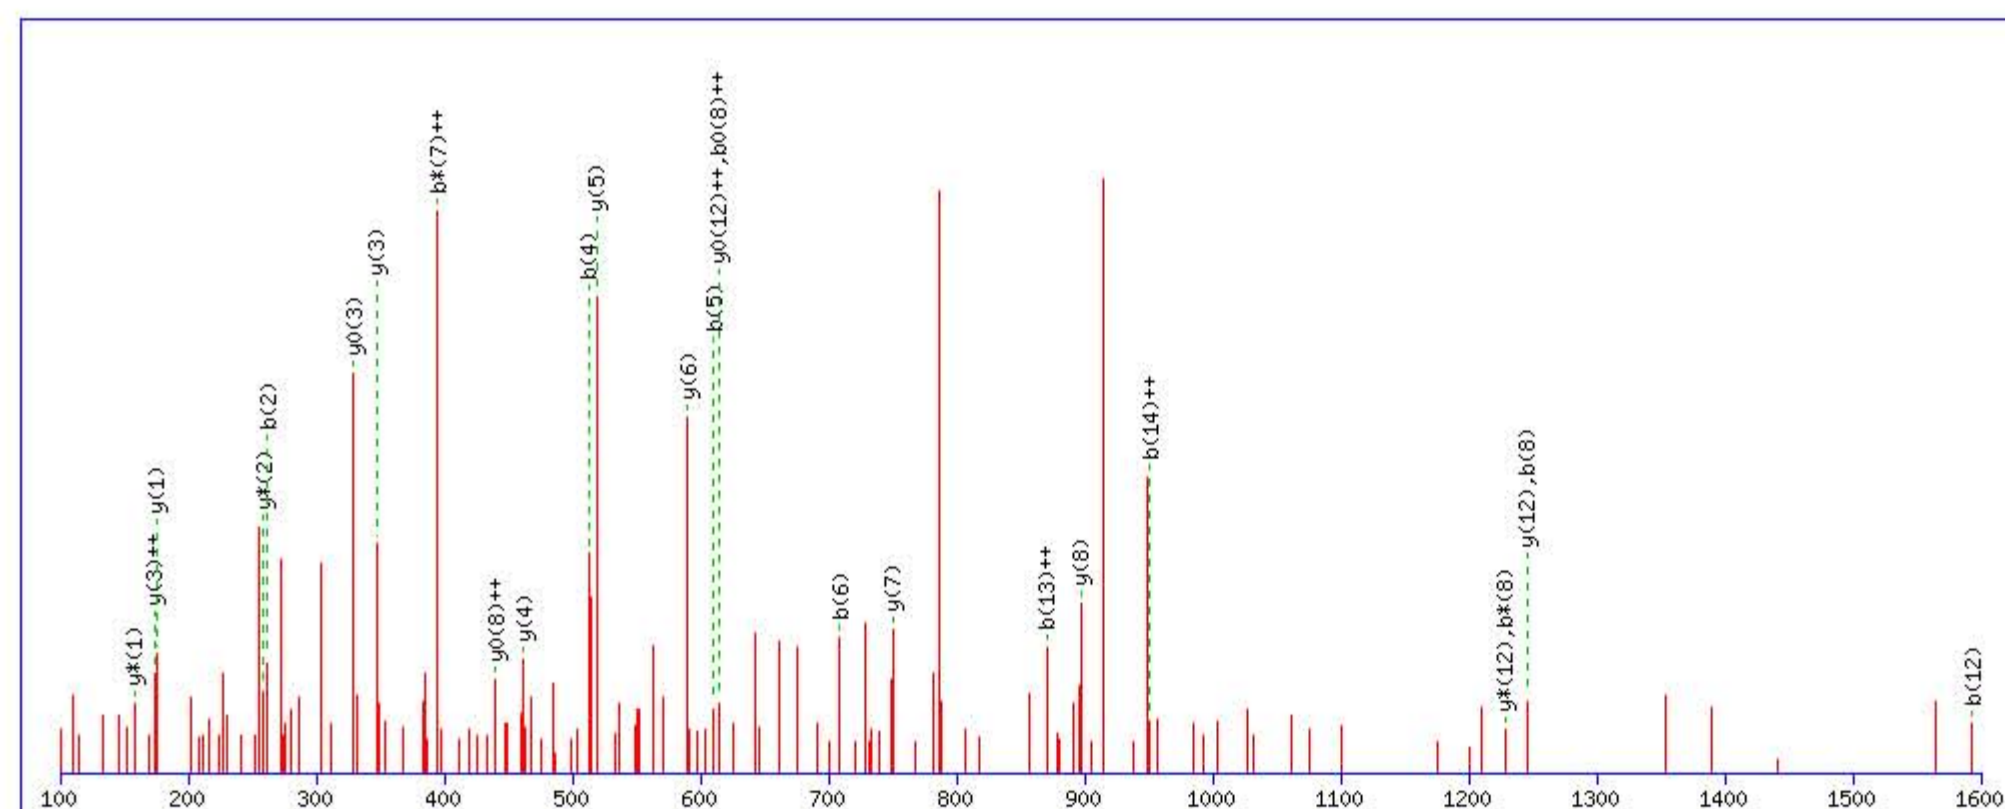

Monoisotopic mass of neutral peptide Mr(calc): 2489.115128  
Fixed modifications: Carbamidomethyl (C) (apply to specified residues or termini only)  
Variable modifications:  
Q8 : Biotin:Thermo-21345 (Q)  
Ions Score: 26 Expect: 0.0077  
Matches : 26/222 fragment ions using 62 most intense peaks [\(help\)](#)

| #  | b                  | b <sup>++</sup>   | b <sup>*</sup>     | b <sup>+++</sup>  | b <sup>0</sup> | b <sup>0++</sup>  | Seq. | y                  | y <sup>++</sup>   | y <sup>*</sup>     | y <sup>+++</sup> | y <sup>0</sup>    | y <sup>0++</sup>  | #  |
|----|--------------------|-------------------|--------------------|-------------------|----------------|-------------------|------|--------------------|-------------------|--------------------|------------------|-------------------|-------------------|----|
| 1  | 102.054955         | 51.531116         |                    |                   | 84.044390      | 42.525833         | T    |                    |                   |                    |                  |                   |                   | 20 |
| 2  | <b>262.085604</b>  | 131.546440        |                    |                   | 244.075039     | 122.541158        | C    | 2389.074689        | 1195.040982       | 2372.048140        | 1186.527708      | 2371.064124       | 1186.035700       | 19 |
| 3  | 376.128531         | 188.567904        | 359.101982         | 180.054629        | 358.117966     | 179.562621        | N    | 2229.044040        | 1115.025658       | 2212.017491        | 1106.512383      | 2211.033475       | 1106.020375       | 18 |
| 4  | <b>513.187443</b>  | 257.097360        | 496.160894         | 248.584085        | 495.176878     | 248.092077        | H    | 2115.001113        | 1058.004194       | 2097.974564        | 1049.490920      | 2096.990548       | 1048.998912       | 17 |
| 5  | <b>610.240207</b>  | 305.623742        | 593.213658         | 297.110467        | 592.229642     | 296.618459        | P    | 1977.942201        | 989.474739        | 1960.915652        | 980.961464       | 1959.931636       | 980.469456        | 16 |
| 6  | <b>709.308621</b>  | 355.157949        | 692.282072         | 346.644674        | 691.298056     | 346.152666        | V    | 1880.889437        | 940.948357        | 1863.862888        | 932.435082       | 1862.878872       | 931.943074        | 15 |
| 7  | 806.361385         | 403.684331        | 789.334836         | <b>395.171056</b> | 788.350820     | 394.679048        | P    | 1781.821023        | 891.414150        | 1764.794474        | 882.900875       | 1763.810458       | 882.408867        | 14 |
| 8  | <b>1245.586711</b> | 623.296994        | <b>1228.560162</b> | 614.783719        | 1227.576146    | <b>614.291711</b> | Q    | 1684.768259        | 842.887768        | 1667.741710        | 834.374493       | 1666.757694       | 833.882485        | 13 |
| 9  | 1382.645623        | 691.826450        | 1365.619074        | 683.313175        | 1364.635058    | 682.821167        | H    | <b>1245.542933</b> | 623.275105        | <b>1228.516384</b> | 614.761830       | 1227.532368       | <b>614.269822</b> | 12 |
| 10 | 1439.667087        | 720.337182        | 1422.640538        | 711.823907        | 1421.656522    | 711.331899        | G    | 1108.484021        | 554.745649        | 1091.457472        | 546.232374       | 1090.473456       | 545.740366        | 11 |
| 11 | 1496.688551        | 748.847914        | 1479.662002        | 740.334639        | 1478.677986    | 739.842631        | G    | 1051.462557        | 526.234917        | 1034.436008        | 517.721642       | 1033.451992       | 517.229634        | 10 |
| 12 | <b>1593.741315</b> | 797.374296        | 1576.714766        | 788.861021        | 1575.730750    | 788.369013        | P    | 994.441093         | 497.724185        | 977.414544         | 489.210910       | 976.430528        | 488.718902        | 9  |
| 13 | 1740.809729        | <b>870.908503</b> | 1723.783180        | 862.395228        | 1722.799164    | 861.903220        | F    | <b>897.388329</b>  | 449.197803        | 880.361780         | 440.684528       | 879.377764        | <b>440.192520</b> | 8  |
| 14 | 1900.840378        | <b>950.923827</b> | 1883.813829        | 942.410553        | 1882.829813    | 941.918545        | C    | <b>750.319915</b>  | 375.663596        | 733.293366         | 367.150321       | 732.309350        | 366.658313        | 7  |
| 15 | 1971.877492        | 986.442384        | 1954.850943        | 977.929110        | 1953.866927    | 977.437102        | A    | <b>590.289266</b>  | 295.648271        | 573.262717         | 287.134997       | 572.278701        | 286.642989        | 6  |
| 16 | 2028.898956        | 1014.953116       | 2011.872407        | 1006.439842       | 2010.888391    | 1005.947834       | G    | <b>519.252152</b>  | 260.129714        | 502.225603         | 251.616440       | 501.241587        | 251.124432        | 5  |
| 17 | 2143.925899        | 1072.466587       | 2126.899350        | 1063.953313       | 2125.915334    | 1063.461305       | D    | <b>462.230688</b>  | 231.618982        | 445.204139         | 223.105707       | 444.220123        | 222.613700        | 4  |
| 18 | 2214.963013        | 1107.985144       | 2197.936464        | 1099.471870       | 2196.952448    | 1098.979862       | A    | <b>347.203745</b>  | <b>174.105510</b> | 330.177196         | 165.592236       | <b>329.193180</b> | 165.100228        | 3  |
| 19 | 2316.010692        | 1158.508984       | 2298.984143        | 1149.995709       | 2298.000127    | 1149.503701       | T    | 276.166631         | 138.586953        | <b>259.140082</b>  | 130.073679       | 258.156066        | 129.581671        | 2  |
| 20 |                    |                   |                    |                   |                |                   | R    | <b>175.118952</b>  | 88.063114         | <b>158.092403</b>  | 79.549839        |                   |                   | 1  |

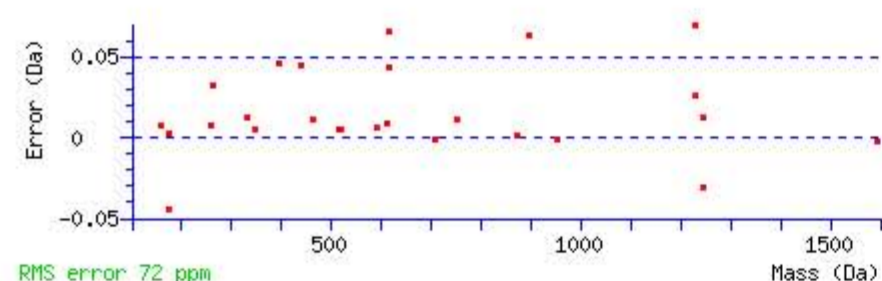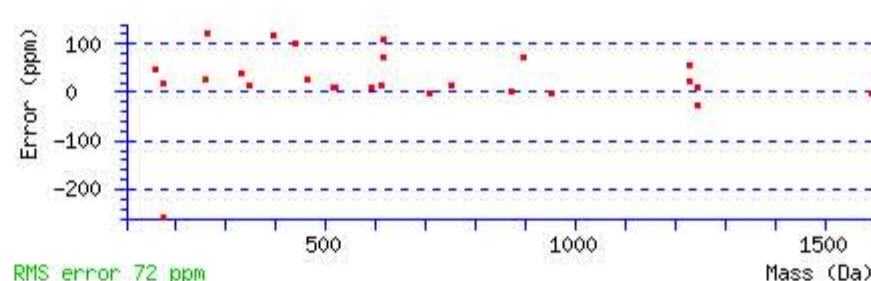

NCBI BLAST search of [TCNHPVPQHGGPFCAGDATR](#)  
(Parameters: blastp, nr protein database, expect=20000, no filter, PAM30)  
Other BLAST [web gateways](#)

## All matches to this query

| Score | Mr(calc):   | Delta     | Sequence                             |
|-------|-------------|-----------|--------------------------------------|
| 26.2  | 2489.115128 | -0.006032 | <a href="#">TCNHPVPQHGGPFCAGDATR</a> |

Mascot: <http://www.matrixscience.com/>



# MASCOT SEARCH RESULTS

## Peptide View

MS/MS Fragmentation of **ECLQTCR**

Found in **AMBP\_HUMAN**, Protein AMBP OS=Homo sapiens GN=AMBP PE=1 SV=1

Match to Query 26115: 1276.583008 from(639.298780,2+) rtinseconds(1458) index(75418)

Title: Locus:1.1.1.1858.23 File:"2013-07-02 CLN FXIII 180 min 1st FT.wiff"

Data file C:\Program Files (x86)\Matrix Science\Mascot Daemon\mgf\7 FXIII 180 min 1st\mascot\_daemon\_merge.mgf

Click mouse within plot area to zoom in by factor of two about that point

Or, Plot from  to  Da

Label all possible matches  Label matches used for scoring

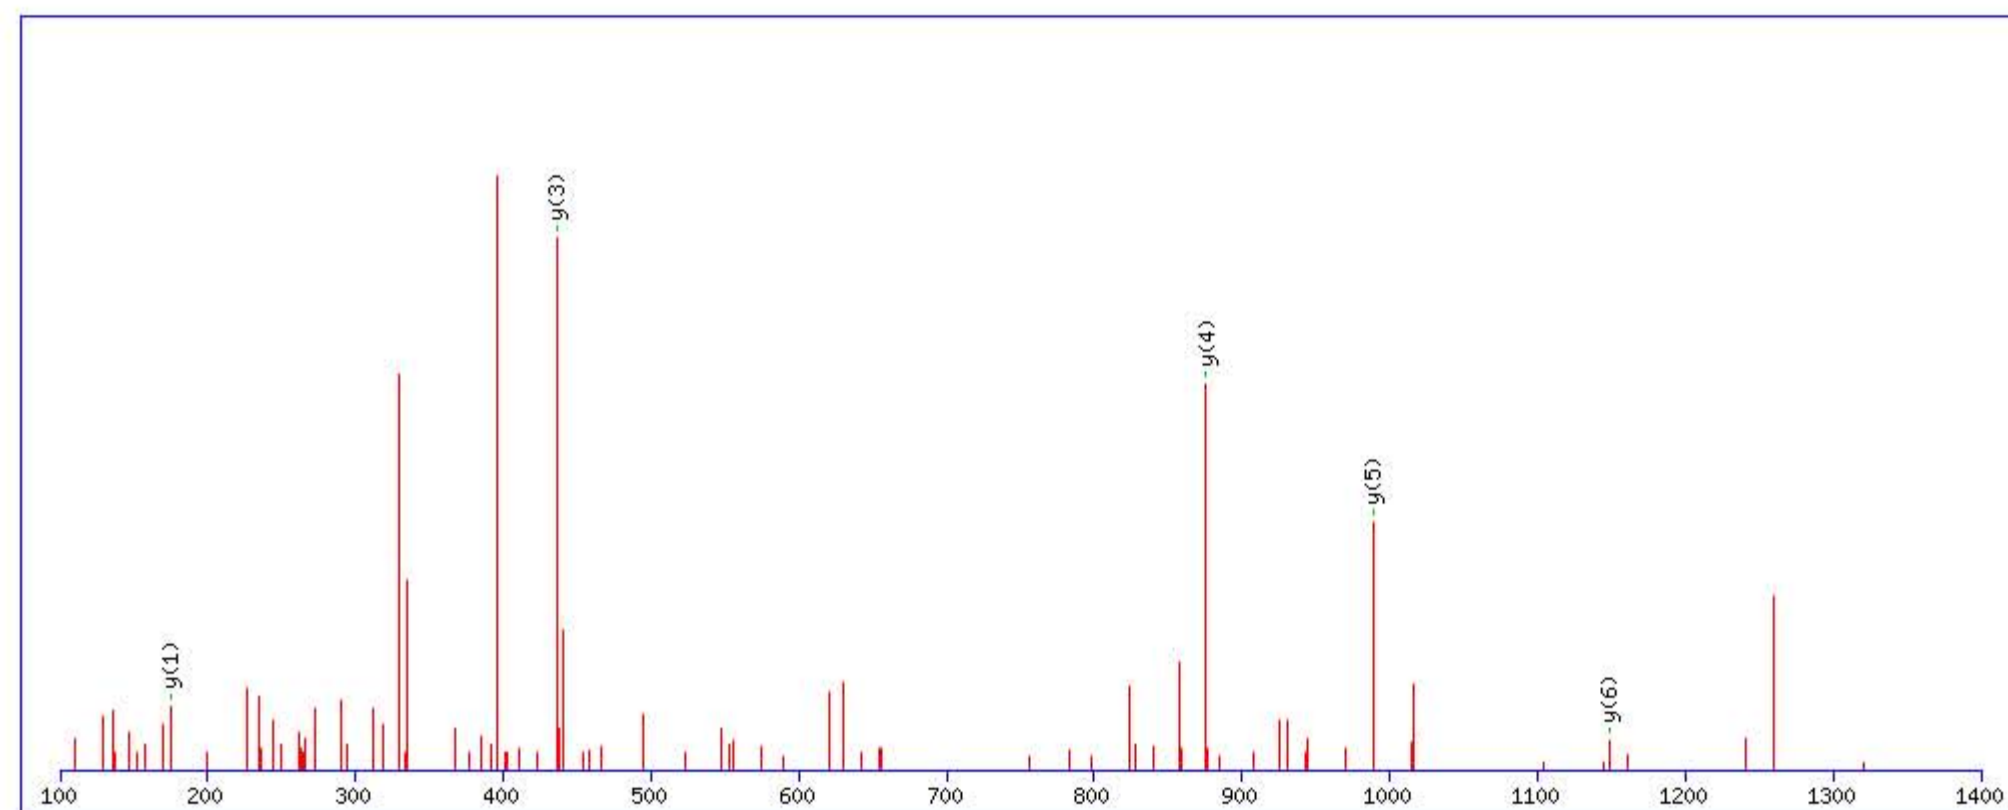

Monoisotopic mass of neutral peptide Mr(calc): 1276.572632

Fixed modifications: Carbamidomethyl (C) (apply to specified residues or termini only)

Variable modifications:

Q4 : Biotin:Thermo-21345 (Q)

Ions Score: 29 Expect: 0.01

Matches : 5/62 fragment ions using 12 most intense peaks [\(help\)](#)

| # | b           | b <sup>++</sup> | b <sup>*</sup> | b <sup>*++</sup> | b <sup>0</sup> | b <sup>0++</sup> | Seq. | y                  | y <sup>++</sup> | y <sup>*</sup> | y <sup>*++</sup> | y <sup>0</sup> | y <sup>0++</sup> | # |
|---|-------------|-----------------|----------------|------------------|----------------|------------------|------|--------------------|-----------------|----------------|------------------|----------------|------------------|---|
| 1 | 130.049869  | 65.528572       |                |                  | 112.039304     | 56.523290        | E    |                    |                 |                |                  |                |                  | 7 |
| 2 | 290.080518  | 145.543897      |                |                  | 272.069953     | 136.538615       | C    | <b>1148.537319</b> | 574.772298      | 1131.510770    | 566.259023       | 1130.526754    | 565.767015       | 6 |
| 3 | 403.164582  | 202.085929      |                |                  | 385.154017     | 193.080647       | L    | <b>988.506670</b>  | 494.756973      | 971.480121     | 486.243699       | 970.496105     | 485.751691       | 5 |
| 4 | 842.389908  | 421.698592      | 825.363359     | 413.185318       | 824.379343     | 412.693310       | Q    | <b>875.422606</b>  | 438.214941      | 858.396057     | 429.701667       | 857.412041     | 429.209659       | 4 |
| 5 | 943.437587  | 472.222432      | 926.411038     | 463.709157       | 925.427022     | 463.217149       | T    | <b>436.197280</b>  | 218.602278      | 419.170731     | 210.089003       | 418.186715     | 209.596995       | 3 |
| 6 | 1103.468236 | 552.237756      | 1086.441687    | 543.724482       | 1085.457671    | 543.232474       | C    | 335.149601         | 168.078438      | 318.123052     | 159.565164       |                |                  | 2 |
| 7 |             |                 |                |                  |                |                  | R    | <b>175.118952</b>  | 88.063114       | 158.092403     | 79.549839        |                |                  | 1 |

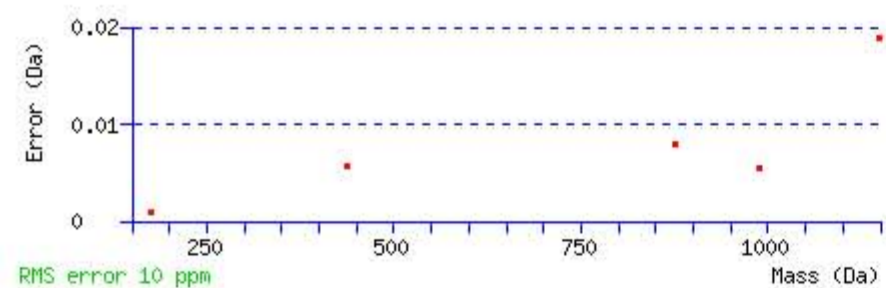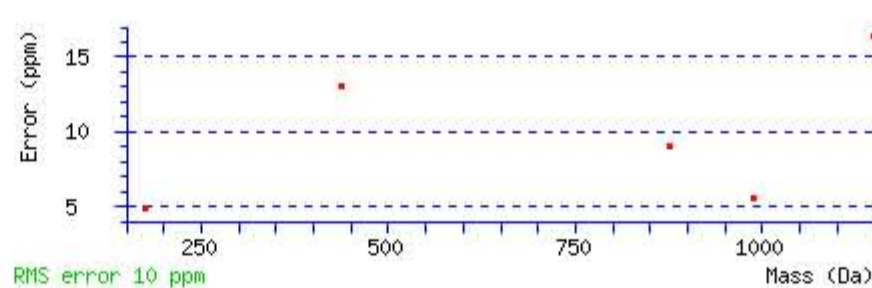

NCBI BLAST search of **ECLQTCR**

(Parameters: blastp, nr protein database, expect=20000, no filter, PAM30)

Other BLAST [web gateways](#)

All matches to this query

| Score | Mr(calc):   | Delta     | Sequence                    |
|-------|-------------|-----------|-----------------------------|
| 29.3  | 1276.572632 | 0.010376  | <a href="#">ECLQTCR</a>     |
| 8.4   | 1276.590393 | -0.007385 | <a href="#">TMHTSVMALDR</a> |
| 6.3   | 1276.583862 | -0.000854 | <a href="#">KMSLSCHVCR</a>  |
| 6.1   | 1276.572388 | 0.010620  | <a href="#">EDSYANYFIR</a>  |
| 4.8   | 1276.590393 | -0.007385 | <a href="#">TMHTSVMALDR</a> |
| 3.5   | 1276.579605 | 0.003403  | <a href="#">EEQRSPFNDR</a>  |
| 3.4   | 1276.582977 | 0.000031  | <a href="#">EMQLGREDQR</a>  |
| 2.2   | 1276.590378 | -0.007370 | <a href="#">MDPCKVNELR</a>  |

# MASCOT Search Results

## Peptide View

MS/MS Fragmentation of **GECVPGEQEPELIPR**

Found in **AMBP\_HUMAN**, Protein AMBP OS=Homo sapiens GN=AMBP PE=1 SV=1

Match to Query 56210: 2230.128582 from(744.383470,3+) rtinseconds(2249) index(26550)

Title: Locus:1.1.1.2925.16 File:"2013-07-02 CLN FXIII 180 min 1st F 2.wiff"

Data file C:\Program Files (x86)\Matrix Science\Mascot Daemon\mgf\7 FXIII 180 min 1st\mascot\_daemon\_merge.mgf

Click mouse within plot area to zoom in by factor of two about that point

Or, Plot from  to  Da

Label all possible matches  Label matches used for scoring

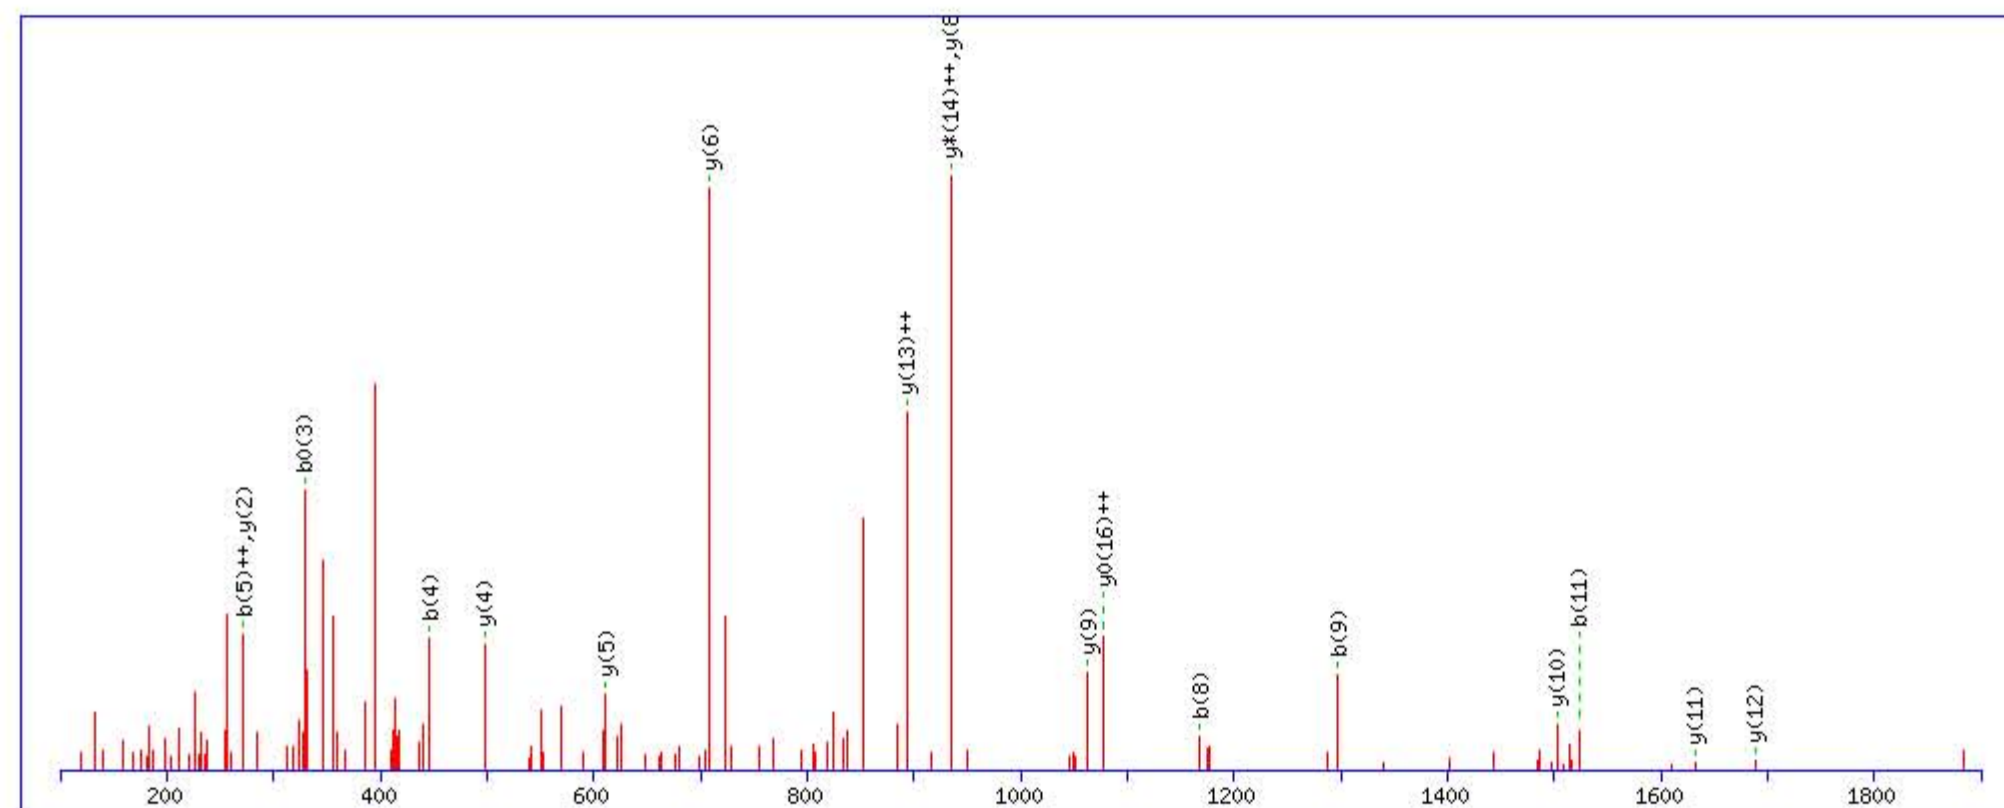

Monoisotopic mass of neutral peptide Mr(calc): 2230.112595

Fixed modifications: Carbamidomethyl (C) (apply to specified residues or termini only)

Variable modifications:

Q8 : Biotin:Thermo-21345 (Q)

Ions Score: 42 Expect: 0.00016

Matches : 18/164 fragment ions using 33 most intense peaks [\(help\)](#)

| #  | b           | b <sup>++</sup> | b <sup>*</sup> | b <sup>*++</sup> | b <sup>0</sup> | b <sup>0++</sup> | Seq. | y           | y <sup>++</sup> | y <sup>*</sup> | y <sup>*++</sup> | y <sup>0</sup> | y <sup>0++</sup> | #  |
|----|-------------|-----------------|----------------|------------------|----------------|------------------|------|-------------|-----------------|----------------|------------------|----------------|------------------|----|
| 1  | 58.028740   | 29.518008       |                |                  |                |                  | G    |             |                 |                |                  |                |                  | 17 |
| 2  | 187.071333  | 94.039305       |                |                  | 169.060768     | 85.034022        | E    | 2174.098425 | 1087.552850     | 2157.071876    | 1079.039576      | 2156.087860    | 1078.547568      | 16 |
| 3  | 347.101982  | 174.054629      |                |                  | 329.091417     | 165.049347       | C    | 2045.055832 | 1023.031554     | 2028.029283    | 1014.518279      | 2027.045267    | 1014.026271      | 15 |
| 4  | 446.170396  | 223.588836      |                |                  | 428.159831     | 214.583554       | V    | 1885.025183 | 943.016229      | 1867.998634    | 934.502955       | 1867.014618    | 934.010947       | 14 |
| 5  | 543.223160  | 272.115218      |                |                  | 525.212595     | 263.109936       | P    | 1785.956769 | 893.482022      | 1768.930220    | 884.968748       | 1767.946204    | 884.476740       | 13 |
| 6  | 600.244624  | 300.625950      |                |                  | 582.234059     | 291.620668       | G    | 1688.904005 | 844.955640      | 1671.877456    | 836.442366       | 1670.893440    | 835.950358       | 12 |
| 7  | 729.287217  | 365.147247      |                |                  | 711.276652     | 356.141964       | E    | 1631.882541 | 816.444908      | 1614.855992    | 807.931634       | 1613.871976    | 807.439626       | 11 |
| 8  | 1168.512543 | 584.759910      | 1151.485994    | 576.246635       | 1150.501978    | 575.754627       | Q    | 1502.839948 | 751.923612      | 1485.813399    | 743.410337       | 1484.829383    | 742.918329       | 10 |
| 9  | 1297.555136 | 649.281206      | 1280.528587    | 640.767932       | 1279.544571    | 640.275924       | E    | 1063.614622 | 532.310949      | 1046.588073    | 523.797674       | 1045.604057    | 523.305666       | 9  |
| 10 | 1394.607900 | 697.807588      | 1377.581351    | 689.294314       | 1376.597335    | 688.802306       | P    | 934.572029  | 467.789652      | 917.545480     | 459.276378       | 916.561464     | 458.784370       | 8  |
| 11 | 1523.650493 | 762.328885      | 1506.623944    | 753.815610       | 1505.639928    | 753.323602       | E    | 837.519265  | 419.263270      | 820.492716     | 410.749996       | 819.508700     | 410.257988       | 7  |
| 12 | 1620.703257 | 810.855267      | 1603.676708    | 802.341992       | 1602.692692    | 801.849984       | P    | 708.476672  | 354.741974      | 691.450123     | 346.228699       |                |                  | 6  |
| 13 | 1733.787321 | 867.397299      | 1716.760772    | 858.884024       | 1715.776756    | 858.392016       | I    | 611.423908  | 306.215592      | 594.397359     | 297.702317       |                |                  | 5  |
| 14 | 1846.871385 | 923.939331      | 1829.844836    | 915.426056       | 1828.860820    | 914.934048       | L    | 498.339844  | 249.673560      | 481.313295     | 241.160285       |                |                  | 4  |
| 15 | 1959.955449 | 980.481363      | 1942.928900    | 971.968088       | 1941.944884    | 971.476080       | I    | 385.255780  | 193.131528      | 368.229231     | 184.618253       |                |                  | 3  |
| 16 | 2057.008213 | 1029.007744     | 2039.981664    | 1020.494470      | 2038.997648    | 1020.002462      | P    | 272.171716  | 136.589496      | 255.145167     | 128.076221       |                |                  | 2  |
| 17 |             |                 |                |                  |                |                  | R    | 175.118952  | 88.063114       | 158.092403     | 79.549839        |                |                  | 1  |

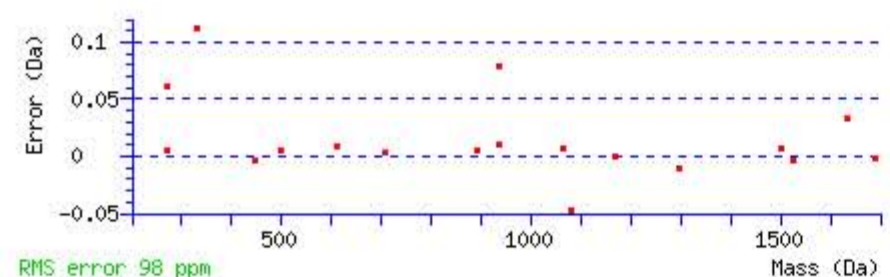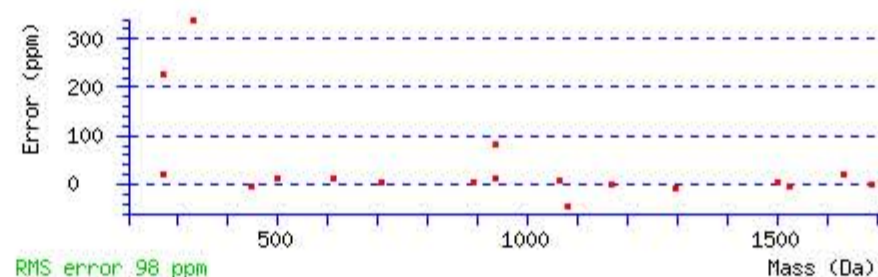

NCBI BLAST search of **GECVPGEQEPELIPR**

(Parameters: blastp, nr protein database, expect=20000, no filter, PAM30)

Other BLAST [web gateways](#)

## All matches to this query

| Score | Mr(calc):   | Delta    | Sequence                            |
|-------|-------------|----------|-------------------------------------|
| 42.1  | 2230.112595 | 0.015987 | <a href="#">GECVPGEQEPELIPR</a>     |
| 1.6   | 2230.120468 | 0.008114 | <a href="#">HVEARDLIEFGMIPEFVGR</a> |

Mascot: <http://www.matrixscience.com/>

# Mascot Search Results

## Peptide View

MS/MS Fragmentation of **KEDSCQLGYSAGPCMGMTSR**  
 Found in **AMBP\_HUMAN**, Protein AMBP OS=Homo sapiens GN=AMBP PE=1 SV=1

Match to Query 63822: 2545.126616 from(637.288930,4+) rtinseconds(1872) index(59789)  
 Title: Locus:1.1.1.3075.18 File:"2013-07-02 CLN FXIII 180 min 1st F 4.wiff"  
 Data file C:\Program Files (x86)\Matrix Science\Mascot Daemon\mgf\7 FXIII 180 min 1st\mascot\_daemon\_merge.mgf

Click mouse within plot area to zoom in by factor of two about that point  
 Or, Plot from  to  Da   
 Label all possible matches  Label matches used for scoring

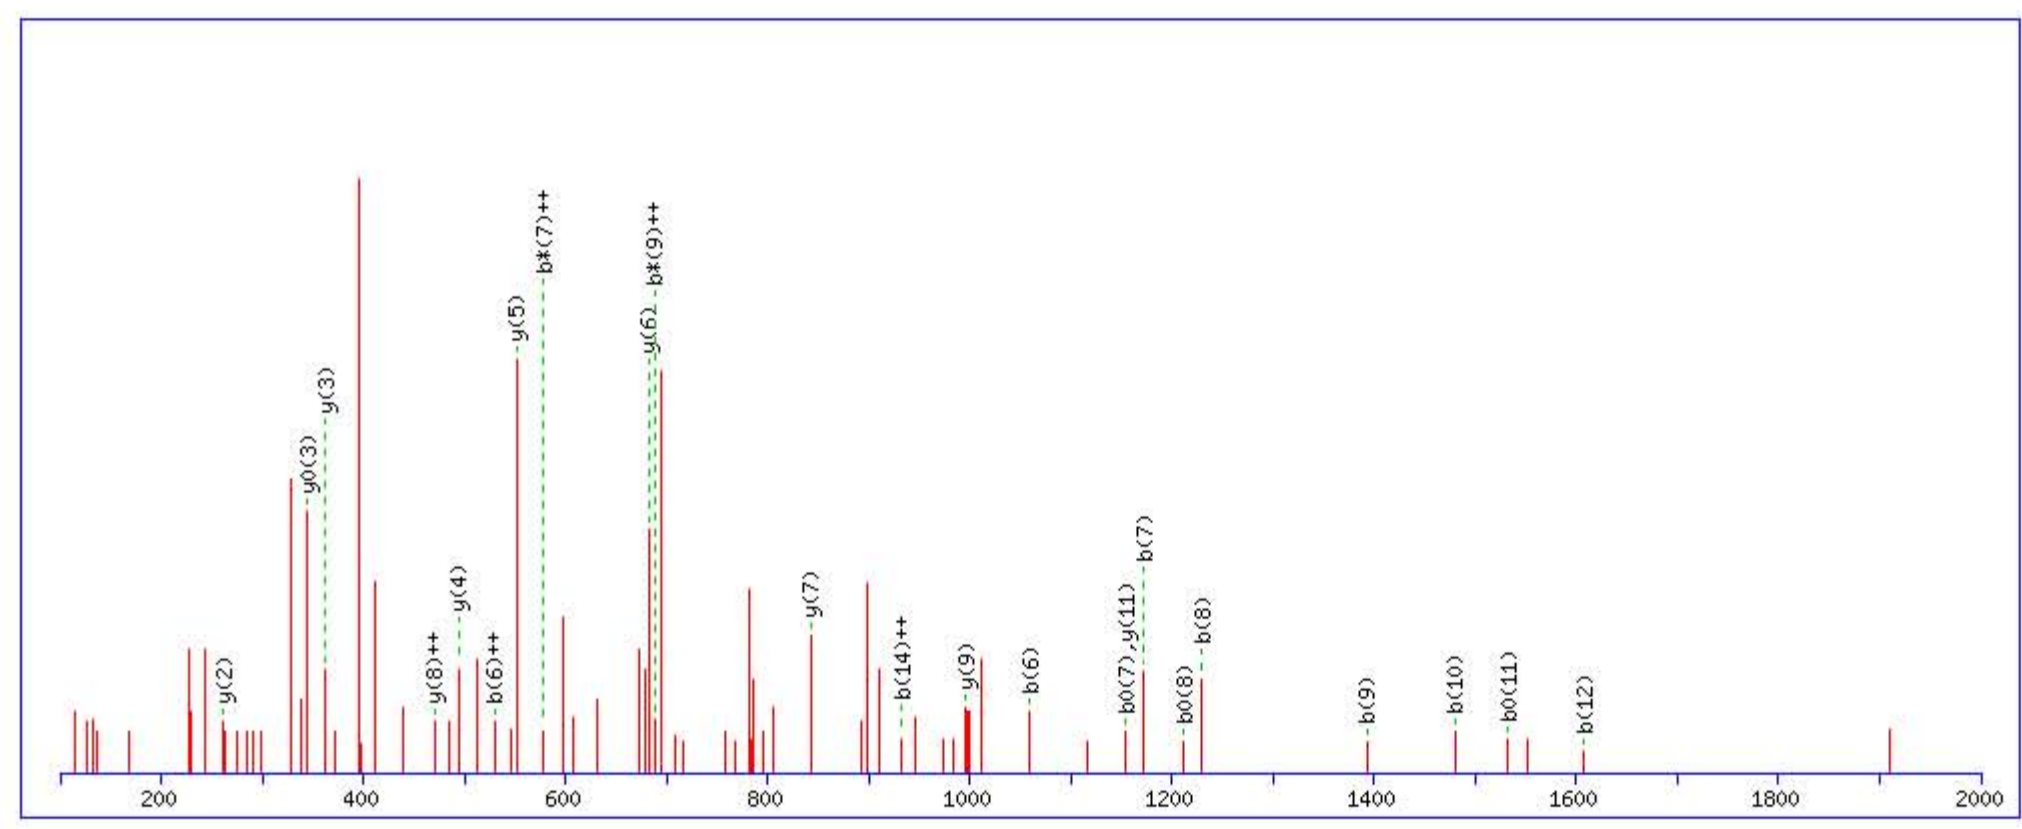

Monoisotopic mass of neutral peptide Mr(calc): 2545.089188  
 Fixed modifications: Carbamidomethyl (C) (apply to specified residues or termini only)  
 Variable modifications:  
 Q6 : Biotin:Thermo-21345 (Q)  
 Ions Score: 27 Expect: 0.012  
 Matches : 23/224 fragment ions using 63 most intense peaks [\(help\)](#)

| #  | b                  | b <sup>++</sup>   | b <sup>*</sup> | b <sup>+++</sup>  | b <sup>0</sup>     | b <sup>0++</sup> | Seq.     | y                  | y <sup>++</sup>   | y <sup>*</sup> | y <sup>+++</sup> | y <sup>0</sup>    | y <sup>0++</sup> | #  |
|----|--------------------|-------------------|----------------|-------------------|--------------------|------------------|----------|--------------------|-------------------|----------------|------------------|-------------------|------------------|----|
| 1  | 129.102239         | 65.054757         | 112.075690     | 56.541483         |                    |                  | <b>K</b> |                    |                   |                |                  |                   |                  | 20 |
| 2  | 258.144832         | 129.576054        | 241.118283     | 121.062780        | 240.134267         | 120.570772       | <b>E</b> | 2418.001508        | 1209.504392       | 2400.974959    | 1200.991117      | 2399.990943       | 1200.499109      | 19 |
| 3  | 373.171775         | 187.089526        | 356.145226     | 178.576251        | 355.161210         | 178.084243       | <b>D</b> | 2288.958915        | 1144.983095       | 2271.932366    | 1136.469821      | 2270.948350       | 1135.977813      | 18 |
| 4  | 460.203803         | 230.605540        | 443.177254     | 222.092265        | 442.193238         | 221.600257       | <b>S</b> | 2173.931972        | 1087.469624       | 2156.905423    | 1078.956349      | 2155.921407       | 1078.464341      | 17 |
| 5  | 620.234452         | 310.620864        | 603.207903     | 302.107590        | 602.223887         | 301.615582       | <b>C</b> | 2086.899944        | 1043.953610       | 2069.873395    | 1035.440335      | 2068.889379       | 1034.948327      | 16 |
| 6  | <b>1059.459778</b> | <b>530.233527</b> | 1042.433229    | 521.720253        | 1041.449213        | 521.228245       | <b>Q</b> | 1926.869295        | 963.938286        | 1909.842746    | 955.425011       | 1908.858730       | 954.933003       | 15 |
| 7  | <b>1172.543842</b> | 586.775559        | 1155.517293    | <b>578.262285</b> | <b>1154.533277</b> | 577.770277       | <b>L</b> | 1487.643969        | 744.325623        | 1470.617420    | 735.812348       | 1469.633404       | 735.320340       | 14 |
| 8  | <b>1229.565306</b> | 615.286291        | 1212.538757    | 606.773017        | <b>1211.554741</b> | 606.281008       | <b>G</b> | 1374.559905        | 687.783591        | 1357.533356    | 679.270316       | 1356.549340       | 678.778308       | 13 |
| 9  | <b>1392.628635</b> | 696.817956        | 1375.602086    | <b>688.304681</b> | 1374.618070        | 687.812673       | <b>Y</b> | 1317.538441        | 659.272859        | 1300.511892    | 650.759584       | 1299.527876       | 650.267576       | 12 |
| 10 | <b>1479.660663</b> | 740.333970        | 1462.634114    | 731.820695        | 1461.650098        | 731.328687       | <b>S</b> | <b>1154.475112</b> | 577.741194        | 1137.448563    | 569.227920       | 1136.464547       | 568.735912       | 11 |
| 11 | 1550.697777        | 775.852527        | 1533.671228    | 767.339252        | <b>1532.687212</b> | 766.847244       | <b>A</b> | 1067.443084        | 534.225180        | 1050.416535    | 525.711906       | 1049.432519       | 525.219898       | 10 |
| 12 | <b>1607.719241</b> | 804.363259        | 1590.692692    | 795.849984        | 1589.708676        | 795.357976       | <b>G</b> | <b>996.405970</b>  | 498.706623        | 979.379421     | 490.193349       | 978.395405        | 489.701341       | 9  |
| 13 | 1704.772005        | 852.889641        | 1687.745456    | 844.376366        | 1686.761440        | 843.884358       | <b>P</b> | 939.384506         | <b>470.195891</b> | 922.357957     | 461.682617       | 921.373941        | 461.190609       | 8  |
| 14 | 1864.802654        | <b>932.904965</b> | 1847.776105    | 924.391691        | 1846.792089        | 923.899683       | <b>C</b> | <b>842.331742</b>  | 421.669509        | 825.305193     | 413.156235       | 824.321177        | 412.664227       | 7  |
| 15 | 1995.843139        | 998.425208        | 1978.816590    | 989.911933        | 1977.832574        | 989.419925       | <b>M</b> | <b>682.301093</b>  | 341.654185        | 665.274544     | 333.140910       | 664.290528        | 332.648902       | 6  |
| 16 | 2052.864603        | 1026.935939       | 2035.838054    | 1018.422665       | 2034.854038        | 1017.930657      | <b>G</b> | <b>551.260608</b>  | 276.133942        | 534.234059     | 267.620668       | 533.250043        | 267.128660       | 5  |
| 17 | 2183.905088        | 1092.456182       | 2166.878539    | 1083.942907       | 2165.894523        | 1083.450899      | <b>M</b> | <b>494.239144</b>  | 247.623210        | 477.212595     | 239.109935       | 476.228579        | 238.617927       | 4  |
| 18 | 2284.952767        | 1142.980021       | 2267.926218    | 1134.466747       | 2266.942202        | 1133.974739      | <b>T</b> | <b>363.198659</b>  | 182.102967        | 346.172110     | 173.589693       | <b>345.188094</b> | 173.097685       | 3  |
| 19 | 2371.984795        | 1186.496035       | 2354.958246    | 1177.982761       | 2353.974230        | 1177.490753      | <b>S</b> | <b>262.150980</b>  | 131.579128        | 245.124431     | 123.065854       | 244.140415        | 122.573846       | 2  |
| 20 |                    |                   |                |                   |                    |                  | <b>R</b> | 175.118952         | 88.063114         | 158.092403     | 79.549839        |                   |                  | 1  |

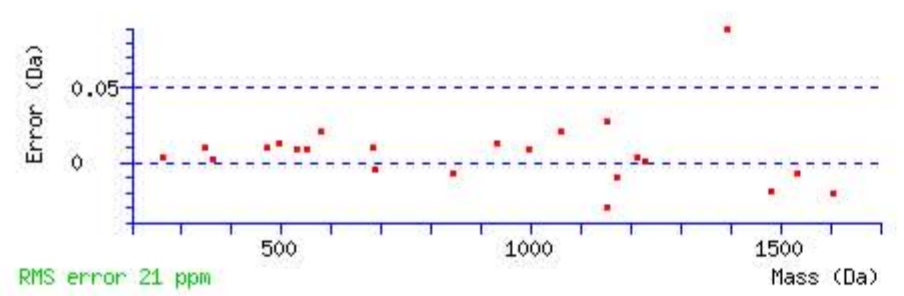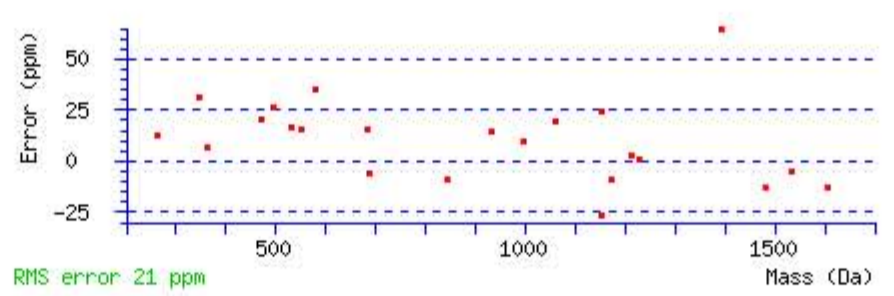

NCBI BLAST search of **KEDSCQLGYSAGPCMGMTSR**  
 (Parameters: blastp, nr protein database, expect=20000, no filter, PAM30)  
 Other BLAST [web gateways](#)

### All matches to this query

| Score | Mr(calc):   | Delta    | Sequence                             |
|-------|-------------|----------|--------------------------------------|
| 26.9  | 2545.089188 | 0.037428 | <a href="#">KEDSCQLGYSAGPCMGMTSR</a> |

# MASCOT SCIENCE Mascot Search Results

## Peptide View

MS/MS Fragmentation of **VGALSQLR**

Found in **MENT\_HUMAN**, Protein MENT OS=Homo sapiens GN=MENT PE=2 SV=1

Match to Query 22013: 1153.672528 from(577.843540,2+) rtinseconds(1918) index(41581)

Title: Locus:1.1.1.3117.11 File:"2013-07-02 CLN FXIII 180 min 1st F 3.wiff"

Data file C:\Program Files (x86)\Matrix Science\Mascot Daemon\mgf\7 FXIII 180 min 1st\mascot\_daemon\_merge.mgf

Click mouse within plot area to zoom in by factor of two about that point

Or, Plot from  to  Da

Label all possible matches  Label matches used for scoring

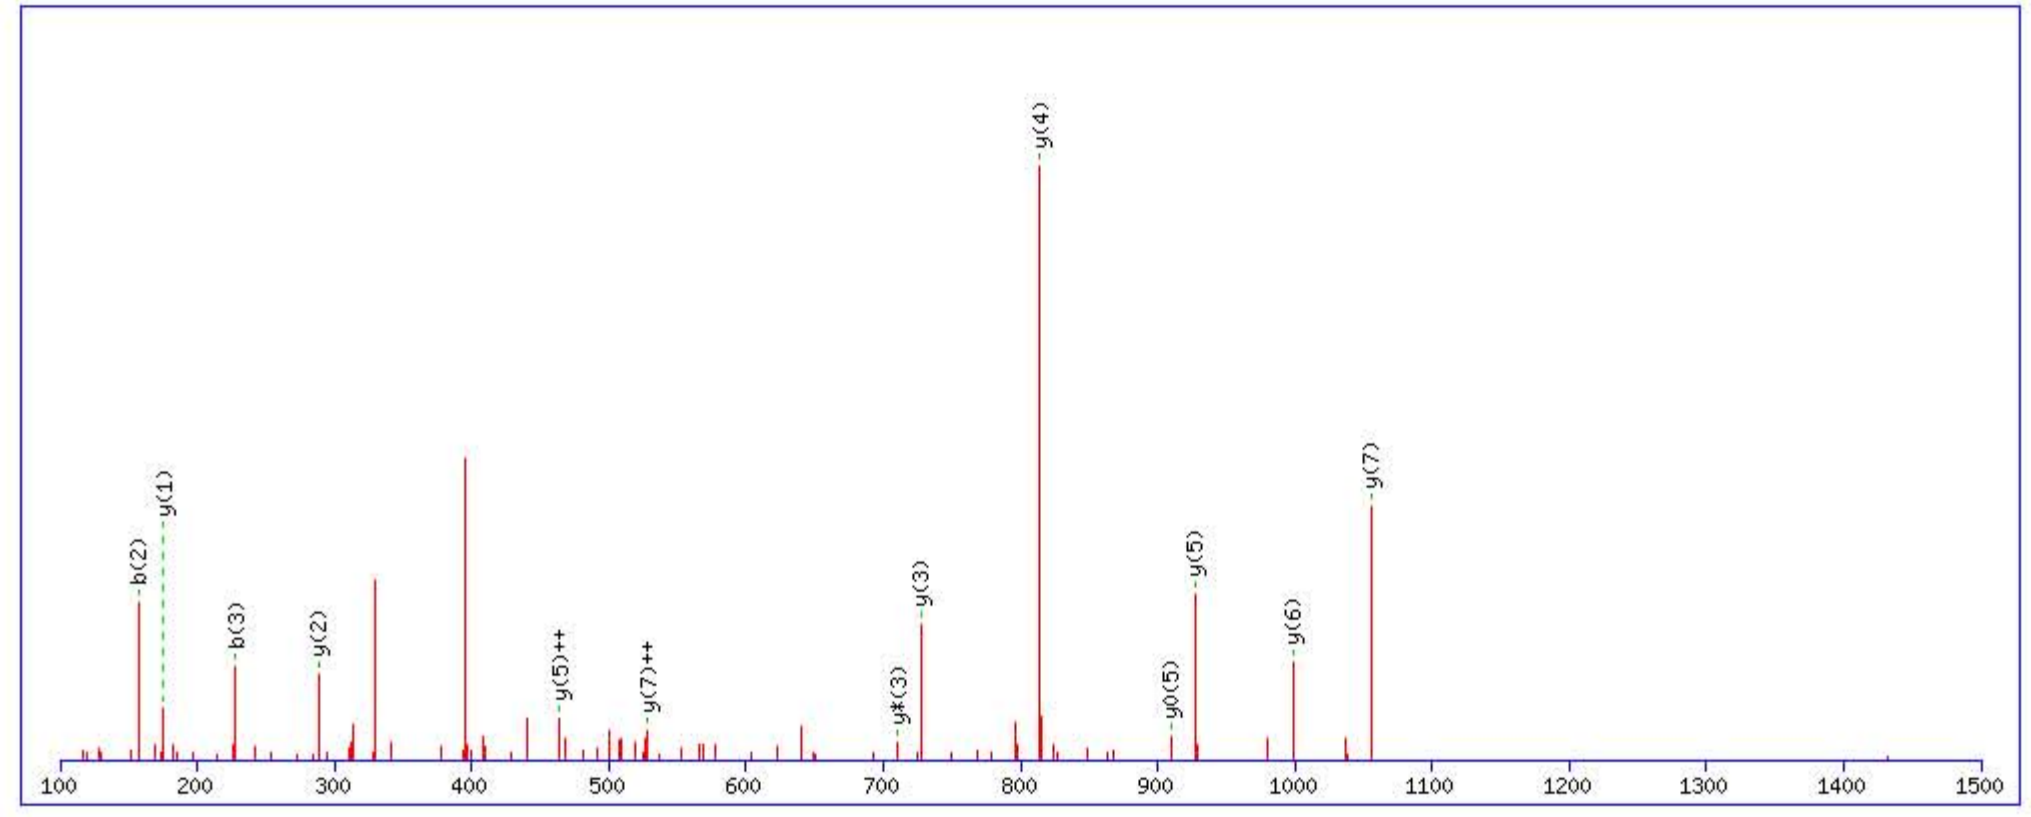

Monoisotopic mass of neutral peptide Mr(calc): 1153.664139

Fixed modifications: Carbamidomethyl (C) (apply to specified residues or termini only)

Variable modifications:

Q6 : Biotin:Thermo-21345 (Q)

Ions Score: 53 Expect: 6.9e-005

Matches : 13/60 fragment ions using 20 most intense peaks [\(help\)](#)

| # | b                 | b <sup>++</sup> | b <sup>*</sup> | b <sup>*++</sup> | b <sup>0</sup> | b <sup>0++</sup> | Seq. | y                  | y <sup>++</sup>   | y <sup>*</sup>    | y <sup>*++</sup> | y <sup>0</sup>    | y <sup>0++</sup> | # |
|---|-------------------|-----------------|----------------|------------------|----------------|------------------|------|--------------------|-------------------|-------------------|------------------|-------------------|------------------|---|
| 1 | 100.075690        | 50.541483       |                |                  |                |                  | V    |                    |                   |                   |                  |                   |                  | 8 |
| 2 | <b>157.097154</b> | 79.052215       |                |                  |                |                  | G    | <b>1055.603012</b> | <b>528.305144</b> | 1038.576463       | 519.791870       | 1037.592447       | 519.299862       | 7 |
| 3 | <b>228.134268</b> | 114.570772      |                |                  |                |                  | A    | <b>998.581548</b>  | 499.794412        | 981.554999        | 491.281138       | 980.570983        | 490.789130       | 6 |
| 4 | 341.218332        | 171.112804      |                |                  |                |                  | L    | <b>927.544434</b>  | <b>464.275855</b> | 910.517885        | 455.762581       | <b>909.533869</b> | 455.270573       | 5 |
| 5 | 428.250360        | 214.628818      |                |                  | 410.239795     | 205.623535       | S    | <b>814.460370</b>  | 407.733823        | 797.433821        | 399.220549       | 796.449805        | 398.728541       | 4 |
| 6 | 867.475686        | 434.241481      | 850.449137     | 425.728207       | 849.465121     | 425.236199       | Q    | <b>727.428342</b>  | 364.217809        | <b>710.401793</b> | 355.704535       |                   |                  | 3 |
| 7 | 980.559750        | 490.783513      | 963.533201     | 482.270239       | 962.549185     | 481.778231       | L    | <b>288.203016</b>  | 144.605146        | 271.176467        | 136.091872       |                   |                  | 2 |
| 8 |                   |                 |                |                  |                |                  | R    | <b>175.118952</b>  | 88.063114         | 158.092403        | 79.549840        |                   |                  | 1 |

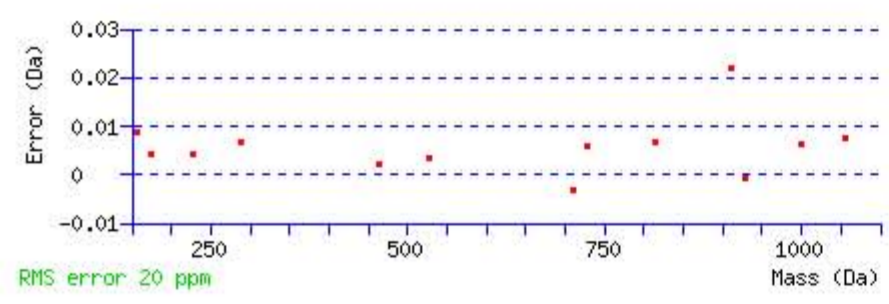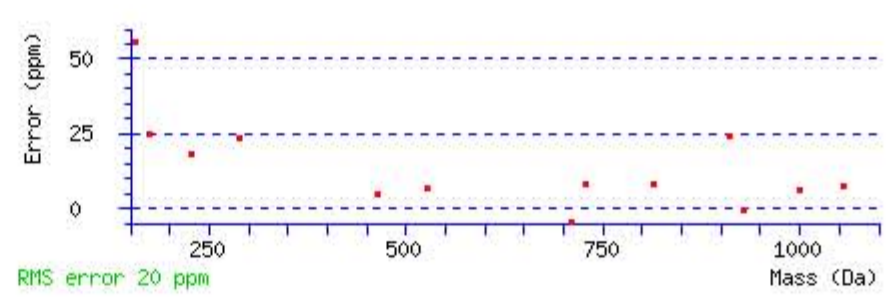

NCBI BLAST search of **VGALSQLR**

(Parameters: blastp, nr protein database, expect=20000, no filter, PAM30)

Other BLAST [web gateways](#)

All matches to this query

| Score | Mr(calc):   | Delta     | Sequence                    |
|-------|-------------|-----------|-----------------------------|
| 53.0  | 1153.664139 | 0.008389  | <a href="#">VGALSQLR</a>    |
| 19.6  | 1153.667953 | 0.004575  | <a href="#">RANPNSIRVK</a>  |
| 13.0  | 1153.675354 | -0.002826 | <a href="#">RALLSQR</a>     |
| 13.0  | 1153.675369 | -0.002841 | <a href="#">RALTVQR</a>     |
| 12.1  | 1153.681885 | -0.009357 | <a href="#">VQKLTALPLR</a>  |
| 11.2  | 1153.664124 | 0.008404  | <a href="#">VKQEALR</a>     |
| 9.8   | 1153.681870 | -0.009342 | <a href="#">RALENLLPTK</a>  |
| 5.3   | 1153.675369 | -0.002841 | <a href="#">QTVRALR</a>     |
| 4.8   | 1153.656723 | 0.015805  | <a href="#">RPSADPGKKAK</a> |
| 2.6   | 1153.664139 | 0.008389  | <a href="#">VTQINLR</a>     |

# MASCOT Search Results

## Peptide View

MS/MS Fragmentation of **RPALNYPVYGETTQVR**

Found in **PRG4\_HUMAN**, Proteoglycan 4 OS=Homo sapiens GN=PRG4 PE=1 SV=2

Match to Query 54788: 2174.132982 from(725.718270,3+) rtinseconds(1868) index(23714)

Title: Locus:1.1.1.2793.9 File:"2013-07-02 CLN FXIII 180 min 1st F 2.wiff"

Data file C:\Program Files (x86)\Matrix Science\Mascot Daemon\mgf\7 FXIII 180 min 1st\mascot\_daemon\_merge.mgf

Click mouse within plot area to zoom in by factor of two about that point

Or, Plot from  to  Da

Label all possible matches  Label matches used for scoring

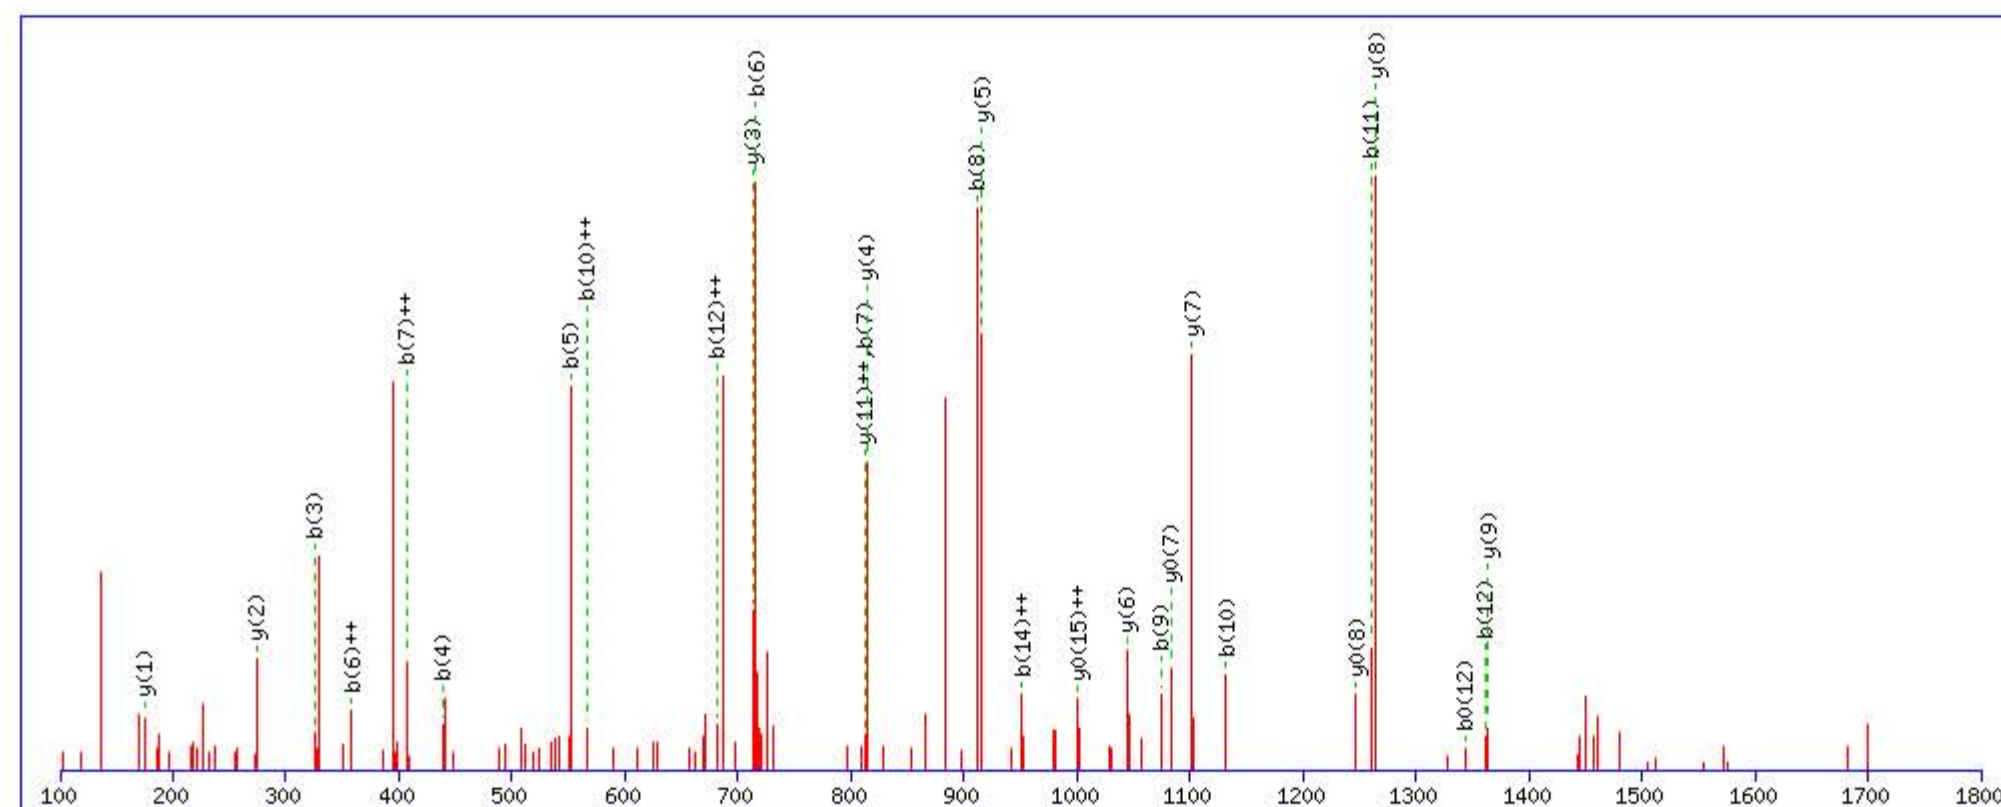

Monoisotopic mass of neutral peptide Mr(calc): 2174.130630

Fixed modifications: Carbamidomethyl (C) (apply to specified residues or termini only)

Variable modifications:

Q14 : Biotin:Thermo-21345 (Q)

Ions Score: 53 Expect: 2.8e-005

Matches : 30/154 fragment ions using 59 most intense peaks [\(help\)](#)

| #  | b                  | b <sup>++</sup>    | b <sup>*</sup> | b <sup>+++</sup> | b <sup>0</sup>     | b <sup>0++</sup> | Seq. | y                  | y <sup>++</sup>   | y <sup>*</sup> | y <sup>+++</sup> | y <sup>0</sup>     | y <sup>0++</sup> | #  |
|----|--------------------|--------------------|----------------|------------------|--------------------|------------------|------|--------------------|-------------------|----------------|------------------|--------------------|------------------|----|
| 1  | 157.108387         | 79.057831          | 140.081838     | 70.544557        |                    |                  | R    |                    |                   |                |                  |                    |                  | 16 |
| 2  | 254.161151         | 127.584213         | 237.134602     | 119.070939       |                    |                  | P    | 2019.036812        | 1010.022044       | 2002.010263    | 1001.508770      | 2001.026247        | 1001.016762      | 15 |
| 3  | <b>325.198265</b>  | 163.102770         | 308.171716     | 154.589496       |                    |                  | A    | 1921.984048        | 961.495662        | 1904.957499    | 952.982388       | 1903.973483        | 952.490380       | 14 |
| 4  | <b>438.282329</b>  | 219.644803         | 421.255780     | 211.131528       |                    |                  | L    | 1850.946934        | 925.977105        | 1833.920385    | 917.463831       | 1832.936369        | 916.971823       | 13 |
| 5  | <b>552.325256</b>  | 276.666266         | 535.298707     | 268.152992       |                    |                  | N    | 1737.862870        | 869.435073        | 1720.836321    | 860.921799       | 1719.852305        | 860.429791       | 12 |
| 6  | <b>715.388585</b>  | <b>358.197931</b>  | 698.362036     | 349.684656       |                    |                  | Y    | 1623.819943        | <b>812.413610</b> | 1606.793394    | 803.900335       | 1605.809378        | 803.408327       | 11 |
| 7  | <b>812.441349</b>  | <b>406.724313</b>  | 795.414800     | 398.211038       |                    |                  | P    | 1460.756614        | 730.881945        | 1443.730065    | 722.368671       | 1442.746049        | 721.876663       | 10 |
| 8  | <b>911.509763</b>  | 456.258520         | 894.483214     | 447.745245       |                    |                  | V    | <b>1363.703850</b> | 682.355563        | 1346.677301    | 673.842289       | 1345.693285        | 673.350281       | 9  |
| 9  | <b>1074.573092</b> | 537.790184         | 1057.546543    | 529.276910       |                    |                  | Y    | <b>1264.635436</b> | 632.821356        | 1247.608887    | 624.308082       | <b>1246.624871</b> | 623.816074       | 8  |
| 10 | <b>1131.594556</b> | <b>566.300916</b>  | 1114.568007    | 557.787642       |                    |                  | G    | <b>1101.572107</b> | 551.289692        | 1084.545558    | 542.776417       | <b>1083.561542</b> | 542.284409       | 7  |
| 11 | <b>1260.637149</b> | 630.822212         | 1243.610600    | 622.308938       | 1242.626584        | 621.816930       | E    | <b>1044.550643</b> | 522.778960        | 1027.524094    | 514.265685       | 1026.540078        | 513.773677       | 6  |
| 12 | <b>1361.684828</b> | <b>681.346052</b>  | 1344.658279    | 672.832778       | <b>1343.674263</b> | 672.340769       | T    | <b>915.508050</b>  | 458.257663        | 898.481501     | 449.744389       | 897.497485         | 449.252381       | 5  |
| 13 | 1462.732507        | 731.869891         | 1445.705958    | 723.356617       | 1444.721942        | 722.864609       | T    | <b>814.460371</b>  | 407.733824        | 797.433822     | 399.220549       | 796.449806         | 398.728541       | 4  |
| 14 | 1901.957833        | <b>951.482555</b>  | 1884.931284    | 942.969280       | 1883.947268        | 942.477272       | Q    | <b>713.412692</b>  | 357.209984        | 696.386143     | 348.696710       |                    |                  | 3  |
| 15 | 2001.026247        | <b>1001.016762</b> | 1983.999698    | 992.503487       | 1983.015682        | 992.011479       | V    | <b>274.187366</b>  | 137.597321        | 257.160817     | 129.084047       |                    |                  | 2  |
| 16 |                    |                    |                |                  |                    |                  | R    | <b>175.118952</b>  | 88.063114         | 158.092403     | 79.549840        |                    |                  | 1  |

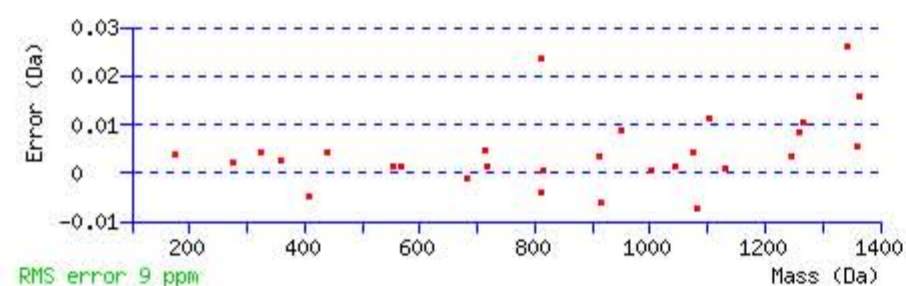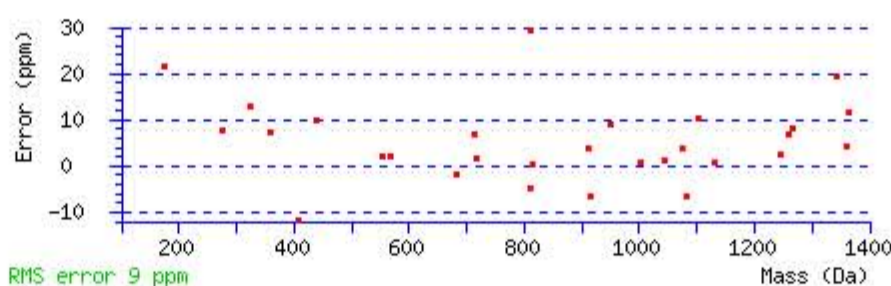

NCBI BLAST search of **RPALNYPVYGETTQVR**

(Parameters: blastp, nr protein database, expect=20000, no filter, PAM30)

Other BLAST [web gateways](#)

All matches to this query

| Score | Mr(calc):   | Delta     | Sequence                             |
|-------|-------------|-----------|--------------------------------------|
| 53.1  | 2174.130630 | 0.002352  | <a href="#">RPALNYPVYGETTQVR</a>     |
| 4.6   | 2174.133148 | -0.000166 | <a href="#">TLGGETRILAVTDFEPTQAR</a> |

# MASCOT SCIENCE Mascot Search Results

## Peptide View

MS/MS Fragmentation of **ETAASLLQAGYK**

Found in **THRB\_HUMAN**, Prothrombin OS=Homo sapiens GN=F2 PE=1 SV=2

Match to Query 36750: 1561.832488 from(781.923520,2+) rtinseconds(2110) index(61492)

Title: Locus:1.1.1.3157.14 File:"2013-07-02 CLN FXIII 180 min 1st F 4.wiff"

Data file C:\Program Files (x86)\Matrix Science\Mascot Daemon\mgf7 FXIII 180 min 1st\mascot\_daemon\_merge.mgf

Click mouse within plot area to zoom in by factor of two about that point

Or, Plot from  to  Da

Label all possible matches  Label matches used for scoring

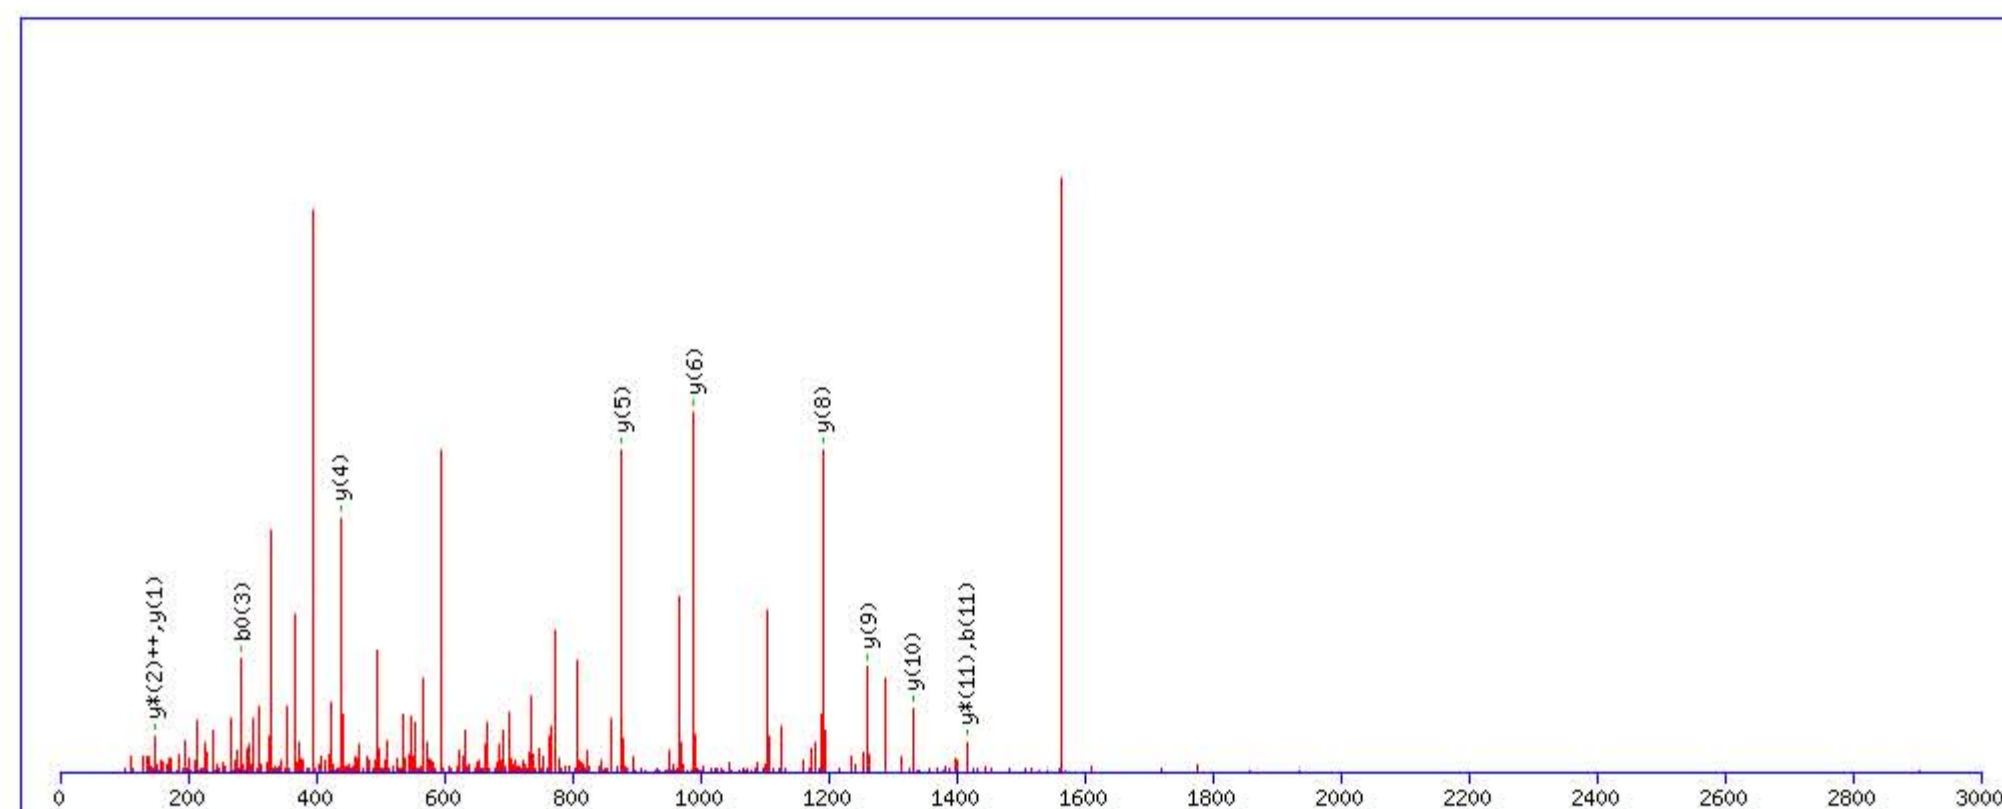

Monoisotopic mass of neutral peptide Mr(calc): 1561.817383

Fixed modifications: Carbamidomethyl (C) (apply to specified residues or termini only)

Variable modifications:

Q8 : Biotin:Thermo-21345 (Q)

Ions Score: 44 Expect: 0.0001

Matches : 11/104 fragment ions using 15 most intense peaks [\(help\)](#)

| #  | b           | b <sup>++</sup> | b <sup>*</sup> | b <sup>+++</sup> | b <sup>0</sup> | b <sup>0++</sup> | Seq. | y           | y <sup>++</sup> | y <sup>*</sup> | y <sup>+++</sup> | y <sup>0</sup> | y <sup>0++</sup> | #  |
|----|-------------|-----------------|----------------|------------------|----------------|------------------|------|-------------|-----------------|----------------|------------------|----------------|------------------|----|
| 1  | 130.049869  | 65.528572       |                |                  | 112.039304     | 56.523290        | E    |             |                 |                |                  |                |                  | 12 |
| 2  | 231.097548  | 116.052412      |                |                  | 213.086983     | 107.047130       | T    | 1433.782100 | 717.394688      | 1416.755551    | 708.881414       | 1415.771535    | 708.389406       | 11 |
| 3  | 302.134662  | 151.570969      |                |                  | 284.124097     | 142.565687       | A    | 1332.734421 | 666.870848      | 1315.707872    | 658.357574       | 1314.723856    | 657.865566       | 10 |
| 4  | 373.171776  | 187.089526      |                |                  | 355.161211     | 178.084243       | A    | 1261.697307 | 631.352292      | 1244.670758    | 622.839017       | 1243.686742    | 622.347009       | 9  |
| 5  | 460.203804  | 230.605540      |                |                  | 442.193239     | 221.600257       | S    | 1190.660193 | 595.833734      | 1173.633644    | 587.320460       | 1172.649628    | 586.828452       | 8  |
| 6  | 573.287868  | 287.147572      |                |                  | 555.277303     | 278.142290       | L    | 1103.628165 | 552.317721      | 1086.601616    | 543.804446       |                |                  | 7  |
| 7  | 686.371932  | 343.689604      |                |                  | 668.361367     | 334.684322       | L    | 990.544101  | 495.775689      | 973.517552     | 487.262414       |                |                  | 6  |
| 8  | 1125.597258 | 563.302267      | 1108.570709    | 554.788993       | 1107.586693    | 554.296985       | Q    | 877.460037  | 439.233657      | 860.433488     | 430.720382       |                |                  | 5  |
| 9  | 1196.634372 | 598.820824      | 1179.607823    | 590.307550       | 1178.623807    | 589.815541       | A    | 438.234711  | 219.620993      | 421.208162     | 211.107719       |                |                  | 4  |
| 10 | 1253.655836 | 627.331556      | 1236.629287    | 618.818282       | 1235.645271    | 618.326273       | G    | 367.197597  | 184.102436      | 350.171048     | 175.589162       |                |                  | 3  |
| 11 | 1416.719165 | 708.863221      | 1399.692616    | 700.349946       | 1398.708600    | 699.857938       | Y    | 310.176133  | 155.591705      | 293.149584     | 147.078430       |                |                  | 2  |
| 12 |             |                 |                |                  |                |                  | K    | 147.112804  | 74.060040       | 130.086255     | 65.546765        |                |                  | 1  |

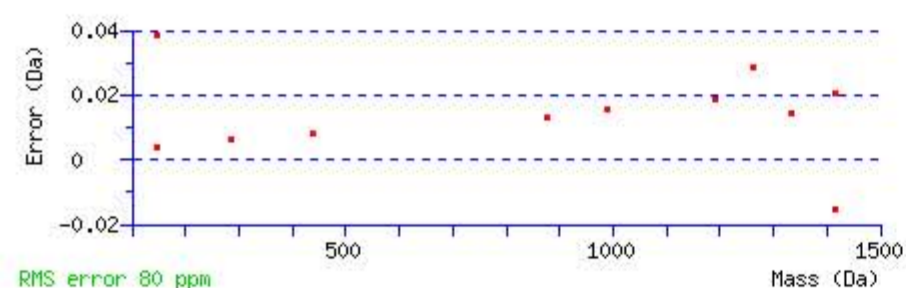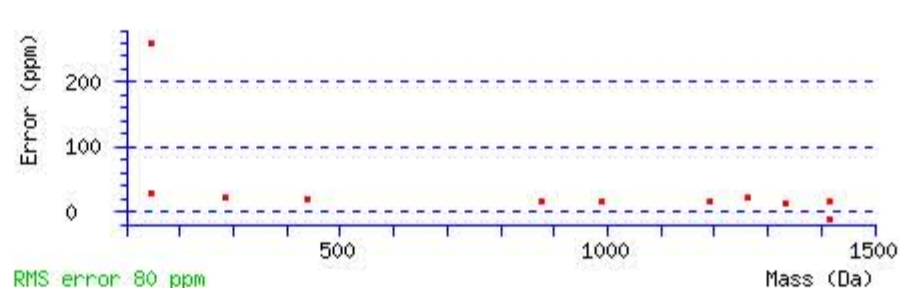

NCBI BLAST search of [ETAASLLQAGYK](#)

(Parameters: blastp, nr protein database, expect=20000, no filter, PAM30)

Other BLAST [web gateways](#)

All matches to this query

| Score | Mr(calc):   | Delta    | Sequence                      |
|-------|-------------|----------|-------------------------------|
| 44.3  | 1561.817383 | 0.015105 | <a href="#">ETAASLLQAGYK</a>  |
| 1.8   | 1561.817398 | 0.015090 | <a href="#">VLPEVLEKQCGYK</a> |

Mascot: <http://www.matrixscience.com/>

# MASCOT Search Results

## Peptide View

MS/MS Fragmentation of **HQDFNSAVQLVENFCR**  
 Found in **THRB\_HUMAN**, Prothrombin OS=Homo sapiens GN=F2 PE=1 SV=2

Match to Query 57320: 2274.093192 from(759.038340,3+) rtinseconds(2431) index(81734)  
 Title: Locus:1.1.1.2197.10 File:"2013-07-02 CLN FXIII 180 min 1st FT.wiff"  
 Data file C:\Program Files (x86)\Matrix Science\Mascot Daemon\mgf7 FXIII 180 min 1st\mascot\_daemon\_merge.mgf

Click mouse within plot area to zoom in by factor of two about that point  
 Or, Plot from  to  Da   
 Label all possible matches  Label matches used for scoring

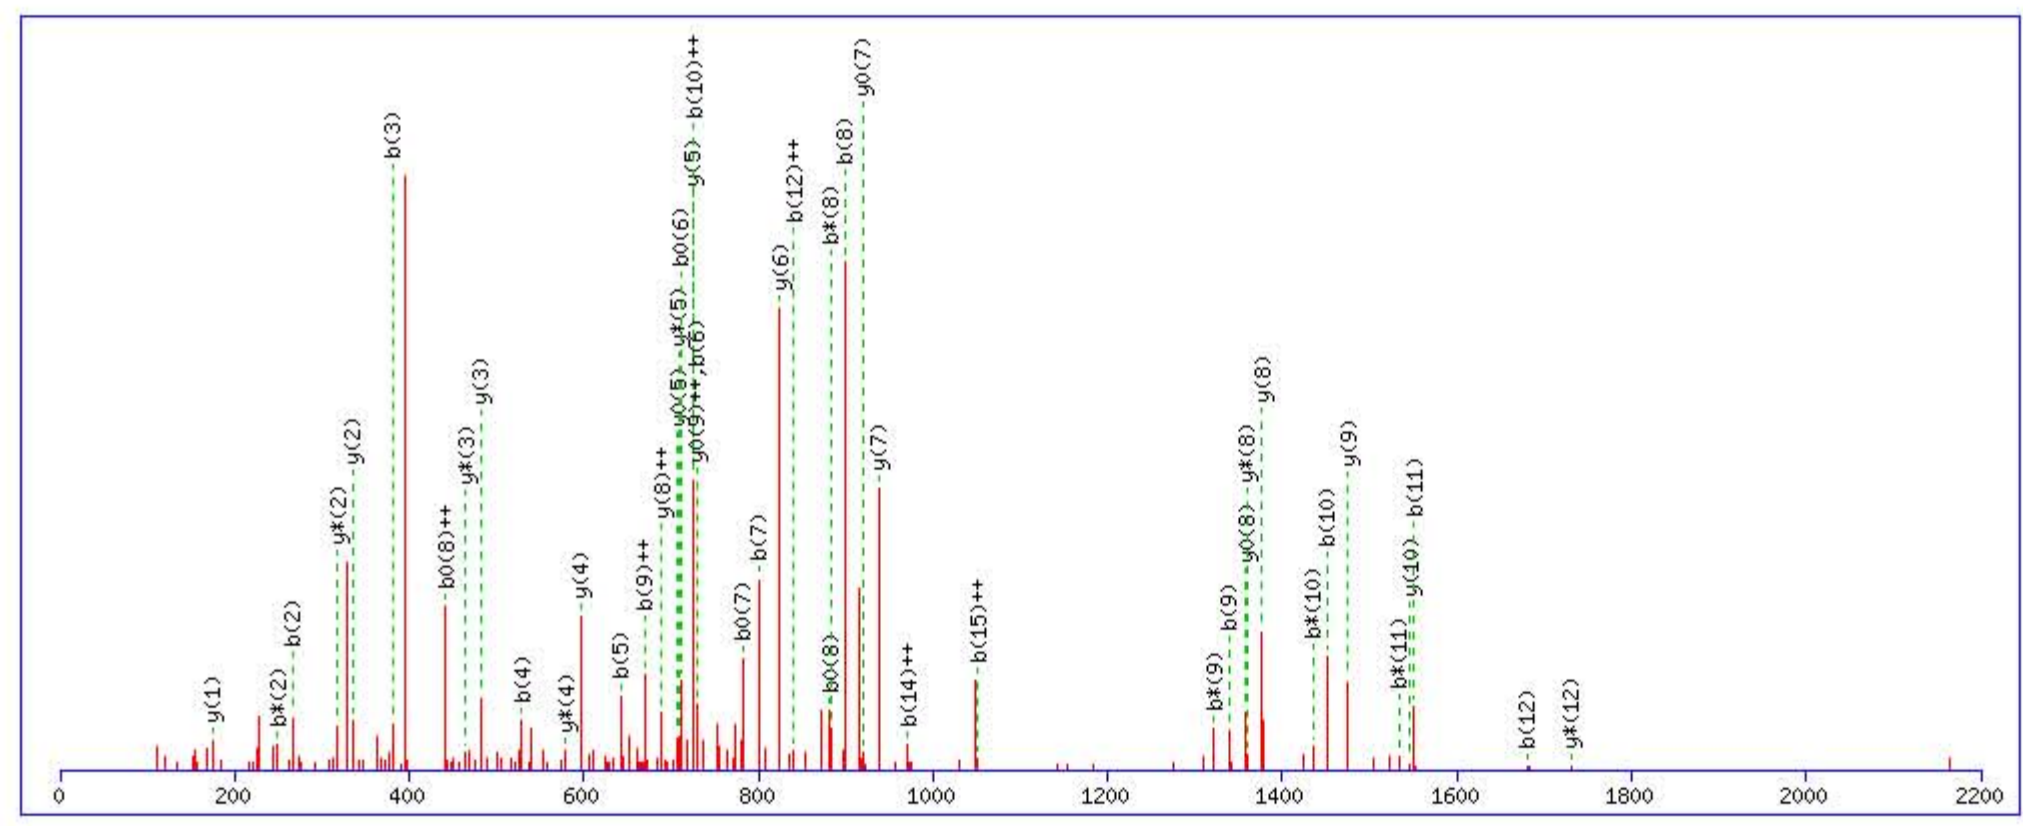

Monoisotopic mass of neutral peptide Mr(calc): 2274.067398  
 Fixed modifications: Carbamidomethyl (C) (apply to specified residues or termini only)  
 Variable modifications:  
 Q9 : Biotin:Thermo-21345 (Q)  
 Ions Score: 59 Expect: 6.1e-006  
 Matches : 46/166 fragment ions using 82 most intense peaks [\(help\)](#)

| #  | b                  | b <sup>++</sup>    | b <sup>*</sup>     | b <sup>++</sup> | b <sup>0</sup>    | b <sup>0++</sup>  | Seq. | y                  | y <sup>++</sup>   | y <sup>*</sup>     | y <sup>++</sup> | y <sup>0</sup>     | y <sup>0++</sup>  | #  |
|----|--------------------|--------------------|--------------------|-----------------|-------------------|-------------------|------|--------------------|-------------------|--------------------|-----------------|--------------------|-------------------|----|
| 1  | 138.066188         | 69.536732          |                    |                 |                   |                   | H    |                    |                   |                    |                 |                    |                   | 16 |
| 2  | <b>266.124766</b>  | 133.566021         | <b>249.098217</b>  | 125.052746      |                   |                   | Q    | 2138.015757        | 1069.511516       | 2120.989208        | 1060.998242     | 2120.005192        | 1060.506234       | 15 |
| 3  | <b>381.151709</b>  | 191.079492         | 364.125160         | 182.566218      | 363.141144        | 182.074210        | D    | 2009.957179        | 1005.482228       | 1992.930630        | 996.968953      | 1991.946614        | 996.476945        | 14 |
| 4  | <b>528.220123</b>  | 264.613700         | 511.193574         | 256.100425      | 510.209558        | 255.608417        | F    | 1894.930236        | 947.968756        | 1877.903687        | 939.455482      | 1876.919671        | 938.963474        | 13 |
| 5  | <b>642.263050</b>  | 321.635163         | 625.236501         | 313.121889      | 624.252485        | 312.629881        | N    | 1747.861822        | 874.434549        | <b>1730.835273</b> | 865.921275      | 1729.851257        | 865.429267        | 12 |
| 6  | <b>729.295078</b>  | 365.151177         | 712.268529         | 356.637903      | <b>711.284513</b> | 356.145895        | S    | 1633.818895        | 817.413086        | 1616.792346        | 808.899811      | 1615.808330        | 808.407803        | 11 |
| 7  | <b>800.332192</b>  | 400.669734         | 783.305643         | 392.156459      | <b>782.321627</b> | 391.664451        | A    | <b>1546.786867</b> | 773.897072        | 1529.760318        | 765.383797      | 1528.776302        | 764.891789        | 10 |
| 8  | <b>899.400606</b>  | 450.203941         | <b>882.374057</b>  | 441.690666      | <b>881.390041</b> | <b>441.198658</b> | V    | <b>1475.749753</b> | 738.378515        | 1458.723204        | 729.865240      | 1457.739188        | <b>729.373232</b> | 9  |
| 9  | <b>1338.625932</b> | <b>669.816604</b>  | <b>1321.599383</b> | 661.303330      | 1320.615367       | 660.811322        | Q    | <b>1376.681339</b> | <b>688.844308</b> | <b>1359.654790</b> | 680.331033      | <b>1358.670774</b> | 679.839025        | 8  |
| 10 | <b>1451.709996</b> | <b>726.358636</b>  | <b>1434.683447</b> | 717.845362      | 1433.699431       | 717.353354        | L    | <b>937.456013</b>  | 469.231645        | 920.429464         | 460.718370      | <b>919.445448</b>  | 460.226362        | 7  |
| 11 | <b>1550.778410</b> | 775.892843         | <b>1533.751861</b> | 767.379569      | 1532.767845       | 766.887561        | V    | <b>824.371949</b>  | 412.689613        | 807.345400         | 404.176338      | 806.361384         | 403.684330        | 6  |
| 12 | <b>1679.821003</b> | <b>840.414140</b>  | 1662.794454        | 831.900865      | 1661.810438       | 831.408857        | E    | <b>725.303535</b>  | 363.155406        | <b>708.276986</b>  | 354.642131      | <b>707.292970</b>  | 354.150123        | 5  |
| 13 | 1793.863930        | 897.435603         | 1776.837381        | 888.922329      | 1775.853365       | 888.430321        | N    | <b>596.260942</b>  | 298.634109        | <b>579.234393</b>  | 290.120835      |                    |                   | 4  |
| 14 | 1940.932344        | <b>970.969810</b>  | 1923.905795        | 962.456536      | 1922.921779       | 961.964528        | F    | <b>482.218015</b>  | 241.612646        | <b>465.191466</b>  | 233.099371      |                    |                   | 3  |
| 15 | 2100.962993        | <b>1050.985135</b> | 2083.936444        | 1042.471860     | 2082.952428       | 1041.979852       | C    | <b>335.149601</b>  | 168.078438        | <b>318.123052</b>  | 159.565164      |                    |                   | 2  |
| 16 |                    |                    |                    |                 |                   |                   | R    | <b>175.118952</b>  | 88.063114         | 158.092403         | 79.549839       |                    |                   | 1  |

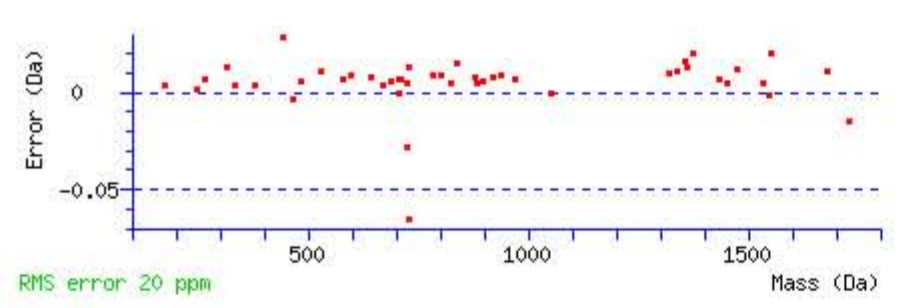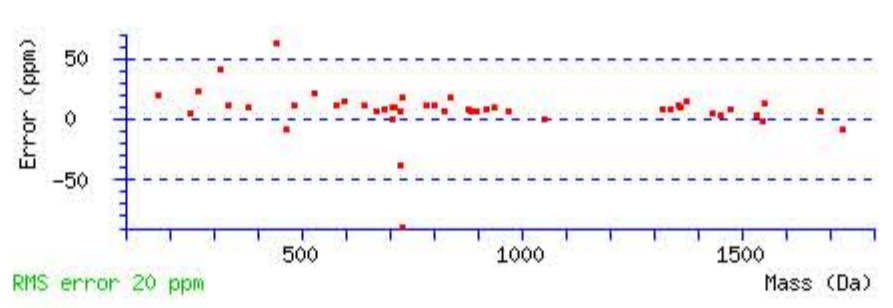

NCBI BLAST search of [HQDFNSAVQLVENFCR](#)  
 (Parameters: blastp, nr protein database, expect=20000, no filter, PAM30)  
 Other BLAST [web gateways](#)

### All matches to this query

| Score | Mr(calc):   | Delta     | Sequence                               |
|-------|-------------|-----------|----------------------------------------|
| 59.0  | 2274.067398 | 0.025794  | <a href="#">HQDFNSAVQLVENFCR</a>       |
| 15.0  | 2274.067398 | 0.025794  | <a href="#">HQDFNSAVQLVENFCR</a>       |
| 3.4   | 2274.106277 | -0.013085 | <a href="#">EKRMTPPGGTLPGAEDVYGGSR</a> |

# MASCOT Search Results

## Peptide View

MS/MS Fragmentation of **GQPSVLQVVNLPIVERPVCK**

Found in **THRB\_HUMAN**, Prothrombin OS=Homo sapiens GN=F2 PE=1 SV=2

Match to Query 63771: 2542.447392 from(848.489740,3+) rtinseconds(2497) index(28027)

Title: Locus:1.1.1.3011.17 File:"2013-07-02 CLN FXIII 180 min 1st F 2.wiff"

Data file C:\Program Files (x86)\Matrix Science\Mascot Daemon\mgf\7 FXIII 180 min 1st\mascot\_daemon\_merge.mgf

Click mouse within plot area to zoom in by factor of two about that point

Or, Plot from  to  Da

Label all possible matches  Label matches used for scoring

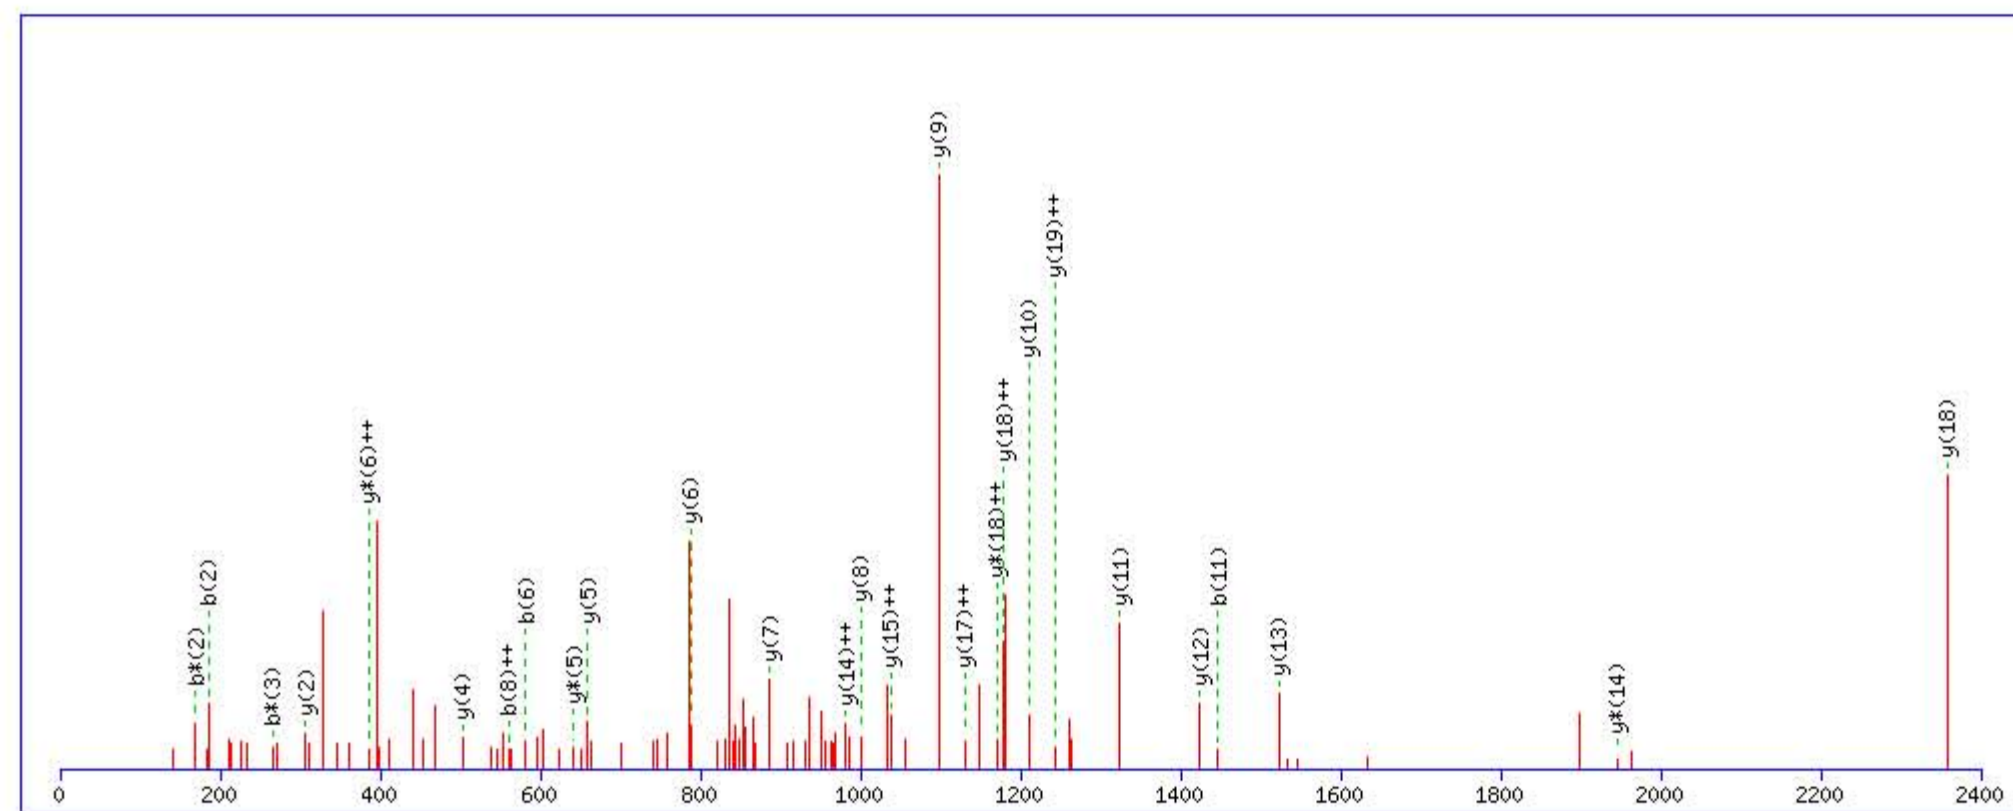

Monoisotopic mass of neutral peptide Mr(calc): 2542.412766

Fixed modifications: Carbamidomethyl (C) (apply to specified residues or termini only)

Variable modifications:

Q7 : Biotin:Thermo-21345 (Q)

Ions Score: 38 Expect: 0.00069

Matches : 27/210 fragment ions using 83 most intense peaks [\(help\)](#)

| #  | b                  | b <sup>++</sup>   | b <sup>*</sup>    | b <sup>*++</sup> | b <sup>0</sup> | b <sup>0++</sup> | Seq. | y                  | y <sup>++</sup>    | y <sup>*</sup>     | y <sup>*++</sup>   | y <sup>0</sup> | y <sup>0++</sup> | #  |
|----|--------------------|-------------------|-------------------|------------------|----------------|------------------|------|--------------------|--------------------|--------------------|--------------------|----------------|------------------|----|
| 1  | 58.028740          | 29.518008         |                   |                  |                |                  | G    |                    |                    |                    |                    |                |                  | 20 |
| 2  | <b>186.087318</b>  | 93.547297         | <b>169.060769</b> | 85.034023        |                |                  | Q    | 2486.398570        | <b>1243.702923</b> | 2469.372021        | 1235.189648        | 2468.388005    | 1234.697640      | 19 |
| 3  | 283.140082         | 142.073679        | <b>266.113533</b> | 133.560405       |                |                  | P    | <b>2358.339992</b> | <b>1179.673634</b> | 2341.313443        | <b>1171.160359</b> | 2340.329427    | 1170.668351      | 18 |
| 4  | 370.172110         | 185.589693        | 353.145561        | 177.076419       | 352.161545     | 176.584411       | S    | 2261.287228        | <b>1131.147252</b> | 2244.260679        | 1122.633977        | 2243.276663    | 1122.141969      | 17 |
| 5  | 469.240524         | 235.123900        | 452.213975        | 226.610626       | 451.229959     | 226.118618       | V    | 2174.255200        | 1087.631238        | 2157.228651        | 1079.117963        | 2156.244635    | 1078.625955      | 16 |
| 6  | <b>582.324588</b>  | 291.665932        | 565.298039        | 283.152658       | 564.314023     | 282.660650       | L    | 2075.186786        | <b>1038.097031</b> | 2058.160237        | 1029.583756        | 2057.176221    | 1029.091748      | 15 |
| 7  | 1021.549914        | 511.278595        | 1004.523365       | 502.765321       | 1003.539349    | 502.273313       | Q    | 1962.102722        | <b>981.554999</b>  | <b>1945.076173</b> | 973.041724         | 1944.092157    | 972.549716       | 14 |
| 8  | 1120.618328        | <b>560.812802</b> | 1103.591779       | 552.299528       | 1102.607763    | 551.807520       | V    | <b>1522.877396</b> | 761.942336         | 1505.850847        | 753.429061         | 1504.866831    | 752.937053       | 13 |
| 9  | 1219.686742        | 610.347009        | 1202.660193       | 601.833735       | 1201.676177    | 601.341727       | V    | <b>1423.808982</b> | 712.408129         | 1406.782433        | 703.894854         | 1405.798417    | 703.402846       | 12 |
| 10 | 1333.729669        | 667.368473        | 1316.703120       | 658.855198       | 1315.719104    | 658.363190       | N    | <b>1324.740568</b> | 662.873922         | 1307.714019        | 654.360647         | 1306.730003    | 653.868639       | 11 |
| 11 | <b>1446.813733</b> | 723.910505        | 1429.787184       | 715.397230       | 1428.803168    | 714.905222       | L    | <b>1210.697641</b> | 605.852458         | 1193.671092        | 597.339184         | 1192.687076    | 596.847176       | 10 |
| 12 | 1543.866497        | 772.436887        | 1526.839948       | 763.923612       | 1525.855932    | 763.431604       | P    | <b>1097.613577</b> | 549.310426         | 1080.587028        | 540.797152         | 1079.603012    | 540.305144       | 9  |
| 13 | 1656.950561        | 828.978918        | 1639.924012       | 820.465644       | 1638.939996    | 819.973636       | I    | <b>1000.560813</b> | 500.784044         | 983.534264         | 492.270770         | 982.550248     | 491.778762       | 8  |
| 14 | 1756.018975        | 878.513126        | 1738.992426       | 869.999851       | 1738.008410    | 869.507843       | V    | <b>887.476749</b>  | 444.242012         | 870.450200         | 435.728738         | 869.466184     | 435.236730       | 7  |
| 15 | 1885.061568        | 943.034422        | 1868.035019       | 934.521147       | 1867.051003    | 934.029139       | E    | <b>788.408335</b>  | 394.707805         | 771.381786         | <b>386.194531</b>  | 770.397770     | 385.702523       | 6  |
| 16 | 2041.162679        | 1021.084977       | 2024.136130       | 1012.571703      | 2023.152114    | 1012.079695      | R    | <b>659.365742</b>  | 330.186509         | <b>642.339193</b>  | 321.673234         |                |                  | 5  |
| 17 | 2138.215443        | 1069.611359       | 2121.188894       | 1061.098085      | 2120.204878    | 1060.606077      | P    | <b>503.264631</b>  | 252.135953         | 486.238082         | 243.622679         |                |                  | 4  |
| 18 | 2237.283857        | 1119.145566       | 2220.257308       | 1110.632292      | 2219.273292    | 1110.140284      | V    | 406.211867         | 203.609571         | 389.185318         | 195.096297         |                |                  | 3  |
| 19 | 2397.314506        | 1199.160891       | 2380.287957       | 1190.647616      | 2379.303941    | 1190.155608      | C    | <b>307.143453</b>  | 154.075364         | 290.116904         | 145.562090         |                |                  | 2  |
| 20 |                    |                   |                   |                  |                |                  | K    | 147.112804         | 74.060040          | 130.086255         | 65.546765          |                |                  | 1  |

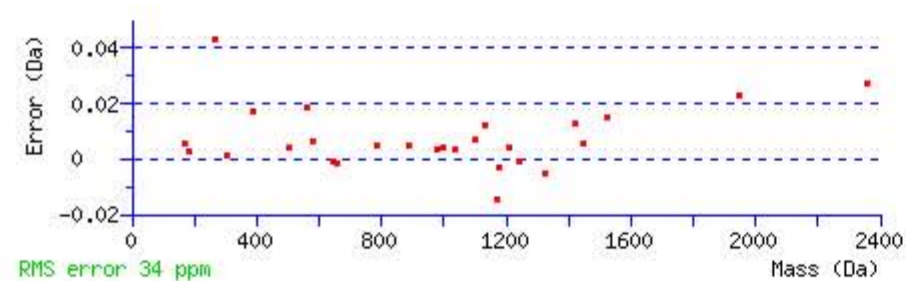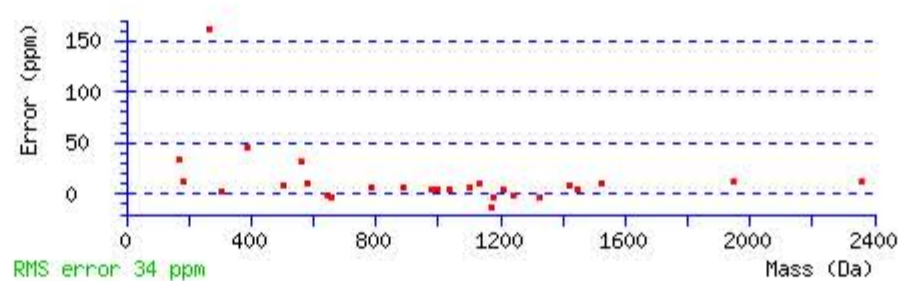

NCBI BLAST search of **GQPSVLQVVNLPIVERPVCK**

(Parameters: blastp, nr protein database, expect=20000, no filter, PAM30)

Other BLAST [web gateways](#)

All matches to this query

| Score | Mr(calc):   | Delta    | Sequence                             |
|-------|-------------|----------|--------------------------------------|
| 38.5  | 2542.412766 | 0.034626 | <a href="#">GQPSVLQVVNLPIVERPVCK</a> |
| 20.4  | 2542.412766 | 0.034626 | <a href="#">GQPSVLQVVNLPIVERPVCK</a> |



# MASCOT Search Results

## Peptide View

MS/MS Fragmentation of **RQEC SIPVCGQDQVT VAMTPR**

Found in **THRB\_HUMAN**, Prothrombin OS=Homo sapiens GN=F2 PE=1 SV=2

Match to Query 66258: 2742.336372 from(915.119400,3+) rtinseconds(1990) index(78837)

Title: Locus:1.1.1.2043.20 File:"2013-07-02 CLN FXIII 180 min 1st FT.wiff"

Data file C:\Program Files (x86)\Matrix Science\Mascot Daemon\mgf7 FXIII 180 min 1st\mascot\_daemon\_merge.mgf

Click mouse within plot area to zoom in by factor of two about that point

Or, Plot from  to  Da

Label all possible matches  Label matches used for scoring

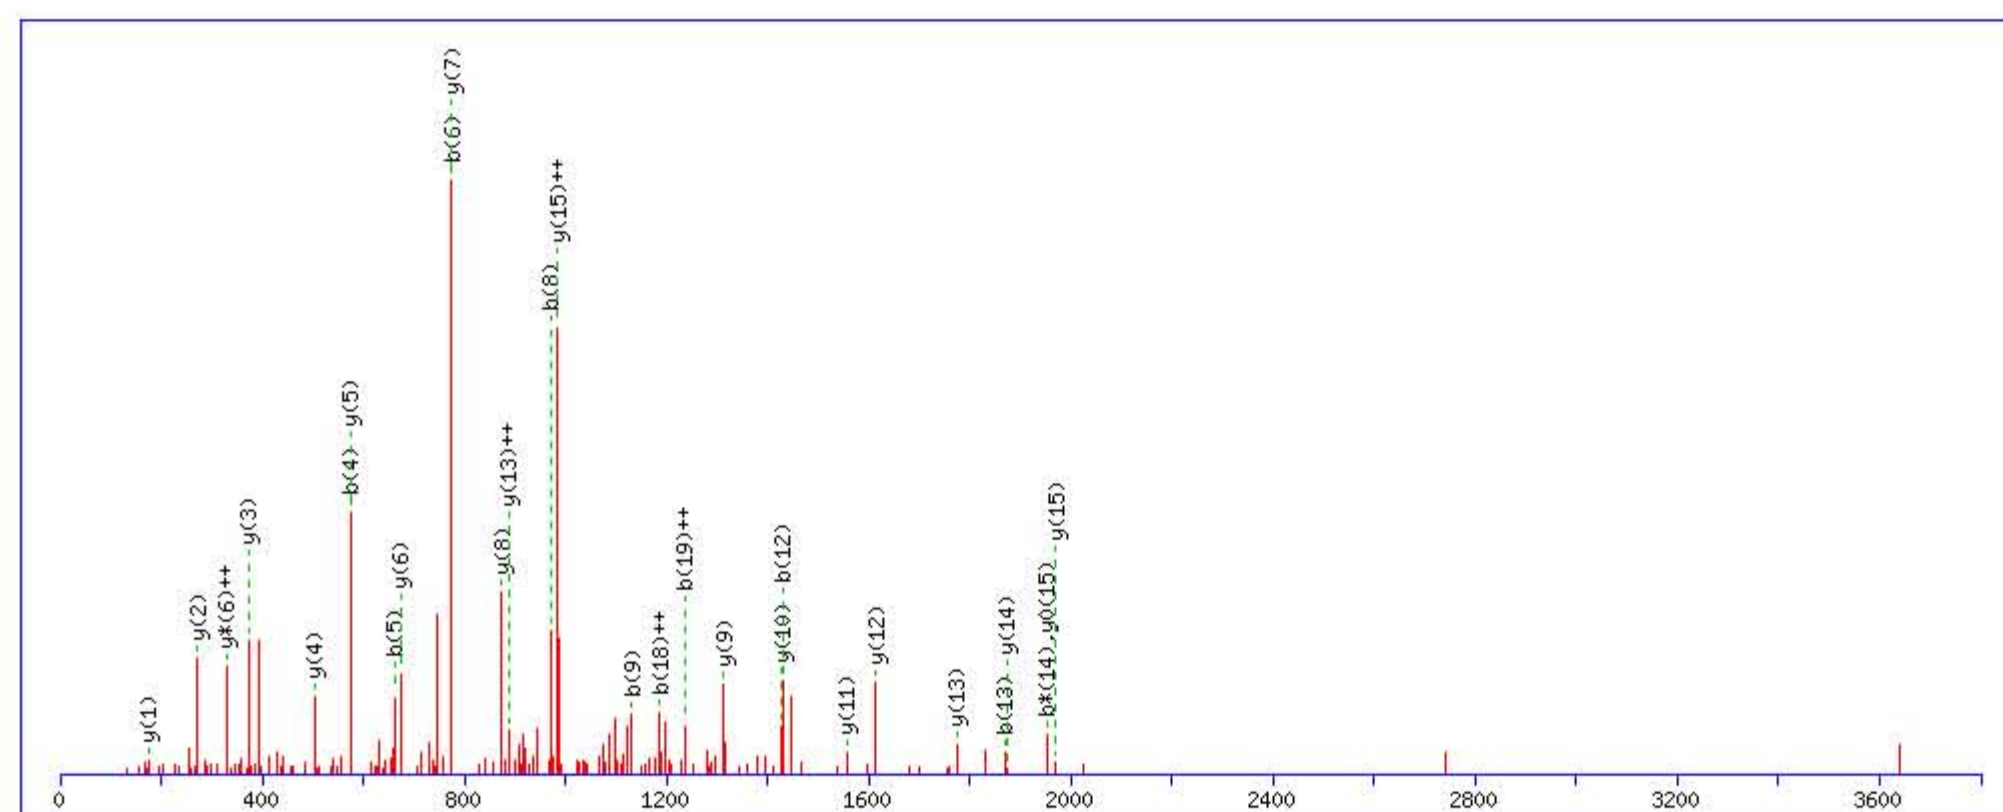

Monoisotopic mass of neutral peptide Mr(calc): 2742.307404

Fixed modifications: Carbamidomethyl (C) (apply to specified residues or termini only)

Variable modifications:

Q13 : Biotin:Thermo-21345 (Q)

Ions Score: 118 Expect: 4.8e-011

Matches : 29/232 fragment ions using 39 most intense peaks [\(help\)](#)

| #  | b                  | b <sup>++</sup>    | b <sup>*</sup>     | b <sup>*++</sup> | b <sup>0</sup> | b <sup>0++</sup> | Seq. | y                  | y <sup>++</sup>   | y <sup>*</sup> | y <sup>*++</sup>  | y <sup>0</sup>     | y <sup>0++</sup> | #  |
|----|--------------------|--------------------|--------------------|------------------|----------------|------------------|------|--------------------|-------------------|----------------|-------------------|--------------------|------------------|----|
| 1  | 157.108387         | 79.057831          | 140.081838         | 70.544557        |                |                  | R    |                    |                   |                |                   |                    |                  | 21 |
| 2  | 285.166965         | 143.087121         | 268.140416         | 134.573846       |                |                  | Q    | 2587.213551        | 1294.110413       | 2570.187002    | 1285.597139       | 2569.202986        | 1285.105131      | 20 |
| 3  | 414.209558         | 207.608417         | 397.183009         | 199.095143       | 396.198993     | 198.603135       | E    | 2459.154973        | 1230.081124       | 2442.128424    | 1221.567850       | 2441.144408        | 1221.075842      | 19 |
| 4  | <b>574.240207</b>  | 287.623742         | 557.213658         | 279.110467       | 556.229642     | 278.618459       | C    | 2330.112380        | 1165.559828       | 2313.085831    | 1157.046553       | 2312.101815        | 1156.554545      | 18 |
| 5  | <b>661.272235</b>  | 331.139756         | 644.245686         | 322.626481       | 643.261670     | 322.134473       | S    | 2170.081731        | 1085.544503       | 2153.055182    | 1077.031229       | 2152.071166        | 1076.539221      | 17 |
| 6  | <b>774.356299</b>  | 387.681788         | 757.329750         | 379.168513       | 756.345734     | 378.676505       | I    | 2083.049703        | 1042.028489       | 2066.023154    | 1033.515215       | 2065.039138        | 1033.023207      | 16 |
| 7  | 871.409063         | 436.208170         | 854.382514         | 427.694895       | 853.398498     | 427.202887       | P    | <b>1969.965639</b> | <b>985.486458</b> | 1952.939090    | 976.973183        | <b>1951.955074</b> | 976.481175       | 15 |
| 8  | <b>970.477477</b>  | 485.742377         | 953.450928         | 477.229102       | 952.466912     | 476.737094       | V    | <b>1872.912875</b> | 936.960076        | 1855.886326    | 928.446801        | 1854.902310        | 927.954793       | 14 |
| 9  | <b>1130.508126</b> | 565.757701         | 1113.481577        | 557.244427       | 1112.497561    | 556.752418       | C    | <b>1773.844461</b> | <b>887.425868</b> | 1756.817912    | 878.912594        | 1755.833896        | 878.420586       | 13 |
| 10 | 1187.529590        | 594.268433         | 1170.503041        | 585.755158       | 1169.519025    | 585.263150       | G    | <b>1613.813812</b> | 807.410544        | 1596.787263    | 798.897270        | 1595.803247        | 798.405262       | 12 |
| 11 | 1315.588168        | 658.297722         | 1298.561619        | 649.784448       | 1297.577603    | 649.292440       | Q    | <b>1556.792348</b> | 778.899812        | 1539.765799    | 770.386538        | 1538.781783        | 769.894530       | 11 |
| 12 | <b>1430.615111</b> | 715.811194         | 1413.588562        | 707.297919       | 1412.604546    | 706.805911       | D    | <b>1428.733770</b> | 714.870523        | 1411.707221    | 706.357249        | 1410.723205        | 705.865241       | 10 |
| 13 | <b>1869.840437</b> | 935.423857         | 1852.813888        | 926.910582       | 1851.829872    | 926.418574       | Q    | <b>1313.706827</b> | 657.357052        | 1296.680278    | 648.843777        | 1295.696262        | 648.351769       | 9  |
| 14 | 1968.908851        | 984.958064         | <b>1951.882302</b> | 976.444789       | 1950.898286    | 975.952781       | V    | <b>874.481501</b>  | 437.744389        | 857.454952     | 429.231114        | 856.470936         | 428.739106       | 8  |
| 15 | 2069.956530        | 1035.481903        | 2052.929981        | 1026.968628      | 2051.945965    | 1026.476620      | T    | <b>775.413087</b>  | 388.210181        | 758.386538     | 379.696907        | 757.402522         | 379.204899       | 7  |
| 16 | 2169.024944        | 1085.016110        | 2151.998395        | 1076.502835      | 2151.014379    | 1076.010827      | V    | <b>674.365408</b>  | 337.686342        | 657.338859     | <b>329.173067</b> | 656.354843         | 328.681059       | 6  |
| 17 | 2240.062058        | 1120.534667        | 2223.035509        | 1112.021392      | 2222.051493    | 1111.529384      | A    | <b>575.296994</b>  | 288.152135        | 558.270445     | 279.638861        | 557.286429         | 279.146853       | 5  |
| 18 | 2371.102543        | <b>1186.054909</b> | 2354.075994        | 1177.541635      | 2353.091978    | 1177.049627      | M    | <b>504.259880</b>  | 252.633578        | 487.233331     | 244.120303        | 486.249315         | 243.628295       | 4  |
| 19 | 2472.150222        | <b>1236.578749</b> | 2455.123673        | 1228.065474      | 2454.139657    | 1227.573466      | T    | <b>373.219395</b>  | 187.113335        | 356.192846     | 178.600061        | 355.208830         | 178.108053       | 3  |
| 20 | 2569.202986        | 1285.105131        | 2552.176437        | 1276.591856      | 2551.192421    | 1276.099848      | P    | <b>272.171716</b>  | 136.589496        | 255.145167     | 128.076221        |                    |                  | 2  |
| 21 |                    |                    |                    |                  |                |                  | R    | <b>175.118952</b>  | 88.063114         | 158.092403     | 79.549839         |                    |                  | 1  |

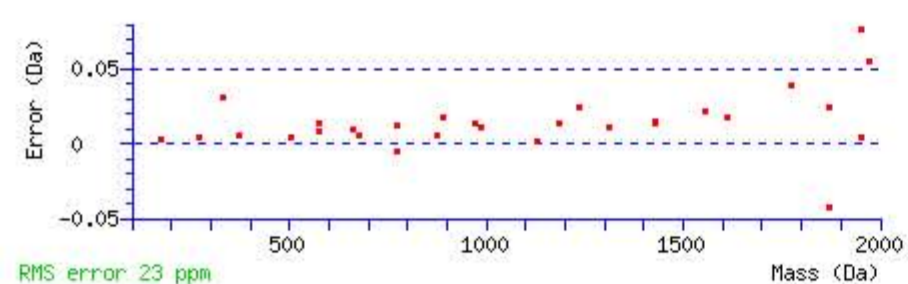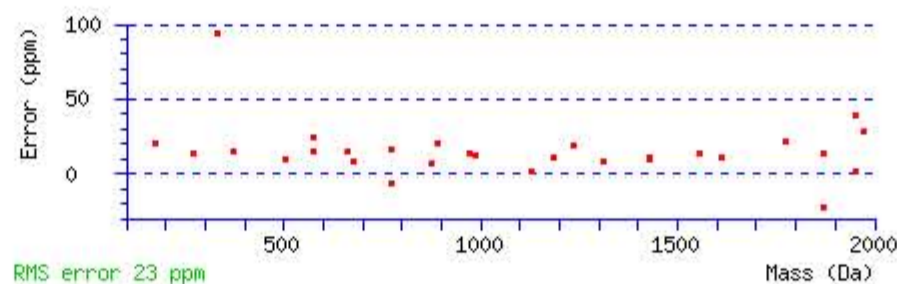

NCBI BLAST search of [RQEC SIPVCGQDQVT VAMTPR](#)

(Parameters: blastp, nr protein database, expect=20000, no filter, PAM30)

Other BLAST [web gateways](#)

All matches to this query

| Score | Mr(calc):   | Delta    | Sequence                                |
|-------|-------------|----------|-----------------------------------------|
| 117.7 | 2742.307404 | 0.028968 | <a href="#">RQEC SIPVCGQDQVT VAMTPR</a> |
| 87.4  | 2742.307404 | 0.028968 | <a href="#">RQEC SIPVCGQDQVT VAMTPR</a> |
| 25.8  | 2742.307404 | 0.028968 | <a href="#">RQEC SIPVCGQDQVT VAMTPR</a> |

# MASCOT SCIENCE Mascot Search Results

## Peptide View

MS/MS Fragmentation of **DMPASEDLQDLQK**

Found in **SEPP1\_HUMAN**, Selenoprotein P OS=Homo sapiens GN=SEPP1 PE=1 SV=3

Match to Query 45287: 1799.853282 from(600.958370,3+) rtinseconds(2162) index(25854)

Title: Locus:1.1.1.2895.7 File:"2013-07-02 CLN FXIII 180 min 1st F 2.wiff"

Data file C:\Program Files (x86)\Matrix Science\Mascot Daemon\mgf\7 FXIII 180 min 1st\mascot\_daemon\_merge.mgf

Click mouse within plot area to zoom in by factor of two about that point

Or, Plot from  to  Da

Label all possible matches  Label matches used for scoring

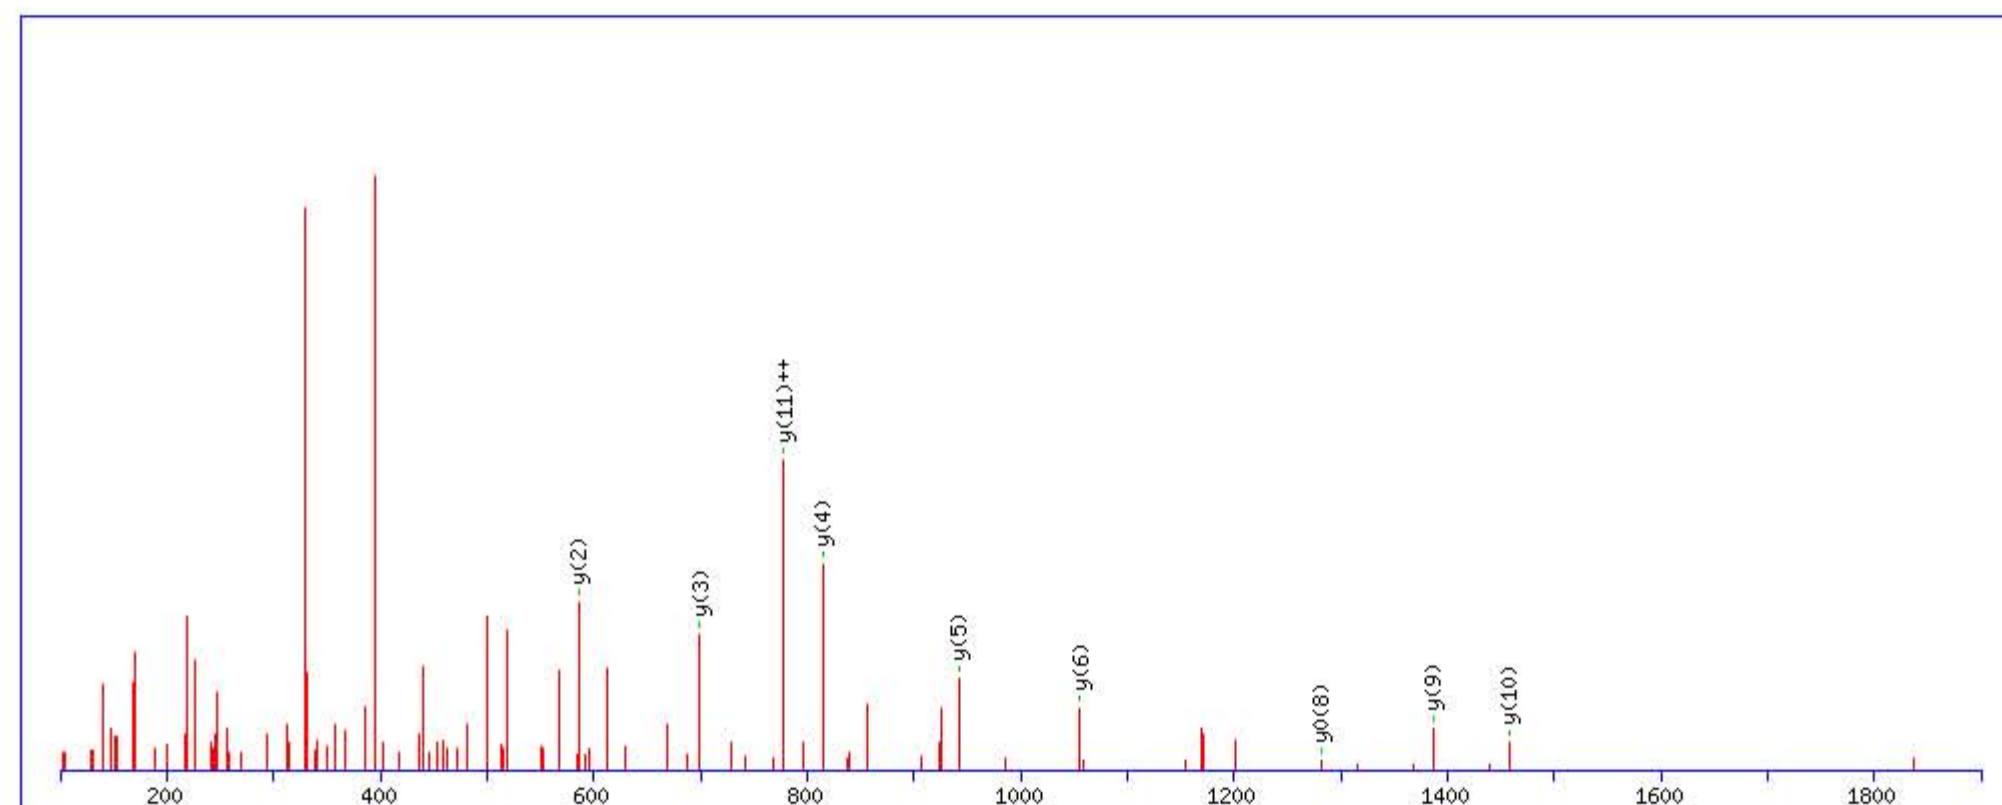

Monoisotopic mass of neutral peptide Mr(calc): 1799.843353

Fixed modifications: Carbamidomethyl (C) (apply to specified residues or termini only)

Variable modifications:

Q12 : Biotin:Thermo-21345 (Q)

Ions Score: 44 Expect: 0.00071

Matches : 9/122 fragment ions using 14 most intense peaks [\(help\)](#)

| #  | b           | b <sup>++</sup> | b <sup>*</sup> | b <sup>*++</sup> | b <sup>0</sup> | b <sup>0++</sup> | Seq. | y           | y <sup>++</sup> | y <sup>*</sup> | y <sup>*++</sup> | y <sup>0</sup> | y <sup>0++</sup> | #  |
|----|-------------|-----------------|----------------|------------------|----------------|------------------|------|-------------|-----------------|----------------|------------------|----------------|------------------|----|
| 1  | 116.034219  | 58.520748       |                |                  | 98.023654      | 49.515465        | D    |             |                 |                |                  |                |                  | 13 |
| 2  | 247.074704  | 124.040990      |                |                  | 229.064139     | 115.035708       | M    | 1685.823706 | 843.415491      | 1668.797157    | 834.902217       | 1667.813141    | 834.410209       | 12 |
| 3  | 344.127468  | 172.567372      |                |                  | 326.116903     | 163.562089       | P    | 1554.783221 | 777.895249      | 1537.756672    | 769.381974       | 1536.772656    | 768.889966       | 11 |
| 4  | 415.164582  | 208.085929      |                |                  | 397.154017     | 199.080646       | A    | 1457.730457 | 729.368867      | 1440.703908    | 720.855592       | 1439.719892    | 720.363584       | 10 |
| 5  | 502.196610  | 251.601943      |                |                  | 484.186045     | 242.596660       | S    | 1386.693343 | 693.850310      | 1369.666794    | 685.337035       | 1368.682778    | 684.845027       | 9  |
| 6  | 631.239203  | 316.123240      |                |                  | 613.228638     | 307.117957       | E    | 1299.661315 | 650.334296      | 1282.634766    | 641.821021       | 1281.650750    | 641.329013       | 8  |
| 7  | 746.266146  | 373.636711      |                |                  | 728.255581     | 364.631428       | D    | 1170.618722 | 585.812999      | 1153.592173    | 577.299725       | 1152.608157    | 576.807717       | 7  |
| 8  | 859.350210  | 430.178743      |                |                  | 841.339645     | 421.173460       | L    | 1055.591779 | 528.299528      | 1038.565230    | 519.786253       | 1037.581214    | 519.294245       | 6  |
| 9  | 987.408788  | 494.208032      | 970.382239     | 485.694757       | 969.398223     | 485.202749       | Q    | 942.507715  | 471.757496      | 925.481166     | 463.244221       | 924.497150     | 462.752213       | 5  |
| 10 | 1102.435731 | 551.721504      | 1085.409182    | 543.208229       | 1084.425166    | 542.716221       | D    | 814.449137  | 407.728207      | 797.422588     | 399.214932       | 796.438572     | 398.722924       | 4  |
| 11 | 1215.519795 | 608.263535      | 1198.493246    | 599.750261       | 1197.509230    | 599.258253       | L    | 699.422194  | 350.214735      | 682.395645     | 341.701461       |                |                  | 3  |
| 12 | 1654.745121 | 827.876199      | 1637.718572    | 819.362924       | 1636.734556    | 818.870916       | Q    | 586.338130  | 293.672703      | 569.311581     | 285.159429       |                |                  | 2  |
| 13 |             |                 |                |                  |                |                  | K    | 147.112804  | 74.060040       | 130.086255     | 65.546765        |                |                  | 1  |

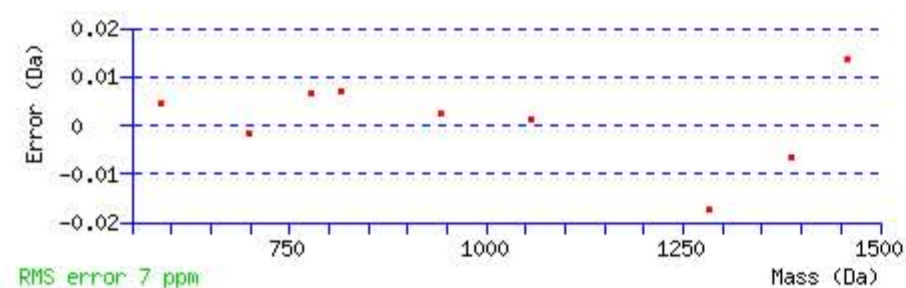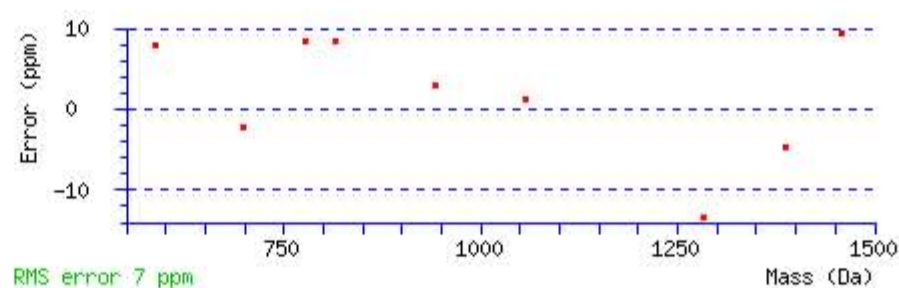

NCBI BLAST search of **DMPASEDLQDLQK**

(Parameters: blastp, nr protein database, expect=20000, no filter, PAM30)

Other BLAST [web gateways](#)

All matches to this query

| Score | Mr(calc):   | Delta    | Sequence                      |
|-------|-------------|----------|-------------------------------|
| 43.6  | 1799.843353 | 0.009929 | <a href="#">DMPASEDLQDLQK</a> |
| 8.8   | 1799.843353 | 0.009929 | <a href="#">DMPASEDLQDLQK</a> |

Mascot: <http://www.matrixscience.com/>

# MASCOT Search Results

## Peptide View

MS/MS Fragmentation of **HQTVPQNTGGK**

Found in **TRFE\_HUMAN**, Serotransferrin OS=Homo sapiens GN=TF PE=1 SV=3

Match to Query 34208: 1476.759732 from(493.260520,3+) rtinseconds(1184) index(73548)

Title: Locus:1.1.1.1763.10 File:"2013-07-02 CLN FXIII 180 min 1st FT.wiff"

Data file C:\Program Files (x86)\Matrix Science\Mascot Daemon\mgf7 FXIII 180 min 1st\mascot\_daemon\_merge.mgf

Click mouse within plot area to zoom in by factor of two about that point

Or, Plot from  to  Da

Label all possible matches  Label matches used for scoring

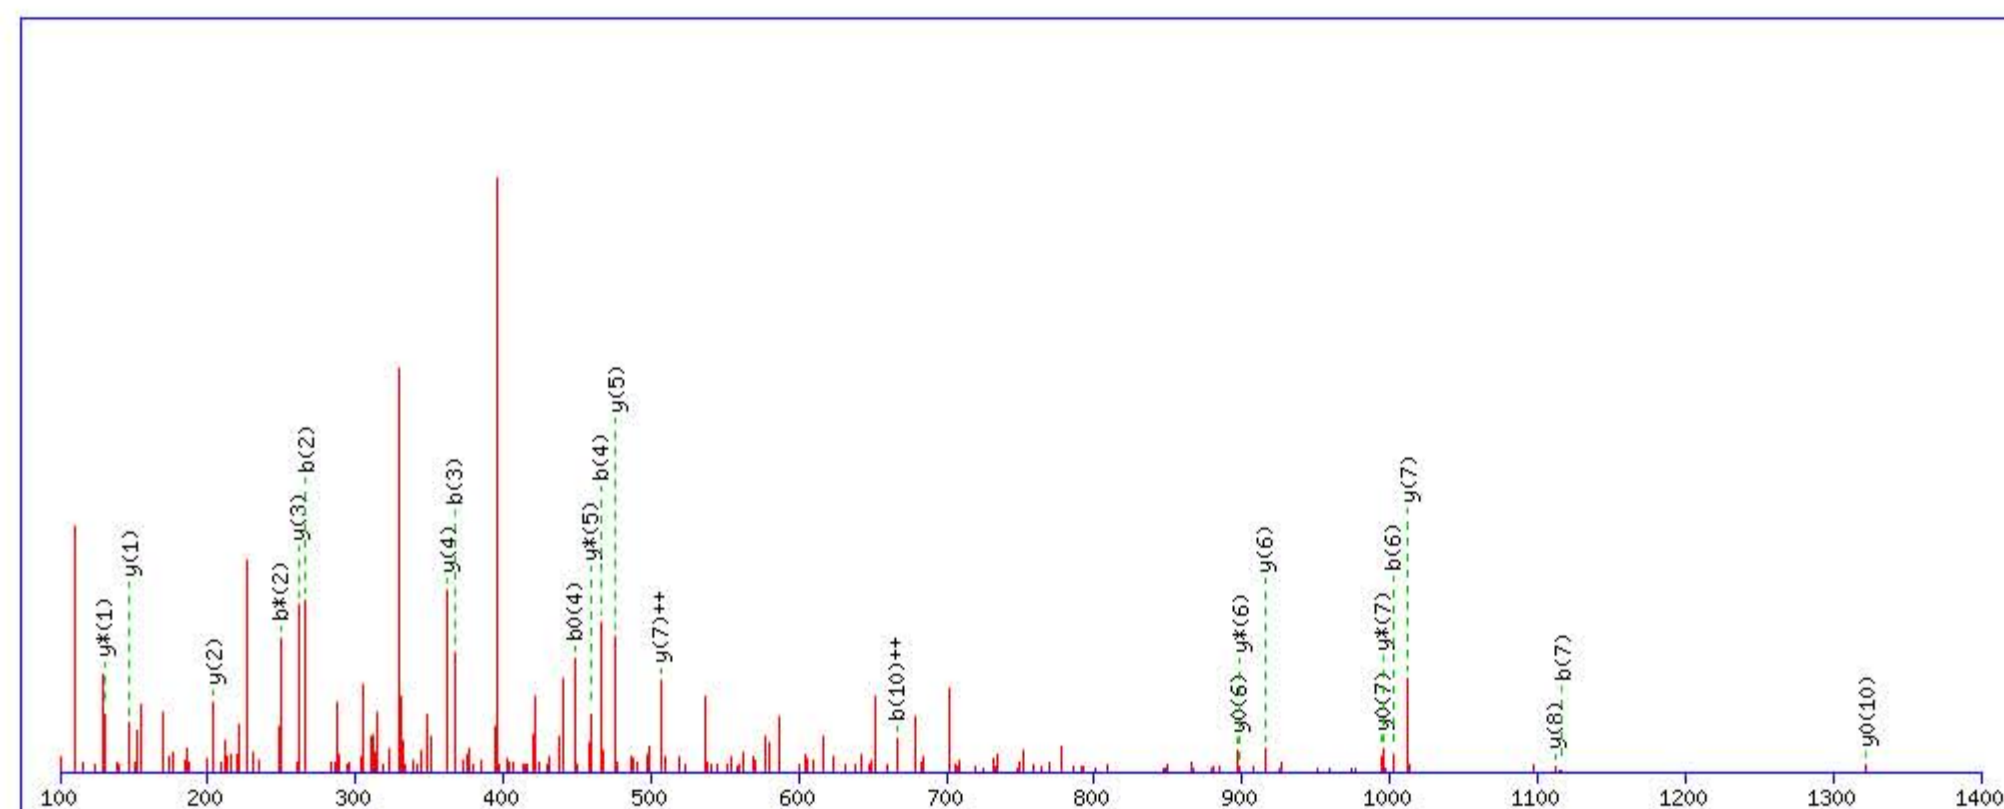

Monoisotopic mass of neutral peptide Mr(calc): 1476.750748

Fixed modifications: Carbamidomethyl (C) (apply to specified residues or termini only)

Variable modifications:

Q6 : Biotin:Thermo-21345 (Q)

Ions Score: 27 Expect: 0.0039

Matches : 24/108 fragment ions using 62 most intense peaks [\(help\)](#)

| #  | b                  | b <sup>++</sup>   | b <sup>*</sup>    | b <sup>*++</sup> | b <sup>0</sup>    | b <sup>0++</sup> | Seq. | y                  | y <sup>++</sup>   | y <sup>*</sup>    | y <sup>*++</sup> | y <sup>0</sup>     | y <sup>0++</sup> | #  |
|----|--------------------|-------------------|-------------------|------------------|-------------------|------------------|------|--------------------|-------------------|-------------------|------------------|--------------------|------------------|----|
| 1  | 138.066188         | 69.536732         |                   |                  |                   |                  | H    |                    |                   |                   |                  |                    |                  | 11 |
| 2  | <b>266.124766</b>  | 133.566021        | <b>249.098217</b> | 125.052746       |                   |                  | Q    | 1340.699099        | 670.853187        | 1323.672550       | 662.339913       | <b>1322.688534</b> | 661.847905       | 10 |
| 3  | <b>367.172445</b>  | 184.089860        | 350.145896        | 175.576586       | 349.161880        | 175.084578       | T    | 1212.640521        | 606.823899        | 1195.613972       | 598.310624       | 1194.629956        | 597.818616       | 9  |
| 4  | <b>466.240859</b>  | 233.624068        | 449.214310        | 225.110793       | <b>448.230294</b> | 224.618785       | V    | <b>1111.592842</b> | 556.300059        | 1094.566293       | 547.786784       | 1093.582277        | 547.294776       | 8  |
| 5  | 563.293623         | 282.150450        | 546.267074        | 273.637175       | 545.283058        | 273.145167       | P    | <b>1012.524428</b> | <b>506.765852</b> | <b>995.497879</b> | 498.252577       | <b>994.513863</b>  | 497.760569       | 7  |
| 6  | <b>1002.518949</b> | 501.763113        | 985.492400        | 493.249838       | 984.508384        | 492.757830       | Q    | <b>915.471664</b>  | 458.239470        | <b>898.445115</b> | 449.726195       | <b>897.461099</b>  | 449.234187       | 6  |
| 7  | <b>1116.561876</b> | 558.784576        | 1099.535327       | 550.271302       | 1098.551311       | 549.779293       | N    | <b>476.246338</b>  | 238.626807        | <b>459.219789</b> | 230.113532       | 458.235773         | 229.621524       | 5  |
| 8  | 1217.609555        | 609.308416        | 1200.583006       | 600.795141       | 1199.598990       | 600.303133       | T    | <b>362.203411</b>  | 181.605343        | 345.176862        | 173.092069       | 344.192846         | 172.600061       | 4  |
| 9  | 1274.631019        | 637.819147        | 1257.604470       | 629.305873       | 1256.620454       | 628.813865       | G    | <b>261.155732</b>  | 131.081504        | 244.129183        | 122.568229       |                    |                  | 3  |
| 10 | 1331.652483        | <b>666.329879</b> | 1314.625934       | 657.816605       | 1313.641918       | 657.324597       | G    | <b>204.134268</b>  | 102.570772        | 187.107719        | 94.057497        |                    |                  | 2  |
| 11 |                    |                   |                   |                  |                   |                  | K    | <b>147.112804</b>  | 74.060040         | <b>130.086255</b> | 65.546765        |                    |                  | 1  |

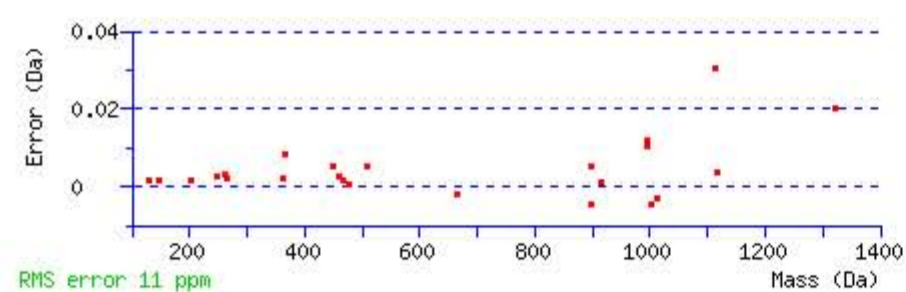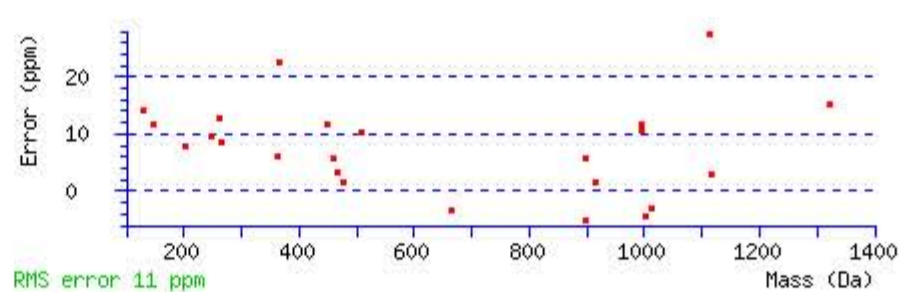

NCBI BLAST search of [HQTVPQNTGGK](#)

(Parameters: blastp, nr protein database, expect=20000, no filter, PAM30)

Other BLAST [web gateways](#)

All matches to this query

| Score | Mr(calc):   | Delta    | Sequence                      |
|-------|-------------|----------|-------------------------------|
| 27.4  | 1476.750748 | 0.008984 | <a href="#">HQTVPQNTGGK</a>   |
| 16.4  | 1476.750748 | 0.008984 | <a href="#">HQTVPQNTGGK</a>   |
| 1.6   | 1476.739487 | 0.020245 | <a href="#">GPEVMAFIEQGKR</a> |

Mascot: <http://www.matrixscience.com/>

# MASCOT Search Results

## Peptide View

MS/MS Fragmentation of **DSGFQMNQLR**

Found in **TRFE\_HUMAN**, Serotransferrin OS=Homo sapiens GN=TF PE=1 SV=3

Match to Query 35137: 1505.722588 from(753.868570,2+) rtinseconds(2053) index(79227)

Title: Locus:1.1.1.2065.23 File:"2013-07-02 CLN FXIII 180 min 1st FT.wiff"

Data file C:\Program Files (x86)\Matrix Science\Mascot Daemon\mgf\7 FXIII 180 min 1st\mascot\_daemon\_merge.mgf

Click mouse within plot area to zoom in by factor of two about that point

Or, Plot from  to  Da

Label all possible matches  Label matches used for scoring

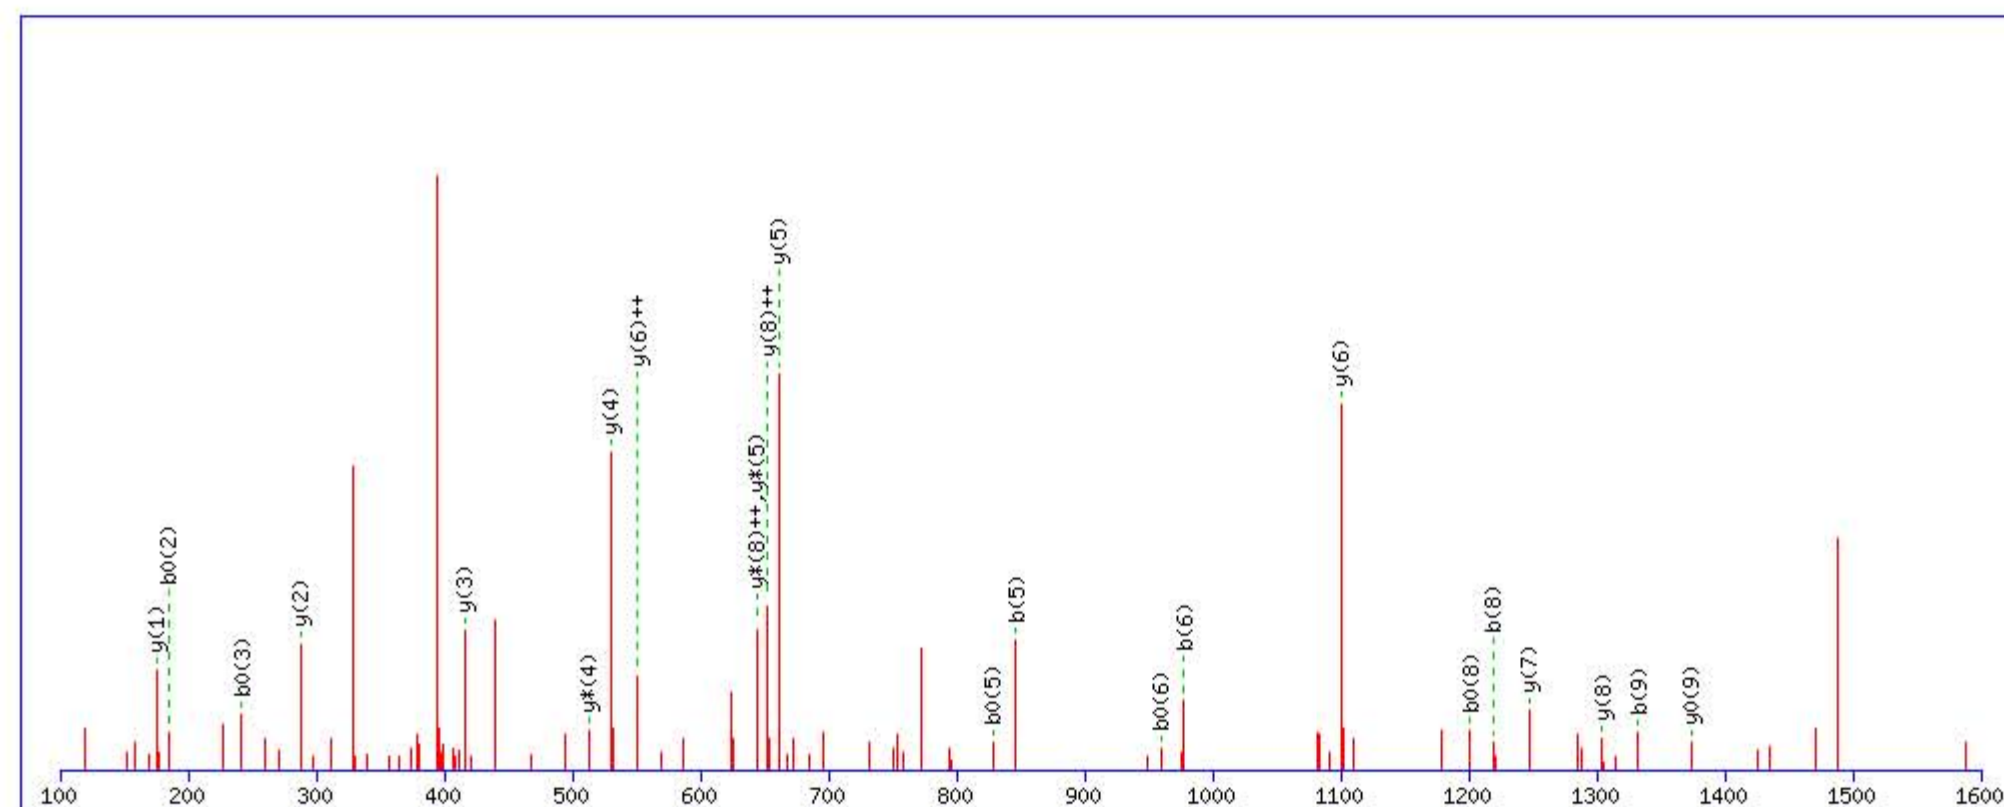

Monoisotopic mass of neutral peptide Mr(calc): 1505.711899

Fixed modifications: Carbamidomethyl (C) (apply to specified residues or termini only)

Variable modifications:

Q5 : Biotin:Thermo-21345 (Q)

Ions Score: 48 Expect: 0.00027

Matches : 23/84 fragment ions using 40 most intense peaks [\(help\)](#)

| #  | b           | b <sup>++</sup> | b <sup>+</sup> | b <sup>+++</sup> | b <sup>0</sup> | b <sup>0++</sup> | Seq. | y           | y <sup>++</sup> | y <sup>+</sup> | y <sup>+++</sup> | y <sup>0</sup> | y <sup>0++</sup> | #  |
|----|-------------|-----------------|----------------|------------------|----------------|------------------|------|-------------|-----------------|----------------|------------------|----------------|------------------|----|
| 1  | 116.034219  | 58.520748       |                |                  | 98.023654      | 49.515465        | D    |             |                 |                |                  |                |                  | 10 |
| 2  | 203.066247  | 102.036761      |                |                  | 185.055682     | 93.031479        | S    | 1391.692238 | 696.349757      | 1374.665689    | 687.836482       | 1373.681673    | 687.344474       | 9  |
| 3  | 260.087711  | 130.547493      |                |                  | 242.077146     | 121.542211       | G    | 1304.660210 | 652.833743      | 1287.633661    | 644.320469       |                |                  | 8  |
| 4  | 407.156125  | 204.081700      |                |                  | 389.145560     | 195.076418       | F    | 1247.638746 | 624.323011      | 1230.612197    | 615.809736       |                |                  | 7  |
| 5  | 846.381451  | 423.694364      | 829.354902     | 415.181089       | 828.370886     | 414.689081       | Q    | 1100.570332 | 550.788804      | 1083.543783    | 542.275530       |                |                  | 6  |
| 6  | 977.421936  | 489.214606      | 960.395387     | 480.701331       | 959.411371     | 480.209323       | M    | 661.345006  | 331.176141      | 644.318457     | 322.662867       |                |                  | 5  |
| 7  | 1091.464863 | 546.236069      | 1074.438314    | 537.722795       | 1073.454298    | 537.230787       | N    | 530.304521  | 265.655899      | 513.277972     | 257.142624       |                |                  | 4  |
| 8  | 1219.523441 | 610.265359      | 1202.496892    | 601.752084       | 1201.512876    | 601.260076       | Q    | 416.261594  | 208.634435      | 399.235045     | 200.121160       |                |                  | 3  |
| 9  | 1332.607505 | 666.807391      | 1315.580956    | 658.294116       | 1314.596940    | 657.802108       | L    | 288.203016  | 144.605146      | 271.176467     | 136.091871       |                |                  | 2  |
| 10 |             |                 |                |                  |                |                  | R    | 175.118952  | 88.063114       | 158.092403     | 79.549839        |                |                  | 1  |

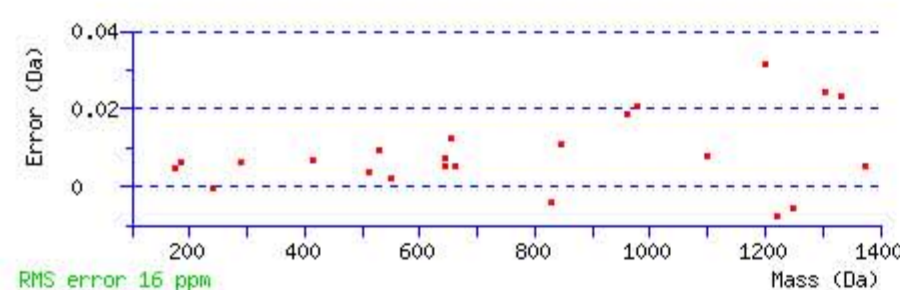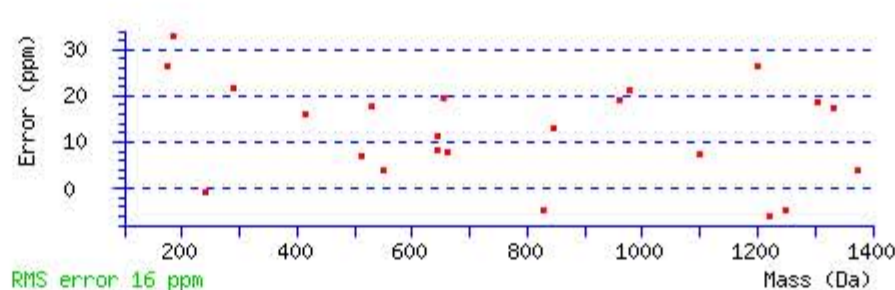

NCBI BLAST search of **DSGFQMNQLR**

(Parameters: blastp, nr protein database, expect=20000, no filter, PAM30)

Other BLAST [web gateways](#)

All matches to this query

| Score | Mr(calc):   | Delta     | Sequence                          |
|-------|-------------|-----------|-----------------------------------|
| 48.5  | 1505.711899 | 0.010689  | <a href="#">DSGFQMNQLR</a>        |
| 15.6  | 1505.711899 | 0.010689  | <a href="#">DSGFQMNQLR</a>        |
| 13.9  | 1505.740891 | -0.018303 | <a href="#">VQTSNFPRECIR</a>      |
| 10.2  | 1505.704025 | 0.018563  | <a href="#">MQMEIDQLR</a>         |
| 9.7   | 1505.703140 | 0.019448  | <a href="#">DETMEEQDIKLR</a>      |
| 5.7   | 1505.744232 | -0.021644 | <a href="#">QAKMAPSRMDSLRL</a>    |
| 3.9   | 1505.740891 | -0.018303 | <a href="#">GSPKCFRSVSPER</a>     |
| 2.9   | 1505.730530 | -0.007942 | <a href="#">QIFCQACLR</a>         |
| 2.9   | 1505.736862 | -0.014274 | <a href="#">EVMSPGTGSARGRSR</a>   |
| 2.1   | 1505.736877 | -0.014289 | <a href="#">AAMAVGGAGGSRVSSGR</a> |

# MASCOT Search Results

## Peptide View

MS/MS Fragmentation of **KDSGFQMNQLR**

Found in **TRFE\_HUMAN**, Serotransferrin OS=Homo sapiens GN=TF PE=1 SV=3

Match to Query 40673: 1633.818308 from(817.916430,2+) rtinseconds(1732) index(77123)

Title: Locus:1.1.1.1954.11 File:"2013-07-02 CLN FXIII 180 min 1st FT.wiff"

Data file C:\Program Files (x86)\Matrix Science\Mascot Daemon\mgf\7 FXIII 180 min 1st\mascot\_daemon\_merge.mgf

Click mouse within plot area to zoom in by factor of two about that point

Or, Plot from  to  Da

Label all possible matches  Label matches used for scoring

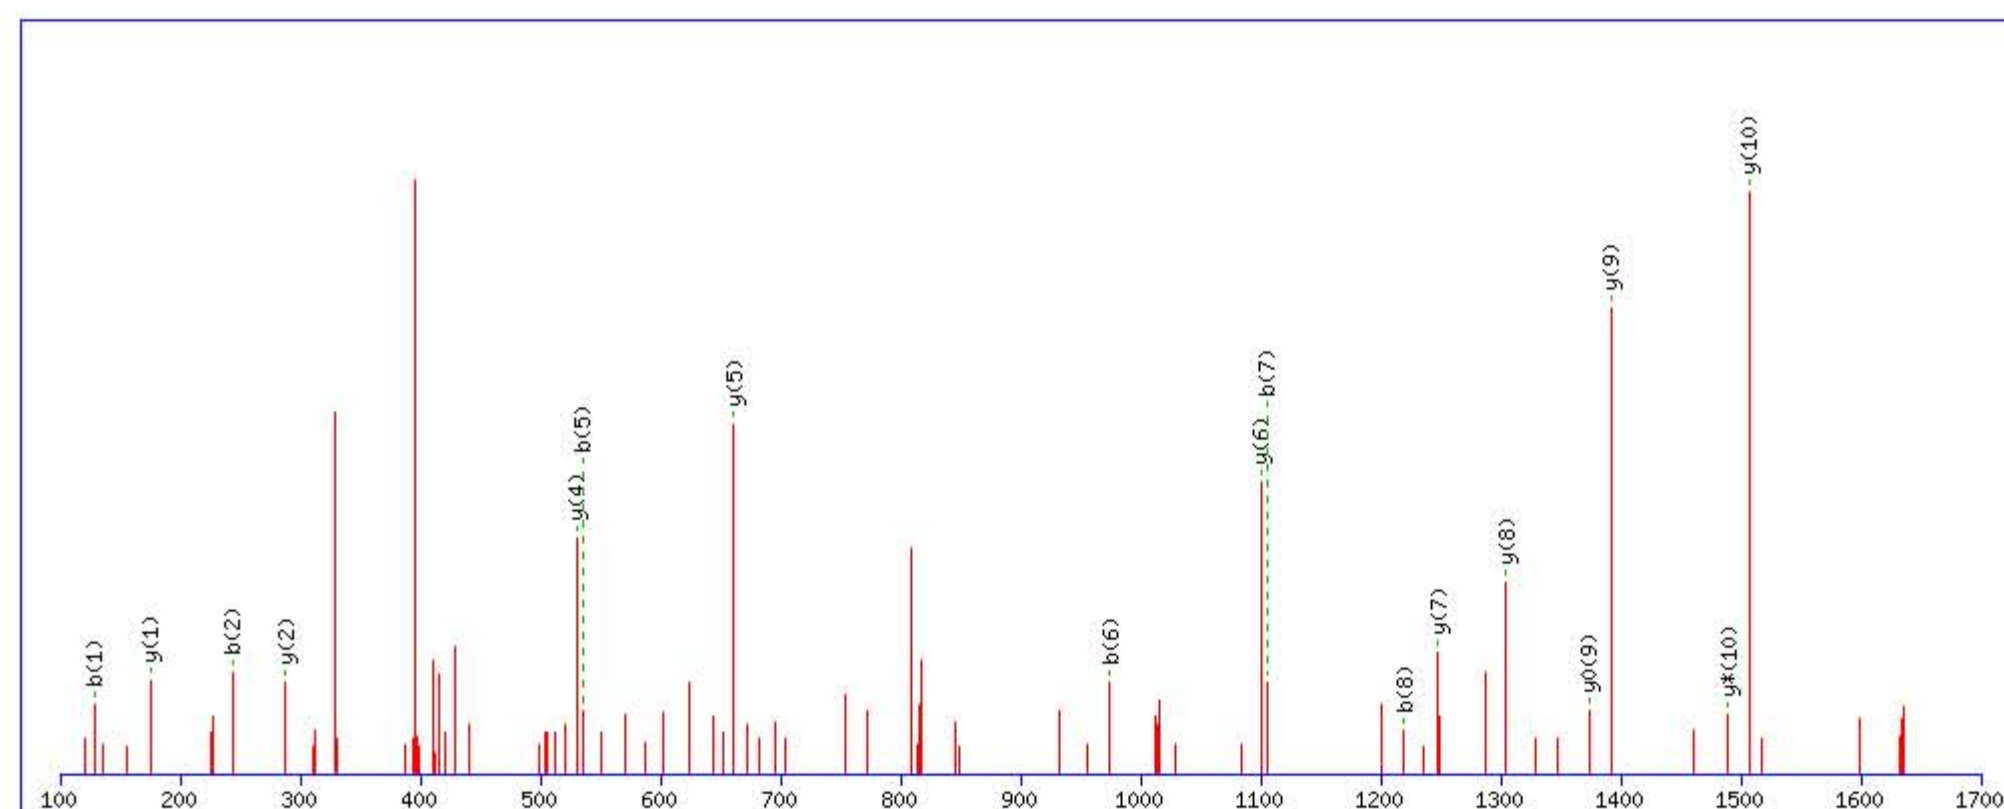

Monoisotopic mass of neutral peptide Mr(calc): 1633.806854

Fixed modifications: Carbamidomethyl (C) (apply to specified residues or termini only)

Variable modifications:

Q6 : Biotin:Thermo-21345 (Q)

Ions Score: 65 Expect: 3.3e-006

Matches : 17/102 fragment ions using 30 most intense peaks [\(help\)](#)

| #  | b                  | b <sup>++</sup> | b <sup>*</sup> | b <sup>+++</sup> | b <sup>0</sup> | b <sup>0++</sup> | Seq.     | y                  | y <sup>++</sup> | y <sup>*</sup>     | y <sup>+++</sup> | y <sup>0</sup>     | y <sup>0++</sup> | #         |
|----|--------------------|-----------------|----------------|------------------|----------------|------------------|----------|--------------------|-----------------|--------------------|------------------|--------------------|------------------|-----------|
| 1  | <b>129.102239</b>  | 65.054757       | 112.075690     | 56.541483        |                |                  | <b>K</b> |                    |                 |                    |                  |                    |                  | <b>11</b> |
| 2  | <b>244.129182</b>  | 122.568229      | 227.102633     | 114.054955       | 226.118617     | 113.562947       | <b>D</b> | <b>1506.719181</b> | 753.863228      | <b>1489.692632</b> | 745.349954       | 1488.708616        | 744.857946       | <b>10</b> |
| 3  | 331.161210         | 166.084243      | 314.134661     | 157.570969       | 313.150645     | 157.078961       | <b>S</b> | <b>1391.692238</b> | 696.349757      | 1374.665689        | 687.836482       | <b>1373.681673</b> | 687.344474       | <b>9</b>  |
| 4  | 388.182674         | 194.594975      | 371.156125     | 186.081701       | 370.172109     | 185.589693       | <b>G</b> | <b>1304.660210</b> | 652.833743      | 1287.633661        | 644.320468       |                    |                  | <b>8</b>  |
| 5  | <b>535.251088</b>  | 268.129182      | 518.224539     | 259.615908       | 517.240523     | 259.123900       | <b>F</b> | <b>1247.638746</b> | 624.323011      | 1230.612197        | 615.809736       |                    |                  | <b>7</b>  |
| 6  | <b>974.476414</b>  | 487.741845      | 957.449865     | 479.228571       | 956.465849     | 478.736563       | <b>Q</b> | <b>1100.570332</b> | 550.788804      | 1083.543783        | 542.275530       |                    |                  | <b>6</b>  |
| 7  | <b>1105.516899</b> | 553.262088      | 1088.490350    | 544.748813       | 1087.506334    | 544.256805       | <b>M</b> | <b>661.345006</b>  | 331.176141      | 644.318457         | 322.662866       |                    |                  | <b>5</b>  |
| 8  | <b>1219.559826</b> | 610.283551      | 1202.533277    | 601.770277       | 1201.549261    | 601.278268       | <b>N</b> | <b>530.304521</b>  | 265.655899      | 513.277972         | 257.142624       |                    |                  | <b>4</b>  |
| 9  | 1347.618404        | 674.312840      | 1330.591855    | 665.799566       | 1329.607839    | 665.307558       | <b>Q</b> | 416.261594         | 208.634435      | 399.235045         | 200.121160       |                    |                  | <b>3</b>  |
| 10 | 1460.702468        | 730.854872      | 1443.675919    | 722.341598       | 1442.691903    | 721.849589       | <b>L</b> | <b>288.203016</b>  | 144.605146      | 271.176467         | 136.091871       |                    |                  | <b>2</b>  |
| 11 |                    |                 |                |                  |                |                  | <b>R</b> | <b>175.118952</b>  | 88.063114       | 158.092403         | 79.549839        |                    |                  | <b>1</b>  |

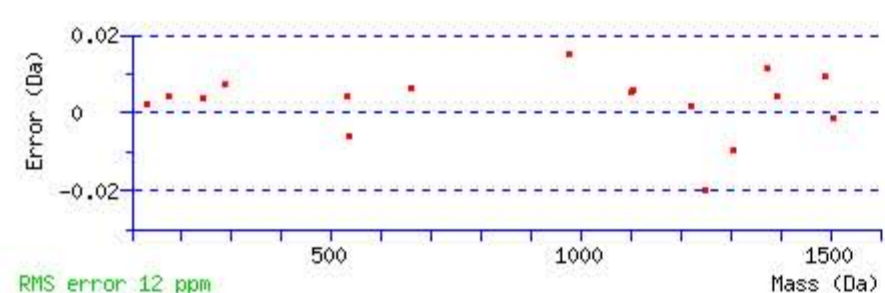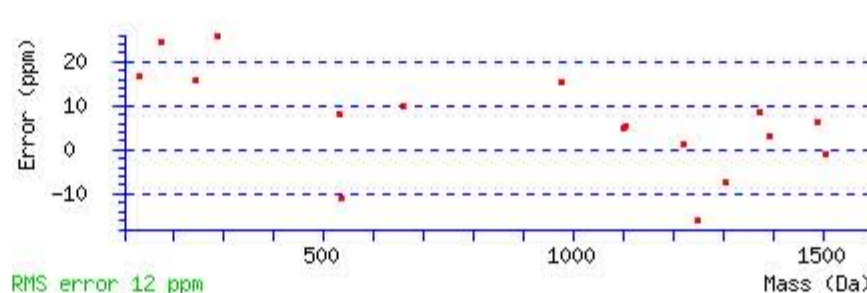

NCBI BLAST search of **KDSGFQMNQLR**

(Parameters: blastp, nr protein database, expect=20000, no filter, PAM30)

Other BLAST [web gateways](#)

## All matches to this query

| Score | Mr(calc):   | Delta     | Sequence                         |
|-------|-------------|-----------|----------------------------------|
| 64.5  | 1633.806854 | 0.011454  | <a href="#">KDSGFQMNQLR</a>      |
| 34.2  | 1633.806854 | 0.011454  | <a href="#">KDSGFQMNQLR</a>      |
| 5.7   | 1633.822128 | -0.003820 | <a href="#">QFMKGQVSWGR</a>      |
| 5.0   | 1633.842361 | -0.024053 | <a href="#">QDLIPSYSLGSNKGR</a>  |
| 3.8   | 1633.803482 | 0.014826  | <a href="#">QLFERDWSSR</a>       |
| 3.6   | 1633.824615 | -0.006307 | <a href="#">AGGAFLMAGQVAEQLR</a> |
| 3.2   | 1633.821930 | -0.003622 | <a href="#">GGRMDQQPALPHRR</a>   |
| 2.5   | 1633.795609 | 0.022699  | <a href="#">KFMEDEQQLR</a>       |
| 2.4   | 1633.798111 | 0.020197  | <a href="#">CTTVDEAEKAIELR</a>   |
| 1.9   | 1633.806885 | 0.011423  | <a href="#">MGVHCFLGLTATATR</a>  |

# MASCOT Search Results

## Peptide View

MS/MS Fragmentation of **KDSGFQMNQLR**

Found in **TRFE\_HUMAN**, Serotransferrin OS=Homo sapiens GN=TF PE=1 SV=3

Match to Query 41157: 1649.808328 from(825.911440,2+) rtinseconds(1533) index(75941)

Title: Locus:1.1.1.1884.24 File:"2013-07-02 CLN FXIII 180 min 1st FT.wiff"

Data file C:\Program Files (x86)\Matrix Science\Mascot Daemon\mgf\7 FXIII 180 min 1st\mascot\_daemon\_merge.mgf

Click mouse within plot area to zoom in by factor of two about that point

Or, Plot from  to  Da

Label all possible matches  Label matches used for scoring

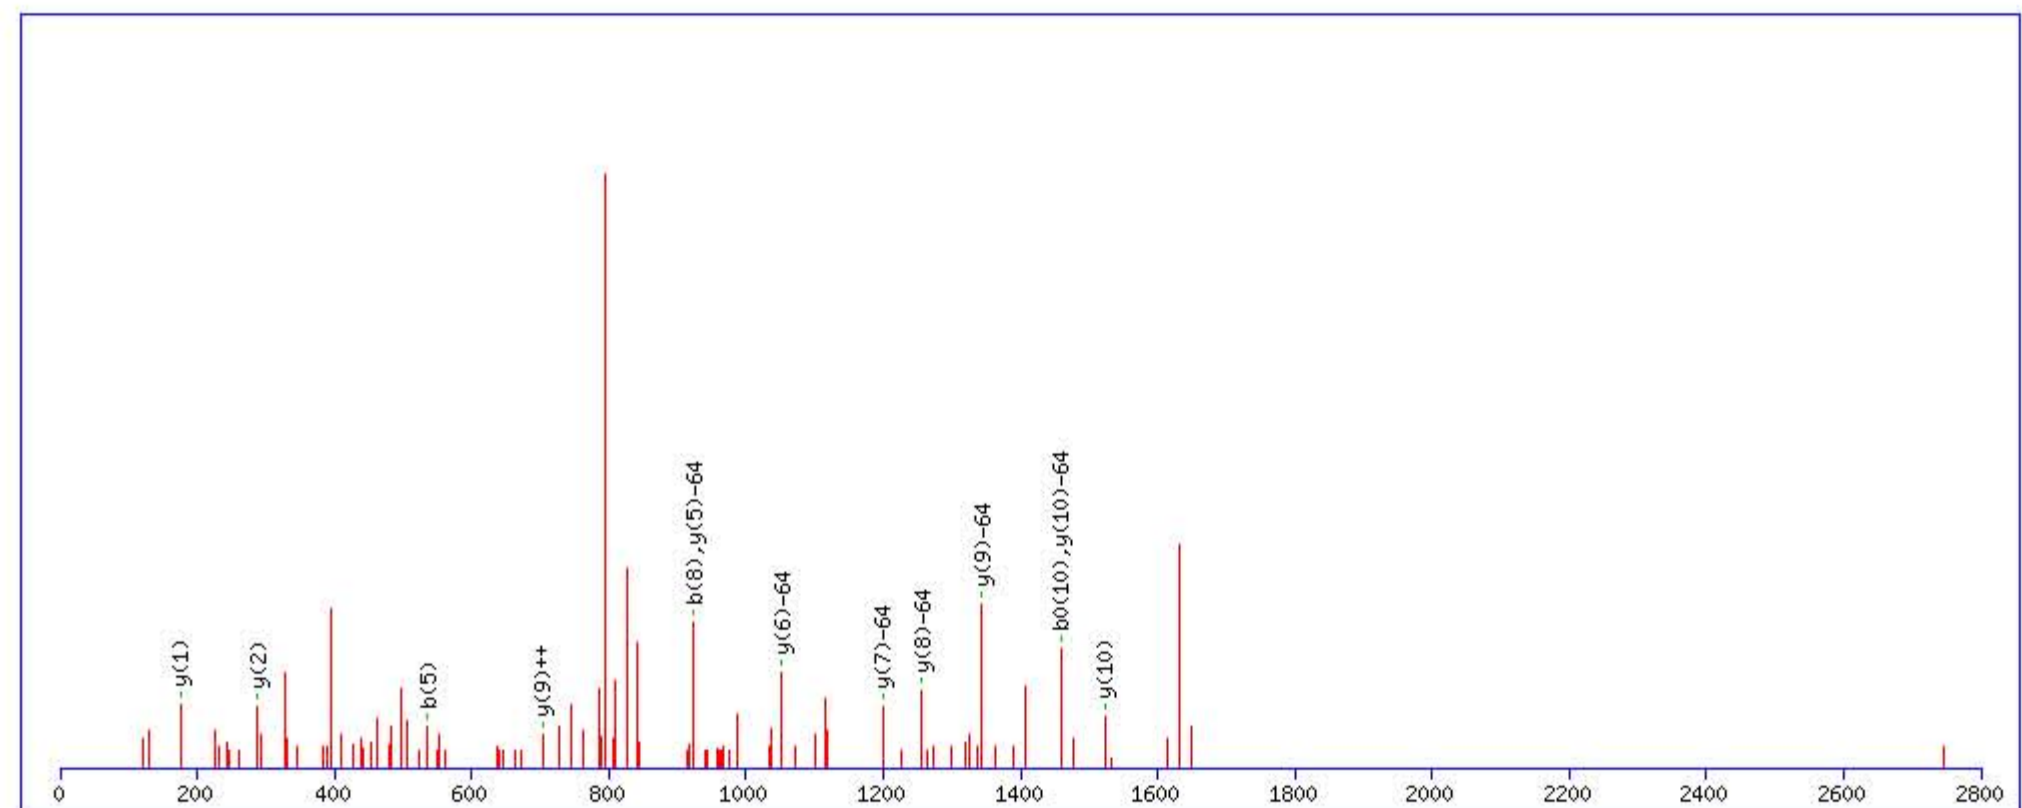

Monoisotopic mass of neutral peptide Mr(calc): 1649.801773

Fixed modifications: Carbamidomethyl (C) (apply to specified residues or termini only)

Variable modifications:

M7 : Oxidation (M), with neutral losses 63.998285 (shown in table), 0.000000

Q9 : Biotin:Thermo-21345 (Q)

Ions Score: 53 Expect: 0.00013

Matches : 13/154 fragment ions using 16 most intense peaks [\(help\)](#)

| #  | b                 | b <sup>++</sup> | b <sup>*</sup> | b <sup>*++</sup> | b <sup>0</sup> | b <sup>0++</sup> | Seq.     | y                  | y <sup>++</sup> | y <sup>*</sup> | y <sup>*++</sup> | y <sup>0</sup> | y <sup>0++</sup> | #         |
|----|-------------------|-----------------|----------------|------------------|----------------|------------------|----------|--------------------|-----------------|----------------|------------------|----------------|------------------|-----------|
| 1  | 129.102239        | 65.054757       | 112.075690     | 56.541483        |                |                  | <b>K</b> |                    |                 |                |                  |                |                  | <b>11</b> |
| 2  | 244.129182        | 122.568229      | 227.102633     | 114.054955       | 226.118617     | 113.562947       | <b>D</b> | <b>1458.715811</b> | 729.861544      | 1441.689262    | 721.348269       | 1440.705246    | 720.856261       | <b>10</b> |
| 3  | 331.161210        | 166.084243      | 314.134661     | 157.570969       | 313.150645     | 157.078961       | <b>S</b> | <b>1343.688868</b> | 672.348072      | 1326.662319    | 663.834798       | 1325.678303    | 663.342790       | <b>9</b>  |
| 4  | 388.182674        | 194.594975      | 371.156125     | 186.081701       | 370.172109     | 185.589693       | <b>G</b> | <b>1256.656840</b> | 628.832058      | 1239.630291    | 620.318784       |                |                  | <b>8</b>  |
| 5  | <b>535.251088</b> | 268.129182      | 518.224539     | 259.615908       | 517.240523     | 259.123900       | <b>F</b> | <b>1199.635376</b> | 600.321326      | 1182.608827    | 591.808052       |                |                  | <b>7</b>  |
| 6  | 663.309666        | 332.158471      | 646.283117     | 323.645197       | 645.299101     | 323.153189       | <b>Q</b> | <b>1052.566962</b> | 526.787119      | 1035.540413    | 518.273845       |                |                  | <b>6</b>  |
| 7  | 746.346781        | 373.677029      | 729.320232     | 365.163754       | 728.336216     | 364.671746       | <b>M</b> | <b>924.508384</b>  | 462.757830      | 907.481835     | 454.244556       |                |                  | <b>5</b>  |
| 8  | 860.389708        | 430.698492      | 843.363159     | 422.185218       | 842.379143     | 421.693210       | <b>N</b> | 841.471269         | 421.239273      | 824.444720     | 412.725998       |                |                  | <b>4</b>  |
| 9  | 1299.615034       | 650.311155      | 1282.588485    | 641.797881       | 1281.604469    | 641.305873       | <b>Q</b> | 727.428342         | 364.217809      | 710.401793     | 355.704535       |                |                  | <b>3</b>  |
| 10 | 1412.699098       | 706.853187      | 1395.672549    | 698.339913       | 1394.688533    | 697.847905       | <b>L</b> | <b>288.203016</b>  | 144.605146      | 271.176467     | 136.091871       |                |                  | <b>2</b>  |
| 11 |                   |                 |                |                  |                |                  | <b>R</b> | <b>175.118952</b>  | 88.063114       | 158.092403     | 79.549839        |                |                  | <b>1</b>  |

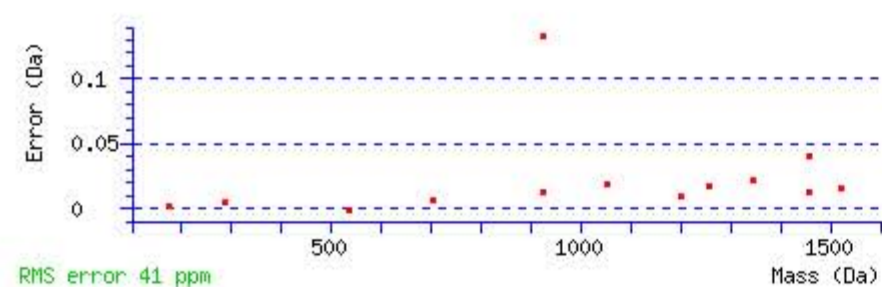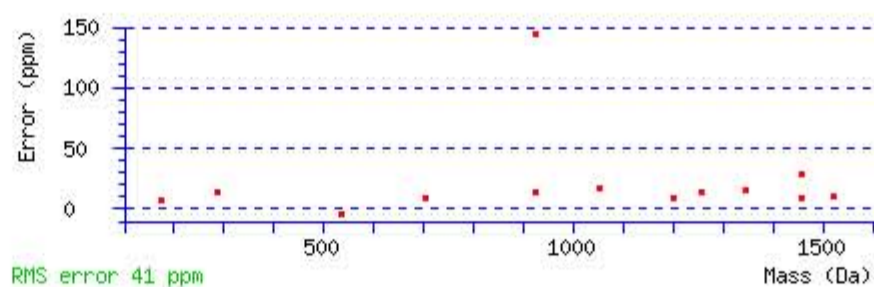

NCBI BLAST search of **KDSGFQMNQLR**

(Parameters: blastp, nr protein database, expect=20000, no filter, PAM30)

Other BLAST [web gateways](#)

## All matches to this query

| Score | Mr(calc):   | Delta     | Sequence                        |
|-------|-------------|-----------|---------------------------------|
| 52.9  | 1649.801773 | 0.006555  | <a href="#">KDSGFQMNQLR</a>     |
| 39.4  | 1649.801773 | 0.006555  | <a href="#">KDSGFQMNQLR</a>     |
| 10.9  | 1649.794373 | 0.013955  | <a href="#">FCSNSGRLSGPAELR</a> |
| 9.9   | 1649.790527 | 0.017801  | <a href="#">KFMEDEQQLR</a>      |
| 5.3   | 1649.790527 | 0.017801  | <a href="#">KFMEDEQQLR</a>      |
| 4.9   | 1649.793045 | 0.015283  | <a href="#">EEQMDGTVTLKDLR</a>  |
| 3.2   | 1649.808304 | 0.000024  | <a href="#">ISPQSNVDFDLMLR</a>  |
| 3.0   | 1649.824234 | -0.015906 | <a href="#">QLEQHMGQRGR</a>     |
| 2.5   | 1649.830780 | -0.022452 | <a href="#">QDTRVAFCSALQR</a>   |
| 2.3   | 1649.813019 | -0.004691 | <a href="#">VHAMTQHSVQPMLR</a>  |

# MASCOT Search Results

## Peptide View

MS/MS Fragmentation of **HQTVPQNTGGK**

Found in **TRFE\_HUMAN**, Serotransferrin OS=Homo sapiens GN=TF PE=1 SV=3

Match to Query 44955: 1787.927952 from(596.983260,3+) rtinseconds(1589) index(76331)

Title: Locus:1.1.1.1904.8 File:"2013-07-02 CLN FXIII 180 min 1st FT.wiff"

Data file C:\Program Files (x86)\Matrix Science\Mascot Daemon\mgf\7 FXIII 180 min 1st\mascot\_daemon\_merge.mgf

Click mouse within plot area to zoom in by factor of two about that point

Or, Plot from  to  Da

Label all possible matches  Label matches used for scoring

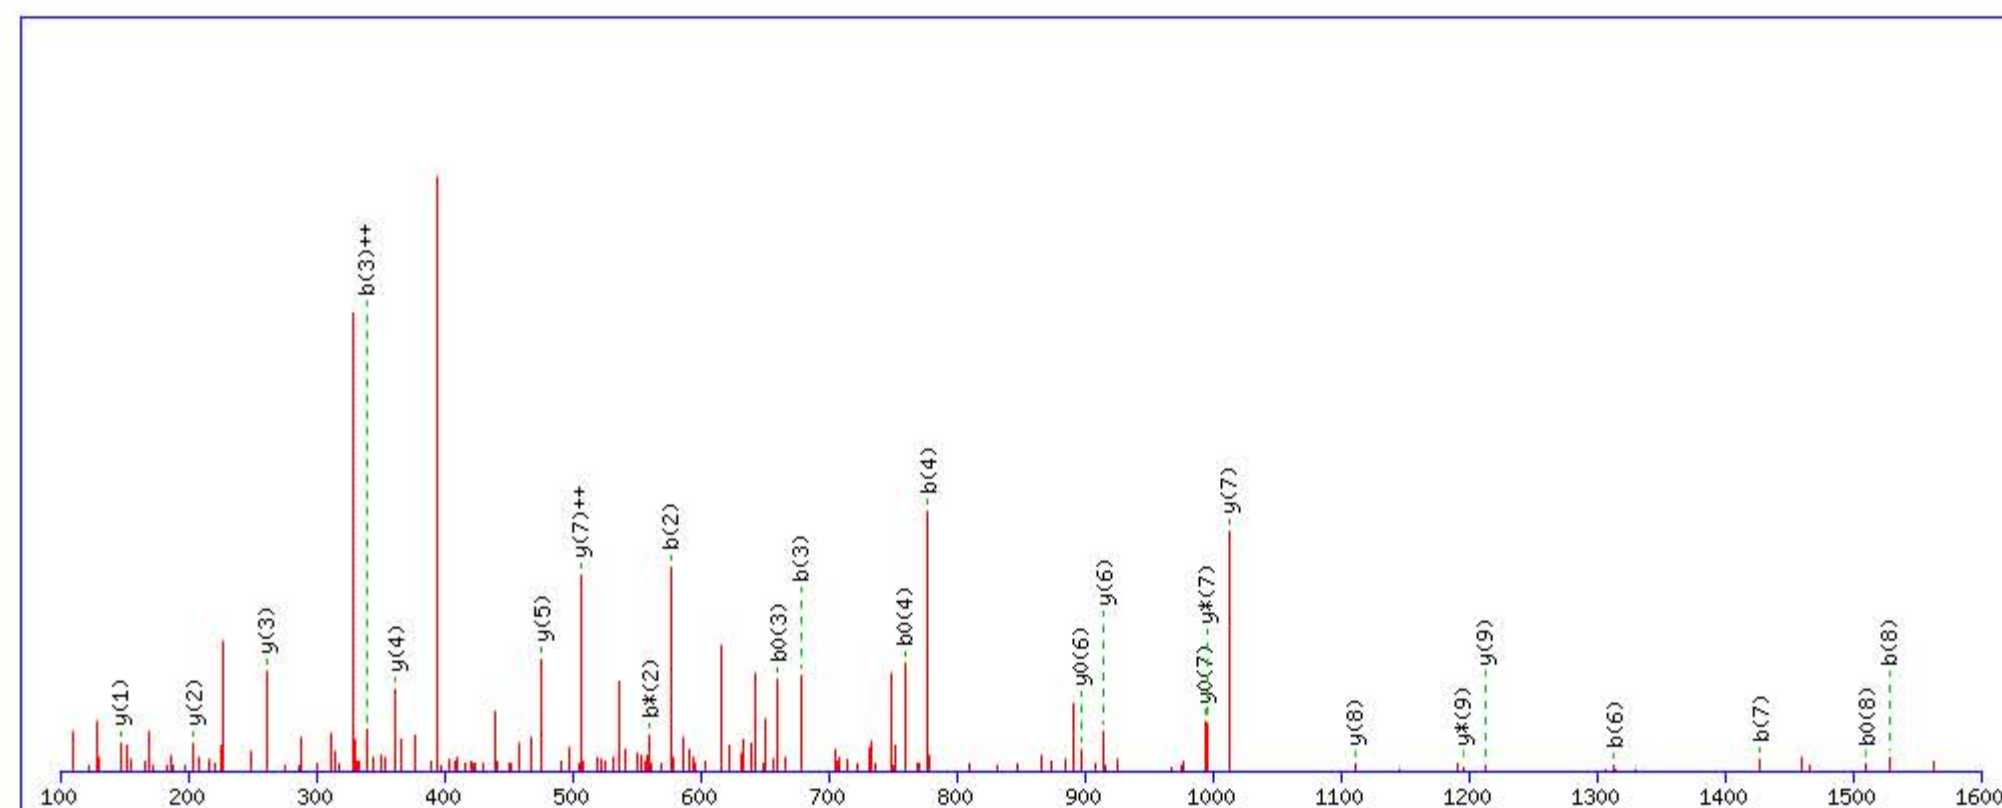

Monoisotopic mass of neutral peptide Mr(calc): 1787.917496

Fixed modifications: Carbamidomethyl (C) (apply to specified residues or termini only)

Variable modifications:

Q2 : Biotin:Thermo-21345 (Q)

Q6 : Biotin:Thermo-21345 (Q)

Ions Score: 32 Expect: 0.0014

Matches : 25/108 fragment ions using 63 most intense peaks [\(help\)](#)

| #  | b                  | b <sup>++</sup>   | b <sup>*</sup>    | b <sup>*++</sup> | b <sup>0</sup>     | b <sup>0++</sup> | Seq. | y                  | y <sup>++</sup>   | y <sup>*</sup>     | y <sup>*++</sup> | y <sup>0</sup>    | y <sup>0++</sup> | #  |
|----|--------------------|-------------------|-------------------|------------------|--------------------|------------------|------|--------------------|-------------------|--------------------|------------------|-------------------|------------------|----|
| 1  | 138.066188         | 69.536732         |                   |                  |                    |                  | H    |                    |                   |                    |                  |                   |                  | 11 |
| 2  | <b>577.291514</b>  | 289.149395        | <b>560.264965</b> | 280.636121       |                    |                  | Q    | 1651.865847        | 826.436562        | 1634.839298        | 817.923287       | 1633.855282       | 817.431279       | 10 |
| 3  | <b>678.339193</b>  | <b>339.673235</b> | 661.312644        | 331.159960       | <b>660.328628</b>  | 330.667952       | T    | <b>1212.640521</b> | 606.823899        | <b>1195.613972</b> | 598.310624       | 1194.629956       | 597.818616       | 9  |
| 4  | <b>777.407607</b>  | 389.207442        | 760.381058        | 380.694167       | <b>759.397042</b>  | 380.202159       | V    | <b>1111.592842</b> | 556.300059        | 1094.566293        | 547.786785       | 1093.582277       | 547.294777       | 8  |
| 5  | 874.460371         | 437.733824        | 857.433822        | 429.220549       | 856.449806         | 428.728541       | P    | <b>1012.524428</b> | <b>506.765852</b> | <b>995.497879</b>  | 498.252578       | <b>994.513863</b> | 497.760570       | 7  |
| 6  | <b>1313.685697</b> | 657.346487        | 1296.659148       | 648.833212       | 1295.675132        | 648.341204       | Q    | <b>915.471664</b>  | 458.239470        | 898.445115         | 449.726196       | <b>897.461099</b> | 449.234188       | 6  |
| 7  | <b>1427.728624</b> | 714.367950        | 1410.702075       | 705.854676       | 1409.718059        | 705.362668       | N    | <b>476.246338</b>  | 238.626807        | 459.219789         | 230.113532       | 458.235773        | 229.621524       | 5  |
| 8  | <b>1528.776303</b> | 764.891790        | 1511.749754       | 756.378515       | <b>1510.765738</b> | 755.886507       | T    | <b>362.203411</b>  | 181.605343        | 345.176862         | 173.092069       | 344.192846        | 172.600061       | 4  |
| 9  | 1585.797767        | 793.402522        | 1568.771218       | 784.889247       | 1567.787202        | 784.397239       | G    | <b>261.155732</b>  | 131.081504        | 244.129183         | 122.568229       |                   |                  | 3  |
| 10 | 1642.819231        | 821.913254        | 1625.792682       | 813.399979       | 1624.808666        | 812.907971       | G    | <b>204.134268</b>  | 102.570772        | 187.107719         | 94.057497        |                   |                  | 2  |
| 11 |                    |                   |                   |                  |                    |                  | K    | <b>147.112804</b>  | 74.060040         | 130.086255         | 65.546765        |                   |                  | 1  |

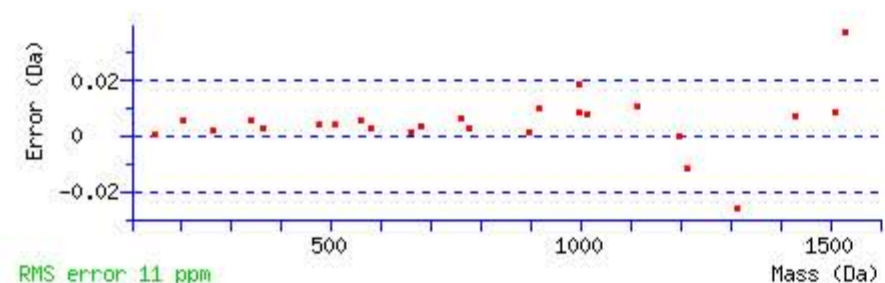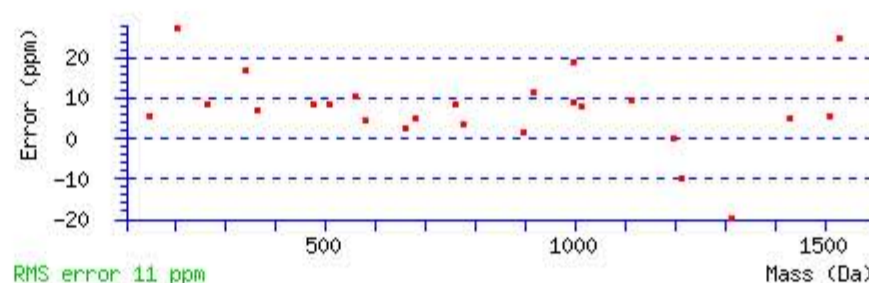

NCBI BLAST search of **HQTVPQNTGGK**

(Parameters: blastp, nr protein database, expect=20000, no filter, PAM30)

Other BLAST [web gateways](#)

All matches to this query

| Score | Mr(calc):   | Delta    | Sequence                          |
|-------|-------------|----------|-----------------------------------|
| 31.6  | 1787.917496 | 0.010456 | <a href="#">HQTVPQNTGGK</a>       |
| 1.2   | 1787.923996 | 0.003956 | <a href="#">VPLQGFAALEGMNGIQK</a> |

Mascot: <http://www.matrixscience.com/>

# MASCOT SEARCH RESULTS

## Peptide View

MS/MS Fragmentation of **SKEFQLFSSPHGK**

Found in **TRFE\_HUMAN**, Serotransferrin OS=Homo sapiens GN=TF PE=1 SV=3

Match to Query 45333: 1801.931322 from(601.651050,3+) rtinseconds(1761) index(77338)

Title: Locus:1.1.1.1964.16 File:"2013-07-02 CLN FXIII 180 min 1st FT.wiff"

Data file C:\Program Files (x86)\Matrix Science\Mascot Daemon\mgf\7 FXIII 180 min 1st\mascot\_daemon\_merge.mgf

Click mouse within plot area to zoom in by factor of two about that point

Or, Plot from  to  Da

Label all possible matches  Label matches used for scoring

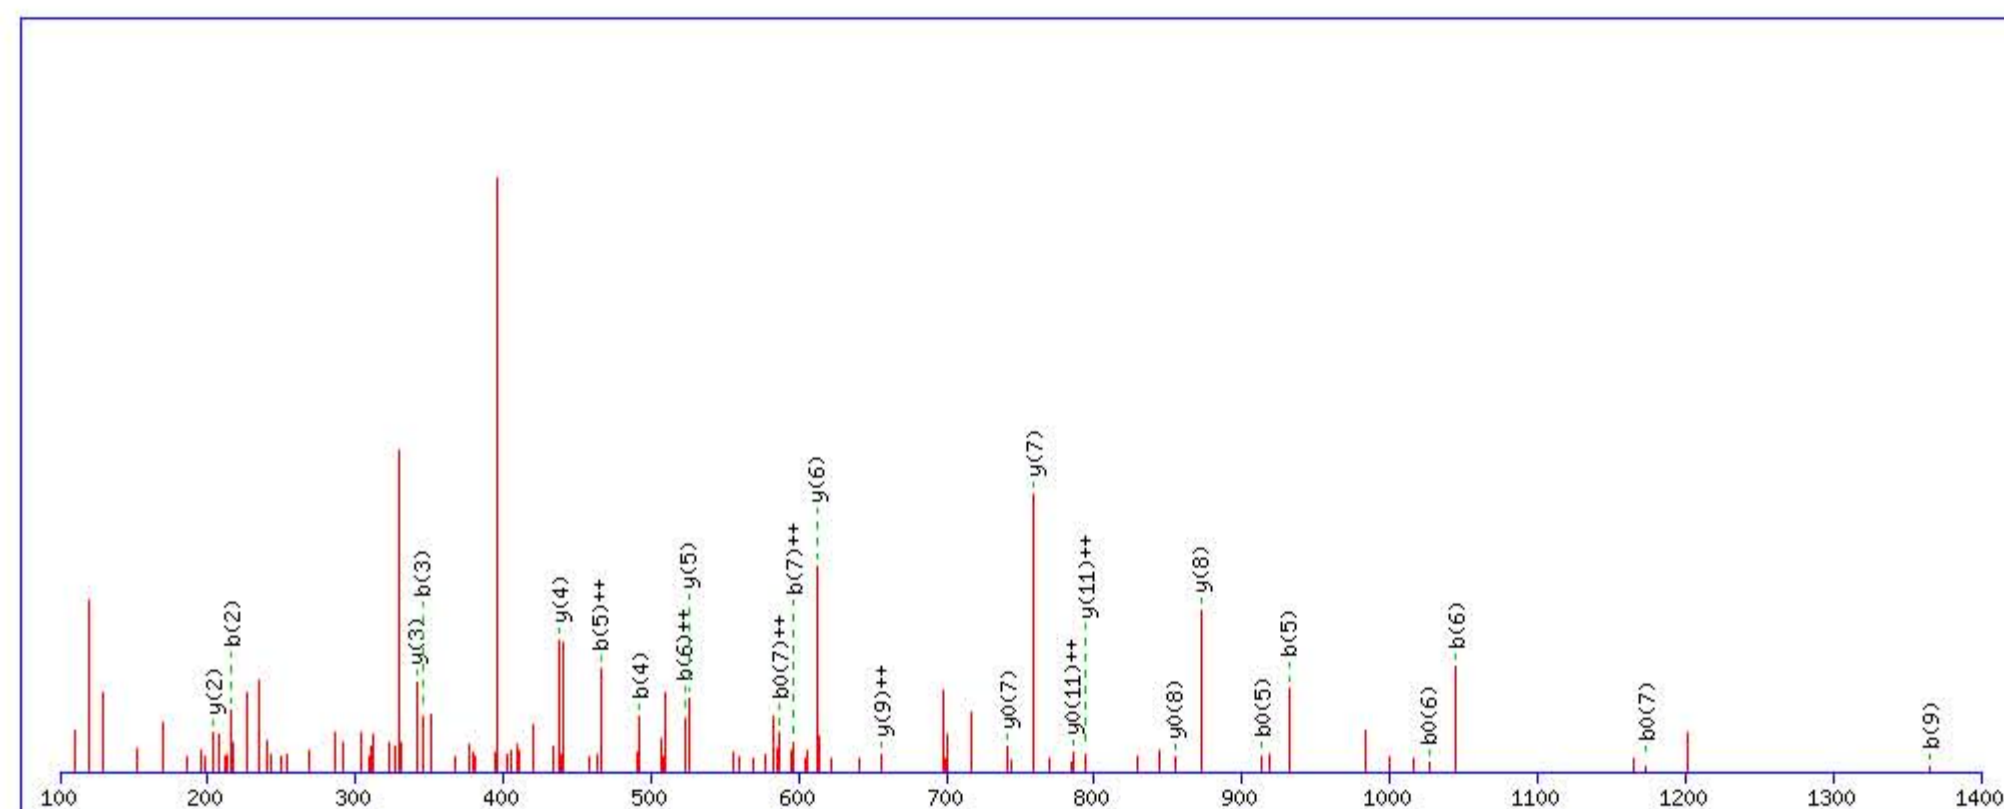

Monoisotopic mass of neutral peptide Mr(calc): 1801.918518

Fixed modifications: Carbamidomethyl (C) (apply to specified residues or termini only)

Variable modifications:

Q5 : Biotin:Thermo-21345 (Q)

Ions Score: 29 Expect: 0.0039

Matches : 25/134 fragment ions using 58 most intense peaks [\(help\)](#)

| #  | b                  | b <sup>++</sup>   | b <sup>*</sup> | b <sup>*++</sup> | b <sup>0</sup>     | b <sup>0++</sup>  | Seq. | y                 | y <sup>++</sup>   | y <sup>*</sup> | y <sup>*++</sup> | y <sup>0</sup>    | y <sup>0++</sup>  | #  |
|----|--------------------|-------------------|----------------|------------------|--------------------|-------------------|------|-------------------|-------------------|----------------|------------------|-------------------|-------------------|----|
| 1  | 88.039304          | 44.523290         |                |                  | 70.028739          | 35.518008         | S    |                   |                   |                |                  |                   |                   | 13 |
| 2  | <b>216.134267</b>  | 108.570771        | 199.107718     | 100.057497       | 198.123702         | 99.565489         | K    | 1715.893774       | 858.450525        | 1698.867225    | 849.937251       | 1697.883209       | 849.445243        | 12 |
| 3  | <b>345.176860</b>  | 173.092068        | 328.150311     | 164.578793       | 327.166295         | 164.086785        | E    | 1587.798811       | <b>794.403044</b> | 1570.772262    | 785.889769       | 1569.788246       | <b>785.397761</b> | 11 |
| 4  | <b>492.245274</b>  | 246.626275        | 475.218725     | 238.113000       | 474.234709         | 237.620992        | F    | 1458.756218       | 729.881747        | 1441.729669    | 721.368473       | 1440.745653       | 720.876465        | 10 |
| 5  | <b>931.470600</b>  | <b>466.238938</b> | 914.444051     | 457.725664       | <b>913.460035</b>  | 457.233656        | Q    | 1311.687804       | <b>656.347540</b> | 1294.661255    | 647.834266       | 1293.677239       | 647.342258        | 9  |
| 6  | <b>1044.554664</b> | <b>522.780970</b> | 1027.528115    | 514.267696       | <b>1026.544099</b> | 513.775688        | L    | <b>872.462478</b> | 436.734877        | 855.435929     | 428.221603       | <b>854.451913</b> | 427.729595        | 8  |
| 7  | 1191.623078        | <b>596.315177</b> | 1174.596529    | 587.801903       | <b>1173.612513</b> | <b>587.309895</b> | F    | <b>759.378414</b> | 380.192845        | 742.351865     | 371.679571       | <b>741.367849</b> | 371.187563        | 7  |
| 8  | 1278.655106        | 639.831191        | 1261.628557    | 631.317917       | 1260.644541        | 630.825909        | S    | <b>612.310000</b> | 306.658638        | 595.283451     | 298.145364       | 594.299435        | 297.653356        | 6  |
| 9  | <b>1365.687134</b> | 683.347205        | 1348.660585    | 674.833931       | 1347.676569        | 674.341923        | S    | <b>525.277972</b> | 263.142624        | 508.251423     | 254.629350       | 507.267407        | 254.137342        | 5  |
| 10 | 1462.739898        | 731.873587        | 1445.713349    | 723.360313       | 1444.729333        | 722.868305        | P    | <b>438.245944</b> | 219.626610        | 421.219395     | 211.113335       |                   |                   | 4  |
| 11 | 1599.798810        | 800.403043        | 1582.772261    | 791.889769       | 1581.788245        | 791.397761        | H    | <b>341.193180</b> | 171.100228        | 324.166631     | 162.586953       |                   |                   | 3  |
| 12 | 1656.820274        | 828.913775        | 1639.793725    | 820.400501       | 1638.809709        | 819.908493        | G    | <b>204.134268</b> | 102.570772        | 187.107719     | 94.057497        |                   |                   | 2  |
| 13 |                    |                   |                |                  |                    |                   | K    | 147.112804        | 74.060040         | 130.086255     | 65.546765        |                   |                   | 1  |

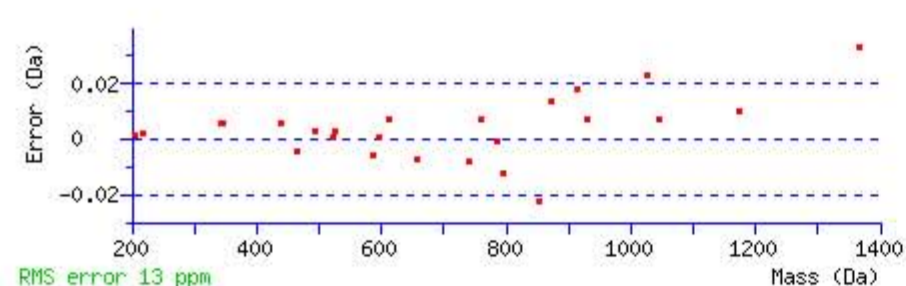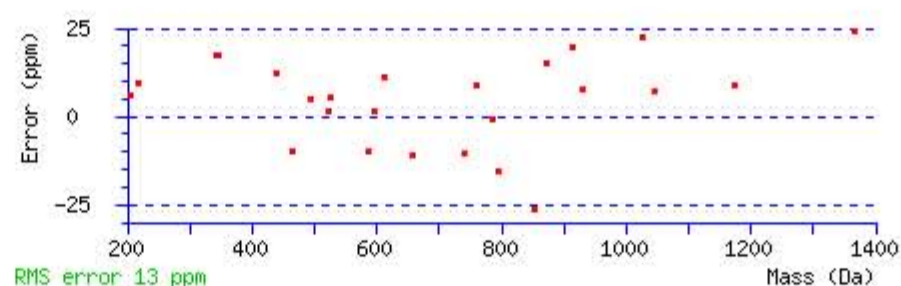

NCBI BLAST search of **SKEFQLFSSPHGK**

(Parameters: blastp, nr protein database, expect=20000, no filter, PAM30)

Other BLAST [web gateways](#)

All matches to this query

| Score | Mr(calc):   | Delta    | Sequence                           |
|-------|-------------|----------|------------------------------------|
| 29.0  | 1801.918518 | 0.012804 | <a href="#">SKEFQLFSSPHGK</a>      |
| 3.1   | 1801.914536 | 0.016786 | <a href="#">QIVMTVVYGVTRYGGR</a>   |
| 0.9   | 1801.905701 | 0.025621 | <a href="#">DAEAAEATAEGALKAEEK</a> |
| 0.5   | 1801.924332 | 0.006990 | <a href="#">MIQQEEIRKLEEEK</a>     |

Mascot: <http://www.matrixscience.com/>



# MASCOT SEARCH RESULTS

## Peptide View

MS/MS Fragmentation of **EDPQTFYYAVAVVK**

Found in **TRFE\_HUMAN**, Serotransferrin OS=Homo sapiens GN=TF PE=1 SV=3

Match to Query 48485: 1939.997082 from(647.672970,3+) rtinseconds(2547) index(82435)

Title: Locus:1.1.1.2237.8 File:"2013-07-02 CLN FXIII 180 min 1st FT.wiff"

Data file C:\Program Files (x86)\Matrix Science\Mascot Daemon\mgf\7 FXIII 180 min 1st\mascot\_daemon\_merge.mgf

Click mouse within plot area to zoom in by factor of two about that point

Or, Plot from  to  Da

Label all possible matches  Label matches used for scoring

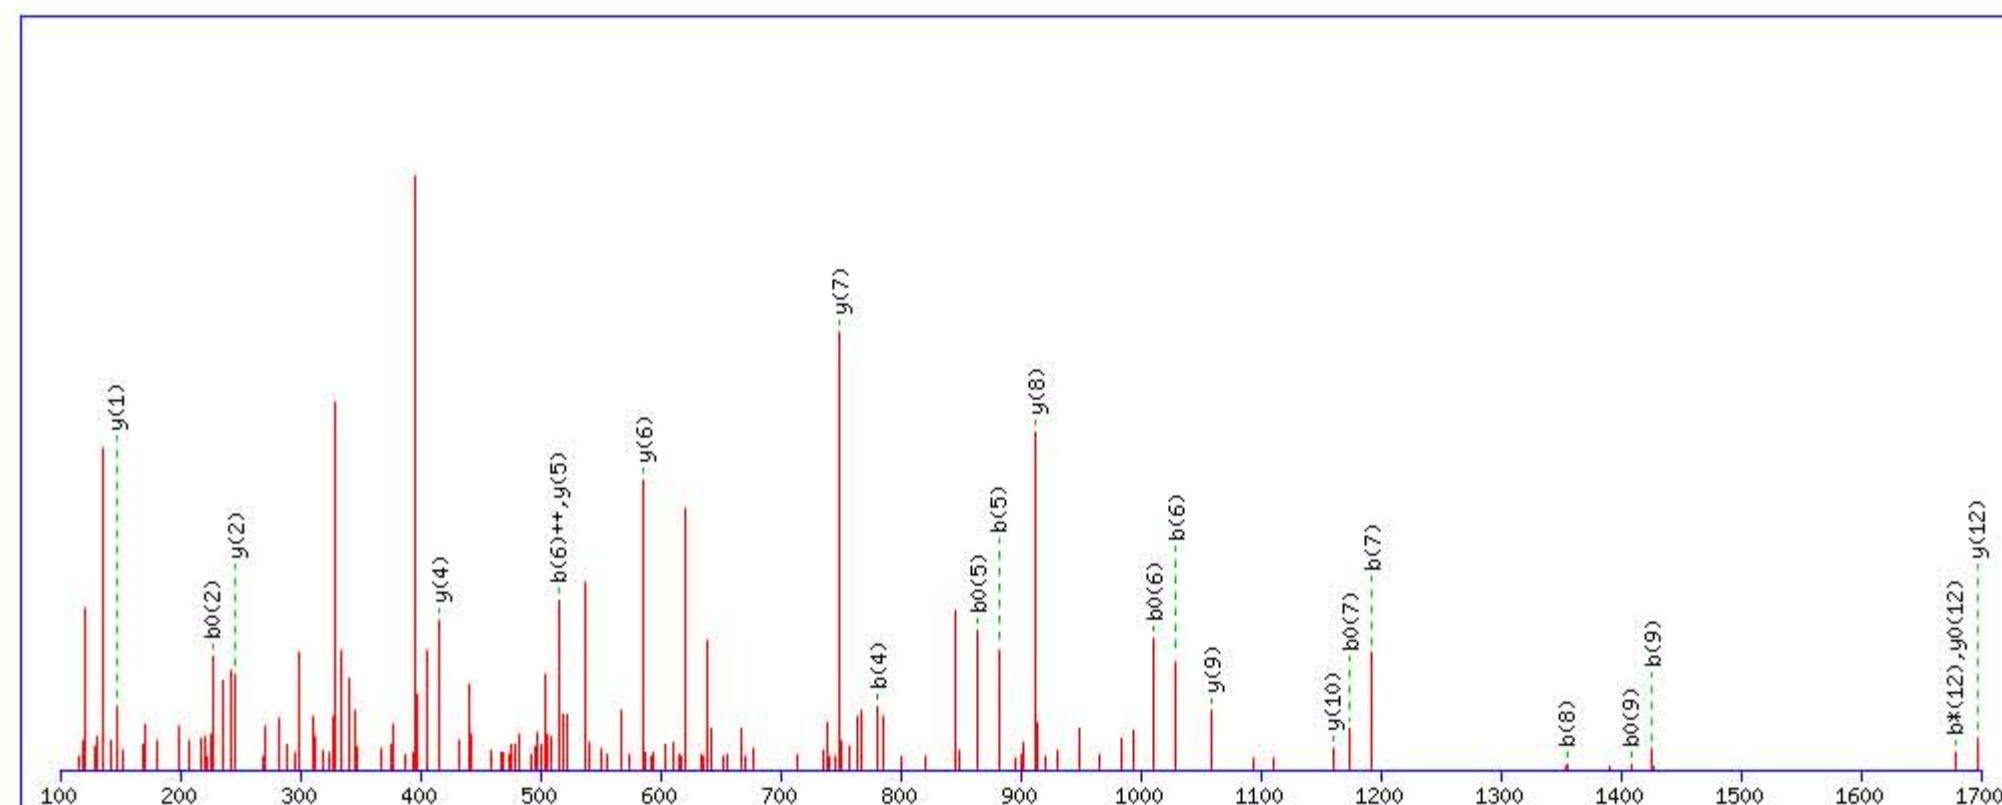

Monoisotopic mass of neutral peptide Mr(calc): 1939.975372

Fixed modifications: Carbamidomethyl (C) (apply to specified residues or termini only)

Variable modifications:

Q4 : Biotin:Thermo-21345 (Q)

Ions Score: 45 Expect: 0.00095

Matches : 24/132 fragment ions using 51 most intense peaks [\(help\)](#)

| #  | b           | b <sup>++</sup> | b <sup>*</sup> | b <sup>*++</sup> | b <sup>0</sup> | b <sup>0++</sup> | Seq. | y           | y <sup>++</sup> | y <sup>*</sup> | y <sup>*++</sup> | y <sup>0</sup> | y <sup>0++</sup> | #  |
|----|-------------|-----------------|----------------|------------------|----------------|------------------|------|-------------|-----------------|----------------|------------------|----------------|------------------|----|
| 1  | 130.049869  | 65.528572       |                |                  | 112.039304     | 56.523290        | E    |             |                 |                |                  |                |                  | 14 |
| 2  | 245.076812  | 123.042044      |                |                  | 227.066247     | 114.036762       | D    | 1811.940058 | 906.473667      | 1794.913509    | 897.960393       | 1793.929493    | 897.468385       | 13 |
| 3  | 342.129576  | 171.568426      |                |                  | 324.119011     | 162.563144       | P    | 1696.913115 | 848.960196      | 1679.886566    | 840.446921       | 1678.902550    | 839.954913       | 12 |
| 4  | 781.354902  | 391.181089      | 764.328353     | 382.667815       | 763.344337     | 382.175807       | Q    | 1599.860351 | 800.433814      | 1582.833802    | 791.920539       | 1581.849786    | 791.428531       | 11 |
| 5  | 882.402581  | 441.704929      | 865.376032     | 433.191654       | 864.392016     | 432.699646       | T    | 1160.635025 | 580.821151      | 1143.608476    | 572.307876       | 1142.624460    | 571.815868       | 10 |
| 6  | 1029.470995 | 515.239136      | 1012.444446    | 506.725861       | 1011.460430    | 506.233853       | F    | 1059.587346 | 530.297311      | 1042.560797    | 521.784037       |                |                  | 9  |
| 7  | 1192.534324 | 596.770800      | 1175.507775    | 588.257526       | 1174.523759    | 587.765518       | Y    | 912.518932  | 456.763104      | 895.492383     | 448.249830       |                |                  | 8  |
| 8  | 1355.597653 | 678.302465      | 1338.571104    | 669.789190       | 1337.587088    | 669.297182       | Y    | 749.455603  | 375.231440      | 732.429054     | 366.718165       |                |                  | 7  |
| 9  | 1426.634767 | 713.821022      | 1409.608218    | 705.307747       | 1408.624202    | 704.815739       | A    | 586.392274  | 293.699775      | 569.365725     | 285.186501       |                |                  | 6  |
| 10 | 1525.703181 | 763.355229      | 1508.676632    | 754.841954       | 1507.692616    | 754.349946       | V    | 515.355160  | 258.181218      | 498.328611     | 249.667944       |                |                  | 5  |
| 11 | 1596.740295 | 798.873786      | 1579.713746    | 790.360511       | 1578.729730    | 789.868503       | A    | 416.286746  | 208.647011      | 399.260197     | 200.133737       |                |                  | 4  |
| 12 | 1695.808709 | 848.407993      | 1678.782160    | 839.894718       | 1677.798144    | 839.402710       | V    | 345.249632  | 173.128454      | 328.223083     | 164.615180       |                |                  | 3  |
| 13 | 1794.877123 | 897.942200      | 1777.850574    | 889.428925       | 1776.866558    | 888.936917       | V    | 246.181218  | 123.594247      | 229.154669     | 115.080973       |                |                  | 2  |
| 14 |             |                 |                |                  |                |                  | K    | 147.112804  | 74.060040       | 130.086255     | 65.546765        |                |                  | 1  |

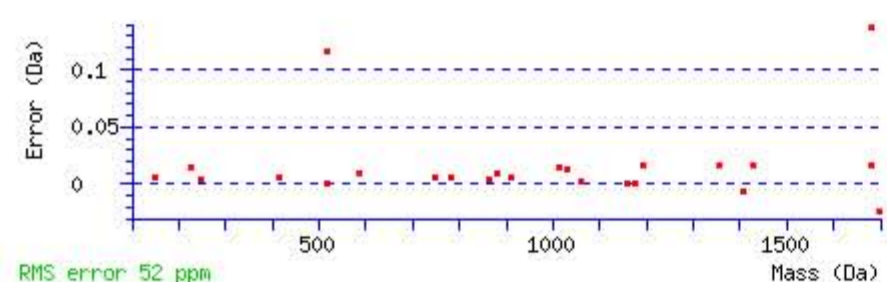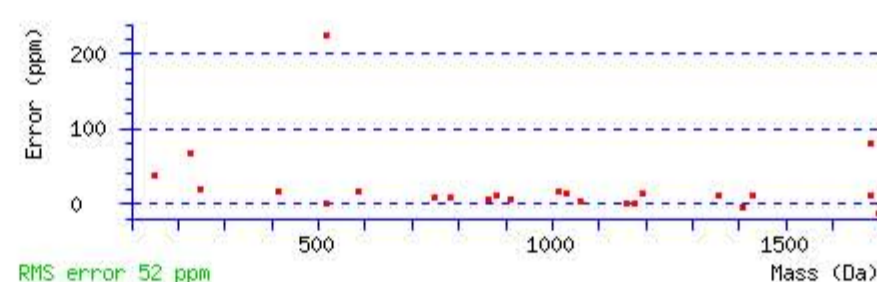

NCBI BLAST search of **EDPQTFYYAVAVVK**

(Parameters: blastp, nr protein database, expect=20000, no filter, PAM30)

Other BLAST [web gateways](#)

All matches to this query

| Score | Mr(calc):   | Delta    | Sequence                       |
|-------|-------------|----------|--------------------------------|
| 45.1  | 1939.975372 | 0.021710 | <a href="#">EDPQTFYYAVAVVK</a> |

Mascot: <http://www.matrixscience.com/>

# MASCOT Search Results

## Peptide View

MS/MS Fragmentation of **KDSGFQMNQLR**

Found in **TRFE\_HUMAN**, Serotransferrin OS=Homo sapiens GN=TF PE=1 SV=3

Match to Query 48961: 1960.982292 from(654.668040,3+) rtinseconds(1880) index(77974)

Title: Locus:1.1.1.2005.23 File:"2013-07-02 CLN FXIII 180 min 1st FT.wiff"

Data file C:\Program Files (x86)\Matrix Science\Mascot Daemon\mgf\7 FXIII 180 min 1st\mascot\_daemon\_merge.mgf

Click mouse within plot area to zoom in by factor of two about that point

Or, Plot from  to  Da

Label all possible matches  Label matches used for scoring

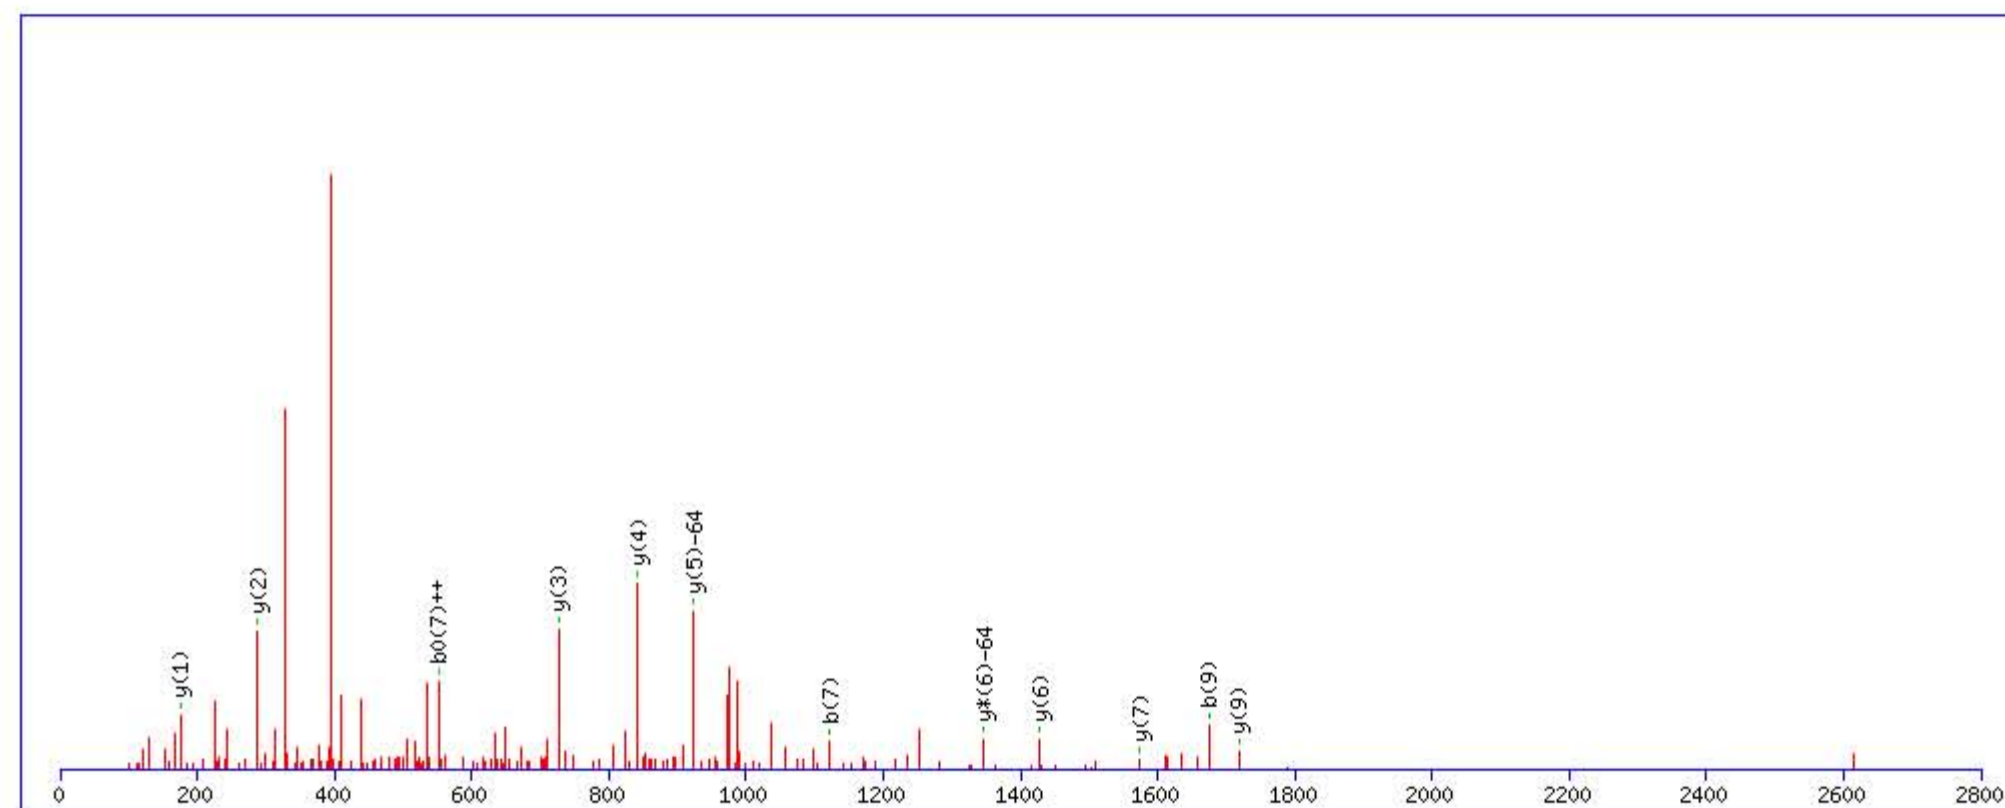

Monoisotopic mass of neutral peptide Mr(calc): 1960.968521

Fixed modifications: Carbamidomethyl (C) (apply to specified residues or termini only)

Variable modifications:

Q6 : Biotin:Thermo-21345 (Q)

M7 : Oxidation (M), with neutral losses 0.000000(shown in table), 63.998285

Q9 : Biotin:Thermo-21345 (Q)

Ions Score: 42 Expect: 0.00041

Matches : 12/154 fragment ions using 17 most intense peaks [\(help\)](#)

| #  | b                  | b <sup>++</sup> | b <sup>*</sup> | b <sup>+++</sup> | b <sup>0</sup> | b <sup>0++</sup>  | Seq.     | y                  | y <sup>++</sup> | y <sup>*</sup> | y <sup>+++</sup> | y <sup>0</sup> | y <sup>0++</sup> | #         |
|----|--------------------|-----------------|----------------|------------------|----------------|-------------------|----------|--------------------|-----------------|----------------|------------------|----------------|------------------|-----------|
| 1  | 129.102239         | 65.054757       | 112.075690     | 56.541483        |                |                   | <b>K</b> |                    |                 |                |                  |                |                  | <b>11</b> |
| 2  | 244.129182         | 122.568229      | 227.102633     | 114.054955       | 226.118617     | 113.562947        | <b>D</b> | 1833.880844        | 917.444060      | 1816.854295    | 908.930785       | 1815.870279    | 908.438777       | <b>10</b> |
| 3  | 331.161210         | 166.084243      | 314.134661     | 157.570969       | 313.150645     | 157.078961        | <b>S</b> | <b>1718.853901</b> | 859.930588      | 1701.827352    | 851.417314       | 1700.843336    | 850.925306       | <b>9</b>  |
| 4  | 388.182674         | 194.594975      | 371.156125     | 186.081701       | 370.172109     | 185.589693        | <b>G</b> | 1631.821873        | 816.414574      | 1614.795324    | 807.901300       |                |                  | <b>8</b>  |
| 5  | 535.251088         | 268.129182      | 518.224539     | 259.615908       | 517.240523     | 259.123900        | <b>F</b> | <b>1574.800409</b> | 787.903842      | 1557.773860    | 779.390568       |                |                  | <b>7</b>  |
| 6  | 974.476414         | 487.741845      | 957.449865     | 479.228571       | 956.465849     | 478.736563        | <b>Q</b> | <b>1427.731995</b> | 714.369635      | 1410.705446    | 705.856361       |                |                  | <b>6</b>  |
| 7  | <b>1121.511814</b> | 561.259545      | 1104.485265    | 552.746271       | 1103.501249    | <b>552.254262</b> | <b>M</b> | 988.506669         | 494.756972      | 971.480120     | 486.243698       |                |                  | <b>5</b>  |
| 8  | 1235.554741        | 618.281008      | 1218.528192    | 609.767734       | 1217.544176    | 609.275726        | <b>N</b> | <b>841.471269</b>  | 421.239272      | 824.444720     | 412.725998       |                |                  | <b>4</b>  |
| 9  | <b>1674.780067</b> | 837.893671      | 1657.753518    | 829.380397       | 1656.769502    | 828.888389        | <b>Q</b> | <b>727.428342</b>  | 364.217809      | 710.401793     | 355.704534       |                |                  | <b>3</b>  |
| 10 | 1787.864131        | 894.435703      | 1770.837582    | 885.922429       | 1769.853566    | 885.430421        | <b>L</b> | <b>288.203016</b>  | 144.605146      | 271.176467     | 136.091871       |                |                  | <b>2</b>  |
| 11 |                    |                 |                |                  |                |                   | <b>R</b> | <b>175.118952</b>  | 88.063114       | 158.092403     | 79.549839        |                |                  | <b>1</b>  |

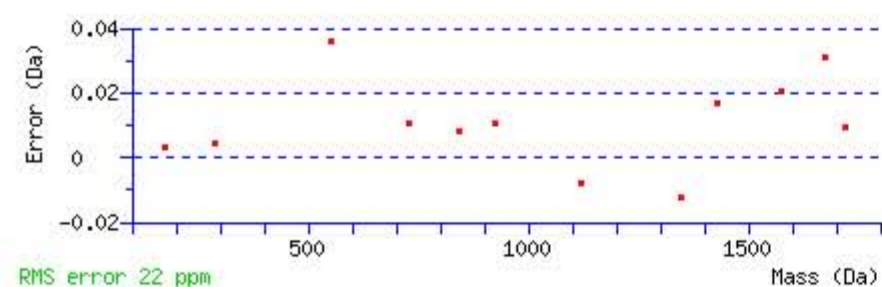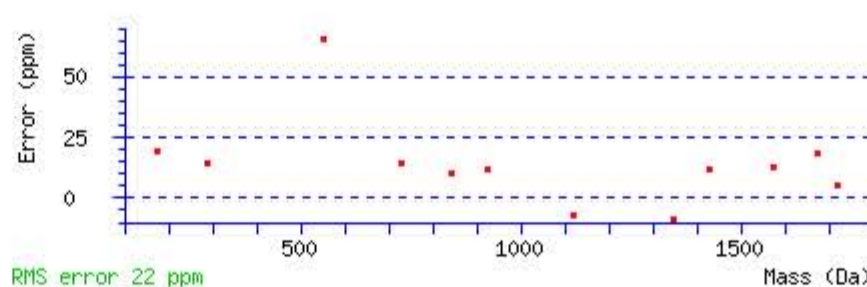

NCBI BLAST search of **KDSGFQMNQLR**

(Parameters: blastp, nr protein database, expect=20000, no filter, PAM30)

Other BLAST [web gateways](#)

All matches to this query

| Score | Mr(calc):   | Delta     | Sequence                           |
|-------|-------------|-----------|------------------------------------|
| 41.8  | 1960.968521 | 0.013771  | <a href="#">KDSGFQMNQLR</a>        |
| 5.3   | 1960.967636 | 0.014656  | <a href="#">QLSEFDTEREQLR</a>      |
| 2.4   | 1960.963608 | 0.018684  | <a href="#">GSPSSQSIPEKNSKSLCR</a> |
| 1.8   | 1960.961609 | 0.020683  | <a href="#">FDNTGDQHQPQRHLR</a>    |
| 0.2   | 1961.011414 | -0.029122 | <a href="#">NLCNIFPSNIVLAVMEK</a>  |

Mascot: <http://www.matrixscience.com/>

# MASCOT SEARCH RESULTS

## Peptide View

MS/MS Fragmentation of **ADRDQYELLCLDNTR**

Found in **TRFE\_HUMAN**, Serotransferrin OS=Homo sapiens GN=TF PE=1 SV=3

Match to Query 55208: 2192.055072 from(731.692300,3+) rtinseconds(2173) index(80072)

Title: Locus:1.1.1.2107.14 File:"2013-07-02 CLN FXIII 180 min 1st FT.wiff"

Data file C:\Program Files (x86)\Matrix Science\Mascot Daemon\mgf7 FXIII 180 min 1st\mascot\_daemon\_merge.mgf

Click mouse within plot area to zoom in by factor of two about that point

Or, Plot from 0 to 2200 Da Full range

Label all possible matches  Label matches used for scoring

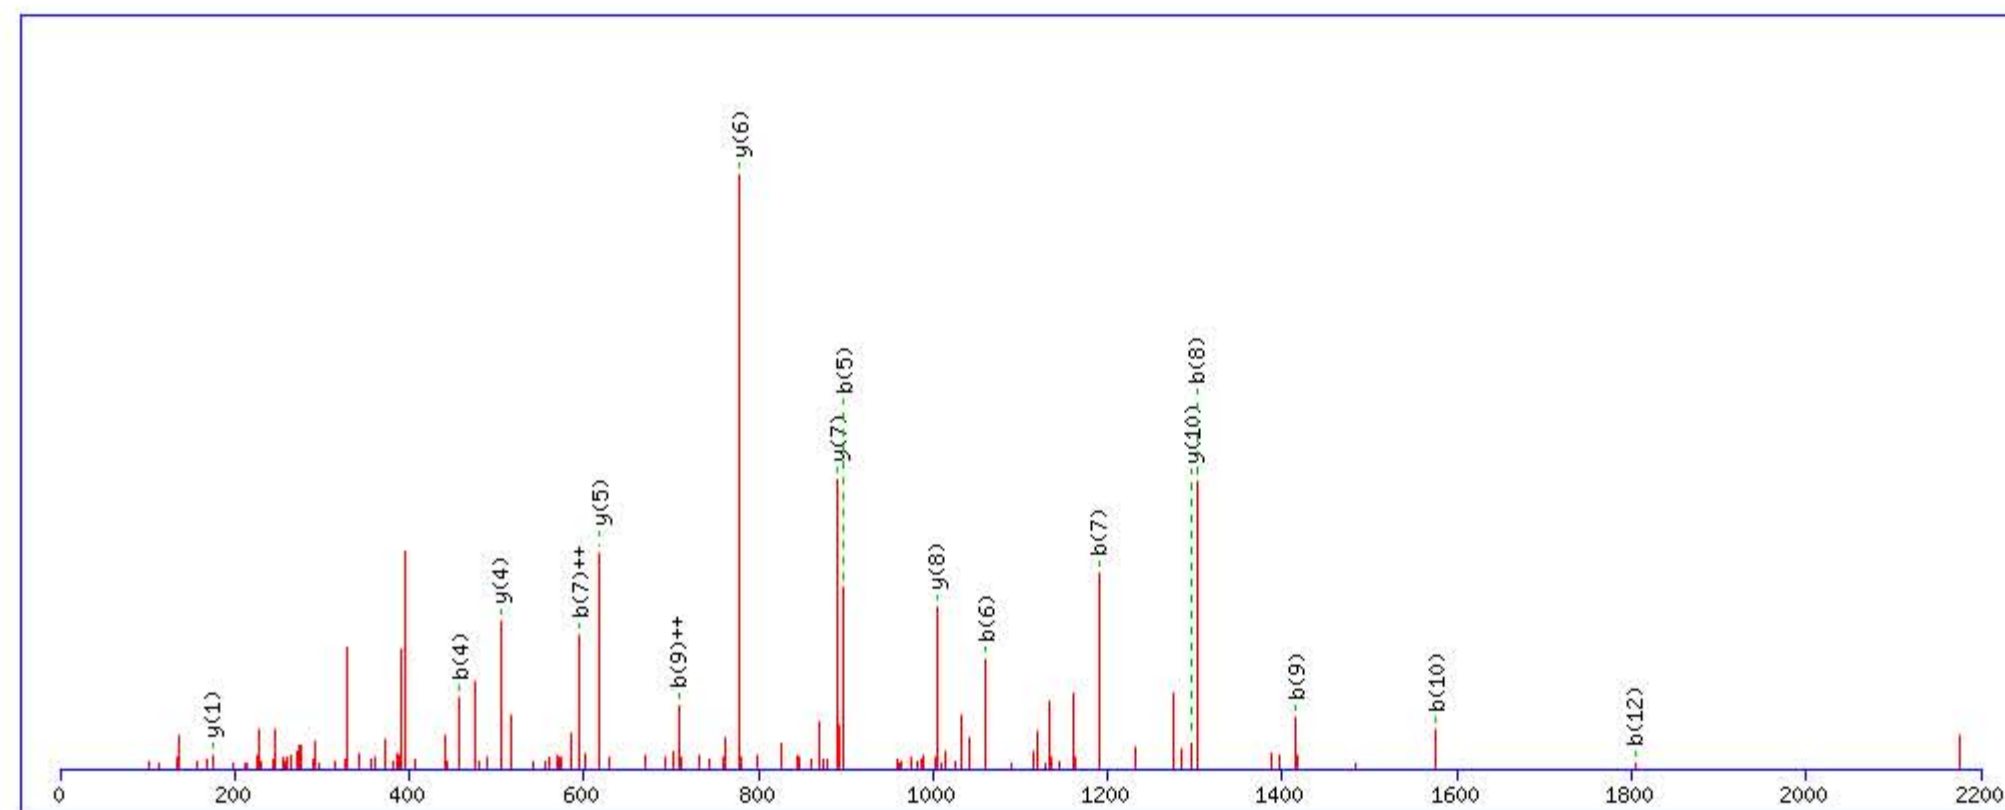

Monoisotopic mass of neutral peptide Mr(calc): 2192.035400

Fixed modifications: Carbamidomethyl (C) (apply to specified residues or termini only)

Variable modifications:

Q5 : Biotin:Thermo-21345 (Q)

Ions Score: 49 Expect: 0.00024

Matches : 17/160 fragment ions using 31 most intense peaks [\(help\)](#)

| #  | b                  | b <sup>++</sup>   | b <sup>+</sup> | b <sup>+++</sup> | b <sup>0</sup> | b <sup>0++</sup> | Seq. | y                  | y <sup>++</sup> | y <sup>+</sup> | y <sup>+++</sup> | y <sup>0</sup> | y <sup>0++</sup> | #  |
|----|--------------------|-------------------|----------------|------------------|----------------|------------------|------|--------------------|-----------------|----------------|------------------|----------------|------------------|----|
| 1  | 72.044390          | 36.525833         |                |                  |                |                  | A    |                    |                 |                |                  |                |                  | 15 |
| 2  | 187.071333         | 94.039304         |                |                  | 169.060768     | 85.034022        | D    | 2122.005587        | 1061.506431     | 2104.979038    | 1052.993157      | 2103.995022    | 1052.501149      | 14 |
| 3  | 343.172444         | 172.089860        | 326.145895     | 163.576585       | 325.161879     | 163.084577       | R    | 2006.978644        | 1003.992960     | 1989.952095    | 995.479685       | 1988.968079    | 994.987677       | 13 |
| 4  | <b>458.199387</b>  | 229.603332        | 441.172838     | 221.090057       | 440.188822     | 220.598049       | D    | 1850.877533        | 925.942404      | 1833.850984    | 917.429130       | 1832.866968    | 916.937122       | 12 |
| 5  | <b>897.424713</b>  | 449.215995        | 880.398164     | 440.702720       | 879.414148     | 440.210712       | Q    | 1735.850590        | 868.428933      | 1718.824041    | 859.915658       | 1717.840025    | 859.423650       | 11 |
| 6  | <b>1060.488042</b> | 530.747659        | 1043.461493    | 522.234385       | 1042.477477    | 521.742376       | Y    | <b>1296.625264</b> | 648.816270      | 1279.598715    | 640.302995       | 1278.614699    | 639.810987       | 10 |
| 7  | <b>1189.530635</b> | <b>595.268955</b> | 1172.504086    | 586.755681       | 1171.520070    | 586.263673       | E    | 1133.561935        | 567.284605      | 1116.535386    | 558.771331       | 1115.551370    | 558.279323       | 9  |
| 8  | <b>1302.614699</b> | 651.810987        | 1285.588150    | 643.297713       | 1284.604134    | 642.805705       | L    | <b>1004.519342</b> | 502.763309      | 987.492793     | 494.250034       | 986.508777     | 493.758026       | 8  |
| 9  | <b>1415.698763</b> | <b>708.353019</b> | 1398.672214    | 699.839745       | 1397.688198    | 699.347737       | L    | <b>891.435278</b>  | 446.221277      | 874.408729     | 437.708002       | 873.424713     | 437.215994       | 7  |
| 10 | <b>1575.729412</b> | 788.368344        | 1558.702863    | 779.855069       | 1557.718847    | 779.363061       | C    | <b>778.351214</b>  | 389.679245      | 761.324665     | 381.165971       | 760.340649     | 380.673963       | 6  |
| 11 | 1688.813476        | 844.910376        | 1671.786927    | 836.397101       | 1670.802911    | 835.905093       | L    | <b>618.320565</b>  | 309.663921      | 601.294016     | 301.150646       | 600.310000     | 300.658638       | 5  |
| 12 | <b>1803.840419</b> | 902.423847        | 1786.813870    | 893.910573       | 1785.829854    | 893.418565       | D    | <b>505.236501</b>  | 253.121888      | 488.209952     | 244.608614       | 487.225936     | 244.116606       | 4  |
| 13 | 1917.883346        | 959.445311        | 1900.856797    | 950.932036       | 1899.872781    | 950.440028       | N    | 390.209558         | 195.608417      | 373.183009     | 187.095142       | 372.198993     | 186.603134       | 3  |
| 14 | 2018.931025        | 1009.969150       | 2001.904476    | 1001.455876      | 2000.920460    | 1000.963868      | T    | 276.166631         | 138.586953      | 259.140082     | 130.073679       | 258.156066     | 129.581671       | 2  |
| 15 |                    |                   |                |                  |                |                  | R    | <b>175.118952</b>  | 88.063114       | 158.092403     | 79.549839        |                |                  | 1  |

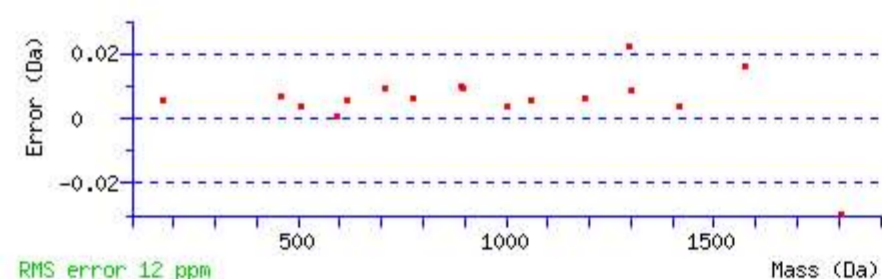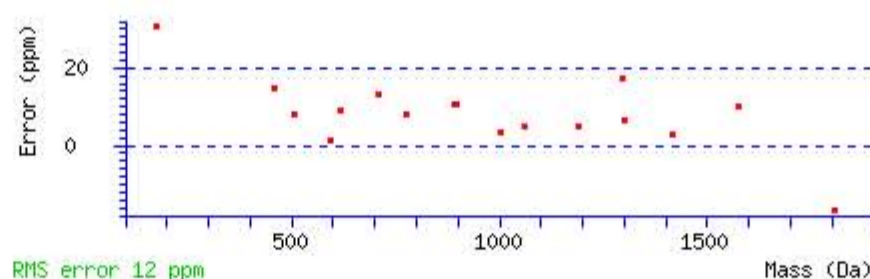

NCBI BLAST search of [ADRDQYELLCLDNTR](#)

(Parameters: blastp, nr protein database, expect=20000, no filter, PAM30)

Other BLAST [web gateways](#)

All matches to this query

| Score | Mr(calc):   | Delta    | Sequence                        |
|-------|-------------|----------|---------------------------------|
| 49.4  | 2192.035400 | 0.019672 | <a href="#">ADRDQYELLCLDNTR</a> |

Mascot: <http://www.matrixscience.com/>

# MASCOT Search Results

## Peptide View

MS/MS Fragmentation of **EDLIWELLNQAQEHFQK**

Found in **TRFE\_HUMAN**, Serotransferrin OS=Homo sapiens GN=TF PE=1 SV=3

Match to Query 59490: 2380.212252 from(794.411360,3+) rtinseconds(3258) index(87601)

Title: Locus:1.1.1.2479.11 File:"2013-07-02 CLN FXIII 180 min 1st FT.wiff"

Data file C:\Program Files (x86)\Matrix Science\Mascot Daemon\mgf\7 FXIII 180 min 1st\mascot\_daemon\_merge.mgf

Click mouse within plot area to zoom in by factor of two about that point

Or, Plot from  to  Da

Label all possible matches  Label matches used for scoring

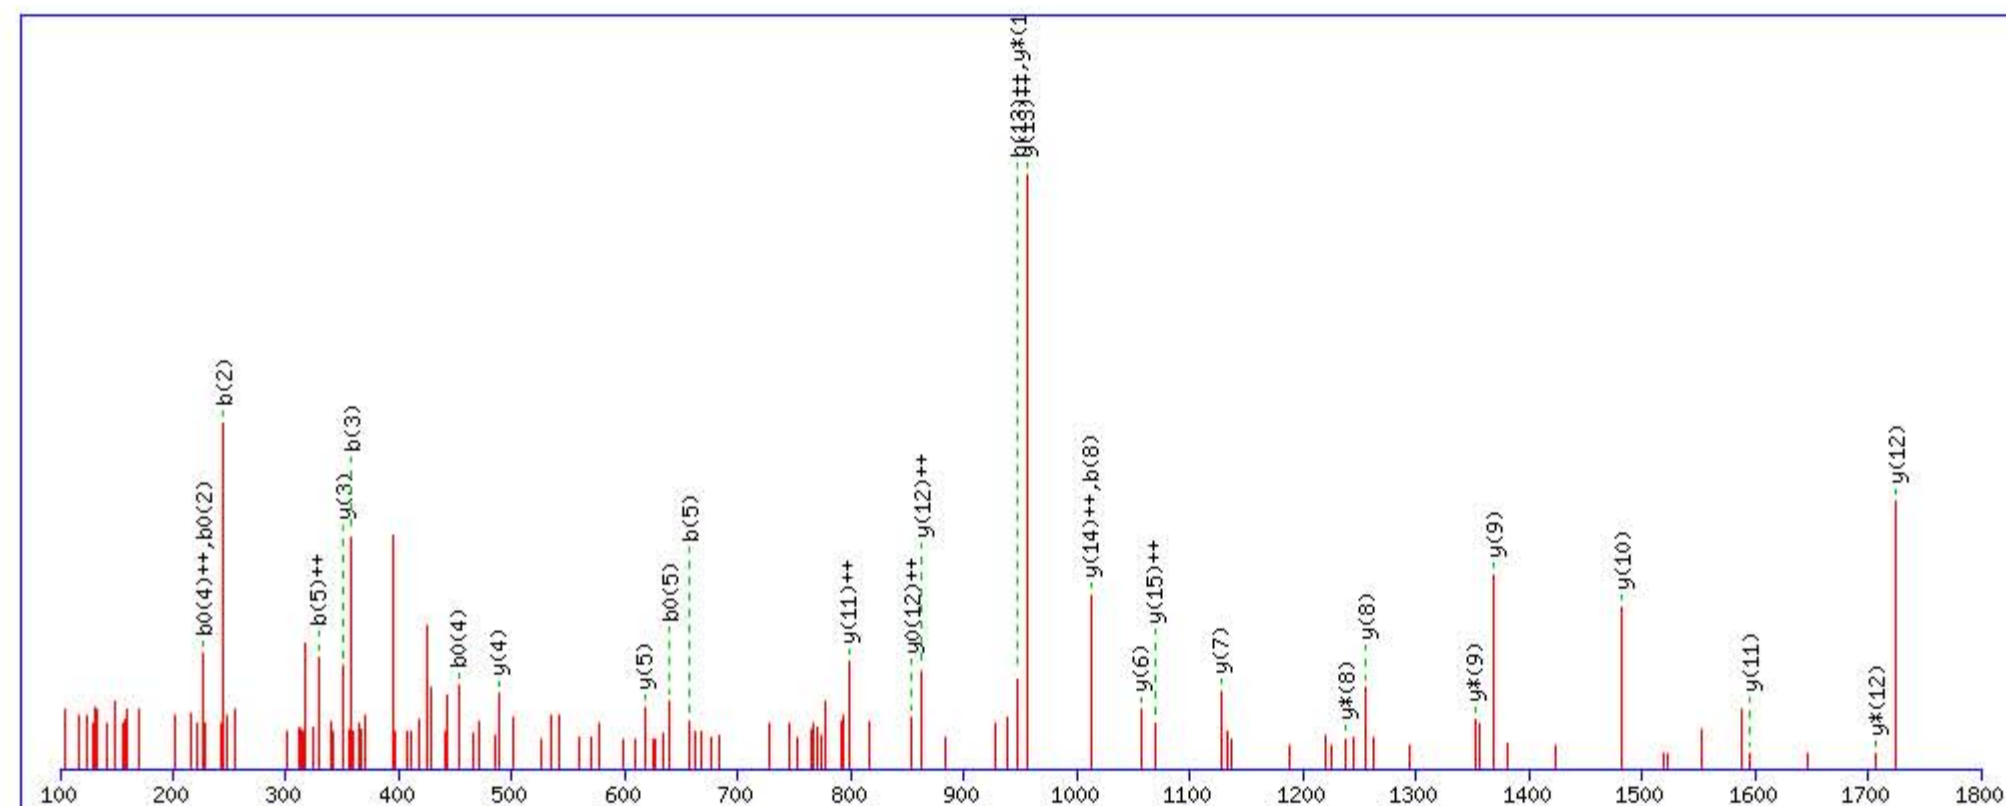

Monoisotopic mass of neutral peptide Mr(calc): 2380.188522

Fixed modifications: Carbamidomethyl (C) (apply to specified residues or termini only)

Variable modifications:

Q12 : Biotin:Thermo-21345 (Q)

Ions Score: 33 Expect: 0.00087

Matches : 30/168 fragment ions using 72 most intense peaks [\(help\)](#)

| #  | b                  | b <sup>++</sup>   | b <sup>+</sup> | b <sup>+++</sup> | b <sup>0</sup>    | b <sup>0++</sup>  | Seq. | y                  | y <sup>++</sup>    | y <sup>+</sup>     | y <sup>+++</sup>  | y <sup>0</sup> | y <sup>0++</sup>  | #  |
|----|--------------------|-------------------|----------------|------------------|-------------------|-------------------|------|--------------------|--------------------|--------------------|-------------------|----------------|-------------------|----|
| 1  | 130.049869         | 65.528572         |                |                  | 112.039304        | 56.523290         | E    |                    |                    |                    |                   |                |                   | 17 |
| 2  | <b>245.076812</b>  | 123.042044        |                |                  | <b>227.066247</b> | 114.036762        | D    | 2252.153237        | 1126.580256        | 2235.126688        | 1118.066982       | 2234.142672    | 1117.574974       | 16 |
| 3  | <b>358.160876</b>  | 179.584076        |                |                  | 340.150311        | 170.578794        | L    | 2137.126294        | <b>1069.066785</b> | 2120.099745        | 1060.553510       | 2119.115729    | 1060.061502       | 15 |
| 4  | 471.244940         | 236.126108        |                |                  | <b>453.234375</b> | <b>227.120826</b> | I    | 2024.042230        | <b>1012.524753</b> | 2007.015681        | 1004.011479       | 2006.031665    | 1003.519470       | 14 |
| 5  | <b>657.324253</b>  | <b>329.165765</b> |                |                  | <b>639.313688</b> | 320.160482        | W    | 1910.958166        | <b>955.982721</b>  | 1893.931617        | <b>947.469447</b> | 1892.947601    | 946.977438        | 13 |
| 6  | 786.366846         | 393.687061        |                |                  | 768.356281        | 384.681779        | E    | <b>1724.878853</b> | <b>862.943064</b>  | <b>1707.852304</b> | 854.429790        | 1706.868288    | <b>853.937782</b> | 12 |
| 7  | 899.450910         | 450.229093        |                |                  | 881.440345        | 441.223811        | L    | <b>1595.836260</b> | <b>798.421768</b>  | 1578.809711        | 789.908493        | 1577.825695    | 789.416485        | 11 |
| 8  | <b>1012.534974</b> | 506.771125        |                |                  | 994.524409        | 497.765843        | L    | <b>1482.752196</b> | 741.879736         | 1465.725647        | 733.366461        | 1464.741631    | 732.874453        | 10 |
| 9  | 1126.577901        | 563.792589        | 1109.551352    | 555.279314       | 1108.567336       | 554.787306        | N    | <b>1369.668132</b> | 685.337704         | <b>1352.641583</b> | 676.824429        | 1351.657567    | 676.332421        | 9  |
| 10 | 1254.636479        | 627.821878        | 1237.609930    | 619.308603       | 1236.625914       | 618.816595        | Q    | <b>1255.625205</b> | 628.316240         | <b>1238.598656</b> | 619.802966        | 1237.614640    | 619.310958        | 8  |
| 11 | 1325.673593        | 663.340435        | 1308.647044    | 654.827160       | 1307.663028       | 654.335152        | A    | <b>1127.566627</b> | 564.286951         | 1110.540078        | 555.773677        | 1109.556062    | 555.281669        | 7  |
| 12 | 1764.898919        | 882.953098        | 1747.872370    | 874.439823       | 1746.888354       | 873.947815        | Q    | <b>1056.529513</b> | 528.768395         | 1039.502964        | 520.255120        | 1038.518948    | 519.763112        | 6  |
| 13 | 1893.941512        | <b>947.474394</b> | 1876.914963    | 938.961120       | 1875.930947       | 938.469112        | E    | <b>617.304187</b>  | 309.155732         | 600.277638         | 300.642457        | 599.293622     | 300.150449        | 5  |
| 14 | 2031.000424        | 1016.003850       | 2013.973875    | 1007.490576      | 2012.989859       | 1006.998568       | H    | <b>488.261594</b>  | 244.634435         | 471.235045         | 236.121160        |                |                   | 4  |
| 15 | 2178.068838        | 1089.538057       | 2161.042289    | 1081.024782      | 2160.058273       | 1080.532774       | F    | <b>351.202682</b>  | 176.104979         | 334.176133         | 167.591704        |                |                   | 3  |
| 16 | 2235.090302        | 1118.048789       | 2218.063753    | 1109.535514      | 2217.079737       | 1109.043506       | G    | 204.134268         | 102.570772         | 187.107719         | 94.057497         |                |                   | 2  |
| 17 |                    |                   |                |                  |                   |                   | K    | 147.112804         | 74.060040          | 130.086255         | 65.546765         |                |                   | 1  |

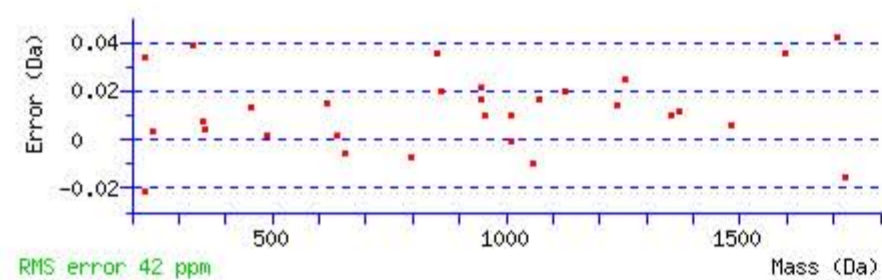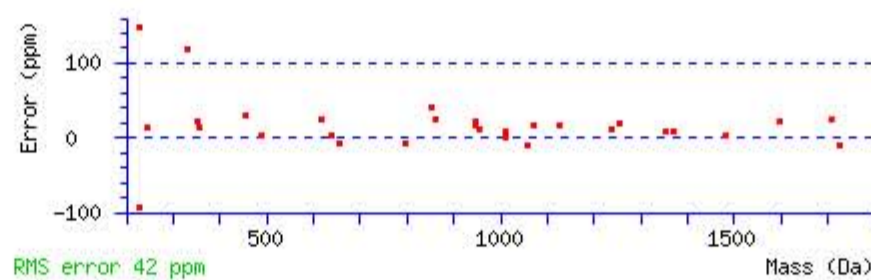

NCBI BLAST search of **EDLIWELLNQAQEHFQK**

(Parameters: blastp, nr protein database, expect=20000, no filter, PAM30)

Other BLAST [web gateways](#)

## All matches to this query

| Score | Mr(calc):   | Delta    | Sequence                                 |
|-------|-------------|----------|------------------------------------------|
| 32.8  | 2380.188522 | 0.023730 | <a href="#">EDLIWELLNQAQEHFQK</a>        |
| 28.5  | 2380.188522 | 0.023730 | <a href="#">EDLIWELLNQAQEHFQK</a>        |
| 0.2   | 2380.199814 | 0.012438 | <a href="#">GEPGLQGFPGKPGFLGEVGPMPGR</a> |

# Mascot Search Results

## Peptide View

MS/MS Fragmentation of **SMGGKEDLIWELLNQAQEHFGK**

Found in **TRFE\_HUMAN**, Serotransferrin OS=Homo sapiens GN=TF PE=1 SV=3

Match to Query 68325: 2856.426576 from(715.113920,4+) rtinseconds(2911) index(85150)

Title: Locus:1.1.1.2361.10 File:"2013-07-02 CLN FXIII 180 min 1st FT.wiff"

Data file C:\Program Files (x86)\Matrix Science\Mascot Daemon\mgf\7 FXIII 180 min 1st\mascot\_daemon\_merge.mgf

Click mouse within plot area to zoom in by factor of two about that point

Or, Plot from  to  Da

Label all possible matches  Label matches used for scoring

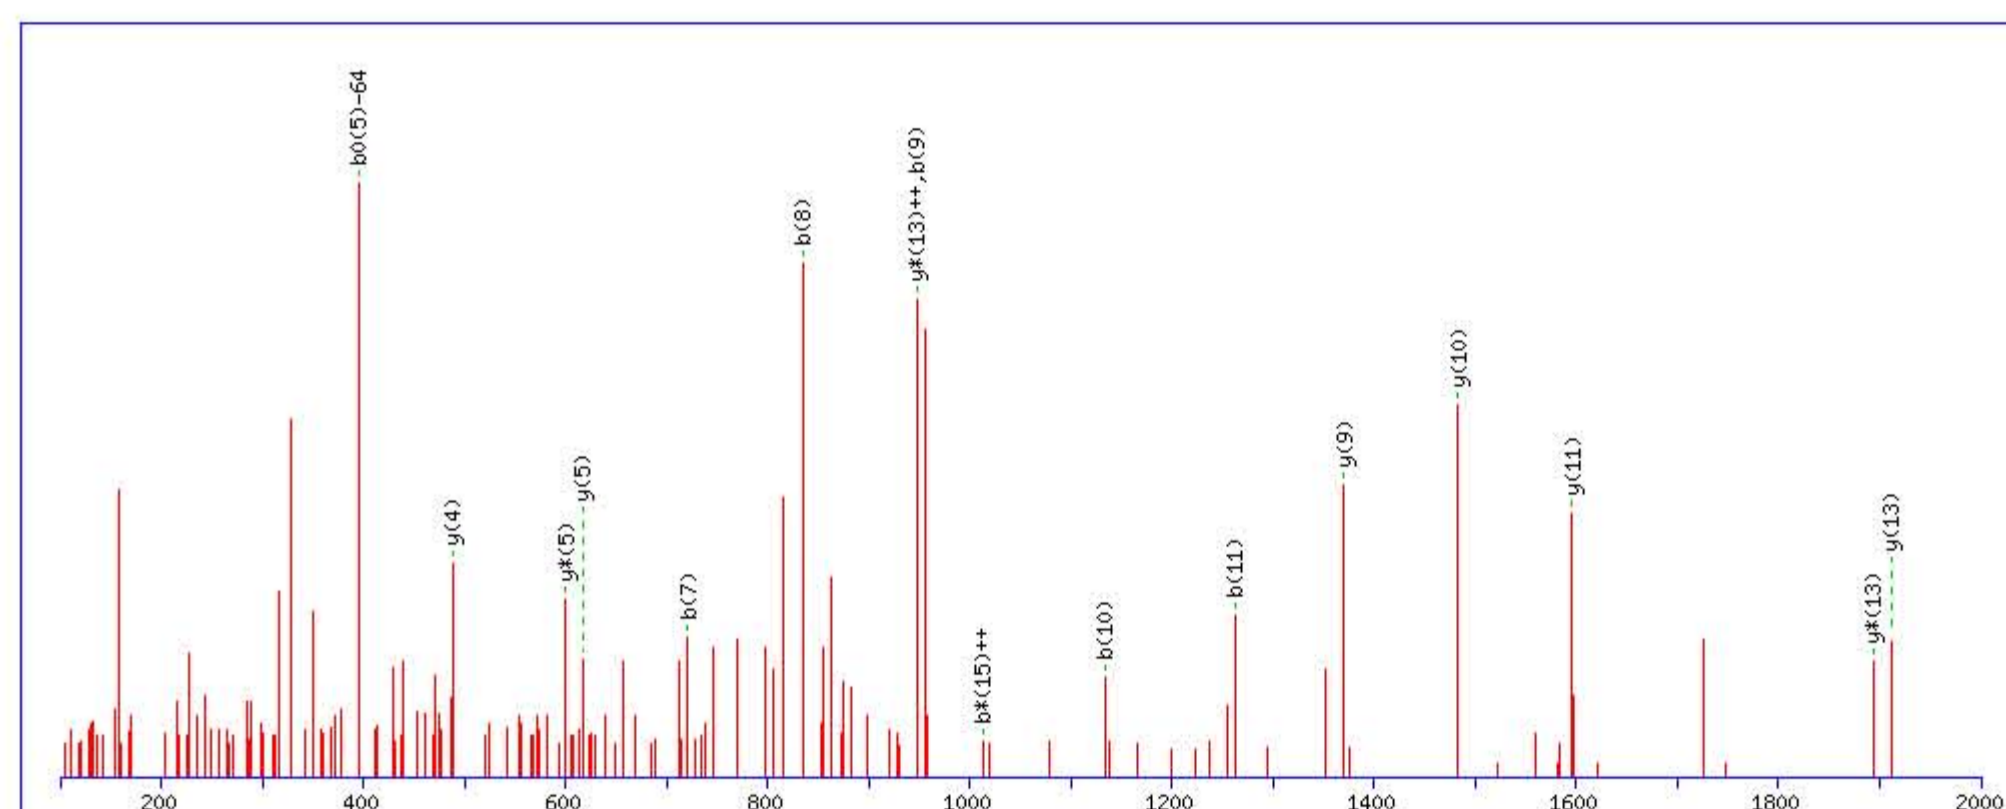

Monoisotopic mass of neutral peptide Mr(calc): 2856.393845

Fixed modifications: Carbamidomethyl (C) (apply to specified residues or termini only)

Variable modifications:

M2 : Oxidation (M), with neutral losses 0.000000 (shown in table), 63.998285

Q15 : Biotin:Thermo-21345 (Q)

Ions Score: 41 Expect: 0.0023

Matches : 16/356 fragment ions using 19 most intense peaks [\(help\)](#)

| #  | b                  | b <sup>++</sup> | b <sup>+</sup> | b <sup>+++</sup>   | b <sup>0</sup> | b <sup>0++</sup> | Seq. | y                  | y <sup>++</sup> | y <sup>+</sup>     | y <sup>+++</sup>  | y <sup>0</sup> | y <sup>0++</sup> | #  |
|----|--------------------|-----------------|----------------|--------------------|----------------|------------------|------|--------------------|-----------------|--------------------|-------------------|----------------|------------------|----|
| 1  | 88.039304          | 44.523290       |                |                    | 70.028739      | 35.518008        | S    |                    |                 |                    |                   |                |                  | 22 |
| 2  | 235.074704         | 118.040990      |                |                    | 217.064139     | 109.035707       | M    | 2770.369121        | 1385.688198     | 2753.342572        | 1377.174924       | 2752.358556    | 1376.682916      | 21 |
| 3  | 292.096168         | 146.551722      |                |                    | 274.085603     | 137.546439       | G    | 2623.333721        | 1312.170498     | 2606.307172        | 1303.657224       | 2605.323156    | 1303.165216      | 20 |
| 4  | 349.117632         | 175.062454      |                |                    | 331.107067     | 166.057171       | G    | 2566.312257        | 1283.659766     | 2549.285708        | 1275.146492       | 2548.301692    | 1274.654484      | 19 |
| 5  | 477.212595         | 239.109935      | 460.186046     | 230.596661         | 459.202030     | 230.104653       | K    | 2509.290793        | 1255.149034     | 2492.264244        | 1246.635760       | 2491.280228    | 1246.143752      | 18 |
| 6  | 606.255188         | 303.631232      | 589.228639     | 295.117958         | 588.244623     | 294.625950       | E    | 2381.195830        | 1191.101553     | 2364.169281        | 1182.588278       | 2363.185265    | 1182.096270      | 17 |
| 7  | <b>721.282131</b>  | 361.144704      | 704.255582     | 352.631429         | 703.271566     | 352.139421       | D    | 2252.153237        | 1126.580256     | 2235.126688        | 1118.066982       | 2234.142672    | 1117.574974      | 16 |
| 8  | <b>834.366195</b>  | 417.686736      | 817.339646     | 409.173461         | 816.355630     | 408.681453       | L    | 2137.126294        | 1069.066785     | 2120.099745        | 1060.553510       | 2119.115729    | 1060.061502      | 15 |
| 9  | <b>947.450259</b>  | 474.228768      | 930.423710     | 465.715493         | 929.439694     | 465.223485       | I    | 2024.042230        | 1012.524753     | 2007.015681        | 1004.011479       | 2006.031665    | 1003.519471      | 14 |
| 10 | <b>1133.529572</b> | 567.268424      | 1116.503023    | 558.755150         | 1115.519007    | 558.263142       | W    | <b>1910.958166</b> | 955.982721      | <b>1893.931617</b> | <b>947.469447</b> | 1892.947601    | 946.977439       | 13 |
| 11 | <b>1262.572165</b> | 631.789721      | 1245.545616    | 623.276446         | 1244.561600    | 622.784438       | E    | 1724.878853        | 862.943065      | 1707.852304        | 854.429790        | 1706.868288    | 853.937782       | 12 |
| 12 | 1375.656229        | 688.331753      | 1358.629680    | 679.818478         | 1357.645664    | 679.326470       | L    | <b>1595.836260</b> | 798.421768      | 1578.809711        | 789.908494        | 1577.825695    | 789.416486       | 11 |
| 13 | 1488.740293        | 744.873785      | 1471.713744    | 736.360510         | 1470.729728    | 735.868502       | L    | <b>1482.752196</b> | 741.879736      | 1465.725647        | 733.366462        | 1464.741631    | 732.874454       | 10 |
| 14 | 1602.783220        | 801.895248      | 1585.756671    | 793.381974         | 1584.772655    | 792.889966       | N    | <b>1369.668132</b> | 685.337704      | 1352.641583        | 676.824430        | 1351.657567    | 676.332422       | 9  |
| 15 | 2042.008546        | 1021.507911     | 2024.981997    | <b>1012.994637</b> | 2023.997981    | 1012.502629      | Q    | 1255.625205        | 628.316241      | 1238.598656        | 619.802966        | 1237.614640    | 619.310958       | 8  |
| 16 | 2113.045660        | 1057.026468     | 2096.019111    | 1048.513193        | 2095.035095    | 1048.021186      | A    | 816.399879         | 408.703578      | 799.373330         | 400.190303        | 798.389314     | 399.698295       | 7  |
| 17 | 2241.104238        | 1121.055757     | 2224.077689    | 1112.542483        | 2223.093673    | 1112.050475      | Q    | 745.362765         | 373.185021      | 728.336216         | 364.671746        | 727.352200     | 364.179738       | 6  |
| 18 | 2370.146831        | 1185.577054     | 2353.120282    | 1177.063779        | 2352.136266    | 1176.571771      | E    | <b>617.304187</b>  | 309.155732      | <b>600.277638</b>  | 300.642457        | 599.293622     | 300.150449       | 5  |
| 19 | 2507.205743        | 1254.106510     | 2490.179194    | 1245.593235        | 2489.195178    | 1245.101227      | H    | <b>488.261594</b>  | 244.634435      | 471.235045         | 236.121160        |                |                  | 4  |
| 20 | 2654.274157        | 1327.640717     | 2637.247608    | 1319.127442        | 2636.263592    | 1318.635434      | F    | 351.202682         | 176.104979      | 334.176133         | 167.591704        |                |                  | 3  |
| 21 | 2711.295621        | 1356.151449     | 2694.269072    | 1347.638174        | 2693.285056    | 1347.146166      | G    | 204.134268         | 102.570772      | 187.107719         | 94.057497         |                |                  | 2  |
| 22 |                    |                 |                |                    |                |                  | K    | 147.112804         | 74.060040       | 130.086255         | 65.546765         |                |                  | 1  |

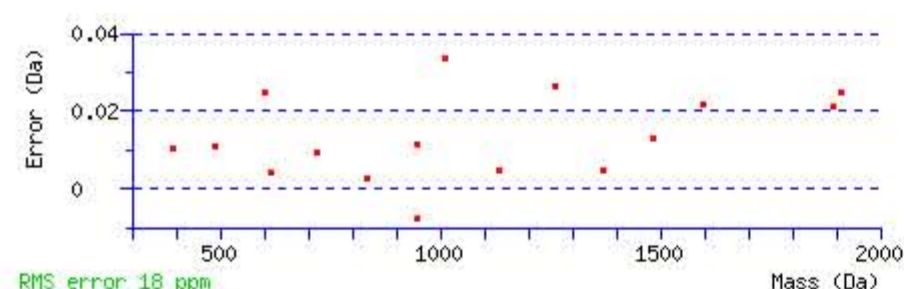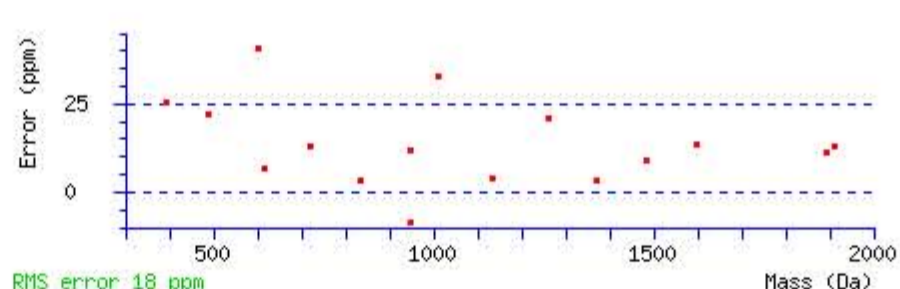

NCBI BLAST search of [SMGGKEDLIWELLNQAQEHFGK](#)

(Parameters: blastp, nr protein database, expect=20000, no filter, PAM30)

Other BLAST [web gateways](#)

All matches to this query

| Score | Mr(calc):   | Delta    | Sequence                               |
|-------|-------------|----------|----------------------------------------|
| 40.9  | 2856.393845 | 0.032731 | <a href="#">SMGGKEDLIWELLNQAQEHFGK</a> |
| 38.3  | 2856.393845 | 0.032731 | <a href="#">SMGGKEDLIWELLNQAQEHFGK</a> |

# MASCOT Search Results

## Peptide View

MS/MS Fragmentation of **KPVDEYKDCHLAQVPSHTVVAR**

Found in **TRFE\_HUMAN**, Serotransferrin OS=Homo sapiens GN=TF PE=1 SV=3

Match to Query 68410: 2859.474296 from(715.875850,4+) rtinseconds(1492) index(75675)

Title: Locus:1.1.1.1870.12 File:"2013-07-02 CLN FXIII 180 min 1st FT.wiff"

Data file C:\Program Files (x86)\Matrix Science\Mascot Daemon\mgf7 FXIII 180 min 1st\mascot\_daemon\_merge.mgf

Click mouse within plot area to zoom in by factor of two about that point

Or, Plot from  to  Da

Label all possible matches  Label matches used for scoring

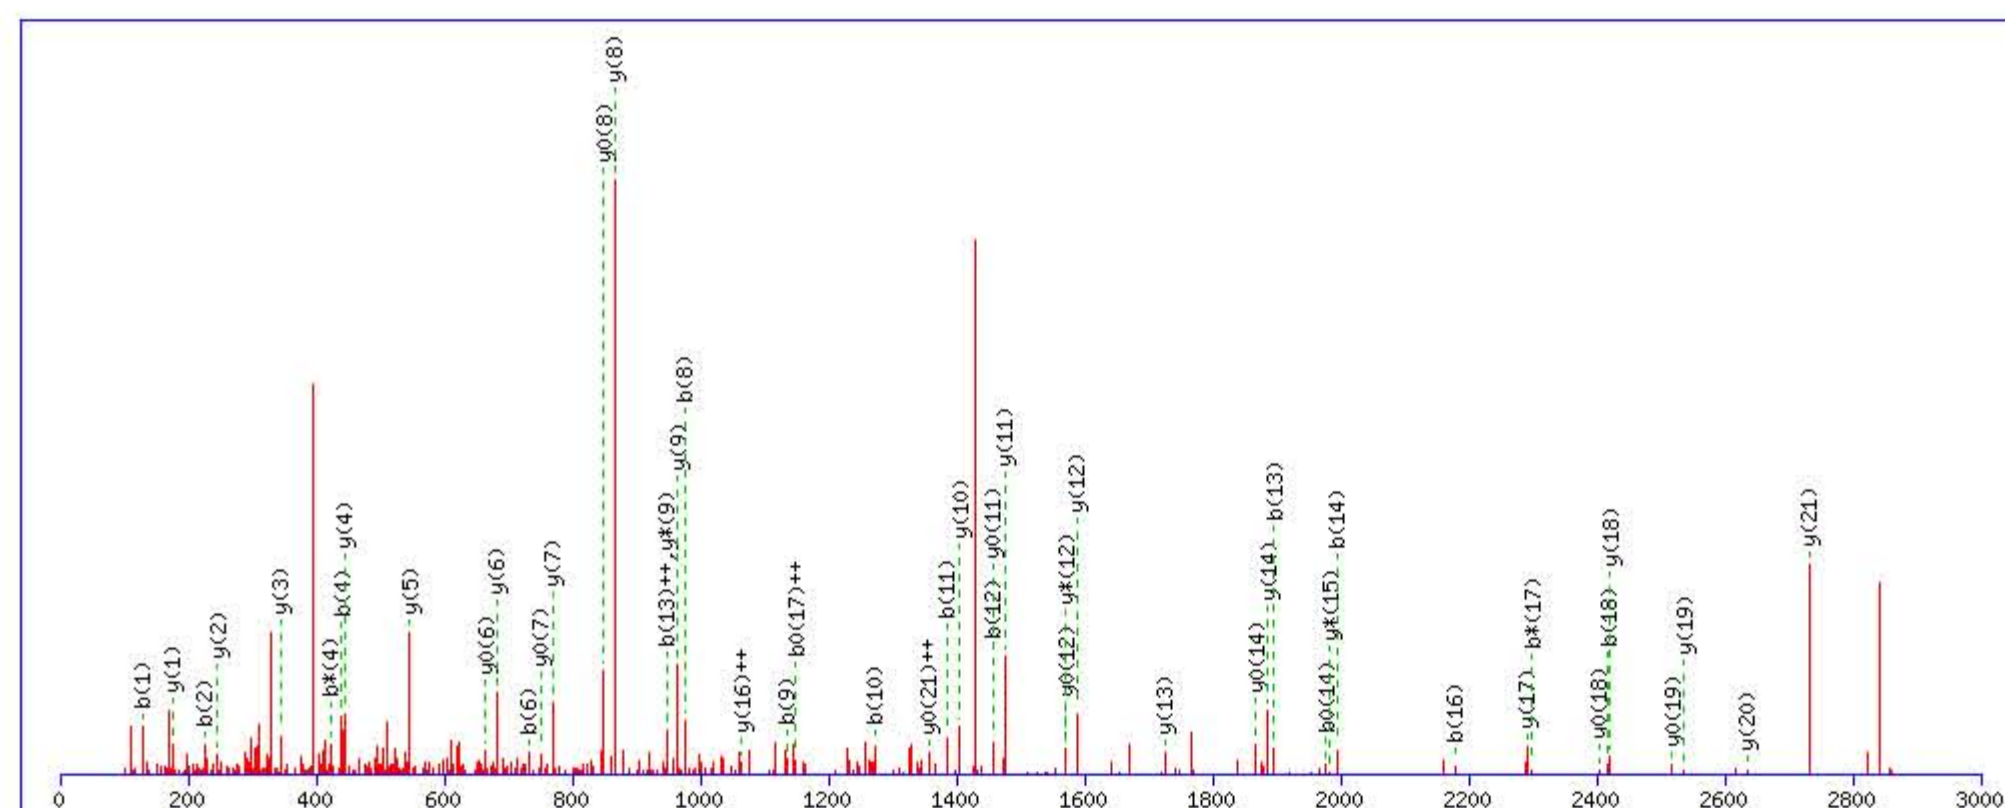

Monoisotopic mass of neutral peptide Mr(calc): 2859.452393

Fixed modifications: Carbamidomethyl (C) (apply to specified residues or termini only)

Variable modifications:

Q13 : Biotin:Thermo-21345 (Q)

Ions Score: 100 Expect: 8e-010

Matches : 50/238 fragment ions using 112 most intense peaks [\(help\)](#)

| #  | b           | b <sup>++</sup> | b <sup>*</sup> | b <sup>*++</sup> | b <sup>0</sup> | b <sup>0++</sup> | Seq. | y           | y <sup>++</sup> | y <sup>*</sup> | y <sup>*++</sup> | y <sup>0</sup> | y <sup>0++</sup> | #  |
|----|-------------|-----------------|----------------|------------------|----------------|------------------|------|-------------|-----------------|----------------|------------------|----------------|------------------|----|
| 1  | 129.102239  | 65.054757       | 112.075690     | 56.541483        |                |                  | K    |             |                 |                |                  |                |                  | 22 |
| 2  | 226.155003  | 113.581139      | 209.128454     | 105.067865       |                |                  | P    | 2732.364705 | 1366.685990     | 2715.338156    | 1358.172716      | 2714.354140    | 1357.680708      | 21 |
| 3  | 325.223417  | 163.115346      | 308.196868     | 154.602072       |                |                  | V    | 2635.311941 | 1318.159608     | 2618.285392    | 1309.646334      | 2617.301376    | 1309.154326      | 20 |
| 4  | 440.250360  | 220.628818      | 423.223811     | 212.115544       | 422.239795     | 211.623536       | D    | 2536.243527 | 1268.625401     | 2519.216978    | 1260.112127      | 2518.232962    | 1259.620119      | 19 |
| 5  | 569.292953  | 285.150115      | 552.266404     | 276.636840       | 551.282388     | 276.144832       | E    | 2421.216584 | 1211.111930     | 2404.190035    | 1202.598655      | 2403.206019    | 1202.106647      | 18 |
| 6  | 732.356282  | 366.681779      | 715.329733     | 358.168505       | 714.345717     | 357.676497       | Y    | 2292.173991 | 1146.590633     | 2275.147442    | 1138.077359      | 2274.163426    | 1137.585351      | 17 |
| 7  | 860.451245  | 430.729261      | 843.424696     | 422.215986       | 842.440680     | 421.723978       | K    | 2129.110662 | 1065.058969     | 2112.084113    | 1056.545694      | 2111.100097    | 1056.053686      | 16 |
| 8  | 975.478188  | 488.242732      | 958.451639     | 479.729458       | 957.467623     | 479.237450       | D    | 2001.015699 | 1001.011487     | 1983.989150    | 992.498213       | 1983.005134    | 992.006205       | 15 |
| 9  | 1135.508837 | 568.258057      | 1118.482288    | 559.744782       | 1117.498272    | 559.252774       | C    | 1885.988756 | 943.498016      | 1868.962207    | 934.984741       | 1867.978191    | 934.492733       | 14 |
| 10 | 1272.567749 | 636.787513      | 1255.541200    | 628.274238       | 1254.557184    | 627.782230       | H    | 1725.958107 | 863.482691      | 1708.931558    | 854.969417       | 1707.947542    | 854.477409       | 13 |
| 11 | 1385.651813 | 693.329545      | 1368.625264    | 684.816270       | 1367.641248    | 684.324262       | L    | 1588.899195 | 794.953235      | 1571.872646    | 786.439961       | 1570.888630    | 785.947953       | 12 |
| 12 | 1456.688927 | 728.848101      | 1439.662378    | 720.334827       | 1438.678362    | 719.842819       | A    | 1475.815131 | 738.411203      | 1458.788582    | 729.897929       | 1457.804566    | 729.405921       | 11 |
| 13 | 1895.914253 | 948.460765      | 1878.887704    | 939.947490       | 1877.903688    | 939.455482       | Q    | 1404.778017 | 702.892646      | 1387.751468    | 694.379372       | 1386.767452    | 693.887364       | 10 |
| 14 | 1994.982667 | 997.994972      | 1977.956118    | 989.481697       | 1976.972102    | 988.989689       | V    | 965.552691  | 483.279983      | 948.526142     | 474.766709       | 947.542126     | 474.274701       | 9  |
| 15 | 2092.035431 | 1046.521353     | 2075.008882    | 1038.008079      | 2074.024866    | 1037.516071      | P    | 866.484277  | 433.745776      | 849.457728     | 425.232502       | 848.473712     | 424.740494       | 8  |
| 16 | 2179.067459 | 1090.037367     | 2162.040910    | 1081.524093      | 2161.056894    | 1081.032085      | S    | 769.431513  | 385.219394      | 752.404964     | 376.706120       | 751.420948     | 376.214112       | 7  |
| 17 | 2316.126371 | 1158.566823     | 2299.099822    | 1150.053549      | 2298.115806    | 1149.561541      | H    | 682.399485  | 341.703380      | 665.372936     | 333.190106       | 664.388920     | 332.698098       | 6  |
| 18 | 2417.174050 | 1209.090663     | 2400.147501    | 1200.577388      | 2399.163485    | 1200.085380      | T    | 545.340573  | 273.173924      | 528.314024     | 264.660650       | 527.330008     | 264.168642       | 5  |
| 19 | 2516.242464 | 1258.624870     | 2499.215915    | 1250.111595      | 2498.231899    | 1249.619587      | V    | 444.292894  | 222.650085      | 427.266345     | 214.136810       |                |                  | 4  |
| 20 | 2615.310878 | 1308.159077     | 2598.284329    | 1299.645802      | 2597.300313    | 1299.153794      | V    | 345.224480  | 173.115878      | 328.197931     | 164.602603       |                |                  | 3  |
| 21 | 2686.347992 | 1343.677634     | 2669.321443    | 1335.164359      | 2668.337427    | 1334.672351      | A    | 246.156066  | 123.581671      | 229.129517     | 115.068397       |                |                  | 2  |
| 22 |             |                 |                |                  |                |                  | R    | 175.118952  | 88.063114       | 158.092403     | 79.549839        |                |                  | 1  |

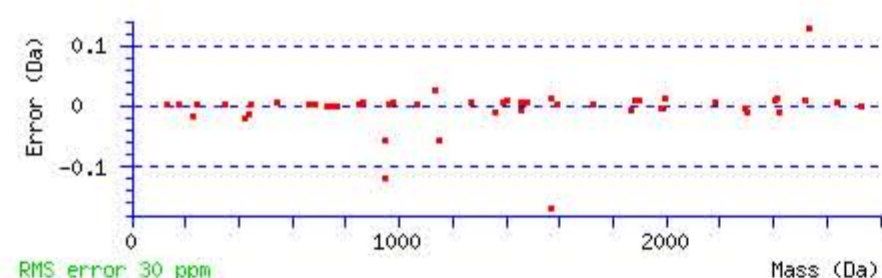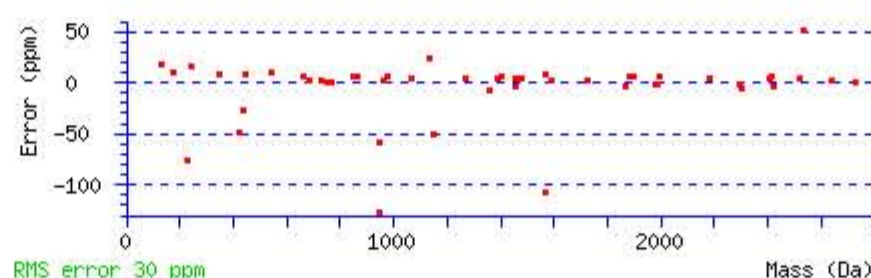

NCBI BLAST search of **KPVDEYKDCHLAQVPSHTVVAR**  
 (Parameters: blastp, nr protein database, expect=20000, no filter, PAM30)  
 Other BLAST [web gateways](#)

### All matches to this query

| Score | Mr(calc):   | Delta     | Sequence                                  |
|-------|-------------|-----------|-------------------------------------------|
| 99.9  | 2859.452393 | 0.021903  | <a href="#">KPVDEYKDCHLAQVPSHTVVAR</a>    |
| 2.7   | 2859.504028 | -0.029732 | <a href="#">KIFGSVHPVRPMRLESFSACIWVK</a>  |
| 0.5   | 2859.516418 | -0.042122 | <a href="#">QPAKEVTKASDGSLLGDLGHTPLSK</a> |

# **MASCOT** Mascot Search Results

## Peptide View

MS/MS Fragmentation of **FQNALLVR**

Found in **ALBU\_HUMAN**, Serum albumin OS=Homo sapiens GN=ALB PE=1 SV=2

Match to Query 25947: 1270.729188 from(636.371870,2+) rtinseconds(2084) index(25280)

Title: Locus:1.1.1.2868.8 File:"2013-07-02 CLN FXIII 180 min 1st F 2.wiff"

Data file C:\Program Files (x86)\Matrix Science\Mascot Daemon\mgf\7 FXIII 180 min 1st\mascot\_daemon\_merge.mgf

Click mouse within plot area to zoom in by factor of two about that point

Or, Plot from  to  Da

Label all possible matches  Label matches used for scoring

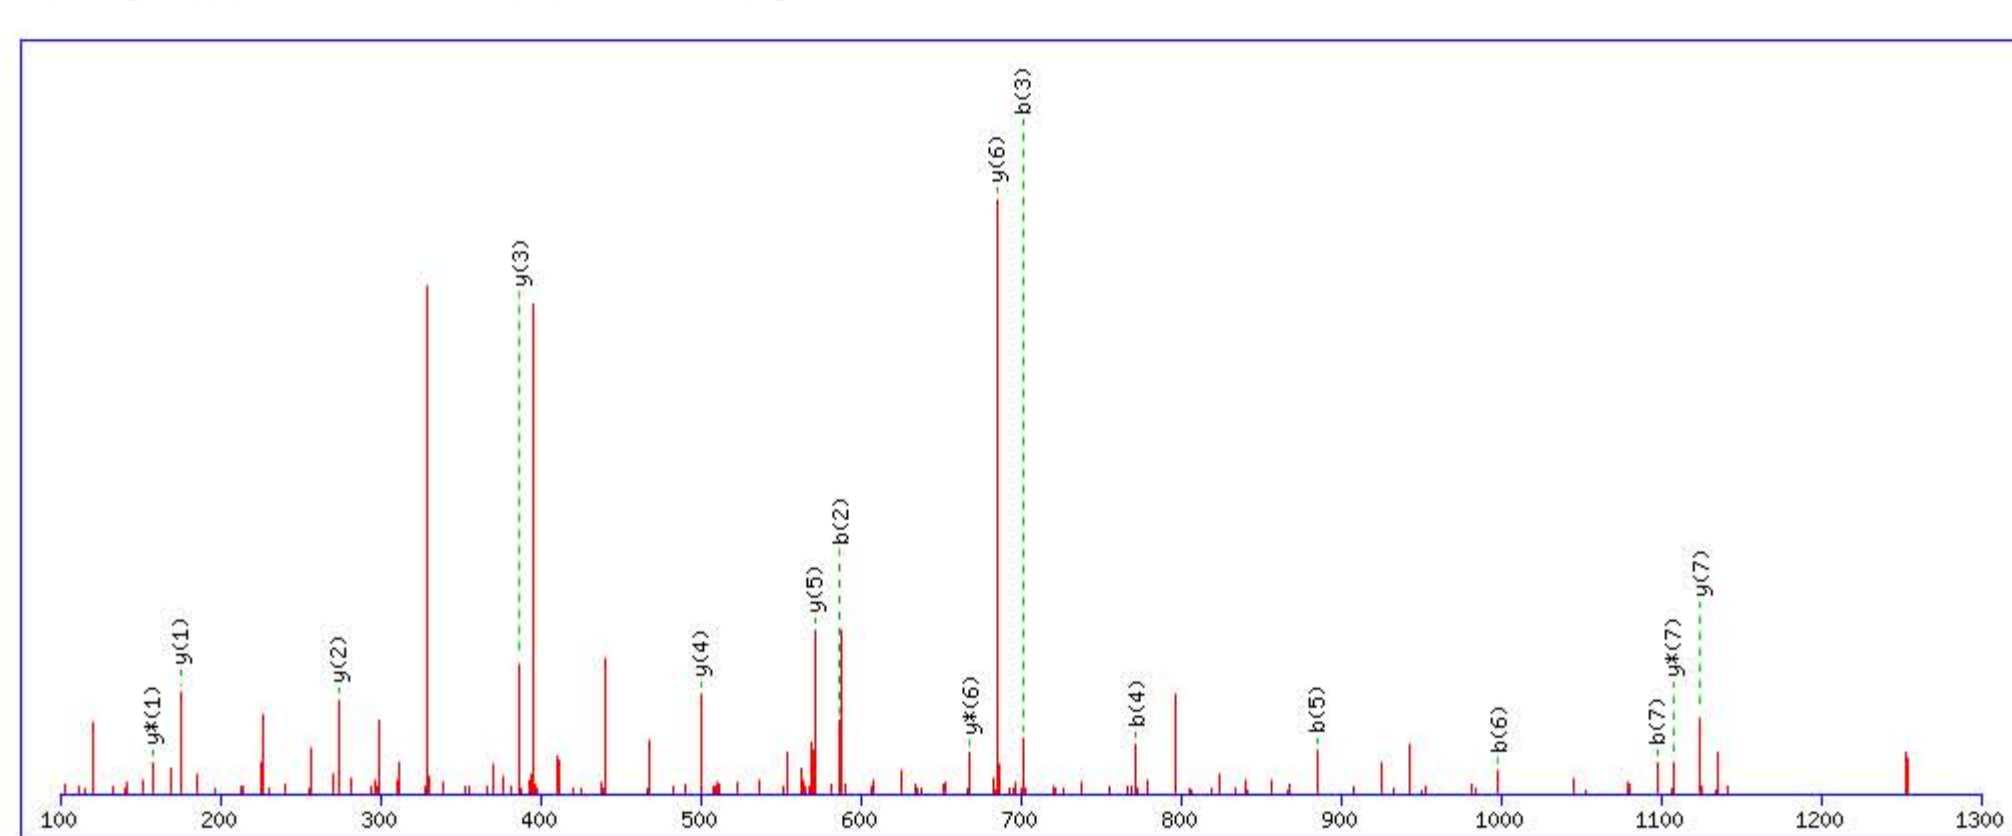

Monoisotopic mass of neutral peptide Mr(calc): 1270.721985

Fixed modifications: Carbamidomethyl (C) (apply to specified residues or termini only)

Variable modifications:

Q2 : Biotin:Thermo-21345 (Q)

Ions Score: 37 Expect: 0.0027

Matches : 16/54 fragment ions using 35 most intense peaks [\(help\)](#)

| # | b                  | b <sup>++</sup> | b <sup>*</sup> | b <sup>***</sup> | Seq. | y                  | y <sup>++</sup> | y <sup>*</sup>     | y <sup>***</sup> | # |
|---|--------------------|-----------------|----------------|------------------|------|--------------------|-----------------|--------------------|------------------|---|
| 1 | 148.075690         | 74.541483       |                |                  | F    |                    |                 |                    |                  | 8 |
| 2 | <b>587.301016</b>  | 294.154146      | 570.274467     | 285.640872       | Q    | <b>1124.660861</b> | 562.834068      | <b>1107.634312</b> | 554.320794       | 7 |
| 3 | <b>701.343943</b>  | 351.175610      | 684.317394     | 342.662335       | N    | <b>685.435535</b>  | 343.221406      | <b>668.408986</b>  | 334.708131       | 6 |
| 4 | <b>772.381057</b>  | 386.694166      | 755.354508     | 378.180892       | A    | <b>571.392608</b>  | 286.199942      | 554.366059         | 277.686668       | 5 |
| 5 | <b>885.465121</b>  | 443.236199      | 868.438572     | 434.722924       | L    | <b>500.355494</b>  | 250.681385      | 483.328945         | 242.168110       | 4 |
| 6 | <b>998.549185</b>  | 499.778231      | 981.522636     | 491.264956       | L    | <b>387.271430</b>  | 194.139353      | 370.244881         | 185.626078       | 3 |
| 7 | <b>1097.617599</b> | 549.312437      | 1080.591050    | 540.799163       | V    | <b>274.187366</b>  | 137.597321      | 257.160817         | 129.084046       | 2 |
| 8 |                    |                 |                |                  | R    | <b>175.118952</b>  | 88.063114       | <b>158.092403</b>  | 79.549839        | 1 |

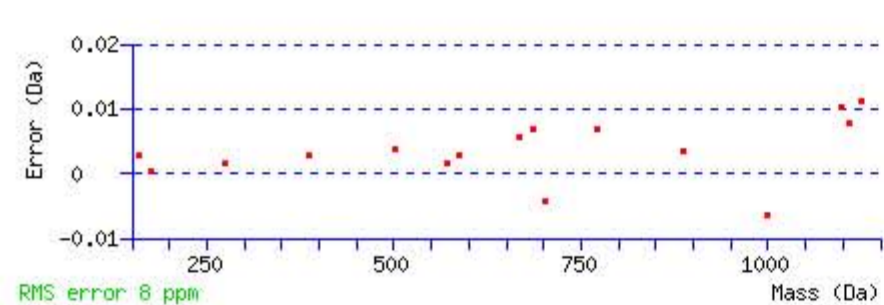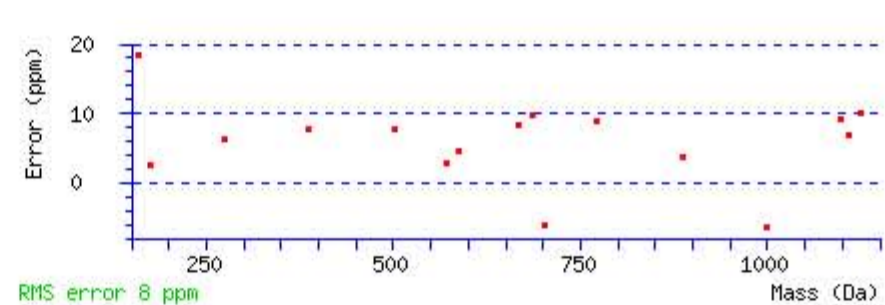

NCBI BLAST search of [FQNALLVR](#)

(Parameters: blastp, nr protein database, expect=20000, no filter, PAM30)

Other BLAST [web gateways](#)

### All matches to this query

| Score | Mr(calc):   | Delta     | Sequence                     |
|-------|-------------|-----------|------------------------------|
| 37.5  | 1270.721985 | 0.007203  | <a href="#">FQNALLVR</a>     |
| 16.6  | 1270.722000 | 0.007188  | <a href="#">FQIAQVVR</a>     |
| 12.9  | 1270.735687 | -0.006499 | <a href="#">KEAELRSGIIR</a>  |
| 10.9  | 1270.733215 | -0.004027 | <a href="#">MFHIRAVILR</a>   |
| 7.2   | 1270.733215 | -0.004027 | <a href="#">FQRQILR</a>      |
| 6.8   | 1270.725357 | 0.003831  | <a href="#">QKVMAIVR</a>     |
| 5.7   | 1270.735687 | -0.006499 | <a href="#">LKKLSNLNADR</a>  |
| 4.1   | 1270.735733 | -0.006545 | <a href="#">EILGRGVSSVVR</a> |
| 4.0   | 1270.717957 | 0.011231  | <a href="#">QLSRTLRSR</a>    |
| 3.8   | 1270.739761 | -0.010573 | <a href="#">QVVNIPSFIVR</a>  |

# MASCOT Search Results

## Peptide View

MS/MS Fragmentation of **LVAASQAALGL**

Found in **ALBU\_HUMAN**, Serum albumin OS=Homo sapiens GN=ALB PE=1 SV=2

Match to Query 27457: 1323.770968 from(662.892760,2+) rtinseconds(2520) index(28224)

Title: Locus:1.1.1.3019.14 File:"2013-07-02 CLN FXIII 180 min 1st F 2.wiff"

Data file C:\Program Files (x86)\Matrix Science\Mascot Daemon\mgf7 FXIII 180 min 1st\mascot\_daemon\_merge.mgf

Click mouse within plot area to zoom in by factor of two about that point

Or, Plot from  to  Da

Label all possible matches  Label matches used for scoring

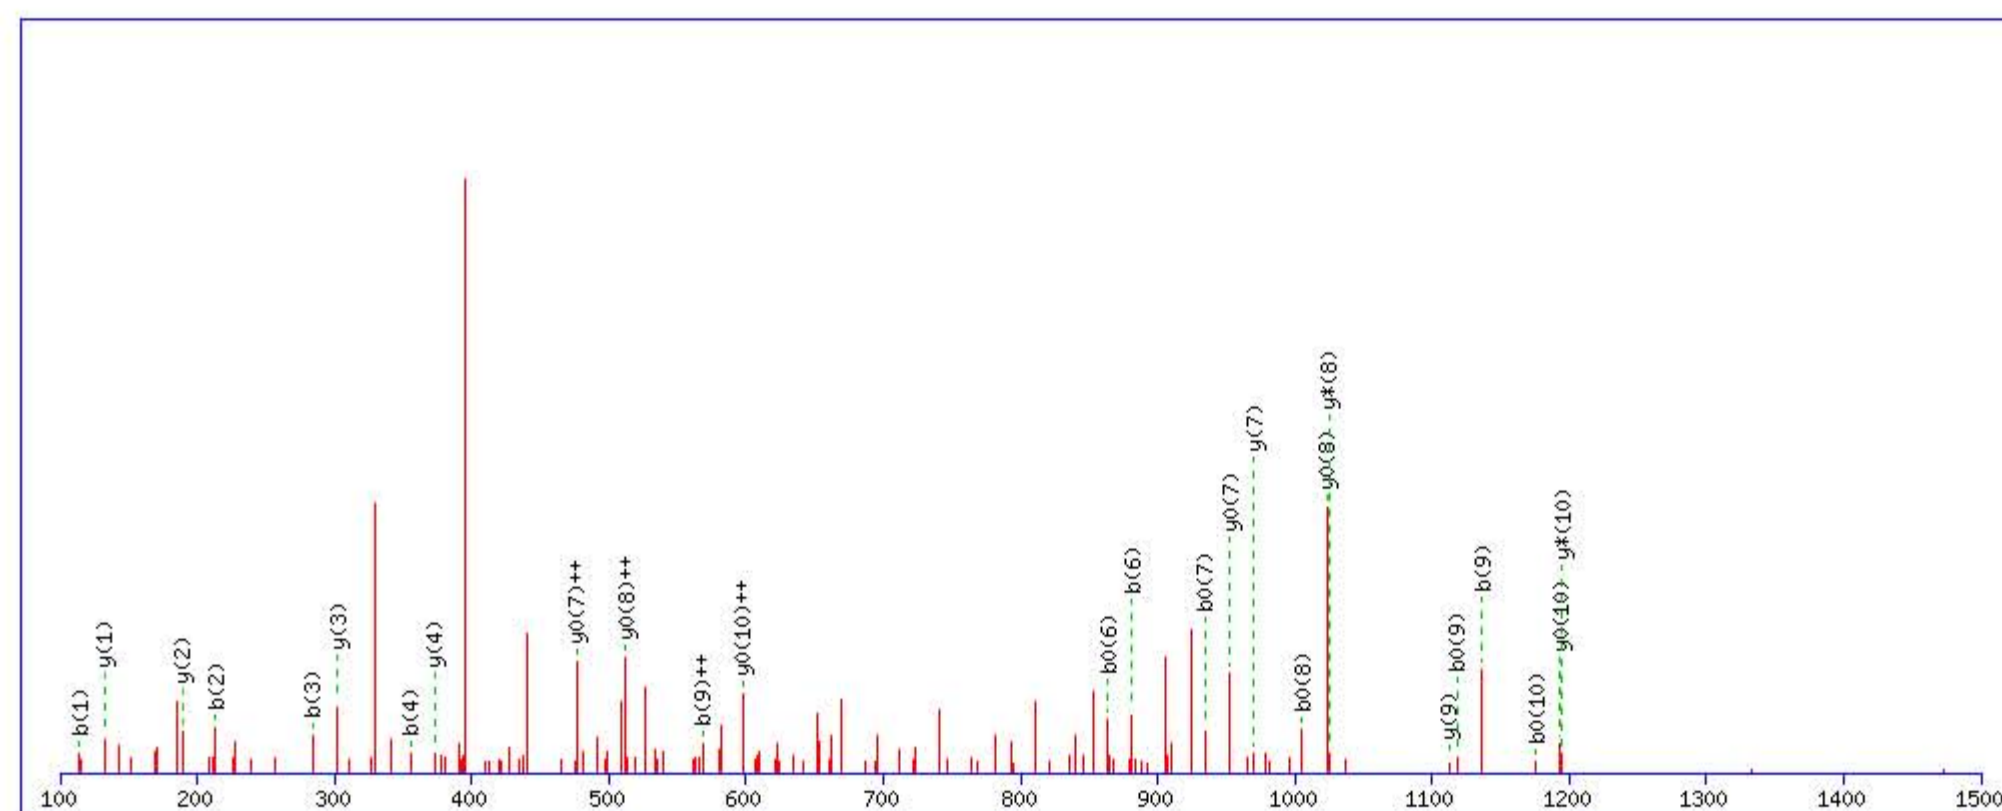

Monoisotopic mass of neutral peptide Mr(calc): 1323.758423

Fixed modifications: Carbamidomethyl (C) (apply to specified residues or termini only)

Variable modifications:

Q6 : Biotin:Thermo-21345 (Q)

Ions Score: 35 Expect: 0.0012

Matches : 32/80 fragment ions using 80 most intense peaks [\(help\)](#)

| #  | b                  | b <sup>++</sup>   | b <sup>+</sup> | b <sup>+++</sup> | b <sup>0</sup>     | b <sup>0++</sup> | Seq. | y                  | y <sup>++</sup> | y <sup>+</sup>     | y <sup>+++</sup> | y <sup>0</sup>     | y <sup>0++</sup>  | #  |
|----|--------------------|-------------------|----------------|------------------|--------------------|------------------|------|--------------------|-----------------|--------------------|------------------|--------------------|-------------------|----|
| 1  | <b>114.091340</b>  | 57.549308         |                |                  |                    |                  | L    |                    |                 |                    |                  |                    |                   | 11 |
| 2  | <b>213.159754</b>  | 107.083515        |                |                  |                    |                  | V    | 1211.681657        | 606.344466      | <b>1194.655108</b> | 597.831192       | <b>1193.671092</b> | <b>597.339184</b> | 10 |
| 3  | <b>284.196868</b>  | 142.602072        |                |                  |                    |                  | A    | <b>1112.613243</b> | 556.810259      | 1095.586694        | 548.296985       | 1094.602678        | 547.804977        | 9  |
| 4  | <b>355.233982</b>  | 178.120629        |                |                  |                    |                  | A    | 1041.576129        | 521.291702      | <b>1024.549580</b> | 512.778428       | <b>1023.565564</b> | <b>512.286420</b> | 8  |
| 5  | 442.266010         | 221.636643        |                |                  | 424.255445         | 212.631361       | S    | <b>970.539015</b>  | 485.773145      | 953.512466         | 477.259871       | <b>952.528450</b>  | <b>476.767863</b> | 7  |
| 6  | <b>881.491336</b>  | 441.249306        | 864.464787     | 432.736032       | <b>863.480771</b>  | 432.244024       | Q    | 883.506987         | 442.257131      | 866.480438         | 433.743857       |                    |                   | 6  |
| 7  | <b>952.528450</b>  | <b>476.767863</b> | 935.501901     | 468.254589       | <b>934.517885</b>  | 467.762581       | A    | 444.281661         | 222.644468      |                    |                  |                    |                   | 5  |
| 8  | <b>1023.565564</b> | <b>512.286420</b> | 1006.539015    | 503.773146       | <b>1005.554999</b> | 503.281138       | A    | <b>373.244547</b>  | 187.125911      |                    |                  |                    |                   | 4  |
| 9  | <b>1136.649628</b> | <b>568.828452</b> | 1119.623079    | 560.315178       | <b>1118.639063</b> | 559.823169       | L    | <b>302.207433</b>  | 151.607354      |                    |                  |                    |                   | 3  |
| 10 | <b>1193.671092</b> | <b>597.339184</b> | 1176.644543    | 588.825909       | <b>1175.660527</b> | 588.333901       | G    | <b>189.123369</b>  | 95.065322       |                    |                  |                    |                   | 2  |
| 11 |                    |                   |                |                  |                    |                  | L    | <b>132.101905</b>  | 66.554590       |                    |                  |                    |                   | 1  |

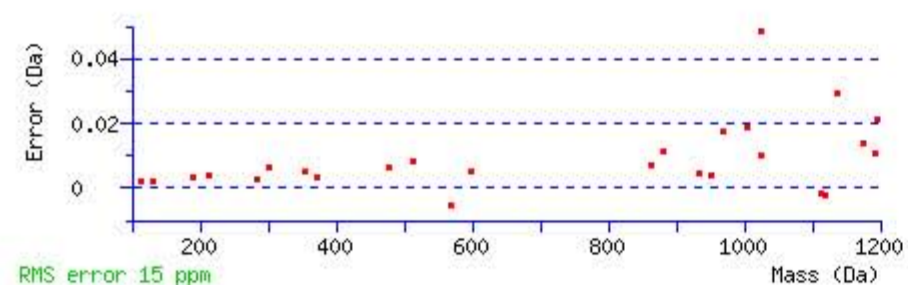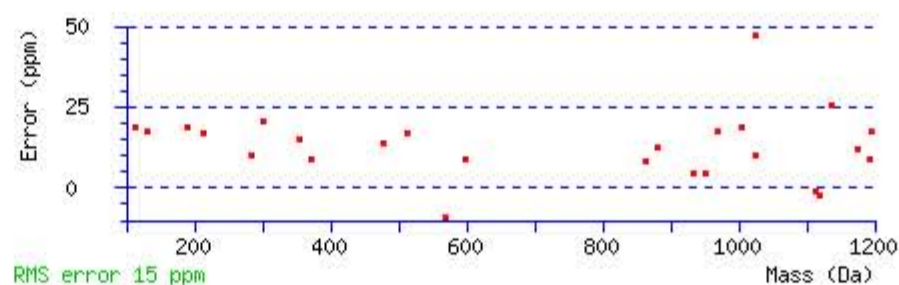

NCBI BLAST search of **LVAASQAALGL**

(Parameters: blastp, nr protein database, expect=20000, no filter, PAM30)

Other BLAST [web gateways](#)

All matches to this query

| Score | Mr(calc):   | Delta     | Sequence                      |
|-------|-------------|-----------|-------------------------------|
| 34.5  | 1323.758423 | 0.012545  | <a href="#">LVAASQAALGL</a>   |
| 3.3   | 1323.780899 | -0.009931 | <a href="#">MLGV PANRIVVR</a> |

Mascot: <http://www.matrixscience.com/>



# MASCOT SEARCH RESULTS

## Peptide View

MS/MS Fragmentation of **AAFTECCQAADK**

Found in **ALBU\_HUMAN**, Serum albumin OS=Homo sapiens GN=ALB PE=1 SV=2

Match to Query 42027: 1681.733248 from(841.873900,2+) rtinseconds(1585) index(21636)

Title: Locus:1.1.1.2694.14 File:"2013-07-02 CLN FXIII 180 min 1st F 2.wiff"

Data file C:\Program Files (x86)\Matrix Science\Mascot Daemon\mgf7 FXIII 180 min 1st\mascot\_daemon\_merge.mgf

Click mouse within plot area to zoom in by factor of two about that point

Or, Plot from  to  Da

Label all possible matches  Label matches used for scoring

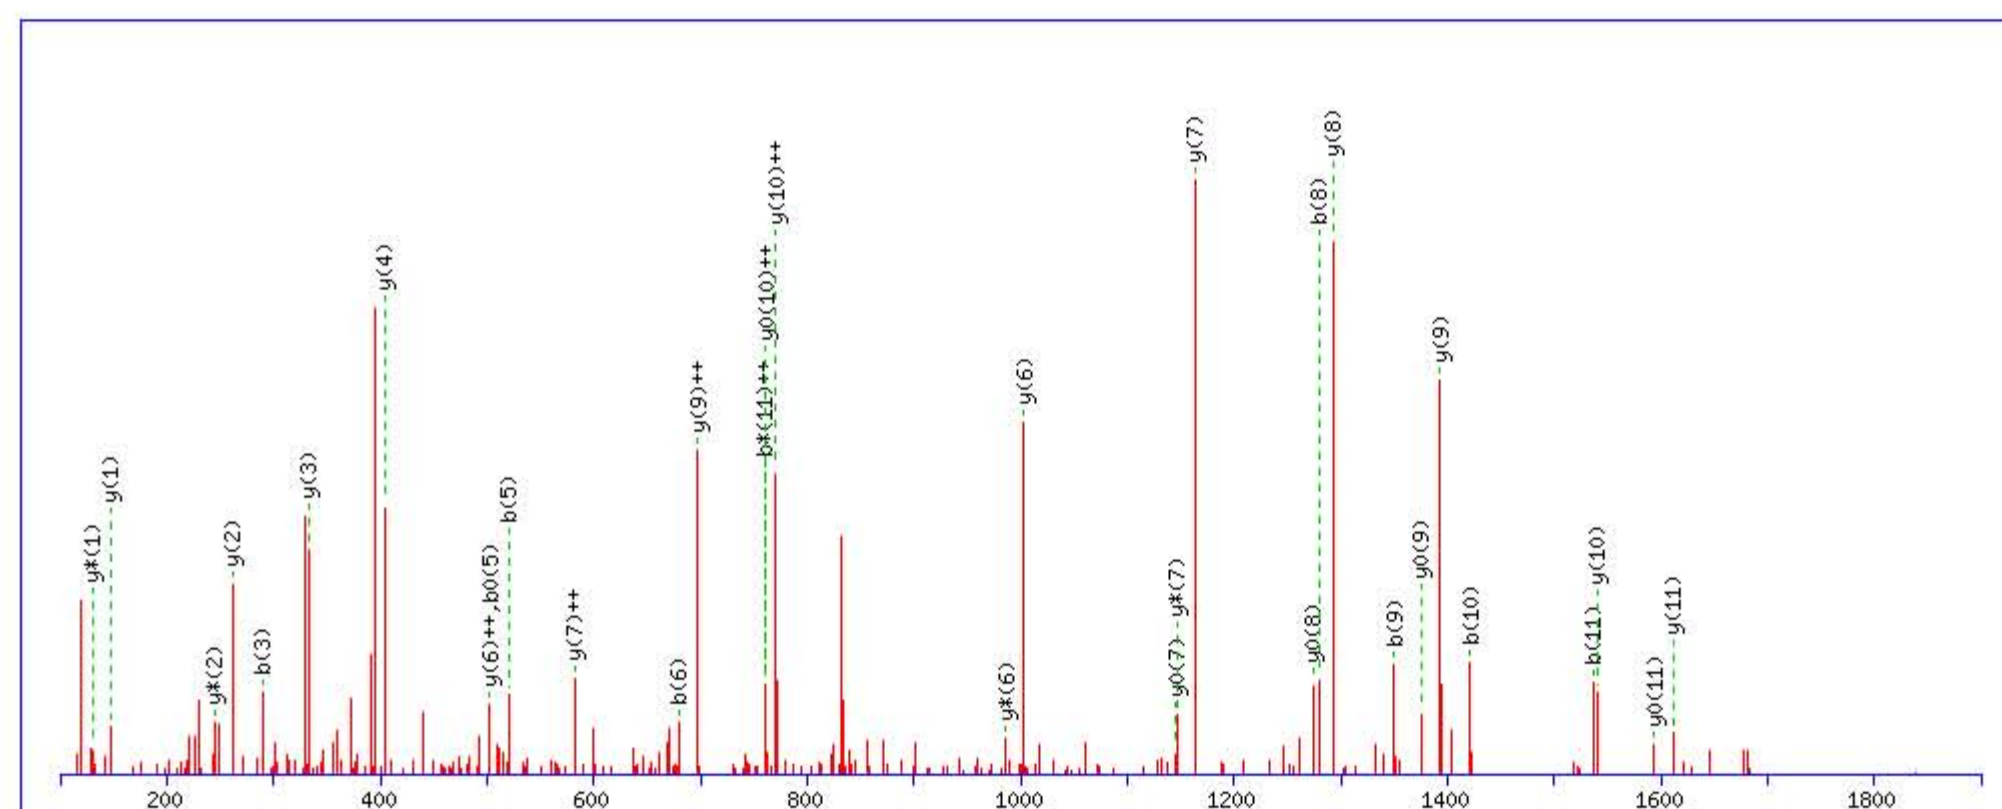

Monoisotopic mass of neutral peptide Mr(calc): 1681.726227

Fixed modifications: Carbamidomethyl (C) (apply to specified residues or termini only)

Variable modifications:

Q8 : Biotin:Thermo-21345 (Q)

Ions Score: 56 Expect: 7.7e-006

Matches : 32/110 fragment ions using 62 most intense peaks [\(help\)](#)

| #  | b           | b <sup>++</sup> | b <sup>*</sup> | b <sup>*++</sup> | b <sup>0</sup> | b <sup>0++</sup> | Seq. | y           | y <sup>++</sup> | y <sup>*</sup> | y <sup>*++</sup> | y <sup>0</sup> | y <sup>0++</sup> | #  |
|----|-------------|-----------------|----------------|------------------|----------------|------------------|------|-------------|-----------------|----------------|------------------|----------------|------------------|----|
| 1  | 72.044390   | 36.525833       |                |                  |                |                  | A    |             |                 |                |                  |                |                  | 12 |
| 2  | 143.081504  | 72.044390       |                |                  |                |                  | A    | 1611.696399 | 806.351838      | 1594.669850    | 797.838563       | 1593.685834    | 797.346555       | 11 |
| 3  | 290.149918  | 145.578597      |                |                  |                |                  | F    | 1540.659285 | 770.833281      | 1523.632736    | 762.320006       | 1522.648720    | 761.827998       | 10 |
| 4  | 391.197597  | 196.102437      |                |                  | 373.187032     | 187.097154       | T    | 1393.590871 | 697.299074      | 1376.564322    | 688.785799       | 1375.580306    | 688.293791       | 9  |
| 5  | 520.240190  | 260.623733      |                |                  | 502.229625     | 251.618451       | E    | 1292.543192 | 646.775234      | 1275.516643    | 638.261960       | 1274.532627    | 637.769952       | 8  |
| 6  | 680.270839  | 340.639058      |                |                  | 662.260274     | 331.633775       | C    | 1163.500599 | 582.253938      | 1146.474050    | 573.740663       | 1145.490034    | 573.248655       | 7  |
| 7  | 840.301488  | 420.654382      |                |                  | 822.290923     | 411.649100       | C    | 1003.469950 | 502.238613      | 986.443401     | 493.725339       | 985.459385     | 493.233331       | 6  |
| 8  | 1279.526814 | 640.267045      | 1262.500265    | 631.753771       | 1261.516249    | 631.261763       | Q    | 843.439301  | 422.223289      | 826.412752     | 413.710014       | 825.428736     | 413.218006       | 5  |
| 9  | 1350.563928 | 675.785602      | 1333.537379    | 667.272328       | 1332.553363    | 666.780320       | A    | 404.213975  | 202.610626      | 387.187426     | 194.097351       | 386.203410     | 193.605343       | 4  |
| 10 | 1421.601042 | 711.304159      | 1404.574493    | 702.790885       | 1403.590477    | 702.298877       | A    | 333.176861  | 167.092069      | 316.150312     | 158.578794       | 315.166296     | 158.086786       | 3  |
| 11 | 1536.627985 | 768.817631      | 1519.601436    | 760.304356       | 1518.617420    | 759.812348       | D    | 262.139747  | 131.573512      | 245.113198     | 123.060237       | 244.129182     | 122.568229       | 2  |
| 12 |             |                 |                |                  |                |                  | K    | 147.112804  | 74.060040       | 130.086255     | 65.546765        |                |                  | 1  |

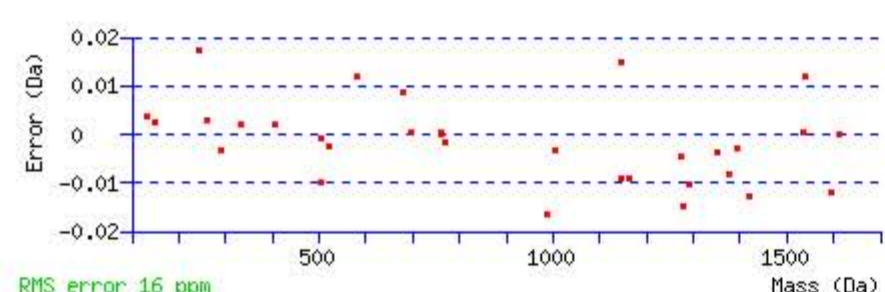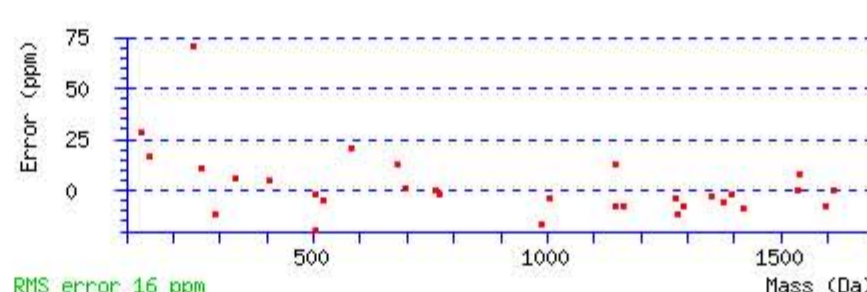

NCBI BLAST search of **AAFTECCQAADK**

(Parameters: blastp, nr protein database, expect=20000, no filter, PAM30)

Other BLAST [web gateways](#)

All matches to this query

| Score | Mr(calc):   | Delta     | Sequence                       |
|-------|-------------|-----------|--------------------------------|
| 56.1  | 1681.726227 | 0.007021  | <a href="#">AAFTECCQAADK</a>   |
| 1.6   | 1681.757706 | -0.024458 | <a href="#">ESRSTCLKTNDEDK</a> |
| 1.0   | 1681.737442 | -0.004194 | <a href="#">CENCGNAYKQK</a>    |

Mascot: <http://www.matrixscience.com/>

# MASCOT Search Results

## Peptide View

MS/MS Fragmentation of **YICENQDSISSK**

Found in **ALBU\_HUMAN**, Serum albumin OS=Homo sapiens GN=ALB PE=1 SV=2

Match to Query 43980: 1753.809808 from(877.912180,2+) rtinseconds(1641) index(21975)

Title: Locus:1.1.1.2714.17 File:"2013-07-02 CLN FXIII 180 min 1st F 2.wiff"

Data file C:\Program Files (x86)\Matrix Science\Mascot Daemon\mgf7 FXIII 180 min 1st\mascot\_daemon\_merge.mgf

Click mouse within plot area to zoom in by factor of two about that point

Or, Plot from  to  Da

Label all possible matches  Label matches used for scoring

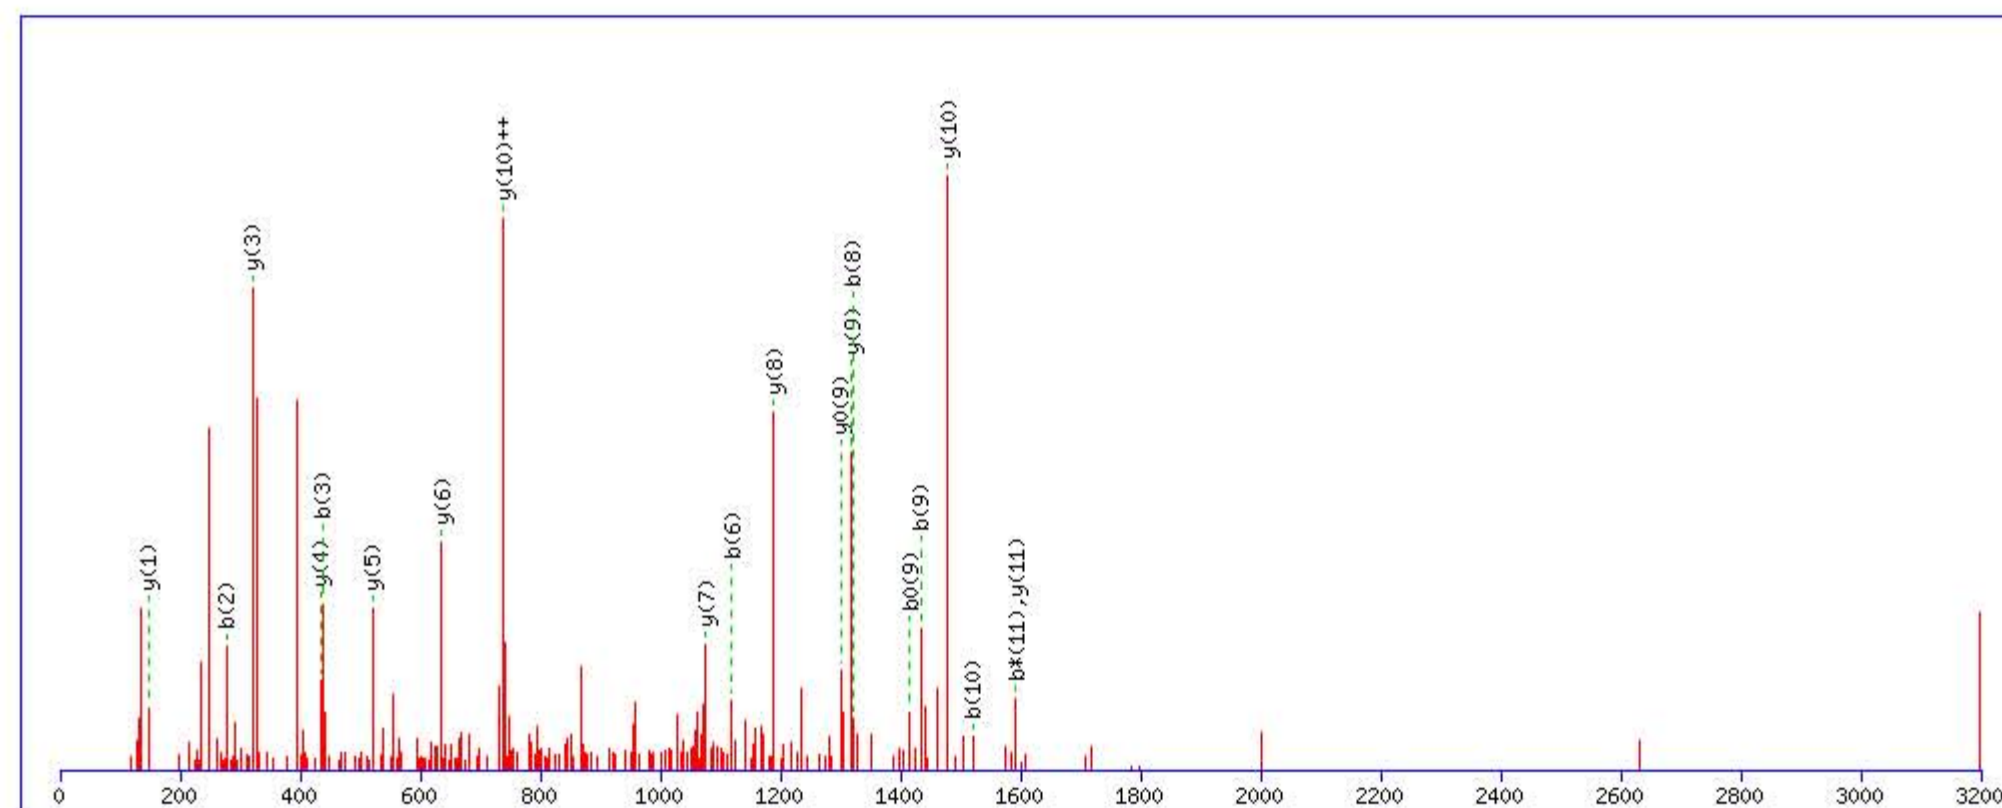

Monoisotopic mass of neutral peptide Mr(calc): 1753.801483

Fixed modifications: Carbamidomethyl (C) (apply to specified residues or termini only)

Variable modifications:

Q6 : Biotin:Thermo-21345 (Q)

Ions Score: 73 Expect: 6.5e-007

Matches : 20/116 fragment ions using 33 most intense peaks [\(help\)](#)

| #  | b                  | b <sup>++</sup> | b <sup>+</sup>     | b <sup>*++</sup> | b <sup>0</sup>     | b <sup>0++</sup> | Seq. | y                  | y <sup>++</sup>   | y <sup>+</sup> | y <sup>*++</sup> | y <sup>0</sup>     | y <sup>0++</sup> | #  |
|----|--------------------|-----------------|--------------------|------------------|--------------------|------------------|------|--------------------|-------------------|----------------|------------------|--------------------|------------------|----|
| 1  | 164.070605         | 82.538940       |                    |                  |                    |                  | Y    |                    |                   |                |                  |                    |                  | 12 |
| 2  | <b>277.154669</b>  | 139.080973      |                    |                  |                    |                  | I    | <b>1591.745454</b> | 796.376365        | 1574.718905    | 787.863091       | 1573.734889        | 787.371083       | 11 |
| 3  | <b>437.185318</b>  | 219.096297      |                    |                  |                    |                  | C    | <b>1478.661390</b> | <b>739.834333</b> | 1461.634841    | 731.321059       | 1460.650825        | 730.829051       | 10 |
| 4  | 566.227911         | 283.617594      |                    |                  | 548.217346         | 274.612311       | E    | <b>1318.630741</b> | 659.819009        | 1301.604192    | 651.305734       | <b>1300.620176</b> | 650.813726       | 9  |
| 5  | 680.270838         | 340.639057      | 663.244289         | 332.125783       | 662.260273         | 331.633775       | N    | <b>1189.588148</b> | 595.297712        | 1172.561599    | 586.784438       | 1171.577583        | 586.292430       | 8  |
| 6  | <b>1119.496164</b> | 560.251720      | 1102.469615        | 551.738446       | 1101.485599        | 551.246437       | Q    | <b>1075.545221</b> | 538.276249        | 1058.518672    | 529.762974       | 1057.534656        | 529.270966       | 7  |
| 7  | 1234.523107        | 617.765192      | 1217.496558        | 609.251917       | 1216.512542        | 608.759909       | D    | <b>636.319895</b>  | 318.663586        | 619.293346     | 310.150311       | 618.309330         | 309.658303       | 6  |
| 8  | <b>1321.555135</b> | 661.281206      | 1304.528586        | 652.767931       | 1303.544570        | 652.275923       | S    | <b>521.292952</b>  | 261.150114        | 504.266403     | 252.636840       | 503.282387         | 252.144832       | 5  |
| 9  | <b>1434.639199</b> | 717.823238      | 1417.612650        | 709.309963       | <b>1416.628634</b> | 708.817955       | I    | <b>434.260924</b>  | 217.634100        | 417.234375     | 209.120826       | 416.250359         | 208.628818       | 4  |
| 10 | <b>1521.671227</b> | 761.339252      | 1504.644678        | 752.825977       | 1503.660662        | 752.333969       | S    | <b>321.176860</b>  | 161.092068        | 304.150311     | 152.578794       | 303.166295         | 152.086786       | 3  |
| 11 | 1608.703255        | 804.855266      | <b>1591.676706</b> | 796.341991       | 1590.692690        | 795.849983       | S    | 234.144832         | 117.576054        | 217.118283     | 109.062780       | 216.134267         | 108.570772       | 2  |
| 12 |                    |                 |                    |                  |                    |                  | K    | <b>147.112804</b>  | 74.060040         | 130.086255     | 65.546765        |                    |                  | 1  |

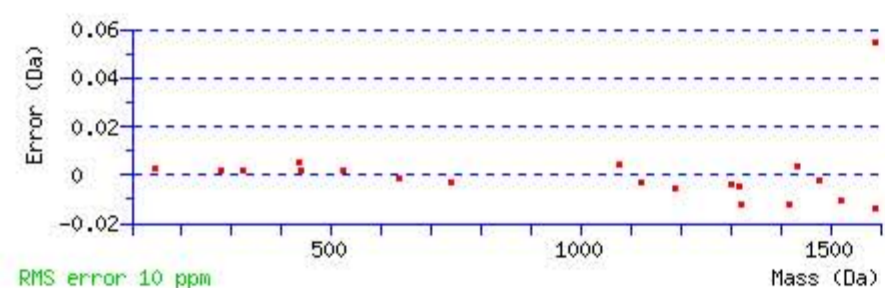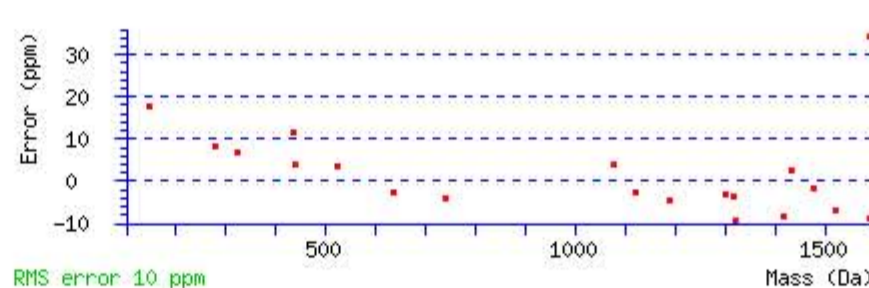

NCBI BLAST search of [YICENQDSISSK](#)

(Parameters: blastp, nr protein database, expect=20000, no filter, PAM30)

Other BLAST [web gateways](#)

All matches to this query

| Score | Mr(calc):   | Delta    | Sequence                     |
|-------|-------------|----------|------------------------------|
| 72.7  | 1753.801483 | 0.008325 | <a href="#">YICENQDSISSK</a> |

Mascot: <http://www.matrixscience.com/>

# MASCOT Search Results

## Peptide View

MS/MS Fragmentation of **KVPQVSTPTLVEVSR**

Found in **ALBU\_HUMAN**, Serum albumin OS=Homo sapiens GN=ALB PE=1 SV=2

Match to Query 48701: 1950.107352 from(651.043060,3+) rtinseconds(1938) index(24273)

Title: Locus:1.1.1.2817.12 File:"2013-07-02 CLN FXIII 180 min 1st F 2.wiff"

Data file C:\Program Files (x86)\Matrix Science\Mascot Daemon\mgf7 FXIII 180 min 1st\mascot\_daemon\_merge.mgf

Click mouse within plot area to zoom in by factor of two about that point

Or, Plot from  to  Da

Label all possible matches  Label matches used for scoring

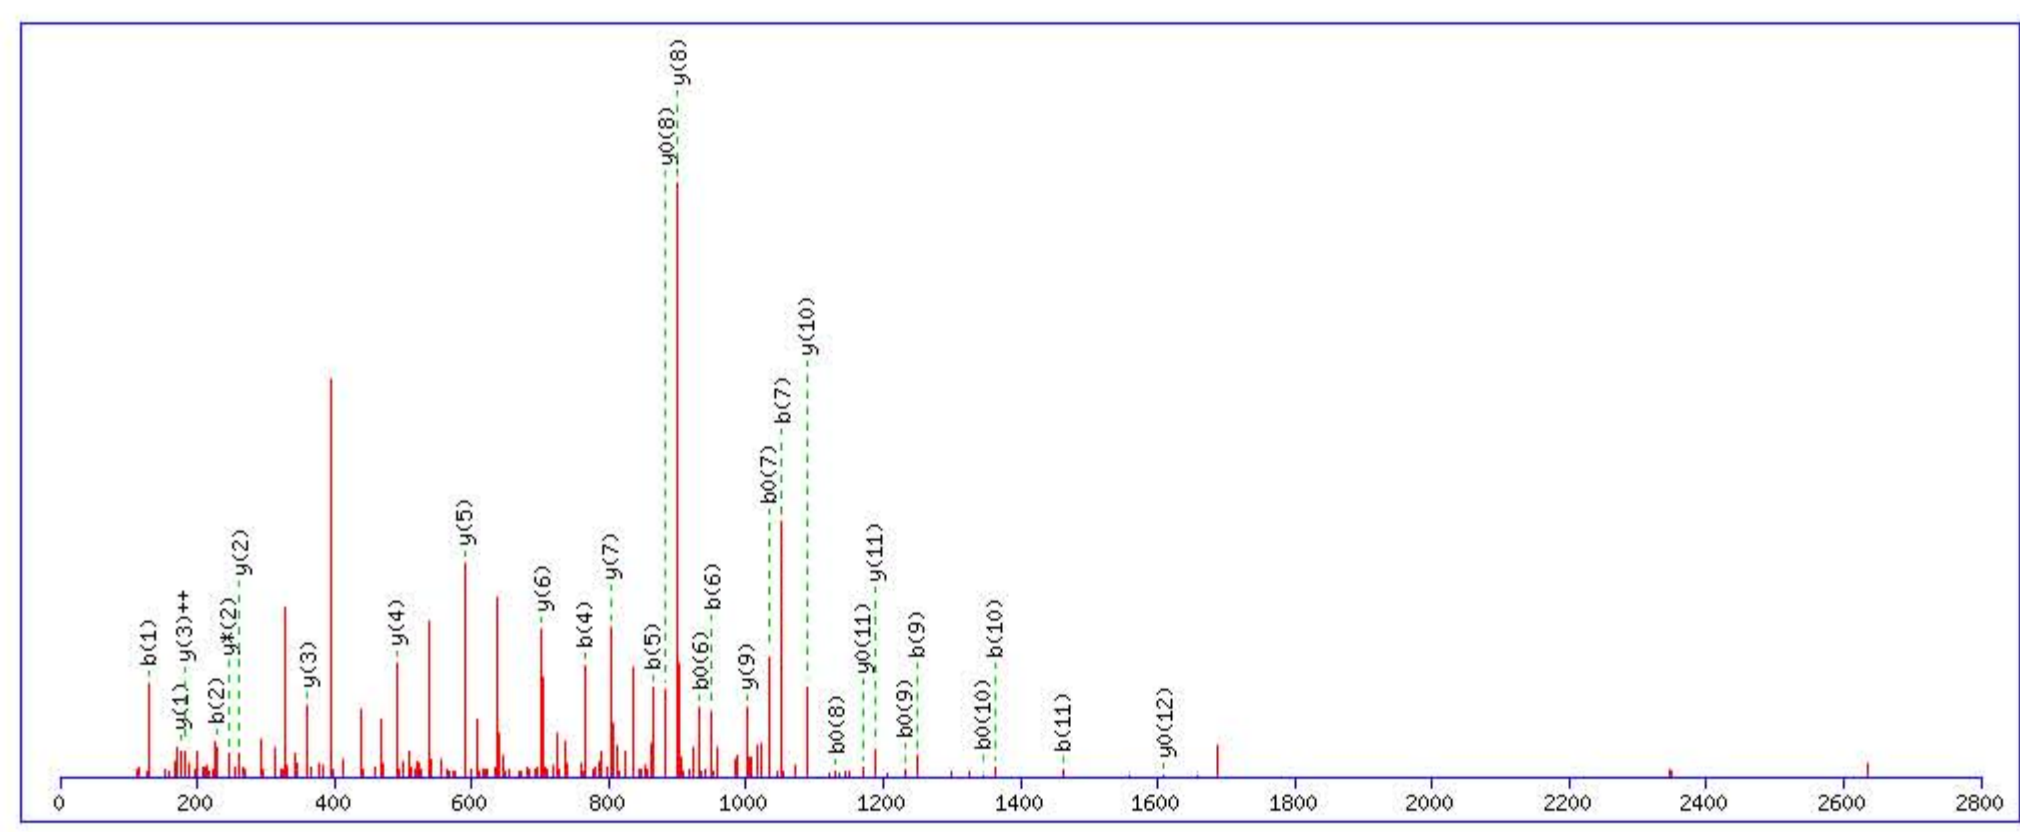

Monoisotopic mass of neutral peptide Mr(calc): 1950.097229

Fixed modifications: Carbamidomethyl (C) (apply to specified residues or termini only)

Variable modifications:

Q4 : Biotin:Thermo-21345 (Q)

Ions Score: 52 Expect: 6.1e-005

Matches : 30/156 fragment ions using 67 most intense peaks [\(help\)](#)

| #  | b                  | b <sup>++</sup> | b <sup>*</sup> | b <sup>*++</sup> | b <sup>0</sup>     | b <sup>0++</sup> | Seq.     | y                  | y <sup>++</sup> | y <sup>*</sup>    | y <sup>*++</sup> | y <sup>0</sup>     | y <sup>0++</sup> | #         |
|----|--------------------|-----------------|----------------|------------------|--------------------|------------------|----------|--------------------|-----------------|-------------------|------------------|--------------------|------------------|-----------|
| 1  | <b>129.102239</b>  | 65.054757       | 112.075690     | 56.541483        |                    |                  | <b>K</b> |                    |                 |                   |                  |                    |                  | <b>15</b> |
| 2  | <b>228.170653</b>  | 114.588965      | 211.144104     | 106.075690       |                    |                  | <b>V</b> | 1823.009533        | 912.008404      | 1805.982984       | 903.495130       | 1804.998968        | 903.003122       | <b>14</b> |
| 3  | 325.223417         | 163.115346      | 308.196868     | 154.602072       |                    |                  | <b>P</b> | 1723.941119        | 862.474197      | 1706.914570       | 853.960923       | 1705.930554        | 853.468915       | <b>13</b> |
| 4  | <b>764.448743</b>  | 382.728010      | 747.422194     | 374.214735       |                    |                  | <b>Q</b> | 1626.888355        | 813.947815      | 1609.861806       | 805.434541       | <b>1608.877790</b> | 804.942533       | <b>12</b> |
| 5  | <b>863.517157</b>  | 432.262217      | 846.490608     | 423.748942       |                    |                  | <b>V</b> | <b>1187.663029</b> | 594.335153      | 1170.636480       | 585.821878       | <b>1169.652464</b> | 585.329870       | <b>11</b> |
| 6  | <b>950.549185</b>  | 475.778231      | 933.522636     | 467.264956       | <b>932.538620</b>  | 466.772948       | <b>S</b> | <b>1088.594615</b> | 544.800946      | 1071.568066       | 536.287671       | 1070.584050        | 535.795663       | <b>10</b> |
| 7  | <b>1051.596864</b> | 526.302070      | 1034.570315    | 517.788795       | <b>1033.586299</b> | 517.296787       | <b>T</b> | <b>1001.562587</b> | 501.284932      | 984.536038        | 492.771657       | 983.552022         | 492.279649       | <b>9</b>  |
| 8  | 1148.649628        | 574.828452      | 1131.623079    | 566.315178       | <b>1130.639063</b> | 565.823169       | <b>P</b> | <b>900.514908</b>  | 450.761092      | 883.488359        | 442.247818       | <b>882.504343</b>  | 441.755810       | <b>8</b>  |
| 9  | <b>1249.697307</b> | 625.352291      | 1232.670758    | 616.839017       | <b>1231.686742</b> | 616.347009       | <b>T</b> | <b>803.462144</b>  | 402.234710      | 786.435595        | 393.721436       | 785.451579         | 393.229428       | <b>7</b>  |
| 10 | <b>1362.781371</b> | 681.894323      | 1345.754822    | 673.381049       | <b>1344.770806</b> | 672.889041       | <b>L</b> | <b>702.414465</b>  | 351.710871      | 685.387916        | 343.197596       | 684.403900         | 342.705588       | <b>6</b>  |
| 11 | <b>1461.849785</b> | 731.428530      | 1444.823236    | 722.915256       | 1443.839220        | 722.423248       | <b>V</b> | <b>589.330401</b>  | 295.168839      | 572.303852        | 286.655564       | 571.319836         | 286.163556       | <b>5</b>  |
| 12 | 1590.892378        | 795.949827      | 1573.865829    | 787.436552       | 1572.881813        | 786.944544       | <b>E</b> | <b>490.261987</b>  | 245.634631      | 473.235438        | 237.121357       | 472.251422         | 236.629349       | <b>4</b>  |
| 13 | 1689.960792        | 845.484034      | 1672.934243    | 836.970759       | 1671.950227        | 836.478751       | <b>V</b> | <b>361.219394</b>  | 181.113335      | 344.192845        | 172.600061       | 343.208829         | 172.108053       | <b>3</b>  |
| 14 | 1776.992820        | 889.000048      | 1759.966271    | 880.486774       | 1758.982255        | 879.994765       | <b>S</b> | <b>262.150980</b>  | 131.579128      | <b>245.124431</b> | 123.065854       | 244.140415         | 122.573846       | <b>2</b>  |
| 15 |                    |                 |                |                  |                    |                  | <b>R</b> | <b>175.118952</b>  | 88.063114       | 158.092403        | 79.549839        |                    |                  | <b>1</b>  |

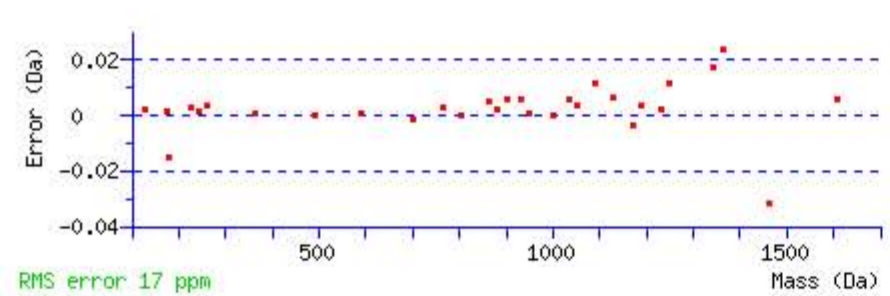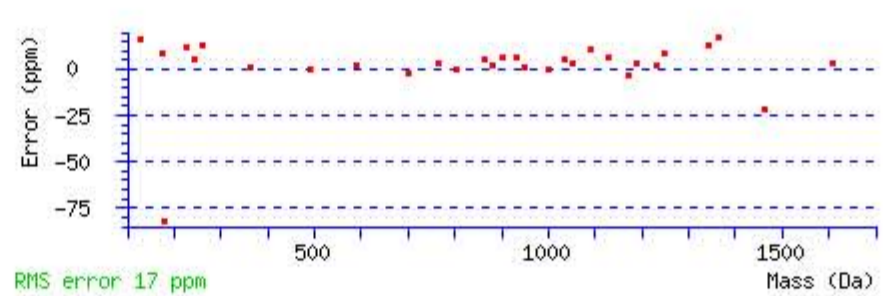

NCBI BLAST search of **KVPQVSTPTLVEVSR**

(Parameters: blastp, nr protein database, expect=20000, no filter, PAM30)

Other BLAST [web gateways](#)

All matches to this query

| Score | Mr(calc):   | Delta    | Sequence                        |
|-------|-------------|----------|---------------------------------|
| 52.1  | 1950.097229 | 0.010123 | <a href="#">KVPQVSTPTLVEVSR</a> |

Mascot: <http://www.matrixscience.com/>

# MASCOT SEARCH RESULTS

## Peptide View

MS/MS Fragmentation of **QNCELFEQLGEYK**

Found in **ALBU\_HUMAN**, Serum albumin OS=Homo sapiens GN=ALB PE=1 SV=2

Match to Query 49205: 1967.929872 from(656.983900,3+) rtinseconds(2373) index(27329)

Title: Locus:1.1.1.2968.13 File:"2013-07-02 CLN FXIII 180 min 1st F 2.wiff"

Data file C:\Program Files (x86)\Matrix Science\Mascot Daemon\mgf\7 FXIII 180 min 1st\mascot\_daemon\_merge.mgf

Click mouse within plot area to zoom in by factor of two about that point

Or, Plot from  to  Da

Label all possible matches  Label matches used for scoring

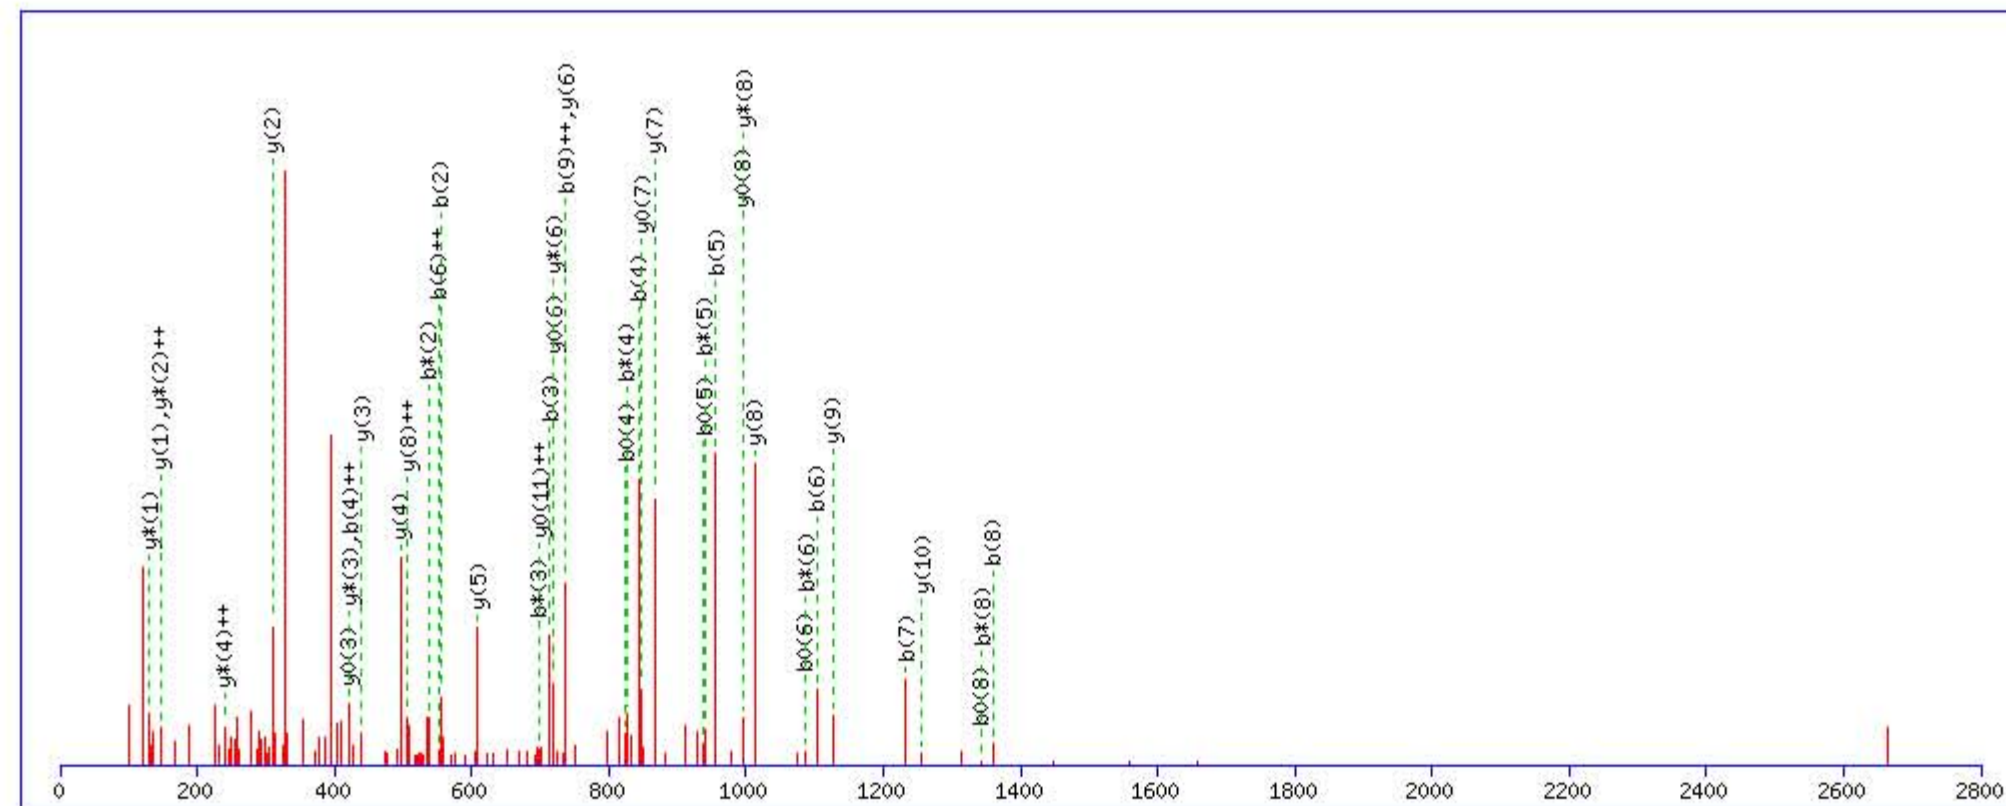

Monoisotopic mass of neutral peptide Mr(calc): 1967.912094

Fixed modifications: Carbamidomethyl (C) (apply to specified residues or termini only)

Variable modifications:

Q1 : Biotin:Thermo-21345 (Q)

Ions Score: 43 Expect: 0.00028

Matches : 42/134 fragment ions using 81 most intense peaks [\(help\)](#)

| #  | b                  | b <sup>++</sup>   | b <sup>+</sup>     | b <sup>++</sup> | b <sup>0</sup>     | b <sup>0++</sup> | Seq. | y                  | y <sup>++</sup>   | y <sup>+</sup>    | y <sup>++</sup>   | y <sup>0</sup>    | y <sup>0++</sup>  | #  |
|----|--------------------|-------------------|--------------------|-----------------|--------------------|------------------|------|--------------------|-------------------|-------------------|-------------------|-------------------|-------------------|----|
| 1  | 440.232602         | 220.619939        | 423.206053         | 212.106664      |                    |                  | Q    |                    |                   |                   |                   |                   |                   | 13 |
| 2  | <b>554.275529</b>  | 277.641403        | <b>537.248980</b>  | 269.128128      |                    |                  | N    | 1529.694072        | 765.350674        | 1512.667523       | 756.837400        | 1511.683507       | 756.345392        | 12 |
| 3  | <b>714.306178</b>  | 357.656727        | <b>697.279629</b>  | 349.143453      |                    |                  | C    | 1415.651145        | 708.329211        | 1398.624596       | 699.815936        | 1397.640580       | <b>699.323928</b> | 11 |
| 4  | <b>843.348771</b>  | <b>422.178024</b> | <b>826.322222</b>  | 413.664749      | <b>825.338206</b>  | 413.172741       | E    | <b>1255.620496</b> | 628.313886        | 1238.593947       | 619.800612        | 1237.609931       | 619.308604        | 10 |
| 5  | <b>956.432835</b>  | 478.720056        | <b>939.406286</b>  | 470.206781      | <b>938.422270</b>  | 469.714773       | L    | <b>1126.577903</b> | 563.792590        | 1109.551354       | 555.279315        | 1108.567338       | 554.787307        | 9  |
| 6  | <b>1103.501249</b> | <b>552.254263</b> | <b>1086.474700</b> | 543.740988      | <b>1085.490684</b> | 543.248980       | F    | <b>1013.493839</b> | <b>507.250558</b> | <b>996.467290</b> | 498.737283        | <b>995.483274</b> | 498.245275        | 8  |
| 7  | <b>1232.543842</b> | 616.775559        | 1215.517293        | 608.262285      | 1214.533277        | 607.770277       | E    | <b>866.425425</b>  | 433.716351        | 849.398876        | 425.203076        | <b>848.414860</b> | 424.711068        | 7  |
| 8  | <b>1360.602420</b> | 680.804848        | <b>1343.575871</b> | 672.291574      | <b>1342.591855</b> | 671.799566       | Q    | <b>737.382832</b>  | 369.195054        | <b>720.356283</b> | 360.681780        | <b>719.372267</b> | 360.189772        | 6  |
| 9  | 1473.686484        | <b>737.346880</b> | 1456.659935        | 728.833606      | 1455.675919        | 728.341598       | L    | <b>609.324254</b>  | 305.165765        | 592.297705        | 296.652490        | 591.313689        | 296.160482        | 5  |
| 10 | 1530.707948        | 765.857612        | 1513.681399        | 757.344338      | 1512.697383        | 756.852330       | G    | <b>496.240190</b>  | 248.623733        | 479.213641        | <b>240.110458</b> | 478.229625        | 239.618450        | 4  |
| 11 | 1659.750541        | 830.378909        | 1642.723992        | 821.865634      | 1641.739976        | 821.373626       | E    | <b>439.218726</b>  | 220.113001        | <b>422.192177</b> | 211.599726        | <b>421.208161</b> | 211.107718        | 3  |
| 12 | 1822.813870        | 911.910573        | 1805.787321        | 903.397299      | 1804.803305        | 902.905291       | Y    | <b>310.176133</b>  | 155.591705        | 293.149584        | <b>147.078430</b> |                   |                   | 2  |
| 13 |                    |                   |                    |                 |                    |                  | K    | <b>147.112804</b>  | 74.060040         | <b>130.086255</b> | 65.546765         |                   |                   | 1  |

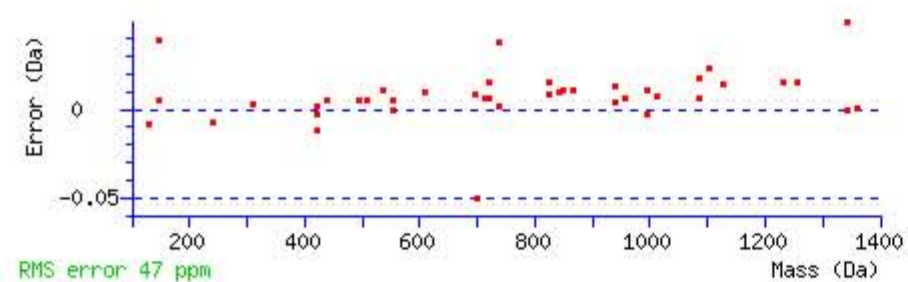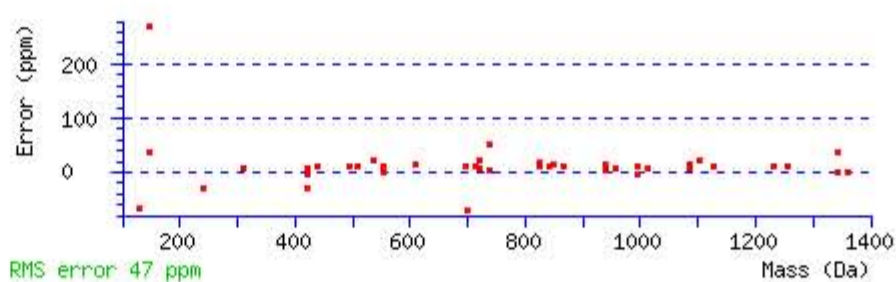

NCBI BLAST search of **QNCELFEQLGEYK**

(Parameters: blastp, nr protein database, expect=20000, no filter, PAM30)

Other BLAST [web gateways](#)

All matches to this query

| Score | Mr(calc):   | Delta     | Sequence                      |
|-------|-------------|-----------|-------------------------------|
| 42.9  | 1967.912094 | 0.017778  | <a href="#">QNCELFEQLGEYK</a> |
| 5.1   | 1967.930069 | -0.000197 | <a href="#">TQORMKEMESVMK</a> |
| 5.1   | 1967.930069 | -0.000197 | <a href="#">TQORMKEMESVMK</a> |

# MASCOT Search Results

## Peptide View

MS/MS Fragmentation of **VFDEFKPLVEEPQNLIK**  
 Found in **ALBU\_HUMAN**, Serum albumin OS=Homo sapiens GN=ALB PE=1 SV=2

Match to Query 59169: 2355.281652 from(786.101160,3+) rtinseconds(2598) index(28675)  
 Title: Locus:1.1.1.3046.14 File:"2013-07-02 CLN FXIII 180 min 1st F 2.wiff"  
 Data file C:\Program Files (x86)\Matrix Science\Mascot Daemon\mgf\7 FXIII 180 min 1st\mascot\_daemon\_merge.mgf

Click mouse within plot area to zoom in by factor of two about that point  
 Or, Plot from  to  Da   
 Label all possible matches  Label matches used for scoring

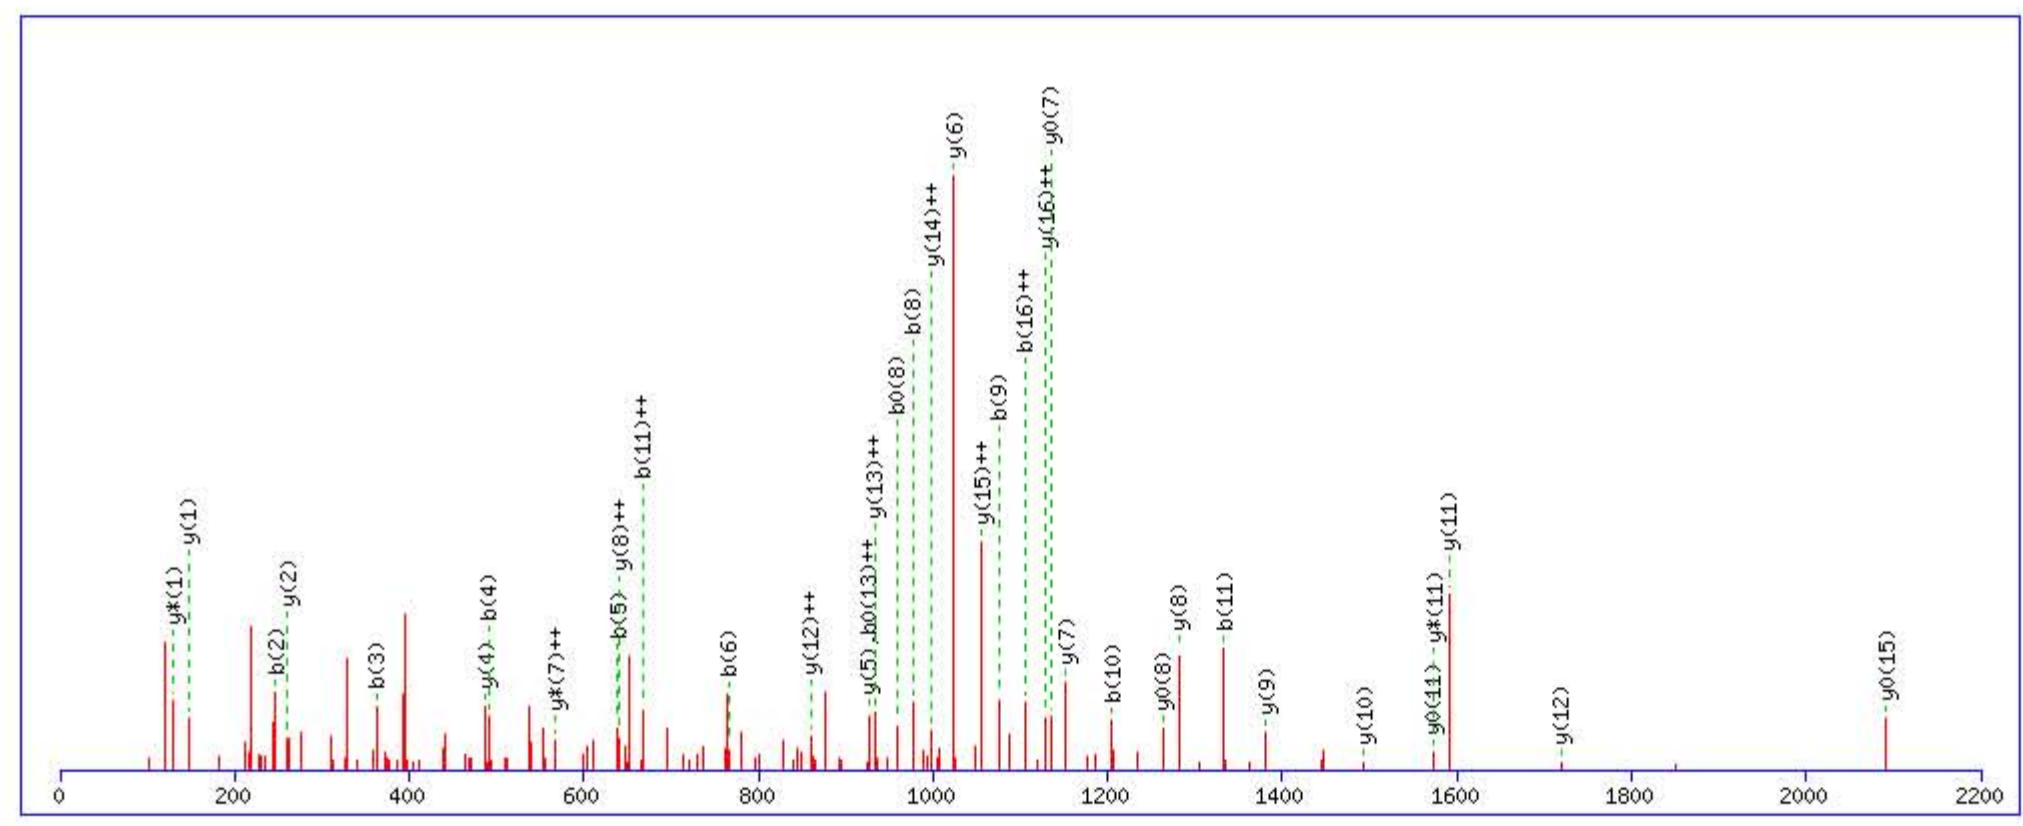

Monoisotopic mass of neutral peptide Mr(calc): 2355.254822  
 Fixed modifications: Carbamidomethyl (C) (apply to specified residues or termini only)  
 Variable modifications:  
 Q13 : Biotin:Thermo-21345 (Q)  
 Ions Score: 51 Expect: 4.3e-005  
 Matches : 37/166 fragment ions using 76 most intense peaks [\(help\)](#)

| #  | b                  | b <sup>++</sup>    | b <sup>*</sup> | b <sup>+++</sup> | b <sup>0</sup>    | b <sup>0++</sup>  | Seq. | y                  | y <sup>++</sup>    | y <sup>*</sup>     | y <sup>+++</sup>  | y <sup>0</sup>     | y <sup>0++</sup> | #  |
|----|--------------------|--------------------|----------------|------------------|-------------------|-------------------|------|--------------------|--------------------|--------------------|-------------------|--------------------|------------------|----|
| 1  | 100.075690         | 50.541483          |                |                  |                   |                   | V    |                    |                    |                    |                   |                    |                  | 17 |
| 2  | <b>247.144104</b>  | 124.075690         |                |                  |                   |                   | F    | 2257.193704        | <b>1129.100490</b> | 2240.167155        | 1120.587216       | 2239.183139        | 1120.095208      | 16 |
| 3  | <b>362.171047</b>  | 181.589161         |                |                  | 344.160482        | 172.583879        | D    | 2110.125290        | <b>1055.566283</b> | 2093.098741        | 1047.053008       | <b>2092.114725</b> | 1046.561000      | 15 |
| 4  | <b>491.213640</b>  | 246.110458         |                |                  | 473.203075        | 237.105176        | E    | 1995.098347        | <b>998.052812</b>  | 1978.071798        | 989.539537        | 1977.087782        | 989.047529       | 14 |
| 5  | <b>638.282054</b>  | 319.644665         |                |                  | 620.271489        | 310.639383        | F    | 1866.055754        | <b>933.531515</b>  | 1849.029205        | 925.018241        | 1848.045189        | 924.526233       | 13 |
| 6  | <b>766.377017</b>  | 383.692147         | 749.350468     | 375.178872       | 748.366452        | 374.686864        | K    | <b>1718.987340</b> | <b>859.997308</b>  | 1701.960791        | 851.484034        | 1700.976775        | 850.992026       | 12 |
| 7  | 863.429781         | 432.218529         | 846.403232     | 423.705254       | 845.419216        | 423.213246        | P    | <b>1590.892377</b> | 795.949827         | <b>1573.865828</b> | 787.436552        | <b>1572.881812</b> | 786.944544       | 11 |
| 8  | <b>976.513845</b>  | 488.760561         | 959.487296     | 480.247286       | <b>958.503280</b> | 479.755278        | L    | <b>1493.839613</b> | 747.423445         | 1476.813064        | 738.910170        | 1475.829048        | 738.418162       | 10 |
| 9  | <b>1075.582259</b> | 538.294768         | 1058.555710    | 529.781493       | 1057.571694       | 529.289485        | V    | <b>1380.755549</b> | 690.881413         | 1363.729000        | 682.368138        | 1362.744984        | 681.876130       | 9  |
| 10 | <b>1204.624852</b> | 602.816064         | 1187.598303    | 594.302790       | 1186.614287       | 593.810782        | E    | <b>1281.687135</b> | <b>641.347206</b>  | 1264.660586        | 632.833931        | <b>1263.676570</b> | 632.341923       | 8  |
| 11 | <b>1333.667445</b> | <b>667.337361</b>  | 1316.640896    | 658.824086       | 1315.656880       | 658.332078        | E    | <b>1152.644542</b> | 576.825909         | 1135.617993        | <b>568.312635</b> | <b>1134.633977</b> | 567.820627       | 7  |
| 12 | 1430.720209        | 715.863743         | 1413.693660    | 707.350468       | 1412.709644       | 706.858460        | P    | <b>1023.601949</b> | 512.304613         | 1006.575400        | 503.791338        |                    |                  | 6  |
| 13 | 1869.945535        | 935.476406         | 1852.918986    | 926.963131       | 1851.934970       | <b>926.471123</b> | Q    | <b>926.549185</b>  | 463.778231         | 909.522636         | 455.264956        |                    |                  | 5  |
| 14 | 1983.988462        | 992.497869         | 1966.961913    | 983.984595       | 1965.977897       | 983.492587        | N    | <b>487.323859</b>  | 244.165568         | 470.297310         | 235.652293        |                    |                  | 4  |
| 15 | 2097.072526        | 1049.039901        | 2080.045977    | 1040.526627      | 2079.061961       | 1040.034619       | L    | 373.280932         | 187.144104         | 356.254383         | 178.630830        |                    |                  | 3  |
| 16 | 2210.156590        | <b>1105.581933</b> | 2193.130041    | 1097.068659      | 2192.146025       | 1096.576651       | I    | <b>260.196868</b>  | 130.602072         | 243.170319         | 122.088798        |                    |                  | 2  |
| 17 |                    |                    |                |                  |                   |                   | K    | <b>147.112804</b>  | 74.060040          | <b>130.086255</b>  | 65.546765         |                    |                  | 1  |

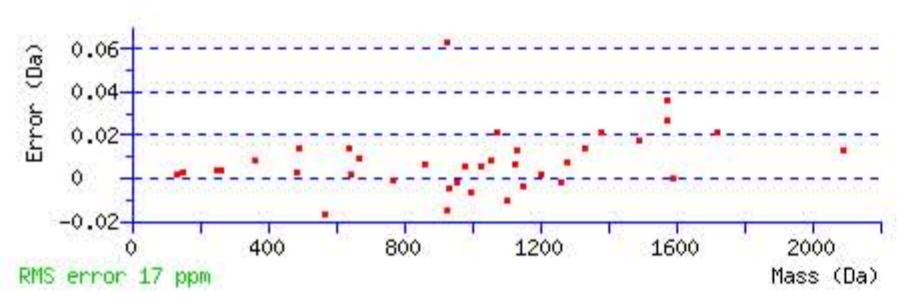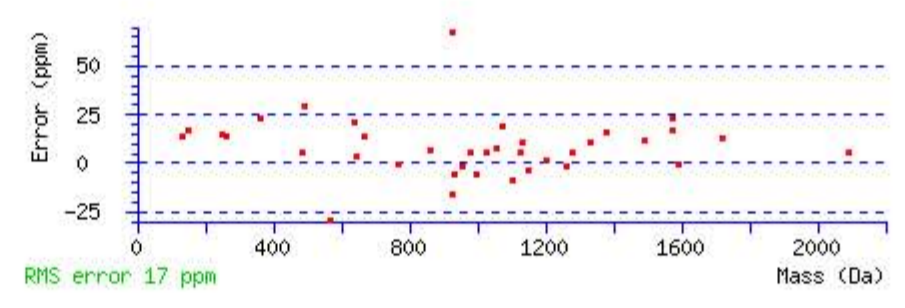

NCBI BLAST search of **VFDEFKPLVEEPQNLIK**  
 (Parameters: blastp, nr protein database, expect=20000, no filter, PAM30)  
 Other BLAST [web gateways](#)

### All matches to this query

| Score | Mr(calc):   | Delta    | Sequence                              |
|-------|-------------|----------|---------------------------------------|
| 51.4  | 2355.254822 | 0.026830 | <a href="#">VFDEFKPLVEEPQNLIK</a>     |
| 4.8   | 2355.254166 | 0.027486 | <a href="#">MDSTACLKSLLLTVSQYKAVK</a> |

**Peptide View**

MS/MS Fragmentation of **RMPCAEDYLSVVLNQLCVLHEK**  
 Found in **ALBU\_HUMAN**, Serum albumin OS=Homo sapiens GN=ALB PE=1 SV=2

Match to Query 70246: 2984.504896 from(747.133500,4+) rtinseconds(3047) index(31738)  
 Title: Locus:1.1.1.3200.8 File:"2013-07-02 CLN FXIII 180 min 1st F 2.wiff"  
 Data file C:\Program Files (x86)\Matrix Science\Mascot Daemon\mgf\7 FXIII 180 min 1st\mascot\_daemon\_merge.mgf

Click mouse within plot area to zoom in by factor of two about that point  
 Or, Plot from  to  Da   
 Label all possible matches  Label matches used for scoring

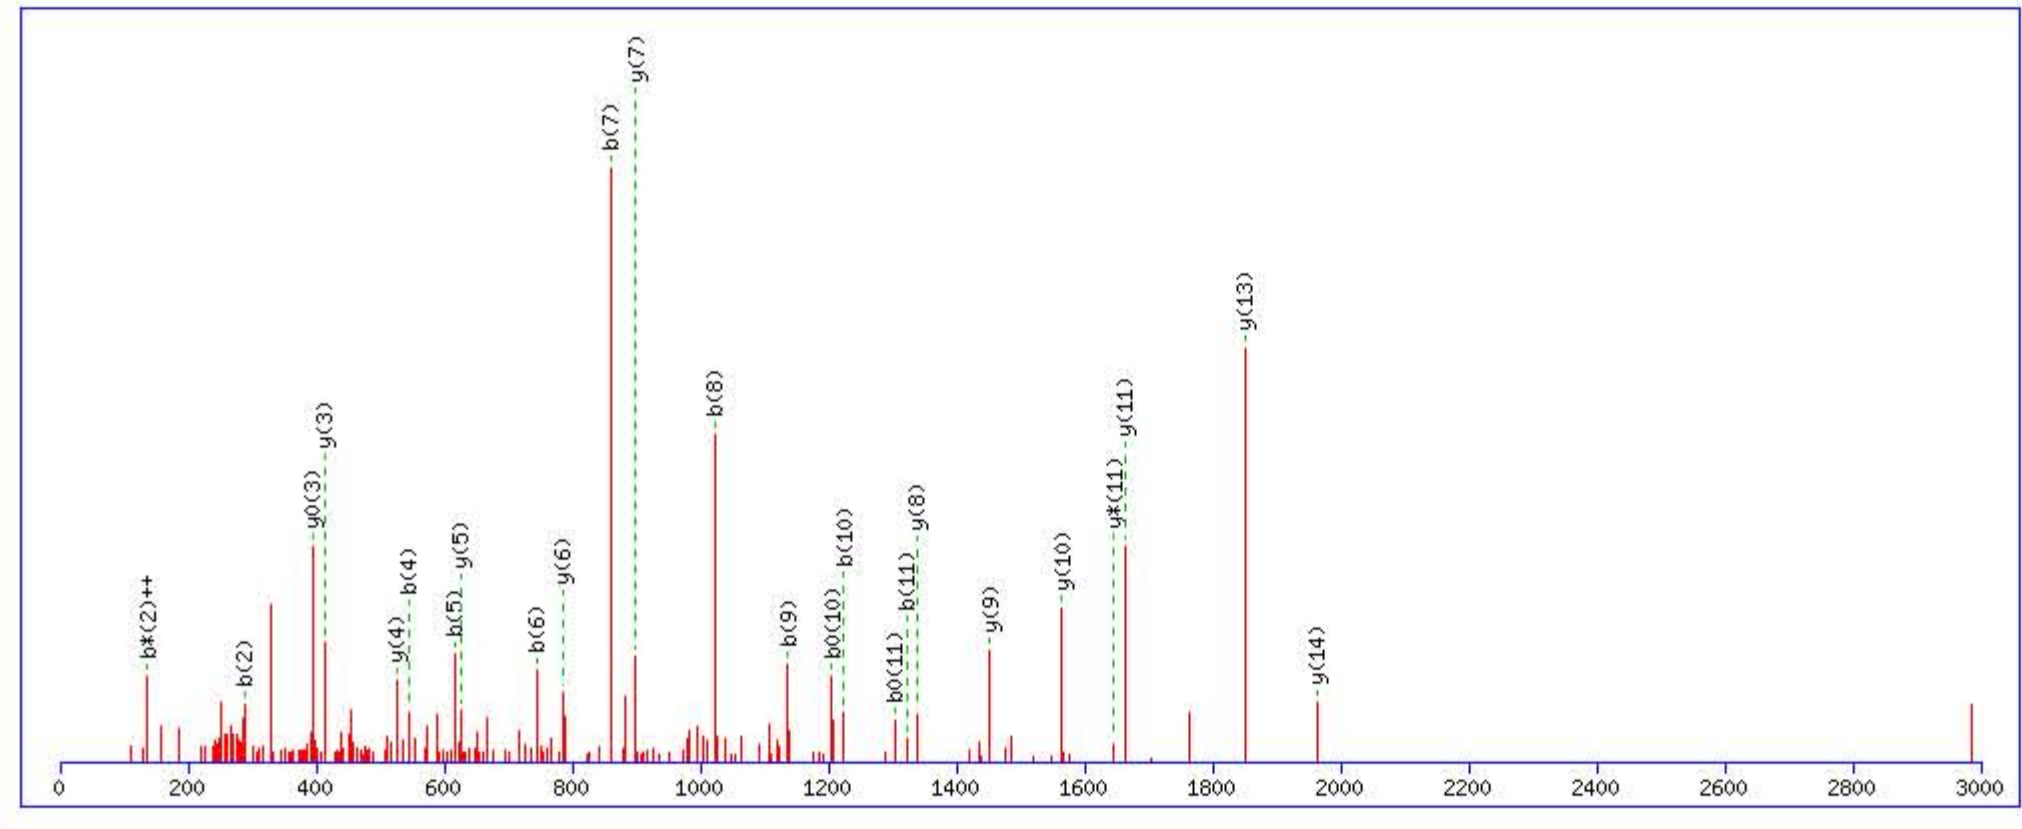

Monoisotopic mass of neutral peptide Mr(calc): 2984.474426  
 Fixed modifications: Carbamidomethyl (C) (apply to specified residues or termini only)  
 Variable modifications: Q15 : Biotin:Thermo-21345 (Q)  
 Ions Score: 92 Expect: 2e-008  
 Matches : 25/240 fragment ions using 36 most intense peaks [\(help\)](#)

| #  | b                  | b <sup>++</sup> | b <sup>*</sup> | b <sup>*++</sup>  | b <sup>0</sup>     | b <sup>0++</sup> | Seq. | y                  | y <sup>++</sup> | y <sup>*</sup>     | y <sup>*++</sup> | y <sup>0</sup>    | y <sup>0++</sup> | #  |
|----|--------------------|-----------------|----------------|-------------------|--------------------|------------------|------|--------------------|-----------------|--------------------|------------------|-------------------|------------------|----|
| 1  | 157.108387         | 79.057831       | 140.081838     | 70.544557         |                    |                  | R    |                    |                 |                    |                  |                   |                  | 22 |
| 2  | <b>288.148872</b>  | 144.578074      | 271.122323     | <b>136.064799</b> |                    |                  | M    | 2829.380614        | 1415.193945     | 2812.354065        | 1406.680670      | 2811.370049       | 1406.188662      | 21 |
| 3  | 385.201636         | 193.104456      | 368.175087     | 184.591181        |                    |                  | P    | 2698.340129        | 1349.673702     | 2681.313580        | 1341.160428      | 2680.329564       | 1340.668420      | 20 |
| 4  | <b>545.232285</b>  | 273.119781      | 528.205736     | 264.606506        |                    |                  | C    | 2601.287365        | 1301.147320     | 2584.260816        | 1292.634046      | 2583.276800       | 1292.142038      | 19 |
| 5  | <b>616.269399</b>  | 308.638338      | 599.242850     | 300.125063        |                    |                  | A    | 2441.256716        | 1221.131996     | 2424.230167        | 1212.618721      | 2423.246151       | 1212.126713      | 18 |
| 6  | <b>745.311992</b>  | 373.159634      | 728.285443     | 364.646360        | 727.301427         | 364.154352       | E    | 2370.219602        | 1185.613439     | 2353.193053        | 1177.100164      | 2352.209037       | 1176.608156      | 17 |
| 7  | <b>860.338935</b>  | 430.673106      | 843.312386     | 422.159831        | 842.328370         | 421.667823       | D    | 2241.177009        | 1121.092142     | 2224.150460        | 1112.578868      | 2223.166444       | 1112.086860      | 16 |
| 8  | <b>1023.402264</b> | 512.204770      | 1006.375715    | 503.691496        | 1005.391699        | 503.199488       | Y    | 2126.150066        | 1063.578671     | 2109.123517        | 1055.065396      | 2108.139501       | 1054.573388      | 15 |
| 9  | <b>1136.486328</b> | 568.746802      | 1119.459779    | 560.233528        | 1118.475763        | 559.741519       | L    | <b>1963.086737</b> | 982.047007      | 1946.060188        | 973.533732       | 1945.076172       | 973.041724       | 14 |
| 10 | <b>1223.518356</b> | 612.262816      | 1206.491807    | 603.749542        | <b>1205.507791</b> | 603.257534       | S    | <b>1850.002673</b> | 925.504975      | 1832.976124        | 916.991700       | 1831.992108       | 916.499692       | 13 |
| 11 | <b>1322.586770</b> | 661.797023      | 1305.560221    | 653.283749        | <b>1304.576205</b> | 652.791741       | V    | 1762.970645        | 881.988961      | 1745.944096        | 873.475686       | 1744.960080       | 872.983678       | 12 |
| 12 | 1421.655184        | 711.331230      | 1404.628635    | 702.817956        | 1403.644619        | 702.325948       | V    | <b>1663.902231</b> | 832.454754      | <b>1646.875682</b> | 823.941479       | 1645.891666       | 823.449471       | 11 |
| 13 | 1534.739248        | 767.873262      | 1517.712699    | 759.359988        | 1516.728683        | 758.867980       | L    | <b>1564.833817</b> | 782.920547      | 1547.807268        | 774.407272       | 1546.823252       | 773.915264       | 10 |
| 14 | 1648.782175        | 824.894726      | 1631.755626    | 816.381451        | 1630.771610        | 815.889443       | N    | <b>1451.749753</b> | 726.378515      | 1434.723204        | 717.865240       | 1433.739188       | 717.373232       | 9  |
| 15 | 2088.007501        | 1044.507388     | 2070.980952    | 1035.994114       | 2069.996936        | 1035.502106      | Q    | <b>1337.706826</b> | 669.357051      | 1320.680277        | 660.843777       | 1319.696261       | 660.351769       | 8  |
| 16 | 2201.091565        | 1101.049421     | 2184.065016    | 1092.536146       | 2183.081000        | 1092.044138      | L    | <b>898.481500</b>  | 449.744388      | 881.454951         | 441.231114       | 880.470935        | 440.739106       | 7  |
| 17 | 2361.122214        | 1181.064745     | 2344.095665    | 1172.551470       | 2343.111649        | 1172.059462      | C    | <b>785.397436</b>  | 393.202356      | 768.370887         | 384.689081       | 767.386871        | 384.197073       | 6  |
| 18 | 2460.190628        | 1230.598952     | 2443.164079    | 1222.085677       | 2442.180063        | 1221.593669      | V    | <b>625.366787</b>  | 313.187032      | 608.340238         | 304.673757       | 607.356222        | 304.181749       | 5  |
| 19 | 2573.274692        | 1287.140984     | 2556.248143    | 1278.627709       | 2555.264127        | 1278.135701      | L    | <b>526.298373</b>  | 263.652825      | 509.271824         | 255.139550       | 508.287808        | 254.647542       | 4  |
| 20 | 2710.333604        | 1355.670440     | 2693.307055    | 1347.157165       | 2692.323039        | 1346.665157      | H    | <b>413.214309</b>  | 207.110793      | 396.187760         | 198.597518       | <b>395.203744</b> | 198.105510       | 3  |
| 21 | 2839.376197        | 1420.191736     | 2822.349648    | 1411.678462       | 2821.365632        | 1411.186454      | E    | 276.155397         | 138.581337      | 259.128848         | 130.068062       | 258.144832        | 129.576054       | 2  |
| 22 |                    |                 |                |                   |                    |                  | K    | 147.112804         | 74.060040       | 130.086255         | 65.546765        |                   |                  | 1  |

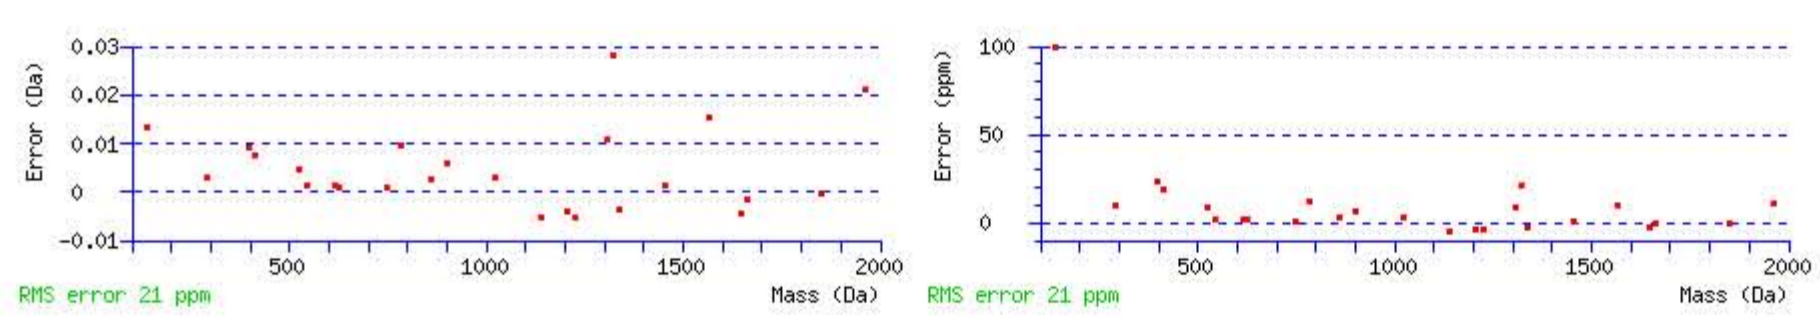

NCBI BLAST search of [RMPCAEDYLSVVLNQLCVLHEK](#)  
 (Parameters: blastp, nr protein database, expect=20000, no filter, PAM30)  
 Other BLAST [web gateways](#)

**All matches to this query**

| Score | Mr(calc):   | Delta     | Sequence                                   |
|-------|-------------|-----------|--------------------------------------------|
| 91.7  | 2984.474426 | 0.030470  | <a href="#">RMPCAEDYLSVVLNQLCVLHEK</a>     |
| 10.3  | 2984.466171 | 0.038725  | <a href="#">QQMNGLTSLDASTVYGSSPALERQLR</a> |
| 0.7   | 2984.506546 | -0.001650 | <a href="#">LEDHEYKPLDPKDRLPPMPPSER</a>    |

# MASCOT Search Results

## Peptide View

MS/MS Fragmentation of **NHQSSYQTR**

Found in **PON1\_HUMAN**, Serum paraoxonase/arylesterase 1 OS=Homo sapiens GN=PON1 PE=1 SV=3

Match to Query 32658: 1430.680812 from(477.900880,3+) rtinseconds(1146) index(36386)

Title: Locus:1.1.1.2848.7 File:"2013-07-02 CLN FXIII 180 min 1st F 3.wiff"

Data file C:\Program Files (x86)\Matrix Science\Mascot Daemon\mgf\7 FXIII 180 min 1st\mascot\_daemon\_merge.mgf

Click mouse within plot area to zoom in by factor of two about that point

Or, Plot from  to  Da

Label all possible matches  Label matches used for scoring

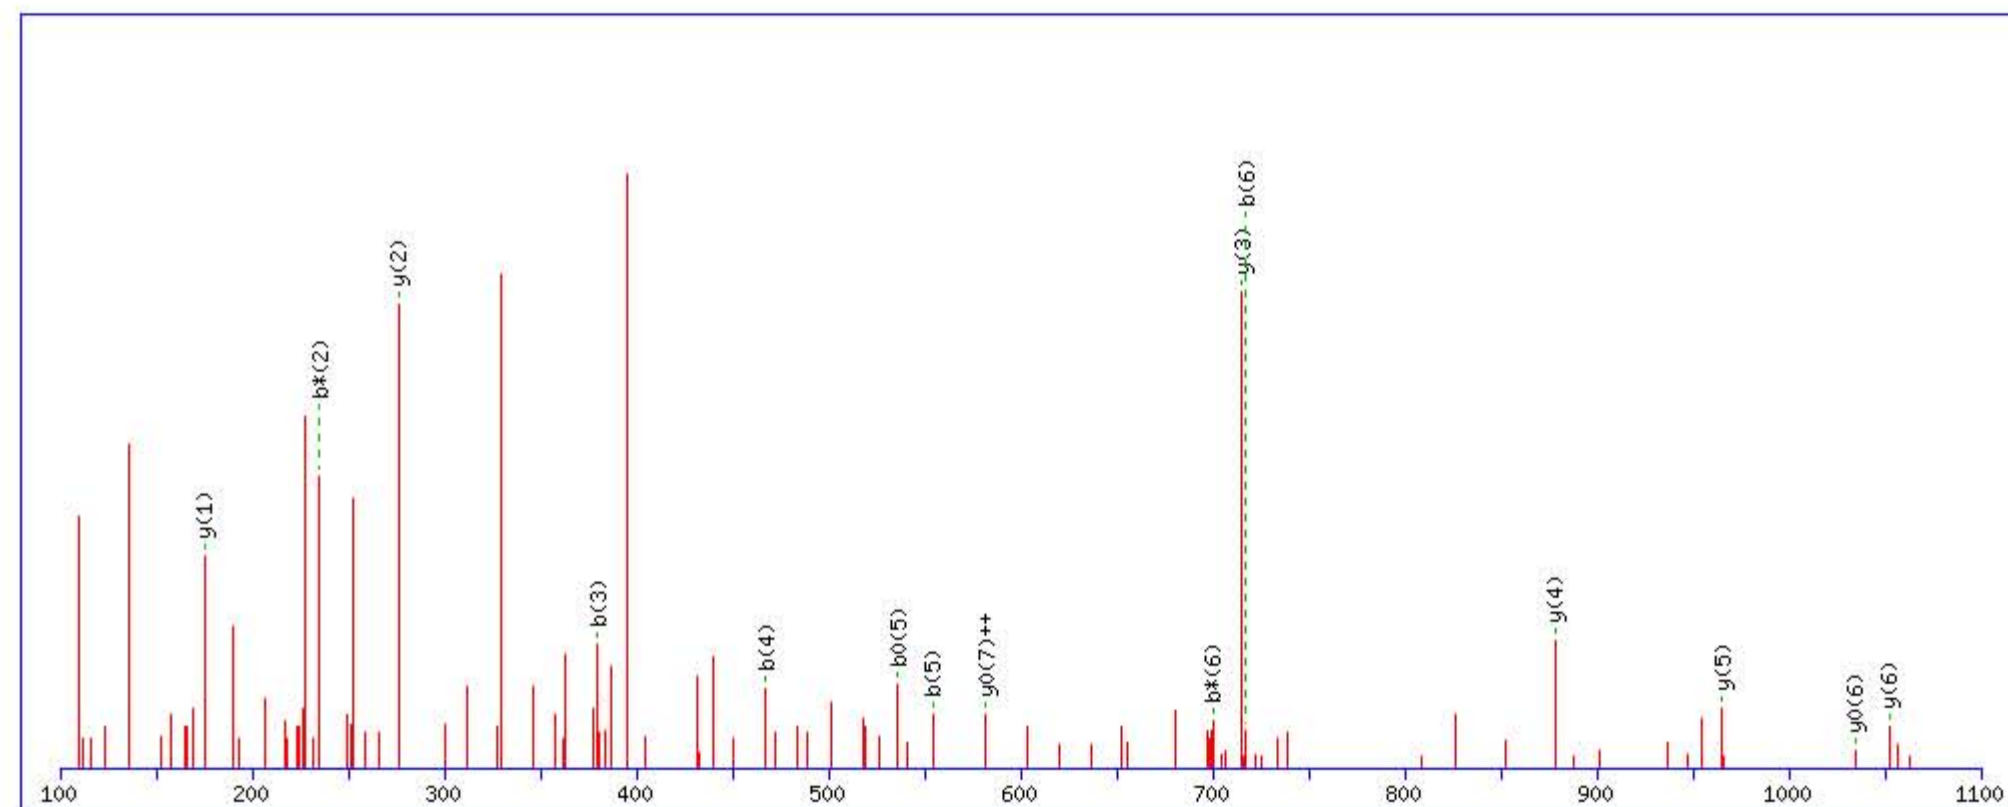

Monoisotopic mass of neutral peptide Mr(calc): 1430.672470

Fixed modifications: Carbamidomethyl (C) (apply to specified residues or termini only)

Variable modifications:

Q7 : Biotin:Thermo-21345 (Q)

Ions Score: 27 Expect: 0.013

Matches : 15/88 fragment ions using 30 most intense peaks ([help](#))

| # | b           | b <sup>++</sup> | b <sup>*</sup> | b <sup>+++</sup> | b <sup>0</sup> | b <sup>0++</sup> | Seq. | y           | y <sup>++</sup> | y <sup>*</sup> | y <sup>+++</sup> | y <sup>0</sup> | y <sup>0++</sup> | # |
|---|-------------|-----------------|----------------|------------------|----------------|------------------|------|-------------|-----------------|----------------|------------------|----------------|------------------|---|
| 1 | 115.050203  | 58.028740       | 98.023654      | 49.515465        |                |                  | N    |             |                 |                |                  |                |                  | 9 |
| 2 | 252.109115  | 126.558195      | 235.082566     | 118.044921       |                |                  | H    | 1317.636832 | 659.322054      | 1300.610283    | 650.808780       | 1299.626267    | 650.316772       | 8 |
| 3 | 380.167693  | 190.587484      | 363.141144     | 182.074210       |                |                  | Q    | 1180.577920 | 590.792598      | 1163.551371    | 582.279324       | 1162.567355    | 581.787316       | 7 |
| 4 | 467.199721  | 234.103499      | 450.173172     | 225.590224       | 449.189156     | 225.098216       | S    | 1052.519342 | 526.763309      | 1035.492793    | 518.250035       | 1034.508777    | 517.758027       | 6 |
| 5 | 554.231749  | 277.619513      | 537.205200     | 269.106238       | 536.221184     | 268.614230       | S    | 965.487314  | 483.247295      | 948.460765     | 474.734021       | 947.476749     | 474.242013       | 5 |
| 6 | 717.295078  | 359.151177      | 700.268529     | 350.637903       | 699.284513     | 350.145895       | Y    | 878.455286  | 439.731281      | 861.428737     | 431.218007       | 860.444721     | 430.725999       | 4 |
| 7 | 1156.520404 | 578.763840      | 1139.493855    | 570.250566       | 1138.509839    | 569.758558       | Q    | 715.391957  | 358.199617      | 698.365408     | 349.686342       | 697.381392     | 349.194334       | 3 |
| 8 | 1257.568083 | 629.287680      | 1240.541534    | 620.774405       | 1239.557518    | 620.282397       | T    | 276.166631  | 138.586953      | 259.140082     | 130.073679       | 258.156066     | 129.581671       | 2 |
| 9 |             |                 |                |                  |                |                  | R    | 175.118952  | 88.063114       | 158.092403     | 79.549839        |                |                  | 1 |

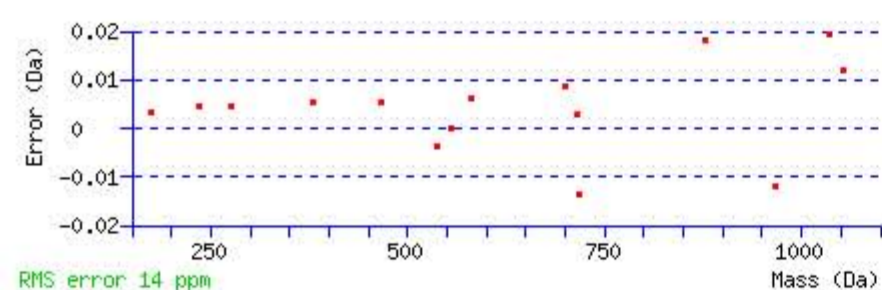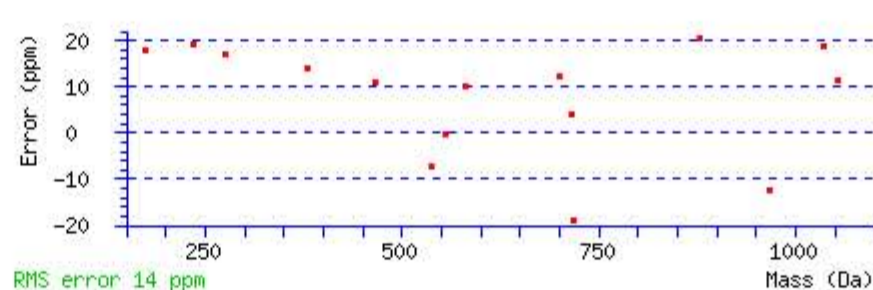

NCBI BLAST search of **NHQSSYQTR**

(Parameters: blastp, nr protein database, expect=20000, no filter, PAM30)

Other BLAST [web gateways](#)

All matches to this query

| Score | Mr(calc):   | Delta     | Sequence                   |
|-------|-------------|-----------|----------------------------|
| 27.3  | 1430.672470 | 0.008342  | <a href="#">NHQSSYQTR</a>  |
| 7.1   | 1430.689743 | -0.008931 | <a href="#">QKPSGSEMEK</a> |

Mascot: <http://www.matrixscience.com/>

# MASCOT SCIENCE Mascot Search Results

## Peptide View

MS/MS Fragmentation of **NHQSSYQTR**

Found in **PON1\_HUMAN**, Serum paraoxonase/arylesterase 1 OS=Homo sapiens GN=PON1 PE=1 SV=3

Match to Query 43506: 1741.854612 from(581.625480,3+) rtinseconds(1536) index(39041)

Title: Locus:1.1.1.2984.16 File:"2013-07-02 CLN FXIII 180 min 1st F 3.wiff"

Data file C:\Program Files (x86)\Matrix Science\Mascot Daemon\mgf\7 FXIII 180 min 1st\mascot\_daemon\_merge.mgf

Click mouse within plot area to zoom in by factor of two about that point

Or, Plot from  to  Da

Label all possible matches  Label matches used for scoring

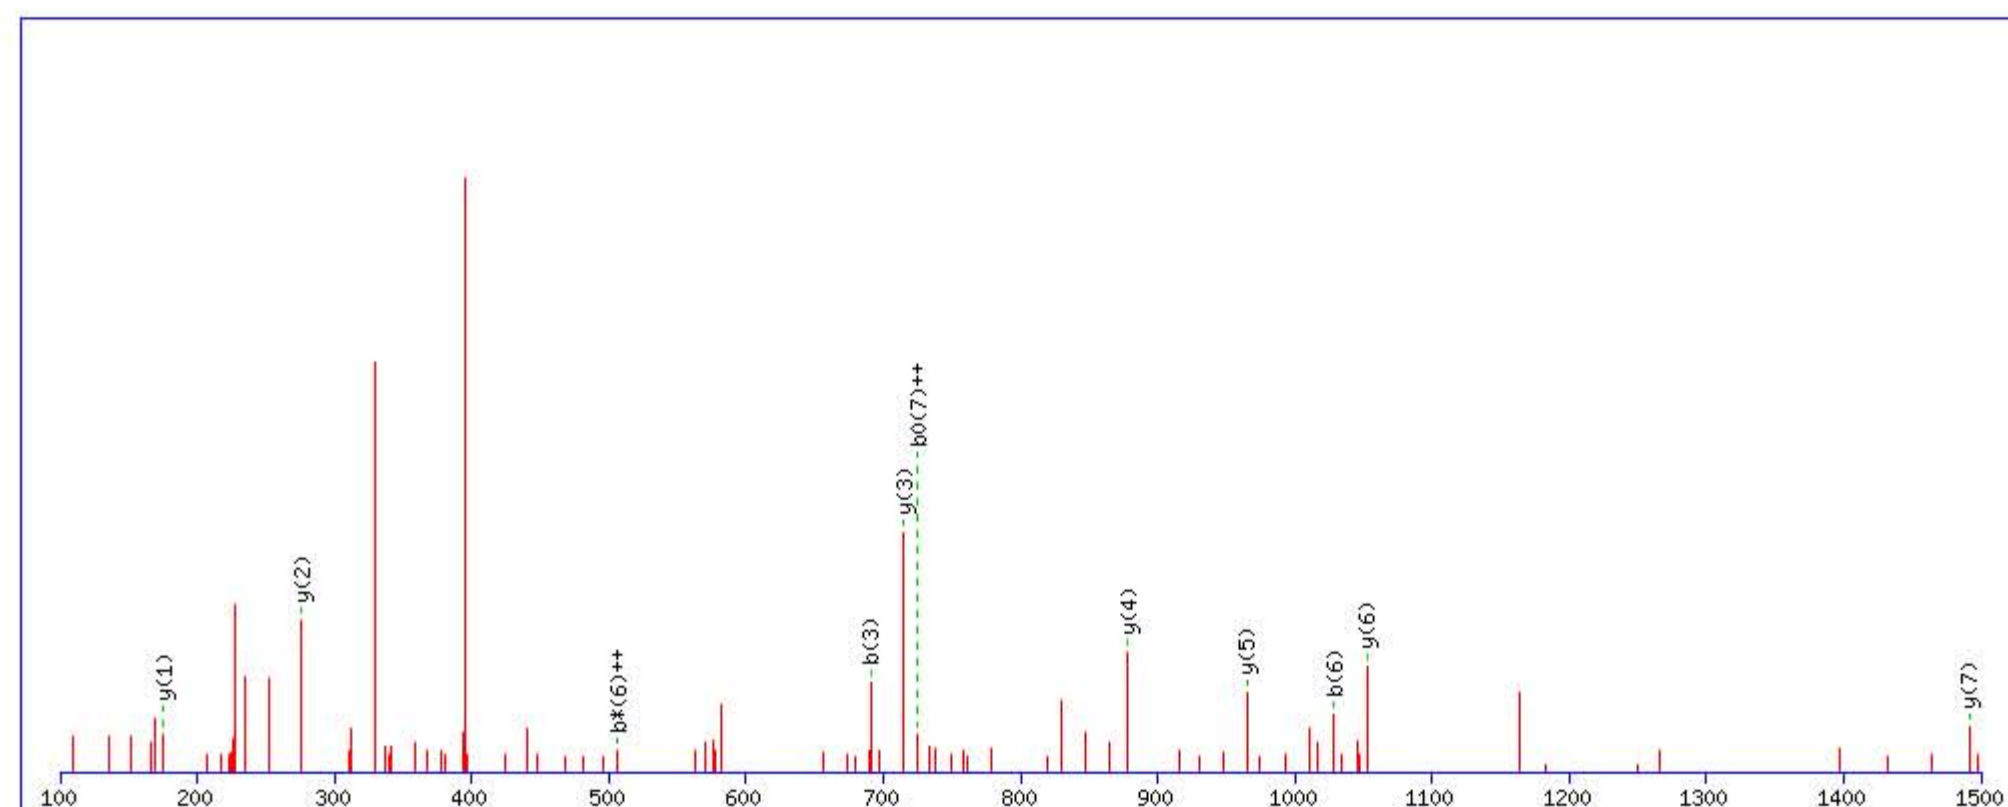

Monoisotopic mass of neutral peptide Mr(calc): 1741.839218

Fixed modifications: Carbamidomethyl (C) (apply to specified residues or termini only)

Variable modifications:

Q3 : Biotin:Thermo-21345 (Q)

Q7 : Biotin:Thermo-21345 (Q)

Ions Score: 28 Expect: 0.0087

Matches : 11/88 fragment ions using 27 most intense peaks [\(help\)](#)

| # | b                  | b <sup>++</sup> | b <sup>*</sup> | b <sup>*++</sup>  | b <sup>0</sup> | b <sup>0++</sup>  | Seq. | y                  | y <sup>++</sup> | y <sup>*</sup> | y <sup>*++</sup> | y <sup>0</sup> | y <sup>0++</sup> | # |
|---|--------------------|-----------------|----------------|-------------------|----------------|-------------------|------|--------------------|-----------------|----------------|------------------|----------------|------------------|---|
| 1 | 115.050203         | 58.028740       | 98.023654      | 49.515465         |                |                   | N    |                    |                 |                |                  |                |                  | 9 |
| 2 | 252.109115         | 126.558195      | 235.082566     | 118.044921        |                |                   | H    | 1628.803580        | 814.905428      | 1611.777031    | 806.392154       | 1610.793015    | 805.900146       | 8 |
| 3 | <b>691.334441</b>  | 346.170859      | 674.307892     | 337.657584        |                |                   | Q    | <b>1491.744668</b> | 746.375972      | 1474.718119    | 737.862698       | 1473.734103    | 737.370690       | 7 |
| 4 | 778.366469         | 389.686872      | 761.339920     | 381.173598        | 760.355904     | 380.681590        | S    | <b>1052.519342</b> | 526.763309      | 1035.492793    | 518.250035       | 1034.508777    | 517.758027       | 6 |
| 5 | 865.398497         | 433.202886      | 848.371948     | 424.689612        | 847.387932     | 424.197604        | S    | <b>965.487314</b>  | 483.247295      | 948.460765     | 474.734021       | 947.476749     | 474.242013       | 5 |
| 6 | <b>1028.461826</b> | 514.734551      | 1011.435277    | <b>506.221276</b> | 1010.451261    | 505.729268        | Y    | <b>878.455286</b>  | 439.731281      | 861.428737     | 431.218007       | 860.444721     | 430.725999       | 4 |
| 7 | 1467.687152        | 734.347214      | 1450.660603    | 725.833940        | 1449.676587    | <b>725.341932</b> | Q    | <b>715.391957</b>  | 358.199617      | 698.365408     | 349.686342       | 697.381392     | 349.194334       | 3 |
| 8 | 1568.734831        | 784.871054      | 1551.708282    | 776.357779        | 1550.724266    | 775.865771        | T    | <b>276.166631</b>  | 138.586953      | 259.140082     | 130.073679       | 258.156066     | 129.581671       | 2 |
| 9 |                    |                 |                |                   |                |                   | R    | <b>175.118952</b>  | 88.063114       | 158.092403     | 79.549839        |                |                  | 1 |

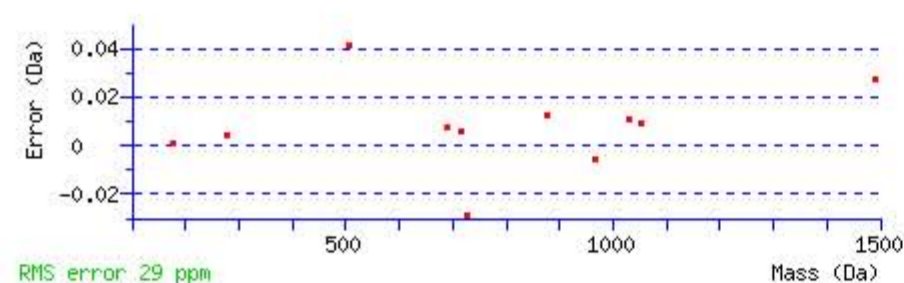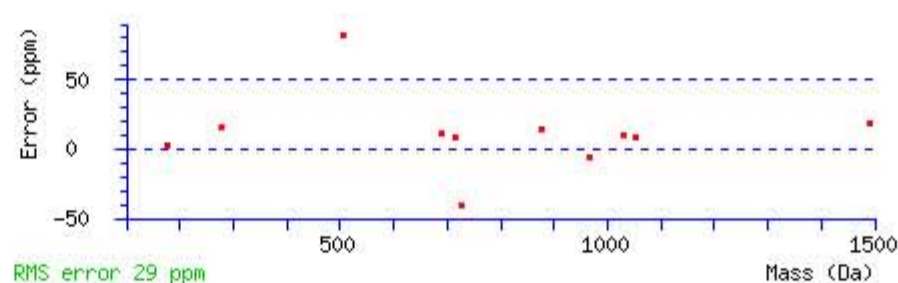

NCBI BLAST search of **NHQSSYQTR**

(Parameters: blastp, nr protein database, expect=20000, no filter, PAM30)

Other BLAST [web gateways](#)

All matches to this query

| Score | Mr(calc):   | Delta     | Sequence                        |
|-------|-------------|-----------|---------------------------------|
| 28.3  | 1741.839218 | 0.015394  | <a href="#">NHQSSYQTR</a>       |
| 6.3   | 1741.878082 | -0.023470 | <a href="#">TLEESNSGPLMKKHR</a> |

Mascot: <http://www.matrixscience.com/>



# MASCOT Search Results

## Peptide View

MS/MS Fragmentation of **QAEISASAPTSLR**

Found in **SHBG\_HUMAN**, Sex hormone-binding globulin OS=Homo sapiens GN=SHBG PE=1 SV=2

Match to Query 40964: 1640.871228 from(821.442890,2+) rtinseconds(1853) index(5478)

Title: Locus:1.1.1.2899.18 File:"2013-07-02 CLN FXIII 180 min 1st F 1.wiff"

Data file C:\Program Files (x86)\Matrix Science\Mascot Daemon\mgf7 FXIII 180 min 1st\mascot\_daemon\_merge.mgf

Click mouse within plot area to zoom in by factor of two about that point

Or, Plot from  to  Da

Label all possible matches  Label matches used for scoring

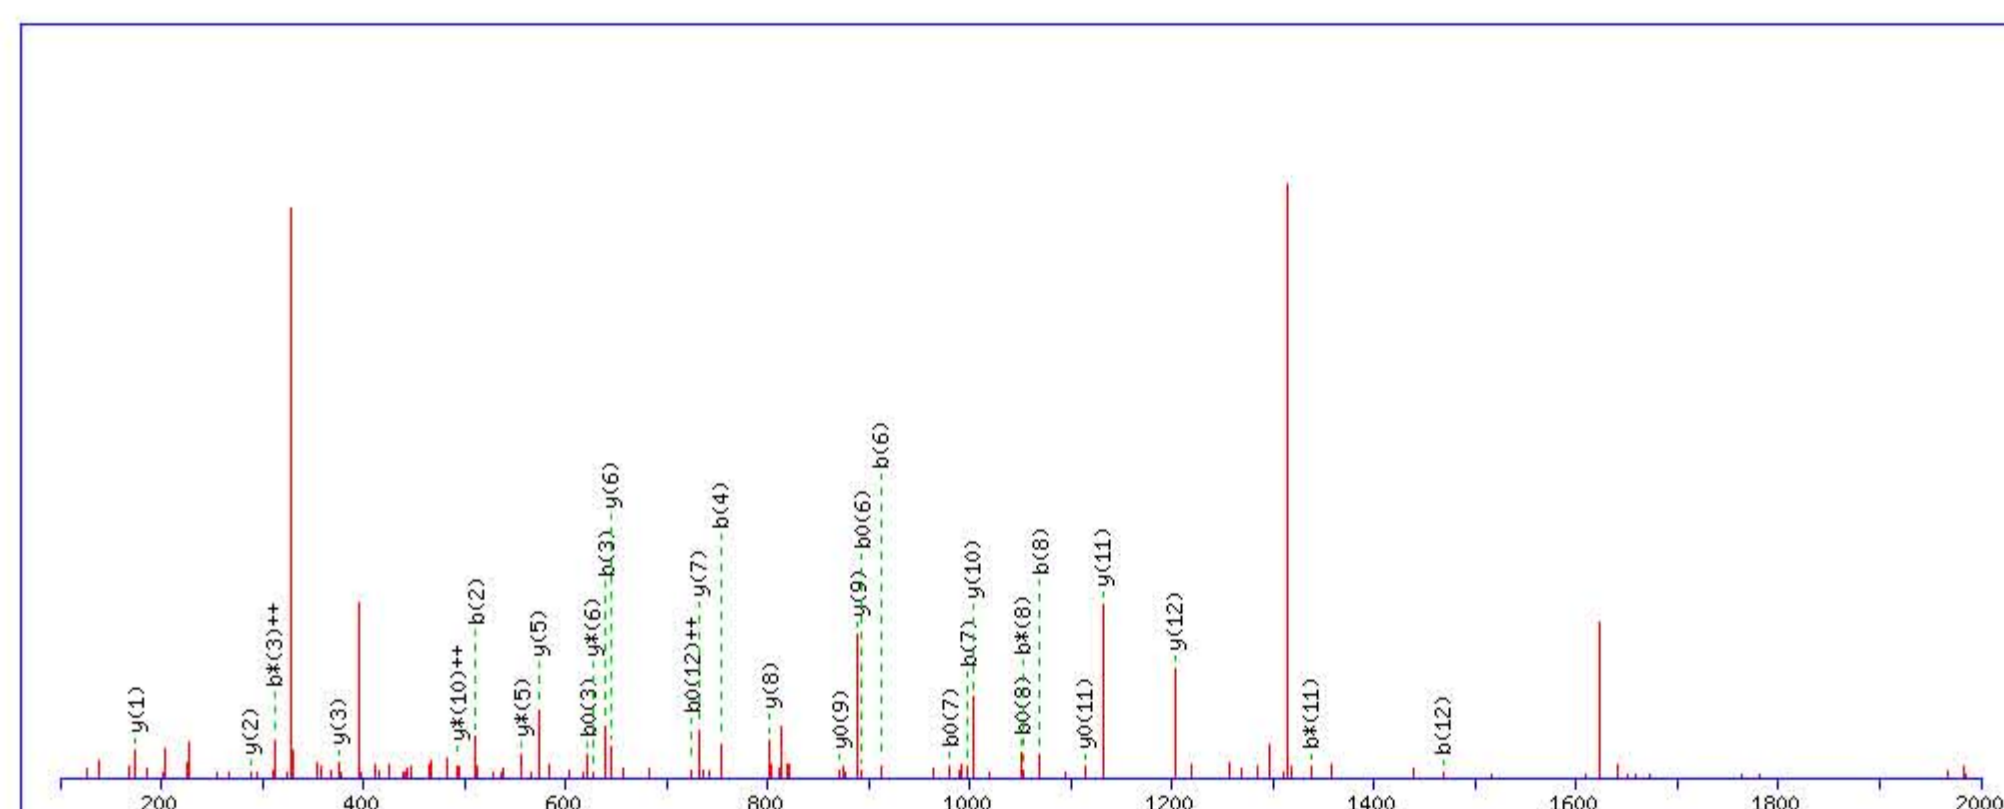

Monoisotopic mass of neutral peptide Mr(calc): 1640.855560

Fixed modifications: Carbamidomethyl (C) (apply to specified residues or termini only)

Variable modifications:

Q1 : Biotin:Thermo-21345 (Q)

Ions Score: 54 Expect: 3.8e-005

Matches : 31/136 fragment ions using 78 most intense peaks [\(help\)](#)

| #  | b                  | b <sup>++</sup> | b <sup>*</sup>     | b <sup>*++</sup>  | b <sup>0</sup>     | b <sup>0++</sup>  | Seq. | y                  | y <sup>++</sup> | y <sup>*</sup>    | y <sup>*++</sup>  | y <sup>0</sup>     | y <sup>0++</sup> | #  |
|----|--------------------|-----------------|--------------------|-------------------|--------------------|-------------------|------|--------------------|-----------------|-------------------|-------------------|--------------------|------------------|----|
| 1  | 440.232602         | 220.619939      | 423.206053         | 212.106664        |                    |                   | Q    |                    |                 |                   |                   |                    |                  | 13 |
| 2  | <b>511.269716</b>  | 256.138496      | 494.243167         | 247.625221        |                    |                   | A    | <b>1202.637542</b> | 601.822409      | 1185.610993       | 593.309135        | 1184.626977        | 592.817126       | 12 |
| 3  | <b>640.312309</b>  | 320.659793      | 623.285760         | <b>312.146518</b> | <b>622.301744</b>  | 311.654510        | E    | <b>1131.600428</b> | 566.303852      | 1114.573879       | 557.790578        | <b>1113.589863</b> | 557.298569       | 11 |
| 4  | <b>753.396373</b>  | 377.201825      | 736.369824         | 368.688550        | 735.385808         | 368.196542        | I    | <b>1002.557835</b> | 501.782556      | 985.531286        | <b>493.269281</b> | 984.547270         | 492.777273       | 10 |
| 5  | 840.428401         | 420.717839      | 823.401852         | 412.204564        | 822.417836         | 411.712556        | S    | <b>889.473771</b>  | 445.240523      | 872.447222        | 436.727249        | <b>871.463206</b>  | 436.235241       | 9  |
| 6  | <b>911.465515</b>  | 456.236396      | 894.438966         | 447.723121        | <b>893.454950</b>  | 447.231113        | A    | <b>802.441743</b>  | 401.724510      | 785.415194        | 393.211235        | 784.431178         | 392.719227       | 8  |
| 7  | <b>998.497543</b>  | 499.752410      | 981.470994         | 491.239135        | <b>980.486978</b>  | 490.747127        | S    | <b>731.404629</b>  | 366.205953      | 714.378080        | 357.692678        | 713.394064         | 357.200670       | 7  |
| 8  | <b>1069.534657</b> | 535.270966      | <b>1052.508108</b> | 526.757692        | <b>1051.524092</b> | 526.265684        | A    | <b>644.372601</b>  | 322.689939      | <b>627.346052</b> | 314.176664        | 626.362036         | 313.684656       | 6  |
| 9  | 1166.587421        | 583.797349      | 1149.560872        | 575.284074        | 1148.576856        | 574.792066        | P    | <b>573.335487</b>  | 287.171382      | <b>556.308938</b> | 278.658107        | 555.324922         | 278.166099       | 5  |
| 10 | 1267.635100        | 634.321188      | 1250.608551        | 625.807914        | 1249.624535        | 625.315905        | T    | 476.282723         | 238.644999      | 459.256174        | 230.131725        | 458.272158         | 229.639717       | 4  |
| 11 | 1354.667128        | 677.837202      | <b>1337.640579</b> | 669.323928        | 1336.656563        | 668.831920        | S    | <b>375.235044</b>  | 188.121160      | 358.208495        | 179.607885        | 357.224479         | 179.115877       | 3  |
| 12 | <b>1467.751192</b> | 734.379234      | 1450.724643        | 725.865960        | 1449.740627        | <b>725.373951</b> | L    | <b>288.203016</b>  | 144.605146      | 271.176467        | 136.091871        |                    |                  | 2  |
| 13 |                    |                 |                    |                   |                    |                   | R    | <b>175.118952</b>  | 88.063114       | 158.092403        | 79.549839         |                    |                  | 1  |

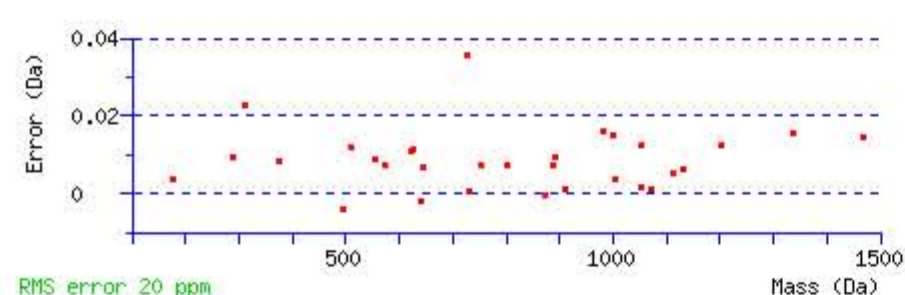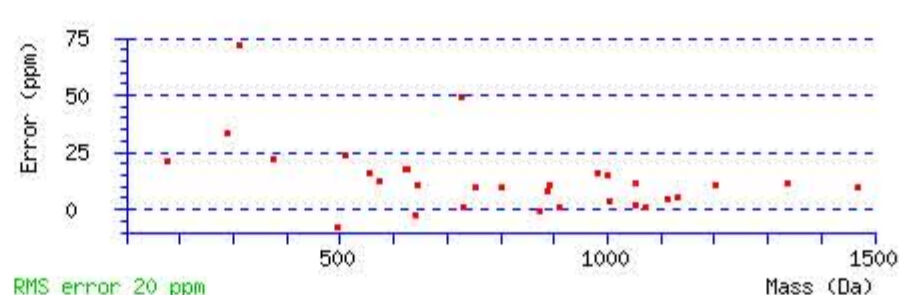

NCBI BLAST search of **QAEISASAPTSLR**

(Parameters: blastp, nr protein database, expect=20000, no filter, PAM30)

Other BLAST [web gateways](#)

All matches to this query

| Score | Mr(calc):   | Delta     | Sequence                        |
|-------|-------------|-----------|---------------------------------|
| 54.0  | 1640.855560 | 0.015668  | <a href="#">QAEISASAPTSLR</a>   |
| 6.5   | 1640.885422 | -0.014194 | <a href="#">LLKKDLCNTHLMR</a>   |
| 3.7   | 1640.866791 | 0.004437  | <a href="#">QAQAGGSKKAEQK</a>   |
| 3.5   | 1640.852188 | 0.019040  | <a href="#">EPPKEKEFQSPGLR</a>  |
| 3.0   | 1640.849030 | 0.022198  | <a href="#">AQEMEAAVGRLR</a>    |
| 1.8   | 1640.879364 | -0.008136 | <a href="#">MAHRAGLLPNHRPR</a>  |
| 1.6   | 1640.884521 | -0.013293 | <a href="#">EAQKKPAESQKIER</a>  |
| 1.1   | 1640.855530 | 0.015698  | <a href="#">QAKLEKEEAER</a>     |
| 0.9   | 1640.870804 | 0.000424  | <a href="#">FLMSAERYDKLLR</a>   |
| 0.8   | 1640.848160 | 0.023068  | <a href="#">LQRILEGEGNQEAGK</a> |

# MASCOT Search Results

## Peptide View

MS/MS Fragmentation of **KGHQLQLDYFGACK**

Found in **SPRL1\_HUMAN**, SPARC-like protein 1 OS=Homo sapiens GN=SPARCL1 PE=1 SV=2

Match to Query 49361: 1975.000976 from(494.757520,4+) rtinseconds(1924) index(60205)

Title: Locus:1.1.1.3093.6 File:"2013-07-02 CLN FXIII 180 min 1st F 4.wiff"

Data file C:\Program Files (x86)\Matrix Science\Mascot Daemon\mgf\7 FXIII 180 min 1st\mascot\_daemon\_merge.mgf

Click mouse within plot area to zoom in by factor of two about that point

Or, Plot from  to  Da

Label all possible matches  Label matches used for scoring

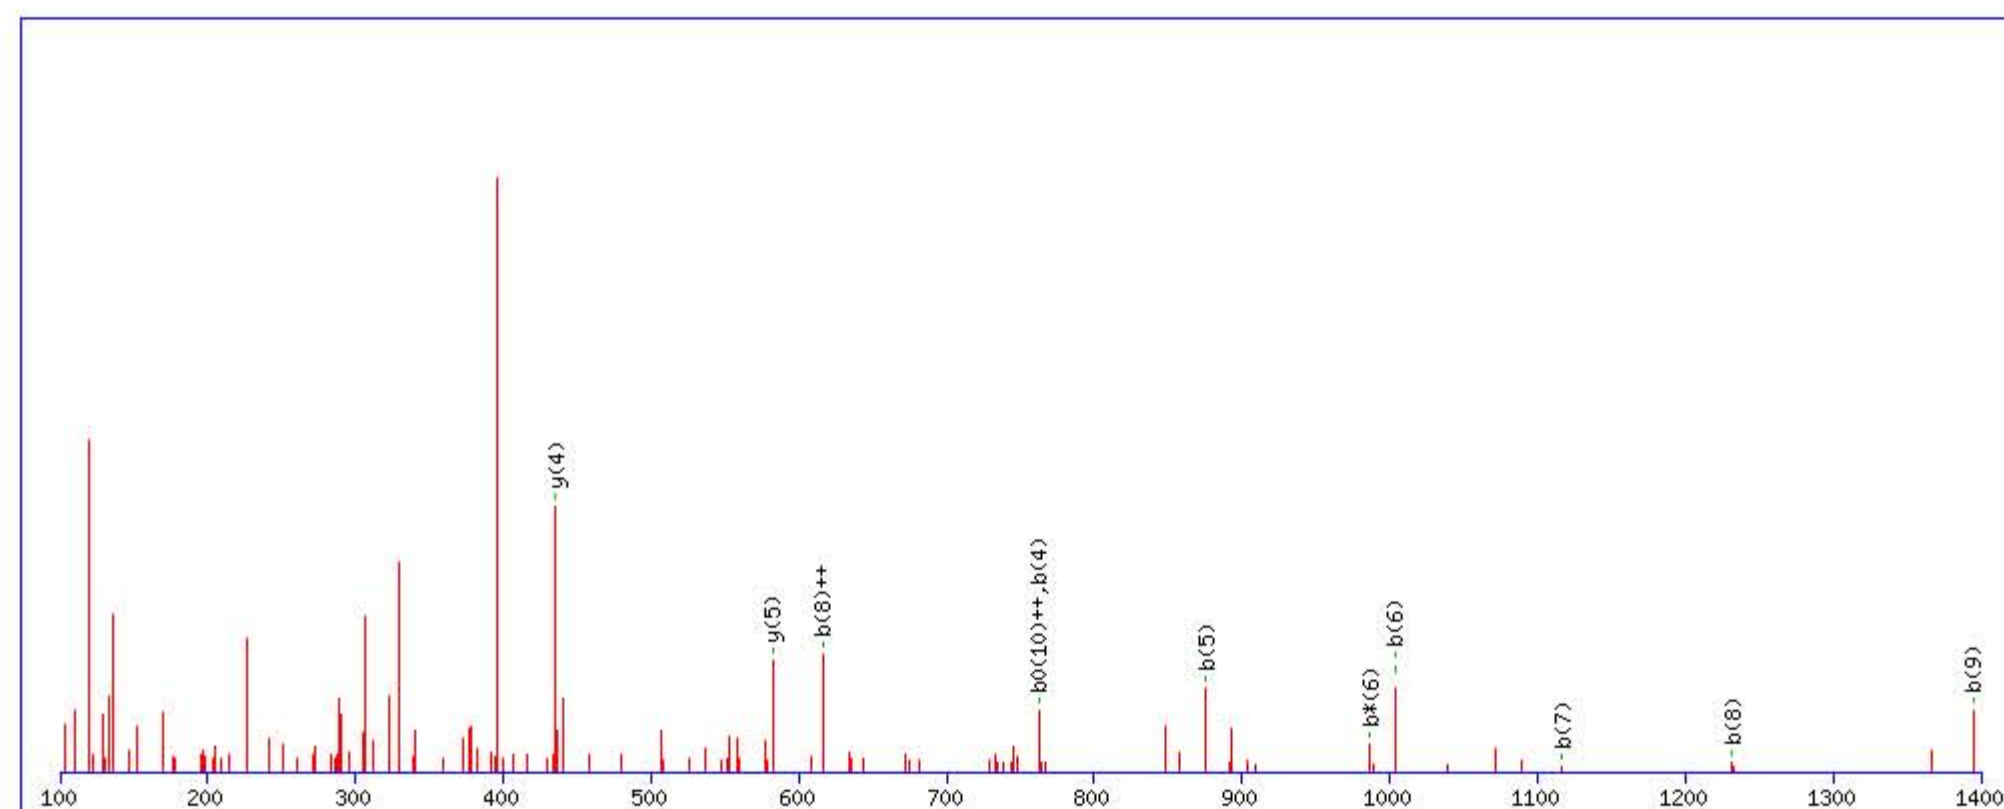

Monoisotopic mass of neutral peptide Mr(calc): 1974.980804

Fixed modifications: Carbamidomethyl (C) (apply to specified residues or termini only)

Variable modifications:

Q4 : Biotin:Thermo-21345 (Q)

Ions Score: 39 Expect: 0.0003

Matches : 11/130 fragment ions using 13 most intense peaks [\(help\)](#)

| #  | b                  | b <sup>++</sup>   | b <sup>*</sup>    | b <sup>+++</sup> | b <sup>0</sup> | b <sup>0++</sup>  | Seq. | y                 | y <sup>++</sup> | y <sup>*</sup> | y <sup>+++</sup> | y <sup>0</sup> | y <sup>0++</sup> | #  |
|----|--------------------|-------------------|-------------------|------------------|----------------|-------------------|------|-------------------|-----------------|----------------|------------------|----------------|------------------|----|
| 1  | 129.102239         | 65.054757         | 112.075690        | 56.541483        |                |                   | K    |                   |                 |                |                  |                |                  | 14 |
| 2  | 186.123703         | 93.565489         | 169.097154        | 85.052215        |                |                   | G    | 1847.893125       | 924.450201      | 1830.866576    | 915.936926       | 1829.882560    | 915.444918       | 13 |
| 3  | 323.182615         | 162.094945        | 306.156066        | 153.581671       |                |                   | H    | 1790.871661       | 895.939469      | 1773.845112    | 887.426194       | 1772.861096    | 886.934186       | 12 |
| 4  | <b>762.407941</b>  | 381.707609        | 745.381392        | 373.194334       |                |                   | Q    | 1653.812749       | 827.410013      | 1636.786200    | 818.896738       | 1635.802184    | 818.404730       | 11 |
| 5  | <b>875.492005</b>  | 438.249641        | 858.465456        | 429.736366       |                |                   | L    | 1214.587423       | 607.797350      | 1197.560874    | 599.284075       | 1196.576858    | 598.792067       | 10 |
| 6  | <b>1003.550583</b> | 502.278930        | <b>986.524034</b> | 493.765655       |                |                   | Q    | 1101.503359       | 551.255318      | 1084.476810    | 542.742043       | 1083.492794    | 542.250035       | 9  |
| 7  | <b>1116.634647</b> | 558.820962        | 1099.608098       | 550.307687       |                |                   | L    | 973.444781        | 487.226029      | 956.418232     | 478.712754       | 955.434216     | 478.220746       | 8  |
| 8  | <b>1231.661590</b> | <b>616.334433</b> | 1214.635041       | 607.821159       | 1213.651025    | 607.329151        | D    | 860.360717        | 430.683997      | 843.334168     | 422.170722       | 842.350152     | 421.678714       | 7  |
| 9  | <b>1394.724919</b> | 697.866098        | 1377.698370       | 689.352823       | 1376.714354    | 688.860815        | Y    | 745.333774        | 373.170525      | 728.307225     | 364.657251       |                |                  | 6  |
| 10 | 1541.793333        | 771.400305        | 1524.766784       | 762.887030       | 1523.782768    | <b>762.395022</b> | F    | <b>582.270445</b> | 291.638861      | 565.243896     | 283.125586       |                |                  | 5  |
| 11 | 1598.814797        | 799.911037        | 1581.788248       | 791.397762       | 1580.804232    | 790.905754        | G    | <b>435.202031</b> | 218.104653      | 418.175482     | 209.591379       |                |                  | 4  |
| 12 | 1669.851911        | 835.429594        | 1652.825362       | 826.916319       | 1651.841346    | 826.424311        | A    | 378.180567        | 189.593921      | 361.154018     | 181.080647       |                |                  | 3  |
| 13 | 1829.882560        | 915.444918        | 1812.856011       | 906.931644       | 1811.871995    | 906.439636        | C    | 307.143453        | 154.075365      | 290.116904     | 145.562090       |                |                  | 2  |
| 14 |                    |                   |                   |                  |                |                   | K    | 147.112804        | 74.060040       | 130.086255     | 65.546765        |                |                  | 1  |

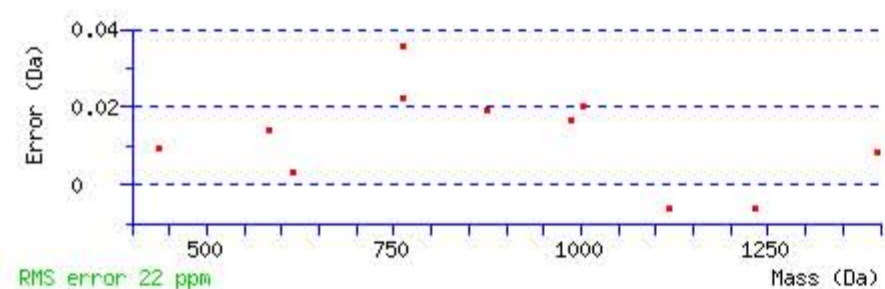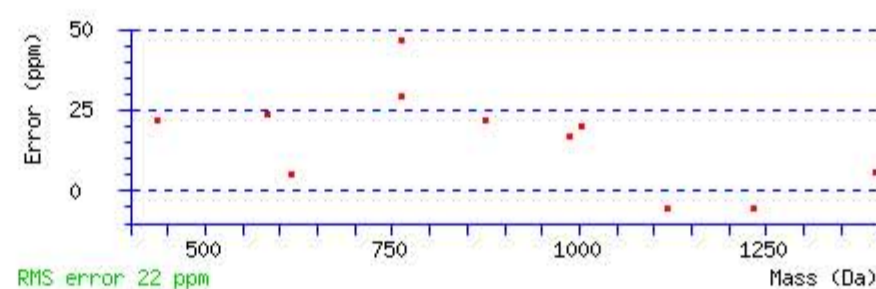

NCBI BLAST search of **KGHQLQLDYFGACK**

(Parameters: blastp, nr protein database, expect=20000, no filter, PAM30)

Other BLAST [web gateways](#)

All matches to this query

| Score | Mr(calc):   | Delta     | Sequence                         |
|-------|-------------|-----------|----------------------------------|
| 38.5  | 1974.980804 | 0.020172  | <a href="#">KGHQLQLDYFGACK</a>   |
| 17.2  | 1974.980804 | 0.020172  | <a href="#">KGHQLQLDYFGACK</a>   |
| 0.9   | 1975.015823 | -0.014847 | <a href="#">AEKTFSVYEIMCKILK</a> |

Mascot: <http://www.matrixscience.com/>

# MASCOT Search Results

## Peptide View

MS/MS Fragmentation of **MVGGIAQIIAAQEEMLR**

Found in **TLN1\_HUMAN**, Talin-1 OS=Homo sapiens GN=TLN1 PE=1 SV=3

Match to Query 53942: 2140.152642 from(714.391490,3+) rtinseconds(2998) index(49404)

Title: Locus:1.1.1.3489.7 File:"2013-07-02 CLN FXIII 180 min 1st F 3.wiff"

Data file C:\Program Files (x86)\Matrix Science\Mascot Daemon\mgf\7 FXIII 180 min 1st\mascot\_daemon\_merge.mgf

Click mouse within plot area to zoom in by factor of two about that point

Or, Plot from  to  Da

Label all possible matches  Label matches used for scoring

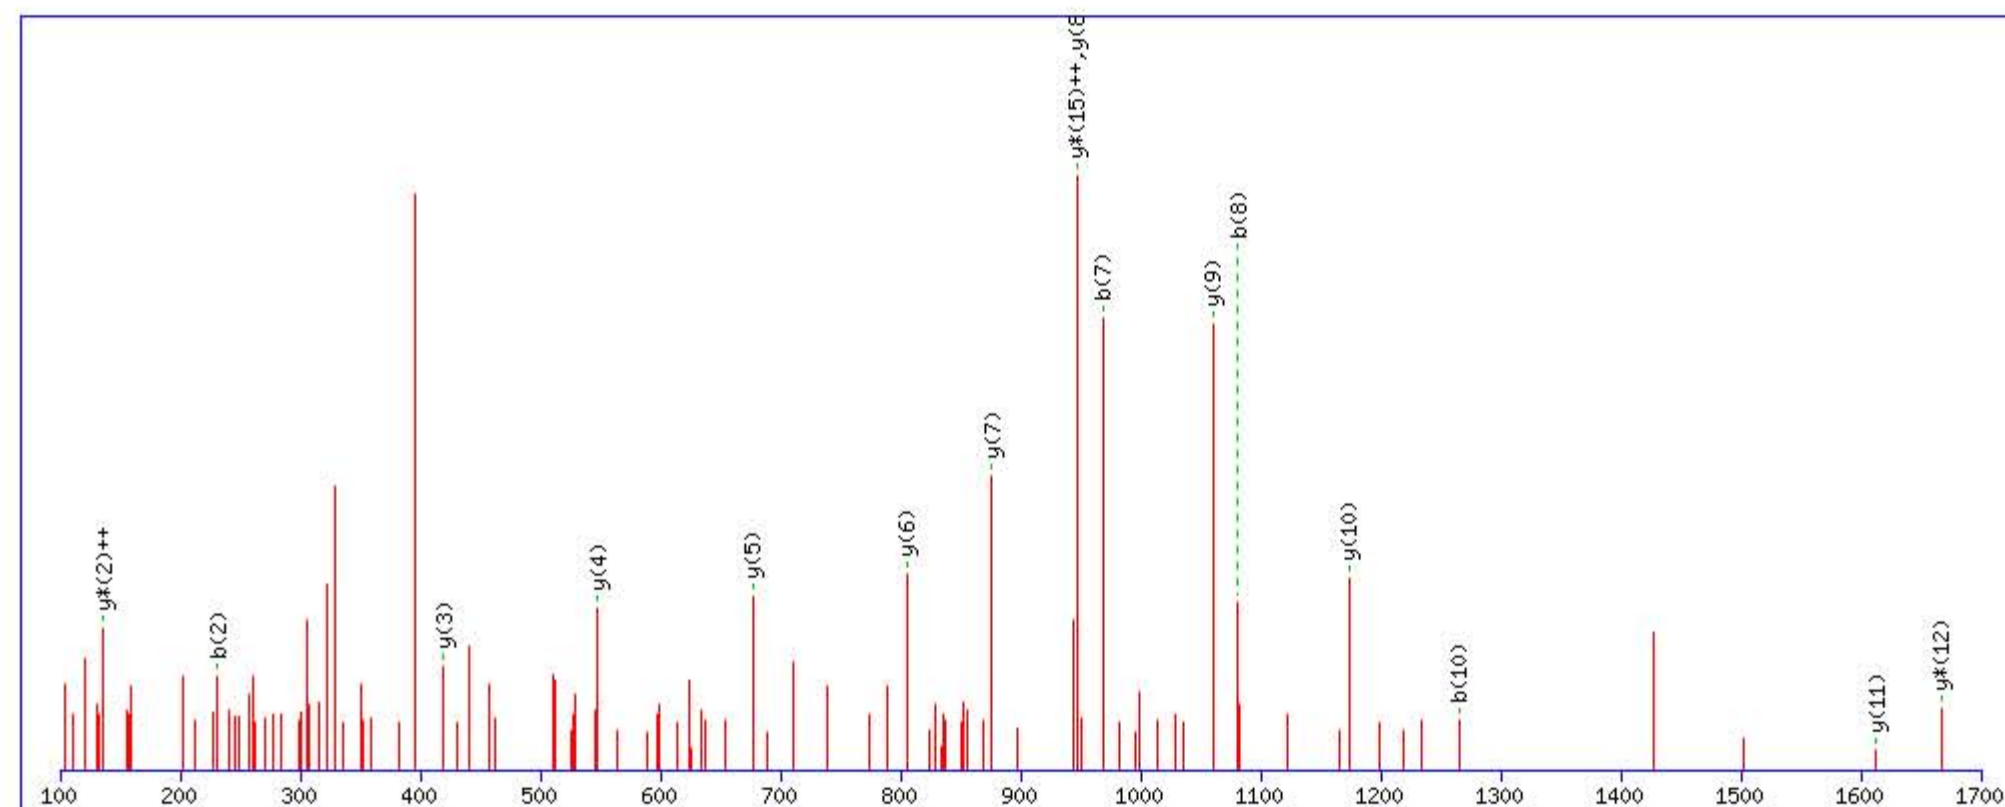

Monoisotopic mass of neutral peptide Mr(calc): 2140.120636

Fixed modifications: Carbamidomethyl (C) (apply to specified residues or termini only)

Variable modifications:

Q7 : Biotin:Thermo-21345 (Q)

Ions Score: 49 Expect: 2.4e-005

Matches : 16/150 fragment ions using 28 most intense peaks [\(help\)](#)

| #  | b                  | b <sup>++</sup> | b <sup>+</sup> | b <sup>+++</sup> | b <sup>0</sup> | b <sup>0++</sup> | Seq.     | y                  | y <sup>++</sup> | y <sup>+</sup>     | y <sup>+++</sup>  | y <sup>0</sup> | y <sup>0++</sup> | #  |
|----|--------------------|-----------------|----------------|------------------|----------------|------------------|----------|--------------------|-----------------|--------------------|-------------------|----------------|------------------|----|
| 1  | 132.047761         | 66.527518       |                |                  |                |                  | <b>M</b> |                    |                 |                    |                   |                |                  | 17 |
| 2  | <b>231.116175</b>  | 116.061725      |                |                  |                |                  | <b>V</b> | 2010.087467        | 1005.547372     | 1993.060918        | 997.034097        | 1992.076902    | 996.542089       | 16 |
| 3  | 288.137639         | 144.572457      |                |                  |                |                  | <b>G</b> | 1911.019053        | 956.013165      | 1893.992504        | <b>947.499890</b> | 1893.008488    | 947.007882       | 15 |
| 4  | 345.159103         | 173.083189      |                |                  |                |                  | <b>G</b> | 1853.997589        | 927.502433      | 1836.971040        | 918.989158        | 1835.987024    | 918.497150       | 14 |
| 5  | 458.243167         | 229.625221      |                |                  |                |                  | <b>I</b> | 1796.976125        | 898.991701      | 1779.949576        | 890.478426        | 1778.965560    | 889.986418       | 13 |
| 6  | 529.280281         | 265.143779      |                |                  |                |                  | <b>A</b> | 1683.892061        | 842.449669      | <b>1666.865512</b> | 833.936394        | 1665.881496    | 833.444386       | 12 |
| 7  | <b>968.505607</b>  | 484.756442      | 951.479058     | 476.243167       |                |                  | <b>Q</b> | <b>1612.854947</b> | 806.931112      | 1595.828398        | 798.417837        | 1594.844382    | 797.925829       | 11 |
| 8  | <b>1081.589671</b> | 541.298474      | 1064.563122    | 532.785199       |                |                  | <b>I</b> | <b>1173.629621</b> | 587.318449      | 1156.603072        | 578.805174        | 1155.619056    | 578.313166       | 10 |
| 9  | 1194.673735        | 597.840505      | 1177.647186    | 589.327231       |                |                  | <b>I</b> | <b>1060.545557</b> | 530.776417      | 1043.519008        | 522.263142        | 1042.534992    | 521.771134       | 9  |
| 10 | <b>1265.710849</b> | 633.359062      | 1248.684300    | 624.845788       |                |                  | <b>A</b> | <b>947.461493</b>  | 474.234385      | 930.434944         | 465.721110        | 929.450928     | 465.229102       | 8  |
| 11 | 1336.747963        | 668.877619      | 1319.721414    | 660.364345       |                |                  | <b>A</b> | <b>876.424379</b>  | 438.715828      | 859.397830         | 430.202553        | 858.413814     | 429.710545       | 7  |
| 12 | 1464.806541        | 732.906908      | 1447.779992    | 724.393634       |                |                  | <b>Q</b> | <b>805.387265</b>  | 403.197271      | 788.360716         | 394.683996        | 787.376700     | 394.191988       | 6  |
| 13 | 1593.849134        | 797.428205      | 1576.822585    | 788.914930       | 1575.838569    | 788.422922       | <b>E</b> | <b>677.328687</b>  | 339.167982      | 660.302138         | 330.654707        | 659.318122     | 330.162699       | 5  |
| 14 | 1722.891727        | 861.949502      | 1705.865178    | 853.436227       | 1704.881162    | 852.944219       | <b>E</b> | <b>548.286094</b>  | 274.646685      | 531.259545         | 266.133411        | 530.275529     | 265.641403       | 4  |
| 15 | 1853.932212        | 927.469744      | 1836.905663    | 918.956470       | 1835.921647    | 918.464461       | <b>M</b> | <b>419.243501</b>  | 210.125389      | 402.216952         | 201.612114        |                |                  | 3  |
| 16 | 1967.016276        | 984.011776      | 1949.989727    | 975.498501       | 1949.005711    | 975.006493       | <b>L</b> | 288.203016         | 144.605146      | 271.176467         | <b>136.091872</b> |                |                  | 2  |
| 17 |                    |                 |                |                  |                |                  | <b>R</b> | 175.118952         | 88.063114       | 158.092403         | 79.549840         |                |                  | 1  |

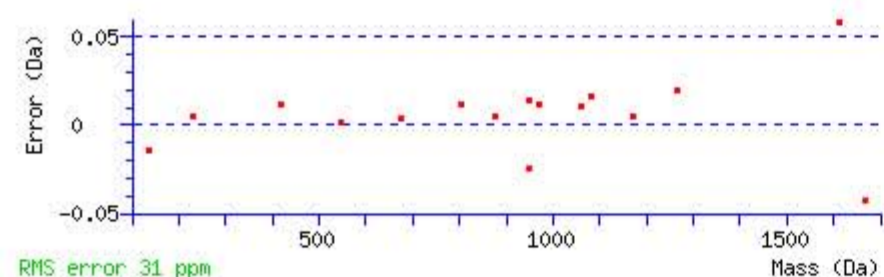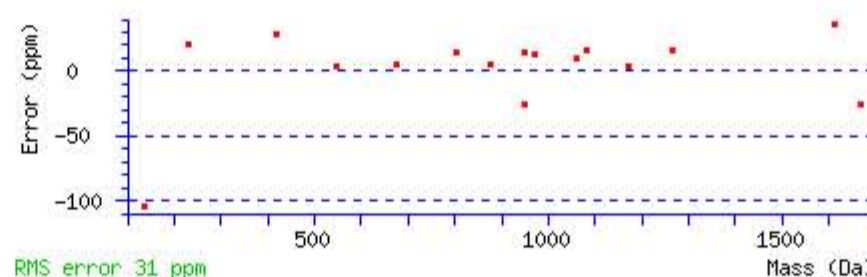

NCBI BLAST search of [MVGGIAQIIAAQEEMLR](#)

(Parameters: blastp, nr protein database, expect=20000, no filter, PAM30)

Other BLAST [web gateways](#)

### All matches to this query

| Score | Mr(calc):   | Delta    | Sequence                          |
|-------|-------------|----------|-----------------------------------|
| 49.4  | 2140.120636 | 0.032006 | <a href="#">MVGGIAQIIAAQEEMLR</a> |
| 0.4   | 2140.120636 | 0.032006 | <a href="#">MVGGIAQIIAAQEEMLR</a> |
| 0.1   | 2140.135010 | 0.017632 | <a href="#">RMLEESNLSFLKELLFR</a> |

# MASCOT Search Results

## Peptide View

MS/MS Fragmentation of **LDTLAQEVALLK**

Found in **TETN\_HUMAN**, Tetranectin OS=Homo sapiens GN=CLEC3B PE=1 SV=3

Match to Query 39903: 1623.943148 from(812.978850,2+) rtinseconds(2563) index(10096)

Title: Locus:1.1.1.3146.16 File:"2013-07-02 CLN FXIII 180 min 1st F 1.wiff"

Data file C:\Program Files (x86)\Matrix Science\Mascot Daemon\mgf\7 FXIII 180 min 1st\mascot\_daemon\_merge.mgf

Click mouse within plot area to zoom in by factor of two about that point

Or, Plot from  to  Da

Label all possible matches  Label matches used for scoring

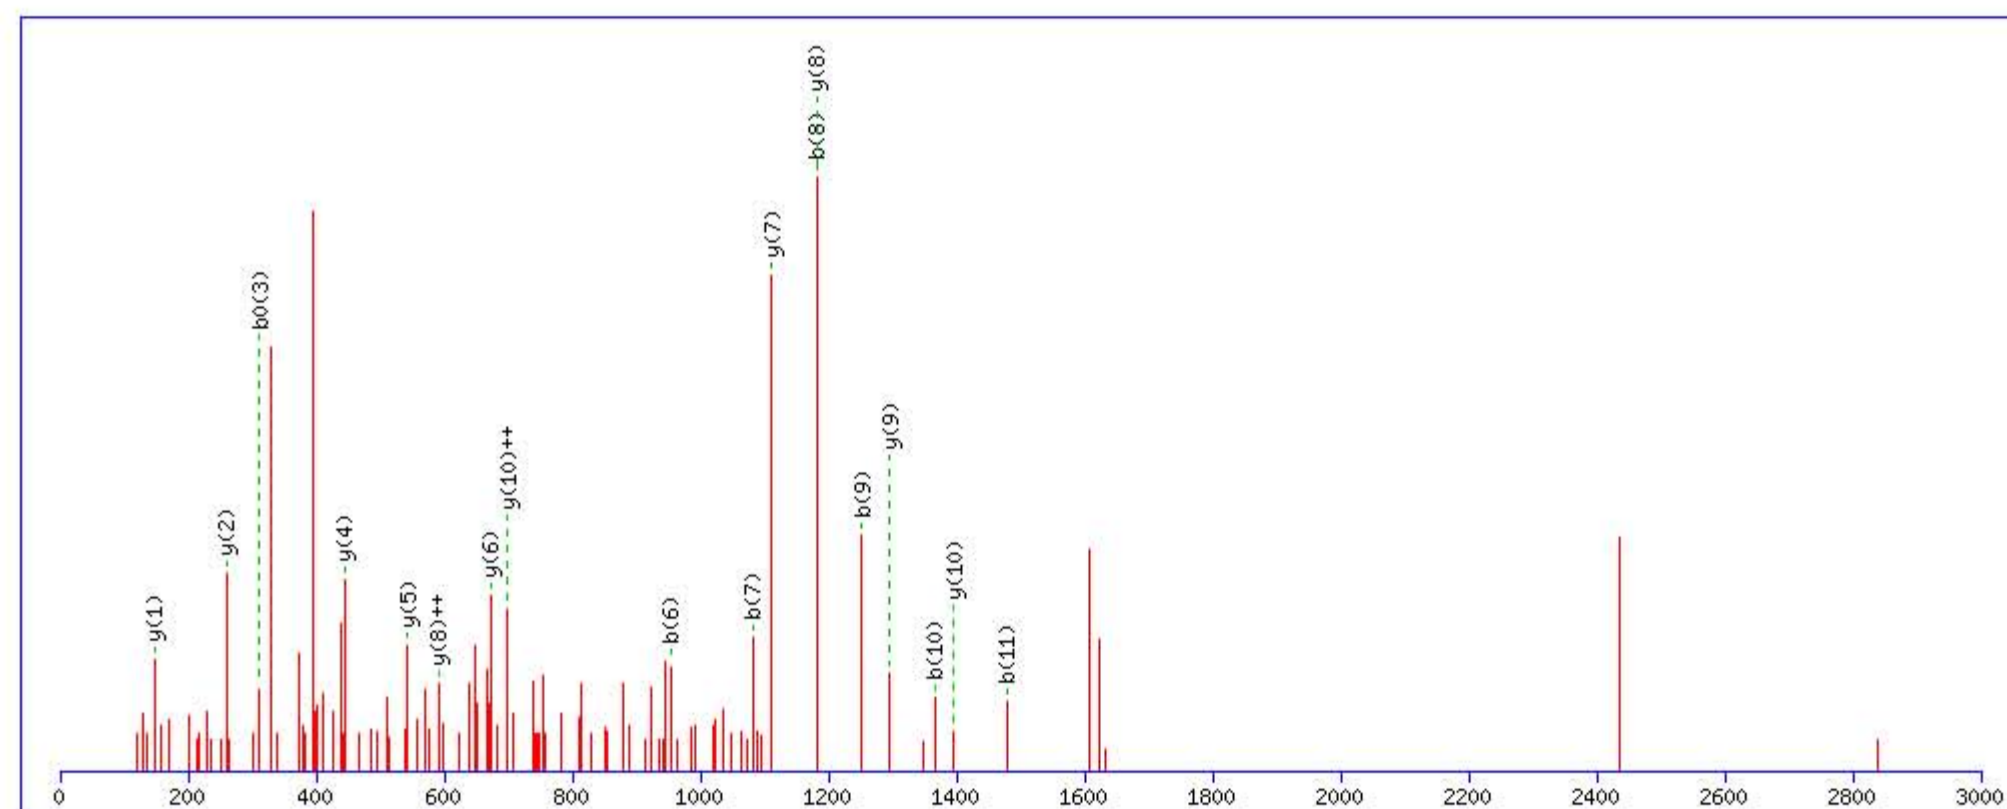

Monoisotopic mass of neutral peptide  $M_r(\text{calc})$ : 1623.926941

Fixed modifications: Carbamidomethyl (C) (apply to specified residues or termini only)

Variable modifications:

Q6 : Biotin:Thermo-21345 (Q)

Ions Score: 65 Expect: 2.2e-006

Matches : 18/110 fragment ions using 28 most intense peaks [\(help\)](#)

| #  | b           | b <sup>++</sup> | b <sup>*</sup> | b <sup>*++</sup> | b <sup>0</sup> | b <sup>0++</sup> | Seq. | y           | y <sup>++</sup> | y <sup>*</sup> | y <sup>*++</sup> | y <sup>0</sup> | y <sup>0++</sup> | #  |
|----|-------------|-----------------|----------------|------------------|----------------|------------------|------|-------------|-----------------|----------------|------------------|----------------|------------------|----|
| 1  | 114.091340  | 57.549308       |                |                  |                |                  | L    |             |                 |                |                  |                |                  | 12 |
| 2  | 229.118283  | 115.062779      |                |                  | 211.107718     | 106.057497       | D    | 1511.850179 | 756.428728      | 1494.823630    | 747.915453       | 1493.839614    | 747.423445       | 11 |
| 3  | 330.165962  | 165.586619      |                |                  | 312.155397     | 156.581336       | T    | 1396.823236 | 698.915256      | 1379.796687    | 690.401982       | 1378.812671    | 689.909973       | 10 |
| 4  | 443.250026  | 222.128651      |                |                  | 425.239461     | 213.123369       | L    | 1295.775557 | 648.391416      | 1278.749008    | 639.878142       | 1277.764992    | 639.386134       | 9  |
| 5  | 514.287140  | 257.647208      |                |                  | 496.276575     | 248.641926       | A    | 1182.691493 | 591.849385      | 1165.664944    | 583.336110       | 1164.680928    | 582.844102       | 8  |
| 6  | 953.512466  | 477.259871      | 936.485917     | 468.746597       | 935.501901     | 468.254589       | Q    | 1111.654379 | 556.330827      | 1094.627830    | 547.817553       | 1093.643814    | 547.325545       | 7  |
| 7  | 1082.555059 | 541.781168      | 1065.528510    | 533.267893       | 1064.544494    | 532.775885       | E    | 672.429053  | 336.718165      | 655.402504     | 328.204890       | 654.418488     | 327.712882       | 6  |
| 8  | 1181.623473 | 591.315375      | 1164.596924    | 582.802100       | 1163.612908    | 582.310092       | V    | 543.386460  | 272.196868      | 526.359911     | 263.683593       |                |                  | 5  |
| 9  | 1252.660587 | 626.833932      | 1235.634038    | 618.320657       | 1234.650022    | 617.828649       | A    | 444.318046  | 222.662661      | 427.291497     | 214.149386       |                |                  | 4  |
| 10 | 1365.744651 | 683.375964      | 1348.718102    | 674.862689       | 1347.734086    | 674.370681       | L    | 373.280932  | 187.144104      | 356.254383     | 178.630829       |                |                  | 3  |
| 11 | 1478.828715 | 739.917995      | 1461.802166    | 731.404721       | 1460.818150    | 730.912713       | L    | 260.196868  | 130.602072      | 243.170319     | 122.088797       |                |                  | 2  |
| 12 |             |                 |                |                  |                |                  | K    | 147.112804  | 74.060040       | 130.086255     | 65.546765        |                |                  | 1  |

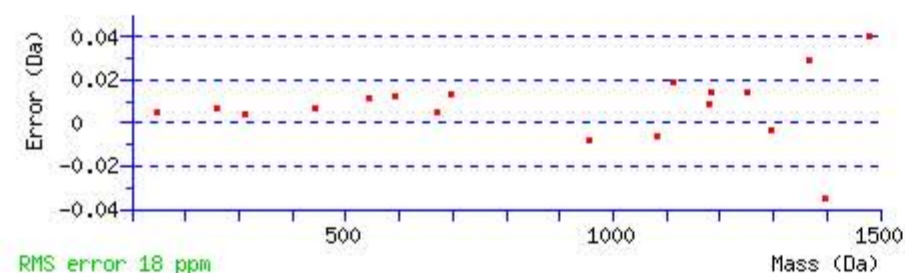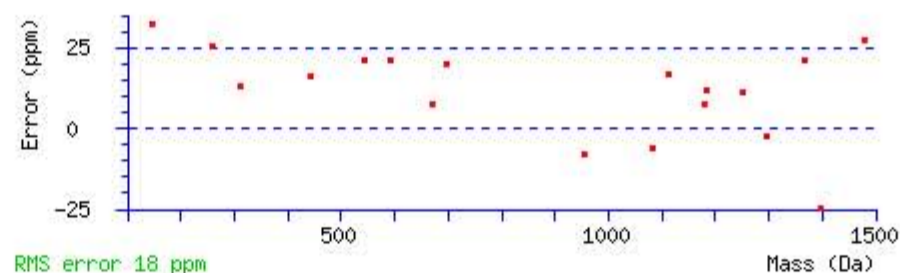

NCBI BLAST search of **LDTLAQEVALLK**

(Parameters: blastp, nr protein database, expect=20000, no filter, PAM30)

Other BLAST [web gateways](#)

All matches to this query

| Score | $M_r(\text{calc})$ : | Delta     | Sequence                        |
|-------|----------------------|-----------|---------------------------------|
| 65.3  | 1623.926941          | 0.016207  | <a href="#">LDTLAQEVALLK</a>    |
| 7.2   | 1623.942001          | 0.001147  | <a href="#">ESKPGGLPRRSSIIK</a> |
| 3.8   | 1623.957260          | -0.014112 | <a href="#">IFRPKHTRISELK</a>   |
| 2.7   | 1623.934799          | 0.008349  | <a href="#">FIQKFSQASSKILK</a>  |
| 2.7   | 1623.928284          | 0.014864  | <a href="#">LCHAAFLPSVRLK</a>   |
| 2.7   | 1623.942200          | 0.000948  | <a href="#">LLPVQENFLK</a>      |
| 2.2   | 1623.928268          | 0.014880  | <a href="#">EVQRLYHKLK</a>      |

# MASCOT Search Results

## Peptide View

MS/MS Fragmentation of **ETIEQEK**

Found in **TYB10\_HUMAN**, Thymosin beta-10 OS=Homo sapiens GN=TMSB10 PE=1 SV=2

Match to Query 23329: 1186.597268 from(594.305910,2+) rtinseconds(1438) index(75254)

Title: Locus:1.1.1.1851.12 File:"2013-07-02 CLN FXIII 180 min 1st FT.wiff"

Data file C:\Program Files (x86)\Matrix Science\Mascot Daemon\mgf\7 FXIII 180 min 1st\mascot\_daemon\_merge.mgf

Click mouse within plot area to zoom in by factor of two about that point

Or, Plot from  to  Da

Label all possible matches  Label matches used for scoring

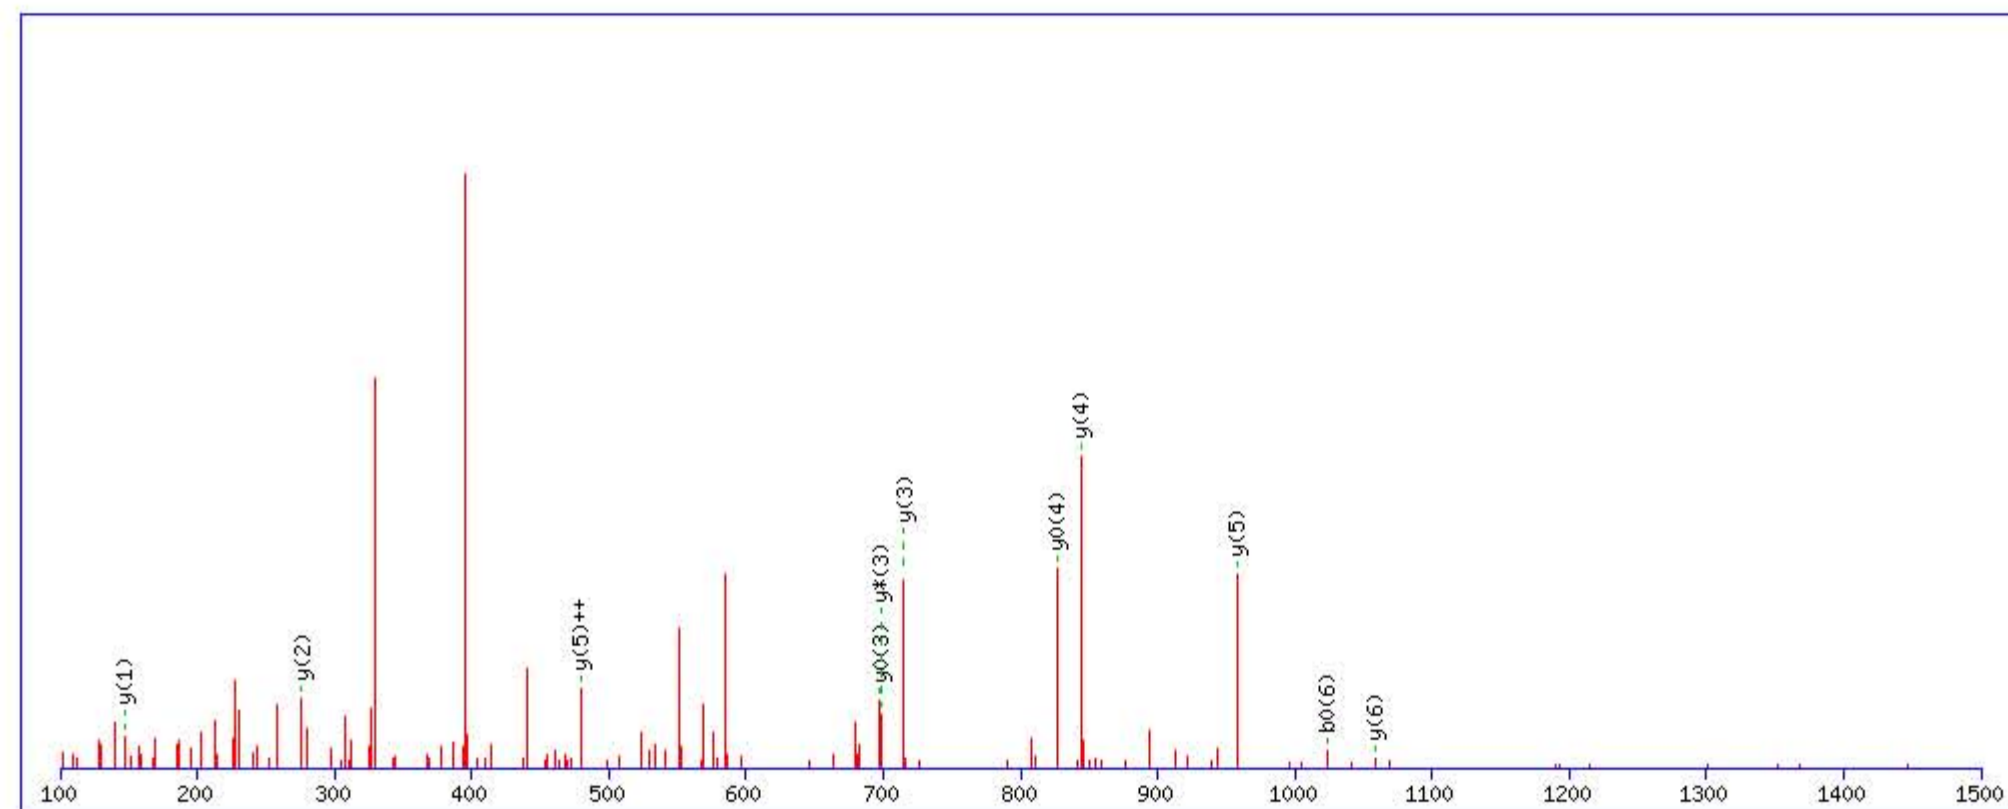

Monoisotopic mass of neutral peptide Mr(calc): 1186.590347

Fixed modifications: Carbamidomethyl (C) (apply to specified residues or termini only)

Variable modifications:

Q5 : Biotin:Thermo-21345 (Q)

Ions Score: 34 Expect: 0.0066

Matches : 11/62 fragment ions using 20 most intense peaks [\(help\)](#)

| # | b           | b <sup>++</sup> | b <sup>*</sup> | b <sup>+++</sup> | b <sup>0</sup>     | b <sup>0++</sup> | Seq. | y                  | y <sup>++</sup>   | y <sup>*</sup>    | y <sup>+++</sup> | y <sup>0</sup>    | y <sup>0++</sup> | # |
|---|-------------|-----------------|----------------|------------------|--------------------|------------------|------|--------------------|-------------------|-------------------|------------------|-------------------|------------------|---|
| 1 | 130.049869  | 65.528572       |                |                  | 112.039304         | 56.523290        | E    |                    |                   |                   |                  |                   |                  | 7 |
| 2 | 231.097548  | 116.052412      |                |                  | 213.086983         | 107.047130       | T    | <b>1058.555059</b> | 529.781168        | 1041.528510       | 521.267893       | 1040.544494       | 520.775885       | 6 |
| 3 | 344.181612  | 172.594444      |                |                  | 326.171047         | 163.589162       | I    | <b>957.507380</b>  | <b>479.257328</b> | 940.480831        | 470.744054       | 939.496815        | 470.252046       | 5 |
| 4 | 473.224205  | 237.115741      |                |                  | 455.213640         | 228.110458       | E    | <b>844.423316</b>  | 422.715296        | 827.396767        | 414.202022       | <b>826.412751</b> | 413.710014       | 4 |
| 5 | 912.449531  | 456.728404      | 895.422982     | 448.215129       | 894.438966         | 447.723121       | Q    | <b>715.380723</b>  | 358.194000        | <b>698.354174</b> | 349.680725       | <b>697.370158</b> | 349.188717       | 3 |
| 6 | 1041.492124 | 521.249700      | 1024.465575    | 512.736426       | <b>1023.481559</b> | 512.244418       | E    | <b>276.155397</b>  | 138.581336        | 259.128848        | 130.068062       | 258.144832        | 129.576054       | 2 |
| 7 |             |                 |                |                  |                    |                  | K    | <b>147.112804</b>  | 74.060040         | 130.086255        | 65.546765        |                   |                  | 1 |

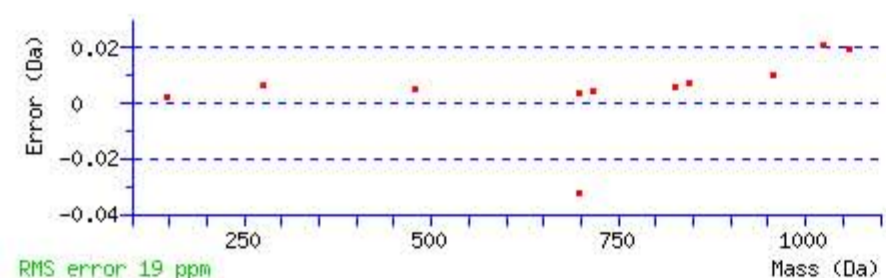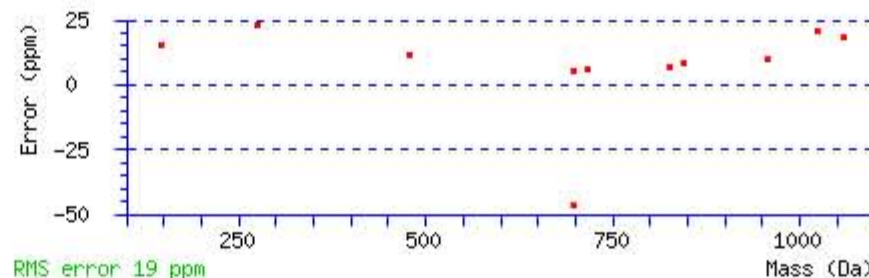

NCBI BLAST search of **ETIEQEK**

(Parameters: blastp, nr protein database, expect=20000, no filter, PAM30)

Other BLAST [web gateways](#)

All matches to this query

| Score | Mr(calc):   | Delta     | Sequence                     |
|-------|-------------|-----------|------------------------------|
| 33.6  | 1186.590347 | 0.006921  | <a href="#">ETIEQEK</a>      |
| 9.7   | 1186.612808 | -0.015540 | <a href="#">TLEKMEKHR</a>    |
| 6.5   | 1186.591721 | 0.005547  | <a href="#">KTVGFHSHMK</a>   |
| 4.3   | 1186.601578 | -0.004310 | <a href="#">TNEKQEK</a>      |
| 3.1   | 1186.605606 | -0.008338 | <a href="#">MEPPNLYPVK</a>   |
| 2.8   | 1186.590347 | 0.006921  | <a href="#">QEEELTK</a>      |
| 2.7   | 1186.601578 | -0.004310 | <a href="#">QEQKESK</a>      |
| 2.6   | 1186.613464 | -0.016196 | <a href="#">WAEHFIKEK</a>    |
| 1.9   | 1186.609436 | -0.012168 | <a href="#">KNHKKEEFQK</a>   |
| 0.7   | 1186.594223 | 0.003045  | <a href="#">EPGRGGTETVVK</a> |

Mascot: <http://www.matrixscience.com/>

# MASCOT SEARCH RESULTS

## Peptide View

MS/MS Fragmentation of **SPYQLVLQHSR**

Found in **BGH3\_HUMAN**, Transforming growth factor-beta-induced protein ig-h3 OS=Homo sapiens GN=TGFB1 PE=1 SV=1

Match to Query 40836: 1637.873922 from(546.965250,3+) rtinseconds(1865) index(23694)

Title: Locus:1.1.1.2792.9 File:"2013-07-02 CLN FXIII 180 min 1st F 2.wiff"

Data file C:\Program Files (x86)\Matrix Science\Mascot Daemon\mgf\7 FXIII 180 min 1st\mascot\_daemon\_merge.mgf

Click mouse within plot area to zoom in by factor of two about that point

Or, Plot from  to  Da

Label all possible matches  Label matches used for scoring

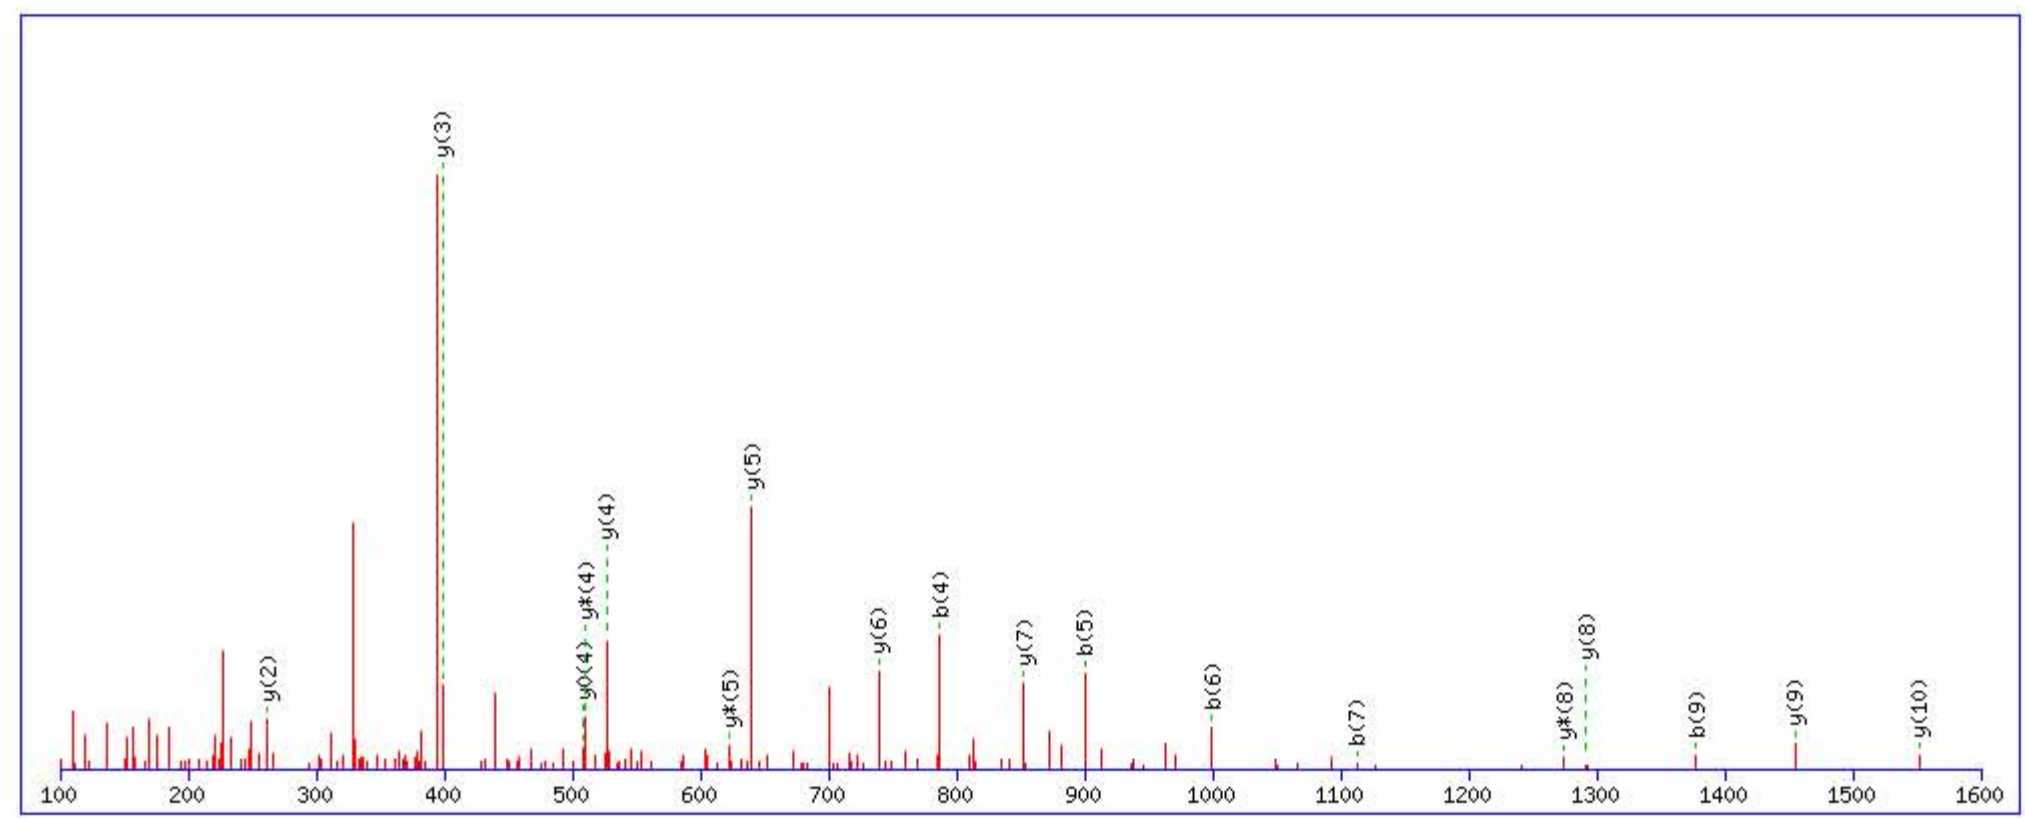

Monoisotopic mass of neutral peptide Mr(calc): 1637.871170

Fixed modifications: Carbamidomethyl (C) (apply to specified residues or termini only)

Variable modifications:

Q4 : Biotin:Thermo-21345 (Q)

Ions Score: 46 Expect: 5.9e-005

Matches : 18/112 fragment ions using 39 most intense peaks [\(help\)](#)

| #  | b           | b <sup>++</sup> | b <sup>*</sup> | b <sup>*++</sup> | b <sup>0</sup> | b <sup>0++</sup> | Seq. | y           | y <sup>++</sup> | y <sup>*</sup> | y <sup>*++</sup> | y <sup>0</sup> | y <sup>0++</sup> | #  |
|----|-------------|-----------------|----------------|------------------|----------------|------------------|------|-------------|-----------------|----------------|------------------|----------------|------------------|----|
| 1  | 88.039304   | 44.523290       |                |                  | 70.028739      | 35.518008        | S    |             |                 |                |                  |                |                  | 11 |
| 2  | 185.092068  | 93.049672       |                |                  | 167.081503     | 84.044389        | P    | 1551.846431 | 776.426853      | 1534.819882    | 767.913579       | 1533.835866    | 767.421571       | 10 |
| 3  | 348.155397  | 174.581336      |                |                  | 330.144832     | 165.576054       | Y    | 1454.793667 | 727.900471      | 1437.767118    | 719.387197       | 1436.783102    | 718.895189       | 9  |
| 4  | 787.380723  | 394.194000      | 770.354174     | 385.680725       | 769.370158     | 385.188717       | Q    | 1291.730338 | 646.368807      | 1274.703789    | 637.855532       | 1273.719773    | 637.363524       | 8  |
| 5  | 900.464787  | 450.736032      | 883.438238     | 442.222757       | 882.454222     | 441.730749       | L    | 852.505012  | 426.756144      | 835.478463     | 418.242869       | 834.494447     | 417.750861       | 7  |
| 6  | 999.533201  | 500.270239      | 982.506652     | 491.756964       | 981.522636     | 491.264956       | V    | 739.420948  | 370.214112      | 722.394399     | 361.700837       | 721.410383     | 361.208829       | 6  |
| 7  | 1112.617265 | 556.812270      | 1095.590716    | 548.298996       | 1094.606700    | 547.806988       | L    | 640.352534  | 320.679905      | 623.325985     | 312.166630       | 622.341969     | 311.674622       | 5  |
| 8  | 1240.675843 | 620.841559      | 1223.649294    | 612.328285       | 1222.665278    | 611.836277       | Q    | 527.268470  | 264.137873      | 510.241921     | 255.624598       | 509.257905     | 255.132590       | 4  |
| 9  | 1377.734755 | 689.371015      | 1360.708206    | 680.857741       | 1359.724190    | 680.365733       | H    | 399.209892  | 200.108584      | 382.183343     | 191.595309       | 381.199327     | 191.103301       | 3  |
| 10 | 1464.766783 | 732.887029      | 1447.740234    | 724.373755       | 1446.756218    | 723.881747       | S    | 262.150980  | 131.579128      | 245.124431     | 123.065854       | 244.140415     | 122.573846       | 2  |
| 11 |             |                 |                |                  |                |                  | R    | 175.118952  | 88.063114       | 158.092403     | 79.549839        |                |                  | 1  |

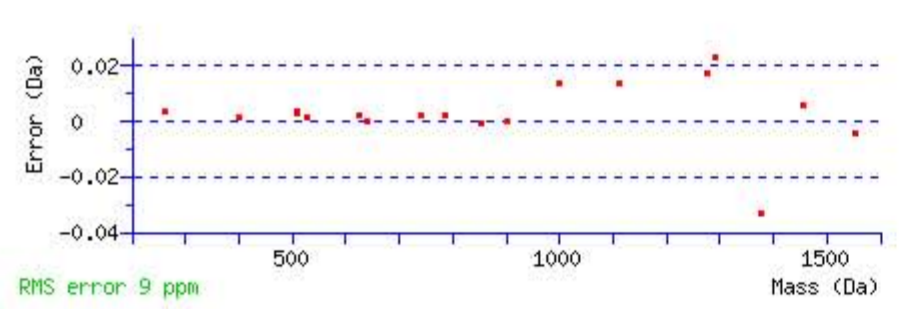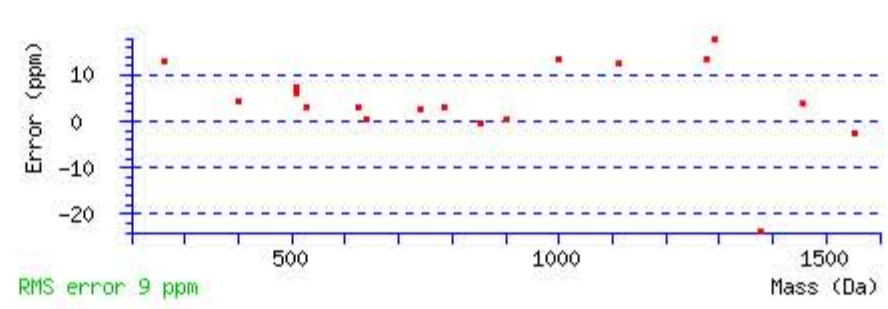

NCBI BLAST search of **SPYQLVLQHSR**

(Parameters: blastp, nr protein database, expect=20000, no filter, PAM30)

Other BLAST [web gateways](#)

### All matches to this query

| Score | Mr(calc):   | Delta    | Sequence                       |
|-------|-------------|----------|--------------------------------|
| 46.4  | 1637.871170 | 0.002752 | <a href="#">SPYQLVLQHSR</a>    |
| 3.5   | 1637.871170 | 0.002752 | <a href="#">SPYQLVLQHSR</a>    |
| 1.3   | 1637.855911 | 0.018011 | <a href="#">RTAYSGVPMILSSR</a> |

# MASCOT Search Results

## Peptide View

MS/MS Fragmentation of **NLHDLVSDNQLER**

Found in **VASN\_HUMAN**, Vasorin OS=Homo sapiens GN=VASN PE=1 SV=1

Match to Query 49407: 1977.967902 from(660.329910,3+) rtinseconds(1918) index(24106)

Title: Locus:1.1.1.2810.6 File:"2013-07-02 CLN FXIII 180 min 1st F 2.wiff"

Data file C:\Program Files (x86)\Matrix Science\Mascot Daemon\mgf\7 FXIII 180 min 1st\mascot\_daemon\_merge.mgf

Click mouse within plot area to zoom in by factor of two about that point

Or, Plot from  to  Da

Label all possible matches  Label matches used for scoring

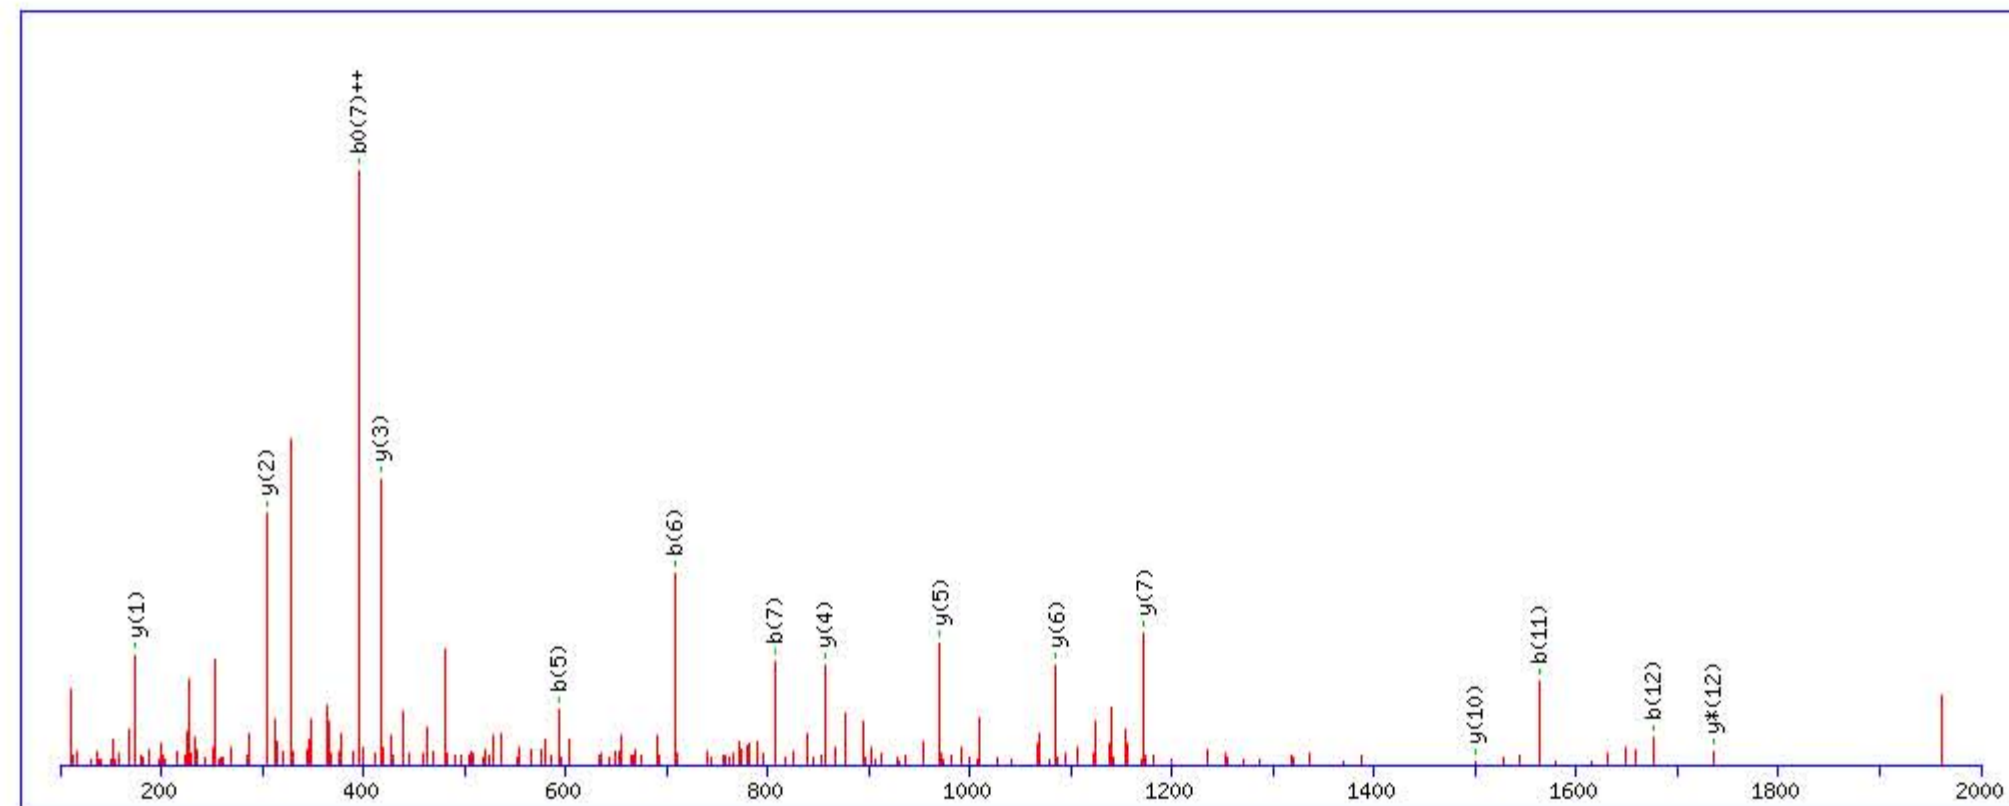

Monoisotopic mass of neutral peptide Mr(calc): 1977.957809

Fixed modifications: Carbamidomethyl (C) (apply to specified residues or termini only)

Variable modifications:

Q11 : Biotin:Thermo-21345 (Q)

Ions Score: 70 Expect: 2.8e-007

Matches : 15/148 fragment ions using 18 most intense peaks [\(help\)](#)

| #  | b                  | b <sup>++</sup> | b <sup>+</sup> | b <sup>*++</sup> | b <sup>0</sup> | b <sup>0++</sup>  | Seq. | y                  | y <sup>++</sup> | y <sup>+</sup>     | y <sup>*++</sup> | y <sup>0</sup> | y <sup>0++</sup> | #  |
|----|--------------------|-----------------|----------------|------------------|----------------|-------------------|------|--------------------|-----------------|--------------------|------------------|----------------|------------------|----|
| 1  | 115.050203         | 58.028740       | 98.023654      | 49.515465        |                |                   | N    |                    |                 |                    |                  |                |                  | 14 |
| 2  | 228.134267         | 114.570771      | 211.107718     | 106.057497       |                |                   | L    | 1864.922173        | 932.964724      | 1847.895624        | 924.451450       | 1846.911608    | 923.959442       | 13 |
| 3  | 365.193179         | 183.100227      | 348.166630     | 174.586953       |                |                   | H    | 1751.838109        | 876.422692      | <b>1734.811560</b> | 867.909418       | 1733.827544    | 867.417410       | 12 |
| 4  | 480.220122         | 240.613699      | 463.193573     | 232.100425       | 462.209557     | 231.608417        | D    | 1614.779197        | 807.893236      | 1597.752648        | 799.379962       | 1596.768632    | 798.887954       | 11 |
| 5  | <b>593.304186</b>  | 297.155731      | 576.277637     | 288.642457       | 575.293621     | 288.150449        | L    | <b>1499.752254</b> | 750.379765      | 1482.725705        | 741.866490       | 1481.741689    | 741.374482       | 10 |
| 6  | <b>708.331129</b>  | 354.669203      | 691.304580     | 346.155928       | 690.320564     | 345.663920        | D    | 1386.668190        | 693.837733      | 1369.641641        | 685.324458       | 1368.657625    | 684.832450       | 9  |
| 7  | <b>807.399543</b>  | 404.203410      | 790.372994     | 395.690135       | 789.388978     | <b>395.198127</b> | V    | 1271.641247        | 636.324261      | 1254.614698        | 627.810987       | 1253.630682    | 627.318979       | 8  |
| 8  | 894.431571         | 447.719424      | 877.405022     | 439.206149       | 876.421006     | 438.714141        | S    | <b>1172.572833</b> | 586.790054      | 1155.546284        | 578.276780       | 1154.562268    | 577.784772       | 7  |
| 9  | 1009.458514        | 505.232895      | 992.431965     | 496.719620       | 991.447949     | 496.227612        | D    | <b>1085.540805</b> | 543.274040      | 1068.514256        | 534.760766       | 1067.530240    | 534.268758       | 6  |
| 10 | 1123.501441        | 562.254358      | 1106.474892    | 553.741084       | 1105.490876    | 553.249076        | N    | <b>970.513862</b>  | 485.760569      | 953.487313         | 477.247294       | 952.503297     | 476.755286       | 5  |
| 11 | <b>1562.726767</b> | 781.867021      | 1545.700218    | 773.353747       | 1544.716202    | 772.861739        | Q    | <b>856.470935</b>  | 428.739105      | 839.444386         | 420.225831       | 838.460370     | 419.733823       | 4  |
| 12 | <b>1675.810831</b> | 838.409053      | 1658.784282    | 829.895779       | 1657.800266    | 829.403771        | L    | <b>417.245609</b>  | 209.126442      | 400.219060         | 200.613168       | 399.235044     | 200.121160       | 3  |
| 13 | 1804.853424        | 902.930350      | 1787.826875    | 894.417075       | 1786.842859    | 893.925067        | E    | <b>304.161545</b>  | 152.584410      | 287.134996         | 144.071136       | 286.150980     | 143.579128       | 2  |
| 14 |                    |                 |                |                  |                |                   | R    | <b>175.118952</b>  | 88.063114       | 158.092403         | 79.549839        |                |                  | 1  |

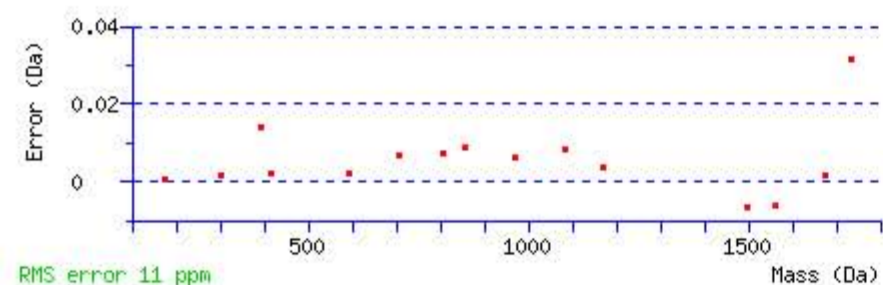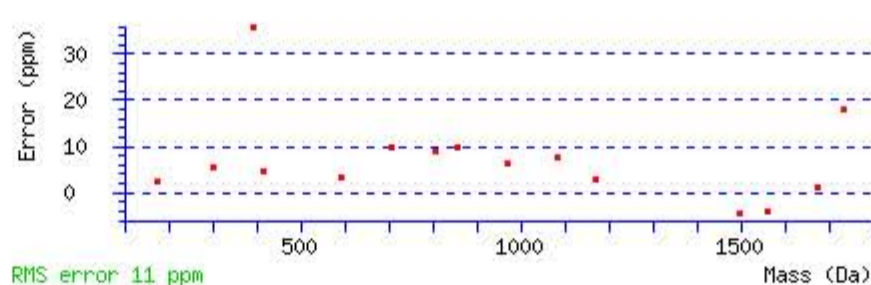

NCBI BLAST search of **NLHDLVSDNQLER**

(Parameters: blastp, nr protein database, expect=20000, no filter, PAM30)

Other BLAST [web gateways](#)

All matches to this query

| Score | Mr(calc):   | Delta     | Sequence                          |
|-------|-------------|-----------|-----------------------------------|
| 70.0  | 1977.957809 | 0.010093  | <a href="#">NLHDLVSDNQLER</a>     |
| 0.1   | 1977.979813 | -0.011911 | <a href="#">TMPRTVPGSTMKGSLER</a> |

Mascot: <http://www.matrixscience.com/>

# MASCOT Search Results

## Peptide View

MS/MS Fragmentation of **LAGLGLQLDEGLFSR**

Found in **VASN\_HUMAN**, Vasorin OS=Homo sapiens GN=VASN PE=1 SV=1

Match to Query 51460: 2027.116512 from(676.712780,3+) rtinseconds(2791) index(11539)

Title: Locus:1.1.1.3225.14 File:"2013-07-02 CLN FXIII 180 min 1st F 1.wiff"

Data file C:\Program Files (x86)\Matrix Science\Mascot Daemon\mgf\7 FXIII 180 min 1st\mascot\_daemon\_merge.mgf

Click mouse within plot area to zoom in by factor of two about that point

Or, Plot from  to  Da

Label all possible matches  Label matches used for scoring

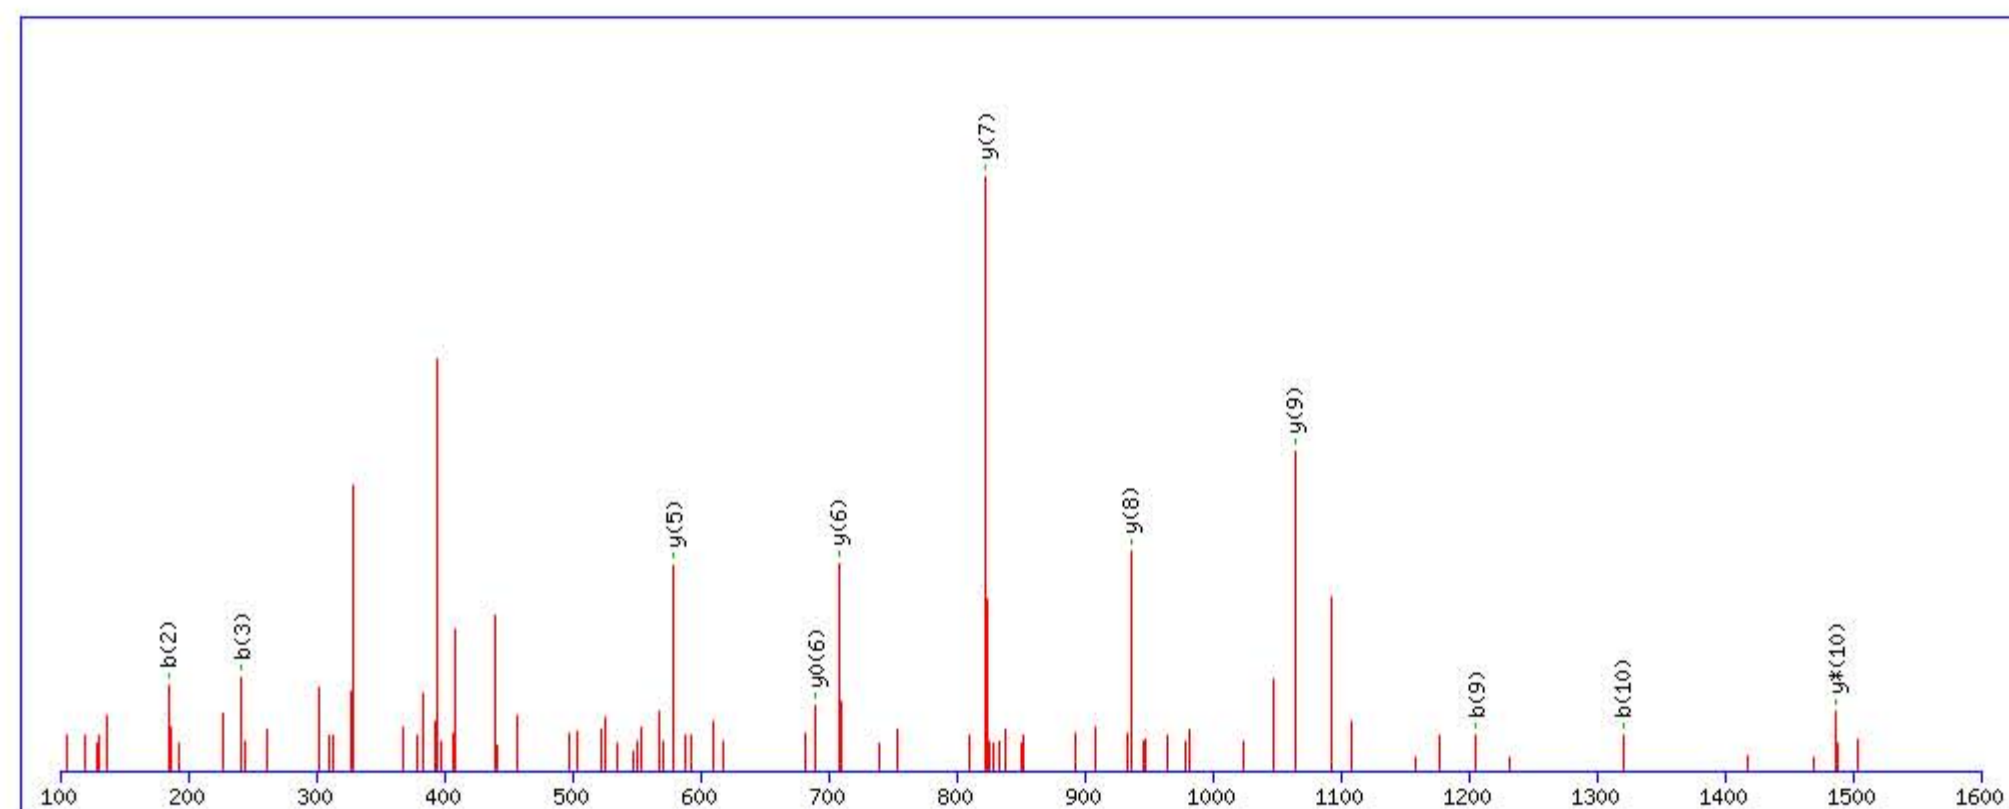

Monoisotopic mass of neutral peptide Mr(calc): 2027.087372

Fixed modifications: Carbamidomethyl (C) (apply to specified residues or termini only)

Variable modifications:

Q7 : Biotin:Thermo-21345 (Q)

Ions Score: 37 Expect: 0.0033

Matches : 11/148 fragment ions using 14 most intense peaks [\(help\)](#)

| #  | b                  | b <sup>++</sup> | b <sup>*</sup> | b <sup>*++</sup> | b <sup>0</sup> | b <sup>0++</sup> | Seq. | y                  | y <sup>++</sup> | y <sup>*</sup>     | y <sup>*++</sup> | y <sup>0</sup>    | y <sup>0++</sup> | #  |
|----|--------------------|-----------------|----------------|------------------|----------------|------------------|------|--------------------|-----------------|--------------------|------------------|-------------------|------------------|----|
| 1  | 114.091340         | 57.549308       |                |                  |                |                  | L    |                    |                 |                    |                  |                   |                  | 16 |
| 2  | <b>185.128454</b>  | 93.067865       |                |                  |                |                  | A    | 1915.010596        | 958.008936      | 1897.984047        | 949.495662       | 1897.000031       | 949.003654       | 15 |
| 3  | <b>242.149918</b>  | 121.578597      |                |                  |                |                  | G    | 1843.973482        | 922.490379      | 1826.946933        | 913.977105       | 1825.962917       | 913.485097       | 14 |
| 4  | 355.233982         | 178.120629      |                |                  |                |                  | L    | 1786.952018        | 893.979647      | 1769.925469        | 885.466373       | 1768.941453       | 884.974364       | 13 |
| 5  | 412.255446         | 206.631361      |                |                  |                |                  | G    | 1673.867954        | 837.437615      | 1656.841405        | 828.924341       | 1655.857389       | 828.432333       | 12 |
| 6  | 525.339510         | 263.173393      |                |                  |                |                  | L    | 1616.846490        | 808.926883      | 1599.819941        | 800.413609       | 1598.835925       | 799.921601       | 11 |
| 7  | 964.564836         | 482.786056      | 947.538287     | 474.272782       |                |                  | Q    | 1503.762426        | 752.384851      | <b>1486.735877</b> | 743.871577       | 1485.751861       | 743.379569       | 10 |
| 8  | 1092.623414        | 546.815345      | 1075.596865    | 538.302071       |                |                  | Q    | <b>1064.537100</b> | 532.772188      | 1047.510551        | 524.258914       | 1046.526535       | 523.766906       | 9  |
| 9  | <b>1205.707478</b> | 603.357377      | 1188.680929    | 594.844102       |                |                  | L    | <b>936.478522</b>  | 468.742899      | 919.451973         | 460.229625       | 918.467957        | 459.737617       | 8  |
| 10 | <b>1320.734421</b> | 660.870848      | 1303.707872    | 652.357574       | 1302.723856    | 651.865566       | D    | <b>823.394458</b>  | 412.200867      | 806.367909         | 403.687593       | 805.383893        | 403.195585       | 7  |
| 11 | 1449.777014        | 725.392145      | 1432.750465    | 716.878871       | 1431.766449    | 716.386863       | E    | <b>708.367515</b>  | 354.687396      | 691.340966         | 346.174121       | <b>690.356950</b> | 345.682113       | 6  |
| 12 | 1506.798478        | 753.902877      | 1489.771929    | 745.389603       | 1488.787913    | 744.897594       | G    | <b>579.324922</b>  | 290.166099      | 562.298373         | 281.652825       | 561.314357        | 281.160817       | 5  |
| 13 | 1619.882542        | 810.444909      | 1602.855993    | 801.931634       | 1601.871977    | 801.439626       | L    | 522.303458         | 261.655367      | 505.276909         | 253.142093       | 504.292893        | 252.650085       | 4  |
| 14 | 1766.950956        | 883.979116      | 1749.924407    | 875.465842       | 1748.940391    | 874.973833       | F    | 409.219394         | 205.113335      | 392.192845         | 196.600061       | 391.208829        | 196.108053       | 3  |
| 15 | 1853.982984        | 927.495130      | 1836.956435    | 918.981856       | 1835.972419    | 918.489848       | S    | 262.150980         | 131.579128      | 245.124431         | 123.065854       | 244.140415        | 122.573846       | 2  |
| 16 |                    |                 |                |                  |                |                  | R    | 175.118952         | 88.063114       | 158.092403         | 79.549839        |                   |                  | 1  |

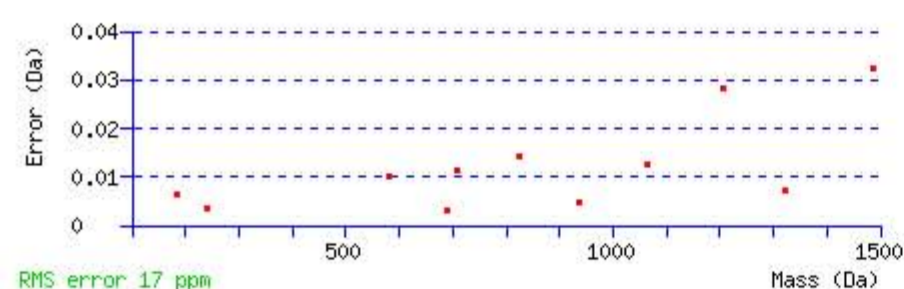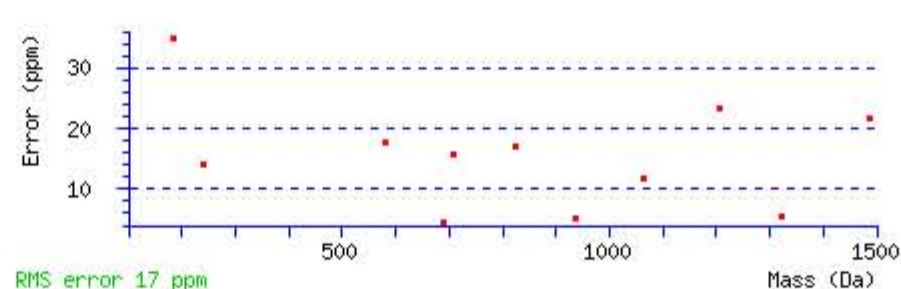

NCBI BLAST search of **LAGLGLQLDEGLFSR**

(Parameters: blastp, nr protein database, expect=20000, no filter, PAM30)

Other BLAST [web gateways](#)

All matches to this query

| Score | Mr(calc):   | Delta    | Sequence                        |
|-------|-------------|----------|---------------------------------|
| 37.0  | 2027.087372 | 0.029140 | <a href="#">LAGLGLQLDEGLFSR</a> |
| 27.8  | 2027.087372 | 0.029140 | <a href="#">LAGLGLQLDEGLFSR</a> |

Mascot: <http://www.matrixscience.com/>



# MASCOT Search Results

## Peptide View

MS/MS Fragmentation of **KFPSGTFEQVSQLVK**

Found in **VTDB\_HUMAN**, Vitamin D-binding protein OS=Homo sapiens GN=GC PE=1 SV=1

Match to Query 27767: 2005.056282 from(669.359370,3+) rtinseconds(2348) index(81230)

Title: Locus:1.1.1.2168.10 File:"2013-07-02 CLN FXIII 180 min 1st FT.wiff"

Data file C:\Program Files (x86)\Matrix Science\Mascot Daemon\mgf\7 FXIII 180 min 1st\mascot\_daemon\_merge.mgf

Click mouse within plot area to zoom in by factor of two about that point

Or, Plot from  to  Da

Label all possible matches  Label matches used for scoring

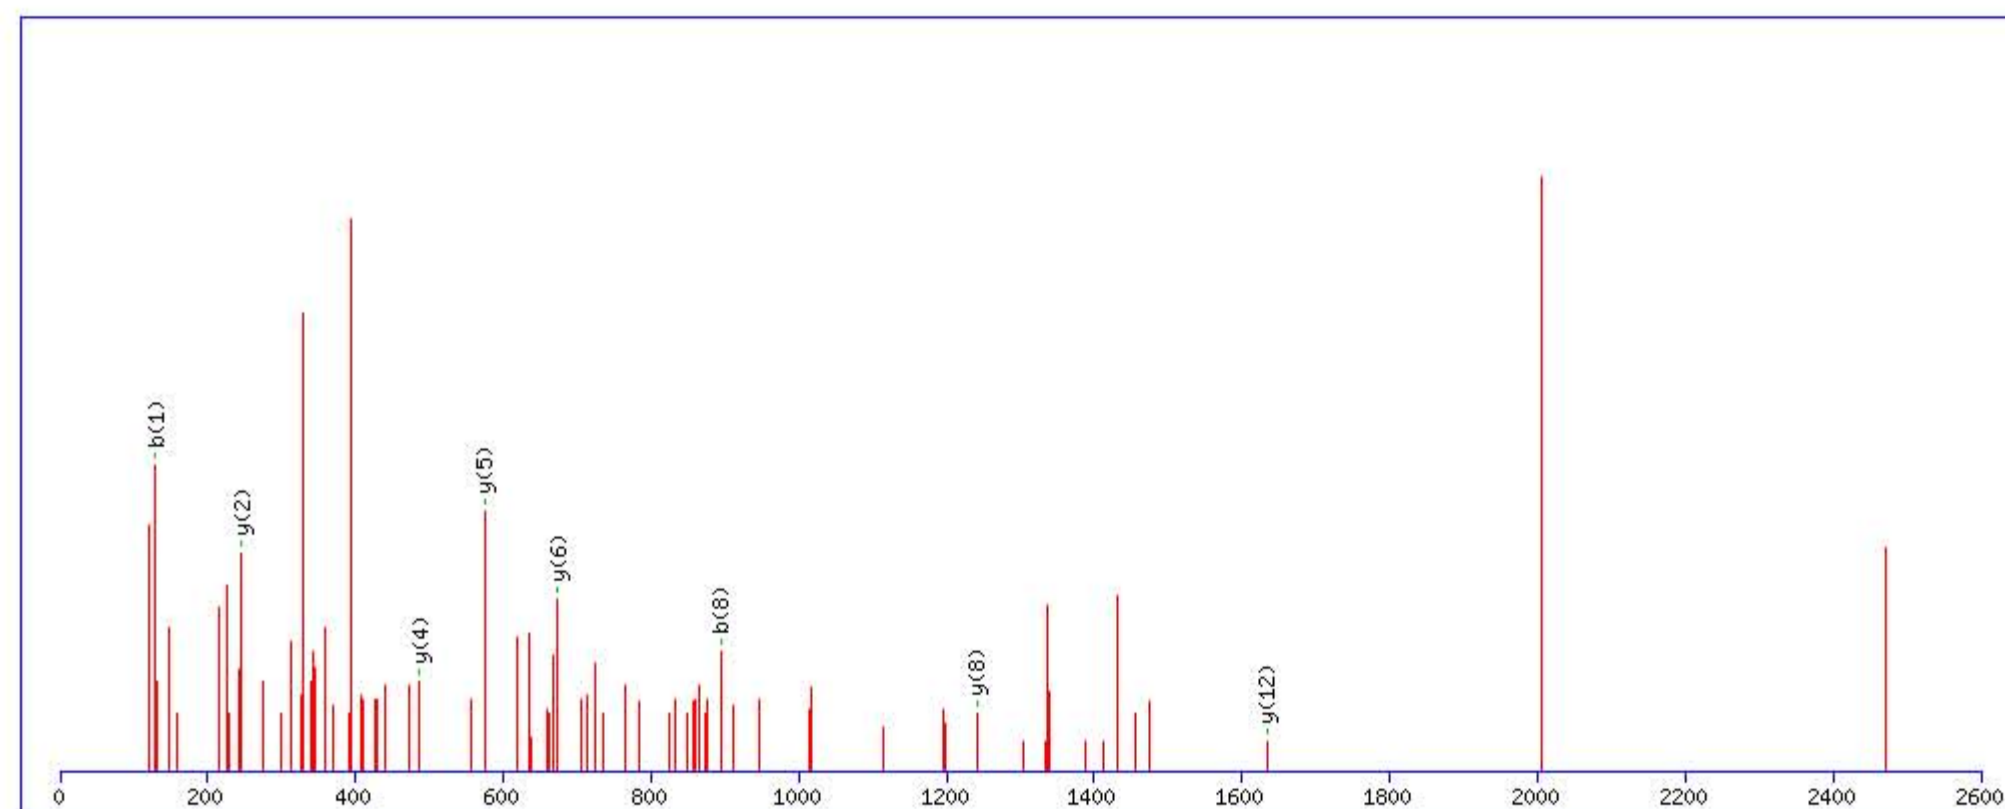

Monoisotopic mass of neutral peptide Mr(calc): 2005.070679

Fixed modifications: Carbamidomethyl (C) (apply to specified residues or termini only)

Variable modifications:

Q9 : Biotin:Thermo-21345 (Q)

Ions Score: 27 Expect: 0.0057

Matches : 8/154 fragment ions using 15 most intense peaks [\(help\)](#)

| #  | b                 | b <sup>++</sup> | b <sup>*</sup> | b <sup>*++</sup> | b <sup>0</sup> | b <sup>0++</sup> | Seq.     | y                  | y <sup>++</sup> | y <sup>*</sup> | y <sup>*++</sup> | y <sup>0</sup> | y <sup>0++</sup> | #         |
|----|-------------------|-----------------|----------------|------------------|----------------|------------------|----------|--------------------|-----------------|----------------|------------------|----------------|------------------|-----------|
| 1  | <b>129.102239</b> | 65.054757       | 112.075690     | 56.541483        |                |                  | <b>K</b> |                    |                 |                |                  |                |                  | <b>15</b> |
| 2  | 276.170653        | 138.588964      | 259.144104     | 130.075690       |                |                  | <b>F</b> | 1877.982984        | 939.495130      | 1860.956435    | 930.981856       | 1859.972419    | 930.489848       | <b>14</b> |
| 3  | 373.223417        | 187.115346      | 356.196868     | 178.602072       |                |                  | <b>P</b> | 1730.914570        | 865.960923      | 1713.888021    | 857.447649       | 1712.904005    | 856.955641       | <b>13</b> |
| 4  | 460.255445        | 230.631360      | 443.228896     | 222.118086       | 442.244880     | 221.626078       | <b>S</b> | <b>1633.861806</b> | 817.434541      | 1616.835257    | 808.921267       | 1615.851241    | 808.429259       | <b>12</b> |
| 5  | 517.276909        | 259.142093      | 500.250360     | 250.628818       | 499.266344     | 250.136810       | <b>G</b> | 1546.829778        | 773.918527      | 1529.803229    | 765.405253       | 1528.819213    | 764.913245       | <b>11</b> |
| 6  | 618.324588        | 309.665932      | 601.298039     | 301.152658       | 600.314023     | 300.660650       | <b>T</b> | 1489.808314        | 745.407795      | 1472.781765    | 736.894521       | 1471.797749    | 736.402513       | <b>10</b> |
| 7  | 765.393002        | 383.200139      | 748.366453     | 374.686865       | 747.382437     | 374.194857       | <b>F</b> | 1388.760635        | 694.883955      | 1371.734086    | 686.370681       | 1370.750070    | 685.878673       | <b>9</b>  |
| 8  | <b>894.435595</b> | 447.721436      | 877.409046     | 439.208161       | 876.425030     | 438.716153       | <b>E</b> | <b>1241.692221</b> | 621.349749      | 1224.665672    | 612.836474       | 1223.681656    | 612.344466       | <b>8</b>  |
| 9  | 1333.660921       | 667.334098      | 1316.634372    | 658.820824       | 1315.650356    | 658.328816       | <b>Q</b> | 1112.649628        | 556.828452      | 1095.623079    | 548.315178       | 1094.639063    | 547.823169       | <b>7</b>  |
| 10 | 1432.729335       | 716.868306      | 1415.702786    | 708.355031       | 1414.718770    | 707.863023       | <b>V</b> | <b>673.424302</b>  | 337.215789      | 656.397753     | 328.702515       | 655.413737     | 328.210507       | <b>6</b>  |
| 11 | 1519.761363       | 760.384320      | 1502.734814    | 751.871045       | 1501.750798    | 751.379037       | <b>S</b> | <b>574.355888</b>  | 287.681582      | 557.329339     | 279.168308       | 556.345323     | 278.676300       | <b>5</b>  |
| 12 | 1647.819941       | 824.413609      | 1630.793392    | 815.900334       | 1629.809376    | 815.408326       | <b>Q</b> | <b>487.323860</b>  | 244.165568      | 470.297311     | 235.652293       |                |                  | <b>4</b>  |
| 13 | 1760.904005       | 880.955640      | 1743.877456    | 872.442366       | 1742.893440    | 871.950358       | <b>L</b> | 359.265282         | 180.136279      | 342.238733     | 171.623004       |                |                  | <b>3</b>  |
| 14 | 1859.972419       | 930.489848      | 1842.945870    | 921.976573       | 1841.961854    | 921.484565       | <b>V</b> | <b>246.181218</b>  | 123.594247      | 229.154669     | 115.080973       |                |                  | <b>2</b>  |
| 15 |                   |                 |                |                  |                |                  | <b>K</b> | 147.112804         | 74.060040       | 130.086255     | 65.546765        |                |                  | <b>1</b>  |

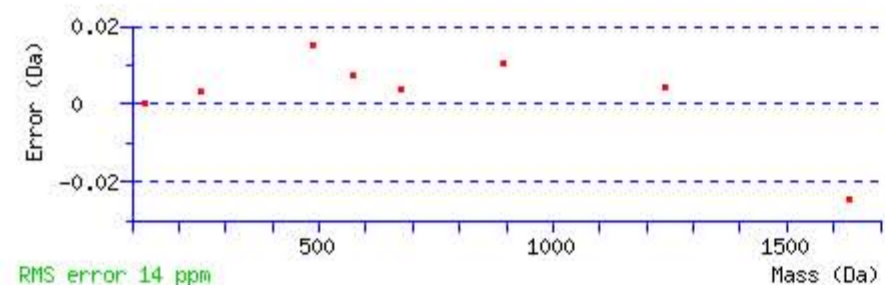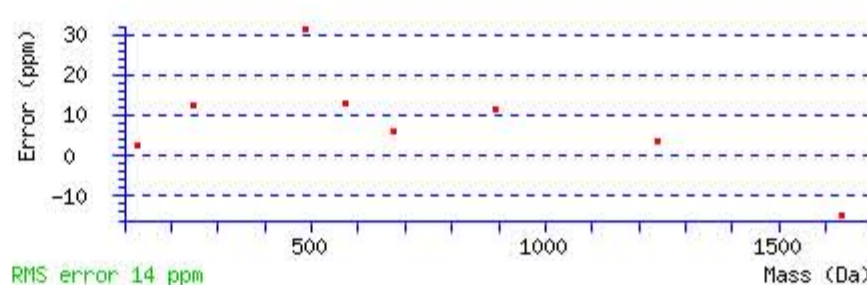

NCBI BLAST search of **KFPSGTFEQVSQLVK**

(Parameters: blastp, nr protein database, expect=20000, no filter, PAM30)

Other BLAST [web gateways](#)

## All matches to this query

| Score | Mr(calc):   | Delta     | Sequence                         |
|-------|-------------|-----------|----------------------------------|
| 27.3  | 2005.070679 | -0.014397 | <a href="#">KFPSGTFEQVSQLVK</a>  |
| 4.8   | 2005.070679 | -0.014397 | <a href="#">KFPSGTFEQVSQLVK</a>  |
| 3.3   | 2005.048874 | 0.007408  | <a href="#">KTMSKPGNGQPPVPEK</a> |

Mascot: <http://www.matrixscience.com/>

# Mascot Search Results

## Peptide View

MS/MS Fragmentation of **FEDCCQEK**

Found in **VTDB\_HUMAN**, Vitamin D-binding protein OS=Homo sapiens GN=GC PE=1 SV=1

Match to Query 32479: 1425.579948 from(713.797250,2+) rtinseconds(1446) index(2928)

Title: Locus:1.1.1.2757.24 File:"2013-07-02 CLN FXIII 180 min 1st F 1.wiff"

Data file C:\Program Files (x86)\Matrix Science\Mascot Daemon\mgf\7 FXIII 180 min 1st\mascot\_daemon\_merge.mgf

Click mouse within plot area to zoom in by factor of two about that point

Or, Plot from  to  Da

Label all possible matches  Label matches used for scoring

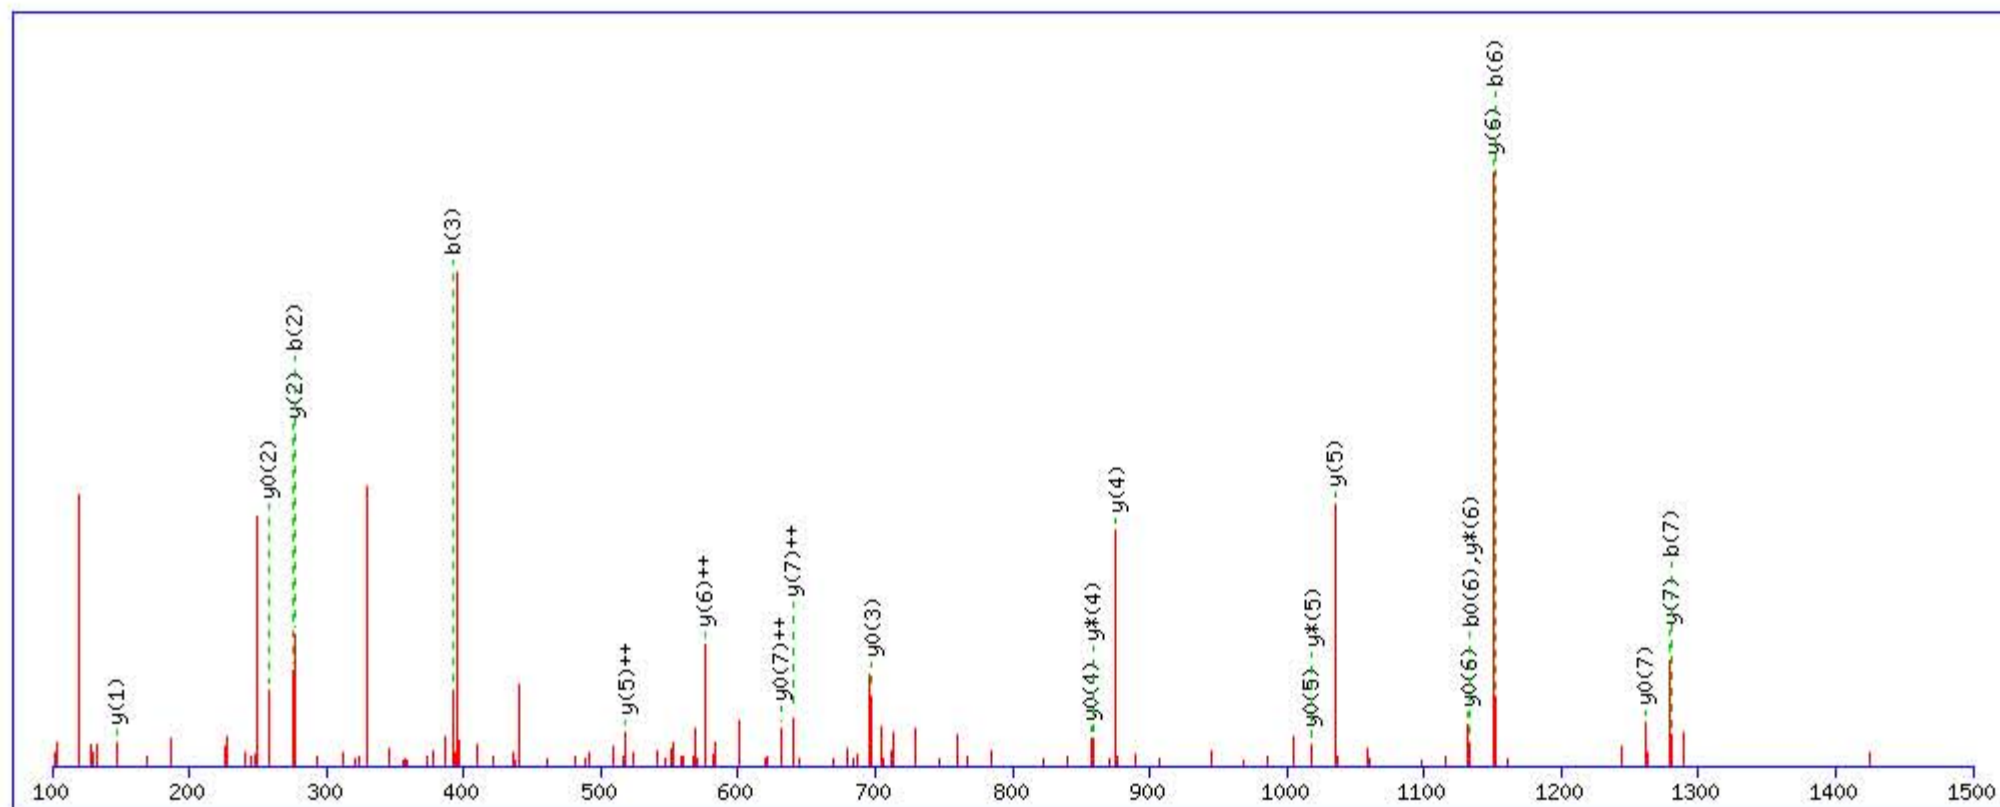

Monoisotopic mass of neutral peptide Mr(calc): 1425.572693

Fixed modifications: Carbamidomethyl (C) (apply to specified residues or termini only)

Variable modifications:

Q6 : Biotin:Thermo-21345 (Q)

Ions Score: 25 Expect: 0.0035

Matches : 24/70 fragment ions using 49 most intense peaks [\(help\)](#)

| # | b                  | b <sup>++</sup> | b <sup>+</sup> | b <sup>+++</sup> | b <sup>0</sup>     | b <sup>0++</sup> | Seq. | y                  | y <sup>++</sup>   | y <sup>+</sup>     | y <sup>+++</sup> | y <sup>0</sup>     | y <sup>0++</sup>  | # |
|---|--------------------|-----------------|----------------|------------------|--------------------|------------------|------|--------------------|-------------------|--------------------|------------------|--------------------|-------------------|---|
| 1 | 148.075690         | 74.541483       |                |                  |                    |                  | F    |                    |                   |                    |                  |                    |                   | 8 |
| 2 | <b>277.118283</b>  | 139.062779      |                |                  | 259.107718         | 130.057497       | E    | <b>1279.511557</b> | <b>640.259417</b> | 1262.485008        | 631.746142       | <b>1261.500992</b> | <b>631.254134</b> | 7 |
| 3 | <b>392.145226</b>  | 196.576251      |                |                  | 374.134661         | 187.570968       | D    | <b>1150.468964</b> | <b>575.738120</b> | <b>1133.442415</b> | 567.224846       | <b>1132.458399</b> | 566.732838        | 6 |
| 4 | 552.175875         | 276.591576      |                |                  | 534.165310         | 267.586293       | C    | <b>1035.442021</b> | <b>518.224649</b> | <b>1018.415472</b> | 509.711374       | <b>1017.431456</b> | 509.219366        | 5 |
| 5 | 712.206524         | 356.606900      |                |                  | 694.195959         | 347.601618       | C    | <b>875.411372</b>  | 438.209324        | <b>858.384823</b>  | 429.696050       | <b>857.400807</b>  | 429.204042        | 4 |
| 6 | <b>1151.431850</b> | 576.219563      | 1134.405301    | 567.706289       | <b>1133.421285</b> | 567.214281       | Q    | 715.380723         | 358.194000        | 698.354174         | 349.680725       | <b>697.370158</b>  | 349.188717        | 3 |
| 7 | <b>1280.474443</b> | 640.740860      | 1263.447894    | 632.227585       | 1262.463878        | 631.735577       | E    | <b>276.155397</b>  | 138.581337        | 259.128848         | 130.068062       | <b>258.144832</b>  | 129.576054        | 2 |
| 8 |                    |                 |                |                  |                    |                  | K    | <b>147.112804</b>  | 74.060040         | 130.086255         | 65.546765        |                    |                   | 1 |

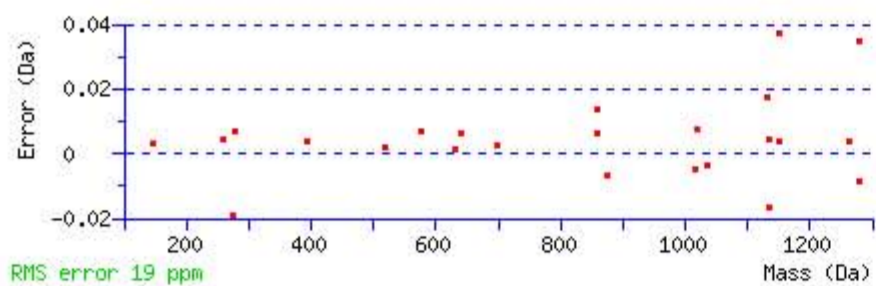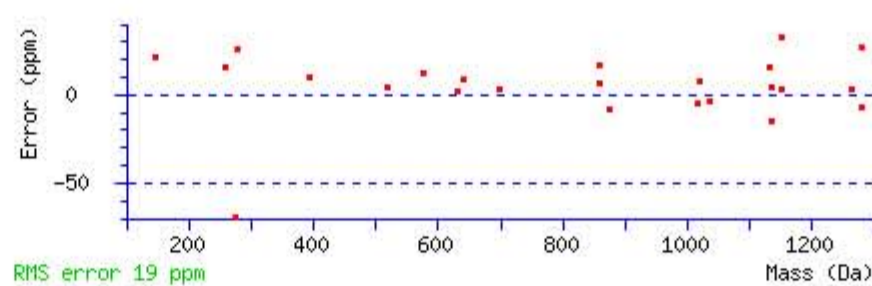

NCBI BLAST search of [FEDCCQEK](#)

(Parameters: blastp, nr protein database, expect=20000, no filter, PAM30)

Other BLAST [web gateways](#)

All matches to this query

| Score | Mr(calc):   | Delta    | Sequence                 |
|-------|-------------|----------|--------------------------|
| 25.3  | 1425.572693 | 0.007255 | <a href="#">FEDCCQEK</a> |

Mascot: <http://www.matrixscience.com/>

# MASCOT SEARCH RESULTS

## Peptide View

MS/MS Fragmentation of **VCSQYAAYGEK**

Found in **VTDB\_HUMAN**, Vitamin D-binding protein OS=Homo sapiens GN=GC PE=1 SV=1

Match to Query 38013: 1585.733788 from(793.874170,2+) rtinseconds(1636) index(4155)

Title: Locus:1.1.1.2823.14 File:"2013-07-02 CLN FXIII 180 min 1st F 1.wiff"

Data file C:\Program Files (x86)\Matrix Science\Mascot Daemon\mgf7 FXIII 180 min 1st\mascot\_daemon\_merge.mgf

Click mouse within plot area to zoom in by factor of two about that point

Or, Plot from  to  Da

Label all possible matches  Label matches used for scoring

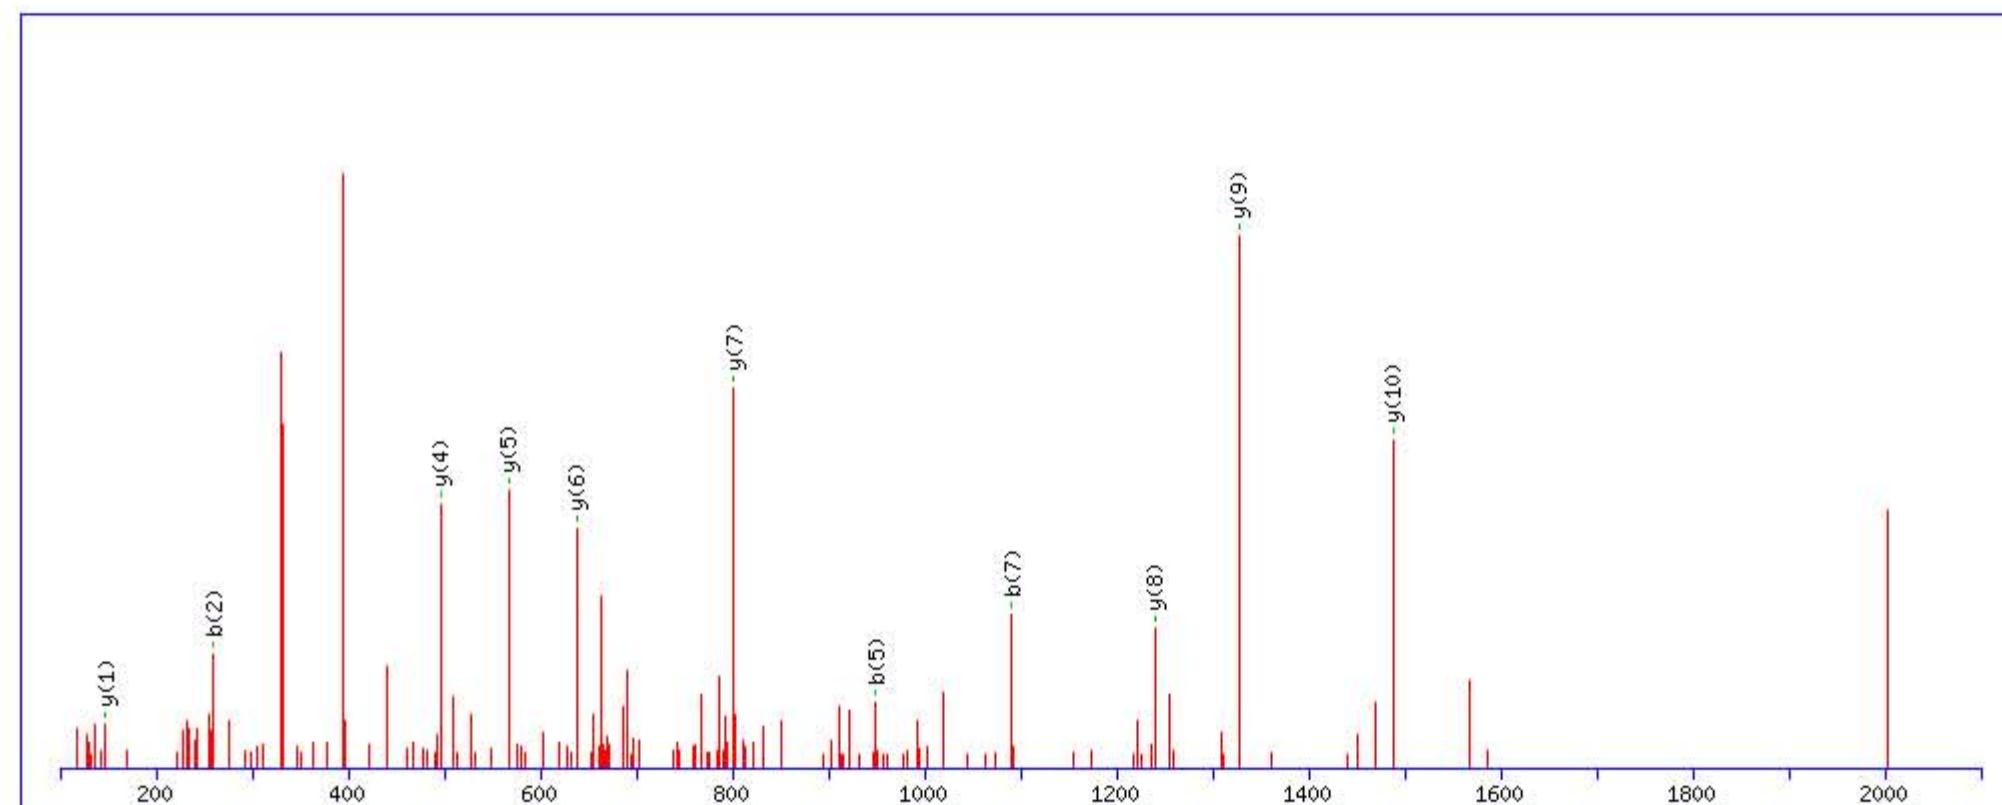

Monoisotopic mass of neutral peptide Mr(calc): 1585.726868

Fixed modifications: Carbamidomethyl (C) (apply to specified residues or termini only)

Variable modifications:

Q4 : Biotin:Thermo-21345 (Q)

Ions Score: 67 Expect: 2.3e-006

Matches : 11/108 fragment ions using 15 most intense peaks [\(help\)](#)

| #  | b                  | b <sup>++</sup> | b <sup>*</sup> | b <sup>*++</sup> | b <sup>0</sup> | b <sup>0++</sup> | Seq. | y                  | y <sup>++</sup> | y <sup>*</sup> | y <sup>*++</sup> | y <sup>0</sup> | y <sup>0++</sup> | #  |
|----|--------------------|-----------------|----------------|------------------|----------------|------------------|------|--------------------|-----------------|----------------|------------------|----------------|------------------|----|
| 1  | 100.075690         | 50.541483       |                |                  |                |                  | V    |                    |                 |                |                  |                |                  | 11 |
| 2  | <b>260.106339</b>  | 130.556807      |                |                  |                |                  | C    | <b>1487.665750</b> | 744.336513      | 1470.639201    | 735.823239       | 1469.655185    | 735.331231       | 10 |
| 3  | 347.138367         | 174.072821      |                |                  | 329.127802     | 165.067539       | S    | <b>1327.635101</b> | 664.321189      | 1310.608552    | 655.807914       | 1309.624536    | 655.315906       | 9  |
| 4  | 786.363693         | 393.685485      | 769.337144     | 385.172210       | 768.353128     | 384.680202       | Q    | <b>1240.603073</b> | 620.805175      | 1223.576524    | 612.291900       | 1222.592508    | 611.799892       | 8  |
| 5  | <b>949.427022</b>  | 475.217149      | 932.400473     | 466.703875       | 931.416457     | 466.211867       | Y    | <b>801.377747</b>  | 401.192512      | 784.351198     | 392.679237       | 783.367182     | 392.187229       | 7  |
| 6  | 1020.464136        | 510.735706      | 1003.437587    | 502.222432       | 1002.453571    | 501.730424       | A    | <b>638.314418</b>  | 319.660847      | 621.287869     | 311.147573       | 620.303853     | 310.655565       | 6  |
| 7  | <b>1091.501250</b> | 546.254263      | 1074.474701    | 537.740989       | 1073.490685    | 537.248981       | A    | <b>567.277304</b>  | 284.142290      | 550.250755     | 275.629016       | 549.266739     | 275.137008       | 5  |
| 8  | 1254.564579        | 627.785928      | 1237.538030    | 619.272653       | 1236.554014    | 618.780645       | Y    | <b>496.240190</b>  | 248.623733      | 479.213641     | 240.110459       | 478.229625     | 239.618451       | 4  |
| 9  | 1311.586043        | 656.296660      | 1294.559494    | 647.783385       | 1293.575478    | 647.291377       | G    | 333.176861         | 167.092069      | 316.150312     | 158.578794       | 315.166296     | 158.086786       | 3  |
| 10 | 1440.628636        | 720.817956      | 1423.602087    | 712.304682       | 1422.618071    | 711.812674       | E    | 276.155397         | 138.581337      | 259.128848     | 130.068062       | 258.144832     | 129.576054       | 2  |
| 11 |                    |                 |                |                  |                |                  | K    | <b>147.112804</b>  | 74.060040       | 130.086255     | 65.546765        |                |                  | 1  |

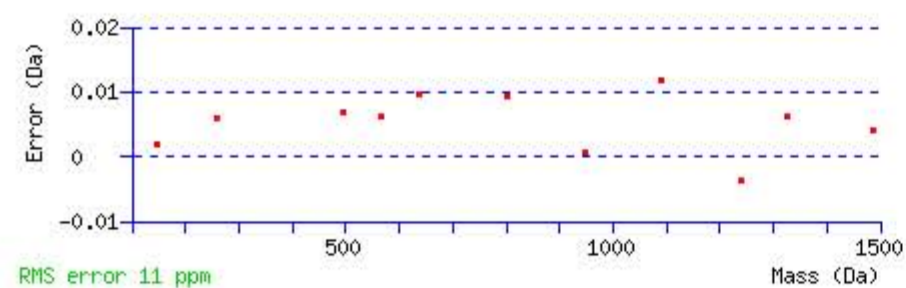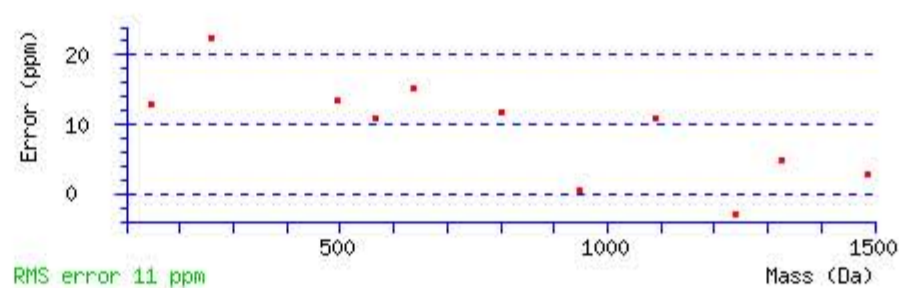

NCBI BLAST search of **VCSQYAAYGEK**

(Parameters: blastp, nr protein database, expect=20000, no filter, PAM30)

Other BLAST [web gateways](#)

All matches to this query

| Score | Mr(calc):   | Delta     | Sequence                        |
|-------|-------------|-----------|---------------------------------|
| 66.9  | 1585.726868 | 0.006920  | <a href="#">VCSQYAAYGEK</a>     |
| 18.2  | 1585.744614 | -0.010826 | <a href="#">MSVNYAAGLSPYADK</a> |
| 1.9   | 1585.747986 | -0.014198 | <a href="#">MKMGQEFVESKEK</a>   |

Mascot: <http://www.matrixscience.com/>

# MASCOT Search Results

## Peptide View

MS/MS Fragmentation of **KFPSGTFEQVSQLVK**

Found in **VTDB\_HUMAN**, Vitamin D-binding protein OS=Homo sapiens GN=GC PE=1 SV=1

Match to Query 50938: 2005.087182 from(669.369670,3+) rtinseconds(2228) index(80469)

Title: Locus:1.1.1.2126.14 File:"2013-07-02 CLN FXIII 180 min 1st FT.wiff"

Data file C:\Program Files (x86)\Matrix Science\Mascot Daemon\mgf7 FXIII 180 min 1st\mascot\_daemon\_merge.mgf

Click mouse within plot area to zoom in by factor of two about that point

Or, Plot from  to  Da

Label all possible matches  Label matches used for scoring

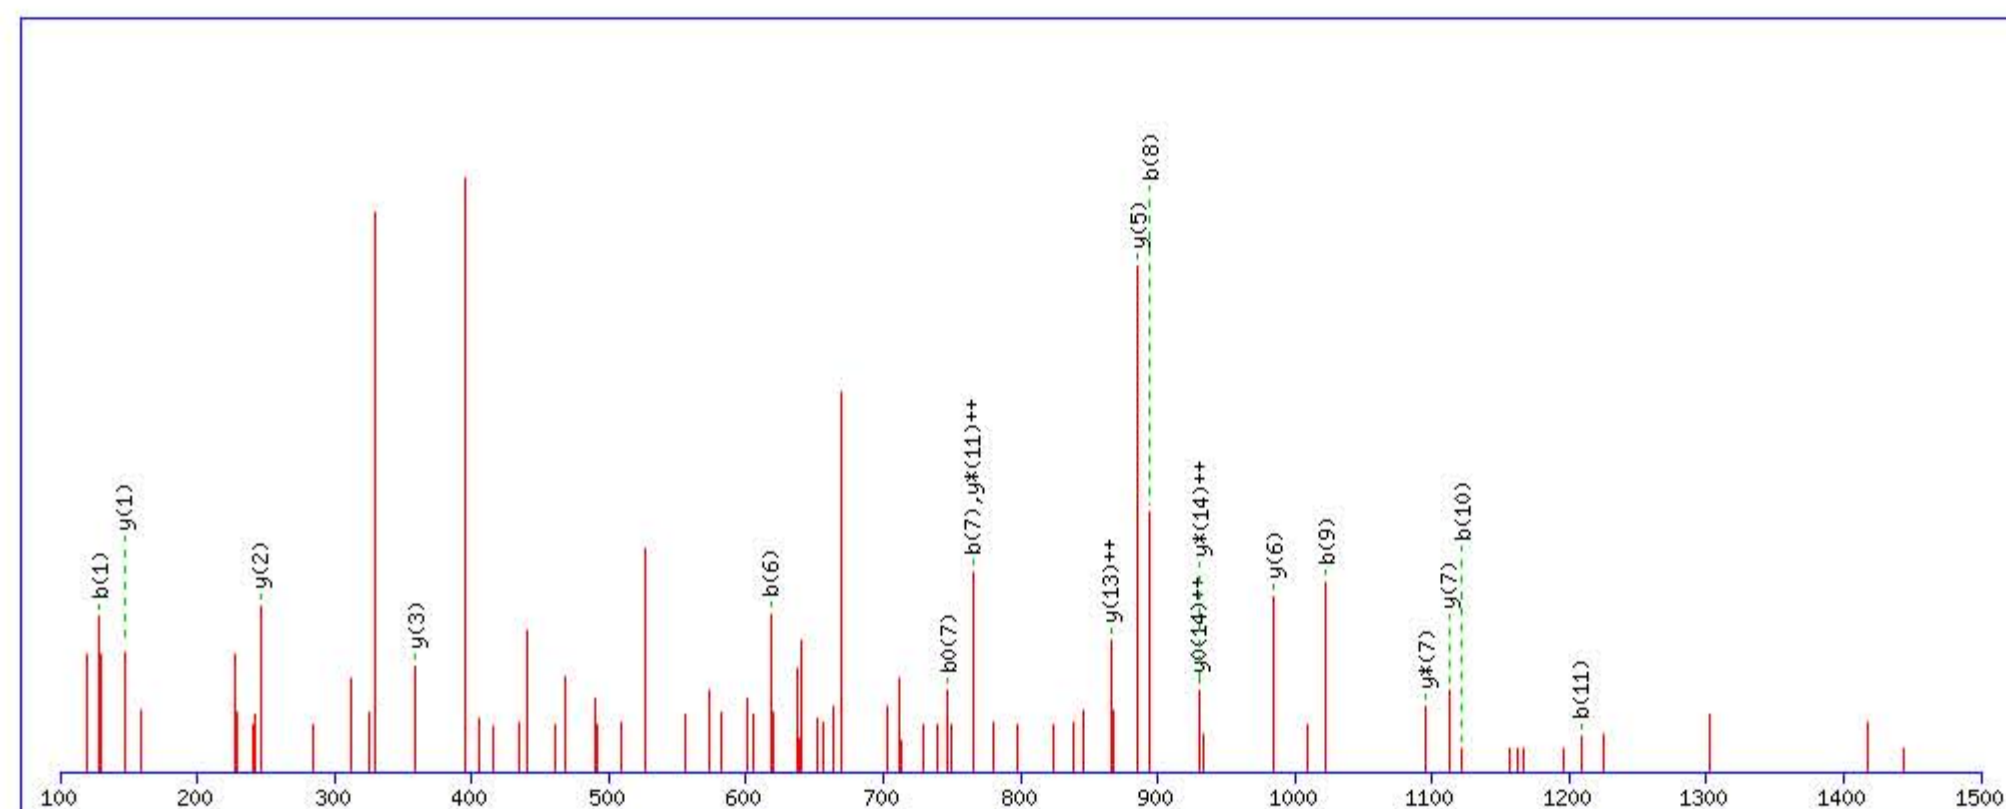

Monoisotopic mass of neutral peptide Mr(calc): 2005.070679

Fixed modifications: Carbamidomethyl (C) (apply to specified residues or termini only)

Variable modifications:

Q12 : Biotin:Thermo-21345 (Q)

Ions Score: 34 Expect: 0.0076

Matches : 20/154 fragment ions using 37 most intense peaks [\(help\)](#)

| #  | b                  | b <sup>++</sup>   | b <sup>*</sup> | b <sup>*++</sup> | b <sup>0</sup>    | b <sup>0++</sup> | Seq.     | y                  | y <sup>++</sup>   | y <sup>*</sup>     | y <sup>*++</sup>  | y <sup>0</sup> | y <sup>0++</sup>  | #         |
|----|--------------------|-------------------|----------------|------------------|-------------------|------------------|----------|--------------------|-------------------|--------------------|-------------------|----------------|-------------------|-----------|
| 1  | <b>129.102239</b>  | 65.054757         | 112.075690     | 56.541483        |                   |                  | <b>K</b> |                    |                   |                    |                   |                |                   | <b>15</b> |
| 2  | 276.170653         | 138.588964        | 259.144104     | 130.075690       |                   |                  | <b>F</b> | 1877.982984        | 939.495130        | 1860.956435        | <b>930.981856</b> | 1859.972419    | <b>930.489848</b> | <b>14</b> |
| 3  | 373.223417         | 187.115346        | 356.196868     | 178.602072       |                   |                  | <b>P</b> | 1730.914570        | <b>865.960923</b> | 1713.888021        | 857.447649        | 1712.904005    | 856.955641        | <b>13</b> |
| 4  | 460.255445         | 230.631360        | 443.228896     | 222.118086       | 442.244880        | 221.626078       | <b>S</b> | 1633.861806        | 817.434541        | 1616.835257        | 808.921267        | 1615.851241    | 808.429259        | <b>12</b> |
| 5  | 517.276909         | 259.142093        | 500.250360     | 250.628818       | 499.266344        | 250.136810       | <b>G</b> | 1546.829778        | 773.918527        | 1529.803229        | <b>765.405253</b> | 1528.819213    | 764.913245        | <b>11</b> |
| 6  | <b>618.324588</b>  | 309.665932        | 601.298039     | 301.152658       | 600.314023        | 300.660650       | <b>T</b> | 1489.808314        | 745.407795        | 1472.781765        | 736.894521        | 1471.797749    | 736.402513        | <b>10</b> |
| 7  | <b>765.393002</b>  | 383.200139        | 748.366453     | 374.686865       | <b>747.382437</b> | 374.194857       | <b>F</b> | 1388.760635        | 694.883956        | 1371.734086        | 686.370681        | 1370.750070    | 685.878673        | <b>9</b>  |
| 8  | <b>894.435595</b>  | 447.721436        | 877.409046     | 439.208161       | 876.425030        | 438.716153       | <b>E</b> | 1241.692221        | 621.349749        | 1224.665672        | 612.836474        | 1223.681656    | 612.344466        | <b>8</b>  |
| 9  | <b>1022.494173</b> | 511.750725        | 1005.467624    | 503.237450       | 1004.483608       | 502.745442       | <b>Q</b> | <b>1112.649628</b> | 556.828452        | <b>1095.623079</b> | 548.315178        | 1094.639063    | 547.823170        | <b>7</b>  |
| 10 | <b>1121.562587</b> | 561.284932        | 1104.536038    | 552.771657       | 1103.552022       | 552.279649       | <b>V</b> | <b>984.591050</b>  | 492.799163        | 967.564501         | 484.285889        | 966.580485     | 483.793881        | <b>6</b>  |
| 11 | <b>1208.594615</b> | 604.800946        | 1191.568066    | 596.287671       | 1190.584050       | 595.795663       | <b>S</b> | <b>885.522636</b>  | 443.264956        | 868.496087         | 434.751682        | 867.512071     | 434.259674        | <b>5</b>  |
| 12 | 1647.819941        | 824.413609        | 1630.793392    | 815.900334       | 1629.809376       | 815.408326       | <b>Q</b> | 798.490608         | 399.748942        | 781.464059         | 391.235668        |                |                   | <b>4</b>  |
| 13 | 1760.904005        | 880.955641        | 1743.877456    | 872.442366       | 1742.893440       | 871.950358       | <b>L</b> | <b>359.265282</b>  | 180.136279        | 342.238733         | 171.623004        |                |                   | <b>3</b>  |
| 14 | 1859.972419        | <b>930.489848</b> | 1842.945870    | 921.976573       | 1841.961854       | 921.484565       | <b>V</b> | <b>246.181218</b>  | 123.594247        | 229.154669         | 115.080973        |                |                   | <b>2</b>  |
| 15 |                    |                   |                |                  |                   |                  | <b>K</b> | <b>147.112804</b>  | 74.060040         | 130.086255         | 65.546765         |                |                   | <b>1</b>  |

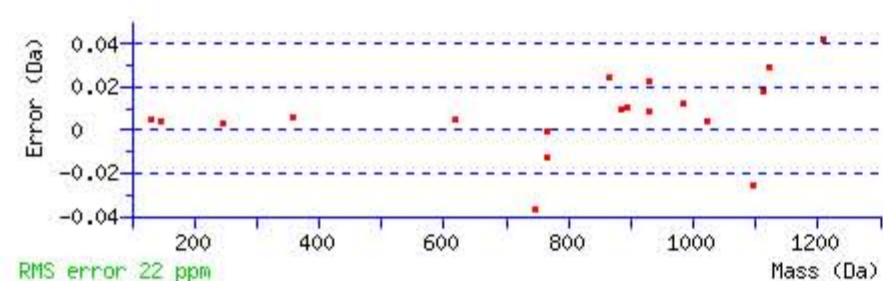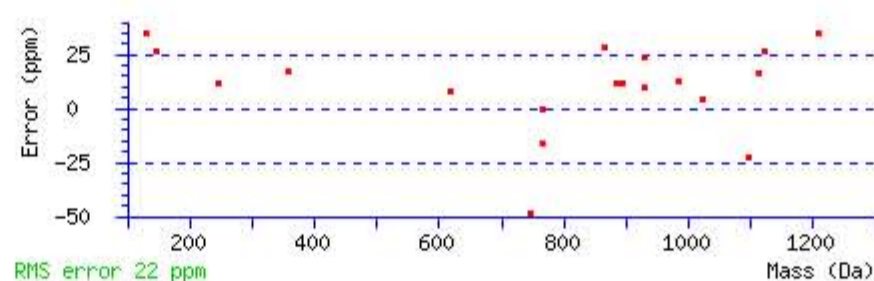

NCBI BLAST search of **KFPSGTFEQVSQLVK**

(Parameters: blastp, nr protein database, expect=20000, no filter, PAM30)

Other BLAST [web gateways](#)

All matches to this query

| Score | Mr(calc):   | Delta    | Sequence                        |
|-------|-------------|----------|---------------------------------|
| 33.9  | 2005.070679 | 0.016503 | <a href="#">KFPSGTFEQVSQLVK</a> |
| 8.7   | 2005.070679 | 0.016503 | <a href="#">KFPSGTFEQVSQLVK</a> |

Mascot: <http://www.matrixscience.com/>

# MASCOT Search Results

## Peptide View

MS/MS Fragmentation of **GQELCADYSENTFTEYK**

Found in **VTDB\_HUMAN**, Vitamin D-binding protein OS=Homo sapiens GN=GC PE=1 SV=1

Match to Query 59312: 2365.047012 from(789.356280,3+) rtinseconds(2160) index(79957)

Title: Locus:1.1.1.2102.22 File:"2013-07-02 CLN FXIII 180 min 1st FT.wiff"

Data file C:\Program Files (x86)\Matrix Science\Mascot Daemon\mgf\7 FXIII 180 min 1st\mascot\_daemon\_merge.mgf

Click mouse within plot area to zoom in by factor of two about that point

Or, Plot from  to  Da

Label all possible matches  Label matches used for scoring

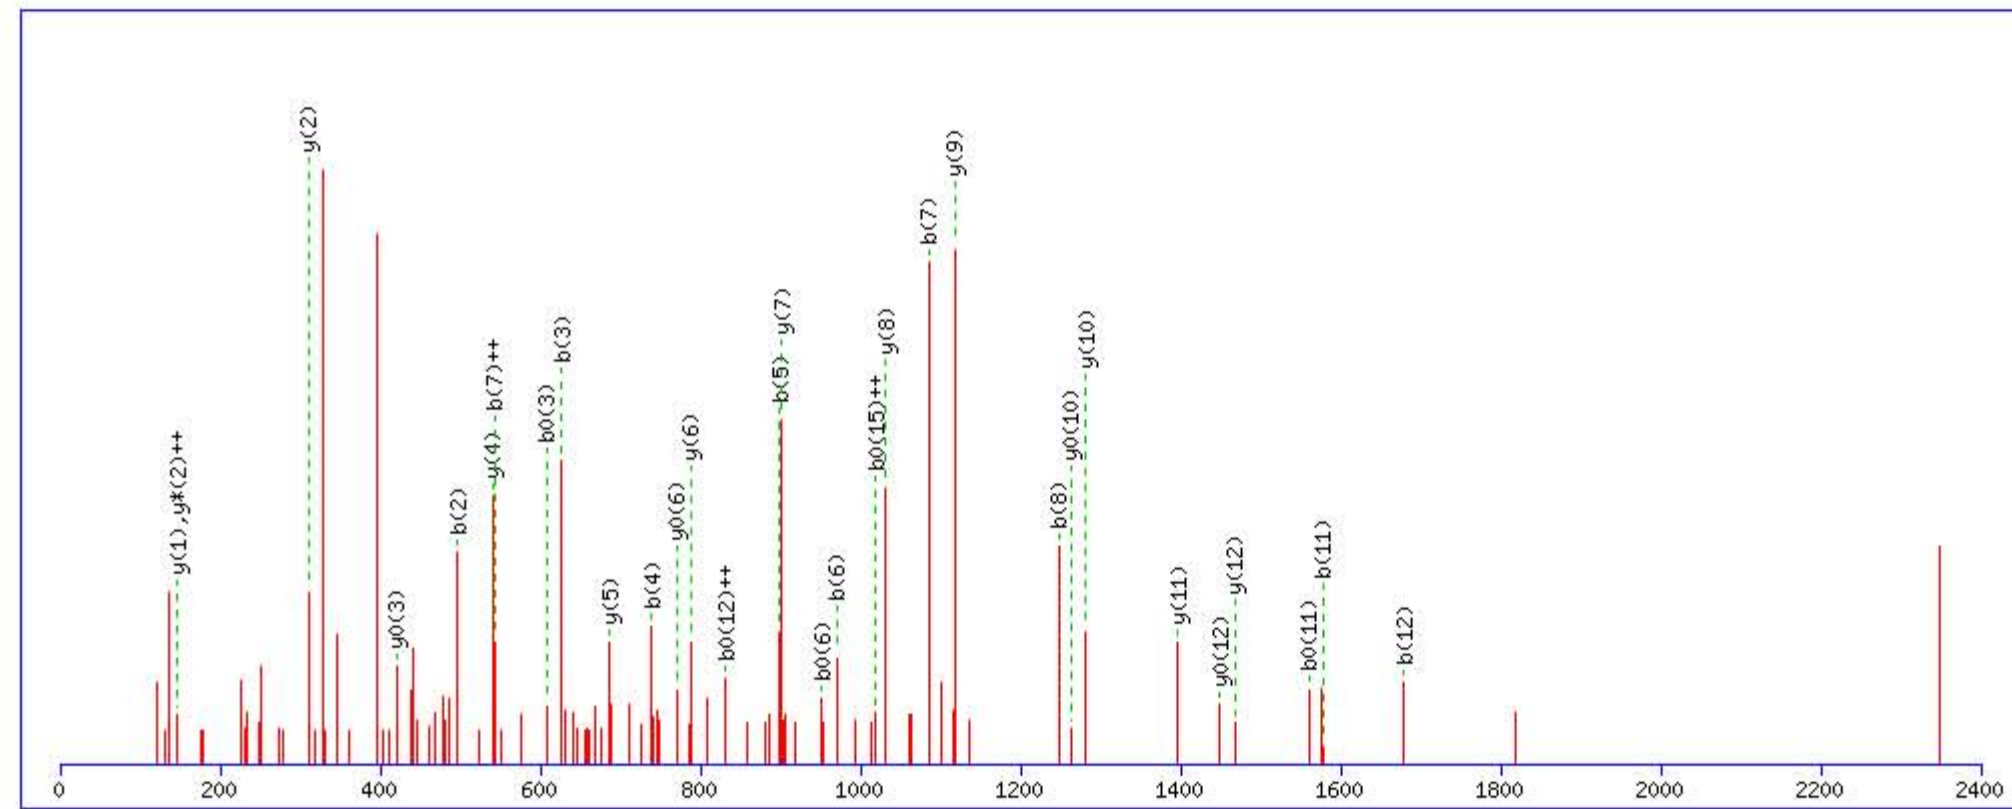

Monoisotopic mass of neutral peptide Mr(calc): 2365.024231

Fixed modifications: Carbamidomethyl (C) (apply to specified residues or termini only)

Variable modifications:

Q2 : Biotin:Thermo-21345 (Q)

Ions Score: 81 Expect: 4.3e-008

Matches : 31/182 fragment ions using 43 most intense peaks [\(help\)](#)

| #  | b                  | b <sup>++</sup>   | b <sup>*</sup> | b <sup>*++</sup> | b <sup>0</sup>     | b <sup>0++</sup> | Seq. | y                  | y <sup>++</sup> | y <sup>*</sup> | y <sup>*++</sup>  | y <sup>0</sup>     | y <sup>0++</sup> | #  |
|----|--------------------|-------------------|----------------|------------------|--------------------|------------------|------|--------------------|-----------------|----------------|-------------------|--------------------|------------------|----|
| 1  | 58.028740          | 29.518008         |                |                  |                    |                  | G    |                    |                 |                |                   |                    |                  | 17 |
| 2  | <b>497.254066</b>  | 249.130671        | 480.227517     | 240.617397       |                    |                  | Q    | 2309.010064        | 1155.008670     | 2291.983515    | 1146.495395       | 2290.999499        | 1146.003387      | 16 |
| 3  | <b>626.296659</b>  | 313.651968        | 609.270110     | 305.138693       | <b>608.286094</b>  | 304.646685       | E    | 1869.784738        | 935.396007      | 1852.758189    | 926.882733        | 1851.774173        | 926.390725       | 15 |
| 4  | <b>739.380723</b>  | 370.194000        | 722.354174     | 361.680725       | 721.370158         | 361.188717       | L    | 1740.742145        | 870.874711      | 1723.715596    | 862.361436        | 1722.731580        | 861.869428       | 14 |
| 5  | <b>899.411372</b>  | 450.209324        | 882.384823     | 441.696050       | 881.400807         | 441.204042       | C    | 1627.658081        | 814.332679      | 1610.631532    | 805.819404        | 1609.647516        | 805.327396       | 13 |
| 6  | <b>970.448486</b>  | 485.727881        | 953.421937     | 477.214607       | <b>952.437921</b>  | 476.722599       | A    | <b>1467.627432</b> | 734.317354      | 1450.600883    | 725.804080        | <b>1449.616867</b> | 725.312072       | 12 |
| 7  | <b>1085.475429</b> | <b>543.241353</b> | 1068.448880    | 534.728078       | 1067.464864        | 534.236070       | D    | <b>1396.590318</b> | 698.798797      | 1379.563769    | 690.285523        | 1378.579753        | 689.793515       | 11 |
| 8  | <b>1248.538758</b> | 624.773017        | 1231.512209    | 616.259743       | 1230.528193        | 615.767735       | Y    | <b>1281.563375</b> | 641.285326      | 1264.536826    | 632.772051        | <b>1263.552810</b> | 632.280043       | 10 |
| 9  | 1335.570786        | 668.289031        | 1318.544237    | 659.775757       | 1317.560221        | 659.283749       | S    | <b>1118.500046</b> | 559.753661      | 1101.473497    | 551.240387        | 1100.489481        | 550.748379       | 9  |
| 10 | 1464.613379        | 732.810328        | 1447.586830    | 724.297053       | 1446.602814        | 723.805045       | E    | <b>1031.468018</b> | 516.237647      | 1014.441469    | 507.724373        | 1013.457453        | 507.232365       | 8  |
| 11 | <b>1578.656306</b> | 789.831791        | 1561.629757    | 781.318517       | <b>1560.645741</b> | 780.826509       | N    | <b>902.425425</b>  | 451.716351      | 885.398876     | 443.203076        | 884.414860         | 442.711068       | 7  |
| 12 | <b>1679.703985</b> | 840.355631        | 1662.677436    | 831.842356       | 1661.693420        | 831.350348       | T    | <b>788.382498</b>  | 394.694887      | 771.355949     | 386.181613        | <b>770.371933</b>  | 385.689605       | 6  |
| 13 | 1826.772399        | 913.889838        | 1809.745850    | 905.376563       | 1808.761834        | 904.884555       | F    | <b>687.334819</b>  | 344.171048      | 670.308270     | 335.657773        | 669.324254         | 335.165765       | 5  |
| 14 | 1927.820078        | 964.413677        | 1910.793529    | 955.900403       | 1909.809513        | 955.408395       | T    | <b>540.266405</b>  | 270.636841      | 523.239856     | 262.123566        | 522.255840         | 261.631558       | 4  |
| 15 | 2056.862671        | 1028.934973       | 2039.836122    | 1020.421699      | 2038.852106        | 1019.929691      | E    | 439.218726         | 220.113001      | 422.192177     | 211.599726        | <b>421.208161</b>  | 211.107718       | 3  |
| 16 | 2219.926000        | 1110.466638       | 2202.899451    | 1101.953363      | 2201.915435        | 1101.461355      | Y    | <b>310.176133</b>  | 155.591705      | 293.149584     | <b>147.078430</b> |                    |                  | 2  |
| 17 |                    |                   |                |                  |                    |                  | K    | <b>147.112804</b>  | 74.060040       | 130.086255     | 65.546765         |                    |                  | 1  |

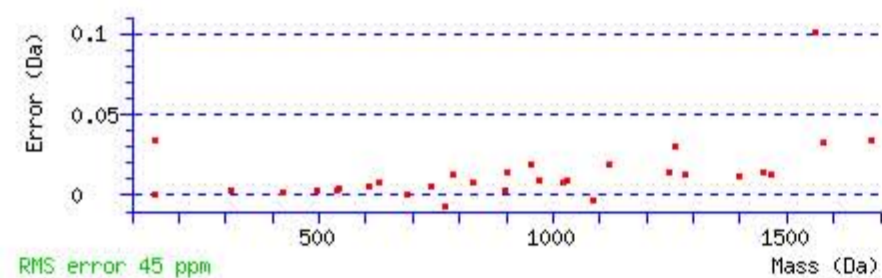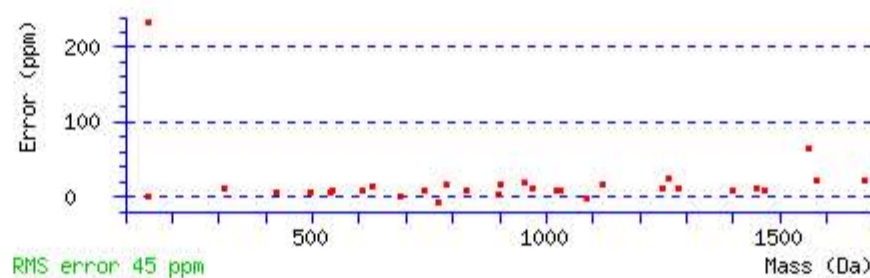

NCBI BLAST search of [GQELCADYSENTFTEYK](#)

(Parameters: blastp, nr protein database, expect=20000, no filter, PAM30)

Other BLAST [web gateways](#)

All matches to this query

| Score | Mr(calc):   | Delta    | Sequence                          |
|-------|-------------|----------|-----------------------------------|
| 81.3  | 2365.024231 | 0.022781 | <a href="#">GQELCADYSENTFTEYK</a> |

Mascot: <http://www.matrixscience.com/>

# MASCOT SEARCH RESULTS

## Peptide View

MS/MS Fragmentation of **HQPQEFPTYVEPTNDEICEAFR**

Found in **VTDB\_HUMAN**, Vitamin D-binding protein OS=Homo sapiens GN=GC PE=1 SV=1

Match to Query 70546: 3017.411772 from(1006.811200,3+) rtinseconds(2329) index(81122)

Title: Locus:1.1.1.2161.25 File:"2013-07-02 CLN FXIII 180 min 1st FT.wiff"

Data file C:\Program Files (x86)\Matrix Science\Mascot Daemon\mgf7 FXIII 180 min 1st\mascot\_daemon\_merge.mgf

Click mouse within plot area to zoom in by factor of two about that point

Or, Plot from  to  Da

Label all possible matches  Label matches used for scoring

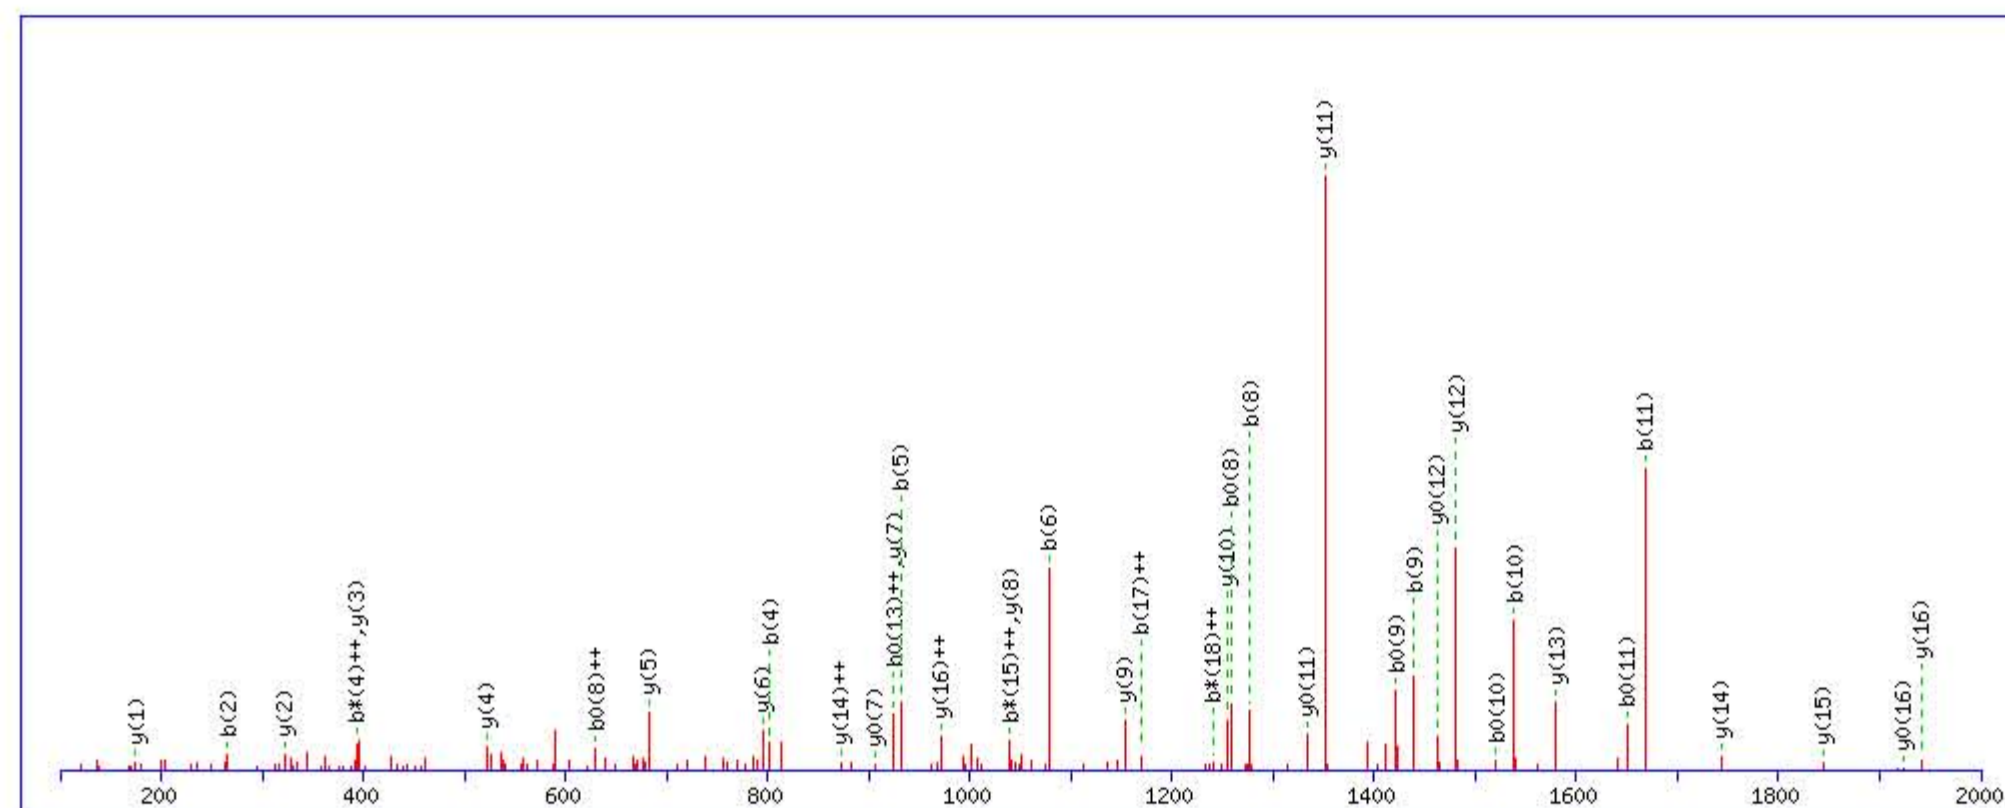

Monoisotopic mass of neutral peptide Mr(calc): 3017.368774

Fixed modifications: Carbamidomethyl (C) (apply to specified residues or termini only)

Variable modifications:

Q4 : Biotin:Thermo-21345 (Q)

Ions Score: 88 Expect: 7e-009

Matches : 40/236 fragment ions using 71 most intense peaks [\(help\)](#)

| #  | b                  | b <sup>++</sup>    | b <sup>*</sup> | b <sup>*++</sup>   | b <sup>0</sup>     | b <sup>0++</sup>  | Seq. | y                  | y <sup>++</sup>   | y <sup>*</sup> | y <sup>*++</sup> | y <sup>0</sup>     | y <sup>0++</sup> | #  |
|----|--------------------|--------------------|----------------|--------------------|--------------------|-------------------|------|--------------------|-------------------|----------------|------------------|--------------------|------------------|----|
| 1  | 138.066188         | 69.536732          |                |                    |                    |                   | H    |                    |                   |                |                  |                    |                  | 22 |
| 2  | <b>266.124766</b>  | 133.566021         | 249.098217     | 125.052746         |                    |                   | Q    | 2881.317146        | 1441.162211       | 2864.290597    | 1432.648936      | 2863.306581        | 1432.156928      | 21 |
| 3  | 363.177530         | 182.092403         | 346.150981     | 173.579129         |                    |                   | P    | 2753.258568        | 1377.132922       | 2736.232019    | 1368.619647      | 2735.248003        | 1368.127639      | 20 |
| 4  | <b>802.402856</b>  | 401.705066         | 785.376307     | <b>393.191792</b>  |                    |                   | Q    | 2656.205804        | 1328.606540       | 2639.179255    | 1320.093265      | 2638.195239        | 1319.601257      | 19 |
| 5  | <b>931.445449</b>  | 466.226363         | 914.418900     | 457.713088         | 913.434884         | 457.221080        | E    | 2216.980478        | 1108.993877       | 2199.953929    | 1100.480602      | 2198.969913        | 1099.988594      | 18 |
| 6  | <b>1078.513863</b> | 539.760570         | 1061.487314    | 531.247295         | 1060.503298        | 530.755287        | F    | 2087.937885        | 1044.472580       | 2070.911336    | 1035.959306      | 2069.927320        | 1035.467298      | 17 |
| 7  | 1175.566627        | 588.286952         | 1158.540078    | 579.773677         | 1157.556062        | 579.281669        | P    | <b>1940.869471</b> | <b>970.938374</b> | 1923.842922    | 962.425099       | <b>1922.858906</b> | 961.933091       | 16 |
| 8  | <b>1276.614306</b> | 638.810791         | 1259.587757    | 630.297517         | <b>1258.603741</b> | <b>629.805509</b> | T    | <b>1843.816707</b> | 922.411992        | 1826.790158    | 913.898717       | 1825.806142        | 913.406709       | 15 |
| 9  | <b>1439.677635</b> | 720.342456         | 1422.651086    | 711.829181         | <b>1421.667070</b> | 711.337173        | Y    | <b>1742.769028</b> | <b>871.888152</b> | 1725.742479    | 863.374878       | 1724.758463        | 862.882870       | 14 |
| 10 | <b>1538.746049</b> | 769.876663         | 1521.719500    | 761.363388         | <b>1520.735484</b> | 760.871380        | V    | <b>1579.705699</b> | 790.356488        | 1562.679150    | 781.843213       | 1561.695134        | 781.351205       | 13 |
| 11 | <b>1667.788642</b> | 834.397959         | 1650.762093    | 825.884685         | <b>1649.778077</b> | 825.392677        | E    | <b>1480.637285</b> | 740.822281        | 1463.610736    | 732.309006       | <b>1462.626720</b> | 731.816998       | 12 |
| 12 | 1764.841406        | 882.924341         | 1747.814857    | 874.411067         | 1746.830841        | 873.919059        | P    | <b>1351.594692</b> | 676.300984        | 1334.568143    | 667.787710       | <b>1333.584127</b> | 667.295702       | 11 |
| 13 | 1865.889085        | 933.448181         | 1848.862536    | 924.934906         | 1847.878520        | <b>924.442898</b> | T    | <b>1254.541928</b> | 627.774602        | 1237.515379    | 619.261328       | 1236.531363        | 618.769320       | 10 |
| 14 | 1979.932012        | 990.469644         | 1962.905463    | 981.956370         | 1961.921447        | 981.464362        | N    | <b>1153.494249</b> | 577.250763        | 1136.467700    | 568.737488       | 1135.483684        | 568.245480       | 9  |
| 15 | 2094.958955        | 1047.983115        | 2077.932406    | <b>1039.469841</b> | 2076.948390        | 1038.977833       | D    | <b>1039.451322</b> | 520.229299        | 1022.424773    | 511.716025       | 1021.440757        | 511.224017       | 8  |
| 16 | 2224.001548        | 1112.504412        | 2206.974999    | 1103.991137        | 2205.990983        | 1103.499130       | E    | <b>924.424379</b>  | 462.715828        | 907.397830     | 454.202553       | <b>906.413814</b>  | 453.710545       | 7  |
| 17 | 2337.085612        | <b>1169.046444</b> | 2320.059063    | 1160.533170        | 2319.075047        | 1160.041162       | I    | <b>795.381786</b>  | 398.194531        | 778.355237     | 389.681257       | 777.371221         | 389.189249       | 6  |
| 18 | 2497.116261        | 1249.061769        | 2480.089712    | <b>1240.548494</b> | 2479.105696        | 1240.056486       | C    | <b>682.297722</b>  | 341.652499        | 665.271173     | 333.139225       | 664.287157         | 332.647217       | 5  |
| 19 | 2626.158854        | 1313.583065        | 2609.132305    | 1305.069791        | 2608.148289        | 1304.577783       | E    | <b>522.267073</b>  | 261.637175        | 505.240524     | 253.123900       | 504.256508         | 252.631892       | 4  |
| 20 | 2697.195968        | 1349.101622        | 2680.169419    | 1340.588348        | 2679.185403        | 1340.096340       | A    | <b>393.224480</b>  | 197.115878        | 376.197931     | 188.602603       |                    |                  | 3  |
| 21 | 2844.264382        | 1422.635829        | 2827.237833    | 1414.122555        | 2826.253817        | 1413.630547       | F    | <b>322.187366</b>  | 161.597321        | 305.160817     | 153.084046       |                    |                  | 2  |
| 22 |                    |                    |                |                    |                    |                   | R    | <b>175.118952</b>  | 88.063114         | 158.092403     | 79.549839        |                    |                  | 1  |

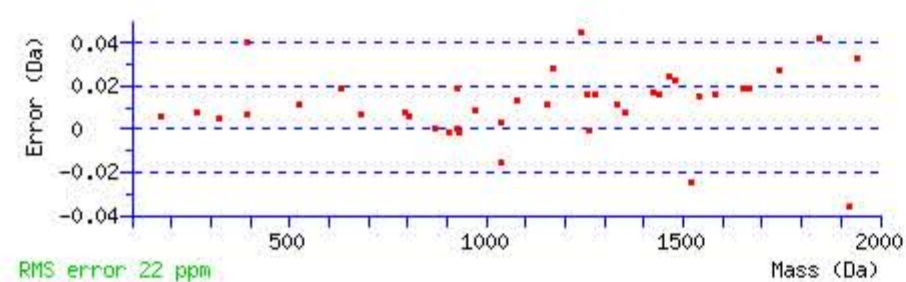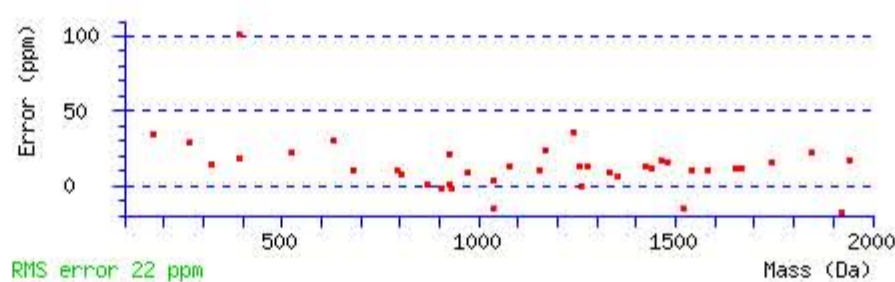

NCBI BLAST search of **HQPQEFPTYVEPTNDEICEAFR**

(Parameters: blastp, nr protein database, expect=20000, no filter, PAM30)

Other BLAST [web gateways](#)

All matches to this query

| Score | Mr(calc):   | Delta     | Sequence                                    |
|-------|-------------|-----------|---------------------------------------------|
| 87.7  | 3017.368774 | 0.042998  | <a href="#">HQPQEFPTYVEPTNDEICEAFR</a>      |
| 86.1  | 3017.368774 | 0.042998  | <a href="#">HQPQEFPTYVEPTNDEICEAFR</a>      |
| 0.7   | 3017.420258 | -0.008486 | <a href="#">VGWARPGCRPDVELGADDQAFVFEGNR</a> |

Mascot: <http://www.matrixscience.com/>

# MASCOT Search Results

## Peptide View

MS/MS Fragmentation of **LGDDLLQCHPAVK**

Found in **PROC\_HUMAN**, Vitamin K-dependent protein C OS=Homo sapiens GN=PROC PE=1 SV=1

Match to Query 44686: 1775.930352 from(592.984060,3+) rtinseconds(1945) index(60388)

Title: Locus:1.1.1.3100.14 File:"2013-07-02 CLN FXIII 180 min 1st F 4.wiff"

Data file C:\Program Files (x86)\Matrix Science\Mascot Daemon\mgf7 FXIII 180 min 1st\mascot\_daemon\_merge.mgf

Click mouse within plot area to zoom in by factor of two about that point

Or, Plot from  to  Da

Label all possible matches  Label matches used for scoring

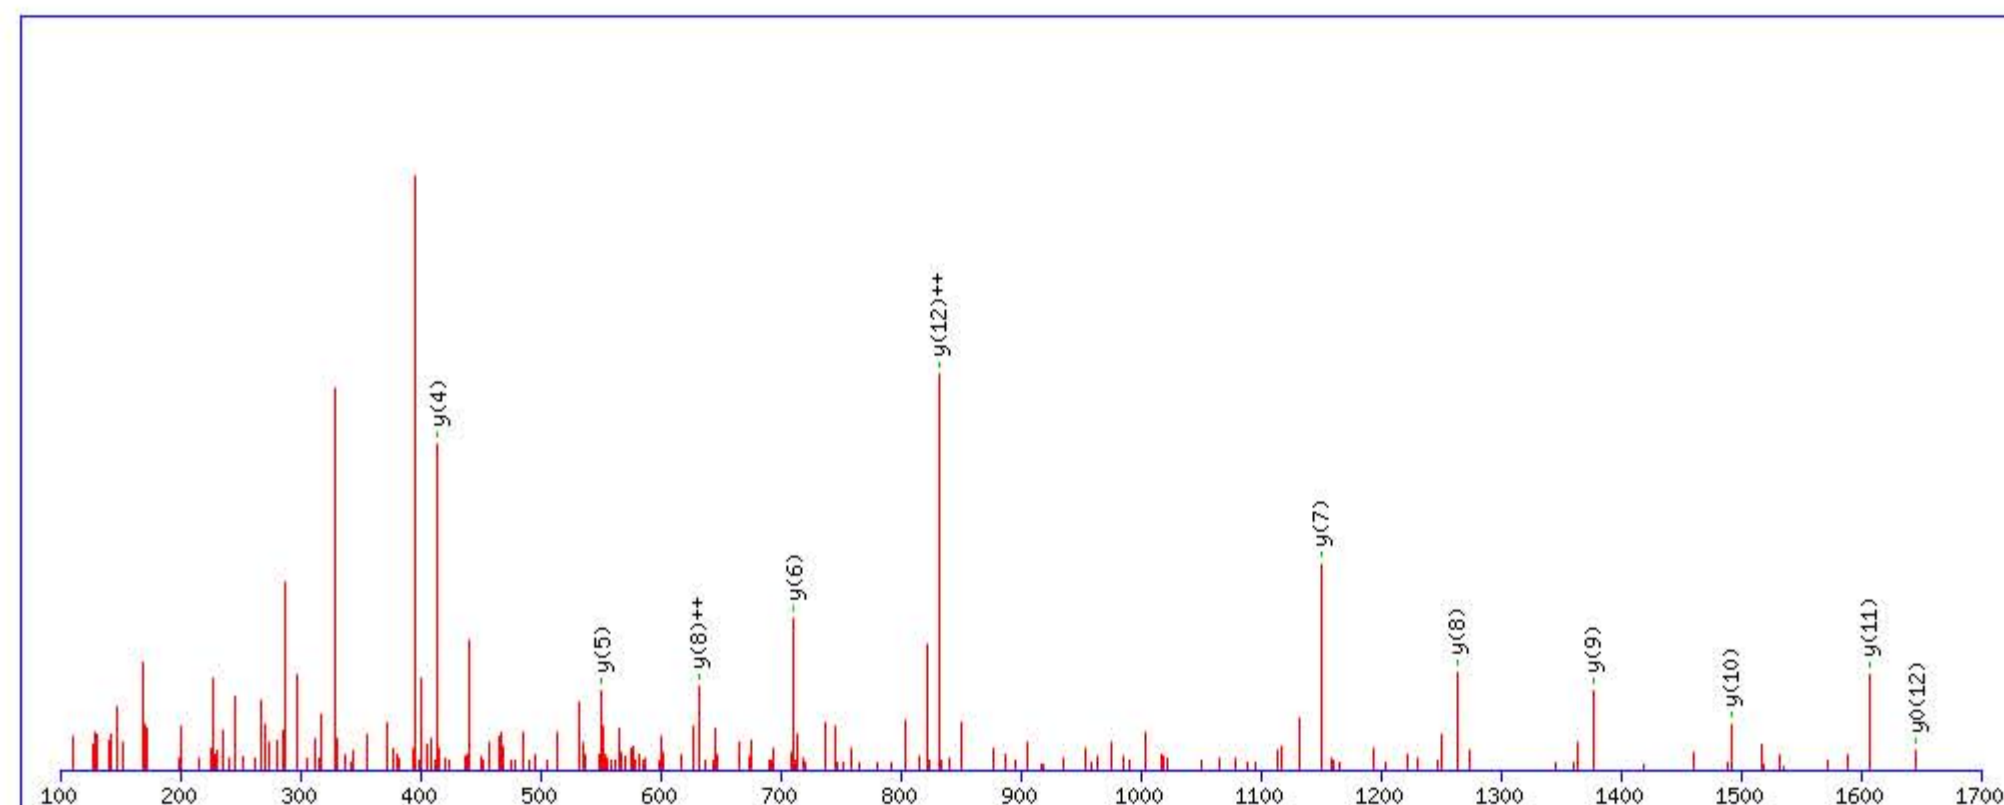

Monoisotopic mass of neutral peptide Mr(calc): 1775.906250

Fixed modifications: Carbamidomethyl (C) (apply to specified residues or termini only)

Variable modifications:

Q7 : Biotin:Thermo-21345 (Q)

Ions Score: 57 Expect: 4.5e-006

Matches : 11/110 fragment ions using 16 most intense peaks [\(help\)](#)

| #  | b           | b <sup>++</sup> | b <sup>*</sup> | b <sup>*++</sup> | b <sup>0</sup> | b <sup>0++</sup> | Seq. | y           | y <sup>++</sup> | y <sup>*</sup> | y <sup>*++</sup> | y <sup>0</sup> | y <sup>0++</sup> | #  |
|----|-------------|-----------------|----------------|------------------|----------------|------------------|------|-------------|-----------------|----------------|------------------|----------------|------------------|----|
| 1  | 114.091340  | 57.549308       |                |                  |                |                  | L    |             |                 |                |                  |                |                  | 13 |
| 2  | 171.112804  | 86.060040       |                |                  |                |                  | G    | 1663.829461 | 832.418369      | 1646.802912    | 823.905094       | 1645.818896    | 823.413086       | 12 |
| 3  | 286.139747  | 143.573512      |                |                  | 268.129182     | 134.568229       | D    | 1606.807997 | 803.907637      | 1589.781448    | 795.394362       | 1588.797432    | 794.902354       | 11 |
| 4  | 401.166690  | 201.086983      |                |                  | 383.156125     | 192.081701       | D    | 1491.781054 | 746.394165      | 1474.754505    | 737.880891       | 1473.770489    | 737.388883       | 10 |
| 5  | 514.250754  | 257.629015      |                |                  | 496.240189     | 248.623733       | L    | 1376.754111 | 688.880694      | 1359.727562    | 680.367419       |                |                  | 9  |
| 6  | 627.334818  | 314.171047      |                |                  | 609.324253     | 305.165765       | L    | 1263.670047 | 632.338662      | 1246.643498    | 623.825387       |                |                  | 8  |
| 7  | 1066.560144 | 533.783710      | 1049.533595    | 525.270436       | 1048.549579    | 524.778428       | Q    | 1150.585983 | 575.796630      | 1133.559434    | 567.283355       |                |                  | 7  |
| 8  | 1226.590793 | 613.799035      | 1209.564244    | 605.285760       | 1208.580228    | 604.793752       | C    | 711.360657  | 356.183967      | 694.334108     | 347.670692       |                |                  | 6  |
| 9  | 1363.649705 | 682.328491      | 1346.623156    | 673.815216       | 1345.639140    | 673.323208       | H    | 551.330008  | 276.168642      | 534.303459     | 267.655368       |                |                  | 5  |
| 10 | 1460.702469 | 730.854873      | 1443.675920    | 722.341598       | 1442.691904    | 721.849590       | P    | 414.271096  | 207.639186      | 397.244547     | 199.125912       |                |                  | 4  |
| 11 | 1531.739583 | 766.373430      | 1514.713034    | 757.860155       | 1513.729018    | 757.368147       | A    | 317.218332  | 159.112804      | 300.191783     | 150.599530       |                |                  | 3  |
| 12 | 1630.807997 | 815.907637      | 1613.781448    | 807.394362       | 1612.797432    | 806.902354       | V    | 246.181218  | 123.594247      | 229.154669     | 115.080973       |                |                  | 2  |
| 13 |             |                 |                |                  |                |                  | K    | 147.112804  | 74.060040       | 130.086255     | 65.546765        |                |                  | 1  |

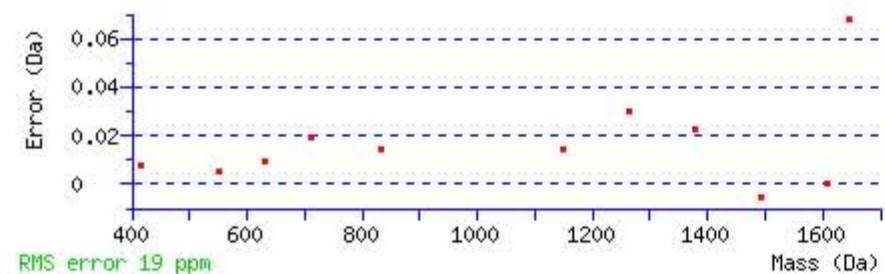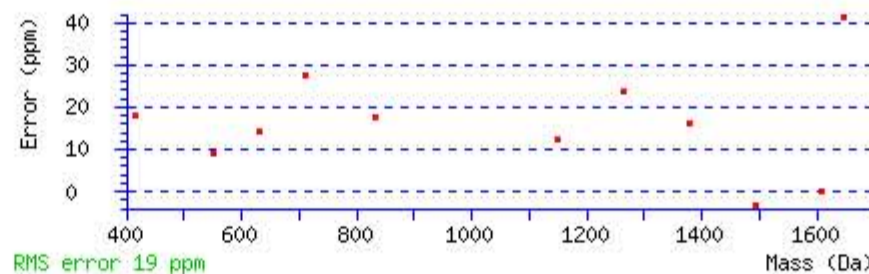

NCBI BLAST search of [LGDDLLQCHPAVK](#)

(Parameters: blastp, nr protein database, expect=20000, no filter, PAM30)

Other BLAST [web gateways](#)

All matches to this query

| Score | Mr(calc):   | Delta     | Sequence                       |
|-------|-------------|-----------|--------------------------------|
| 57.3  | 1775.906250 | 0.024102  | <a href="#">LGDDLLQCHPAVK</a>  |
| 0.2   | 1775.935852 | -0.005500 | <a href="#">KRSPYNYLQVAYFK</a> |

Mascot: <http://www.matrixscience.com/>

# MASCOT SEARCH RESULTS

## Peptide View

MS/MS Fragmentation of **QLAVLDK**

Found in **PROS\_HUMAN**, Vitamin K-dependent protein S OS=Homo sapiens GN=PROS1 PE=1 SV=1

Match to Query 18865: 1096.645548 from(549.330050,2+) rtinseconds(1959) index(60506)

Title: Locus:1.1.1.3105.7 File:"2013-07-02 CLN FXIII 180 min 1st F 4.wiff"

Data file C:\Program Files (x86)\Matrix Science\Mascot Daemon\mgf\7 FXIII 180 min 1st\mascot\_daemon\_merge.mgf

Click mouse within plot area to zoom in by factor of two about that point

Or, Plot from  to  Da

Label all possible matches  Label matches used for scoring

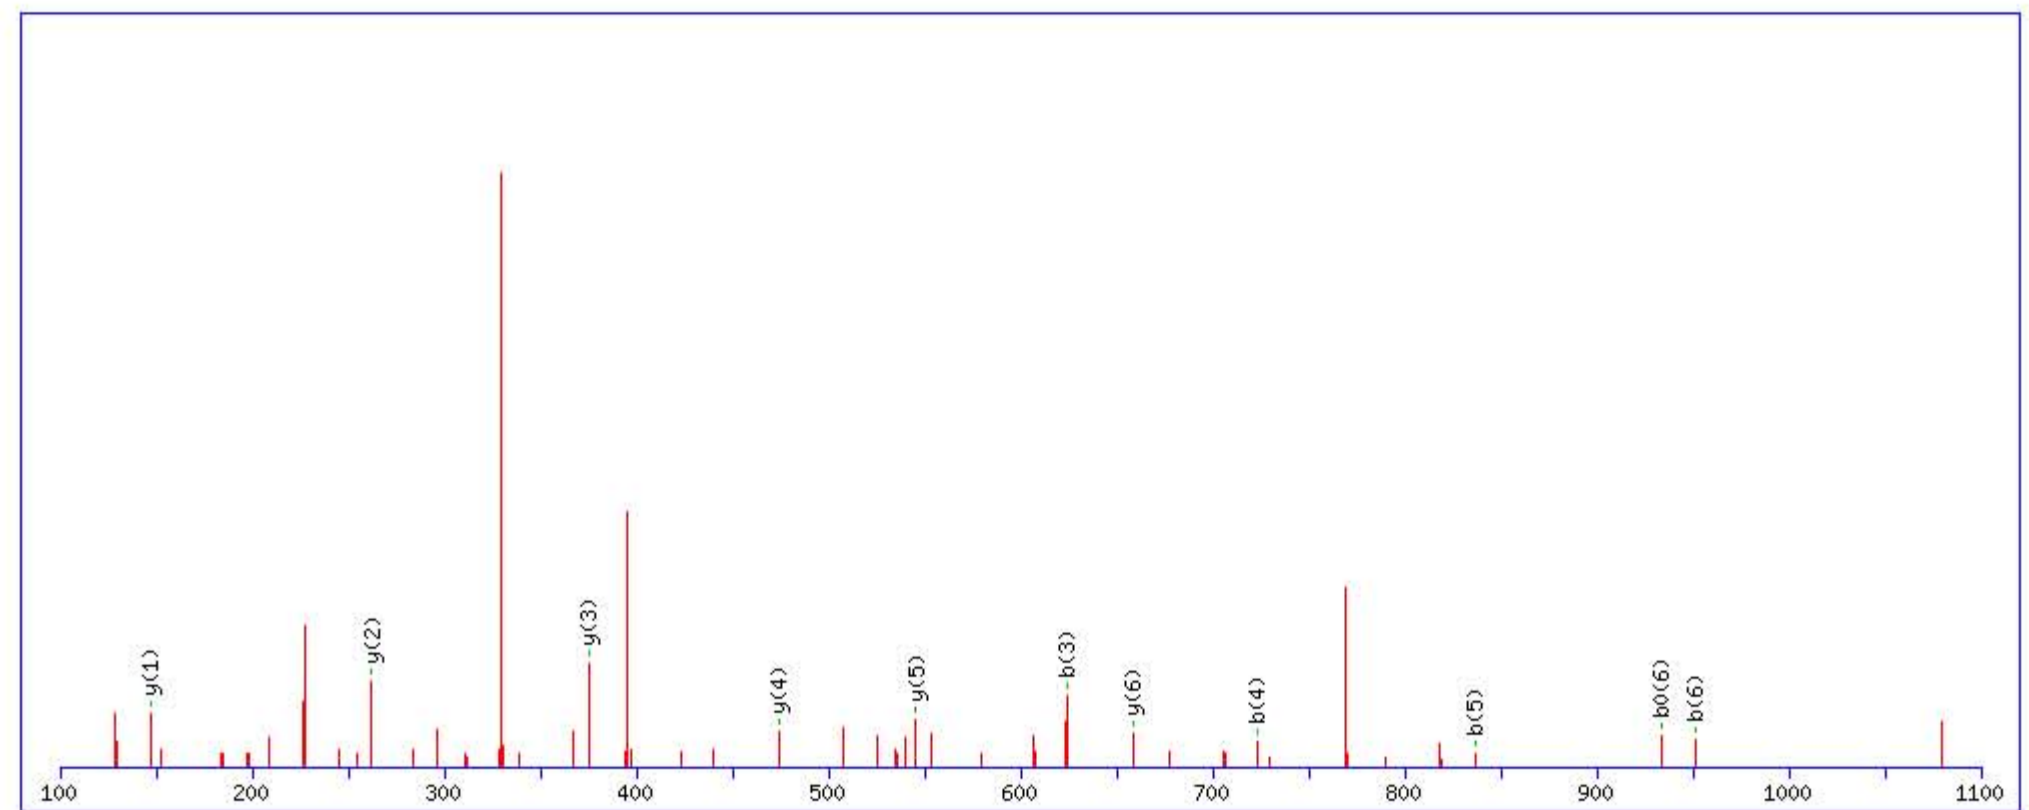

Monoisotopic mass of neutral peptide Mr(calc): 1096.631439

Fixed modifications: Carbamidomethyl (C) (apply to specified residues or termini only)

Variable modifications:

Q1 : Biotin:Thermo-21345 (Q)

Ions Score: 30 Expect: 0.01

Matches : 11/60 fragment ions using 25 most intense peaks [\(help\)](#)

| # | b          | b <sup>++</sup> | b <sup>*</sup> | b <sup>*++</sup> | b <sup>0</sup> | b <sup>0++</sup> | Seq. | y          | y <sup>++</sup> | y <sup>*</sup> | y <sup>*++</sup> | y <sup>0</sup> | y <sup>0++</sup> | # |
|---|------------|-----------------|----------------|------------------|----------------|------------------|------|------------|-----------------|----------------|------------------|----------------|------------------|---|
| 1 | 440.232602 | 220.619939      | 423.206053     | 212.106664       |                |                  | Q    |            |                 |                |                  |                |                  | 7 |
| 2 | 553.316666 | 277.161971      | 536.290117     | 268.648697       |                |                  | L    | 658.413403 | 329.710340      | 641.386854     | 321.197065       | 640.402838     | 320.705057       | 6 |
| 3 | 624.353780 | 312.680528      | 607.327231     | 304.167254       |                |                  | A    | 545.329339 | 273.168308      | 528.302790     | 264.655033       | 527.318774     | 264.163025       | 5 |
| 4 | 723.422194 | 362.214735      | 706.395645     | 353.701461       |                |                  | V    | 474.292225 | 237.649750      | 457.265676     | 229.136476       | 456.281660     | 228.644468       | 4 |
| 5 | 836.506258 | 418.756767      | 819.479709     | 410.243493       |                |                  | L    | 375.223811 | 188.115543      | 358.197262     | 179.602269       | 357.213246     | 179.110261       | 3 |
| 6 | 951.533201 | 476.270239      | 934.506652     | 467.756964       | 933.522636     | 467.264956       | D    | 262.139747 | 131.573511      | 245.113198     | 123.060237       | 244.129182     | 122.568229       | 2 |
| 7 |            |                 |                |                  |                |                  | K    | 147.112804 | 74.060040       | 130.086255     | 65.546765        |                |                  | 1 |

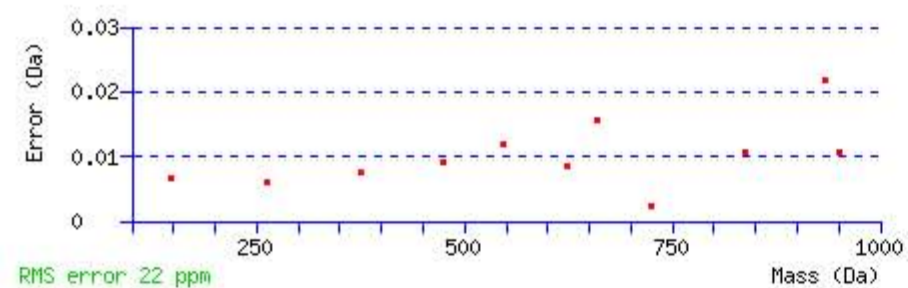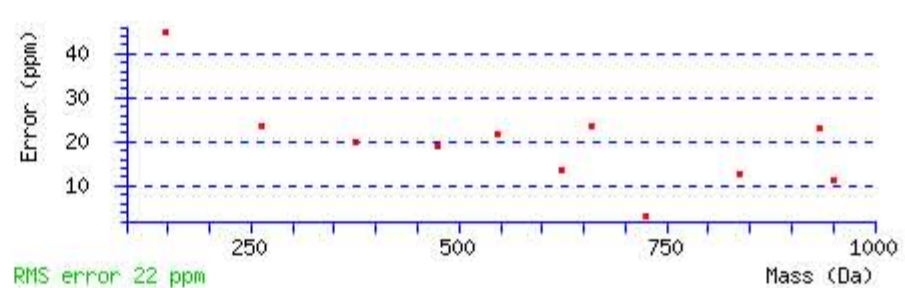

NCBI BLAST search of **QLAVLDK**

(Parameters: blastp, nr protein database, expect=20000, no filter, PAM30)

Other BLAST [web gateways](#)

All matches to this query

| Score | Mr(calc):   | Delta     | Sequence                   |
|-------|-------------|-----------|----------------------------|
| 30.4  | 1096.631439 | 0.014109  | <a href="#">QLAVLDK</a>    |
| 8.6   | 1096.631439 | 0.014109  | <a href="#">GILQLDK</a>    |
| 7.5   | 1096.639297 | 0.006251  | <a href="#">AHVSPLFKAK</a> |
| 4.5   | 1096.660416 | -0.014868 | <a href="#">EPVLRKDLK</a>  |
| 3.9   | 1096.631439 | 0.014109  | <a href="#">QIDVAIK</a>    |
| 2.1   | 1096.635269 | 0.010279  | <a href="#">SSSLVIHKAR</a> |
| 1.7   | 1096.660431 | -0.014883 | <a href="#">SLKVVPEGIR</a> |
| 1.0   | 1096.646500 | -0.000952 | <a href="#">KPDQARVRK</a>  |

Mascot: <http://www.matrixscience.com/>



# MASCOT Search Results

## Peptide View

MS/MS Fragmentation of **QSTNAYPDLR**

Found in **PROS\_HUMAN**, Vitamin K-dependent protein S OS=Homo sapiens GN=PROS1 PE=1 SV=1

Match to Query 34119: 1474.734608 from(738.374580,2+) rtinseconds(1757) index(40488)

Title: Locus:1.1.1.3061.20 File:"2013-07-02 CLN FXIII 180 min 1st F 3.wiff"

Data file C:\Program Files (x86)\Matrix Science\Mascot Daemon\mgf\7 FXIII 180 min 1st\mascot\_daemon\_merge.mgf

Click mouse within plot area to zoom in by factor of two about that point

Or, Plot from  to  Da

Label all possible matches  Label matches used for scoring

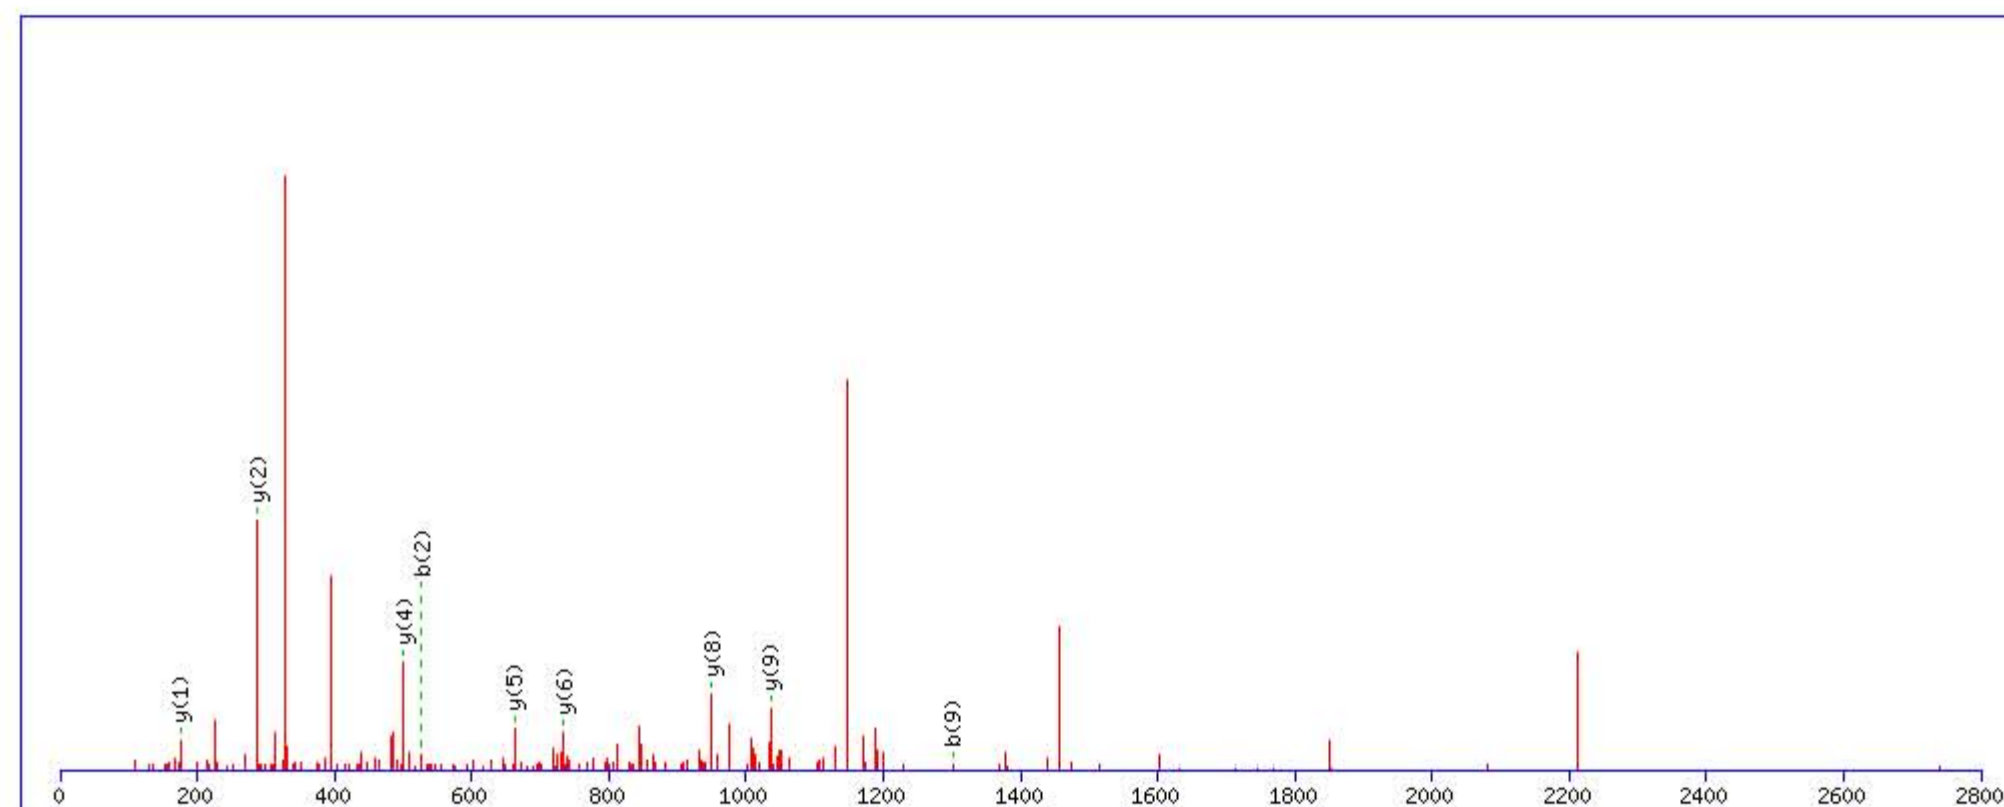

Monoisotopic mass of neutral peptide Mr(calc): 1474.723831

Fixed modifications: Carbamidomethyl (C) (apply to specified residues or termini only)

Variable modifications:

Q1 : Biotin:Thermo-21345 (Q)

Ions Score: 51 Expect: 0.00019

Matches : 9/102 fragment ions using 14 most intense peaks [\(help\)](#)

| #  | b                  | b <sup>++</sup> | b <sup>+</sup> | b <sup>+++</sup> | b <sup>0</sup> | b <sup>0++</sup> | Seq. | y                  | y <sup>++</sup> | y <sup>+</sup> | y <sup>+++</sup> | y <sup>0</sup> | y <sup>0++</sup> | #  |
|----|--------------------|-----------------|----------------|------------------|----------------|------------------|------|--------------------|-----------------|----------------|------------------|----------------|------------------|----|
| 1  | 440.232602         | 220.619939      | 423.206053     | 212.106664       |                |                  | Q    |                    |                 |                |                  |                |                  | 10 |
| 2  | <b>527.264630</b>  | 264.135953      | 510.238081     | 255.622679       | 509.254065     | 255.130671       | S    | <b>1036.505800</b> | 518.756538      | 1019.479251    | 510.243263       | 1018.495235    | 509.751255       | 9  |
| 3  | 628.312309         | 314.659793      | 611.285760     | 306.146518       | 610.301744     | 305.654510       | T    | <b>949.473772</b>  | 475.240524      | 932.447223     | 466.727249       | 931.463207     | 466.235241       | 8  |
| 4  | 742.355236         | 371.681256      | 725.328687     | 363.167982       | 724.344671     | 362.675974       | N    | 848.426093         | 424.716684      | 831.399544     | 416.203410       | 830.415528     | 415.711402       | 7  |
| 5  | 813.392350         | 407.199813      | 796.365801     | 398.686538       | 795.381785     | 398.194530       | A    | <b>734.383166</b>  | 367.695221      | 717.356617     | 359.181946       | 716.372601     | 358.689938       | 6  |
| 6  | 976.455679         | 488.731477      | 959.429130     | 480.218203       | 958.445114     | 479.726195       | Y    | <b>663.346052</b>  | 332.176664      | 646.319503     | 323.663389       | 645.335487     | 323.171382       | 5  |
| 7  | 1073.508443        | 537.257860      | 1056.481894    | 528.744585       | 1055.497878    | 528.252577       | P    | <b>500.282723</b>  | 250.644999      | 483.256174     | 242.131725       | 482.272158     | 241.639717       | 4  |
| 8  | 1188.535386        | 594.771331      | 1171.508837    | 586.258057       | 1170.524821    | 585.766049       | D    | 403.229959         | 202.118617      | 386.203410     | 193.605343       | 385.219394     | 193.113335       | 3  |
| 9  | <b>1301.619450</b> | 651.313363      | 1284.592901    | 642.800089       | 1283.608885    | 642.308080       | L    | <b>288.203016</b>  | 144.605146      | 271.176467     | 136.091871       |                |                  | 2  |
| 10 |                    |                 |                |                  |                |                  | R    | <b>175.118952</b>  | 88.063114       | 158.092403     | 79.549839        |                |                  | 1  |

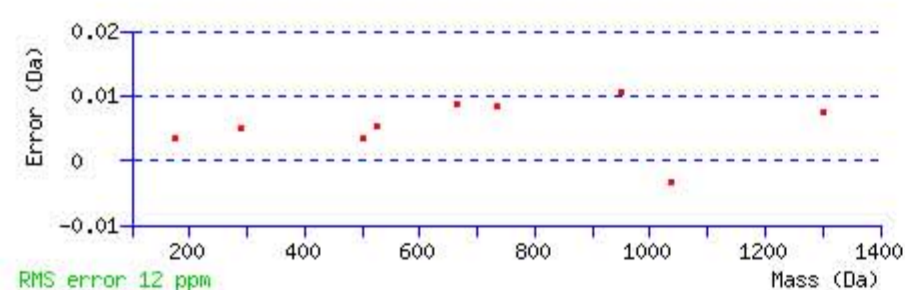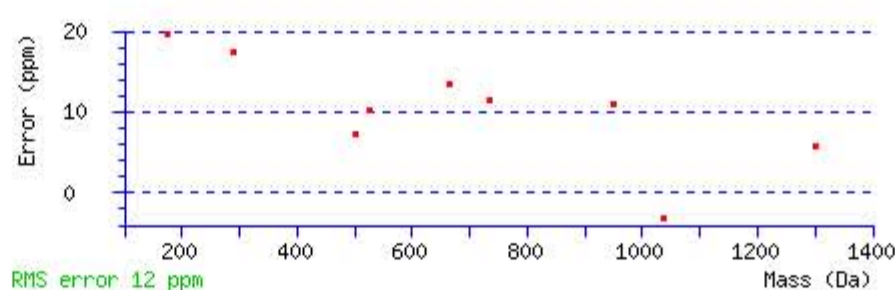

NCBI BLAST search of **QSTNAYPDLR**

(Parameters: blastp, nr protein database, expect=20000, no filter, PAM30)

Other BLAST [web gateways](#)

## All matches to this query

| Score | Mr(calc):   | Delta     | Sequence                        |
|-------|-------------|-----------|---------------------------------|
| 50.7  | 1474.723831 | 0.010777  | <a href="#">QSTNAYPDLR</a>      |
| 10.6  | 1474.741592 | -0.006984 | <a href="#">SSLEHGSDVYLLR</a>   |
| 9.6   | 1474.721161 | 0.013447  | <a href="#">QSTHGERGHR</a>      |
| 9.0   | 1474.744934 | -0.010326 | <a href="#">LSKEELIQNMDR</a>    |
| 6.3   | 1474.731033 | 0.003575  | <a href="#">RGDGGKMAAAGALER</a> |
| 5.3   | 1474.746307 | -0.011699 | <a href="#">DAVQHERGPR</a>      |
| 5.2   | 1474.748779 | -0.014171 | <a href="#">LQSESTNNGKNKR</a>   |
| 4.0   | 1474.742462 | -0.007854 | <a href="#">QCKSEFPIR</a>       |
| 4.0   | 1474.753708 | -0.019100 | <a href="#">QRPSFTCLR</a>       |
| 2.5   | 1474.735092 | -0.000484 | <a href="#">GTVAPHDQSPR</a>     |

# MASCOT Search Results

## Peptide View

MS/MS Fragmentation of **IETISHEDLQR**

Found in **PROS\_HUMAN**, Vitamin K-dependent protein S OS=Homo sapiens GN=PROS1 PE=1 SV=1

Match to Query 41217: 1650.860728 from(826.437640,2+) rtinseconds(1631) index(39647)

Title: Locus:1.1.1.3017.15 File:"2013-07-02 CLN FXIII 180 min 1st F 3.wiff"

Data file C:\Program Files (x86)\Matrix Science\Mascot Daemon\mgf\7 FXIII 180 min 1st\mascot\_daemon\_merge.mgf

Click mouse within plot area to zoom in by factor of two about that point

Or, Plot from  to  Da

Label all possible matches  Label matches used for scoring

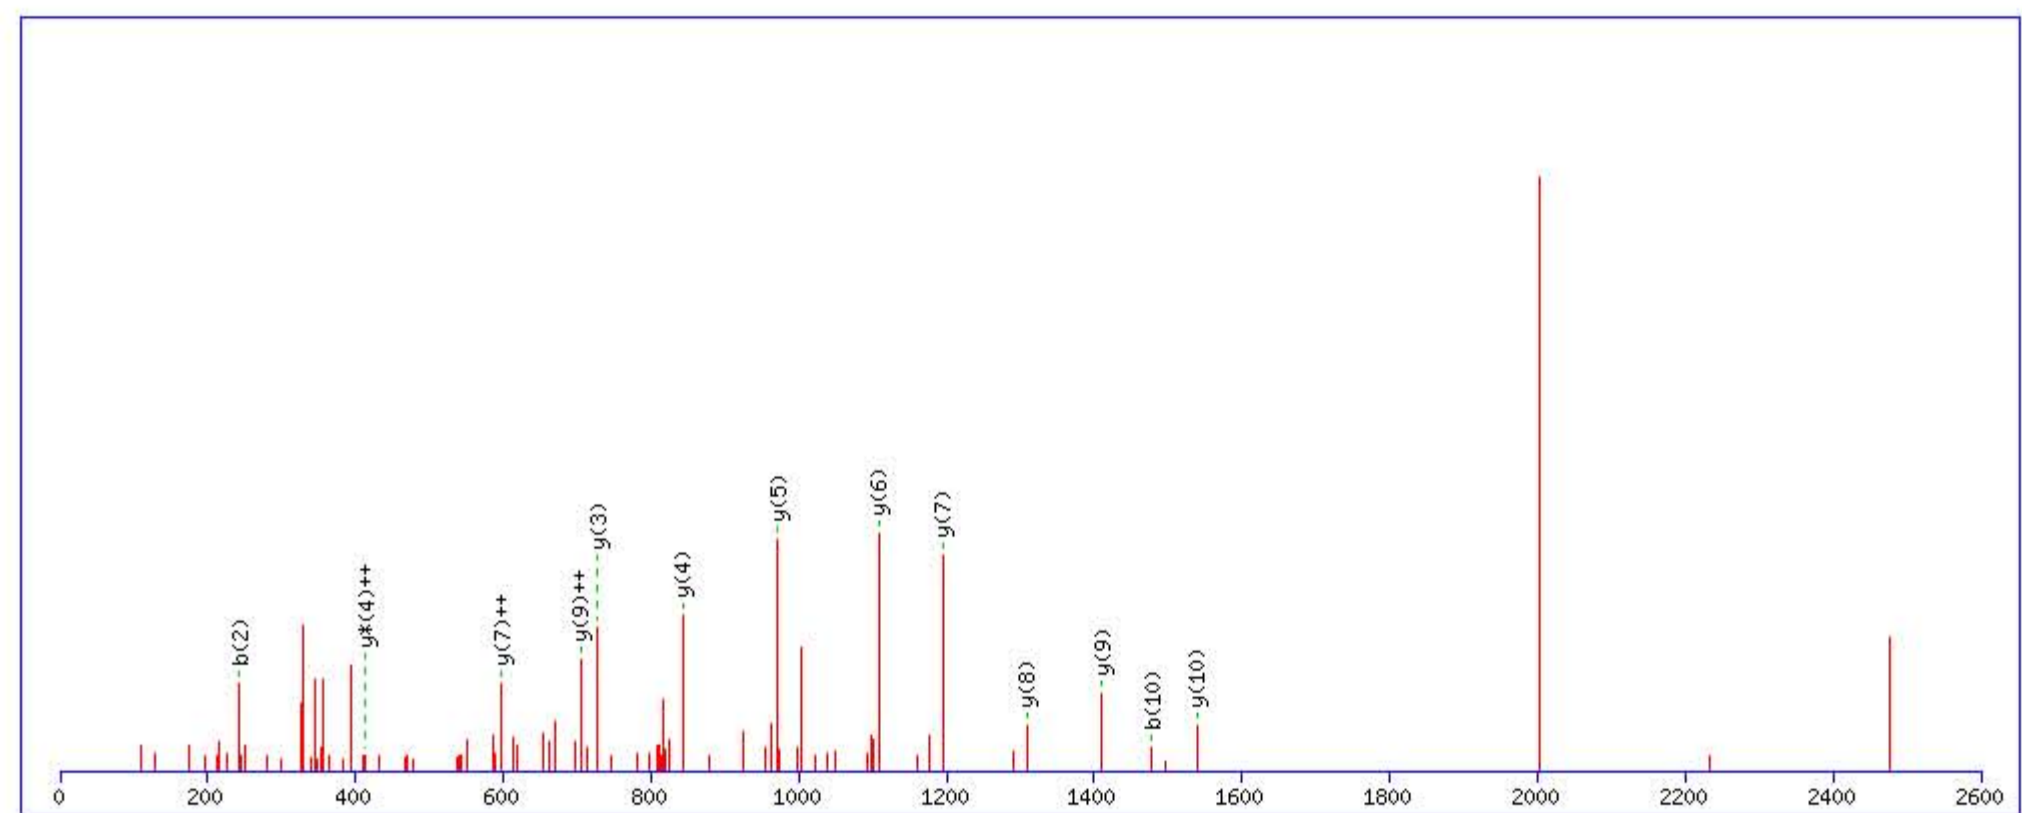

Monoisotopic mass of neutral peptide Mr(calc): 1650.839920

Fixed modifications: Carbamidomethyl (C) (apply to specified residues or termini only)

Variable modifications:

Q10 : Biotin:Thermo-21345 (Q)

Ions Score: 71 Expect: 1.2e-006

Matches : 13/94 fragment ions using 15 most intense peaks [\(help\)](#)

| #  | b                  | b <sup>++</sup> | b <sup>*</sup> | b <sup>*++</sup> | b <sup>0</sup> | b <sup>0++</sup> | Seq. | y                  | y <sup>++</sup>   | y <sup>*</sup> | y <sup>*++</sup>  | y <sup>0</sup> | y <sup>0++</sup> | #  |
|----|--------------------|-----------------|----------------|------------------|----------------|------------------|------|--------------------|-------------------|----------------|-------------------|----------------|------------------|----|
| 1  | 114.091340         | 57.549308       |                |                  |                |                  | I    |                    |                   |                |                   |                |                  | 11 |
| 2  | <b>243.133933</b>  | 122.070605      |                |                  | 225.123368     | 113.065322       | E    | <b>1538.763154</b> | 769.885215        | 1521.736605    | 761.371941        | 1520.752589    | 760.879933       | 10 |
| 3  | 344.181612         | 172.594444      |                |                  | 326.171047     | 163.589162       | T    | <b>1409.720561</b> | <b>705.363919</b> | 1392.694012    | 696.850644        | 1391.709996    | 696.358636       | 9  |
| 4  | 457.265676         | 229.136476      |                |                  | 439.255111     | 220.131194       | I    | <b>1308.672882</b> | 654.840079        | 1291.646333    | 646.326805        | 1290.662317    | 645.834797       | 8  |
| 5  | 544.297704         | 272.652490      |                |                  | 526.287139     | 263.647208       | S    | <b>1195.588818</b> | <b>598.298047</b> | 1178.562269    | 589.784773        | 1177.578253    | 589.292764       | 7  |
| 6  | 681.356616         | 341.181946      |                |                  | 663.346051     | 332.176664       | H    | <b>1108.556790</b> | 554.782033        | 1091.530241    | 546.268759        | 1090.546225    | 545.776751       | 6  |
| 7  | 810.399209         | 405.703243      |                |                  | 792.388644     | 396.697960       | E    | <b>971.497878</b>  | 486.252577        | 954.471329     | 477.739303        | 953.487313     | 477.247295       | 5  |
| 8  | 925.426152         | 463.216714      |                |                  | 907.415587     | 454.211432       | D    | <b>842.455285</b>  | 421.731281        | 825.428736     | <b>413.218006</b> | 824.444720     | 412.725998       | 4  |
| 9  | 1038.510216        | 519.758746      |                |                  | 1020.499651    | 510.753463       | L    | <b>727.428342</b>  | 364.217809        | 710.401793     | 355.704535        |                |                  | 3  |
| 10 | <b>1477.735542</b> | 739.371409      | 1460.708993    | 730.858135       | 1459.724977    | 730.366127       | Q    | 614.344278         | 307.675777        | 597.317729     | 299.162503        |                |                  | 2  |
| 11 |                    |                 |                |                  |                |                  | R    | 175.118952         | 88.063114         | 158.092403     | 79.549839         |                |                  | 1  |

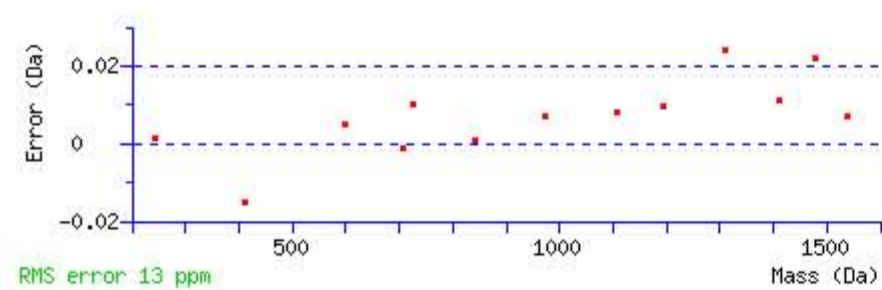

RMS error 13 ppm

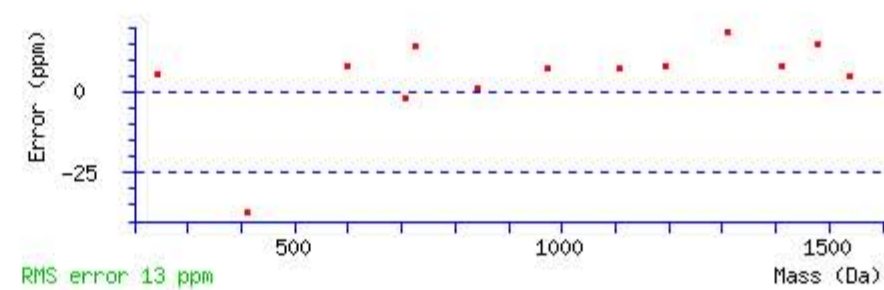

RMS error 13 ppm

NCBI BLAST search of [IETISHEDLQR](#)

(Parameters: blastp, nr protein database, expect=20000, no filter, PAM30)

Other BLAST [web gateways](#)

All matches to this query

| Score | Mr(calc):   | Delta     | Sequence                       |
|-------|-------------|-----------|--------------------------------|
| 71.3  | 1650.839920 | 0.020808  | <a href="#">IETISHEDLQR</a>    |
| 7.9   | 1650.858551 | 0.002177  | <a href="#">LQQEQLR</a>        |
| 5.5   | 1650.868896 | -0.008168 | <a href="#">LELLELDHEQTRR</a>  |
| 4.9   | 1650.870239 | -0.009511 | <a href="#">LFRSNSHLKEHQ</a>   |
| 3.6   | 1650.863037 | -0.002309 | <a href="#">NQFLPNALREFFR</a>  |
| 2.2   | 1650.884171 | -0.023443 | <a href="#">NKSTLEAFRSPVFR</a> |
| 2.1   | 1650.855164 | 0.005564  | <a href="#">KKEYNFLDQR</a>     |

Mascot: <http://www.matrixscience.com/>

# MASCOT Search Results

## Peptide View

MS/MS Fragmentation of **IQALSLCSDQQSHLEFR**

Found in **PROS\_HUMAN**, Vitamin K-dependent protein S OS=Homo sapiens GN=PROS1 PE=1 SV=1

Match to Query 58967: 2342.172372 from(781.731400,3+) rtinseconds(2148) index(79860)

Title: Locus:1.1.1.2098.25 File:"2013-07-02 CLN FXIII 180 min 1st FT.wiff"

Data file C:\Program Files (x86)\Matrix Science\Mascot Daemon\mgf\7 FXIII 180 min 1st\mascot\_daemon\_merge.mgf

Click mouse within plot area to zoom in by factor of two about that point

Or, Plot from  to  Da

Label all possible matches  Label matches used for scoring

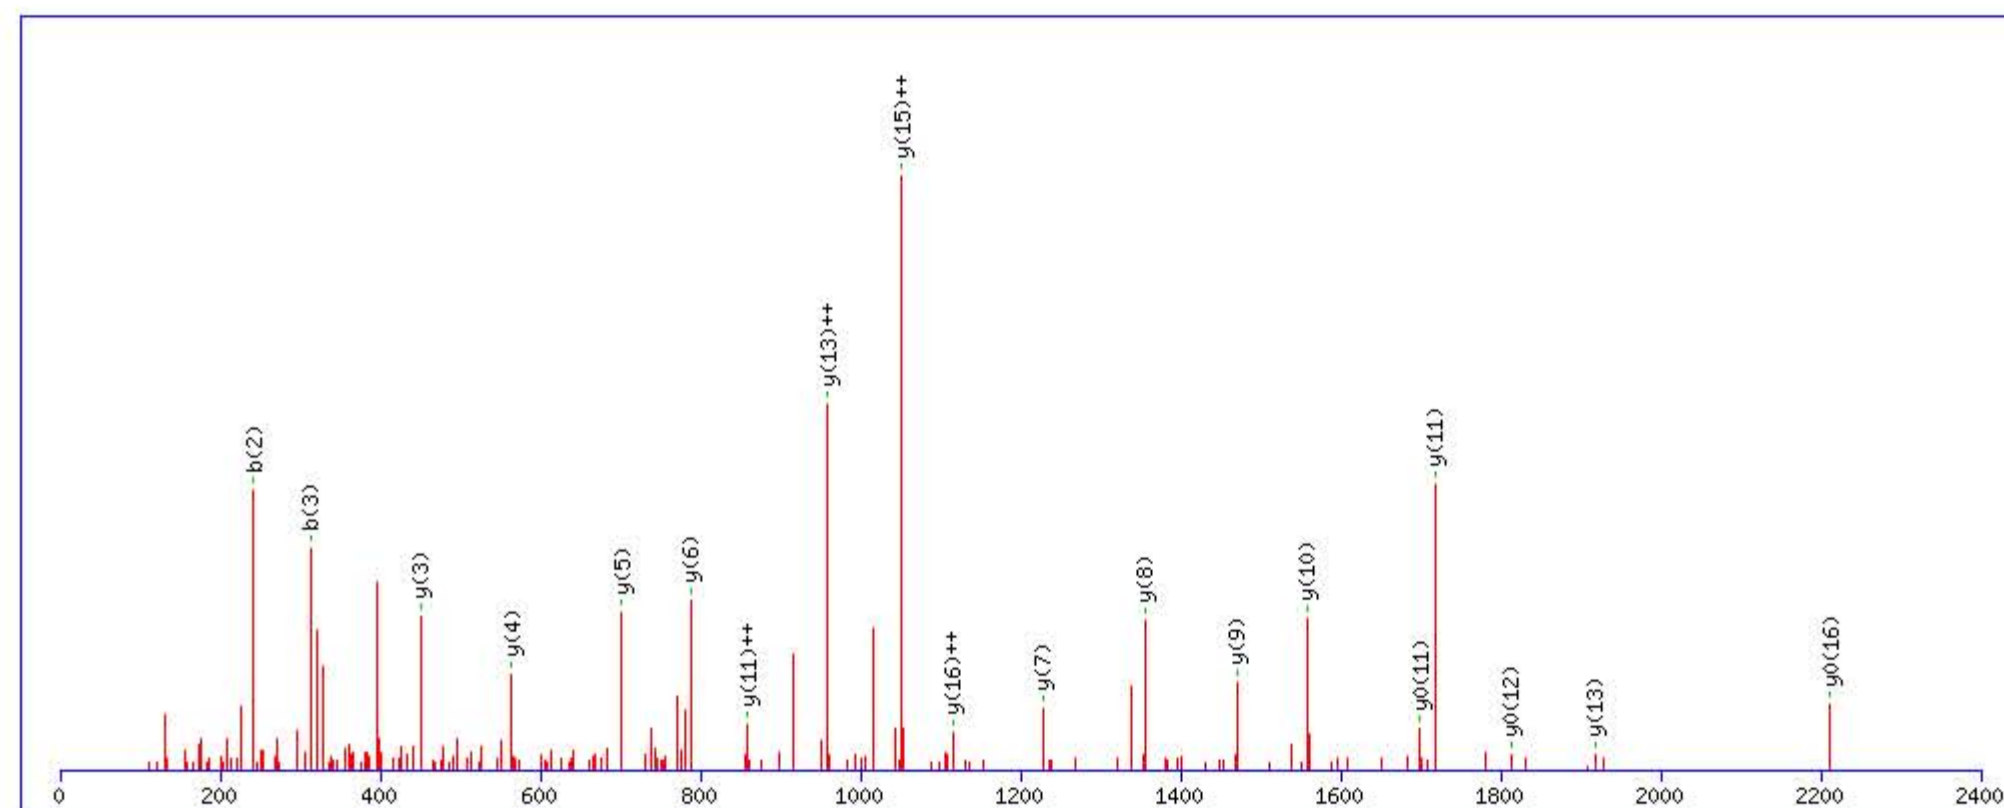

Monoisotopic mass of neutral peptide Mr(calc): 2342.151108

Fixed modifications: Carbamidomethyl (C) (apply to specified residues or termini only)

Variable modifications:

Q11 : Biotin:Thermo-21345 (Q)

Ions Score: 93 Expect: 1.7e-008

Matches : 19/178 fragment ions using 20 most intense peaks [\(help\)](#)

| #  | b                 | b <sup>++</sup> | b <sup>*</sup> | b <sup>***</sup> | b <sup>0</sup> | b <sup>0++</sup> | Seq. | y                  | y <sup>++</sup>    | y <sup>*</sup> | y <sup>***</sup> | y <sup>0</sup>     | y <sup>0++</sup> | #  |
|----|-------------------|-----------------|----------------|------------------|----------------|------------------|------|--------------------|--------------------|----------------|------------------|--------------------|------------------|----|
| 1  | 114.091340        | 57.549308       |                |                  |                |                  | I    |                    |                    |                |                  |                    |                  | 17 |
| 2  | <b>242.149918</b> | 121.578597      | 225.123369     | 113.065323       |                |                  | Q    | 2230.074335        | <b>1115.540805</b> | 2213.047786    | 1107.027531      | <b>2212.063770</b> | 1106.535523      | 16 |
| 3  | <b>313.187032</b> | 157.097154      | 296.160483     | 148.583879       |                |                  | A    | 2102.015757        | <b>1051.511516</b> | 2084.989208    | 1042.998242      | 2084.005192        | 1042.506234      | 15 |
| 4  | 426.271096        | 213.639186      | 409.244547     | 205.125912       |                |                  | L    | 2030.978643        | 1015.992959        | 2013.952094    | 1007.479685      | 2012.968078        | 1006.987677      | 14 |
| 5  | 513.303124        | 257.155200      | 496.276575     | 248.641926       | 495.292559     | 248.149918       | S    | <b>1917.894579</b> | <b>959.450927</b>  | 1900.868030    | 950.937653       | 1899.884014        | 950.445645       | 13 |
| 6  | 626.387188        | 313.697232      | 609.360639     | 305.183958       | 608.376623     | 304.691950       | L    | 1830.862551        | 915.934913         | 1813.836002    | 907.421639       | <b>1812.851986</b> | 906.929631       | 12 |
| 7  | 786.417837        | 393.712557      | 769.391288     | 385.199282       | 768.407272     | 384.707274       | C    | <b>1717.778487</b> | <b>859.392881</b>  | 1700.751938    | 850.879607       | <b>1699.767922</b> | 850.387599       | 11 |
| 8  | 873.449865        | 437.228571      | 856.423316     | 428.715296       | 855.439300     | 428.223288       | S    | <b>1557.747838</b> | 779.377557         | 1540.721289    | 770.864282       | 1539.737273        | 770.372274       | 10 |
| 9  | 988.476808        | 494.742042      | 971.450259     | 486.228768       | 970.466243     | 485.736760       | D    | <b>1470.715810</b> | 735.861543         | 1453.689261    | 727.348268       | 1452.705245        | 726.856260       | 9  |
| 10 | 1116.535386       | 558.771331      | 1099.508837    | 550.258057       | 1098.524821    | 549.766049       | Q    | <b>1355.688867</b> | 678.348071         | 1338.662318    | 669.834797       | 1337.678302        | 669.342789       | 8  |
| 11 | 1555.760712       | 778.383994      | 1538.734163    | 769.870720       | 1537.750147    | 769.378712       | Q    | <b>1227.630289</b> | 614.318782         | 1210.603740    | 605.805508       | 1209.619724        | 605.313500       | 7  |
| 12 | 1642.792740       | 821.900008      | 1625.766191    | 813.386734       | 1624.782175    | 812.894726       | S    | <b>788.404963</b>  | 394.706119         | 771.378414     | 386.192845       | 770.394398         | 385.700837       | 6  |
| 13 | 1779.851652       | 890.429464      | 1762.825103    | 881.916190       | 1761.841087    | 881.424182       | H    | <b>701.372935</b>  | 351.190105         | 684.346386     | 342.676831       | 683.362370         | 342.184823       | 5  |
| 14 | 1892.935716       | 946.971496      | 1875.909167    | 938.458222       | 1874.925151    | 937.966213       | L    | <b>564.314023</b>  | 282.660649         | 547.287474     | 274.147375       | 546.303458         | 273.655367       | 4  |
| 15 | 2021.978309       | 1011.492793     | 2004.951760    | 1002.979518      | 2003.967744    | 1002.487510      | E    | <b>451.229959</b>  | 226.118617         | 434.203410     | 217.605343       | 433.219394         | 217.113335       | 3  |
| 16 | 2169.046723       | 1085.026999     | 2152.020174    | 1076.513725      | 2151.036158    | 1076.021717      | F    | 322.187366         | 161.597321         | 305.160817     | 153.084046       |                    |                  | 2  |
| 17 |                   |                 |                |                  |                |                  | R    | 175.118952         | 88.063114          | 158.092403     | 79.549839        |                    |                  | 1  |

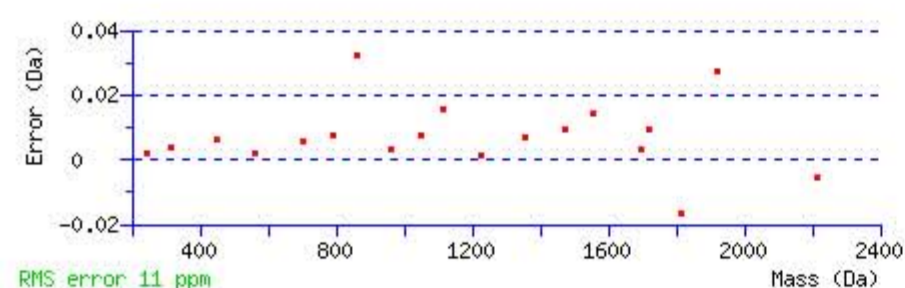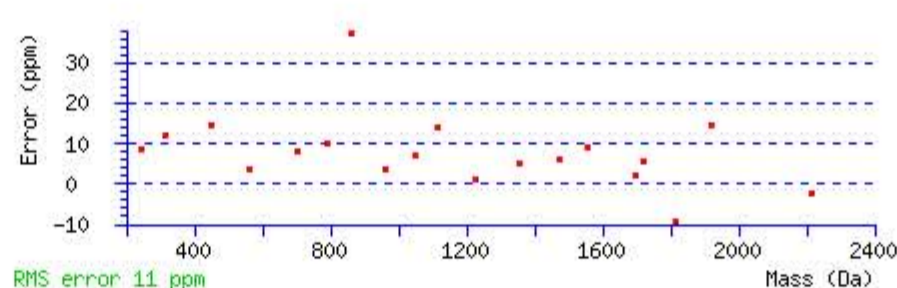

NCBI BLAST search of **IQALSLCSDQQSHLEFR**

(Parameters: blastp, nr protein database, expect=20000, no filter, PAM30)

Other BLAST [web gateways](#)

## All matches to this query

| Score | Mr(calc):   | Delta    | Sequence                          |
|-------|-------------|----------|-----------------------------------|
| 92.6  | 2342.151108 | 0.021264 | <a href="#">IQALSLCSDQQSHLEFR</a> |
| 76.0  | 2342.151108 | 0.021264 | <a href="#">IQALSLCSDQQSHLEFR</a> |

# MASCOT SEARCH RESULTS

## Peptide View

MS/MS Fragmentation of **QPQFISR**

Found in **VTNC\_HUMAN**, Vitronectin OS=Homo sapiens GN=VTN PE=1 SV=1

Match to Query 23311: 1185.649788 from(593.832170,2+) rtinseconds(1760) index(59049)

Title: Locus:1.1.1.3036.10 File:"2013-07-02 CLN FXIII 180 min 1st F 4.wiff"

Data file C:\Program Files (x86)\Matrix Science\Mascot Daemon\mgf\7 FXIII 180 min 1st\mascot\_daemon\_merge.mgf

Click mouse within plot area to zoom in by factor of two about that point

Or, Plot from  to  Da

Label all possible matches  Label matches used for scoring

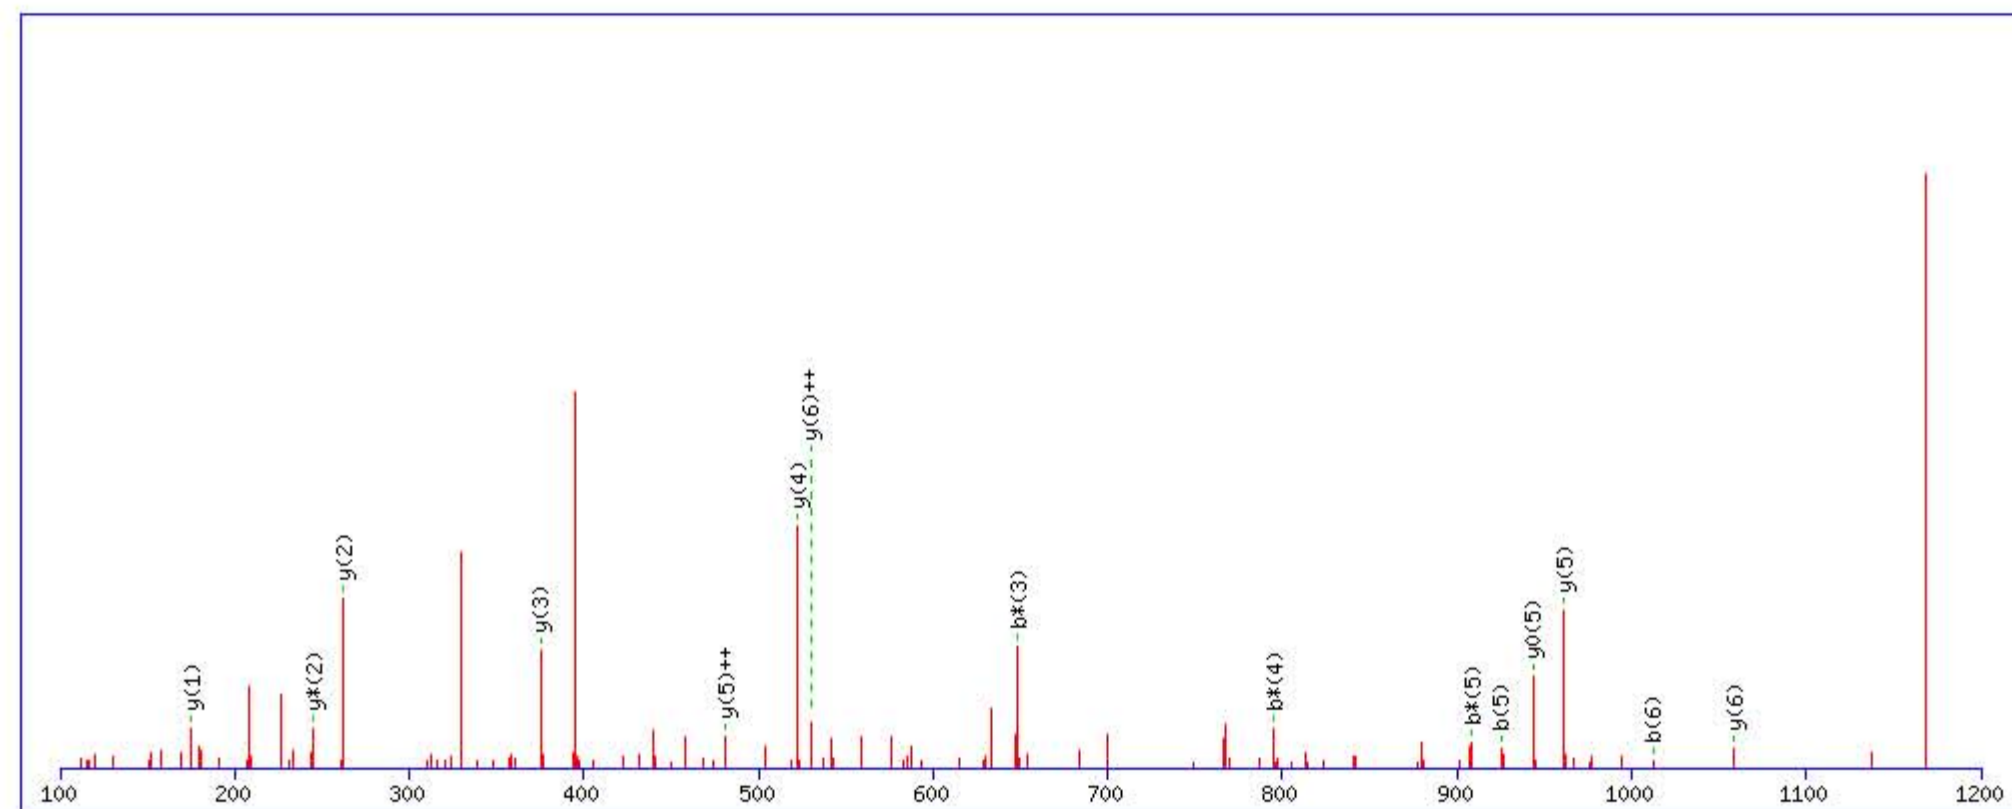

Monoisotopic mass of neutral peptide Mr(calc): 1185.632843

Fixed modifications: Carbamidomethyl (C) (apply to specified residues or termini only)

Variable modifications:

Q3 : Biotin:Thermo-21345 (Q)

Ions Score: 32 Expect: 0.014

Matches : 15/60 fragment ions using 31 most intense peaks [\(help\)](#)

| # | b           | b <sup>++</sup> | b <sup>*</sup> | b <sup>*++</sup> | b <sup>0</sup> | b <sup>0++</sup> | Seq. | y           | y <sup>++</sup> | y <sup>*</sup> | y <sup>*++</sup> | y <sup>0</sup> | y <sup>0++</sup> | # |
|---|-------------|-----------------|----------------|------------------|----------------|------------------|------|-------------|-----------------|----------------|------------------|----------------|------------------|---|
| 1 | 129.065854  | 65.036565       | 112.039305     | 56.523291        |                |                  | Q    |             |                 |                |                  |                |                  | 7 |
| 2 | 226.118618  | 113.562947      | 209.092069     | 105.049673       |                |                  | P    | 1058.581548 | 529.794412      | 1041.554999    | 521.281138       | 1040.570983    | 520.789129       | 6 |
| 3 | 665.343944  | 333.175610      | 648.317395     | 324.662336       |                |                  | Q    | 961.528784  | 481.268030      | 944.502235     | 472.754755       | 943.518219     | 472.262747       | 5 |
| 4 | 812.412358  | 406.709817      | 795.385809     | 398.196543       |                |                  | F    | 522.303458  | 261.655367      | 505.276909     | 253.142092       | 504.292893     | 252.650084       | 4 |
| 5 | 925.496422  | 463.251849      | 908.469873     | 454.738575       |                |                  | I    | 375.235044  | 188.121160      | 358.208495     | 179.607885       | 357.224479     | 179.115877       | 3 |
| 6 | 1012.528450 | 506.767863      | 995.501901     | 498.254589       | 994.517885     | 497.762581       | S    | 262.150980  | 131.579128      | 245.124431     | 123.065853       | 244.140415     | 122.573845       | 2 |
| 7 |             |                 |                |                  |                |                  | R    | 175.118952  | 88.063114       | 158.092403     | 79.549839        |                |                  | 1 |

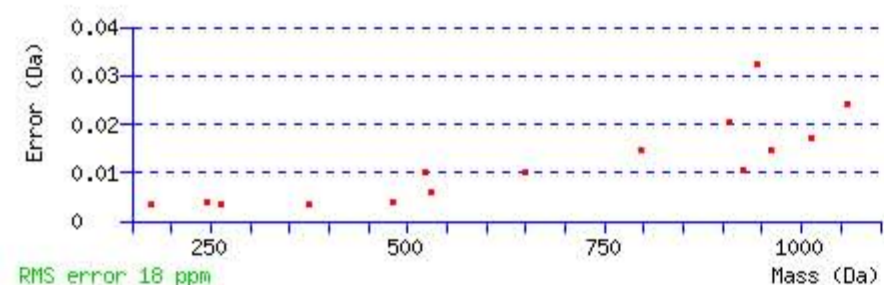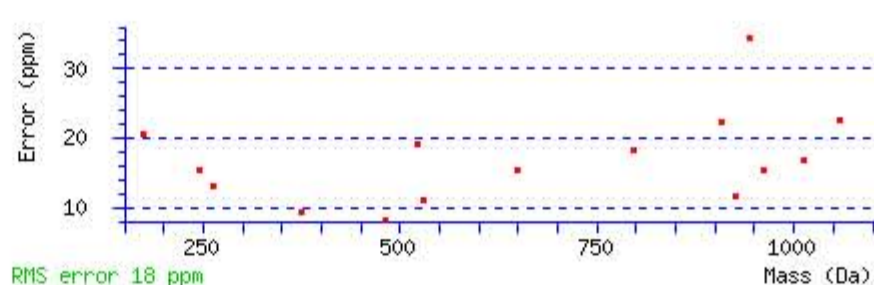

NCBI BLAST search of **QPQFISR**

(Parameters: blastp, nr protein database, expect=20000, no filter, PAM30)

Other BLAST [web gateways](#)

All matches to this query

| Score | Mr(calc):   | Delta     | Sequence                     |
|-------|-------------|-----------|------------------------------|
| 32.0  | 1185.632843 | 0.016945  | <a href="#">QPQFISR</a>      |
| 18.5  | 1185.646561 | 0.003227  | <a href="#">KPIDSLRDSR</a>   |
| 13.5  | 1185.632843 | 0.016945  | <a href="#">QPQFISR</a>      |
| 10.5  | 1185.653961 | -0.004173 | <a href="#">LSGALPLCLSR</a>  |
| 7.0   | 1185.636200 | 0.013588  | <a href="#">QIAAVMSR</a>     |
| 5.8   | 1185.657806 | -0.008018 | <a href="#">RLRLVDGDSR</a>   |
| 4.9   | 1185.650604 | -0.000816 | <a href="#">KPVITENVVPER</a> |
| 4.8   | 1185.653946 | -0.004158 | <a href="#">NMEIPKGLIR</a>   |
| 4.6   | 1185.646561 | 0.003227  | <a href="#">APSAKKPSTGSR</a> |
| 4.4   | 1185.653976 | -0.004188 | <a href="#">TQITLGSR</a>     |

Mascot: <http://www.matrixscience.com/>

# MASCOT Search Results

## Peptide View

MS/MS Fragmentation of **GQYCYELDEK**

Found in **VTNC\_HUMAN**, Vitronectin OS=Homo sapiens GN=VTN PE=1 SV=1

Match to Query 39359: 1614.728188 from(808.371370,2+) rtinseconds(1861) index(41099)

Title: Locus:1.1.1.3097.14 File:"2013-07-02 CLN FXIII 180 min 1st F 3.wiff"

Data file C:\Program Files (x86)\Matrix Science\Mascot Daemon\mgf\7 FXIII 180 min 1st\mascot\_daemon\_merge.mgf

Click mouse within plot area to zoom in by factor of two about that point

Or, Plot from  to  Da

Label all possible matches  Label matches used for scoring

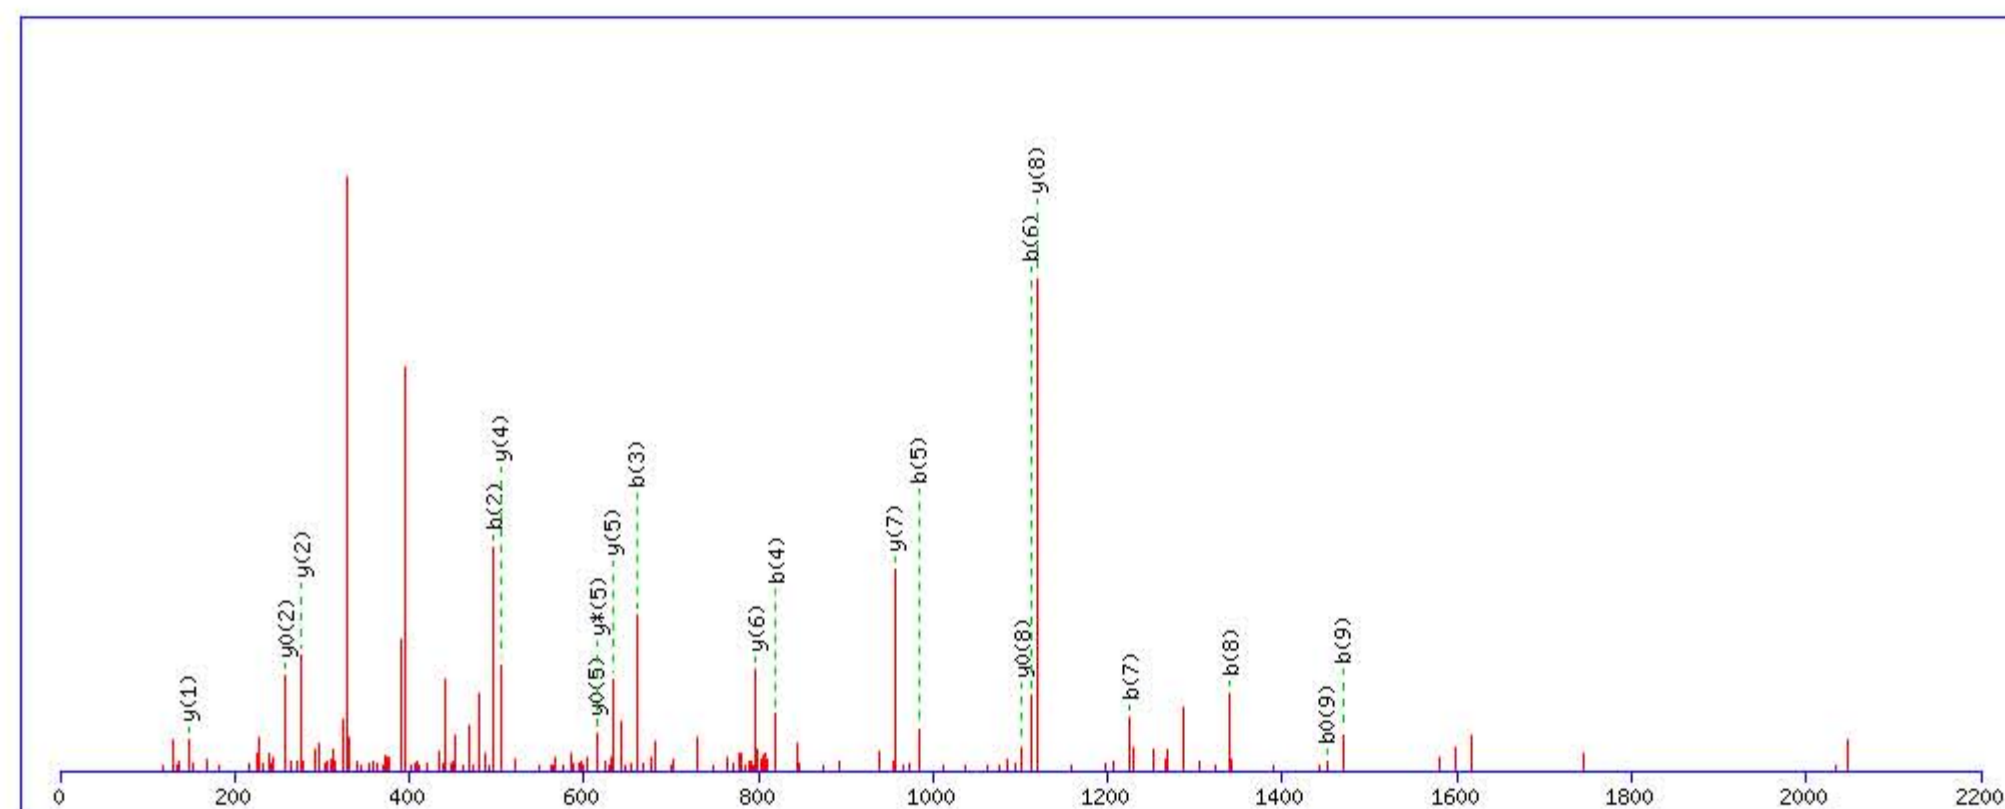

Monoisotopic mass of neutral peptide Mr(calc): 1614.705795

Fixed modifications: Carbamidomethyl (C) (apply to specified residues or termini only)

Variable modifications:

Q2 : Biotin:Thermo-21345 (Q)

Ions Score: 57 Expect: 1.1e-005

Matches : 20/94 fragment ions using 30 most intense peaks [\(help\)](#)

| #  | b                  | b <sup>++</sup> | b <sup>*</sup> | b <sup>+++</sup> | b <sup>0</sup>     | b <sup>0++</sup> | Seq. | y                  | y <sup>++</sup> | y <sup>*</sup>    | y <sup>+++</sup> | y <sup>0</sup>     | y <sup>0++</sup> | #  |
|----|--------------------|-----------------|----------------|------------------|--------------------|------------------|------|--------------------|-----------------|-------------------|------------------|--------------------|------------------|----|
| 1  | 58.028740          | 29.518008       |                |                  |                    |                  | G    |                    |                 |                   |                  |                    |                  | 10 |
| 2  | <b>497.254066</b>  | 249.130671      | 480.227517     | 240.617397       |                    |                  | Q    | 1558.691630        | 779.849453      | 1541.665081       | 771.336179       | 1540.681065        | 770.844171       | 9  |
| 3  | <b>660.317395</b>  | 330.662336      | 643.290846     | 322.149061       |                    |                  | Y    | <b>1119.466304</b> | 560.236790      | 1102.439755       | 551.723516       | <b>1101.455739</b> | 551.231508       | 8  |
| 4  | <b>820.348044</b>  | 410.677660      | 803.321495     | 402.164386       |                    |                  | C    | <b>956.402975</b>  | 478.705126      | 939.376426        | 470.191851       | 938.392410         | 469.699843       | 7  |
| 5  | <b>983.411373</b>  | 492.209325      | 966.384824     | 483.696050       |                    |                  | Y    | <b>796.372326</b>  | 398.689801      | 779.345777        | 390.176527       | 778.361761         | 389.684519       | 6  |
| 6  | <b>1112.453966</b> | 556.730621      | 1095.427417    | 548.217347       | 1094.443401        | 547.725339       | E    | <b>633.308997</b>  | 317.158137      | <b>616.282448</b> | 308.644862       | <b>615.298432</b>  | 308.152854       | 5  |
| 7  | <b>1225.538030</b> | 613.272653      | 1208.511481    | 604.759379       | 1207.527465        | 604.267371       | L    | <b>504.266404</b>  | 252.636840      | 487.239855        | 244.123566       | 486.255839         | 243.631558       | 4  |
| 8  | <b>1340.564973</b> | 670.786125      | 1323.538424    | 662.272850       | 1322.554408        | 661.780842       | D    | 391.182340         | 196.094808      | 374.155791        | 187.581534       | 373.171775         | 187.089526       | 3  |
| 9  | <b>1469.607566</b> | 735.307421      | 1452.581017    | 726.794147       | <b>1451.597001</b> | 726.302139       | E    | <b>276.155397</b>  | 138.581337      | 259.128848        | 130.068062       | <b>258.144832</b>  | 129.576054       | 2  |
| 10 |                    |                 |                |                  |                    |                  | K    | <b>147.112804</b>  | 74.060040       | 130.086255        | 65.546765        |                    |                  | 1  |

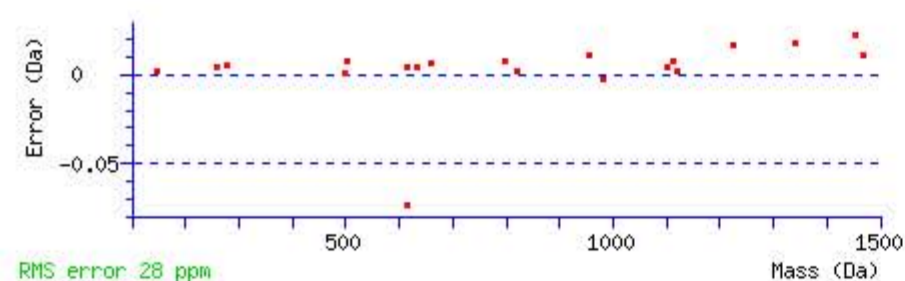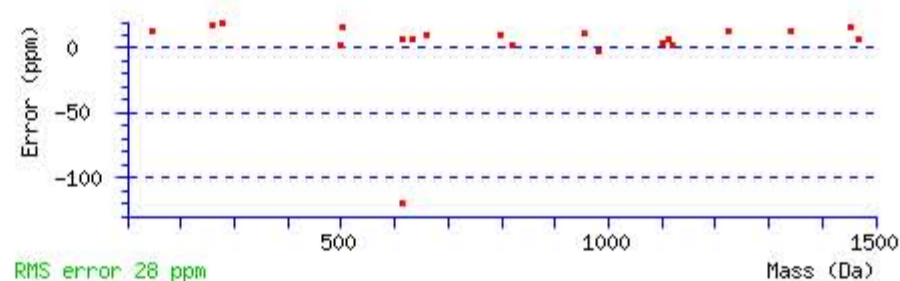

NCBI BLAST search of **GQYCYELDEK**

(Parameters: blastp, nr protein database, expect=20000, no filter, PAM30)

Other BLAST [web gateways](#)

All matches to this query

| Score | Mr(calc):   | Delta     | Sequence                         |
|-------|-------------|-----------|----------------------------------|
| 57.4  | 1614.705795 | 0.022393  | <a href="#">GQYCYELDEK</a>       |
| 10.9  | 1614.748520 | -0.020332 | <a href="#">TRAPAEEGAEGPSDTK</a> |
| 7.1   | 1614.717010 | 0.011178  | <a href="#">EYFRMELMHAEK</a>     |
| 4.8   | 1614.738129 | -0.009941 | <a href="#">EKAKADAECYTAMK</a>   |
| 3.3   | 1614.738174 | -0.009986 | <a href="#">MDSCIEAFGTTKQK</a>   |
| 1.3   | 1614.748535 | -0.020347 | <a href="#">VDNSSLTGESEPQPR</a>  |
| 1.1   | 1614.748489 | -0.020301 | <a href="#">EPGNSALEEREQEK</a>   |
| 0.6   | 1614.738174 | -0.009986 | <a href="#">KFCNETDVSQMLK</a>    |

# MASCOT Search Results

## Peptide View

MS/MS Fragmentation of **DWHGVPGQVDAAMAGR**

Found in **VTNC\_HUMAN**, Vitronectin OS=Homo sapiens GN=VTN PE=1 SV=1

Match to Query 49704: 1992.957522 from(665.326450,3+) rtinseconds(1928) index(60240)

Title: Locus:1.1.1.3094.16 File:"2013-07-02 CLN FXIII 180 min 1st F 4.wiff"

Data file C:\Program Files (x86)\Matrix Science\Mascot Daemon\mgf\7 FXIII 180 min 1st\mascot\_daemon\_merge.mgf

Click mouse within plot area to zoom in by factor of two about that point

Or, Plot from  to  Da

Label all possible matches  Label matches used for scoring

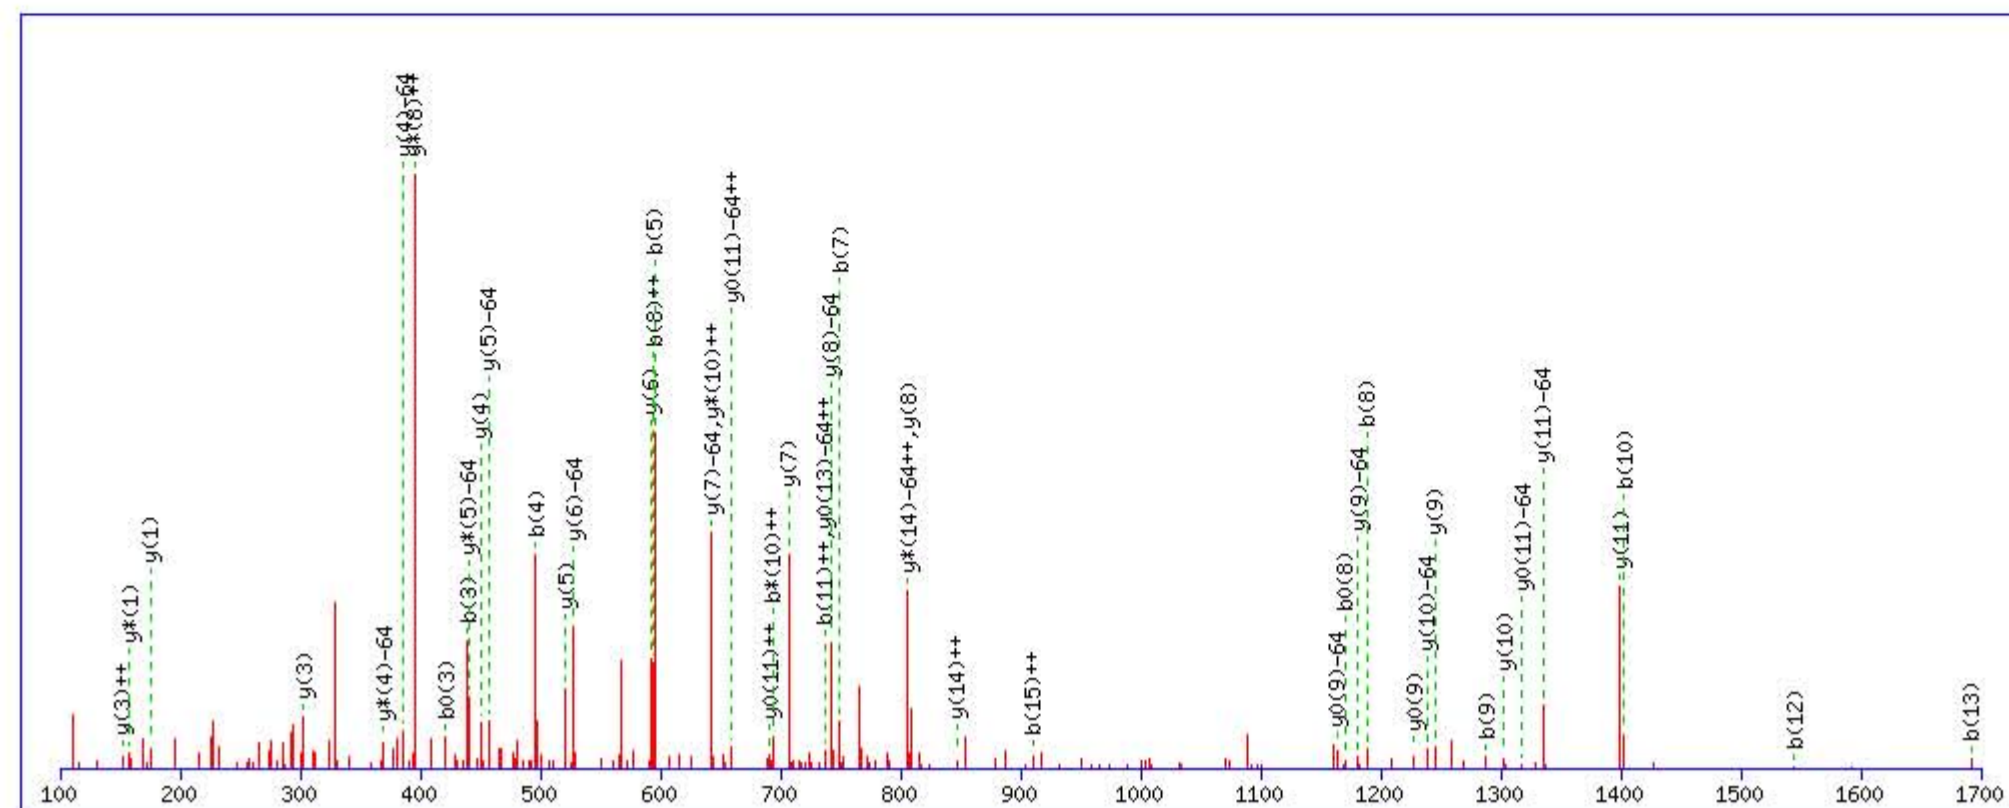

Monoisotopic mass of neutral peptide Mr(calc): 1992.929855

Fixed modifications: Carbamidomethyl (C) (apply to specified residues or termini only)

Variable modifications:

Q8 : Biotin:Thermo-21345 (Q)

M13 : Oxidation (M), with neutral losses 0.000000 (shown in table), 63.998285

Ions Score: 40 Expect: 0.0002

Matches : 47/238 fragment ions using 94 most intense peaks [\(help\)](#)

| #  | b                  | b <sup>++</sup>   | b <sup>*</sup> | b <sup>+++</sup>  | b <sup>0</sup>     | b <sup>0++</sup> | Seq. | y                  | y <sup>++</sup>   | y <sup>*</sup>    | y <sup>+++</sup>  | y <sup>0</sup>     | y <sup>0++</sup>  | #  |
|----|--------------------|-------------------|----------------|-------------------|--------------------|------------------|------|--------------------|-------------------|-------------------|-------------------|--------------------|-------------------|----|
| 1  | 116.034219         | 58.520748         |                |                   | 98.023654          | 49.515465        | D    |                    |                   |                   |                   |                    |                   | 16 |
| 2  | 302.113532         | 151.560404        |                |                   | 284.102967         | 142.555122       | W    | 1878.910172        | 939.958724        | 1861.883623       | 931.445450        | 1860.899607        | 930.953441        | 15 |
| 3  | <b>439.172444</b>  | 220.089860        |                |                   | <b>421.161879</b>  | 211.084577       | H    | 1692.830859        | <b>846.919067</b> | 1675.804310       | 838.405793        | 1674.820294        | 837.913785        | 14 |
| 4  | <b>496.193908</b>  | 248.600592        |                |                   | 478.183343         | 239.595309       | G    | 1555.771947        | 778.389612        | 1538.745398       | 769.876337        | 1537.761382        | 769.384329        | 13 |
| 5  | <b>595.262322</b>  | 298.134799        |                |                   | 577.251757         | 289.129517       | V    | 1498.750483        | 749.878880        | 1481.723934       | 741.365605        | 1480.739918        | 740.873597        | 12 |
| 6  | 692.315086         | 346.661181        |                |                   | 674.304521         | 337.655899       | P    | <b>1399.682069</b> | 700.344673        | 1382.655520       | 691.831398        | 1381.671504        | <b>691.339390</b> | 11 |
| 7  | <b>749.336550</b>  | 375.171913        |                |                   | 731.325985         | 366.166631       | G    | <b>1302.629305</b> | 651.818290        | 1285.602756       | <b>643.305016</b> | 1284.618740        | 642.813008        | 10 |
| 8  | <b>1188.561876</b> | <b>594.784576</b> | 1171.535327    | 586.271302        | <b>1170.551311</b> | 585.779293       | Q    | <b>1245.607841</b> | 623.307558        | 1228.581292       | 614.794284        | <b>1227.597276</b> | 614.302276        | 9  |
| 9  | <b>1287.630290</b> | 644.318783        | 1270.603741    | 635.805509        | 1269.619725        | 635.313501       | V    | <b>806.382515</b>  | 403.694896        | 789.355966        | <b>395.181621</b> | 788.371950         | 394.689613        | 8  |
| 10 | <b>1402.657233</b> | 701.832255        | 1385.630684    | <b>693.318980</b> | 1384.646668        | 692.826972       | D    | <b>707.314101</b>  | 354.160688        | 690.287552        | 345.647414        | 689.303536         | 345.155406        | 7  |
| 11 | 1473.694347        | <b>737.350812</b> | 1456.667798    | 728.837537        | 1455.683782        | 728.345529       | A    | <b>592.287158</b>  | 296.647217        | 575.260609        | 288.133942        |                    |                   | 6  |
| 12 | <b>1544.731461</b> | 772.869369        | 1527.704912    | 764.356094        | 1526.720896        | 763.864086       | A    | <b>521.250044</b>  | 261.128660        | 504.223495        | 252.615385        |                    |                   | 5  |
| 13 | <b>1691.766861</b> | 846.387069        | 1674.740312    | 837.873794        | 1673.756296        | 837.381786       | M    | <b>450.212930</b>  | 225.610103        | 433.186381        | 217.096828        |                    |                   | 4  |
| 14 | 1762.803975        | 881.905626        | 1745.777426    | 873.392351        | 1744.793410        | 872.900343       | A    | <b>303.177530</b>  | <b>152.092403</b> | 286.150981        | 143.579128        |                    |                   | 3  |
| 15 | 1819.825439        | <b>910.416358</b> | 1802.798890    | 901.903083        | 1801.814874        | 901.411075       | G    | 232.140416         | 116.573846        | 215.113867        | 108.060571        |                    |                   | 2  |
| 16 |                    |                   |                |                   |                    |                  | R    | <b>175.118952</b>  | 88.063114         | <b>158.092403</b> | 79.549839         |                    |                   | 1  |

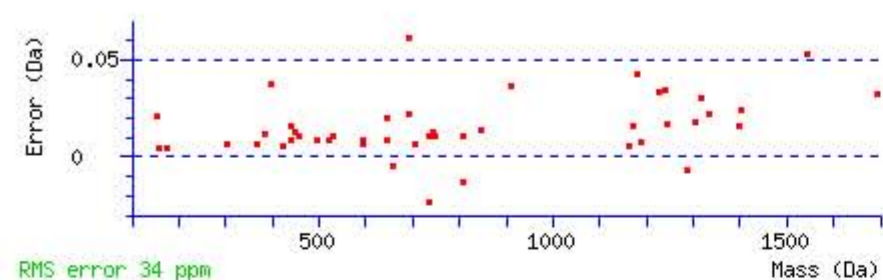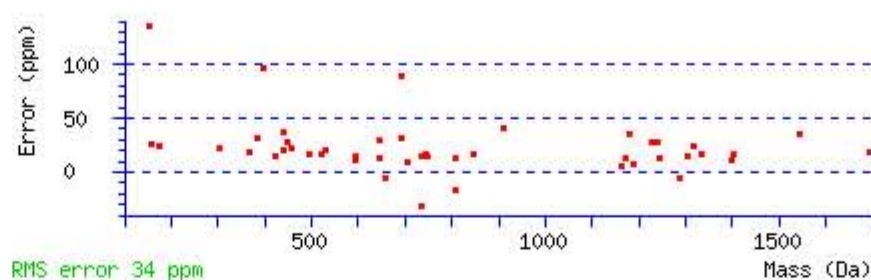

NCBI BLAST search of **DWHGVPGQVDAAMAGR**

(Parameters: blastp, nr protein database, expect=20000, no filter, PAM30)

Other BLAST [web gateways](#)

All matches to this query

| Score | Mr(calc):   | Delta     | Sequence                          |
|-------|-------------|-----------|-----------------------------------|
| 39.9  | 1992.929855 | 0.027667  | <a href="#">DWHGVPGQVDAAMAGR</a>  |
| 0.4   | 1992.973892 | -0.016370 | <a href="#">RTHTFNSGEARPGDRHR</a> |

Mascot: <http://www.matrixscience.com/>

# MASCOT Search Results

## Peptide View

MS/MS Fragmentation of **GGQIMTLK**

Found in **VWF\_HUMAN**, von Willebrand factor OS=Homo sapiens GN=VWF PE=1 SV=4

Match to Query 22101: 1157.641928 from(579.828240,2+) rtinseconds(1906) index(41483)

Title: Locus:1.1.1.3113.13 File:"2013-07-02 CLN FXIII 180 min 1st F 3.wiff"

Data file C:\Program Files (x86)\Matrix Science\Mascot Daemon\mgf7 FXIII 180 min 1st\mascot\_daemon\_merge.mgf

Click mouse within plot area to zoom in by factor of two about that point

Or, Plot from  to  Da

Label all possible matches  Label matches used for scoring

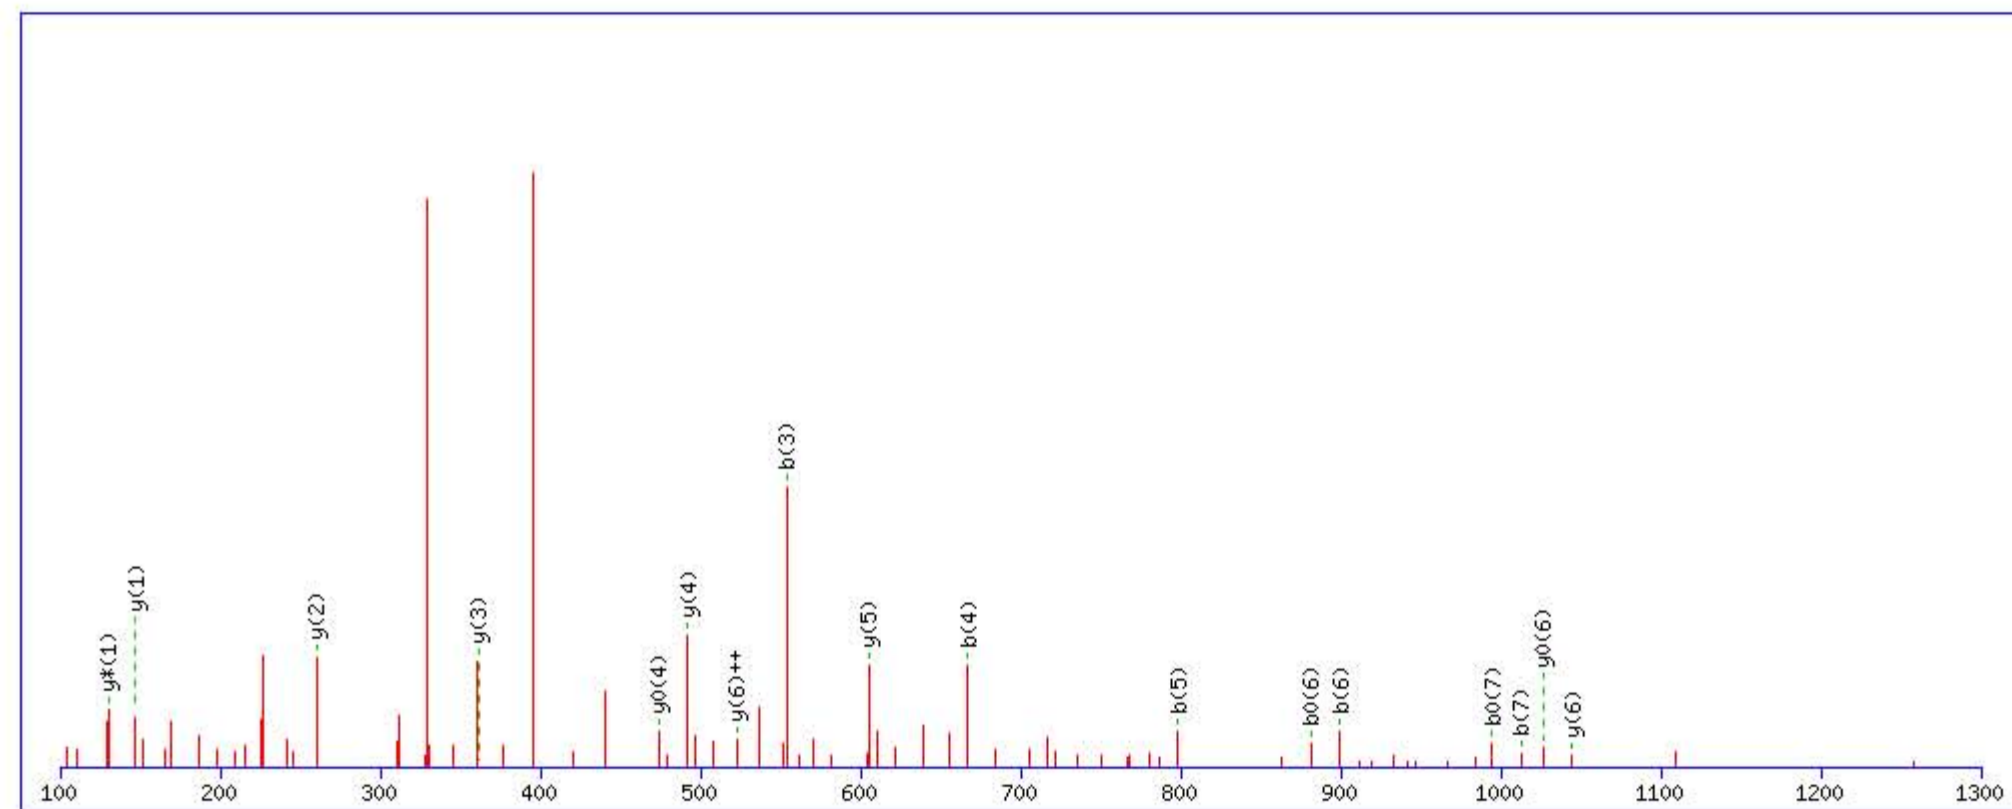

Monoisotopic mass of neutral peptide Mr(calc): 1157.630066

Fixed modifications: Carbamidomethyl (C) (apply to specified residues or termini only)

Variable modifications:

Q3 : Biotin:Thermo-21345 (Q)

Ions Score: 30 Expect: 0.024

Matches : 17/66 fragment ions using 31 most intense peaks [\(help\)](#)

| # | b                  | b <sup>++</sup> | b <sup>*</sup> | b <sup>*++</sup> | b <sup>0</sup>    | b <sup>0++</sup> | Seq. | y                  | y <sup>++</sup>   | y <sup>*</sup>    | y <sup>*++</sup> | y <sup>0</sup>     | y <sup>0++</sup> | # |
|---|--------------------|-----------------|----------------|------------------|-------------------|------------------|------|--------------------|-------------------|-------------------|------------------|--------------------|------------------|---|
| 1 | 58.028740          | 29.518008       |                |                  |                   |                  | G    |                    |                   |                   |                  |                    |                  | 8 |
| 2 | 115.050204         | 58.028740       |                |                  |                   |                  | G    | 1101.615886        | 551.311581        | 1084.589337       | 542.798307       | 1083.605321        | 542.306299       | 7 |
| 3 | <b>554.275530</b>  | 277.641403      | 537.248981     | 269.128129       |                   |                  | Q    | <b>1044.594422</b> | <b>522.800849</b> | 1027.567873       | 514.287575       | <b>1026.583857</b> | 513.795567       | 6 |
| 4 | <b>667.359594</b>  | 334.183435      | 650.333045     | 325.670161       |                   |                  | I    | <b>605.369096</b>  | 303.188186        | 588.342547        | 294.674912       | 587.358531         | 294.182904       | 5 |
| 5 | <b>798.400079</b>  | 399.703678      | 781.373530     | 391.190403       |                   |                  | M    | <b>492.285032</b>  | 246.646154        | 475.258483        | 238.132880       | <b>474.274467</b>  | 237.640872       | 4 |
| 6 | <b>899.447758</b>  | 450.227517      | 882.421209     | 441.714243       | <b>881.437193</b> | 441.222235       | T    | <b>361.244547</b>  | 181.125912        | 344.217998        | 172.612637       | 343.233982         | 172.120629       | 3 |
| 7 | <b>1012.531822</b> | 506.769549      | 995.505273     | 498.256275       | <b>994.521257</b> | 497.764267       | L    | <b>260.196868</b>  | 130.602072        | 243.170319        | 122.088798       |                    |                  | 2 |
| 8 |                    |                 |                |                  |                   |                  | K    | <b>147.112804</b>  | 74.060040         | <b>130.086255</b> | 65.546765        |                    |                  | 1 |

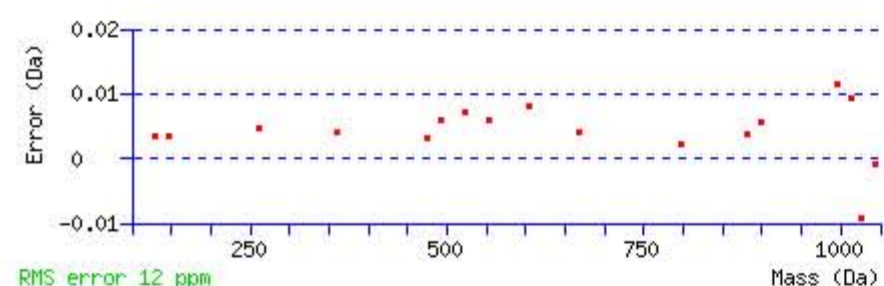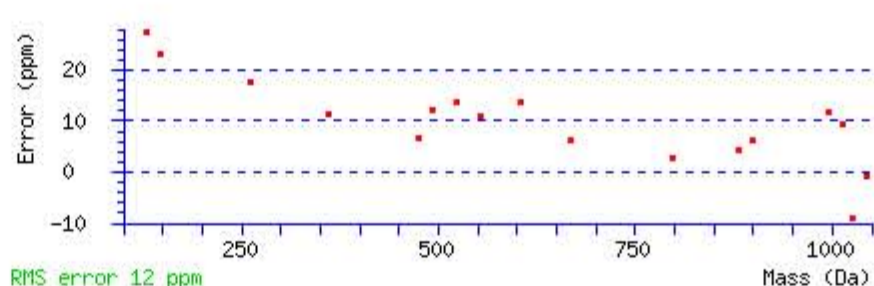

NCBI BLAST search of [GGQIMTLK](#)

(Parameters: blastp, nr protein database, expect=20000, no filter, PAM30)

Other BLAST [web gateways](#)

All matches to this query

| Score | Mr(calc):   | Delta     | Sequence                     |
|-------|-------------|-----------|------------------------------|
| 30.2  | 1157.630066 | 0.011862  | <a href="#">GGQIMTLK</a>     |
| 14.3  | 1157.630051 | 0.011877  | <a href="#">QLSQMLK</a>      |
| 11.6  | 1157.647827 | -0.005899 | <a href="#">ALVGGTAPMTIK</a> |
| 9.9   | 1157.640411 | 0.001517  | <a href="#">SPGKNSSIQLK</a>  |
| 7.7   | 1157.647827 | -0.005899 | <a href="#">IMVPINGSVTK</a>  |
| 6.2   | 1157.640411 | 0.001517  | <a href="#">AQQLSSGNLK</a>   |
| 5.9   | 1157.636566 | 0.005362  | <a href="#">ILVEEMAPLK</a>   |
| 5.9   | 1157.629196 | 0.012732  | <a href="#">EPQTITQLTK</a>   |
| 5.2   | 1157.630081 | 0.011847  | <a href="#">CVTLVQK</a>      |
| 4.2   | 1157.636566 | 0.005362  | <a href="#">LLAIMPDELK</a>   |

# MASCOT Search Results

## Peptide View

MS/MS Fragmentation of **VSSQCADTR**

Found in **VWF\_HUMAN**, von Willebrand factor OS=Homo sapiens GN=VWF PE=1 SV=4

Match to Query 27657: 1333.624628 from(667.819590,2+) rtinseconds(1259) index(37085)

Title: Locus:1.1.1.2887.23 File:"2013-07-02 CLN FXIII 180 min 1st F 3.wiff"

Data file C:\Program Files (x86)\Matrix Science\Mascot Daemon\mgf\7 FXIII 180 min 1st\mascot\_daemon\_merge.mgf

Click mouse within plot area to zoom in by factor of two about that point

Or, Plot from  to  Da

Label all possible matches  Label matches used for scoring

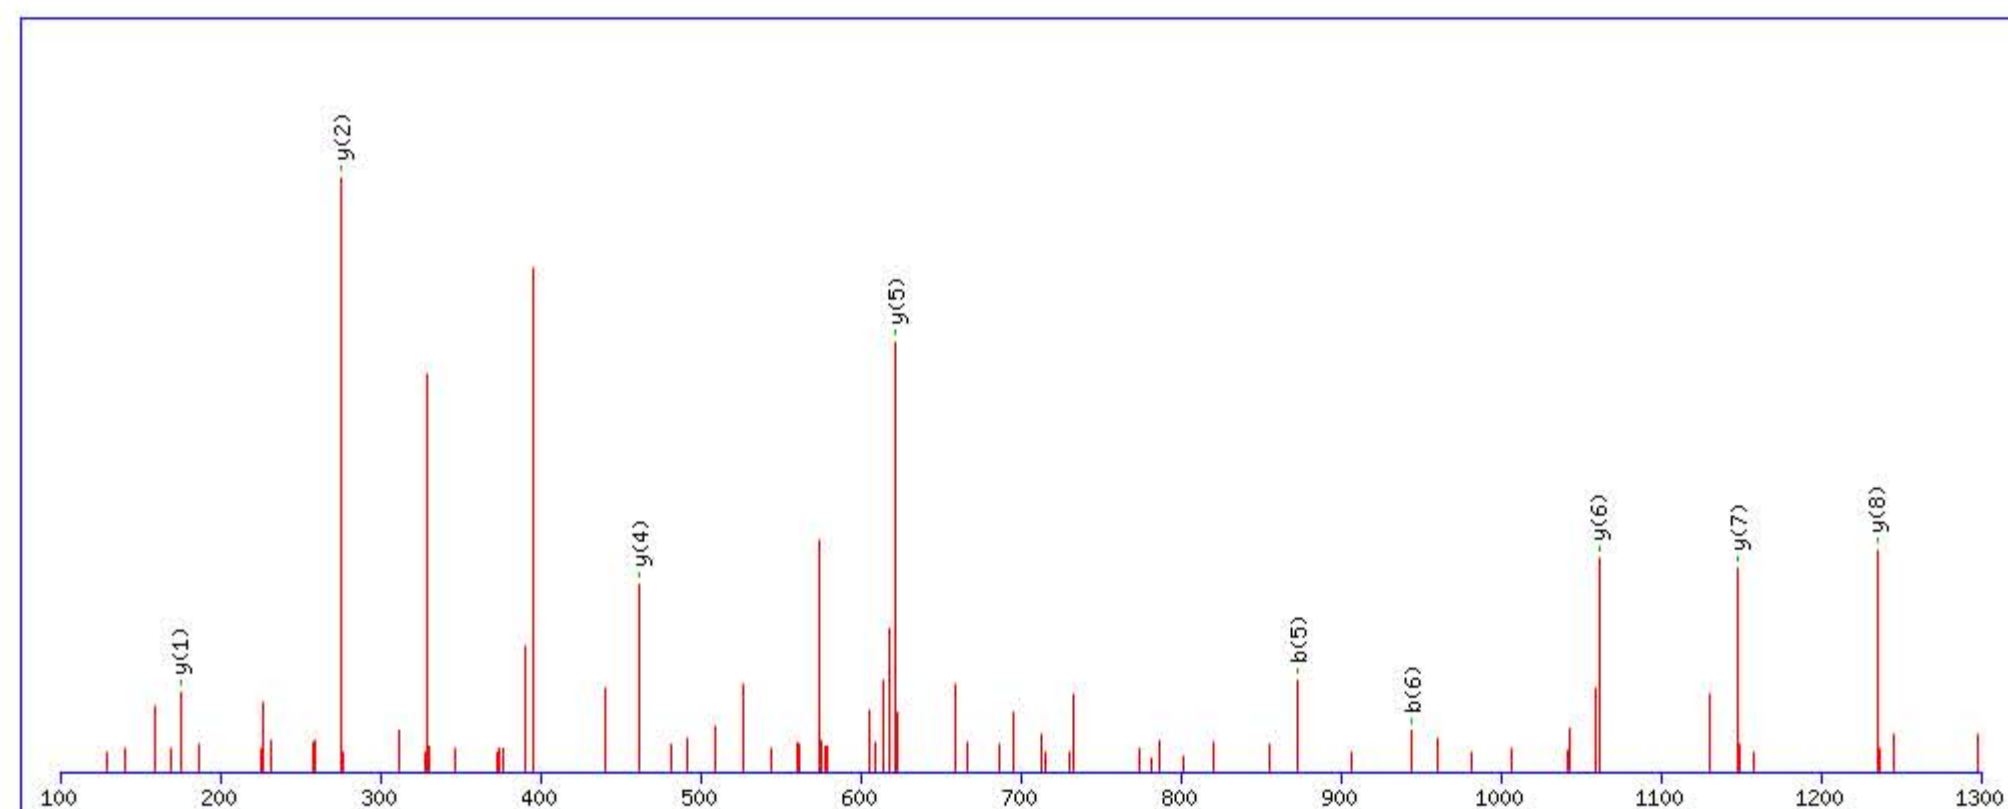

Monoisotopic mass of neutral peptide Mr(calc): 1333.611862

Fixed modifications: Carbamidomethyl (C) (apply to specified residues or termini only)

Variable modifications:

Q4 : Biotin:Thermo-21345 (Q)

Ions Score: 61 Expect: 1e-005

Matches : 9/86 fragment ions using 12 most intense peaks ([help](#))

| # | b                 | b <sup>++</sup> | b <sup>*</sup> | b <sup>*++</sup> | b <sup>0</sup> | b <sup>0++</sup> | Seq. | y                  | y <sup>++</sup> | y <sup>*</sup> | y <sup>*++</sup> | y <sup>0</sup> | y <sup>0++</sup> | # |
|---|-------------------|-----------------|----------------|------------------|----------------|------------------|------|--------------------|-----------------|----------------|------------------|----------------|------------------|---|
| 1 | 100.075690        | 50.541483       |                |                  |                |                  | V    |                    |                 |                |                  |                |                  | 9 |
| 2 | 187.107718        | 94.057497       |                |                  | 169.097153     | 85.052214        | S    | <b>1235.550719</b> | 618.278998      | 1218.524170    | 609.765723       | 1217.540154    | 609.273715       | 8 |
| 3 | 274.139746        | 137.573511      |                |                  | 256.129181     | 128.568229       | S    | <b>1148.518691</b> | 574.762984      | 1131.492142    | 566.249709       | 1130.508126    | 565.757701       | 7 |
| 4 | 713.365072        | 357.186174      | 696.338523     | 348.672900       | 695.354507     | 348.180892       | Q    | <b>1061.486663</b> | 531.246970      | 1044.460114    | 522.733695       | 1043.476098    | 522.241687       | 6 |
| 5 | <b>873.395721</b> | 437.201499      | 856.369172     | 428.688224       | 855.385156     | 428.196216       | C    | <b>622.261337</b>  | 311.634307      | 605.234788     | 303.121032       | 604.250772     | 302.629024       | 5 |
| 6 | <b>944.432835</b> | 472.720056      | 927.406286     | 464.206781       | 926.422270     | 463.714773       | A    | <b>462.230688</b>  | 231.618982      | 445.204139     | 223.105707       | 444.220123     | 222.613700       | 4 |
| 7 | 1059.459778       | 530.233527      | 1042.433229    | 521.720253       | 1041.449213    | 521.228245       | D    | 391.193574         | 196.100425      | 374.167025     | 187.587151       | 373.183009     | 187.095143       | 3 |
| 8 | 1160.507457       | 580.757367      | 1143.480908    | 572.244092       | 1142.496892    | 571.752084       | T    | <b>276.166631</b>  | 138.586953      | 259.140082     | 130.073679       | 258.156066     | 129.581671       | 2 |
| 9 |                   |                 |                |                  |                |                  | R    | <b>175.118952</b>  | 88.063114       | 158.092403     | 79.549839        |                |                  | 1 |

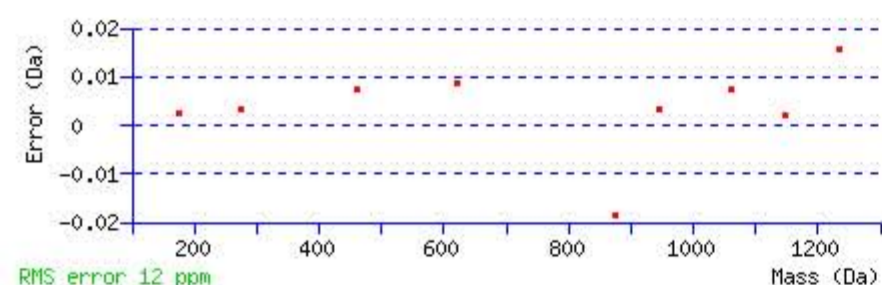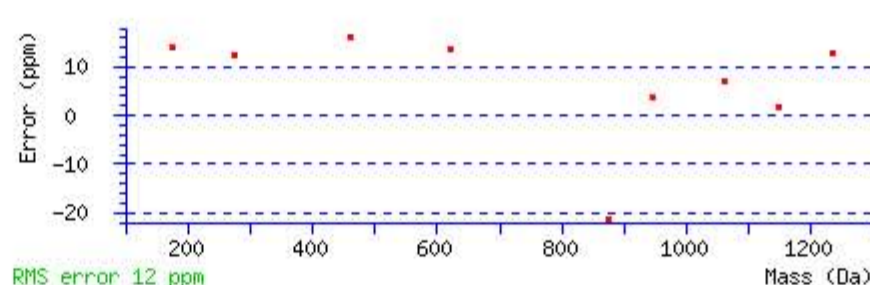

NCBI BLAST search of **VSSQCADTR**

(Parameters: blastp, nr protein database, expect=20000, no filter, PAM30)

Other BLAST [web gateways](#)

All matches to this query

| Score | Mr(calc):   | Delta     | Sequence                     |
|-------|-------------|-----------|------------------------------|
| 61.2  | 1333.611862 | 0.012766  | <a href="#">VSSQCADTR</a>    |
| 9.2   | 1333.633606 | -0.008978 | <a href="#">LIYNTHMADEK</a>  |
| 5.1   | 1333.636108 | -0.011480 | <a href="#">VSEEKEVTEER</a>  |
| 3.2   | 1333.636993 | -0.012365 | <a href="#">VSPSAEMVMIDR</a> |
| 2.8   | 1333.607117 | 0.017511  | <a href="#">GEIEIESDAPMK</a> |



# MASCOT Search Results

## Peptide View

MS/MS Fragmentation of **GLWEQCQLLK**

Found in **VWF\_HUMAN**, von Willebrand factor OS=Homo sapiens GN=VWF PE=1 SV=4

Match to Query 37980: 1584.838228 from(793.426390,2+) rtinseconds(2382) index(44891)

Title: Locus:1.1.1.3278.20 File:"2013-07-02 CLN FXIII 180 min 1st F 3.wiff"

Data file C:\Program Files (x86)\Matrix Science\Mascot Daemon\mgf\7 FXIII 180 min 1st\mascot\_daemon\_merge.mgf

Click mouse within plot area to zoom in by factor of two about that point

Or, Plot from  to  Da

Label all possible matches  Label matches used for scoring

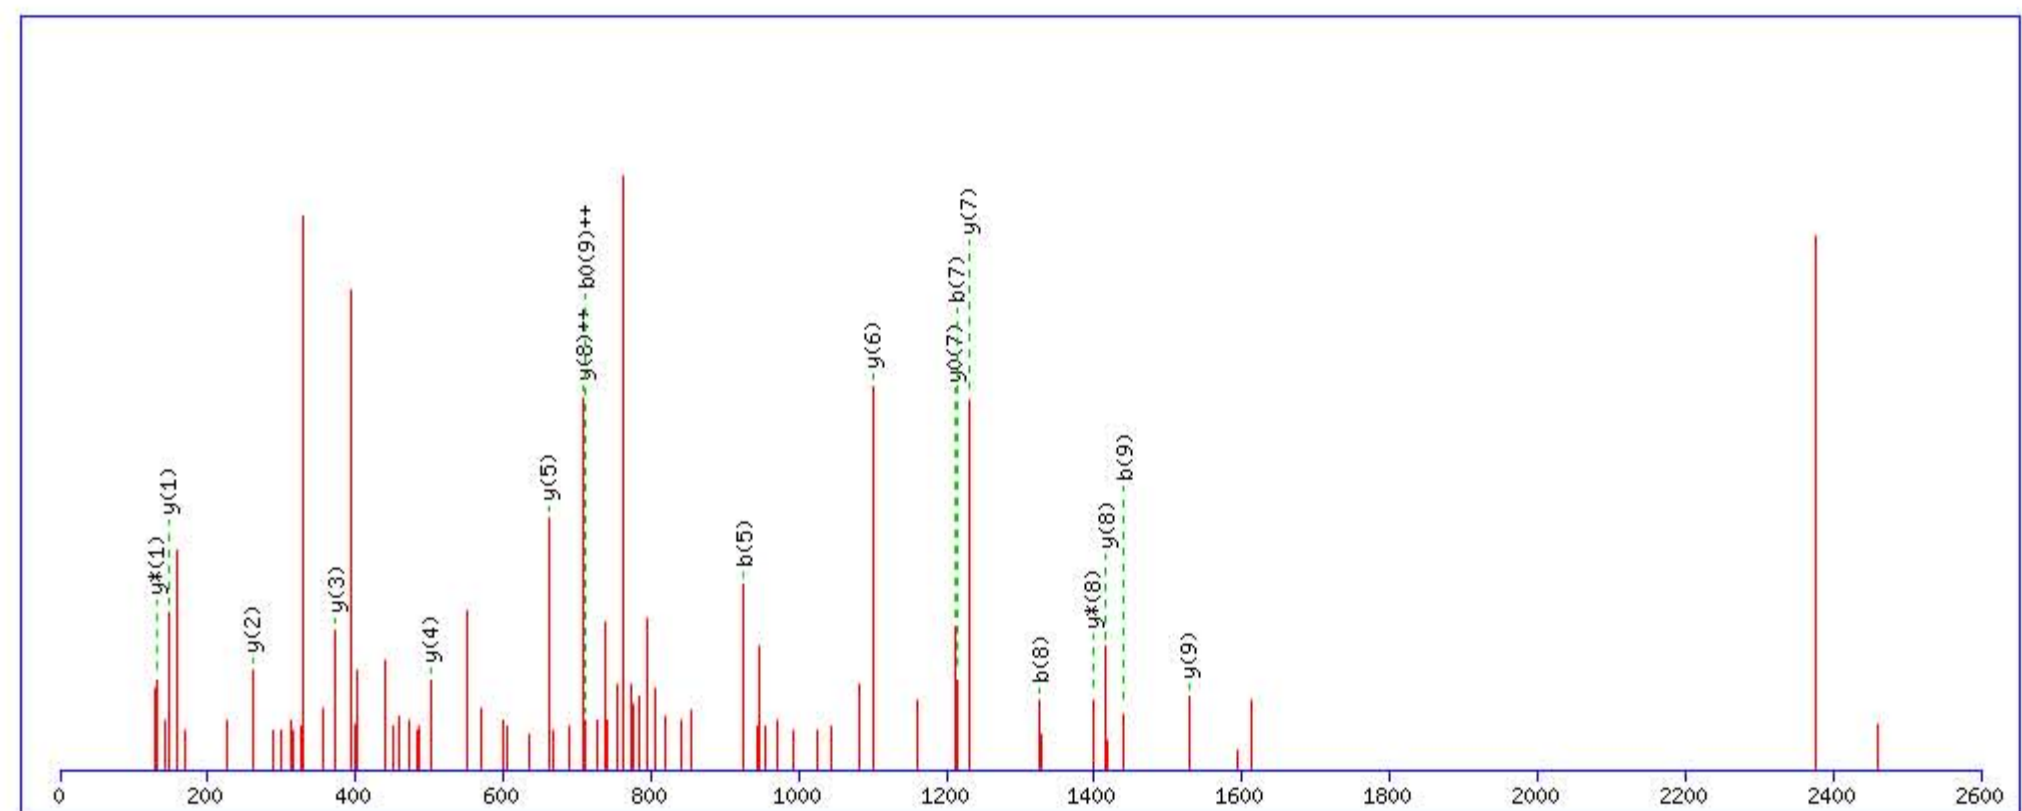

Monoisotopic mass of neutral peptide Mr(calc): 1584.815628

Fixed modifications: Carbamidomethyl (C) (apply to specified residues or termini only)

Variable modifications:

Q5 : Biotin:Thermo-21345 (Q)

Ions Score: 42 Expect: 0.0013

Matches : 18/82 fragment ions using 42 most intense peaks [\(help\)](#)

| #  | b                  | b <sup>++</sup> | b <sup>+</sup> | b <sup>+++</sup> | b <sup>0</sup> | b <sup>0++</sup>  | Seq.     | y                  | y <sup>++</sup>   | y <sup>+</sup>     | y <sup>+++</sup> | y <sup>0</sup>     | y <sup>0++</sup> | #         |
|----|--------------------|-----------------|----------------|------------------|----------------|-------------------|----------|--------------------|-------------------|--------------------|------------------|--------------------|------------------|-----------|
| 1  | 58.028740          | 29.518008       |                |                  |                |                   | <b>G</b> |                    |                   |                    |                  |                    |                  | <b>10</b> |
| 2  | 171.112804         | 86.060040       |                |                  |                |                   | <b>L</b> | <b>1528.801455</b> | 764.904366        | 1511.774906        | 756.391091       | 1510.790890        | 755.899083       | <b>9</b>  |
| 3  | 357.192117         | 179.099696      |                |                  |                |                   | <b>W</b> | <b>1415.717391</b> | <b>708.362333</b> | <b>1398.690842</b> | 699.849059       | 1397.706826        | 699.357051       | <b>8</b>  |
| 4  | 486.234710         | 243.620993      |                |                  | 468.224145     | 234.615711        | <b>E</b> | <b>1229.638078</b> | 615.322677        | 1212.611529        | 606.809403       | <b>1211.627513</b> | 606.317394       | <b>7</b>  |
| 5  | <b>925.460036</b>  | 463.233656      | 908.433487     | 454.720382       | 907.449471     | 454.228374        | <b>Q</b> | <b>1100.595485</b> | 550.801381        | 1083.568936        | 542.288106       |                    |                  | <b>6</b>  |
| 6  | 1085.490685        | 543.248981      | 1068.464136    | 534.735706       | 1067.480120    | 534.243698        | <b>C</b> | <b>661.370159</b>  | 331.188718        | 644.343610         | 322.675443       |                    |                  | <b>5</b>  |
| 7  | <b>1213.549263</b> | 607.278270      | 1196.522714    | 598.764995       | 1195.538698    | 598.272987        | <b>Q</b> | <b>501.339510</b>  | 251.173393        | 484.312961         | 242.660118       |                    |                  | <b>4</b>  |
| 8  | <b>1326.633327</b> | 663.820302      | 1309.606778    | 655.307027       | 1308.622762    | 654.815019        | <b>L</b> | <b>373.280932</b>  | 187.144104        | 356.254383         | 178.630829       |                    |                  | <b>3</b>  |
| 9  | <b>1439.717391</b> | 720.362333      | 1422.690842    | 711.849059       | 1421.706826    | <b>711.357051</b> | <b>L</b> | <b>260.196868</b>  | 130.602072        | 243.170319         | 122.088797       |                    |                  | <b>2</b>  |
| 10 |                    |                 |                |                  |                |                   | <b>K</b> | <b>147.112804</b>  | 74.060040         | <b>130.086255</b>  | 65.546765        |                    |                  | <b>1</b>  |

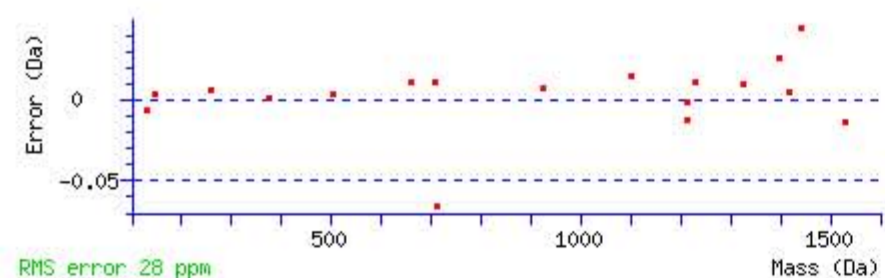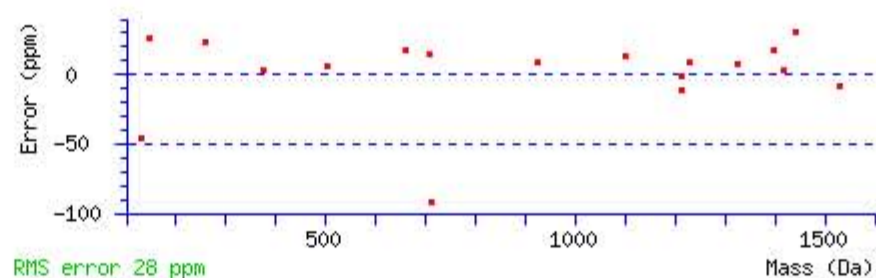

NCBI BLAST search of **GLWEQCQLLK**

(Parameters: blastp, nr protein database, expect=20000, no filter, PAM30)

Other BLAST [web gateways](#)

## All matches to this query

| Score | Mr(calc):   | Delta     | Sequence                        |
|-------|-------------|-----------|---------------------------------|
| 42.3  | 1584.815628 | 0.022600  | <a href="#">GLWEQCQLLK</a>      |
| 21.7  | 1584.815628 | 0.022600  | <a href="#">GLWEQCQLLK</a>      |
| 10.7  | 1584.836746 | 0.001482  | <a href="#">EQVAAMQAGLLK</a>    |
| 6.1   | 1584.824615 | 0.013613  | <a href="#">EADETKLAEEIPLK</a>  |
| 5.3   | 1584.836746 | 0.001482  | <a href="#">EQVAAMQAGLLK</a>    |
| 4.0   | 1584.858337 | -0.020109 | <a href="#">GAKTQAQEREVIQK</a>  |
| 3.5   | 1584.818130 | 0.020098  | <a href="#">VTRAFSTSMSEISIK</a> |
| 3.0   | 1584.858322 | -0.020094 | <a href="#">QRNSTIEAANLAGLK</a> |
| 2.5   | 1584.858322 | -0.020094 | <a href="#">EAERASKLGQLQK</a>   |
| 2.0   | 1584.858353 | -0.020125 | <a href="#">QLDGLAGLKGEGRGK</a> |

# MASCOT SCIENCE Mascot Search Results

## Peptide View

MS/MS Fragmentation of **VKEEVFIQQR**

Found in **VWF\_HUMAN**, von Willebrand factor OS=Homo sapiens GN=VWF PE=1 SV=4

Match to Query 38034: 1585.878102 from(529.633310,3+) rtinseconds(1767) index(40564)

Title: Locus:1.1.1.3065.6 File:"2013-07-02 CLN FXIII 180 min 1st F 3.wiff"

Data file C:\Program Files (x86)\Matrix Science\Mascot Daemon\mgf\7 FXIII 180 min 1st\mascot\_daemon\_merge.mgf

Click mouse within plot area to zoom in by factor of two about that point

Or, Plot from  to  Da

Label all possible matches  Label matches used for scoring

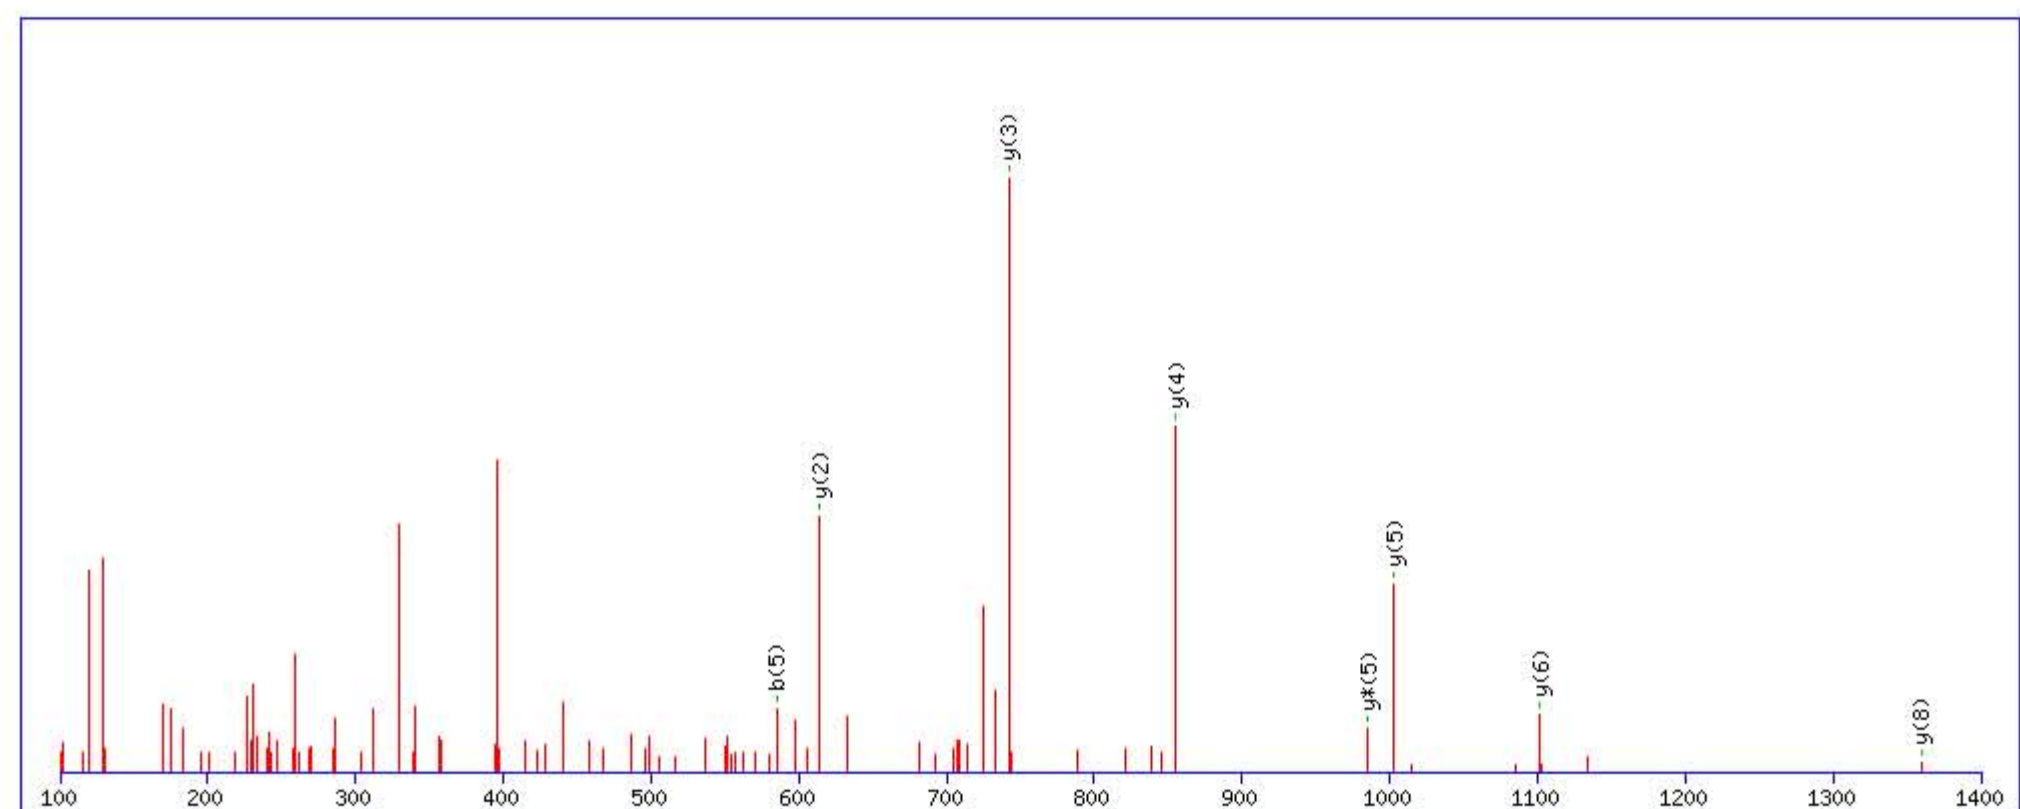

Monoisotopic mass of neutral peptide Mr(calc): 1585.865021

Fixed modifications: Carbamidomethyl (C) (apply to specified residues or termini only)

Variable modifications:

Q9 : Biotin:Thermo-21345 (Q)

Ions Score: 40 Expect: 0.0011

Matches : 8/90 fragment ions using 12 most intense peaks [\(help\)](#)

| #  | b                 | b <sup>++</sup> | b <sup>*</sup> | b <sup>*++</sup> | b <sup>0</sup> | b <sup>0++</sup> | Seq. | y                  | y <sup>++</sup> | y <sup>*</sup>    | y <sup>*++</sup> | y <sup>0</sup> | y <sup>0++</sup> | #  |
|----|-------------------|-----------------|----------------|------------------|----------------|------------------|------|--------------------|-----------------|-------------------|------------------|----------------|------------------|----|
| 1  | 100.075690        | 50.541483       |                |                  |                |                  | V    |                    |                 |                   |                  |                |                  | 10 |
| 2  | 228.170653        | 114.588965      | 211.144104     | 106.075690       |                |                  | K    | 1487.803897        | 744.405587      | 1470.777348       | 735.892312       | 1469.793332    | 735.400304       | 9  |
| 3  | 357.213246        | 179.110261      | 340.186697     | 170.596987       | 339.202681     | 170.104979       | E    | <b>1359.708934</b> | 680.358105      | 1342.682385       | 671.844831       | 1341.698369    | 671.352823       | 8  |
| 4  | 486.255839        | 243.631558      | 469.229290     | 235.118283       | 468.245274     | 234.626275       | E    | 1230.666341        | 615.836809      | 1213.639792       | 607.323534       | 1212.655776    | 606.831526       | 7  |
| 5  | <b>585.324253</b> | 293.165765      | 568.297704     | 284.652490       | 567.313688     | 284.160482       | V    | <b>1101.623748</b> | 551.315512      | 1084.597199       | 542.802238       |                |                  | 6  |
| 6  | 732.392667        | 366.699972      | 715.366118     | 358.186697       | 714.382102     | 357.694689       | F    | <b>1002.555334</b> | 501.781305      | <b>985.528785</b> | 493.268031       |                |                  | 5  |
| 7  | 845.476731        | 423.242004      | 828.450182     | 414.728729       | 827.466166     | 414.236721       | I    | <b>855.486920</b>  | 428.247098      | 838.460371        | 419.733824       |                |                  | 4  |
| 8  | 973.535309        | 487.271293      | 956.508760     | 478.758018       | 955.524744     | 478.266010       | Q    | <b>742.402856</b>  | 371.705066      | 725.376307        | 363.191792       |                |                  | 3  |
| 9  | 1412.760635       | 706.883956      | 1395.734086    | 698.370681       | 1394.750070    | 697.878673       | Q    | <b>614.344278</b>  | 307.675777      | 597.317729        | 299.162503       |                |                  | 2  |
| 10 |                   |                 |                |                  |                |                  | R    | 175.118952         | 88.063114       | 158.092403        | 79.549839        |                |                  | 1  |

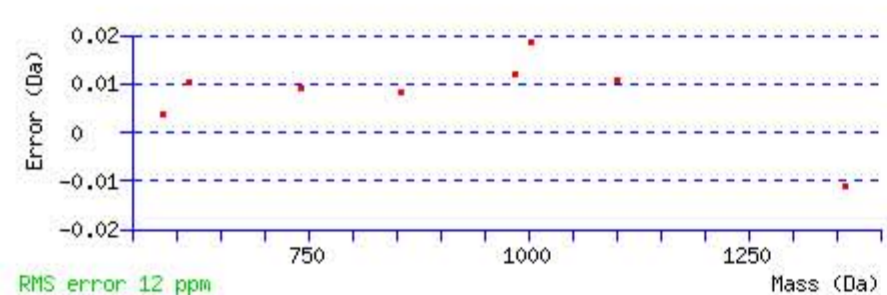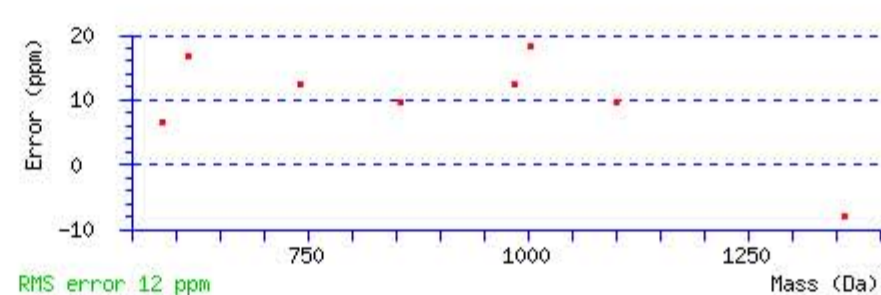

NCBI BLAST search of **VKEEVFIQQR**

(Parameters: blastp, nr protein database, expect=20000, no filter, PAM30)

Other BLAST [web gateways](#)

All matches to this query

| Score | Mr(calc):   | Delta     | Sequence                       |
|-------|-------------|-----------|--------------------------------|
| 39.6  | 1585.865021 | 0.013081  | <a href="#">VKEEVFIQQR</a>     |
| 26.5  | 1585.865021 | 0.013081  | <a href="#">VKEEVFIQQR</a>     |
| 7.9   | 1585.893524 | -0.015422 | <a href="#">QDLIKSLAMLK</a>    |
| 3.7   | 1585.857605 | 0.020497  | <a href="#">QEEVAGIRAKFPNK</a> |

Mascot: <http://www.matrixscience.com/>

# MASCOT SEARCH RESULTS

## Peptide View

MS/MS Fragmentation of **QHSDPCALNPR**

Found in **VWF\_HUMAN**, von Willebrand factor OS=Homo sapiens GN=VWF PE=1 SV=4

Match to Query 38908: 1604.762922 from(535.928250,3+) rtinseconds(1418) index(38115)

Title: Locus:1.1.1.2943.11 File:"2013-07-02 CLN FXIII 180 min 1st F 3.wiff"

Data file C:\Program Files (x86)\Matrix Science\Mascot Daemon\mgf7 FXIII 180 min 1st\mascot\_daemon\_merge.mgf

Click mouse within plot area to zoom in by factor of two about that point

Or, Plot from  to  Da

Label all possible matches  Label matches used for scoring

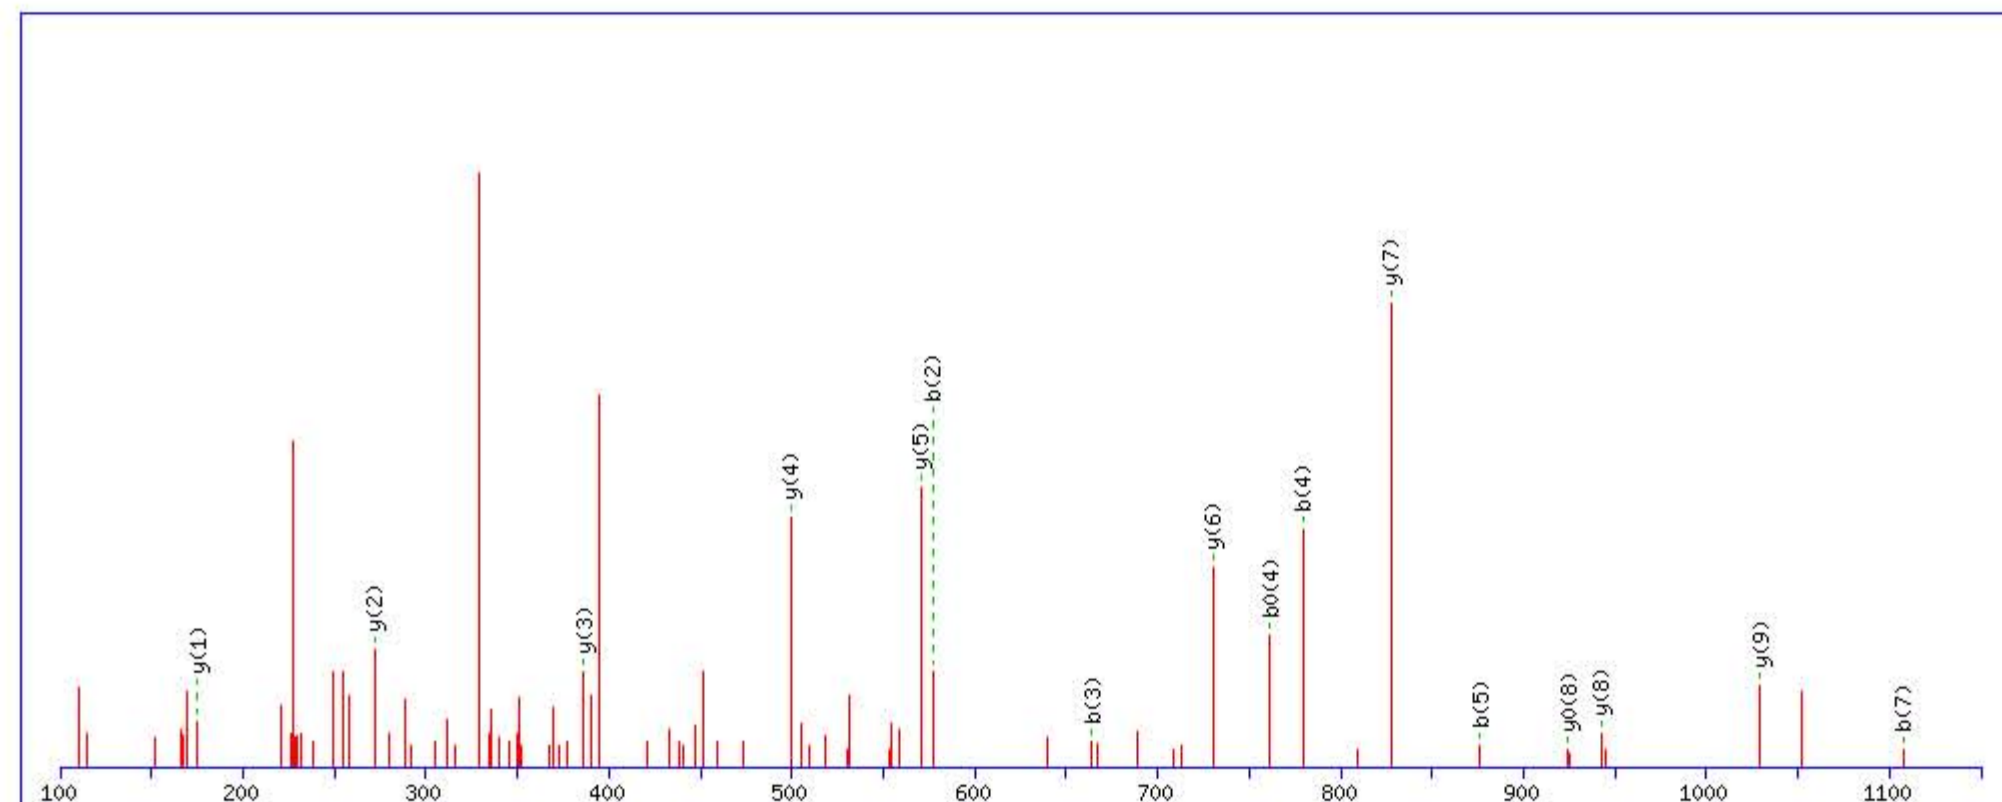

Monoisotopic mass of neutral peptide Mr(calc): 1604.755157

Fixed modifications: Carbamidomethyl (C) (apply to specified residues or termini only)

Variable modifications:

Q1 : Biotin:Thermo-21345 (Q)

Ions Score: 57 Expect: 3.4e-005

Matches : 16/102 fragment ions using 29 most intense peaks [\(help\)](#)

| #  | b                  | b <sup>++</sup> | b <sup>*</sup> | b <sup>*++</sup> | b <sup>0</sup>    | b <sup>0++</sup> | Seq. | y                  | y <sup>++</sup> | y <sup>*</sup> | y <sup>*++</sup> | y <sup>0</sup>    | y <sup>0++</sup> | #  |
|----|--------------------|-----------------|----------------|------------------|-------------------|------------------|------|--------------------|-----------------|----------------|------------------|-------------------|------------------|----|
| 1  | 440.232602         | 220.619939      | 423.206053     | 212.106664       |                   |                  | Q    |                    |                 |                |                  |                   |                  | 11 |
| 2  | <b>577.291514</b>  | 289.149395      | 560.264965     | 280.636121       |                   |                  | H    | 1166.537117        | 583.772196      | 1149.510568    | 575.258922       | 1148.526552       | 574.766914       | 10 |
| 3  | <b>664.323542</b>  | 332.665409      | 647.296993     | 324.152134       | 646.312977        | 323.660126       | S    | <b>1029.478205</b> | 515.242740      | 1012.451656    | 506.729466       | 1011.467640       | 506.237458       | 9  |
| 4  | <b>779.350485</b>  | 390.178880      | 762.323936     | 381.665606       | <b>761.339920</b> | 381.173598       | D    | <b>942.446177</b>  | 471.726726      | 925.419628     | 463.213452       | <b>924.435612</b> | 462.721444       | 8  |
| 5  | <b>876.403249</b>  | 438.705263      | 859.376700     | 430.191988       | 858.392684        | 429.699980       | P    | <b>827.419234</b>  | 414.213255      | 810.392685     | 405.699980       |                   |                  | 7  |
| 6  | 1036.433898        | 518.720587      | 1019.407349    | 510.207313       | 1018.423333       | 509.715305       | C    | <b>730.366470</b>  | 365.686873      | 713.339921     | 357.173598       |                   |                  | 6  |
| 7  | <b>1107.471012</b> | 554.239144      | 1090.444463    | 545.725870       | 1089.460447       | 545.233861       | A    | <b>570.335821</b>  | 285.671548      | 553.309272     | 277.158274       |                   |                  | 5  |
| 8  | 1220.555076        | 610.781176      | 1203.528527    | 602.267901       | 1202.544511       | 601.775893       | L    | <b>499.298707</b>  | 250.152991      | 482.272158     | 241.639717       |                   |                  | 4  |
| 9  | 1334.598003        | 667.802639      | 1317.571454    | 659.289365       | 1316.587438       | 658.797357       | N    | <b>386.214643</b>  | 193.610959      | 369.188094     | 185.097685       |                   |                  | 3  |
| 10 | 1431.650767        | 716.329021      | 1414.624218    | 707.815747       | 1413.640202       | 707.323739       | P    | <b>272.171716</b>  | 136.589496      | 255.145167     | 128.076221       |                   |                  | 2  |
| 11 |                    |                 |                |                  |                   |                  | R    | <b>175.118952</b>  | 88.063114       | 158.092403     | 79.549839        |                   |                  | 1  |

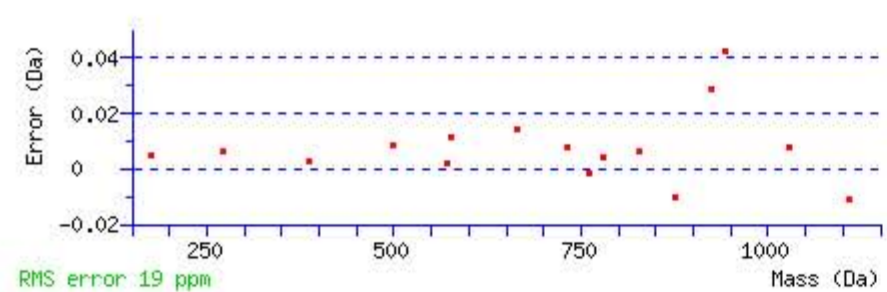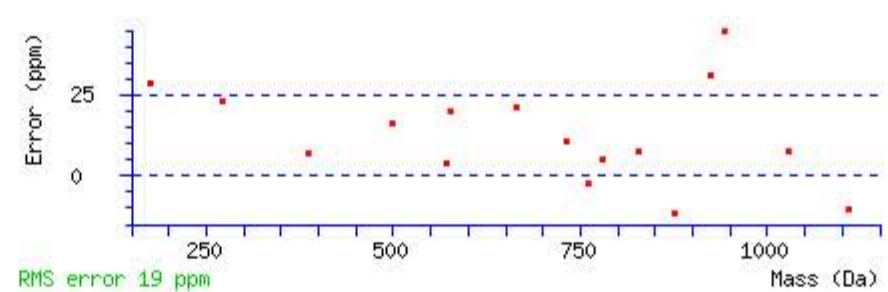

NCBI BLAST search of **QHSDPCALNPR**

(Parameters: blastp, nr protein database, expect=20000, no filter, PAM30)

Other BLAST [web gateways](#)

### All matches to this query

| Score | Mr(calc):   | Delta     | Sequence                          |
|-------|-------------|-----------|-----------------------------------|
| 57.0  | 1604.755157 | 0.007765  | <a href="#">QHSDPCALNPR</a>       |
| 10.4  | 1604.782806 | -0.019884 | <a href="#">QEIQINTMTQDLR</a>     |
| 4.8   | 1604.747070 | 0.015852  | <a href="#">NGYAEFPSPSNPTK</a>    |
| 2.0   | 1604.754288 | 0.008634  | <a href="#">GPSPASSSSSSPPAHPR</a> |

# MASCOT SEARCH RESULTS

## Peptide View

MS/MS Fragmentation of **TCQSLHINEMCQER**

Found in **VWF\_HUMAN**, von Willebrand factor OS=Homo sapiens GN=VWF PE=1 SV=4

Match to Query 53432: 2115.956562 from(706.326130,3+) rtinseconds(1726) index(40235)

Title: Locus:1.1.1.3050.17 File:"2013-07-02 CLN FXIII 180 min 1st F 3.wiff"

Data file C:\Program Files (x86)\Matrix Science\Mascot Daemon\mgf7 FXIII 180 min 1st\mascot\_daemon\_merge.mgf

Click mouse within plot area to zoom in by factor of two about that point

Or, Plot from 0 to 2200 Da Full range

Label all possible matches  Label matches used for scoring

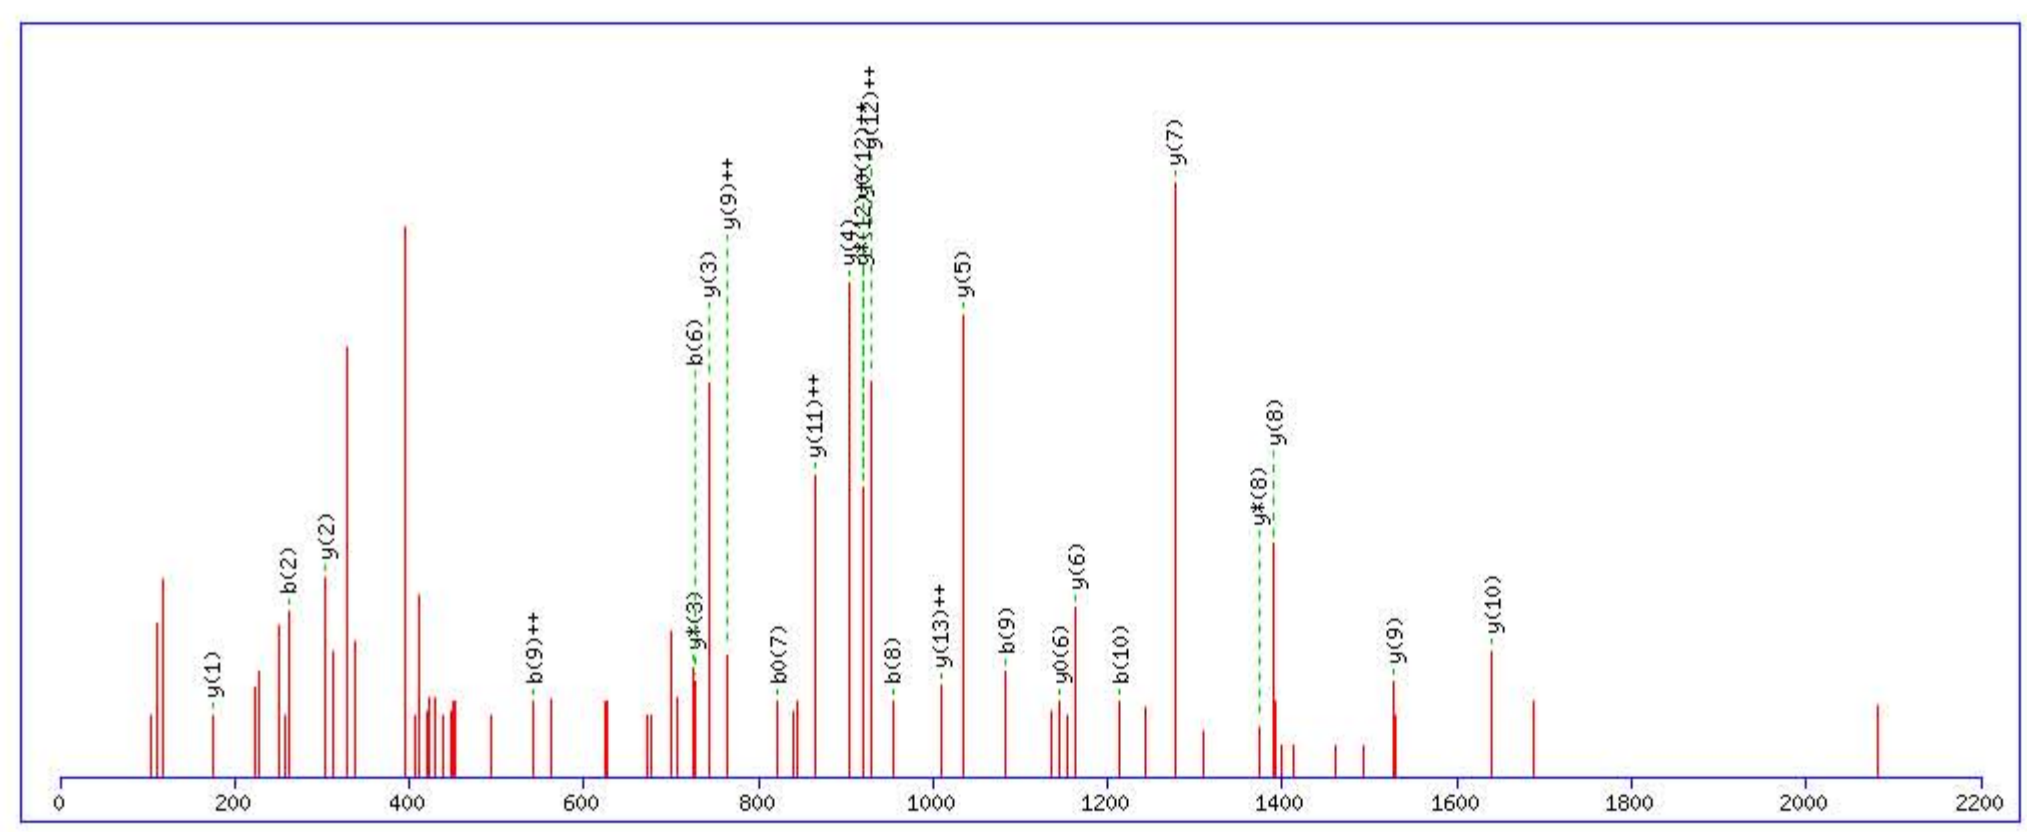

Monoisotopic mass of neutral peptide Mr(calc): 2115.932205

Fixed modifications: Carbamidomethyl (C) (apply to specified residues or termini only)

Variable modifications:

Q12 : Biotin:Thermo-21345 (Q)

Ions Score: 45 Expect: 0.00016

Matches : 26/150 fragment ions using 57 most intense peaks [\(help\)](#)

| #  | b                  | b <sup>++</sup>   | b <sup>+</sup> | b <sup>+++</sup> | b <sup>0</sup>    | b <sup>0++</sup> | Seq. | y                  | y <sup>++</sup>    | y <sup>+</sup>     | y <sup>+++</sup>  | y <sup>0</sup>     | y <sup>0++</sup>  | #  |
|----|--------------------|-------------------|----------------|------------------|-------------------|------------------|------|--------------------|--------------------|--------------------|-------------------|--------------------|-------------------|----|
| 1  | 102.054955         | 51.531116         |                |                  | 84.044390         | 42.525833        | T    |                    |                    |                    |                   |                    |                   | 14 |
| 2  | <b>262.085604</b>  | 131.546440        |                |                  | 244.075039        | 122.541158       | C    | 2015.891820        | <b>1008.449548</b> | 1998.865271        | 999.936274        | 1997.881255        | 999.444266        | 13 |
| 3  | 390.144182         | 195.575729        | 373.117633     | 187.062455       | 372.133617        | 186.570447       | Q    | 1855.861171        | <b>928.434224</b>  | 1838.834622        | <b>919.920949</b> | 1837.850606        | <b>919.428941</b> | 12 |
| 4  | 477.176210         | 239.091743        | 460.149661     | 230.578469       | 459.165645        | 230.086461       | S    | 1727.802593        | <b>864.404935</b>  | 1710.776044        | 855.891660        | 1709.792028        | 855.399652        | 11 |
| 5  | 590.260274         | 295.633775        | 573.233725     | 287.120501       | 572.249709        | 286.628493       | L    | <b>1640.770565</b> | 820.888921         | 1623.744016        | 812.375646        | 1622.760000        | 811.883638        | 10 |
| 6  | <b>727.319186</b>  | 364.163231        | 710.292637     | 355.649957       | 709.308621        | 355.157949       | H    | <b>1527.686501</b> | <b>764.346889</b>  | 1510.659952        | 755.833614        | 1509.675936        | 755.341606        | 9  |
| 7  | 840.403250         | 420.705263        | 823.376701     | 412.191989       | <b>822.392685</b> | 411.699981       | I    | <b>1390.627589</b> | 695.817433         | <b>1373.601040</b> | 687.304158        | 1372.617024        | 686.812150        | 8  |
| 8  | <b>954.446177</b>  | 477.726727        | 937.419628     | 469.213452       | 936.435612        | 468.721444       | N    | <b>1277.543525</b> | 639.275401         | 1260.516976        | 630.762126        | 1259.532960        | 630.270118        | 7  |
| 9  | <b>1083.488770</b> | <b>542.248023</b> | 1066.462221    | 533.734749       | 1065.478205       | 533.242741       | E    | <b>1163.500598</b> | 582.253937         | 1146.474049        | 573.740663        | <b>1145.490033</b> | 573.248655        | 6  |
| 10 | <b>1214.529255</b> | 607.768266        | 1197.502706    | 599.254991       | 1196.518690       | 598.762983       | M    | <b>1034.458005</b> | 517.732641         | 1017.431456        | 509.219366        | 1016.447440        | 508.727358        | 5  |
| 11 | 1374.559904        | 687.783590        | 1357.533355    | 679.270316       | 1356.549339       | 678.778308       | C    | <b>903.417520</b>  | 452.212398         | 886.390971         | 443.699124        | 885.406955         | 443.207116        | 4  |
| 12 | 1813.785230        | 907.396253        | 1796.758681    | 898.882979       | 1795.774665       | 898.390971       | Q    | <b>743.386871</b>  | 372.197074         | <b>726.360322</b>  | 363.683799        | 725.376306         | 363.191791        | 3  |
| 13 | 1942.827823        | 971.917550        | 1925.801274    | 963.404275       | 1924.817258       | 962.912267       | E    | <b>304.161545</b>  | 152.584411         | 287.134996         | 144.071136        | 286.150980         | 143.579128        | 2  |
| 14 |                    |                   |                |                  |                   |                  | R    | <b>175.118952</b>  | 88.063114          | 158.092403         | 79.549839         |                    |                   | 1  |

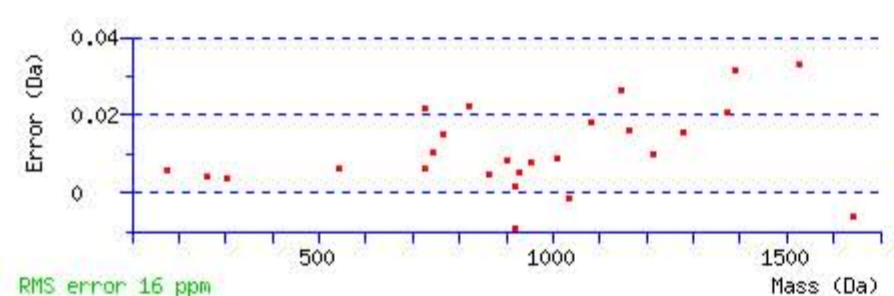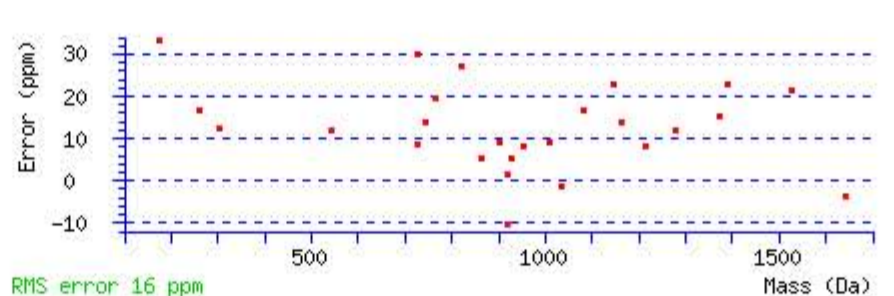

NCBI BLAST search of **TCQSLHINEMCQER**

(Parameters: blastp, nr protein database, expect=20000, no filter, PAM30)

Other BLAST [web gateways](#)

All matches to this query

| Score | Mr(calc):   | Delta     | Sequence                            |
|-------|-------------|-----------|-------------------------------------|
| 44.7  | 2115.932205 | 0.024357  | <a href="#">TCQSLHINEMCQER</a>      |
| 4.3   | 2115.981628 | -0.025066 | <a href="#">DKPASSMSDDEMPVLEIPR</a> |

Mascot: <http://www.matrixscience.com/>

# MASCOT Search Results

## Peptide View

MS/MS Fragmentation of **LGHPEALSAGTGSPQPPSFTYAQQR**  
 Found in **ZYX\_HUMAN**, Zyxin OS=Homo sapiens GN=ZYX PE=1 SV=1

Match to Query 69152: 2907.459896 from(727.872250,4+) rtinseconds(1997) index(6501)  
 Title: Locus:1.1.1.2949.14 File:"2013-07-02 CLN FXIII 180 min 1st F 1.wiff"  
 Data file C:\Program Files (x86)\Matrix Science\Mascot Daemon\mgf\7 FXIII 180 min 1st\mascot\_daemon\_merge.mgf

Click mouse within plot area to zoom in by factor of two about that point  
 Or, Plot from  to  Da   
 Label all possible matches  Label matches used for scoring

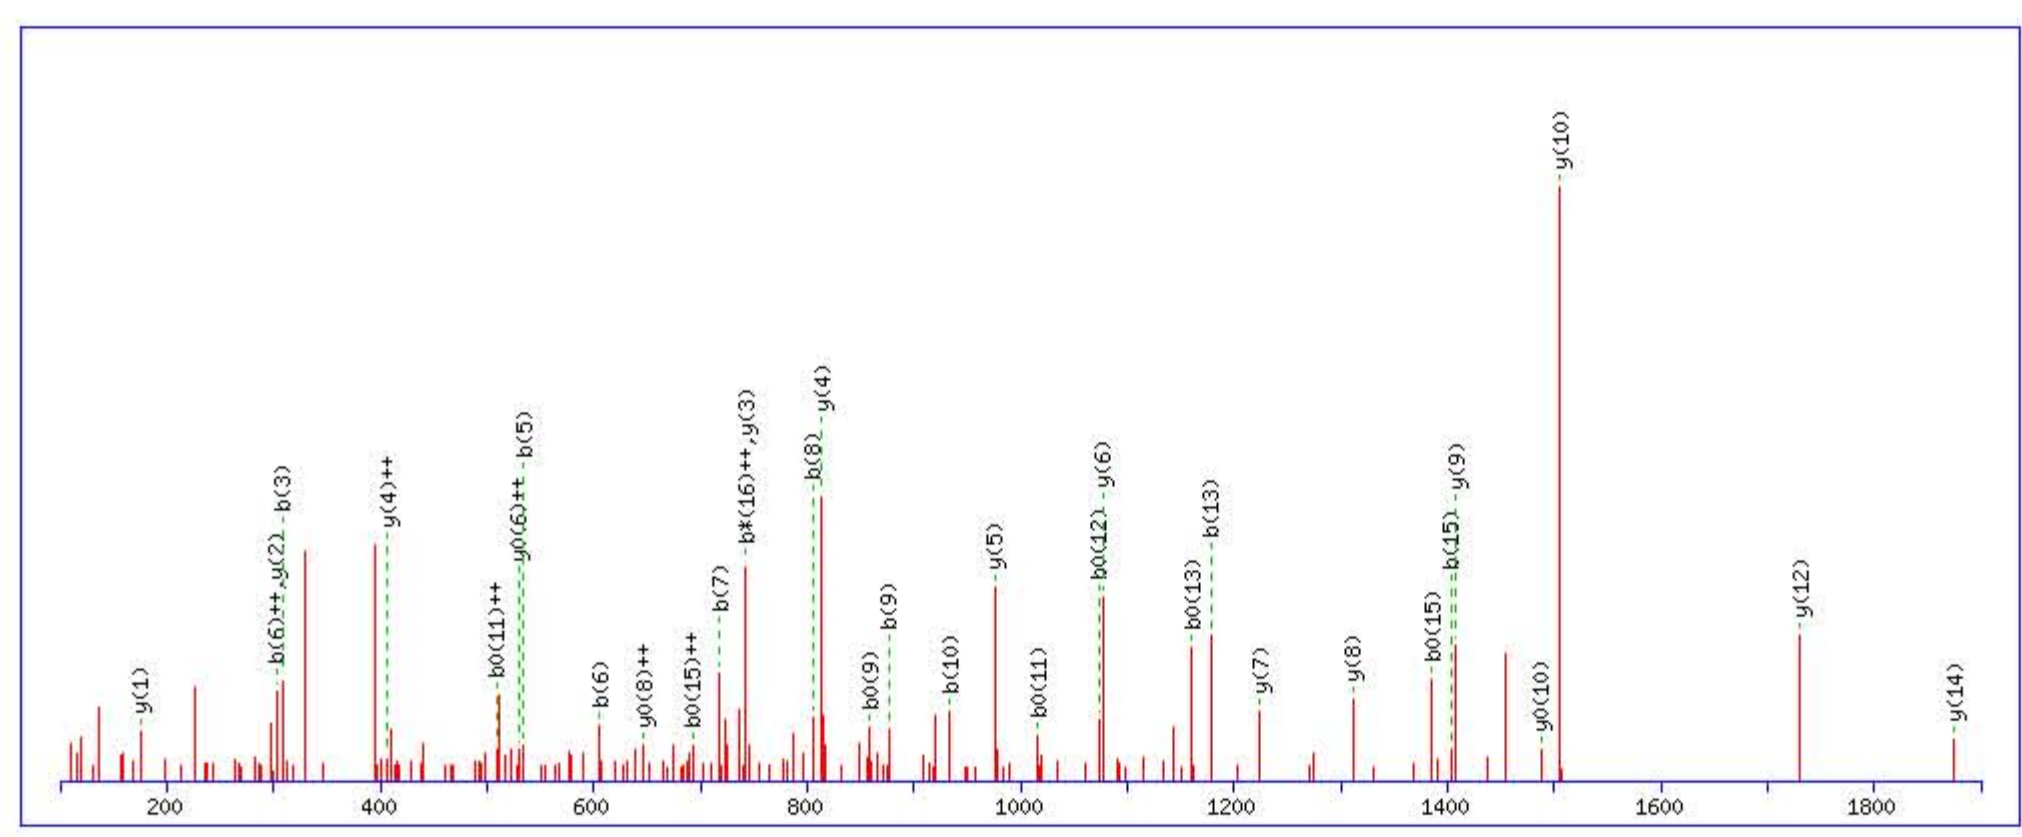

Monoisotopic mass of neutral peptide Mr(calc): 2907.433762  
 Fixed modifications: Carbamidomethyl (C) (apply to specified residues or termini only)  
 Variable modifications:  
 Q23 : Biotin:Thermo-21345 (Q)  
 Ions Score: 72 Expect: 2.1e-006  
 Matches : 34/242 fragment ions using 57 most intense peaks [\(help\)](#)

| #  | b                  | b <sup>++</sup>   | b <sup>*</sup> | b <sup>+++</sup>  | b <sup>0</sup>     | b <sup>0++</sup>  | Seq. | y                  | y <sup>++</sup>   | y <sup>*</sup> | y <sup>+++</sup> | y <sup>0</sup>     | y <sup>0++</sup>  | #  |
|----|--------------------|-------------------|----------------|-------------------|--------------------|-------------------|------|--------------------|-------------------|----------------|------------------|--------------------|-------------------|----|
| 1  | 114.091340         | 57.549308         |                |                   |                    |                   | L    |                    |                   |                |                  |                    |                   | 25 |
| 2  | 171.112804         | 86.060040         |                |                   |                    |                   | G    | 2795.356978        | 1398.182127       | 2778.330429    | 1389.668853      | 2777.346413        | 1389.176845       | 24 |
| 3  | <b>308.171716</b>  | 154.589496        |                |                   |                    |                   | H    | 2738.335514        | 1369.671395       | 2721.308965    | 1361.158121      | 2720.324949        | 1360.666113       | 23 |
| 4  | 405.224480         | 203.115878        |                |                   |                    |                   | P    | 2601.276602        | 1301.141939       | 2584.250053    | 1292.628665      | 2583.266037        | 1292.136657       | 22 |
| 5  | <b>534.267073</b>  | 267.637175        |                |                   | 516.256508         | 258.631892        | E    | 2504.223838        | 1252.615557       | 2487.197289    | 1244.102283      | 2486.213273        | 1243.610275       | 21 |
| 6  | <b>605.304187</b>  | <b>303.155732</b> |                |                   | 587.293622         | 294.150449        | A    | 2375.181245        | 1188.094261       | 2358.154696    | 1179.580986      | 2357.170680        | 1179.088978       | 20 |
| 7  | <b>718.388251</b>  | 359.697764        |                |                   | 700.377686         | 350.692481        | L    | 2304.144131        | 1152.575704       | 2287.117582    | 1144.062429      | 2286.133566        | 1143.570421       | 19 |
| 8  | <b>805.420279</b>  | 403.213778        |                |                   | 787.409714         | 394.208495        | S    | 2191.060067        | 1096.033672       | 2174.033518    | 1087.520397      | 2173.049502        | 1087.028389       | 18 |
| 9  | <b>876.457393</b>  | 438.732335        |                |                   | <b>858.446828</b>  | 429.727052        | A    | 2104.028039        | 1052.517658       | 2087.001490    | 1044.004383      | 2086.017474        | 1043.512375       | 17 |
| 10 | <b>933.478857</b>  | 467.243067        |                |                   | 915.468292         | 458.237784        | G    | 2032.990925        | 1016.999101       | 2015.964376    | 1008.485826      | 2014.980360        | 1007.993818       | 16 |
| 11 | 1034.526536        | 517.766906        |                |                   | <b>1016.515971</b> | <b>508.761624</b> | T    | 1975.969461        | 988.488369        | 1958.942912    | 979.975094       | 1957.958896        | 979.483086        | 15 |
| 12 | 1091.548000        | 546.277638        |                |                   | <b>1073.537435</b> | 537.272356        | G    | <b>1874.921782</b> | 937.964529        | 1857.895233    | 929.451255       | 1856.911217        | 928.959247        | 14 |
| 13 | <b>1178.580028</b> | 589.793652        |                |                   | <b>1160.569463</b> | 580.788370        | S    | 1817.900318        | 909.453797        | 1800.873769    | 900.940523       | 1799.889753        | 900.448515        | 13 |
| 14 | 1275.632792        | 638.320034        |                |                   | 1257.622227        | 629.314752        | P    | <b>1730.868290</b> | 865.937783        | 1713.841741    | 857.424509       | 1712.857725        | 856.932501        | 12 |
| 15 | <b>1403.691370</b> | 702.349323        | 1386.664821    | 693.836049        | <b>1385.680805</b> | <b>693.344041</b> | Q    | 1633.815526        | 817.411401        | 1616.788977    | 808.898127       | 1615.804961        | 808.406119        | 11 |
| 16 | 1500.744134        | 750.875705        | 1483.717585    | <b>742.362431</b> | 1482.733569        | 741.870423        | P    | <b>1505.756948</b> | 753.382112        | 1488.730399    | 744.868838       | <b>1487.746383</b> | 744.376830        | 10 |
| 17 | 1597.796898        | 799.402087        | 1580.770349    | 790.888813        | 1579.786333        | 790.396805        | P    | <b>1408.704184</b> | 704.855730        | 1391.677635    | 696.342456       | 1390.693619        | 695.850448        | 9  |
| 18 | 1684.828926        | 842.918101        | 1667.802377    | 834.404827        | 1666.818361        | 833.912819        | S    | <b>1311.651420</b> | 656.329348        | 1294.624871    | 647.816074       | 1293.640855        | <b>647.324066</b> | 8  |
| 19 | 1831.897340        | 916.452308        | 1814.870791    | 907.939034        | 1813.886775        | 907.447026        | F    | <b>1224.619392</b> | 612.813334        | 1207.592843    | 604.300060       | 1206.608827        | 603.808052        | 7  |
| 20 | 1932.945019        | 966.976148        | 1915.918470    | 958.462873        | 1914.934454        | 957.970865        | T    | <b>1077.550978</b> | 539.279127        | 1060.524429    | 530.765853       | 1059.540413        | <b>530.273845</b> | 6  |
| 21 | 2096.008348        | 1048.507812       | 2078.981799    | 1039.994538       | 2077.997783        | 1039.502530       | Y    | <b>976.503299</b>  | 488.755288        | 959.476750     | 480.242013       |                    |                   | 5  |
| 22 | 2167.045462        | 1084.026369       | 2150.018913    | 1075.513095       | 2149.034897        | 1075.021087       | A    | <b>813.439970</b>  | <b>407.223623</b> | 796.413421     | 398.710349       |                    |                   | 4  |
| 23 | 2606.270788        | 1303.639032       | 2589.244239    | 1295.125758       | 2588.260223        | 1294.633750       | Q    | <b>742.402856</b>  | 371.705066        | 725.376307     | 363.191792       |                    |                   | 3  |
| 24 | 2734.329366        | 1367.668321       | 2717.302817    | 1359.155047       | 2716.318801        | 1358.663039       | Q    | <b>303.177530</b>  | 152.092403        | 286.150981     | 143.579129       |                    |                   | 2  |
| 25 |                    |                   |                |                   |                    |                   | R    | <b>175.118952</b>  | 88.063114         | 158.092403     | 79.549839        |                    |                   | 1  |

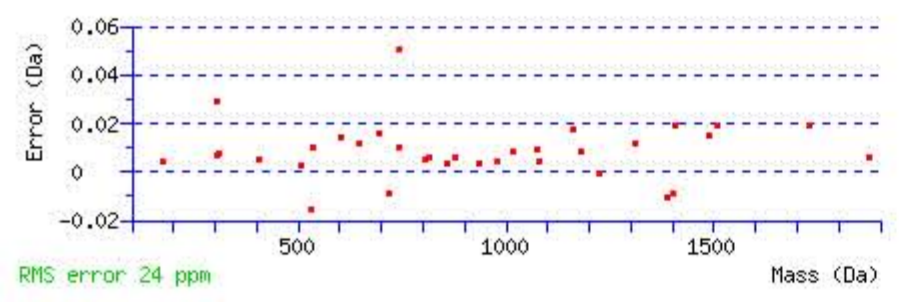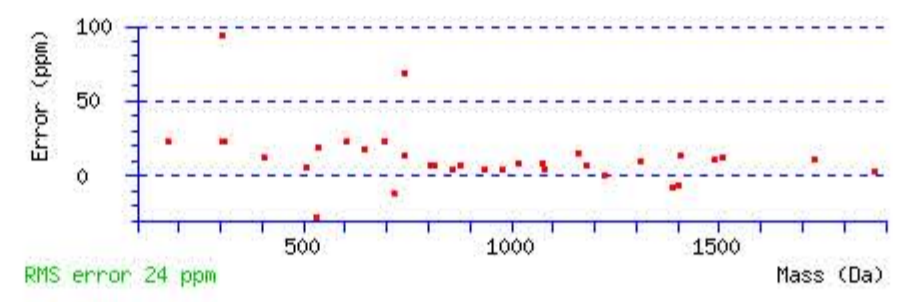

NCBI BLAST search of **LGHPEALSAGTGSPQPPSFTYAQQR**  
 (Parameters: blastp, nr protein database, expect=20000, no filter, PAM30)  
 Other BLAST [web gateways](#)

### All matches to this query

| Score | Mr(calc):   | Delta    | Sequence                                  |
|-------|-------------|----------|-------------------------------------------|
| 71.5  | 2907.433762 | 0.026134 | <a href="#">LGHPEALSAGTGSPQPPSFTYAQQR</a> |
| 71.4  | 2907.433762 | 0.026134 | <a href="#">LGHPEALSAGTGSPQPPSFTYAQQR</a> |
| 17.5  | 2907.433762 | 0.026134 | <a href="#">LGHPEALSAGTGSPQPPSFTYAQQR</a> |

# MASCOT Search Results

## Peptide View

MS/MS Fragmentation of **LGHPEALSAGTGSPQPPSFTYAQQR**  
 Found in **ZYX\_HUMAN**, Zyxin OS=Homo sapiens GN=ZYX PE=1 SV=1

Match to Query 69153: 2907.459896 from(727.872250,4+) rtinseconds(1992) index(6474)  
 Title: Locus:1.1.1.2947.6 File:"2013-07-02 CLN FXIII 180 min 1st F 1.wiff"  
 Data file C:\Program Files (x86)\Matrix Science\Mascot Daemon\mgf\7 FXIII 180 min 1st\mascot\_daemon\_merge.mgf

Click mouse within plot area to zoom in by factor of two about that point  
 Or, Plot from  to  Da   
 Label all possible matches  Label matches used for scoring

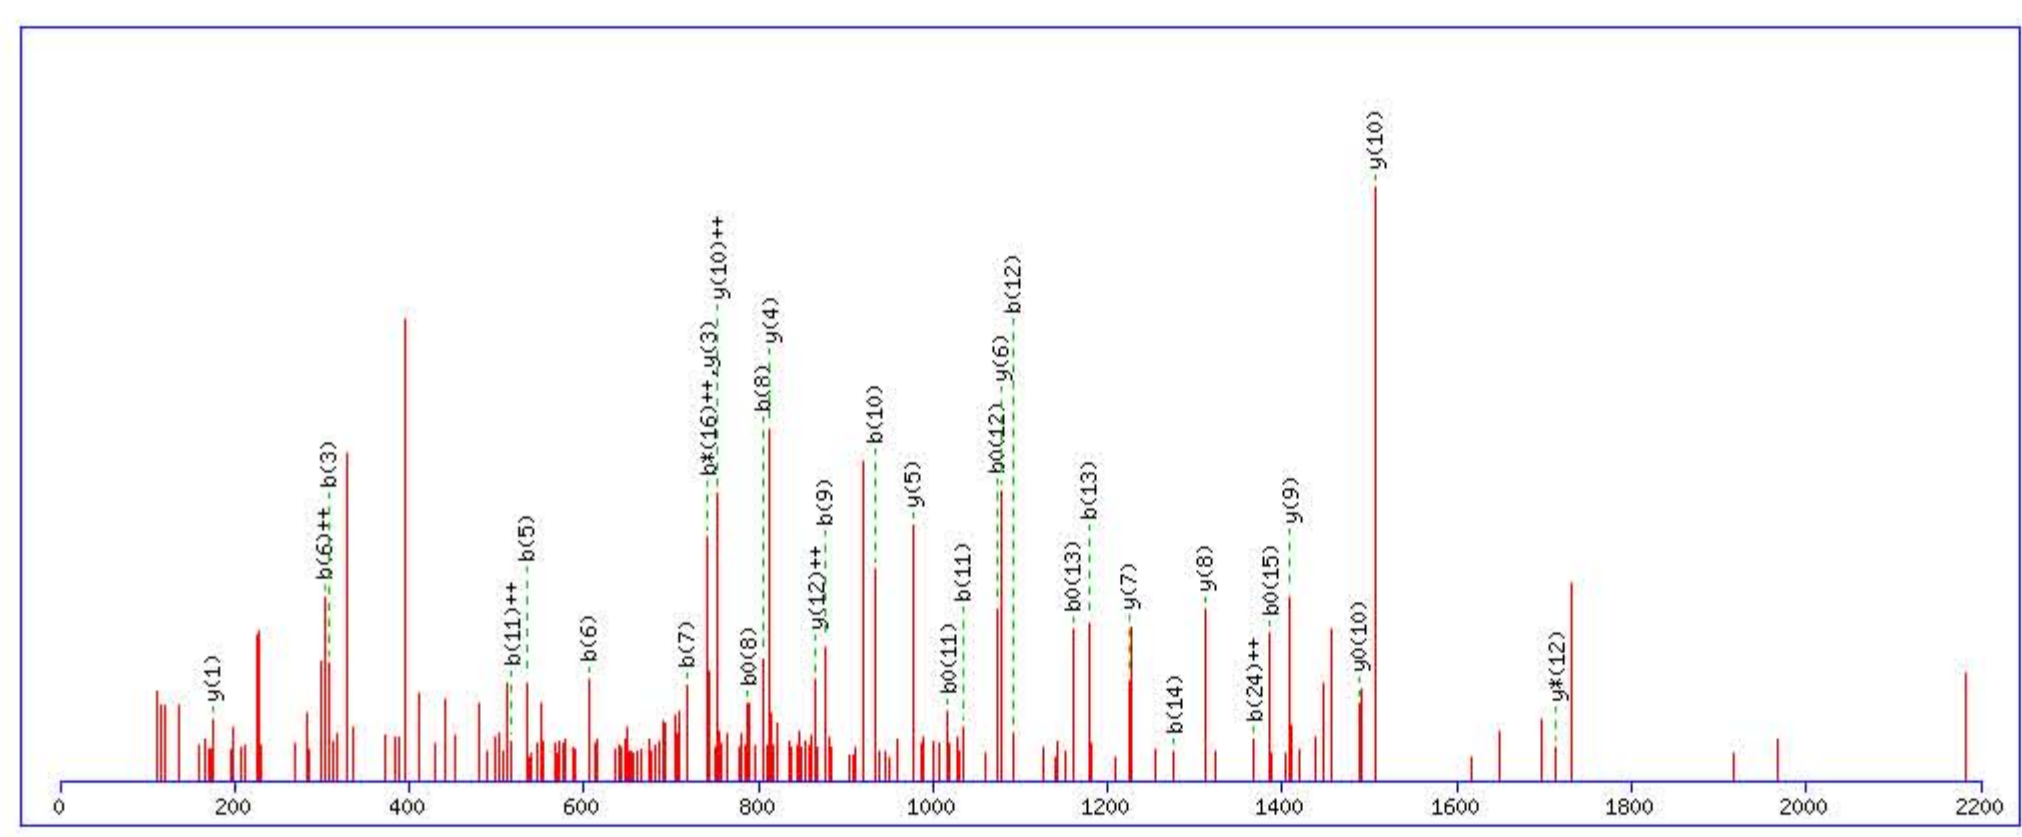

Monoisotopic mass of neutral peptide Mr(calc): 2907.433762  
 Fixed modifications: Carbamidomethyl (C) (apply to specified residues or termini only)  
 Variable modifications:  
 Q24 : Biotin:Thermo-21345 (Q)  
 Ions Score: 51 Expect: 0.00023  
 Matches : 33/242 fragment ions using 93 most intense peaks [\(help\)](#)

| #  | b                  | b <sup>++</sup>    | b <sup>*</sup> | b <sup>+++</sup>  | b <sup>0</sup>     | b <sup>0++</sup> | Seq. | y                  | y <sup>++</sup>   | y <sup>*</sup>     | y <sup>+++</sup> | y <sup>0</sup>     | y <sup>0++</sup> | #  |
|----|--------------------|--------------------|----------------|-------------------|--------------------|------------------|------|--------------------|-------------------|--------------------|------------------|--------------------|------------------|----|
| 1  | 114.091340         | 57.549308          |                |                   |                    |                  | L    |                    |                   |                    |                  |                    |                  | 25 |
| 2  | 171.112804         | 86.060040          |                |                   |                    |                  | G    | 2795.356978        | 1398.182127       | 2778.330429        | 1389.668853      | 2777.346413        | 1389.176845      | 24 |
| 3  | <b>308.171716</b>  | 154.589496         |                |                   |                    |                  | H    | 2738.335514        | 1369.671395       | 2721.308965        | 1361.158121      | 2720.324949        | 1360.666113      | 23 |
| 4  | 405.224480         | 203.115878         |                |                   |                    |                  | P    | 2601.276602        | 1301.141939       | 2584.250053        | 1292.628665      | 2583.266037        | 1292.136657      | 22 |
| 5  | <b>534.267073</b>  | 267.637175         |                |                   | 516.256508         | 258.631892       | E    | 2504.223838        | 1252.615557       | 2487.197289        | 1244.102283      | 2486.213273        | 1243.610275      | 21 |
| 6  | <b>605.304187</b>  | <b>303.155732</b>  |                |                   | 587.293622         | 294.150449       | A    | 2375.181245        | 1188.094261       | 2358.154696        | 1179.580986      | 2357.170680        | 1179.088978      | 20 |
| 7  | <b>718.388251</b>  | 359.697764         |                |                   | 700.377686         | 350.692481       | L    | 2304.144131        | 1152.575704       | 2287.117582        | 1144.062429      | 2286.133566        | 1143.570421      | 19 |
| 8  | <b>805.420279</b>  | 403.213778         |                |                   | <b>787.409714</b>  | 394.208495       | S    | 2191.060067        | 1096.033672       | 2174.033518        | 1087.520397      | 2173.049502        | 1087.028389      | 18 |
| 9  | <b>876.457393</b>  | 438.732335         |                |                   | 858.446828         | 429.727052       | A    | 2104.028039        | 1052.517658       | 2087.001490        | 1044.004383      | 2086.017474        | 1043.512375      | 17 |
| 10 | <b>933.478857</b>  | 467.243067         |                |                   | 915.468292         | 458.237784       | G    | 2032.990925        | 1016.999101       | 2015.964376        | 1008.485826      | 2014.980360        | 1007.993818      | 16 |
| 11 | <b>1034.526536</b> | <b>517.766906</b>  |                |                   | <b>1016.515971</b> | 508.761624       | T    | 1975.969461        | 988.488369        | 1958.942912        | 979.975094       | 1957.958896        | 979.483086       | 15 |
| 12 | <b>1091.548000</b> | 546.277638         |                |                   | <b>1073.537435</b> | 537.272356       | G    | 1874.921782        | 937.964529        | 1857.895233        | 929.451255       | 1856.911217        | 928.959247       | 14 |
| 13 | <b>1178.580028</b> | 589.793652         |                |                   | <b>1160.569463</b> | 580.788370       | S    | 1817.900318        | 909.453797        | 1800.873769        | 900.940523       | 1799.889753        | 900.448515       | 13 |
| 14 | <b>1275.632792</b> | 638.320034         |                |                   | 1257.622227        | 629.314752       | P    | 1730.868290        | <b>865.937783</b> | <b>1713.841741</b> | 857.424509       | 1712.857725        | 856.932501       | 12 |
| 15 | 1403.691370        | 702.349323         | 1386.664821    | 693.836049        | <b>1385.680805</b> | 693.344041       | Q    | 1633.815526        | 817.411401        | 1616.788977        | 808.898127       | 1615.804961        | 808.406119       | 11 |
| 16 | 1500.744134        | 750.875705         | 1483.717585    | <b>742.362431</b> | 1482.733569        | 741.870423       | P    | <b>1505.756948</b> | <b>753.382112</b> | 1488.730399        | 744.868838       | <b>1487.746383</b> | 744.376830       | 10 |
| 17 | 1597.796898        | 799.402087         | 1580.770349    | 790.888813        | 1579.786333        | 790.396805       | P    | <b>1408.704184</b> | 704.855730        | 1391.677635        | 696.342456       | 1390.693619        | 695.850448       | 9  |
| 18 | 1684.828926        | 842.918101         | 1667.802377    | 834.404827        | 1666.818361        | 833.912819       | S    | <b>1311.651420</b> | 656.329348        | 1294.624871        | 647.816074       | 1293.640855        | 647.324066       | 8  |
| 19 | 1831.897340        | 916.452308         | 1814.870791    | 907.939034        | 1813.886775        | 907.447026       | F    | <b>1224.619392</b> | 612.813334        | 1207.592843        | 604.300060       | 1206.608827        | 603.808052       | 7  |
| 20 | 1932.945019        | 966.976148         | 1915.918470    | 958.462873        | 1914.934454        | 957.970865       | T    | <b>1077.550978</b> | 539.279127        | 1060.524429        | 530.765853       | 1059.540413        | 530.273845       | 6  |
| 21 | 2096.008348        | 1048.507812        | 2078.981799    | 1039.994538       | 2077.997783        | 1039.502530      | Y    | <b>976.503299</b>  | 488.755288        | 959.476750         | 480.242013       |                    |                  | 5  |
| 22 | 2167.045462        | 1084.026369        | 2150.018913    | 1075.513095       | 2149.034897        | 1075.021087      | A    | <b>813.439970</b>  | 407.223623        | 796.413421         | 398.710349       |                    |                  | 4  |
| 23 | 2295.104040        | 1148.055658        | 2278.077491    | 1139.542384       | 2277.093475        | 1139.050376      | Q    | <b>742.402856</b>  | 371.705066        | 725.376307         | 363.191792       |                    |                  | 3  |
| 24 | 2734.329366        | <b>1367.668321</b> | 2717.302817    | 1359.155047       | 2716.318801        | 1358.663039      | Q    | 614.344278         | 307.675777        | 597.317729         | 299.162503       |                    |                  | 2  |
| 25 |                    |                    |                |                   |                    |                  | R    | <b>175.118952</b>  | 88.063114         | 158.092403         | 79.549839        |                    |                  | 1  |

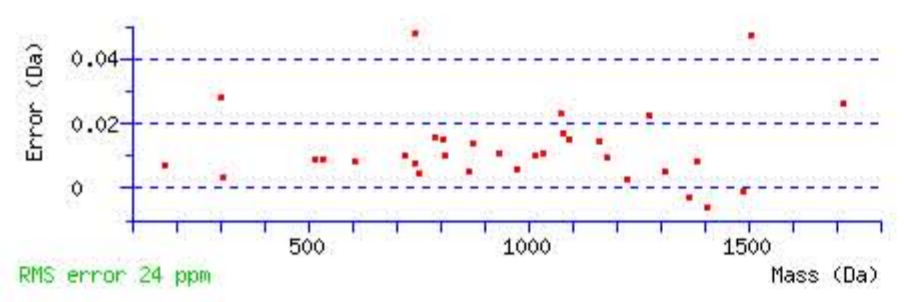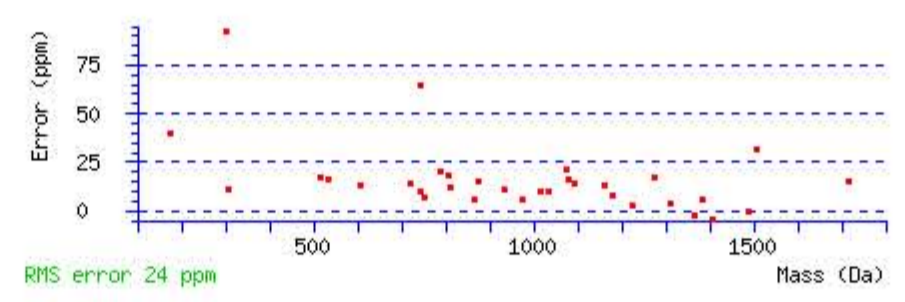

NCBI BLAST search of **LGHPEALSAGTGSPQPPSFTYAQQR**  
 (Parameters: blastp, nr protein database, expect=20000, no filter, PAM30)  
 Other BLAST [web gateways](#)

### All matches to this query

| Score | Mr(calc):   | Delta    | Sequence                                  |
|-------|-------------|----------|-------------------------------------------|
| 51.2  | 2907.433762 | 0.026134 | <a href="#">LGHPEALSAGTGSPQPPSFTYAQQR</a> |
| 48.8  | 2907.433762 | 0.026134 | <a href="#">LGHPEALSAGTGSPQPPSFTYAQQR</a> |
| 16.0  | 2907.433762 | 0.026134 | <a href="#">LGHPEALSAGTGSPQPPSFTYAQQR</a> |
