# Supplementary material
Source: PubMed Central journal article supplement (PMC3945317)
Supplement: supp_M113.517904_jbc.M113.517904-11.pdf [file supp_M113.517904_jbc.M113.517904-11.pdf]

MATRIX

SCIENCE

Mascot Search Results

Peptide View

MS/MS Fragmentation of **LAEQAER**  
Found in **1433B\_HUMAN**, 14-3-3 protein beta/alpha OS=Homo sapiens GN=YWHAB PE=1 SV=3

Match to Query 17501: 1126.586508 from(564.300530,2+) rtinseconds(1412) index(46413)  
Title: Locus:1.1.1.1729.22 File:"2013-07-02 CLN FXIII 180 min 2nd F 4.wiff"  
Data file C:\Program Files (x86)\Matrix Science\Mascot Daemon\mgf\8 FXIII 180 min 2nd\mascot\_daemon\_merge.mgf

Click mouse within plot area to zoom in by factor of two about that point  
Or, 

Plot from

100

 to 

1300

 Da 

Full range

  
Label all possible matches ☐ Label matches used for scoring ☒

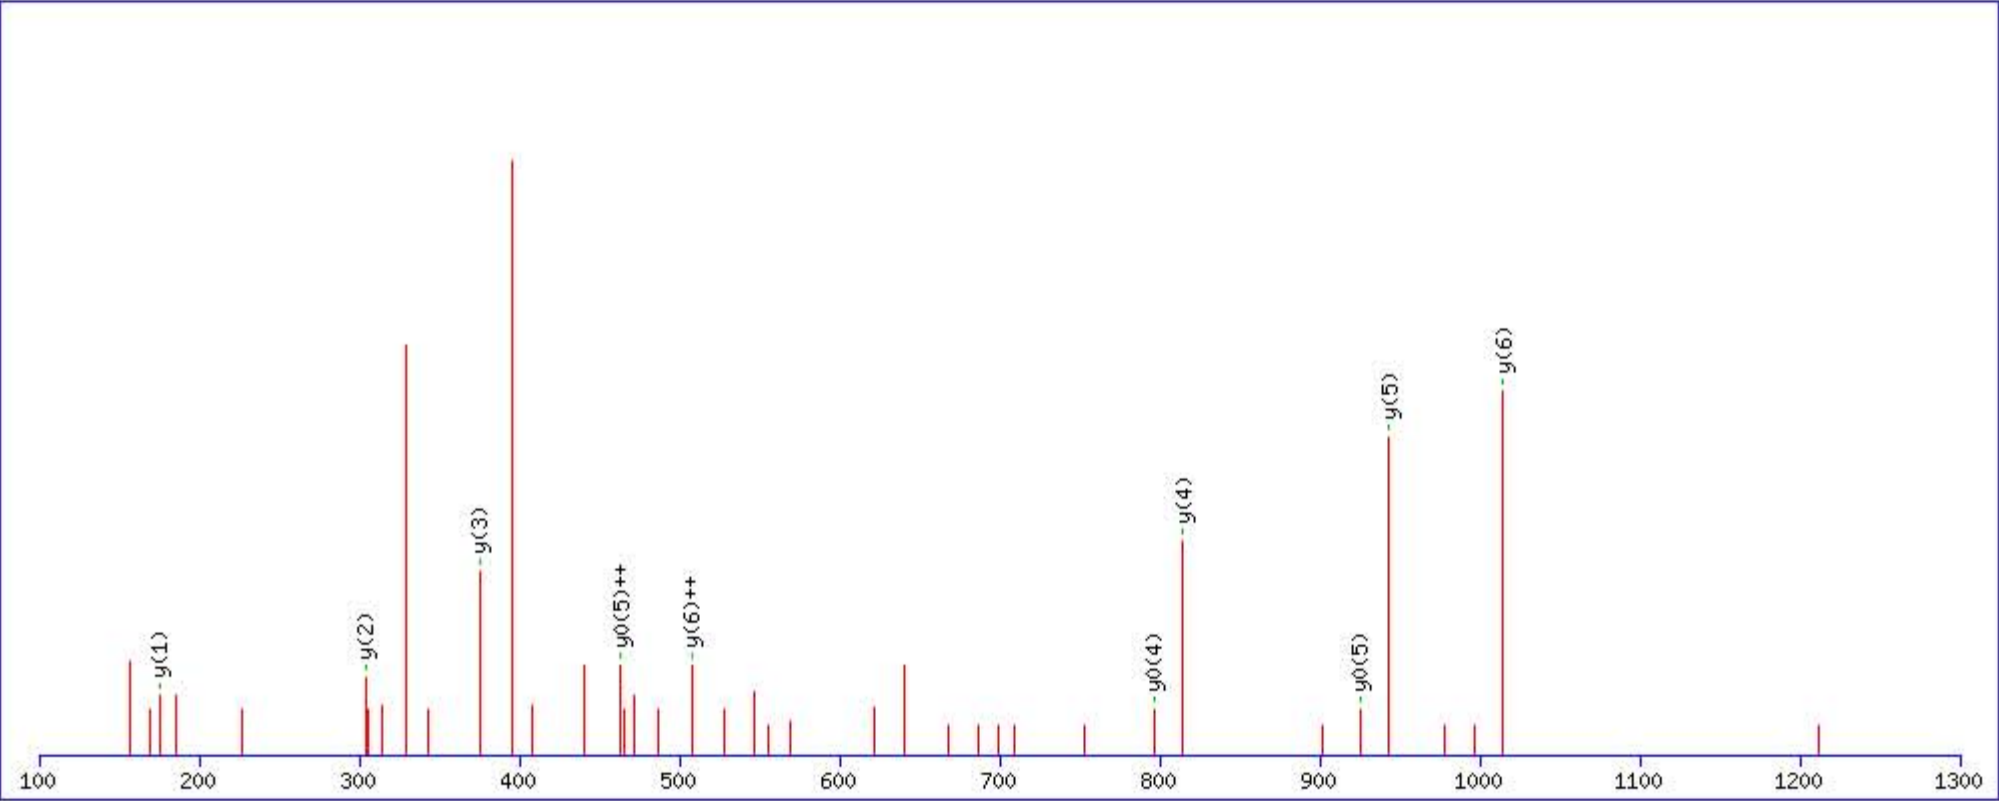

Monoisotopic mass of neutral peptide Mr(calc): 1126.580444  
Fixed modifications: Carbamidomethyl (C) (apply to specified residues or termini only)  
Variable modifications:  
Q4 : Biotin:Thermo-21345 (Q)  
Ions Score: 35 Expect: 0.0057  
Matches : 10/60 fragment ions using 18 most intense peaks [\(help\)](#)

| # | b          | b <sup>++</sup> | b <sup>*</sup> | b <sup>*++</sup> | b <sup>0</sup> | b <sup>0++</sup> | Seq. | y           | y <sup>++</sup> | y <sup>*</sup> | y <sup>*++</sup> | y <sup>0</sup> | y <sup>0++</sup> | # |
|---|------------|-----------------|----------------|------------------|----------------|------------------|------|-------------|-----------------|----------------|------------------|----------------|------------------|---|
| 1 | 114.091340 | 57.549308       |                |                  |                |                  | L    |             |                 |                |                  |                |                  | 7 |
| 2 | 185.128454 | 93.067865       |                |                  |                |                  | A    | 1014.503692 | 507.755484      | 997.477143     | 499.242210       | 996.493127     | 498.750202       | 6 |
| 3 | 314.171047 | 157.589161      |                |                  | 296.160482     | 148.583879       | E    | 943.466578  | 472.236927      | 926.440029     | 463.723653       | 925.456013     | 463.231645       | 5 |
| 4 | 753.396373 | 377.201825      | 736.369824     | 368.688550       | 735.385808     | 368.196542       | Q    | 814.423985  | 407.715631      | 797.397436     | 399.202356       | 796.413420     | 398.710348       | 4 |
| 5 | 824.433487 | 412.720382      | 807.406938     | 404.207107       | 806.422922     | 403.715099       | A    | 375.198659  | 188.102968      | 358.172110     | 179.589693       | 357.188094     | 179.097685       | 3 |
| 6 | 953.476080 | 477.241678      | 936.449531     | 468.728404       | 935.465515     | 468.236396       | E    | 304.161545  | 152.584411      | 287.134996     | 144.071136       | 286.150980     | 143.579128       | 2 |
| 7 |            |                 |                |                  |                |                  | R    | 175.118952  | 88.063114       | 158.092403     | 79.549840        |                |                  | 1 |

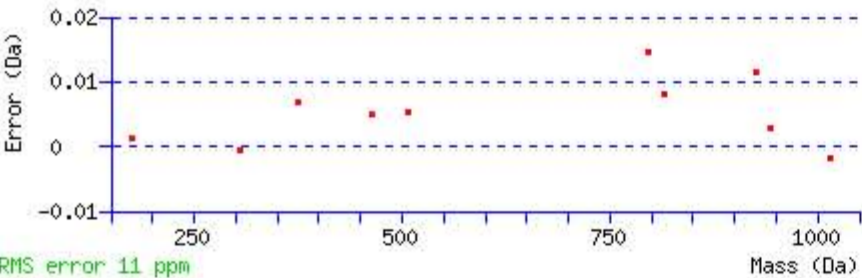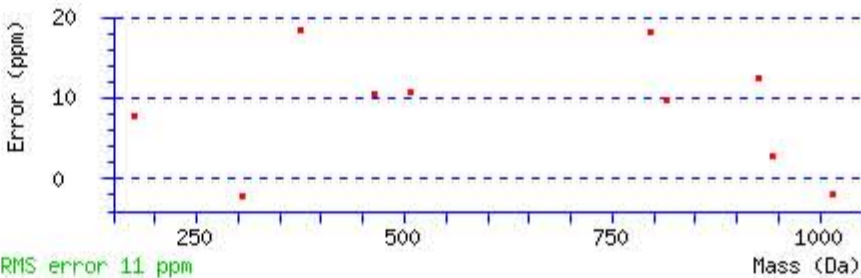

NCBI BLAST search of [LAEQAER](#)  
(Parameters: blastp, nr protein database, expect=20000, no filter, PAM30)  
Other BLAST [web gateways](#)

All matches to this query

| Score | Mr(calc):   | Delta     | Sequence                    |
|-------|-------------|-----------|-----------------------------|
| 35.3  | 1126.580444 | 0.006064  | <a href="#">LAEQAER</a>     |
| 14.3  | 1126.598221 | -0.011713 | <a href="#">LISDPAGELGR</a> |
| 11.8  | 1126.580444 | 0.006064  | <a href="#">LAQAEER</a>     |
| 8.6   | 1126.573074 | 0.013434  | <a href="#">SPERPTGDLR</a>  |
| 4.0   | 1126.580444 | 0.006064  | <a href="#">LEAEQAR</a>     |
| 2.7   | 1126.580444 | 0.006064  | <a href="#">AIQAEER</a>     |
| 2.5   | 1126.588318 | -0.001810 | <a href="#">SPFHEIKNR</a>   |
| 2.2   | 1126.599075 | -0.012567 | <a href="#">MAMFKKSLR</a>   |

MATRIX

SCIENCE

Mascot Search Results

Peptide View

MS/MS Fragmentation of **HQGVMVGMGQK**  
Found in **ACTA\_HUMAN**, Actin, aortic smooth muscle OS=Homo sapiens GN=ACTA2 PE=1 SV=1

Match to Query 30638: 1481.731242 from(494.917690,3+) rtinseconds(1604) index(17650)  
Title: Locus:1.1.1.2941.11 File:"2013-07-02 CLN FXIII 180 min 2nd F 2.wiff"  
Data file C:\Program Files (x86)\Matrix Science\Mascot Daemon\mgf\8 FXIII 180 min 2nd\mascot\_daemon\_merge.mgf

Click mouse within plot area to zoom in by factor of two about that point  
Or, 

Plot from

100

 to 

1050

 Da 

Full range

  
Label all possible matches ☐ Label matches used for scoring ☒

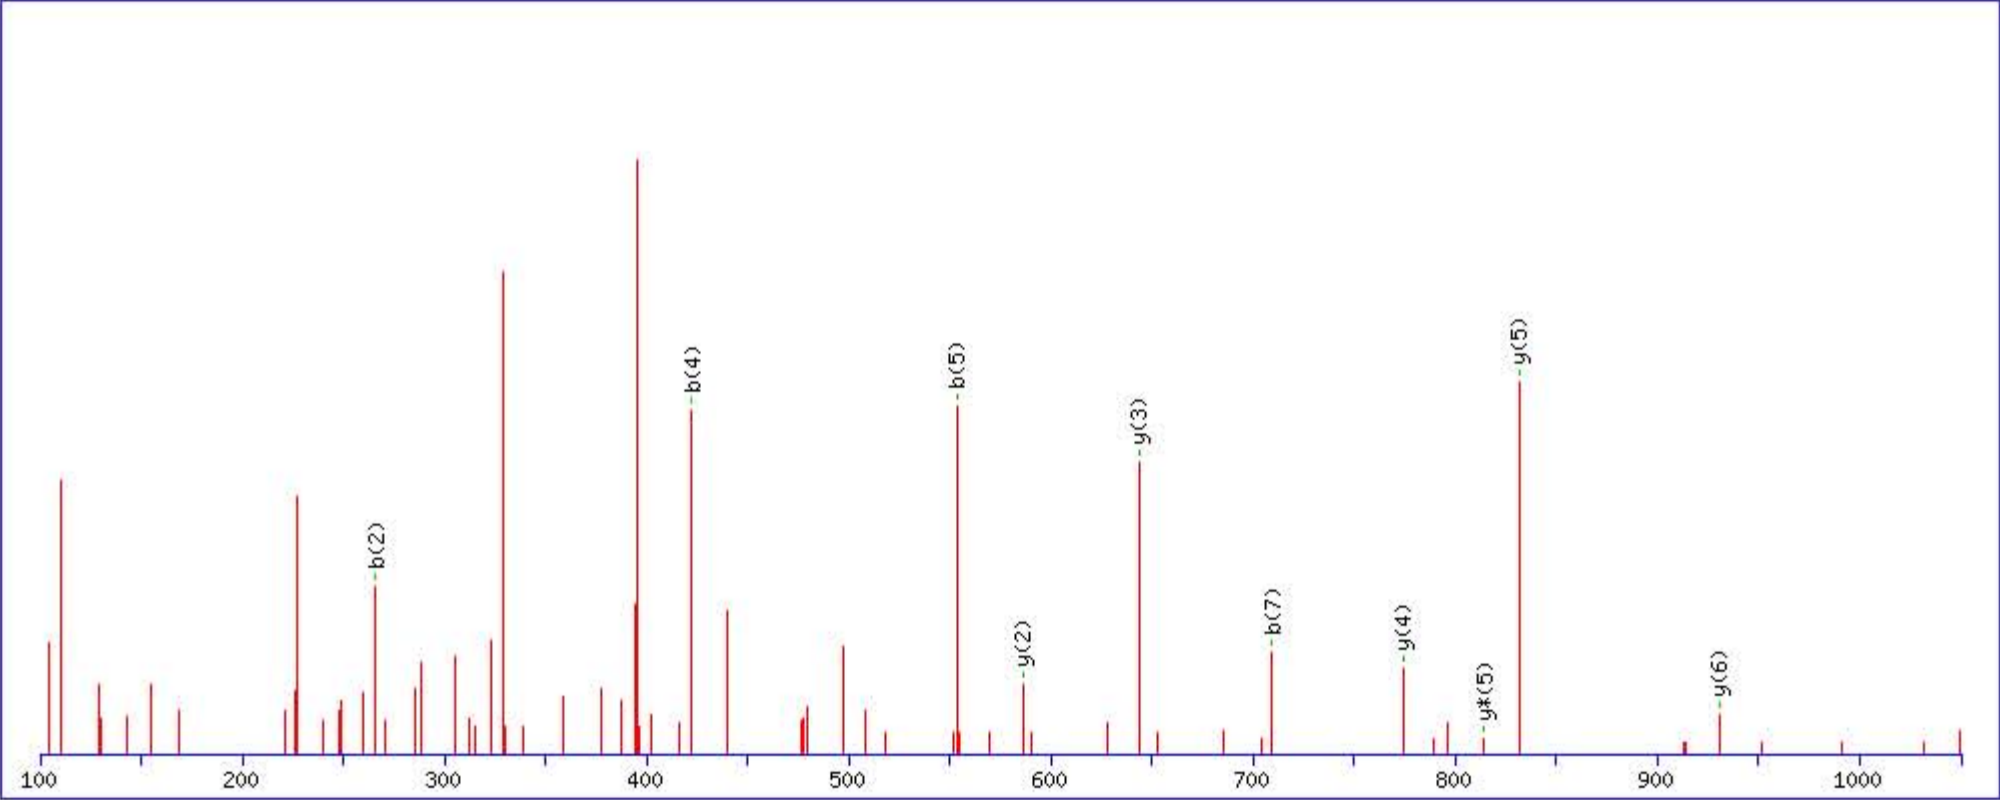

Monoisotopic mass of neutral peptide Mr(calc): 1481.730545  
Fixed modifications: Carbamidomethyl (C) (apply to specified residues or termini only)  
Variable modifications:  
Q10 : Biotin:Thermo-21345 (Q)  
Ions Score: 27 Expect: 0.039  
Matches : 10/78 fragment ions using 20 most intense peaks [\(help\)](#)

| #  | b           | b <sup>++</sup> | b <sup>*</sup> | b <sup>++*</sup> | Seq. | y           | y <sup>++</sup> | y <sup>*</sup> | y <sup>++*</sup> | #  |
|----|-------------|-----------------|----------------|------------------|------|-------------|-----------------|----------------|------------------|----|
| 1  | 138.066188  | 69.536732       |                |                  | H    |             |                 |                |                  | 11 |
| 2  | 266.124766  | 133.566021      | 249.098217     | 125.052746       | Q    | 1345.678898 | 673.343087      | 1328.652349    | 664.829813       | 10 |
| 3  | 323.146230  | 162.076753      | 306.119681     | 153.563478       | G    | 1217.620320 | 609.313798      | 1200.593771    | 600.800524       | 9  |
| 4  | 422.214644  | 211.610960      | 405.188095     | 203.097685       | V    | 1160.598856 | 580.803066      | 1143.572307    | 572.289792       | 8  |
| 5  | 553.255129  | 277.131203      | 536.228580     | 268.617928       | M    | 1061.530442 | 531.268859      | 1044.503893    | 522.755585       | 7  |
| 6  | 652.323543  | 326.665410      | 635.296994     | 318.152135       | V    | 930.489957  | 465.748617      | 913.463408     | 457.235342       | 6  |
| 7  | 709.345007  | 355.176142      | 692.318458     | 346.662867       | G    | 831.421543  | 416.214410      | 814.394994     | 407.701135       | 5  |
| 8  | 840.385492  | 420.696384      | 823.358943     | 412.183110       | M    | 774.400079  | 387.703678      | 757.373530     | 379.190403       | 4  |
| 9  | 897.406956  | 449.207116      | 880.380407     | 440.693842       | G    | 643.359594  | 322.183435      | 626.333045     | 313.670161       | 3  |
| 10 | 1336.632282 | 668.819779      | 1319.605733    | 660.306505       | Q    | 586.338130  | 293.672703      | 569.311581     | 285.159429       | 2  |
| 11 |             |                 |                |                  | K    | 147.112804  | 74.060040       | 130.086255     | 65.546765        | 1  |

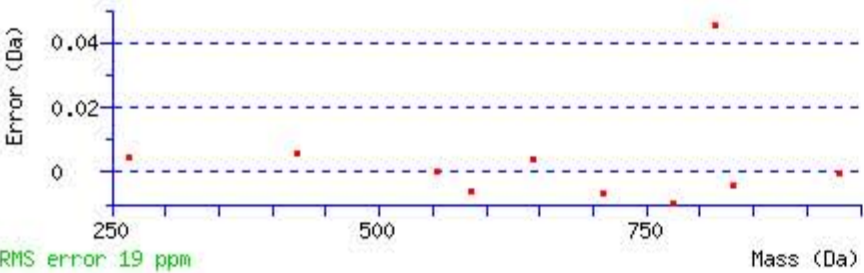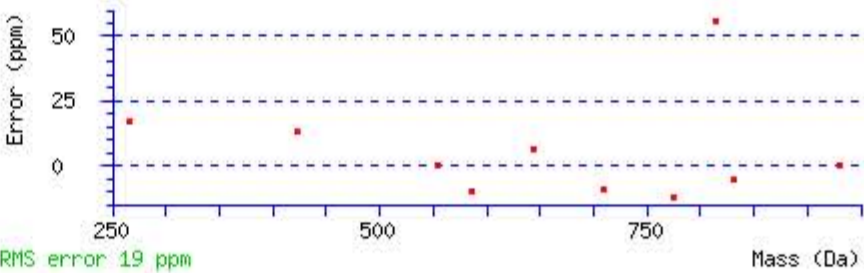

NCBI BLAST search of [HQGVMVGMGQK](#)  
(Parameters: blastp, nr protein database, expect=20000, no filter, PAM30)  
Other BLAST [web gateways](#)

All matches to this query

| Score | Mr(calc):   | Delta    | Sequence                    |
|-------|-------------|----------|-----------------------------|
| 26.6  | 1481.730545 | 0.000697 | <a href="#">HQGVMVGMGQK</a> |

MATRIX

SCIENCE

Mascot Search Results

Peptide View

MS/MS Fragmentation of **DSYVGDEAQSK**  
Found in **ACTA\_HUMAN**, Actin, aortic smooth muscle OS=Homo sapiens GN=ACTA2 PE=1 SV=1

Match to Query 31437: 1508.692888 from(755.353720,2+) rtinseconds(1599) index(47625)  
Title: Locus:1.1.1.1794.22 File:"2013-07-02 CLN FXIII 180 min 2nd F 4.wiff"  
Data file C:\Program Files (x86)\Matrix Science\Mascot Daemon\mgf\8 FXIII 180 min 2nd\mascot\_daemon\_merge.mgf

Click mouse within plot area to zoom in by factor of two about that point  
Or,   to  Da   
Label all possible matches ☐ Label matches used for scoring ☒

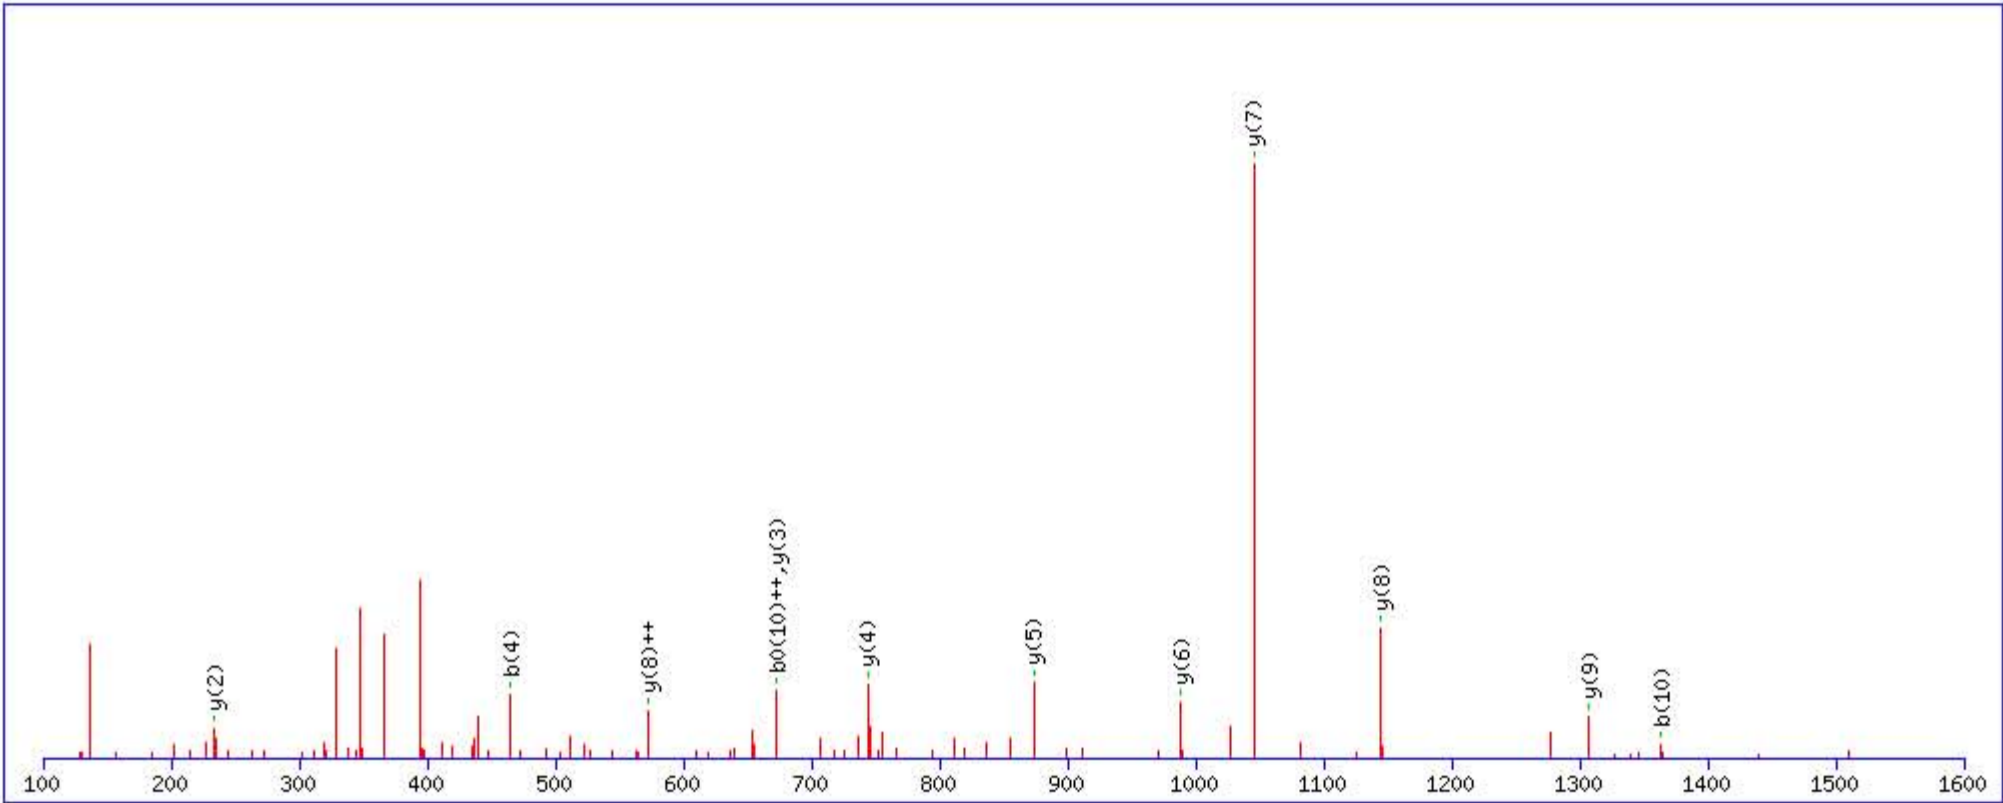

Monoisotopic mass of neutral peptide Mr(calc): 1508.681702  
Fixed modifications: Carbamidomethyl (C) (apply to specified residues or termini only)  
Variable modifications:  
Q9 : Biotin:Thermo-21345 (Q)  
Ions Score: 69 Expect: 1.5e-006  
Matches : 12/102 fragment ions using 14 most intense peaks ([help](#))

| #  | b           | b <sup>++</sup> | b <sup>*</sup> | b <sup>*++</sup> | b <sup>0</sup> | b <sup>0++</sup> | Seq. | y           | y <sup>++</sup> | y <sup>*</sup> | y <sup>*++</sup> | y <sup>0</sup> | y <sup>0++</sup> | #  |
|----|-------------|-----------------|----------------|------------------|----------------|------------------|------|-------------|-----------------|----------------|------------------|----------------|------------------|----|
| 1  | 116.034219  | 58.520748       |                |                  | 98.023654      | 49.515465        | D    |             |                 |                |                  |                |                  | 11 |
| 2  | 203.066247  | 102.036761      |                |                  | 185.055682     | 93.031479        | S    | 1394.662043 | 697.834660      | 1377.635494    | 689.321385       | 1376.651478    | 688.829377       | 10 |
| 3  | 366.129576  | 183.568426      |                |                  | 348.119011     | 174.563144       | Y    | 1307.630015 | 654.318646      | 1290.603466    | 645.805371       | 1289.619450    | 645.313363       | 9  |
| 4  | 465.197990  | 233.102633      |                |                  | 447.187425     | 224.097351       | V    | 1144.566686 | 572.786981      | 1127.540137    | 564.273707       | 1126.556121    | 563.781699       | 8  |
| 5  | 522.219454  | 261.613365      |                |                  | 504.208889     | 252.608083       | G    | 1045.498272 | 523.252774      | 1028.471723    | 514.739500       | 1027.487707    | 514.247492       | 7  |
| 6  | 637.246397  | 319.126837      |                |                  | 619.235832     | 310.121554       | D    | 988.476808  | 494.742042      | 971.450259     | 486.228768       | 970.466243     | 485.736760       | 6  |
| 7  | 766.288990  | 383.648133      |                |                  | 748.278425     | 374.642851       | E    | 873.449865  | 437.228571      | 856.423316     | 428.715296       | 855.439300     | 428.223288       | 5  |
| 8  | 837.326104  | 419.166690      |                |                  | 819.315539     | 410.161408       | A    | 744.407272  | 372.707274      | 727.380723     | 364.194000       | 726.396707     | 363.701992       | 4  |
| 9  | 1276.551430 | 638.779353      | 1259.524881    | 630.266079       | 1258.540865    | 629.774070       | Q    | 673.370158  | 337.188717      | 656.343609     | 328.675443       | 655.359593     | 328.183435       | 3  |
| 10 | 1363.583458 | 682.295367      | 1346.556909    | 673.782093       | 1345.572893    | 673.290085       | S    | 234.144832  | 117.576054      | 217.118283     | 109.062780       | 216.134267     | 108.570772       | 2  |
| 11 |             |                 |                |                  |                |                  | K    | 147.112804  | 74.060040       | 130.086255     | 65.546765        |                |                  | 1  |

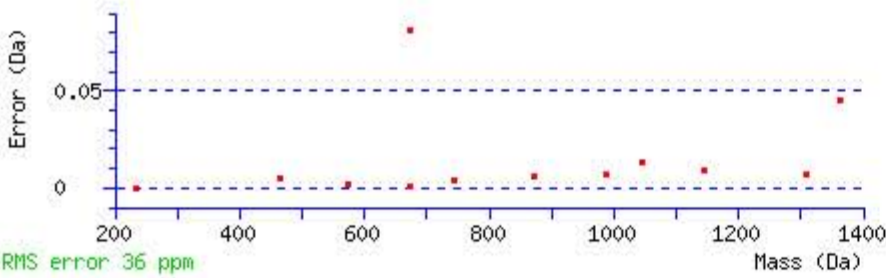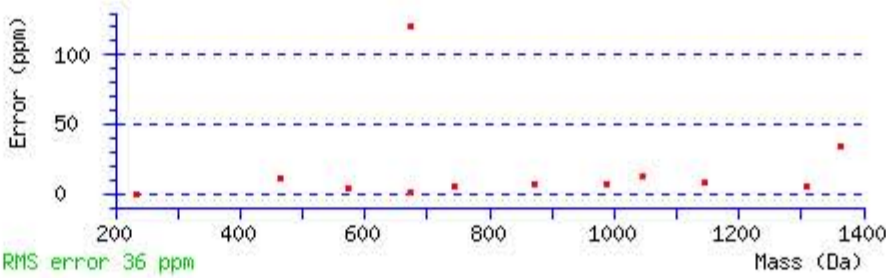

NCBI BLAST search of [DSYVGDEAQSK](#)  
(Parameters: blastp, nr protein database, expect=20000, no filter, PAM30)  
Other BLAST [web gateways](#)

All matches to this query

| Score | Mr(calc):   | Delta     | Sequence                         |
|-------|-------------|-----------|----------------------------------|
| 69.0  | 1508.681702 | 0.011186  | <a href="#">DSYVGDEAQSK</a>      |
| 8.4   | 1508.690277 | 0.002611  | <a href="#">GGRGGMGGSDRGGFNK</a> |
| 0.8   | 1508.714066 | -0.021178 | <a href="#">EGTQLSSQQSVMSK</a>   |

MATRIX

SCIENCE

Mascot Search Results

Peptide View

MS/MS Fragmentation of **SYELPDGQVITIGNER**  
Found in **ACTA\_HUMAN**, Actin, aortic smooth muscle OS=Homo sapiens GN=ACTA2 PE=1 SV=1

Match to Query 46615: 2101.061412 from(701.361080,3+) rtinseconds(2629) index(54170)  
Title: Locus:1.1.1.2152.4 File:"2013-07-02 CLN FXIII 180 min 2nd F 4.wiff"  
Data file C:\Program Files (x86)\Matrix Science\Mascot Daemon\mgf\8 FXIII 180 min 2nd\mascot\_daemon\_merge.mgf

Click mouse within plot area to zoom in by factor of two about that point  
Or, 

Plot from

100

 to 

1900

 Da 

Full range

  
Label all possible matches ☐ Label matches used for scoring ☒

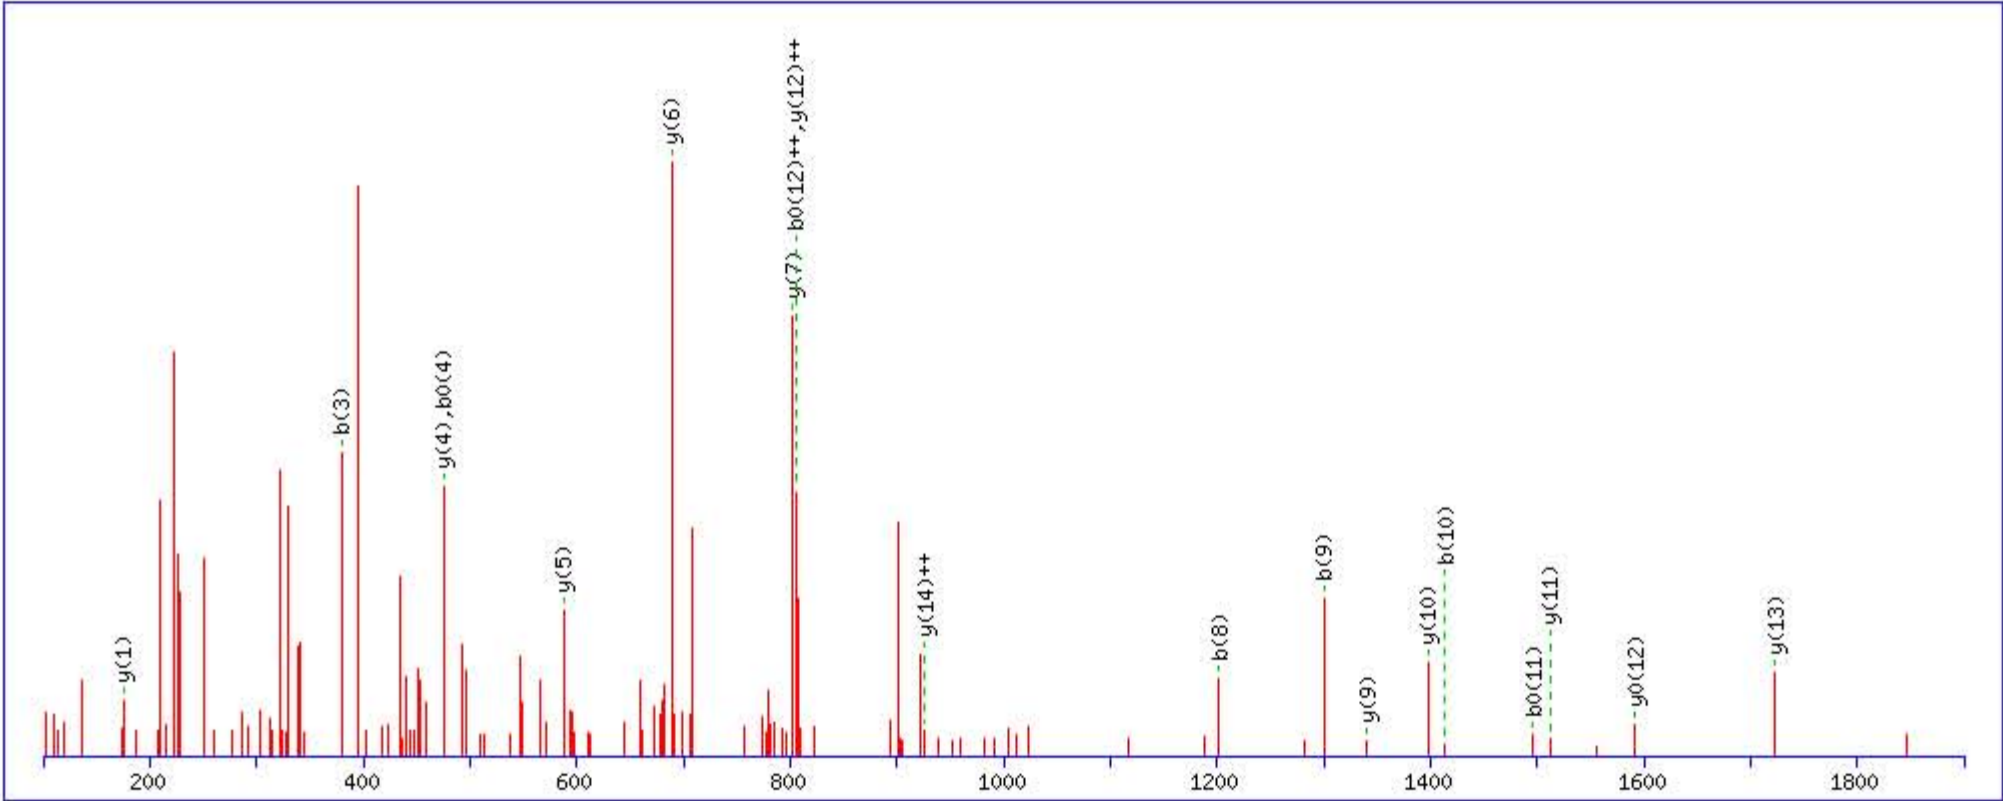

Monoisotopic mass of neutral peptide Mr(calc): 2101.051376  
Fixed modifications: Carbamidomethyl (C) (apply to specified residues or termini only)  
Variable modifications:  
Q8 : Biotin:Thermo-21345 (Q)  
Ions Score: 48 Expect: 0.00052  
Matches : 19/164 fragment ions using 32 most intense peaks ([help](#))

| #  | b           | b <sup>++</sup> | b <sup>+</sup> | b <sup>+++</sup> | b <sup>0</sup> | b <sup>0++</sup> | Seq. | y           | y <sup>++</sup> | y <sup>+</sup> | y <sup>+++</sup> | y <sup>0</sup> | y <sup>0++</sup> | #  |
|----|-------------|-----------------|----------------|------------------|----------------|------------------|------|-------------|-----------------|----------------|------------------|----------------|------------------|----|
| 1  | 88.039304   | 44.523290       |                |                  | 70.028739      | 35.518008        | S    |             |                 |                |                  |                |                  | 16 |
| 2  | 251.102633  | 126.054954      |                |                  | 233.092068     | 117.049672       | Y    | 2015.026640 | 1008.016958     | 1998.000091    | 999.503683       | 1997.016075    | 999.011675       | 15 |
| 3  | 380.145226  | 190.576251      |                |                  | 362.134661     | 181.570969       | E    | 1851.963311 | 926.485294      | 1834.936762    | 917.972019       | 1833.952746    | 917.480011       | 14 |
| 4  | 493.229290  | 247.118283      |                |                  | 475.218725     | 238.113001       | L    | 1722.920718 | 861.963997      | 1705.894169    | 853.450722       | 1704.910153    | 852.958714       | 13 |
| 5  | 590.282054  | 295.644665      |                |                  | 572.271489     | 286.639383       | P    | 1609.836654 | 805.421965      | 1592.810105    | 796.908691       | 1591.826089    | 796.416682       | 12 |
| 6  | 705.308997  | 353.158137      |                |                  | 687.298432     | 344.152854       | D    | 1512.783890 | 756.895583      | 1495.757341    | 748.382309       | 1494.773325    | 747.890300       | 11 |
| 7  | 762.330461  | 381.668869      |                |                  | 744.319896     | 372.663586       | G    | 1397.756947 | 699.382111      | 1380.730398    | 690.868837       | 1379.746382    | 690.376829       | 10 |
| 8  | 1201.555787 | 601.281532      | 1184.529238    | 592.768257       | 1183.545222    | 592.276249       | Q    | 1340.735483 | 670.871379      | 1323.708934    | 662.358105       | 1322.724918    | 661.866097       | 9  |
| 9  | 1300.624201 | 650.815739      | 1283.597652    | 642.302464       | 1282.613636    | 641.810456       | V    | 901.510157  | 451.258716      | 884.483608     | 442.745442       | 883.499592     | 442.253434       | 8  |
| 10 | 1413.708265 | 707.357771      | 1396.681716    | 698.844496       | 1395.697700    | 698.352488       | I    | 802.441743  | 401.724509      | 785.415194     | 393.211235       | 784.431178     | 392.719227       | 7  |
| 11 | 1514.755944 | 757.881610      | 1497.729395    | 749.368336       | 1496.745379    | 748.876328       | T    | 689.357679  | 345.182478      | 672.331130     | 336.669203       | 671.347114     | 336.177195       | 6  |
| 12 | 1627.840008 | 814.423642      | 1610.813459    | 805.910368       | 1609.829443    | 805.418359       | I    | 588.310000  | 294.658638      | 571.283451     | 286.145363       | 570.299435     | 285.653355       | 5  |
| 13 | 1684.861472 | 842.934374      | 1667.834923    | 834.421099       | 1666.850907    | 833.929091       | G    | 475.225936  | 238.116606      | 458.199387     | 229.603331       | 457.215371     | 229.111323       | 4  |
| 14 | 1798.904399 | 899.955837      | 1781.877850    | 891.442563       | 1780.893834    | 890.950555       | N    | 418.204472  | 209.605874      | 401.177923     | 201.092600       | 400.193907     | 200.600592       | 3  |
| 15 | 1927.946992 | 964.477134      | 1910.920443    | 955.963860       | 1909.936427    | 955.471851       | E    | 304.161545  | 152.584411      | 287.134996     | 144.071136       | 286.150980     | 143.579128       | 2  |
| 16 |             |                 |                |                  |                |                  | R    | 175.118952  | 88.063114       | 158.092403     | 79.549839        |                |                  | 1  |

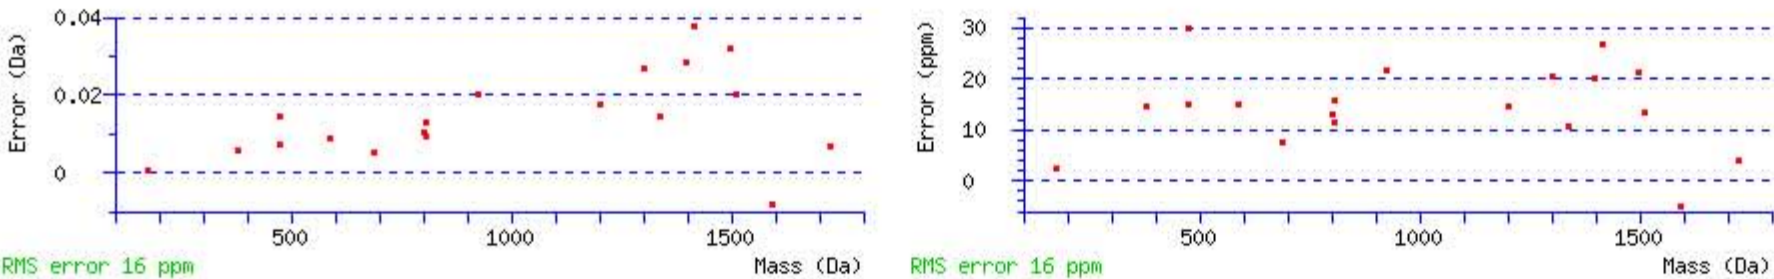

NCBI BLAST search of [SYELPDGQVITIGNER](#)  
(Parameters: blastp, nr protein database, expect=20000, no filter, PAM30)  
Other BLAST [web gateways](#)

All matches to this query

| Score | Mr(calc):   | Delta    | Sequence                         |
|-------|-------------|----------|----------------------------------|
| 47.6  | 2101.051376 | 0.010036 | <a href="#">SYELPDGQVITIGNER</a> |

MATRIX

SCIENCE

Mascot Search Results

Peptide View

MS/MS Fragmentation of **QDSISSK**  
Found in **AFAM\_HUMAN**, Afamin OS=Homo sapiens GN=AFM PE=1 SV=1

Match to Query 15754: 1074.538248 from(538.276400,2+) rtinseconds(1372) index(1759)  
Title: Locus:1.1.1.1754.21 File:"2013-07-02 CLN FXIII 180 min 2nd F 1.wiff"  
Data file C:\Program Files (x86)\Matrix Science\Mascot Daemon\mgf\8 FXIII 180 min 2nd\mascot\_daemon\_merge.mgf

Click mouse within plot area to zoom in by factor of two about that point  
Or, 

Plot from

100

 to 

1400

 Da 

Full range

  
Label all possible matches ☐ Label matches used for scoring ☒

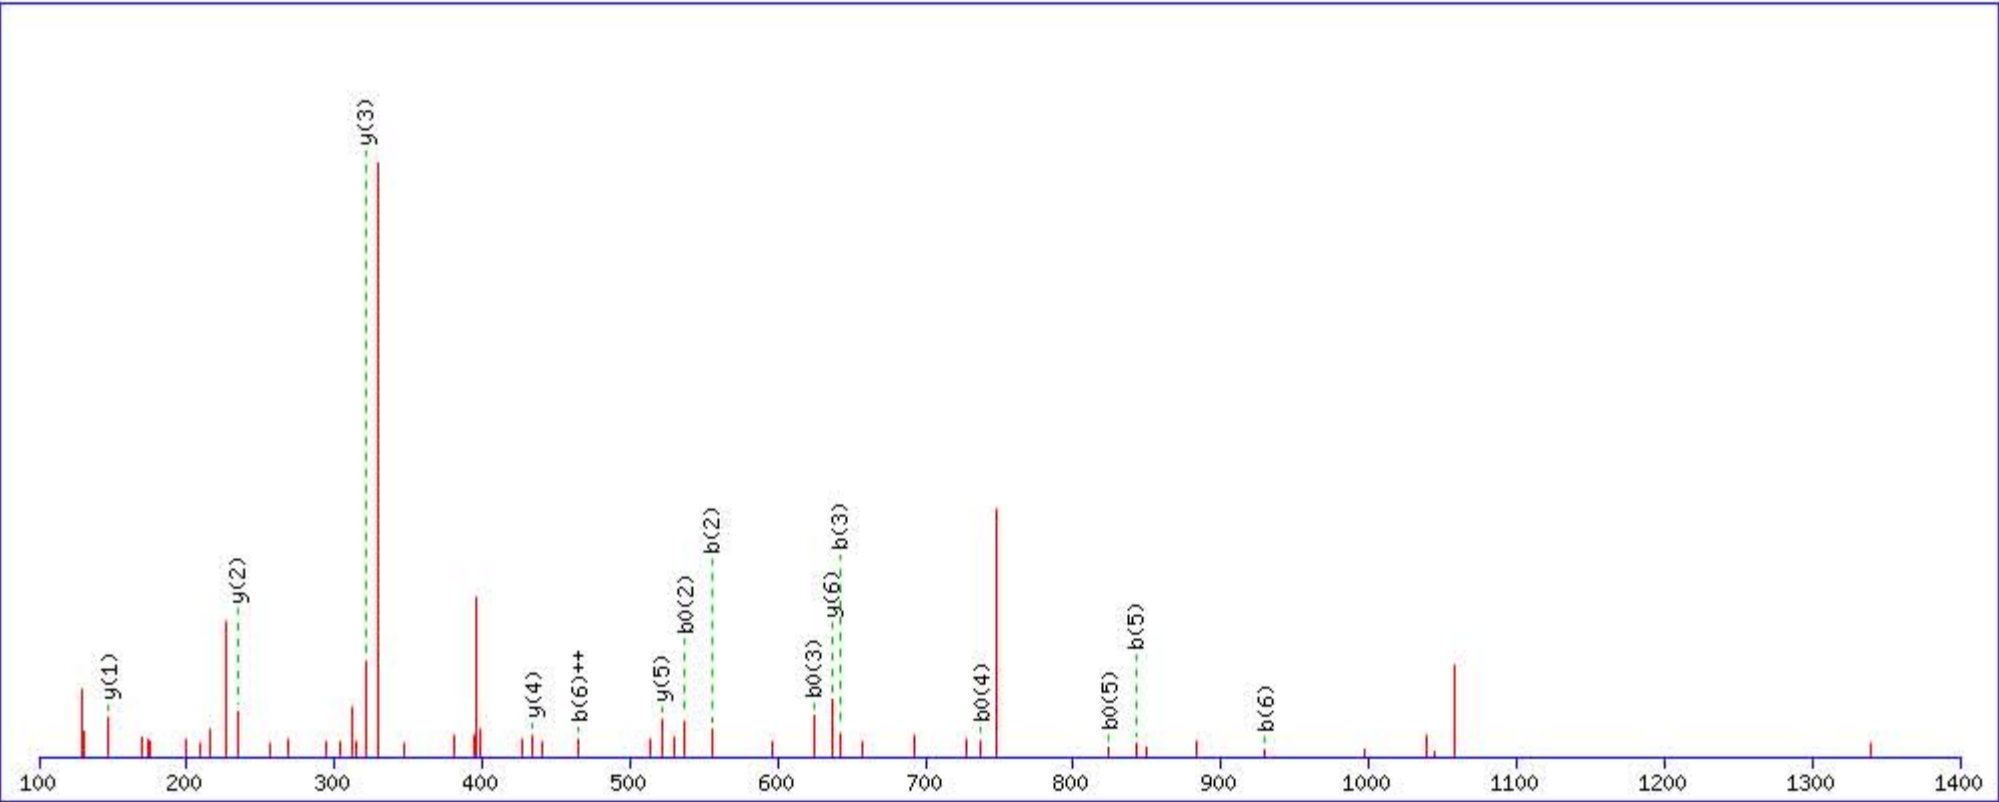

Monoisotopic mass of neutral peptide Mr(calc): 1074.537933  
Fixed modifications: Carbamidomethyl (C) (apply to specified residues or termini only)  
Variable modifications:  
Q1 : Biotin:Thermo-21345 (Q)  
Ions Score: 32 Expect: 0.0068  
Matches : 15/68 fragment ions using 30 most intense peaks [\(help\)](#)

| # | b          | b <sup>++</sup> | b <sup>*</sup> | b <sup>*++</sup> | b <sup>0</sup> | b <sup>0++</sup> | Seq. | y          | y <sup>++</sup> | y <sup>*</sup> | y <sup>*++</sup> | y <sup>0</sup> | y <sup>0++</sup> | # |
|---|------------|-----------------|----------------|------------------|----------------|------------------|------|------------|-----------------|----------------|------------------|----------------|------------------|---|
| 1 | 440.232602 | 220.619939      | 423.206053     | 212.106664       |                |                  | Q    |            |                 |                |                  |                |                  | 7 |
| 2 | 555.259545 | 278.133411      | 538.232996     | 269.620136       | 537.248980     | 269.128128       | D    | 636.319895 | 318.663586      | 619.293346     | 310.150311       | 618.309330     | 309.658303       | 6 |
| 3 | 642.291573 | 321.649425      | 625.265024     | 313.136150       | 624.281008     | 312.644142       | S    | 521.292952 | 261.150114      | 504.266403     | 252.636840       | 503.282387     | 252.144832       | 5 |
| 4 | 755.375637 | 378.191457      | 738.349088     | 369.678182       | 737.365072     | 369.186174       | I    | 434.260924 | 217.634100      | 417.234375     | 209.120826       | 416.250359     | 208.628818       | 4 |
| 5 | 842.407665 | 421.707471      | 825.381116     | 413.194196       | 824.397100     | 412.702188       | S    | 321.176860 | 161.092068      | 304.150311     | 152.578794       | 303.166295     | 152.086786       | 3 |
| 6 | 929.439693 | 465.223484      | 912.413144     | 456.710210       | 911.429128     | 456.218202       | S    | 234.144832 | 117.576054      | 217.118283     | 109.062780       | 216.134267     | 108.570772       | 2 |
| 7 |            |                 |                |                  |                |                  | K    | 147.112804 | 74.060040       | 130.086255     | 65.546766        |                |                  | 1 |

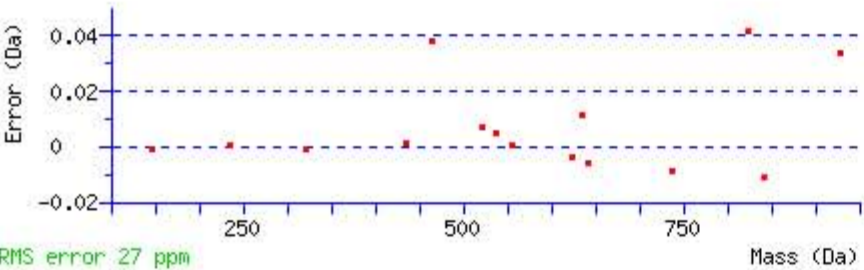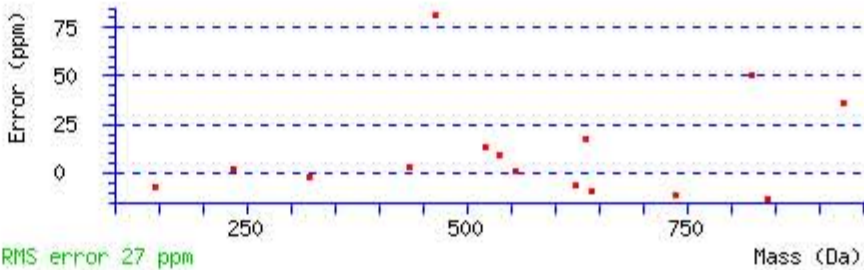

NCBI **BLAST** search of [QDSISSK](#)  
(Parameters: blastp, nr protein database, expect=20000, no filter, PAM30)  
Other BLAST [web gateways](#)

All matches to this query

| Score | Mr(calc):   | Delta     | Sequence                    |
|-------|-------------|-----------|-----------------------------|
| 31.7  | 1074.537933 | 0.000315  | <a href="#">QDSISSK</a>     |
| 8.1   | 1074.530548 | 0.007700  | <a href="#">QVTEPTSSAR</a>  |
| 7.6   | 1074.537933 | 0.000315  | <a href="#">QDSSKSI</a>     |
| 3.7   | 1074.549164 | -0.010916 | <a href="#">NIRPVDMSK</a>   |
| 3.6   | 1074.553192 | -0.014944 | <a href="#">QPSFSAK</a>     |
| 3.4   | 1074.553207 | -0.014959 | <a href="#">QDGGFLFK</a>    |
| 2.8   | 1074.531418 | 0.006830  | <a href="#">LLACPSVCR</a>   |
| 2.0   | 1074.541763 | -0.003515 | <a href="#">KSNSVQEQR</a>   |
| 1.1   | 1074.537933 | 0.000315  | <a href="#">SQEVSSK</a>     |
| 1.0   | 1074.530518 | 0.007730  | <a href="#">VDNAAASEKNK</a> |

MATRIX

SCIENCE

Mascot Search Results

Peptide View

MS/MS Fragmentation of **AFSSYQK**  
Found in **AFAM\_HUMAN**, Afamin OS=Homo sapiens GN=AFM PE=1 SV=1

Match to Query 18676: 1140.564408 from(571.289480,2+) rtinseconds(1601) index(17624)  
Title: Locus:1.1.1.2940.9 File:"2013-07-02 CLN FXIII 180 min 2nd F 2.wiff"  
Data file C:\Program Files (x86)\Matrix Science\Mascot Daemon\mgf\8 FXIII 180 min 2nd\mascot\_daemon\_merge.mgf

Click mouse within plot area to zoom in by factor of two about that point  
Or, 

Plot from

100

 to 

1200

 Da 

Full range

  
Label all possible matches ☐ Label matches used for scoring ☒

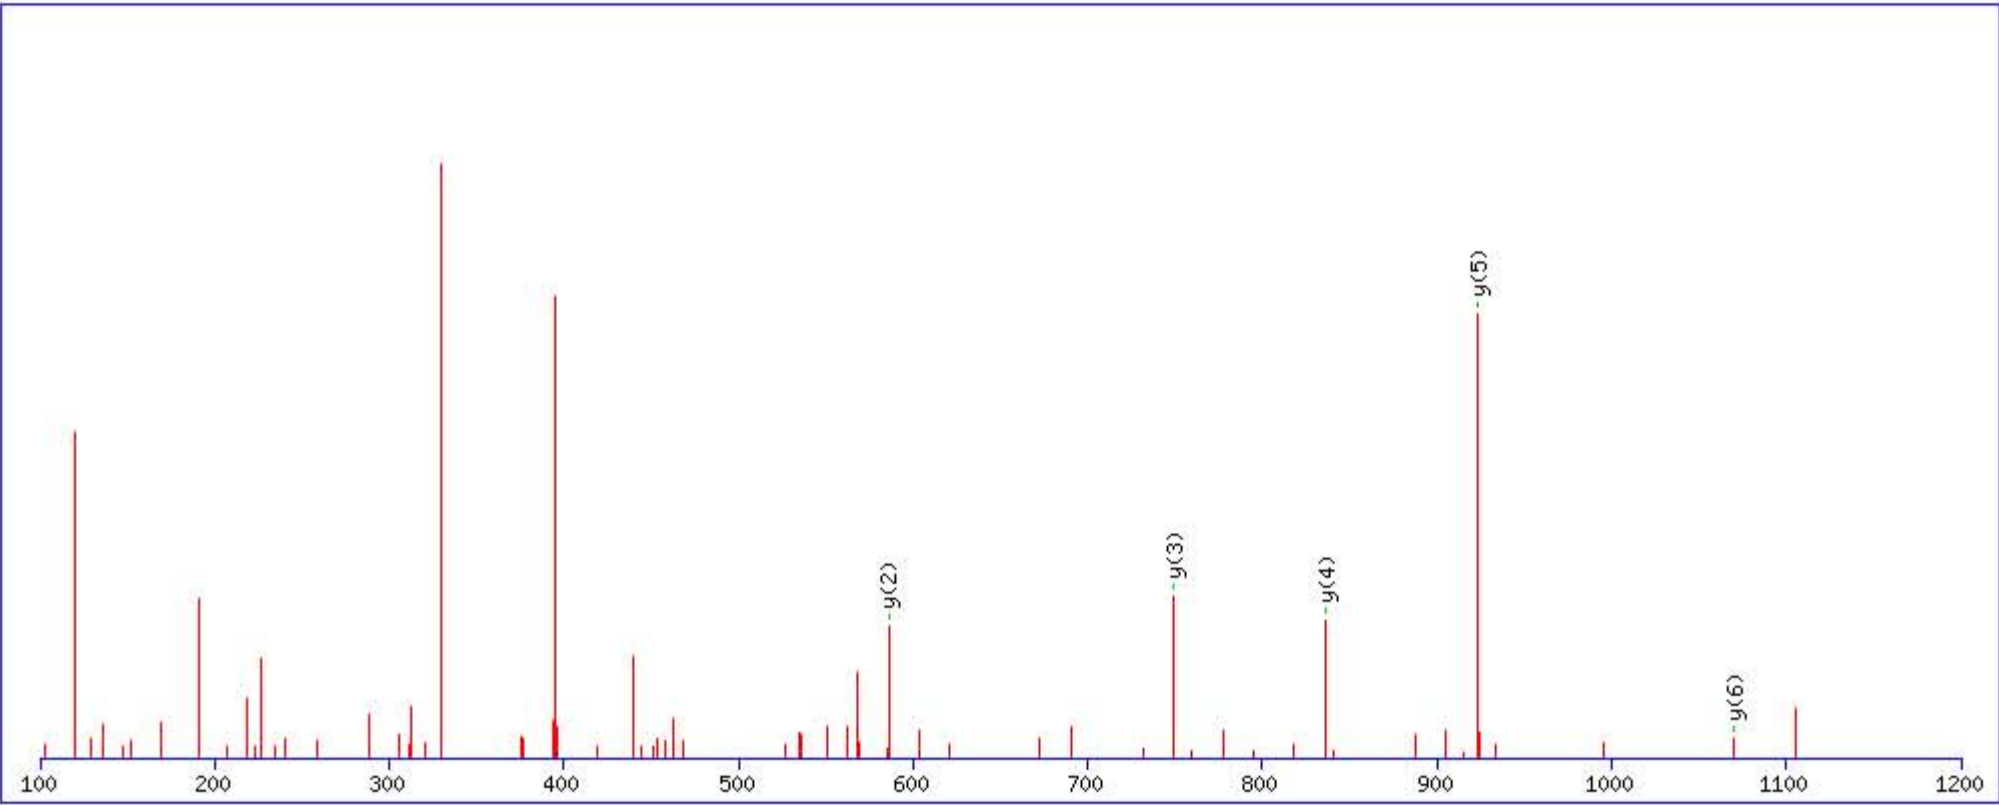

Monoisotopic mass of neutral peptide Mr(calc): 1140.563751  
Fixed modifications: Carbamidomethyl (C) (apply to specified residues or termini only)  
Variable modifications:  
Q6 : Biotin:Thermo-21345 (Q)  
Ions Score: 26 Expect: 0.011  
Matches : 5/52 fragment ions using 11 most intense peaks ([help](#))

| # | b          | b <sup>++</sup> | b <sup>*</sup> | b <sup>∗++</sup> | b <sup>0</sup> | b <sup>0++</sup> | Seq. | y           | y <sup>++</sup> | y <sup>*</sup> | y <sup>∗++</sup> | y <sup>0</sup> | y <sup>0++</sup> | # |
|---|------------|-----------------|----------------|------------------|----------------|------------------|------|-------------|-----------------|----------------|------------------|----------------|------------------|---|
| 1 | 72.044390  | 36.525833       |                |                  |                |                  | A    |             |                 |                |                  |                |                  | 7 |
| 2 | 219.112804 | 110.060040      |                |                  |                |                  | F    | 1070.533929 | 535.770603      | 1053.507380    | 527.257328       | 1052.523364    | 526.765320       | 6 |
| 3 | 306.144832 | 153.576054      |                |                  | 288.134267     | 144.570772       | S    | 923.465515  | 462.236396      | 906.438966     | 453.723121       | 905.454950     | 453.231113       | 5 |
| 4 | 393.176860 | 197.092068      |                |                  | 375.166295     | 188.086785       | S    | 836.433487  | 418.720382      | 819.406938     | 410.207107       | 818.422922     | 409.715099       | 4 |
| 5 | 556.240189 | 278.623733      |                |                  | 538.229624     | 269.618450       | Y    | 749.401459  | 375.204368      | 732.374910     | 366.691093       |                |                  | 3 |
| 6 | 995.465515 | 498.236396      | 978.438966     | 489.723121       | 977.454950     | 489.231113       | Q    | 586.338130  | 293.672703      | 569.311581     | 285.159429       |                |                  | 2 |
| 7 |            |                 |                |                  |                |                  | K    | 147.112804  | 74.060040       | 130.086255     | 65.546765        |                |                  | 1 |

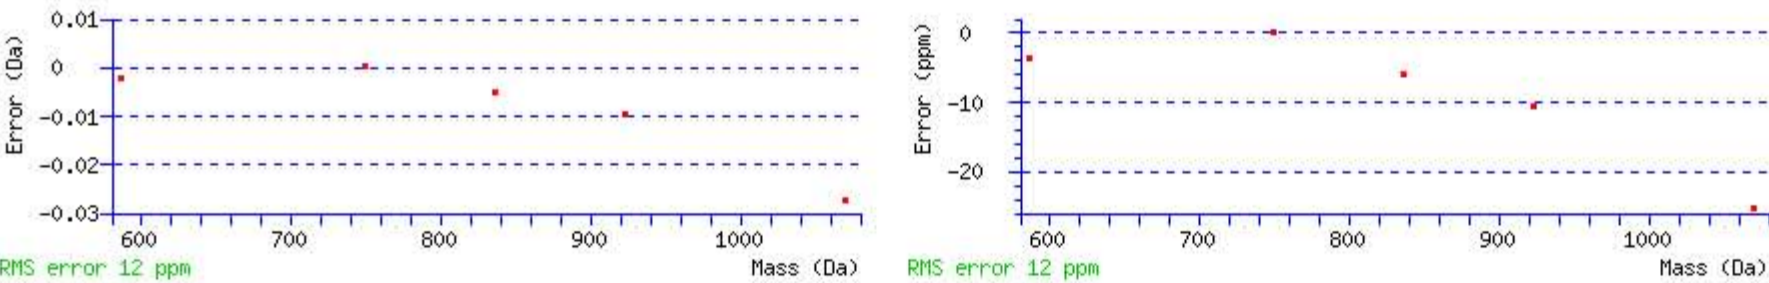

NCBI BLAST search of [AFSSYQK](#)  
(Parameters: blastp, nr protein database, expect=20000, no filter, PAM30)  
Other BLAST [web gateways](#)

All matches to this query

| Score | Mr(calc):   | Delta     | Sequence                   |
|-------|-------------|-----------|----------------------------|
| 25.9  | 1140.563751 | 0.000657  | <a href="#">AFSSYQK</a>    |
| 4.8   | 1140.559723 | 0.004685  | <a href="#">AFSRSSDLMK</a> |
| 1.4   | 1140.581497 | -0.017089 | <a href="#">AFEAVDKAYK</a> |
| 0.9   | 1140.548477 | 0.015931  | <a href="#">MATAAYEQLK</a> |
| 0.0   | 1140.552322 | 0.012086  | <a href="#">AHDEAVRSEK</a> |

***MATRIX***  
***SCIENCE***

# Mascot Search Results

Peptide View

MS/MS Fragmentation of **VNCLQTR**  
Found in **AFAM\_HUMAN**, Afamin OS=Homo sapiens GN=AFM PE=1 SV=1

Match to Query 20555: 1200.607868 from(601.311210,2+) rtinseconds(1572) index(3135)  
Title: Locus:1.1.1.1824.16 File:"2013-07-02 CLN FXIII 180 min 2nd F 1.wiff"  
Data file C:\Program Files (x86)\Matrix Science\Mascot Daemon\mgf\8 FXIII 180 min 2nd\mascot\_daemon\_merge.mgf

Click mouse within plot area to zoom in by factor of two about that point  
Or,   to  Da   
Label all possible matches ☐ Label matches used for scoring ☒

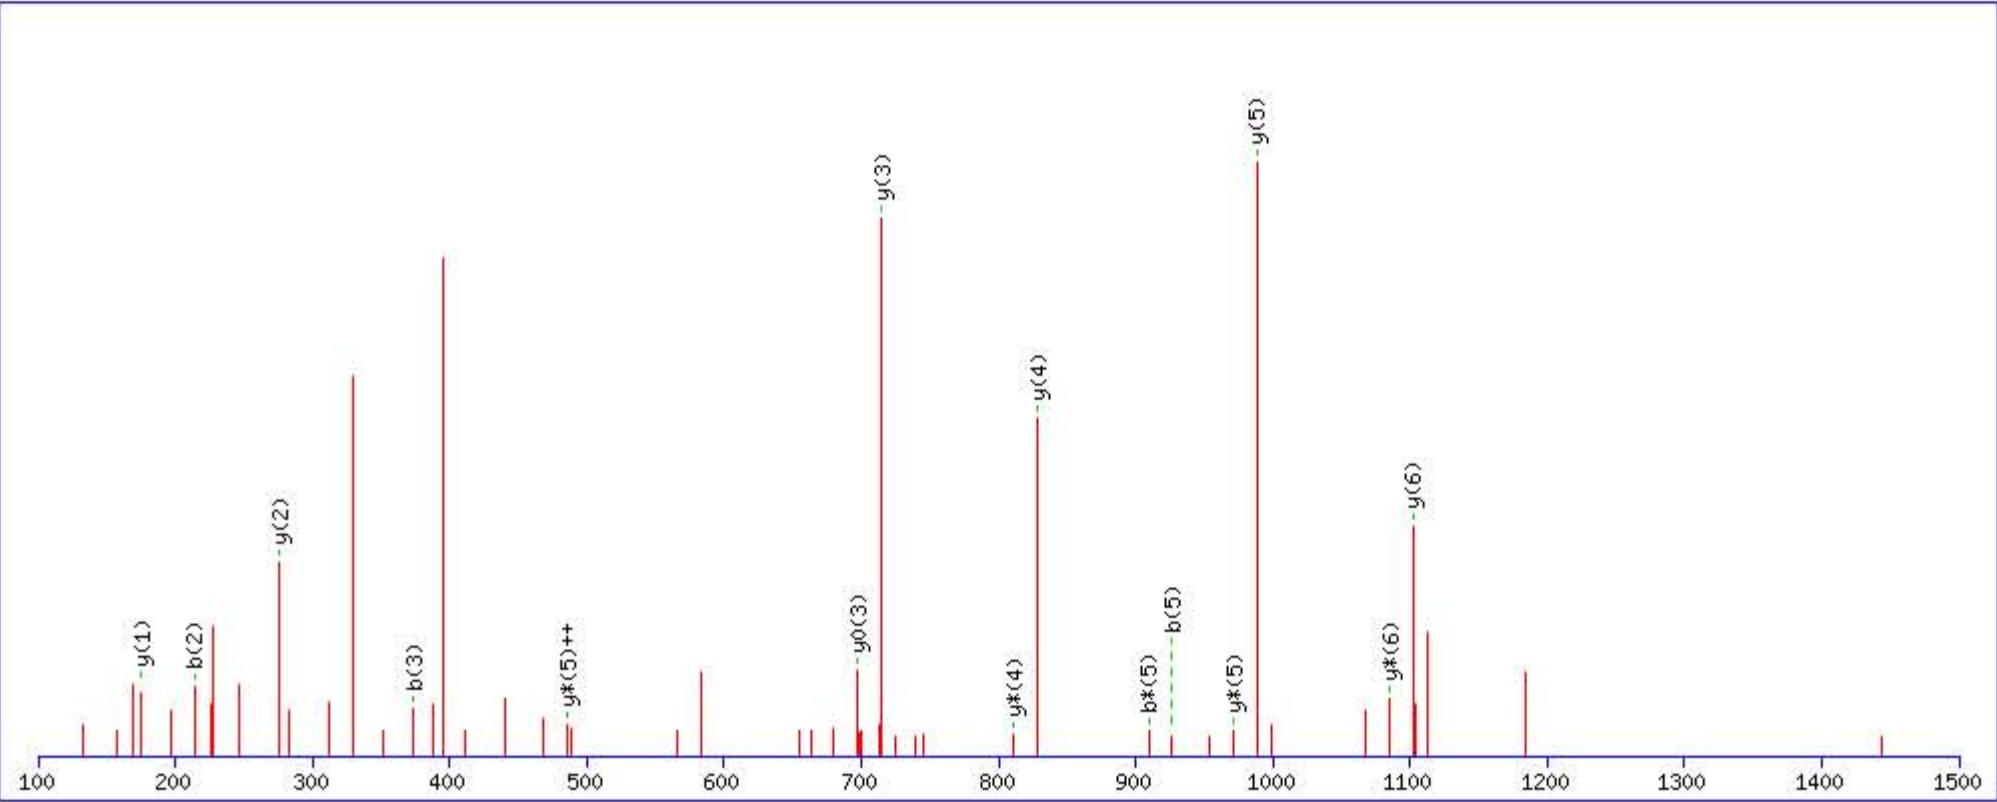

Monoisotopic mass of neutral peptide Mr(calc): 1200.610733  
Fixed modifications: Carbamidomethyl (C) (apply to specified residues or termini only)  
Variable modifications:  
Q5 : Biotin:Thermo-21345 (Q)  
Ions Score: 29 Expect: 0.0026  
Matches : 15/58 fragment ions using 38 most intense peaks ([help](#))

| # | b           | b <sup>++</sup> | b <sup>*</sup> | b <sup>*++</sup> | b <sup>0</sup> | b <sup>0++</sup> | Seq. | y           | y <sup>++</sup> | y <sup>*</sup> | y <sup>*++</sup> | y <sup>0</sup> | y <sup>0++</sup> | # |
|---|-------------|-----------------|----------------|------------------|----------------|------------------|------|-------------|-----------------|----------------|------------------|----------------|------------------|---|
| 1 | 100.075690  | 50.541483       |                |                  |                |                  | V    |             |                 |                |                  |                |                  | 7 |
| 2 | 214.118617  | 107.562947      | 197.092068     | 99.049672        |                |                  | N    | 1102.549597 | 551.778437      | 1085.523048    | 543.265162       | 1084.539032    | 542.773154       | 6 |
| 3 | 374.149266  | 187.578271      | 357.122717     | 179.064997       |                |                  | C    | 988.506670  | 494.756973      | 971.480121     | 486.243698       | 970.496105     | 485.751691       | 5 |
| 4 | 487.233330  | 244.120303      | 470.206781     | 235.607029       |                |                  | L    | 828.476021  | 414.741649      | 811.449472     | 406.228374       | 810.465456     | 405.736366       | 4 |
| 5 | 926.458656  | 463.732966      | 909.432107     | 455.219692       |                |                  | Q    | 715.391957  | 358.199617      | 698.365408     | 349.686342       | 697.381392     | 349.194334       | 3 |
| 6 | 1027.506335 | 514.256806      | 1010.479786    | 505.743531       | 1009.495770    | 505.251523       | T    | 276.166631  | 138.586953      | 259.140082     | 130.073679       | 258.156066     | 129.581671       | 2 |
| 7 |             |                 |                |                  |                |                  | R    | 175.118952  | 88.063114       | 158.092403     | 79.549839        |                |                  | 1 |

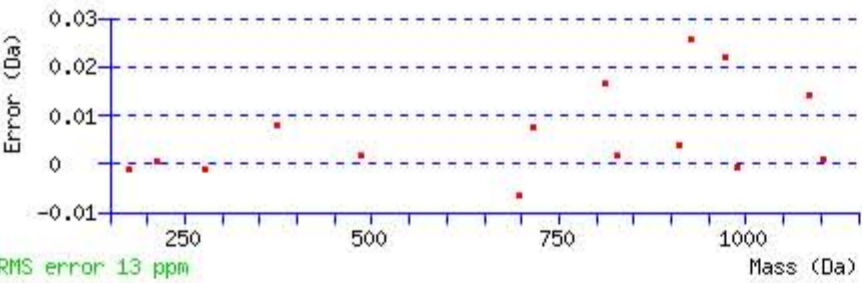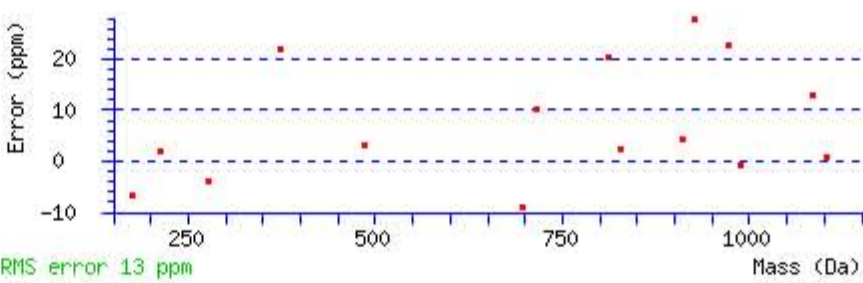

NCBI BLAST search of [VNCLQTR](#)  
(Parameters: blastp, nr protein database, expect=20000, no filter, PAM30)  
Other BLAST [web gateways](#)

All matches to this query

| Score | Mr(calc):   | Delta     | Sequence                    |
|-------|-------------|-----------|-----------------------------|
| 28.9  | 1200.610733 | -0.002865 | <a href="#">VNCLQTR</a>     |
| 1.3   | 1200.617233 | -0.009365 | <a href="#">VMEETPNILR</a>  |
| 1.2   | 1200.603333 | 0.004535  | <a href="#">VMSKSGHSNVR</a> |

***MATRIX***  
***SCIENCE***

# Mascot Search Results

Peptide View

MS/MS Fragmentation of **MVQQECK**  
Found in **AFAM\_HUMAN**, Afamin OS=Homo sapiens GN=AFM PE=1 SV=1

Match to Query 21830: 1248.566888 from(625.290720,2+) rtinseconds(1165) index(789)  
Title: Locus:1.1.1.1682.8 File:"2013-07-02 CLN FXIII 180 min 2nd F 1.wiff"  
Data file C:\Program Files (x86)\Matrix Science\Mascot Daemon\mgf\8 FXIII 180 min 2nd\mascot\_daemon\_merge.mgf

Click mouse within plot area to zoom in by factor of two about that point  
Or,   to  Da   
Label all possible matches ☐ Label matches used for scoring ☒

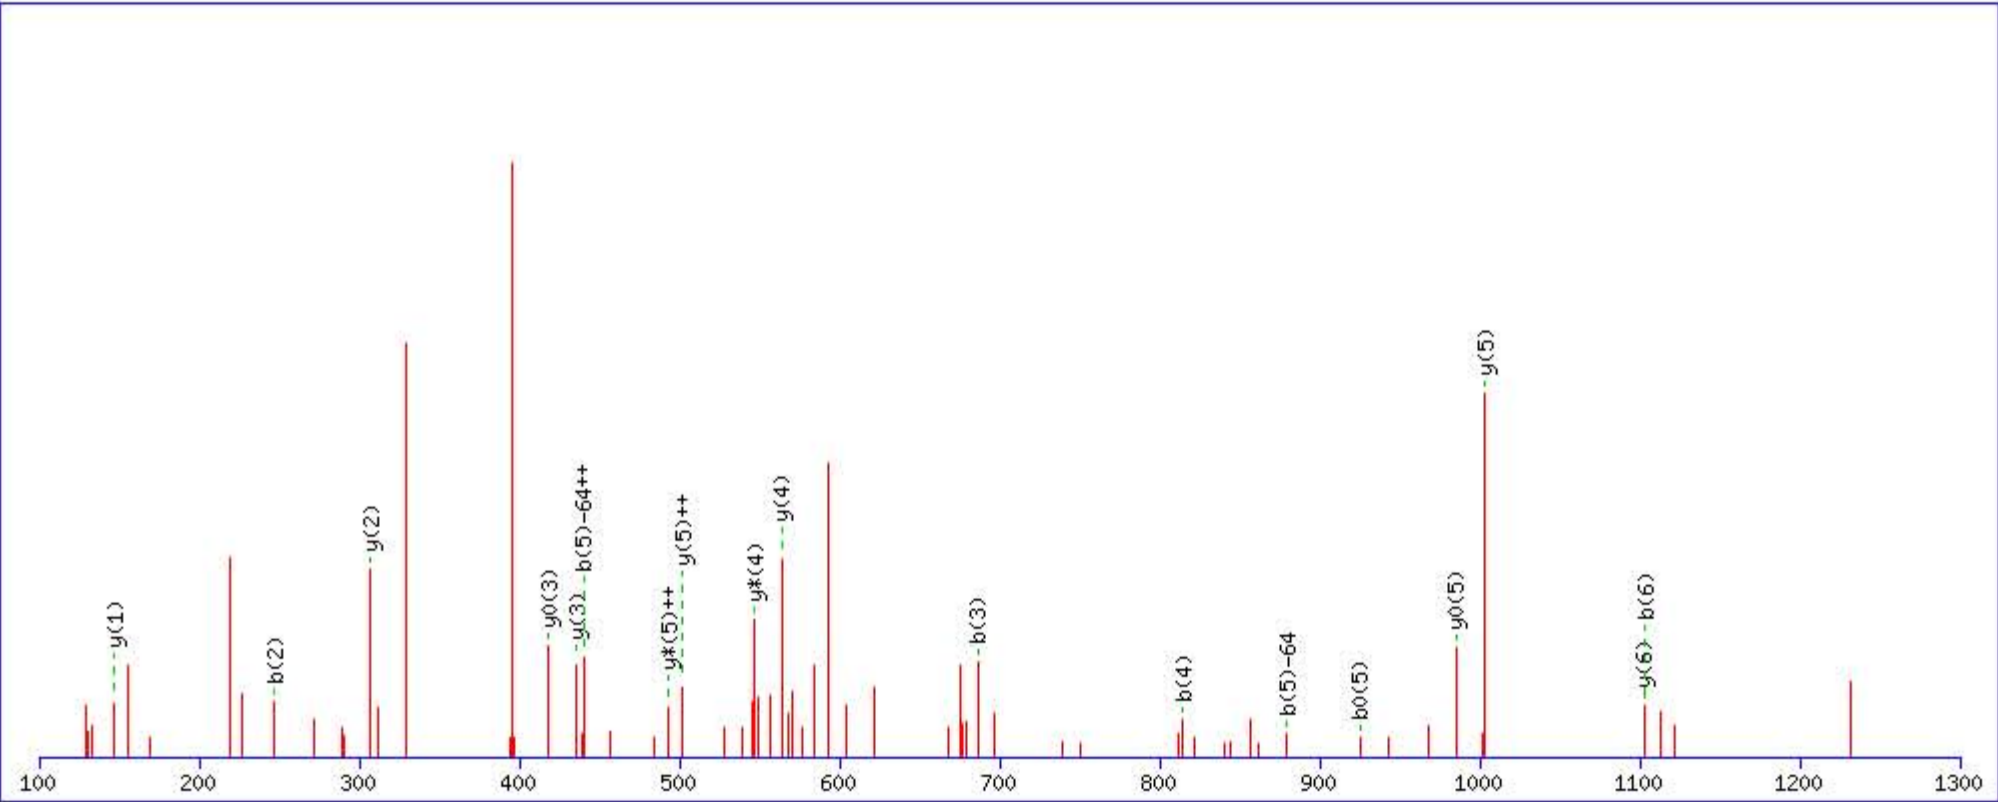

Monoisotopic mass of neutral peptide Mr(calc): 1248.566483  
Fixed modifications: Carbamidomethyl (C) (apply to specified residues or termini only)  
Variable modifications:  
M1 : Oxidation (M), with neutral losses 0.000000 (shown in table), 63.998285  
Q3 : Biotin:Thermo-21345 (Q)  
Ions Score: 26 Expect: 0.025  
Matches : 18/80 fragment ions using 41 most intense peaks ([help](#))

| # | b           | b <sup>++</sup> | b <sup>*</sup> | b <sup>+++</sup> | b <sup>0</sup> | b <sup>0++</sup> | Seq. | y           | y <sup>++</sup> | y <sup>*</sup> | y <sup>+++</sup> | y <sup>0</sup> | y <sup>0++</sup> | # |
|---|-------------|-----------------|----------------|------------------|----------------|------------------|------|-------------|-----------------|----------------|------------------|----------------|------------------|---|
| 1 | 148.042676  | 74.524976       |                |                  |                |                  | M    |             |                 |                |                  |                |                  | 7 |
| 2 | 247.111090  | 124.059183      |                |                  |                |                  | V    | 1102.538364 | 551.772820      | 1085.511815    | 543.259546       | 1084.527799    | 542.767538       | 6 |
| 3 | 686.336416  | 343.671846      | 669.309867     | 335.158572       |                |                  | Q    | 1003.469950 | 502.238613      | 986.443401     | 493.725339       | 985.459385     | 493.233331       | 5 |
| 4 | 814.394994  | 407.701135      | 797.368445     | 399.187861       |                |                  | Q    | 564.244624  | 282.625950      | 547.218075     | 274.112676       | 546.234059     | 273.620668       | 4 |
| 5 | 943.437587  | 472.222432      | 926.411038     | 463.709157       | 925.427022     | 463.217149       | E    | 436.186046  | 218.596661      | 419.159497     | 210.083387       | 418.175481     | 209.591379       | 3 |
| 6 | 1103.468236 | 552.237756      | 1086.441687    | 543.724482       | 1085.457671    | 543.232474       | C    | 307.143453  | 154.075365      | 290.116904     | 145.562090       |                |                  | 2 |
| 7 |             |                 |                |                  |                |                  | K    | 147.112804  | 74.060040       | 130.086255     | 65.546765        |                |                  | 1 |

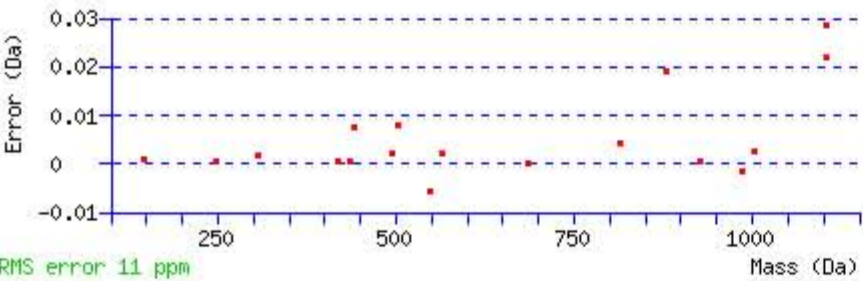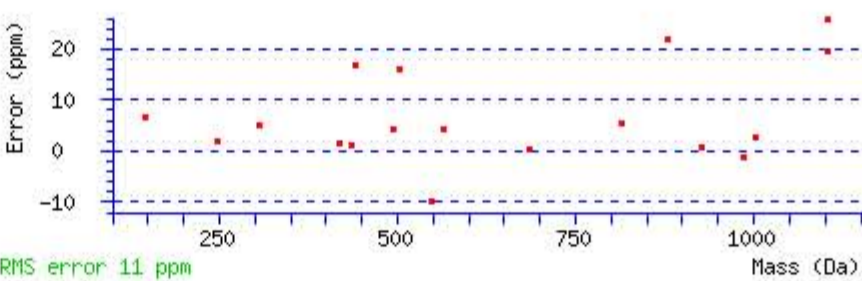

NCBI BLAST search of [MVQQECK](#)  
(Parameters: blastp, nr protein database, expect=20000, no filter, PAM30)  
Other BLAST [web gateways](#)

All matches to this query

| Score | Mr(calc):   | Delta    | Sequence                |
|-------|-------------|----------|-------------------------|
| 25.6  | 1248.566483 | 0.000405 | <a href="#">MVQQECK</a> |
| 15.7  | 1248.566483 | 0.000405 | <a href="#">MVQQECK</a> |

MATRIX

SCIENCE

Mascot Search Results

Peptide View

MS/MS Fragmentation of **MVQQECK**  
Found in **AFAM\_HUMAN**, Afamin OS=Homo sapiens GN=AFM PE=1 SV=1

Match to Query 21834: 1248.570908 from(625.292730,2+) rtinseconds(1232) index(980)  
Title: Locus:1.1.1.1705.10 File:"2013-07-02 CLN FXIII 180 min 2nd F 1.wiff"  
Data file C:\Program Files (x86)\Matrix Science\Mascot Daemon\mgf\8 FXIII 180 min 2nd\mascot\_daemon\_merge.mgf

Click mouse within plot area to zoom in by factor of two about that point  
Or,   to  Da   
Label all possible matches ☐ Label matches used for scoring ☒

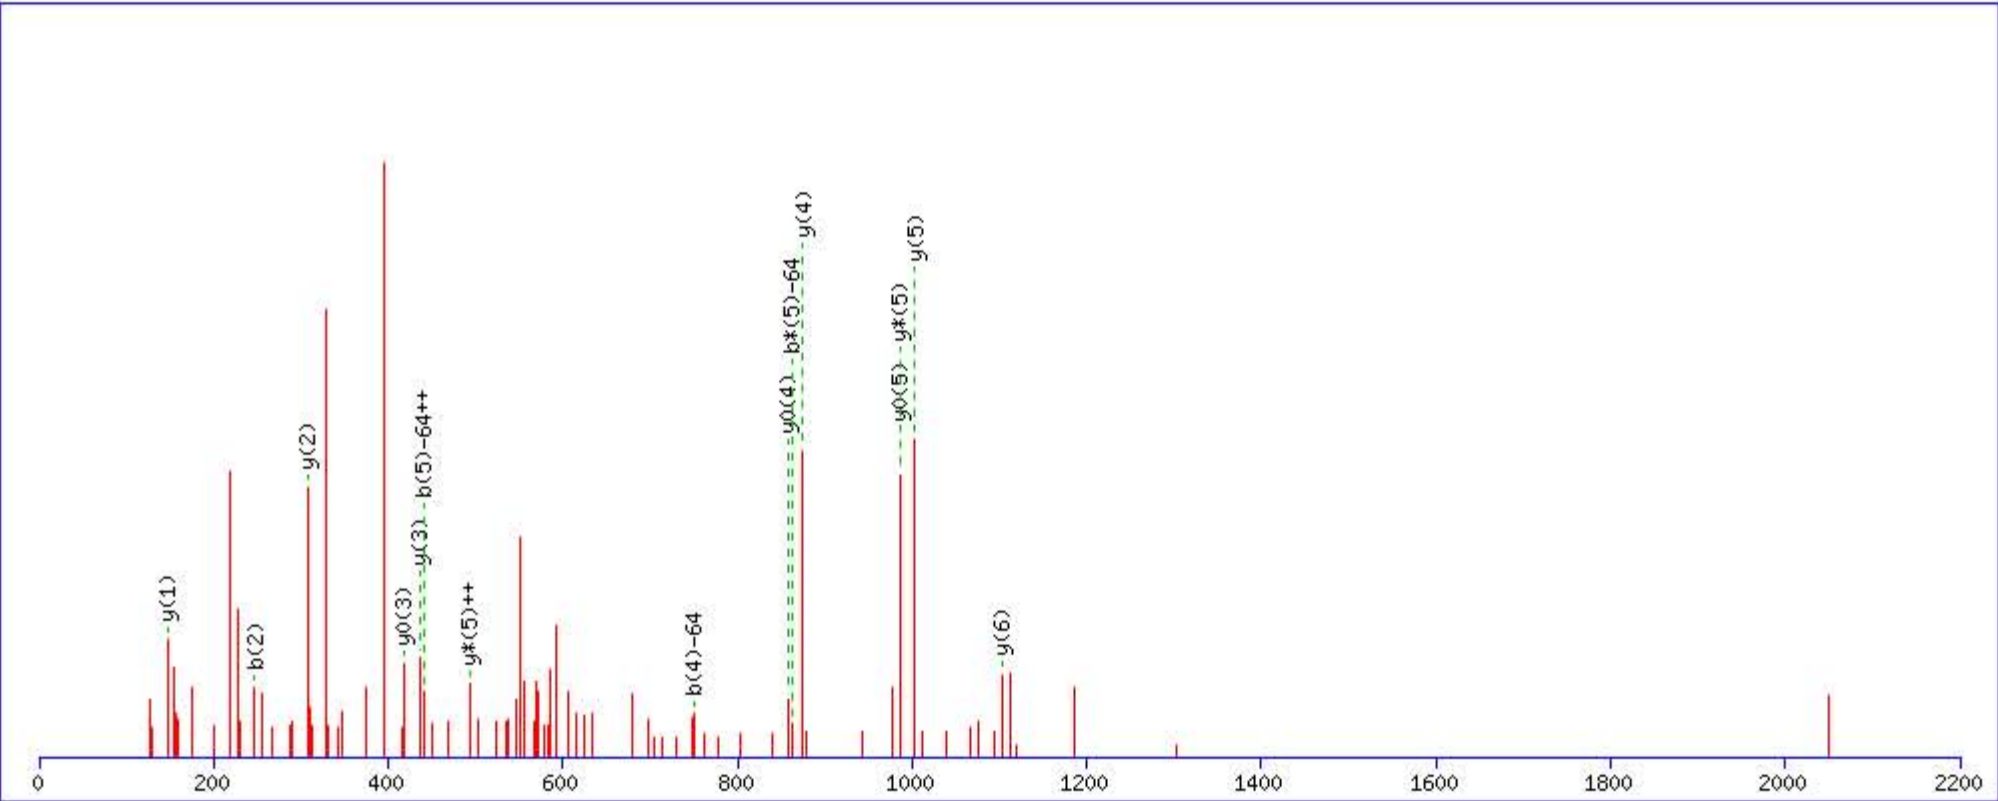

Monoisotopic mass of neutral peptide Mr(calc): 1248.566483  
Fixed modifications: Carbamidomethyl (C) (apply to specified residues or termini only)  
Variable modifications:  
M1 : Oxidation (M), with neutral losses 63.998285 (shown in table), 0.000000  
Q4 : Biotin:Thermo-21345 (Q)  
Ions Score: 27 Expect: 0.0076  
Matches : 15/80 fragment ions using 31 most intense peaks ([help](#))

| # | b           | b <sup>++</sup> | b <sup>*</sup> | b <sup>*++</sup> | b <sup>0</sup> | b <sup>0++</sup> | Seq. | y           | y <sup>++</sup> | y <sup>*</sup> | y <sup>*++</sup> | y <sup>0</sup> | y <sup>0++</sup> | # |
|---|-------------|-----------------|----------------|------------------|----------------|------------------|------|-------------|-----------------|----------------|------------------|----------------|------------------|---|
| 1 | 84.044391   | 42.525833       |                |                  |                |                  | M    |             |                 |                |                  |                |                  | 7 |
| 2 | 183.112805  | 92.060040       |                |                  |                |                  | V    | 1102.538364 | 551.772820      | 1085.511815    | 543.259546       | 1084.527799    | 542.767538       | 6 |
| 3 | 311.171383  | 156.089329      | 294.144834     | 147.576055       |                |                  | Q    | 1003.469950 | 502.238613      | 986.443401     | 493.725338       | 985.459385     | 493.233330       | 5 |
| 4 | 750.396709  | 375.701993      | 733.370160     | 367.188718       |                |                  | Q    | 875.411372  | 438.209324      | 858.384823     | 429.696050       | 857.400807     | 429.204042       | 4 |
| 5 | 879.439302  | 440.223289      | 862.412753     | 431.710015       | 861.428737     | 431.218007       | E    | 436.186046  | 218.596661      | 419.159497     | 210.083386       | 418.175481     | 209.591378       | 3 |
| 6 | 1039.469951 | 520.238614      | 1022.443402    | 511.725339       | 1021.459386    | 511.233331       | C    | 307.143453  | 154.075364      | 290.116904     | 145.562090       |                |                  | 2 |
| 7 |             |                 |                |                  |                |                  | K    | 147.112804  | 74.060040       | 130.086255     | 65.546765        |                |                  | 1 |

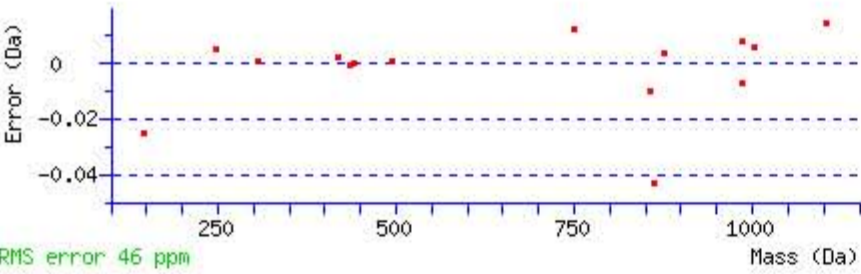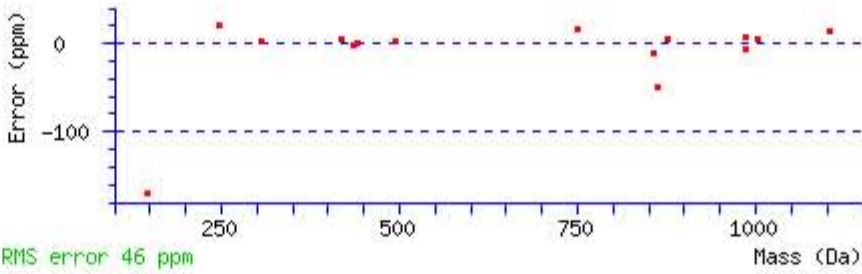

NCBI BLAST search of [MVQQECK](#)  
(Parameters: blastp, nr protein database, expect=20000, no filter, PAM30)  
Other BLAST [web gateways](#)

All matches to this query

| Score | Mr(calc):   | Delta     | Sequence                    |
|-------|-------------|-----------|-----------------------------|
| 26.8  | 1248.566483 | 0.004425  | <a href="#">MVQQECK</a>     |
| 16.0  | 1248.566483 | 0.004425  | <a href="#">MVQQECK</a>     |
| 4.0   | 1248.576813 | -0.005905 | <a href="#">KCESLEQEAR</a>  |
| 3.5   | 1248.588089 | -0.017181 | <a href="#">MVDVGGQRSER</a> |
| 2.8   | 1248.584244 | -0.013336 | <a href="#">MHSMISSVDVK</a> |
| 1.5   | 1248.580872 | -0.009964 | <a href="#">AQMTYYTVR</a>   |

***{MATRIX}***  
***{SCIENCE}*** Mascot Search Results

Peptide View

MS/MS Fragmentation of **CQAYESNR**  
Found in **AFAM\_HUMAN**, Afamin OS=Homo sapiens GN=AFM PE=1 SV=1

Match to Query 24052: 1337.588488 from(669.801520,2+) rtinseconds(1369) index(1736)  
Title: Locus:1.1.1.1753.20 File:"2013-07-02 CLN FXIII 180 min 2nd F 1.wiff"  
Data file C:\Program Files (x86)\Matrix Science\Mascot Daemon\mgf\8 FXIII 180 min 2nd\mascot\_daemon\_merge.mgf

Click mouse within plot area to zoom in by factor of two about that point  
Or,   to  Da   
Label all possible matches ☐ Label matches used for scoring ☒

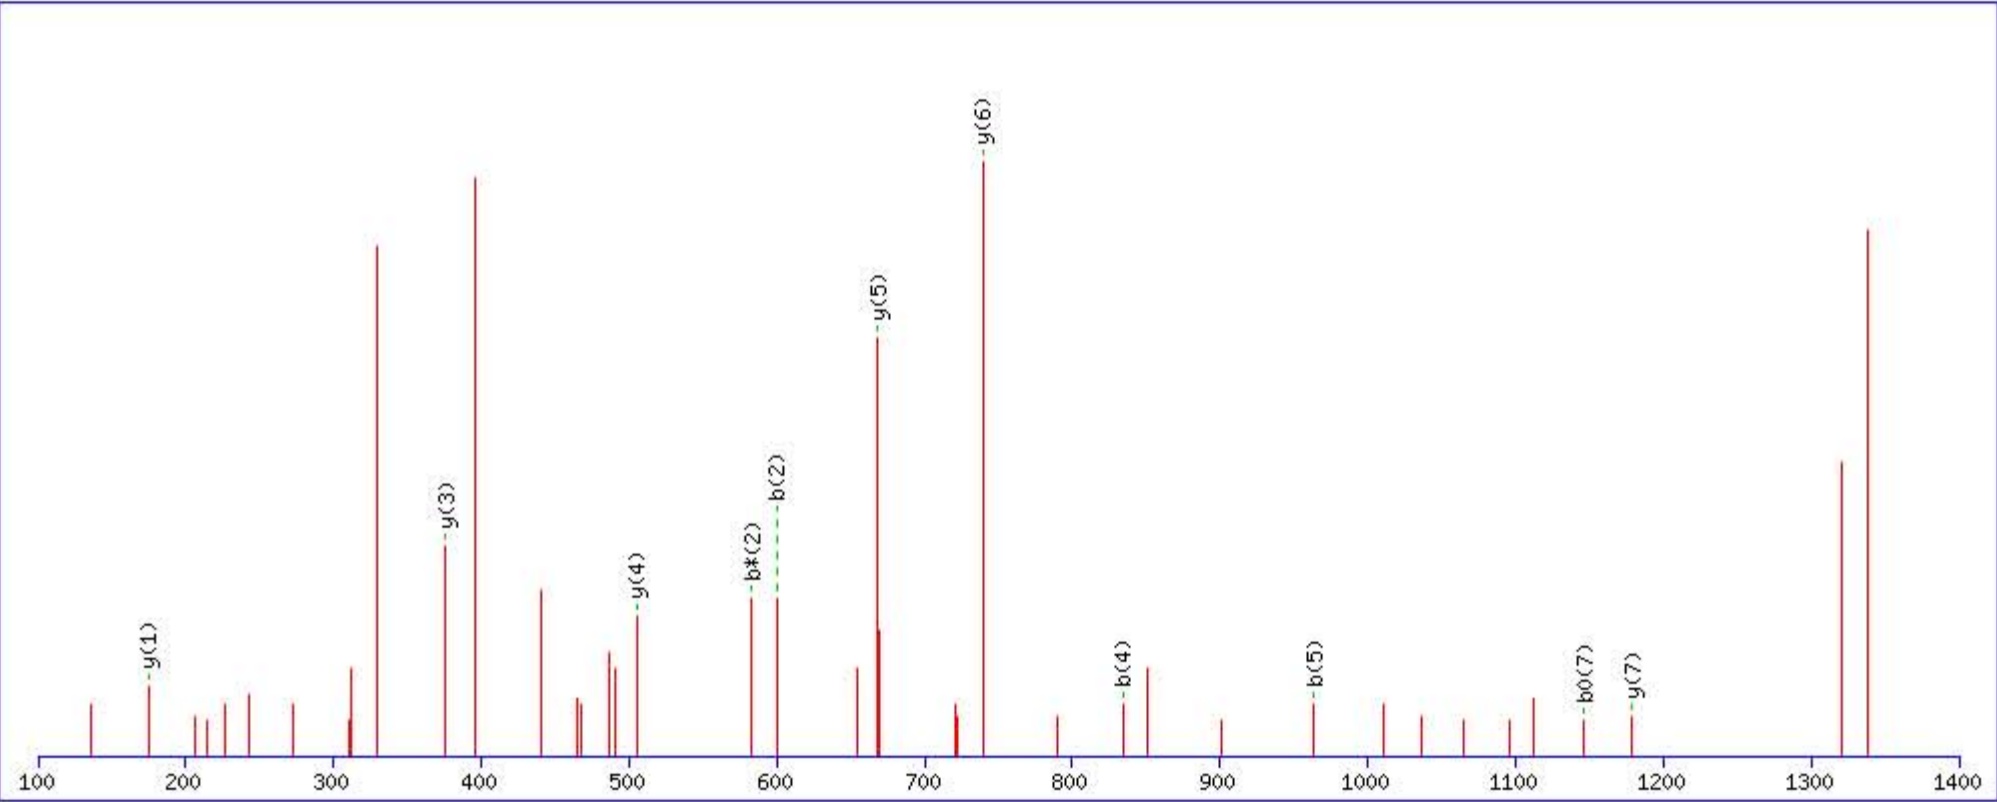

Monoisotopic mass of neutral peptide Mr(calc): 1337.585617  
Fixed modifications: Carbamidomethyl (C) (apply to specified residues or termini only)  
Variable modifications:  
Q2 : Biotin:Thermo-21345 (Q)  
Ions Score: 32 Expect: 0.0032  
Matches : 11/70 fragment ions using 23 most intense peaks ([help](#))

| # | b           | b <sup>++</sup> | b <sup>*</sup> | b <sup>*++</sup> | b <sup>0</sup> | b <sup>0++</sup> | Seq. | y           | y <sup>++</sup> | y <sup>*</sup> | y <sup>*++</sup> | y <sup>0</sup> | y <sup>0++</sup> | # |
|---|-------------|-----------------|----------------|------------------|----------------|------------------|------|-------------|-----------------|----------------|------------------|----------------|------------------|---|
| 1 | 161.037925  | 81.022600       |                |                  |                |                  | C    |             |                 |                |                  |                |                  | 8 |
| 2 | 600.263251  | 300.635264      | 583.236702     | 292.121989       |                |                  | Q    | 1178.562269 | 589.784773      | 1161.535720    | 581.271498       | 1160.551704    | 580.779490       | 7 |
| 3 | 671.300365  | 336.153821      | 654.273816     | 327.640546       |                |                  | A    | 739.336943  | 370.172110      | 722.310394     | 361.658835       | 721.326378     | 361.166827       | 6 |
| 4 | 834.363694  | 417.685485      | 817.337145     | 409.172211       |                |                  | Y    | 668.299829  | 334.653553      | 651.273280     | 326.140278       | 650.289264     | 325.648270       | 5 |
| 5 | 963.406287  | 482.206782      | 946.379738     | 473.693507       | 945.395722     | 473.201499       | E    | 505.236500  | 253.121888      | 488.209951     | 244.608613       | 487.225935     | 244.116605       | 4 |
| 6 | 1050.438315 | 525.722796      | 1033.411766    | 517.209521       | 1032.427750    | 516.717513       | S    | 376.193907  | 188.600591      | 359.167358     | 180.087317       | 358.183342     | 179.595309       | 3 |
| 7 | 1164.481242 | 582.744259      | 1147.454693    | 574.230985       | 1146.470677    | 573.738977       | N    | 289.161879  | 145.084577      | 272.135330     | 136.571303       |                |                  | 2 |
| 8 |             |                 |                |                  |                |                  | R    | 175.118952  | 88.063114       | 158.092403     | 79.549839        |                |                  | 1 |

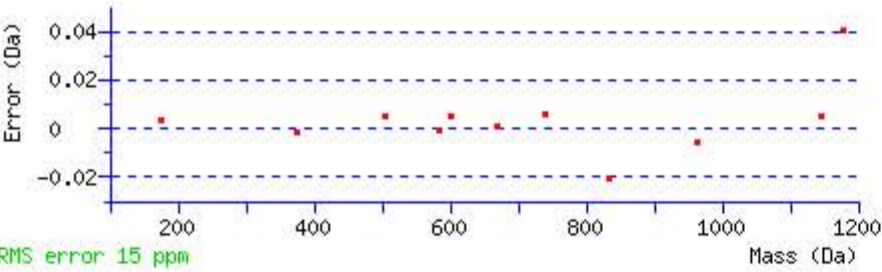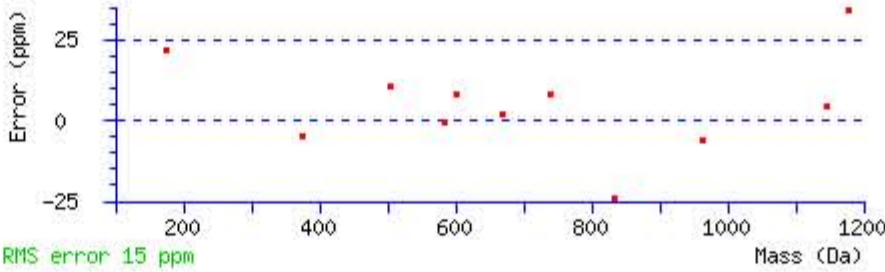

NCBI BLAST search of [CQAYESNR](#)  
(Parameters: blastp, nr protein database, expect=20000, no filter, PAM30)  
Other BLAST [web gateways](#)

All matches to this query

| Score | Mr(calc):   | Delta     | Sequence                   |
|-------|-------------|-----------|----------------------------|
| 32.2  | 1337.585617 | 0.002871  | <a href="#">CQAYESNR</a>   |
| 15.5  | 1337.596848 | -0.008360 | <a href="#">CYEMASHLRR</a> |

MATRIX

SCIENCE

Mascot Search Results

Peptide View

MS/MS Fragmentation of **LPNNVLQEK**  
Found in **AFAM\_HUMAN**, Afamin OS=Homo sapiens GN=AFM PE=1 SV=1

Match to Query 26083: 1364.759868 from(683.387210,2+) rtinseconds(1849) index(4571)  
Title: Locus:1.1.1.1921.6 File:"2013-07-02 CLN FXIII 180 min 2nd F 1.wiff"  
Data file C:\Program Files (x86)\Matrix Science\Mascot Daemon\mgf\8 FXIII 180 min 2nd\mascot\_daemon\_merge.mgf

Click mouse within plot area to zoom in by factor of two about that point  
Or,  Plot from  to  Da   
Label all possible matches ☐ Label matches used for scoring ☒

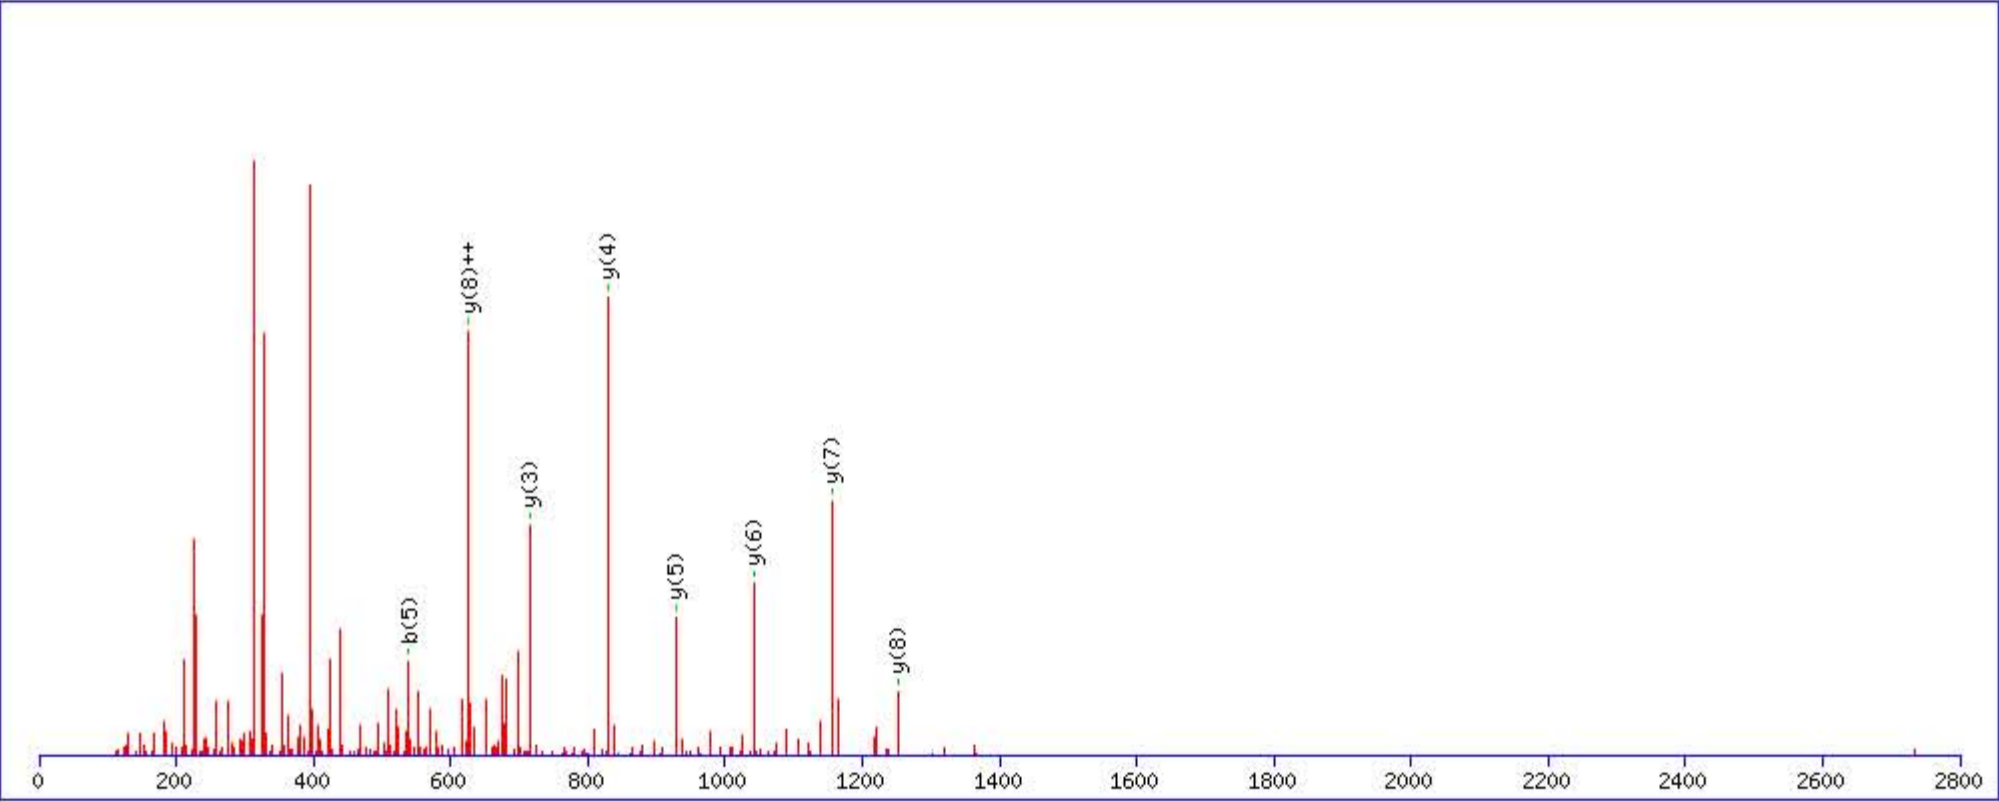

Monoisotopic mass of neutral peptide Mr(calc): 1364.748581  
Fixed modifications: Carbamidomethyl (C) (apply to specified residues or termini only)  
Variable modifications:  
Q7 : Biotin:Thermo-21345 (Q)  
Ions Score: 38 Expect: 0.0014  
Matches : 8/76 fragment ions using 13 most intense peaks [\(help\)](#)

| # | b           | b <sup>++</sup> | b <sup>*</sup> | b <sup>*++</sup> | b <sup>0</sup> | b <sup>0++</sup> | Seq. | y           | y <sup>++</sup> | y <sup>*</sup> | y <sup>*++</sup> | y <sup>0</sup> | y <sup>0++</sup> | # |
|---|-------------|-----------------|----------------|------------------|----------------|------------------|------|-------------|-----------------|----------------|------------------|----------------|------------------|---|
| 1 | 114.091340  | 57.549308       |                |                  |                |                  | L    |             |                 |                |                  |                |                  | 9 |
| 2 | 211.144104  | 106.075690      |                |                  |                |                  | P    | 1252.671819 | 626.839548      | 1235.645270    | 618.326273       | 1234.661254    | 617.834265       | 8 |
| 3 | 325.187031  | 163.097153      | 308.160482     | 154.583879       |                |                  | N    | 1155.619055 | 578.313166      | 1138.592506    | 569.799891       | 1137.608490    | 569.307883       | 7 |
| 4 | 439.229958  | 220.118617      | 422.203409     | 211.605343       |                |                  | N    | 1041.576128 | 521.291702      | 1024.549579    | 512.778428       | 1023.565563    | 512.286420       | 6 |
| 5 | 538.298372  | 269.652824      | 521.271823     | 261.139550       |                |                  | V    | 927.533201  | 464.270239      | 910.506652     | 455.756964       | 909.522636     | 455.264956       | 5 |
| 6 | 651.382436  | 326.194856      | 634.355887     | 317.681582       |                |                  | L    | 828.464787  | 414.736032      | 811.438238     | 406.222757       | 810.454222     | 405.730749       | 4 |
| 7 | 1090.607762 | 545.807519      | 1073.581213    | 537.294245       |                |                  | Q    | 715.380723  | 358.194000      | 698.354174     | 349.680725       | 697.370158     | 349.188717       | 3 |
| 8 | 1219.650355 | 610.328816      | 1202.623806    | 601.815541       | 1201.639790    | 601.323533       | E    | 276.155397  | 138.581336      | 259.128848     | 130.068062       | 258.144832     | 129.576054       | 2 |
| 9 |             |                 |                |                  |                |                  | K    | 147.112804  | 74.060040       | 130.086255     | 65.546765        |                |                  | 1 |

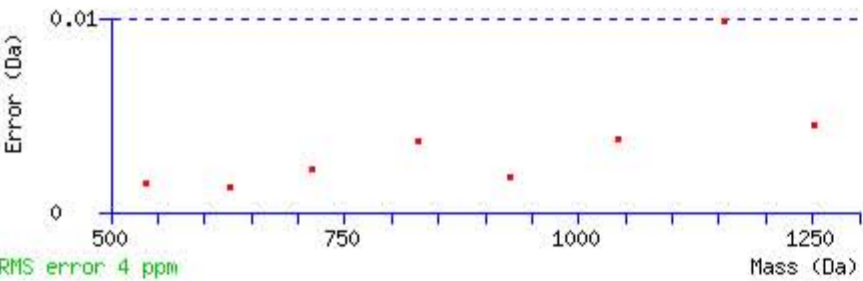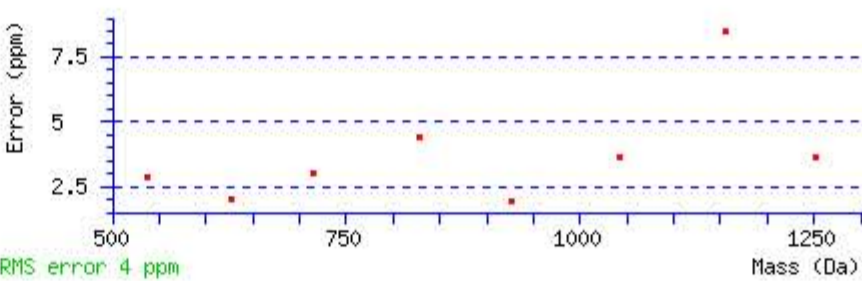

NCBI BLAST search of [LPNNVLQEK](#)  
(Parameters: blastp, nr protein database, expect=20000, no filter, PAM30)  
Other BLAST [web gateways](#)

All matches to this query

| Score | Mr(calc):   | Delta     | Sequence                      |
|-------|-------------|-----------|-------------------------------|
| 37.9  | 1364.748581 | 0.011287  | <a href="#">LPNNVLQEK</a>     |
| 7.0   | 1364.759827 | 0.000041  | <a href="#">QTSSLIHR</a>      |
| 5.9   | 1364.745239 | 0.014629  | <a href="#">KVVSUIDVYTR</a>   |
| 2.4   | 1364.752609 | 0.007259  | <a href="#">ILPIMFPSLYR</a>   |
| 1.7   | 1364.752609 | 0.007259  | <a href="#">KQFLDYLK</a>      |
| 1.0   | 1364.777573 | -0.017705 | <a href="#">LNSSPRAPVSPLK</a> |

MATRIX

SCIENCE

Mascot Search Results

Peptide View

MS/MS Fragmentation of **ICAMEGLPQK**  
Found in **AFAM\_HUMAN**, Afamin OS=Homo sapiens GN=AFM PE=1 SV=1

Match to Query 29841: 1456.722612 from(486.581480,3+) rtinseconds(1950) index(5381)  
Title: Locus:1.1.1.1956.9 File:"2013-07-02 CLN FXIII 180 min 2nd F 1.wiff"  
Data file C:\Program Files (x86)\Matrix Science\Mascot Daemon\mgf\8 FXIII 180 min 2nd\mascot\_daemon\_merge.mgf

Click mouse within plot area to zoom in by factor of two about that point  
Or,   to  Da   
Label all possible matches ☐ Label matches used for scoring ☒

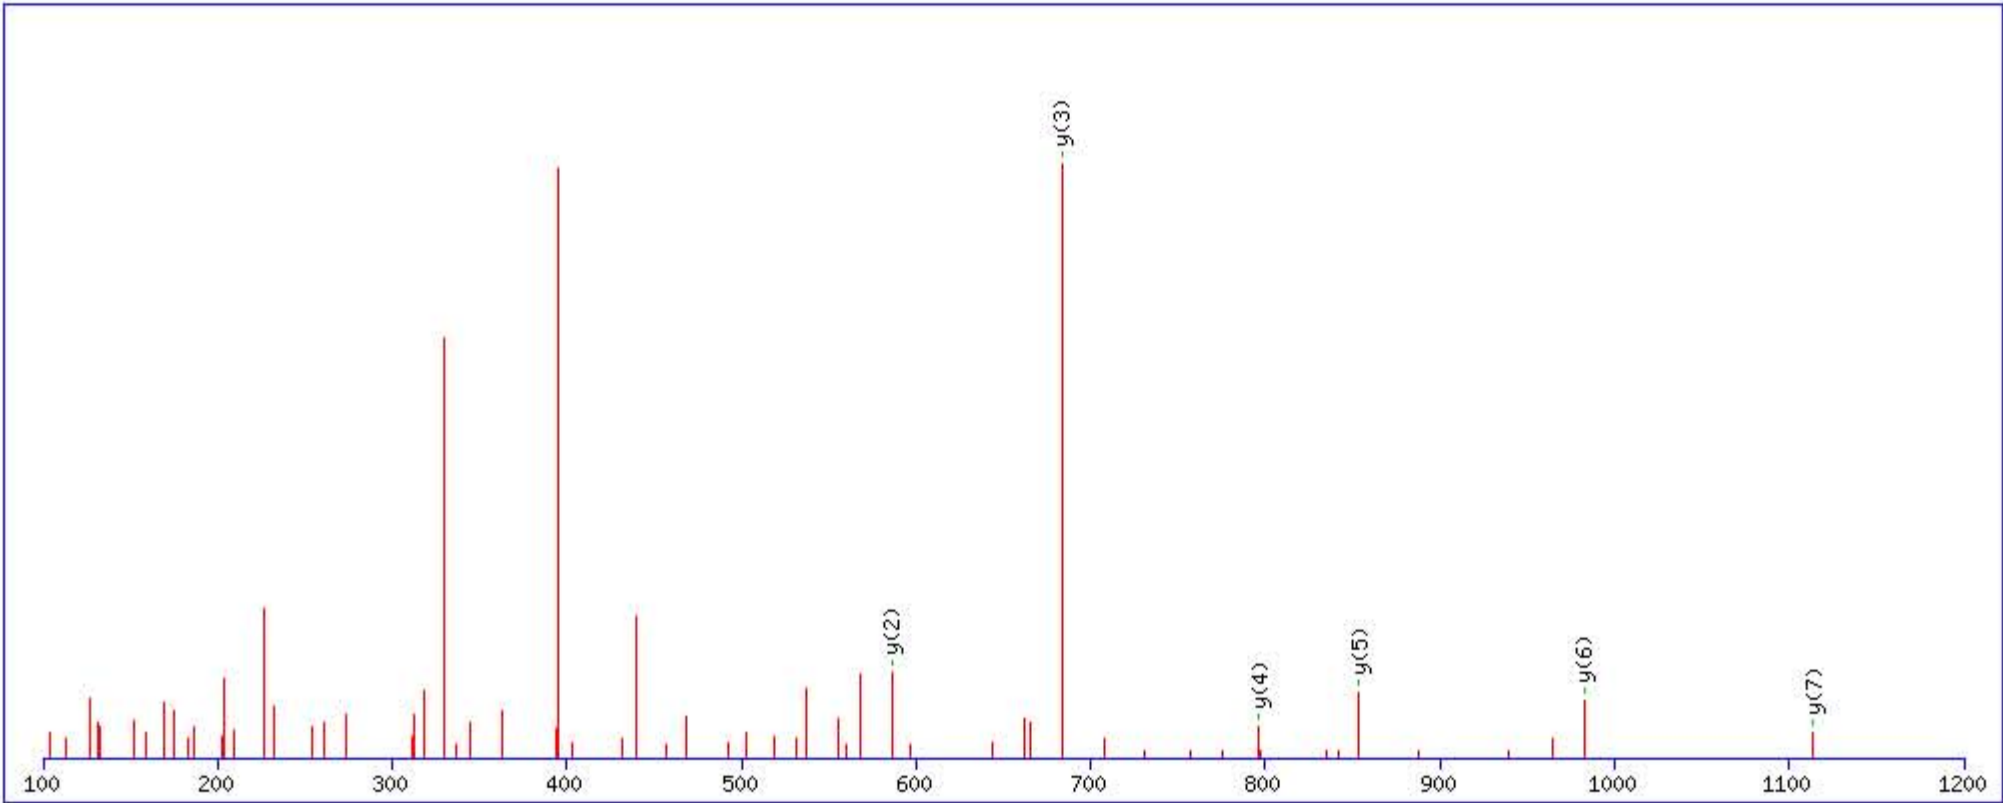

Monoisotopic mass of neutral peptide Mr(calc): 1456.724030  
Fixed modifications: Carbamidomethyl (C) (apply to specified residues or termini only)  
Variable modifications:  
Q9 : Biotin:Thermo-21345 (Q)  
Ions Score: 38 Expect: 0.00093  
Matches : 6/74 fragment ions using 10 most intense peaks [\(help\)](#)

| #  | b           | b <sup>++</sup> | b <sup>*</sup> | b <sup>*++</sup> | b <sup>0</sup> | b <sup>0++</sup> | Seq. | y           | y <sup>++</sup> | y <sup>*</sup> | y <sup>*++</sup> | y <sup>0</sup> | y <sup>0++</sup> | #  |
|----|-------------|-----------------|----------------|------------------|----------------|------------------|------|-------------|-----------------|----------------|------------------|----------------|------------------|----|
| 1  | 114.091340  | 57.549308       |                |                  |                |                  | I    |             |                 |                |                  |                |                  | 10 |
| 2  | 274.121989  | 137.564632      |                |                  |                |                  | C    | 1344.647263 | 672.827270      | 1327.620714    | 664.313995       | 1326.636698    | 663.821987       | 9  |
| 3  | 345.159103  | 173.083190      |                |                  |                |                  | A    | 1184.616614 | 592.811945      | 1167.590065    | 584.298671       | 1166.606049    | 583.806663       | 8  |
| 4  | 476.199588  | 238.603432      |                |                  |                |                  | M    | 1113.579500 | 557.293388      | 1096.552951    | 548.780114       | 1095.568935    | 548.288106       | 7  |
| 5  | 605.242181  | 303.124729      |                |                  | 587.231616     | 294.119446       | E    | 982.539015  | 491.773146      | 965.512466     | 483.259871       | 964.528450     | 482.767863       | 6  |
| 6  | 662.263645  | 331.635461      |                |                  | 644.253080     | 322.630178       | G    | 853.496422  | 427.251849      | 836.469873     | 418.738575       |                |                  | 5  |
| 7  | 775.347709  | 388.177493      |                |                  | 757.337144     | 379.172210       | L    | 796.474958  | 398.741117      | 779.448409     | 390.227843       |                |                  | 4  |
| 8  | 872.400473  | 436.703875      |                |                  | 854.389908     | 427.698592       | P    | 683.390894  | 342.199085      | 666.364345     | 333.685811       |                |                  | 3  |
| 9  | 1311.625799 | 656.316538      | 1294.599250    | 647.803263       | 1293.615234    | 647.311255       | Q    | 586.338130  | 293.672703      | 569.311581     | 285.159429       |                |                  | 2  |
| 10 |             |                 |                |                  |                |                  | K    | 147.112804  | 74.060040       | 130.086255     | 65.546765        |                |                  | 1  |

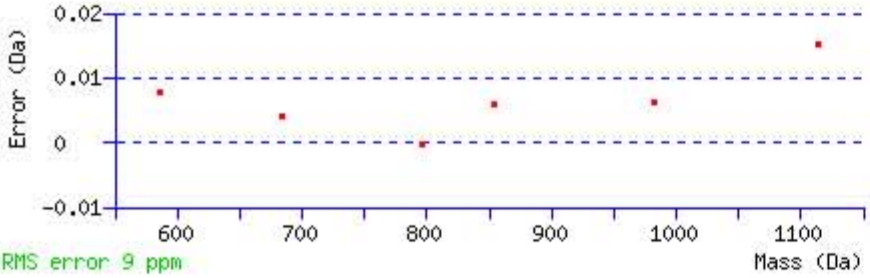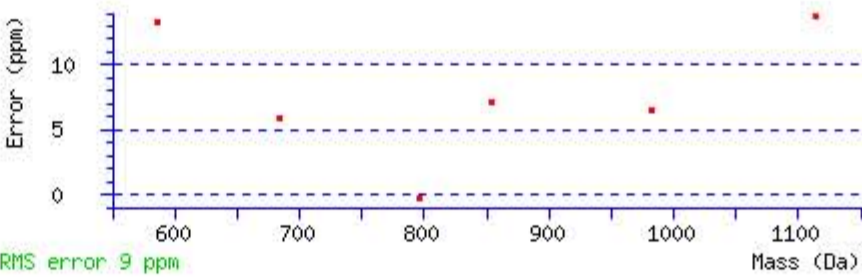

NCBI BLAST search of [ICAMEGLPQK](#)  
(Parameters: blastp, nr protein database, expect=20000, no filter, PAM30)  
Other BLAST [web gateways](#)

All matches to this query

| Score | Mr(calc):   | Delta     | Sequence                        |
|-------|-------------|-----------|---------------------------------|
| 38.0  | 1456.724030 | -0.001418 | <a href="#">ICAMEGLPQK</a>      |
| 5.3   | 1456.734390 | -0.011778 | <a href="#">QDQISASELR</a>      |
| 3.2   | 1456.740921 | -0.018309 | <a href="#">ATVPAGEGVSLEEAK</a> |
| 0.5   | 1456.723145 | -0.000533 | <a href="#">QQTLEAEEAK</a>      |

MATRIX

SCIENCE

Mascot Search Results

Peptide View

MS/MS Fragmentation of **FTDSENVQCQR**  
Found in **AFAM\_HUMAN**, Afamin OS=Homo sapiens GN=AFM PE=1 SV=1

Match to Query 37825: 1694.745788 from(848.380170,2+) rtinseconds(1553) index(2986)  
Title: Locus:1.1.1.1817.21 File:"2013-07-02 CLN FXIII 180 min 2nd F 1.wiff"  
Data file C:\Program Files (x86)\Matrix Science\Mascot Daemon\mgf\8 FXIII 180 min 2nd\mascot\_daemon\_merge.mgf

Click mouse within plot area to zoom in by factor of two about that point  
Or, 

Plot from

100

 to 

1700

 Da 

Full range

  
Label all possible matches ☐ Label matches used for scoring ☒

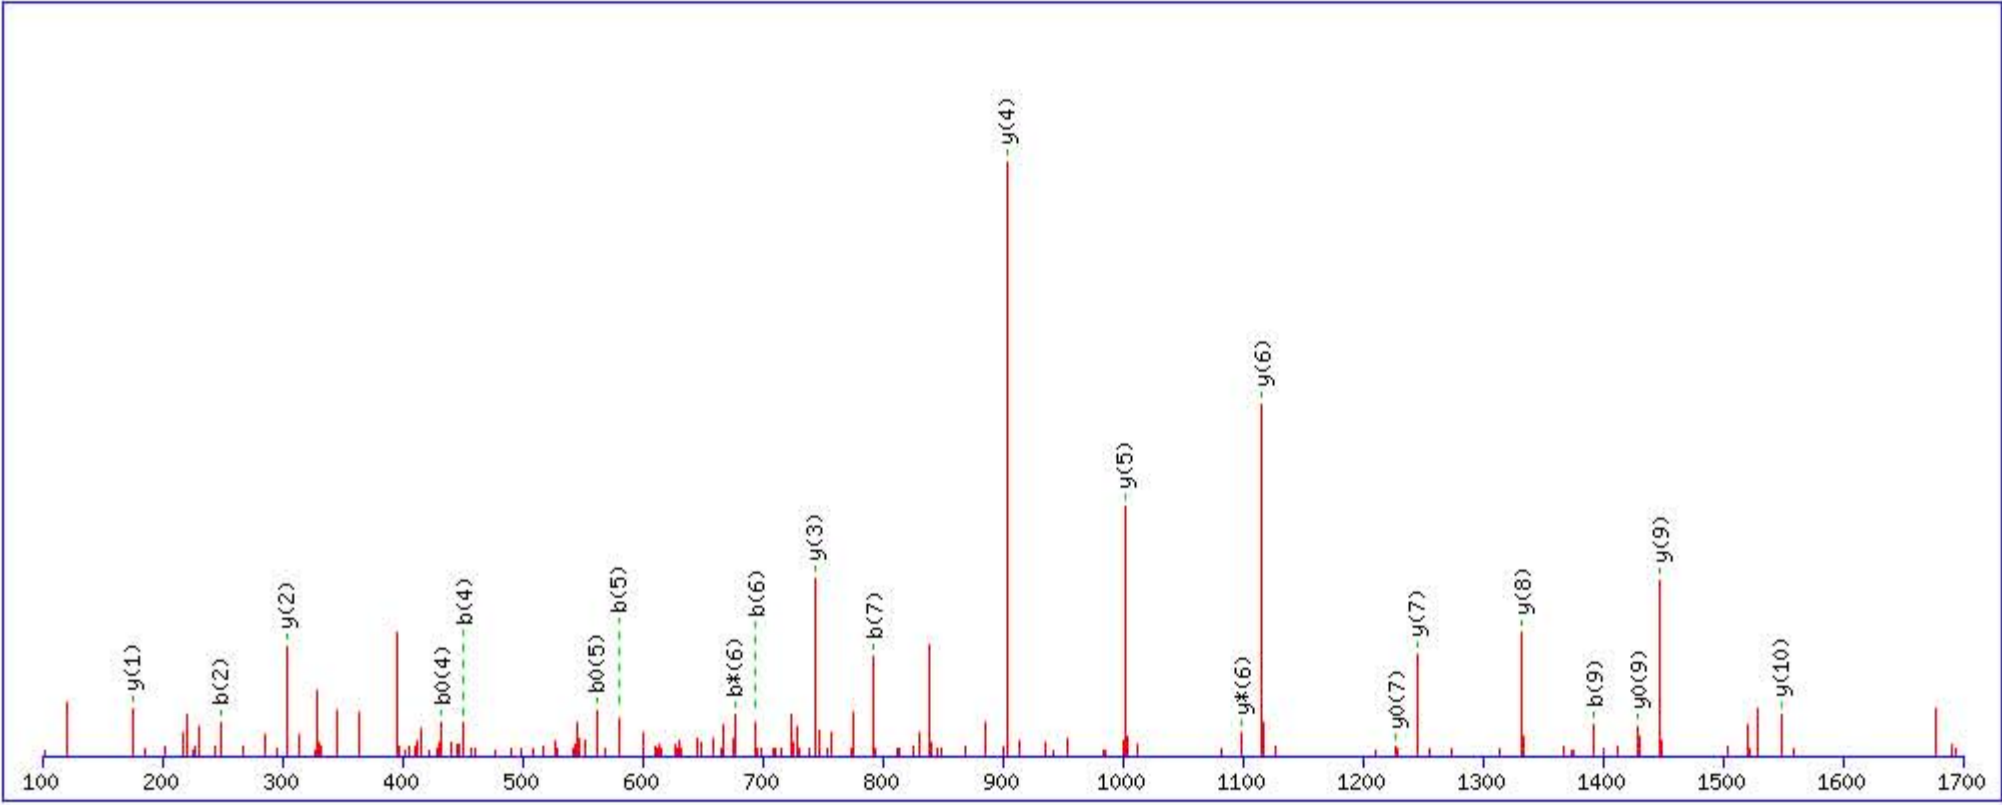

Monoisotopic mass of neutral peptide **Mr(calc):** 1694.739243  
Fixed modifications: Carbamidomethyl (C) (apply to specified residues or termini only)  
Variable modifications:  
Q9 : Biotin:Thermo-21345 (Q)  
Ions Score: 83 Expect: 2.6e-008  
Matches : 22/106 fragment ions using 32 most intense peaks [\(help\)](#)

| #  | b           | b <sup>++</sup> | b <sup>+</sup> | b <sup>++</sup> * | b <sup>0</sup> | b <sup>0++</sup> | Seq. | y           | y <sup>++</sup> | y <sup>+</sup> | y <sup>++</sup> * | y <sup>0</sup> | y <sup>0++</sup> | #  |
|----|-------------|-----------------|----------------|-------------------|----------------|------------------|------|-------------|-----------------|----------------|-------------------|----------------|------------------|----|
| 1  | 148.075690  | 74.541483       |                |                   |                |                  | F    |             |                 |                |                   |                |                  | 11 |
| 2  | 249.123369  | 125.065322      |                |                   | 231.112804     | 116.060040       | T    | 1548.678104 | 774.842690      | 1531.651555    | 766.329416        | 1530.667539    | 765.837408       | 10 |
| 3  | 364.150312  | 182.578794      |                |                   | 346.139747     | 173.573512       | D    | 1447.630425 | 724.318851      | 1430.603876    | 715.805576        | 1429.619860    | 715.313568       | 9  |
| 4  | 451.182340  | 226.094808      |                |                   | 433.171775     | 217.089526       | S    | 1332.603482 | 666.805379      | 1315.576933    | 658.292105        | 1314.592917    | 657.800097       | 8  |
| 5  | 580.224933  | 290.616105      |                |                   | 562.214368     | 281.610822       | E    | 1245.571454 | 623.289365      | 1228.544905    | 614.776091        | 1227.560889    | 614.284083       | 7  |
| 6  | 694.267860  | 347.637568      | 677.241311     | 339.124294        | 676.257295     | 338.632286       | N    | 1116.528861 | 558.768069      | 1099.502312    | 550.254794        | 1098.518296    | 549.762786       | 6  |
| 7  | 793.336274  | 397.171775      | 776.309725     | 388.658501        | 775.325709     | 388.166493       | V    | 1002.485934 | 501.746605      | 985.459385     | 493.233331        | 984.475369     | 492.741323       | 5  |
| 8  | 953.366923  | 477.187100      | 936.340374     | 468.673825        | 935.356358     | 468.181817       | C    | 903.417520  | 452.212398      | 886.390971     | 443.699124        | 885.406955     | 443.207116       | 4  |
| 9  | 1392.592249 | 696.799763      | 1375.565700    | 688.286488        | 1374.581684    | 687.794480       | Q    | 743.386871  | 372.197074      | 726.360322     | 363.683799        | 725.376306     | 363.191791       | 3  |
| 10 | 1521.634842 | 761.321059      | 1504.608293    | 752.807785        | 1503.624277    | 752.315777       | E    | 304.161545  | 152.584411      | 287.134996     | 144.071136        | 286.150980     | 143.579128       | 2  |
| 11 |             |                 |                |                   |                |                  | R    | 175.118952  | 88.063114       | 158.092403     | 79.549839         |                |                  | 1  |

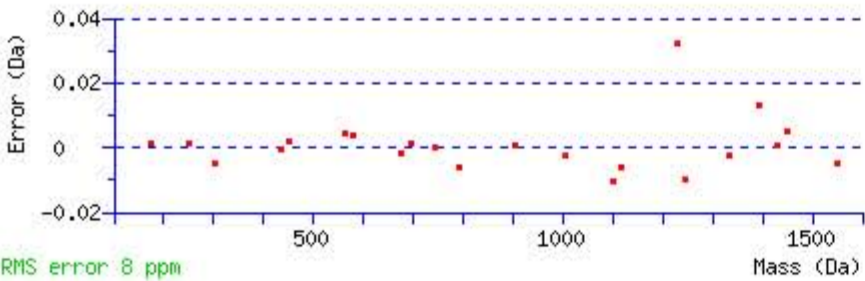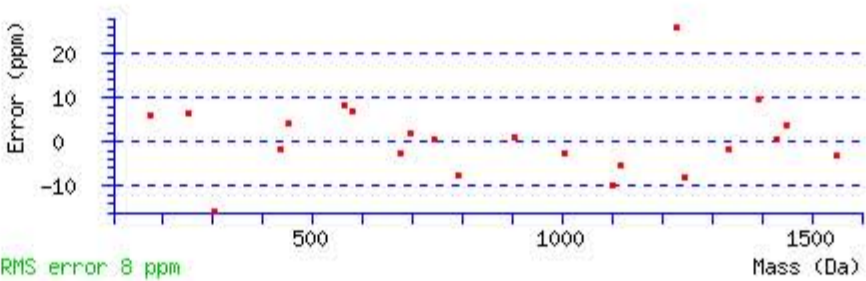

NCBI **BLAST** search of [FTDSENVQCQR](#)  
(Parameters: blastp, nr protein database, expect=20000, no filter, PAM30)  
Other BLAST [web gateways](#)

All matches to this query

| Score | Mr(calc):   | Delta     | Sequence                       |
|-------|-------------|-----------|--------------------------------|
| 83.1  | 1694.739243 | 0.006545  | <a href="#">FTDSENVQCQR</a>    |
| 9.5   | 1694.768219 | -0.022431 | <a href="#">EQSVDCRAGLEFER</a> |

MATRIX

SCIENCE

Mascot Search Results

Peptide View

MS/MS Fragmentation of **GQCIINSNKDDRPK**  
Found in **AFAM\_HUMAN**, Afamin OS=Homo sapiens GN=AFM PE=1 SV=1

Match to Query 43201: 1954.970056 from(489.749790,4+) rtinseconds(1389) index(1888)  
Title: Locus:1.1.1.1760.11 File:"2013-07-02 CLN FXIII 180 min 2nd F 1.wiff"  
Data file C:\Program Files (x86)\Matrix Science\Mascot Daemon\mgf\8 FXIII 180 min 2nd\mascot\_daemon\_merge.mgf

Click mouse within plot area to zoom in by factor of two about that point  
Or, 

Plot from

100

 to 

1200

 Da 

Full range

  
Label all possible matches ☐ Label matches used for scoring ☒

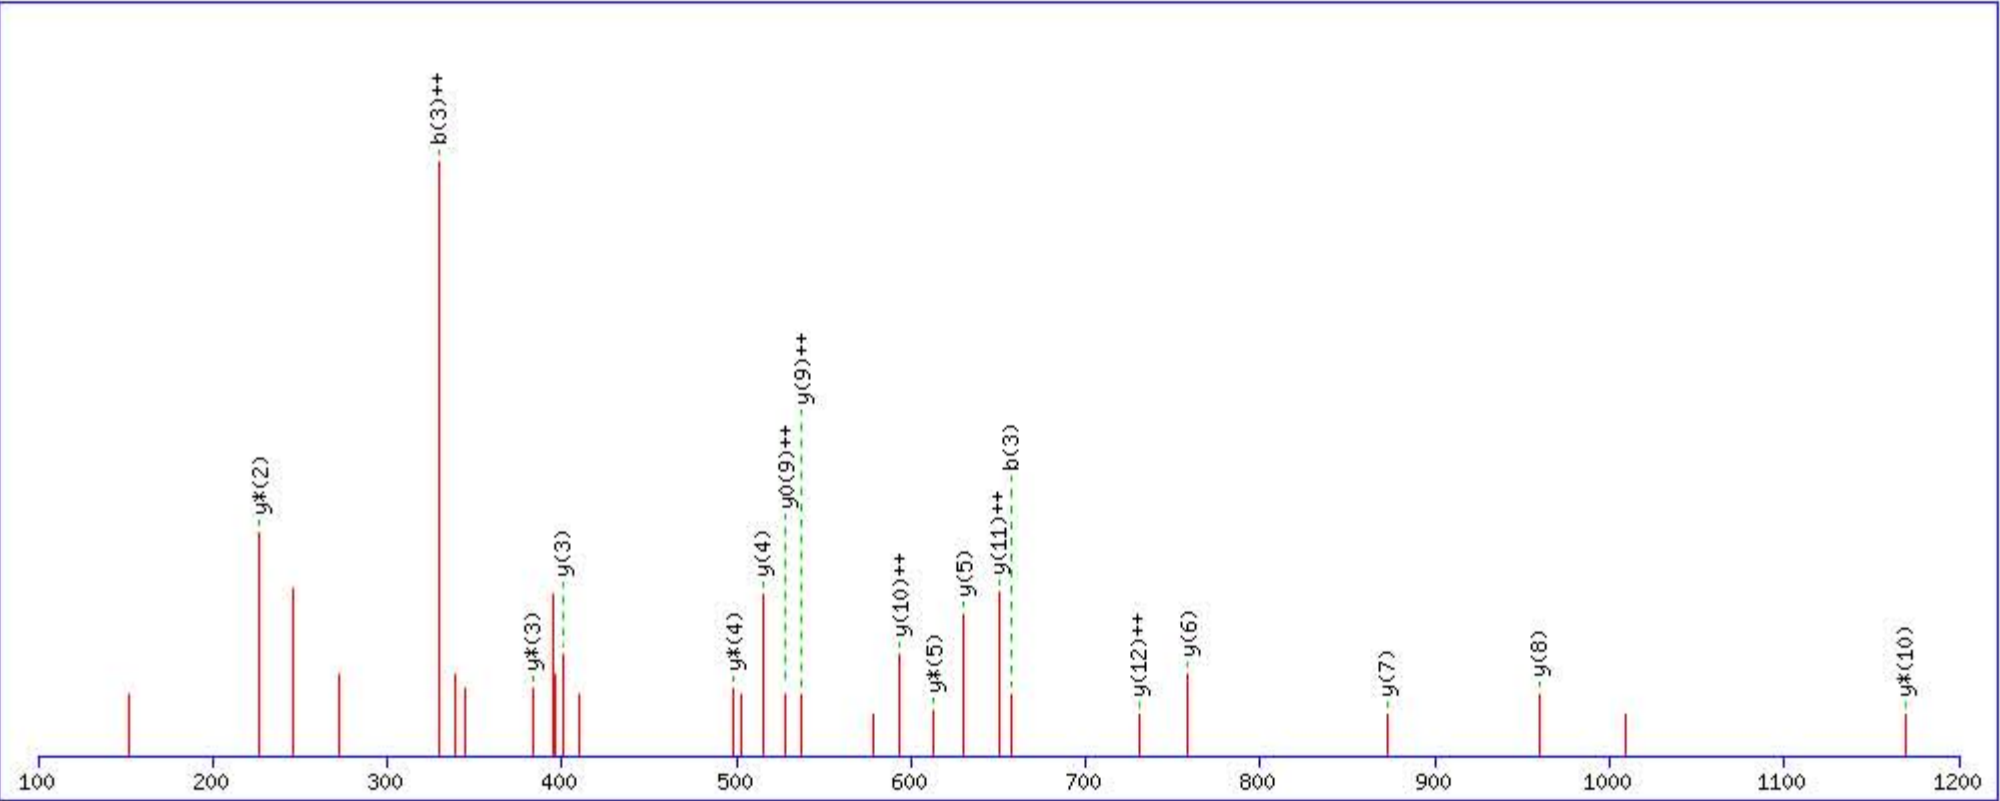

Monoisotopic mass of neutral peptide Mr(calc): 1954.971680  
Fixed modifications: Carbamidomethyl (C) (apply to specified residues or termini only)  
Variable modifications:  
Q2 : Biotin:Thermo-21345 (Q)  
Ions Score: 38 Expect: 0.00035  
Matches : 18/136 fragment ions using 29 most intense peaks [\(help\)](#)

| #  | b           | b <sup>++</sup> | b <sup>*</sup> | b <sup>++</sup> * | b <sup>0</sup> | b <sup>0++</sup> | Seq. | y           | y <sup>++</sup> | y <sup>*</sup> | y <sup>++</sup> * | y <sup>0</sup> | y <sup>0++</sup> | #  |
|----|-------------|-----------------|----------------|-------------------|----------------|------------------|------|-------------|-----------------|----------------|-------------------|----------------|------------------|----|
| 1  | 58.028740   | 29.518008       |                |                   |                |                  | G    |             |                 |                |                   |                |                  | 14 |
| 2  | 497.254066  | 249.130671      | 480.227517     | 240.617397        |                |                  | Q    | 1898.957513 | 949.982395      | 1881.930964    | 941.469120        | 1880.946948    | 940.977112       | 13 |
| 3  | 657.284715  | 329.145996      | 640.258166     | 320.632721        |                |                  | C    | 1459.732187 | 730.369732      | 1442.705638    | 721.856457        | 1441.721622    | 721.364449       | 12 |
| 4  | 770.368779  | 385.688028      | 753.342230     | 377.174753        |                |                  | I    | 1299.701538 | 650.354407      | 1282.674989    | 641.841133        | 1281.690973    | 641.349125       | 11 |
| 5  | 883.452843  | 442.230060      | 866.426294     | 433.716785        |                |                  | I    | 1186.617474 | 593.812375      | 1169.590925    | 585.299101        | 1168.606909    | 584.807093       | 10 |
| 6  | 997.495770  | 499.251523      | 980.469221     | 490.738249        |                |                  | N    | 1073.533410 | 537.270343      | 1056.506861    | 528.757069        | 1055.522845    | 528.265061       | 9  |
| 7  | 1084.527798 | 542.767537      | 1067.501249    | 534.254263        | 1066.517233    | 533.762255       | S    | 959.490483  | 480.248880      | 942.463934     | 471.735605        | 941.479918     | 471.243597       | 8  |
| 8  | 1198.570725 | 599.789001      | 1181.544176    | 591.275726        | 1180.560160    | 590.783718       | N    | 872.458455  | 436.732866      | 855.431906     | 428.219591        | 854.447890     | 427.727583       | 7  |
| 9  | 1326.665688 | 663.836482      | 1309.639139    | 655.323208        | 1308.655123    | 654.831200       | K    | 758.415528  | 379.711402      | 741.388979     | 371.198128        | 740.404963     | 370.706120       | 6  |
| 10 | 1441.692631 | 721.349954      | 1424.666082    | 712.836679        | 1423.682066    | 712.344671       | D    | 630.320565  | 315.663921      | 613.294016     | 307.150646        | 612.310000     | 306.658638       | 5  |
| 11 | 1556.719574 | 778.863425      | 1539.693025    | 770.350151        | 1538.709009    | 769.858143       | D    | 515.293622  | 258.150449      | 498.267073     | 249.637175        | 497.283057     | 249.145167       | 4  |
| 12 | 1712.820685 | 856.913981      | 1695.794136    | 848.400706        | 1694.810120    | 847.908698       | R    | 400.266679  | 200.636977      | 383.240130     | 192.123703        |                |                  | 3  |
| 13 | 1809.873449 | 905.440363      | 1792.846900    | 896.927088        | 1791.862884    | 896.435080       | P    | 244.165568  | 122.586422      | 227.139019     | 114.073148        |                |                  | 2  |
| 14 |             |                 |                |                   |                |                  | K    | 147.112804  | 74.060040       | 130.086255     | 65.546765         |                |                  | 1  |

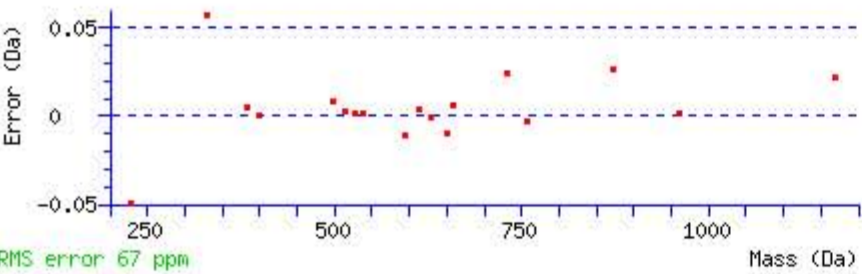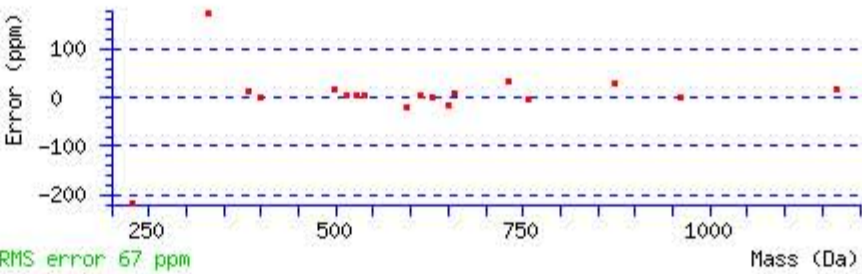

NCBI BLAST search of **GQCIINSNKDDRPK**  
(Parameters: blastp, nr protein database, expect=20000, no filter, PAM30)  
Other BLAST [web gateways](#)

All matches to this query

| Score | Mr(calc):   | Delta     | Sequence                          |
|-------|-------------|-----------|-----------------------------------|
| 38.0  | 1954.971680 | -0.001624 | <a href="#">GQCIINSNKDDRPK</a>    |
| 1.2   | 1954.964981 | 0.005075  | <a href="#">STAIRQTFFPGGDQFQR</a> |
| 1.0   | 1954.975708 | -0.005652 | <a href="#">IVLLMAYSGKGYHGMQR</a> |

MATRIX

SCIENCE

Mascot Search Results

Peptide View

MS/MS Fragmentation of **SCCEEQNKVNCLQTR**  
Found in **AFAM\_HUMAN**, Afamin OS=Homo sapiens GN=AFM PE=1 SV=1

Match to Query 49225: 2235.984432 from(746.335420,3+) rtinseconds(1438) index(2243)  
Title: Locus:1.1.1.1777.24 File:"2013-07-02 CLN FXIII 180 min 2nd F 1.wiff"  
Data file C:\Program Files (x86)\Matrix Science\Mascot Daemon\mgf\8 FXIII 180 min 2nd\mascot\_daemon\_merge.mgf

Click mouse within plot area to zoom in by factor of two about that point  
Or, 

Plot from

0

 to 

2400

 Da 

Full range

  
Label all possible matches ☐ Label matches used for scoring ☒

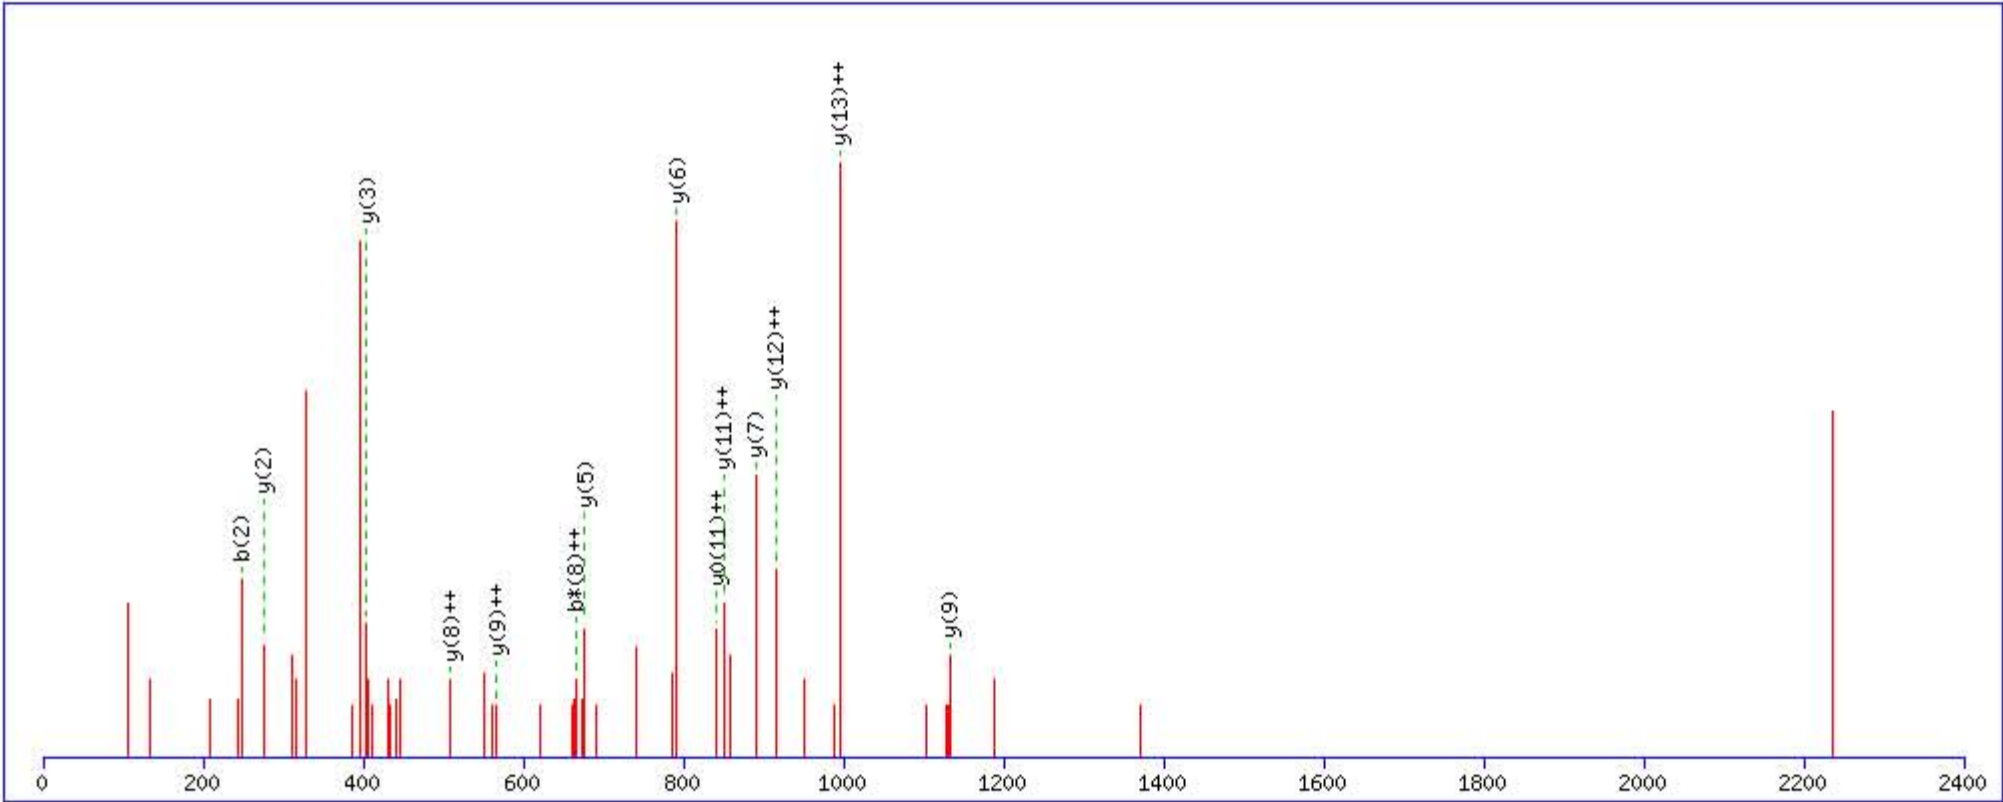

Monoisotopic mass of neutral peptide Mr(calc): 2235.985703  
Fixed modifications: Carbamidomethyl (C) (apply to specified residues or termini only)  
Variable modifications:  
Q6 : Biotin:Thermo-21345 (Q)  
Ions Score: 26 Expect: 0.013  
Matches : 14/156 fragment ions using 32 most intense peaks [\(help\)](#)

| #  | b           | b <sup>++</sup> | b <sup>*</sup> | b <sup>+++</sup> | b <sup>0</sup> | b <sup>0++</sup> | Seq. | y           | y <sup>++</sup> | y <sup>*</sup> | y <sup>+++</sup> | y <sup>0</sup> | y <sup>0++</sup> | #  |
|----|-------------|-----------------|----------------|------------------|----------------|------------------|------|-------------|-----------------|----------------|------------------|----------------|------------------|----|
| 1  | 88.039304   | 44.523290       |                |                  | 70.028739      | 35.518008        | S    |             |                 |                |                  |                |                  | 15 |
| 2  | 248.069953  | 124.538614      |                |                  | 230.059388     | 115.533332       | C    | 2149.960963 | 1075.484119     | 2132.934414    | 1066.970845      | 2131.950398    | 1066.478837      | 14 |
| 3  | 408.100602  | 204.553939      |                |                  | 390.090037     | 195.548657       | C    | 1989.930314 | 995.468795      | 1972.903765    | 986.955521       | 1971.919749    | 986.463512       | 13 |
| 4  | 537.143195  | 269.075236      |                |                  | 519.132630     | 260.069953       | E    | 1829.899665 | 915.453470      | 1812.873116    | 906.940196       | 1811.889100    | 906.448188       | 12 |
| 5  | 666.185788  | 333.596532      |                |                  | 648.175223     | 324.591250       | E    | 1700.857072 | 850.932174      | 1683.830523    | 842.418899       | 1682.846507    | 841.926891       | 11 |
| 6  | 1105.411114 | 553.209195      | 1088.384565    | 544.695921       | 1087.400549    | 544.203913       | Q    | 1571.814479 | 786.410877      | 1554.787930    | 777.897603       | 1553.803914    | 777.405595       | 10 |
| 7  | 1219.454041 | 610.230659      | 1202.427492    | 601.717384       | 1201.443476    | 601.225376       | N    | 1132.589153 | 566.798214      | 1115.562604    | 558.284940       | 1114.578588    | 557.792932       | 9  |
| 8  | 1347.549004 | 674.278140      | 1330.522455    | 665.764866       | 1329.538439    | 665.272858       | K    | 1018.546226 | 509.776751      | 1001.519677    | 501.263476       | 1000.535661    | 500.771468       | 8  |
| 9  | 1446.617418 | 723.812347      | 1429.590869    | 715.299073       | 1428.606853    | 714.807065       | V    | 890.451263  | 445.729269      | 873.424714     | 437.215995       | 872.440698     | 436.723987       | 7  |
| 10 | 1560.660345 | 780.833811      | 1543.633796    | 772.320536       | 1542.649780    | 771.828528       | N    | 791.382849  | 396.195062      | 774.356300     | 387.681788       | 773.372284     | 387.189780       | 6  |
| 11 | 1720.690994 | 860.849135      | 1703.664445    | 852.335861       | 1702.680429    | 851.843853       | C    | 677.339922  | 339.173599      | 660.313373     | 330.660324       | 659.329357     | 330.168316       | 5  |
| 12 | 1833.775058 | 917.391167      | 1816.748509    | 908.877893       | 1815.764493    | 908.385885       | L    | 517.309273  | 259.158274      | 500.282724     | 250.645000       | 499.298708     | 250.152992       | 4  |
| 13 | 1961.833636 | 981.420456      | 1944.807087    | 972.907182       | 1943.823071    | 972.415174       | Q    | 404.225209  | 202.616242      | 387.198660     | 194.102968       | 386.214644     | 193.610960       | 3  |
| 14 | 2062.881315 | 1031.944295     | 2045.854766    | 1023.431021      | 2044.870750    | 1022.939013      | T    | 276.166631  | 138.586953      | 259.140082     | 130.073679       | 258.156066     | 129.581671       | 2  |
| 15 |             |                 |                |                  |                |                  | R    | 175.118952  | 88.063114       | 158.092403     | 79.549839        |                |                  | 1  |

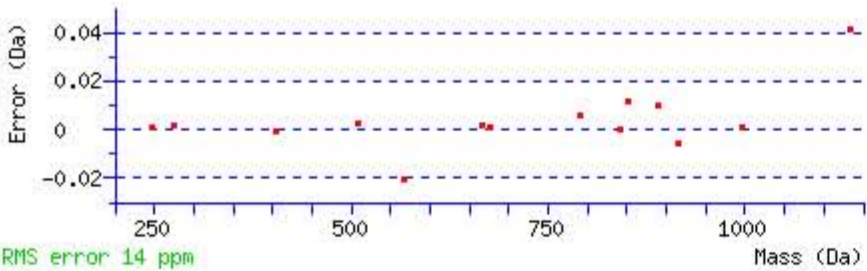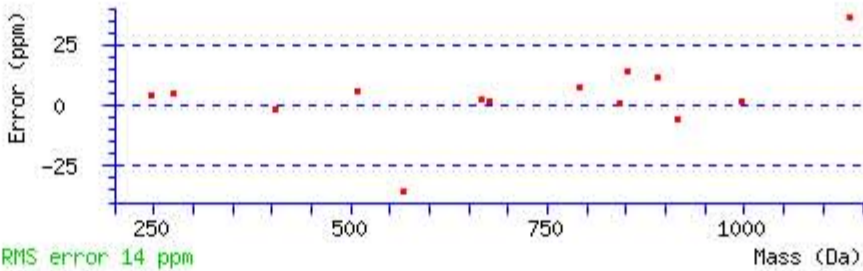

NCBI BLAST search of [SCCEEQNKVNCLQTR](#)  
(Parameters: blastp, nr protein database, expect=20000, no filter, PAM30)  
Other BLAST [web gateways](#)

All matches to this query

| Score | Mr(calc):   | Delta     | Sequence                        |
|-------|-------------|-----------|---------------------------------|
| 26.1  | 2235.985703 | -0.001271 | <a href="#">SCCEEQNKVNCLQTR</a> |
| 0.1   | 2235.985703 | -0.001271 | <a href="#">SCCEEQNKVNCLQTR</a> |

M

A

T

R

I

X

S

C

I

E

N

C

E

Mascot Search Results

Peptide View

MS/MS Fragmentation of **SCCEEQNKVNCLQTR**  
Found in **AFAM\_HUMAN**, Afamin OS=Homo sapiens GN=AFM PE=1 SV=1

Match to Query 54981: 2547.172122 from(850.064650,3+) rtinseconds(1764) index(4184)  
Title: Locus:1.1.1.1891.22 File:"2013-07-02 CLN FXIII 180 min 2nd F 1.wiff"  
Data file C:\Program Files (x86)\Matrix Science\Mascot Daemon\mgf\8 FXIII 180 min 2nd\mascot\_daemon\_merge.mgf

Click mouse within plot area to zoom in by factor of two about that point  
Or, 

Plot from

100

 to 

1700

 Da 

Full range

  
Label all possible matches ☐ Label matches used for scoring ☒

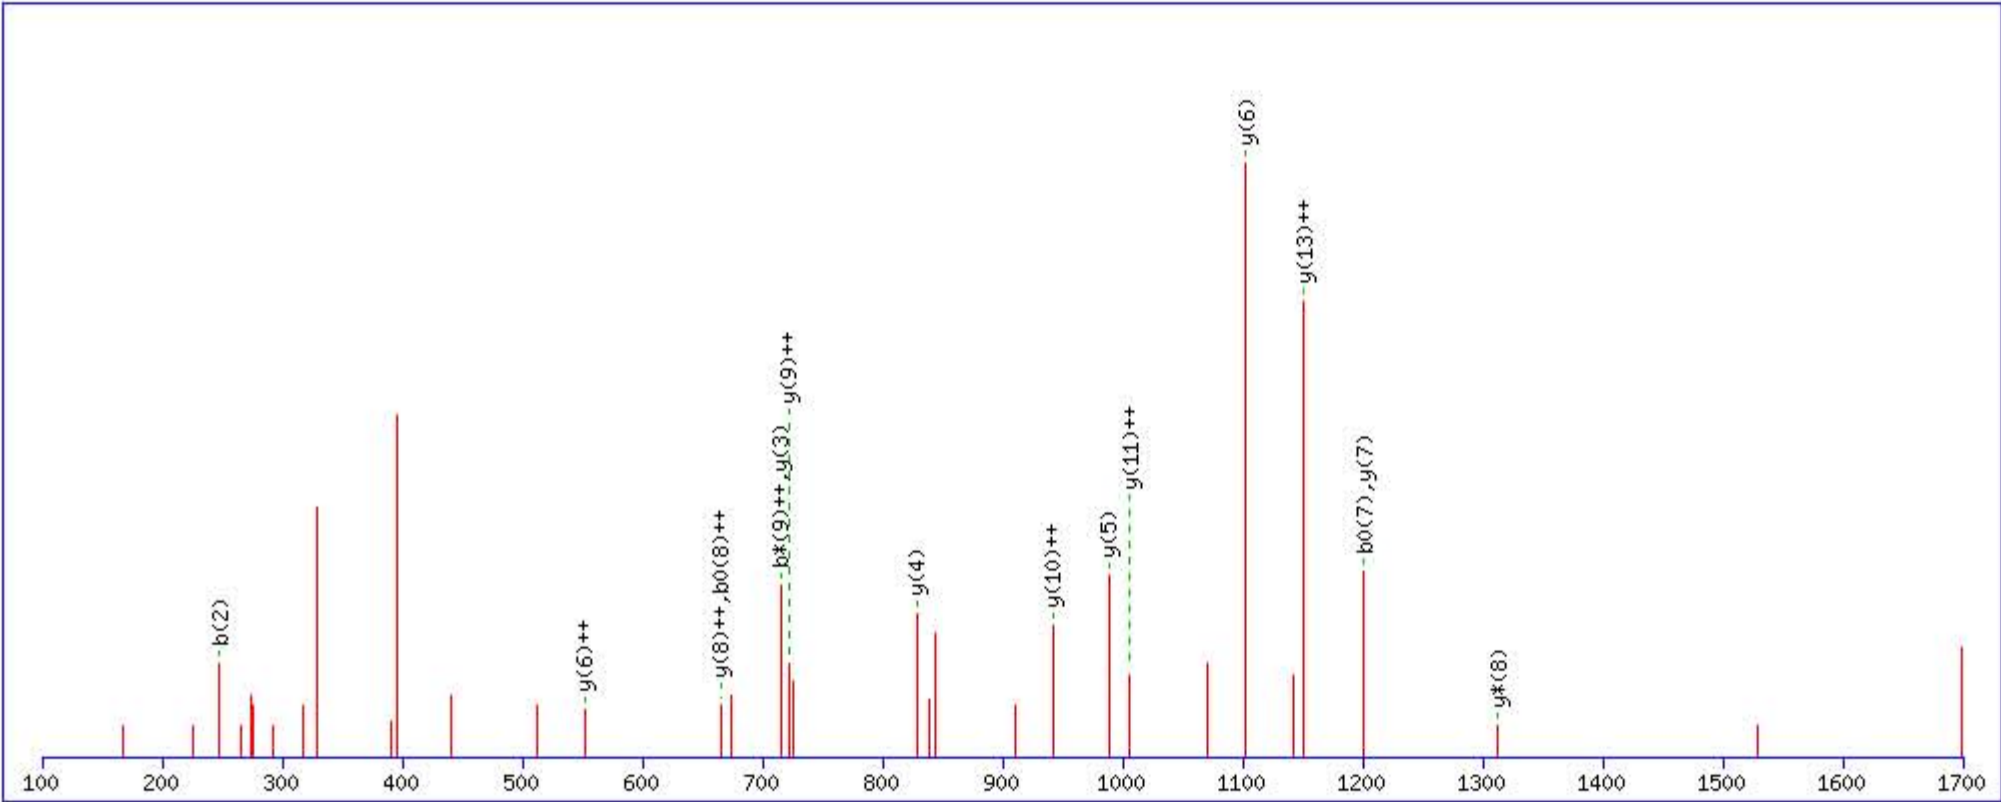

Monoisotopic mass of neutral peptide Mr(calc): 2547.152451  
Fixed modifications: Carbamidomethyl (C) (apply to specified residues or termini only)  
Variable modifications:  
Q6 : Biotin:Thermo-21345 (Q)  
Q13 : Biotin:Thermo-21345 (Q)  
Ions Score: 36 Expect: 0.00084  
Matches : 16/156 fragment ions using 23 most intense peaks [\(help\)](#)

| #  | b           | b <sup>++</sup> | b <sup>*</sup> | b <sup>+++</sup> | b <sup>0</sup> | b <sup>0++</sup> | Seq. | y           | y <sup>++</sup> | y <sup>*</sup> | y <sup>+++</sup> | y <sup>0</sup> | y <sup>0++</sup> | #  |
|----|-------------|-----------------|----------------|------------------|----------------|------------------|------|-------------|-----------------|----------------|------------------|----------------|------------------|----|
| 1  | 88.039304   | 44.523290       |                |                  | 70.028739      | 35.518008        | S    |             |                 |                |                  |                |                  | 15 |
| 2  | 248.069953  | 124.538614      |                |                  | 230.059388     | 115.533332       | C    | 2461.127711 | 1231.067493     | 2444.101162    | 1222.554219      | 2443.117146    | 1222.062211      | 14 |
| 3  | 408.100602  | 204.553939      |                |                  | 390.090037     | 195.548657       | C    | 2301.097062 | 1151.052169     | 2284.070513    | 1142.538894      | 2283.086497    | 1142.046886      | 13 |
| 4  | 537.143195  | 269.075236      |                |                  | 519.132630     | 260.069953       | E    | 2141.066413 | 1071.036844     | 2124.039864    | 1062.523570      | 2123.055848    | 1062.031562      | 12 |
| 5  | 666.185788  | 333.596532      |                |                  | 648.175223     | 324.591250       | E    | 2012.023820 | 1006.515548     | 1994.997271    | 998.002274       | 1994.013255    | 997.510265       | 11 |
| 6  | 1105.411114 | 553.209195      | 1088.384565    | 544.695921       | 1087.400549    | 544.203913       | Q    | 1882.981227 | 941.994252      | 1865.954678    | 933.480977       | 1864.970662    | 932.988969       | 10 |
| 7  | 1219.454041 | 610.230659      | 1202.427492    | 601.717384       | 1201.443476    | 601.225376       | N    | 1443.755901 | 722.381588      | 1426.729352    | 713.868314       | 1425.745336    | 713.376306       | 9  |
| 8  | 1347.549004 | 674.278140      | 1330.522455    | 665.764866       | 1329.538439    | 665.272858       | K    | 1329.712974 | 665.360125      | 1312.686425    | 656.846850       | 1311.702409    | 656.354842       | 8  |
| 9  | 1446.617418 | 723.812347      | 1429.590869    | 715.299073       | 1428.606853    | 714.807065       | V    | 1201.618011 | 601.312643      | 1184.591462    | 592.799369       | 1183.607446    | 592.307361       | 7  |
| 10 | 1560.660345 | 780.833811      | 1543.633796    | 772.320536       | 1542.649780    | 771.828528       | N    | 1102.549597 | 551.778436      | 1085.523048    | 543.265162       | 1084.539032    | 542.773154       | 6  |
| 11 | 1720.690994 | 860.849135      | 1703.664445    | 852.335861       | 1702.680429    | 851.843853       | C    | 988.506670  | 494.756973      | 971.480121     | 486.243698       | 970.496105     | 485.751690       | 5  |
| 12 | 1833.775058 | 917.391167      | 1816.748509    | 908.877893       | 1815.764493    | 908.385885       | L    | 828.476021  | 414.741648      | 811.449472     | 406.228374       | 810.465456     | 405.736366       | 4  |
| 13 | 2273.000384 | 1137.003830     | 2255.973835    | 1128.490555      | 2254.989819    | 1127.998547      | Q    | 715.391957  | 358.199616      | 698.365408     | 349.686342       | 697.381392     | 349.194334       | 3  |
| 14 | 2374.048063 | 1187.527669     | 2357.021514    | 1179.014395      | 2356.037498    | 1178.522387      | T    | 276.166631  | 138.586953      | 259.140082     | 130.073679       | 258.156066     | 129.581671       | 2  |
| 15 |             |                 |                |                  |                |                  | R    | 175.118952  | 88.063114       | 158.092403     | 79.549839        |                |                  | 1  |

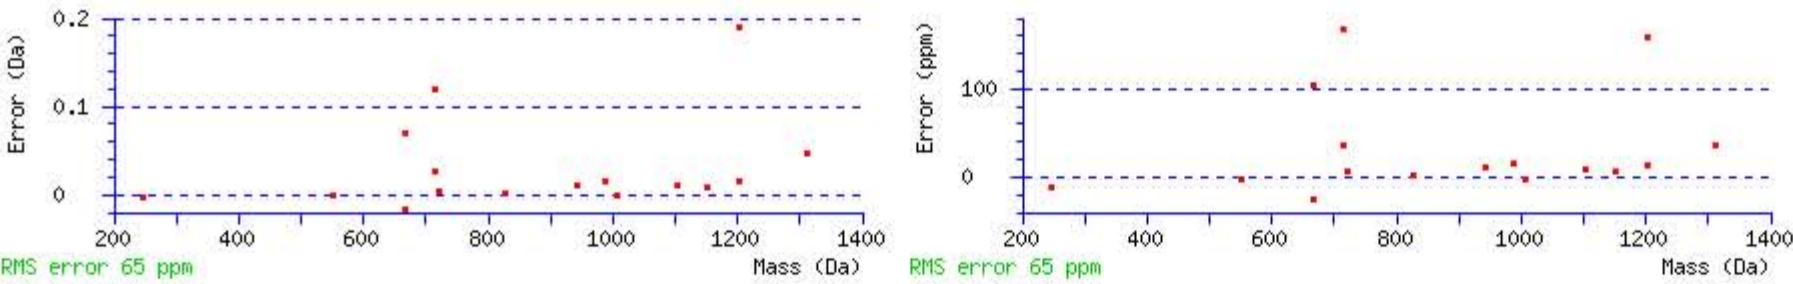

NCBI BLAST search of [SCCEEQNKVNCLQTR](#)  
(Parameters: blastp, nr protein database, expect=20000, no filter, PAM30)  
Other BLAST [web gateways](#)

All matches to this query

| Score | Mr(calc):   | Delta     | Sequence                                  |
|-------|-------------|-----------|-------------------------------------------|
| 36.4  | 2547.152451 | 0.019671  | <a href="#">SCCEEQNKVNCLQTR</a>           |
| 3.5   | 2547.197632 | -0.025510 | <a href="#">LNQLESSLWEEASDEGTLGGSP TK</a> |
| 2.0   | 2547.201859 | -0.029737 | <a href="#">ASKYSGSQMEILANQLTGLMDMK</a>   |
| 2.0   | 2547.201859 | -0.029737 | <a href="#">ASKYSGSQMEILANQLTGLMDMK</a>   |

MATRIX

SCIENCE

Mascot Search Results

Peptide View

MS/MS Fragmentation of **HQFLLTGDTQGR**  
Found in **A1BG\_HUMAN**, Alpha-1B-glycoprotein OS=Homo sapiens GN=A1BG PE=1 SV=4

Match to Query 37601: 1682.860002 from(561.960610,3+) rtinseconds(1936) index(5255)  
Title: Locus:1.1.1.1951.8 File:"2013-07-02 CLN FXIII 180 min 2nd F 1.wiff"  
Data file C:\Program Files (x86)\Matrix Science\Mascot Daemon\mgf\8 FXIII 180 min 2nd\mascot\_daemon\_merge.mgf

Click mouse within plot area to zoom in by factor of two about that point  
Or,   to  Da   
Label all possible matches ☐ Label matches used for scoring ☒

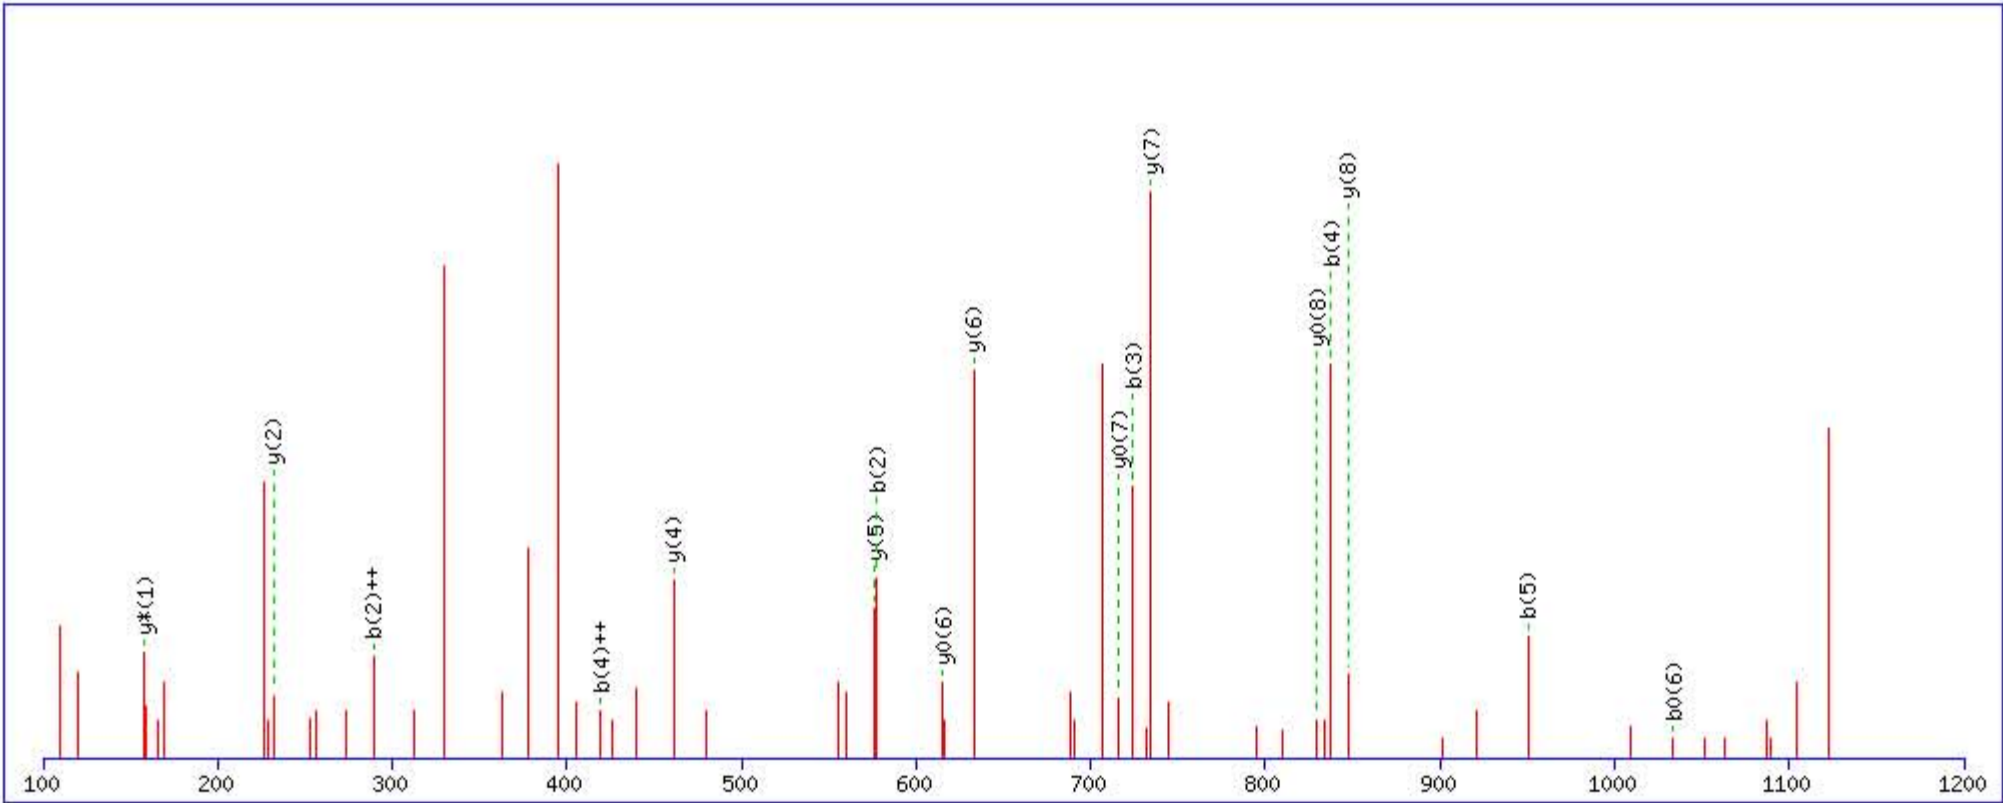

Monoisotopic mass of neutral peptide Mr(calc): 1682.856277  
Fixed modifications: Carbamidomethyl (C) (apply to specified residues or termini only)  
Variable modifications:  
Q2 : Biotin:Thermo-21345 (Q)  
Ions Score: 30 Expect: 0.0018  
Matches : 17/114 fragment ions using 31 most intense peaks ([help](#))

| #  | b           | b <sup>++</sup> | b <sup>*</sup> | b <sup>*++</sup> | b <sup>0</sup> | b <sup>0++</sup> | Seq. | y           | y <sup>++</sup> | y <sup>*</sup> | y <sup>*++</sup> | y <sup>0</sup> | y <sup>0++</sup> | #  |
|----|-------------|-----------------|----------------|------------------|----------------|------------------|------|-------------|-----------------|----------------|------------------|----------------|------------------|----|
| 1  | 138.066188  | 69.536732       |                |                  |                |                  | H    |             |                 |                |                  |                |                  | 12 |
| 2  | 577.291514  | 289.149395      | 560.264965     | 280.636121       |                |                  | Q    | 1546.804627 | 773.905951      | 1529.778078    | 765.392677       | 1528.794062    | 764.900669       | 11 |
| 3  | 724.359928  | 362.683602      | 707.333379     | 354.170327       |                |                  | F    | 1107.579301 | 554.293288      | 1090.552752    | 545.780014       | 1089.568736    | 545.288006       | 10 |
| 4  | 837.443992  | 419.225634      | 820.417443     | 410.712359       |                |                  | L    | 960.510887  | 480.759081      | 943.484338     | 472.245807       | 942.500322     | 471.753799       | 9  |
| 5  | 950.528056  | 475.767666      | 933.501507     | 467.254392       |                |                  | L    | 847.426823  | 424.217049      | 830.400274     | 415.703775       | 829.416258     | 415.211767       | 8  |
| 6  | 1051.575735 | 526.291505      | 1034.549186    | 517.778231       | 1033.565170    | 517.286223       | T    | 734.342759  | 367.675017      | 717.316210     | 359.161743       | 716.332194     | 358.669735       | 7  |
| 7  | 1108.597199 | 554.802237      | 1091.570650    | 546.288963       | 1090.586634    | 545.796955       | G    | 633.295080  | 317.151178      | 616.268531     | 308.637903       | 615.284515     | 308.145895       | 6  |
| 8  | 1223.624142 | 612.315709      | 1206.597593    | 603.802435       | 1205.613577    | 603.310426       | D    | 576.273616  | 288.640446      | 559.247067     | 280.127171       | 558.263051     | 279.635163       | 5  |
| 9  | 1324.671821 | 662.839548      | 1307.645272    | 654.326274       | 1306.661256    | 653.834266       | T    | 461.246673  | 231.126974      | 444.220124     | 222.613700       | 443.236108     | 222.121692       | 4  |
| 10 | 1452.730399 | 726.868837      | 1435.703850    | 718.355563       | 1434.719834    | 717.863555       | Q    | 360.198994  | 180.603135      | 343.172445     | 172.089860       |                |                  | 3  |
| 11 | 1509.751863 | 755.379569      | 1492.725314    | 746.866295       | 1491.741298    | 746.374287       | G    | 232.140416  | 116.573846      | 215.113867     | 108.060571       |                |                  | 2  |
| 12 |             |                 |                |                  |                |                  | R    | 175.118952  | 88.063114       | 158.092403     | 79.549839        |                |                  | 1  |

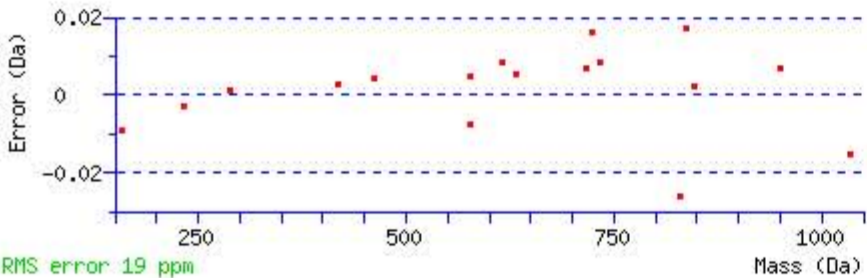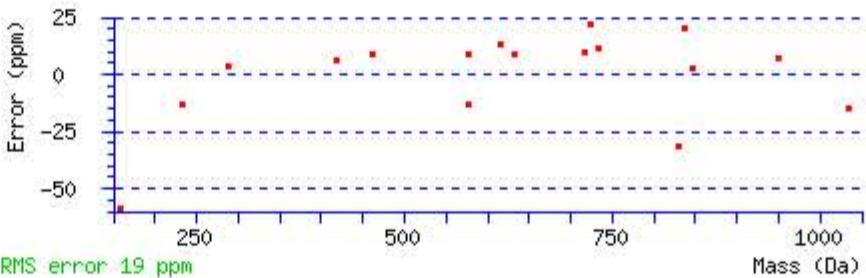

NCBI BLAST search of [HQFLLTGDTQGR](#)  
(Parameters: blastp, nr protein database, expect=20000, no filter, PAM30)  
Other BLAST [web gateways](#)

All matches to this query

| Score | Mr(calc):   | Delta    | Sequence                     |
|-------|-------------|----------|------------------------------|
| 29.9  | 1682.856277 | 0.003725 | <a href="#">HQFLLTGDTQGR</a> |
| 0.6   | 1682.845032 | 0.014970 | <a href="#">QFHLTDDDLLR</a>  |

MATRIX

SCIENCE

Mascot Search Results

Peptide View

MS/MS Fragmentation of **HQFLLTGDTQGR**  
Found in **A1BG\_HUMAN**, Alpha-1B-glycoprotein OS=Homo sapiens GN=A1BG PE=1 SV=4

Match to Query 37605: 1682.863902 from(561.961910,3+) rtinseconds(1873) index(4722)  
Title: Locus:1.1.1.1929.21 File:"2013-07-02 CLN FXIII 180 min 2nd F 1.wiff"  
Data file C:\Program Files (x86)\Matrix Science\Mascot Daemon\mgf\8 FXIII 180 min 2nd\mascot\_daemon\_merge.mgf

Click mouse within plot area to zoom in by factor of two about that point  
Or,   to  Da   
Label all possible matches ☐ Label matches used for scoring ☒

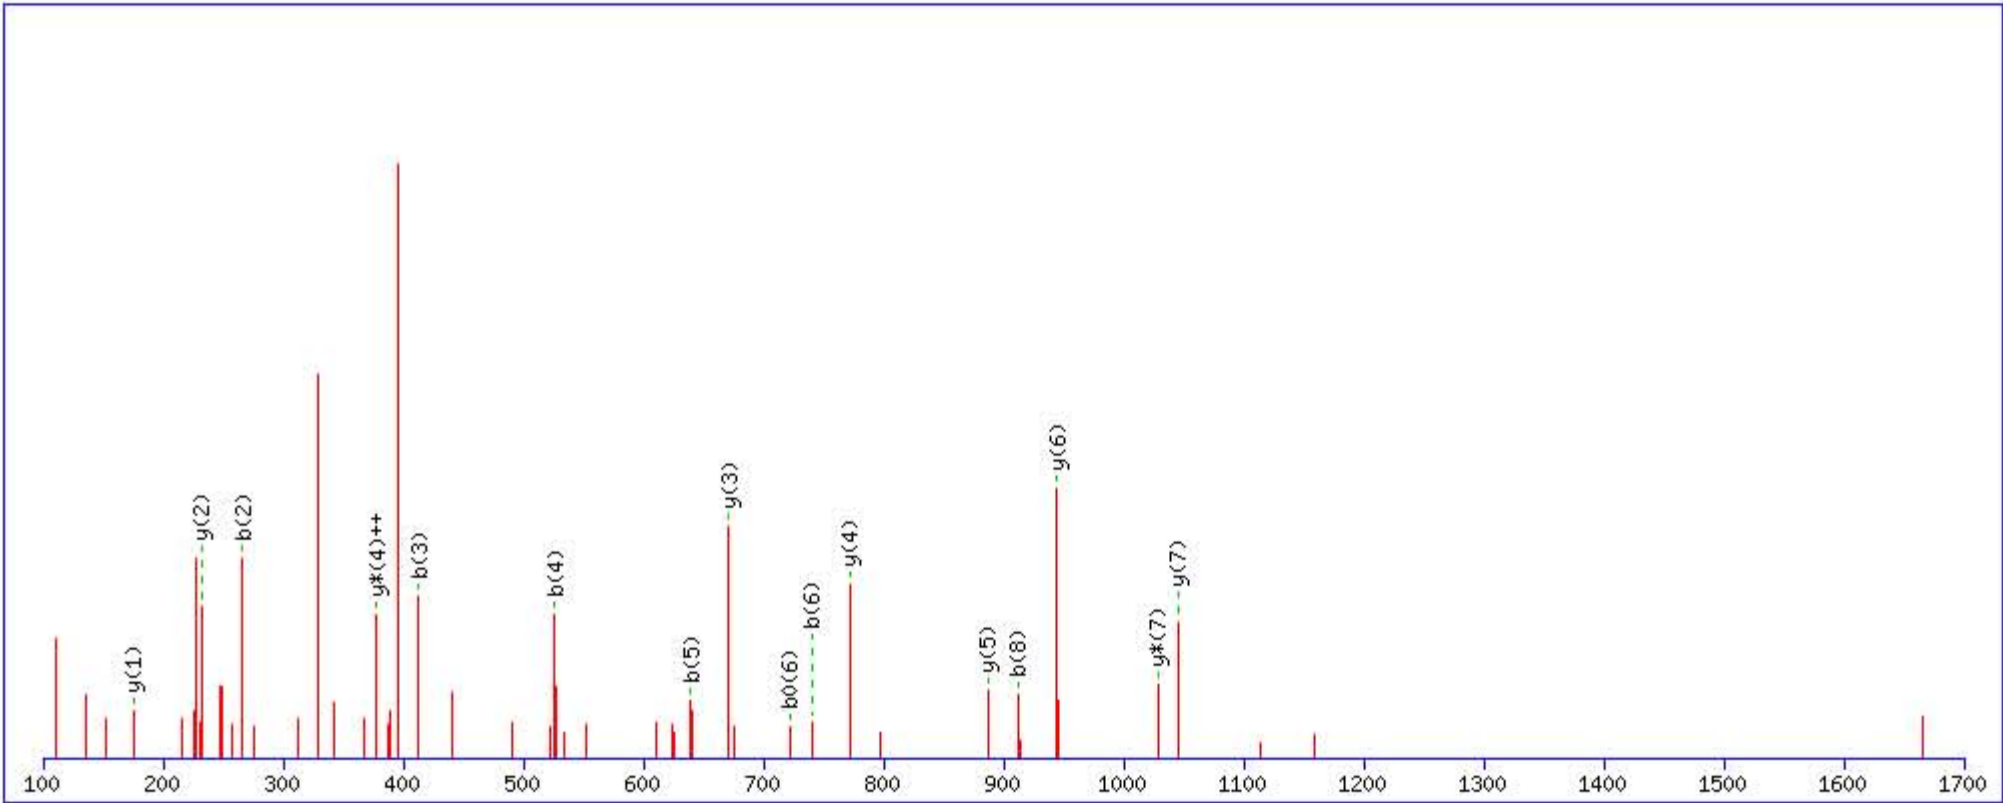

Monoisotopic mass of neutral peptide Mr(calc): 1682.856277  
Fixed modifications: Carbamidomethyl (C) (apply to specified residues or termini only)  
Variable modifications:  
Q10 : Biotin:Thermo-21345 (Q)  
Ions Score: 45 Expect: 0.00027  
Matches : 16/114 fragment ions using 31 most intense peaks ([help](#))

| #  | b           | b <sup>++</sup> | b <sup>*</sup> | b <sup>*++</sup> | b <sup>0</sup> | b <sup>0++</sup> | Seq. | y           | y <sup>++</sup> | y <sup>*</sup> | y <sup>*++</sup> | y <sup>0</sup> | y <sup>0++</sup> | #  |
|----|-------------|-----------------|----------------|------------------|----------------|------------------|------|-------------|-----------------|----------------|------------------|----------------|------------------|----|
| 1  | 138.066188  | 69.536732       |                |                  |                |                  | H    |             |                 |                |                  |                |                  | 12 |
| 2  | 266.124766  | 133.566021      | 249.098217     | 125.052746       |                |                  | Q    | 1546.804627 | 773.905952      | 1529.778078    | 765.392677       | 1528.794062    | 764.900669       | 11 |
| 3  | 413.193180  | 207.100228      | 396.166631     | 198.586953       |                |                  | F    | 1418.746049 | 709.876663      | 1401.719500    | 701.363388       | 1400.735484    | 700.871380       | 10 |
| 4  | 526.277244  | 263.642260      | 509.250695     | 255.128986       |                |                  | L    | 1271.677635 | 636.342456      | 1254.651086    | 627.829181       | 1253.667070    | 627.337173       | 9  |
| 5  | 639.361308  | 320.184292      | 622.334759     | 311.671018       |                |                  | L    | 1158.593571 | 579.800424      | 1141.567022    | 571.287149       | 1140.583006    | 570.795141       | 8  |
| 6  | 740.408987  | 370.708132      | 723.382438     | 362.194857       | 722.398422     | 361.702849       | T    | 1045.509507 | 523.258392      | 1028.482958    | 514.745117       | 1027.498942    | 514.253109       | 7  |
| 7  | 797.430451  | 399.218864      | 780.403902     | 390.705589       | 779.419886     | 390.213581       | G    | 944.461828  | 472.734552      | 927.435279     | 464.221278       | 926.451263     | 463.729270       | 6  |
| 8  | 912.457394  | 456.732335      | 895.430845     | 448.219061       | 894.446829     | 447.727053       | D    | 887.440364  | 444.223820      | 870.413815     | 435.710546       | 869.429799     | 435.218538       | 5  |
| 9  | 1013.505073 | 507.256175      | 996.478524     | 498.742900       | 995.494508     | 498.250892       | T    | 772.413421  | 386.710349      | 755.386872     | 378.197074       | 754.402856     | 377.705066       | 4  |
| 10 | 1452.730399 | 726.868838      | 1435.703850    | 718.355563       | 1434.719834    | 717.863555       | Q    | 671.365742  | 336.186509      | 654.339193     | 327.673235       |                |                  | 3  |
| 11 | 1509.751863 | 755.379570      | 1492.725314    | 746.866295       | 1491.741298    | 746.374287       | G    | 232.140416  | 116.573846      | 215.113867     | 108.060571       |                |                  | 2  |
| 12 |             |                 |                |                  |                |                  | R    | 175.118952  | 88.063114       | 158.092403     | 79.549839        |                |                  | 1  |

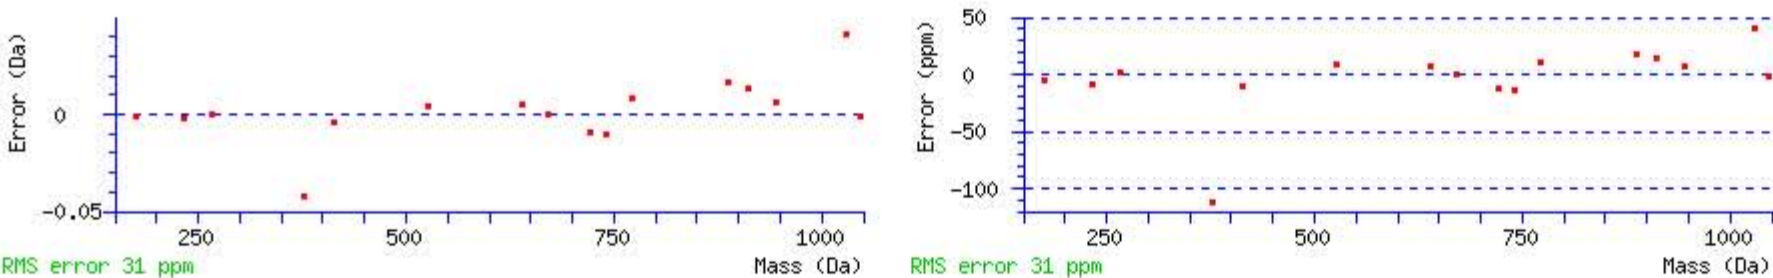

NCBI BLAST search of [HQFLLTGDTQGR](#)  
(Parameters: blastp, nr protein database, expect=20000, no filter, PAM30)  
Other BLAST [web gateways](#)

All matches to this query

| Score | Mr(calc):   | Delta    | Sequence                       |
|-------|-------------|----------|--------------------------------|
| 45.0  | 1682.856277 | 0.007625 | <a href="#">HQFLLTGDTQGR</a>   |
| 7.0   | 1682.856232 | 0.007670 | <a href="#">RWPLMIDPQSQANK</a> |

MATRIX

SCIENCE

Mascot Search Results

Peptide View

MS/MS Fragmentation of **VTLTCVAPLSGVDFQLR**  
Found in **A1BG\_HUMAN**, Alpha-1B-glycoprotein OS=Homo sapiens GN=A1BG PE=1 SV=4

Match to Query 48242: 2186.172402 from(729.731410,3+) rtinseconds(2726) index(9492)  
Title: Locus:1.1.1.2226.8 File:"2013-07-02 CLN FXIII 180 min 2nd F 1.wiff"  
Data file C:\Program Files (x86)\Matrix Science\Mascot Daemon\mgf\8 FXIII 180 min 2nd\mascot\_daemon\_merge.mgf

Click mouse within plot area to zoom in by factor of two about that point  
Or,   to  Da   
Label all possible matches ☐ Label matches used for scoring ☒

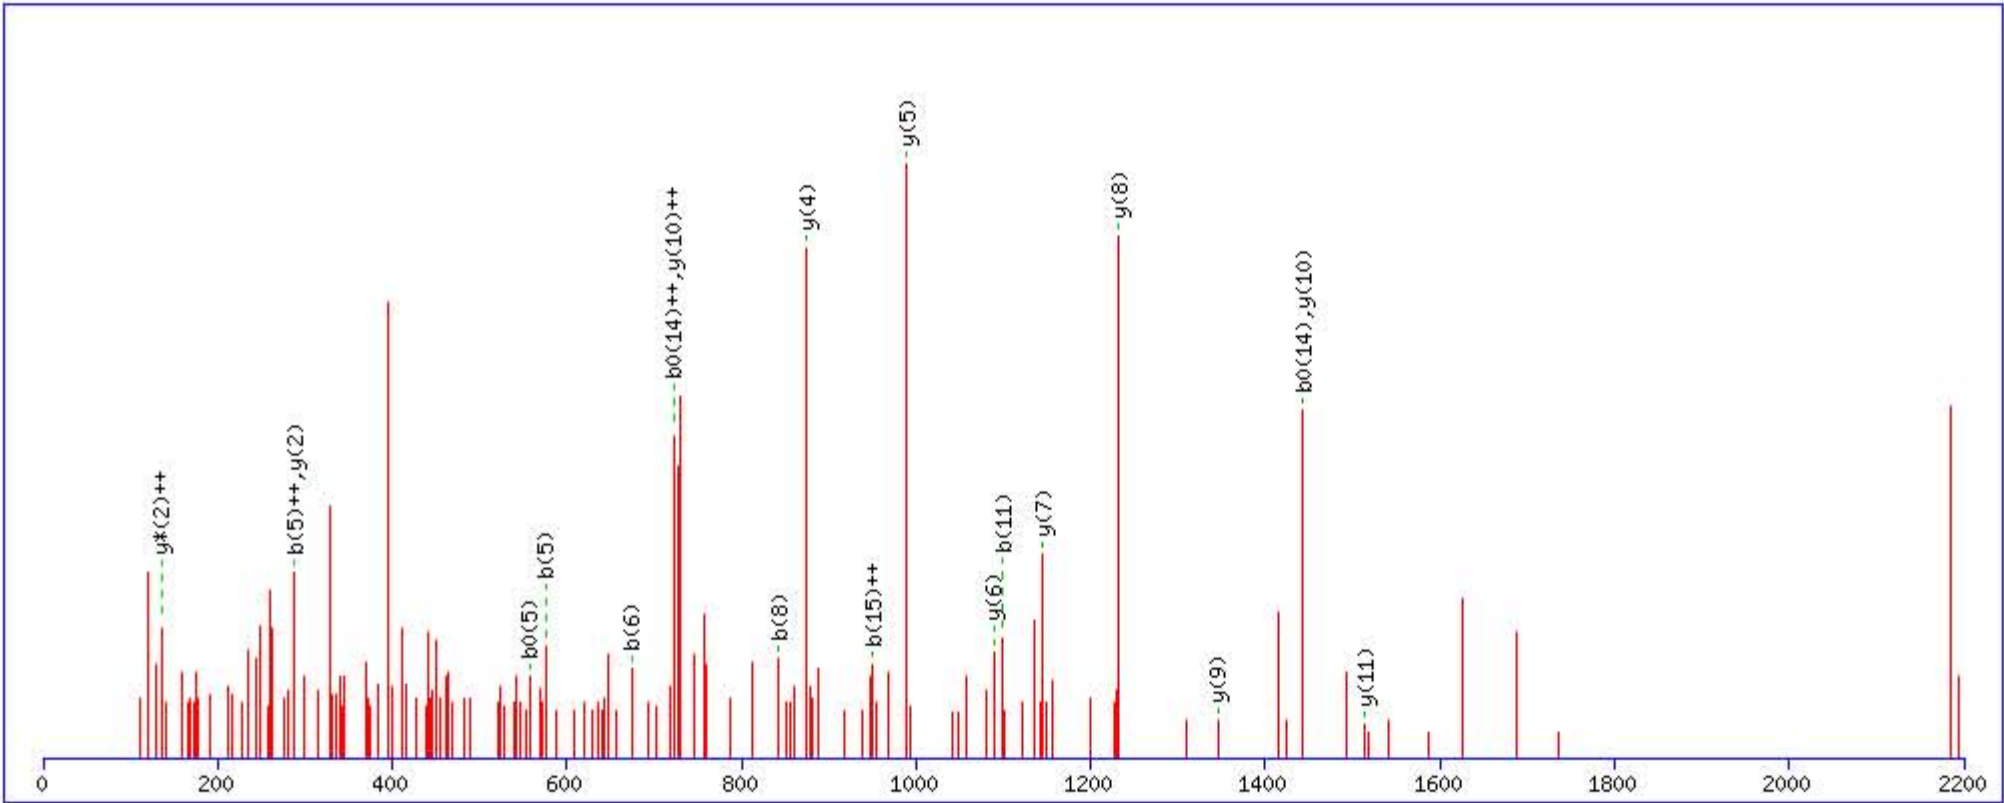

Monoisotopic mass of neutral peptide Mr(calc): 2186.159195  
Fixed modifications: Carbamidomethyl (C) (apply to specified residues or termini only)  
Variable modifications:  
Q15 : Biotin:Thermo-21345 (Q)  
Ions Score: 45 Expect: 8e-005  
Matches : 20/154 fragment ions using 33 most intense peaks [\(help\)](#)

| #  | b           | b <sup>++</sup> | b <sup>*</sup> | b <sup>+++</sup> | b <sup>0</sup> | b <sup>0++</sup> | Seq. | y           | y <sup>++</sup> | y <sup>*</sup> | y <sup>+++</sup> | y <sup>0</sup> | y <sup>0++</sup> | #  |
|----|-------------|-----------------|----------------|------------------|----------------|------------------|------|-------------|-----------------|----------------|------------------|----------------|------------------|----|
| 1  | 100.075690  | 50.541483       |                |                  |                |                  | V    |             |                 |                |                  |                |                  | 17 |
| 2  | 201.123369  | 101.065322      |                |                  | 183.112804     | 92.060040        | T    | 2088.098032 | 1044.552654     | 2071.071483    | 1036.039379      | 2070.087467    | 1035.547371      | 16 |
| 3  | 314.207433  | 157.607354      |                |                  | 296.196868     | 148.602072       | L    | 1987.050353 | 994.028815      | 1970.023804    | 985.515540       | 1969.039788    | 985.023532       | 15 |
| 4  | 415.255112  | 208.131194      |                |                  | 397.244547     | 199.125912       | T    | 1873.966289 | 937.486783      | 1856.939740    | 928.973508       | 1855.955724    | 928.481500       | 14 |
| 5  | 575.285761  | 288.146519      |                |                  | 557.275196     | 279.141236       | C    | 1772.918610 | 886.962943      | 1755.892061    | 878.449669       | 1754.908045    | 877.957661       | 13 |
| 6  | 674.354175  | 337.680726      |                |                  | 656.343610     | 328.675443       | V    | 1612.887961 | 806.947619      | 1595.861412    | 798.434344       | 1594.877396    | 797.942336       | 12 |
| 7  | 745.391289  | 373.199283      |                |                  | 727.380724     | 364.194000       | A    | 1513.819547 | 757.413412      | 1496.792998    | 748.900137       | 1495.808982    | 748.408129       | 11 |
| 8  | 842.444053  | 421.725665      |                |                  | 824.433488     | 412.720382       | P    | 1442.782433 | 721.894855      | 1425.755884    | 713.381580       | 1424.771868    | 712.889572       | 10 |
| 9  | 955.528117  | 478.267697      |                |                  | 937.517552     | 469.262414       | L    | 1345.729669 | 673.368473      | 1328.703120    | 664.855198       | 1327.719104    | 664.363190       | 9  |
| 10 | 1042.560145 | 521.783711      |                |                  | 1024.549580    | 512.778428       | S    | 1232.645605 | 616.826441      | 1215.619056    | 608.313166       | 1214.635040    | 607.821158       | 8  |
| 11 | 1099.581609 | 550.294443      |                |                  | 1081.571044    | 541.289160       | G    | 1145.613577 | 573.310427      | 1128.587028    | 564.797152       | 1127.603012    | 564.305144       | 7  |
| 12 | 1198.650023 | 599.828650      |                |                  | 1180.639458    | 590.823367       | V    | 1088.592113 | 544.799695      | 1071.565564    | 536.286420       | 1070.581548    | 535.794412       | 6  |
| 13 | 1313.676966 | 657.342121      |                |                  | 1295.666401    | 648.336839       | D    | 989.523699  | 495.265488      | 972.497150     | 486.752213       | 971.513134     | 486.260205       | 5  |
| 14 | 1460.745380 | 730.876328      |                |                  | 1442.734815    | 721.871046       | F    | 874.496756  | 437.752016      | 857.470207     | 429.238742       |                |                  | 4  |
| 15 | 1899.970706 | 950.488991      | 1882.944157    | 941.975717       | 1881.960141    | 941.483709       | Q    | 727.428342  | 364.217809      | 710.401793     | 355.704535       |                |                  | 3  |
| 16 | 2013.054770 | 1007.031023     | 1996.028221    | 998.517749       | 1995.044205    | 998.025741       | L    | 288.203016  | 144.605146      | 271.176467     | 136.091872       |                |                  | 2  |
| 17 |             |                 |                |                  |                |                  | R    | 175.118952  | 88.063114       | 158.092403     | 79.549840        |                |                  | 1  |

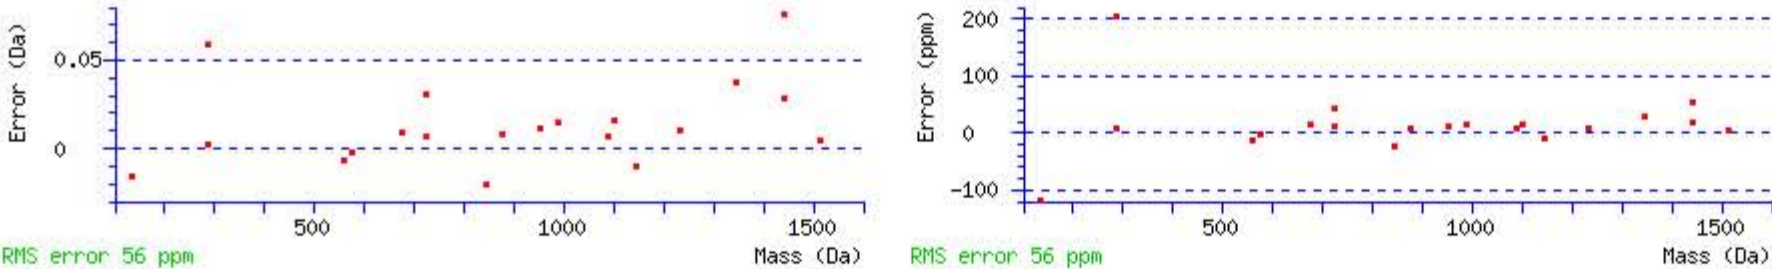

NCBI BLAST search of [VTLTCVAPLSGVDFQLR](#)  
(Parameters: blastp, nr protein database, expect=20000, no filter, PAM30)  
Other BLAST [web gateways](#)

All matches to this query

| Score | Mr(calc):   | Delta     | Sequence                           |
|-------|-------------|-----------|------------------------------------|
| 45.2  | 2186.159195 | 0.013207  | <a href="#">VTLTCVAPLSGVDFQLR</a>  |
| 1.5   | 2186.188126 | -0.015724 | <a href="#">KLTSHQMLSSTEILKWLR</a> |



MATRIX

SCIENCE

Mascot Search Results

Peptide View

MS/MS Fragmentation of **FDPSLTQR**  
Found in **A2AP\_HUMAN**, Alpha-2-antiplasmin OS=Homo sapiens GN=SERPINF2 PE=1 SV=3

Match to Query 22558: 1273.654328 from(637.834440,2+) rtinseconds(1882) index(4796)  
Title: Locus:1.1.1.1932.21 File:"2013-07-02 CLN FXIII 180 min 2nd F 1.wiff"  
Data file C:\Program Files (x86)\Matrix Science\Mascot Daemon\mgf\8 FXIII 180 min 2nd\mascot\_daemon\_merge.mgf

Click mouse within plot area to zoom in by factor of two about that point  
Or, 

Plot from

100

 to 

1800

 Da 

Full range

  
Label all possible matches ☐ Label matches used for scoring ☒

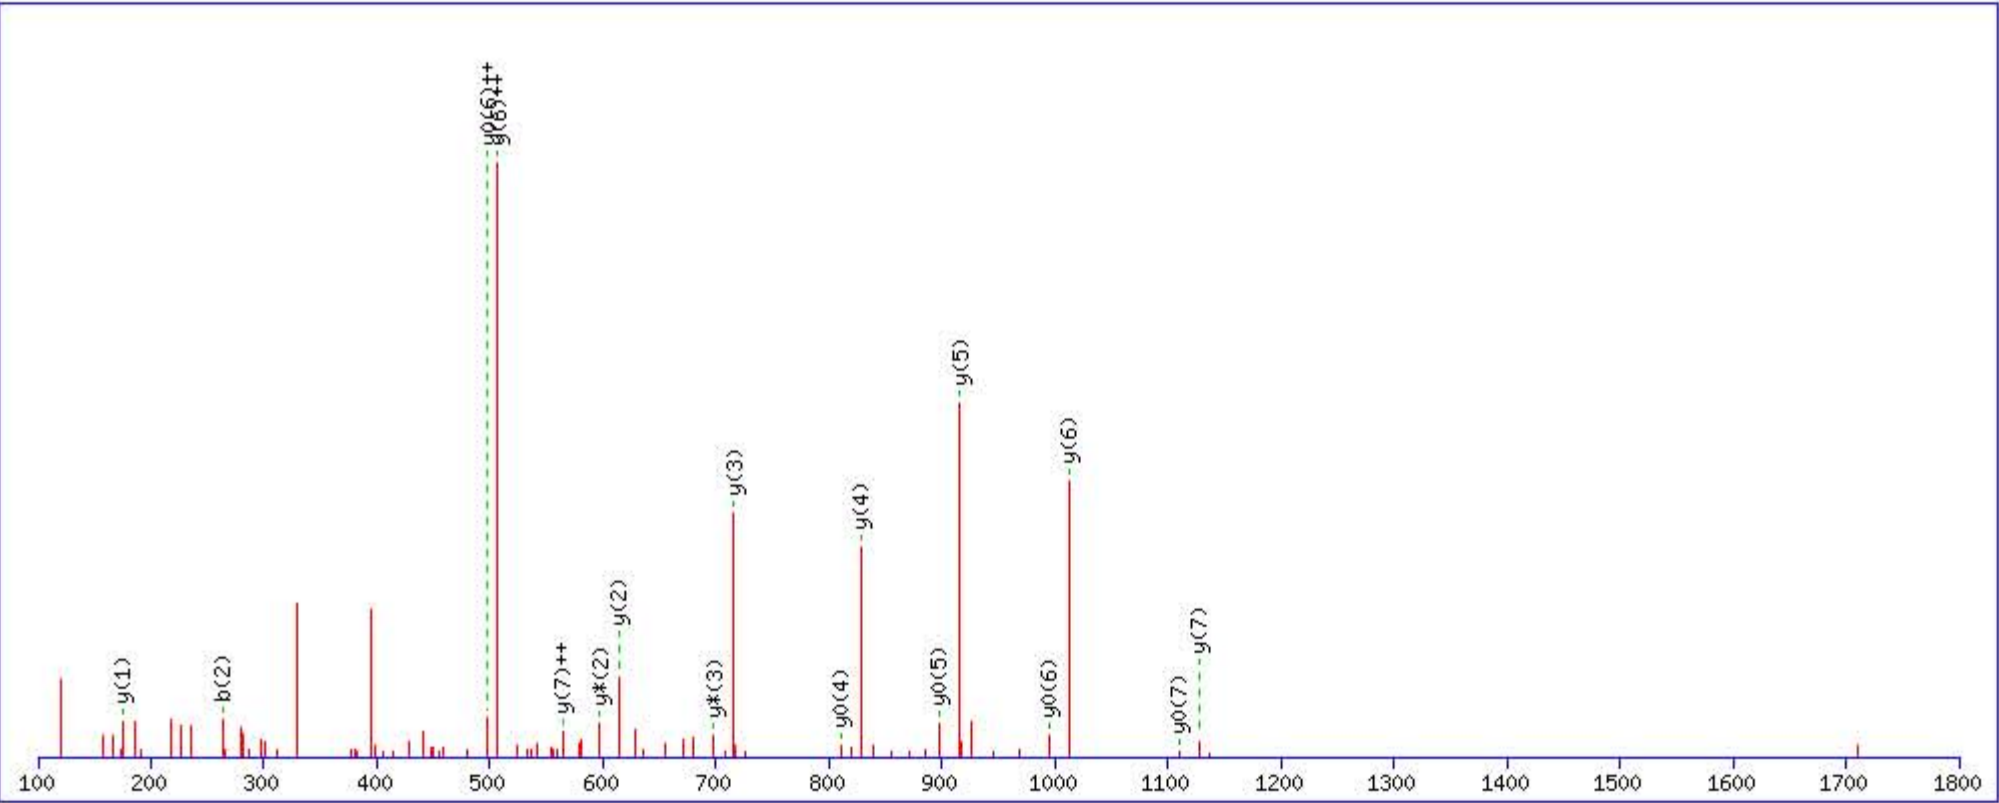

Monoisotopic mass of neutral peptide Mr(calc): 1273.648895  
Fixed modifications: Carbamidomethyl (C) (apply to specified residues or termini only)  
Variable modifications:  
Q7 : Biotin:Thermo-21345 (Q)  
Ions Score: 45 Expect: 0.00078  
Matches : 17/66 fragment ions using 29 most intense peaks ([help](#))

| # | b           | b <sup>++</sup> | b <sup>*</sup> | b <sup>*++</sup> | b <sup>0</sup> | b <sup>0++</sup> | Seq. | y           | y <sup>++</sup> | y <sup>*</sup> | y <sup>*++</sup> | y <sup>0</sup> | y <sup>0++</sup> | # |
|---|-------------|-----------------|----------------|------------------|----------------|------------------|------|-------------|-----------------|----------------|------------------|----------------|------------------|---|
| 1 | 148.075690  | 74.541483       |                |                  |                |                  | F    |             |                 |                |                  |                |                  | 8 |
| 2 | 263.102633  | 132.054954      |                |                  | 245.092068     | 123.049672       | D    | 1127.587756 | 564.297516      | 1110.561207    | 555.784242       | 1109.577191    | 555.292233       | 7 |
| 3 | 360.155397  | 180.581336      |                |                  | 342.144832     | 171.576054       | P    | 1012.560813 | 506.784045      | 995.534264     | 498.270770       | 994.550248     | 497.778762       | 6 |
| 4 | 447.187425  | 224.097350      |                |                  | 429.176860     | 215.092068       | S    | 915.508049  | 458.257663      | 898.481500     | 449.744388       | 897.497484     | 449.252380       | 5 |
| 5 | 560.271489  | 280.639383      |                |                  | 542.260924     | 271.634100       | L    | 828.476021  | 414.741649      | 811.449472     | 406.228374       | 810.465456     | 405.736366       | 4 |
| 6 | 661.319168  | 331.163222      |                |                  | 643.308603     | 322.157940       | T    | 715.391957  | 358.199617      | 698.365408     | 349.686342       | 697.381392     | 349.194334       | 3 |
| 7 | 1100.544494 | 550.775885      | 1083.517945    | 542.262611       | 1082.533929    | 541.770603       | Q    | 614.344278  | 307.675777      | 597.317729     | 299.162503       |                |                  | 2 |
| 8 |             |                 |                |                  |                |                  | R    | 175.118952  | 88.063114       | 158.092403     | 79.549839        |                |                  | 1 |

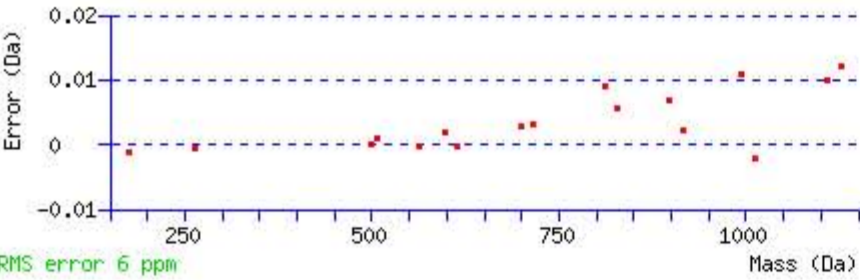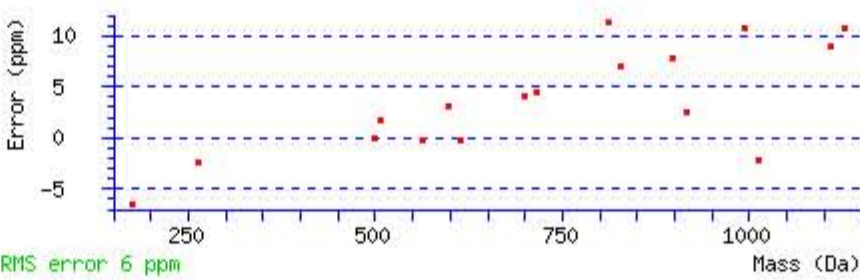

NCBI BLAST search of [FDPSLTQR](#)  
(Parameters: blastp, nr protein database, expect=20000, no filter, PAM30)  
Other BLAST [web gateways](#)

All matches to this query

| Score | Mr(calc):   | Delta     | Sequence                     |
|-------|-------------|-----------|------------------------------|
| 45.2  | 1273.648895 | 0.005433  | <a href="#">FDPSLTQR</a>     |
| 20.7  | 1273.670654 | -0.016326 | <a href="#">FDIAIYYTR</a>    |
| 6.6   | 1273.670029 | -0.015701 | <a href="#">TDPSILGGMIVR</a> |

MATRIX

SCIENCE

Mascot Search Results

Peptide View

MS/MS Fragmentation of **EQQDSPGNK**  
Found in **A2AP\_HUMAN**, Alpha-2-antiplasmin OS=Homo sapiens GN=SERPINF2 PE=1 SV=3

Match to Query 23538: 1312.611288 from(657.312920,2+) rtinseconds(1153) index(61445)  
Title: Locus:1.1.1.1676.8 File:"2013-07-02 CLN FXIII 180 min 2nd FT.wiff"  
Data file C:\Program Files (x86)\Matrix Science\Mascot Daemon\mgf\8 FXIII 180 min 2nd\mascot\_daemon\_merge.mgf

Click mouse within plot area to zoom in by factor of two about that point  
Or, 

Plot from

100

 to 

1100

 Da 

Full range

  
Label all possible matches ☐ Label matches used for scoring ☒

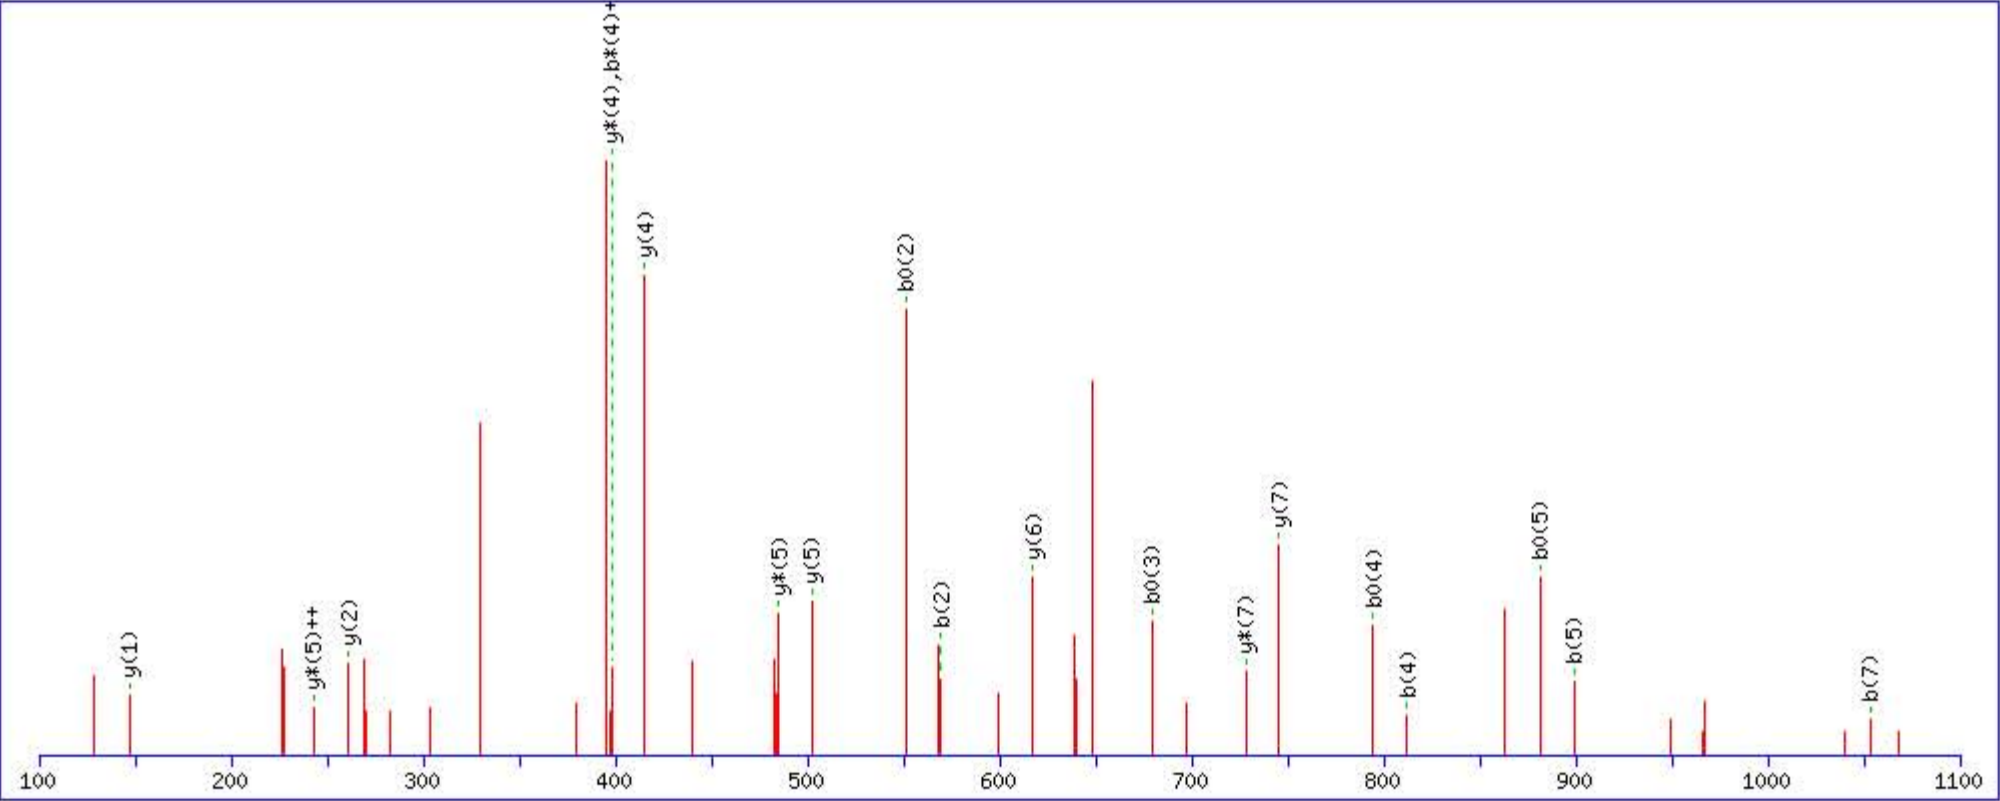

Monoisotopic mass of neutral peptide Mr(calc): 1312.608139  
Fixed modifications: Carbamidomethyl (C) (apply to specified residues or termini only)  
Variable modifications:  
Q2 : Biotin:Thermo-21345 (Q)  
Ions Score: 32 Expect: 0.0029  
Matches : 19/86 fragment ions using 36 most intense peaks [\(help\)](#)

| # | b           | b <sup>++</sup> | b <sup>+</sup> | b <sup>++</sup> | b <sup>0</sup> | b <sup>0++</sup> | Seq. | y           | y <sup>++</sup> | y <sup>+</sup> | y <sup>++</sup> | y <sup>0</sup> | y <sup>0++</sup> | # |
|---|-------------|-----------------|----------------|-----------------|----------------|------------------|------|-------------|-----------------|----------------|-----------------|----------------|------------------|---|
| 1 | 130.049869  | 65.528572       |                |                 | 112.039304     | 56.523290        | E    |             |                 |                |                 |                |                  | 9 |
| 2 | 569.275195  | 285.141236      | 552.248646     | 276.627961      | 551.264630     | 276.135953       | Q    | 1184.572834 | 592.790055      | 1167.546285    | 584.276780      | 1166.562269    | 583.784772       | 8 |
| 3 | 697.333773  | 349.170525      | 680.307224     | 340.657250      | 679.323208     | 340.165242       | Q    | 745.347508  | 373.177392      | 728.320959     | 364.664117      | 727.336943     | 364.172109       | 7 |
| 4 | 812.360716  | 406.683996      | 795.334167     | 398.170722      | 794.350151     | 397.678714       | D    | 617.288930  | 309.148103      | 600.262381     | 300.634828      | 599.278365     | 300.142820       | 6 |
| 5 | 899.392744  | 450.200010      | 882.366195     | 441.686736      | 881.382179     | 441.194728       | S    | 502.261987  | 251.634631      | 485.235438     | 243.121357      | 484.251422     | 242.629349       | 5 |
| 6 | 996.445508  | 498.726392      | 979.418959     | 490.213118      | 978.434943     | 489.721110       | P    | 415.229959  | 208.118617      | 398.203410     | 199.605343      |                |                  | 4 |
| 7 | 1053.466972 | 527.237124      | 1036.440423    | 518.723850      | 1035.456407    | 518.231841       | G    | 318.177195  | 159.592235      | 301.150646     | 151.078961      |                |                  | 3 |
| 8 | 1167.509899 | 584.258587      | 1150.483350    | 575.745313      | 1149.499334    | 575.253305       | N    | 261.155731  | 131.081503      | 244.129182     | 122.568229      |                |                  | 2 |
| 9 |             |                 |                |                 |                |                  | K    | 147.112804  | 74.060040       | 130.086255     | 65.546765       |                |                  | 1 |

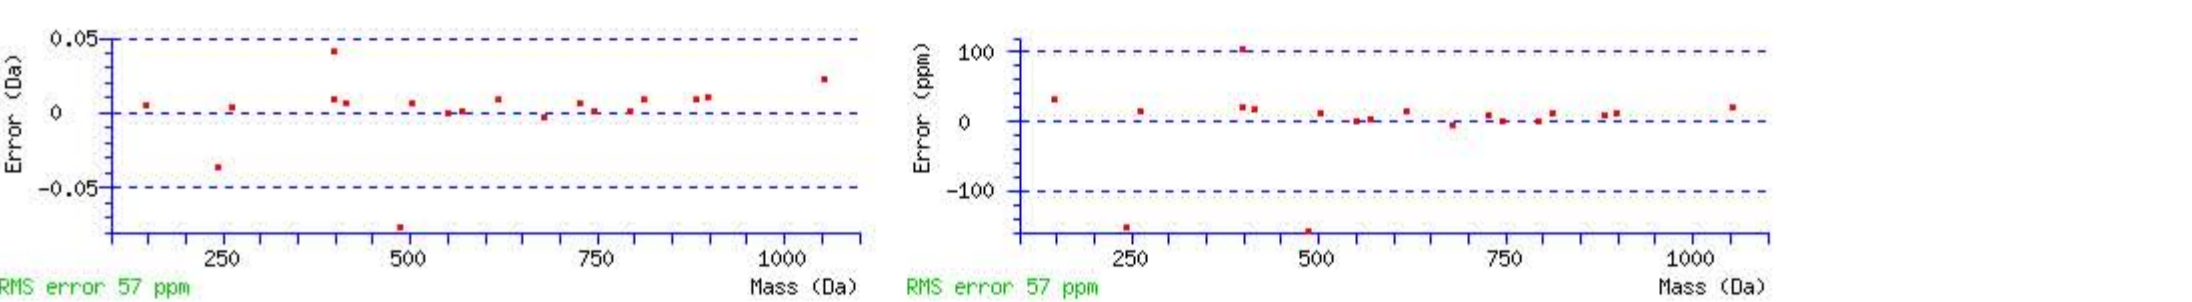

NCBI BLAST search of [EQQDSPGNK](#)  
(Parameters: blastp, nr protein database, expect=20000, no filter, PAM30)  
Other BLAST [web gateways](#)

All matches to this query

| Score | Mr(calc):   | Delta    | Sequence                    |
|-------|-------------|----------|-----------------------------|
| 31.7  | 1312.608139 | 0.003149 | <a href="#">EQQDSPGNK</a>   |
| 18.4  | 1312.608139 | 0.003149 | <a href="#">EQQDSPGNK</a>   |
| 4.3   | 1312.596878 | 0.014410 | <a href="#">Kymeendqlk</a>  |
| 0.7   | 1312.601624 | 0.009664 | <a href="#">CGECGKAfTRK</a> |

MATRIX

SCIENCE

Mascot Search Results

Peptide View

MS/MS Fragmentation of **LGNQEPGGQTALK**  
Found in **A2AP\_HUMAN**, Alpha-2-antiplasmin OS=Homo sapiens GN=SERPINF2 PE=1 SV=3

Match to Query 35657: 1622.844852 from(541.955560,3+) rtinseconds(1624) index(3396)  
Title: Locus:1.1.1.1842.10 File:"2013-07-02 CLN FXIII 180 min 2nd F 1.wiff"  
Data file C:\Program Files (x86)\Matrix Science\Mascot Daemon\mgf\8 FXIII 180 min 2nd\mascot\_daemon\_merge.mgf

Click mouse within plot area to zoom in by factor of two about that point  
Or, 

Plot from

0

 to 

2200

 Da 

Full range

  
Label all possible matches ☐ Label matches used for scoring ☒

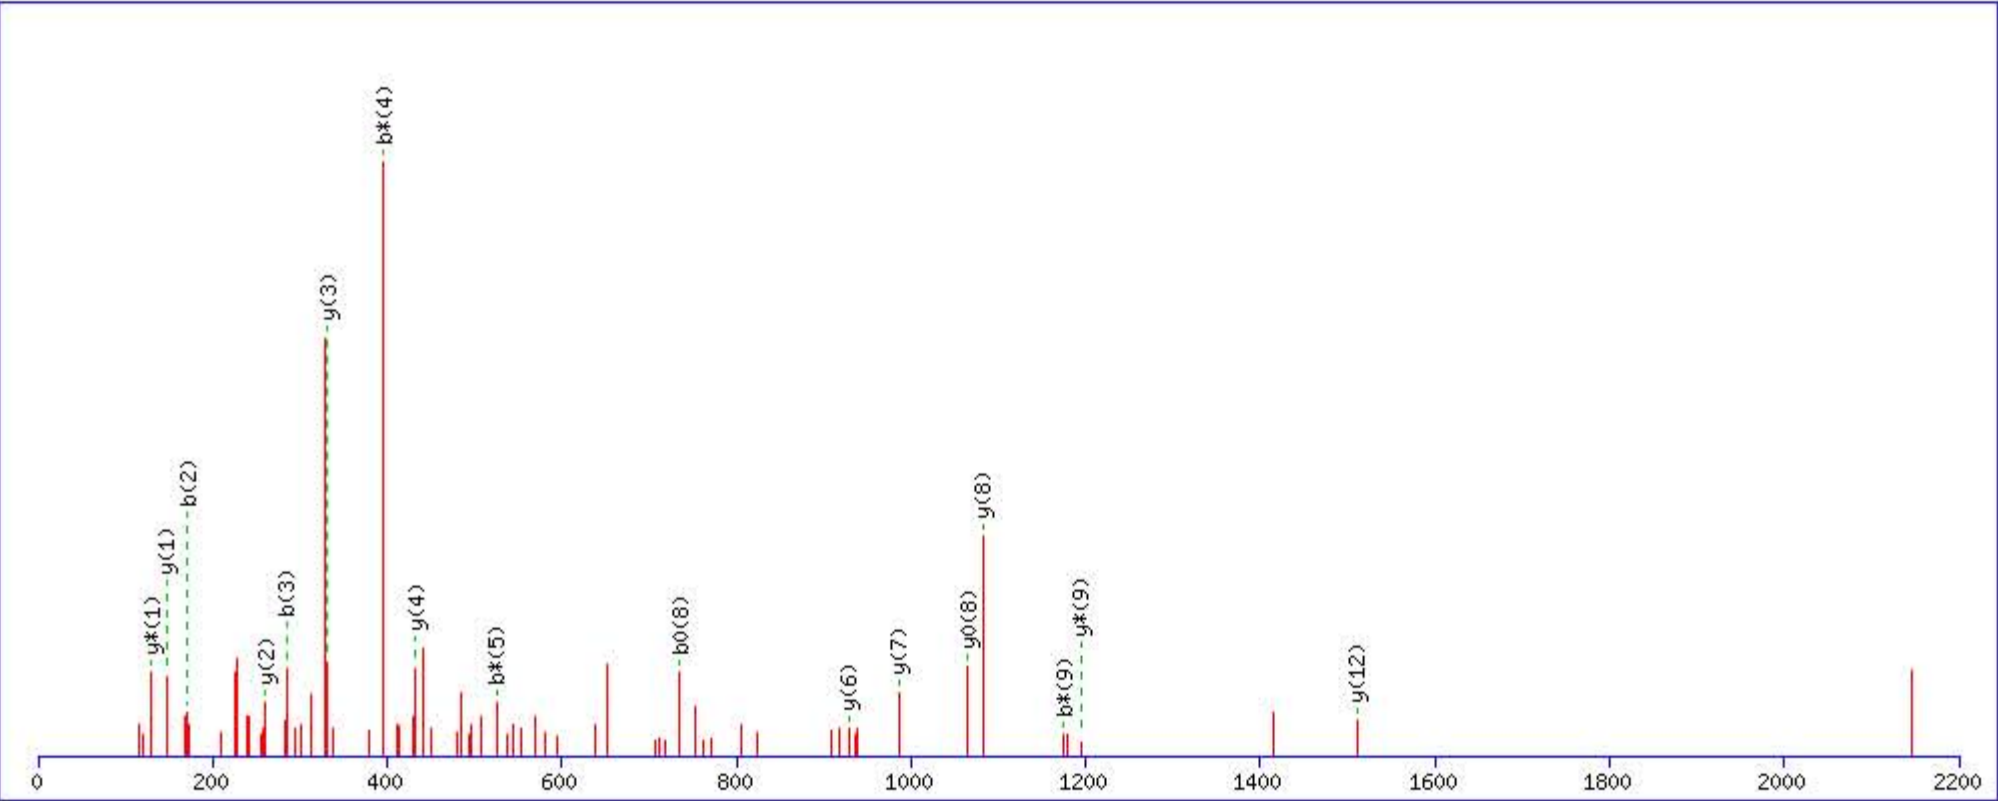

Monoisotopic mass of neutral peptide Mr(calc): 1622.845016  
Fixed modifications: Carbamidomethyl (C) (apply to specified residues or termini only)  
Variable modifications:  
Q9 : Biotin:Thermo-21345 (Q)  
Ions Score: 27 Expect: 0.0035  
Matches : 17/126 fragment ions using 50 most intense peaks [\(help\)](#)

| #  | b           | b <sup>++</sup> | b <sup>*</sup> | b <sup>*++</sup> | b <sup>0</sup> | b <sup>0++</sup> | Seq. | y           | y <sup>++</sup> | y <sup>*</sup> | y <sup>*++</sup> | y <sup>0</sup> | y <sup>0++</sup> | #  |
|----|-------------|-----------------|----------------|------------------|----------------|------------------|------|-------------|-----------------|----------------|------------------|----------------|------------------|----|
| 1  | 114.091340  | 57.549308       |                |                  |                |                  | L    |             |                 |                |                  |                |                  | 13 |
| 2  | 171.112804  | 86.060040       |                |                  |                |                  | G    | 1510.768241 | 755.887759      | 1493.741692    | 747.374484       | 1492.757676    | 746.882476       | 12 |
| 3  | 285.155731  | 143.081504      | 268.129182     | 134.568229       |                |                  | N    | 1453.746777 | 727.377027      | 1436.720228    | 718.863752       | 1435.736212    | 718.371744       | 11 |
| 4  | 413.214309  | 207.110793      | 396.187760     | 198.597518       |                |                  | Q    | 1339.703850 | 670.355563      | 1322.677301    | 661.842289       | 1321.693285    | 661.350281       | 10 |
| 5  | 542.256902  | 271.632089      | 525.230353     | 263.118815       | 524.246337     | 262.626807       | E    | 1211.645272 | 606.326274      | 1194.618723    | 597.813000       | 1193.634707    | 597.320991       | 9  |
| 6  | 639.309666  | 320.158471      | 622.283117     | 311.645197       | 621.299101     | 311.153189       | P    | 1082.602679 | 541.804978      | 1065.576130    | 533.291703       | 1064.592114    | 532.799695       | 8  |
| 7  | 696.331130  | 348.669203      | 679.304581     | 340.155929       | 678.320565     | 339.663921       | G    | 985.549915  | 493.278596      | 968.523366     | 484.765321       | 967.539350     | 484.273313       | 7  |
| 8  | 753.352594  | 377.179935      | 736.326045     | 368.666661       | 735.342029     | 368.174653       | G    | 928.528451  | 464.767864      | 911.501902     | 456.254589       | 910.517886     | 455.762581       | 6  |
| 9  | 1192.577920 | 596.792598      | 1175.551371    | 588.279324       | 1174.567355    | 587.787316       | Q    | 871.506987  | 436.257132      | 854.480438     | 427.743857       | 853.496422     | 427.251849       | 5  |
| 10 | 1293.625599 | 647.316438      | 1276.599050    | 638.803163       | 1275.615034    | 638.311155       | T    | 432.281661  | 216.644468      | 415.255112     | 208.131194       | 414.271096     | 207.639186       | 4  |
| 11 | 1364.662713 | 682.834995      | 1347.636164    | 674.321720       | 1346.652148    | 673.829712       | A    | 331.233982  | 166.120629      | 314.207433     | 157.607354       |                |                  | 3  |
| 12 | 1477.746777 | 739.377027      | 1460.720228    | 730.863752       | 1459.736212    | 730.371744       | L    | 260.196868  | 130.602072      | 243.170319     | 122.088797       |                |                  | 2  |
| 13 |             |                 |                |                  |                |                  | K    | 147.112804  | 74.060040       | 130.086255     | 65.546765        |                |                  | 1  |

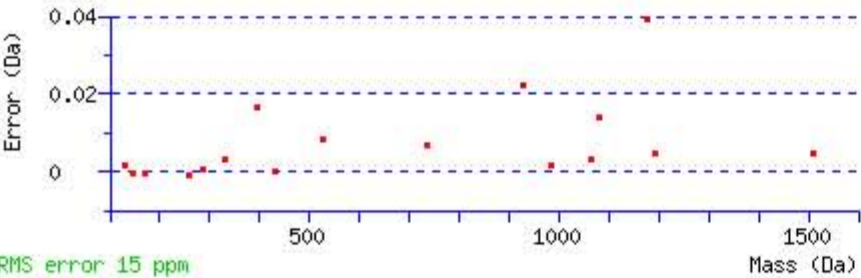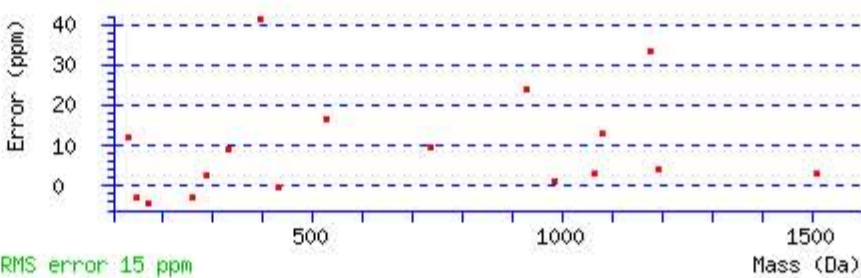

NCBI BLAST search of [LGNQEPGGQTALK](#)  
(Parameters: blastp, nr protein database, expect=20000, no filter, PAM30)  
Other BLAST [web gateways](#)

All matches to this query

| Score | Mr(calc):   | Delta     | Sequence                        |
|-------|-------------|-----------|---------------------------------|
| 26.8  | 1622.845016 | -0.000164 | <a href="#">LGNQEPGGQTALK</a>   |
| 7.8   | 1622.845016 | -0.000164 | <a href="#">LGNQEPGGQTALK</a>   |
| 0.5   | 1622.849045 | -0.004193 | <a href="#">IPMPDFDLHLKGPK</a>  |
| 0.2   | 1622.820511 | 0.024341  | <a href="#">FPPEASGYLHIGHAK</a> |

MATRIX

SCIENCE

Mascot Search Results

Peptide View

MS/MS Fragmentation of **LGNQEPGGQTALK**  
Found in **A2AP\_HUMAN**, Alpha-2-antiplasmin OS=Homo sapiens GN=SERPINF2 PE=1 SV=3

Match to Query 42834: 1934.019912 from(645.680580,3+) rtinseconds(1959) index(66203)  
Title: Locus:1.1.1.1957.13 File:"2013-07-02 CLN FXIII 180 min 2nd FT.wiff"  
Data file C:\Program Files (x86)\Matrix Science\Mascot Daemon\mgf\8 FXIII 180 min 2nd\mascot\_daemon\_merge.mgf

Click mouse within plot area to zoom in by factor of two about that point  
Or, 

Plot from

100

 to 

1700

 Da 

Full range

  
Label all possible matches ☐ Label matches used for scoring ☒

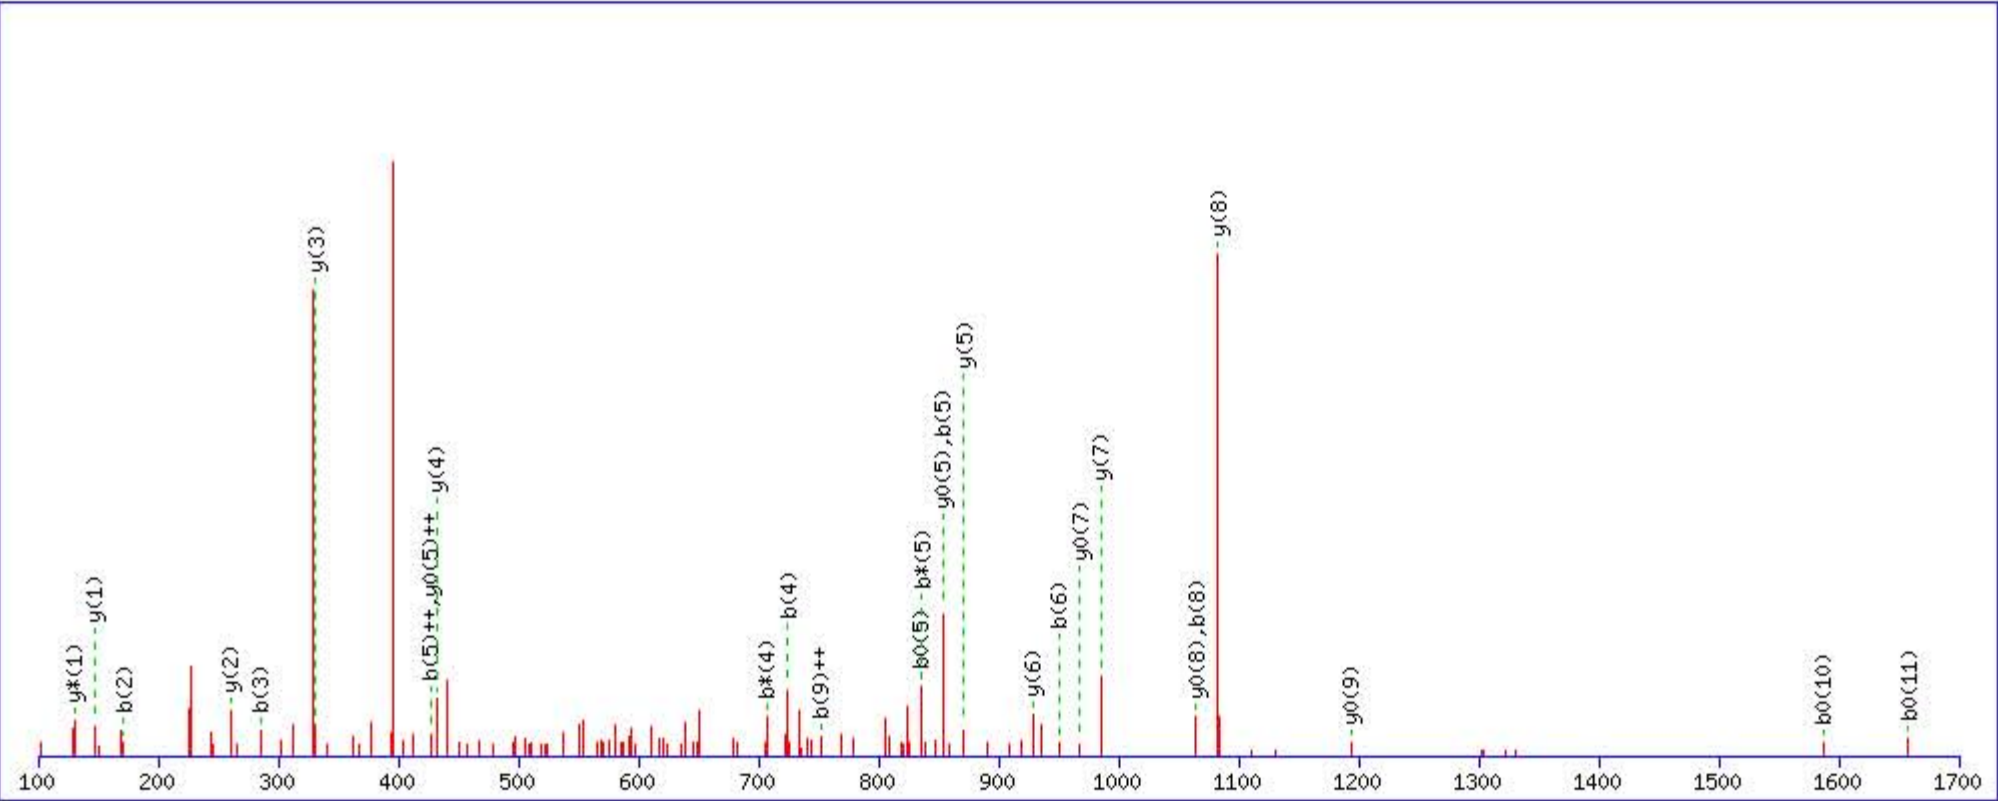

Monoisotopic mass of neutral peptide Mr(calc): 1934.011765  
Fixed modifications: Carbamidomethyl (C) (apply to specified residues or termini only)  
Variable modifications:  
Q4 : Biotin:Thermo-21345 (Q)  
Q9 : Biotin:Thermo-21345 (Q)  
Ions Score: 28 Expect: 0.011  
Matches : 27/126 fragment ions using 66 most intense peaks [\(help\)](#)

| #  | b           | b <sup>++</sup> | b <sup>+</sup> | b <sup>++</sup> | b <sup>0</sup> | b <sup>0++</sup> | Seq. | y           | y <sup>++</sup> | y <sup>+</sup> | y <sup>++</sup> | y <sup>0</sup> | y <sup>0++</sup> | #  |
|----|-------------|-----------------|----------------|-----------------|----------------|------------------|------|-------------|-----------------|----------------|-----------------|----------------|------------------|----|
| 1  | 114.091340  | 57.549308       |                |                 |                |                  | L    |             |                 |                |                 |                |                  | 13 |
| 2  | 171.112804  | 86.060040       |                |                 |                |                  | G    | 1821.934989 | 911.471133      | 1804.908440    | 902.957858      | 1803.924424    | 902.465850       | 12 |
| 3  | 285.155731  | 143.081504      | 268.129182     | 134.568229      |                |                  | N    | 1764.913525 | 882.960400      | 1747.886976    | 874.447126      | 1746.902960    | 873.955118       | 11 |
| 4  | 724.381057  | 362.694167      | 707.354508     | 354.180892      |                |                  | Q    | 1650.870598 | 825.938937      | 1633.844049    | 817.425663      | 1632.860033    | 816.933654       | 10 |
| 5  | 853.423650  | 427.215463      | 836.397101     | 418.702189      | 835.413085     | 418.210181       | E    | 1211.645272 | 606.326274      | 1194.618723    | 597.813000      | 1193.634707    | 597.320991       | 9  |
| 6  | 950.476414  | 475.741845      | 933.449865     | 467.228571      | 932.465849     | 466.736563       | P    | 1082.602679 | 541.804977      | 1065.576130    | 533.291703      | 1064.592114    | 532.799695       | 8  |
| 7  | 1007.497878 | 504.252577      | 990.471329     | 495.739303      | 989.487313     | 495.247295       | G    | 985.549915  | 493.278595      | 968.523366     | 484.765321      | 967.539350     | 484.273313       | 7  |
| 8  | 1064.519342 | 532.763309      | 1047.492793    | 524.250035      | 1046.508777    | 523.758027       | G    | 928.528451  | 464.767863      | 911.501902     | 456.254589      | 910.517886     | 455.762581       | 6  |
| 9  | 1503.744668 | 752.375972      | 1486.718119    | 743.862698      | 1485.734103    | 743.370690       | Q    | 871.506987  | 436.257132      | 854.480438     | 427.743857      | 853.496422     | 427.251849       | 5  |
| 10 | 1604.792347 | 802.899812      | 1587.765798    | 794.386537      | 1586.781782    | 793.894529       | T    | 432.281661  | 216.644468      | 415.255112     | 208.131194      | 414.271096     | 207.639186       | 4  |
| 11 | 1675.829461 | 838.418369      | 1658.802912    | 829.905094      | 1657.818896    | 829.413086       | A    | 331.233982  | 166.120629      | 314.207433     | 157.607354      |                |                  | 3  |
| 12 | 1788.913525 | 894.960400      | 1771.886976    | 886.447126      | 1770.902960    | 885.955118       | L    | 260.196868  | 130.602072      | 243.170319     | 122.088797      |                |                  | 2  |
| 13 |             |                 |                |                 |                |                  | K    | 147.112804  | 74.060040       | 130.086255     | 65.546765       |                |                  | 1  |

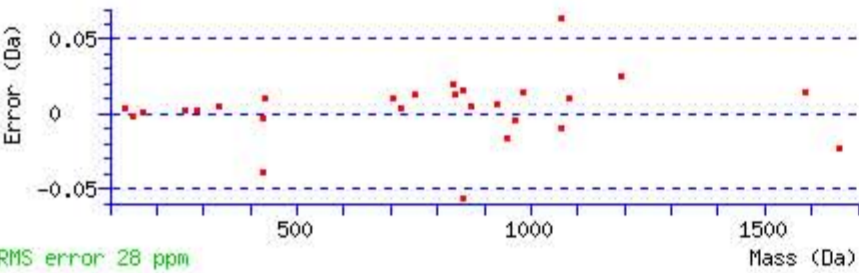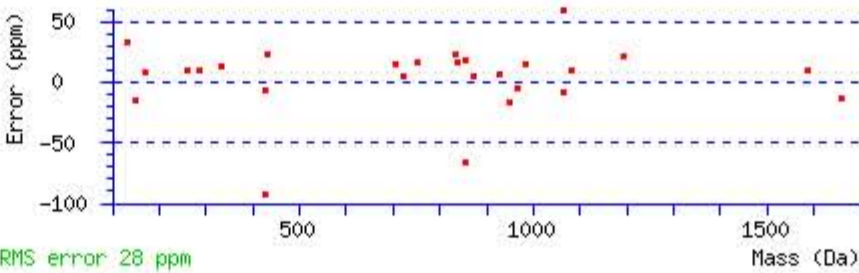

NCBI BLAST search of **LGNQEPGGQTALK**  
(Parameters: blastp, nr protein database, expect=20000, no filter, PAM30)  
Other BLAST [web gateways](#)

All matches to this query

| Score | Mr(calc):   | Delta     | Sequence                          |
|-------|-------------|-----------|-----------------------------------|
| 27.7  | 1934.011765 | 0.008147  | <a href="#">LGNQEPGGQTALK</a>     |
| 6.8   | 1934.032867 | -0.012955 | <a href="#">KSRPLTGLMDLAKEMTK</a> |
| 0.0   | 1934.032867 | -0.012955 | <a href="#">KSRPLTGLMDLAKEMTK</a> |

MATRIX

SCIENCE

Mascot Search Results

Peptide View

MS/MS Fragmentation of **EQQDSPGNKDFLQSLK**  
Found in **A2AP\_HUMAN**, Alpha-2-antiplasmin OS=Homo sapiens GN=SERPINF2 PE=1 SV=3

Match to Query 47309: 2144.076252 from(715.699360,3+) rtinseconds(2019) index(5714)  
Title: Locus:1.1.1.1980.9 File:"2013-07-02 CLN FXIII 180 min 2nd F 1.wiff"  
Data file C:\Program Files (x86)\Matrix Science\Mascot Daemon\mgf\8 FXIII 180 min 2nd\mascot\_daemon\_merge.mgf

Click mouse within plot area to zoom in by factor of two about that point  
Or, 

Plot from

100

 to 

1600

 Da 

Full range

  
Label all possible matches ☐ Label matches used for scoring ☒

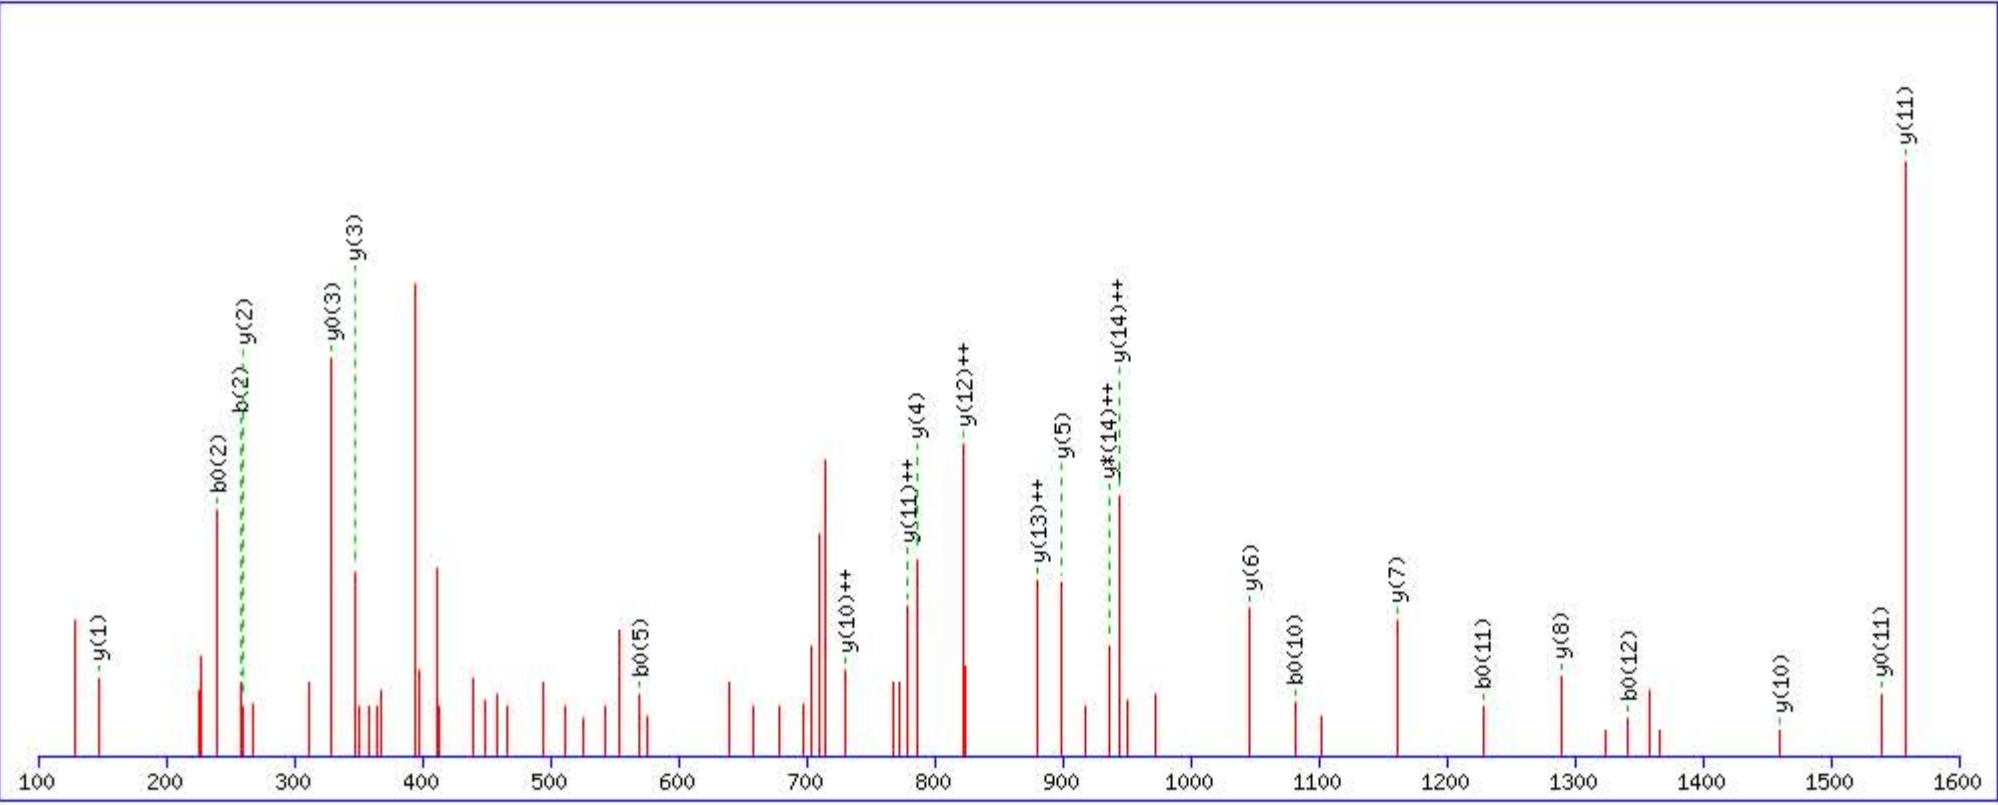

Monoisotopic mass of neutral peptide Mr(calc): 2144.057190  
Fixed modifications: Carbamidomethyl (C) (apply to specified residues or termini only)  
Variable modifications:  
Q13 : Biotin:Thermo-21345 (Q)  
Ions Score: 35 Expect: 0.0081  
Matches : 24/174 fragment ions using 55 most intense peaks [\(help\)](#)

| #  | b           | b <sup>++</sup> | b <sup>+</sup> | b <sup>++</sup> | b <sup>0</sup> | b <sup>0++</sup> | Seq. | y           | y <sup>++</sup> | y <sup>+</sup> | y <sup>++</sup> | y <sup>0</sup> | y <sup>0++</sup> | #  |
|----|-------------|-----------------|----------------|-----------------|----------------|------------------|------|-------------|-----------------|----------------|-----------------|----------------|------------------|----|
| 1  | 130.049869  | 65.528572       |                |                 | 112.039304     | 56.523290        | E    |             |                 |                |                 |                |                  | 16 |
| 2  | 258.108447  | 129.557862      | 241.081898     | 121.044587      | 240.097882     | 120.552579       | Q    | 2016.021888 | 1008.514582     | 1998.995339    | 1000.001308     | 1998.011323    | 999.509300       | 15 |
| 3  | 386.167025  | 193.587151      | 369.140476     | 185.073876      | 368.156460     | 184.581868       | Q    | 1887.963310 | 944.485293      | 1870.936761    | 935.972019      | 1869.952745    | 935.480011       | 14 |
| 4  | 501.193968  | 251.100622      | 484.167419     | 242.587348      | 483.183403     | 242.095340       | D    | 1759.904732 | 880.456004      | 1742.878183    | 871.942730      | 1741.894167    | 871.450722       | 13 |
| 5  | 588.225996  | 294.616636      | 571.199447     | 286.103362      | 570.215431     | 285.611354       | S    | 1644.877789 | 822.942533      | 1627.851240    | 814.429258      | 1626.867224    | 813.937250       | 12 |
| 6  | 685.278760  | 343.143018      | 668.252211     | 334.629744      | 667.268195     | 334.137736       | P    | 1557.845761 | 779.426519      | 1540.819212    | 770.913244      | 1539.835196    | 770.421236       | 11 |
| 7  | 742.300224  | 371.653750      | 725.273675     | 363.140476      | 724.289659     | 362.648468       | G    | 1460.792997 | 730.900137      | 1443.766448    | 722.386862      | 1442.782432    | 721.894854       | 10 |
| 8  | 856.343151  | 428.675214      | 839.316602     | 420.161939      | 838.332586     | 419.669931       | N    | 1403.771533 | 702.389405      | 1386.744984    | 693.876130      | 1385.760968    | 693.384122       | 9  |
| 9  | 984.438114  | 492.722695      | 967.411565     | 484.209421      | 966.427549     | 483.717413       | K    | 1289.728606 | 645.367941      | 1272.702057    | 636.854667      | 1271.718041    | 636.362659       | 8  |
| 10 | 1099.465057 | 550.236167      | 1082.438508    | 541.722892      | 1081.454492    | 541.230884       | D    | 1161.633643 | 581.320460      | 1144.607094    | 572.807185      | 1143.623078    | 572.315177       | 7  |
| 11 | 1246.533471 | 623.770374      | 1229.506922    | 615.257099      | 1228.522906    | 614.765091       | F    | 1046.606700 | 523.806988      | 1029.580151    | 515.293714      | 1028.596135    | 514.801706       | 6  |
| 12 | 1359.617535 | 680.312406      | 1342.590986    | 671.799131      | 1341.606970    | 671.307123       | L    | 899.538286  | 450.272781      | 882.511737     | 441.759507      | 881.527721     | 441.267499       | 5  |
| 13 | 1798.842861 | 899.925069      | 1781.816312    | 891.411794      | 1780.832296    | 890.919786       | Q    | 786.454222  | 393.730749      | 769.427673     | 385.217475      | 768.443657     | 384.725467       | 4  |
| 14 | 1885.874889 | 943.441083      | 1868.848340    | 934.927808      | 1867.864324    | 934.435800       | S    | 347.228896  | 174.118086      | 330.202347     | 165.604812      | 329.218331     | 165.112804       | 3  |
| 15 | 1998.958953 | 999.983115      | 1981.932404    | 991.469840      | 1980.948388    | 990.977832       | L    | 260.196868  | 130.602072      | 243.170319     | 122.088798      |                |                  | 2  |
| 16 |             |                 |                |                 |                |                  | K    | 147.112804  | 74.060040       | 130.086255     | 65.546766       |                |                  | 1  |

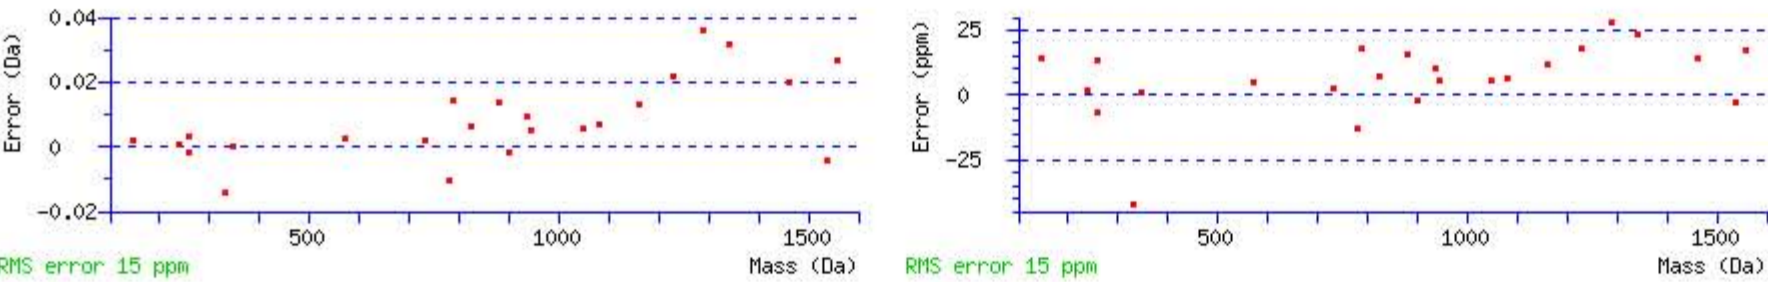

NCBI BLAST search of [EQQDSPGNKDFLQSLK](#)  
(Parameters: blastp, nr protein database, expect=20000, no filter, PAM30)  
Other BLAST [web gateways](#)

All matches to this query

| Score | Mr(calc):   | Delta    | Sequence                         |
|-------|-------------|----------|----------------------------------|
| 35.3  | 2144.057190 | 0.019062 | <a href="#">EQQDSPGNKDFLQSLK</a> |

MATRIX

SCIENCE

Mascot Search Results

Peptide View

MS/MS Fragmentation of **QLTSGPNQEQVSPLTLLK**  
Found in **A2AP\_HUMAN**, Alpha-2-antiplasmin OS=Homo sapiens GN=SERPINF2 PE=1 SV=3

Match to Query 49791: 2263.244832 from(755.422220,3+) rtinseconds(2535) index(8513)  
Title: Locus:1.1.1.2160.10 File:"2013-07-02 CLN FXIII 180 min 2nd F 1.wiff"  
Data file C:\Program Files (x86)\Matrix Science\Mascot Daemon\mgf\8 FXIII 180 min 2nd\mascot\_daemon\_merge.mgf

Click mouse within plot area to zoom in by factor of two about that point  
Or, 

Plot from 

0

 to 

2400

 Da 

Full range

  
Label all possible matches ☐ Label matches used for scoring ☒

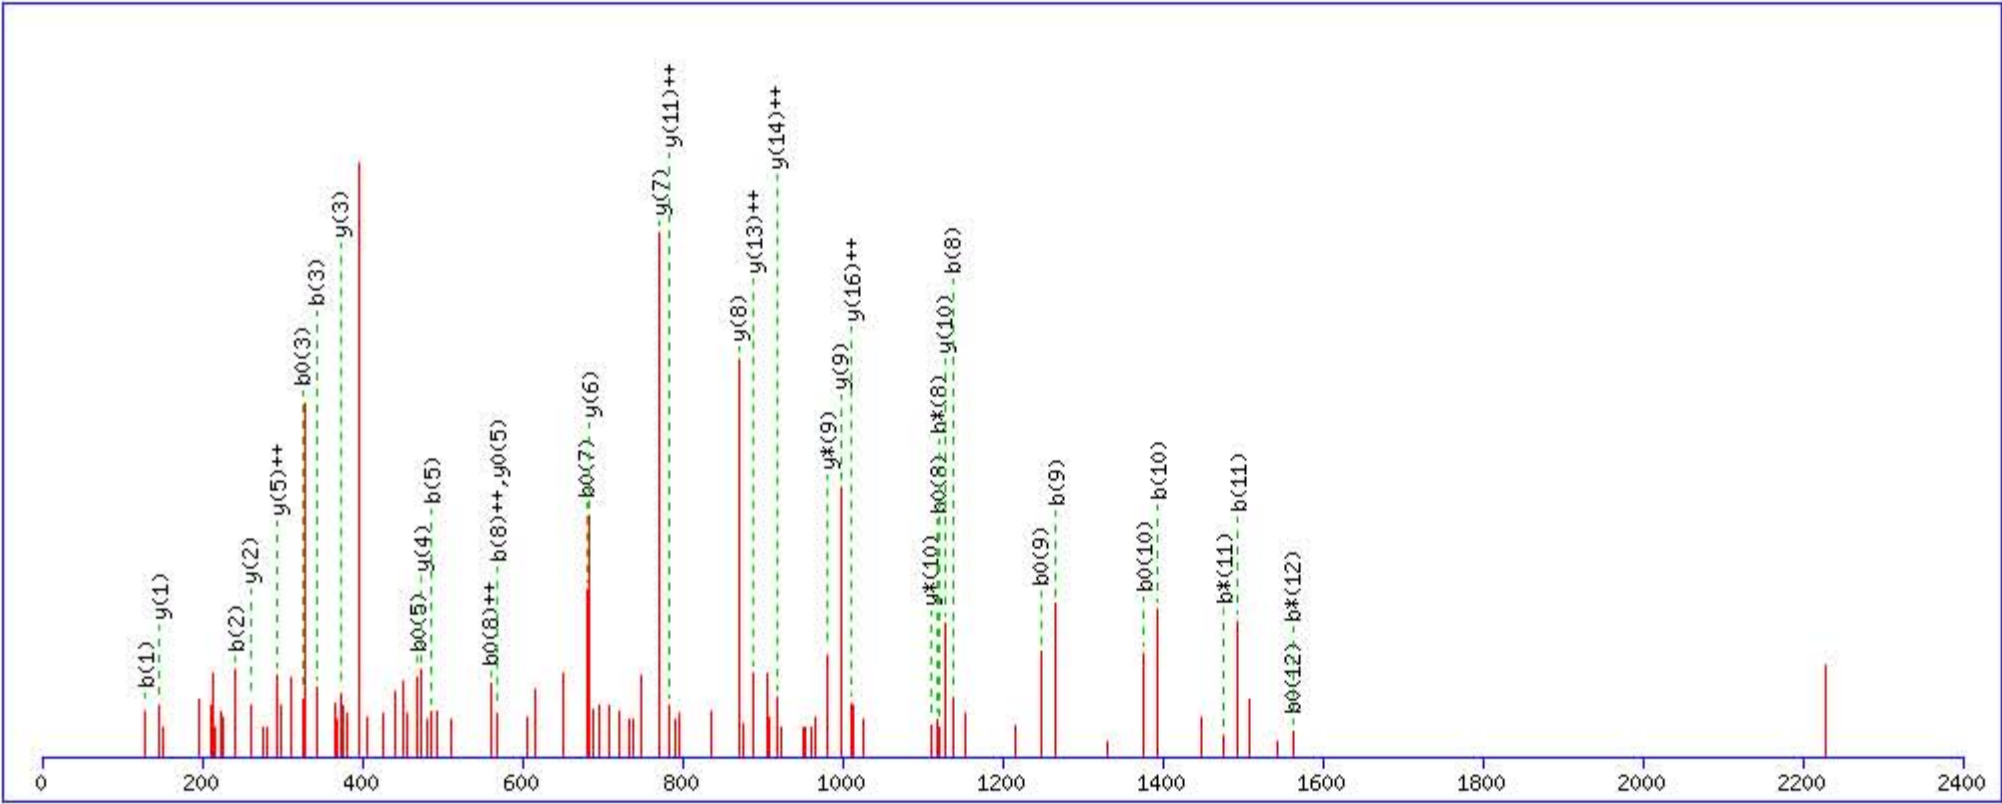

Monoisotopic mass of neutral peptide Mr(calc): 2263.224594  
Fixed modifications: Carbamidomethyl (C) (apply to specified residues or termini only)  
Variable modifications:  
Q8 : Biotin:Thermo-21345 (Q)  
Ions Score: 53 Expect: 7.5e-005  
Matches : 37/194 fragment ions using 65 most intense peaks [\(help\)](#)

| #  | b           | b <sup>++</sup> | b <sup>*</sup> | b <sup>+++</sup> | b <sup>0</sup> | b <sup>0++</sup> | Seq. | y           | y <sup>++</sup> | y <sup>*</sup> | y <sup>+++</sup> | y <sup>0</sup> | y <sup>0++</sup> | #  |
|----|-------------|-----------------|----------------|------------------|----------------|------------------|------|-------------|-----------------|----------------|------------------|----------------|------------------|----|
| 1  | 129.065854  | 65.036565       | 112.039305     | 56.523291        |                |                  | Q    |             |                 |                |                  |                |                  | 18 |
| 2  | 242.149918  | 121.578597      | 225.123369     | 113.065323       |                |                  | L    | 2136.173304 | 1068.590290     | 2119.146755    | 1060.077015      | 2118.162739    | 1059.585007      | 17 |
| 3  | 343.197597  | 172.102437      | 326.171048     | 163.589162       | 325.187032     | 163.097154       | T    | 2023.089240 | 1012.048258     | 2006.062691    | 1003.534984      | 2005.078675    | 1003.042976      | 16 |
| 4  | 430.229625  | 215.618450      | 413.203076     | 207.105176       | 412.219060     | 206.613168       | S    | 1922.041561 | 961.524419      | 1905.015012    | 953.011144       | 1904.030996    | 952.519136       | 15 |
| 5  | 487.251089  | 244.129182      | 470.224540     | 235.615908       | 469.240524     | 235.123900       | G    | 1835.009533 | 918.008405      | 1817.982984    | 909.495130       | 1816.998968    | 909.003122       | 14 |
| 6  | 584.303853  | 292.655565      | 567.277304     | 284.142290       | 566.293288     | 283.650282       | P    | 1777.988069 | 889.497673      | 1760.961520    | 880.984398       | 1759.977504    | 880.492390       | 13 |
| 7  | 698.346780  | 349.677028      | 681.320231     | 341.163753       | 680.336215     | 340.671745       | N    | 1680.935305 | 840.971291      | 1663.908756    | 832.458016       | 1662.924740    | 831.966008       | 12 |
| 8  | 1137.572106 | 569.289691      | 1120.545557    | 560.776416       | 1119.561541    | 560.284408       | Q    | 1566.892378 | 783.949827      | 1549.865829    | 775.436553       | 1548.881813    | 774.944545       | 11 |
| 9  | 1266.614699 | 633.810988      | 1249.588150    | 625.297713       | 1248.604134    | 624.805705       | E    | 1127.667052 | 564.337164      | 1110.640503    | 555.823890       | 1109.656487    | 555.331882       | 10 |
| 10 | 1394.673277 | 697.840277      | 1377.646728    | 689.327002       | 1376.662712    | 688.834994       | Q    | 998.624459  | 499.815868      | 981.597910     | 491.302593       | 980.613894     | 490.810585       | 9  |
| 11 | 1493.741691 | 747.374484      | 1476.715142    | 738.861209       | 1475.731126    | 738.369201       | V    | 870.565881  | 435.786579      | 853.539332     | 427.273304       | 852.555316     | 426.781296       | 8  |
| 12 | 1580.773719 | 790.890498      | 1563.747170    | 782.377223       | 1562.763154    | 781.885215       | S    | 771.497467  | 386.252372      | 754.470918     | 377.739097       | 753.486902     | 377.247089       | 7  |
| 13 | 1677.826483 | 839.416880      | 1660.799934    | 830.903605       | 1659.815918    | 830.411597       | P    | 684.465439  | 342.736358      | 667.438890     | 334.223083       | 666.454874     | 333.731075       | 6  |
| 14 | 1790.910547 | 895.958912      | 1773.883998    | 887.445637       | 1772.899982    | 886.953629       | L    | 587.412675  | 294.209976      | 570.386126     | 285.696701       | 569.402110     | 285.204693       | 5  |
| 15 | 1891.958226 | 946.482751      | 1874.931677    | 937.969477       | 1873.947661    | 937.477469       | T    | 474.328611  | 237.667944      | 457.302062     | 229.154669       | 456.318046     | 228.662661       | 4  |
| 16 | 2005.042290 | 1003.024783     | 1988.015741    | 994.511509       | 1987.031725    | 994.019501       | L    | 373.280932  | 187.144104      | 356.254383     | 178.630830       |                |                  | 3  |
| 17 | 2118.126354 | 1059.566815     | 2101.099805    | 1051.053540      | 2100.115789    | 1050.561532      | L    | 260.196868  | 130.602072      | 243.170319     | 122.088798       |                |                  | 2  |
| 18 |             |                 |                |                  |                |                  | K    | 147.112804  | 74.060040       | 130.086255     | 65.546765        |                |                  | 1  |

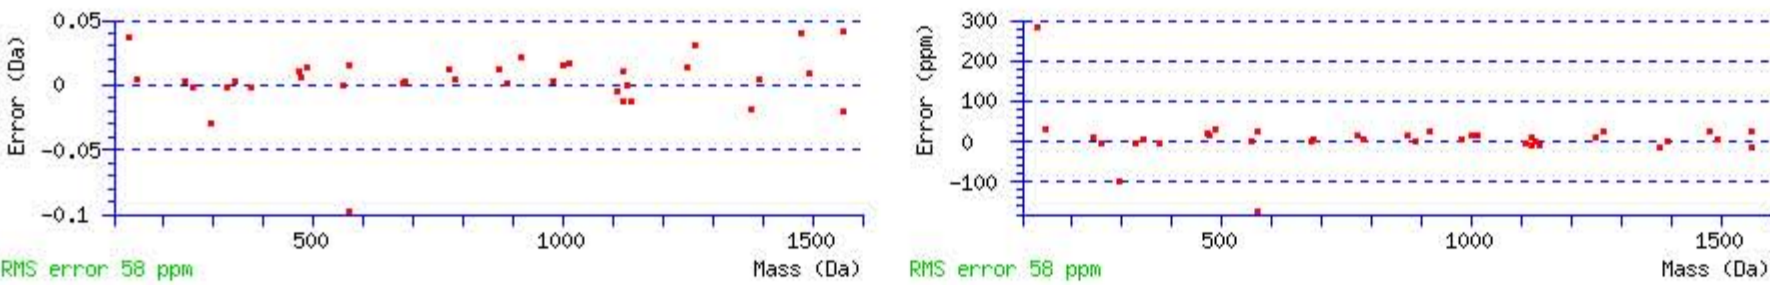

NCBI BLAST search of **QLTSGPNQEQVSPLTLLK**  
(Parameters: blastp, nr protein database, expect=20000, no filter, PAM30)  
Other BLAST [web gateways](#)

All matches to this query

| Score | Mr(calc):   | Delta    | Sequence                             |
|-------|-------------|----------|--------------------------------------|
| 52.9  | 2263.224594 | 0.020238 | <a href="#">QLTSGPNQEQVSPLTLLK</a>   |
| 39.4  | 2263.224594 | 0.020238 | <a href="#">QLTSGPNQEQVSPLTLLK</a>   |
| 30.0  | 2263.224594 | 0.020238 | <a href="#">QLTSGPNQEQVSPLTLLK</a>   |
| 12.4  | 2263.224594 | 0.020238 | <a href="#">GLALSSNKVKSVMVVFENEK</a> |

M

A

T

R

I

X

S

C

I

E

N

C

E

Mascot Search Results

Peptide View

MS/MS Fragmentation of **LQQVLHAGSGPCLPHLLSR**  
Found in **A2AP\_HUMAN**, Alpha-2-antiplasmin OS=Homo sapiens GN=SERPINF2 PE=1 SV=3

Match to Query 51831: 2393.294416 from(599.330880,4+) rtinseconds(2122) index(6301)  
Title: Locus:1.1.1.2016.4 File:"2013-07-02 CLN FXIII 180 min 2nd F 1.wiff"  
Data file C:\Program Files (x86)\Matrix Science\Mascot Daemon\mgf\8 FXIII 180 min 2nd\mascot\_daemon\_merge.mgf

Click mouse within plot area to zoom in by factor of two about that point  
Or,   to  Da   
Label all possible matches ☐ Label matches used for scoring ☒

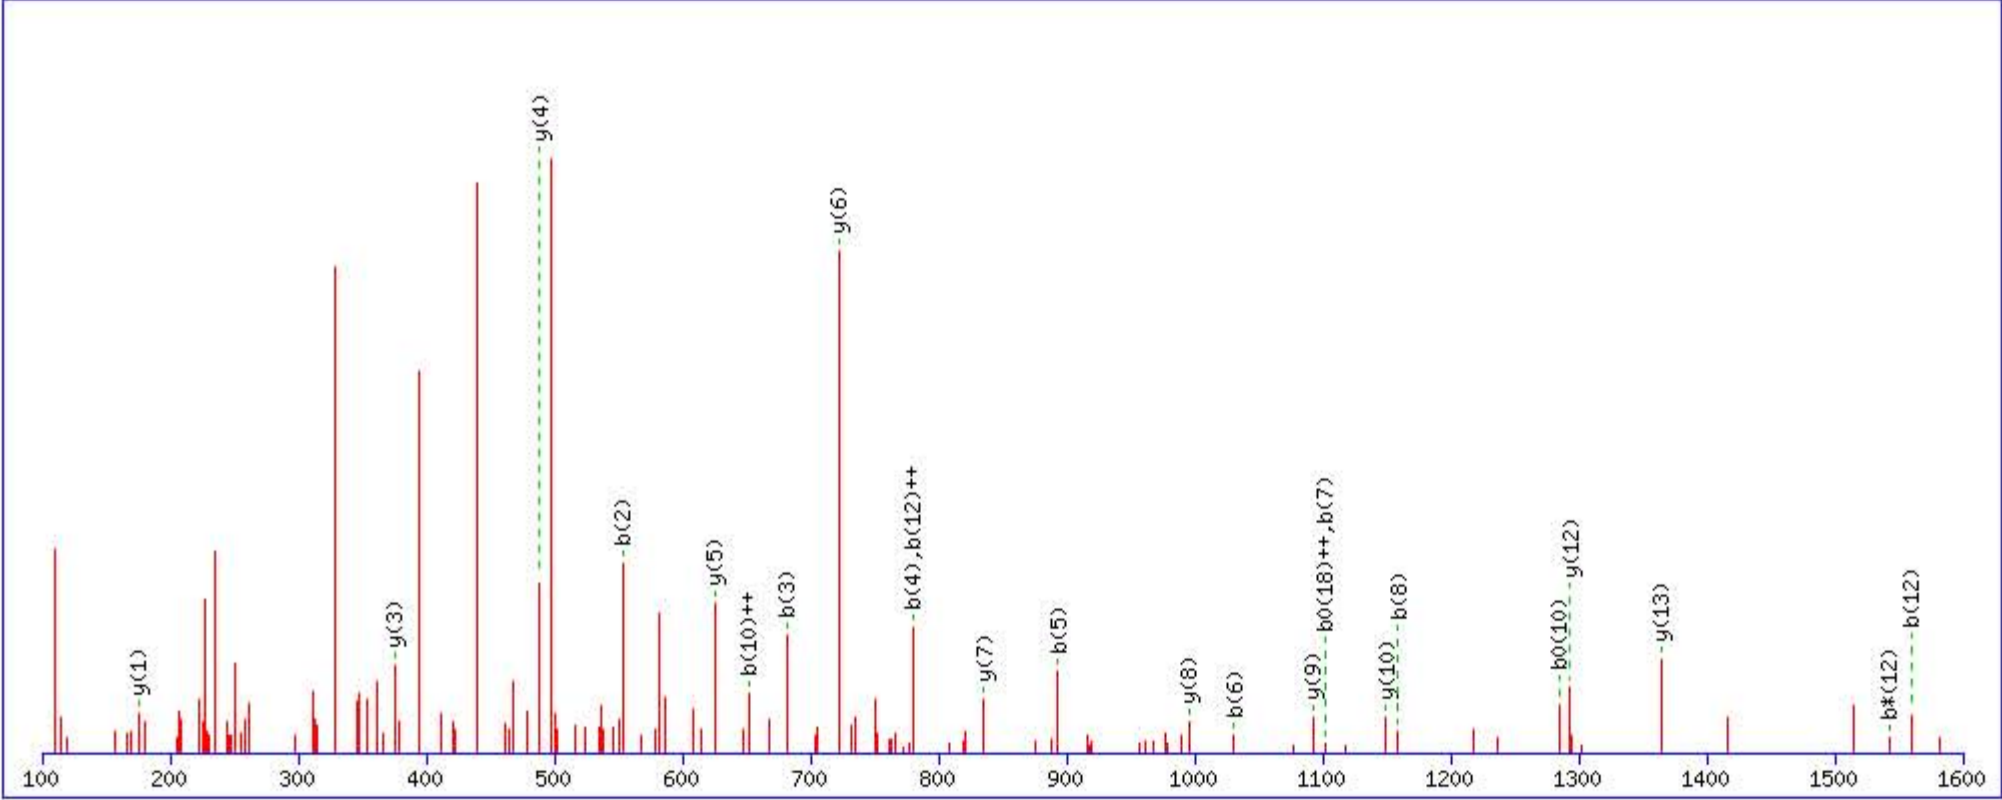

Monoisotopic mass of neutral peptide Mr(calc): 2393.282410  
Fixed modifications: Carbamidomethyl (C) (apply to specified residues or termini only)  
Variable modifications:  
Q2 : Biotin:Thermo-21345 (Q)  
Ions Score: 68 Expect: 3.4e-006  
Matches : 24/196 fragment ions using 41 most intense peaks [\(help\)](#)

| #  | b           | b <sup>++</sup> | b <sup>*</sup> | b <sup>*++</sup> | b <sup>0</sup> | b <sup>0++</sup> | Seq. | y           | y <sup>++</sup> | y <sup>*</sup> | y <sup>*++</sup> | y <sup>0</sup> | y <sup>0++</sup> | #  |
|----|-------------|-----------------|----------------|------------------|----------------|------------------|------|-------------|-----------------|----------------|------------------|----------------|------------------|----|
| 1  | 114.091340  | 57.549308       |                |                  |                |                  | L    |             |                 |                |                  |                |                  | 19 |
| 2  | 553.316666  | 277.161971      | 536.290117     | 268.648697       |                |                  | Q    | 2281.205625 | 1141.106450     | 2264.179076    | 1132.593176      | 2263.195060    | 1132.101168      | 18 |
| 3  | 681.375244  | 341.191260      | 664.348695     | 332.677986       |                |                  | Q    | 1841.980299 | 921.493788      | 1824.953750    | 912.980513       | 1823.969734    | 912.488505       | 17 |
| 4  | 780.443658  | 390.725467      | 763.417109     | 382.212193       |                |                  | V    | 1713.921721 | 857.464498      | 1696.895172    | 848.951224       | 1695.911156    | 848.459216       | 16 |
| 5  | 893.527722  | 447.267499      | 876.501173     | 438.754225       |                |                  | L    | 1614.853307 | 807.930292      | 1597.826758    | 799.417017       | 1596.842742    | 798.925009       | 15 |
| 6  | 1030.586634 | 515.796955      | 1013.560085    | 507.283681       |                |                  | H    | 1501.769243 | 751.388260      | 1484.742694    | 742.874985       | 1483.758678    | 742.382977       | 14 |
| 7  | 1101.623748 | 551.315512      | 1084.597199    | 542.802238       |                |                  | A    | 1364.710331 | 682.858804      | 1347.683782    | 674.345529       | 1346.699766    | 673.853521       | 13 |
| 8  | 1158.645212 | 579.826244      | 1141.618663    | 571.312970       |                |                  | G    | 1293.673217 | 647.340247      | 1276.646668    | 638.826972       | 1275.662652    | 638.334964       | 12 |
| 9  | 1245.677240 | 623.342258      | 1228.650691    | 614.828984       | 1227.666675    | 614.336975       | S    | 1236.651753 | 618.829515      | 1219.625204    | 610.316240       | 1218.641188    | 609.824232       | 11 |
| 10 | 1302.698704 | 651.852990      | 1285.672155    | 643.339716       | 1284.688139    | 642.847707       | G    | 1149.619725 | 575.313501      | 1132.593176    | 566.800226       | 1131.609160    | 566.308218       | 10 |
| 11 | 1399.751468 | 700.379372      | 1382.724919    | 691.866098       | 1381.740903    | 691.374089       | P    | 1092.598261 | 546.802769      | 1075.571712    | 538.289494       | 1074.587696    | 537.797486       | 9  |
| 12 | 1559.782117 | 780.394697      | 1542.755568    | 771.881422       | 1541.771552    | 771.389414       | C    | 995.545497  | 498.276387      | 978.518948     | 489.763112       | 977.534932     | 489.271104       | 8  |
| 13 | 1672.866181 | 836.936728      | 1655.839632    | 828.423454       | 1654.855616    | 827.931446       | L    | 835.514848  | 418.261062      | 818.488299     | 409.747788       | 817.504283     | 409.255780       | 7  |
| 14 | 1769.918945 | 885.463110      | 1752.892396    | 876.949836       | 1751.908380    | 876.457828       | P    | 722.430784  | 361.719030      | 705.404235     | 353.205756       | 704.420219     | 352.713748       | 6  |
| 15 | 1906.977857 | 953.992566      | 1889.951308    | 945.479292       | 1888.967292    | 944.987284       | H    | 625.378020  | 313.192648      | 608.351471     | 304.679374       | 607.367455     | 304.187366       | 5  |
| 16 | 2020.061921 | 1010.534598     | 2003.035372    | 1002.021324      | 2002.051356    | 1001.529316      | L    | 488.319108  | 244.663192      | 471.292559     | 236.149918       | 470.308543     | 235.657910       | 4  |
| 17 | 2133.145985 | 1067.076630     | 2116.119436    | 1058.563356      | 2115.135420    | 1058.071348      | L    | 375.235044  | 188.121160      | 358.208495     | 179.607886       | 357.224479     | 179.115878       | 3  |
| 18 | 2220.178013 | 1110.592644     | 2203.151464    | 1102.079370      | 2202.167448    | 1101.587362      | S    | 262.150980  | 131.579128      | 245.124431     | 123.065854       | 244.140415     | 122.573846       | 2  |
| 19 |             |                 |                |                  |                |                  | R    | 175.118952  | 88.063114       | 158.092403     | 79.549839        |                |                  | 1  |

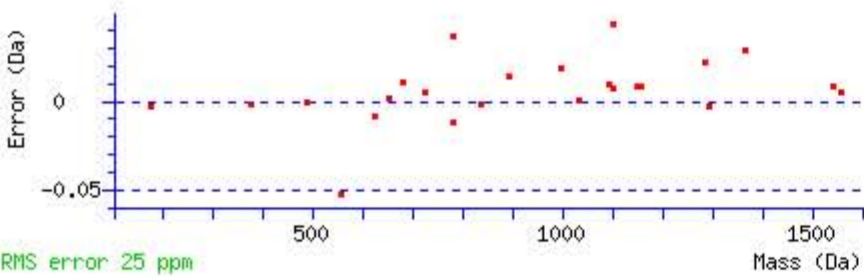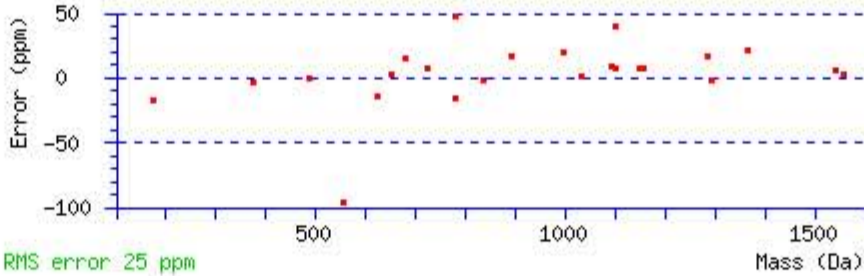

NCBI BLAST search of [LQQVLHAGSGPCLPHLLSR](#)  
(Parameters: blastp, nr protein database, expect=20000, no filter, PAM30)  
Other BLAST [web gateways](#)

All matches to this query

| Score | Mr(calc):   | Delta    | Sequence                            |
|-------|-------------|----------|-------------------------------------|
| 67.8  | 2393.282410 | 0.012006 | <a href="#">LQQVLHAGSGPCLPHLLSR</a> |
| 62.1  | 2393.282410 | 0.012006 | <a href="#">LQQVLHAGSGPCLPHLLSR</a> |

M

A

T

R

I

X

S

C

I

E

N

C

E

Mascot Search Results

Peptide View

MS/MS Fragmentation of **WFLLEQPEIQVAHFPEK**  
Found in **A2AP\_HUMAN**, Alpha-2-antiplasmin OS=Homo sapiens GN=SERPINF2 PE=1 SV=3

Match to Query 52799: 2439.305622 from(814.109150,3+) rtinseconds(2930) index(10727)  
Title: Locus:1.1.1.2296.13 File:"2013-07-02 CLN FXIII 180 min 2nd F 1.wiff"  
Data file C:\Program Files (x86)\Matrix Science\Mascot Daemon\mgf\8 FXIII 180 min 2nd\mascot\_daemon\_merge.mgf

Click mouse within plot area to zoom in by factor of two about that point  
Or, 

Plot from

100

 to 

2000

 Da 

Full range

  
Label all possible matches ☐ Label matches used for scoring ☒

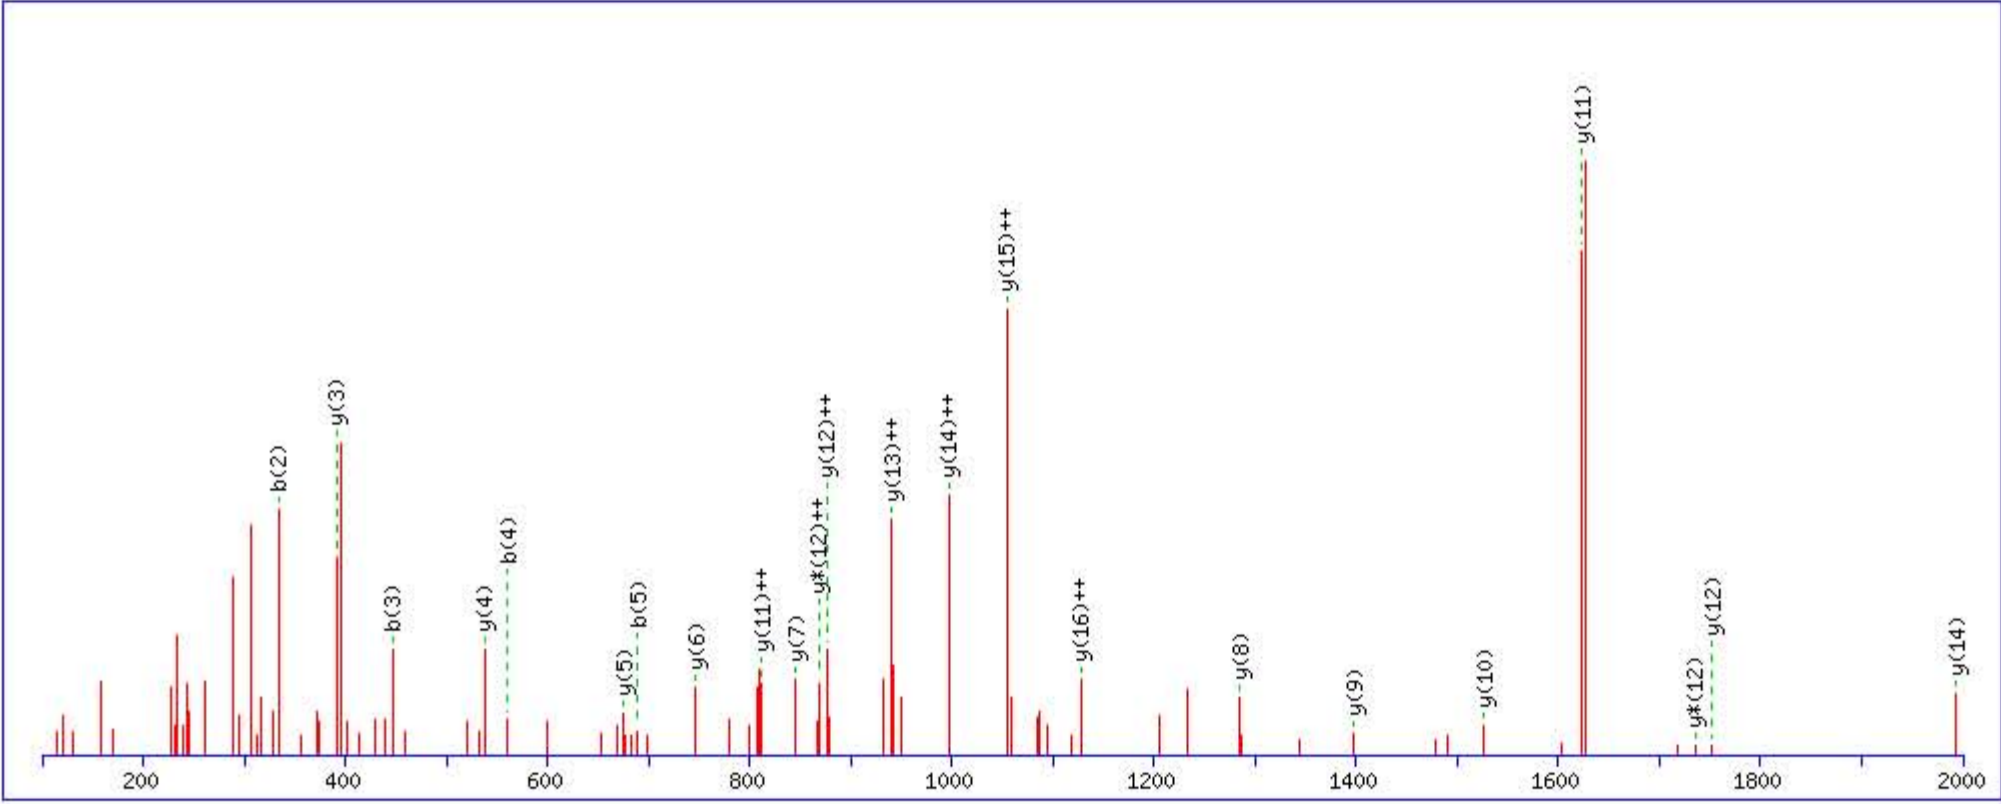

Monoisotopic mass of neutral peptide Mr(calc): 2439.281326  
Fixed modifications: Carbamidomethyl (C) (apply to specified residues or termini only)  
Variable modifications:  
Q10 : Biotin:Thermo-21345 (Q)  
Ions Score: 54 Expect: 8.8e-005  
Matches : 23/156 fragment ions using 48 most intense peaks [\(help\)](#)

| #  | b           | b <sup>++</sup> | b <sup>*</sup> | b <sup>+++</sup> | b <sup>0</sup> | b <sup>0++</sup> | Seq. | y           | y <sup>++</sup> | y <sup>*</sup> | y <sup>+++</sup> | y <sup>0</sup> | y <sup>0++</sup> | #  |
|----|-------------|-----------------|----------------|------------------|----------------|------------------|------|-------------|-----------------|----------------|------------------|----------------|------------------|----|
| 1  | 187.086589  | 94.046932       |                |                  |                |                  | W    |             |                 |                |                  |                |                  | 17 |
| 2  | 334.155003  | 167.581140      |                |                  |                |                  | F    | 2254.209296 | 1127.608286     | 2237.182747    | 1119.095011      | 2236.198731    | 1118.603003      | 16 |
| 3  | 447.239067  | 224.123172      |                |                  |                |                  | L    | 2107.140882 | 1054.074079     | 2090.114333    | 1045.560804      | 2089.130317    | 1045.068796      | 15 |
| 4  | 560.323131  | 280.665204      |                |                  |                |                  | L    | 1994.056818 | 997.532047      | 1977.030269    | 989.018772       | 1976.046253    | 988.526764       | 14 |
| 5  | 689.365724  | 345.186500      |                |                  | 671.355159     | 336.181218       | E    | 1880.972754 | 940.990015      | 1863.946205    | 932.476741       | 1862.962189    | 931.984732       | 13 |
| 6  | 817.424302  | 409.215789      | 800.397753     | 400.702515       | 799.413737     | 400.210507       | Q    | 1751.930161 | 876.468719      | 1734.903612    | 867.955444       | 1733.919596    | 867.463436       | 12 |
| 7  | 914.477066  | 457.742171      | 897.450517     | 449.228897       | 896.466501     | 448.736889       | P    | 1623.871583 | 812.439429      | 1606.845034    | 803.926155       | 1605.861018    | 803.434147       | 11 |
| 8  | 1043.519659 | 522.263468      | 1026.493110    | 513.750193       | 1025.509094    | 513.258185       | E    | 1526.818819 | 763.913047      | 1509.792270    | 755.399773       | 1508.808254    | 754.907765       | 10 |
| 9  | 1156.603723 | 578.805500      | 1139.577174    | 570.292225       | 1138.593158    | 569.800217       | I    | 1397.776226 | 699.391751      | 1380.749677    | 690.878476       |                |                  | 9  |
| 10 | 1595.829049 | 798.418163      | 1578.802500    | 789.904888       | 1577.818484    | 789.412880       | Q    | 1284.692162 | 642.849719      | 1267.665613    | 634.336444       |                |                  | 8  |
| 11 | 1694.897463 | 847.952370      | 1677.870914    | 839.439095       | 1676.886898    | 838.947087       | V    | 845.466836  | 423.237056      | 828.440287     | 414.723781       |                |                  | 7  |
| 12 | 1765.934577 | 883.470927      | 1748.908028    | 874.957652       | 1747.924012    | 874.465644       | A    | 746.398422  | 373.702849      | 729.371873     | 365.189574       |                |                  | 6  |
| 13 | 1902.993489 | 952.000383      | 1885.966940    | 943.487108       | 1884.982924    | 942.995100       | H    | 675.361308  | 338.184292      | 658.334759     | 329.671017       |                |                  | 5  |
| 14 | 2050.061903 | 1025.534589     | 2033.035354    | 1017.021315      | 2032.051338    | 1016.529307      | F    | 538.302396  | 269.654836      | 521.275847     | 261.141561       |                |                  | 4  |
| 15 | 2147.114667 | 1074.060971     | 2130.088118    | 1065.547697      | 2129.104102    | 1065.055689      | P    | 391.233982  | 196.120629      | 374.207433     | 187.607354       |                |                  | 3  |
| 16 | 2294.183081 | 1147.595178     | 2277.156532    | 1139.081904      | 2276.172516    | 1138.589896      | F    | 294.181218  | 147.594247      | 277.154669     | 139.080972       |                |                  | 2  |
| 17 |             |                 |                |                  |                |                  | K    | 147.112804  | 74.060040       | 130.086255     | 65.546765        |                |                  | 1  |

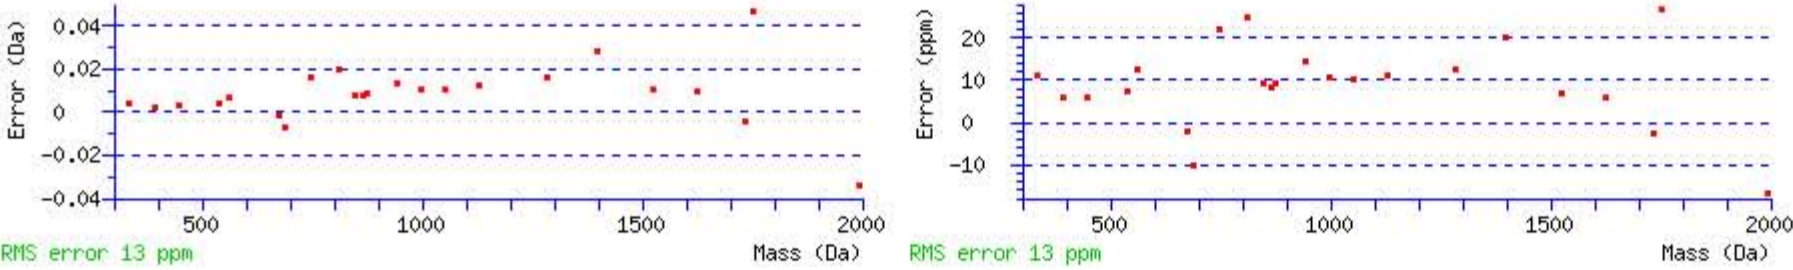

NCBI BLAST search of **WFLLEQPEIQVAHFPEK**  
(Parameters: blastp, nr protein database, expect=20000, no filter, PAM30)  
Other BLAST [web gateways](#)

All matches to this query

| Score | Mr(calc):   | Delta    | Sequence                          |
|-------|-------------|----------|-----------------------------------|
| 53.9  | 2439.281326 | 0.024296 | <a href="#">WFLLEQPEIQVAHFPEK</a> |
| 25.4  | 2439.281326 | 0.024296 | <a href="#">WFLLEQPEIQVAHFPEK</a> |

MATRIX

SCIENCE

Mascot Search Results

Peptide View

MS/MS Fragmentation of **QLTSGPNQEQVSPLTLLK**  
Found in **A2AP\_HUMAN**, Alpha-2-antiplasmin OS=Homo sapiens GN=SERPINF2 PE=1 SV=3

Match to Query 55235: 2574.414792 from(859.145540,3+) rtinseconds(2709) index(9405)  
Title: Locus:1.1.1.2220.20 File:"2013-07-02 CLN FXIII 180 min 2nd F 1.wiff"  
Data file C:\Program Files (x86)\Matrix Science\Mascot Daemon\mgf\8 FXIII 180 min 2nd\mascot\_daemon\_merge.mgf

Click mouse within plot area to zoom in by factor of two about that point  
Or, 

Plot from

0

 to 

2600

 Da 

Full range

  
Label all possible matches ☐ Label matches used for scoring ☒

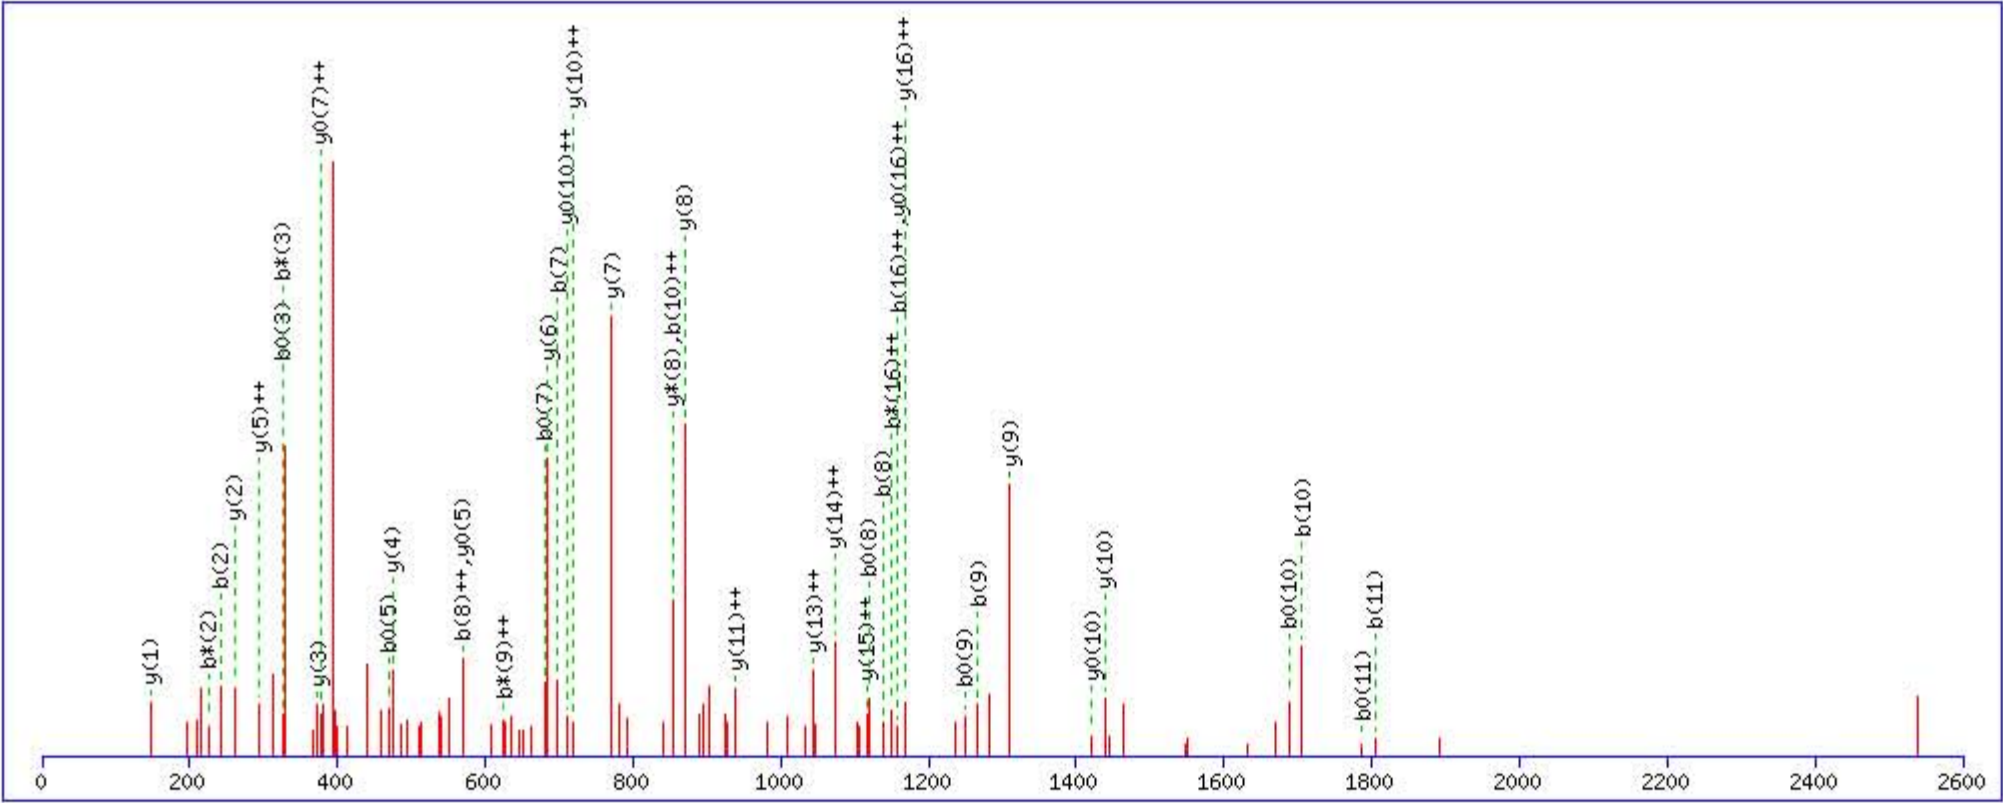

Monoisotopic mass of neutral peptide Mr(calc): 2574.391342  
Fixed modifications: Carbamidomethyl (C) (apply to specified residues or termini only)  
Variable modifications:  
Q8 : Biotin:Thermo-21345 (Q)  
Q10 : Biotin:Thermo-21345 (Q)  
Ions Score: 45 Expect: 0.00041  
Matches : 42/194 fragment ions using 82 most intense peaks [\(help\)](#)

| #  | b           | b <sup>++</sup> | b <sup>*</sup> | b <sup>*++</sup> | b <sup>0</sup> | b <sup>0++</sup> | Seq. | y           | y <sup>++</sup> | y <sup>*</sup> | y <sup>*++</sup> | y <sup>0</sup> | y <sup>0++</sup> | #  |
|----|-------------|-----------------|----------------|------------------|----------------|------------------|------|-------------|-----------------|----------------|------------------|----------------|------------------|----|
| 1  | 129.065854  | 65.036565       | 112.039305     | 56.523291        |                |                  | Q    |             |                 |                |                  |                |                  | 18 |
| 2  | 242.149918  | 121.578597      | 225.123369     | 113.065323       |                |                  | L    | 2447.340052 | 1224.173664     | 2430.313503    | 1215.660389      | 2429.329487    | 1215.168381      | 17 |
| 3  | 343.197597  | 172.102437      | 326.171048     | 163.589162       | 325.187032     | 163.097154       | T    | 2334.255988 | 1167.631632     | 2317.229439    | 1159.118357      | 2316.245423    | 1158.626349      | 16 |
| 4  | 430.229625  | 215.618450      | 413.203076     | 207.105176       | 412.219060     | 206.613168       | S    | 2233.208309 | 1117.107792     | 2216.181760    | 1108.594518      | 2215.197744    | 1108.102510      | 15 |
| 5  | 487.251089  | 244.129182      | 470.224540     | 235.615908       | 469.240524     | 235.123900       | G    | 2146.176281 | 1073.591778     | 2129.149732    | 1065.078504      | 2128.165716    | 1064.586496      | 14 |
| 6  | 584.303853  | 292.655565      | 567.277304     | 284.142290       | 566.293288     | 283.650282       | P    | 2089.154817 | 1045.081046     | 2072.128268    | 1036.567772      | 2071.144252    | 1036.075764      | 13 |
| 7  | 698.346780  | 349.677028      | 681.320231     | 341.163753       | 680.336215     | 340.671745       | N    | 1992.102053 | 996.554665      | 1975.075504    | 988.041390       | 1974.091488    | 987.549382       | 12 |
| 8  | 1137.572106 | 569.289691      | 1120.545557    | 560.776416       | 1119.561541    | 560.284408       | Q    | 1878.059126 | 939.533201      | 1861.032577    | 931.019927       | 1860.048561    | 930.527919       | 11 |
| 9  | 1266.614699 | 633.810988      | 1249.588150    | 625.297713       | 1248.604134    | 624.805705       | E    | 1438.833800 | 719.920538      | 1421.807251    | 711.407264       | 1420.823235    | 710.915256       | 10 |
| 10 | 1705.840025 | 853.423651      | 1688.813476    | 844.910376       | 1687.829460    | 844.418368       | Q    | 1309.791207 | 655.399242      | 1292.764658    | 646.885967       | 1291.780642    | 646.393959       | 9  |
| 11 | 1804.908439 | 902.957858      | 1787.881890    | 894.444583       | 1786.897874    | 893.952575       | V    | 870.565881  | 435.786579      | 853.539332     | 427.273304       | 852.555316     | 426.781296       | 8  |
| 12 | 1891.940467 | 946.473872      | 1874.913918    | 937.960597       | 1873.929902    | 937.468589       | S    | 771.497467  | 386.252372      | 754.470918     | 377.739097       | 753.486902     | 377.247089       | 7  |
| 13 | 1988.993231 | 995.000254      | 1971.966682    | 986.486979       | 1970.982666    | 985.994971       | P    | 684.465439  | 342.736358      | 667.438890     | 334.223083       | 666.454874     | 333.731075       | 6  |
| 14 | 2102.077295 | 1051.542285     | 2085.050746    | 1043.029011      | 2084.066730    | 1042.537003      | L    | 587.412675  | 294.209976      | 570.386126     | 285.696701       | 569.402110     | 285.204693       | 5  |
| 15 | 2203.124974 | 1102.066125     | 2186.098425    | 1093.552850      | 2185.114409    | 1093.060842      | T    | 474.328611  | 237.667944      | 457.302062     | 229.154669       | 456.318046     | 228.662661       | 4  |
| 16 | 2316.209038 | 1158.608157     | 2299.182489    | 1150.094882      | 2298.198473    | 1149.602874      | L    | 373.280932  | 187.144104      | 356.254383     | 178.630830       |                |                  | 3  |
| 17 | 2429.293102 | 1215.150189     | 2412.266553    | 1206.636914      | 2411.282537    | 1206.144906      | L    | 260.196868  | 130.602072      | 243.170319     | 122.088798       |                |                  | 2  |
| 18 |             |                 |                |                  |                |                  | K    | 147.112804  | 74.060040       | 130.086255     | 65.546765        |                |                  | 1  |

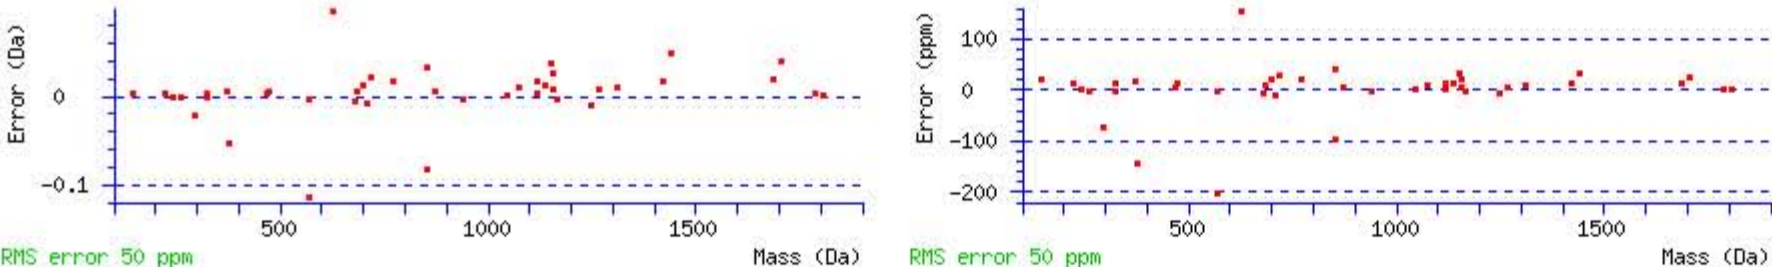

NCBI BLAST search of [QLTSGPNQEQVSPLTLLK](#)  
(Parameters: blastp, nr protein database, expect=20000, no filter, PAM30)  
Other BLAST [web gateways](#)

All matches to this query

| Score | Mr(calc):   | Delta    | Sequence                           |
|-------|-------------|----------|------------------------------------|
| 45.0  | 2574.391342 | 0.023450 | <a href="#">QLTSGPNQEQVSPLTLLK</a> |
| 27.9  | 2574.391342 | 0.023450 | <a href="#">QLTSGPNQEQVSPLTLLK</a> |
| 11.8  | 2574.391342 | 0.023450 | <a href="#">QLTSGPNQEQVSPLTLLK</a> |

MATRIX

SCIENCE

Mascot Search Results

Peptide View

MS/MS Fragmentation of **QLTSGPNQEQVSPLTLLK**  
Found in **A2AP\_HUMAN**, Alpha-2-antiplasmin OS=Homo sapiens GN=SERPINF2 PE=1 SV=3

Match to Query 55236: 2574.427812 from(859.149880,3+) rtinseconds(2659) index(9030)  
Title: Locus:1.1.1.2203.9 File:"2013-07-02 CLN FXIII 180 min 2nd F 1.wiff"  
Data file C:\Program Files (x86)\Matrix Science\Mascot Daemon\mgf\8 FXIII 180 min 2nd\mascot\_daemon\_merge.mgf

Click mouse within plot area to zoom in by factor of two about that point  
Or, 

Plot from

0

 to 

2600

 Da 

Full range

  
Label all possible matches ☐ Label matches used for scoring ☒

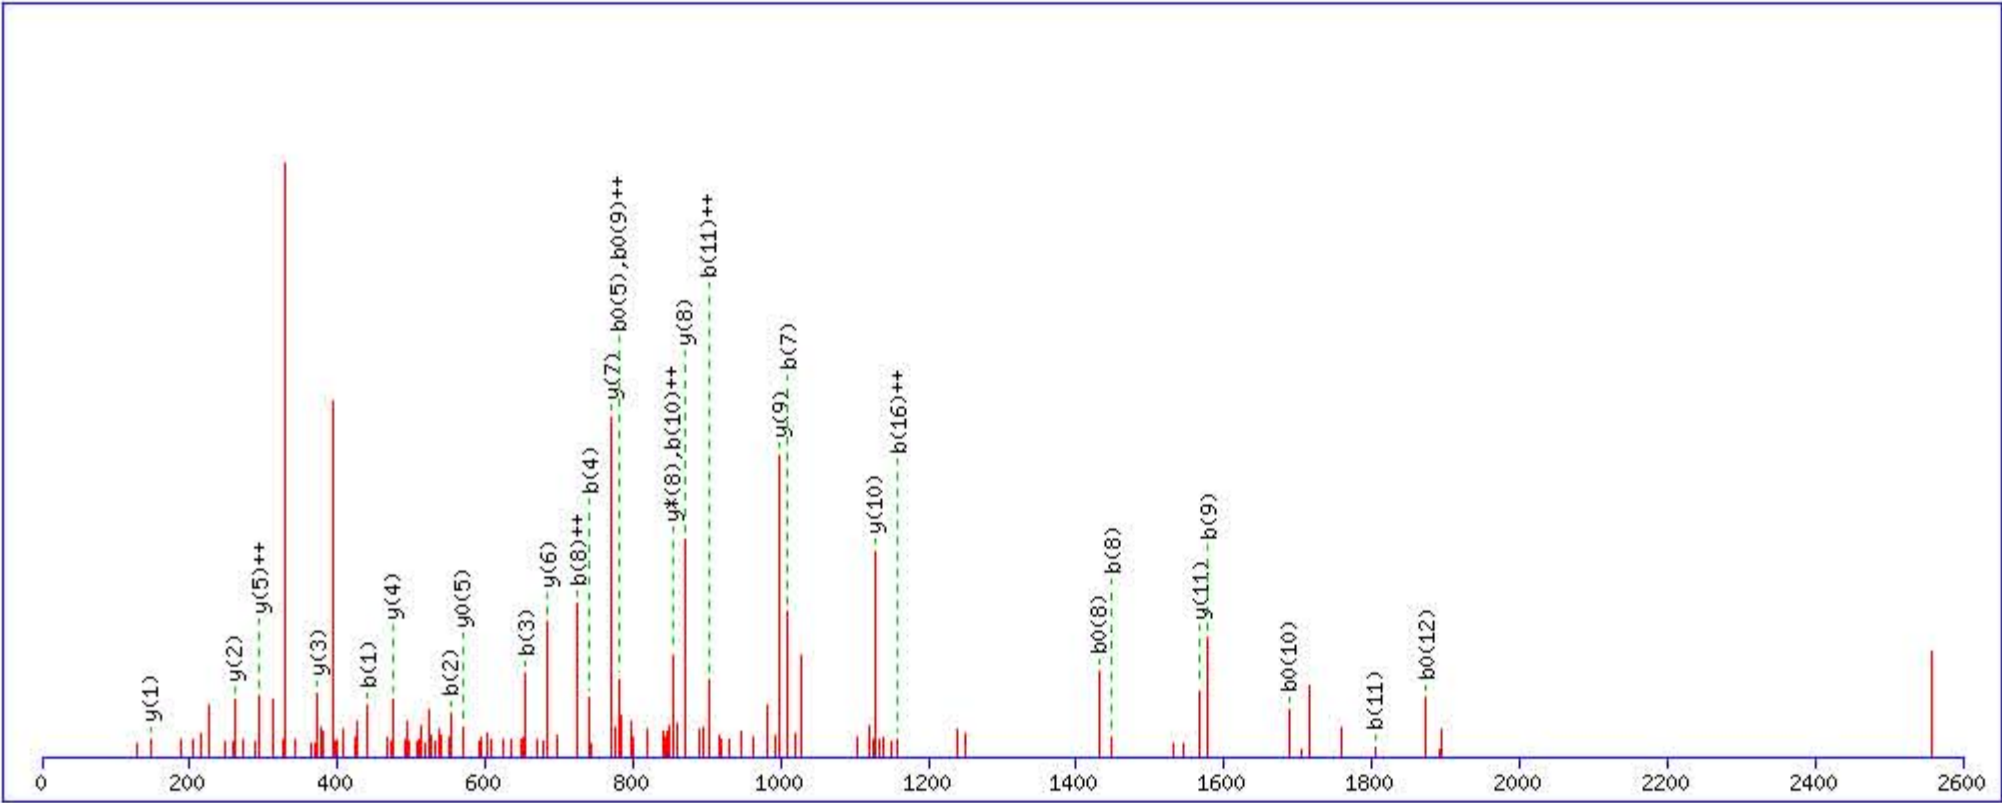

Monoisotopic mass of neutral peptide Mr(calc): 2574.391342  
Fixed modifications: Carbamidomethyl (C) (apply to specified residues or termini only)  
Variable modifications:  
Q1 : Biotin:Thermo-21345 (Q)  
Q8 : Biotin:Thermo-21345 (Q)  
Ions Score: 59 Expect: 3.5e-006  
Matches : 30/194 fragment ions using 50 most intense peaks [\(help\)](#)

| #  | b           | b <sup>++</sup> | b <sup>*</sup> | b <sup>+++</sup> | b <sup>0</sup> | b <sup>0++</sup> | Seq. | y           | y <sup>++</sup> | y <sup>*</sup> | y <sup>+++</sup> | y <sup>0</sup> | y <sup>0++</sup> | #  |
|----|-------------|-----------------|----------------|------------------|----------------|------------------|------|-------------|-----------------|----------------|------------------|----------------|------------------|----|
| 1  | 440.232602  | 220.619939      | 423.206053     | 212.106664       |                |                  | Q    |             |                 |                |                  |                |                  | 18 |
| 2  | 553.316666  | 277.161971      | 536.290117     | 268.648697       |                |                  | L    | 2136.173304 | 1068.590290     | 2119.146755    | 1060.077015      | 2118.162739    | 1059.585007      | 17 |
| 3  | 654.364345  | 327.685811      | 637.337796     | 319.172536       | 636.353780     | 318.680528       | T    | 2023.089240 | 1012.048258     | 2006.062691    | 1003.534984      | 2005.078675    | 1003.042976      | 16 |
| 4  | 741.396373  | 371.201825      | 724.369824     | 362.688550       | 723.385808     | 362.196542       | S    | 1922.041561 | 961.524419      | 1905.015012    | 953.011144       | 1904.030996    | 952.519136       | 15 |
| 5  | 798.417837  | 399.712557      | 781.391288     | 391.199282       | 780.407272     | 390.707274       | G    | 1835.009533 | 918.008405      | 1817.982984    | 909.495130       | 1816.998968    | 909.003122       | 14 |
| 6  | 895.470601  | 448.238939      | 878.444052     | 439.725664       | 877.460036     | 439.233656       | P    | 1777.988069 | 889.497673      | 1760.961520    | 880.984398       | 1759.977504    | 880.492390       | 13 |
| 7  | 1009.513528 | 505.260402      | 992.486979     | 496.747128       | 991.502963     | 496.255120       | N    | 1680.935305 | 840.971291      | 1663.908756    | 832.458016       | 1662.924740    | 831.966008       | 12 |
| 8  | 1448.738854 | 724.873065      | 1431.712305    | 716.359791       | 1430.728289    | 715.867782       | Q    | 1566.892378 | 783.949827      | 1549.865829    | 775.436553       | 1548.881813    | 774.944545       | 11 |
| 9  | 1577.781447 | 789.394362      | 1560.754898    | 780.881087       | 1559.770882    | 780.389079       | E    | 1127.667052 | 564.337164      | 1110.640503    | 555.823890       | 1109.656487    | 555.331882       | 10 |
| 10 | 1705.840025 | 853.423651      | 1688.813476    | 844.910376       | 1687.829460    | 844.418368       | Q    | 998.624459  | 499.815868      | 981.597910     | 491.302593       | 980.613894     | 490.810585       | 9  |
| 11 | 1804.908439 | 902.957858      | 1787.881890    | 894.444583       | 1786.897874    | 893.952575       | V    | 870.565881  | 435.786579      | 853.539332     | 427.273304       | 852.555316     | 426.781296       | 8  |
| 12 | 1891.940467 | 946.473872      | 1874.913918    | 937.960597       | 1873.929902    | 937.468589       | S    | 771.497467  | 386.252372      | 754.470918     | 377.739097       | 753.486902     | 377.247089       | 7  |
| 13 | 1988.993231 | 995.000254      | 1971.966682    | 986.486979       | 1970.982666    | 985.994971       | P    | 684.465439  | 342.736358      | 667.438890     | 334.223083       | 666.454874     | 333.731075       | 6  |
| 14 | 2102.077295 | 1051.542285     | 2085.050746    | 1043.029011      | 2084.066730    | 1042.537003      | L    | 587.412675  | 294.209976      | 570.386126     | 285.696701       | 569.402110     | 285.204693       | 5  |
| 15 | 2203.124974 | 1102.066125     | 2186.098425    | 1093.552850      | 2185.114409    | 1093.060842      | T    | 474.328611  | 237.667944      | 457.302062     | 229.154669       | 456.318046     | 228.662661       | 4  |
| 16 | 2316.209038 | 1158.608157     | 2299.182489    | 1150.094882      | 2298.198473    | 1149.602874      | L    | 373.280932  | 187.144104      | 356.254383     | 178.630830       |                |                  | 3  |
| 17 | 2429.293102 | 1215.150189     | 2412.266553    | 1206.636914      | 2411.282537    | 1206.144906      | L    | 260.196868  | 130.602072      | 243.170319     | 122.088798       |                |                  | 2  |
| 18 |             |                 |                |                  |                |                  | K    | 147.112804  | 74.060040       | 130.086255     | 65.546765        |                |                  | 1  |

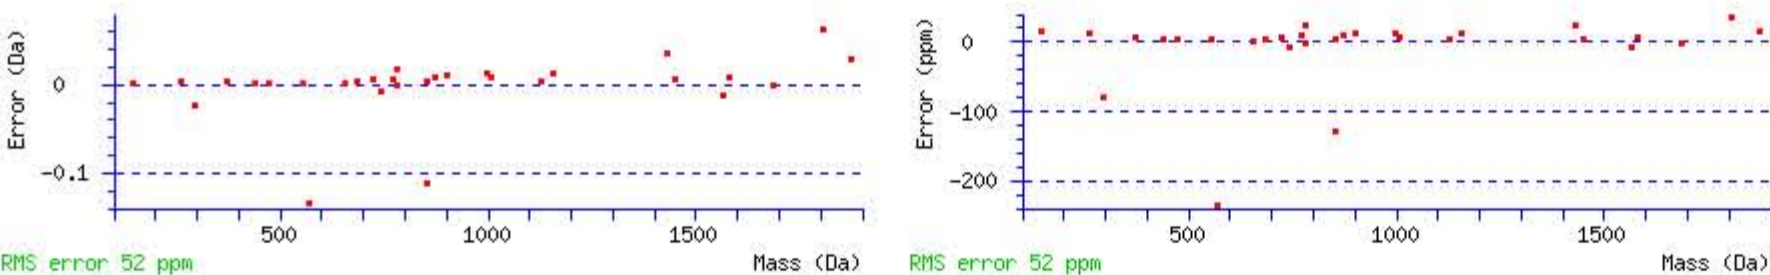

NCBI BLAST search of **QLTSGPNQEQVSPLTLLK**  
(Parameters: blastp, nr protein database, expect=20000, no filter, PAM30)  
Other BLAST [web gateways](#)

All matches to this query

| Score | Mr(calc):   | Delta    | Sequence                               |
|-------|-------------|----------|----------------------------------------|
| 58.7  | 2574.391342 | 0.036470 | <a href="#">QLTSGPNQEQVSPLTLLK</a>     |
| 42.0  | 2574.391342 | 0.036470 | <a href="#">QLTSGPNQEQVSPLTLLK</a>     |
| 14.9  | 2574.391342 | 0.036470 | <a href="#">QLTSGPNQEQVSPLTLLK</a>     |
| 0.5   | 2574.402542 | 0.025270 | <a href="#">NTLAVANMKVSRPVMKVPYALK</a> |

Peptide View

MS/MS Fragmentation of **GFPIKEDFLEQSEQLFGAKPVS****LTGK**  
Found in **A2AP\_HUMAN**, Alpha-2-antiplasmin OS=Homo sapiens GN=SERPINF2 PE=1 SV=3

Match to Query 61514: 3175.694896 from(794.931000,4+) rtinseconds(2767) index(9728)  
Title: Locus:1.1.1.2240.9 File:"2013-07-02 CLN FXIII 180 min 2nd F 1.wiff"  
Data file C:\Program Files (x86)\Matrix Science\Mascot Daemon\mgf\8 FXIII 180 min 2nd\mascot\_daemon\_merge.mgf

Click mouse within plot area to zoom in by factor of two about that point  
Or, 

Plot from

0

 to 

3000

 Da 

Full range

  
Label all possible matches ☐ Label matches used for scoring ☒

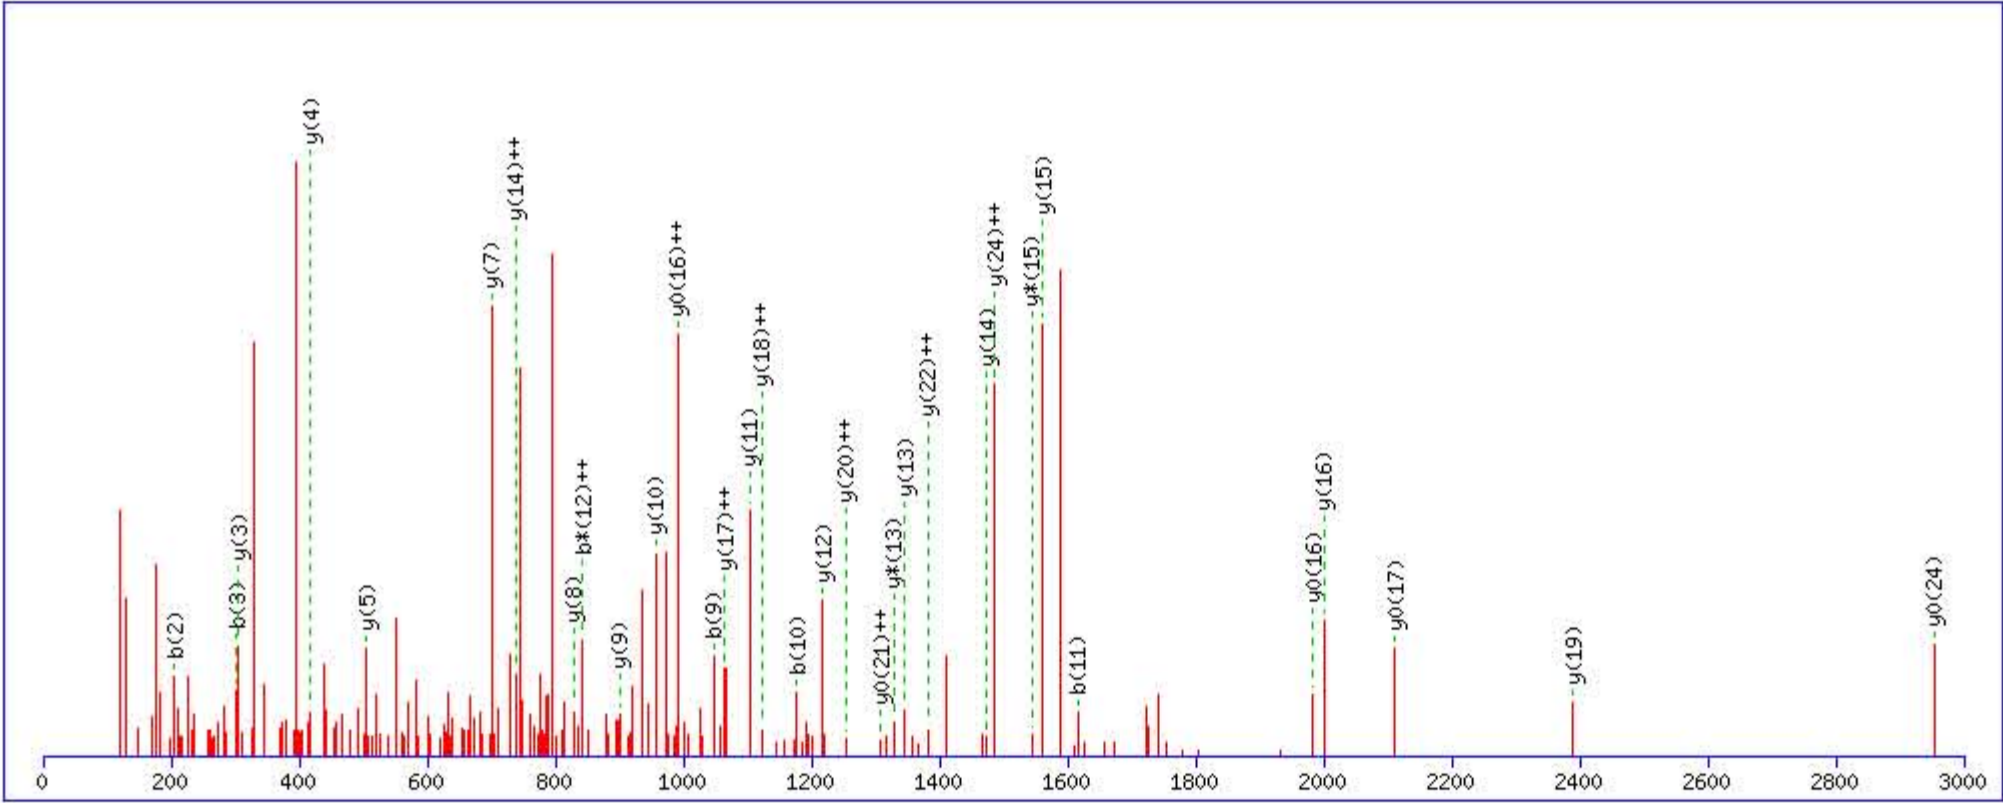

Monoisotopic mass of neutral peptide Mr(calc): 3175.662750  
Fixed modifications: Carbamidomethyl (C) (apply to specified residues or termini only)  
Variable modifications:  
Q11 : Biotin:Thermo-21345 (Q)  
Ions Score: 63 Expect: 8.1e-006  
Matches : 33/278 fragment ions using 72 most intense peaks [\(help\)](#)

| #  | b           | b <sup>++</sup> | b <sup>*</sup> | b <sup>++</sup> | b <sup>0</sup> | b <sup>0++</sup> | Seq. | y           | y <sup>++</sup> | y <sup>*</sup> | y <sup>++</sup> | y <sup>0</sup> | y <sup>0++</sup> | #  |
|----|-------------|-----------------|----------------|-----------------|----------------|------------------|------|-------------|-----------------|----------------|-----------------|----------------|------------------|----|
| 1  | 58.028740   | 29.518008       |                |                 |                |                  | G    |             |                 |                |                 |                |                  | 26 |
| 2  | 205.097154  | 103.052215      |                |                 |                |                  | F    | 3119.648573 | 1560.327924     | 3102.622024    | 1551.814650     | 3101.638008    | 1551.322642      | 25 |
| 3  | 302.149918  | 151.578597      |                |                 |                |                  | P    | 2972.580159 | 1486.793717     | 2955.553610    | 1478.280443     | 2954.569594    | 1477.788435      | 24 |
| 4  | 415.233982  | 208.120629      |                |                 |                |                  | I    | 2875.527395 | 1438.267335     | 2858.500846    | 1429.754061     | 2857.516830    | 1429.262053      | 23 |
| 5  | 543.328945  | 272.168111      | 526.302396     | 263.654836      |                |                  | K    | 2762.443331 | 1381.725303     | 2745.416782    | 1373.212029     | 2744.432766    | 1372.720021      | 22 |
| 6  | 672.371538  | 336.689407      | 655.344989     | 328.176133      | 654.360973     | 327.684125       | E    | 2634.348368 | 1317.677822     | 2617.321819    | 1309.164547     | 2616.337803    | 1308.672539      | 21 |
| 7  | 787.398481  | 394.202879      | 770.371932     | 385.689604      | 769.387916     | 385.197596       | D    | 2505.305775 | 1253.156525     | 2488.279226    | 1244.643251     | 2487.295210    | 1244.151243      | 20 |
| 8  | 934.466895  | 467.737086      | 917.440346     | 459.223811      | 916.456330     | 458.731803       | F    | 2390.278832 | 1195.643054     | 2373.252283    | 1187.129779     | 2372.268267    | 1186.637771      | 19 |
| 9  | 1047.550959 | 524.279117      | 1030.524410    | 515.765843      | 1029.540394    | 515.273835       | L    | 2243.210418 | 1122.108847     | 2226.183869    | 1113.595572     | 2225.199853    | 1113.103564      | 18 |
| 10 | 1176.593552 | 588.800414      | 1159.567003    | 580.287140      | 1158.582987    | 579.795132       | E    | 2130.126354 | 1065.566815     | 2113.099805    | 1057.053540     | 2112.115789    | 1056.561532      | 17 |
| 11 | 1615.818878 | 808.413077      | 1598.792329    | 799.899803      | 1597.808313    | 799.407795       | Q    | 2001.083761 | 1001.045519     | 1984.057212    | 992.532244      | 1983.073196    | 992.040236       | 16 |
| 12 | 1702.850906 | 851.929091      | 1685.824357    | 843.415817      | 1684.840341    | 842.923809       | S    | 1561.858435 | 781.432856      | 1544.831886    | 772.919581      | 1543.847870    | 772.427573       | 15 |
| 13 | 1831.893499 | 916.450388      | 1814.866950    | 907.937113      | 1813.882934    | 907.445105       | E    | 1474.826407 | 737.916842      | 1457.799858    | 729.403567      | 1456.815842    | 728.911559       | 14 |
| 14 | 1959.952077 | 980.479677      | 1942.925528    | 971.966402      | 1941.941512    | 971.474394       | Q    | 1345.783814 | 673.395545      | 1328.757265    | 664.882271      | 1327.773249    | 664.390263       | 13 |
| 15 | 2073.036141 | 1037.021709     | 2056.009592    | 1028.508434     | 2055.025576    | 1028.016426      | L    | 1217.725236 | 609.366256      | 1200.698687    | 600.852982      | 1199.714671    | 600.360974       | 12 |
| 16 | 2220.104555 | 1110.555916     | 2203.078006    | 1102.042641     | 2202.093990    | 1101.550633      | F    | 1104.641172 | 552.824224      | 1087.614623    | 544.310949      | 1086.630607    | 543.818941       | 11 |
| 17 | 2277.126019 | 1139.066648     | 2260.099470    | 1130.553373     | 2259.115454    | 1130.061365      | G    | 957.572758  | 479.290017      | 940.546209     | 470.776743      | 939.562193     | 470.284735       | 10 |
| 18 | 2348.163133 | 1174.585205     | 2331.136584    | 1166.071930     | 2330.152568    | 1165.579922      | A    | 900.551294  | 450.779285      | 883.524745     | 442.266011      | 882.540729     | 441.774003       | 9  |
| 19 | 2476.258096 | 1238.632686     | 2459.231547    | 1230.119412     | 2458.247531    | 1229.627404      | K    | 829.514180  | 415.260728      | 812.487631     | 406.747453      | 811.503615     | 406.255445       | 8  |
| 20 | 2573.310860 | 1287.159068     | 2556.284311    | 1278.645794     | 2555.300295    | 1278.153786      | P    | 701.419217  | 351.213246      | 684.392668     | 342.699972      | 683.408652     | 342.207964       | 7  |
| 21 | 2672.379274 | 1336.693275     | 2655.352725    | 1328.180001     | 2654.368709    | 1327.687993      | V    | 604.366453  | 302.686864      | 587.339904     | 294.173590      | 586.355888     | 293.681582       | 6  |
| 22 | 2759.411302 | 1380.209289     | 2742.384753    | 1371.696015     | 2741.400737    | 1371.204007      | S    | 505.298039  | 253.152657      | 488.271490     | 244.639383      | 487.287474     | 244.147375       | 5  |
| 23 | 2872.495366 | 1436.751321     | 2855.468817    | 1428.238047     | 2854.484801    | 1427.746039      | L    | 418.266011  | 209.636643      | 401.239462     | 201.123369      | 400.255446     | 200.631361       | 4  |
| 24 | 2973.543045 | 1487.275161     | 2956.516496    | 1478.761886     | 2955.532480    | 1478.269878      | T    | 305.181947  | 153.094611      | 288.155398     | 144.581337      | 287.171382     | 144.089329       | 3  |
| 25 | 3030.564509 | 1515.785893     | 3013.537960    | 1507.272618     | 3012.553944    | 1506.780610      | G    | 204.134268  | 102.570772      | 187.107719     | 94.057497       |                |                  | 2  |
| 26 |             |                 |                |                 |                |                  | K    | 147.112804  | 74.060040       | 130.086255     | 65.546765       |                |                  | 1  |

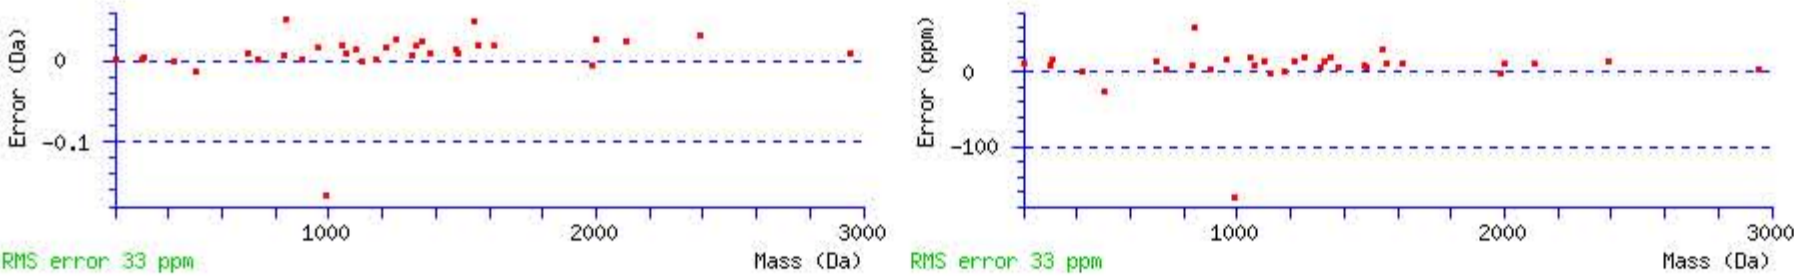

NCBI BLAST search of [GFPIKEDFLEQSEQLFGAKPVS](#)**LTGK**  
(Parameters: blastp, nr protein database, expect=20000, no filter, PAM30)  
Other BLAST [web gateways](#)

All matches to this query

| Score | Mr(calc):   | Delta    | Sequence                                           |
|-------|-------------|----------|----------------------------------------------------|
| 63.5  | 3175.662750 | 0.032146 | <a href="#">GFPIKEDFLEQSEQLFGAKPVS</a> <b>LTGK</b> |
| 34.8  | 3175.662750 | 0.032146 | <a href="#">GFPIKEDFLEQSEQLFGAKPVS</a> <b>LTGK</b> |

MATRIX

SCIENCE

Mascot Search Results

Peptide View

MS/MS Fragmentation of **HTLNQIDEVK**  
Found in **FETUA\_HUMAN**, Alpha-2-HS-glycoprotein OS=Homo sapiens GN=AHSG PE=1 SV=1

Match to Query 31351: 1506.791328 from(754.402940,2+) rtinseconds(1636) index(47897)  
Title: Locus:1.1.1.1807.22 File:"2013-07-02 CLN FXIII 180 min 2nd F 4.wiff"  
Data file C:\Program Files (x86)\Matrix Science\Mascot Daemon\mgf\8 FXIII 180 min 2nd\mascot\_daemon\_merge.mgf

Click mouse within plot area to zoom in by factor of two about that point  
Or,   to  Da   
Label all possible matches ☐ Label matches used for scoring ☒

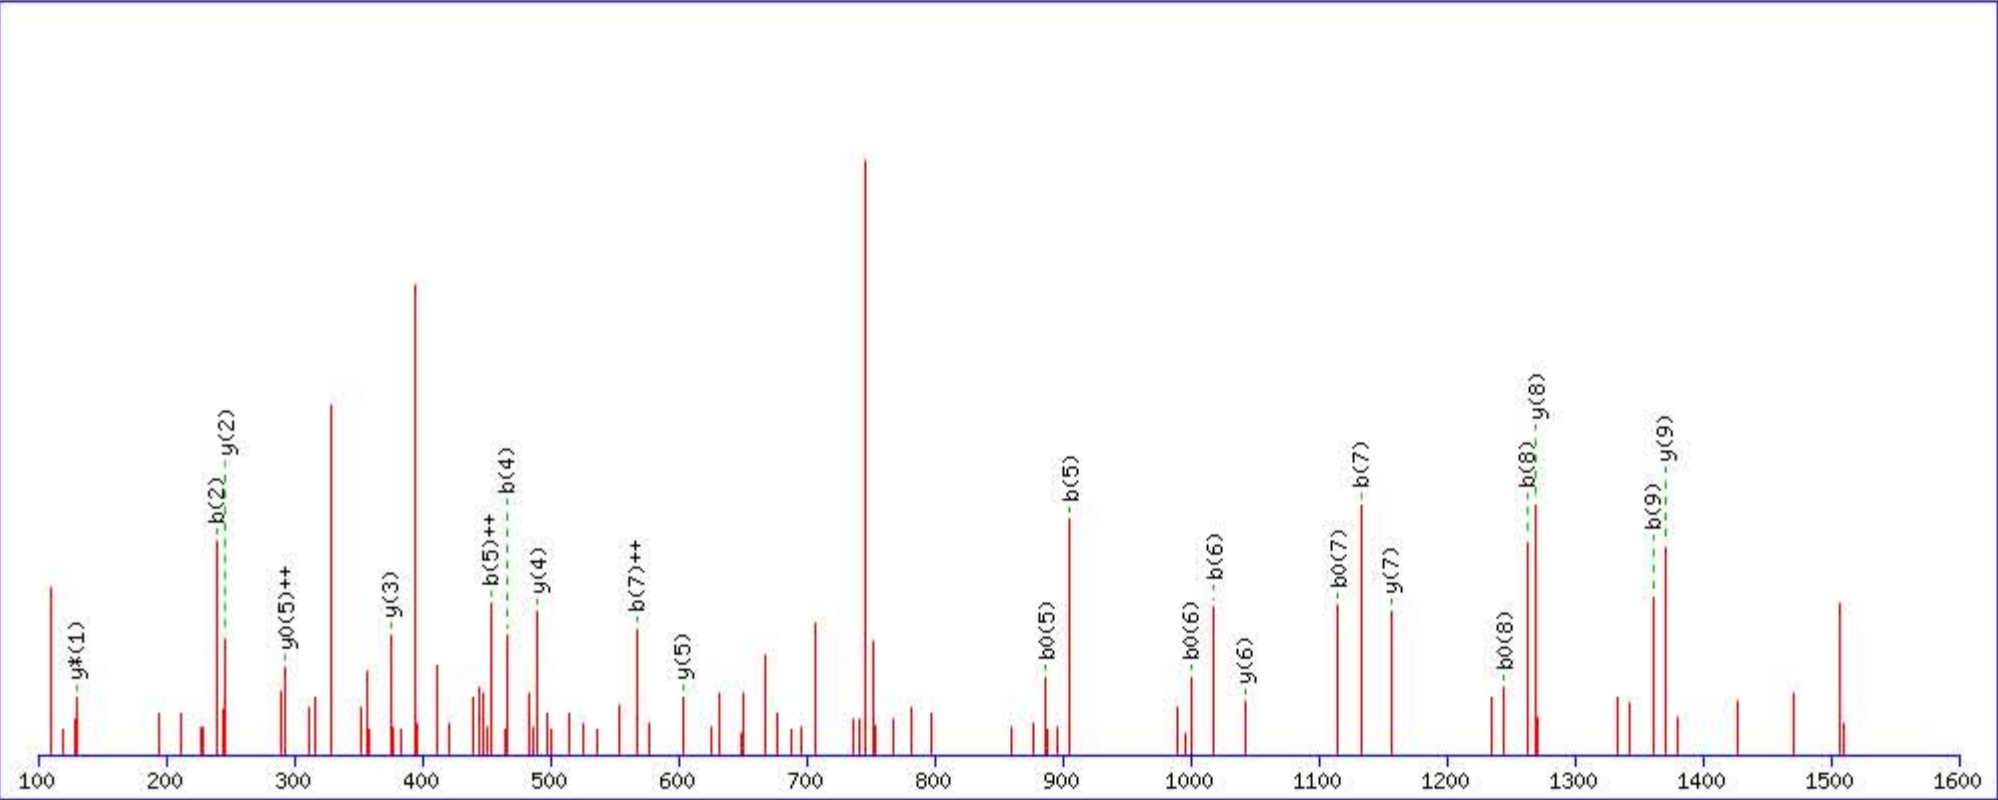

Monoisotopic mass of neutral peptide Mr(calc): 1506.786438  
Fixed modifications: Carbamidomethyl (C) (apply to specified residues or termini only)  
Variable modifications:  
Q5 : Biotin:Thermo-21345 (Q)  
Ions Score: 52 Expect: 0.00013  
Matches : 23/96 fragment ions using 40 most intense peaks [\(help\)](#)

| #  | b           | b <sup>++</sup> | b <sup>*</sup> | b <sup>+++</sup> | b <sup>0</sup> | b <sup>0++</sup> | Seq. | y           | y <sup>++</sup> | y <sup>*</sup> | y <sup>+++</sup> | y <sup>0</sup> | y <sup>0++</sup> | #  |
|----|-------------|-----------------|----------------|------------------|----------------|------------------|------|-------------|-----------------|----------------|------------------|----------------|------------------|----|
| 1  | 138.066188  | 69.536732       |                |                  |                |                  | H    |             |                 |                |                  |                |                  | 10 |
| 2  | 239.113867  | 120.060571      |                |                  | 221.103302     | 111.055289       | T    | 1370.734814 | 685.871045      | 1353.708265    | 677.357771       | 1352.724249    | 676.865763       | 9  |
| 3  | 352.197931  | 176.602603      |                |                  | 334.187366     | 167.597321       | L    | 1269.687135 | 635.347206      | 1252.660586    | 626.833931       | 1251.676570    | 626.341923       | 8  |
| 4  | 466.240858  | 233.624067      | 449.214309     | 225.110793       | 448.230293     | 224.618785       | N    | 1156.603071 | 578.805174      | 1139.576522    | 570.291899       | 1138.592506    | 569.799891       | 7  |
| 5  | 905.466184  | 453.236730      | 888.439635     | 444.723456       | 887.455619     | 444.231448       | Q    | 1042.560144 | 521.783710      | 1025.533595    | 513.270436       | 1024.549579    | 512.778428       | 6  |
| 6  | 1018.550248 | 509.778762      | 1001.523699    | 501.265488       | 1000.539683    | 500.773480       | I    | 603.334818  | 302.171047      | 586.308269     | 293.657773       | 585.324253     | 293.165765       | 5  |
| 7  | 1133.577191 | 567.292234      | 1116.550642    | 558.778959       | 1115.566626    | 558.286951       | D    | 490.250754  | 245.629015      | 473.224205     | 237.115741       | 472.240189     | 236.623733       | 4  |
| 8  | 1262.619784 | 631.813530      | 1245.593235    | 623.300256       | 1244.609219    | 622.808248       | E    | 375.223811  | 188.115544      | 358.197262     | 179.602269       | 357.213246     | 179.110261       | 3  |
| 9  | 1361.688198 | 681.347737      | 1344.661649    | 672.834463       | 1343.677633    | 672.342455       | V    | 246.181218  | 123.594247      | 229.154669     | 115.080973       |                |                  | 2  |
| 10 |             |                 |                |                  |                |                  | K    | 147.112804  | 74.060040       | 130.086255     | 65.546765        |                |                  | 1  |

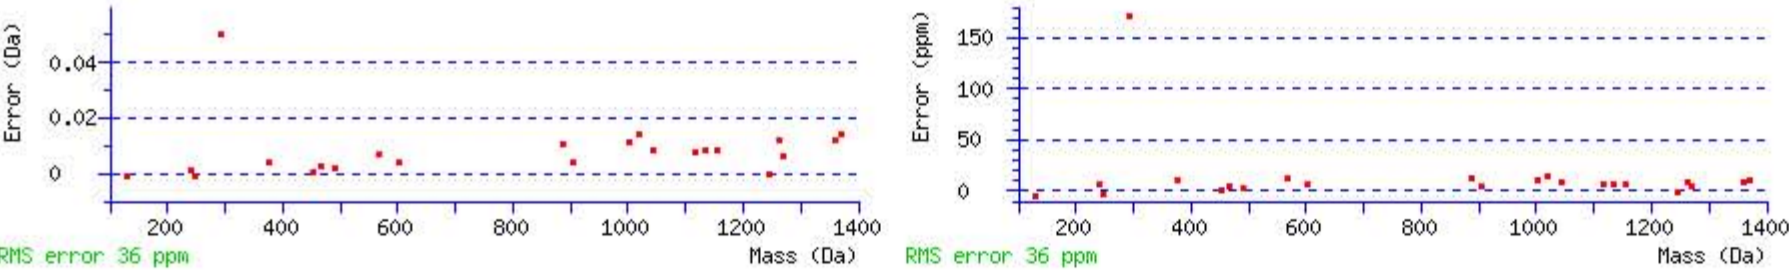

NCBI BLAST search of [HTLNQIDEVK](#)  
(Parameters: blastp, nr protein database, expect=20000, no filter, PAM30)  
Other BLAST [web gateways](#)

All matches to this query

| Score | Mr(calc):   | Delta     | Sequence                      |
|-------|-------------|-----------|-------------------------------|
| 52.0  | 1506.786438 | 0.004890  | <a href="#">HTLNQIDEVK</a>    |
| 9.8   | 1506.779037 | 0.012291  | <a href="#">EHQALQDLVDLAR</a> |
| 4.5   | 1506.790253 | 0.001075  | <a href="#">SSRFLKEGNNLSR</a> |
| 3.9   | 1506.771149 | 0.020179  | <a href="#">GEKSSMERLLTEK</a> |
| 3.9   | 1506.792969 | -0.001641 | <a href="#">IGDFGLTKAETDK</a> |
| 3.6   | 1506.769150 | 0.022178  | <a href="#">VFSRSSQLQYHR</a>  |
| 3.3   | 1506.794983 | -0.003655 | <a href="#">HRATQSGQRR</a>    |
| 2.4   | 1506.792953 | -0.001625 | <a href="#">EDFEKTLTSAIVK</a> |
| 1.9   | 1506.808899 | -0.017571 | <a href="#">HDVIMKSQLRHK</a>  |

MATRIX

SCIENCE

Mascot Search Results

Peptide View

MS/MS Fragmentation of **EHAVEGDCDFQLLK**  
Found in **FETUA\_HUMAN**, Alpha-2-HS-glycoprotein OS=Homo sapiens GN=AHSG PE=1 SV=1

Match to Query 43596: 1970.934972 from(657.985600,3+) rtinseconds(2080) index(6097)  
Title: Locus:1.1.1.2001.8 File:"2013-07-02 CLN FXIII 180 min 2nd F 1.wiff"  
Data file C:\Program Files (x86)\Matrix Science\Mascot Daemon\mgf\8 FXIII 180 min 2nd\mascot\_daemon\_merge.mgf

Click mouse within plot area to zoom in by factor of two about that point  
Or, 

Plot from

0

 to 

2800

 Da 

Full range

  
Label all possible matches ☐ Label matches used for scoring ☒

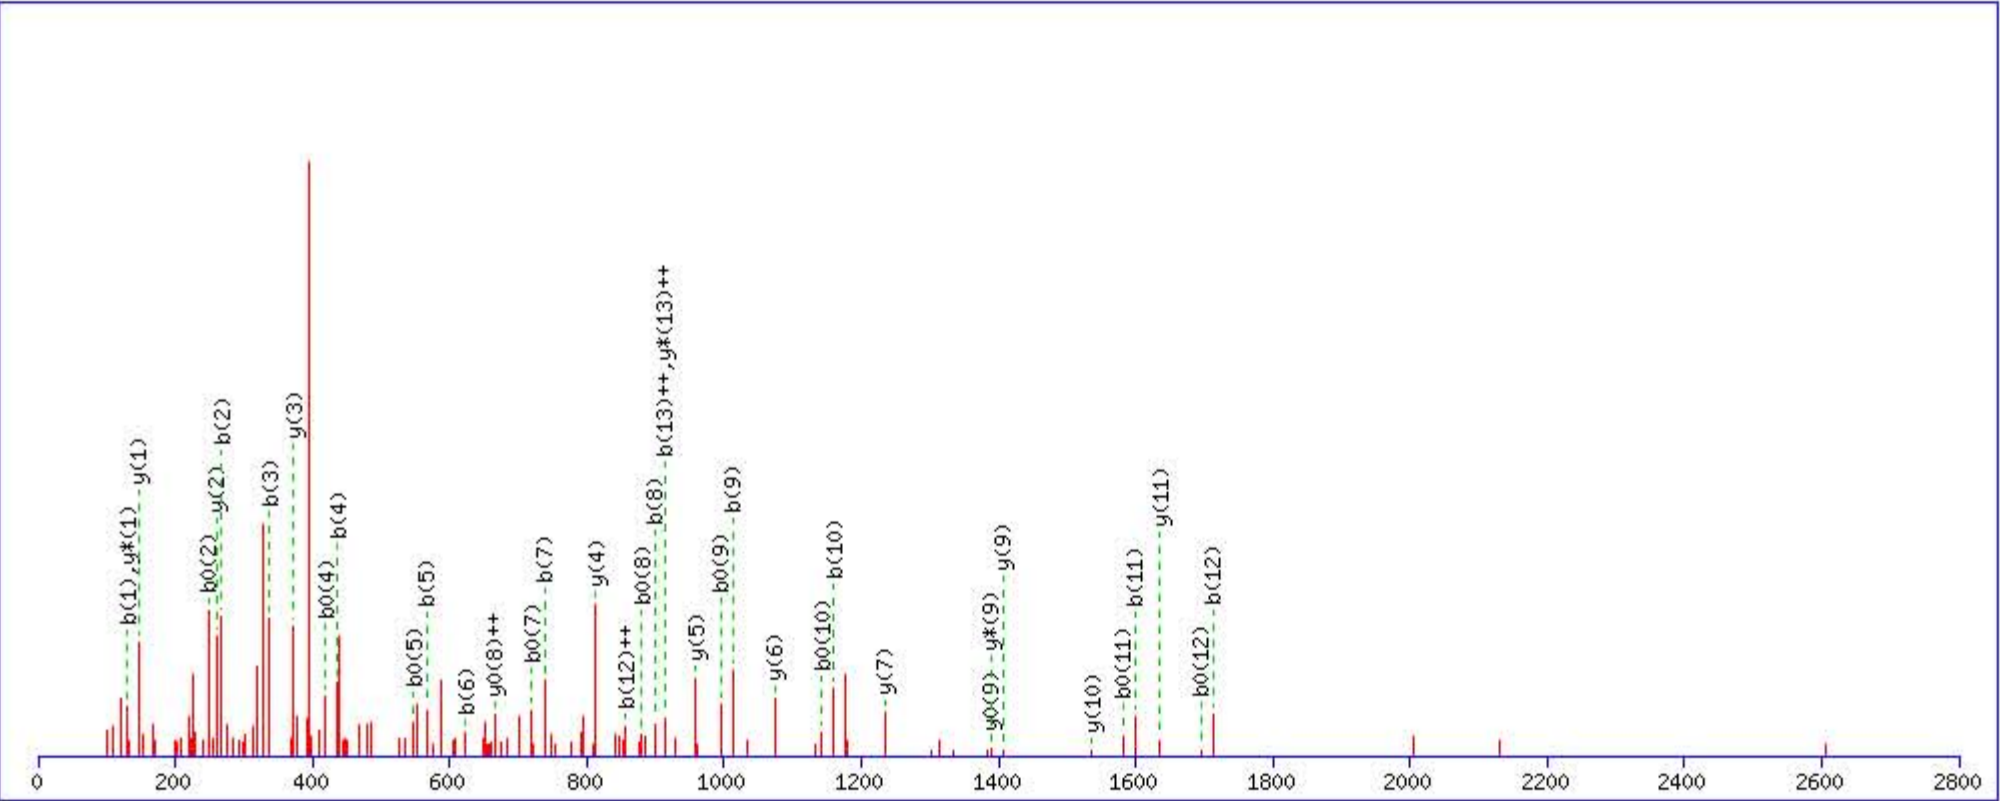

Monoisotopic mass of neutral peptide Mr(calc): 1970.923019  
Fixed modifications: Carbamidomethyl (C) (apply to specified residues or termini only)  
Variable modifications:  
Q11 : Biotin:Thermo-21345 (Q)  
Ions Score: 81 Expect: 1e-007  
Matches : 38/126 fragment ions using 56 most intense peaks [\(help\)](#)

| #  | b           | b <sup>++</sup> | b <sup>*</sup> | b <sup>+++</sup> | b <sup>0</sup> | b <sup>0++</sup> | Seq. | y           | y <sup>++</sup> | y <sup>*</sup> | y <sup>+++</sup> | y <sup>0</sup> | y <sup>0++</sup> | #  |
|----|-------------|-----------------|----------------|------------------|----------------|------------------|------|-------------|-----------------|----------------|------------------|----------------|------------------|----|
| 1  | 130.049869  | 65.528572       |                |                  | 112.039304     | 56.523290        | E    |             |                 |                |                  |                |                  | 14 |
| 2  | 267.108781  | 134.058028      |                |                  | 249.098216     | 125.052746       | H    | 1842.887704 | 921.947490      | 1825.861155    | 913.434216       | 1824.877139    | 912.942207       | 13 |
| 3  | 338.145895  | 169.576585      |                |                  | 320.135330     | 160.571303       | A    | 1705.828792 | 853.418034      | 1688.802243    | 844.904760       | 1687.818227    | 844.412752       | 12 |
| 4  | 437.214309  | 219.110792      |                |                  | 419.203744     | 210.105510       | V    | 1634.791678 | 817.899477      | 1617.765129    | 809.386203       | 1616.781113    | 808.894195       | 11 |
| 5  | 566.256902  | 283.632089      |                |                  | 548.246337     | 274.626807       | E    | 1535.723264 | 768.365270      | 1518.696715    | 759.851996       | 1517.712699    | 759.359988       | 10 |
| 6  | 623.278366  | 312.142821      |                |                  | 605.267801     | 303.137539       | G    | 1406.680671 | 703.843974      | 1389.654122    | 695.330699       | 1388.670106    | 694.838691       | 9  |
| 7  | 738.305309  | 369.656293      |                |                  | 720.294744     | 360.651010       | D    | 1349.659207 | 675.333241      | 1332.632658    | 666.819967       | 1331.648642    | 666.327959       | 8  |
| 8  | 898.335958  | 449.671617      |                |                  | 880.325393     | 440.666335       | C    | 1234.632264 | 617.819770      | 1217.605715    | 609.306496       | 1216.621699    | 608.814488       | 7  |
| 9  | 1013.362901 | 507.185089      |                |                  | 995.352336     | 498.179806       | D    | 1074.601615 | 537.804446      | 1057.575066    | 529.291171       | 1056.591050    | 528.799163       | 6  |
| 10 | 1160.431315 | 580.719296      |                |                  | 1142.420750    | 571.714013       | F    | 959.574672  | 480.290974      | 942.548123     | 471.777700       |                |                  | 5  |
| 11 | 1599.656641 | 800.331959      | 1582.630092    | 791.818684       | 1581.646076    | 791.326676       | Q    | 812.506258  | 406.756767      | 795.479709     | 398.243493       |                |                  | 4  |
| 12 | 1712.740705 | 856.873991      | 1695.714156    | 848.360716       | 1694.730140    | 847.868708       | L    | 373.280932  | 187.144104      | 356.254383     | 178.630829       |                |                  | 3  |
| 13 | 1825.824769 | 913.416023      | 1808.798220    | 904.902748       | 1807.814204    | 904.410740       | L    | 260.196868  | 130.602072      | 243.170319     | 122.088797       |                |                  | 2  |
| 14 |             |                 |                |                  |                |                  | K    | 147.112804  | 74.060040       | 130.086255     | 65.546765        |                |                  | 1  |

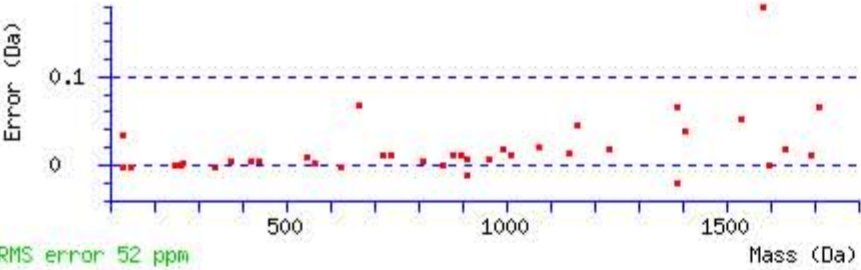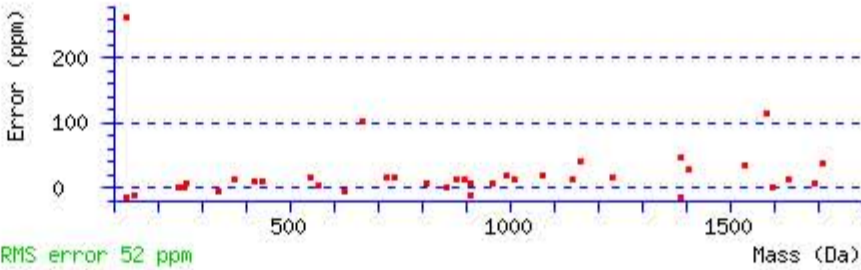

NCBI BLAST search of [EHAVEGDCDFQLLK](#)  
(Parameters: blastp, nr protein database, expect=20000, no filter, PAM30)  
Other BLAST [web gateways](#)

All matches to this query

| Score | Mr(calc):   | Delta     | Sequence                         |
|-------|-------------|-----------|----------------------------------|
| 80.9  | 1970.923019 | 0.011953  | <a href="#">EHAVEGDCDFQLLK</a>   |
| 6.2   | 1970.959396 | -0.024424 | <a href="#">DVQSAMDRYTAFLK</a>   |
| 3.2   | 1970.959381 | -0.024409 | <a href="#">NEEKPVQMMFKQSTFK</a> |

MATRIX

SCIENCE

Mascot Search Results

Peptide View

MS/MS Fragmentation of **QGIPFFGQVR**  
Found in **A2MG\_HUMAN**, Alpha-2-macroglobulin OS=Homo sapiens GN=A2M PE=1 SV=3

Match to Query 29910: 1458.798768 from(730.406660,2+) rtinseconds(2539) index(23443)  
Title: Locus:1.1.1.3266.16 File:"2013-07-02 CLN FXIII 180 min 2nd F 2.wiff"  
Data file C:\Program Files (x86)\Matrix Science\Mascot Daemon\mgf\8 FXIII 180 min 2nd\mascot\_daemon\_merge.mgf

Click mouse within plot area to zoom in by factor of two about that point  
Or, 

Plot from

100

 to 

1600

 Da 

Full range

  
Label all possible matches ☐ Label matches used for scoring ☒

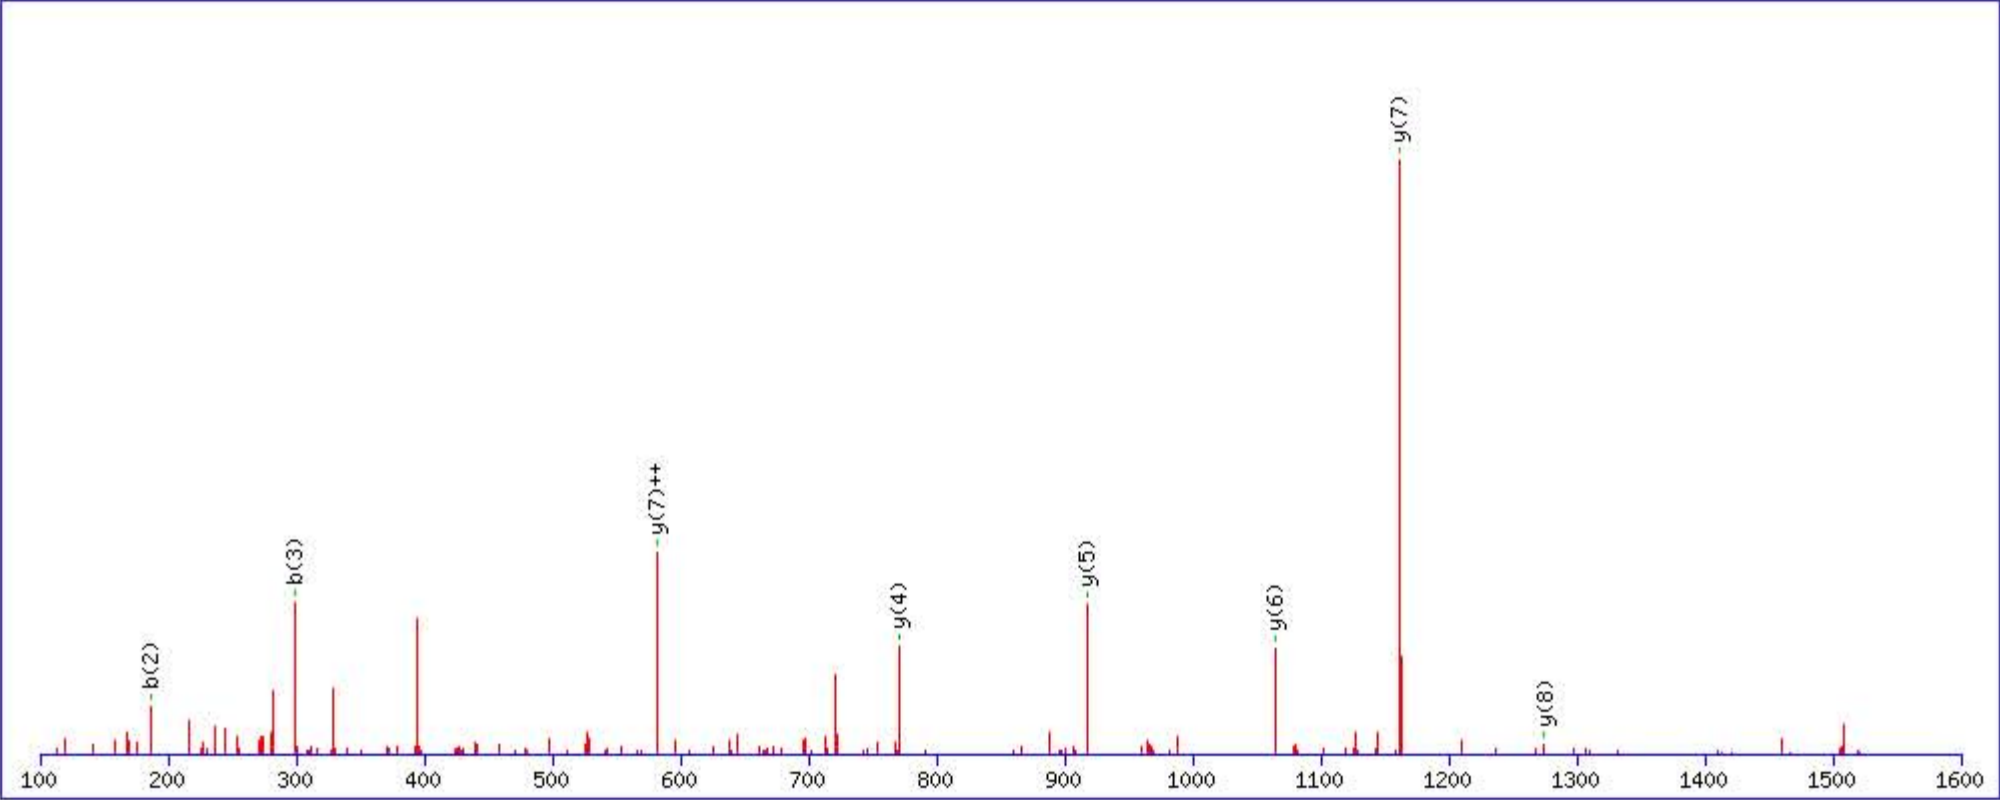

Monoisotopic mass of neutral peptide Mr(calc): 1458.780594  
Fixed modifications: Carbamidomethyl (C) (apply to specified residues or termini only)  
Variable modifications:  
Q8 : Biotin:Thermo-21345 (Q)  
Ions Score: 29 Expect: 0.0025  
Matches : 8/72 fragment ions using 14 most intense peaks [\(help\)](#)

| #  | b           | b <sup>++</sup> | b <sup>*</sup> | b <sup>++*</sup> | Seq. | y           | y <sup>++</sup> | y <sup>*</sup> | y <sup>++*</sup> | #  |
|----|-------------|-----------------|----------------|------------------|------|-------------|-----------------|----------------|------------------|----|
| 1  | 129.065854  | 65.036565       | 112.039305     | 56.523291        | Q    |             |                 |                |                  | 10 |
| 2  | 186.087318  | 93.547297       | 169.060769     | 85.034023        | G    | 1331.729276 | 666.368276      | 1314.702727    | 657.855002       | 9  |
| 3  | 299.171382  | 150.089329      | 282.144833     | 141.576055       | I    | 1274.707812 | 637.857544      | 1257.681263    | 629.344270       | 8  |
| 4  | 396.224146  | 198.615711      | 379.197597     | 190.102436       | P    | 1161.623748 | 581.315512      | 1144.597199    | 572.802238       | 7  |
| 5  | 543.292560  | 272.149918      | 526.266011     | 263.636643       | F    | 1064.570984 | 532.789130      | 1047.544435    | 524.275856       | 6  |
| 6  | 690.360974  | 345.684125      | 673.334425     | 337.170850       | F    | 917.502570  | 459.254923      | 900.476021     | 450.741649       | 5  |
| 7  | 747.382438  | 374.194857      | 730.355889     | 365.681582       | G    | 770.434156  | 385.720716      | 753.407607     | 377.207442       | 4  |
| 8  | 1186.607764 | 593.807520      | 1169.581215    | 585.294246       | Q    | 713.412692  | 357.209984      | 696.386143     | 348.696710       | 3  |
| 9  | 1285.676178 | 643.341727      | 1268.649629    | 634.828453       | V    | 274.187366  | 137.597321      | 257.160817     | 129.084047       | 2  |
| 10 |             |                 |                |                  | R    | 175.118952  | 88.063114       | 158.092403     | 79.549839        | 1  |

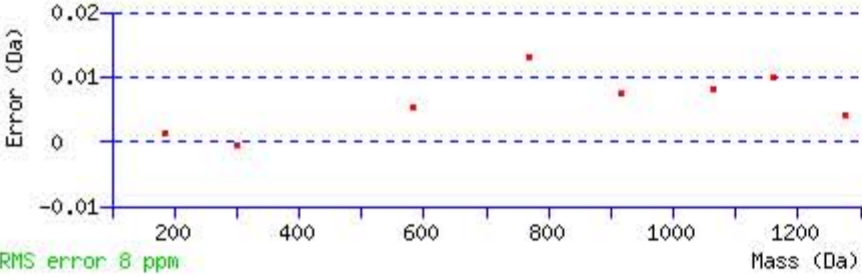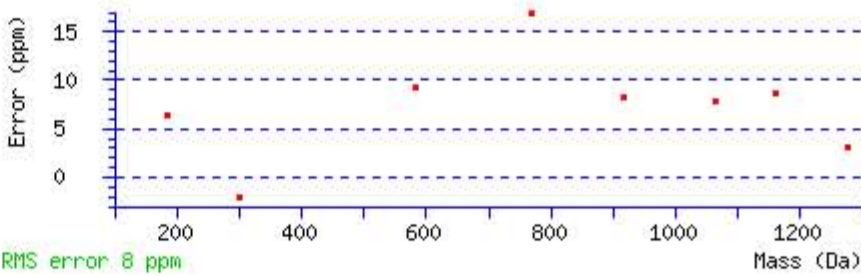

NCBI BLAST search of [QGIPFFGQVR](#)  
(Parameters: blastp, nr protein database, expect=20000, no filter, PAM30)  
Other BLAST [web gateways](#)

All matches to this query

| Score | Mr(calc):   | Delta     | Sequence                      |
|-------|-------------|-----------|-------------------------------|
| 28.5  | 1458.780594 | 0.018174  | <a href="#">QGIPFFGQVR</a>    |
| 0.9   | 1458.805054 | -0.006286 | <a href="#">AVQPLLKVSMSMR</a> |

MATRIX

SCIENCE

Mascot Search Results

Peptide View

MS/MS Fragmentation of **AIGYLNTGYQR**  
Found in **A2MG\_HUMAN**, Alpha-2-macroglobulin OS=Homo sapiens GN=A2M PE=1 SV=3

Match to Query 33116: 1565.812628 from(783.913590,2+) rtinseconds(1987) index(20164)  
Title: Locus:1.1.1.3074.13 File:"2013-07-02 CLN FXIII 180 min 2nd F 2.wiff"  
Data file C:\Program Files (x86)\Matrix Science\Mascot Daemon\mgf\8 FXIII 180 min 2nd\mascot\_daemon\_merge.mgf

Click mouse within plot area to zoom in by factor of two about that point  
Or,   to  Da   
Label all possible matches ☐ Label matches used for scoring ☒

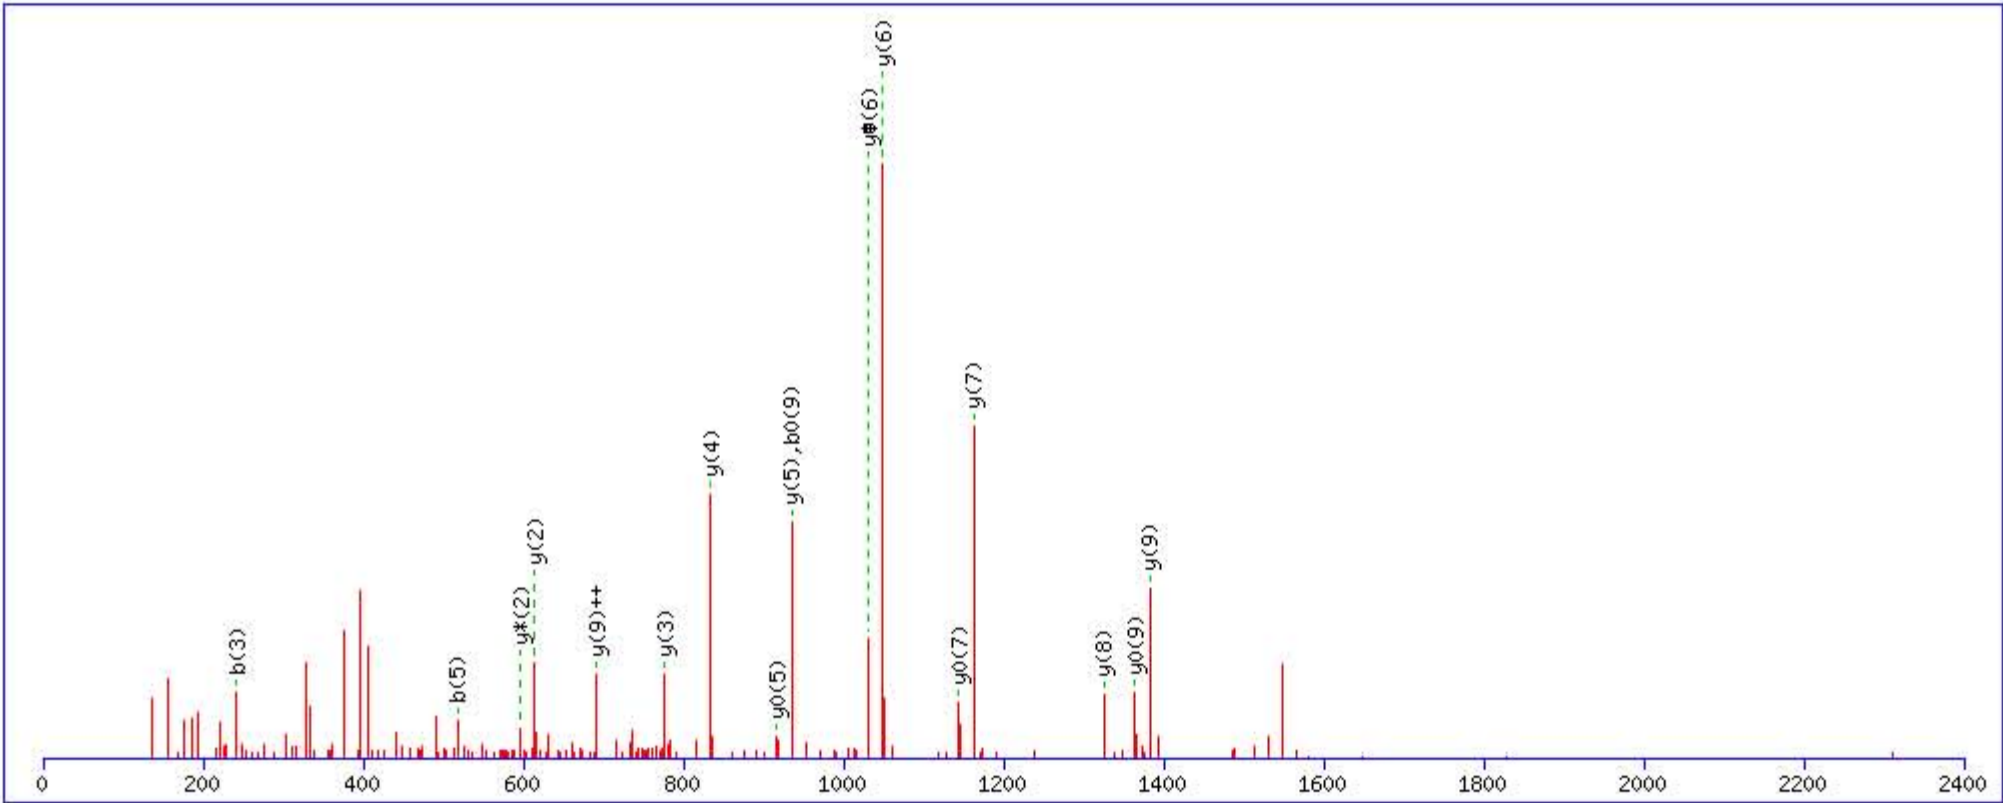

Monoisotopic mass of neutral peptide Mr(calc): 1565.802414  
Fixed modifications: Carbamidomethyl (C) (apply to specified residues or termini only)  
Variable modifications:  
Q10 : Biotin:Thermo-21345 (Q)  
Ions Score: 52 Expect: 0.00014  
Matches : 18/90 fragment ions using 29 most intense peaks ([help](#))

| #  | b           | b <sup>++</sup> | b <sup>*</sup> | b <sup>*++</sup> | b <sup>0</sup> | b <sup>0++</sup> | Seq. | y           | y <sup>++</sup> | y <sup>*</sup> | y <sup>*++</sup> | y <sup>0</sup> | y <sup>0++</sup> | #  |
|----|-------------|-----------------|----------------|------------------|----------------|------------------|------|-------------|-----------------|----------------|------------------|----------------|------------------|----|
| 1  | 72.044390   | 36.525833       |                |                  |                |                  | A    |             |                 |                |                  |                |                  | 11 |
| 2  | 185.128454  | 93.067865       |                |                  |                |                  | I    | 1495.772598 | 748.389937      | 1478.746049    | 739.876663       | 1477.762033    | 739.384655       | 10 |
| 3  | 242.149918  | 121.578597      |                |                  |                |                  | G    | 1382.688534 | 691.847905      | 1365.661985    | 683.334631       | 1364.677969    | 682.842623       | 9  |
| 4  | 405.213247  | 203.110261      |                |                  |                |                  | Y    | 1325.667070 | 663.337173      | 1308.640521    | 654.823899       | 1307.656505    | 654.331890       | 8  |
| 5  | 518.297311  | 259.652294      |                |                  |                |                  | L    | 1162.603741 | 581.805509      | 1145.577192    | 573.292234       | 1144.593176    | 572.800226       | 7  |
| 6  | 632.340238  | 316.673757      | 615.313689     | 308.160483       |                |                  | N    | 1049.519677 | 525.263477      | 1032.493128    | 516.750202       | 1031.509112    | 516.258194       | 6  |
| 7  | 733.387917  | 367.197597      | 716.361368     | 358.684322       | 715.377352     | 358.192314       | T    | 935.476750  | 468.242013      | 918.450201     | 459.728739       | 917.466185     | 459.236731       | 5  |
| 8  | 790.409381  | 395.708329      | 773.382832     | 387.195054       | 772.398816     | 386.703046       | G    | 834.429071  | 417.718174      | 817.402522     | 409.204899       |                |                  | 4  |
| 9  | 953.472710  | 477.239993      | 936.446161     | 468.726719       | 935.462145     | 468.234711       | Y    | 777.407607  | 389.207442      | 760.381058     | 380.694167       |                |                  | 3  |
| 10 | 1392.698036 | 696.852656      | 1375.671487    | 688.339382       | 1374.687471    | 687.847374       | Q    | 614.344278  | 307.675777      | 597.317729     | 299.162503       |                |                  | 2  |
| 11 |             |                 |                |                  |                |                  | R    | 175.118952  | 88.063114       | 158.092403     | 79.549839        |                |                  | 1  |

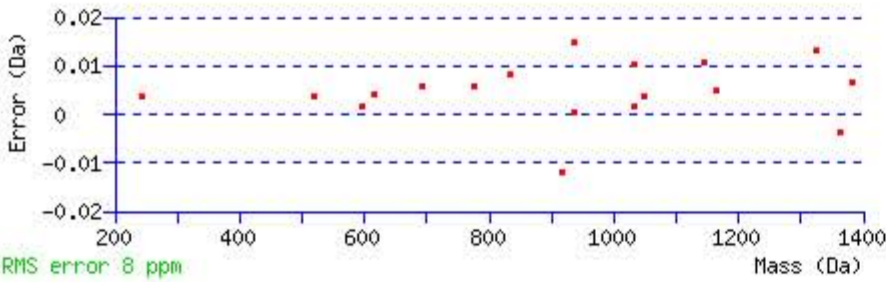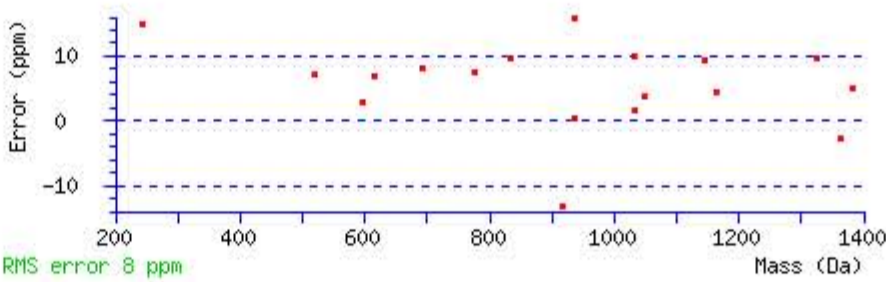

NCBI BLAST search of [AIGYLNTGYQR](#)  
(Parameters: blastp, nr protein database, expect=20000, no filter, PAM30)  
Other BLAST [web gateways](#)

All matches to this query

| Score | Mr(calc):   | Delta     | Sequence                       |
|-------|-------------|-----------|--------------------------------|
| 52.3  | 1565.802414 | 0.010214  | <a href="#">AIGYLNTGYQR</a>    |
| 11.5  | 1565.827393 | -0.014765 | <a href="#">VHPALNVSTRTSER</a> |
| 4.8   | 1565.802399 | 0.010229  | <a href="#">FQELPFRKNEMK</a>   |

MATRIX

SCIENCE

Mascot Search Results

Peptide View

MS/MS Fragmentation of **VTAAPQSVCALR**  
Found in **A2MG\_HUMAN**, Alpha-2-macroglobulin OS=Homo sapiens GN=A2M PE=1 SV=3

Match to Query 33799: 1582.841868 from(792.428210,2+) rtinseconds(1837) index(19093)  
Title: Locus:1.1.1.3022.9 File:"2013-07-02 CLN FXIII 180 min 2nd F 2.wiff"  
Data file C:\Program Files (x86)\Matrix Science\Mascot Daemon\mgf\8 FXIII 180 min 2nd\mascot\_daemon\_merge.mgf

Click mouse within plot area to zoom in by factor of two about that point  
Or,   to  Da   
Label all possible matches ☐ Label matches used for scoring ☒

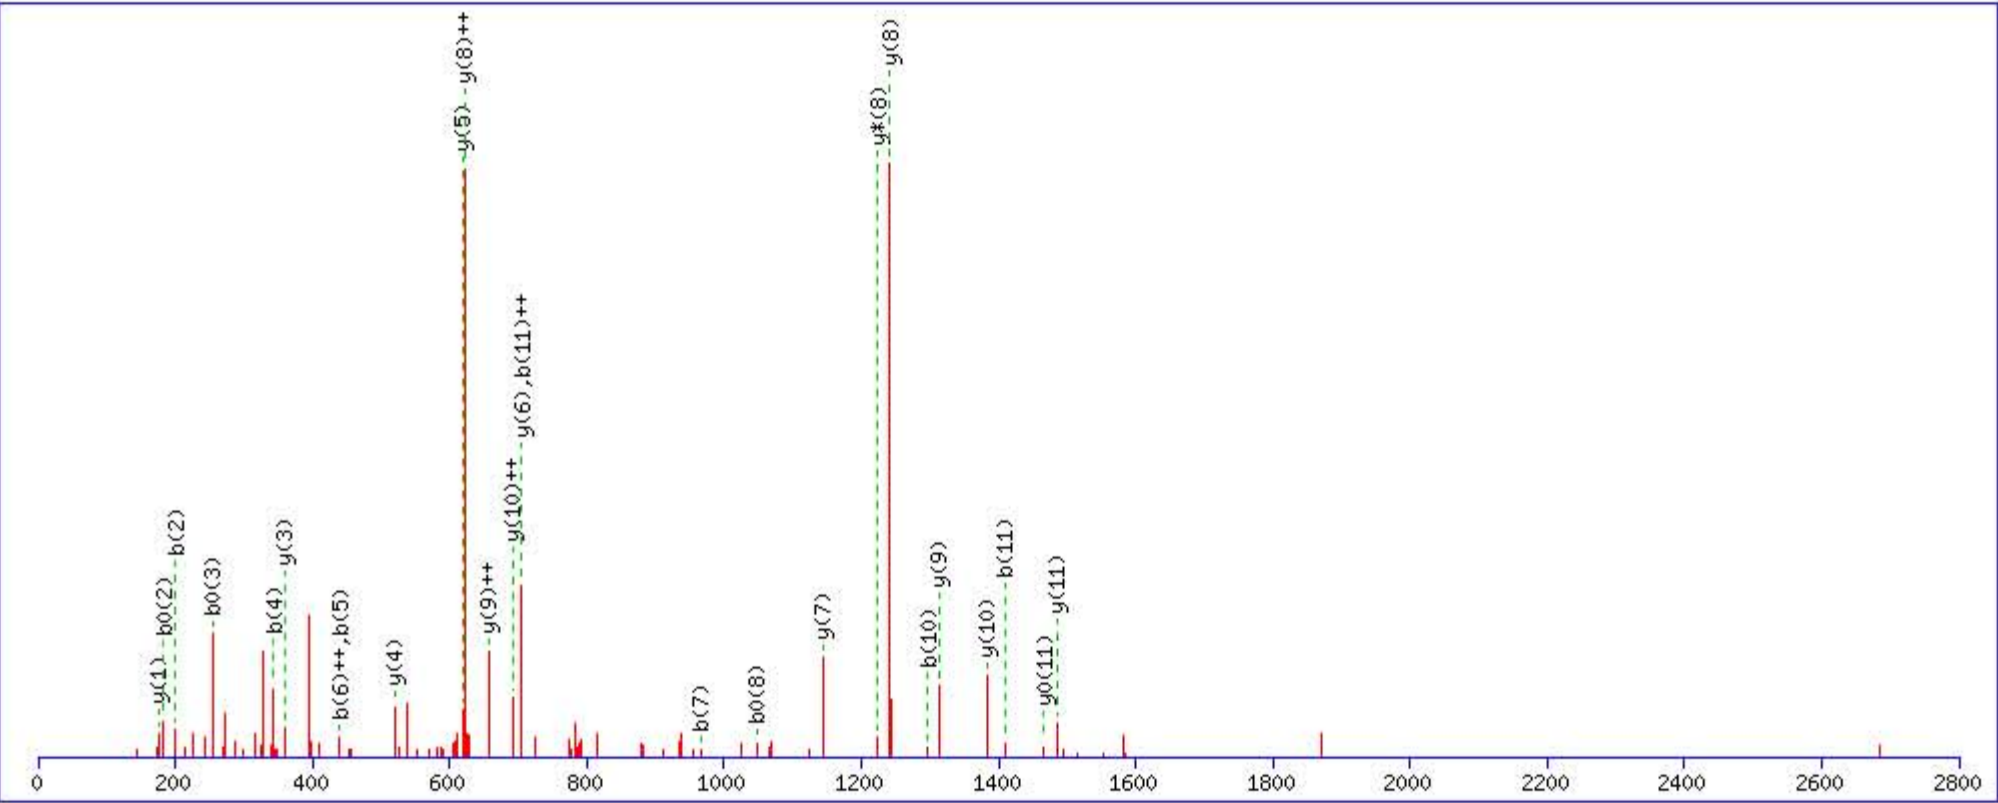

Monoisotopic mass of neutral peptide Mr(calc): 1582.832352  
Fixed modifications: Carbamidomethyl (C) (apply to specified residues or termini only)  
Variable modifications:  
Q6 : Biotin:Thermo-21345 (Q)  
Ions Score: 68 Expect: 1.5e-006  
Matches : 26/110 fragment ions using 42 most intense peaks [\(help\)](#)

| #  | b           | b <sup>++</sup> | b <sup>*</sup> | b <sup>*++</sup> | b <sup>0</sup> | b <sup>0++</sup> | Seq. | y           | y <sup>++</sup> | y <sup>*</sup> | y <sup>*++</sup> | y <sup>0</sup> | y <sup>0++</sup> | #  |
|----|-------------|-----------------|----------------|------------------|----------------|------------------|------|-------------|-----------------|----------------|------------------|----------------|------------------|----|
| 1  | 100.075690  | 50.541483       |                |                  |                |                  | V    |             |                 |                |                  |                |                  | 12 |
| 2  | 201.123369  | 101.065322      |                |                  | 183.112804     | 92.060040        | T    | 1484.771218 | 742.889247      | 1467.744669    | 734.375972       | 1466.760653    | 733.883964       | 11 |
| 3  | 272.160483  | 136.583879      |                |                  | 254.149918     | 127.578597       | A    | 1383.723539 | 692.365407      | 1366.696990    | 683.852133       | 1365.712974    | 683.360125       | 10 |
| 4  | 343.197597  | 172.102437      |                |                  | 325.187032     | 163.097154       | A    | 1312.686425 | 656.846850      | 1295.659876    | 648.333576       | 1294.675860    | 647.841568       | 9  |
| 5  | 440.250361  | 220.628819      |                |                  | 422.239796     | 211.623536       | P    | 1241.649311 | 621.328293      | 1224.622762    | 612.815019       | 1223.638746    | 612.323011       | 8  |
| 6  | 879.475687  | 440.241482      | 862.449138     | 431.728207       | 861.465122     | 431.236199       | Q    | 1144.596547 | 572.801911      | 1127.569998    | 564.288637       | 1126.585982    | 563.796629       | 7  |
| 7  | 966.507715  | 483.757496      | 949.481166     | 475.244221       | 948.497150     | 474.752213       | S    | 705.371221  | 353.189248      | 688.344672     | 344.675974       | 687.360656     | 344.183966       | 6  |
| 8  | 1065.576129 | 533.291703      | 1048.549580    | 524.778428       | 1047.565564    | 524.286420       | V    | 618.339193  | 309.673234      | 601.312644     | 301.159960       |                |                  | 5  |
| 9  | 1225.606778 | 613.307027      | 1208.580229    | 604.793753       | 1207.596213    | 604.301745       | C    | 519.270779  | 260.139028      | 502.244230     | 251.625753       |                |                  | 4  |
| 10 | 1296.643892 | 648.825584      | 1279.617343    | 640.312310       | 1278.633327    | 639.820302       | A    | 359.240130  | 180.123703      | 342.213581     | 171.610428       |                |                  | 3  |
| 11 | 1409.727956 | 705.367616      | 1392.701407    | 696.854342       | 1391.717391    | 696.362333       | L    | 288.203016  | 144.605146      | 271.176467     | 136.091871       |                |                  | 2  |
| 12 |             |                 |                |                  |                |                  | R    | 175.118952  | 88.063114       | 158.092403     | 79.549839        |                |                  | 1  |

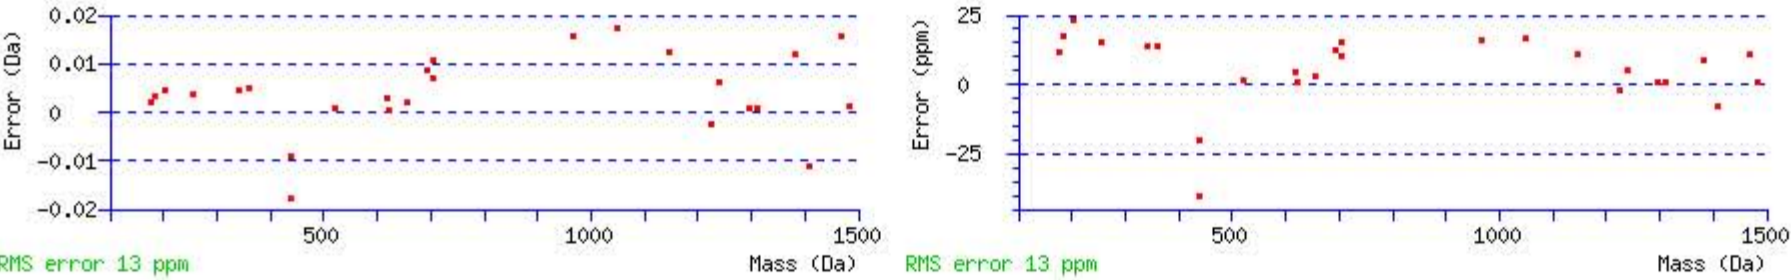

NCBI BLAST search of [VTAAPQSVCALR](#)  
(Parameters: blastp, nr protein database, expect=20000, no filter, PAM30)  
Other BLAST [web gateways](#)

All matches to this query

| Score | Mr(calc):   | Delta     | Sequence                         |
|-------|-------------|-----------|----------------------------------|
| 67.9  | 1582.832352 | 0.009516  | <a href="#">VTAAPQSVCALR</a>     |
| 5.4   | 1582.865356 | -0.023488 | <a href="#">QPAPGPVEKPPR</a>     |
| 2.3   | 1582.850067 | -0.008199 | <a href="#">AEQEASLQKL</a>       |
| 1.9   | 1582.853943 | -0.012075 | <a href="#">LSSGSQSSHILVRGR</a>  |
| 1.5   | 1582.821564 | 0.020304  | <a href="#">LSKAVATWHANTER</a>   |
| 1.0   | 1582.861328 | -0.019460 | <a href="#">RDKGETIQGLR</a>      |
| 0.9   | 1582.853912 | -0.012044 | <a href="#">RKPASGGLAASSAPAR</a> |
| 0.6   | 1582.857956 | -0.016088 | <a href="#">LEDVKSQWVRPAR</a>    |
| 0.6   | 1582.831451 | 0.010417  | <a href="#">SAKELVEQDIQPAR</a>   |
| 0.5   | 1582.846756 | -0.004888 | <a href="#">VTEVWTL PQVAGQR</a>  |

MATRIX

SCIENCE

Mascot Search Results

Peptide View

MS/MS Fragmentation of **VTGEGCVYLQTSLK**  
Found in **A2MG\_HUMAN**, Alpha-2-macroglobulin OS=Homo sapiens GN=A2M PE=1 SV=3

Match to Query 41616: 1864.965428 from(933.489990,2+) rtinseconds(2106) index(20876)  
Title: Locus:1.1.1.3115.19 File:"2013-07-02 CLN FXIII 180 min 2nd F 2.wiff"  
Data file C:\Program Files (x86)\Matrix Science\Mascot Daemon\mgf\8 FXIII 180 min 2nd\mascot\_daemon\_merge.mgf

Click mouse within plot area to zoom in by factor of two about that point  
Or,   to  Da   
Label all possible matches ☐ Label matches used for scoring ☒

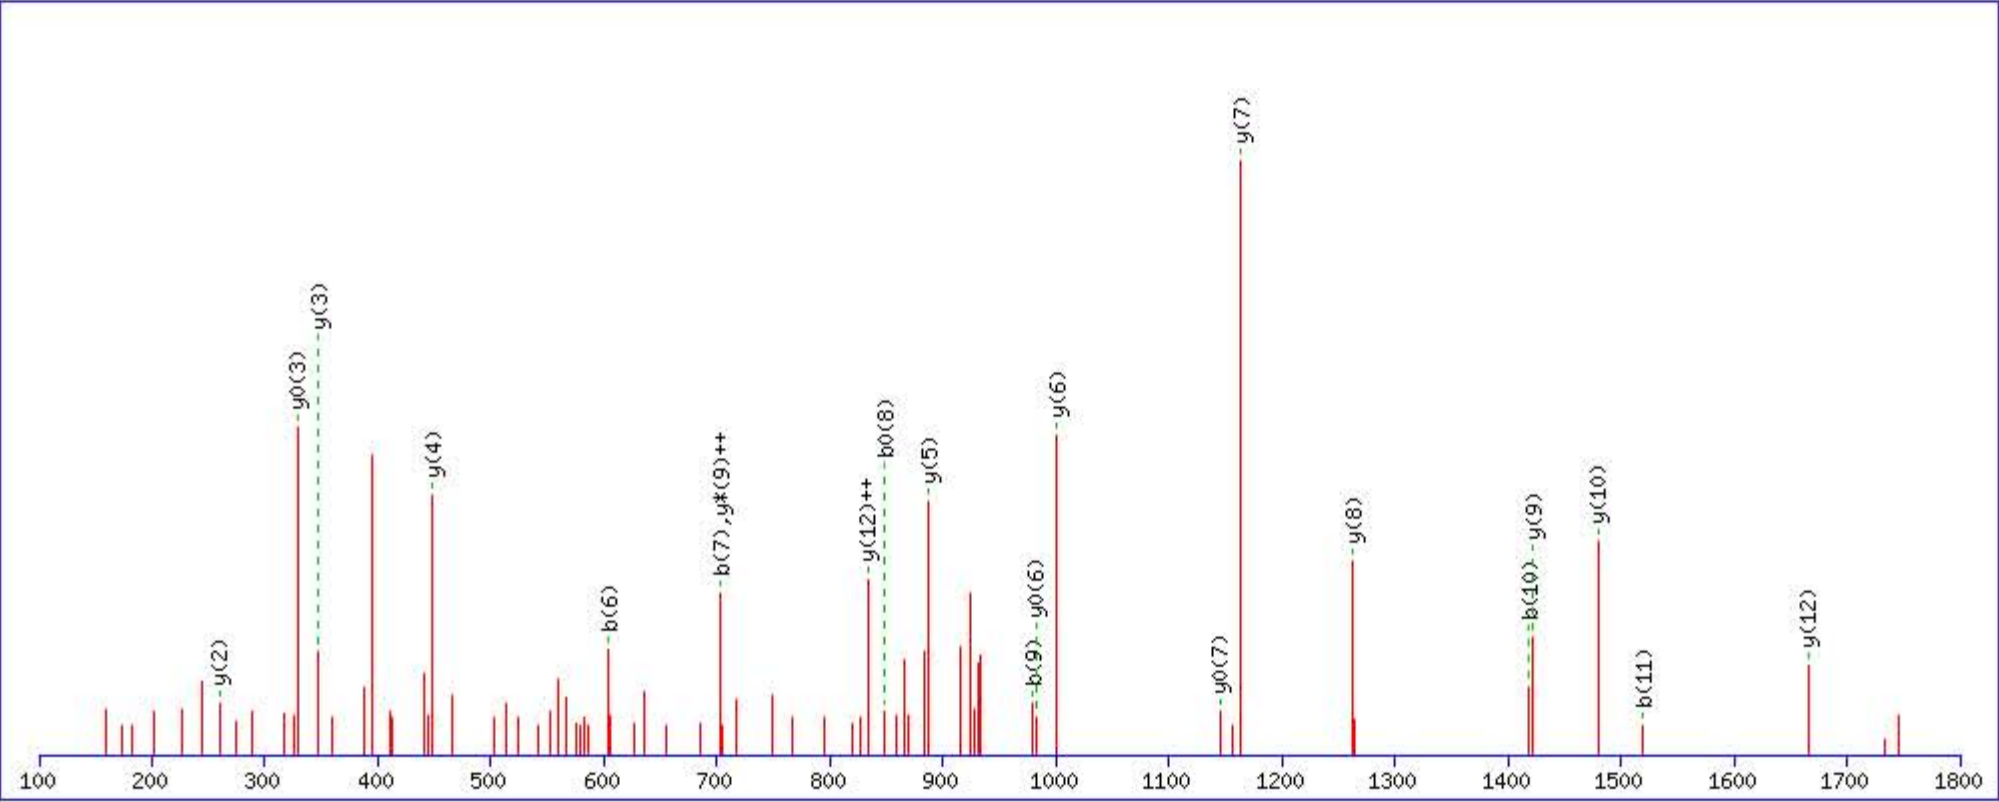

Monoisotopic mass of neutral peptide Mr(calc): 1864.942703  
Fixed modifications: Carbamidomethyl (C) (apply to specified residues or termini only)  
Variable modifications:  
Q10 : Biotin:Thermo-21345 (Q)  
Ions Score: 59 Expect: 9.6e-005  
Matches : 21/132 fragment ions using 40 most intense peaks [\(help\)](#)

| #  | b           | b <sup>++</sup> | b <sup>*</sup> | b <sup>*++</sup> | b <sup>0</sup> | b <sup>0++</sup> | Seq. | y           | y <sup>++</sup> | y <sup>*</sup> | y <sup>*++</sup> | y <sup>0</sup> | y <sup>0++</sup> | #  |
|----|-------------|-----------------|----------------|------------------|----------------|------------------|------|-------------|-----------------|----------------|------------------|----------------|------------------|----|
| 1  | 100.075690  | 50.541483       |                |                  |                |                  | V    |             |                 |                |                  |                |                  | 14 |
| 2  | 201.123369  | 101.065322      |                |                  | 183.112804     | 92.060040        | T    | 1766.881557 | 883.944417      | 1749.855008    | 875.431142       | 1748.870992    | 874.939134       | 13 |
| 3  | 258.144833  | 129.576055      |                |                  | 240.134268     | 120.570772       | G    | 1665.833878 | 833.420577      | 1648.807329    | 824.907303       | 1647.823313    | 824.415295       | 12 |
| 4  | 387.187426  | 194.097351      |                |                  | 369.176861     | 185.092069       | E    | 1608.812414 | 804.909845      | 1591.785865    | 796.396571       | 1590.801849    | 795.904563       | 11 |
| 5  | 444.208890  | 222.608083      |                |                  | 426.198325     | 213.602801       | G    | 1479.769821 | 740.388549      | 1462.743272    | 731.875274       | 1461.759256    | 731.383266       | 10 |
| 6  | 604.239539  | 302.623408      |                |                  | 586.228974     | 293.618125       | C    | 1422.748357 | 711.877817      | 1405.721808    | 703.364542       | 1404.737792    | 702.872534       | 9  |
| 7  | 703.307953  | 352.157615      |                |                  | 685.297388     | 343.152332       | V    | 1262.717708 | 631.862492      | 1245.691159    | 623.349218       | 1244.707143    | 622.857210       | 8  |
| 8  | 866.371282  | 433.689279      |                |                  | 848.360717     | 424.683997       | Y    | 1163.649294 | 582.328285      | 1146.622745    | 573.815011       | 1145.638729    | 573.323003       | 7  |
| 9  | 979.455346  | 490.231311      |                |                  | 961.444781     | 481.226029       | L    | 1000.585965 | 500.796621      | 983.559416     | 492.283346       | 982.575400     | 491.791338       | 6  |
| 10 | 1418.680672 | 709.843974      | 1401.654123    | 701.330700       | 1400.670107    | 700.838692       | Q    | 887.501901  | 444.254589      | 870.475352     | 435.741314       | 869.491336     | 435.249306       | 5  |
| 11 | 1519.728351 | 760.367814      | 1502.701802    | 751.854539       | 1501.717786    | 751.362531       | T    | 448.276575  | 224.641925      | 431.250026     | 216.128651       | 430.266010     | 215.636643       | 4  |
| 12 | 1606.760379 | 803.883828      | 1589.733830    | 795.370553       | 1588.749814    | 794.878545       | S    | 347.228896  | 174.118086      | 330.202347     | 165.604811       | 329.218331     | 165.112803       | 3  |
| 13 | 1719.844443 | 860.425860      | 1702.817894    | 851.912585       | 1701.833878    | 851.420577       | L    | 260.196868  | 130.602072      | 243.170319     | 122.088797       |                |                  | 2  |
| 14 |             |                 |                |                  |                |                  | K    | 147.112804  | 74.060040       | 130.086255     | 65.546765        |                |                  | 1  |

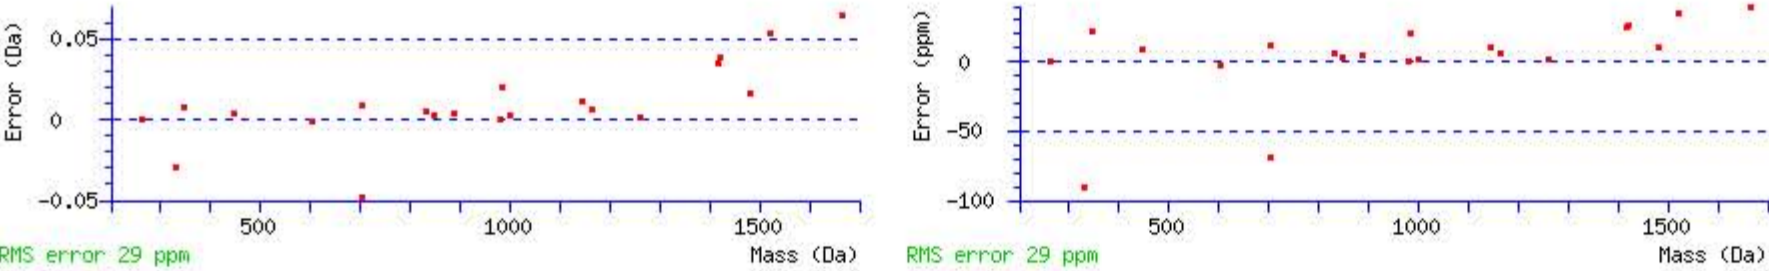

NCBI BLAST search of [VTGEGCVYLQTSLK](#)  
(Parameters: blastp, nr protein database, expect=20000, no filter, PAM30)  
Other BLAST [web gateways](#)

All matches to this query

| Score | Mr(calc):   | Delta    | Sequence                       |
|-------|-------------|----------|--------------------------------|
| 59.1  | 1864.942703 | 0.022725 | <a href="#">VTGEGCVYLQTSLK</a> |

MATRIX

SCIENCE

Mascot Search Results

Peptide View

MS/MS Fragmentation of **FSGQLNSHGCFYQQVK**  
Found in **A2MG\_HUMAN**, Alpha-2-macroglobulin OS=Homo sapiens GN=A2M PE=1 SV=3

Match to Query 48617: 2210.053722 from(737.691850,3+) rtinseconds(1852) index(19199)  
Title: Locus:1.1.1.3027.20 File:"2013-07-02 CLN FXIII 180 min 2nd F 2.wiff"  
Data file C:\Program Files (x86)\Matrix Science\Mascot Daemon\mgf\8 FXIII 180 min 2nd\mascot\_daemon\_merge.mgf

Click mouse within plot area to zoom in by factor of two about that point  
Or, 

Plot from

0

 to 

2200

 Da 

Full range

  
Label all possible matches ☐ Label matches used for scoring ☒

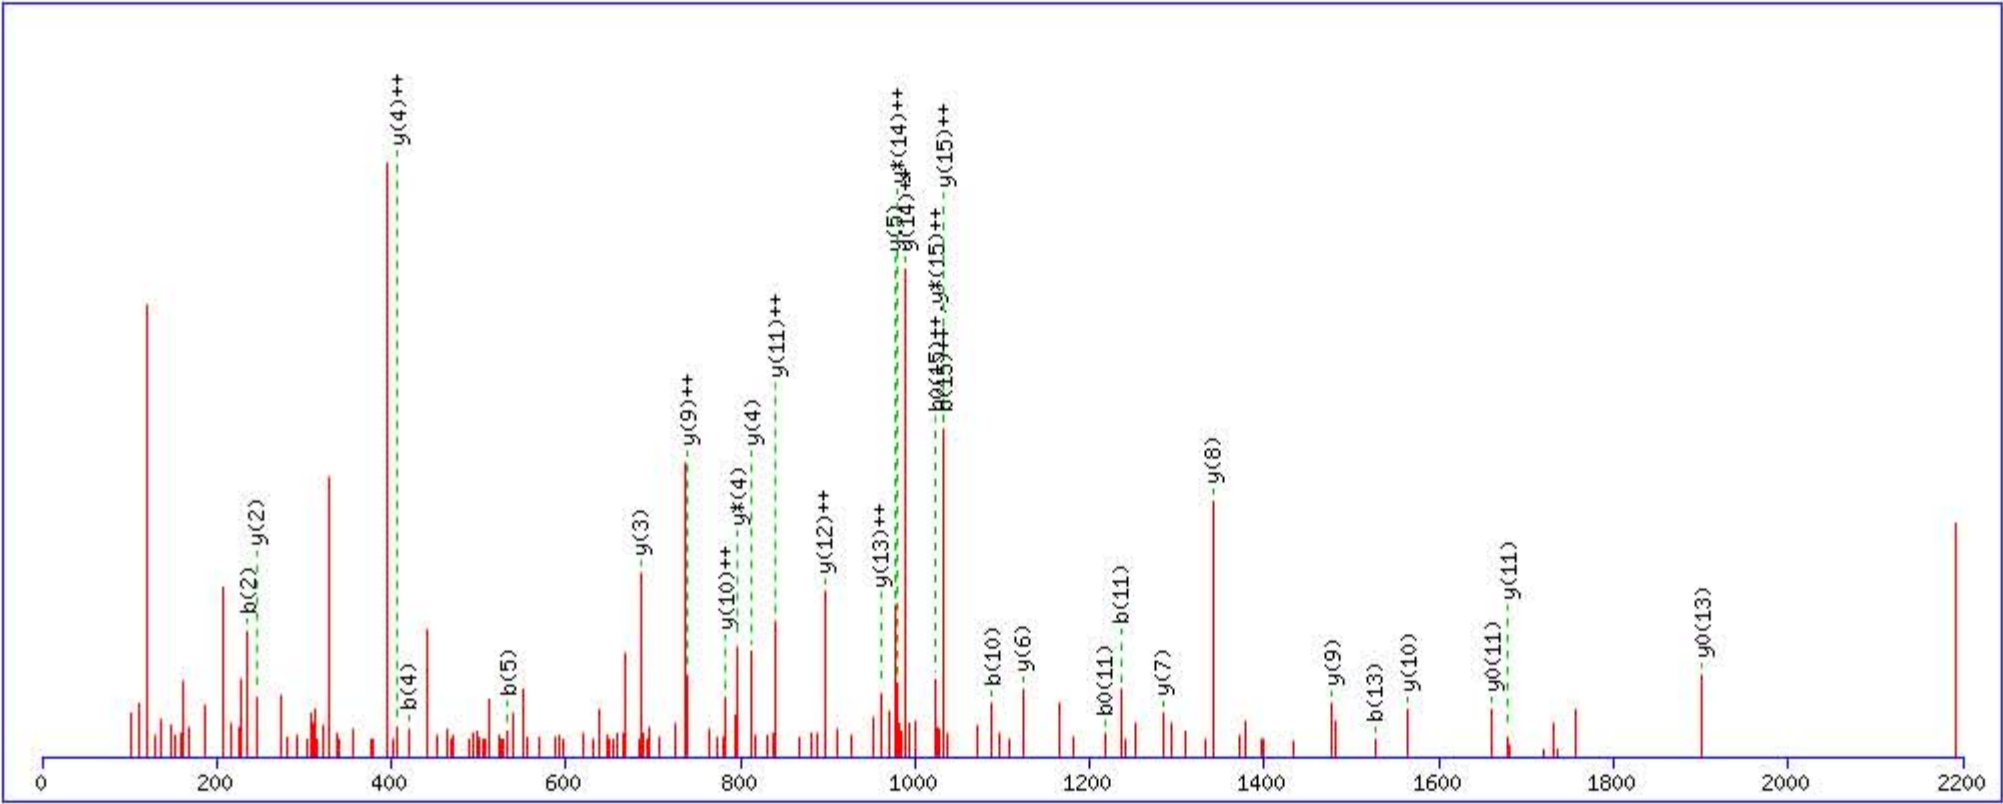

Monoisotopic mass of neutral peptide Mr(calc): 2210.040131  
Fixed modifications: Carbamidomethyl (C) (apply to specified residues or termini only)  
Variable modifications:  
Q14 : Biotin:Thermo-21345 (Q)  
Ions Score: 41 Expect: 0.0003  
Matches : 32/154 fragment ions using 80 most intense peaks [\(help\)](#)

| #  | b           | b <sup>++</sup> | b <sup>*</sup> | b <sup>++</sup> * | b <sup>0</sup> | b <sup>0++</sup> | Seq. | y           | y <sup>++</sup> | y <sup>*</sup> | y <sup>++</sup> * | y <sup>0</sup> | y <sup>0++</sup> | #  |
|----|-------------|-----------------|----------------|-------------------|----------------|------------------|------|-------------|-----------------|----------------|-------------------|----------------|------------------|----|
| 1  | 148.075690  | 74.541483       |                |                   |                |                  | F    |             |                 |                |                   |                |                  | 16 |
| 2  | 235.107718  | 118.057497      |                |                   | 217.097153     | 109.052214       | S    | 2063.978979 | 1032.493127     | 2046.952430    | 1023.979853       | 2045.968414    | 1023.487845      | 15 |
| 3  | 292.129182  | 146.568229      |                |                   | 274.118617     | 137.562946       | G    | 1976.946951 | 988.977114      | 1959.920402    | 980.463839        | 1958.936386    | 979.971831       | 14 |
| 4  | 420.187760  | 210.597518      | 403.161211     | 202.084243        | 402.177195     | 201.592235       | Q    | 1919.925487 | 960.466382      | 1902.898938    | 951.953107        | 1901.914922    | 951.461099       | 13 |
| 5  | 533.271824  | 267.139550      | 516.245275     | 258.626276        | 515.261259     | 258.134268       | L    | 1791.866909 | 896.437093      | 1774.840360    | 887.923818        | 1773.856344    | 887.431810       | 12 |
| 6  | 647.314751  | 324.161014      | 630.288202     | 315.647739        | 629.304186     | 315.155731       | N    | 1678.782845 | 839.895061      | 1661.756296    | 831.381786        | 1660.772280    | 830.889778       | 11 |
| 7  | 734.346779  | 367.677028      | 717.320230     | 359.163753        | 716.336214     | 358.671745       | S    | 1564.739918 | 782.873597      | 1547.713369    | 774.360323        | 1546.729353    | 773.868315       | 10 |
| 8  | 871.405691  | 436.206483      | 854.379142     | 427.693209        | 853.395126     | 427.201201       | H    | 1477.707890 | 739.357583      | 1460.681341    | 730.844309        |                |                  | 9  |
| 9  | 928.427155  | 464.717216      | 911.400606     | 456.203941        | 910.416590     | 455.711933       | G    | 1340.648978 | 670.828127      | 1323.622429    | 662.314853        |                |                  | 8  |
| 10 | 1088.457804 | 544.732540      | 1071.431255    | 536.219266        | 1070.447239    | 535.727257       | C    | 1283.627514 | 642.317395      | 1266.600965    | 633.804121        |                |                  | 7  |
| 11 | 1235.526218 | 618.266747      | 1218.499669    | 609.753473        | 1217.515653    | 609.261464       | F    | 1123.596865 | 562.302071      | 1106.570316    | 553.788796        |                |                  | 6  |
| 12 | 1398.589547 | 699.798412      | 1381.562998    | 691.285137        | 1380.578982    | 690.793129       | Y    | 976.528451  | 488.767864      | 959.501902     | 480.254589        |                |                  | 5  |
| 13 | 1526.648125 | 763.827700      | 1509.621576    | 755.314426        | 1508.637560    | 754.822418       | Q    | 813.465122  | 407.236199      | 796.438573     | 398.722925        |                |                  | 4  |
| 14 | 1965.873451 | 983.440364      | 1948.846902    | 974.927089        | 1947.862886    | 974.435081       | Q    | 685.406544  | 343.206910      | 668.379995     | 334.693636        |                |                  | 3  |
| 15 | 2064.941865 | 1032.974570     | 2047.915316    | 1024.461296       | 2046.931300    | 1023.969288      | V    | 246.181218  | 123.594247      | 229.154669     | 115.080972        |                |                  | 2  |
| 16 |             |                 |                |                   |                |                  | K    | 147.112804  | 74.060040       | 130.086255     | 65.546765         |                |                  | 1  |

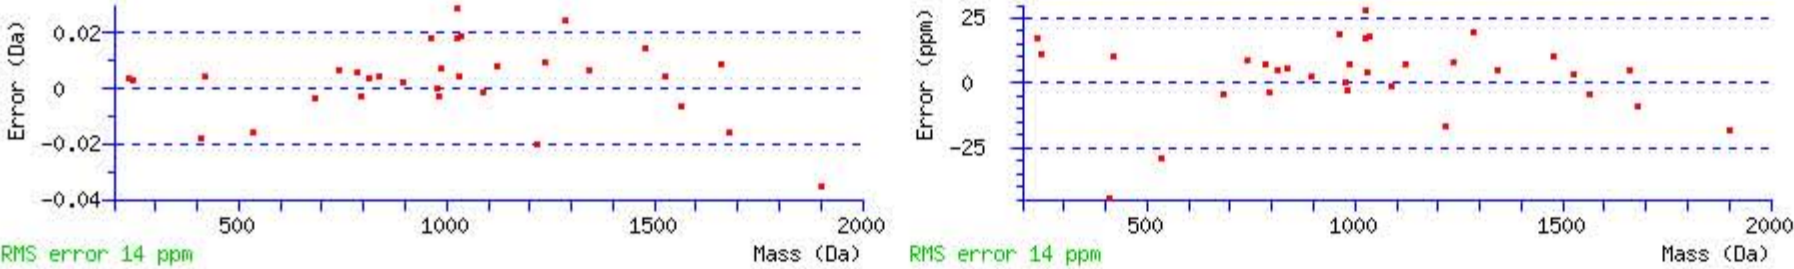

NCBI BLAST search of **FSGQLNSHGCFYQQVK**  
(Parameters: blastp, nr protein database, expect=20000, no filter, PAM30)  
Other BLAST [web gateways](#)

All matches to this query

| Score | Mr(calc):   | Delta     | Sequence                         |
|-------|-------------|-----------|----------------------------------|
| 40.6  | 2210.040131 | 0.013591  | <a href="#">FSGQLNSHGCFYQQVK</a> |
| 33.1  | 2210.040131 | 0.013591  | <a href="#">FSGQLNSHGCFYQQVK</a> |
| 3.0   | 2210.058075 | -0.004353 | <a href="#">FSHLSRNMTMQRTMK</a>  |
| 3.0   | 2210.058075 | -0.004353 | <a href="#">FSHLSRNMTMQRTMK</a>  |
| 1.1   | 2210.045486 | 0.008236  | <a href="#">MSMKEVDEQMLAIQSK</a> |

MATRIX

SCIENCE

Mascot Search Results

Peptide View

MS/MS Fragmentation of **FSGQLNSHGCFYQQVK**  
Found in **A2MG\_HUMAN**, Alpha-2-macroglobulin OS=Homo sapiens GN=A2M PE=1 SV=3

Match to Query 48620: 2210.055432 from(737.692420,3+) rtinseconds(1834) index(19079)  
Title: Locus:1.1.1.3021.16 File:"2013-07-02 CLN FXIII 180 min 2nd F 2.wiff"  
Data file C:\Program Files (x86)\Matrix Science\Mascot Daemon\mgf\8 FXIII 180 min 2nd\mascot\_daemon\_merge.mgf

Click mouse within plot area to zoom in by factor of two about that point  
Or,   to  Da   
Label all possible matches ☐ Label matches used for scoring ☒

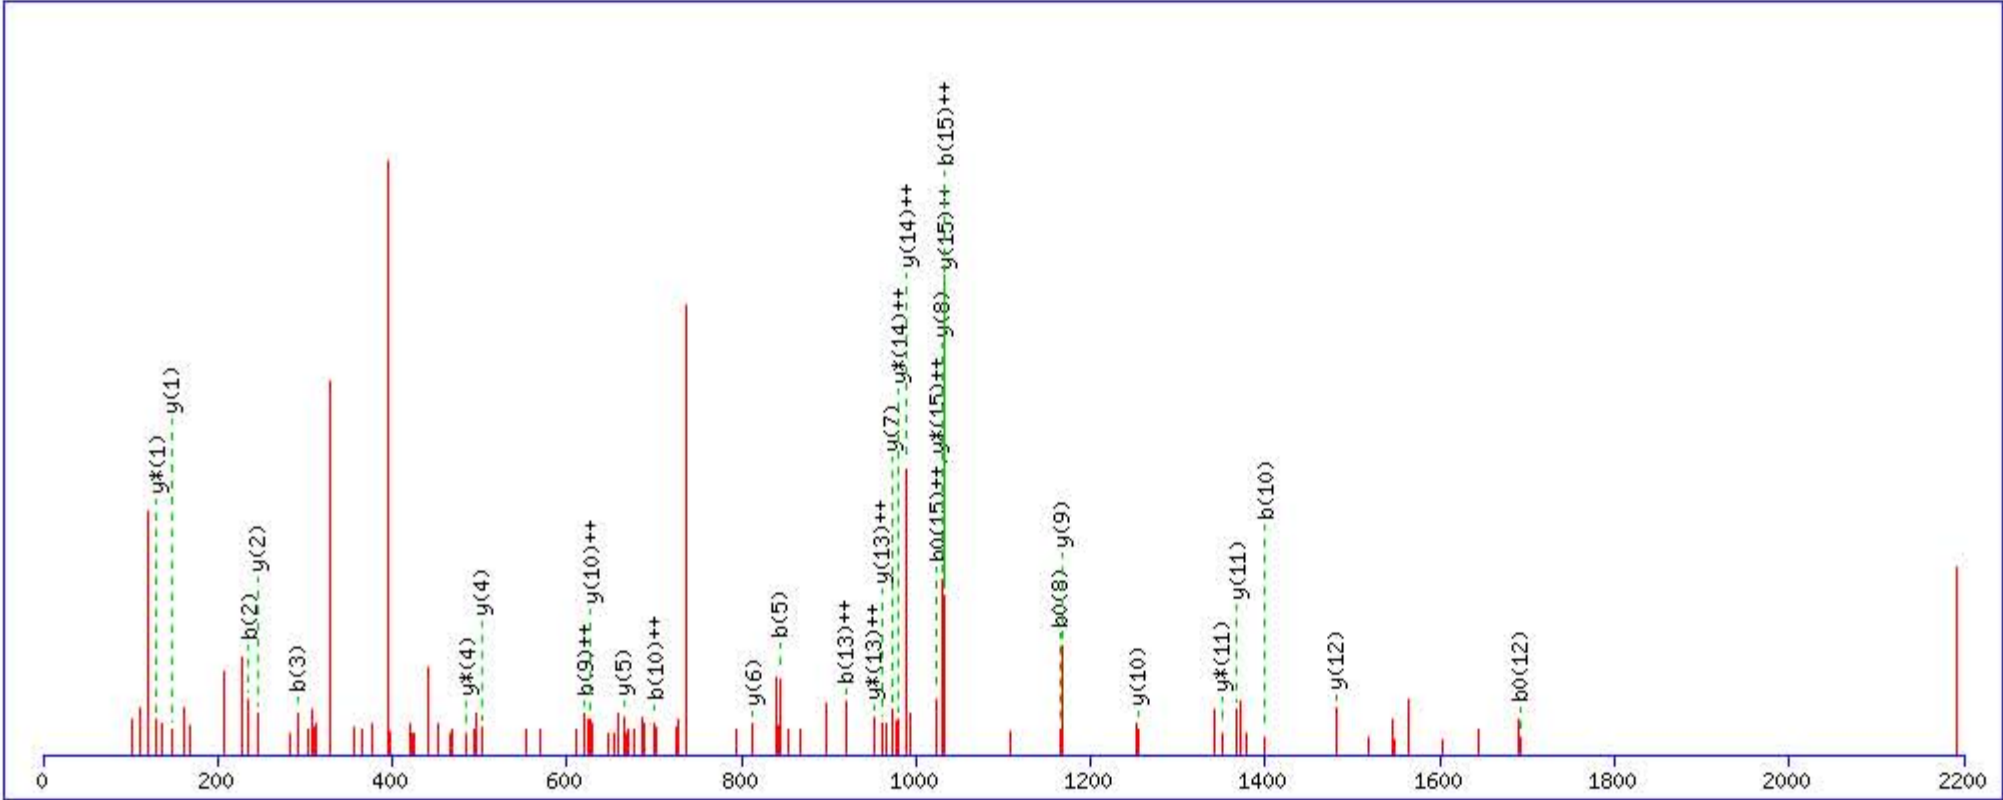

Monoisotopic mass of neutral peptide Mr(calc): 2210.040131  
Fixed modifications: Carbamidomethyl (C) (apply to specified residues or termini only)  
Variable modifications:  
Q4 : Biotin:Thermo-21345 (Q)  
Ions Score: 30 Expect: 0.02  
Matches : 32/154 fragment ions using 100 most intense peaks [\(help\)](#)

| #  | b           | b <sup>++</sup> | b <sup>*</sup> | b <sup>+++</sup> | b <sup>0</sup> | b <sup>0++</sup> | Seq. | y           | y <sup>++</sup> | y <sup>*</sup> | y <sup>+++</sup> | y <sup>0</sup> | y <sup>0++</sup> | #  |
|----|-------------|-----------------|----------------|------------------|----------------|------------------|------|-------------|-----------------|----------------|------------------|----------------|------------------|----|
| 1  | 148.075690  | 74.541483       |                |                  |                |                  | F    |             |                 |                |                  |                |                  | 16 |
| 2  | 235.107718  | 118.057497      |                |                  | 217.097153     | 109.052214       | S    | 2063.978979 | 1032.493127     | 2046.952430    | 1023.979853      | 2045.968414    | 1023.487845      | 15 |
| 3  | 292.129182  | 146.568229      |                |                  | 274.118617     | 137.562946       | G    | 1976.946951 | 988.977114      | 1959.920402    | 980.463839       | 1958.936386    | 979.971831       | 14 |
| 4  | 731.354508  | 366.180892      | 714.327959     | 357.667618       | 713.343943     | 357.175610       | Q    | 1919.925487 | 960.466382      | 1902.898938    | 951.953107       | 1901.914922    | 951.461099       | 13 |
| 5  | 844.438572  | 422.722924      | 827.412023     | 414.209650       | 826.428007     | 413.717642       | L    | 1480.700161 | 740.853719      | 1463.673612    | 732.340444       | 1462.689596    | 731.848436       | 12 |
| 6  | 958.481499  | 479.744388      | 941.454950     | 471.231113       | 940.470934     | 470.739105       | N    | 1367.616097 | 684.311687      | 1350.589548    | 675.798412       | 1349.605532    | 675.306404       | 11 |
| 7  | 1045.513527 | 523.260402      | 1028.486978    | 514.747127       | 1027.502962    | 514.255119       | S    | 1253.573170 | 627.290223      | 1236.546621    | 618.776949       | 1235.562605    | 618.284941       | 10 |
| 8  | 1182.572439 | 591.789858      | 1165.545890    | 583.276583       | 1164.561874    | 582.784575       | H    | 1166.541142 | 583.774209      | 1149.514593    | 575.260935       |                |                  | 9  |
| 9  | 1239.593903 | 620.300590      | 1222.567354    | 611.787315       | 1221.583338    | 611.295307       | G    | 1029.482230 | 515.244753      | 1012.455681    | 506.731479       |                |                  | 8  |
| 10 | 1399.624552 | 700.315914      | 1382.598003    | 691.802640       | 1381.613987    | 691.310632       | C    | 972.460766  | 486.734021      | 955.434217     | 478.220747       |                |                  | 7  |
| 11 | 1546.692966 | 773.850121      | 1529.666417    | 765.336847       | 1528.682401    | 764.844839       | F    | 812.430117  | 406.718697      | 795.403568     | 398.205422       |                |                  | 6  |
| 12 | 1709.756295 | 855.381786      | 1692.729746    | 846.868511       | 1691.745730    | 846.376503       | Y    | 665.361703  | 333.184490      | 648.335154     | 324.671215       |                |                  | 5  |
| 13 | 1837.814873 | 919.411075      | 1820.788324    | 910.897800       | 1819.804308    | 910.405792       | Q    | 502.298374  | 251.652825      | 485.271825     | 243.139550       |                |                  | 4  |
| 14 | 1965.873451 | 983.440364      | 1948.846902    | 974.927089       | 1947.862886    | 974.435081       | Q    | 374.239796  | 187.623536      | 357.213247     | 179.110261       |                |                  | 3  |
| 15 | 2064.941865 | 1032.974570     | 2047.915316    | 1024.461296      | 2046.931300    | 1023.969288      | V    | 246.181218  | 123.594247      | 229.154669     | 115.080972       |                |                  | 2  |
| 16 |             |                 |                |                  |                |                  | K    | 147.112804  | 74.060040       | 130.086255     | 65.546765        |                |                  | 1  |

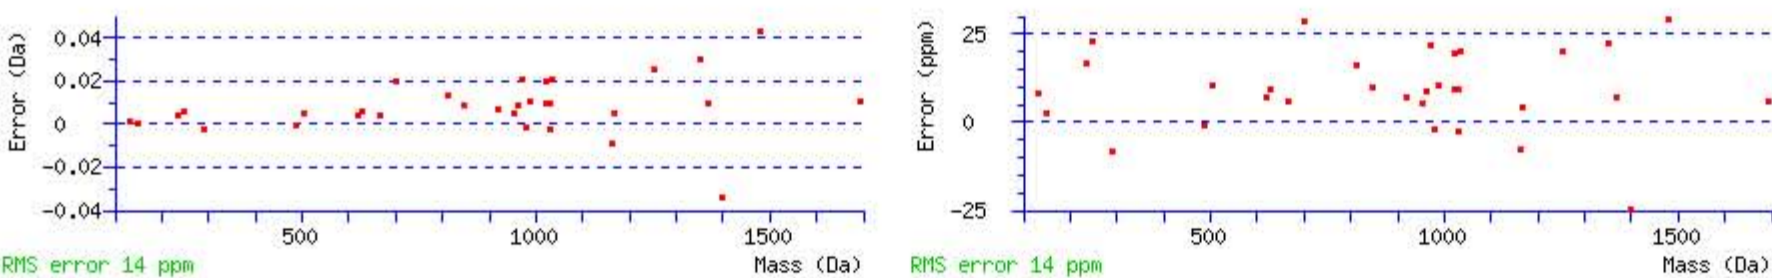

NCBI BLAST search of **FSGQLNSHGCFYQQVK**  
(Parameters: blastp, nr protein database, expect=20000, no filter, PAM30)  
Other BLAST [web gateways](#)

All matches to this query

| Score | Mr(calc):   | Delta    | Sequence                         |
|-------|-------------|----------|----------------------------------|
| 29.7  | 2210.040131 | 0.015301 | <a href="#">FSGQLNSHGCFYQQVK</a> |
| 2.0   | 2210.040131 | 0.015301 | <a href="#">FSGQLNSHGCFYQQVK</a> |

M

A

T

R

I

X

S

C

I

E

N

C

E

Mascot Search Results

Peptide View

MS/MS Fragmentation of **LLLQQVSLPELPGEYSMK**  
Found in **A2MG\_HUMAN**, Alpha-2-macroglobulin OS=Homo sapiens GN=A2M PE=1 SV=3

Match to Query 51399: 2355.289092 from(786.103640,3+) rtinseconds(2874) index(25414)  
Title: Locus:1.1.1.3381.15 File:"2013-07-02 CLN FXIII 180 min 2nd F 2.wiff"  
Data file C:\Program Files (x86)\Matrix Science\Mascot Daemon\mgf\8 FXIII 180 min 2nd\mascot\_daemon\_merge.mgf

Click mouse within plot area to zoom in by factor of two about that point  
Or, 

Plot from100to1800Da

Full range

  
Label all possible matches ☐ Label matches used for scoring ☒

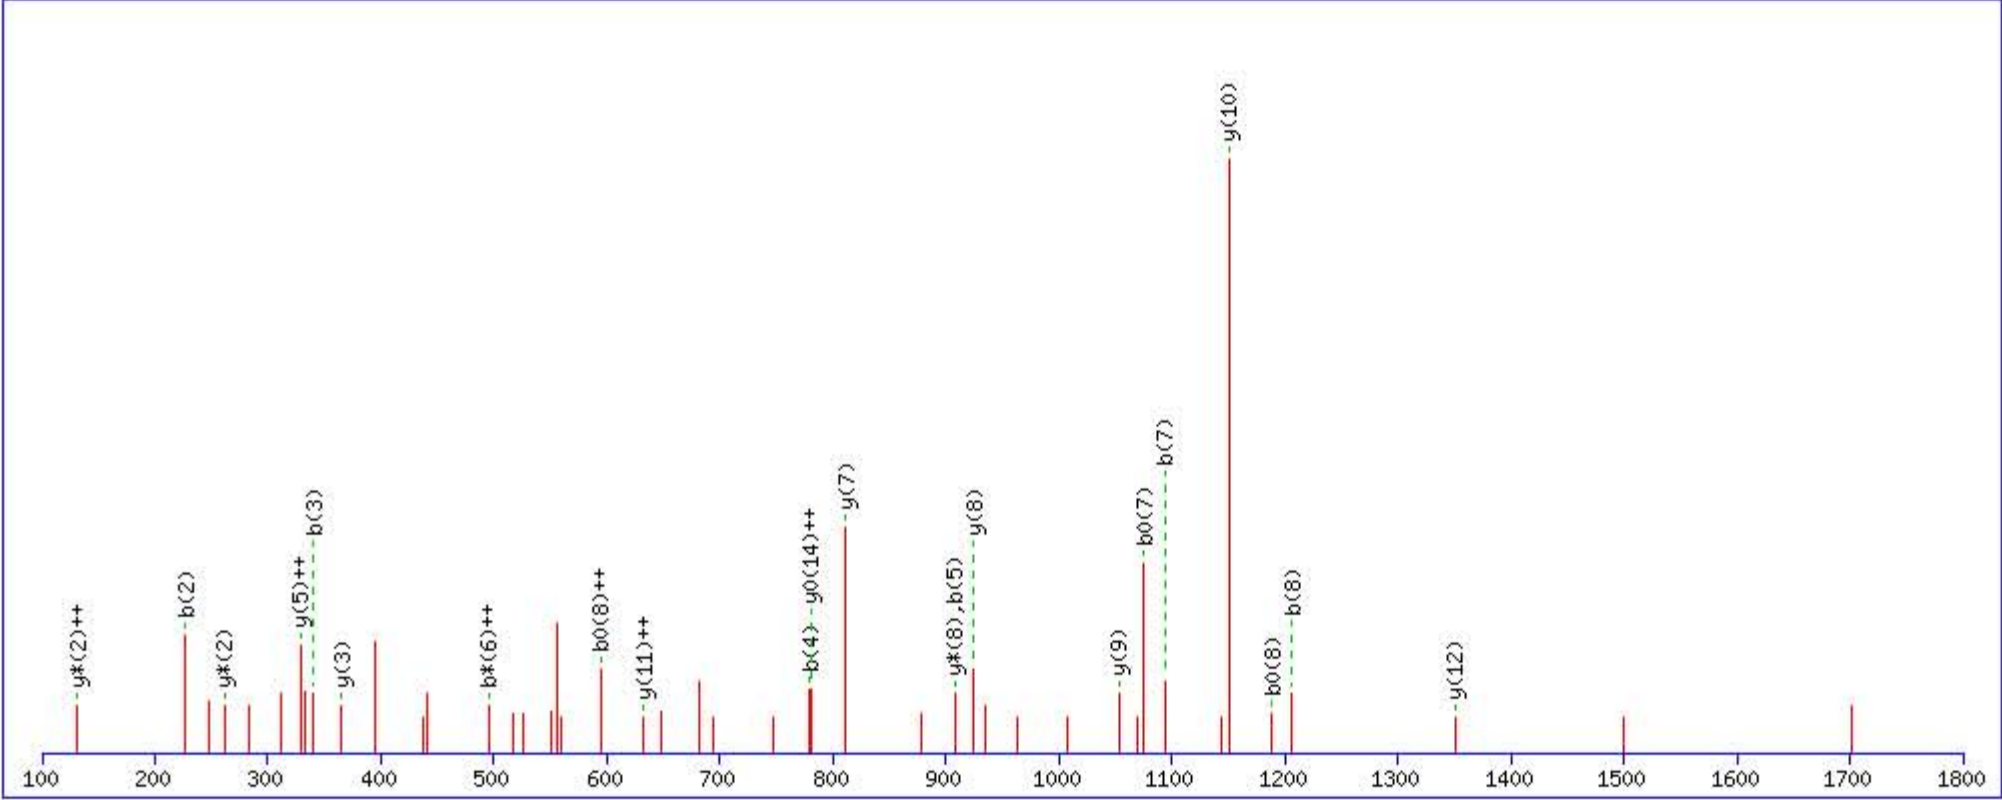

Monoisotopic mass of neutral peptide Mr(calc): 2355.258179  
Fixed modifications: Carbamidomethyl (C) (apply to specified residues or termini only)  
Variable modifications:  
Q4 : Biotin:Thermo-21345 (Q)  
Ions Score: 35 Expect: 0.0006  
Matches : 22/182 fragment ions using 43 most intense peaks [\(help\)](#)

| #  | b           | b <sup>++</sup> | b <sup>*</sup> | b <sup>++</sup> | b <sup>0</sup> | b <sup>0++</sup> | Seq. | y           | y <sup>++</sup> | y <sup>*</sup> | y <sup>++</sup> | y <sup>0</sup> | y <sup>0++</sup> | #  |
|----|-------------|-----------------|----------------|-----------------|----------------|------------------|------|-------------|-----------------|----------------|-----------------|----------------|------------------|----|
| 1  | 114.091340  | 57.549308       |                |                 |                |                  | L    |             |                 |                |                 |                |                  | 18 |
| 2  | 227.175404  | 114.091340      |                |                 |                |                  | L    | 2243.181426 | 1122.094351     | 2226.154877    | 1113.581076     | 2225.170861    | 1113.089068      | 17 |
| 3  | 340.259468  | 170.633372      |                |                 |                |                  | L    | 2130.097362 | 1065.552319     | 2113.070813    | 1057.039044     | 2112.086797    | 1056.547036      | 16 |
| 4  | 779.484794  | 390.246035      | 762.458245     | 381.732760      |                |                  | Q    | 2017.013298 | 1009.010287     | 1999.986749    | 1000.497013     | 1999.002733    | 1000.005005      | 15 |
| 5  | 907.543372  | 454.275324      | 890.516823     | 445.762049      |                |                  | Q    | 1577.787972 | 789.397624      | 1560.761423    | 780.884350      | 1559.777407    | 780.392342       | 14 |
| 6  | 1006.611786 | 503.809531      | 989.585237     | 495.296256      |                |                  | V    | 1449.729394 | 725.368335      | 1432.702845    | 716.855061      | 1431.718829    | 716.363053       | 13 |
| 7  | 1093.643814 | 547.325545      | 1076.617265    | 538.812271      | 1075.633249    | 538.320263       | S    | 1350.660980 | 675.834128      | 1333.634431    | 667.320854      | 1332.650415    | 666.828846       | 12 |
| 8  | 1206.727878 | 603.867577      | 1189.701329    | 595.354303      | 1188.717313    | 594.862294       | L    | 1263.628952 | 632.318114      | 1246.602403    | 623.804840      | 1245.618387    | 623.312832       | 11 |
| 9  | 1303.780642 | 652.393959      | 1286.754093    | 643.880685      | 1285.770077    | 643.388676       | P    | 1150.544888 | 575.776082      | 1133.518339    | 567.262808      | 1132.534323    | 566.770800       | 10 |
| 10 | 1432.823235 | 716.915256      | 1415.796686    | 708.401981      | 1414.812670    | 707.909973       | E    | 1053.492124 | 527.249700      | 1036.465575    | 518.736426      | 1035.481559    | 518.244418       | 9  |
| 11 | 1545.907299 | 773.457288      | 1528.880750    | 764.944013      | 1527.896734    | 764.452005       | L    | 924.449531  | 462.728404      | 907.422982     | 454.215129      | 906.438966     | 453.723121       | 8  |
| 12 | 1642.960063 | 821.983670      | 1625.933514    | 813.470395      | 1624.949498    | 812.978387       | P    | 811.365467  | 406.186372      | 794.338918     | 397.673097      | 793.354902     | 397.181089       | 7  |
| 13 | 1699.981527 | 850.494401      | 1682.954978    | 841.981127      | 1681.970962    | 841.489119       | G    | 714.312703  | 357.659990      | 697.286154     | 349.146715      | 696.302138     | 348.654707       | 6  |
| 14 | 1829.024120 | 915.015698      | 1811.997571    | 906.502423      | 1811.013555    | 906.010415       | E    | 657.291239  | 329.149258      | 640.264690     | 320.635983      | 639.280674     | 320.143975       | 5  |
| 15 | 1992.087449 | 996.547362      | 1975.060900    | 988.034088      | 1974.076884    | 987.542080       | Y    | 528.248646  | 264.627961      | 511.222097     | 256.114687      | 510.238081     | 255.622679       | 4  |
| 16 | 2079.119477 | 1040.063376     | 2062.092928    | 1031.550102     | 2061.108912    | 1031.058094      | S    | 365.185317  | 183.096297      | 348.158768     | 174.583022      | 347.174752     | 174.091014       | 3  |
| 17 | 2210.159962 | 1105.583619     | 2193.133413    | 1097.070344     | 2192.149397    | 1096.578336      | M    | 278.153289  | 139.580282      | 261.126740     | 131.067008      |                |                  | 2  |
| 18 |             |                 |                |                 |                |                  | K    | 147.112804  | 74.060040       | 130.086255     | 65.546765       |                |                  | 1  |

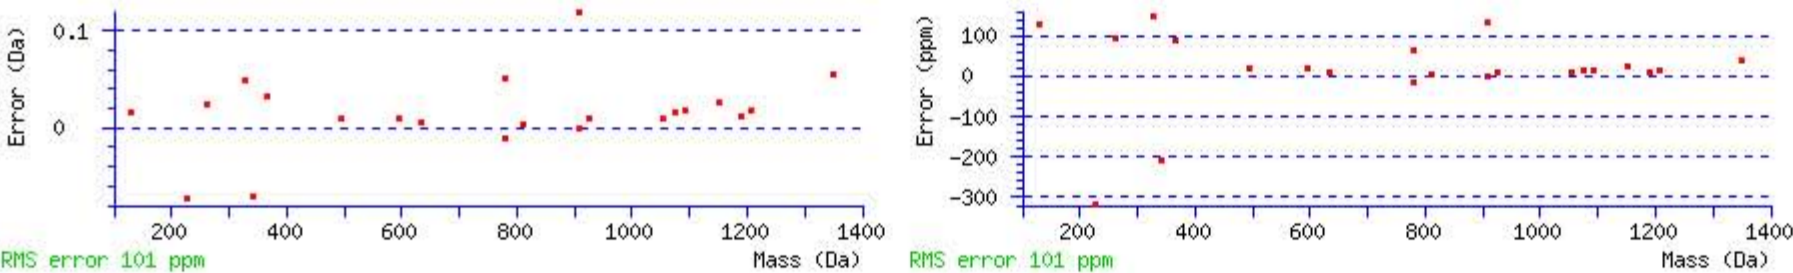

NCBI BLAST search of [LLLQQVSLPELPGEYSMK](#)  
(Parameters: blastp, nr protein database, expect=20000, no filter, PAM30)  
Other BLAST [web gateways](#)

All matches to this query

| Score | Mr(calc):   | Delta    | Sequence                           |
|-------|-------------|----------|------------------------------------|
| 34.5  | 2355.258179 | 0.030913 | <a href="#">LLLQQVSLPELPGEYSMK</a> |
| 27.0  | 2355.258179 | 0.030913 | <a href="#">LLLQQVSLPELPGEYSMK</a> |
| 0.1   | 2355.259354 | 0.029738 | <a href="#">SQPRASGPPRSIQPVSPR</a> |

MATRIX

SCIENCE

Mascot Search Results

Peptide View

MS/MS Fragmentation of **LLLQQVSLPELPGEYSMK**  
Found in **A2MG\_HUMAN**, Alpha-2-macroglobulin OS=Homo sapiens GN=A2M PE=1 SV=3

Match to Query 51402: 2355.289422 from(786.103750,3+) rtinseconds(2841) index(25147)  
Title: Locus:1.1.1.3370.16 File:"2013-07-02 CLN FXIII 180 min 2nd F 2.wiff"  
Data file C:\Program Files (x86)\Matrix Science\Mascot Daemon\mgf\8 FXIII 180 min 2nd\mascot\_daemon\_merge.mgf

Click mouse within plot area to zoom in by factor of two about that point  
Or, 

Plot from

0

 to 

2200

 Da 

Full range

  
Label all possible matches ☐ Label matches used for scoring ☒

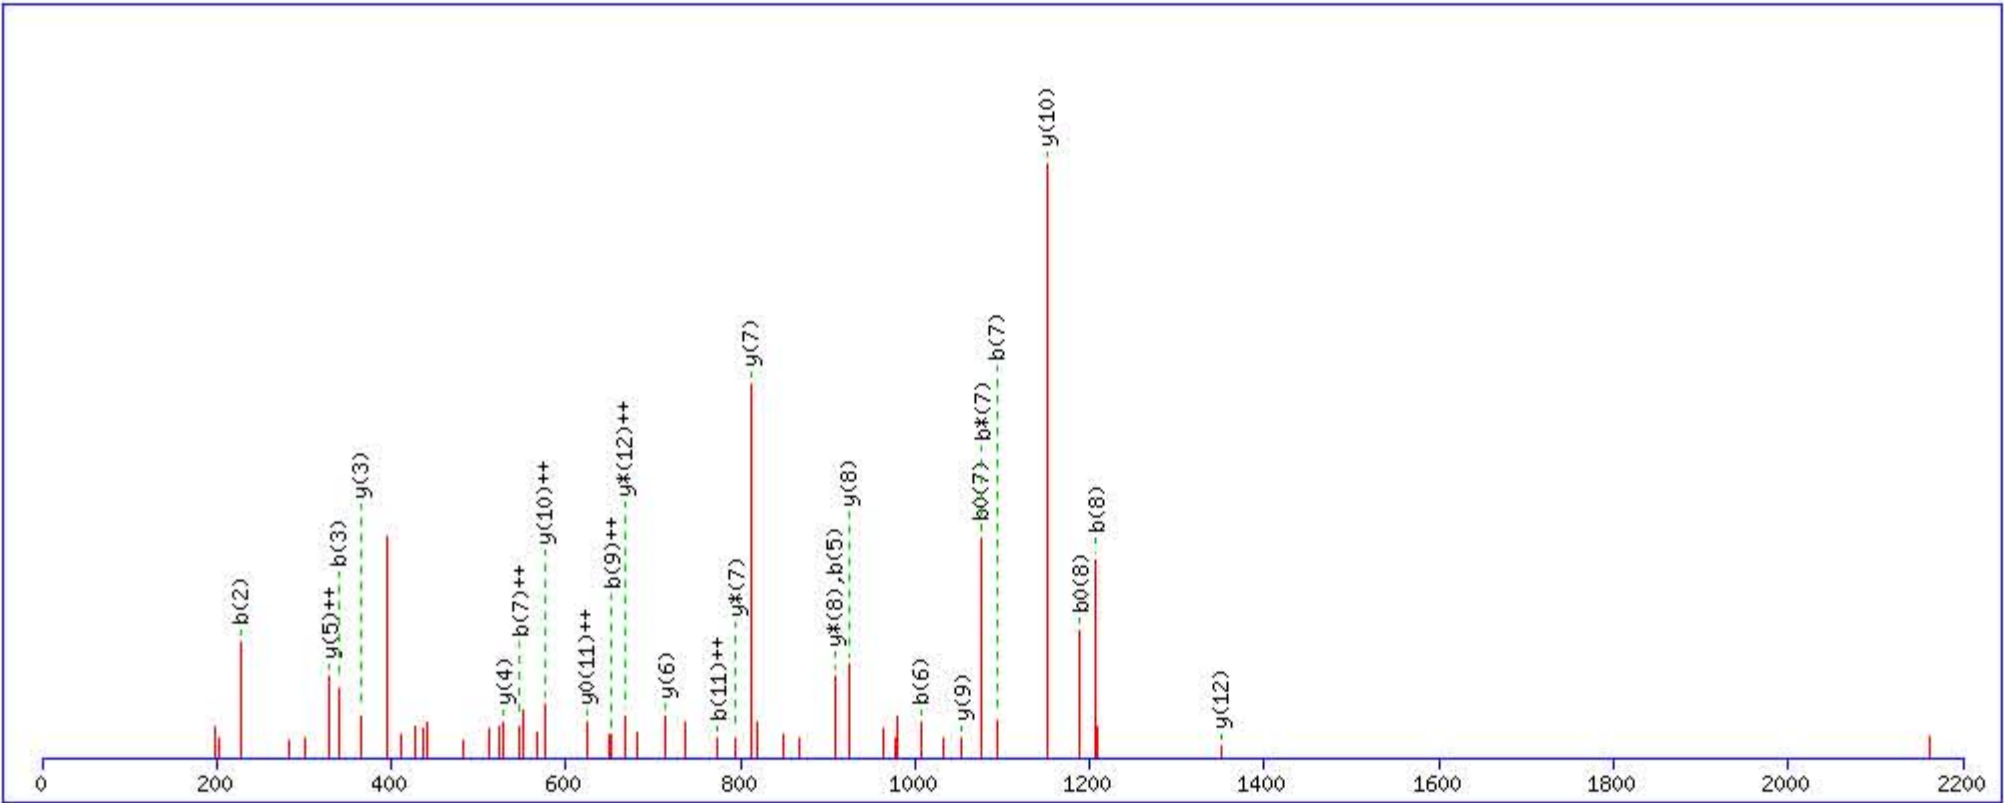

Monoisotopic mass of neutral peptide Mr(calc): 2355.258179  
Fixed modifications: Carbamidomethyl (C) (apply to specified residues or termini only)  
Variable modifications:  
Q5 : Biotin:Thermo-21345 (Q)  
Ions Score: 42 Expect: 0.00048  
Matches : 26/182 fragment ions using 50 most intense peaks [\(help\)](#)

| #  | b           | b <sup>++</sup> | b <sup>*</sup> | b <sup>+++</sup> | b <sup>0</sup> | b <sup>0++</sup> | Seq. | y           | y <sup>++</sup> | y <sup>*</sup> | y <sup>+++</sup> | y <sup>0</sup> | y <sup>0++</sup> | #  |
|----|-------------|-----------------|----------------|------------------|----------------|------------------|------|-------------|-----------------|----------------|------------------|----------------|------------------|----|
| 1  | 114.091340  | 57.549308       |                |                  |                |                  | L    |             |                 |                |                  |                |                  | 18 |
| 2  | 227.175404  | 114.091340      |                |                  |                |                  | L    | 2243.181426 | 1122.094351     | 2226.154877    | 1113.581076      | 2225.170861    | 1113.089068      | 17 |
| 3  | 340.259468  | 170.633372      |                |                  |                |                  | L    | 2130.097362 | 1065.552319     | 2113.070813    | 1057.039044      | 2112.086797    | 1056.547036      | 16 |
| 4  | 468.318046  | 234.662661      | 451.291497     | 226.149386       |                |                  | Q    | 2017.013298 | 1009.010287     | 1999.986749    | 1000.497013      | 1999.002733    | 1000.005005      | 15 |
| 5  | 907.543372  | 454.275324      | 890.516823     | 445.762049       |                |                  | Q    | 1888.954720 | 944.980998      | 1871.928171    | 936.467724       | 1870.944155    | 935.975715       | 14 |
| 6  | 1006.611786 | 503.809531      | 989.585237     | 495.296256       |                |                  | V    | 1449.729394 | 725.368335      | 1432.702845    | 716.855061       | 1431.718829    | 716.363053       | 13 |
| 7  | 1093.643814 | 547.325545      | 1076.617265    | 538.812271       | 1075.633249    | 538.320263       | S    | 1350.660980 | 675.834128      | 1333.634431    | 667.320854       | 1332.650415    | 666.828846       | 12 |
| 8  | 1206.727878 | 603.867577      | 1189.701329    | 595.354303       | 1188.717313    | 594.862294       | L    | 1263.628952 | 632.318114      | 1246.602403    | 623.804840       | 1245.618387    | 623.312832       | 11 |
| 9  | 1303.780642 | 652.393959      | 1286.754093    | 643.880685       | 1285.770077    | 643.388676       | P    | 1150.544888 | 575.776082      | 1133.518339    | 567.262808       | 1132.534323    | 566.770800       | 10 |
| 10 | 1432.823235 | 716.915256      | 1415.796686    | 708.401981       | 1414.812670    | 707.909973       | E    | 1053.492124 | 527.249700      | 1036.465575    | 518.736426       | 1035.481559    | 518.244418       | 9  |
| 11 | 1545.907299 | 773.457288      | 1528.880750    | 764.944013       | 1527.896734    | 764.452005       | L    | 924.449531  | 462.728404      | 907.422982     | 454.215129       | 906.438966     | 453.723121       | 8  |
| 12 | 1642.960063 | 821.983670      | 1625.933514    | 813.470395       | 1624.949498    | 812.978387       | P    | 811.365467  | 406.186372      | 794.338918     | 397.673097       | 793.354902     | 397.181089       | 7  |
| 13 | 1699.981527 | 850.494401      | 1682.954978    | 841.981127       | 1681.970962    | 841.489119       | G    | 714.312703  | 357.659990      | 697.286154     | 349.146715       | 696.302138     | 348.654707       | 6  |
| 14 | 1829.024120 | 915.015698      | 1811.997571    | 906.502423       | 1811.013555    | 906.010415       | E    | 657.291239  | 329.149258      | 640.264690     | 320.635983       | 639.280674     | 320.143975       | 5  |
| 15 | 1992.087449 | 996.547362      | 1975.060900    | 988.034088       | 1974.076884    | 987.542080       | Y    | 528.248646  | 264.627961      | 511.222097     | 256.114687       | 510.238081     | 255.622679       | 4  |
| 16 | 2079.119477 | 1040.063376     | 2062.092928    | 1031.550102      | 2061.108912    | 1031.058094      | S    | 365.185317  | 183.096297      | 348.158768     | 174.583022       | 347.174752     | 174.091014       | 3  |
| 17 | 2210.159962 | 1105.583619     | 2193.133413    | 1097.070344      | 2192.149397    | 1096.578336      | M    | 278.153289  | 139.580282      | 261.126740     | 131.067008       |                |                  | 2  |
| 18 |             |                 |                |                  |                |                  | K    | 147.112804  | 74.060040       | 130.086255     | 65.546765        |                |                  | 1  |

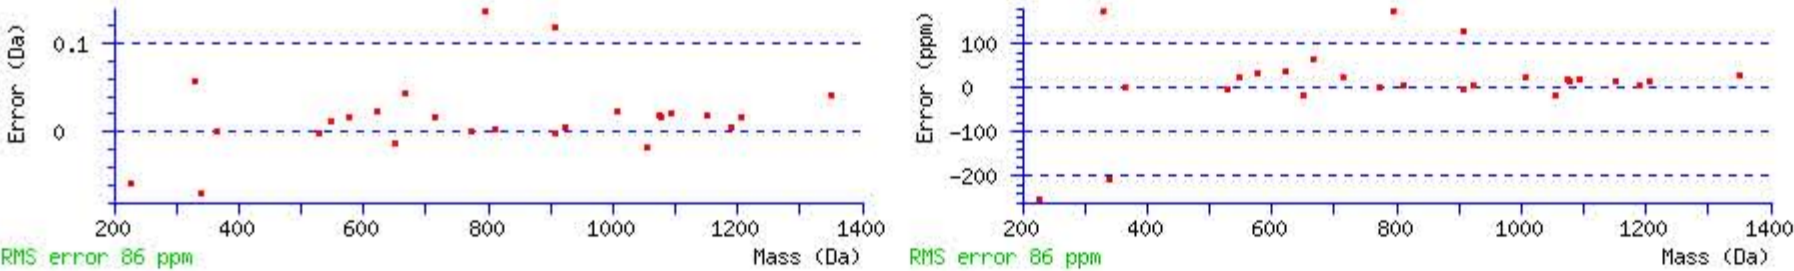

NCBI BLAST search of [LLLQQVSLPELPGEYSMK](#)  
(Parameters: blastp, nr protein database, expect=20000, no filter, PAM30)  
Other BLAST [web gateways](#)

All matches to this query

| Score | Mr(calc):   | Delta    | Sequence                            |
|-------|-------------|----------|-------------------------------------|
| 41.7  | 2355.258179 | 0.031243 | <a href="#">LLLQQVSLPELPGEYSMK</a>  |
| 41.7  | 2355.258179 | 0.031243 | <a href="#">LLLQQVSLPELPGEYSMK</a>  |
| 6.0   | 2355.288498 | 0.000924 | <a href="#">LIQQUERALLNFTQWKQ</a>   |
| 6.0   | 2355.288498 | 0.000924 | <a href="#">LIQQUERALLNFTQWKQ</a>   |
| 0.9   | 2355.259354 | 0.030068 | <a href="#">SQPRASGPPRSIQPQVSPR</a> |
| 0.3   | 2355.273270 | 0.016152 | <a href="#">NQLGSQEVHLSQLIITHK</a>  |

MATRIX

SCIENCE

Mascot Search Results

Peptide View

MS/MS Fragmentation of **VDLSFSPSQSLPASHAHLR**  
Found in **A2MG\_HUMAN**, Alpha-2-macroglobulin OS=Homo sapiens GN=A2M PE=1 SV=3

Match to Query 51448: 2359.218976 from(590.812020,4+) rtinseconds(1997) index(20220)  
Title: Locus:1.1.1.3078.3 File:"2013-07-02 CLN FXIII 180 min 2nd F 2.wiff"  
Data file C:\Program Files (x86)\Matrix Science\Mascot Daemon\mgf\8 FXIII 180 min 2nd\mascot\_daemon\_merge.mgf

Click mouse within plot area to zoom in by factor of two about that point  
Or, 

Plot from

100

 to 

2000

 Da 

Full range

  
Label all possible matches ☐ Label matches used for scoring ☒

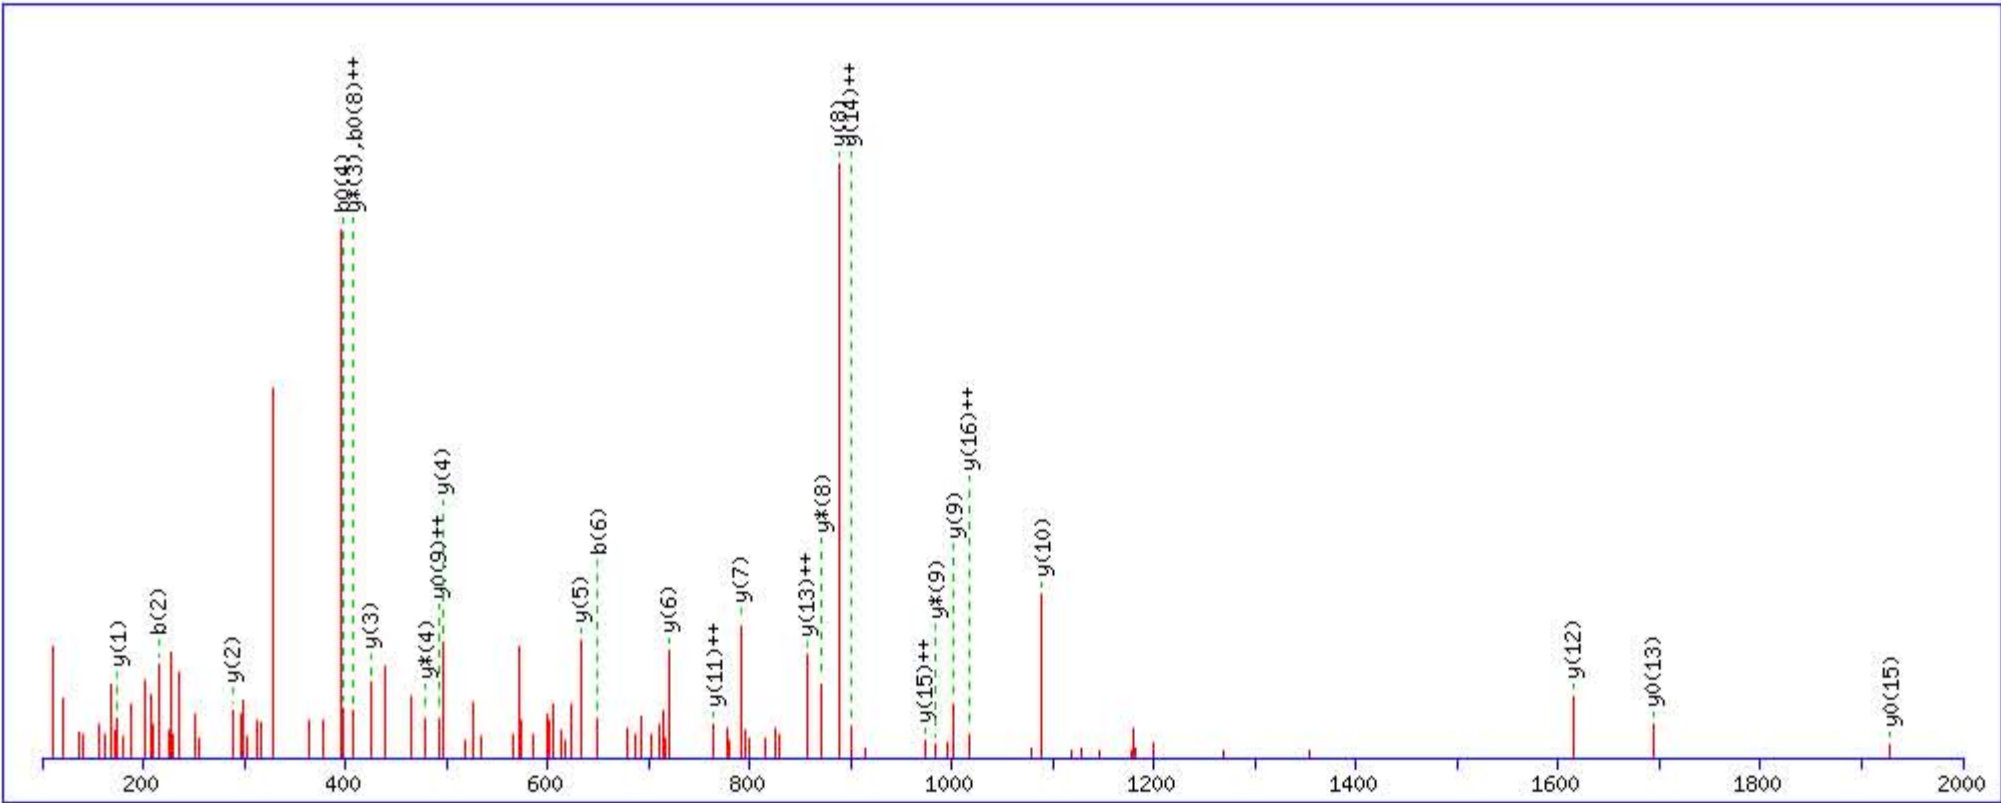

Monoisotopic mass of neutral peptide Mr(calc): 2359.210678  
Fixed modifications: Carbamidomethyl (C) (apply to specified residues or termini only)  
Variable modifications:  
Q9 : Biotin:Thermo-21345 (Q)  
Ions Score: 43 Expect: 0.0016  
Matches : 27/188 fragment ions using 76 most intense peaks [\(help\)](#)

| #  | b           | b <sup>++</sup> | b <sup>*</sup> | b <sup>*++</sup> | b <sup>0</sup> | b <sup>0++</sup> | Seq. | y           | y <sup>++</sup> | y <sup>*</sup> | y <sup>*++</sup> | y <sup>0</sup> | y <sup>0++</sup> | #  |
|----|-------------|-----------------|----------------|------------------|----------------|------------------|------|-------------|-----------------|----------------|------------------|----------------|------------------|----|
| 1  | 100.075690  | 50.541483       |                |                  |                |                  | V    |             |                 |                |                  |                |                  | 19 |
| 2  | 215.102633  | 108.054954      |                |                  | 197.092068     | 99.049672        | D    | 2261.149547 | 1131.078411     | 2244.122998    | 1122.565137      | 2243.138982    | 1122.073129      | 18 |
| 3  | 328.186697  | 164.596986      |                |                  | 310.176132     | 155.591704       | L    | 2146.122604 | 1073.564940     | 2129.096055    | 1065.051665      | 2128.112039    | 1064.559657      | 17 |
| 4  | 415.218725  | 208.113001      |                |                  | 397.208160     | 199.107718       | S    | 2033.038540 | 1017.022908     | 2016.011991    | 1008.509634      | 2015.027975    | 1008.017626      | 16 |
| 5  | 562.287139  | 281.647208      |                |                  | 544.276574     | 272.641925       | F    | 1946.006512 | 973.506894      | 1928.979963    | 964.993620       | 1927.995947    | 964.501612       | 15 |
| 6  | 649.319167  | 325.163222      |                |                  | 631.308602     | 316.157939       | S    | 1798.938098 | 899.972687      | 1781.911549    | 891.459413       | 1780.927533    | 890.967405       | 14 |
| 7  | 746.371931  | 373.689604      |                |                  | 728.361366     | 364.684321       | P    | 1711.906070 | 856.456673      | 1694.879521    | 847.943399       | 1693.895505    | 847.451391       | 13 |
| 8  | 833.403959  | 417.205618      |                |                  | 815.393394     | 408.200335       | S    | 1614.853306 | 807.930291      | 1597.826757    | 799.417017       | 1596.842741    | 798.925009       | 12 |
| 9  | 1272.629285 | 636.818281      | 1255.602736    | 628.305006       | 1254.618720    | 627.812998       | Q    | 1527.821278 | 764.414277      | 1510.794729    | 755.901003       | 1509.810713    | 755.408995       | 11 |
| 10 | 1359.661313 | 680.334295      | 1342.634764    | 671.821020       | 1341.650748    | 671.329012       | S    | 1088.595952 | 544.801614      | 1071.569403    | 536.288340       | 1070.585387    | 535.796332       | 10 |
| 11 | 1472.745377 | 736.876327      | 1455.718828    | 728.363052       | 1454.734812    | 727.871044       | L    | 1001.563924 | 501.285600      | 984.537375     | 492.772326       | 983.553359     | 492.280318       | 9  |
| 12 | 1569.798141 | 785.402709      | 1552.771592    | 776.889434       | 1551.787576    | 776.397426       | P    | 888.479860  | 444.743568      | 871.453311     | 436.230294       | 870.469295     | 435.738286       | 8  |
| 13 | 1640.835255 | 820.921266      | 1623.808706    | 812.407991       | 1622.824690    | 811.915983       | A    | 791.427096  | 396.217186      | 774.400547     | 387.703912       | 773.416531     | 387.211904       | 7  |
| 14 | 1727.867283 | 864.437280      | 1710.840734    | 855.924005       | 1709.856718    | 855.431997       | S    | 720.389982  | 360.698629      | 703.363433     | 352.185355       | 702.379417     | 351.693347       | 6  |
| 15 | 1864.926195 | 932.966736      | 1847.899646    | 924.453461       | 1846.915630    | 923.961453       | H    | 633.357954  | 317.182615      | 616.331405     | 308.669341       |                |                  | 5  |
| 16 | 1935.963309 | 968.485293      | 1918.936760    | 959.972018       | 1917.952744    | 959.480010       | A    | 496.299042  | 248.653159      | 479.272493     | 240.139884       |                |                  | 4  |
| 17 | 2073.022221 | 1037.014748     | 2055.995672    | 1028.501474      | 2055.011656    | 1028.009466      | H    | 425.261928  | 213.134602      | 408.235379     | 204.621328       |                |                  | 3  |
| 18 | 2186.106285 | 1093.556780     | 2169.079736    | 1085.043506      | 2168.095720    | 1084.551498      | L    | 288.203016  | 144.605146      | 271.176467     | 136.091872       |                |                  | 2  |
| 19 |             |                 |                |                  |                |                  | R    | 175.118952  | 88.063114       | 158.092403     | 79.549839        |                |                  | 1  |

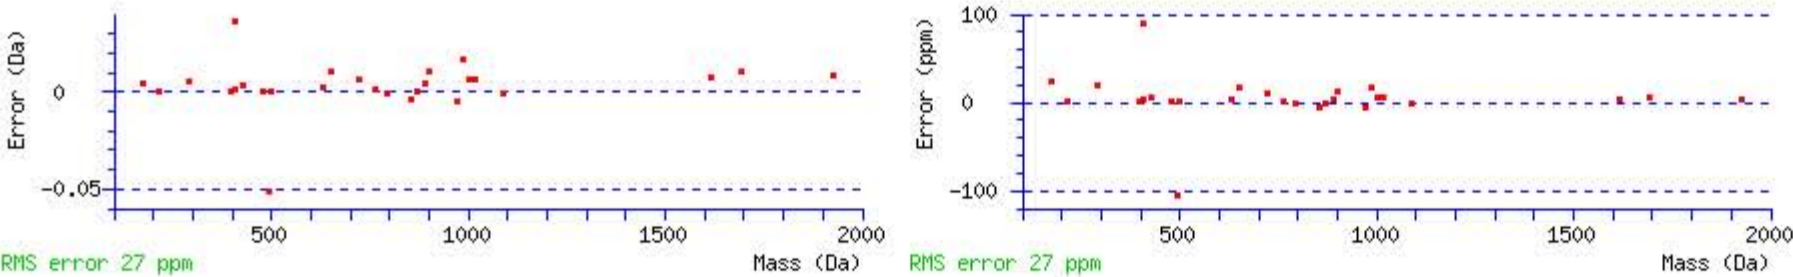

NCBI BLAST search of [VDLSFSPSQSLPASHAHLR](#)  
(Parameters: blastp, nr protein database, expect=20000, no filter, PAM30)  
Other BLAST [web gateways](#)

All matches to this query

| Score | Mr(calc):   | Delta    | Sequence                            |
|-------|-------------|----------|-------------------------------------|
| 42.9  | 2359.210678 | 0.008298 | <a href="#">VDLSFSPSQSLPASHAHLR</a> |

M

A

T

R

I

X

S

C

I

E

N

C

E

Mascot Search Results

Peptide View

MS/MS Fragmentation of **MCPQLQQYEMHGPEGLR**  
Found in **A2MG\_HUMAN**, Alpha-2-macroglobulin OS=Homo sapiens GN=A2M PE=1 SV=3

Match to Query 51697: 2384.106222 from(795.709350,3+) rtinseconds(2045) index(20491)  
Title: Locus:1.1.1.3094.18 File:"2013-07-02 CLN FXIII 180 min 2nd F 2.wiff"  
Data file C:\Program Files (x86)\Matrix Science\Mascot Daemon\mgf\8 FXIII 180 min 2nd\mascot\_daemon\_merge.mgf

Click mouse within plot area to zoom in by factor of two about that point  
Or,   to  Da   
Label all possible matches ☐ Label matches used for scoring ☒

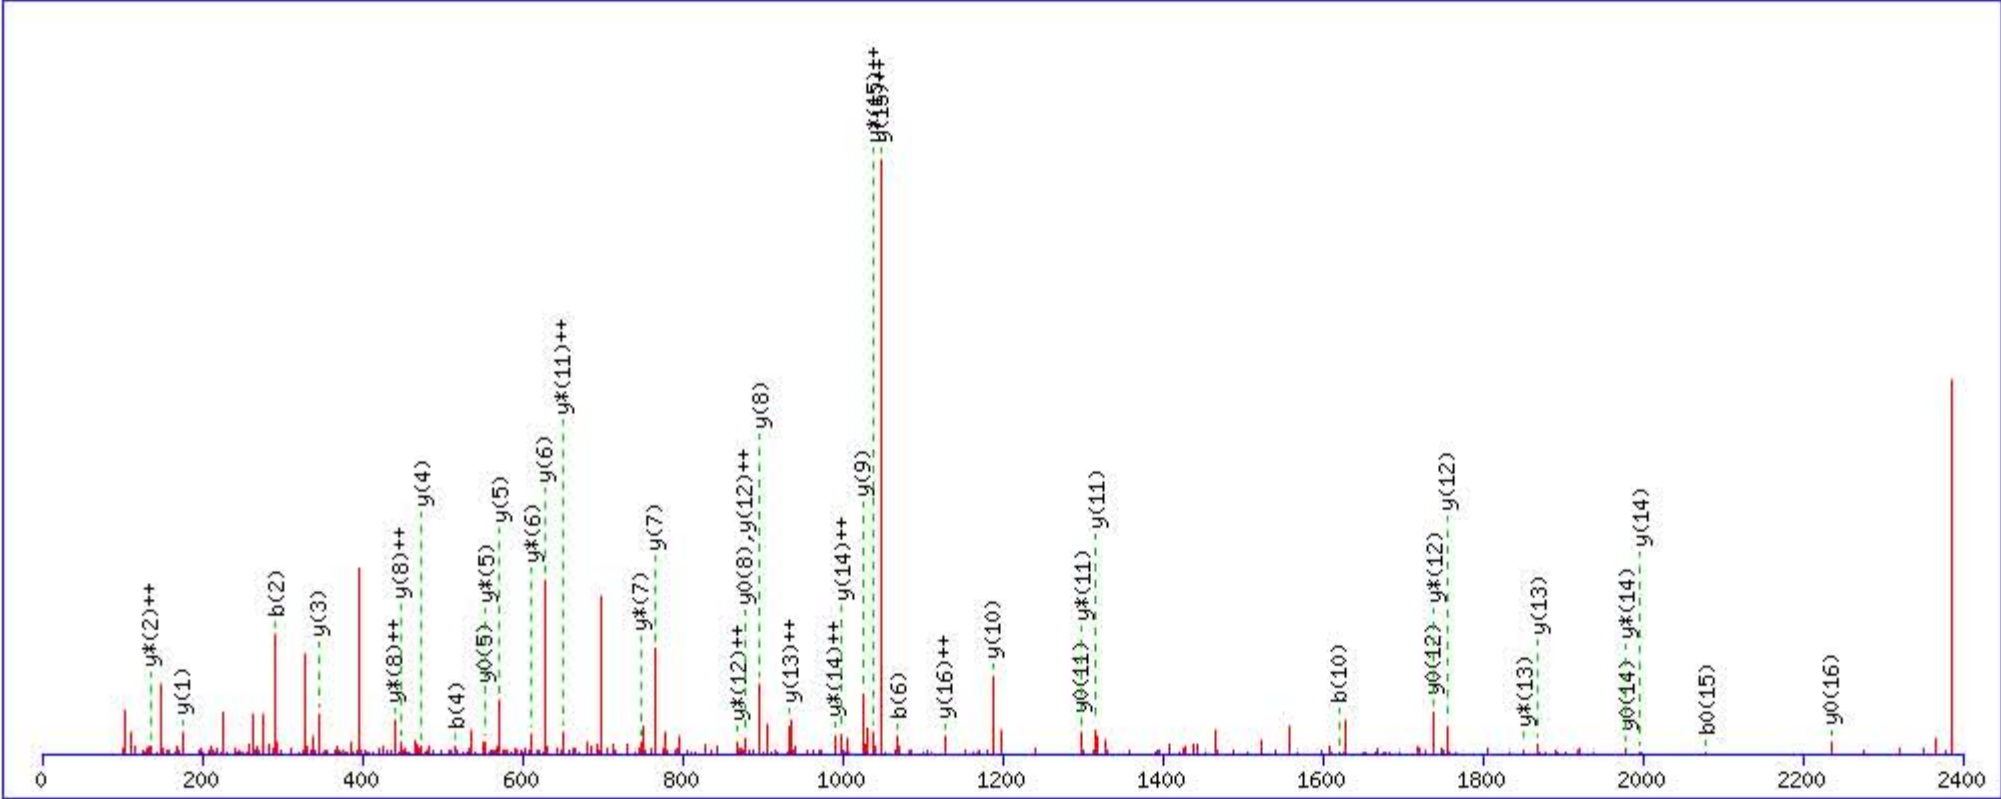

Monoisotopic mass of neutral peptide Mr(calc): 2384.089767  
Fixed modifications: Carbamidomethyl (C) (apply to specified residues or termini only)  
Variable modifications:  
Q6 : Biotin:Thermo-21345 (Q)  
Ions Score: 37 Expect: 0.0031  
Matches : 43/164 fragment ions using 137 most intense peaks [\(help\)](#)

| #  | b           | b <sup>++</sup> | b <sup>+</sup> | b <sup>+++</sup> | b <sup>0</sup> | b <sup>0++</sup> | Seq. | y           | y <sup>++</sup> | y <sup>+</sup> | y <sup>+++</sup> | y <sup>0</sup> | y <sup>0++</sup> | #  |
|----|-------------|-----------------|----------------|------------------|----------------|------------------|------|-------------|-----------------|----------------|------------------|----------------|------------------|----|
| 1  | 132.047761  | 66.527518       |                |                  |                |                  | M    |             |                 |                |                  |                |                  | 17 |
| 2  | 292.078410  | 146.542843      |                |                  |                |                  | C    | 2254.056579 | 1127.531927     | 2237.030030    | 1119.018653      | 2236.046014    | 1118.526645      | 16 |
| 3  | 389.131174  | 195.069225      |                |                  |                |                  | P    | 2094.025930 | 1047.516603     | 2076.999381    | 1039.003328      | 2076.015365    | 1038.511320      | 15 |
| 4  | 517.189752  | 259.098514      | 500.163203     | 250.585240       |                |                  | Q    | 1996.973166 | 998.990221      | 1979.946617    | 990.476947       | 1978.962601    | 989.984939       | 14 |
| 5  | 630.273816  | 315.640546      | 613.247267     | 307.127272       |                |                  | L    | 1868.914588 | 934.960932      | 1851.888039    | 926.447658       | 1850.904023    | 925.955650       | 13 |
| 6  | 1069.499142 | 535.253209      | 1052.472593    | 526.739935       |                |                  | Q    | 1755.830524 | 878.418900      | 1738.803975    | 869.905626       | 1737.819959    | 869.413618       | 12 |
| 7  | 1197.557720 | 599.282498      | 1180.531171    | 590.769224       |                |                  | Q    | 1316.605198 | 658.806237      | 1299.578649    | 650.292963       | 1298.594633    | 649.800955       | 11 |
| 8  | 1360.621049 | 680.814163      | 1343.594500    | 672.300888       |                |                  | Y    | 1188.546620 | 594.776948      | 1171.520071    | 586.263674       | 1170.536055    | 585.771666       | 10 |
| 9  | 1489.663642 | 745.335459      | 1472.637093    | 736.822185       | 1471.653077    | 736.330177       | E    | 1025.483291 | 513.245284      | 1008.456742    | 504.732009       | 1007.472726    | 504.240001       | 9  |
| 10 | 1620.704127 | 810.855702      | 1603.677578    | 802.342427       | 1602.693562    | 801.850419       | M    | 896.440698  | 448.723987      | 879.414149     | 440.210713       | 878.430133     | 439.718705       | 8  |
| 11 | 1757.763039 | 879.385158      | 1740.736490    | 870.871883       | 1739.752474    | 870.379875       | H    | 765.400213  | 383.203745      | 748.373664     | 374.690470       | 747.389648     | 374.198462       | 7  |
| 12 | 1814.784503 | 907.895890      | 1797.757954    | 899.382615       | 1796.773938    | 898.890607       | G    | 628.341301  | 314.674289      | 611.314752     | 306.161014       | 610.330736     | 305.669006       | 6  |
| 13 | 1911.837267 | 956.422272      | 1894.810718    | 947.908997       | 1893.826702    | 947.416989       | P    | 571.319837  | 286.163557      | 554.293288     | 277.650282       | 553.309272     | 277.158274       | 5  |
| 14 | 2040.879860 | 1020.943568     | 2023.853311    | 1012.430294      | 2022.869295    | 1011.938286      | E    | 474.267073  | 237.637175      | 457.240524     | 229.123900       | 456.256508     | 228.631892       | 4  |
| 15 | 2097.901324 | 1049.454300     | 2080.874775    | 1040.941025      | 2079.890759    | 1040.449017      | G    | 345.224480  | 173.115878      | 328.197931     | 164.602603       |                |                  | 3  |
| 16 | 2210.985388 | 1105.996332     | 2193.958839    | 1097.483057      | 2192.974823    | 1096.991049      | L    | 288.203016  | 144.605146      | 271.176467     | 136.091872       |                |                  | 2  |
| 17 |             |                 |                |                  |                |                  | R    | 175.118952  | 88.063114       | 158.092403     | 79.549839        |                |                  | 1  |

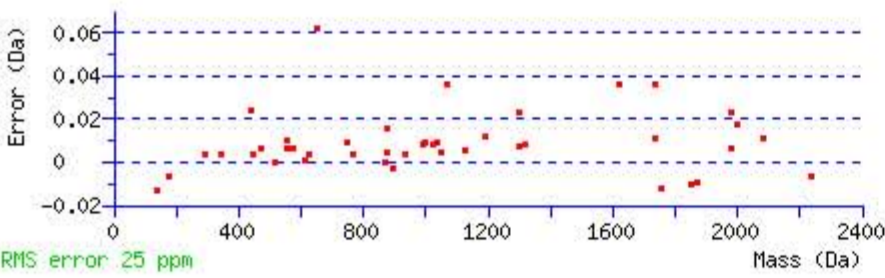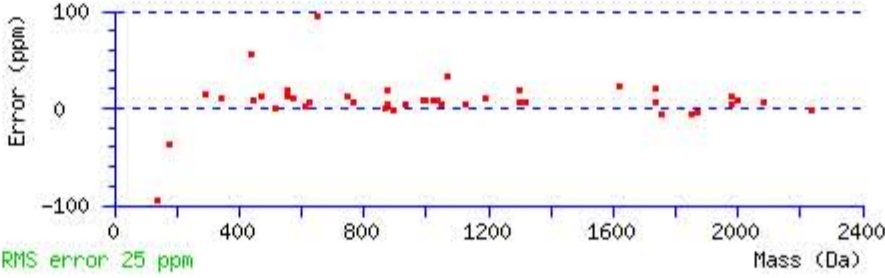

NCBI BLAST search of [MCPQLQQYEMHGPEGLR](#)  
(Parameters: blastp, nr protein database, expect=20000, no filter, PAM30)  
Other BLAST [web gateways](#)

All matches to this query

| Score | Mr(calc):   | Delta    | Sequence                          |
|-------|-------------|----------|-----------------------------------|
| 36.8  | 2384.089767 | 0.016455 | <a href="#">MCPQLQQYEMHGPEGLR</a> |
| 35.2  | 2384.089767 | 0.016455 | <a href="#">MCPQLQQYEMHGPEGLR</a> |
| 34.4  | 2384.089767 | 0.016455 | <a href="#">MCPQLQQYEMHGPEGLR</a> |

M

A

T

R

I

X

S

C

I

E

N

C

E

Mascot Search Results

Peptide View

MS/MS Fragmentation of **MCPQLQQYEMHGPEGLR**  
Found in **A2MG\_HUMAN**, Alpha-2-macroglobulin OS=Homo sapiens GN=A2M PE=1 SV=3

Match to Query 51710: 2384.114768 from(1193.064660,2+) rtinseconds(2017) index(20341)  
Title: Locus:1.1.1.3084.18 File:"2013-07-02 CLN FXIII 180 min 2nd F 2.wiff"  
Data file C:\Program Files (x86)\Matrix Science\Mascot Daemon\mgf\8 FXIII 180 min 2nd\mascot\_daemon\_merge.mgf

Click mouse within plot area to zoom in by factor of two about that point  
Or,  0  3600    
Label all possible matches ☐ Label matches used for scoring ☒

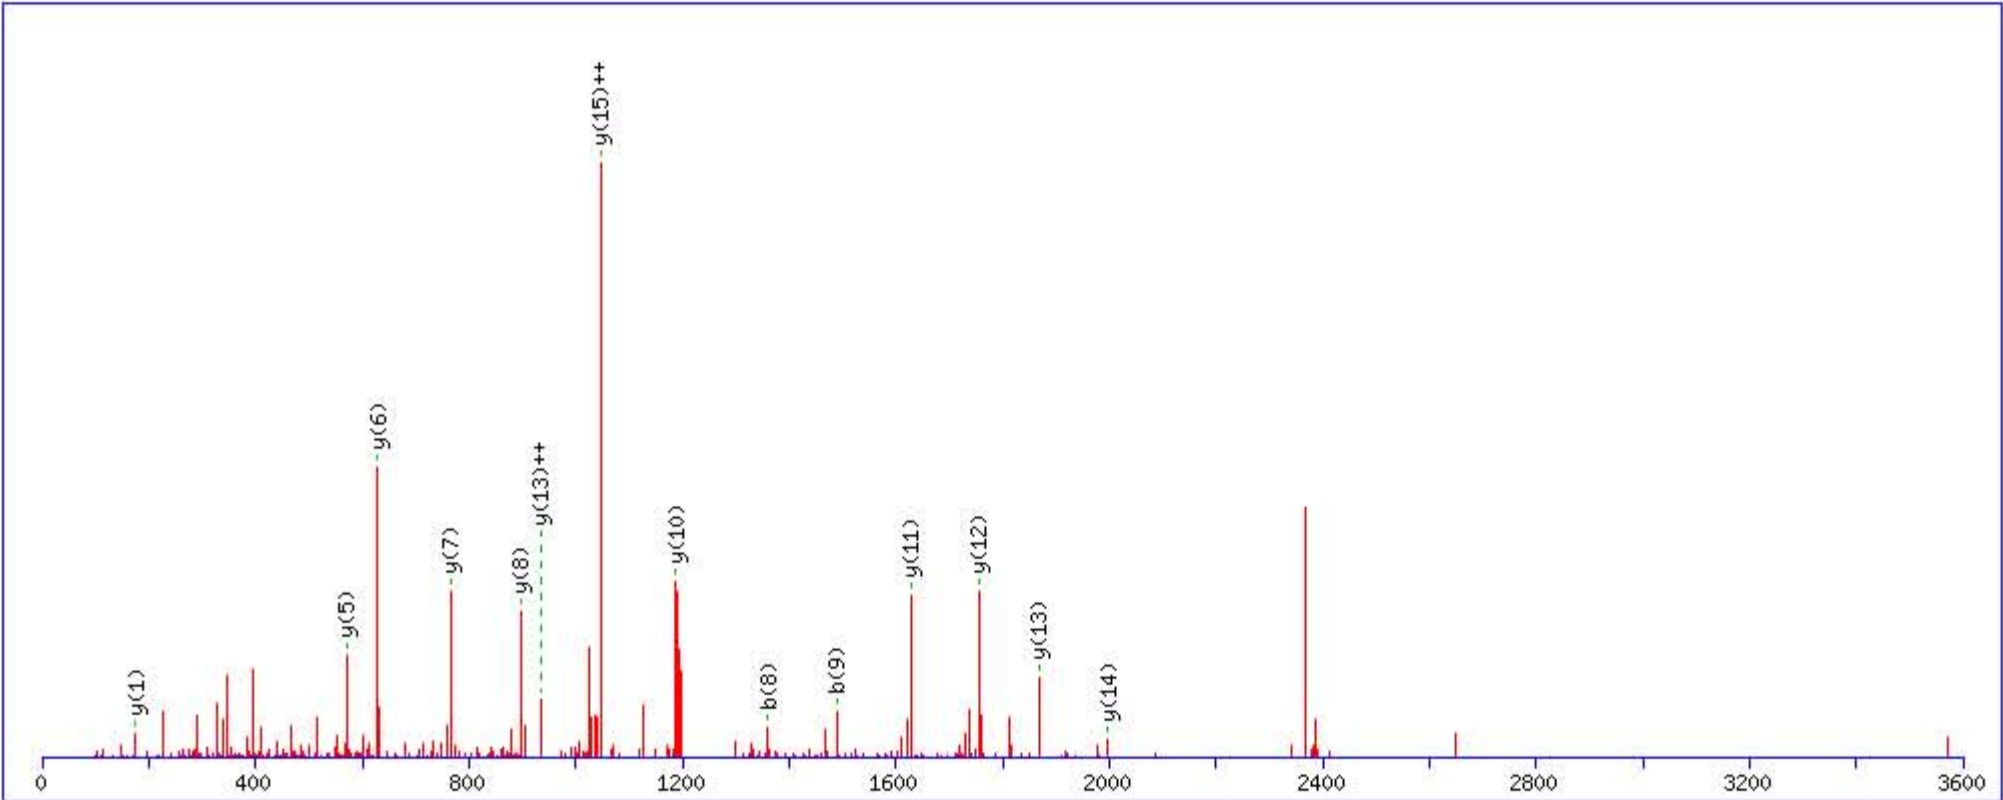

Monoisotopic mass of neutral peptide Mr(calc): 2384.089767  
Fixed modifications: Carbamidomethyl (C) (apply to specified residues or termini only)  
Variable modifications:  
Q7 : Biotin:Thermo-21345 (Q)  
Ions Score: 73 Expect: 1.7e-007  
Matches : 14/164 fragment ions using 21 most intense peaks ([help](#))

| #  | b           | b <sup>++</sup> | b <sup>+</sup> | b <sup>++</sup> | b <sup>0</sup> | b <sup>0++</sup> | Seq. | y           | y <sup>++</sup> | y <sup>+</sup> | y <sup>++</sup> | y <sup>0</sup> | y <sup>0++</sup> | #  |
|----|-------------|-----------------|----------------|-----------------|----------------|------------------|------|-------------|-----------------|----------------|-----------------|----------------|------------------|----|
| 1  | 132.047761  | 66.527518       |                |                 |                |                  | M    |             |                 |                |                 |                |                  | 17 |
| 2  | 292.078410  | 146.542843      |                |                 |                |                  | C    | 2254.056579 | 1127.531927     | 2237.030030    | 1119.018653     | 2236.046014    | 1118.526645      | 16 |
| 3  | 389.131174  | 195.069225      |                |                 |                |                  | P    | 2094.025930 | 1047.516603     | 2076.999381    | 1039.003328     | 2076.015365    | 1038.511320      | 15 |
| 4  | 517.189752  | 259.098514      | 500.163203     | 250.585240      |                |                  | Q    | 1996.973166 | 998.990221      | 1979.946617    | 990.476947      | 1978.962601    | 989.984939       | 14 |
| 5  | 630.273816  | 315.640546      | 613.247267     | 307.127272      |                |                  | L    | 1868.914588 | 934.960932      | 1851.888039    | 926.447658      | 1850.904023    | 925.955650       | 13 |
| 6  | 758.332394  | 379.669835      | 741.305845     | 371.156561      |                |                  | Q    | 1755.830524 | 878.418900      | 1738.803975    | 869.905626      | 1737.819959    | 869.413618       | 12 |
| 7  | 1197.557720 | 599.282498      | 1180.531171    | 590.769224      |                |                  | Q    | 1627.771946 | 814.389611      | 1610.745397    | 805.876337      | 1609.761381    | 805.384329       | 11 |
| 8  | 1360.621049 | 680.814163      | 1343.594500    | 672.300888      |                |                  | Y    | 1188.546620 | 594.776948      | 1171.520071    | 586.263674      | 1170.536055    | 585.771666       | 10 |
| 9  | 1489.663642 | 745.335459      | 1472.637093    | 736.822185      | 1471.653077    | 736.330177       | E    | 1025.483291 | 513.245284      | 1008.456742    | 504.732009      | 1007.472726    | 504.240001       | 9  |
| 10 | 1620.704127 | 810.855702      | 1603.677578    | 802.342427      | 1602.693562    | 801.850419       | M    | 896.440698  | 448.723987      | 879.414149     | 440.210713      | 878.430133     | 439.718705       | 8  |
| 11 | 1757.763039 | 879.385158      | 1740.736490    | 870.871883      | 1739.752474    | 870.379875       | H    | 765.400213  | 383.203745      | 748.373664     | 374.690470      | 747.389648     | 374.198462       | 7  |
| 12 | 1814.784503 | 907.895890      | 1797.757954    | 899.382615      | 1796.773938    | 898.890607       | G    | 628.341301  | 314.674289      | 611.314752     | 306.161014      | 610.330736     | 305.669006       | 6  |
| 13 | 1911.837267 | 956.422272      | 1894.810718    | 947.908997      | 1893.826702    | 947.416989       | P    | 571.319837  | 286.163557      | 554.293288     | 277.650282      | 553.309272     | 277.158274       | 5  |
| 14 | 2040.879860 | 1020.943568     | 2023.853311    | 1012.430294     | 2022.869295    | 1011.938286      | E    | 474.267073  | 237.637175      | 457.240524     | 229.123900      | 456.256508     | 228.631892       | 4  |
| 15 | 2097.901324 | 1049.454300     | 2080.874775    | 1040.941025     | 2079.890759    | 1040.449017      | G    | 345.224480  | 173.115878      | 328.197931     | 164.602603      |                |                  | 3  |
| 16 | 2210.985388 | 1105.996332     | 2193.958839    | 1097.483057     | 2192.974823    | 1096.991049      | L    | 288.203016  | 144.605146      | 271.176467     | 136.091872      |                |                  | 2  |
| 17 |             |                 |                |                 |                |                  | R    | 175.118952  | 88.063114       | 158.092403     | 79.549839       |                |                  | 1  |

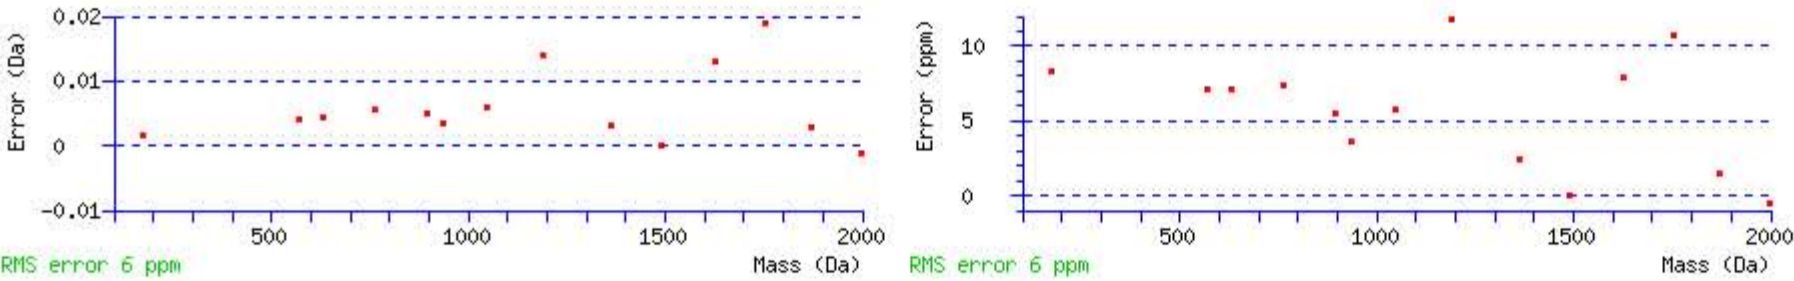

NCBI BLAST search of [MCPQLQQYEMHGPEGLR](#)  
(Parameters: blastp, nr protein database, expect=20000, no filter, PAM30)  
Other BLAST [web gateways](#)

All matches to this query

| Score | Mr(calc):   | Delta    | Sequence                              |
|-------|-------------|----------|---------------------------------------|
| 73.1  | 2384.089767 | 0.025001 | <a href="#">MCPQLQQYEMHGPEGLR</a>     |
| 62.3  | 2384.089767 | 0.025001 | <a href="#">MCPQLQQYEMHGPEGLR</a>     |
| 33.4  | 2384.089767 | 0.025001 | <a href="#">MCPQLQQYEMHGPEGLR</a>     |
| 0.9   | 2384.094772 | 0.019996 | <a href="#">TASEQINCTQTSMEVSDLRSK</a> |

M

A

T

R

I

X

S

C

I

E

N

C

E

Mascot Search Results

Peptide View

MS/MS Fragmentation of **YSDASDCHGEDSQAFCEK**  
Found in **A2MG\_HUMAN**, Alpha-2-macroglobulin OS=Homo sapiens GN=A2M PE=1 SV=3

Match to Query 52346: 2415.942252 from(806.321360,3+) rtinseconds(1544) index(17225)  
Title: Locus:1.1.1.2920.12 File:"2013-07-02 CLN FXIII 180 min 2nd F 2.wiff"  
Data file C:\Program Files (x86)\Matrix Science\Mascot Daemon\mgf\8 FXIII 180 min 2nd\mascot\_daemon\_merge.mgf

Click mouse within plot area to zoom in by factor of two about that point  
Or, 

Plot from

0

 to 

2400

 Da 

Full range

  
Label all possible matches ☐ Label matches used for scoring ☒

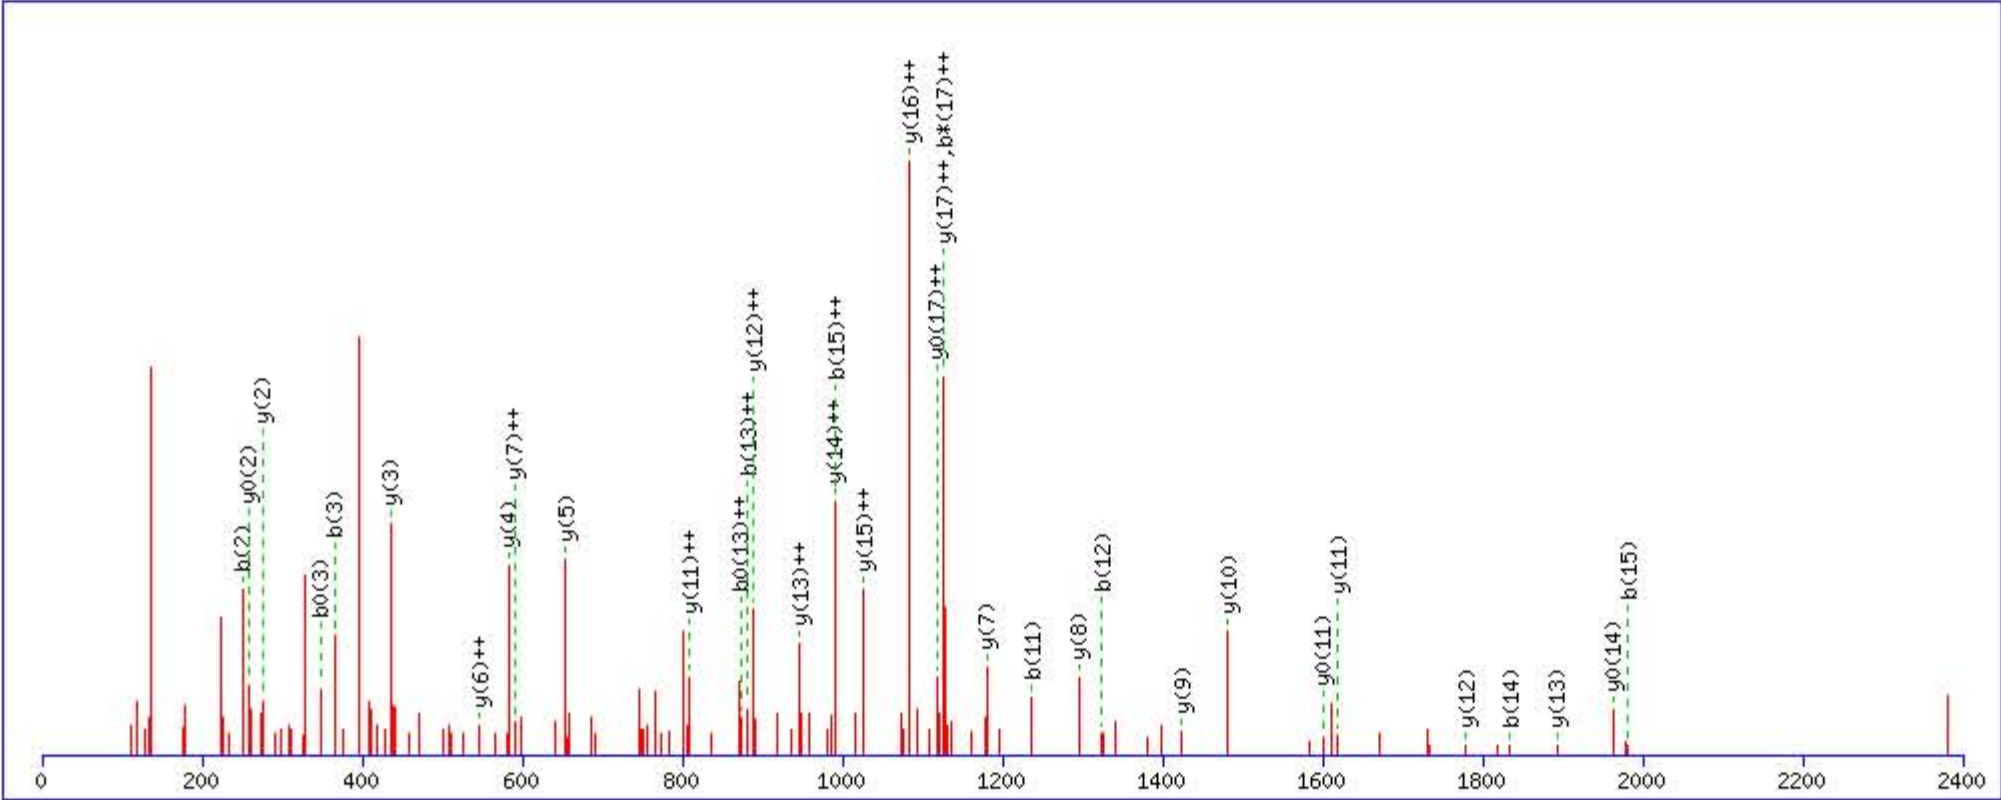

Monoisotopic mass of neutral peptide Mr(calc): 2415.940598  
Fixed modifications: Carbamidomethyl (C) (apply to specified residues or termini only)  
Variable modifications:  
Q13 : Biotin:Thermo-21345 (Q)  
Ions Score: 65 Expect: 3.1e-007  
Matches : 35/176 fragment ions using 68 most intense peaks [\(help\)](#)

| #  | b           | b <sup>++</sup> | b <sup>*</sup> | b <sup>+++</sup> | b <sup>0</sup> | b <sup>0++</sup> | Seq. | y           | y <sup>++</sup> | y <sup>*</sup> | y <sup>+++</sup> | y <sup>0</sup> | y <sup>0++</sup> | #  |
|----|-------------|-----------------|----------------|------------------|----------------|------------------|------|-------------|-----------------|----------------|------------------|----------------|------------------|----|
| 1  | 164.070605  | 82.538940       |                |                  |                |                  | Y    |             |                 |                |                  |                |                  | 18 |
| 2  | 251.102633  | 126.054954      |                |                  | 233.092068     | 117.049672       | S    | 2253.884545 | 1127.445910     | 2236.857996    | 1118.932636      | 2235.873980    | 1118.440628      | 17 |
| 3  | 366.129576  | 183.568426      |                |                  | 348.119011     | 174.563144       | D    | 2166.852517 | 1083.929896     | 2149.825968    | 1075.416622      | 2148.841952    | 1074.924614      | 16 |
| 4  | 437.166690  | 219.086983      |                |                  | 419.156125     | 210.081700       | A    | 2051.825574 | 1026.416425     | 2034.799025    | 1017.903150      | 2033.815009    | 1017.411142      | 15 |
| 5  | 524.198718  | 262.602997      |                |                  | 506.188153     | 253.597715       | S    | 1980.788460 | 990.897868      | 1963.761911    | 982.384594       | 1962.777895    | 981.892586       | 14 |
| 6  | 639.225661  | 320.116469      |                |                  | 621.215096     | 311.111186       | D    | 1893.756432 | 947.381854      | 1876.729883    | 938.868580       | 1875.745867    | 938.376572       | 13 |
| 7  | 799.256310  | 400.131793      |                |                  | 781.245745     | 391.126510       | C    | 1778.729489 | 889.868383      | 1761.702940    | 881.355108       | 1760.718924    | 880.863100       | 12 |
| 8  | 936.315222  | 468.661249      |                |                  | 918.304657     | 459.655966       | H    | 1618.698840 | 809.853058      | 1601.672291    | 801.339784       | 1600.688275    | 800.847776       | 11 |
| 9  | 993.336686  | 497.171981      |                |                  | 975.326121     | 488.166699       | G    | 1481.639928 | 741.323602      | 1464.613379    | 732.810328       | 1463.629363    | 732.318320       | 10 |
| 10 | 1122.379279 | 561.693278      |                |                  | 1104.368714    | 552.687995       | E    | 1424.618464 | 712.812870      | 1407.591915    | 704.299596       | 1406.607899    | 703.807588       | 9  |
| 11 | 1237.406222 | 619.206749      |                |                  | 1219.395657    | 610.201467       | D    | 1295.575871 | 648.291574      | 1278.549322    | 639.778299       | 1277.565306    | 639.286291       | 8  |
| 12 | 1324.438250 | 662.722763      |                |                  | 1306.427685    | 653.717481       | S    | 1180.548928 | 590.778102      | 1163.522379    | 582.264828       | 1162.538363    | 581.772820       | 7  |
| 13 | 1763.663576 | 882.335426      | 1746.637027    | 873.822152       | 1745.653011    | 873.330144       | Q    | 1093.516900 | 547.262088      | 1076.490351    | 538.748814       | 1075.506335    | 538.256806       | 6  |
| 14 | 1834.700690 | 917.853983      | 1817.674141    | 909.340709       | 1816.690125    | 908.848701       | A    | 654.291574  | 327.649425      | 637.265025     | 319.136151       | 636.281009     | 318.644143       | 5  |
| 15 | 1981.769104 | 991.388190      | 1964.742555    | 982.874916       | 1963.758539    | 982.382908       | F    | 583.254460  | 292.130868      | 566.227911     | 283.617594       | 565.243895     | 283.125586       | 4  |
| 16 | 2141.799753 | 1071.403514     | 2124.773204    | 1062.890240      | 2123.789188    | 1062.398232      | C    | 436.186046  | 218.596661      | 419.159497     | 210.083386       | 418.175481     | 209.591378       | 3  |
| 17 | 2270.842346 | 1135.924811     | 2253.815797    | 1127.411536      | 2252.831781    | 1126.919528      | E    | 276.155397  | 138.581337      | 259.128848     | 130.068062       | 258.144832     | 129.576054       | 2  |
| 18 |             |                 |                |                  |                |                  | K    | 147.112804  | 74.060040       | 130.086255     | 65.546765        |                |                  | 1  |

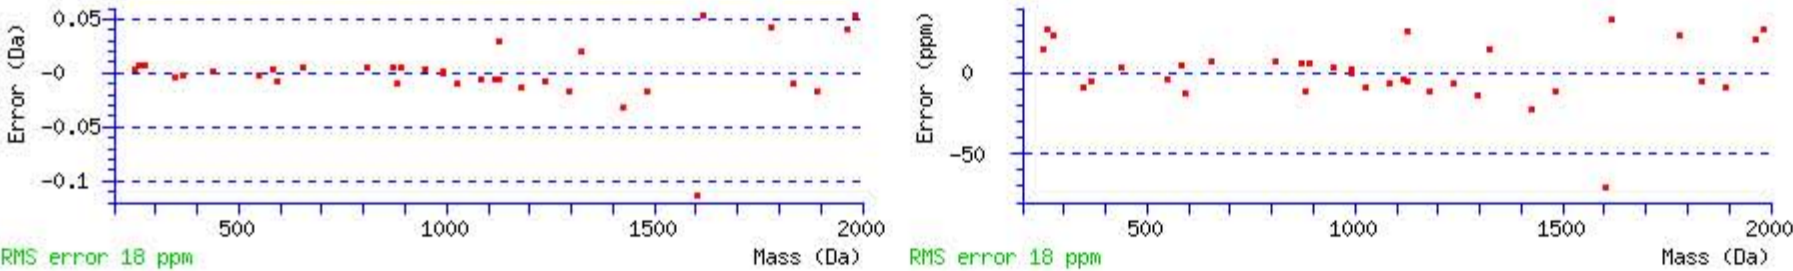

NCBI BLAST search of [YSDASDCHGEDSQAFCEK](#)  
(Parameters: blastp, nr protein database, expect=20000, no filter, PAM30)  
Other BLAST [web gateways](#)

All matches to this query

| Score | Mr(calc):   | Delta    | Sequence                           |
|-------|-------------|----------|------------------------------------|
| 65.1  | 2415.940598 | 0.001654 | <a href="#">YSDASDCHGEDSQAFCEK</a> |

M

A

T

R

I

X

S

C

I

E

N

C

E

Mascot Search Results

Peptide View

MS/MS Fragmentation of **MCPQLQQYEMHGPEGLR**  
Found in **A2MG\_HUMAN**, Alpha-2-macroglobulin OS=Homo sapiens GN=A2M PE=1 SV=3

Match to Query 56287: 2695.275096 from(674.826050,4+) rtinseconds(2199) index(21488)  
Title: Locus:1.1.1.3148.11 File:"2013-07-02 CLN FXIII 180 min 2nd F 2.wiff"  
Data file C:\Program Files (x86)\Matrix Science\Mascot Daemon\mgf\8 FXIII 180 min 2nd\mascot\_daemon\_merge.mgf

Click mouse within plot area to zoom in by factor of two about that point  
Or, 

Plot from

0

 to 

2600

Da

Full range

  
Label all possible matches ☐ Label matches used for scoring ☒

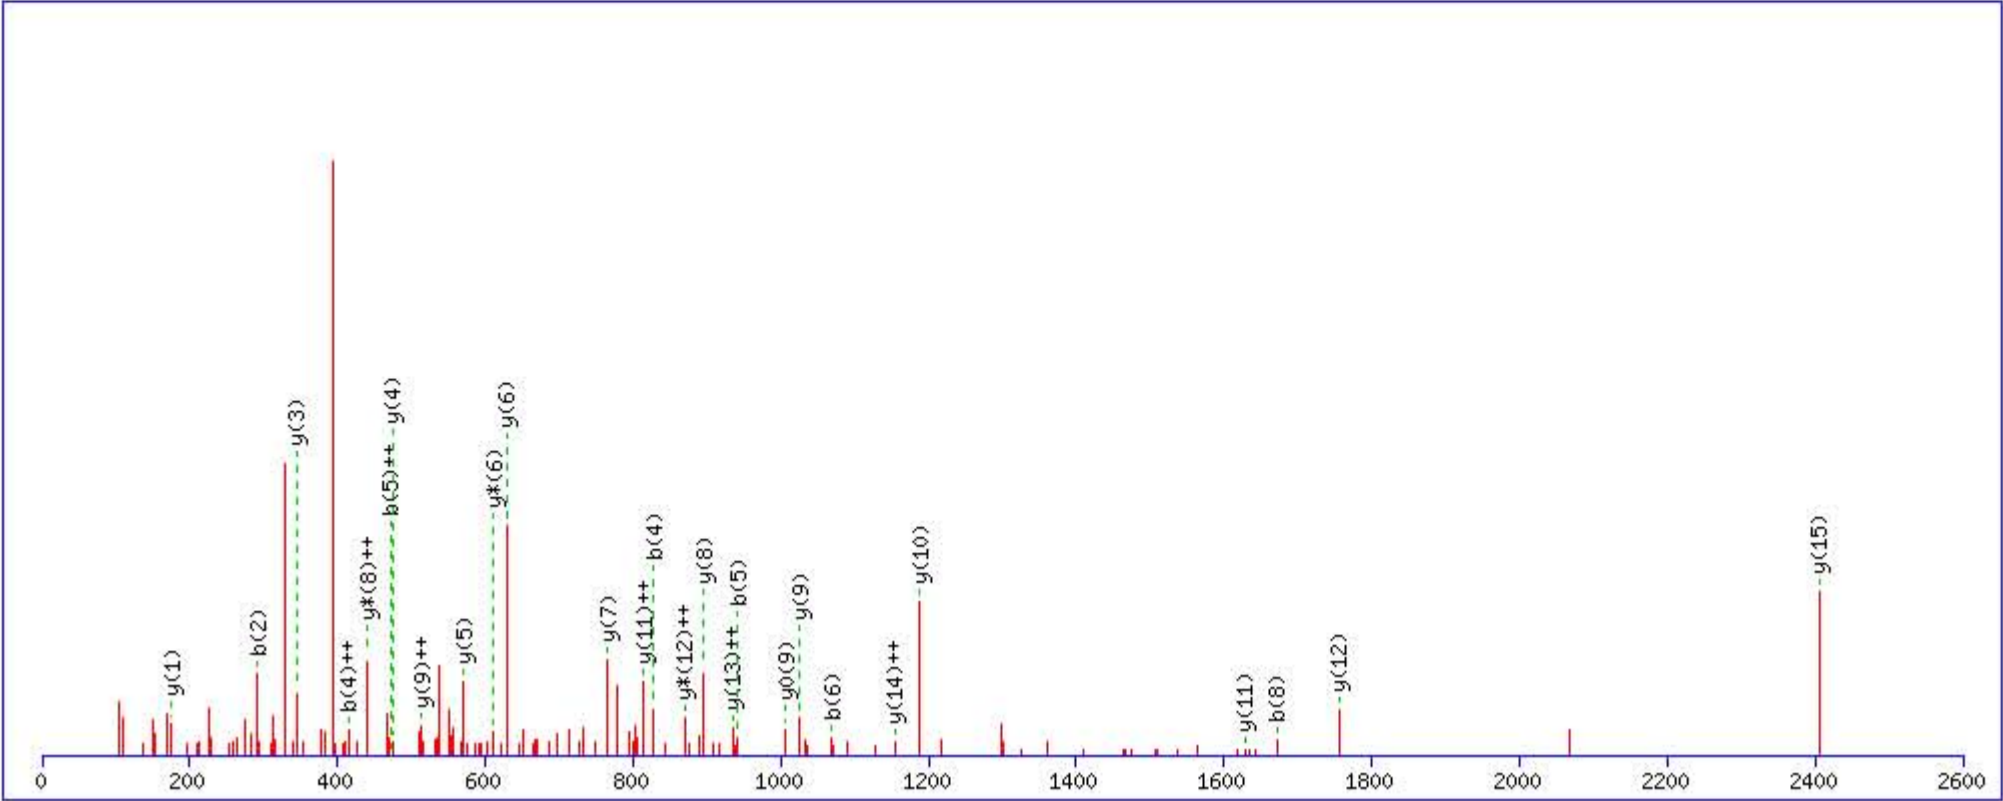

Monoisotopic mass of neutral peptide Mr(calc): 2695.256516  
Fixed modifications: Carbamidomethyl (C) (apply to specified residues or termini only)  
Variable modifications:  
Q4 : Biotin:Thermo-21345 (Q)  
Q7 : Biotin:Thermo-21345 (Q)  
Ions Score: 41 Expect: 0.0015  
Matches : 27/164 fragment ions using 74 most intense peaks [\(help\)](#)

| #  | b           | b <sup>++</sup> | b <sup>+</sup> | b <sup>+++</sup> | b <sup>0</sup> | b <sup>0++</sup> | Seq. | y           | y <sup>++</sup> | y <sup>+</sup> | y <sup>+++</sup> | y <sup>0</sup> | y <sup>0++</sup> | #  |
|----|-------------|-----------------|----------------|------------------|----------------|------------------|------|-------------|-----------------|----------------|------------------|----------------|------------------|----|
| 1  | 132.047761  | 66.527518       |                |                  |                |                  | M    |             |                 |                |                  |                |                  | 17 |
| 2  | 292.078410  | 146.542843      |                |                  |                |                  | C    | 2565.223327 | 1283.115301     | 2548.196778    | 1274.602027      | 2547.212762    | 1274.110019      | 16 |
| 3  | 389.131174  | 195.069225      |                |                  |                |                  | P    | 2405.192678 | 1203.099977     | 2388.166129    | 1194.586702      | 2387.182113    | 1194.094694      | 15 |
| 4  | 828.356500  | 414.681888      | 811.329951     | 406.168614       |                |                  | Q    | 2308.139914 | 1154.573595     | 2291.113365    | 1146.060320      | 2290.129349    | 1145.568312      | 14 |
| 5  | 941.440564  | 471.223920      | 924.414015     | 462.710646       |                |                  | L    | 1868.914588 | 934.960932      | 1851.888039    | 926.447658       | 1850.904023    | 925.955650       | 13 |
| 6  | 1069.499142 | 535.253209      | 1052.472593    | 526.739935       |                |                  | Q    | 1755.830524 | 878.418900      | 1738.803975    | 869.905626       | 1737.819959    | 869.413618       | 12 |
| 7  | 1508.724468 | 754.865872      | 1491.697919    | 746.352598       |                |                  | Q    | 1627.771946 | 814.389611      | 1610.745397    | 805.876337       | 1609.761381    | 805.384329       | 11 |
| 8  | 1671.787797 | 836.397537      | 1654.761248    | 827.884262       |                |                  | Y    | 1188.546620 | 594.776948      | 1171.520071    | 586.263674       | 1170.536055    | 585.771666       | 10 |
| 9  | 1800.830390 | 900.918833      | 1783.803841    | 892.405559       | 1782.819825    | 891.913551       | E    | 1025.483291 | 513.245284      | 1008.456742    | 504.732009       | 1007.472726    | 504.240001       | 9  |
| 10 | 1931.870875 | 966.439076      | 1914.844326    | 957.925801       | 1913.860310    | 957.433793       | M    | 896.440698  | 448.723987      | 879.414149     | 440.210713       | 878.430133     | 439.718705       | 8  |
| 11 | 2068.929787 | 1034.968531     | 2051.903238    | 1026.455257      | 2050.919222    | 1025.963249      | H    | 765.400213  | 383.203745      | 748.373664     | 374.690470       | 747.389648     | 374.198462       | 7  |
| 12 | 2125.951251 | 1063.479263     | 2108.924702    | 1054.965989      | 2107.940686    | 1054.473981      | G    | 628.341301  | 314.674289      | 611.314752     | 306.161014       | 610.330736     | 305.669006       | 6  |
| 13 | 2223.004015 | 1112.005645     | 2205.977466    | 1103.492371      | 2204.993450    | 1103.000363      | P    | 571.319837  | 286.163557      | 554.293288     | 277.650282       | 553.309272     | 277.158274       | 5  |
| 14 | 2352.046608 | 1176.526942     | 2335.020059    | 1168.013667      | 2334.036043    | 1167.521659      | E    | 474.267073  | 237.637175      | 457.240524     | 229.123900       | 456.256508     | 228.631892       | 4  |
| 15 | 2409.068072 | 1205.037674     | 2392.041523    | 1196.524399      | 2391.057507    | 1196.032391      | G    | 345.224480  | 173.115878      | 328.197931     | 164.602603       |                |                  | 3  |
| 16 | 2522.152136 | 1261.579706     | 2505.125587    | 1253.066431      | 2504.141571    | 1252.574424      | L    | 288.203016  | 144.605146      | 271.176467     | 136.091872       |                |                  | 2  |
| 17 |             |                 |                |                  |                |                  | R    | 175.118952  | 88.063114       | 158.092403     | 79.549839        |                |                  | 1  |

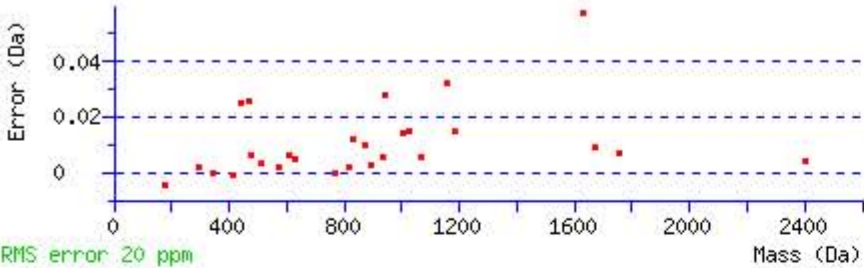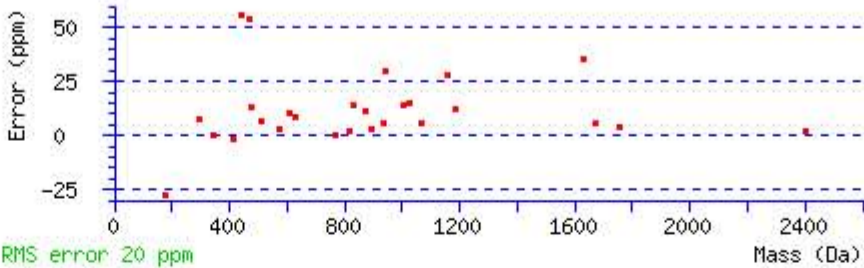

NCBI BLAST search of [MCPQLQQYEMHGPEGLR](#)  
(Parameters: blastp, nr protein database, expect=20000, no filter, PAM30)  
Other BLAST [web gateways](#)

All matches to this query

| Score | Mr(calc):   | Delta    | Sequence                          |
|-------|-------------|----------|-----------------------------------|
| 41.0  | 2695.256516 | 0.018580 | <a href="#">MCPQLQQYEMHGPEGLR</a> |
| 34.9  | 2695.256516 | 0.018580 | <a href="#">MCPQLQQYEMHGPEGLR</a> |
| 33.7  | 2695.256516 | 0.018580 | <a href="#">MCPQLQQYEMHGPEGLR</a> |

MATRIX

SCIENCE

Mascot Search Results

Peptide View

MS/MS Fragmentation of **MCPQLQQYEMHGPEGLR**  
Found in **A2MG\_HUMAN**, Alpha-2-macroglobulin OS=Homo sapiens GN=A2M PE=1 SV=3

Match to Query 56289: 2695.276376 from(674.826370,4+) rtinseconds(2182) index(6671)  
Title: Locus:1.1.1.2037.4 File:"2013-07-02 CLN FXIII 180 min 2nd F 1.wiff"  
Data file C:\Program Files (x86)\Matrix Science\Mascot Daemon\mgf\8 FXIII 180 min 2nd\mascot\_daemon\_merge.mgf

Click mouse within plot area to zoom in by factor of two about that point  
Or, 

Plot from

0

 to 

2800

Da

Full range

Label all possible matches

Label matches used for scoring

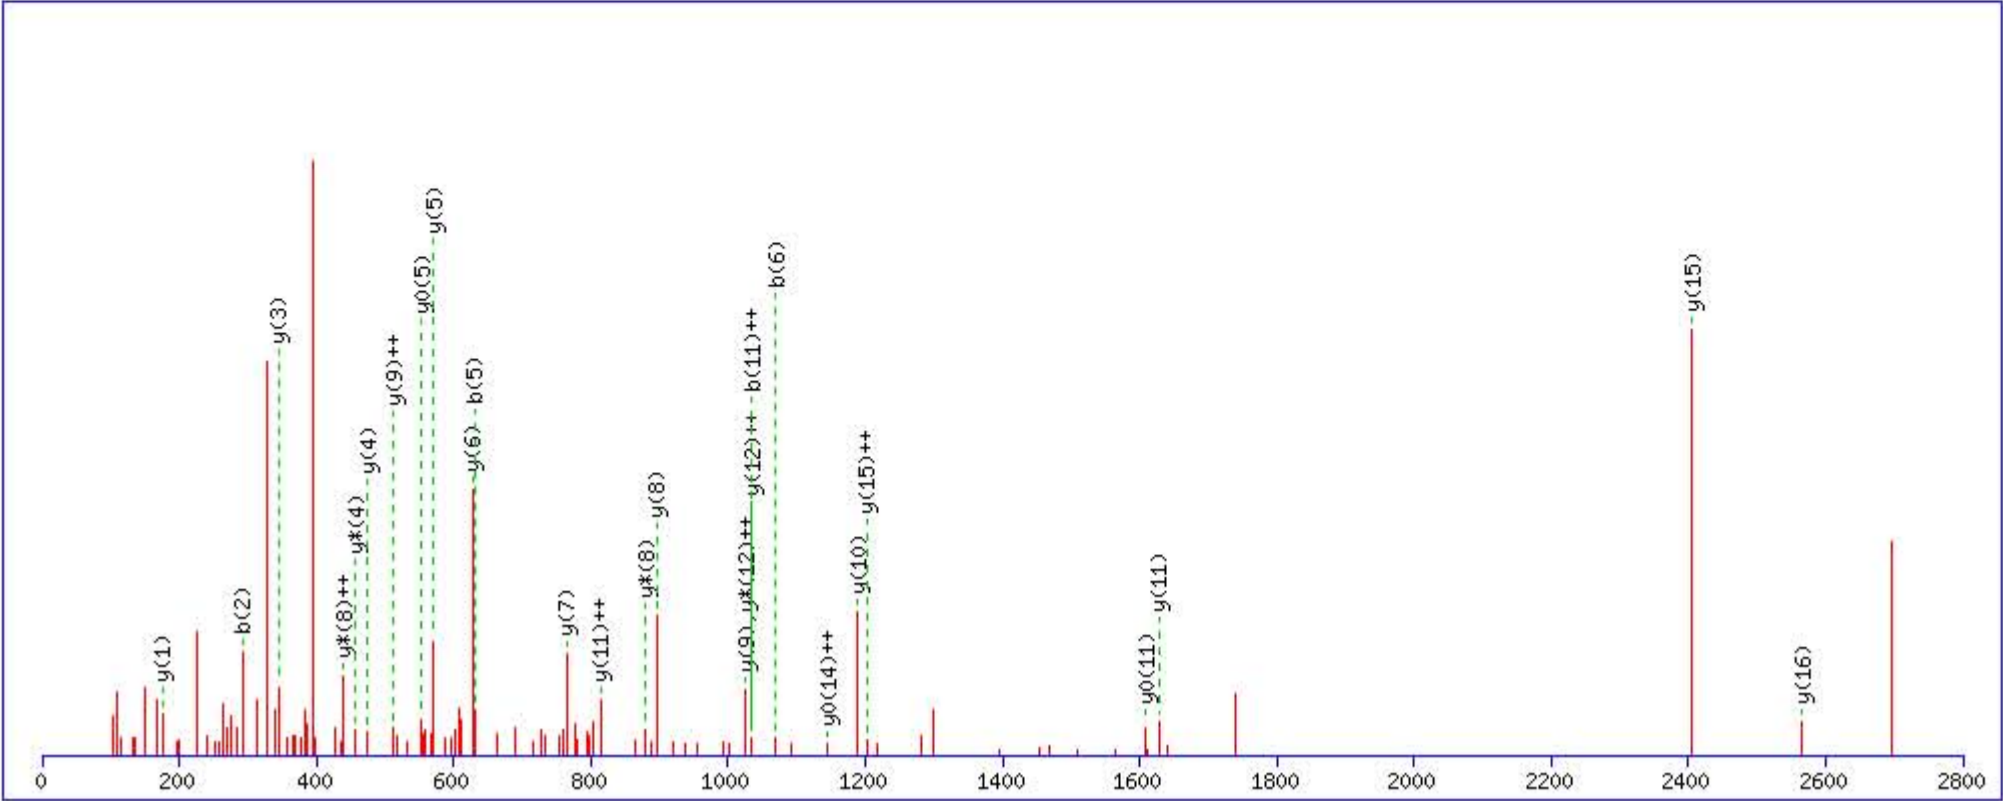

Monoisotopic mass of neutral peptide Mr(calc): 2695.256516  
Fixed modifications: Carbamidomethyl (C) (apply to specified residues or termini only)  
Variable modifications:  
Q6 : Biotin:Thermo-21345 (Q)  
Q7 : Biotin:Thermo-21345 (Q)  
Ions Score: 48 Expect: 0.00027  
Matches : 27/164 fragment ions using 61 most intense peaks [\(help\)](#)

| #  | b           | b <sup>++</sup> | b <sup>+</sup> | b <sup>++</sup> | b <sup>0</sup> | b <sup>0++</sup> | Seq. | y           | y <sup>++</sup> | y <sup>+</sup> | y <sup>++</sup> | y <sup>0</sup> | y <sup>0++</sup> | #  |
|----|-------------|-----------------|----------------|-----------------|----------------|------------------|------|-------------|-----------------|----------------|-----------------|----------------|------------------|----|
| 1  | 132.047761  | 66.527518       |                |                 |                |                  | M    |             |                 |                |                 |                |                  | 17 |
| 2  | 292.078410  | 146.542843      |                |                 |                |                  | C    | 2565.223327 | 1283.115301     | 2548.196778    | 1274.602027     | 2547.212762    | 1274.110019      | 16 |
| 3  | 389.131174  | 195.069225      |                |                 |                |                  | P    | 2405.192678 | 1203.099977     | 2388.166129    | 1194.586702     | 2387.182113    | 1194.094694      | 15 |
| 4  | 517.189752  | 259.098514      | 500.163203     | 250.585240      |                |                  | Q    | 2308.139914 | 1154.573595     | 2291.113365    | 1146.060320     | 2290.129349    | 1145.568312      | 14 |
| 5  | 630.273816  | 315.640546      | 613.247267     | 307.127272      |                |                  | L    | 2180.081336 | 1090.544306     | 2163.054787    | 1082.031031     | 2162.070771    | 1081.539023      | 13 |
| 6  | 1069.499142 | 535.253209      | 1052.472593    | 526.739935      |                |                  | Q    | 2066.997272 | 1034.002274     | 2049.970723    | 1025.488999     | 2048.986707    | 1024.996991      | 12 |
| 7  | 1508.724468 | 754.865872      | 1491.697919    | 746.352598      |                |                  | Q    | 1627.771946 | 814.389611      | 1610.745397    | 805.876337      | 1609.761381    | 805.384329       | 11 |
| 8  | 1671.787797 | 836.397537      | 1654.761248    | 827.884262      |                |                  | Y    | 1188.546620 | 594.776948      | 1171.520071    | 586.263674      | 1170.536055    | 585.771666       | 10 |
| 9  | 1800.830390 | 900.918833      | 1783.803841    | 892.405559      | 1782.819825    | 891.913551       | E    | 1025.483291 | 513.245284      | 1008.456742    | 504.732009      | 1007.472726    | 504.240001       | 9  |
| 10 | 1931.870875 | 966.439076      | 1914.844326    | 957.925801      | 1913.860310    | 957.433793       | M    | 896.440698  | 448.723987      | 879.414149     | 440.210713      | 878.430133     | 439.718705       | 8  |
| 11 | 2068.929787 | 1034.968531     | 2051.903238    | 1026.455257     | 2050.919222    | 1025.963249      | H    | 765.400213  | 383.203745      | 748.373664     | 374.690470      | 747.389648     | 374.198462       | 7  |
| 12 | 2125.951251 | 1063.479263     | 2108.924702    | 1054.965989     | 2107.940686    | 1054.473981      | G    | 628.341301  | 314.674289      | 611.314752     | 306.161014      | 610.330736     | 305.669006       | 6  |
| 13 | 2223.004015 | 1112.005645     | 2205.977466    | 1103.492371     | 2204.993450    | 1103.000363      | P    | 571.319837  | 286.163557      | 554.293288     | 277.650282      | 553.309272     | 277.158274       | 5  |
| 14 | 2352.046608 | 1176.526942     | 2335.020059    | 1168.013667     | 2334.036043    | 1167.521659      | E    | 474.267073  | 237.637175      | 457.240524     | 229.123900      | 456.256508     | 228.631892       | 4  |
| 15 | 2409.068072 | 1205.037674     | 2392.041523    | 1196.524399     | 2391.057507    | 1196.032391      | G    | 345.224480  | 173.115878      | 328.197931     | 164.602603      |                |                  | 3  |
| 16 | 2522.152136 | 1261.579706     | 2505.125587    | 1253.066431     | 2504.141571    | 1252.574424      | L    | 288.203016  | 144.605146      | 271.176467     | 136.091872      |                |                  | 2  |
| 17 |             |                 |                |                 |                |                  | R    | 175.118952  | 88.063114       | 158.092403     | 79.549839       |                |                  | 1  |

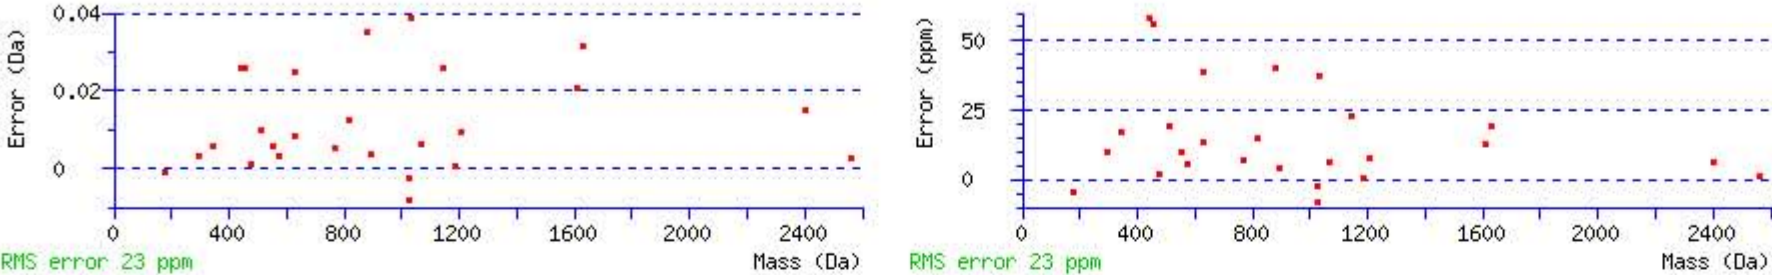

NCBI BLAST search of [MCPQLQQYEMHGPEGLR](#)  
(Parameters: blastp, nr protein database, expect=20000, no filter, PAM30)  
Other BLAST [web gateways](#)

All matches to this query

| Score | Mr(calc):   | Delta    | Sequence                          |
|-------|-------------|----------|-----------------------------------|
| 48.5  | 2695.256516 | 0.019860 | <a href="#">MCPQLQQYEMHGPEGLR</a> |
| 47.1  | 2695.256516 | 0.019860 | <a href="#">MCPQLQQYEMHGPEGLR</a> |
| 42.7  | 2695.256516 | 0.019860 | <a href="#">MCPQLQQYEMHGPEGLR</a> |

Peptide View

MS/MS Fragmentation of **MCPQLQQYEMHGPEGLR**  
Found in **A2MG\_HUMAN**, Alpha-2-macroglobulin OS=Homo sapiens GN=A2M PE=1 SV=3

Match to Query 56297: 2695.286376 from(674.828870,4+) rtinseconds(2224) index(35600)  
Title: Locus:1.1.1.883.9 File:"2013-07-02 CLN FXIII 180 min 2nd F 3.wiff"  
Data file C:\Program Files (x86)\Matrix Science\Mascot Daemon\mgf\8 FXIII 180 min 2nd\mascot\_daemon\_merge.mgf

Click mouse within plot area to zoom in by factor of two about that point  
Or, 

Plot from

0

 to 

2600

 Da 

Full range

  
Label all possible matches ☐ Label matches used for scoring ☒

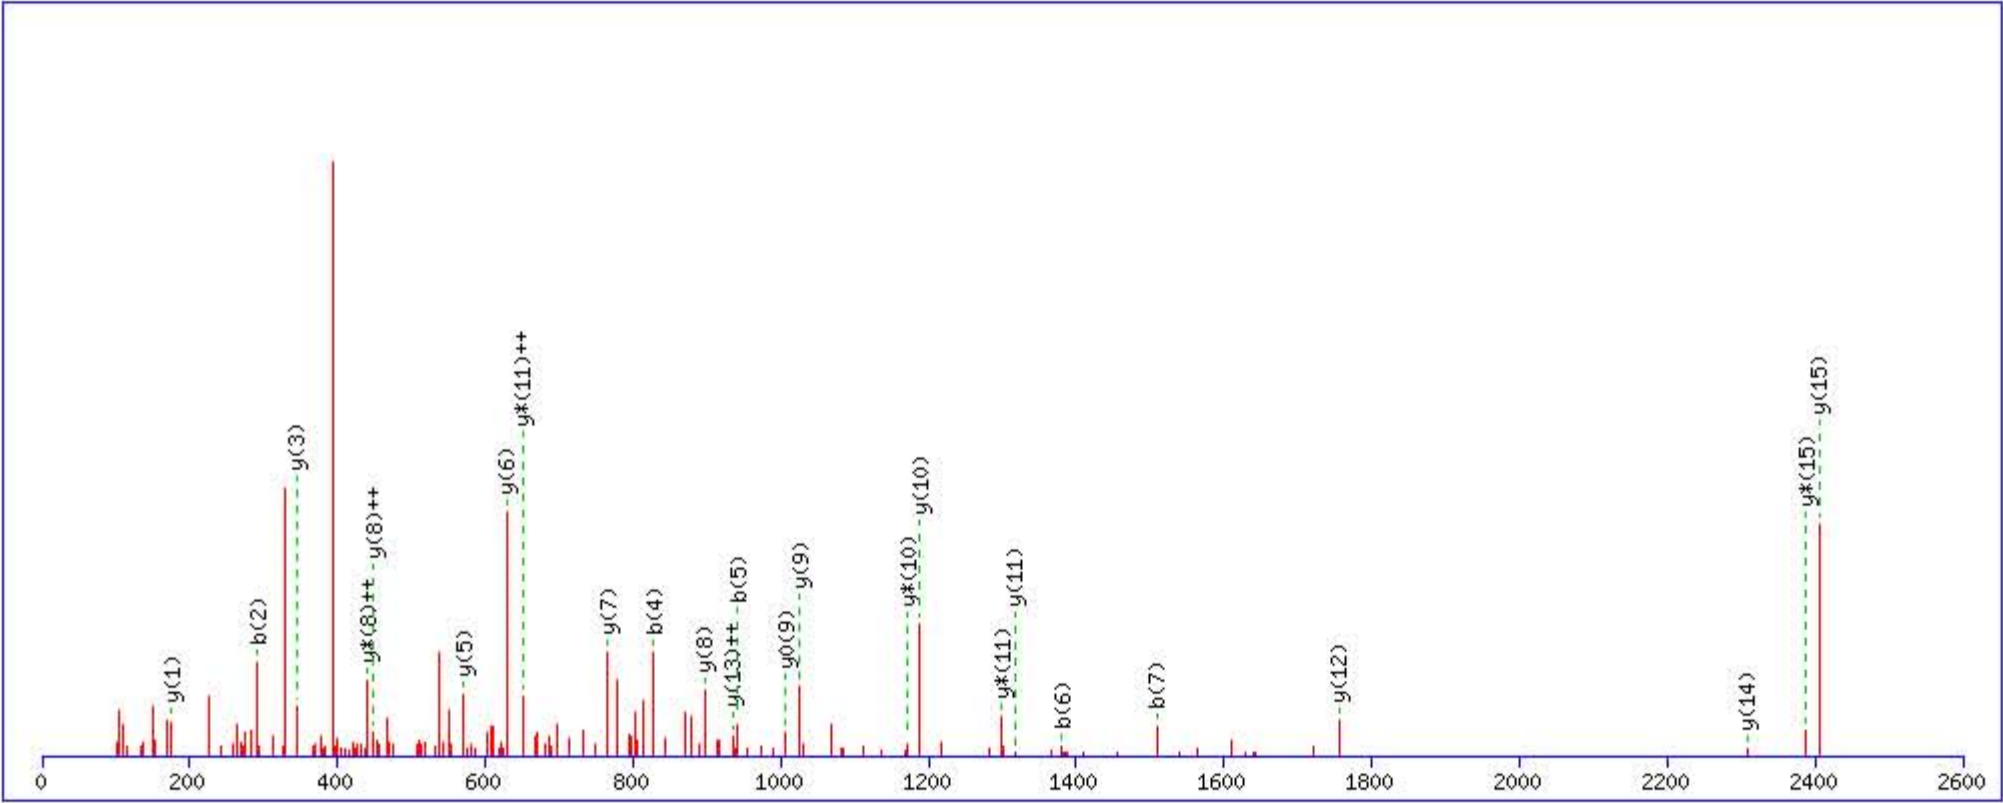

Monoisotopic mass of neutral peptide Mr(calc): 2695.256516  
Fixed modifications: Carbamidomethyl (C) (apply to specified residues or termini only)  
Variable modifications:  
Q4 : Biotin:Thermo-21345 (Q)  
Q6 : Biotin:Thermo-21345 (Q)  
Ions Score: 43 Expect: 0.00011  
Matches : 25/164 fragment ions using 68 most intense peaks [\(help\)](#)

| #  | b           | b <sup>++</sup> | b <sup>*</sup> | b <sup>*++</sup> | b <sup>0</sup> | b <sup>0++</sup> | Seq. | y           | y <sup>++</sup> | y <sup>*</sup> | y <sup>*++</sup> | y <sup>0</sup> | y <sup>0++</sup> | #  |
|----|-------------|-----------------|----------------|------------------|----------------|------------------|------|-------------|-----------------|----------------|------------------|----------------|------------------|----|
| 1  | 132.047761  | 66.527518       |                |                  |                |                  | M    |             |                 |                |                  |                |                  | 17 |
| 2  | 292.078410  | 146.542843      |                |                  |                |                  | C    | 2565.223327 | 1283.115301     | 2548.196778    | 1274.602027      | 2547.212762    | 1274.110019      | 16 |
| 3  | 389.131174  | 195.069225      |                |                  |                |                  | P    | 2405.192678 | 1203.099977     | 2388.166129    | 1194.586702      | 2387.182113    | 1194.094694      | 15 |
| 4  | 828.356500  | 414.681888      | 811.329951     | 406.168614       |                |                  | Q    | 2308.139914 | 1154.573595     | 2291.113365    | 1146.060320      | 2290.129349    | 1145.568312      | 14 |
| 5  | 941.440564  | 471.223920      | 924.414015     | 462.710646       |                |                  | L    | 1868.914588 | 934.960932      | 1851.888039    | 926.447658       | 1850.904023    | 925.955650       | 13 |
| 6  | 1380.665890 | 690.836583      | 1363.639341    | 682.323309       |                |                  | Q    | 1755.830524 | 878.418900      | 1738.803975    | 869.905626       | 1737.819959    | 869.413618       | 12 |
| 7  | 1508.724468 | 754.865872      | 1491.697919    | 746.352598       |                |                  | Q    | 1316.605198 | 658.806237      | 1299.578649    | 650.292963       | 1298.594633    | 649.800955       | 11 |
| 8  | 1671.787797 | 836.397537      | 1654.761248    | 827.884262       |                |                  | Y    | 1188.546620 | 594.776948      | 1171.520071    | 586.263674       | 1170.536055    | 585.771666       | 10 |
| 9  | 1800.830390 | 900.918833      | 1783.803841    | 892.405559       | 1782.819825    | 891.913551       | E    | 1025.483291 | 513.245284      | 1008.456742    | 504.732009       | 1007.472726    | 504.240001       | 9  |
| 10 | 1931.870875 | 966.439076      | 1914.844326    | 957.925801       | 1913.860310    | 957.433793       | M    | 896.440698  | 448.723987      | 879.414149     | 440.210713       | 878.430133     | 439.718705       | 8  |
| 11 | 2068.929787 | 1034.968531     | 2051.903238    | 1026.455257      | 2050.919222    | 1025.963249      | H    | 765.400213  | 383.203745      | 748.373664     | 374.690470       | 747.389648     | 374.198462       | 7  |
| 12 | 2125.951251 | 1063.479263     | 2108.924702    | 1054.965989      | 2107.940686    | 1054.473981      | G    | 628.341301  | 314.674289      | 611.314752     | 306.161014       | 610.330736     | 305.669006       | 6  |
| 13 | 2223.004015 | 1112.005645     | 2205.977466    | 1103.492371      | 2204.993450    | 1103.000363      | P    | 571.319837  | 286.163557      | 554.293288     | 277.650282       | 553.309272     | 277.158274       | 5  |
| 14 | 2352.046608 | 1176.526942     | 2335.020059    | 1168.013667      | 2334.036043    | 1167.521659      | E    | 474.267073  | 237.637175      | 457.240524     | 229.123900       | 456.256508     | 228.631892       | 4  |
| 15 | 2409.068072 | 1205.037674     | 2392.041523    | 1196.524399      | 2391.057507    | 1196.032391      | G    | 345.224480  | 173.115878      | 328.197931     | 164.602603       |                |                  | 3  |
| 16 | 2522.152136 | 1261.579706     | 2505.125587    | 1253.066431      | 2504.141571    | 1252.574424      | L    | 288.203016  | 144.605146      | 271.176467     | 136.091872       |                |                  | 2  |
| 17 |             |                 |                |                  |                |                  | R    | 175.118952  | 88.063114       | 158.092403     | 79.549839        |                |                  | 1  |

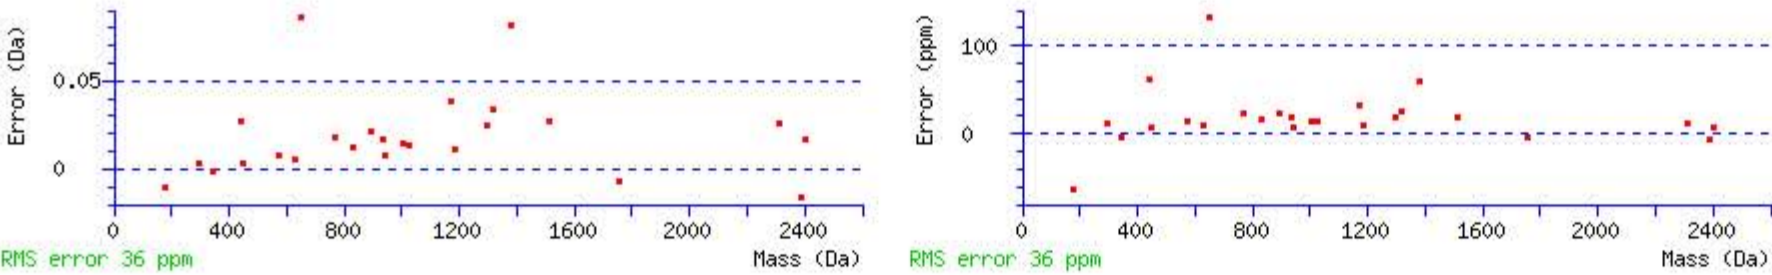

NCBI BLAST search of [MCPQLQQYEMHGPEGLR](#)  
(Parameters: blastp, nr protein database, expect=20000, no filter, PAM30)  
Other BLAST [web gateways](#)

All matches to this query

| Score | Mr(calc):   | Delta     | Sequence                          |
|-------|-------------|-----------|-----------------------------------|
| 42.7  | 2695.256516 | 0.029860  | <a href="#">MCPQLQQYEMHGPEGLR</a> |
| 38.2  | 2695.256516 | 0.029860  | <a href="#">MCPQLQQYEMHGPEGLR</a> |
| 26.1  | 2695.256516 | 0.029860  | <a href="#">MCPQLQQYEMHGPEGLR</a> |
| 0.4   | 2695.299408 | -0.013032 | <a href="#">MSGMEKLQNASWIYQOK</a> |

Peptide View

MS/MS Fragmentation of **MCPQLQQYEMHGPEGLR**  
Found in **A2MG\_HUMAN**, Alpha-2-macroglobulin OS=Homo sapiens GN=A2M PE=1 SV=3

Match to Query 56478: 2711.268896 from(678.824500,4+) rtinseconds(2155) index(6483)  
Title: Locus:1.1.1.2027.19 File:"2013-07-02 CLN FXIII 180 min 2nd F 1.wiff"  
Data file C:\Program Files (x86)\Matrix Science\Mascot Daemon\mgf\8 FXIII 180 min 2nd\mascot\_daemon\_merge.mgf

Click mouse within plot area to zoom in by factor of two about that point  
Or, 

Plot from

0

 to 

2400

 Da 

Full range

  
Label all possible matches ☐ Label matches used for scoring ☒

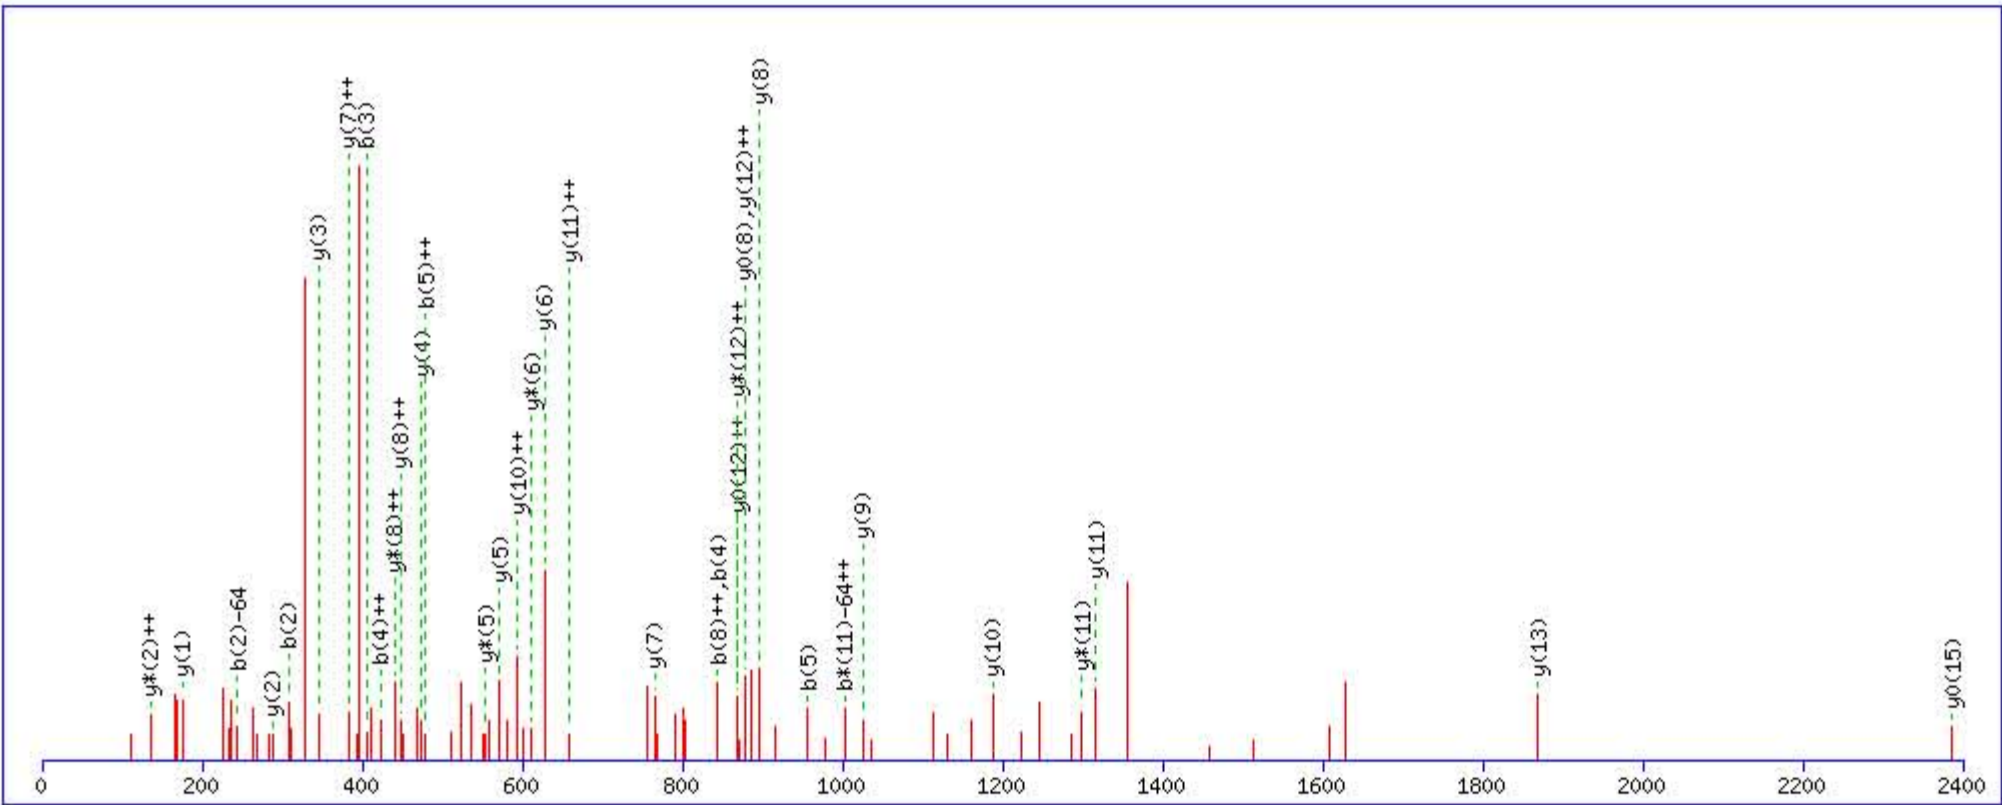

Monoisotopic mass of neutral peptide Mr(calc): 2711.251434  
Fixed modifications: Carbamidomethyl (C) (apply to specified residues or termini only)  
Variable modifications:  
M1 : Oxidation (M), with neutral losses 0.000000 (shown in table), 63.998285  
Q4 : Biotin:Thermo-21345 (Q)  
Q6 : Biotin:Thermo-21345 (Q)  
Ions Score: 43 Expect: 0.00078  
Matches : 35/238 fragment ions using 81 most intense peaks [\(help\)](#)

| #  | b           | b <sup>++</sup> | b <sup>*</sup> | b <sup>++</sup> * | b <sup>0</sup> | b <sup>0++</sup> | Seq. | y           | y <sup>++</sup> | y <sup>*</sup> | y <sup>++</sup> * | y <sup>0</sup> | y <sup>0++</sup> | #  |
|----|-------------|-----------------|----------------|-------------------|----------------|------------------|------|-------------|-----------------|----------------|-------------------|----------------|------------------|----|
| 1  | 148.042676  | 74.524976       |                |                   |                |                  | M    |             |                 |                |                   |                |                  | 17 |
| 2  | 308.073325  | 154.540301      |                |                   |                |                  | C    | 2565.223327 | 1283.115302     | 2548.196778    | 1274.602027       | 2547.212762    | 1274.110019      | 16 |
| 3  | 405.126089  | 203.066683      |                |                   |                |                  | P    | 2405.192678 | 1203.099977     | 2388.166129    | 1194.586702       | 2387.182113    | 1194.094694      | 15 |
| 4  | 844.351415  | 422.679346      | 827.324866     | 414.166071        |                |                  | Q    | 2308.139914 | 1154.573595     | 2291.113365    | 1146.060320       | 2290.129349    | 1145.568312      | 14 |
| 5  | 957.435479  | 479.221378      | 940.408930     | 470.708103        |                |                  | L    | 1868.914588 | 934.960932      | 1851.888039    | 926.447658        | 1850.904023    | 925.955650       | 13 |
| 6  | 1396.660805 | 698.834041      | 1379.634256    | 690.320766        |                |                  | Q    | 1755.830524 | 878.418900      | 1738.803975    | 869.905626        | 1737.819959    | 869.413618       | 12 |
| 7  | 1524.719383 | 762.863330      | 1507.692834    | 754.350055        |                |                  | Q    | 1316.605198 | 658.806237      | 1299.578649    | 650.292963        | 1298.594633    | 649.800955       | 11 |
| 8  | 1687.782712 | 844.394994      | 1670.756163    | 835.881720        |                |                  | Y    | 1188.546620 | 594.776948      | 1171.520071    | 586.263674        | 1170.536055    | 585.771666       | 10 |
| 9  | 1816.825305 | 908.916291      | 1799.798756    | 900.403016        | 1798.814740    | 899.911008       | E    | 1025.483291 | 513.245284      | 1008.456742    | 504.732009        | 1007.472726    | 504.240001       | 9  |
| 10 | 1947.865790 | 974.436533      | 1930.839241    | 965.923259        | 1929.855225    | 965.431251       | M    | 896.440698  | 448.723987      | 879.414149     | 440.210713        | 878.430133     | 439.718705       | 8  |
| 11 | 2084.924702 | 1042.965989     | 2067.898153    | 1034.452715       | 2066.914137    | 1033.960707      | H    | 765.400213  | 383.203745      | 748.373664     | 374.690470        | 747.389648     | 374.198462       | 7  |
| 12 | 2141.946166 | 1071.476721     | 2124.919617    | 1062.963446       | 2123.935601    | 1062.471439      | G    | 628.341301  | 314.674289      | 611.314752     | 306.161014        | 610.330736     | 305.669006       | 6  |
| 13 | 2238.998930 | 1120.003103     | 2221.972381    | 1111.489828       | 2220.988365    | 1110.997821      | P    | 571.319837  | 286.163557      | 554.293288     | 277.650282        | 553.309272     | 277.158274       | 5  |
| 14 | 2368.041523 | 1184.524400     | 2351.014974    | 1176.011125       | 2350.030958    | 1175.519117      | E    | 474.267073  | 237.637175      | 457.240524     | 229.123900        | 456.256508     | 228.631892       | 4  |
| 15 | 2425.062987 | 1213.035132     | 2408.036438    | 1204.521857       | 2407.052422    | 1204.029849      | G    | 345.224480  | 173.115878      | 328.197931     | 164.602603        |                |                  | 3  |
| 16 | 2538.147051 | 1269.577164     | 2521.120502    | 1261.063889       | 2520.136486    | 1260.571881      | L    | 288.203016  | 144.605146      | 271.176467     | 136.091872        |                |                  | 2  |
| 17 |             |                 |                |                   |                |                  | R    | 175.118952  | 88.063114       | 158.092403     | 79.549839         |                |                  | 1  |

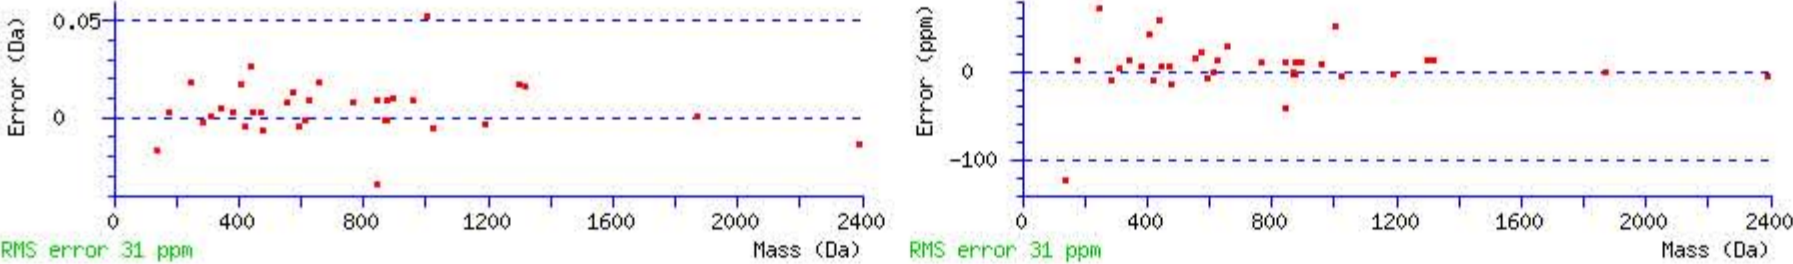

NCBI BLAST search of [MCPQLQQYEMHGPEGLR](#)  
(Parameters: blastp, nr protein database, expect=20000, no filter, PAM30)  
Other BLAST [web gateways](#)

All matches to this query

| Score | Mr(calc):   | Delta    | Sequence                          |
|-------|-------------|----------|-----------------------------------|
| 43.4  | 2711.251434 | 0.017462 | <a href="#">MCPQLQQYEMHGPEGLR</a> |
| 43.4  | 2711.251434 | 0.017462 | <a href="#">MCPQLQQYEMHGPEGLR</a> |
| 30.2  | 2711.251434 | 0.017462 | <a href="#">MCPQLQQYEMHGPEGLR</a> |
| 0.1   | 2711.251434 | 0.017462 | <a href="#">MCPQLQQYEMHGPEGLR</a> |
| 0.1   | 2711.251434 | 0.017462 | <a href="#">MCPQLQQYEMHGPEGLR</a> |

MATRIX

SCIENCE

Mascot Search Results

Peptide View

MS/MS Fragmentation of **MCPQLQQYEMHGPEGLR**  
Found in **A2MG\_HUMAN**, Alpha-2-macroglobulin OS=Homo sapiens GN=A2M PE=1 SV=3

Match to Query 60183: 3006.455096 from(752.621050,4+) rtinseconds(2338) index(22240)  
Title: Locus:1.1.1.3196.20 File:"2013-07-02 CLN FXIII 180 min 2nd F 2.wiff"  
Data file C:\Program Files (x86)\Matrix Science\Mascot Daemon\mgf\8 FXIII 180 min 2nd\mascot\_daemon\_merge.mgf

Click mouse within plot area to zoom in by factor of two about that point  
Or, 

Plot from

0

 to 

2800

 Da 

Full range

  
Label all possible matches ☐ Label matches used for scoring ☒

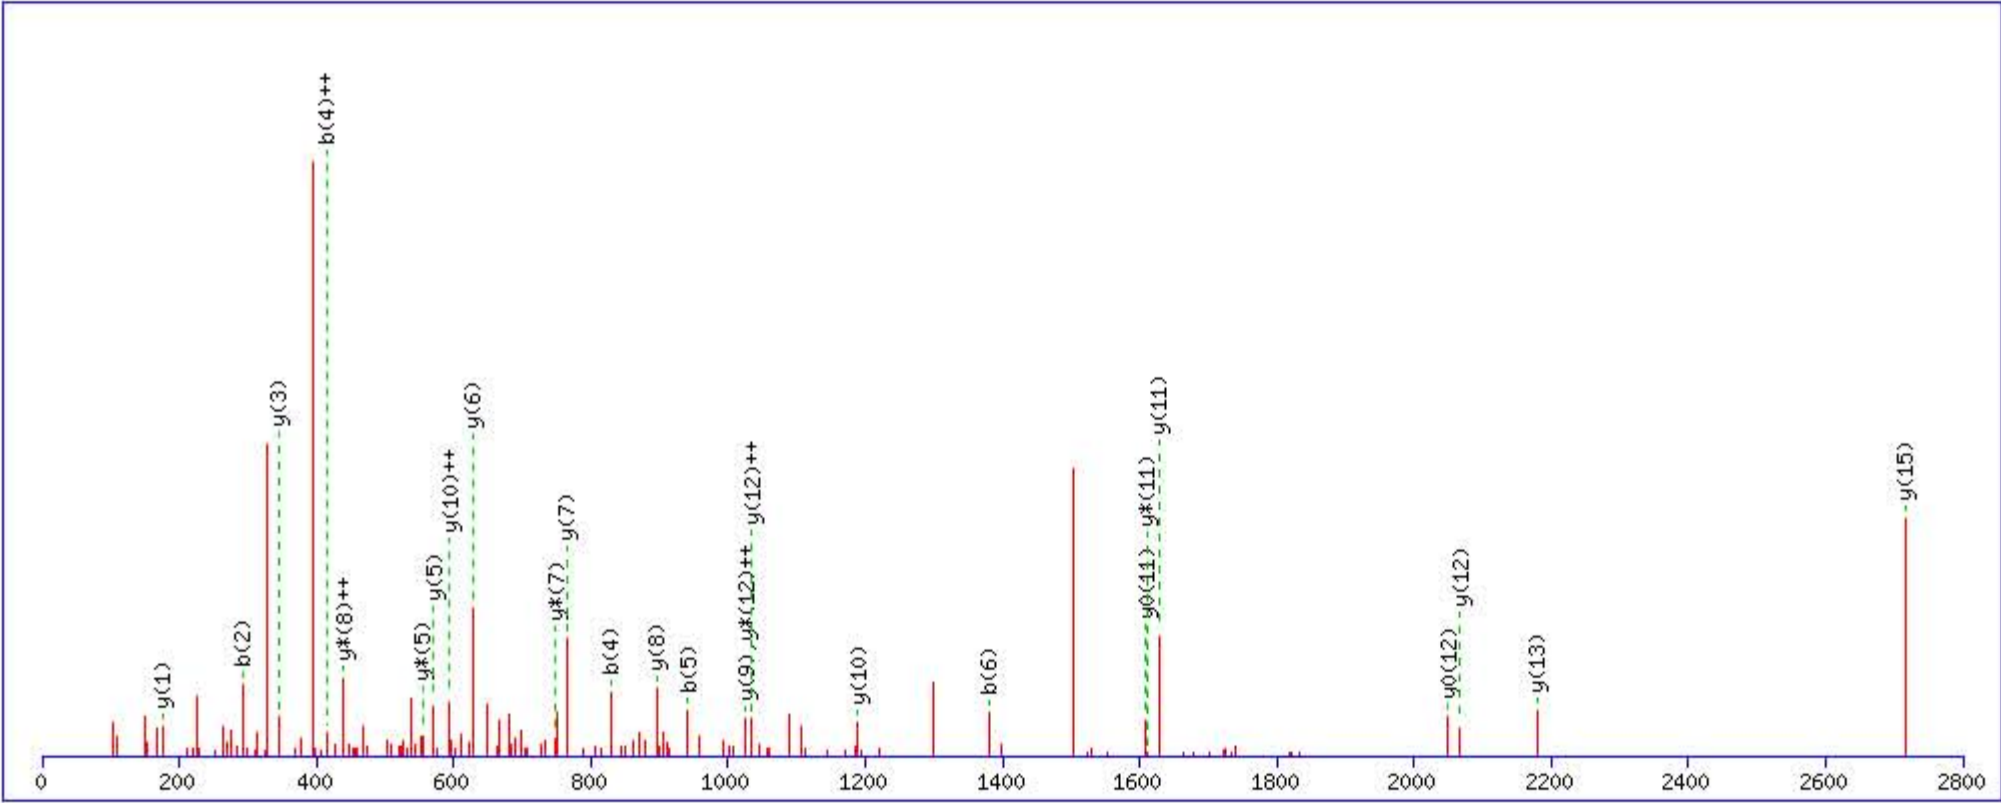

Monoisotopic mass of neutral peptide Mr(calc): 3006.423264  
Fixed modifications: Carbamidomethyl (C) (apply to specified residues or termini only)  
Variable modifications:  
Q4 : Biotin:Thermo-21345 (Q)  
Q6 : Biotin:Thermo-21345 (Q)  
Q7 : Biotin:Thermo-21345 (Q)  
Ions Score: 40 Expect: 0.0025  
Matches : 26/164 fragment ions using 68 most intense peaks [\(help\)](#)

| #  | b           | b <sup>++</sup> | b <sup>*</sup> | b <sup>+++</sup> | b <sup>0</sup> | b <sup>0++</sup> | Seq. | y           | y <sup>++</sup> | y <sup>*</sup> | y <sup>+++</sup> | y <sup>0</sup> | y <sup>0++</sup> | #  |
|----|-------------|-----------------|----------------|------------------|----------------|------------------|------|-------------|-----------------|----------------|------------------|----------------|------------------|----|
| 1  | 132.047761  | 66.527518       |                |                  |                |                  | M    |             |                 |                |                  |                |                  | 17 |
| 2  | 292.078410  | 146.542843      |                |                  |                |                  | C    | 2876.390075 | 1438.698675     | 2859.363526    | 1430.185401      | 2858.379510    | 1429.693393      | 16 |
| 3  | 389.131174  | 195.069225      |                |                  |                |                  | P    | 2716.359426 | 1358.683351     | 2699.332877    | 1350.170076      | 2698.348861    | 1349.678068      | 15 |
| 4  | 828.356500  | 414.681888      | 811.329951     | 406.168614       |                |                  | Q    | 2619.306662 | 1310.156969     | 2602.280113    | 1301.643694      | 2601.296097    | 1301.151686      | 14 |
| 5  | 941.440564  | 471.223920      | 924.414015     | 462.710646       |                |                  | L    | 2180.081336 | 1090.544306     | 2163.054787    | 1082.031031      | 2162.070771    | 1081.539023      | 13 |
| 6  | 1380.665890 | 690.836583      | 1363.639341    | 682.323309       |                |                  | Q    | 2066.997272 | 1034.002274     | 2049.970723    | 1025.488999      | 2048.986707    | 1024.996991      | 12 |
| 7  | 1819.891216 | 910.449246      | 1802.864667    | 901.935972       |                |                  | Q    | 1627.771946 | 814.389611      | 1610.745397    | 805.876337       | 1609.761381    | 805.384329       | 11 |
| 8  | 1982.954545 | 991.980911      | 1965.927996    | 983.467636       |                |                  | Y    | 1188.546620 | 594.776948      | 1171.520071    | 586.263674       | 1170.536055    | 585.771666       | 10 |
| 9  | 2111.997138 | 1056.502207     | 2094.970589    | 1047.988932      | 2093.986573    | 1047.496925      | E    | 1025.483291 | 513.245284      | 1008.456742    | 504.732009       | 1007.472726    | 504.240001       | 9  |
| 10 | 2243.037623 | 1122.022450     | 2226.011074    | 1113.509175      | 2225.027058    | 1113.017167      | M    | 896.440698  | 448.723987      | 879.414149     | 440.210713       | 878.430133     | 439.718705       | 8  |
| 11 | 2380.096535 | 1190.551906     | 2363.069986    | 1182.038631      | 2362.085970    | 1181.546623      | H    | 765.400213  | 383.203745      | 748.373664     | 374.690470       | 747.389648     | 374.198462       | 7  |
| 12 | 2437.117999 | 1219.062637     | 2420.091450    | 1210.549363      | 2419.107434    | 1210.057355      | G    | 628.341301  | 314.674289      | 611.314752     | 306.161014       | 610.330736     | 305.669006       | 6  |
| 13 | 2534.170763 | 1267.589019     | 2517.144214    | 1259.075745      | 2516.160198    | 1258.583737      | P    | 571.319837  | 286.163557      | 554.293288     | 277.650282       | 553.309272     | 277.158274       | 5  |
| 14 | 2663.213356 | 1332.110316     | 2646.186807    | 1323.597041      | 2645.202791    | 1323.105034      | E    | 474.267073  | 237.637175      | 457.240524     | 229.123900       | 456.256508     | 228.631892       | 4  |
| 15 | 2720.234820 | 1360.621048     | 2703.208271    | 1352.107773      | 2702.224255    | 1351.615766      | G    | 345.224480  | 173.115878      | 328.197931     | 164.602603       |                |                  | 3  |
| 16 | 2833.318884 | 1417.163080     | 2816.292335    | 1408.649806      | 2815.308319    | 1408.157798      | L    | 288.203016  | 144.605146      | 271.176467     | 136.091872       |                |                  | 2  |
| 17 |             |                 |                |                  |                |                  | R    | 175.118952  | 88.063114       | 158.092403     | 79.549839        |                |                  | 1  |

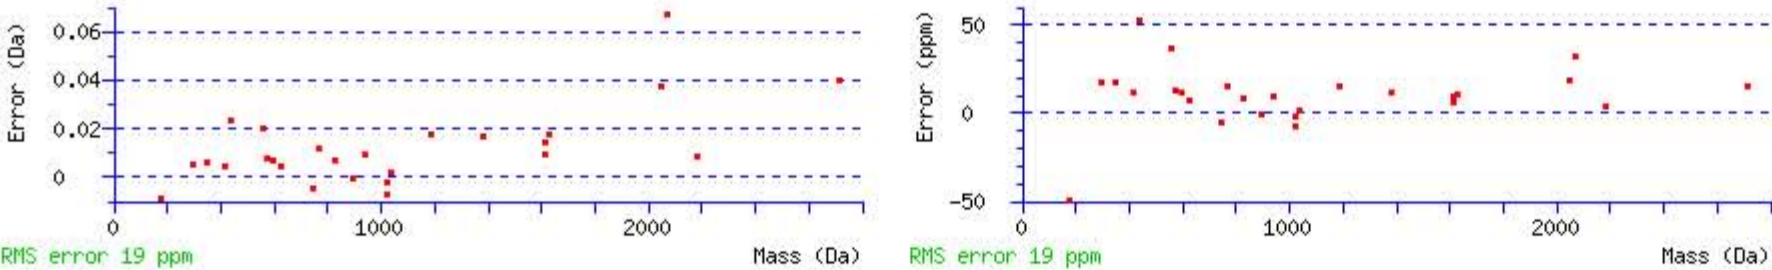

NCBI BLAST search of [MCPQLQQYEMHGPEGLR](#)  
(Parameters: blastp, nr protein database, expect=20000, no filter, PAM30)  
Other BLAST [web gateways](#)

All matches to this query

| Score | Mr(calc):   | Delta    | Sequence                          |
|-------|-------------|----------|-----------------------------------|
| 40.4  | 3006.423264 | 0.031832 | <a href="#">MCPQLQQYEMHGPEGLR</a> |

MATRIX

SCIENCE

Mascot Search Results

Peptide View

MS/MS Fragmentation of **AVDQSVLLMKPDAELSASSVYNLLPEK**  
Found in **A2MG\_HUMAN**, Alpha-2-macroglobulin OS=Homo sapiens GN=A2M PE=1 SV=3

Match to Query 62709: 3227.726536 from(807.938910,4+) rtinseconds(2766) index(24867)  
Title: Locus:1.1.1.3344.19 File:"2013-07-02 CLN FXIII 180 min 2nd F 2.wiff"  
Data file C:\Program Files (x86)\Matrix Science\Mascot Daemon\mgf\8 FXIII 180 min 2nd\mascot\_daemon\_merge.mgf

Click mouse within plot area to zoom in by factor of two about that point  
Or, 

Plot from

0

 to 

3000

 Da 

Full range

  
Label all possible matches ☐ Label matches used for scoring ☒

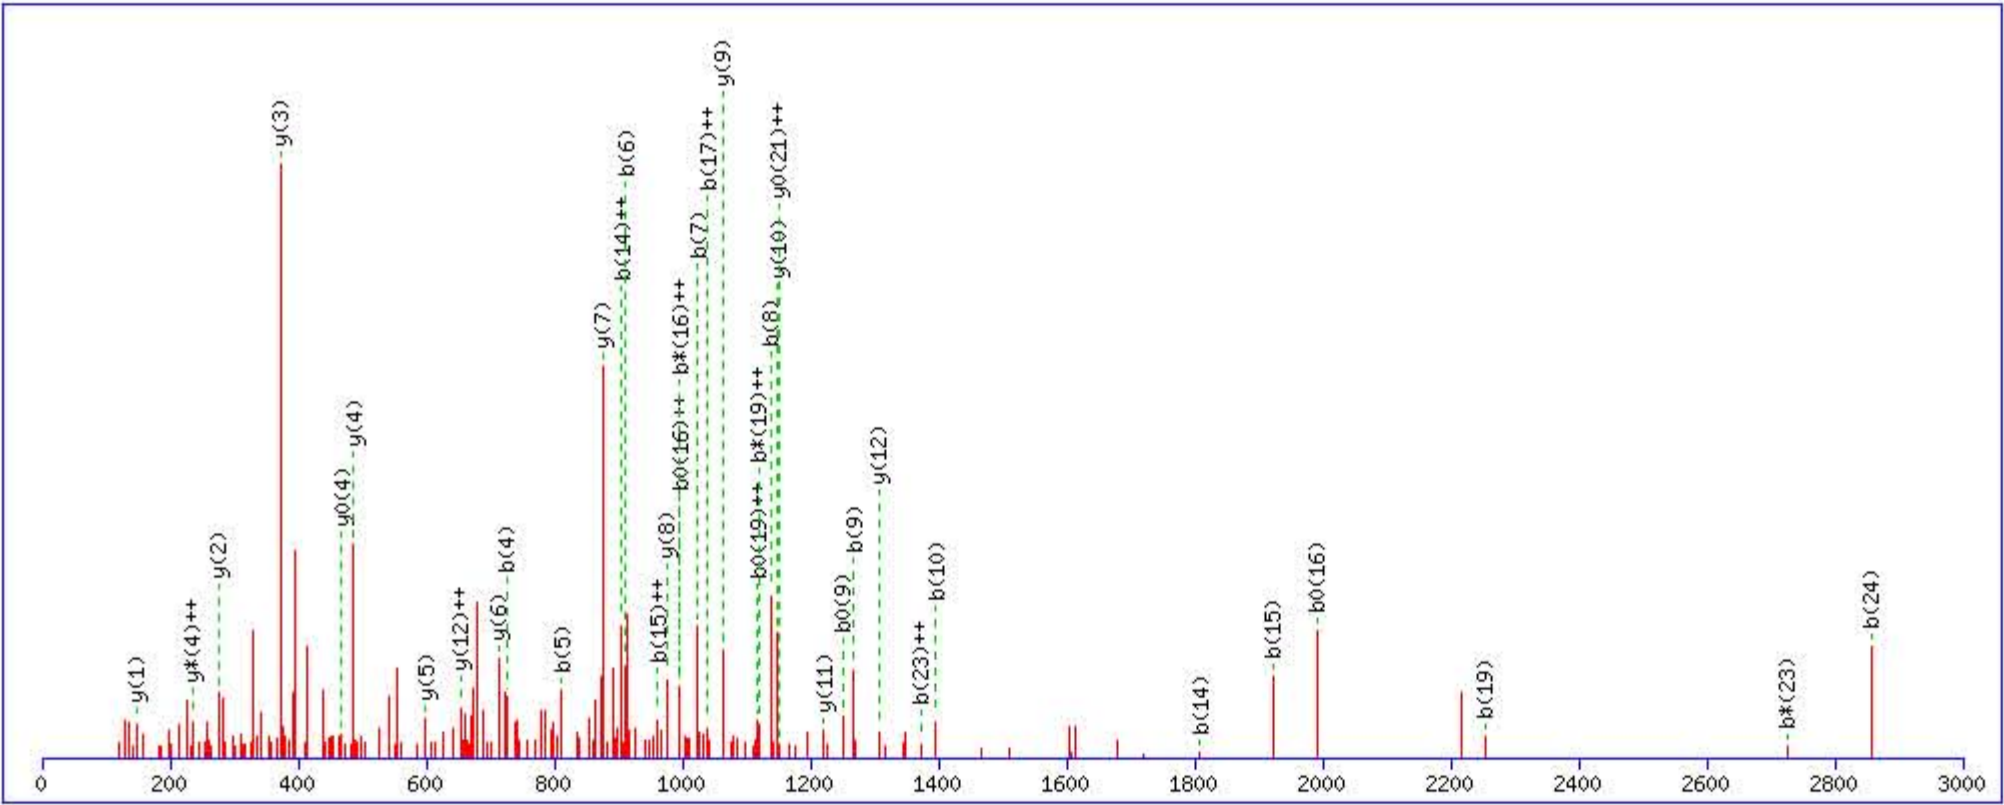

Monoisotopic mass of neutral peptide Mr(calc): 3227.682129  
Fixed modifications: Carbamidomethyl (C) (apply to specified residues or termini only)  
Variable modifications:  
Q4 : Biotin:Thermo-21345 (Q)  
Ions Score: 71 Expect: 2.6e-007  
Matches : 38/300 fragment ions using 79 most intense peaks [\(help\)](#)

| #  | b           | b <sup>++</sup> | b <sup>*</sup> | b <sup>++</sup> | b <sup>0</sup> | b <sup>0++</sup> | Seq. | y           | y <sup>++</sup> | y <sup>*</sup> | y <sup>++</sup> | y <sup>0</sup> | y <sup>0++</sup> | #  |
|----|-------------|-----------------|----------------|-----------------|----------------|------------------|------|-------------|-----------------|----------------|-----------------|----------------|------------------|----|
| 1  | 72.044390   | 36.525833       |                |                 |                |                  | A    |             |                 |                |                 |                |                  | 27 |
| 2  | 171.112804  | 86.060040       |                |                 |                |                  | V    | 3157.652336 | 1579.329806     | 3140.625787    | 1570.816531     | 3139.641771    | 1570.324523      | 26 |
| 3  | 286.139747  | 143.573512      |                |                 | 268.129182     | 134.568229       | D    | 3058.583922 | 1529.795599     | 3041.557373    | 1521.282324     | 3040.573357    | 1520.790316      | 25 |
| 4  | 725.365073  | 363.186175      | 708.338524     | 354.672900      | 707.354508     | 354.180892       | Q    | 2943.556979 | 1472.282127     | 2926.530430    | 1463.768853     | 2925.546414    | 1463.276845      | 24 |
| 5  | 812.397101  | 406.702189      | 795.370552     | 398.188914      | 794.386536     | 397.696906       | S    | 2504.331653 | 1252.669464     | 2487.305104    | 1244.156190     | 2486.321088    | 1243.664182      | 23 |
| 6  | 911.465515  | 456.236396      | 894.438966     | 447.723121      | 893.454950     | 447.231113       | V    | 2417.299625 | 1209.153451     | 2400.273076    | 1200.640176     | 2399.289060    | 1200.148168      | 22 |
| 7  | 1024.549579 | 512.778427      | 1007.523030    | 504.265153      | 1006.539014    | 503.773145       | L    | 2318.231211 | 1159.619243     | 2301.204662    | 1151.105969     | 2300.220646    | 1150.613961      | 21 |
| 8  | 1137.633643 | 569.320459      | 1120.607094    | 560.807185      | 1119.623078    | 560.315177       | L    | 2205.147147 | 1103.077212     | 2188.120598    | 1094.563937     | 2187.136582    | 1094.071929      | 20 |
| 9  | 1268.674128 | 634.840702      | 1251.647579    | 626.327428      | 1250.663563    | 625.835419       | M    | 2092.063083 | 1046.535179     | 2075.036534    | 1038.021905     | 2074.052518    | 1037.529897      | 19 |
| 10 | 1396.769091 | 698.888183      | 1379.742542    | 690.374909      | 1378.758526    | 689.882901       | K    | 1961.022598 | 981.014937      | 1943.996049    | 972.501663      | 1943.012033    | 972.009655       | 18 |
| 11 | 1493.821855 | 747.414565      | 1476.795306    | 738.901291      | 1475.811290    | 738.409283       | P    | 1832.927635 | 916.967456      | 1815.901086    | 908.454181      | 1814.917070    | 907.962173       | 17 |
| 12 | 1608.848798 | 804.928037      | 1591.822249    | 796.414763      | 1590.838233    | 795.922755       | D    | 1735.874871 | 868.441074      | 1718.848322    | 859.927799      | 1717.864306    | 859.435791       | 16 |
| 13 | 1679.885912 | 840.446594      | 1662.859363    | 831.933320      | 1661.875347    | 831.441311       | A    | 1620.847928 | 810.927602      | 1603.821379    | 802.414328      | 1602.837363    | 801.922320       | 15 |
| 14 | 1808.928505 | 904.967891      | 1791.901956    | 896.454616      | 1790.917940    | 895.962608       | E    | 1549.810814 | 775.409045      | 1532.784265    | 766.895771      | 1531.800249    | 766.403763       | 14 |
| 15 | 1922.012569 | 961.509923      | 1904.986020    | 952.996648      | 1904.002004    | 952.504640       | L    | 1420.768221 | 710.887749      | 1403.741672    | 702.374474      | 1402.757656    | 701.882466       | 13 |
| 16 | 2009.044597 | 1005.025937     | 1992.018048    | 996.512662      | 1991.034032    | 996.020654       | S    | 1307.684157 | 654.345717      | 1290.657608    | 645.832442      | 1289.673592    | 645.340434       | 12 |
| 17 | 2080.081711 | 1040.544493     | 2063.055162    | 1032.031219     | 2062.071146    | 1031.539211      | A    | 1220.652129 | 610.829703      | 1203.625580    | 602.316428      | 1202.641564    | 601.824420       | 11 |
| 18 | 2167.113739 | 1084.060507     | 2150.087190    | 1075.547233     | 2149.103174    | 1075.055225      | S    | 1149.615015 | 575.311146      | 1132.588466    | 566.797871      | 1131.604450    | 566.305863       | 10 |
| 19 | 2254.145767 | 1127.576521     | 2237.119218    | 1119.063247     | 2236.135202    | 1118.571239      | S    | 1062.582987 | 531.795132      | 1045.556438    | 523.281857      | 1044.572422    | 522.789849       | 9  |
| 20 | 2353.214181 | 1177.110728     | 2336.187632    | 1168.597454     | 2335.203616    | 1168.105446      | V    | 975.550959  | 488.279118      | 958.524410     | 479.765843      | 957.540394     | 479.273835       | 8  |
| 21 | 2516.277510 | 1258.642393     | 2499.250961    | 1250.129118     | 2498.266945    | 1249.637110      | Y    | 876.482545  | 438.744911      | 859.455996     | 430.231636      | 858.471980     | 429.739628       | 7  |
| 22 | 2630.320437 | 1315.663856     | 2613.293888    | 1307.150582     | 2612.309872    | 1306.658574      | N    | 713.419216  | 357.213246      | 696.392667     | 348.699972      | 695.408651     | 348.207964       | 6  |
| 23 | 2743.404501 | 1372.205888     | 2726.377952    | 1363.692614     | 2725.393936    | 1363.200606      | L    | 599.376289  | 300.191783      | 582.349740     | 291.678508      | 581.365724     | 291.186500       | 5  |
| 24 | 2856.488565 | 1428.747921     | 2839.462016    | 1420.234646     | 2838.478000    | 1419.742638      | L    | 486.292225  | 243.649751      | 469.265676     | 235.136476      | 468.281660     | 234.644468       | 4  |
| 25 | 2953.541329 | 1477.274303     | 2936.514780    | 1468.761028     | 2935.530764    | 1468.269020      | P    | 373.208161  | 187.107719      | 356.181612     | 178.594444      | 355.197596     | 178.102436       | 3  |
| 26 | 3082.583922 | 1541.795599     | 3065.557373    | 1533.282325     | 3064.573357    | 1532.790317      | E    | 276.155397  | 138.581337      | 259.128848     | 130.068062      | 258.144832     | 129.576054       | 2  |
| 27 |             |                 |                |                 |                |                  | K    | 147.112804  | 74.060040       | 130.086255     | 65.546765       |                |                  | 1  |

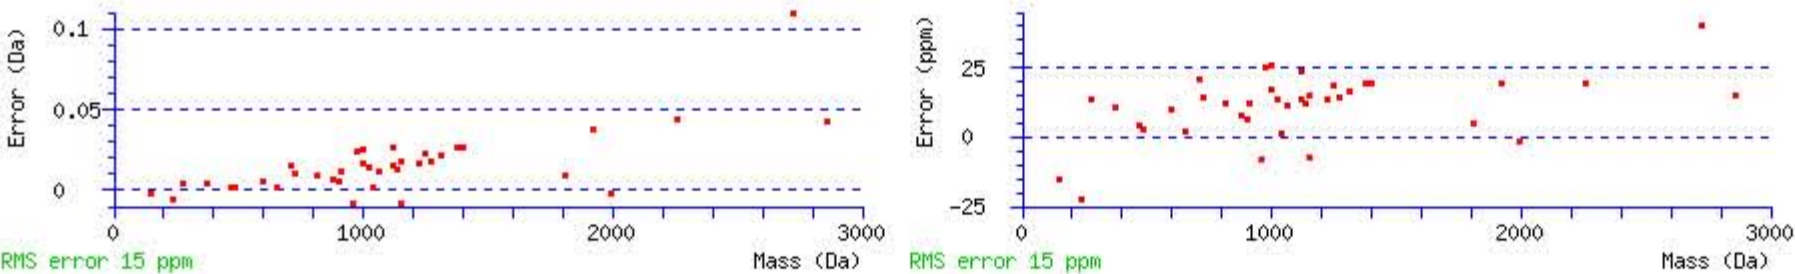

NCBI BLAST search of **AVDQSVLLMKPDAELSASSVYNLLPEK**  
(Parameters: blastp, nr protein database, expect=20000, no filter, PAM30)  
Other BLAST [web gateways](#)

All matches to this query

| Score | Mr(calc):   | Delta     | Sequence                                       |
|-------|-------------|-----------|------------------------------------------------|
| 70.7  | 3227.682129 | 0.044407  | <a href="#">AVDQSVLLMKPDAELSASSVYNLLPEK</a>    |
| 0.5   | 3227.749542 | -0.023006 | <a href="#">LVAGLLLWASLLTGAWPSFPTQDHLPATPR</a> |

MATRIX

SCIENCE

Mascot Search Results

Peptide View

MS/MS Fragmentation of **SPCYGYQWVSEEHEEAHHTAYLVFSPSK**  
Found in **A2MG\_HUMAN**, Alpha-2-macroglobulin OS=Homo sapiens GN=A2M PE=1 SV=3

Match to Query 66934: 3648.683376 from(913.178120,4+) rtinseconds(2155) index(21228)  
Title: Locus:1.1.1.3132.23 File:"2013-07-02 CLN FXIII 180 min 2nd F 2.wiff"  
Data file C:\Program Files (x86)\Matrix Science\Mascot Daemon\mgf\8 FXIII 180 min 2nd\mascot\_daemon\_merge.mgf

Click mouse within plot area to zoom in by factor of two about that point  
Or, 

Plot from

0

 to 

2800

 Da 

Full range

  
Label all possible matches ☐ Label matches used for scoring ☒

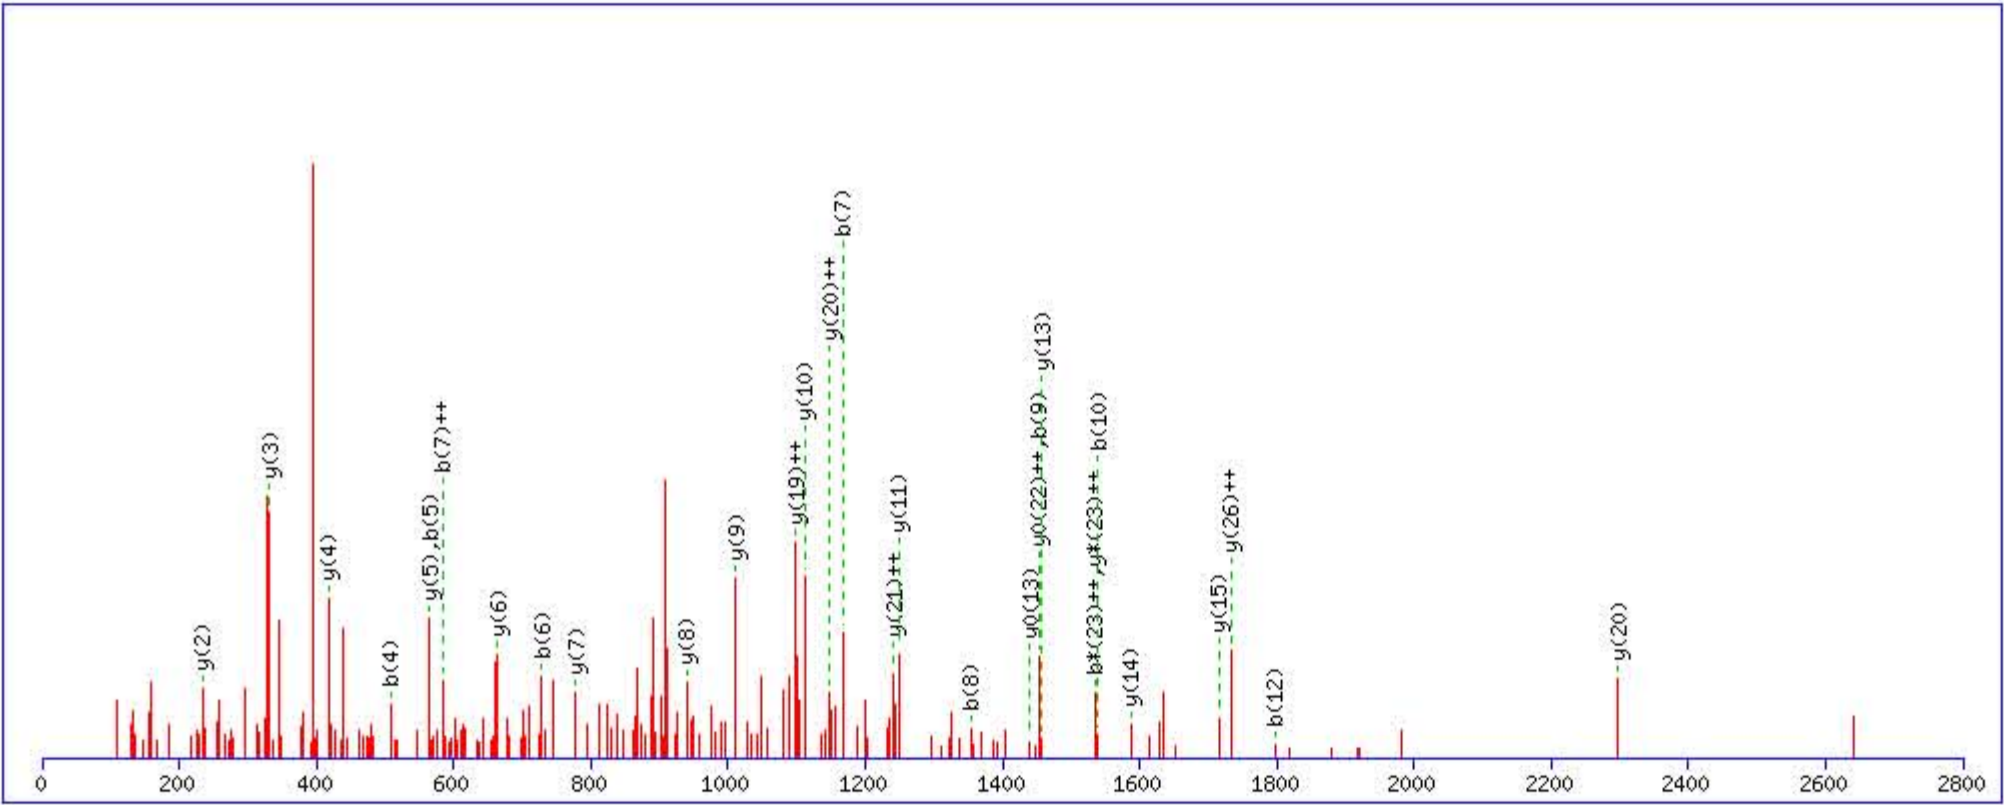

Monoisotopic mass of neutral peptide Mr(calc): 3648.644211  
Fixed modifications: Carbamidomethyl (C) (apply to specified residues or termini only)  
Variable modifications:  
Q7 : Biotin:Thermo-21345 (Q)  
Ions Score: 69 Expect: 1.8e-006  
Matches : 31/310 fragment ions using 58 most intense peaks [\(help\)](#)

| #  | b           | b <sup>++</sup> | b <sup>*</sup> | b <sup>+++</sup> | b <sup>0</sup> | b <sup>0++</sup> | Seq. | y           | y <sup>++</sup> | y <sup>*</sup> | y <sup>+++</sup> | y <sup>0</sup> | y <sup>0++</sup> | #  |
|----|-------------|-----------------|----------------|------------------|----------------|------------------|------|-------------|-----------------|----------------|------------------|----------------|------------------|----|
| 1  | 88.039304   | 44.523290       |                |                  | 70.028739      | 35.518008        | S    |             |                 |                |                  |                |                  | 28 |
| 2  | 185.092068  | 93.049672       |                |                  | 167.081503     | 84.044389        | P    | 3562.619476 | 1781.813376     | 3545.592927    | 1773.300101      | 3544.608911    | 1772.808093      | 27 |
| 3  | 345.122717  | 173.064997      |                |                  | 327.112152     | 164.059714       | C    | 3465.566712 | 1733.286994     | 3448.540163    | 1724.773719      | 3447.556147    | 1724.281711      | 26 |
| 4  | 508.186046  | 254.596661      |                |                  | 490.175481     | 245.591379       | Y    | 3305.536063 | 1653.271669     | 3288.509514    | 1644.758395      | 3287.525498    | 1644.266387      | 25 |
| 5  | 565.207510  | 283.107393      |                |                  | 547.196945     | 274.102111       | G    | 3142.472734 | 1571.740005     | 3125.446185    | 1563.226730      | 3124.462169    | 1562.734722      | 24 |
| 6  | 728.270839  | 364.639058      |                |                  | 710.260274     | 355.633775       | Y    | 3085.451270 | 1543.229273     | 3068.424721    | 1534.715998      | 3067.440705    | 1534.223990      | 23 |
| 7  | 1167.496165 | 584.251721      | 1150.469616    | 575.738446       | 1149.485600    | 575.246438       | Q    | 2922.387941 | 1461.697608     | 2905.361392    | 1453.184334      | 2904.377376    | 1452.692326      | 22 |
| 8  | 1353.575478 | 677.291377      | 1336.548929    | 668.778103       | 1335.564913    | 668.286094       | W    | 2483.162615 | 1242.084945     | 2466.136066    | 1233.571671      | 2465.152050    | 1233.079663      | 21 |
| 9  | 1452.643892 | 726.825584      | 1435.617343    | 718.312310       | 1434.633327    | 717.820302       | V    | 2297.083302 | 1149.045289     | 2280.056753    | 1140.532014      | 2279.072737    | 1140.040006      | 20 |
| 10 | 1539.675920 | 770.341598      | 1522.649371    | 761.828324       | 1521.665355    | 761.336316       | S    | 2198.014888 | 1099.511082     | 2180.988339    | 1090.997807      | 2180.004323    | 1090.505800      | 19 |
| 11 | 1668.718513 | 834.862895      | 1651.691964    | 826.349620       | 1650.707948    | 825.857612       | E    | 2110.982860 | 1055.995068     | 2093.956311    | 1047.481793      | 2092.972295    | 1046.989785      | 18 |
| 12 | 1797.761106 | 899.384191      | 1780.734557    | 890.870917       | 1779.750541    | 890.378909       | E    | 1981.940267 | 991.473772      | 1964.913718    | 982.960497       | 1963.929702    | 982.468489       | 17 |
| 13 | 1934.820018 | 967.913647      | 1917.793469    | 959.400373       | 1916.809453    | 958.908365       | H    | 1852.897674 | 926.952475      | 1835.871125    | 918.439201       | 1834.887109    | 917.947193       | 16 |
| 14 | 2063.862611 | 1032.434943     | 2046.836062    | 1023.921669      | 2045.852046    | 1023.429661      | E    | 1715.838762 | 858.423019      | 1698.812213    | 849.909745       | 1697.828197    | 849.417737       | 15 |
| 15 | 2192.905204 | 1096.956240     | 2175.878655    | 1088.442965      | 2174.894639    | 1087.950958      | E    | 1586.796169 | 793.901723      | 1569.769620    | 785.388448       | 1568.785604    | 784.896440       | 14 |
| 16 | 2263.942318 | 1132.474797     | 2246.915769    | 1123.961523      | 2245.931753    | 1123.469515      | A    | 1457.753576 | 729.380426      | 1440.727027    | 720.867152       | 1439.743011    | 720.375144       | 13 |
| 17 | 2401.001230 | 1201.004253     | 2383.974681    | 1192.490979      | 2382.990665    | 1191.998971      | H    | 1386.716462 | 693.861869      | 1369.689913    | 685.348595       | 1368.705897    | 684.856587       | 12 |
| 18 | 2538.060142 | 1269.533709     | 2521.033593    | 1261.020435      | 2520.049577    | 1260.528427      | H    | 1249.657550 | 625.332413      | 1232.631001    | 616.819139       | 1231.646985    | 616.327131       | 11 |
| 19 | 2639.107821 | 1320.057548     | 2622.081272    | 1311.544274      | 2621.097256    | 1311.052266      | T    | 1112.598638 | 556.802957      | 1095.572089    | 548.289683       | 1094.588073    | 547.797675       | 10 |
| 20 | 2710.144935 | 1355.576106     | 2693.118386    | 1347.062831      | 2692.134370    | 1346.570823      | A    | 1011.550959 | 506.279118      | 994.524410     | 497.765843       | 993.540394     | 497.273835       | 9  |
| 21 | 2873.208264 | 1437.107770     | 2856.181715    | 1428.594496      | 2855.197699    | 1428.102488      | Y    | 940.513845  | 470.760561      | 923.487296     | 462.247286       | 922.503280     | 461.755278       | 8  |
| 22 | 2986.292328 | 1493.649802     | 2969.265779    | 1485.136528      | 2968.281763    | 1484.644520      | L    | 777.450516  | 389.228896      | 760.423967     | 380.715622       | 759.439951     | 380.223614       | 7  |
| 23 | 3085.360742 | 1543.184009     | 3068.334193    | 1534.670735      | 3067.350177    | 1534.178727      | V    | 664.366452  | 332.686864      | 647.339903     | 324.173589       | 646.355887     | 323.681581       | 6  |
| 24 | 3232.429156 | 1616.718216     | 3215.402607    | 1608.204941      | 3214.418591    | 1607.712934      | F    | 565.298038  | 283.152657      | 548.271489     | 274.639383       | 547.287473     | 274.147375       | 5  |
| 25 | 3319.461184 | 1660.234230     | 3302.434635    | 1651.720955      | 3301.450619    | 1651.228948      | S    | 418.229624  | 209.618450      | 401.203075     | 201.105176       | 400.219059     | 200.613168       | 4  |
| 26 | 3416.513948 | 1708.760612     | 3399.487399    | 1700.247338      | 3398.503383    | 1699.755330      | P    | 331.197596  | 166.102436      | 314.171047     | 157.589162       | 313.187031     | 157.097154       | 3  |
| 27 | 3503.545976 | 1752.276626     | 3486.519427    | 1743.763352      | 3485.535411    | 1743.271344      | S    | 234.144832  | 117.576054      | 217.118283     | 109.062780       | 216.134267     | 108.570772       | 2  |
| 28 |             |                 |                |                  |                |                  | K    | 147.112804  | 74.060040       | 130.086255     | 65.546765        |                |                  | 1  |

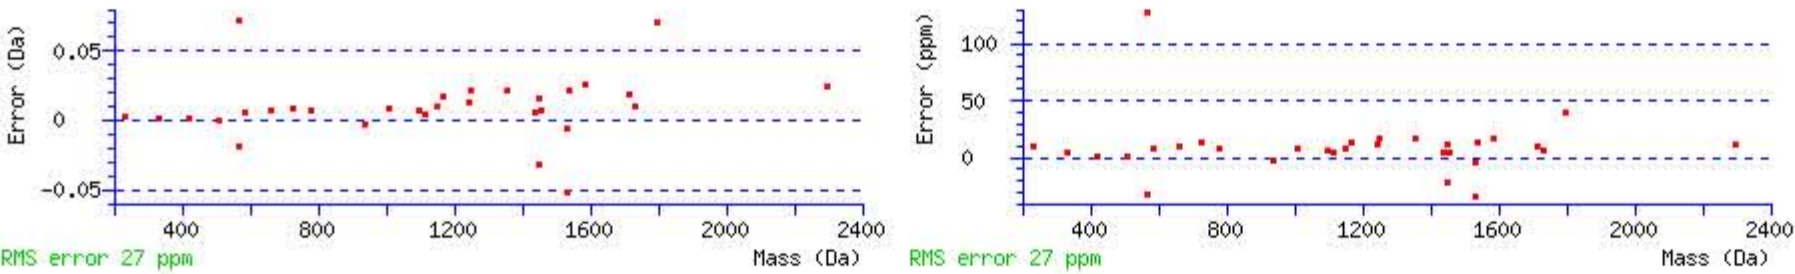

NCBI BLAST search of [SPCYGYQWVSEEHEEAHHTAYLVFSPSK](#)  
(Parameters: blastp, nr protein database, expect=20000, no filter, PAM30)  
Other BLAST [web gateways](#)

All matches to this query

| Score | Mr(calc):   | Delta    | Sequence                                     |
|-------|-------------|----------|----------------------------------------------|
| 68.9  | 3648.644211 | 0.039165 | <a href="#">SPCYGYQWVSEEHEEAHHTAYLVFSPSK</a> |

MATRIX

SCIENCE

Mascot Search Results

Peptide View

MS/MS Fragmentation of **KATEDEGSEQK**  
Found in **ANT3\_HUMAN**, Antithrombin-III OS=Homo sapiens GN=SERPINC1 PE=1 SV=1

Match to Query 32082: 1531.718982 from(511.580270,3+) rtinseconds(1029) index(14604)  
Title: Locus:1.1.1.2740.4 File:"2013-07-02 CLN FXIII 180 min 2nd F 2.wiff"  
Data file C:\Program Files (x86)\Matrix Science\Mascot Daemon\mgf\8 FXIII 180 min 2nd\mascot\_daemon\_merge.mgf

Click mouse within plot area to zoom in by factor of two about that point  
Or,   to  Da   
Label all possible matches ☐ Label matches used for scoring ☒

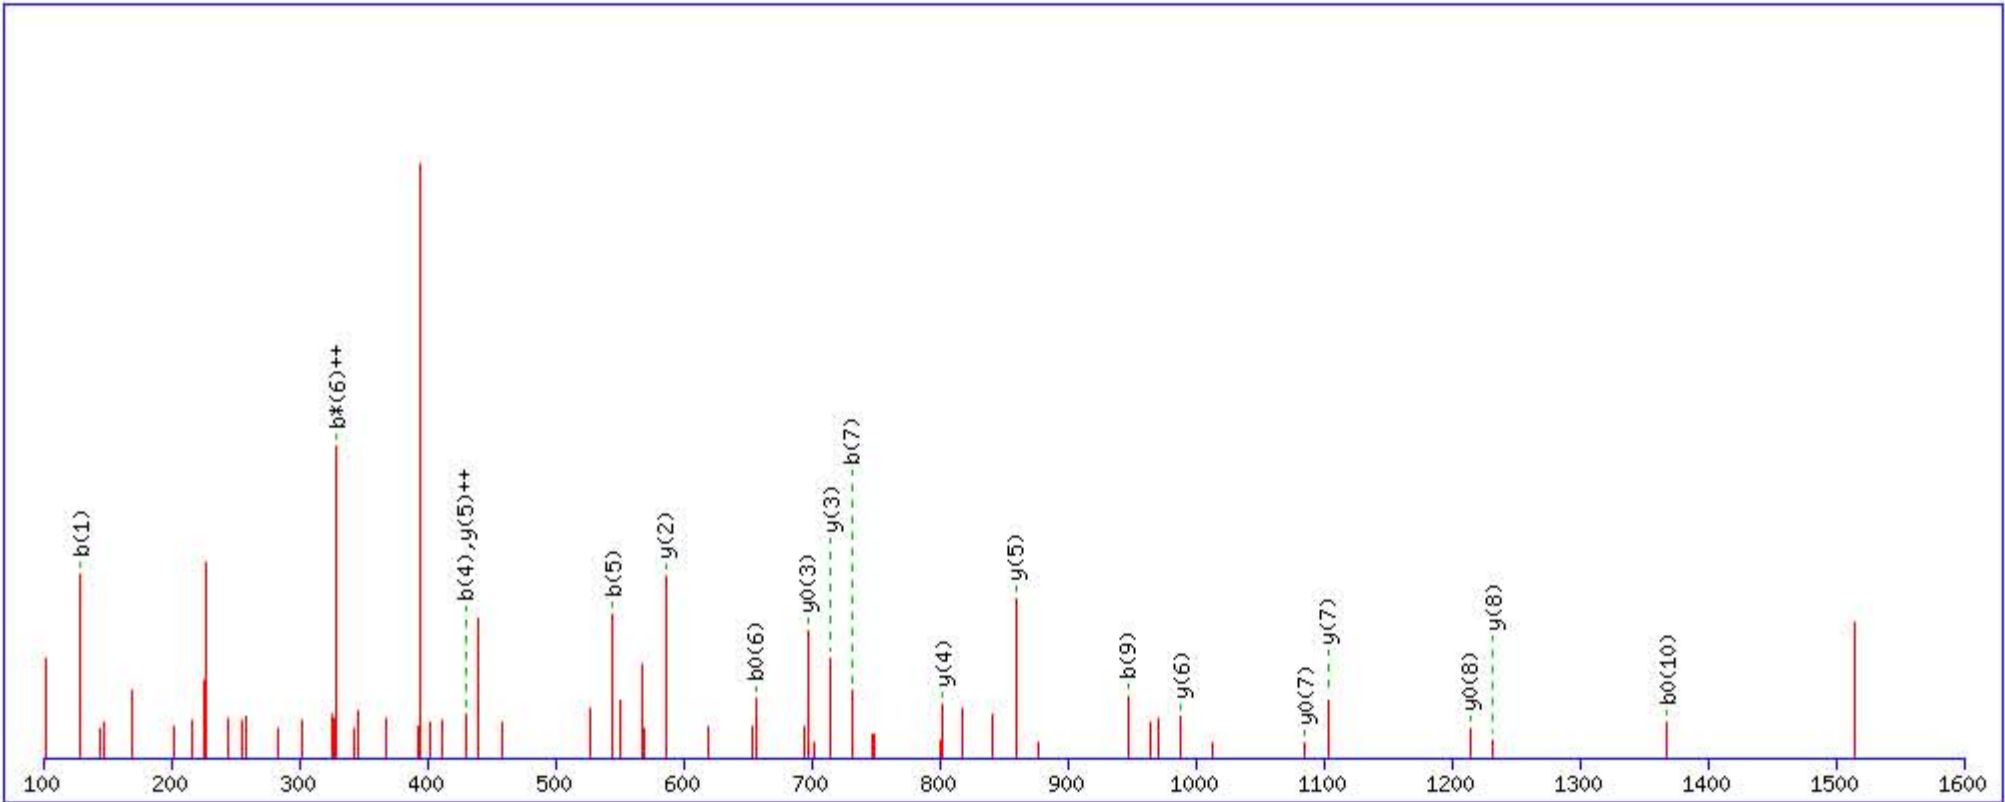

Monoisotopic mass of neutral peptide Mr(calc): 1531.718796  
Fixed modifications: Carbamidomethyl (C) (apply to specified residues or termini only)  
Variable modifications:  
Q10 : Biotin:Thermo-21345 (Q)  
Ions Score: 51 Expect: 0.00013  
Matches : 19/112 fragment ions using 25 most intense peaks [\(help\)](#)

| #  | b           | b <sup>++</sup> | b <sup>+</sup> | b <sup>+++</sup> | b <sup>0</sup> | b <sup>0++</sup> | Seq. | y           | y <sup>++</sup> | y <sup>+</sup> | y <sup>+++</sup> | y <sup>0</sup> | y <sup>0++</sup> | #  |
|----|-------------|-----------------|----------------|------------------|----------------|------------------|------|-------------|-----------------|----------------|------------------|----------------|------------------|----|
| 1  | 129.102239  | 65.054757       | 112.075690     | 56.541483        |                |                  | K    |             |                 |                |                  |                |                  | 11 |
| 2  | 200.139353  | 100.573315      | 183.112804     | 92.060040        |                |                  | A    | 1404.631137 | 702.819207      | 1387.604588    | 694.305932       | 1386.620572    | 693.813924       | 10 |
| 3  | 301.187032  | 151.097154      | 284.160483     | 142.583879       | 283.176467     | 142.091872       | T    | 1333.594023 | 667.300650      | 1316.567474    | 658.787375       | 1315.583458    | 658.295367       | 9  |
| 4  | 430.229625  | 215.618450      | 413.203076     | 207.105176       | 412.219060     | 206.613168       | E    | 1232.546344 | 616.776810      | 1215.519795    | 608.263536       | 1214.535779    | 607.771528       | 8  |
| 5  | 545.256568  | 273.131922      | 528.230019     | 264.618648       | 527.246003     | 264.126640       | D    | 1103.503751 | 552.255514      | 1086.477202    | 543.742239       | 1085.493186    | 543.250231       | 7  |
| 6  | 674.299161  | 337.653219      | 657.272612     | 329.139944       | 656.288596     | 328.647936       | E    | 988.476808  | 494.742042      | 971.450259     | 486.228768       | 970.466243     | 485.736760       | 6  |
| 7  | 731.320625  | 366.163951      | 714.294076     | 357.650676       | 713.310060     | 357.158668       | G    | 859.434215  | 430.220746      | 842.407666     | 421.707471       | 841.423650     | 421.215463       | 5  |
| 8  | 818.352653  | 409.679965      | 801.326104     | 401.166690       | 800.342088     | 400.674682       | S    | 802.412751  | 401.710014      | 785.386202     | 393.196739       | 784.402186     | 392.704731       | 4  |
| 9  | 947.395246  | 474.201261      | 930.368697     | 465.687987       | 929.384681     | 465.195979       | E    | 715.380723  | 358.194000      | 698.354174     | 349.680725       | 697.370158     | 349.188717       | 3  |
| 10 | 1386.620572 | 693.813924      | 1369.594023    | 685.300650       | 1368.610007    | 684.808642       | Q    | 586.338130  | 293.672703      | 569.311581     | 285.159429       |                |                  | 2  |
| 11 |             |                 |                |                  |                |                  | K    | 147.112804  | 74.060040       | 130.086255     | 65.546765        |                |                  | 1  |

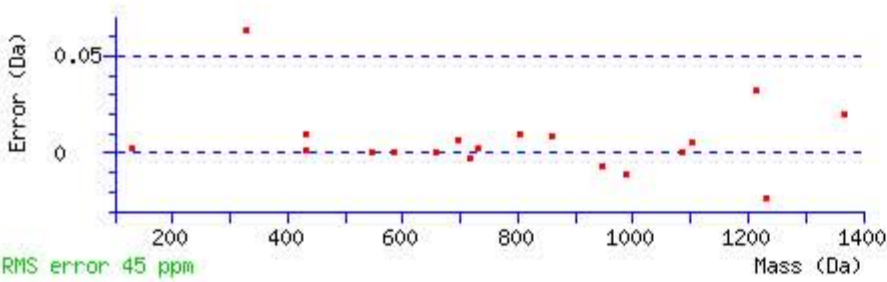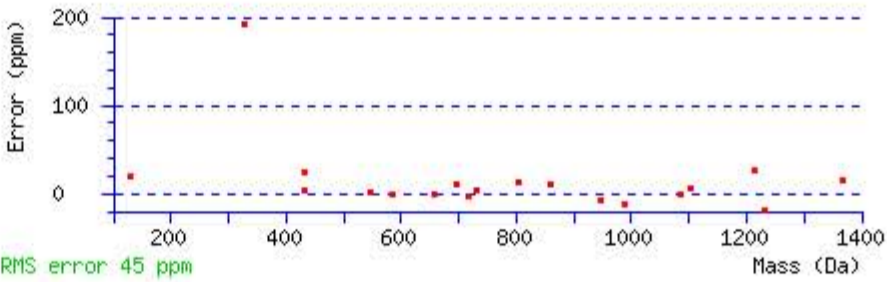

NCBI BLAST search of [KATEDEGSEQK](#)  
(Parameters: blastp, nr protein database, expect=20000, no filter, PAM30)  
Other BLAST [web gateways](#)

All matches to this query

| Score | Mr(calc):   | Delta     | Sequence                       |
|-------|-------------|-----------|--------------------------------|
| 51.0  | 1531.718796 | 0.000186  | <a href="#">KATEDEGSEQK</a>    |
| 9.9   | 1531.715454 | 0.003528  | <a href="#">EWNGVVSESDSPVK</a> |
| 9.9   | 1531.716309 | 0.002673  | <a href="#">QVDSMWAEQK</a>     |
| 1.4   | 1531.734055 | -0.015073 | <a href="#">VNPQEESYQK</a>     |
| 0.6   | 1531.711380 | 0.007602  | <a href="#">KDSEEEAASPEGKR</a> |

MATRIX

SCIENCE

Mascot Search Results

Peptide View

MS/MS Fragmentation of **TSDQIHFFFAK**  
Found in **ANT3\_HUMAN**, Antithrombin-III OS=Homo sapiens GN=SERPINC1 PE=1 SV=1

Match to Query 36903: 1650.834012 from(551.285280,3+) rtinseconds(2339) index(22251)  
Title: Locus:1.1.1.3197.6 File:"2013-07-02 CLN FXIII 180 min 2nd F 2.wiff"  
Data file C:\Program Files (x86)\Matrix Science\Mascot Daemon\mgf\8 FXIII 180 min 2nd\mascot\_daemon\_merge.mgf

Click mouse within plot area to zoom in by factor of two about that point  
Or, 

Plot from

100

 to 

1600

 Da 

Full range

  
Label all possible matches ☐ Label matches used for scoring ☒

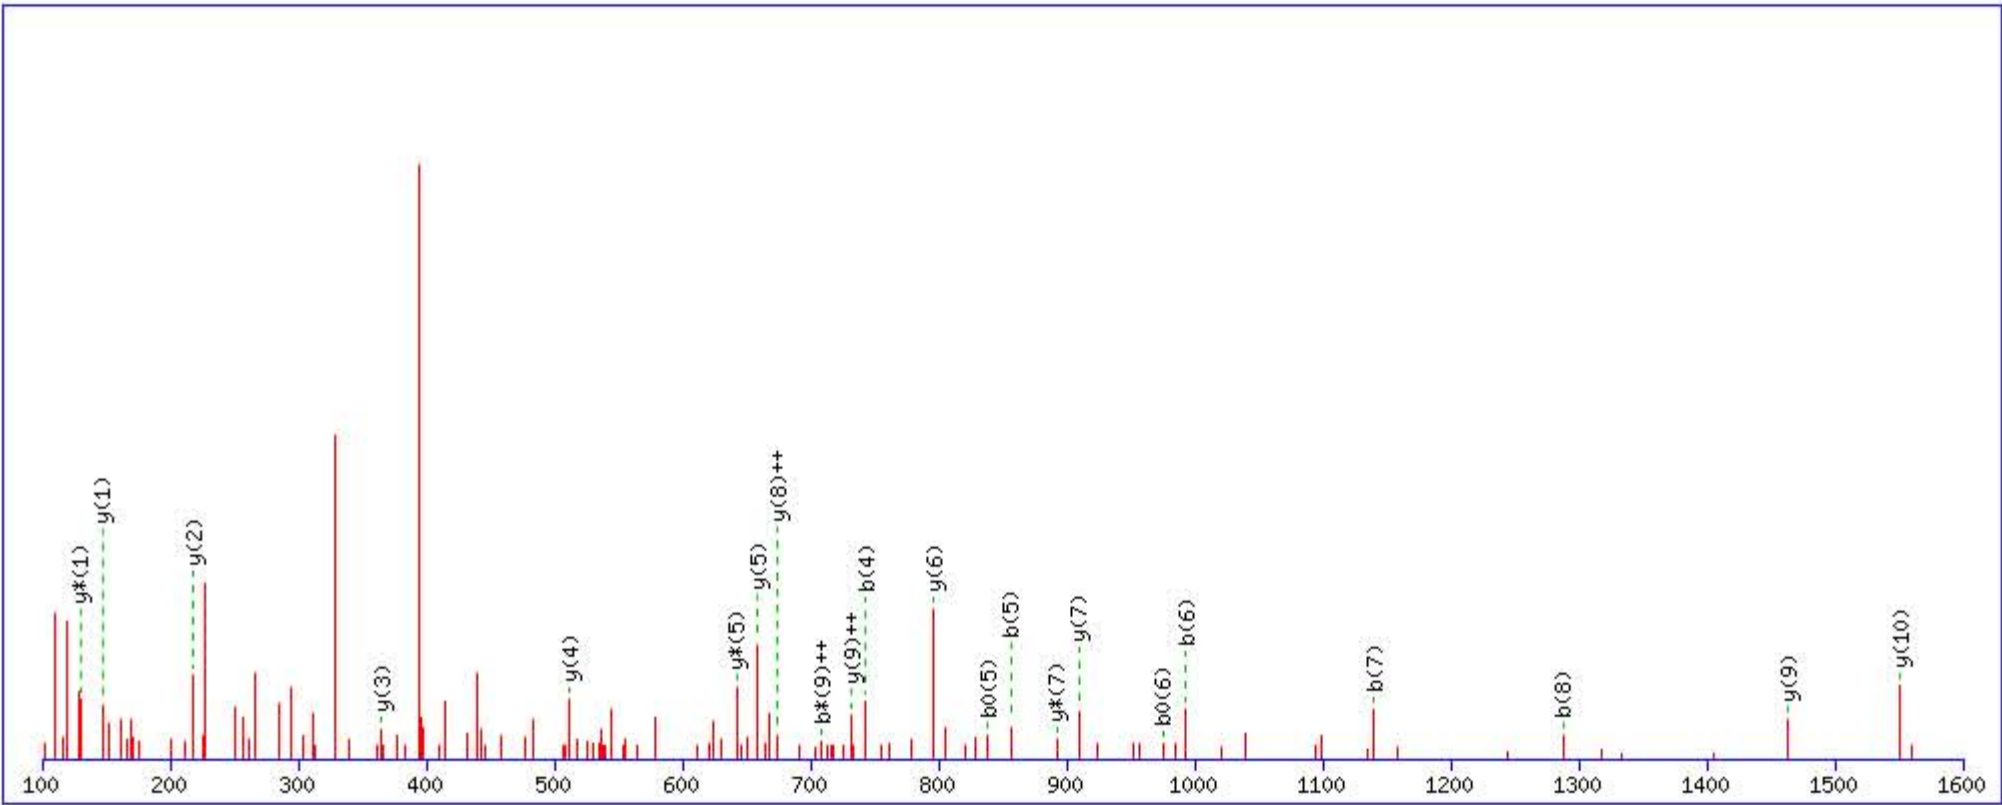

Monoisotopic mass of neutral peptide **Mr(calc):** 1650.822845  
**Fixed modifications:** Carbamidomethyl (C) (apply to specified residues or termini only)  
**Variable modifications:**  
Q4 : Biotin:Thermo-21345 (Q)  
**Ions Score:** 28 **Expect:** 0.038  
**Matches :** 22/98 fragment ions using 70 most intense peaks ([help](#))

| #  | b           | b <sup>++</sup> | b <sup>*</sup> | b <sup>*++</sup> | b <sup>0</sup> | b <sup>0++</sup> | Seq. | y           | y <sup>++</sup> | y <sup>*</sup> | y <sup>*++</sup> | y <sup>0</sup> | y <sup>0++</sup> | #  |
|----|-------------|-----------------|----------------|------------------|----------------|------------------|------|-------------|-----------------|----------------|------------------|----------------|------------------|----|
| 1  | 102.054955  | 51.531116       |                |                  | 84.044390      | 42.525833        | T    |             |                 |                |                  |                |                  | 11 |
| 2  | 189.086983  | 95.047129       |                |                  | 171.076418     | 86.041847        | S    | 1550.782433 | 775.894855      | 1533.755884    | 767.381580       | 1532.771868    | 766.889572       | 10 |
| 3  | 304.113926  | 152.560601      |                |                  | 286.103361     | 143.555319       | D    | 1463.750405 | 732.378841      | 1446.723856    | 723.865566       | 1445.739840    | 723.373558       | 9  |
| 4  | 743.339252  | 372.173264      | 726.312703     | 363.659989       | 725.328687     | 363.167982       | Q    | 1348.723462 | 674.865369      | 1331.696913    | 666.352095       |                |                  | 8  |
| 5  | 856.423316  | 428.715296      | 839.396767     | 420.202022       | 838.412751     | 419.710014       | I    | 909.498136  | 455.252706      | 892.471587     | 446.739432       |                |                  | 7  |
| 6  | 993.482228  | 497.244752      | 976.455679     | 488.731477       | 975.471663     | 488.239469       | H    | 796.414072  | 398.710674      | 779.387523     | 390.197400       |                |                  | 6  |
| 7  | 1140.550642 | 570.778959      | 1123.524093    | 562.265685       | 1122.540077    | 561.773676       | F    | 659.355160  | 330.181218      | 642.328611     | 321.667944       |                |                  | 5  |
| 8  | 1287.619056 | 644.313166      | 1270.592507    | 635.799892       | 1269.608491    | 635.307884       | F    | 512.286746  | 256.647011      | 495.260197     | 248.133737       |                |                  | 4  |
| 9  | 1434.687470 | 717.847373      | 1417.660921    | 709.334099       | 1416.676905    | 708.842091       | F    | 365.218332  | 183.112804      | 348.191783     | 174.599530       |                |                  | 3  |
| 10 | 1505.724584 | 753.365930      | 1488.698035    | 744.852656       | 1487.714019    | 744.360648       | A    | 218.149918  | 109.578597      | 201.123369     | 101.065322       |                |                  | 2  |
| 11 |             |                 |                |                  |                |                  | K    | 147.112804  | 74.060040       | 130.086255     | 65.546765        |                |                  | 1  |

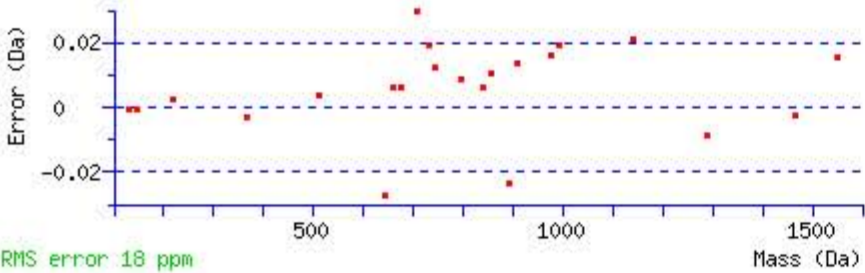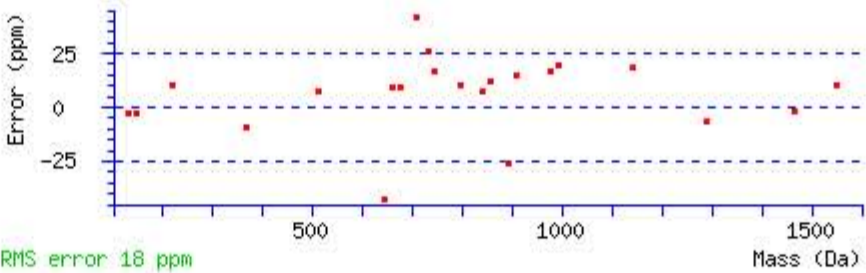

NCBI BLAST search of [TSDQIHFFFAK](#)  
(Parameters: blastp, nr protein database, expect=20000, no filter, PAM30)  
Other BLAST [web gateways](#)

All matches to this query

| Score | Mr(calc):   | Delta    | Sequence                    |
|-------|-------------|----------|-----------------------------|
| 27.9  | 1650.822845 | 0.011167 | <a href="#">TSDQIHFFFAK</a> |

MATRIX

SCIENCE

Mascot Search Results

Peptide View

MS/MS Fragmentation of **FATTFYQHLADSK**  
Found in **ANT3\_HUMAN**, Antithrombin-III OS=Homo sapiens GN=SERPINC1 PE=1 SV=1

Match to Query 41030: 1838.912652 from(613.978160,3+) rtinseconds(2056) index(20571)  
Title: Locus:1.1.1.3098.11 File:"2013-07-02 CLN FXIII 180 min 2nd F 2.wiff"  
Data file C:\Program Files (x86)\Matrix Science\Mascot Daemon\mgf\8 FXIII 180 min 2nd\mascot\_daemon\_merge.mgf

Click mouse within plot area to zoom in by factor of two about that point  
Or, 

Plot from

100

 to 

1700

 Da 

Full range

  
Label all possible matches ☐ Label matches used for scoring ☒

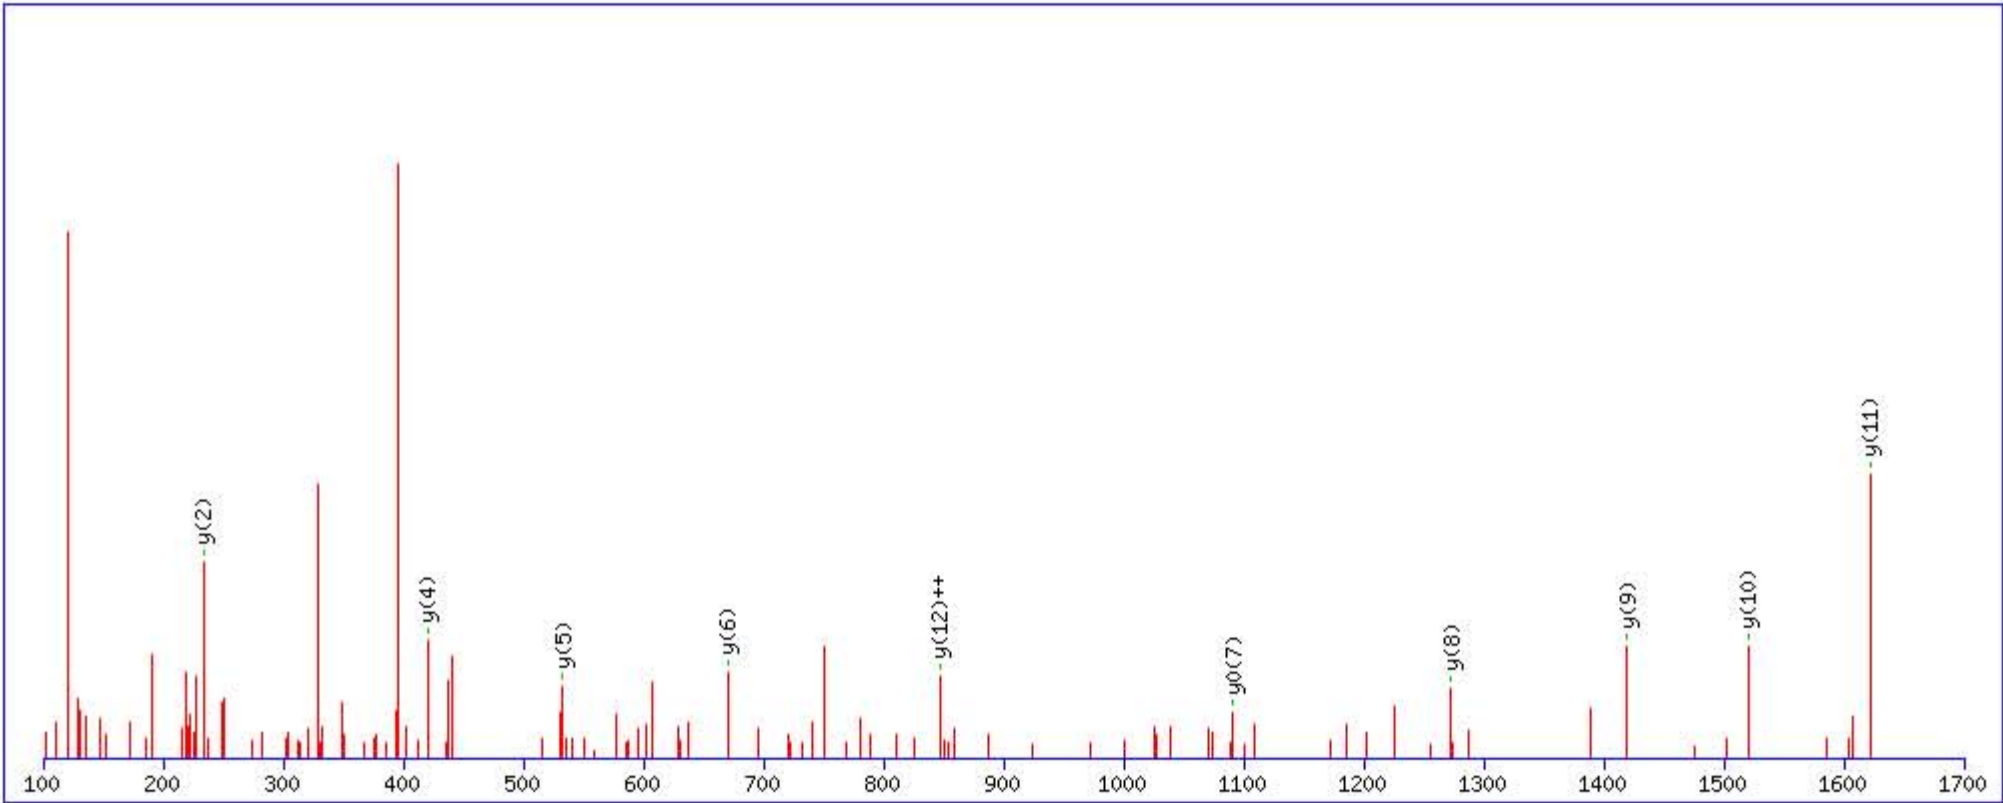

Monoisotopic mass of neutral peptide Mr(calc): 1838.902542  
Fixed modifications: Carbamidomethyl (C) (apply to specified residues or termini only)  
Variable modifications:  
Q7 : Biotin:Thermo-21345 (Q)  
Ions Score: 49 Expect: 0.0003  
Matches : 10/126 fragment ions using 16 most intense peaks [\(help\)](#)

| #  | b           | b <sup>++</sup> | b <sup>*</sup> | b <sup>*++</sup> | b <sup>0</sup> | b <sup>0++</sup> | Seq. | y           | y <sup>++</sup> | y <sup>*</sup> | y <sup>*++</sup> | y <sup>0</sup> | y <sup>0++</sup> | #  |
|----|-------------|-----------------|----------------|------------------|----------------|------------------|------|-------------|-----------------|----------------|------------------|----------------|------------------|----|
| 1  | 148.075690  | 74.541483       |                |                  |                |                  | F    |             |                 |                |                  |                |                  | 13 |
| 2  | 219.112804  | 110.060040      |                |                  |                |                  | A    | 1692.841406 | 846.924341      | 1675.814857    | 838.411067       | 1674.830841    | 837.919059       | 12 |
| 3  | 320.160483  | 160.583879      |                |                  | 302.149918     | 151.578597       | T    | 1621.804292 | 811.405784      | 1604.777743    | 802.892510       | 1603.793727    | 802.400502       | 11 |
| 4  | 421.208162  | 211.107719      |                |                  | 403.197597     | 202.102437       | T    | 1520.756613 | 760.881945      | 1503.730064    | 752.368670       | 1502.746048    | 751.876662       | 10 |
| 5  | 568.276576  | 284.641926      |                |                  | 550.266011     | 275.636644       | F    | 1419.708934 | 710.358105      | 1402.682385    | 701.844831       | 1401.698369    | 701.352823       | 9  |
| 6  | 731.339905  | 366.173591      |                |                  | 713.329340     | 357.168308       | Y    | 1272.640520 | 636.823898      | 1255.613971    | 628.310624       | 1254.629955    | 627.818616       | 8  |
| 7  | 1170.565231 | 585.786254      | 1153.538682    | 577.272979       | 1152.554666    | 576.780971       | Q    | 1109.577191 | 555.292234      | 1092.550642    | 546.778959       | 1091.566626    | 546.286951       | 7  |
| 8  | 1307.624143 | 654.315710      | 1290.597594    | 645.802435       | 1289.613578    | 645.310427       | H    | 670.351865  | 335.679571      | 653.325316     | 327.166296       | 652.341300     | 326.674288       | 6  |
| 9  | 1420.708207 | 710.857741      | 1403.681658    | 702.344467       | 1402.697642    | 701.852459       | L    | 533.292953  | 267.150115      | 516.266404     | 258.636840       | 515.282388     | 258.144832       | 5  |
| 10 | 1491.745321 | 746.376298      | 1474.718772    | 737.863024       | 1473.734756    | 737.371016       | A    | 420.208889  | 210.608083      | 403.182340     | 202.094808       | 402.198324     | 201.602800       | 4  |
| 11 | 1606.772264 | 803.889770      | 1589.745715    | 795.376496       | 1588.761699    | 794.884487       | D    | 349.171775  | 175.089526      | 332.145226     | 166.576251       | 331.161210     | 166.084243       | 3  |
| 12 | 1693.804292 | 847.405784      | 1676.777743    | 838.892510       | 1675.793727    | 838.400502       | S    | 234.144832  | 117.576054      | 217.118283     | 109.062780       | 216.134267     | 108.570772       | 2  |
| 13 |             |                 |                |                  |                |                  | K    | 147.112804  | 74.060040       | 130.086255     | 65.546765        |                |                  | 1  |

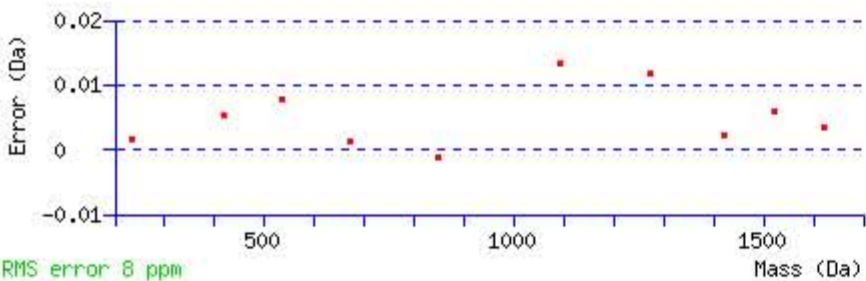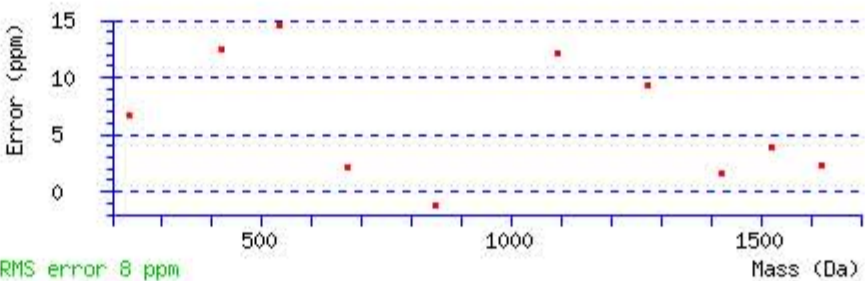

NCBI BLAST search of [FATTFYQHLADSK](#)  
(Parameters: blastp, nr protein database, expect=20000, no filter, PAM30)  
Other BLAST [web gateways](#)

All matches to this query

| Score | Mr(calc):   | Delta    | Sequence                      |
|-------|-------------|----------|-------------------------------|
| 48.9  | 1838.902542 | 0.010110 | <a href="#">FATTFYQHLADSK</a> |

MATRIX

SCIENCE

Mascot Search Results

Peptide View

MS/MS Fragmentation of **LQPLDFKENAEQSR**  
Found in **ANT3\_HUMAN**, Antithrombin-III OS=Homo sapiens GN=SERPINC1 PE=1 SV=1

Match to Query 43836: 1985.014122 from(662.678650,3+) rtinseconds(1898) index(19583)  
Title: Locus:1.1.1.3043.13 File:"2013-07-02 CLN FXIII 180 min 2nd F 2.wiff"  
Data file C:\Program Files (x86)\Matrix Science\Mascot Daemon\mgf\8 FXIII 180 min 2nd\mascot\_daemon\_merge.mgf

Click mouse within plot area to zoom in by factor of two about that point  
Or, 

Plot from

100

 to 

2000

 Da 

Full range

  
Label all possible matches ☐ Label matches used for scoring ☒

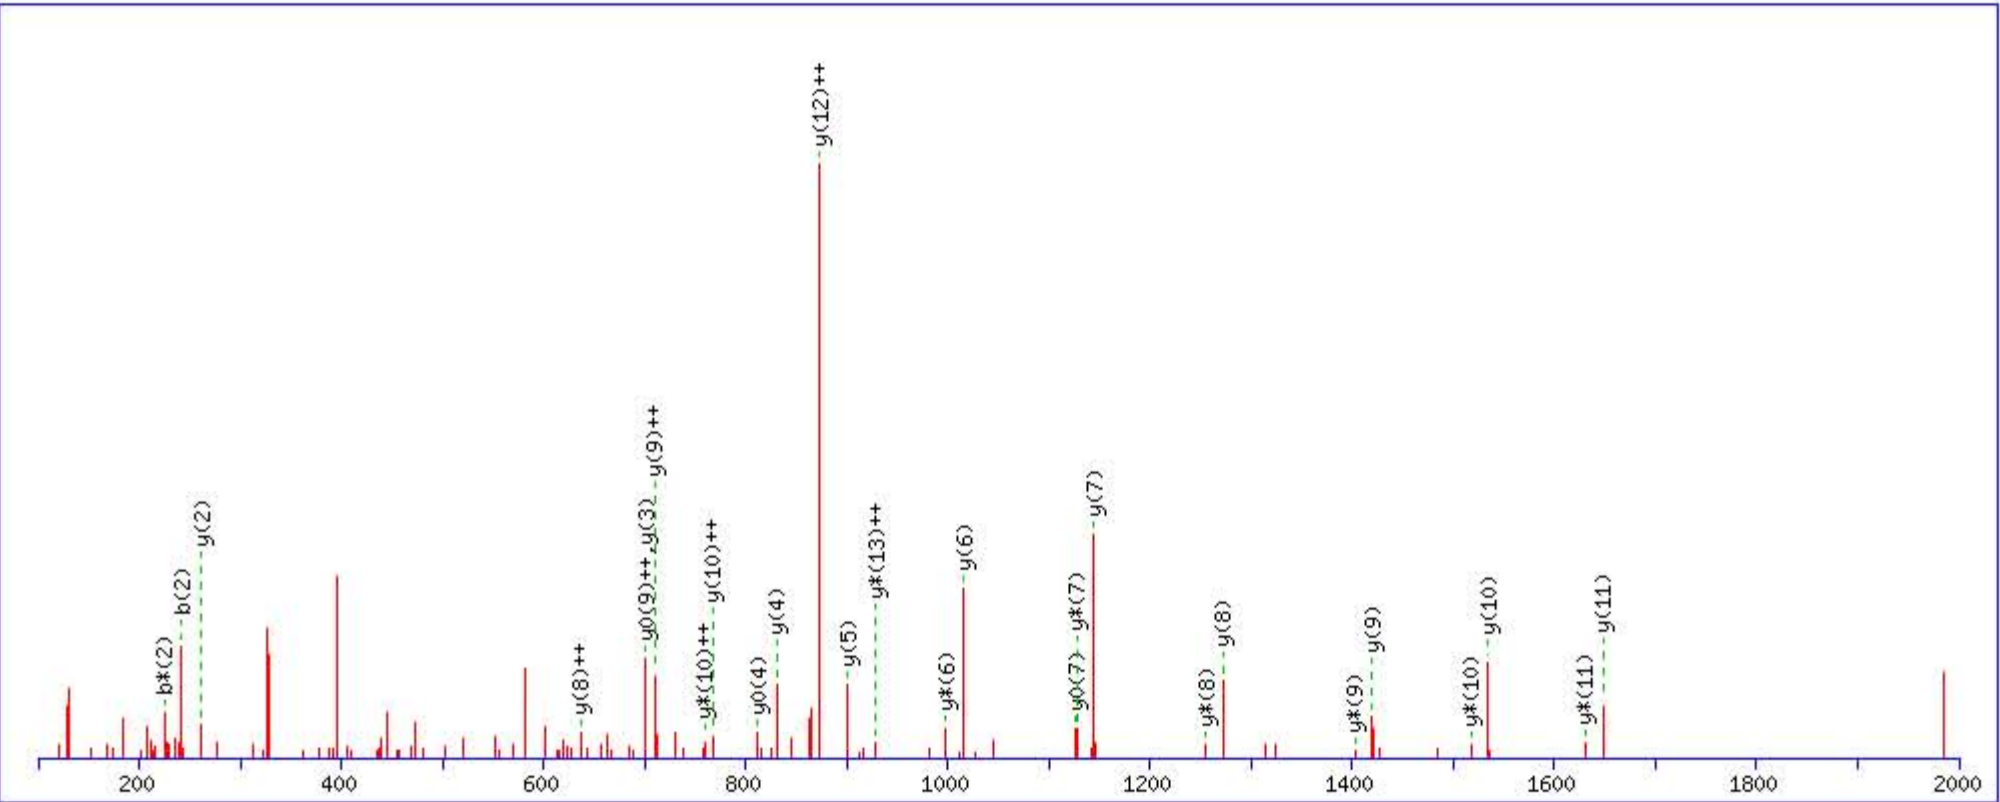

Monoisotopic mass of neutral peptide Mr(calc): 1985.004013  
Fixed modifications: Carbamidomethyl (C) (apply to specified residues or termini only)  
Variable modifications:  
Q12 : Biotin:Thermo-21345 (Q)  
Ions Score: 44 Expect: 0.00012  
Matches : 27/144 fragment ions using 58 most intense peaks [\(help\)](#)

| #  | b           | b <sup>++</sup> | b <sup>*</sup> | b <sup>+++</sup> | b <sup>0</sup> | b <sup>0++</sup> | Seq. | y           | y <sup>++</sup> | y <sup>*</sup> | y <sup>+++</sup> | y <sup>0</sup> | y <sup>0++</sup> | #  |
|----|-------------|-----------------|----------------|------------------|----------------|------------------|------|-------------|-----------------|----------------|------------------|----------------|------------------|----|
| 1  | 114.091340  | 57.549308       |                |                  |                |                  | L    |             |                 |                |                  |                |                  | 14 |
| 2  | 242.149918  | 121.578597      | 225.123369     | 113.065323       |                |                  | Q    | 1872.927259 | 936.967268      | 1855.900710    | 928.453993       | 1854.916694    | 927.961985       | 13 |
| 3  | 339.202682  | 170.104979      | 322.176133     | 161.591705       |                |                  | P    | 1744.868681 | 872.937979      | 1727.842132    | 864.424704       | 1726.858116    | 863.932696       | 12 |
| 4  | 452.286746  | 226.647011      | 435.260197     | 218.133737       |                |                  | L    | 1647.815917 | 824.411597      | 1630.789368    | 815.898322       | 1629.805352    | 815.406314       | 11 |
| 5  | 567.313689  | 284.160483      | 550.287140     | 275.647208       | 549.303124     | 275.155200       | D    | 1534.731853 | 767.869565      | 1517.705304    | 759.356290       | 1516.721288    | 758.864282       | 10 |
| 6  | 714.382103  | 357.694690      | 697.355554     | 349.181415       | 696.371538     | 348.689407       | F    | 1419.704910 | 710.356093      | 1402.678361    | 701.842819       | 1401.694345    | 701.350811       | 9  |
| 7  | 842.477066  | 421.742171      | 825.450517     | 413.228897       | 824.466501     | 412.736889       | K    | 1272.636496 | 636.821886      | 1255.609947    | 628.308612       | 1254.625931    | 627.816604       | 8  |
| 8  | 971.519659  | 486.263468      | 954.493110     | 477.750193       | 953.509094     | 477.258185       | E    | 1144.541533 | 572.774405      | 1127.514984    | 564.261130       | 1126.530968    | 563.769122       | 7  |
| 9  | 1085.562586 | 543.284931      | 1068.536037    | 534.771657       | 1067.552021    | 534.279649       | N    | 1015.498940 | 508.253108      | 998.472391     | 499.739834       | 997.488375     | 499.247826       | 6  |
| 10 | 1156.599700 | 578.803488      | 1139.573151    | 570.290214       | 1138.589135    | 569.798205       | A    | 901.456013  | 451.231645      | 884.429464     | 442.718370       | 883.445448     | 442.226362       | 5  |
| 11 | 1285.642293 | 643.324785      | 1268.615744    | 634.811510       | 1267.631728    | 634.319502       | E    | 830.418899  | 415.713088      | 813.392350     | 407.199813       | 812.408334     | 406.707805       | 4  |
| 12 | 1724.867619 | 862.937448      | 1707.841070    | 854.424173       | 1706.857054    | 853.932165       | Q    | 701.376306  | 351.191791      | 684.349757     | 342.678517       | 683.365741     | 342.186509       | 3  |
| 13 | 1811.899647 | 906.453462      | 1794.873098    | 897.940187       | 1793.889082    | 897.448179       | S    | 262.150980  | 131.579128      | 245.124431     | 123.065854       | 244.140415     | 122.573846       | 2  |
| 14 |             |                 |                |                  |                |                  | R    | 175.118952  | 88.063114       | 158.092403     | 79.549839        |                |                  | 1  |

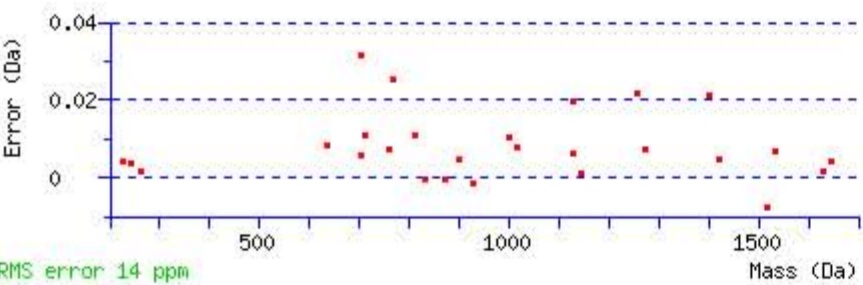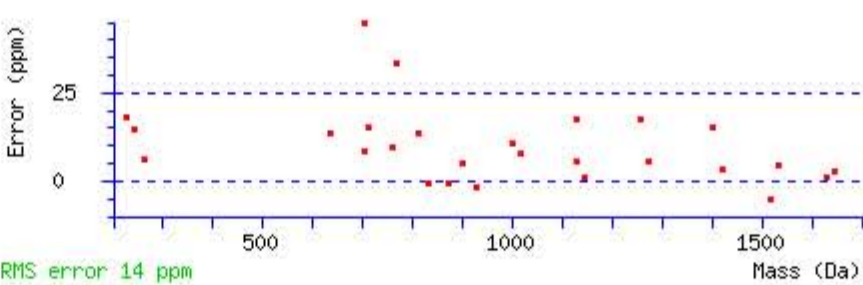

NCBI BLAST search of **LQPLDFKENAEQSR**  
(Parameters: blastp, nr protein database, expect=20000, no filter, PAM30)  
Other BLAST [web gateways](#)

All matches to this query

| Score | Mr(calc):   | Delta     | Sequence                       |
|-------|-------------|-----------|--------------------------------|
| 43.6  | 1985.004013 | 0.010109  | <a href="#">LQPLDFKENAEQSR</a> |
| 1.9   | 1985.043762 | -0.029640 | <a href="#">QLIEKMNLSAIQDR</a> |

MATRIX

SCIENCE

Mascot Search Results

Peptide View

MS/MS Fragmentation of **VAEGTQVLELPFKGDDITMVLILPKPEK**  
Found in **ANT3\_HUMAN**, Antithrombin-III OS=Homo sapiens GN=SERPINC1 PE=1 SV=1

Match to Query 64892: 3390.904536 from(848.733410,4+) rtinseconds(2889) index(25543)  
Title: Locus:1.1.1.3386.19 File:"2013-07-02 CLN FXIII 180 min 2nd F 2.wiff"  
Data file C:\Program Files (x86)\Matrix Science\Mascot Daemon\mgf\8 FXIII 180 min 2nd\mascot\_daemon\_merge.mgf

Click mouse within plot area to zoom in by factor of two about that point  
Or, 

Plot from

100

 to 

2000

 Da 

Full range

  
Label all possible matches ☐ Label matches used for scoring ☒

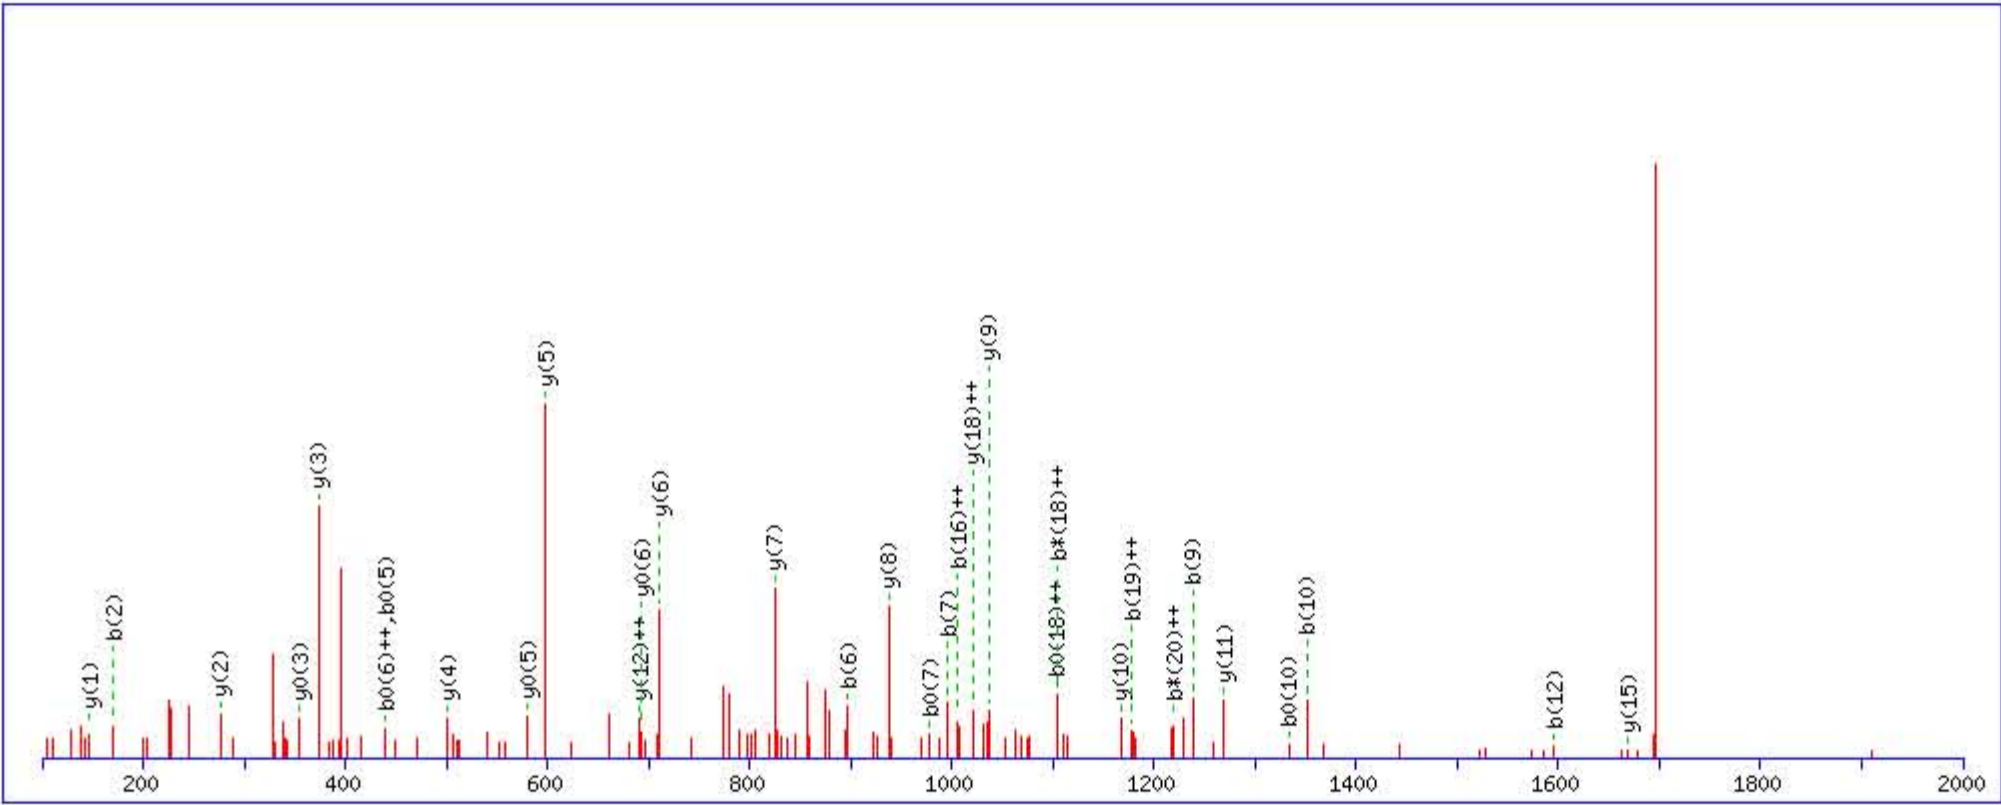

Monoisotopic mass of neutral peptide Mr(calc): 3390.854645  
Fixed modifications: Carbamidomethyl (C) (apply to specified residues or termini only)  
Variable modifications:  
Q6 : Biotin:Thermo-21345 (Q)  
Ions Score: 60 Expect: 3.6e-006  
Matches : 32/308 fragment ions using 62 most intense peaks [\(help\)](#)

| #  | b           | b <sup>++</sup> | b <sup>*</sup> | b <sup>+++</sup> | b <sup>0</sup> | b <sup>0++</sup> | Seq. | y           | y <sup>++</sup> | y <sup>*</sup> | y <sup>+++</sup> | y <sup>0</sup> | y <sup>0++</sup> | #  |
|----|-------------|-----------------|----------------|------------------|----------------|------------------|------|-------------|-----------------|----------------|------------------|----------------|------------------|----|
| 1  | 100.075690  | 50.541483       |                |                  |                |                  | V    |             |                 |                |                  |                |                  | 28 |
| 2  | 171.112804  | 86.060040       |                |                  |                |                  | A    | 3292.793524 | 1646.900400     | 3275.766975    | 1638.387125      | 3274.782959    | 1637.895117      | 27 |
| 3  | 300.155397  | 150.581336      |                |                  | 282.144832     | 141.576054       | E    | 3221.756410 | 1611.381843     | 3204.729861    | 1602.868568      | 3203.745845    | 1602.376560      | 26 |
| 4  | 357.176861  | 179.092068      |                |                  | 339.166296     | 170.086786       | G    | 3092.713817 | 1546.860546     | 3075.687268    | 1538.347272      | 3074.703252    | 1537.855264      | 25 |
| 5  | 458.224540  | 229.615908      |                |                  | 440.213975     | 220.610626       | T    | 3035.692353 | 1518.349814     | 3018.665804    | 1509.836540      | 3017.681788    | 1509.344532      | 24 |
| 6  | 897.449866  | 449.228571      | 880.423317     | 440.715297       | 879.439301     | 440.223289       | Q    | 2934.644674 | 1467.825975     | 2917.618125    | 1459.312700      | 2916.634109    | 1458.820692      | 23 |
| 7  | 996.518280  | 498.762778      | 979.491731     | 490.249504       | 978.507715     | 489.757496       | V    | 2495.419348 | 1248.213312     | 2478.392799    | 1239.700037      | 2477.408783    | 1239.208029      | 22 |
| 8  | 1109.602344 | 555.304810      | 1092.575795    | 546.791536       | 1091.591779    | 546.299527       | L    | 2396.350934 | 1198.679105     | 2379.324385    | 1190.165830      | 2378.340369    | 1189.673822      | 21 |
| 9  | 1238.644937 | 619.826106      | 1221.618388    | 611.312832       | 1220.634372    | 610.820824       | E    | 2283.266870 | 1142.137073     | 2266.240321    | 1133.623798      | 2265.256305    | 1133.131790      | 20 |
| 10 | 1351.729001 | 676.368138      | 1334.702452    | 667.854864       | 1333.718436    | 667.362856       | L    | 2154.224277 | 1077.615776     | 2137.197728    | 1069.102502      | 2136.213712    | 1068.610494      | 19 |
| 11 | 1448.781765 | 724.894520      | 1431.755216    | 716.381246       | 1430.771200    | 715.889238       | P    | 2041.140213 | 1021.073745     | 2024.113664    | 1012.560470      | 2023.129648    | 1012.068462      | 18 |
| 12 | 1595.850179 | 798.428727      | 1578.823630    | 789.915453       | 1577.839614    | 789.423445       | F    | 1944.087449 | 972.547363      | 1927.060900    | 964.034088       | 1926.076884    | 963.542080       | 17 |
| 13 | 1723.945142 | 862.476209      | 1706.918593    | 853.962934       | 1705.934577    | 853.470926       | K    | 1797.019035 | 899.013156      | 1779.992486    | 890.499881       | 1779.008470    | 890.007873       | 16 |
| 14 | 1780.966606 | 890.986941      | 1763.940057    | 882.473666       | 1762.956041    | 881.981658       | G    | 1668.924072 | 834.965674      | 1651.897523    | 826.452400       | 1650.913507    | 825.960392       | 15 |
| 15 | 1895.993549 | 948.500412      | 1878.967000    | 939.987138       | 1877.982984    | 939.495130       | D    | 1611.902608 | 806.454942      | 1594.876059    | 797.941668       | 1593.892043    | 797.449660       | 14 |
| 16 | 2011.020492 | 1006.013884     | 1993.993943    | 997.500610       | 1993.009927    | 997.008601       | D    | 1496.875665 | 748.941471      | 1479.849116    | 740.428196       | 1478.865100    | 739.936188       | 13 |
| 17 | 2124.104556 | 1062.555916     | 2107.078007    | 1054.042641      | 2106.093991    | 1053.550633      | I    | 1381.848722 | 691.427999      | 1364.822173    | 682.914725       | 1363.838157    | 682.422717       | 12 |
| 18 | 2225.152235 | 1113.079755     | 2208.125686    | 1104.566481      | 2207.141670    | 1104.074473      | T    | 1268.764658 | 634.885967      | 1251.738109    | 626.372693       | 1250.754093    | 625.880685       | 11 |
| 19 | 2356.192720 | 1178.599998     | 2339.166171    | 1170.086723      | 2338.182155    | 1169.594715      | M    | 1167.716979 | 584.362128      | 1150.690430    | 575.848853       | 1149.706414    | 575.356845       | 10 |
| 20 | 2455.261134 | 1228.134205     | 2438.234585    | 1219.620930      | 2437.250569    | 1219.128922      | V    | 1036.676494 | 518.841885      | 1019.649945    | 510.328611       | 1018.665929    | 509.836603       | 9  |
| 21 | 2568.345198 | 1284.676237     | 2551.318649    | 1276.162962      | 2550.334633    | 1275.670954      | L    | 937.608080  | 469.307678      | 920.581531     | 460.794404       | 919.597515     | 460.302396       | 8  |
| 22 | 2681.429262 | 1341.218269     | 2664.402713    | 1332.704994      | 2663.418697    | 1332.212986      | I    | 824.524016  | 412.765646      | 807.497467     | 404.252372       | 806.513451     | 403.760364       | 7  |
| 23 | 2794.513326 | 1397.760301     | 2777.486777    | 1389.247026      | 2776.502761    | 1388.755018      | L    | 711.439952  | 356.223614      | 694.413403     | 347.710340       | 693.429387     | 347.218332       | 6  |
| 24 | 2891.566090 | 1446.286683     | 2874.539541    | 1437.773408      | 2873.555525    | 1437.281400      | P    | 598.355888  | 299.681582      | 581.329339     | 291.168308       | 580.345323     | 290.676300       | 5  |
| 25 | 3019.661053 | 1510.334164     | 3002.634504    | 1501.820890      | 3001.650488    | 1501.328882      | K    | 501.303124  | 251.155200      | 484.276575     | 242.641926       | 483.292559     | 242.149918       | 4  |
| 26 | 3116.713817 | 1558.860546     | 3099.687268    | 1550.347272      | 3098.703252    | 1549.855264      | P    | 373.208161  | 187.107719      | 356.181612     | 178.594444       | 355.197596     | 178.102436       | 3  |
| 27 | 3245.756410 | 1623.381843     | 3228.729861    | 1614.868568      | 3227.745845    | 1614.376560      | E    | 276.155397  | 138.581337      | 259.128848     | 130.068062       | 258.144832     | 129.576054       | 2  |
| 28 |             |                 |                |                  |                |                  | K    | 147.112804  | 74.060040       | 130.086255     | 65.546765        |                |                  | 1  |

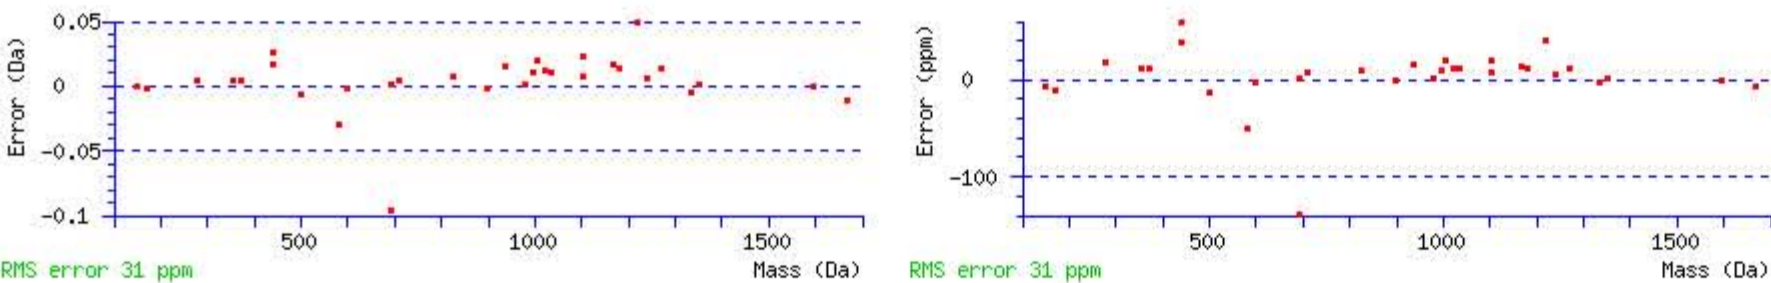

NCBI BLAST search of **VAEGTQVLELPFKGDDITMVLILPKPEK**  
(Parameters: blastp, nr protein database, expect=20000, no filter, PAM30)  
Other BLAST [web gateways](#)

All matches to this query

| Score | Mr(calc):   | Delta     | Sequence                                         |
|-------|-------------|-----------|--------------------------------------------------|
| 60.3  | 3390.854645 | 0.049891  | <a href="#">VAEGTQVLELPFKGDDITMVLILPKPEK</a>     |
| 5.6   | 3390.924728 | -0.020192 | <a href="#">TRASGVLLVNLSLGHLLLAALDMPFTLLGVMR</a> |

MATRIX

SCIENCE

Mascot Search Results

Peptide View

MS/MS Fragmentation of **LFLEPTQADIALLK**  
Found in **APOA\_HUMAN**, Apolipoprotein(a) OS=Homo sapiens GN=LPA PE=1 SV=1

Match to Query 41880: 1882.086942 from(628.369590,3+) rtinseconds(2778) index(38989)  
Title: Locus:1.1.1.1075.8 File:"2013-07-02 CLN FXIII 180 min 2nd F 3.wiff"  
Data file C:\Program Files (x86)\Matrix Science\Mascot Daemon\mgf\8 FXIII 180 min 2nd\mascot\_daemon\_merge.mgf

Click mouse within plot area to zoom in by factor of two about that point  
Or, 

Plot from

100

 to 

1700

 Da 

Full range

  
Label all possible matches ☐ Label matches used for scoring ☒

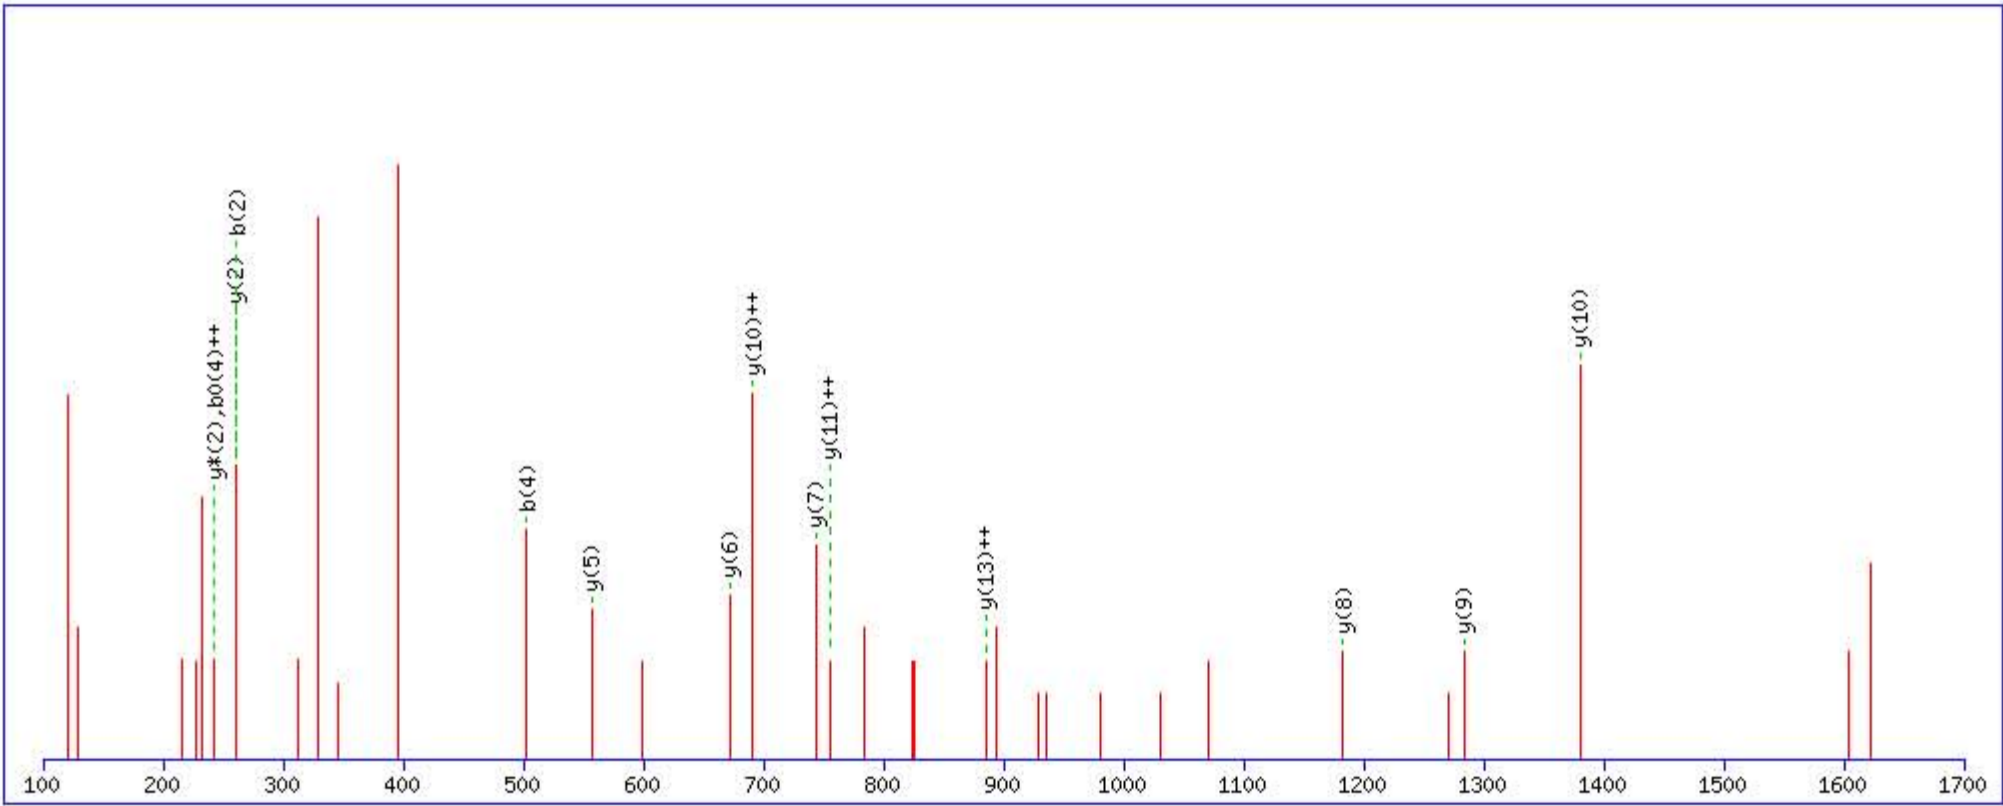

Monoisotopic mass of neutral peptide Mr(calc): 1882.063766  
Fixed modifications: Carbamidomethyl (C) (apply to specified residues or termini only)  
Variable modifications:  
Q7 : Biotin:Thermo-21345 (Q)  
Ions Score: 27 Expect: 0.014  
Matches : 14/128 fragment ions using 33 most intense peaks [\(help\)](#)

| #  | b           | b <sup>++</sup> | b <sup>*</sup> | b <sup>*++</sup> | b <sup>0</sup> | b <sup>0++</sup> | Seq. | y           | y <sup>++</sup> | y <sup>*</sup> | y <sup>*++</sup> | y <sup>0</sup> | y <sup>0++</sup> | #  |
|----|-------------|-----------------|----------------|------------------|----------------|------------------|------|-------------|-----------------|----------------|------------------|----------------|------------------|----|
| 1  | 114.091340  | 57.549308       |                |                  |                |                  | L    |             |                 |                |                  |                |                  | 14 |
| 2  | 261.159754  | 131.083515      |                |                  |                |                  | F    | 1769.987007 | 885.497142      | 1752.960458    | 876.983867       | 1751.976442    | 876.491859       | 13 |
| 3  | 374.243818  | 187.625547      |                |                  |                |                  | L    | 1622.918593 | 811.962934      | 1605.892044    | 803.449660       | 1604.908028    | 802.957652       | 12 |
| 4  | 503.286411  | 252.146843      |                |                  | 485.275846     | 243.141561       | E    | 1509.834529 | 755.420903      | 1492.807980    | 746.907628       | 1491.823964    | 746.415620       | 11 |
| 5  | 600.339175  | 300.673226      |                |                  | 582.328610     | 291.667943       | P    | 1380.791936 | 690.899606      | 1363.765387    | 682.386331       | 1362.781371    | 681.894323       | 10 |
| 6  | 701.386854  | 351.197065      |                |                  | 683.376289     | 342.191783       | T    | 1283.739172 | 642.373224      | 1266.712623    | 633.859949       | 1265.728607    | 633.367941       | 9  |
| 7  | 1140.612180 | 570.809728      | 1123.585631    | 562.296454       | 1122.601615    | 561.804446       | Q    | 1182.691493 | 591.849384      | 1165.664944    | 583.336110       | 1164.680928    | 582.844102       | 8  |
| 8  | 1211.649294 | 606.328285      | 1194.622745    | 597.815011       | 1193.638729    | 597.323003       | A    | 743.466167  | 372.236721      | 726.439618     | 363.723447       | 725.455602     | 363.231439       | 7  |
| 9  | 1326.676237 | 663.841757      | 1309.649688    | 655.328482       | 1308.665672    | 654.836474       | D    | 672.429053  | 336.718164      | 655.402504     | 328.204890       | 654.418488     | 327.712882       | 6  |
| 10 | 1439.760301 | 720.383789      | 1422.733752    | 711.870514       | 1421.749736    | 711.378506       | I    | 557.402110  | 279.204693      | 540.375561     | 270.691418       |                |                  | 5  |
| 11 | 1510.797415 | 755.902346      | 1493.770866    | 747.389071       | 1492.786850    | 746.897063       | A    | 444.318046  | 222.662661      | 427.291497     | 214.149386       |                |                  | 4  |
| 12 | 1623.881479 | 812.444377      | 1606.854930    | 803.931103       | 1605.870914    | 803.439095       | L    | 373.280932  | 187.144104      | 356.254383     | 178.630829       |                |                  | 3  |
| 13 | 1736.965543 | 868.986409      | 1719.938994    | 860.473135       | 1718.954978    | 859.981127       | L    | 260.196868  | 130.602072      | 243.170319     | 122.088797       |                |                  | 2  |
| 14 |             |                 |                |                  |                |                  | K    | 147.112804  | 74.060040       | 130.086255     | 65.546765        |                |                  | 1  |

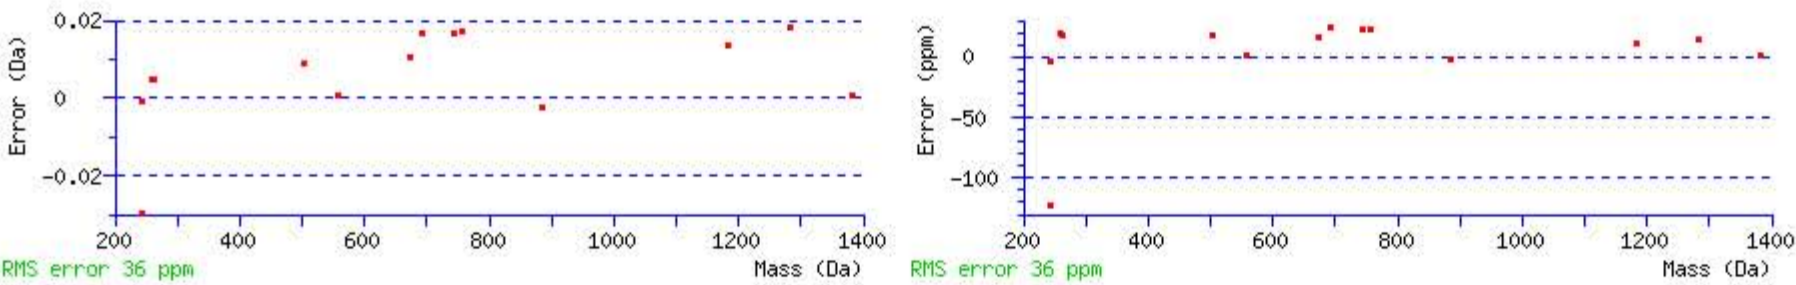

NCBI BLAST search of [LFLEPTQADIALLK](#)  
(Parameters: blastp, nr protein database, expect=20000, no filter, PAM30)  
Other BLAST [web gateways](#)

All matches to this query

| Score | Mr(calc):   | Delta    | Sequence                       |
|-------|-------------|----------|--------------------------------|
| 27.0  | 1882.063766 | 0.023176 | <a href="#">LFLEPTQADIALLK</a> |

MATRIX

SCIENCE

Mascot Search Results

Peptide View

MS/MS Fragmentation of **AELQEGAR**  
Found in **APOA1\_HUMAN**, Apolipoprotein A-I OS=Homo sapiens GN=APOA1 PE=1 SV=1

Match to Query 20117: 1183.601408 from(592.807980,2+) rtinseconds(1455) index(63221)  
Title: Locus:1.1.1.1781.23 File:"2013-07-02 CLN FXIII 180 min 2nd FT.wiff"  
Data file C:\Program Files (x86)\Matrix Science\Mascot Daemon\mgf\8 FXIII 180 min 2nd\mascot\_daemon\_merge.mgf

Click mouse within plot area to zoom in by factor of two about that point  
Or, 

Plot from

100

 to 

1600

 Da 

Full range

  
Label all possible matches ☐ Label matches used for scoring ☒

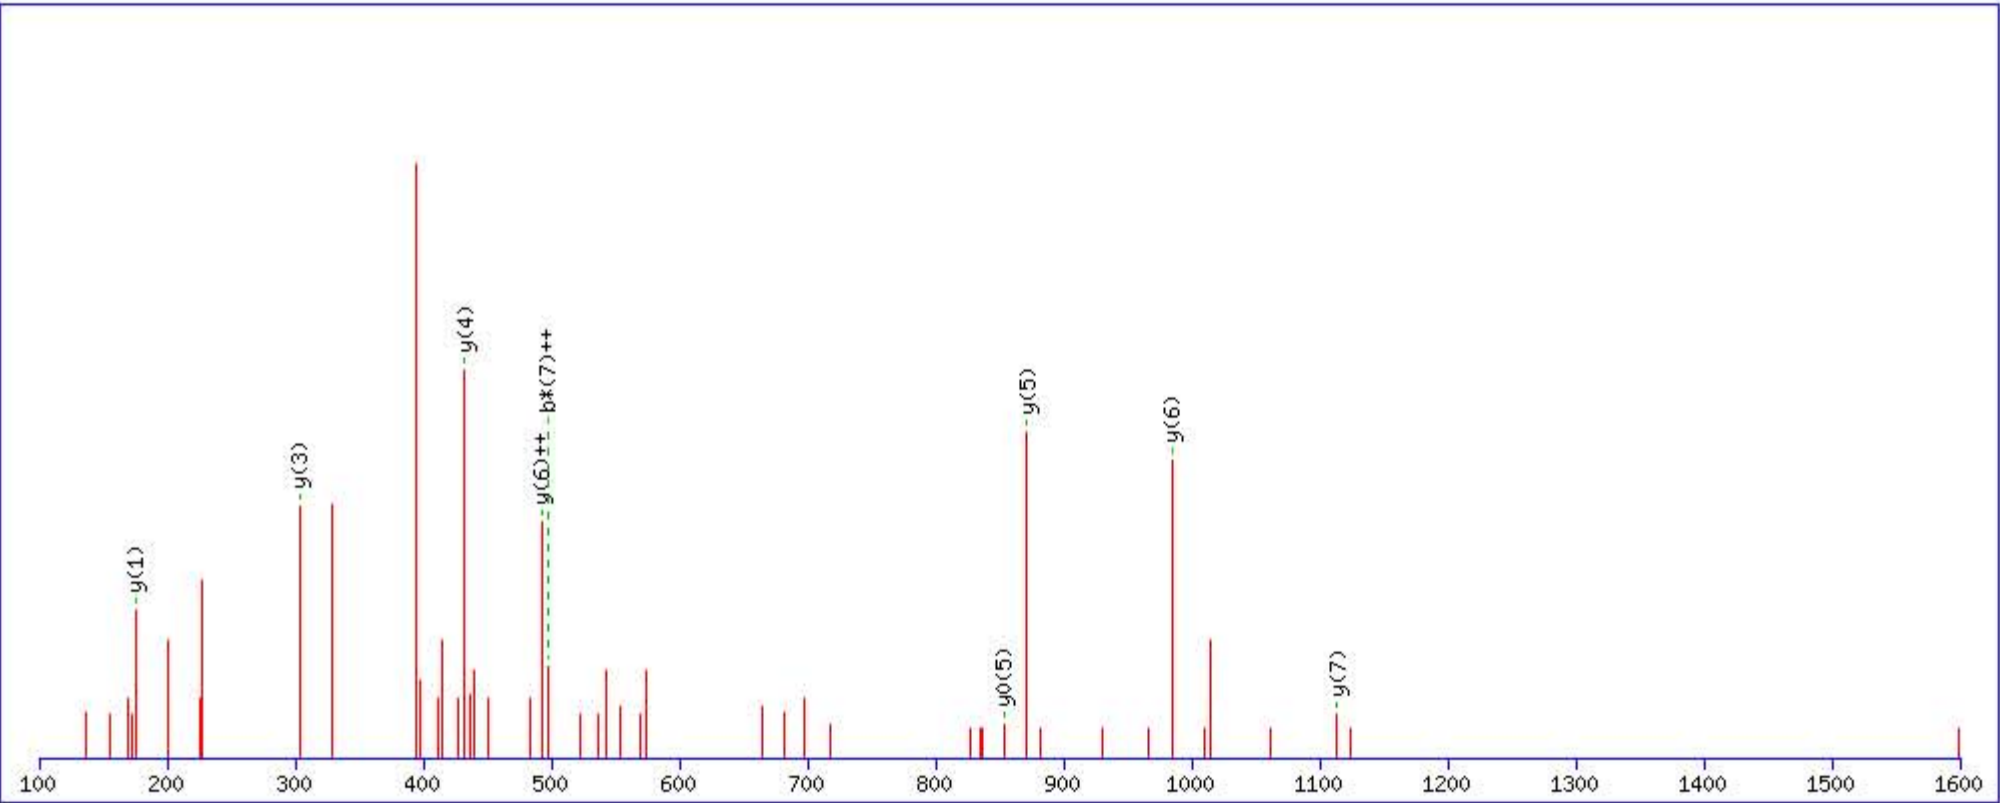

Monoisotopic mass of neutral peptide **Mr(calc): 1183.601913**  
Fixed modifications: Carbamidomethyl (C) (apply to specified residues or termini only)  
Variable modifications:  
Q4 : Biotin:Thermo-21345 (Q)  
Ions Score: 28 Expect: 0.02  
Matches : 9/70 fragment ions using 20 most intense peaks [\(help\)](#)

| # | b           | b <sup>++</sup> | b <sup>*</sup> | b <sup>*++</sup> | b <sup>0</sup> | b <sup>0++</sup> | Seq. | y           | y <sup>++</sup> | y <sup>*</sup> | y <sup>*++</sup> | y <sup>0</sup> | y <sup>0++</sup> | # |
|---|-------------|-----------------|----------------|------------------|----------------|------------------|------|-------------|-----------------|----------------|------------------|----------------|------------------|---|
| 1 | 72.044390   | 36.525833       |                |                  |                |                  | A    |             |                 |                |                  |                |                  | 8 |
| 2 | 201.086983  | 101.047130      |                |                  | 183.076418     | 92.041847        | E    | 1113.572106 | 557.289691      | 1096.545557    | 548.776417       | 1095.561541    | 548.284409       | 7 |
| 3 | 314.171047  | 157.589161      |                |                  | 296.160482     | 148.583879       | L    | 984.529513  | 492.768395      | 967.502964     | 484.255120       | 966.518948     | 483.763112       | 6 |
| 4 | 753.396373  | 377.201825      | 736.369824     | 368.688550       | 735.385808     | 368.196542       | Q    | 871.445449  | 436.226363      | 854.418900     | 427.713088       | 853.434884     | 427.221080       | 5 |
| 5 | 882.438966  | 441.723121      | 865.412417     | 433.209847       | 864.428401     | 432.717839       | E    | 432.220123  | 216.613699      | 415.193574     | 208.100425       | 414.209558     | 207.608417       | 4 |
| 6 | 939.460430  | 470.233853      | 922.433881     | 461.720579       | 921.449865     | 461.228571       | G    | 303.177530  | 152.092403      | 286.150981     | 143.579128       |                |                  | 3 |
| 7 | 1010.497544 | 505.752410      | 993.470995     | 497.239136       | 992.486979     | 496.747128       | A    | 246.156066  | 123.581671      | 229.129517     | 115.068396       |                |                  | 2 |
| 8 |             |                 |                |                  |                |                  | R    | 175.118952  | 88.063114       | 158.092403     | 79.549839        |                |                  | 1 |

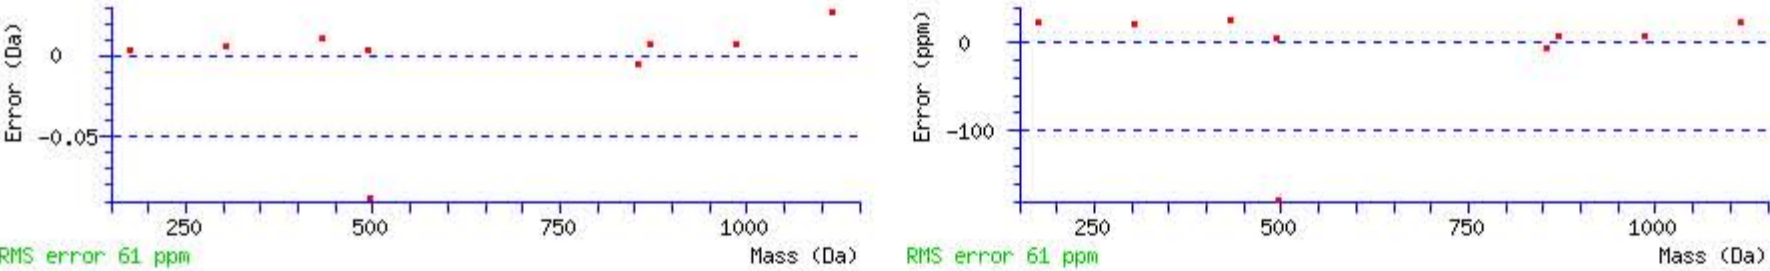

NCBI BLAST search of [AELQEGAR](#)  
(Parameters: blastp, nr protein database, expect=20000, no filter, PAM30)  
Other BLAST [web gateways](#)

All matches to this query

| Score | Mr(calc):   | Delta     | Sequence                    |
|-------|-------------|-----------|-----------------------------|
| 28.0  | 1183.601913 | -0.000505 | <a href="#">AELQEGAR</a>    |
| 9.4   | 1183.601913 | -0.000505 | <a href="#">EALEQQR</a>     |
| 4.2   | 1183.601913 | -0.000505 | <a href="#">EALEQQR</a>     |
| 3.9   | 1183.587357 | 0.014051  | <a href="#">SSVDFQAFGVK</a> |
| 2.9   | 1183.601913 | -0.000505 | <a href="#">ELQAEAGR</a>    |
| 1.8   | 1183.601913 | -0.000505 | <a href="#">LQEAQER</a>     |

MATRIX

SCIENCE

Mascot Search Results

Peptide View

MS/MS Fragmentation of **QGLLPVLESFK**  
Found in **APOA1\_HUMAN**, Apolipoprotein A-I OS=Homo sapiens GN=APOA1 PE=1 SV=1

Match to Query 32304: 1540.882488 from(771.448520,2+) rtinseconds(2830) index(10091)  
Title: Locus:1.1.1.2262.15 File:"2013-07-02 CLN FXIII 180 min 2nd F 1.wiff"  
Data file C:\Program Files (x86)\Matrix Science\Mascot Daemon\mgf\8 FXIII 180 min 2nd\mascot\_daemon\_merge.mgf

Click mouse within plot area to zoom in by factor of two about that point  
Or,   to  Da   
Label all possible matches ☐ Label matches used for scoring ☒

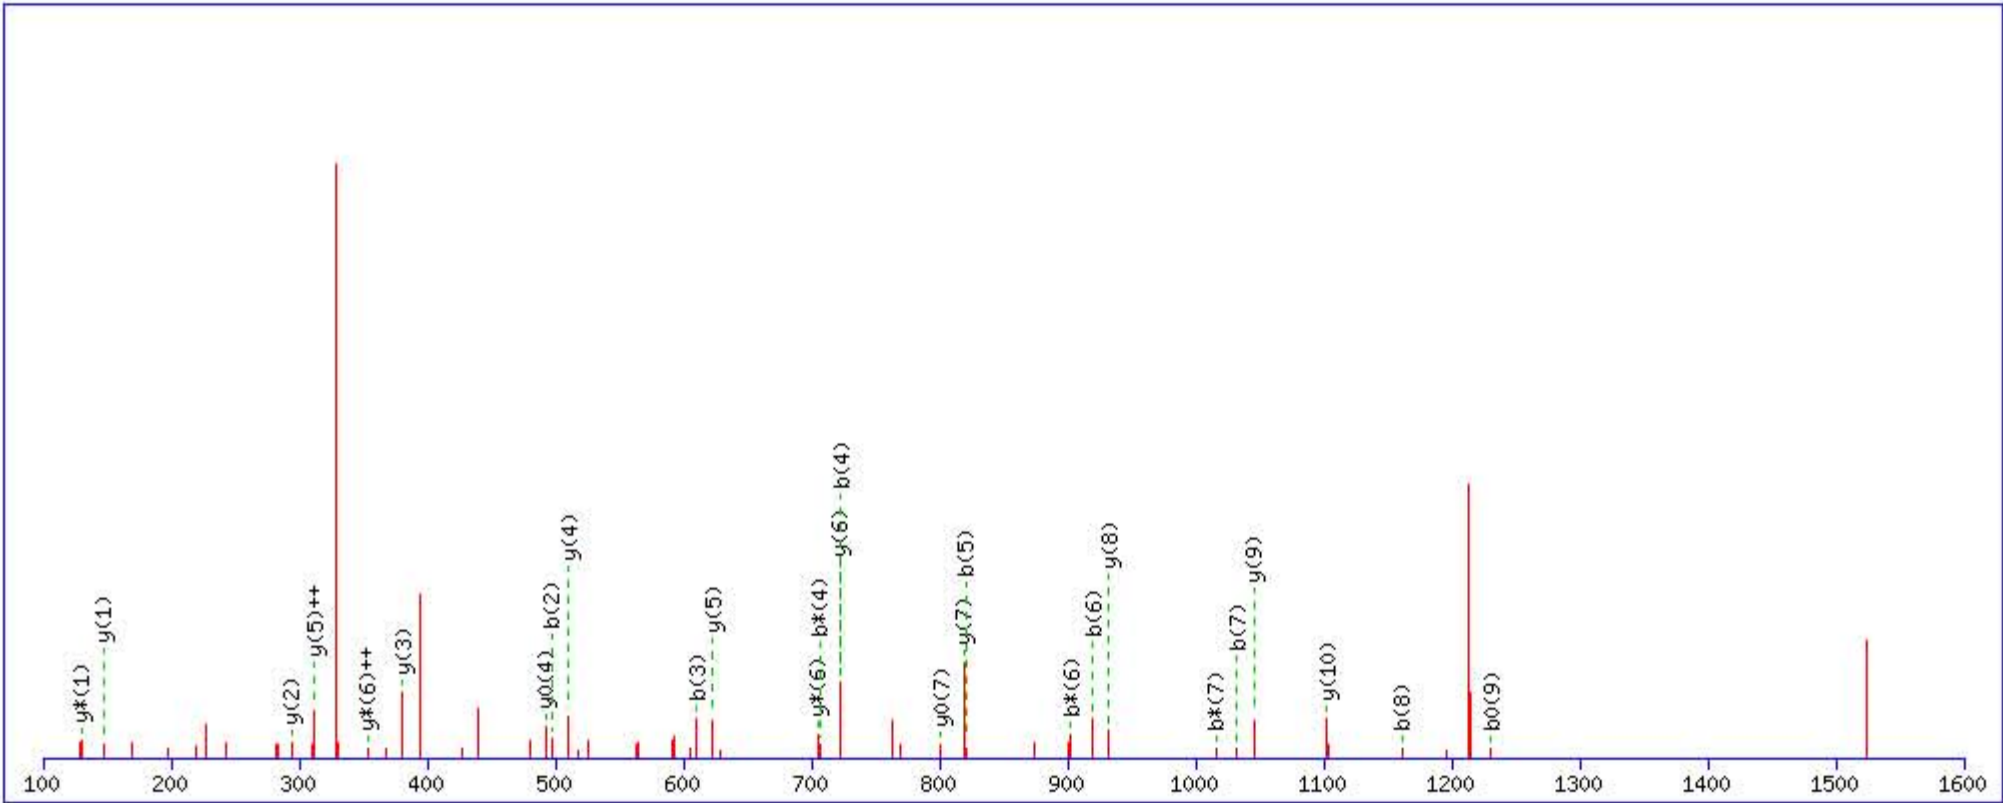

Monoisotopic mass of neutral peptide Mr(calc): 1540.868713  
Fixed modifications: Carbamidomethyl (C) (apply to specified residues or termini only)  
Variable modifications:  
Q1 : Biotin:Thermo-21345 (Q)  
Ions Score: 62 Expect: 6.4e-006  
Matches : 27/102 fragment ions using 50 most intense peaks [\(help\)](#)

| #  | b           | b <sup>++</sup> | b <sup>*</sup> | b <sup>*++</sup> | b <sup>0</sup> | b <sup>0++</sup> | Seq. | y           | y <sup>++</sup> | y <sup>*</sup> | y <sup>*++</sup> | y <sup>0</sup> | y <sup>0++</sup> | #  |
|----|-------------|-----------------|----------------|------------------|----------------|------------------|------|-------------|-----------------|----------------|------------------|----------------|------------------|----|
| 1  | 440.232602  | 220.619939      | 423.206053     | 212.106664       |                |                  | Q    |             |                 |                |                  |                |                  | 11 |
| 2  | 497.254066  | 249.130671      | 480.227517     | 240.617396       |                |                  | G    | 1102.650673 | 551.828975      | 1085.624124    | 543.315700       | 1084.640108    | 542.823692       | 10 |
| 3  | 610.338130  | 305.672703      | 593.311581     | 297.159428       |                |                  | L    | 1045.629209 | 523.318243      | 1028.602660    | 514.804968       | 1027.618644    | 514.312960       | 9  |
| 4  | 723.422194  | 362.214735      | 706.395645     | 353.701461       |                |                  | L    | 932.545145  | 466.776211      | 915.518596     | 458.262936       | 914.534580     | 457.770928       | 8  |
| 5  | 820.474958  | 410.741117      | 803.448409     | 402.227843       |                |                  | P    | 819.461081  | 410.234179      | 802.434532     | 401.720904       | 801.450516     | 401.228896       | 7  |
| 6  | 919.543372  | 460.275324      | 902.516823     | 451.762049       |                |                  | V    | 722.408317  | 361.707797      | 705.381768     | 353.194522       | 704.397752     | 352.702514       | 6  |
| 7  | 1032.627436 | 516.817356      | 1015.600887    | 508.304082       |                |                  | L    | 623.339903  | 312.173590      | 606.313354     | 303.660315       | 605.329338     | 303.168307       | 5  |
| 8  | 1161.670029 | 581.338653      | 1144.643480    | 572.825378       | 1143.659464    | 572.333370       | E    | 510.255839  | 255.631558      | 493.229290     | 247.118283       | 492.245274     | 246.626275       | 4  |
| 9  | 1248.702057 | 624.854667      | 1231.675508    | 616.341392       | 1230.691492    | 615.849384       | S    | 381.213246  | 191.110261      | 364.186697     | 182.596987       | 363.202681     | 182.104979       | 3  |
| 10 | 1395.770471 | 698.388874      | 1378.743922    | 689.875599       | 1377.759906    | 689.383591       | F    | 294.181218  | 147.594247      | 277.154669     | 139.080973       |                |                  | 2  |
| 11 |             |                 |                |                  |                |                  | K    | 147.112804  | 74.060040       | 130.086255     | 65.546765        |                |                  | 1  |

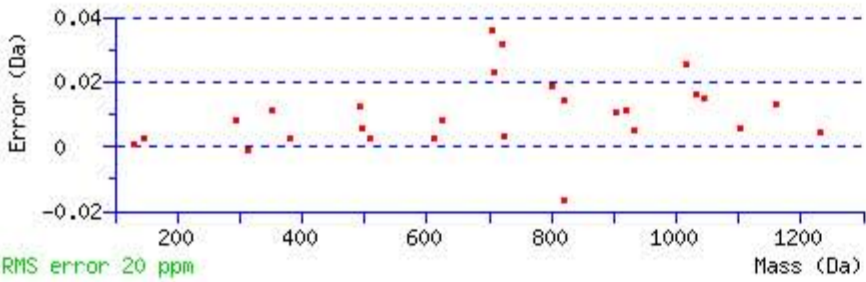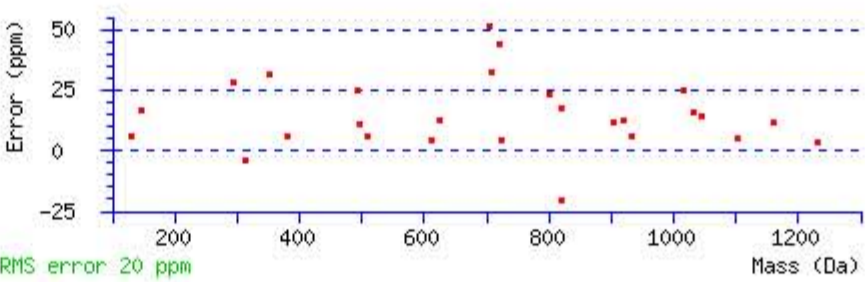

NCBI BLAST search of [QGLLPVLESFK](#)  
(Parameters: blastp, nr protein database, expect=20000, no filter, PAM30)  
Other BLAST [web gateways](#)

All matches to this query

| Score | Mr(calc):   | Delta     | Sequence                      |
|-------|-------------|-----------|-------------------------------|
| 62.4  | 1540.868713 | 0.013775  | <a href="#">QGLLPVLESFK</a>   |
| 11.6  | 1540.894531 | -0.012043 | <a href="#">QAVLSMVRKAK</a>   |
| 2.6   | 1540.872559 | 0.009929  | <a href="#">ELSRVLHTNVVFK</a> |

MATRIX

SCIENCE

Mascot Search Results

Peptide View

MS/MS Fragmentation of **VQPYLDDFQK**  
Found in **APOA1\_HUMAN**, Apolipoprotein A-I OS=Homo sapiens GN=APOA1 PE=1 SV=1

Match to Query 32945: 1562.800068 from(782.407310,2+) rtinseconds(2198) index(35455)  
Title: Locus:1.1.1.874.9 File:"2013-07-02 CLN FXIII 180 min 2nd F 3.wiff"  
Data file C:\Program Files (x86)\Matrix Science\Mascot Daemon\mgf\8 FXIII 180 min 2nd\mascot\_daemon\_merge.mgf

Click mouse within plot area to zoom in by factor of two about that point  
Or, 

Plot from

100

 to 

2000

 Da 

Full range

Label all possible matches

Label matches used for scoring

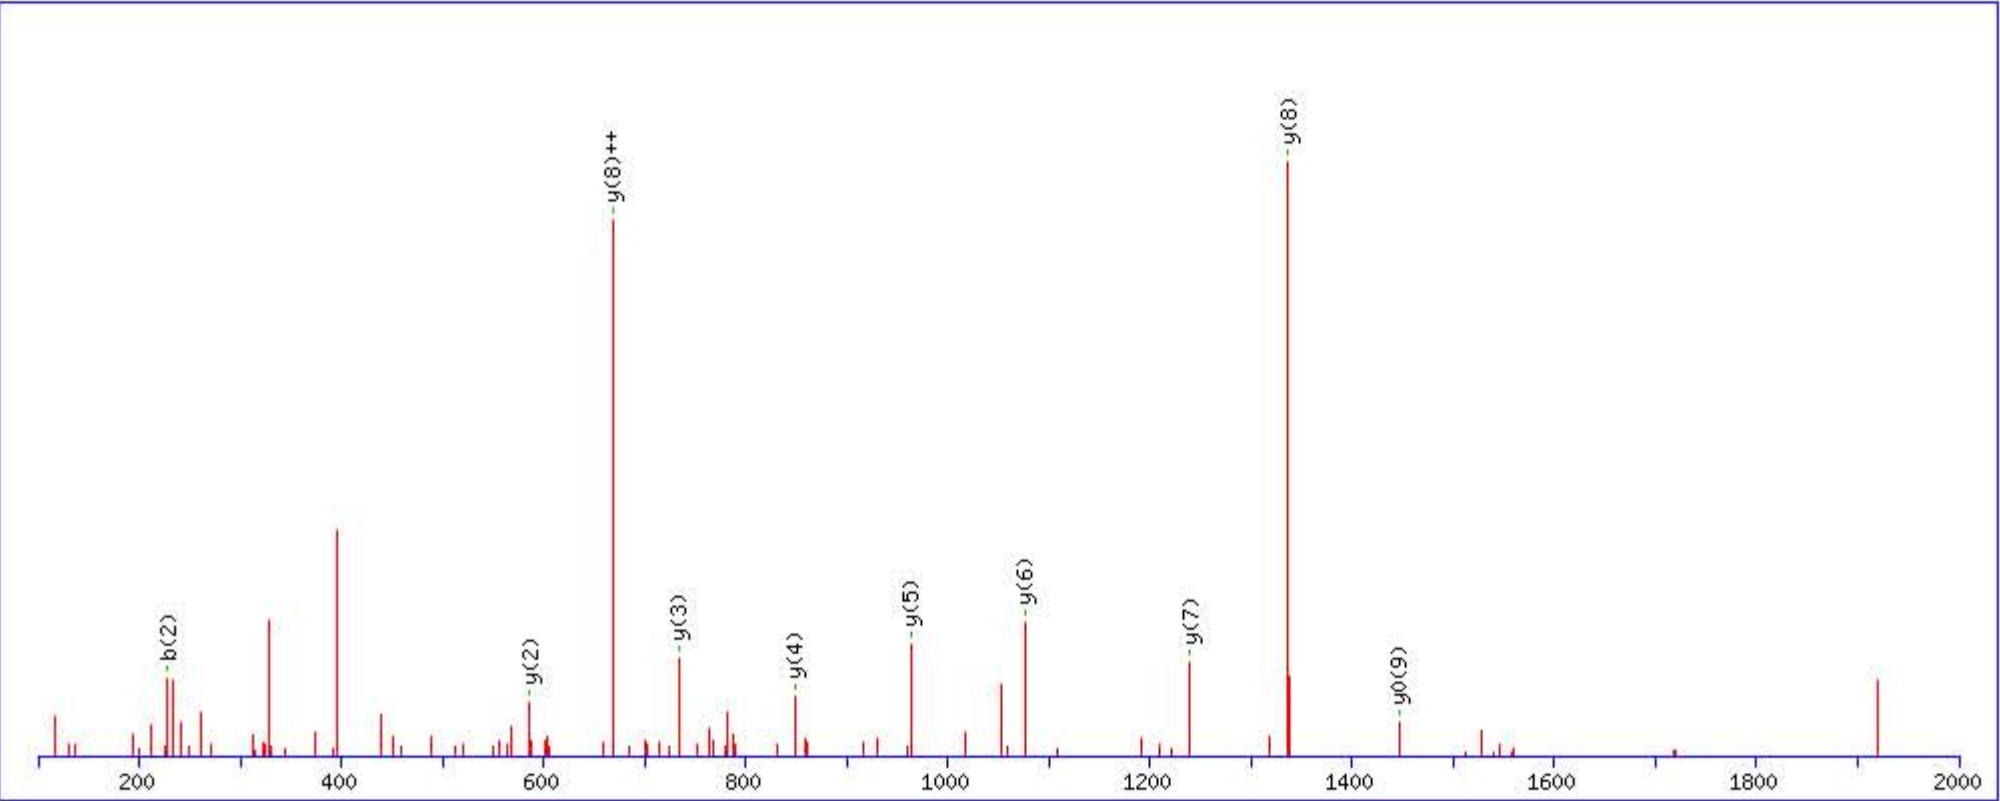

Monoisotopic mass of neutral peptide Mr(calc): 1562.780304  
Fixed modifications: Carbamidomethyl (C) (apply to specified residues or termini only)  
Variable modifications:  
Q9 : Biotin:Thermo-21345 (Q)  
Ions Score: 44 Expect: 0.00032  
Matches : 10/90 fragment ions using 15 most intense peaks [\(help\)](#)

| #  | b           | b <sup>++</sup> | b <sup>*</sup> | b <sup>++</sup> * | b <sup>0</sup> | b <sup>0++</sup> | Seq. | y           | y <sup>++</sup> | y <sup>*</sup> | y <sup>++</sup> * | y <sup>0</sup> | y <sup>0++</sup> | #  |
|----|-------------|-----------------|----------------|-------------------|----------------|------------------|------|-------------|-----------------|----------------|-------------------|----------------|------------------|----|
| 1  | 100.075690  | 50.541483       |                |                   |                |                  | V    |             |                 |                |                   |                |                  | 10 |
| 2  | 228.134268  | 114.570772      | 211.107719     | 106.057498        |                |                  | Q    | 1464.719165 | 732.863221      | 1447.692616    | 724.349946        | 1446.708600    | 723.857938       | 9  |
| 3  | 325.187032  | 163.097154      | 308.160483     | 154.583879        |                |                  | P    | 1336.660587 | 668.833932      | 1319.634038    | 660.320657        | 1318.650022    | 659.828649       | 8  |
| 4  | 488.250361  | 244.628818      | 471.223812     | 236.115544        |                |                  | Y    | 1239.607823 | 620.307550      | 1222.581274    | 611.794275        | 1221.597258    | 611.302267       | 7  |
| 5  | 601.334425  | 301.170851      | 584.307876     | 292.657576        |                |                  | L    | 1076.544494 | 538.775885      | 1059.517945    | 530.262611        | 1058.533929    | 529.770603       | 6  |
| 6  | 716.361368  | 358.684322      | 699.334819     | 350.171047        | 698.350803     | 349.679039       | D    | 963.460430  | 482.233853      | 946.433881     | 473.720579        | 945.449865     | 473.228571       | 5  |
| 7  | 831.388311  | 416.197793      | 814.361762     | 407.684519        | 813.377746     | 407.192511       | D    | 848.433487  | 424.720382      | 831.406938     | 416.207107        | 830.422922     | 415.715099       | 4  |
| 8  | 978.456725  | 489.732000      | 961.430176     | 481.218726        | 960.446160     | 480.726718       | F    | 733.406544  | 367.206910      | 716.379995     | 358.693636        |                |                  | 3  |
| 9  | 1417.682051 | 709.344664      | 1400.655502    | 700.831389        | 1399.671486    | 700.339381       | Q    | 586.338130  | 293.672703      | 569.311581     | 285.159429        |                |                  | 2  |
| 10 |             |                 |                |                   |                |                  | K    | 147.112804  | 74.060040       | 130.086255     | 65.546765         |                |                  | 1  |

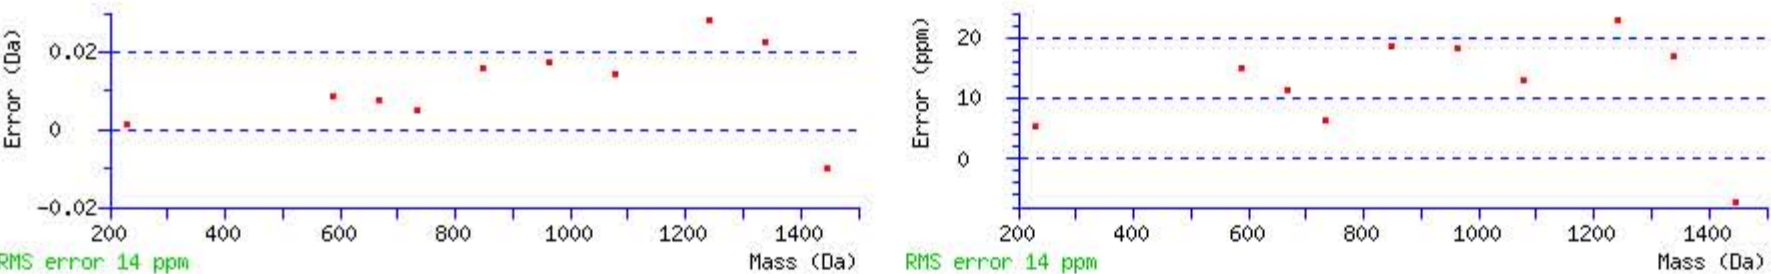

NCBI BLAST search of [VQPYLDDFQK](#)  
(Parameters: blastp, nr protein database, expect=20000, no filter, PAM30)  
Other BLAST [web gateways](#)

All matches to this query

| Score | Mr(calc):   | Delta     | Sequence                       |
|-------|-------------|-----------|--------------------------------|
| 44.3  | 1562.780304 | 0.019764  | <a href="#">VQPYLDDFQK</a>     |
| 6.5   | 1562.804764 | -0.004696 | <a href="#">QVEELLMAMEKVK</a>  |
| 6.2   | 1562.808624 | -0.008556 | <a href="#">LNSPTTTSQIMARK</a> |
| 1.1   | 1562.787521 | 0.012547  | <a href="#">VQLVDNVYCIGQR</a>  |
| 0.9   | 1562.804764 | -0.004696 | <a href="#">QVEELLMAMEKVK</a>  |
| 0.3   | 1562.779633 | 0.020435  | <a href="#">QQTGKLSMSEK</a>    |
| 0.2   | 1562.795364 | 0.004704  | <a href="#">KVKFTQQNYHDR</a>   |

MATRIX

SCIENCE

Mascot Search Results

Peptide View

MS/MS Fragmentation of **EQLTPLIK**  
Found in **APOA2\_HUMAN**, Apolipoprotein A-II OS=Homo sapiens GN=APOA2 PE=1 SV=1

Match to Query 21987: 1251.732468 from(626.873510,2+) rtinseconds(2110) index(20900)  
Title: Locus:1.1.1.3117.7 File:"2013-07-02 CLN FXIII 180 min 2nd F 2.wiff"  
Data file C:\Program Files (x86)\Matrix Science\Mascot Daemon\mgf\8 FXIII 180 min 2nd\mascot\_daemon\_merge.mgf

Click mouse within plot area to zoom in by factor of two about that point  
Or, 

Plot from

100

 to 

1300

 Da 

Full range

  
Label all possible matches ☐ Label matches used for scoring ☒

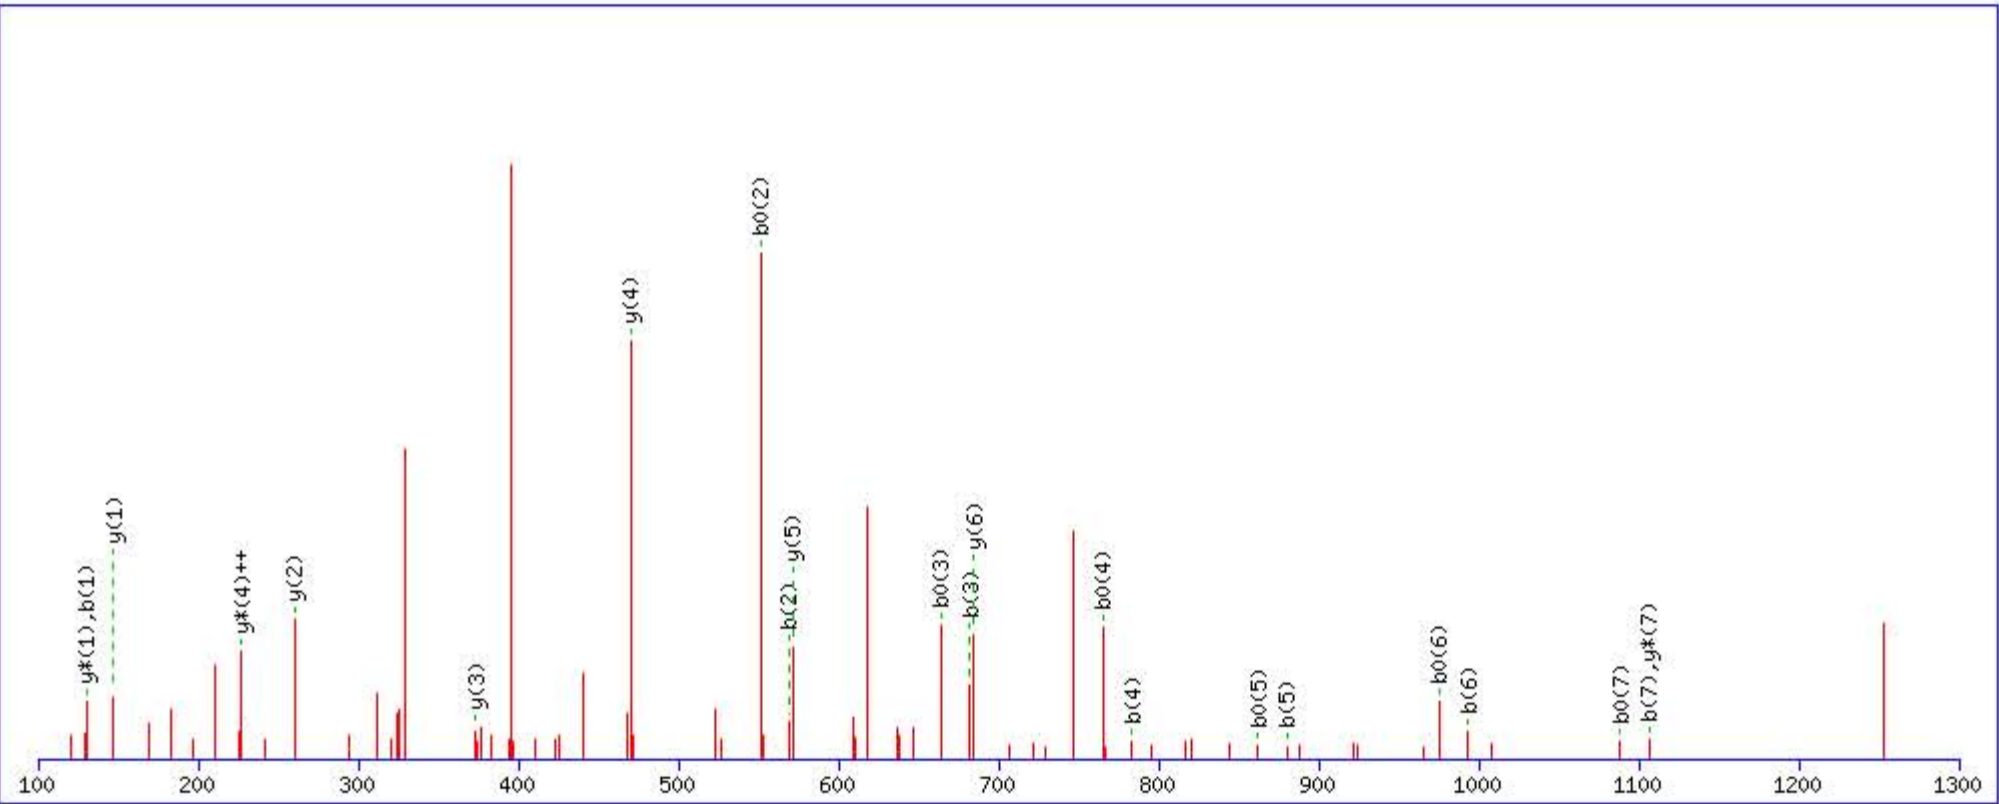

Monoisotopic mass of neutral peptide Mr(calc): 1251.726059  
Fixed modifications: Carbamidomethyl (C) (apply to specified residues or termini only)  
Variable modifications:  
Q2 : Biotin:Thermo-21345 (Q)  
Ions Score: 28 Expect: 0.013  
Matches : 22/74 fragment ions using 55 most intense peaks [\(help\)](#)

| # | b           | b <sup>++</sup> | b <sup>*</sup> | b <sup>*++</sup> | b <sup>0</sup> | b <sup>0++</sup> | Seq. | y           | y <sup>++</sup> | y <sup>*</sup> | y <sup>*++</sup> | y <sup>0</sup> | y <sup>0++</sup> | # |
|---|-------------|-----------------|----------------|------------------|----------------|------------------|------|-------------|-----------------|----------------|------------------|----------------|------------------|---|
| 1 | 130.049869  | 65.528572       |                |                  | 112.039304     | 56.523290        | E    |             |                 |                |                  |                |                  | 8 |
| 2 | 569.275195  | 285.141236      | 552.248646     | 276.627961       | 551.264630     | 276.135953       | Q    | 1123.690765 | 562.349021      | 1106.664216    | 553.835746       | 1105.680200    | 553.343738       | 7 |
| 3 | 682.359259  | 341.683268      | 665.332710     | 333.169993       | 664.348694     | 332.677985       | L    | 684.465439  | 342.736358      | 667.438890     | 334.223083       | 666.454874     | 333.731075       | 6 |
| 4 | 783.406938  | 392.207107      | 766.380389     | 383.693833       | 765.396373     | 383.201825       | T    | 571.381375  | 286.194326      | 554.354826     | 277.681051       | 553.370810     | 277.189043       | 5 |
| 5 | 880.459702  | 440.733489      | 863.433153     | 432.220215       | 862.449137     | 431.728207       | P    | 470.333696  | 235.670486      | 453.307147     | 227.157212       |                |                  | 4 |
| 6 | 993.543766  | 497.275521      | 976.517217     | 488.762247       | 975.533201     | 488.270239       | L    | 373.280932  | 187.144104      | 356.254383     | 178.630830       |                |                  | 3 |
| 7 | 1106.627830 | 553.817553      | 1089.601281    | 545.304279       | 1088.617265    | 544.812271       | I    | 260.196868  | 130.602072      | 243.170319     | 122.088798       |                |                  | 2 |
| 8 |             |                 |                |                  |                |                  | K    | 147.112804  | 74.060040       | 130.086255     | 65.546765        |                |                  | 1 |

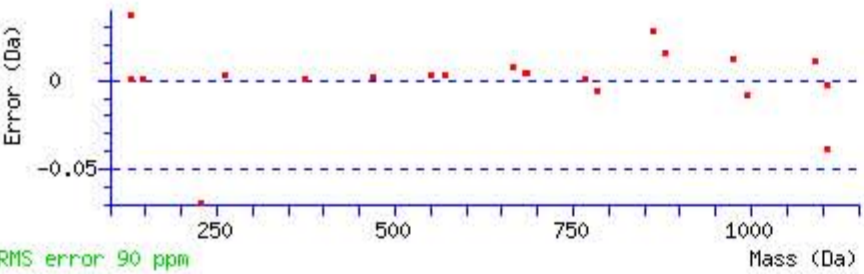

NCBI BLAST search of [EQLTPLIK](#)  
(Parameters: blastp, nr protein database, expect=20000, no filter, PAM30)  
Other BLAST [web gateways](#)

All matches to this query

| Score | Mr(calc):   | Delta     | Sequence                       |
|-------|-------------|-----------|--------------------------------|
| 28.4  | 1251.726059 | 0.006409  | <a href="#">EQLTPLIK</a>       |
| 13.5  | 1251.722672 | 0.009796  | <a href="#">NYIPYLTKLK</a>     |
| 12.1  | 1251.744690 | -0.012222 | <a href="#">QMLPIVLK</a>       |
| 11.1  | 1251.729874 | 0.002594  | <a href="#">RHKLESELIK</a>     |
| 8.2   | 1251.722702 | 0.009766  | <a href="#">FFKTLQDLLK</a>     |
| 7.2   | 1251.718689 | 0.013779  | <a href="#">ASGVGLPGGSLPIK</a> |
| 3.8   | 1251.733917 | -0.001449 | <a href="#">IRGYVFKELK</a>     |
| 3.2   | 1251.748520 | -0.016052 | <a href="#">AILTAVHMIRK</a>    |
| 1.8   | 1251.733932 | -0.001464 | <a href="#">LPVIQLWDLR</a>     |
| 0.9   | 1251.729874 | 0.002594  | <a href="#">LEKSLEHLRK</a>     |

MATRIX

SCIENCE

Mascot Search Results

Peptide View

MS/MS Fragmentation of **SPELQAEAK**  
Found in **APOA2\_HUMAN**, Apolipoprotein A-II OS=Homo sapiens GN=APOA2 PE=1 SV=1

Match to Query 22917: 1282.659168 from(642.336860,2+) rtinseconds(1558) index(17338)  
Title: Locus:1.1.1.2925.11 File:"2013-07-02 CLN FXIII 180 min 2nd F 2.wiff"  
Data file C:\Program Files (x86)\Matrix Science\Mascot Daemon\mgf\8 FXIII 180 min 2nd\mascot\_daemon\_merge.mgf

Click mouse within plot area to zoom in by factor of two about that point  
Or, 

Plot from

100

 to 

1300

 Da 

Full range

  
Label all possible matches ☐ Label matches used for scoring ☒

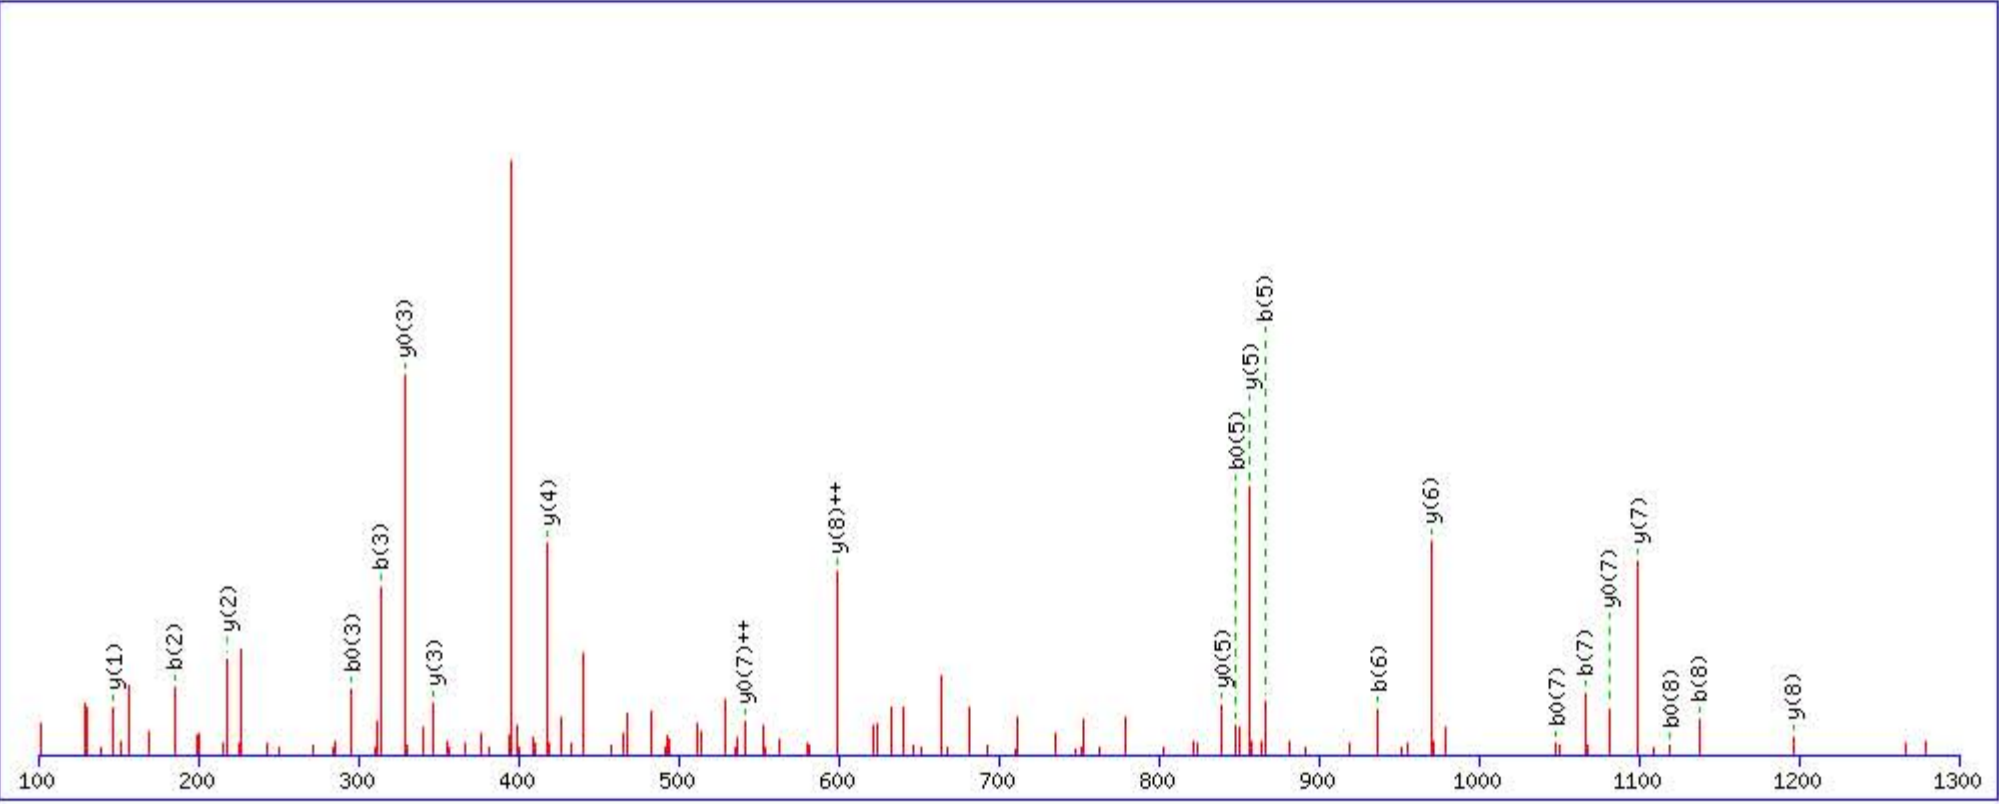

Monoisotopic mass of neutral peptide Mr(calc): 1282.659088  
Fixed modifications: Carbamidomethyl (C) (apply to specified residues or termini only)  
Variable modifications:  
Q5 : Biotin:Thermo-21345 (Q)  
Ions Score: 46 Expect: 0.00057  
Matches : 23/84 fragment ions using 46 most intense peaks [\(help\)](#)

| # | b           | b <sup>++</sup> | b <sup>*</sup> | b <sup>*++</sup> | b <sup>0</sup> | b <sup>0++</sup> | Seq. | y           | y <sup>++</sup> | y <sup>*</sup> | y <sup>*++</sup> | y <sup>0</sup> | y <sup>0++</sup> | # |
|---|-------------|-----------------|----------------|------------------|----------------|------------------|------|-------------|-----------------|----------------|------------------|----------------|------------------|---|
| 1 | 88.039304   | 44.523290       |                |                  | 70.028739      | 35.518008        | S    |             |                 |                |                  |                |                  | 9 |
| 2 | 185.092068  | 93.049672       |                |                  | 167.081503     | 84.044389        | P    | 1196.634372 | 598.820824      | 1179.607823    | 590.307550       | 1178.623807    | 589.815541       | 8 |
| 3 | 314.134661  | 157.570968      |                |                  | 296.124096     | 148.565686       | E    | 1099.581608 | 550.294442      | 1082.555059    | 541.781168       | 1081.571043    | 541.289160       | 7 |
| 4 | 427.218725  | 214.113001      |                |                  | 409.208160     | 205.107718       | L    | 970.539015  | 485.773146      | 953.512466     | 477.259871       | 952.528450     | 476.767863       | 6 |
| 5 | 866.444051  | 433.725664      | 849.417502     | 425.212389       | 848.433486     | 424.720381       | Q    | 857.454951  | 429.231114      | 840.428402     | 420.717839       | 839.444386     | 420.225831       | 5 |
| 6 | 937.481165  | 469.244221      | 920.454616     | 460.730946       | 919.470600     | 460.238938       | A    | 418.229625  | 209.618450      | 401.203076     | 201.105176       | 400.219060     | 200.613168       | 4 |
| 7 | 1066.523758 | 533.765517      | 1049.497209    | 525.252243       | 1048.513193    | 524.760235       | E    | 347.192511  | 174.099893      | 330.165962     | 165.586619       | 329.181946     | 165.094611       | 3 |
| 8 | 1137.560872 | 569.284074      | 1120.534323    | 560.770800       | 1119.550307    | 560.278792       | A    | 218.149918  | 109.578597      | 201.123369     | 101.065322       |                |                  | 2 |
| 9 |             |                 |                |                  |                |                  | K    | 147.112804  | 74.060040       | 130.086255     | 65.546765        |                |                  | 1 |

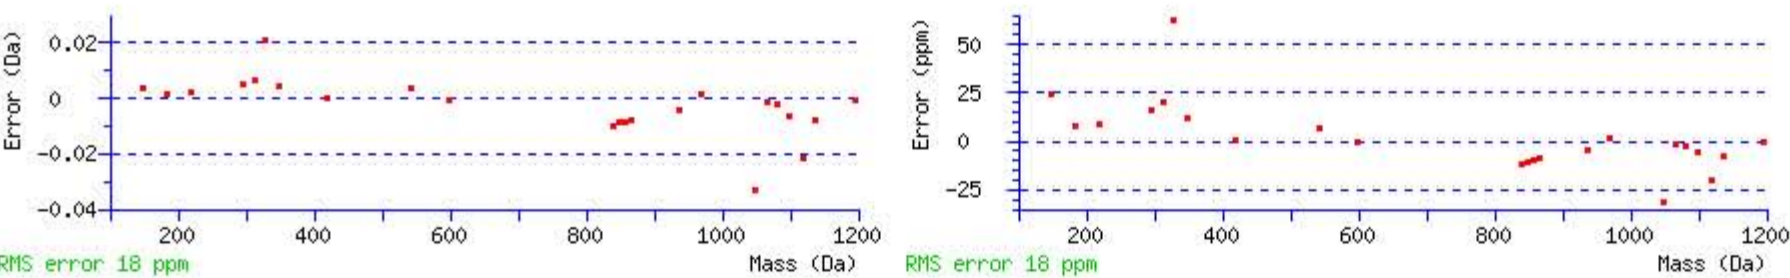

NCBI BLAST search of [SPELQAEAK](#)  
(Parameters: blastp, nr protein database, expect=20000, no filter, PAM30)  
Other BLAST [web gateways](#)

All matches to this query

| Score | Mr(calc):   | Delta     | Sequence                     |
|-------|-------------|-----------|------------------------------|
| 45.7  | 1282.659088 | 0.000080  | <a href="#">SPELQAEAK</a>    |
| 14.7  | 1282.676865 | -0.017697 | <a href="#">ITANEDPPVISK</a> |
| 2.8   | 1282.641815 | 0.017353  | <a href="#">SEAFFRKADGR</a>  |
| 2.3   | 1282.641830 | 0.017338  | <a href="#">SYPGHVQPATAR</a> |
| 1.8   | 1282.655716 | 0.003452  | <a href="#">ALEAEKYGFQK</a>  |
| 1.7   | 1282.662949 | -0.003781 | <a href="#">KLGQSESQGPPR</a> |
| 1.6   | 1282.670334 | -0.011166 | <a href="#">EPIQASTAR</a>    |
| 1.5   | 1282.662949 | -0.003781 | <a href="#">DLSDTQRHLAK</a>  |
| 0.4   | 1282.670334 | -0.011166 | <a href="#">QLEAVQER</a>     |
| 0.1   | 1282.670334 | -0.011166 | <a href="#">ELPSPRISCPK</a>  |

Peptide View

MS/MS Fragmentation of **EPCVESLVSQYFQTVTDYGK**  
Found in **APOA2\_HUMAN**, Apolipoprotein A-II OS=Homo sapiens GN=APOA2 PE=1 SV=1

Match to Query 55982: 2660.276892 from(887.766240,3+) rtinseconds(3159) index(12010)  
Title: Locus:1.1.1.2375.12 File:"2013-07-02 CLN FXIII 180 min 2nd F 1.wiff"  
Data file C:\Program Files (x86)\Matrix Science\Mascot Daemon\mgf\8 FXIII 180 min 2nd\mascot\_daemon\_merge.mgf

Click mouse within plot area to zoom in by factor of two about that point  
Or,   to  Da   
Label all possible matches ☐ Label matches used for scoring ☒

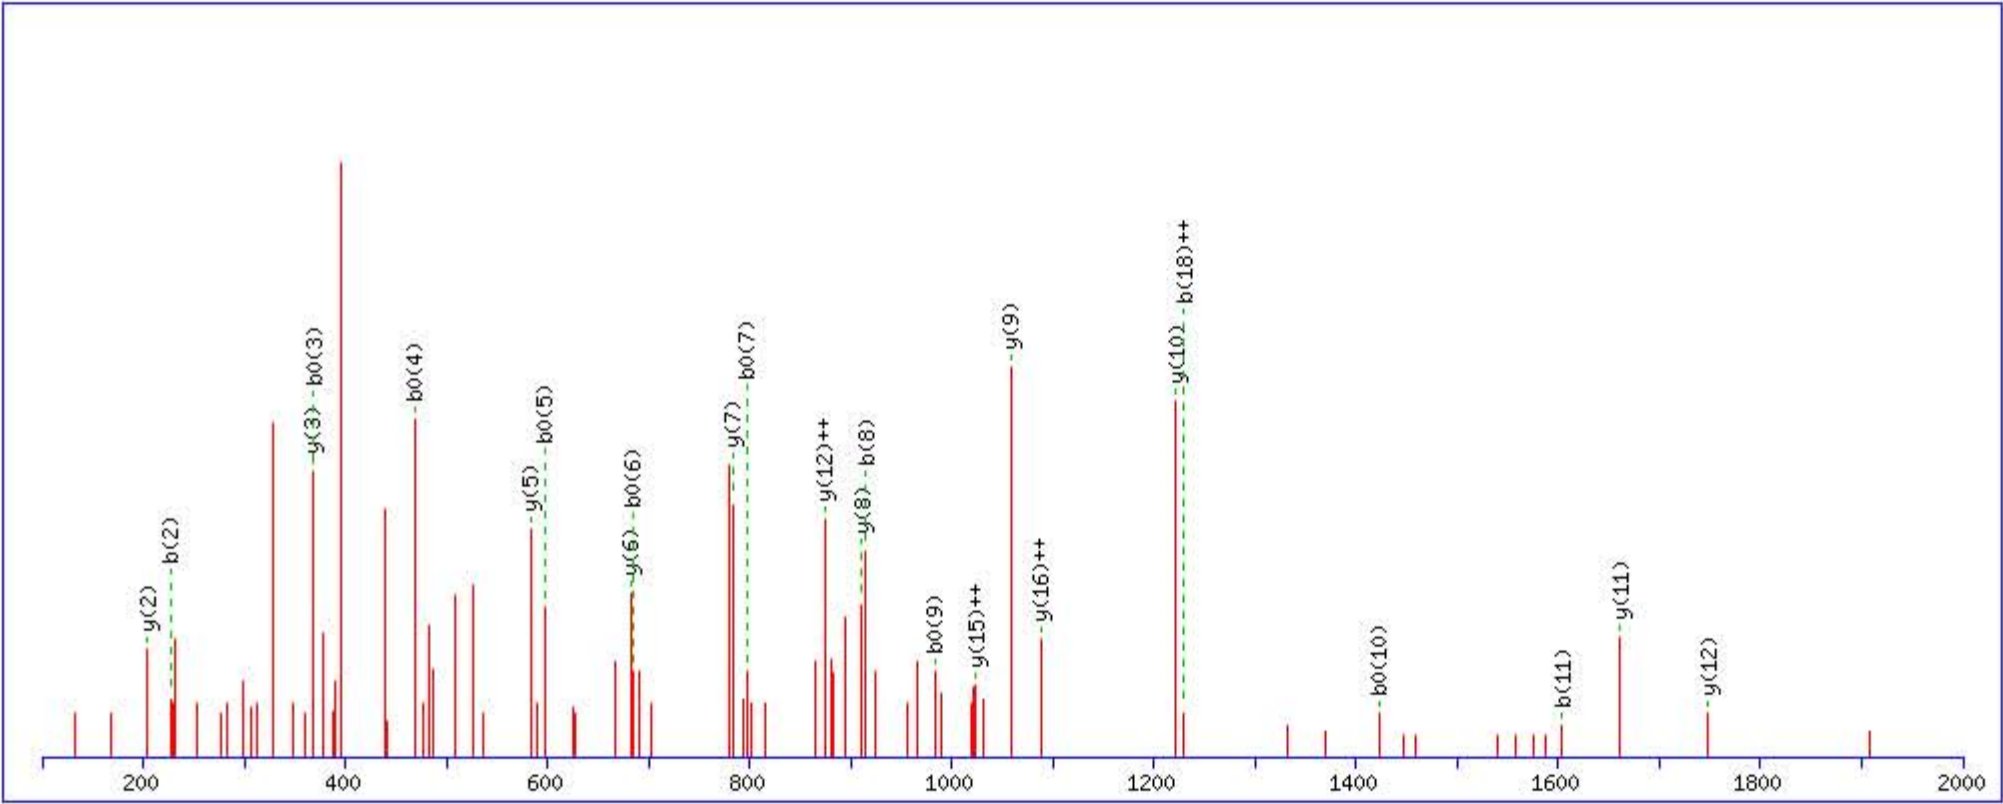

Monoisotopic mass of neutral peptide Mr(calc): 2660.250244  
Fixed modifications: Carbamidomethyl (C) (apply to specified residues or termini only)  
Variable modifications:  
Q10 : Biotin:Thermo-21345 (Q)  
Ions Score: 49 Expect: 0.00028  
Matches : 24/204 fragment ions using 43 most intense peaks [\(help\)](#)

| #  | b           | b <sup>++</sup> | b <sup>*</sup> | b <sup>*++</sup> | b <sup>0</sup> | b <sup>0++</sup> | Seq. | y           | y <sup>++</sup> | y <sup>*</sup> | y <sup>*++</sup> | y <sup>0</sup> | y <sup>0++</sup> | #  |
|----|-------------|-----------------|----------------|------------------|----------------|------------------|------|-------------|-----------------|----------------|------------------|----------------|------------------|----|
| 1  | 130.049869  | 65.528572       |                |                  | 112.039304     | 56.523290        | E    |             |                 |                |                  |                |                  | 20 |
| 2  | 227.102633  | 114.054954      |                |                  | 209.092068     | 105.049672       | P    | 2532.214913 | 1266.611094     | 2515.188364    | 1258.097820      | 2514.204348    | 1257.605812      | 19 |
| 3  | 387.133282  | 194.070279      |                |                  | 369.122717     | 185.064997       | C    | 2435.162149 | 1218.084712     | 2418.135600    | 1209.571438      | 2417.151584    | 1209.079430      | 18 |
| 4  | 486.201696  | 243.604486      |                |                  | 468.191131     | 234.599204       | V    | 2275.131500 | 1138.069388     | 2258.104951    | 1129.556113      | 2257.120935    | 1129.064105      | 17 |
| 5  | 615.244289  | 308.125783      |                |                  | 597.233724     | 299.120500       | E    | 2176.063086 | 1088.535181     | 2159.036537    | 1080.021906      | 2158.052521    | 1079.529898      | 16 |
| 6  | 702.276317  | 351.641797      |                |                  | 684.265752     | 342.636514       | S    | 2047.020493 | 1024.013884     | 2029.993944    | 1015.500610      | 2029.009928    | 1015.008602      | 15 |
| 7  | 815.360381  | 408.183829      |                |                  | 797.349816     | 399.178546       | L    | 1959.988465 | 980.497870      | 1942.961916    | 971.984596       | 1941.977900    | 971.492588       | 14 |
| 8  | 914.428795  | 457.718036      |                |                  | 896.418230     | 448.712753       | V    | 1846.904401 | 923.955838      | 1829.877852    | 915.442564       | 1828.893836    | 914.950556       | 13 |
| 9  | 1001.460823 | 501.234050      |                |                  | 983.450258     | 492.228767       | S    | 1747.835987 | 874.421631      | 1730.809438    | 865.908357       | 1729.825422    | 865.416349       | 12 |
| 10 | 1440.686149 | 720.846712      | 1423.659600    | 712.333438       | 1422.675584    | 711.841430       | Q    | 1660.803959 | 830.905617      | 1643.777410    | 822.392343       | 1642.793394    | 821.900335       | 11 |
| 11 | 1603.749478 | 802.378377      | 1586.722929    | 793.865103       | 1585.738913    | 793.373094       | Y    | 1221.578633 | 611.292954      | 1204.552084    | 602.779680       | 1203.568068    | 602.287672       | 10 |
| 12 | 1750.817892 | 875.912584      | 1733.791343    | 867.399310       | 1732.807327    | 866.907302       | F    | 1058.515304 | 529.761290      | 1041.488755    | 521.248015       | 1040.504739    | 520.756007       | 9  |
| 13 | 1878.876470 | 939.941873      | 1861.849921    | 931.428599       | 1860.865905    | 930.936590       | Q    | 911.446890  | 456.227083      | 894.420341     | 447.713808       | 893.436325     | 447.221800       | 8  |
| 14 | 1979.924149 | 990.465713      | 1962.897600    | 981.952438       | 1961.913584    | 981.460430       | T    | 783.388312  | 392.197794      | 766.361763     | 383.684519       | 765.377747     | 383.192511       | 7  |
| 15 | 2078.992563 | 1039.999919     | 2061.966014    | 1031.486645      | 2060.981998    | 1030.994637      | V    | 682.340633  | 341.673954      | 665.314084     | 333.160680       | 664.330068     | 332.668672       | 6  |
| 16 | 2180.040242 | 1090.523759     | 2163.013693    | 1082.010484      | 2162.029677    | 1081.518476      | T    | 583.272219  | 292.139747      | 566.245670     | 283.626473       | 565.261654     | 283.134465       | 5  |
| 17 | 2295.067185 | 1148.037230     | 2278.040636    | 1139.523956      | 2277.056620    | 1139.031948      | D    | 482.224540  | 241.615908      | 465.197991     | 233.102633       | 464.213975     | 232.610625       | 4  |
| 18 | 2458.130514 | 1229.568895     | 2441.103965    | 1221.055620      | 2440.119949    | 1220.563612      | Y    | 367.197597  | 184.102436      | 350.171048     | 175.589162       |                |                  | 3  |
| 19 | 2515.151978 | 1258.079627     | 2498.125429    | 1249.566352      | 2497.141413    | 1249.074344      | G    | 204.134268  | 102.570772      | 187.107719     | 94.057497        |                |                  | 2  |
| 20 |             |                 |                |                  |                |                  | K    | 147.112804  | 74.060040       | 130.086255     | 65.546765        |                |                  | 1  |

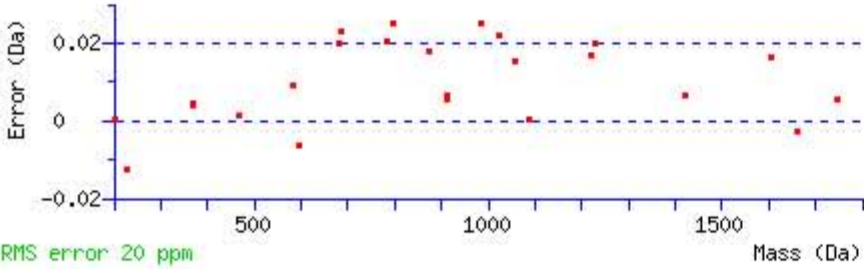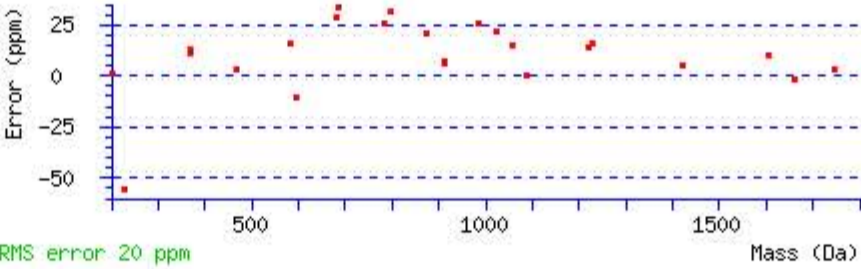

NCBI BLAST search of [EPCVESLVSQYFQTVTDYGK](#)  
(Parameters: blastp, nr protein database, expect=20000, no filter, PAM30)  
Other BLAST [web gateways](#)

All matches to this query

| Score | Mr(calc):   | Delta    | Sequence                             |
|-------|-------------|----------|--------------------------------------|
| 49.2  | 2660.250244 | 0.026648 | <a href="#">EPCVESLVSQYFQTVTDYGK</a> |
| 28.7  | 2660.250244 | 0.026648 | <a href="#">EPCVESLVSQYFQTVTDYGK</a> |



MATRIX

SCIENCE

Mascot Search Results

Peptide View

MS/MS Fragmentation of **EIQQR**  
Found in **T161A\_HUMAN**, Transmembrane protein 161A OS=Homo sapiens GN=TMEM161A PE=2 SV=1

Match to Query 13167: 983.519408 from(492.766980,2+) rtinseconds(1380) index(1827)  
Title: Locus:1.1.1.1757.19 File:"2013-07-02 CLN FXIII 180 min 2nd F 1.wiff"  
Data file C:\Program Files (x86)\Matrix Science\Mascot Daemon\mgf\8 FXIII 180 min 2nd\mascot\_daemon\_merge.mgf

Click mouse within plot area to zoom in by factor of two about that point  
Or,   to  Da   
Label all possible matches ☐ Label matches used for scoring ☒

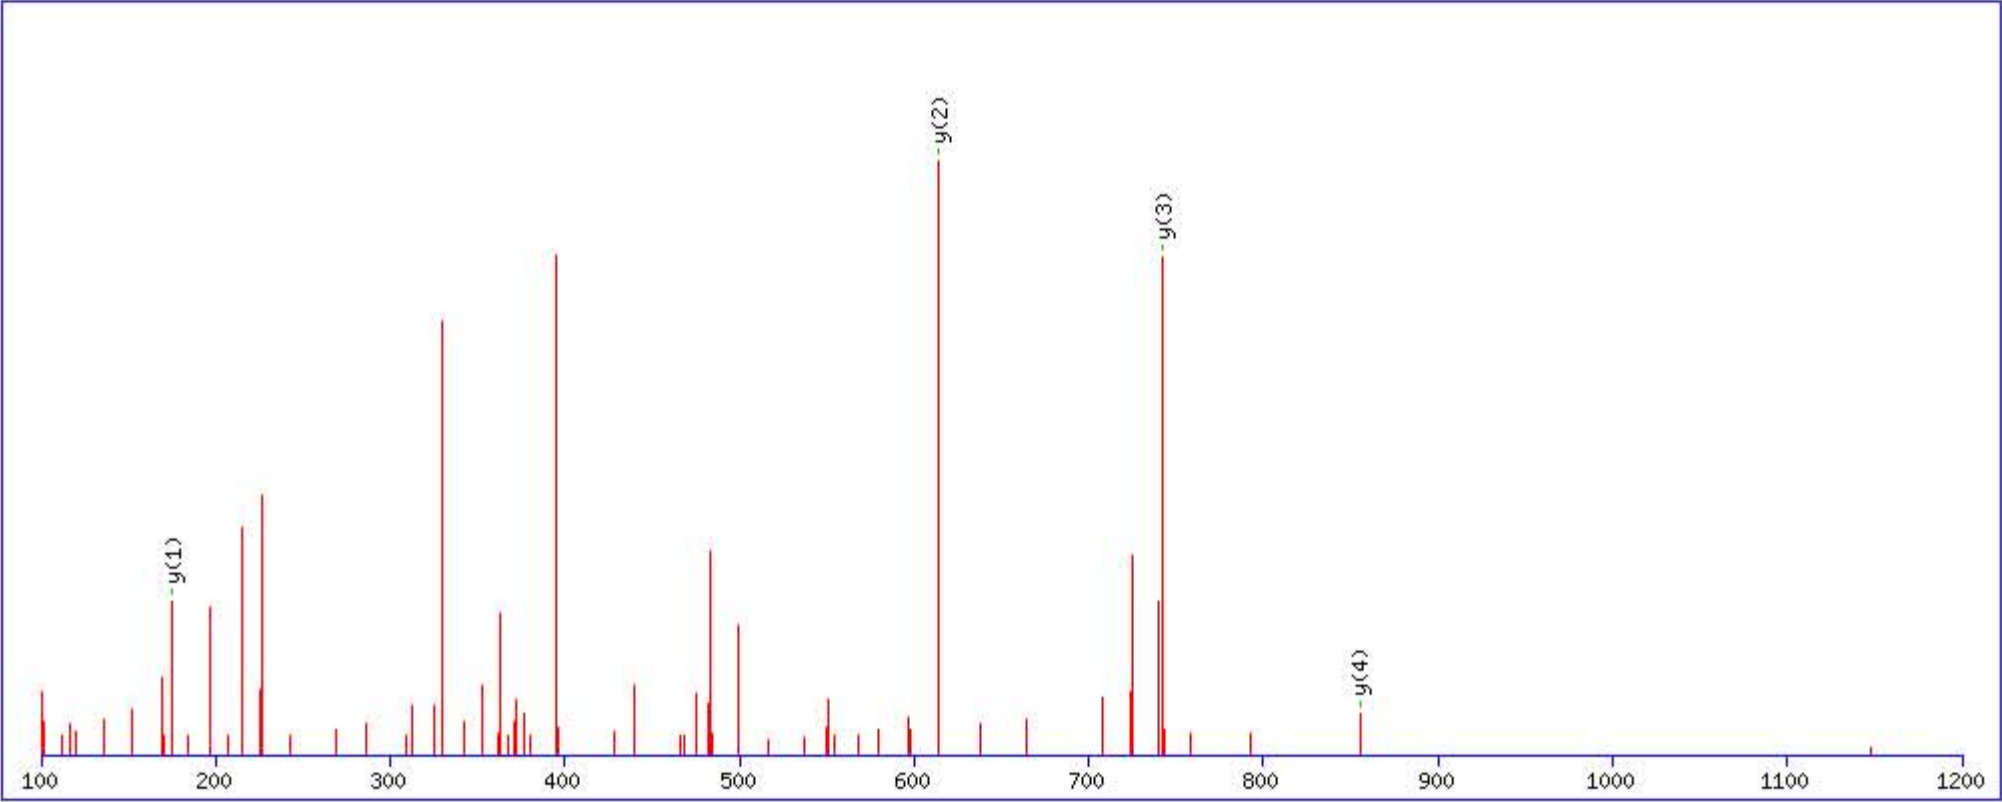

Monoisotopic mass of neutral peptide Mr(calc): 983.522217  
Fixed modifications: Carbamidomethyl (C) (apply to specified residues or termini only)  
Variable modifications:  
Q4 : Biotin:Thermo-21345 (Q)  
Ions Score: 25 Expect: 0.06  
Matches : 4/36 fragment ions using 8 most intense peaks [\(help\)](#)

| # | b          | b <sup>++</sup> | b <sup>*</sup> | b <sup>*++</sup> | b <sup>0</sup> | b <sup>0++</sup> | Seq. | y          | y <sup>++</sup> | y <sup>*</sup> | y <sup>*++</sup> | # |
|---|------------|-----------------|----------------|------------------|----------------|------------------|------|------------|-----------------|----------------|------------------|---|
| 1 | 130.049869 | 65.528572       |                |                  | 112.039304     | 56.523290        | E    |            |                 |                |                  | 5 |
| 2 | 243.133933 | 122.070605      |                |                  | 225.123368     | 113.065322       | I    | 855.486920 | 428.247098      | 838.460371     | 419.733824       | 4 |
| 3 | 371.192511 | 186.099894      | 354.165962     | 177.586619       | 353.181946     | 177.094611       | Q    | 742.402856 | 371.705066      | 725.376307     | 363.191792       | 3 |
| 4 | 810.417837 | 405.712557      | 793.391288     | 397.199282       | 792.407272     | 396.707274       | Q    | 614.344278 | 307.675777      | 597.317729     | 299.162503       | 2 |
| 5 |            |                 |                |                  |                |                  | R    | 175.118952 | 88.063114       | 158.092403     | 79.549840        | 1 |

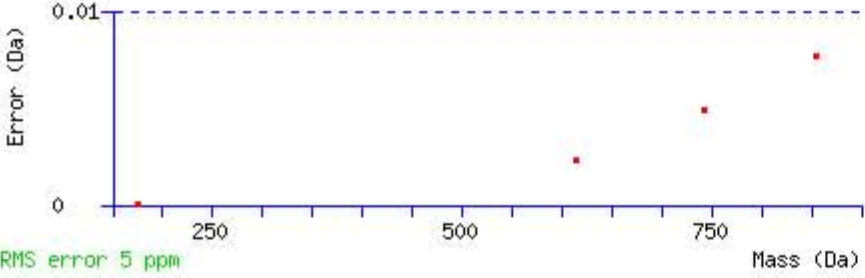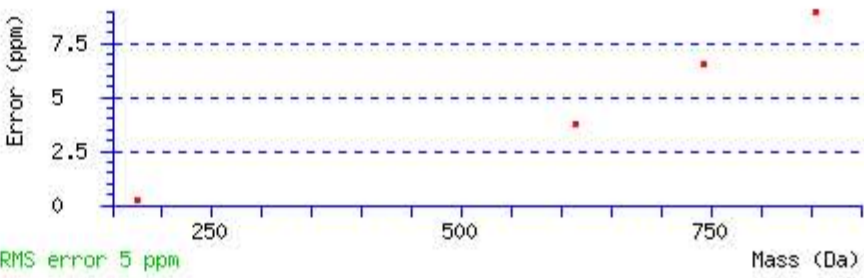

NCBI BLAST search of [EIQQR](#)  
(Parameters: blastp, nr protein database, expect=20000, no filter, PAM30)  
Other BLAST [web gateways](#)

All matches to this query

| Score | Mr(calc):  | Delta     | Sequence                 |
|-------|------------|-----------|--------------------------|
| 25.3  | 983.522217 | -0.002809 | <a href="#">EIQQR</a>    |
| 25.3  | 983.522217 | -0.002809 | <a href="#">ELQQR</a>    |
| 13.2  | 983.522217 | -0.002809 | <a href="#">IEQQR</a>    |
| 13.2  | 983.507599 | 0.011809  | <a href="#">LEKEFYR</a>  |
| 13.2  | 983.522217 | -0.002809 | <a href="#">LEQQR</a>    |
| 11.6  | 983.522217 | -0.002809 | <a href="#">EAAVQR</a>   |
| 11.6  | 983.522217 | -0.002809 | <a href="#">EGLAQR</a>   |
| 11.6  | 983.514816 | 0.004592  | <a href="#">EKISHNTR</a> |
| 11.6  | 983.522217 | -0.002809 | <a href="#">EQIQR</a>    |
| 11.6  | 983.522217 | -0.002809 | <a href="#">EQLQR</a>    |

MATRIX

SCIENCE

Mascot Search Results

Peptide View

MS/MS Fragmentation of **GNTEGLQK**  
Found in **APOA4\_HUMAN**, Apolipoprotein A-IV OS=Homo sapiens GN=APOA4 PE=1 SV=3

Match to Query 19120: 1156.591248 from(579.302900,2+) rtinseconds(1394) index(62745)  
Title: Locus:1.1.1.1760.21 File:"2013-07-02 CLN FXIII 180 min 2nd FT.wiff"  
Data file C:\Program Files (x86)\Matrix Science\Mascot Daemon\mgf\8 FXIII 180 min 2nd\mascot\_daemon\_merge.mgf

Click mouse within plot area to zoom in by factor of two about that point  
Or, 

Plot from

100

 to 

1150

 Da 

Full range

  
Label all possible matches ☐ Label matches used for scoring ☒

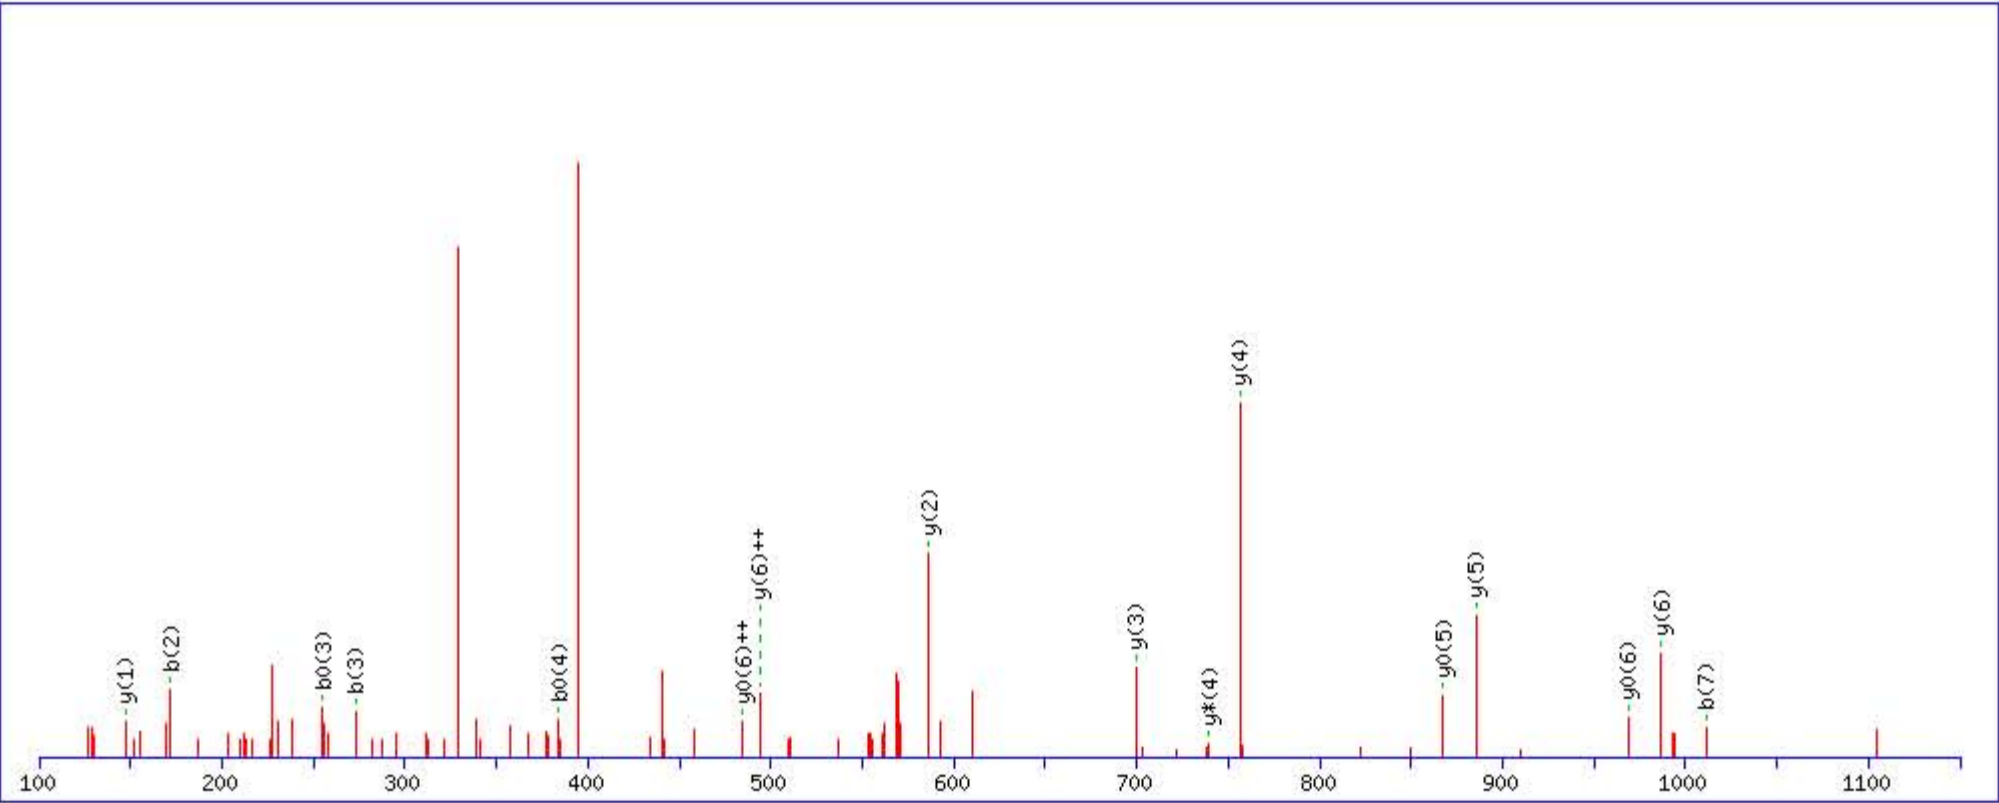

Monoisotopic mass of neutral peptide Mr(calc): 1156.591034  
Fixed modifications: Carbamidomethyl (C) (apply to specified residues or termini only)  
Variable modifications:  
Q7 : Biotin:Thermo-21345 (Q)  
Ions Score: 34 Expect: 0.00099  
Matches : 16/70 fragment ions using 28 most intense peaks ([help](#))

| # | b           | b <sup>++</sup> | b <sup>*</sup> | b <sup>++</sup> | b <sup>0</sup> | b <sup>0++</sup> | Seq. | y           | y <sup>++</sup> | y <sup>*</sup> | y <sup>++</sup> | y <sup>0</sup> | y <sup>0++</sup> | # |
|---|-------------|-----------------|----------------|-----------------|----------------|------------------|------|-------------|-----------------|----------------|-----------------|----------------|------------------|---|
| 1 | 58.028740   | 29.518008       |                |                 |                |                  | G    |             |                 |                |                 |                |                  | 8 |
| 2 | 172.071667  | 86.539471       | 155.045118     | 78.026197       |                |                  | N    | 1100.576857 | 550.792067      | 1083.550308    | 542.278792      | 1082.566292    | 541.786784       | 7 |
| 3 | 273.119346  | 137.063311      | 256.092797     | 128.550037      | 255.108781     | 128.058029       | T    | 986.533930  | 493.770603      | 969.507381     | 485.257329      | 968.523365     | 484.765321       | 6 |
| 4 | 402.161939  | 201.584608      | 385.135390     | 193.071333      | 384.151374     | 192.579325       | E    | 885.486251  | 443.246764      | 868.459702     | 434.733489      | 867.475686     | 434.241481       | 5 |
| 5 | 459.183403  | 230.095339      | 442.156854     | 221.582065      | 441.172838     | 221.090057       | G    | 756.443658  | 378.725467      | 739.417109     | 370.212193      |                |                  | 4 |
| 6 | 572.267467  | 286.637372      | 555.240918     | 278.124097      | 554.256902     | 277.632089       | L    | 699.422194  | 350.214735      | 682.395645     | 341.701461      |                |                  | 3 |
| 7 | 1011.492793 | 506.250035      | 994.466244     | 497.736760      | 993.482228     | 497.244752       | Q    | 586.338130  | 293.672703      | 569.311581     | 285.159429      |                |                  | 2 |
| 8 |             |                 |                |                 |                |                  | K    | 147.112804  | 74.060040       | 130.086255     | 65.546766       |                |                  | 1 |

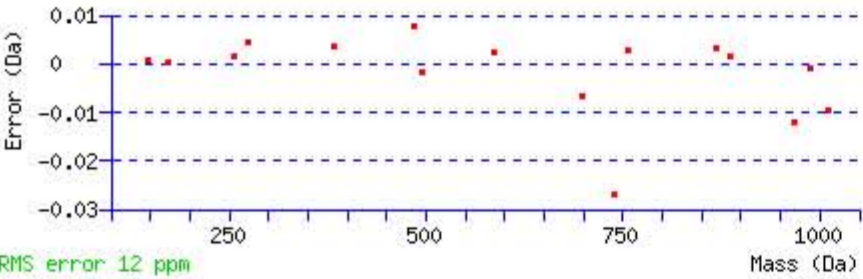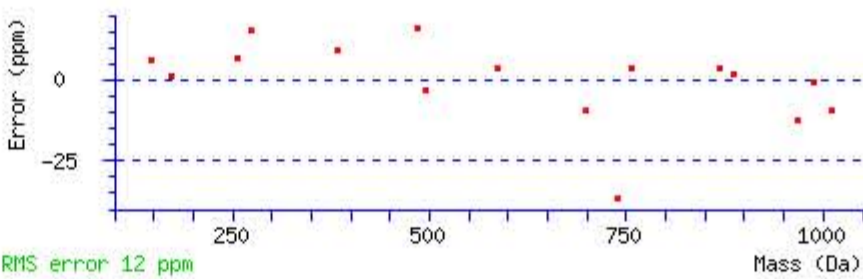

NCBI BLAST search of [GNTEGLQK](#)  
(Parameters: blastp, nr protein database, expect=20000, no filter, PAM30)  
Other BLAST [web gateways](#)

All matches to this query

| Score | Mr(calc):   | Delta    | Sequence                  |
|-------|-------------|----------|---------------------------|
| 34.1  | 1156.591034 | 0.000214 | <a href="#">GNTEGLQK</a>  |
| 2.0   | 1156.591003 | 0.000245 | <a href="#">KEEANQK</a>   |
| 0.1   | 1156.577118 | 0.014130 | <a href="#">QLSTRCHQK</a> |

MATRIX

SCIENCE

Mascot Search Results

Peptide View

MS/MS Fragmentation of **IDQNVEELK**  
Found in **APOA4\_HUMAN**, Apolipoprotein A-IV OS=Homo sapiens GN=APOA4 PE=1 SV=3

Match to Query 27247: 1397.724948 from(699.869750,2+) rtinseconds(1824) index(4449)  
Title: Locus:1.1.1.1912.10 File:"2013-07-02 CLN FXIII 180 min 2nd F 1.wiff"  
Data file C:\Program Files (x86)\Matrix Science\Mascot Daemon\mgf\8 FXIII 180 min 2nd\mascot\_daemon\_merge.mgf

Click mouse within plot area to zoom in by factor of two about that point  
Or, 

Plot from

0

 to 

4000

 Da 

Full range

  
Label all possible matches ☐ Label matches used for scoring ☒

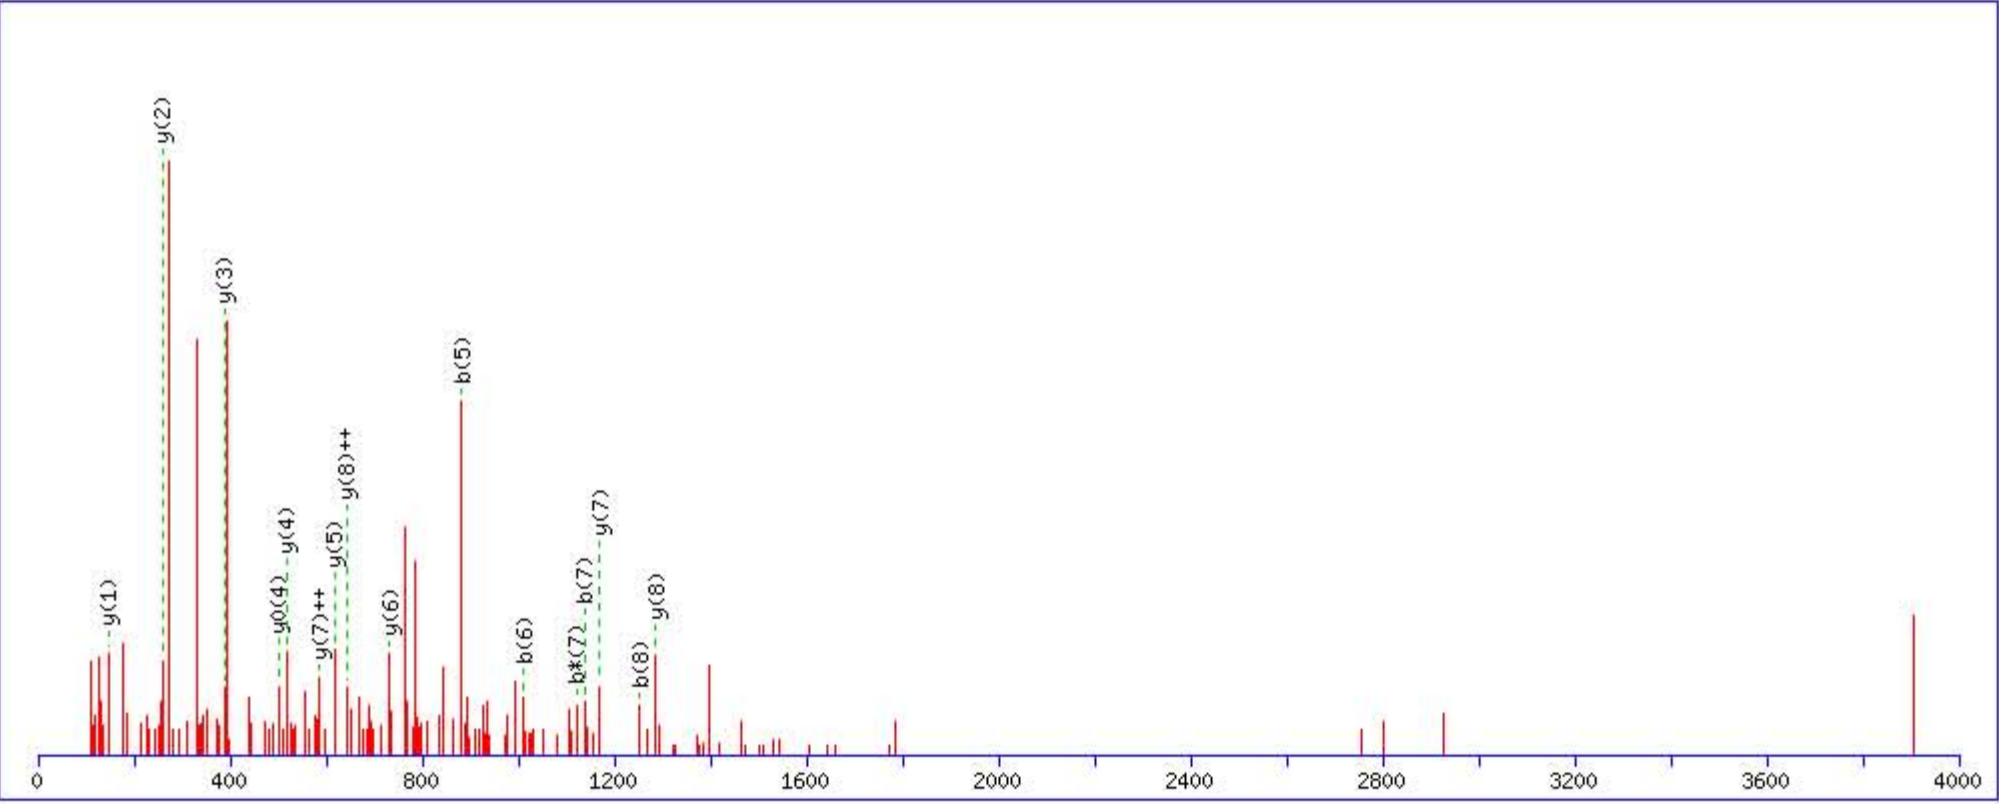

Monoisotopic mass of neutral peptide Mr(calc): 1397.722427  
Fixed modifications: Carbamidomethyl (C) (apply to specified residues or termini only)  
Variable modifications:  
Q3 : Biotin:Thermo-21345 (Q)  
Ions Score: 36 Expect: 0.0069  
Matches : 16/86 fragment ions using 39 most intense peaks [\(help\)](#)

| # | b           | b <sup>++</sup> | b <sup>*</sup> | b <sup>++</sup> * | b <sup>0</sup> | b <sup>0++</sup> | Seq. | y           | y <sup>++</sup> | y <sup>*</sup> | y <sup>++</sup> * | y <sup>0</sup> | y <sup>0++</sup> | # |
|---|-------------|-----------------|----------------|-------------------|----------------|------------------|------|-------------|-----------------|----------------|-------------------|----------------|------------------|---|
| 1 | 114.091340  | 57.549308       |                |                   |                |                  | I    |             |                 |                |                   |                |                  | 9 |
| 2 | 229.118283  | 115.062779      |                |                   | 211.107718     | 106.057497       | D    | 1285.645664 | 643.326470      | 1268.619115    | 634.813196        | 1267.635099    | 634.321187       | 8 |
| 3 | 668.343609  | 334.675443      | 651.317060     | 326.162168        | 650.333044     | 325.670160       | Q    | 1170.618721 | 585.812998      | 1153.592172    | 577.299724        | 1152.608156    | 576.807716       | 7 |
| 4 | 782.386536  | 391.696906      | 765.359987     | 383.183631        | 764.375971     | 382.691623       | N    | 731.393395  | 366.200335      | 714.366846     | 357.687061        | 713.382830     | 357.195053       | 6 |
| 5 | 881.454950  | 441.231113      | 864.428401     | 432.717838        | 863.444385     | 432.225830       | V    | 617.350468  | 309.178872      | 600.323919     | 300.665597        | 599.339903     | 300.173589       | 5 |
| 6 | 1010.497543 | 505.752410      | 993.470994     | 497.239135        | 992.486978     | 496.747127       | E    | 518.282054  | 259.644665      | 501.255505     | 251.131390        | 500.271489     | 250.639382       | 4 |
| 7 | 1139.540136 | 570.273706      | 1122.513587    | 561.760431        | 1121.529571    | 561.268423       | E    | 389.239461  | 195.123368      | 372.212912     | 186.610094        | 371.228896     | 186.118086       | 3 |
| 8 | 1252.624200 | 626.815738      | 1235.597651    | 618.302463        | 1234.613635    | 617.810455       | L    | 260.196868  | 130.602072      | 243.170319     | 122.088797        |                |                  | 2 |
| 9 |             |                 |                |                   |                |                  | K    | 147.112804  | 74.060040       | 130.086255     | 65.546765         |                |                  | 1 |

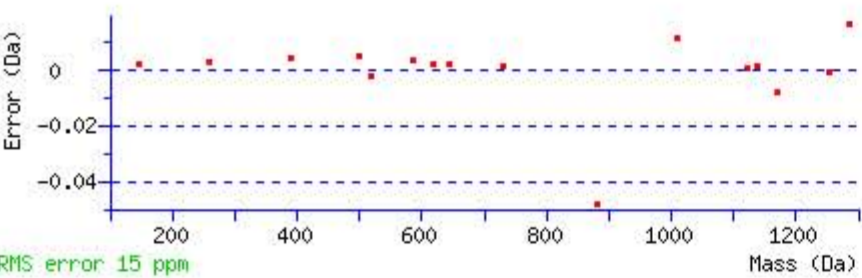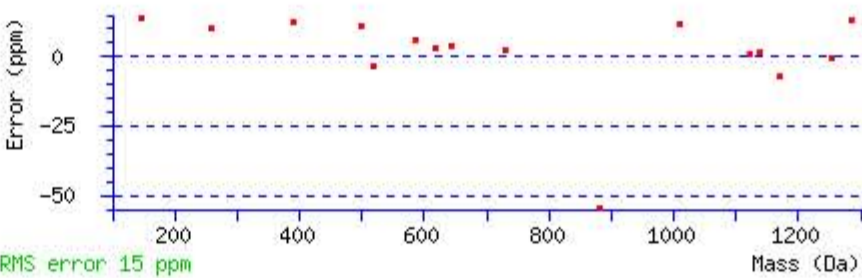

NCBI BLAST search of [IDQNVEELK](#)  
(Parameters: blastp, nr protein database, expect=20000, no filter, PAM30)  
Other BLAST [web gateways](#)

All matches to this query

| Score | Mr(calc):   | Delta     | Sequence                     |
|-------|-------------|-----------|------------------------------|
| 35.9  | 1397.722427 | 0.002521  | <a href="#">IDQNVEELK</a>    |
| 14.0  | 1397.744873 | -0.019925 | <a href="#">QRREEELK</a>     |
| 12.9  | 1397.730301 | -0.005353 | <a href="#">ELAFGDHELVIR</a> |
| 7.3   | 1397.733658 | -0.008710 | <a href="#">AQVRDLEEK</a>    |
| 6.8   | 1397.722412 | 0.002536  | <a href="#">QLEAQLEEK</a>    |
| 6.1   | 1397.744873 | -0.019925 | <a href="#">MLEKARHQELK</a>  |
| 4.5   | 1397.708496 | 0.016452  | <a href="#">QMEIQKHKDNK</a>  |
| 4.2   | 1397.744904 | -0.019956 | <a href="#">SSGPQRAGSLK</a>  |
| 3.8   | 1397.737701 | -0.012753 | <a href="#">VIQFYETMLVR</a>  |
| 3.6   | 1397.722427 | 0.002521  | <a href="#">SSPEEQLGIK</a>   |

MATRIX

SCIENCE

Mascot Search Results

Peptide View

MS/MS Fragmentation of **IDQTVHEELR**  
Found in **APOA4\_HUMAN**, Apolipoprotein A-IV OS=Homo sapiens GN=APOA4 PE=1 SV=3

Match to Query 28181: 1412.739168 from(707.376860,2+) rtinseconds(1914) index(49688)  
Title: Locus:1.1.1.1904.16 File:"2013-07-02 CLN FXIII 180 min 2nd F 4.wiff"  
Data file C:\Program Files (x86)\Matrix Science\Mascot Daemon\mgf\8 FXIII 180 min 2nd\mascot\_daemon\_merge.mgf

Click mouse within plot area to zoom in by factor of two about that point  
Or,   to  Da   
Label all possible matches ☐ Label matches used for scoring ☒

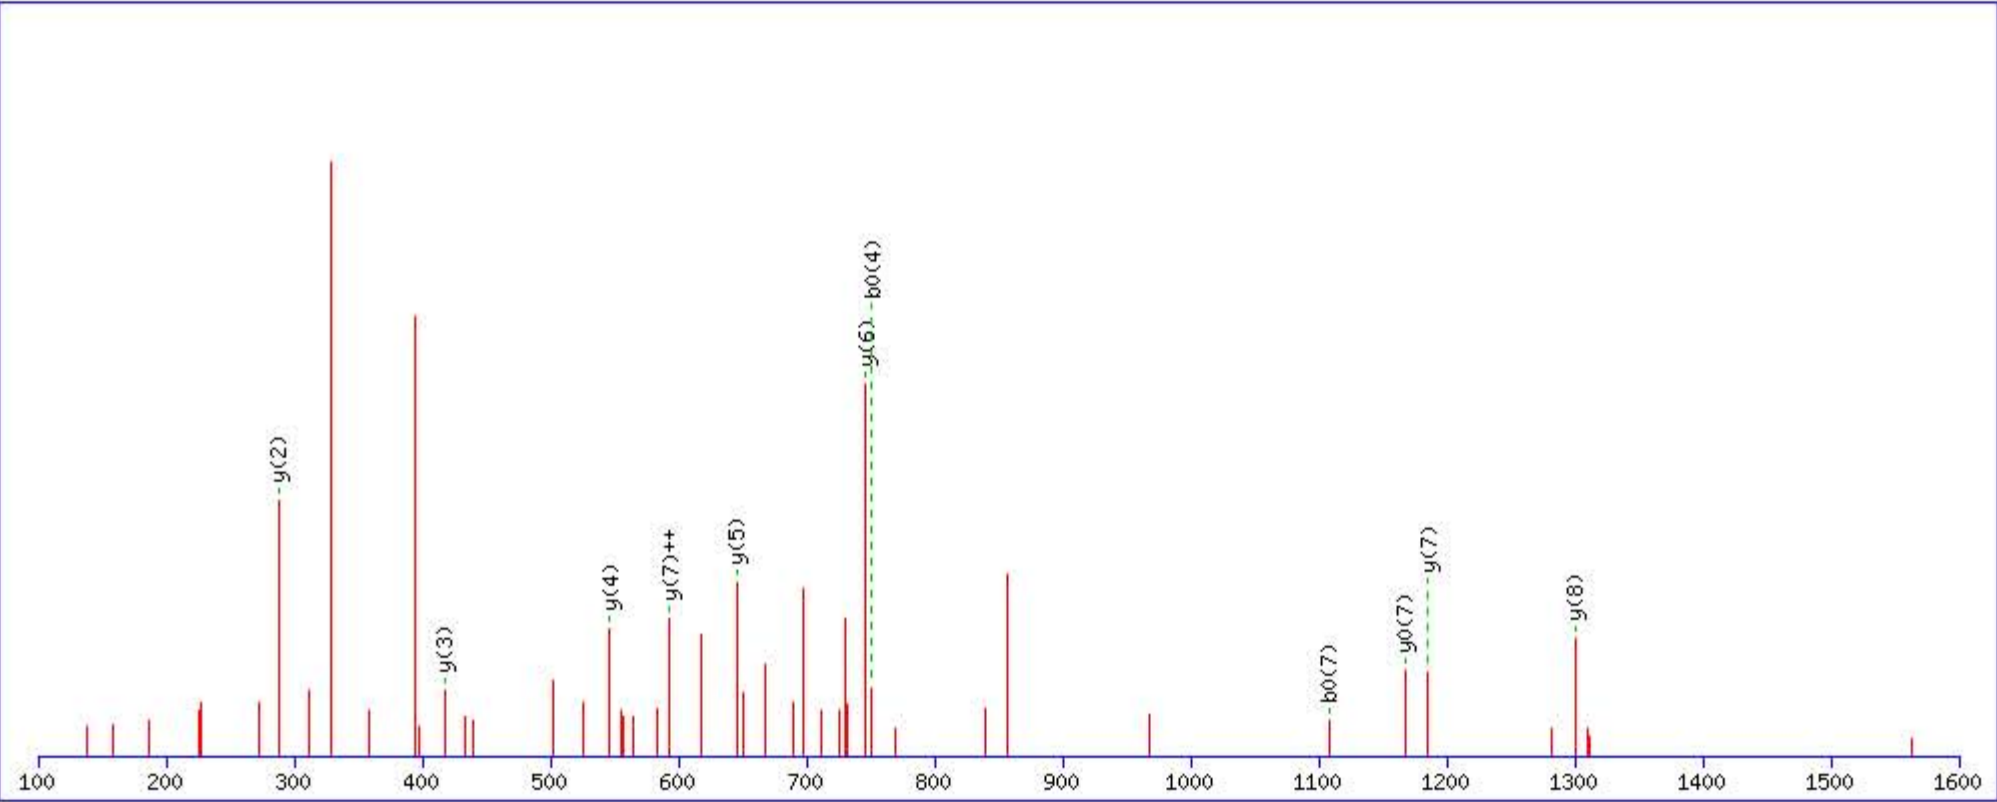

Monoisotopic mass of neutral peptide Mr(calc): 1412.733337  
Fixed modifications: Carbamidomethyl (C) (apply to specified residues or termini only)  
Variable modifications:  
Q3 : Biotin:Thermo-21345 (Q)  
Ions Score: 36 Expect: 0.0073  
Matches : 11/86 fragment ions using 22 most intense peaks [\(help\)](#)

| # | b           | b <sup>++</sup> | b <sup>*</sup> | b <sup>*++</sup> | b <sup>0</sup> | b <sup>0++</sup> | Seq. | y           | y <sup>++</sup> | y <sup>*</sup> | y <sup>*++</sup> | y <sup>0</sup> | y <sup>0++</sup> | # |
|---|-------------|-----------------|----------------|------------------|----------------|------------------|------|-------------|-----------------|----------------|------------------|----------------|------------------|---|
| 1 | 114.091340  | 57.549308       |                |                  |                |                  | I    |             |                 |                |                  |                |                  | 9 |
| 2 | 229.118283  | 115.062779      |                |                  | 211.107718     | 106.057497       | D    | 1300.656564 | 650.831920      | 1283.630015    | 642.318646       | 1282.645999    | 641.826638       | 8 |
| 3 | 668.343609  | 334.675443      | 651.317060     | 326.162168       | 650.333044     | 325.670160       | Q    | 1185.629621 | 593.318449      | 1168.603072    | 584.805174       | 1167.619056    | 584.313166       | 7 |
| 4 | 769.391288  | 385.199282      | 752.364739     | 376.686008       | 751.380723     | 376.194000       | T    | 746.404295  | 373.705786      | 729.377746     | 365.192511       | 728.393730     | 364.700503       | 6 |
| 5 | 868.459702  | 434.733489      | 851.433153     | 426.220215       | 850.449137     | 425.728207       | V    | 645.356616  | 323.181946      | 628.330067     | 314.668672       | 627.346051     | 314.176664       | 5 |
| 6 | 997.502295  | 499.254786      | 980.475746     | 490.741511       | 979.491730     | 490.249503       | E    | 546.288202  | 273.647739      | 529.261653     | 265.134465       | 528.277637     | 264.642457       | 4 |
| 7 | 1126.544888 | 563.776082      | 1109.518339    | 555.262808       | 1108.534323    | 554.770800       | E    | 417.245609  | 209.126442      | 400.219060     | 200.613168       | 399.235044     | 200.121160       | 3 |
| 8 | 1239.628952 | 620.318114      | 1222.602403    | 611.804840       | 1221.618387    | 611.312832       | L    | 288.203016  | 144.605146      | 271.176467     | 136.091871       |                |                  | 2 |
| 9 |             |                 |                |                  |                |                  | R    | 175.118952  | 88.063114       | 158.092403     | 79.549839        |                |                  | 1 |

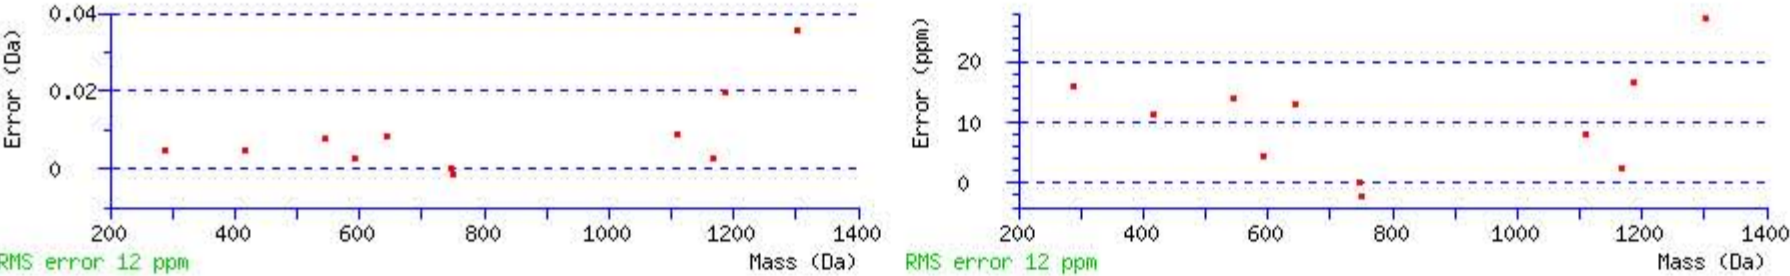

NCBI BLAST search of [IDQTVHEELR](#)  
(Parameters: blastp, nr protein database, expect=20000, no filter, PAM30)  
Other BLAST [web gateways](#)

All matches to this query

| Score | Mr(calc):   | Delta    | Sequence                   |
|-------|-------------|----------|----------------------------|
| 35.7  | 1412.733337 | 0.005831 | <a href="#">IDQTVHEELR</a> |

MATRIX

SCIENCE

Mascot Search Results

Peptide View

MS/MS Fragmentation of **LEPYADQLR**  
Found in **APOA4\_HUMAN**, Apolipoprotein A-IV OS=Homo sapiens GN=APOA4 PE=1 SV=3

Match to Query 28215: 1414.734948 from(708.374750,2+) rtinseconds(1960) index(66208)  
Title: Locus:1.1.1.1957.18 File:"2013-07-02 CLN FXIII 180 min 2nd FT.wiff"  
Data file C:\Program Files (x86)\Matrix Science\Mascot Daemon\mgf\8 FXIII 180 min 2nd\mascot\_daemon\_merge.mgf

Click mouse within plot area to zoom in by factor of two about that point  
Or, 

Plot from

100

 to 

1600

 Da 

Full range

  
Label all possible matches ☐ Label matches used for scoring ☒

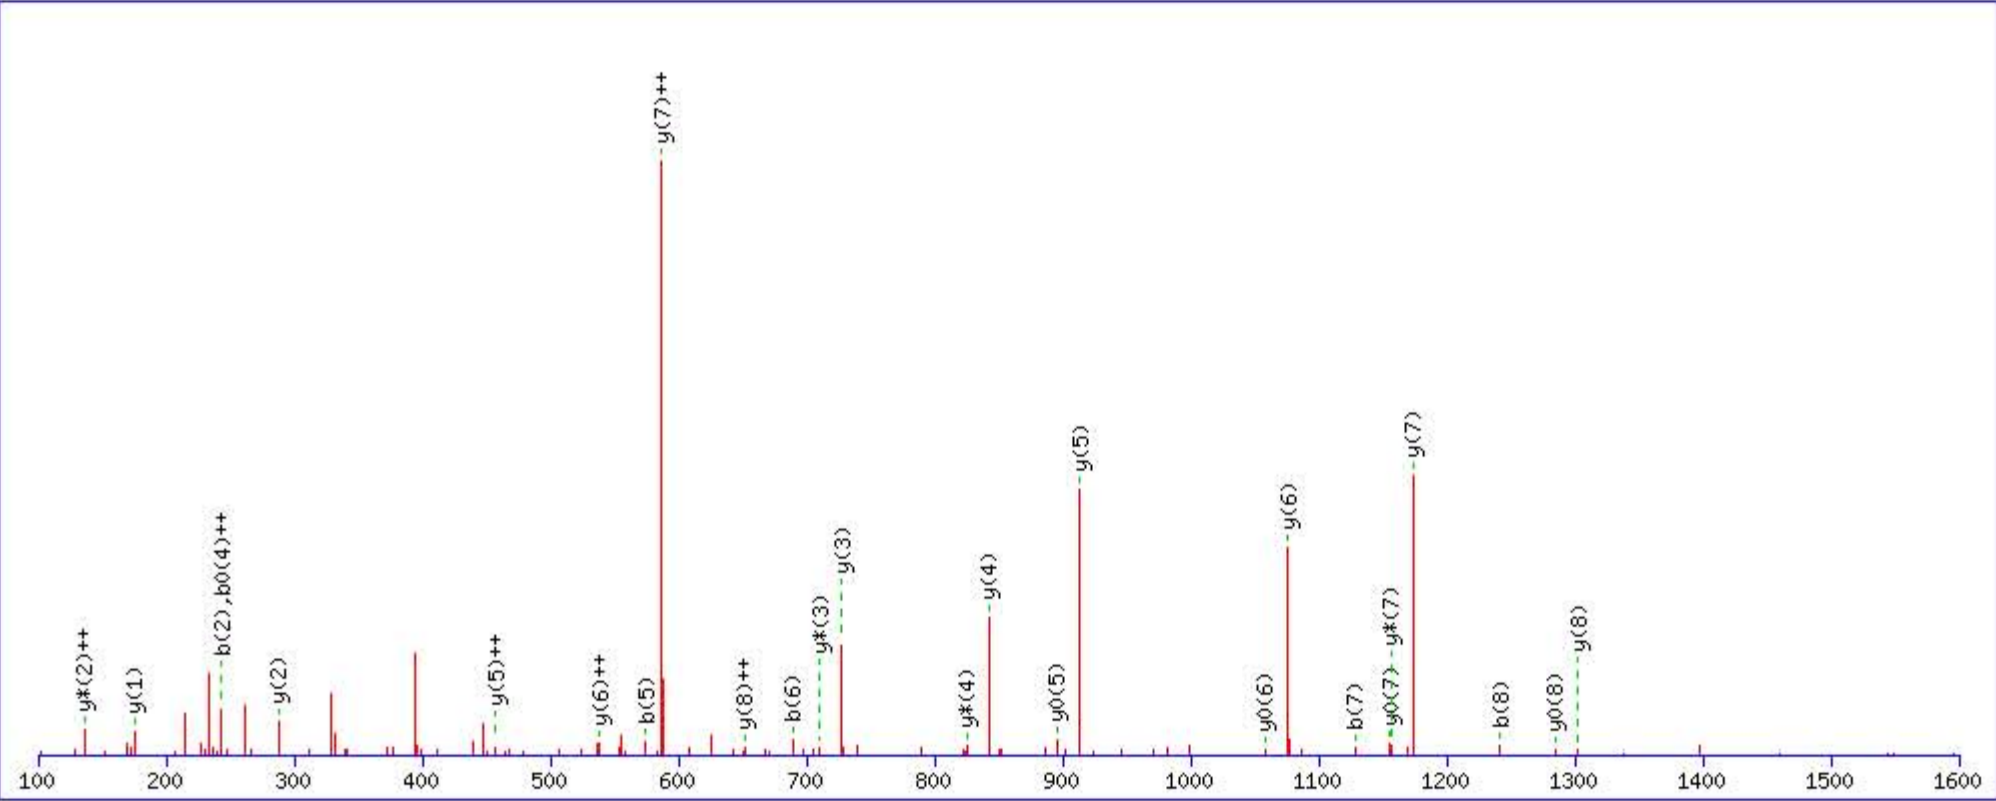

Monoisotopic mass of neutral peptide Mr(calc): 1414.727844  
Fixed modifications: Carbamidomethyl (C) (apply to specified residues or termini only)  
Variable modifications:  
Q7 : Biotin:Thermo-21345 (Q)  
Ions Score: 39 Expect: 0.0012  
Matches : 26/76 fragment ions using 59 most intense peaks [\(help\)](#)

| # | b           | b <sup>++</sup> | b <sup>*</sup> | b <sup>*++</sup> | b <sup>0</sup> | b <sup>0++</sup> | Seq. | y           | y <sup>++</sup> | y <sup>*</sup> | y <sup>*++</sup> | y <sup>0</sup> | y <sup>0++</sup> | # |
|---|-------------|-----------------|----------------|------------------|----------------|------------------|------|-------------|-----------------|----------------|------------------|----------------|------------------|---|
| 1 | 114.091340  | 57.549308       |                |                  |                |                  | L    |             |                 |                |                  |                |                  | 9 |
| 2 | 243.133933  | 122.070605      |                |                  | 225.123368     | 113.065322       | E    | 1302.651085 | 651.829181      | 1285.624536    | 643.315906       | 1284.640520    | 642.823898       | 8 |
| 3 | 340.186697  | 170.596987      |                |                  | 322.176132     | 161.591704       | P    | 1173.608492 | 587.307884      | 1156.581943    | 578.794610       | 1155.597927    | 578.302602       | 7 |
| 4 | 503.250026  | 252.128651      |                |                  | 485.239461     | 243.123369       | Y    | 1076.555728 | 538.781502      | 1059.529179    | 530.268228       | 1058.545163    | 529.776220       | 6 |
| 5 | 574.287140  | 287.647208      |                |                  | 556.276575     | 278.641926       | A    | 913.492399  | 457.249838      | 896.465850     | 448.736563       | 895.481834     | 448.244555       | 5 |
| 6 | 689.314083  | 345.160680      |                |                  | 671.303518     | 336.155397       | D    | 842.455285  | 421.731281      | 825.428736     | 413.218006       | 824.444720     | 412.725998       | 4 |
| 7 | 1128.539409 | 564.773343      | 1111.512860    | 556.260068       | 1110.528844    | 555.768060       | Q    | 727.428342  | 364.217809      | 710.401793     | 355.704535       |                |                  | 3 |
| 8 | 1241.623473 | 621.315375      | 1224.596924    | 612.802100       | 1223.612908    | 612.310092       | L    | 288.203016  | 144.605146      | 271.176467     | 136.091871       |                |                  | 2 |
| 9 |             |                 |                |                  |                |                  | R    | 175.118952  | 88.063114       | 158.092403     | 79.549839        |                |                  | 1 |

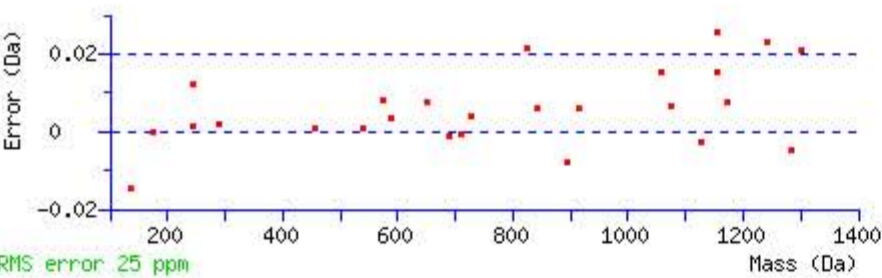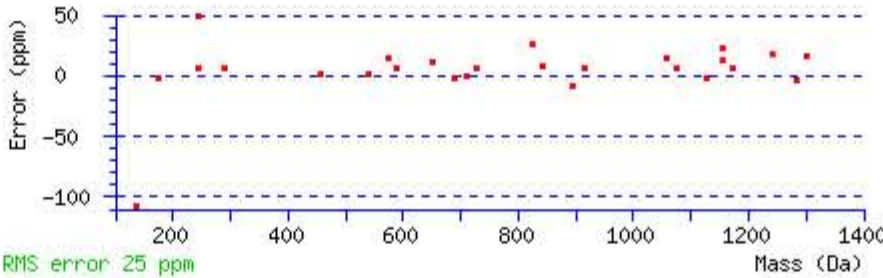

NCBI BLAST search of [LEPYADQLR](#)  
(Parameters: blastp, nr protein database, expect=20000, no filter, PAM30)  
Other BLAST [web gateways](#)

All matches to this query

| Score | Mr(calc):   | Delta     | Sequence                       |
|-------|-------------|-----------|--------------------------------|
| 38.6  | 1414.727844 | 0.007104  | <a href="#">LEPYADQLR</a>      |
| 6.9   | 1414.735931 | -0.000983 | <a href="#">LMRGLLHCMIR</a>    |
| 6.2   | 1414.752777 | -0.017829 | <a href="#">KNIESARAELE</a>    |
| 4.7   | 1414.731216 | 0.003732  | <a href="#">LMELQEAVR</a>      |
| 4.4   | 1414.741577 | -0.006629 | <a href="#">ELDVEVSRLEAR</a>   |
| 3.9   | 1414.735062 | -0.000114 | <a href="#">IQLMQEVDQR</a>     |
| 1.3   | 1414.731689 | 0.003259  | <a href="#">NKAEFHQSVISR</a>   |
| 0.7   | 1414.735077 | -0.000129 | <a href="#">SSMSGHLHLVKQGR</a> |
| 0.7   | 1414.716400 | 0.018548  | <a href="#">LEEDARLEERR</a>    |
| 0.2   | 1414.748978 | -0.014030 | <a href="#">NKDIPNMLDVLK</a>   |

MATRIX

SCIENCE

Mascot Search Results

Peptide View

MS/MS Fragmentation of **ALVQQMEQLR**  
Found in **APOA4\_HUMAN**, Apolipoprotein A-IV OS=Homo sapiens GN=APOA4 PE=1 SV=3

Match to Query 31955: 1525.823128 from(763.918840,2+) rtinseconds(2106) index(6223)  
Title: Locus:1.1.1.2010.14 File:"2013-07-02 CLN FXIII 180 min 2nd F 1.wiff"  
Data file C:\Program Files (x86)\Matrix Science\Mascot Daemon\mgf\8 FXIII 180 min 2nd\mascot\_daemon\_merge.mgf

Click mouse within plot area to zoom in by factor of two about that point  
Or, 

Plot from

100

to

2000

Da

Full range

Label all possible matches ☐Label matches used for scoring ☒

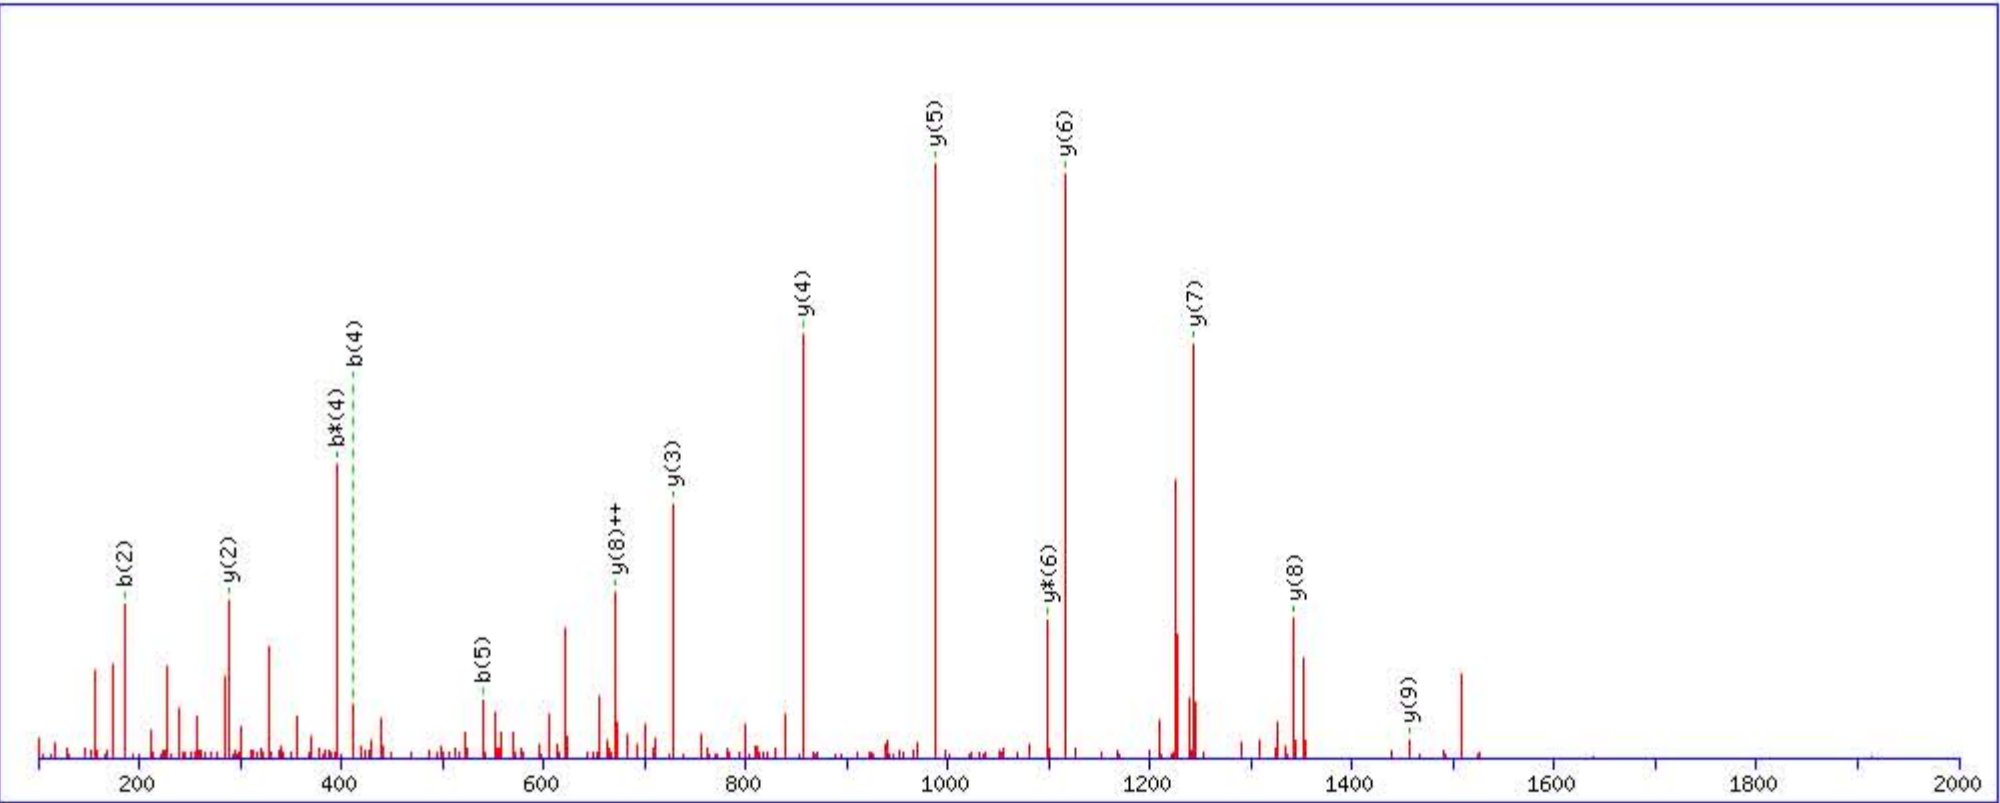

Monoisotopic mass of neutral peptide Mr(calc): 1525.810867  
Fixed modifications: Carbamidomethyl (C) (apply to specified residues or termini only)  
Variable modifications:  
Q8 : Biotin:Thermo-21345 (Q)  
Ions Score: 79 Expect: 2.6e-007  
Matches : 14/84 fragment ions using 15 most intense peaks [\(help\)](#)

| #  | b           | b <sup>++</sup> | b <sup>*</sup> | b <sup>*++</sup> | b <sup>0</sup> | b <sup>0++</sup> | Seq. | y           | y <sup>++</sup> | y <sup>*</sup> | y <sup>*++</sup> | y <sup>0</sup> | y <sup>0++</sup> | #  |
|----|-------------|-----------------|----------------|------------------|----------------|------------------|------|-------------|-----------------|----------------|------------------|----------------|------------------|----|
| 1  | 72.044390   | 36.525833       |                |                  |                |                  | A    |             |                 |                |                  |                |                  | 10 |
| 2  | 185.128454  | 93.067865       |                |                  |                |                  | L    | 1455.781054 | 728.394165      | 1438.754505    | 719.880890       | 1437.770489    | 719.388882       | 9  |
| 3  | 284.196868  | 142.602072      |                |                  |                |                  | V    | 1342.696990 | 671.852133      | 1325.670441    | 663.338858       | 1324.686425    | 662.846850       | 8  |
| 4  | 412.255446  | 206.631361      | 395.228897     | 198.118087       |                |                  | Q    | 1243.628576 | 622.317926      | 1226.602027    | 613.804651       | 1225.618011    | 613.312643       | 7  |
| 5  | 540.314024  | 270.660650      | 523.287475     | 262.147376       |                |                  | Q    | 1115.569998 | 558.288637      | 1098.543449    | 549.775362       | 1097.559433    | 549.283354       | 6  |
| 6  | 671.354509  | 336.180893      | 654.327960     | 327.667618       |                |                  | M    | 987.511420  | 494.259348      | 970.484871     | 485.746073       | 969.500855     | 485.254065       | 5  |
| 7  | 800.397102  | 400.702189      | 783.370553     | 392.188915       | 782.386537     | 391.696907       | E    | 856.470935  | 428.739105      | 839.444386     | 420.225831       | 838.460370     | 419.733823       | 4  |
| 8  | 1239.622428 | 620.314852      | 1222.595879    | 611.801578       | 1221.611863    | 611.309569       | Q    | 727.428342  | 364.217809      | 710.401793     | 355.704534       |                |                  | 3  |
| 9  | 1352.706492 | 676.856884      | 1335.679943    | 668.343609       | 1334.695927    | 667.851601       | L    | 288.203016  | 144.605146      | 271.176467     | 136.091871       |                |                  | 2  |
| 10 |             |                 |                |                  |                |                  | R    | 175.118952  | 88.063114       | 158.092403     | 79.549839        |                |                  | 1  |

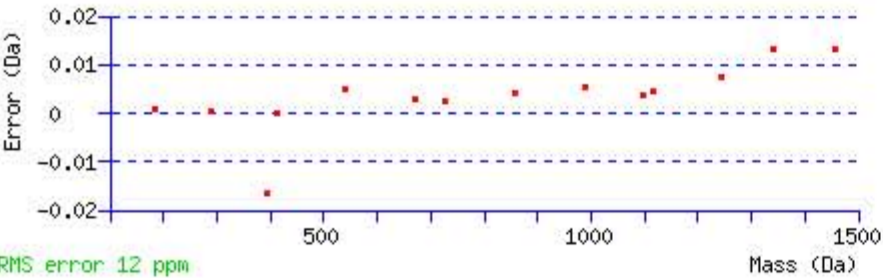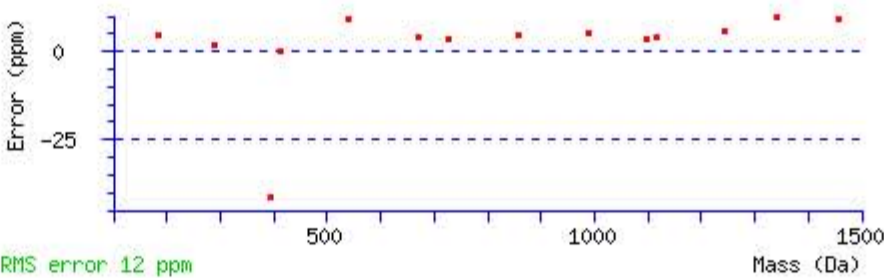

NCBI BLAST search of [ALVQQMEQLR](#)  
(Parameters: blastp, nr protein database, expect=20000, no filter, PAM30)  
Other BLAST [web gateways](#)

All matches to this query

| Score | Mr(calc):   | Delta     | Sequence                        |
|-------|-------------|-----------|---------------------------------|
| 78.7  | 1525.810867 | 0.012261  | <a href="#">ALVQQMEQLR</a>      |
| 30.5  | 1525.810867 | 0.012261  | <a href="#">ALVQQMEQLR</a>      |
| 14.7  | 1525.810867 | 0.012261  | <a href="#">ALVQQMEQLR</a>      |
| 8.0   | 1525.803467 | 0.019661  | <a href="#">SPPSPRSSMAAVALR</a> |
| 6.2   | 1525.843689 | -0.020561 | <a href="#">QAQADRVSLRNLR</a>   |
| 5.1   | 1525.803482 | 0.019646  | <a href="#">VNTPAGSSQKAR</a>    |
| 4.9   | 1525.814697 | 0.008431  | <a href="#">ERQRTEQLR</a>       |
| 4.7   | 1525.814682 | 0.008446  | <a href="#">LARASEQERR</a>      |
| 4.3   | 1525.843887 | -0.020759 | <a href="#">QFSLLSQHKK</a>      |
| 4.0   | 1525.807495 | 0.015633  | <a href="#">WPPQQLMLSAALR</a>   |

MATRIX

SCIENCE

Mascot Search Results

Peptide View

MS/MS Fragmentation of **LLPHANEVSQK**  
Found in **APOA4\_HUMAN**, Apolipoprotein A-IV OS=Homo sapiens GN=APOA4 PE=1 SV=3

Match to Query 32419: 1545.825162 from(516.282330,3+) rtinseconds(1524) index(17081)  
Title: Locus:1.1.1.2913.11 File:"2013-07-02 CLN FXIII 180 min 2nd F 2.wiff"  
Data file C:\Program Files (x86)\Matrix Science\Mascot Daemon\mgf\8 FXIII 180 min 2nd\mascot\_daemon\_merge.mgf

Click mouse within plot area to zoom in by factor of two about that point  
Or,   to  Da   
Label all possible matches ☐ Label matches used for scoring ☒

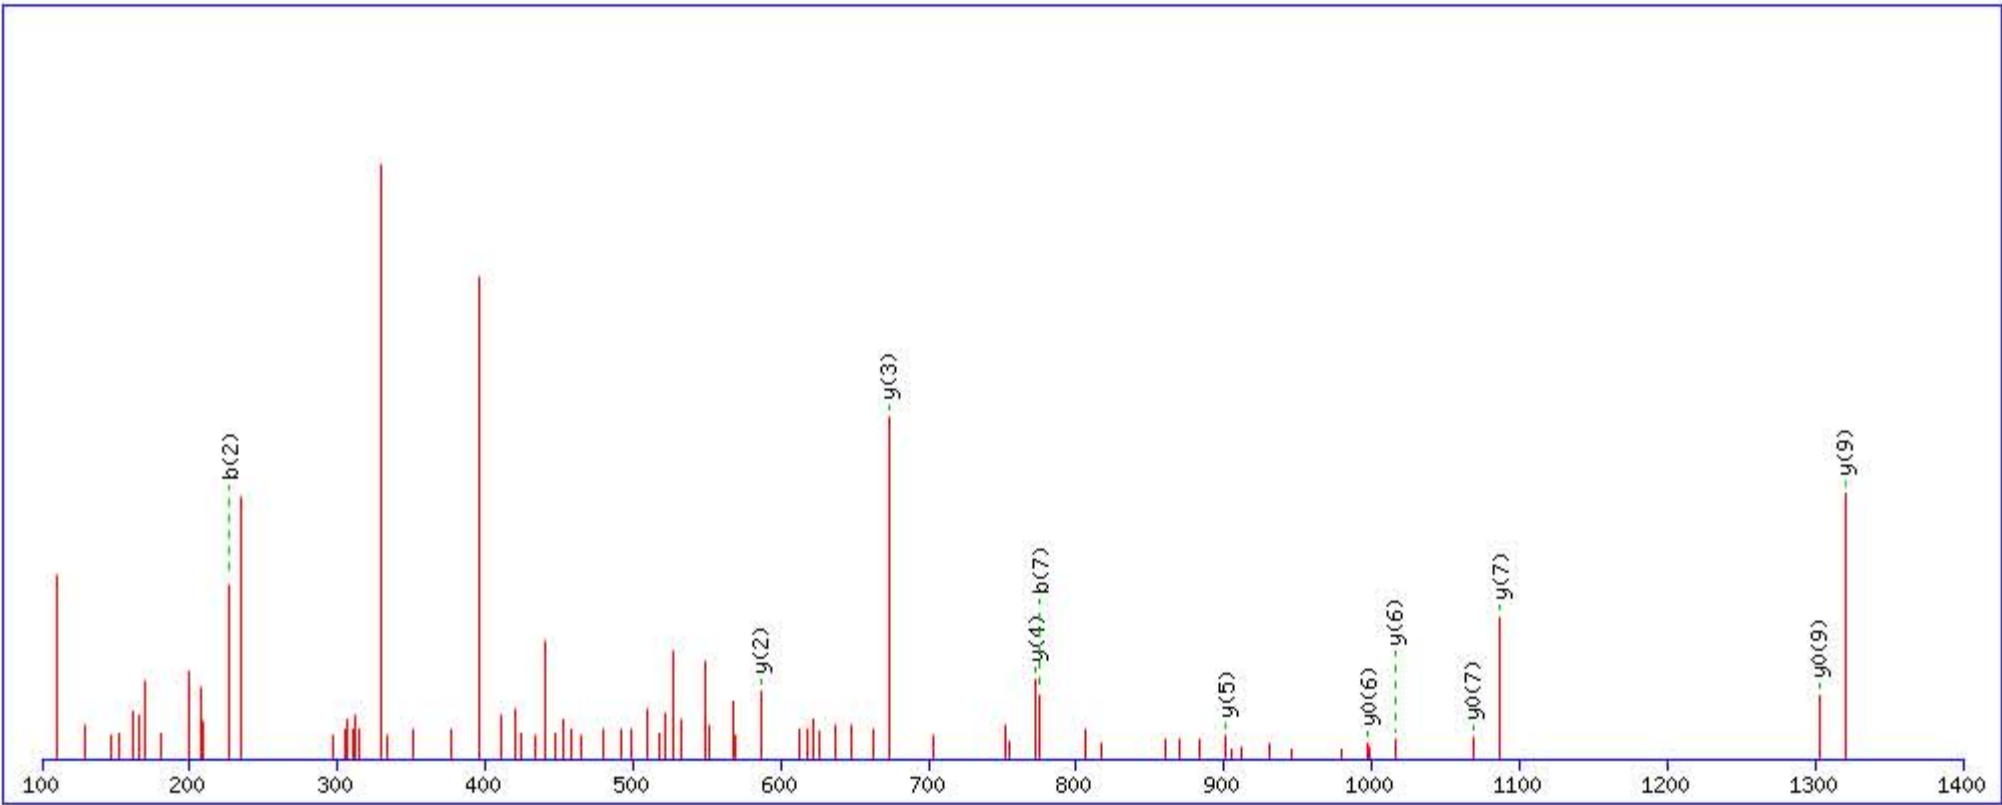

Monoisotopic mass of neutral peptide **Mr(calc):** 1545.833710  
Fixed modifications: Carbamidomethyl (C) (apply to specified residues or termini only)  
Variable modifications:  
Q10 : Biotin:Thermo-21345 (Q)  
Ions Score: 27 Expect: 0.042  
Matches : 12/94 fragment ions using 32 most intense peaks ([help](#))

| #  | b           | b <sup>++</sup> | b <sup>*</sup> | b <sup>++</sup> * | b <sup>0</sup> | b <sup>0++</sup> | Seq. | y           | y <sup>++</sup> | y <sup>*</sup> | y <sup>++</sup> * | y <sup>0</sup> | y <sup>0++</sup> | #  |
|----|-------------|-----------------|----------------|-------------------|----------------|------------------|------|-------------|-----------------|----------------|-------------------|----------------|------------------|----|
| 1  | 114.091340  | 57.549308       |                |                   |                |                  | L    |             |                 |                |                   |                |                  | 11 |
| 2  | 227.175404  | 114.091340      |                |                   |                |                  | L    | 1433.756946 | 717.382111      | 1416.730397    | 708.868837        | 1415.746381    | 708.376828       | 10 |
| 3  | 324.228168  | 162.617722      |                |                   |                |                  | P    | 1320.672882 | 660.840079      | 1303.646333    | 652.326804        | 1302.662317    | 651.834796       | 9  |
| 4  | 461.287080  | 231.147178      |                |                   |                |                  | H    | 1223.620118 | 612.313697      | 1206.593569    | 603.800422        | 1205.609553    | 603.308414       | 8  |
| 5  | 532.324194  | 266.665735      |                |                   |                |                  | A    | 1086.561206 | 543.784241      | 1069.534657    | 535.270966        | 1068.550641    | 534.778958       | 7  |
| 6  | 646.367121  | 323.687199      | 629.340572     | 315.173924        |                |                  | N    | 1015.524092 | 508.265684      | 998.497543     | 499.752409        | 997.513527     | 499.260401       | 6  |
| 7  | 775.409714  | 388.208495      | 758.383165     | 379.695221        | 757.399149     | 379.203213       | E    | 901.481165  | 451.244220      | 884.454616     | 442.730946        | 883.470600     | 442.238938       | 5  |
| 8  | 874.478128  | 437.742702      | 857.451579     | 429.229427        | 856.467563     | 428.737419       | V    | 772.438572  | 386.722924      | 755.412023     | 378.209649        | 754.428007     | 377.717641       | 4  |
| 9  | 961.510156  | 481.258716      | 944.483607     | 472.745441        | 943.499591     | 472.253433       | S    | 673.370158  | 337.188717      | 656.343609     | 328.675442        | 655.359593     | 328.183434       | 3  |
| 10 | 1400.735482 | 700.871379      | 1383.708933    | 692.358104        | 1382.724917    | 691.866096       | Q    | 586.338130  | 293.672703      | 569.311581     | 285.159428        |                |                  | 2  |
| 11 |             |                 |                |                   |                |                  | K    | 147.112804  | 74.060040       | 130.086255     | 65.546765         |                |                  | 1  |

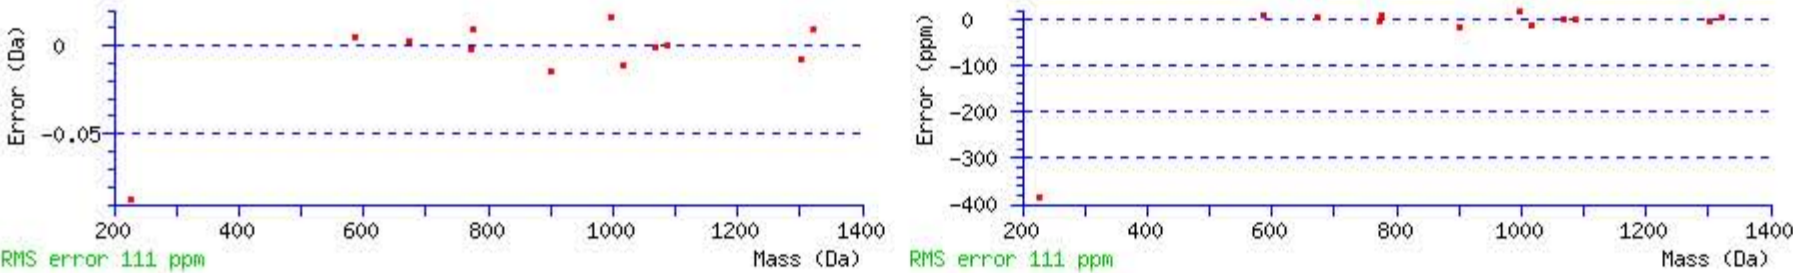

NCBI **BLAST** search of [LLPHANEVSQK](#)  
(Parameters: blastp, nr protein database, expect=20000, no filter, PAM30)  
Other BLAST [web gateways](#)

All matches to this query

| Score | Mr(calc):   | Delta     | Sequence                    |
|-------|-------------|-----------|-----------------------------|
| 27.2  | 1545.833710 | -0.008548 | <a href="#">LLPHANEVSQK</a> |

MATRIX

SCIENCE

Mascot Search Results

Peptide View

MS/MS Fragmentation of **TQVNTQAEQLR**  
Found in **APOA4\_HUMAN**, Apolipoprotein A-IV OS=Homo sapiens GN=APOA4 PE=1 SV=3

Match to Query 34636: 1597.825962 from(533.615930,3+) rtinseconds(1566) index(3084)  
Title: Locus:1.1.1.1822.11 File:"2013-07-02 CLN FXIII 180 min 2nd F 1.wiff"  
Data file C:\Program Files (x86)\Matrix Science\Mascot Daemon\mgf\8 FXIII 180 min 2nd\mascot\_daemon\_merge.mgf

Click mouse within plot area to zoom in by factor of two about that point  
Or,   to  Da   
Label all possible matches ☐ Label matches used for scoring ☒

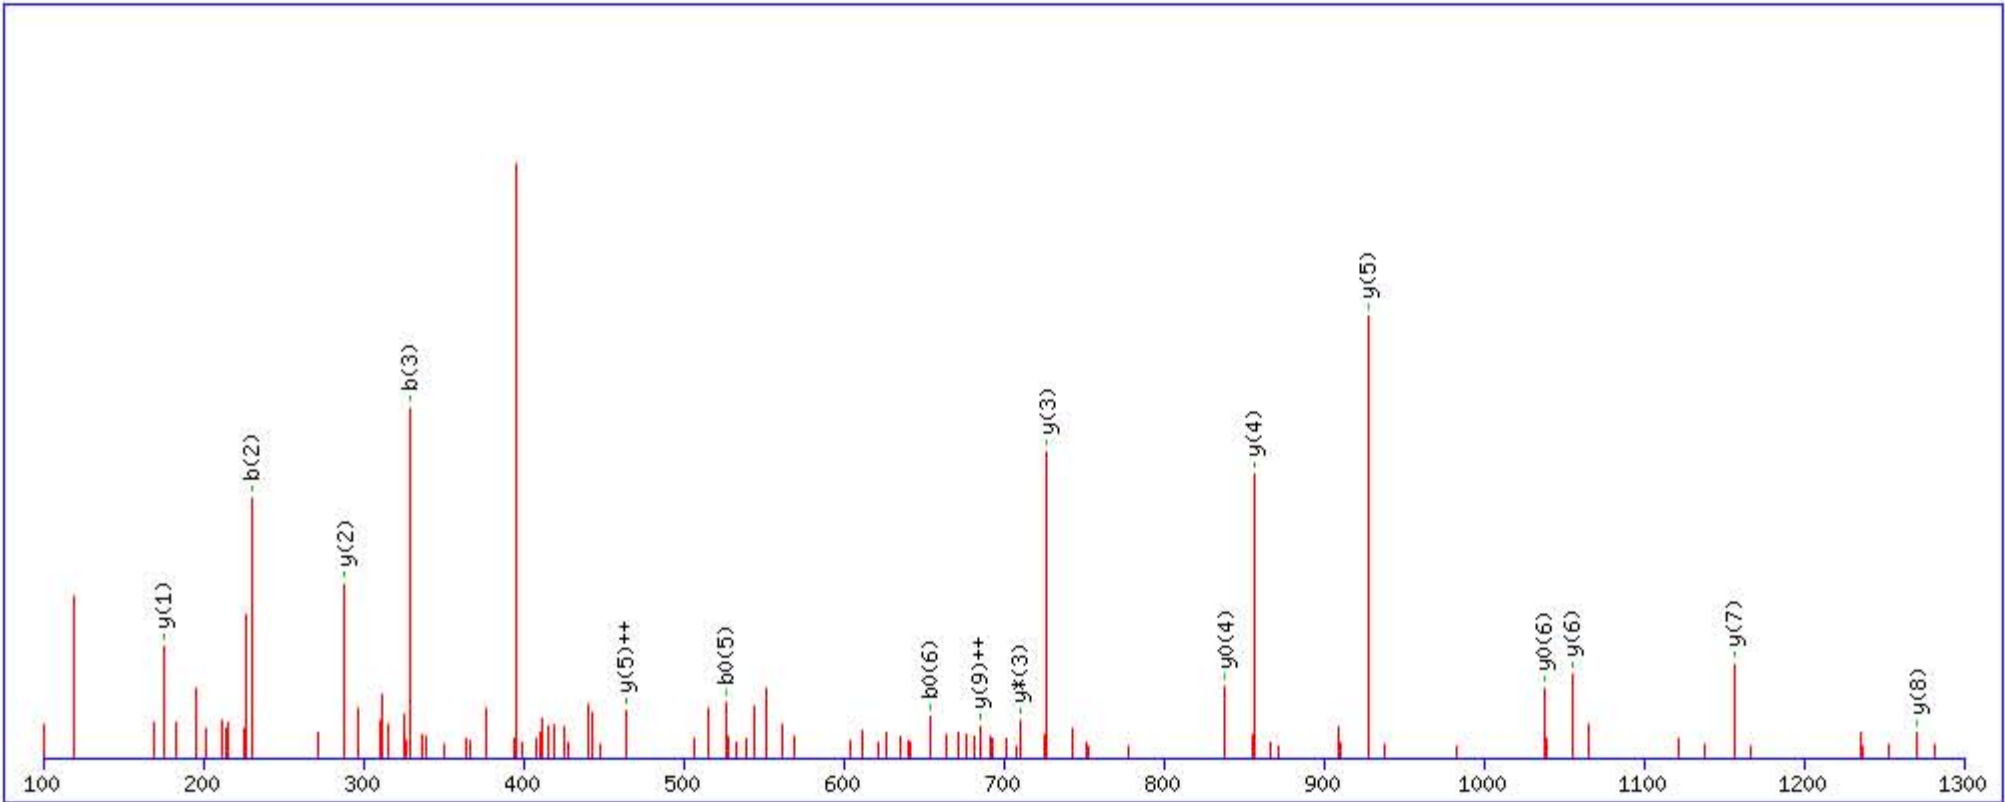

Monoisotopic mass of neutral peptide Mr(calc): 1597.824615  
Fixed modifications: Carbamidomethyl (C) (apply to specified residues or termini only)  
Variable modifications:  
Q9 : Biotin:Thermo-21345 (Q)  
Ions Score: 58 Expect: 1.9e-005  
Matches : 17/112 fragment ions using 24 most intense peaks [\(help\)](#)

| #  | b           | b <sup>++</sup> | b <sup>*</sup> | b <sup>+++</sup> | b <sup>0</sup> | b <sup>0++</sup> | Seq. | y           | y <sup>++</sup> | y <sup>*</sup> | y <sup>+++</sup> | y <sup>0</sup> | y <sup>0++</sup> | #  |
|----|-------------|-----------------|----------------|------------------|----------------|------------------|------|-------------|-----------------|----------------|------------------|----------------|------------------|----|
| 1  | 102.054955  | 51.531116       |                |                  | 84.044390      | 42.525833        | T    |             |                 |                |                  |                |                  | 11 |
| 2  | 230.113533  | 115.560405      | 213.086984     | 107.047130       | 212.102968     | 106.555122       | Q    | 1497.784225 | 749.395751      | 1480.757676    | 740.882476       | 1479.773660    | 740.390468       | 10 |
| 3  | 329.181947  | 165.094612      | 312.155398     | 156.581337       | 311.171382     | 156.089329       | V    | 1369.725647 | 685.366462      | 1352.699098    | 676.853187       | 1351.715082    | 676.361179       | 9  |
| 4  | 443.224874  | 222.116075      | 426.198325     | 213.602801       | 425.214309     | 213.110793       | N    | 1270.657233 | 635.832255      | 1253.630684    | 627.318980       | 1252.646668    | 626.826972       | 8  |
| 5  | 544.272553  | 272.639915      | 527.246004     | 264.126640       | 526.261988     | 263.634632       | T    | 1156.614306 | 578.810791      | 1139.587757    | 570.297517       | 1138.603741    | 569.805509       | 7  |
| 6  | 672.331131  | 336.669204      | 655.304582     | 328.155929       | 654.320566     | 327.663921       | Q    | 1055.566627 | 528.286951      | 1038.540078    | 519.773677       | 1037.556062    | 519.281669       | 6  |
| 7  | 743.368245  | 372.187761      | 726.341696     | 363.674486       | 725.357680     | 363.182478       | A    | 927.508049  | 464.257663      | 910.481500     | 455.744388       | 909.497484     | 455.252380       | 5  |
| 8  | 872.410838  | 436.709057      | 855.384289     | 428.195783       | 854.400273     | 427.703775       | E    | 856.470935  | 428.739106      | 839.444386     | 420.225831       | 838.460370     | 419.733823       | 4  |
| 9  | 1311.636164 | 656.321720      | 1294.609615    | 647.808446       | 1293.625599    | 647.316438       | Q    | 727.428342  | 364.217809      | 710.401793     | 355.704535       |                |                  | 3  |
| 10 | 1424.720228 | 712.863752      | 1407.693679    | 704.350478       | 1406.709663    | 703.858470       | L    | 288.203016  | 144.605146      | 271.176467     | 136.091871       |                |                  | 2  |
| 11 |             |                 |                |                  |                |                  | R    | 175.118952  | 88.063114       | 158.092403     | 79.549839        |                |                  | 1  |

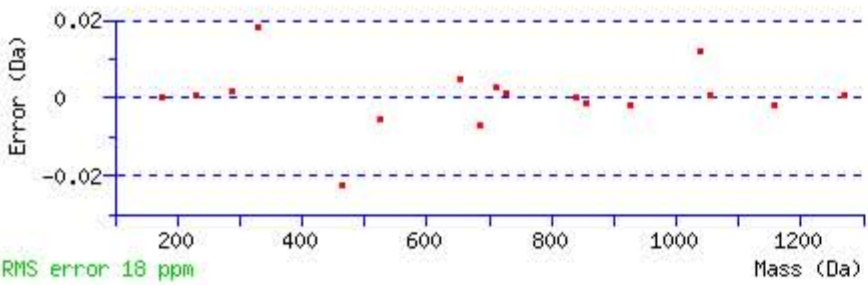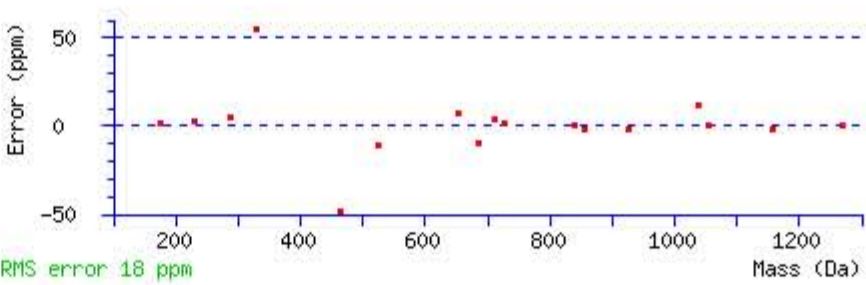

NCBI BLAST search of [TQVNTQAEQLR](#)  
(Parameters: blastp, nr protein database, expect=20000, no filter, PAM30)  
Other BLAST [web gateways](#)

All matches to this query

| Score | Mr(calc):   | Delta     | Sequence                        |
|-------|-------------|-----------|---------------------------------|
| 58.5  | 1597.824615 | 0.001347  | <a href="#">TQVNTQAEQLR</a>     |
| 14.5  | 1597.824615 | 0.001347  | <a href="#">TQVNTQAEQLR</a>     |
| 7.7   | 1597.835846 | -0.009884 | <a href="#">TKAAATAGGQGGAAR</a> |
| 1.3   | 1597.828629 | -0.002667 | <a href="#">AWDILSGEQLR</a>     |
| 0.8   | 1597.846375 | -0.020413 | <a href="#">EQLPIFKAQNPDAK</a>  |

MATRIX

SCIENCE

Mascot Search Results

Peptide View

MS/MS Fragmentation of **SLAPYAQDTQEK**  
Found in **APOA4\_HUMAN**, Apolipoprotein A-IV OS=Homo sapiens GN=APOA4 PE=1 SV=3

Match to Query 37128: 1660.821748 from(831.418150,2+) rtinseconds(1705) index(18273)  
Title: Locus:1.1.1.2976.11 File:"2013-07-02 CLN FXIII 180 min 2nd F 2.wiff"  
Data file C:\Program Files (x86)\Matrix Science\Mascot Daemon\mgf\8 FXIII 180 min 2nd\mascot\_daemon\_merge.mgf

Click mouse within plot area to zoom in by factor of two about that point  
Or, 

Plot from

100

 to 

1800

 Da 

Full range

  
Label all possible matches ☐ Label matches used for scoring ☒

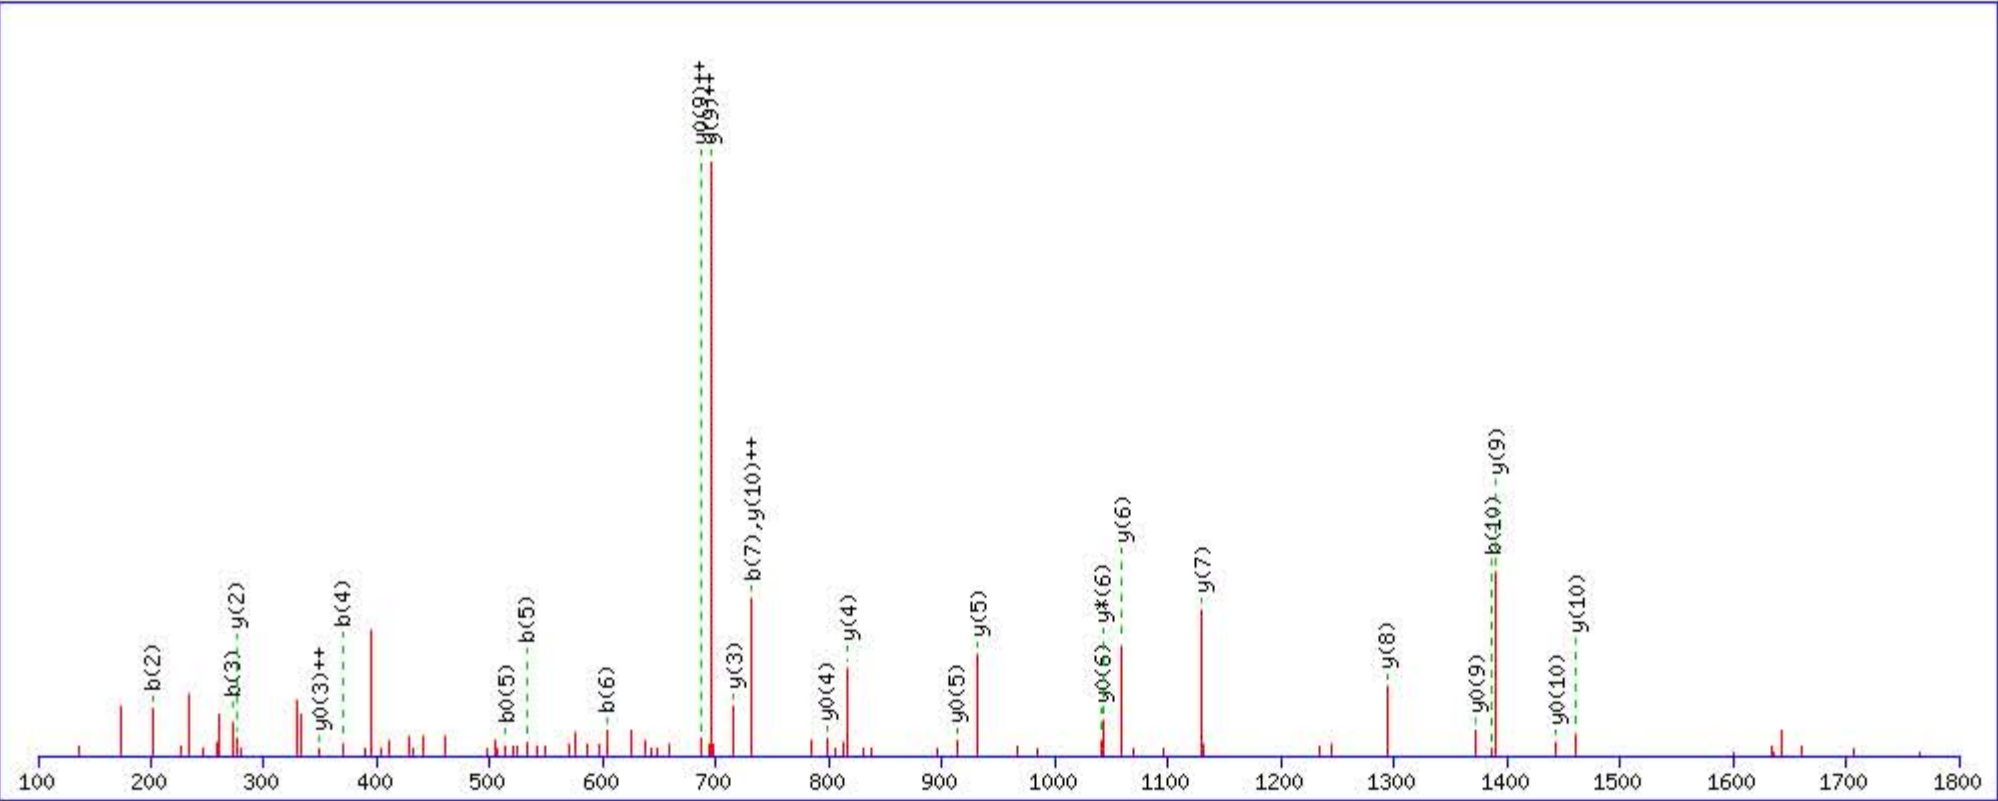

Monoisotopic mass of neutral peptide Mr(calc): 1660.813034  
Fixed modifications: Carbamidomethyl (C) (apply to specified residues or termini only)  
Variable modifications:  
Q10 : Biotin:Thermo-21345 (Q)  
Ions Score: 46 Expect: 0.0002  
Matches : 27/118 fragment ions using 58 most intense peaks [\(help\)](#)

| #  | b           | b <sup>++</sup> | b <sup>+</sup> | b <sup>#+</sup> | b <sup>0</sup> | b <sup>0++</sup> | Seq. | y           | y <sup>++</sup> | y <sup>+</sup> | y <sup>#+</sup> | y <sup>0</sup> | y <sup>0++</sup> | #  |
|----|-------------|-----------------|----------------|-----------------|----------------|------------------|------|-------------|-----------------|----------------|-----------------|----------------|------------------|----|
| 1  | 88.039304   | 44.523290       |                |                 | 70.028739      | 35.518008        | S    |             |                 |                |                 |                |                  | 12 |
| 2  | 201.123368  | 101.065322      |                |                 | 183.112803     | 92.060039        | L    | 1574.788308 | 787.897792      | 1557.761759    | 779.384518      | 1556.777743    | 778.892510       | 11 |
| 3  | 272.160482  | 136.583879      |                |                 | 254.149917     | 127.578596       | A    | 1461.704244 | 731.355760      | 1444.677695    | 722.842486      | 1443.693679    | 722.350478       | 10 |
| 4  | 369.213246  | 185.110261      |                |                 | 351.202681     | 176.104978       | P    | 1390.667130 | 695.837203      | 1373.640581    | 687.323929      | 1372.656565    | 686.831921       | 9  |
| 5  | 532.276575  | 266.641926      |                |                 | 514.266010     | 257.636643       | Y    | 1293.614366 | 647.310821      | 1276.587817    | 638.797547      | 1275.603801    | 638.305539       | 8  |
| 6  | 603.313689  | 302.160483      |                |                 | 585.303124     | 293.155200       | A    | 1130.551037 | 565.779157      | 1113.524488    | 557.265882      | 1112.540472    | 556.773874       | 7  |
| 7  | 731.372267  | 366.189772      | 714.345718     | 357.676497      | 713.361702     | 357.184489       | Q    | 1059.513923 | 530.260600      | 1042.487374    | 521.747325      | 1041.503358    | 521.255317       | 6  |
| 8  | 846.399210  | 423.703243      | 829.372661     | 415.189969      | 828.388645     | 414.697961       | D    | 931.455345  | 466.231311      | 914.428796     | 457.718036      | 913.444780     | 457.226028       | 5  |
| 9  | 947.446889  | 474.227083      | 930.420340     | 465.713808      | 929.436324     | 465.221800       | T    | 816.428402  | 408.717839      | 799.401853     | 400.204565      | 798.417837     | 399.712557       | 4  |
| 10 | 1386.672215 | 693.839746      | 1369.645666    | 685.326471      | 1368.661650    | 684.834463       | Q    | 715.380723  | 358.194000      | 698.354174     | 349.680725      | 697.370158     | 349.188717       | 3  |
| 11 | 1515.714808 | 758.361042      | 1498.688259    | 749.847768      | 1497.704243    | 749.355760       | E    | 276.155397  | 138.581337      | 259.128848     | 130.068062      | 258.144832     | 129.576054       | 2  |
| 12 |             |                 |                |                 |                |                  | K    | 147.112804  | 74.060040       | 130.086255     | 65.546765       |                |                  | 1  |

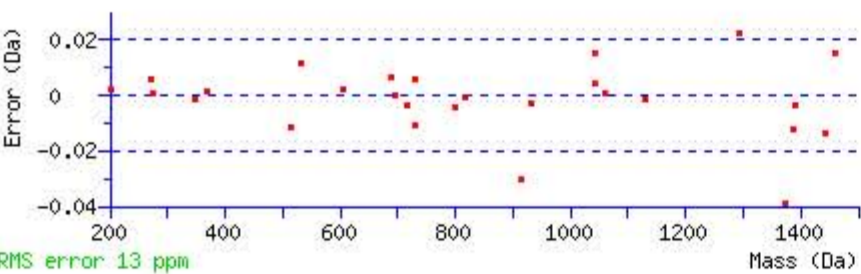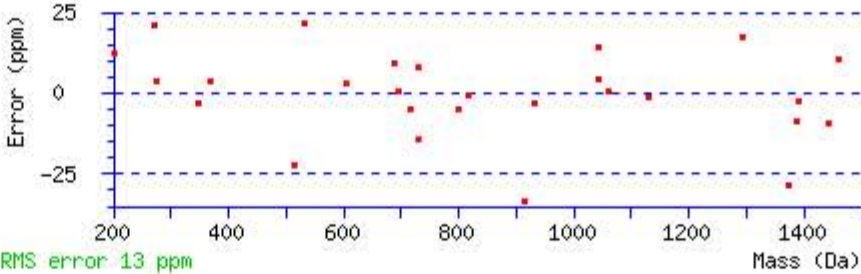

NCBI BLAST search of **SLAPYAQDTQEK**  
(Parameters: blastp, nr protein database, expect=20000, no filter, PAM30)  
Other BLAST [web gateways](#)

All matches to this query

| Score | Mr(calc):   | Delta     | Sequence                          |
|-------|-------------|-----------|-----------------------------------|
| 45.7  | 1660.813034 | 0.008714  | <a href="#">SLAPYAQDTQEK</a>      |
| 25.1  | 1660.813034 | 0.008714  | <a href="#">SLAPYAQDTQEK</a>      |
| 5.9   | 1660.820908 | 0.000840  | <a href="#">SLARAGFYTG VNDK</a>   |
| 2.6   | 1660.842911 | -0.021163 | <a href="#">QGQEVEPPR</a>         |
| 0.5   | 1660.826782 | -0.005034 | <a href="#">EAATQAQQT LGSTIDK</a> |

MATRIX

SCIENCE

Mascot Search Results

Peptide View

MS/MS Fragmentation of **LGEVNTYAGDLQK**  
Found in **APOA4\_HUMAN**, Apolipoprotein A-IV OS=Homo sapiens GN=APOA4 PE=1 SV=3

Match to Query 38354: 1717.885128 from(859.949840,2+) rtinseconds(1982) index(20135)  
Title: Locus:1.1.1.3072.11 File:"2013-07-02 CLN FXIII 180 min 2nd F 2.wiff"  
Data file C:\Program Files (x86)\Matrix Science\Mascot Daemon\mgf\8 FXIII 180 min 2nd\mascot\_daemon\_merge.mgf

Click mouse within plot area to zoom in by factor of two about that point  
Or, 

Plot from

100

 to 

1800

 Da 

Full range

  
Label all possible matches ☐ Label matches used for scoring ☒

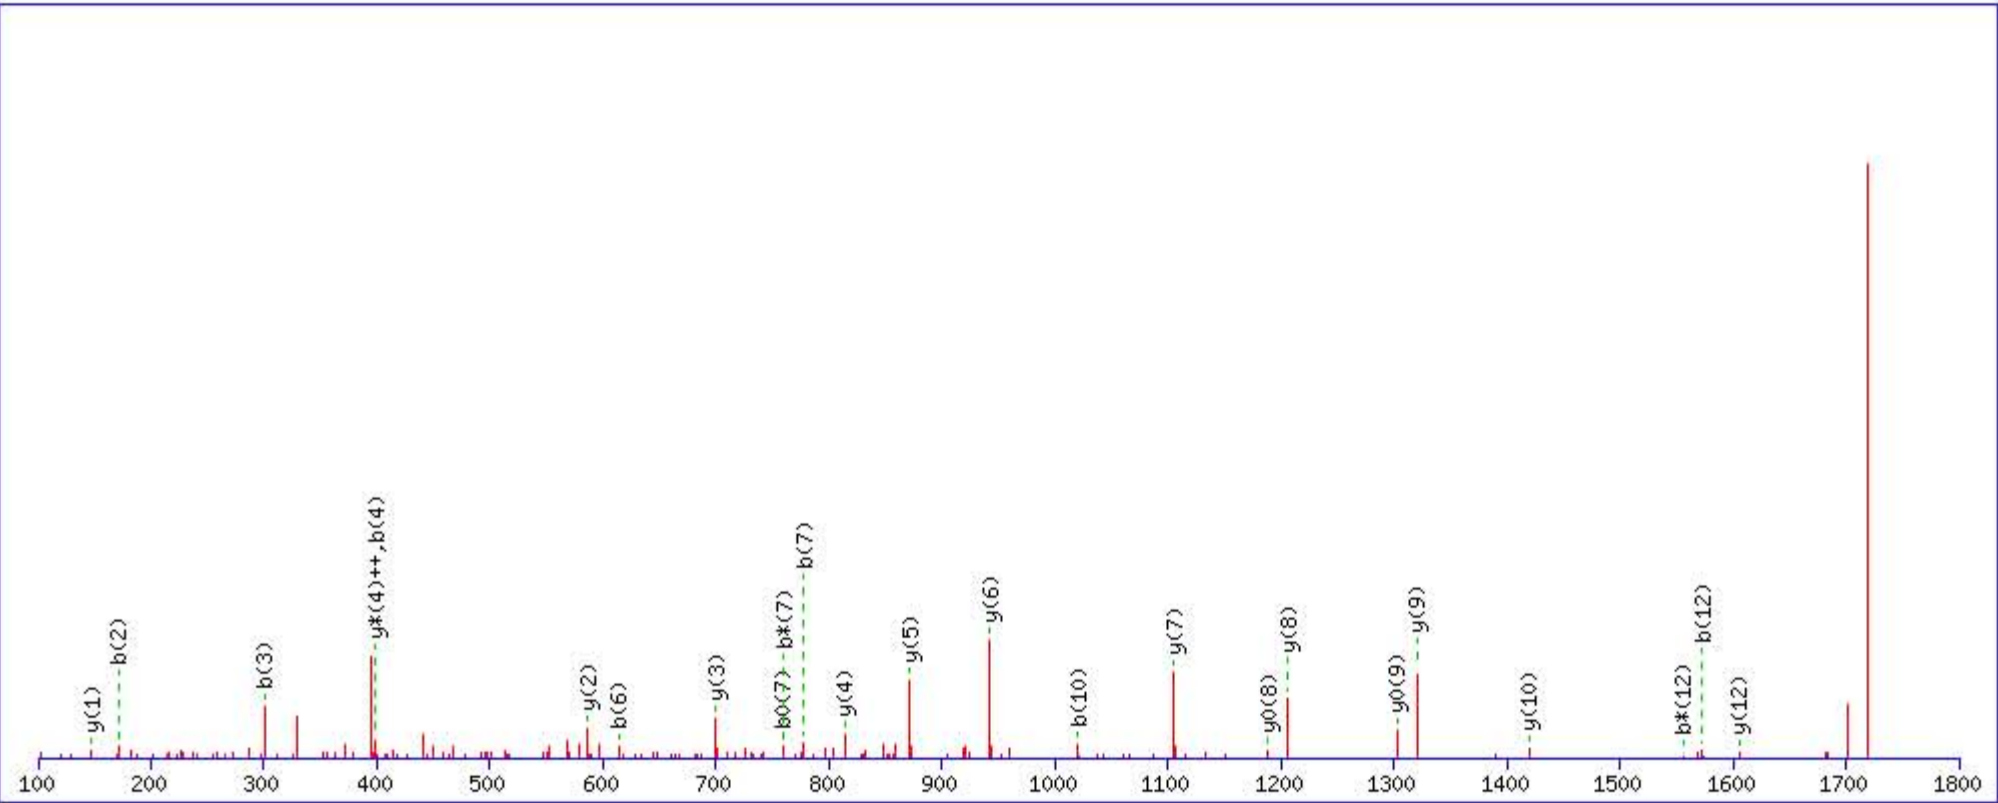

Monoisotopic mass of neutral peptide Mr(calc): 1717.870895  
Fixed modifications: Carbamidomethyl (C) (apply to specified residues or termini only)  
Variable modifications:  
Q12 : Biotin:Thermo-21345 (Q)  
Ions Score: 73 Expect: 1.2e-006  
Matches : 24/126 fragment ions using 44 most intense peaks [\(help\)](#)

| #  | b           | b <sup>++</sup> | b <sup>*</sup> | b <sup>*++</sup> | b <sup>0</sup> | b <sup>0++</sup> | Seq. | y           | y <sup>++</sup> | y <sup>*</sup> | y <sup>*++</sup> | y <sup>0</sup> | y <sup>0++</sup> | #  |
|----|-------------|-----------------|----------------|------------------|----------------|------------------|------|-------------|-----------------|----------------|------------------|----------------|------------------|----|
| 1  | 114.091340  | 57.549308       |                |                  |                |                  | L    |             |                 |                |                  |                |                  | 13 |
| 2  | 171.112804  | 86.060040       |                |                  |                |                  | G    | 1605.794121 | 803.400699      | 1588.767572    | 794.887424       | 1587.783556    | 794.395416       | 12 |
| 3  | 300.155397  | 150.581336      |                |                  | 282.144832     | 141.576054       | E    | 1548.772657 | 774.889967      | 1531.746108    | 766.376692       | 1530.762092    | 765.884684       | 11 |
| 4  | 399.223811  | 200.115544      |                |                  | 381.213246     | 191.110261       | V    | 1419.730064 | 710.368670      | 1402.703515    | 701.855396       | 1401.719499    | 701.363388       | 10 |
| 5  | 513.266738  | 257.137007      | 496.240189     | 248.623733       | 495.256173     | 248.131725       | N    | 1320.661650 | 660.834463      | 1303.635101    | 652.321189       | 1302.651085    | 651.829181       | 9  |
| 6  | 614.314417  | 307.660847      | 597.287868     | 299.147572       | 596.303852     | 298.655564       | T    | 1206.618723 | 603.813000      | 1189.592174    | 595.299725       | 1188.608158    | 594.807717       | 8  |
| 7  | 777.377746  | 389.192511      | 760.351197     | 380.679237       | 759.367181     | 380.187229       | Y    | 1105.571044 | 553.289160      | 1088.544495    | 544.775886       | 1087.560479    | 544.283878       | 7  |
| 8  | 848.414860  | 424.711068      | 831.388311     | 416.197794       | 830.404295     | 415.705786       | A    | 942.507715  | 471.757496      | 925.481166     | 463.244221       | 924.497150     | 462.752213       | 6  |
| 9  | 905.436324  | 453.221800      | 888.409775     | 444.708526       | 887.425759     | 444.216518       | G    | 871.470601  | 436.238939      | 854.444052     | 427.725664       | 853.460036     | 427.233656       | 5  |
| 10 | 1020.463267 | 510.735272      | 1003.436718    | 502.221997       | 1002.452702    | 501.729989       | D    | 814.449137  | 407.728207      | 797.422588     | 399.214932       | 796.438572     | 398.722924       | 4  |
| 11 | 1133.547331 | 567.277304      | 1116.520782    | 558.764029       | 1115.536766    | 558.272021       | L    | 699.422194  | 350.214735      | 682.395645     | 341.701461       |                |                  | 3  |
| 12 | 1572.772657 | 786.889967      | 1555.746108    | 778.376692       | 1554.762092    | 777.884684       | Q    | 586.338130  | 293.672703      | 569.311581     | 285.159429       |                |                  | 2  |
| 13 |             |                 |                |                  |                |                  | K    | 147.112804  | 74.060040       | 130.086255     | 65.546765        |                |                  | 1  |

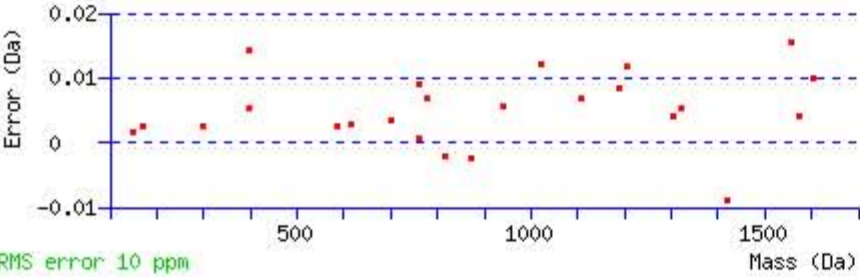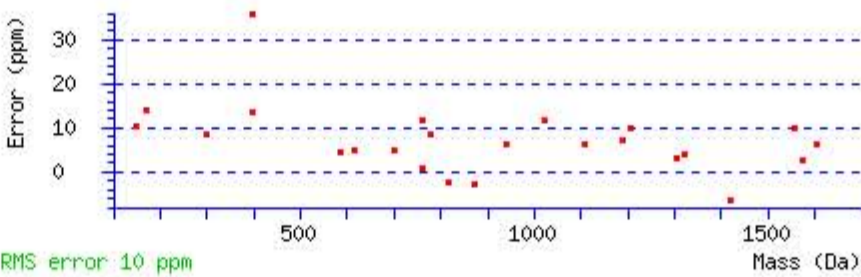

NCBI BLAST search of **LGEVNTYAGDLQK**  
(Parameters: blastp, nr protein database, expect=20000, no filter, PAM30)  
Other BLAST [web gateways](#)

All matches to this query

| Score | Mr(calc):   | Delta     | Sequence                         |
|-------|-------------|-----------|----------------------------------|
| 73.0  | 1717.870895 | 0.014233  | <a href="#">LGEVNTYAGDLQK</a>    |
| 9.2   | 1717.866867 | 0.018261  | <a href="#">IDAVNAETIREVCTK</a>  |
| 5.4   | 1717.878067 | 0.007061  | <a href="#">RATEKEINNMGNTLK</a>  |
| 0.8   | 1717.892014 | -0.006886 | <a href="#">LSTAVNIGKMDSPIEK</a> |
| 0.2   | 1717.859634 | 0.025494  | <a href="#">QELLEEEYEQVK</a>     |
| 0.2   | 1717.871567 | 0.013561  | <a href="#">EAKACSRIVQCLQR</a>   |
| 0.0   | 1717.903229 | -0.018101 | <a href="#">ELRSIIETMKDQQK</a>   |

MATRIX

SCIENCE

Mascot Search Results

Peptide View

MS/MS Fragmentation of **ALVQQMEQLR**  
Found in **APOA4\_HUMAN**, Apolipoprotein A-IV OS=Homo sapiens GN=APOA4 PE=1 SV=3

Match to Query 41005: 1836.989442 from(613.337090,3+) rtinseconds(2329) index(68313)  
Title: Locus:1.1.1.2086.9 File:"2013-07-02 CLN FXIII 180 min 2nd FT.wiff"  
Data file C:\Program Files (x86)\Matrix Science\Mascot Daemon\mgf\8 FXIII 180 min 2nd\mascot\_daemon\_merge.mgf

Click mouse within plot area to zoom in by factor of two about that point

Or, 

Plot from

100

 to 

1600

 Da 

Full range

Label all possible matches ☐ Label matches used for scoring ☒

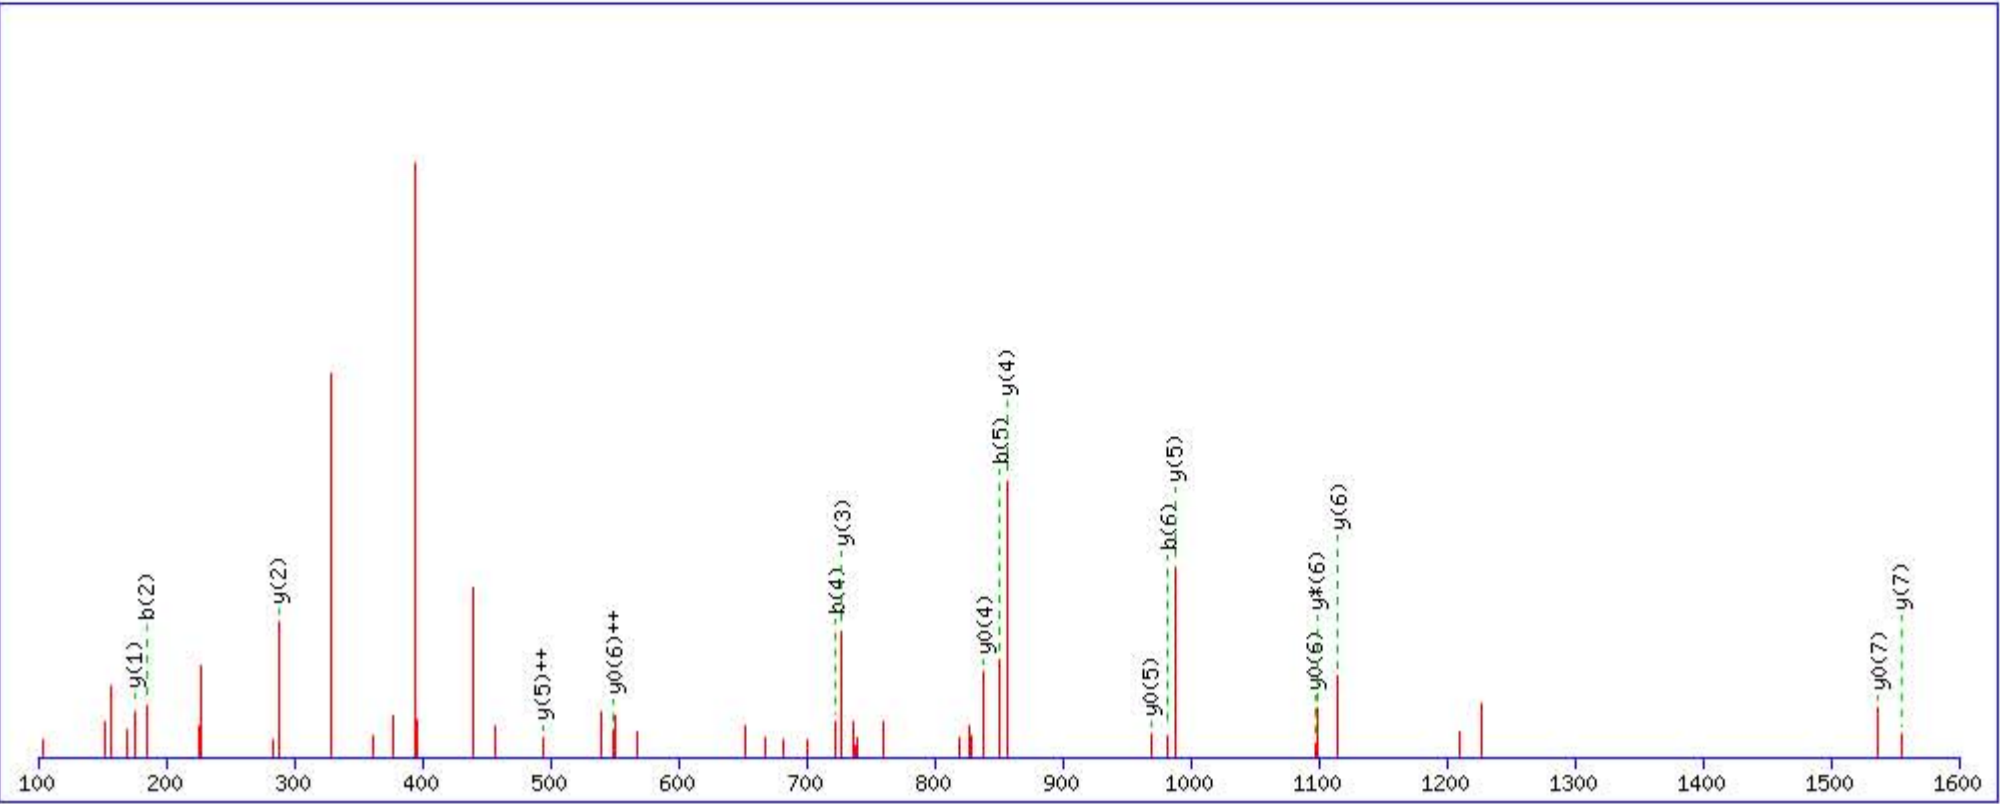

Monoisotopic mass of neutral peptide Mr(calc): 1836.977615  
Fixed modifications: Carbamidomethyl (C) (apply to specified residues or termini only)  
Variable modifications:  
Q4 : Biotin:Thermo-21345 (Q)  
Q8 : Biotin:Thermo-21345 (Q)  
Ions Score: 31 Expect: 0.017  
Matches : 18/84 fragment ions using 34 most intense peaks [\(help\)](#)

| #  | b           | b <sup>++</sup> | b <sup>*</sup> | b <sup>+++</sup> | b <sup>0</sup> | b <sup>0++</sup> | Seq. | y           | y <sup>++</sup> | y <sup>*</sup> | y <sup>+++</sup> | y <sup>0</sup> | y <sup>0++</sup> | #  |
|----|-------------|-----------------|----------------|------------------|----------------|------------------|------|-------------|-----------------|----------------|------------------|----------------|------------------|----|
| 1  | 72.044390   | 36.525833       |                |                  |                |                  | A    |             |                 |                |                  |                |                  | 10 |
| 2  | 185.128454  | 93.067865       |                |                  |                |                  | L    | 1766.947802 | 883.977539      | 1749.921253    | 875.464265       | 1748.937237    | 874.972256       | 9  |
| 3  | 284.196868  | 142.602072      |                |                  |                |                  | V    | 1653.863738 | 827.435507      | 1636.837189    | 818.922232       | 1635.853173    | 818.430224       | 8  |
| 4  | 723.422194  | 362.214735      | 706.395645     | 353.701461       |                |                  | Q    | 1554.795324 | 777.901300      | 1537.768775    | 769.388026       | 1536.784759    | 768.896017       | 7  |
| 5  | 851.480772  | 426.244024      | 834.454223     | 417.730750       |                |                  | Q    | 1115.569998 | 558.288637      | 1098.543449    | 549.775363       | 1097.559433    | 549.283354       | 6  |
| 6  | 982.521257  | 491.764267      | 965.494708     | 483.250992       |                |                  | M    | 987.511420  | 494.259348      | 970.484871     | 485.746073       | 969.500855     | 485.254065       | 5  |
| 7  | 1111.563850 | 556.285563      | 1094.537301    | 547.772289       | 1093.553285    | 547.280281       | E    | 856.470935  | 428.739105      | 839.444386     | 420.225831       | 838.460370     | 419.733823       | 4  |
| 8  | 1550.789176 | 775.898226      | 1533.762627    | 767.384952       | 1532.778611    | 766.892944       | Q    | 727.428342  | 364.217809      | 710.401793     | 355.704534       |                |                  | 3  |
| 9  | 1663.873240 | 832.440258      | 1646.846691    | 823.926984       | 1645.862675    | 823.434975       | L    | 288.203016  | 144.605146      | 271.176467     | 136.091871       |                |                  | 2  |
| 10 |             |                 |                |                  |                |                  | R    | 175.118952  | 88.063114       | 158.092403     | 79.549839        |                |                  | 1  |

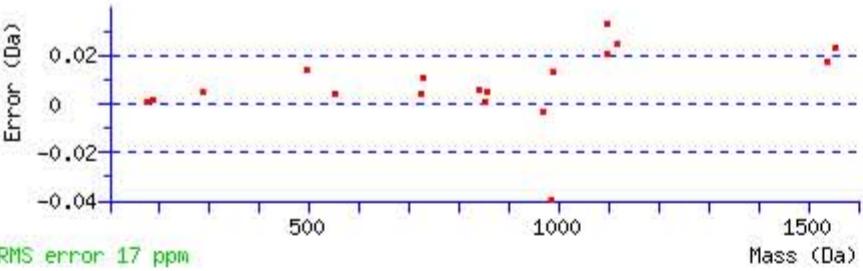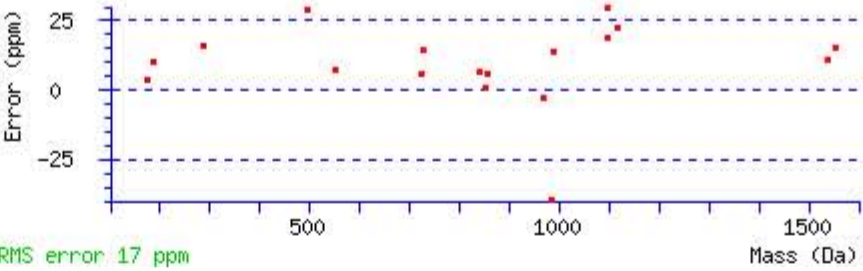

NCBI BLAST search of [ALVQQMEQLR](#)  
(Parameters: blastp, nr protein database, expect=20000, no filter, PAM30)  
Other BLAST [web gateways](#)

All matches to this query

| Score | Mr(calc):   | Delta     | Sequence                         |
|-------|-------------|-----------|----------------------------------|
| 31.5  | 1836.977615 | 0.011827  | <a href="#">ALVQQMEQLR</a>       |
| 20.4  | 1836.977615 | 0.011827  | <a href="#">ALVQQMEQLR</a>       |
| 17.2  | 1836.999207 | -0.009765 | <a href="#">QQSLQRQLEQLR</a>     |
| 4.2   | 1837.004578 | -0.015136 | <a href="#">RHSWRQQIFLR</a>      |
| 2.7   | 1836.995377 | -0.005935 | <a href="#">QVLMEHKATTIQK</a>    |
| 2.6   | 1836.977615 | 0.011827  | <a href="#">ALVQQMEQLR</a>       |
| 2.3   | 1837.005722 | -0.016280 | <a href="#">AIVTEPKTEKPERPSR</a> |
| 0.3   | 1836.981445 | 0.007997  | <a href="#">ERQRTEQLR</a>        |

MATRIX

SCIENCE

Mascot Search Results

Peptide View

MS/MS Fragmentation of **LNHQLEGLTFQMK**  
Found in **APOA4\_HUMAN**, Apolipoprotein A-IV OS=Homo sapiens GN=APOA4 PE=1 SV=3

Match to Query 41661: 1868.976042 from(623.999290,3+) rtinseconds(2148) index(6434)  
Title: Locus:1.1.1.2025.9 File:"2013-07-02 CLN FXIII 180 min 2nd F 1.wiff"  
Data file C:\Program Files (x86)\Matrix Science\Mascot Daemon\mgf\8 FXIII 180 min 2nd\mascot\_daemon\_merge.mgf

Click mouse within plot area to zoom in by factor of two about that point  
Or, 

Plot from

100

 to 

1800

 Da 

Full range

  
Label all possible matches ☐ Label matches used for scoring ☒

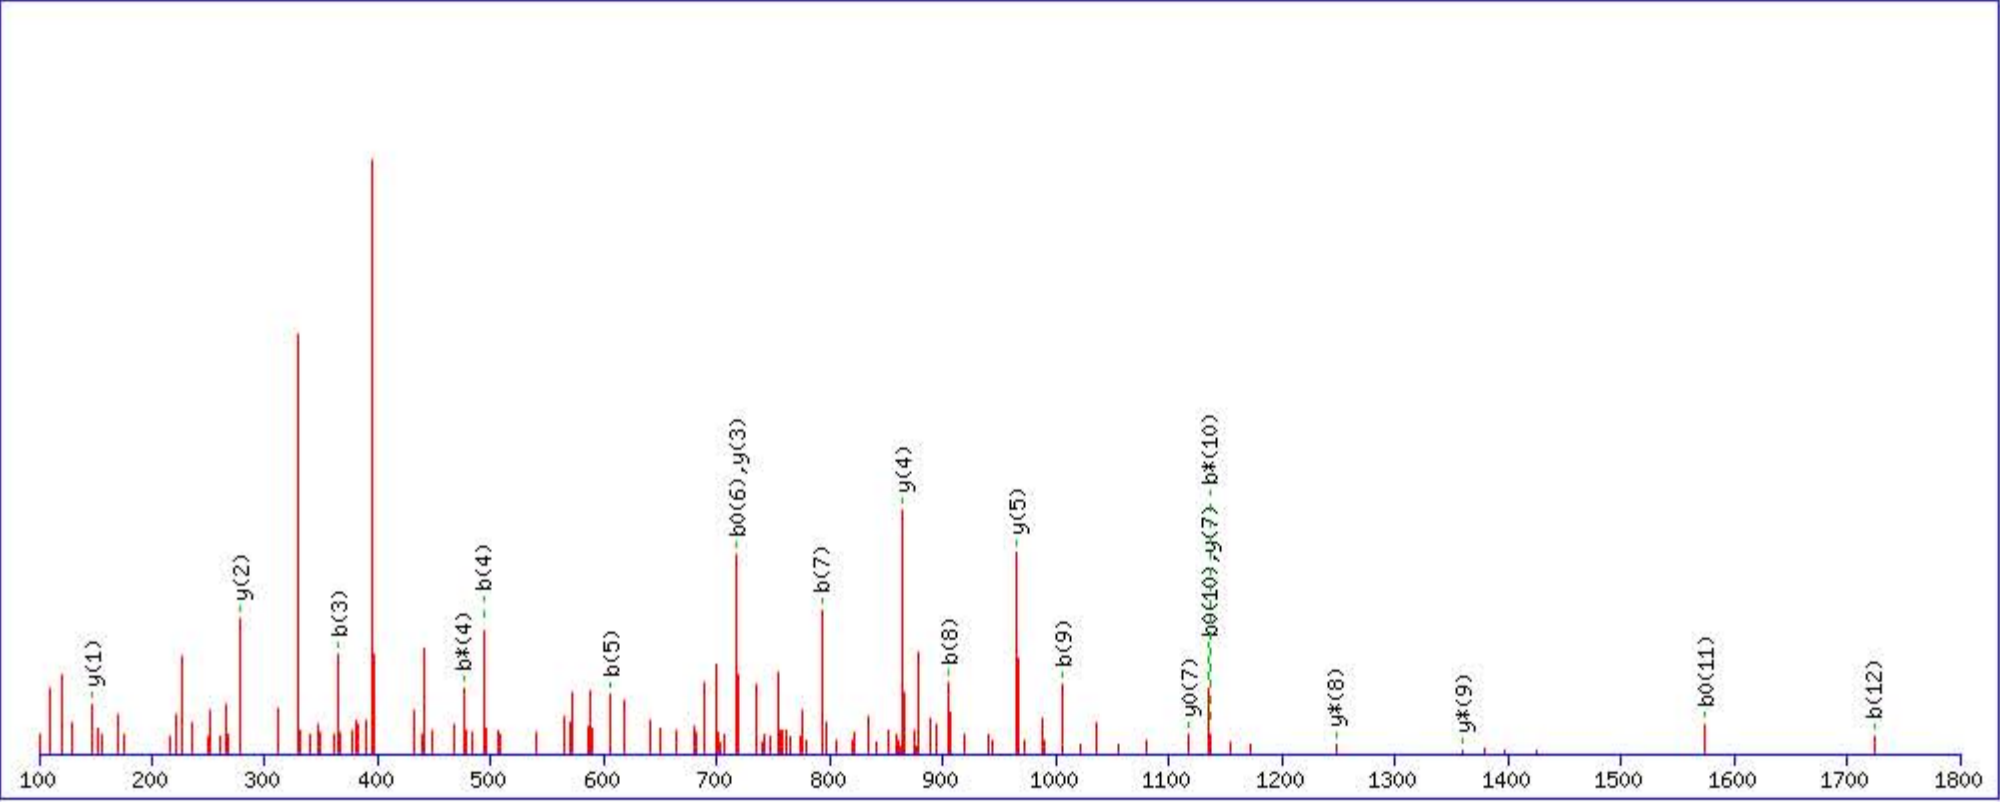

Monoisotopic mass of neutral peptide Mr(calc): 1868.964081  
Fixed modifications: Carbamidomethyl (C) (apply to specified residues or termini only)  
Variable modifications:  
Q11 : Biotin:Thermo-21345 (Q)  
Ions Score: 35 Expect: 0.0092  
Matches : 21/124 fragment ions using 40 most intense peaks [\(help\)](#)

| #  | b           | b <sup>++</sup> | b <sup>*</sup> | b <sup>*++</sup> | b <sup>0</sup> | b <sup>0++</sup> | Seq. | y           | y <sup>++</sup> | y <sup>*</sup> | y <sup>*++</sup> | y <sup>0</sup> | y <sup>0++</sup> | #  |
|----|-------------|-----------------|----------------|------------------|----------------|------------------|------|-------------|-----------------|----------------|------------------|----------------|------------------|----|
| 1  | 114.091340  | 57.549308       |                |                  |                |                  | L    |             |                 |                |                  |                |                  | 13 |
| 2  | 228.134267  | 114.570771      | 211.107718     | 106.057497       |                |                  | N    | 1756.887310 | 878.947293      | 1739.860761    | 870.434019       | 1738.876745    | 869.942011       | 12 |
| 3  | 365.193179  | 183.100227      | 348.166630     | 174.586953       |                |                  | H    | 1642.844383 | 821.925830      | 1625.817834    | 813.412555       | 1624.833818    | 812.920547       | 11 |
| 4  | 493.251757  | 247.129516      | 476.225208     | 238.616242       |                |                  | Q    | 1505.785471 | 753.396374      | 1488.758922    | 744.883099       | 1487.774906    | 744.391091       | 10 |
| 5  | 606.335821  | 303.671549      | 589.309272     | 295.158274       |                |                  | L    | 1377.726893 | 689.367085      | 1360.700344    | 680.853810       | 1359.716328    | 680.361802       | 9  |
| 6  | 735.378414  | 368.192845      | 718.351865     | 359.679571       | 717.367849     | 359.187563       | E    | 1264.642829 | 632.825053      | 1247.616280    | 624.311778       | 1246.632264    | 623.819770       | 8  |
| 7  | 792.399878  | 396.703577      | 775.373329     | 388.190303       | 774.389313     | 387.698295       | G    | 1135.600236 | 568.303756      | 1118.573687    | 559.790482       | 1117.589671    | 559.298474       | 7  |
| 8  | 905.483942  | 453.245609      | 888.457393     | 444.732335       | 887.473377     | 444.240327       | L    | 1078.578772 | 539.793024      | 1061.552223    | 531.279750       | 1060.568207    | 530.787742       | 6  |
| 9  | 1006.531621 | 503.769449      | 989.505072     | 495.256174       | 988.521056     | 494.764166       | T    | 965.494708  | 483.250992      | 948.468159     | 474.737718       | 947.484143     | 474.245710       | 5  |
| 10 | 1153.600035 | 577.303656      | 1136.573486    | 568.790381       | 1135.589470    | 568.298373       | F    | 864.447029  | 432.727153      | 847.420480     | 424.213878       |                |                  | 4  |
| 11 | 1592.825361 | 796.916319      | 1575.798812    | 788.403044       | 1574.814796    | 787.911036       | Q    | 717.378615  | 359.192946      | 700.352066     | 350.679671       |                |                  | 3  |
| 12 | 1723.865846 | 862.436561      | 1706.839297    | 853.923287       | 1705.855281    | 853.431279       | M    | 278.153289  | 139.580282      | 261.126740     | 131.067008       |                |                  | 2  |
| 13 |             |                 |                |                  |                |                  | K    | 147.112804  | 74.060040       | 130.086255     | 65.546765        |                |                  | 1  |

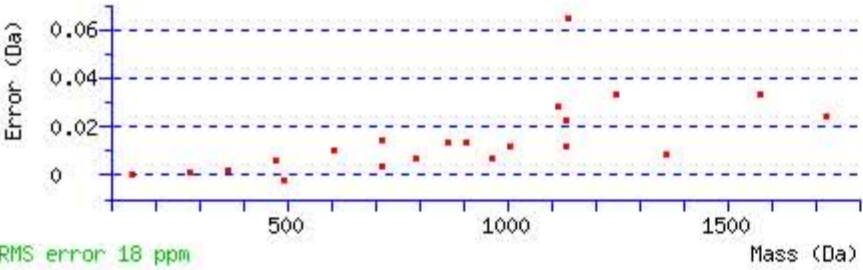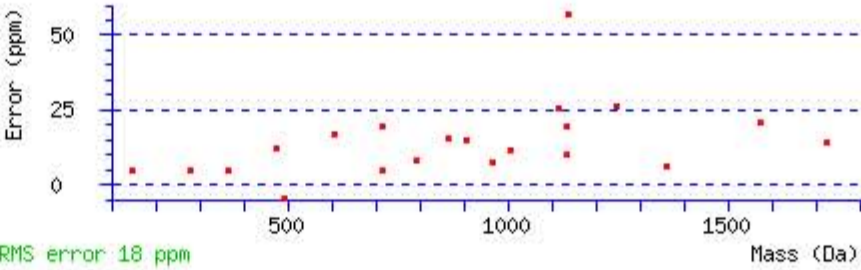

NCBI BLAST search of **LNHQLEGLTFQMK**  
(Parameters: blastp, nr protein database, expect=20000, no filter, PAM30)  
Other BLAST [web gateways](#)

All matches to this query

| Score | Mr(calc):   | Delta    | Sequence                      |
|-------|-------------|----------|-------------------------------|
| 34.9  | 1868.964081 | 0.011961 | <a href="#">LNHQLEGLTFQMK</a> |

MATRIX

SCIENCE

Mascot Search Results

Peptide View

MS/MS Fragmentation of **TQVNTQAEQLR**  
Found in **APOA4\_HUMAN**, Apolipoprotein A-IV OS=Homo sapiens GN=APOA4 PE=1 SV=3

Match to Query 42299: 1908.996252 from(637.339360,3+) rtinseconds(1916) index(5094)  
Title: Locus:1.1.1.1944.19 File:"2013-07-02 CLN FXIII 180 min 2nd F 1.wiff"  
Data file C:\Program Files (x86)\Matrix Science\Mascot Daemon\mgf\8 FXIII 180 min 2nd\mascot\_daemon\_merge.mgf

Click mouse within plot area to zoom in by factor of two about that point  
Or, 

Plot from100to1900Da

Full range

  
Label all possible matches ☐ Label matches used for scoring ☒

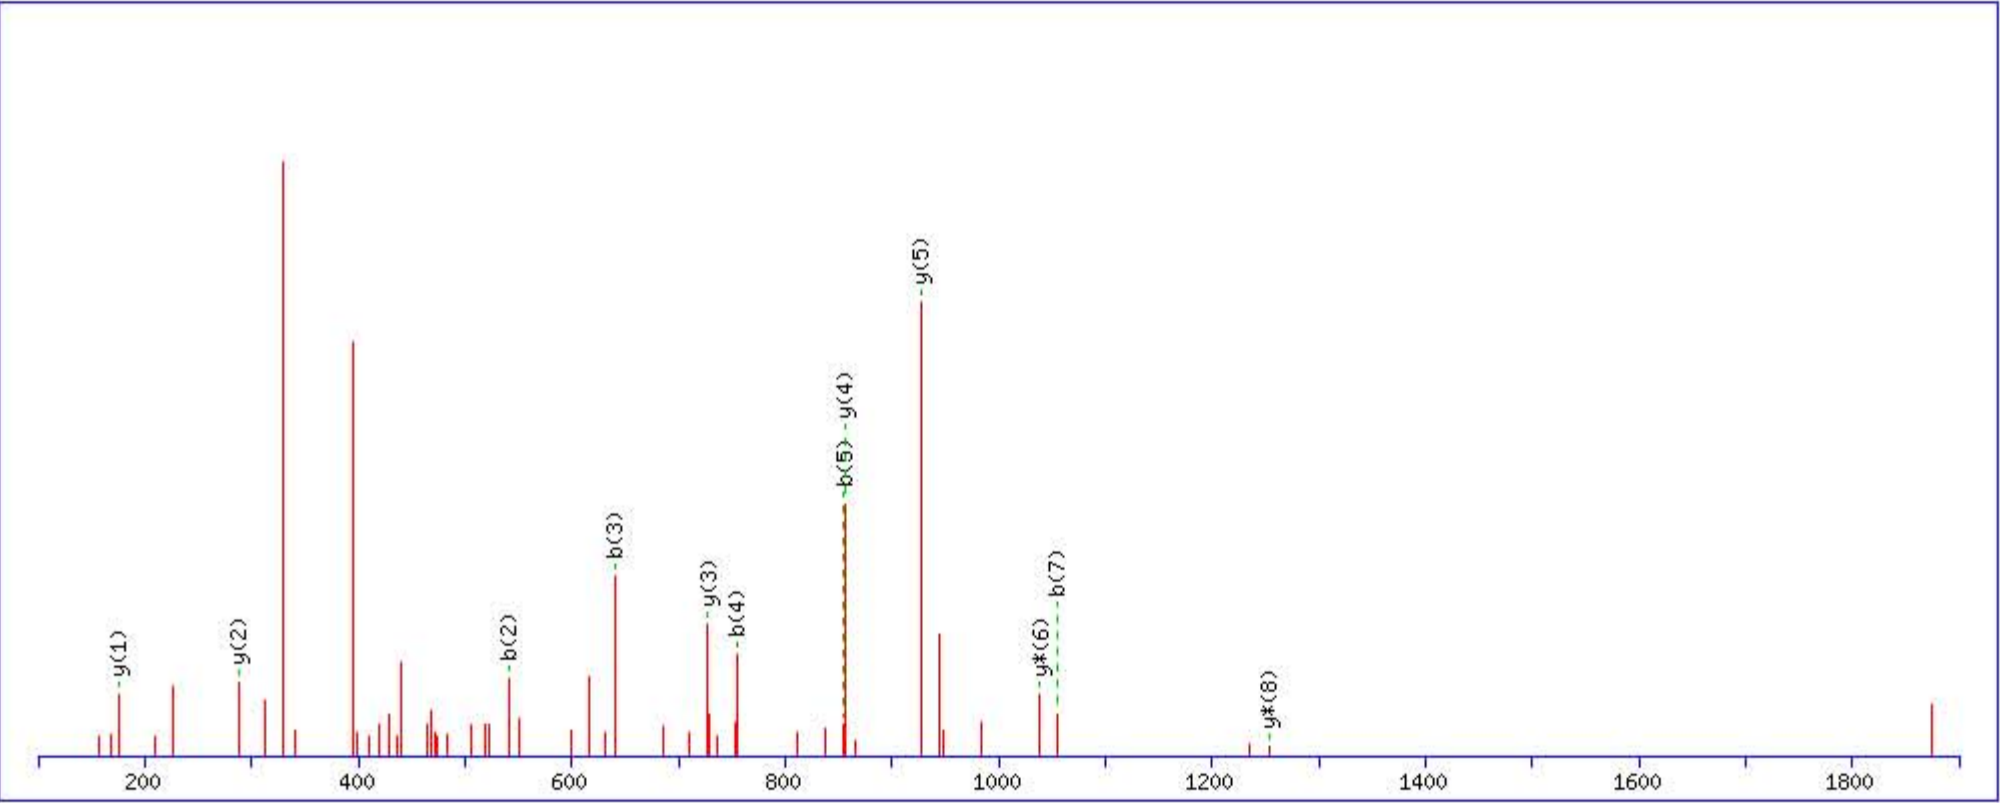

Monoisotopic mass of neutral peptide Mr(calc): 1908.991364  
Fixed modifications: Carbamidomethyl (C) (apply to specified residues or termini only)  
Variable modifications:  
Q2 : Biotin:Thermo-21345 (Q)  
Q9 : Biotin:Thermo-21345 (Q)  
Ions Score: 38 Expect: 0.0022  
Matches : 12/112 fragment ions using 21 most intense peaks [\(help\)](#)

| #  | b           | b <sup>++</sup> | b <sup>*</sup> | b <sup>++</sup> * | b <sup>0</sup> | b <sup>0++</sup> | Seq. | y           | y <sup>++</sup> | y <sup>*</sup> | y <sup>++</sup> * | y <sup>0</sup> | y <sup>0++</sup> | #  |
|----|-------------|-----------------|----------------|-------------------|----------------|------------------|------|-------------|-----------------|----------------|-------------------|----------------|------------------|----|
| 1  | 102.054955  | 51.531116       |                |                   | 84.044390      | 42.525833        | T    |             |                 |                |                   |                |                  | 11 |
| 2  | 541.280281  | 271.143779      | 524.253732     | 262.630504        | 523.269716     | 262.138496       | Q    | 1808.950973 | 904.979125      | 1791.924424    | 896.465850        | 1790.940408    | 895.973842       | 10 |
| 3  | 640.348695  | 320.677986      | 623.322146     | 312.164711        | 622.338130     | 311.672703       | V    | 1369.725647 | 685.366462      | 1352.699098    | 676.853187        | 1351.715082    | 676.361179       | 9  |
| 4  | 754.391622  | 377.699449      | 737.365073     | 369.186174        | 736.381057     | 368.694166       | N    | 1270.657233 | 635.832255      | 1253.630684    | 627.318980        | 1252.646668    | 626.826972       | 8  |
| 5  | 855.439301  | 428.223289      | 838.412752     | 419.710014        | 837.428736     | 419.218006       | T    | 1156.614306 | 578.810791      | 1139.587757    | 570.297517        | 1138.603741    | 569.805509       | 7  |
| 6  | 983.497879  | 492.252578      | 966.471330     | 483.739303        | 965.487314     | 483.247295       | Q    | 1055.566627 | 528.286952      | 1038.540078    | 519.773677        | 1037.556062    | 519.281669       | 6  |
| 7  | 1054.534993 | 527.771135      | 1037.508444    | 519.257860        | 1036.524428    | 518.765852       | A    | 927.508049  | 464.257663      | 910.481500     | 455.744388        | 909.497484     | 455.252380       | 5  |
| 8  | 1183.577586 | 592.292431      | 1166.551037    | 583.779157        | 1165.567021    | 583.287149       | E    | 856.470935  | 428.739106      | 839.444386     | 420.225831        | 838.460370     | 419.733823       | 4  |
| 9  | 1622.802912 | 811.905094      | 1605.776363    | 803.391820        | 1604.792347    | 802.899812       | Q    | 727.428342  | 364.217809      | 710.401793     | 355.704535        |                |                  | 3  |
| 10 | 1735.886976 | 868.447126      | 1718.860427    | 859.933852        | 1717.876411    | 859.441844       | L    | 288.203016  | 144.605146      | 271.176467     | 136.091871        |                |                  | 2  |
| 11 |             |                 |                |                   |                |                  | R    | 175.118952  | 88.063114       | 158.092403     | 79.549839         |                |                  | 1  |

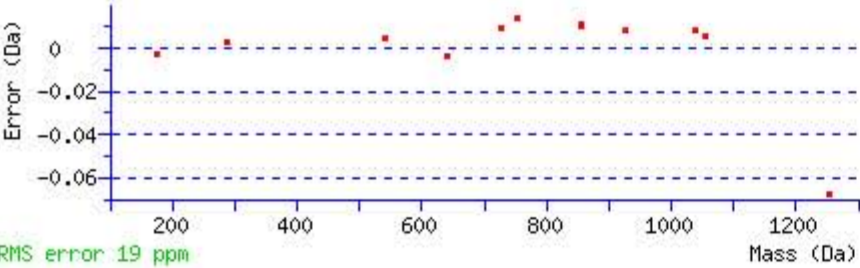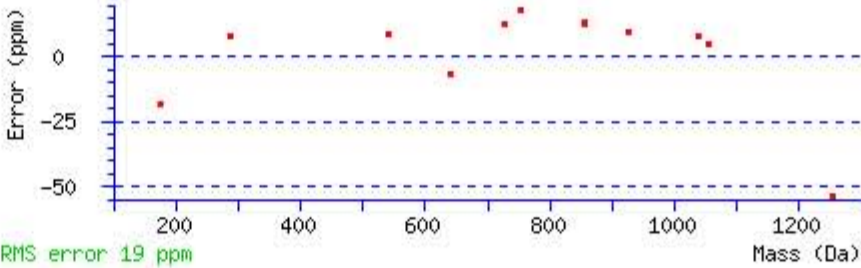

NCBI BLAST search of [TQVNTQAEQLR](#)  
(Parameters: blastp, nr protein database, expect=20000, no filter, PAM30)  
Other BLAST [web gateways](#)

All matches to this query

| Score | Mr(calc):   | Delta     | Sequence                            |
|-------|-------------|-----------|-------------------------------------|
| 37.9  | 1908.991364 | 0.004888  | <a href="#">TQVNTQAEQLR</a>         |
| 16.9  | 1908.991364 | 0.004888  | <a href="#">TQVNTQAEQLR</a>         |
| 9.1   | 1908.991364 | 0.004888  | <a href="#">TQVNTQAEQLR</a>         |
| 9.0   | 1908.974045 | 0.022207  | <a href="#">SAQWAINRVAMEIQHR</a>    |
| 5.4   | 1909.015610 | -0.019358 | <a href="#">SSIALTAPDAAADPKEKPK</a> |
| 1.8   | 1908.980591 | 0.015661  | <a href="#">QAHHTDKFSSQELILR</a>    |
| 1.2   | 1909.013123 | -0.016871 | <a href="#">EQLPIFKAQNPDAK</a>      |
| 0.4   | 1909.015610 | -0.019358 | <a href="#">AEQEIAALVEQLTPIER</a>   |
| 0.3   | 1908.995148 | 0.001104  | <a href="#">RALQEEERAAAQAR</a>      |
| 0.3   | 1908.983932 | 0.012320  | <a href="#">AEEQAQRQEQLLR</a>       |

MATRIX

SCIENCE

Mascot Search Results

Peptide View

MS/MS Fragmentation of **SELTQQLNALFQDK**  
Found in **APOA4\_HUMAN**, Apolipoprotein A-IV OS=Homo sapiens GN=APOA4 PE=1 SV=3

Match to Query 43006: 1945.025468 from(973.520010,2+) rtinseconds(2886) index(72055)  
Title: Locus:1.1.1.2278.20 File:"2013-07-02 CLN FXIII 180 min 2nd FT.wiff"  
Data file C:\Program Files (x86)\Matrix Science\Mascot Daemon\mgf\8 FXIII 180 min 2nd\mascot\_daemon\_merge.mgf

Click mouse within plot area to zoom in by factor of two about that point  
Or, 

Plot from

100

 to 

1800

 Da 

Full range

  
Label all possible matches ☐ Label matches used for scoring ☒

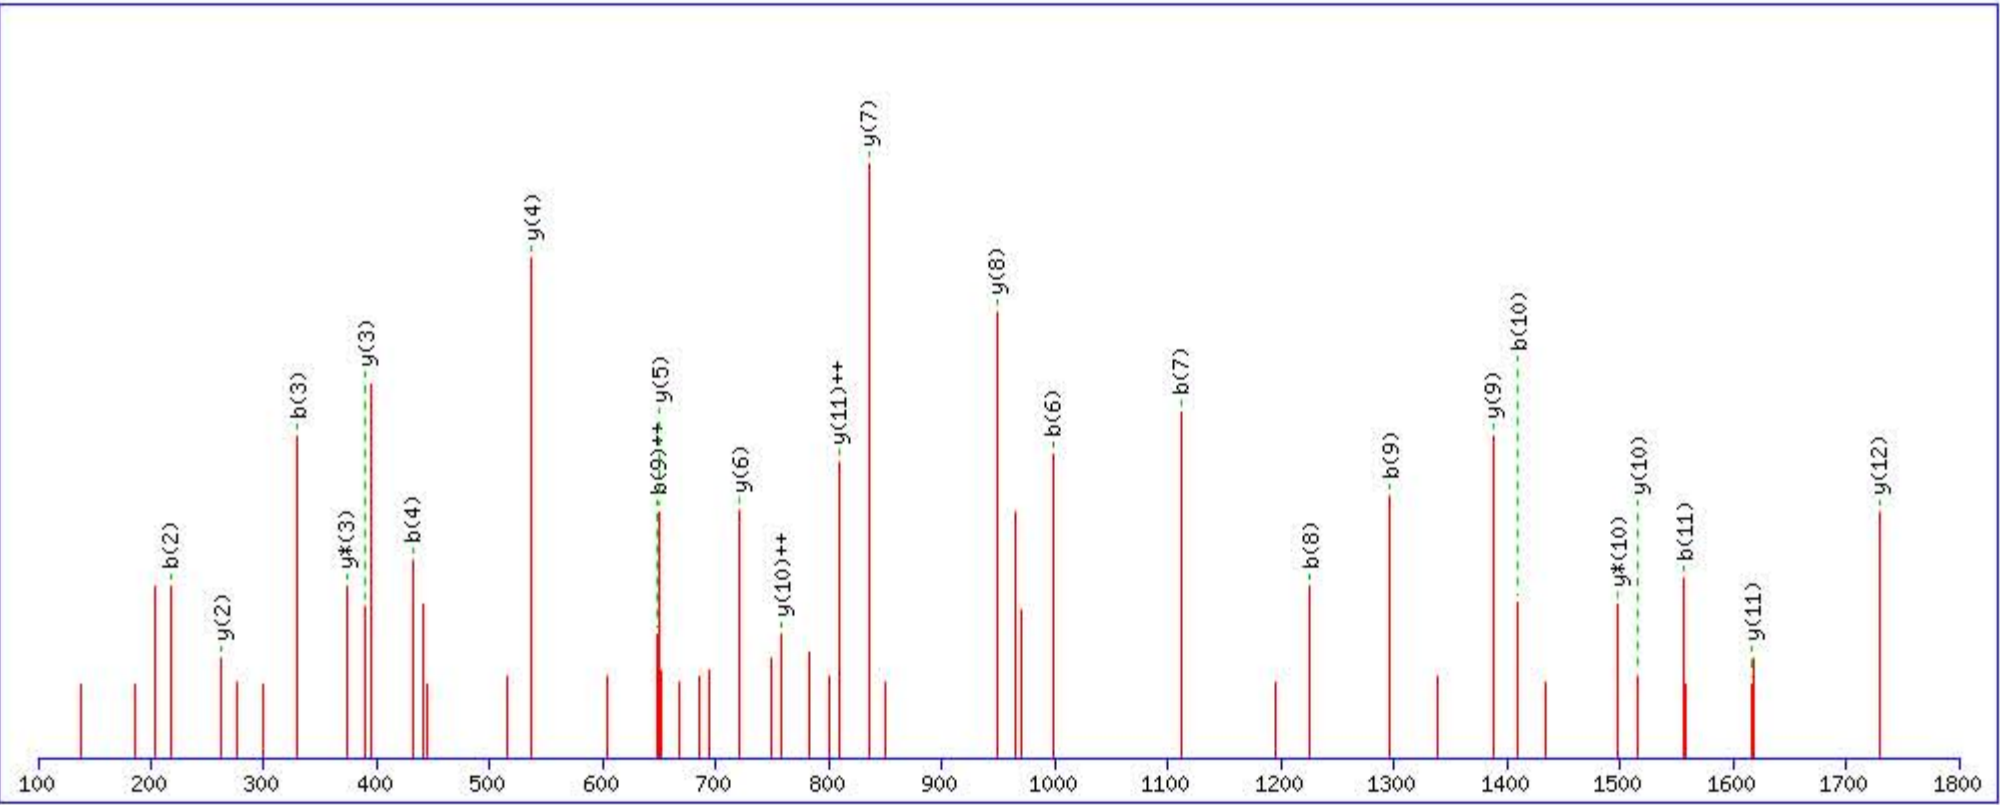

Monoisotopic mass of neutral peptide **Mr(calc)**: 1944.997879  
Fixed modifications: Carbamidomethyl (C) (apply to specified residues or termini only)  
Variable modifications:  
Q6 : Biotin:Thermo-21345 (Q)  
Ions Score: 71 Expect: 5.6e-007  
Matches : 25/146 fragment ions using 45 most intense peaks [\(help\)](#)

| #  | b           | b <sup>++</sup> | b <sup>*</sup> | b <sup>++</sup> * | b <sup>0</sup> | b <sup>0++</sup> | Seq. | y           | y <sup>++</sup> | y <sup>*</sup> | y <sup>++</sup> * | y <sup>0</sup> | y <sup>0++</sup> | #  |
|----|-------------|-----------------|----------------|-------------------|----------------|------------------|------|-------------|-----------------|----------------|-------------------|----------------|------------------|----|
| 1  | 88.039304   | 44.523290       |                |                   | 70.028739      | 35.518008        | S    |             |                 |                |                   |                |                  | 14 |
| 2  | 217.081897  | 109.044586      |                |                   | 199.071332     | 100.039304       | E    | 1858.973148 | 929.990212      | 1841.946599    | 921.476938        | 1840.962583    | 920.984930       | 13 |
| 3  | 330.165961  | 165.586618      |                |                   | 312.155396     | 156.581336       | L    | 1729.930555 | 865.468916      | 1712.904006    | 856.955641        | 1711.919990    | 856.463633       | 12 |
| 4  | 431.213640  | 216.110458      |                |                   | 413.203075     | 207.105176       | T    | 1616.846491 | 808.926884      | 1599.819942    | 800.413609        | 1598.835926    | 799.921601       | 11 |
| 5  | 559.272218  | 280.139747      | 542.245669     | 271.626473        | 541.261653     | 271.134465       | Q    | 1515.798812 | 758.403044      | 1498.772263    | 749.889770        | 1497.788247    | 749.397762       | 10 |
| 6  | 998.497544  | 499.752410      | 981.470995     | 491.239136        | 980.486979     | 490.747128       | Q    | 1387.740234 | 694.373755      | 1370.713685    | 685.860481        | 1369.729669    | 685.368473       | 9  |
| 7  | 1111.581608 | 556.294442      | 1094.555059    | 547.781168        | 1093.571043    | 547.289159       | L    | 948.514908  | 474.761092      | 931.488359     | 466.247818        | 930.504343     | 465.755810       | 8  |
| 8  | 1225.624535 | 613.315905      | 1208.597986    | 604.802631        | 1207.613970    | 604.310623       | N    | 835.430844  | 418.219060      | 818.404295     | 409.705786        | 817.420279     | 409.213778       | 7  |
| 9  | 1296.661649 | 648.834462      | 1279.635100    | 640.321188        | 1278.651084    | 639.829180       | A    | 721.387917  | 361.197597      | 704.361368     | 352.684322        | 703.377352     | 352.192314       | 6  |
| 10 | 1409.745713 | 705.376494      | 1392.719164    | 696.863220        | 1391.735148    | 696.371212       | L    | 650.350803  | 325.679040      | 633.324254     | 317.165765        | 632.340238     | 316.673757       | 5  |
| 11 | 1556.814127 | 778.910701      | 1539.787578    | 770.397427        | 1538.803562    | 769.905419       | F    | 537.266739  | 269.137008      | 520.240190     | 260.623733        | 519.256174     | 260.131725       | 4  |
| 12 | 1684.872705 | 842.939991      | 1667.846156    | 834.426716        | 1666.862140    | 833.934708       | Q    | 390.198325  | 195.602801      | 373.171776     | 187.089526        | 372.187760     | 186.597518       | 3  |
| 13 | 1799.899648 | 900.453462      | 1782.873099    | 891.940188        | 1781.889083    | 891.448180       | D    | 262.139747  | 131.573512      | 245.113198     | 123.060237        | 244.129182     | 122.568229       | 2  |
| 14 |             |                 |                |                   |                |                  | K    | 147.112804  | 74.060040       | 130.086255     | 65.546765         |                |                  | 1  |

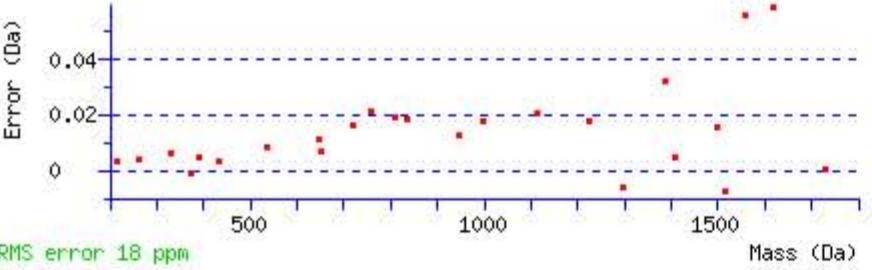

RMS error 18 ppm

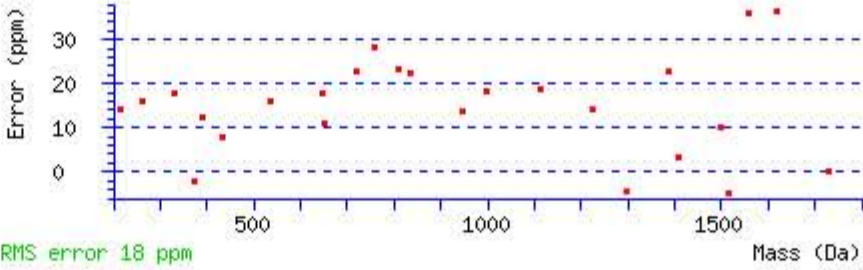

RMS error 18 ppm

NCBI BLAST search of [SELTQQLNALFQDK](#)  
(Parameters: blastp, nr protein database, expect=20000, no filter, PAM30)  
Other BLAST [web gateways](#)

All matches to this query

| Score | Mr(calc):   | Delta     | Sequence                           |
|-------|-------------|-----------|------------------------------------|
| 70.6  | 1944.997879 | 0.027589  | <a href="#">SELTQQLNALFQDK</a>     |
| 59.6  | 1944.997879 | 0.027589  | <a href="#">SELTQQLNALFQDK</a>     |
| 9.1   | 1944.997879 | 0.027589  | <a href="#">SELTQQLNALFQDK</a>     |
| 3.6   | 1945.027740 | -0.002272 | <a href="#">GGFGSMLRALGAQIEK</a>   |
| 1.0   | 1945.009109 | 0.016359  | <a href="#">ESQTALVANQRSLFA</a>    |
| 0.8   | 1945.024384 | 0.001084  | <a href="#">QASLWVQGDI FRSK</a>    |
| 0.5   | 1945.020325 | 0.005143  | <a href="#">SIQHLALGKNFN NMKSK</a> |

MATRIX

SCIENCE

Mascot Search Results

Peptide View

MS/MS Fragmentation of **SLAELGGHLDQQVEEFR**  
Found in **APOA4\_HUMAN**, Apolipoprotein A-IV OS=Homo sapiens GN=APOA4 PE=1 SV=3

Match to Query 49262: 2238.132408 from(1120.073480,2+) rtinseconds(2236) index(6994)  
Title: Locus:1.1.1.2055.20 File:"2013-07-02 CLN FXIII 180 min 2nd F 1.wiff"  
Data file C:\Program Files (x86)\Matrix Science\Mascot Daemon\mgf\8 FXIII 180 min 2nd\mascot\_daemon\_merge.mgf

Click mouse within plot area to zoom in by factor of two about that point

Or, 

Plot from

0

 to 

3400

 Da 

Full range

Label all possible matches ☐ Label matches used for scoring ☒

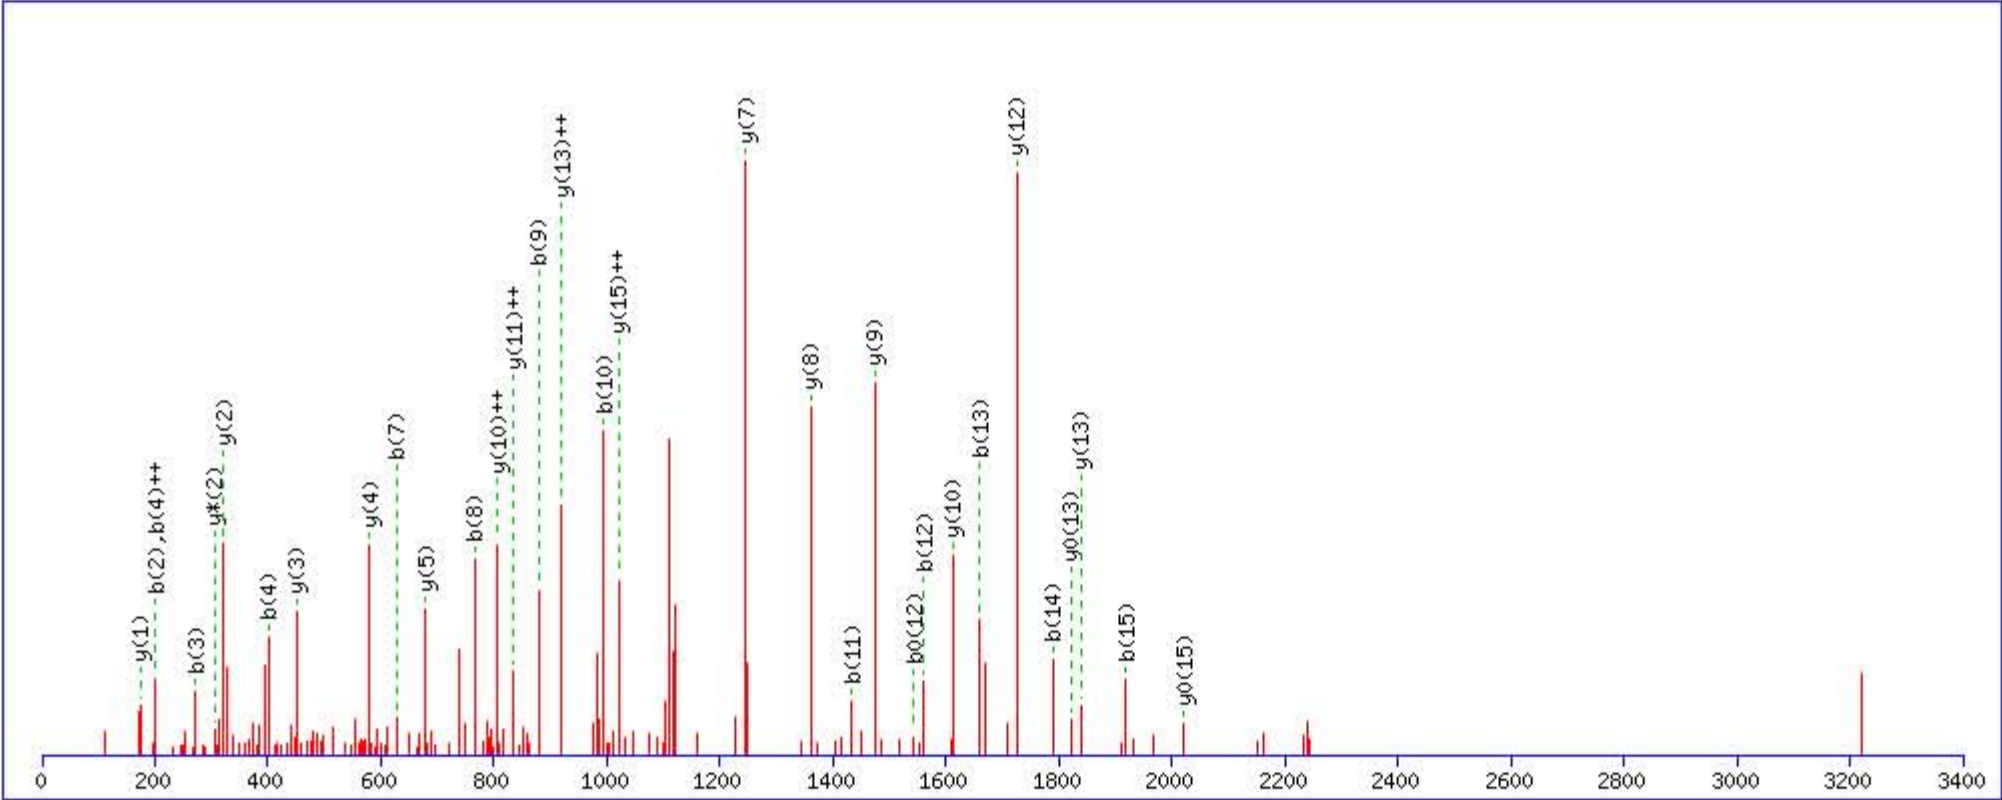

Monoisotopic mass of neutral peptide Mr(calc): 2238.110291  
Fixed modifications: Carbamidomethyl (C) (apply to specified residues or termini only)  
Variable modifications:  
Q11 : Biotin:Thermo-21345 (Q)  
Ions Score: 98 Expect: 8e-009  
Matches : 32/168 fragment ions using 42 most intense peaks [\(help\)](#)

| #  | b           | b <sup>++</sup> | b <sup>*</sup> | b <sup>+++</sup> | b <sup>0</sup> | b <sup>0++</sup> | Seq. | y           | y <sup>++</sup> | y <sup>*</sup> | y <sup>+++</sup> | y <sup>0</sup> | y <sup>0++</sup> | #  |
|----|-------------|-----------------|----------------|------------------|----------------|------------------|------|-------------|-----------------|----------------|------------------|----------------|------------------|----|
| 1  | 88.039304   | 44.523290       |                |                  | 70.028739      | 35.518008        | S    |             |                 |                |                  |                |                  | 17 |
| 2  | 201.123368  | 101.065322      |                |                  | 183.112803     | 92.060039        | L    | 2152.085552 | 1076.546414     | 2135.059003    | 1068.033139      | 2134.074987    | 1067.541131      | 16 |
| 3  | 272.160482  | 136.583879      |                |                  | 254.149917     | 127.578596       | A    | 2039.001488 | 1020.004382     | 2021.974939    | 1011.491108      | 2020.990923    | 1010.999100      | 15 |
| 4  | 401.203075  | 201.105175      |                |                  | 383.192510     | 192.099893       | E    | 1967.964374 | 984.485825      | 1950.937825    | 975.972551       | 1949.953809    | 975.480543       | 14 |
| 5  | 514.287139  | 257.647208      |                |                  | 496.276574     | 248.641925       | L    | 1838.921781 | 919.964529      | 1821.895232    | 911.451254       | 1820.911216    | 910.959246       | 13 |
| 6  | 571.308603  | 286.157940      |                |                  | 553.298038     | 277.152657       | G    | 1725.837717 | 863.422497      | 1708.811168    | 854.909222       | 1707.827152    | 854.417214       | 12 |
| 7  | 628.330067  | 314.668672      |                |                  | 610.319502     | 305.663389       | G    | 1668.816253 | 834.911765      | 1651.789704    | 826.398490       | 1650.805688    | 825.906482       | 11 |
| 8  | 765.388979  | 383.198128      |                |                  | 747.378414     | 374.192845       | H    | 1611.794789 | 806.401033      | 1594.768240    | 797.887758       | 1593.784224    | 797.395750       | 10 |
| 9  | 878.473043  | 439.740160      |                |                  | 860.462478     | 430.734877       | L    | 1474.735877 | 737.871577      | 1457.709328    | 729.358302       | 1456.725312    | 728.866294       | 9  |
| 10 | 993.499986  | 497.253631      |                |                  | 975.489421     | 488.248349       | D    | 1361.651813 | 681.329545      | 1344.625264    | 672.816270       | 1343.641248    | 672.324262       | 8  |
| 11 | 1432.725312 | 716.866294      | 1415.698763    | 708.353020       | 1414.714747    | 707.861012       | Q    | 1246.624870 | 623.816073      | 1229.598321    | 615.302799       | 1228.614305    | 614.810791       | 7  |
| 12 | 1560.783890 | 780.895583      | 1543.757341    | 772.382309       | 1542.773325    | 771.890301       | Q    | 807.399544  | 404.203410      | 790.372995     | 395.690136       | 789.388979     | 395.198128       | 6  |
| 13 | 1659.852304 | 830.429790      | 1642.825755    | 821.916516       | 1641.841739    | 821.424508       | V    | 679.340966  | 340.174121      | 662.314417     | 331.660846       | 661.330401     | 331.168838       | 5  |
| 14 | 1788.894897 | 894.951087      | 1771.868348    | 886.437812       | 1770.884332    | 885.945804       | E    | 580.272552  | 290.639914      | 563.246003     | 282.126639       | 562.261987     | 281.634631       | 4  |
| 15 | 1917.937490 | 959.472383      | 1900.910941    | 950.959109       | 1899.926925    | 950.467101       | E    | 451.229959  | 226.118617      | 434.203410     | 217.605343       | 433.219394     | 217.113335       | 3  |
| 16 | 2065.005904 | 1033.006590     | 2047.979355    | 1024.493316      | 2046.995339    | 1024.001307      | F    | 322.187366  | 161.597321      | 305.160817     | 153.084046       |                |                  | 2  |
| 17 |             |                 |                |                  |                |                  | R    | 175.118952  | 88.063114       | 158.092403     | 79.549839        |                |                  | 1  |

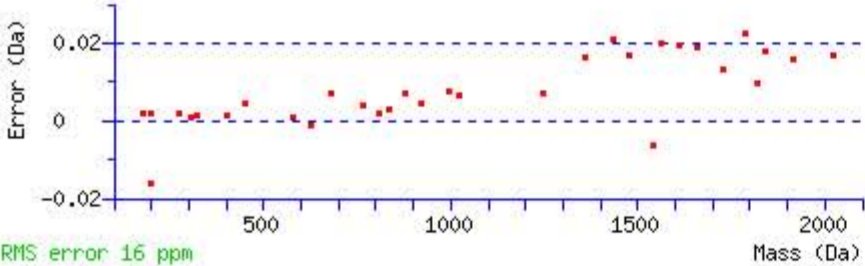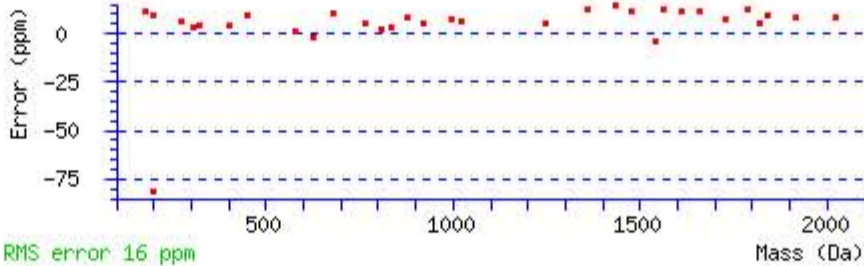

NCBI BLAST search of [SLAELGGHLDQQVEEFR](#)  
(Parameters: blastp, nr protein database, expect=20000, no filter, PAM30)  
Other BLAST [web gateways](#)

All matches to this query

| Score | Mr(calc):   | Delta    | Sequence                          |
|-------|-------------|----------|-----------------------------------|
| 98.3  | 2238.110291 | 0.022117 | <a href="#">SLAELGGHLDQQVEEFR</a> |
| 89.6  | 2238.110291 | 0.022117 | <a href="#">SLAELGGHLDQQVEEFR</a> |

M

A

T

R

I

X

S

C

I

E

N

C

E

Mascot Search Results

Peptide View

MS/MS Fragmentation of **ENADSLQASLRPHADELK**  
Found in **APOA4\_HUMAN**, Apolipoprotein A-IV OS=Homo sapiens GN=APOA4 PE=1 SV=3

Match to Query 50604: 2304.169152 from(769.063660,3+) rtinseconds(1885) index(65570)  
Title: Locus:1.1.1.1931.25 File:"2013-07-02 CLN FXIII 180 min 2nd FT.wiff"  
Data file C:\Program Files (x86)\Matrix Science\Mascot Daemon\mgf\8 FXIII 180 min 2nd\mascot\_daemon\_merge.mgf

Click mouse within plot area to zoom in by factor of two about that point  
Or, 

Plot from

0

 to 

2400

 Da 

Full range

  
Label all possible matches ☐ Label matches used for scoring ☒

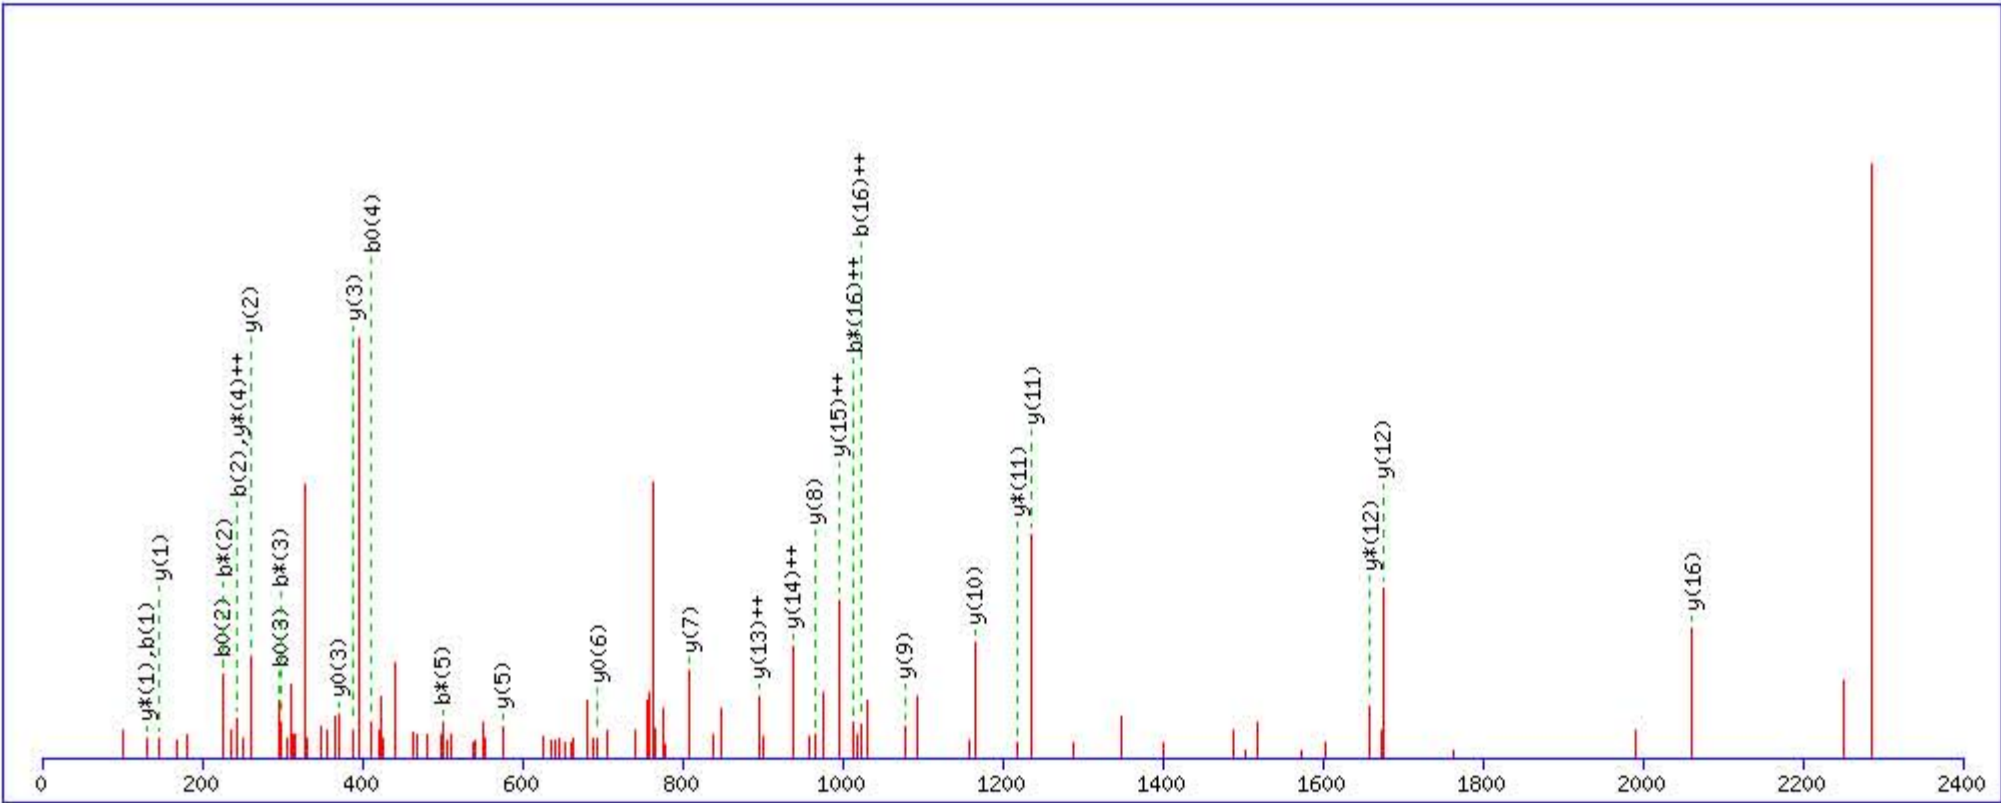

Monoisotopic mass of neutral peptide Mr(calc): 2304.153183  
Fixed modifications: Carbamidomethyl (C) (apply to specified residues or termini only)  
Variable modifications:  
Q7 : Biotin:Thermo-21345 (Q)  
Ions Score: 32 Expect: 0.0045  
Matches : 30/198 fragment ions using 90 most intense peaks [\(help\)](#)

| #  | b           | b <sup>++</sup> | b <sup>+</sup> | b <sup>+++</sup> | b <sup>0</sup> | b <sup>0++</sup> | Seq. | y           | y <sup>++</sup> | y <sup>+</sup> | y <sup>+++</sup> | y <sup>0</sup> | y <sup>0++</sup> | #  |
|----|-------------|-----------------|----------------|------------------|----------------|------------------|------|-------------|-----------------|----------------|------------------|----------------|------------------|----|
| 1  | 130.049869  | 65.528572       |                |                  | 112.039304     | 56.523290        | E    |             |                 |                |                  |                |                  | 18 |
| 2  | 244.092796  | 122.550036      | 227.066247     | 114.036762       | 226.082231     | 113.544754       | N    | 2176.117913 | 1088.562594     | 2159.091364    | 1080.049320      | 2158.107348    | 1079.557312      | 17 |
| 3  | 315.129910  | 158.068593      | 298.103361     | 149.555319       | 297.119345     | 149.063311       | A    | 2062.074986 | 1031.541131     | 2045.048437    | 1023.027856      | 2044.064421    | 1022.535848      | 16 |
| 4  | 430.156853  | 215.582065      | 413.130304     | 207.068790       | 412.146288     | 206.576782       | D    | 1991.037872 | 996.022574      | 1974.011323    | 987.509300       | 1973.027307    | 987.017292       | 15 |
| 5  | 517.188881  | 259.098079      | 500.162332     | 250.584804       | 499.178316     | 250.092796       | S    | 1876.010929 | 938.509103      | 1858.984380    | 929.995828       | 1858.000364    | 929.503820       | 14 |
| 6  | 630.272945  | 315.640111      | 613.246396     | 307.126836       | 612.262380     | 306.634828       | L    | 1788.978901 | 894.993089      | 1771.952352    | 886.479814       | 1770.968336    | 885.987806       | 13 |
| 7  | 1069.498271 | 535.252774      | 1052.471722    | 526.739499       | 1051.487706    | 526.247491       | Q    | 1675.894837 | 838.451057      | 1658.868288    | 829.937782       | 1657.884272    | 829.445774       | 12 |
| 8  | 1140.535385 | 570.771331      | 1123.508836    | 562.258056       | 1122.524820    | 561.766048       | A    | 1236.669511 | 618.838394      | 1219.642962    | 610.325119       | 1218.658946    | 609.833111       | 11 |
| 9  | 1227.567413 | 614.287345      | 1210.540864    | 605.774070       | 1209.556848    | 605.282062       | S    | 1165.632397 | 583.319837      | 1148.605848    | 574.806562       | 1147.621832    | 574.314554       | 10 |
| 10 | 1340.651477 | 670.829377      | 1323.624928    | 662.316102       | 1322.640912    | 661.824094       | L    | 1078.600369 | 539.803823      | 1061.573820    | 531.290548       | 1060.589804    | 530.798540       | 9  |
| 11 | 1496.752588 | 748.879932      | 1479.726039    | 740.366658       | 1478.742023    | 739.874650       | R    | 965.516305  | 483.261791      | 948.489756     | 474.748516       | 947.505740     | 474.256508       | 8  |
| 12 | 1593.805352 | 797.406314      | 1576.778803    | 788.893040       | 1575.794787    | 788.401032       | P    | 809.415194  | 405.211235      | 792.388645     | 396.697961       | 791.404629     | 396.205953       | 7  |
| 13 | 1730.864264 | 865.935770      | 1713.837715    | 857.422496       | 1712.853699    | 856.930488       | H    | 712.362430  | 356.684853      | 695.335881     | 348.171579       | 694.351865     | 347.679571       | 6  |
| 14 | 1801.901378 | 901.454327      | 1784.874829    | 892.941053       | 1783.890813    | 892.449045       | A    | 575.303518  | 288.155397      | 558.276969     | 279.642123       | 557.292953     | 279.150115       | 5  |
| 15 | 1916.928321 | 958.967799      | 1899.901772    | 950.454524       | 1898.917756    | 949.962516       | D    | 504.266404  | 252.636840      | 487.239855     | 244.123566       | 486.255839     | 243.631558       | 4  |
| 16 | 2045.970914 | 1023.489095     | 2028.944365    | 1014.975821      | 2027.960349    | 1014.483813      | E    | 389.239461  | 195.123369      | 372.212912     | 186.610094       | 371.228896     | 186.118086       | 3  |
| 17 | 2159.054978 | 1080.031127     | 2142.028429    | 1071.517852      | 2141.044413    | 1071.025844      | L    | 260.196868  | 130.602072      | 243.170319     | 122.088798       |                |                  | 2  |
| 18 |             |                 |                |                  |                |                  | K    | 147.112804  | 74.060040       | 130.086255     | 65.546765        |                |                  | 1  |

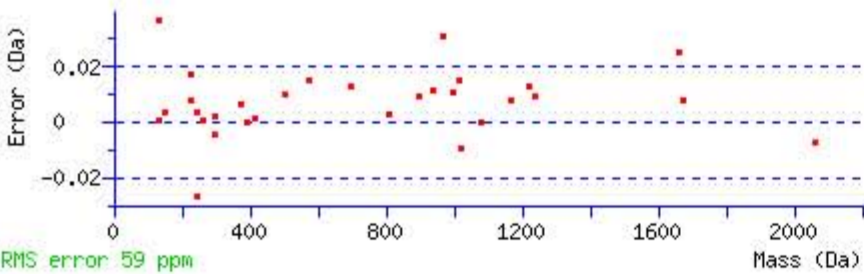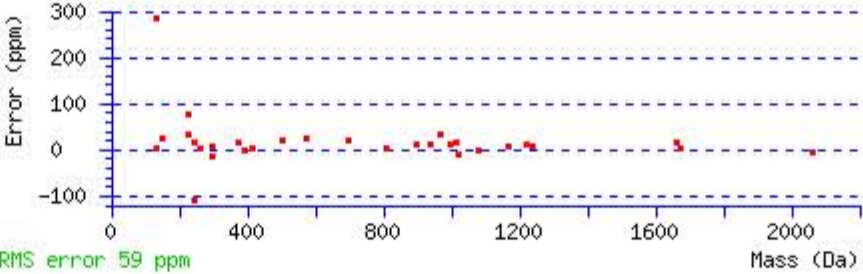

NCBI BLAST search of [ENADSLQASLRPHADELK](#)  
(Parameters: blastp, nr protein database, expect=20000, no filter, PAM30)  
Other BLAST [web gateways](#)

All matches to this query

| Score | Mr(calc):   | Delta    | Sequence                             |
|-------|-------------|----------|--------------------------------------|
| 31.6  | 2304.153183 | 0.015969 | <a href="#">ENADSLQASLRPHADELK</a>   |
| 6.5   | 2304.149384 | 0.019768 | <a href="#">LNCMETFEVKVDSPVKPAPK</a> |

MATRIX

SCIENCE

Mascot Search Results

Peptide View

MS/MS Fragmentation of **QSELSAK**  
Found in **APOC1\_HUMAN**, Apolipoprotein C-I OS=Homo sapiens GN=APOC1 PE=1 SV=1

Match to Query 15710: 1072.556508 from(537.285530,2+) rtinseconds(1422) index(62970)  
Title: Locus:1.1.1.1770.13 File:"2013-07-02 CLN FXIII 180 min 2nd FT.wiff"  
Data file C:\Program Files (x86)\Matrix Science\Mascot Daemon\mgf\8 FXIII 180 min 2nd\mascot\_daemon\_merge.mgf

Click mouse within plot area to zoom in by factor of two about that point  
Or, 

Plot from

100

 to 

1100

 Da 

Full range

  
Label all possible matches ☐ Label matches used for scoring ☒

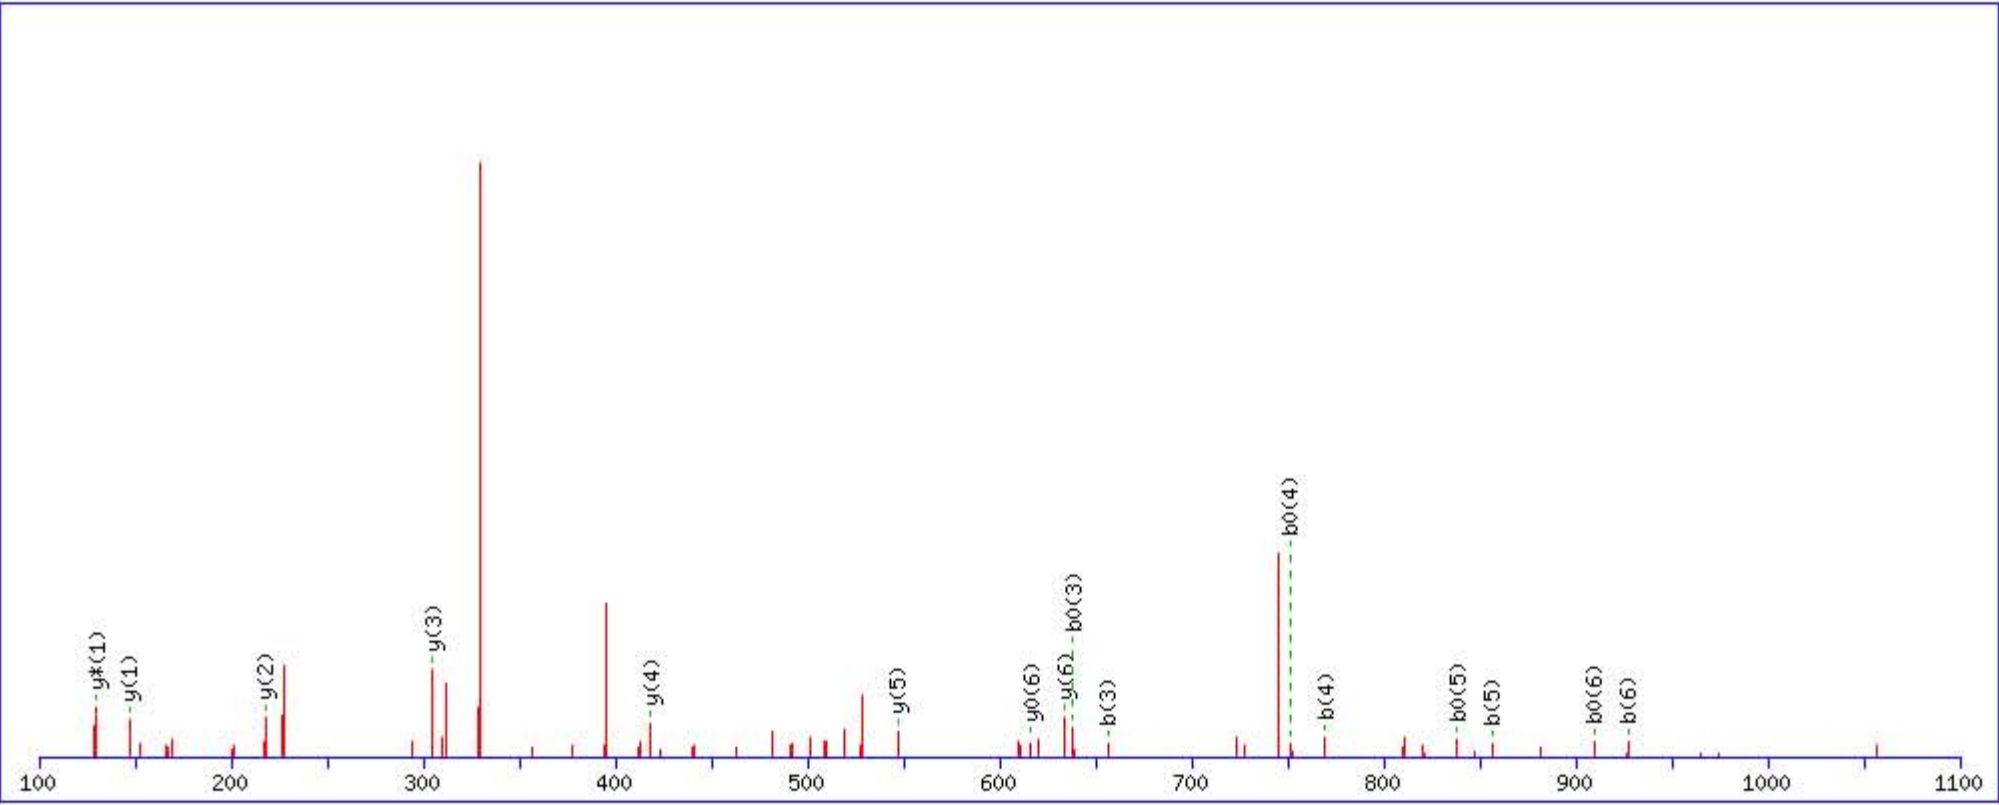

Monoisotopic mass of neutral peptide Mr(calc): 1072.558655  
Fixed modifications: Carbamidomethyl (C) (apply to specified residues or termini only)  
Variable modifications:  
Q1 : Biotin:Thermo-21345 (Q)  
Ions Score: 26 Expect: 0.061  
Matches : 16/66 fragment ions using 43 most intense peaks [\(help\)](#)

| # | b          | b <sup>++</sup> | b <sup>*</sup> | b <sup>*++</sup> | b <sup>0</sup> | b <sup>0++</sup> | Seq. | y          | y <sup>++</sup> | y <sup>*</sup> | y <sup>*++</sup> | y <sup>0</sup> | y <sup>0++</sup> | # |
|---|------------|-----------------|----------------|------------------|----------------|------------------|------|------------|-----------------|----------------|------------------|----------------|------------------|---|
| 1 | 440.232602 | 220.619939      | 423.206053     | 212.106664       |                |                  | Q    |            |                 |                |                  |                |                  | 7 |
| 2 | 527.264630 | 264.135953      | 510.238081     | 255.622679       | 509.254065     | 255.130671       | S    | 634.340631 | 317.673954      | 617.314082     | 309.160679       | 616.330066     | 308.668671       | 6 |
| 3 | 656.307223 | 328.657250      | 639.280674     | 320.143975       | 638.296658     | 319.651967       | E    | 547.308603 | 274.157940      | 530.282054     | 265.644665       | 529.298038     | 265.152657       | 5 |
| 4 | 769.391287 | 385.199282      | 752.364738     | 376.686007       | 751.380722     | 376.193999       | L    | 418.266010 | 209.636643      | 401.239461     | 201.123368       | 400.255445     | 200.631360       | 4 |
| 5 | 856.423315 | 428.715296      | 839.396766     | 420.202021       | 838.412750     | 419.710013       | S    | 305.181946 | 153.094611      | 288.155397     | 144.581336       | 287.171381     | 144.089328       | 3 |
| 6 | 927.460429 | 464.233853      | 910.433880     | 455.720578       | 909.449864     | 455.228570       | A    | 218.149918 | 109.578597      | 201.123369     | 101.065322       |                |                  | 2 |
| 7 |            |                 |                |                  |                |                  | K    | 147.112804 | 74.060040       | 130.086255     | 65.546765        |                |                  | 1 |

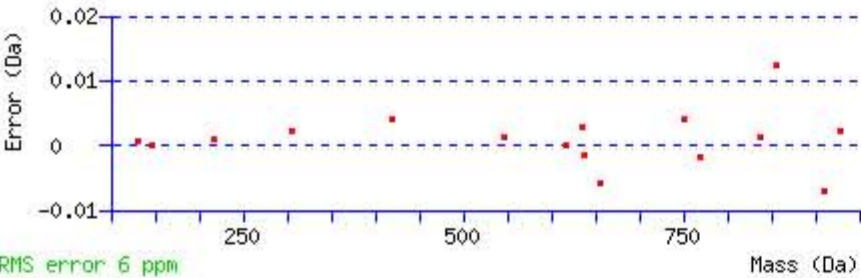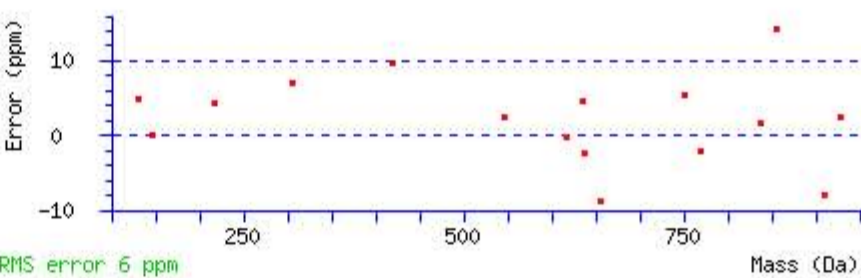

NCBI **BLAST** search of [QSELSAK](#)  
(Parameters: blastp, nr protein database, expect=20000, no filter, PAM30)  
Other BLAST [web gateways](#)

All matches to this query

| Score | Mr(calc):   | Delta     | Sequence                    |
|-------|-------------|-----------|-----------------------------|
| 25.8  | 1072.558655 | -0.002147 | <a href="#">QSELSAK</a>     |
| 15.3  | 1072.544739 | 0.011769  | <a href="#">RPGQAAGMSAK</a> |
| 10.6  | 1072.551239 | 0.005269  | <a href="#">EAERELQAK</a>   |
| 9.6   | 1072.562500 | -0.005992 | <a href="#">HSSTSSRIAK</a>  |
| 9.2   | 1072.551239 | 0.005269  | <a href="#">ERQEALEAK</a>   |
| 7.8   | 1072.558670 | -0.002162 | <a href="#">VTQESAK</a>     |
| 7.7   | 1072.551254 | 0.005254  | <a href="#">KEAPRDETK</a>   |
| 5.8   | 1072.558670 | -0.002162 | <a href="#">QSEGLTK</a>     |
| 5.5   | 1072.558655 | -0.002147 | <a href="#">QSLSAEK</a>     |
| 4.4   | 1072.562500 | -0.005992 | <a href="#">KQQQQQSAK</a>   |

MATRIX

SCIENCE

Mascot Search Results

Peptide View

MS/MS Fragmentation of **TAAQNLYEK**  
Found in **APOC2\_HUMAN**, Apolipoprotein C-II OS=Homo sapiens GN=APOC2 PE=1 SV=1

Match to Query 24302: 1347.691988 from(674.853270,2+) rtinseconds(1636) index(47893)  
Title: Locus:1.1.1.1807.18 File:"2013-07-02 CLN FXIII 180 min 2nd F 4.wiff"  
Data file C:\Program Files (x86)\Matrix Science\Mascot Daemon\mgf\8 FXIII 180 min 2nd\mascot\_daemon\_merge.mgf

Click mouse within plot area to zoom in by factor of two about that point  
Or, 

Plot from

100

 to 

1400

 Da 

Full range

  
Label all possible matches ☐ Label matches used for scoring ☒

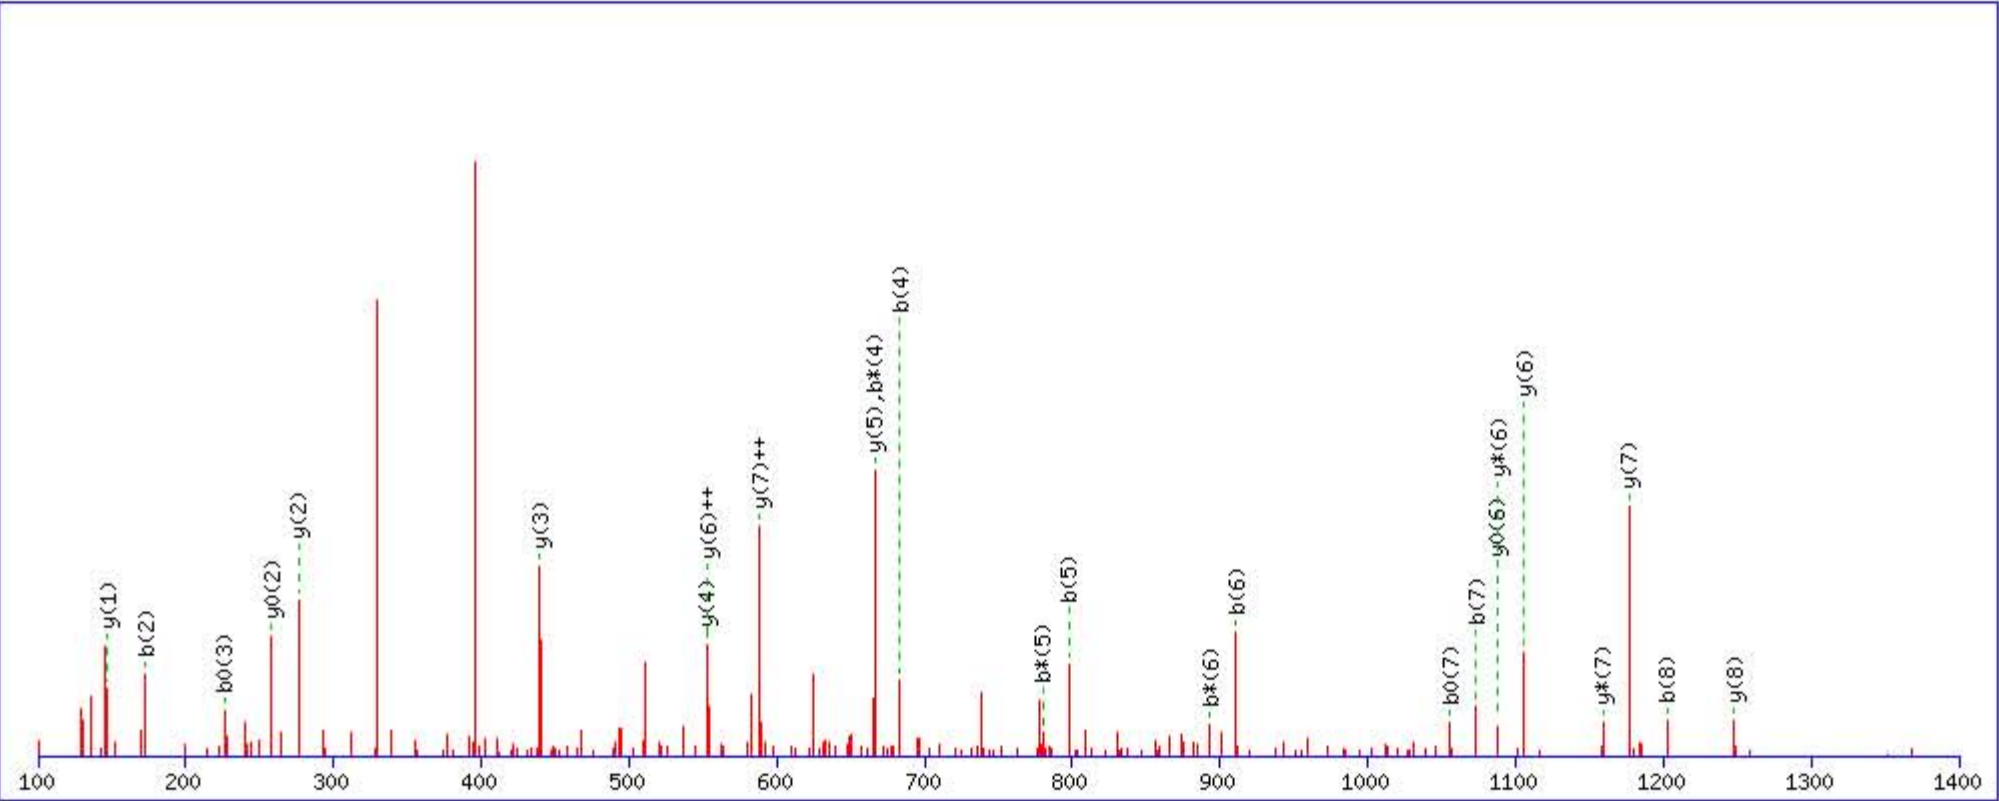

Monoisotopic mass of neutral peptide Mr(calc): 1347.685638  
Fixed modifications: Carbamidomethyl (C) (apply to specified residues or termini only)  
Variable modifications:  
Q4 : Biotin:Thermo-21345 (Q)  
Ions Score: 43 Expect: 0.0008  
Matches : 25/88 fragment ions using 48 most intense peaks [\(help\)](#)

| # | b           | b <sup>++</sup> | b <sup>*</sup> | b <sup>+++</sup> | b <sup>0</sup> | b <sup>0++</sup> | Seq. | y           | y <sup>++</sup> | y <sup>*</sup> | y <sup>+++</sup> | y <sup>0</sup> | y <sup>0++</sup> | # |
|---|-------------|-----------------|----------------|------------------|----------------|------------------|------|-------------|-----------------|----------------|------------------|----------------|------------------|---|
| 1 | 102.054955  | 51.531116       |                |                  | 84.044390      | 42.525833        | T    |             |                 |                |                  |                |                  | 9 |
| 2 | 173.092069  | 87.049672       |                |                  | 155.081504     | 78.044390        | A    | 1247.645271 | 624.326273      | 1230.618722    | 615.812999       | 1229.634706    | 615.320991       | 8 |
| 3 | 244.129183  | 122.568229      |                |                  | 226.118618     | 113.562947       | A    | 1176.608157 | 588.807716      | 1159.581608    | 580.294442       | 1158.597592    | 579.802434       | 7 |
| 4 | 683.354509  | 342.180893      | 666.327960     | 333.667618       | 665.343944     | 333.175610       | Q    | 1105.571043 | 553.289159      | 1088.544494    | 544.775885       | 1087.560478    | 544.283877       | 6 |
| 5 | 797.397436  | 399.202356      | 780.370887     | 390.689081       | 779.386871     | 390.197073       | N    | 666.345717  | 333.676496      | 649.319168     | 325.163222       | 648.335152     | 324.671214       | 5 |
| 6 | 910.481500  | 455.744388      | 893.454951     | 447.231113       | 892.470935     | 446.739105       | L    | 552.302790  | 276.655033      | 535.276241     | 268.141758       | 534.292225     | 267.649750       | 4 |
| 7 | 1073.544829 | 537.276052      | 1056.518280    | 528.762778       | 1055.534264    | 528.270770       | Y    | 439.218726  | 220.113001      | 422.192177     | 211.599726       | 421.208161     | 211.107718       | 3 |
| 8 | 1202.587422 | 601.797349      | 1185.560873    | 593.284074       | 1184.576857    | 592.792066       | E    | 276.155397  | 138.581336      | 259.128848     | 130.068062       | 258.144832     | 129.576054       | 2 |
| 9 |             |                 |                |                  |                |                  | K    | 147.112804  | 74.060040       | 130.086255     | 65.546765        |                |                  | 1 |

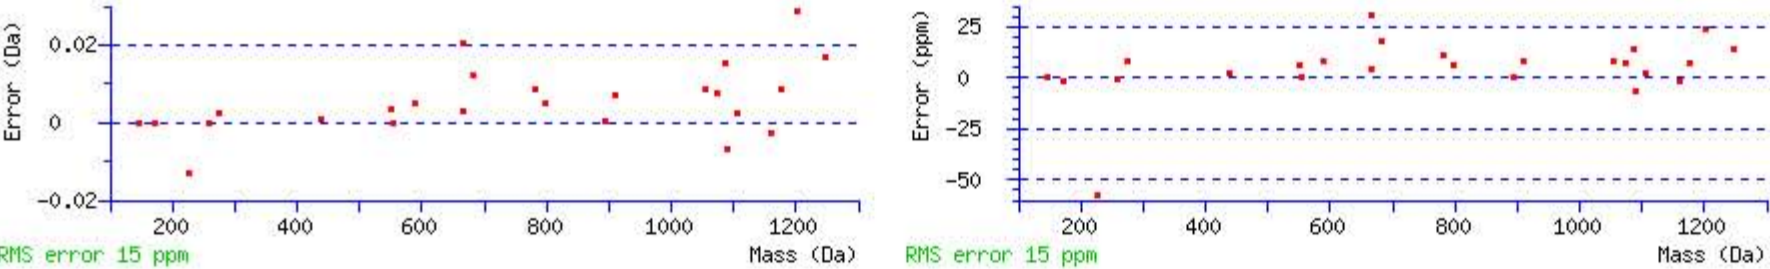

NCBI BLAST search of [TAAQNLYEK](#)  
(Parameters: blastp, nr protein database, expect=20000, no filter, PAM30)  
Other BLAST [web gateways](#)

All matches to this query

| Score | Mr(calc):   | Delta    | Sequence                      |
|-------|-------------|----------|-------------------------------|
| 42.7  | 1347.685638 | 0.006350 | <a href="#">TAAQNLYEK</a>     |
| 9.1   | 1347.682297 | 0.009691 | <a href="#">TAYFSLDTRFK</a>   |
| 6.0   | 1347.682480 | 0.009508 | <a href="#">QSRMKMEK</a>      |
| 5.6   | 1347.681610 | 0.010378 | <a href="#">RSQISMEQLEK</a>   |
| 2.8   | 1347.688156 | 0.003832 | <a href="#">TTSEAALSVVNEK</a> |
| 1.9   | 1347.689011 | 0.002977 | <a href="#">DKCMLPKSLEK</a>   |
| 1.5   | 1347.688156 | 0.003832 | <a href="#">LLSQDSVAASTEK</a> |
| 0.7   | 1347.681625 | 0.010363 | <a href="#">GLERNLAVMSDK</a>  |
| 0.3   | 1347.681625 | 0.010363 | <a href="#">QMGDQLIKASNK</a>  |

M

A

T

R

I

X

S

C

I

E

N

C

E

Mascot Search Results

Peptide View

MS/MS Fragmentation of **STAAMSTYTGIFTDQVLSVLK**  
Found in **APOC2\_HUMAN**, Apolipoprotein C-II OS=Homo sapiens GN=APOC2 PE=1 SV=1

Match to Query 54920: 2543.332572 from(848.784800,3+) rtinseconds(3234) index(73923)  
Title: Locus:1.1.1.2396.17 File:"2013-07-02 CLN FXIII 180 min 2nd FT.wiff"  
Data file C:\Program Files (x86)\Matrix Science\Mascot Daemon\mgf\8 FXIII 180 min 2nd\mascot\_daemon\_merge.mgf

Click mouse within plot area to zoom in by factor of two about that point  
Or, 

Plot from

0

 to 

2200

 Da 

Full range

  
Label all possible matches ☐ Label matches used for scoring ☒

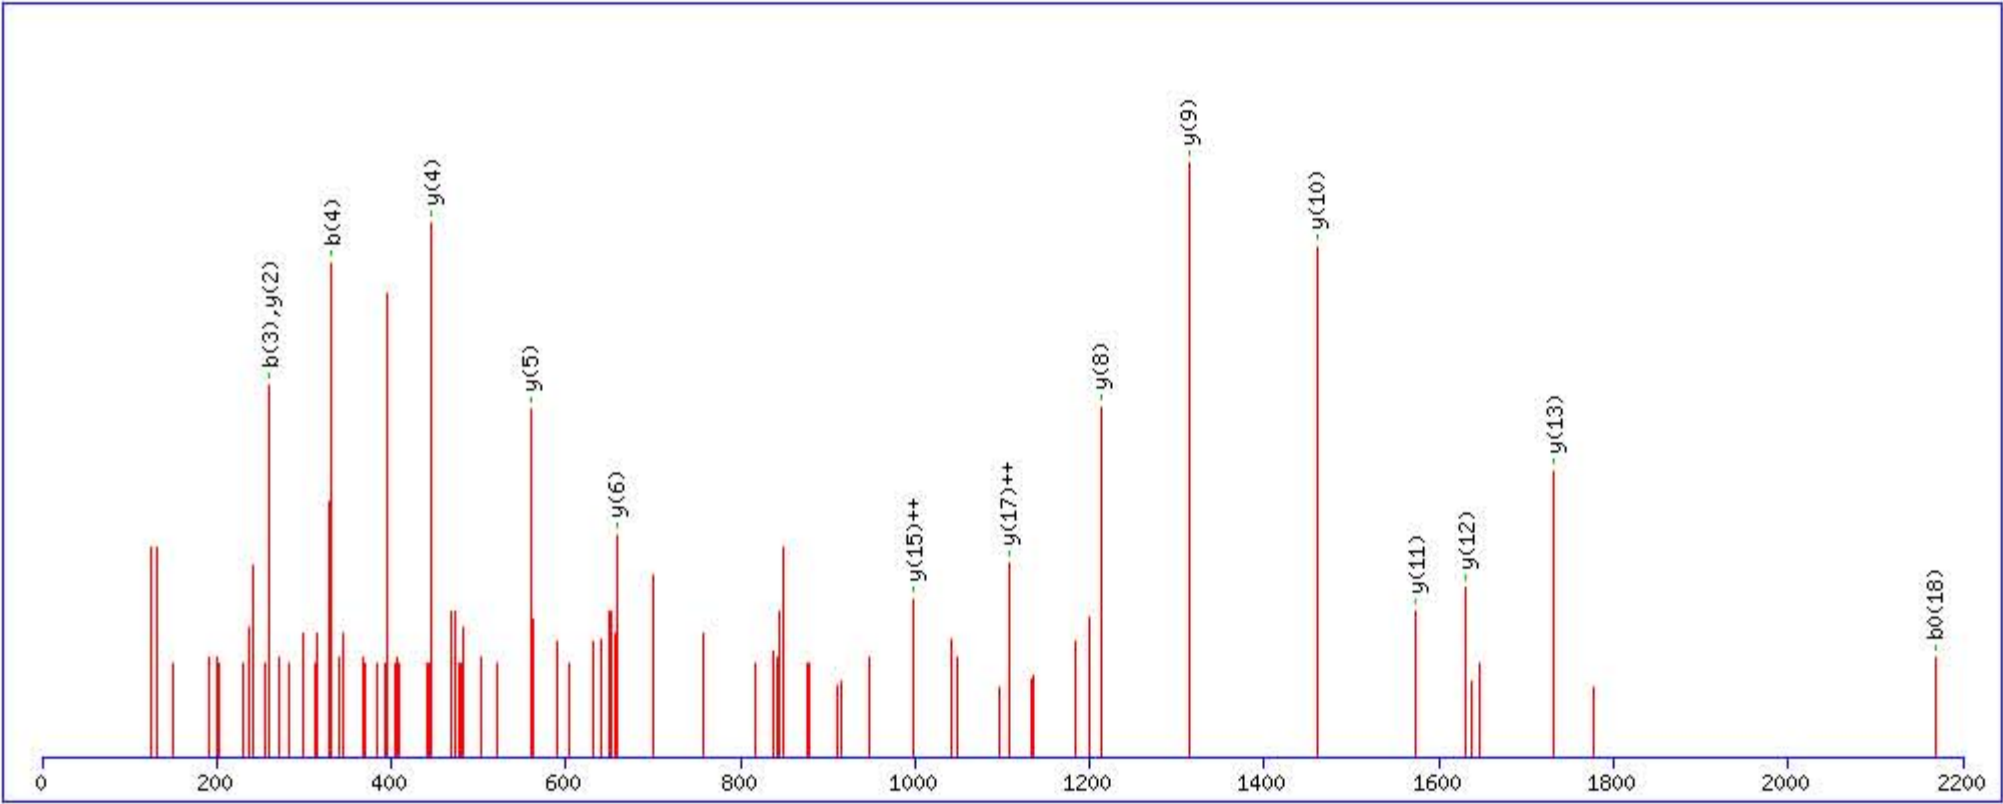

Monoisotopic mass of neutral peptide Mr(calc): 2543.301544  
Fixed modifications: Carbamidomethyl (C) (apply to specified residues or termini only)  
Variable modifications:  
Q15 : Biotin:Thermo-21345 (Q)  
Ions Score: 81 Expect: 2.1e-007  
Matches : 15/206 fragment ions using 17 most intense peaks ([help](#))

| #  | b           | b <sup>++</sup> | b <sup>*</sup> | b <sup>*++</sup> | b <sup>0</sup> | b <sup>0++</sup> | Seq. | y           | y <sup>++</sup> | y <sup>*</sup> | y <sup>*++</sup> | y <sup>0</sup> | y <sup>0++</sup> | #  |
|----|-------------|-----------------|----------------|------------------|----------------|------------------|------|-------------|-----------------|----------------|------------------|----------------|------------------|----|
| 1  | 88.039304   | 44.523290       |                |                  | 70.028739      | 35.518008        | S    |             |                 |                |                  |                |                  | 21 |
| 2  | 189.086983  | 95.047129       |                |                  | 171.076418     | 86.041847        | T    | 2457.276785 | 1229.142030     | 2440.250236    | 1220.628756      | 2439.266220    | 1220.136748      | 20 |
| 3  | 260.124097  | 130.565686      |                |                  | 242.113532     | 121.560404       | A    | 2356.229106 | 1178.618191     | 2339.202557    | 1170.104916      | 2338.218541    | 1169.612908      | 19 |
| 4  | 331.161211  | 166.084243      |                |                  | 313.150646     | 157.078961       | A    | 2285.191992 | 1143.099634     | 2268.165443    | 1134.586359      | 2267.181427    | 1134.094351      | 18 |
| 5  | 462.201696  | 231.604486      |                |                  | 444.191131     | 222.599203       | M    | 2214.154878 | 1107.581077     | 2197.128329    | 1099.067802      | 2196.144313    | 1098.575794      | 17 |
| 6  | 549.233724  | 275.120500      |                |                  | 531.223159     | 266.115217       | S    | 2083.114393 | 1042.060834     | 2066.087844    | 1033.547560      | 2065.103828    | 1033.055552      | 16 |
| 7  | 650.281403  | 325.644340      |                |                  | 632.270838     | 316.639057       | T    | 1996.082365 | 998.544821      | 1979.055816    | 990.031546       | 1978.071800    | 989.539538       | 15 |
| 8  | 813.344732  | 407.176004      |                |                  | 795.334167     | 398.170722       | Y    | 1895.034686 | 948.020981      | 1878.008137    | 939.507707       | 1877.024121    | 939.015699       | 14 |
| 9  | 914.392411  | 457.699844      |                |                  | 896.381846     | 448.694561       | T    | 1731.971357 | 866.489317      | 1714.944808    | 857.976042       | 1713.960792    | 857.484034       | 13 |
| 10 | 971.413875  | 486.210576      |                |                  | 953.403310     | 477.205293       | G    | 1630.923678 | 815.965477      | 1613.897129    | 807.452203       | 1612.913113    | 806.960195       | 12 |
| 11 | 1084.497939 | 542.752608      |                |                  | 1066.487374    | 533.747325       | I    | 1573.902214 | 787.454745      | 1556.875665    | 778.941471       | 1555.891649    | 778.449463       | 11 |
| 12 | 1231.566353 | 616.286815      |                |                  | 1213.555788    | 607.281532       | F    | 1460.818150 | 730.912713      | 1443.791601    | 722.399439       | 1442.807585    | 721.907431       | 10 |
| 13 | 1332.614032 | 666.810654      |                |                  | 1314.603467    | 657.805372       | T    | 1313.749736 | 657.378506      | 1296.723187    | 648.865232       | 1295.739171    | 648.373224       | 9  |
| 14 | 1447.640975 | 724.324126      |                |                  | 1429.630410    | 715.318843       | D    | 1212.702057 | 606.854667      | 1195.675508    | 598.341392       | 1194.691492    | 597.849384       | 8  |
| 15 | 1886.866301 | 943.936789      | 1869.839752    | 935.423514       | 1868.855736    | 934.931506       | Q    | 1097.675114 | 549.341195      | 1080.648565    | 540.827921       | 1079.664549    | 540.335913       | 7  |
| 16 | 1985.934715 | 993.470996      | 1968.908166    | 984.957721       | 1967.924150    | 984.465713       | V    | 658.449788  | 329.728532      | 641.423239     | 321.215258       | 640.439223     | 320.723250       | 6  |
| 17 | 2099.018779 | 1050.013027     | 2081.992230    | 1041.499753      | 2081.008214    | 1041.007745      | L    | 559.381374  | 280.194325      | 542.354825     | 271.681051       | 541.370809     | 271.189043       | 5  |
| 18 | 2186.050807 | 1093.529041     | 2169.024258    | 1085.015767      | 2168.040242    | 1084.523759      | S    | 446.297310  | 223.652293      | 429.270761     | 215.139019       | 428.286745     | 214.647011       | 4  |
| 19 | 2285.119221 | 1143.063248     | 2268.092672    | 1134.549974      | 2267.108656    | 1134.057966      | V    | 359.265282  | 180.136279      | 342.238733     | 171.623004       |                |                  | 3  |
| 20 | 2398.203285 | 1199.605280     | 2381.176736    | 1191.092006      | 2380.192720    | 1190.599998      | L    | 260.196868  | 130.602072      | 243.170319     | 122.088798       |                |                  | 2  |
| 21 |             |                 |                |                  |                |                  | K    | 147.112804  | 74.060040       | 130.086255     | 65.546765        |                |                  | 1  |

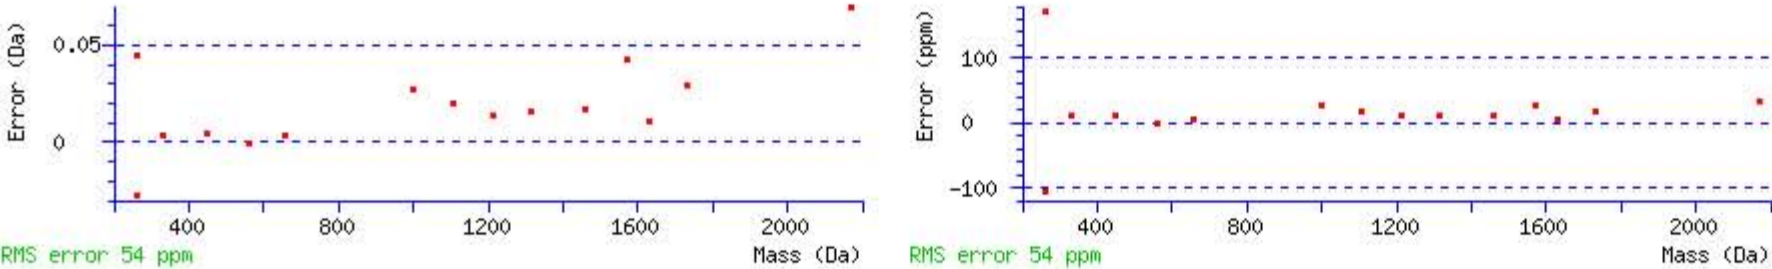

NCBI BLAST search of [STAAMSTYTGIFTDQVLSVLK](#)  
(Parameters: blastp, nr protein database, expect=20000, no filter, PAM30)  
Other BLAST [web gateways](#)

All matches to this query

| Score | Mr(calc):   | Delta    | Sequence                              |
|-------|-------------|----------|---------------------------------------|
| 80.9  | 2543.301544 | 0.031028 | <a href="#">STAAMSTYTGIFTDQVLSVLK</a> |



MATRIX

SCIENCE

Mascot Search Results

Peptide View

MS/MS Fragmentation of **DALSSVQESQVAQQAR**  
Found in **APOC3\_HUMAN**, Apolipoprotein C-III OS=Homo sapiens GN=APOC3 PE=1 SV=1

Match to Query 45162: 2027.016852 from(676.679560,3+) rtinseconds(1936) index(5263)  
Title: Locus:1.1.1.1951.16 File:"2013-07-02 CLN FXIII 180 min 2nd F 1.wiff"  
Data file C:\Program Files (x86)\Matrix Science\Mascot Daemon\mgf\8 FXIII 180 min 2nd\mascot\_daemon\_merge.mgf

Click mouse within plot area to zoom in by factor of two about that point  
Or, 

Plot from

100

 to 

1600

 Da 

Full range

  
Label all possible matches ☐ Label matches used for scoring ☒

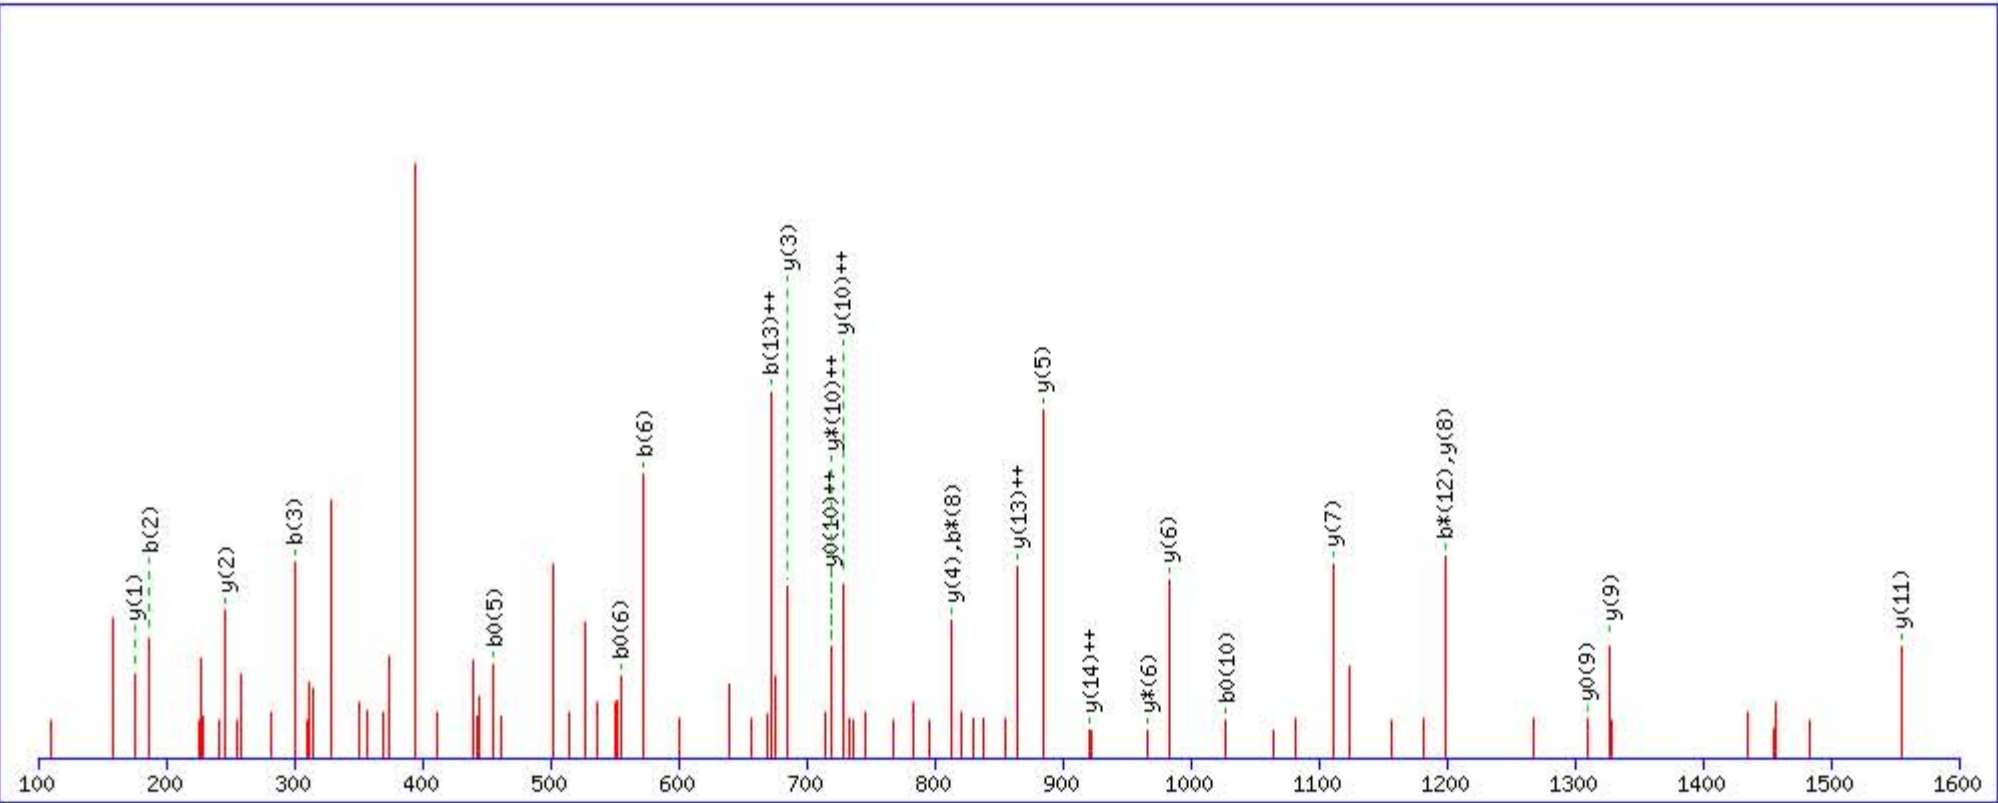

Monoisotopic mass of neutral peptide Mr(calc): 2027.010574  
Fixed modifications: Carbamidomethyl (C) (apply to specified residues or termini only)  
Variable modifications:  
Q14 : Biotin:Thermo-21345 (Q)  
Ions Score: 58 Expect: 4.4e-005  
Matches : 26/154 fragment ions using 41 most intense peaks [\(help\)](#)

| #  | b           | b <sup>++</sup> | b <sup>*</sup> | b <sup>*++</sup> | b <sup>0</sup> | b <sup>0++</sup> | Seq. | y           | y <sup>++</sup> | y <sup>*</sup> | y <sup>*++</sup> | y <sup>0</sup> | y <sup>0++</sup> | #  |
|----|-------------|-----------------|----------------|------------------|----------------|------------------|------|-------------|-----------------|----------------|------------------|----------------|------------------|----|
| 1  | 116.034219  | 58.520748       |                |                  | 98.023654      | 49.515465        | D    |             |                 |                |                  |                |                  | 16 |
| 2  | 187.071333  | 94.039304       |                |                  | 169.060768     | 85.034022        | A    | 1912.990923 | 956.999100      | 1895.964374    | 948.485825       | 1894.980358    | 947.993817       | 15 |
| 3  | 300.155397  | 150.581336      |                |                  | 282.144832     | 141.576054       | L    | 1841.953809 | 921.480543      | 1824.927260    | 912.967268       | 1823.943244    | 912.475260       | 14 |
| 4  | 387.187425  | 194.097351      |                |                  | 369.176860     | 185.092068       | S    | 1728.869745 | 864.938511      | 1711.843196    | 856.425236       | 1710.859180    | 855.933228       | 13 |
| 5  | 474.219453  | 237.613364      |                |                  | 456.208888     | 228.608082       | S    | 1641.837717 | 821.422497      | 1624.811168    | 812.909222       | 1623.827152    | 812.417214       | 12 |
| 6  | 573.287867  | 287.147572      |                |                  | 555.277302     | 278.142289       | V    | 1554.805689 | 777.906483      | 1537.779140    | 769.393208       | 1536.795124    | 768.901200       | 11 |
| 7  | 701.346445  | 351.176861      | 684.319896     | 342.663586       | 683.335880     | 342.171578       | Q    | 1455.737275 | 728.372276      | 1438.710726    | 719.859001       | 1437.726710    | 719.366993       | 10 |
| 8  | 830.389038  | 415.698157      | 813.362489     | 407.184883       | 812.378473     | 406.692875       | E    | 1327.678697 | 664.342987      | 1310.652148    | 655.829712       | 1309.668132    | 655.337704       | 9  |
| 9  | 917.421066  | 459.214171      | 900.394517     | 450.700897       | 899.410501     | 450.208889       | S    | 1198.636104 | 599.821690      | 1181.609555    | 591.308416       | 1180.625539    | 590.816408       | 8  |
| 10 | 1045.479644 | 523.243460      | 1028.453095    | 514.730186       | 1027.469079    | 514.238178       | Q    | 1111.604076 | 556.305676      | 1094.577527    | 547.792402       |                |                  | 7  |
| 11 | 1144.548058 | 572.777667      | 1127.521509    | 564.264393       | 1126.537493    | 563.772385       | V    | 983.545498  | 492.276387      | 966.518949     | 483.763113       |                |                  | 6  |
| 12 | 1215.585172 | 608.296224      | 1198.558623    | 599.782950       | 1197.574607    | 599.290942       | A    | 884.477084  | 442.742180      | 867.450535     | 434.228906       |                |                  | 5  |
| 13 | 1343.643750 | 672.325513      | 1326.617201    | 663.812239       | 1325.633185    | 663.320230       | Q    | 813.439970  | 407.223623      | 796.413421     | 398.710349       |                |                  | 4  |
| 14 | 1782.869076 | 891.938176      | 1765.842527    | 883.424902       | 1764.858511    | 882.932894       | Q    | 685.381392  | 343.194334      | 668.354843     | 334.681060       |                |                  | 3  |
| 15 | 1853.906190 | 927.456733      | 1836.879641    | 918.943459       | 1835.895625    | 918.451451       | A    | 246.156066  | 123.581671      | 229.129517     | 115.068396       |                |                  | 2  |
| 16 |             |                 |                |                  |                |                  | R    | 175.118952  | 88.063114       | 158.092403     | 79.549839        |                |                  | 1  |

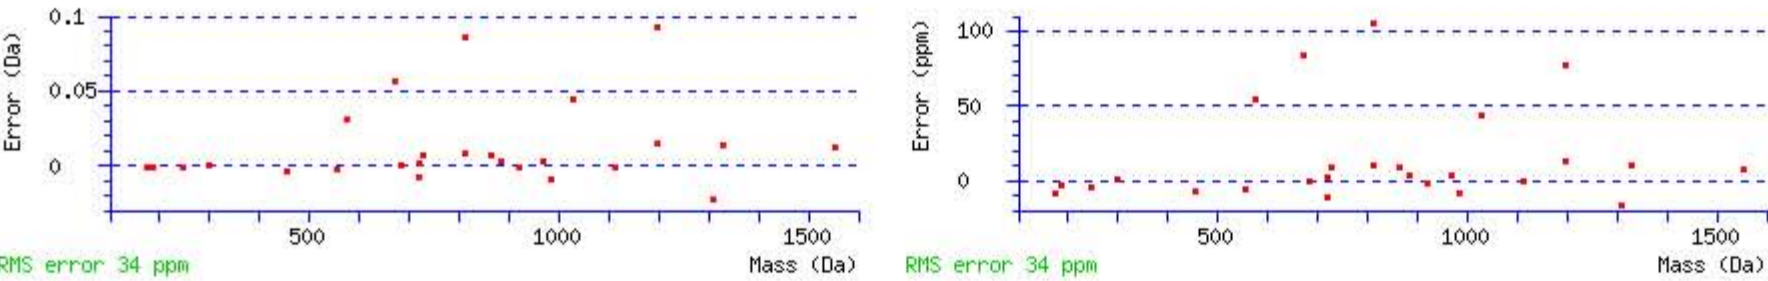

NCBI **BLAST** search of [DALSSVQESQVAQQAR](#)  
(Parameters: blastp, nr protein database, expect=20000, no filter, PAM30)  
Other BLAST [web gateways](#)

All matches to this query

| Score | Mr(calc):   | Delta    | Sequence                         |
|-------|-------------|----------|----------------------------------|
| 57.5  | 2027.010574 | 0.006278 | <a href="#">DALSSVQESQVAQQAR</a> |
| 57.0  | 2027.010574 | 0.006278 | <a href="#">DALSSVQESQVAQQAR</a> |
| 53.8  | 2027.010574 | 0.006278 | <a href="#">DALSSVQESQVAQQAR</a> |
| 25.9  | 2027.010574 | 0.006278 | <a href="#">DALSSVQESQVAQQAR</a> |

MATRIX

SCIENCE

Mascot Search Results

Peptide View

MS/MS Fragmentation of **DALSSVQESQVAQQAR**  
Found in **APOC3\_HUMAN**, Apolipoprotein C-III OS=Homo sapiens GN=APOC3 PE=1 SV=1

Match to Query 45168: 2027.023092 from(676.681640,3+) rtinseconds(1932) index(19866)  
Title: Locus:1.1.1.3055.9 File:"2013-07-02 CLN FXIII 180 min 2nd F 2.wiff"  
Data file C:\Program Files (x86)\Matrix Science\Mascot Daemon\mgf\8 FXIII 180 min 2nd\mascot\_daemon\_merge.mgf

Click mouse within plot area to zoom in by factor of two about that point  
Or, 

Plot from

0

 to 

2200

 Da 

Full range

  
Label all possible matches ☐ Label matches used for scoring ☒

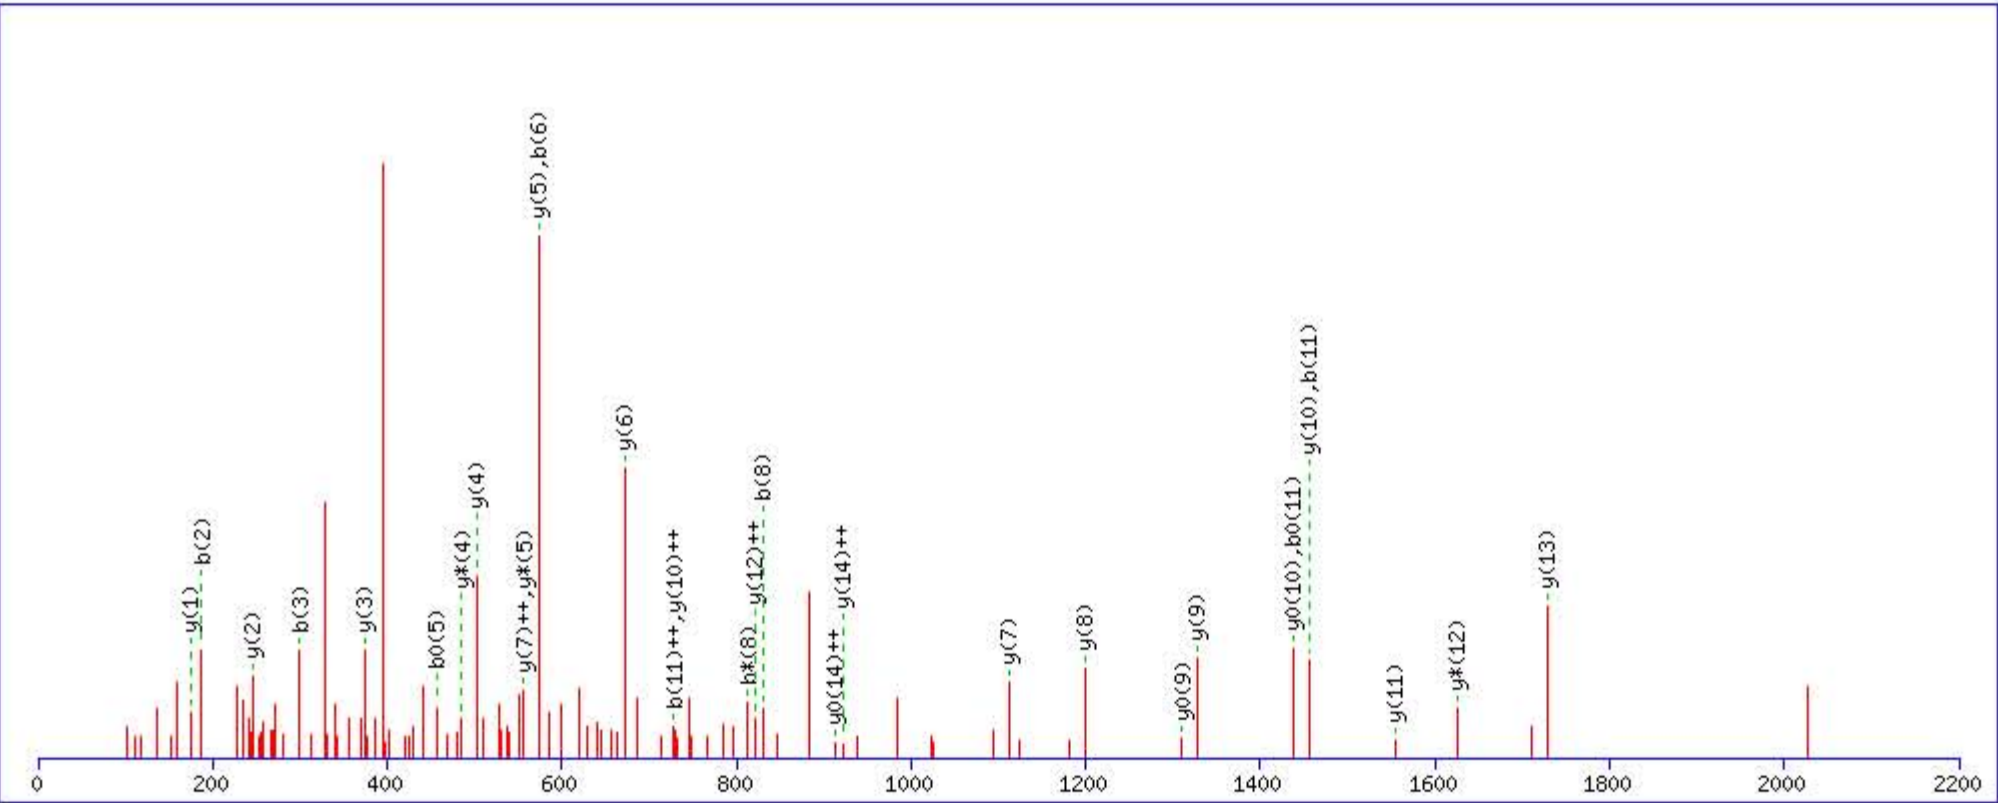

Monoisotopic mass of neutral peptide Mr(calc): 2027.010574  
Fixed modifications: Carbamidomethyl (C) (apply to specified residues or termini only)  
Variable modifications:  
Q10 : Biotin:Thermo-21345 (Q)  
Ions Score: 67 Expect: 5.4e-006  
Matches : 31/154 fragment ions using 53 most intense peaks [\(help\)](#)

| #  | b           | b <sup>++</sup> | b <sup>+</sup> | b <sup>++</sup> | b <sup>0</sup> | b <sup>0++</sup> | Seq. | y           | y <sup>++</sup> | y <sup>+</sup> | y <sup>++</sup> | y <sup>0</sup> | y <sup>0++</sup> | #  |
|----|-------------|-----------------|----------------|-----------------|----------------|------------------|------|-------------|-----------------|----------------|-----------------|----------------|------------------|----|
| 1  | 116.034219  | 58.520748       |                |                 | 98.023654      | 49.515465        | D    |             |                 |                |                 |                |                  | 16 |
| 2  | 187.071333  | 94.039304       |                |                 | 169.060768     | 85.034022        | A    | 1912.990923 | 956.999100      | 1895.964374    | 948.485825      | 1894.980358    | 947.993817       | 15 |
| 3  | 300.155397  | 150.581336      |                |                 | 282.144832     | 141.576054       | L    | 1841.953809 | 921.480543      | 1824.927260    | 912.967268      | 1823.943244    | 912.475260       | 14 |
| 4  | 387.187425  | 194.097351      |                |                 | 369.176860     | 185.092068       | S    | 1728.869745 | 864.938511      | 1711.843196    | 856.425236      | 1710.859180    | 855.933228       | 13 |
| 5  | 474.219453  | 237.613364      |                |                 | 456.208888     | 228.608082       | S    | 1641.837717 | 821.422497      | 1624.811168    | 812.909222      | 1623.827152    | 812.417214       | 12 |
| 6  | 573.287867  | 287.147572      |                |                 | 555.277302     | 278.142289       | V    | 1554.805689 | 777.906483      | 1537.779140    | 769.393208      | 1536.795124    | 768.901200       | 11 |
| 7  | 701.346445  | 351.176861      | 684.319896     | 342.663586      | 683.335880     | 342.171578       | Q    | 1455.737275 | 728.372276      | 1438.710726    | 719.859001      | 1437.726710    | 719.366993       | 10 |
| 8  | 830.389038  | 415.698157      | 813.362489     | 407.184883      | 812.378473     | 406.692875       | E    | 1327.678697 | 664.342987      | 1310.652148    | 655.829712      | 1309.668132    | 655.337704       | 9  |
| 9  | 917.421066  | 459.214171      | 900.394517     | 450.700897      | 899.410501     | 450.208889       | S    | 1198.636104 | 599.821690      | 1181.609555    | 591.308416      | 1180.625539    | 590.816408       | 8  |
| 10 | 1356.646392 | 678.826834      | 1339.619843    | 670.313560      | 1338.635827    | 669.821551       | Q    | 1111.604076 | 556.305676      | 1094.577527    | 547.792402      |                |                  | 7  |
| 11 | 1455.714806 | 728.361041      | 1438.688257    | 719.847767      | 1437.704241    | 719.355758       | V    | 672.378750  | 336.693013      | 655.352201     | 328.179739      |                |                  | 6  |
| 12 | 1526.751920 | 763.879598      | 1509.725371    | 755.366324      | 1508.741355    | 754.874315       | A    | 573.310336  | 287.158806      | 556.283787     | 278.645532      |                |                  | 5  |
| 13 | 1654.810498 | 827.908887      | 1637.783949    | 819.395613      | 1636.799933    | 818.903605       | Q    | 502.273222  | 251.640249      | 485.246673     | 243.126975      |                |                  | 4  |
| 14 | 1782.869076 | 891.938176      | 1765.842527    | 883.424902      | 1764.858511    | 882.932894       | Q    | 374.214644  | 187.610960      | 357.188095     | 179.097686      |                |                  | 3  |
| 15 | 1853.906190 | 927.456733      | 1836.879641    | 918.943459      | 1835.895625    | 918.451451       | A    | 246.156066  | 123.581671      | 229.129517     | 115.068396      |                |                  | 2  |
| 16 |             |                 |                |                 |                |                  | R    | 175.118952  | 88.063114       | 158.092403     | 79.549839       |                |                  | 1  |

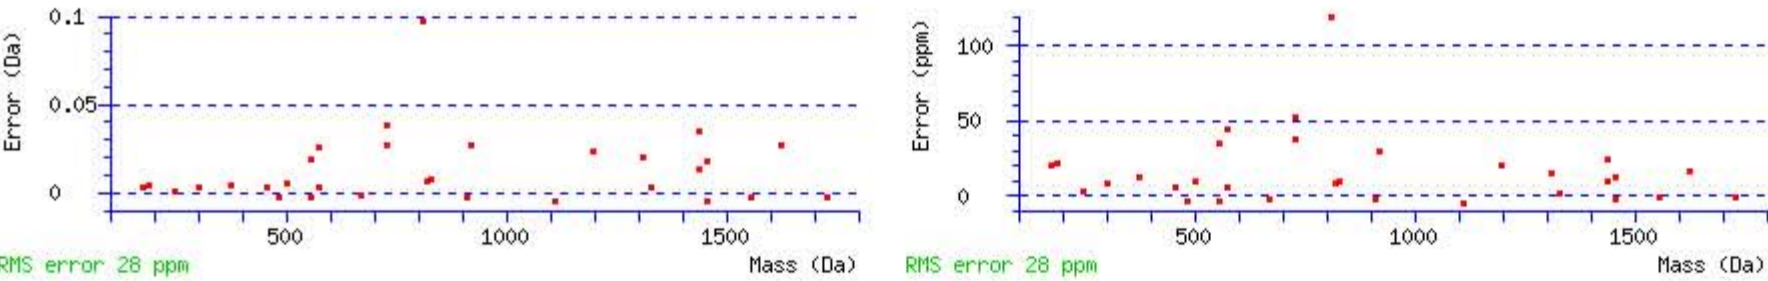

NCBI **BLAST** search of [DALSSVQESQVAQQAR](#)  
(Parameters: blastp, nr protein database, expect=20000, no filter, PAM30)  
Other BLAST [web gateways](#)

All matches to this query

| Score | Mr(calc):   | Delta    | Sequence                         |
|-------|-------------|----------|----------------------------------|
| 66.9  | 2027.010574 | 0.012518 | <a href="#">DALSSVQESQVAQQAR</a> |
| 65.2  | 2027.010574 | 0.012518 | <a href="#">DALSSVQESQVAQQAR</a> |
| 64.8  | 2027.010574 | 0.012518 | <a href="#">DALSSVQESQVAQQAR</a> |
| 33.5  | 2027.010574 | 0.012518 | <a href="#">DALSSVQESQVAQQAR</a> |

M

A

T

R

I

X

S

C

I

E

N

C

E

Mascot Search Results

Peptide View

MS/MS Fragmentation of **DALSSVQESQVAQQAR**  
Found in **APOC3\_HUMAN**, Apolipoprotein C-III OS=Homo sapiens GN=APOC3 PE=1 SV=1

Match to Query 45169: 2027.024948 from(1014.519750,2+) rtinseconds(1928) index(19831)  
Title: Locus:1.1.1.3053.21 File:"2013-07-02 CLN FXIII 180 min 2nd F 2.wiff"  
Data file C:\Program Files (x86)\Matrix Science\Mascot Daemon\mgf\8 FXIII 180 min 2nd\mascot\_daemon\_merge.mgf

Click mouse within plot area to zoom in by factor of two about that point  
Or, 

Plot from

100

 to 

1900

 Da 

Full range

  
Label all possible matches ☐ Label matches used for scoring ☒

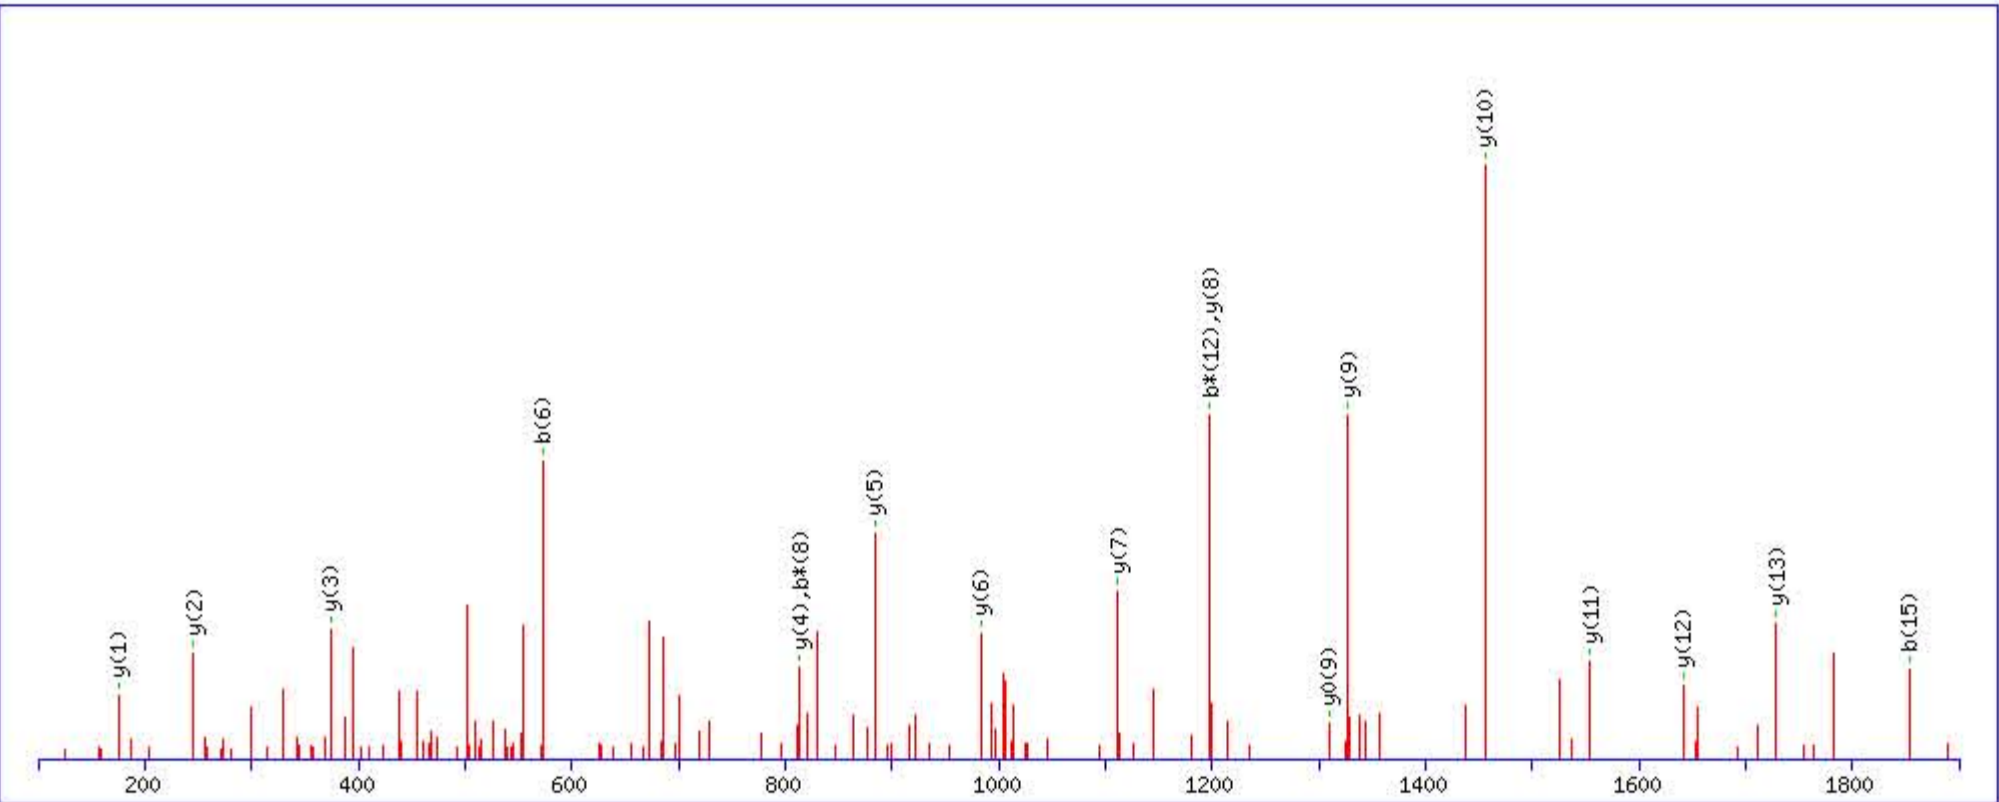

Monoisotopic mass of neutral peptide Mr(calc): 2027.010574  
Fixed modifications: Carbamidomethyl (C) (apply to specified residues or termini only)  
Variable modifications:  
Q13 : Biotin:Thermo-21345 (Q)  
Ions Score: 131 Expect: 6.5e-012  
Matches : 18/154 fragment ions using 18 most intense peaks [\(help\)](#)

| #  | b           | b <sup>++</sup> | b <sup>+</sup> | b <sup>+++</sup> | b <sup>0</sup> | b <sup>0++</sup> | Seq. | y           | y <sup>++</sup> | y <sup>*</sup> | y <sup>+++</sup> | y <sup>0</sup> | y <sup>0++</sup> | #  |
|----|-------------|-----------------|----------------|------------------|----------------|------------------|------|-------------|-----------------|----------------|------------------|----------------|------------------|----|
| 1  | 116.034219  | 58.520748       |                |                  | 98.023654      | 49.515465        | D    |             |                 |                |                  |                |                  | 16 |
| 2  | 187.071333  | 94.039304       |                |                  | 169.060768     | 85.034022        | A    | 1912.990923 | 956.999100      | 1895.964374    | 948.485825       | 1894.980358    | 947.993817       | 15 |
| 3  | 300.155397  | 150.581336      |                |                  | 282.144832     | 141.576054       | L    | 1841.953809 | 921.480543      | 1824.927260    | 912.967268       | 1823.943244    | 912.475260       | 14 |
| 4  | 387.187425  | 194.097351      |                |                  | 369.176860     | 185.092068       | S    | 1728.869745 | 864.938511      | 1711.843196    | 856.425236       | 1710.859180    | 855.933228       | 13 |
| 5  | 474.219453  | 237.613364      |                |                  | 456.208888     | 228.608082       | S    | 1641.837717 | 821.422497      | 1624.811168    | 812.909222       | 1623.827152    | 812.417214       | 12 |
| 6  | 573.287867  | 287.147572      |                |                  | 555.277302     | 278.142289       | V    | 1554.805689 | 777.906483      | 1537.779140    | 769.393208       | 1536.795124    | 768.901200       | 11 |
| 7  | 701.346445  | 351.176861      | 684.319896     | 342.663586       | 683.335880     | 342.171578       | Q    | 1455.737275 | 728.372276      | 1438.710726    | 719.859001       | 1437.726710    | 719.366993       | 10 |
| 8  | 830.389038  | 415.698157      | 813.362489     | 407.184883       | 812.378473     | 406.692875       | E    | 1327.678697 | 664.342987      | 1310.652148    | 655.829712       | 1309.668132    | 655.337704       | 9  |
| 9  | 917.421066  | 459.214171      | 900.394517     | 450.700897       | 899.410501     | 450.208889       | S    | 1198.636104 | 599.821690      | 1181.609555    | 591.308416       | 1180.625539    | 590.816408       | 8  |
| 10 | 1045.479644 | 523.243460      | 1028.453095    | 514.730186       | 1027.469079    | 514.238178       | Q    | 1111.604076 | 556.305676      | 1094.577527    | 547.792402       |                |                  | 7  |
| 11 | 1144.548058 | 572.777667      | 1127.521509    | 564.264393       | 1126.537493    | 563.772385       | V    | 983.545498  | 492.276387      | 966.518949     | 483.763113       |                |                  | 6  |
| 12 | 1215.585172 | 608.296224      | 1198.558623    | 599.782950       | 1197.574607    | 599.290942       | A    | 884.477084  | 442.742180      | 867.450535     | 434.228906       |                |                  | 5  |
| 13 | 1654.810498 | 827.908887      | 1637.783949    | 819.395613       | 1636.799933    | 818.903605       | Q    | 813.439970  | 407.223623      | 796.413421     | 398.710349       |                |                  | 4  |
| 14 | 1782.869076 | 891.938176      | 1765.842527    | 883.424902       | 1764.858511    | 882.932894       | Q    | 374.214644  | 187.610960      | 357.188095     | 179.097686       |                |                  | 3  |
| 15 | 1853.906190 | 927.456733      | 1836.879641    | 918.943459       | 1835.895625    | 918.451451       | A    | 246.156066  | 123.581671      | 229.129517     | 115.068396       |                |                  | 2  |
| 16 |             |                 |                |                  |                |                  | R    | 175.118952  | 88.063114       | 158.092403     | 79.549839        |                |                  | 1  |

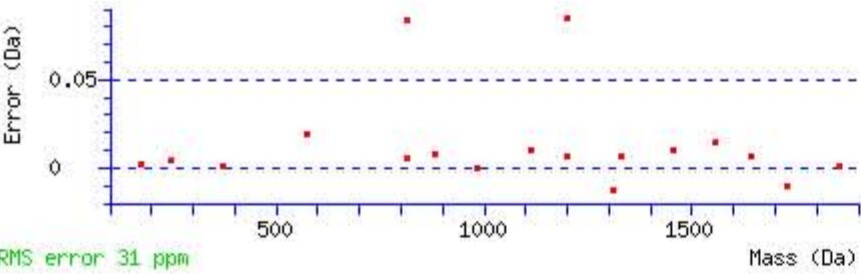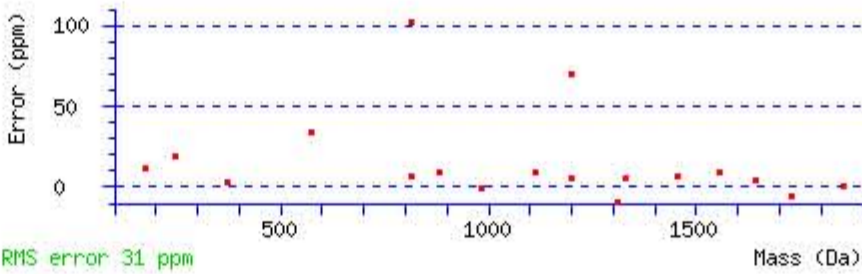

NCBI BLAST search of [DALSSVQESQVAQQAR](#)  
(Parameters: blastp, nr protein database, expect=20000, no filter, PAM30)  
Other BLAST [web gateways](#)

All matches to this query

| Score | Mr(calc):   | Delta     | Sequence                             |
|-------|-------------|-----------|--------------------------------------|
| 130.9 | 2027.010574 | 0.014374  | <a href="#">DALSSVQESQVAQQAR</a>     |
| 130.8 | 2027.010574 | 0.014374  | <a href="#">DALSSVQESQVAQQAR</a>     |
| 112.2 | 2027.010574 | 0.014374  | <a href="#">DALSSVQESQVAQQAR</a>     |
| 70.1  | 2027.010574 | 0.014374  | <a href="#">DALSSVQESQVAQQAR</a>     |
| 11.1  | 2027.021805 | 0.003143  | <a href="#">VASVESQGEISGNRR</a>      |
| 7.7   | 2027.017960 | 0.006988  | <a href="#">MFELTLRGMSEALVDKR</a>    |
| 7.6   | 2027.029633 | -0.004685 | <a href="#">QEESSEHSHKHLIELRR</a>    |
| 3.5   | 2027.021820 | 0.003128  | <a href="#">DTDNKAAIRDCGGVPALVR</a>  |
| 3.2   | 2027.046936 | -0.021988 | <a href="#">AVESLQASLDAETRAR</a>     |
| 3.1   | 2027.039520 | -0.014572 | <a href="#">GLERALEEAAANSGLNLSAR</a> |

MATRIX

SCIENCE

Mascot Search Results

Peptide View

MS/MS Fragmentation of **DALSSVQESQVAQQAR**  
Found in **APOC3\_HUMAN**, Apolipoprotein C-III OS=Homo sapiens GN=APOC3 PE=1 SV=1

Match to Query 45171: 2027.028192 from(676.683340,3+) rtinseconds(1980) index(34142)  
Title: Locus:1.1.1.798.13 File:"2013-07-02 CLN FXIII 180 min 2nd F 3.wiff"  
Data file C:\Program Files (x86)\Matrix Science\Mascot Daemon\mgf\8 FXIII 180 min 2nd\mascot\_daemon\_merge.mgf

Click mouse within plot area to zoom in by factor of two about that point  
Or, 

Plot from

100

 to 

1800

 Da 

Full range

  
Label all possible matches ☐ Label matches used for scoring ☒

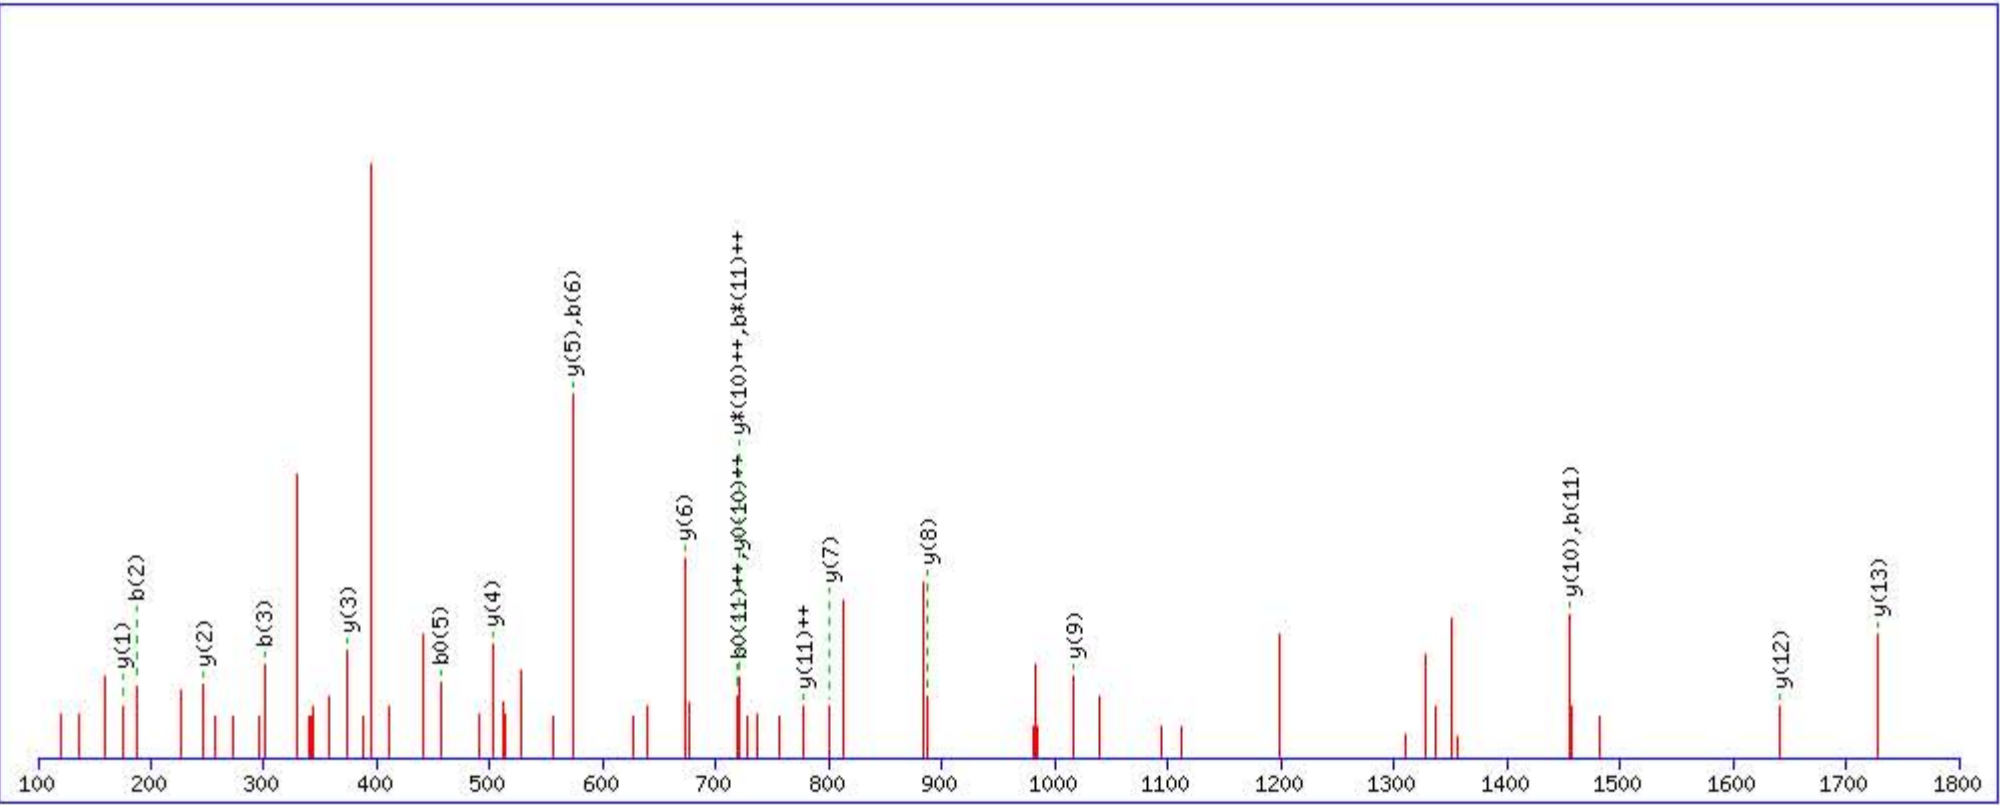

Monoisotopic mass of neutral peptide Mr(calc): 2027.010574  
Fixed modifications: Carbamidomethyl (C) (apply to specified residues or termini only)  
Variable modifications:  
Q7 : Biotin:Thermo-21345 (Q)  
Ions Score: 65 Expect: 9.3e-007  
Matches : 22/154 fragment ions using 40 most intense peaks [\(help\)](#)

| #  | b           | b <sup>++</sup> | b <sup>*</sup> | b <sup>++</sup> * | b <sup>0</sup> | b <sup>0++</sup> | Seq. | y           | y <sup>++</sup> | y <sup>*</sup> | y <sup>++</sup> * | y <sup>0</sup> | y <sup>0++</sup> | #  |
|----|-------------|-----------------|----------------|-------------------|----------------|------------------|------|-------------|-----------------|----------------|-------------------|----------------|------------------|----|
| 1  | 116.034219  | 58.520748       |                |                   | 98.023654      | 49.515465        | D    |             |                 |                |                   |                |                  | 16 |
| 2  | 187.071333  | 94.039304       |                |                   | 169.060768     | 85.034022        | A    | 1912.990923 | 956.999100      | 1895.964374    | 948.485825        | 1894.980358    | 947.993817       | 15 |
| 3  | 300.155397  | 150.581336      |                |                   | 282.144832     | 141.576054       | L    | 1841.953809 | 921.480543      | 1824.927260    | 912.967268        | 1823.943244    | 912.475260       | 14 |
| 4  | 387.187425  | 194.097351      |                |                   | 369.176860     | 185.092068       | S    | 1728.869745 | 864.938511      | 1711.843196    | 856.425236        | 1710.859180    | 855.933228       | 13 |
| 5  | 474.219453  | 237.613364      |                |                   | 456.208888     | 228.608082       | S    | 1641.837717 | 821.422497      | 1624.811168    | 812.909222        | 1623.827152    | 812.417214       | 12 |
| 6  | 573.287867  | 287.147572      |                |                   | 555.277302     | 278.142289       | V    | 1554.805689 | 777.906483      | 1537.779140    | 769.393208        | 1536.795124    | 768.901200       | 11 |
| 7  | 1012.513193 | 506.760235      | 995.486644     | 498.246960        | 994.502628     | 497.754952       | Q    | 1455.737275 | 728.372276      | 1438.710726    | 719.859001        | 1437.726710    | 719.366993       | 10 |
| 8  | 1141.555786 | 571.281531      | 1124.529237    | 562.768257        | 1123.545221    | 562.276249       | E    | 1016.511949 | 508.759613      | 999.485400     | 500.246338        | 998.501384     | 499.754330       | 9  |
| 9  | 1228.587814 | 614.797545      | 1211.561265    | 606.284271        | 1210.577249    | 605.792263       | S    | 887.469356  | 444.238316      | 870.442807     | 435.725042        | 869.458791     | 435.233034       | 8  |
| 10 | 1356.646392 | 678.826834      | 1339.619843    | 670.313560        | 1338.635827    | 669.821552       | Q    | 800.437328  | 400.722302      | 783.410779     | 392.209028        |                |                  | 7  |
| 11 | 1455.714806 | 728.361041      | 1438.688257    | 719.847767        | 1437.704241    | 719.355759       | V    | 672.378750  | 336.693013      | 655.352201     | 328.179739        |                |                  | 6  |
| 12 | 1526.751920 | 763.879598      | 1509.725371    | 755.366324        | 1508.741355    | 754.874316       | A    | 573.310336  | 287.158806      | 556.283787     | 278.645532        |                |                  | 5  |
| 13 | 1654.810498 | 827.908887      | 1637.783949    | 819.395613        | 1636.799933    | 818.903605       | Q    | 502.273222  | 251.640249      | 485.246673     | 243.126975        |                |                  | 4  |
| 14 | 1782.869076 | 891.938176      | 1765.842527    | 883.424902        | 1764.858511    | 882.932894       | Q    | 374.214644  | 187.610960      | 357.188095     | 179.097686        |                |                  | 3  |
| 15 | 1853.906190 | 927.456733      | 1836.879641    | 918.943459        | 1835.895625    | 918.451451       | A    | 246.156066  | 123.581671      | 229.129517     | 115.068396        |                |                  | 2  |
| 16 |             |                 |                |                   |                |                  | R    | 175.118952  | 88.063114       | 158.092403     | 79.549839         |                |                  | 1  |

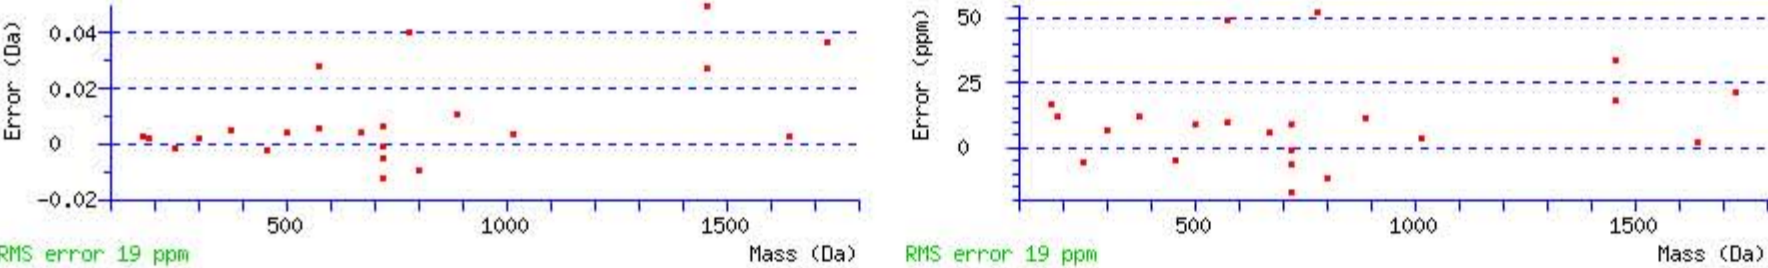

NCBI BLAST search of [DALSSVQESQVAQQAR](#)  
(Parameters: blastp, nr protein database, expect=20000, no filter, PAM30)  
Other BLAST [web gateways](#)

All matches to this query

| Score | Mr(calc):   | Delta    | Sequence                          |
|-------|-------------|----------|-----------------------------------|
| 65.3  | 2027.010574 | 0.017618 | <a href="#">DALSSVQESQVAQQAR</a>  |
| 60.4  | 2027.010574 | 0.017618 | <a href="#">DALSSVQESQVAQQAR</a>  |
| 60.3  | 2027.010574 | 0.017618 | <a href="#">DALSSVQESQVAQQAR</a>  |
| 49.5  | 2027.010574 | 0.017618 | <a href="#">DALSSVQESQVAQQAR</a>  |
| 1.0   | 2027.027161 | 0.001031 | <a href="#">IHSGKKPYQCGKAFNHR</a> |

MATRIX

SCIENCE

Mascot Search Results

Peptide View

MS/MS Fragmentation of **VLNQELR**  
Found in **APOD\_HUMAN**, Apolipoprotein D OS=Homo sapiens GN=APOD PE=1 SV=1

Match to Query 20098: 1181.668288 from(591.841420,2+) rtinseconds(1765) index(32694)  
Title: Locus:1.1.1.723.12 File:"2013-07-02 CLN FXIII 180 min 2nd F 3.wiff"  
Data file C:\Program Files (x86)\Matrix Science\Mascot Daemon\mgf\8 FXIII 180 min 2nd\mascot\_daemon\_merge.mgf

Click mouse within plot area to zoom in by factor of two about that point  
Or,   to  Da   
Label all possible matches ☐ Label matches used for scoring ☒

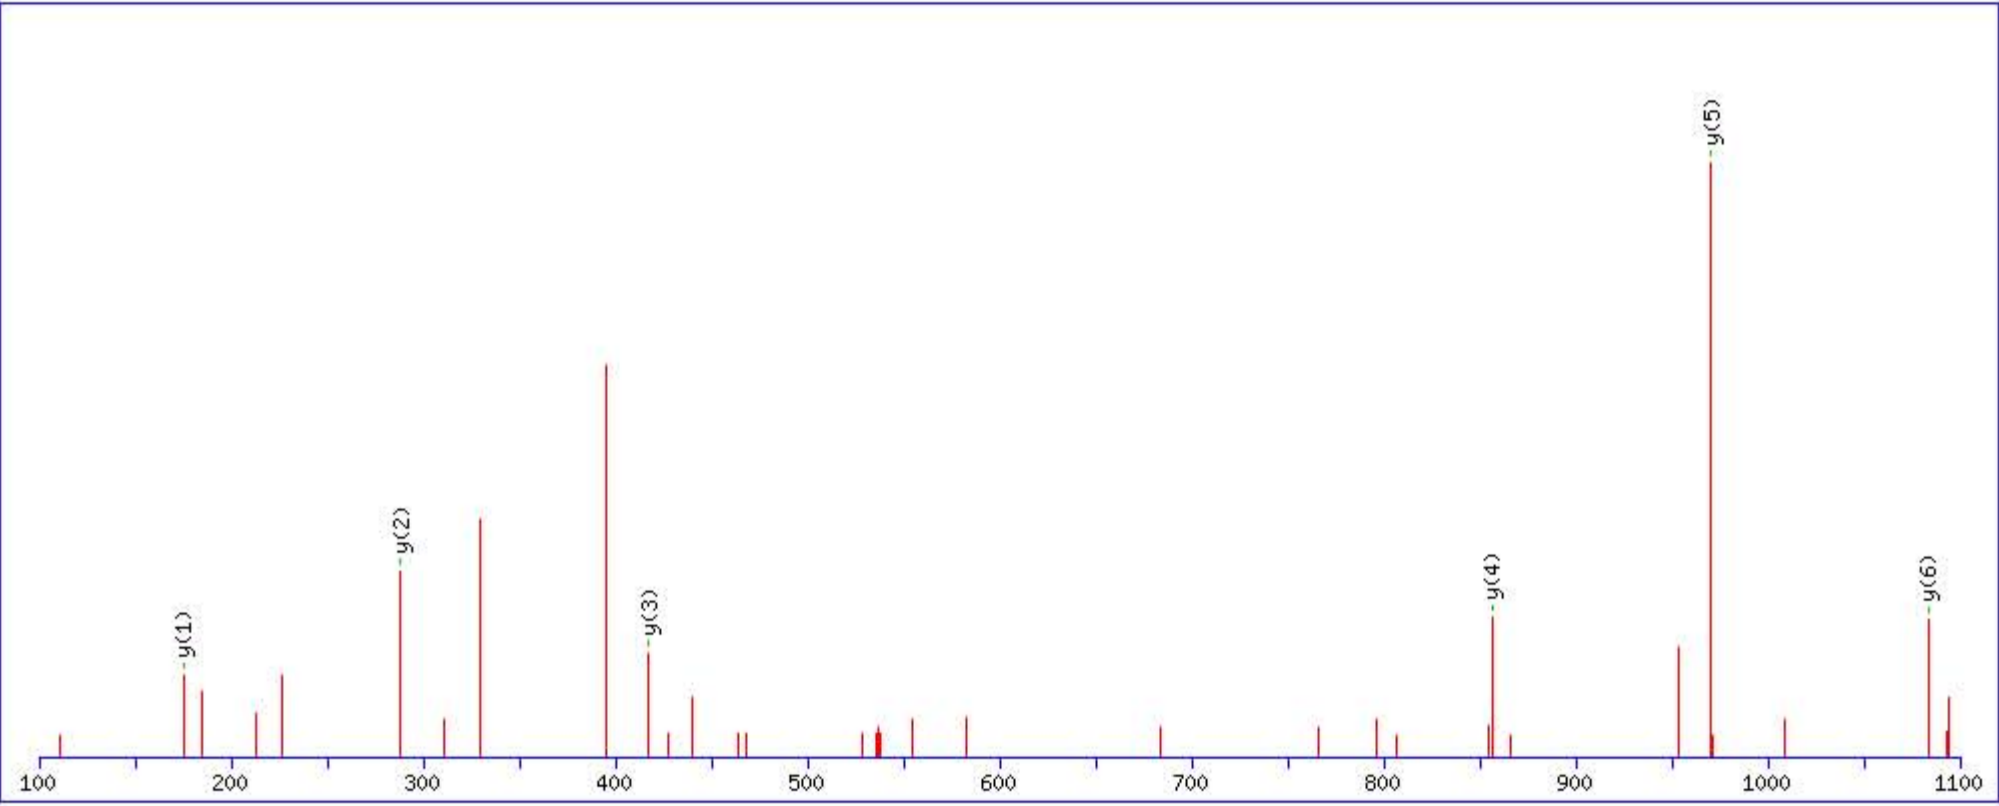

Monoisotopic mass of neutral peptide Mr(calc): 1181.659042  
Fixed modifications: Carbamidomethyl (C) (apply to specified residues or termini only)  
Variable modifications:  
Q4 : Biotin:Thermo-21345 (Q)  
Ions Score: 48 Expect: 0.00028  
Matches : 6/56 fragment ions using 10 most intense peaks [\(help\)](#)

| # | b           | b <sup>++</sup> | b <sup>*</sup> | b <sup>*++</sup> | b <sup>0</sup> | b <sup>0++</sup> | Seq. | y           | y <sup>++</sup> | y <sup>*</sup> | y <sup>*++</sup> | y <sup>0</sup> | y <sup>0++</sup> | # |
|---|-------------|-----------------|----------------|------------------|----------------|------------------|------|-------------|-----------------|----------------|------------------|----------------|------------------|---|
| 1 | 100.075690  | 50.541483       |                |                  |                |                  | V    |             |                 |                |                  |                |                  | 7 |
| 2 | 213.159754  | 107.083515      |                |                  |                |                  | L    | 1083.597926 | 542.302601      | 1066.571377    | 533.789327       | 1065.587361    | 533.297318       | 6 |
| 3 | 327.202681  | 164.104978      | 310.176132     | 155.591704       |                |                  | N    | 970.513862  | 485.760569      | 953.487313     | 477.247295       | 952.503297     | 476.755287       | 5 |
| 4 | 766.428007  | 383.717642      | 749.401458     | 375.204367       |                |                  | Q    | 856.470935  | 428.739106      | 839.444386     | 420.225831       | 838.460370     | 419.733823       | 4 |
| 5 | 895.470600  | 448.238938      | 878.444051     | 439.725664       | 877.460035     | 439.233656       | E    | 417.245609  | 209.126442      | 400.219060     | 200.613168       | 399.235044     | 200.121160       | 3 |
| 6 | 1008.554664 | 504.780970      | 991.528115     | 496.267696       | 990.544099     | 495.775688       | L    | 288.203016  | 144.605146      | 271.176467     | 136.091871       |                |                  | 2 |
| 7 |             |                 |                |                  |                |                  | R    | 175.118952  | 88.063114       | 158.092403     | 79.549839        |                |                  | 1 |

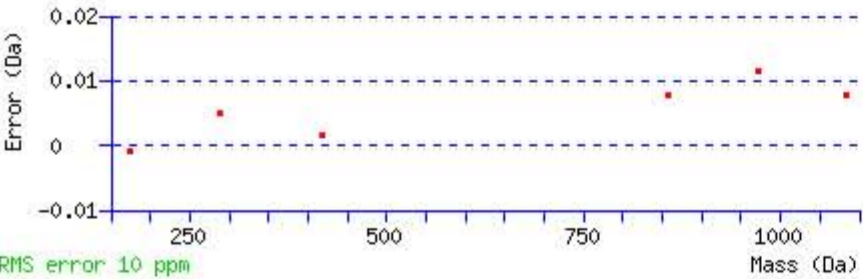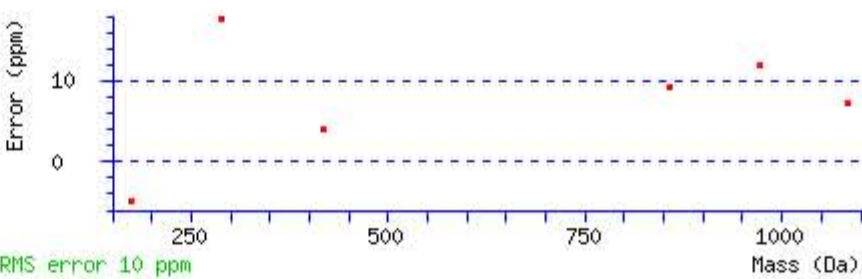

NCBI BLAST search of [VLNQELR](#)  
(Parameters: blastp, nr protein database, expect=20000, no filter, PAM30)  
Other BLAST [web gateways](#)

All matches to this query

| Score | Mr(calc):   | Delta     | Sequence                     |
|-------|-------------|-----------|------------------------------|
| 48.0  | 1181.659042 | 0.009246  | <a href="#">VLNQELR</a>      |
| 23.3  | 1181.676788 | -0.008500 | <a href="#">VIPGAAEKIER</a>  |
| 10.0  | 1181.670273 | -0.001985 | <a href="#">VLEQARR</a>      |
| 10.0  | 1181.659058 | 0.009230  | <a href="#">VLLGDAQR</a>     |
| 10.0  | 1181.670273 | -0.001985 | <a href="#">VLQARER</a>      |
| 9.7   | 1181.676804 | -0.008516 | <a href="#">VLALASGPELGR</a> |
| 9.7   | 1181.662918 | 0.005370  | <a href="#">VVQSVRHTR</a>    |
| 7.2   | 1181.670273 | -0.001985 | <a href="#">ARVEQLR</a>      |
| 7.2   | 1181.659058 | 0.009230  | <a href="#">VGLQADIR</a>     |
| 7.2   | 1181.670273 | -0.001985 | <a href="#">VREQALR</a>      |

MATRIX

SCIENCE

Mascot Search Results

Peptide View

MS/MS Fragmentation of **EQVAEVR**  
Found in **APOE\_HUMAN**, Apolipoprotein E OS=Homo sapiens GN=APOE PE=1 SV=1

Match to Query 18683: 1140.598748 from(571.306650,2+) rtinseconds(1509) index(16964)  
Title: Locus:1.1.1.2908.6 File:"2013-07-02 CLN FXIII 180 min 2nd F 2.wiff"  
Data file C:\Program Files (x86)\Matrix Science\Mascot Daemon\mgf\8 FXIII 180 min 2nd\mascot\_daemon\_merge.mgf

Click mouse within plot area to zoom in by factor of two about that point  
Or, 

Plot from

100

 to 

1500

 Da 

Full range

  
Label all possible matches ☐ Label matches used for scoring ☒

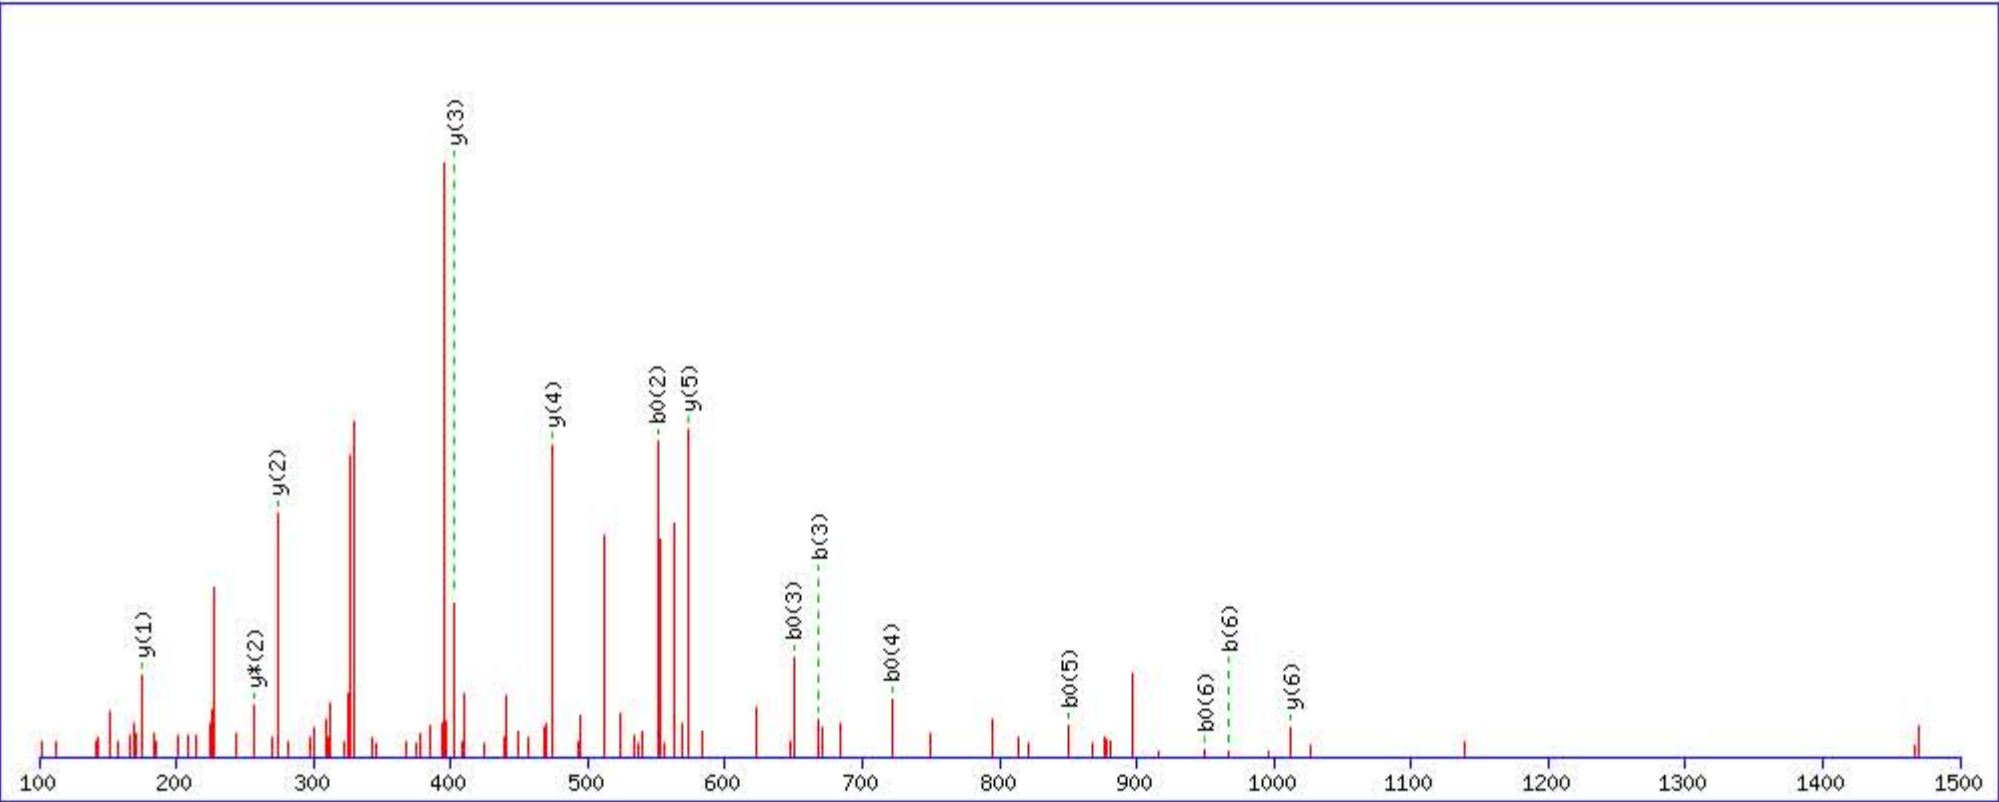

Monoisotopic mass of neutral peptide Mr(calc): 1140.596115  
Fixed modifications: Carbamidomethyl (C) (apply to specified residues or termini only)  
Variable modifications:  
Q2 : Biotin:Thermo-21345 (Q)  
Ions Score: 30 Expect: 0.023  
Matches : 14/66 fragment ions using 30 most intense peaks [\(help\)](#)

| # | b          | b <sup>++</sup> | b <sup>*</sup> | b <sup>+++</sup> | b <sup>0</sup> | b <sup>0++</sup> | Seq. | y           | y <sup>++</sup> | y <sup>*</sup> | y <sup>+++</sup> | y <sup>0</sup> | y <sup>0++</sup> | # |
|---|------------|-----------------|----------------|------------------|----------------|------------------|------|-------------|-----------------|----------------|------------------|----------------|------------------|---|
| 1 | 130.049869 | 65.528572       |                |                  | 112.039304     | 56.523290        | E    |             |                 |                |                  |                |                  | 7 |
| 2 | 569.275195 | 285.141236      | 552.248646     | 276.627961       | 551.264630     | 276.135953       | Q    | 1012.560813 | 506.784044      | 995.534264     | 498.270770       | 994.550248     | 497.778762       | 6 |
| 3 | 668.343609 | 334.675443      | 651.317060     | 326.162168       | 650.333044     | 325.670160       | V    | 573.335487  | 287.171382      | 556.308938     | 278.658107       | 555.324922     | 278.166099       | 5 |
| 4 | 739.380723 | 370.194000      | 722.354174     | 361.680725       | 721.370158     | 361.188717       | A    | 474.267073  | 237.637174      | 457.240524     | 229.123900       | 456.256508     | 228.631892       | 4 |
| 5 | 868.423316 | 434.715296      | 851.396767     | 426.202022       | 850.412751     | 425.710014       | E    | 403.229959  | 202.118617      | 386.203410     | 193.605343       | 385.219394     | 193.113335       | 3 |
| 6 | 967.491730 | 484.249503      | 950.465181     | 475.736228       | 949.481165     | 475.244220       | V    | 274.187366  | 137.597321      | 257.160817     | 129.084046       |                |                  | 2 |
| 7 |            |                 |                |                  |                |                  | R    | 175.118952  | 88.063114       | 158.092403     | 79.549839        |                |                  | 1 |

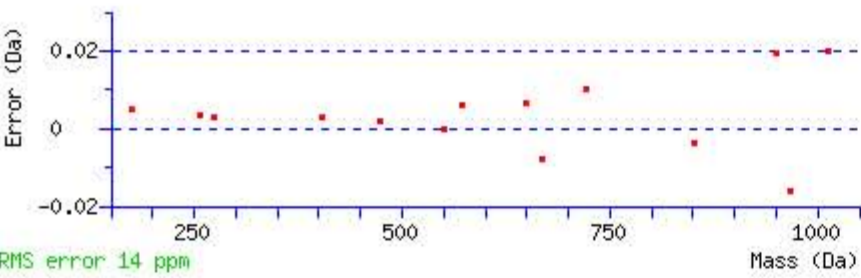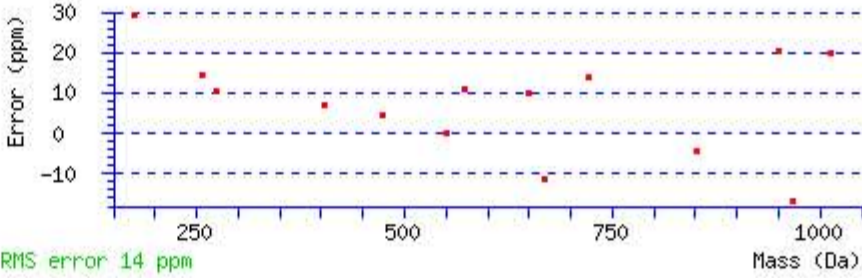

NCBI BLAST search of [EQVAEVR](#)  
(Parameters: blastp, nr protein database, expect=20000, no filter, PAM30)  
Other BLAST [web gateways](#)

All matches to this query

| Score | Mr(calc):   | Delta     | Sequence                    |
|-------|-------------|-----------|-----------------------------|
| 30.5  | 1140.596115 | 0.002633  | <a href="#">EQVAEVR</a>     |
| 12.2  | 1140.596115 | 0.002633  | <a href="#">EQALDVR</a>     |
| 10.2  | 1140.596115 | 0.002633  | <a href="#">QEVADLR</a>     |
| 3.9   | 1140.607361 | -0.008613 | <a href="#">QAQQTVR</a>     |
| 3.4   | 1140.599945 | -0.001197 | <a href="#">ERVALSHSSR</a>  |
| 3.3   | 1140.611176 | -0.012428 | <a href="#">GLRNRASDPR</a>  |
| 2.5   | 1140.592789 | 0.005959  | <a href="#">IGTGSFGTVFR</a> |
| 1.8   | 1140.596115 | 0.002633  | <a href="#">EQSTLPR</a>     |
| 1.6   | 1140.613876 | -0.015128 | <a href="#">LLQAPDIDL</a>   |
| 1.3   | 1140.599945 | -0.001197 | <a href="#">SSSKLAQHQR</a>  |

MATRIX

SCIENCE

Mascot Search Results

Peptide View

MS/MS Fragmentation of **ELQAAQAR**  
Found in **APOE\_HUMAN**, Apolipoprotein E OS=Homo sapiens GN=APOE PE=1 SV=1

Match to Query 20476: 1196.634968 from(599.324760,2+) rtinseconds(1488) index(30988)  
Title: Locus:1.1.1.626.21 File:"2013-07-02 CLN FXIII 180 min 2nd F 3.wiff"  
Data file C:\Program Files (x86)\Matrix Science\Mascot Daemon\mgf\8 FXIII 180 min 2nd\mascot\_daemon\_merge.mgf

Click mouse within plot area to zoom in by factor of two about that point  
Or, 

Plot from

100

 to 

1200

 Da 

Full range

  
Label all possible matches ☐ Label matches used for scoring ☒

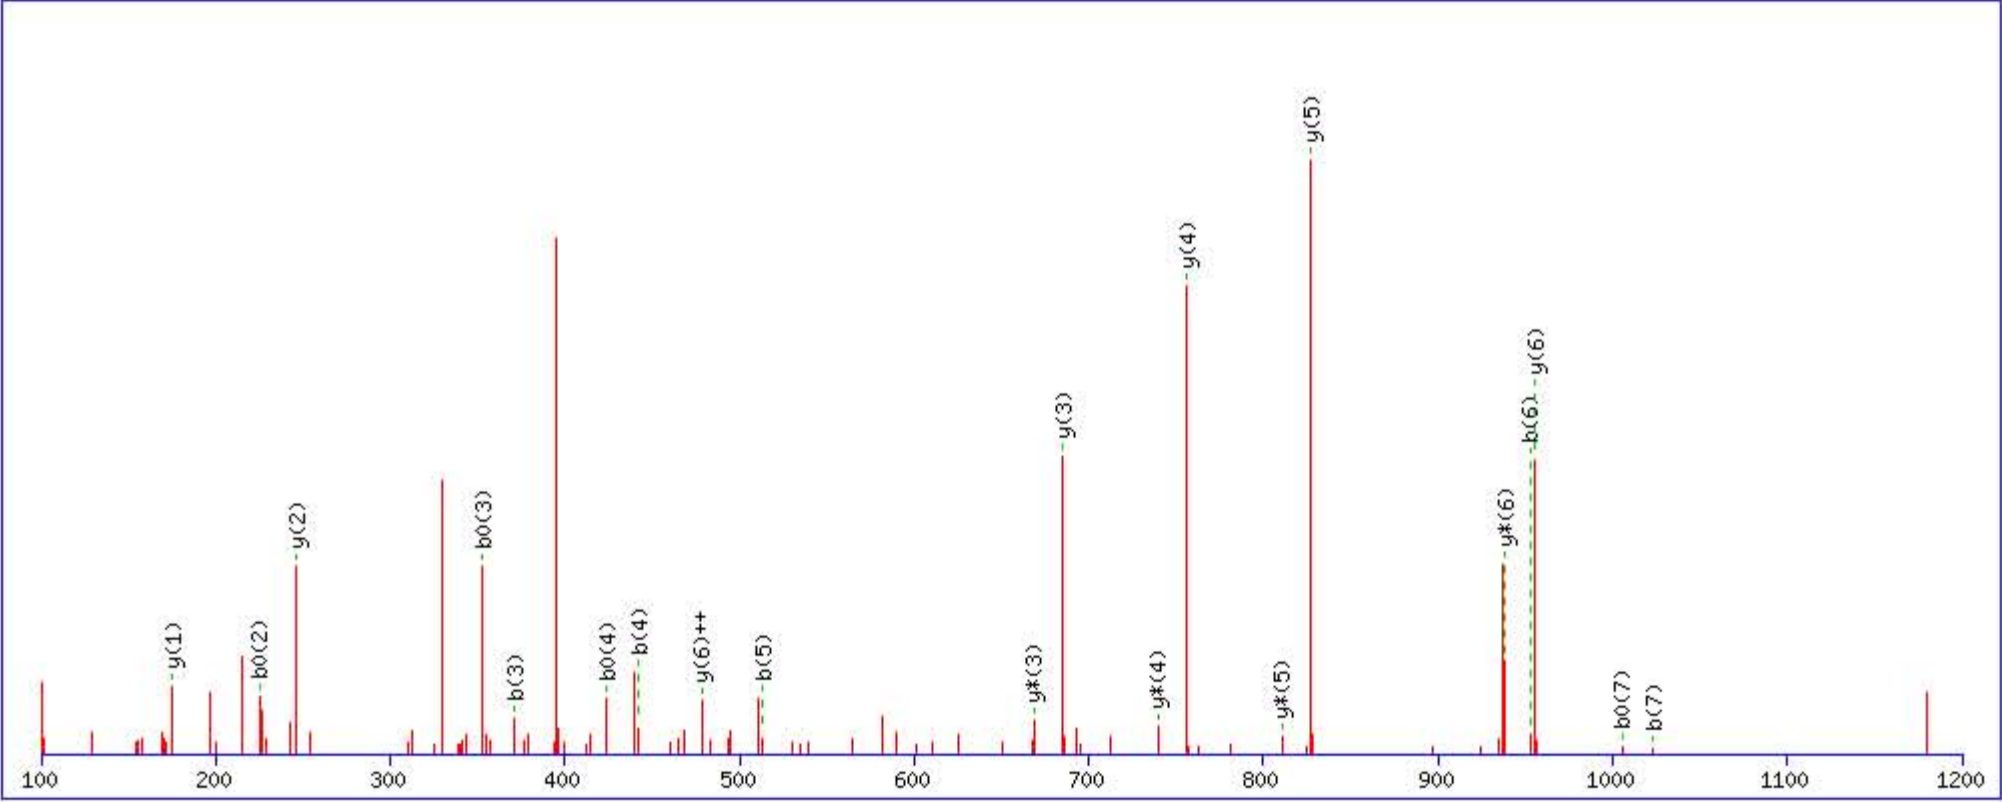

Monoisotopic mass of neutral peptide Mr(calc): 1196.633545  
Fixed modifications: Carbamidomethyl (C) (apply to specified residues or termini only)  
Variable modifications:  
Q6 : Biotin:Thermo-21345 (Q)  
Ions Score: 31 Expect: 0.007  
Matches : 20/66 fragment ions using 39 most intense peaks [\(help\)](#)

| # | b           | b <sup>++</sup> | b <sup>*</sup> | b <sup>++</sup> * | b <sup>0</sup> | b <sup>0++</sup> | Seq. | y           | y <sup>++</sup> | y <sup>*</sup> | y <sup>++</sup> * | # |
|---|-------------|-----------------|----------------|-------------------|----------------|------------------|------|-------------|-----------------|----------------|-------------------|---|
| 1 | 130.049869  | 65.528572       |                |                   | 112.039304     | 56.523290        | E    |             |                 |                |                   | 8 |
| 2 | 243.133933  | 122.070605      |                |                   | 225.123368     | 113.065322       | L    | 1068.598262 | 534.802769      | 1051.571713    | 526.289495        | 7 |
| 3 | 371.192511  | 186.099894      | 354.165962     | 177.586619        | 353.181946     | 177.094611       | Q    | 955.514198  | 478.260737      | 938.487649     | 469.747463        | 6 |
| 4 | 442.229625  | 221.618450      | 425.203076     | 213.105176        | 424.219060     | 212.613168       | A    | 827.455620  | 414.231448      | 810.429071     | 405.718174        | 5 |
| 5 | 513.266739  | 257.137008      | 496.240190     | 248.623733        | 495.256174     | 248.131725       | A    | 756.418506  | 378.712891      | 739.391957     | 370.199617        | 4 |
| 6 | 952.492065  | 476.749671      | 935.465516     | 468.236396        | 934.481500     | 467.744388       | Q    | 685.381392  | 343.194334      | 668.354843     | 334.681060        | 3 |
| 7 | 1023.529179 | 512.268227      | 1006.502630    | 503.754953        | 1005.518614    | 503.262945       | A    | 246.156066  | 123.581671      | 229.129517     | 115.068397        | 2 |
| 8 |             |                 |                |                   |                |                  | R    | 175.118952  | 88.063114       | 158.092403     | 79.549840         | 1 |

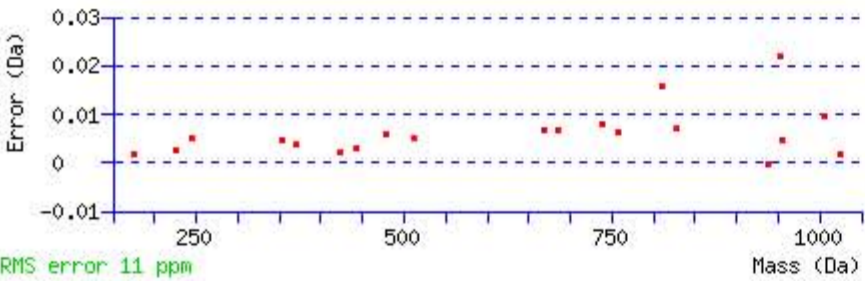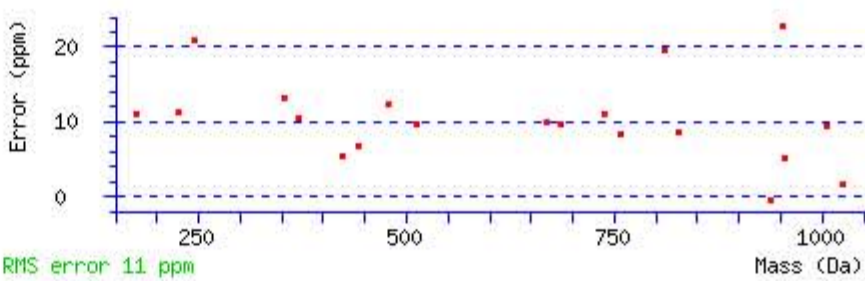

NCBI BLAST search of [ELQAAQAR](#)  
(Parameters: blastp, nr protein database, expect=20000, no filter, PAM30)  
Other BLAST [web gateways](#)

All matches to this query

| Score | Mr(calc):   | Delta     | Sequence                    |
|-------|-------------|-----------|-----------------------------|
| 31.4  | 1196.633545 | 0.001423  | <a href="#">ELQAAQAR</a>    |
| 8.1   | 1196.633575 | 0.001393  | <a href="#">QASTQVPR</a>    |
| 5.8   | 1196.630890 | 0.004078  | <a href="#">TNHCRRVVR</a>   |
| 5.4   | 1196.627029 | 0.007939  | <a href="#">AGMPRQAR</a>    |
| 3.4   | 1196.637390 | -0.002422 | <a href="#">TLRQAGAPNNR</a> |
| 3.1   | 1196.641434 | -0.006466 | <a href="#">STRPQAWVPR</a>  |
| 2.3   | 1196.641418 | -0.006450 | <a href="#">EAKKAGPGFHR</a> |
| 0.8   | 1196.633575 | 0.001393  | <a href="#">QASTQVPR</a>    |

***{MATRIX}***  
***{SCIENCE}*** Mascot Search Results

Peptide View

MS/MS Fragmentation of **ELQAAQAR**  
Found in **APOE\_HUMAN**, Apolipoprotein E OS=Homo sapiens GN=APOE PE=1 SV=1

Match to Query 20479: 1196.643408 from(599.328980,2+) rtinseconds(1468) index(30840)  
Title: Locus:1.1.1.619.22 File:"2013-07-02 CLN FXIII 180 min 2nd F 3.wiff"  
Data file C:\Program Files (x86)\Matrix Science\Mascot Daemon\mgf\8 FXIII 180 min 2nd\mascot\_daemon\_merge.mgf

Click mouse within plot area to zoom in by factor of two about that point  
Or,   to  Da   
Label all possible matches ☐ Label matches used for scoring ☒

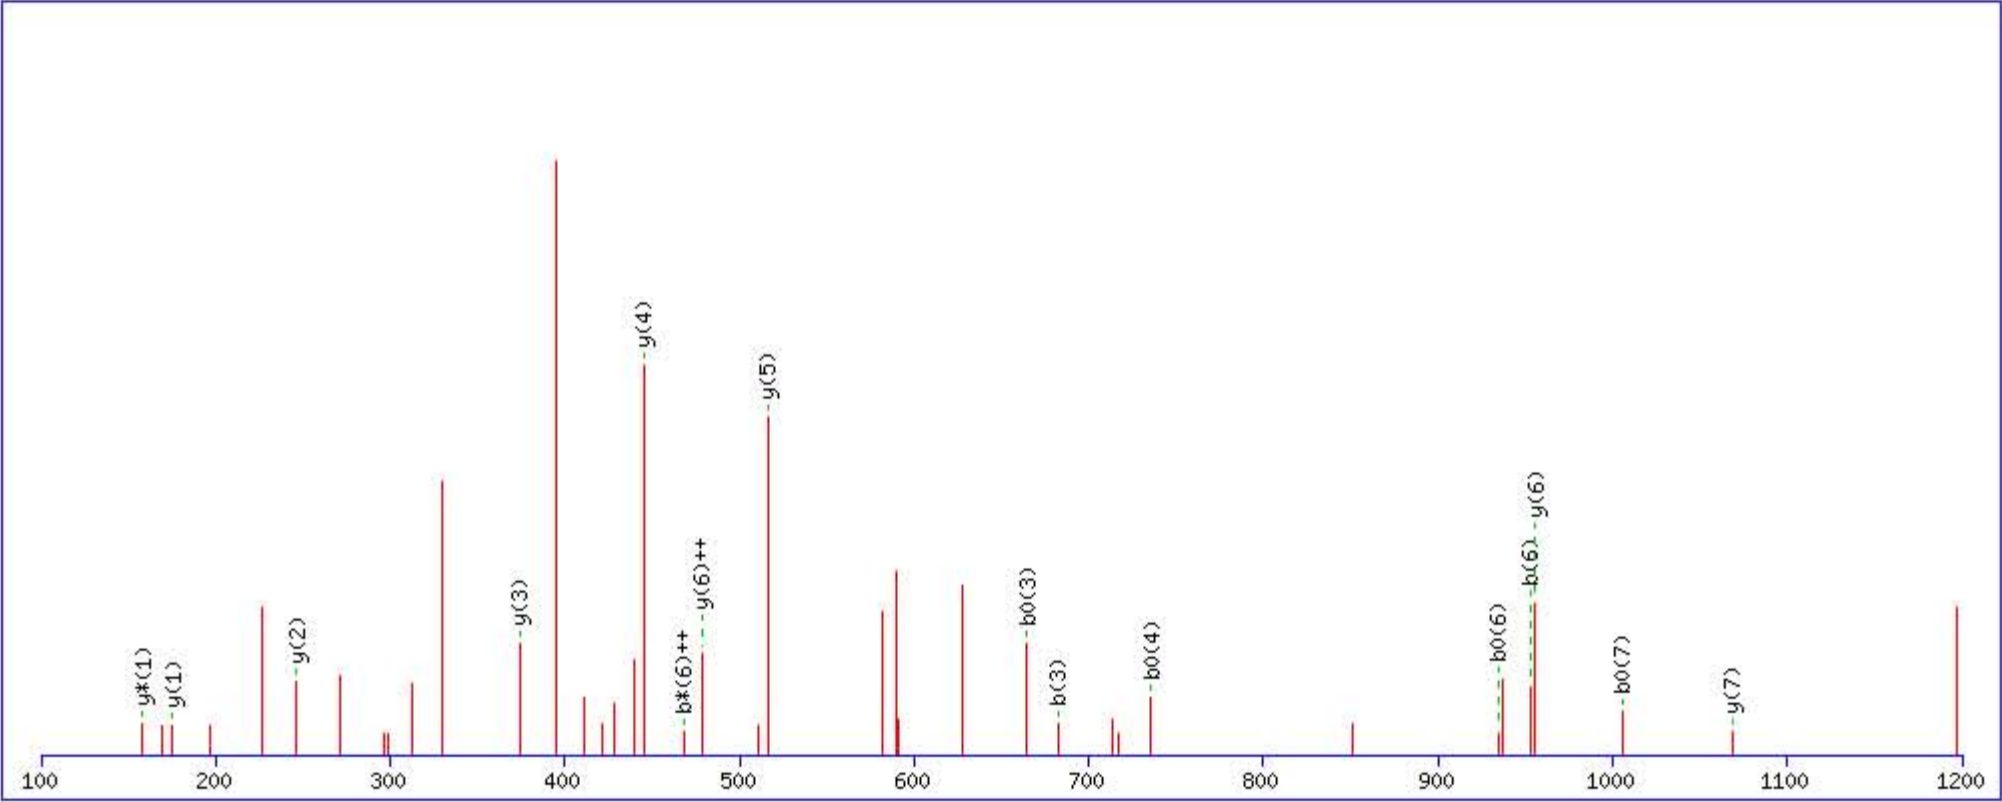

Monoisotopic mass of neutral peptide Mr(calc): 1196.633545  
Fixed modifications: Carbamidomethyl (C) (apply to specified residues or termini only)  
Variable modifications:  
Q3 : Biotin:Thermo-21345 (Q)  
Ions Score: 39 Expect: 0.0022  
Matches : 16/66 fragment ions using 36 most intense peaks [\(help\)](#)

| # | b           | b <sup>++</sup> | b <sup>*</sup> | b <sup>*++</sup> | b <sup>0</sup> | b <sup>0++</sup> | Seq. | y           | y <sup>++</sup> | y <sup>*</sup> | y <sup>*++</sup> | # |
|---|-------------|-----------------|----------------|------------------|----------------|------------------|------|-------------|-----------------|----------------|------------------|---|
| 1 | 130.049869  | 65.528572       |                |                  | 112.039304     | 56.523290        | E    |             |                 |                |                  | 8 |
| 2 | 243.133933  | 122.070605      |                |                  | 225.123368     | 113.065322       | L    | 1068.598262 | 534.802769      | 1051.571713    | 526.289495       | 7 |
| 3 | 682.359259  | 341.683268      | 665.332710     | 333.169993       | 664.348694     | 332.677985       | Q    | 955.514198  | 478.260737      | 938.487649     | 469.747463       | 6 |
| 4 | 753.396373  | 377.201825      | 736.369824     | 368.688550       | 735.385808     | 368.196542       | A    | 516.288872  | 258.648074      | 499.262323     | 250.134800       | 5 |
| 5 | 824.433487  | 412.720382      | 807.406938     | 404.207107       | 806.422922     | 403.715099       | A    | 445.251758  | 223.129517      | 428.225209     | 214.616243       | 4 |
| 6 | 952.492065  | 476.749671      | 935.465516     | 468.236396       | 934.481500     | 467.744388       | Q    | 374.214644  | 187.610960      | 357.188095     | 179.097686       | 3 |
| 7 | 1023.529179 | 512.268227      | 1006.502630    | 503.754953       | 1005.518614    | 503.262945       | A    | 246.156066  | 123.581671      | 229.129517     | 115.068397       | 2 |
| 8 |             |                 |                |                  |                |                  | R    | 175.118952  | 88.063114       | 158.092403     | 79.549840        | 1 |

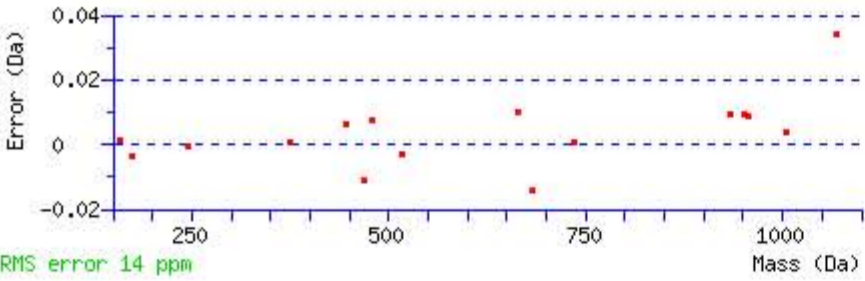

RMS error 14 ppm

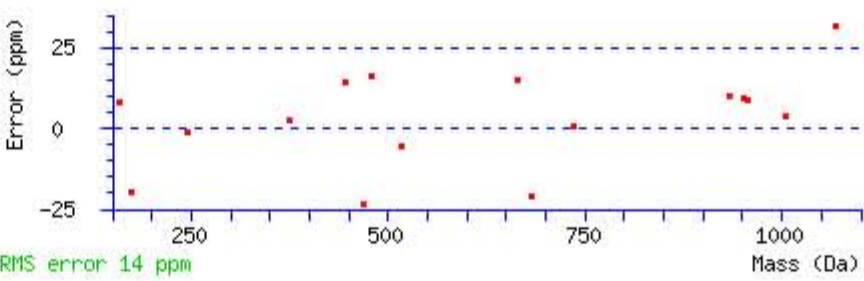

RMS error 14 ppm

NCBI BLAST search of [ELQAAQAR](#)  
(Parameters: blastp, nr protein database, expect=20000, no filter, PAM30)  
Other BLAST [web gateways](#)

All matches to this query

| Score | Mr(calc):   | Delta     | Sequence                    |
|-------|-------------|-----------|-----------------------------|
| 39.3  | 1196.633545 | 0.009863  | <a href="#">ELQAAQAR</a>    |
| 13.0  | 1196.641418 | 0.001990  | <a href="#">EAKKAGPGFHR</a> |
| 6.9   | 1196.627701 | 0.015707  | <a href="#">WLWMLGVHR</a>   |
| 6.7   | 1196.644775 | -0.001367 | <a href="#">LEQANRR</a>     |
| 3.5   | 1196.633545 | 0.009863  | <a href="#">ELQAAQAR</a>    |
| 1.7   | 1196.640076 | 0.003332  | <a href="#">ELASPVSPELR</a> |
| 0.2   | 1196.655304 | -0.011896 | <a href="#">EYLKALAAAYR</a> |

MATRIX

SCIENCE

Mascot Search Results

Peptide View

MS/MS Fragmentation of **LGPLVEQGR**  
Found in **APOE\_HUMAN**, Apolipoprotein E OS=Homo sapiens GN=APOE PE=1 SV=1

Match to Query 22690: 1278.716728 from(640.365640,2+) rtinseconds(1940) index(19913)  
Title: Locus:1.1.1.3058.5 File:"2013-07-02 CLN FXIII 180 min 2nd F 2.wiff"  
Data file C:\Program Files (x86)\Matrix Science\Mascot Daemon\mgf\8 FXIII 180 min 2nd\mascot\_daemon\_merge.mgf

Click mouse within plot area to zoom in by factor of two about that point  
Or, 

Plot from

100

 to 

1700

 Da 

Full range

  
Label all possible matches ☐ Label matches used for scoring ☒

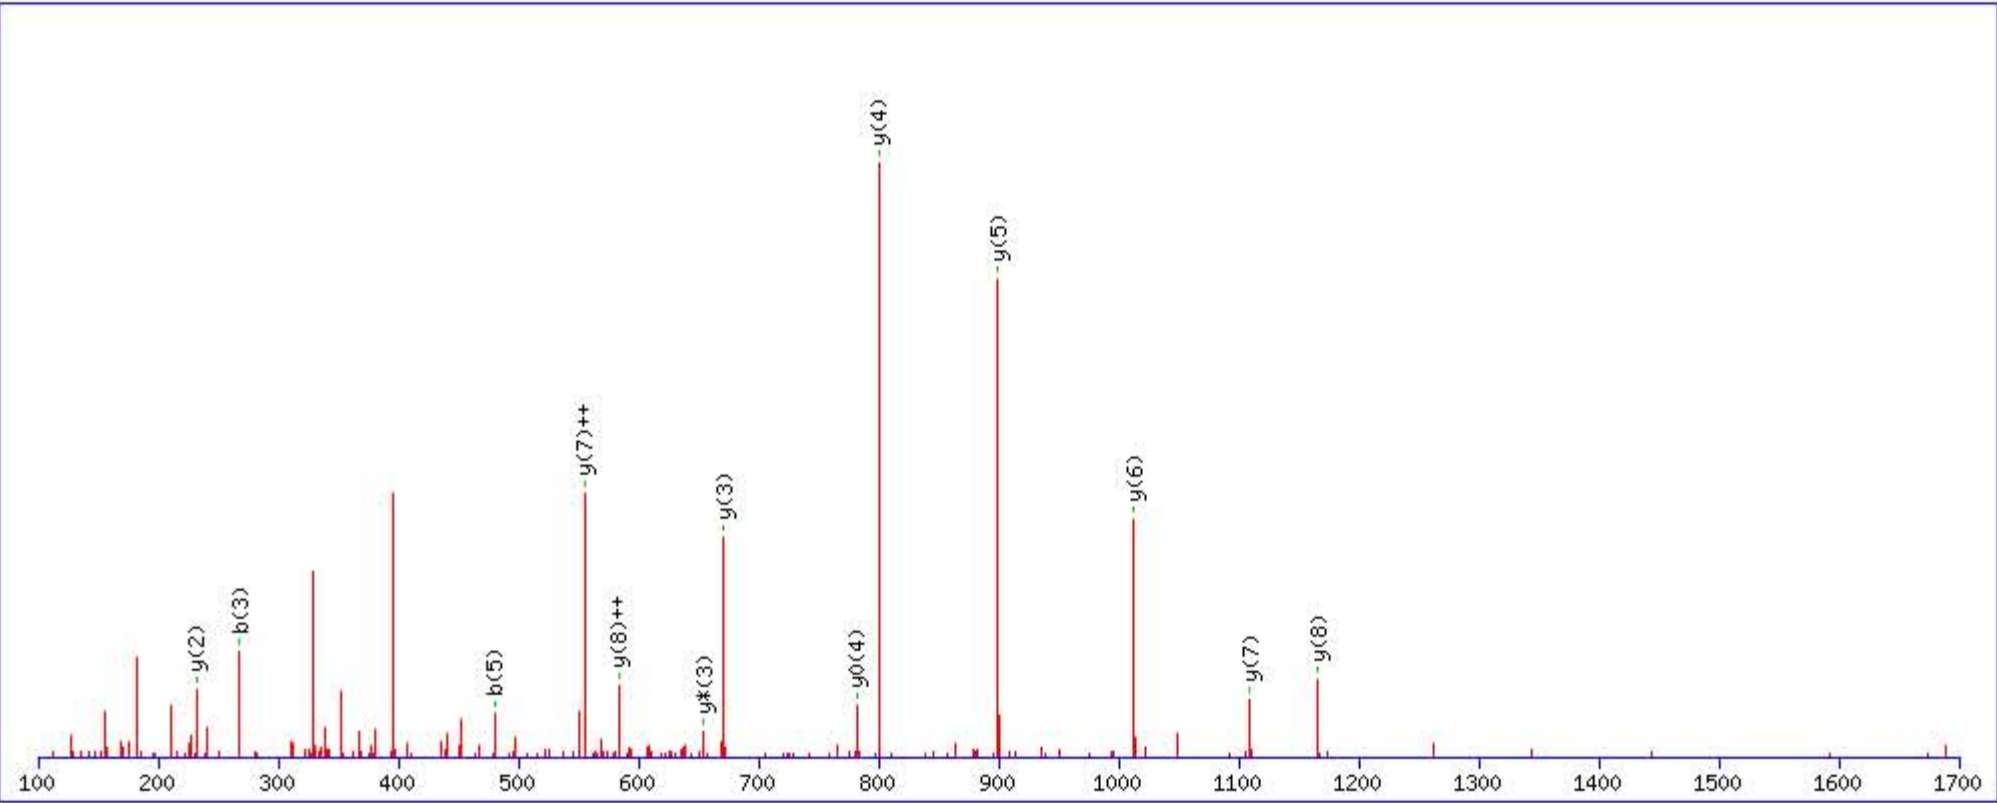

Monoisotopic mass of neutral peptide Mr(calc): 1278.711823  
Fixed modifications: Carbamidomethyl (C) (apply to specified residues or termini only)  
Variable modifications:  
Q7 : Biotin:Thermo-21345 (Q)  
Ions Score: 48 Expect: 3.2e-005  
Matches : 13/68 fragment ions using 23 most intense peaks ([help](#))

| # | b           | b <sup>++</sup> | b <sup>*</sup> | b <sup>*++</sup> | b <sup>0</sup> | b <sup>0++</sup> | Seq. | y           | y <sup>++</sup> | y <sup>*</sup> | y <sup>*++</sup> | y <sup>0</sup> | y <sup>0++</sup> | # |
|---|-------------|-----------------|----------------|------------------|----------------|------------------|------|-------------|-----------------|----------------|------------------|----------------|------------------|---|
| 1 | 114.091340  | 57.549308       |                |                  |                |                  | L    |             |                 |                |                  |                |                  | 9 |
| 2 | 171.112804  | 86.060040       |                |                  |                |                  | G    | 1166.635041 | 583.821159      | 1149.608492    | 575.307884       | 1148.624476    | 574.815876       | 8 |
| 3 | 268.165568  | 134.586422      |                |                  |                |                  | P    | 1109.613577 | 555.310426      | 1092.587028    | 546.797152       | 1091.603012    | 546.305144       | 7 |
| 4 | 381.249632  | 191.128454      |                |                  |                |                  | L    | 1012.560813 | 506.784044      | 995.534264     | 498.270770       | 994.550248     | 497.778762       | 6 |
| 5 | 480.318046  | 240.662661      |                |                  |                |                  | V    | 899.476749  | 450.242012      | 882.450200     | 441.728738       | 881.466184     | 441.236730       | 5 |
| 6 | 609.360639  | 305.183958      |                |                  | 591.350074     | 296.178675       | E    | 800.408335  | 400.707805      | 783.381786     | 392.194531       | 782.397770     | 391.702523       | 4 |
| 7 | 1048.585965 | 524.796621      | 1031.559416    | 516.283346       | 1030.575400    | 515.791338       | Q    | 671.365742  | 336.186509      | 654.339193     | 327.673234       |                |                  | 3 |
| 8 | 1105.607429 | 553.307352      | 1088.580880    | 544.794078       | 1087.596864    | 544.302070       | G    | 232.140416  | 116.573846      | 215.113867     | 108.060571       |                |                  | 2 |
| 9 |             |                 |                |                  |                |                  | R    | 175.118952  | 88.063114       | 158.092403     | 79.549839        |                |                  | 1 |

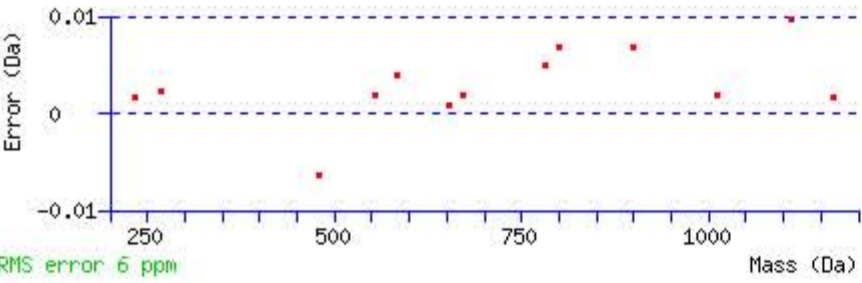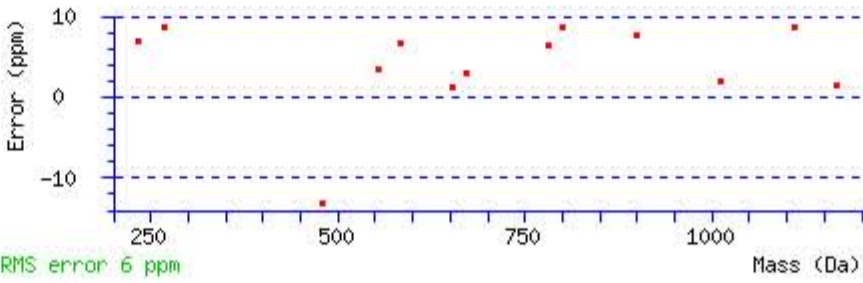

NCBI BLAST search of [LGPLVEQGR](#)  
(Parameters: blastp, nr protein database, expect=20000, no filter, PAM30)  
Other BLAST [web gateways](#)

All matches to this query

| Score | Mr(calc):   | Delta    | Sequence                  |
|-------|-------------|----------|---------------------------|
| 48.3  | 1278.711823 | 0.004905 | <a href="#">LGPLVEQGR</a> |
| 0.3   | 1278.697891 | 0.018837 | <a href="#">LGSVCRRIR</a> |

Peptide View

MS/MS Fragmentation of **LQAEAFQAR**  
Found in **APOE\_HUMAN**, Apolipoprotein E OS=Homo sapiens GN=APOE PE=1 SV=1

Match to Query 24204: 1343.697568 from(672.856060,2+) rtinseconds(1782) index(18758)  
Title: Locus:1.1.1.3003.7 File:"2013-07-02 CLN FXIII 180 min 2nd F 2.wiff"  
Data file C:\Program Files (x86)\Matrix Science\Mascot Daemon\mgf\8 FXIII 180 min 2nd\mascot\_daemon\_merge.mgf

Click mouse within plot area to zoom in by factor of two about that point  
Or, 

Plot from

100

 to 

1600

 Da 

Full range

  
Label all possible matches ☐ Label matches used for scoring ☒

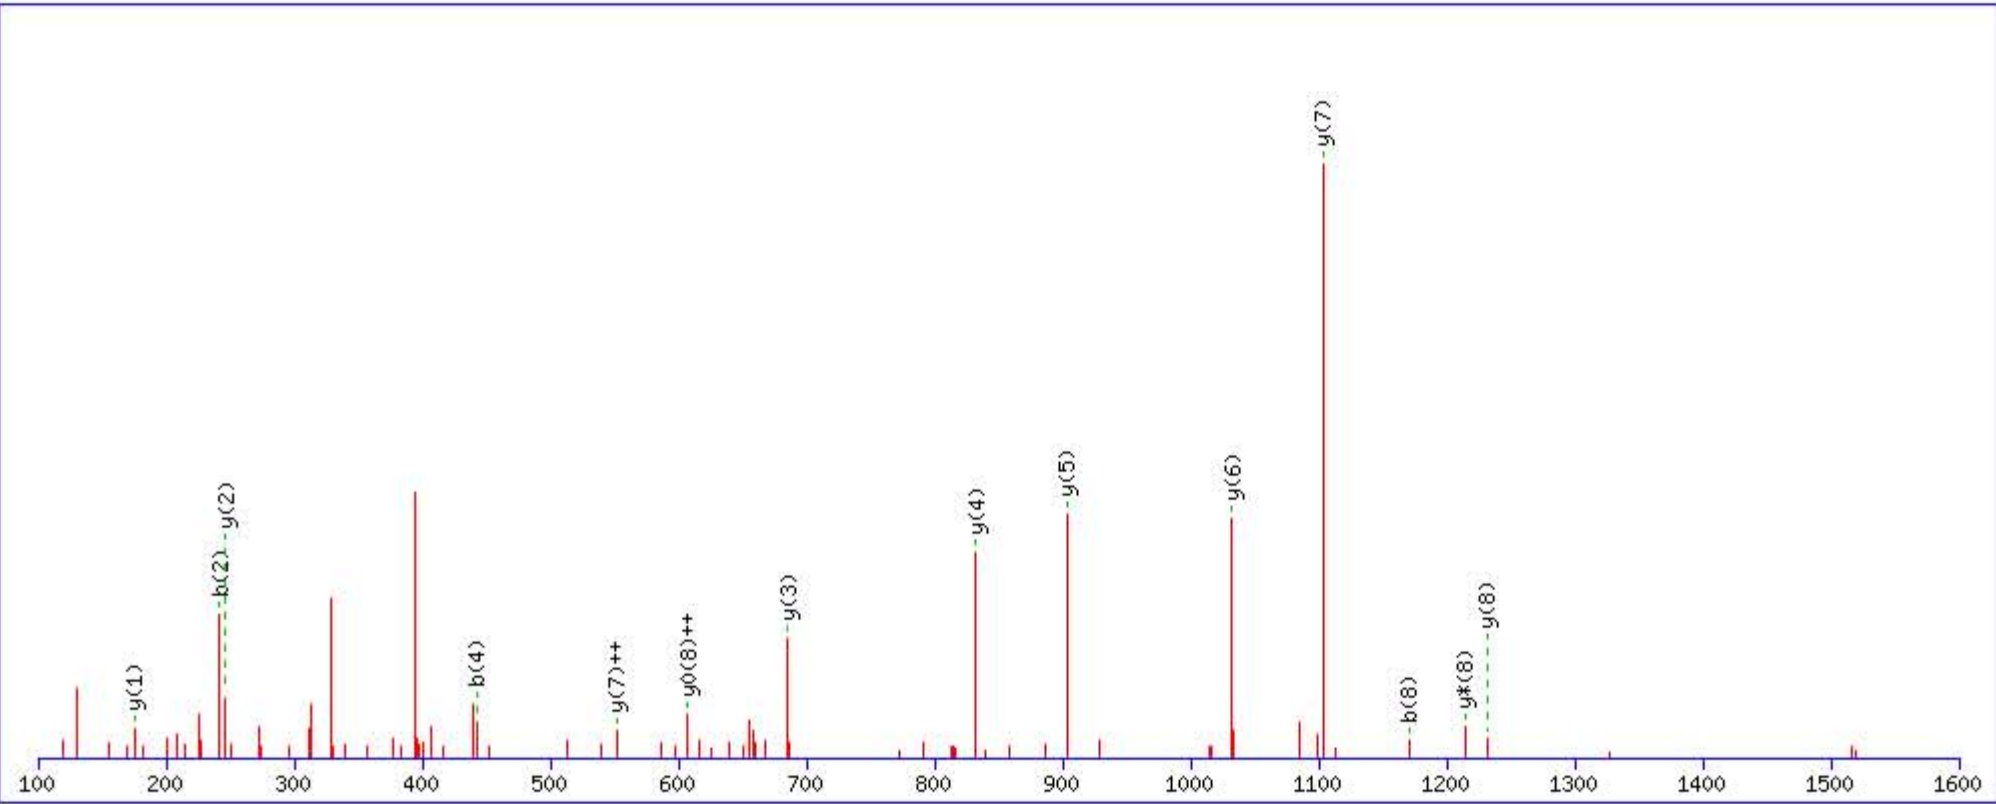

Monoisotopic mass of neutral peptide Mr(calc): 1343.701965  
Fixed modifications: Carbamidomethyl (C) (apply to specified residues or termini only)  
Variable modifications:  
Q7 : Biotin:Thermo-21345 (Q)  
Ions Score: 58 Expect: 4.6e-005  
Matches : 14/78 fragment ions using 24 most intense peaks [\(help\)](#)

| # | b           | b <sup>++</sup> | b <sup>*</sup> | b <sup>*++</sup> | b <sup>0</sup> | b <sup>0++</sup> | Seq. | y           | y <sup>++</sup> | y <sup>*</sup> | y <sup>*++</sup> | y <sup>0</sup> | y <sup>0++</sup> | # |
|---|-------------|-----------------|----------------|------------------|----------------|------------------|------|-------------|-----------------|----------------|------------------|----------------|------------------|---|
| 1 | 114.091340  | 57.549308       |                |                  |                |                  | L    |             |                 |                |                  |                |                  | 9 |
| 2 | 242.149918  | 121.578597      | 225.123369     | 113.065323       |                |                  | Q    | 1231.625205 | 616.316241      | 1214.598656    | 607.802966       | 1213.614640    | 607.310958       | 8 |
| 3 | 313.187032  | 157.097154      | 296.160483     | 148.583879       |                |                  | A    | 1103.566627 | 552.286951      | 1086.540078    | 543.773677       | 1085.556062    | 543.281669       | 7 |
| 4 | 442.229625  | 221.618450      | 425.203076     | 213.105176       | 424.219060     | 212.613168       | E    | 1032.529513 | 516.768395      | 1015.502964    | 508.255120       | 1014.518948    | 507.763112       | 6 |
| 5 | 513.266739  | 257.137008      | 496.240190     | 248.623733       | 495.256174     | 248.131725       | A    | 903.486920  | 452.247098      | 886.460371     | 443.733823       |                |                  | 5 |
| 6 | 660.335153  | 330.671215      | 643.308604     | 322.157940       | 642.324588     | 321.665932       | F    | 832.449806  | 416.728541      | 815.423257     | 408.215266       |                |                  | 4 |
| 7 | 1099.560479 | 550.283878      | 1082.533930    | 541.770603       | 1081.549914    | 541.278595       | Q    | 685.381392  | 343.194334      | 668.354843     | 334.681060       |                |                  | 3 |
| 8 | 1170.597593 | 585.802435      | 1153.571044    | 577.289160       | 1152.587028    | 576.797152       | A    | 246.156066  | 123.581671      | 229.129517     | 115.068396       |                |                  | 2 |
| 9 |             |                 |                |                  |                |                  | R    | 175.118952  | 88.063114       | 158.092403     | 79.549839        |                |                  | 1 |

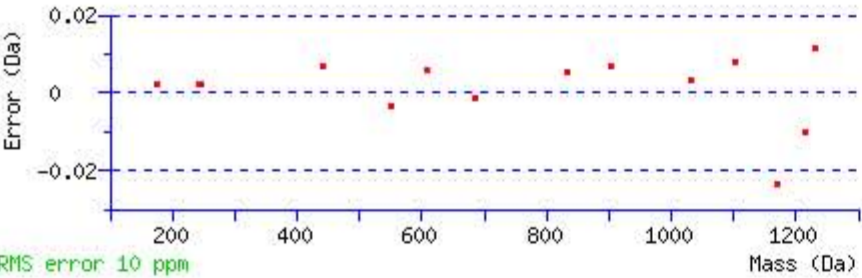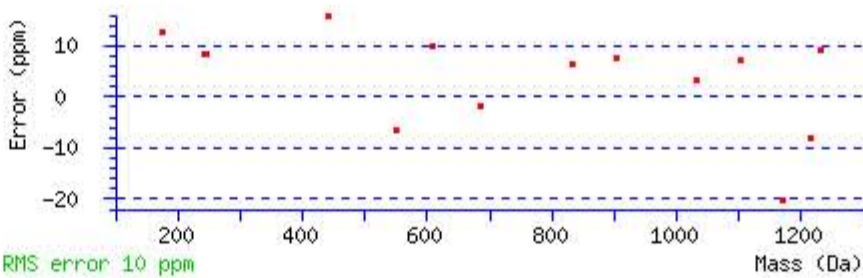

NCBI BLAST search of [LQAEAFQAR](#)  
(Parameters: blastp, nr protein database, expect=20000, no filter, PAM30)  
Other BLAST [web gateways](#)

All matches to this query

| Score | Mr(calc):   | Delta     | Sequence                         |
|-------|-------------|-----------|----------------------------------|
| 57.6  | 1343.701965 | -0.004397 | <a href="#">LQAEAFQAR</a>        |
| 11.5  | 1343.694107 | 0.003461  | <a href="#">IQAMSEVQK</a>        |
| 11.5  | 1343.704453 | -0.006885 | <a href="#">IQEKKDEDIAR</a>      |
| 9.8   | 1343.715683 | -0.018115 | <a href="#">LKDSEAE LQRR</a>     |
| 9.6   | 1343.683350 | 0.014218  | <a href="#">GSPAAP EGA LGYVR</a> |
| 8.3   | 1343.683350 | 0.014218  | <a href="#">LSKSVSSGYNFR</a>     |
| 7.1   | 1343.704453 | -0.006885 | <a href="#">IKGEELSEANVR</a>     |
| 7.1   | 1343.704453 | -0.006885 | <a href="#">LQAANAEDIKSGK</a>    |
| 5.3   | 1343.716583 | -0.019015 | <a href="#">LQQVMSRR</a>         |
| 5.0   | 1343.693237 | 0.004331  | <a href="#">LQDLELDLETR</a>      |

MATRIX

SCIENCE

Mascot Search Results

Peptide View

MS/MS Fragmentation of **QQTEWQSGQR**  
Found in **APOE\_HUMAN**, Apolipoprotein E OS=Homo sapiens GN=APOE PE=1 SV=1

Match to Query 32655: 1557.737208 from(779.875880,2+) rtinseconds(1556) index(3011)  
Title: Locus:1.1.1.1818.22 File:"2013-07-02 CLN FXIII 180 min 2nd F 1.wiff"  
Data file C:\Program Files (x86)\Matrix Science\Mascot Daemon\mgf\8 FXIII 180 min 2nd\mascot\_daemon\_merge.mgf

Click mouse within plot area to zoom in by factor of two about that point

Or, 

Plot from

100

 to 

1600

 Da 

Full range

Label all possible matches ☐ Label matches used for scoring ☒

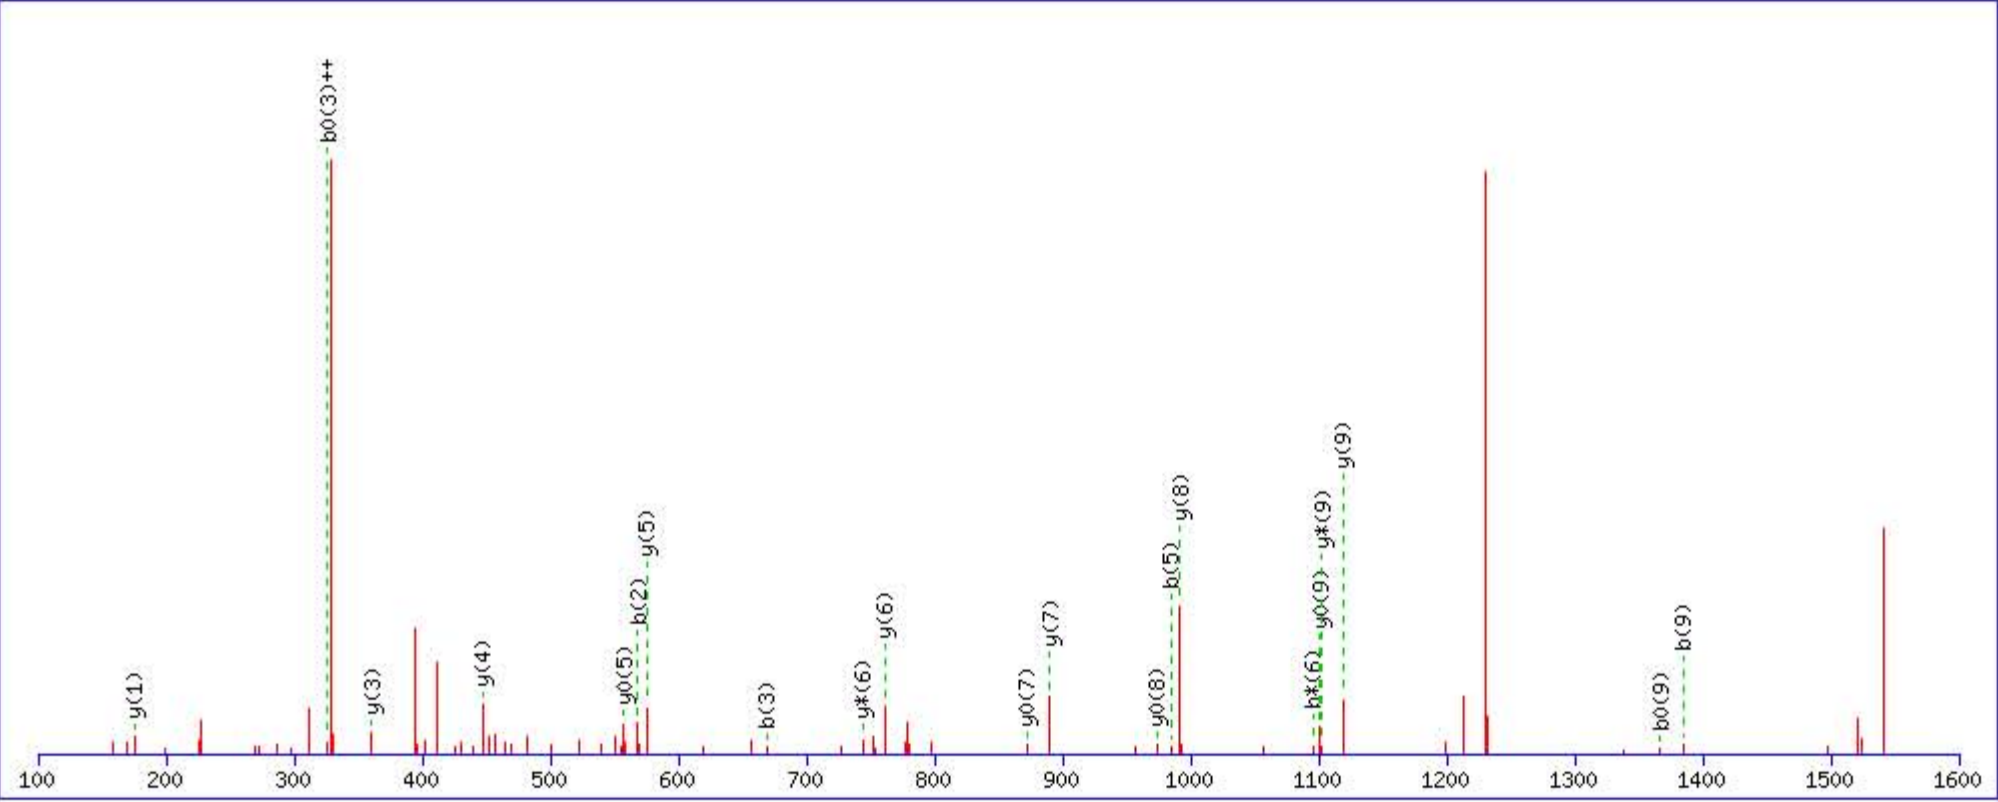

Monoisotopic mass of neutral peptide Mr(calc): 1557.735809  
Fixed modifications: Carbamidomethyl (C) (apply to specified residues or termini only)  
Variable modifications:  
Q1 : Biotin:Thermo-21345 (Q)  
Ions Score: 33 Expect: 0.0063  
Matches : 21/98 fragment ions using 51 most intense peaks [\(help\)](#)

| #  | b           | b <sup>++</sup> | b <sup>*</sup> | b <sup>++</sup> * | b <sup>0</sup> | b <sup>0++</sup> | Seq. | y           | y <sup>++</sup> | y <sup>*</sup> | y <sup>++</sup> * | y <sup>0</sup> | y <sup>0++</sup> | #  |
|----|-------------|-----------------|----------------|-------------------|----------------|------------------|------|-------------|-----------------|----------------|-------------------|----------------|------------------|----|
| 1  | 440.232602  | 220.619939      | 423.206053     | 212.106664        |                |                  | Q    |             |                 |                |                   |                |                  | 10 |
| 2  | 568.291180  | 284.649228      | 551.264631     | 276.135954        |                |                  | Q    | 1119.517763 | 560.262520      | 1102.491214    | 551.749245        | 1101.507198    | 551.257237       | 9  |
| 3  | 669.338859  | 335.173068      | 652.312310     | 326.659793        | 651.328294     | 326.167785       | T    | 991.459185  | 496.233231      | 974.432636     | 487.719956        | 973.448620     | 487.227948       | 8  |
| 4  | 798.381452  | 399.694364      | 781.354903     | 391.181090        | 780.370887     | 390.689082       | E    | 890.411506  | 445.709391      | 873.384957     | 437.196117        | 872.400941     | 436.704109       | 7  |
| 5  | 984.460765  | 492.734021      | 967.434216     | 484.220746        | 966.450200     | 483.728738       | W    | 761.368913  | 381.188095      | 744.342364     | 372.674820        | 743.358348     | 372.182812       | 6  |
| 6  | 1112.519343 | 556.763310      | 1095.492794    | 548.250035        | 1094.508778    | 547.758027       | Q    | 575.289600  | 288.148438      | 558.263051     | 279.635164        | 557.279035     | 279.143156       | 5  |
| 7  | 1199.551371 | 600.279324      | 1182.524822    | 591.766049        | 1181.540806    | 591.274041       | S    | 447.231022  | 224.119149      | 430.204473     | 215.605875        | 429.220457     | 215.113867       | 4  |
| 8  | 1256.572835 | 628.790056      | 1239.546286    | 620.276781        | 1238.562270    | 619.784773       | G    | 360.198994  | 180.603135      | 343.172445     | 172.089860        |                |                  | 3  |
| 9  | 1384.631413 | 692.819345      | 1367.604864    | 684.306070        | 1366.620848    | 683.814062       | Q    | 303.177530  | 152.092403      | 286.150981     | 143.579129        |                |                  | 2  |
| 10 |             |                 |                |                   |                |                  | R    | 175.118952  | 88.063114       | 158.092403     | 79.549839         |                |                  | 1  |

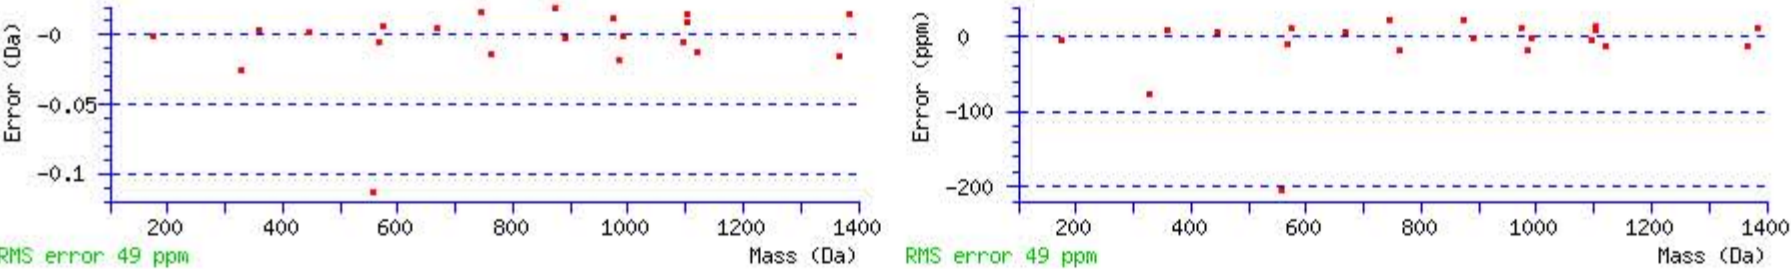

NCBI BLAST search of [QQTEWQSGQR](#)  
(Parameters: blastp, nr protein database, expect=20000, no filter, PAM30)  
Other BLAST [web gateways](#)

All matches to this query

| Score | Mr(calc):   | Delta     | Sequence                          |
|-------|-------------|-----------|-----------------------------------|
| 33.3  | 1557.735809 | 0.001399  | <a href="#">QQTEWQSGQR</a>        |
| 22.3  | 1557.735809 | 0.001399  | <a href="#">QQTEWQSGQR</a>        |
| 9.9   | 1557.747040 | -0.009832 | <a href="#">AFSHCSSLTKHQR</a>     |
| 4.2   | 1557.720566 | 0.016642  | <a href="#">QEAAATGVDTICTHR</a>   |
| 2.7   | 1557.720551 | 0.016657  | <a href="#">LSQVSPEDDRPCR</a>     |
| 2.4   | 1557.742340 | -0.005132 | <a href="#">TQSFEIPQPDGPR</a>     |
| 2.2   | 1557.756897 | -0.019689 | <a href="#">MAASAAAAELQASGGPR</a> |
| 1.8   | 1557.749496 | -0.012288 | <a href="#">QAEATRQAAAQEER</a>    |
| 1.1   | 1557.753571 | -0.016363 | <a href="#">DYSSVVRPVEDHR</a>     |
| 0.9   | 1557.728638 | 0.008570  | <a href="#">TFLFCTPFTPDGR</a>     |

MATRIX

SCIENCE

Mascot Search Results

Peptide View

MS/MS Fragmentation of **AKLEEQAQQIR**  
Found in **APOE\_HUMAN**, Apolipoprotein E OS=Homo sapiens GN=APOE PE=1 SV=1

Match to Query 35710: 1623.876222 from(542.299350,3+) rtinseconds(1475) index(16732)  
Title: Locus:1.1.1.2896.11 File:"2013-07-02 CLN FXIII 180 min 2nd F 2.wiff"  
Data file C:\Program Files (x86)\Matrix Science\Mascot Daemon\mgf\8 FXIII 180 min 2nd\mascot\_daemon\_merge.mgf

Click mouse within plot area to zoom in by factor of two about that point

Or,   to  Da

Label all possible matches ☐ Label matches used for scoring ☒

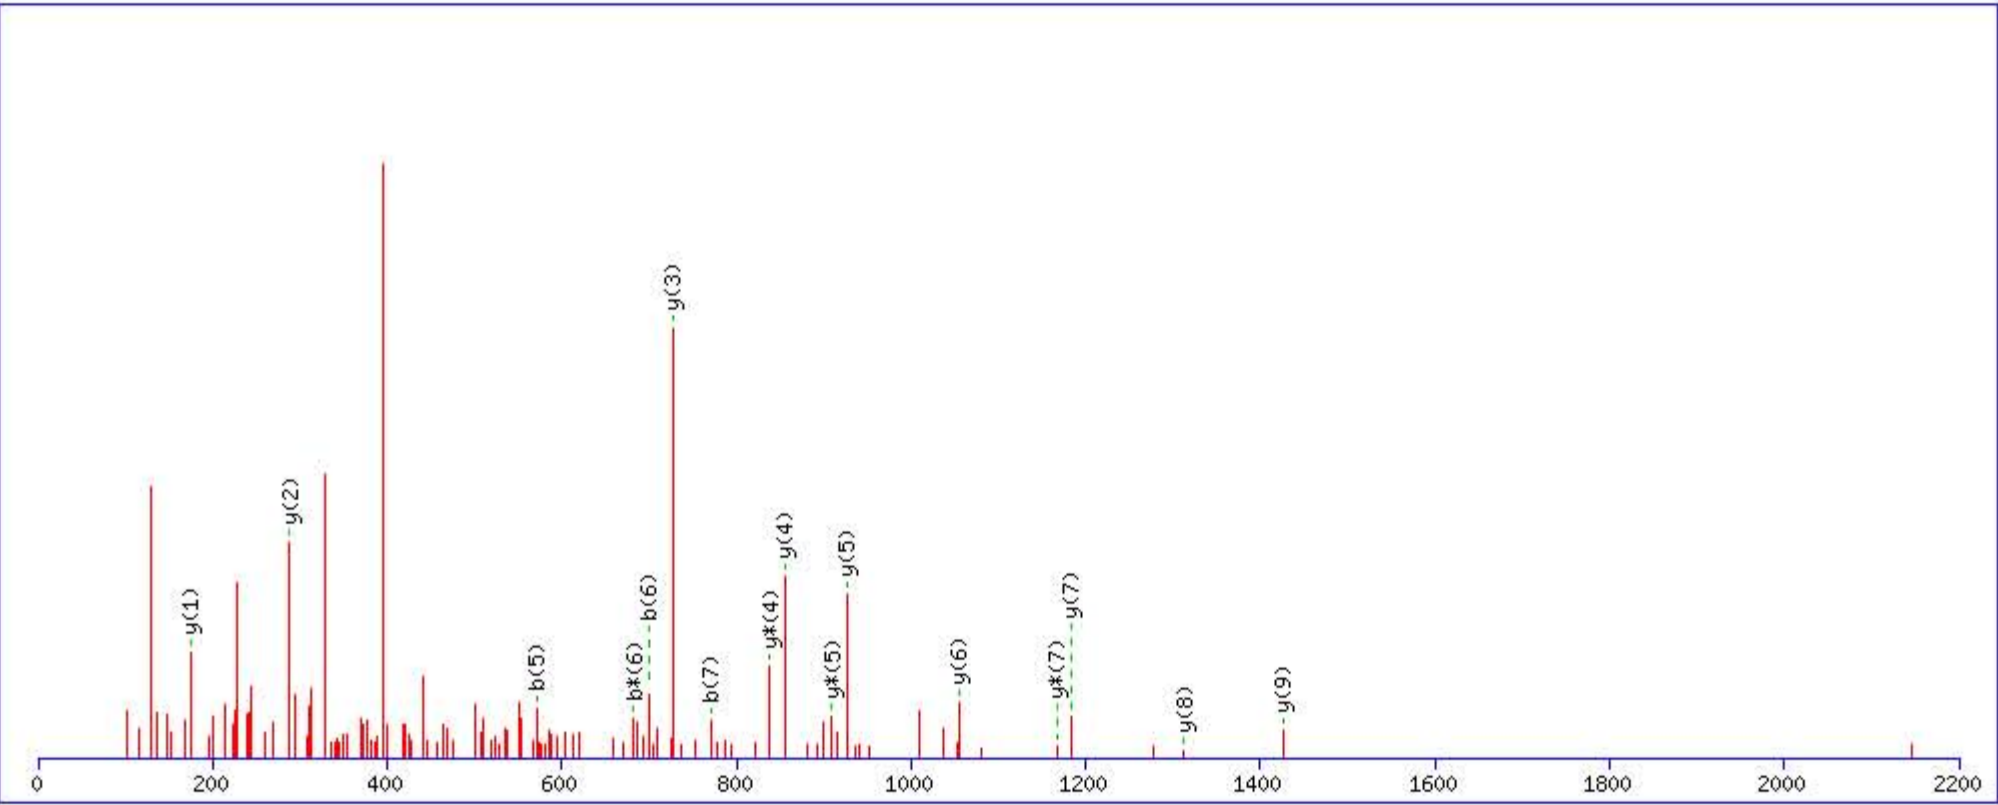

Monoisotopic mass of neutral peptide Mr(calc): 1623.876617  
Fixed modifications: Carbamidomethyl (C) (apply to specified residues or termini only)  
Variable modifications:  
Q9 : Biotin:Thermo-21345 (Q)  
Ions Score: 63 Expect: 1.1e-005  
Matches : 16/100 fragment ions using 25 most intense peaks [\(help\)](#)

| #  | b           | b <sup>++</sup> | b <sup>*</sup> | b <sup>+++</sup> | b <sup>0</sup> | b <sup>0++</sup> | Seq. | y           | y <sup>++</sup> | y <sup>*</sup> | y <sup>+++</sup> | y <sup>0</sup> | y <sup>0++</sup> | #  |
|----|-------------|-----------------|----------------|------------------|----------------|------------------|------|-------------|-----------------|----------------|------------------|----------------|------------------|----|
| 1  | 72.044390   | 36.525833       |                |                  |                |                  | A    |             |                 |                |                  |                |                  | 11 |
| 2  | 200.139353  | 100.573315      | 183.112804     | 92.060040        |                |                  | K    | 1553.846825 | 777.427050      | 1536.820276    | 768.913776       | 1535.836260    | 768.421768       | 10 |
| 3  | 313.223417  | 157.115346      | 296.196868     | 148.602072       |                |                  | L    | 1425.751862 | 713.379569      | 1408.725313    | 704.866294       | 1407.741297    | 704.374286       | 9  |
| 4  | 442.266010  | 221.636643      | 425.239461     | 213.123369       | 424.255445     | 212.631361       | E    | 1312.667798 | 656.837537      | 1295.641249    | 648.324262       | 1294.657233    | 647.832254       | 8  |
| 5  | 571.308603  | 286.157940      | 554.282054     | 277.644665       | 553.298038     | 277.152657       | E    | 1183.625205 | 592.316240      | 1166.598656    | 583.802966       | 1165.614640    | 583.310958       | 7  |
| 6  | 699.367181  | 350.187229      | 682.340632     | 341.673954       | 681.356616     | 341.181946       | Q    | 1054.582612 | 527.794944      | 1037.556063    | 519.281670       |                |                  | 6  |
| 7  | 770.404295  | 385.705786      | 753.377746     | 377.192511       | 752.393730     | 376.700503       | A    | 926.524034  | 463.765655      | 909.497485     | 455.252380       |                |                  | 5  |
| 8  | 898.462873  | 449.735075      | 881.436324     | 441.221800       | 880.452308     | 440.729792       | Q    | 855.486920  | 428.247098      | 838.460371     | 419.733823       |                |                  | 4  |
| 9  | 1337.688199 | 669.347737      | 1320.661650    | 660.834463       | 1319.677634    | 660.342455       | Q    | 727.428342  | 364.217809      | 710.401793     | 355.704534       |                |                  | 3  |
| 10 | 1450.772263 | 725.889769      | 1433.745714    | 717.376495       | 1432.761698    | 716.884487       | I    | 288.203016  | 144.605146      | 271.176467     | 136.091871       |                |                  | 2  |
| 11 |             |                 |                |                  |                |                  | R    | 175.118952  | 88.063114       | 158.092403     | 79.549839        |                |                  | 1  |

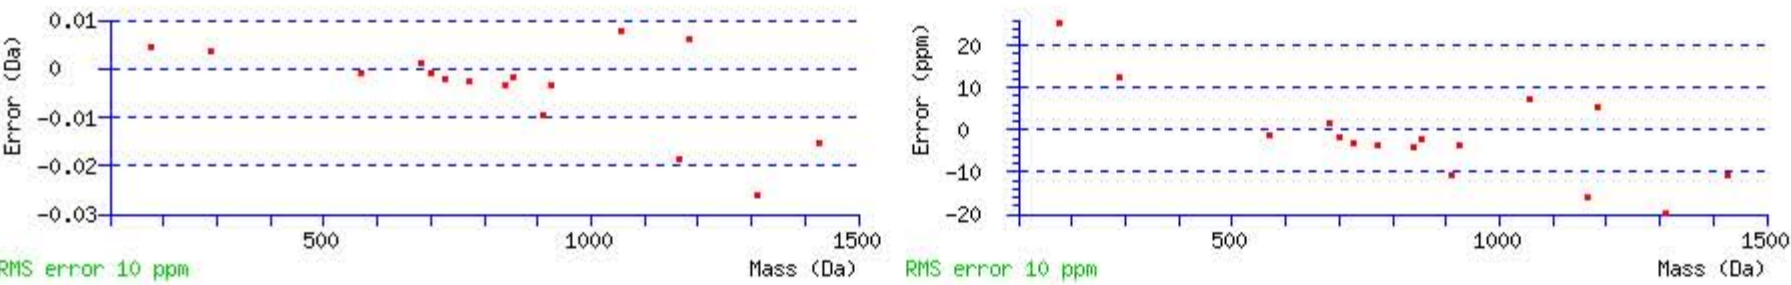

NCBI BLAST search of [AKLEEQAQQIR](#)  
(Parameters: blastp, nr protein database, expect=20000, no filter, PAM30)  
Other BLAST [web gateways](#)

All matches to this query

| Score | Mr(calc):   | Delta     | Sequence                     |
|-------|-------------|-----------|------------------------------|
| 63.2  | 1623.876617 | -0.000395 | <a href="#">AKLEEQAQQIR</a>  |
| 48.7  | 1623.876617 | -0.000395 | <a href="#">AKLEEQAQQIR</a>  |
| 27.7  | 1623.877502 | -0.001280 | <a href="#">QMKAQQLR</a>     |
| 18.6  | 1623.877502 | -0.001280 | <a href="#">QMKAQQLR</a>     |
| 13.1  | 1623.876617 | -0.000395 | <a href="#">AKLEEQAQQIR</a>  |
| 6.8   | 1623.877502 | -0.001280 | <a href="#">AQKMQQLR</a>     |
| 6.5   | 1623.866745 | 0.009477  | <a href="#">QAQAQPHLPPAR</a> |
| 6.5   | 1623.876617 | -0.000395 | <a href="#">QAEFAVAKLQAR</a> |
| 4.1   | 1623.877502 | -0.001280 | <a href="#">QMKAQQLR</a>     |
| 3.5   | 1623.876633 | -0.000411 | <a href="#">QKALVDNEQLR</a>  |

MATRIX

SCIENCE

Mascot Search Results

Peptide View

MS/MS Fragmentation of **AATVGSLAGQPLQER**  
Found in **APOE\_HUMAN**, Apolipoprotein E OS=Homo sapiens GN=APOE PE=1 SV=1

Match to Query 40406: 1807.971612 from(603.664480,3+) rtinseconds(1932) index(19864)  
Title: Locus:1.1.1.3055.7 File:"2013-07-02 CLN FXIII 180 min 2nd F 2.wiff"  
Data file C:\Program Files (x86)\Matrix Science\Mascot Daemon\mgf\8 FXIII 180 min 2nd\mascot\_daemon\_merge.mgf

Click mouse within plot area to zoom in by factor of two about that point

Or, 

Plot from

100

 to 

1700

 Da 

Full range

Label all possible matches ☐ Label matches used for scoring ☒

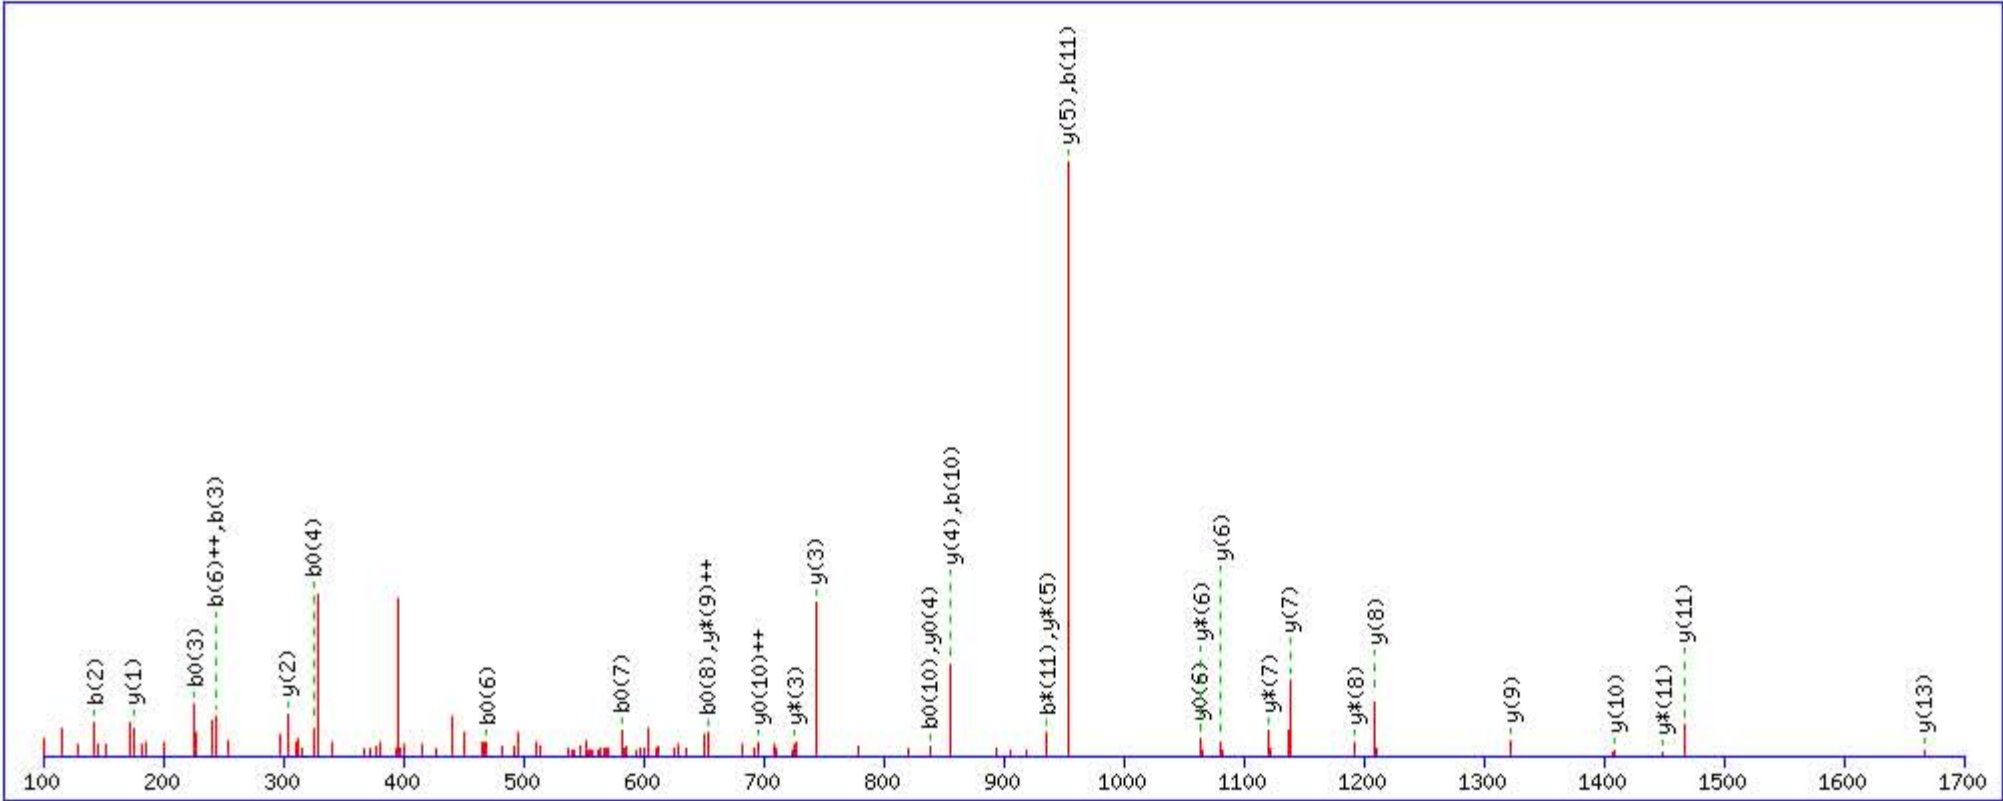

Monoisotopic mass of neutral peptide Mr(calc): 1807.961441

Fixed modifications: Carbamidomethyl (C) (apply to specified residues or termini only)

Variable modifications:

Q13 : Biotin:Thermo-21345 (Q)

Ions Score: 77 Expect: 5e-007

Matches : 34/144 fragment ions using 52 most intense peaks [\(help\)](#)

| #  | b           | b <sup>++</sup> | b <sup>*</sup> | b <sup>*++</sup> | b <sup>0</sup> | b <sup>0++</sup> | Seq. | y           | y <sup>++</sup> | y <sup>*</sup> | y <sup>*++</sup> | y <sup>0</sup> | y <sup>0++</sup> | #  |
|----|-------------|-----------------|----------------|------------------|----------------|------------------|------|-------------|-----------------|----------------|------------------|----------------|------------------|----|
| 1  | 72.044390   | 36.525833       |                |                  |                |                  | A    |             |                 |                |                  |                |                  | 15 |
| 2  | 143.081504  | 72.044390       |                |                  |                |                  | A    | 1737.931618 | 869.469447      | 1720.905069    | 860.956173       | 1719.921053    | 860.464165       | 14 |
| 3  | 244.129183  | 122.568230      |                |                  | 226.118618     | 113.562947       | T    | 1666.894504 | 833.950890      | 1649.867955    | 825.437616       | 1648.883939    | 824.945608       | 13 |
| 4  | 343.197597  | 172.102437      |                |                  | 325.187032     | 163.097154       | V    | 1565.846825 | 783.427051      | 1548.820276    | 774.913776       | 1547.836260    | 774.421768       | 12 |
| 5  | 400.219061  | 200.613169      |                |                  | 382.208496     | 191.607886       | G    | 1466.778411 | 733.892844      | 1449.751862    | 725.379569       | 1448.767846    | 724.887561       | 11 |
| 6  | 487.251089  | 244.129183      |                |                  | 469.240524     | 235.123900       | S    | 1409.756947 | 705.382112      | 1392.730398    | 696.868837       | 1391.746382    | 696.376829       | 10 |
| 7  | 600.335153  | 300.671215      |                |                  | 582.324588     | 291.665932       | L    | 1322.724919 | 661.866098      | 1305.698370    | 653.352823       | 1304.714354    | 652.860815       | 9  |
| 8  | 671.372267  | 336.189772      |                |                  | 653.361702     | 327.184489       | A    | 1209.640855 | 605.324066      | 1192.614306    | 596.810791       | 1191.630290    | 596.318783       | 8  |
| 9  | 728.393731  | 364.700504      |                |                  | 710.383166     | 355.695221       | G    | 1138.603741 | 569.805509      | 1121.577192    | 561.292234       | 1120.593176    | 560.800226       | 7  |
| 10 | 856.452309  | 428.729793      | 839.425760     | 420.216518       | 838.441744     | 419.724510       | Q    | 1081.582277 | 541.294777      | 1064.555728    | 532.781502       | 1063.571712    | 532.289494       | 6  |
| 11 | 953.505073  | 477.256175      | 936.478524     | 468.742900       | 935.494508     | 468.250892       | P    | 953.523699  | 477.265488      | 936.497150     | 468.752213       | 935.513134     | 468.260205       | 5  |
| 12 | 1066.589137 | 533.798207      | 1049.562588    | 525.284932       | 1048.578572    | 524.792924       | L    | 856.470935  | 428.739106      | 839.444386     | 420.225831       | 838.460370     | 419.733823       | 4  |
| 13 | 1505.814463 | 753.410870      | 1488.787914    | 744.897595       | 1487.803898    | 744.405587       | Q    | 743.386871  | 372.197074      | 726.360322     | 363.683799       | 725.376306     | 363.191791       | 3  |
| 14 | 1634.857056 | 817.932166      | 1617.830507    | 809.418892       | 1616.846491    | 808.926884       | E    | 304.161545  | 152.584411      | 287.134996     | 144.071136       | 286.150980     | 143.579128       | 2  |
| 15 |             |                 |                |                  |                |                  | R    | 175.118952  | 88.063114       | 158.092403     | 79.549839        |                |                  | 1  |

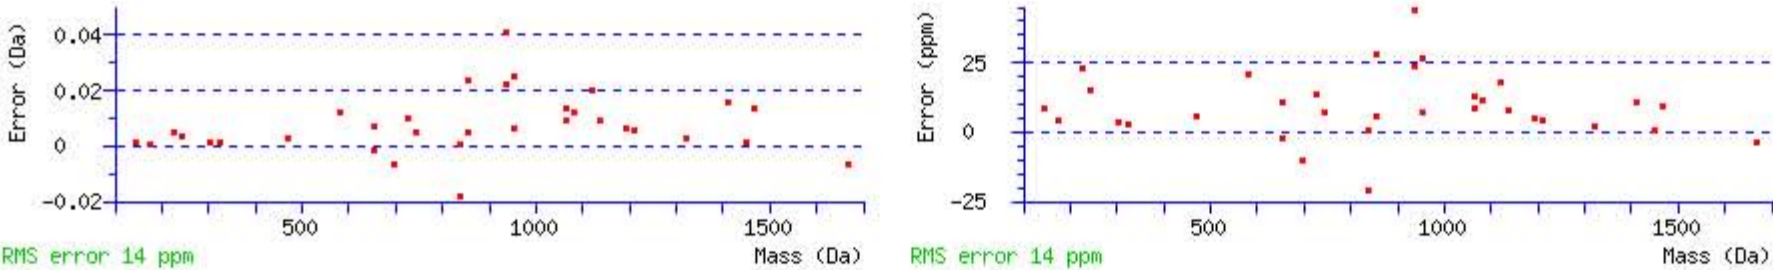

NCBI BLAST search of [AATVGSLAGQPLQER](#)  
(Parameters: blastp, nr protein database, expect=20000, no filter, PAM30)  
Other BLAST [web gateways](#)

All matches to this query

| Score | Mr(calc):   | Delta    | Sequence                          |
|-------|-------------|----------|-----------------------------------|
| 76.6  | 1807.961441 | 0.010171 | <a href="#">AATVGSLAGQPLQER</a>   |
| 35.5  | 1807.961441 | 0.010171 | <a href="#">AATVGSLAGQPLQER</a>   |
| 15.3  | 1807.947510 | 0.024102 | <a href="#">VGLAQIAAMDISRGNHR</a> |

MATRIX

SCIENCE

Mascot Search Results

Peptide View

MS/MS Fragmentation of **SWFEPLVEDMQR**  
Found in **APOE\_HUMAN**, Apolipoprotein E OS=Homo sapiens GN=APOE PE=1 SV=1

Match to Query 41189: 1846.887852 from(616.636560,3+) rtinseconds(2815) index(9962)  
Title: Locus:1.1.1.2257.9 File:"2013-07-02 CLN FXIII 180 min 2nd F 1.wiff"  
Data file C:\Program Files (x86)\Matrix Science\Mascot Daemon\mgf\8 FXIII 180 min 2nd\mascot\_daemon\_merge.mgf

Click mouse within plot area to zoom in by factor of two about that point  
Or, 

Plot from

100

 to 

1300

 Da 

Full range

  
Label all possible matches ☐ Label matches used for scoring ☒

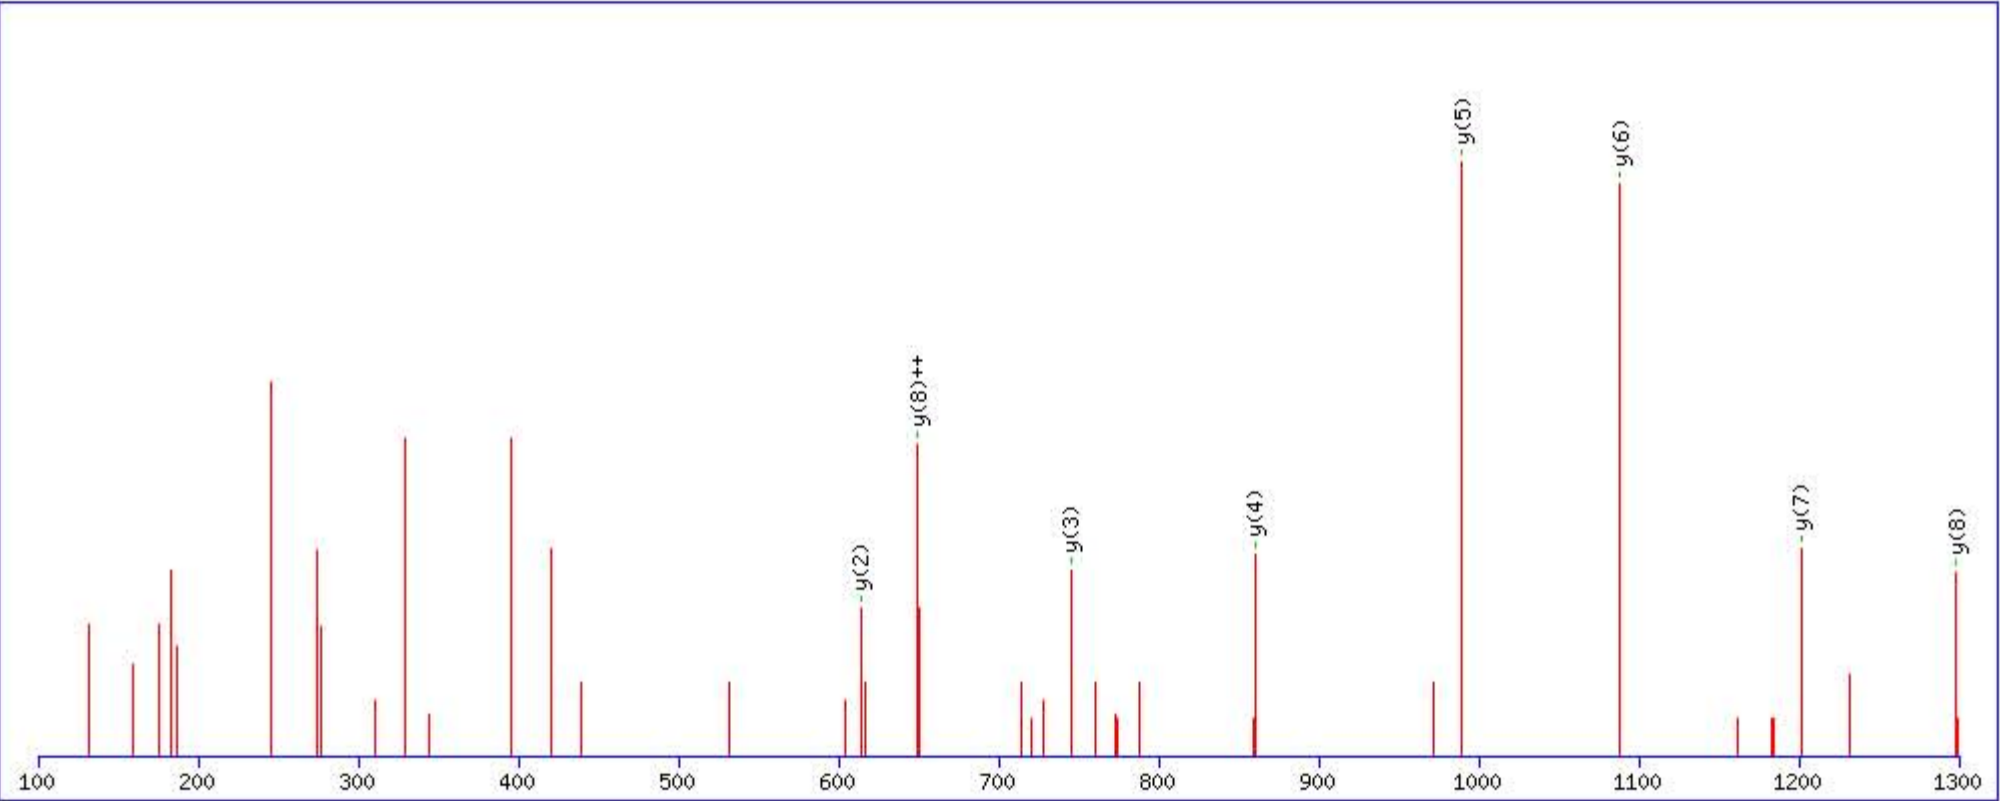

Monoisotopic mass of neutral peptide Mr(calc): 1846.874603  
Fixed modifications: Carbamidomethyl (C) (apply to specified residues or termini only)  
Variable modifications:  
Q11 : Biotin:Thermo-21345 (Q)  
Ions Score: 49 Expect: 0.0001  
Matches : 8/106 fragment ions using 12 most intense peaks [\(help\)](#)

| #  | b           | b <sup>++</sup> | b <sup>*</sup> | b <sup>*++</sup> | b <sup>0</sup> | b <sup>0++</sup> | Seq. | y           | y <sup>++</sup> | y <sup>*</sup> | y <sup>*++</sup> | y <sup>0</sup> | y <sup>0++</sup> | #  |
|----|-------------|-----------------|----------------|------------------|----------------|------------------|------|-------------|-----------------|----------------|------------------|----------------|------------------|----|
| 1  | 88.039304   | 44.523290       |                |                  | 70.028739      | 35.518008        | S    |             |                 |                |                  |                |                  | 12 |
| 2  | 274.118617  | 137.562947      |                |                  | 256.108052     | 128.557664       | W    | 1760.849861 | 880.928568      | 1743.823312    | 872.415294       | 1742.839296    | 871.923286       | 11 |
| 3  | 421.187031  | 211.097153      |                |                  | 403.176466     | 202.091871       | F    | 1574.770548 | 787.888912      | 1557.743999    | 779.375638       | 1556.759983    | 778.883629       | 10 |
| 4  | 550.229624  | 275.618450      |                |                  | 532.219059     | 266.613168       | E    | 1427.702134 | 714.354705      | 1410.675585    | 705.841431       | 1409.691569    | 705.349422       | 9  |
| 5  | 647.282388  | 324.144832      |                |                  | 629.271823     | 315.139550       | P    | 1298.659541 | 649.833409      | 1281.632992    | 641.320134       | 1280.648976    | 640.828126       | 8  |
| 6  | 760.366452  | 380.686864      |                |                  | 742.355887     | 371.681582       | L    | 1201.606777 | 601.307027      | 1184.580228    | 592.793752       | 1183.596212    | 592.301744       | 7  |
| 7  | 859.434866  | 430.221071      |                |                  | 841.424301     | 421.215789       | V    | 1088.522713 | 544.764995      | 1071.496164    | 536.251720       | 1070.512148    | 535.759712       | 6  |
| 8  | 988.477459  | 494.742368      |                |                  | 970.466894     | 485.737085       | E    | 989.454299  | 495.230788      | 972.427750     | 486.717513       | 971.443734     | 486.225505       | 5  |
| 9  | 1103.504402 | 552.255839      |                |                  | 1085.493837    | 543.250557       | D    | 860.411706  | 430.709491      | 843.385157     | 422.196216       | 842.401141     | 421.704208       | 4  |
| 10 | 1234.544887 | 617.776082      |                |                  | 1216.534322    | 608.770799       | M    | 745.384763  | 373.196020      | 728.358214     | 364.682745       |                |                  | 3  |
| 11 | 1673.770213 | 837.388745      | 1656.743664    | 828.875470       | 1655.759648    | 828.383462       | Q    | 614.344278  | 307.675777      | 597.317729     | 299.162503       |                |                  | 2  |
| 12 |             |                 |                |                  |                |                  | R    | 175.118952  | 88.063114       | 158.092403     | 79.549839        |                |                  | 1  |

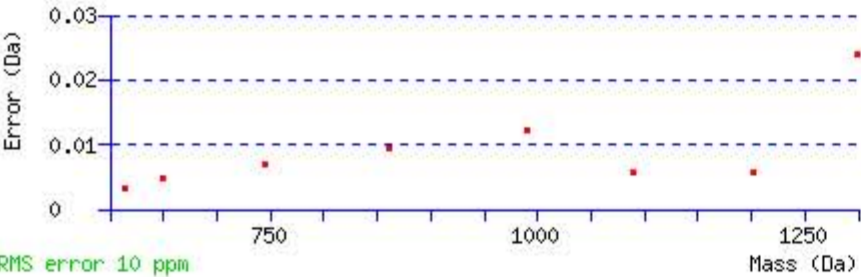

NCBI BLAST search of [SWFEPLVEDMQR](#)  
(Parameters: blastp, nr protein database, expect=20000, no filter, PAM30)  
Other BLAST [web gateways](#)

All matches to this query

| Score | Mr(calc):   | Delta     | Sequence                           |
|-------|-------------|-----------|------------------------------------|
| 49.1  | 1846.874603 | 0.013249  | <a href="#">SWFEPLVEDMQR</a>       |
| 6.0   | 1846.866562 | 0.021290  | <a href="#">LCMAQPRTVQDVEER</a>    |
| 1.6   | 1846.895721 | -0.007869 | <a href="#">LQLEETMPSPYGR</a>      |
| 0.7   | 1846.902084 | -0.014232 | <a href="#">GTSRVDDKPSSPGDSSKK</a> |
| 0.0   | 1846.895706 | -0.007854 | <a href="#">CFELQALLEEER</a>       |

MATRIX

SCIENCE

Mascot Search Results

Peptide View

MS/MS Fragmentation of **VQAAVGTSAAPVPSDNH**  
Found in **APOE\_HUMAN**, Apolipoprotein E OS=Homo sapiens GN=APOE PE=1 SV=1

Match to Query 42718: 1930.977788 from(966.496170,2+) rtinseconds(1697) index(32258)  
Title: Locus:1.1.1.699.10 File:"2013-07-02 CLN FXIII 180 min 2nd F 3.wiff"  
Data file C:\Program Files (x86)\Matrix Science\Mascot Daemon\mgf\8 FXIII 180 min 2nd\mascot\_daemon\_merge.mgf

Click mouse within plot area to zoom in by factor of two about that point

Or, 

Plot from

100

 to 

2000

 Da 

Full range

Label all possible matches ☐ Label matches used for scoring ☒

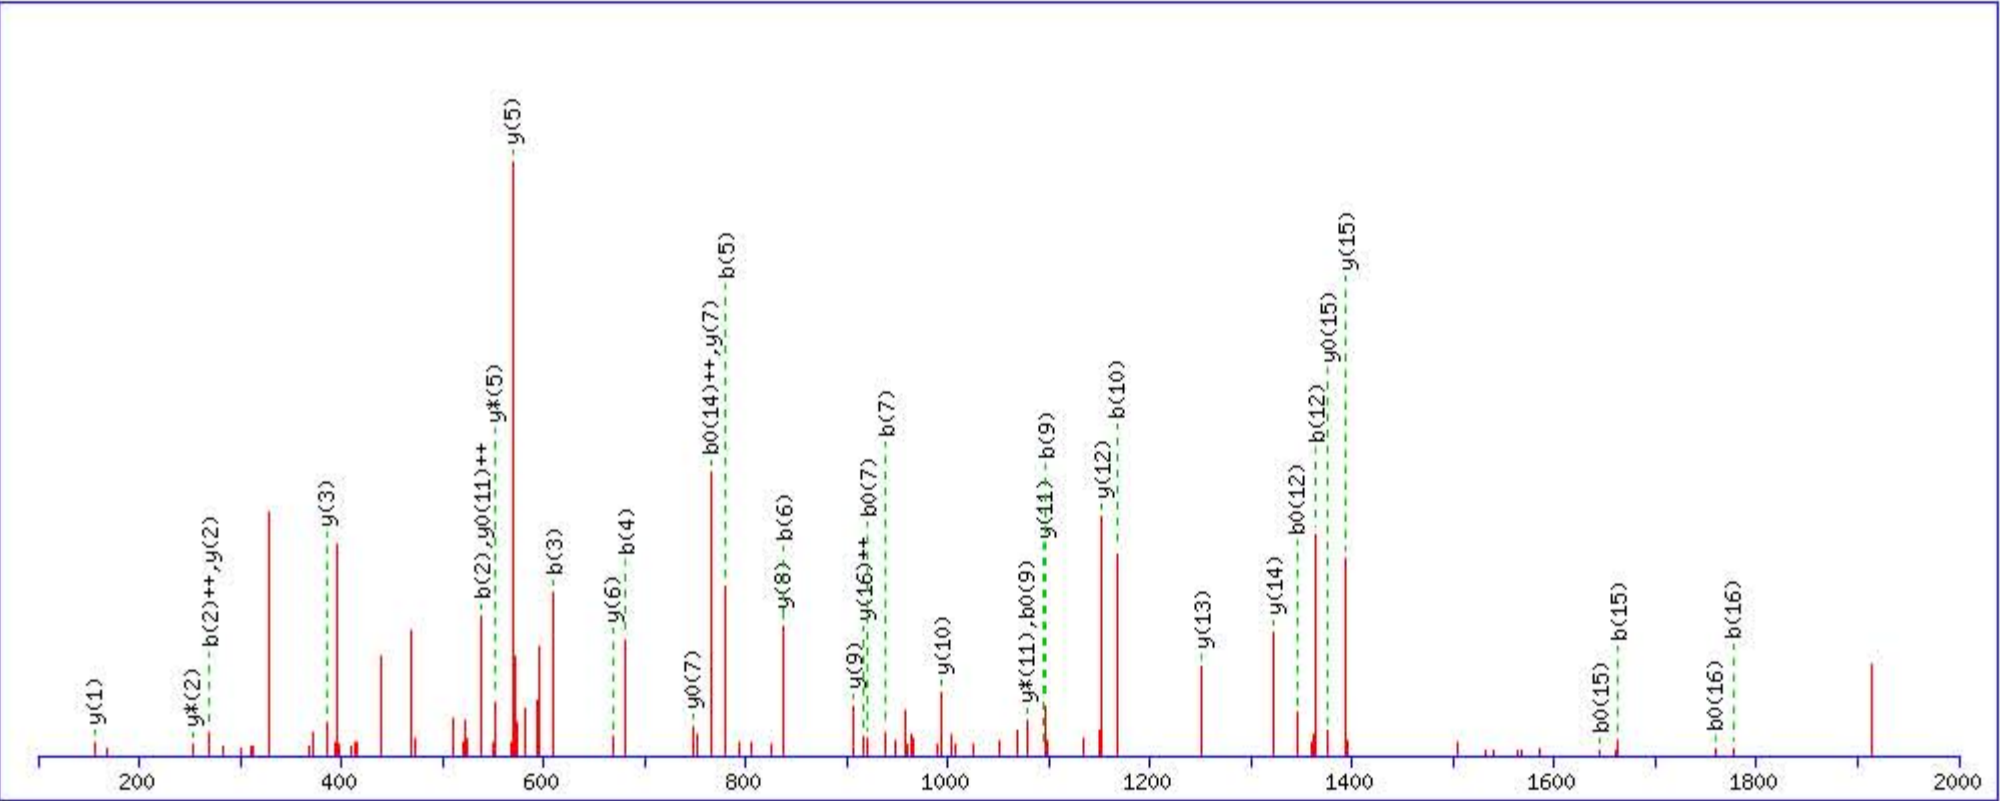

Monoisotopic mass of neutral peptide Mr(calc): 1930.957108  
Fixed modifications: Carbamidomethyl (C) (apply to specified residues or termini only)  
Variable modifications:  
Q2 : Biotin:Thermo-21345 (Q)  
Ions Score: 102 Expect: 1.9e-009  
Matches : 39/172 fragment ions using 59 most intense peaks [\(help\)](#)

| #  | b           | b <sup>++</sup> | b <sup>*</sup> | b <sup>*++</sup> | b <sup>0</sup> | b <sup>0++</sup> | Seq. | y           | y <sup>++</sup> | y <sup>*</sup> | y <sup>*++</sup> | y <sup>0</sup> | y <sup>0++</sup> | #  |
|----|-------------|-----------------|----------------|------------------|----------------|------------------|------|-------------|-----------------|----------------|------------------|----------------|------------------|----|
| 1  | 100.075690  | 50.541483       |                |                  |                |                  | V    |             |                 |                |                  |                |                  | 17 |
| 2  | 539.301016  | 270.154146      | 522.274467     | 261.640872       |                |                  | Q    | 1832.895960 | 916.951618      | 1815.869411    | 908.438344       | 1814.885395    | 907.946336       | 16 |
| 3  | 610.338130  | 305.672703      | 593.311581     | 297.159429       |                |                  | A    | 1393.670634 | 697.338955      | 1376.644085    | 688.825681       | 1375.660069    | 688.333673       | 15 |
| 4  | 681.375244  | 341.191260      | 664.348695     | 332.677986       |                |                  | A    | 1322.633520 | 661.820398      | 1305.606971    | 653.307124       | 1304.622955    | 652.815116       | 14 |
| 5  | 780.443658  | 390.725467      | 763.417109     | 382.212193       |                |                  | V    | 1251.596406 | 626.301841      | 1234.569857    | 617.788567       | 1233.585841    | 617.296559       | 13 |
| 6  | 837.465122  | 419.236199      | 820.438573     | 410.722925       |                |                  | G    | 1152.527992 | 576.767634      | 1135.501443    | 568.254360       | 1134.517427    | 567.762352       | 12 |
| 7  | 938.512801  | 469.760039      | 921.486252     | 461.246764       | 920.502236     | 460.754756       | T    | 1095.506528 | 548.256902      | 1078.479979    | 539.743628       | 1077.495963    | 539.251620       | 11 |
| 8  | 1025.544829 | 513.276053      | 1008.518280    | 504.762778       | 1007.534264    | 504.270770       | S    | 994.458849  | 497.733063      | 977.432300     | 489.219788       | 976.448284     | 488.727780       | 10 |
| 9  | 1096.581943 | 548.794610      | 1079.555394    | 540.281335       | 1078.571378    | 539.789327       | A    | 907.426821  | 454.217049      | 890.400272     | 445.703774       | 889.416256     | 445.211766       | 9  |
| 10 | 1167.619057 | 584.313167      | 1150.592508    | 575.799892       | 1149.608492    | 575.307884       | A    | 836.389707  | 418.698492      | 819.363158     | 410.185217       | 818.379142     | 409.693209       | 8  |
| 11 | 1264.671821 | 632.839549      | 1247.645272    | 624.326274       | 1246.661256    | 623.834266       | P    | 765.352593  | 383.179935      | 748.326044     | 374.666660       | 747.342028     | 374.174652       | 7  |
| 12 | 1363.740235 | 682.373756      | 1346.713686    | 673.860481       | 1345.729670    | 673.368473       | V    | 668.299829  | 334.653553      | 651.273280     | 326.140278       | 650.289264     | 325.648270       | 6  |
| 13 | 1460.792999 | 730.900138      | 1443.766450    | 722.386863       | 1442.782434    | 721.894855       | P    | 569.231415  | 285.119346      | 552.204866     | 276.606071       | 551.220850     | 276.114063       | 5  |
| 14 | 1547.825027 | 774.416152      | 1530.798478    | 765.902877       | 1529.814462    | 765.410869       | S    | 472.178651  | 236.592964      | 455.152102     | 228.079689       | 454.168086     | 227.587681       | 4  |
| 15 | 1662.851970 | 831.929623      | 1645.825421    | 823.416349       | 1644.841405    | 822.924341       | D    | 385.146623  | 193.076949      | 368.120074     | 184.563675       | 367.136058     | 184.071667       | 3  |
| 16 | 1776.894897 | 888.951087      | 1759.868348    | 880.437812       | 1758.884332    | 879.945804       | N    | 270.119680  | 135.563478      | 253.093131     | 127.050203       |                |                  | 2  |
| 17 |             |                 |                |                  |                |                  | H    | 156.076753  | 78.542014       |                |                  |                |                  | 1  |

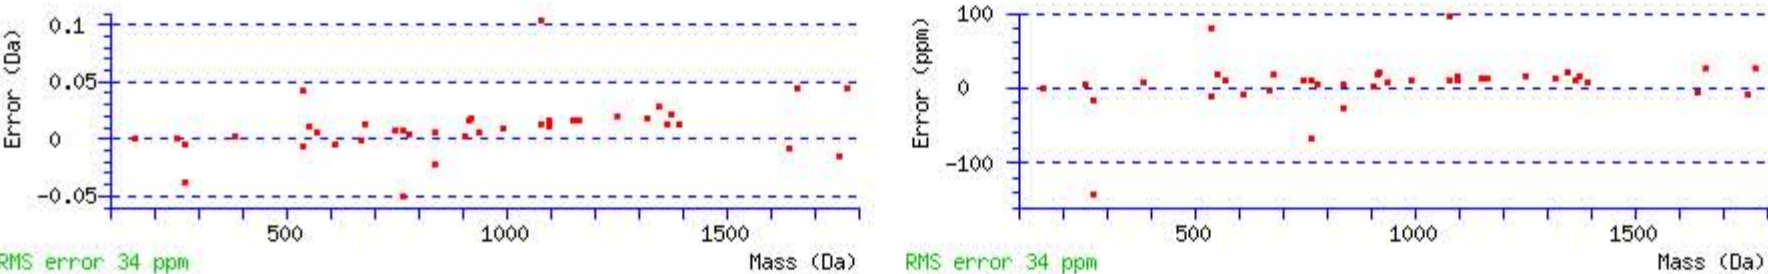

NCBI BLAST search of [VQAAVGTSAAPVPSDNH](#)  
(Parameters: blastp, nr protein database, expect=20000, no filter, PAM30)  
Other BLAST [web gateways](#)

All matches to this query

| Score | Mr(calc):   | Delta    | Sequence                          |
|-------|-------------|----------|-----------------------------------|
| 102.0 | 1930.957108 | 0.020680 | <a href="#">VQAAVGTSAAPVPSDNH</a> |

MATRIX

SCIENCE

Mascot Search Results

Peptide View

MS/MS Fragmentation of **SGVQQLIQYYQDQK**  
Found in **APOF\_HUMAN**, Apolipoprotein F OS=Homo sapiens GN=APOF PE=1 SV=2

Match to Query 44879: 2008.034112 from(670.351980,3+) rtinseconds(2478) index(53228)  
Title: Locus:1.1.1.2100.7 File:"2013-07-02 CLN FXIII 180 min 2nd F 4.wiff"  
Data file C:\Program Files (x86)\Matrix Science\Mascot Daemon\mgf\8 FXIII 180 min 2nd\mascot\_daemon\_merge.mgf

Click mouse within plot area to zoom in by factor of two about that point  
Or,   to  Da   
Label all possible matches ☐ Label matches used for scoring ☒

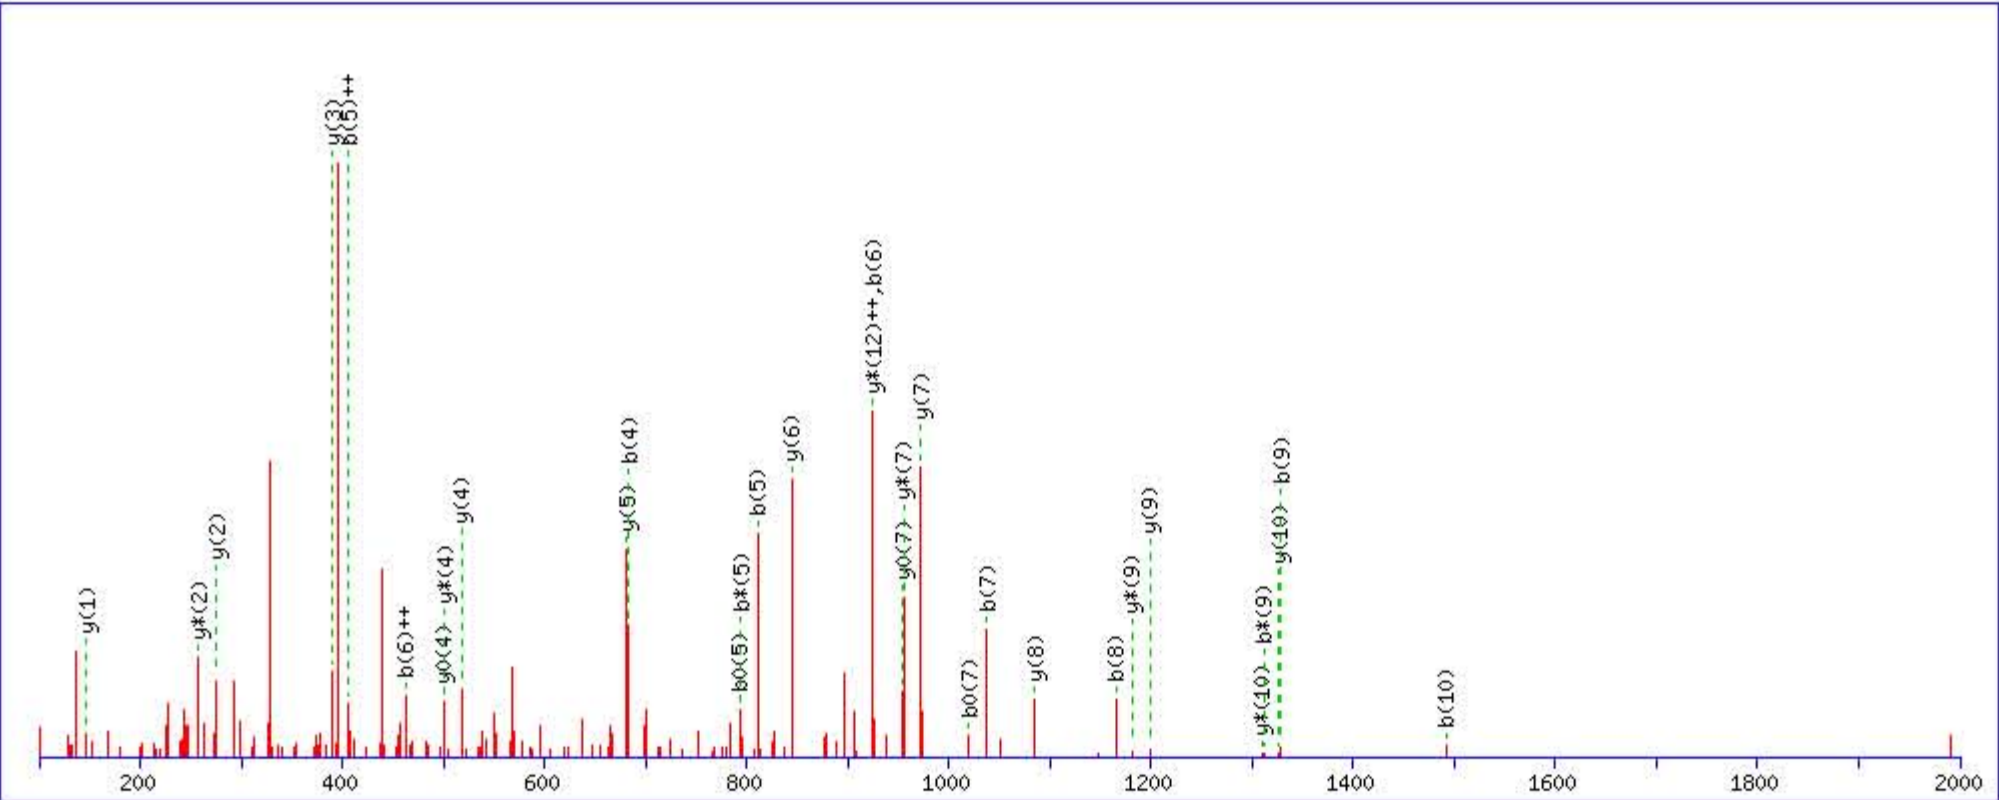

Monoisotopic mass of neutral peptide Mr(calc): 2008.008789  
Fixed modifications: Carbamidomethyl (C) (apply to specified residues or termini only)  
Variable modifications:  
Q4 : Biotin:Thermo-21345 (Q)  
Ions Score: 59 Expect: 3.8e-005  
Matches : 31/146 fragment ions using 50 most intense peaks [\(help\)](#)

| #  | b           | b <sup>++</sup> | b <sup>*</sup> | b <sup>+++</sup> | b <sup>0</sup> | b <sup>0++</sup> | Seq. | y           | y <sup>++</sup> | y <sup>*</sup> | y <sup>+++</sup> | y <sup>0</sup> | y <sup>0++</sup> | #  |
|----|-------------|-----------------|----------------|------------------|----------------|------------------|------|-------------|-----------------|----------------|------------------|----------------|------------------|----|
| 1  | 88.039304   | 44.523290       |                |                  | 70.028739      | 35.518008        | S    |             |                 |                |                  |                |                  | 14 |
| 2  | 145.060768  | 73.034022       |                |                  | 127.050203     | 64.028740        | G    | 1921.984049 | 961.495663      | 1904.957500    | 952.982388       | 1903.973484    | 952.490380       | 13 |
| 3  | 244.129182  | 122.568229      |                |                  | 226.118617     | 113.562947       | V    | 1864.962585 | 932.984931      | 1847.936036    | 924.471656       | 1846.952020    | 923.979648       | 12 |
| 4  | 683.354508  | 342.180892      | 666.327959     | 333.667618       | 665.343943     | 333.175610       | Q    | 1765.894171 | 883.450724      | 1748.867622    | 874.937449       | 1747.883606    | 874.445441       | 11 |
| 5  | 811.413086  | 406.210181      | 794.386537     | 397.696907       | 793.402521     | 397.204899       | Q    | 1326.668845 | 663.838061      | 1309.642296    | 655.324786       | 1308.658280    | 654.832778       | 10 |
| 6  | 924.497150  | 462.752213      | 907.470601     | 454.238939       | 906.486585     | 453.746931       | L    | 1198.610267 | 599.808772      | 1181.583718    | 591.295497       | 1180.599702    | 590.803489       | 9  |
| 7  | 1037.581214 | 519.294245      | 1020.554665    | 510.780971       | 1019.570649    | 510.288963       | I    | 1085.526203 | 543.266740      | 1068.499654    | 534.753465       | 1067.515638    | 534.261457       | 8  |
| 8  | 1165.639792 | 583.323534      | 1148.613243    | 574.810260       | 1147.629227    | 574.318252       | Q    | 972.442139  | 486.724708      | 955.415590     | 478.211433       | 954.431574     | 477.719425       | 7  |
| 9  | 1328.703121 | 664.855199      | 1311.676572    | 656.341924       | 1310.692556    | 655.849916       | Y    | 844.383561  | 422.695419      | 827.357012     | 414.182144       | 826.372996     | 413.690136       | 6  |
| 10 | 1491.766450 | 746.386863      | 1474.739901    | 737.873589       | 1473.755885    | 737.381581       | Y    | 681.320232  | 341.163754      | 664.293683     | 332.650480       | 663.309667     | 332.158472       | 5  |
| 11 | 1619.825028 | 810.416152      | 1602.798479    | 801.902878       | 1601.814463    | 801.410870       | Q    | 518.256903  | 259.632090      | 501.230354     | 251.118815       | 500.246338     | 250.626807       | 4  |
| 12 | 1734.851971 | 867.929624      | 1717.825422    | 859.416349       | 1716.841406    | 858.924341       | D    | 390.198325  | 195.602800      | 373.171776     | 187.089526       | 372.187760     | 186.597518       | 3  |
| 13 | 1862.910549 | 931.958913      | 1845.884000    | 923.445638       | 1844.899984    | 922.953630       | Q    | 275.171382  | 138.089329      | 258.144833     | 129.576054       |                |                  | 2  |
| 14 |             |                 |                |                  |                |                  | K    | 147.112804  | 74.060040       | 130.086255     | 65.546765        |                |                  | 1  |

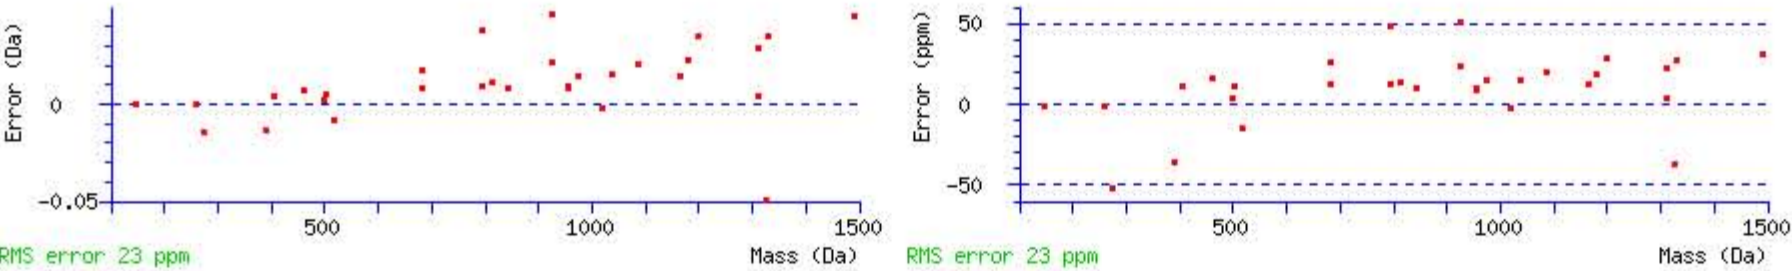

NCBI BLAST search of [SGVQQLIQYYQDQK](#)  
(Parameters: blastp, nr protein database, expect=20000, no filter, PAM30)  
Other BLAST [web gateways](#)

All matches to this query

| Score | Mr(calc):   | Delta     | Sequence                           |
|-------|-------------|-----------|------------------------------------|
| 58.7  | 2008.008789 | 0.025323  | <a href="#">SGVQQLIQYYQDQK</a>     |
| 45.2  | 2008.008789 | 0.025323  | <a href="#">SGVQQLIQYYQDQK</a>     |
| 15.4  | 2008.063568 | -0.029456 | <a href="#">QQLAQRAEAERLR</a>      |
| 11.1  | 2008.008789 | 0.025323  | <a href="#">SGVQQLIQYYQDQK</a>     |
| 6.2   | 2008.063568 | -0.029456 | <a href="#">QQLAQRAEAERLR</a>      |
| 3.0   | 2008.026535 | 0.007577  | <a href="#">HYSNTLKALGISDEFVSK</a> |
| 2.9   | 2008.030762 | 0.003350  | <a href="#">ASVMLFMKGKNGQEAQ</a>   |
| 1.3   | 2008.051895 | -0.017783 | <a href="#">MIEDTMTLLSLLGRIMR</a>  |
| 0.5   | 2008.037308 | -0.003196 | <a href="#">VVPVSLSELYLLQCNMK</a>  |

MATRIX

SCIENCE

Mascot Search Results

Peptide View

MS/MS Fragmentation of **VAQELEEK**  
Found in **APOLI\_HUMAN**, Apolipoprotein L1 OS=Homo sapiens GN=APOL1 PE=1 SV=5

Match to Query 22050: 1255.653568 from(628.834060,2+) rtinseconds(1583) index(47492)  
Title: Locus:1.1.1.1789.10 File:"2013-07-02 CLN FXIII 180 min 2nd F 4.wiff"  
Data file C:\Program Files (x86)\Matrix Science\Mascot Daemon\mgf\8 FXIII 180 min 2nd\mascot\_daemon\_merge.mgf

Click mouse within plot area to zoom in by factor of two about that point  
Or, 

Plot from

100

 to 

1300

 Da 

Full range

  
Label all possible matches ☐ Label matches used for scoring ☒

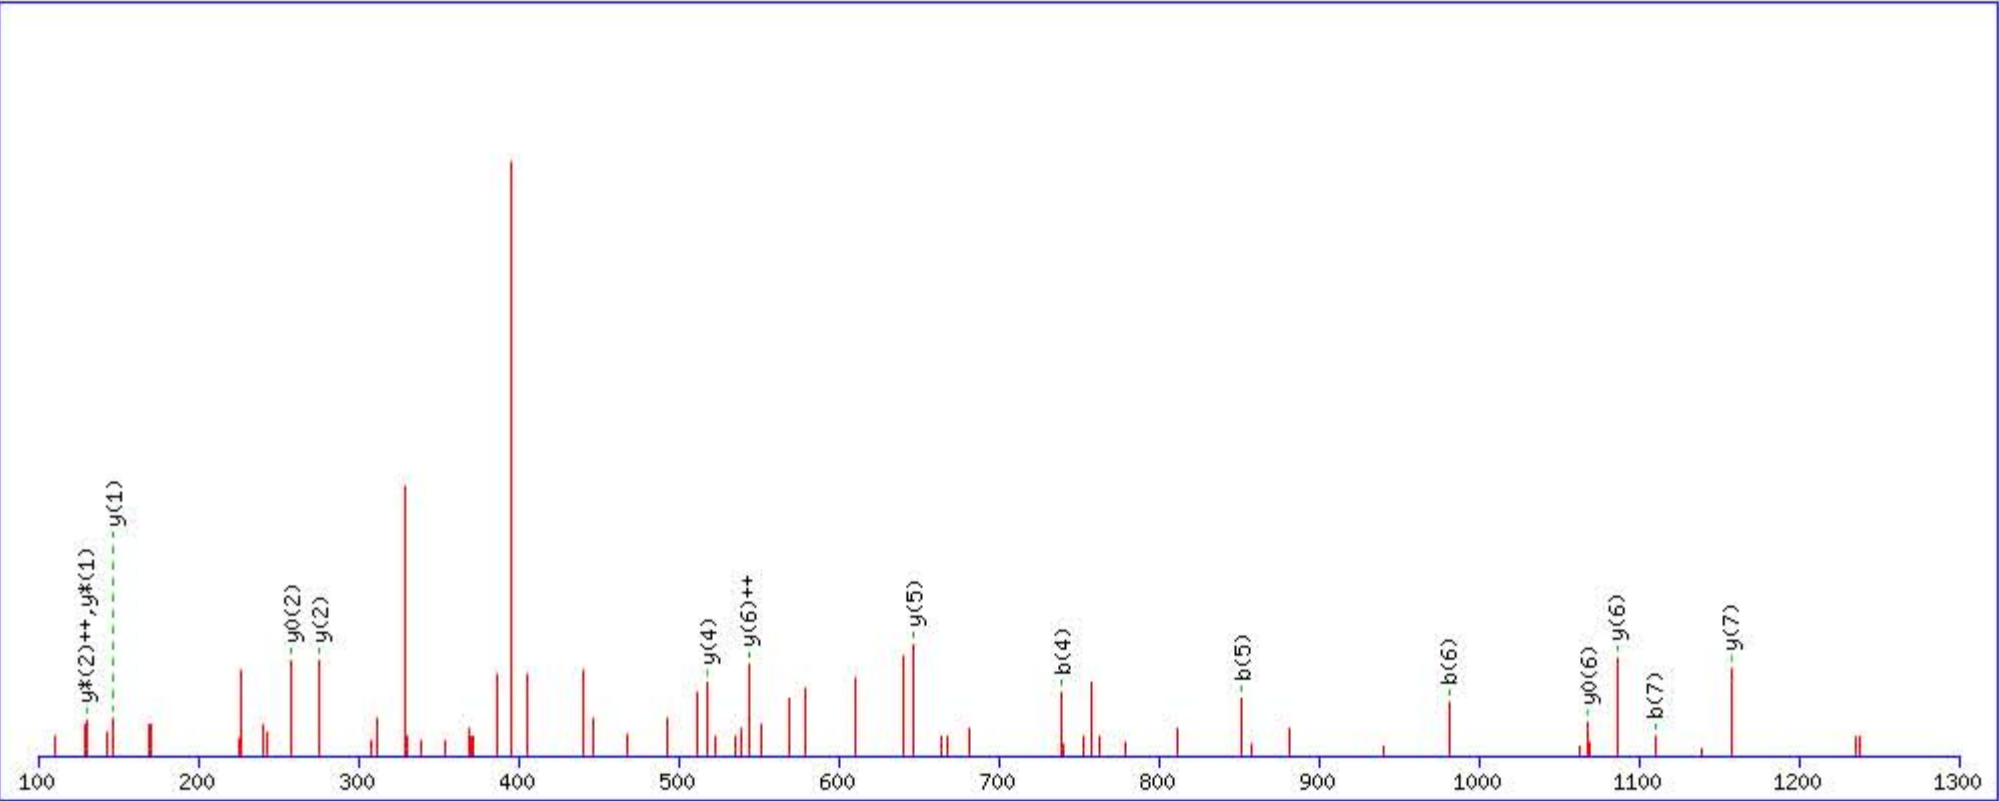

Monoisotopic mass of neutral peptide Mr(calc): 1255.648193  
Fixed modifications: Carbamidomethyl (C) (apply to specified residues or termini only)  
Variable modifications:  
Q3 : Biotin:Thermo-21345 (Q)  
Ions Score: 33 Expect: 0.01  
Matches : 15/72 fragment ions using 24 most intense peaks [\(help\)](#)

| # | b           | b <sup>++</sup> | b <sup>*</sup> | b <sup>+++</sup> | b <sup>0</sup> | b <sup>0++</sup> | Seq. | y           | y <sup>++</sup> | y <sup>*</sup> | y <sup>+++</sup> | y <sup>0</sup> | y <sup>0++</sup> | # |
|---|-------------|-----------------|----------------|------------------|----------------|------------------|------|-------------|-----------------|----------------|------------------|----------------|------------------|---|
| 1 | 100.075690  | 50.541483       |                |                  |                |                  | V    |             |                 |                |                  |                |                  | 8 |
| 2 | 171.112804  | 86.060040       |                |                  |                |                  | A    | 1157.587087 | 579.297182      | 1140.560538    | 570.783907       | 1139.576522    | 570.291899       | 7 |
| 3 | 610.338130  | 305.672703      | 593.311581     | 297.159429       |                |                  | Q    | 1086.549973 | 543.778625      | 1069.523424    | 535.265350       | 1068.539408    | 534.773342       | 6 |
| 4 | 739.380723  | 370.194000      | 722.354174     | 361.680725       | 721.370158     | 361.188717       | E    | 647.324647  | 324.165962      | 630.298098     | 315.652687       | 629.314082     | 315.160679       | 5 |
| 5 | 852.464787  | 426.736032      | 835.438238     | 418.222757       | 834.454222     | 417.730749       | L    | 518.282054  | 259.644665      | 501.255505     | 251.131391       | 500.271489     | 250.639383       | 4 |
| 6 | 981.507380  | 491.257328      | 964.480831     | 482.744054       | 963.496815     | 482.252046       | E    | 405.197990  | 203.102633      | 388.171441     | 194.589359       | 387.187425     | 194.097351       | 3 |
| 7 | 1110.549973 | 555.778625      | 1093.523424    | 547.265350       | 1092.539408    | 546.773342       | E    | 276.155397  | 138.581336      | 259.128848     | 130.068062       | 258.144832     | 129.576054       | 2 |
| 8 |             |                 |                |                  |                |                  | K    | 147.112804  | 74.060040       | 130.086255     | 65.546765        |                |                  | 1 |

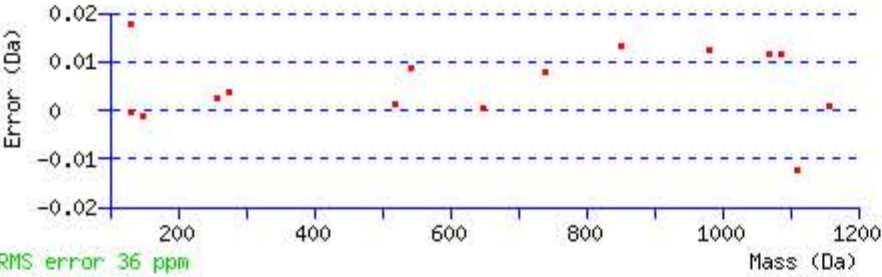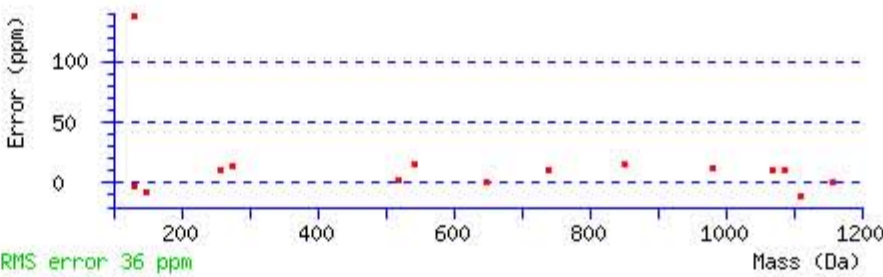

NCBI BLAST search of [VAQELEEK](#)  
(Parameters: blastp, nr protein database, expect=20000, no filter, PAM30)  
Other BLAST [web gateways](#)

All matches to this query

| Score | Mr(calc):   | Delta     | Sequence                    |
|-------|-------------|-----------|-----------------------------|
| 33.5  | 1255.648193 | 0.005375  | <a href="#">VAQELEEK</a>    |
| 11.8  | 1255.659424 | -0.005856 | <a href="#">QAEKNVEK</a>    |
| 10.3  | 1255.659439 | -0.005871 | <a href="#">GLQGEKG EK</a>  |
| 9.1   | 1255.656067 | -0.002499 | <a href="#">ALPIQSFSHEK</a> |
| 8.6   | 1255.659439 | -0.005871 | <a href="#">STGAQPKEK</a>   |
| 7.7   | 1255.645508 | 0.008060  | <a href="#">TRMIEANIHR</a>  |
| 7.2   | 1255.640793 | 0.012775  | <a href="#">DTHKKLEEEK</a>  |
| 6.3   | 1255.648193 | 0.005375  | <a href="#">EQVEIAEK</a>    |
| 6.0   | 1255.638306 | 0.015262  | <a href="#">FKEHQEK</a>     |
| 5.8   | 1255.659439 | -0.005871 | <a href="#">LLIENGVSMHK</a> |

MATRIX

SCIENCE

Mascot Search Results

Peptide View

MS/MS Fragmentation of **VTEPISAESGEQVER**  
Found in **APOLI\_HUMAN**, Apolipoprotein L1 OS=Homo sapiens GN=APOL1 PE=1 SV=5

Match to Query 42942: 1940.956182 from(647.992670,3+) rtinseconds(1702) index(18248)  
Title: Locus:1.1.1.2975.11 File:"2013-07-02 CLN FXIII 180 min 2nd F 2.wiff"  
Data file C:\Program Files (x86)\Matrix Science\Mascot Daemon\mgf\8 FXIII 180 min 2nd\mascot\_daemon\_merge.mgf

Click mouse within plot area to zoom in by factor of two about that point  
Or, 

Plot from

100

 to 

1700

 Da 

Full range

  
Label all possible matches ☐ Label matches used for scoring ☒

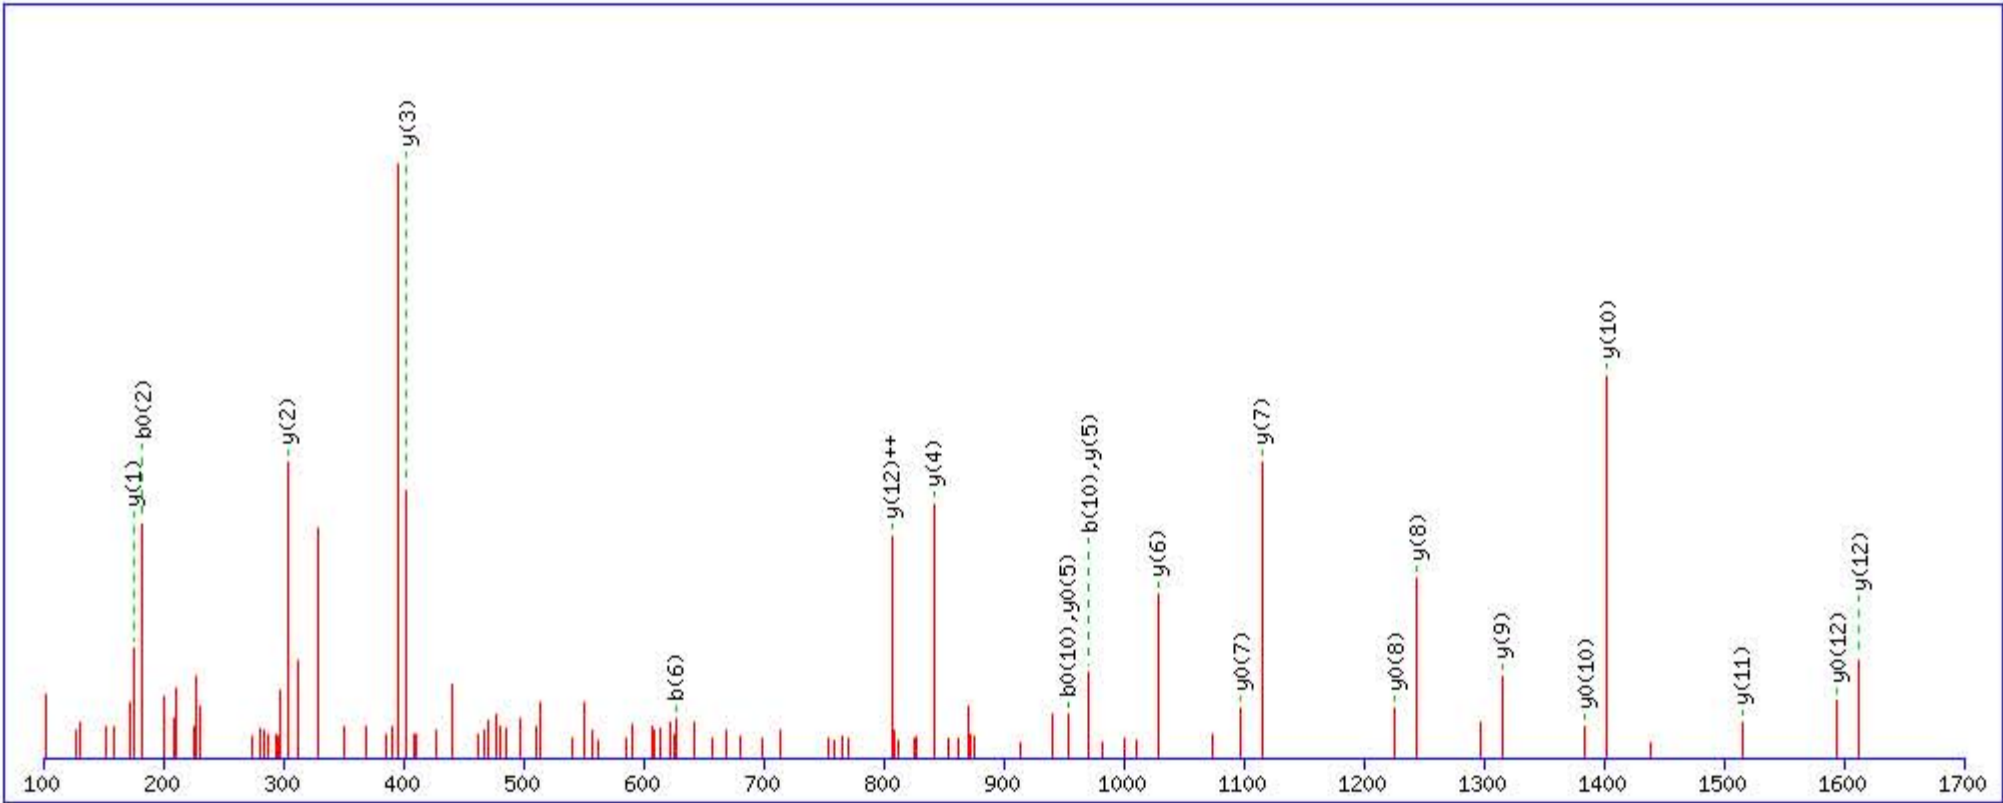

Monoisotopic mass of neutral peptide Mr(calc): 1940.951324  
Fixed modifications: Carbamidomethyl (C) (apply to specified residues or termini only)  
Variable modifications:  
Q12 : Biotin:Thermo-21345 (Q)  
Ions Score: 91 Expect: 1.8e-008  
Matches : 22/142 fragment ions using 30 most intense peaks [\(help\)](#)

| #  | b           | b <sup>++</sup> | b <sup>*</sup> | b <sup>*++</sup> | b <sup>0</sup> | b <sup>0++</sup> | Seq. | y           | y <sup>++</sup> | y <sup>*</sup> | y <sup>*++</sup> | y <sup>0</sup> | y <sup>0++</sup> | #  |
|----|-------------|-----------------|----------------|------------------|----------------|------------------|------|-------------|-----------------|----------------|------------------|----------------|------------------|----|
| 1  | 100.075690  | 50.541483       |                |                  |                |                  | V    |             |                 |                |                  |                |                  | 15 |
| 2  | 201.123369  | 101.065322      |                |                  | 183.112804     | 92.060040        | T    | 1842.890205 | 921.948741      | 1825.863656    | 913.435466       | 1824.879640    | 912.943458       | 14 |
| 3  | 330.165962  | 165.586619      |                |                  | 312.155397     | 156.581336       | E    | 1741.842526 | 871.424901      | 1724.815977    | 862.911627       | 1723.831961    | 862.419619       | 13 |
| 4  | 427.218726  | 214.113001      |                |                  | 409.208161     | 205.107719       | P    | 1612.799933 | 806.903605      | 1595.773384    | 798.390330       | 1594.789368    | 797.898322       | 12 |
| 5  | 540.302790  | 270.655033      |                |                  | 522.292225     | 261.649751       | I    | 1515.747169 | 758.377223      | 1498.720620    | 749.863948       | 1497.736604    | 749.371940       | 11 |
| 6  | 627.334818  | 314.171047      |                |                  | 609.324253     | 305.165765       | S    | 1402.663105 | 701.835191      | 1385.636556    | 693.321916       | 1384.652540    | 692.829908       | 10 |
| 7  | 698.371932  | 349.689604      |                |                  | 680.361367     | 340.684322       | A    | 1315.631077 | 658.319177      | 1298.604528    | 649.805902       | 1297.620512    | 649.313894       | 9  |
| 8  | 827.414525  | 414.210901      |                |                  | 809.403960     | 405.205618       | E    | 1244.593963 | 622.800620      | 1227.567414    | 614.287345       | 1226.583398    | 613.795337       | 8  |
| 9  | 914.446553  | 457.726915      |                |                  | 896.435988     | 448.721632       | S    | 1115.551370 | 558.279323      | 1098.524821    | 549.766049       | 1097.540805    | 549.274041       | 7  |
| 10 | 971.468017  | 486.237647      |                |                  | 953.457452     | 477.232364       | G    | 1028.519342 | 514.763309      | 1011.492793    | 506.250035       | 1010.508777    | 505.758027       | 6  |
| 11 | 1100.510610 | 550.758943      |                |                  | 1082.500045    | 541.753661       | E    | 971.497878  | 486.252577      | 954.471329     | 477.739303       | 953.487313     | 477.247295       | 5  |
| 12 | 1539.735936 | 770.371606      | 1522.709387    | 761.858332       | 1521.725371    | 761.366324       | Q    | 842.455285  | 421.731281      | 825.428736     | 413.218006       | 824.444720     | 412.725998       | 4  |
| 13 | 1638.804350 | 819.905813      | 1621.777801    | 811.392539       | 1620.793785    | 810.900531       | V    | 403.229959  | 202.118617      | 386.203410     | 193.605343       | 385.219394     | 193.113335       | 3  |
| 14 | 1767.846943 | 884.427110      | 1750.820394    | 875.913835       | 1749.836378    | 875.421827       | E    | 304.161545  | 152.584410      | 287.134996     | 144.071136       | 286.150980     | 143.579128       | 2  |
| 15 |             |                 |                |                  |                |                  | R    | 175.118952  | 88.063114       | 158.092403     | 79.549839        |                |                  | 1  |

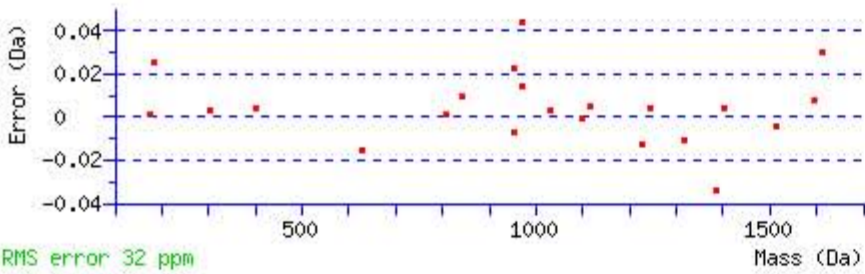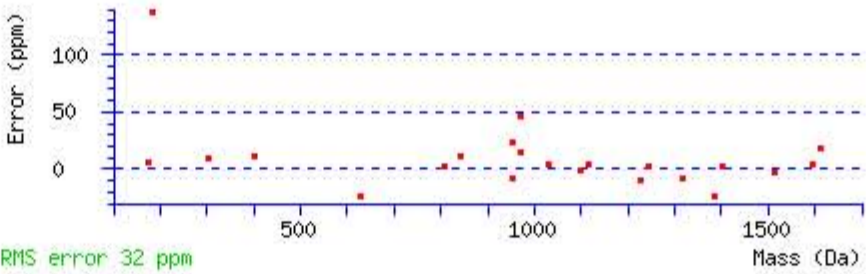

NCBI BLAST search of **VTEPISAESGEQVER**  
(Parameters: blastp, nr protein database, expect=20000, no filter, PAM30)  
Other BLAST [web gateways](#)

All matches to this query

| Score | Mr(calc):   | Delta     | Sequence                           |
|-------|-------------|-----------|------------------------------------|
| 91.2  | 1940.951324 | 0.004858  | <a href="#">VTEPISAESGEQVER</a>    |
| 10.6  | 1940.962540 | -0.006358 | <a href="#">LLNDQEEEGTQRAK</a>     |
| 3.7   | 1940.981659 | -0.025477 | <a href="#">HRGYLSETVSNALGPQGR</a> |
| 0.9   | 1940.937378 | 0.018804  | <a href="#">SNNLEREQEQLDR</a>      |
| 0.6   | 1940.970413 | -0.014231 | <a href="#">SELHQDRSSPPPLPER</a>   |

MATRIX

SCIENCE

Mascot Search Results

Peptide View

MS/MS Fragmentation of **NQEACELSNN**  
Found in **APOM\_HUMAN**, Apolipoprotein M OS=Homo sapiens GN=APOM PE=1 SV=2

Match to Query 30730: 1488.637808 from(745.326180,2+) rtinseconds(1644) index(17839)  
Title: Locus:1.1.1.2955.10 File:"2013-07-02 CLN FXIII 180 min 2nd F 2.wiff"  
Data file C:\Program Files (x86)\Matrix Science\Mascot Daemon\mgf\8 FXIII 180 min 2nd\mascot\_daemon\_merge.mgf

Click mouse within plot area to zoom in by factor of two about that point  
Or, 

Plot from

100

 to 

1600

 Da 

Full range

  
Label all possible matches ☐ Label matches used for scoring ☒

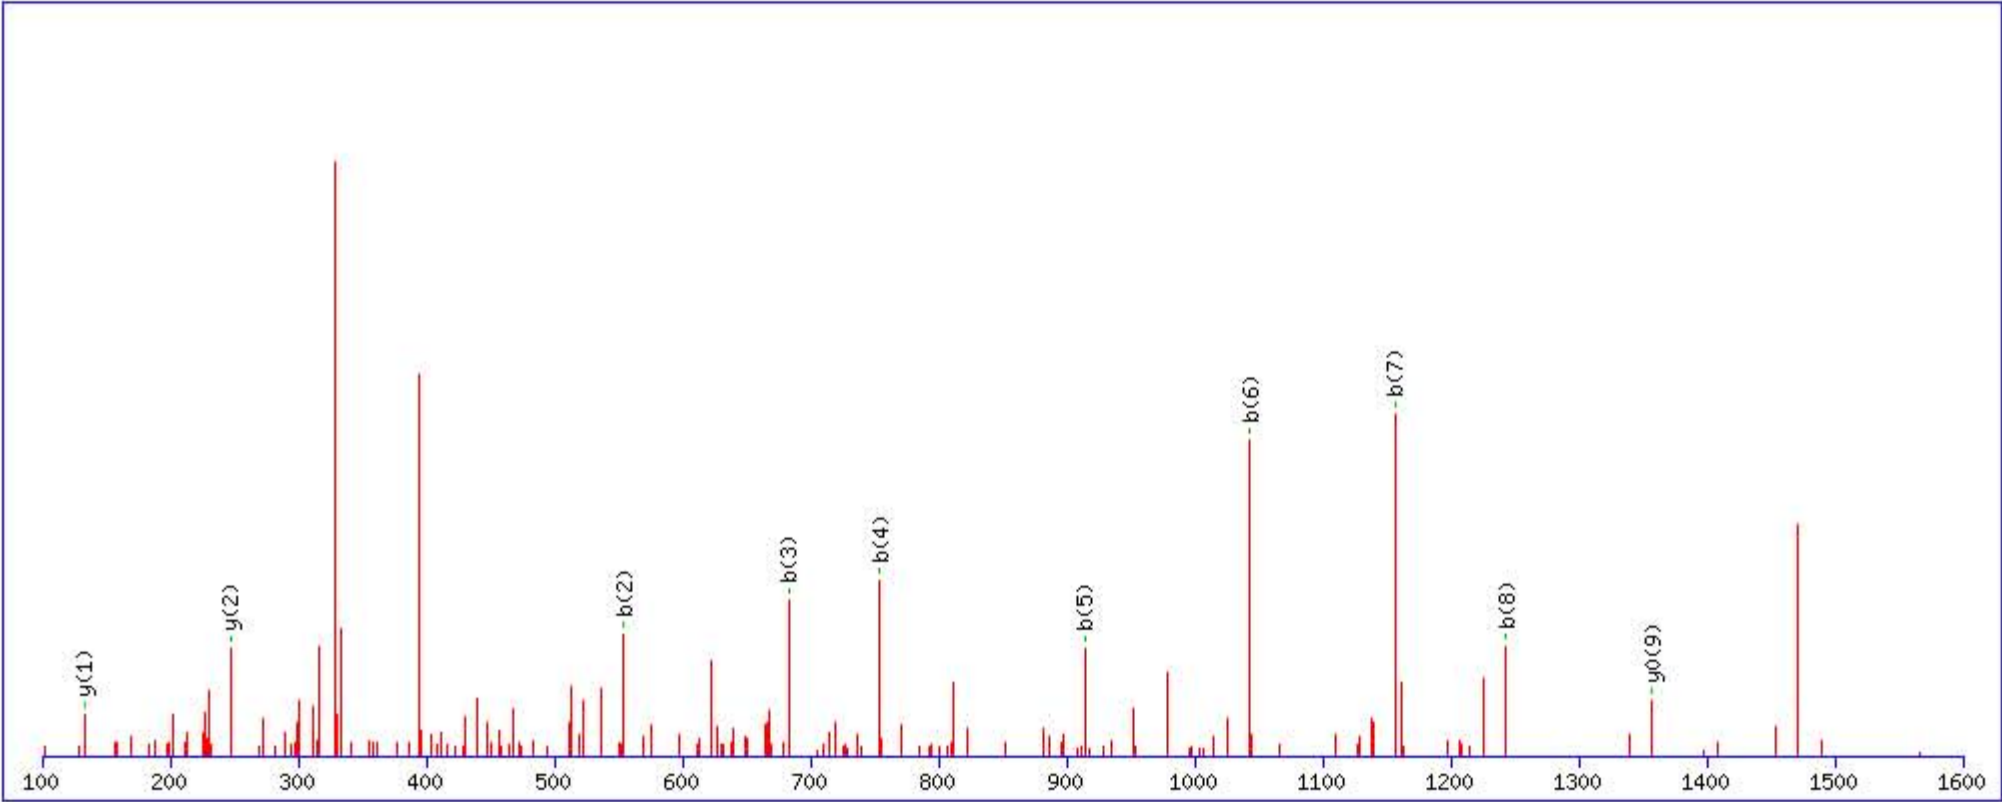

Monoisotopic mass of neutral peptide Mr(calc): 1488.633682  
Fixed modifications: Carbamidomethyl (C) (apply to specified residues or termini only)  
Variable modifications:  
Q2 : Biotin:Thermo-21345 (Q)  
Ions Score: 67 Expect: 7.6e-007  
Matches : 11/100 fragment ions using 14 most intense peaks [\(help\)](#)

| #  | b           | b <sup>++</sup> | b <sup>*</sup> | b <sup>+++</sup> | b <sup>0</sup> | b <sup>0++</sup> | Seq. | y           | y <sup>++</sup> | y <sup>*</sup> | y <sup>+++</sup> | y <sup>0</sup> | y <sup>0++</sup> | #  |
|----|-------------|-----------------|----------------|------------------|----------------|------------------|------|-------------|-----------------|----------------|------------------|----------------|------------------|----|
| 1  | 115.050203  | 58.028740       | 98.023654      | 49.515465        |                |                  | N    |             |                 |                |                  |                |                  | 10 |
| 2  | 554.275529  | 277.641403      | 537.248980     | 269.128128       |                |                  | Q    | 1375.598062 | 688.302669      | 1358.571513    | 679.789395       | 1357.587497    | 679.297387       | 9  |
| 3  | 683.318122  | 342.162699      | 666.291573     | 333.649425       | 665.307557     | 333.157417       | E    | 936.372736  | 468.690006      | 919.346187     | 460.176732       | 918.362171     | 459.684724       | 8  |
| 4  | 754.355236  | 377.681256      | 737.328687     | 369.167982       | 736.344671     | 368.675974       | A    | 807.330143  | 404.168710      | 790.303594     | 395.655435       | 789.319578     | 395.163427       | 7  |
| 5  | 914.385885  | 457.696581      | 897.359336     | 449.183306       | 896.375320     | 448.691298       | C    | 736.293029  | 368.650153      | 719.266480     | 360.136878       | 718.282464     | 359.644870       | 6  |
| 6  | 1043.428478 | 522.217877      | 1026.401929    | 513.704603       | 1025.417913    | 513.212595       | E    | 576.262380  | 288.634828      | 559.235831     | 280.121554       | 558.251815     | 279.629546       | 5  |
| 7  | 1156.512542 | 578.759909      | 1139.485993    | 570.246635       | 1138.501977    | 569.754626       | L    | 447.219787  | 224.113531      | 430.193238     | 215.600257       | 429.209222     | 215.108249       | 4  |
| 8  | 1243.544570 | 622.275923      | 1226.518021    | 613.762649       | 1225.534005    | 613.270641       | S    | 334.135723  | 167.571499      | 317.109174     | 159.058225       | 316.125158     | 158.566217       | 3  |
| 9  | 1357.587497 | 679.297387      | 1340.560948    | 670.784112       | 1339.576932    | 670.292104       | N    | 247.103695  | 124.055485      | 230.077146     | 115.542211       |                |                  | 2  |
| 10 |             |                 |                |                  |                |                  | N    | 133.060768  | 67.034022       | 116.034219     | 58.520747        |                |                  | 1  |

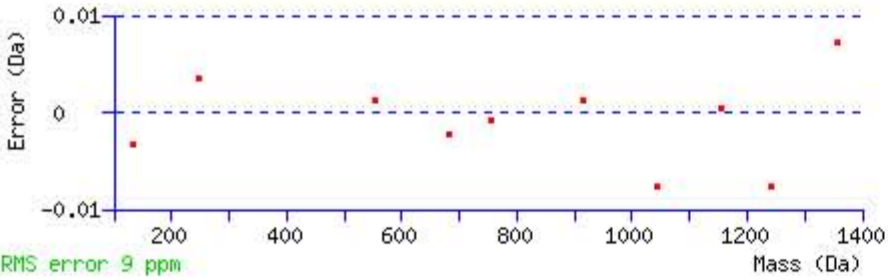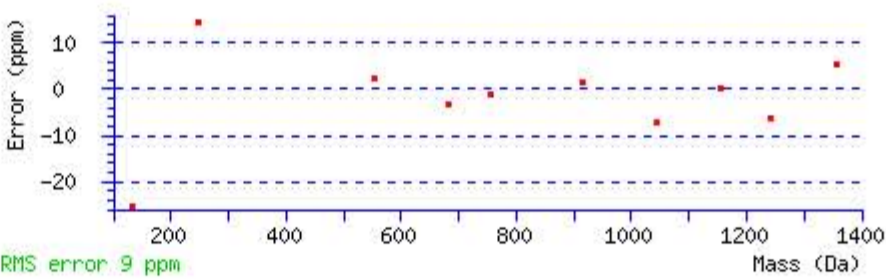

NCBI BLAST search of [NQEACELSNN](#)  
(Parameters: blastp, nr protein database, expect=20000, no filter, PAM30)  
Other BLAST [web gateways](#)

All matches to this query

| Score | Mr(calc):   | Delta    | Sequence                   |
|-------|-------------|----------|----------------------------|
| 67.4  | 1488.633682 | 0.004126 | <a href="#">NQEACELSNN</a> |

MATRIX

SCIENCE

Mascot Search Results

Peptide View

MS/MS Fragmentation of **SCALDQNCQWEPR**  
Found in **ATRN\_HUMAN**, Attractin OS=Homo sapiens GN=ATRN PE=1 SV=2

Match to Query 43642: 1973.862702 from(658.961510,3+) rtinseconds(1985) index(5557)  
Title: Locus:1.1.1.1968.11 File:"2013-07-02 CLN FXIII 180 min 2nd F 1.wiff"  
Data file C:\Program Files (x86)\Matrix Science\Mascot Daemon\mgf\8 FXIII 180 min 2nd\mascot\_daemon\_merge.mgf

Click mouse within plot area to zoom in by factor of two about that point  
Or,   to  Da   
Label all possible matches ☐ Label matches used for scoring ☒

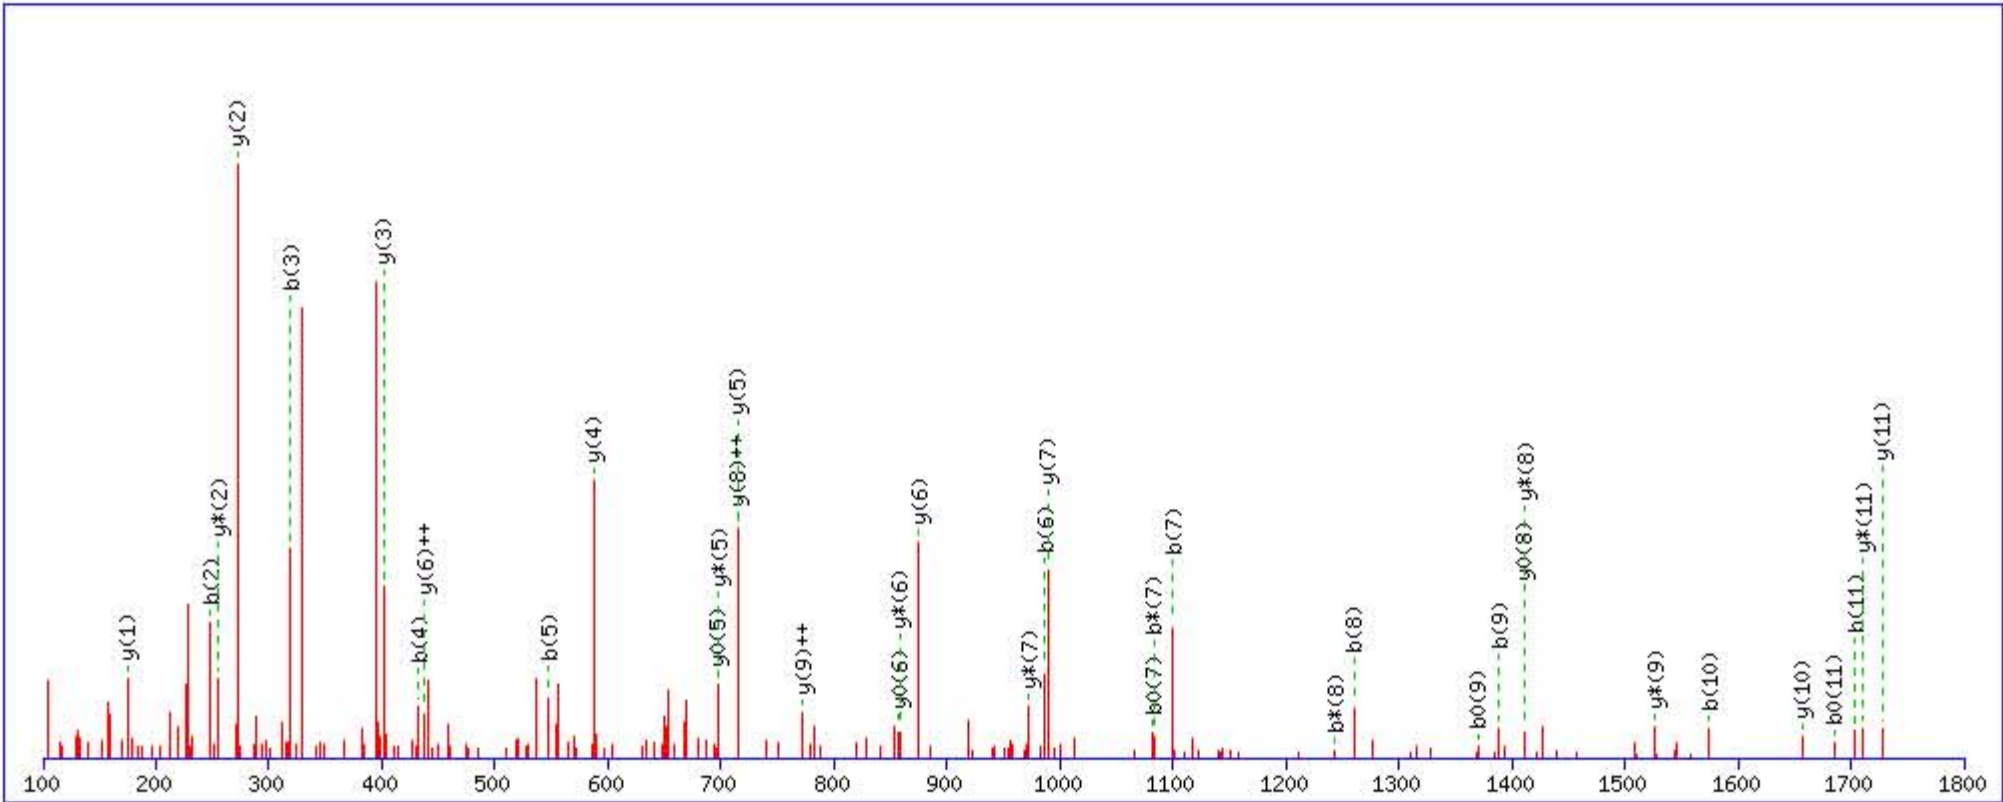

Monoisotopic mass of neutral peptide Mr(calc): 1973.854614  
Fixed modifications: Carbamidomethyl (C) (apply to specified residues or termini only)  
Variable modifications:  
Q6 : Biotin:Thermo-21345 (Q)  
Ions Score: 53 Expect: 2.5e-005  
Matches : 37/130 fragment ions using 65 most intense peaks [\(help\)](#)

| #  | b           | b <sup>++</sup> | b <sup>+</sup> | b <sup>+++</sup> | b <sup>0</sup> | b <sup>0++</sup> | Seq. | y           | y <sup>++</sup> | y <sup>+</sup> | y <sup>+++</sup> | y <sup>0</sup> | y <sup>0++</sup> | #  |
|----|-------------|-----------------|----------------|------------------|----------------|------------------|------|-------------|-----------------|----------------|------------------|----------------|------------------|----|
| 1  | 88.039304   | 44.523290       |                |                  | 70.028739      | 35.518008        | S    |             |                 |                |                  |                |                  | 13 |
| 2  | 248.069953  | 124.538614      |                |                  | 230.059388     | 115.533332       | C    | 1887.829872 | 944.418574      | 1870.803323    | 935.905300       | 1869.819307    | 935.413292       | 12 |
| 3  | 319.107067  | 160.057171      |                |                  | 301.096502     | 151.051889       | A    | 1727.799223 | 864.403250      | 1710.772674    | 855.889975       | 1709.788658    | 855.397967       | 11 |
| 4  | 432.191131  | 216.599203      |                |                  | 414.180566     | 207.593921       | L    | 1656.762109 | 828.884693      | 1639.735560    | 820.371418       | 1638.751544    | 819.879410       | 10 |
| 5  | 547.218074  | 274.112675      |                |                  | 529.207509     | 265.107393       | D    | 1543.678045 | 772.342661      | 1526.651496    | 763.829386       | 1525.667480    | 763.337378       | 9  |
| 6  | 986.443400  | 493.725338      | 969.416851     | 485.212064       | 968.432835     | 484.720056       | Q    | 1428.651102 | 714.829189      | 1411.624553    | 706.315915       | 1410.640537    | 705.823907       | 8  |
| 7  | 1100.486327 | 550.746802      | 1083.459778    | 542.233527       | 1082.475762    | 541.741519       | N    | 989.425776  | 495.216526      | 972.399227     | 486.703252       | 971.415211     | 486.211244       | 7  |
| 8  | 1260.516976 | 630.762126      | 1243.490427    | 622.248852       | 1242.506411    | 621.756844       | C    | 875.382849  | 438.195063      | 858.356300     | 429.681788       | 857.372284     | 429.189780       | 6  |
| 9  | 1388.575554 | 694.791415      | 1371.549005    | 686.278141       | 1370.564989    | 685.786133       | Q    | 715.352200  | 358.179738      | 698.325651     | 349.666464       | 697.341635     | 349.174456       | 5  |
| 10 | 1574.654867 | 787.831072      | 1557.628318    | 779.317797       | 1556.644302    | 778.825789       | W    | 587.293622  | 294.150449      | 570.267073     | 285.637174       | 569.283057     | 285.145166       | 4  |
| 11 | 1703.697460 | 852.352368      | 1686.670911    | 843.839094       | 1685.686895    | 843.347086       | E    | 401.214309  | 201.110792      | 384.187760     | 192.597518       | 383.203744     | 192.105510       | 3  |
| 12 | 1800.750224 | 900.878750      | 1783.723675    | 892.365476       | 1782.739659    | 891.873468       | P    | 272.171716  | 136.589496      | 255.145167     | 128.076221       |                |                  | 2  |
| 13 |             |                 |                |                  |                |                  | R    | 175.118952  | 88.063114       | 158.092403     | 79.549839        |                |                  | 1  |

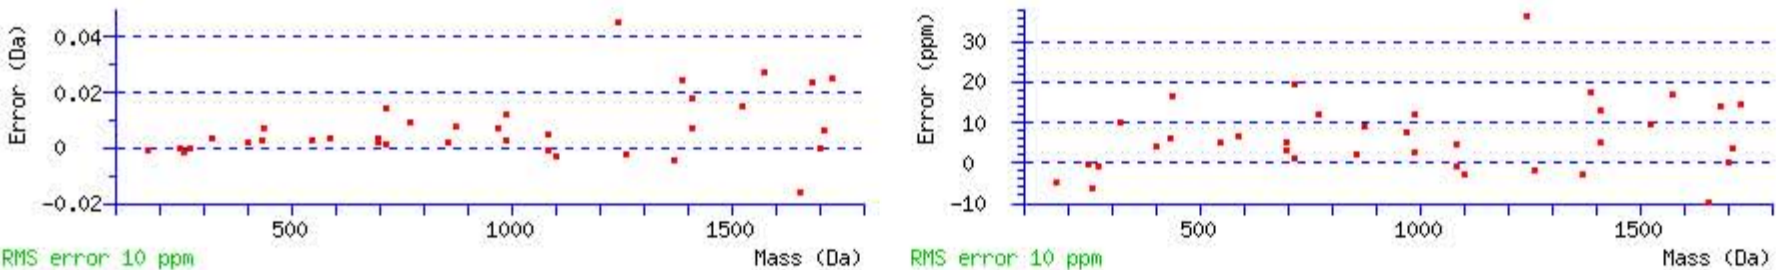

NCBI BLAST search of [SCALDQNCQWEPR](#)  
(Parameters: blastp, nr protein database, expect=20000, no filter, PAM30)  
Other BLAST [web gateways](#)

All matches to this query

| Score | Mr(calc):   | Delta    | Sequence                           |
|-------|-------------|----------|------------------------------------|
| 52.9  | 1973.854614 | 0.008088 | <a href="#">SCALDQNCQWEPR</a>      |
| 18.5  | 1973.854614 | 0.008088 | <a href="#">SCALDQNCQWEPR</a>      |
| 12.9  | 1973.853729 | 0.008973 | <a href="#">DSPETGEEMGRAEGAWPR</a> |

M

A

T

R

I

X

S

C

I

E

N

C

E

Mascot Search Results

Peptide View

MS/MS Fragmentation of **KCSYTEDAQCIDGTIEVPK**  
Found in **APOH\_HUMAN**, Beta-2-glycoprotein 1 OS=Homo sapiens GN=APOH PE=1 SV=3

Match to Query 54713: 2524.183152 from(842.401660,3+) rtinseconds(1955) index(66164)  
Title: Locus:1.1.1.1955.24 File:"2013-07-02 CLN FXIII 180 min 2nd FT.wiff"  
Data file C:\Program Files (x86)\Matrix Science\Mascot Daemon\mgf\8 FXIII 180 min 2nd\mascot\_daemon\_merge.mgf

Click mouse within plot area to zoom in by factor of two about that point  
Or, 

Plot from

100

 to 

2000

 Da 

Full range

  
Label all possible matches ☐ Label matches used for scoring ☒

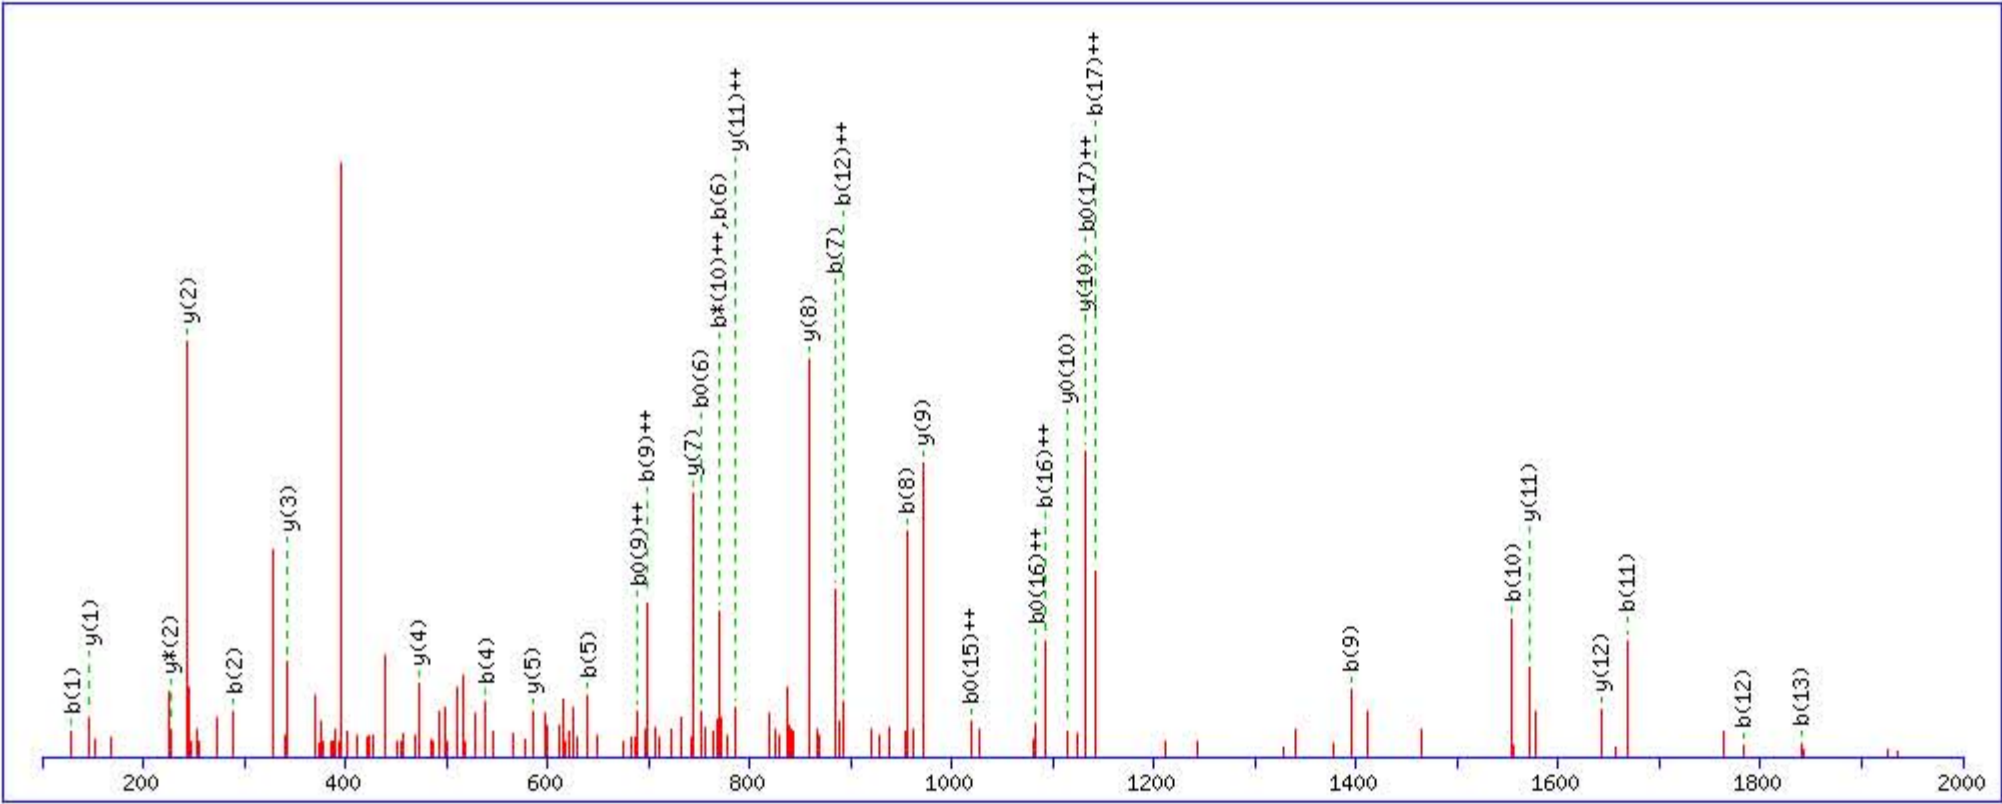

Monoisotopic mass of neutral peptide Mr(calc): 2524.164780  
Fixed modifications: Carbamidomethyl (C) (apply to specified residues or termini only)  
Variable modifications:  
Q9 : Biotin:Thermo-21345 (Q)  
Ions Score: 77 Expect: 1.4e-007  
Matches : 36/206 fragment ions using 65 most intense peaks [\(help\)](#)

| #  | b           | b <sup>++</sup> | b <sup>*</sup> | b <sup>++</sup> * | b <sup>0</sup> | b <sup>0++</sup> | Seq. | y           | y <sup>++</sup> | y <sup>*</sup> | y <sup>++</sup> * | y <sup>0</sup> | y <sup>0++</sup> | #  |
|----|-------------|-----------------|----------------|-------------------|----------------|------------------|------|-------------|-----------------|----------------|-------------------|----------------|------------------|----|
| 1  | 129.102239  | 65.054757       | 112.075690     | 56.541483         |                |                  | K    |             |                 |                |                   |                |                  | 19 |
| 2  | 289.132888  | 145.070082      | 272.106339     | 136.556808        |                |                  | C    | 2397.077099 | 1199.042187     | 2380.050550    | 1190.528913       | 2379.066534    | 1190.036905      | 18 |
| 3  | 376.164916  | 188.586096      | 359.138367     | 180.072822        | 358.154351     | 179.580814       | S    | 2237.046450 | 1119.026863     | 2220.019901    | 1110.513588       | 2219.035885    | 1110.021580      | 17 |
| 4  | 539.228245  | 270.117761      | 522.201696     | 261.604486        | 521.217680     | 261.112478       | Y    | 2150.014422 | 1075.510849     | 2132.987873    | 1066.997574       | 2132.003857    | 1066.505566      | 16 |
| 5  | 640.275924  | 320.641600      | 623.249375     | 312.128326        | 622.265359     | 311.636318       | T    | 1986.951093 | 993.979185      | 1969.924544    | 985.465910        | 1968.940528    | 984.973902       | 15 |
| 6  | 769.318517  | 385.162897      | 752.291968     | 376.649622        | 751.307952     | 376.157614       | E    | 1885.903414 | 943.455345      | 1868.876865    | 934.942071        | 1867.892849    | 934.450063       | 14 |
| 7  | 884.345460  | 442.676368      | 867.318911     | 434.163094        | 866.334895     | 433.671086       | D    | 1756.860821 | 878.934049      | 1739.834272    | 870.420774        | 1738.850256    | 869.928766       | 13 |
| 8  | 955.382574  | 478.194925      | 938.356025     | 469.681650        | 937.372009     | 469.189642       | A    | 1641.833878 | 821.420577      | 1624.807329    | 812.907303        | 1623.823313    | 812.415295       | 12 |
| 9  | 1394.607900 | 697.807588      | 1377.581351    | 689.294314        | 1376.597335    | 688.802306       | Q    | 1570.796764 | 785.902020      | 1553.770215    | 777.388746        | 1552.786199    | 776.896738       | 11 |
| 10 | 1554.638549 | 777.822913      | 1537.612000    | 769.309638        | 1536.627984    | 768.817630       | C    | 1131.571438 | 566.289357      | 1114.544889    | 557.776083        | 1113.560873    | 557.284075       | 10 |
| 11 | 1667.722613 | 834.364945      | 1650.696064    | 825.851670        | 1649.712048    | 825.359662       | I    | 971.540789  | 486.274033      | 954.514240     | 477.760758        | 953.530224     | 477.268750       | 9  |
| 12 | 1782.749556 | 891.878416      | 1765.723007    | 883.365142        | 1764.738991    | 882.873134       | D    | 858.456725  | 429.732001      | 841.430176     | 421.218726        | 840.446160     | 420.726718       | 8  |
| 13 | 1839.771020 | 920.389148      | 1822.744471    | 911.875874        | 1821.760455    | 911.383866       | G    | 743.429782  | 372.218529      | 726.403233     | 363.705255        | 725.419217     | 363.213247       | 7  |
| 14 | 1940.818699 | 970.912988      | 1923.792150    | 962.399713        | 1922.808134    | 961.907705       | T    | 686.408318  | 343.707797      | 669.381769     | 335.194523        | 668.397753     | 334.702515       | 6  |
| 15 | 2053.902763 | 1027.455019     | 2036.876214    | 1018.941745       | 2035.892198    | 1018.449737      | I    | 585.360639  | 293.183958      | 568.334090     | 284.670683        | 567.350074     | 284.178675       | 5  |
| 16 | 2182.945356 | 1091.976316     | 2165.918807    | 1083.463041       | 2164.934791    | 1082.971034      | E    | 472.276575  | 236.641925      | 455.250026     | 228.128651        | 454.266010     | 227.636643       | 4  |
| 17 | 2282.013770 | 1141.510523     | 2264.987221    | 1132.997248       | 2264.003205    | 1132.505240      | V    | 343.233982  | 172.120629      | 326.207433     | 163.607354        |                |                  | 3  |
| 18 | 2379.066534 | 1190.036905     | 2362.039985    | 1181.523630       | 2361.055969    | 1181.031622      | P    | 244.165568  | 122.586422      | 227.139019     | 114.073148        |                |                  | 2  |
| 19 |             |                 |                |                   |                |                  | K    | 147.112804  | 74.060040       | 130.086255     | 65.546765         |                |                  | 1  |

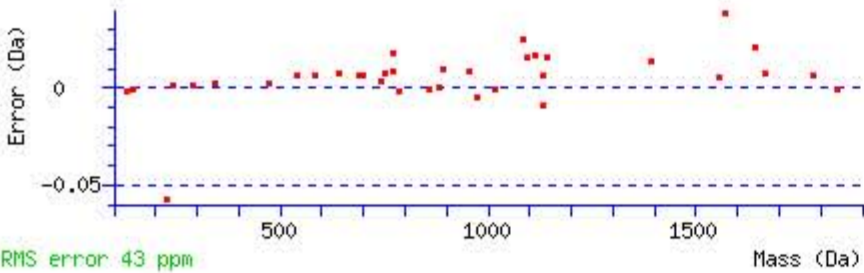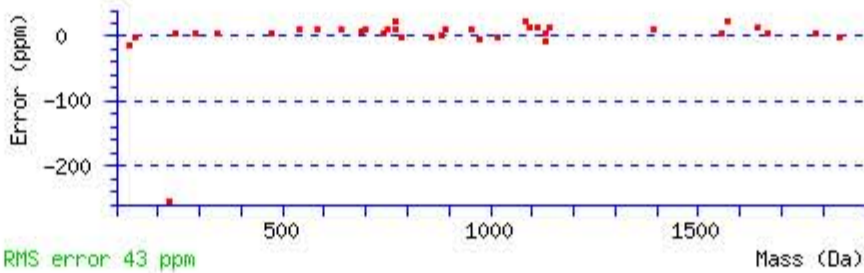

NCBI BLAST search of [KCSYTEDAQCIDGTIEVPK](#)  
(Parameters: blastp, nr protein database, expect=20000, no filter, PAM30)  
Other BLAST [web gateways](#)

All matches to this query

| Score | Mr(calc):   | Delta     | Sequence                              |
|-------|-------------|-----------|---------------------------------------|
| 77.3  | 2524.164780 | 0.018372  | <a href="#">KCSYTEDAQCIDGTIEVPK</a>   |
| 4.2   | 2524.211487 | -0.028335 | <a href="#">DLEITNATLQSEDSRYMKPGK</a> |

MATRIX

SCIENCE

Mascot Search Results

Peptide View

MS/MS Fragmentation of **CEVQDR**  
Found in **C4BPA\_HUMAN**, C4b-binding protein alpha chain OS=Homo sapiens GN=C4BPA PE=1 SV=2

Match to Query 17156: 1116.511408 from(559.262980,2+) rtinseconds(1333) index(30064)  
Title: Locus:1.1.1.572.20 File:"2013-07-02 CLN FXIII 180 min 2nd F 3.wiff"  
Data file C:\Program Files (x86)\Matrix Science\Mascot Daemon\mgf\8 FXIII 180 min 2nd\mascot\_daemon\_merge.mgf

Click mouse within plot area to zoom in by factor of two about that point  
Or, 

Plot from

100

 to 

1100

 Da 

Full range

  
Label all possible matches ☐ Label matches used for scoring ☒

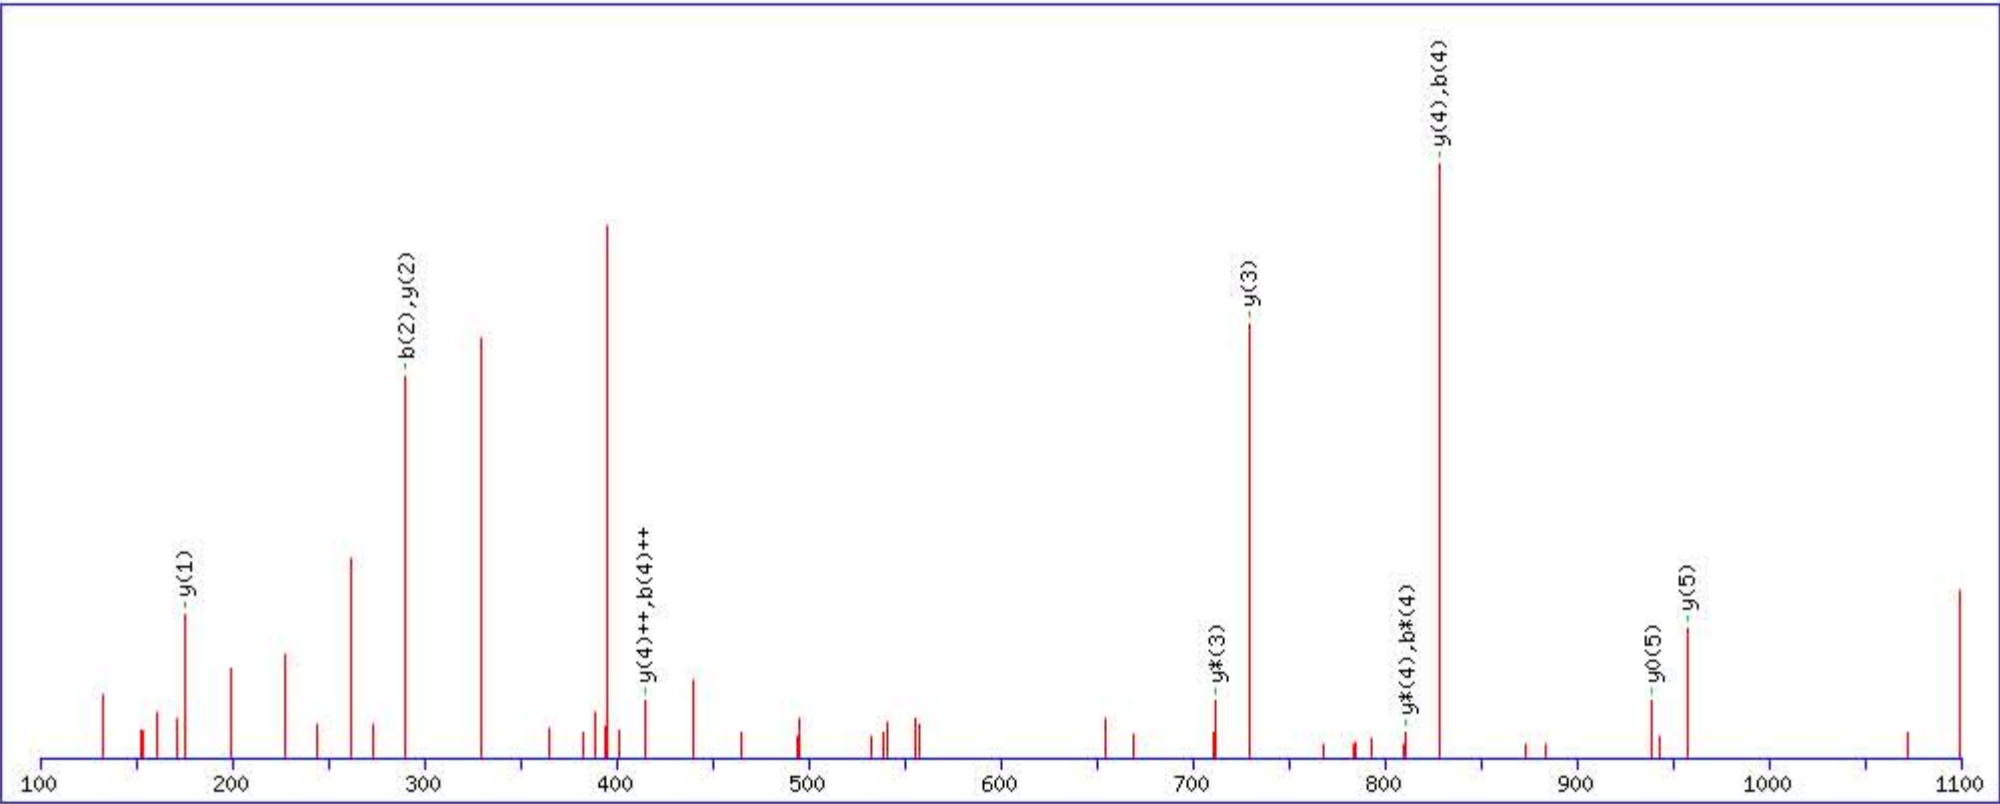

Monoisotopic mass of neutral peptide Mr(calc): 1116.505600  
Fixed modifications: Carbamidomethyl (C) (apply to specified residues or termini only)  
Variable modifications:  
Q4 : Biotin:Thermo-21345 (Q)  
Ions Score: 26 Expect: 0.019  
Matches : 13/50 fragment ions using 20 most intense peaks [\(help\)](#)

| # | b          | b <sup>++</sup> | b <sup>*</sup> | b <sup>+++</sup> | b <sup>0</sup> | b <sup>0++</sup> | Seq. | y          | y <sup>++</sup> | y <sup>*</sup> | y <sup>+++</sup> | y <sup>0</sup> | y <sup>0++</sup> | # |
|---|------------|-----------------|----------------|------------------|----------------|------------------|------|------------|-----------------|----------------|------------------|----------------|------------------|---|
| 1 | 161.037925 | 81.022600       |                |                  |                |                  | C    |            |                 |                |                  |                |                  | 6 |
| 2 | 290.080518 | 145.543897      |                |                  | 272.069953     | 136.538615       | E    | 957.482228 | 479.244752      | 940.455679     | 470.731478       | 939.471663     | 470.239470       | 5 |
| 3 | 389.148932 | 195.078104      |                |                  | 371.138367     | 186.072822       | V    | 828.439635 | 414.723456      | 811.413086     | 406.210181       | 810.429070     | 405.718173       | 4 |
| 4 | 828.374258 | 414.690767      | 811.347709     | 406.177493       | 810.363693     | 405.685485       | Q    | 729.371221 | 365.189249      | 712.344672     | 356.675974       | 711.360656     | 356.183966       | 3 |
| 5 | 943.401201 | 472.204239      | 926.374652     | 463.690964       | 925.390636     | 463.198956       | D    | 290.145895 | 145.576585      | 273.119346     | 137.063311       | 272.135330     | 136.571303       | 2 |
| 6 |            |                 |                |                  |                |                  | R    | 175.118952 | 88.063114       | 158.092403     | 79.549839        |                |                  | 1 |

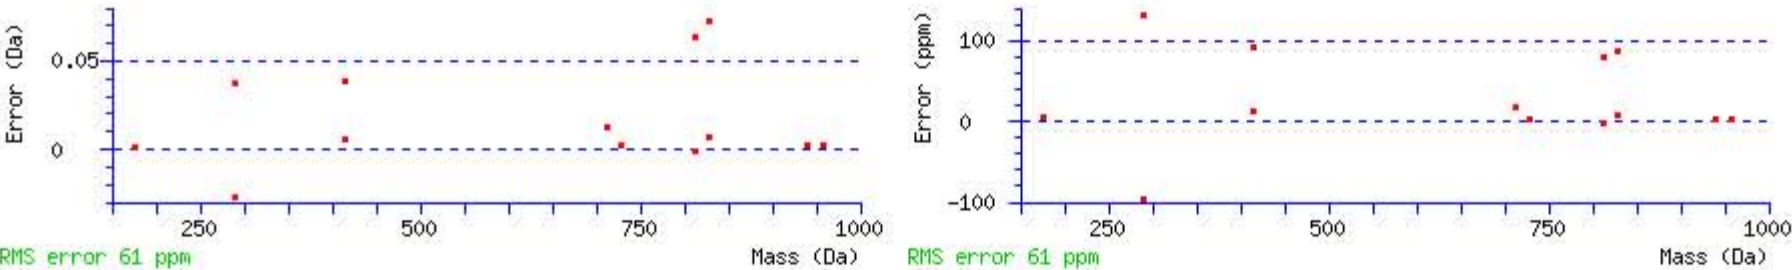

NCBI BLAST search of [CEVQDR](#)  
(Parameters: blastp, nr protein database, expect=20000, no filter, PAM30)  
Other BLAST [web gateways](#)

All matches to this query

| Score | Mr(calc):   | Delta     | Sequence                   |
|-------|-------------|-----------|----------------------------|
| 26.0  | 1116.505600 | 0.005808  | <a href="#">CEVQDR</a>     |
| 7.3   | 1116.505600 | 0.005808  | <a href="#">DICQDR</a>     |
| 7.3   | 1116.502228 | 0.009180  | <a href="#">SWDQDR</a>     |
| 6.1   | 1116.527206 | -0.015798 | <a href="#">TSTSGTHRDR</a> |
| 4.8   | 1116.509644 | 0.001764  | <a href="#">CFSVLGFCK</a>  |
| 0.1   | 1116.504700 | 0.006708  | <a href="#">ELQAEQEDR</a>  |

MATRIX

SCIENCE

Mascot Search Results

Peptide View

MS/MS Fragmentation of **GYILVGQAK**  
Found in **C4BPA\_HUMAN**, C4b-binding protein alpha chain OS=Homo sapiens GN=C4BPA PE=1 SV=2

Match to Query 22096: 1258.719648 from(630.367100,2+) rtinseconds(2049) index(50637)  
Title: Locus:1.1.1.1951.4 File:"2013-07-02 CLN FXIII 180 min 2nd F 4.wiff"  
Data file C:\Program Files (x86)\Matrix Science\Mascot Daemon\mgf\8 FXIII 180 min 2nd\mascot\_daemon\_merge.mgf

Click mouse within plot area to zoom in by factor of two about that point  
Or, 

Plot from

100

 to 

1900

 Da 

Full range

  
Label all possible matches ☐ Label matches used for scoring ☒

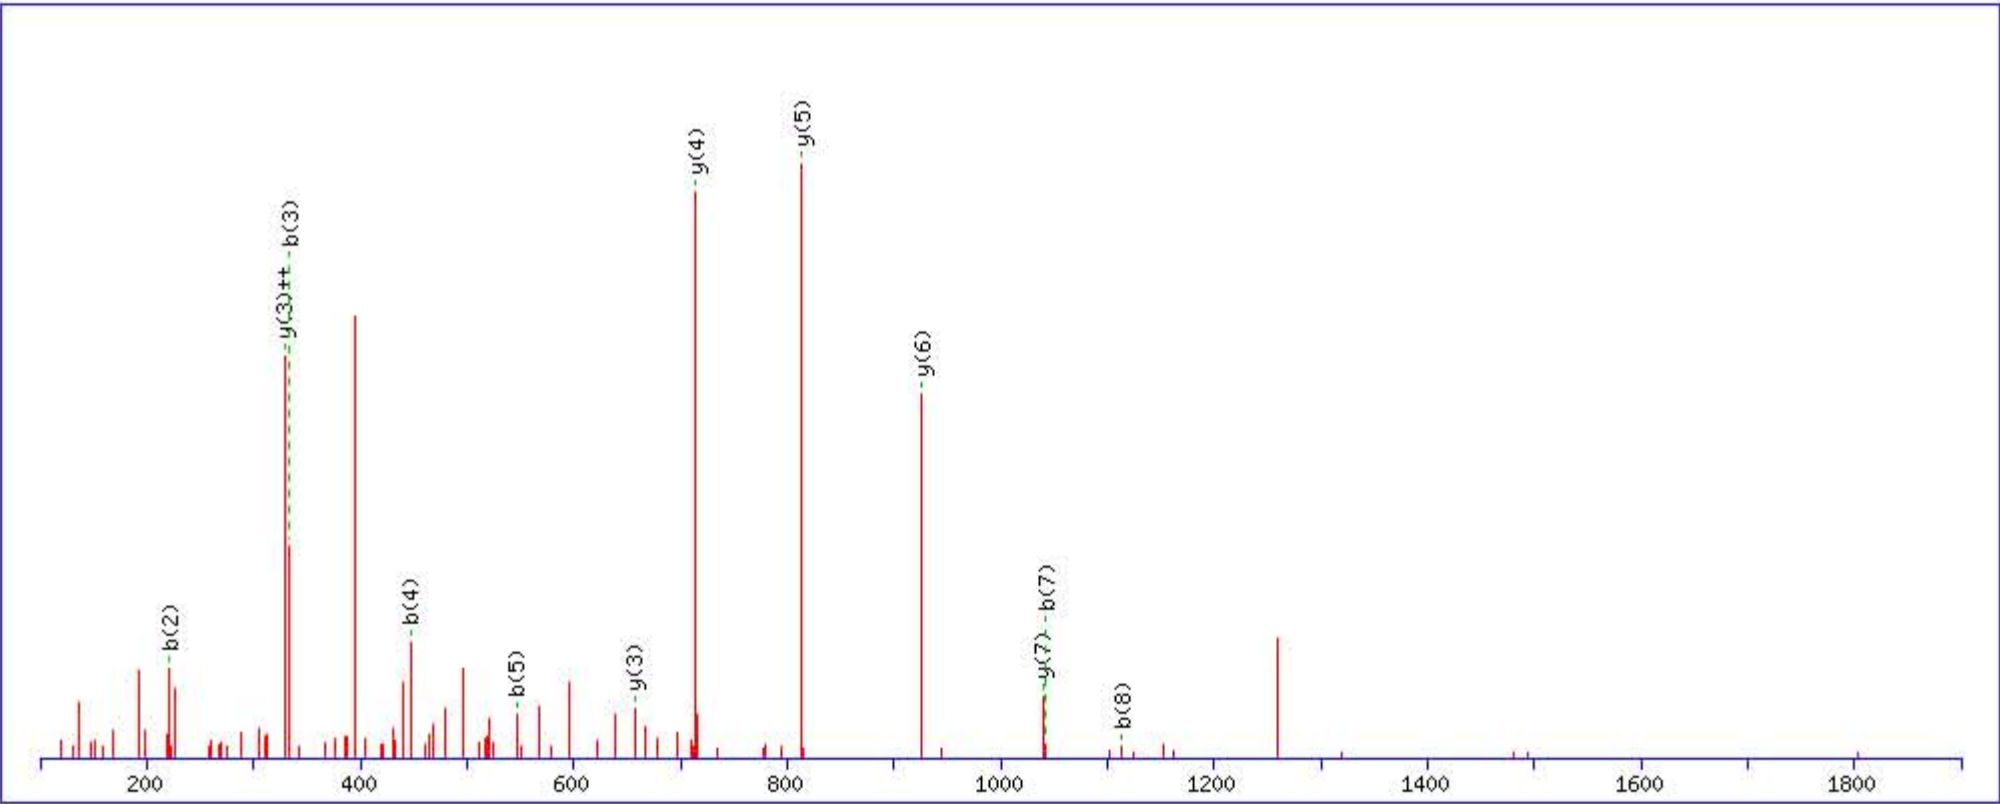

Monoisotopic mass of neutral peptide Mr(calc): 1258.710754  
Fixed modifications: Carbamidomethyl (C) (apply to specified residues or termini only)  
Variable modifications:  
Q7 : Biotin:Thermo-21345 (Q)  
Ions Score: 28 Expect: 0.026  
Matches : 12/52 fragment ions using 29 most intense peaks [\(help\)](#)

| # | b           | b <sup>++</sup> | b <sup>*</sup> | b <sup>++</sup> * | Seq. | y           | y <sup>++</sup> | y <sup>*</sup> | y <sup>++</sup> * | # |
|---|-------------|-----------------|----------------|-------------------|------|-------------|-----------------|----------------|-------------------|---|
| 1 | 58.028740   | 29.518008       |                |                   | G    |             |                 |                |                   | 9 |
| 2 | 221.092069  | 111.049673      |                |                   | Y    | 1202.696579 | 601.851928      | 1185.670030    | 593.338653        | 8 |
| 3 | 334.176133  | 167.591704      |                |                   | I    | 1039.633250 | 520.320263      | 1022.606701    | 511.806989        | 7 |
| 4 | 447.260197  | 224.133737      |                |                   | L    | 926.549186  | 463.778231      | 909.522637     | 455.264957        | 6 |
| 5 | 546.328611  | 273.667944      |                |                   | V    | 813.465122  | 407.236199      | 796.438573     | 398.722925        | 5 |
| 6 | 603.350075  | 302.178676      |                |                   | G    | 714.396708  | 357.701992      | 697.370159     | 349.188718        | 4 |
| 7 | 1042.575401 | 521.791339      | 1025.548852    | 513.278064        | Q    | 657.375244  | 329.191260      | 640.348695     | 320.677986        | 3 |
| 8 | 1113.612515 | 557.309896      | 1096.585966    | 548.796621        | A    | 218.149918  | 109.578597      | 201.123369     | 101.065322        | 2 |
| 9 |             |                 |                |                   | K    | 147.112804  | 74.060040       | 130.086255     | 65.546765         | 1 |

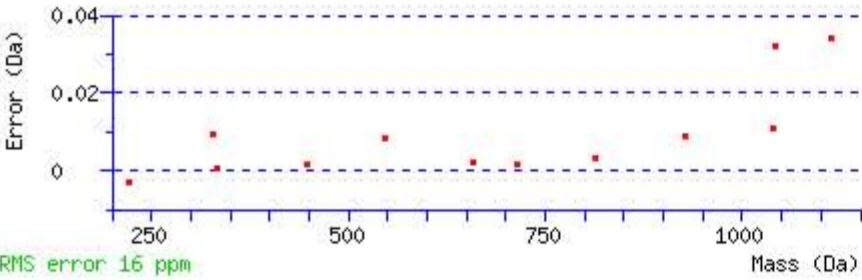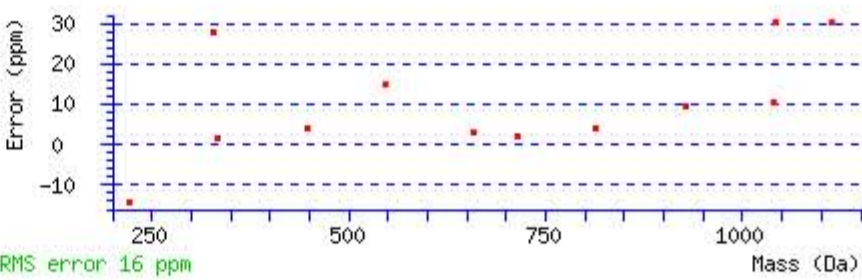

NCBI BLAST search of [GYILVGQAK](#)  
(Parameters: blastp, nr protein database, expect=20000, no filter, PAM30)  
Other BLAST [web gateways](#)

All matches to this query

| Score | Mr(calc):   | Delta     | Sequence                   |
|-------|-------------|-----------|----------------------------|
| 27.5  | 1258.710754 | 0.008894  | <a href="#">GYILVGQAK</a>  |
| 11.0  | 1258.721970 | -0.002322 | <a href="#">GYILQAKR</a>   |
| 8.8   | 1258.717941 | 0.001707  | <a href="#">RILAKVQEMR</a> |

MATRIX

SCIENCE

Mascot Search Results

Peptide View

MS/MS Fragmentation of **QSSSYSFFK**  
Found in **C4BPA\_HUMAN**, C4b-binding protein alpha chain OS=Homo sapiens GN=C4BPA PE=1 SV=2

Match to Query 26925: 1390.672608 from(696.343580,2+) rtinseconds(2064) index(34651)  
Title: Locus:1.1.1.827.14 File:"2013-07-02 CLN FXIII 180 min 2nd F 3.wiff"  
Data file C:\Program Files (x86)\Matrix Science\Mascot Daemon\mgf\8 FXIII 180 min 2nd\mascot\_daemon\_merge.mgf

Click mouse within plot area to zoom in by factor of two about that point  
Or, 

Plot from

100

 to 

1700

 Da 

Full range

Label all possible matches ☐ Label matches used for scoring ☒

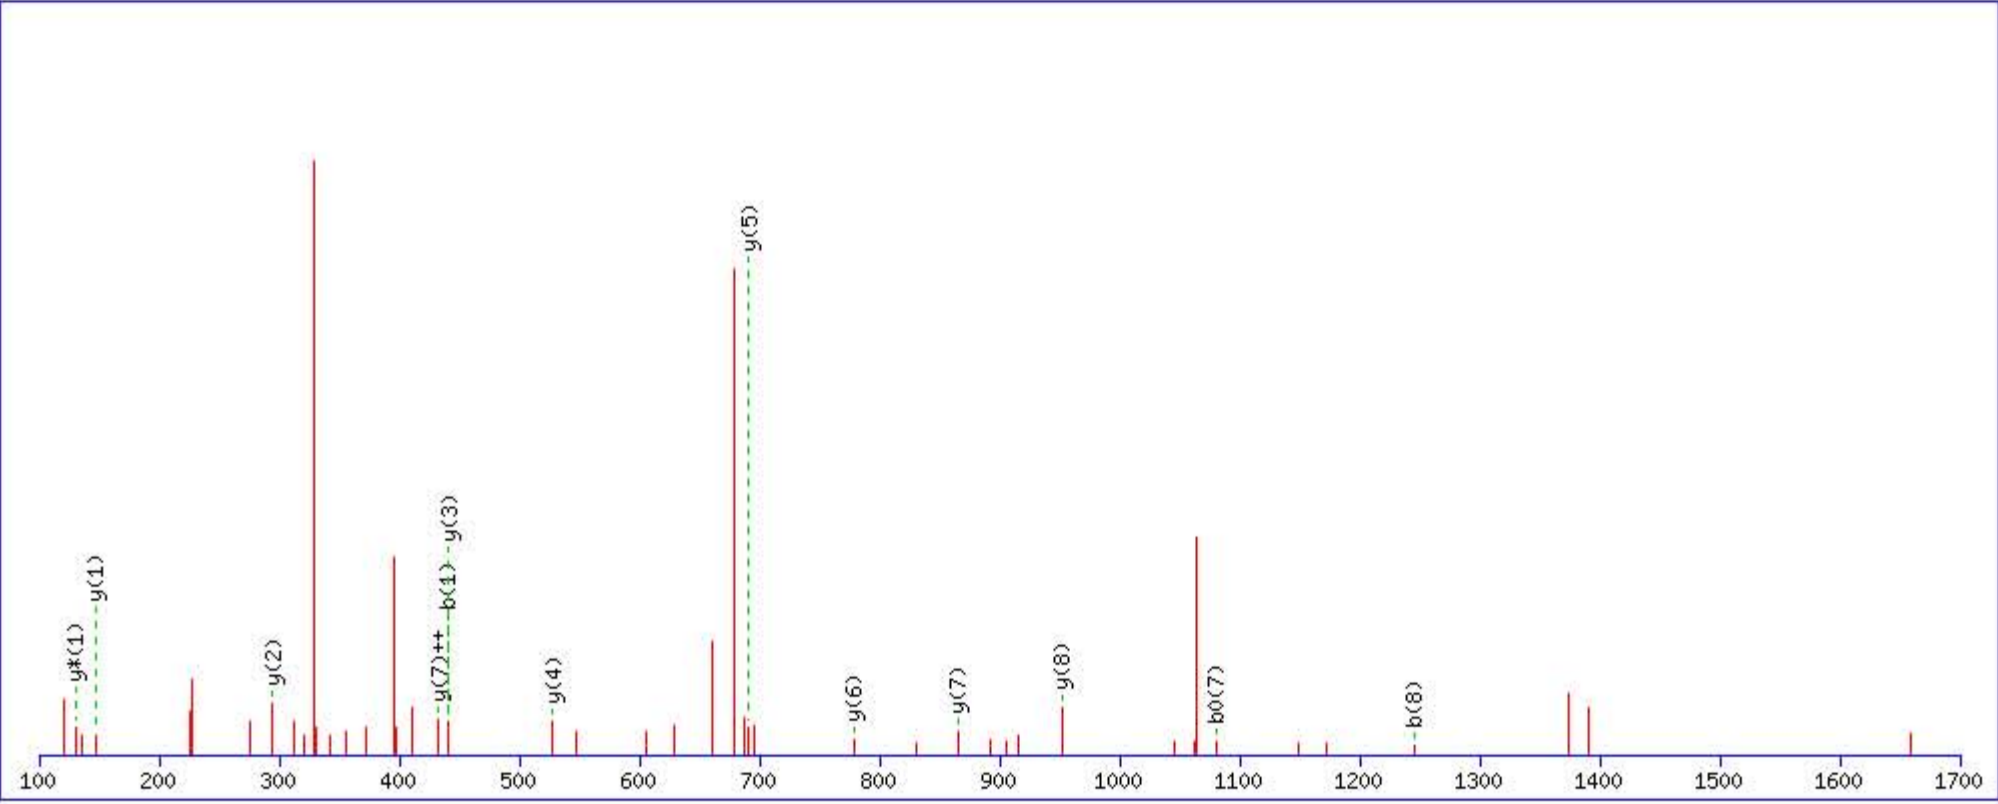

Monoisotopic mass of neutral peptide Mr(calc): 1390.659119  
Fixed modifications: Carbamidomethyl (C) (apply to specified residues or termini only)  
Variable modifications:  
Q1 : Biotin:Thermo-21345 (Q)  
Ions Score: 34 Expect: 0.0051  
Matches : 13/88 fragment ions using 42 most intense peaks [\(help\)](#)

| # | b           | b <sup>++</sup> | b <sup>+</sup> | b <sup>+++</sup> | b <sup>0</sup> | b <sup>0++</sup> | Seq. | y          | y <sup>++</sup> | y <sup>+</sup> | y <sup>+++</sup> | y <sup>0</sup> | y <sup>0++</sup> | # |
|---|-------------|-----------------|----------------|------------------|----------------|------------------|------|------------|-----------------|----------------|------------------|----------------|------------------|---|
| 1 | 440.232602  | 220.619939      | 423.206053     | 212.106664       |                |                  | Q    |            |                 |                |                  |                |                  | 9 |
| 2 | 527.264630  | 264.135953      | 510.238081     | 255.622679       | 509.254065     | 255.130671       | S    | 952.441073 | 476.724175      | 935.414524     | 468.210900       | 934.430508     | 467.718892       | 8 |
| 3 | 614.296658  | 307.651967      | 597.270109     | 299.138692       | 596.286093     | 298.646684       | S    | 865.409045 | 433.208161      | 848.382496     | 424.694886       | 847.398480     | 424.202878       | 7 |
| 4 | 701.328686  | 351.167981      | 684.302137     | 342.654706       | 683.318121     | 342.162698       | S    | 778.377017 | 389.692147      | 761.350468     | 381.178872       | 760.366452     | 380.686864       | 6 |
| 5 | 864.392015  | 432.699645      | 847.365466     | 424.186371       | 846.381450     | 423.694363       | Y    | 691.344989 | 346.176133      | 674.318440     | 337.662858       | 673.334424     | 337.170850       | 5 |
| 6 | 951.424043  | 476.215659      | 934.397494     | 467.702385       | 933.413478     | 467.210377       | S    | 528.281660 | 264.644468      | 511.255111     | 256.131194       | 510.271095     | 255.639186       | 4 |
| 7 | 1098.492457 | 549.749866      | 1081.465908    | 541.236592       | 1080.481892    | 540.744584       | F    | 441.249632 | 221.128454      | 424.223083     | 212.615180       |                |                  | 3 |
| 8 | 1245.560871 | 623.284073      | 1228.534322    | 614.770799       | 1227.550306    | 614.278791       | F    | 294.181218 | 147.594247      | 277.154669     | 139.080973       |                |                  | 2 |
| 9 |             |                 |                |                  |                |                  | K    | 147.112804 | 74.060040       | 130.086255     | 65.546765        |                |                  | 1 |

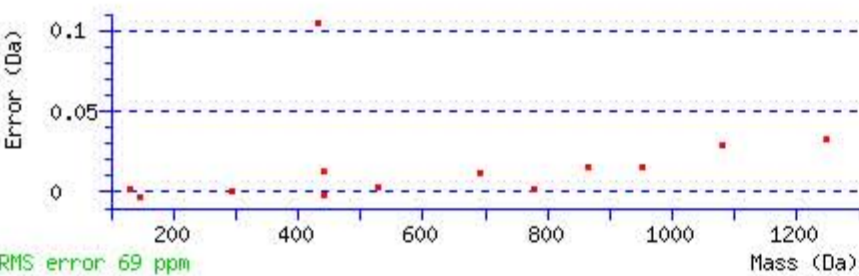

RMS error 69 ppm

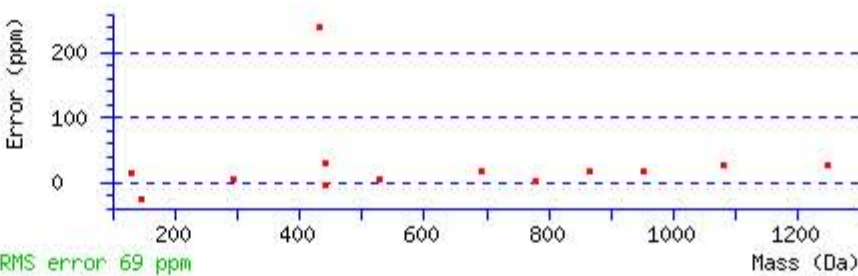

RMS error 69 ppm

NCBI BLAST search of [QSSSYSFFK](#)  
(Parameters: blastp, nr protein database, expect=20000, no filter, PAM30)  
Other BLAST [web gateways](#)

All matches to this query

| Score | Mr(calc):   | Delta     | Sequence                     |
|-------|-------------|-----------|------------------------------|
| 33.7  | 1390.659119 | 0.013489  | <a href="#">QSSSYSFFK</a>    |
| 8.8   | 1390.691467 | -0.018859 | <a href="#">VTKEMNEFIHK</a>  |
| 8.4   | 1390.688797 | -0.016189 | <a href="#">ISVNCGHPSRHK</a> |
| 7.2   | 1390.677078 | -0.004470 | <a href="#">CVCNLMIKEPK</a>  |
| 6.0   | 1390.673706 | -0.001098 | <a href="#">TLNADLMMFAHK</a> |
| 3.1   | 1390.669678 | 0.002930  | <a href="#">CAPASIRLMDNK</a> |
| 3.1   | 1390.687424 | -0.014816 | <a href="#">ENTMARVDEAKK</a> |
| 2.6   | 1390.676208 | -0.003600 | <a href="#">AEKSSSTDQK</a>   |
| 1.6   | 1390.684967 | -0.012359 | <a href="#">QCGKGFQQK</a>    |
| 1.6   | 1390.684967 | -0.012359 | <a href="#">QCGKGFQQK</a>    |

MATRIX

SCIENCE

Mascot Search Results

Peptide View

MS/MS Fragmentation of **LNNGEITQHR**  
Found in **C4BPA\_HUMAN**, C4b-binding protein alpha chain OS=Homo sapiens GN=C4BPA PE=1 SV=2

Match to Query 30840: 1491.751242 from(498.257690,3+) rtinseconds(1433) index(30608)  
Title: Locus:1.1.1.607.7 File:"2013-07-02 CLN FXIII 180 min 2nd F 3.wiff"  
Data file C:\Program Files (x86)\Matrix Science\Mascot Daemon\mgf\8 FXIII 180 min 2nd\mascot\_daemon\_merge.mgf

Click mouse within plot area to zoom in by factor of two about that point  
Or, 

Plot from

100

 to 

1400

 Da 

Full range

  
Label all possible matches ☐ Label matches used for scoring ☒

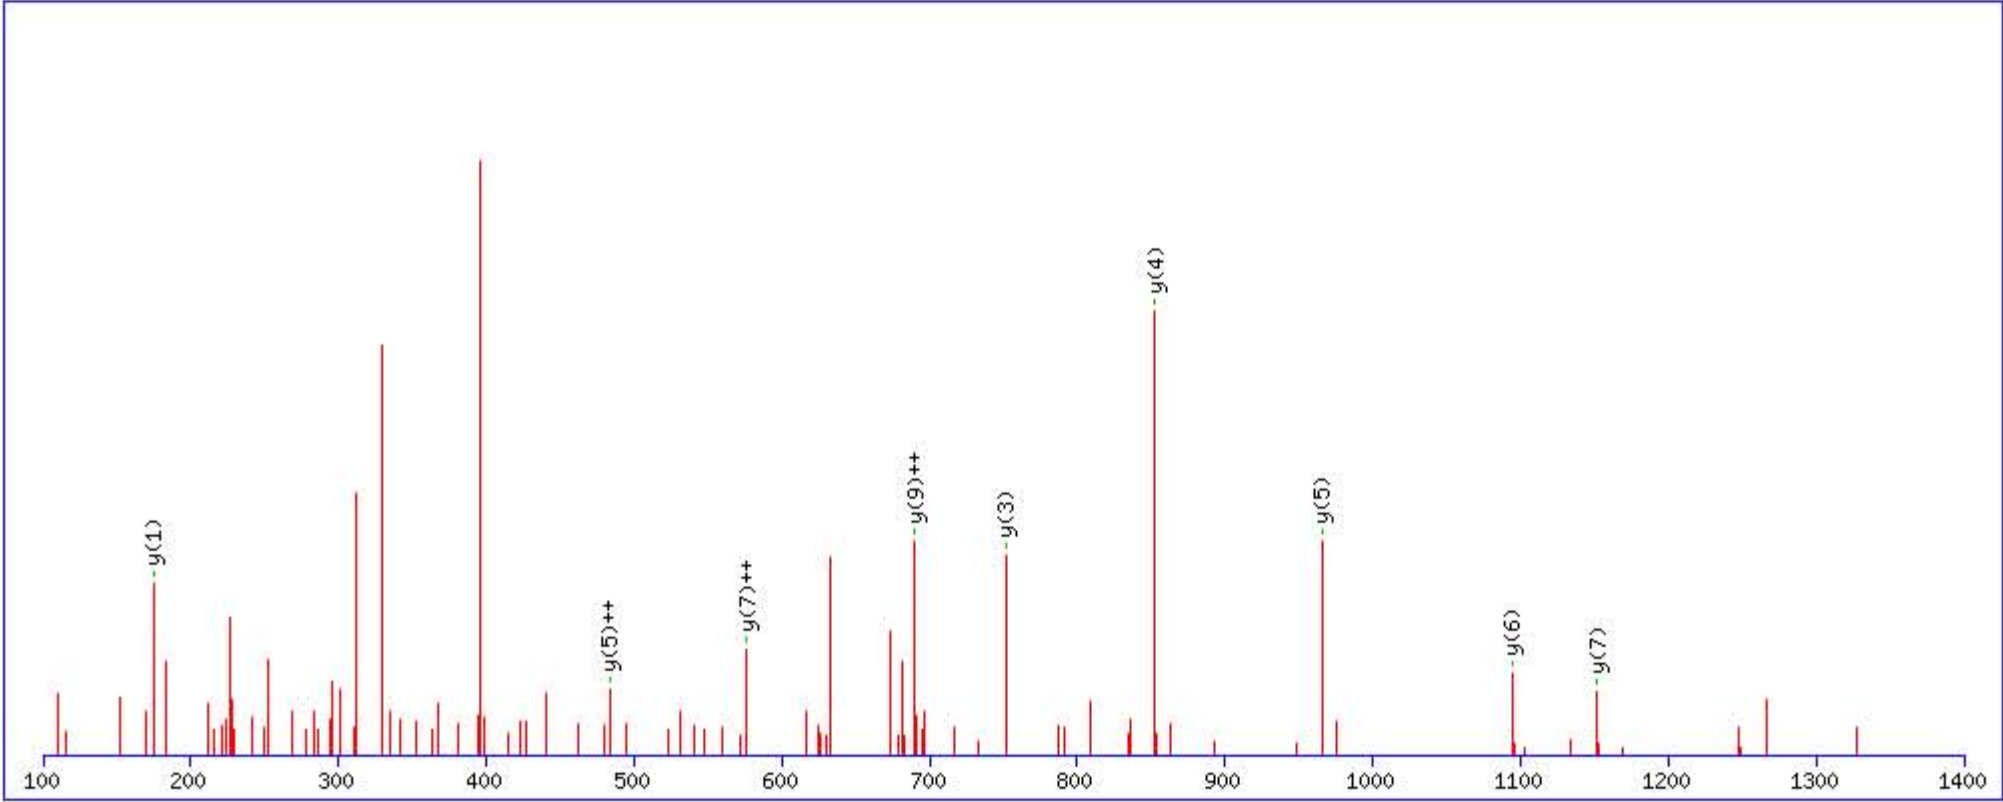

Monoisotopic mass of neutral peptide Mr(calc): 1491.761612  
Fixed modifications: Carbamidomethyl (C) (apply to specified residues or termini only)  
Variable modifications:  
Q8 : Biotin:Thermo-21345 (Q)  
Ions Score: 40 Expect: 0.00069  
Matches : 9/92 fragment ions using 13 most intense peaks [\(help\)](#)

| #  | b           | b <sup>++</sup> | b <sup>*</sup> | b <sup>*++</sup> | b <sup>0</sup> | b <sup>0++</sup> | Seq. | y           | y <sup>++</sup> | y <sup>*</sup> | y <sup>*++</sup> | y <sup>0</sup> | y <sup>0++</sup> | #  |
|----|-------------|-----------------|----------------|------------------|----------------|------------------|------|-------------|-----------------|----------------|------------------|----------------|------------------|----|
| 1  | 114.091340  | 57.549308       |                |                  |                |                  | L    |             |                 |                |                  |                |                  | 10 |
| 2  | 228.134267  | 114.570771      | 211.107718     | 106.057497       |                |                  | N    | 1379.684844 | 690.346060      | 1362.658295    | 681.832786       | 1361.674279    | 681.340778       | 9  |
| 3  | 342.177194  | 171.592235      | 325.150645     | 163.078960       |                |                  | N    | 1265.641917 | 633.324596      | 1248.615368    | 624.811322       | 1247.631352    | 624.319314       | 8  |
| 4  | 399.198658  | 200.102967      | 382.172109     | 191.589692       |                |                  | G    | 1151.598990 | 576.303133      | 1134.572441    | 567.789859       | 1133.588425    | 567.297850       | 7  |
| 5  | 528.241251  | 264.624264      | 511.214702     | 256.110989       | 510.230686     | 255.618981       | E    | 1094.577526 | 547.792401      | 1077.550977    | 539.279127       | 1076.566961    | 538.787119       | 6  |
| 6  | 641.325315  | 321.166296      | 624.298766     | 312.653021       | 623.314750     | 312.161013       | I    | 965.534933  | 483.271105      | 948.508384     | 474.757830       | 947.524368     | 474.265822       | 5  |
| 7  | 742.372994  | 371.690135      | 725.346445     | 363.176861       | 724.362429     | 362.684853       | T    | 852.450869  | 426.729073      | 835.424320     | 418.215798       | 834.440304     | 417.723790       | 4  |
| 8  | 1181.598320 | 591.302798      | 1164.571771    | 582.789524       | 1163.587755    | 582.297516       | Q    | 751.403190  | 376.205233      | 734.376641     | 367.691959       |                |                  | 3  |
| 9  | 1318.657232 | 659.832254      | 1301.630683    | 651.318980       | 1300.646667    | 650.826972       | H    | 312.177864  | 156.592570      | 295.151315     | 148.079295       |                |                  | 2  |
| 10 |             |                 |                |                  |                |                  | R    | 175.118952  | 88.063114       | 158.092403     | 79.549839        |                |                  | 1  |

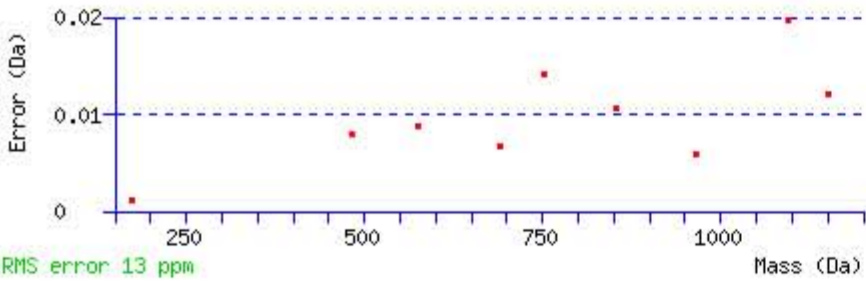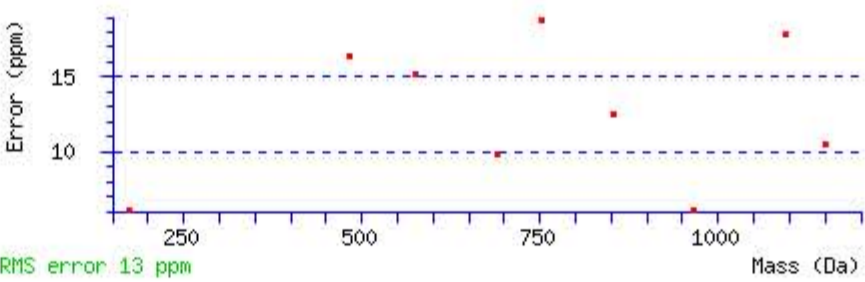

NCBI BLAST search of [LNNGEITQHR](#)  
(Parameters: blastp, nr protein database, expect=20000, no filter, PAM30)  
Other BLAST [web gateways](#)

All matches to this query

| Score | Mr(calc):   | Delta     | Sequence                       |
|-------|-------------|-----------|--------------------------------|
| 40.4  | 1491.761612 | -0.010370 | <a href="#">LNNGEITQHR</a>     |
| 6.3   | 1491.740021 | 0.011221  | <a href="#">LIDQFQMMR</a>      |
| 6.3   | 1491.740021 | 0.011221  | <a href="#">LIDQFQMMR</a>      |
| 2.9   | 1491.746338 | 0.004904  | <a href="#">IREMSSTLDRER</a>   |
| 1.4   | 1491.756927 | -0.005685 | <a href="#">IEEVIGTGSFGEVR</a> |

***MATRIX***  
***SCIENCE***

# Mascot Search Results

Peptide View

MS/MS Fragmentation of **FSAICQGDGTWSPR**  
Found in **C4BPA\_HUMAN**, C4b-binding protein alpha chain OS=Homo sapiens GN=C4BPA PE=1 SV=2

Match to Query 41981: 1891.890432 from(631.637420,3+) rtinseconds(2139) index(51278)  
Title: Locus:1.1.1.1982.9 File:"2013-07-02 CLN FXIII 180 min 2nd F 4.wiff"  
Data file C:\Program Files (x86)\Matrix Science\Mascot Daemon\mgf8 FXIII 180 min 2nd\mascot\_daemon\_merge.mgf

Click mouse within plot area to zoom in by factor of two about that point  
Or,   to  Da   
Label all possible matches ☐ Label matches used for scoring ☒

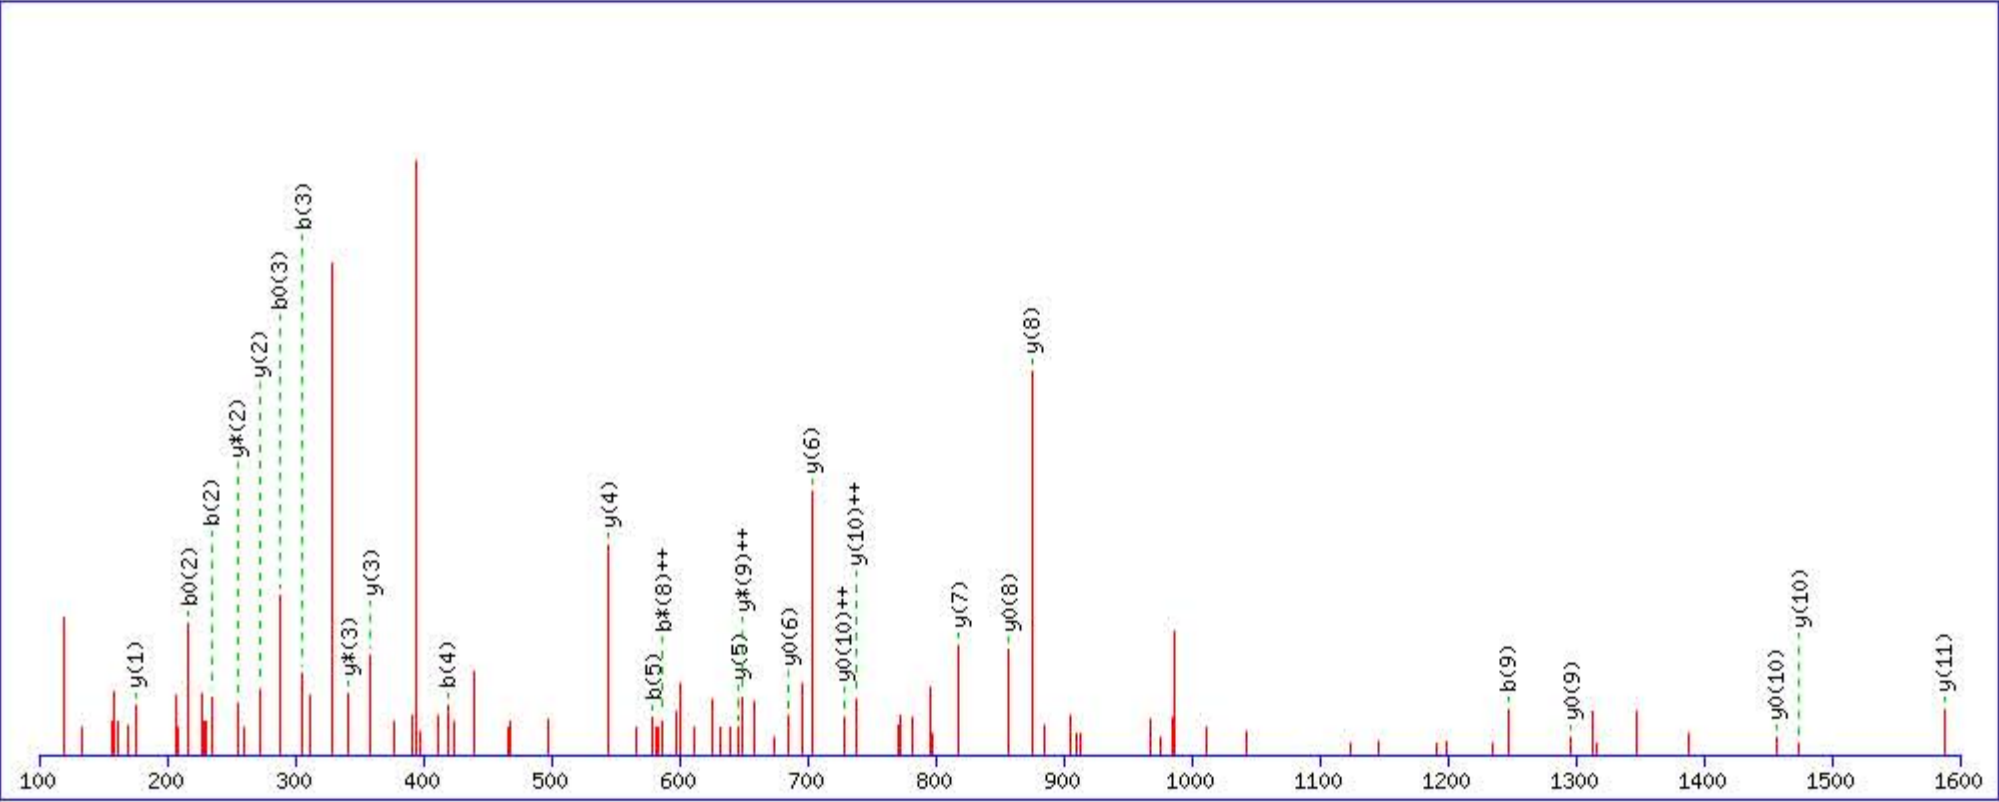

Monoisotopic mass of neutral peptide Mr(calc): 1891.870941  
Fixed modifications: Carbamidomethyl (C) (apply to specified residues or termini only)  
Variable modifications:  
Q6 : Biotin:Thermo-21345 (Q)  
Ions Score: 35 Expect: 0.0048  
Matches : 27/140 fragment ions using 73 most intense peaks [\(help\)](#)

| #  | b           | b <sup>++</sup> | b <sup>*</sup> | b <sup>*++</sup> | b <sup>0</sup> | b <sup>0++</sup> | Seq. | y           | y <sup>++</sup> | y <sup>*</sup> | y <sup>*++</sup> | y <sup>0</sup> | y <sup>0++</sup> | #  |
|----|-------------|-----------------|----------------|------------------|----------------|------------------|------|-------------|-----------------|----------------|------------------|----------------|------------------|----|
| 1  | 148.075690  | 74.541483       |                |                  |                |                  | F    |             |                 |                |                  |                |                  | 14 |
| 2  | 235.107718  | 118.057497      |                |                  | 217.097153     | 109.052214       | S    | 1745.809788 | 873.408532      | 1728.783239    | 864.895258       | 1727.799223    | 864.403250       | 13 |
| 3  | 306.144832  | 153.576054      |                |                  | 288.134267     | 144.570772       | A    | 1658.777760 | 829.892518      | 1641.751211    | 821.379244       | 1640.767195    | 820.887236       | 12 |
| 4  | 419.228896  | 210.118086      |                |                  | 401.218331     | 201.112804       | I    | 1587.740646 | 794.373961      | 1570.714097    | 785.860687       | 1569.730081    | 785.368678       | 11 |
| 5  | 579.259545  | 290.133411      |                |                  | 561.248980     | 281.128128       | C    | 1474.656582 | 737.831929      | 1457.630033    | 729.318655       | 1456.646017    | 728.826647       | 10 |
| 6  | 1018.484871 | 509.746074      | 1001.458322    | 501.232799       | 1000.474306    | 500.740791       | Q    | 1314.625933 | 657.816605      | 1297.599384    | 649.303330       | 1296.615368    | 648.811322       | 9  |
| 7  | 1075.506335 | 538.256806      | 1058.479786    | 529.743531       | 1057.495770    | 529.251523       | G    | 875.400607  | 438.203942      | 858.374058     | 429.690667       | 857.390042     | 429.198659       | 8  |
| 8  | 1190.533278 | 595.770277      | 1173.506729    | 587.257003       | 1172.522713    | 586.764995       | D    | 818.379143  | 409.693210      | 801.352594     | 401.179935       | 800.368578     | 400.687927       | 7  |
| 9  | 1247.554742 | 624.281009      | 1230.528193    | 615.767735       | 1229.544177    | 615.275727       | G    | 703.352200  | 352.179738      | 686.325651     | 343.666464       | 685.341635     | 343.174456       | 6  |
| 10 | 1348.602421 | 674.804849      | 1331.575872    | 666.291574       | 1330.591856    | 665.799566       | T    | 646.330736  | 323.669006      | 629.304187     | 315.155732       | 628.320171     | 314.663724       | 5  |
| 11 | 1534.681734 | 767.844505      | 1517.655185    | 759.331231       | 1516.671169    | 758.839223       | W    | 545.283057  | 273.145167      | 528.256508     | 264.631892       | 527.272492     | 264.139884       | 4  |
| 12 | 1621.713762 | 811.360519      | 1604.687213    | 802.847245       | 1603.703197    | 802.355237       | S    | 359.203744  | 180.105510      | 342.177195     | 171.592236       | 341.193179     | 171.100228       | 3  |
| 13 | 1718.766526 | 859.886901      | 1701.739977    | 851.373627       | 1700.755961    | 850.881619       | P    | 272.171716  | 136.589496      | 255.145167     | 128.076221       |                |                  | 2  |
| 14 |             |                 |                |                  |                |                  | R    | 175.118952  | 88.063114       | 158.092403     | 79.549839        |                |                  | 1  |

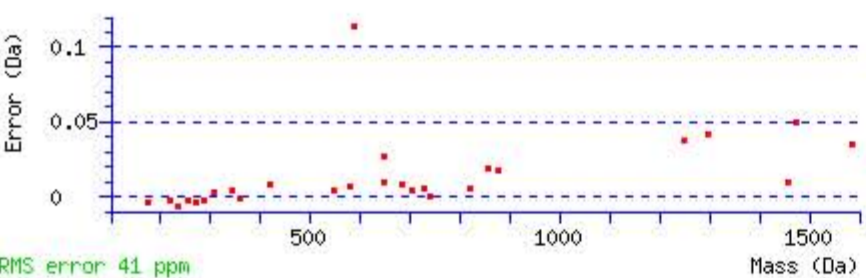

NCBI BLAST search of [FSAICQGDGTWSPR](#)  
(Parameters: blastp, nr protein database, expect=20000, no filter, PAM30)  
Other BLAST [web gateways](#)

All matches to this query

| Score | Mr(calc):   | Delta    | Sequence                       |
|-------|-------------|----------|--------------------------------|
| 35.2  | 1891.870941 | 0.019491 | <a href="#">FSAICQGDGTWSPR</a> |

MATRIX

SCIENCE

Mascot Search Results

Peptide View

MS/MS Fragmentation of **GVGWSHPLPQCEIVK**  
Found in **C4BPA\_HUMAN**, C4b-binding protein alpha chain OS=Homo sapiens GN=C4BPA PE=1 SV=2

Match to Query 45024: 2017.045422 from(673.355750,3+) rtinseconds(2072) index(50800)  
Title: Locus:1.1.1.1959.7 File:"2013-07-02 CLN FXIII 180 min 2nd F 4.wiff"  
Data file C:\Program Files (x86)\Matrix Science\Mascot Daemon\mgf\8 FXIII 180 min 2nd\mascot\_daemon\_merge.mgf

Click mouse within plot area to zoom in by factor of two about that point  
Or,   to  Da   
Label all possible matches ☐ Label matches used for scoring ☒

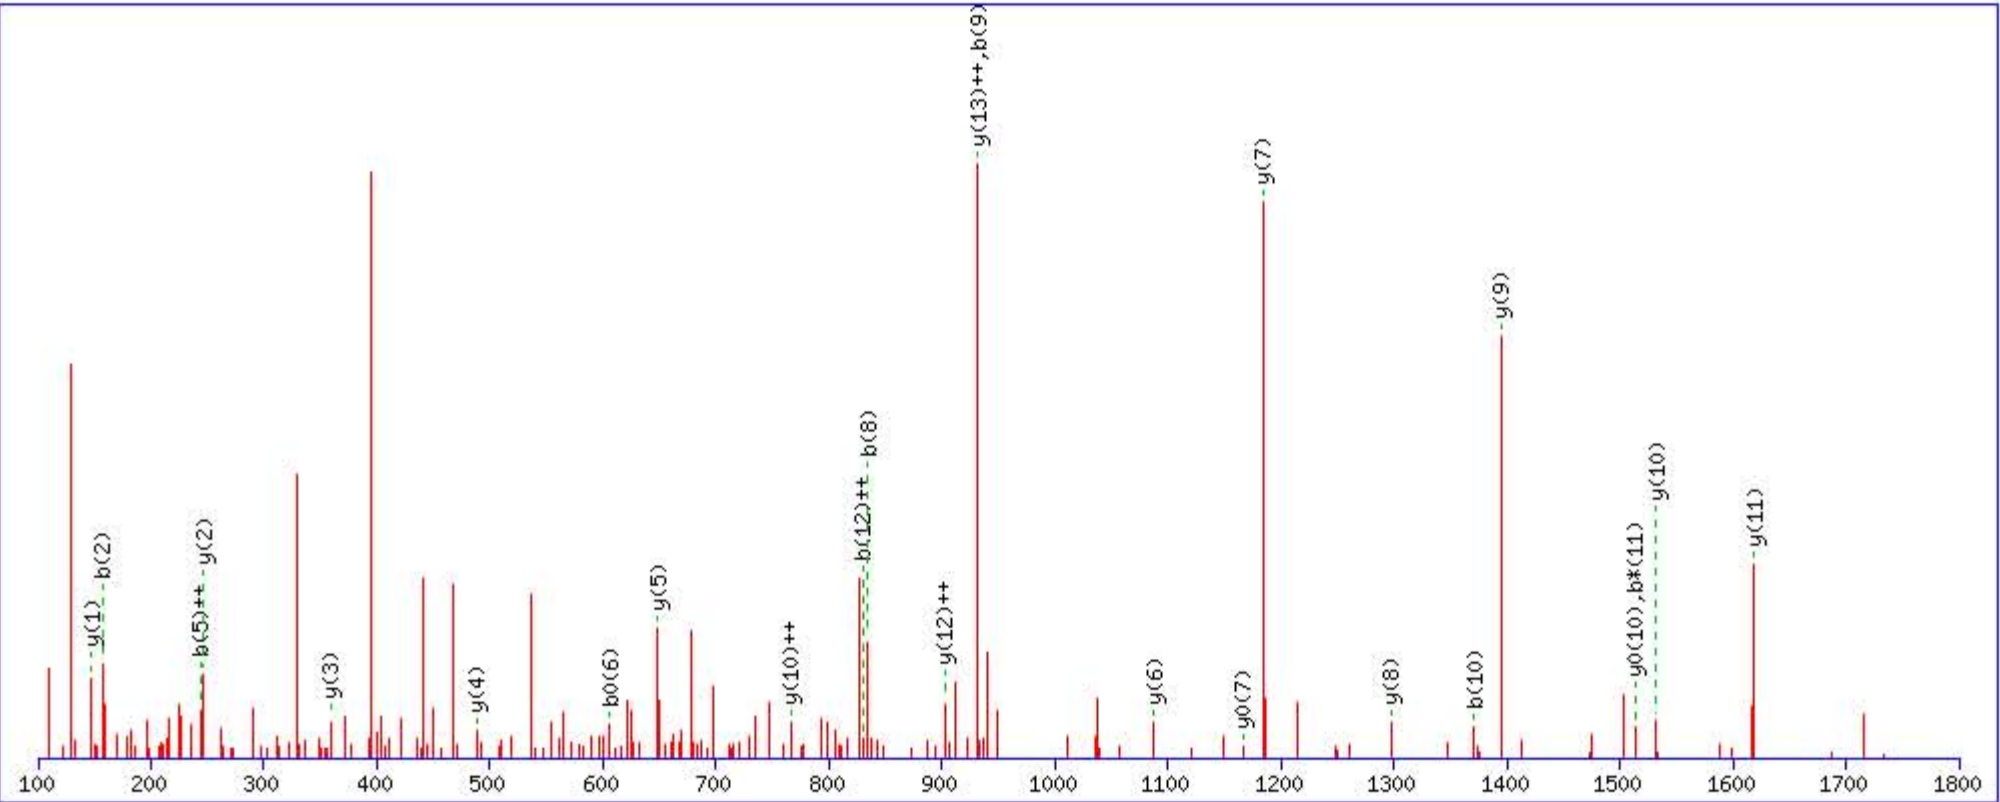

Monoisotopic mass of neutral peptide Mr(calc): 2017.027771  
Fixed modifications: Carbamidomethyl (C) (apply to specified residues or termini only)  
Variable modifications:  
Q10 : Biotin:Thermo-21345 (Q)  
Ions Score: 32 Expect: 0.017  
Matches : 24/136 fragment ions using 79 most intense peaks [\(help\)](#)

| #  | b           | b <sup>++</sup> | b <sup>*</sup> | b <sup>++</sup> * | b <sup>0</sup> | b <sup>0++</sup> | Seq. | y           | y <sup>++</sup> | y <sup>*</sup> | y <sup>++</sup> * | y <sup>0</sup> | y <sup>0++</sup> | #  |
|----|-------------|-----------------|----------------|-------------------|----------------|------------------|------|-------------|-----------------|----------------|-------------------|----------------|------------------|----|
| 1  | 58.028740   | 29.518008       |                |                   |                |                  | G    |             |                 |                |                   |                |                  | 15 |
| 2  | 157.097154  | 79.052215       |                |                   |                |                  | V    | 1961.013573 | 981.010425      | 1943.987024    | 972.497150        | 1943.003008    | 972.005142       | 14 |
| 3  | 214.118618  | 107.562947      |                |                   |                |                  | G    | 1861.945159 | 931.476217      | 1844.918610    | 922.962943        | 1843.934594    | 922.470935       | 13 |
| 4  | 400.197931  | 200.602603      |                |                   |                |                  | W    | 1804.923695 | 902.965486      | 1787.897146    | 894.452211        | 1786.913130    | 893.960203       | 12 |
| 5  | 487.229959  | 244.118617      |                |                   | 469.219394     | 235.113335       | S    | 1618.844382 | 809.925829      | 1601.817833    | 801.412555        | 1600.833817    | 800.920547       | 11 |
| 6  | 624.288871  | 312.648074      |                |                   | 606.278306     | 303.642791       | H    | 1531.812354 | 766.409815      | 1514.785805    | 757.896541        | 1513.801789    | 757.404532       | 10 |
| 7  | 721.341635  | 361.174456      |                |                   | 703.331070     | 352.169173       | P    | 1394.753442 | 697.880359      | 1377.726893    | 689.367085        | 1376.742877    | 688.875076       | 9  |
| 8  | 834.425699  | 417.716488      |                |                   | 816.415134     | 408.711205       | L    | 1297.700678 | 649.353977      | 1280.674129    | 640.840703        | 1279.690113    | 640.348694       | 8  |
| 9  | 931.478463  | 466.242870      |                |                   | 913.467898     | 457.237587       | P    | 1184.616614 | 592.811945      | 1167.590065    | 584.298670        | 1166.606049    | 583.806662       | 7  |
| 10 | 1370.703789 | 685.855532      | 1353.677240    | 677.342258        | 1352.693224    | 676.850250       | Q    | 1087.563850 | 544.285563      | 1070.537301    | 535.772288        | 1069.553285    | 535.280280       | 6  |
| 11 | 1530.734438 | 765.870857      | 1513.707889    | 757.357583        | 1512.723873    | 756.865574       | C    | 648.338524  | 324.672900      | 631.311975     | 316.159626        | 630.327959     | 315.667618       | 5  |
| 12 | 1659.777031 | 830.392153      | 1642.750482    | 821.878879        | 1641.766466    | 821.386871       | E    | 488.307875  | 244.657575      | 471.281326     | 236.144301        | 470.297310     | 235.652293       | 4  |
| 13 | 1772.861095 | 886.934185      | 1755.834546    | 878.420911        | 1754.850530    | 877.928903       | I    | 359.265282  | 180.136279      | 342.238733     | 171.623004        |                |                  | 3  |
| 14 | 1871.929509 | 936.468392      | 1854.902960    | 927.955118        | 1853.918944    | 927.463110       | V    | 246.181218  | 123.594247      | 229.154669     | 115.080973        |                |                  | 2  |
| 15 |             |                 |                |                   |                |                  | K    | 147.112804  | 74.060040       | 130.086255     | 65.546765         |                |                  | 1  |

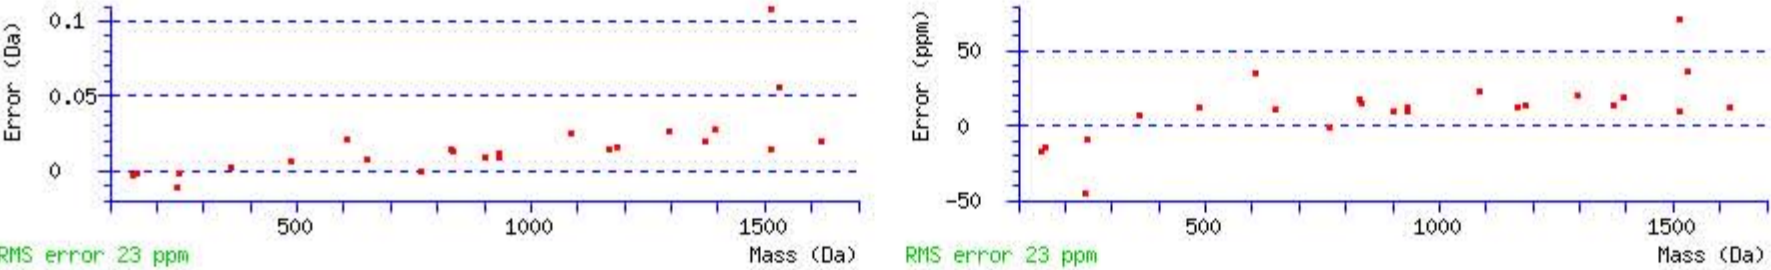

NCBI BLAST search of [GVGWSHPLPQCEIVK](#)  
(Parameters: blastp, nr protein database, expect=20000, no filter, PAM30)  
Other BLAST [web gateways](#)

All matches to this query

| Score | Mr(calc):   | Delta    | Sequence                        |
|-------|-------------|----------|---------------------------------|
| 32.3  | 2017.027771 | 0.017651 | <a href="#">GVGWSHPLPQCEIVK</a> |

MATRIX

SCIENCE

Mascot Search Results

Peptide View

MS/MS Fragmentation of **LSCSYSHWSAPAPQCK**  
Found in **C4BPA\_HUMAN**, C4b-binding protein alpha chain OS=Homo sapiens GN=C4BPA PE=1 SV=2

Match to Query 48275: 2189.005422 from(730.675750,3+) rtinseconds(1768) index(32719)  
Title: Locus:1.1.1.724.18 File:"2013-07-02 CLN FXIII 180 min 2nd F 3.wiff"  
Data file C:\Program Files (x86)\Matrix Science\Mascot Daemon\mgf\8 FXIII 180 min 2nd\mascot\_daemon\_merge.mgf

Click mouse within plot area to zoom in by factor of two about that point  
Or, 

Plot from

100

 to 

1800

 Da 

Full range

  
Label all possible matches ☐ Label matches used for scoring ☒

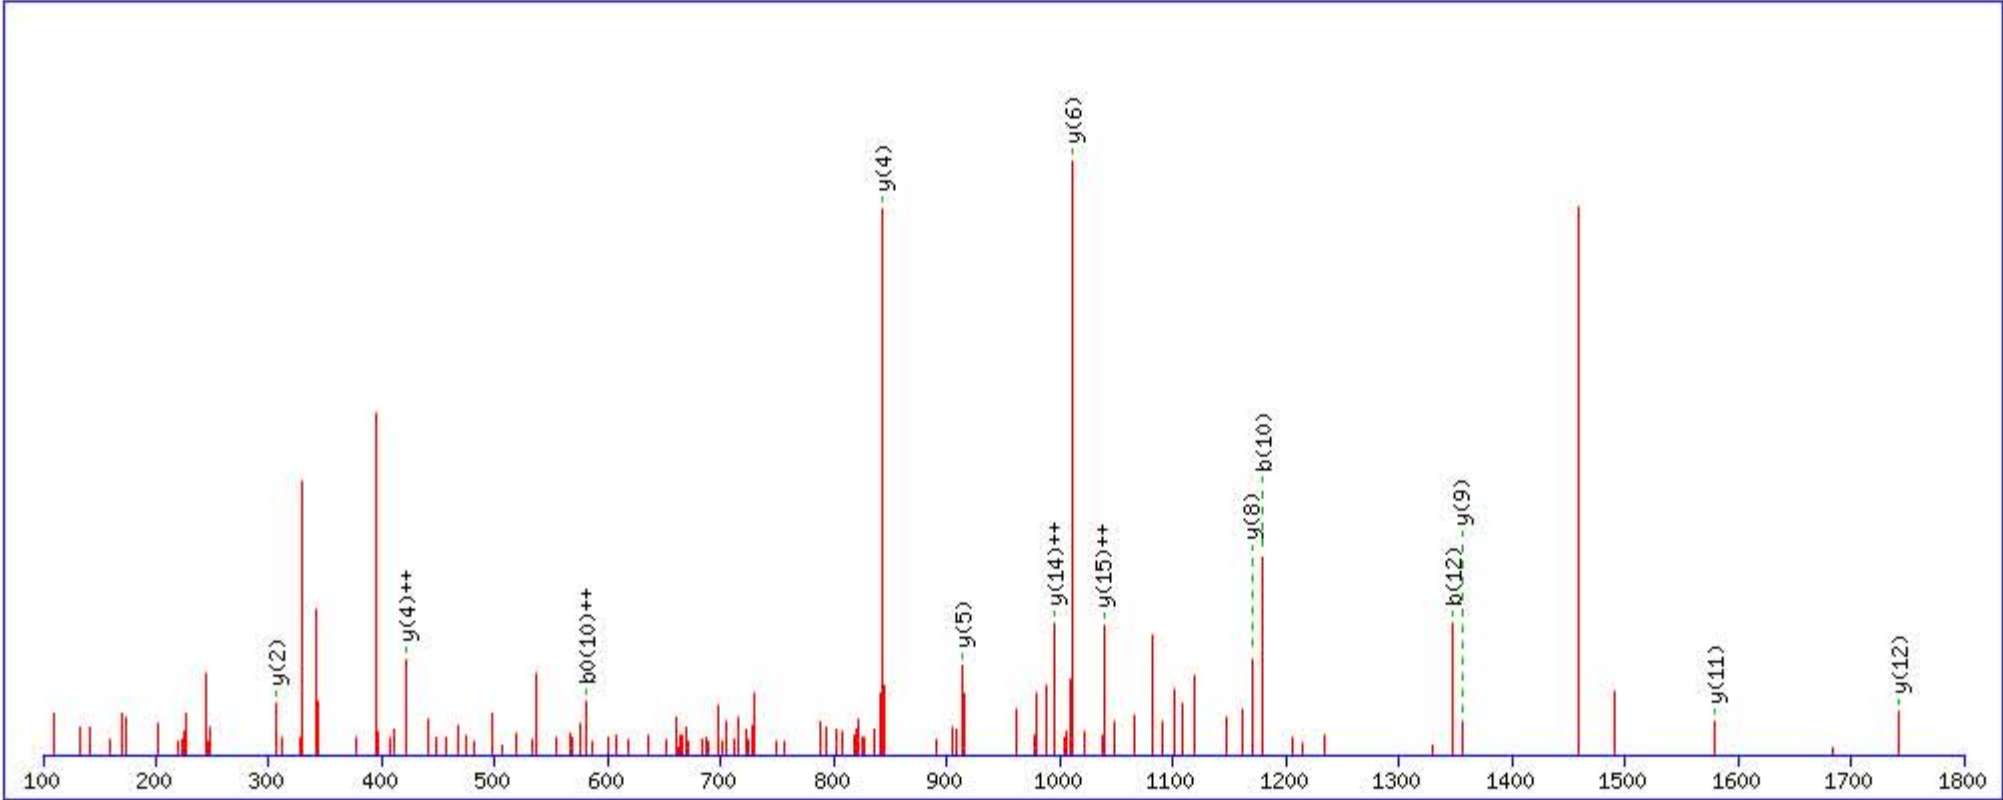

Monoisotopic mass of neutral peptide Mr(calc): 2188.985626  
Fixed modifications: Carbamidomethyl (C) (apply to specified residues or termini only)  
Variable modifications:  
Q14 : Biotin:Thermo-21345 (Q)  
Ions Score: 35 Expect: 0.00058  
Matches : 14/138 fragment ions using 31 most intense peaks [\(help\)](#)

| #  | b           | b <sup>++</sup> | b <sup>*</sup> | b <sup>++</sup> | b <sup>0</sup> | b <sup>0++</sup> | Seq. | y           | y <sup>++</sup> | y <sup>*</sup> | y <sup>++</sup> | y <sup>0</sup> | y <sup>0++</sup> | #  |
|----|-------------|-----------------|----------------|-----------------|----------------|------------------|------|-------------|-----------------|----------------|-----------------|----------------|------------------|----|
| 1  | 114.091340  | 57.549308       |                |                 |                |                  | L    |             |                 |                |                 |                |                  | 16 |
| 2  | 201.123368  | 101.065322      |                |                 | 183.112803     | 92.060039        | S    | 2076.908850 | 1038.958063     | 2059.882301    | 1030.444788     | 2058.898285    | 1029.952780      | 15 |
| 3  | 361.154017  | 181.080647      |                |                 | 343.143452     | 172.075364       | C    | 1989.876822 | 995.442049      | 1972.850273    | 986.928775      | 1971.866257    | 986.436767       | 14 |
| 4  | 448.186045  | 224.596660      |                |                 | 430.175480     | 215.591378       | S    | 1829.846173 | 915.426725      | 1812.819624    | 906.913450      | 1811.835608    | 906.421442       | 13 |
| 5  | 611.249374  | 306.128325      |                |                 | 593.238809     | 297.123043       | Y    | 1742.814145 | 871.910711      | 1725.787596    | 863.397436      | 1724.803580    | 862.905428       | 12 |
| 6  | 698.281402  | 349.644339      |                |                 | 680.270837     | 340.639056       | S    | 1579.750816 | 790.379046      | 1562.724267    | 781.865772      | 1561.740251    | 781.373764       | 11 |
| 7  | 835.340314  | 418.173795      |                |                 | 817.329749     | 409.168512       | H    | 1492.718788 | 746.863032      | 1475.692239    | 738.349758      | 1474.708223    | 737.857750       | 10 |
| 8  | 1021.419627 | 511.213452      |                |                 | 1003.409062    | 502.208169       | W    | 1355.659876 | 678.333576      | 1338.633327    | 669.820302      | 1337.649311    | 669.328294       | 9  |
| 9  | 1108.451655 | 554.729466      |                |                 | 1090.441090    | 545.724183       | S    | 1169.580563 | 585.293920      | 1152.554014    | 576.780645      | 1151.569998    | 576.288637       | 8  |
| 10 | 1179.488769 | 590.248023      |                |                 | 1161.478204    | 581.242740       | A    | 1082.548535 | 541.777906      | 1065.521986    | 533.264631      |                |                  | 7  |
| 11 | 1276.541533 | 638.774405      |                |                 | 1258.530968    | 629.769122       | P    | 1011.511421 | 506.259349      | 994.484872     | 497.746074      |                |                  | 6  |
| 12 | 1347.578647 | 674.292962      |                |                 | 1329.568082    | 665.287679       | A    | 914.458657  | 457.732967      | 897.432108     | 449.219692      |                |                  | 5  |
| 13 | 1444.631411 | 722.819344      |                |                 | 1426.620846    | 713.814061       | P    | 843.421543  | 422.214410      | 826.394994     | 413.701135      |                |                  | 4  |
| 14 | 1883.856737 | 942.432007      | 1866.830188    | 933.918732      | 1865.846172    | 933.426724       | Q    | 746.368779  | 373.688028      | 729.342230     | 365.174753      |                |                  | 3  |
| 15 | 2043.887386 | 1022.447331     | 2026.860837    | 1013.934057     | 2025.876821    | 1013.442049      | C    | 307.143453  | 154.075365      | 290.116904     | 145.562090      |                |                  | 2  |
| 16 |             |                 |                |                 |                |                  | K    | 147.112804  | 74.060040       | 130.086255     | 65.546766       |                |                  | 1  |

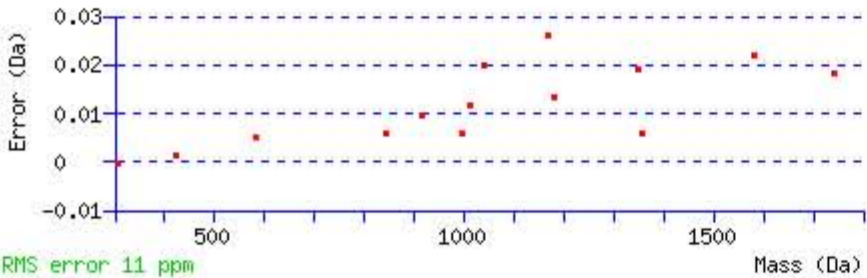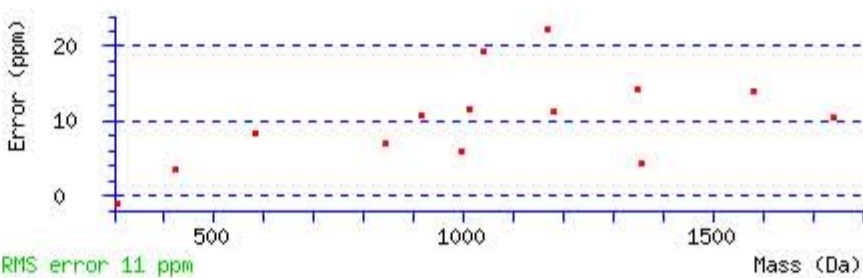

NCBI BLAST search of **LSCSYSHWSAPAPQCK**  
(Parameters: blastp, nr protein database, expect=20000, no filter, PAM30)  
Other BLAST [web gateways](#)

All matches to this query

| Score | Mr(calc):   | Delta     | Sequence                         |
|-------|-------------|-----------|----------------------------------|
| 34.8  | 2188.985626 | 0.019796  | <a href="#">LSCSYSHWSAPAPQCK</a> |
| 0.2   | 2189.031891 | -0.026469 | <a href="#">QNYDEMSPAGQISK</a>   |

MATRIX

SCIENCE

Mascot Search Results

Peptide View

MS/MS Fragmentation of **WTPYQGCEALCCPEPK**  
Found in **C4BPA\_HUMAN**, C4b-binding protein alpha chain OS=Homo sapiens GN=C4BPA PE=1 SV=2

Match to Query 50643: 2306.026962 from(769.682930,3+) rtinseconds(2119) index(51136)  
Title: Locus:1.1.1.1975.14 File:"2013-07-02 CLN FXIII 180 min 2nd F 4.wiff"  
Data file C:\Program Files (x86)\Matrix Science\Mascot Daemon\mgf\8 FXIII 180 min 2nd\mascot\_daemon\_merge.mgf

Click mouse within plot area to zoom in by factor of two about that point  
Or, 

Plot from

100

 to 

1800

 Da 

Full range

  
Label all possible matches ☐ Label matches used for scoring ☒

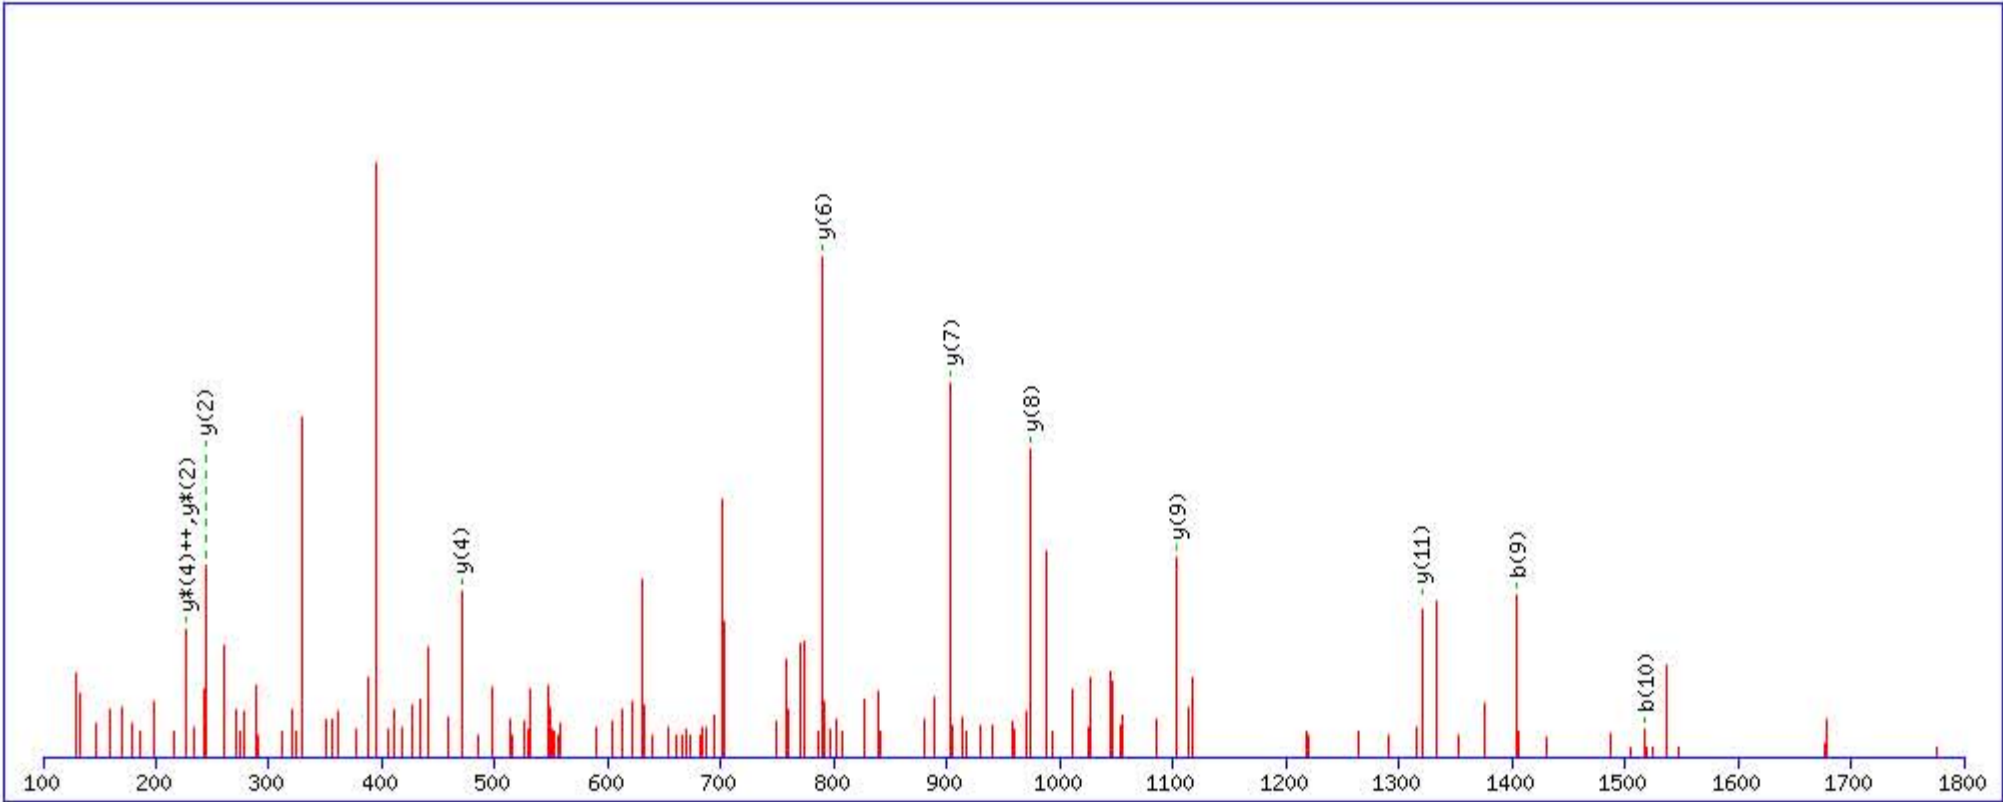

Monoisotopic mass of neutral peptide **Mr(calc):** 2305.999237  
Fixed modifications: Carbamidomethyl (C) (apply to specified residues or termini only)  
Variable modifications:  
Q5 : Biotin:Thermo-21345 (Q)  
Ions Score: 37 Expect: 0.0013  
Matches : 11/166 fragment ions using 17 most intense peaks [\(help\)](#)

| #  | b           | b <sup>++</sup> | b <sup>*</sup> | b <sup>+++</sup> | b <sup>0</sup> | b <sup>0++</sup> | Seq. | y           | y <sup>++</sup> | y <sup>*</sup> | y <sup>+++</sup> | y <sup>0</sup> | y <sup>0++</sup> | #  |
|----|-------------|-----------------|----------------|------------------|----------------|------------------|------|-------------|-----------------|----------------|------------------|----------------|------------------|----|
| 1  | 187.086589  | 94.046932       |                |                  |                |                  | W    |             |                 |                |                  |                |                  | 16 |
| 2  | 288.134268  | 144.570772      |                |                  | 270.123703     | 135.565490       | T    | 2120.927205 | 1060.967240     | 2103.900656    | 1052.453966      | 2102.916640    | 1051.961958      | 15 |
| 3  | 385.187032  | 193.097154      |                |                  | 367.176467     | 184.091872       | P    | 2019.879526 | 1010.443401     | 2002.852977    | 1001.930127      | 2001.868961    | 1001.438119      | 14 |
| 4  | 548.250361  | 274.628819      |                |                  | 530.239796     | 265.623536       | Y    | 1922.826762 | 961.917019      | 1905.800213    | 953.403745       | 1904.816197    | 952.911737       | 13 |
| 5  | 987.475687  | 494.241482      | 970.449138     | 485.728207       | 969.465122     | 485.236199       | Q    | 1759.763433 | 880.385355      | 1742.736884    | 871.872080       | 1741.752868    | 871.380072       | 12 |
| 6  | 1044.497151 | 522.752214      | 1027.470602    | 514.238939       | 1026.486586    | 513.746931       | G    | 1320.538107 | 660.772692      | 1303.511558    | 652.259417       | 1302.527542    | 651.767409       | 11 |
| 7  | 1204.527800 | 602.767538      | 1187.501251    | 594.254264       | 1186.517235    | 593.762256       | C    | 1263.516643 | 632.261960      | 1246.490094    | 623.748685       | 1245.506078    | 623.256677       | 10 |
| 8  | 1333.570393 | 667.288835      | 1316.543844    | 658.775560       | 1315.559828    | 658.283552       | E    | 1103.485994 | 552.246635      | 1086.459445    | 543.733361       | 1085.475429    | 543.241353       | 9  |
| 9  | 1404.607507 | 702.807392      | 1387.580958    | 694.294117       | 1386.596942    | 693.802109       | A    | 974.443401  | 487.725339      | 957.416852     | 479.212064       | 956.432836     | 478.720056       | 8  |
| 10 | 1517.691571 | 759.349424      | 1500.665022    | 750.836149       | 1499.681006    | 750.344141       | L    | 903.406287  | 452.206782      | 886.379738     | 443.693507       | 885.395722     | 443.201499       | 7  |
| 11 | 1677.722220 | 839.364748      | 1660.695671    | 830.851474       | 1659.711655    | 830.359466       | C    | 790.322223  | 395.664750      | 773.295674     | 387.151475       | 772.311658     | 386.659467       | 6  |
| 12 | 1837.752869 | 919.380073      | 1820.726320    | 910.866798       | 1819.742304    | 910.374790       | C    | 630.291574  | 315.649425      | 613.265025     | 307.136151       | 612.281009     | 306.644143       | 5  |
| 13 | 1934.805633 | 967.906455      | 1917.779084    | 959.393180       | 1916.795068    | 958.901172       | P    | 470.260925  | 235.634101      | 453.234376     | 227.120826       | 452.250360     | 226.628818       | 4  |
| 14 | 2063.848226 | 1032.427751     | 2046.821677    | 1023.914477      | 2045.837661    | 1023.422469      | E    | 373.208161  | 187.107719      | 356.181612     | 178.594444       | 355.197596     | 178.102436       | 3  |
| 15 | 2160.900990 | 1080.954133     | 2143.874441    | 1072.440858      | 2142.890425    | 1071.948850      | P    | 244.165568  | 122.586422      | 227.139019     | 114.073148       |                |                  | 2  |
| 16 |             |                 |                |                  |                |                  | K    | 147.112804  | 74.060040       | 130.086255     | 65.546765        |                |                  | 1  |

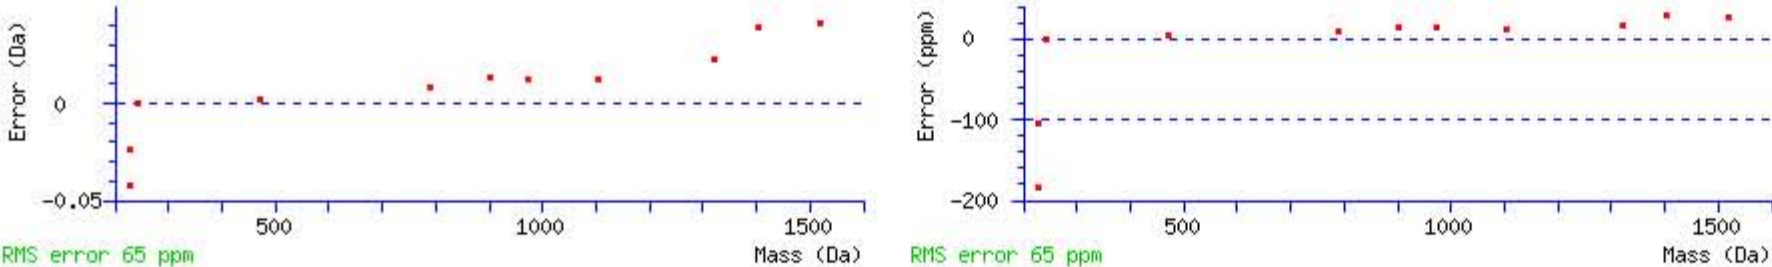

NCBI BLAST search of [WTPYQGCEALCCPEPK](#)  
(Parameters: blastp, nr protein database, expect=20000, no filter, PAM30)  
Other BLAST [web gateways](#)

All matches to this query

| Score | Mr(calc):   | Delta    | Sequence                         |
|-------|-------------|----------|----------------------------------|
| 37.5  | 2305.999237 | 0.027725 | <a href="#">WTPYQGCEALCCPEPK</a> |

M

A

T

R

I

X

S

C

I

E

N

C

E

Mascot Search Results

Peptide View

MS/MS Fragmentation of **CHPGYKPTTDEPTTVICQK**  
Found in **C4BPA\_HUMAN**, C4b-binding protein alpha chain OS=Homo sapiens GN=C4BPA PE=1 SV=2

Match to Query 54899: 2542.216776 from(636.561470,4+) rtinseconds(1612) index(47736)  
Title: Locus:1.1.1.1799.8 File:"2013-07-02 CLN FXIII 180 min 2nd F 4.wiff"  
Data file C:\Program Files (x86)\Matrix Science\Mascot Daemon\mgf\8 FXIII 180 min 2nd\mascot\_daemon\_merge.mgf

Click mouse within plot area to zoom in by factor of two about that point  
Or,   to  Da   
Label all possible matches ☐ Label matches used for scoring ☒

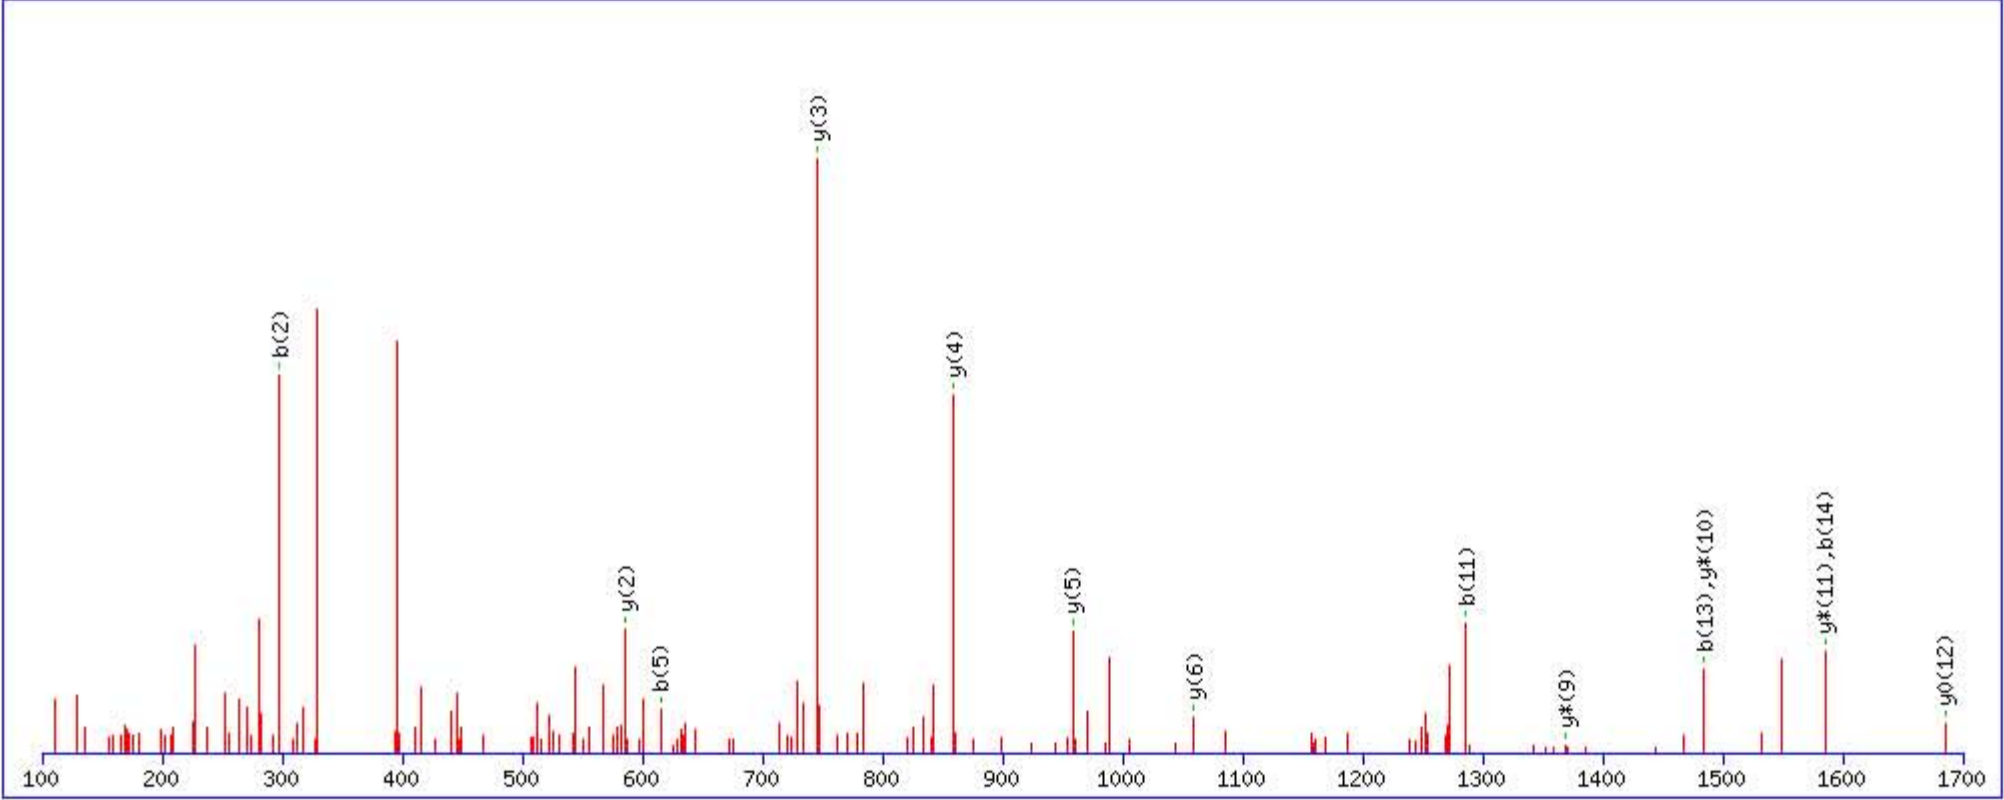

Monoisotopic mass of neutral peptide Mr(calc): 2542.201859  
Fixed modifications: Carbamidomethyl (C) (apply to specified residues or termini only)  
Variable modifications:  
Q18 : Biotin:Thermo-21345 (Q)  
Ions Score: 39 Expect: 0.00026  
Matches : 14/182 fragment ions using 16 most intense peaks [\(help\)](#)

| #  | b           | b <sup>++</sup> | b <sup>*</sup> | b <sup>++</sup> * | b <sup>0</sup> | b <sup>0++</sup> | Seq. | y           | y <sup>++</sup> | y <sup>*</sup> | y <sup>++</sup> * | y <sup>0</sup> | y <sup>0++</sup> | #  |
|----|-------------|-----------------|----------------|-------------------|----------------|------------------|------|-------------|-----------------|----------------|-------------------|----------------|------------------|----|
| 1  | 161.037925  | 81.022600       |                |                   |                |                  | C    |             |                 |                |                   |                |                  | 19 |
| 2  | 298.096837  | 149.552056      |                |                   |                |                  | H    | 2383.178469 | 1192.092872     | 2366.151920    | 1183.579598       | 2365.167904    | 1183.087590      | 18 |
| 3  | 395.149601  | 198.078439      |                |                   |                |                  | P    | 2246.119557 | 1123.563416     | 2229.093008    | 1115.050142       | 2228.108992    | 1114.558134      | 17 |
| 4  | 452.171065  | 226.589170      |                |                   |                |                  | G    | 2149.066793 | 1075.037034     | 2132.040244    | 1066.523760       | 2131.056228    | 1066.031752      | 16 |
| 5  | 615.234394  | 308.120835      |                |                   |                |                  | Y    | 2092.045329 | 1046.526302     | 2075.018780    | 1038.013028       | 2074.034764    | 1037.521020      | 15 |
| 6  | 743.329357  | 372.168317      | 726.302808     | 363.655042        |                |                  | K    | 1928.982000 | 964.994638      | 1911.955451    | 956.481364        | 1910.971435    | 955.989356       | 14 |
| 7  | 840.382121  | 420.694699      | 823.355572     | 412.181424        |                |                  | P    | 1800.887037 | 900.947157      | 1783.860488    | 892.433882        | 1782.876472    | 891.941874       | 13 |
| 8  | 941.429800  | 471.218538      | 924.403251     | 462.705264        | 923.419235     | 462.213256       | T    | 1703.834273 | 852.420775      | 1686.807724    | 843.907500        | 1685.823708    | 843.415492       | 12 |
| 9  | 1042.477479 | 521.742378      | 1025.450930    | 513.229103        | 1024.466914    | 512.737095       | T    | 1602.786594 | 801.896935      | 1585.760045    | 793.383661        | 1584.776029    | 792.891653       | 11 |
| 10 | 1157.504422 | 579.255849      | 1140.477873    | 570.742575        | 1139.493857    | 570.250567       | D    | 1501.738915 | 751.373096      | 1484.712366    | 742.859821        | 1483.728350    | 742.367813       | 10 |
| 11 | 1286.547015 | 643.777146      | 1269.520466    | 635.263871        | 1268.536450    | 634.771863       | E    | 1386.711972 | 693.859624      | 1369.685423    | 685.346350        | 1368.701407    | 684.854342       | 9  |
| 12 | 1383.599779 | 692.303528      | 1366.573230    | 683.790253        | 1365.589214    | 683.298245       | P    | 1257.669379 | 629.338328      | 1240.642830    | 620.825053        | 1239.658814    | 620.333045       | 8  |
| 13 | 1484.647458 | 742.827367      | 1467.620909    | 734.314093        | 1466.636893    | 733.822085       | T    | 1160.616615 | 580.811946      | 1143.590066    | 572.298671        | 1142.606050    | 571.806663       | 7  |
| 14 | 1585.695137 | 793.351207      | 1568.668588    | 784.837932        | 1567.684572    | 784.345924       | T    | 1059.568936 | 530.288106      | 1042.542387    | 521.774832        | 1041.558371    | 521.282824       | 6  |
| 15 | 1684.763551 | 842.885414      | 1667.737002    | 834.372139        | 1666.752986    | 833.880131       | V    | 958.521257  | 479.764267      | 941.494708     | 471.250992        |                |                  | 5  |
| 16 | 1797.847615 | 899.427446      | 1780.821066    | 890.914171        | 1779.837050    | 890.422163       | I    | 859.452843  | 430.230060      | 842.426294     | 421.716785        |                |                  | 4  |
| 17 | 1957.878264 | 979.442770      | 1940.851715    | 970.929496        | 1939.867699    | 970.437488       | C    | 746.368779  | 373.688028      | 729.342230     | 365.174753        |                |                  | 3  |
| 18 | 2397.103590 | 1199.055433     | 2380.077041    | 1190.542158       | 2379.093025    | 1190.050151      | Q    | 586.338130  | 293.672703      | 569.311581     | 285.159429        |                |                  | 2  |
| 19 |             |                 |                |                   |                |                  | K    | 147.112804  | 74.060040       | 130.086255     | 65.546765         |                |                  | 1  |

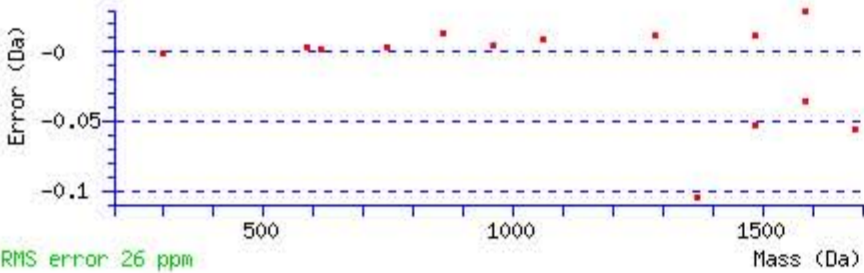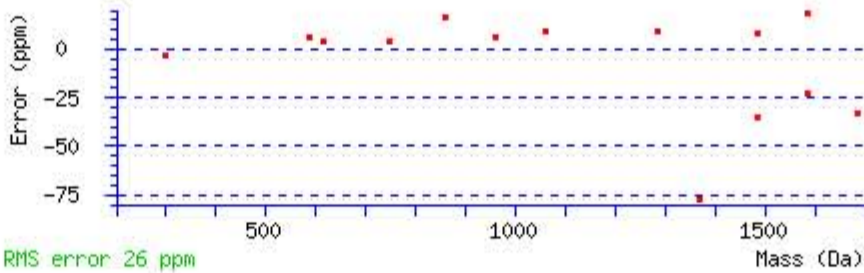

NCBI BLAST search of [CHPGYKPTTDEPTTVICQK](#)  
(Parameters: blastp, nr protein database, expect=20000, no filter, PAM30)  
Other BLAST [web gateways](#)

All matches to this query

| Score | Mr(calc):   | Delta     | Sequence                                     |
|-------|-------------|-----------|----------------------------------------------|
| 39.0  | 2542.201859 | 0.014917  | <a href="#">CHPGYKPTTDEPTTVICQK</a>          |
| 0.9   | 2542.227280 | -0.010504 | <a href="#">GPGGSPGRRPSPAAPDGAPASGTSEPGR</a> |

MATRIX

SCIENCE

Mascot Search Results

Peptide View

MS/MS Fragmentation of **ALLAFQESK**  
Found in **C4BPB\_HUMAN**, C4b-binding protein beta chain OS=Homo sapiens GN=C4BPB PE=1 SV=1

Match to Query 23620: 1316.730528 from(659.372540,2+) rtinseconds(2232) index(35656)  
Title: Locus:1.1.1.886.8 File:"2013-07-02 CLN FXIII 180 min 2nd F 3.wiff"  
Data file C:\Program Files (x86)\Matrix Science\Mascot Daemon\mgf\8 FXIII 180 min 2nd\mascot\_daemon\_merge.mgf

Click mouse within plot area to zoom in by factor of two about that point  
Or,   to  Da   
Label all possible matches ☐ Label matches used for scoring ☒

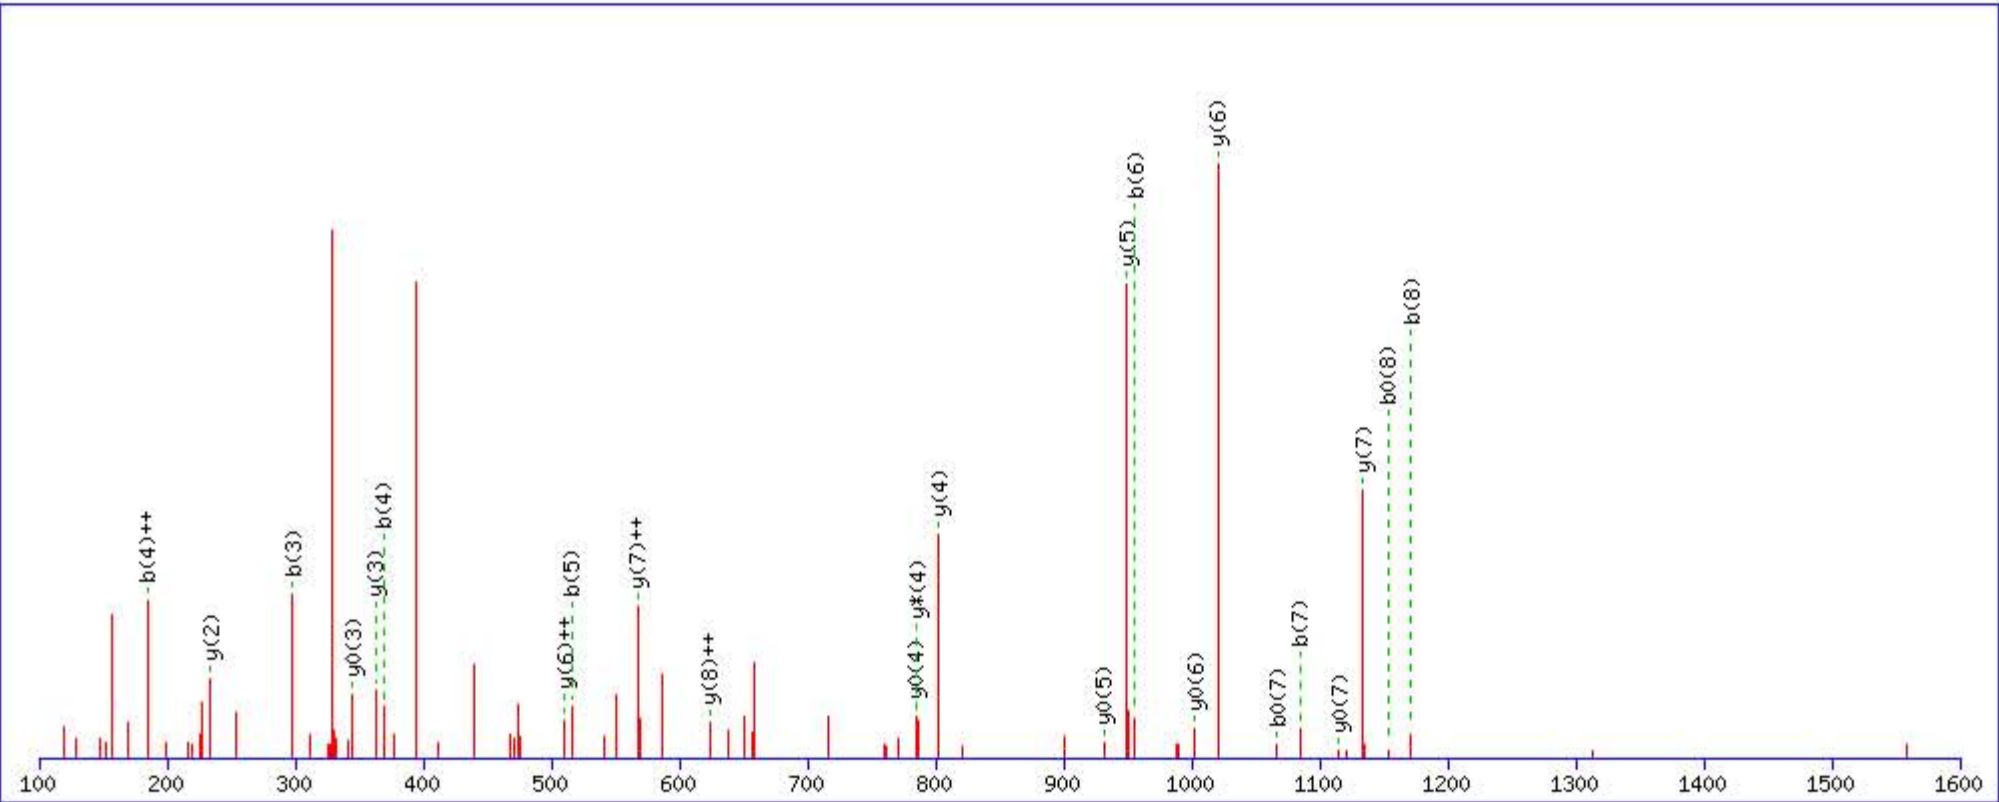

Monoisotopic mass of neutral peptide Mr(calc): 1316.716217  
Fixed modifications: Carbamidomethyl (C) (apply to specified residues or termini only)  
Variable modifications:  
Q6 : Biotin:Thermo-21345 (Q)  
Ions Score: 32 Expect: 0.0065  
Matches : 25/72 fragment ions using 53 most intense peaks [\(help\)](#)

| # | b           | b <sup>++</sup> | b <sup>*</sup> | b <sup>++</sup> * | b <sup>0</sup> | b <sup>0++</sup> | Seq. | y           | y <sup>++</sup> | y <sup>*</sup> | y <sup>++</sup> * | y <sup>0</sup> | y <sup>0++</sup> | # |
|---|-------------|-----------------|----------------|-------------------|----------------|------------------|------|-------------|-----------------|----------------|-------------------|----------------|------------------|---|
| 1 | 72.044390   | 36.525833       |                |                   |                |                  | A    |             |                 |                |                   |                |                  | 9 |
| 2 | 185.128454  | 93.067865       |                |                   |                |                  | L    | 1246.686407 | 623.846842      | 1229.659858    | 615.333567        | 1228.675842    | 614.841559       | 8 |
| 3 | 298.212518  | 149.609897      |                |                   |                |                  | L    | 1133.602343 | 567.304810      | 1116.575794    | 558.791535        | 1115.591778    | 558.299527       | 7 |
| 4 | 369.249632  | 185.128454      |                |                   |                |                  | A    | 1020.518279 | 510.762778      | 1003.491730    | 502.249503        | 1002.507714    | 501.757495       | 6 |
| 5 | 516.318046  | 258.662661      |                |                   |                |                  | F    | 949.481165  | 475.244221      | 932.454616     | 466.730946        | 931.470600     | 466.238938       | 5 |
| 6 | 955.543372  | 478.275324      | 938.516823     | 469.762049        |                |                  | Q    | 802.412751  | 401.710014      | 785.386202     | 393.196739        | 784.402186     | 392.704731       | 4 |
| 7 | 1084.585965 | 542.796621      | 1067.559416    | 534.283346        | 1066.575400    | 533.791338       | E    | 363.187425  | 182.097351      | 346.160876     | 173.584076        | 345.176860     | 173.092068       | 3 |
| 8 | 1171.617993 | 586.312635      | 1154.591444    | 577.799360        | 1153.607428    | 577.307352       | S    | 234.144832  | 117.576054      | 217.118283     | 109.062780        | 216.134267     | 108.570772       | 2 |
| 9 |             |                 |                |                   |                |                  | K    | 147.112804  | 74.060040       | 130.086255     | 65.546765         |                |                  | 1 |

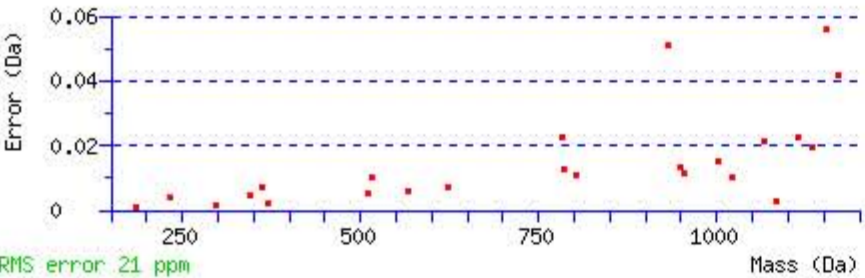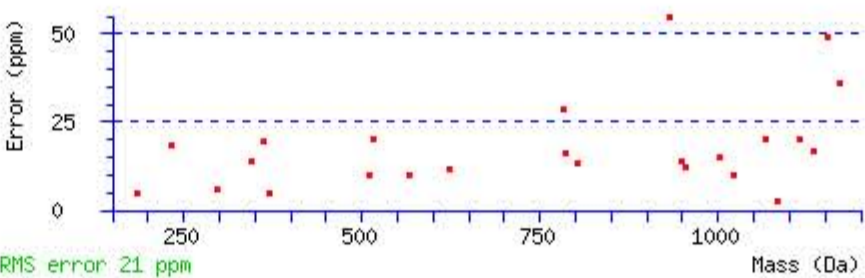

NCBI BLAST search of [ALLAFQESK](#)  
(Parameters: blastp, nr protein database, expect=20000, no filter, PAM30)  
Other BLAST [web gateways](#)

All matches to this query

| Score | Mr(calc):   | Delta     | Sequence                      |
|-------|-------------|-----------|-------------------------------|
| 32.5  | 1316.716217 | 0.014311  | <a href="#">ALLAFQESK</a>     |
| 8.6   | 1316.749924 | -0.019396 | <a href="#">SPLIRHQR</a>      |
| 4.6   | 1316.731308 | -0.000780 | <a href="#">KTFPISGARGGAR</a> |
| 2.4   | 1316.742050 | -0.011522 | <a href="#">AILCRKGKPMK</a>   |
| 2.1   | 1316.733994 | -0.003466 | <a href="#">LALVINGDFLDK</a>  |
| 2.1   | 1316.745224 | -0.014696 | <a href="#">SPLQLQTVIYR</a>   |
| 0.6   | 1316.729935 | 0.000593  | <a href="#">NTITNEELKKK</a>   |

MATRIX

SCIENCE

Mascot Search Results

Peptide View

MS/MS Fragmentation of **EVEGQILGTYVCIK**  
Found in **C4BPB\_HUMAN**, C4b-binding protein beta chain OS=Homo sapiens GN=C4BPB PE=1 SV=1

Match to Query 42495: 1919.016912 from(640.679580,3+) rtinseconds(2479) index(36913)  
Title: Locus:1.1.1.972.5 File:"2013-07-02 CLN FXIII 180 min 2nd F 3.wiff"  
Data file C:\Program Files (x86)\Matrix Science\Mascot Daemon\mgf\8 FXIII 180 min 2nd\mascot\_daemon\_merge.mgf

Click mouse within plot area to zoom in by factor of two about that point  
Or, 

Plot from

100

 to 

1300

 Da 

Full range

  
Label all possible matches ☐ Label matches used for scoring ☒

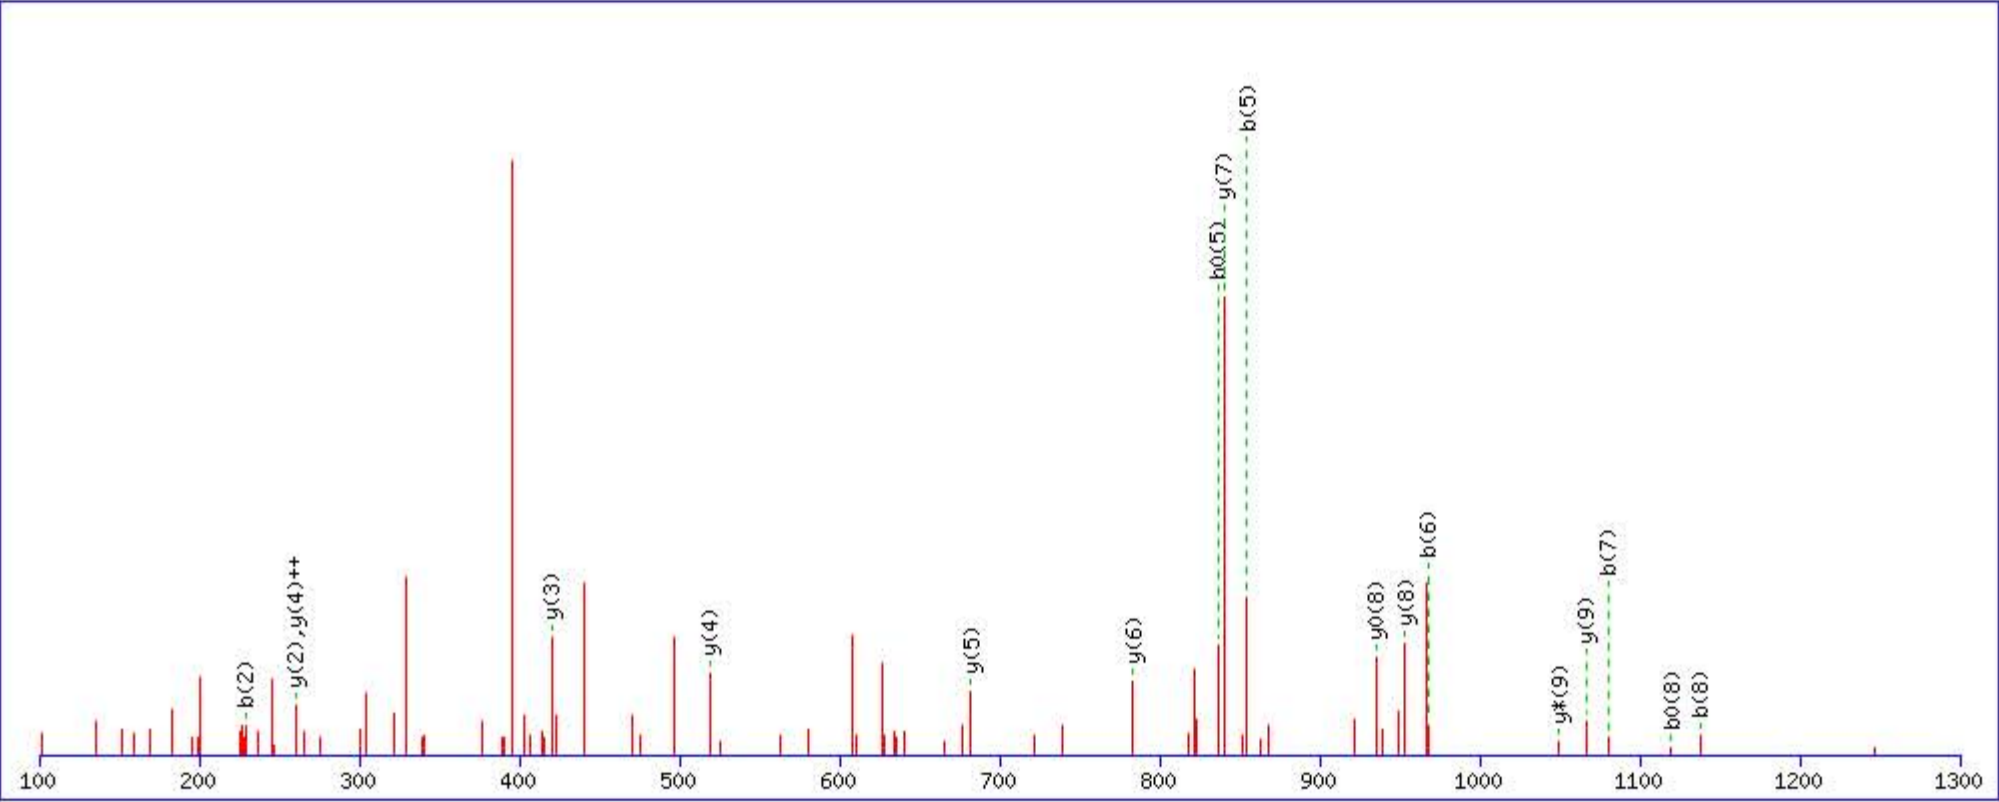

Monoisotopic mass of neutral peptide Mr(calc): 1918.989639  
Fixed modifications: Carbamidomethyl (C) (apply to specified residues or termini only)  
Variable modifications:  
Q5 : Biotin:Thermo-21345 (Q)  
Ions Score: 39 Expect: 0.0027  
Matches : 18/138 fragment ions using 33 most intense peaks [\(help\)](#)

| #  | b           | b <sup>++</sup> | b <sup>*</sup> | b <sup>*,++</sup> | b <sup>0</sup> | b <sup>0++</sup> | Seq. | y           | y <sup>++</sup> | y <sup>*</sup> | y <sup>*,++</sup> | y <sup>0</sup> | y <sup>0++</sup> | #  |
|----|-------------|-----------------|----------------|-------------------|----------------|------------------|------|-------------|-----------------|----------------|-------------------|----------------|------------------|----|
| 1  | 130.049869  | 65.528572       |                |                   | 112.039304     | 56.523290        | E    |             |                 |                |                   |                |                  | 14 |
| 2  | 229.118283  | 115.062780      |                |                   | 211.107718     | 106.057497       | V    | 1790.954328 | 895.980802      | 1773.927779    | 887.467528        | 1772.943763    | 886.975520       | 13 |
| 3  | 358.160876  | 179.584076      |                |                   | 340.150311     | 170.578794       | E    | 1691.885914 | 846.446595      | 1674.859365    | 837.933321        | 1673.875349    | 837.441313       | 12 |
| 4  | 415.182340  | 208.094808      |                |                   | 397.171775     | 199.089526       | G    | 1562.843321 | 781.925299      | 1545.816772    | 773.412024        | 1544.832756    | 772.920016       | 11 |
| 5  | 854.407666  | 427.707471      | 837.381117     | 419.194197        | 836.397101     | 418.702189       | Q    | 1505.821857 | 753.414567      | 1488.795308    | 744.901292        | 1487.811292    | 744.409284       | 10 |
| 6  | 967.491730  | 484.249503      | 950.465181     | 475.736229        | 949.481165     | 475.244221       | I    | 1066.596531 | 533.801904      | 1049.569982    | 525.288629        | 1048.585966    | 524.796621       | 9  |
| 7  | 1080.575794 | 540.791535      | 1063.549245    | 532.278261        | 1062.565229    | 531.786253       | L    | 953.512467  | 477.259872      | 936.485918     | 468.746597        | 935.501902     | 468.254589       | 8  |
| 8  | 1137.597258 | 569.302267      | 1120.570709    | 560.788993        | 1119.586693    | 560.296985       | G    | 840.428403  | 420.717840      | 823.401854     | 412.204565        | 822.417838     | 411.712557       | 7  |
| 9  | 1238.644937 | 619.826107      | 1221.618388    | 611.312832        | 1220.634372    | 610.820824       | T    | 783.406939  | 392.207108      | 766.380390     | 383.693833        | 765.396374     | 383.201825       | 6  |
| 10 | 1401.708266 | 701.357771      | 1384.681717    | 692.844497        | 1383.697701    | 692.352489       | Y    | 682.359260  | 341.683268      | 665.332711     | 333.169994        |                |                  | 5  |
| 11 | 1500.776680 | 750.891978      | 1483.750131    | 742.378704        | 1482.766115    | 741.886696       | V    | 519.295931  | 260.151604      | 502.269382     | 251.638329        |                |                  | 4  |
| 12 | 1660.807329 | 830.907303      | 1643.780780    | 822.394028        | 1642.796764    | 821.902020       | C    | 420.227517  | 210.617396      | 403.200968     | 202.104122        |                |                  | 3  |
| 13 | 1773.891393 | 887.449335      | 1756.864844    | 878.936060        | 1755.880828    | 878.444052       | I    | 260.196868  | 130.602072      | 243.170319     | 122.088797        |                |                  | 2  |
| 14 |             |                 |                |                   |                |                  | K    | 147.112804  | 74.060040       | 130.086255     | 65.546765         |                |                  | 1  |

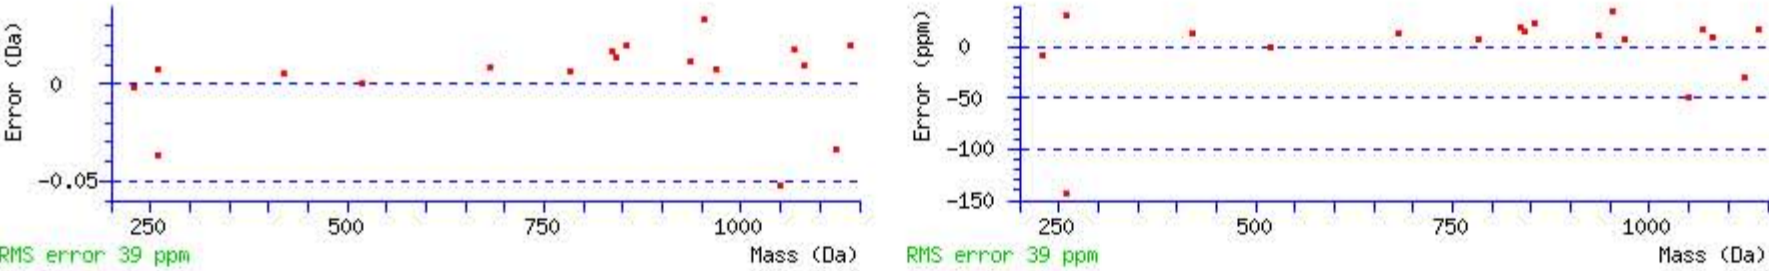

NCBI BLAST search of [EVEGQILGTYVCIK](#)  
(Parameters: blastp, nr protein database, expect=20000, no filter, PAM30)  
Other BLAST [web gateways](#)

All matches to this query

| Score | Mr(calc):   | Delta    | Sequence                       |
|-------|-------------|----------|--------------------------------|
| 39.5  | 1918.989639 | 0.027273 | <a href="#">EVEGQILGTYVCIK</a> |

MATRIX

SCIENCE

Mascot Search Results

Peptide View

MS/MS Fragmentation of **NLCEAMENFMQQLK**  
Found in **C4BPB\_HUMAN**, C4b-binding protein beta chain OS=Homo sapiens GN=C4BPB PE=1 SV=1

Match to Query 46042: 2065.967742 from(689.663190,3+) rtinseconds(3099) index(57706)  
Title: Locus:1.1.1.2312.8 File:"2013-07-02 CLN FXIII 180 min 2nd F 4.wiff"  
Data file C:\Program Files (x86)\Matrix Science\Mascot Daemon\mgf\8 FXIII 180 min 2nd\mascot\_daemon\_merge.mgf

Click mouse within plot area to zoom in by factor of two about that point  
Or,   to  Da   
Label all possible matches ☐ Label matches used for scoring ☒

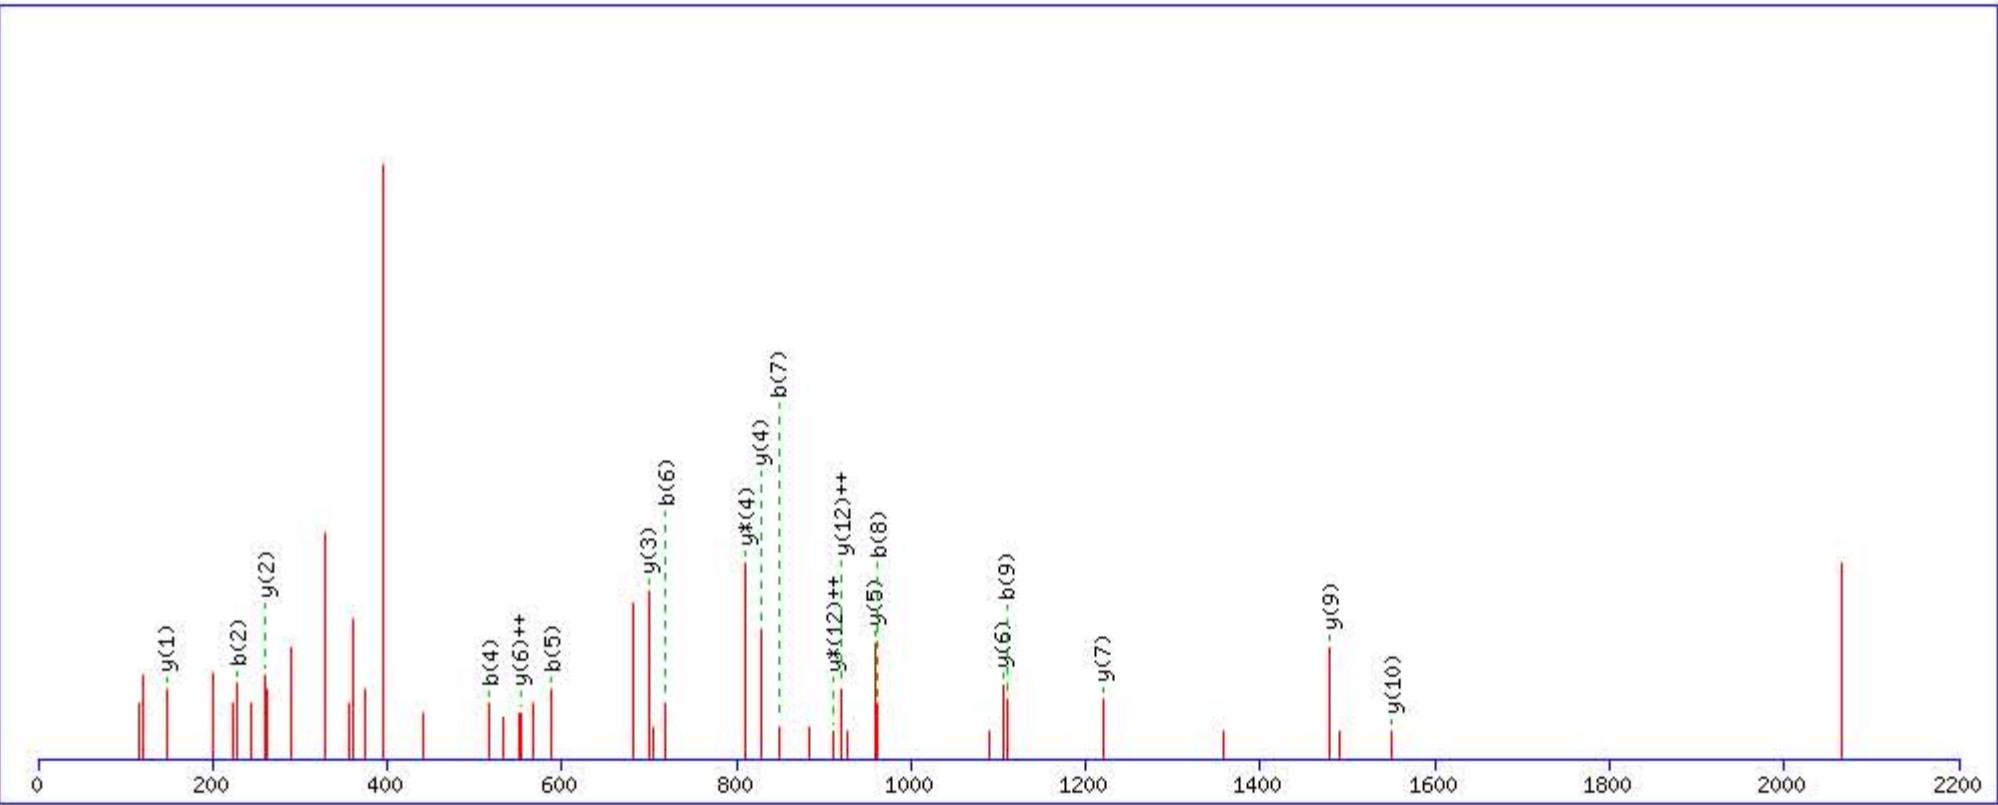

Monoisotopic mass of neutral peptide Mr(calc): 2065.945709  
Fixed modifications: Carbamidomethyl (C) (apply to specified residues or termini only)  
Variable modifications:  
Q12 : Biotin:Thermo-21345 (Q)  
Ions Score: 47 Expect: 4.5e-005  
Matches : 20/136 fragment ions using 40 most intense peaks [\(help\)](#)

| #  | b           | b <sup>++</sup> | b <sup>*</sup> | b <sup>*++</sup> | b <sup>0</sup> | b <sup>0++</sup> | Seq. | y           | y <sup>++</sup> | y <sup>*</sup> | y <sup>*++</sup> | y <sup>0</sup> | y <sup>0++</sup> | #  |
|----|-------------|-----------------|----------------|------------------|----------------|------------------|------|-------------|-----------------|----------------|------------------|----------------|------------------|----|
| 1  | 115.050203  | 58.028740       | 98.023654      | 49.515465        |                |                  | N    |             |                 |                |                  |                |                  | 14 |
| 2  | 228.134267  | 114.570771      | 211.107718     | 106.057497       |                |                  | L    | 1952.910096 | 976.958686      | 1935.883547    | 968.445412       | 1934.899531    | 967.953404       | 13 |
| 3  | 388.164916  | 194.586096      | 371.138367     | 186.072822       |                |                  | C    | 1839.826032 | 920.416654      | 1822.799483    | 911.903380       | 1821.815467    | 911.411371       | 12 |
| 4  | 517.207509  | 259.107393      | 500.180960     | 250.594118       | 499.196944     | 250.102110       | E    | 1679.795383 | 840.401329      | 1662.768834    | 831.888055       | 1661.784818    | 831.396047       | 11 |
| 5  | 588.244623  | 294.625950      | 571.218074     | 286.112675       | 570.234058     | 285.620667       | A    | 1550.752790 | 775.880033      | 1533.726241    | 767.366759       | 1532.742225    | 766.874751       | 10 |
| 6  | 719.285108  | 360.146192      | 702.258559     | 351.632918       | 701.274543     | 351.140910       | M    | 1479.715676 | 740.361476      | 1462.689127    | 731.848202       | 1461.705111    | 731.356194       | 9  |
| 7  | 848.327701  | 424.667489      | 831.301152     | 416.154214       | 830.317136     | 415.662206       | E    | 1348.675191 | 674.841234      | 1331.648642    | 666.327959       | 1330.664626    | 665.835951       | 8  |
| 8  | 962.370628  | 481.688952      | 945.344079     | 473.175678       | 944.360063     | 472.683670       | N    | 1219.632598 | 610.319937      | 1202.606049    | 601.806663       |                |                  | 7  |
| 9  | 1109.439042 | 555.223159      | 1092.412493    | 546.709885       | 1091.428477    | 546.217876       | F    | 1105.589671 | 553.298474      | 1088.563122    | 544.785199       |                |                  | 6  |
| 10 | 1240.479527 | 620.743402      | 1223.452978    | 612.230127       | 1222.468962    | 611.738119       | M    | 958.521257  | 479.764267      | 941.494708     | 471.250992       |                |                  | 5  |
| 11 | 1368.538105 | 684.772690      | 1351.511556    | 676.259416       | 1350.527540    | 675.767408       | Q    | 827.480772  | 414.244024      | 810.454223     | 405.730750       |                |                  | 4  |
| 12 | 1807.763431 | 904.385354      | 1790.736882    | 895.872079       | 1789.752866    | 895.380071       | Q    | 699.422194  | 350.214735      | 682.395645     | 341.701461       |                |                  | 3  |
| 13 | 1920.847495 | 960.927386      | 1903.820946    | 952.414111       | 1902.836930    | 951.922103       | L    | 260.196868  | 130.602072      | 243.170319     | 122.088797       |                |                  | 2  |
| 14 |             |                 |                |                  |                |                  | K    | 147.112804  | 74.060040       | 130.086255     | 65.546765        |                |                  | 1  |

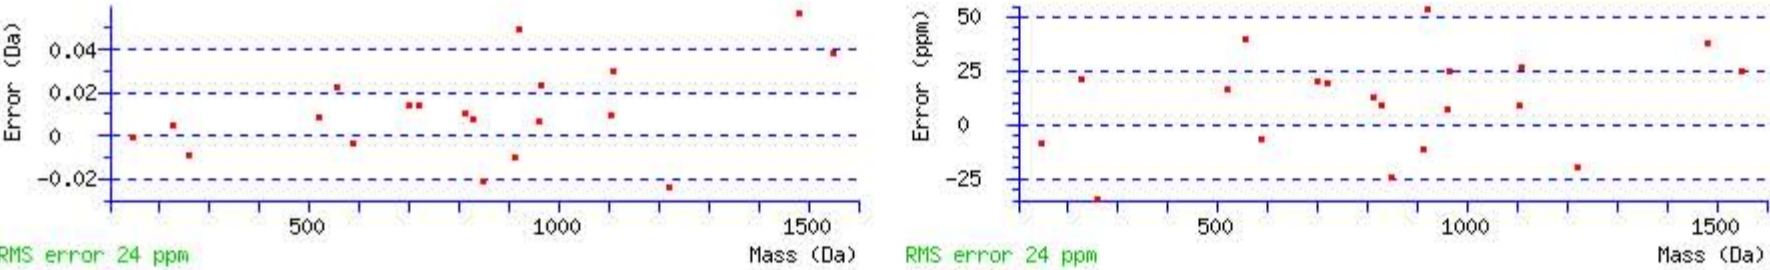

NCBI BLAST search of [NLCEAMENFMQQLK](#)  
(Parameters: blastp, nr protein database, expect=20000, no filter, PAM30)  
Other BLAST [web gateways](#)

All matches to this query

| Score | Mr(calc):   | Delta     | Sequence                          |
|-------|-------------|-----------|-----------------------------------|
| 46.6  | 2065.945709 | 0.022033  | <a href="#">NLCEAMENFMQQLK</a>    |
| 38.6  | 2065.945709 | 0.022033  | <a href="#">NLCEAMENFMQQLK</a>    |
| 0.3   | 2065.985092 | -0.017350 | <a href="#">QGENSTHQQSASASVPK</a> |
| 0.2   | 2065.966843 | 0.000899  | <a href="#">QEMECCLNSILKSK</a>    |

MATRIX

SCIENCE

Mascot Search Results

Peptide View

MS/MS Fragmentation of **SIPQVSPVR**  
Found in **CBPN\_HUMAN**, Carboxypeptidase N catalytic chain OS=Homo sapiens GN=CPN1 PE=1 SV=1

Match to Query 23221: 1292.737348 from(647.375950,2+) rtinseconds(1891) index(33388)  
Title: Locus:1.1.1.767.17 File:"2013-07-02 CLN FXIII 180 min 2nd F 3.wiff"  
Data file C:\Program Files (x86)\Matrix Science\Mascot Daemon\mgf\8 FXIII 180 min 2nd\mascot\_daemon\_merge.mgf

Click mouse within plot area to zoom in by factor of two about that point  
Or, 

Plot from

100

 to 

1700

 Da 

Full range

  
Label all possible matches ☐ Label matches used for scoring ☒

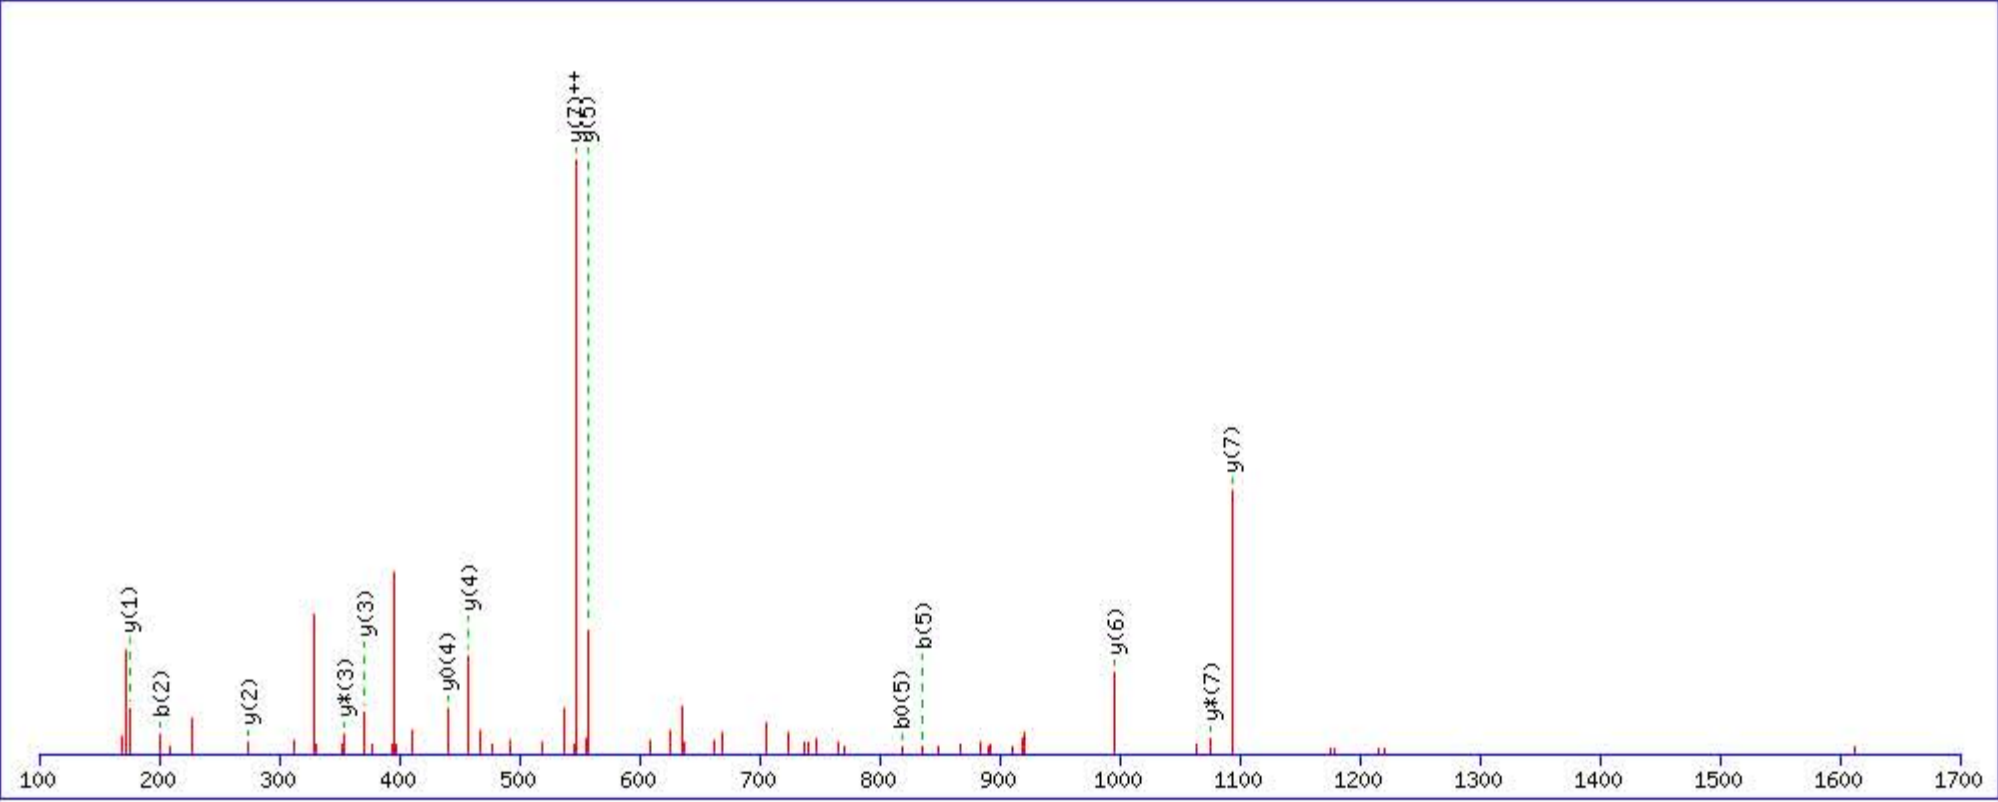

Monoisotopic mass of neutral peptide Mr(calc): 1292.727478  
Fixed modifications: Carbamidomethyl (C) (apply to specified residues or termini only)  
Variable modifications:  
Q4 : Biotin:Thermo-21345 (Q)  
Ions Score: 27 Expect: 0.016  
Matches : 14/84 fragment ions using 41 most intense peaks ([help](#))

| # | b           | b <sup>++</sup> | b <sup>*</sup> | b <sup>*++</sup> | b <sup>0</sup> | b <sup>0++</sup> | Seq. | y           | y <sup>++</sup> | y <sup>*</sup> | y <sup>*++</sup> | y <sup>0</sup> | y <sup>0++</sup> | # |
|---|-------------|-----------------|----------------|------------------|----------------|------------------|------|-------------|-----------------|----------------|------------------|----------------|------------------|---|
| 1 | 88.039304   | 44.523290       |                |                  | 70.028739      | 35.518008        | S    |             |                 |                |                  |                |                  | 9 |
| 2 | 201.123368  | 101.065322      |                |                  | 183.112803     | 92.060039        | I    | 1206.702726 | 603.855001      | 1189.676177    | 595.341727       | 1188.692161    | 594.849718       | 8 |
| 3 | 298.176132  | 149.591704      |                |                  | 280.165567     | 140.586422       | P    | 1093.618662 | 547.312969      | 1076.592113    | 538.799695       | 1075.608097    | 538.307687       | 7 |
| 4 | 737.401458  | 369.204367      | 720.374909     | 360.691093       | 719.390893     | 360.199085       | Q    | 996.565898  | 498.786587      | 979.539349     | 490.273313       | 978.555333     | 489.781305       | 6 |
| 5 | 836.469872  | 418.738574      | 819.443323     | 410.225300       | 818.459307     | 409.733292       | V    | 557.340572  | 279.173924      | 540.314023     | 270.660650       | 539.330007     | 270.168642       | 5 |
| 6 | 923.501900  | 462.254588      | 906.475351     | 453.741313       | 905.491335     | 453.249305       | S    | 458.272158  | 229.639717      | 441.245609     | 221.126443       | 440.261593     | 220.634435       | 4 |
| 7 | 1020.554664 | 510.780970      | 1003.528115    | 502.267696       | 1002.544099    | 501.775688       | P    | 371.240130  | 186.123703      | 354.213581     | 177.610429       |                |                  | 3 |
| 8 | 1119.623078 | 560.315177      | 1102.596529    | 551.801903       | 1101.612513    | 551.309895       | V    | 274.187366  | 137.597321      | 257.160817     | 129.084047       |                |                  | 2 |
| 9 |             |                 |                |                  |                |                  | R    | 175.118952  | 88.063114       | 158.092403     | 79.549839        |                |                  | 1 |

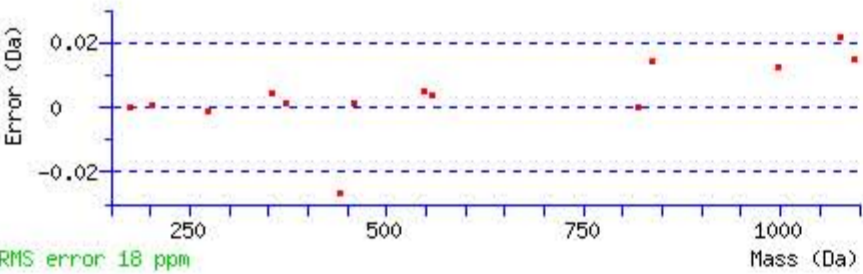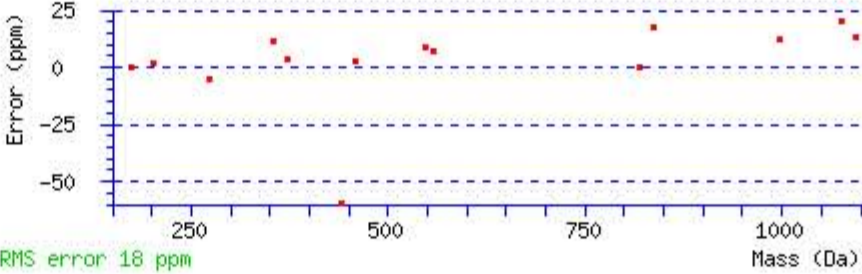

NCBI BLAST search of [SIPQVSPVR](#)  
(Parameters: blastp, nr protein database, expect=20000, no filter, PAM30)  
Other BLAST [web gateways](#)

All matches to this query

| Score | Mr(calc):   | Delta     | Sequence                     |
|-------|-------------|-----------|------------------------------|
| 27.3  | 1292.727478 | 0.009870  | <a href="#">SIPQVSPVR</a>    |
| 9.8   | 1292.756454 | -0.019106 | <a href="#">LSIPQITTKHR</a>  |
| 4.5   | 1292.756485 | -0.019137 | <a href="#">VTAVEVGKHVVR</a> |
| 1.9   | 1292.756470 | -0.019122 | <a href="#">TVTLLSPPRGR</a>  |
| 1.4   | 1292.745224 | -0.007876 | <a href="#">LSPSQHLAVLTK</a> |

Peptide View

MS/MS Fragmentation of **EALIQFLEQVHQGIK**  
Found in **CBPN\_HUMAN**, Carboxypeptidase N catalytic chain OS=Homo sapiens GN=CPN1 PE=1 SV=1

Match to Query 46015: 2063.153322 from(688.725050,3+) rtinseconds(2770) index(38920)  
Title: Locus:1.1.1.1072.14 File:"2013-07-02 CLN FXIII 180 min 2nd F 3.wiff"  
Data file C:\Program Files (x86)\Matrix Science\Mascot Daemon\mgf\8 FXIII 180 min 2nd\mascot\_daemon\_merge.mgf

Click mouse within plot area to zoom in by factor of two about that point  
Or, 

Plot from

0

 to 

2200

 Da 

Full range

  
Label all possible matches ☐ Label matches used for scoring ☒

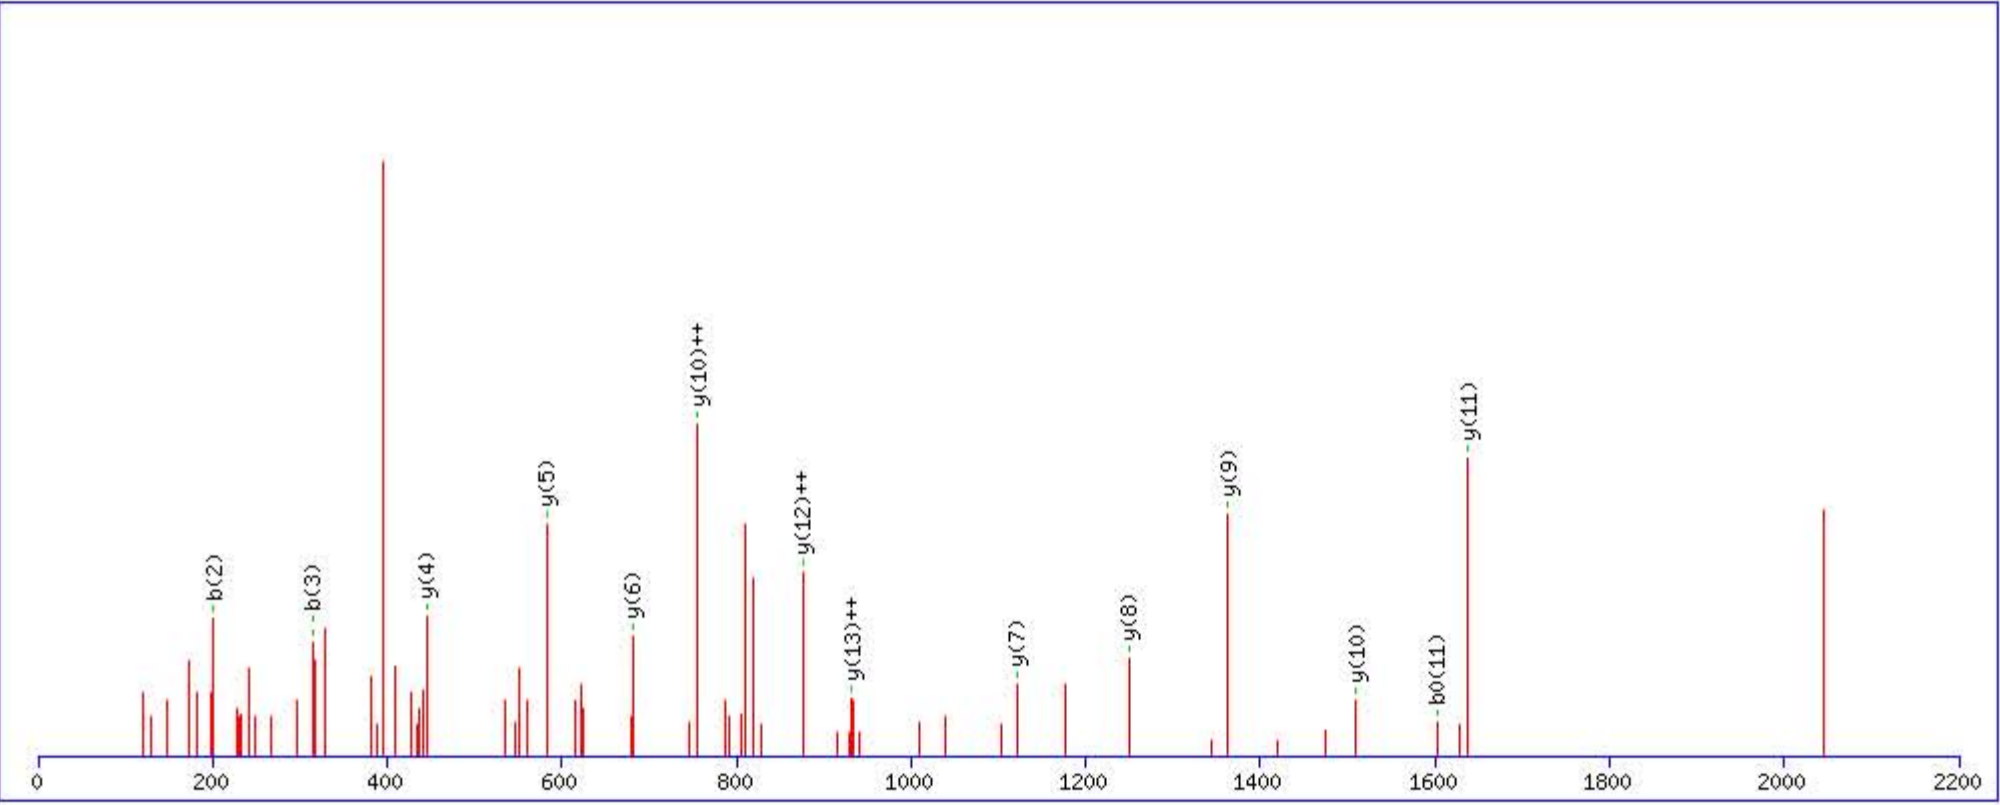

Monoisotopic mass of neutral peptide Mr(calc): 2063.123749  
Fixed modifications: Carbamidomethyl (C) (apply to specified residues or termini only)  
Variable modifications:  
Q9 : Biotin:Thermo-21345 (Q)  
Ions Score: 62 Expect: 7.6e-006  
Matches : 14/146 fragment ions using 17 most intense peaks [\(help\)](#)

| #  | b           | b <sup>++</sup> | b <sup>*</sup> | b <sup>*++</sup> | b <sup>0</sup> | b <sup>0++</sup> | Seq. | y           | y <sup>++</sup> | y <sup>*</sup> | y <sup>*++</sup> | y <sup>0</sup> | y <sup>0++</sup> | #  |
|----|-------------|-----------------|----------------|------------------|----------------|------------------|------|-------------|-----------------|----------------|------------------|----------------|------------------|----|
| 1  | 130.049869  | 65.528572       |                |                  | 112.039304     | 56.523290        | E    |             |                 |                |                  |                |                  | 15 |
| 2  | 201.086983  | 101.047130      |                |                  | 183.076418     | 92.041847        | A    | 1935.088453 | 968.047865      | 1918.061904    | 959.534590       | 1917.077888    | 959.042582       | 14 |
| 3  | 314.171047  | 157.589161      |                |                  | 296.160482     | 148.583879       | L    | 1864.051339 | 932.529307      | 1847.024790    | 924.016033       | 1846.040774    | 923.524025       | 13 |
| 4  | 427.255111  | 214.131193      |                |                  | 409.244546     | 205.125911       | I    | 1750.967275 | 875.987276      | 1733.940726    | 867.474001       | 1732.956710    | 866.981993       | 12 |
| 5  | 555.313689  | 278.160483      | 538.287140     | 269.647208       | 537.303124     | 269.155200       | Q    | 1637.883211 | 819.445244      | 1620.856662    | 810.931969       | 1619.872646    | 810.439961       | 11 |
| 6  | 702.382103  | 351.694690      | 685.355554     | 343.181415       | 684.371538     | 342.689407       | F    | 1509.824633 | 755.415955      | 1492.798084    | 746.902680       | 1491.814068    | 746.410672       | 10 |
| 7  | 815.466167  | 408.236722      | 798.439618     | 399.723447       | 797.455602     | 399.231439       | L    | 1362.756219 | 681.881748      | 1345.729670    | 673.368473       | 1344.745654    | 672.876465       | 9  |
| 8  | 944.508760  | 472.758018      | 927.482211     | 464.244744       | 926.498195     | 463.752736       | E    | 1249.672155 | 625.339716      | 1232.645606    | 616.826441       | 1231.661590    | 616.334433       | 8  |
| 9  | 1383.734086 | 692.370681      | 1366.707537    | 683.857407       | 1365.723521    | 683.365399       | Q    | 1120.629562 | 560.818419      | 1103.603013    | 552.305144       |                |                  | 7  |
| 10 | 1482.802500 | 741.904888      | 1465.775951    | 733.391614       | 1464.791935    | 732.899606       | V    | 681.404236  | 341.205756      | 664.377687     | 332.692481       |                |                  | 6  |
| 11 | 1619.861412 | 810.434344      | 1602.834863    | 801.921070       | 1601.850847    | 801.429062       | H    | 582.335822  | 291.671549      | 565.309273     | 283.158274       |                |                  | 5  |
| 12 | 1747.919990 | 874.463633      | 1730.893441    | 865.950359       | 1729.909425    | 865.458351       | Q    | 445.276910  | 223.142093      | 428.250361     | 214.628818       |                |                  | 4  |
| 13 | 1804.941454 | 902.974365      | 1787.914905    | 894.461091       | 1786.930889    | 893.969083       | G    | 317.218332  | 159.112804      | 300.191783     | 150.599529       |                |                  | 3  |
| 14 | 1918.025518 | 959.516397      | 1900.998969    | 951.003123       | 1900.014953    | 950.511114       | I    | 260.196868  | 130.602072      | 243.170319     | 122.088797       |                |                  | 2  |
| 15 |             |                 |                |                  |                |                  | K    | 147.112804  | 74.060040       | 130.086255     | 65.546765        |                |                  | 1  |

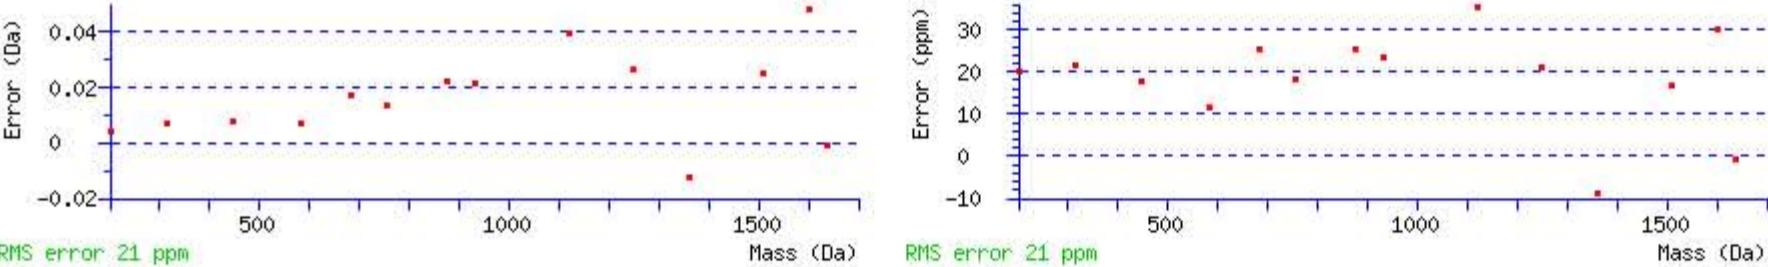

NCBI BLAST search of [EALIQFLEQVHQGIK](#)  
(Parameters: blastp, nr protein database, expect=20000, no filter, PAM30)  
Other BLAST [web gateways](#)

All matches to this query

| Score | Mr(calc):   | Delta    | Sequence                        |
|-------|-------------|----------|---------------------------------|
| 62.2  | 2063.123749 | 0.029573 | <a href="#">EALIQFLEQVHQGIK</a> |
| 25.1  | 2063.123749 | 0.029573 | <a href="#">EALIQFLEQVHQGIK</a> |
| 13.5  | 2063.123749 | 0.029573 | <a href="#">EALIQFLEQVHQGIK</a> |

MATRIX

SCIENCE

Mascot Search Results

Peptide View

MS/MS Fragmentation of **AGGSWDLAVQER**  
Found in **CPN2\_HUMAN**, Carboxypeptidase N subunit 2 OS=Homo sapiens GN=CPN2 PE=1 SV=3

Match to Query 34671: 1598.809308 from(800.411930,2+) rtinseconds(2161) index(35223)  
Title: Locus:1.1.1.861.16 File:"2013-07-02 CLN FXIII 180 min 2nd F 3.wiff"  
Data file C:\Program Files (x86)\Matrix Science\Mascot Daemon\mgf\8 FXIII 180 min 2nd\mascot\_daemon\_merge.mgf

Click mouse within plot area to zoom in by factor of two about that point  
Or, 

Plot from

100

 to 

1600

 Da 

Full range

  
Label all possible matches ☐ Label matches used for scoring ☒

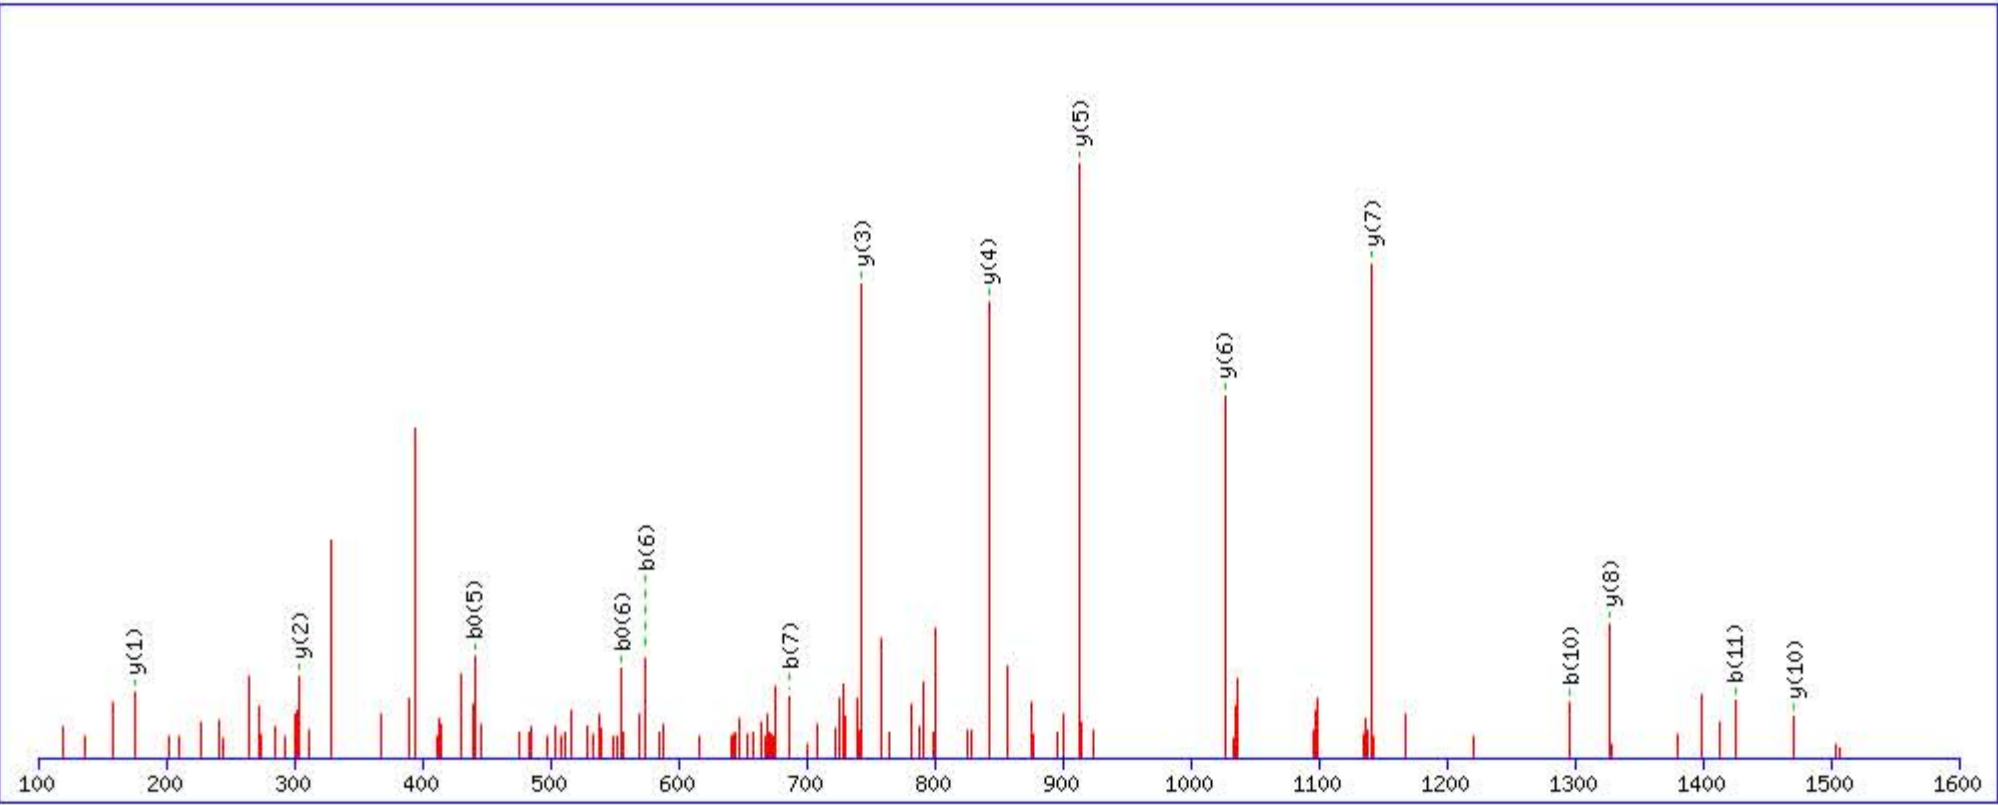

Monoisotopic mass of neutral peptide Mr(calc): 1598.787506  
Fixed modifications: Carbamidomethyl (C) (apply to specified residues or termini only)  
Variable modifications:  
Q10 : Biotin:Thermo-21345 (Q)  
Ions Score: 59 Expect: 3.3e-005  
Matches : 15/106 fragment ions using 27 most intense peaks [\(help\)](#)

| #  | b           | b <sup>++</sup> | b <sup>*</sup> | b <sup>+++</sup> | b <sup>0</sup> | b <sup>0++</sup> | Seq. | y           | y <sup>++</sup> | y <sup>*</sup> | y <sup>+++</sup> | y <sup>0</sup> | y <sup>0++</sup> | #  |
|----|-------------|-----------------|----------------|------------------|----------------|------------------|------|-------------|-----------------|----------------|------------------|----------------|------------------|----|
| 1  | 72.044390   | 36.525833       |                |                  |                |                  | A    |             |                 |                |                  |                |                  | 12 |
| 2  | 129.065854  | 65.036565       |                |                  |                |                  | G    | 1528.757675 | 764.882476      | 1511.731126    | 756.369201       | 1510.747110    | 755.877193       | 11 |
| 3  | 186.087318  | 93.547297       |                |                  |                |                  | G    | 1471.736211 | 736.371744      | 1454.709662    | 727.858469       | 1453.725646    | 727.366461       | 10 |
| 4  | 273.119346  | 137.063311      |                |                  | 255.108781     | 128.058029       | S    | 1414.714747 | 707.861012      | 1397.688198    | 699.347737       | 1396.704182    | 698.855729       | 9  |
| 5  | 459.198659  | 230.102968      |                |                  | 441.188094     | 221.097685       | W    | 1327.682719 | 664.344998      | 1310.656170    | 655.831723       | 1309.672154    | 655.339715       | 8  |
| 6  | 574.225602  | 287.616439      |                |                  | 556.215037     | 278.611157       | D    | 1141.603406 | 571.305341      | 1124.576857    | 562.792067       | 1123.592841    | 562.300059       | 7  |
| 7  | 687.309666  | 344.158471      |                |                  | 669.299101     | 335.153189       | L    | 1026.576463 | 513.791870      | 1009.549914    | 505.278595       | 1008.565898    | 504.786587       | 6  |
| 8  | 758.346780  | 379.677028      |                |                  | 740.336215     | 370.671746       | A    | 913.492399  | 457.249838      | 896.465850     | 448.736563       | 895.481834     | 448.244555       | 5  |
| 9  | 857.415194  | 429.211235      |                |                  | 839.404629     | 420.205953       | V    | 842.455285  | 421.731281      | 825.428736     | 413.218006       | 824.444720     | 412.725998       | 4  |
| 10 | 1296.640520 | 648.823898      | 1279.613971    | 640.310624       | 1278.629955    | 639.818616       | Q    | 743.386871  | 372.197074      | 726.360322     | 363.683799       | 725.376306     | 363.191791       | 3  |
| 11 | 1425.683113 | 713.345195      | 1408.656564    | 704.831920       | 1407.672548    | 704.339912       | E    | 304.161545  | 152.584411      | 287.134996     | 144.071136       | 286.150980     | 143.579128       | 2  |
| 12 |             |                 |                |                  |                |                  | R    | 175.118952  | 88.063114       | 158.092403     | 79.549839        |                |                  | 1  |

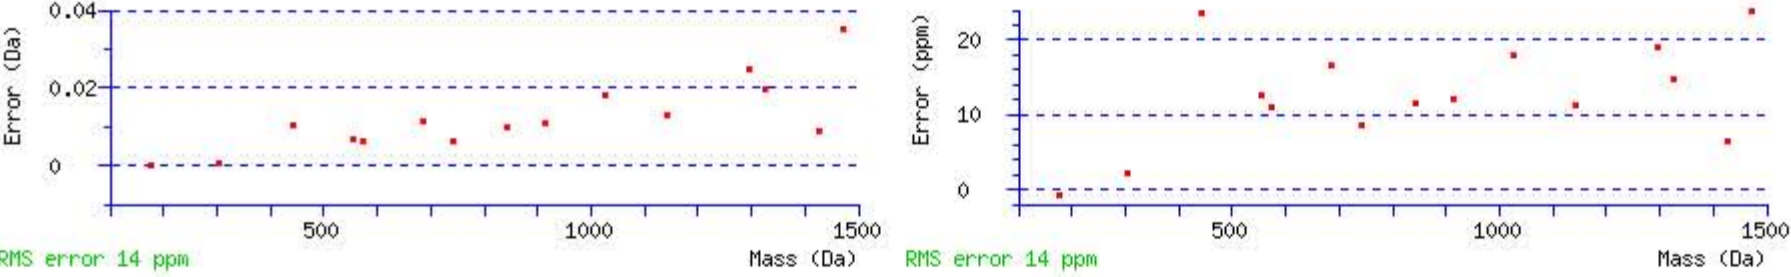

NCBI **BLAST** search of [AGGSWDLAVQER](#)  
(Parameters: blastp, nr protein database, expect=20000, no filter, PAM30)  
Other BLAST [web gateways](#)

All matches to this query

| Score | Mr(calc):   | Delta     | Sequence                         |
|-------|-------------|-----------|----------------------------------|
| 58.7  | 1598.787506 | 0.021802  | <a href="#">AGGSWDLAVQER</a>     |
| 15.0  | 1598.797409 | 0.011899  | <a href="#">EDVDDLVSQLR</a>      |
| 8.8   | 1598.797379 | 0.011929  | <a href="#">ELDESLQVAER</a>      |
| 5.4   | 1598.797379 | 0.011929  | <a href="#">LEESDVLQEAR</a>      |
| 5.2   | 1598.789993 | 0.019315  | <a href="#">AGATSGELPVVEAENR</a> |
| 4.1   | 1598.823883 | -0.014575 | <a href="#">LQISNPGFQER</a>      |
| 1.7   | 1598.791306 | 0.018002  | <a href="#">EREQRLEAFHER</a>     |
| 0.6   | 1598.790009 | 0.019299  | <a href="#">QELLEGDQDLVGQR</a>   |
| 0.6   | 1598.831100 | -0.021792 | <a href="#">QVETRTADGRR</a>      |

MATRIX

SCIENCE

Mascot Search Results

Peptide View

MS/MS Fragmentation of **DHLGFQVTWPDESK**  
Found in **CPN2\_HUMAN**, Carboxypeptidase N subunit 2 OS=Homo sapiens GN=CPN2 PE=1 SV=3

Match to Query 43556: 1968.959232 from(657.327020,3+) rtinseconds(2304) index(36070)  
Title: Locus:1.1.1.911.9 File:"2013-07-02 CLN FXIII 180 min 2nd F 3.wiff"  
Data file C:\Program Files (x86)\Matrix Science\Mascot Daemon\mgf\8 FXIII 180 min 2nd\mascot\_daemon\_merge.mgf

Click mouse within plot area to zoom in by factor of two about that point  
Or,   to  Da   
Label all possible matches ☐ Label matches used for scoring ☒

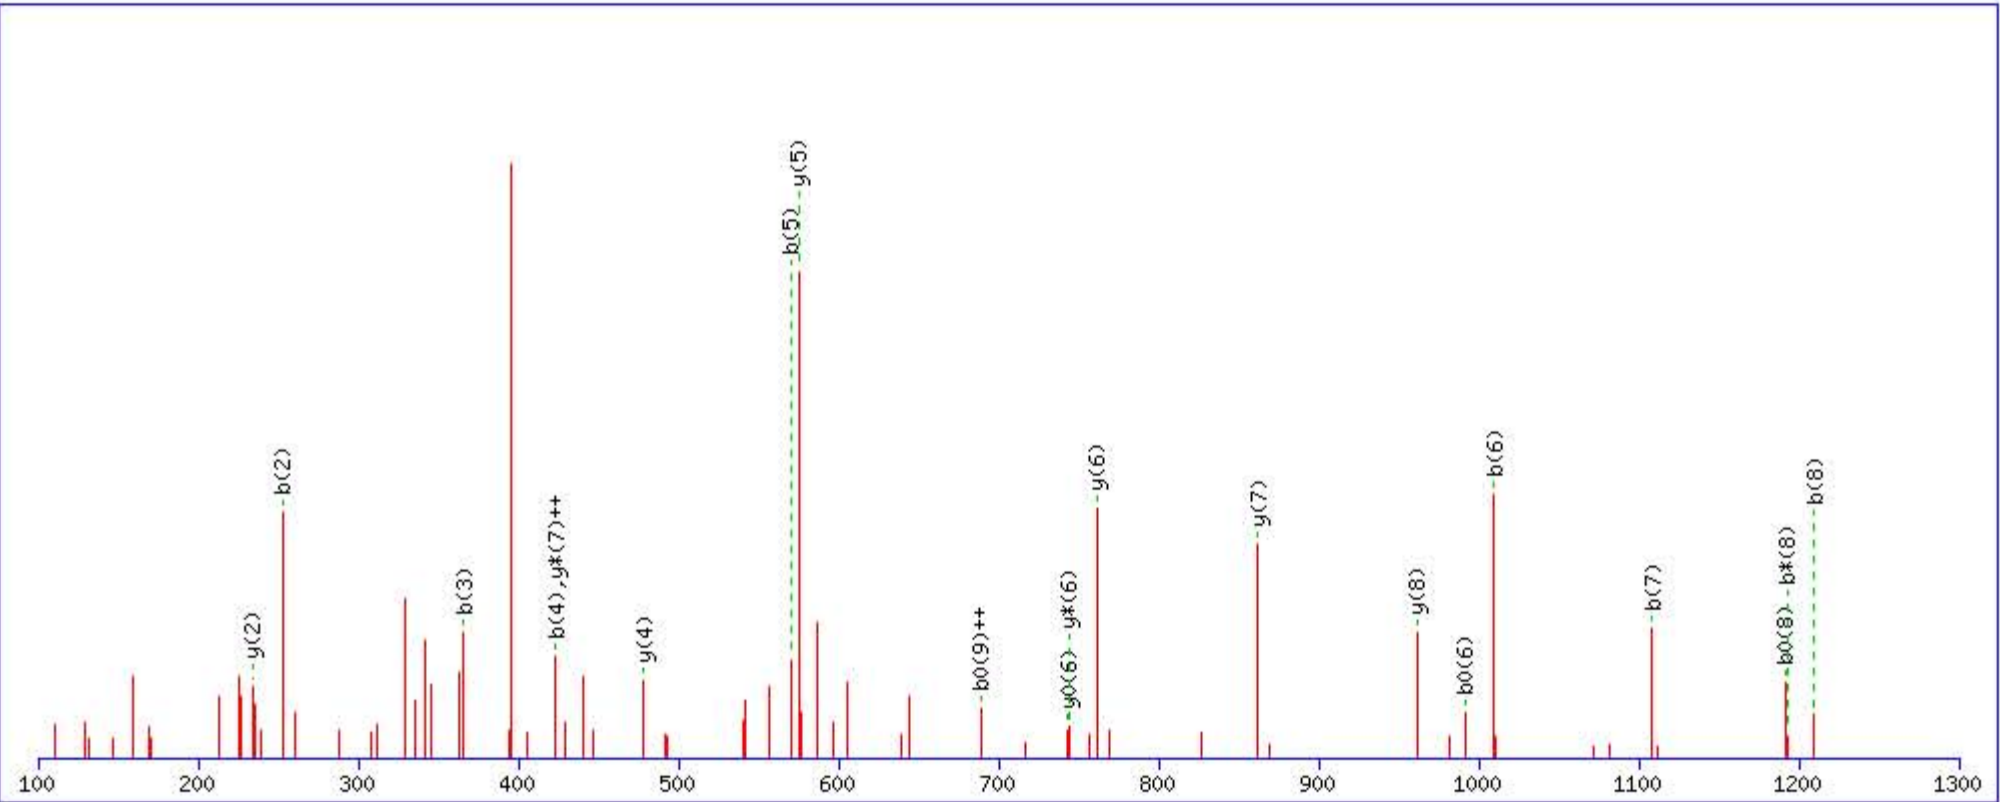

Monoisotopic mass of neutral peptide Mr(calc): 1968.940399  
Fixed modifications: Carbamidomethyl (C) (apply to specified residues or termini only)  
Variable modifications:  
Q6 : Biotin:Thermo-21345 (Q)  
Ions Score: 44 Expect: 0.00012  
Matches : 20/144 fragment ions using 33 most intense peaks [\(help\)](#)

| #  | b           | b <sup>++</sup> | b <sup>+</sup> | b <sup>+++</sup> | b <sup>0</sup> | b <sup>0++</sup> | Seq. | y           | y <sup>++</sup> | y <sup>+</sup> | y <sup>+++</sup> | y <sup>0</sup> | y <sup>0++</sup> | #  |
|----|-------------|-----------------|----------------|------------------|----------------|------------------|------|-------------|-----------------|----------------|------------------|----------------|------------------|----|
| 1  | 116.034219  | 58.520748       |                |                  | 98.023654      | 49.515465        | D    |             |                 |                |                  |                |                  | 14 |
| 2  | 253.093131  | 127.050203      |                |                  | 235.082566     | 118.044921       | H    | 1854.920718 | 927.963997      | 1837.894169    | 919.450723       | 1836.910153    | 918.958715       | 13 |
| 3  | 366.177195  | 183.592235      |                |                  | 348.166630     | 174.586953       | L    | 1717.861806 | 859.434541      | 1700.835257    | 850.921267       | 1699.851241    | 850.429259       | 12 |
| 4  | 423.198659  | 212.102967      |                |                  | 405.188094     | 203.097685       | G    | 1604.777742 | 802.892509      | 1587.751193    | 794.379235       | 1586.767177    | 793.887227       | 11 |
| 5  | 570.267073  | 285.637175      |                |                  | 552.256508     | 276.631892       | F    | 1547.756278 | 774.381777      | 1530.729729    | 765.868503       | 1529.745713    | 765.376495       | 10 |
| 6  | 1009.492399 | 505.249838      | 992.465850     | 496.736563       | 991.481834     | 496.244555       | Q    | 1400.687864 | 700.847570      | 1383.661315    | 692.334296       | 1382.677299    | 691.842288       | 9  |
| 7  | 1108.560813 | 554.784045      | 1091.534264    | 546.270770       | 1090.550248    | 545.778762       | V    | 961.462538  | 481.234907      | 944.435989     | 472.721633       | 943.451973     | 472.229625       | 8  |
| 8  | 1209.608492 | 605.307884      | 1192.581943    | 596.794610       | 1191.597927    | 596.302602       | T    | 862.394124  | 431.700700      | 845.367575     | 423.187426       | 844.383559     | 422.695418       | 7  |
| 9  | 1395.687805 | 698.347541      | 1378.661256    | 689.834266       | 1377.677240    | 689.342258       | W    | 761.346445  | 381.176861      | 744.319896     | 372.663586       | 743.335880     | 372.171578       | 6  |
| 10 | 1492.740569 | 746.873923      | 1475.714020    | 738.360648       | 1474.730004    | 737.868640       | P    | 575.267132  | 288.137204      | 558.240583     | 279.623930       | 557.256567     | 279.131922       | 5  |
| 11 | 1607.767512 | 804.387394      | 1590.740963    | 795.874120       | 1589.756947    | 795.382112       | D    | 478.214368  | 239.610822      | 461.187819     | 231.097548       | 460.203803     | 230.605540       | 4  |
| 12 | 1736.810105 | 868.908691      | 1719.783556    | 860.395416       | 1718.799540    | 859.903408       | E    | 363.187425  | 182.097351      | 346.160876     | 173.584076       | 345.176860     | 173.092068       | 3  |
| 13 | 1823.842133 | 912.424705      | 1806.815584    | 903.911430       | 1805.831568    | 903.419422       | S    | 234.144832  | 117.576054      | 217.118283     | 109.062780       | 216.134267     | 108.570772       | 2  |
| 14 |             |                 |                |                  |                |                  | K    | 147.112804  | 74.060040       | 130.086255     | 65.546765        |                |                  | 1  |

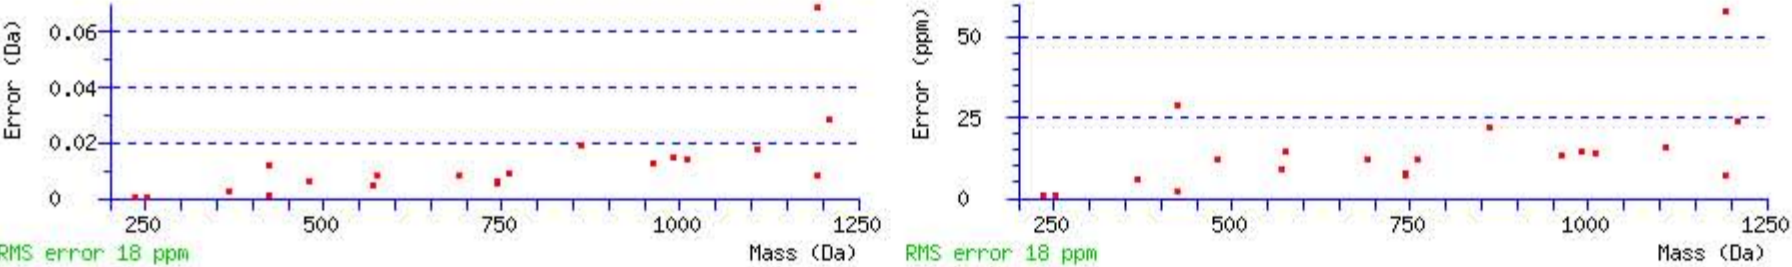

NCBI BLAST search of [DHLGFQVTWPDESK](#)  
(Parameters: blastp, nr protein database, expect=20000, no filter, PAM30)  
Other BLAST [web gateways](#)

All matches to this query

| Score | Mr(calc):   | Delta    | Sequence                           |
|-------|-------------|----------|------------------------------------|
| 43.9  | 1968.940399 | 0.018833 | <a href="#">DHLGFQVTWPDESK</a>     |
| 1.9   | 1968.949585 | 0.009647 | <a href="#">EGQMESVEAAMSSKTLKK</a> |

MATRIX

SCIENCE

Mascot Search Results

Peptide View

MS/MS Fragmentation of **QLVCPVTR**  
Found in **CPN2\_HUMAN**, Carboxypeptidase N subunit 2 OS=Homo sapiens GN=CPN2 PE=1 SV=3

Match to Query 6799: 1282.690602 from(428.570810,3+) rtinseconds(1772) index(32751)  
Title: Locus:1.1.1.726.5 File:"2013-07-02 CLN FXIII 180 min 2nd F 3.wiff"  
Data file C:\Program Files (x86)\Matrix Science\Mascot Daemon\mgf\8 FXIII 180 min 2nd\mascot\_daemon\_merge.mgf

Click mouse within plot area to zoom in by factor of two about that point  
Or, 

Plot from

100

 to 

1000

 Da 

Full range

  
Label all possible matches ☐ Label matches used for scoring ☒

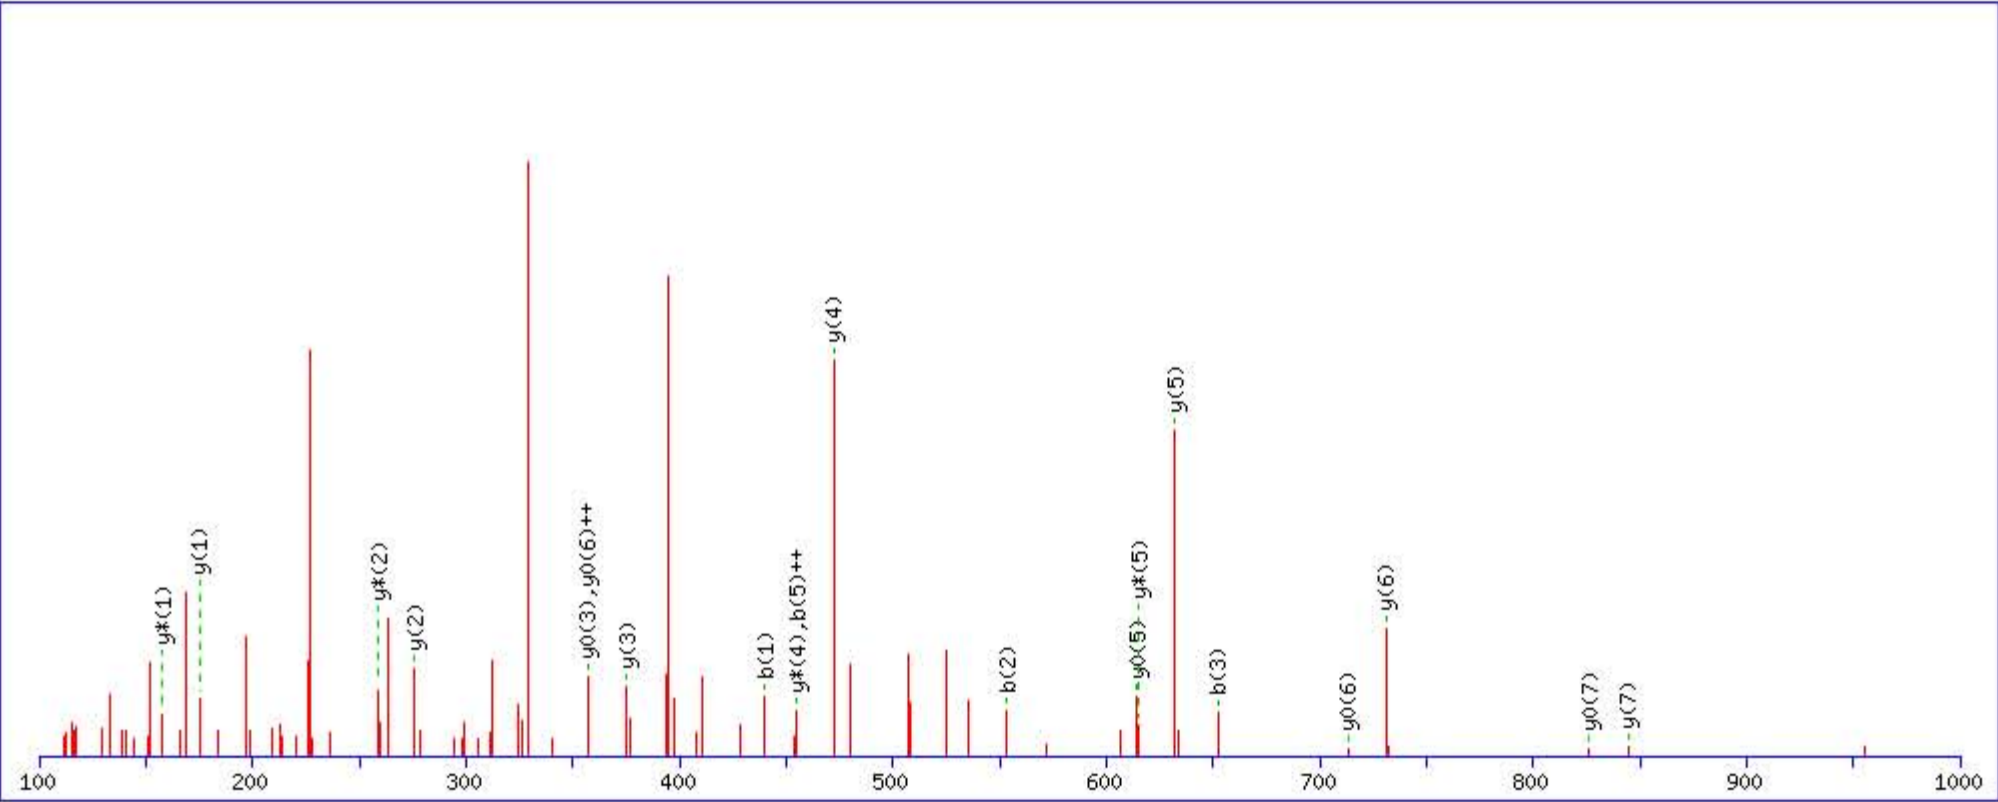

Monoisotopic mass of neutral peptide Mr(calc): 1282.688995  
Fixed modifications: Carbamidomethyl (C) (apply to specified residues or termini only)  
Variable modifications:  
Q1 : Biotin:Thermo-21345 (Q)  
Ions Score: 29 Expect: 0.0021  
Matches : 20/70 fragment ions using 44 most intense peaks [\(help\)](#)

| # | b           | b <sup>++</sup> | b <sup>*</sup> | b <sup>*++</sup> | b <sup>0</sup> | b <sup>0++</sup> | Seq. | y          | y <sup>++</sup> | y <sup>*</sup> | y <sup>*++</sup> | y <sup>0</sup> | y <sup>0++</sup> | # |
|---|-------------|-----------------|----------------|------------------|----------------|------------------|------|------------|-----------------|----------------|------------------|----------------|------------------|---|
| 1 | 440.232602  | 220.619939      | 423.206053     | 212.106664       |                |                  | Q    |            |                 |                |                  |                |                  | 8 |
| 2 | 553.316666  | 277.161971      | 536.290117     | 268.648697       |                |                  | L    | 844.470936 | 422.739106      | 827.444387     | 414.225831       | 826.460371     | 413.733823       | 7 |
| 3 | 652.385080  | 326.696178      | 635.358531     | 318.182904       |                |                  | V    | 731.386872 | 366.197074      | 714.360323     | 357.683799       | 713.376307     | 357.191791       | 6 |
| 4 | 812.415729  | 406.711503      | 795.389180     | 398.198228       |                |                  | C    | 632.318458 | 316.662867      | 615.291909     | 308.149592       | 614.307893     | 307.657584       | 5 |
| 5 | 909.468493  | 455.237885      | 892.441944     | 446.724610       |                |                  | P    | 472.287809 | 236.647542      | 455.261260     | 228.134268       | 454.277244     | 227.642260       | 4 |
| 6 | 1008.536907 | 504.772092      | 991.510358     | 496.258817       |                |                  | V    | 375.235045 | 188.121160      | 358.208496     | 179.607886       | 357.224480     | 179.115878       | 3 |
| 7 | 1109.584586 | 555.295931      | 1092.558037    | 546.782657       | 1091.574021    | 546.290648       | T    | 276.166631 | 138.586953      | 259.140082     | 130.073679       | 258.156066     | 129.581671       | 2 |
| 8 |             |                 |                |                  |                |                  | R    | 175.118952 | 88.063114       | 158.092403     | 79.549839        |                |                  | 1 |

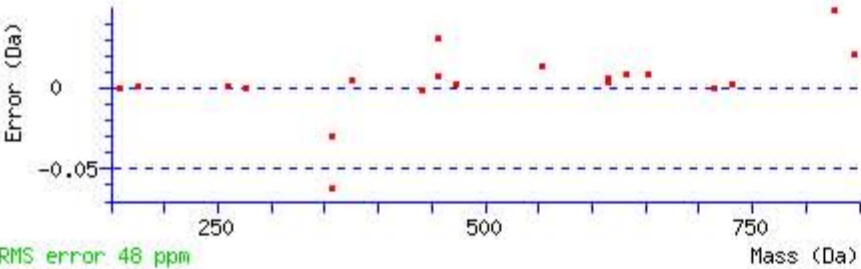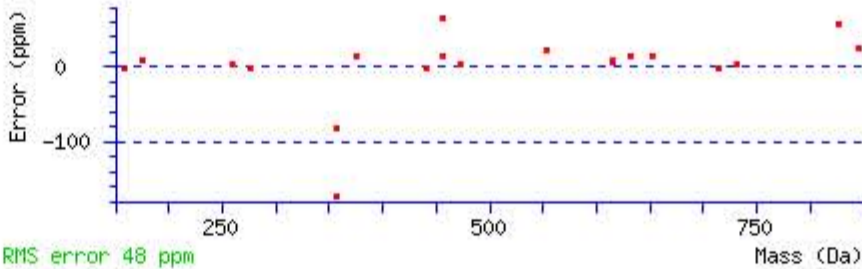

NCBI BLAST search of [QLVCPVTR](#)  
(Parameters: blastp, nr protein database, expect=20000, no filter, PAM30)  
Other BLAST [web gateways](#)

All matches to this query

| Score | Mr(calc):   | Delta    | Sequence                      |
|-------|-------------|----------|-------------------------------|
| 29.1  | 1282.688995 | 0.001607 | <a href="#">QLVCPVTR</a>      |
| 0.6   | 1282.681595 | 0.009007 | <a href="#">KNMGGLGGLVHGK</a> |

MATRIX

SCIENCE

Mascot Search Results

Peptide View

MS/MS Fragmentation of **SSTGPGEQLR**  
Found in **COMP\_HUMAN**, Cartilage oligomeric matrix protein OS=Homo sapiens GN=COMP PE=1 SV=2

Match to Query 24163: 1341.680868 from(671.847710,2+) rtinseconds(1589) index(47545)  
Title: Locus:1.1.1.1791.13 File:"2013-07-02 CLN FXIII 180 min 2nd F 4.wiff"  
Data file C:\Program Files (x86)\Matrix Science\Mascot Daemon\mgf\8 FXIII 180 min 2nd\mascot\_daemon\_merge.mgf

Click mouse within plot area to zoom in by factor of two about that point  
Or, 

Plot from

100

 to 

1600

 Da 

Full range

  
Label all possible matches ☐ Label matches used for scoring ☒

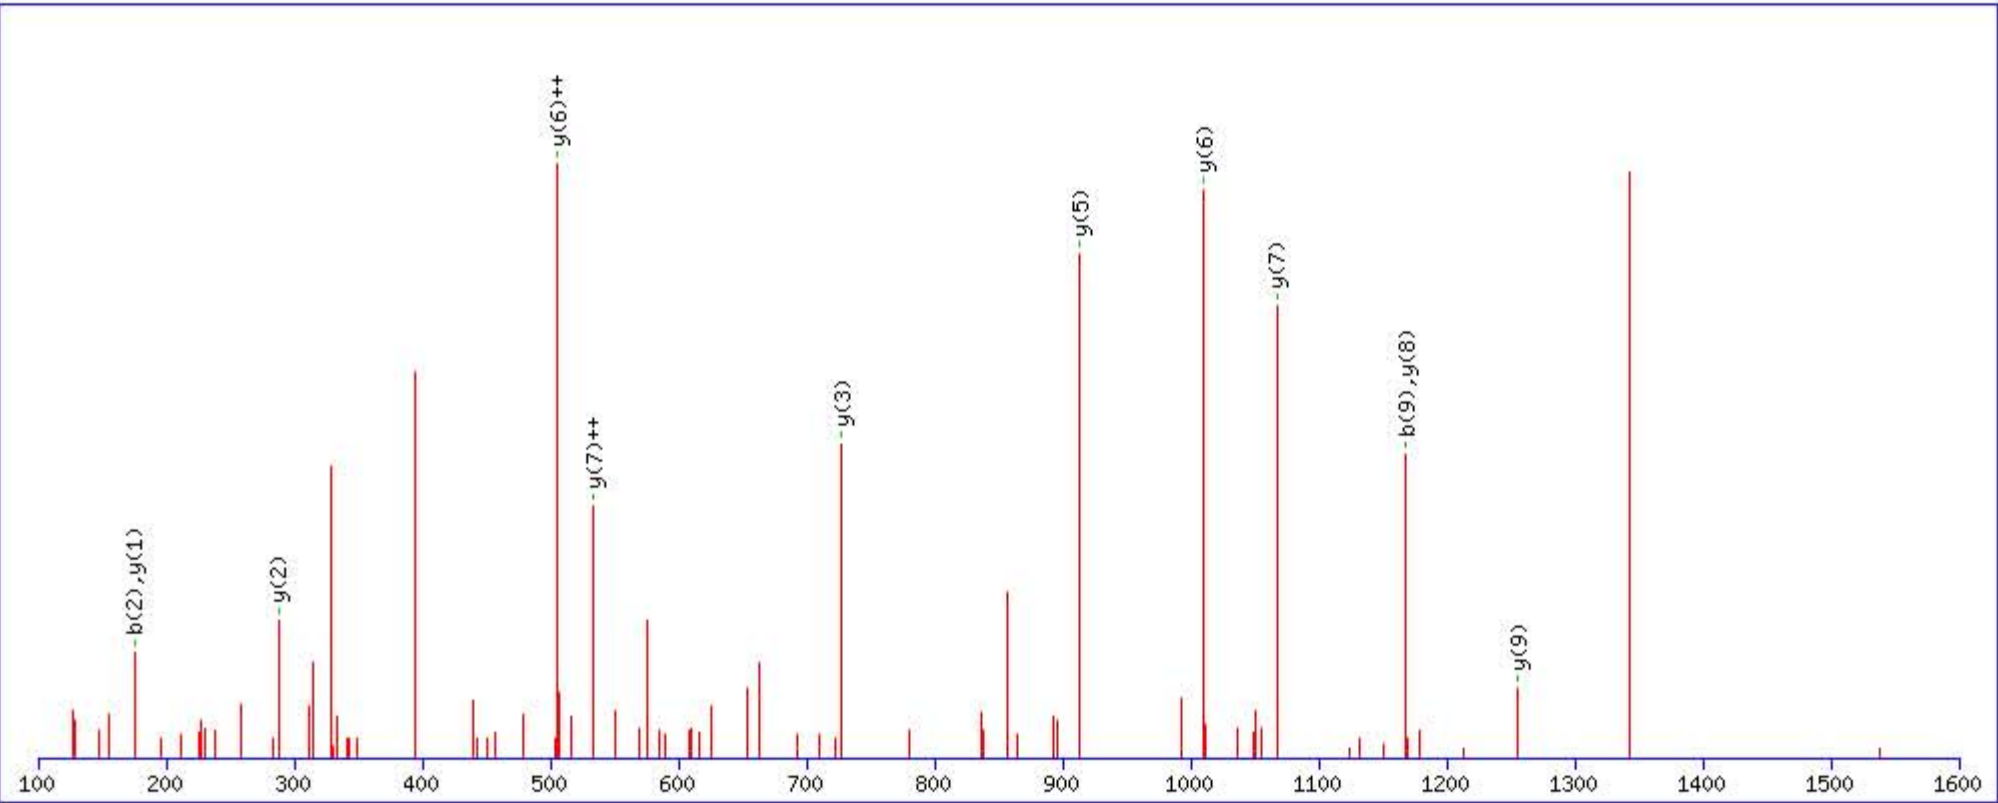

Monoisotopic mass of neutral peptide Mr(calc): 1341.671082  
Fixed modifications: Carbamidomethyl (C) (apply to specified residues or termini only)  
Variable modifications:  
Q8 : Biotin:Thermo-21345 (Q)  
Ions Score: 80 Expect: 2.3e-007  
Matches : 12/88 fragment ions using 12 most intense peaks [\(help\)](#)

| #  | b           | b <sup>++</sup> | b <sup>*</sup> | b <sup>++</sup> * | b <sup>0</sup> | b <sup>0++</sup> | Seq. | y           | y <sup>++</sup> | y <sup>*</sup> | y <sup>++</sup> * | y <sup>0</sup> | y <sup>0++</sup> | #  |
|----|-------------|-----------------|----------------|-------------------|----------------|------------------|------|-------------|-----------------|----------------|-------------------|----------------|------------------|----|
| 1  | 88.039304   | 44.523290       |                |                   | 70.028739      | 35.518008        | S    |             |                 |                |                   |                |                  | 10 |
| 2  | 175.071332  | 88.039304       |                |                   | 157.060767     | 79.034021        | S    | 1255.646334 | 628.326805      | 1238.619785    | 619.813530        | 1237.635769    | 619.321522       | 9  |
| 3  | 276.119011  | 138.563144      |                |                   | 258.108446     | 129.557861       | T    | 1168.614306 | 584.810791      | 1151.587757    | 576.297517        | 1150.603741    | 575.805508       | 8  |
| 4  | 333.140475  | 167.073875      |                |                   | 315.129910     | 158.068593       | G    | 1067.566627 | 534.286951      | 1050.540078    | 525.773677        | 1049.556062    | 525.281669       | 7  |
| 5  | 430.193239  | 215.600258      |                |                   | 412.182674     | 206.594975       | P    | 1010.545163 | 505.776219      | 993.518614     | 497.262945        | 992.534598     | 496.770937       | 6  |
| 6  | 487.214703  | 244.110989      |                |                   | 469.204138     | 235.105707       | G    | 913.492399  | 457.249837      | 896.465850     | 448.736563        | 895.481834     | 448.244555       | 5  |
| 7  | 616.257296  | 308.632286      |                |                   | 598.246731     | 299.627004       | E    | 856.470935  | 428.739105      | 839.444386     | 420.225831        | 838.460370     | 419.733823       | 4  |
| 8  | 1055.482622 | 528.244949      | 1038.456073    | 519.731675        | 1037.472057    | 519.239667       | Q    | 727.428342  | 364.217809      | 710.401793     | 355.704534        |                |                  | 3  |
| 9  | 1168.566686 | 584.786981      | 1151.540137    | 576.273707        | 1150.556121    | 575.781698       | L    | 288.203016  | 144.605146      | 271.176467     | 136.091871        |                |                  | 2  |
| 10 |             |                 |                |                   |                |                  | R    | 175.118952  | 88.063114       | 158.092403     | 79.549839         |                |                  | 1  |

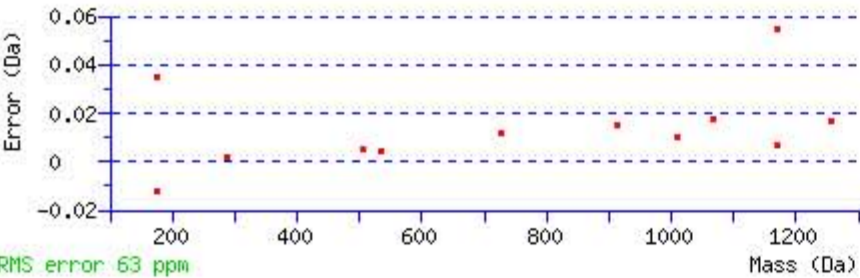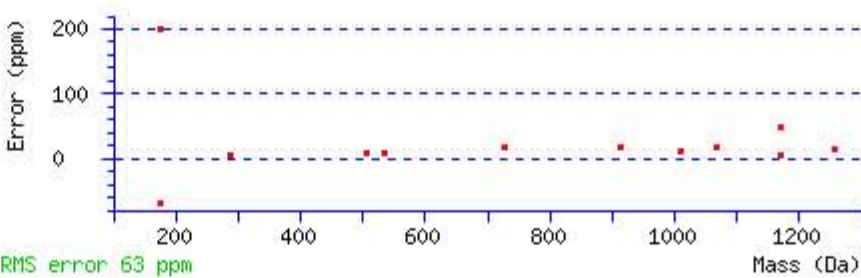

NCBI BLAST search of [SSTGPGEQLR](#)  
(Parameters: blastp, nr protein database, expect=20000, no filter, PAM30)  
Other BLAST [web gateways](#)

All matches to this query

| Score | Mr(calc):   | Delta     | Sequence                      |
|-------|-------------|-----------|-------------------------------|
| 80.1  | 1341.671082 | 0.009786  | <a href="#">SSTGPGEQLR</a>    |
| 12.0  | 1341.663681 | 0.017187  | <a href="#">SSHKDSPRDVSK</a>  |
| 10.4  | 1341.674911 | 0.005957  | <a href="#">TSPERREPGTGR</a>  |
| 10.0  | 1341.663651 | 0.017217  | <a href="#">ESARDPKPEASR</a>  |
| 7.3   | 1341.697556 | -0.016688 | <a href="#">QASEWVRR</a>      |
| 6.7   | 1341.688828 | -0.007960 | <a href="#">DDAQLSGLPSALR</a> |
| 6.4   | 1341.663696 | 0.017172  | <a href="#">SVGSVGDSPREPR</a> |
| 6.4   | 1341.693512 | -0.012644 | <a href="#">ASEQERRR</a>      |
| 5.9   | 1341.682297 | -0.001429 | <a href="#">ASEQDVRAR</a>     |
| 4.9   | 1341.682327 | -0.001459 | <a href="#">SLHVGQTQCALTR</a> |

MATRIX

SCIENCE

Mascot Search Results

Peptide View

MS/MS Fragmentation of **NALWHTGDTESQVR**  
Found in **COMP\_HUMAN**, Cartilage oligomeric matrix protein OS=Homo sapiens GN=COMP PE=1 SV=2

Match to Query 42602: 1923.938172 from(642.320000,3+) rtinseconds(1769) index(48776)  
Title: Locus:1.1.1.1854.7 File:"2013-07-02 CLN FXIII 180 min 2nd F 4.wiff"  
Data file C:\Program Files (x86)\Matrix Science\Mascot Daemon\mgf\8 FXIII 180 min 2nd\mascot\_daemon\_merge.mgf

Click mouse within plot area to zoom in by factor of two about that point  
Or,   to  Da   
Label all possible matches ☐ Label matches used for scoring ☒

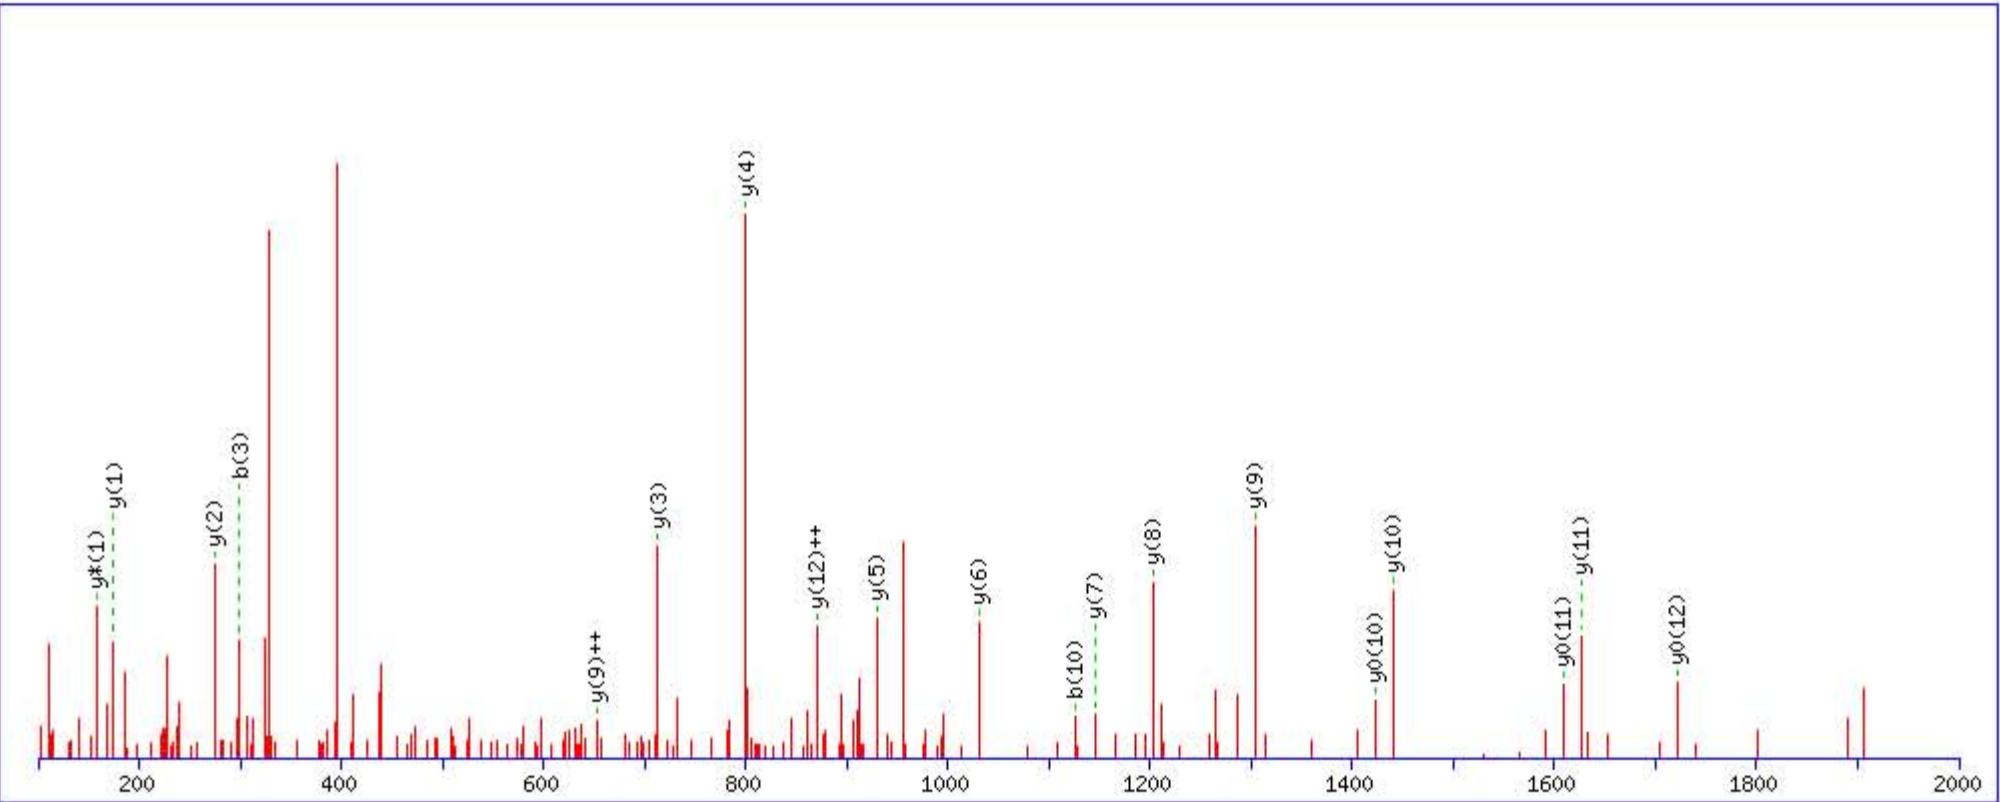

Monoisotopic mass of neutral peptide Mr(calc): 1923.926132  
Fixed modifications: Carbamidomethyl (C) (apply to specified residues or termini only)  
Variable modifications:  
Q12 : Biotin:Thermo-21345 (Q)  
Ions Score: 72 Expect: 4.4e-007  
Matches : 19/140 fragment ions using 36 most intense peaks [\(help\)](#)

| #  | b           | b <sup>++</sup> | b <sup>+</sup> | b <sup>+++</sup> | b <sup>0</sup> | b <sup>0++</sup> | Seq. | y           | y <sup>++</sup> | y <sup>+</sup> | y <sup>+++</sup> | y <sup>0</sup> | y <sup>0++</sup> | #  |
|----|-------------|-----------------|----------------|------------------|----------------|------------------|------|-------------|-----------------|----------------|------------------|----------------|------------------|----|
| 1  | 115.050203  | 58.028740       | 98.023654      | 49.515465        |                |                  | N    |             |                 |                |                  |                |                  | 14 |
| 2  | 186.087317  | 93.547296       | 169.060768     | 85.034022        |                |                  | A    | 1810.890481 | 905.948879      | 1793.863932    | 897.435604       | 1792.879916    | 896.943596       | 13 |
| 3  | 299.171381  | 150.089328      | 282.144832     | 141.576054       |                |                  | L    | 1739.853367 | 870.430322      | 1722.826818    | 861.917047       | 1721.842802    | 861.425039       | 12 |
| 4  | 485.250694  | 243.128985      | 468.224145     | 234.615711       |                |                  | W    | 1626.769303 | 813.888290      | 1609.742754    | 805.375015       | 1608.758738    | 804.883007       | 11 |
| 5  | 622.309606  | 311.658441      | 605.283057     | 303.145167       |                |                  | H    | 1440.689990 | 720.848633      | 1423.663441    | 712.335359       | 1422.679425    | 711.843351       | 10 |
| 6  | 723.357285  | 362.182281      | 706.330736     | 353.669006       | 705.346720     | 353.176998       | T    | 1303.631078 | 652.319177      | 1286.604529    | 643.805903       | 1285.620513    | 643.313895       | 9  |
| 7  | 780.378749  | 390.693013      | 763.352200     | 382.179738       | 762.368184     | 381.687730       | G    | 1202.583399 | 601.795338      | 1185.556850    | 593.282063       | 1184.572834    | 592.790055       | 8  |
| 8  | 895.405692  | 448.206484      | 878.379143     | 439.693210       | 877.395127     | 439.201202       | D    | 1145.561935 | 573.284606      | 1128.535386    | 564.771331       | 1127.551370    | 564.279323       | 7  |
| 9  | 996.453371  | 498.730324      | 979.426822     | 490.217049       | 978.442806     | 489.725041       | T    | 1030.534992 | 515.771134      | 1013.508443    | 507.257860       | 1012.524427    | 506.765852       | 6  |
| 10 | 1125.495964 | 563.251620      | 1108.469415    | 554.738346       | 1107.485399    | 554.246337       | E    | 929.487313  | 465.247295      | 912.460764     | 456.734020       | 911.476748     | 456.242012       | 5  |
| 11 | 1212.527992 | 606.767634      | 1195.501443    | 598.254360       | 1194.517427    | 597.762352       | S    | 800.444720  | 400.725998      | 783.418171     | 392.212724       | 782.434155     | 391.720716       | 4  |
| 12 | 1651.753318 | 826.380297      | 1634.726769    | 817.867023       | 1633.742753    | 817.375015       | Q    | 713.412692  | 357.209984      | 696.386143     | 348.696710       |                |                  | 3  |
| 13 | 1750.821732 | 875.914504      | 1733.795183    | 867.401230       | 1732.811167    | 866.909222       | V    | 274.187366  | 137.597321      | 257.160817     | 129.084047       |                |                  | 2  |
| 14 |             |                 |                |                  |                |                  | R    | 175.118952  | 88.063114       | 158.092403     | 79.549839        |                |                  | 1  |

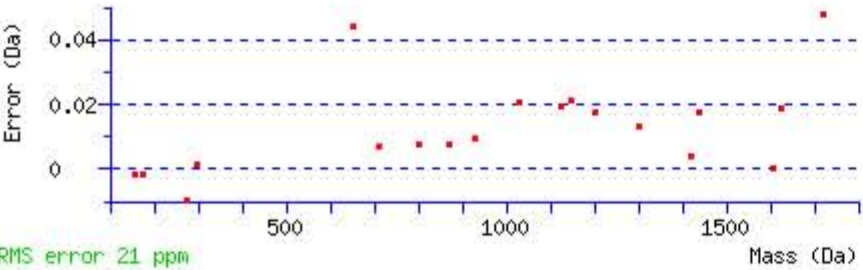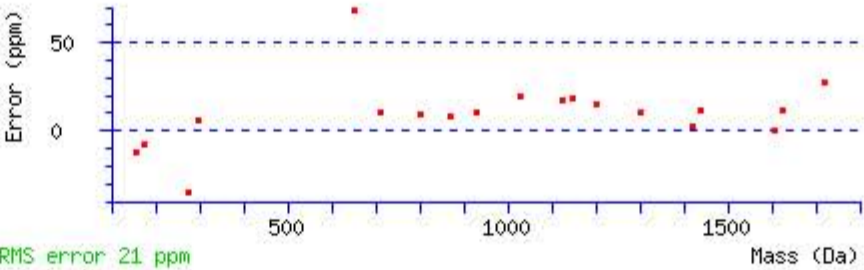

NCBI BLAST search of [NALWHTGDTESQVR](#)  
(Parameters: blastp, nr protein database, expect=20000, no filter, PAM30)  
Other BLAST [web gateways](#)

All matches to this query

| Score | Mr(calc):   | Delta    | Sequence                           |
|-------|-------------|----------|------------------------------------|
| 71.9  | 1923.926132 | 0.012040 | <a href="#">NALWHTGDTESQVR</a>     |
| 4.1   | 1923.909531 | 0.028641 | <a href="#">NLEAVETLGSTSTICSDK</a> |

MATRIX

SCIENCE

Mascot Search Results

Peptide View

MS/MS Fragmentation of **EDQVVCK**  
Found in **CD5L\_HUMAN**, CD5 antigen-like OS=Homo sapiens GN=CD5L PE=1 SV=1

Match to Query 20223: 1187.573068 from(594.793810,2+) rtinseconds(1473) index(30889)  
Title: Locus:1.1.1.621.21 File:"2013-07-02 CLN FXIII 180 min 2nd F 3.wiff"  
Data file C:\Program Files (x86)\Matrix Science\Mascot Daemon\mgf\8 FXIII 180 min 2nd\mascot\_daemon\_merge.mgf

Click mouse within plot area to zoom in by factor of two about that point  
Or,   to  Da   
Label all possible matches ☐ Label matches used for scoring ☒

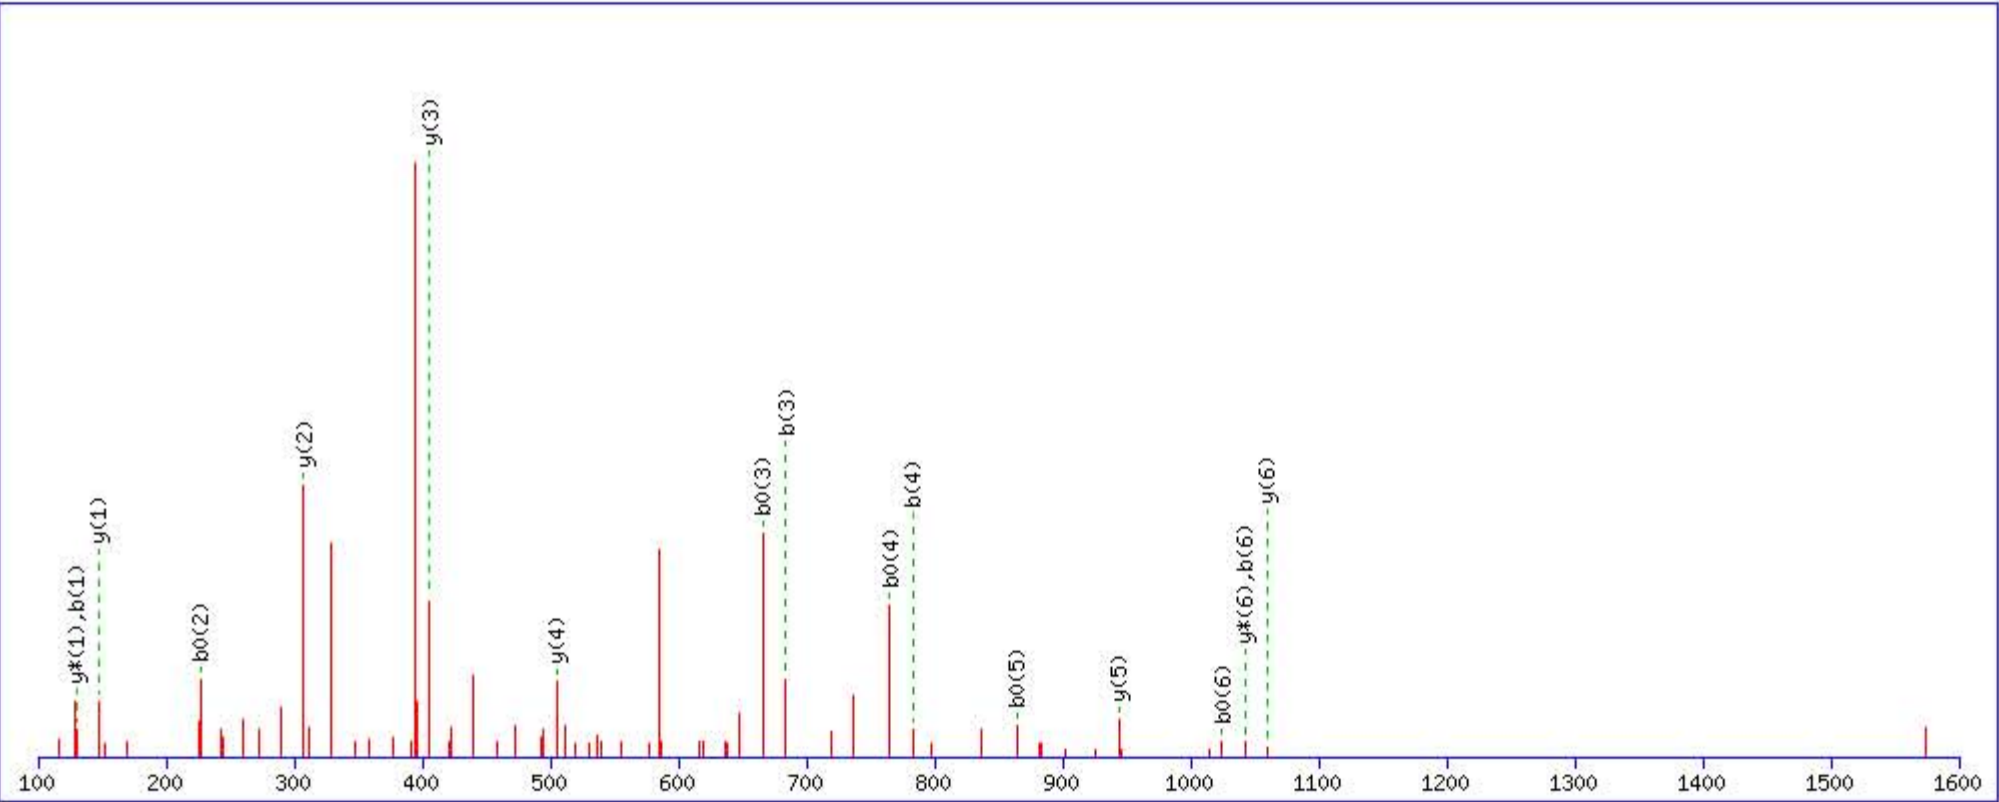

Monoisotopic mass of neutral peptide Mr(calc): 1187.567871  
Fixed modifications: Carbamidomethyl (C) (apply to specified residues or termini only)  
Variable modifications:  
Q3 : Biotin:Thermo-21345 (Q)  
Ions Score: 32 Expect: 0.0056  
Matches : 17/58 fragment ions using 30 most intense peaks [\(help\)](#)

| # | b           | b <sup>++</sup> | b <sup>*</sup> | b <sup>++</sup> * | b <sup>0</sup> | b <sup>0++</sup> | Seq. | y           | y <sup>++</sup> | y <sup>*</sup> | y <sup>++</sup> * | y <sup>0</sup> | y <sup>0++</sup> | # |
|---|-------------|-----------------|----------------|-------------------|----------------|------------------|------|-------------|-----------------|----------------|-------------------|----------------|------------------|---|
| 1 | 130.049869  | 65.528572       |                |                   | 112.039304     | 56.523290        | E    |             |                 |                |                   |                |                  | 7 |
| 2 | 245.076812  | 123.042044      |                |                   | 227.066247     | 114.036762       | D    | 1059.532550 | 530.269913      | 1042.506001    | 521.756639        | 1041.521985    | 521.264631       | 6 |
| 3 | 684.302138  | 342.654707      | 667.275589     | 334.141433        | 666.291573     | 333.649425       | Q    | 944.505607  | 472.756442      | 927.479058     | 464.243167        |                |                  | 5 |
| 4 | 783.370552  | 392.188914      | 766.344003     | 383.675639        | 765.359987     | 383.183631       | V    | 505.280281  | 253.143778      | 488.253732     | 244.630504        |                |                  | 4 |
| 5 | 882.438966  | 441.723121      | 865.412417     | 433.209846        | 864.428401     | 432.717838       | V    | 406.211867  | 203.609571      | 389.185318     | 195.096297        |                |                  | 3 |
| 6 | 1042.469615 | 521.738446      | 1025.443066    | 513.225171        | 1024.459050    | 512.733163       | C    | 307.143453  | 154.075365      | 290.116904     | 145.562090        |                |                  | 2 |
| 7 |             |                 |                |                   |                |                  | K    | 147.112804  | 74.060040       | 130.086255     | 65.546765         |                |                  | 1 |

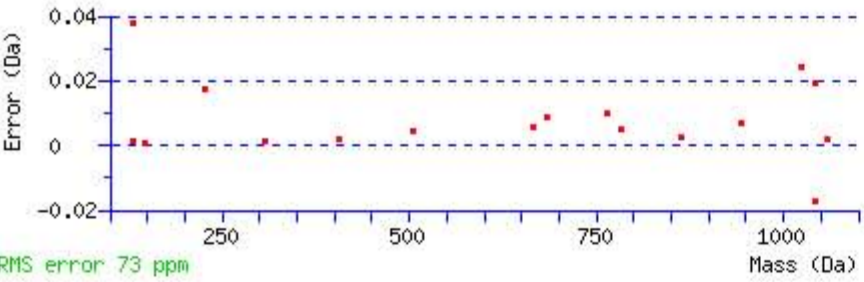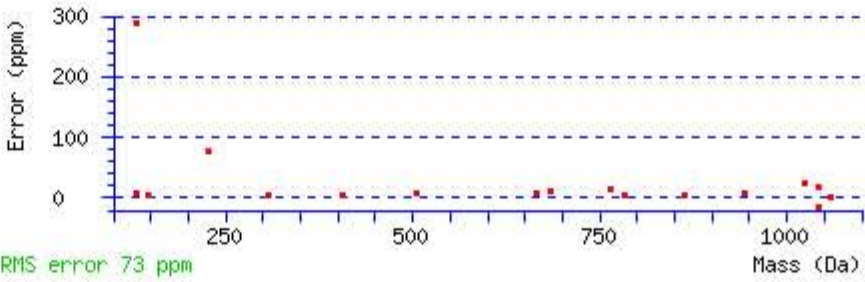

NCBI BLAST search of [EDQVVCK](#)  
(Parameters: blastp, nr protein database, expect=20000, no filter, PAM30)  
Other BLAST [web gateways](#)

All matches to this query

| Score | Mr(calc):   | Delta     | Sequence                    |
|-------|-------------|-----------|-----------------------------|
| 32.5  | 1187.567871 | 0.005197  | <a href="#">EDQVVCK</a>     |
| 8.0   | 1187.585617 | -0.012549 | <a href="#">QEDGTSLK</a>    |
| 2.6   | 1187.585602 | -0.012534 | <a href="#">KIAELCDDPK</a>  |
| 2.4   | 1187.567841 | 0.005227  | <a href="#">QAEIECK</a>     |
| 2.4   | 1187.567841 | 0.005227  | <a href="#">QAIEECK</a>     |
| 2.4   | 1187.557968 | 0.015100  | <a href="#">QASFHCK</a>     |
| 2.3   | 1187.574371 | -0.001303 | <a href="#">EEEEVMVVPK</a>  |
| 0.7   | 1187.585602 | -0.012534 | <a href="#">EDTEKQK</a>     |
| 0.7   | 1187.586258 | -0.013190 | <a href="#">EFNFLDYLK</a>   |
| 0.1   | 1187.578201 | -0.005133 | <a href="#">EKSGSQQAEPK</a> |

MATRIX

SCIENCE

Mascot Search Results

Peptide View

MS/MS Fragmentation of **VDKDNEDFQESNR**  
Found in **CERU\_HUMAN**, Ceruloplasmin OS=Homo sapiens GN=CP PE=1 SV=1

Match to Query 42193: 1905.859512 from(636.293780,3+) rtinseconds(1494) index(31034)  
Title: Locus:1.1.1.628.23 File:"2013-07-02 CLN FXIII 180 min 2nd F 3.wiff"  
Data file C:\Program Files (x86)\Matrix Science\Mascot Daemon\mgf\8 FXIII 180 min 2nd\mascot\_daemon\_merge.mgf

Click mouse within plot area to zoom in by factor of two about that point  
Or, 

Plot from

100

 to 

1600

 Da 

Full range

  
Label all possible matches ☐ Label matches used for scoring ☒

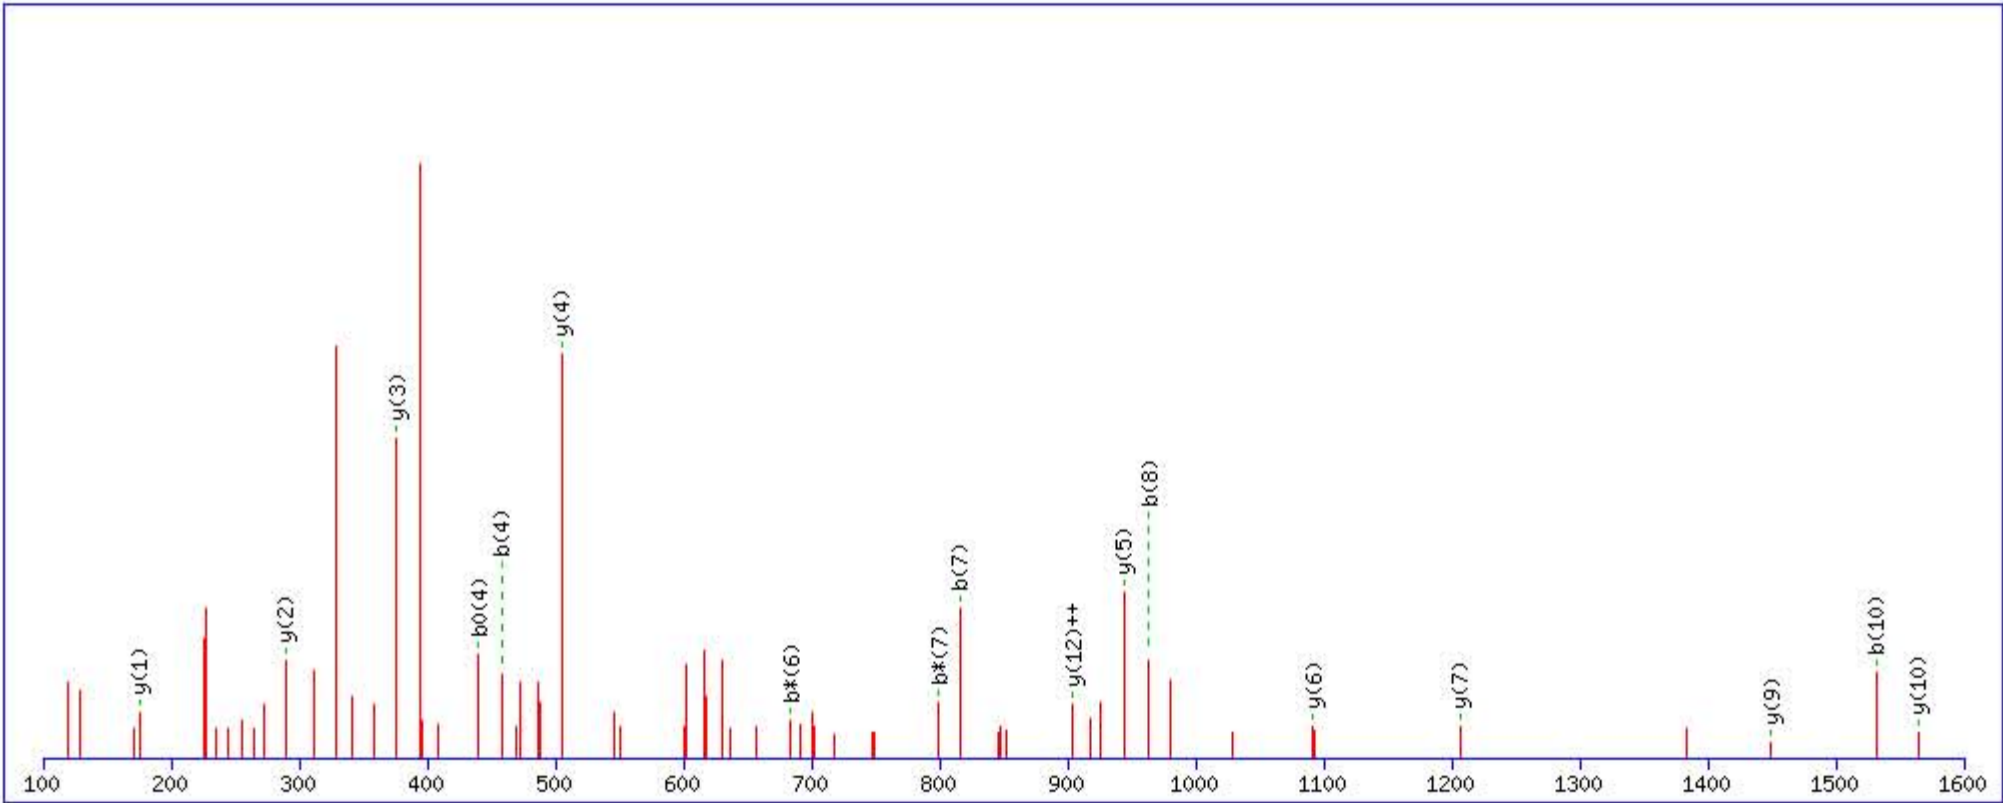

Monoisotopic mass of neutral peptide Mr(calc): 1905.852676  
Fixed modifications: Carbamidomethyl (C) (apply to specified residues or termini only)  
Variable modifications:  
Q9 : Biotin:Thermo-21345 (Q)  
Ions Score: 44 Expect: 0.00044  
Matches : 17/134 fragment ions using 35 most intense peaks [\(help\)](#)

| #  | b           | b <sup>++</sup> | b <sup>*</sup> | b <sup>*++</sup> | b <sup>0</sup> | b <sup>0++</sup> | Seq. | y           | y <sup>++</sup> | y <sup>*</sup> | y <sup>*++</sup> | y <sup>0</sup> | y <sup>0++</sup> | #  |
|----|-------------|-----------------|----------------|------------------|----------------|------------------|------|-------------|-----------------|----------------|------------------|----------------|------------------|----|
| 1  | 100.075690  | 50.541483       |                |                  |                |                  | V    |             |                 |                |                  |                |                  | 13 |
| 2  | 215.102633  | 108.054954      |                |                  | 197.092068     | 99.049672        | D    | 1807.791552 | 904.399414      | 1790.765003    | 895.886140       | 1789.780987    | 895.394132       | 12 |
| 3  | 343.197596  | 172.102436      | 326.171047     | 163.589162       | 325.187031     | 163.097154       | K    | 1692.764609 | 846.885943      | 1675.738060    | 838.372668       | 1674.754044    | 837.880660       | 11 |
| 4  | 458.224539  | 229.615908      | 441.197990     | 221.102633       | 440.213974     | 220.610625       | D    | 1564.669646 | 782.838461      | 1547.643097    | 774.325187       | 1546.659081    | 773.833179       | 10 |
| 5  | 572.267466  | 286.637371      | 555.240917     | 278.124097       | 554.256901     | 277.632089       | N    | 1449.642703 | 725.324990      | 1432.616154    | 716.811715       | 1431.632138    | 716.319707       | 9  |
| 6  | 701.310059  | 351.158668      | 684.283510     | 342.645393       | 683.299494     | 342.153385       | E    | 1335.599776 | 668.303526      | 1318.573227    | 659.790252       | 1317.589211    | 659.298244       | 8  |
| 7  | 816.337002  | 408.672139      | 799.310453     | 400.158865       | 798.326437     | 399.666857       | D    | 1206.557183 | 603.782230      | 1189.530634    | 595.268955       | 1188.546618    | 594.776947       | 7  |
| 8  | 963.405416  | 482.206346      | 946.378867     | 473.693072       | 945.394851     | 473.201064       | F    | 1091.530240 | 546.268758      | 1074.503691    | 537.755484       | 1073.519675    | 537.263476       | 6  |
| 9  | 1402.630742 | 701.819009      | 1385.604193    | 693.305735       | 1384.620177    | 692.813727       | Q    | 944.461826  | 472.734551      | 927.435277     | 464.221277       | 926.451261     | 463.729269       | 5  |
| 10 | 1531.673335 | 766.340306      | 1514.646786    | 757.827031       | 1513.662770    | 757.335023       | E    | 505.236500  | 253.121888      | 488.209951     | 244.608614       | 487.225935     | 244.116606       | 4  |
| 11 | 1618.705363 | 809.856320      | 1601.678814    | 801.343045       | 1600.694798    | 800.851037       | S    | 376.193907  | 188.600591      | 359.167358     | 180.087317       | 358.183342     | 179.595309       | 3  |
| 12 | 1732.748290 | 866.877783      | 1715.721741    | 858.364509       | 1714.737725    | 857.872501       | N    | 289.161879  | 145.084577      | 272.135330     | 136.571303       |                |                  | 2  |
| 13 |             |                 |                |                  |                |                  | R    | 175.118952  | 88.063114       | 158.092403     | 79.549839        |                |                  | 1  |

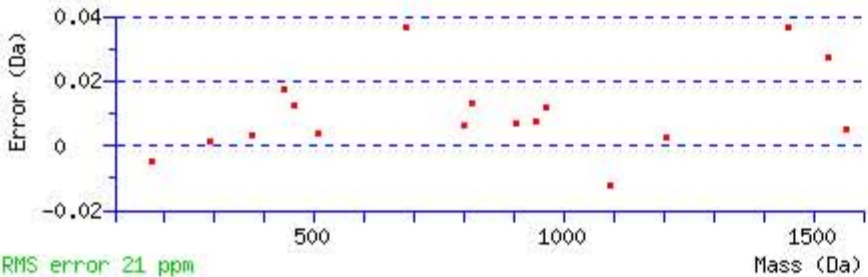

RMS error 21 ppm

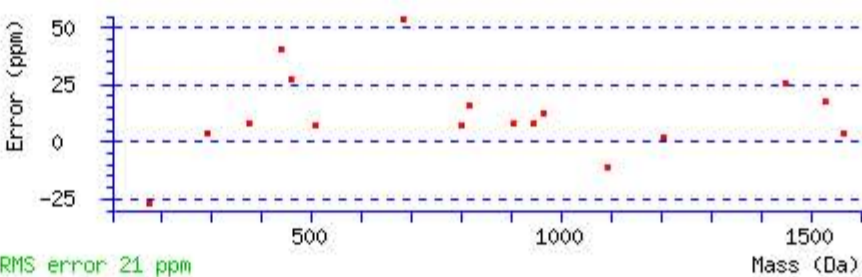

RMS error 21 ppm

NCBI BLAST search of [VDKDNEDFQESNR](#)  
(Parameters: blastp, nr protein database, expect=20000, no filter, PAM30)  
Other BLAST [web gateways](#)

All matches to this query

| Score | Mr(calc):   | Delta    | Sequence                      |
|-------|-------------|----------|-------------------------------|
| 43.9  | 1905.852676 | 0.006836 | <a href="#">VDKDNEDFQESNR</a> |

MATRIX

SCIENCE

Mascot Search Results

Peptide View

MS/MS Fragmentation of **NNEGTYYSPNYPQSR**  
Found in **CERU\_HUMAN**, Ceruloplasmin OS=Homo sapiens GN=CP PE=1 SV=1

Match to Query 48730: 2213.999292 from(739.007040,3+) rtinseconds(1814) index(33006)  
Title: Locus:1.1.1.740.14 File:"2013-07-02 CLN FXIII 180 min 2nd F 3.wiff"  
Data file C:\Program Files (x86)\Matrix Science\Mascot Daemon\mgf\8 FXIII 180 min 2nd\mascot\_daemon\_merge.mgf

Click mouse within plot area to zoom in by factor of two about that point

Or, 

Plot from

0

 to 

3000

 Da 

Full range

Label all possible matches ☐ Label matches used for scoring ☒

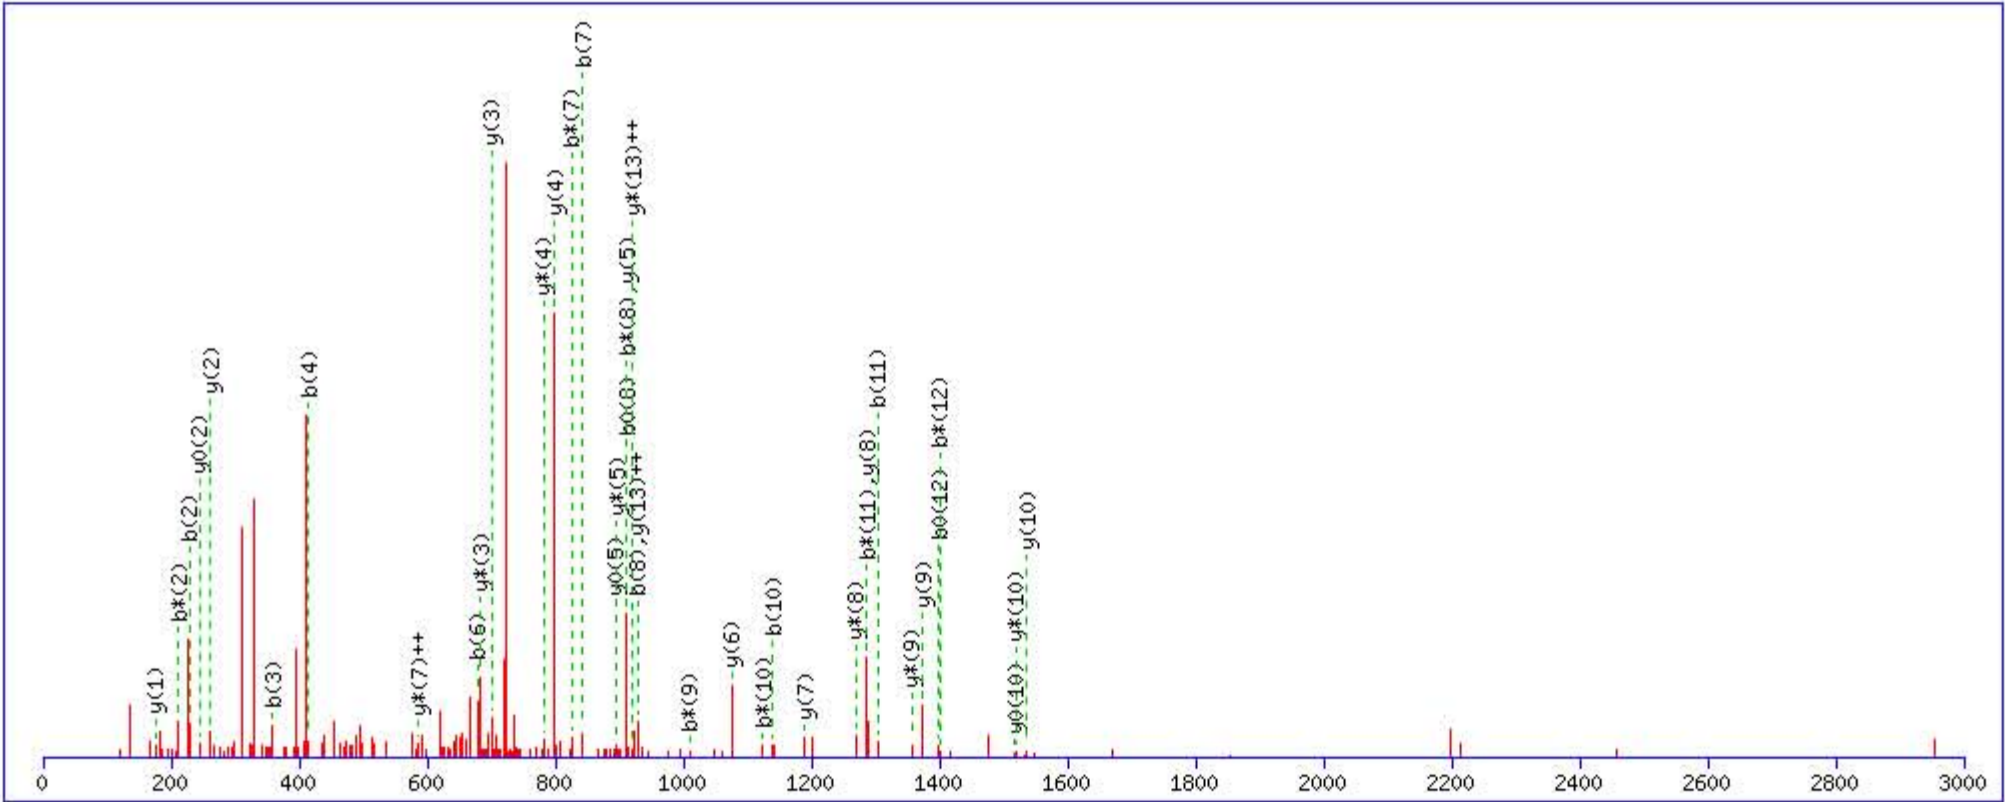

Monoisotopic mass of neutral peptide Mr(calc): 2213.979980  
Fixed modifications: Carbamidomethyl (C) (apply to specified residues or termini only)  
Variable modifications:  
Q14 : Biotin:Thermo-21345 (Q)  
Ions Score: 34 Expect: 0.0035  
Matches : 39/174 fragment ions using 95 most intense peaks [\(help\)](#)

| #  | b           | b <sup>++</sup> | b <sup>*</sup> | b <sup>+++</sup> | b <sup>0</sup> | b <sup>0++</sup> | Seq. | y           | y <sup>++</sup> | y <sup>*</sup> | y <sup>+++</sup> | y <sup>0</sup> | y <sup>0++</sup> | #  |
|----|-------------|-----------------|----------------|------------------|----------------|------------------|------|-------------|-----------------|----------------|------------------|----------------|------------------|----|
| 1  | 115.050203  | 58.028740       | 98.023654      | 49.515465        |                |                  | N    |             |                 |                |                  |                |                  | 16 |
| 2  | 229.093130  | 115.050203      | 212.066581     | 106.536929       |                |                  | N    | 2100.944366 | 1050.975821     | 2083.917817    | 1042.462546      | 2082.933801    | 1041.970538      | 15 |
| 3  | 358.135723  | 179.571500      | 341.109174     | 171.058225       | 340.125158     | 170.566217       | E    | 1986.901439 | 993.954358      | 1969.874890    | 985.441083       | 1968.890874    | 984.949075       | 14 |
| 4  | 415.157187  | 208.082232      | 398.130638     | 199.568957       | 397.146622     | 199.076949       | G    | 1857.858846 | 929.433061      | 1840.832297    | 920.919787       | 1839.848281    | 920.427779       | 13 |
| 5  | 516.204866  | 258.606071      | 499.178317     | 250.092797       | 498.194301     | 249.600789       | T    | 1800.837382 | 900.922329      | 1783.810833    | 892.409055       | 1782.826817    | 891.917047       | 12 |
| 6  | 679.268195  | 340.137736      | 662.241646     | 331.624461       | 661.257630     | 331.132453       | Y    | 1699.789703 | 850.398490      | 1682.763154    | 841.885215       | 1681.779138    | 841.393207       | 11 |
| 7  | 842.331524  | 421.669400      | 825.304975     | 413.156126       | 824.320959     | 412.664118       | Y    | 1536.726374 | 768.866825      | 1519.699825    | 760.353551       | 1518.715809    | 759.861543       | 10 |
| 8  | 929.363552  | 465.185414      | 912.337003     | 456.672140       | 911.352987     | 456.180132       | S    | 1373.663045 | 687.335161      | 1356.636496    | 678.821886       | 1355.652480    | 678.329878       | 9  |
| 9  | 1026.416316 | 513.711796      | 1009.389767    | 505.198522       | 1008.405751    | 504.706514       | P    | 1286.631017 | 643.819147      | 1269.604468    | 635.305872       | 1268.620452    | 634.813864       | 8  |
| 10 | 1140.459243 | 570.733260      | 1123.432694    | 562.219985       | 1122.448678    | 561.727977       | N    | 1189.578253 | 595.292765      | 1172.551704    | 586.779490       | 1171.567688    | 586.287482       | 7  |
| 11 | 1303.522572 | 652.264924      | 1286.496023    | 643.751650       | 1285.512007    | 643.259642       | Y    | 1075.535326 | 538.271301      | 1058.508777    | 529.758027       | 1057.524761    | 529.266019       | 6  |
| 12 | 1417.565499 | 709.286388      | 1400.538950    | 700.773113       | 1399.554934    | 700.281105       | N    | 912.471997  | 456.739637      | 895.445448     | 448.226362       | 894.461432     | 447.734354       | 5  |
| 13 | 1514.618263 | 757.812770      | 1497.591714    | 749.299495       | 1496.607698    | 748.807487       | P    | 798.429070  | 399.718173      | 781.402521     | 391.204899       | 780.418505     | 390.712891       | 4  |
| 14 | 1953.843589 | 977.425433      | 1936.817040    | 968.912158       | 1935.833024    | 968.420150       | Q    | 701.376306  | 351.191791      | 684.349757     | 342.678517       | 683.365741     | 342.186509       | 3  |
| 15 | 2040.875617 | 1020.941447     | 2023.849068    | 1012.428172      | 2022.865052    | 1011.936164      | S    | 262.150980  | 131.579128      | 245.124431     | 123.065854       | 244.140415     | 122.573846       | 2  |
| 16 |             |                 |                |                  |                |                  | R    | 175.118952  | 88.063114       | 158.092403     | 79.549839        |                |                  | 1  |

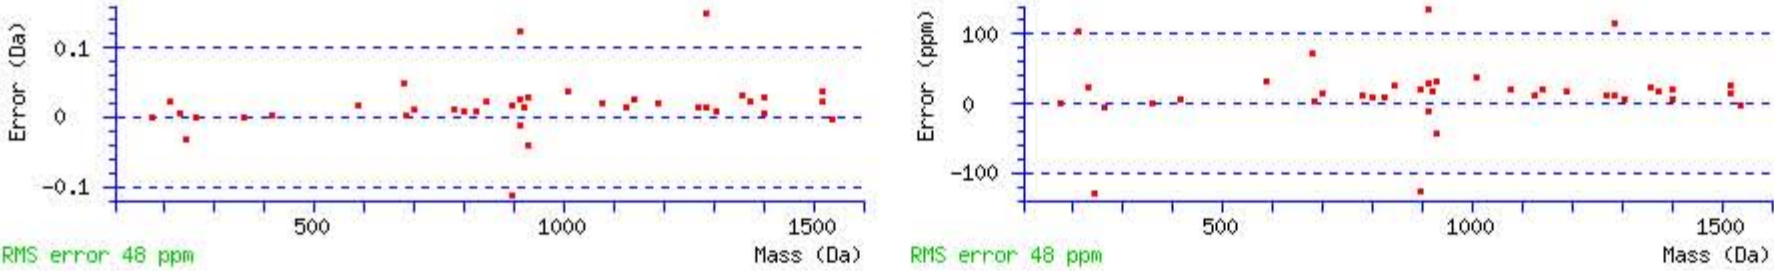

NCBI BLAST search of [NNEGTYYSPNYPQSR](#)  
(Parameters: blastp, nr protein database, expect=20000, no filter, PAM30)  
Other BLAST [web gateways](#)

All matches to this query

| Score | Mr(calc):   | Delta    | Sequence                        |
|-------|-------------|----------|---------------------------------|
| 34.5  | 2213.979980 | 0.019312 | <a href="#">NNEGTYYSPNYPQSR</a> |

M

A

T

R

I

X

S

C

I

E

N

C

E

Mascot Search Results

Peptide View

MS/MS Fragmentation of **KAEEEHLGILGPQLHADVGDK**  
Found in **CERU\_HUMAN**, Ceruloplasmin OS=Homo sapiens GN=CP PE=1 SV=1

Match to Query 55103: 2566.356672 from(856.459500,3+) rtinseconds(1941) index(49922)  
Title: Locus:1.1.1.1913.25 File:"2013-07-02 CLN FXIII 180 min 2nd F 4.wiff"  
Data file C:\Program Files (x86)\Matrix Science\Mascot Daemon\mgf\8 FXIII 180 min 2nd\mascot\_daemon\_merge.mgf

Click mouse within plot area to zoom in by factor of two about that point  
Or, 

Plot from

100

 to 

1900

 Da 

Full range

  
Label all possible matches ☐ Label matches used for scoring ☒

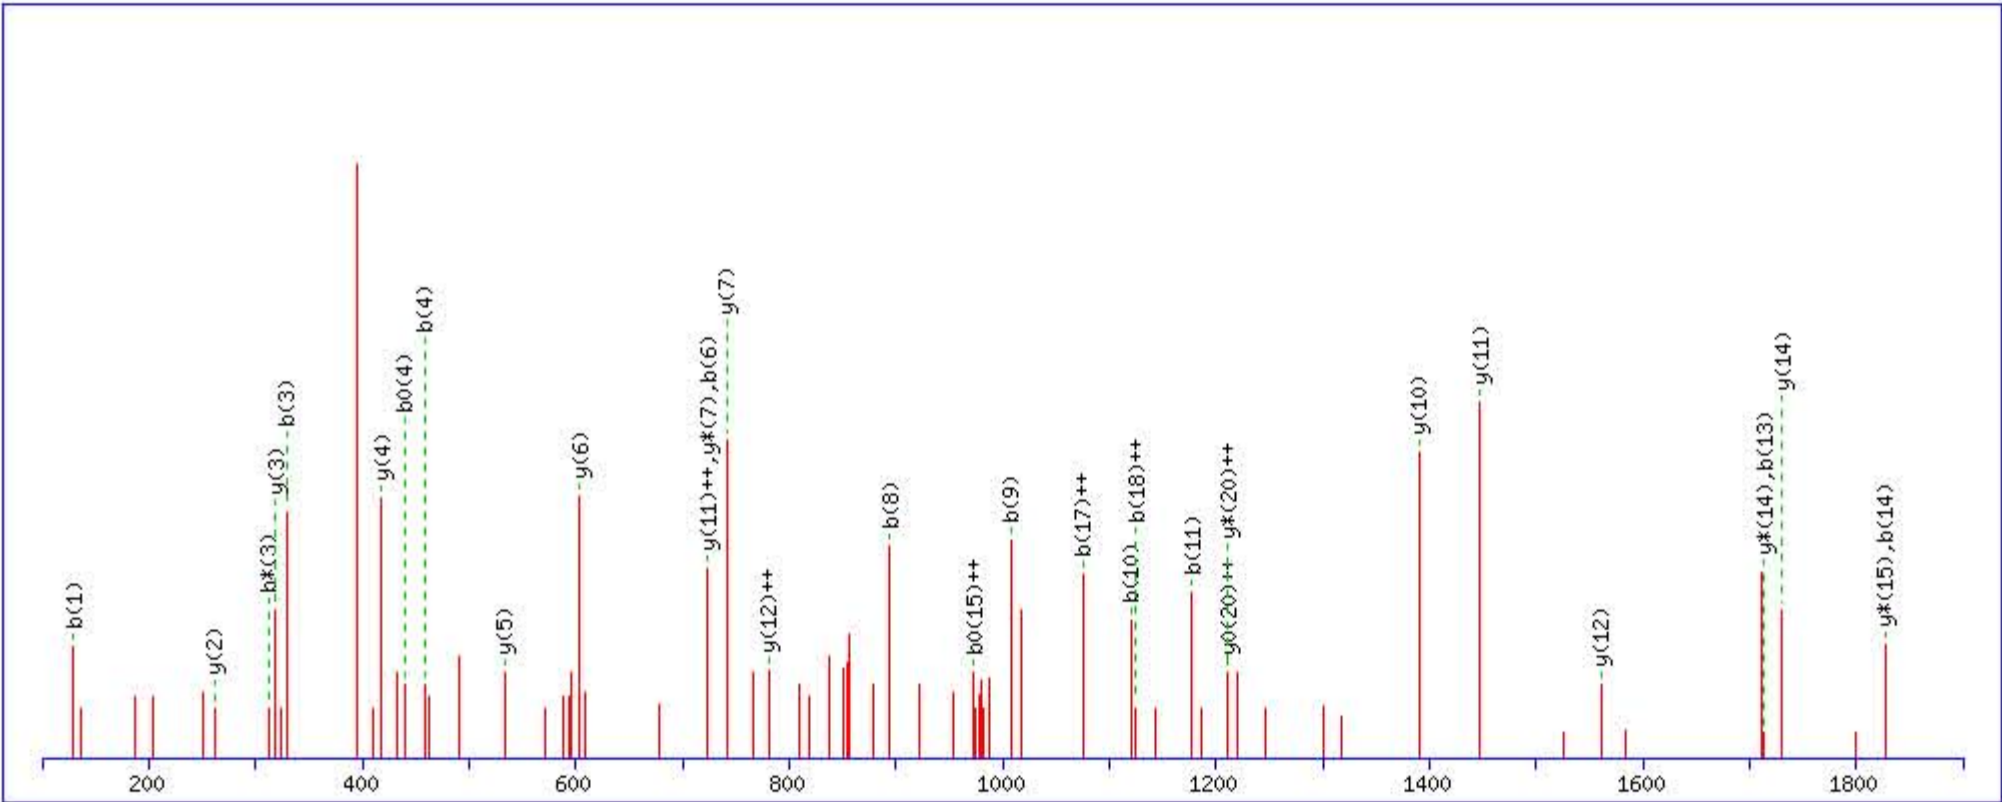

Monoisotopic mass of neutral peptide Mr(calc): 2566.321335  
Fixed modifications: Carbamidomethyl (C) (apply to specified residues or termini only)  
Variable modifications:  
Q13 : Biotin:Thermo-21345 (Q)  
Ions Score: 65 Expect: 8e-007  
Matches : 33/234 fragment ions using 56 most intense peaks [\(help\)](#)

| #  | b           | b <sup>++</sup> | b <sup>*</sup> | b <sup>*++</sup> | b <sup>0</sup> | b <sup>0++</sup> | Seq. | y           | y <sup>++</sup> | y <sup>*</sup> | y <sup>*++</sup> | y <sup>0</sup> | y <sup>0++</sup> | #  |
|----|-------------|-----------------|----------------|------------------|----------------|------------------|------|-------------|-----------------|----------------|------------------|----------------|------------------|----|
| 1  | 129.102239  | 65.054757       | 112.075690     | 56.541483        |                |                  | K    |             |                 |                |                  |                |                  | 21 |
| 2  | 200.139353  | 100.573315      | 183.112804     | 92.060040        |                |                  | A    | 2439.233673 | 1220.120474     | 2422.207124    | 1211.607200      | 2421.223108    | 1211.115192      | 20 |
| 3  | 329.181946  | 165.094611      | 312.155397     | 156.581336       | 311.171381     | 156.089328       | E    | 2368.196559 | 1184.601917     | 2351.170010    | 1176.088643      | 2350.185994    | 1175.596635      | 19 |
| 4  | 458.224539  | 229.615907      | 441.197990     | 221.102633       | 440.213974     | 220.610625       | E    | 2239.153966 | 1120.080621     | 2222.127417    | 1111.567346      | 2221.143401    | 1111.075338      | 18 |
| 5  | 587.267132  | 294.137204      | 570.240583     | 285.623930       | 569.256567     | 285.131922       | E    | 2110.111373 | 1055.559324     | 2093.084824    | 1047.046050      | 2092.100808    | 1046.554042      | 17 |
| 6  | 724.326044  | 362.666660      | 707.299495     | 354.153386       | 706.315479     | 353.661378       | H    | 1981.068780 | 991.038028      | 1964.042231    | 982.524753       | 1963.058215    | 982.032745       | 16 |
| 7  | 837.410108  | 419.208692      | 820.383559     | 410.695418       | 819.399543     | 410.203410       | L    | 1844.009868 | 922.508572      | 1826.983319    | 913.995297       | 1825.999303    | 913.503289       | 15 |
| 8  | 894.431572  | 447.719424      | 877.405023     | 439.206150       | 876.421007     | 438.714142       | G    | 1730.925804 | 865.966540      | 1713.899255    | 857.453265       | 1712.915239    | 856.961257       | 14 |
| 9  | 1007.515636 | 504.261456      | 990.489087     | 495.748182       | 989.505071     | 495.256174       | I    | 1673.904340 | 837.455808      | 1656.877791    | 828.942533       | 1655.893775    | 828.450525       | 13 |
| 10 | 1120.599700 | 560.803488      | 1103.573151    | 552.290214       | 1102.589135    | 551.798205       | L    | 1560.820276 | 780.913776      | 1543.793727    | 772.400501       | 1542.809711    | 771.908493       | 12 |
| 11 | 1177.621164 | 589.314220      | 1160.594615    | 580.800946       | 1159.610599    | 580.308937       | G    | 1447.736212 | 724.371744      | 1430.709663    | 715.858469       | 1429.725647    | 715.366461       | 11 |
| 12 | 1274.673928 | 637.840602      | 1257.647379    | 629.327328       | 1256.663363    | 628.835319       | P    | 1390.714748 | 695.861012      | 1373.688199    | 687.347737       | 1372.704183    | 686.855729       | 10 |
| 13 | 1713.899254 | 857.453265      | 1696.872705    | 848.939991       | 1695.888689    | 848.447983       | Q    | 1293.661984 | 647.334630      | 1276.635435    | 638.821355       | 1275.651419    | 638.329347       | 9  |
| 14 | 1826.983318 | 913.995297      | 1809.956769    | 905.482023       | 1808.972753    | 904.990015       | L    | 854.436658  | 427.721967      | 837.410109     | 419.208692       | 836.426093     | 418.716684       | 8  |
| 15 | 1964.042230 | 982.524753      | 1947.015681    | 974.011479       | 1946.031665    | 973.519471       | H    | 741.352594  | 371.179935      | 724.326045     | 362.666660       | 723.342029     | 362.174652       | 7  |
| 16 | 2035.079344 | 1018.043310     | 2018.052795    | 1009.530036      | 2017.068779    | 1009.038028      | A    | 604.293682  | 302.650479      | 587.267133     | 294.137204       | 586.283117     | 293.645196       | 6  |
| 17 | 2150.106287 | 1075.556781     | 2133.079738    | 1067.043507      | 2132.095722    | 1066.551499      | D    | 533.256568  | 267.131922      | 516.230019     | 258.618647       | 515.246003     | 258.126639       | 5  |
| 18 | 2249.174701 | 1125.090988     | 2232.148152    | 1116.577714      | 2231.164136    | 1116.085706      | V    | 418.229625  | 209.618450      | 401.203076     | 201.105176       | 400.219060     | 200.613168       | 4  |
| 19 | 2306.196165 | 1153.601720     | 2289.169616    | 1145.088446      | 2288.185600    | 1144.596438      | G    | 319.161211  | 160.084243      | 302.134662     | 151.570969       | 301.150646     | 151.078961       | 3  |
| 20 | 2421.223108 | 1211.115192     | 2404.196559    | 1202.601917      | 2403.212543    | 1202.109909      | D    | 262.139747  | 131.573511      | 245.113198     | 123.060237       | 244.129182     | 122.568229       | 2  |
| 21 |             |                 |                |                  |                |                  | K    | 147.112804  | 74.060040       | 130.086255     | 65.546765        |                |                  | 1  |

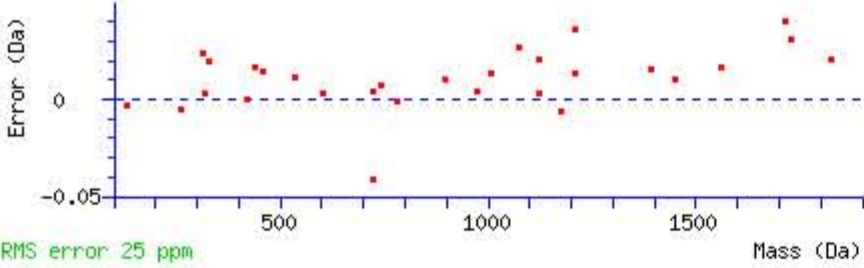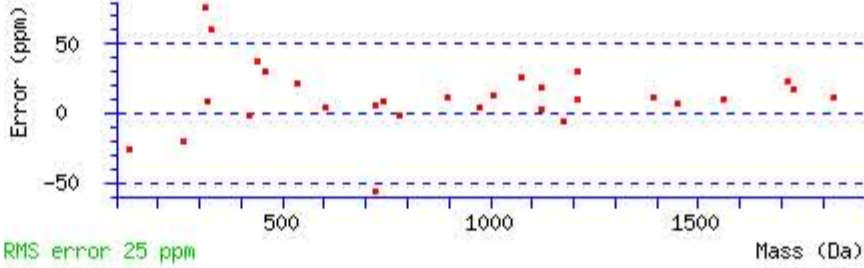

NCBI BLAST search of [KAEEEHLGILGPQLHADVGDK](#)  
(Parameters: blastp, nr protein database, expect=20000, no filter, PAM30)  
Other BLAST [web gateways](#)

All matches to this query

| Score | Mr(calc):   | Delta    | Sequence                               |
|-------|-------------|----------|----------------------------------------|
| 65.1  | 2566.321335 | 0.035337 | <a href="#">KAEEEHLGILGPQLHADVGDK</a>  |
| 0.1   | 2566.342453 | 0.014219 | <a href="#">GEIQNILQKVNIPLVTNEECQK</a> |

MATRIX

SCIENCE

Mascot Search Results

Peptide View

MS/MS Fragmentation of **ELDESLQVAER**  
Found in **CLUS\_HUMAN**, Clusterin OS=Homo sapiens GN=CLU PE=1 SV=1

Match to Query 34668: 1598.807308 from(800.410930,2+) rtinseconds(1952) index(5396)  
Title: Locus:1.1.1.1956.24 File:"2013-07-02 CLN FXIII 180 min 2nd F 1.wiff"  
Data file C:\Program Files (x86)\Matrix Science\Mascot Daemon\mgf\8 FXIII 180 min 2nd\mascot\_daemon\_merge.mgf

Click mouse within plot area to zoom in by factor of two about that point

Or, 

Plot from

100

 to 

1700

 Da 

Full range

Label all possible matches ☐ Label matches used for scoring ☒

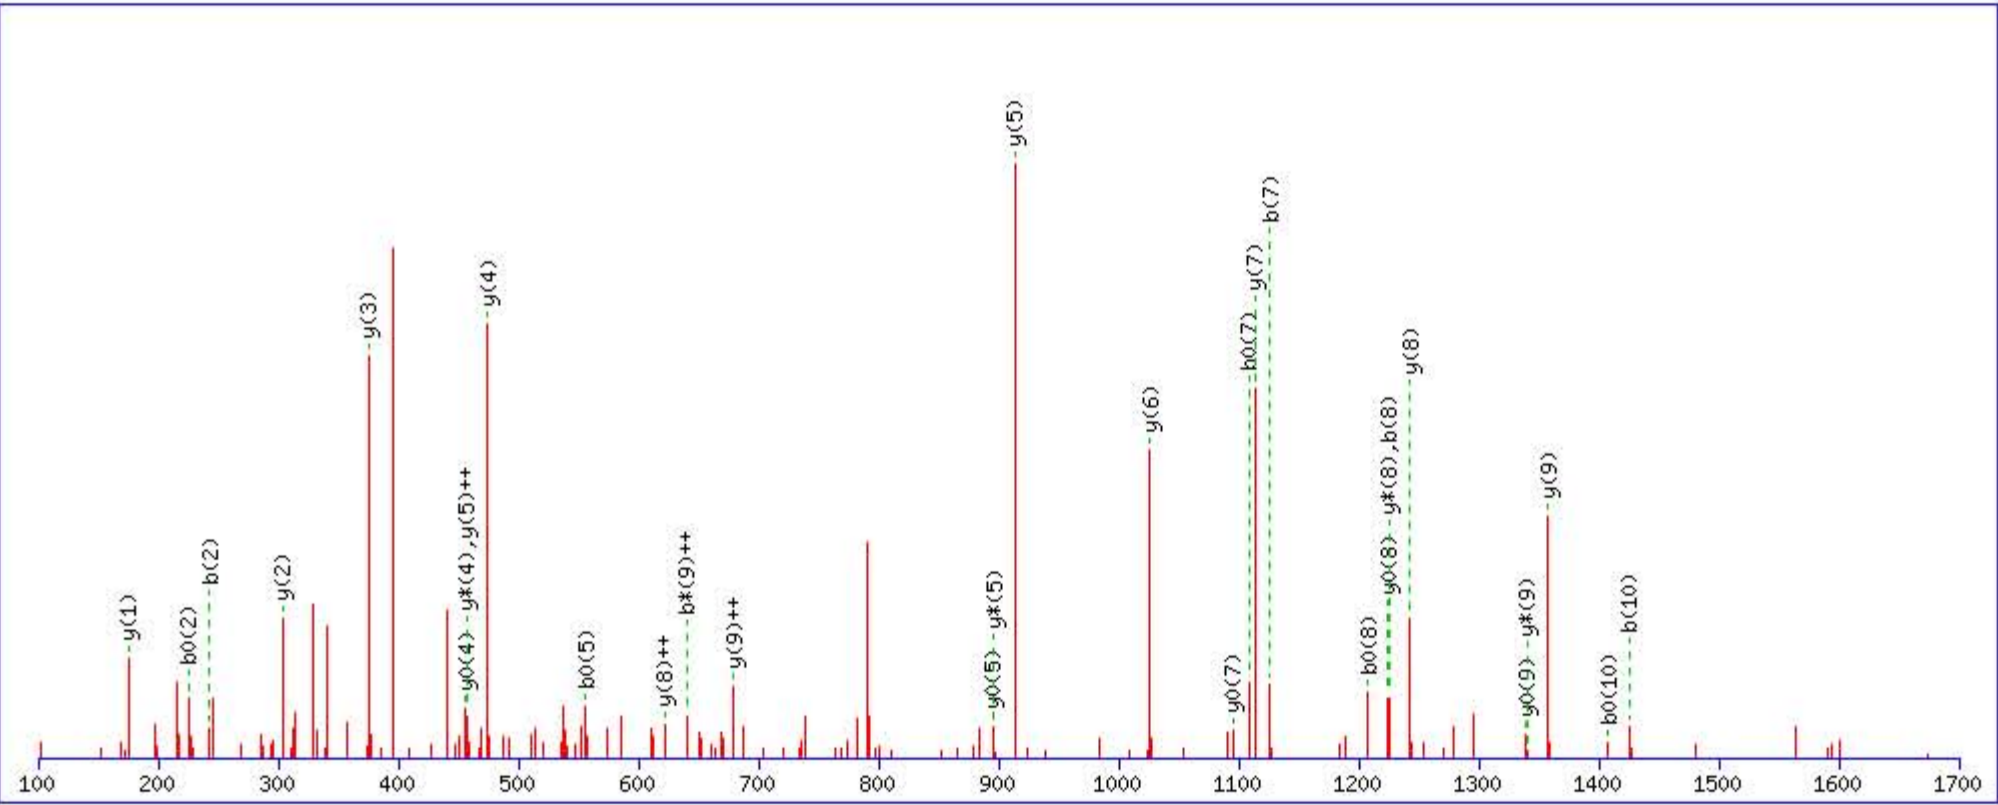

Monoisotopic mass of neutral peptide Mr(calc): 1598.797379  
Fixed modifications: Carbamidomethyl (C) (apply to specified residues or termini only)  
Variable modifications:  
Q7 : Biotin:Thermo-21345 (Q)  
Ions Score: 50 Expect: 6.4e-005  
Matches : 31/106 fragment ions using 59 most intense peaks [\(help\)](#)

| #  | b           | b <sup>++</sup> | b <sup>*</sup> | b <sup>++</sup> * | b <sup>0</sup> | b <sup>0++</sup> | Seq. | y           | y <sup>++</sup> | y <sup>*</sup> | y <sup>++</sup> * | y <sup>0</sup> | y <sup>0++</sup> | #  |
|----|-------------|-----------------|----------------|-------------------|----------------|------------------|------|-------------|-----------------|----------------|-------------------|----------------|------------------|----|
| 1  | 130.049869  | 65.528572       |                |                   | 112.039304     | 56.523290        | E    |             |                 |                |                   |                |                  | 11 |
| 2  | 243.133933  | 122.070605      |                |                   | 225.123368     | 113.065322       | L    | 1470.762091 | 735.884684      | 1453.735542    | 727.371409        | 1452.751526    | 726.879401       | 10 |
| 3  | 358.160876  | 179.584076      |                |                   | 340.150311     | 170.578794       | D    | 1357.678027 | 679.342652      | 1340.651478    | 670.829377        | 1339.667462    | 670.337369       | 9  |
| 4  | 487.203469  | 244.105373      |                |                   | 469.192904     | 235.100090       | E    | 1242.651084 | 621.829180      | 1225.624535    | 613.315906        | 1224.640519    | 612.823898       | 8  |
| 5  | 574.235497  | 287.621387      |                |                   | 556.224932     | 278.616104       | S    | 1113.608491 | 557.307884      | 1096.581942    | 548.794609        | 1095.597926    | 548.302601       | 7  |
| 6  | 687.319561  | 344.163419      |                |                   | 669.308996     | 335.158136       | L    | 1026.576463 | 513.791870      | 1009.549914    | 505.278595        | 1008.565898    | 504.786587       | 6  |
| 7  | 1126.544887 | 563.776082      | 1109.518338    | 555.262807        | 1108.534322    | 554.770799       | Q    | 913.492399  | 457.249838      | 896.465850     | 448.736563        | 895.481834     | 448.244555       | 5  |
| 8  | 1225.613301 | 613.310289      | 1208.586752    | 604.797014        | 1207.602736    | 604.305006       | V    | 474.267073  | 237.637175      | 457.240524     | 229.123900        | 456.256508     | 228.631892       | 4  |
| 9  | 1296.650415 | 648.828846      | 1279.623866    | 640.315571        | 1278.639850    | 639.823563       | A    | 375.198659  | 188.102968      | 358.172110     | 179.589693        | 357.188094     | 179.097685       | 3  |
| 10 | 1425.693008 | 713.350142      | 1408.666459    | 704.836868        | 1407.682443    | 704.344860       | E    | 304.161545  | 152.584411      | 287.134996     | 144.071136        | 286.150980     | 143.579128       | 2  |
| 11 |             |                 |                |                   |                |                  | R    | 175.118952  | 88.063114       | 158.092403     | 79.549839         |                |                  | 1  |

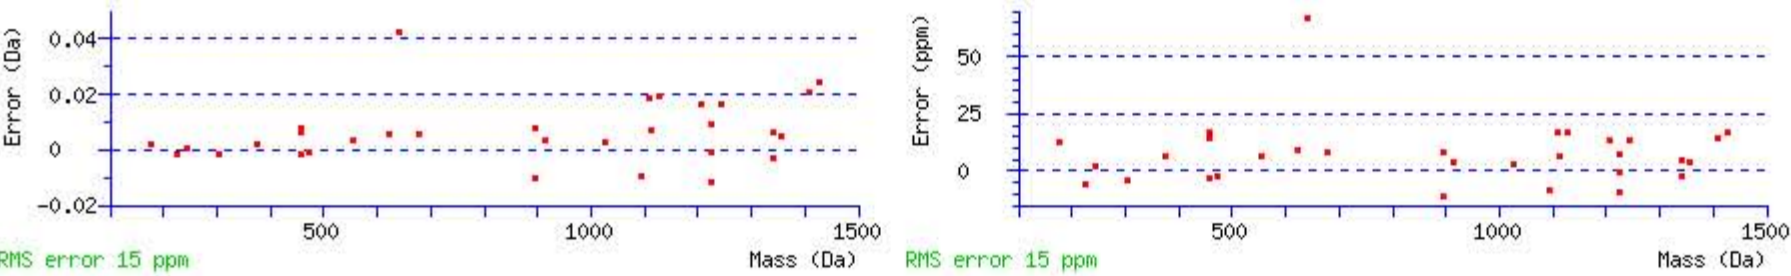

NCBI BLAST search of [ELDESLQVAER](#)  
(Parameters: blastp, nr protein database, expect=20000, no filter, PAM30)  
Other BLAST [web gateways](#)

All matches to this query

| Score | Mr(calc):   | Delta     | Sequence                         |
|-------|-------------|-----------|----------------------------------|
| 49.8  | 1598.797379 | 0.009929  | <a href="#">ELDESLQVAER</a>      |
| 4.8   | 1598.827271 | -0.019963 | <a href="#">LQGQLCDVSIR</a>      |
| 4.5   | 1598.823883 | -0.016575 | <a href="#">TPTEKVEKMFPHR</a>    |
| 4.5   | 1598.790024 | 0.017284  | <a href="#">VTAEGDSHTEVVISR</a>  |
| 4.4   | 1598.797379 | 0.009929  | <a href="#">LEESDVLQEAR</a>      |
| 3.0   | 1598.827271 | -0.019963 | <a href="#">LQGQLCDVSIR</a>      |
| 2.2   | 1598.787506 | 0.019802  | <a href="#">AGGSWDLAVQER</a>     |
| 1.5   | 1598.789993 | 0.017315  | <a href="#">AGATSGELPVVEAENR</a> |
| 1.5   | 1598.797409 | 0.009899  | <a href="#">EDVDDLVSQLR</a>      |
| 1.3   | 1598.817352 | -0.010044 | <a href="#">DRAALCQLWR</a>       |

MATRIX

SCIENCE

Mascot Search Results

Peptide View

MS/MS Fragmentation of **ASSIIDELFQDR**  
Found in **CLUS\_HUMAN**, Clusterin OS=Homo sapiens GN=CLU PE=1 SV=1

Match to Query 38064: 1703.863722 from(568.961850,3+) rtinseconds(2812) index(9935)  
Title: Locus:1.1.1.2256.7 File:"2013-07-02 CLN FXIII 180 min 2nd F 1.wiff"  
Data file C:\Program Files (x86)\Matrix Science\Mascot Daemon\mgf\8 FXIII 180 min 2nd\mascot\_daemon\_merge.mgf

Click mouse within plot area to zoom in by factor of two about that point  
Or,   to  Da   
Label all possible matches ☐ Label matches used for scoring ☒

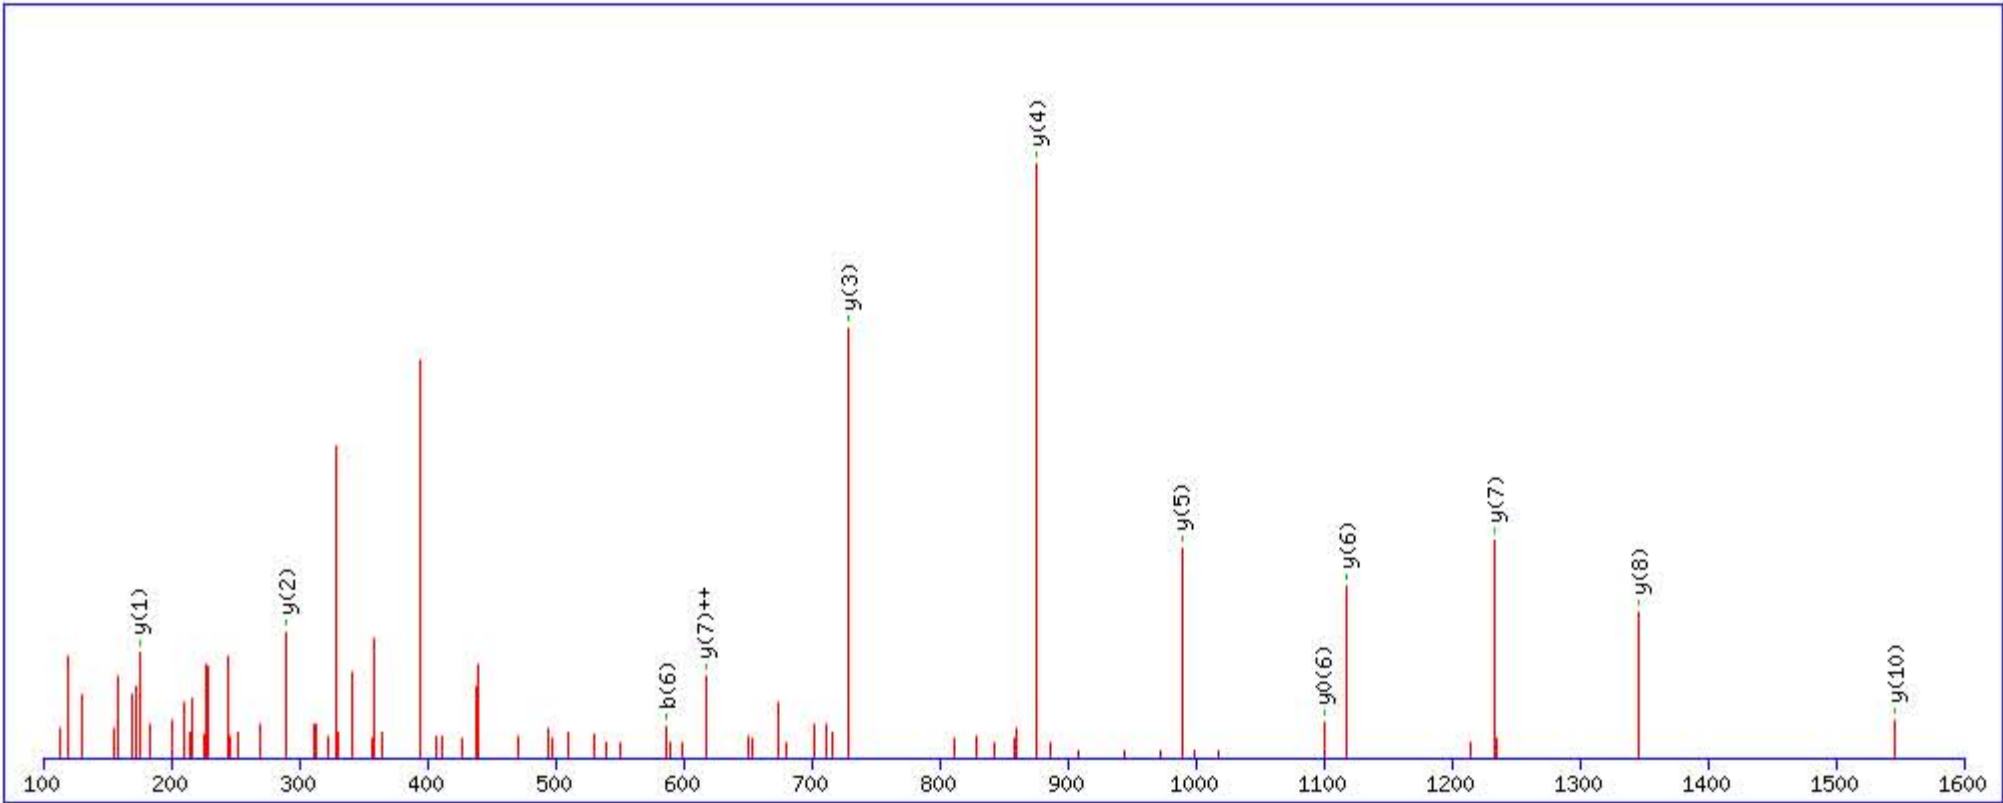

Monoisotopic mass of neutral peptide Mr(calc): 1703.855240  
Fixed modifications: Carbamidomethyl (C) (apply to specified residues or termini only)  
Variable modifications:  
Q10 : Biotin:Thermo-21345 (Q)  
Ions Score: 82 Expect: 7e-008  
Matches : 12/110 fragment ions using 14 most intense peaks ([help](#))

| #  | b           | b <sup>++</sup> | b <sup>*</sup> | b <sup>*++</sup> | b <sup>0</sup> | b <sup>0++</sup> | Seq. | y           | y <sup>++</sup> | y <sup>*</sup> | y <sup>*++</sup> | y <sup>0</sup> | y <sup>0++</sup> | #  |
|----|-------------|-----------------|----------------|------------------|----------------|------------------|------|-------------|-----------------|----------------|------------------|----------------|------------------|----|
| 1  | 72.044390   | 36.525833       |                |                  |                |                  | A    |             |                 |                |                  |                |                  | 12 |
| 2  | 159.076418  | 80.041847       |                |                  | 141.065853     | 71.036564        | S    | 1633.825419 | 817.416348      | 1616.798870    | 808.903073       | 1615.814854    | 808.411065       | 11 |
| 3  | 246.108446  | 123.557861      |                |                  | 228.097881     | 114.552578       | S    | 1546.793391 | 773.900333      | 1529.766842    | 765.387059       | 1528.782826    | 764.895051       | 10 |
| 4  | 359.192510  | 180.099893      |                |                  | 341.181945     | 171.094610       | I    | 1459.761363 | 730.384320      | 1442.734814    | 721.871045       | 1441.750798    | 721.379037       | 9  |
| 5  | 472.276574  | 236.641925      |                |                  | 454.266009     | 227.636642       | I    | 1346.677299 | 673.842288      | 1329.650750    | 665.329013       | 1328.666734    | 664.837005       | 8  |
| 6  | 587.303517  | 294.155397      |                |                  | 569.292952     | 285.150114       | D    | 1233.593235 | 617.300256      | 1216.566686    | 608.786981       | 1215.582670    | 608.294973       | 7  |
| 7  | 716.346110  | 358.676693      |                |                  | 698.335545     | 349.671411       | E    | 1118.566292 | 559.786784      | 1101.539743    | 551.273510       | 1100.555727    | 550.781501       | 6  |
| 8  | 829.430174  | 415.218725      |                |                  | 811.419609     | 406.213443       | L    | 989.523699  | 495.265488      | 972.497150     | 486.752213       | 971.513134     | 486.260205       | 5  |
| 9  | 976.498588  | 488.752932      |                |                  | 958.488023     | 479.747650       | F    | 876.439635  | 438.723456      | 859.413086     | 430.210181       | 858.429070     | 429.718173       | 4  |
| 10 | 1415.723914 | 708.365595      | 1398.697365    | 699.852321       | 1397.713349    | 699.360312       | Q    | 729.371221  | 365.189249      | 712.344672     | 356.675974       | 711.360656     | 356.183966       | 3  |
| 11 | 1530.750857 | 765.879067      | 1513.724308    | 757.365792       | 1512.740292    | 756.873784       | D    | 290.145895  | 145.576585      | 273.119346     | 137.063311       | 272.135330     | 136.571303       | 2  |
| 12 |             |                 |                |                  |                |                  | R    | 175.118952  | 88.063114       | 158.092403     | 79.549839        |                |                  | 1  |

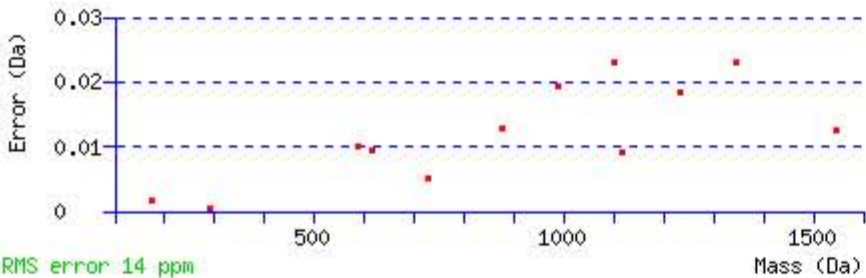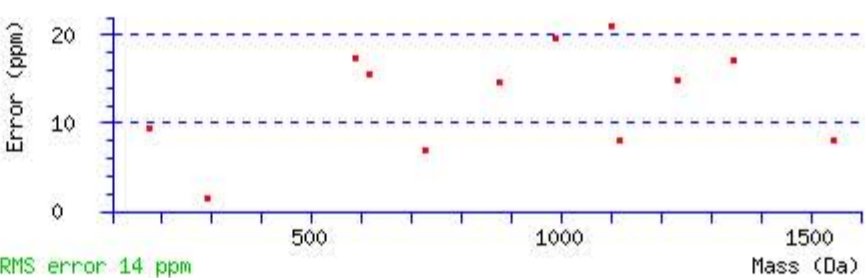

NCBI BLAST search of [ASSIIDELFQDR](#)  
(Parameters: blastp, nr protein database, expect=20000, no filter, PAM30)  
Other BLAST [web gateways](#)

All matches to this query

| Score | Mr(calc):   | Delta    | Sequence                       |
|-------|-------------|----------|--------------------------------|
| 82.4  | 1703.855240 | 0.008482 | <a href="#">ASSIIDELFQDR</a>   |
| 6.1   | 1703.859070 | 0.004652 | <a href="#">RWDELETTTQAKAR</a> |

MATRIX

SCIENCE

Mascot Search Results

Peptide View

MS/MS Fragmentation of **EILSVDCSTNNPSQAK**  
Found in **CLUS\_HUMAN**, Clusterin OS=Homo sapiens GN=CLU PE=1 SV=1

Match to Query 46129: 2072.994522 from(692.005450,3+) rtinseconds(1807) index(4382)  
Title: Locus:1.1.1.1906.6 File:"2013-07-02 CLN FXIII 180 min 2nd F 1.wiff"  
Data file C:\Program Files (x86)\Matrix Science\Mascot Daemon\mgf\8 FXIII 180 min 2nd\mascot\_daemon\_merge.mgf

Click mouse within plot area to zoom in by factor of two about that point  
Or, 

Plot from

0

 to 

2200

 Da 

Full range

  
Label all possible matches ☐ Label matches used for scoring ☒

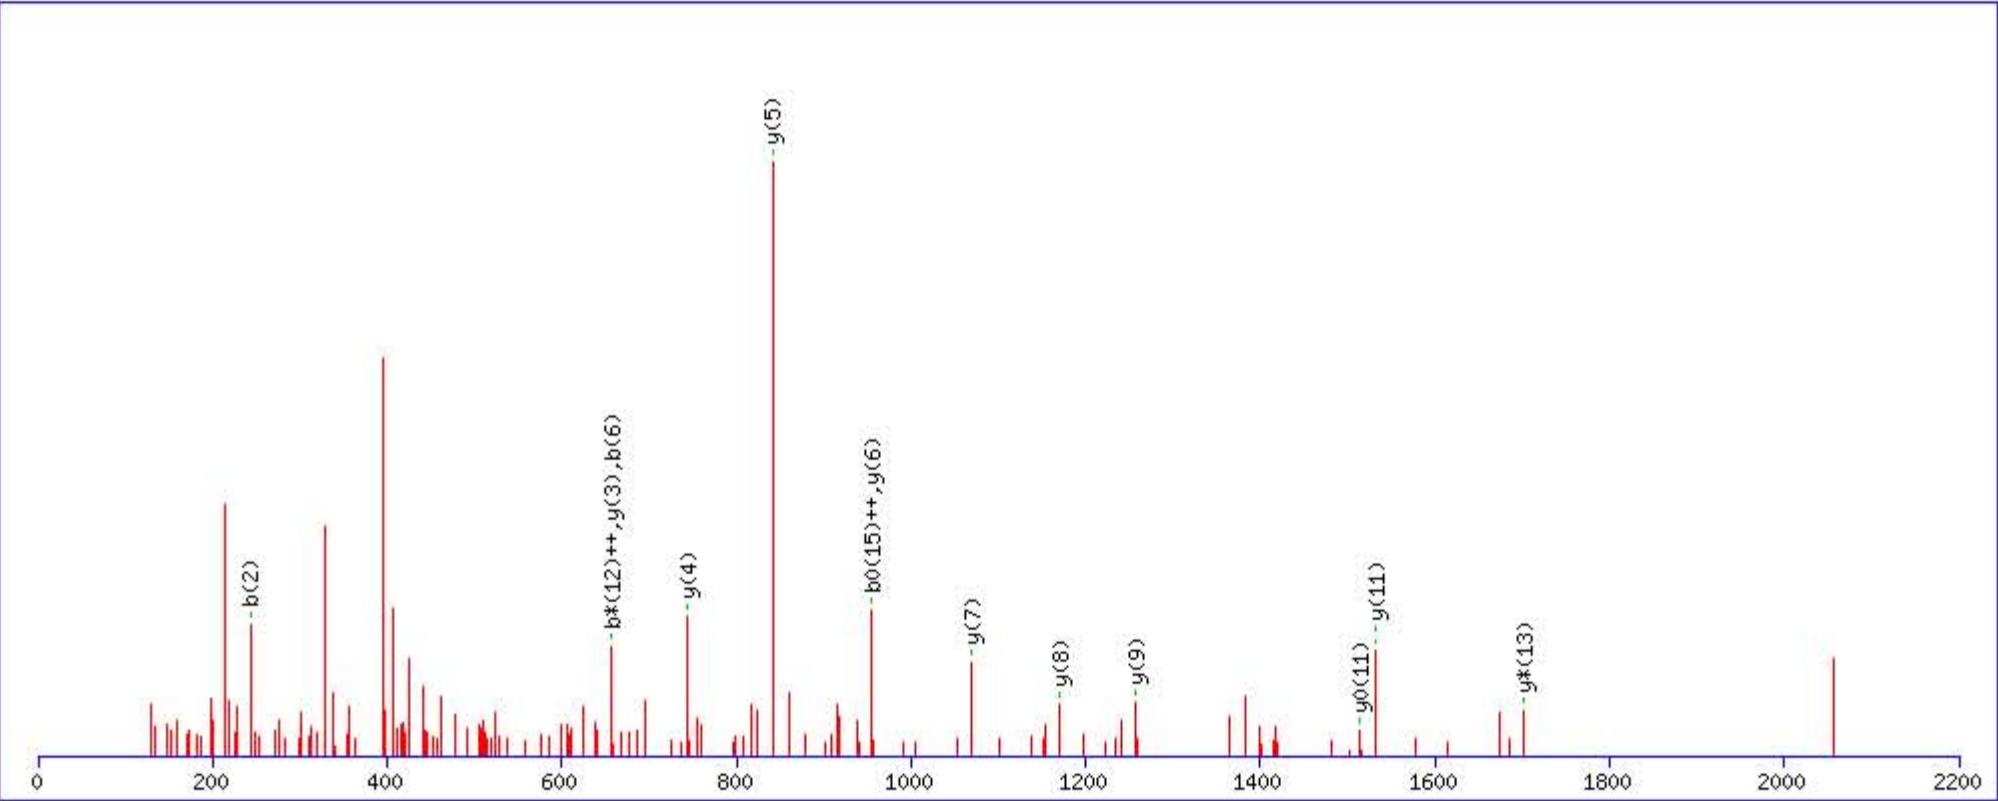

Monoisotopic mass of neutral peptide Mr(calc): 2072.987061  
Fixed modifications: Carbamidomethyl (C) (apply to specified residues or termini only)  
Variable modifications:  
Q14 : Biotin:Thermo-21345 (Q)  
Ions Score: 55 Expect: 7.6e-006  
Matches : 14/156 fragment ions using 17 most intense peaks [\(help\)](#)

| #  | b           | b <sup>++</sup> | b <sup>*</sup> | b <sup>*++</sup> | b <sup>0</sup> | b <sup>0++</sup> | Seq. | y           | y <sup>++</sup> | y <sup>*</sup> | y <sup>*++</sup> | y <sup>0</sup> | y <sup>0++</sup> | #  |
|----|-------------|-----------------|----------------|------------------|----------------|------------------|------|-------------|-----------------|----------------|------------------|----------------|------------------|----|
| 1  | 130.049869  | 65.528572       |                |                  | 112.039304     | 56.523290        | E    |             |                 |                |                  |                |                  | 16 |
| 2  | 243.133933  | 122.070605      |                |                  | 225.123368     | 113.065322       | I    | 1944.951759 | 972.979517      | 1927.925210    | 964.466243       | 1926.941194    | 963.974235       | 15 |
| 3  | 356.217997  | 178.612637      |                |                  | 338.207432     | 169.607354       | L    | 1831.867695 | 916.437485      | 1814.841146    | 907.924211       | 1813.857130    | 907.432203       | 14 |
| 4  | 443.250025  | 222.128650      |                |                  | 425.239460     | 213.123368       | S    | 1718.783631 | 859.895454      | 1701.757082    | 851.382179       | 1700.773066    | 850.890171       | 13 |
| 5  | 542.318439  | 271.662858      |                |                  | 524.307874     | 262.657575       | V    | 1631.751603 | 816.379439      | 1614.725054    | 807.866165       | 1613.741038    | 807.374157       | 12 |
| 6  | 657.345382  | 329.176329      |                |                  | 639.334817     | 320.171046       | D    | 1532.683189 | 766.845233      | 1515.656640    | 758.331958       | 1514.672624    | 757.839950       | 11 |
| 7  | 817.376031  | 409.191654      |                |                  | 799.365466     | 400.186371       | C    | 1417.656246 | 709.331761      | 1400.629697    | 700.818487       | 1399.645681    | 700.326479       | 10 |
| 8  | 904.408059  | 452.707668      |                |                  | 886.397494     | 443.702385       | S    | 1257.625597 | 629.316437      | 1240.599048    | 620.803162       | 1239.615032    | 620.311154       | 9  |
| 9  | 1005.455738 | 503.231507      |                |                  | 987.445173     | 494.226225       | T    | 1170.593569 | 585.800422      | 1153.567020    | 577.287148       | 1152.583004    | 576.795140       | 8  |
| 10 | 1119.498665 | 560.252971      | 1102.472116    | 551.739696       | 1101.488100    | 551.247688       | N    | 1069.545890 | 535.276583      | 1052.519341    | 526.763309       | 1051.535325    | 526.271301       | 7  |
| 11 | 1233.541592 | 617.274434      | 1216.515043    | 608.761160       | 1215.531027    | 608.269152       | N    | 955.502963  | 478.255119      | 938.476414     | 469.741845       | 937.492398     | 469.249837       | 6  |
| 12 | 1330.594356 | 665.800816      | 1313.567807    | 657.287542       | 1312.583791    | 656.795534       | P    | 841.460036  | 421.233656      | 824.433487     | 412.720381       | 823.449471     | 412.228373       | 5  |
| 13 | 1417.626384 | 709.316830      | 1400.599835    | 700.803556       | 1399.615819    | 700.311548       | S    | 744.407272  | 372.707274      | 727.380723     | 364.193999       | 726.396707     | 363.701991       | 4  |
| 14 | 1856.851710 | 928.929493      | 1839.825161    | 920.416219       | 1838.841145    | 919.924211       | Q    | 657.375244  | 329.191260      | 640.348695     | 320.677985       |                |                  | 3  |
| 15 | 1927.888824 | 964.448050      | 1910.862275    | 955.934776       | 1909.878259    | 955.442768       | A    | 218.149918  | 109.578597      | 201.123369     | 101.065322       |                |                  | 2  |
| 16 |             |                 |                |                  |                |                  | K    | 147.112804  | 74.060040       | 130.086255     | 65.546765        |                |                  | 1  |

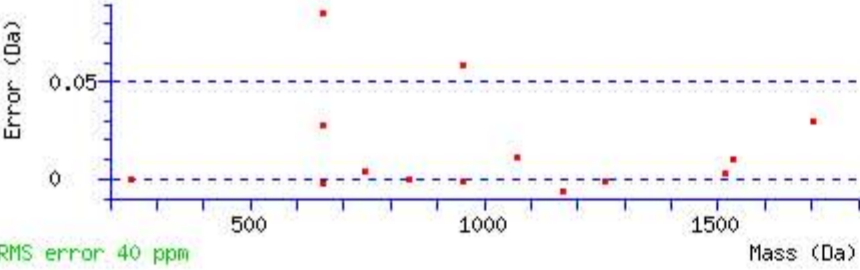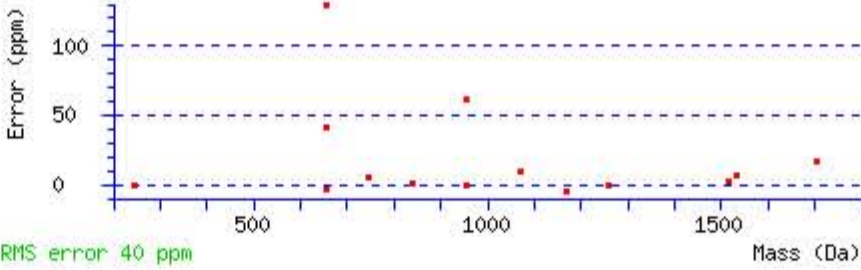

NCBI BLAST search of [EILSVDCSTNNPSQAK](#)  
(Parameters: blastp, nr protein database, expect=20000, no filter, PAM30)  
Other BLAST [web gateways](#)

All matches to this query

| Score | Mr(calc):   | Delta     | Sequence                           |
|-------|-------------|-----------|------------------------------------|
| 54.7  | 2072.987061 | 0.007461  | <a href="#">EILSVDCSTNNPSQAK</a>   |
| 0.1   | 2073.002747 | -0.008225 | <a href="#">DPQAWPSRYREALLEEAR</a> |

MATRIX

SCIENCE

Mascot Search Results

Peptide View

MS/MS Fragmentation of **QQTHMLDVMQDHF****SR**  
Found in **CLUS\_HUMAN**, Clusterin OS=Homo sapiens GN=CLU PE=1 SV=1

Match to Query 48132: 2183.013496 from(546.760650,4+) rtinseconds(2024) index(50490)  
Title: Locus:1.1.1.1942.4 File:"2013-07-02 CLN FXIII 180 min 2nd F 4.wiff"  
Data file C:\Program Files (x86)\Matrix Science\Mascot Daemon\mgf\8 FXIII 180 min 2nd\mascot\_daemon\_merge.mgf

Click mouse within plot area to zoom in by factor of two about that point  
Or, 

Plot from

100

to

1600

Da

Full range

  
Label all possible matches ☐ Label matches used for scoring ☒

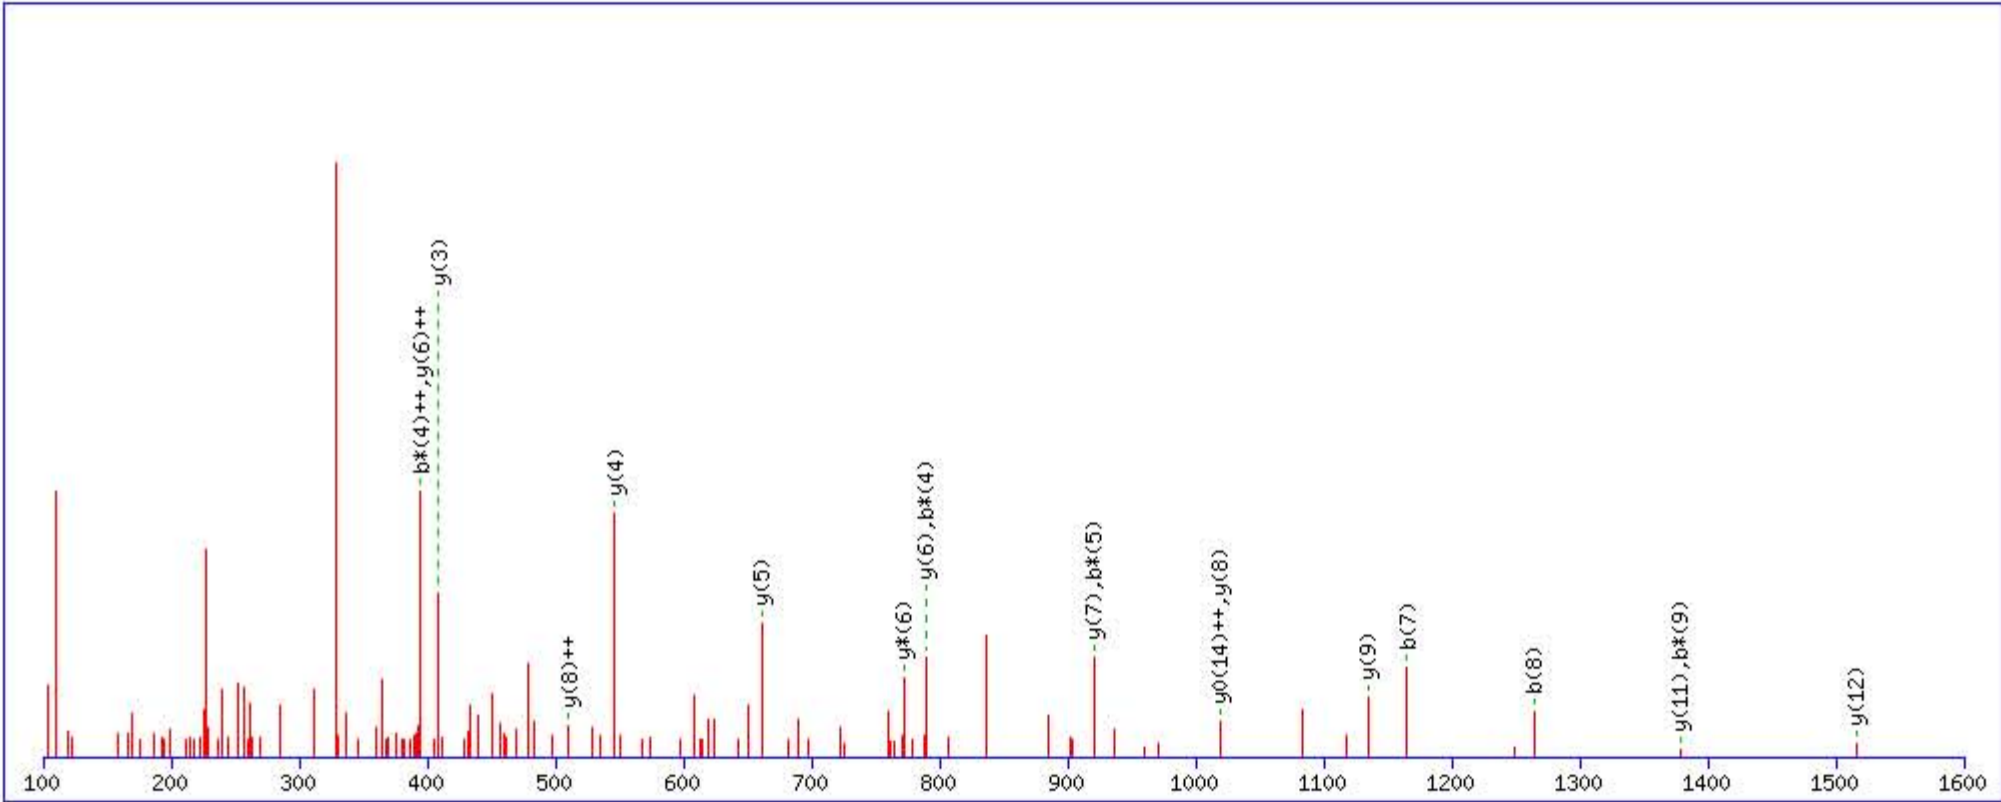

Monoisotopic mass of neutral peptide Mr(calc): 2183.007446  
Fixed modifications: Carbamidomethyl (C) (apply to specified residues or termini only)  
Variable modifications:  
Q2 : Biotin:Thermo-21345 (Q)  
Ions Score: 52 Expect: 8.7e-005  
Matches : 19/162 fragment ions using 26 most intense peaks [\(help\)](#)

| #  | b           | b <sup>++</sup> | b <sup>+</sup> | b <sup>++</sup> | b <sup>0</sup> | b <sup>0++</sup> | Seq. | y           | y <sup>++</sup> | y <sup>+</sup> | y <sup>++</sup> | y <sup>0</sup> | y <sup>0++</sup> | #  |
|----|-------------|-----------------|----------------|-----------------|----------------|------------------|------|-------------|-----------------|----------------|-----------------|----------------|------------------|----|
| 1  | 129.065854  | 65.036565       | 112.039305     | 56.523291       |                |                  | Q    |             |                 |                |                 |                |                  | 15 |
| 2  | 568.291180  | 284.649228      | 551.264631     | 276.135954      |                |                  | Q    | 2055.956135 | 1028.481705     | 2038.929586    | 1019.968431     | 2037.945570    | 1019.476423      | 14 |
| 3  | 669.338859  | 335.173068      | 652.312310     | 326.659793      | 651.328294     | 326.167785       | T    | 1616.730809 | 808.869043      | 1599.704260    | 800.355768      | 1598.720244    | 799.863760       | 13 |
| 4  | 806.397771  | 403.702524      | 789.371222     | 395.189249      | 788.387206     | 394.697241       | H    | 1515.683130 | 758.345203      | 1498.656581    | 749.831929      | 1497.672565    | 749.339921       | 12 |
| 5  | 937.438256  | 469.222766      | 920.411707     | 460.709492      | 919.427691     | 460.217484       | M    | 1378.624218 | 689.815747      | 1361.597669    | 681.302473      | 1360.613653    | 680.810465       | 11 |
| 6  | 1050.522320 | 525.764798      | 1033.495771    | 517.251524      | 1032.511755    | 516.759516       | L    | 1247.583733 | 624.295505      | 1230.557184    | 615.782230      | 1229.573168    | 615.290222       | 10 |
| 7  | 1165.549263 | 583.278270      | 1148.522714    | 574.764995      | 1147.538698    | 574.272987       | D    | 1134.499669 | 567.753473      | 1117.473120    | 559.240198      | 1116.489104    | 558.748190       | 9  |
| 8  | 1264.617677 | 632.812477      | 1247.591128    | 624.299202      | 1246.607112    | 623.807194       | V    | 1019.472726 | 510.240001      | 1002.446177    | 501.726727      | 1001.462161    | 501.234719       | 8  |
| 9  | 1395.658162 | 698.332719      | 1378.631613    | 689.819445      | 1377.647597    | 689.327437       | M    | 920.404312  | 460.705794      | 903.377763     | 452.192520      | 902.393747     | 451.700512       | 7  |
| 10 | 1523.716740 | 762.362008      | 1506.690191    | 753.848734      | 1505.706175    | 753.356726       | Q    | 789.363827  | 395.185552      | 772.337278     | 386.672277      | 771.353262     | 386.180269       | 6  |
| 11 | 1638.743683 | 819.875480      | 1621.717134    | 811.362205      | 1620.733118    | 810.870197       | D    | 661.305249  | 331.156263      | 644.278700     | 322.642988      | 643.294684     | 322.150980       | 5  |
| 12 | 1775.802595 | 888.404936      | 1758.776046    | 879.891661      | 1757.792030    | 879.399653       | H    | 546.278306  | 273.642791      | 529.251757     | 265.129517      | 528.267741     | 264.637509       | 4  |
| 13 | 1922.871009 | 961.939143      | 1905.844460    | 953.425868      | 1904.860444    | 952.933860       | F    | 409.219394  | 205.113335      | 392.192845     | 196.600061      | 391.208829     | 196.108053       | 3  |
| 14 | 2009.903037 | 1005.455157     | 1992.876488    | 996.941882      | 1991.892472    | 996.449874       | S    | 262.150980  | 131.579128      | 245.124431     | 123.065854      | 244.140415     | 122.573846       | 2  |
| 15 |             |                 |                |                 |                |                  | R    | 175.118952  | 88.063114       | 158.092403     | 79.549839       |                |                  | 1  |

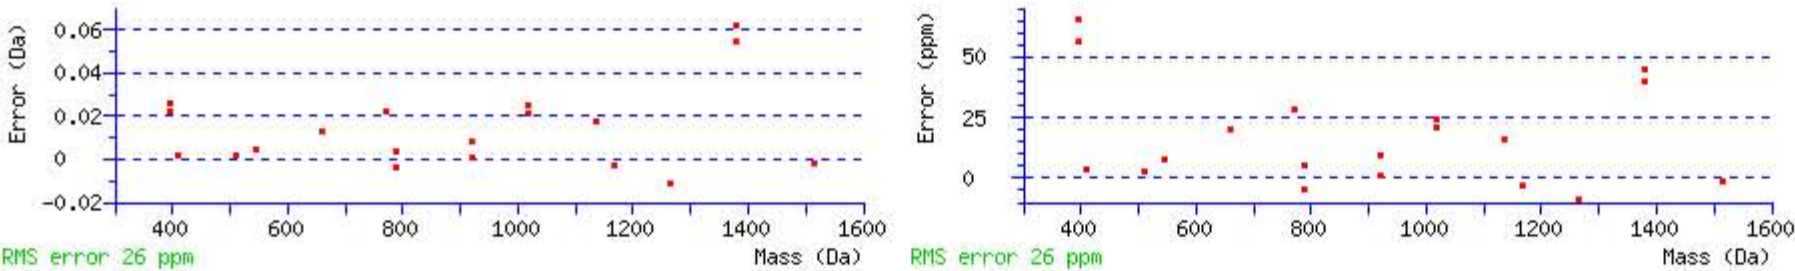

NCBI BLAST search of **QQTHMLDVMQDHF****SR**  
(Parameters: blastp, nr protein database, expect=20000, no filter, PAM30)  
Other BLAST [web gateways](#)

All matches to this query

| Score | Mr(calc):   | Delta    | Sequence                                         |
|-------|-------------|----------|--------------------------------------------------|
| 51.9  | 2183.007446 | 0.006050 | <a href="#">QQTHMLDVMQDHF</a> <a href="#">SR</a> |
| 51.9  | 2183.007446 | 0.006050 | <a href="#">QQTHMLDVMQDHF</a> <a href="#">SR</a> |

MATRIX

SCIENCE

Mascot Search Results

Peptide View

MS/MS Fragmentation of **QQTHMLDVMQDHFSR**  
Found in **CLUS\_HUMAN**, Clusterin OS=Homo sapiens GN=CLU PE=1 SV=1

Match to Query 48139: 2183.031728 from(1092.523140,2+) rtinseconds(1988) index(20170)  
Title: Locus:1.1.1.3074.19 File:"2013-07-02 CLN FXIII 180 min 2nd F 2.wiff"  
Data file C:\Program Files (x86)\Matrix Science\Mascot Daemon\mgf\8 FXIII 180 min 2nd\mascot\_daemon\_merge.mgf

Click mouse within plot area to zoom in by factor of two about that point  
Or,   to  Da   
Label all possible matches ☐ Label matches used for scoring ☒

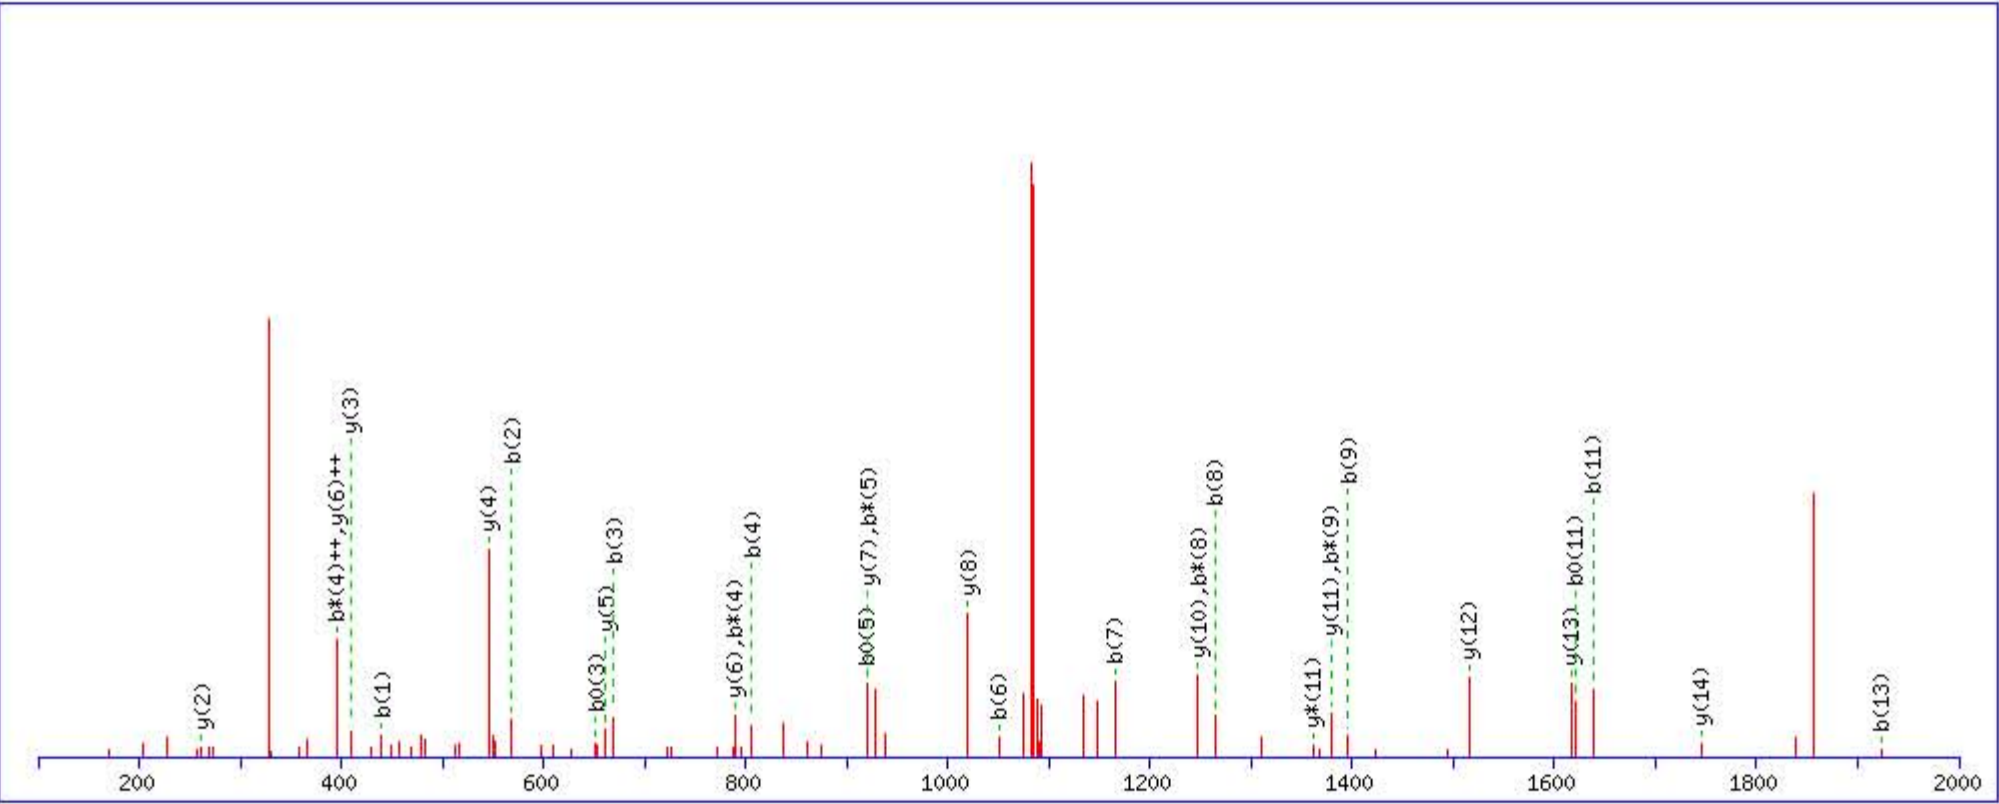

Monoisotopic mass of neutral peptide Mr(calc): 2183.007446  
Fixed modifications: Carbamidomethyl (C) (apply to specified residues or termini only)  
Variable modifications:  
Q1 : Biotin:Thermo-21345 (Q)  
Ions Score: 81 Expect: 3.8e-008  
Matches : 32/162 fragment ions using 46 most intense peaks [\(help\)](#)

| #  | b           | b <sup>++</sup> | b <sup>*</sup> | b <sup>++</sup> * | b <sup>0</sup> | b <sup>0++</sup> | Seq. | y           | y <sup>++</sup> | y <sup>*</sup> | y <sup>++</sup> * | y <sup>0</sup> | y <sup>0++</sup> | #  |
|----|-------------|-----------------|----------------|-------------------|----------------|------------------|------|-------------|-----------------|----------------|-------------------|----------------|------------------|----|
| 1  | 440.232602  | 220.619939      | 423.206053     | 212.106664        |                |                  | Q    |             |                 |                |                   |                |                  | 15 |
| 2  | 568.291180  | 284.649228      | 551.264631     | 276.135954        |                |                  | Q    | 1744.789387 | 872.898332      | 1727.762838    | 864.385057        | 1726.778822    | 863.893049       | 14 |
| 3  | 669.338859  | 335.173068      | 652.312310     | 326.659793        | 651.328294     | 326.167785       | T    | 1616.730809 | 808.869043      | 1599.704260    | 800.355768        | 1598.720244    | 799.863760       | 13 |
| 4  | 806.397771  | 403.702524      | 789.371222     | 395.189249        | 788.387206     | 394.697241       | H    | 1515.683130 | 758.345203      | 1498.656581    | 749.831929        | 1497.672565    | 749.339921       | 12 |
| 5  | 937.438256  | 469.222766      | 920.411707     | 460.709492        | 919.427691     | 460.217484       | M    | 1378.624218 | 689.815747      | 1361.597669    | 681.302473        | 1360.613653    | 680.810465       | 11 |
| 6  | 1050.522320 | 525.764798      | 1033.495771    | 517.251524        | 1032.511755    | 516.759516       | L    | 1247.583733 | 624.295505      | 1230.557184    | 615.782230        | 1229.573168    | 615.290222       | 10 |
| 7  | 1165.549263 | 583.278270      | 1148.522714    | 574.764995        | 1147.538698    | 574.272987       | D    | 1134.499669 | 567.753473      | 1117.473120    | 559.240198        | 1116.489104    | 558.748190       | 9  |
| 8  | 1264.617677 | 632.812477      | 1247.591128    | 624.299202        | 1246.607112    | 623.807194       | V    | 1019.472726 | 510.240001      | 1002.446177    | 501.726727        | 1001.462161    | 501.234719       | 8  |
| 9  | 1395.658162 | 698.332719      | 1378.631613    | 689.819445        | 1377.647597    | 689.327437       | M    | 920.404312  | 460.705794      | 903.377763     | 452.192520        | 902.393747     | 451.700512       | 7  |
| 10 | 1523.716740 | 762.362008      | 1506.690191    | 753.848734        | 1505.706175    | 753.356726       | Q    | 789.363827  | 395.185552      | 772.337278     | 386.672277        | 771.353262     | 386.180269       | 6  |
| 11 | 1638.743683 | 819.875480      | 1621.717134    | 811.362205        | 1620.733118    | 810.870197       | D    | 661.305249  | 331.156263      | 644.278700     | 322.642988        | 643.294684     | 322.150980       | 5  |
| 12 | 1775.802595 | 888.404936      | 1758.776046    | 879.891661        | 1757.792030    | 879.399653       | H    | 546.278306  | 273.642791      | 529.251757     | 265.129517        | 528.267741     | 264.637509       | 4  |
| 13 | 1922.871009 | 961.939143      | 1905.844460    | 953.425868        | 1904.860444    | 952.933860       | F    | 409.219394  | 205.113335      | 392.192845     | 196.600061        | 391.208829     | 196.108053       | 3  |
| 14 | 2009.903037 | 1005.455157     | 1992.876488    | 996.941882        | 1991.892472    | 996.449874       | S    | 262.150980  | 131.579128      | 245.124431     | 123.065854        | 244.140415     | 122.573846       | 2  |
| 15 |             |                 |                |                   |                |                  | R    | 175.118952  | 88.063114       | 158.092403     | 79.549839         |                |                  | 1  |

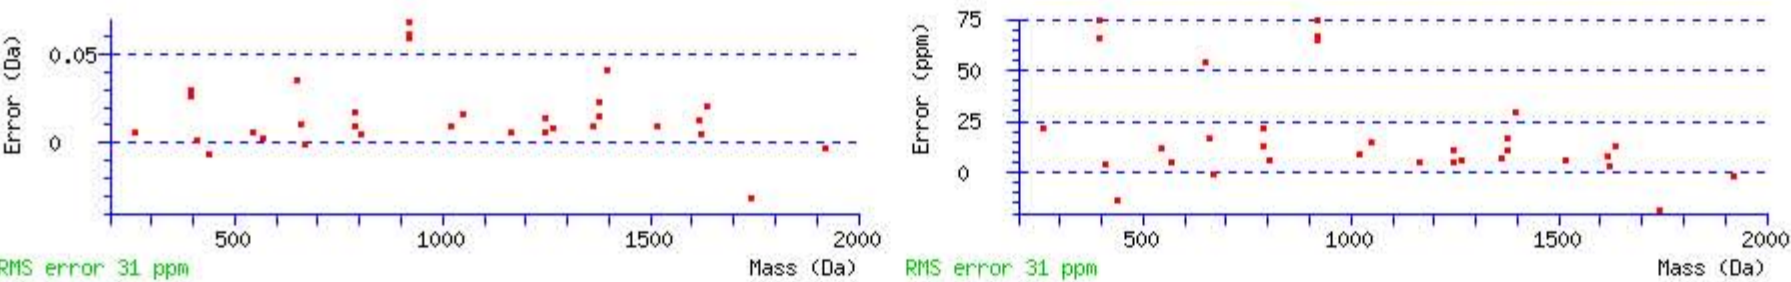

NCBI BLAST search of [QQTHMLDVMQDHFSR](#)  
(Parameters: blastp, nr protein database, expect=20000, no filter, PAM30)  
Other BLAST [web gateways](#)

All matches to this query

| Score | Mr(calc):   | Delta     | Sequence                                 |
|-------|-------------|-----------|------------------------------------------|
| 80.9  | 2183.007446 | 0.024282  | <a href="#">QQTHMLDVMQDHFSR</a>          |
| 66.9  | 2183.007446 | 0.024282  | <a href="#">QQTHMLDVMQDHFSR</a>          |
| 1.6   | 2183.007446 | 0.024282  | <a href="#">QQTHMLDVMQDHFSR</a>          |
| 1.6   | 2183.050842 | -0.019114 | <a href="#">GYGSGGGGAQQLGAGPFPAQPPGR</a> |
| 0.9   | 2183.001816 | 0.029912  | <a href="#">KPYRIESDEEDFENVGK</a>        |
| 0.8   | 2183.009933 | 0.021795  | <a href="#">GNDCVRISPDAPLQCAEGPK</a>     |

MATRIX

SCIENCE

Mascot Search Results

Peptide View

MS/MS Fragmentation of **QQTHMLDVMQDHFSR**  
Found in **CLUS\_HUMAN**, Clusterin OS=Homo sapiens GN=CLU PE=1 SV=1

Match to Query 54235: 2494.208136 from(624.559310,4+) rtinseconds(2203) index(35486)  
Title: Locus:1.1.1.876.7 File:"2013-07-02 CLN FXIII 180 min 2nd F 3.wiff"  
Data file C:\Program Files (x86)\Matrix Science\Mascot Daemon\mgf\8 FXIII 180 min 2nd\mascot\_daemon\_merge.mgf

Click mouse within plot area to zoom in by factor of two about that point  
Or, 

Plot from

100

 to 

1700

 Da 

Full range

  
Label all possible matches ☐ Label matches used for scoring ☒

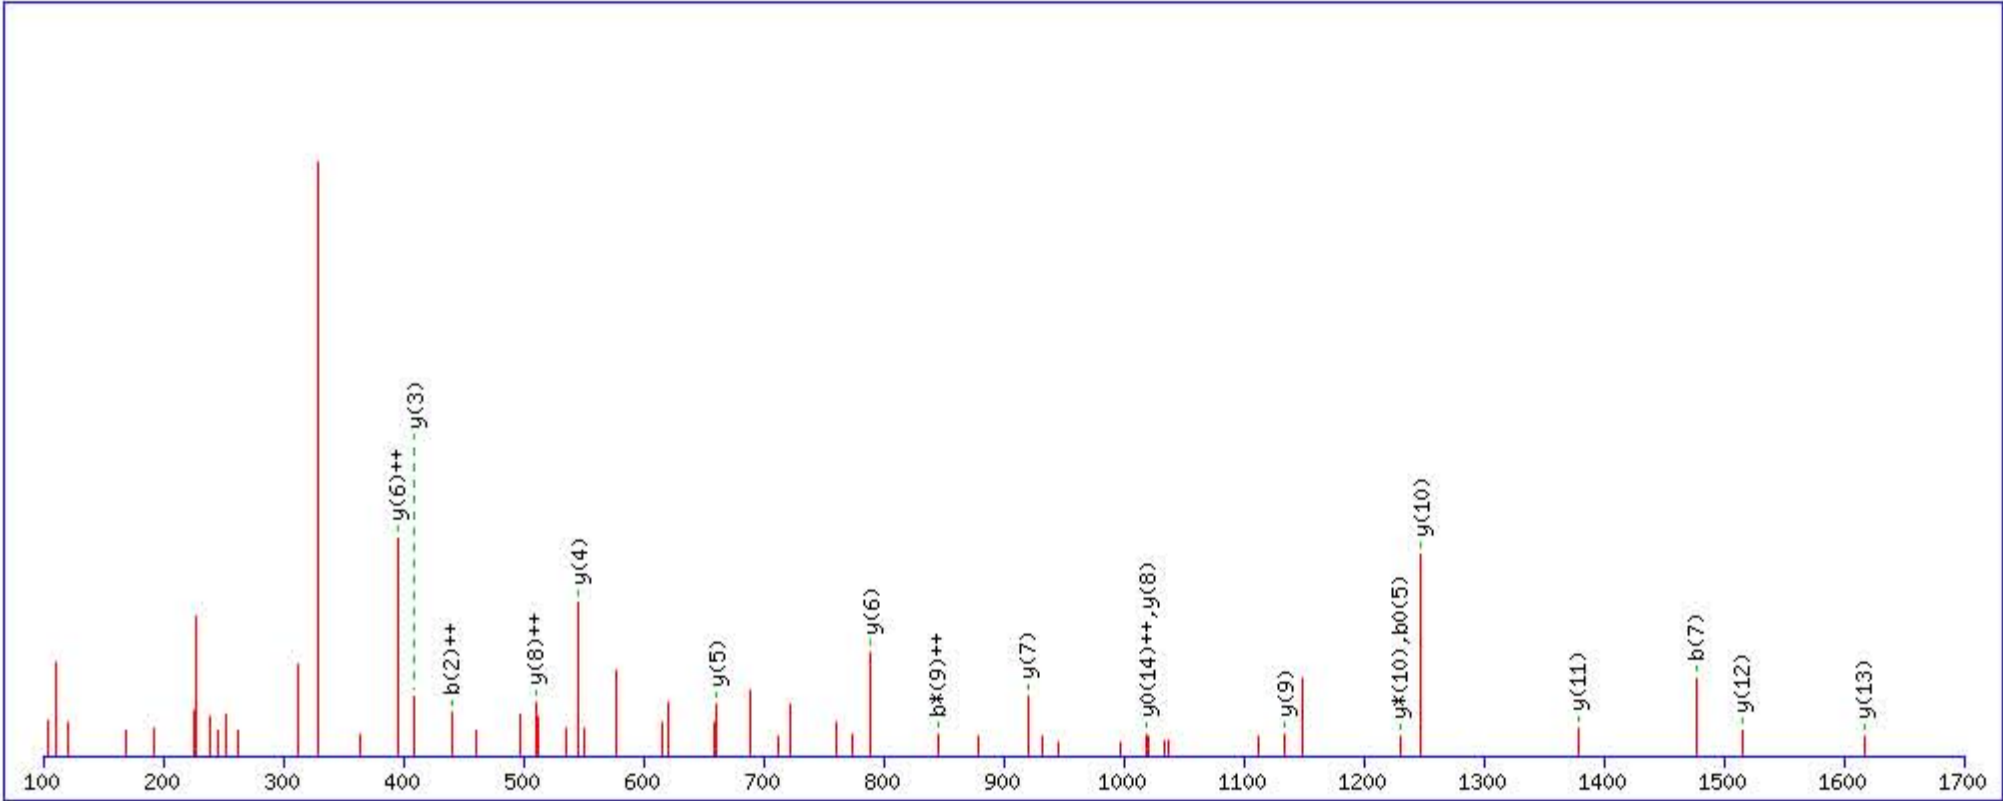

Monoisotopic mass of neutral peptide Mr(calc): 2494.174194  
Fixed modifications: Carbamidomethyl (C) (apply to specified residues or termini only)  
Variable modifications:  
Q1 : Biotin:Thermo-21345 (Q)  
Q2 : Biotin:Thermo-21345 (Q)  
Ions Score: 55 Expect: 8.3e-005  
Matches : 20/162 fragment ions using 39 most intense peaks [\(help\)](#)

| #  | b           | b <sup>++</sup> | b <sup>+</sup> | b <sup>+++</sup> | b <sup>0</sup> | b <sup>0++</sup> | Seq. | y           | y <sup>++</sup> | y <sup>+</sup> | y <sup>+++</sup> | y <sup>0</sup> | y <sup>0++</sup> | #  |
|----|-------------|-----------------|----------------|------------------|----------------|------------------|------|-------------|-----------------|----------------|------------------|----------------|------------------|----|
| 1  | 440.232602  | 220.619939      | 423.206053     | 212.106664       |                |                  | Q    |             |                 |                |                  |                |                  | 15 |
| 2  | 879.457928  | 440.232602      | 862.431379     | 431.719328       |                |                  | Q    | 2055.956135 | 1028.481705     | 2038.929586    | 1019.968431      | 2037.945570    | 1019.476423      | 14 |
| 3  | 980.505607  | 490.756442      | 963.479058     | 482.243167       | 962.495042     | 481.751159       | T    | 1616.730809 | 808.869043      | 1599.704260    | 800.355768       | 1598.720244    | 799.863760       | 13 |
| 4  | 1117.564519 | 559.285898      | 1100.537970    | 550.772623       | 1099.553954    | 550.280615       | H    | 1515.683130 | 758.345203      | 1498.656581    | 749.831929       | 1497.672565    | 749.339921       | 12 |
| 5  | 1248.605004 | 624.806140      | 1231.578455    | 616.292866       | 1230.594439    | 615.800858       | M    | 1378.624218 | 689.815747      | 1361.597669    | 681.302473       | 1360.613653    | 680.810465       | 11 |
| 6  | 1361.689068 | 681.348172      | 1344.662519    | 672.834898       | 1343.678503    | 672.342889       | L    | 1247.583733 | 624.295505      | 1230.557184    | 615.782230       | 1229.573168    | 615.290222       | 10 |
| 7  | 1476.716011 | 738.861644      | 1459.689462    | 730.348369       | 1458.705446    | 729.856361       | D    | 1134.499669 | 567.753473      | 1117.473120    | 559.240198       | 1116.489104    | 558.748190       | 9  |
| 8  | 1575.784425 | 788.395851      | 1558.757876    | 779.882576       | 1557.773860    | 779.390568       | V    | 1019.472726 | 510.240001      | 1002.446177    | 501.726727       | 1001.462161    | 501.234719       | 8  |
| 9  | 1706.824910 | 853.916093      | 1689.798361    | 845.402819       | 1688.814345    | 844.910811       | M    | 920.404312  | 460.705794      | 903.377763     | 452.192520       | 902.393747     | 451.700512       | 7  |
| 10 | 1834.883488 | 917.945382      | 1817.856939    | 909.432108       | 1816.872923    | 908.940100       | Q    | 789.363827  | 395.185552      | 772.337278     | 386.672277       | 771.353262     | 386.180269       | 6  |
| 11 | 1949.910431 | 975.458854      | 1932.883882    | 966.945579       | 1931.899866    | 966.453571       | D    | 661.305249  | 331.156263      | 644.278700     | 322.642988       | 643.294684     | 322.150980       | 5  |
| 12 | 2086.969343 | 1043.988310     | 2069.942794    | 1035.475035      | 2068.958778    | 1034.983027      | H    | 546.278306  | 273.642791      | 529.251757     | 265.129517       | 528.267741     | 264.637509       | 4  |
| 13 | 2234.037757 | 1117.522516     | 2217.011208    | 1109.009242      | 2216.027192    | 1108.517234      | F    | 409.219394  | 205.113335      | 392.192845     | 196.600060       | 391.208829     | 196.108052       | 3  |
| 14 | 2321.069785 | 1161.038531     | 2304.043236    | 1152.525256      | 2303.059220    | 1152.033248      | S    | 262.150980  | 131.579128      | 245.124431     | 123.065854       | 244.140415     | 122.573846       | 2  |
| 15 |             |                 |                |                  |                |                  | R    | 175.118952  | 88.063114       | 158.092403     | 79.549839        |                |                  | 1  |

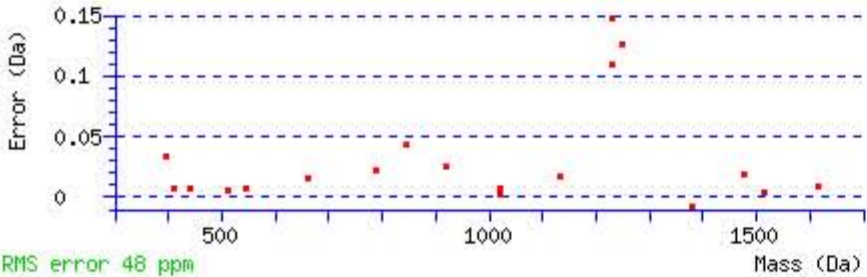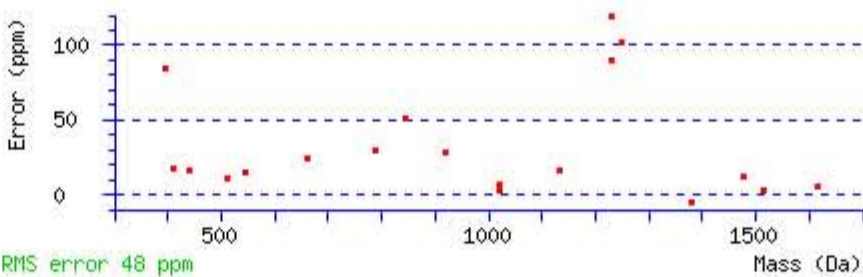

NCBI BLAST search of [QQTHMLDVMQDHFSR](#)  
(Parameters: blastp, nr protein database, expect=20000, no filter, PAM30)  
Other BLAST [web gateways](#)

All matches to this query

| Score | Mr(calc):   | Delta    | Sequence                        |
|-------|-------------|----------|---------------------------------|
| 54.7  | 2494.174194 | 0.033942 | <a href="#">QQTHMLDVMQDHFSR</a> |

MATRIX

SCIENCE

Mascot Search Results

Peptide View

MS/MS Fragmentation of **VSVSQTSK**  
Found in **FA9\_HUMAN**, Coagulation factor IX OS=Homo sapiens GN=F9 PE=1 SV=2

Match to Query 18811: 1145.617068 from(573.815810,2+) rtinseconds(1415) index(46433)  
Title: Locus:1.1.1.1730.17 File:"2013-07-02 CLN FXIII 180 min 2nd F 4.wiff"  
Data file C:\Program Files (x86)\Matrix Science\Mascot Daemon\mgf\8 FXIII 180 min 2nd\mascot\_daemon\_merge.mgf

Click mouse within plot area to zoom in by factor of two about that point  
Or,   to  Da   
Label all possible matches ☐ Label matches used for scoring ☒

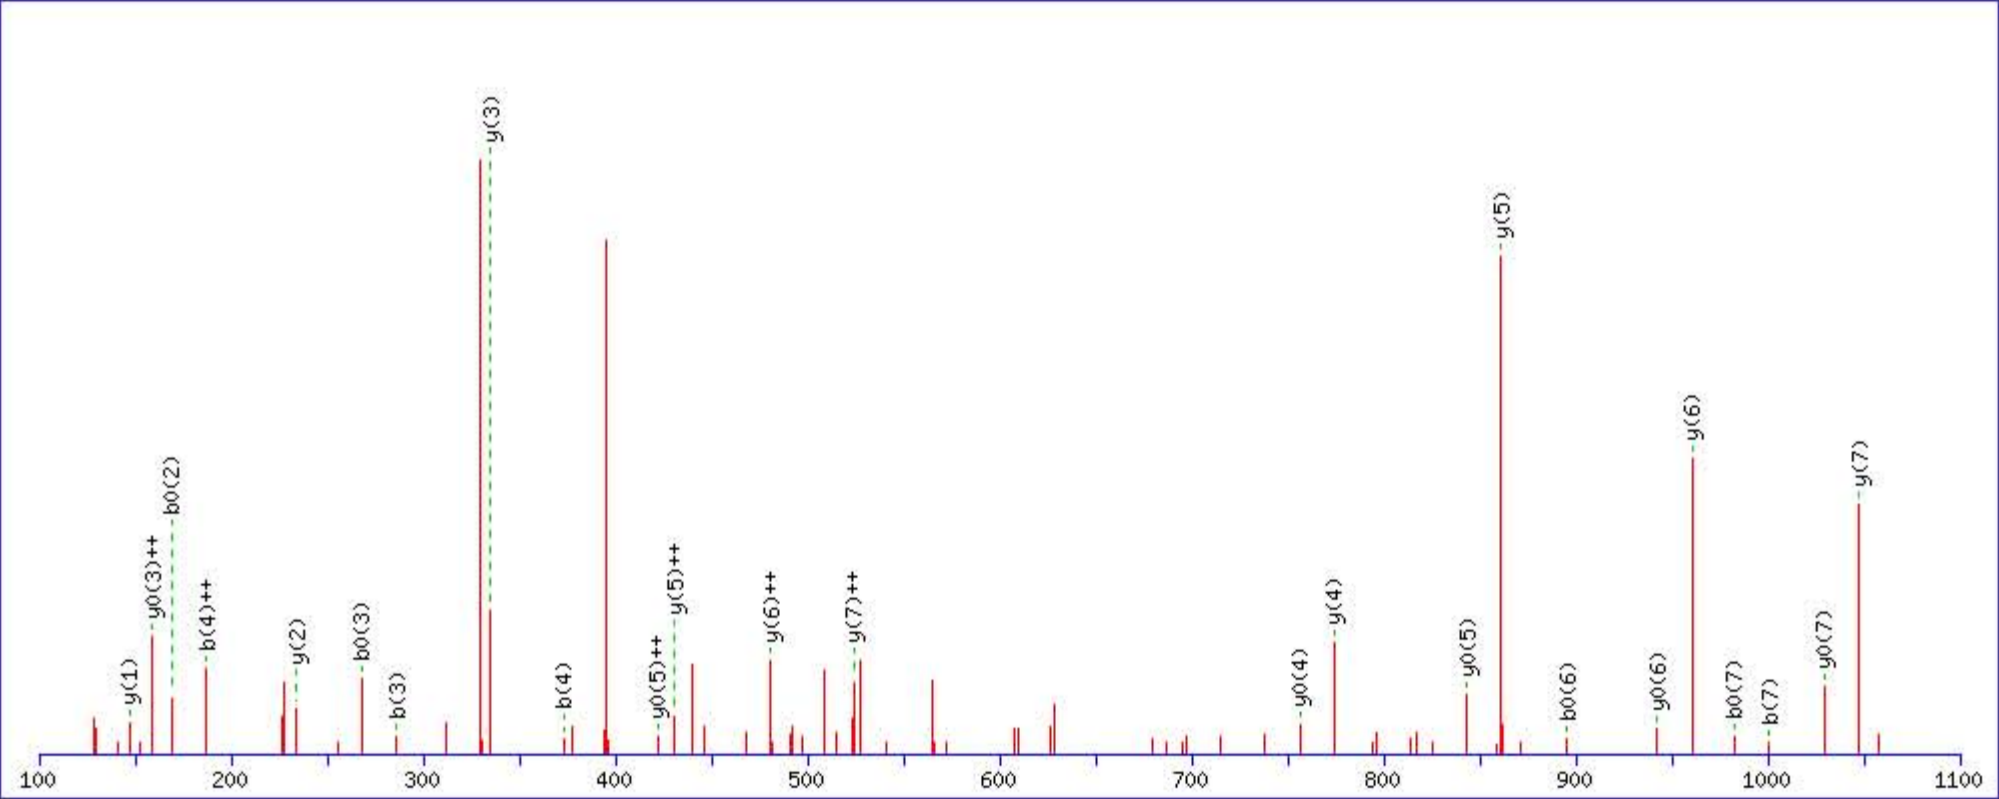

Monoisotopic mass of neutral peptide Mr(calc): 1145.611450  
Fixed modifications: Carbamidomethyl (C) (apply to specified residues or termini only)  
Variable modifications:  
Q5 : Biotin:Thermo-21345 (Q)  
Ions Score: 31 Expect: 0.019  
Matches : 25/72 fragment ions using 58 most intense peaks ([help](#))

| # | b           | b <sup>++</sup> | b <sup>*</sup> | b <sup>*++</sup> | b <sup>0</sup> | b <sup>0++</sup> | Seq. | y           | y <sup>++</sup> | y <sup>*</sup> | y <sup>*++</sup> | y <sup>0</sup> | y <sup>0++</sup> | # |
|---|-------------|-----------------|----------------|------------------|----------------|------------------|------|-------------|-----------------|----------------|------------------|----------------|------------------|---|
| 1 | 100.075690  | 50.541483       |                |                  |                |                  | V    |             |                 |                |                  |                |                  | 8 |
| 2 | 187.107718  | 94.057497       |                |                  | 169.097153     | 85.052214        | S    | 1047.550307 | 524.278792      | 1030.523758    | 515.765517       | 1029.539742    | 515.273509       | 7 |
| 3 | 286.176132  | 143.591704      |                |                  | 268.165567     | 134.586422       | V    | 960.518279  | 480.762778      | 943.491730     | 472.249503       | 942.507714     | 471.757495       | 6 |
| 4 | 373.208160  | 187.107718      |                |                  | 355.197595     | 178.102435       | S    | 861.449865  | 431.228571      | 844.423316     | 422.715296       | 843.439300     | 422.223288       | 5 |
| 5 | 812.433486  | 406.720381      | 795.406937     | 398.207107       | 794.422921     | 397.715099       | Q    | 774.417837  | 387.712557      | 757.391288     | 379.199282       | 756.407272     | 378.707274       | 4 |
| 6 | 913.481165  | 457.244221      | 896.454616     | 448.730946       | 895.470600     | 448.238938       | T    | 335.192511  | 168.099893      | 318.165962     | 159.586619       | 317.181946     | 159.094611       | 3 |
| 7 | 1000.513193 | 500.760235      | 983.486644     | 492.246960       | 982.502628     | 491.754952       | S    | 234.144832  | 117.576054      | 217.118283     | 109.062779       | 216.134267     | 108.570771       | 2 |
| 8 |             |                 |                |                  |                |                  | K    | 147.112804  | 74.060040       | 130.086255     | 65.546765        |                |                  | 1 |

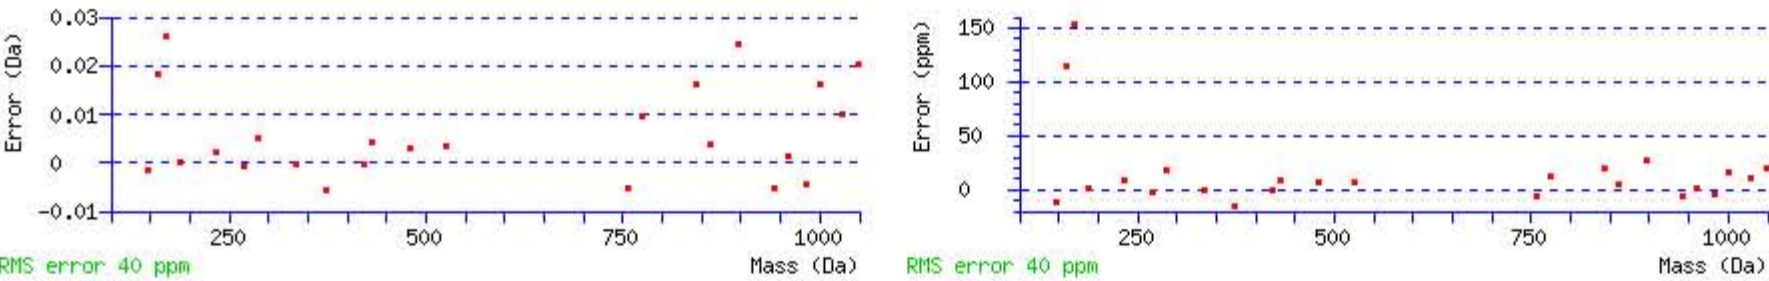

NCBI BLAST search of [VSVSQTSK](#)  
(Parameters: blastp, nr protein database, expect=20000, no filter, PAM30)  
Other BLAST [web gateways](#)

All matches to this query

| Score | Mr(calc):   | Delta     | Sequence                     |
|-------|-------------|-----------|------------------------------|
| 31.1  | 1145.611450 | 0.005618  | <a href="#">VSVSQTSK</a>     |
| 12.2  | 1145.611420 | 0.005648  | <a href="#">KSIMVQSPEK</a>   |
| 4.2   | 1145.604034 | 0.013034  | <a href="#">STPSSSPSLRK</a>  |
| 3.8   | 1145.629196 | -0.012128 | <a href="#">GEVLGLSSSLGK</a> |
| 2.6   | 1145.623337 | -0.006269 | <a href="#">WVDGGKPLFK</a>   |
| 1.0   | 1145.604004 | 0.013064  | <a href="#">SANELLSREK</a>   |
| 0.1   | 1145.630524 | -0.013456 | <a href="#">VRPFSQREK</a>    |
| 0.1   | 1145.622650 | -0.005582 | <a href="#">VDNAMSRLLK</a>   |

MATRIX

SCIENCE

Mascot Search Results

Peptide View

MS/MS Fragmentation of **SALVLQYLR**  
Found in **FA9\_HUMAN**, Coagulation factor IX OS=Homo sapiens GN=F9 PE=1 SV=2

Match to Query 26346: 1372.803288 from(687.408920,2+) rtinseconds(2420) index(52971)  
Title: Locus:1.1.1.2080.7 File:"2013-07-02 CLN FXIII 180 min 2nd F 4.wiff"  
Data file C:\Program Files (x86)\Matrix Science\Mascot Daemon\mgf\8 FXIII 180 min 2nd\mascot\_daemon\_merge.mgf

Click mouse within plot area to zoom in by factor of two about that point  
Or, 

Plot from

100

 to 

1500

 Da 

Full range

  
Label all possible matches ☐ Label matches used for scoring ☒

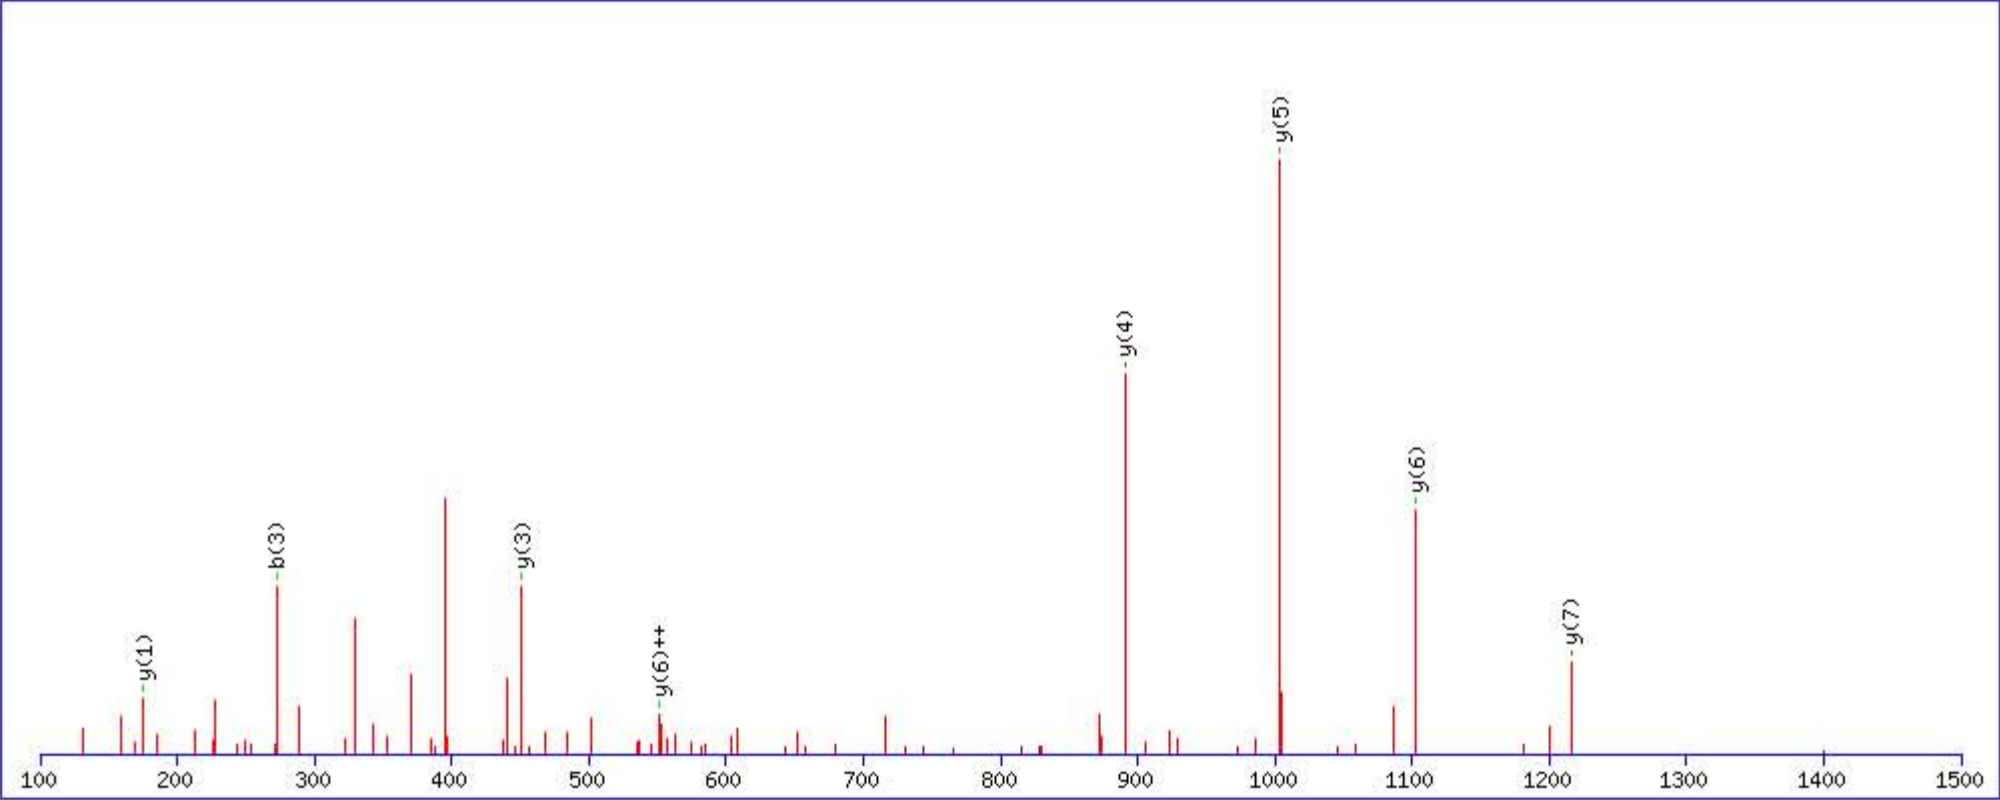

Monoisotopic mass of neutral peptide Mr(calc): 1372.790054  
Fixed modifications: Carbamidomethyl (C) (apply to specified residues or termini only)  
Variable modifications:  
Q6 : Biotin:Thermo-21345 (Q)  
Ions Score: 47 Expect: 8.7e-005  
Matches : 8/70 fragment ions using 11 most intense peaks [\(help\)](#)

| # | b           | b <sup>++</sup> | b <sup>*</sup> | b <sup>+++</sup> | b <sup>0</sup> | b <sup>0++</sup> | Seq. | y           | y <sup>++</sup> | y <sup>*</sup> | y <sup>+++</sup> | # |
|---|-------------|-----------------|----------------|------------------|----------------|------------------|------|-------------|-----------------|----------------|------------------|---|
| 1 | 88.039304   | 44.523290       |                |                  | 70.028739      | 35.518008        | S    |             |                 |                |                  | 9 |
| 2 | 159.076418  | 80.041847       |                |                  | 141.065853     | 71.036564        | A    | 1286.765327 | 643.886301      | 1269.738778    | 635.373027       | 8 |
| 3 | 272.160482  | 136.583879      |                |                  | 254.149917     | 127.578597       | L    | 1215.728213 | 608.367744      | 1198.701664    | 599.854470       | 7 |
| 4 | 371.228896  | 186.118086      |                |                  | 353.218331     | 177.112804       | V    | 1102.644149 | 551.825713      | 1085.617600    | 543.312438       | 6 |
| 5 | 484.312960  | 242.660118      |                |                  | 466.302395     | 233.654836       | L    | 1003.575735 | 502.291505      | 986.549186     | 493.778231       | 5 |
| 6 | 923.538286  | 462.272781      | 906.511737     | 453.759507       | 905.527721     | 453.267499       | Q    | 890.491671  | 445.749473      | 873.465122     | 437.236199       | 4 |
| 7 | 1086.601615 | 543.804446      | 1069.575066    | 535.291171       | 1068.591050    | 534.799163       | Y    | 451.266345  | 226.136810      | 434.239796     | 217.623536       | 3 |
| 8 | 1199.685679 | 600.346477      | 1182.659130    | 591.833203       | 1181.675114    | 591.341195       | L    | 288.203016  | 144.605146      | 271.176467     | 136.091871       | 2 |
| 9 |             |                 |                |                  |                |                  | R    | 175.118952  | 88.063114       | 158.092403     | 79.549839        | 1 |

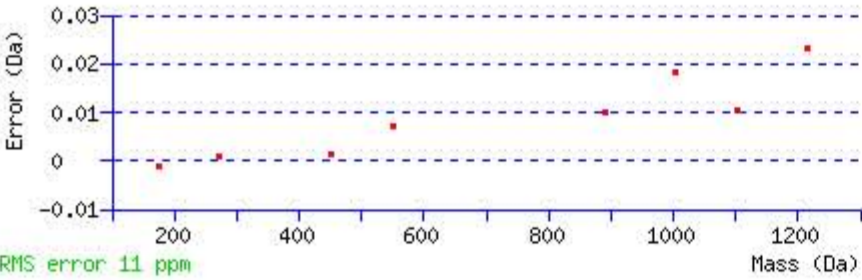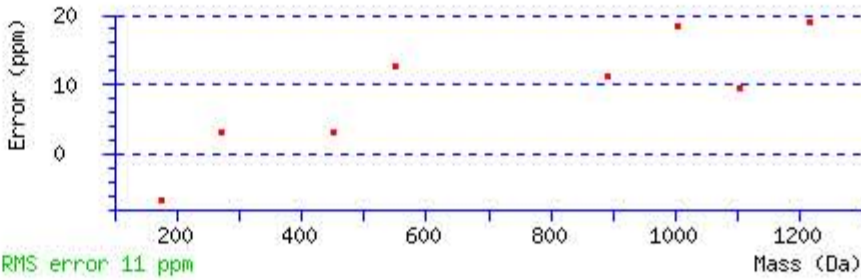

NCBI BLAST search of [SALVLQYLR](#)  
(Parameters: blastp, nr protein database, expect=20000, no filter, PAM30)  
Other BLAST [web gateways](#)

All matches to this query

| Score | Mr(calc):   | Delta    | Sequence                  |
|-------|-------------|----------|---------------------------|
| 46.6  | 1372.790054 | 0.013234 | <a href="#">SALVLQYLR</a> |
| 3.2   | 1372.790039 | 0.013249 | <a href="#">KELQILYR</a>  |
| 1.3   | 1372.790039 | 0.013249 | <a href="#">IIEKYQLR</a>  |

M

A

T

R

I

X

S

C

I

E

N

C

E

Mascot Search Results

Peptide View

MS/MS Fragmentation of **ITVVAGEHNIEETEHTEQK**  
Found in **FA9\_HUMAN**, Coagulation factor IX OS=Homo sapiens GN=F9 PE=1 SV=2

Match to Query 53602: 2474.223816 from(619.563230,4+) rtinseconds(1618) index(47771)  
Title: Locus:1.1.1.1801.10 File:"2013-07-02 CLN FXIII 180 min 2nd F 4.wiff"  
Data file C:\Program Files (x86)\Matrix Science\Mascot Daemon\mgf\8 FXIII 180 min 2nd\mascot\_daemon\_merge.mgf

Click mouse within plot area to zoom in by factor of two about that point  
Or,  0  2600    
Label all possible matches ☐ Label matches used for scoring ☒

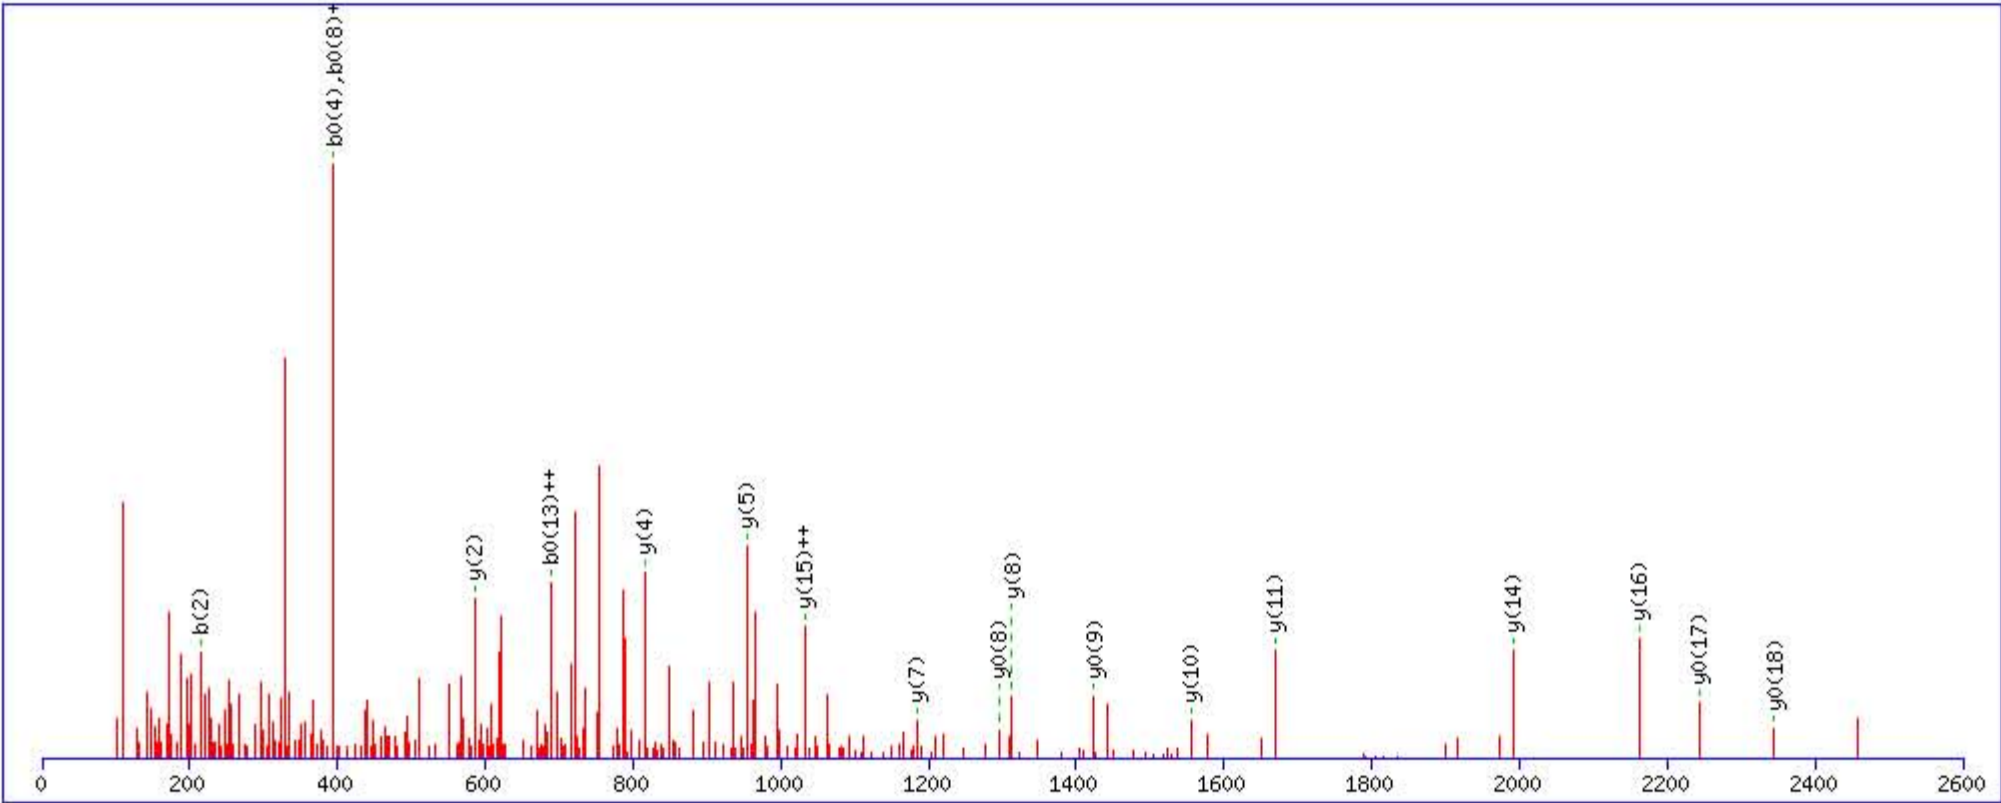

Monoisotopic mass of neutral peptide Mr(calc): 2474.211121  
Fixed modifications: Carbamidomethyl (C) (apply to specified residues or termini only)  
Variable modifications:  
Q18 : Biotin:Thermo-21345 (Q)  
Ions Score: 52 Expect: 0.00017  
Matches : 18/194 fragment ions using 23 most intense peaks [\(help\)](#)

| #  | b           | b <sup>++</sup> | b <sup>+</sup> | b <sup>+++</sup> | b <sup>0</sup> | b <sup>0++</sup> | Seq. | y           | y <sup>++</sup> | y <sup>+</sup> | y <sup>+++</sup> | y <sup>0</sup> | y <sup>0++</sup> | #  |
|----|-------------|-----------------|----------------|------------------|----------------|------------------|------|-------------|-----------------|----------------|------------------|----------------|------------------|----|
| 1  | 114.091340  | 57.549308       |                |                  |                |                  | I    |             |                 |                |                  |                |                  | 19 |
| 2  | 215.139019  | 108.073147      |                |                  | 197.128454     | 99.067865        | T    | 2362.134353 | 1181.570814     | 2345.107804    | 1173.057540      | 2344.123788    | 1172.565532      | 18 |
| 3  | 314.207433  | 157.607354      |                |                  | 296.196868     | 148.602072       | V    | 2261.086674 | 1131.046975     | 2244.060125    | 1122.533700      | 2243.076109    | 1122.041692      | 17 |
| 4  | 413.275847  | 207.141561      |                |                  | 395.265282     | 198.136279       | V    | 2162.018260 | 1081.512768     | 2144.991711    | 1072.999493      | 2144.007695    | 1072.507485      | 16 |
| 5  | 484.312961  | 242.660119      |                |                  | 466.302396     | 233.654836       | A    | 2062.949846 | 1031.978561     | 2045.923297    | 1023.465286      | 2044.939281    | 1022.973278      | 15 |
| 6  | 541.334425  | 271.170851      |                |                  | 523.323860     | 262.165568       | G    | 1991.912732 | 996.460004      | 1974.886183    | 987.946730       | 1973.902167    | 987.454722       | 14 |
| 7  | 670.377018  | 335.692147      |                |                  | 652.366453     | 326.686865       | E    | 1934.891268 | 967.949272      | 1917.864719    | 959.435998       | 1916.880703    | 958.943990       | 13 |
| 8  | 807.435930  | 404.221603      |                |                  | 789.425365     | 395.216321       | H    | 1805.848675 | 903.427976      | 1788.822126    | 894.914701       | 1787.838110    | 894.422693       | 12 |
| 9  | 921.478857  | 461.243067      | 904.452308     | 452.729792       | 903.468292     | 452.237784       | N    | 1668.789763 | 834.898520      | 1651.763214    | 826.385245       | 1650.779198    | 825.893237       | 11 |
| 10 | 1034.562921 | 517.785099      | 1017.536372    | 509.271824       | 1016.552356    | 508.779816       | I    | 1554.746836 | 777.877056      | 1537.720287    | 769.363782       | 1536.736271    | 768.871774       | 10 |
| 11 | 1163.605514 | 582.306395      | 1146.578965    | 573.793121       | 1145.594949    | 573.301113       | E    | 1441.662772 | 721.335024      | 1424.636223    | 712.821750       | 1423.652207    | 712.329742       | 9  |
| 12 | 1292.648107 | 646.827692      | 1275.621558    | 638.314417       | 1274.637542    | 637.822409       | E    | 1312.620179 | 656.813728      | 1295.593630    | 648.300453       | 1294.609614    | 647.808445       | 8  |
| 13 | 1393.695786 | 697.351531      | 1376.669237    | 688.838257       | 1375.685221    | 688.346249       | T    | 1183.577586 | 592.292431      | 1166.551037    | 583.779157       | 1165.567021    | 583.287149       | 7  |
| 14 | 1522.738379 | 761.872828      | 1505.711830    | 753.359553       | 1504.727814    | 752.867545       | E    | 1082.529907 | 541.768592      | 1065.503358    | 533.255317       | 1064.519342    | 532.763309       | 6  |
| 15 | 1659.797291 | 830.402284      | 1642.770742    | 821.889009       | 1641.786726    | 821.397001       | H    | 953.487314  | 477.247295      | 936.460765     | 468.734021       | 935.476749     | 468.242013       | 5  |
| 16 | 1760.844970 | 880.926123      | 1743.818421    | 872.412849       | 1742.834405    | 871.920841       | T    | 816.428402  | 408.717839      | 799.401853     | 400.204565       | 798.417837     | 399.712557       | 4  |
| 17 | 1889.887563 | 945.447420      | 1872.861014    | 936.934145       | 1871.876998    | 936.442137       | E    | 715.380723  | 358.194000      | 698.354174     | 349.680725       | 697.370158     | 349.188717       | 3  |
| 18 | 2329.112889 | 1165.060082     | 2312.086340    | 1156.546808      | 2311.102324    | 1156.054800      | Q    | 586.338130  | 293.672703      | 569.311581     | 285.159429       |                |                  | 2  |
| 19 |             |                 |                |                  |                |                  | K    | 147.112804  | 74.060040       | 130.086255     | 65.546765        |                |                  | 1  |

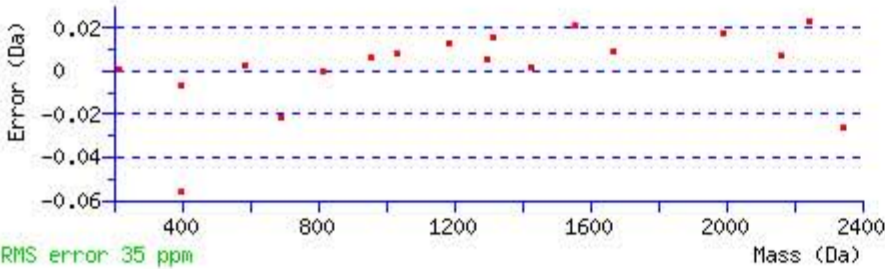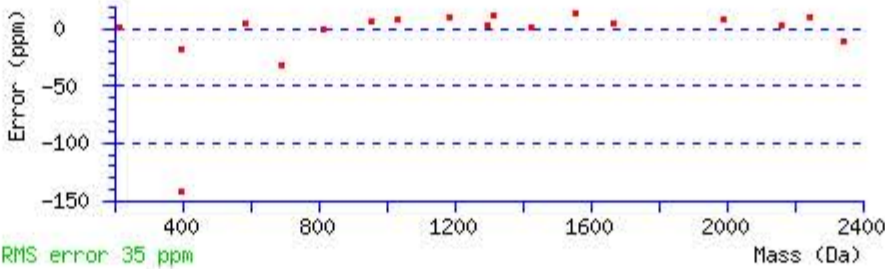

NCBI BLAST search of [ITVVAGEHNIEETEHTEQK](#)  
(Parameters: blastp, nr protein database, expect=20000, no filter, PAM30)  
Other BLAST [web gateways](#)

All matches to this query

| Score | Mr(calc):   | Delta    | Sequence                            |
|-------|-------------|----------|-------------------------------------|
| 52.0  | 2474.211121 | 0.012695 | <a href="#">ITVVAGEHNIEETEHTEQK</a> |



MATRIX

SCIENCE

Mascot Search Results

Peptide View

MS/MS Fragmentation of **APSHQQATTAGSPLR**  
Found in **FA5\_HUMAN**, Coagulation factor V OS=Homo sapiens GN=F5 PE=1 SV=4

Match to Query 40924: 1831.946952 from(611.656260,3+) rtinseconds(1415) index(46435)  
Title: Locus:1.1.1.1730.19 File:"2013-07-02 CLN FXIII 180 min 2nd F 4.wiff"  
Data file C:\Program Files (x86)\Matrix Science\Mascot Daemon\mgf\8 FXIII 180 min 2nd\mascot\_daemon\_merge.mgf

Click mouse within plot area to zoom in by factor of two about that point

Or, 

Plot from

100

 to 

1300

 Da 

Full range

Label all possible matches ☐ Label matches used for scoring ☒

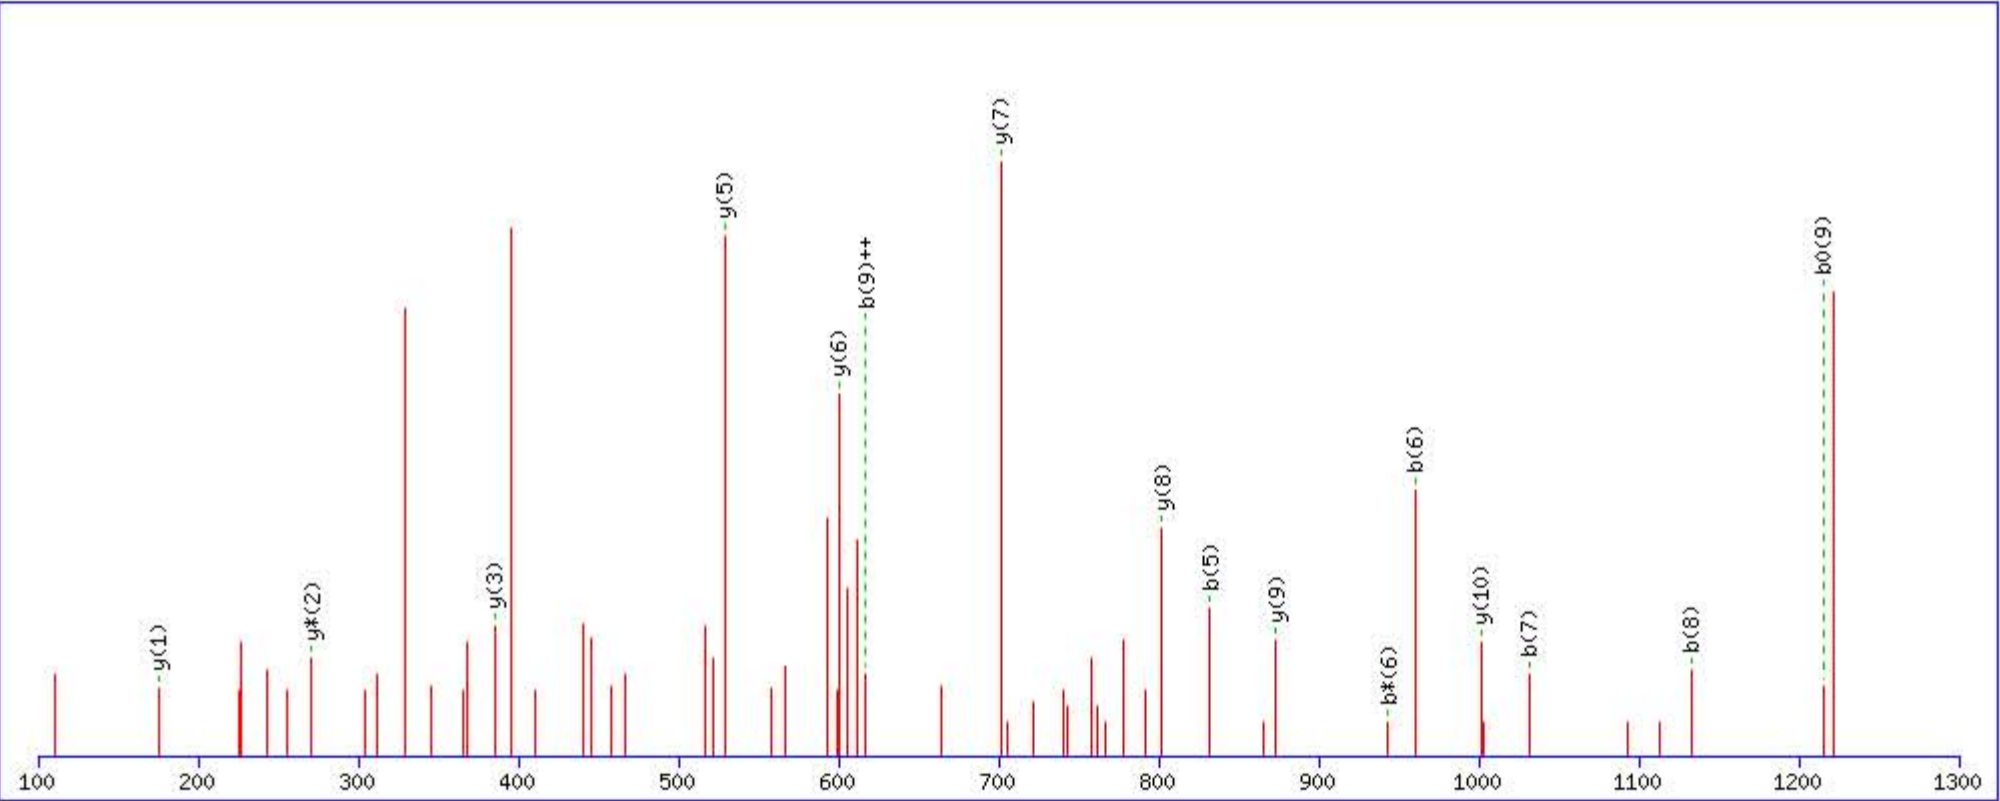

Monoisotopic mass of neutral peptide Mr(calc): 1831.936295  
Fixed modifications: Carbamidomethyl (C) (apply to specified residues or termini only)  
Variable modifications:  
Q5 : Biotin:Thermo-21345 (Q)  
Ions Score: 39 Expect: 0.0038  
Matches : 16/150 fragment ions using 32 most intense peaks [\(help\)](#)

| #  | b           | b <sup>++</sup> | b <sup>*</sup> | b <sup>*++</sup> | b <sup>0</sup> | b <sup>0++</sup> | Seq. | y           | y <sup>++</sup> | y <sup>*</sup> | y <sup>*++</sup> | y <sup>0</sup> | y <sup>0++</sup> | #  |
|----|-------------|-----------------|----------------|------------------|----------------|------------------|------|-------------|-----------------|----------------|------------------|----------------|------------------|----|
| 1  | 72.044390   | 36.525833       |                |                  |                |                  | A    |             |                 |                |                  |                |                  | 15 |
| 2  | 169.097154  | 85.052215       |                |                  |                |                  | P    | 1761.906466 | 881.456871      | 1744.879917    | 872.943597       | 1743.895901    | 872.451588       | 14 |
| 3  | 256.129182  | 128.568229      |                |                  | 238.118617     | 119.562947       | S    | 1664.853702 | 832.930489      | 1647.827153    | 824.417215       | 1646.843137    | 823.925206       | 13 |
| 4  | 393.188094  | 197.097685      |                |                  | 375.177529     | 188.092402       | H    | 1577.821674 | 789.414475      | 1560.795125    | 780.901200       | 1559.811109    | 780.409192       | 12 |
| 5  | 832.413420  | 416.710348      | 815.386871     | 408.197073       | 814.402855     | 407.705065       | Q    | 1440.762762 | 720.885019      | 1423.736213    | 712.371744       | 1422.752197    | 711.879736       | 11 |
| 6  | 960.471998  | 480.739637      | 943.445449     | 472.226362       | 942.461433     | 471.734354       | Q    | 1001.537436 | 501.272356      | 984.510887     | 492.759081       | 983.526871     | 492.267073       | 10 |
| 7  | 1031.509112 | 516.258194      | 1014.482563    | 507.744919       | 1013.498547    | 507.252911       | A    | 873.478858  | 437.243067      | 856.452309     | 428.729792       | 855.468293     | 428.237784       | 9  |
| 8  | 1132.556791 | 566.782034      | 1115.530242    | 558.268759       | 1114.546226    | 557.776751       | T    | 802.441744  | 401.724510      | 785.415195     | 393.211235       | 784.431179     | 392.719227       | 8  |
| 9  | 1233.604470 | 617.305873      | 1216.577921    | 608.792599       | 1215.593905    | 608.300591       | T    | 701.394065  | 351.200671      | 684.367516     | 342.687396       | 683.383500     | 342.195388       | 7  |
| 10 | 1304.641584 | 652.824430      | 1287.615035    | 644.311156       | 1286.631019    | 643.819147       | A    | 600.346386  | 300.676831      | 583.319837     | 292.163556       | 582.335821     | 291.671548       | 6  |
| 11 | 1361.663048 | 681.335162      | 1344.636499    | 672.821888       | 1343.652483    | 672.329879       | G    | 529.309272  | 265.158274      | 512.282723     | 256.644999       | 511.298707     | 256.152991       | 5  |
| 12 | 1448.695076 | 724.851176      | 1431.668527    | 716.337902       | 1430.684511    | 715.845893       | S    | 472.287808  | 236.647542      | 455.261259     | 228.134267       | 454.277243     | 227.642259       | 4  |
| 13 | 1545.747840 | 773.377558      | 1528.721291    | 764.864284       | 1527.737275    | 764.372276       | P    | 385.255780  | 193.131528      | 368.229231     | 184.618253       |                |                  | 3  |
| 14 | 1658.831904 | 829.919590      | 1641.805355    | 821.406316       | 1640.821339    | 820.914307       | L    | 288.203016  | 144.605146      | 271.176467     | 136.091871       |                |                  | 2  |
| 15 |             |                 |                |                  |                |                  | R    | 175.118952  | 88.063114       | 158.092403     | 79.549839        |                |                  | 1  |

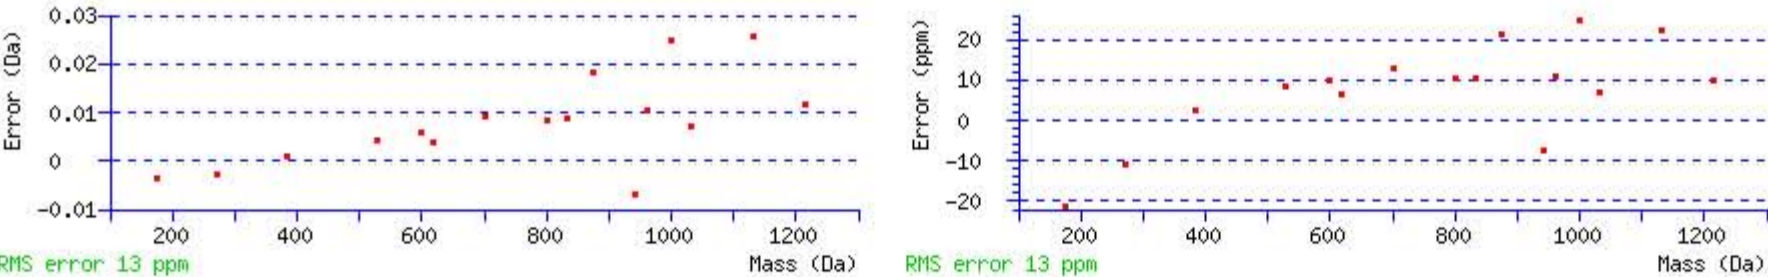

NCBI BLAST search of [APSHQQATTAGSPLR](#)  
(Parameters: blastp, nr protein database, expect=20000, no filter, PAM30)  
Other BLAST [web gateways](#)

All matches to this query

| Score | Mr(calc):   | Delta    | Sequence                        |
|-------|-------------|----------|---------------------------------|
| 38.8  | 1831.936295 | 0.010657 | <a href="#">APSHQQATTAGSPLR</a> |
| 27.3  | 1831.936295 | 0.010657 | <a href="#">APSHQQATTAGSPLR</a> |

MATRIX

SCIENCE

Mascot Search Results

Peptide View

MS/MS Fragmentation of **MPMGLSTGIISDSQIK**  
Found in **FA5\_HUMAN**, Coagulation factor V OS=Homo sapiens GN=F5 PE=1 SV=4

Match to Query 43878: 1988.033622 from(663.685150,3+) rtinseconds(2461) index(53154)  
Title: Locus:1.1.1.2094.7 File:"2013-07-02 CLN FXIII 180 min 2nd F 4.wiff"  
Data file C:\Program Files (x86)\Matrix Science\Mascot Daemon\mgf\8 FXIII 180 min 2nd\mascot\_daemon\_merge.mgf

Click mouse within plot area to zoom in by factor of two about that point  
Or, 

Plot from

100

 to 

1800

 Da 

Full range

  
Label all possible matches ☐ Label matches used for scoring ☒

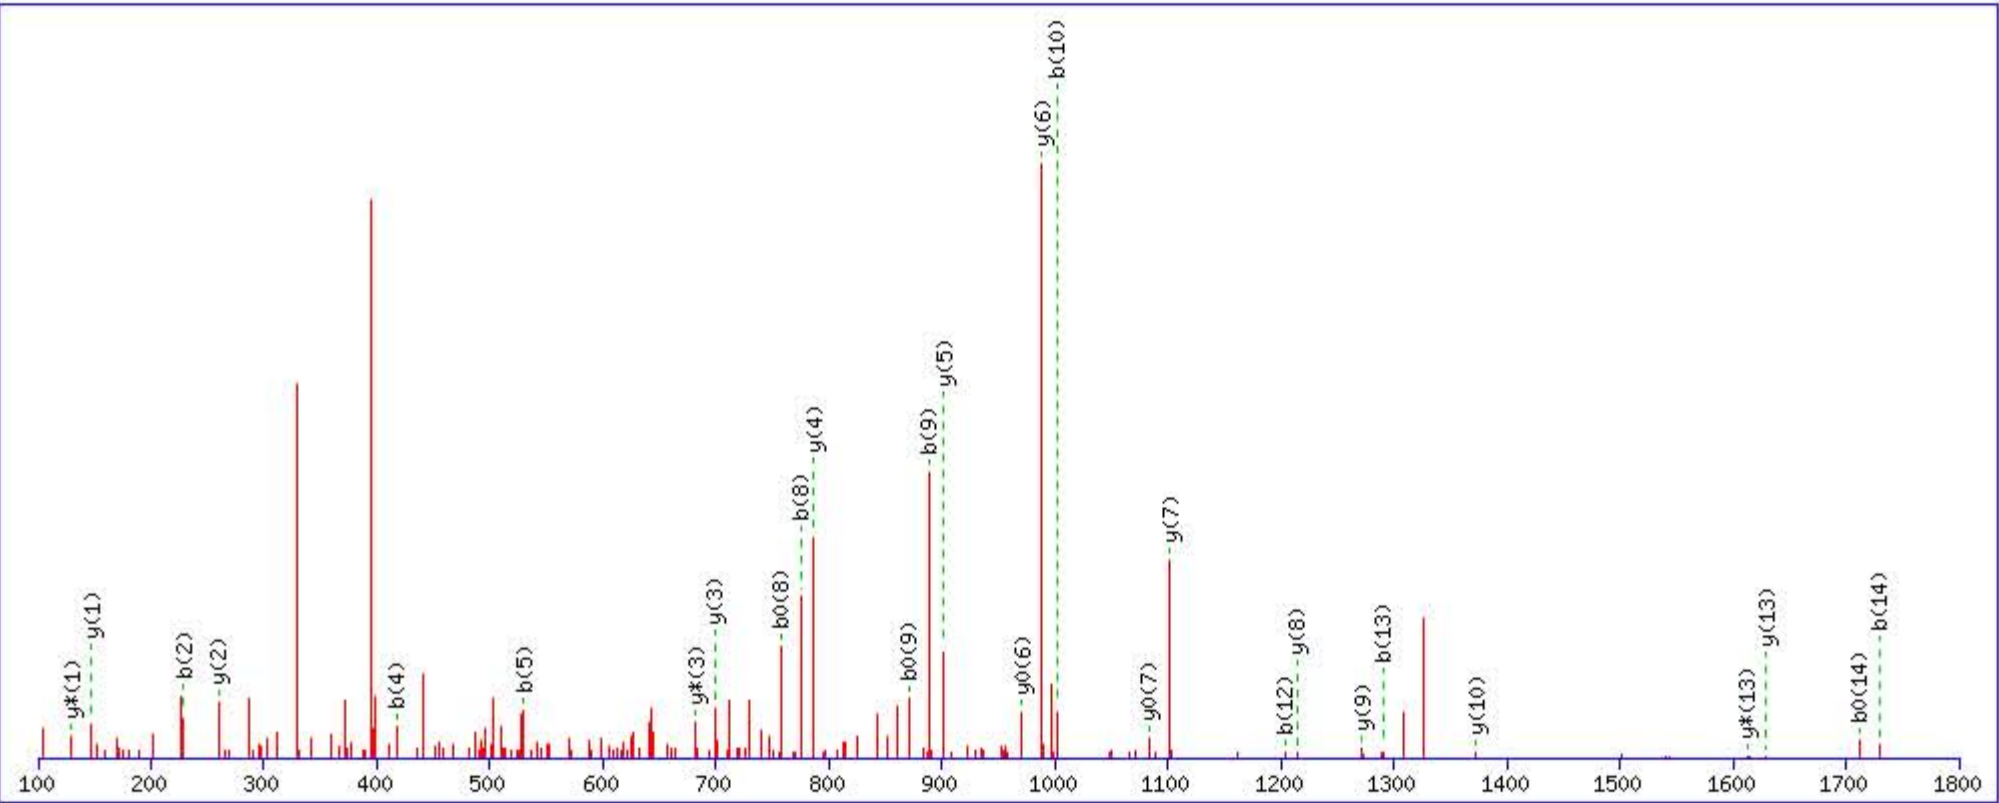

Monoisotopic mass of neutral peptide Mr(calc): 1988.014465  
Fixed modifications: Carbamidomethyl (C) (apply to specified residues or termini only)  
Variable modifications:  
Q14 : Biotin:Thermo-21345 (Q)  
Ions Score: 64 Expect: 3.6e-006  
Matches : 28/138 fragment ions using 57 most intense peaks [\(help\)](#)

| #  | b           | b <sup>++</sup> | b <sup>+</sup> | b <sup>+++</sup> | b <sup>0</sup> | b <sup>0++</sup> | Seq. | y           | y <sup>++</sup> | y <sup>+</sup> | y <sup>+++</sup> | y <sup>0</sup> | y <sup>0++</sup> | #  |
|----|-------------|-----------------|----------------|------------------|----------------|------------------|------|-------------|-----------------|----------------|------------------|----------------|------------------|----|
| 1  | 132.047761  | 66.527518       |                |                  |                |                  | M    |             |                 |                |                  |                |                  | 16 |
| 2  | 229.100525  | 115.053900      |                |                  |                |                  | P    | 1857.981269 | 929.494273      | 1840.954720    | 920.980998       | 1839.970704    | 920.488990       | 15 |
| 3  | 360.141010  | 180.574143      |                |                  |                |                  | M    | 1760.928505 | 880.967891      | 1743.901956    | 872.454616       | 1742.917940    | 871.962608       | 14 |
| 4  | 417.162474  | 209.084875      |                |                  |                |                  | G    | 1629.888020 | 815.447648      | 1612.861471    | 806.934374       | 1611.877455    | 806.442366       | 13 |
| 5  | 530.246538  | 265.626907      |                |                  |                |                  | L    | 1572.866556 | 786.936916      | 1555.840007    | 778.423642       | 1554.855991    | 777.931634       | 12 |
| 6  | 617.278566  | 309.142921      |                |                  | 599.268001     | 300.137638       | S    | 1459.782492 | 730.394884      | 1442.755943    | 721.881610       | 1441.771927    | 721.389602       | 11 |
| 7  | 718.326245  | 359.666761      |                |                  | 700.315680     | 350.661478       | T    | 1372.750464 | 686.878870      | 1355.723915    | 678.365596       | 1354.739899    | 677.873588       | 10 |
| 8  | 775.347709  | 388.177493      |                |                  | 757.337144     | 379.172210       | G    | 1271.702785 | 636.355031      | 1254.676236    | 627.841756       | 1253.692220    | 627.349748       | 9  |
| 9  | 888.431773  | 444.719525      |                |                  | 870.421208     | 435.714242       | I    | 1214.681321 | 607.844299      | 1197.654772    | 599.331024       | 1196.670756    | 598.839016       | 8  |
| 10 | 1001.515837 | 501.261557      |                |                  | 983.505272     | 492.256274       | I    | 1101.597257 | 551.302267      | 1084.570708    | 542.788992       | 1083.586692    | 542.296984       | 7  |
| 11 | 1088.547865 | 544.777571      |                |                  | 1070.537300    | 535.772288       | S    | 988.513193  | 494.760235      | 971.486644     | 486.246960       | 970.502628     | 485.754952       | 6  |
| 12 | 1203.574808 | 602.291042      |                |                  | 1185.564243    | 593.285760       | D    | 901.481165  | 451.244221      | 884.454616     | 442.730946       | 883.470600     | 442.238938       | 5  |
| 13 | 1290.606836 | 645.807056      |                |                  | 1272.596271    | 636.801774       | S    | 786.454222  | 393.730749      | 769.427673     | 385.217475       | 768.443657     | 384.725467       | 4  |
| 14 | 1729.832162 | 865.419719      | 1712.805613    | 856.906445       | 1711.821597    | 856.414437       | Q    | 699.422194  | 350.214735      | 682.395645     | 341.701461       |                |                  | 3  |
| 15 | 1842.916226 | 921.961751      | 1825.889677    | 913.448477       | 1824.905661    | 912.956469       | I    | 260.196868  | 130.602072      | 243.170319     | 122.088797       |                |                  | 2  |
| 16 |             |                 |                |                  |                |                  | K    | 147.112804  | 74.060040       | 130.086255     | 65.546765        |                |                  | 1  |

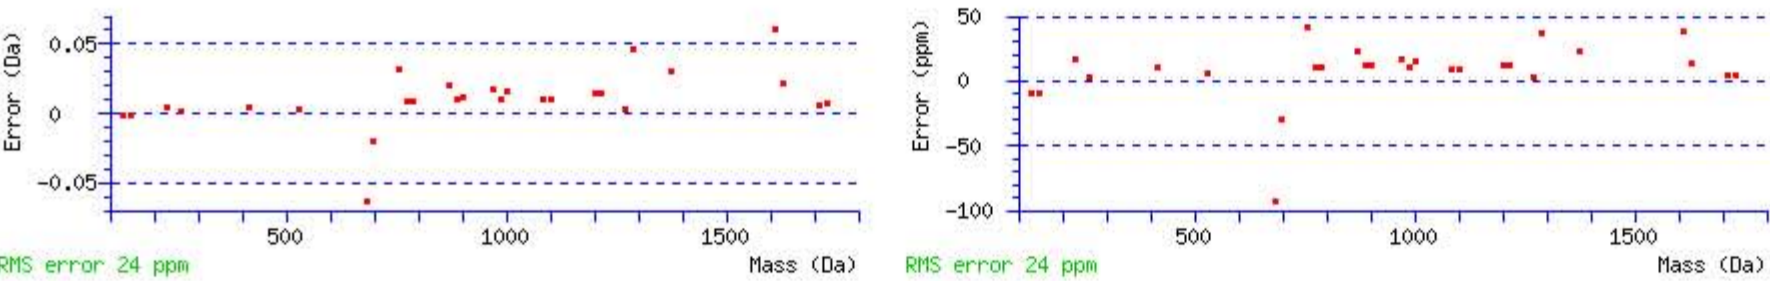

NCBI **BLAST** search of [MPMGLSTGIISDSQIK](#)  
(Parameters: blastp, nr protein database, expect=20000, no filter, PAM30)  
Other BLAST [web gateways](#)

All matches to this query

| Score | Mr(calc):   | Delta     | Sequence                          |
|-------|-------------|-----------|-----------------------------------|
| 64.0  | 1988.014465 | 0.019157  | <a href="#">MPMGLSTGIISDSQIK</a>  |
| 5.7   | 1988.054688 | -0.021066 | <a href="#">EVGKILCTDCATRPKLK</a> |
| 4.0   | 1988.011108 | 0.022514  | <a href="#">QSMVNSLPTFPTDIK</a>   |
| 0.3   | 1988.051331 | -0.017709 | <a href="#">MTHKLVFLEDGTSQVRK</a> |

M

A

T

R

I

X

S

C

I

E

N

C

E

Mascot Search Results

Peptide View

MS/MS Fragmentation of **AADIEQQAVFAVFDENK**  
Found in **FA5\_HUMAN**, Coagulation factor V OS=Homo sapiens GN=F5 PE=1 SV=4

Match to Query 48539: 2205.109512 from(736.043780,3+) rtinseconds(2758) index(55184)  
Title: Locus:1.1.1.2196.15 File:"2013-07-02 CLN FXIII 180 min 2nd F 4.wiff"  
Data file C:\Program Files (x86)\Matrix Science\Mascot Daemon\mgf\8 FXIII 180 min 2nd\mascot\_daemon\_merge.mgf

Click mouse within plot area to zoom in by factor of two about that point  
Or, 

Plot from

100

 to 

1600

 Da 

Full range

  
Label all possible matches ☐ Label matches used for scoring ☒

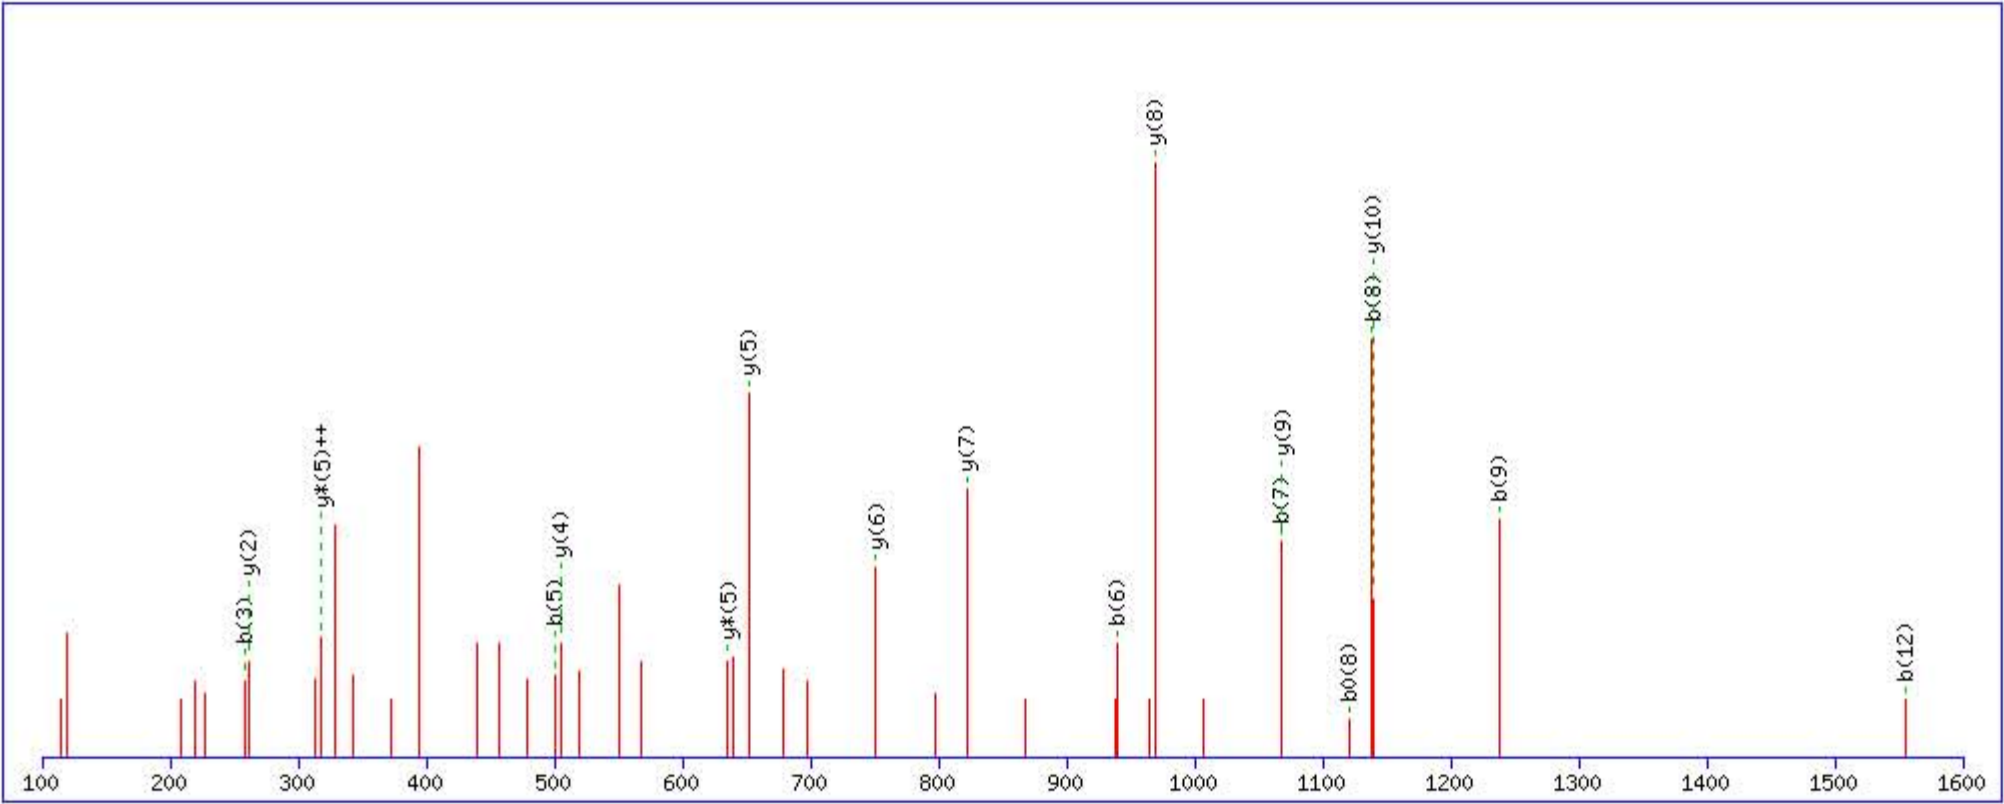

Monoisotopic mass of neutral peptide Mr(calc): 2205.077591  
Fixed modifications: Carbamidomethyl (C) (apply to specified residues or termini only)  
Variable modifications:  
Q6 : Biotin:Thermo-21345 (Q)  
Ions Score: 45 Expect: 0.00029  
Matches : 18/174 fragment ions using 37 most intense peaks [\(help\)](#)

| #  | b           | b <sup>++</sup> | b <sup>*</sup> | b <sup>++</sup> * | b <sup>0</sup> | b <sup>0++</sup> | Seq. | y           | y <sup>++</sup> | y <sup>*</sup> | y <sup>++</sup> * | y <sup>0</sup> | y <sup>0++</sup> | #  |
|----|-------------|-----------------|----------------|-------------------|----------------|------------------|------|-------------|-----------------|----------------|-------------------|----------------|------------------|----|
| 1  | 72.044390   | 36.525833       |                |                   |                |                  | A    |             |                 |                |                   |                |                  | 17 |
| 2  | 143.081504  | 72.044390       |                |                   |                |                  | A    | 2135.047769 | 1068.027522     | 2118.021220    | 1059.514248       | 2117.037204    | 1059.022240      | 16 |
| 3  | 258.108447  | 129.557862      |                |                   | 240.097882     | 120.552579       | D    | 2064.010655 | 1032.508965     | 2046.984106    | 1023.995691       | 2046.000090    | 1023.503683      | 15 |
| 4  | 371.192511  | 186.099894      |                |                   | 353.181946     | 177.094611       | I    | 1948.983712 | 974.995494      | 1931.957163    | 966.482220        | 1930.973147    | 965.990212       | 14 |
| 5  | 500.235104  | 250.621190      |                |                   | 482.224539     | 241.615908       | E    | 1835.899648 | 918.453462      | 1818.873099    | 909.940188        | 1817.889083    | 909.448180       | 13 |
| 6  | 939.460430  | 470.233853      | 922.433881     | 461.720579        | 921.449865     | 461.228571       | Q    | 1706.857055 | 853.932166      | 1689.830506    | 845.418891        | 1688.846490    | 844.926883       | 12 |
| 7  | 1067.519008 | 534.263142      | 1050.492459    | 525.749868        | 1049.508443    | 525.257860       | Q    | 1267.631729 | 634.319503      | 1250.605180    | 625.806228        | 1249.621164    | 625.314220       | 11 |
| 8  | 1138.556122 | 569.781699      | 1121.529573    | 561.268425        | 1120.545557    | 560.776416       | A    | 1139.573151 | 570.290214      | 1122.546602    | 561.776939        | 1121.562586    | 561.284931       | 10 |
| 9  | 1237.624536 | 619.315906      | 1220.597987    | 610.802632        | 1219.613971    | 610.310624       | V    | 1068.536037 | 534.771657      | 1051.509488    | 526.258382        | 1050.525472    | 525.766374       | 9  |
| 10 | 1384.692950 | 692.850113      | 1367.666401    | 684.336839        | 1366.682385    | 683.844831       | F    | 969.467623  | 485.237450      | 952.441074     | 476.724175        | 951.457058     | 476.232167       | 8  |
| 11 | 1455.730064 | 728.368670      | 1438.703515    | 719.855396        | 1437.719499    | 719.363388       | A    | 822.399209  | 411.703243      | 805.372660     | 403.189968        | 804.388644     | 402.697960       | 7  |
| 12 | 1554.798478 | 777.902877      | 1537.771929    | 769.389603        | 1536.787913    | 768.897595       | V    | 751.362095  | 376.184686      | 734.335546     | 367.671411        | 733.351530     | 367.179403       | 6  |
| 13 | 1701.866892 | 851.437084      | 1684.840343    | 842.923810        | 1683.856327    | 842.431802       | F    | 652.293681  | 326.650479      | 635.267132     | 318.137204        | 634.283116     | 317.645196       | 5  |
| 14 | 1816.893835 | 908.950556      | 1799.867286    | 900.437281        | 1798.883270    | 899.945273       | D    | 505.225267  | 253.116271      | 488.198718     | 244.602997        | 487.214702     | 244.110989       | 4  |
| 15 | 1945.936428 | 973.471852      | 1928.909879    | 964.958578        | 1927.925863    | 964.466570       | E    | 390.198324  | 195.602800      | 373.171775     | 187.089525        | 372.187759     | 186.597517       | 3  |
| 16 | 2059.979355 | 1030.493315     | 2042.952806    | 1021.980041       | 2041.968790    | 1021.488033      | N    | 261.155731  | 131.081503      | 244.129182     | 122.568229        |                |                  | 2  |
| 17 |             |                 |                |                   |                |                  | K    | 147.112804  | 74.060040       | 130.086255     | 65.546765         |                |                  | 1  |

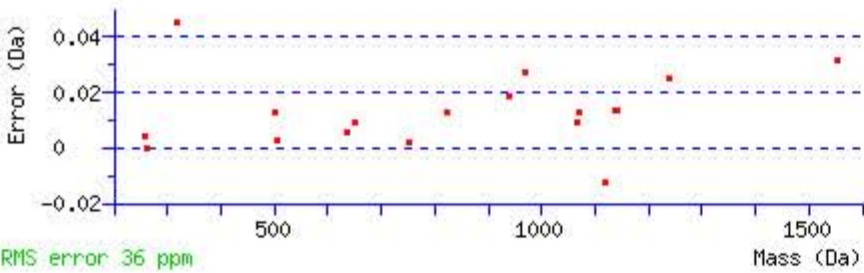

RMS error 36 ppm

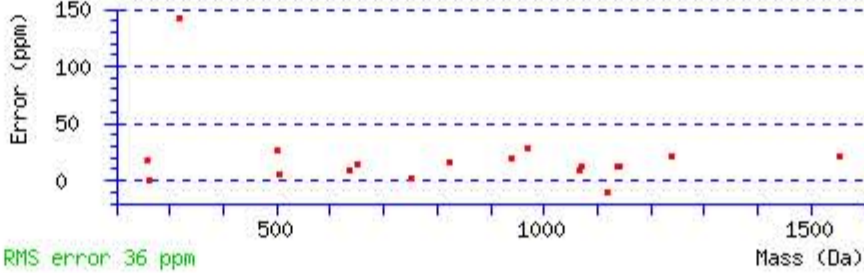

RMS error 36 ppm

NCBI BLAST search of [AADIEQQAVFAVFDENK](#)  
(Parameters: blastp, nr protein database, expect=20000, no filter, PAM30)  
Other BLAST [web gateways](#)

All matches to this query

| Score | Mr(calc):   | Delta     | Sequence                            |
|-------|-------------|-----------|-------------------------------------|
| 45.1  | 2205.077591 | 0.031921  | <a href="#">AADIEQQAVFAVFDENK</a>   |
| 42.0  | 2205.077591 | 0.031921  | <a href="#">AADIEQQAVFAVFDENK</a>   |
| 6.9   | 2205.080063 | 0.029449  | <a href="#">EKENDELDIQLKVF DENK</a> |
| 3.2   | 2205.129929 | -0.020417 | <a href="#">YPGRNGAQMMVHIVFKVAR</a> |
| 0.7   | 2205.115311 | -0.005799 | <a href="#">FLPPPGYAPCHEADLPRER</a> |

M

A

T

R

I

X

S

C

I

E

N

C

E

Mascot Search Results

Peptide View

MS/MS Fragmentation of **AADIEQQAVFAVFDENK**  
Found in **FAS\_HUMAN**, Coagulation factor V OS=Homo sapiens GN=F5 PE=1 SV=4

Match to Query 48540: 2205.109512 from(736.043780,3+) rtinseconds(2749) index(55104)  
Title: Locus:1.1.1.2193.10 File:"2013-07-02 CLN FXIII 180 min 2nd F 4.wiff"  
Data file C:\Program Files (x86)\Matrix Science\Mascot Daemon\mgf\8 FXIII 180 min 2nd\mascot\_daemon\_merge.mgf

Click mouse within plot area to zoom in by factor of two about that point  
Or,   to  Da   
Label all possible matches ☐ Label matches used for scoring ☒

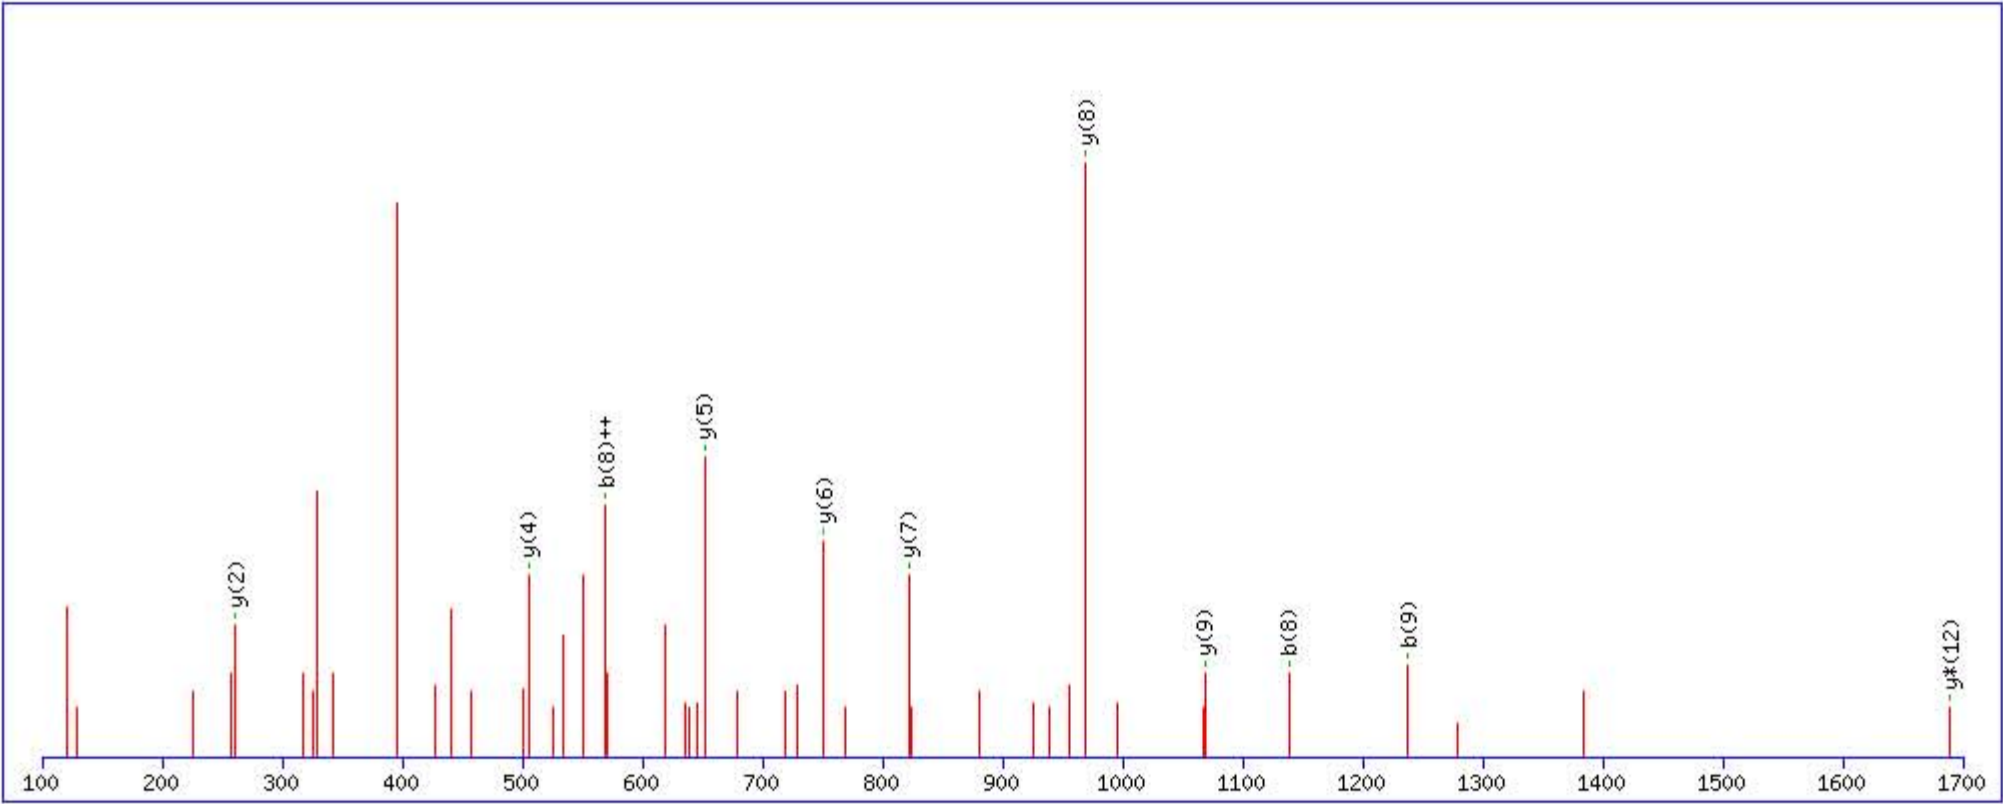

Monoisotopic mass of neutral peptide Mr(calc): 2205.077591  
Fixed modifications: Carbamidomethyl (C) (apply to specified residues or termini only)  
Variable modifications:  
Q7 : Biotin:Thermo-21345 (Q)  
Ions Score: 51 Expect: 4.2e-005  
Matches : 11/174 fragment ions using 14 most intense peaks ([help](#))

| #  | b           | b <sup>++</sup> | b <sup>+</sup> | b <sup>+++</sup> | b <sup>0</sup> | b <sup>0++</sup> | Seq. | y           | y <sup>++</sup> | y <sup>+</sup> | y <sup>+++</sup> | y <sup>0</sup> | y <sup>0++</sup> | #  |
|----|-------------|-----------------|----------------|------------------|----------------|------------------|------|-------------|-----------------|----------------|------------------|----------------|------------------|----|
| 1  | 72.044390   | 36.525833       |                |                  |                |                  | A    |             |                 |                |                  |                |                  | 17 |
| 2  | 143.081504  | 72.044390       |                |                  |                |                  | A    | 2135.047769 | 1068.027522     | 2118.021220    | 1059.514248      | 2117.037204    | 1059.022240      | 16 |
| 3  | 258.108447  | 129.557862      |                |                  | 240.097882     | 120.552579       | D    | 2064.010655 | 1032.508965     | 2046.984106    | 1023.995691      | 2046.000090    | 1023.503683      | 15 |
| 4  | 371.192511  | 186.099894      |                |                  | 353.181946     | 177.094611       | I    | 1948.983712 | 974.995494      | 1931.957163    | 966.482220       | 1930.973147    | 965.990212       | 14 |
| 5  | 500.235104  | 250.621190      |                |                  | 482.224539     | 241.615908       | E    | 1835.899648 | 918.453462      | 1818.873099    | 909.940188       | 1817.889083    | 909.448180       | 13 |
| 6  | 628.293682  | 314.650479      | 611.267133     | 306.137205       | 610.283117     | 305.645197       | Q    | 1706.857055 | 853.932166      | 1689.830506    | 845.418891       | 1688.846490    | 844.926883       | 12 |
| 7  | 1067.519008 | 534.263142      | 1050.492459    | 525.749868       | 1049.508443    | 525.257860       | Q    | 1578.798477 | 789.902877      | 1561.771928    | 781.389602       | 1560.787912    | 780.897594       | 11 |
| 8  | 1138.556122 | 569.781699      | 1121.529573    | 561.268425       | 1120.545557    | 560.776416       | A    | 1139.573151 | 570.290214      | 1122.546602    | 561.776939       | 1121.562586    | 561.284931       | 10 |
| 9  | 1237.624536 | 619.315906      | 1220.597987    | 610.802632       | 1219.613971    | 610.310624       | V    | 1068.536037 | 534.771657      | 1051.509488    | 526.258382       | 1050.525472    | 525.766374       | 9  |
| 10 | 1384.692950 | 692.850113      | 1367.666401    | 684.336839       | 1366.682385    | 683.844831       | F    | 969.467623  | 485.237450      | 952.441074     | 476.724175       | 951.457058     | 476.232167       | 8  |
| 11 | 1455.730064 | 728.368670      | 1438.703515    | 719.855396       | 1437.719499    | 719.363388       | A    | 822.399209  | 411.703243      | 805.372660     | 403.189968       | 804.388644     | 402.697960       | 7  |
| 12 | 1554.798478 | 777.902877      | 1537.771929    | 769.389603       | 1536.787913    | 768.897595       | V    | 751.362095  | 376.184686      | 734.335546     | 367.671411       | 733.351530     | 367.179403       | 6  |
| 13 | 1701.866892 | 851.437084      | 1684.840343    | 842.923810       | 1683.856327    | 842.431802       | F    | 652.293681  | 326.650479      | 635.267132     | 318.137204       | 634.283116     | 317.645196       | 5  |
| 14 | 1816.893835 | 908.950556      | 1799.867286    | 900.437281       | 1798.883270    | 899.945273       | D    | 505.225267  | 253.116271      | 488.198718     | 244.602997       | 487.214702     | 244.110989       | 4  |
| 15 | 1945.936428 | 973.471852      | 1928.909879    | 964.958578       | 1927.925863    | 964.466570       | E    | 390.198324  | 195.602800      | 373.171775     | 187.089525       | 372.187759     | 186.597517       | 3  |
| 16 | 2059.979355 | 1030.493315     | 2042.952806    | 1021.980041      | 2041.968790    | 1021.488033      | N    | 261.155731  | 131.081503      | 244.129182     | 122.568229       |                |                  | 2  |
| 17 |             |                 |                |                  |                |                  | K    | 147.112804  | 74.060040       | 130.086255     | 65.546765        |                |                  | 1  |

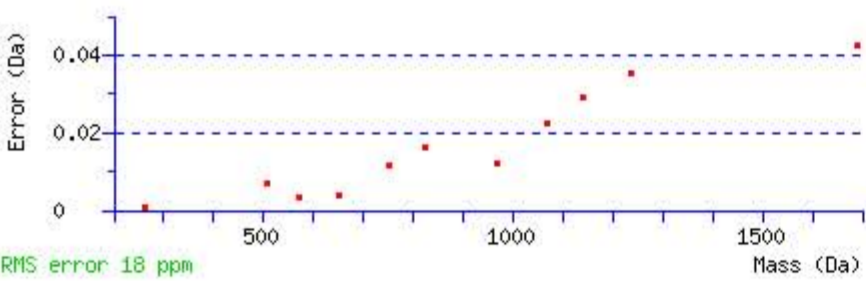

RMS error 18 ppm

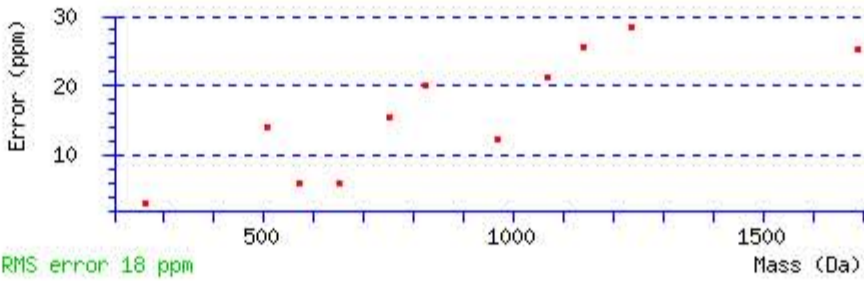

RMS error 18 ppm

NCBI BLAST search of [AADIEQQAVFAVFDENK](#)  
(Parameters: blastp, nr protein database, expect=20000, no filter, PAM30)  
Other BLAST [web gateways](#)

All matches to this query

| Score | Mr(calc):   | Delta     | Sequence                            |
|-------|-------------|-----------|-------------------------------------|
| 50.6  | 2205.077591 | 0.031921  | <a href="#">AADIEQQAVFAVFDENK</a>   |
| 50.6  | 2205.077591 | 0.031921  | <a href="#">AADIEQQAVFAVFDENK</a>   |
| 3.9   | 2205.080063 | 0.029449  | <a href="#">EKENDELDIQLKVFDENK</a>  |
| 3.4   | 2205.129929 | -0.020417 | <a href="#">YPGRNGAQMMVHIVFKVAR</a> |

MATRIX

SCIENCE

Mascot Search Results

Peptide View

MS/MS Fragmentation of **IVGGQECK**  
Found in **FA10\_HUMAN**, Coagulation factor X OS=Homo sapiens GN=F10 PE=1 SV=2

Match to Query 20552: 1200.605628 from(601.310090,2+) rtinseconds(1435) index(46572)  
Title: Locus:1.1.1.1737.11 File:"2013-07-02 CLN FXIII 180 min 2nd F 4.wiff"  
Data file C:\Program Files (x86)\Matrix Science\Mascot Daemon\mgf\8 FXIII 180 min 2nd\mascot\_daemon\_merge.mgf

Click mouse within plot area to zoom in by factor of two about that point  
Or, 

Plot from

100

 to 

1500

 Da 

Full range

  
Label all possible matches ☐ Label matches used for scoring ☒

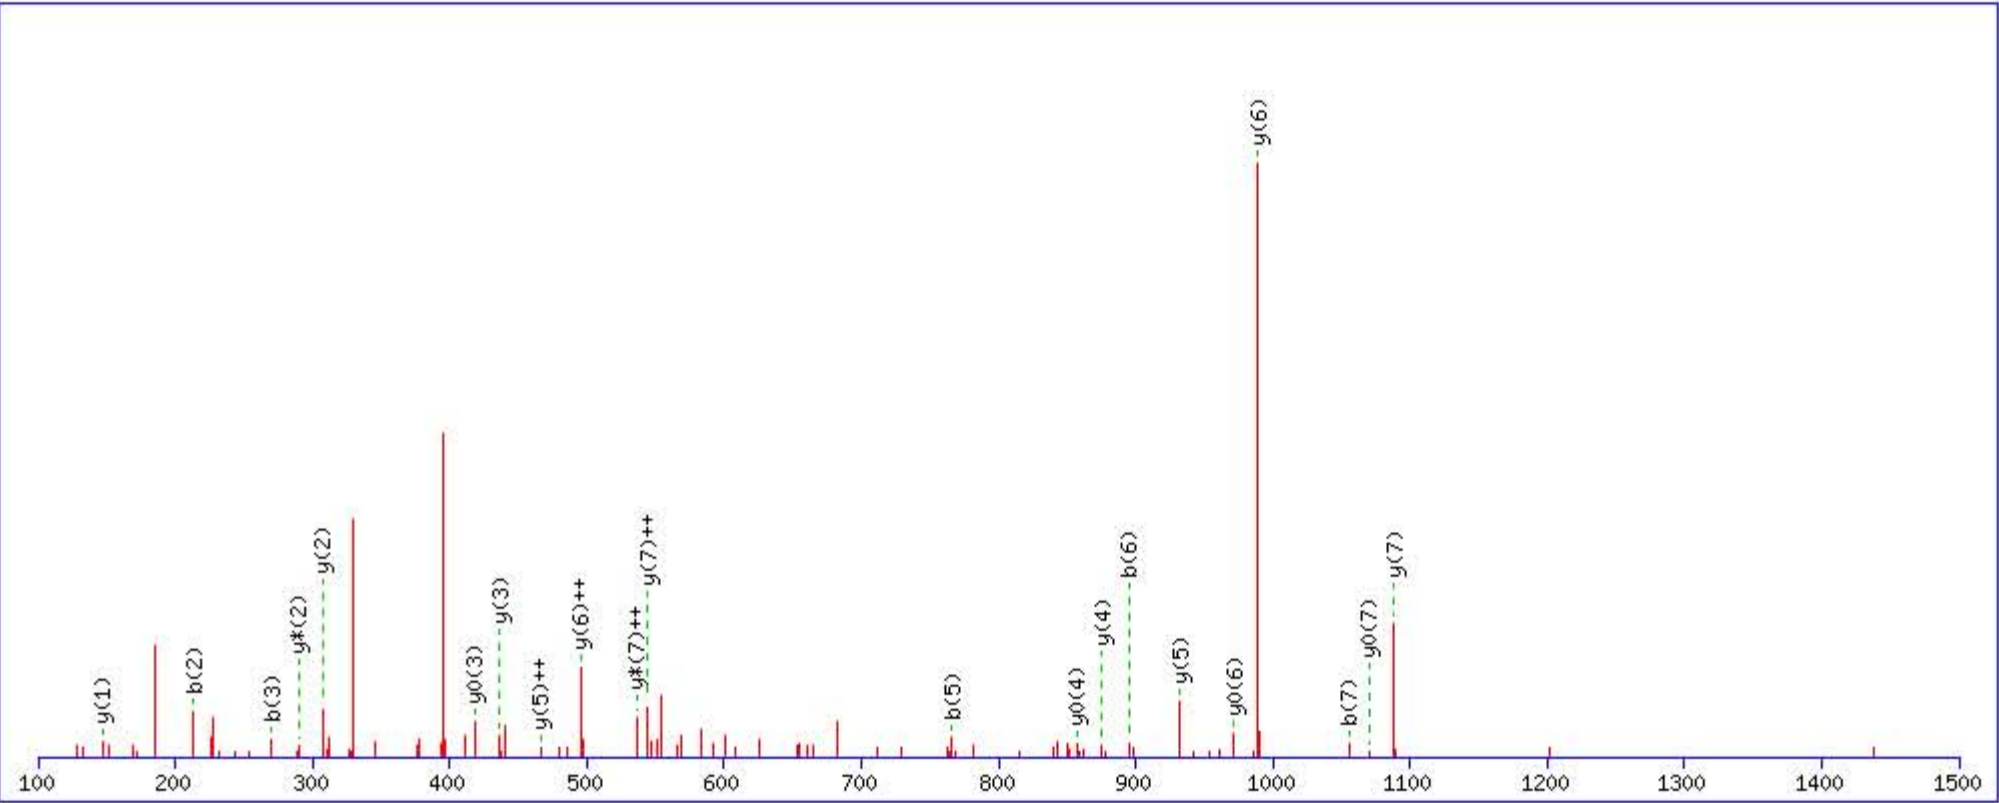

Monoisotopic mass of neutral peptide Mr(calc): 1200.599503  
Fixed modifications: Carbamidomethyl (C) (apply to specified residues or termini only)  
Variable modifications:  
Q5 : Biotin:Thermo-21345 (Q)  
Ions Score: 33 Expect: 0.0011  
Matches : 21/62 fragment ions using 49 most intense peaks ([help](#))

| # | b           | b <sup>++</sup> | b <sup>*</sup> | b <sup>+++</sup> | b <sup>0</sup> | b <sup>0++</sup> | Seq. | y           | y <sup>++</sup> | y <sup>*</sup> | y <sup>+++</sup> | y <sup>0</sup> | y <sup>0++</sup> | # |
|---|-------------|-----------------|----------------|------------------|----------------|------------------|------|-------------|-----------------|----------------|------------------|----------------|------------------|---|
| 1 | 114.091340  | 57.549308       |                |                  |                |                  | I    |             |                 |                |                  |                |                  | 8 |
| 2 | 213.159754  | 107.083515      |                |                  |                |                  | V    | 1088.522714 | 544.764995      | 1071.496165    | 536.251721       | 1070.512149    | 535.759713       | 7 |
| 3 | 270.181218  | 135.594247      |                |                  |                |                  | G    | 989.454300  | 495.230788      | 972.427751     | 486.717514       | 971.443735     | 486.225506       | 6 |
| 4 | 327.202682  | 164.104979      |                |                  |                |                  | G    | 932.432836  | 466.720056      | 915.406287     | 458.206782       | 914.422271     | 457.714774       | 5 |
| 5 | 766.428008  | 383.717642      | 749.401459     | 375.204368       |                |                  | Q    | 875.411372  | 438.209324      | 858.384823     | 429.696050       | 857.400807     | 429.204042       | 4 |
| 6 | 895.470601  | 448.238939      | 878.444052     | 439.725664       | 877.460036     | 439.233656       | E    | 436.186046  | 218.596661      | 419.159497     | 210.083386       | 418.175481     | 209.591378       | 3 |
| 7 | 1055.501250 | 528.254263      | 1038.474701    | 519.740989       | 1037.490685    | 519.248981       | C    | 307.143453  | 154.075364      | 290.116904     | 145.562090       |                |                  | 2 |
| 8 |             |                 |                |                  |                |                  | K    | 147.112804  | 74.060040       | 130.086255     | 65.546765        |                |                  | 1 |

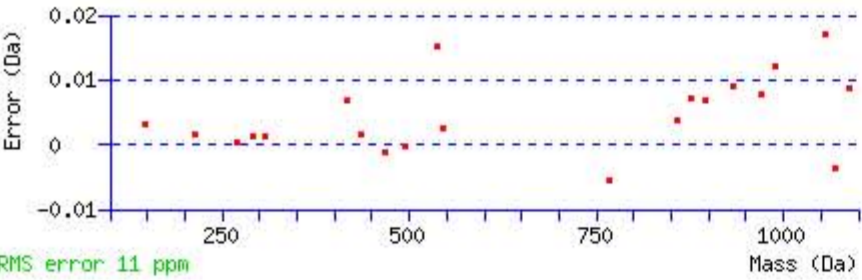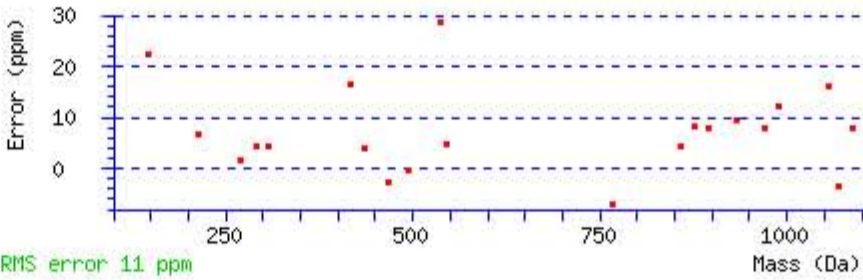

NCBI BLAST search of [IVGGQECK](#)  
(Parameters: blastp, nr protein database, expect=20000, no filter, PAM30)  
Other BLAST [web gateways](#)

All matches to this query

| Score | Mr(calc):   | Delta    | Sequence                  |
|-------|-------------|----------|---------------------------|
| 33.4  | 1200.599503 | 0.006125 | <a href="#">IVGGQECK</a>  |
| 1.9   | 1200.599503 | 0.006125 | <a href="#">LIQGDGCK</a>  |
| 1.3   | 1200.596100 | 0.009528 | <a href="#">LVKYMYDNR</a> |

MATRIX

SCIENCE

Mascot Search Results

Peptide View

MS/MS Fragmentation of **DWAESTLMTQK**  
Found in **FA10\_HUMAN**, Coagulation factor X OS=Homo sapiens GN=F10 PE=1 SV=2

Match to Query 36517: 1635.783648 from(818.899100,2+) rtinseconds(2076) index(50824)  
Title: Locus:1.1.1.1960.10 File:"2013-07-02 CLN FXIII 180 min 2nd F 4.wiff"  
Data file C:\Program Files (x86)\Matrix Science\Mascot Daemon\mgf\8 FXIII 180 min 2nd\mascot\_daemon\_merge.mgf

Click mouse within plot area to zoom in by factor of two about that point  
Or, 

Plot from

0

 to 

2600

 Da 

Full range

  
Label all possible matches ☐ Label matches used for scoring ☒

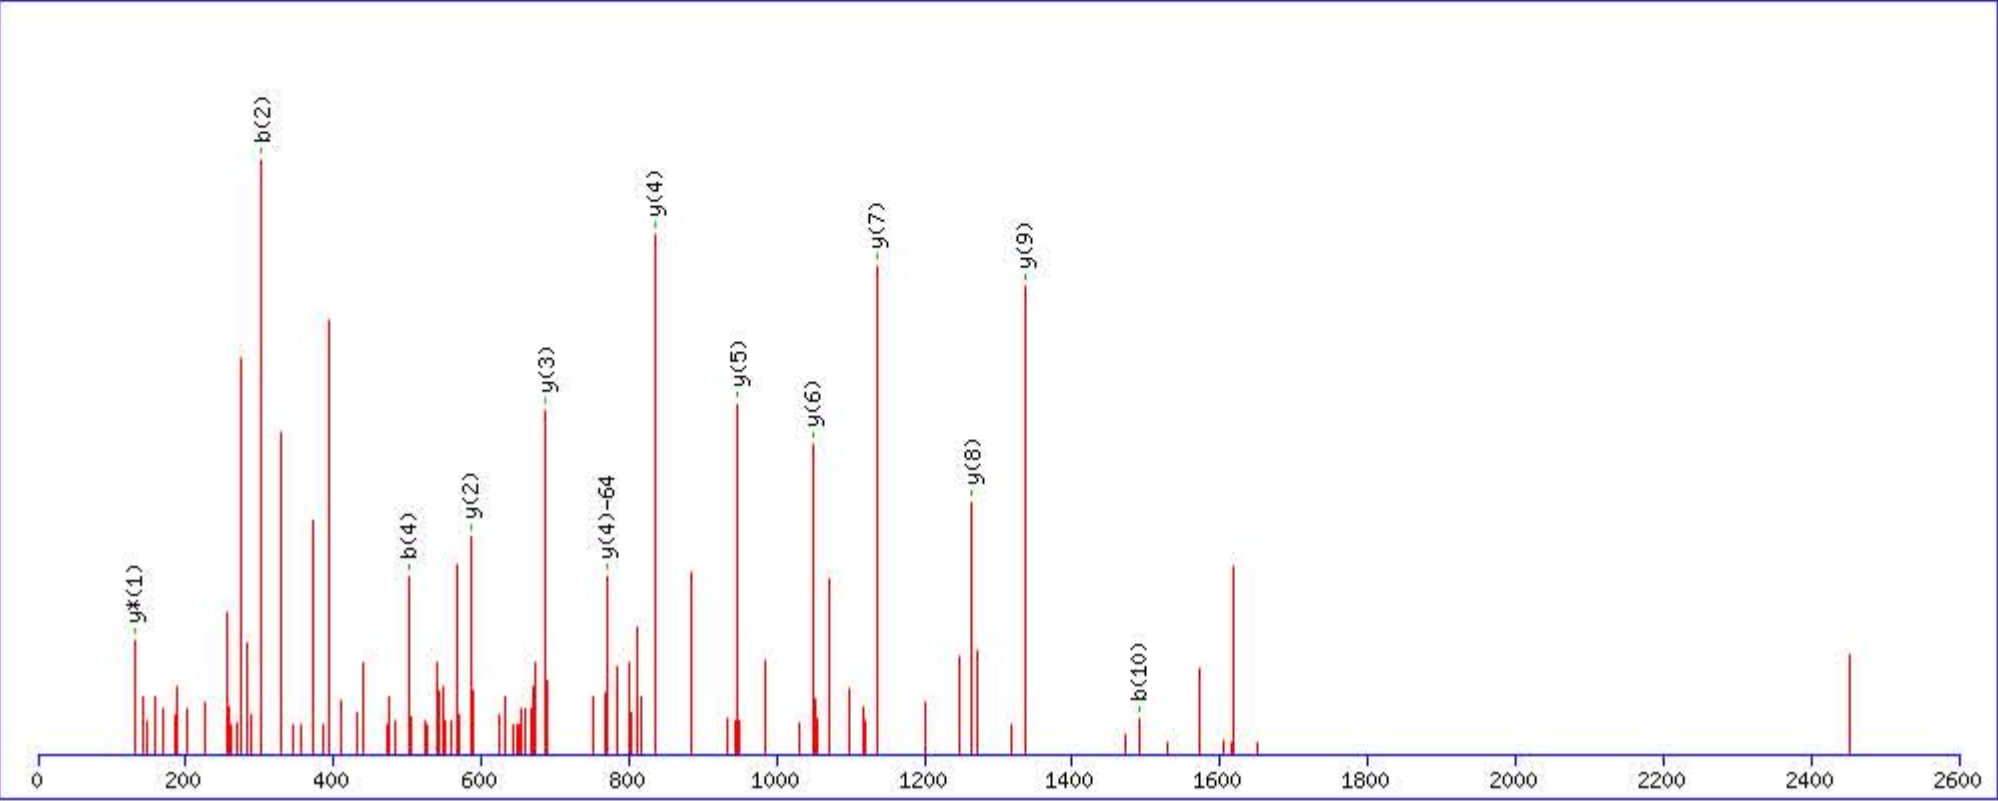

Monoisotopic mass of neutral peptide Mr(calc): 1635.763657  
Fixed modifications: Carbamidomethyl (C) (apply to specified residues or termini only)  
Variable modifications:  
M8 : Oxidation (M), with neutral losses 0.000000 (shown in table), 63.998285  
Q10 : Biotin:Thermo-21345 (Q)  
Ions Score: 76 Expect: 1.9e-007  
Matches : 13/154 fragment ions using 15 most intense peaks [\(help\)](#)

| #  | b           | b <sup>++</sup> | b <sup>+</sup> | b <sup>+++</sup> | b <sup>0</sup> | b <sup>0++</sup> | Seq. | y           | y <sup>++</sup> | y <sup>+</sup> | y <sup>+++</sup> | y <sup>0</sup> | y <sup>0++</sup> | #  |
|----|-------------|-----------------|----------------|------------------|----------------|------------------|------|-------------|-----------------|----------------|------------------|----------------|------------------|----|
| 1  | 116.034219  | 58.520748       |                |                  | 98.023654      | 49.515465        | D    |             |                 |                |                  |                |                  | 11 |
| 2  | 302.113532  | 151.560404      |                |                  | 284.102967     | 142.555122       | W    | 1521.744000 | 761.375638      | 1504.717451    | 752.862364       | 1503.733435    | 752.370356       | 10 |
| 3  | 373.150646  | 187.078961      |                |                  | 355.140081     | 178.073679       | A    | 1335.664687 | 668.335982      | 1318.638138    | 659.822707       | 1317.654122    | 659.330699       | 9  |
| 4  | 502.193239  | 251.600258      |                |                  | 484.182674     | 242.594975       | E    | 1264.627573 | 632.817425      | 1247.601024    | 624.304150       | 1246.617008    | 623.812142       | 8  |
| 5  | 589.225267  | 295.116272      |                |                  | 571.214702     | 286.110989       | S    | 1135.584980 | 568.296128      | 1118.558431    | 559.782854       | 1117.574415    | 559.290846       | 7  |
| 6  | 690.272946  | 345.640111      |                |                  | 672.262381     | 336.634829       | T    | 1048.552952 | 524.780114      | 1031.526403    | 516.266840       | 1030.542387    | 515.774832       | 6  |
| 7  | 803.357010  | 402.182143      |                |                  | 785.346445     | 393.176861       | L    | 947.505273  | 474.256275      | 930.478724     | 465.743000       | 929.494708     | 465.250992       | 5  |
| 8  | 950.392410  | 475.699843      |                |                  | 932.381845     | 466.694561       | M    | 834.421209  | 417.714243      | 817.394660     | 409.200968       | 816.410644     | 408.708960       | 4  |
| 9  | 1051.440089 | 526.223683      |                |                  | 1033.429524    | 517.218400       | T    | 687.385809  | 344.196543      | 670.359260     | 335.683268       | 669.375244     | 335.191260       | 3  |
| 10 | 1490.665415 | 745.836346      | 1473.638866    | 737.323071       | 1472.654850    | 736.831063       | Q    | 586.338130  | 293.672703      | 569.311581     | 285.159429       |                |                  | 2  |
| 11 |             |                 |                |                  |                |                  | K    | 147.112804  | 74.060040       | 130.086255     | 65.546765        |                |                  | 1  |

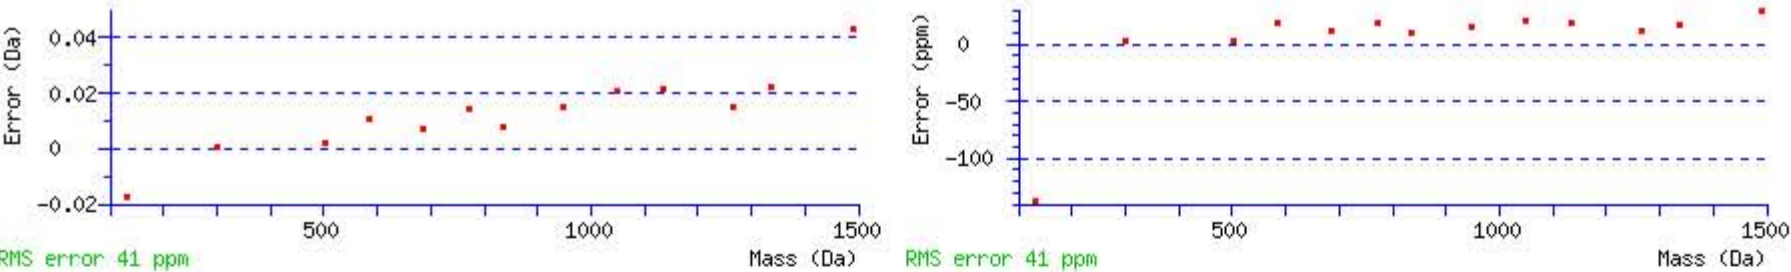

NCBI BLAST search of [DWAESTLMTQK](#)  
(Parameters: blastp, nr protein database, expect=20000, no filter, PAM30)  
Other BLAST [web gateways](#)

All matches to this query

| Score | Mr(calc):   | Delta     | Sequence                         |
|-------|-------------|-----------|----------------------------------|
| 76.1  | 1635.763657 | 0.019991  | <a href="#">DWAESTLMTQK</a>      |
| 4.3   | 1635.789291 | -0.005643 | <a href="#">VSWTPPSDSVDRYK</a>   |
| 2.8   | 1635.781418 | 0.002230  | <a href="#">SDSPDPAPTPALPMPK</a> |
| 2.3   | 1635.781418 | 0.002230  | <a href="#">EAAMWETLSVTGVDK</a>  |
| 2.2   | 1635.778259 | 0.005389  | <a href="#">VRVMADSMQEK</a>      |
| 0.7   | 1635.763657 | 0.019991  | <a href="#">AFAPDSIQDSMK</a>     |

MATRIX

SCIENCE

Mascot Search Results

Peptide View

MS/MS Fragmentation of **QEDACQGDSGGPHVTR**  
Found in **FA10\_HUMAN**, Coagulation factor X OS=Homo sapiens GN=F10 PE=1 SV=2

Match to Query 45122: 2023.897902 from(675.639910,3+) rtinseconds(1338) index(45991)  
Title: Locus:1.1.1.1703.18 File:"2013-07-02 CLN FXIII 180 min 2nd F 4.wiff"  
Data file C:\Program Files (x86)\Matrix Science\Mascot Daemon\mgf\8 FXIII 180 min 2nd\mascot\_daemon\_merge.mgf

Click mouse within plot area to zoom in by factor of two about that point  
Or, 

Plot from

100

 to 

2000

 Da 

Full range

  
Label all possible matches ☐ Label matches used for scoring ☒

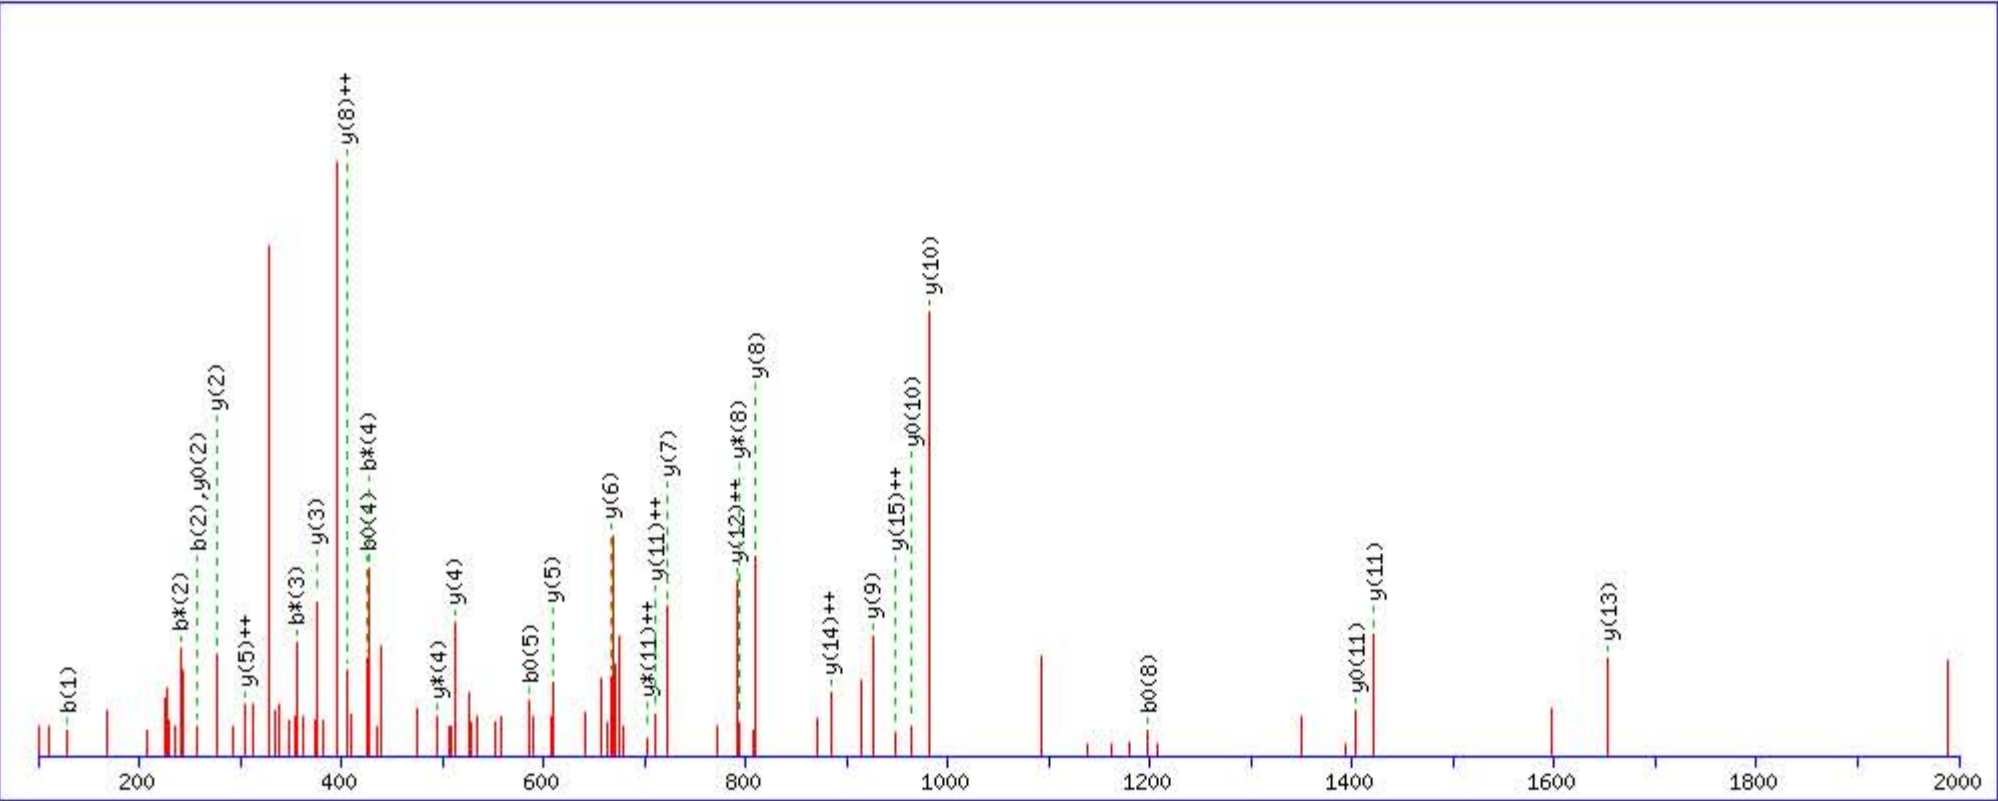

Monoisotopic mass of neutral peptide Mr(calc): 2023.884033  
Fixed modifications: Carbamidomethyl (C) (apply to specified residues or termini only)  
Variable modifications:  
Q6 : Biotin:Thermo-21345 (Q)  
Ions Score: 51 Expect: 5.6e-005  
Matches : 31/176 fragment ions using 68 most intense peaks [\(help\)](#)

| #  | b           | b <sup>++</sup> | b <sup>*</sup> | b <sup>*++</sup> | b <sup>0</sup> | b <sup>0++</sup> | Seq. | y           | y <sup>++</sup> | y <sup>*</sup> | y <sup>*++</sup> | y <sup>0</sup> | y <sup>0++</sup> | #  |
|----|-------------|-----------------|----------------|------------------|----------------|------------------|------|-------------|-----------------|----------------|------------------|----------------|------------------|----|
| 1  | 129.065854  | 65.036565       | 112.039305     | 56.523291        |                |                  | Q    |             |                 |                |                  |                |                  | 16 |
| 2  | 258.108447  | 129.557862      | 241.081898     | 121.044587       | 240.097882     | 120.552579       | E    | 1896.832709 | 948.919993      | 1879.806160    | 940.406718       | 1878.822144    | 939.914710       | 15 |
| 3  | 373.135390  | 187.071333      | 356.108841     | 178.558059       | 355.124825     | 178.066051       | D    | 1767.790116 | 884.398696      | 1750.763567    | 875.885422       | 1749.779551    | 875.393414       | 14 |
| 4  | 444.172504  | 222.589890      | 427.145955     | 214.076616       | 426.161939     | 213.584608       | A    | 1652.763173 | 826.885225      | 1635.736624    | 818.371950       | 1634.752608    | 817.879942       | 13 |
| 5  | 604.203153  | 302.605215      | 587.176604     | 294.091940       | 586.192588     | 293.599932       | C    | 1581.726059 | 791.366668      | 1564.699510    | 782.853393       | 1563.715494    | 782.361385       | 12 |
| 6  | 1043.428479 | 522.217878      | 1026.401930    | 513.704603       | 1025.417914    | 513.212595       | Q    | 1421.695410 | 711.351343      | 1404.668861    | 702.838069       | 1403.684845    | 702.346061       | 11 |
| 7  | 1100.449943 | 550.728610      | 1083.423394    | 542.215335       | 1082.439378    | 541.723327       | G    | 982.470084  | 491.738680      | 965.443535     | 483.225406       | 964.459519     | 482.733398       | 10 |
| 8  | 1215.476886 | 608.242081      | 1198.450337    | 599.728807       | 1197.466321    | 599.236799       | D    | 925.448620  | 463.227948      | 908.422071     | 454.714674       | 907.438055     | 454.222666       | 9  |
| 9  | 1302.508914 | 651.758095      | 1285.482365    | 643.244821       | 1284.498349    | 642.752813       | S    | 810.421677  | 405.714477      | 793.395128     | 397.201202       | 792.411112     | 396.709194       | 8  |
| 10 | 1359.530378 | 680.268827      | 1342.503829    | 671.755553       | 1341.519813    | 671.263545       | G    | 723.389649  | 362.198463      | 706.363100     | 353.685188       | 705.379084     | 353.193180       | 7  |
| 11 | 1416.551842 | 708.779559      | 1399.525293    | 700.266285       | 1398.541277    | 699.774277       | G    | 666.368185  | 333.687731      | 649.341636     | 325.174456       | 648.357620     | 324.682448       | 6  |
| 12 | 1513.604606 | 757.305941      | 1496.578057    | 748.792667       | 1495.594041    | 748.300659       | P    | 609.346721  | 305.176999      | 592.320172     | 296.663724       | 591.336156     | 296.171716       | 5  |
| 13 | 1650.663518 | 825.835397      | 1633.636969    | 817.322123       | 1632.652953    | 816.830115       | H    | 512.293957  | 256.650617      | 495.267408     | 248.137342       | 494.283392     | 247.645334       | 4  |
| 14 | 1749.731932 | 875.369604      | 1732.705383    | 866.856330       | 1731.721367    | 866.364322       | V    | 375.235045  | 188.121161      | 358.208496     | 179.607886       | 357.224480     | 179.115878       | 3  |
| 15 | 1850.779611 | 925.893444      | 1833.753062    | 917.380169       | 1832.769046    | 916.888161       | T    | 276.166631  | 138.586953      | 259.140082     | 130.073679       | 258.156066     | 129.581671       | 2  |
| 16 |             |                 |                |                  |                |                  | R    | 175.118952  | 88.063114       | 158.092403     | 79.549839        |                |                  | 1  |

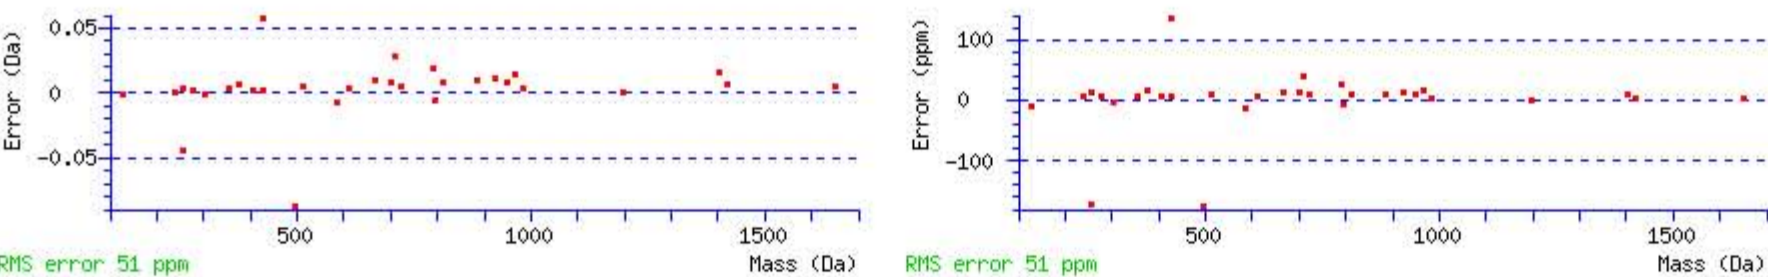

NCBI BLAST search of [QEDACQGDSGGPHVTR](#)  
(Parameters: blastp, nr protein database, expect=20000, no filter, PAM30)  
Other BLAST [web gateways](#)

All matches to this query

| Score | Mr(calc):   | Delta    | Sequence                         |
|-------|-------------|----------|----------------------------------|
| 50.8  | 2023.884033 | 0.013869 | <a href="#">QEDACQGDSGGPHVTR</a> |
| 18.4  | 2023.884033 | 0.013869 | <a href="#">QEDACQGDSGGPHVTR</a> |

MATRIX

SCIENCE

Mascot Search Results

Peptide View

MS/MS Fragmentation of **QEDACQGDSGGPHVTR**  
Found in **FA10\_HUMAN**, Coagulation factor X OS=Homo sapiens GN=F10 PE=1 SV=2

Match to Query 45124: 2023.898742 from(675.640190,3+) rtinseconds(1309) index(45788)  
Title: Locus:1.1.1.1693.17 File:"2013-07-02 CLN FXIII 180 min 2nd F 4.wiff"  
Data file C:\Program Files (x86)\Matrix Science\Mascot Daemon\mgf\8 FXIII 180 min 2nd\mascot\_daemon\_merge.mgf

Click mouse within plot area to zoom in by factor of two about that point  
Or, 

Plot from

100

 to 

1700

 Da 

Full range

  
Label all possible matches ☐ Label matches used for scoring ☒

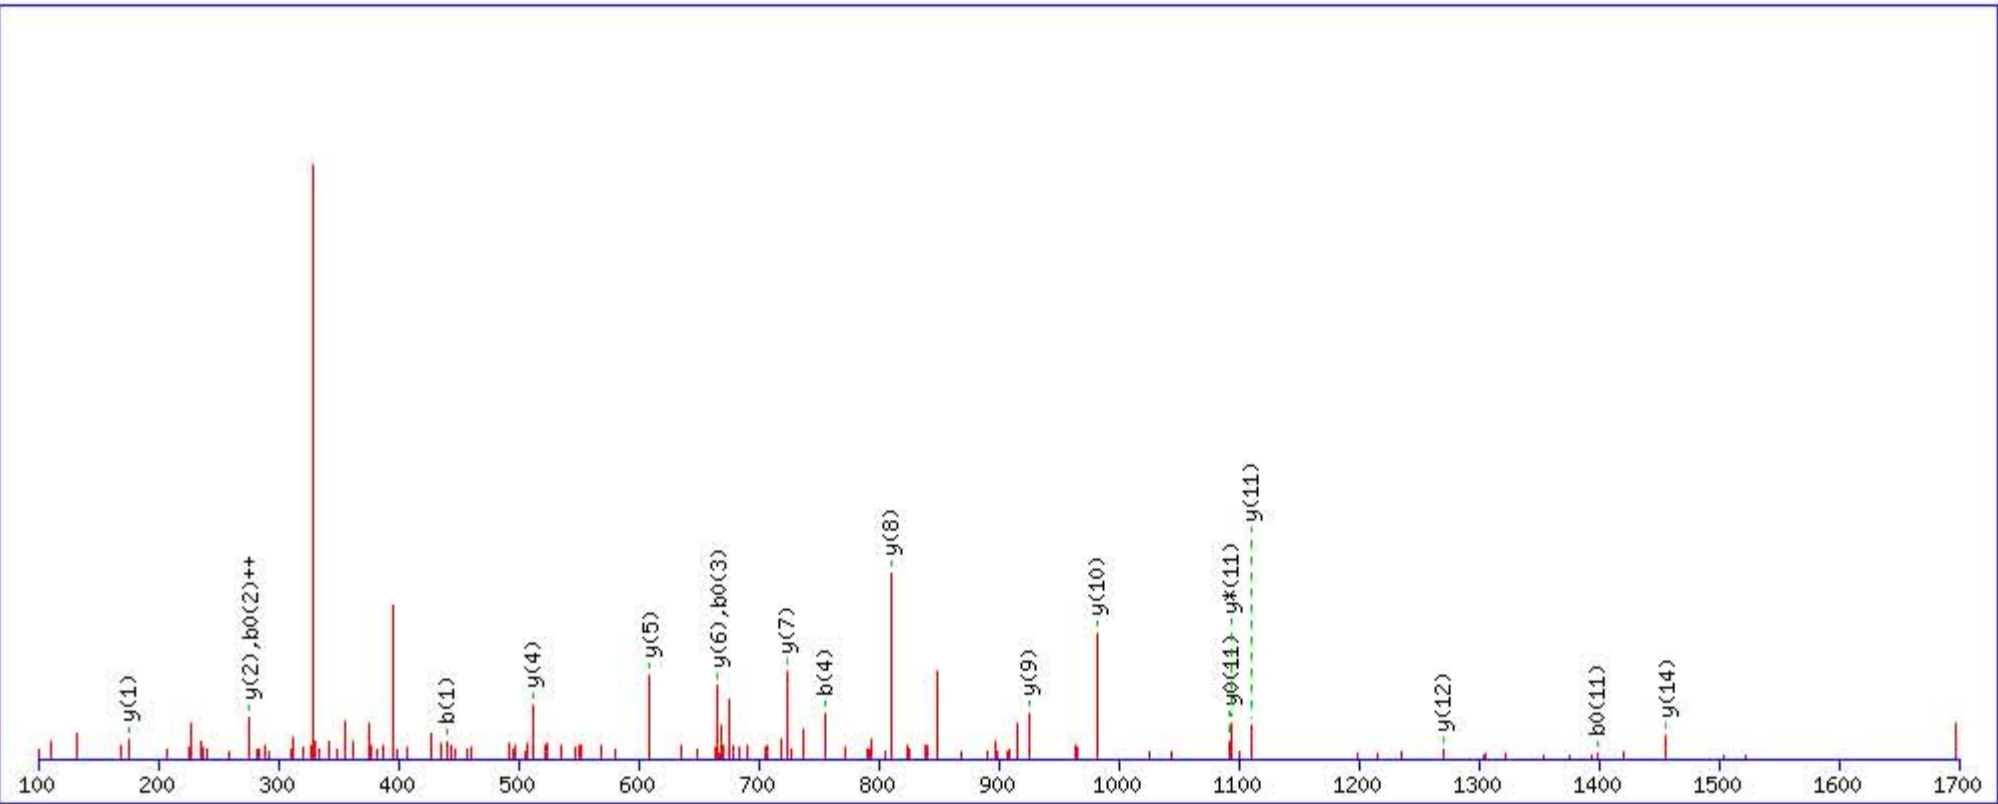

Monoisotopic mass of neutral peptide Mr(calc): 2023.884033  
Fixed modifications: Carbamidomethyl (C) (apply to specified residues or termini only)  
Variable modifications:  
Q1 : Biotin:Thermo-21345 (Q)  
Ions Score: 80 Expect: 7.1e-008  
Matches : 19/176 fragment ions using 31 most intense peaks [\(help\)](#)

| #  | b           | b <sup>++</sup> | b <sup>*</sup> | b <sup>*++</sup> | b <sup>0</sup> | b <sup>0++</sup> | Seq. | y           | y <sup>++</sup> | y <sup>*</sup> | y <sup>*++</sup> | y <sup>0</sup> | y <sup>0++</sup> | #  |
|----|-------------|-----------------|----------------|------------------|----------------|------------------|------|-------------|-----------------|----------------|------------------|----------------|------------------|----|
| 1  | 440.232602  | 220.619939      | 423.206053     | 212.106664       |                |                  | Q    |             |                 |                |                  |                |                  | 16 |
| 2  | 569.275195  | 285.141236      | 552.248646     | 276.627961       | 551.264630     | 276.135953       | E    | 1585.665961 | 793.336618      | 1568.639412    | 784.823344       | 1567.655396    | 784.331336       | 15 |
| 3  | 684.302138  | 342.654707      | 667.275589     | 334.141433       | 666.291573     | 333.649425       | D    | 1456.623368 | 728.815322      | 1439.596819    | 720.302047       | 1438.612803    | 719.810039       | 14 |
| 4  | 755.339252  | 378.173264      | 738.312703     | 369.659989       | 737.328687     | 369.167982       | A    | 1341.596425 | 671.301851      | 1324.569876    | 662.788576       | 1323.585860    | 662.296568       | 13 |
| 5  | 915.369901  | 458.188589      | 898.343352     | 449.675314       | 897.359336     | 449.183306       | C    | 1270.559311 | 635.783294      | 1253.532762    | 627.270019       | 1252.548746    | 626.778011       | 12 |
| 6  | 1043.428479 | 522.217877      | 1026.401930    | 513.704603       | 1025.417914    | 513.212595       | Q    | 1110.528662 | 555.767969      | 1093.502113    | 547.254695       | 1092.518097    | 546.762686       | 11 |
| 7  | 1100.449943 | 550.728609      | 1083.423394    | 542.215335       | 1082.439378    | 541.723327       | G    | 982.470084  | 491.738680      | 965.443535     | 483.225406       | 964.459519     | 482.733398       | 10 |
| 8  | 1215.476886 | 608.242081      | 1198.450337    | 599.728807       | 1197.466321    | 599.236798       | D    | 925.448620  | 463.227948      | 908.422071     | 454.714674       | 907.438055     | 454.222666       | 9  |
| 9  | 1302.508914 | 651.758095      | 1285.482365    | 643.244821       | 1284.498349    | 642.752813       | S    | 810.421677  | 405.714477      | 793.395128     | 397.201202       | 792.411112     | 396.709194       | 8  |
| 10 | 1359.530378 | 680.268827      | 1342.503829    | 671.755553       | 1341.519813    | 671.263544       | G    | 723.389649  | 362.198463      | 706.363100     | 353.685188       | 705.379084     | 353.193180       | 7  |
| 11 | 1416.551842 | 708.779559      | 1399.525293    | 700.266284       | 1398.541277    | 699.774276       | G    | 666.368185  | 333.687731      | 649.341636     | 325.174456       | 648.357620     | 324.682448       | 6  |
| 12 | 1513.604606 | 757.305941      | 1496.578057    | 748.792667       | 1495.594041    | 748.300658       | P    | 609.346721  | 305.176999      | 592.320172     | 296.663724       | 591.336156     | 296.171716       | 5  |
| 13 | 1650.663518 | 825.835397      | 1633.636969    | 817.322122       | 1632.652953    | 816.830114       | H    | 512.293957  | 256.650617      | 495.267408     | 248.137342       | 494.283392     | 247.645334       | 4  |
| 14 | 1749.731932 | 875.369604      | 1732.705383    | 866.856330       | 1731.721367    | 866.364321       | V    | 375.235045  | 188.121161      | 358.208496     | 179.607886       | 357.224480     | 179.115878       | 3  |
| 15 | 1850.779611 | 925.893443      | 1833.753062    | 917.380169       | 1832.769046    | 916.888161       | T    | 276.166631  | 138.586953      | 259.140082     | 130.073679       | 258.156066     | 129.581671       | 2  |
| 16 |             |                 |                |                  |                |                  | R    | 175.118952  | 88.063114       | 158.092403     | 79.549839        |                |                  | 1  |

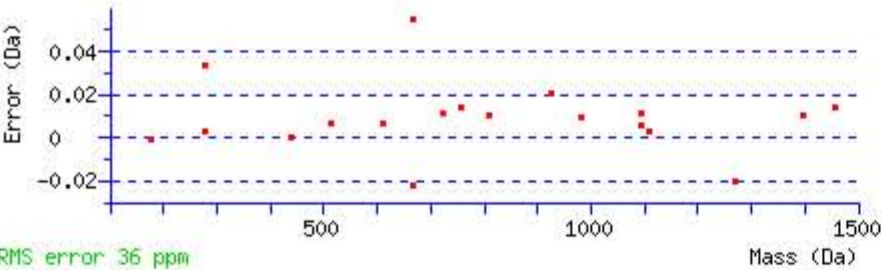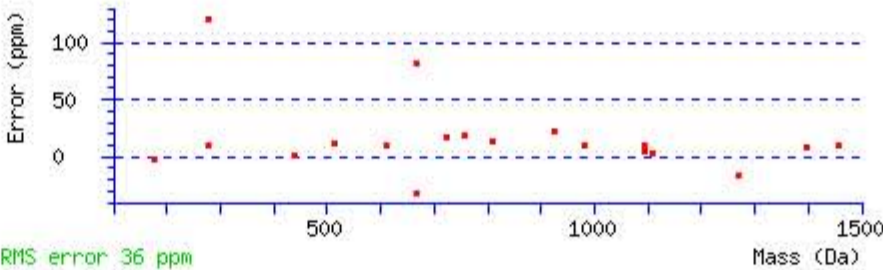

NCBI BLAST search of [QEDACQGDSGGPHVTR](#)  
(Parameters: blastp, nr protein database, expect=20000, no filter, PAM30)  
Other BLAST [web gateways](#)

All matches to this query

| Score | Mr(calc):   | Delta    | Sequence                         |
|-------|-------------|----------|----------------------------------|
| 79.8  | 2023.884033 | 0.014709 | <a href="#">QEDACQGDSGGPHVTR</a> |
| 45.2  | 2023.884033 | 0.014709 | <a href="#">QEDACQGDSGGPHVTR</a> |

MATRIX

SCIENCE

Mascot Search Results

Peptide View

MS/MS Fragmentation of **YKDGDCETSPCQNQGK**  
Found in **FA10\_HUMAN**, Coagulation factor X OS=Homo sapiens GN=F10 PE=1 SV=2

Match to Query 50989: 2325.002952 from(776.008260,3+) rtinseconds(1278) index(45600)  
Title: Locus:1.1.1.1682.11 File:"2013-07-02 CLN FXIII 180 min 2nd F 4.wiff"  
Data file C:\Program Files (x86)\Matrix Science\Mascot Daemon\mgf\8 FXIII 180 min 2nd\mascot\_daemon\_merge.mgf

Click mouse within plot area to zoom in by factor of two about that point  
Or, 

Plot from

100

 to 

1500

 Da 

Full range

  
Label all possible matches ☐ Label matches used for scoring ☒

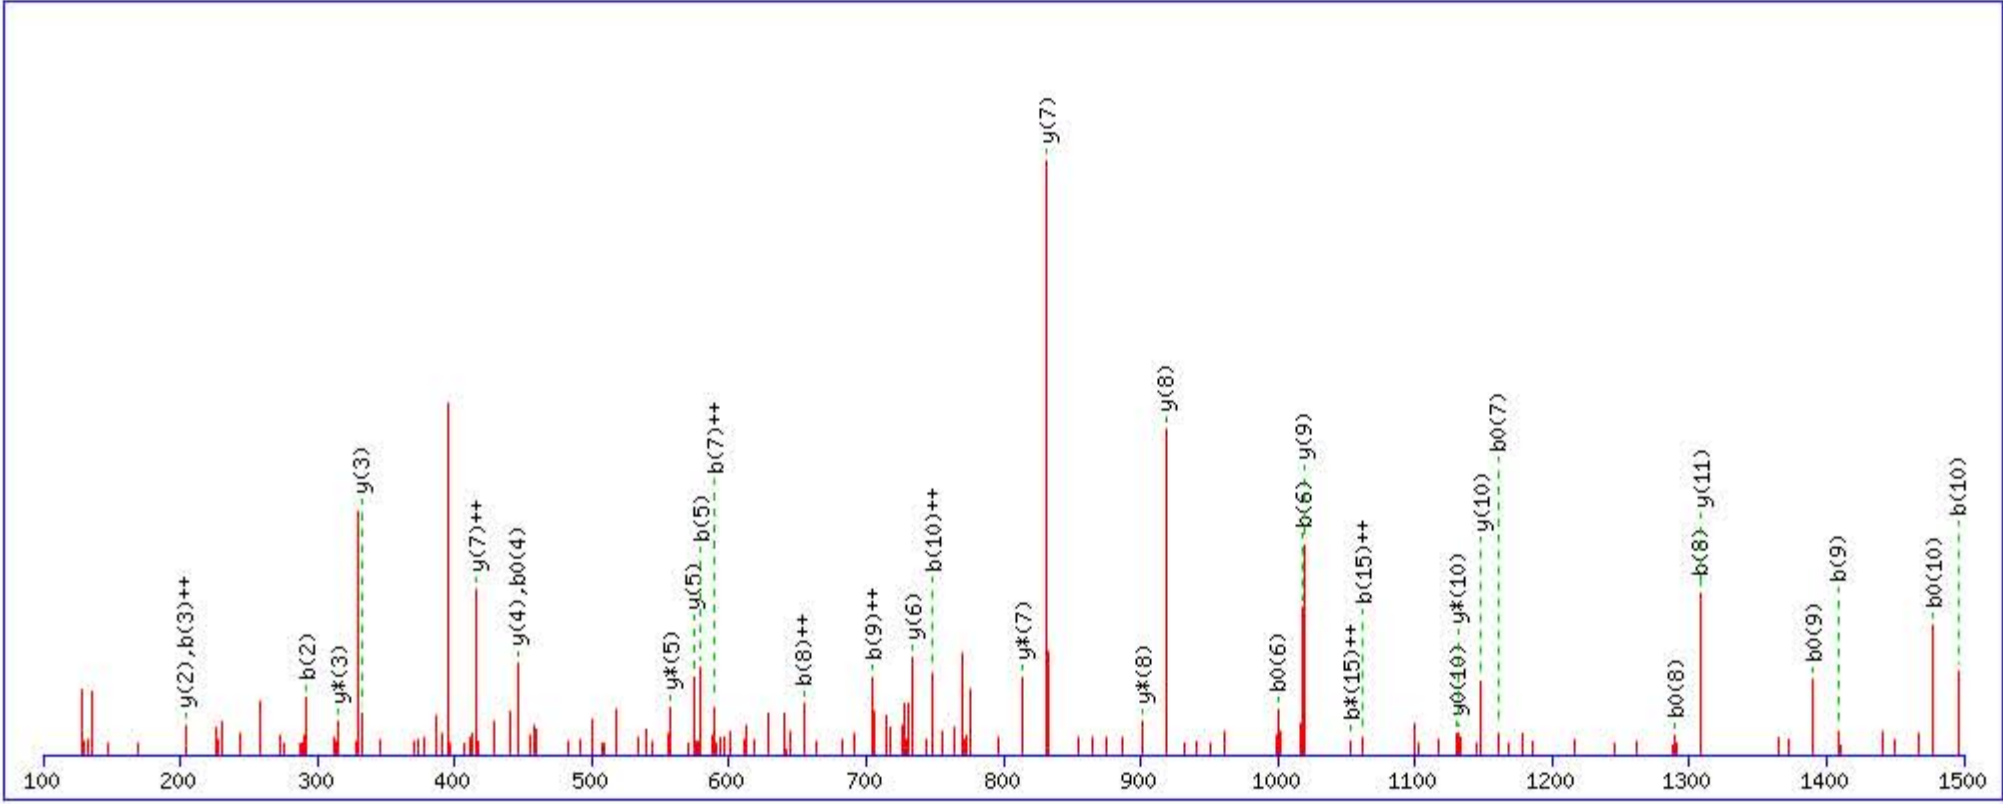

Monoisotopic mass of neutral peptide Mr(calc): 2324.982407  
Fixed modifications: Carbamidomethyl (C) (apply to specified residues or termini only)  
Variable modifications:  
Q6 : Biotin:Thermo-21345 (Q)  
Ions Score: 53 Expect: 2e-005  
Matches : 36/172 fragment ions using 56 most intense peaks [\(help\)](#)

| #  | b           | b <sup>++</sup> | b <sup>*</sup> | b <sup>+++</sup> | b <sup>0</sup> | b <sup>0++</sup> | Seq. | y           | y <sup>++</sup> | y <sup>*</sup> | y <sup>+++</sup> | y <sup>0</sup> | y <sup>0++</sup> | #  |
|----|-------------|-----------------|----------------|------------------|----------------|------------------|------|-------------|-----------------|----------------|------------------|----------------|------------------|----|
| 1  | 164.070605  | 82.538940       |                |                  |                |                  | Y    |             |                 |                |                  |                |                  | 17 |
| 2  | 292.165568  | 146.586422      | 275.139019     | 138.073148       |                |                  | K    | 2162.926352 | 1081.966814     | 2145.899803    | 1073.453539      | 2144.915787    | 1072.961531      | 16 |
| 3  | 407.192511  | 204.099894      | 390.165962     | 195.586619       | 389.181946     | 195.094611       | D    | 2034.831389 | 1017.919333     | 2017.804840    | 1009.406058      | 2016.820824    | 1008.914050      | 15 |
| 4  | 464.213975  | 232.610626      | 447.187426     | 224.097351       | 446.203410     | 223.605343       | G    | 1919.804446 | 960.405861      | 1902.777897    | 951.892587       | 1901.793881    | 951.400579       | 14 |
| 5  | 579.240918  | 290.124097      | 562.214369     | 281.610823       | 561.230353     | 281.118815       | D    | 1862.782982 | 931.895129      | 1845.756433    | 923.381855       | 1844.772417    | 922.889847       | 13 |
| 6  | 1018.466244 | 509.736760      | 1001.439695    | 501.223486       | 1000.455679    | 500.731478       | Q    | 1747.756039 | 874.381658      | 1730.729490    | 865.868383       | 1729.745474    | 865.376375       | 12 |
| 7  | 1178.496893 | 589.752085      | 1161.470344    | 581.238810       | 1160.486328    | 580.746802       | C    | 1308.530713 | 654.768995      | 1291.504164    | 646.255720       | 1290.520148    | 645.763712       | 11 |
| 8  | 1307.539486 | 654.273381      | 1290.512937    | 645.760107       | 1289.528921    | 645.268098       | E    | 1148.500064 | 574.753670      | 1131.473515    | 566.240396       | 1130.489499    | 565.748388       | 10 |
| 9  | 1408.587165 | 704.797220      | 1391.560616    | 696.283946       | 1390.576600    | 695.791938       | T    | 1019.457471 | 510.232374      | 1002.430922    | 501.719099       | 1001.446906    | 501.227091       | 9  |
| 10 | 1495.619193 | 748.313235      | 1478.592644    | 739.799960       | 1477.608628    | 739.307952       | S    | 918.409792  | 459.708534      | 901.383243     | 451.195260       | 900.399227     | 450.703252       | 8  |
| 11 | 1592.671957 | 796.839617      | 1575.645408    | 788.326342       | 1574.661392    | 787.834334       | P    | 831.377764  | 416.192520      | 814.351215     | 407.679246       |                |                  | 7  |
| 12 | 1752.702606 | 876.854941      | 1735.676057    | 868.341667       | 1734.692041    | 867.849659       | C    | 734.325000  | 367.666138      | 717.298451     | 359.152864       |                |                  | 6  |
| 13 | 1880.761184 | 940.884230      | 1863.734635    | 932.370956       | 1862.750619    | 931.878948       | Q    | 574.294351  | 287.650814      | 557.267802     | 279.137539       |                |                  | 5  |
| 14 | 1994.804111 | 997.905694      | 1977.777562    | 989.392419       | 1976.793546    | 988.900411       | N    | 446.235773  | 223.621524      | 429.209224     | 215.108250       |                |                  | 4  |
| 15 | 2122.862689 | 1061.934982     | 2105.836140    | 1053.421708      | 2104.852124    | 1052.929700      | Q    | 332.192846  | 166.600061      | 315.166297     | 158.086787       |                |                  | 3  |
| 16 | 2179.884153 | 1090.445714     | 2162.857604    | 1081.932440      | 2161.873588    | 1081.440432      | G    | 204.134268  | 102.570772      | 187.107719     | 94.057497        |                |                  | 2  |
| 17 |             |                 |                |                  |                |                  | K    | 147.112804  | 74.060040       | 130.086255     | 65.546765        |                |                  | 1  |

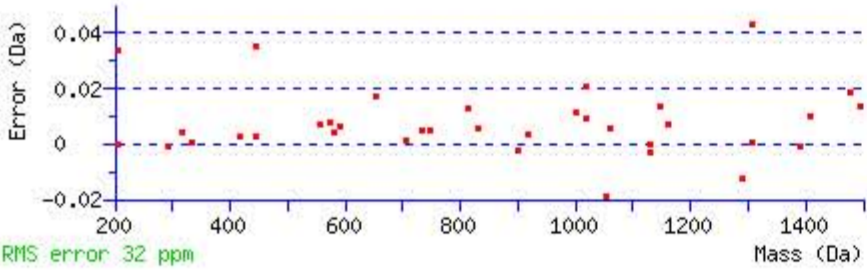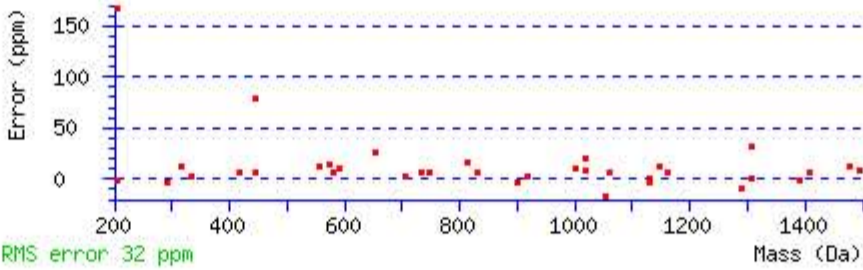

NCBI BLAST search of **YKDGDCETSPCQNQGK**  
(Parameters: blastp, nr protein database, expect=20000, no filter, PAM30)  
Other BLAST [web gateways](#)

All matches to this query

| Score | Mr(calc):   | Delta    | Sequence                         |
|-------|-------------|----------|----------------------------------|
| 52.8  | 2324.982407 | 0.020545 | <a href="#">YKDGDCETSPCQNQGK</a> |

MATRIX

SCIENCE

Mascot Search Results

Peptide View

MS/MS Fragmentation of **IPLVTNEECQK**  
Found in **FA11\_HUMAN**, Coagulation factor XI OS=Homo sapiens GN=F11 PE=1 SV=1

Match to Query 36696: 1640.845548 from(821.430050,2+) rtinseconds(1865) index(65428)  
Title: Locus:1.1.1.1924.13 File:"2013-07-02 CLN FXIII 180 min 2nd FT.wiff"  
Data file C:\Program Files (x86)\Matrix Science\Mascot Daemon\mgf\8 FXIII 180 min 2nd\mascot\_daemon\_merge.mgf

Click mouse within plot area to zoom in by factor of two about that point  
Or, Plot from 0 to 2600 Da Full range  
Label all possible matches ☐ Label matches used for scoring ☒

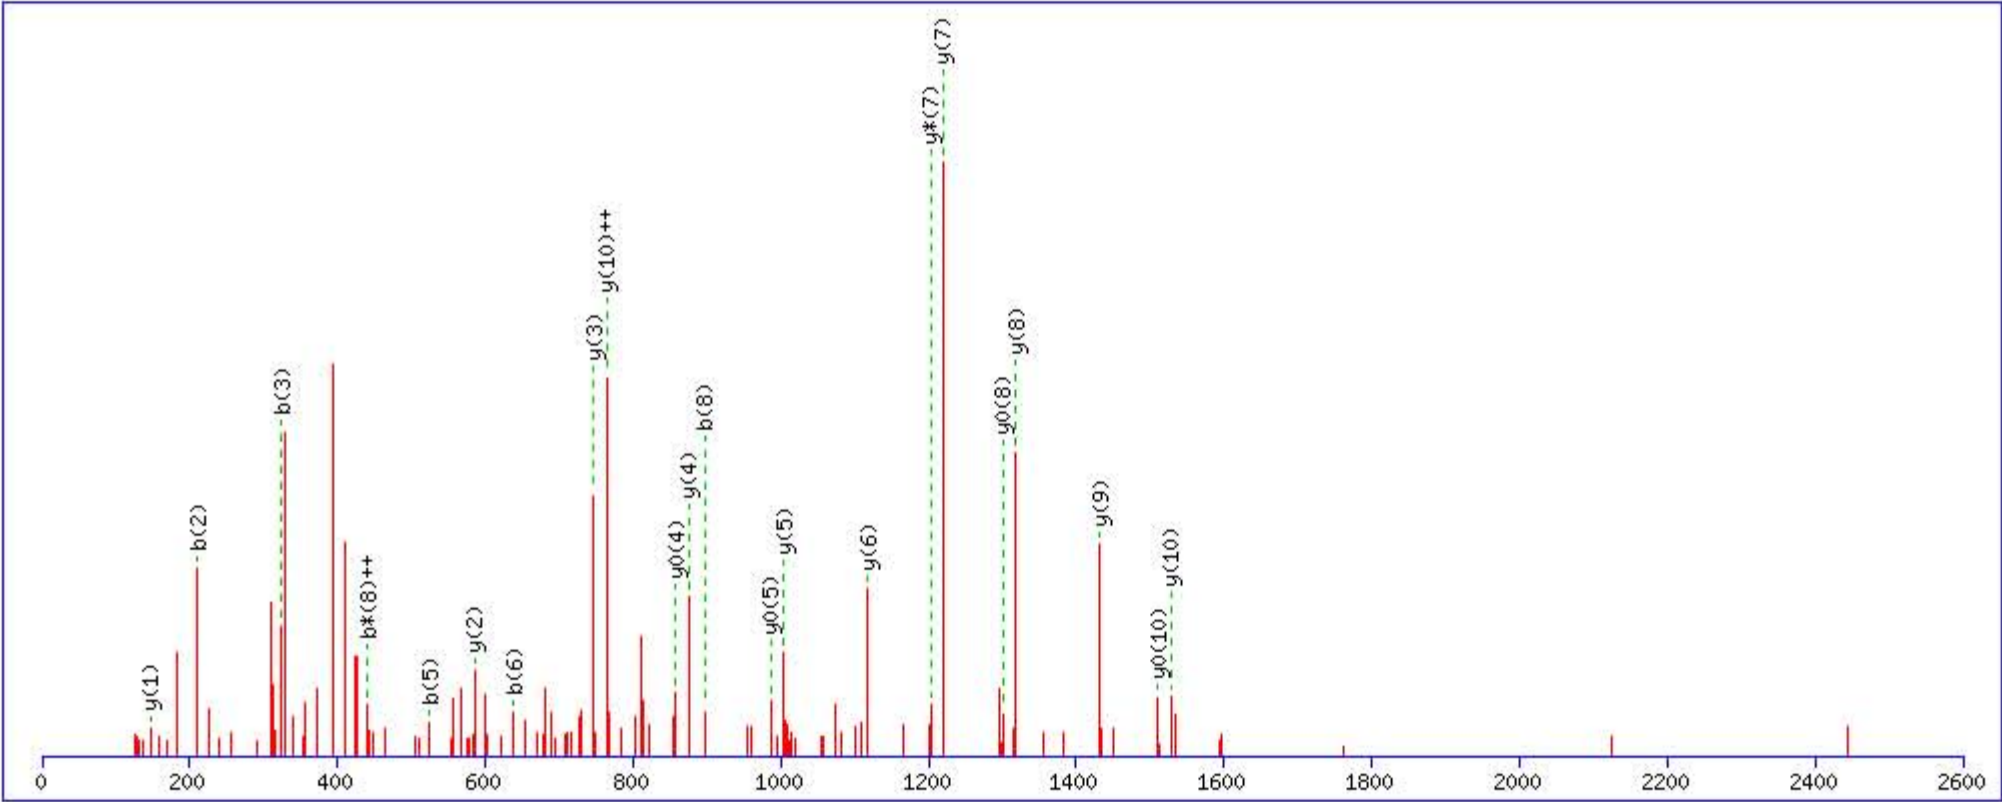

Monoisotopic mass of neutral peptide Mr(calc): 1640.826584  
Fixed modifications: Carbamidomethyl (C) (apply to specified residues or termini only)  
Variable modifications:  
Q10 : Biotin:Thermo-21345 (Q)  
Ions Score: 59 Expect: 5e-006  
Matches : 22/96 fragment ions using 44 most intense peaks (help)

| #  | b           | b <sup>++</sup> | b <sup>+</sup> | b <sup>++</sup> * | b <sup>0</sup> | b <sup>0++</sup> | Seq. | y           | y <sup>++</sup> | y <sup>+</sup> | y <sup>++</sup> * | y <sup>0</sup> | y <sup>0++</sup> | #  |
|----|-------------|-----------------|----------------|-------------------|----------------|------------------|------|-------------|-----------------|----------------|-------------------|----------------|------------------|----|
| 1  | 114.091340  | 57.549308       |                |                   |                |                  | I    |             |                 |                |                   |                |                  | 11 |
| 2  | 211.144104  | 106.075690      |                |                   |                |                  | P    | 1528.749813 | 764.878545      | 1511.723264    | 756.365270        | 1510.739248    | 755.873262       | 10 |
| 3  | 324.228168  | 162.617722      |                |                   |                |                  | L    | 1431.697049 | 716.352163      | 1414.670500    | 707.838888        | 1413.686484    | 707.346880       | 9  |
| 4  | 423.296582  | 212.151929      |                |                   |                |                  | V    | 1318.612985 | 659.810131      | 1301.586436    | 651.296856        | 1300.602420    | 650.804848       | 8  |
| 5  | 524.344261  | 262.675769      |                |                   | 506.333696     | 253.670486       | T    | 1219.544571 | 610.275924      | 1202.518022    | 601.762649        | 1201.534006    | 601.270641       | 7  |
| 6  | 638.387188  | 319.697232      | 621.360639     | 311.183958        | 620.376623     | 310.691950       | N    | 1118.496892 | 559.752084      | 1101.470343    | 551.238810        | 1100.486327    | 550.746802       | 6  |
| 7  | 767.429781  | 384.218529      | 750.403232     | 375.705254        | 749.419216     | 375.213246       | E    | 1004.453965 | 502.730621      | 987.427416     | 494.217346        | 986.443400     | 493.725338       | 5  |
| 8  | 896.472374  | 448.739825      | 879.445825     | 440.226551        | 878.461809     | 439.734543       | E    | 875.411372  | 438.209324      | 858.384823     | 429.696050        | 857.400807     | 429.204042       | 4  |
| 9  | 1056.503023 | 528.755150      | 1039.476474    | 520.241875        | 1038.492458    | 519.749867       | C    | 746.368779  | 373.688028      | 729.342230     | 365.174753        |                |                  | 3  |
| 10 | 1495.728349 | 748.367813      | 1478.701800    | 739.854538        | 1477.717784    | 739.362530       | Q    | 586.338130  | 293.672703      | 569.311581     | 285.159429        |                |                  | 2  |
| 11 |             |                 |                |                   |                |                  | K    | 147.112804  | 74.060040       | 130.086255     | 65.546765         |                |                  | 1  |

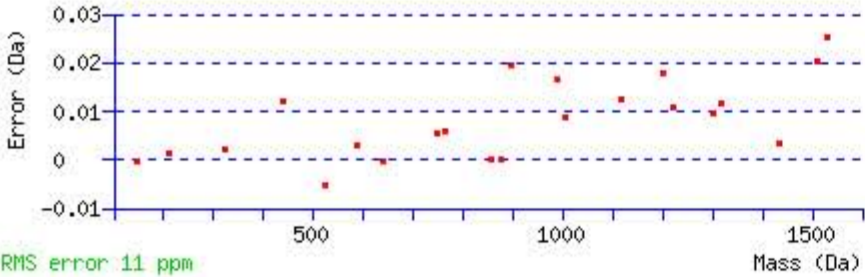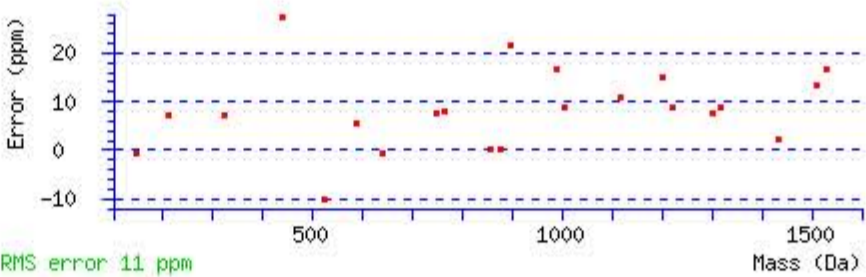

NCBI BLAST search of [IPLVTNEECQK](#)  
(Parameters: blastp, nr protein database, expect=20000, no filter, PAM30)  
Other BLAST [web gateways](#)

All matches to this query

| Score | Mr(calc):   | Delta     | Sequence                       |
|-------|-------------|-----------|--------------------------------|
| 58.7  | 1640.826584 | 0.018964  | <a href="#">IPLVTNEECQK</a>    |
| 2.2   | 1640.862961 | -0.017413 | <a href="#">LPVTKMKYSGNLMK</a> |

***MATRIX***  
***SCIENCE***

# Mascot Search Results

Peptide View

MS/MS Fragmentation of **LASQACR**  
Found in **FA12\_HUMAN**, Coagulation factor XII OS=Homo sapiens GN=F12 PE=1 SV=3

Match to Query 17133: 1115.556188 from(558.785370,2+) rtinseconds(1343) index(1572)  
Title: Locus:1.1.1.1744.19 File:"2013-07-02 CLN FXIII 180 min 2nd F 1.wiff"  
Data file C:\Program Files (x86)\Matrix Science\Mascot Daemon\mgf\8 FXIII 180 min 2nd\mascot\_daemon\_merge.mgf

Click mouse within plot area to zoom in by factor of two about that point  
Or,   to  Da   
Label all possible matches ☐ Label matches used for scoring ☒

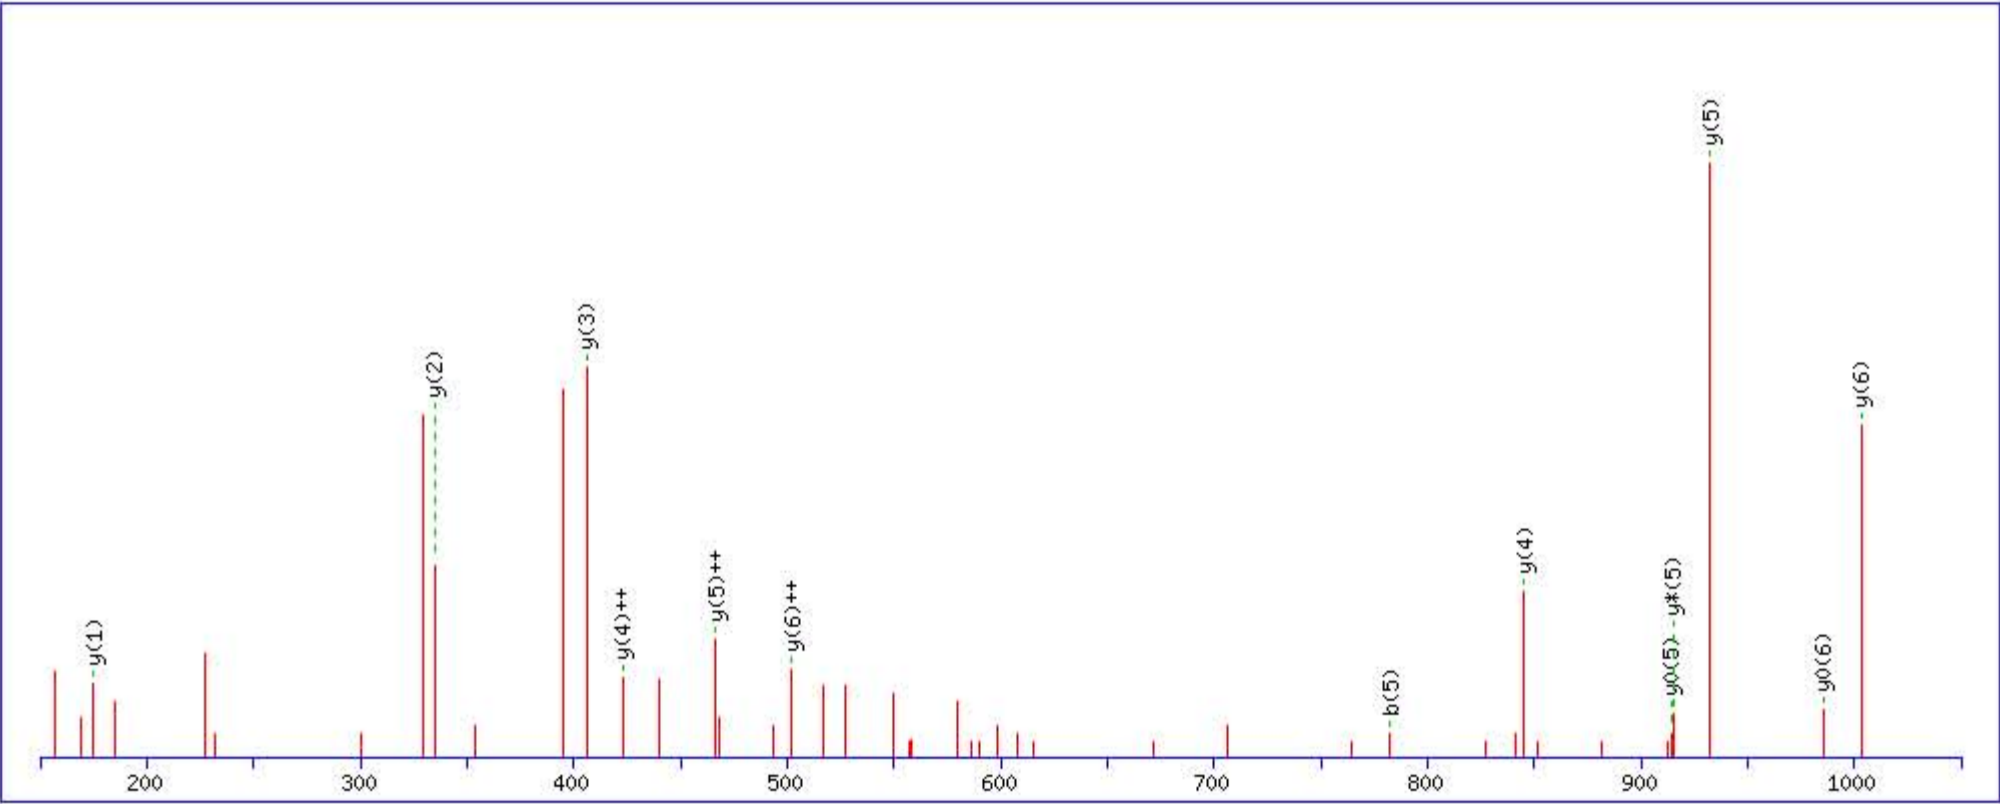

Monoisotopic mass of neutral peptide Mr(calc): 1115.557953  
Fixed modifications: Carbamidomethyl (C) (apply to specified residues or termini only)  
Variable modifications:  
Q4 : Biotin:Thermo-21345 (Q)  
Ions Score: 33 Expect: 0.0029  
Matches : 13/54 fragment ions using 25 most intense peaks ([help](#))

| # | b          | b <sup>++</sup> | b <sup>*</sup> | b <sup>+++</sup> | b <sup>0</sup> | b <sup>0++</sup> | Seq. | y           | y <sup>++</sup> | y <sup>*</sup> | y <sup>+++</sup> | y <sup>0</sup> | y <sup>0++</sup> | # |
|---|------------|-----------------|----------------|------------------|----------------|------------------|------|-------------|-----------------|----------------|------------------|----------------|------------------|---|
| 1 | 114.091340 | 57.549308       |                |                  |                |                  | L    |             |                 |                |                  |                |                  | 7 |
| 2 | 185.128454 | 93.067865       |                |                  |                |                  | A    | 1003.481183 | 502.244230      | 986.454634     | 493.730955       | 985.470618     | 493.238947       | 6 |
| 3 | 272.160482 | 136.583879      |                |                  | 254.149917     | 127.578596       | S    | 932.444069  | 466.725673      | 915.417520     | 458.212398       | 914.433504     | 457.720390       | 5 |
| 4 | 711.385808 | 356.196542      | 694.359259     | 347.683268       | 693.375243     | 347.191260       | Q    | 845.412041  | 423.209659      | 828.385492     | 414.696384       |                |                  | 4 |
| 5 | 782.422922 | 391.715099      | 765.396373     | 383.201824       | 764.412357     | 382.709816       | A    | 406.186715  | 203.596995      | 389.160166     | 195.083721       |                |                  | 3 |
| 6 | 942.453571 | 471.730424      | 925.427022     | 463.217149       | 924.443006     | 462.725141       | C    | 335.149601  | 168.078438      | 318.123052     | 159.565164       |                |                  | 2 |
| 7 |            |                 |                |                  |                |                  | R    | 175.118952  | 88.063114       | 158.092403     | 79.549839        |                |                  | 1 |

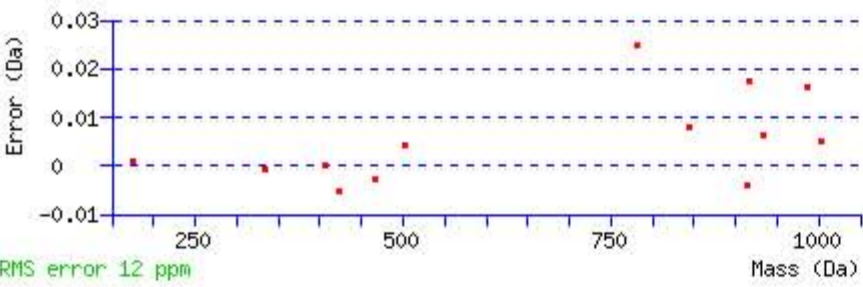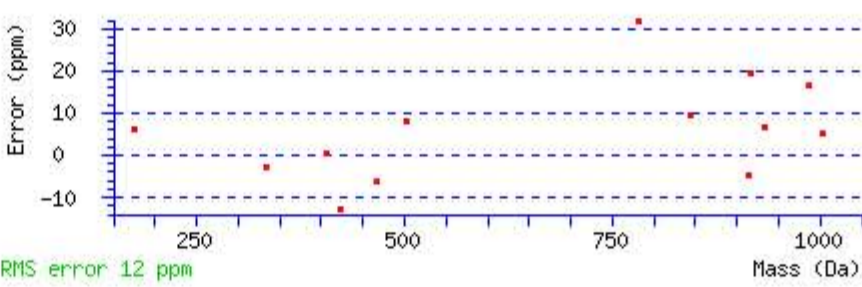

NCBI BLAST search of [LASQACR](#)  
(Parameters: blastp, nr protein database, expect=20000, no filter, PAM30)  
Other BLAST [web gateways](#)

All matches to this query

| Score | Mr(calc):   | Delta     | Sequence                   |
|-------|-------------|-----------|----------------------------|
| 33.0  | 1115.557953 | -0.001765 | <a href="#">LASQACR</a>    |
| 5.6   | 1115.550552 | 0.005636  | <a href="#">LAAGSRCPER</a> |
| 1.0   | 1115.546722 | 0.009466  | <a href="#">LAQDACK</a>    |
| 0.0   | 1115.569199 | -0.013011 | <a href="#">QSRVCR</a>     |

MATRIX

SCIENCE

Mascot Search Results

Peptide View

MS/MS Fragmentation of **TEQAAVAR**  
Found in **FA12\_HUMAN**, Coagulation factor XII OS=Homo sapiens GN=F12 PE=1 SV=3

Match to Query 19101: 1155.605528 from(578.810040,2+) rtinseconds(1371) index(62575)  
Title: Locus:1.1.1.1752.23 File:"2013-07-02 CLN FXIII 180 min 2nd FT.wiff"  
Data file C:\Program Files (x86)\Matrix Science\Mascot Daemon\mgf\8 FXIII 180 min 2nd\mascot\_daemon\_merge.mgf

Click mouse within plot area to zoom in by factor of two about that point  
Or, 

Plot from

100

 to 

1200

 Da 

Full range

  
Label all possible matches ☐ Label matches used for scoring ☒

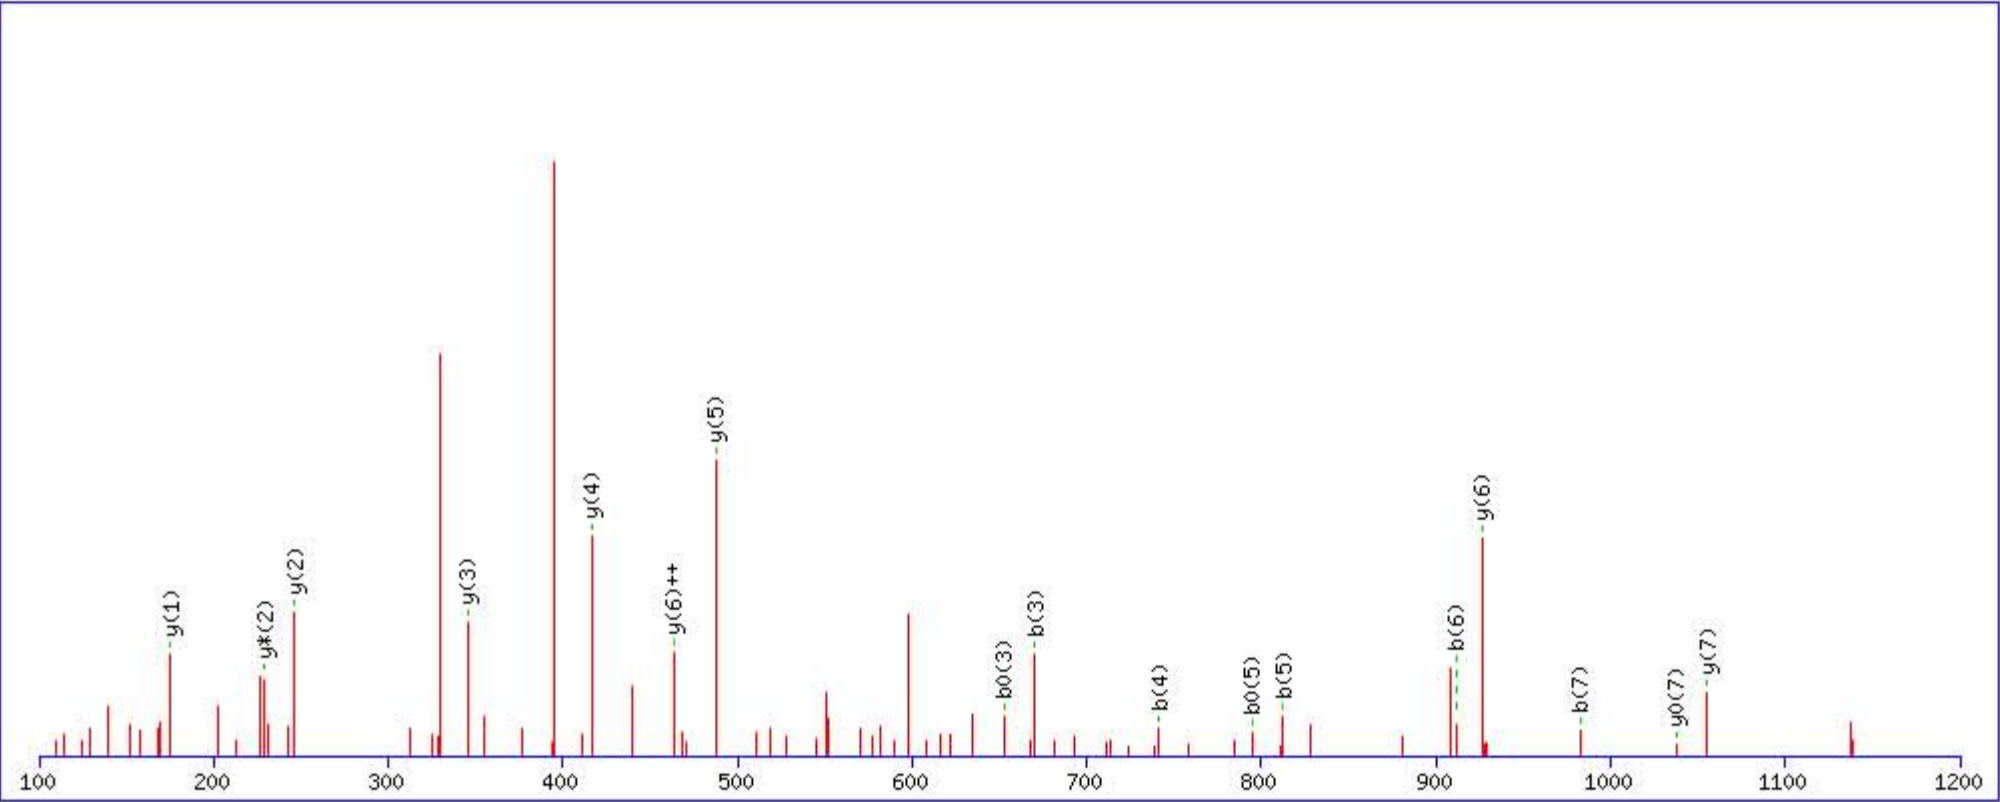

Monoisotopic mass of neutral peptide Mr(calc): 1155.607010  
Fixed modifications: Carbamidomethyl (C) (apply to specified residues or termini only)  
Variable modifications:  
Q3 : Biotin:Thermo-21345 (Q)  
Ions Score: 42 Expect: 0.0012  
Matches : 17/68 fragment ions using 31 most intense peaks [\(help\)](#)

| # | b          | b <sup>++</sup> | b <sup>*</sup> | b <sup>++</sup> * | b <sup>0</sup> | b <sup>0++</sup> | Seq. | y           | y <sup>++</sup> | y <sup>*</sup> | y <sup>++</sup> * | y <sup>0</sup> | y <sup>0++</sup> | # |
|---|------------|-----------------|----------------|-------------------|----------------|------------------|------|-------------|-----------------|----------------|-------------------|----------------|------------------|---|
| 1 | 102.054955 | 51.531116       |                |                   | 84.044390      | 42.525833        | T    |             |                 |                |                   |                |                  | 8 |
| 2 | 231.097548 | 116.052412      |                |                   | 213.086983     | 107.047130       | E    | 1055.566627 | 528.286951      | 1038.540078    | 519.773677        | 1037.556062    | 519.281669       | 7 |
| 3 | 670.322874 | 335.665075      | 653.296325     | 327.151801        | 652.312309     | 326.659793       | Q    | 926.524034  | 463.765655      | 909.497485     | 455.252380        |                |                  | 6 |
| 4 | 741.359988 | 371.183632      | 724.333439     | 362.670358        | 723.349423     | 362.178350       | A    | 487.298708  | 244.152992      | 470.272159     | 235.639717        |                |                  | 5 |
| 5 | 812.397102 | 406.702189      | 795.370553     | 398.188915        | 794.386537     | 397.696907       | A    | 416.261594  | 208.634435      | 399.235045     | 200.121160        |                |                  | 4 |
| 6 | 911.465516 | 456.236396      | 894.438967     | 447.723121        | 893.454951     | 447.231113       | V    | 345.224480  | 173.115878      | 328.197931     | 164.602603        |                |                  | 3 |
| 7 | 982.502630 | 491.754953      | 965.476081     | 483.241678        | 964.492065     | 482.749670       | A    | 246.156066  | 123.581671      | 229.129517     | 115.068396        |                |                  | 2 |
| 8 |            |                 |                |                   |                |                  | R    | 175.118952  | 88.063114       | 158.092403     | 79.549839         |                |                  | 1 |

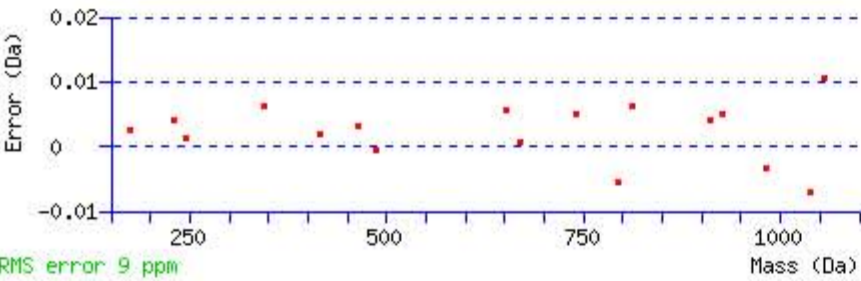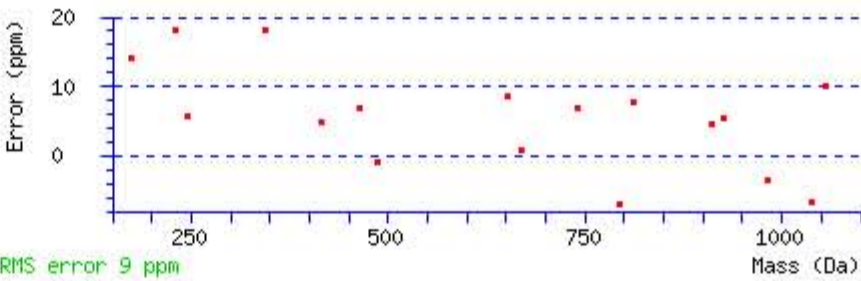

NCBI BLAST search of [TEQAAVAR](#)  
(Parameters: blastp, nr protein database, expect=20000, no filter, PAM30)  
Other BLAST [web gateways](#)

All matches to this query

| Score | Mr(calc):   | Delta     | Sequence                      |
|-------|-------------|-----------|-------------------------------|
| 42.3  | 1155.607010 | -0.001482 | <a href="#">TEQAAVAR</a>      |
| 10.5  | 1155.588394 | 0.017134  | <a href="#">VEQIEAGTPGR</a>   |
| 8.2   | 1155.607025 | -0.001497 | <a href="#">VQDSAVAR</a>      |
| 8.1   | 1155.607025 | -0.001497 | <a href="#">AMAAVPQDVVR</a>   |
| 5.5   | 1155.610855 | -0.005327 | <a href="#">GAGAGLSRPGSAR</a> |
| 4.7   | 1155.588379 | 0.017149  | <a href="#">TEVPLAENQR</a>    |
| 3.9   | 1155.599594 | 0.005934  | <a href="#">TKESKHEAAR</a>    |
| 3.9   | 1155.607010 | -0.001482 | <a href="#">QQLETAR</a>       |
| 3.7   | 1155.607010 | -0.001482 | <a href="#">QQLETAR</a>       |
| 3.6   | 1155.614883 | -0.009355 | <a href="#">RSGDWLLPGR</a>    |

MATRIX

SCIENCE

Mascot Search Results

Peptide View

MS/MS Fragmentation of **AEHTVVLTVTGEPCHFPFQYHR**  
Found in **FA12\_HUMAN**, Coagulation factor XII OS=Homo sapiens GN=F12 PE=1 SV=3

Match to Query 60577: 3064.498736 from(767.131960,4+) rtinseconds(2147) index(67300)  
Title: Locus:1.1.1.2022.23 File:"2013-07-02 CLN FXIII 180 min 2nd FT.wiff"  
Data file C:\Program Files (x86)\Matrix Science\Mascot Daemon\mgf\8 FXIII 180 min 2nd\mascot\_daemon\_merge.mgf

Click mouse within plot area to zoom in by factor of two about that point  
Or, 

Plot from

100

 to 

1900

 Da 

Full range

  
Label all possible matches ☐ Label matches used for scoring ☒

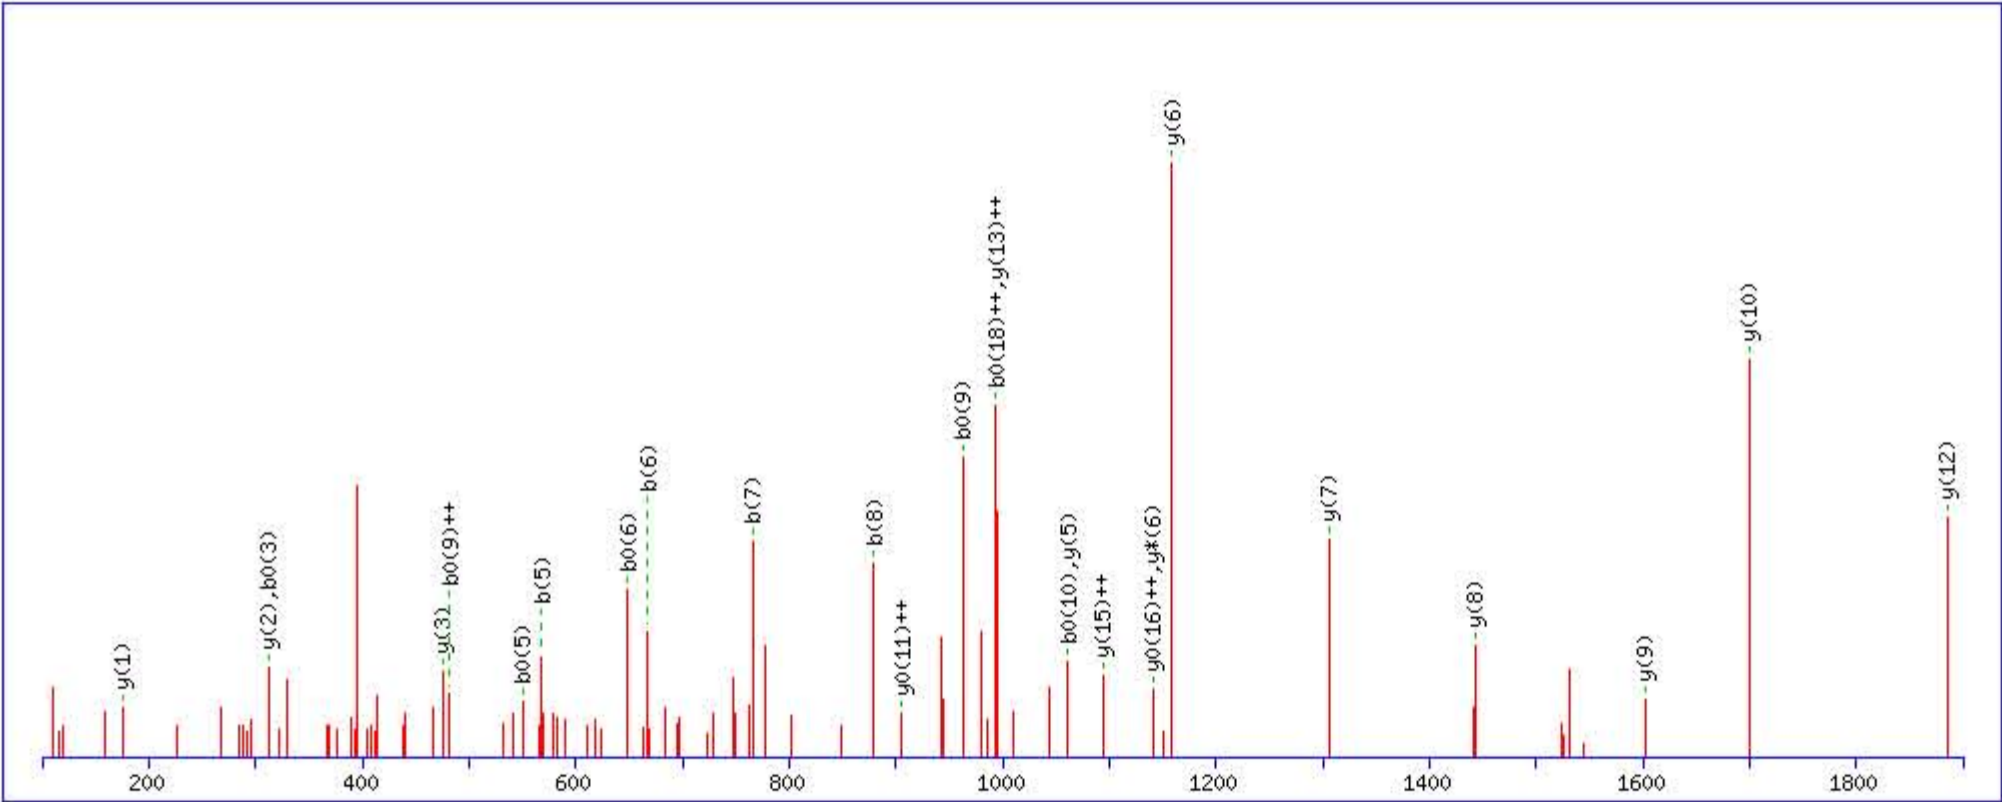

Monoisotopic mass of neutral peptide Mr(calc): 3064.468796  
Fixed modifications: Carbamidomethyl (C) (apply to specified residues or termini only)  
Variable modifications:  
Q20 : Biotin:Thermo-21345 (Q)  
Ions Score: 63 Expect: 1.3e-005  
Matches : 26/204 fragment ions using 31 most intense peaks [\(help\)](#)

| #  | b           | b <sup>++</sup> | b <sup>*</sup> | b <sup>*++</sup> | b <sup>0</sup> | b <sup>0++</sup> | Seq. | y           | y <sup>++</sup> | y <sup>*</sup> | y <sup>*++</sup> | y <sup>0</sup> | y <sup>0++</sup> | #  |
|----|-------------|-----------------|----------------|------------------|----------------|------------------|------|-------------|-----------------|----------------|------------------|----------------|------------------|----|
| 1  | 72.044390   | 36.525833       |                |                  |                |                  | A    |             |                 |                |                  |                |                  | 23 |
| 2  | 201.086983  | 101.047130      |                |                  | 183.076418     | 92.041847        | E    | 2994.438934 | 1497.723105     | 2977.412385    | 1489.209830      | 2976.428369    | 1488.717822      | 22 |
| 3  | 330.129576  | 165.568426      |                |                  | 312.119011     | 156.563144       | E    | 2865.396341 | 1433.201808     | 2848.369792    | 1424.688534      | 2847.385776    | 1424.196526      | 21 |
| 4  | 467.188488  | 234.097882      |                |                  | 449.177923     | 225.092599       | H    | 2736.353748 | 1368.680512     | 2719.327199    | 1360.167237      | 2718.343183    | 1359.675229      | 20 |
| 5  | 568.236167  | 284.621722      |                |                  | 550.225602     | 275.616439       | T    | 2599.294836 | 1300.151056     | 2582.268287    | 1291.637781      | 2581.284271    | 1291.145773      | 19 |
| 6  | 667.304581  | 334.155929      |                |                  | 649.294016     | 325.150646       | V    | 2498.247157 | 1249.627216     | 2481.220608    | 1241.113942      | 2480.236592    | 1240.621934      | 18 |
| 7  | 766.372995  | 383.690136      |                |                  | 748.362430     | 374.684853       | V    | 2399.178743 | 1200.093009     | 2382.152194    | 1191.579735      | 2381.168178    | 1191.087727      | 17 |
| 8  | 879.457059  | 440.232168      |                |                  | 861.446494     | 431.226885       | L    | 2300.110329 | 1150.558802     | 2283.083780    | 1142.045528      | 2282.099764    | 1141.553520      | 16 |
| 9  | 980.504738  | 490.756007      |                |                  | 962.494173     | 481.750724       | T    | 2187.026265 | 1094.016770     | 2169.999716    | 1085.503496      | 2169.015700    | 1085.011488      | 15 |
| 10 | 1079.573152 | 540.290214      |                |                  | 1061.562587    | 531.284931       | V    | 2085.978586 | 1043.492931     | 2068.952037    | 1034.979656      | 2067.968021    | 1034.487648      | 14 |
| 11 | 1180.620831 | 590.814054      |                |                  | 1162.610266    | 581.808771       | T    | 1986.910172 | 993.958724      | 1969.883623    | 985.445450       | 1968.899607    | 984.953442       | 13 |
| 12 | 1237.642295 | 619.324785      |                |                  | 1219.631730    | 610.319503       | G    | 1885.862493 | 943.434885      | 1868.835944    | 934.921610       | 1867.851928    | 934.429602       | 12 |
| 13 | 1366.684888 | 683.846082      |                |                  | 1348.674323    | 674.840800       | E    | 1828.841029 | 914.924153      | 1811.814480    | 906.410878       | 1810.830464    | 905.918870       | 11 |
| 14 | 1463.737652 | 732.372464      |                |                  | 1445.727087    | 723.367182       | P    | 1699.798436 | 850.402856      | 1682.771887    | 841.889582       |                |                  | 10 |
| 15 | 1623.768301 | 812.387789      |                |                  | 1605.757736    | 803.382506       | C    | 1602.745672 | 801.876474      | 1585.719123    | 793.363200       |                |                  | 9  |
| 16 | 1760.827213 | 880.917245      |                |                  | 1742.816648    | 871.911962       | H    | 1442.715023 | 721.861150      | 1425.688474    | 713.347875       |                |                  | 8  |
| 17 | 1907.895627 | 954.451452      |                |                  | 1889.885062    | 945.446169       | F    | 1305.656111 | 653.331694      | 1288.629562    | 644.818419       |                |                  | 7  |
| 18 | 2004.948391 | 1002.977834     |                |                  | 1986.937826    | 993.972551       | P    | 1158.587697 | 579.797487      | 1141.561148    | 571.284212       |                |                  | 6  |
| 19 | 2152.016805 | 1076.512040     |                |                  | 2134.006240    | 1067.506758      | F    | 1061.534933 | 531.271105      | 1044.508384    | 522.757830       |                |                  | 5  |
| 20 | 2591.242131 | 1296.124703     | 2574.215582    | 1287.611429      | 2573.231566    | 1287.119421      | Q    | 914.466519  | 457.736898      | 897.439970     | 449.223623       |                |                  | 4  |
| 21 | 2754.305460 | 1377.656368     | 2737.278911    | 1369.143093      | 2736.294895    | 1368.651085      | Y    | 475.241193  | 238.124234      | 458.214644     | 229.610960       |                |                  | 3  |
| 22 | 2891.364372 | 1446.185824     | 2874.337823    | 1437.672549      | 2873.353807    | 1437.180541      | H    | 312.177864  | 156.592570      | 295.151315     | 148.079295       |                |                  | 2  |
| 23 |             |                 |                |                  |                |                  | R    | 175.118952  | 88.063114       | 158.092403     | 79.549839        |                |                  | 1  |

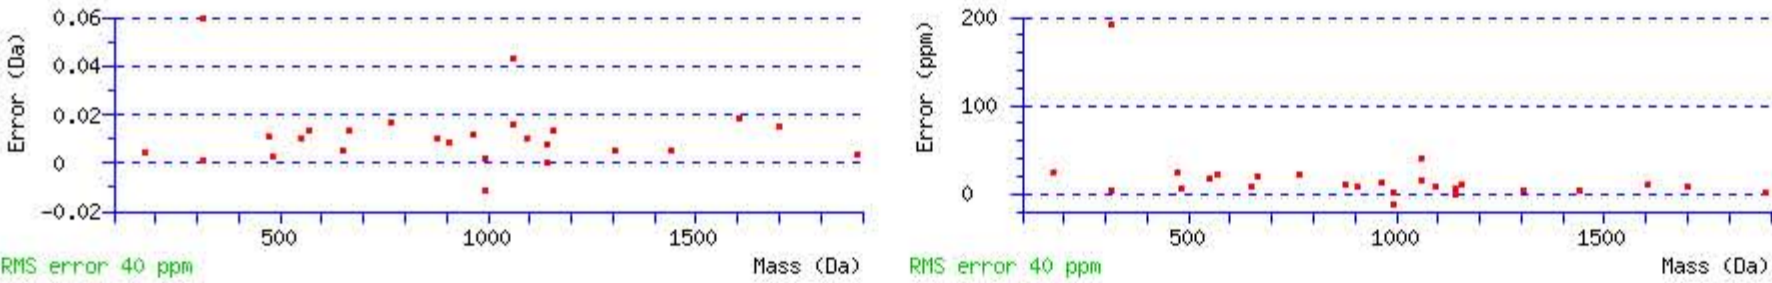

NCBI BLAST search of [AEHTVVLTVTGEPCHFPFQYHR](#)  
(Parameters: blastp, nr protein database, expect=20000, no filter, PAM30)  
Other BLAST [web gateways](#)

All matches to this query

| Score | Mr(calc):   | Delta    | Sequence                               |
|-------|-------------|----------|----------------------------------------|
| 63.1  | 3064.468796 | 0.029940 | <a href="#">AEHTVVLTVTGEPCHFPFQYHR</a> |

MATRIX

SCIENCE

Mascot Search Results

Peptide View

MS/MS Fragmentation of **AQMDLSGR**  
Found in **F13A\_HUMAN**, Coagulation factor XIII A chain OS=Homo sapiens GN=F13A1 PE=1 SV=4

Match to Query 20228: 1187.580408 from(594.797480,2+) rtinseconds(1723) index(3908)  
Title: Locus:1.1.1.1877.11 File:"2013-07-02 CLN FXIII 180 min 2nd F 1.wiff"  
Data file C:\Program Files (x86)\Matrix Science\Mascot Daemon\mgf\8 FXIII 180 min 2nd\mascot\_daemon\_merge.mgf

Click mouse within plot area to zoom in by factor of two about that point  
Or, 

Plot from

100

 to 

1200

 Da 

Full range

  
Label all possible matches ☐ Label matches used for scoring ☒

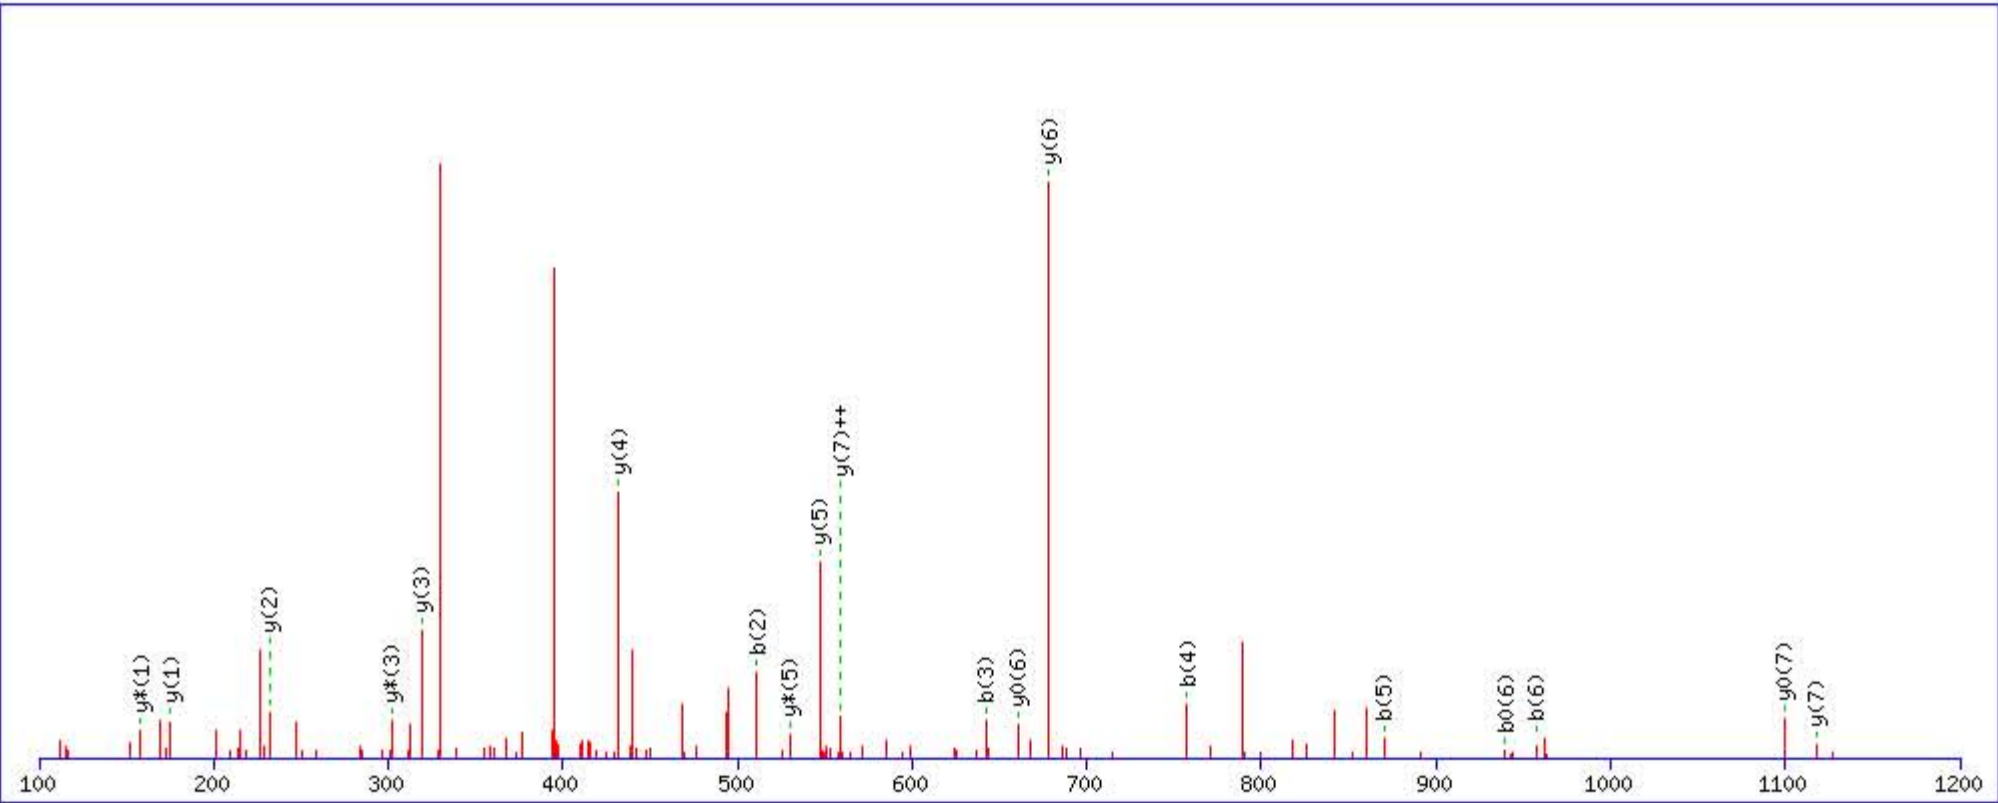

Monoisotopic mass of neutral peptide Mr(calc): 1187.579086  
Fixed modifications: Carbamidomethyl (C) (apply to specified residues or termini only)  
Variable modifications:  
Q2 : Biotin:Thermo-21345 (Q)  
Ions Score: 44 Expect: 0.0003  
Matches : 19/72 fragment ions using 31 most intense peaks [\(help\)](#)

| # | b           | b <sup>++</sup> | b <sup>*</sup> | b <sup>++</sup> * | b <sup>0</sup> | b <sup>0++</sup> | Seq. | y           | y <sup>++</sup> | y <sup>*</sup> | y <sup>++</sup> * | y <sup>0</sup> | y <sup>0++</sup> | # |
|---|-------------|-----------------|----------------|-------------------|----------------|------------------|------|-------------|-----------------|----------------|-------------------|----------------|------------------|---|
| 1 | 72.044390   | 36.525833       |                |                   |                |                  | A    |             |                 |                |                   |                |                  | 8 |
| 2 | 511.269716  | 256.138496      | 494.243167     | 247.625221        |                |                  | Q    | 1117.549262 | 559.278269      | 1100.522713    | 550.764995        | 1099.538697    | 550.272987       | 7 |
| 3 | 642.310201  | 321.658739      | 625.283652     | 313.145464        |                |                  | M    | 678.323936  | 339.665606      | 661.297387     | 331.152332        | 660.313371     | 330.660324       | 6 |
| 4 | 757.337144  | 379.172210      | 740.310595     | 370.658935        | 739.326579     | 370.166927       | D    | 547.283451  | 274.145364      | 530.256902     | 265.632089        | 529.272886     | 265.140081       | 5 |
| 5 | 870.421208  | 435.714242      | 853.394659     | 427.200967        | 852.410643     | 426.708959       | L    | 432.256508  | 216.631892      | 415.229959     | 208.118617        | 414.245943     | 207.626609       | 4 |
| 6 | 957.453236  | 479.230256      | 940.426687     | 470.716981        | 939.442671     | 470.224973       | S    | 319.172444  | 160.089860      | 302.145895     | 151.576585        | 301.161879     | 151.084577       | 3 |
| 7 | 1014.474700 | 507.740988      | 997.448151     | 499.227713        | 996.464135     | 498.735705       | G    | 232.140416  | 116.573846      | 215.113867     | 108.060571        |                |                  | 2 |
| 8 |             |                 |                |                   |                |                  | R    | 175.118952  | 88.063114       | 158.092403     | 79.549839         |                |                  | 1 |

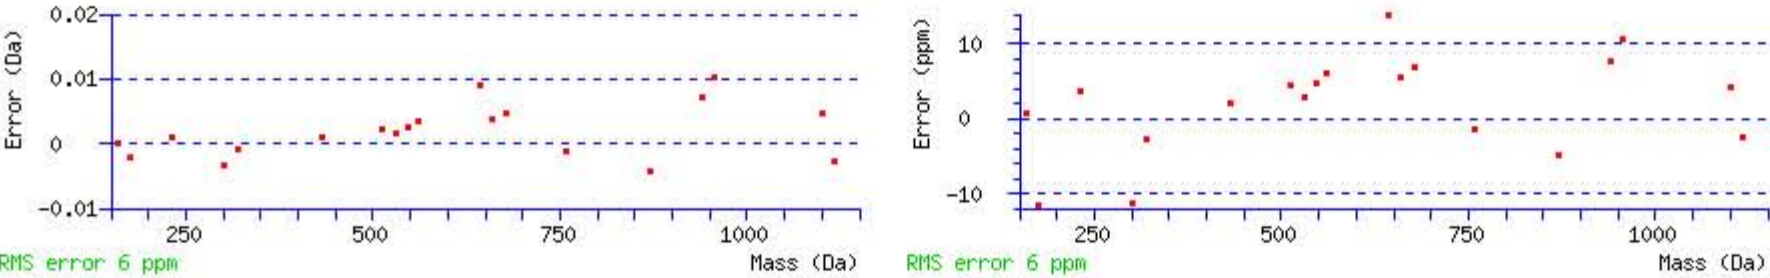

NCBI BLAST search of [AQMDLSGR](#)  
(Parameters: blastp, nr protein database, expect=20000, no filter, PAM30)  
Other BLAST [web gateways](#)

All matches to this query

| Score | Mr(calc):   | Delta     | Sequence                    |
|-------|-------------|-----------|-----------------------------|
| 44.0  | 1187.579086 | 0.001322  | <a href="#">AQMDLSGR</a>    |
| 6.1   | 1187.568314 | 0.012094  | <a href="#">QREDIWEGR</a>   |
| 5.6   | 1187.578201 | 0.002207  | <a href="#">SSLENEPSLGR</a> |
| 4.1   | 1187.579086 | 0.001322  | <a href="#">QAAEVMGR</a>    |
| 3.5   | 1187.593475 | -0.013067 | <a href="#">AESFPNTPLGR</a> |
| 0.3   | 1187.575714 | 0.004694  | <a href="#">YQDAAGPR</a>    |

MATRIX

SCIENCE

Mascot Search Results

Peptide View

MS/MS Fragmentation of **FQEGQEEER**  
Found in **F13A\_HUMAN**, Coagulation factor XIII A chain OS=Homo sapiens GN=F13A1 PE=1 SV=4

Match to Query 29976: 1461.657548 from(731.836050,2+) rtinseconds(1455) index(16593)  
Title: Locus:1.1.1.2889.16 File:"2013-07-02 CLN FXIII 180 min 2nd F 2.wiff"  
Data file C:\Program Files (x86)\Matrix Science\Mascot Daemon\mgf\8 FXIII 180 min 2nd\mascot\_daemon\_merge.mgf

Click mouse within plot area to zoom in by factor of two about that point  
Or, 

Plot from

0

 to 

2400

 Da 

Full range

  
Label all possible matches ☐ Label matches used for scoring ☒

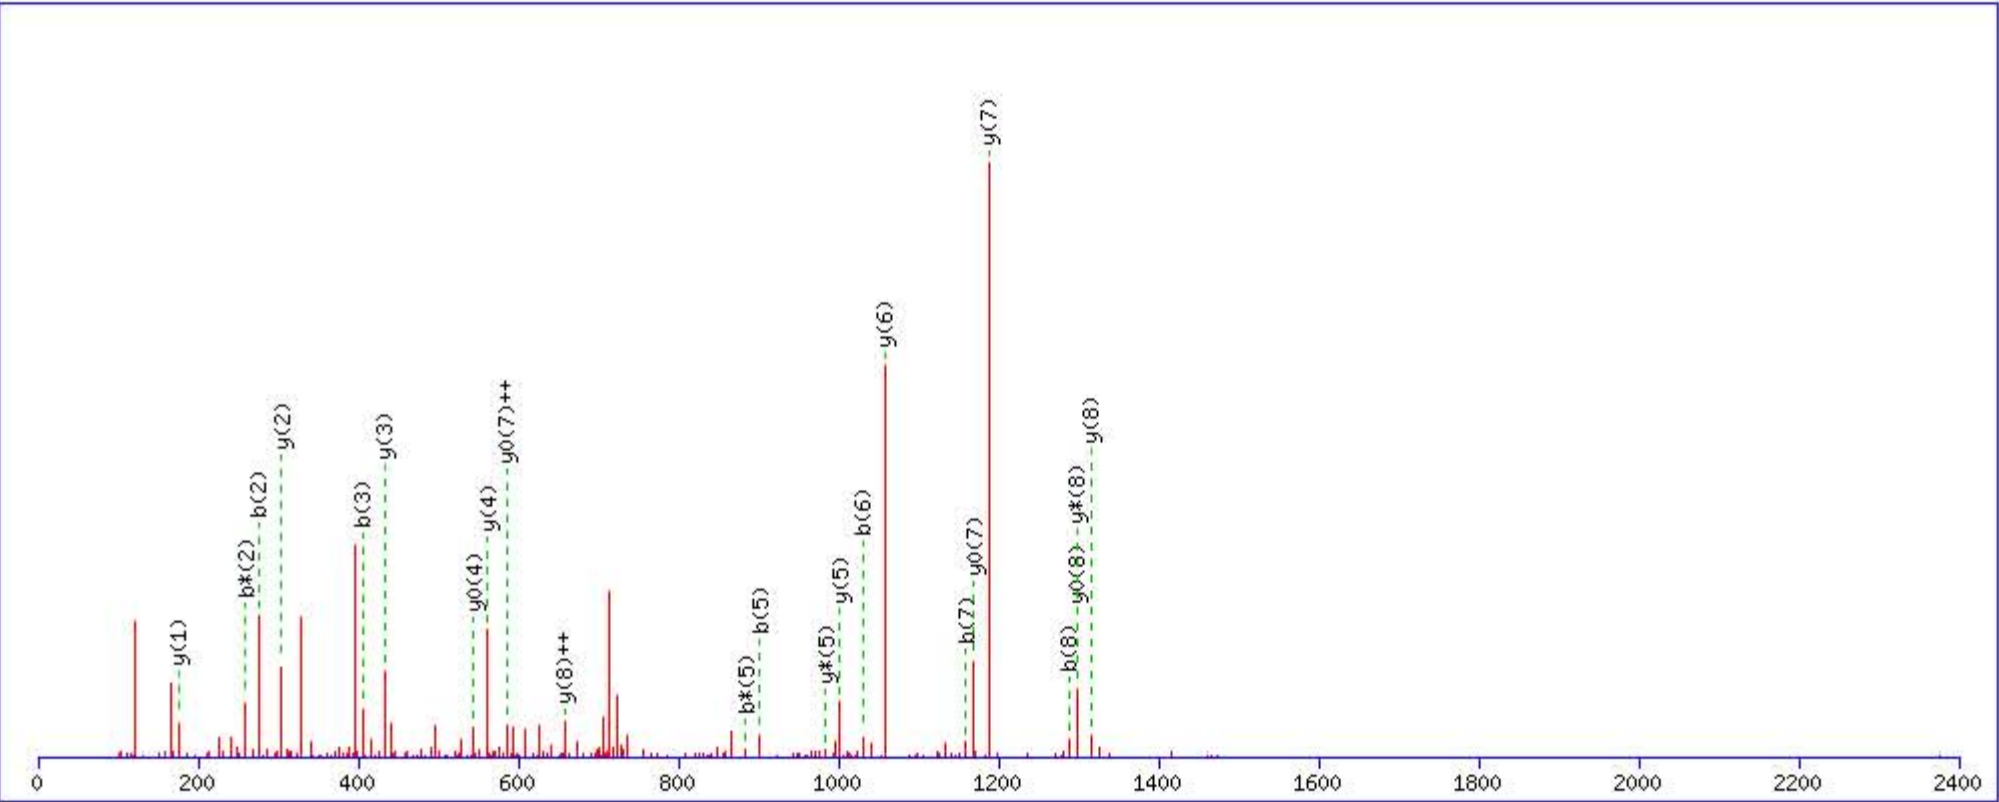

Monoisotopic mass of neutral peptide Mr(calc): 1461.655807  
Fixed modifications: Carbamidomethyl (C) (apply to specified residues or termini only)  
Variable modifications:  
Q5 : Biotin:Thermo-21345 (Q)  
Ions Score: 48 Expect: 0.00012  
Matches : 23/88 fragment ions using 41 most intense peaks ([help](#))

| # | b           | b <sup>++</sup> | b <sup>*</sup> | b <sup>*++</sup> | b <sup>0</sup> | b <sup>0++</sup> | Seq. | y           | y <sup>++</sup> | y <sup>*</sup> | y <sup>*++</sup> | y <sup>0</sup> | y <sup>0++</sup> | # |
|---|-------------|-----------------|----------------|------------------|----------------|------------------|------|-------------|-----------------|----------------|------------------|----------------|------------------|---|
| 1 | 148.075690  | 74.541483       |                |                  |                |                  | F    |             |                 |                |                  |                |                  | 9 |
| 2 | 276.134268  | 138.570772      | 259.107719     | 130.057497       |                |                  | Q    | 1315.594692 | 658.300984      | 1298.568143    | 649.787710       | 1297.584127    | 649.295702       | 8 |
| 3 | 405.176861  | 203.092068      | 388.150312     | 194.578794       | 387.166296     | 194.086786       | E    | 1187.536114 | 594.271695      | 1170.509565    | 585.758421       | 1169.525549    | 585.266413       | 7 |
| 4 | 462.198325  | 231.602800      | 445.171776     | 223.089526       | 444.187760     | 222.597518       | G    | 1058.493521 | 529.750399      | 1041.466972    | 521.237124       | 1040.482956    | 520.745116       | 6 |
| 5 | 901.423651  | 451.215464      | 884.397102     | 442.702189       | 883.413086     | 442.210181       | Q    | 1001.472057 | 501.239667      | 984.445508     | 492.726392       | 983.461492     | 492.234384       | 5 |
| 6 | 1030.466244 | 515.736760      | 1013.439695    | 507.223485       | 1012.455679    | 506.731477       | E    | 562.246731  | 281.627004      | 545.220182     | 273.113729       | 544.236166     | 272.621721       | 4 |
| 7 | 1159.508837 | 580.258057      | 1142.482288    | 571.744782       | 1141.498272    | 571.252774       | E    | 433.204138  | 217.105707      | 416.177589     | 208.592433       | 415.193573     | 208.100425       | 3 |
| 8 | 1288.551430 | 644.779353      | 1271.524881    | 636.266079       | 1270.540865    | 635.774071       | E    | 304.161545  | 152.584411      | 287.134996     | 144.071136       | 286.150980     | 143.579128       | 2 |
| 9 |             |                 |                |                  |                |                  | R    | 175.118952  | 88.063114       | 158.092403     | 79.549839        |                |                  | 1 |

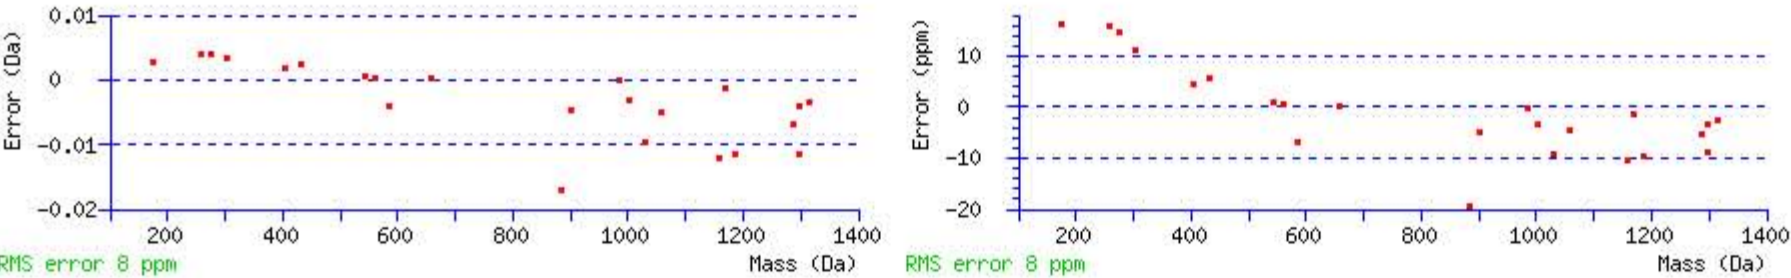

NCBI BLAST search of [FQEGQEEER](#)  
(Parameters: blastp, nr protein database, expect=20000, no filter, PAM30)  
Other BLAST [web gateways](#)

All matches to this query

| Score | Mr(calc):   | Delta     | Sequence                       |
|-------|-------------|-----------|--------------------------------|
| 48.1  | 1461.655807 | 0.001741  | <a href="#">FQEGQEEER</a>      |
| 11.5  | 1461.640564 | 0.016984  | <a href="#">NSGTQSDGEEK</a>    |
| 10.8  | 1461.655807 | 0.001741  | <a href="#">FQEGQEEER</a>      |
| 9.1   | 1461.640564 | 0.016984  | <a href="#">VMTDVAGNPEEER</a>  |
| 7.8   | 1461.648392 | 0.009156  | <a href="#">HREELSDYEER</a>    |
| 5.2   | 1461.637161 | 0.020387  | <a href="#">ESELQWQEEER</a>    |
| 5.1   | 1461.677811 | -0.020263 | <a href="#">MSQMASVPER</a>     |
| 0.8   | 1461.676956 | -0.019408 | <a href="#">MSGQVGDLSPSQEK</a> |

MATRIX

SCIENCE

Mascot Search Results

Peptide View

MS/MS Fragmentation of **HVYGELDVQIQR**  
Found in **F13A\_HUMAN**, Coagulation factor XIII A chain OS=Homo sapiens GN=F13A1 PE=1 SV=4

Match to Query 39506: 1766.918532 from(589.980120,3+) rtinseconds(1966) index(66259)  
Title: Locus:1.1.1.1959.20 File:"2013-07-02 CLN FXIII 180 min 2nd FT.wiff"  
Data file C:\Program Files (x86)\Matrix Science\Mascot Daemon\mgf\8 FXIII 180 min 2nd\mascot\_daemon\_merge.mgf

Click mouse within plot area to zoom in by factor of two about that point  
Or, 

Plot from

100

 to 

1400

 Da 

Full range

  
Label all possible matches ☐ Label matches used for scoring ☒

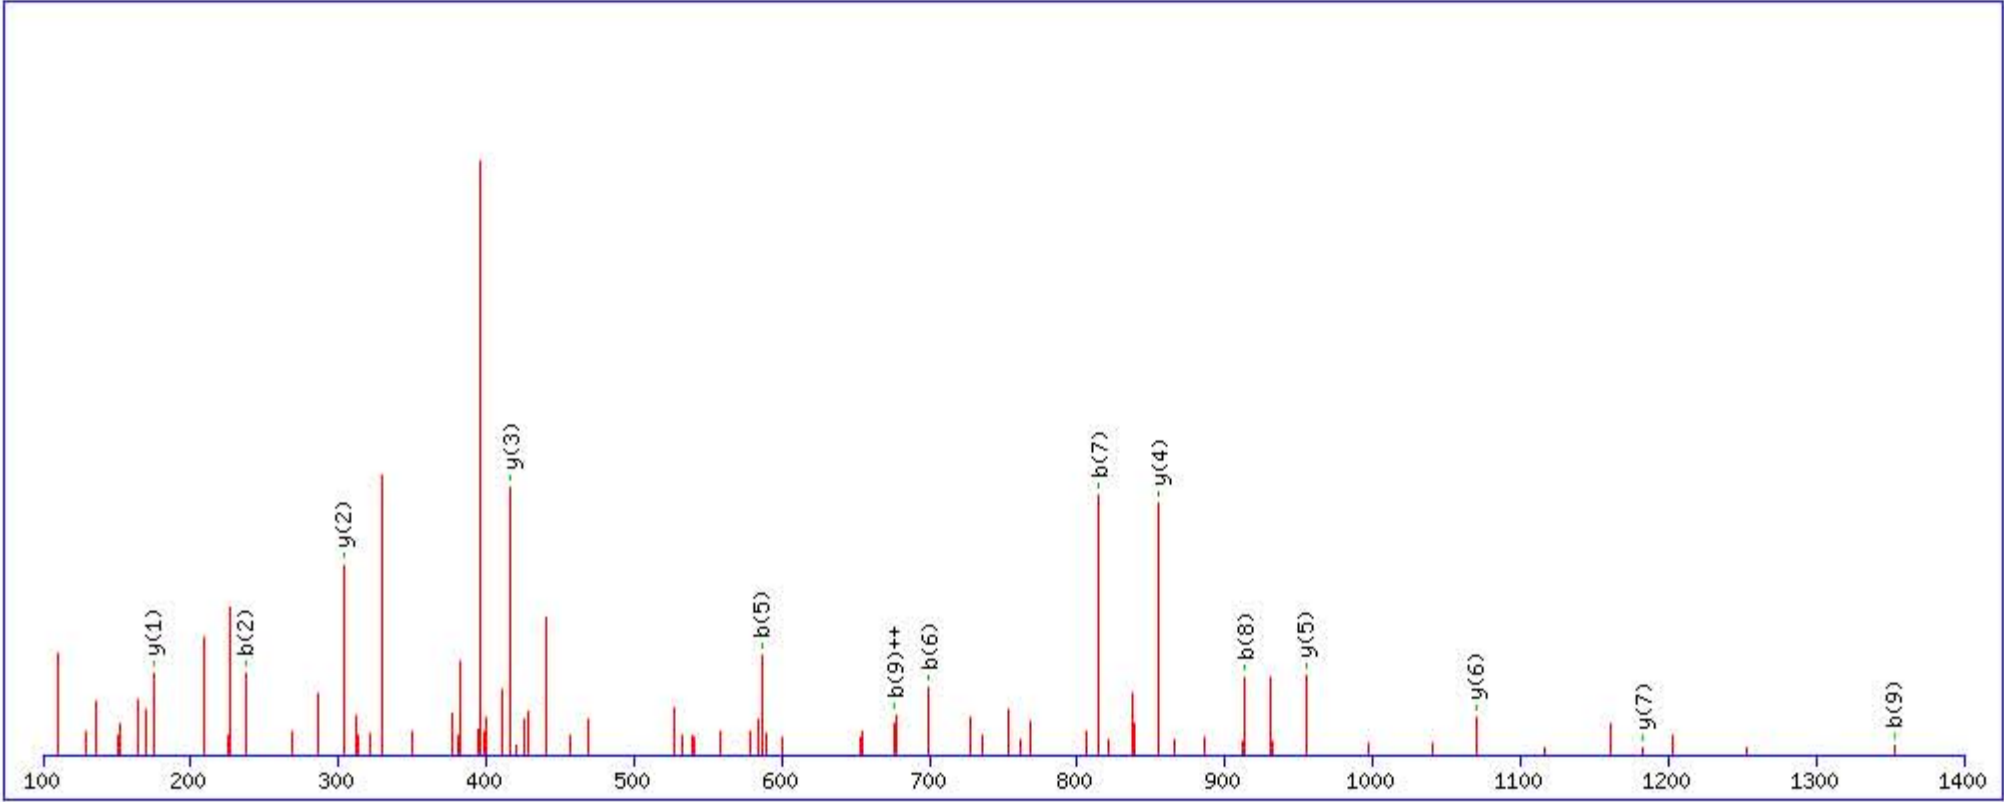

Monoisotopic mass of neutral peptide Mr(calc): 1766.913773  
Fixed modifications: Carbamidomethyl (C) (apply to specified residues or termini only)  
Variable modifications:  
Q9 : Biotin:Thermo-21345 (Q)  
Ions Score: 28 Expect: 0.0083  
Matches : 14/98 fragment ions using 34 most intense peaks [\(help\)](#)

| #  | b           | b <sup>++</sup> | b <sup>*</sup> | b <sup>+++</sup> | b <sup>0</sup> | b <sup>0++</sup> | Seq. | y           | y <sup>++</sup> | y <sup>*</sup> | y <sup>+++</sup> | y <sup>0</sup> | y <sup>0++</sup> | #  |
|----|-------------|-----------------|----------------|------------------|----------------|------------------|------|-------------|-----------------|----------------|------------------|----------------|------------------|----|
| 1  | 138.066188  | 69.536732       |                |                  |                |                  | H    |             |                 |                |                  |                |                  | 12 |
| 2  | 237.134602  | 119.070939      |                |                  |                |                  | V    | 1630.862141 | 815.934708      | 1613.835592    | 807.421434       | 1612.851576    | 806.929426       | 11 |
| 3  | 400.197931  | 200.602603      |                |                  |                |                  | Y    | 1531.793727 | 766.400501      | 1514.767178    | 757.887227       | 1513.783162    | 757.395219       | 10 |
| 4  | 457.219395  | 229.113335      |                |                  |                |                  | G    | 1368.730398 | 684.868837      | 1351.703849    | 676.355563       | 1350.719833    | 675.863554       | 9  |
| 5  | 586.261988  | 293.634632      |                |                  | 568.251423     | 284.629349       | E    | 1311.708934 | 656.358105      | 1294.682385    | 647.844830       | 1293.698369    | 647.352822       | 8  |
| 6  | 699.346052  | 350.176664      |                |                  | 681.335487     | 341.171382       | L    | 1182.666341 | 591.836808      | 1165.639792    | 583.323534       | 1164.655776    | 582.831526       | 7  |
| 7  | 814.372995  | 407.690136      |                |                  | 796.362430     | 398.684853       | D    | 1069.582277 | 535.294776      | 1052.555728    | 526.781502       | 1051.571712    | 526.289494       | 6  |
| 8  | 913.441409  | 457.224342      |                |                  | 895.430844     | 448.219060       | V    | 954.555334  | 477.781305      | 937.528785     | 469.268030       |                |                  | 5  |
| 9  | 1352.666735 | 676.837006      | 1335.640186    | 668.323731       | 1334.656170    | 667.831723       | Q    | 855.486920  | 428.247098      | 838.460371     | 419.733823       |                |                  | 4  |
| 10 | 1465.750799 | 733.379037      | 1448.724250    | 724.865763       | 1447.740234    | 724.373755       | I    | 416.261594  | 208.634435      | 399.235045     | 200.121160       |                |                  | 3  |
| 11 | 1593.809377 | 797.408326      | 1576.782828    | 788.895052       | 1575.798812    | 788.403044       | Q    | 303.177530  | 152.092403      | 286.150981     | 143.579128       |                |                  | 2  |
| 12 |             |                 |                |                  |                |                  | R    | 175.118952  | 88.063114       | 158.092403     | 79.549839        |                |                  | 1  |

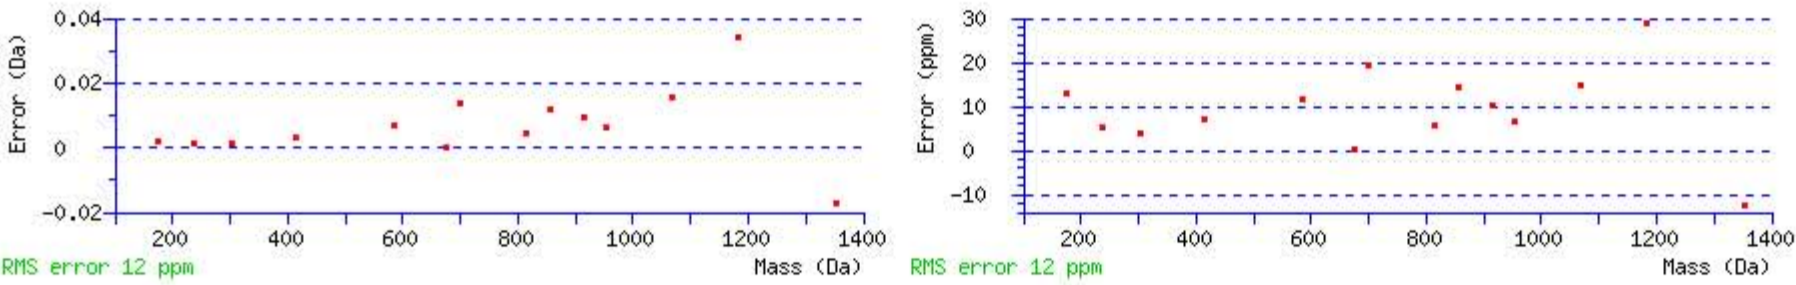

NCBI BLAST search of [HVYGELDVQIQR](#)  
(Parameters: blastp, nr protein database, expect=20000, no filter, PAM30)  
Other BLAST [web gateways](#)

All matches to this query

| Score | Mr(calc):   | Delta     | Sequence                        |
|-------|-------------|-----------|---------------------------------|
| 27.6  | 1766.913773 | 0.004759  | <a href="#">HVYGELDVQIQR</a>    |
| 16.7  | 1766.913773 | 0.004759  | <a href="#">HVYGELDVQIQR</a>    |
| 5.4   | 1766.924988 | -0.006456 | <a href="#">GNFPVEAVKMQHAIR</a> |

MATRIX

SCIENCE

Mascot Search Results

Peptide View

MS/MS Fragmentation of **FQEGQEEER**  
Found in **F13A\_HUMAN**, Coagulation factor XIII A chain OS=Homo sapiens GN=F13A1 PE=1 SV=4

Match to Query 39703: 1772.819908 from(887.417230,2+) rtinseconds(1822) index(65262)  
Title: Locus:1.1.1.1909.12 File:"2013-07-02 CLN FXIII 180 min 2nd FT.wiff"  
Data file C:\Program Files (x86)\Matrix Science\Mascot Daemon\mgf\8 FXIII 180 min 2nd\mascot\_daemon\_merge.mgf

Click mouse within plot area to zoom in by factor of two about that point  
Or, 

Plot from

0

 to 

2400

 Da 

Full range

  
Label all possible matches ☐ Label matches used for scoring ☒

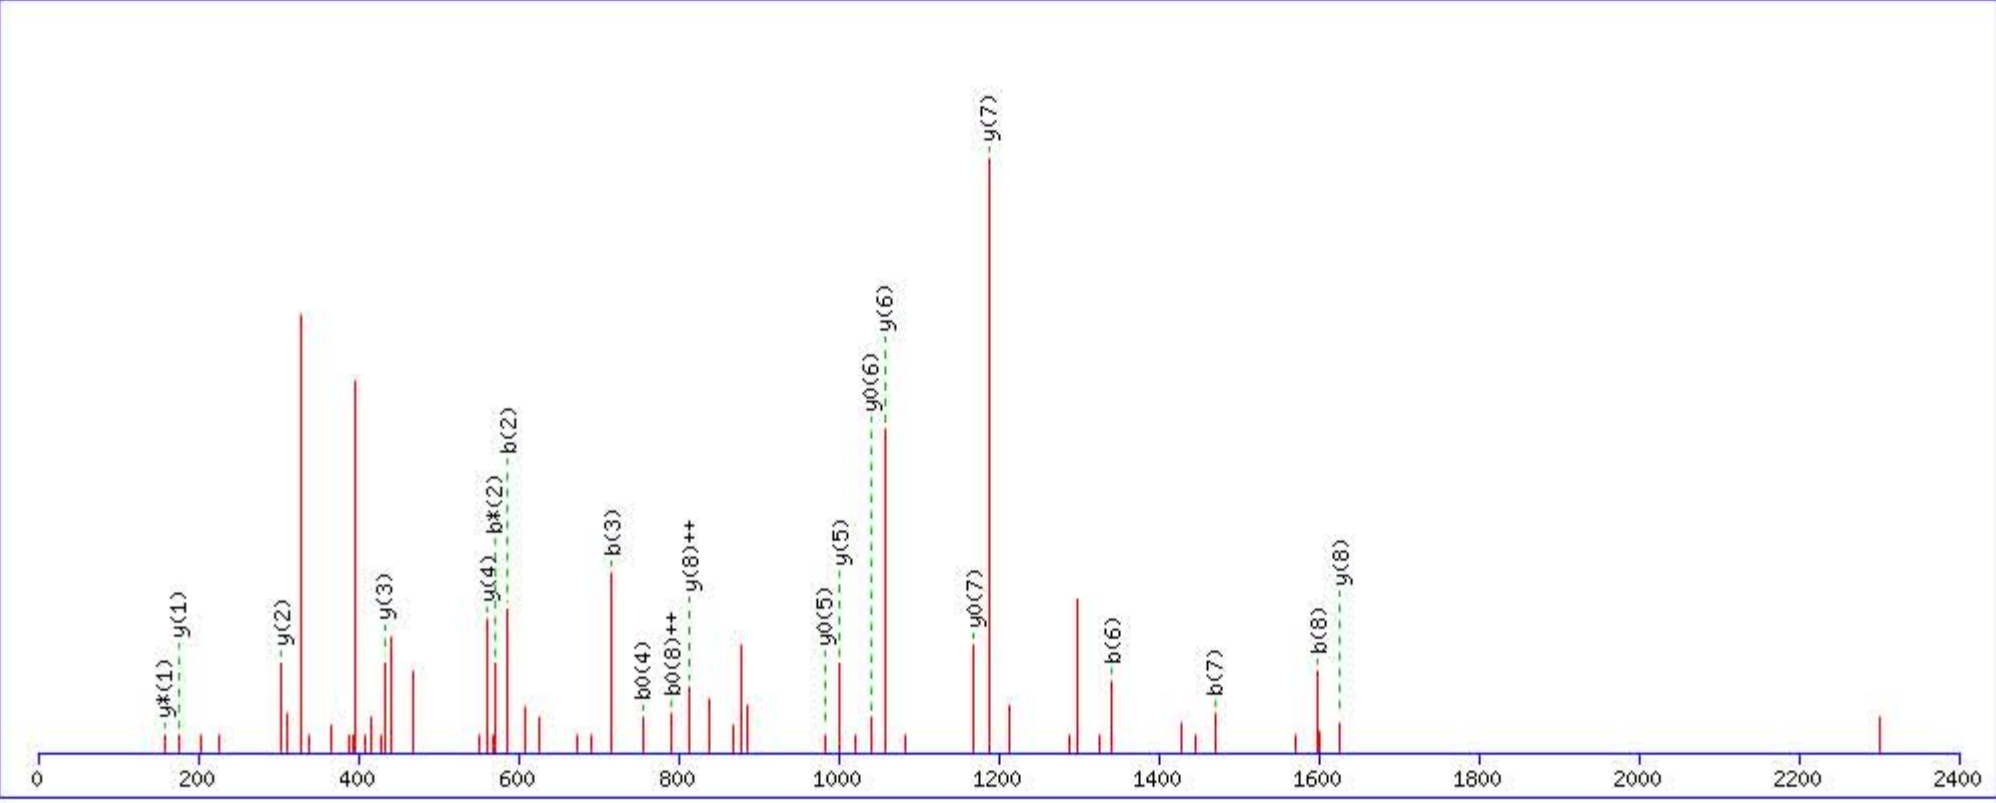

Monoisotopic mass of neutral peptide Mr(calc): 1772.822556  
Fixed modifications: Carbamidomethyl (C) (apply to specified residues or termini only)  
Variable modifications:  
Q2 : Biotin:Thermo-21345 (Q)  
Q5 : Biotin:Thermo-21345 (Q)  
Ions Score: 42 Expect: 0.0026  
Matches : 21/88 fragment ions using 41 most intense peaks [\(help\)](#)

| # | b           | b <sup>++</sup> | b <sup>*</sup> | b <sup>+++</sup> | b <sup>0</sup> | b <sup>0++</sup> | Seq. | y           | y <sup>++</sup> | y <sup>*</sup> | y <sup>+++</sup> | y <sup>0</sup> | y <sup>0++</sup> | # |
|---|-------------|-----------------|----------------|------------------|----------------|------------------|------|-------------|-----------------|----------------|------------------|----------------|------------------|---|
| 1 | 148.075690  | 74.541483       |                |                  |                |                  | F    |             |                 |                |                  |                |                  | 9 |
| 2 | 587.301016  | 294.154146      | 570.274467     | 285.640872       |                |                  | Q    | 1626.761440 | 813.884358      | 1609.734891    | 805.371084       | 1608.750875    | 804.879076       | 8 |
| 3 | 716.343609  | 358.675443      | 699.317060     | 350.162168       | 698.333044     | 349.670160       | E    | 1187.536114 | 594.271695      | 1170.509565    | 585.758421       | 1169.525549    | 585.266413       | 7 |
| 4 | 773.365073  | 387.186175      | 756.338524     | 378.672900       | 755.354508     | 378.180892       | G    | 1058.493521 | 529.750399      | 1041.466972    | 521.237124       | 1040.482956    | 520.745116       | 6 |
| 5 | 1212.590399 | 606.798837      | 1195.563850    | 598.285563       | 1194.579834    | 597.793555       | Q    | 1001.472057 | 501.239667      | 984.445508     | 492.726392       | 983.461492     | 492.234384       | 5 |
| 6 | 1341.632992 | 671.320134      | 1324.606443    | 662.806860       | 1323.622427    | 662.314852       | E    | 562.246731  | 281.627004      | 545.220182     | 273.113729       | 544.236166     | 272.621721       | 4 |
| 7 | 1470.675585 | 735.841431      | 1453.649036    | 727.328156       | 1452.665020    | 726.836148       | E    | 433.204138  | 217.105707      | 416.177589     | 208.592433       | 415.193573     | 208.100425       | 3 |
| 8 | 1599.718178 | 800.362727      | 1582.691629    | 791.849453       | 1581.707613    | 791.357445       | E    | 304.161545  | 152.584411      | 287.134996     | 144.071136       | 286.150980     | 143.579128       | 2 |
| 9 |             |                 |                |                  |                |                  | R    | 175.118952  | 88.063114       | 158.092403     | 79.549839        |                |                  | 1 |

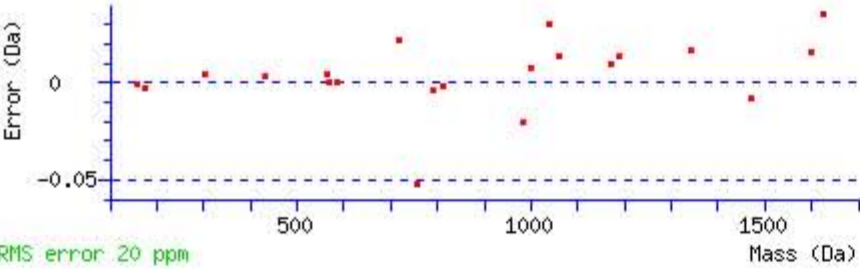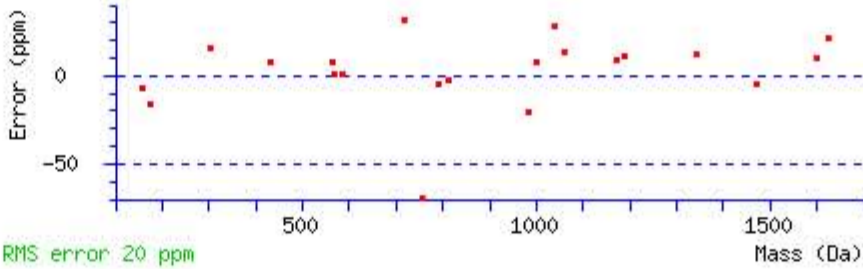

NCBI BLAST search of [FQEGQEEER](#)  
(Parameters: blastp, nr protein database, expect=20000, no filter, PAM30)  
Other BLAST [web gateways](#)

All matches to this query

| Score | Mr(calc):   | Delta     | Sequence                             |
|-------|-------------|-----------|--------------------------------------|
| 42.1  | 1772.822556 | -0.002648 | <a href="#">FQEGQEEER</a>            |
| 24.0  | 1772.803909 | 0.015999  | <a href="#">ESELQWQEEER</a>          |
| 5.1   | 1772.828873 | -0.008965 | <a href="#">QAEQEATVAREEQER</a>      |
| 4.6   | 1772.798752 | 0.021156  | <a href="#">HISSCMRWPGHYSR</a>       |
| 4.3   | 1772.803909 | 0.015999  | <a href="#">ESELQWQEEER</a>          |
| 4.2   | 1772.836288 | -0.016380 | <a href="#">ADGSLTGGGLEAAAAMAPER</a> |
| 3.6   | 1772.842789 | -0.022881 | <a href="#">ESSPPEKEEAQKTKGK</a>     |
| 3.2   | 1772.811127 | 0.008781  | <a href="#">QHELSESCSASALQAR</a>     |
| 2.8   | 1772.811798 | 0.008110  | <a href="#">YQTPPHQNFDLER</a>        |
| 2.3   | 1772.803909 | 0.015999  | <a href="#">DMASPNWSILPEEER</a>      |

MATRIX

SCIENCE

Mascot Search Results

Peptide View

MS/MS Fragmentation of **GTYPVPIVSELQSGK**  
Found in **F13A\_HUMAN**, Coagulation factor XIII A chain OS=Homo sapiens GN=F13A1 PE=1 SV=4

Match to Query 44070: 1998.101232 from(667.041020,3+) rtinseconds(2757) index(9675)  
Title: Locus:1.1.1.2237.10 File:"2013-07-02 CLN FXIII 180 min 2nd F 1.wiff"  
Data file C:\Program Files (x86)\Matrix Science\Mascot Daemon\mgf\8 FXIII 180 min 2nd\mascot\_daemon\_merge.mgf

Click mouse within plot area to zoom in by factor of two about that point  
Or, 

Plot from

100

 to 

1700

 Da 

Full range

  
Label all possible matches ☐ Label matches used for scoring ☒

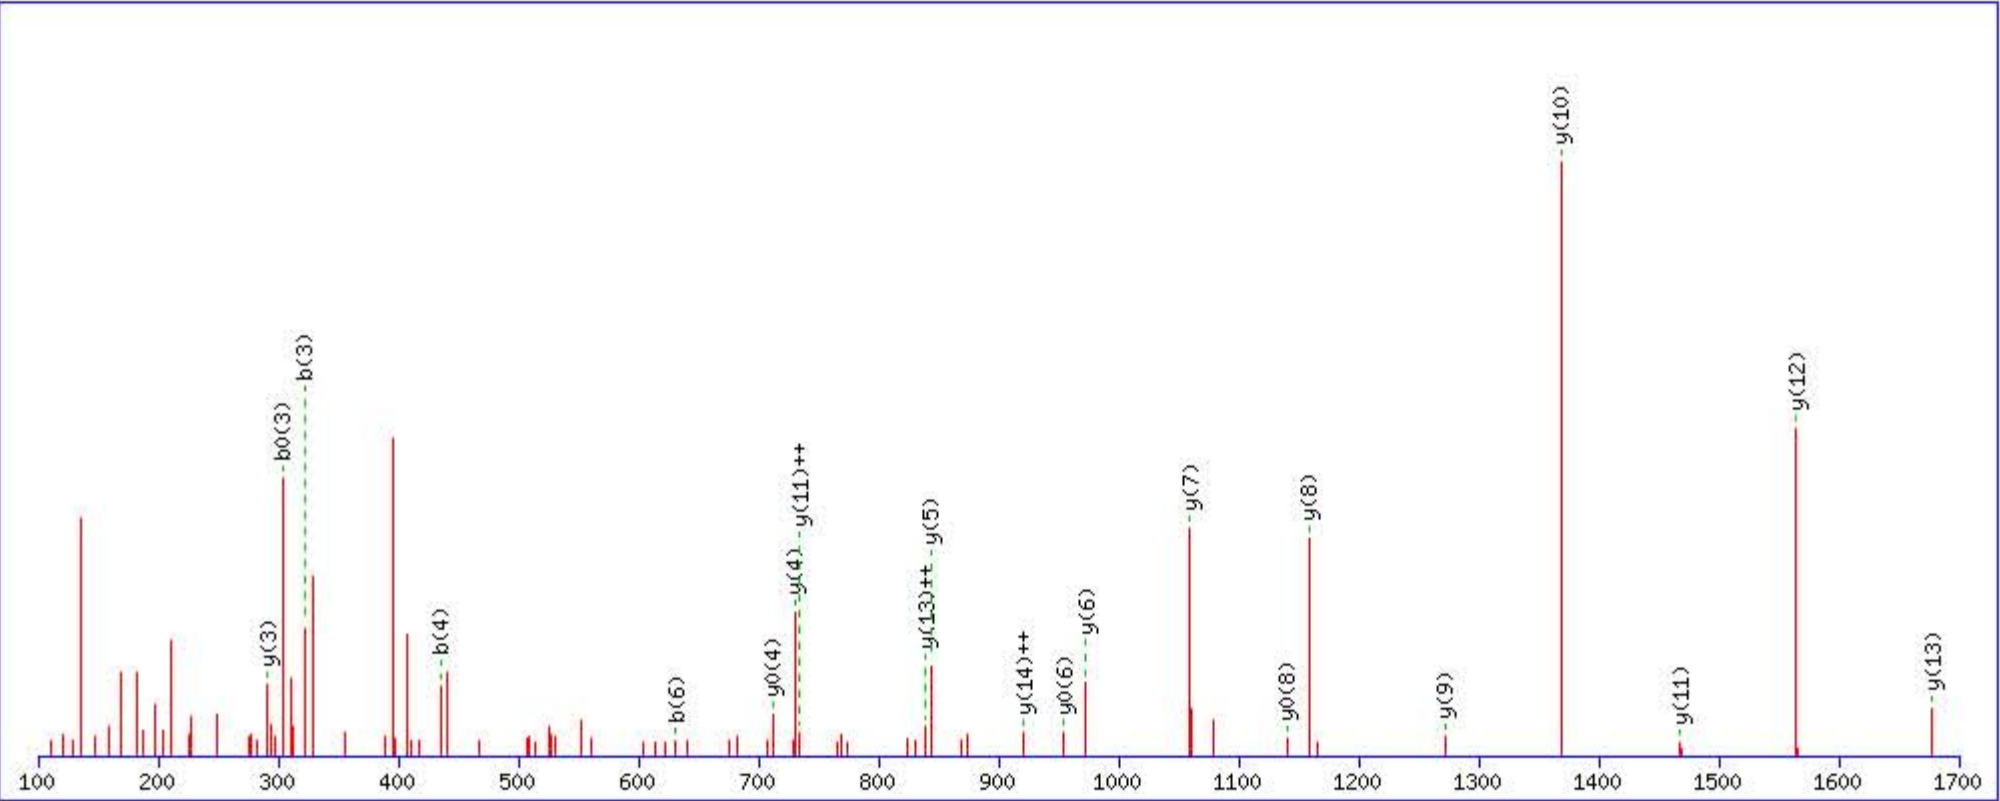

Monoisotopic mass of neutral peptide Mr(calc): 1998.085983  
Fixed modifications: Carbamidomethyl (C) (apply to specified residues or termini only)  
Variable modifications:  
Q13 : Biotin:Thermo-21345 (Q)  
Ions Score: 64 Expect: 2.3e-006  
Matches : 21/150 fragment ions using 41 most intense peaks [\(help\)](#)

| #  | b           | b <sup>++</sup> | b <sup>*</sup> | b <sup>+++</sup> | b <sup>0</sup> | b <sup>0++</sup> | Seq. | y           | y <sup>++</sup> | y <sup>*</sup> | y <sup>+++</sup> | y <sup>0</sup> | y <sup>0++</sup> | #  |
|----|-------------|-----------------|----------------|------------------|----------------|------------------|------|-------------|-----------------|----------------|------------------|----------------|------------------|----|
| 1  | 58.028740   | 29.518008       |                |                  |                |                  | G    |             |                 |                |                  |                |                  | 16 |
| 2  | 159.076419  | 80.041847       |                |                  | 141.065854     | 71.036565        | T    | 1942.071799 | 971.539538      | 1925.045250    | 963.026263       | 1924.061234    | 962.534255       | 15 |
| 3  | 322.139748  | 161.573512      |                |                  | 304.129183     | 152.568230       | Y    | 1841.024120 | 921.015698      | 1823.997571    | 912.502424       | 1823.013555    | 912.010416       | 14 |
| 4  | 435.223812  | 218.115544      |                |                  | 417.213247     | 209.110262       | I    | 1677.960791 | 839.484034      | 1660.934242    | 830.970759       | 1659.950226    | 830.478751       | 13 |
| 5  | 532.276576  | 266.641926      |                |                  | 514.266011     | 257.636644       | P    | 1564.876727 | 782.942002      | 1547.850178    | 774.428727       | 1546.866162    | 773.936719       | 12 |
| 6  | 631.344990  | 316.176133      |                |                  | 613.334425     | 307.170851       | V    | 1467.823963 | 734.415620      | 1450.797414    | 725.902345       | 1449.813398    | 725.410337       | 11 |
| 7  | 728.397754  | 364.702515      |                |                  | 710.387189     | 355.697233       | P    | 1368.755549 | 684.881413      | 1351.729000    | 676.368138       | 1350.744984    | 675.876130       | 10 |
| 8  | 841.481818  | 421.244547      |                |                  | 823.471253     | 412.239265       | I    | 1271.702785 | 636.355031      | 1254.676236    | 627.841756       | 1253.692220    | 627.349748       | 9  |
| 9  | 940.550232  | 470.778754      |                |                  | 922.539667     | 461.773472       | V    | 1158.618721 | 579.812999      | 1141.592172    | 571.299724       | 1140.608156    | 570.807716       | 8  |
| 10 | 1027.582260 | 514.294768      |                |                  | 1009.571695    | 505.289486       | S    | 1059.550307 | 530.278792      | 1042.523758    | 521.765517       | 1041.539742    | 521.273509       | 7  |
| 11 | 1156.624853 | 578.816065      |                |                  | 1138.614288    | 569.810782       | E    | 972.518279  | 486.762777      | 955.491730     | 478.249503       | 954.507714     | 477.757495       | 6  |
| 12 | 1269.708917 | 635.358096      |                |                  | 1251.698352    | 626.352814       | L    | 843.475686  | 422.241481      | 826.449137     | 413.728207       | 825.465121     | 413.236199       | 5  |
| 13 | 1708.934243 | 854.970759      | 1691.907694    | 846.457485       | 1690.923678    | 845.965477       | Q    | 730.391622  | 365.699449      | 713.365073     | 357.186175       | 712.381057     | 356.694167       | 4  |
| 14 | 1795.966271 | 898.486774      | 1778.939722    | 889.973499       | 1777.955706    | 889.481491       | S    | 291.166296  | 146.086786      | 274.139747     | 137.573512       | 273.155731     | 137.081504       | 3  |
| 15 | 1852.987735 | 926.997505      | 1835.961186    | 918.484231       | 1834.977170    | 917.992223       | G    | 204.134268  | 102.570772      | 187.107719     | 94.057497        |                |                  | 2  |
| 16 |             |                 |                |                  |                |                  | K    | 147.112804  | 74.060040       | 130.086255     | 65.546765        |                |                  | 1  |

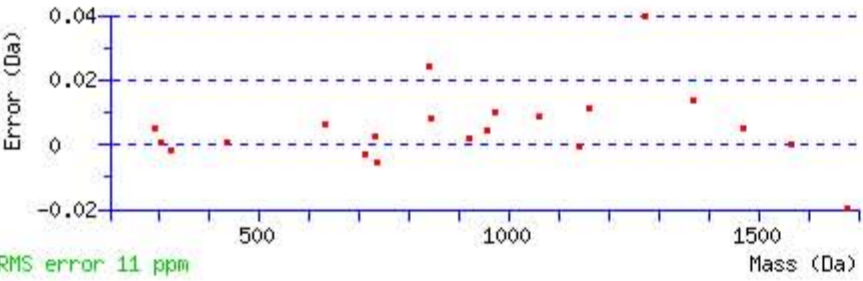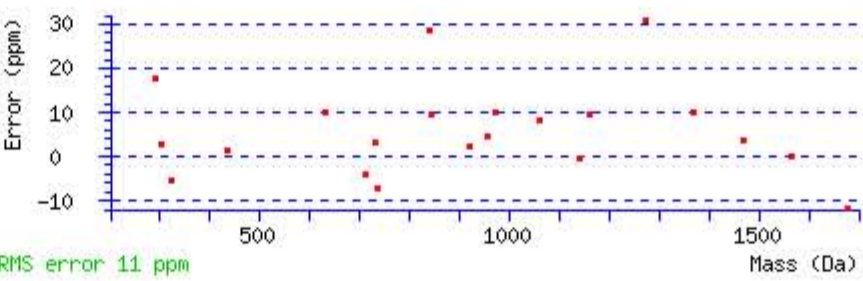

NCBI BLAST search of [GTYPVPIVSELQSGK](#)  
(Parameters: blastp, nr protein database, expect=20000, no filter, PAM30)  
Other BLAST [web gateways](#)

All matches to this query

| Score | Mr(calc):   | Delta    | Sequence                            |
|-------|-------------|----------|-------------------------------------|
| 64.1  | 1998.085983 | 0.015249 | <a href="#">GTYPVPIVSELQSGK</a>     |
| 4.0   | 1998.099731 | 0.001501 | <a href="#">GDEVVVELVENGKKVTVGK</a> |

MATRIX

SCIENCE

Mascot Search Results

Peptide View

MS/MS Fragmentation of **GVNLQEFLNVTSVHLFK**  
Found in **F13A\_HUMAN**, Coagulation factor XIII A chain OS=Homo sapiens GN=F13A1 PE=1 SV=4

Match to Query 49543: 2255.234442 from(752.752090,3+) rtinseconds(3004) index(11297)  
Title: Locus:1.1.1.2321.18 File:"2013-07-02 CLN FXIII 180 min 2nd F 1.wiff"  
Data file C:\Program Files (x86)\Matrix Science\Mascot Daemon\mgf\8 FXIII 180 min 2nd\mascot\_daemon\_merge.mgf

Click mouse within plot area to zoom in by factor of two about that point  
Or,   to  Da   
Label all possible matches ☐ Label matches used for scoring ☒

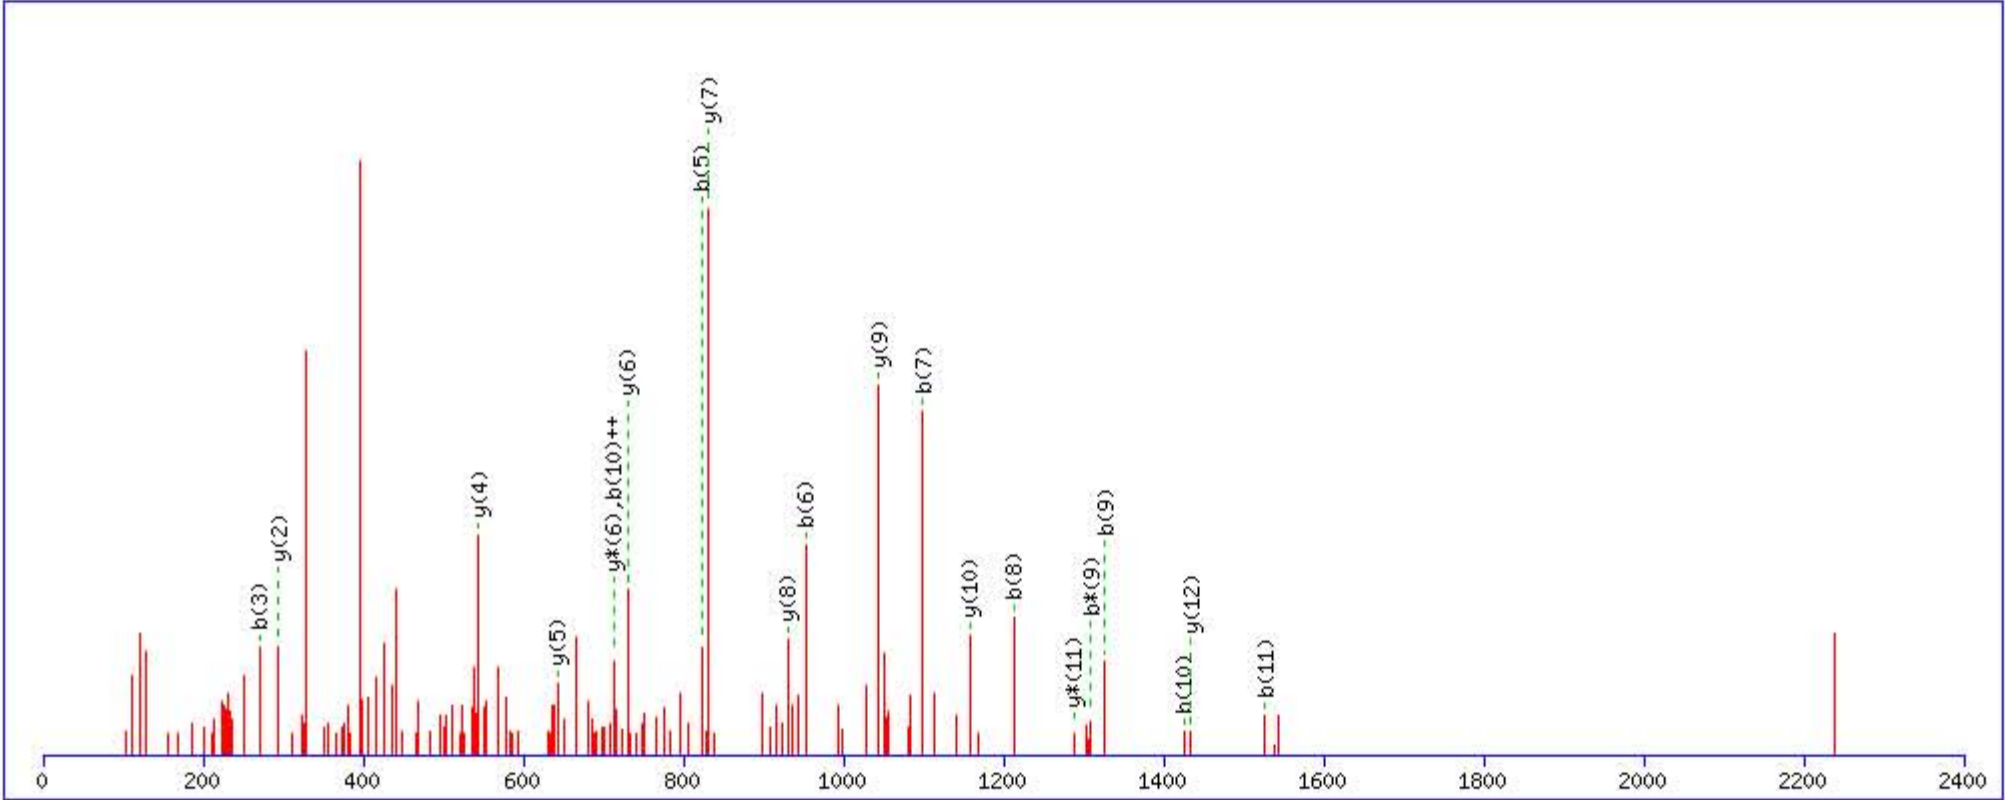

Monoisotopic mass of neutral peptide Mr(calc): 2255.213654  
Fixed modifications: Carbamidomethyl (C) (apply to specified residues or termini only)  
Variable modifications:  
Q5 : Biotin:Thermo-21345 (Q)  
Ions Score: 63 Expect: 8.7e-006  
Matches : 21/168 fragment ions using 31 most intense peaks [\(help\)](#)

| #  | b           | b <sup>++</sup> | b <sup>*</sup> | b <sup>*++</sup> | b <sup>0</sup> | b <sup>0++</sup> | Seq. | y           | y <sup>++</sup> | y <sup>*</sup> | y <sup>*++</sup> | y <sup>0</sup> | y <sup>0++</sup> | #  |
|----|-------------|-----------------|----------------|------------------|----------------|------------------|------|-------------|-----------------|----------------|------------------|----------------|------------------|----|
| 1  | 58.028740   | 29.518008       |                |                  |                |                  | G    |             |                 |                |                  |                |                  | 17 |
| 2  | 157.097154  | 79.052215       |                |                  |                |                  | V    | 2199.199458 | 1100.103367     | 2182.172909    | 1091.590092      | 2181.188893    | 1091.098084      | 16 |
| 3  | 271.140081  | 136.073679      | 254.113532     | 127.560404       |                |                  | N    | 2100.131044 | 1050.569160     | 2083.104495    | 1042.055885      | 2082.120479    | 1041.563877      | 15 |
| 4  | 384.224145  | 192.615711      | 367.197596     | 184.102436       |                |                  | L    | 1986.088117 | 993.547697      | 1969.061568    | 985.034422       | 1968.077552    | 984.542414       | 14 |
| 5  | 823.449471  | 412.228374      | 806.422922     | 403.715099       |                |                  | Q    | 1873.004053 | 937.005665      | 1855.977504    | 928.492390       | 1854.993488    | 928.000382       | 13 |
| 6  | 952.492064  | 476.749670      | 935.465515     | 468.236396       | 934.481499     | 467.744388       | E    | 1433.778727 | 717.393002      | 1416.752178    | 708.879727       | 1415.768162    | 708.387719       | 12 |
| 7  | 1099.560478 | 550.283877      | 1082.533929    | 541.770603       | 1081.549913    | 541.278595       | F    | 1304.736134 | 652.871705      | 1287.709585    | 644.358431       | 1286.725569    | 643.866423       | 11 |
| 8  | 1212.644542 | 606.825909      | 1195.617993    | 598.312635       | 1194.633977    | 597.820627       | L    | 1157.667720 | 579.337498      | 1140.641171    | 570.824224       | 1139.657155    | 570.332216       | 10 |
| 9  | 1326.687469 | 663.847373      | 1309.660920    | 655.334098       | 1308.676904    | 654.842090       | N    | 1044.583656 | 522.795466      | 1027.557107    | 514.282192       | 1026.573091    | 513.790184       | 9  |
| 10 | 1425.755883 | 713.381580      | 1408.729334    | 704.868305       | 1407.745318    | 704.376297       | V    | 930.540729  | 465.774003      | 913.514180     | 457.260728       | 912.530164     | 456.768720       | 8  |
| 11 | 1526.803562 | 763.905419      | 1509.777013    | 755.392145       | 1508.792997    | 754.900137       | T    | 831.472315  | 416.239796      | 814.445766     | 407.726521       | 813.461750     | 407.234513       | 7  |
| 12 | 1613.835590 | 807.421433      | 1596.809041    | 798.908159       | 1595.825025    | 798.416151       | S    | 730.424636  | 365.715956      | 713.398087     | 357.202682       | 712.414071     | 356.710674       | 6  |
| 13 | 1712.904004 | 856.955640      | 1695.877455    | 848.442366       | 1694.893439    | 847.950358       | V    | 643.392608  | 322.199942      | 626.366059     | 313.686668       |                |                  | 5  |
| 14 | 1849.962916 | 925.485096      | 1832.936367    | 916.971822       | 1831.952351    | 916.479814       | H    | 544.324194  | 272.665735      | 527.297645     | 264.152461       |                |                  | 4  |
| 15 | 1963.046980 | 982.027128      | 1946.020431    | 973.513854       | 1945.036415    | 973.021846       | L    | 407.265282  | 204.136279      | 390.238733     | 195.623004       |                |                  | 3  |
| 16 | 2110.115394 | 1055.561335     | 2093.088845    | 1047.048060      | 2092.104829    | 1046.556052      | F    | 294.181218  | 147.594247      | 277.154669     | 139.080973       |                |                  | 2  |
| 17 |             |                 |                |                  |                |                  | K    | 147.112804  | 74.060040       | 130.086255     | 65.546765        |                |                  | 1  |

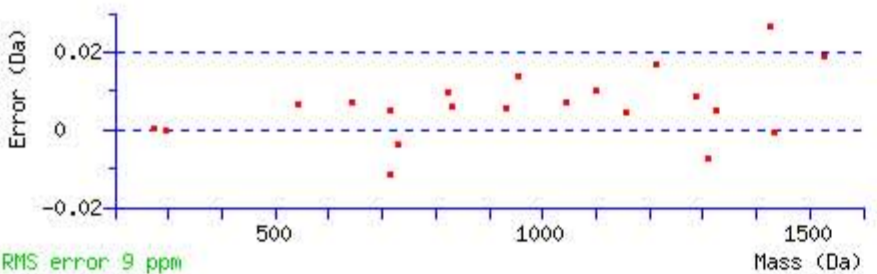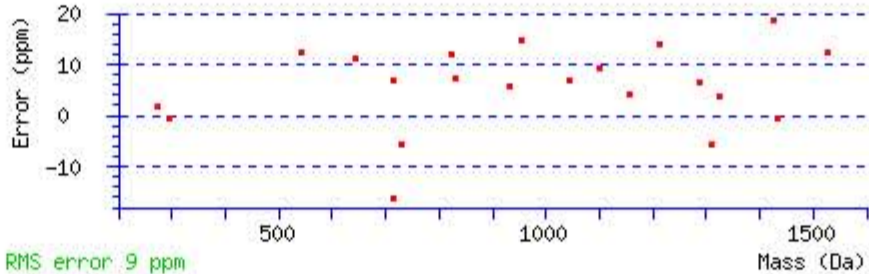

NCBI BLAST search of [GVNLQEFLNVTSVHLFK](#)  
(Parameters: blastp, nr protein database, expect=20000, no filter, PAM30)  
Other BLAST [web gateways](#)

All matches to this query

| Score | Mr(calc):   | Delta    | Sequence                          |
|-------|-------------|----------|-----------------------------------|
| 62.9  | 2255.213654 | 0.020788 | <a href="#">GVNLQEFLNVTSVHLFK</a> |

MATRIX

SCIENCE

Mascot Search Results

Peptide View

MS/MS Fragmentation of **AVPPNNSNAAEDDLPTVELQGVVPR**  
Found in **F13A\_HUMAN**, Coagulation factor XIII A chain OS=Homo sapiens GN=F13A1 PE=1 SV=4

Match to Query 59186: 2912.505972 from(971.842600,3+) rtinseconds(2515) index(69421)  
Title: Locus:1.1.1.2150.25 File:"2013-07-02 CLN FXIII 180 min 2nd FT.wiff"  
Data file C:\Program Files (x86)\Matrix Science\Mascot Daemon\mgf\8 FXIII 180 min 2nd\mascot\_daemon\_merge.mgf

Click mouse within plot area to zoom in by factor of two about that point  
Or, 

Plot from 

100

 to 

2000

 Da 

Full range

  
Label all possible matches ☐ Label matches used for scoring ☒

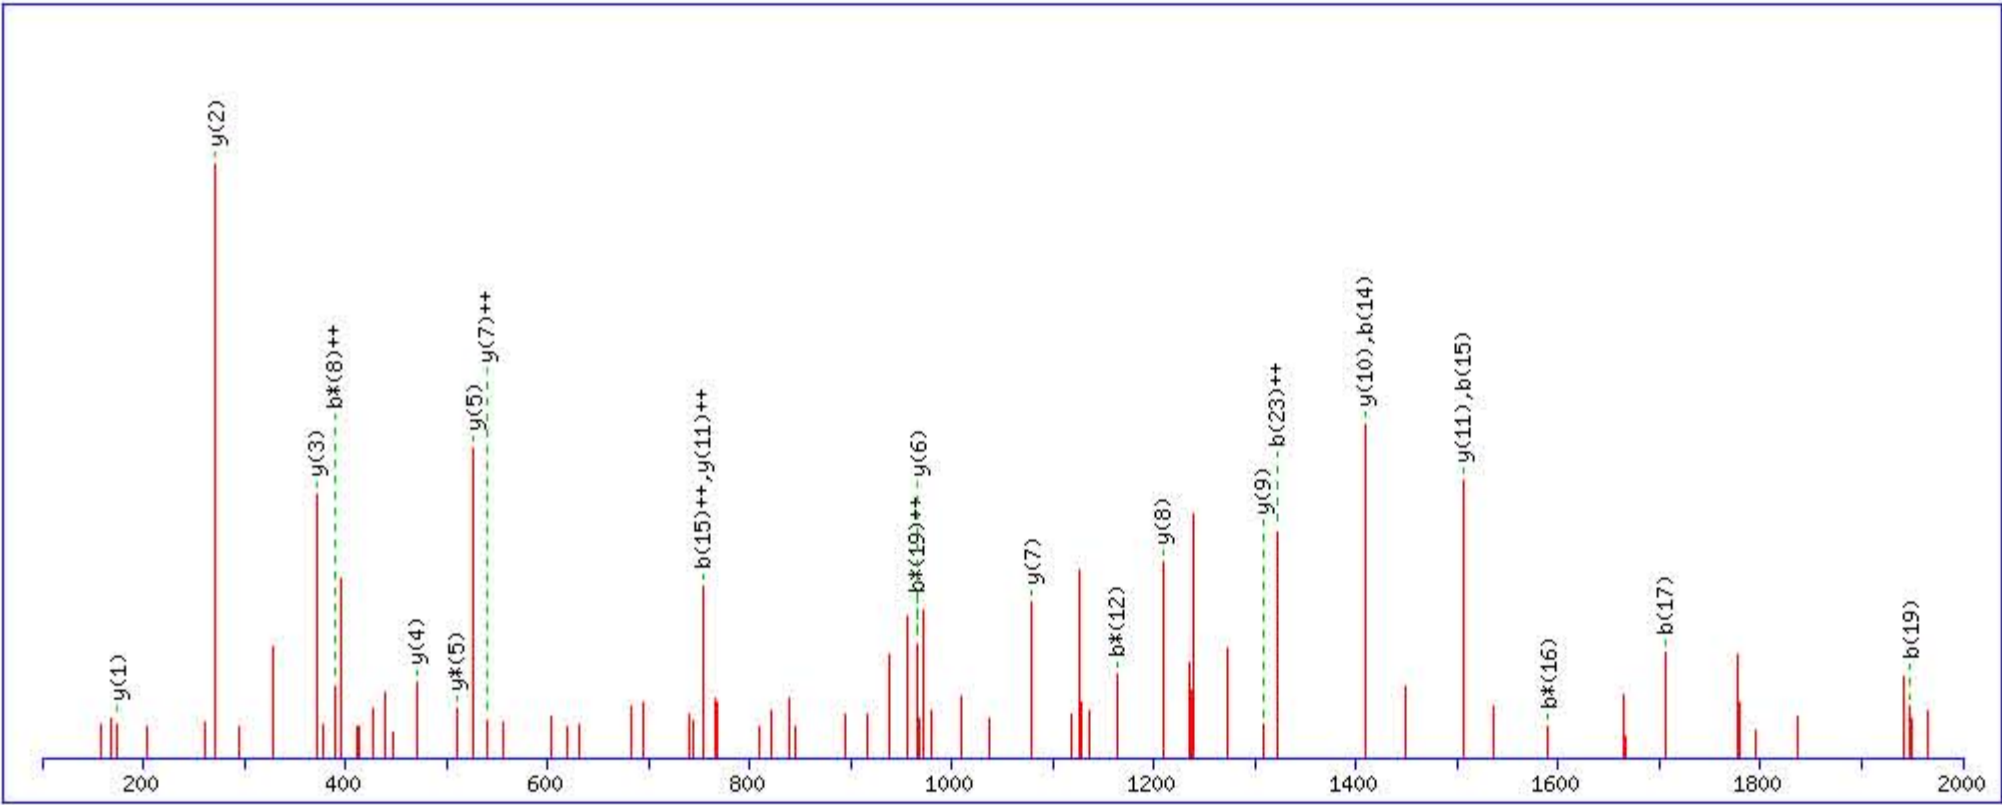

Monoisotopic mass of neutral peptide Mr(calc): 2912.470200  
Fixed modifications: Carbamidomethyl (C) (apply to specified residues or termini only)  
Variable modifications:  
Q20 : Biotin:Thermo-21345 (Q)  
Ions Score: 34 Expect: 0.01  
Matches : 24/254 fragment ions using 64 most intense peaks [\(help\)](#)

| #                  | b                  | b <sup>++</sup>    | b <sup>*</sup>     | b <sup>*++</sup>  | b <sup>0</sup> | b <sup>0++</sup> | Seq.     | y                  | y <sup>++</sup>   | y <sup>*</sup>    | y <sup>*++</sup> | y <sup>0</sup> | y <sup>0++</sup> | #                  |
|--------------------|--------------------|--------------------|--------------------|-------------------|----------------|------------------|----------|--------------------|-------------------|-------------------|------------------|----------------|------------------|--------------------|
| <a href="#">1</a>  | 72.044390          | 36.525833          |                    |                   |                |                  | <b>A</b> |                    |                   |                   |                  |                |                  | <a href="#">25</a> |
| <a href="#">2</a>  | 171.112804         | 86.060040          |                    |                   |                |                  | <b>V</b> | 2842.440370        | 1421.723823       | 2825.413821       | 1413.210548      | 2824.429805    | 1412.718540      | <a href="#">24</a> |
| <a href="#">3</a>  | 268.165568         | 134.586422         |                    |                   |                |                  | <b>P</b> | 2743.371956        | 1372.189616       | 2726.345407       | 1363.676341      | 2725.361391    | 1363.184333      | <a href="#">23</a> |
| <a href="#">4</a>  | 365.218332         | 183.112804         |                    |                   |                |                  | <b>P</b> | 2646.319192        | 1323.663234       | 2629.292643       | 1315.149959      | 2628.308627    | 1314.657951      | <a href="#">22</a> |
| <a href="#">5</a>  | 479.261259         | 240.134267         | 462.234710         | 231.620993        |                |                  | <b>N</b> | 2549.266428        | 1275.136852       | 2532.239879       | 1266.623577      | 2531.255863    | 1266.131569      | <a href="#">21</a> |
| <a href="#">6</a>  | 593.304186         | 297.155731         | 576.277637         | 288.642457        |                |                  | <b>N</b> | 2435.223501        | 1218.115388       | 2418.196952       | 1209.602114      | 2417.212936    | 1209.110106      | <a href="#">20</a> |
| <a href="#">7</a>  | 680.336214         | 340.671745         | 663.309665         | 332.158471        | 662.325649     | 331.666463       | <b>S</b> | 2321.180574        | 1161.093925       | 2304.154025       | 1152.580650      | 2303.170009    | 1152.088642      | <a href="#">19</a> |
| <a href="#">8</a>  | 794.379141         | 397.693209         | 777.352592         | <b>389.179934</b> | 776.368576     | 388.687926       | <b>N</b> | 2234.148546        | 1117.577911       | 2217.121997       | 1109.064636      | 2216.137981    | 1108.572628      | <a href="#">18</a> |
| <a href="#">9</a>  | 865.416255         | 433.211766         | 848.389706         | 424.698491        | 847.405690     | 424.206483       | <b>A</b> | 2120.105619        | 1060.556447       | 2103.079070       | 1052.043173      | 2102.095054    | 1051.551165      | <a href="#">17</a> |
| <a href="#">10</a> | 936.453369         | 468.730323         | 919.426820         | 460.217048        | 918.442804     | 459.725040       | <b>A</b> | 2049.068505        | 1025.037890       | 2032.041956       | 1016.524616      | 2031.057940    | 1016.032608      | <a href="#">16</a> |
| <a href="#">11</a> | 1065.495962        | 533.251619         | 1048.469413        | 524.738345        | 1047.485397    | 524.246336       | <b>E</b> | 1978.031391        | 989.519333        | 1961.004842       | 981.006059       | 1960.020826    | 980.514051       | <a href="#">15</a> |
| <a href="#">12</a> | 1180.522905        | 590.765091         | <b>1163.496356</b> | 582.251816        | 1162.512340    | 581.759808       | <b>D</b> | 1848.988798        | 924.998037        | 1831.962249       | 916.484762       | 1830.978233    | 915.992754       | <a href="#">14</a> |
| <a href="#">13</a> | 1295.549848        | 648.278562         | 1278.523299        | 639.765288        | 1277.539283    | 639.273280       | <b>D</b> | 1733.961855        | 867.484565        | 1716.935306       | 858.971291       | 1715.951290    | 858.479283       | <a href="#">13</a> |
| <a href="#">14</a> | <b>1408.633912</b> | 704.820594         | 1391.607363        | 696.307320        | 1390.623347    | 695.815312       | <b>L</b> | 1618.934912        | 809.971094        | 1601.908363       | 801.457819       | 1600.924347    | 800.965811       | <a href="#">12</a> |
| <a href="#">15</a> | <b>1505.686676</b> | <b>753.346976</b>  | 1488.660127        | 744.833702        | 1487.676111    | 744.341694       | <b>P</b> | <b>1505.850848</b> | <b>753.429062</b> | 1488.824299       | 744.915787       | 1487.840283    | 744.423779       | <a href="#">11</a> |
| <a href="#">16</a> | 1606.734355        | 803.870816         | <b>1589.707806</b> | 795.357541        | 1588.723790    | 794.865533       | <b>T</b> | <b>1408.798084</b> | 704.902680        | 1391.771535       | 696.389405       | 1390.787519    | 695.897397       | <a href="#">10</a> |
| <a href="#">17</a> | <b>1705.802769</b> | 853.405023         | 1688.776220        | 844.891748        | 1687.792204    | 844.399740       | <b>V</b> | <b>1307.750405</b> | 654.378840        | 1290.723856       | 645.865566       | 1289.739840    | 645.373558       | <a href="#">9</a>  |
| <a href="#">18</a> | 1834.845362        | 917.926319         | 1817.818813        | 909.413045        | 1816.834797    | 908.921037       | <b>E</b> | <b>1208.681991</b> | 604.844633        | 1191.655442       | 596.331359       | 1190.671426    | 595.839351       | <a href="#">8</a>  |
| <a href="#">19</a> | <b>1947.929426</b> | 974.468351         | 1930.902877        | <b>965.955077</b> | 1929.918861    | 965.463069       | <b>L</b> | <b>1079.639398</b> | <b>540.323337</b> | 1062.612849       | 531.810062       |                |                  | <a href="#">7</a>  |
| <a href="#">20</a> | 2387.154752        | 1194.081014        | 2370.128203        | 1185.567739       | 2369.144187    | 1185.075731      | <b>Q</b> | <b>966.555334</b>  | 483.781305        | 949.528785        | 475.268030       |                |                  | <a href="#">6</a>  |
| <a href="#">21</a> | 2444.176216        | 1222.591746        | 2427.149667        | 1214.078471       | 2426.165651    | 1213.586463      | <b>G</b> | <b>527.330008</b>  | 264.168642        | <b>510.303459</b> | 255.655367       |                |                  | <a href="#">5</a>  |
| <a href="#">22</a> | 2543.244630        | 1272.125953        | 2526.218081        | 1263.612678       | 2525.234065    | 1263.120670      | <b>V</b> | <b>470.308544</b>  | 235.657910        | 453.281995        | 227.144635       |                |                  | <a href="#">4</a>  |
| <a href="#">23</a> | 2642.313044        | <b>1321.660160</b> | 2625.286495        | 1313.146885       | 2624.302479    | 1312.654877      | <b>V</b> | <b>371.240130</b>  | 186.123703        | 354.213581        | 177.610428       |                |                  | <a href="#">3</a>  |
| <a href="#">24</a> | 2739.365808        | 1370.186542        | 2722.339259        | 1361.673267       | 2721.355243    | 1361.181259      | <b>P</b> | <b>272.171716</b>  | 136.589496        | 255.145167        | 128.076221       |                |                  | <a href="#">2</a>  |
| <a href="#">25</a> |                    |                    |                    |                   |                |                  | <b>R</b> | <b>175.118952</b>  | 88.063114         | 158.092403        | 79.549839        |                |                  | <a href="#">1</a>  |

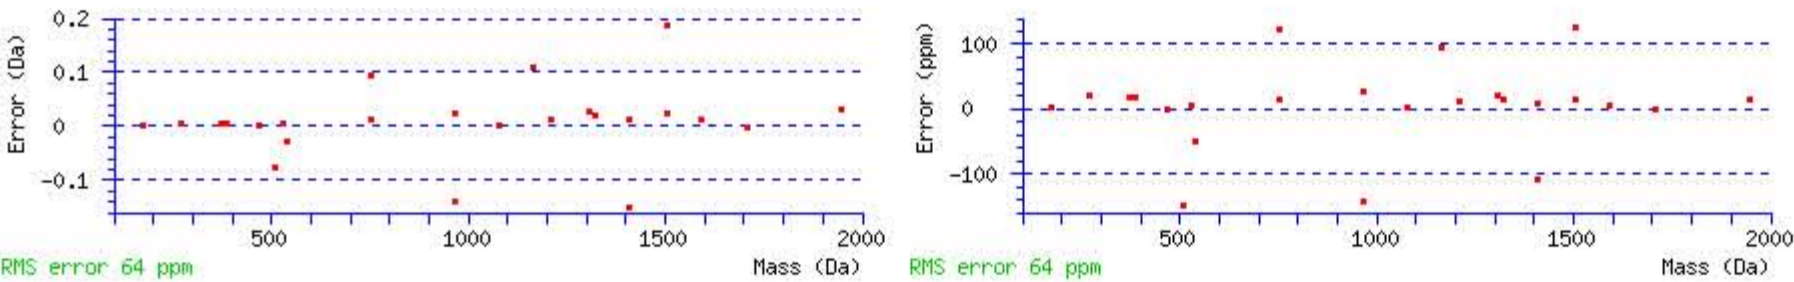

NCBI BLAST search of [AVPPNNSNAAEDDLPTVELQGVVPR](#)  
(Parameters: blastp, nr protein database, expect=20000, no filter, PAM30)  
Other BLAST [web gateways](#)

All matches to this query

| Score | Mr(calc):   | Delta    | Sequence                                  |
|-------|-------------|----------|-------------------------------------------|
| 34.2  | 2912.470200 | 0.035772 | <a href="#">AVPPNNSNAAEDDLPTVELQGVVPR</a> |

MATRIX

SCIENCE

Mascot Search Results

Peptide View

MS/MS Fragmentation of **QSTLSYQEPLR**  
Found in **F13B\_HUMAN**, Coagulation factor XIII B chain OS=Homo sapiens GN=F13B PE=1 SV=3

Match to Query 36406: 1631.840228 from(816.927390,2+) rtinseconds(1934) index(5246)  
Title: Locus:1.1.1.1950.24 File:"2013-07-02 CLN FXIII 180 min 2nd F 1.wiff"  
Data file C:\Program Files (x86)\Matrix Science\Mascot Daemon\mgf\8 FXIII 180 min 2nd\mascot\_daemon\_merge.mgf

Click mouse within plot area to zoom in by factor of two about that point  
Or,   to  Da   
Label all possible matches ☐ Label matches used for scoring ☒

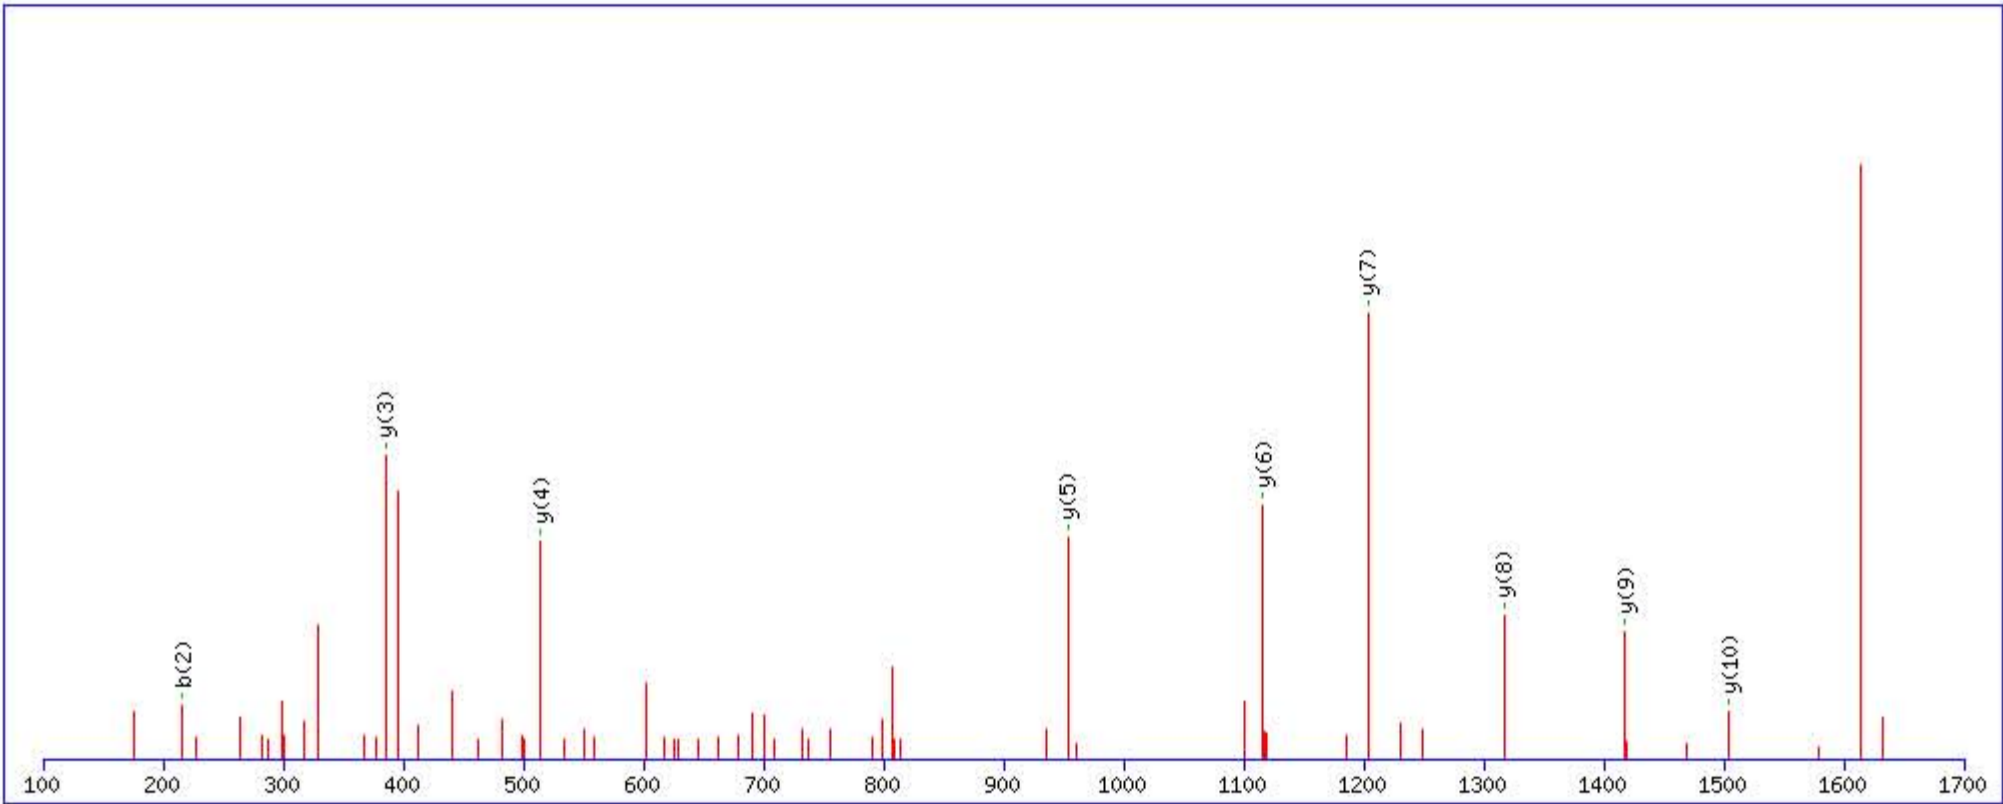

Monoisotopic mass of neutral peptide Mr(calc): 1631.834106  
Fixed modifications: Carbamidomethyl (C) (apply to specified residues or termini only)  
Variable modifications:  
Q7 : Biotin:Thermo-21345 (Q)  
Ions Score: 69 Expect: 2.7e-006  
Matches : 9/112 fragment ions using 14 most intense peaks [\(help\)](#)

| #  | b           | b <sup>++</sup> | b <sup>*</sup> | b <sup>*++</sup> | b <sup>0</sup> | b <sup>0++</sup> | Seq. | y           | y <sup>++</sup> | y <sup>*</sup> | y <sup>*++</sup> | y <sup>0</sup> | y <sup>0++</sup> | #  |
|----|-------------|-----------------|----------------|------------------|----------------|------------------|------|-------------|-----------------|----------------|------------------|----------------|------------------|----|
| 1  | 129.065854  | 65.036565       | 112.039305     | 56.523291        |                |                  | Q    |             |                 |                |                  |                |                  | 11 |
| 2  | 216.097882  | 108.552579      | 199.071333     | 100.039305       | 198.087317     | 99.547296        | S    | 1504.782827 | 752.895052      | 1487.756278    | 744.381777       | 1486.772262    | 743.889769       | 10 |
| 3  | 317.145561  | 159.076418      | 300.119012     | 150.563144       | 299.134996     | 150.071136       | T    | 1417.750799 | 709.379038      | 1400.724250    | 700.865763       | 1399.740234    | 700.373755       | 9  |
| 4  | 430.229625  | 215.618450      | 413.203076     | 207.105176       | 412.219060     | 206.613168       | L    | 1316.703120 | 658.855198      | 1299.676571    | 650.341924       | 1298.692555    | 649.849916       | 8  |
| 5  | 517.261653  | 259.134465      | 500.235104     | 250.621190       | 499.251088     | 250.129182       | S    | 1203.619056 | 602.313166      | 1186.592507    | 593.799892       | 1185.608491    | 593.307884       | 7  |
| 6  | 680.324982  | 340.666129      | 663.298433     | 332.152855       | 662.314417     | 331.660847       | Y    | 1116.587028 | 558.797152      | 1099.560479    | 550.283878       | 1098.576463    | 549.791870       | 6  |
| 7  | 1119.550308 | 560.278792      | 1102.523759    | 551.765518       | 1101.539743    | 551.273510       | Q    | 953.523699  | 477.265488      | 936.497150     | 468.752213       | 935.513134     | 468.260205       | 5  |
| 8  | 1248.592901 | 624.800089      | 1231.566352    | 616.286814       | 1230.582336    | 615.794806       | E    | 514.298373  | 257.652825      | 497.271824     | 249.139550       | 496.287808     | 248.647542       | 4  |
| 9  | 1345.645665 | 673.326471      | 1328.619116    | 664.813196       | 1327.635100    | 664.321188       | P    | 385.255780  | 193.131528      | 368.229231     | 184.618253       |                |                  | 3  |
| 10 | 1458.729729 | 729.868503      | 1441.703180    | 721.355228       | 1440.719164    | 720.863220       | L    | 288.203016  | 144.605146      | 271.176467     | 136.091871       |                |                  | 2  |
| 11 |             |                 |                |                  |                |                  | R    | 175.118952  | 88.063114       | 158.092403     | 79.549839        |                |                  | 1  |

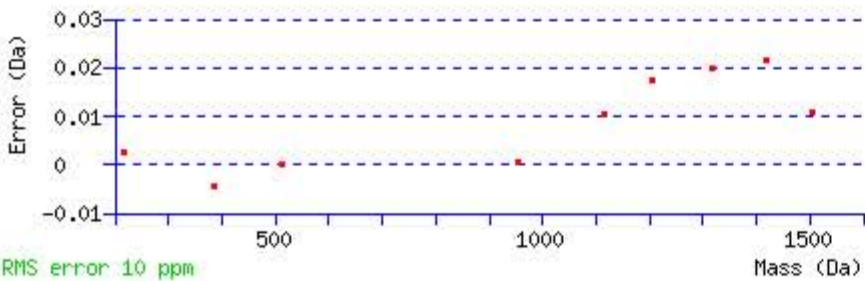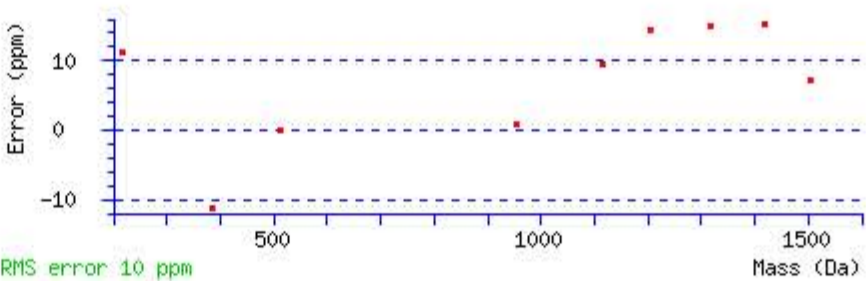

NCBI BLAST search of [QSTLSYQEPLR](#)  
(Parameters: blastp, nr protein database, expect=20000, no filter, PAM30)  
Other BLAST [web gateways](#)

All matches to this query

| Score | Mr(calc):   | Delta     | Sequence                        |
|-------|-------------|-----------|---------------------------------|
| 68.6  | 1631.834106 | 0.006122  | <a href="#">QSTLSYQEPLR</a>     |
| 8.7   | 1631.863098 | -0.022870 | <a href="#">QLSTFEVNSINPKR</a>  |
| 6.8   | 1631.836578 | 0.003650  | <a href="#">NTITDEELKEKNAK</a>  |
| 6.6   | 1631.834106 | 0.006122  | <a href="#">QSTLSYQEPLR</a>     |
| 4.4   | 1631.822693 | 0.017535  | <a href="#">QGISQDLASSRLLDR</a> |
| 4.0   | 1631.840652 | -0.000424 | <a href="#">KSLEGIFDDIVPDGK</a> |
| 1.4   | 1631.838165 | 0.002063  | <a href="#">GASVPWDFLPGLMVK</a> |
| 0.1   | 1631.855225 | -0.014997 | <a href="#">KSQMPNTEKLLDK</a>   |

MATRIX

SCIENCE

Mascot Search Results

Peptide View

MS/MS Fragmentation of **TIAVLLDDILQR**  
Found in **CC126\_HUMAN**, Coiled-coil domain-containing protein 126 OS=Homo sapiens GN=CCDC126 PE=2 SV=2

Match to Query 37542: 1679.977872 from(560.999900,3+) rtinseconds(3118) index(11741)  
Title: Locus:1.1.1.2361.4 File:"2013-07-02 CLN FXIII 180 min 2nd F 1.wiff"  
Data file C:\Program Files (x86)\Matrix Science\Mascot Daemon\mgf\8 FXIII 180 min 2nd\mascot\_daemon\_merge.mgf

Click mouse within plot area to zoom in by factor of two about that point  
Or, 

Plot from

100

 to 

1300

 Da 

Full range

  
Label all possible matches ☐ Label matches used for scoring ☒

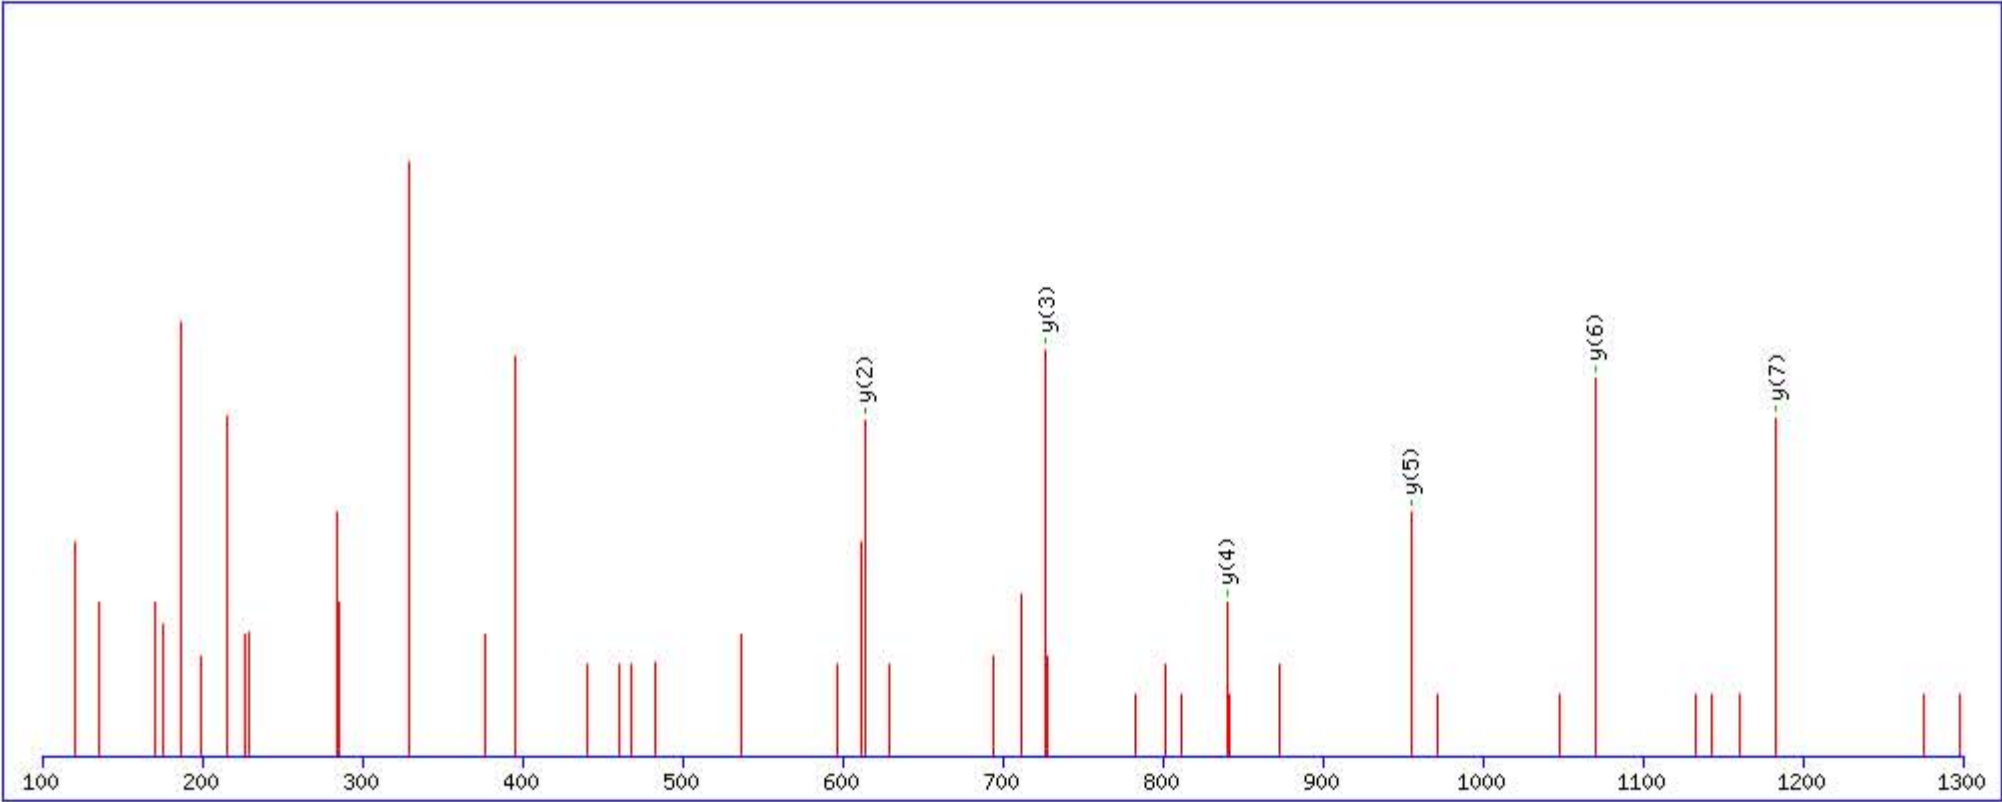

Monoisotopic mass of neutral peptide Mr(calc): 1679.964401  
Fixed modifications: Carbamidomethyl (C) (apply to specified residues or termini only)  
Variable modifications:  
Q11 : Biotin:Thermo-21345 (Q)  
Ions Score: 32 Expect: 0.0048  
Matches : 6/104 fragment ions using 12 most intense peaks [\(help\)](#)

| #                  | b           | b <sup>++</sup> | b <sup>+</sup> | b <sup>+++</sup> | b <sup>0</sup> | b <sup>0++</sup> | Seq.              | y                           | y <sup>++</sup> | y <sup>+</sup> | y <sup>+++</sup> | y <sup>0</sup> | y <sup>0++</sup> | #                  |
|--------------------|-------------|-----------------|----------------|------------------|----------------|------------------|-------------------|-----------------------------|-----------------|----------------|------------------|----------------|------------------|--------------------|
| <a href="#">1</a>  | 102.054955  | 51.531116       |                |                  | 84.044390      | 42.525833        | <a href="#">T</a> |                             |                 |                |                  |                |                  | <a href="#">12</a> |
| <a href="#">2</a>  | 215.139019  | 108.073147      |                |                  | 197.128454     | 99.067865        | <a href="#">I</a> | 1579.924012                 | 790.465644      | 1562.897463    | 781.952370       | 1561.913447    | 781.460361       | <a href="#">11</a> |
| <a href="#">3</a>  | 286.176133  | 143.591704      |                |                  | 268.165568     | 134.586422       | <a href="#">A</a> | 1466.839948                 | 733.923612      | 1449.813399    | 725.410338       | 1448.829383    | 724.918330       | <a href="#">10</a> |
| <a href="#">4</a>  | 385.244547  | 193.125912      |                |                  | 367.233982     | 184.120629       | <a href="#">V</a> | 1395.802834                 | 698.405055      | 1378.776285    | 689.891780       | 1377.792269    | 689.399772       | <a href="#">9</a>  |
| <a href="#">5</a>  | 498.328611  | 249.667944      |                |                  | 480.318046     | 240.662661       | <a href="#">L</a> | 1296.734420                 | 648.870848      | 1279.707871    | 640.357574       | 1278.723855    | 639.865566       | <a href="#">8</a>  |
| <a href="#">6</a>  | 611.412675  | 306.209976      |                |                  | 593.402110     | 297.204693       | <a href="#">L</a> | <a href="#">1183.650356</a> | 592.328816      | 1166.623807    | 583.815541       | 1165.639791    | 583.323533       | <a href="#">7</a>  |
| <a href="#">7</a>  | 726.439618  | 363.723447      |                |                  | 708.429053     | 354.718165       | <a href="#">D</a> | <a href="#">1070.566292</a> | 535.786784      | 1053.539743    | 527.273510       | 1052.555727    | 526.781501       | <a href="#">6</a>  |
| <a href="#">8</a>  | 841.466561  | 421.236919      |                |                  | 823.455996     | 412.231636       | <a href="#">D</a> | <a href="#">955.539349</a>  | 478.273313      | 938.512800     | 469.760038       | 937.528784     | 469.268030       | <a href="#">5</a>  |
| <a href="#">9</a>  | 954.550625  | 477.778951      |                |                  | 936.540060     | 468.773668       | <a href="#">I</a> | <a href="#">840.512406</a>  | 420.759841      | 823.485857     | 412.246567       |                |                  | <a href="#">4</a>  |
| <a href="#">10</a> | 1067.634689 | 534.320983      |                |                  | 1049.624124    | 525.315700       | <a href="#">L</a> | <a href="#">727.428342</a>  | 364.217809      | 710.401793     | 355.704535       |                |                  | <a href="#">3</a>  |
| <a href="#">11</a> | 1506.860015 | 753.933646      | 1489.833466    | 745.420371       | 1488.849450    | 744.928363       | <a href="#">Q</a> | <a href="#">614.344278</a>  | 307.675777      | 597.317729     | 299.162503       |                |                  | <a href="#">2</a>  |
| <a href="#">12</a> |             |                 |                |                  |                |                  | <a href="#">R</a> | 175.118952                  | 88.063114       | 158.092403     | 79.549839        |                |                  | <a href="#">1</a>  |

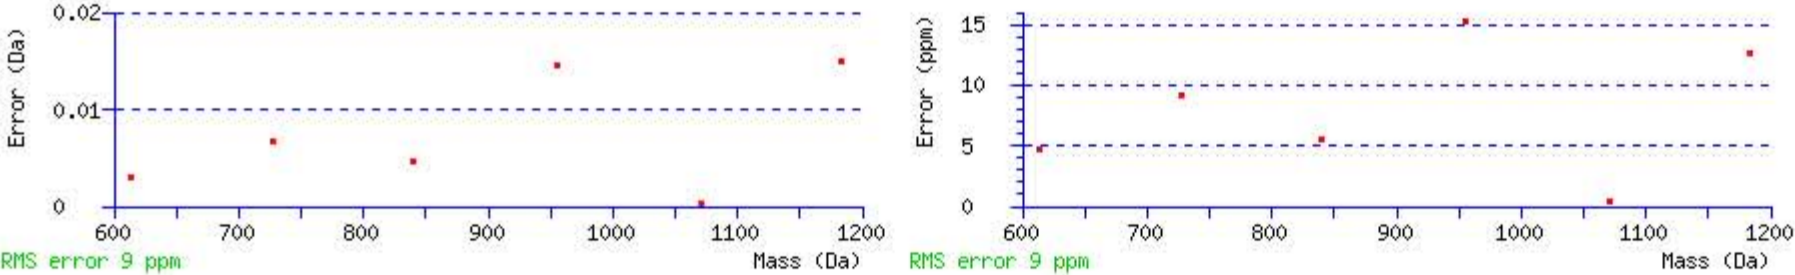

NCBI **BLAST** search of [TIAVLLDDILQR](#)  
(Parameters: blastp, nr protein database, expect=20000, no filter, PAM30)  
Other BLAST [web gateways](#)

All matches to this query

| Score | Mr(calc):   | Delta    | Sequence                     |
|-------|-------------|----------|------------------------------|
| 31.7  | 1679.964401 | 0.013471 | <a href="#">TIAVLLDDILQR</a> |

MATRIX

SCIENCE

Mascot Search Results

Peptide View

MS/MS Fragmentation of **IQYYCHEPYRK**  
Found in **C1R\_HUMAN**, Complement C1r subcomponent OS=Homo sapiens GN=C1R PE=1 SV=2

Match to Query 41764: 1873.864392 from(625.628740,3+) rtinseconds(1707) index(32312)  
Title: Locus:1.1.1.703.10 File:"2013-07-02 CLN FXIII 180 min 2nd F 3.wiff"  
Data file C:\Program Files (x86)\Matrix Science\Mascot Daemon\mgf\8 FXIII 180 min 2nd\mascot\_daemon\_merge.mgf

Click mouse within plot area to zoom in by factor of two about that point  
Or, 

Plot from

100

 to 

1600

 Da 

Full range

  
Label all possible matches ☐ Label matches used for scoring ☒

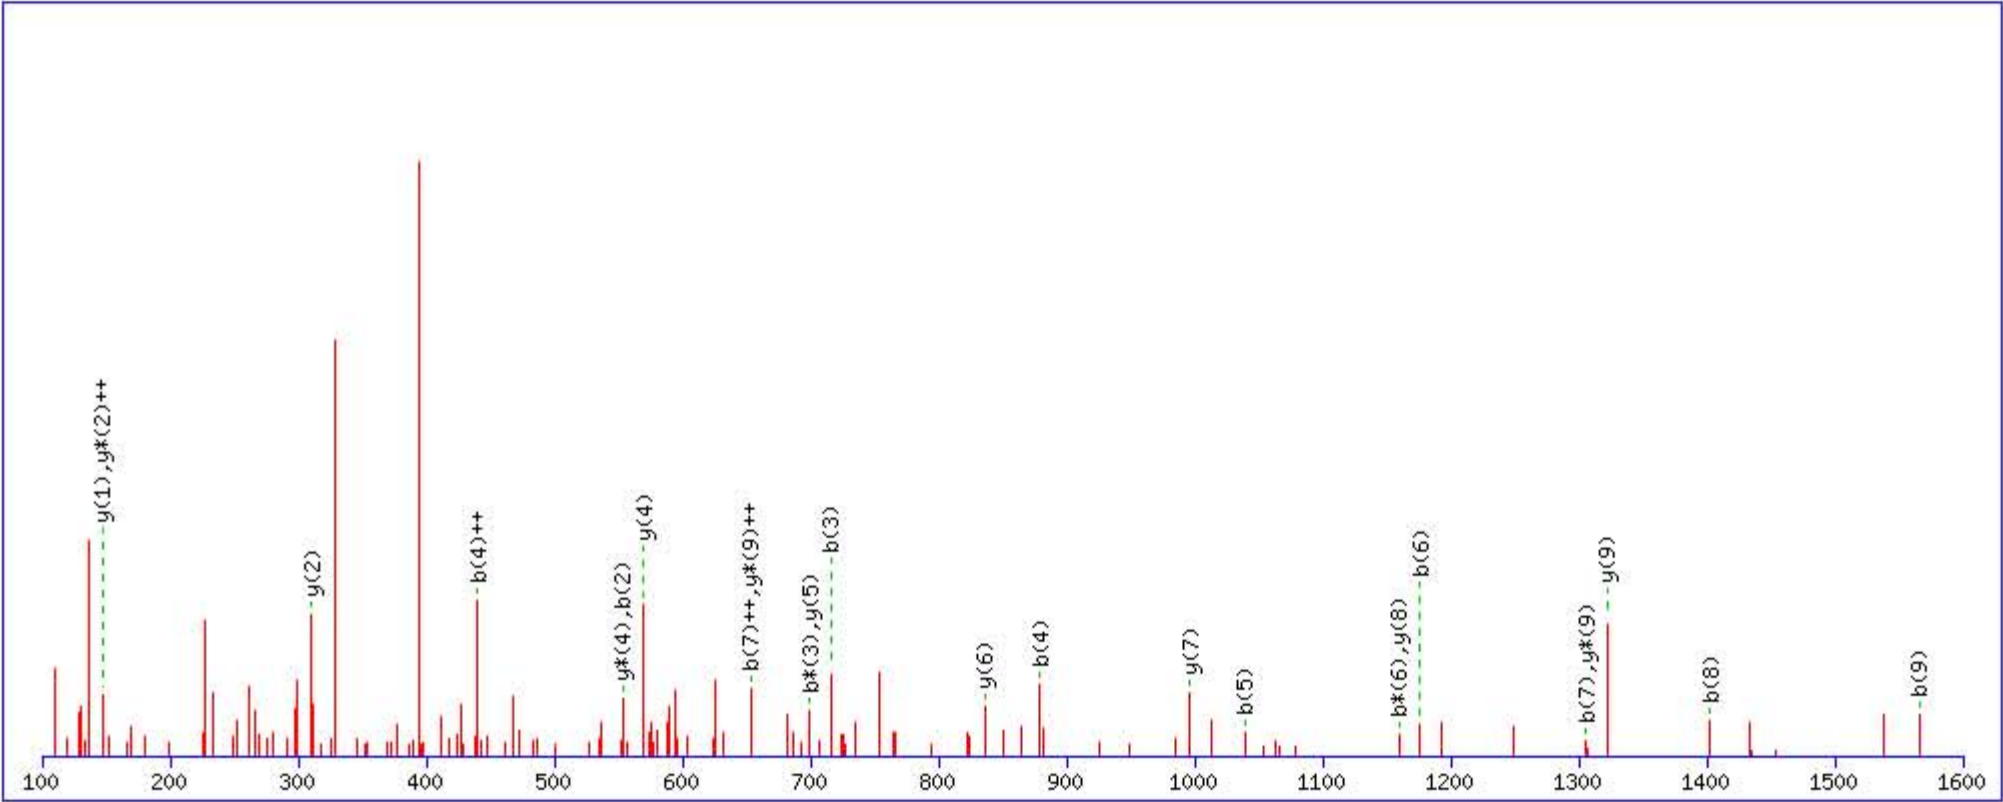

Monoisotopic mass of neutral peptide Mr(calc): 1873.853119  
Fixed modifications: Carbamidomethyl (C) (apply to specified residues or termini only)  
Variable modifications:  
Q2 : Biotin:Thermo-21345 (Q)  
Ions Score: 34 Expect: 0.00083  
Matches : 24/98 fragment ions using 43 most intense peaks [\(help\)](#)

| #  | b           | b <sup>++</sup> | b <sup>*</sup> | b <sup>*++</sup> | b <sup>0</sup> | b <sup>0++</sup> | Seq. | y           | y <sup>++</sup> | y <sup>*</sup> | y <sup>*++</sup> | y <sup>0</sup> | y <sup>0++</sup> | #  |
|----|-------------|-----------------|----------------|------------------|----------------|------------------|------|-------------|-----------------|----------------|------------------|----------------|------------------|----|
| 1  | 114.091340  | 57.549308       |                |                  |                |                  | I    |             |                 |                |                  |                |                  | 11 |
| 2  | 553.316666  | 277.161971      | 536.290117     | 268.648697       |                |                  | Q    | 1761.776364 | 881.391820      | 1744.749815    | 872.878546       | 1743.765799    | 872.386538       | 10 |
| 3  | 716.379995  | 358.693636      | 699.353446     | 350.180361       |                |                  | Y    | 1322.551038 | 661.779157      | 1305.524489    | 653.265883       | 1304.540473    | 652.773875       | 9  |
| 4  | 879.443324  | 440.225300      | 862.416775     | 431.712026       |                |                  | Y    | 1159.487709 | 580.247493      | 1142.461160    | 571.734218       | 1141.477144    | 571.242210       | 8  |
| 5  | 1039.473973 | 520.240625      | 1022.447424    | 511.727350       |                |                  | C    | 996.424380  | 498.715828      | 979.397831     | 490.202554       | 978.413815     | 489.710546       | 7  |
| 6  | 1176.532885 | 588.770081      | 1159.506336    | 580.256806       |                |                  | H    | 836.393731  | 418.700504      | 819.367182     | 410.187229       | 818.383166     | 409.695221       | 6  |
| 7  | 1305.575478 | 653.291377      | 1288.548929    | 644.778103       | 1287.564913    | 644.286094       | E    | 699.334819  | 350.171048      | 682.308270     | 341.657773       | 681.324254     | 341.165765       | 5  |
| 8  | 1402.628242 | 701.817759      | 1385.601693    | 693.304485       | 1384.617677    | 692.812477       | P    | 570.292226  | 285.649751      | 553.265677     | 277.136477       |                |                  | 4  |
| 9  | 1565.691571 | 783.349424      | 1548.665022    | 774.836149       | 1547.681006    | 774.344141       | Y    | 473.239462  | 237.123369      | 456.212913     | 228.610095       |                |                  | 3  |
| 10 | 1728.754900 | 864.881088      | 1711.728351    | 856.367814       | 1710.744335    | 855.875806       | Y    | 310.176133  | 155.591705      | 293.149584     | 147.078430       |                |                  | 2  |
| 11 |             |                 |                |                  |                |                  | K    | 147.112804  | 74.060040       | 130.086255     | 65.546765        |                |                  | 1  |

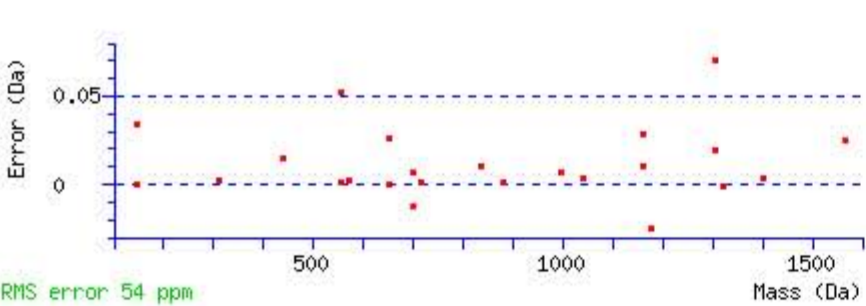

RMS error 54 ppm

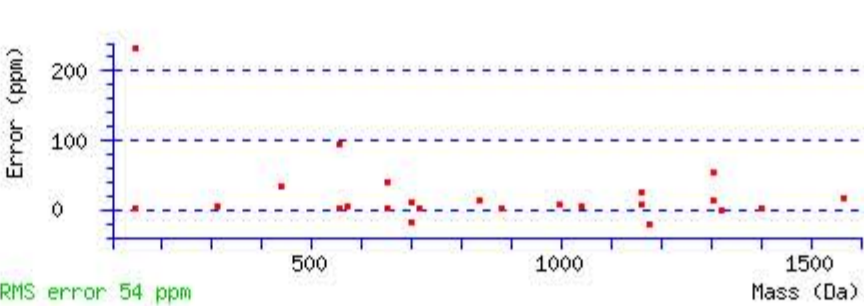

RMS error 54 ppm

NCBI BLAST search of **IQYYCHEPYRK**  
(Parameters: blastp, nr protein database, expect=20000, no filter, PAM30)  
Other BLAST [web gateways](#)

All matches to this query

| Score | Mr(calc):   | Delta     | Sequence                         |
|-------|-------------|-----------|----------------------------------|
| 33.9  | 1873.853119 | 0.011273  | <a href="#">IQYYCHEPYRK</a>      |
| 1.1   | 1873.873611 | -0.009219 | <a href="#">MTLSPSYRMDDGKMVK</a> |

MATRIX

SCIENCE

Mascot Search Results

Peptide View

MS/MS Fragmentation of **QDACQGDSGGVFAVR**  
Found in **C1R\_HUMAN**, Complement C1r subcomponent OS=Homo sapiens GN=C1R PE=1 SV=2

Match to Query 41810: 1876.869192 from(626.630340,3+) rtinseconds(1960) index(33982)  
Title: Locus:1.1.1.791.14 File:"2013-07-02 CLN FXIII 180 min 2nd F 3.wiff"  
Data file C:\Program Files (x86)\Matrix Science\Mascot Daemon\mgf\8 FXIII 180 min 2nd\mascot\_daemon\_merge.mgf

Click mouse within plot area to zoom in by factor of two about that point  
Or, 

Plot from

100

 to 

1300

 Da 

Full range

  
Label all possible matches ☐ Label matches used for scoring ☒

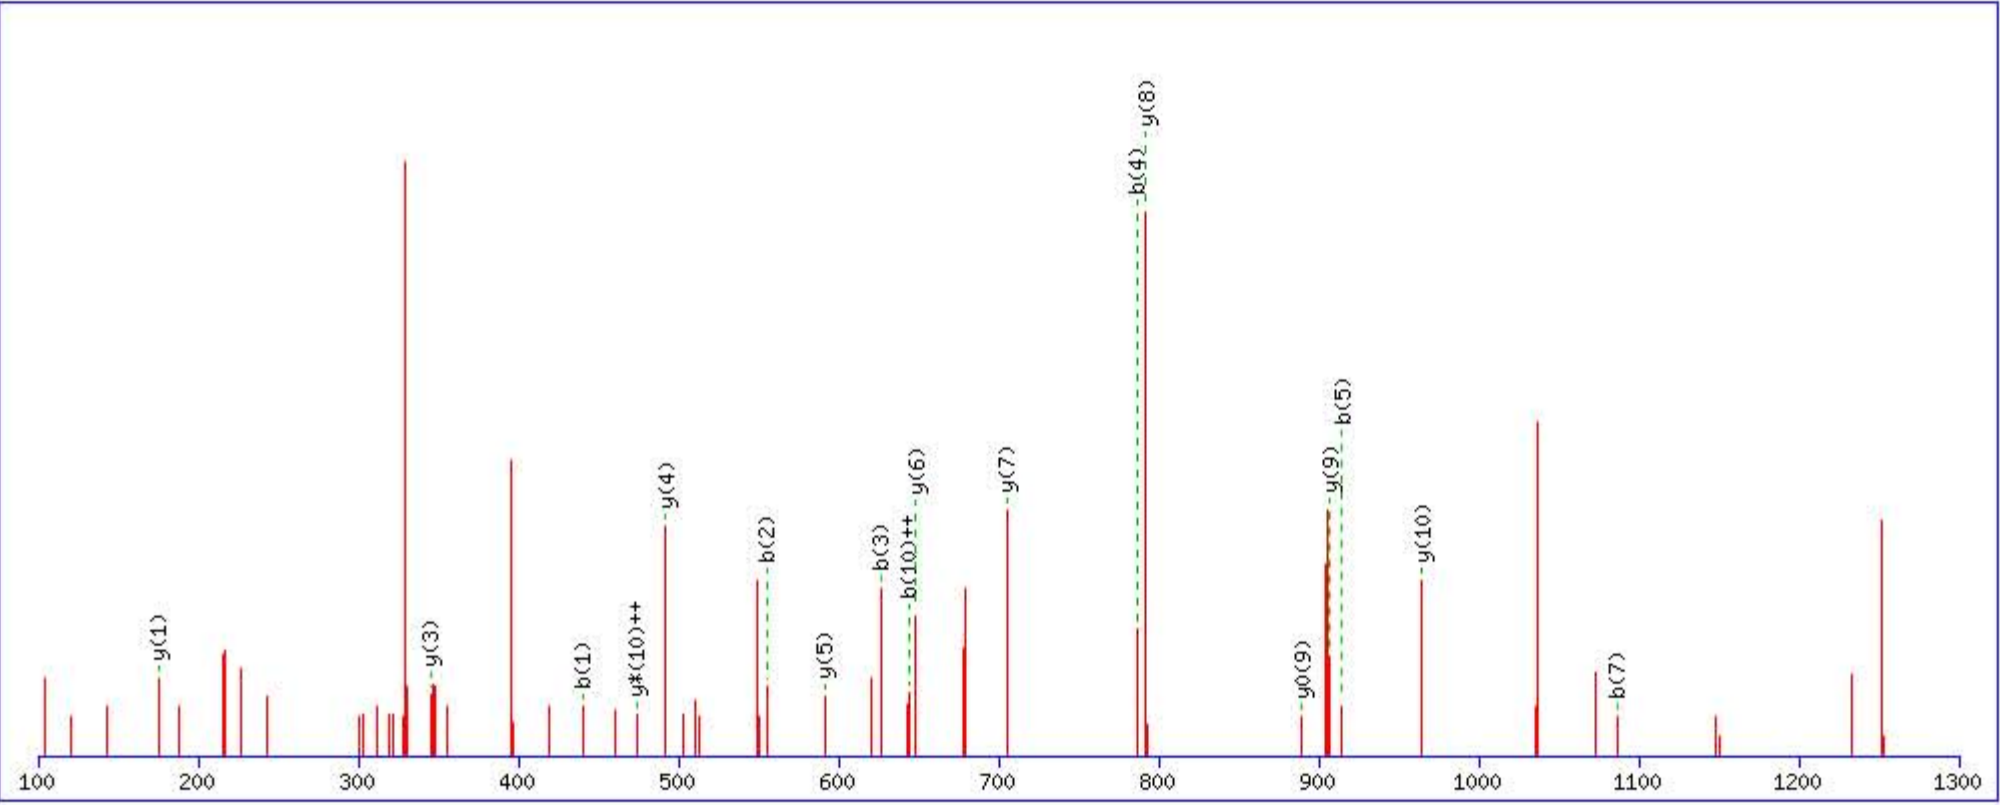

Monoisotopic mass of neutral peptide Mr(calc): 1876.856033  
Fixed modifications: Carbamidomethyl (C) (apply to specified residues or termini only)  
Variable modifications:  
Q1 : Biotin:Thermo-21345 (Q)  
Ions Score: 36 Expect: 0.0014  
Matches : 18/152 fragment ions using 56 most intense peaks [\(help\)](#)

| #  | b           | b <sup>++</sup> | b <sup>*</sup> | b <sup>+++</sup> | b <sup>0</sup> | b <sup>0++</sup> | Seq. | y           | y <sup>++</sup> | y <sup>*</sup> | y <sup>+++</sup> | y <sup>0</sup> | y <sup>0++</sup> | #  |
|----|-------------|-----------------|----------------|------------------|----------------|------------------|------|-------------|-----------------|----------------|------------------|----------------|------------------|----|
| 1  | 440.232602  | 220.619939      | 423.206053     | 212.106664       |                |                  | Q    |             |                 |                |                  |                |                  | 15 |
| 2  | 555.259545  | 278.133411      | 538.232996     | 269.620136       | 537.248980     | 269.128128       | D    | 1438.637955 | 719.822616      | 1421.611406    | 711.309341       | 1420.627390    | 710.817333       | 14 |
| 3  | 626.296659  | 313.651968      | 609.270110     | 305.138693       | 608.286094     | 304.646685       | A    | 1323.611012 | 662.309144      | 1306.584463    | 653.795870       | 1305.600447    | 653.303862       | 13 |
| 4  | 786.327308  | 393.667292      | 769.300759     | 385.154018       | 768.316743     | 384.662010       | C    | 1252.573898 | 626.790587      | 1235.547349    | 618.277313       | 1234.563333    | 617.785305       | 12 |
| 5  | 914.385886  | 457.696581      | 897.359337     | 449.183307       | 896.375321     | 448.691299       | Q    | 1092.543249 | 546.775263      | 1075.516700    | 538.261988       | 1074.532684    | 537.769980       | 11 |
| 6  | 971.407350  | 486.207313      | 954.380801     | 477.694039       | 953.396785     | 477.202031       | G    | 964.484671  | 482.745974      | 947.458122     | 474.232699       | 946.474106     | 473.740691       | 10 |
| 7  | 1086.434293 | 543.720785      | 1069.407744    | 535.207510       | 1068.423728    | 534.715502       | D    | 907.463207  | 454.235242      | 890.436658     | 445.721967       | 889.452642     | 445.229959       | 9  |
| 8  | 1173.466321 | 587.236799      | 1156.439772    | 578.723524       | 1155.455756    | 578.231516       | S    | 792.436264  | 396.721770      | 775.409715     | 388.208496       | 774.425699     | 387.716488       | 8  |
| 9  | 1230.487785 | 615.747531      | 1213.461236    | 607.234256       | 1212.477220    | 606.742248       | G    | 705.404236  | 353.205756      | 688.377687     | 344.692482       |                |                  | 7  |
| 10 | 1287.509249 | 644.258263      | 1270.482700    | 635.744988       | 1269.498684    | 635.252980       | G    | 648.382772  | 324.695024      | 631.356223     | 316.181750       |                |                  | 6  |
| 11 | 1386.577663 | 693.792470      | 1369.551114    | 685.279195       | 1368.567098    | 684.787187       | V    | 591.361308  | 296.184292      | 574.334759     | 287.671018       |                |                  | 5  |
| 12 | 1533.646077 | 767.326677      | 1516.619528    | 758.813402       | 1515.635512    | 758.321394       | F    | 492.292894  | 246.650085      | 475.266345     | 238.136811       |                |                  | 4  |
| 13 | 1604.683191 | 802.845234      | 1587.656642    | 794.331959       | 1586.672626    | 793.839951       | A    | 345.224480  | 173.115878      | 328.197931     | 164.602603       |                |                  | 3  |
| 14 | 1703.751605 | 852.379441      | 1686.725056    | 843.866166       | 1685.741040    | 843.374158       | V    | 274.187366  | 137.597321      | 257.160817     | 129.084047       |                |                  | 2  |
| 15 |             |                 |                |                  |                |                  | R    | 175.118952  | 88.063114       | 158.092403     | 79.549839        |                |                  | 1  |

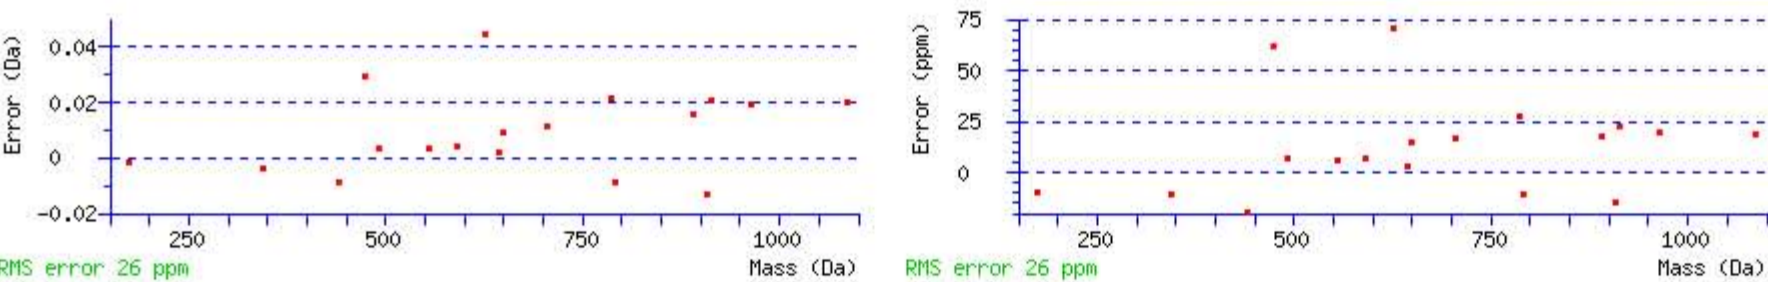

NCBI BLAST search of **QDACQGDSGGVFAVR**  
(Parameters: blastp, nr protein database, expect=20000, no filter, PAM30)  
Other BLAST [web gateways](#)

All matches to this query

| Score | Mr(calc):   | Delta     | Sequence                         |
|-------|-------------|-----------|----------------------------------|
| 36.0  | 1876.856033 | 0.013159  | <a href="#">QDACQGDSGGVFAVR</a>  |
| 23.7  | 1876.856033 | 0.013159  | <a href="#">QDACQGDSGGVFAVR</a>  |
| 5.4   | 1876.892853 | -0.023661 | <a href="#">SFLRDPDASPSQHQHR</a> |

MATRIX

SCIENCE

Mascot Search Results

Peptide View

MS/MS Fragmentation of **LPVANPQACENWLR**  
Found in **C1R\_HUMAN**, Complement C1r subcomponent OS=Homo sapiens GN=C1R PE=1 SV=2

Match to Query 43714: 1978.012332 from(660.344720,3+) rtinseconds(2287) index(35979)  
Title: Locus:1.1.1.905.8 File:"2013-07-02 CLN FXIII 180 min 2nd F 3.wiff"  
Data file C:\Program Files (x86)\Matrix Science\Mascot Daemon\mgf\8 FXIII 180 min 2nd\mascot\_daemon\_merge.mgf

Click mouse within plot area to zoom in by factor of two about that point  
Or,   to  Da   
Label all possible matches ☐ Label matches used for scoring ☒

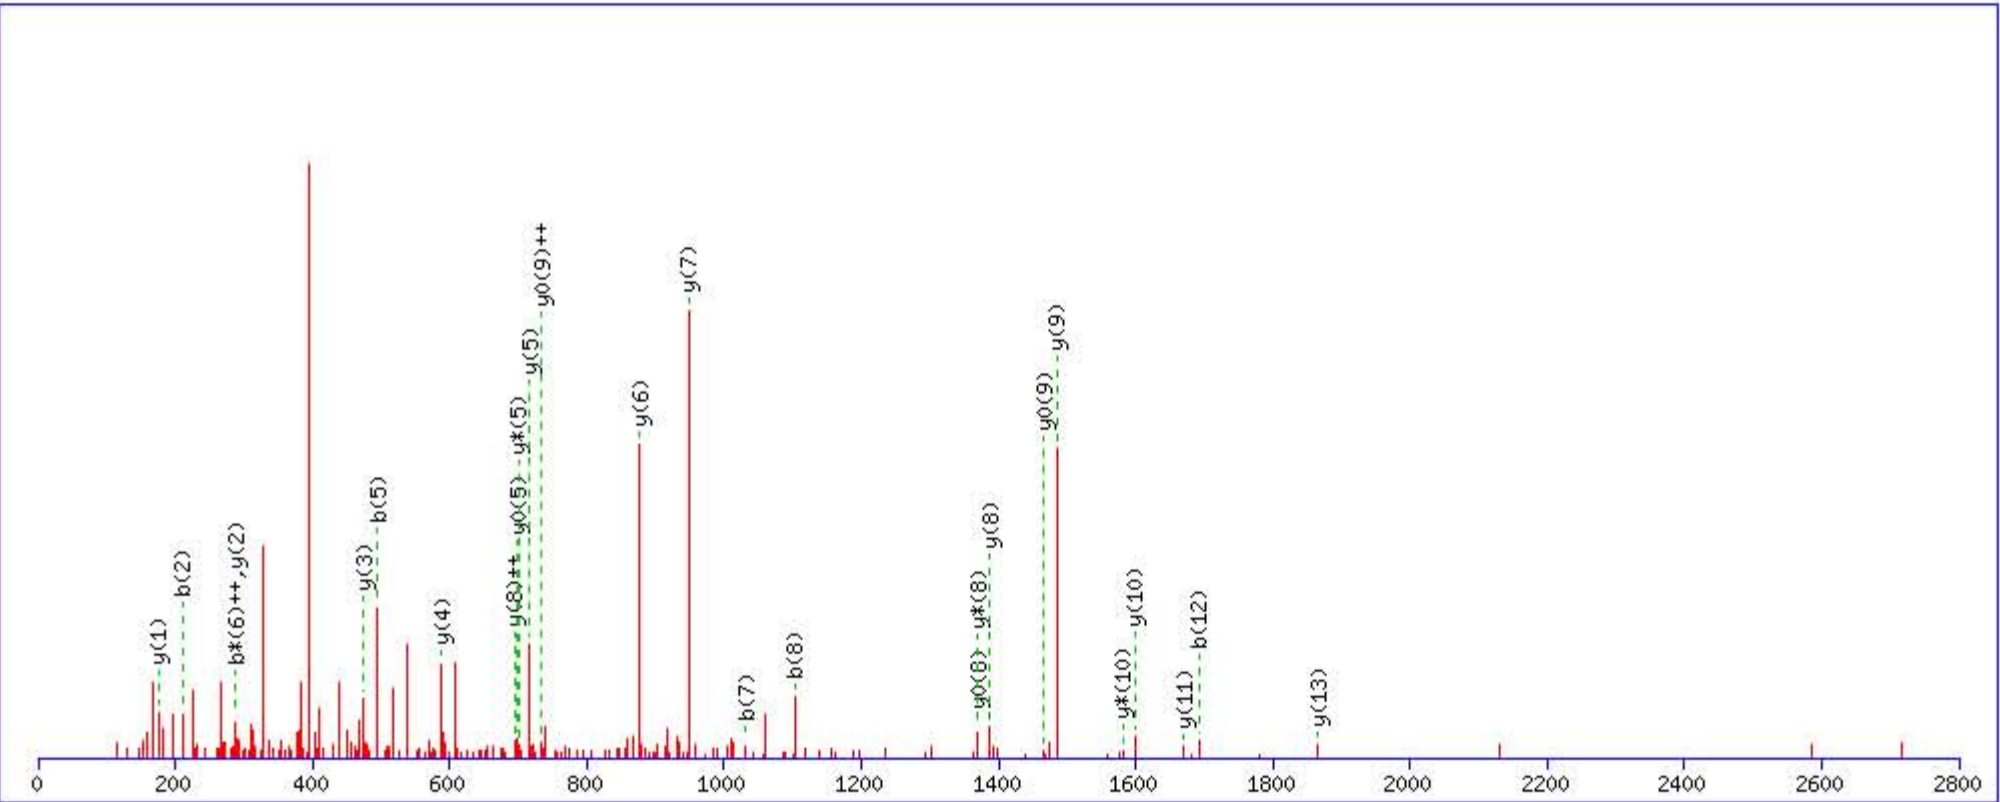

Monoisotopic mass of neutral peptide Mr(calc): 1977.991684  
Fixed modifications: Carbamidomethyl (C) (apply to specified residues or termini only)  
Variable modifications:  
Q7 : Biotin:Thermo-21345 (Q)  
Ions Score: 69 Expect: 4.1e-007  
Matches : 26/122 fragment ions using 50 most intense peaks [\(help\)](#)

| #  | b           | b <sup>++</sup> | b <sup>+</sup> | b <sup>+++</sup> | b <sup>0</sup> | b <sup>0++</sup> | Seq. | y           | y <sup>++</sup> | y <sup>+</sup> | y <sup>+++</sup> | y <sup>0</sup> | y <sup>0++</sup> | #  |
|----|-------------|-----------------|----------------|------------------|----------------|------------------|------|-------------|-----------------|----------------|------------------|----------------|------------------|----|
| 1  | 114.091340  | 57.549308       |                |                  |                |                  | L    |             |                 |                |                  |                |                  | 14 |
| 2  | 211.144104  | 106.075690      |                |                  |                |                  | P    | 1865.914921 | 933.461099      | 1848.888372    | 924.947824       | 1847.904356    | 924.455816       | 13 |
| 3  | 310.212518  | 155.609897      |                |                  |                |                  | V    | 1768.862157 | 884.934717      | 1751.835608    | 876.421442       | 1750.851592    | 875.929434       | 12 |
| 4  | 381.249632  | 191.128454      |                |                  |                |                  | A    | 1669.793743 | 835.400510      | 1652.767194    | 826.887235       | 1651.783178    | 826.395227       | 11 |
| 5  | 495.292559  | 248.149917      | 478.266010     | 239.636643       |                |                  | N    | 1598.756629 | 799.881953      | 1581.730080    | 791.368678       | 1580.746064    | 790.876670       | 10 |
| 6  | 592.345323  | 296.676300      | 575.318774     | 288.163025       |                |                  | P    | 1484.713702 | 742.860489      | 1467.687153    | 734.347215       | 1466.703137    | 733.855207       | 9  |
| 7  | 1031.570649 | 516.288963      | 1014.544100    | 507.775688       |                |                  | Q    | 1387.660938 | 694.334107      | 1370.634389    | 685.820833       | 1369.650373    | 685.328825       | 8  |
| 8  | 1102.607763 | 551.807520      | 1085.581214    | 543.294245       |                |                  | A    | 948.435612  | 474.721444      | 931.409063     | 466.208170       | 930.425047     | 465.716162       | 7  |
| 9  | 1262.638412 | 631.822844      | 1245.611863    | 623.309570       |                |                  | C    | 877.398498  | 439.202887      | 860.371949     | 430.689613       | 859.387933     | 430.197605       | 6  |
| 10 | 1391.681005 | 696.344141      | 1374.654456    | 687.830866       | 1373.670440    | 687.338858       | E    | 717.367849  | 359.187563      | 700.341300     | 350.674288       | 699.357284     | 350.182280       | 5  |
| 11 | 1505.723932 | 753.365604      | 1488.697383    | 744.852330       | 1487.713367    | 744.360322       | N    | 588.325256  | 294.666266      | 571.298707     | 286.152991       |                |                  | 4  |
| 12 | 1691.803245 | 846.405261      | 1674.776696    | 837.891986       | 1673.792680    | 837.399978       | W    | 474.282329  | 237.644802      | 457.255780     | 229.131528       |                |                  | 3  |
| 13 | 1804.887309 | 902.947293      | 1787.860760    | 894.434018       | 1786.876744    | 893.942010       | L    | 288.203016  | 144.605146      | 271.176467     | 136.091871       |                |                  | 2  |
| 14 |             |                 |                |                  |                |                  | R    | 175.118952  | 88.063114       | 158.092403     | 79.549839        |                |                  | 1  |

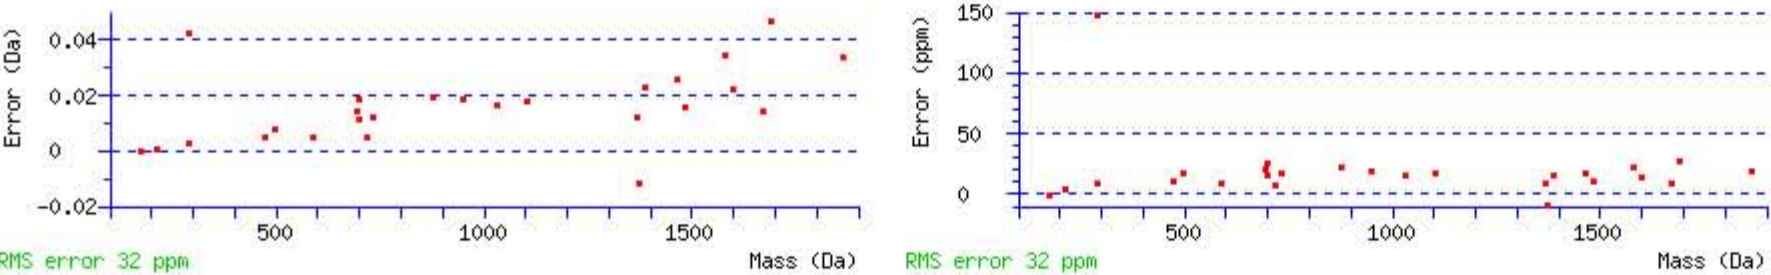

NCBI BLAST search of **LPVANPQACENWLR**  
(Parameters: blastp, nr protein database, expect=20000, no filter, PAM30)  
Other BLAST [web gateways](#)

All matches to this query

| Score | Mr(calc):   | Delta    | Sequence                         |
|-------|-------------|----------|----------------------------------|
| 68.7  | 1977.991684 | 0.020648 | <a href="#">LPVANPQACENWLR</a>   |
| 0.6   | 1977.983856 | 0.028476 | <a href="#">VLGKGGFGEVSACQMK</a> |

MATRIX

SCIENCE

Mascot Search Results

Peptide View

MS/MS Fragmentation of **CLPVCGKPVNPVEQR**  
Found in **C1R\_HUMAN**, Complement C1r subcomponent OS=Homo sapiens GN=C1R PE=1 SV=2

Match to Query 46014: 2063.069652 from(688.697160,3+) rtinseconds(1775) index(48822)  
Title: Locus:1.1.1.1856.6 File:"2013-07-02 CLN FXIII 180 min 2nd F 4.wiff"  
Data file C:\Program Files (x86)\Matrix Science\Mascot Daemon\mgf\8 FXIII 180 min 2nd\mascot\_daemon\_merge.mgf

Click mouse within plot area to zoom in by factor of two about that point  
Or,   to  Da   
Label all possible matches ☐ Label matches used for scoring ☒

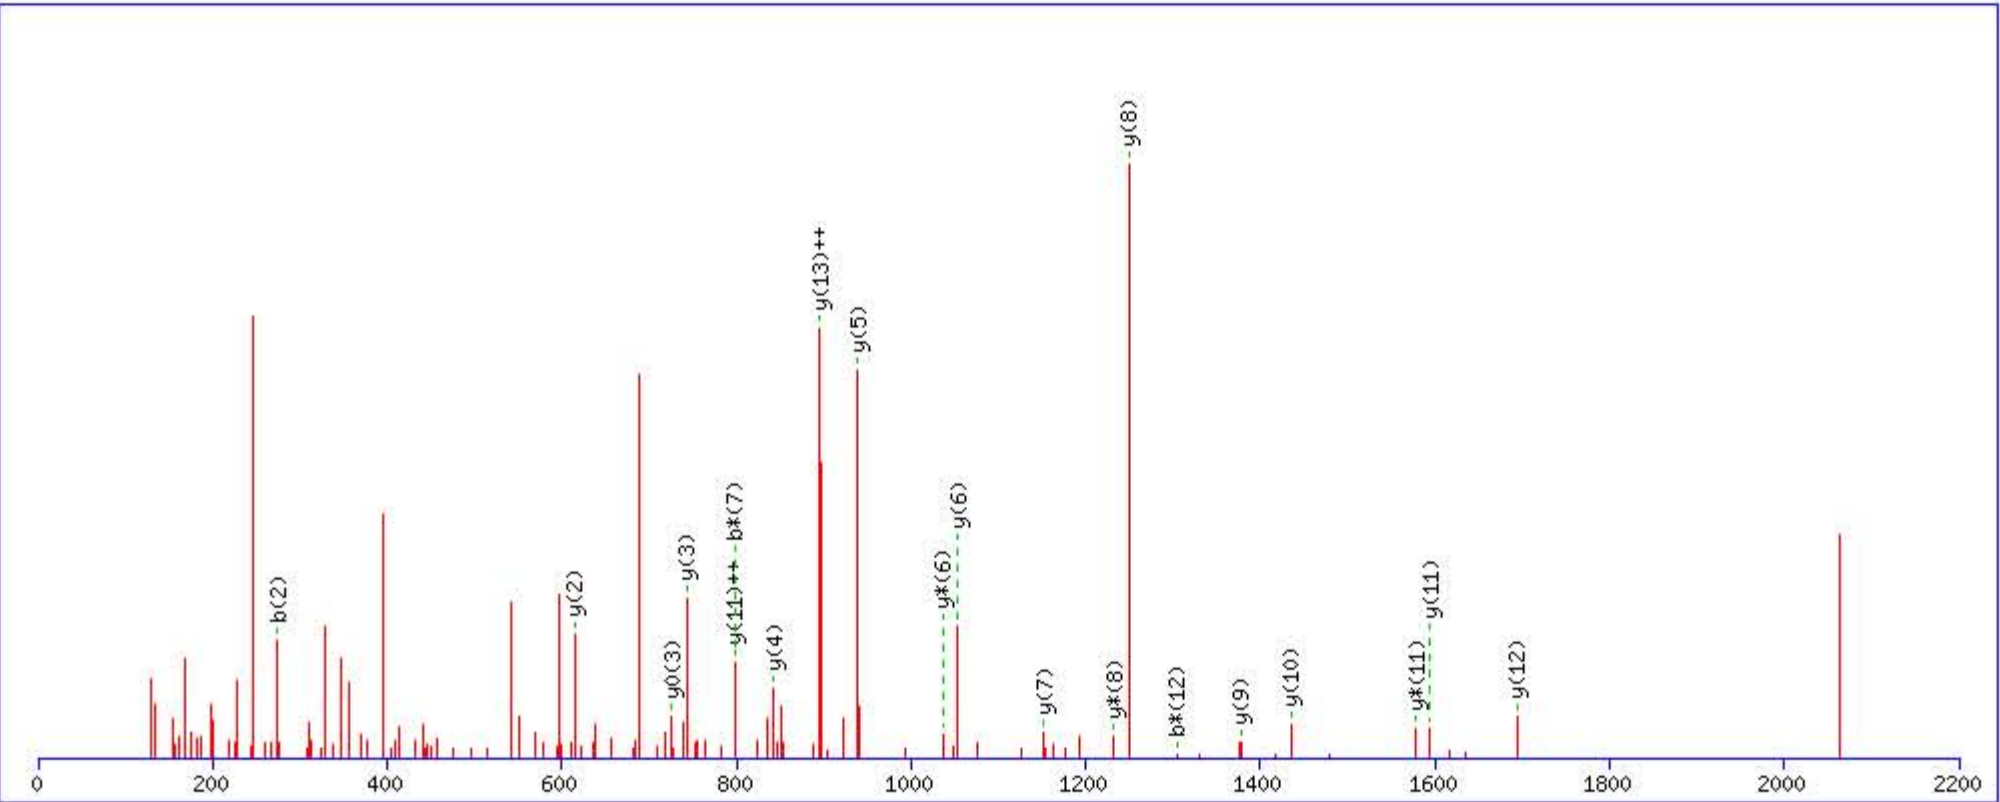

Monoisotopic mass of neutral peptide Mr(calc): 2063.047852  
Fixed modifications: Carbamidomethyl (C) (apply to specified residues or termini only)  
Variable modifications:  
Q14 : Biotin:Thermo-21345 (Q)  
Ions Score: 49 Expect: 0.00038  
Matches : 20/128 fragment ions using 47 most intense peaks [\(help\)](#)

| #                  | b                          | b <sup>++</sup> | b <sup>*</sup>              | b <sup>++</sup> | b <sup>0</sup> | b <sup>0++</sup> | Seq. | y                           | y <sup>++</sup>            | y <sup>*</sup>              | y <sup>++</sup> | y <sup>0</sup>             | y <sup>0++</sup> | #                  |
|--------------------|----------------------------|-----------------|-----------------------------|-----------------|----------------|------------------|------|-----------------------------|----------------------------|-----------------------------|-----------------|----------------------------|------------------|--------------------|
| <a href="#">1</a>  | 161.037925                 | 81.022600       |                             |                 |                |                  | C    |                             |                            |                             |                 |                            |                  | <a href="#">15</a> |
| <a href="#">2</a>  | <a href="#">274.121989</a> | 137.564632      |                             |                 |                |                  | L    | 1904.024472                 | 952.515874                 | 1886.997923                 | 944.002600      | 1886.013907                | 943.510592       | <a href="#">14</a> |
| <a href="#">3</a>  | 371.174753                 | 186.091014      |                             |                 |                |                  | P    | 1790.940408                 | <a href="#">895.973842</a> | 1773.913859                 | 887.460568      | 1772.929843                | 886.968560       | <a href="#">13</a> |
| <a href="#">4</a>  | 470.243167                 | 235.625221      |                             |                 |                |                  | V    | <a href="#">1693.887644</a> | 847.447460                 | 1676.861095                 | 838.934186      | 1675.877079                | 838.442178       | <a href="#">12</a> |
| <a href="#">5</a>  | 630.273816                 | 315.640546      |                             |                 |                |                  | C    | <a href="#">1594.819230</a> | <a href="#">797.913253</a> | <a href="#">1577.792681</a> | 789.399979      | 1576.808665                | 788.907971       | <a href="#">11</a> |
| <a href="#">6</a>  | 687.295280                 | 344.151278      |                             |                 |                |                  | G    | <a href="#">1434.788581</a> | 717.897929                 | 1417.762032                 | 709.384654      | 1416.778016                | 708.892646       | <a href="#">10</a> |
| <a href="#">7</a>  | 815.390243                 | 408.198760      | <a href="#">798.363694</a>  | 399.685485      |                |                  | K    | <a href="#">1377.767117</a> | 689.387197                 | 1360.740568                 | 680.873922      | 1359.756552                | 680.381914       | <a href="#">9</a>  |
| <a href="#">8</a>  | 912.443007                 | 456.725142      | 895.416458                  | 448.211867      |                |                  | P    | <a href="#">1249.672154</a> | 625.339715                 | <a href="#">1232.645605</a> | 616.826441      | 1231.661589                | 616.334433       | <a href="#">8</a>  |
| <a href="#">9</a>  | 1011.511421                | 506.259349      | 994.484872                  | 497.746074      |                |                  | V    | <a href="#">1152.619390</a> | 576.813333                 | 1135.592841                 | 568.300059      | 1134.608825                | 567.808051       | <a href="#">7</a>  |
| <a href="#">10</a> | 1125.554348                | 563.280812      | 1108.527799                 | 554.767538      |                |                  | N    | <a href="#">1053.550976</a> | 527.279126                 | <a href="#">1036.524427</a> | 518.765852      | 1035.540411                | 518.273844       | <a href="#">6</a>  |
| <a href="#">11</a> | 1222.607112                | 611.807194      | 1205.580563                 | 603.293920      |                |                  | P    | <a href="#">939.508049</a>  | 470.257663                 | 922.481500                  | 461.744388      | 921.497484                 | 461.252380       | <a href="#">5</a>  |
| <a href="#">12</a> | 1321.675526                | 661.341401      | <a href="#">1304.648977</a> | 652.828127      |                |                  | V    | <a href="#">842.455285</a>  | 421.731281                 | 825.428736                  | 413.218006      | 824.444720                 | 412.725998       | <a href="#">4</a>  |
| <a href="#">13</a> | 1450.718119                | 725.862698      | 1433.691570                 | 717.349423      | 1432.707554    | 716.857415       | E    | <a href="#">743.386871</a>  | 372.197074                 | 726.360322                  | 363.683799      | <a href="#">725.376306</a> | 363.191791       | <a href="#">3</a>  |
| <a href="#">14</a> | 1889.943445                | 945.475361      | 1872.916896                 | 936.962086      | 1871.932880    | 936.470078       | Q    | <a href="#">614.344278</a>  | 307.675777                 | 597.317729                  | 299.162503      |                            |                  | <a href="#">2</a>  |
| <a href="#">15</a> |                            |                 |                             |                 |                |                  | R    | 175.118952                  | 88.063114                  | 158.092403                  | 79.549839       |                            |                  | <a href="#">1</a>  |

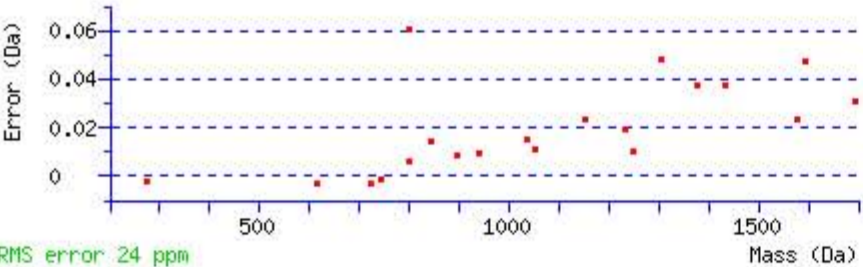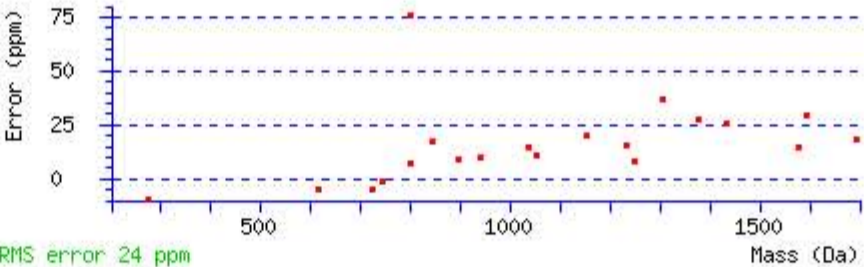

NCBI BLAST search of [CLPVCGKPVNPVEQR](#)  
(Parameters: blastp, nr protein database, expect=20000, no filter, PAM30)  
Other BLAST [web gateways](#)

All matches to this query

| Score | Mr(calc):   | Delta    | Sequence                        |
|-------|-------------|----------|---------------------------------|
| 48.7  | 2063.047852 | 0.021800 | <a href="#">CLPVCGKPVNPVEQR</a> |

MATRIX

SCIENCE

Mascot Search Results

Peptide View

MS/MS Fragmentation of **MGNFPWQVFTNIHGR**  
Found in **C1R\_HUMAN**, Complement C1r subcomponent OS=Homo sapiens GN=C1R PE=1 SV=2

Match to Query 46818: 2114.061822 from(705.694550,3+) rtinseconds(2667) index(54419)  
Title: Locus:1.1.1.2165.15 File:"2013-07-02 CLN FXIII 180 min 2nd F 4.wiff"  
Data file C:\Program Files (x86)\Matrix Science\Mascot Daemon\mgf\8 FXIII 180 min 2nd\mascot\_daemon\_merge.mgf

Click mouse within plot area to zoom in by factor of two about that point  
Or, 

Plot from

100

 to 

1700

 Da 

Full range

  
Label all possible matches ☐ Label matches used for scoring ☒

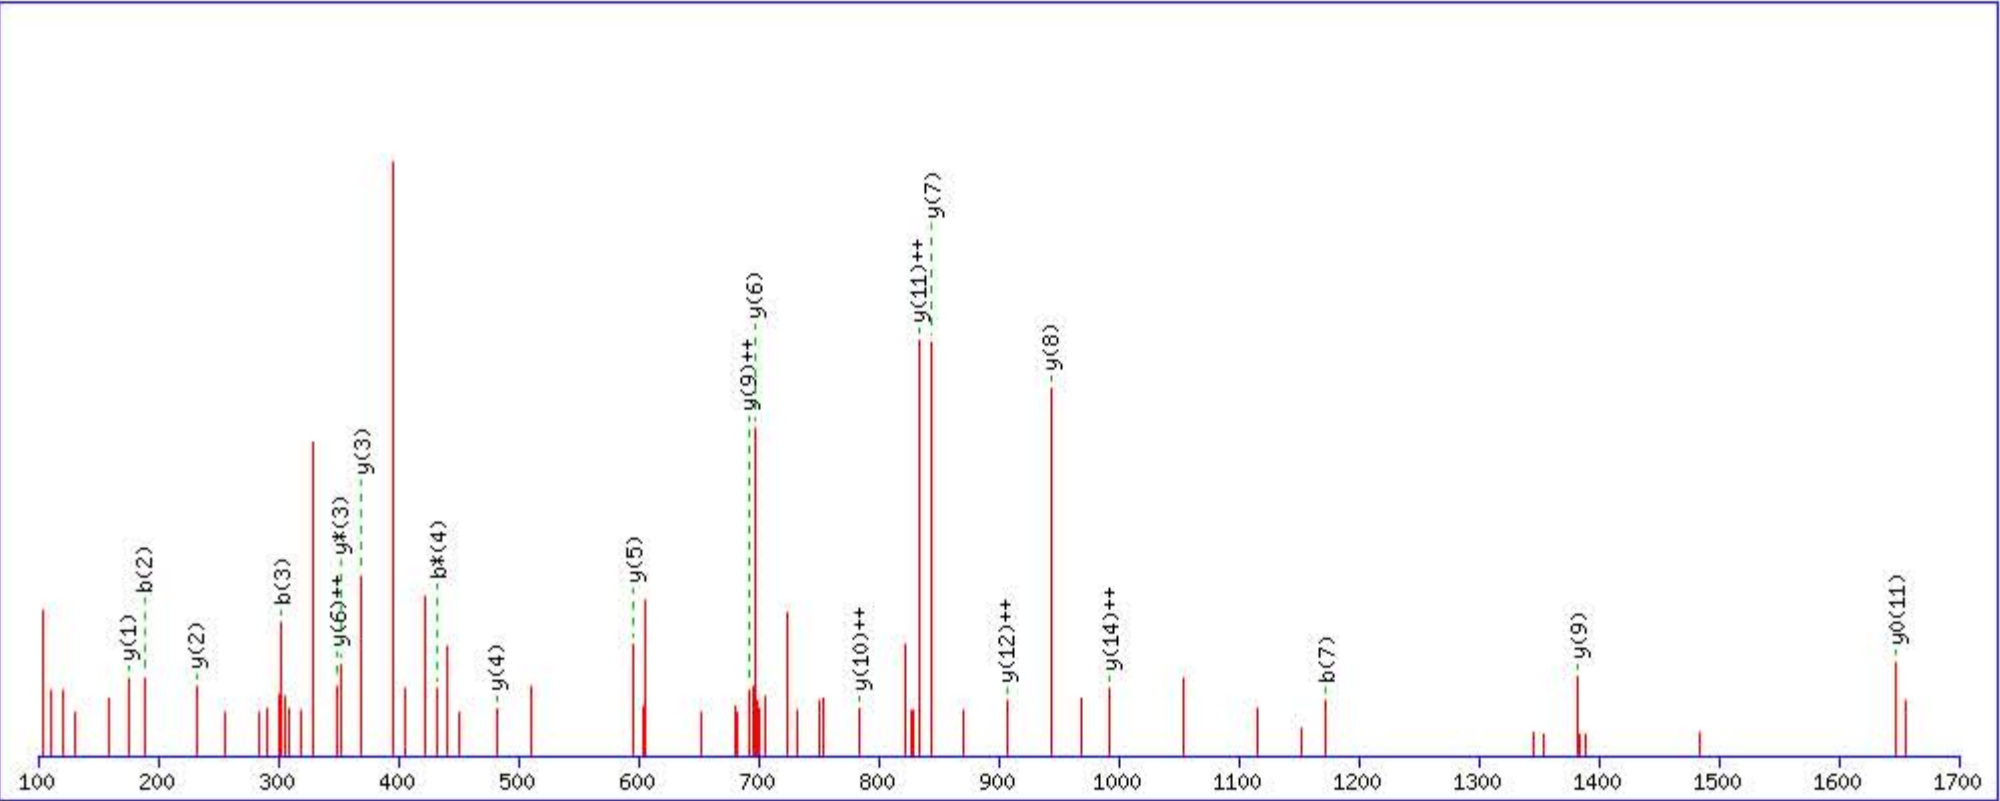

Monoisotopic mass of neutral peptide Mr(calc): 2114.034256  
Fixed modifications: Carbamidomethyl (C) (apply to specified residues or termini only)  
Variable modifications:  
Q7 : Biotin:Thermo-21345 (Q)  
Ions Score: 39 Expect: 0.00025  
Matches : 21/136 fragment ions using 54 most intense peaks [\(help\)](#)

| #  | b           | b <sup>++</sup> | b <sup>*</sup> | b <sup>*++</sup> | b <sup>0</sup> | b <sup>0++</sup> | Seq. | y           | y <sup>++</sup> | y <sup>*</sup> | y <sup>*++</sup> | y <sup>0</sup> | y <sup>0++</sup> | #  |
|----|-------------|-----------------|----------------|------------------|----------------|------------------|------|-------------|-----------------|----------------|------------------|----------------|------------------|----|
| 1  | 132.047761  | 66.527518       |                |                  |                |                  | M    |             |                 |                |                  |                |                  | 15 |
| 2  | 189.069225  | 95.038250       |                |                  |                |                  | G    | 1984.001034 | 992.504155      | 1966.974485    | 983.990881       | 1965.990469    | 983.498873       | 14 |
| 3  | 303.112152  | 152.059714      | 286.085603     | 143.546439       |                |                  | N    | 1926.979570 | 963.993423      | 1909.953021    | 955.480149       | 1908.969005    | 954.988141       | 13 |
| 4  | 450.180566  | 225.593921      | 433.154017     | 217.080646       |                |                  | F    | 1812.936643 | 906.971960      | 1795.910094    | 898.458685       | 1794.926078    | 897.966677       | 12 |
| 5  | 547.233330  | 274.120303      | 530.206781     | 265.607029       |                |                  | P    | 1665.868229 | 833.437753      | 1648.841680    | 824.924478       | 1647.857664    | 824.432470       | 11 |
| 6  | 733.312643  | 367.159960      | 716.286094     | 358.646685       |                |                  | W    | 1568.815465 | 784.911371      | 1551.788916    | 776.398096       | 1550.804900    | 775.906088       | 10 |
| 7  | 1172.537969 | 586.772623      | 1155.511420    | 578.259348       |                |                  | Q    | 1382.736152 | 691.871714      | 1365.709603    | 683.358440       | 1364.725587    | 682.866432       | 9  |
| 8  | 1271.606383 | 636.306830      | 1254.579834    | 627.793555       |                |                  | V    | 943.510826  | 472.259051      | 926.484277     | 463.745777       | 925.500261     | 463.253769       | 8  |
| 9  | 1418.674797 | 709.841037      | 1401.648248    | 701.327762       |                |                  | F    | 844.442412  | 422.724844      | 827.415863     | 414.211570       | 826.431847     | 413.719562       | 7  |
| 10 | 1519.722476 | 760.364876      | 1502.695927    | 751.851602       | 1501.711911    | 751.359594       | T    | 697.373998  | 349.190637      | 680.347449     | 340.677363       | 679.363433     | 340.185355       | 6  |
| 11 | 1633.765403 | 817.386340      | 1616.738854    | 808.873065       | 1615.754838    | 808.381057       | N    | 596.326319  | 298.666798      | 579.299770     | 290.153523       |                |                  | 5  |
| 12 | 1746.849467 | 873.928372      | 1729.822918    | 865.415097       | 1728.838902    | 864.923089       | I    | 482.283392  | 241.645334      | 465.256843     | 233.132059       |                |                  | 4  |
| 13 | 1883.908379 | 942.457828      | 1866.881830    | 933.944553       | 1865.897814    | 933.452545       | H    | 369.199328  | 185.103302      | 352.172779     | 176.590028       |                |                  | 3  |
| 14 | 1940.929843 | 970.968559      | 1923.903294    | 962.455285       | 1922.919278    | 961.963277       | G    | 232.140416  | 116.573846      | 215.113867     | 108.060572       |                |                  | 2  |
| 15 |             |                 |                |                  |                |                  | R    | 175.118952  | 88.063114       | 158.092403     | 79.549840        |                |                  | 1  |

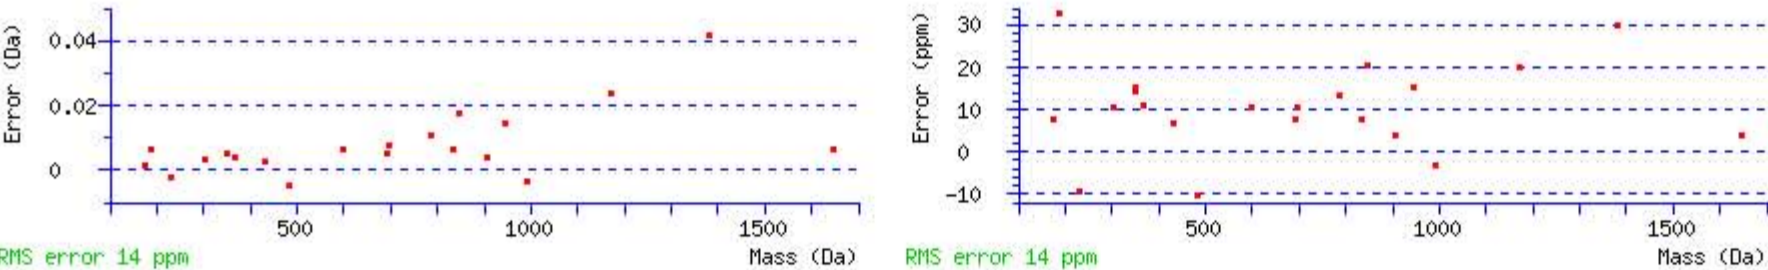

NCBI BLAST search of [MGNFPWQVFTNIHGR](#)  
(Parameters: blastp, nr protein database, expect=20000, no filter, PAM30)  
Other BLAST [web gateways](#)

All matches to this query

| Score | Mr(calc):   | Delta     | Sequence                           |
|-------|-------------|-----------|------------------------------------|
| 39.3  | 2114.034256 | 0.027566  | <a href="#">MGNFPWQVFTNIHGR</a>    |
| 0.8   | 2114.079849 | -0.018027 | <a href="#">SHGLLPKCIMQATDIMRK</a> |

MATRIX

SCIENCE

Mascot Search Results

Peptide View

MS/MS Fragmentation of **ESEQGVYTCTAQGIWK**  
Found in **C1R\_HUMAN**, Complement C1r subcomponent OS=Homo sapiens GN=C1R PE=1 SV=2

Match to Query 47768: 2167.021242 from(723.347690,3+) rtinseconds(2160) index(21272)  
Title: Locus:1.1.1.3134.17 File:"2013-07-02 CLN FXIII 180 min 2nd F 2.wiff"  
Data file C:\Program Files (x86)\Matrix Science\Mascot Daemon\mgf\8 FXIII 180 min 2nd\mascot\_daemon\_merge.mgf

Click mouse within plot area to zoom in by factor of two about that point  
Or, 

Plot from

0

 to 

3400

 Da 

Full range

  
Label all possible matches ☐ Label matches used for scoring ☒

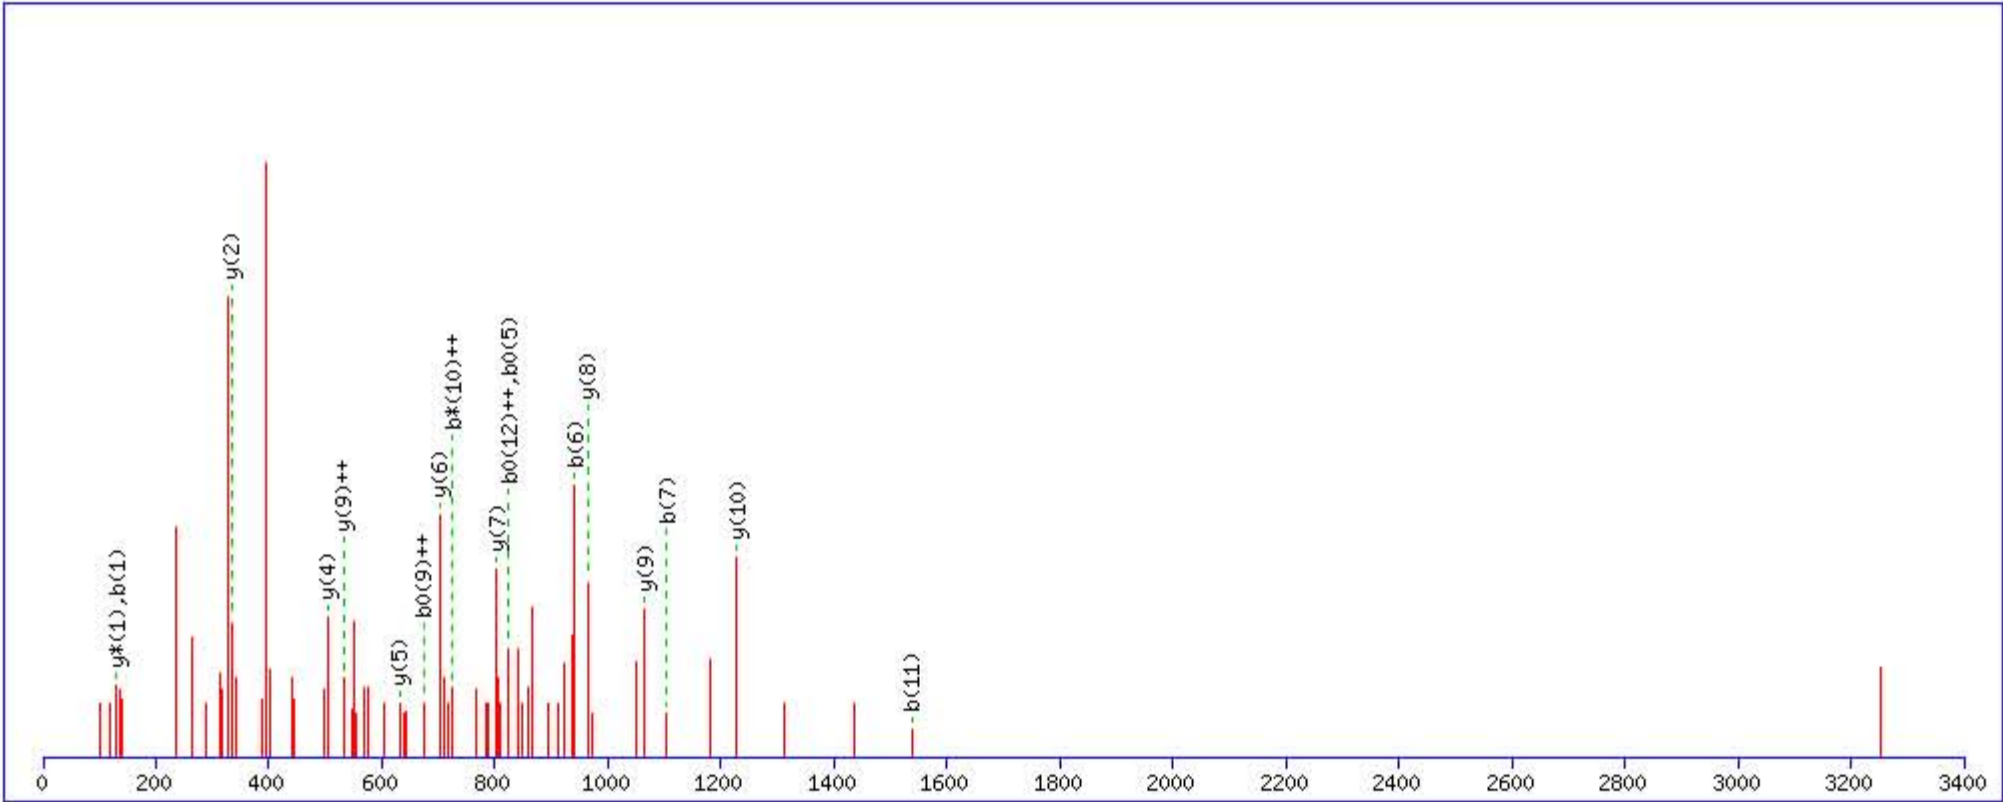

Monoisotopic mass of neutral peptide Mr(calc): 2167.007813  
Fixed modifications: Carbamidomethyl (C) (apply to specified residues or termini only)  
Variable modifications:  
Q4 : Biotin:Thermo-21345 (Q)  
Ions Score: 32 Expect: 0.012  
Matches : 18/162 fragment ions using 35 most intense peaks [\(help\)](#)

| #  | b           | b <sup>++</sup> | b <sup>*</sup> | b <sup>+++</sup> | b <sup>0</sup> | b <sup>0++</sup> | Seq. | y           | y <sup>++</sup> | y <sup>*</sup> | y <sup>+++</sup> | y <sup>0</sup> | y <sup>0++</sup> | #  |
|----|-------------|-----------------|----------------|------------------|----------------|------------------|------|-------------|-----------------|----------------|------------------|----------------|------------------|----|
| 1  | 130.049869  | 65.528572       |                |                  | 112.039304     | 56.523290        | E    |             |                 |                |                  |                |                  | 16 |
| 2  | 217.081897  | 109.044586      |                |                  | 199.071332     | 100.039304       | S    | 2038.972498 | 1019.989887     | 2021.945949    | 1011.476613      | 2020.961933    | 1010.984604      | 15 |
| 3  | 346.124490  | 173.565883      |                |                  | 328.113925     | 164.560600       | E    | 1951.940470 | 976.473873      | 1934.913921    | 967.960599       | 1933.929905    | 967.468591       | 14 |
| 4  | 785.349816  | 393.178546      | 768.323267     | 384.665272       | 767.339251     | 384.173264       | Q    | 1822.897877 | 911.952577      | 1805.871328    | 903.439302       | 1804.887312    | 902.947294       | 13 |
| 5  | 842.371280  | 421.689278      | 825.344731     | 413.176004       | 824.360715     | 412.683996       | G    | 1383.672551 | 692.339913      | 1366.646002    | 683.826639       | 1365.661986    | 683.334631       | 12 |
| 6  | 941.439694  | 471.223485      | 924.413145     | 462.710211       | 923.429129     | 462.218203       | V    | 1326.651087 | 663.829182      | 1309.624538    | 655.315907       | 1308.640522    | 654.823899       | 11 |
| 7  | 1104.503023 | 552.755150      | 1087.476474    | 544.241875       | 1086.492458    | 543.749867       | Y    | 1227.582673 | 614.294975      | 1210.556124    | 605.781700       | 1209.572108    | 605.289692       | 10 |
| 8  | 1205.550702 | 603.278989      | 1188.524153    | 594.765715       | 1187.540137    | 594.273707       | T    | 1064.519344 | 532.763310      | 1047.492795    | 524.250036       | 1046.508779    | 523.758028       | 9  |
| 9  | 1365.581351 | 683.294314      | 1348.554802    | 674.781039       | 1347.570786    | 674.289031       | C    | 963.471665  | 482.239471      | 946.445116     | 473.726196       | 945.461100     | 473.234188       | 8  |
| 10 | 1466.629030 | 733.818153      | 1449.602481    | 725.304879       | 1448.618465    | 724.812871       | T    | 803.441016  | 402.224146      | 786.414467     | 393.710872       | 785.430451     | 393.218864       | 7  |
| 11 | 1537.666144 | 769.336710      | 1520.639595    | 760.823436       | 1519.655579    | 760.331428       | A    | 702.393337  | 351.700307      | 685.366788     | 343.187032       |                |                  | 6  |
| 12 | 1665.724722 | 833.365999      | 1648.698173    | 824.852725       | 1647.714157    | 824.360717       | Q    | 631.356223  | 316.181750      | 614.329674     | 307.668475       |                |                  | 5  |
| 13 | 1722.746186 | 861.876731      | 1705.719637    | 853.363457       | 1704.735621    | 852.871449       | G    | 503.297645  | 252.152460      | 486.271096     | 243.639186       |                |                  | 4  |
| 14 | 1835.830250 | 918.418763      | 1818.803701    | 909.905489       | 1817.819685    | 909.413480       | I    | 446.276181  | 223.641728      | 429.249632     | 215.128454       |                |                  | 3  |
| 15 | 2021.909563 | 1011.458420     | 2004.883014    | 1002.945145      | 2003.898998    | 1002.453137      | W    | 333.192117  | 167.099696      | 316.165568     | 158.586422       |                |                  | 2  |
| 16 |             |                 |                |                  |                |                  | K    | 147.112804  | 74.060040       | 130.086255     | 65.546765        |                |                  | 1  |

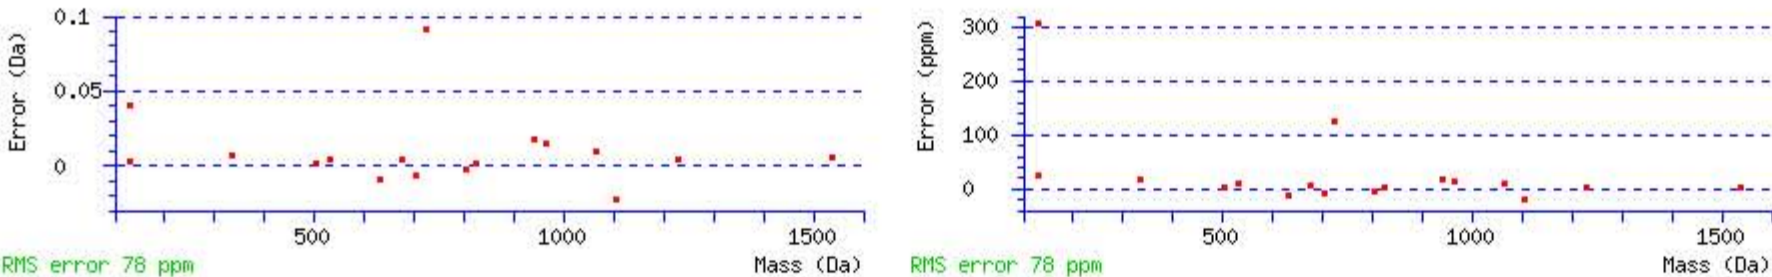

NCBI BLAST search of **ESEQGVYTCTAQGIWK**  
(Parameters: blastp, nr protein database, expect=20000, no filter, PAM30)  
Other BLAST [web gateways](#)

All matches to this query

| Score | Mr(calc):   | Delta    | Sequence                         |
|-------|-------------|----------|----------------------------------|
| 31.7  | 2167.007813 | 0.013429 | <a href="#">ESEQGVYTCTAQGIWK</a> |



MATRIX

SCIENCE

Mascot Search Results

Peptide View

MS/MS Fragmentation of **EACNAWLQK**  
Found in **C1RL\_HUMAN**, Complement C1r subcomponent-like protein OS=Homo sapiens GN=C1RL PE=1 SV=2

Match to Query 29036: 1429.692488 from(715.853520,2+) rtinseconds(1943) index(66066)  
Title: Locus:1.1.1.1951.21 File:"2013-07-02 CLN FXIII 180 min 2nd FT.wiff"  
Data file C:\Program Files (x86)\Matrix Science\Mascot Daemon\mgf\8 FXIII 180 min 2nd\mascot\_daemon\_merge.mgf

Click mouse within plot area to zoom in by factor of two about that point  
Or, 

Plot from

100

 to 

1500

 Da 

Full range

  
Label all possible matches ☐ Label matches used for scoring ☒

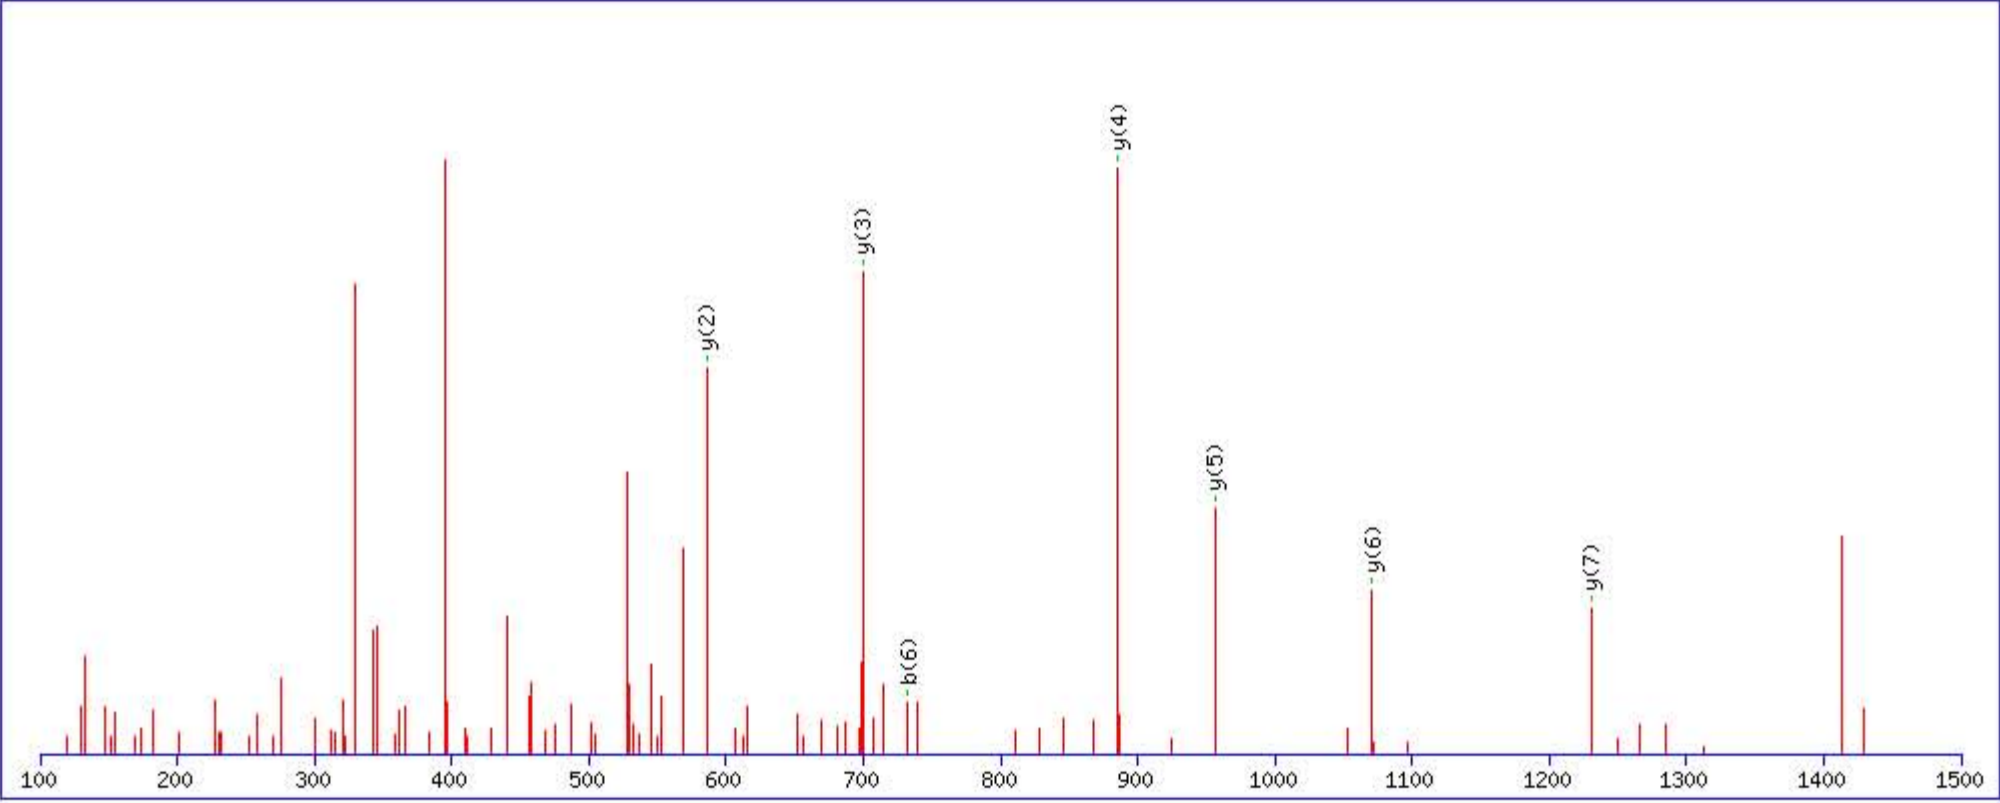

Monoisotopic mass of neutral peptide Mr(calc): 1429.684601  
Fixed modifications: Carbamidomethyl (C) (apply to specified residues or termini only)  
Variable modifications:  
Q8 : Biotin:Thermo-21345 (Q)  
Ions Score: 39 Expect: 0.0022  
Matches : 7/74 fragment ions using 13 most intense peaks [\(help\)](#)

| # | b           | b <sup>++</sup> | b <sup>*</sup> | b <sup>*++</sup> | b <sup>0</sup> | b <sup>0++</sup> | Seq. | y           | y <sup>++</sup> | y <sup>*</sup> | y <sup>*++</sup> | # |
|---|-------------|-----------------|----------------|------------------|----------------|------------------|------|-------------|-----------------|----------------|------------------|---|
| 1 | 130.049869  | 65.528572       |                |                  | 112.039304     | 56.523290        | E    |             |                 |                |                  | 9 |
| 2 | 201.086983  | 101.047130      |                |                  | 183.076418     | 92.041847        | A    | 1301.649311 | 651.328293      | 1284.622762    | 642.815019       | 8 |
| 3 | 361.117632  | 181.062454      |                |                  | 343.107067     | 172.057172       | C    | 1230.612197 | 615.809736      | 1213.585648    | 607.296462       | 7 |
| 4 | 475.160559  | 238.083918      | 458.134010     | 229.570643       | 457.149994     | 229.078635       | N    | 1070.581548 | 535.794412      | 1053.554999    | 527.281138       | 6 |
| 5 | 546.197673  | 273.602475      | 529.171124     | 265.089200       | 528.187108     | 264.597192       | A    | 956.538621  | 478.772948      | 939.512072     | 470.259674       | 5 |
| 6 | 732.276986  | 366.642131      | 715.250437     | 358.128857       | 714.266421     | 357.636849       | W    | 885.501507  | 443.254392      | 868.474958     | 434.741117       | 4 |
| 7 | 845.361050  | 423.184163      | 828.334501     | 414.670889       | 827.350485     | 414.178881       | L    | 699.422194  | 350.214735      | 682.395645     | 341.701461       | 3 |
| 8 | 1284.586376 | 642.796826      | 1267.559827    | 634.283552       | 1266.575811    | 633.791543       | Q    | 586.338130  | 293.672703      | 569.311581     | 285.159428       | 2 |
| 9 |             |                 |                |                  |                |                  | K    | 147.112804  | 74.060040       | 130.086255     | 65.546765        | 1 |

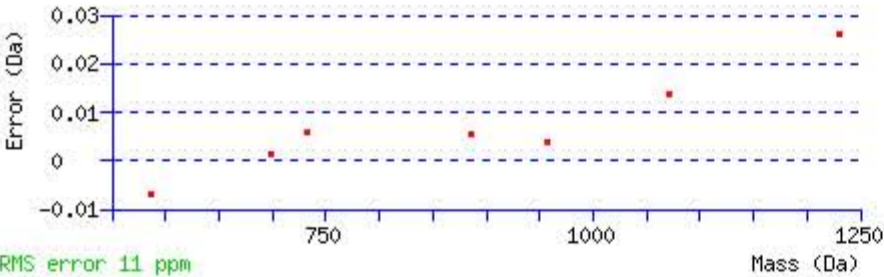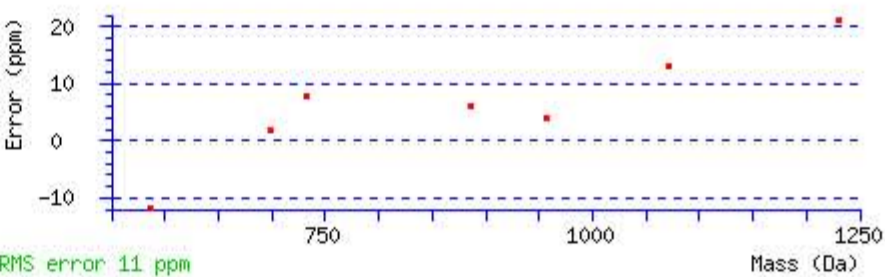

NCBI BLAST search of [EACNAWLQK](#)  
(Parameters: blastp, nr protein database, expect=20000, no filter, PAM30)  
Other BLAST [web gateways](#)

All matches to this query

| Score | Mr(calc):   | Delta     | Sequence                      |
|-------|-------------|-----------|-------------------------------|
| 39.4  | 1429.684601 | 0.007887  | <a href="#">EACNAWLQK</a>     |
| 11.2  | 1429.679886 | 0.012602  | <a href="#">MDDKELIEYFK</a>   |
| 11.0  | 1429.687988 | 0.004500  | <a href="#">CNTPAMGLQK</a>    |
| 8.6   | 1429.687119 | 0.005369  | <a href="#">EQHQTMDISLTK</a>  |
| 8.3   | 1429.705719 | -0.013231 | <a href="#">EANALAMQQK</a>    |
| 7.3   | 1429.687103 | 0.005385  | <a href="#">EIPDPANSTCAKK</a> |
| 7.2   | 1429.702362 | -0.009874 | <a href="#">LSNWESQQK</a>     |
| 6.3   | 1429.705719 | -0.013231 | <a href="#">EANALAMQQK</a>    |
| 6.0   | 1429.680588 | 0.011900  | <a href="#">MRIHCLENVDK</a>   |
| 5.7   | 1429.687103 | 0.005385  | <a href="#">QSEADNNTLK</a>    |

MATRIX

SCIENCE

Mascot Search Results

Peptide View

MS/MS Fragmentation of **TMQENSTPR**  
Found in **C1S\_HUMAN**, Complement C1s subcomponent OS=Homo sapiens GN=C1S PE=1 SV=1

Match to Query 26357: 1373.645048 from(687.829800,2+) rtinseconds(1391) index(30376)  
Title: Locus:1.1.1.592.23 File:"2013-07-02 CLN FXIII 180 min 2nd F 3.wiff"  
Data file C:\Program Files (x86)\Matrix Science\Mascot Daemon\mgf\8 FXIII 180 min 2nd\mascot\_daemon\_merge.mgf

Click mouse within plot area to zoom in by factor of two about that point  
Or, 

Plot from

100

 to 

1400

 Da 

Full range

  
Label all possible matches ☐ Label matches used for scoring ☒

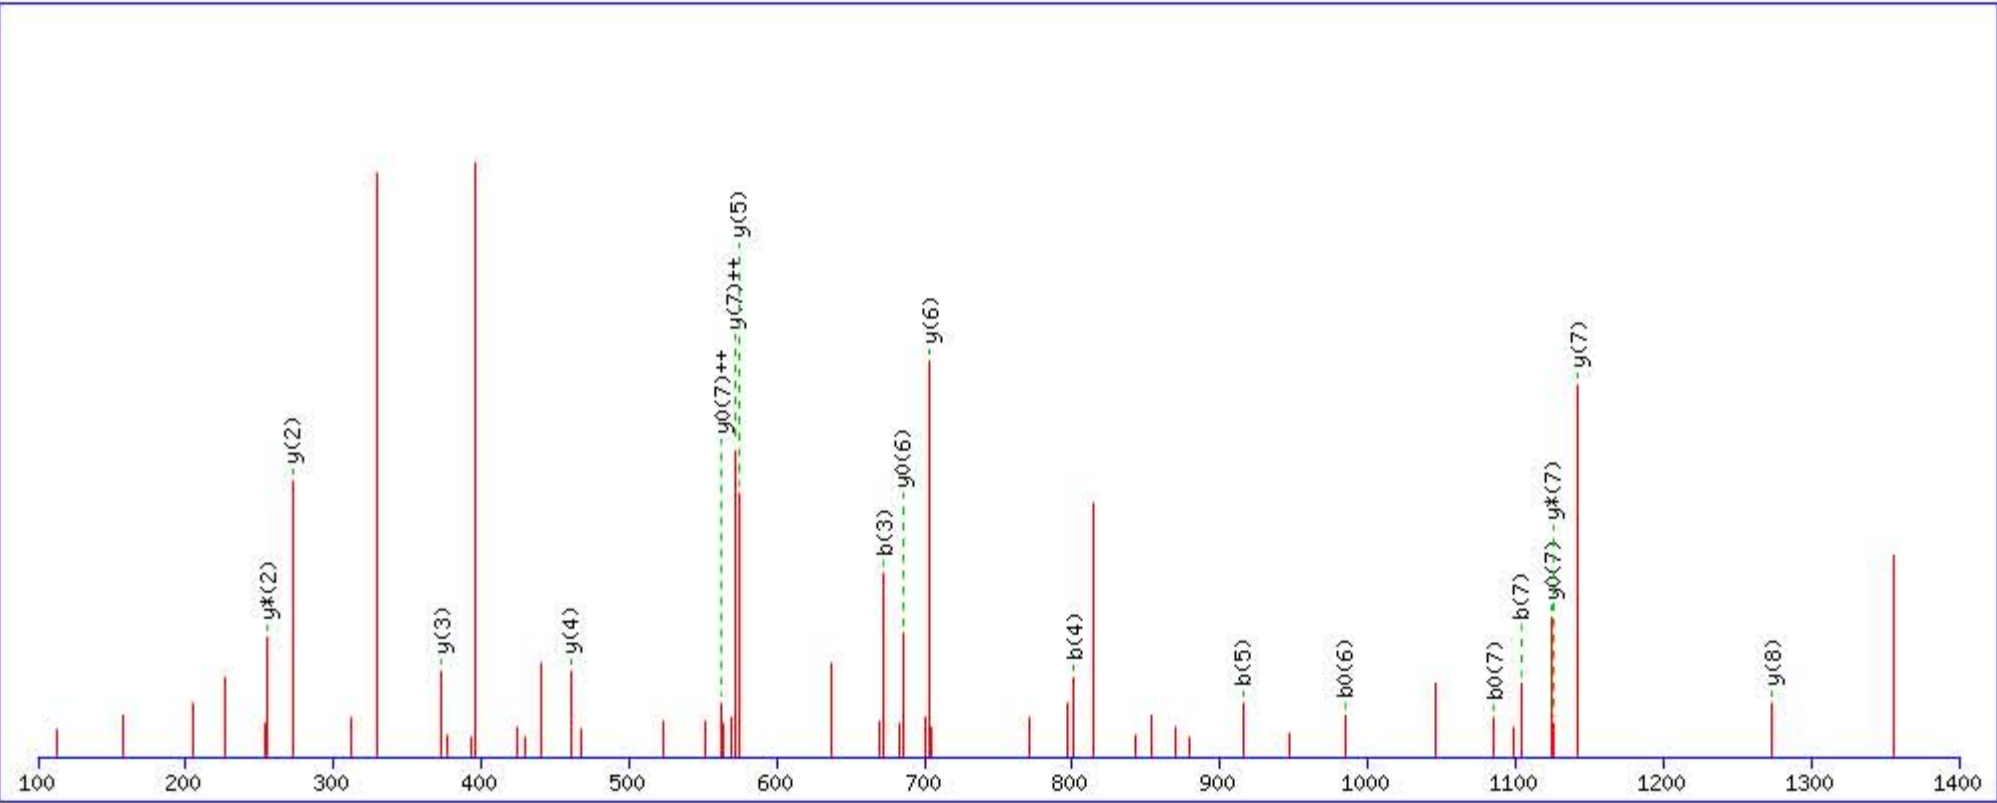

Monoisotopic mass of neutral peptide Mr(calc): 1373.643143  
Fixed modifications: Carbamidomethyl (C) (apply to specified residues or termini only)  
Variable modifications:  
Q3 : Biotin:Thermo-21345 (Q)  
Ions Score: 39 Expect: 0.0008  
Matches : 19/88 fragment ions using 35 most intense peaks ([help](#))

| # | b           | b <sup>++</sup> | b <sup>*</sup> | b <sup>*++</sup> | b <sup>0</sup> | b <sup>0++</sup> | Seq. | y           | y <sup>++</sup> | y <sup>*</sup> | y <sup>*++</sup> | y <sup>0</sup> | y <sup>0++</sup> | # |
|---|-------------|-----------------|----------------|------------------|----------------|------------------|------|-------------|-----------------|----------------|------------------|----------------|------------------|---|
| 1 | 102.054955  | 51.531116       |                |                  | 84.044390      | 42.525833        | T    |             |                 |                |                  |                |                  | 9 |
| 2 | 233.095440  | 117.051358      |                |                  | 215.084875     | 108.046076       | M    | 1273.602754 | 637.305015      | 1256.576205    | 628.791741       | 1255.592189    | 628.299733       | 8 |
| 3 | 672.320766  | 336.664021      | 655.294217     | 328.150747       | 654.310201     | 327.658739       | Q    | 1142.562269 | 571.784773      | 1125.535720    | 563.271498       | 1124.551704    | 562.779490       | 7 |
| 4 | 801.363359  | 401.185318      | 784.336810     | 392.672043       | 783.352794     | 392.180035       | E    | 703.336943  | 352.172110      | 686.310394     | 343.658835       | 685.326378     | 343.166827       | 6 |
| 5 | 915.406286  | 458.206781      | 898.379737     | 449.693507       | 897.395721     | 449.201499       | N    | 574.294350  | 287.650813      | 557.267801     | 279.137539       | 556.283785     | 278.645531       | 5 |
| 6 | 1002.438314 | 501.722795      | 985.411765     | 493.209521       | 984.427749     | 492.717513       | S    | 460.251423  | 230.629349      | 443.224874     | 222.116075       | 442.240858     | 221.624067       | 4 |
| 7 | 1103.485993 | 552.246635      | 1086.459444    | 543.733360       | 1085.475428    | 543.241352       | T    | 373.219395  | 187.113335      | 356.192846     | 178.600061       | 355.208830     | 178.108053       | 3 |
| 8 | 1200.538757 | 600.773017      | 1183.512208    | 592.259742       | 1182.528192    | 591.767734       | P    | 272.171716  | 136.589496      | 255.145167     | 128.076221       |                |                  | 2 |
| 9 |             |                 |                |                  |                |                  | R    | 175.118952  | 88.063114       | 158.092403     | 79.549839        |                |                  | 1 |

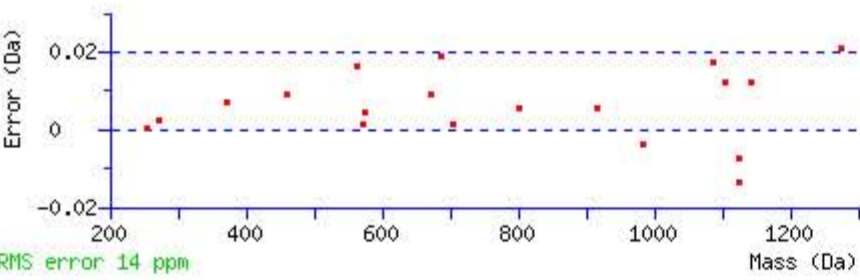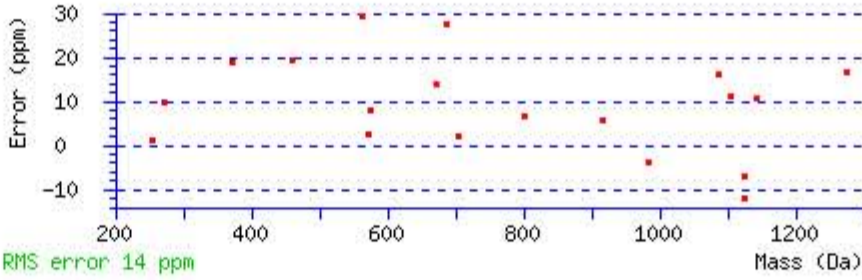

NCBI BLAST search of [TMQENSTPR](#)  
(Parameters: blastp, nr protein database, expect=20000, no filter, PAM30)  
Other BLAST [web gateways](#)

All matches to this query

| Score | Mr(calc):   | Delta    | Sequence                     |
|-------|-------------|----------|------------------------------|
| 38.8  | 1373.643143 | 0.001905 | <a href="#">TMQENSTPR</a>    |
| 5.8   | 1373.635742 | 0.009306 | <a href="#">DRGMPSDSPEKR</a> |

MATRIX

SCIENCE

Mascot Search Results

Peptide View

MS/MS Fragmentation of **EPTMYVGSTSVQTSR**  
Found in **C1S\_HUMAN**, Complement C1s subcomponent OS=Homo sapiens GN=C1S PE=1 SV=1

Match to Query 43162: 1952.950902 from(651.990910,3+) rtinseconds(1894) index(49514)  
Title: Locus:1.1.1.1897.17 File:"2013-07-02 CLN FXIII 180 min 2nd F 4.wiff"  
Data file C:\Program Files (x86)\Matrix Science\Mascot Daemon\mgf\8 FXIII 180 min 2nd\mascot\_daemon\_merge.mgf

Click mouse within plot area to zoom in by factor of two about that point  
Or,   to  Da   
Label all possible matches ☐ Label matches used for scoring ☒

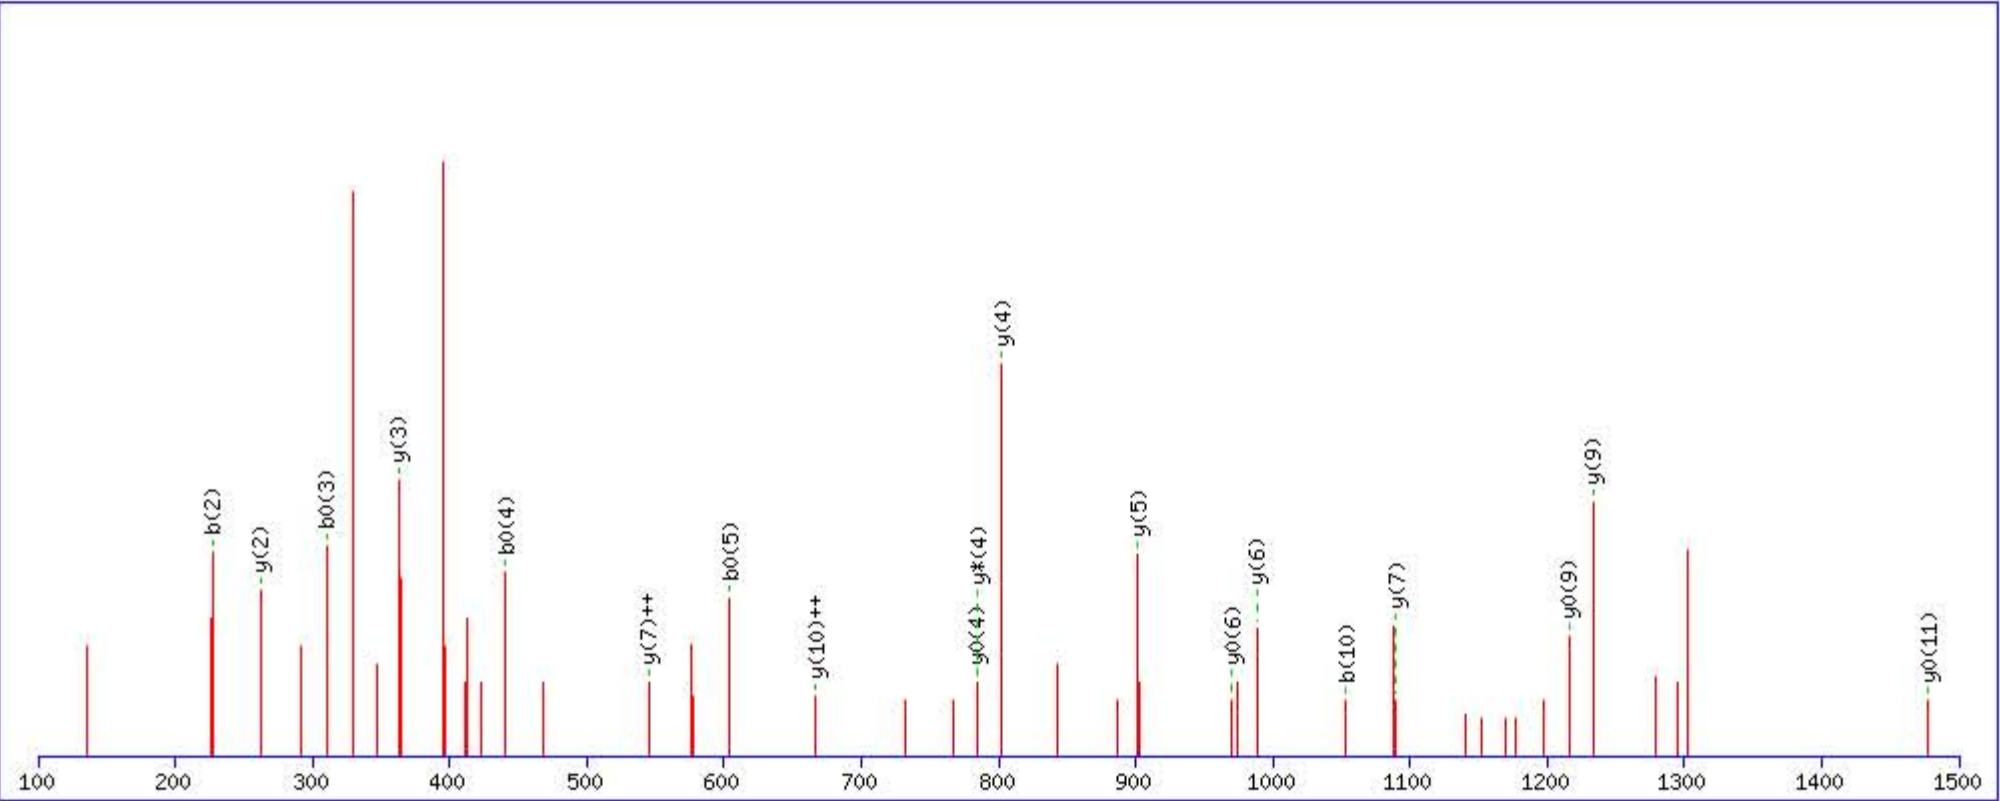

Monoisotopic mass of neutral peptide Mr(calc): 1952.933594  
Fixed modifications: Carbamidomethyl (C) (apply to specified residues or termini only)  
Variable modifications:  
Q12 : Biotin:Thermo-21345 (Q)  
Ions Score: 31 Expect: 0.0012  
Matches : 19/144 fragment ions using 36 most intense peaks [\(help\)](#)

| #  | b           | b <sup>++</sup> | b <sup>+</sup> | b <sup>++</sup> * | b <sup>0</sup> | b <sup>0++</sup> | Seq. | y           | y <sup>++</sup> | y <sup>+</sup> | y <sup>++</sup> * | y <sup>0</sup> | y <sup>0++</sup> | #  |
|----|-------------|-----------------|----------------|-------------------|----------------|------------------|------|-------------|-----------------|----------------|-------------------|----------------|------------------|----|
| 1  | 130.049869  | 65.528572       |                |                   | 112.039304     | 56.523290        | E    |             |                 |                |                   |                |                  | 15 |
| 2  | 227.102633  | 114.054954      |                |                   | 209.092068     | 105.049672       | P    | 1824.898269 | 912.952773      | 1807.871720    | 904.439498        | 1806.887704    | 903.947490       | 14 |
| 3  | 328.150312  | 164.578794      |                |                   | 310.139747     | 155.573512       | T    | 1727.845505 | 864.426391      | 1710.818956    | 855.913116        | 1709.834940    | 855.421108       | 13 |
| 4  | 459.190797  | 230.099036      |                |                   | 441.180232     | 221.093754       | M    | 1626.797826 | 813.902551      | 1609.771277    | 805.389277        | 1608.787261    | 804.897269       | 12 |
| 5  | 622.254126  | 311.630701      |                |                   | 604.243561     | 302.625419       | Y    | 1495.757341 | 748.382309      | 1478.730792    | 739.869034        | 1477.746776    | 739.377026       | 11 |
| 6  | 721.322540  | 361.164908      |                |                   | 703.311975     | 352.159626       | V    | 1332.694012 | 666.850644      | 1315.667463    | 658.337370        | 1314.683447    | 657.845362       | 10 |
| 7  | 778.344004  | 389.675640      |                |                   | 760.333439     | 380.670358       | G    | 1233.625598 | 617.316437      | 1216.599049    | 608.803163        | 1215.615033    | 608.311155       | 9  |
| 8  | 865.376032  | 433.191654      |                |                   | 847.365467     | 424.186372       | S    | 1176.604134 | 588.805705      | 1159.577585    | 580.292431        | 1158.593569    | 579.800423       | 8  |
| 9  | 966.423711  | 483.715494      |                |                   | 948.413146     | 474.710211       | T    | 1089.572106 | 545.289691      | 1072.545557    | 536.776417        | 1071.561541    | 536.284409       | 7  |
| 10 | 1053.455739 | 527.231508      |                |                   | 1035.445174    | 518.226225       | S    | 988.524427  | 494.765852      | 971.497878     | 486.252577        | 970.513862     | 485.760569       | 6  |
| 11 | 1152.524153 | 576.765715      |                |                   | 1134.513588    | 567.760432       | V    | 901.492399  | 451.249838      | 884.465850     | 442.736563        | 883.481834     | 442.244555       | 5  |
| 12 | 1591.749479 | 796.378378      | 1574.722930    | 787.865103        | 1573.738914    | 787.373095       | Q    | 802.423985  | 401.715631      | 785.397436     | 393.202356        | 784.413420     | 392.710348       | 4  |
| 13 | 1692.797158 | 846.902217      | 1675.770609    | 838.388943        | 1674.786593    | 837.896935       | T    | 363.198659  | 182.102968      | 346.172110     | 173.589693        | 345.188094     | 173.097685       | 3  |
| 14 | 1779.829186 | 890.418231      | 1762.802637    | 881.904957        | 1761.818621    | 881.412949       | S    | 262.150980  | 131.579128      | 245.124431     | 123.065854        | 244.140415     | 122.573846       | 2  |
| 15 |             |                 |                |                   |                |                  | R    | 175.118952  | 88.063114       | 158.092403     | 79.549839         |                |                  | 1  |

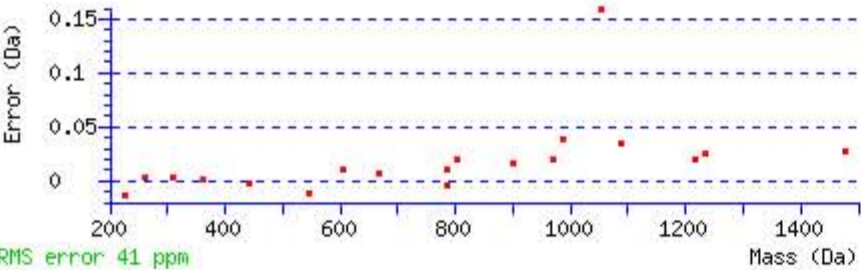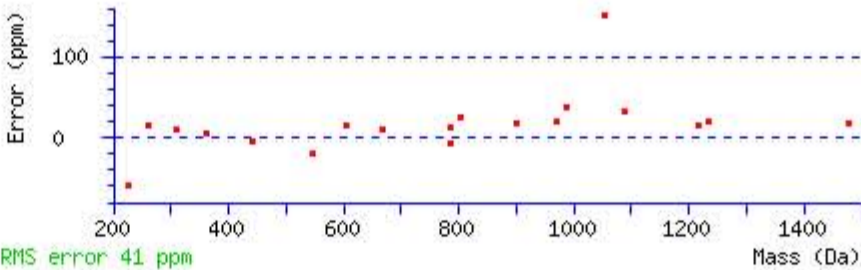

NCBI BLAST search of [EPTMYVGSTSVQTSR](#)  
(Parameters: blastp, nr protein database, expect=20000, no filter, PAM30)  
Other BLAST [web gateways](#)

All matches to this query

| Score | Mr(calc):   | Delta    | Sequence                        |
|-------|-------------|----------|---------------------------------|
| 31.5  | 1952.933594 | 0.017308 | <a href="#">EPTMYVGSTSVQTSR</a> |
| 0.5   | 1952.944794 | 0.006108 | <a href="#">MNQVTSKYANQSAGK</a> |

MATRIX

SCIENCE

Mascot Search Results

Peptide View

MS/MS Fragmentation of **SNALDIHFQDTLTGQK**  
Found in **C1S\_HUMAN**, Complement C1s subcomponent OS=Homo sapiens GN=C1S PE=1 SV=1

Match to Query 46167: 2074.100532 from(692.374120,3+) rtinseconds(2866) index(39587)  
Title: Locus:1.1.1.1105.9 File:"2013-07-02 CLN FXIII 180 min 2nd F 3.wiff"  
Data file C:\Program Files (x86)\Matrix Science\Mascot Daemon\mgf\8 FXIII 180 min 2nd\mascot\_daemon\_merge.mgf

Click mouse within plot area to zoom in by factor of two about that point  
Or, 

Plot from

100

to

1600

Da

Full range

Label all possible matches ☐Label matches used for scoring ☒

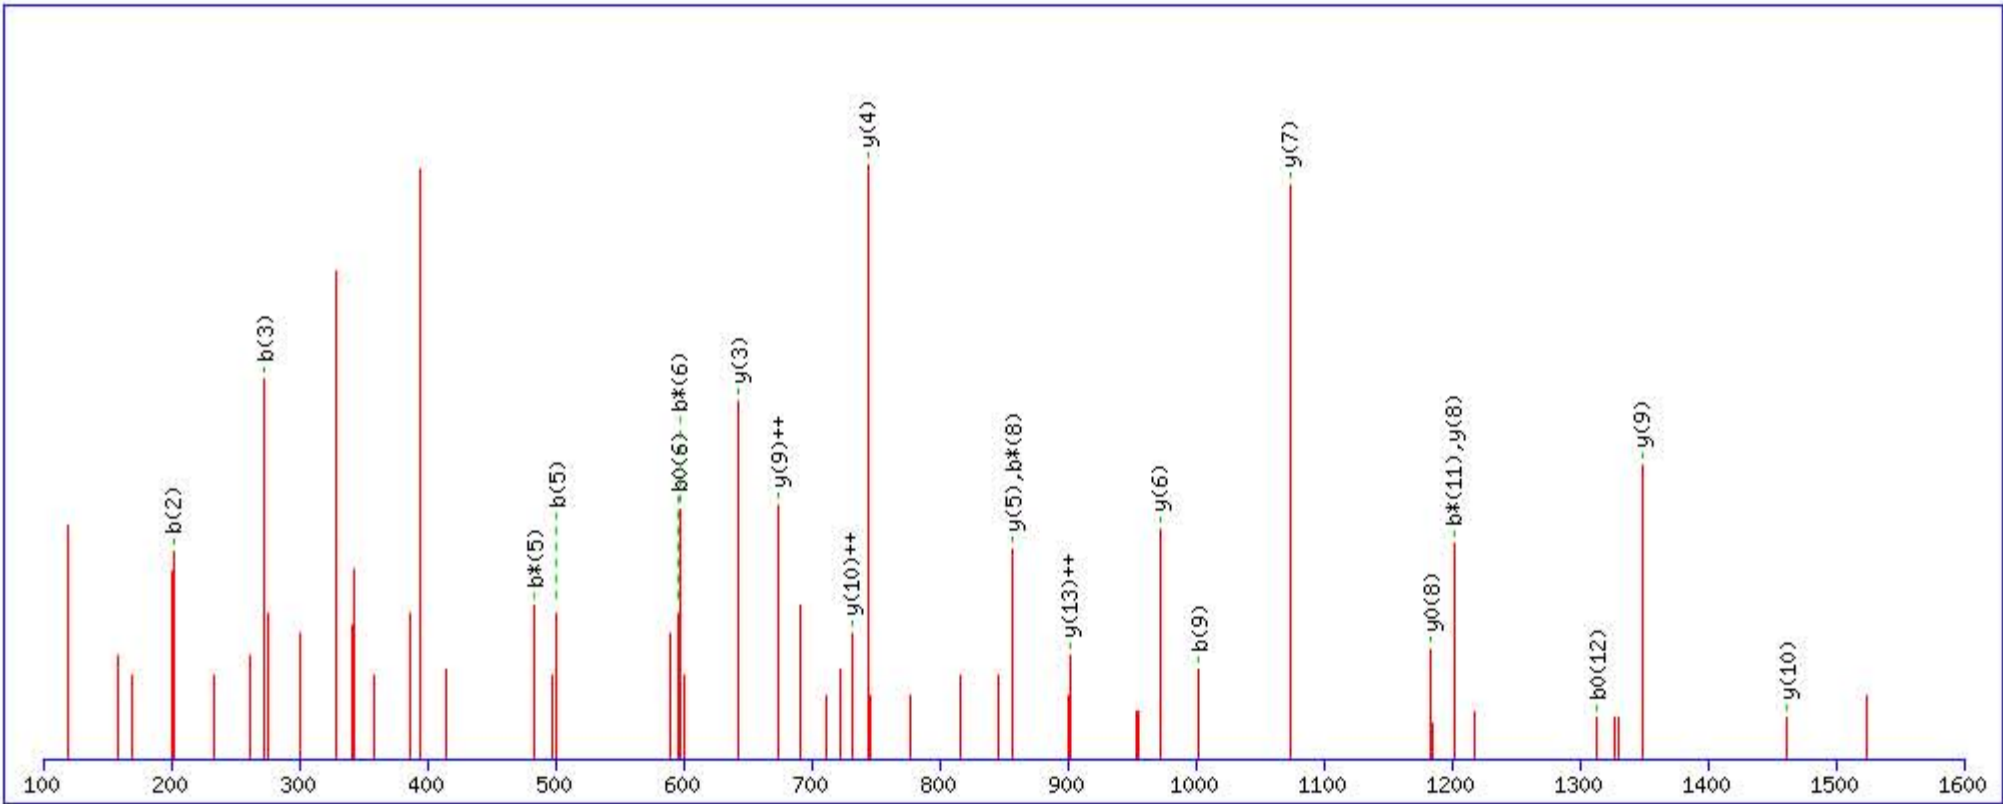

Monoisotopic mass of neutral peptide Mr(calc): 2074.076874  
Fixed modifications: Carbamidomethyl (C) (apply to specified residues or termini only)  
Variable modifications:  
Q15 : Biotin:Thermo-21345 (Q)  
Ions Score: 59 Expect: 5.3e-006  
Matches : 22/172 fragment ions using 26 most intense peaks [\(help\)](#)

| #  | b           | b <sup>++</sup> | b <sup>*</sup> | b <sup>*++</sup> | b <sup>0</sup> | b <sup>0++</sup> | Seq. | y           | y <sup>++</sup> | y <sup>*</sup> | y <sup>*++</sup> | y <sup>0</sup> | y <sup>0++</sup> | #  |
|----|-------------|-----------------|----------------|------------------|----------------|------------------|------|-------------|-----------------|----------------|------------------|----------------|------------------|----|
| 1  | 88.039304   | 44.523290       |                |                  | 70.028739      | 35.518008        | S    |             |                 |                |                  |                |                  | 16 |
| 2  | 202.082231  | 101.544753      | 185.055682     | 93.031479        | 184.071666     | 92.539471        | N    | 1988.052127 | 994.529702      | 1971.025578    | 986.016427       | 1970.041562    | 985.524419       | 15 |
| 3  | 273.119345  | 137.063311      | 256.092796     | 128.550036       | 255.108780     | 128.058028       | A    | 1874.009200 | 937.508238      | 1856.982651    | 928.994964       | 1855.998635    | 928.502956       | 14 |
| 4  | 386.203409  | 193.605343      | 369.176860     | 185.092068       | 368.192844     | 184.600060       | L    | 1802.972086 | 901.989681      | 1785.945537    | 893.476407       | 1784.961521    | 892.984399       | 13 |
| 5  | 501.230352  | 251.118814      | 484.203803     | 242.605540       | 483.219787     | 242.113532       | D    | 1689.888022 | 845.447649      | 1672.861473    | 836.934375       | 1671.877457    | 836.442367       | 12 |
| 6  | 614.314416  | 307.660846      | 597.287867     | 299.147572       | 596.303851     | 298.655564       | I    | 1574.861079 | 787.934178      | 1557.834530    | 779.420903       | 1556.850514    | 778.928895       | 11 |
| 7  | 727.398480  | 364.202878      | 710.371931     | 355.689604       | 709.387915     | 355.197596       | I    | 1461.777015 | 731.392146      | 1444.750466    | 722.878871       | 1443.766450    | 722.386863       | 10 |
| 8  | 874.466894  | 437.737085      | 857.440345     | 429.223811       | 856.456329     | 428.731803       | F    | 1348.692951 | 674.850114      | 1331.666402    | 666.336839       | 1330.682386    | 665.844831       | 9  |
| 9  | 1002.525472 | 501.766374      | 985.498923     | 493.253100       | 984.514907     | 492.761092       | Q    | 1201.624537 | 601.315907      | 1184.597988    | 592.802632       | 1183.613972    | 592.310624       | 8  |
| 10 | 1103.573151 | 552.290214      | 1086.546602    | 543.776939       | 1085.562586    | 543.284931       | T    | 1073.565959 | 537.286618      | 1056.539410    | 528.773343       | 1055.555394    | 528.281335       | 7  |
| 11 | 1218.600094 | 609.803685      | 1201.573545    | 601.290411       | 1200.589529    | 600.798403       | D    | 972.518280  | 486.762778      | 955.491731     | 478.249504       | 954.507715     | 477.757496       | 6  |
| 12 | 1331.684158 | 666.345717      | 1314.657609    | 657.832443       | 1313.673593    | 657.340435       | L    | 857.491337  | 429.249307      | 840.464788     | 420.736032       | 839.480772     | 420.244024       | 5  |
| 13 | 1432.731837 | 716.869557      | 1415.705288    | 708.356282       | 1414.721272    | 707.864274       | T    | 744.407273  | 372.707275      | 727.380724     | 364.194000       | 726.396708     | 363.701992       | 4  |
| 14 | 1489.753301 | 745.380289      | 1472.726752    | 736.867014       | 1471.742736    | 736.375006       | G    | 643.359594  | 322.183435      | 626.333045     | 313.670161       |                |                  | 3  |
| 15 | 1928.978627 | 964.992952      | 1911.952078    | 956.479677       | 1910.968062    | 955.987669       | Q    | 586.338130  | 293.672703      | 569.311581     | 285.159429       |                |                  | 2  |
| 16 |             |                 |                |                  |                |                  | K    | 147.112804  | 74.060040       | 130.086255     | 65.546765        |                |                  | 1  |

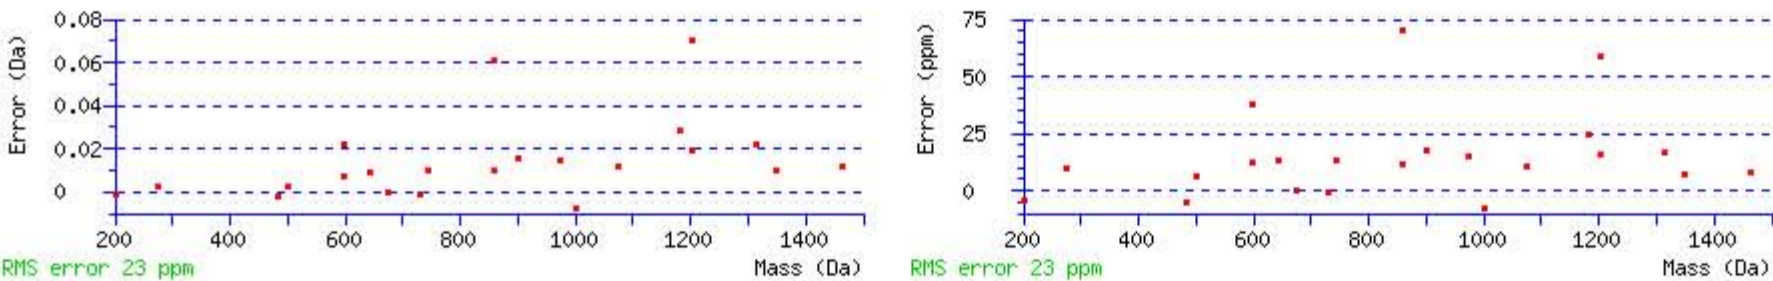

NCBI BLAST search of [SNALDIHFQDTLTGQK](#)  
(Parameters: blastp, nr protein database, expect=20000, no filter, PAM30)  
Other BLAST [web gateways](#)

All matches to this query

| Score | Mr(calc):   | Delta    | Sequence                          |
|-------|-------------|----------|-----------------------------------|
| 58.8  | 2074.076874 | 0.023658 | <a href="#">SNALDIHFQDTLTGQK</a>  |
| 22.4  | 2074.076874 | 0.023658 | <a href="#">SNALDIHFQDTLTGQK</a>  |
| 2.5   | 2074.088104 | 0.012428 | <a href="#">SKGLVQNIDQLYSGGGK</a> |

MATRIX

SCIENCE

Mascot Search Results

Peptide View

MS/MS Fragmentation of **SSGQWQTPGATR**  
Found in **CO2\_HUMAN**, Complement C2 OS=Homo sapiens GN=C2 PE=1 SV=2

Match to Query 34012: 1585.767368 from(793.890960,2+) rtinseconds(1703) index(64586)  
Title: Locus:1.1.1.1868.12 File:"2013-07-02 CLN FXIII 180 min 2nd FT.wiff"  
Data file C:\Program Files (x86)\Matrix Science\Mascot Daemon\mgf\8 FXIII 180 min 2nd\mascot\_daemon\_merge.mgf

Click mouse within plot area to zoom in by factor of two about that point  
Or,   to  Da   
Label all possible matches ☐ Label matches used for scoring ☒

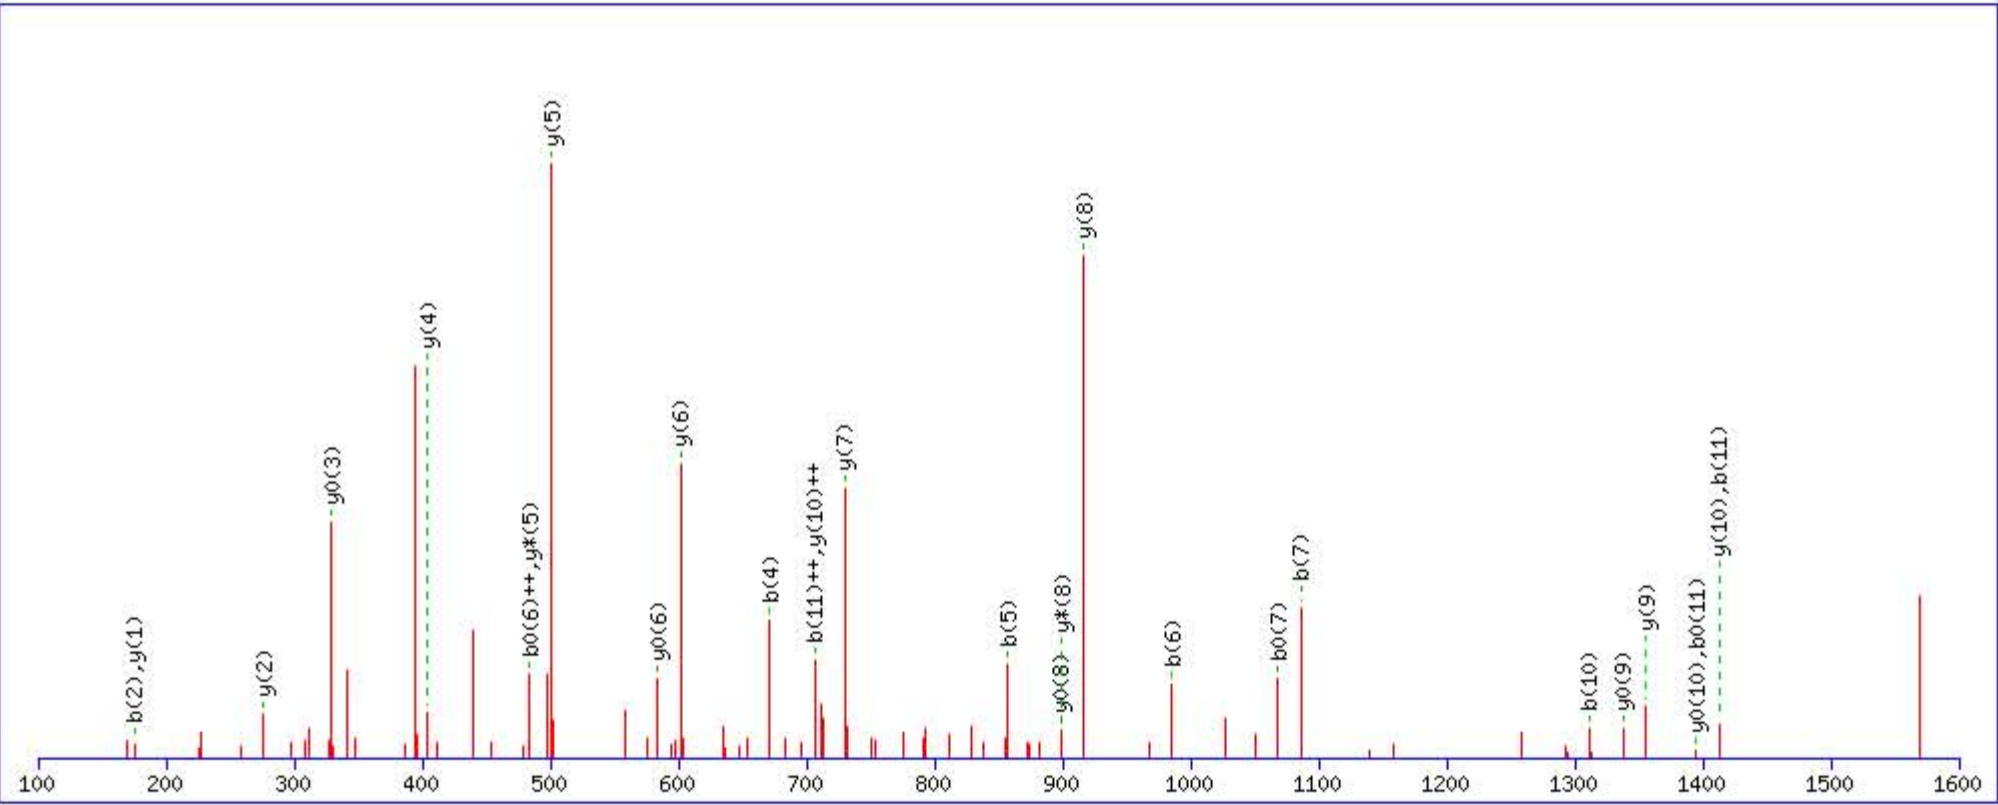

Monoisotopic mass of neutral peptide Mr(calc): 1585.767120  
Fixed modifications: Carbamidomethyl (C) (apply to specified residues or termini only)  
Variable modifications:  
Q4 : Biotin:Thermo-21345 (Q)  
Ions Score: 59 Expect: 1.8e-005  
Matches : 28/124 fragment ions using 38 most intense peaks [\(help\)](#)

| #  | b           | b <sup>++</sup> | b <sup>*</sup> | b <sup>+++</sup> | b <sup>0</sup> | b <sup>0++</sup> | Seq. | y           | y <sup>++</sup> | y <sup>*</sup> | y <sup>+++</sup> | y <sup>0</sup> | y <sup>0++</sup> | #  |
|----|-------------|-----------------|----------------|------------------|----------------|------------------|------|-------------|-----------------|----------------|------------------|----------------|------------------|----|
| 1  | 88.039304   | 44.523290       |                |                  | 70.028739      | 35.518008        | S    |             |                 |                |                  |                |                  | 12 |
| 2  | 175.071332  | 88.039304       |                |                  | 157.060767     | 79.034021        | S    | 1499.742361 | 750.374818      | 1482.715812    | 741.861544       | 1481.731796    | 741.369536       | 11 |
| 3  | 232.092796  | 116.550036      |                |                  | 214.082231     | 107.544753       | G    | 1412.710333 | 706.858805      | 1395.683784    | 698.345530       | 1394.699768    | 697.853522       | 10 |
| 4  | 671.318122  | 336.162699      | 654.291573     | 327.649425       | 653.307557     | 327.157417       | Q    | 1355.688869 | 678.348072      | 1338.662320    | 669.834798       | 1337.678304    | 669.342790       | 9  |
| 5  | 857.397435  | 429.202356      | 840.370886     | 420.689081       | 839.386870     | 420.197073       | W    | 916.463543  | 458.735410      | 899.436994     | 450.222135       | 898.452978     | 449.730127       | 8  |
| 6  | 985.456013  | 493.231645      | 968.429464     | 484.718370       | 967.445448     | 484.226362       | Q    | 730.384230  | 365.695753      | 713.357681     | 357.182478       | 712.373665     | 356.690470       | 7  |
| 7  | 1086.503692 | 543.755484      | 1069.477143    | 535.242210       | 1068.493127    | 534.750202       | T    | 602.325652  | 301.666464      | 585.299103     | 293.153189       | 584.315087     | 292.661181       | 6  |
| 8  | 1183.556456 | 592.281866      | 1166.529907    | 583.768592       | 1165.545891    | 583.276584       | P    | 501.277973  | 251.142624      | 484.251424     | 242.629350       | 483.267408     | 242.137342       | 5  |
| 9  | 1240.577920 | 620.792598      | 1223.551371    | 612.279324       | 1222.567355    | 611.787315       | G    | 404.225209  | 202.616242      | 387.198660     | 194.102968       | 386.214644     | 193.610960       | 4  |
| 10 | 1311.615034 | 656.311155      | 1294.588485    | 647.797881       | 1293.604469    | 647.305872       | A    | 347.203745  | 174.105510      | 330.177196     | 165.592236       | 329.193180     | 165.100228       | 3  |
| 11 | 1412.662713 | 706.834994      | 1395.636164    | 698.321720       | 1394.652148    | 697.829712       | T    | 276.166631  | 138.586953      | 259.140082     | 130.073679       | 258.156066     | 129.581671       | 2  |
| 12 |             |                 |                |                  |                |                  | R    | 175.118952  | 88.063114       | 158.092403     | 79.549839        |                |                  | 1  |

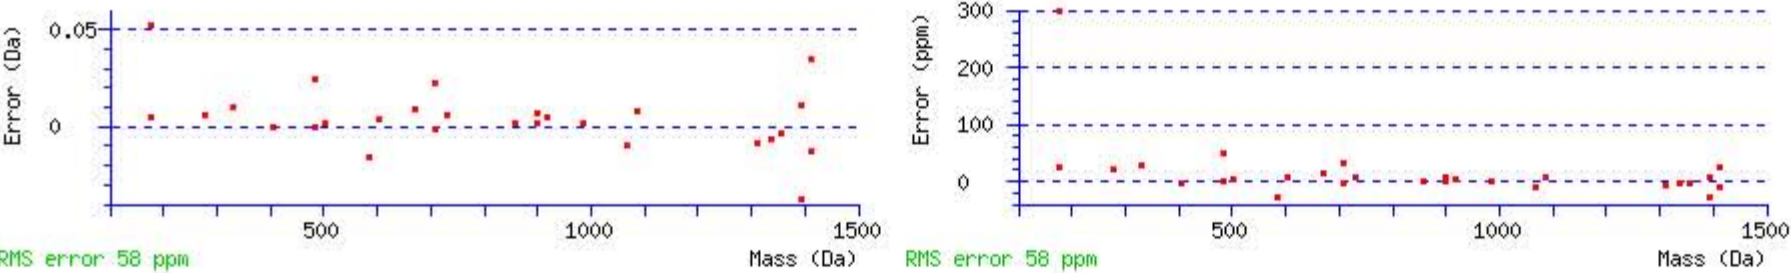

NCBI BLAST search of [SSGQWQTPGATR](#)  
(Parameters: blastp, nr protein database, expect=20000, no filter, PAM30)  
Other BLAST [web gateways](#)

All matches to this query

| Score | Mr(calc):   | Delta     | Sequence                          |
|-------|-------------|-----------|-----------------------------------|
| 59.0  | 1585.767120 | 0.000248  | <a href="#">SSGQWQTPGATR</a>      |
| 30.1  | 1585.767120 | 0.000248  | <a href="#">SSGQWQTPGATR</a>      |
| 7.9   | 1585.769653 | -0.002285 | <a href="#">GDVGTAGSVGGTGEPLR</a> |
| 7.3   | 1585.769592 | -0.002224 | <a href="#">ETDHKSLSSSPDKR</a>    |
| 5.5   | 1585.766922 | 0.000446  | <a href="#">RTSNERPGSGQGQGR</a>   |
| 5.5   | 1585.767075 | 0.000293  | <a href="#">AWENLGEQMGKAPR</a>    |
| 5.0   | 1585.751846 | 0.015522  | <a href="#">LMDEPALRSPGGGDR</a>   |
| 1.8   | 1585.777863 | -0.010495 | <a href="#">MKQPIMADGPR</a>       |
| 0.8   | 1585.781021 | -0.013653 | <a href="#">IGLFYMDNDLITR</a>     |

MATRIX

SCIENCE

Mascot Search Results

Peptide View

MS/MS Fragmentation of **SGQSEDR**  
Found in **CO3\_HUMAN**, Complement C3 OS=Homo sapiens GN=C3 PE=1 SV=2

Match to Query 16029: 1088.496348 from(545.255450,2+) rtinseconds(1146) index(29319)  
Title: Locus:1.1.1.507.6 File:"2013-07-02 CLN FXIII 180 min 2nd F 3.wiff"  
Data file C:\Program Files (x86)\Matrix Science\Mascot Daemon\mgf\8 FXIII 180 min 2nd\mascot\_daemon\_merge.mgf

Click mouse within plot area to zoom in by factor of two about that point  
Or, 

Plot from

100

 to 

1100

 Da 

Full range

  
Label all possible matches ☐ Label matches used for scoring ☒

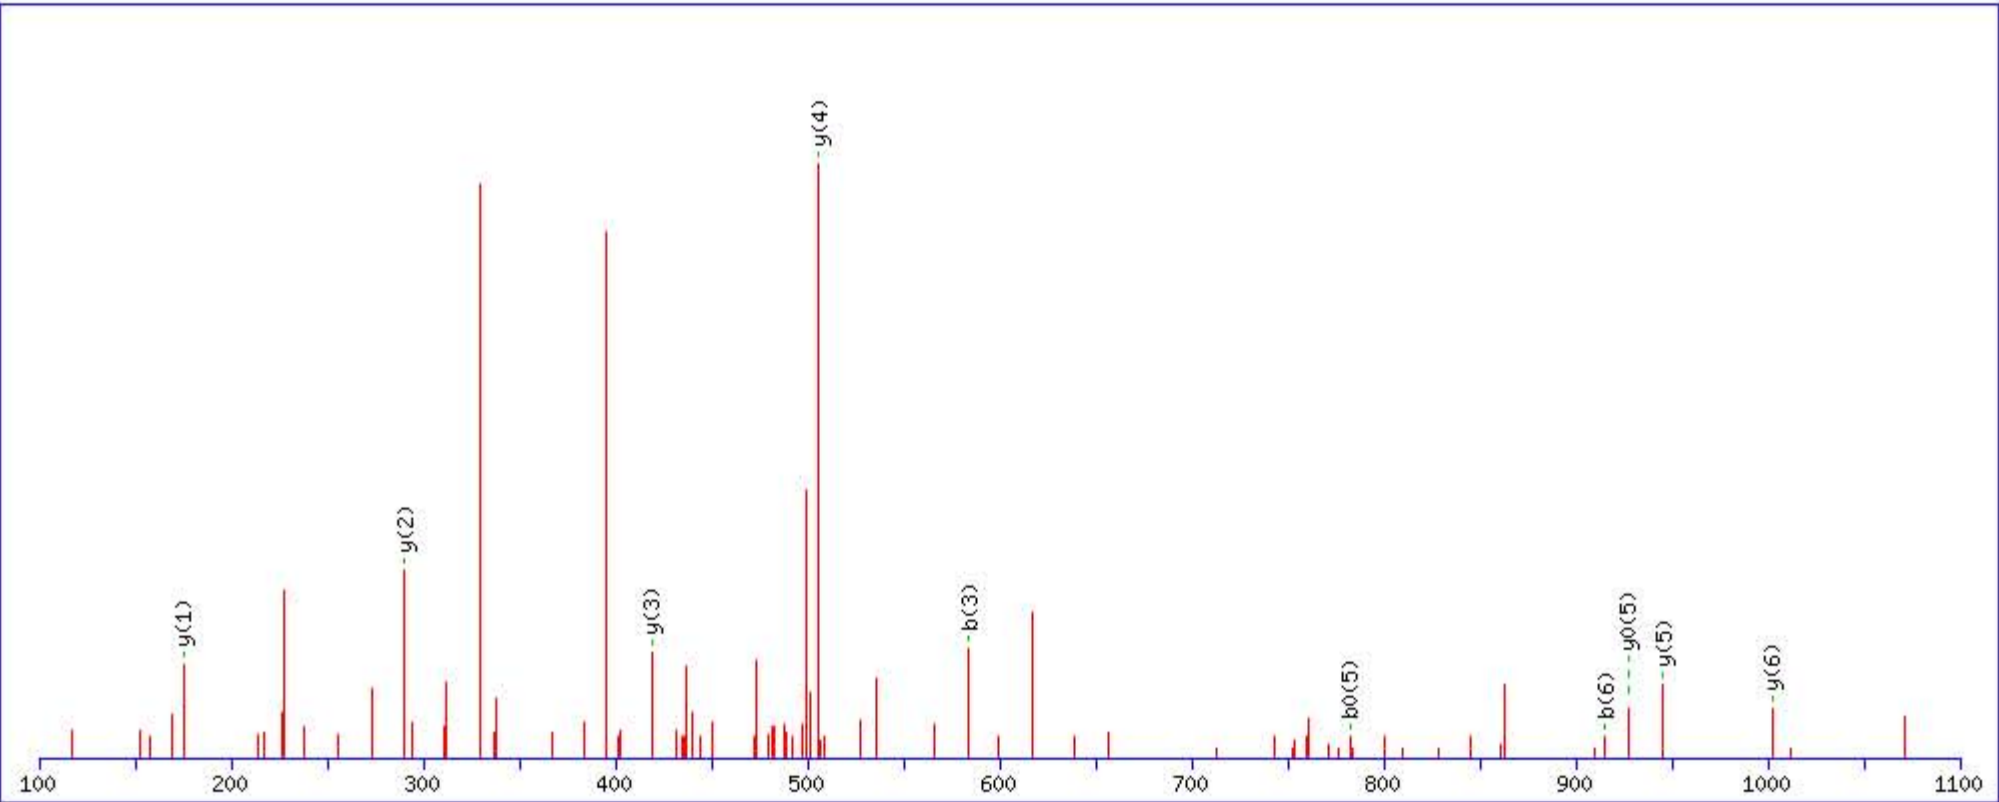

Monoisotopic mass of neutral peptide Mr(calc): 1088.492050  
Fixed modifications: Carbamidomethyl (C) (apply to specified residues or termini only)  
Variable modifications:  
Q3 : Biotin:Thermo-21345 (Q)  
Ions Score: 30 Expect: 0.0067  
Matches : 10/66 fragment ions using 28 most intense peaks [\(help\)](#)

| # | b          | b <sup>++</sup> | b <sup>*</sup> | b <sup>*++</sup> | b <sup>0</sup> | b <sup>0++</sup> | Seq. | y           | y <sup>++</sup> | y <sup>*</sup> | y <sup>*++</sup> | y <sup>0</sup> | y <sup>0++</sup> | # |
|---|------------|-----------------|----------------|------------------|----------------|------------------|------|-------------|-----------------|----------------|------------------|----------------|------------------|---|
| 1 | 88.039304  | 44.523290       |                |                  | 70.028739      | 35.518008        | S    |             |                 |                |                  |                |                  | 7 |
| 2 | 145.060768 | 73.034022       |                |                  | 127.050203     | 64.028740        | G    | 1002.467306 | 501.737291      | 985.440757     | 493.224017       | 984.456741     | 492.732009       | 6 |
| 3 | 584.286094 | 292.646685      | 567.259545     | 284.133411       | 566.275529     | 283.641403       | Q    | 945.445842  | 473.226559      | 928.419293     | 464.713285       | 927.435277     | 464.221277       | 5 |
| 4 | 671.318122 | 336.162699      | 654.291573     | 327.649425       | 653.307557     | 327.157417       | S    | 506.220516  | 253.613896      | 489.193967     | 245.100621       | 488.209951     | 244.608613       | 4 |
| 5 | 800.360715 | 400.683996      | 783.334166     | 392.170721       | 782.350150     | 391.678713       | E    | 419.188488  | 210.097882      | 402.161939     | 201.584608       | 401.177923     | 201.092600       | 3 |
| 6 | 915.387658 | 458.197467      | 898.361109     | 449.684192       | 897.377093     | 449.192185       | D    | 290.145895  | 145.576585      | 273.119346     | 137.063311       | 272.135330     | 136.571303       | 2 |
| 7 |            |                 |                |                  |                |                  | R    | 175.118952  | 88.063114       | 158.092403     | 79.549840        |                |                  | 1 |

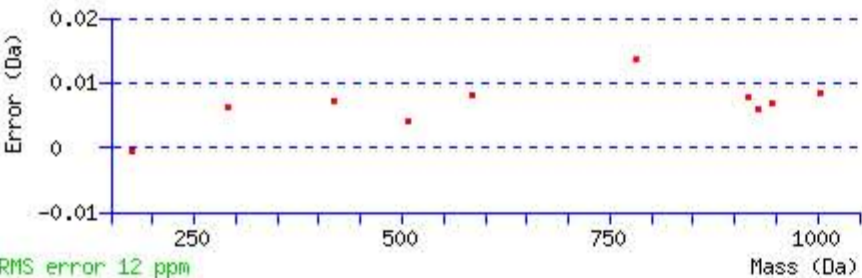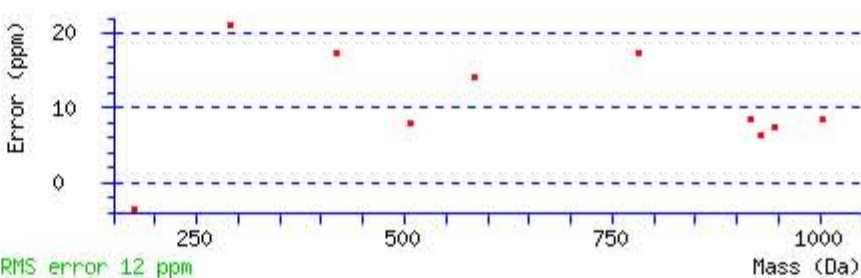

NCBI BLAST search of [SGQSEDR](#)  
(Parameters: blastp, nr protein database, expect=20000, no filter, PAM30)  
Other BLAST [web gateways](#)

All matches to this query

| Score | Mr(calc):   | Delta     | Sequence                    |
|-------|-------------|-----------|-----------------------------|
| 30.4  | 1088.492050 | 0.004298  | <a href="#">SGQSEDR</a>     |
| 9.9   | 1088.509811 | -0.013463 | <a href="#">GAEAGSVVDER</a> |
| 8.1   | 1088.509811 | -0.013463 | <a href="#">DAAPLTSSGDR</a> |
| 4.7   | 1088.492065 | 0.004283  | <a href="#">LSDPAVCGDR</a>  |
| 4.3   | 1088.503265 | -0.006917 | <a href="#">CPAAKENGSR</a>  |
| 2.6   | 1088.510681 | -0.014333 | <a href="#">ATMQGDR</a>     |
| 0.9   | 1088.495880 | 0.000468  | <a href="#">RGEGRDEDR</a>   |

MATRIX

SCIENCE

Mascot Search Results

Peptide View

MS/MS Fragmentation of **SVQLTEK**  
Found in **CO3\_HUMAN**, Complement C3 OS=Homo sapiens GN=C3 PE=1 SV=2

Match to Query 17111: 1114.608448 from(558.311500,2+) rtinseconds(1546) index(47249)  
Title: Locus:1.1.1.1776.11 File:"2013-07-02 CLN FXIII 180 min 2nd F 4.wiff"  
Data file C:\Program Files (x86)\Matrix Science\Mascot Daemon\mgf\8 FXIII 180 min 2nd\mascot\_daemon\_merge.mgf

Click mouse within plot area to zoom in by factor of two about that point

Or, 

Plot from

100

 to 

1050

 Da 

Full range

Label all possible matches ☐ Label matches used for scoring ☒

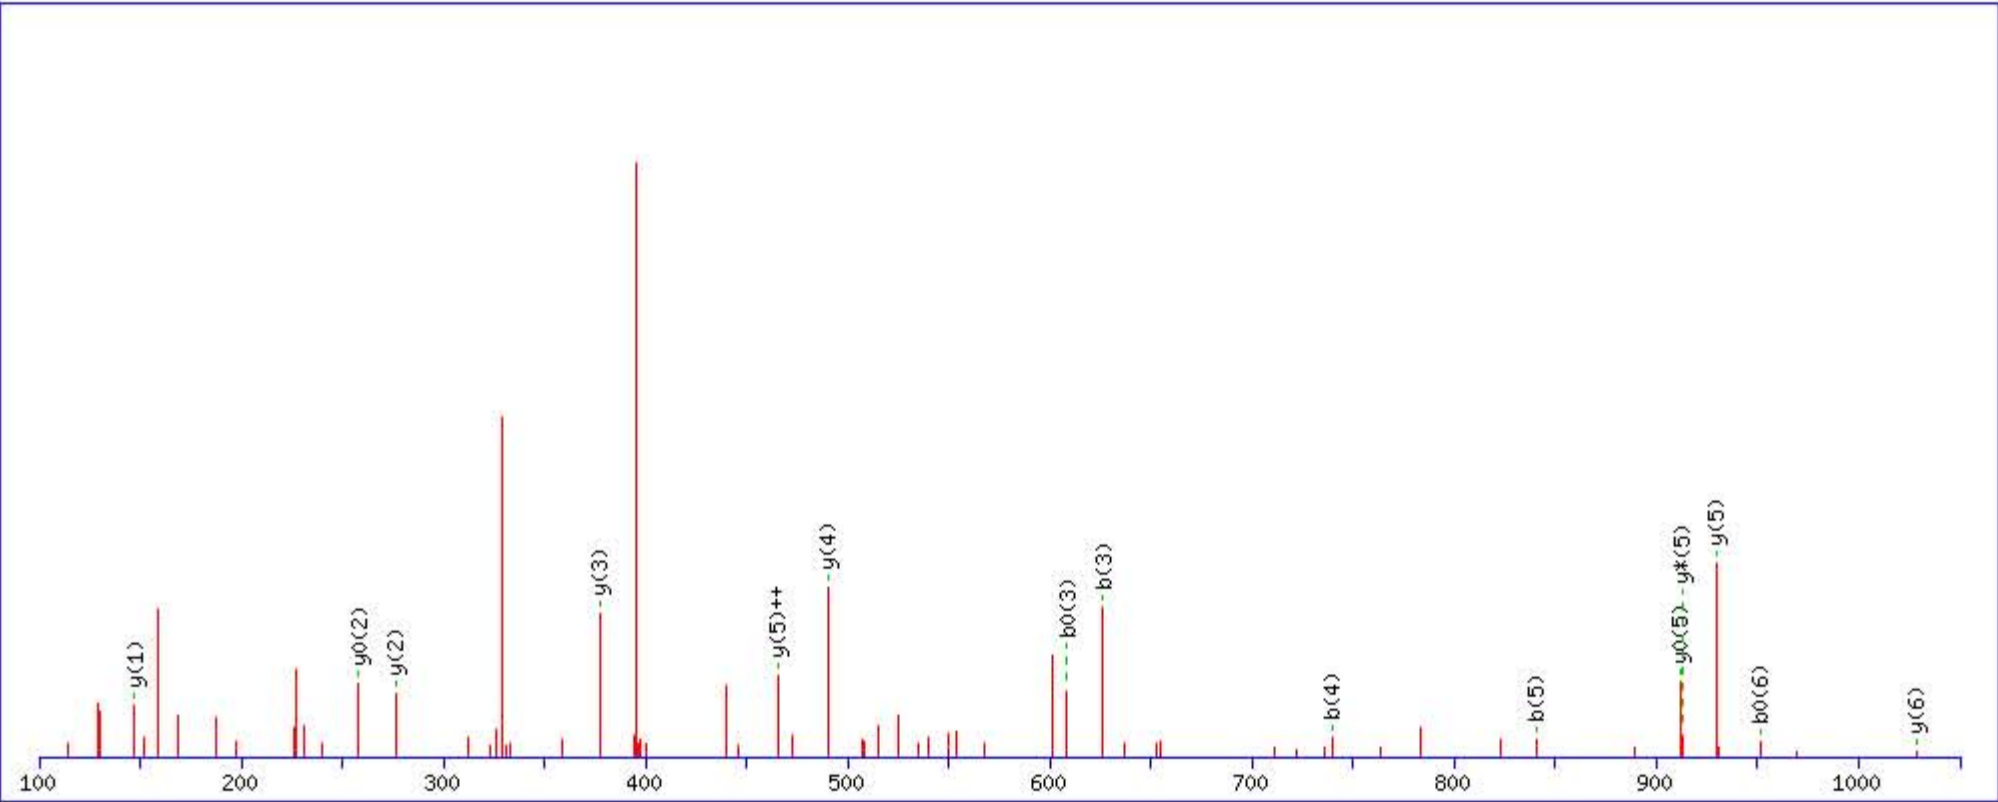

Monoisotopic mass of neutral peptide Mr(calc): 1114.605621  
Fixed modifications: Carbamidomethyl (C) (apply to specified residues or termini only)  
Variable modifications:  
Q3 : Biotin:Thermo-21345 (Q)  
Ions Score: 31 Expect: 0.02  
Matches : 15/66 fragment ions using 28 most intense peaks ([help](#))

| # | b          | b <sup>++</sup> | b <sup>*</sup> | b <sup>++</sup> * | b <sup>0</sup> | b <sup>0++</sup> | Seq. | y           | y <sup>++</sup> | y <sup>*</sup> | y <sup>++</sup> * | y <sup>0</sup> | y <sup>0++</sup> | # |
|---|------------|-----------------|----------------|-------------------|----------------|------------------|------|-------------|-----------------|----------------|-------------------|----------------|------------------|---|
| 1 | 88.039304  | 44.523290       |                |                   | 70.028739      | 35.518008        | S    |             |                 |                |                   |                |                  | 7 |
| 2 | 187.107718 | 94.057497       |                |                   | 169.097153     | 85.052214        | V    | 1028.580880 | 514.794078      | 1011.554331    | 506.280804        | 1010.570315    | 505.788796       | 6 |
| 3 | 626.333044 | 313.670160      | 609.306495     | 305.156885        | 608.322479     | 304.664877       | Q    | 929.512466  | 465.259871      | 912.485917     | 456.746597        | 911.501901     | 456.254589       | 5 |
| 4 | 739.417108 | 370.212192      | 722.390559     | 361.698917        | 721.406543     | 361.206909       | L    | 490.287140  | 245.647208      | 473.260591     | 237.133934        | 472.276575     | 236.641926       | 4 |
| 5 | 840.464787 | 420.736032      | 823.438238     | 412.222757        | 822.454222     | 411.730749       | T    | 377.203076  | 189.105176      | 360.176527     | 180.591902        | 359.192511     | 180.099894       | 3 |
| 6 | 969.507380 | 485.257328      | 952.480831     | 476.744054        | 951.496815     | 476.252046       | E    | 276.155397  | 138.581336      | 259.128848     | 130.068062        | 258.144832     | 129.576054       | 2 |
| 7 |            |                 |                |                   |                |                  | K    | 147.112804  | 74.060040       | 130.086255     | 65.546765         |                |                  | 1 |

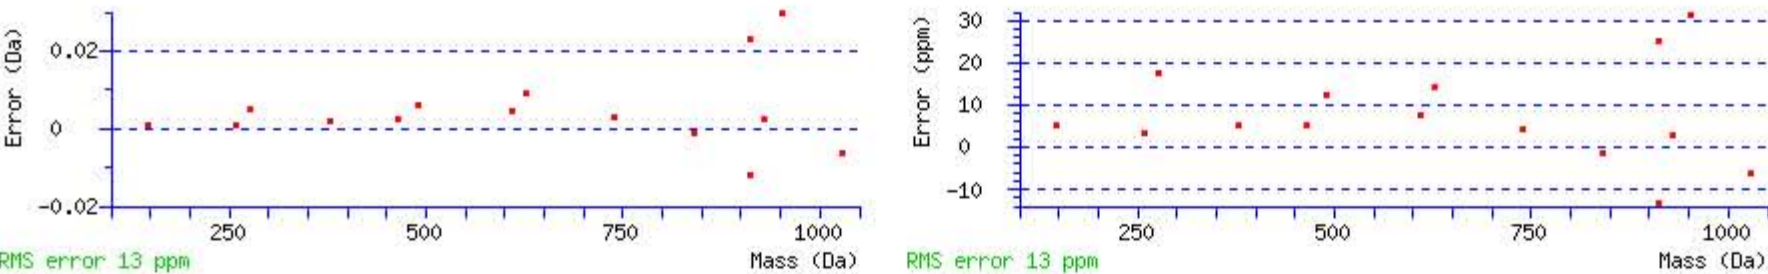

NCBI BLAST search of [SVQLTEK](#)  
(Parameters: blastp, nr protein database, expect=20000, no filter, PAM30)  
Other BLAST [web gateways](#)

All matches to this query

| Score | Mr(calc):   | Delta     | Sequence                    |
|-------|-------------|-----------|-----------------------------|
| 30.8  | 1114.605621 | 0.002827  | <a href="#">SVQLTEK</a>     |
| 18.6  | 1114.613480 | -0.005032 | <a href="#">SVFAKHGLEK</a>  |
| 11.1  | 1114.623367 | -0.014919 | <a href="#">SIQDAELLVK</a>  |
| 7.3   | 1114.623352 | -0.014904 | <a href="#">ILDAIKEADK</a>  |
| 6.2   | 1114.623367 | -0.014919 | <a href="#">ASVGLEVLAEK</a> |
| 6.0   | 1114.623383 | -0.014935 | <a href="#">QVTEAVVIEK</a>  |
| 5.2   | 1114.609451 | -0.001003 | <a href="#">SVARLSPETR</a>  |
| 4.8   | 1114.623352 | -0.014904 | <a href="#">LVEALAAATEK</a> |
| 4.2   | 1114.609436 | -0.000988 | <a href="#">EGIKRQQEK</a>   |
| 3.3   | 1114.598236 | 0.010212  | <a href="#">SAVITSLDPGR</a> |

Peptide View

MS/MS Fragmentation of **NEQVEIR**  
Found in **CO3\_HUMAN**, Complement C3 OS=Homo sapiens GN=C3 PE=1 SV=2

Match to Query 20497: 1197.621788 from(599.818170,2+) rtinseconds(1642) index(32007)  
Title: Locus:1.1.1.680.10 File:"2013-07-02 CLN FXIII 180 min 2nd F 3.wiff"  
Data file C:\Program Files (x86)\Matrix Science\Mascot Daemon\mgf\8 FXIII 180 min 2nd\mascot\_daemon\_merge.mgf

Click mouse within plot area to zoom in by factor of two about that point  
Or,   to  Da   
Label all possible matches ☐ Label matches used for scoring ☒

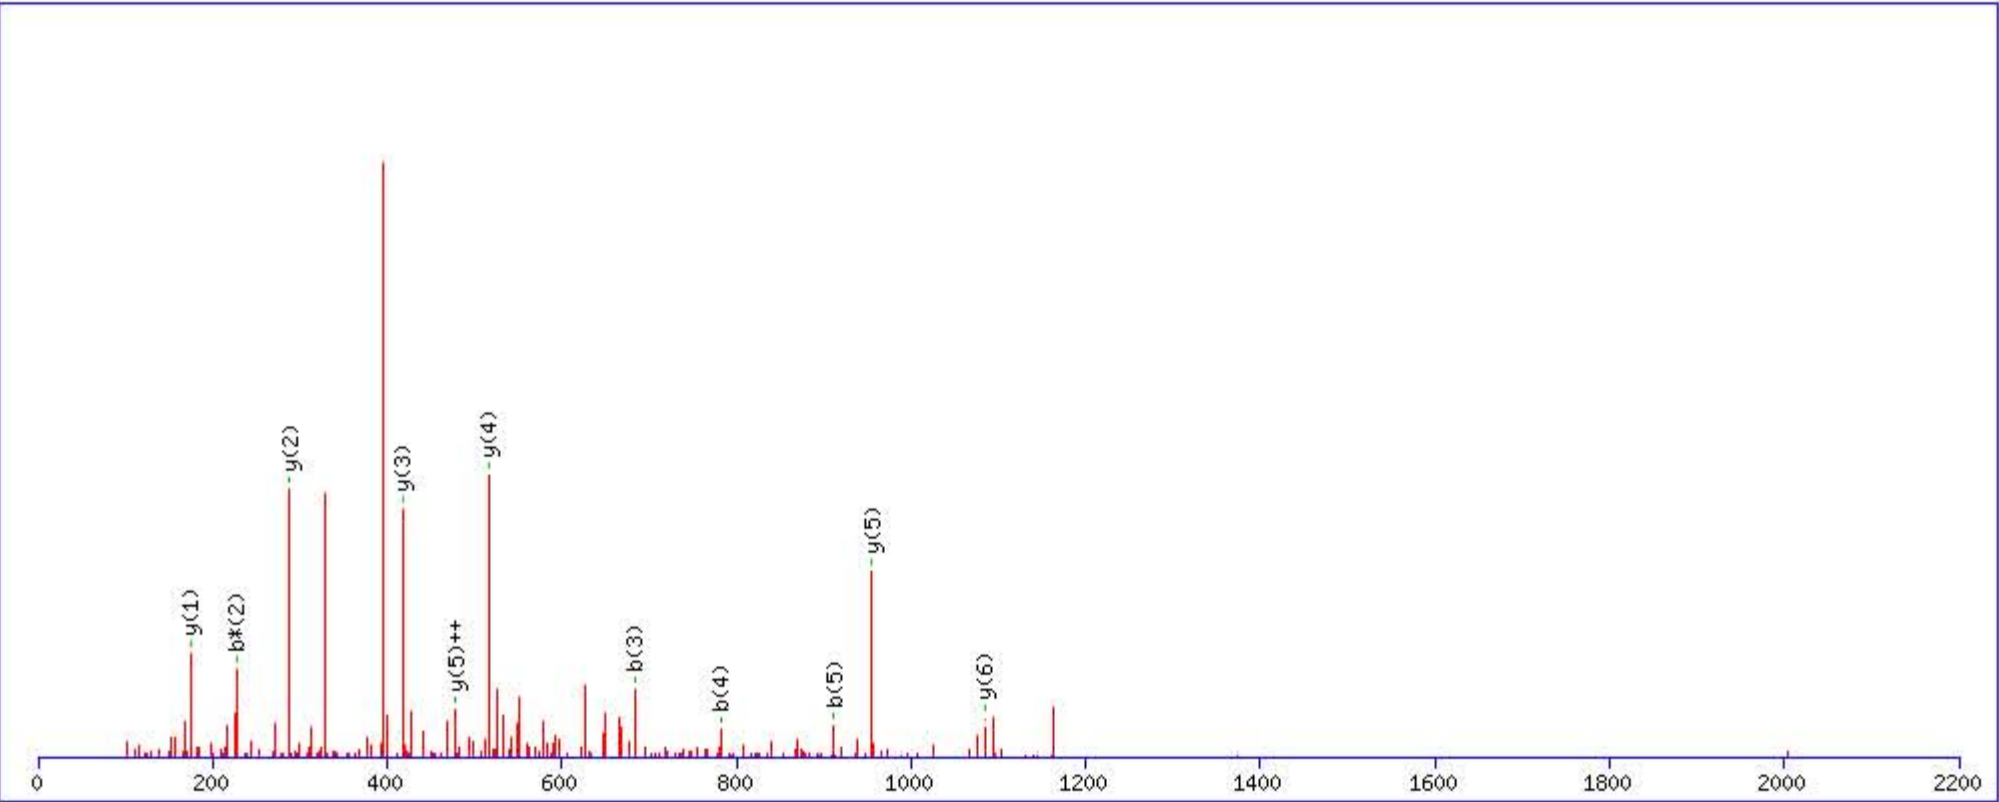

Monoisotopic mass of neutral peptide Mr(calc): 1197.617569  
Fixed modifications: Carbamidomethyl (C) (apply to specified residues or termini only)  
Variable modifications:  
Q3 : Biotin:Thermo-21345 (Q)  
Ions Score: 33 Expect: 0.0089  
Matches : 11/66 fragment ions using 22 most intense peaks ([help](#))

| # | b           | b <sup>++</sup> | b <sup>*</sup> | b <sup>*++</sup> | b <sup>0</sup> | b <sup>0++</sup> | Seq. | y           | y <sup>++</sup> | y <sup>*</sup> | y <sup>*++</sup> | y <sup>0</sup> | y <sup>0++</sup> | # |
|---|-------------|-----------------|----------------|------------------|----------------|------------------|------|-------------|-----------------|----------------|------------------|----------------|------------------|---|
| 1 | 115.050203  | 58.028740       | 98.023654      | 49.515465        |                |                  | N    |             |                 |                |                  |                |                  | 7 |
| 2 | 244.092796  | 122.550036      | 227.066247     | 114.036762       | 226.082231     | 113.544754       | E    | 1084.581942 | 542.794609      | 1067.555393    | 534.281335       | 1066.571377    | 533.789327       | 6 |
| 3 | 683.318122  | 342.162699      | 666.291573     | 333.649425       | 665.307557     | 333.157417       | Q    | 955.539349  | 478.273313      | 938.512800     | 469.760038       | 937.528784     | 469.268030       | 5 |
| 4 | 782.386536  | 391.696906      | 765.359987     | 383.183632       | 764.375971     | 382.691624       | V    | 516.314023  | 258.660650      | 499.287474     | 250.147375       | 498.303458     | 249.655367       | 4 |
| 5 | 911.429129  | 456.218203      | 894.402580     | 447.704928       | 893.418564     | 447.212920       | E    | 417.245609  | 209.126443      | 400.219060     | 200.613168       | 399.235044     | 200.121160       | 3 |
| 6 | 1024.513193 | 512.760235      | 1007.486644    | 504.246960       | 1006.502628    | 503.754952       | I    | 288.203016  | 144.605146      | 271.176467     | 136.091872       |                |                  | 2 |
| 7 |             |                 |                |                  |                |                  | R    | 175.118952  | 88.063114       | 158.092403     | 79.549840        |                |                  | 1 |

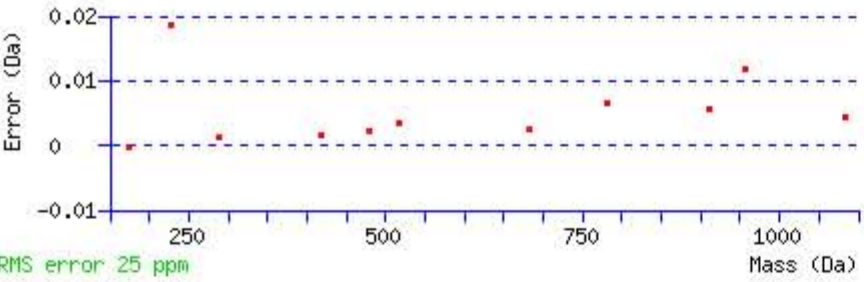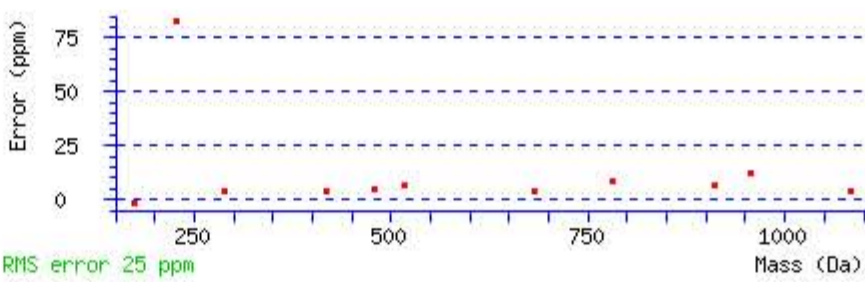

NCBI BLAST search of [NEQVEIR](#)  
(Parameters: blastp, nr protein database, expect=20000, no filter, PAM30)  
Other BLAST [web gateways](#)

All matches to this query

| Score | Mr(calc):   | Delta     | Sequence                     |
|-------|-------------|-----------|------------------------------|
| 33.3  | 1197.617569 | 0.004219  | <a href="#">NEQVEIR</a>      |
| 14.7  | 1197.636215 | -0.014427 | <a href="#">GVSQMPLR</a>     |
| 10.7  | 1197.617569 | 0.004219  | <a href="#">NQEDLLR</a>      |
| 8.5   | 1197.617569 | 0.004219  | <a href="#">LQDNELR</a>      |
| 8.5   | 1197.617569 | 0.004219  | <a href="#">QEVNELR</a>      |
| 6.4   | 1197.621399 | 0.000389  | <a href="#">EKHSTQAKNR</a>   |
| 5.8   | 1197.628815 | -0.007027 | <a href="#">QLSMQVHALR</a>   |
| 4.8   | 1197.625443 | -0.003655 | <a href="#">WGSSLVKHER</a>   |
| 2.0   | 1197.635315 | -0.013527 | <a href="#">AAAAAETPEVLR</a> |
| 1.5   | 1197.617584 | 0.004204  | <a href="#">QDL DQLR</a>     |

M

A

T

R

I

X

S

C

I

E

N

C

E

Mascot Search Results

Peptide View

MS/MS Fragmentation of **DAPDHQELNLDVSLQLPSR**  
Found in **CO3\_HUMAN**, Complement C3 OS=Homo sapiens GN=C3 PE=1 SV=2

Match to Query 21236: 2457.261336 from(615.322610,4+) rtinseconds(2603) index(37719)  
Title: Locus:1.1.1.1015.6 File:"2013-07-02 CLN FXIII 180 min 2nd F 3.wiff"  
Data file C:\Program Files (x86)\Matrix Science\Mascot Daemon\mgf\8 FXIII 180 min 2nd\mascot\_daemon\_merge.mgf

Click mouse within plot area to zoom in by factor of two about that point  
Or,   to  Da   
Label all possible matches ☐ Label matches used for scoring ☒

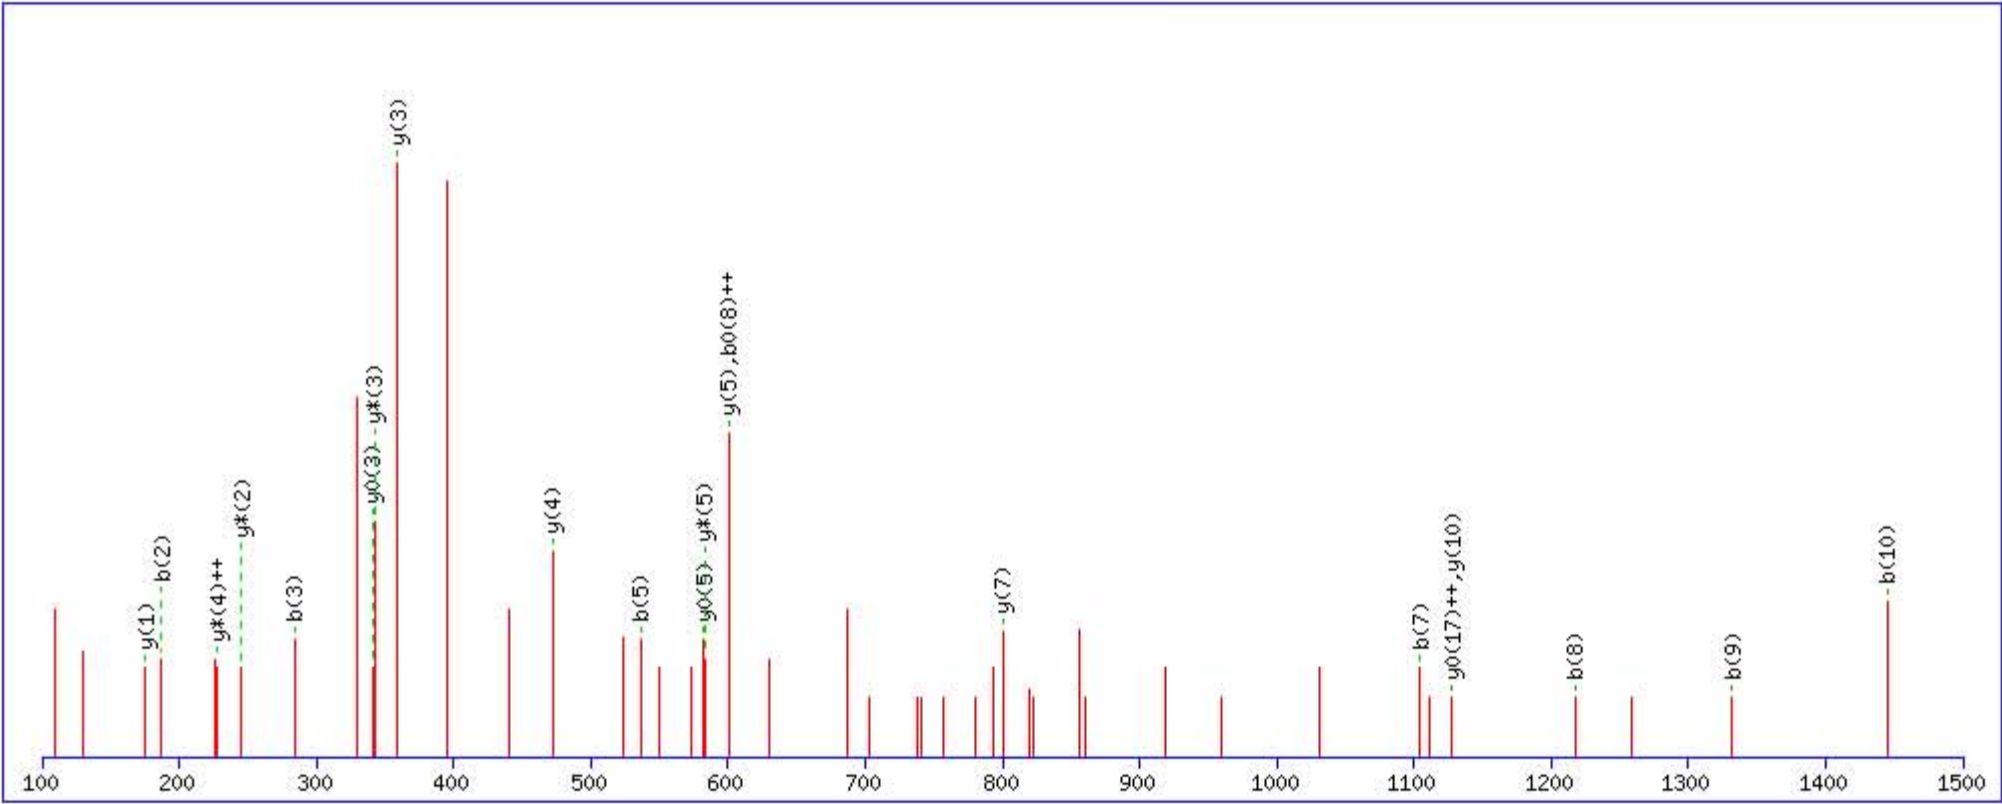

Monoisotopic mass of neutral peptide Mr(calc): 2457.232193  
Fixed modifications: Carbamidomethyl (C) (apply to specified residues or termini only)  
Variable modifications:  
Q6 : Biotin:Thermo-21345 (Q)  
Ions Score: 36 Expect: 0.00076  
Matches : 21/204 fragment ions using 42 most intense peaks ([help](#))

| #  | b           | b <sup>++</sup> | b <sup>*</sup> | b <sup>*++</sup> | b <sup>0</sup> | b <sup>0++</sup> | Seq. | y           | y <sup>++</sup> | y <sup>*</sup> | y <sup>*++</sup> | y <sup>0</sup> | y <sup>0++</sup> | #  |
|----|-------------|-----------------|----------------|------------------|----------------|------------------|------|-------------|-----------------|----------------|------------------|----------------|------------------|----|
| 1  | 116.034219  | 58.520748       |                |                  | 98.023654      | 49.515465        | D    |             |                 |                |                  |                |                  | 19 |
| 2  | 187.071333  | 94.039304       |                |                  | 169.060768     | 85.034022        | A    | 2343.212542 | 1172.109909     | 2326.185993    | 1163.596634      | 2325.201977    | 1163.104626      | 18 |
| 3  | 284.124097  | 142.565686      |                |                  | 266.113532     | 133.560404       | P    | 2272.175428 | 1136.591352     | 2255.148879    | 1128.078077      | 2254.164863    | 1127.586069      | 17 |
| 4  | 399.151040  | 200.079158      |                |                  | 381.140475     | 191.073875       | D    | 2175.122664 | 1088.064970     | 2158.096115    | 1079.551695      | 2157.112099    | 1079.059687      | 16 |
| 5  | 536.209952  | 268.608614      |                |                  | 518.199387     | 259.603332       | H    | 2060.095721 | 1030.551498     | 2043.069172    | 1022.038224      | 2042.085156    | 1021.546216      | 15 |
| 6  | 975.435278  | 488.221277      | 958.408729     | 479.708003       | 957.424713     | 479.215995       | Q    | 1923.036809 | 962.022043      | 1906.010260    | 953.508768       | 1905.026244    | 953.016760       | 14 |
| 7  | 1104.477871 | 552.742574      | 1087.451322    | 544.229299       | 1086.467306    | 543.737291       | E    | 1483.811483 | 742.409380      | 1466.784934    | 733.896105       | 1465.800918    | 733.404097       | 13 |
| 8  | 1217.561935 | 609.284606      | 1200.535386    | 600.771331       | 1199.551370    | 600.279323       | L    | 1354.768890 | 677.888083      | 1337.742341    | 669.374809       | 1336.758325    | 668.882801       | 12 |
| 9  | 1331.604862 | 666.306069      | 1314.578313    | 657.792795       | 1313.594297    | 657.300786       | N    | 1241.684826 | 621.346051      | 1224.658277    | 612.832777       | 1223.674261    | 612.340769       | 11 |
| 10 | 1444.688926 | 722.848101      | 1427.662377    | 714.334826       | 1426.678361    | 713.842818       | L    | 1127.641899 | 564.324588      | 1110.615350    | 555.811313       | 1109.631334    | 555.319305       | 10 |
| 11 | 1559.715869 | 780.361572      | 1542.689320    | 771.848298       | 1541.705304    | 771.356290       | D    | 1014.557835 | 507.782556      | 997.531286     | 499.269281       | 996.547270     | 498.777273       | 9  |
| 12 | 1658.784283 | 829.895780      | 1641.757734    | 821.382505       | 1640.773718    | 820.890497       | V    | 899.530892  | 450.269084      | 882.504343     | 441.755810       | 881.520327     | 441.263802       | 8  |
| 13 | 1745.816311 | 873.411794      | 1728.789762    | 864.898519       | 1727.805746    | 864.406511       | S    | 800.462478  | 400.734877      | 783.435929     | 392.221603       | 782.451913     | 391.729595       | 7  |
| 14 | 1858.900375 | 929.953825      | 1841.873826    | 921.440551       | 1840.889810    | 920.948543       | L    | 713.430450  | 357.218863      | 696.403901     | 348.705589       | 695.419885     | 348.213581       | 6  |
| 15 | 1986.958953 | 993.983115      | 1969.932404    | 985.469840       | 1968.948388    | 984.977832       | Q    | 600.346386  | 300.676831      | 583.319837     | 292.163557       | 582.335821     | 291.671549       | 5  |
| 16 | 2100.043017 | 1050.525146     | 2083.016468    | 1042.011872      | 2082.032452    | 1041.519864      | L    | 472.287808  | 236.647542      | 455.261259     | 228.134268       | 454.277243     | 227.642260       | 4  |
| 17 | 2197.095781 | 1099.051528     | 2180.069232    | 1090.538254      | 2179.085216    | 1090.046246      | P    | 359.203744  | 180.105510      | 342.177195     | 171.592236       | 341.193179     | 171.100228       | 3  |
| 18 | 2284.127809 | 1142.567542     | 2267.101260    | 1134.054268      | 2266.117244    | 1133.562260      | S    | 262.150980  | 131.579128      | 245.124431     | 123.065854       | 244.140415     | 122.573846       | 2  |
| 19 |             |                 |                |                  |                |                  | R    | 175.118952  | 88.063114       | 158.092403     | 79.549839        |                |                  | 1  |

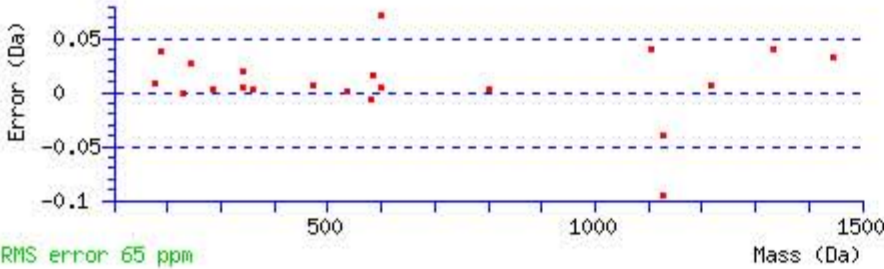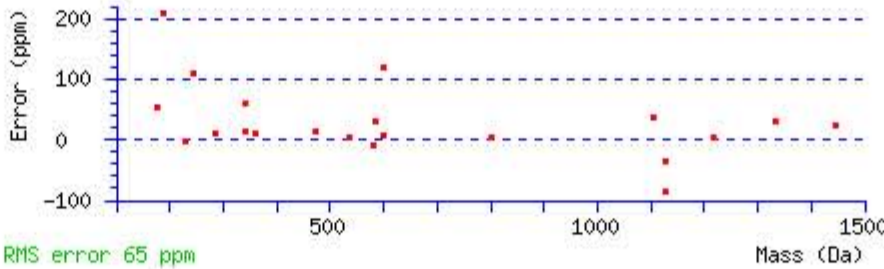

NCBI BLAST search of [DAPDHQELNLDVSLQLPSR](#)  
(Parameters: blastp, nr protein database, expect=20000, no filter, PAM30)  
Other BLAST [web gateways](#)

All matches to this query

| Score | Mr(calc):   | Delta    | Sequence                               |
|-------|-------------|----------|----------------------------------------|
| 36.3  | 2457.232193 | 0.029143 | <a href="#">DAPDHQELNLDVSLQLPSR</a>    |
| 9.6   | 2457.232193 | 0.029143 | <a href="#">DAPDHQELNLDVSLQLPSR</a>    |
| 3.0   | 2457.243423 | 0.017913 | <a href="#">TGLSDAFMILNPSPDVPESRRR</a> |

MATRIX

SCIENCE

Mascot Search Results

Peptide View

MS/MS Fragmentation of **TGLQEVEVK**  
Found in **CO3\_HUMAN**, Complement C3 OS=Homo sapiens GN=C3 PE=1 SV=2

Match to Query 23551: 1312.717528 from(657.366040,2+) rtinseconds(1822) index(33051)  
Title: Locus:1.1.1.743.5 File:"2013-07-02 CLN FXIII 180 min 2nd F 3.wiff"  
Data file C:\Program Files (x86)\Matrix Science\Mascot Daemon\mgf\8 FXIII 180 min 2nd\mascot\_daemon\_merge.mgf

Click mouse within plot area to zoom in by factor of two about that point  
Or, 

Plot from

100

 to 

1600

 Da 

Full range

  
Label all possible matches ☐ Label matches used for scoring ☒

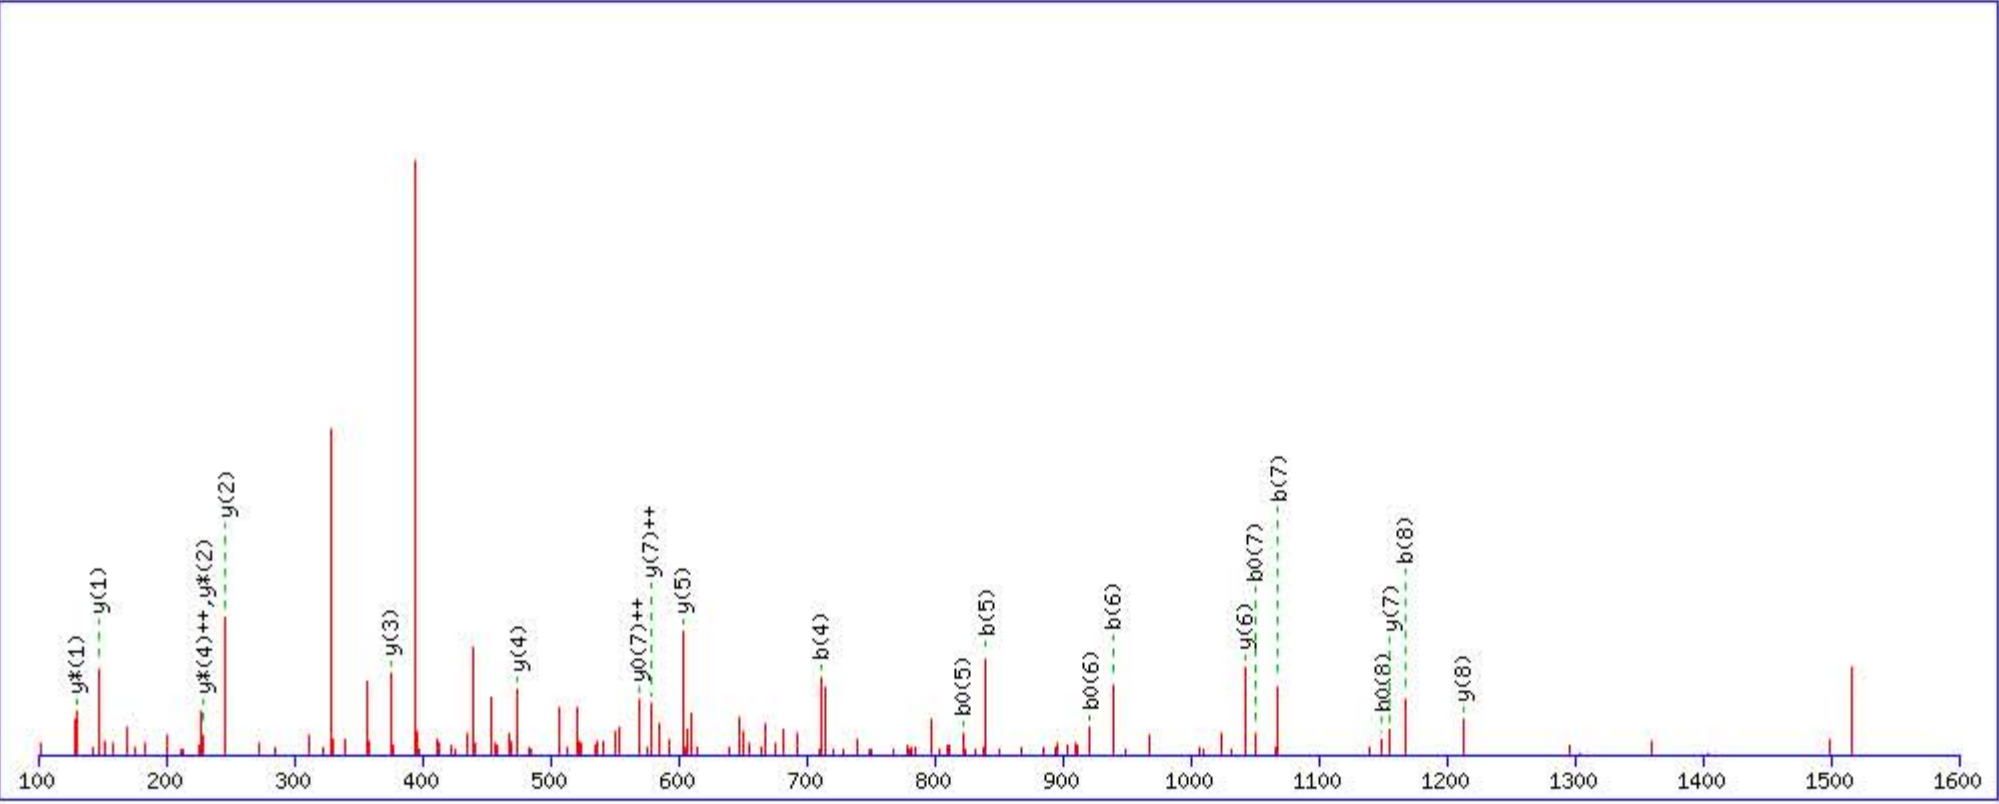

Monoisotopic mass of neutral peptide Mr(calc): 1312.706070  
Fixed modifications: Carbamidomethyl (C) (apply to specified residues or termini only)  
Variable modifications:  
Q4 : Biotin:Thermo-21345 (Q)  
Ions Score: 52 Expect: 0.00014  
Matches : 22/86 fragment ions using 36 most intense peaks [\(help\)](#)

| # | b           | b <sup>++</sup> | b <sup>*</sup> | b <sup>*++</sup> | b <sup>0</sup> | b <sup>0++</sup> | Seq. | y           | y <sup>++</sup> | y <sup>*</sup> | y <sup>*++</sup> | y <sup>0</sup> | y <sup>0++</sup> | # |
|---|-------------|-----------------|----------------|------------------|----------------|------------------|------|-------------|-----------------|----------------|------------------|----------------|------------------|---|
| 1 | 102.054955  | 51.531116       |                |                  | 84.044390      | 42.525833        | T    |             |                 |                |                  |                |                  | 9 |
| 2 | 159.076419  | 80.041847       |                |                  | 141.065854     | 71.036565        | G    | 1212.665672 | 606.836474      | 1195.639123    | 598.323200       | 1194.655107    | 597.831192       | 8 |
| 3 | 272.160483  | 136.583879      |                |                  | 254.149918     | 127.578597       | L    | 1155.644208 | 578.325742      | 1138.617659    | 569.812468       | 1137.633643    | 569.320460       | 7 |
| 4 | 711.385809  | 356.196543      | 694.359260     | 347.683268       | 693.375244     | 347.191260       | Q    | 1042.560144 | 521.783710      | 1025.533595    | 513.270436       | 1024.549579    | 512.778428       | 6 |
| 5 | 840.428402  | 420.717839      | 823.401853     | 412.204565       | 822.417837     | 411.712557       | E    | 603.334818  | 302.171047      | 586.308269     | 293.657773       | 585.324253     | 293.165765       | 5 |
| 6 | 939.496816  | 470.252046      | 922.470267     | 461.738772       | 921.486251     | 461.246764       | V    | 474.292225  | 237.649751      | 457.265676     | 229.136476       | 456.281660     | 228.644468       | 4 |
| 7 | 1068.539409 | 534.773343      | 1051.512860    | 526.260068       | 1050.528844    | 525.768060       | E    | 375.223811  | 188.115544      | 358.197262     | 179.602269       | 357.213246     | 179.110261       | 3 |
| 8 | 1167.607823 | 584.307550      | 1150.581274    | 575.794275       | 1149.597258    | 575.302267       | V    | 246.181218  | 123.594247      | 229.154669     | 115.080973       |                |                  | 2 |
| 9 |             |                 |                |                  |                |                  | K    | 147.112804  | 74.060040       | 130.086255     | 65.546765        |                |                  | 1 |

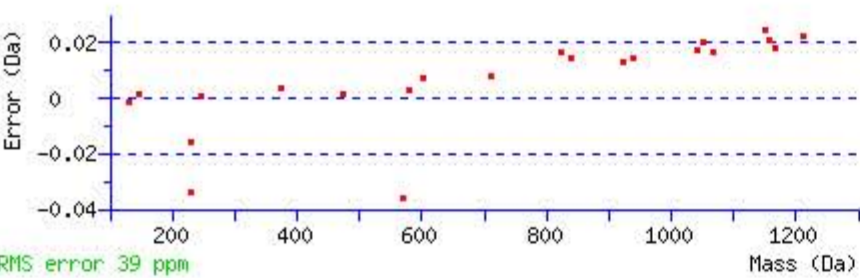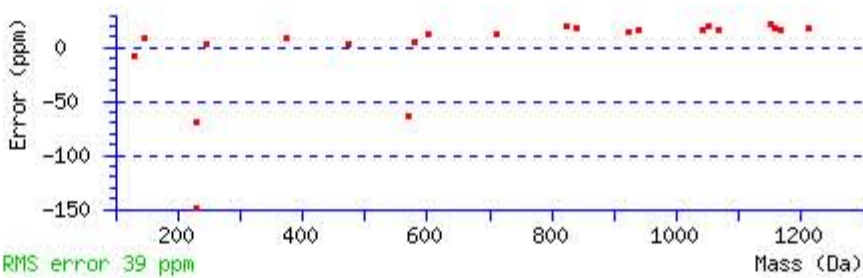

NCBI BLAST search of [TGLQEVEVK](#)  
(Parameters: blastp, nr protein database, expect=20000, no filter, PAM30)  
Other BLAST [web gateways](#)

All matches to this query

| Score | Mr(calc):   | Delta     | Sequence                       |
|-------|-------------|-----------|--------------------------------|
| 52.3  | 1312.706070 | 0.011458  | <a href="#">TGLQEVEVK</a>      |
| 14.7  | 1312.713913 | 0.003615  | <a href="#">KVFEKYTTAAR</a>    |
| 10.2  | 1312.699524 | 0.018004  | <a href="#">TIMHLMINNVK</a>    |
| 9.2   | 1312.735077 | -0.017549 | <a href="#">TSQGGAGVSPLLVK</a> |
| 6.1   | 1312.721130 | -0.003602 | <a href="#">QVEVLTNQRAR</a>    |
| 5.7   | 1312.717300 | 0.000228  | <a href="#">ASLQTVDIR</a>      |
| 5.3   | 1312.728546 | -0.011018 | <a href="#">QGSRGTAIVVK</a>    |
| 3.7   | 1312.728516 | -0.010988 | <a href="#">KPQRGMPKVEK</a>    |
| 3.5   | 1312.735031 | -0.017503 | <a href="#">DIALQIREDIK</a>    |
| 3.2   | 1312.732346 | -0.014818 | <a href="#">QRKRPESGSIR</a>    |

MATRIX

SCIENCE

Mascot Search Results

Peptide View

MS/MS Fragmentation of **VLLDGVQNPR**  
Found in **CO3\_HUMAN**, Complement C3 OS=Homo sapiens GN=C3 PE=1 SV=2

Match to Query 28409: 1420.803348 from(711.408950,2+) rtinseconds(1989) index(34221)  
Title: Locus:1.1.1.801.17 File:"2013-07-02 CLN FXIII 180 min 2nd F 3.wiff"  
Data file C:\Program Files (x86)\Matrix Science\Mascot Daemon\mgf\8 FXIII 180 min 2nd\mascot\_daemon\_merge.mgf

Click mouse within plot area to zoom in by factor of two about that point

Or, 

Plot from

0

 to 

2800

 Da 

Full range

Label all possible matches ☐ Label matches used for scoring ☒

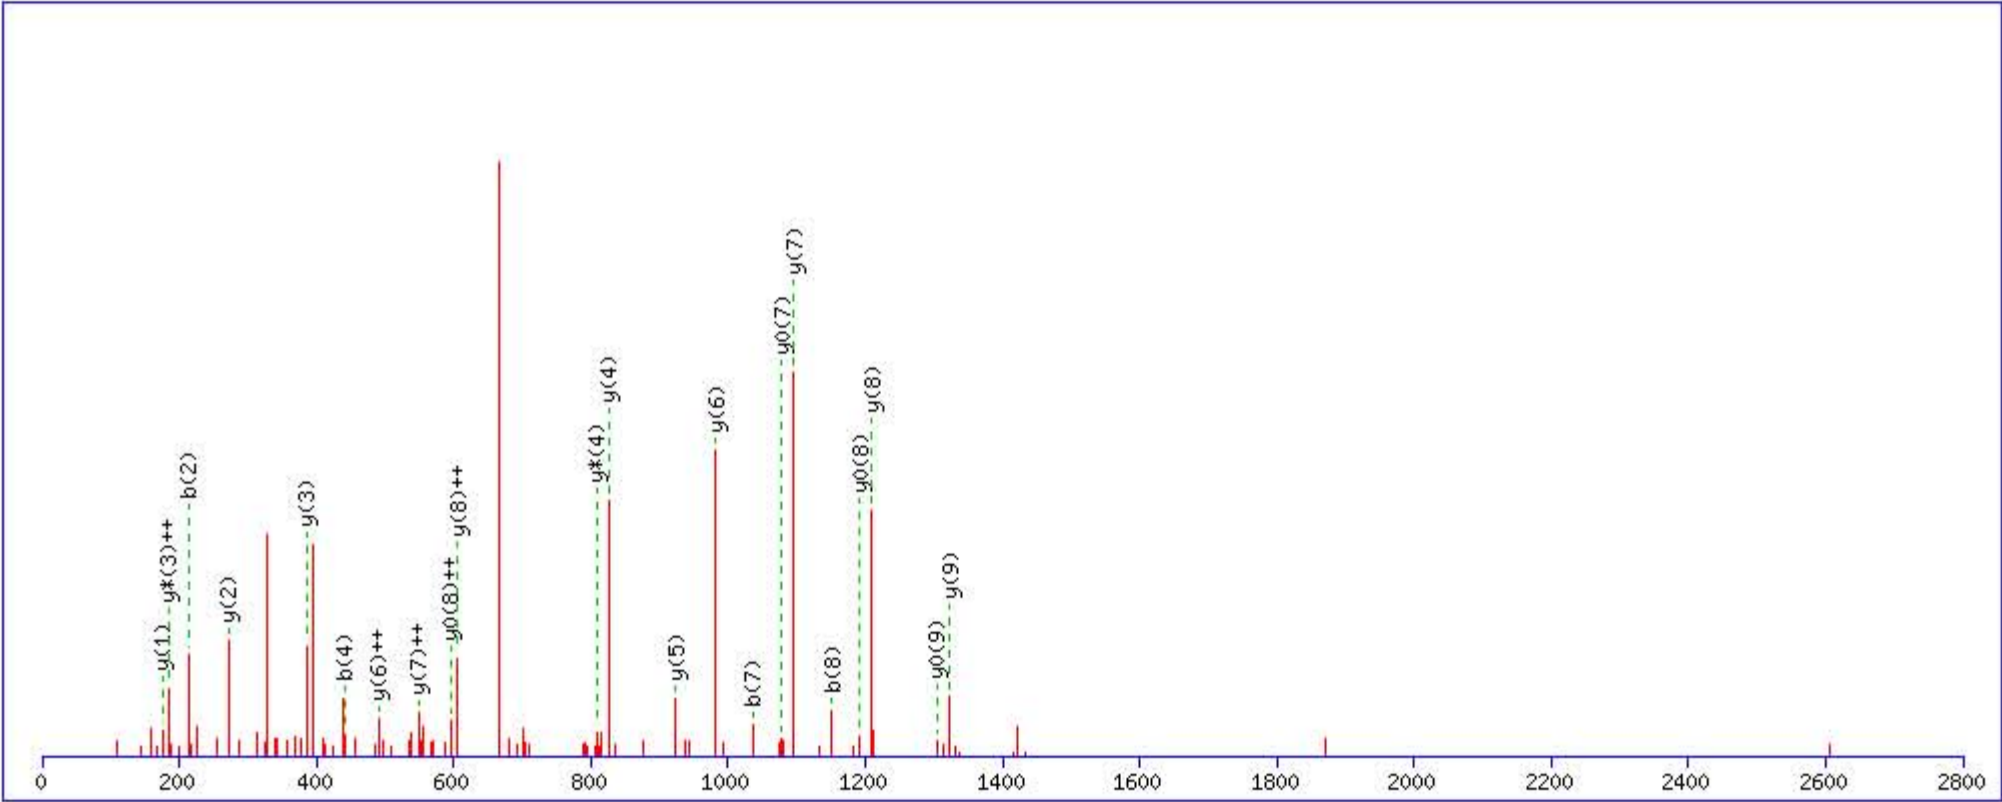

Monoisotopic mass of neutral peptide Mr(calc): 1420.786057  
Fixed modifications: Carbamidomethyl (C) (apply to specified residues or termini only)  
Variable modifications:  
Q7 : Biotin:Thermo-21345 (Q)  
Ions Score: 62 Expect: 7e-006  
Matches : 22/78 fragment ions using 39 most intense peaks ([help](#))

| #  | b           | b <sup>++</sup> | b <sup>*</sup> | b <sup>*++</sup> | b <sup>0</sup> | b <sup>0++</sup> | Seq. | y           | y <sup>++</sup> | y <sup>*</sup> | y <sup>*++</sup> | y <sup>0</sup> | y <sup>0++</sup> | #  |
|----|-------------|-----------------|----------------|------------------|----------------|------------------|------|-------------|-----------------|----------------|------------------|----------------|------------------|----|
| 1  | 100.075690  | 50.541483       |                |                  |                |                  | V    |             |                 |                |                  |                |                  | 10 |
| 2  | 213.159754  | 107.083515      |                |                  |                |                  | L    | 1322.724918 | 661.866097      | 1305.698369    | 653.352823       | 1304.714353    | 652.860814       | 9  |
| 3  | 326.243818  | 163.625547      |                |                  |                |                  | L    | 1209.640854 | 605.324065      | 1192.614305    | 596.810791       | 1191.630289    | 596.318783       | 8  |
| 4  | 441.270761  | 221.139018      |                |                  | 423.260196     | 212.133736       | D    | 1096.556790 | 548.782033      | 1079.530241    | 540.268758       | 1078.546225    | 539.776750       | 7  |
| 5  | 498.292225  | 249.649750      |                |                  | 480.281660     | 240.644468       | G    | 981.529847  | 491.268562      | 964.503298     | 482.755287       |                |                  | 6  |
| 6  | 597.360639  | 299.183958      |                |                  | 579.350074     | 290.178675       | V    | 924.508383  | 462.757830      | 907.481834     | 454.244555       |                |                  | 5  |
| 7  | 1036.585965 | 518.796621      | 1019.559416    | 510.283346       | 1018.575400    | 509.791338       | Q    | 825.439969  | 413.223623      | 808.413420     | 404.710348       |                |                  | 4  |
| 8  | 1150.628892 | 575.818084      | 1133.602343    | 567.304810       | 1132.618327    | 566.812801       | N    | 386.214643  | 193.610959      | 369.188094     | 185.097685       |                |                  | 3  |
| 9  | 1247.681656 | 624.344466      | 1230.655107    | 615.831192       | 1229.671091    | 615.339183       | P    | 272.171716  | 136.589496      | 255.145167     | 128.076221       |                |                  | 2  |
| 10 |             |                 |                |                  |                |                  | R    | 175.118952  | 88.063114       | 158.092403     | 79.549839        |                |                  | 1  |

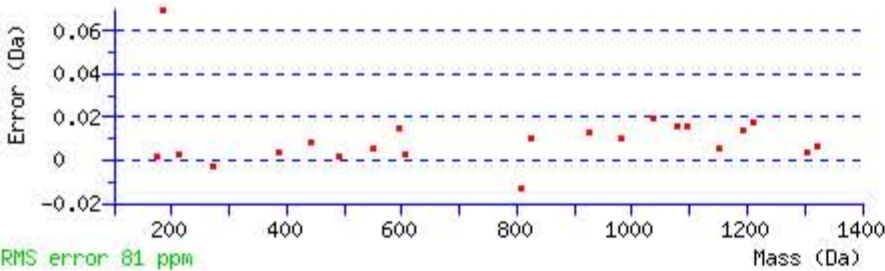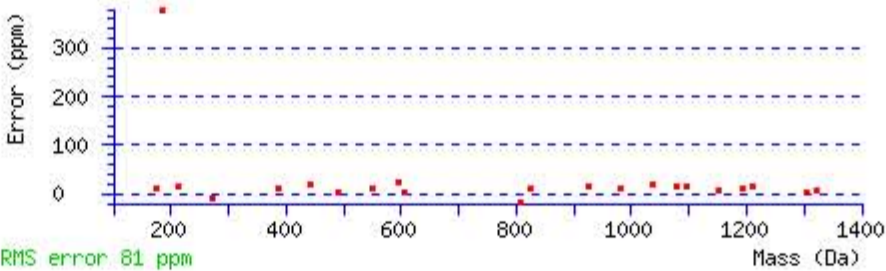

NCBI BLAST search of [VLLDGVQNPR](#)  
(Parameters: blastp, nr protein database, expect=20000, no filter, PAM30)  
Other BLAST [web gateways](#)

All matches to this query

| Score | Mr(calc):   | Delta    | Sequence                   |
|-------|-------------|----------|----------------------------|
| 62.2  | 1420.786057 | 0.017291 | <a href="#">VLLDGVQNPR</a> |

MATRIX

SCIENCE

Mascot Search Results

Peptide View

MS/MS Fragmentation of **HQQTVTIPPK**  
Found in **CO3\_HUMAN**, Complement C3 OS=Homo sapiens GN=C3 PE=1 SV=2

Match to Query 29915: 1458.800382 from(487.274070,3+) rtinseconds(1561) index(31459)  
Title: Locus:1.1.1.652.8 File:"2013-07-02 CLN FXIII 180 min 2nd F 3.wiff"  
Data file C:\Program Files (x86)\Matrix Science\Mascot Daemon\mgf\8 FXIII 180 min 2nd\mascot\_daemon\_merge.mgf

Click mouse within plot area to zoom in by factor of two about that point  
Or, 

Plot from

100

 to 

1150

 Da 

Full range

  
Label all possible matches ☐ Label matches used for scoring ☒

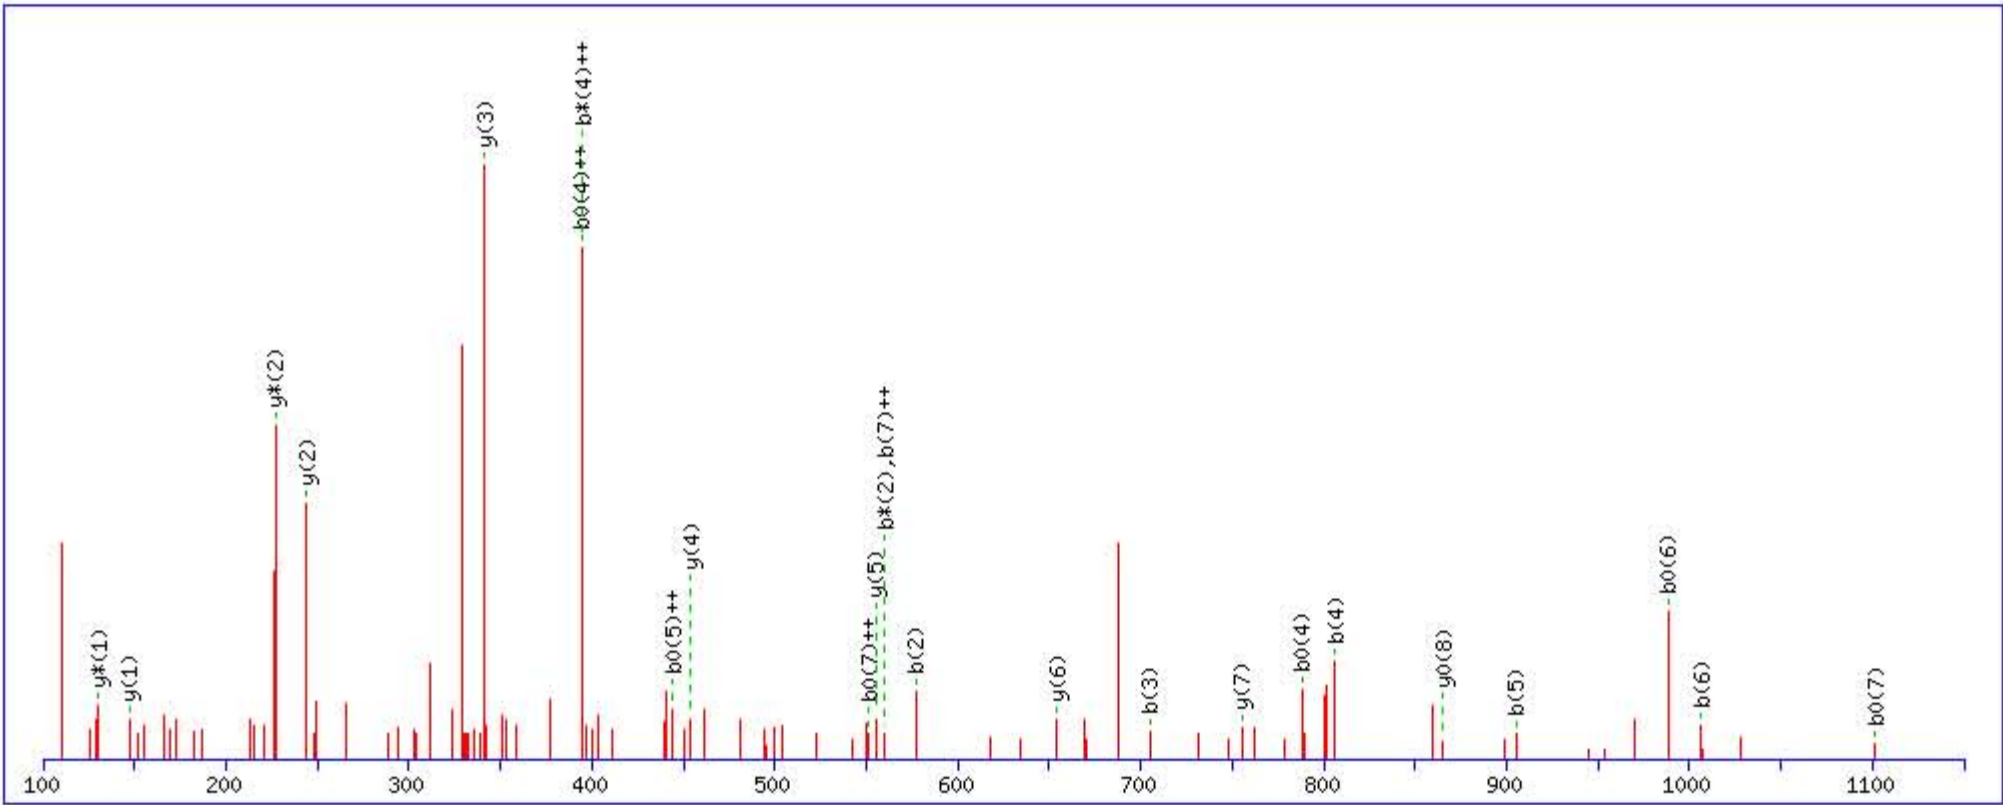

Monoisotopic mass of neutral peptide Mr(calc): 1458.801712  
Fixed modifications: Carbamidomethyl (C) (apply to specified residues or termini only)  
Variable modifications:  
Q2 : Biotin:Thermo-21345 (Q)  
Ions Score: 27 Expect: 0.047  
Matches : 24/92 fragment ions using 55 most intense peaks [\(help\)](#)

| #  | b           | b <sup>++</sup> | b <sup>*</sup> | b <sup>*++</sup> | b <sup>0</sup> | b <sup>0++</sup> | Seq. | y           | y <sup>++</sup> | y <sup>*</sup> | y <sup>*++</sup> | y <sup>0</sup> | y <sup>0++</sup> | #  |
|----|-------------|-----------------|----------------|------------------|----------------|------------------|------|-------------|-----------------|----------------|------------------|----------------|------------------|----|
| 1  | 138.066188  | 69.536732       |                |                  |                |                  | H    |             |                 |                |                  |                |                  | 10 |
| 2  | 577.291514  | 289.149395      | 560.264965     | 280.636121       |                |                  | Q    | 1322.750072 | 661.878674      | 1305.723523    | 653.365400       | 1304.739507    | 652.873392       | 9  |
| 3  | 705.350092  | 353.178684      | 688.323543     | 344.665410       |                |                  | Q    | 883.524746  | 442.266011      | 866.498197     | 433.752737       | 865.514181     | 433.260729       | 8  |
| 4  | 806.397771  | 403.702524      | 789.371222     | 395.189249       | 788.387206     | 394.697241       | T    | 755.466168  | 378.236722      | 738.439619     | 369.723448       | 737.455603     | 369.231440       | 7  |
| 5  | 905.466185  | 453.236731      | 888.439636     | 444.723456       | 887.455620     | 444.231448       | V    | 654.418489  | 327.712883      | 637.391940     | 319.199608       | 636.407924     | 318.707600       | 6  |
| 6  | 1006.513864 | 503.760570      | 989.487315     | 495.247296       | 988.503299     | 494.755288       | T    | 555.350075  | 278.178676      | 538.323526     | 269.665401       | 537.339510     | 269.173393       | 5  |
| 7  | 1119.597928 | 560.302602      | 1102.571379    | 551.789328       | 1101.587363    | 551.297319       | I    | 454.302396  | 227.654836      | 437.275847     | 219.141561       |                |                  | 4  |
| 8  | 1216.650692 | 608.828984      | 1199.624143    | 600.315710       | 1198.640127    | 599.823701       | P    | 341.218332  | 171.112804      | 324.191783     | 162.599530       |                |                  | 3  |
| 9  | 1313.703456 | 657.355366      | 1296.676907    | 648.842092       | 1295.692891    | 648.350083       | P    | 244.165568  | 122.586422      | 227.139019     | 114.073148       |                |                  | 2  |
| 10 |             |                 |                |                  |                |                  | K    | 147.112804  | 74.060040       | 130.086255     | 65.546765        |                |                  | 1  |

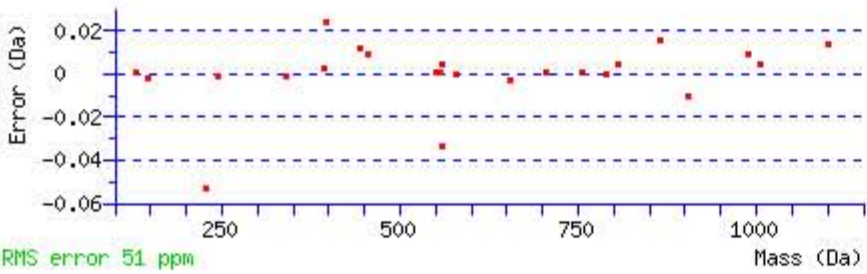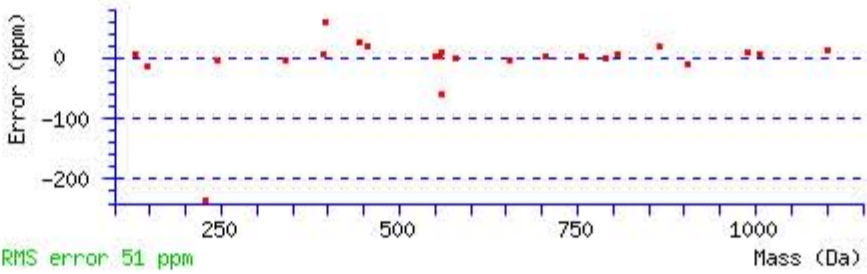

NCBI BLAST search of [HQQTVTIPPK](#)  
(Parameters: blastp, nr protein database, expect=20000, no filter, PAM30)  
Other BLAST [web gateways](#)

All matches to this query

| Score | Mr(calc):   | Delta     | Sequence                   |
|-------|-------------|-----------|----------------------------|
| 26.6  | 1458.801712 | -0.001330 | <a href="#">HQQTVTIPPK</a> |
| 25.7  | 1458.801712 | -0.001330 | <a href="#">HQQTVTIPPK</a> |

MATRIX

SCIENCE

Mascot Search Results

Peptide View

MS/MS Fragmentation of **HQQTVTIPPK**  
Found in **CO3\_HUMAN**, Complement C3 OS=Homo sapiens GN=C3 PE=1 SV=2

Match to Query 29937: 1458.807008 from(730.410780,2+) rtinseconds(1576) index(31548)  
Title: Locus:1.1.1.657.17 File:"2013-07-02 CLN FXIII 180 min 2nd F 3.wiff"  
Data file C:\Program Files (x86)\Matrix Science\Mascot Daemon\mgf\8 FXIII 180 min 2nd\mascot\_daemon\_merge.mgf

Click mouse within plot area to zoom in by factor of two about that point  
Or,   to  Da   
Label all possible matches ☐ Label matches used for scoring ☒

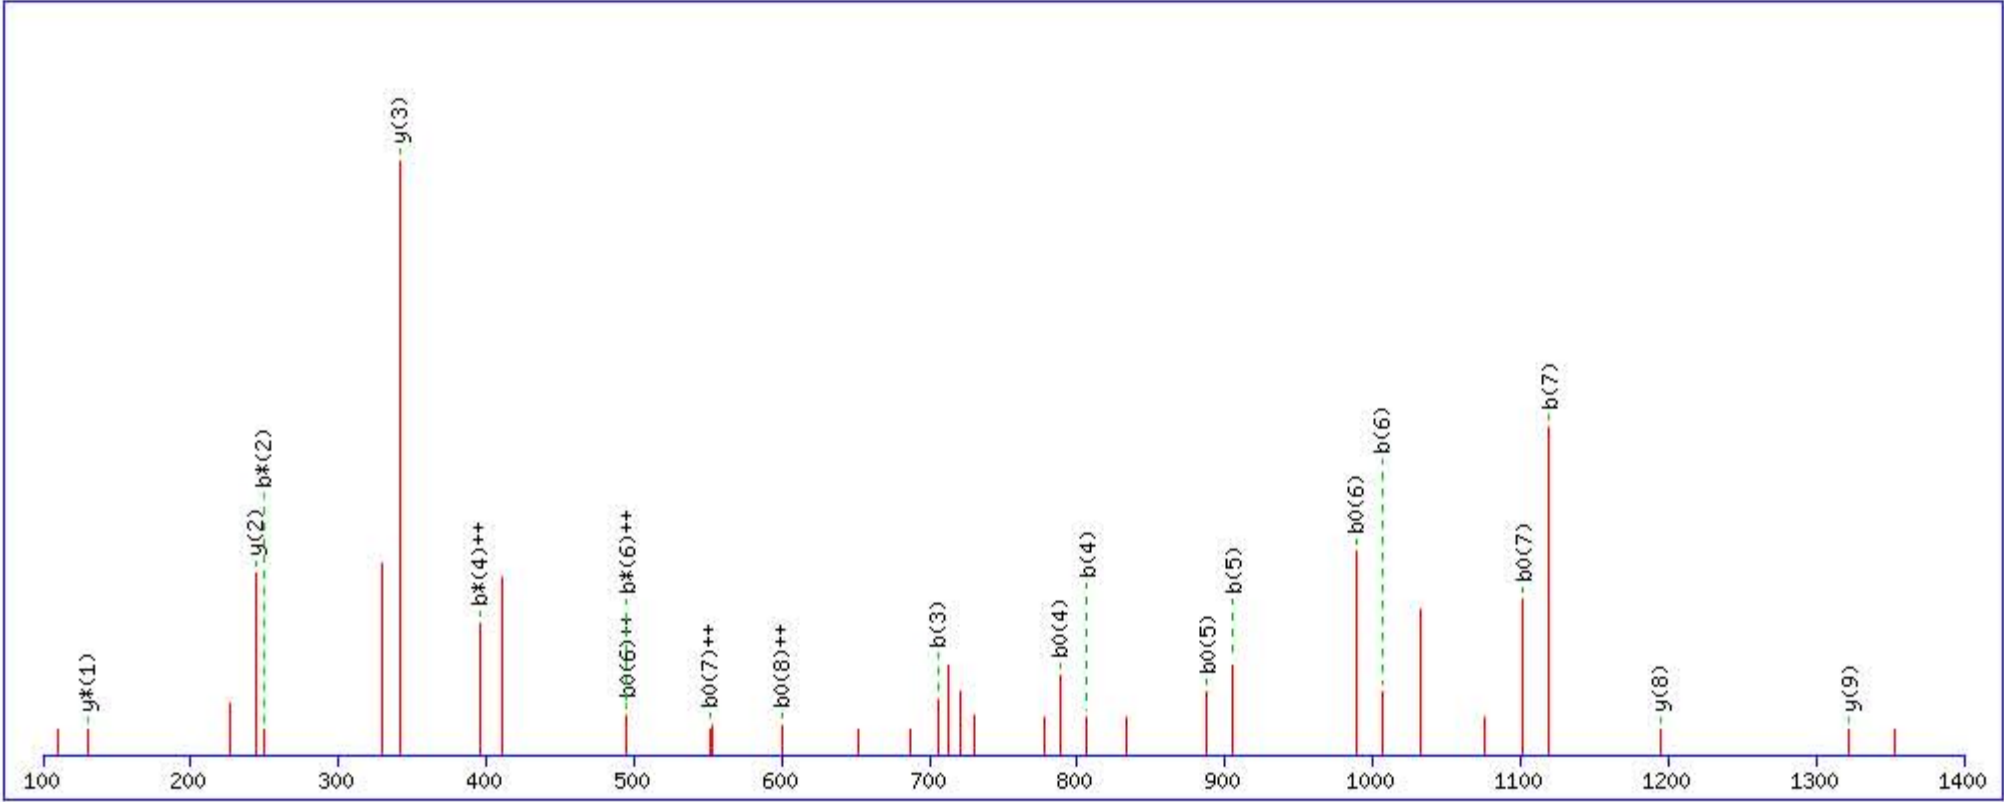

Monoisotopic mass of neutral peptide Mr(calc): 1458.801712  
Fixed modifications: Carbamidomethyl (C) (apply to specified residues or termini only)  
Variable modifications:  
Q3 : Biotin:Thermo-21345 (Q)  
Ions Score: 33 Expect: 0.0028  
Matches : 20/92 fragment ions using 36 most intense peaks [\(help\)](#)

| #  | b           | b <sup>++</sup> | b <sup>*</sup> | b <sup>+++</sup> | b <sup>0</sup> | b <sup>0++</sup> | Seq. | y           | y <sup>++</sup> | y <sup>*</sup> | y <sup>+++</sup> | y <sup>0</sup> | y <sup>0++</sup> | #  |
|----|-------------|-----------------|----------------|------------------|----------------|------------------|------|-------------|-----------------|----------------|------------------|----------------|------------------|----|
| 1  | 138.066188  | 69.536732       |                |                  |                |                  | H    |             |                 |                |                  |                |                  | 10 |
| 2  | 266.124766  | 133.566021      | 249.098217     | 125.052746       |                |                  | Q    | 1322.750072 | 661.878674      | 1305.723523    | 653.365400       | 1304.739507    | 652.873392       | 9  |
| 3  | 705.350092  | 353.178684      | 688.323543     | 344.665410       |                |                  | Q    | 1194.691494 | 597.849385      | 1177.664945    | 589.336111       | 1176.680929    | 588.844102       | 8  |
| 4  | 806.397771  | 403.702524      | 789.371222     | 395.189249       | 788.387206     | 394.697241       | T    | 755.466168  | 378.236722      | 738.439619     | 369.723448       | 737.455603     | 369.231440       | 7  |
| 5  | 905.466185  | 453.236731      | 888.439636     | 444.723456       | 887.455620     | 444.231448       | V    | 654.418489  | 327.712883      | 637.391940     | 319.199608       | 636.407924     | 318.707600       | 6  |
| 6  | 1006.513864 | 503.760570      | 989.487315     | 495.247296       | 988.503299     | 494.755288       | T    | 555.350075  | 278.178676      | 538.323526     | 269.665401       | 537.339510     | 269.173393       | 5  |
| 7  | 1119.597928 | 560.302602      | 1102.571379    | 551.789328       | 1101.587363    | 551.297319       | I    | 454.302396  | 227.654836      | 437.275847     | 219.141561       |                |                  | 4  |
| 8  | 1216.650692 | 608.828984      | 1199.624143    | 600.315710       | 1198.640127    | 599.823701       | P    | 341.218332  | 171.112804      | 324.191783     | 162.599530       |                |                  | 3  |
| 9  | 1313.703456 | 657.355366      | 1296.676907    | 648.842092       | 1295.692891    | 648.350083       | P    | 244.165568  | 122.586422      | 227.139019     | 114.073148       |                |                  | 2  |
| 10 |             |                 |                |                  |                |                  | K    | 147.112804  | 74.060040       | 130.086255     | 65.546765        |                |                  | 1  |

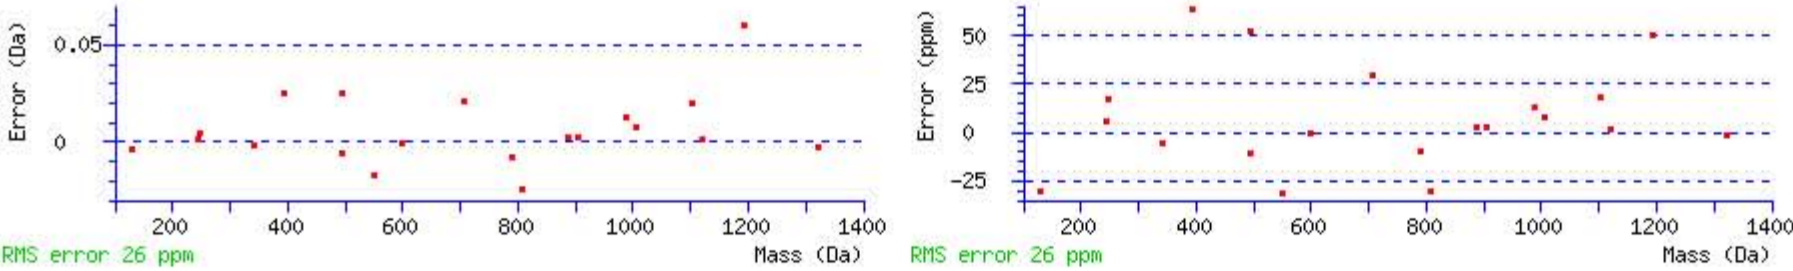

NCBI BLAST search of [HQQTVTIPPK](#)  
(Parameters: blastp, nr protein database, expect=20000, no filter, PAM30)  
Other BLAST [web gateways](#)

All matches to this query

| Score | Mr(calc):   | Delta     | Sequence                       |
|-------|-------------|-----------|--------------------------------|
| 32.6  | 1458.801712 | 0.005296  | <a href="#">HQQTVTIPPK</a>     |
| 24.8  | 1458.801712 | 0.005296  | <a href="#">HQQTVTIPPK</a>     |
| 5.1   | 1458.826859 | -0.019851 | <a href="#">VGALLVQSFSK</a>    |
| 1.0   | 1458.822800 | -0.015792 | <a href="#">DKMSKDLLLLGIAR</a> |
| 0.2   | 1458.790466 | 0.016542  | <a href="#">GIMDGHTIYLVIK</a>  |

MATRIX

SCIENCE

Mascot Search Results

Peptide View

MS/MS Fragmentation of **AELQCPQPAAR**  
Found in **CO3\_HUMAN**, Complement C3 OS=Homo sapiens GN=C3 PE=1 SV=2

Match to Query 32523: 1550.780248 from(776.397400,2+) rtinseconds(1585) index(31607)  
Title: Locus:1.1.1.660.18 File:"2013-07-02 CLN FXIII 180 min 2nd F 3.wiff"  
Data file C:\Program Files (x86)\Matrix Science\Mascot Daemon\mgf\8 FXIII 180 min 2nd\mascot\_daemon\_merge.mgf

Click mouse within plot area to zoom in by factor of two about that point  
Or, 

Plot from

100

 to 

1600

 Da 

Full range

  
Label all possible matches ☐ Label matches used for scoring ☒

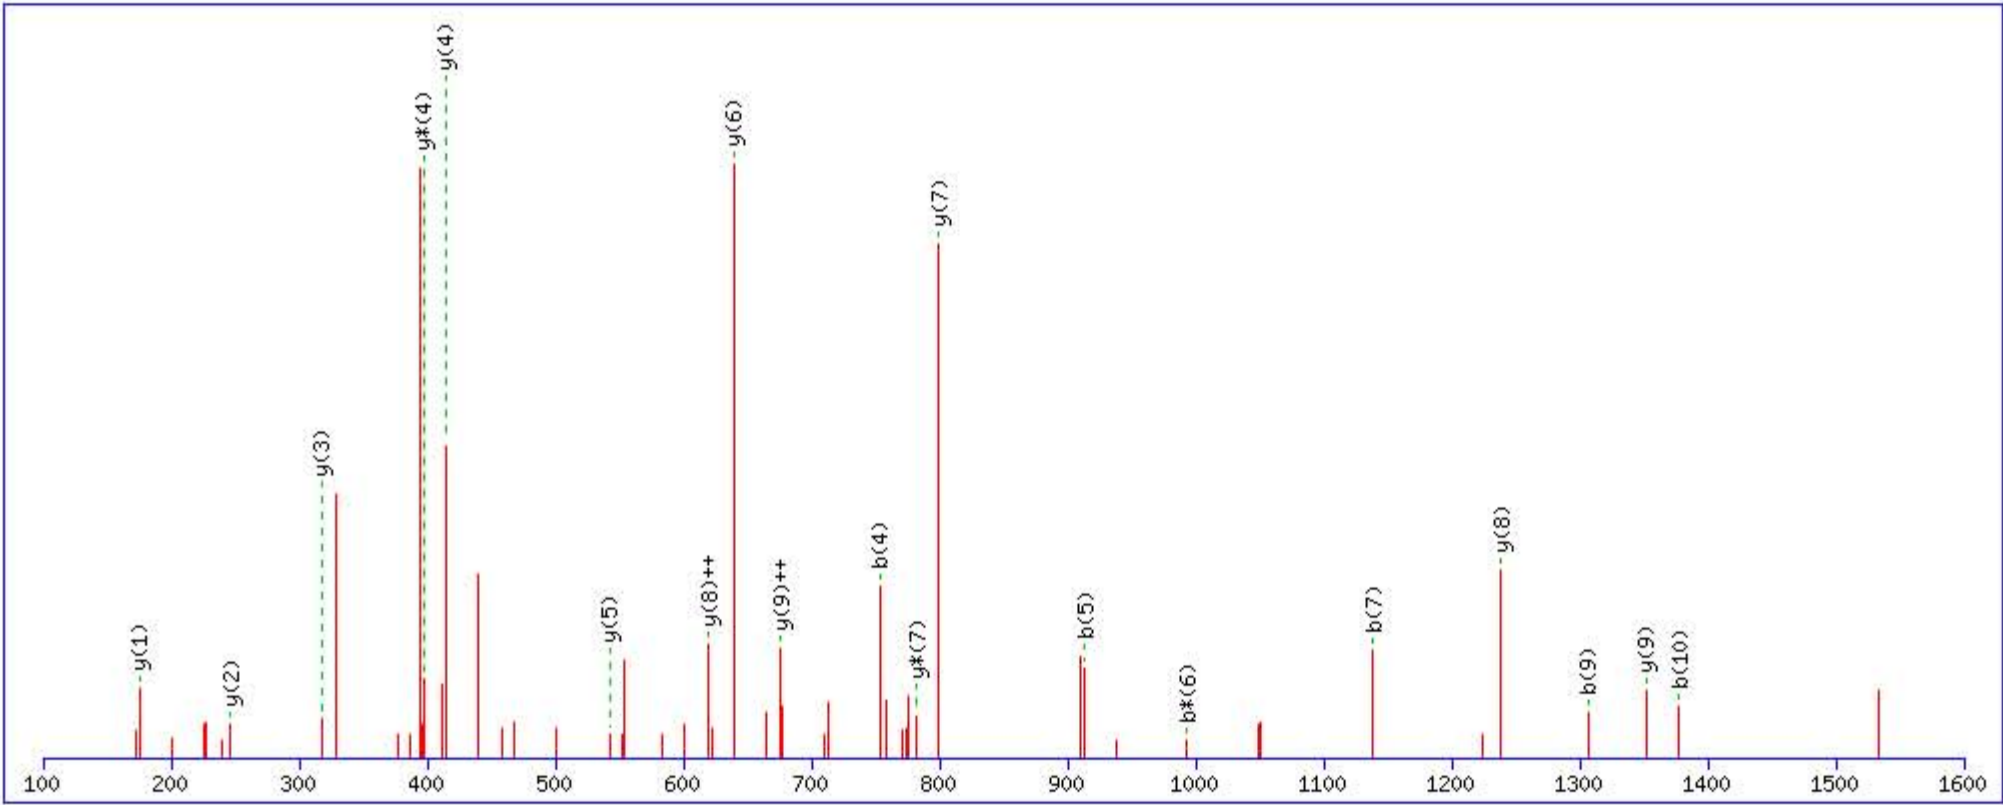

Monoisotopic mass of neutral peptide Mr(calc): 1550.769730  
Fixed modifications: Carbamidomethyl (C) (apply to specified residues or termini only)  
Variable modifications:  
Q4 : Biotin:Thermo-21345 (Q)  
Ions Score: 54 Expect: 8.4e-005  
Matches : 19/94 fragment ions using 40 most intense peaks [\(help\)](#)

| #  | b           | b <sup>++</sup> | b <sup>*</sup> | b <sup>+++</sup> | b <sup>0</sup> | b <sup>0++</sup> | Seq. | y           | y <sup>++</sup> | y <sup>*</sup> | y <sup>+++</sup> | y <sup>0</sup> | y <sup>0++</sup> | #  |
|----|-------------|-----------------|----------------|------------------|----------------|------------------|------|-------------|-----------------|----------------|------------------|----------------|------------------|----|
| 1  | 72.044390   | 36.525833       |                |                  |                |                  | A    |             |                 |                |                  |                |                  | 11 |
| 2  | 201.086983  | 101.047130      |                |                  | 183.076418     | 92.041847        | E    | 1480.739918 | 740.873597      | 1463.713369    | 732.360323       | 1462.729353    | 731.868315       | 10 |
| 3  | 314.171047  | 157.589161      |                |                  | 296.160482     | 148.583879       | L    | 1351.697325 | 676.352301      | 1334.670776    | 667.839026       |                |                  | 9  |
| 4  | 753.396373  | 377.201825      | 736.369824     | 368.688550       | 735.385808     | 368.196542       | Q    | 1238.613261 | 619.810269      | 1221.586712    | 611.296994       |                |                  | 8  |
| 5  | 913.427022  | 457.217149      | 896.400473     | 448.703875       | 895.416457     | 448.211867       | C    | 799.387935  | 400.197606      | 782.361386     | 391.684331       |                |                  | 7  |
| 6  | 1010.479786 | 505.743531      | 993.453237     | 497.230257       | 992.469221     | 496.738249       | P    | 639.357286  | 320.182281      | 622.330737     | 311.669007       |                |                  | 6  |
| 7  | 1138.538364 | 569.772820      | 1121.511815    | 561.259546       | 1120.527799    | 560.767538       | Q    | 542.304522  | 271.655899      | 525.277973     | 263.142625       |                |                  | 5  |
| 8  | 1235.591128 | 618.299202      | 1218.564579    | 609.785928       | 1217.580563    | 609.293920       | P    | 414.245944  | 207.626610      | 397.219395     | 199.113335       |                |                  | 4  |
| 9  | 1306.628242 | 653.817759      | 1289.601693    | 645.304485       | 1288.617677    | 644.812477       | A    | 317.193180  | 159.100228      | 300.166631     | 150.586953       |                |                  | 3  |
| 10 | 1377.665356 | 689.336316      | 1360.638807    | 680.823042       | 1359.654791    | 680.331034       | A    | 246.156066  | 123.581671      | 229.129517     | 115.068396       |                |                  | 2  |
| 11 |             |                 |                |                  |                |                  | R    | 175.118952  | 88.063114       | 158.092403     | 79.549839        |                |                  | 1  |

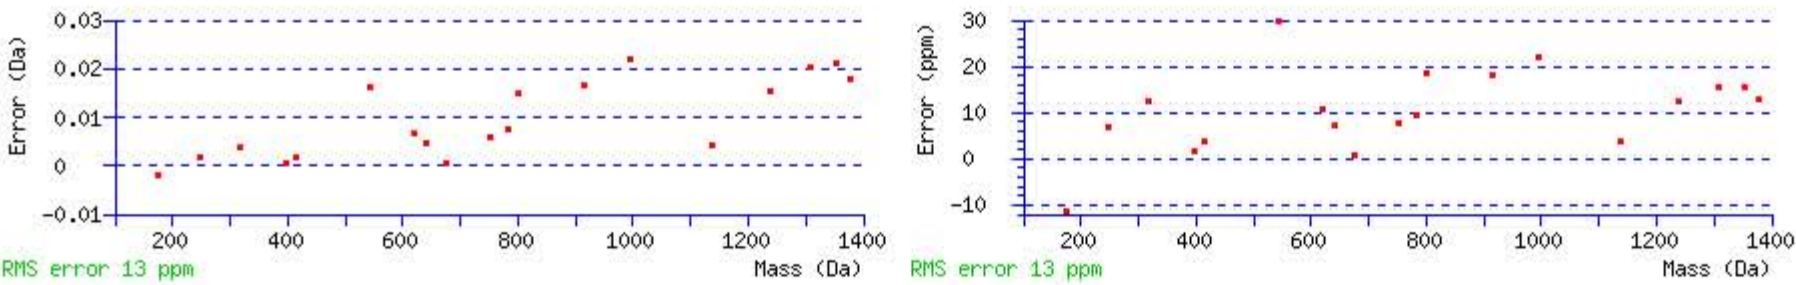

NCBI BLAST search of [AELQCPQPAAR](#)  
(Parameters: blastp, nr protein database, expect=20000, no filter, PAM30)  
Other BLAST [web gateways](#)

All matches to this query

| Score | Mr(calc):   | Delta     | Sequence                         |
|-------|-------------|-----------|----------------------------------|
| 54.4  | 1550.769730 | 0.010518  | <a href="#">AELQCPQPAAR</a>      |
| 17.0  | 1550.769730 | 0.010518  | <a href="#">AELQCPQPAAR</a>      |
| 10.6  | 1550.780121 | 0.000127  | <a href="#">GSSPGPRPVEGTPASR</a> |
| 8.6   | 1550.768845 | 0.011403  | <a href="#">SLGKRDLYDEAER</a>    |
| 7.7   | 1550.761856 | 0.018392  | <a href="#">MCSLMLSKELPAR</a>    |
| 6.7   | 1550.780975 | -0.000727 | <a href="#">AANGQGQQR</a>        |
| 6.7   | 1550.780975 | -0.000727 | <a href="#">AANGQGQQR</a>        |
| 6.3   | 1550.780945 | -0.000697 | <a href="#">EAIREHQMAR</a>       |
| 3.9   | 1550.770218 | 0.010030  | <a href="#">NFSNGHQLTIHQ</a>     |
| 3.5   | 1550.761856 | 0.018392  | <a href="#">MCSLMLSKELPAR</a>    |

MATRIX

SCIENCE

Mascot Search Results

Peptide View

MS/MS Fragmentation of **SGSDEVQVGQQR**  
Found in **CO3\_HUMAN**, Complement C3 OS=Homo sapiens GN=C3 PE=1 SV=2

Match to Query 34701: 1599.782788 from(800.898670,2+) rtinseconds(1576) index(31551)  
Title: Locus:1.1.1.657.20 File:"2013-07-02 CLN FXIII 180 min 2nd F 3.wiff"  
Data file C:\Program Files (x86)\Matrix Science\Mascot Daemon\mgf\8 FXIII 180 min 2nd\mascot\_daemon\_merge.mgf

Click mouse within plot area to zoom in by factor of two about that point  
Or, 

Plot from

100

 to 

2000

 Da 

Full range

  
Label all possible matches ☐ Label matches used for scoring ☒

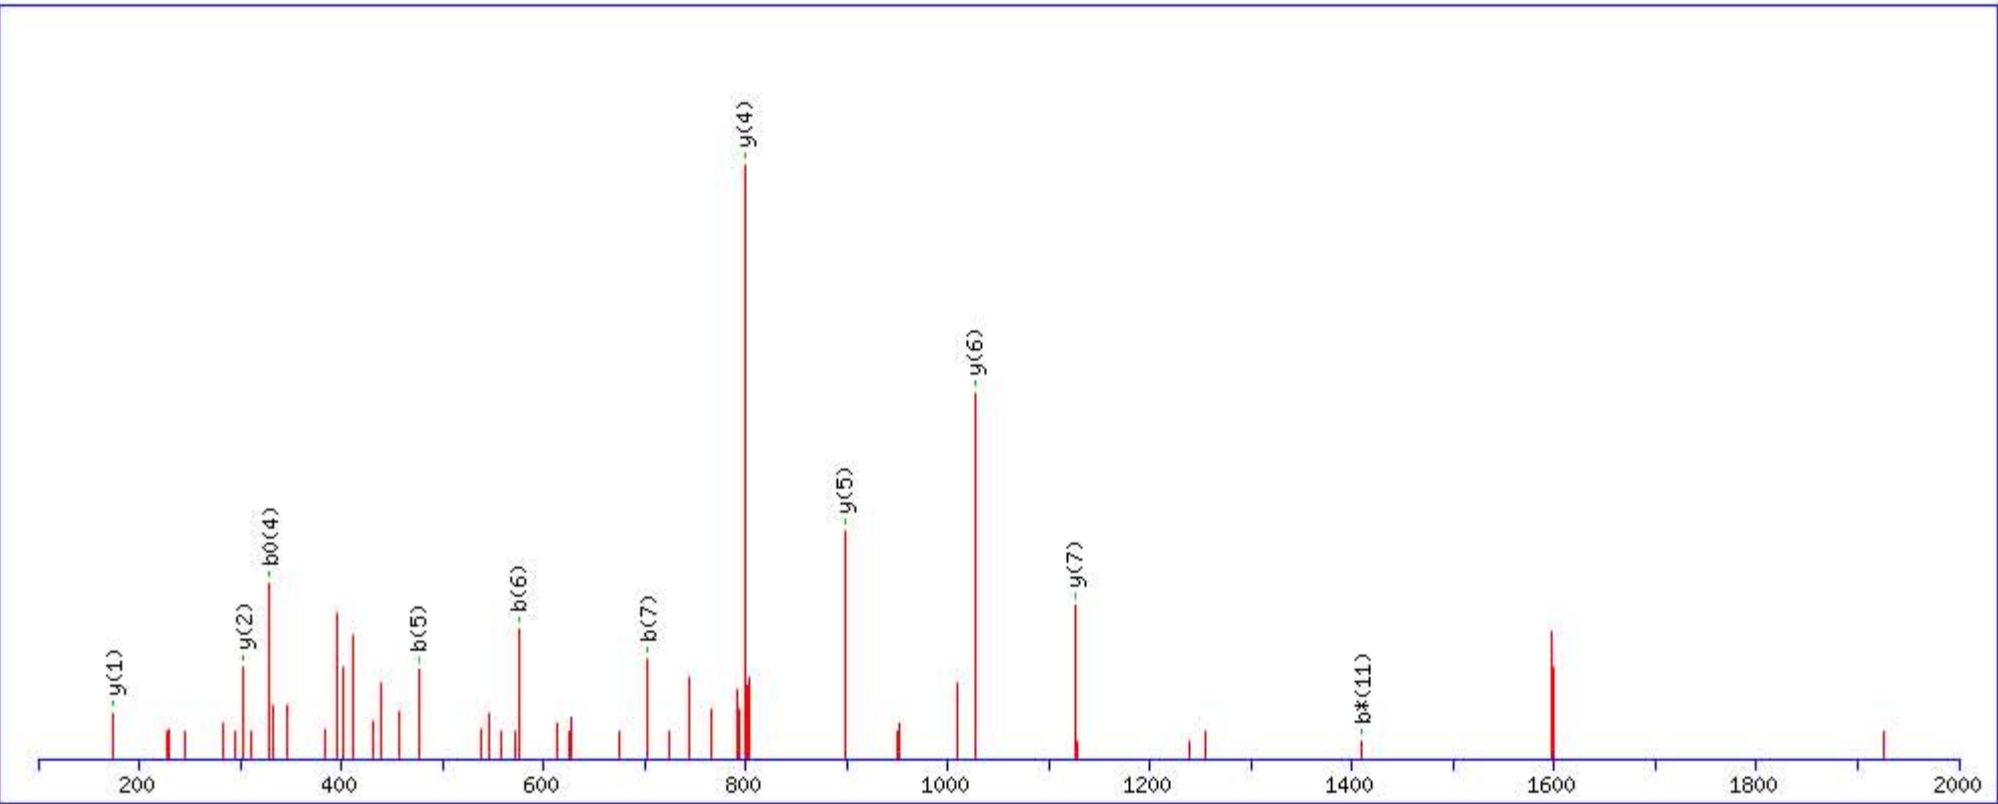

Monoisotopic mass of neutral peptide Mr(calc): 1599.767517  
Fixed modifications: Carbamidomethyl (C) (apply to specified residues or termini only)  
Variable modifications:  
Q10 : Biotin:Thermo-21345 (Q)  
Ions Score: 26 Expect: 0.028  
Matches : 11/106 fragment ions using 25 most intense peaks [\(help\)](#)

| #  | b           | b <sup>++</sup> | b <sup>*</sup> | b <sup>+++</sup> | b <sup>0</sup> | b <sup>0++</sup> | Seq. | y           | y <sup>++</sup> | y <sup>*</sup> | y <sup>+++</sup> | y <sup>0</sup> | y <sup>0++</sup> | #  |
|----|-------------|-----------------|----------------|------------------|----------------|------------------|------|-------------|-----------------|----------------|------------------|----------------|------------------|----|
| 1  | 88.039304   | 44.523290       |                |                  | 70.028739      | 35.518008        | S    |             |                 |                |                  |                |                  | 12 |
| 2  | 145.060768  | 73.034022       |                |                  | 127.050203     | 64.028740        | G    | 1513.742754 | 757.375015      | 1496.716205    | 748.861741       | 1495.732189    | 748.369733       | 11 |
| 3  | 232.092796  | 116.550036      |                |                  | 214.082231     | 107.544753       | S    | 1456.721290 | 728.864283      | 1439.694741    | 720.351009       | 1438.710725    | 719.859001       | 10 |
| 4  | 347.119739  | 174.063507      |                |                  | 329.109174     | 165.058225       | D    | 1369.689262 | 685.348269      | 1352.662713    | 676.834995       | 1351.678697    | 676.342987       | 9  |
| 5  | 476.162332  | 238.584804      |                |                  | 458.151767     | 229.579522       | E    | 1254.662319 | 627.834798      | 1237.635770    | 619.321523       | 1236.651754    | 618.829515       | 8  |
| 6  | 575.230746  | 288.119011      |                |                  | 557.220181     | 279.113729       | V    | 1125.619726 | 563.313501      | 1108.593177    | 554.800227       |                |                  | 7  |
| 7  | 703.289324  | 352.148300      | 686.262775     | 343.635026       | 685.278759     | 343.143018       | Q    | 1026.551312 | 513.779294      | 1009.524763    | 505.266020       |                |                  | 6  |
| 8  | 802.357738  | 401.682507      | 785.331189     | 393.169233       | 784.347173     | 392.677225       | V    | 898.492734  | 449.750005      | 881.466185     | 441.236731       |                |                  | 5  |
| 9  | 859.379202  | 430.193239      | 842.352653     | 421.679965       | 841.368637     | 421.187957       | G    | 799.424320  | 400.215798      | 782.397771     | 391.702524       |                |                  | 4  |
| 10 | 1298.604528 | 649.805902      | 1281.577979    | 641.292628       | 1280.593963    | 640.800620       | Q    | 742.402856  | 371.705066      | 725.376307     | 363.191792       |                |                  | 3  |
| 11 | 1426.663106 | 713.835191      | 1409.636557    | 705.321917       | 1408.652541    | 704.829909       | Q    | 303.177530  | 152.092403      | 286.150981     | 143.579129       |                |                  | 2  |
| 12 |             |                 |                |                  |                |                  | R    | 175.118952  | 88.063114       | 158.092403     | 79.549839        |                |                  | 1  |

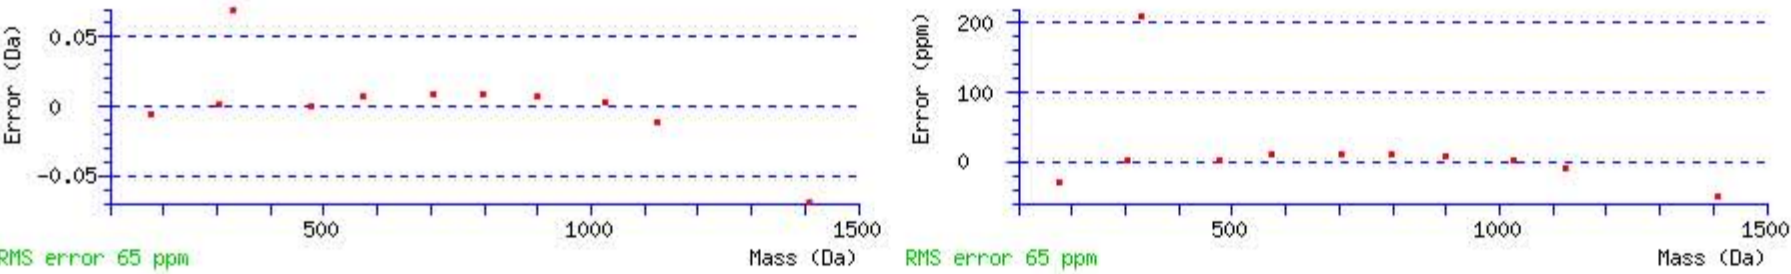

NCBI BLAST search of [SGSDEVQVGQQR](#)  
(Parameters: blastp, nr protein database, expect=20000, no filter, PAM30)  
Other BLAST [web gateways](#)

All matches to this query

| Score | Mr(calc):   | Delta     | Sequence                        |
|-------|-------------|-----------|---------------------------------|
| 25.9  | 1599.767517 | 0.015271  | <a href="#">SGSDEVQVGQQR</a>    |
| 23.7  | 1599.767517 | 0.015271  | <a href="#">SGSDEVQVGQQR</a>    |
| 8.8   | 1599.767471 | 0.015317  | <a href="#">AMNAANLNIPPSDTR</a> |
| 8.5   | 1599.767517 | 0.015271  | <a href="#">SGSDEVQVGQQR</a>    |
| 2.9   | 1599.779388 | 0.003400  | <a href="#">RFPDFSYITQNGR</a>   |
| 0.8   | 1599.793961 | -0.011173 | <a href="#">VGAPAWREAAQAMAR</a> |

MATRIX

SCIENCE

Mascot Search Results

Peptide View

MS/MS Fragmentation of **CAEENCFIQK**  
Found in **CO3\_HUMAN**, Complement C3 OS=Homo sapiens GN=C3 PE=1 SV=2

Match to Query 34957: 1608.729108 from(805.371830,2+) rtinseconds(1794) index(32893)  
Title: Locus:1.1.1.733.20 File:"2013-07-02 CLN FXIII 180 min 2nd F 3.wiff"  
Data file C:\Program Files (x86)\Matrix Science\Mascot Daemon\mgf\8 FXIII 180 min 2nd\mascot\_daemon\_merge.mgf

Click mouse within plot area to zoom in by factor of two about that point

Or,   to  Da

Label all possible matches ☐ Label matches used for scoring ☒

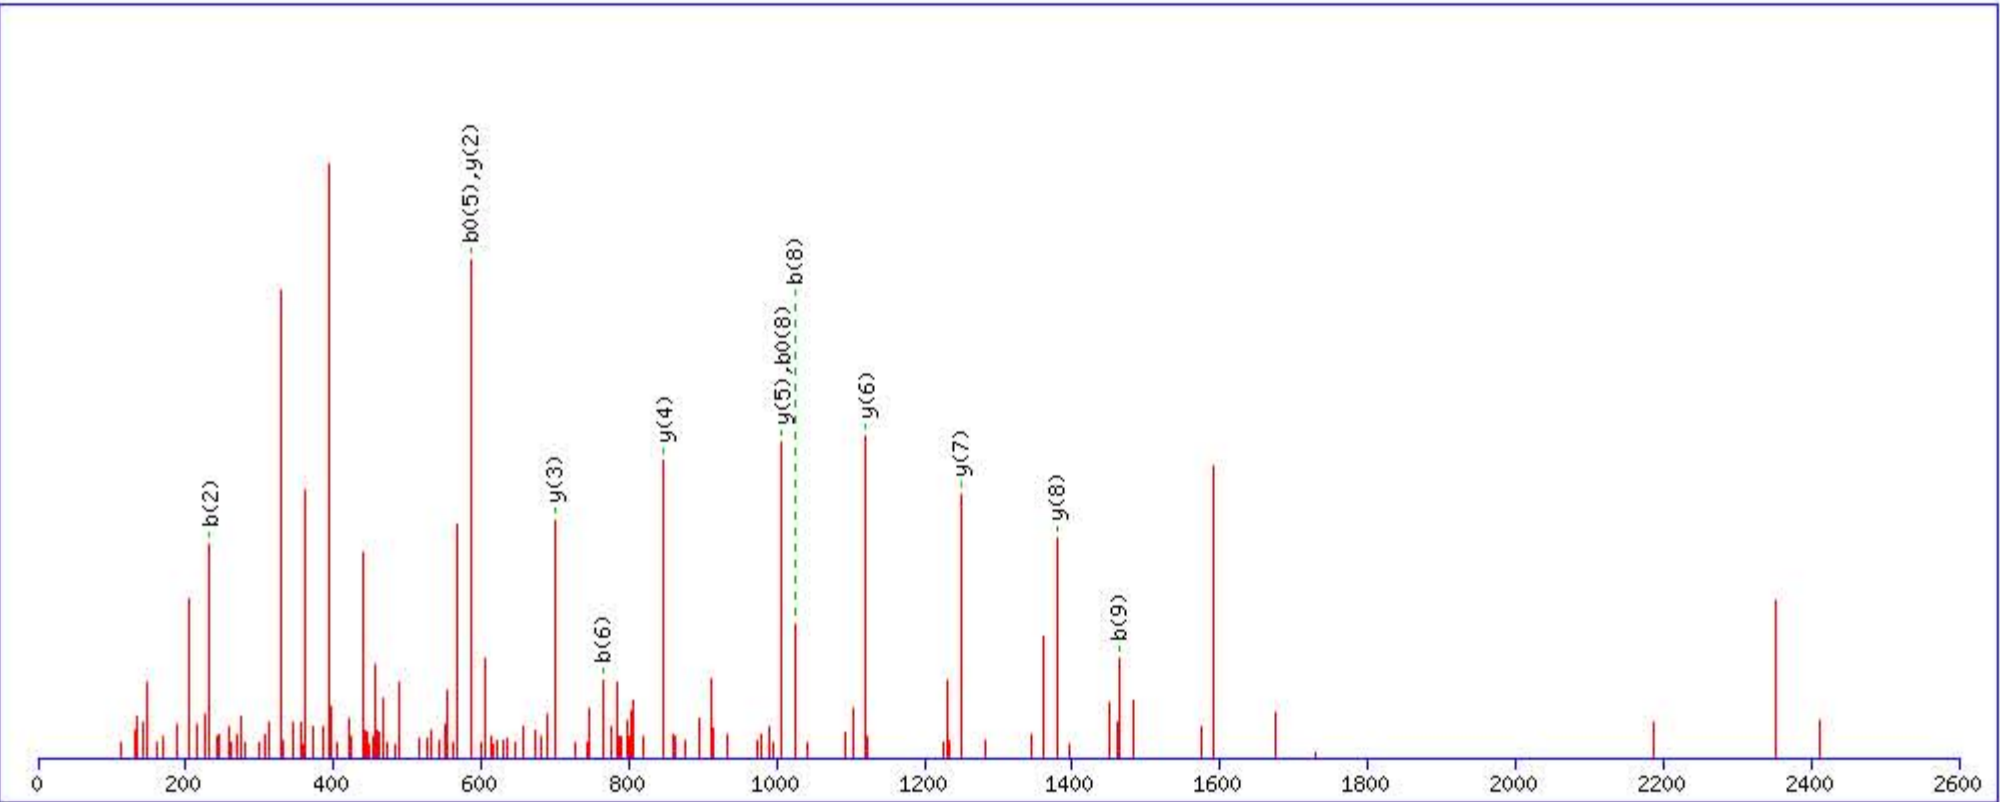

Monoisotopic mass of neutral peptide Mr(calc): 1608.709839  
Fixed modifications: Carbamidomethyl (C) (apply to specified residues or termini only)  
Variable modifications:  
Q9 : Biotin:Thermo-21345 (Q)  
Ions Score: 55 Expect: 2.7e-005  
Matches : 13/84 fragment ions using 15 most intense peaks [\(help\)](#)

| #  | b           | b <sup>++</sup> | b <sup>*</sup> | b <sup>++</sup> | b <sup>0</sup> | b <sup>0++</sup> | Seq. | y           | y <sup>++</sup> | y <sup>*</sup> | y <sup>++</sup> | y <sup>0</sup> | y <sup>0++</sup> | #  |
|----|-------------|-----------------|----------------|-----------------|----------------|------------------|------|-------------|-----------------|----------------|-----------------|----------------|------------------|----|
| 1  | 161.037925  | 81.022600       |                |                 |                |                  | C    |             |                 |                |                 |                |                  | 10 |
| 2  | 232.075039  | 116.541158      |                |                 |                |                  | A    | 1449.686484 | 725.346880      | 1432.659935    | 716.833606      | 1431.675919    | 716.341598       | 9  |
| 3  | 361.117632  | 181.062454      |                |                 | 343.107067     | 172.057172       | E    | 1378.649370 | 689.828323      | 1361.622821    | 681.315049      | 1360.638805    | 680.823041       | 8  |
| 4  | 490.160225  | 245.583751      |                |                 | 472.149660     | 236.578468       | E    | 1249.606777 | 625.307027      | 1232.580228    | 616.793752      | 1231.596212    | 616.301744       | 7  |
| 5  | 604.203152  | 302.605214      | 587.176603     | 294.091940      | 586.192587     | 293.599932       | N    | 1120.564184 | 560.785730      | 1103.537635    | 552.272456      |                |                  | 6  |
| 6  | 764.233801  | 382.620539      | 747.207252     | 374.107264      | 746.223236     | 373.615256       | C    | 1006.521257 | 503.764267      | 989.494708     | 495.250992      |                |                  | 5  |
| 7  | 911.302215  | 456.154746      | 894.275666     | 447.641471      | 893.291650     | 447.149463       | F    | 846.490608  | 423.748942      | 829.464059     | 415.235668      |                |                  | 4  |
| 8  | 1024.386279 | 512.696777      | 1007.359730    | 504.183503      | 1006.375714    | 503.691495       | I    | 699.422194  | 350.214735      | 682.395645     | 341.701461      |                |                  | 3  |
| 9  | 1463.611605 | 732.309441      | 1446.585056    | 723.796166      | 1445.601040    | 723.304158       | Q    | 586.338130  | 293.672703      | 569.311581     | 285.159429      |                |                  | 2  |
| 10 |             |                 |                |                 |                |                  | K    | 147.112804  | 74.060040       | 130.086255     | 65.546765       |                |                  | 1  |

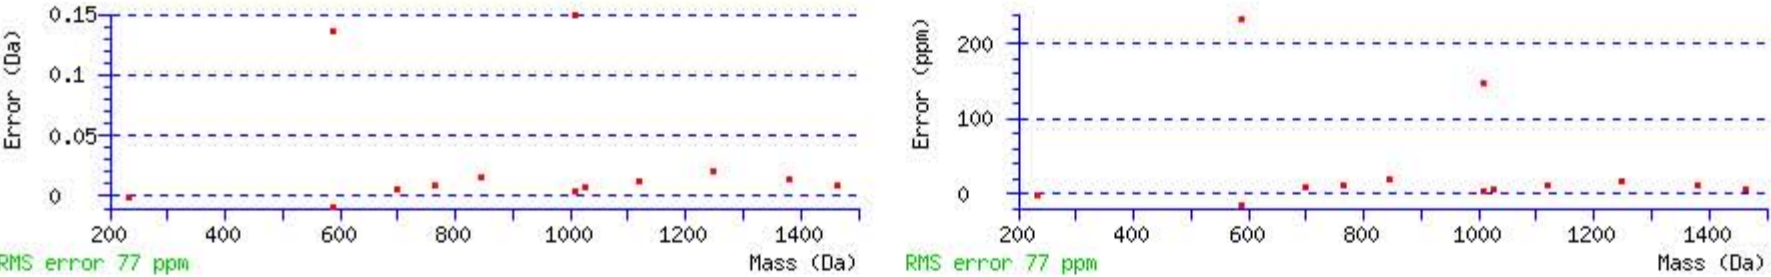

NCBI BLAST search of [CAEENCFIQK](#)  
(Parameters: blastp, nr protein database, expect=20000, no filter, PAM30)  
Other BLAST [web gateways](#)

All matches to this query

| Score | Mr(calc):   | Delta     | Sequence                         |
|-------|-------------|-----------|----------------------------------|
| 55.2  | 1608.709839 | 0.019269  | <a href="#">CAEENCFIQK</a>       |
| 6.2   | 1608.721085 | 0.008023  | <a href="#">CNECGKGFAQK</a>      |
| 4.1   | 1608.750107 | -0.020999 | <a href="#">CPACFVGTTIGDRR</a>   |
| 2.2   | 1608.753220 | -0.024112 | <a href="#">QEEAQKSFVDSWR</a>    |
| 2.1   | 1608.726746 | 0.002362  | <a href="#">TENGTLFEDQNVDK</a>   |
| 0.9   | 1608.731461 | -0.002353 | <a href="#">ELGCGGPQQPDPAAGR</a> |

MATRIX

SCIENCE

Mascot Search Results

Peptide View

MS/MS Fragmentation of **KQELSEAEQATR**  
Found in **CO3\_HUMAN**, Complement C3 OS=Homo sapiens GN=C3 PE=1 SV=2

Match to Query 37938: 1699.862562 from(567.628130,3+) rtinseconds(1414) index(30532)  
Title: Locus:1.1.1.600.7 File:"2013-07-02 CLN FXIII 180 min 2nd F 3.wiff"  
Data file C:\Program Files (x86)\Matrix Science\Mascot Daemon\mgf\8 FXIII 180 min 2nd\mascot\_daemon\_merge.mgf

Click mouse within plot area to zoom in by factor of two about that point  
Or, 

Plot from

100

 to 

1600

 Da 

Full range

  
Label all possible matches ☐ Label matches used for scoring ☒

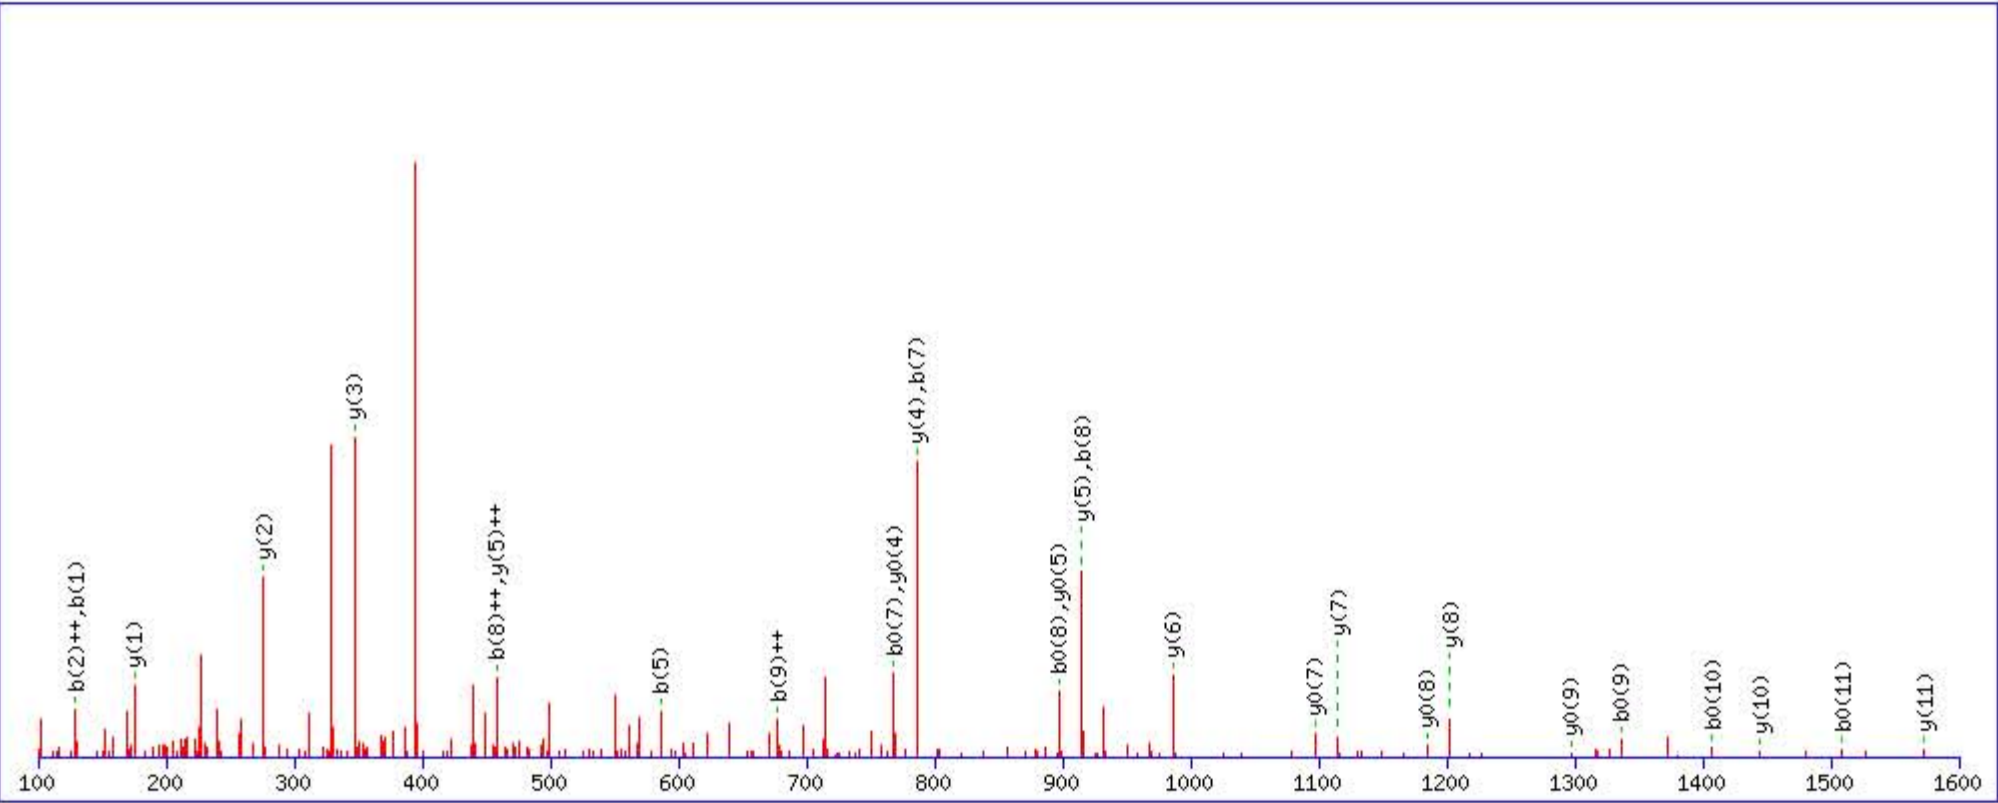

Monoisotopic mass of neutral peptide Mr(calc): 1699.856277  
Fixed modifications: Carbamidomethyl (C) (apply to specified residues or termini only)  
Variable modifications:  
Q9 : Biotin:Thermo-21345 (Q)  
Ions Score: 78 Expect: 4.2e-007  
Matches : 28/126 fragment ions using 30 most intense peaks [\(help\)](#)

| #  | b           | b <sup>++</sup> | b <sup>*</sup> | b <sup>+++</sup> | b <sup>0</sup> | b <sup>0++</sup> | Seq. | y           | y <sup>++</sup> | y <sup>*</sup> | y <sup>+++</sup> | y <sup>0</sup> | y <sup>0++</sup> | #  |
|----|-------------|-----------------|----------------|------------------|----------------|------------------|------|-------------|-----------------|----------------|------------------|----------------|------------------|----|
| 1  | 129.102239  | 65.054757       | 112.075690     | 56.541483        |                |                  | K    |             |                 |                |                  |                |                  | 12 |
| 2  | 257.160817  | 129.084047      | 240.134268     | 120.570772       |                |                  | Q    | 1572.768634 | 786.887955      | 1555.742085    | 778.374681       | 1554.758069    | 777.882673       | 11 |
| 3  | 386.203410  | 193.605343      | 369.176861     | 185.092069       | 368.192845     | 184.600061       | E    | 1444.710056 | 722.858666      | 1427.683507    | 714.345392       | 1426.699491    | 713.853384       | 10 |
| 4  | 499.287474  | 250.147375      | 482.260925     | 241.634101       | 481.276909     | 241.142093       | L    | 1315.667463 | 658.337370      | 1298.640914    | 649.824095       | 1297.656898    | 649.332087       | 9  |
| 5  | 586.319502  | 293.663389      | 569.292953     | 285.150115       | 568.308937     | 284.658107       | S    | 1202.583399 | 601.795338      | 1185.556850    | 593.282063       | 1184.572834    | 592.790055       | 8  |
| 6  | 715.362095  | 358.184686      | 698.335546     | 349.671411       | 697.351530     | 349.179403       | E    | 1115.551371 | 558.279324      | 1098.524822    | 549.766049       | 1097.540806    | 549.274041       | 7  |
| 7  | 786.399209  | 393.703243      | 769.372660     | 385.189968       | 768.388644     | 384.697960       | A    | 986.508778  | 493.758027      | 969.482229     | 485.244753       | 968.498213     | 484.752745       | 6  |
| 8  | 915.441802  | 458.224539      | 898.415253     | 449.711265       | 897.431237     | 449.219257       | E    | 915.471664  | 458.239470      | 898.445115     | 449.726196       | 897.461099     | 449.234188       | 5  |
| 9  | 1354.667128 | 677.837202      | 1337.640579    | 669.323928       | 1336.656563    | 668.831920       | Q    | 786.429071  | 393.718174      | 769.402522     | 385.204899       | 768.418506     | 384.712891       | 4  |
| 10 | 1425.704242 | 713.355759      | 1408.677693    | 704.842485       | 1407.693677    | 704.350477       | A    | 347.203745  | 174.105510      | 330.177196     | 165.592236       | 329.193180     | 165.100228       | 3  |
| 11 | 1526.751921 | 763.879599      | 1509.725372    | 755.366324       | 1508.741356    | 754.874316       | T    | 276.166631  | 138.586953      | 259.140082     | 130.073679       | 258.156066     | 129.581671       | 2  |
| 12 |             |                 |                |                  |                |                  | R    | 175.118952  | 88.063114       | 158.092403     | 79.549839        |                |                  | 1  |

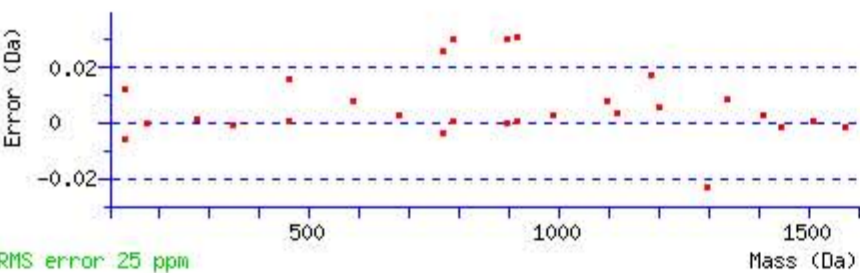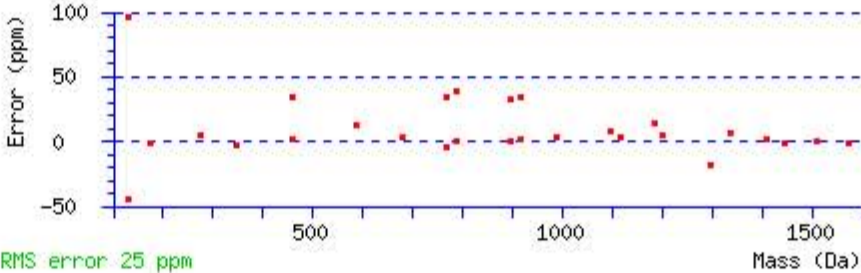

NCBI BLAST search of [KQELSEAEQATR](#)  
(Parameters: blastp, nr protein database, expect=20000, no filter, PAM30)  
Other BLAST [web gateways](#)

All matches to this query

| Score | Mr(calc):   | Delta     | Sequence                         |
|-------|-------------|-----------|----------------------------------|
| 78.1  | 1699.856277 | 0.006285  | <a href="#">KQELSEAEQATR</a>     |
| 22.1  | 1699.856277 | 0.006285  | <a href="#">KQELSEAEQATR</a>     |
| 9.6   | 1699.874039 | -0.011477 | <a href="#">KEISVNDLNESSIPR</a>  |
| 9.6   | 1699.849792 | 0.012770  | <a href="#">QEMRTTQLGPGR</a>     |
| 9.4   | 1699.849792 | 0.012770  | <a href="#">QEMRTTQLGPGR</a>     |
| 8.6   | 1699.845932 | 0.016630  | <a href="#">QAMQEQLSK</a>        |
| 8.0   | 1699.881424 | -0.018862 | <a href="#">LSSKELQEQA EK</a>    |
| 7.0   | 1699.882813 | -0.020250 | <a href="#">IMVHPHVTAVSEQPR</a>  |
| 6.3   | 1699.843735 | 0.018827  | <a href="#">QFNRRQRGVSHAMGGR</a> |
| 6.1   | 1699.863678 | -0.001116 | <a href="#">AGMQLNLEELQK</a>     |

MATRIX

SCIENCE

Mascot Search Results

Peptide View

MS/MS Fragmentation of **HQQTVTIPPK**  
Found in **CO3\_HUMAN**, Complement C3 OS=Homo sapiens GN=C3 PE=1 SV=2

Match to Query 39642: 1769.977002 from(590.999610,3+) rtinseconds(1842) index(33140)  
Title: Locus:1.1.1.750.7 File:"2013-07-02 CLN FXIII 180 min 2nd F 3.wiff"  
Data file C:\Program Files (x86)\Matrix Science\Mascot Daemon\mgf\8 FXIII 180 min 2nd\mascot\_daemon\_merge.mgf

Click mouse within plot area to zoom in by factor of two about that point  
Or,   to  Da   
Label all possible matches ☐ Label matches used for scoring ☒

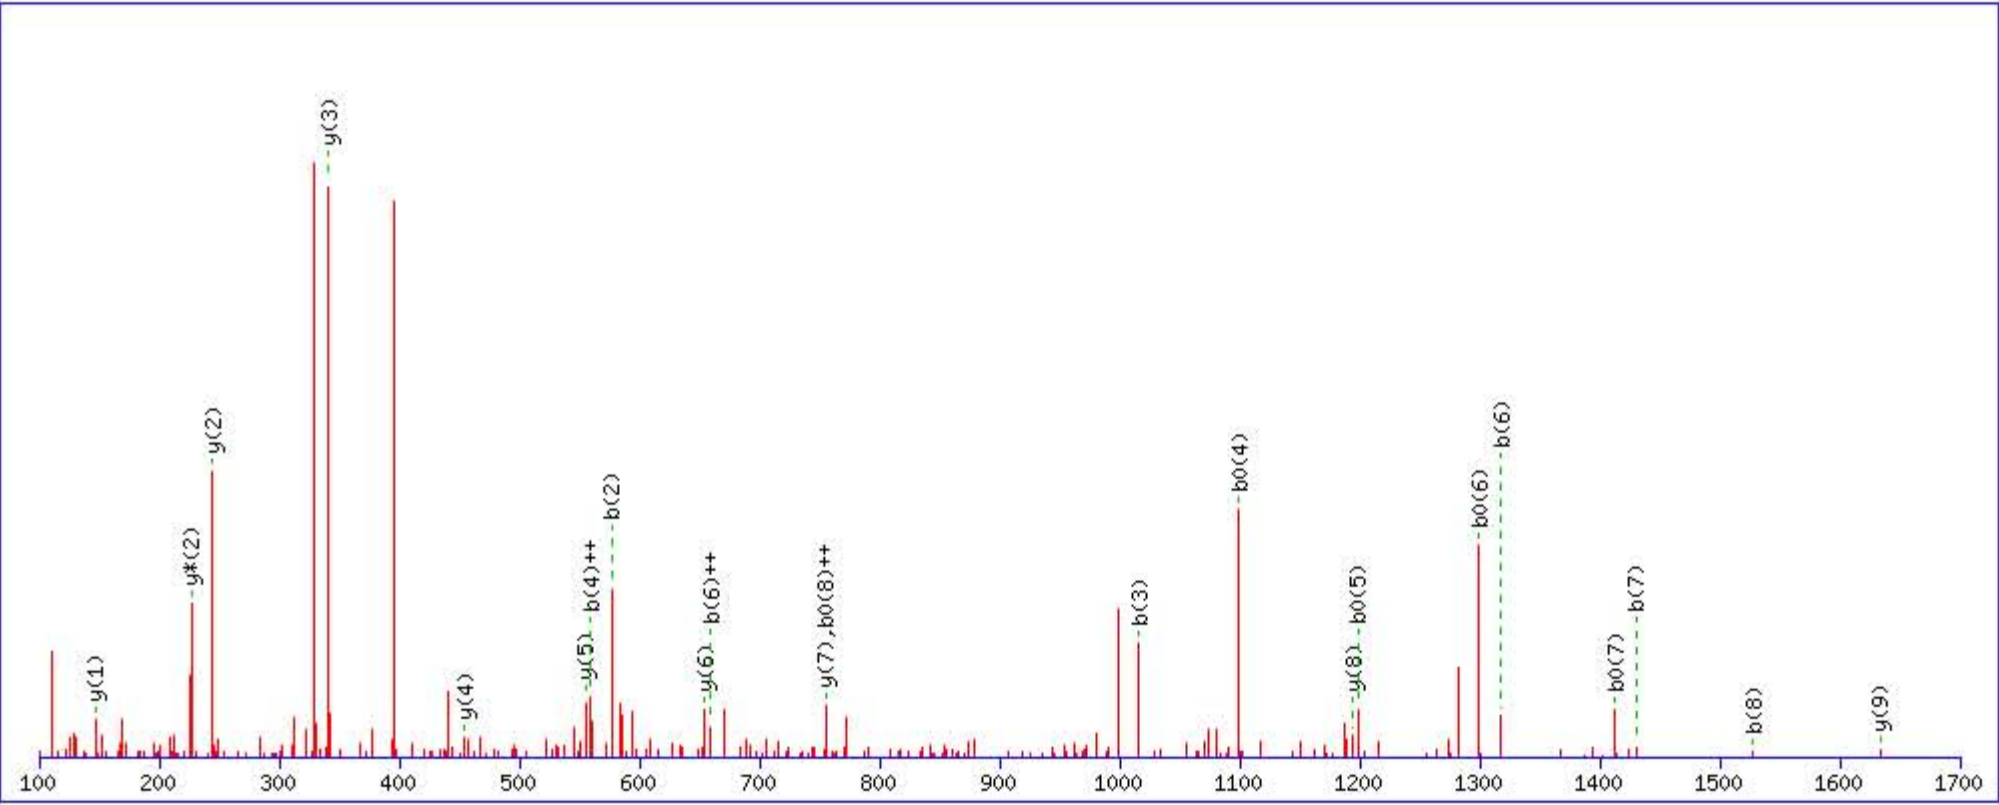

Monoisotopic mass of neutral peptide Mr(calc): 1769.968460  
Fixed modifications: Carbamidomethyl (C) (apply to specified residues or termini only)  
Variable modifications:  
Q2 : Biotin:Thermo-21345 (Q)  
Q3 : Biotin:Thermo-21345 (Q)  
Ions Score: 44 Expect: 0.00056  
Matches : 22/92 fragment ions using 45 most intense peaks [\(help\)](#)

| #  | b           | b <sup>++</sup> | b <sup>*</sup> | b <sup>*++</sup> | b <sup>0</sup> | b <sup>0++</sup> | Seq. | y           | y <sup>++</sup> | y <sup>*</sup> | y <sup>*++</sup> | y <sup>0</sup> | y <sup>0++</sup> | #  |
|----|-------------|-----------------|----------------|------------------|----------------|------------------|------|-------------|-----------------|----------------|------------------|----------------|------------------|----|
| 1  | 138.066188  | 69.536732       |                |                  |                |                  | H    |             |                 |                |                  |                |                  | 10 |
| 2  | 577.291514  | 289.149395      | 560.264965     | 280.636121       |                |                  | Q    | 1633.916820 | 817.462048      | 1616.890271    | 808.948774       | 1615.906255    | 808.456766       | 9  |
| 3  | 1016.516840 | 508.762058      | 999.490291     | 500.248784       |                |                  | Q    | 1194.691494 | 597.849385      | 1177.664945    | 589.336111       | 1176.680929    | 588.844103       | 8  |
| 4  | 1117.564519 | 559.285898      | 1100.537970    | 550.772623       | 1099.553954    | 550.280615       | T    | 755.466168  | 378.236722      | 738.439619     | 369.723448       | 737.455603     | 369.231440       | 7  |
| 5  | 1216.632933 | 608.820105      | 1199.606384    | 600.306830       | 1198.622368    | 599.814822       | V    | 654.418489  | 327.712883      | 637.391940     | 319.199608       | 636.407924     | 318.707600       | 6  |
| 6  | 1317.680612 | 659.343944      | 1300.654063    | 650.830670       | 1299.670047    | 650.338662       | T    | 555.350075  | 278.178676      | 538.323526     | 269.665401       | 537.339510     | 269.173393       | 5  |
| 7  | 1430.764676 | 715.885976      | 1413.738127    | 707.372702       | 1412.754111    | 706.880694       | I    | 454.302396  | 227.654836      | 437.275847     | 219.141561       |                |                  | 4  |
| 8  | 1527.817440 | 764.412358      | 1510.790891    | 755.899084       | 1509.806875    | 755.407076       | P    | 341.218332  | 171.112804      | 324.191783     | 162.599530       |                |                  | 3  |
| 9  | 1624.870204 | 812.938740      | 1607.843655    | 804.425466       | 1606.859639    | 803.933458       | P    | 244.165568  | 122.586422      | 227.139019     | 114.073148       |                |                  | 2  |
| 10 |             |                 |                |                  |                |                  | K    | 147.112804  | 74.060040       | 130.086255     | 65.546765        |                |                  | 1  |

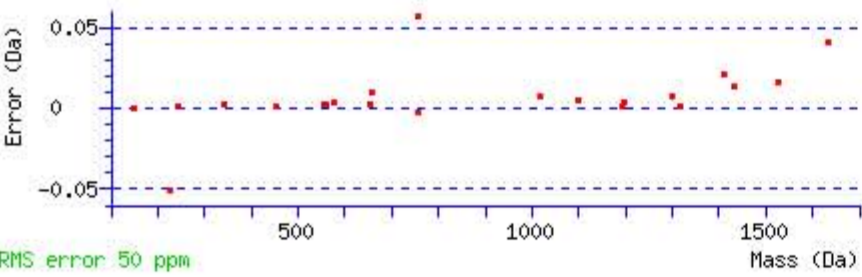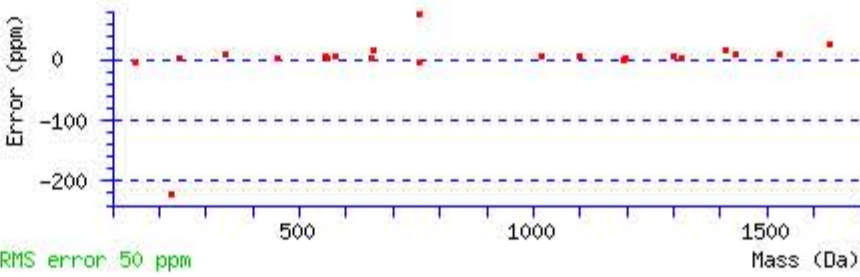

NCBI BLAST search of [HQQTVTIPPK](#)  
(Parameters: blastp, nr protein database, expect=20000, no filter, PAM30)  
Other BLAST [web gateways](#)

All matches to this query

| Score | Mr(calc):   | Delta     | Sequence                          |
|-------|-------------|-----------|-----------------------------------|
| 44.4  | 1769.968460 | 0.008542  | <a href="#">HQQTVTIPPK</a>        |
| 9.2   | 1769.961029 | 0.015973  | <a href="#">WMLSRDRASTLPLPK</a>   |
| 0.9   | 1769.997437 | -0.020435 | <a href="#">AVPPRMPAVNLGQVPPK</a> |

MATRIX

SCIENCE

Mascot Search Results

Peptide View

MS/MS Fragmentation of **QGGLSVVTMYHAK**  
Found in **CO3\_HUMAN**, Complement C3 OS=Homo sapiens GN=C3 PE=1 SV=2

Match to Query 40691: 1817.928342 from(606.983390,3+) rtinseconds(1828) index(33081)  
Title: Locus:1.1.1.745.10 File:"2013-07-02 CLN FXIII 180 min 2nd F 3.wiff"  
Data file C:\Program Files (x86)\Matrix Science\Mascot Daemon\mgf\8 FXIII 180 min 2nd\mascot\_daemon\_merge.mgf

Click mouse within plot area to zoom in by factor of two about that point  
Or,   to  Da   
Label all possible matches ☐ Label matches used for scoring ☒

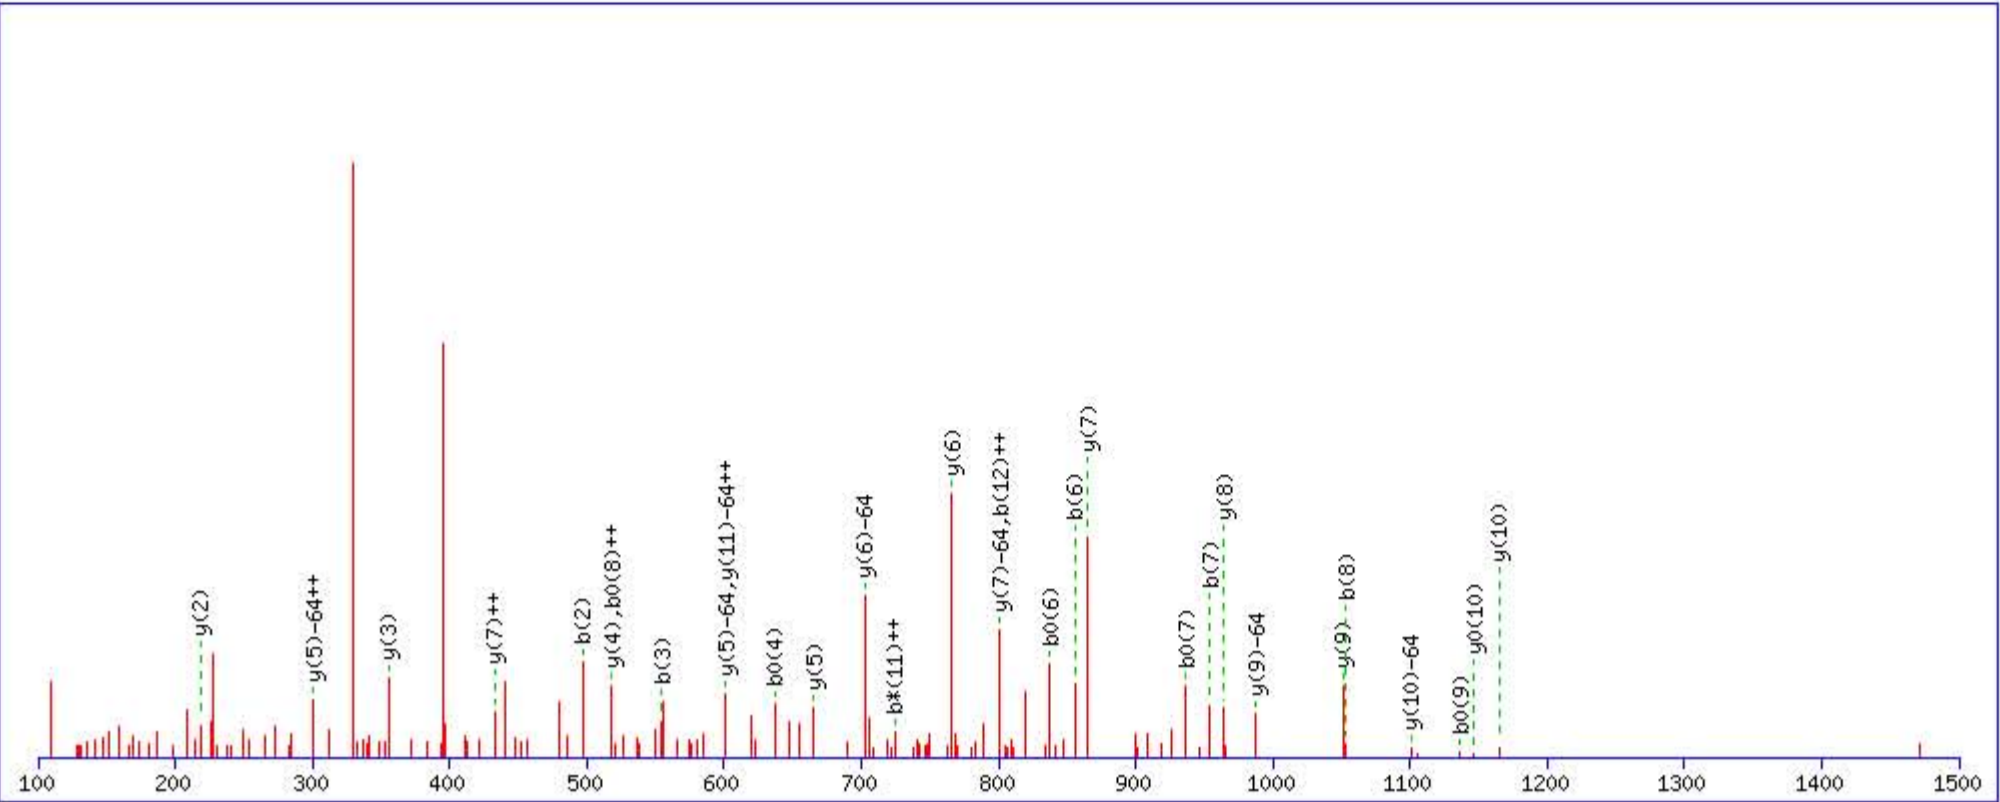

Monoisotopic mass of neutral peptide Mr(calc): 1817.916824  
Fixed modifications: Carbamidomethyl (C) (apply to specified residues or termini only)  
Variable modifications:  
Q2 : Biotin:Thermo-21345 (Q)  
M10 : Oxidation (M), with neutral losses 0.000000(shown in table), 63.998285  
Ions Score: 51 Expect: 0.00022  
Matches : 30/214 fragment ions using 44 most intense peaks [\(help\)](#)

| #  | b           | b <sup>++</sup> | b <sup>*</sup> | b <sup>+++</sup> | b <sup>0</sup> | b <sup>0++</sup> | Seq. | y           | y <sup>++</sup> | y <sup>*</sup> | y <sup>+++</sup> | y <sup>0</sup> | y <sup>0++</sup> | #  |
|----|-------------|-----------------|----------------|------------------|----------------|------------------|------|-------------|-----------------|----------------|------------------|----------------|------------------|----|
| 1  | 58.028740   | 29.518008       |                |                  |                |                  | G    |             |                 |                |                  |                |                  | 14 |
| 2  | 497.254066  | 249.130671      | 480.227517     | 240.617397       |                |                  | Q    | 1761.902627 | 881.454952      | 1744.876078    | 872.941677       | 1743.892062    | 872.449669       | 13 |
| 3  | 554.275530  | 277.641403      | 537.248981     | 269.128129       |                |                  | G    | 1322.677301 | 661.842289      | 1305.650752    | 653.329014       | 1304.666736    | 652.837006       | 12 |
| 4  | 655.323209  | 328.165243      | 638.296660     | 319.651968       | 637.312644     | 319.159960       | T    | 1265.655837 | 633.331557      | 1248.629288    | 624.818282       | 1247.645272    | 624.326274       | 11 |
| 5  | 768.407273  | 384.707275      | 751.380724     | 376.194000       | 750.396708     | 375.701992       | L    | 1164.608158 | 582.807717      | 1147.581609    | 574.294443       | 1146.597593    | 573.802435       | 10 |
| 6  | 855.439301  | 428.223289      | 838.412752     | 419.710014       | 837.428736     | 419.218006       | S    | 1051.524094 | 526.265685      | 1034.497545    | 517.752411       | 1033.513529    | 517.260403       | 9  |
| 7  | 954.507715  | 477.757496      | 937.481166     | 469.244221       | 936.497150     | 468.752213       | V    | 964.492066  | 482.749671      | 947.465517     | 474.236397       | 946.481501     | 473.744389       | 8  |
| 8  | 1053.576129 | 527.291703      | 1036.549580    | 518.778428       | 1035.565564    | 518.286420       | V    | 865.423652  | 433.215464      | 848.397103     | 424.702190       | 847.413087     | 424.210182       | 7  |
| 9  | 1154.623808 | 577.815542      | 1137.597259    | 569.302268       | 1136.613243    | 568.810260       | T    | 766.355238  | 383.681257      | 749.328689     | 375.167983       | 748.344673     | 374.675975       | 6  |
| 10 | 1301.659208 | 651.333242      | 1284.632659    | 642.819968       | 1283.648643    | 642.327960       | M    | 665.307559  | 333.157418      | 648.281010     | 324.644143       |                |                  | 5  |
| 11 | 1464.722537 | 732.864907      | 1447.695988    | 724.351632       | 1446.711972    | 723.859624       | Y    | 518.272159  | 259.639718      | 501.245610     | 251.126443       |                |                  | 4  |
| 12 | 1601.781449 | 801.394363      | 1584.754900    | 792.881088       | 1583.770884    | 792.389080       | H    | 355.208830  | 178.108053      | 338.182281     | 169.594778       |                |                  | 3  |
| 13 | 1672.818563 | 836.912920      | 1655.792014    | 828.399645       | 1654.807998    | 827.907637       | A    | 218.149918  | 109.578597      | 201.123369     | 101.065322       |                |                  | 2  |
| 14 |             |                 |                |                  |                |                  | K    | 147.112804  | 74.060040       | 130.086255     | 65.546765        |                |                  | 1  |

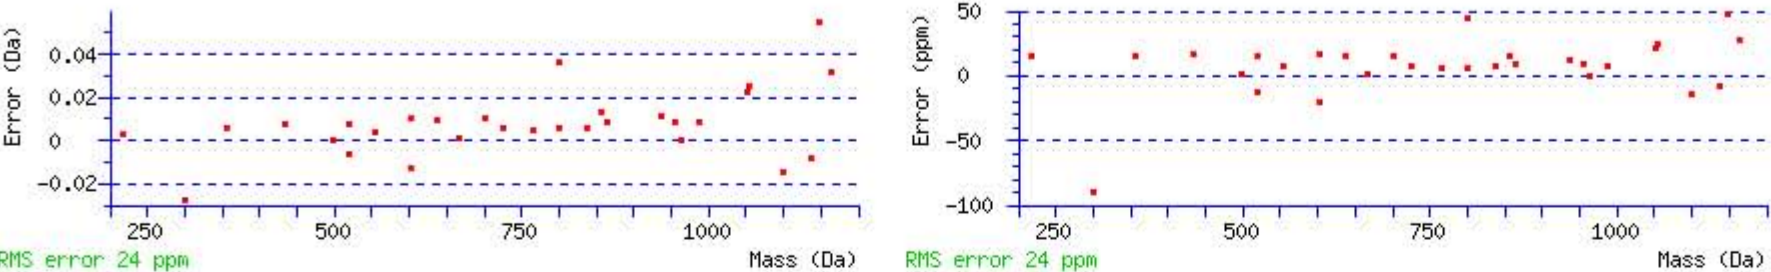

NCBI BLAST search of [QGGLSVVTMYHAK](#)  
(Parameters: blastp, nr protein database, expect=20000, no filter, PAM30)  
Other BLAST [web gateways](#)

All matches to this query

| Score | Mr(calc):   | Delta    | Sequence                      |
|-------|-------------|----------|-------------------------------|
| 51.0  | 1817.916824 | 0.011518 | <a href="#">QGGLSVVTMYHAK</a> |

MATRIX

SCIENCE

Mascot Search Results

Peptide View

MS/MS Fragmentation of **SGSDEVQVGQQR**  
Found in **CO3\_HUMAN**, Complement C3 OS=Homo sapiens GN=C3 PE=1 SV=2

Match to Query 42357: 1910.947692 from(637.989840,3+) rtinseconds(1882) index(33320)  
Title: Locus:1.1.1.764.9 File:"2013-07-02 CLN FXIII 180 min 2nd F 3.wiff"  
Data file C:\Program Files (x86)\Matrix Science\Mascot Daemon\mgf\8 FXIII 180 min 2nd\mascot\_daemon\_merge.mgf

Click mouse within plot area to zoom in by factor of two about that point

Or, 

Plot from

100

 to 

1900

 Da 

Full range

Label all possible matches ☐ Label matches used for scoring ☒

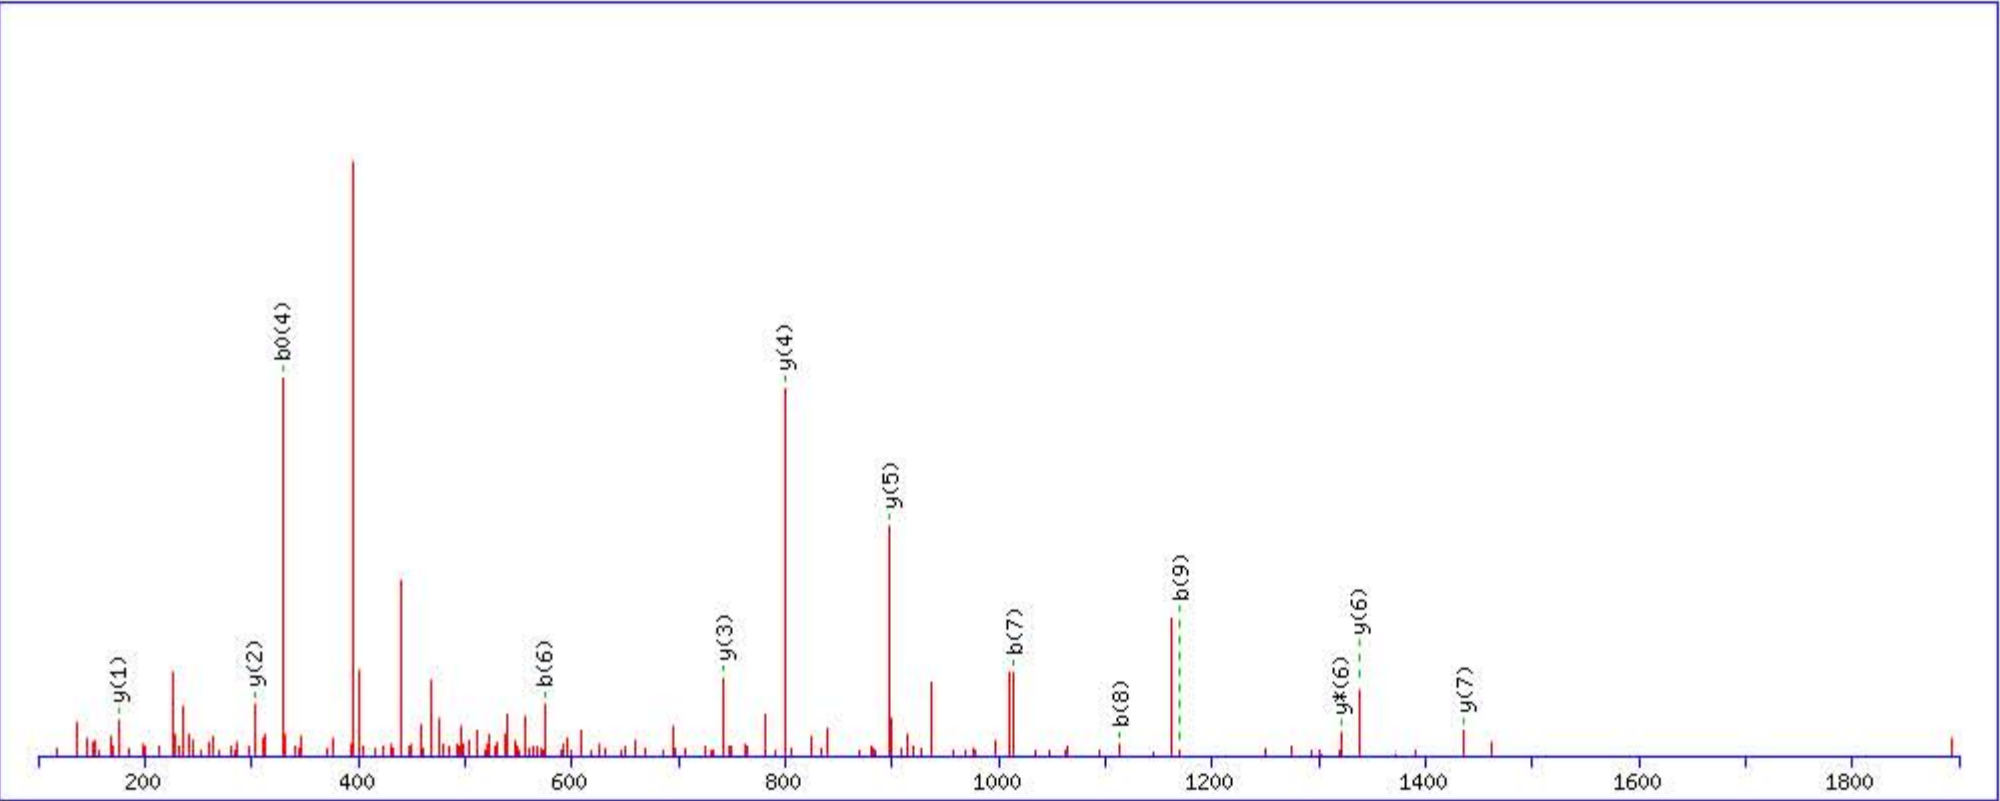

Monoisotopic mass of neutral peptide Mr(calc): 1910.934265  
Fixed modifications: Carbamidomethyl (C) (apply to specified residues or termini only)  
Variable modifications:  
Q7 : Biotin:Thermo-21345 (Q)  
Q10 : Biotin:Thermo-21345 (Q)  
Ions Score: 31 Expect: 0.019  
Matches : 13/106 fragment ions using 29 most intense peaks [\(help\)](#)

| #  | b           | b <sup>++</sup> | b <sup>+</sup> | b <sup>+++</sup> | b <sup>0</sup> | b <sup>0++</sup> | Seq. | y           | y <sup>++</sup> | y <sup>+</sup> | y <sup>+++</sup> | y <sup>0</sup> | y <sup>0++</sup> | #  |
|----|-------------|-----------------|----------------|------------------|----------------|------------------|------|-------------|-----------------|----------------|------------------|----------------|------------------|----|
| 1  | 88.039304   | 44.523290       |                |                  | 70.028739      | 35.518008        | S    |             |                 |                |                  |                |                  | 12 |
| 2  | 145.060768  | 73.034022       |                |                  | 127.050203     | 64.028740        | G    | 1824.909502 | 912.958389      | 1807.882953    | 904.445115       | 1806.898937    | 903.953107       | 11 |
| 3  | 232.092796  | 116.550036      |                |                  | 214.082231     | 107.544753       | S    | 1767.888038 | 884.447657      | 1750.861489    | 875.934383       | 1749.877473    | 875.442375       | 10 |
| 4  | 347.119739  | 174.063507      |                |                  | 329.109174     | 165.058225       | D    | 1680.856010 | 840.931643      | 1663.829461    | 832.418369       | 1662.845445    | 831.926361       | 9  |
| 5  | 476.162332  | 238.584804      |                |                  | 458.151767     | 229.579522       | E    | 1565.829067 | 783.418172      | 1548.802518    | 774.904897       | 1547.818502    | 774.412889       | 8  |
| 6  | 575.230746  | 288.119011      |                |                  | 557.220181     | 279.113729       | V    | 1436.786474 | 718.896875      | 1419.759925    | 710.383601       |                |                  | 7  |
| 7  | 1014.456072 | 507.731674      | 997.429523     | 499.218400       | 996.445507     | 498.726392       | Q    | 1337.718060 | 669.362668      | 1320.691511    | 660.849394       |                |                  | 6  |
| 8  | 1113.524486 | 557.265881      | 1096.497937    | 548.752607       | 1095.513921    | 548.260599       | V    | 898.492734  | 449.750005      | 881.466185     | 441.236731       |                |                  | 5  |
| 9  | 1170.545950 | 585.776613      | 1153.519401    | 577.263339       | 1152.535385    | 576.771330       | G    | 799.424320  | 400.215798      | 782.397771     | 391.702524       |                |                  | 4  |
| 10 | 1609.771276 | 805.389276      | 1592.744727    | 796.876002       | 1591.760711    | 796.383994       | Q    | 742.402856  | 371.705066      | 725.376307     | 363.191792       |                |                  | 3  |
| 11 | 1737.829854 | 869.418565      | 1720.803305    | 860.905291       | 1719.819289    | 860.413283       | Q    | 303.177530  | 152.092403      | 286.150981     | 143.579129       |                |                  | 2  |
| 12 |             |                 |                |                  |                |                  | R    | 175.118952  | 88.063114       | 158.092403     | 79.549839        |                |                  | 1  |

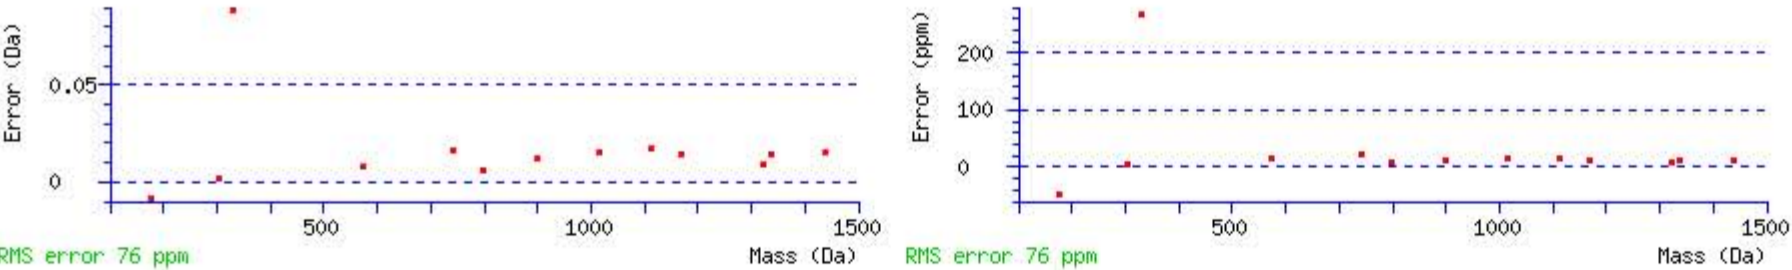

NCBI BLAST search of [SGSDEVQVGQQR](#)  
(Parameters: blastp, nr protein database, expect=20000, no filter, PAM30)  
Other BLAST [web gateways](#)

All matches to this query

| Score | Mr(calc):   | Delta     | Sequence                          |
|-------|-------------|-----------|-----------------------------------|
| 38.9  | 1910.938263 | 0.009429  | <a href="#">YVTSAPMPPEQAPGR</a>   |
| 30.9  | 1910.934265 | 0.013427  | <a href="#">SGSDEVQVGQQR</a>      |
| 21.9  | 1910.934265 | 0.013427  | <a href="#">SGSDEVQVGQQR</a>      |
| 1.6   | 1910.971970 | -0.024278 | <a href="#">KAPMGTARFGHHMAVLR</a> |

MATRIX

SCIENCE

Mascot Search Results

Peptide View

MS/MS Fragmentation of **SGSDEVQVGQQR**  
Found in **CO3\_HUMAN**, Complement C3 OS=Homo sapiens GN=C3 PE=1 SV=2

Match to Query 42358: 1910.949072 from(637.990300,3+) rtinseconds(1940) index(33807)  
Title: Locus:1.1.1.784.14 File:"2013-07-02 CLN FXIII 180 min 2nd F 3.wiff"  
Data file C:\Program Files (x86)\Matrix Science\Mascot Daemon\mgf\8 FXIII 180 min 2nd\mascot\_daemon\_merge.mgf

Click mouse within plot area to zoom in by factor of two about that point  
Or, 

Plot from

100

 to 

1600

 Da 

Full range

  
Label all possible matches ☐ Label matches used for scoring ☒

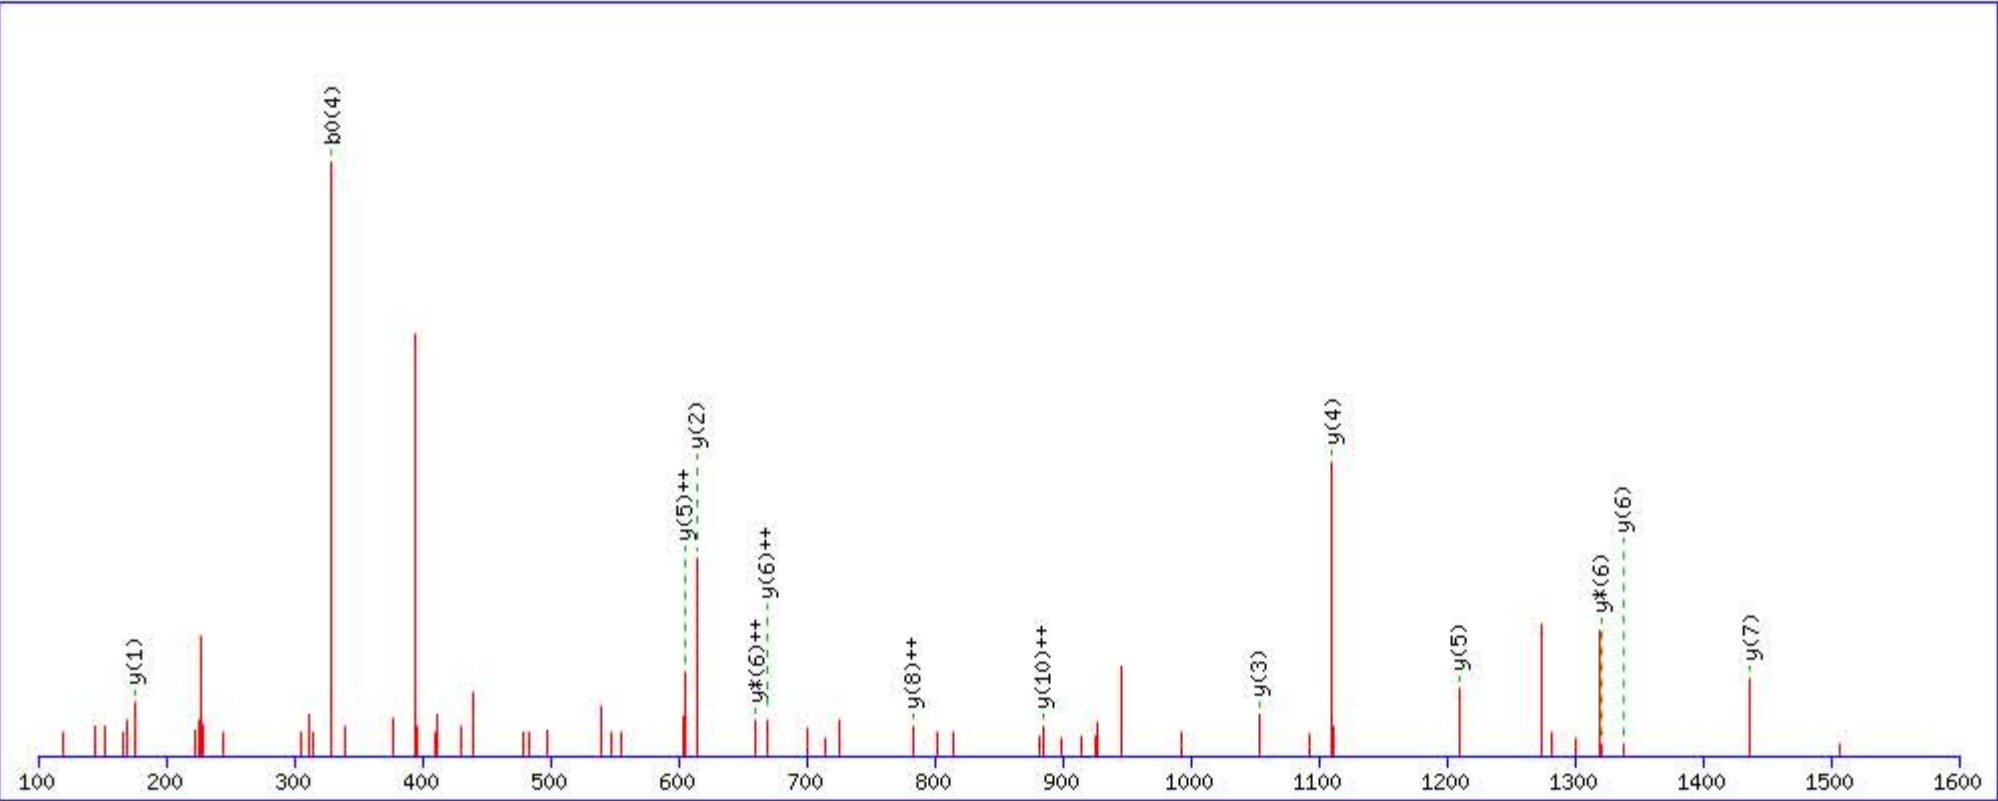

Monoisotopic mass of neutral peptide Mr(calc): 1910.934265  
Fixed modifications: Carbamidomethyl (C) (apply to specified residues or termini only)  
Variable modifications:  
Q10 : Biotin:Thermo-21345 (Q)  
Q11 : Biotin:Thermo-21345 (Q)  
Ions Score: 32 Expect: 0.0017  
Matches : 14/106 fragment ions using 28 most intense peaks [\(help\)](#)

| #  | b           | b <sup>++</sup> | b <sup>+</sup> | b <sup>++</sup> | b <sup>0</sup> | b <sup>0++</sup> | Seq. | y           | y <sup>++</sup> | y <sup>+</sup> | y <sup>++</sup> | y <sup>0</sup> | y <sup>0++</sup> | #  |
|----|-------------|-----------------|----------------|-----------------|----------------|------------------|------|-------------|-----------------|----------------|-----------------|----------------|------------------|----|
| 1  | 88.039304   | 44.523290       |                |                 | 70.028739      | 35.518008        | S    |             |                 |                |                 |                |                  | 12 |
| 2  | 145.060768  | 73.034022       |                |                 | 127.050203     | 64.028740        | G    | 1824.909502 | 912.958389      | 1807.882953    | 904.445115      | 1806.898937    | 903.953107       | 11 |
| 3  | 232.092796  | 116.550036      |                |                 | 214.082231     | 107.544753       | S    | 1767.888038 | 884.447657      | 1750.861489    | 875.934383      | 1749.877473    | 875.442375       | 10 |
| 4  | 347.119739  | 174.063507      |                |                 | 329.109174     | 165.058225       | D    | 1680.856010 | 840.931643      | 1663.829461    | 832.418369      | 1662.845445    | 831.926361       | 9  |
| 5  | 476.162332  | 238.584804      |                |                 | 458.151767     | 229.579522       | E    | 1565.829067 | 783.418172      | 1548.802518    | 774.904897      | 1547.818502    | 774.412889       | 8  |
| 6  | 575.230746  | 288.119011      |                |                 | 557.220181     | 279.113729       | V    | 1436.786474 | 718.896875      | 1419.759925    | 710.383601      |                |                  | 7  |
| 7  | 703.289324  | 352.148300      | 686.262775     | 343.635026      | 685.278759     | 343.143018       | Q    | 1337.718060 | 669.362668      | 1320.691511    | 660.849394      |                |                  | 6  |
| 8  | 802.357738  | 401.682507      | 785.331189     | 393.169233      | 784.347173     | 392.677225       | V    | 1209.659482 | 605.333379      | 1192.632933    | 596.820105      |                |                  | 5  |
| 9  | 859.379202  | 430.193239      | 842.352653     | 421.679965      | 841.368637     | 421.187957       | G    | 1110.591068 | 555.799172      | 1093.564519    | 547.285898      |                |                  | 4  |
| 10 | 1298.604528 | 649.805902      | 1281.577979    | 641.292628      | 1280.593963    | 640.800620       | Q    | 1053.569604 | 527.288440      | 1036.543055    | 518.775166      |                |                  | 3  |
| 11 | 1737.829854 | 869.418565      | 1720.803305    | 860.905291      | 1719.819289    | 860.413283       | Q    | 614.344278  | 307.675777      | 597.317729     | 299.162503      |                |                  | 2  |
| 12 |             |                 |                |                 |                |                  | R    | 175.118952  | 88.063114       | 158.092403     | 79.549839       |                |                  | 1  |

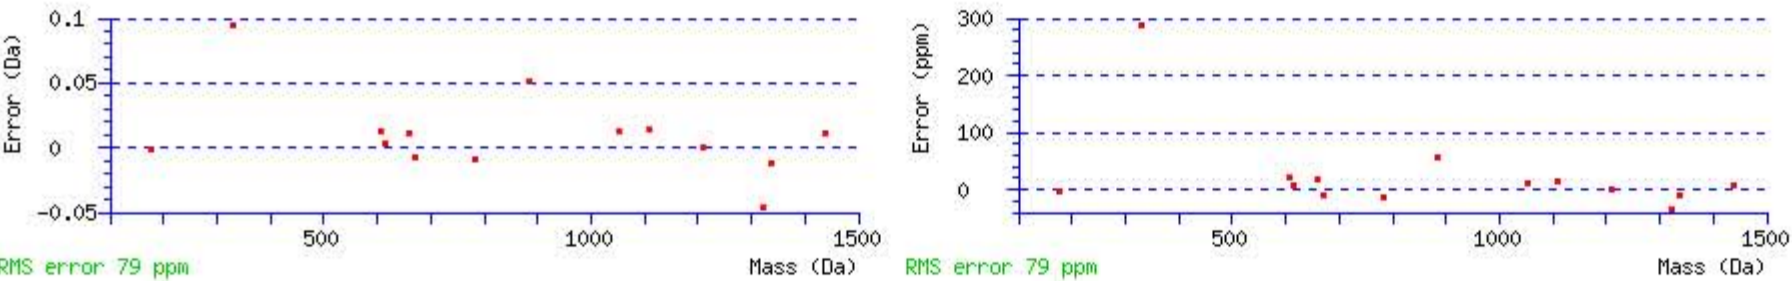

NCBI BLAST search of [SGSDEVQVGQQR](#)  
(Parameters: blastp, nr protein database, expect=20000, no filter, PAM30)  
Other BLAST [web gateways](#)

All matches to this query

| Score | Mr(calc):   | Delta     | Sequence                        |
|-------|-------------|-----------|---------------------------------|
| 31.6  | 1910.934265 | 0.014807  | <a href="#">SGSDEVQVGQQR</a>    |
| 6.7   | 1910.934265 | 0.014807  | <a href="#">SGSDEVQVGQQR</a>    |
| 2.0   | 1910.960709 | -0.011637 | <a href="#">VGAPAWREAAQAMAR</a> |
| 0.5   | 1910.934265 | 0.014807  | <a href="#">SGSDEVQVGQQR</a>    |

MATRIX

SCIENCE

Mascot Search Results

Peptide View

MS/MS Fragmentation of **SGIPIVTSPYQIHFTK**  
Found in **CO3\_HUMAN**, Complement C3 OS=Homo sapiens GN=C3 PE=1 SV=2

Match to Query 46561: 2098.151022 from(700.390950,3+) rtinseconds(2325) index(52399)  
Title: Locus:1.1.1.2047.8 File:"2013-07-02 CLN FXIII 180 min 2nd F 4.wiff"  
Data file C:\Program Files (x86)\Matrix Science\Mascot Daemon\mgf\8 FXIII 180 min 2nd\mascot\_daemon\_merge.mgf

Click mouse within plot area to zoom in by factor of two about that point  
Or, 

Plot from

0

 to 

2800

 Da 

Full range

  
Label all possible matches ☐ Label matches used for scoring ☒

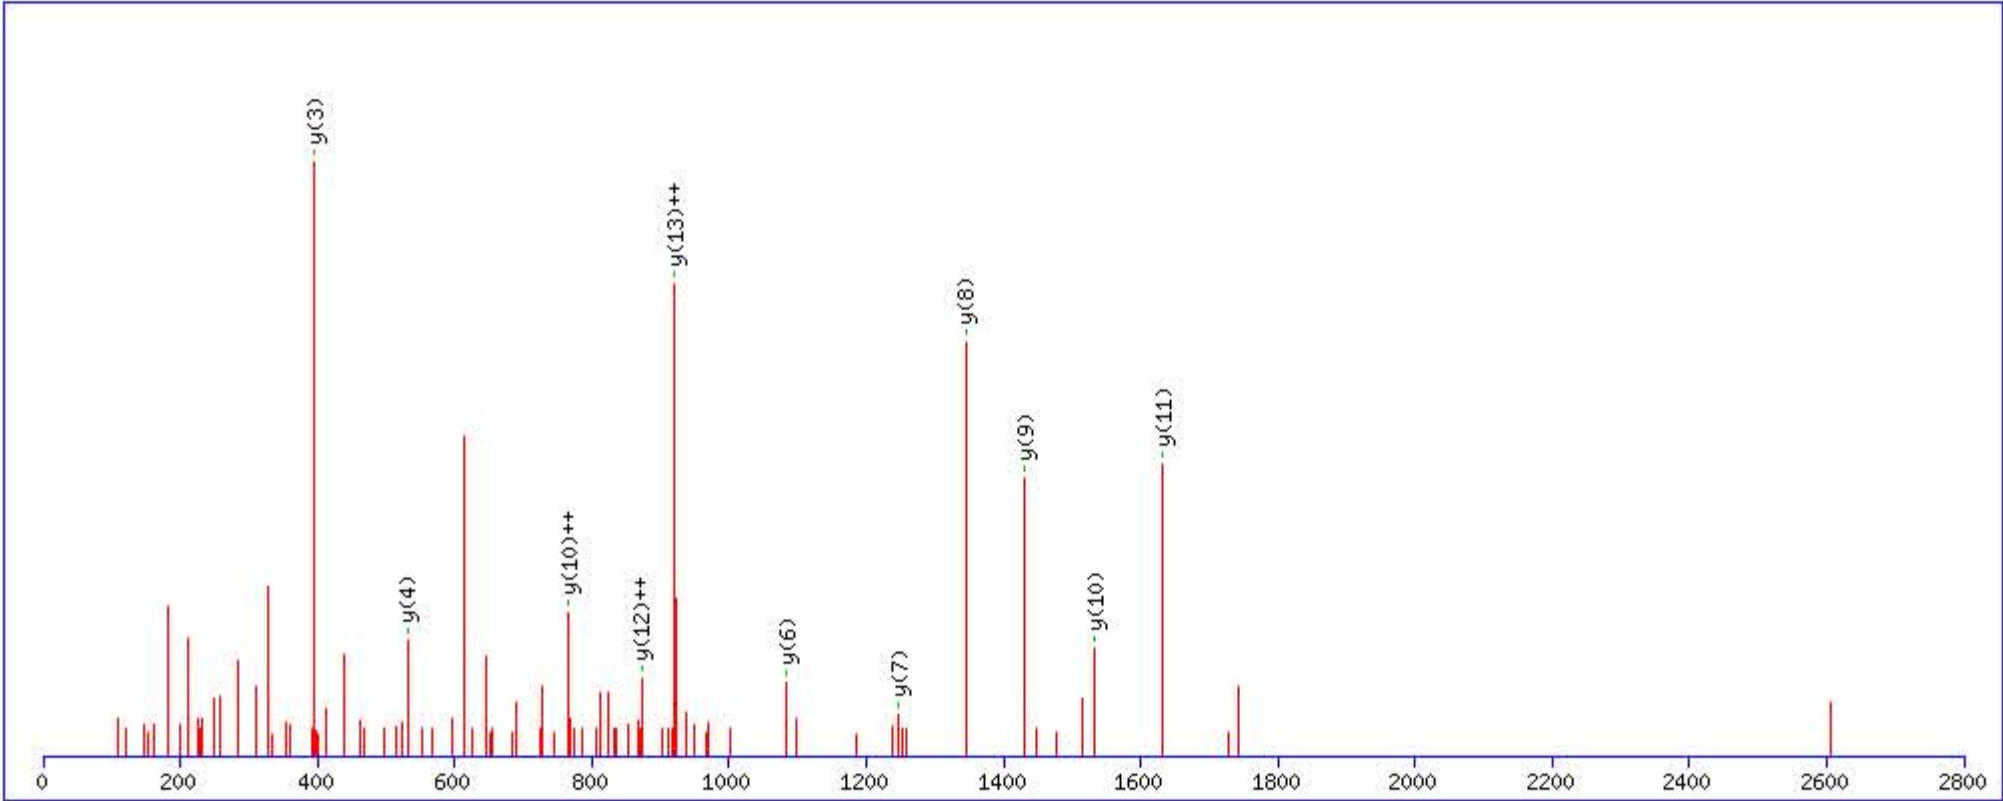

Monoisotopic mass of neutral peptide Mr(calc): 2098.128525  
Fixed modifications: Carbamidomethyl (C) (apply to specified residues or termini only)  
Variable modifications:  
Q11 : Biotin:Thermo-21345 (Q)  
Ions Score: 53 Expect: 7.5e-005  
Matches : 11/158 fragment ions using 17 most intense peaks ([help](#))

| #  | b           | b <sup>++</sup> | b <sup>+</sup> | b <sup>+++</sup> | b <sup>0</sup> | b <sup>0++</sup> | Seq. | y           | y <sup>++</sup> | y <sup>+</sup> | y <sup>+++</sup> | y <sup>0</sup> | y <sup>0++</sup> | #  |
|----|-------------|-----------------|----------------|------------------|----------------|------------------|------|-------------|-----------------|----------------|------------------|----------------|------------------|----|
| 1  | 88.039304   | 44.523290       |                |                  | 70.028739      | 35.518008        | S    |             |                 |                |                  |                |                  | 16 |
| 2  | 145.060768  | 73.034022       |                |                  | 127.050203     | 64.028740        | G    | 2012.103769 | 1006.555523     | 1995.077220    | 998.042248       | 1994.093204    | 997.550240       | 15 |
| 3  | 258.144832  | 129.576054      |                |                  | 240.134267     | 120.570772       | I    | 1955.082305 | 978.044791      | 1938.055756    | 969.531516       | 1937.071740    | 969.039508       | 14 |
| 4  | 355.197596  | 178.102436      |                |                  | 337.187031     | 169.097154       | P    | 1841.998241 | 921.502759      | 1824.971692    | 912.989484       | 1823.987676    | 912.497476       | 13 |
| 5  | 468.281660  | 234.644468      |                |                  | 450.271095     | 225.639186       | I    | 1744.945477 | 872.976377      | 1727.918928    | 864.463102       | 1726.934912    | 863.971094       | 12 |
| 6  | 567.350074  | 284.178675      |                |                  | 549.339509     | 275.173393       | V    | 1631.861413 | 816.434345      | 1614.834864    | 807.921070       | 1613.850848    | 807.429062       | 11 |
| 7  | 668.397753  | 334.702515      |                |                  | 650.387188     | 325.697232       | T    | 1532.792999 | 766.900138      | 1515.766450    | 758.386863       | 1514.782434    | 757.894855       | 10 |
| 8  | 755.429781  | 378.218529      |                |                  | 737.419216     | 369.213246       | S    | 1431.745320 | 716.376298      | 1414.718771    | 707.863024       | 1413.734755    | 707.371016       | 9  |
| 9  | 852.482545  | 426.744911      |                |                  | 834.471980     | 417.739628       | P    | 1344.713292 | 672.860284      | 1327.686743    | 664.347010       | 1326.702727    | 663.855002       | 8  |
| 10 | 1015.545874 | 508.276575      |                |                  | 997.535309     | 499.271293       | Y    | 1247.660528 | 624.333902      | 1230.633979    | 615.820628       | 1229.649963    | 615.328620       | 7  |
| 11 | 1454.771200 | 727.889238      | 1437.744651    | 719.375964       | 1436.760635    | 718.883956       | Q    | 1084.597199 | 542.802238      | 1067.570650    | 534.288963       | 1066.586634    | 533.796955       | 6  |
| 12 | 1567.855264 | 784.431270      | 1550.828715    | 775.917996       | 1549.844699    | 775.425988       | I    | 645.371873  | 323.189574      | 628.345324     | 314.676300       | 627.361308     | 314.184292       | 5  |
| 13 | 1704.914176 | 852.960726      | 1687.887627    | 844.447452       | 1686.903611    | 843.955444       | H    | 532.287809  | 266.647542      | 515.261260     | 258.134268       | 514.277244     | 257.642260       | 4  |
| 14 | 1851.982590 | 926.494933      | 1834.956041    | 917.981659       | 1833.972025    | 917.489651       | F    | 395.228897  | 198.118086      | 378.202348     | 189.604812       | 377.218332     | 189.112804       | 3  |
| 15 | 1953.030269 | 977.018773      | 1936.003720    | 968.505498       | 1935.019704    | 968.013490       | T    | 248.160483  | 124.583879      | 231.133934     | 116.070605       | 230.149918     | 115.578597       | 2  |
| 16 |             |                 |                |                  |                |                  | K    | 147.112804  | 74.060040       | 130.086255     | 65.546765        |                |                  | 1  |

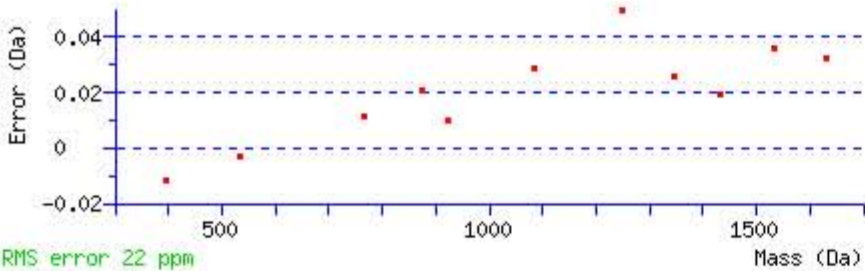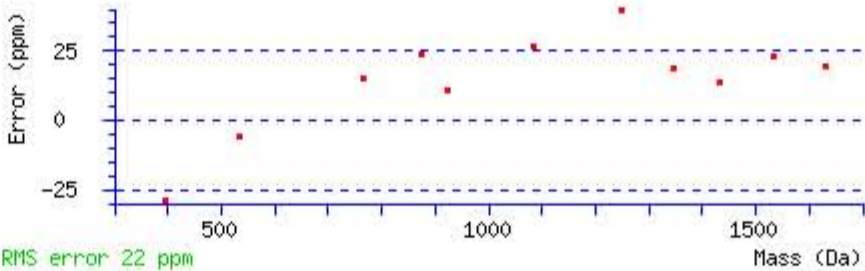

NCBI BLAST search of [SGIPIVTSPYQIHFTK](#)  
(Parameters: blastp, nr protein database, expect=20000, no filter, PAM30)  
Other BLAST [web gateways](#)

All matches to this query

| Score | Mr(calc):   | Delta    | Sequence                         |
|-------|-------------|----------|----------------------------------|
| 53.3  | 2098.128525 | 0.022497 | <a href="#">SGIPIVTSPYQIHFTK</a> |

MATRIX

SCIENCE

Mascot Search Results

Peptide View

MS/MS Fragmentation of **LSINTHPSQKPLSITVR**  
Found in **CO3\_HUMAN**, Complement C3 OS=Homo sapiens GN=C3 PE=1 SV=2

Match to Query 48477: 2201.244696 from(551.318450,4+) rtinseconds(1896) index(33428)  
Title: Locus:1.1.1.769.10 File:"2013-07-02 CLN FXIII 180 min 2nd F 3.wiff"  
Data file C:\Program Files (x86)\Matrix Science\Mascot Daemon\mgf\8 FXIII 180 min 2nd\mascot\_daemon\_merge.mgf

Click mouse within plot area to zoom in by factor of two about that point  
Or,   to  Da   
Label all possible matches ☐ Label matches used for scoring ☒

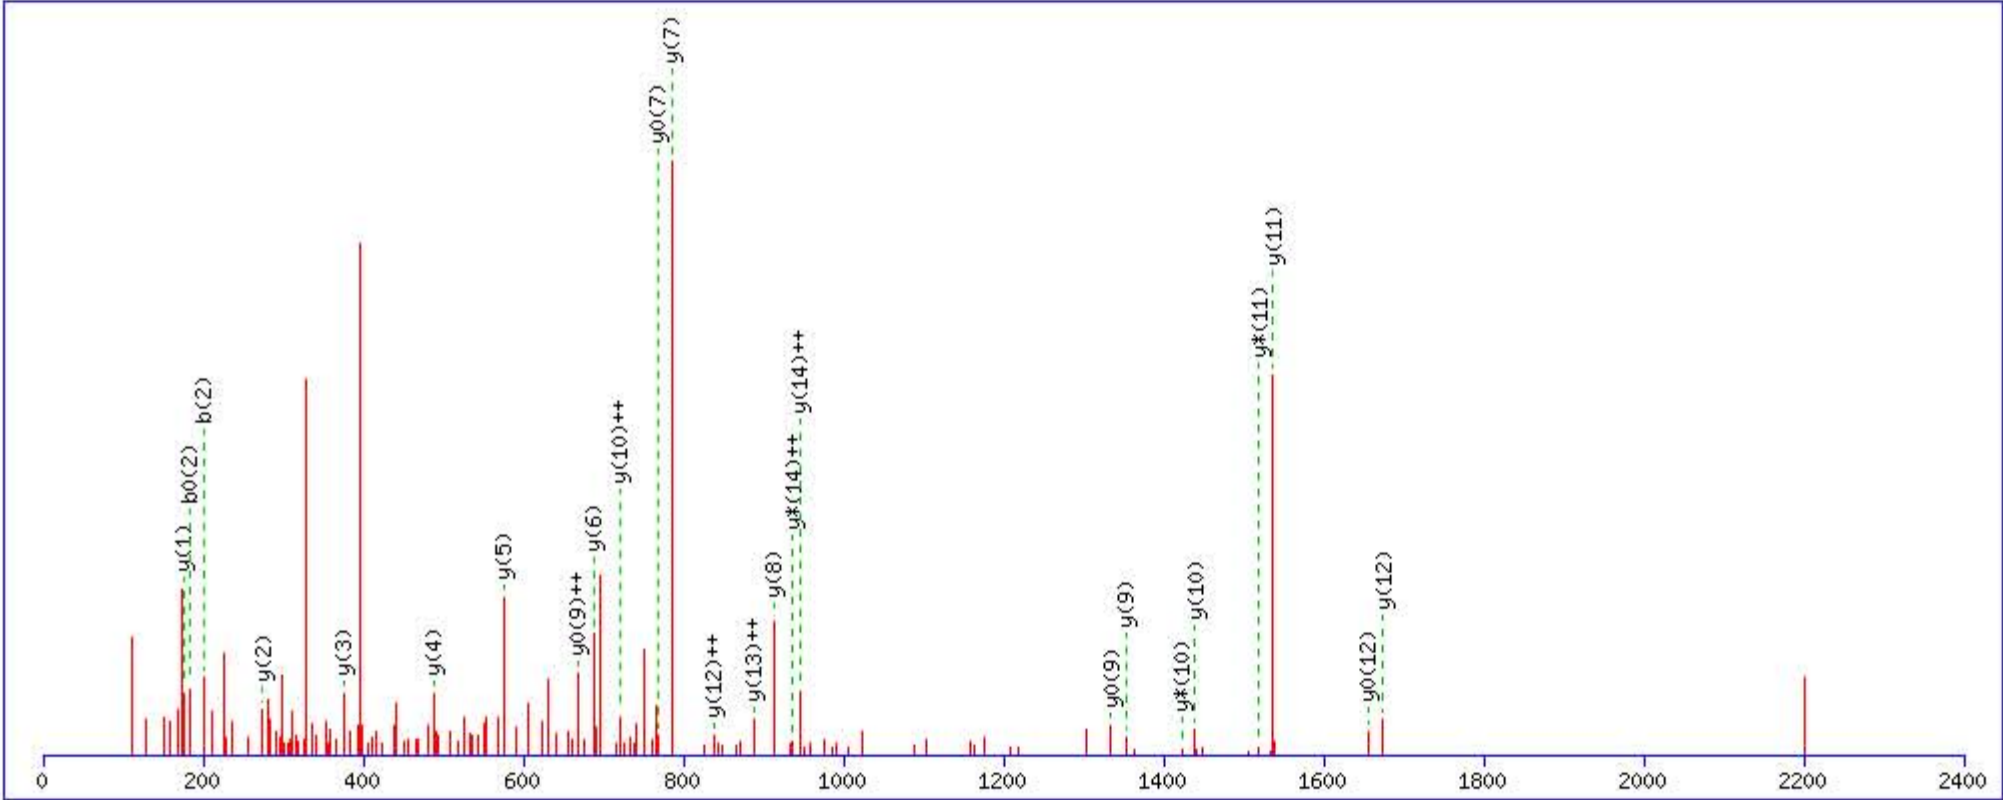

Monoisotopic mass of neutral peptide Mr(calc): 2201.235428  
Fixed modifications: Carbamidomethyl (C) (apply to specified residues or termini only)  
Variable modifications:  
Q9 : Biotin:Thermo-21345 (Q)  
Ions Score: 46 Expect: 0.0002  
Matches : 25/180 fragment ions using 69 most intense peaks [\(help\)](#)

| #  | b           | b <sup>++</sup> | b <sup>*</sup> | b <sup>+++</sup> | b <sup>0</sup> | b <sup>0++</sup> | Seq. | y           | y <sup>++</sup> | y <sup>*</sup> | y <sup>+++</sup> | y <sup>0</sup> | y <sup>0++</sup> | #  |
|----|-------------|-----------------|----------------|------------------|----------------|------------------|------|-------------|-----------------|----------------|------------------|----------------|------------------|----|
| 1  | 114.091340  | 57.549308       |                |                  |                |                  | L    |             |                 |                |                  |                |                  | 17 |
| 2  | 201.123368  | 101.065322      |                |                  | 183.112803     | 92.060039        | S    | 2089.158656 | 1045.082966     | 2072.132107    | 1036.569691      | 2071.148091    | 1036.077683      | 16 |
| 3  | 314.207432  | 157.607354      |                |                  | 296.196867     | 148.602071       | I    | 2002.126628 | 1001.566952     | 1985.100079    | 993.053678       | 1984.116063    | 992.561669       | 15 |
| 4  | 428.250359  | 214.628818      | 411.223810     | 206.115543       | 410.239794     | 205.623535       | N    | 1889.042564 | 945.024920      | 1872.016015    | 936.511646       | 1871.031999    | 936.019638       | 14 |
| 5  | 529.298038  | 265.152657      | 512.271489     | 256.639383       | 511.287473     | 256.147375       | T    | 1774.999637 | 888.003456      | 1757.973088    | 879.490182       | 1756.989072    | 878.998174       | 13 |
| 6  | 666.356950  | 333.682113      | 649.330401     | 325.168838       | 648.346385     | 324.676830       | H    | 1673.951958 | 837.479617      | 1656.925409    | 828.966343       | 1655.941393    | 828.474334       | 12 |
| 7  | 763.409714  | 382.208495      | 746.383165     | 373.695221       | 745.399149     | 373.203213       | P    | 1536.893046 | 768.950161      | 1519.866497    | 760.436887       | 1518.882481    | 759.944878       | 11 |
| 8  | 850.441742  | 425.724509      | 833.415193     | 417.211234       | 832.431177     | 416.719226       | S    | 1439.840282 | 720.423779      | 1422.813733    | 711.910505       | 1421.829717    | 711.418496       | 10 |
| 9  | 1289.667068 | 645.337172      | 1272.640519    | 636.823898       | 1271.656503    | 636.331889       | Q    | 1352.808254 | 676.907765      | 1335.781705    | 668.394491       | 1334.797689    | 667.902483       | 9  |
| 10 | 1417.762031 | 709.384654      | 1400.735482    | 700.871379       | 1399.751466    | 700.379371       | K    | 913.582928  | 457.295102      | 896.556379     | 448.781828       | 895.572363     | 448.289820       | 8  |
| 11 | 1514.814795 | 757.911036      | 1497.788246    | 749.397761       | 1496.804230    | 748.905753       | P    | 785.487965  | 393.247621      | 768.461416     | 384.734346       | 767.477400     | 384.242338       | 7  |
| 12 | 1627.898859 | 814.453067      | 1610.872310    | 805.939793       | 1609.888294    | 805.447785       | L    | 688.435201  | 344.721239      | 671.408652     | 336.207964       | 670.424636     | 335.715956       | 6  |
| 13 | 1714.930887 | 857.969082      | 1697.904338    | 849.455807       | 1696.920322    | 848.963799       | S    | 575.351137  | 288.179207      | 558.324588     | 279.665932       | 557.340572     | 279.173924       | 5  |
| 14 | 1828.014951 | 914.511113      | 1810.988402    | 905.997839       | 1810.004386    | 905.505831       | I    | 488.319109  | 244.663192      | 471.292560     | 236.149918       | 470.308544     | 235.657910       | 4  |
| 15 | 1929.062630 | 965.034953      | 1912.036081    | 956.521679       | 1911.052065    | 956.029670       | T    | 375.235045  | 188.121161      | 358.208496     | 179.607886       | 357.224480     | 179.115878       | 3  |
| 16 | 2028.131044 | 1014.569160     | 2011.104495    | 1006.055886      | 2010.120479    | 1005.563878      | V    | 274.187366  | 137.597321      | 257.160817     | 129.084047       |                |                  | 2  |
| 17 |             |                 |                |                  |                |                  | R    | 175.118952  | 88.063114       | 158.092403     | 79.549839        |                |                  | 1  |

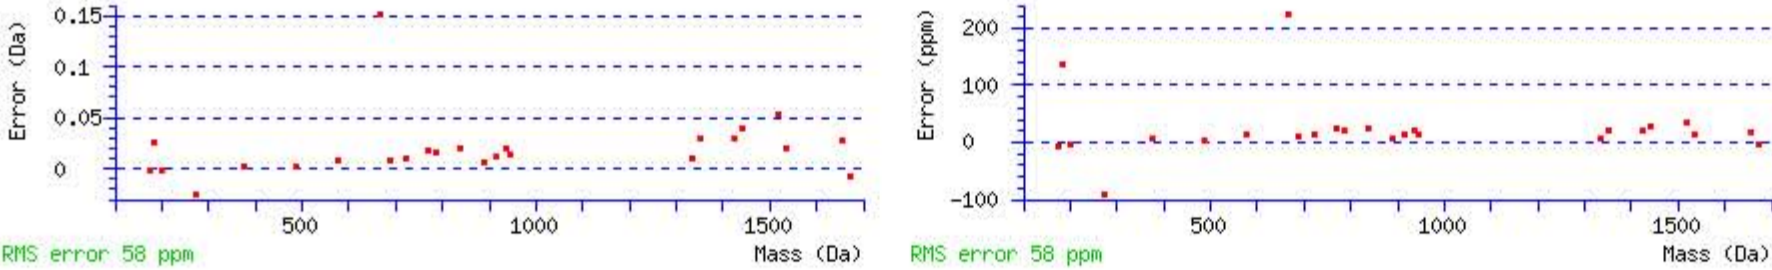

NCBI BLAST search of [LSINTHPSQKPLSITVR](#)  
(Parameters: blastp, nr protein database, expect=20000, no filter, PAM30)  
Other BLAST [web gateways](#)

All matches to this query

| Score | Mr(calc):   | Delta    | Sequence                          |
|-------|-------------|----------|-----------------------------------|
| 45.7  | 2201.235428 | 0.009268 | <a href="#">LSINTHPSQKPLSITVR</a> |

Peptide View

MS/MS Fragmentation of **ILLQGTPVAQMTEDA****DAER**  
Found in **CO3\_HUMAN**, Complement C3 OS=Homo sapiens GN=C3 PE=1 SV=2

Match to Query 53415: 2467.265682 from(823.429170,3+) rtinseconds(2726) index(38549)  
Title: Locus:1.1.1.1057.18 File:"2013-07-02 CLN FXIII 180 min 2nd F 3.wiff"  
Data file C:\Program Files (x86)\Matrix Science\Mascot Daemon\mgf\8 FXIII 180 min 2nd\mascot\_daemon\_merge.mgf

Click mouse within plot area to zoom in by factor of two about that point  
Or, 

Plot from

0

 to 

2600

 Da 

Full range

  
Label all possible matches ☐ Label matches used for scoring ☒

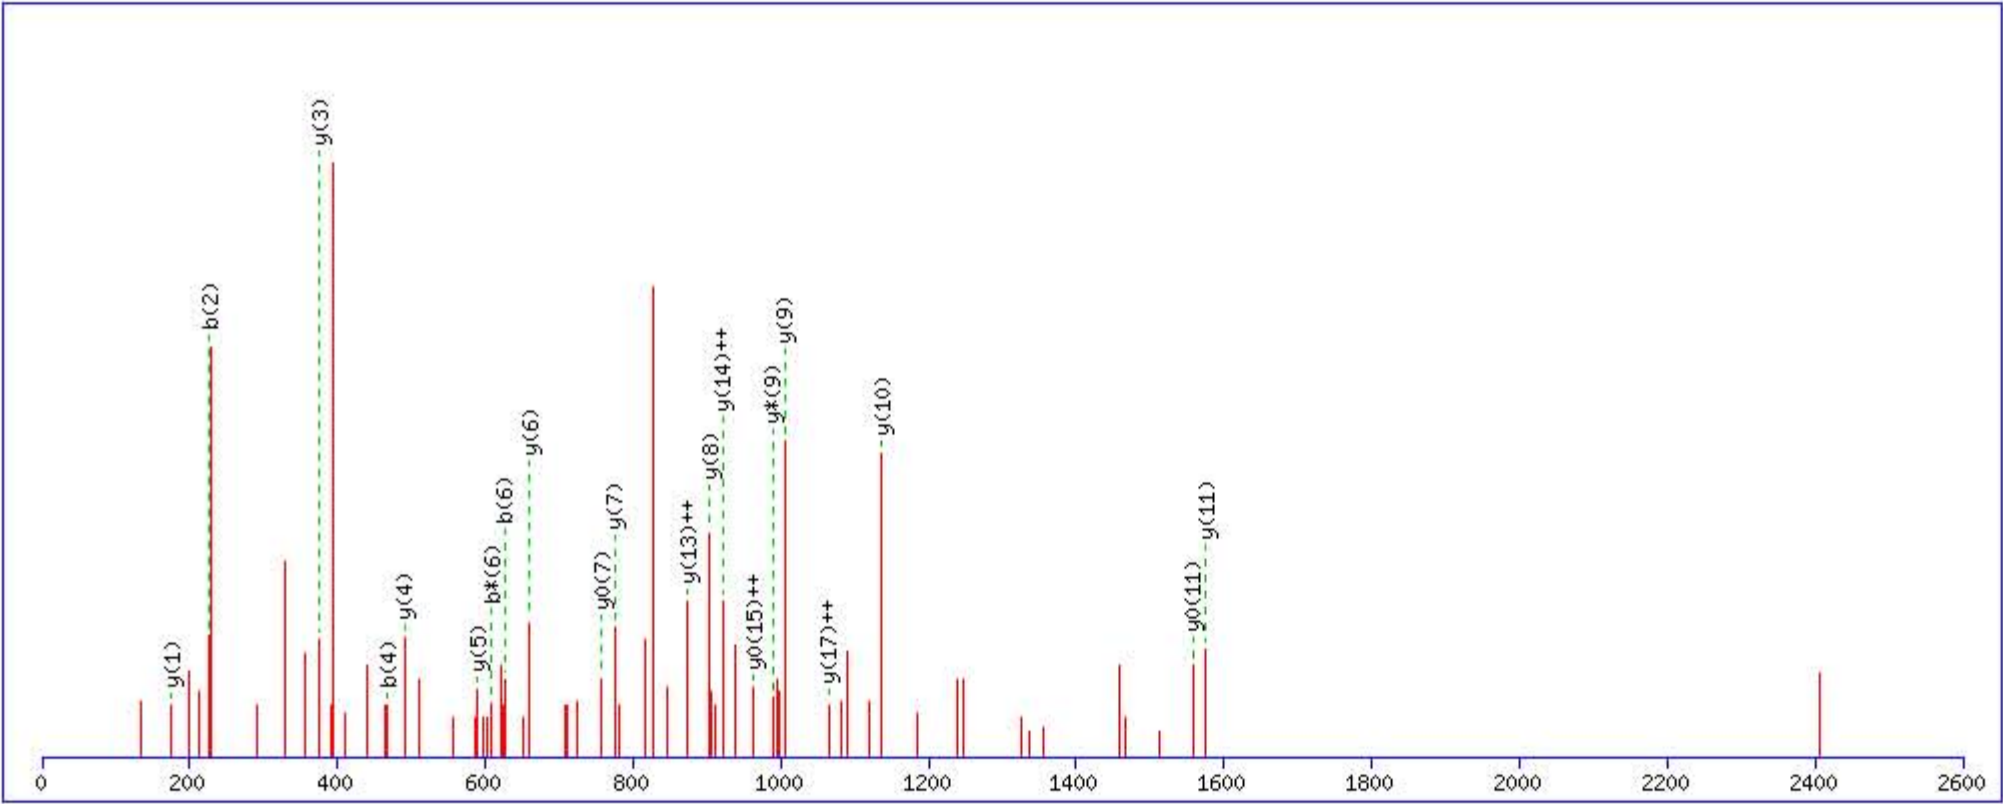

Monoisotopic mass of neutral peptide Mr(calc): 2467.245071  
Fixed modifications: Carbamidomethyl (C) (apply to specified residues or termini only)  
Variable modifications:  
Q10 : Biotin:Thermo-21345 (Q)  
Ions Score: 27 Expect: 0.061  
Matches : 21/210 fragment ions using 68 most intense peaks [\(help\)](#)

| #  | b           | b <sup>++</sup> | b <sup>*</sup> | b <sup>*++</sup> | b <sup>0</sup> | b <sup>0++</sup> | Seq. | y           | y <sup>++</sup> | y <sup>*</sup> | y <sup>*++</sup> | y <sup>0</sup> | y <sup>0++</sup> | #  |
|----|-------------|-----------------|----------------|------------------|----------------|------------------|------|-------------|-----------------|----------------|------------------|----------------|------------------|----|
| 1  | 114.091340  | 57.549308       |                |                  |                |                  | I    |             |                 |                |                  |                |                  | 20 |
| 2  | 227.175404  | 114.091340      |                |                  |                |                  | L    | 2355.168297 | 1178.087786     | 2338.141748    | 1169.574512      | 2337.157732    | 1169.082504      | 19 |
| 3  | 340.259468  | 170.633372      |                |                  |                |                  | L    | 2242.084233 | 1121.545754     | 2225.057684    | 1113.032480      | 2224.073668    | 1112.540472      | 18 |
| 4  | 468.318046  | 234.662661      | 451.291497     | 226.149386       |                |                  | Q    | 2129.000169 | 1065.003722     | 2111.973620    | 1056.490448      | 2110.989604    | 1055.998440      | 17 |
| 5  | 525.339510  | 263.173393      | 508.312961     | 254.660119       |                |                  | G    | 2000.941591 | 1000.974434     | 1983.915042    | 992.461159       | 1982.931026    | 991.969151       | 16 |
| 6  | 626.387189  | 313.697233      | 609.360640     | 305.183958       | 608.376624     | 304.691950       | T    | 1943.920127 | 972.463702      | 1926.893578    | 963.950427       | 1925.909562    | 963.458419       | 15 |
| 7  | 723.439953  | 362.223615      | 706.413404     | 353.710340       | 705.429388     | 353.218332       | P    | 1842.872448 | 921.939862      | 1825.845899    | 913.426588       | 1824.861883    | 912.934580       | 14 |
| 8  | 822.508367  | 411.757822      | 805.481818     | 403.244547       | 804.497802     | 402.752539       | V    | 1745.819684 | 873.413480      | 1728.793135    | 864.900206       | 1727.809119    | 864.408198       | 13 |
| 9  | 893.545481  | 447.276379      | 876.518932     | 438.763104       | 875.534916     | 438.271096       | A    | 1646.751270 | 823.879273      | 1629.724721    | 815.365999       | 1628.740705    | 814.873991       | 12 |
| 10 | 1332.770807 | 666.889042      | 1315.744258    | 658.375767       | 1314.760242    | 657.883759       | Q    | 1575.714156 | 788.360716      | 1558.687607    | 779.847442       | 1557.703591    | 779.355434       | 11 |
| 11 | 1463.811292 | 732.409284      | 1446.784743    | 723.896010       | 1445.800727    | 723.404002       | M    | 1136.488830 | 568.748053      | 1119.462281    | 560.234779       | 1118.478265    | 559.742771       | 10 |
| 12 | 1564.858971 | 782.933124      | 1547.832422    | 774.419849       | 1546.848406    | 773.927841       | T    | 1005.448345 | 503.227811      | 988.421796     | 494.714536       | 987.437780     | 494.222528       | 9  |
| 13 | 1693.901564 | 847.454420      | 1676.875015    | 838.941146       | 1675.890999    | 838.449138       | E    | 904.400666  | 452.703971      | 887.374117     | 444.190697       | 886.390101     | 443.698689       | 8  |
| 14 | 1808.928507 | 904.967892      | 1791.901958    | 896.454617       | 1790.917942    | 895.962609       | D    | 775.358073  | 388.182675      | 758.331524     | 379.669400       | 757.347508     | 379.177392       | 7  |
| 15 | 1879.965621 | 940.486449      | 1862.939072    | 931.973174       | 1861.955056    | 931.481166       | A    | 660.331130  | 330.669203      | 643.304581     | 322.155929       | 642.320565     | 321.663921       | 6  |
| 16 | 1979.034035 | 990.020656      | 1962.007486    | 981.507381       | 1961.023470    | 981.015373       | V    | 589.294016  | 295.150646      | 572.267467     | 286.637372       | 571.283451     | 286.145364       | 5  |
| 17 | 2094.060978 | 1047.534127     | 2077.034429    | 1039.020852      | 2076.050413    | 1038.528844      | D    | 490.225602  | 245.616439      | 473.199053     | 237.103165       | 472.215037     | 236.611157       | 4  |
| 18 | 2165.098092 | 1083.052684     | 2148.071543    | 1074.539409      | 2147.087527    | 1074.047402      | A    | 375.198659  | 188.102968      | 358.172110     | 179.589693       | 357.188094     | 179.097685       | 3  |
| 19 | 2294.140685 | 1147.573981     | 2277.114136    | 1139.060706      | 2276.130120    | 1138.568698      | E    | 304.161545  | 152.584411      | 287.134996     | 144.071136       | 286.150980     | 143.579128       | 2  |
| 20 |             |                 |                |                  |                |                  | R    | 175.118952  | 88.063114       | 158.092403     | 79.549839        |                |                  | 1  |

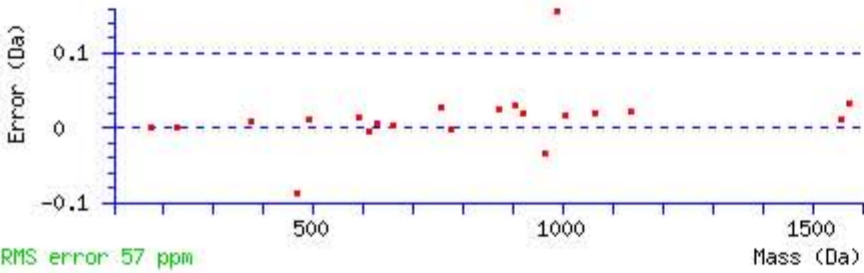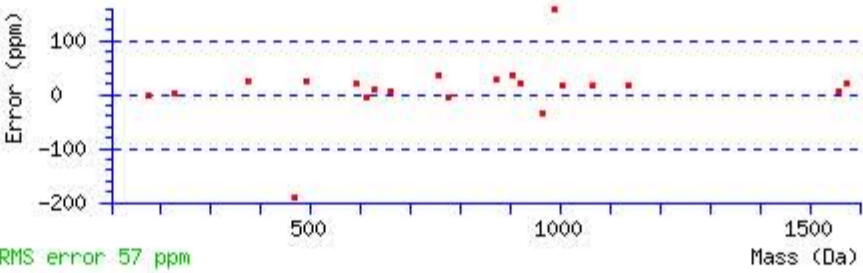

NCBI BLAST search of [ILLQGTPVAQMTEDA](#)[DAER](#)  
(Parameters: blastp, nr protein database, expect=20000, no filter, PAM30)  
Other BLAST [web gateways](#)

All matches to this query

| Score | Mr(calc):   | Delta    | Sequence                                             |
|-------|-------------|----------|------------------------------------------------------|
| 26.6  | 2467.245071 | 0.020611 | <a href="#">ILLQGTPVAQMTEDA</a> <a href="#">DAER</a> |
| 22.7  | 2467.245071 | 0.020611 | <a href="#">ILLQGTPVAQMTEDA</a> <a href="#">DAER</a> |

M

A

T

R

I

X

S

C

I

E

N

C

E

Mascot Search Results

Peptide View

MS/MS Fragmentation of **ILLQGTPVAQMTEDA****DAER**  
Found in **CO3\_HUMAN**, Complement C3 OS=Homo sapiens GN=C3 PE=1 SV=2

Match to Query 53417: 2467.275096 from(617.826050,4+) rtinseconds(2675) index(38137)  
Title: Locus:1.1.1.1040.4 File:"2013-07-02 CLN FXIII 180 min 2nd F 3.wiff"  
Data file C:\Program Files (x86)\Matrix Science\Mascot Daemon\mgf\8 FXIII 180 min 2nd\mascot\_daemon\_merge.mgf

Click mouse within plot area to zoom in by factor of two about that point  
Or, 

Plot from

100

 to 

1600

 Da 

Full range

  
Label all possible matches ☐ Label matches used for scoring ☒

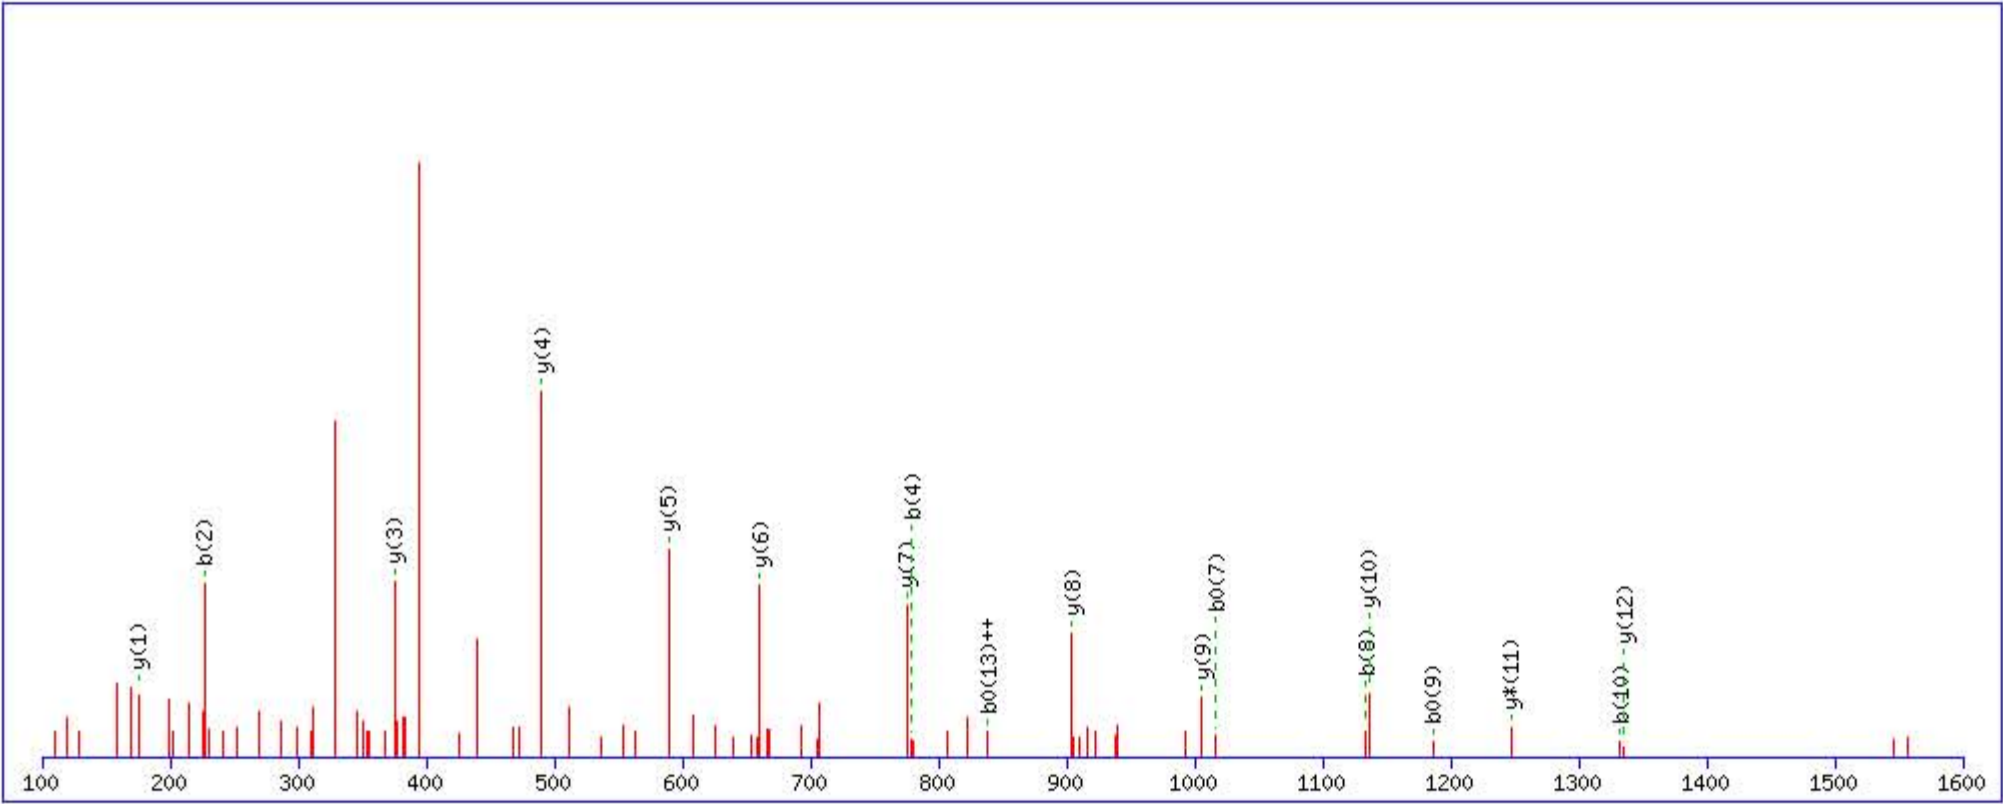

Monoisotopic mass of neutral peptide Mr(calc): 2467.245071  
Fixed modifications: Carbamidomethyl (C) (apply to specified residues or termini only)  
Variable modifications:  
Q4 : Biotin:Thermo-21345 (Q)  
Ions Score: 50 Expect: 0.0003  
Matches : 18/210 fragment ions using 36 most intense peaks [\(help\)](#)

| #  | b           | b <sup>++</sup> | b <sup>*</sup> | b <sup>*++</sup> | b <sup>0</sup> | b <sup>0++</sup> | Seq. | y           | y <sup>++</sup> | y <sup>*</sup> | y <sup>*++</sup> | y <sup>0</sup> | y <sup>0++</sup> | #  |
|----|-------------|-----------------|----------------|------------------|----------------|------------------|------|-------------|-----------------|----------------|------------------|----------------|------------------|----|
| 1  | 114.091340  | 57.549308       |                |                  |                |                  | I    |             |                 |                |                  |                |                  | 20 |
| 2  | 227.175404  | 114.091340      |                |                  |                |                  | L    | 2355.168297 | 1178.087786     | 2338.141748    | 1169.574512      | 2337.157732    | 1169.082504      | 19 |
| 3  | 340.259468  | 170.633372      |                |                  |                |                  | L    | 2242.084233 | 1121.545754     | 2225.057684    | 1113.032480      | 2224.073668    | 1112.540472      | 18 |
| 4  | 779.484794  | 390.246035      | 762.458245     | 381.732760       |                |                  | Q    | 2129.000169 | 1065.003722     | 2111.973620    | 1056.490448      | 2110.989604    | 1055.998440      | 17 |
| 5  | 836.506258  | 418.756767      | 819.479709     | 410.243493       |                |                  | G    | 1689.774843 | 845.391060      | 1672.748294    | 836.877785       | 1671.764278    | 836.385777       | 16 |
| 6  | 937.553937  | 469.280607      | 920.527388     | 460.767332       | 919.543372     | 460.275324       | T    | 1632.753379 | 816.880328      | 1615.726830    | 808.367053       | 1614.742814    | 807.875045       | 15 |
| 7  | 1034.606701 | 517.806988      | 1017.580152    | 509.293714       | 1016.596136    | 508.801706       | P    | 1531.705700 | 766.356488      | 1514.679151    | 757.843214       | 1513.695135    | 757.351206       | 14 |
| 8  | 1133.675115 | 567.341196      | 1116.648566    | 558.827921       | 1115.664550    | 558.335913       | V    | 1434.652936 | 717.830106      | 1417.626387    | 709.316832       | 1416.642371    | 708.824824       | 13 |
| 9  | 1204.712229 | 602.859753      | 1187.685680    | 594.346478       | 1186.701664    | 593.854470       | A    | 1335.584522 | 668.295899      | 1318.557973    | 659.782625       | 1317.573957    | 659.290617       | 12 |
| 10 | 1332.770807 | 666.889042      | 1315.744258    | 658.375767       | 1314.760242    | 657.883759       | Q    | 1264.547408 | 632.777342      | 1247.520859    | 624.264068       | 1246.536843    | 623.772060       | 11 |
| 11 | 1463.811292 | 732.409284      | 1446.784743    | 723.896010       | 1445.800727    | 723.404002       | M    | 1136.488830 | 568.748053      | 1119.462281    | 560.234779       | 1118.478265    | 559.742771       | 10 |
| 12 | 1564.858971 | 782.933124      | 1547.832422    | 774.419849       | 1546.848406    | 773.927841       | T    | 1005.448345 | 503.227811      | 988.421796     | 494.714536       | 987.437780     | 494.222528       | 9  |
| 13 | 1693.901564 | 847.454420      | 1676.875015    | 838.941146       | 1675.890999    | 838.449138       | E    | 904.400666  | 452.703971      | 887.374117     | 444.190697       | 886.390101     | 443.698689       | 8  |
| 14 | 1808.928507 | 904.967892      | 1791.901958    | 896.454617       | 1790.917942    | 895.962609       | D    | 775.358073  | 388.182675      | 758.331524     | 379.669400       | 757.347508     | 379.177392       | 7  |
| 15 | 1879.965621 | 940.486449      | 1862.939072    | 931.973174       | 1861.955056    | 931.481166       | A    | 660.331130  | 330.669203      | 643.304581     | 322.155929       | 642.320565     | 321.663921       | 6  |
| 16 | 1979.034035 | 990.020656      | 1962.007486    | 981.507381       | 1961.023470    | 981.015373       | V    | 589.294016  | 295.150646      | 572.267467     | 286.637372       | 571.283451     | 286.145364       | 5  |
| 17 | 2094.060978 | 1047.534127     | 2077.034429    | 1039.020852      | 2076.050413    | 1038.528844      | D    | 490.225602  | 245.616439      | 473.199053     | 237.103165       | 472.215037     | 236.611157       | 4  |
| 18 | 2165.098092 | 1083.052684     | 2148.071543    | 1074.539409      | 2147.087527    | 1074.047402      | A    | 375.198659  | 188.102968      | 358.172110     | 179.589693       | 357.188094     | 179.097685       | 3  |
| 19 | 2294.140685 | 1147.573981     | 2277.114136    | 1139.060706      | 2276.130120    | 1138.568698      | E    | 304.161545  | 152.584411      | 287.134996     | 144.071136       | 286.150980     | 143.579128       | 2  |
| 20 |             |                 |                |                  |                |                  | R    | 175.118952  | 88.063114       | 158.092403     | 79.549839        |                |                  | 1  |

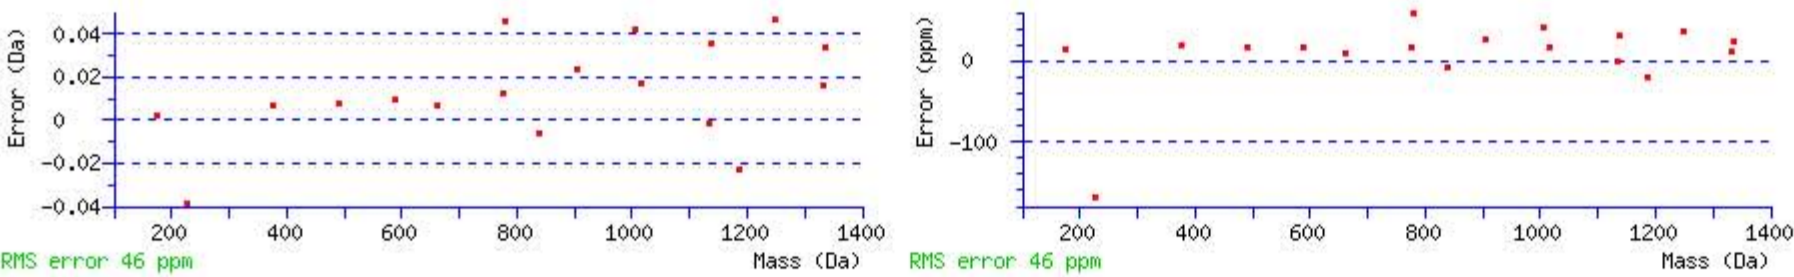

NCBI BLAST search of [ILLQGTPVAQMTEDA](#)**DAER**  
(Parameters: blastp, nr protein database, expect=20000, no filter, PAM30)  
Other BLAST [web gateways](#)

All matches to this query

| Score | Mr(calc):   | Delta    | Sequence                                    |
|-------|-------------|----------|---------------------------------------------|
| 49.9  | 2467.245071 | 0.030025 | <a href="#">ILLQGTPVAQMTEDA</a> <b>DAER</b> |
| 44.1  | 2467.245071 | 0.030025 | <a href="#">ILLQGTPVAQMTEDA</a> <b>DAER</b> |



M

A

T

R

I

X

S

C

I

E

N

C

E

Mascot Search Results

Peptide View

MS/MS Fragmentation of **EDIPPADLSDQVPDTESETR**  
Found in **CO3\_HUMAN**, Complement C3 OS=Homo sapiens GN=C3 PE=1 SV=2

Match to Query 54715: 2524.198932 from(842.406920,3+) rtinseconds(2095) index(34836)  
Title: Locus:1.1.1.838.13 File:"2013-07-02 CLN FXIII 180 min 2nd F 3.wiff"  
Data file C:\Program Files (x86)\Matrix Science\Mascot Daemon\mgf\8 FXIII 180 min 2nd\mascot\_daemon\_merge.mgf

Click mouse within plot area to zoom in by factor of two about that point  
Or,   to  Da   
Label all possible matches ☐ Label matches used for scoring ☒

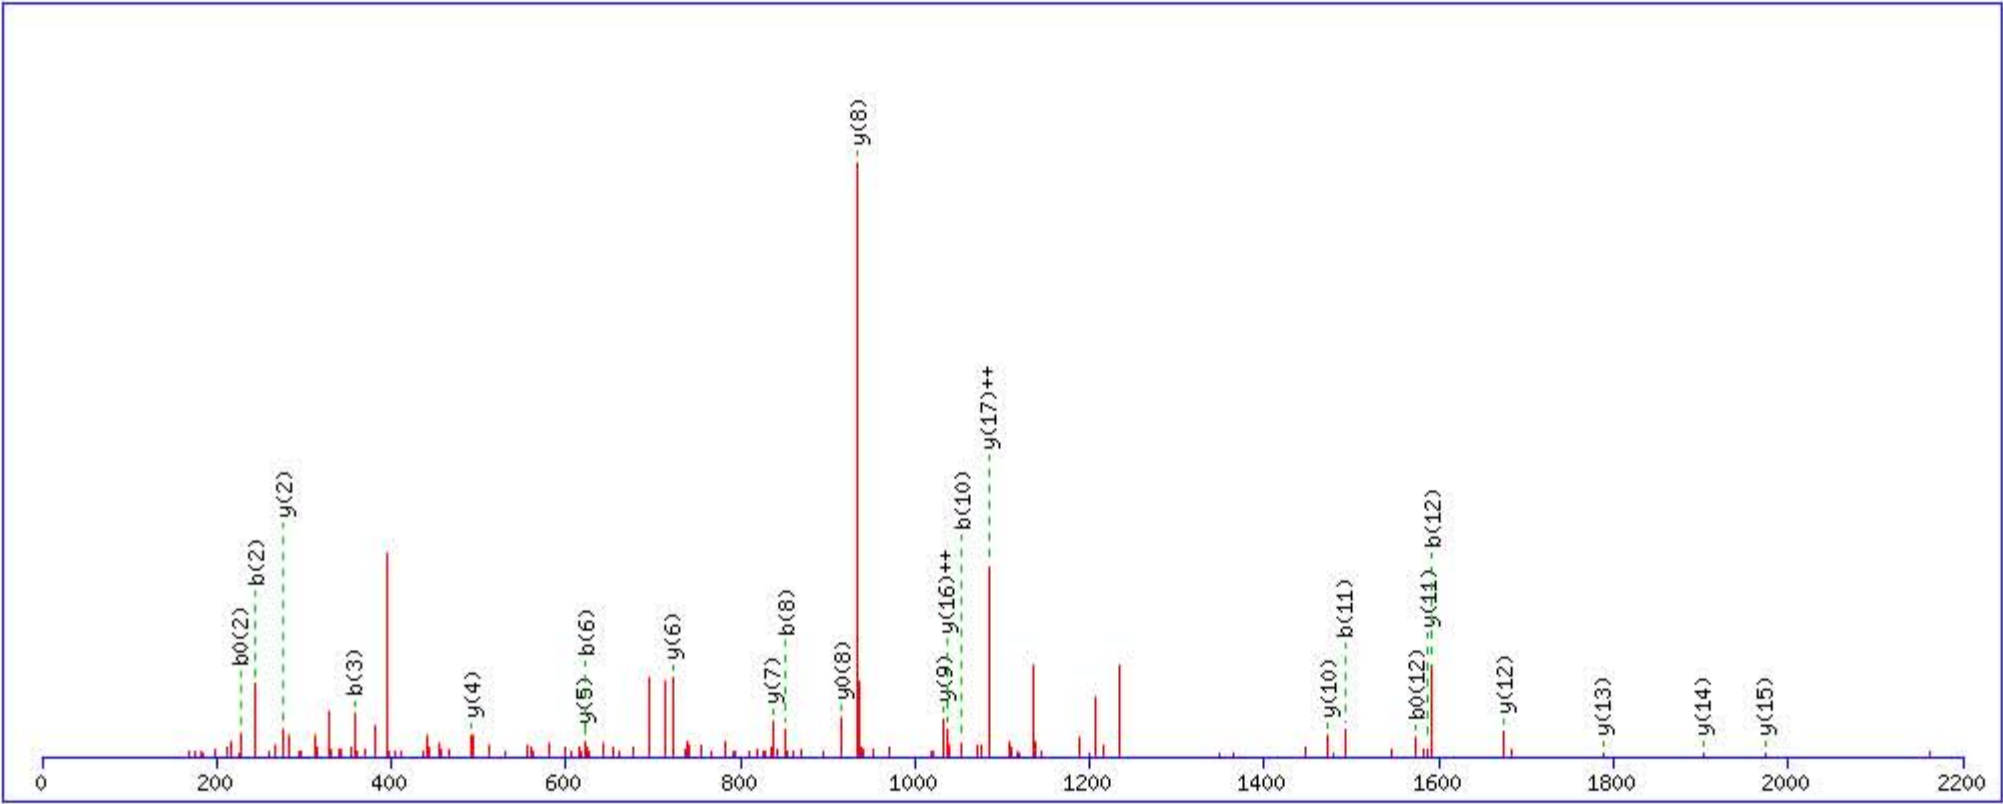

Monoisotopic mass of neutral peptide Mr(calc): 2524.163910  
Fixed modifications: Carbamidomethyl (C) (apply to specified residues or termini only)  
Variable modifications:  
Q11 : Biotin:Thermo-21345 (Q)  
Ions Score: 72 Expect: 1.2e-006  
Matches : 25/206 fragment ions using 50 most intense peaks [\(help\)](#)

| #  | b           | b <sup>++</sup> | b <sup>*</sup> | b <sup>+++</sup> | b <sup>0</sup> | b <sup>0++</sup> | Seq. | y           | y <sup>++</sup> | y <sup>*</sup> | y <sup>+++</sup> | y <sup>0</sup> | y <sup>0++</sup> | #  |
|----|-------------|-----------------|----------------|------------------|----------------|------------------|------|-------------|-----------------|----------------|------------------|----------------|------------------|----|
| 1  | 130.049869  | 65.528572       |                |                  | 112.039304     | 56.523290        | E    |             |                 |                |                  |                |                  | 20 |
| 2  | 245.076812  | 123.042044      |                |                  | 227.066247     | 114.036762       | D    | 2396.128598 | 1198.567937     | 2379.102049    | 1190.054662      | 2378.118033    | 1189.562654      | 19 |
| 3  | 358.160876  | 179.584076      |                |                  | 340.150311     | 170.578794       | I    | 2281.101655 | 1141.054465     | 2264.075106    | 1132.541191      | 2263.091090    | 1132.049183      | 18 |
| 4  | 455.213640  | 228.110458      |                |                  | 437.203075     | 219.105176       | P    | 2168.017591 | 1084.512433     | 2150.991042    | 1075.999159      | 2150.007026    | 1075.507151      | 17 |
| 5  | 552.266404  | 276.636840      |                |                  | 534.255839     | 267.631558       | P    | 2070.964827 | 1035.986051     | 2053.938278    | 1027.472777      | 2052.954262    | 1026.980769      | 16 |
| 6  | 623.303518  | 312.155397      |                |                  | 605.292953     | 303.150115       | A    | 1973.912063 | 987.459670      | 1956.885514    | 978.946395       | 1955.901498    | 978.454387       | 15 |
| 7  | 738.330461  | 369.668869      |                |                  | 720.319896     | 360.663586       | D    | 1902.874949 | 951.941113      | 1885.848400    | 943.427838       | 1884.864384    | 942.935830       | 14 |
| 8  | 851.414525  | 426.210901      |                |                  | 833.403960     | 417.205618       | L    | 1787.848006 | 894.427641      | 1770.821457    | 885.914367       | 1769.837441    | 885.422359       | 13 |
| 9  | 938.446553  | 469.726915      |                |                  | 920.435988     | 460.721632       | S    | 1674.763942 | 837.885609      | 1657.737393    | 829.372335       | 1656.753377    | 828.880327       | 12 |
| 10 | 1053.473496 | 527.240386      |                |                  | 1035.462931    | 518.235104       | D    | 1587.731914 | 794.369595      | 1570.705365    | 785.856321       | 1569.721349    | 785.364313       | 11 |
| 11 | 1492.698822 | 746.853049      | 1475.672273    | 738.339775       | 1474.688257    | 737.847767       | Q    | 1472.704971 | 736.856124      | 1455.678422    | 728.342849       | 1454.694406    | 727.850841       | 10 |
| 12 | 1591.767236 | 796.387256      | 1574.740687    | 787.873982       | 1573.756671    | 787.381974       | V    | 1033.479645 | 517.243461      | 1016.453096    | 508.730186       | 1015.469080    | 508.238178       | 9  |
| 13 | 1688.820000 | 844.913638      | 1671.793451    | 836.400364       | 1670.809435    | 835.908356       | P    | 934.411231  | 467.709254      | 917.384682     | 459.195979       | 916.400666     | 458.703971       | 8  |
| 14 | 1803.846943 | 902.427110      | 1786.820394    | 893.913835       | 1785.836378    | 893.421827       | D    | 837.358467  | 419.182872      | 820.331918     | 410.669597       | 819.347902     | 410.177589       | 7  |
| 15 | 1904.894622 | 952.950949      | 1887.868073    | 944.437675       | 1886.884057    | 943.945667       | T    | 722.331524  | 361.669400      | 705.304975     | 353.156125       | 704.320959     | 352.664117       | 6  |
| 16 | 2033.937215 | 1017.472246     | 2016.910666    | 1008.958971      | 2015.926650    | 1008.466963      | E    | 621.283845  | 311.145560      | 604.257296     | 302.632286       | 603.273280     | 302.140278       | 5  |
| 17 | 2120.969243 | 1060.988259     | 2103.942694    | 1052.474985      | 2102.958678    | 1051.982977      | S    | 492.241252  | 246.624264      | 475.214703     | 238.110989       | 474.230687     | 237.618981       | 4  |
| 18 | 2250.011836 | 1125.509556     | 2232.985287    | 1116.996281      | 2232.001271    | 1116.504274      | E    | 405.209224  | 203.108250      | 388.182675     | 194.594975       | 387.198659     | 194.102967       | 3  |
| 19 | 2351.059515 | 1176.033395     | 2334.032966    | 1167.520121      | 2333.048950    | 1167.028113      | T    | 276.166631  | 138.586953      | 259.140082     | 130.073679       | 258.156066     | 129.581671       | 2  |
| 20 |             |                 |                |                  |                |                  | R    | 175.118952  | 88.063114       | 158.092403     | 79.549839        |                |                  | 1  |

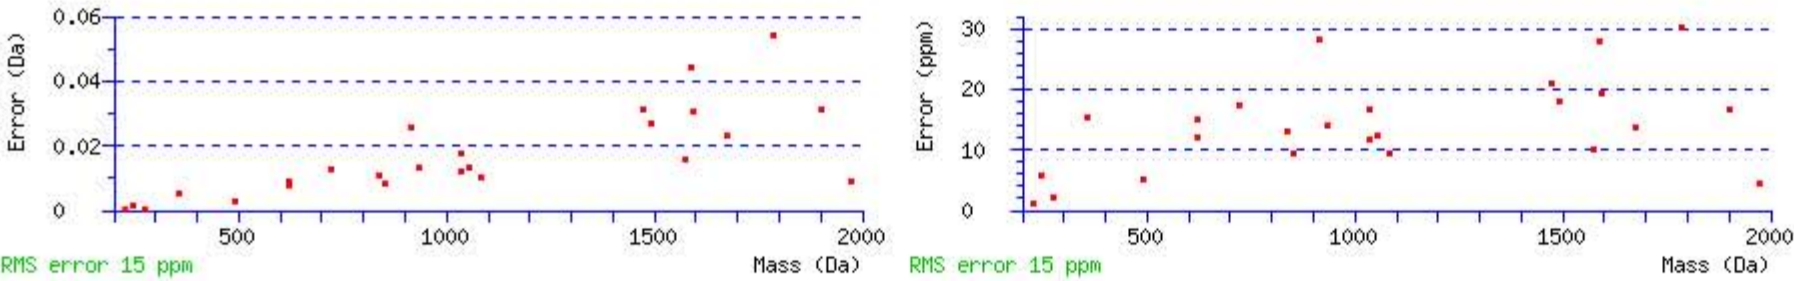

NCBI BLAST search of [EDIPPADLSDQVPDTESETR](#)  
(Parameters: blastp, nr protein database, expect=20000, no filter, PAM30)  
Other BLAST [web gateways](#)

All matches to this query

| Score | Mr(calc):   | Delta    | Sequence                             |
|-------|-------------|----------|--------------------------------------|
| 72.3  | 2524.163910 | 0.035022 | <a href="#">EDIPPADLSDQVPDTESETR</a> |

M

A

T

R

I

X

S

C

I

E

N

C

E

Mascot Search Results

Peptide View

MS/MS Fragmentation of **ILLQGTPVAQMTEDA****DAER**  
Found in **CO3\_HUMAN**, Complement C3 OS=Homo sapiens GN=C3 PE=1 SV=2

Match to Query 57266: 2778.452456 from(695.620390,4+) rtinseconds(2788) index(39070)  
Title: Locus:1.1.1.1078.14 File:"2013-07-02 CLN FXIII 180 min 2nd F 3.wiff"  
Data file C:\Program Files (x86)\Matrix Science\Mascot Daemon\mgf\8 FXIII 180 min 2nd\mascot\_daemon\_merge.mgf

Click mouse within plot area to zoom in by factor of two about that point  
Or, 

Plot from

100

 to 

1900

 Da 

Full range

  
Label all possible matches ☐ Label matches used for scoring ☒

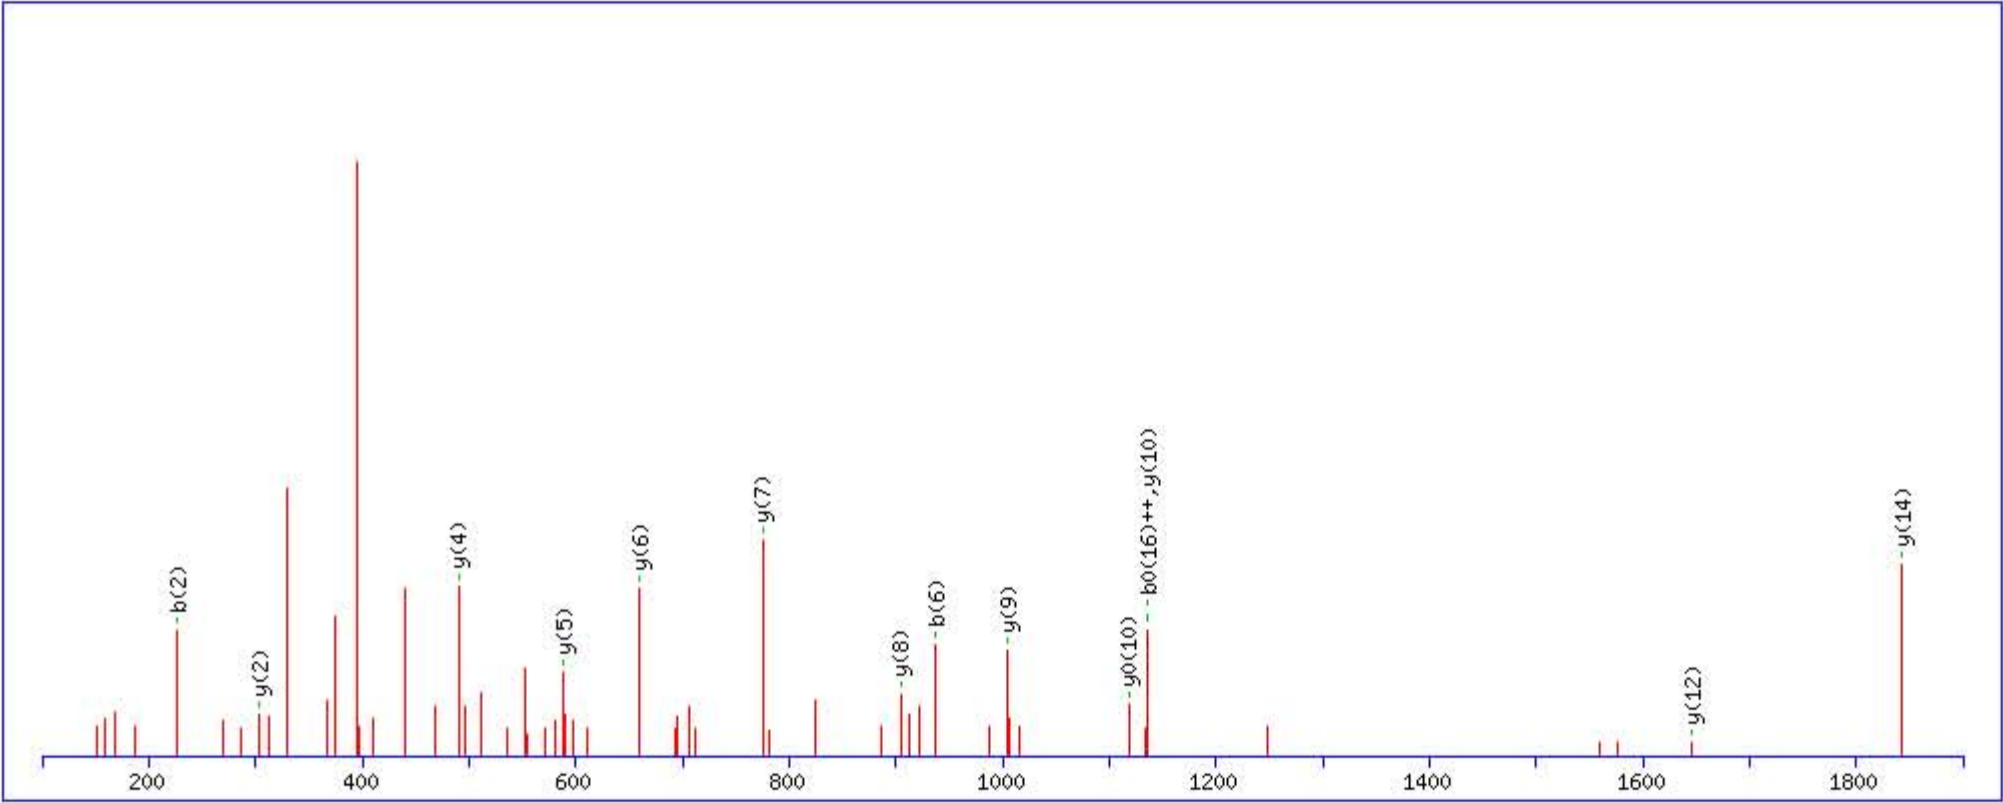

Monoisotopic mass of neutral peptide Mr(calc): 2778.411819  
Fixed modifications: Carbamidomethyl (C) (apply to specified residues or termini only)  
Variable modifications:  
Q4 : Biotin:Thermo-21345 (Q)  
Q10 : Biotin:Thermo-21345 (Q)  
Ions Score: 55 Expect: 7.5e-005  
Matches : 14/210 fragment ions using 24 most intense peaks [\(help\)](#)

| #  | b           | b <sup>++</sup> | b <sup>*</sup> | b <sup>*++</sup> | b <sup>0</sup> | b <sup>0++</sup> | Seq. | y           | y <sup>++</sup> | y <sup>*</sup> | y <sup>*++</sup> | y <sup>0</sup> | y <sup>0++</sup> | #  |
|----|-------------|-----------------|----------------|------------------|----------------|------------------|------|-------------|-----------------|----------------|------------------|----------------|------------------|----|
| 1  | 114.091340  | 57.549308       |                |                  |                |                  | I    |             |                 |                |                  |                |                  | 20 |
| 2  | 227.175404  | 114.091340      |                |                  |                |                  | L    | 2666.335045 | 1333.671160     | 2649.308496    | 1325.157886      | 2648.324480    | 1324.665878      | 19 |
| 3  | 340.259468  | 170.633372      |                |                  |                |                  | L    | 2553.250981 | 1277.129128     | 2536.224432    | 1268.615854      | 2535.240416    | 1268.123846      | 18 |
| 4  | 779.484794  | 390.246035      | 762.458245     | 381.732760       |                |                  | Q    | 2440.166917 | 1220.587096     | 2423.140368    | 1212.073822      | 2422.156352    | 1211.581814      | 17 |
| 5  | 836.506258  | 418.756767      | 819.479709     | 410.243493       |                |                  | G    | 2000.941591 | 1000.974434     | 1983.915042    | 992.461159       | 1982.931026    | 991.969151       | 16 |
| 6  | 937.553937  | 469.280607      | 920.527388     | 460.767332       | 919.543372     | 460.275324       | T    | 1943.920127 | 972.463702      | 1926.893578    | 963.950427       | 1925.909562    | 963.458419       | 15 |
| 7  | 1034.606701 | 517.806988      | 1017.580152    | 509.293714       | 1016.596136    | 508.801706       | P    | 1842.872448 | 921.939862      | 1825.845899    | 913.426588       | 1824.861883    | 912.934580       | 14 |
| 8  | 1133.675115 | 567.341196      | 1116.648566    | 558.827921       | 1115.664550    | 558.335913       | V    | 1745.819684 | 873.413480      | 1728.793135    | 864.900206       | 1727.809119    | 864.408198       | 13 |
| 9  | 1204.712229 | 602.859753      | 1187.685680    | 594.346478       | 1186.701664    | 593.854470       | A    | 1646.751270 | 823.879273      | 1629.724721    | 815.365999       | 1628.740705    | 814.873991       | 12 |
| 10 | 1643.937555 | 822.472416      | 1626.911006    | 813.959141       | 1625.926990    | 813.467133       | Q    | 1575.714156 | 788.360716      | 1558.687607    | 779.847442       | 1557.703591    | 779.355434       | 11 |
| 11 | 1774.978040 | 887.992658      | 1757.951491    | 879.479384       | 1756.967475    | 878.987376       | M    | 1136.488830 | 568.748053      | 1119.462281    | 560.234779       | 1118.478265    | 559.742771       | 10 |
| 12 | 1876.025719 | 938.516498      | 1858.999170    | 930.003223       | 1858.015154    | 929.511215       | T    | 1005.448345 | 503.227811      | 988.421796     | 494.714536       | 987.437780     | 494.222528       | 9  |
| 13 | 2005.068312 | 1003.037794     | 1988.041763    | 994.524520       | 1987.057747    | 994.032512       | E    | 904.400666  | 452.703971      | 887.374117     | 444.190697       | 886.390101     | 443.698689       | 8  |
| 14 | 2120.095255 | 1060.551265     | 2103.068706    | 1052.037991      | 2102.084690    | 1051.545983      | D    | 775.358073  | 388.182675      | 758.331524     | 379.669400       | 757.347508     | 379.177392       | 7  |
| 15 | 2191.132369 | 1096.069822     | 2174.105820    | 1087.556548      | 2173.121804    | 1087.064540      | A    | 660.331130  | 330.669203      | 643.304581     | 322.155929       | 642.320565     | 321.663921       | 6  |
| 16 | 2290.200783 | 1145.604029     | 2273.174234    | 1137.090755      | 2272.190218    | 1136.598747      | V    | 589.294016  | 295.150646      | 572.267467     | 286.637372       | 571.283451     | 286.145364       | 5  |
| 17 | 2405.227726 | 1203.117501     | 2388.201177    | 1194.604226      | 2387.217161    | 1194.112218      | D    | 490.225602  | 245.616439      | 473.199053     | 237.103165       | 472.215037     | 236.611157       | 4  |
| 18 | 2476.264840 | 1238.636058     | 2459.238291    | 1230.122783      | 2458.254275    | 1229.630775      | A    | 375.198659  | 188.102968      | 358.172110     | 179.589693       | 357.188094     | 179.097685       | 3  |
| 19 | 2605.307433 | 1303.157354     | 2588.280884    | 1294.644080      | 2587.296868    | 1294.152072      | E    | 304.161545  | 152.584411      | 287.134996     | 144.071136       | 286.150980     | 143.579128       | 2  |
| 20 |             |                 |                |                  |                |                  | R    | 175.118952  | 88.063114       | 158.092403     | 79.549839        |                |                  | 1  |

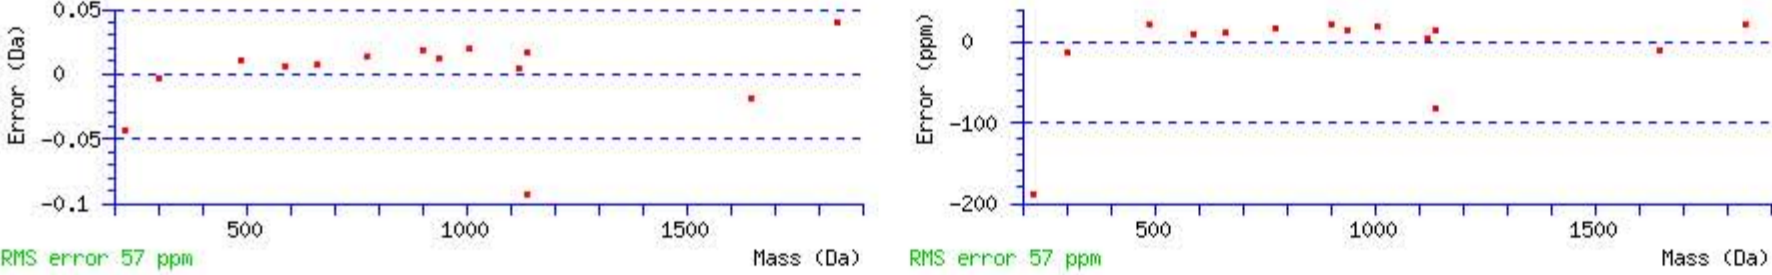

NCBI BLAST search of [ILLQGTPVAQMTEDA](#)**DAER**  
(Parameters: blastp, nr protein database, expect=20000, no filter, PAM30)  
Other BLAST [web gateways](#)

All matches to this query

| Score | Mr(calc):   | Delta    | Sequence                                    |
|-------|-------------|----------|---------------------------------------------|
| 55.4  | 2778.411819 | 0.040637 | <a href="#">ILLQGTPVAQMTEDA</a> <b>DAER</b> |

MATRIX

SCIENCE

Mascot Search Results

Peptide View

MS/MS Fragmentation of **QKPDGVFQEDAPVIHQEMIGGLR**  
Found in **CO3\_HUMAN**, Complement C3 OS=Homo sapiens GN=C3 PE=1 SV=2

Match to Query 58871: 2874.488216 from(719.629330,4+) rtinseconds(2238) index(35689)  
Title: Locus:1.1.1.888.8 File:"2013-07-02 CLN FXIII 180 min 2nd F 3.wiff"  
Data file C:\Program Files (x86)\Matrix Science\Mascot Daemon\mgf\8 FXIII 180 min 2nd\mascot\_daemon\_merge.mgf

Click mouse within plot area to zoom in by factor of two about that point  
Or, 

Plot from 

0

 to 

2200

 Da 

Full range

Label all possible matches ☐ Label matches used for scoring ☒

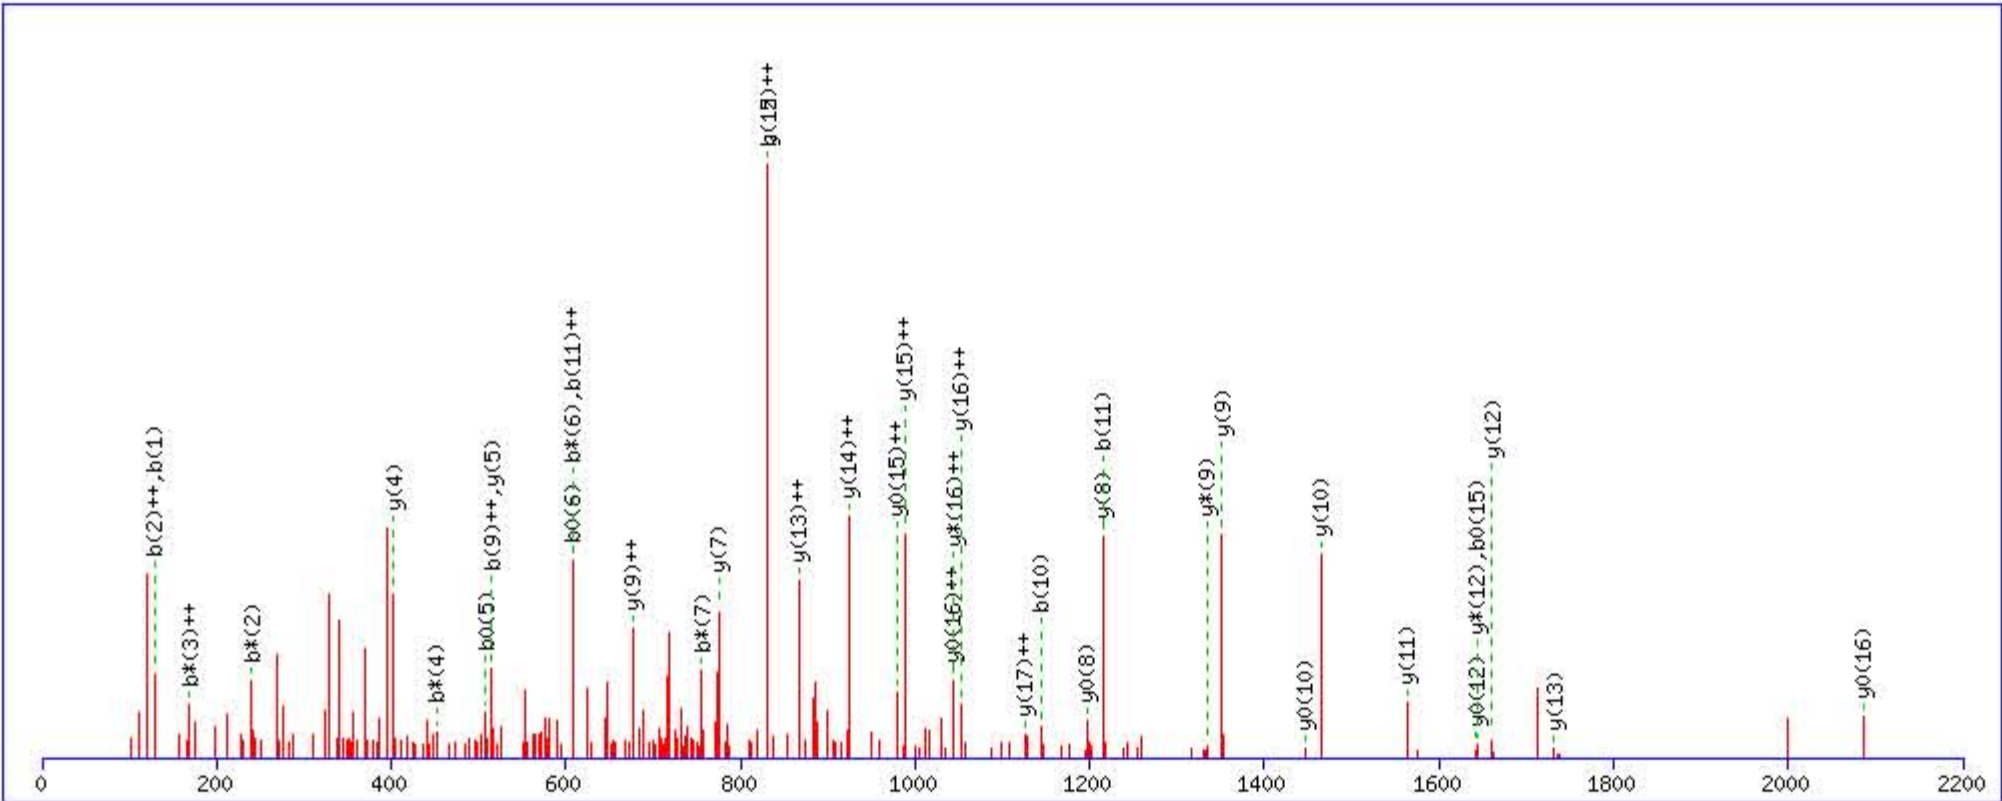

Monoisotopic mass of neutral peptide Mr(calc): 2874.452057  
Fixed modifications: Carbamidomethyl (C) (apply to specified residues or termini only)  
Variable modifications:  
Q16 : Biotin:Thermo-21345 (Q)  
Ions Score: 53 Expect: 1.5e-005  
Matches : 40/246 fragment ions using 52 most intense peaks [\(help\)](#)

| #  | b           | b <sup>++</sup> | b <sup>*</sup> | b <sup>*++</sup> | b <sup>0</sup> | b <sup>0++</sup> | Seq. | y           | y <sup>++</sup> | y <sup>*</sup> | y <sup>*++</sup> | y <sup>0</sup> | y <sup>0++</sup> | #  |
|----|-------------|-----------------|----------------|------------------|----------------|------------------|------|-------------|-----------------|----------------|------------------|----------------|------------------|----|
| 1  | 129.065854  | 65.036565       | 112.039305     | 56.523291        |                |                  | Q    |             |                 |                |                  |                |                  | 23 |
| 2  | 257.160817  | 129.084047      | 240.134268     | 120.570772       |                |                  | K    | 2747.400756 | 1374.204016     | 2730.374207    | 1365.690741      | 2729.390191    | 1365.198733      | 22 |
| 3  | 354.213581  | 177.610429      | 337.187032     | 169.097154       |                |                  | P    | 2619.305793 | 1310.156534     | 2602.279244    | 1301.643260      | 2601.295228    | 1301.151252      | 21 |
| 4  | 469.240524  | 235.123900      | 452.213975     | 226.610626       | 451.229959     | 226.118618       | D    | 2522.253029 | 1261.630152     | 2505.226480    | 1253.116878      | 2504.242464    | 1252.624870      | 20 |
| 5  | 526.261988  | 263.634632      | 509.235439     | 255.121358       | 508.251423     | 254.629350       | G    | 2407.226086 | 1204.116681     | 2390.199537    | 1195.603406      | 2389.215521    | 1195.111398      | 19 |
| 6  | 625.330402  | 313.168839      | 608.303853     | 304.655565       | 607.319837     | 304.163557       | V    | 2350.204622 | 1175.605949     | 2333.178073    | 1167.092674      | 2332.194057    | 1166.600666      | 18 |
| 7  | 772.398816  | 386.703046      | 755.372267     | 378.189772       | 754.388251     | 377.697764       | F    | 2251.136208 | 1126.071742     | 2234.109659    | 1117.558467      | 2233.125643    | 1117.066459      | 17 |
| 8  | 900.457394  | 450.732335      | 883.430845     | 442.219061       | 882.446829     | 441.727053       | Q    | 2104.067794 | 1052.537535     | 2087.041245    | 1044.024260      | 2086.057229    | 1043.532252      | 16 |
| 9  | 1029.499987 | 515.253631      | 1012.473438    | 506.740357       | 1011.489422    | 506.248349       | E    | 1976.009216 | 988.508246      | 1958.982667    | 979.994972       | 1957.998651    | 979.502964       | 15 |
| 10 | 1144.526930 | 572.767103      | 1127.500381    | 564.253829       | 1126.516365    | 563.761821       | D    | 1846.966623 | 923.986950      | 1829.940074    | 915.473675       | 1828.956058    | 914.981667       | 14 |
| 11 | 1215.564044 | 608.285660      | 1198.537495    | 599.772386       | 1197.553479    | 599.280377       | A    | 1731.939680 | 866.473478      | 1714.913131    | 857.960204       | 1713.929115    | 857.468196       | 13 |
| 12 | 1312.616808 | 656.812042      | 1295.590259    | 648.298768       | 1294.606243    | 647.806760       | P    | 1660.902566 | 830.954921      | 1643.876017    | 822.441647       | 1642.892001    | 821.949639       | 12 |
| 13 | 1411.685222 | 706.346249      | 1394.658673    | 697.832975       | 1393.674657    | 697.340967       | V    | 1563.849802 | 782.428539      | 1546.823253    | 773.915265       | 1545.839237    | 773.423257       | 11 |
| 14 | 1524.769286 | 762.888281      | 1507.742737    | 754.375007       | 1506.758721    | 753.882998       | I    | 1464.781388 | 732.894332      | 1447.754839    | 724.381058       | 1446.770823    | 723.889050       | 10 |
| 15 | 1661.828198 | 831.417737      | 1644.801649    | 822.904463       | 1643.817633    | 822.412454       | H    | 1351.697324 | 676.352300      | 1334.670775    | 667.839026       | 1333.686759    | 667.347018       | 9  |
| 16 | 2101.053524 | 1051.030400     | 2084.026975    | 1042.517125      | 2083.042959    | 1042.025117      | Q    | 1214.638412 | 607.822844      | 1197.611863    | 599.309570       | 1196.627847    | 598.817562       | 8  |
| 17 | 2230.096117 | 1115.551696     | 2213.069568    | 1107.038422      | 2212.085552    | 1106.546414      | E    | 775.413086  | 388.210181      | 758.386537     | 379.696907       | 757.402521     | 379.204899       | 7  |
| 18 | 2361.136602 | 1181.071939     | 2344.110053    | 1172.558664      | 2343.126037    | 1172.066656      | M    | 646.370493  | 323.688885      | 629.343944     | 315.175610       |                |                  | 6  |
| 19 | 2474.220666 | 1237.613971     | 2457.194117    | 1229.100696      | 2456.210101    | 1228.608689      | I    | 515.330008  | 258.168642      | 498.303459     | 249.655368       |                |                  | 5  |
| 20 | 2531.242130 | 1266.124703     | 2514.215581    | 1257.611428      | 2513.231565    | 1257.119420      | G    | 402.245944  | 201.626610      | 385.219395     | 193.113335       |                |                  | 4  |
| 21 | 2588.263594 | 1294.635435     | 2571.237045    | 1286.122160      | 2570.253029    | 1285.630152      | G    | 345.224480  | 173.115878      | 328.197931     | 164.602603       |                |                  | 3  |
| 22 | 2701.347658 | 1351.177467     | 2684.321109    | 1342.664192      | 2683.337093    | 1342.172185      | L    | 288.203016  | 144.605146      | 271.176467     | 136.091872       |                |                  | 2  |
| 23 |             |                 |                |                  |                |                  | R    | 175.118952  | 88.063114       | 158.092403     | 79.549839        |                |                  | 1  |

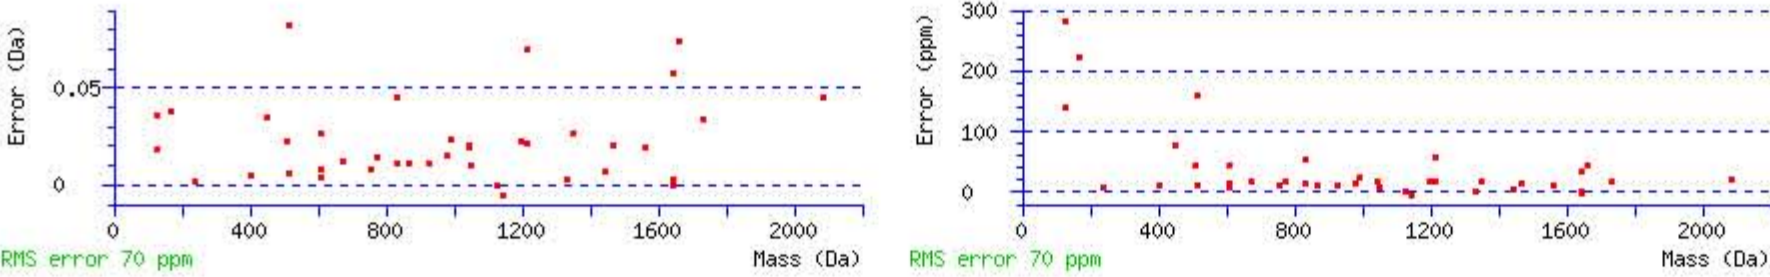

NCBI BLAST search of [QKPDGVFQEDAPVIHQEMIGGLR](#)  
(Parameters: blastp, nr protein database, expect=20000, no filter, PAM30)  
Other BLAST [web gateways](#)

All matches to this query

| Score | Mr(calc):   | Delta    | Sequence                                 |
|-------|-------------|----------|------------------------------------------|
| 53.4  | 2874.452057 | 0.036159 | <a href="#">QKPDGVFQEDAPVIHQEMIGGLR</a>  |
| 4.3   | 2874.452057 | 0.036159 | <a href="#">QKPDGVFQEDAPVIHQEMIGGLR</a>  |
| 2.0   | 2874.452026 | 0.036190 | <a href="#">QPIQYCVVINKEHNFKSLCAVEAK</a> |

M

A

T

R

I

X

S

C

I

E

N

C

E

Mascot Search Results

Peptide View

MS/MS Fragmentation of **DTWVEHWPEEDECQDEENQK**  
Found in **CO3\_HUMAN**, Complement C3 OS=Homo sapiens GN=C3 PE=1 SV=2

Match to Query 59217: 2913.221936 from(729.312760,4+) rtinseconds(2107) index(51037)  
Title: Locus:1.1.1.1971.9 File:"2013-07-02 CLN FXIII 180 min 2nd F 4.wiff"  
Data file C:\Program Files (x86)\Matrix Science\Mascot Daemon\mgf\8 FXIII 180 min 2nd\mascot\_daemon\_merge.mgf

Click mouse within plot area to zoom in by factor of two about that point  
Or,   to  Da   
Label all possible matches ☐ Label matches used for scoring ☒

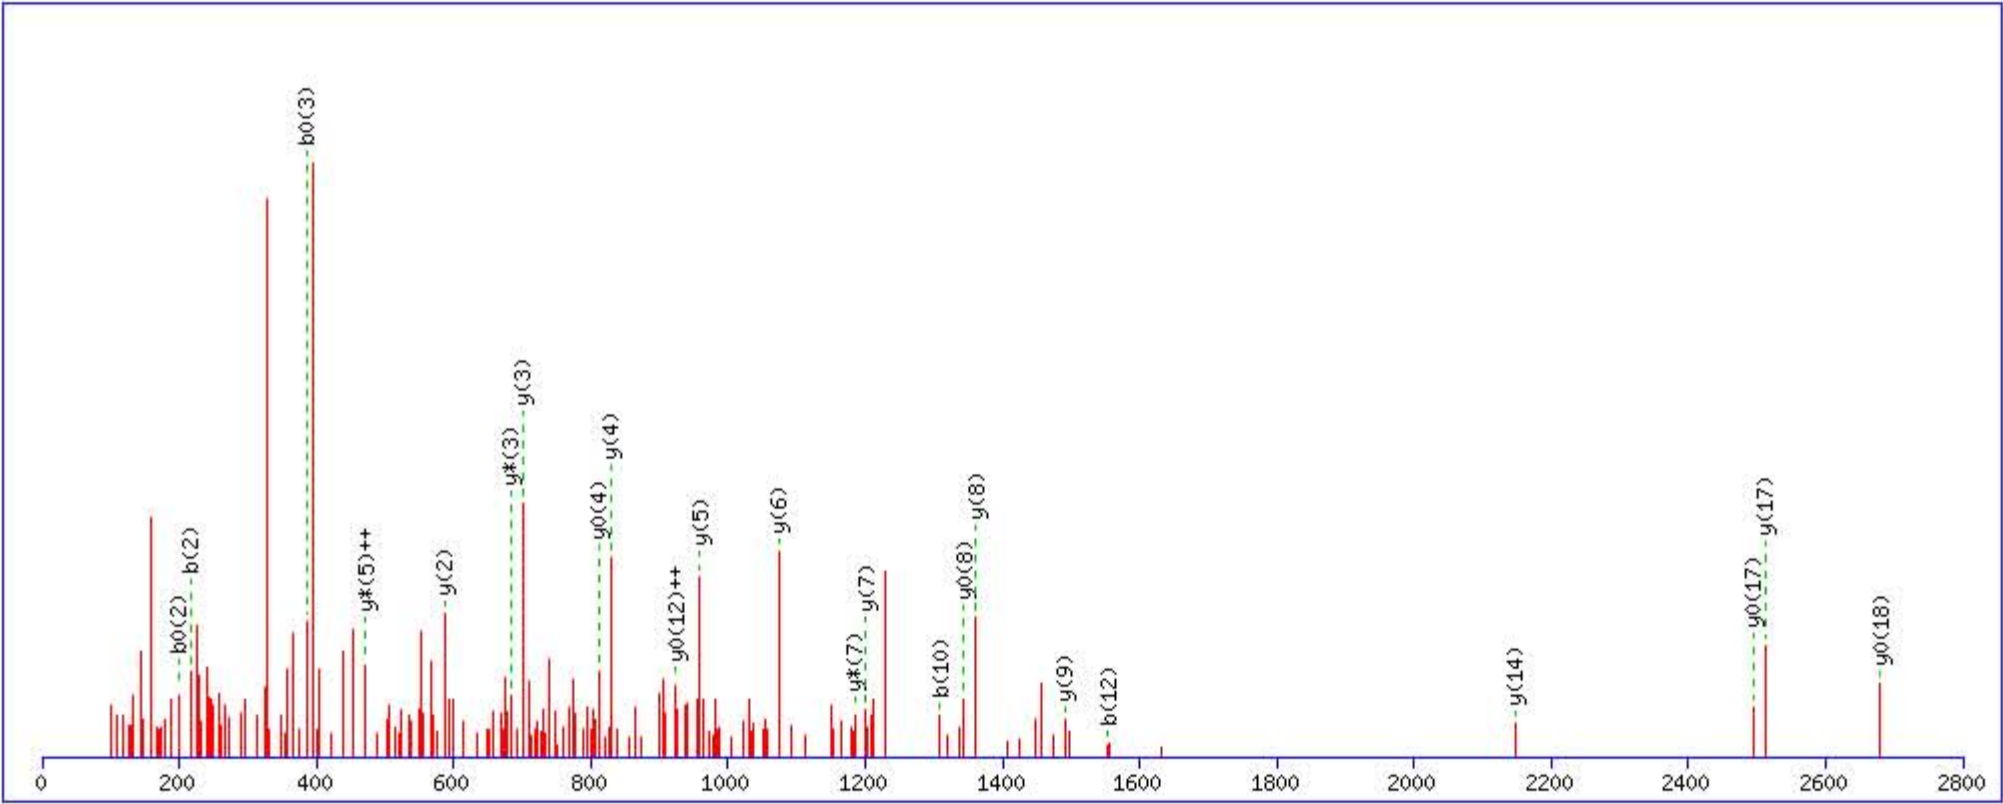

Monoisotopic mass of neutral peptide Mr(calc): 2913.185776  
Fixed modifications: Carbamidomethyl (C) (apply to specified residues or termini only)  
Variable modifications:  
Q19 : Biotin:Thermo-21345 (Q)  
Ions Score: 39 Expect: 0.00025  
Matches : 23/196 fragment ions using 49 most intense peaks [\(help\)](#)

| #  | b           | b <sup>++</sup> | b <sup>*</sup> | b <sup>*++</sup> | b <sup>0</sup> | b <sup>0++</sup> | Seq. | y           | y <sup>++</sup> | y <sup>*</sup> | y <sup>*++</sup> | y <sup>0</sup> | y <sup>0++</sup> | #  |
|----|-------------|-----------------|----------------|------------------|----------------|------------------|------|-------------|-----------------|----------------|------------------|----------------|------------------|----|
| 1  | 116.034219  | 58.520748       |                |                  | 98.023654      | 49.515465        | D    |             |                 |                |                  |                |                  | 20 |
| 2  | 217.081898  | 109.044587      |                |                  | 199.071333     | 100.039304       | T    | 2799.166123 | 1400.086699     | 2782.139574    | 1391.573425      | 2781.155558    | 1391.081417      | 19 |
| 3  | 403.161211  | 202.084244      |                |                  | 385.150646     | 193.078961       | W    | 2698.118444 | 1349.562860     | 2681.091895    | 1341.049585      | 2680.107879    | 1340.557577      | 18 |
| 4  | 502.229625  | 251.618451      |                |                  | 484.219060     | 242.613168       | V    | 2512.039131 | 1256.523203     | 2495.012582    | 1248.009929      | 2494.028566    | 1247.517921      | 17 |
| 5  | 631.272218  | 316.139747      |                |                  | 613.261653     | 307.134465       | E    | 2412.970717 | 1206.988996     | 2395.944168    | 1198.475722      | 2394.960152    | 1197.983714      | 16 |
| 6  | 768.331130  | 384.669203      |                |                  | 750.320565     | 375.663921       | H    | 2283.928124 | 1142.467700     | 2266.901575    | 1133.954425      | 2265.917559    | 1133.462417      | 15 |
| 7  | 954.410443  | 477.708860      |                |                  | 936.399878     | 468.703577       | W    | 2146.869212 | 1073.938244     | 2129.842663    | 1065.424969      | 2128.858647    | 1064.932961      | 14 |
| 8  | 1051.463207 | 526.235242      |                |                  | 1033.452642    | 517.229959       | P    | 1960.789899 | 980.898588      | 1943.763350    | 972.385313       | 1942.779334    | 971.893305       | 13 |
| 9  | 1180.505800 | 590.756538      |                |                  | 1162.495235    | 581.751256       | E    | 1863.737135 | 932.372206      | 1846.710586    | 923.858931       | 1845.726570    | 923.366923       | 12 |
| 10 | 1309.548393 | 655.277835      |                |                  | 1291.537828    | 646.272552       | E    | 1734.694542 | 867.850909      | 1717.667993    | 859.337635       | 1716.683977    | 858.845627       | 11 |
| 11 | 1424.575336 | 712.791306      |                |                  | 1406.564771    | 703.786024       | D    | 1605.651949 | 803.329613      | 1588.625400    | 794.816338       | 1587.641384    | 794.324330       | 10 |
| 12 | 1553.617929 | 777.312603      |                |                  | 1535.607364    | 768.307320       | E    | 1490.625006 | 745.816141      | 1473.598457    | 737.302867       | 1472.614441    | 736.810859       | 9  |
| 13 | 1713.648578 | 857.327927      |                |                  | 1695.638013    | 848.322645       | C    | 1361.582413 | 681.294845      | 1344.555864    | 672.781570       | 1343.571848    | 672.289562       | 8  |
| 14 | 1841.707156 | 921.357216      | 1824.680607    | 912.843942       | 1823.696591    | 912.351934       | Q    | 1201.551764 | 601.279520      | 1184.525215    | 592.766246       | 1183.541199    | 592.274238       | 7  |
| 15 | 1956.734099 | 978.870688      | 1939.707550    | 970.357413       | 1938.723534    | 969.865405       | D    | 1073.493186 | 537.250231      | 1056.466637    | 528.736957       | 1055.482621    | 528.244949       | 6  |
| 16 | 2085.776692 | 1043.391984     | 2068.750143    | 1034.878709      | 2067.766127    | 1034.386701      | E    | 958.466243  | 479.736760      | 941.439694     | 471.223485       | 940.455678     | 470.731477       | 5  |
| 17 | 2214.819285 | 1107.913280     | 2197.792736    | 1099.400006      | 2196.808720    | 1098.907998      | E    | 829.423650  | 415.215463      | 812.397101     | 406.702189       | 811.413085     | 406.210181       | 4  |
| 18 | 2328.862212 | 1164.934744     | 2311.835663    | 1156.421469      | 2310.851647    | 1155.929461      | N    | 700.381057  | 350.694167      | 683.354508     | 342.180892       |                |                  | 3  |
| 19 | 2768.087538 | 1384.547407     | 2751.060989    | 1376.034132      | 2750.076973    | 1375.542125      | Q    | 586.338130  | 293.672703      | 569.311581     | 285.159429       |                |                  | 2  |
| 20 |             |                 |                |                  |                |                  | K    | 147.112804  | 74.060040       | 130.086255     | 65.546765        |                |                  | 1  |

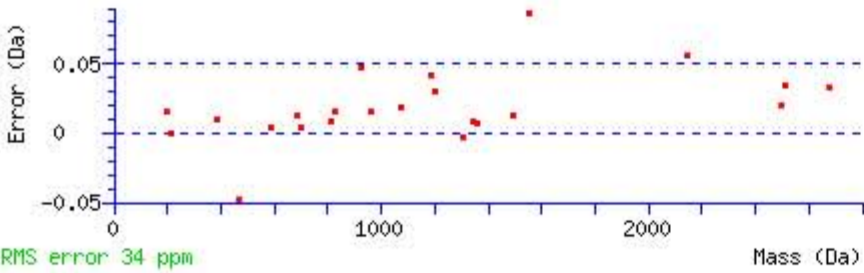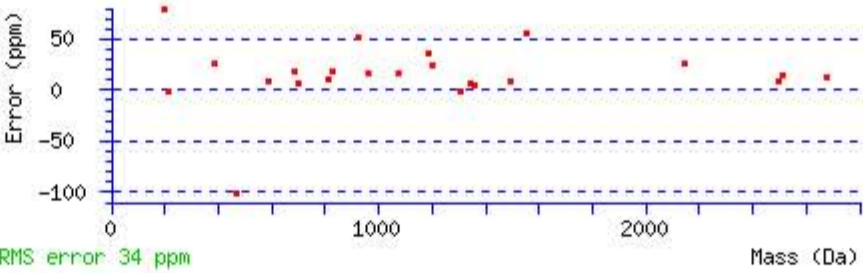

NCBI BLAST search of [DTWVEHWPEEDECQDEENQK](#)  
(Parameters: blastp, nr protein database, expect=20000, no filter, PAM30)  
Other BLAST [web gateways](#)

All matches to this query

| Score | Mr(calc):   | Delta    | Sequence                             |
|-------|-------------|----------|--------------------------------------|
| 39.4  | 2913.185776 | 0.036160 | <a href="#">DTWVEHWPEEDECQDEENQK</a> |
| 10.1  | 2913.185776 | 0.036160 | <a href="#">DTWVEHWPEEDECQDEENQK</a> |

MATRIX

SCIENCE

Mascot Search Results

Peptide View

MS/MS Fragmentation of **AAANQMR**  
Found in **CO4A\_HUMAN**, Complement C4-A OS=Homo sapiens GN=C4A PE=1 SV=2

Match to Query 15686: 1071.535968 from(536.775260,2+) rtinseconds(1375) index(30281)  
Title: Locus:1.1.1.587.15 File:"2013-07-02 CLN FXIII 180 min 2nd F 3.wiff"  
Data file C:\Program Files (x86)\Matrix Science\Mascot Daemon\mgf\8 FXIII 180 min 2nd\mascot\_daemon\_merge.mgf

Click mouse within plot area to zoom in by factor of two about that point  
Or, 

Plot from

100

 to 

1050

 Da 

Full range

  
Label all possible matches ☐ Label matches used for scoring ☒

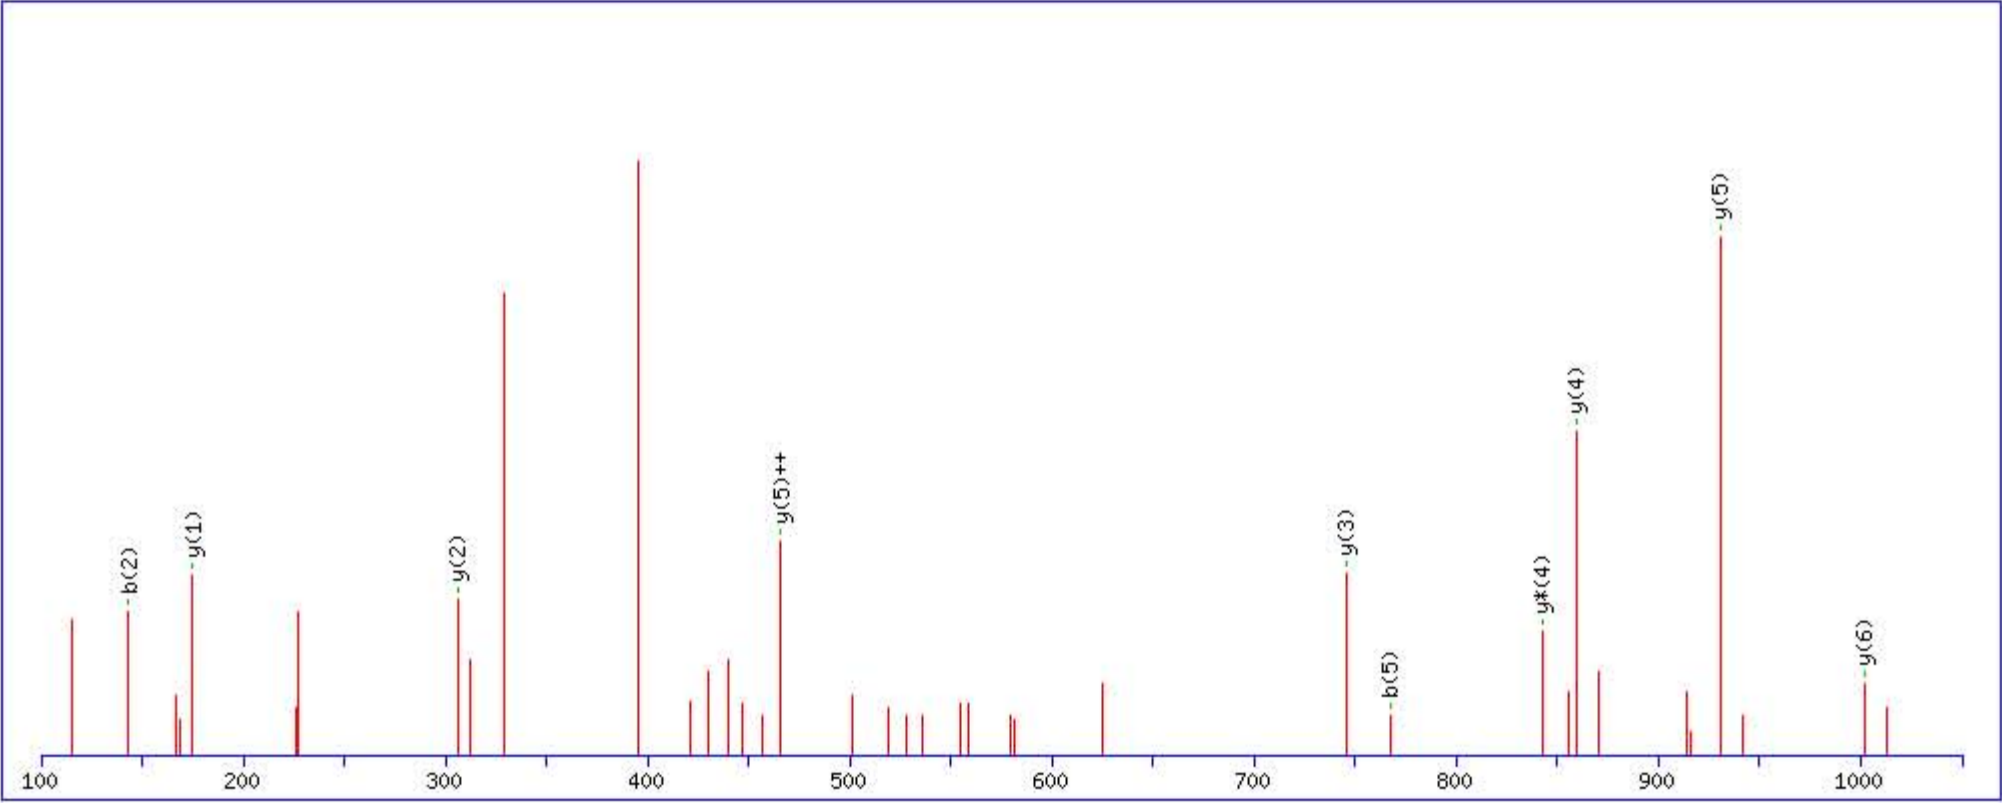

Monoisotopic mass of neutral peptide Mr(calc): 1071.531723  
Fixed modifications: Carbamidomethyl (C) (apply to specified residues or termini only)  
Variable modifications:  
Q5 : Biotin:Thermo-21345 (Q)  
Ions Score: 39 Expect: 0.0026  
Matches : 10/42 fragment ions using 17 most intense peaks ([help](#))

| # | b          | b <sup>++</sup> | b <sup>*</sup> | b <sup>*++</sup> | Seq. | y           | y <sup>++</sup> | y <sup>*</sup> | y <sup>*++</sup> | # |
|---|------------|-----------------|----------------|------------------|------|-------------|-----------------|----------------|------------------|---|
| 1 | 72.044390  | 36.525833       |                |                  | A    |             |                 |                |                  | 7 |
| 2 | 143.081504 | 72.044390       |                |                  | A    | 1001.501918 | 501.254597      | 984.475369     | 492.741323       | 6 |
| 3 | 214.118618 | 107.562947      |                |                  | A    | 930.464804  | 465.736040      | 913.438255     | 457.222766       | 5 |
| 4 | 328.161545 | 164.584410      | 311.134996     | 156.071136       | N    | 859.427690  | 430.217483      | 842.401141     | 421.704209       | 4 |
| 5 | 767.386871 | 384.197074      | 750.360322     | 375.683799       | Q    | 745.384763  | 373.196020      | 728.358214     | 364.682745       | 3 |
| 6 | 898.427356 | 449.717316      | 881.400807     | 441.204042       | M    | 306.159437  | 153.583357      | 289.132888     | 145.070082       | 2 |
| 7 |            |                 |                |                  | R    | 175.118952  | 88.063114       | 158.092403     | 79.549840        | 1 |

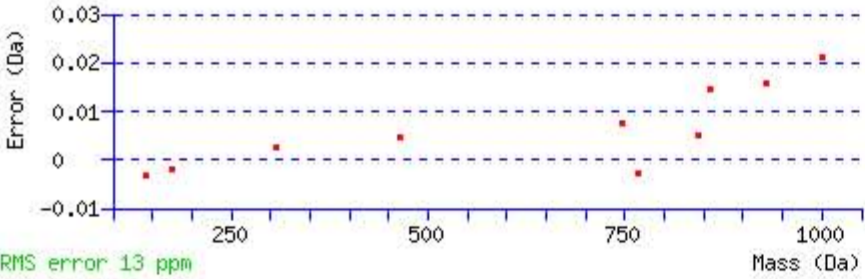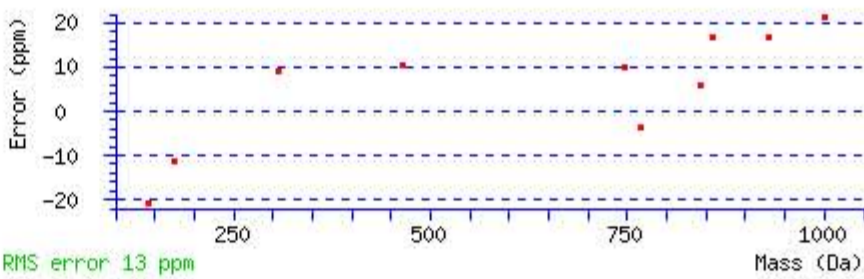

NCBI BLAST search of [AAANQMR](#)  
(Parameters: blastp, nr protein database, expect=20000, no filter, PAM30)  
Other BLAST [web gateways](#)

All matches to this query

| Score | Mr(calc):   | Delta    | Sequence                    |
|-------|-------------|----------|-----------------------------|
| 38.7  | 1071.531723 | 0.004245 | <a href="#">AAANQMR</a>     |
| 19.7  | 1071.530853 | 0.005115 | <a href="#">AAEESGAKGPR</a> |

MATRIX

SCIENCE

Mascot Search Results

Peptide View

MS/MS Fragmentation of **VQQPDCR**  
Found in **CO4A\_HUMAN**, Complement C4-A OS=Homo sapiens GN=C4A PE=1 SV=2

Match to Query 20808: 1212.580108 from(607.297330,2+) rtinseconds(1289) index(45674)  
Title: Locus:1.1.1.1686.18 File:"2013-07-02 CLN FXIII 180 min 2nd F 4.wiff"  
Data file C:\Program Files (x86)\Matrix Science\Mascot Daemon\mgf\8 FXIII 180 min 2nd\mascot\_daemon\_merge.mgf

Click mouse within plot area to zoom in by factor of two about that point  
Or, 

Plot from

100

 to 

1200

 Da 

Full range

  
Label all possible matches ☐ Label matches used for scoring ☒

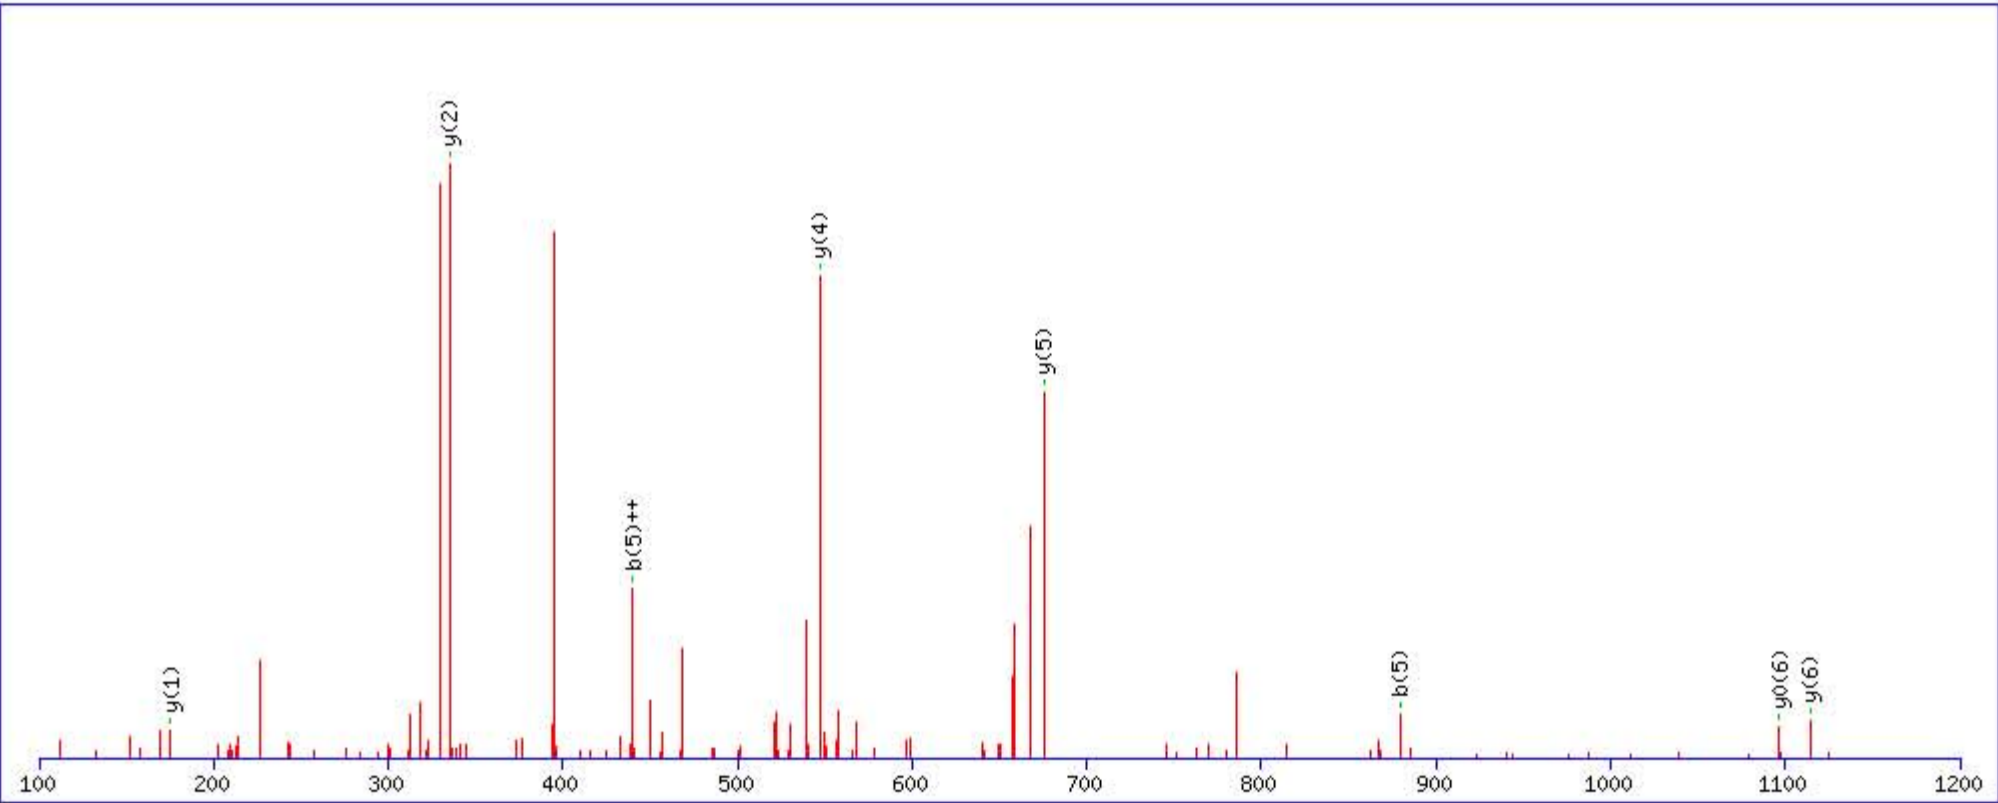

Monoisotopic mass of neutral peptide Mr(calc): 1212.574356  
Fixed modifications: Carbamidomethyl (C) (apply to specified residues or termini only)  
Variable modifications:  
Q2 : Biotin:Thermo-21345 (Q)  
Ions Score: 36 Expect: 0.003  
Matches : 8/58 fragment ions using 11 most intense peaks ([help](#))

| # | b           | b <sup>++</sup> | b <sup>*</sup> | b <sup>*++</sup> | b <sup>0</sup> | b <sup>0++</sup> | Seq. | y           | y <sup>++</sup> | y <sup>*</sup> | y <sup>*++</sup> | y <sup>0</sup> | y <sup>0++</sup> | # |
|---|-------------|-----------------|----------------|------------------|----------------|------------------|------|-------------|-----------------|----------------|------------------|----------------|------------------|---|
| 1 | 100.075690  | 50.541483       |                |                  |                |                  | V    |             |                 |                |                  |                |                  | 7 |
| 2 | 539.301016  | 270.154146      | 522.274467     | 261.640872       |                |                  | Q    | 1114.513212 | 557.760244      | 1097.486663    | 549.246970       | 1096.502647    | 548.754962       | 6 |
| 3 | 667.359594  | 334.183435      | 650.333045     | 325.670161       |                |                  | Q    | 675.287886  | 338.147581      | 658.261337     | 329.634307       | 657.277321     | 329.142299       | 5 |
| 4 | 764.412358  | 382.709817      | 747.385809     | 374.196543       |                |                  | P    | 547.229308  | 274.118292      | 530.202759     | 265.605018       | 529.218743     | 265.113010       | 4 |
| 5 | 879.439301  | 440.223289      | 862.412752     | 431.710014       | 861.428736     | 431.218006       | D    | 450.176544  | 225.591910      | 433.149995     | 217.078635       | 432.165979     | 216.586627       | 3 |
| 6 | 1039.469950 | 520.238613      | 1022.443401    | 511.725339       | 1021.459385    | 511.233331       | C    | 335.149601  | 168.078438      | 318.123052     | 159.565164       |                |                  | 2 |
| 7 |             |                 |                |                  |                |                  | R    | 175.118952  | 88.063114       | 158.092403     | 79.549839        |                |                  | 1 |

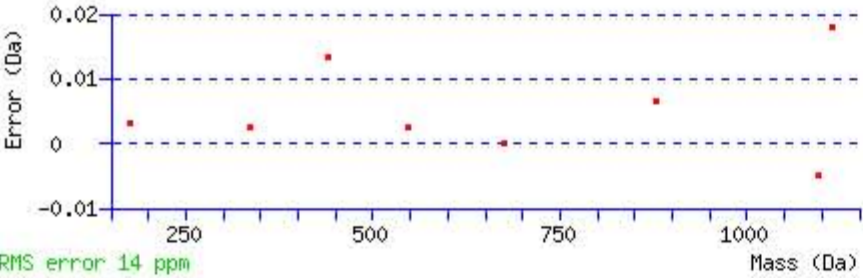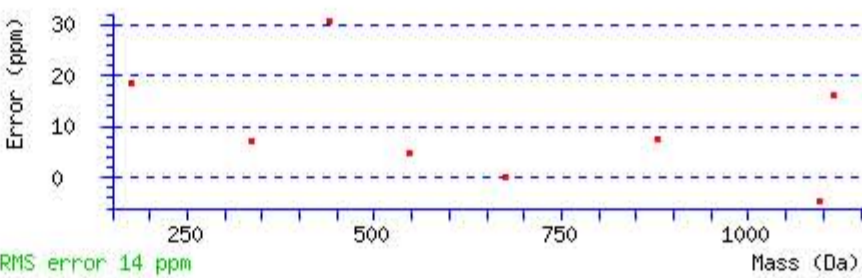

NCBI **BLAST** search of [VQQPDCR](#)  
(Parameters: blastp, nr protein database, expect=20000, no filter, PAM30)  
Other BLAST [web gateways](#)

All matches to this query

| Score | Mr(calc):   | Delta     | Sequence                    |
|-------|-------------|-----------|-----------------------------|
| 36.4  | 1212.574356 | 0.005752  | <a href="#">VQQPDCR</a>     |
| 22.6  | 1212.574356 | 0.005752  | <a href="#">VQQPDCR</a>     |
| 11.5  | 1212.596115 | -0.016007 | <a href="#">YFVEAGAMAVR</a> |
| 4.5   | 1212.592102 | -0.011994 | <a href="#">VQEDQQR</a>     |
| 1.1   | 1212.592758 | -0.012650 | <a href="#">IYYVDHFTR</a>   |
| 0.8   | 1212.562241 | 0.017867  | <a href="#">TTAQYDQASTK</a> |
| 0.6   | 1212.582199 | -0.002091 | <a href="#">GRMPPSEFHR</a>  |

MATRIX

SCIENCE

Mascot Search Results

Peptide View

MS/MS Fragmentation of **VEYGFQVK**  
Found in **CO4A\_HUMAN**, Complement C4-A OS=Homo sapiens GN=C4A PE=1 SV=2

Match to Query 22737: 1279.673408 from(640.843980,2+) rtinseconds(1984) index(34172)  
Title: Locus:1.1.1.799.18 File:"2013-07-02 CLN FXIII 180 min 2nd F 3.wiff"  
Data file C:\Program Files (x86)\Matrix Science\Mascot Daemon\mgf\8 FXIII 180 min 2nd\mascot\_daemon\_merge.mgf

Click mouse within plot area to zoom in by factor of two about that point  
Or, 

Plot from

100

 to 

1300

 Da 

Full range

  
Label all possible matches ☐ Label matches used for scoring ☒

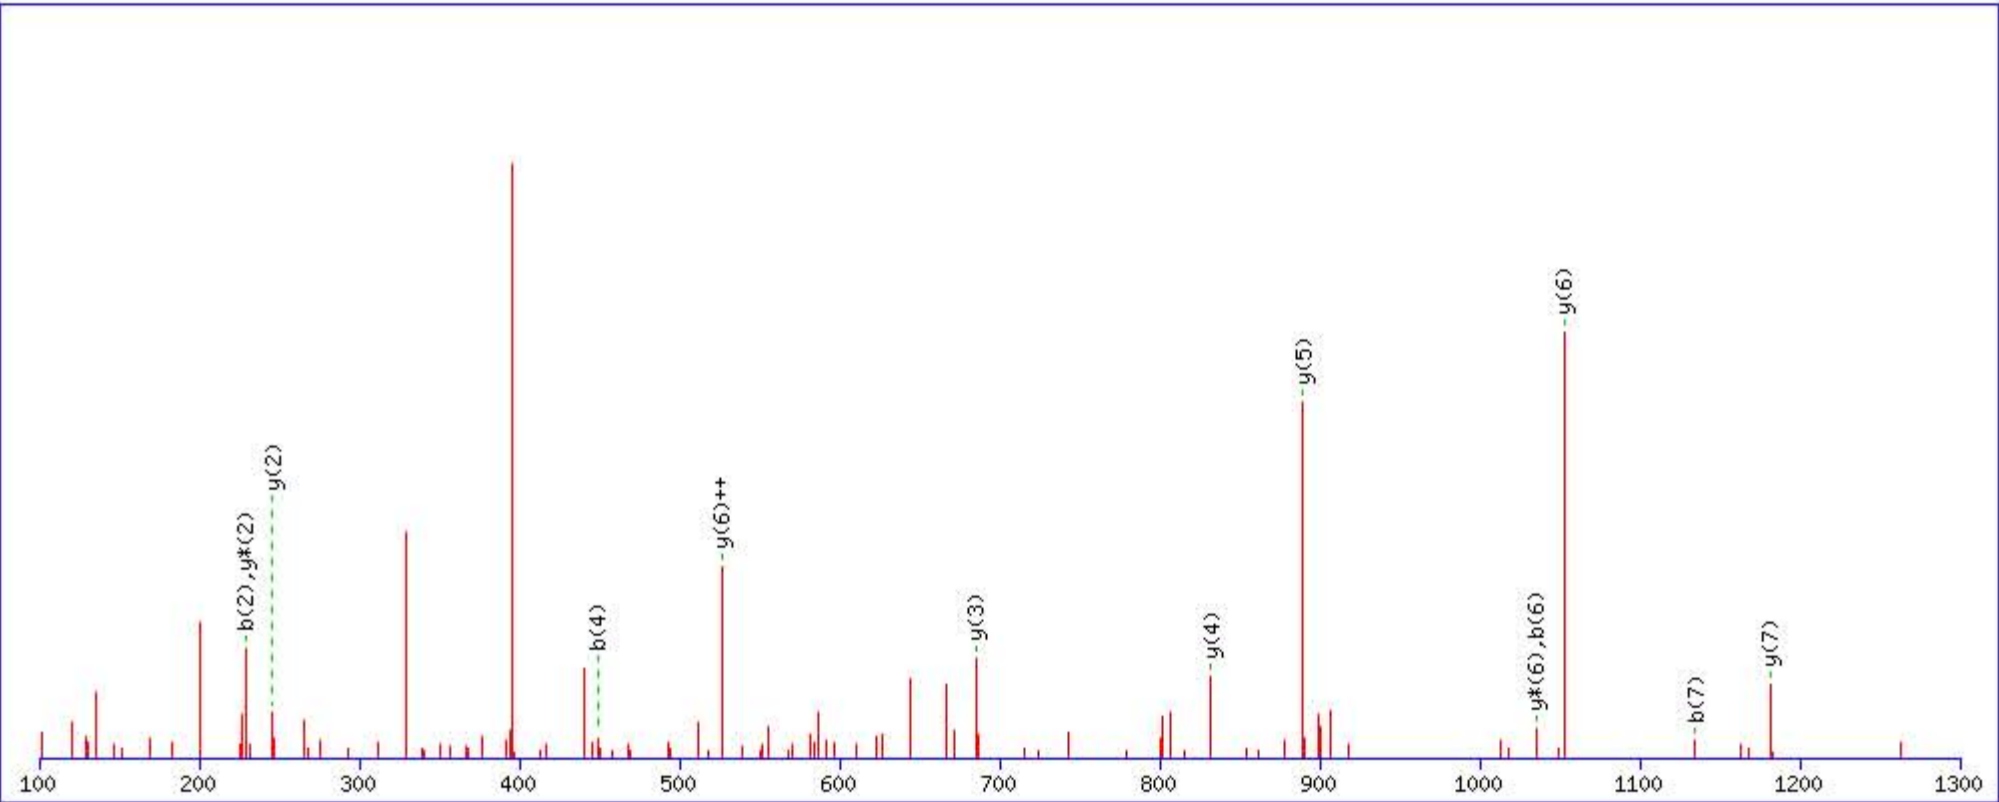

Monoisotopic mass of neutral peptide Mr(calc): 1279.663483  
Fixed modifications: Carbamidomethyl (C) (apply to specified residues or termini only)  
Variable modifications:  
Q6 : Biotin:Thermo-21345 (Q)  
Ions Score: 31 Expect: 0.016  
Matches : 13/60 fragment ions using 23 most intense peaks [\(help\)](#)

| # | b           | b <sup>++</sup> | b <sup>*</sup> | b <sup>+++</sup> | b <sup>0</sup> | b <sup>0++</sup> | Seq. | y           | y <sup>++</sup> | y <sup>*</sup> | y <sup>+++</sup> | y <sup>0</sup> | y <sup>0++</sup> | # |
|---|-------------|-----------------|----------------|------------------|----------------|------------------|------|-------------|-----------------|----------------|------------------|----------------|------------------|---|
| 1 | 100.075690  | 50.541483       |                |                  |                |                  | V    |             |                 |                |                  |                |                  | 8 |
| 2 | 229.118283  | 115.062780      |                |                  | 211.107718     | 106.057497       | E    | 1181.602344 | 591.304810      | 1164.575795    | 582.791536       | 1163.591779    | 582.299528       | 7 |
| 3 | 392.181612  | 196.594444      |                |                  | 374.171047     | 187.589162       | Y    | 1052.559751 | 526.783514      | 1035.533202    | 518.270239       |                |                  | 6 |
| 4 | 449.203076  | 225.105176      |                |                  | 431.192511     | 216.099894       | G    | 889.496422  | 445.251849      | 872.469873     | 436.738575       |                |                  | 5 |
| 5 | 596.271490  | 298.639383      |                |                  | 578.260925     | 289.634101       | F    | 832.474958  | 416.741117      | 815.448409     | 408.227843       |                |                  | 4 |
| 6 | 1035.496816 | 518.252046      | 1018.470267    | 509.738772       | 1017.486251    | 509.246764       | Q    | 685.406544  | 343.206910      | 668.379995     | 334.693636       |                |                  | 3 |
| 7 | 1134.565230 | 567.786253      | 1117.538681    | 559.272979       | 1116.554665    | 558.780971       | V    | 246.181218  | 123.594247      | 229.154669     | 115.080973       |                |                  | 2 |
| 8 |             |                 |                |                  |                |                  | K    | 147.112804  | 74.060040       | 130.086255     | 65.546765        |                |                  | 1 |

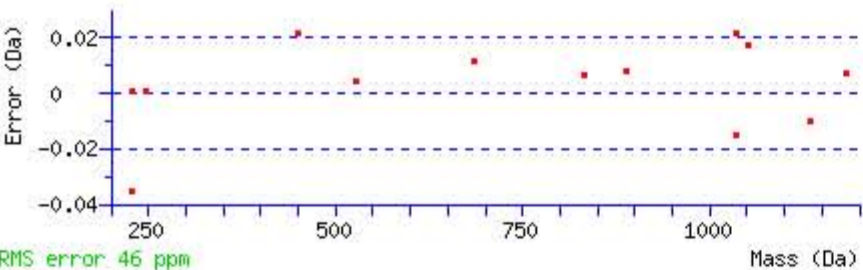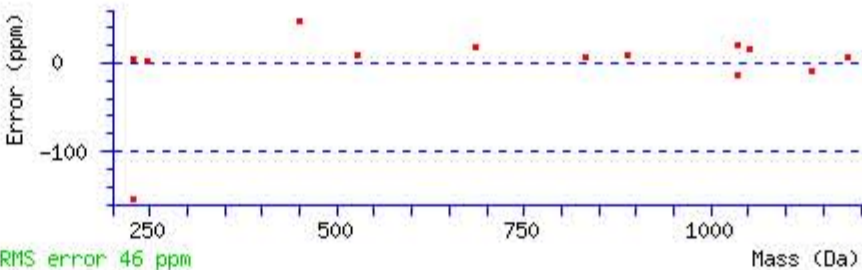

NCBI BLAST search of [VEYGFQVK](#)  
(Parameters: blastp, nr protein database, expect=20000, no filter, PAM30)  
Other BLAST [web gateways](#)

All matches to this query

| Score | Mr(calc):   | Delta     | Sequence                     |
|-------|-------------|-----------|------------------------------|
| 30.6  | 1279.663483 | 0.009925  | <a href="#">VEYGFQVK</a>     |
| 12.3  | 1279.663483 | 0.009925  | <a href="#">QFVGYLDK</a>     |
| 7.1   | 1279.659470 | 0.013938  | <a href="#">VCSFGKQVVEK</a>  |
| 3.3   | 1279.684601 | -0.011193 | <a href="#">TKPLMTEFSVK</a>  |
| 3.1   | 1279.684601 | -0.011193 | <a href="#">MSASAVFILDVK</a> |
| 3.0   | 1279.681229 | -0.007821 | <a href="#">EVTVKEWYVK</a>   |
| 0.9   | 1279.670670 | 0.002738  | <a href="#">VEHKSNOQK</a>    |
| 0.6   | 1279.677200 | -0.003792 | <a href="#">EYVGKTSLVER</a>  |

MATRIX

SCIENCE

Mascot Search Results

Peptide View

MS/MS Fragmentation of **DKGQAGLQR**  
Found in **CO4A\_HUMAN**, Complement C4-A OS=Homo sapiens GN=C4A PE=1 SV=2

Match to Query 22931: 1282.691548 from(642.353050,2+) rtinseconds(1340) index(46002)  
Title: Locus:1.1.1.1704.11 File:"2013-07-02 CLN FXIII 180 min 2nd F 4.wiff"  
Data file C:\Program Files (x86)\Matrix Science\Mascot Daemon\mgf\8 FXIII 180 min 2nd\mascot\_daemon\_merge.mgf

Click mouse within plot area to zoom in by factor of two about that point  
Or, 

Plot from

100

 to 

1800

 Da 

Full range

  
Label all possible matches ☐ Label matches used for scoring ☒

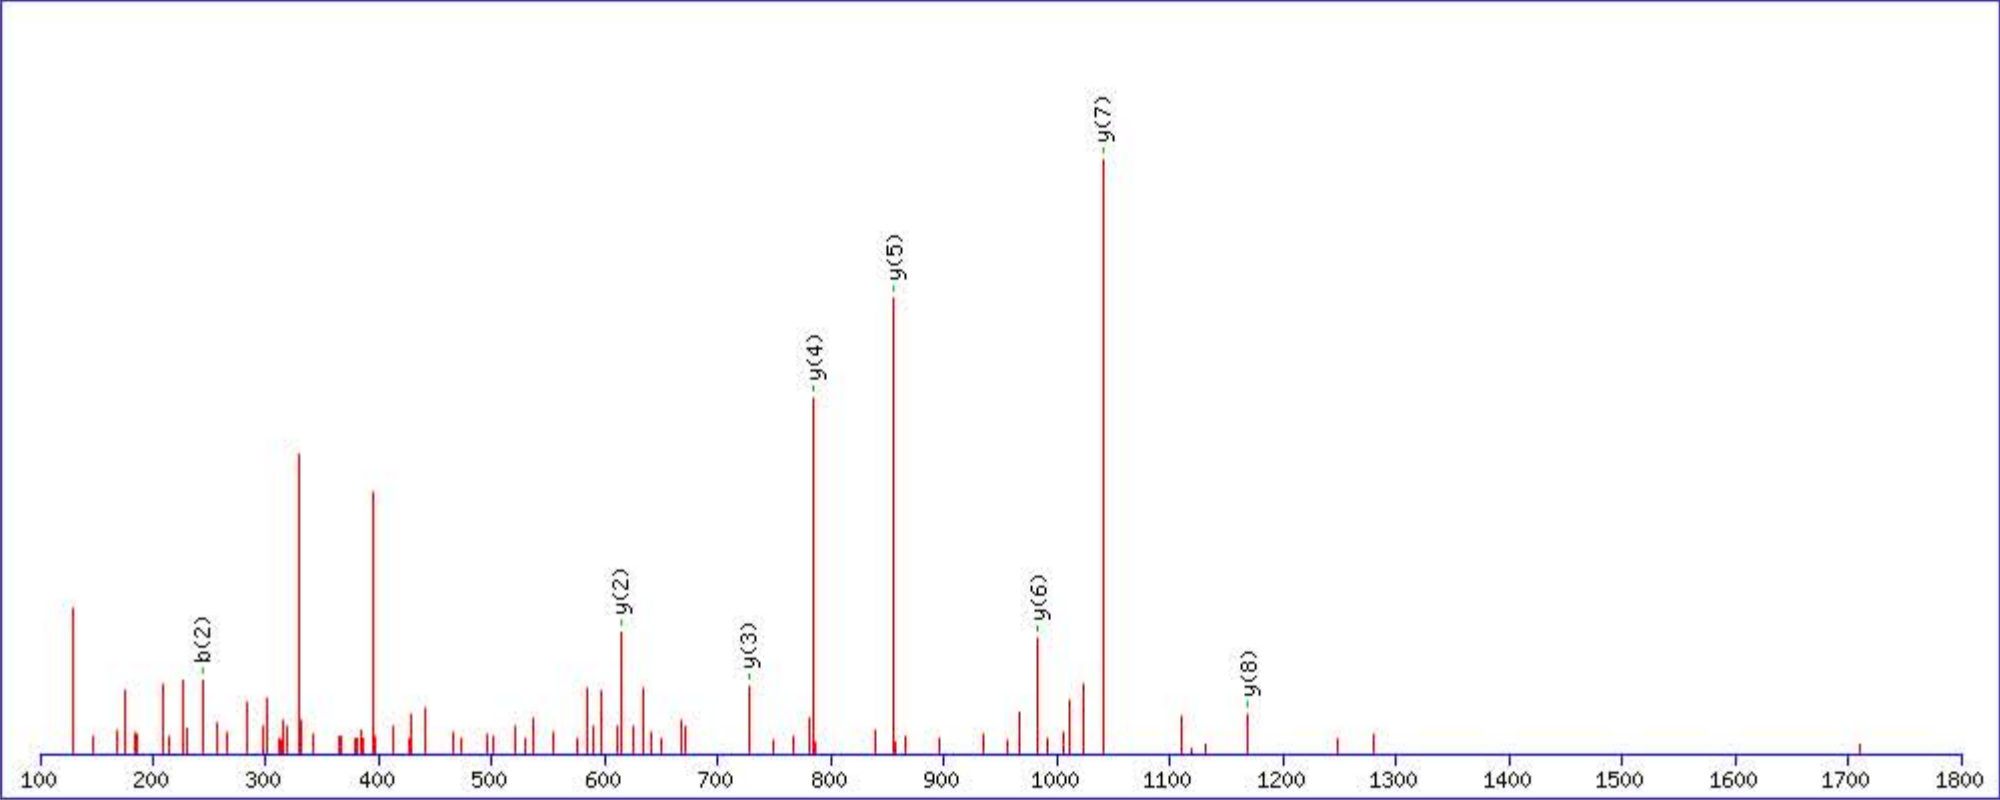

Monoisotopic mass of neutral peptide Mr(calc): 1282.681580  
Fixed modifications: Carbamidomethyl (C) (apply to specified residues or termini only)  
Variable modifications:  
Q8 : Biotin:Thermo-21345 (Q)  
Ions Score: 55 Expect: 6.8e-005  
Matches : 8/78 fragment ions using 12 most intense peaks [\(help\)](#)

| # | b           | b <sup>++</sup> | b <sup>*</sup> | b <sup>*++</sup> | b <sup>0</sup> | b <sup>0++</sup> | Seq. | y           | y <sup>++</sup> | y <sup>*</sup> | y <sup>*++</sup> | # |
|---|-------------|-----------------|----------------|------------------|----------------|------------------|------|-------------|-----------------|----------------|------------------|---|
| 1 | 116.034219  | 58.520748       |                |                  | 98.023654      | 49.515465        | D    |             |                 |                |                  | 9 |
| 2 | 244.129182  | 122.568229      | 227.102633     | 114.054955       | 226.118617     | 113.562947       | K    | 1168.661925 | 584.834600      | 1151.635376    | 576.321326       | 8 |
| 3 | 301.150646  | 151.078961      | 284.124097     | 142.565687       | 283.140081     | 142.073679       | G    | 1040.566962 | 520.787119      | 1023.540413    | 512.273844       | 7 |
| 4 | 429.209224  | 215.108250      | 412.182675     | 206.594976       | 411.198659     | 206.102968       | Q    | 983.545498  | 492.276387      | 966.518949     | 483.763112       | 6 |
| 5 | 500.246338  | 250.626807      | 483.219789     | 242.113532       | 482.235773     | 241.621524       | A    | 855.486920  | 428.247098      | 838.460371     | 419.733823       | 5 |
| 6 | 557.267802  | 279.137539      | 540.241253     | 270.624265       | 539.257237     | 270.132257       | G    | 784.449806  | 392.728541      | 767.423257     | 384.215266       | 4 |
| 7 | 670.351866  | 335.679571      | 653.325317     | 327.166297       | 652.341301     | 326.674289       | L    | 727.428342  | 364.217809      | 710.401793     | 355.704534       | 3 |
| 8 | 1109.577192 | 555.292234      | 1092.550643    | 546.778960       | 1091.566627    | 546.286951       | Q    | 614.344278  | 307.675777      | 597.317729     | 299.162502       | 2 |
| 9 |             |                 |                |                  |                |                  | R    | 175.118952  | 88.063114       | 158.092403     | 79.549839        | 1 |

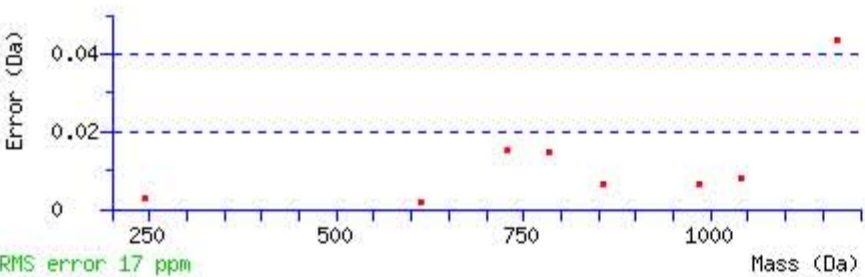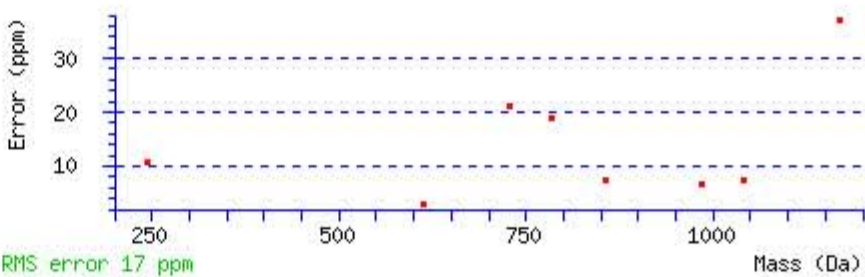

NCBI BLAST search of [DKGQAGLQR](#)  
(Parameters: blastp, nr protein database, expect=20000, no filter, PAM30)  
Other BLAST [web gateways](#)

All matches to this query

| Score | Mr(calc):   | Delta     | Sequence                     |
|-------|-------------|-----------|------------------------------|
| 55.1  | 1282.681580 | 0.009968  | <a href="#">DKGQAGLQR</a>    |
| 15.1  | 1282.674194 | 0.017354  | <a href="#">QGEGQSRLVPGR</a> |
| 12.0  | 1282.706711 | -0.015163 | <a href="#">KDIAELQR</a>     |
| 7.6   | 1282.681580 | 0.009968  | <a href="#">DKGQAGLQR</a>    |
| 7.4   | 1282.706711 | -0.015163 | <a href="#">DKALQELR</a>     |
| 6.6   | 1282.706726 | -0.015178 | <a href="#">ELGISVAQR</a>    |
| 4.7   | 1282.674164 | 0.017384  | <a href="#">NEGKKLGNPKNR</a> |
| 3.7   | 1282.688095 | 0.003453  | <a href="#">KPTKPESQSPGK</a> |
| 3.3   | 1282.706711 | -0.015163 | <a href="#">DKLQAIER</a>     |
| 2.9   | 1282.676834 | 0.014714  | <a href="#">KALEDEKPEPK</a>  |

MATRIX

SCIENCE

Mascot Search Results

Peptide View

MS/MS Fragmentation of **VVEEQESR**  
Found in **CO4A\_HUMAN**, Complement C4-A OS=Homo sapiens GN=C4A PE=1 SV=2

Match to Query 23024: 1285.640788 from(643.827670,2+) rtinseconds(1376) index(30286)  
Title: Locus:1.1.1.587.20 File:"2013-07-02 CLN FXIII 180 min 2nd F 3.wiff"  
Data file C:\Program Files (x86)\Matrix Science\Mascot Daemon\mgf\8 FXIII 180 min 2nd\mascot\_daemon\_merge.mgf

Click mouse within plot area to zoom in by factor of two about that point  
Or,   to  Da   
Label all possible matches ☐ Label matches used for scoring ☒

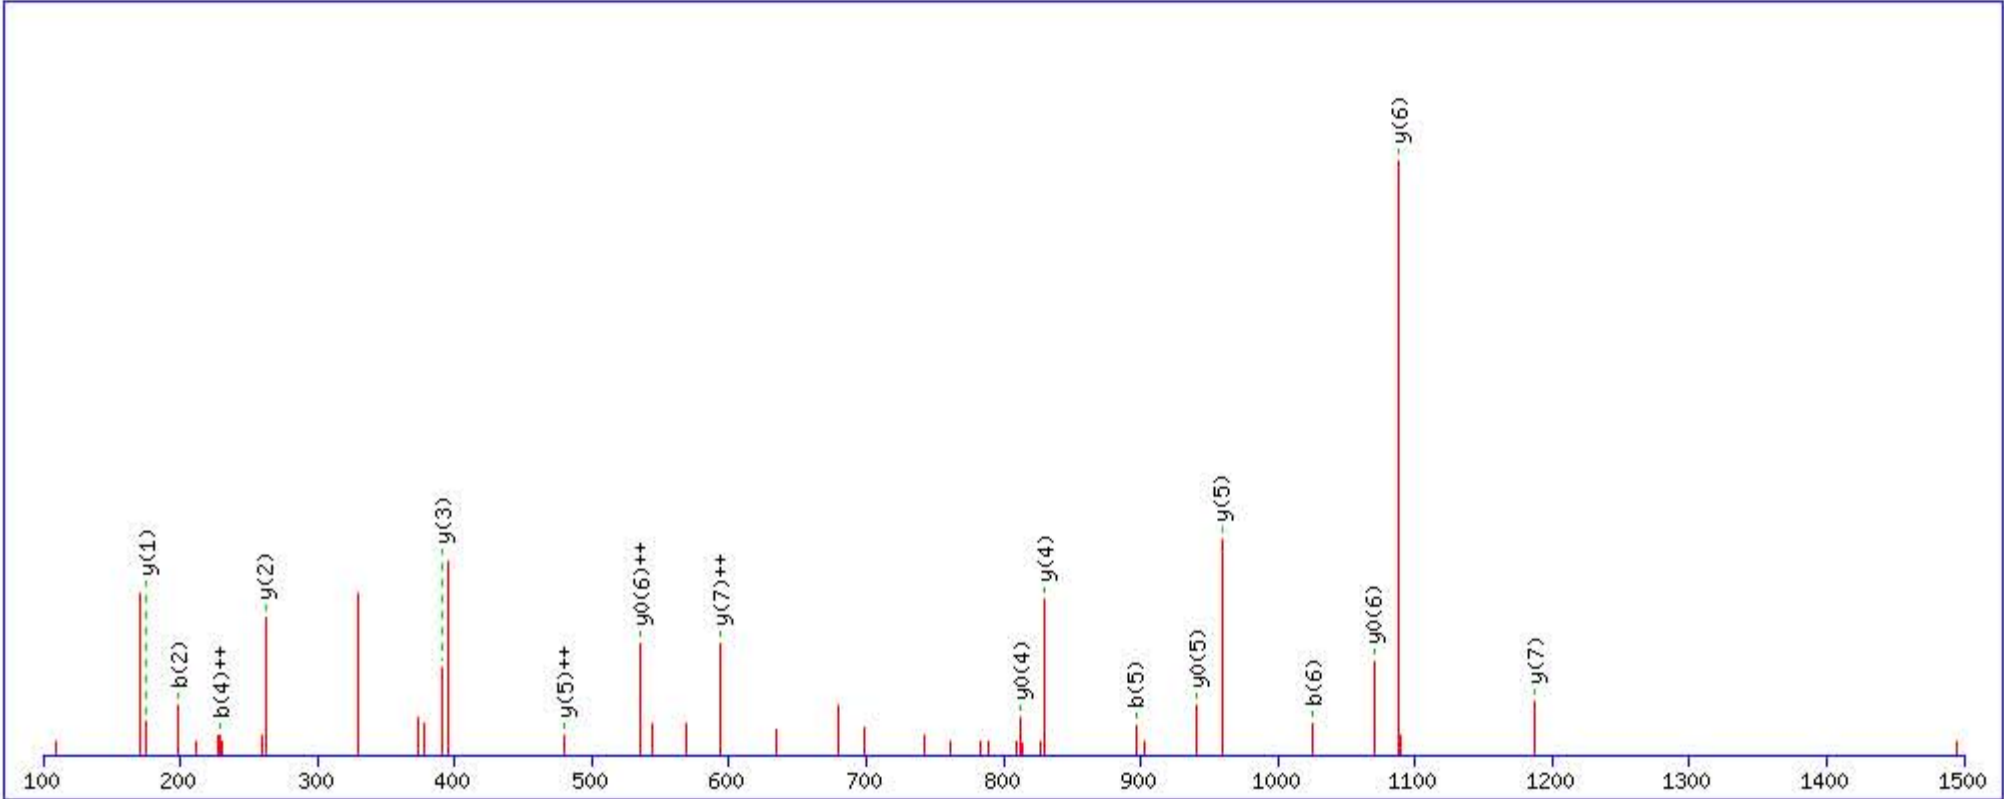

Monoisotopic mass of neutral peptide Mr(calc): 1285.633621  
Fixed modifications: Carbamidomethyl (C) (apply to specified residues or termini only)  
Variable modifications:  
Q5 : Biotin:Thermo-21345 (Q)  
Ions Score: 47 Expect: 0.00042  
Matches : 17/70 fragment ions using 28 most intense peaks [\(help\)](#)

| # | b           | b <sup>++</sup> | b <sup>*</sup> | b <sup>++</sup> * | b <sup>0</sup> | b <sup>0++</sup> | Seq. | y           | y <sup>++</sup> | y <sup>*</sup> | y <sup>++</sup> * | y <sup>0</sup> | y <sup>0++</sup> | # |
|---|-------------|-----------------|----------------|-------------------|----------------|------------------|------|-------------|-----------------|----------------|-------------------|----------------|------------------|---|
| 1 | 100.075690  | 50.541483       |                |                   |                |                  | V    |             |                 |                |                   |                |                  | 8 |
| 2 | 199.144104  | 100.075690      |                |                   |                |                  | V    | 1187.572499 | 594.289888      | 1170.545950    | 585.776613        | 1169.561934    | 585.284605       | 7 |
| 3 | 328.186697  | 164.596987      |                |                   | 310.176132     | 155.591704       | E    | 1088.504085 | 544.755681      | 1071.477536    | 536.242406        | 1070.493520    | 535.750398       | 6 |
| 4 | 457.229290  | 229.118283      |                |                   | 439.218725     | 220.113001       | E    | 959.461492  | 480.234384      | 942.434943     | 471.721110        | 941.450927     | 471.229102       | 5 |
| 5 | 896.454616  | 448.730946      | 879.428067     | 440.217672        | 878.444051     | 439.725664       | Q    | 830.418899  | 415.713088      | 813.392350     | 407.199813        | 812.408334     | 406.707805       | 4 |
| 6 | 1025.497209 | 513.252243      | 1008.470660    | 504.738968        | 1007.486644    | 504.246960       | E    | 391.193573  | 196.100425      | 374.167024     | 187.587150        | 373.183008     | 187.095142       | 3 |
| 7 | 1112.529237 | 556.768257      | 1095.502688    | 548.254982        | 1094.518672    | 547.762974       | S    | 262.150980  | 131.579128      | 245.124431     | 123.065854        | 244.140415     | 122.573846       | 2 |
| 8 |             |                 |                |                   |                |                  | R    | 175.118952  | 88.063114       | 158.092403     | 79.549839         |                |                  | 1 |

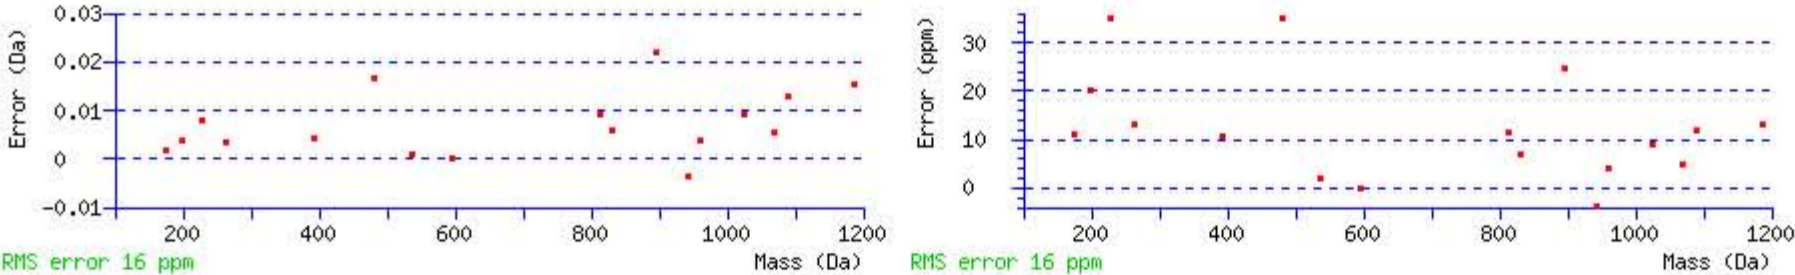

NCBI BLAST search of [VVEEQESR](#)  
(Parameters: blastp, nr protein database, expect=20000, no filter, PAM30)  
Other BLAST [web gateways](#)

All matches to this query

| Score | Mr(calc):   | Delta    | Sequence                 |
|-------|-------------|----------|--------------------------|
| 46.8  | 1285.633621 | 0.007167 | <a href="#">VVEEQESR</a> |

MATRIX

SCIENCE

Mascot Search Results

Peptide View

MS/MS Fragmentation of **CCQDGVTR**  
Found in **CO4A\_HUMAN**, Complement C4-A OS=Homo sapiens GN=C4A PE=1 SV=2

Match to Query 23417: 1305.571108 from(653.792830,2+) rtinseconds(1381) index(46230)  
Title: Locus:1.1.1.1718.14 File:"2013-07-02 CLN FXIII 180 min 2nd F 4.wiff"  
Data file C:\Program Files (x86)\Matrix Science\Mascot Daemon\mgf\8 FXIII 180 min 2nd\mascot\_daemon\_merge.mgf

Click mouse within plot area to zoom in by factor of two about that point  
Or, 

Plot from

100

 to 

1600

 Da 

Full range

  
Label all possible matches ☐ Label matches used for scoring ☒

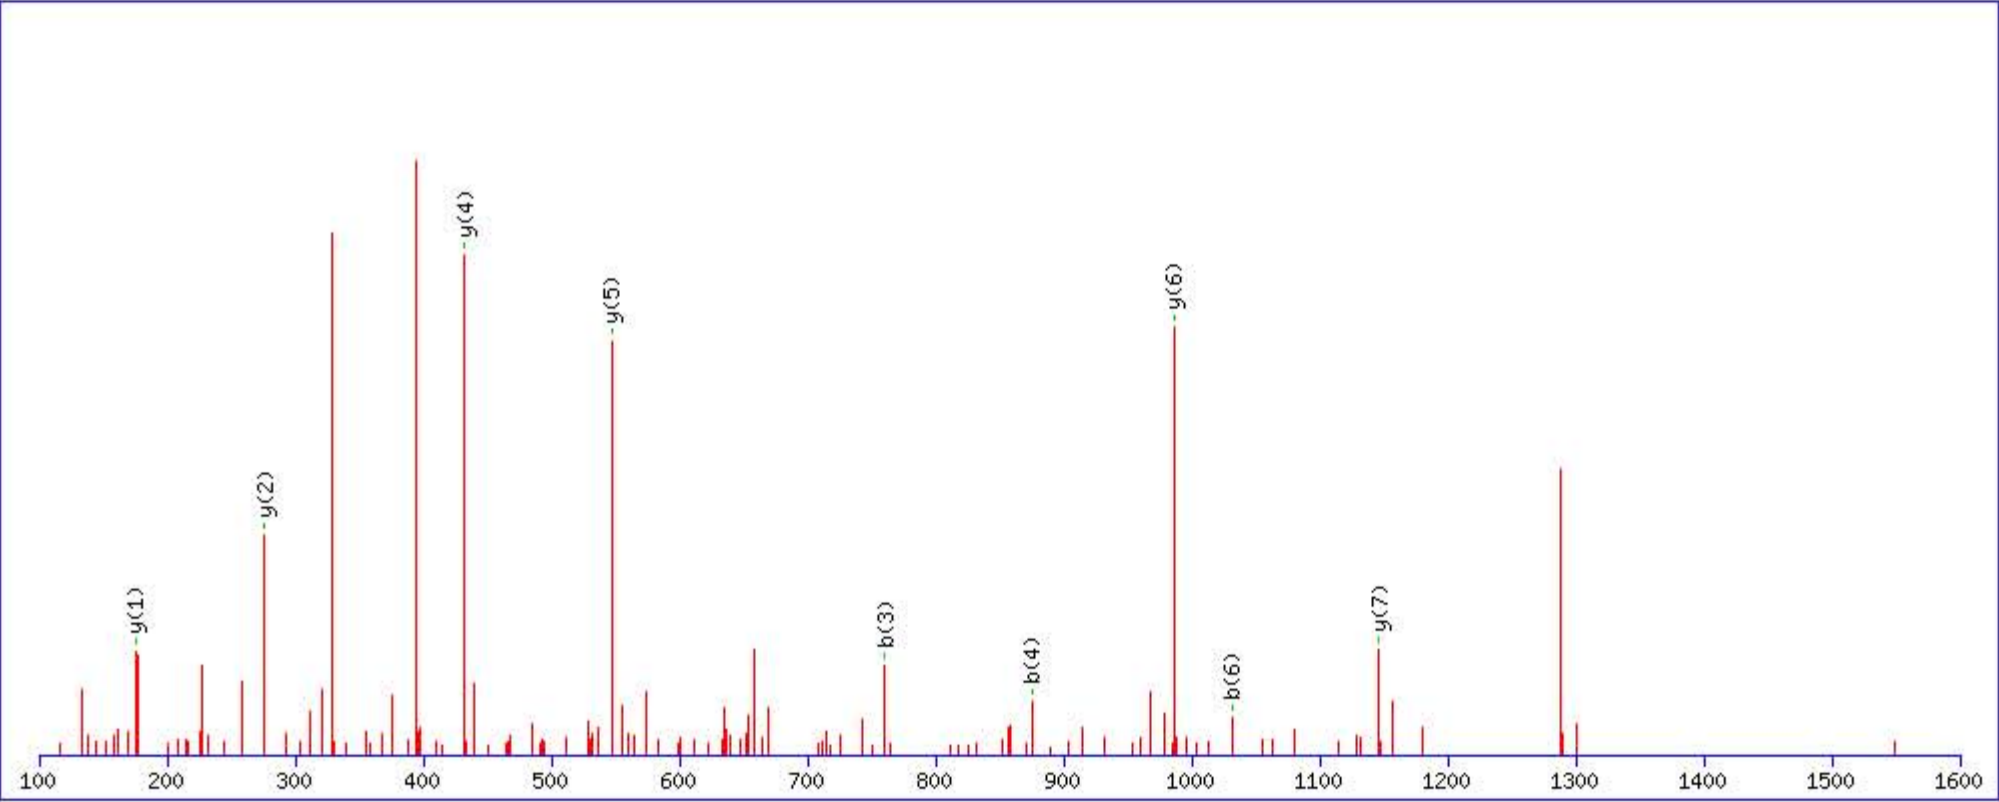

Monoisotopic mass of neutral peptide Mr(calc): 1305.562820  
Fixed modifications: Carbamidomethyl (C) (apply to specified residues or termini only)  
Variable modifications:  
Q3 : Biotin:Thermo-21345 (Q)  
Ions Score: 50 Expect: 4.4e-005  
Matches : 9/72 fragment ions using 12 most intense peaks [\(help\)](#)

| # | b           | b <sup>++</sup> | b <sup>*</sup> | b <sup>+++</sup> | b <sup>0</sup> | b <sup>0++</sup> | Seq. | y           | y <sup>++</sup> | y <sup>*</sup> | y <sup>+++</sup> | y <sup>0</sup> | y <sup>0++</sup> | # |
|---|-------------|-----------------|----------------|------------------|----------------|------------------|------|-------------|-----------------|----------------|------------------|----------------|------------------|---|
| 1 | 161.037925  | 81.022600       |                |                  |                |                  | C    |             |                 |                |                  |                |                  | 8 |
| 2 | 321.068574  | 161.037925      |                |                  |                |                  | C    | 1146.539427 | 573.773352      | 1129.512878    | 565.260077       | 1128.528862    | 564.768069       | 7 |
| 3 | 760.293900  | 380.650588      | 743.267351     | 372.137314       |                |                  | Q    | 986.508778  | 493.758027      | 969.482229     | 485.244753       | 968.498213     | 484.752745       | 6 |
| 4 | 875.320843  | 438.164060      | 858.294294     | 429.650785       | 857.310278     | 429.158777       | D    | 547.283452  | 274.145364      | 530.256903     | 265.632090       | 529.272887     | 265.140082       | 5 |
| 5 | 932.342307  | 466.674792      | 915.315758     | 458.161517       | 914.331742     | 457.669509       | G    | 432.256509  | 216.631893      | 415.229960     | 208.118618       | 414.245944     | 207.626610       | 4 |
| 6 | 1031.410721 | 516.208999      | 1014.384172    | 507.695724       | 1013.400156    | 507.203716       | V    | 375.235045  | 188.121161      | 358.208496     | 179.607886       | 357.224480     | 179.115878       | 3 |
| 7 | 1132.458400 | 566.732838      | 1115.431851    | 558.219564       | 1114.447835    | 557.727556       | T    | 276.166631  | 138.586953      | 259.140082     | 130.073679       | 258.156066     | 129.581671       | 2 |
| 8 |             |                 |                |                  |                |                  | R    | 175.118952  | 88.063114       | 158.092403     | 79.549839        |                |                  | 1 |

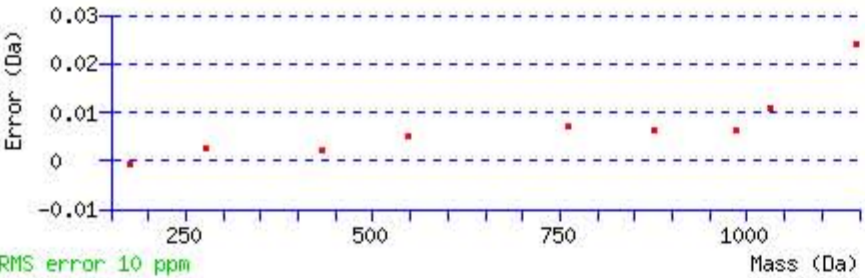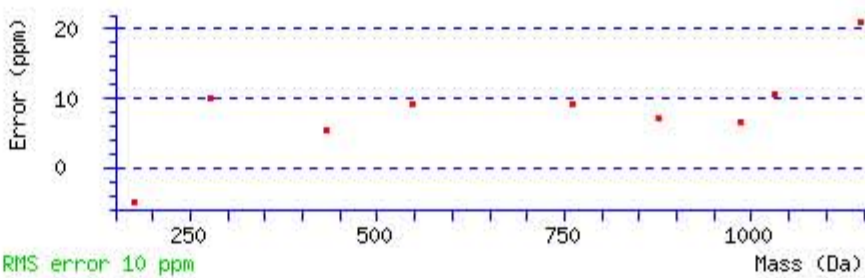

NCBI BLAST search of [CCQDGVTR](#)  
(Parameters: blastp, nr protein database, expect=20000, no filter, PAM30)  
Other BLAST [web gateways](#)

All matches to this query

| Score | Mr(calc):   | Delta     | Sequence                     |
|-------|-------------|-----------|------------------------------|
| 50.4  | 1305.562820 | 0.008288  | <a href="#">CCQDGVTR</a>     |
| 19.7  | 1305.588409 | -0.017301 | <a href="#">CRSSTPADAWR</a>  |
| 9.1   | 1305.577194 | -0.006086 | <a href="#">CDAGWLADGSVR</a> |
| 5.1   | 1305.562805 | 0.008303  | <a href="#">CCTSPSQR</a>     |
| 1.6   | 1305.556061 | 0.015047  | <a href="#">CSFSPWTEHR</a>   |
| 0.3   | 1305.583679 | -0.012571 | <a href="#">EQEPDFEEKR</a>   |
| 0.1   | 1305.588409 | -0.017301 | <a href="#">DGMEDFKRHR</a>   |

MATRIX

SCIENCE

Mascot Search Results

Peptide View

MS/MS Fragmentation of **LGQYASPTAK**  
Found in **CO4A\_HUMAN**, Complement C4-A OS=Homo sapiens GN=C4A PE=1 SV=2

Match to Query 24292: 1345.715168 from(673.864860,2+) rtinseconds(1618) index(47773)  
Title: Locus:1.1.1.1801.12 File:"2013-07-02 CLN FXIII 180 min 2nd F 4.wiff"  
Data file C:\Program Files (x86)\Matrix Science\Mascot Daemon\mgf\8 FXIII 180 min 2nd\mascot\_daemon\_merge.mgf

Click mouse within plot area to zoom in by factor of two about that point  
Or, 

Plot from

100

 to 

1400

 Da 

Full range

  
Label all possible matches ☐ Label matches used for scoring ☒

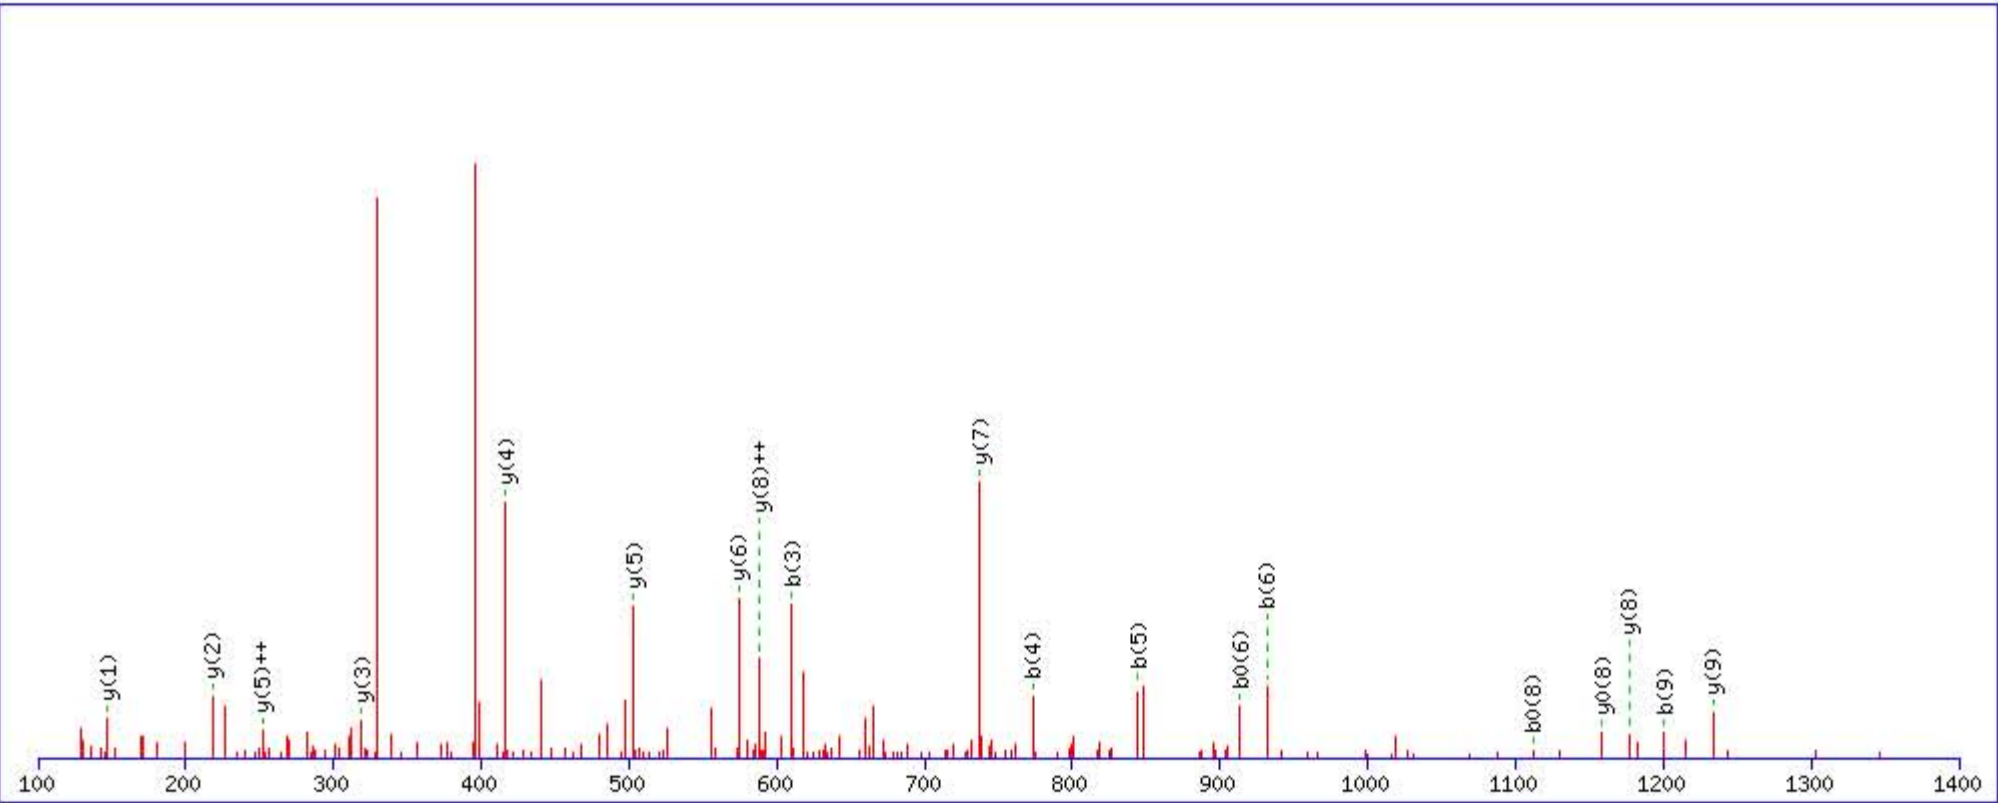

Monoisotopic mass of neutral peptide Mr(calc): 1345.706390  
Fixed modifications: Carbamidomethyl (C) (apply to specified residues or termini only)  
Variable modifications:  
Q3 : Biotin:Thermo-21345 (Q)  
Ions Score: 58 Expect: 3.9e-005  
Matches : 19/90 fragment ions using 36 most intense peaks [\(help\)](#)

| #  | b           | b <sup>++</sup> | b <sup>*</sup> | b <sup>*++</sup> | b <sup>0</sup> | b <sup>0++</sup> | Seq. | y           | y <sup>++</sup> | y <sup>*</sup> | y <sup>*++</sup> | y <sup>0</sup> | y <sup>0++</sup> | #  |
|----|-------------|-----------------|----------------|------------------|----------------|------------------|------|-------------|-----------------|----------------|------------------|----------------|------------------|----|
| 1  | 114.091340  | 57.549308       |                |                  |                |                  | L    |             |                 |                |                  |                |                  | 10 |
| 2  | 171.112804  | 86.060040       |                |                  |                |                  | G    | 1233.629622 | 617.318449      | 1216.603073    | 608.805175       | 1215.619057    | 608.313167       | 9  |
| 3  | 610.338130  | 305.672703      | 593.311581     | 297.159429       |                |                  | Q    | 1176.608158 | 588.807717      | 1159.581609    | 580.294443       | 1158.597593    | 579.802435       | 8  |
| 4  | 773.401459  | 387.204368      | 756.374910     | 378.691093       |                |                  | Y    | 737.382832  | 369.195054      | 720.356283     | 360.681780       | 719.372267     | 360.189772       | 7  |
| 5  | 844.438573  | 422.722925      | 827.412024     | 414.209650       |                |                  | A    | 574.319503  | 287.663389      | 557.292954     | 279.150115       | 556.308938     | 278.658107       | 6  |
| 6  | 931.470601  | 466.238939      | 914.444052     | 457.725664       | 913.460036     | 457.233656       | S    | 503.282389  | 252.144832      | 486.255840     | 243.631558       | 485.271824     | 243.139550       | 5  |
| 7  | 1028.523365 | 514.765321      | 1011.496816    | 506.252046       | 1010.512800    | 505.760038       | P    | 416.250361  | 208.628818      | 399.223812     | 200.115544       | 398.239796     | 199.623536       | 4  |
| 8  | 1129.571044 | 565.289160      | 1112.544495    | 556.775886       | 1111.560479    | 556.283878       | T    | 319.197597  | 160.102436      | 302.171048     | 151.589162       | 301.187032     | 151.097154       | 3  |
| 9  | 1200.608158 | 600.807717      | 1183.581609    | 592.294443       | 1182.597593    | 591.802435       | A    | 218.149918  | 109.578597      | 201.123369     | 101.065322       |                |                  | 2  |
| 10 |             |                 |                |                  |                |                  | K    | 147.112804  | 74.060040       | 130.086255     | 65.546765        |                |                  | 1  |

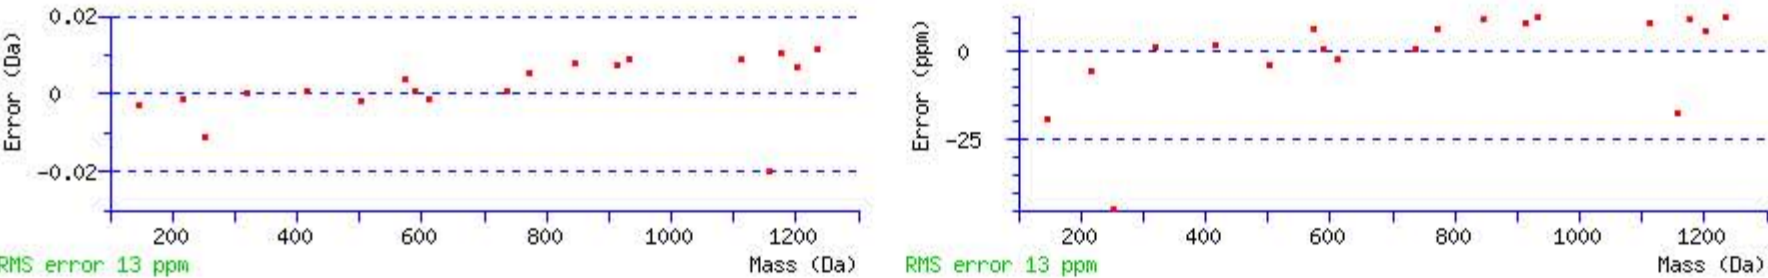

NCBI BLAST search of [LGQYASPTAK](#)  
(Parameters: blastp, nr protein database, expect=20000, no filter, PAM30)  
Other BLAST [web gateways](#)

All matches to this query

| Score | Mr(calc):   | Delta     | Sequence                       |
|-------|-------------|-----------|--------------------------------|
| 58.1  | 1345.706390 | 0.008778  | <a href="#">LGQYASPTAK</a>     |
| 11.1  | 1345.706390 | 0.008778  | <a href="#">LGQYDQALK</a>      |
| 10.1  | 1345.724182 | -0.009014 | <a href="#">LGAVPATSGPTTFK</a> |
| 9.0   | 1345.727509 | -0.012341 | <a href="#">DKLKMEVDQLK</a>    |
| 8.2   | 1345.727509 | -0.012341 | <a href="#">LGLMDNEIKVAK</a>   |
| 7.9   | 1345.706406 | 0.008762  | <a href="#">QGLYTPQTK</a>      |
| 2.5   | 1345.724152 | -0.008984 | <a href="#">QPLQTDIYGLAK</a>   |
| 1.7   | 1345.717636 | -0.002468 | <a href="#">QMPQPTFTLRK</a>    |
| 1.3   | 1345.713608 | 0.001560  | <a href="#">NGMLLTGGGKDRK</a>  |
| 0.7   | 1345.720993 | -0.005825 | <a href="#">QVGMICERLLK</a>    |

MATRIX

SCIENCE

Mascot Search Results

Peptide View

MS/MS Fragmentation of **GLQDEDGYR**  
Found in **CO4A\_HUMAN**, Complement C4-A OS=Homo sapiens GN=C4A PE=1 SV=2

Match to Query 25943: 1362.632588 from(682.323570,2+) rtinseconds(1718) index(48398)  
Title: Locus:1.1.1.1836.9 File:"2013-07-02 CLN FXIII 180 min 2nd F 4.wiff"  
Data file C:\Program Files (x86)\Matrix Science\Mascot Daemon\mgf\8 FXIII 180 min 2nd\mascot\_daemon\_merge.mgf

Click mouse within plot area to zoom in by factor of two about that point  
Or, 

Plot from

100

 to 

2000

 Da 

Full range

  
Label all possible matches ☐ Label matches used for scoring ☒

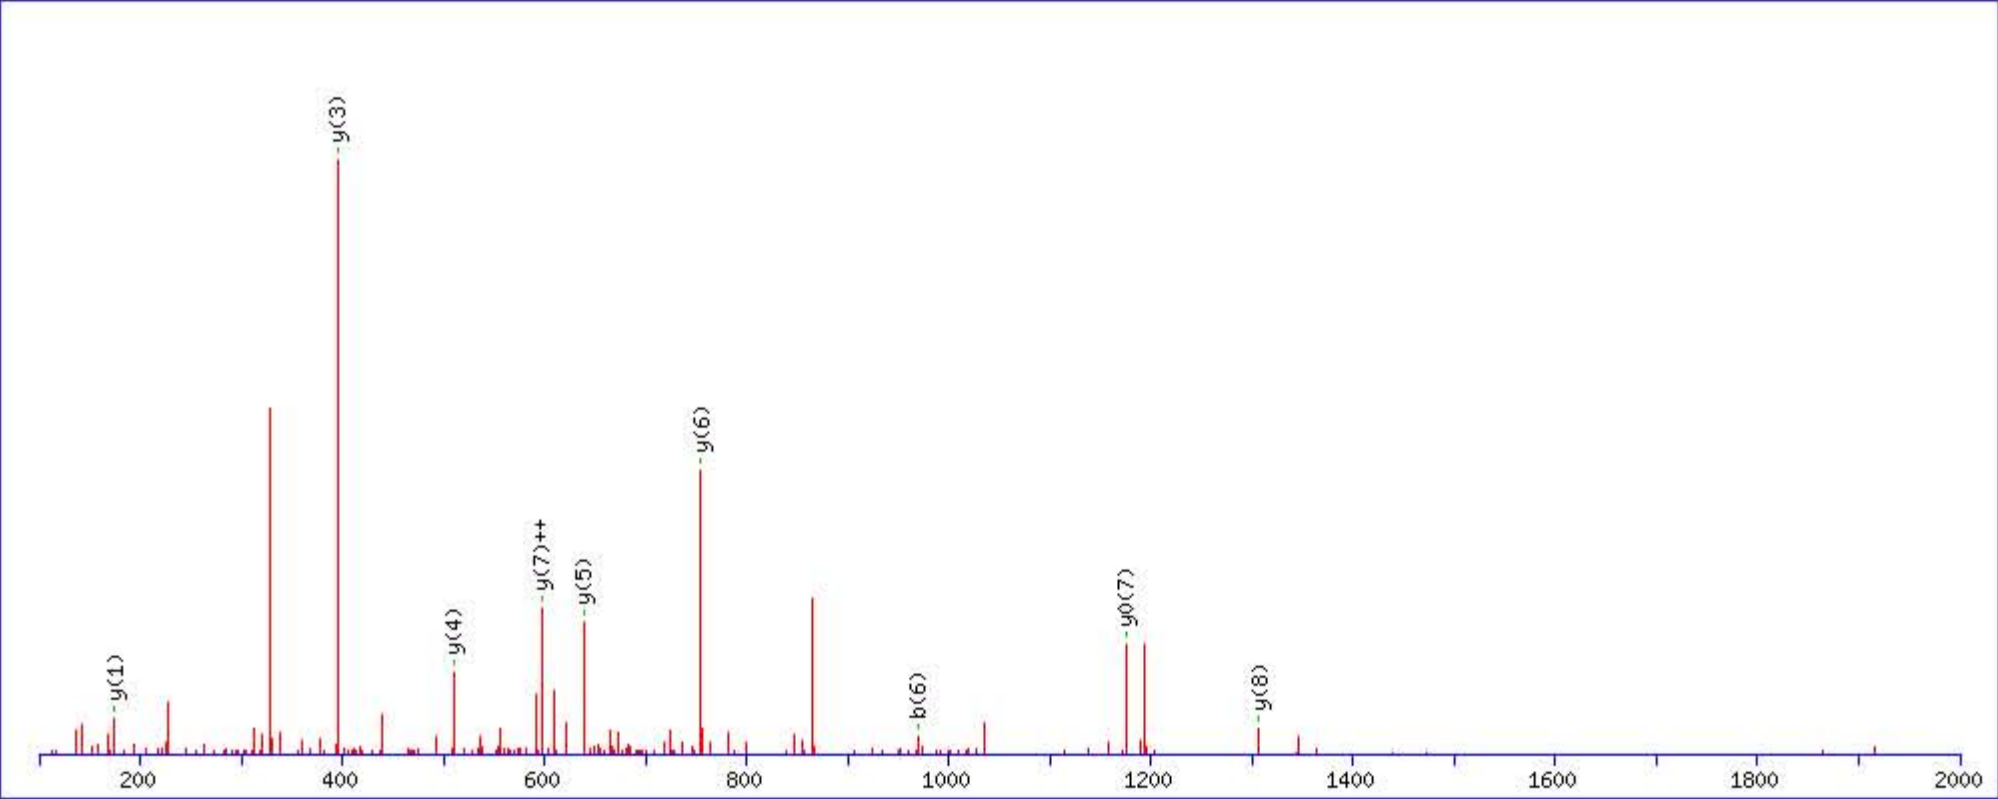

Monoisotopic mass of neutral peptide Mr(calc): 1362.623795  
Fixed modifications: Carbamidomethyl (C) (apply to specified residues or termini only)  
Variable modifications:  
Q3 : Biotin:Thermo-21345 (Q)  
Ions Score: 47 Expect: 0.00014  
Matches : 9/80 fragment ions using 13 most intense peaks ([help](#))

| # | b           | b <sup>++</sup> | b <sup>*</sup> | b <sup>*++</sup> | b <sup>0</sup> | b <sup>0++</sup> | Seq. | y           | y <sup>++</sup> | y <sup>*</sup> | y <sup>*++</sup> | y <sup>0</sup> | y <sup>0++</sup> | # |
|---|-------------|-----------------|----------------|------------------|----------------|------------------|------|-------------|-----------------|----------------|------------------|----------------|------------------|---|
| 1 | 58.028740   | 29.518008       |                |                  |                |                  | G    |             |                 |                |                  |                |                  | 9 |
| 2 | 171.112804  | 86.060040       |                |                  |                |                  | L    | 1306.609614 | 653.808445      | 1289.583065    | 645.295171       | 1288.599049    | 644.803163       | 8 |
| 3 | 610.338130  | 305.672703      | 593.311581     | 297.159429       |                |                  | Q    | 1193.525550 | 597.266413      | 1176.499001    | 588.753139       | 1175.514985    | 588.261131       | 7 |
| 4 | 725.365073  | 363.186175      | 708.338524     | 354.672900       | 707.354508     | 354.180892       | D    | 754.300224  | 377.653750      | 737.273675     | 369.140476       | 736.289659     | 368.648468       | 6 |
| 5 | 854.407666  | 427.707471      | 837.381117     | 419.194197       | 836.397101     | 418.702189       | E    | 639.273281  | 320.140279      | 622.246732     | 311.627004       | 621.262716     | 311.134996       | 5 |
| 6 | 969.434609  | 485.220943      | 952.408060     | 476.707668       | 951.424044     | 476.215660       | D    | 510.230688  | 255.618982      | 493.204139     | 247.105707       | 492.220123     | 246.613700       | 4 |
| 7 | 1026.456073 | 513.731675      | 1009.429524    | 505.218400       | 1008.445508    | 504.726392       | G    | 395.203745  | 198.105511      | 378.177196     | 189.592236       |                |                  | 3 |
| 8 | 1189.519402 | 595.263339      | 1172.492853    | 586.750065       | 1171.508837    | 586.258057       | Y    | 338.182281  | 169.594778      | 321.155732     | 161.081504       |                |                  | 2 |
| 9 |             |                 |                |                  |                |                  | R    | 175.118952  | 88.063114       | 158.092403     | 79.549839        |                |                  | 1 |

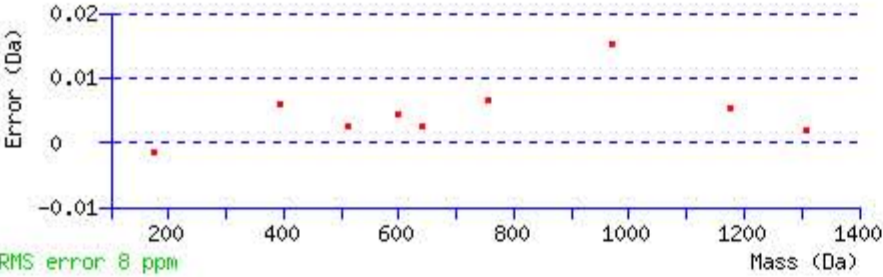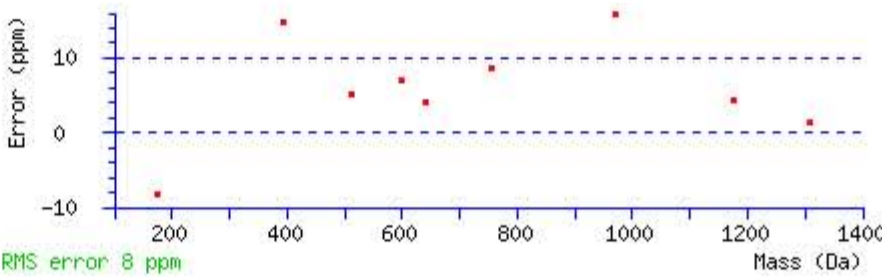

NCBI BLAST search of [GLQDEDGYR](#)  
(Parameters: blastp, nr protein database, expect=20000, no filter, PAM30)  
Other BLAST [web gateways](#)

All matches to this query

| Score | Mr(calc):   | Delta     | Sequence                      |
|-------|-------------|-----------|-------------------------------|
| 46.8  | 1362.623795 | 0.008793  | <a href="#">GLQDEDGYR</a>     |
| 5.3   | 1362.652756 | -0.020168 | <a href="#">GLAADERAEFER</a>  |
| 3.0   | 1362.642883 | -0.010295 | <a href="#">GDRVYSPYNHR</a>   |
| 2.2   | 1362.623795 | 0.008793  | <a href="#">TGFLEIDEHMR</a>   |
| 0.6   | 1362.623795 | 0.008793  | <a href="#">GPAFPGMGSEELR</a> |

MATRIX

SCIENCE

Mascot Search Results

Peptide View

MS/MS Fragmentation of **ITQVLHFTK**  
Found in **CO4A\_HUMAN**, Complement C4-A OS=Homo sapiens GN=C4A PE=1 SV=2

Match to Query 27226: 1396.790862 from(466.604230,3+) rtinseconds(1948) index(49973)  
Title: Locus:1.1.1.1916.6 File:"2013-07-02 CLN FXIII 180 min 2nd F 4.wiff"  
Data file C:\Program Files (x86)\Matrix Science\Mascot Daemon\mgf\8 FXIII 180 min 2nd\mascot\_daemon\_merge.mgf

Click mouse within plot area to zoom in by factor of two about that point  
Or, 

Plot from

100

 to 

1300

 Da 

Full range

  
Label all possible matches ☐ Label matches used for scoring ☒

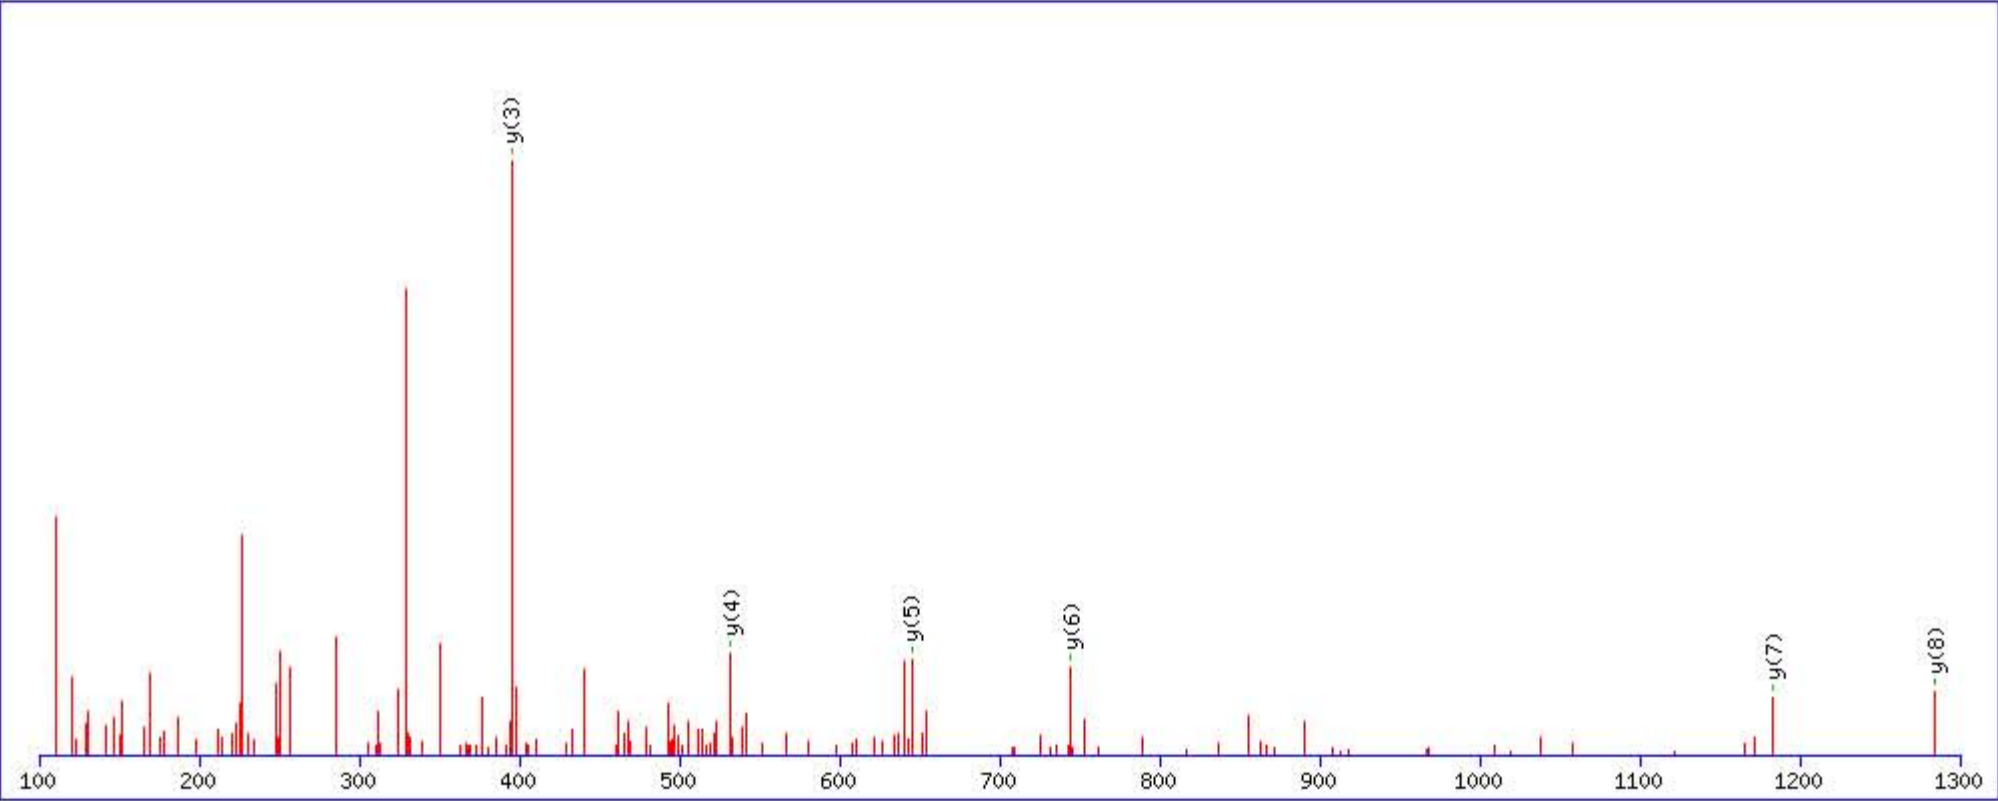

Monoisotopic mass of neutral peptide Mr(calc): 1396.790085  
Fixed modifications: Carbamidomethyl (C) (apply to specified residues or termini only)  
Variable modifications:  
Q3 : Biotin:Thermo-21345 (Q)  
Ions Score: 34 Expect: 0.0015  
Matches : 6/88 fragment ions using 12 most intense peaks [\(help\)](#)

| # | b           | b <sup>++</sup> | b <sup>*</sup> | b <sup>*++</sup> | b <sup>0</sup> | b <sup>0++</sup> | Seq. | y           | y <sup>++</sup> | y <sup>*</sup> | y <sup>*++</sup> | y <sup>0</sup> | y <sup>0++</sup> | # |
|---|-------------|-----------------|----------------|------------------|----------------|------------------|------|-------------|-----------------|----------------|------------------|----------------|------------------|---|
| 1 | 114.091340  | 57.549308       |                |                  |                |                  | I    |             |                 |                |                  |                |                  | 9 |
| 2 | 215.139019  | 108.073147      |                |                  | 197.128454     | 99.067865        | T    | 1284.713292 | 642.860284      | 1267.686743    | 634.347010       | 1266.702727    | 633.855002       | 8 |
| 3 | 654.364345  | 327.685811      | 637.337796     | 319.172536       | 636.353780     | 318.680528       | Q    | 1183.665613 | 592.336445      | 1166.639064    | 583.823170       | 1165.655048    | 583.331162       | 7 |
| 4 | 753.432759  | 377.220018      | 736.406210     | 368.706743       | 735.422194     | 368.214735       | V    | 744.440287  | 372.723782      | 727.413738     | 364.210507       | 726.429722     | 363.718499       | 6 |
| 5 | 866.516823  | 433.762050      | 849.490274     | 425.248775       | 848.506258     | 424.756767       | L    | 645.371873  | 323.189575      | 628.345324     | 314.676300       | 627.361308     | 314.184292       | 5 |
| 6 | 1003.575735 | 502.291506      | 986.549186     | 493.778231       | 985.565170     | 493.286223       | H    | 532.287809  | 266.647543      | 515.261260     | 258.134268       | 514.277244     | 257.642260       | 4 |
| 7 | 1150.644149 | 575.825713      | 1133.617600    | 567.312438       | 1132.633584    | 566.820430       | F    | 395.228897  | 198.118086      | 378.202348     | 189.604812       | 377.218332     | 189.112804       | 3 |
| 8 | 1251.691828 | 626.349552      | 1234.665279    | 617.836278       | 1233.681263    | 617.344270       | T    | 248.160483  | 124.583879      | 231.133934     | 116.070605       | 230.149918     | 115.578597       | 2 |
| 9 |             |                 |                |                  |                |                  | K    | 147.112804  | 74.060040       | 130.086255     | 65.546765        |                |                  | 1 |

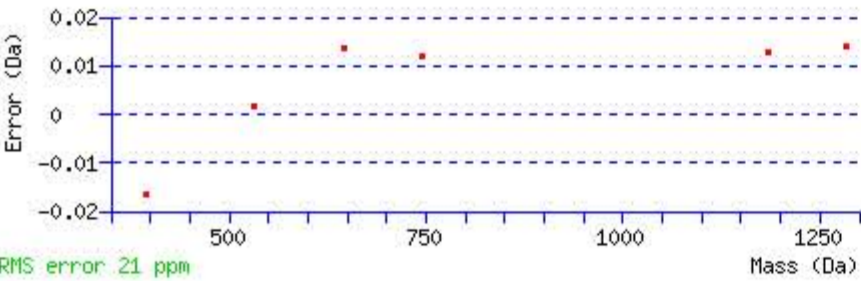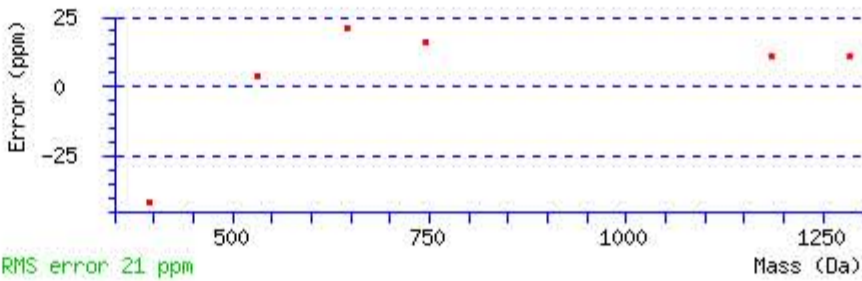

NCBI BLAST search of [ITQVLHFTK](#)  
(Parameters: blastp, nr protein database, expect=20000, no filter, PAM30)  
Other BLAST [web gateways](#)

All matches to this query

| Score | Mr(calc):   | Delta     | Sequence                     |
|-------|-------------|-----------|------------------------------|
| 33.7  | 1396.790085 | 0.000777  | <a href="#">ITQVLHFTK</a>    |
| 3.5   | 1396.792557 | -0.001695 | <a href="#">LLGELQEIQVQK</a> |
| 1.8   | 1396.774796 | 0.016066  | <a href="#">LLQEGIAQSK</a>   |
| 1.2   | 1396.778625 | 0.012237  | <a href="#">LIENGVAERQR</a>  |

MATRIX

SCIENCE

Mascot Search Results

Peptide View

MS/MS Fragmentation of **GLEEELQFSLGSK**  
Found in **CO4A\_HUMAN**, Complement C4-A OS=Homo sapiens GN=C4A PE=1 SV=2

Match to Query 39030: 1746.901002 from(583.307610,3+) rtinseconds(2544) index(53587)  
Title: Locus:1.1.1.2123.5 File:"2013-07-02 CLN FXIII 180 min 2nd F 4.wiff"  
Data file C:\Program Files (x86)\Matrix Science\Mascot Daemon\mgf\8 FXIII 180 min 2nd\mascot\_daemon\_merge.mgf

Click mouse within plot area to zoom in by factor of two about that point

Or, 

Plot from

100

 to 

1600

 Da 

Full range

Label all possible matches ☐ Label matches used for scoring ☒

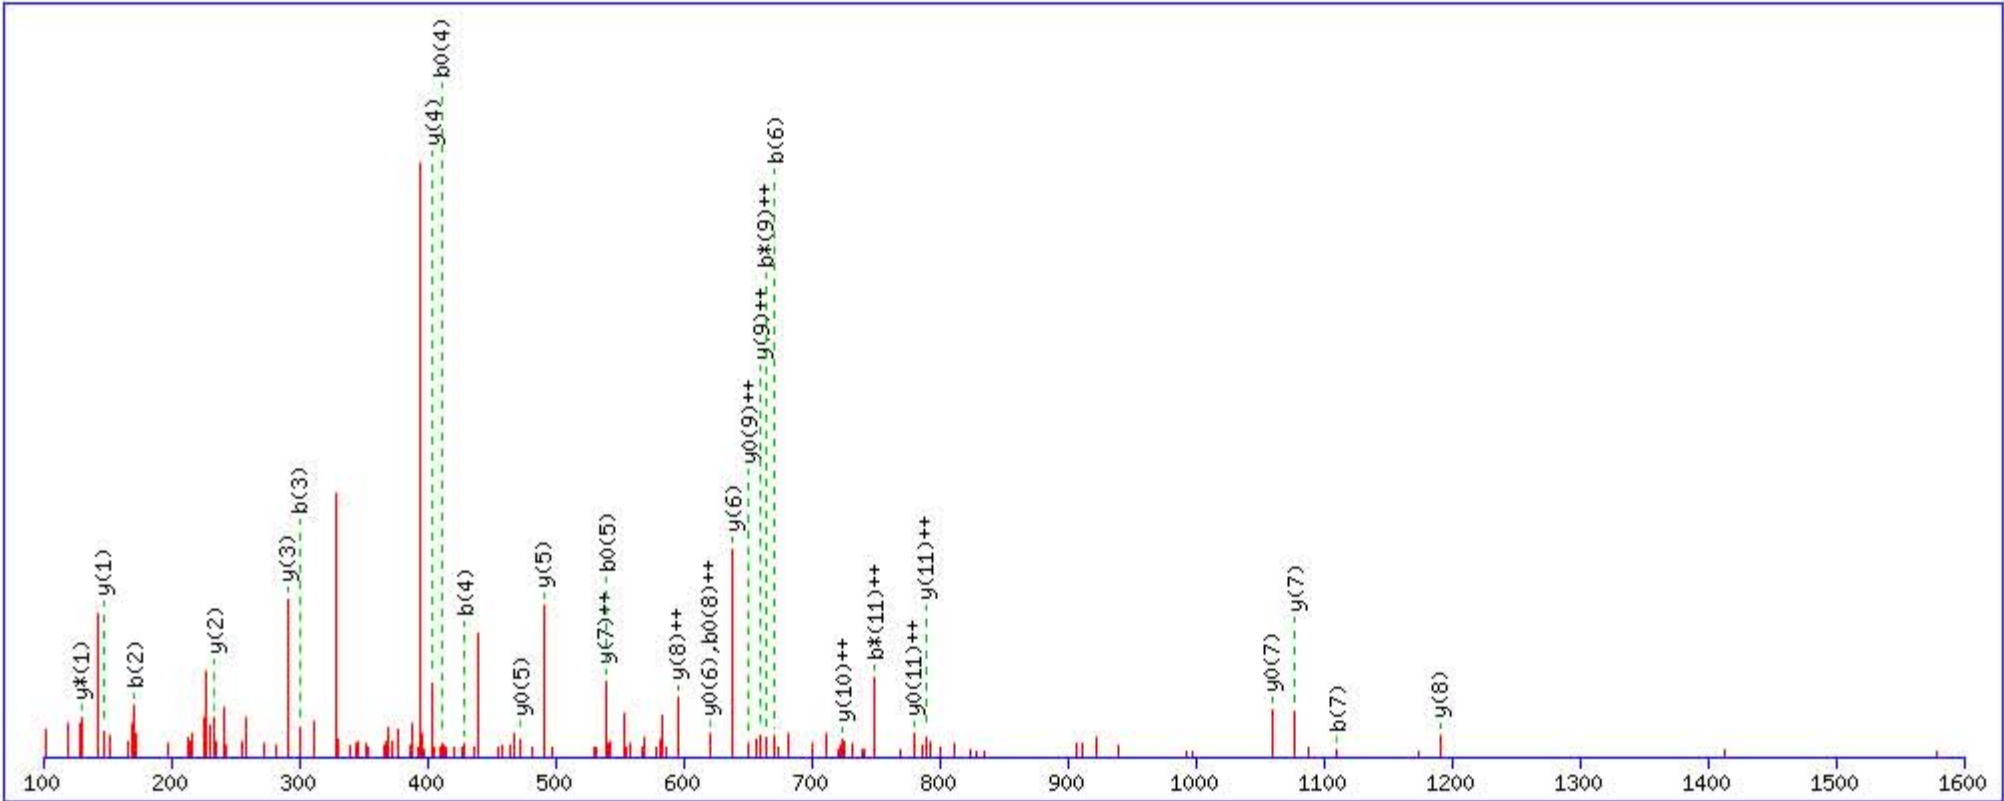

Monoisotopic mass of neutral peptide Mr(calc): 1746.886200  
Fixed modifications: Carbamidomethyl (C) (apply to specified residues or termini only)  
Variable modifications:  
Q7 : Biotin:Thermo-21345 (Q)  
Ions Score: 29 Expect: 0.038  
Matches : 29/126 fragment ions using 74 most intense peaks [\(help\)](#)

| #  | b           | b <sup>++</sup> | b <sup>*</sup> | b <sup>+++</sup> | b <sup>0</sup> | b <sup>0++</sup> | Seq. | y           | y <sup>++</sup> | y <sup>*</sup> | y <sup>+++</sup> | y <sup>0</sup> | y <sup>0++</sup> | #  |
|----|-------------|-----------------|----------------|------------------|----------------|------------------|------|-------------|-----------------|----------------|------------------|----------------|------------------|----|
| 1  | 58.028740   | 29.518008       |                |                  |                |                  | G    |             |                 |                |                  |                |                  | 13 |
| 2  | 171.112804  | 86.060040       |                |                  |                |                  | L    | 1690.872035 | 845.939656      | 1673.845486    | 837.426381       | 1672.861470    | 836.934373       | 12 |
| 3  | 300.155397  | 150.581336      |                |                  | 282.144832     | 141.576054       | E    | 1577.787971 | 789.397624      | 1560.761422    | 780.884349       | 1559.777406    | 780.392341       | 11 |
| 4  | 429.197990  | 215.102633      |                |                  | 411.187425     | 206.097351       | E    | 1448.745378 | 724.876327      | 1431.718829    | 716.363053       | 1430.734813    | 715.871045       | 10 |
| 5  | 558.240583  | 279.623930      |                |                  | 540.230018     | 270.618647       | E    | 1319.702785 | 660.355031      | 1302.676236    | 651.841756       | 1301.692220    | 651.349748       | 9  |
| 6  | 671.324647  | 336.165962      |                |                  | 653.314082     | 327.160679       | L    | 1190.660192 | 595.833734      | 1173.633643    | 587.320460       | 1172.649627    | 586.828452       | 8  |
| 7  | 1110.549973 | 555.778624      | 1093.523424    | 547.265350       | 1092.539408    | 546.773342       | Q    | 1077.576128 | 539.291702      | 1060.549579    | 530.778428       | 1059.565563    | 530.286419       | 7  |
| 8  | 1257.618387 | 629.312832      | 1240.591838    | 620.799557       | 1239.607822    | 620.307549       | F    | 638.350802  | 319.679039      | 621.324253     | 311.165765       | 620.340237     | 310.673757       | 6  |
| 9  | 1344.650415 | 672.828846      | 1327.623866    | 664.315571       | 1326.639850    | 663.823563       | S    | 491.282388  | 246.144832      | 474.255839     | 237.631557       | 473.271823     | 237.139549       | 5  |
| 10 | 1457.734479 | 729.370878      | 1440.707930    | 720.857603       | 1439.723914    | 720.365595       | L    | 404.250360  | 202.628818      | 387.223811     | 194.115543       | 386.239795     | 193.623535       | 4  |
| 11 | 1514.755943 | 757.881609      | 1497.729394    | 749.368335       | 1496.745378    | 748.876327       | G    | 291.166296  | 146.086786      | 274.139747     | 137.573512       | 273.155731     | 137.081504       | 3  |
| 12 | 1601.787971 | 801.397624      | 1584.761422    | 792.884349       | 1583.777406    | 792.392341       | S    | 234.144832  | 117.576054      | 217.118283     | 109.062780       | 216.134267     | 108.570772       | 2  |
| 13 |             |                 |                |                  |                |                  | K    | 147.112804  | 74.060040       | 130.086255     | 65.546765        |                |                  | 1  |

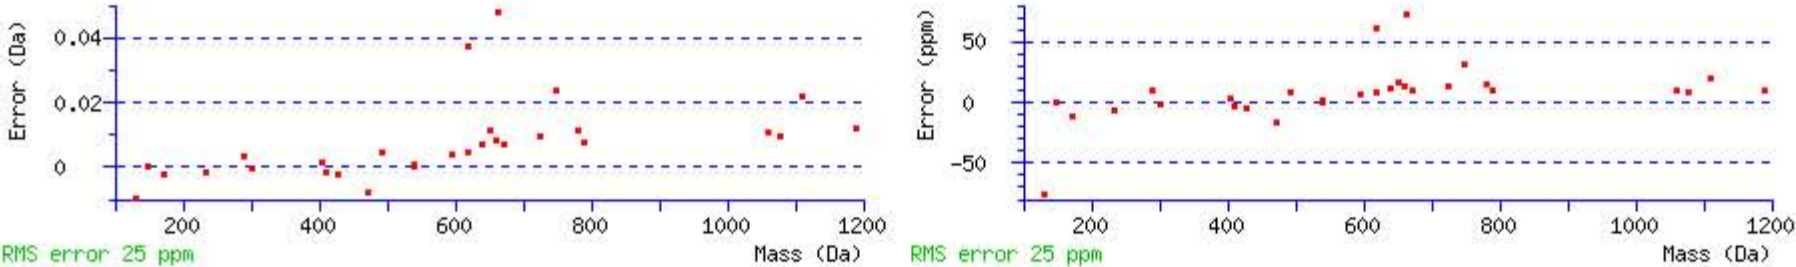

NCBI BLAST search of [GLEEELQFSLGSK](#)  
(Parameters: blastp, nr protein database, expect=20000, no filter, PAM30)  
Other BLAST [web gateways](#)

All matches to this query

| Score | Mr(calc):   | Delta    | Sequence                      |
|-------|-------------|----------|-------------------------------|
| 28.6  | 1746.886200 | 0.014802 | <a href="#">GLEEELQFSLGSK</a> |

MATRIX

SCIENCE

Mascot Search Results

Peptide View

MS/MS Fragmentation of **VLSLAQEQVGGSP**EK  
Found in **CO4A\_HUMAN**, Complement C4-A OS=Homo sapiens GN=C4A PE=1 SV=2

Match to Query 41289: 1851.988242 from(618.336690,3+) rtinseconds(1981) index(50251)  
Title: Locus:1.1.1.1927.9 File:"2013-07-02 CLN FXIII 180 min 2nd F 4.wiff"  
Data file C:\Program Files (x86)\Matrix Science\Mascot Daemon\mgf\8 FXIII 180 min 2nd\mascot\_daemon\_merge.mgf

Click mouse within plot area to zoom in by factor of two about that point  
Or, 

Plot from

100

 to 

1700

 Da 

Full range

  
Label all possible matches ☐ Label matches used for scoring ☒

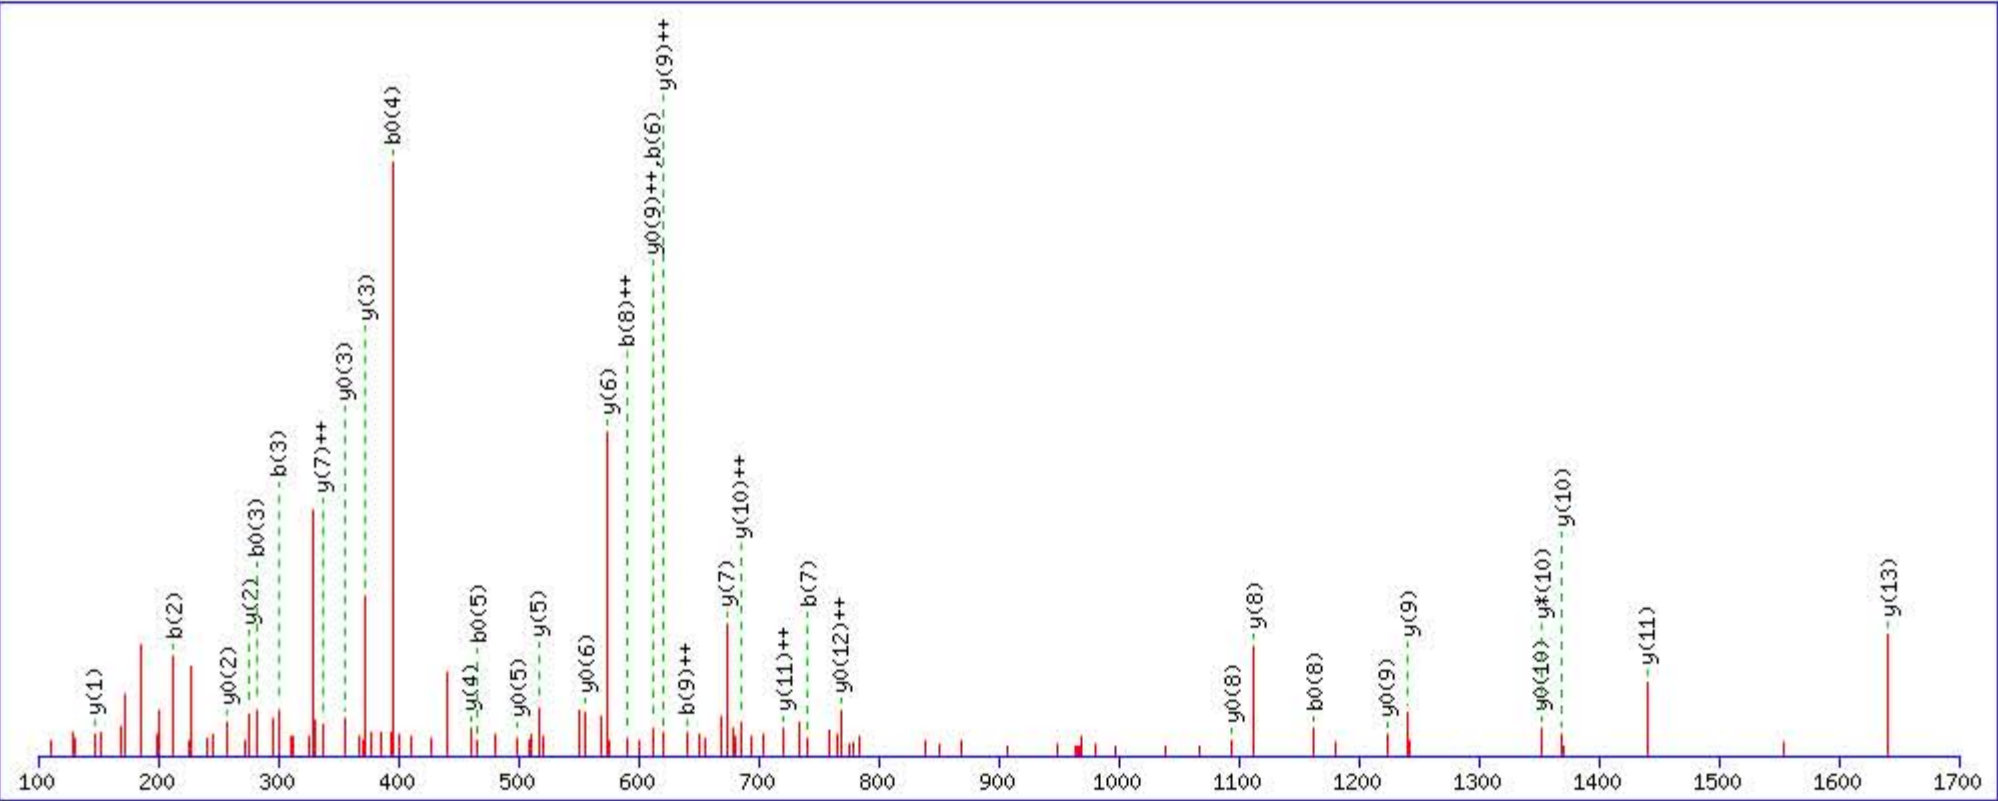

Monoisotopic mass of neutral peptide Mr(calc): 1851.976425  
Fixed modifications: Carbamidomethyl (C) (apply to specified residues or termini only)  
Variable modifications:  
Q8 : Biotin:Thermo-21345 (Q)  
Ions Score: 58 Expect: 3.5e-005  
Matches : 36/152 fragment ions using 83 most intense peaks [\(help\)](#)

| #  | b           | b <sup>++</sup> | b <sup>*</sup> | b <sup>++</sup> * | b <sup>0</sup> | b <sup>0++</sup> | Seq. | y           | y <sup>++</sup> | y <sup>*</sup> | y <sup>++</sup> * | y <sup>0</sup> | y <sup>0++</sup> | #  |
|----|-------------|-----------------|----------------|-------------------|----------------|------------------|------|-------------|-----------------|----------------|-------------------|----------------|------------------|----|
| 1  | 100.075690  | 50.541483       |                |                   |                |                  | V    |             |                 |                |                   |                |                  | 15 |
| 2  | 213.159754  | 107.083515      |                |                   |                |                  | L    | 1753.915298 | 877.461287      | 1736.888749    | 868.948013        | 1735.904733    | 868.456004       | 14 |
| 3  | 300.191782  | 150.599529      |                |                   | 282.181217     | 141.594247       | S    | 1640.831234 | 820.919255      | 1623.804685    | 812.405981        | 1622.820669    | 811.913973       | 13 |
| 4  | 413.275846  | 207.141561      |                |                   | 395.265281     | 198.136279       | L    | 1553.799206 | 777.403241      | 1536.772657    | 768.889967        | 1535.788641    | 768.397958       | 12 |
| 5  | 484.312960  | 242.660118      |                |                   | 466.302395     | 233.654836       | A    | 1440.715142 | 720.861209      | 1423.688593    | 712.347935        | 1422.704577    | 711.855927       | 11 |
| 6  | 612.371538  | 306.689407      | 595.344989     | 298.176133        | 594.360973     | 297.684125       | Q    | 1369.678028 | 685.342652      | 1352.651479    | 676.829378        | 1351.667463    | 676.337370       | 10 |
| 7  | 741.414131  | 371.210704      | 724.387582     | 362.697429        | 723.403566     | 362.205421       | E    | 1241.619450 | 621.313363      | 1224.592901    | 612.800089        | 1223.608885    | 612.308080       | 9  |
| 8  | 1180.639457 | 590.823367      | 1163.612908    | 582.310092        | 1162.628892    | 581.818084       | Q    | 1112.576857 | 556.792066      | 1095.550308    | 548.278792        | 1094.566292    | 547.786784       | 8  |
| 9  | 1279.707871 | 640.357574      | 1262.681322    | 631.844299        | 1261.697306    | 631.352291       | V    | 673.351531  | 337.179404      | 656.324982     | 328.666129        | 655.340966     | 328.174121       | 7  |
| 10 | 1336.729335 | 668.868306      | 1319.702786    | 660.355031        | 1318.718770    | 659.863023       | G    | 574.283117  | 287.645197      | 557.256568     | 279.131922        | 556.272552     | 278.639914       | 6  |
| 11 | 1393.750799 | 697.379037      | 1376.724250    | 688.865763        | 1375.740234    | 688.373755       | G    | 517.261653  | 259.134465      | 500.235104     | 250.621190        | 499.251088     | 250.129182       | 5  |
| 12 | 1480.782827 | 740.895052      | 1463.756278    | 732.381777        | 1462.772262    | 731.889769       | S    | 460.240189  | 230.623732      | 443.213640     | 222.110458        | 442.229624     | 221.618450       | 4  |
| 13 | 1577.835591 | 789.421434      | 1560.809042    | 780.908159        | 1559.825026    | 780.416151       | P    | 373.208161  | 187.107718      | 356.181612     | 178.594444        | 355.197596     | 178.102436       | 3  |
| 14 | 1706.878184 | 853.942730      | 1689.851635    | 845.429456        | 1688.867619    | 844.937447       | E    | 276.155397  | 138.581336      | 259.128848     | 130.068062        | 258.144832     | 129.576054       | 2  |
| 15 |             |                 |                |                   |                |                  | K    | 147.112804  | 74.060040       | 130.086255     | 65.546765         |                |                  | 1  |

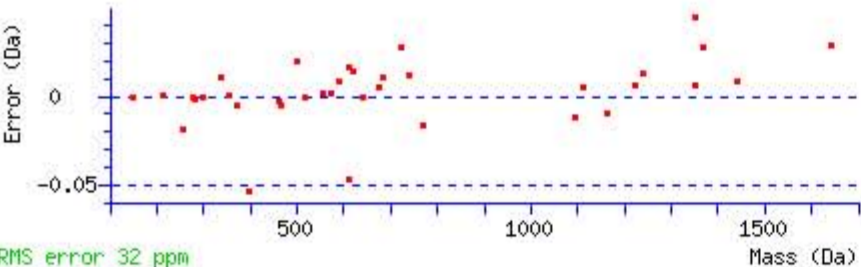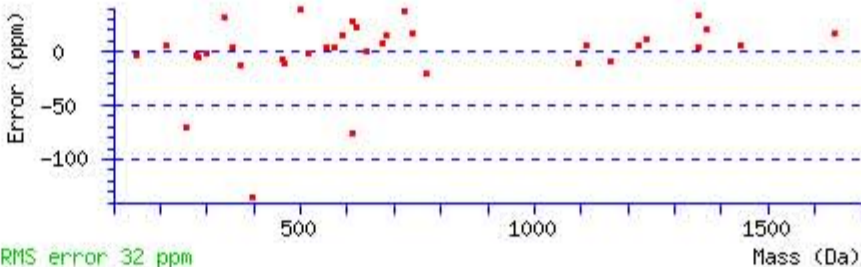

NCBI BLAST search of [VLSLAQEQVGGSP](#)EK  
(Parameters: blastp, nr protein database, expect=20000, no filter, PAM30)  
Other BLAST [web gateways](#)

All matches to this query

| Score | Mr(calc):   | Delta    | Sequence                         |
|-------|-------------|----------|----------------------------------|
| 58.2  | 1851.976425 | 0.011817 | <a href="#">VLSLAQEQVGGSP</a> EK |
| 35.4  | 1851.976425 | 0.011817 | <a href="#">VLSLAQEQVGGSP</a> EK |

MATRIX

SCIENCE

Mascot Search Results

Peptide View

MS/MS Fragmentation of **GPEVQLVAHSPWLK**  
Found in **CO4A\_HUMAN**, Complement C4-A OS=Homo sapiens GN=C4A PE=1 SV=2

Match to Query 41721: 1871.029962 from(624.683930,3+) rtinseconds(2228) index(51842)  
Title: Locus:1.1.1.2013.8 File:"2013-07-02 CLN FXIII 180 min 2nd F 4.wiff"  
Data file C:\Program Files (x86)\Matrix Science\Mascot Daemon\mgf\8 FXIII 180 min 2nd\mascot\_daemon\_merge.mgf

Click mouse within plot area to zoom in by factor of two about that point  
Or, 

Plot from

100

 to 

1800

 Da 

Full range

  
Label all possible matches ☐ Label matches used for scoring ☒

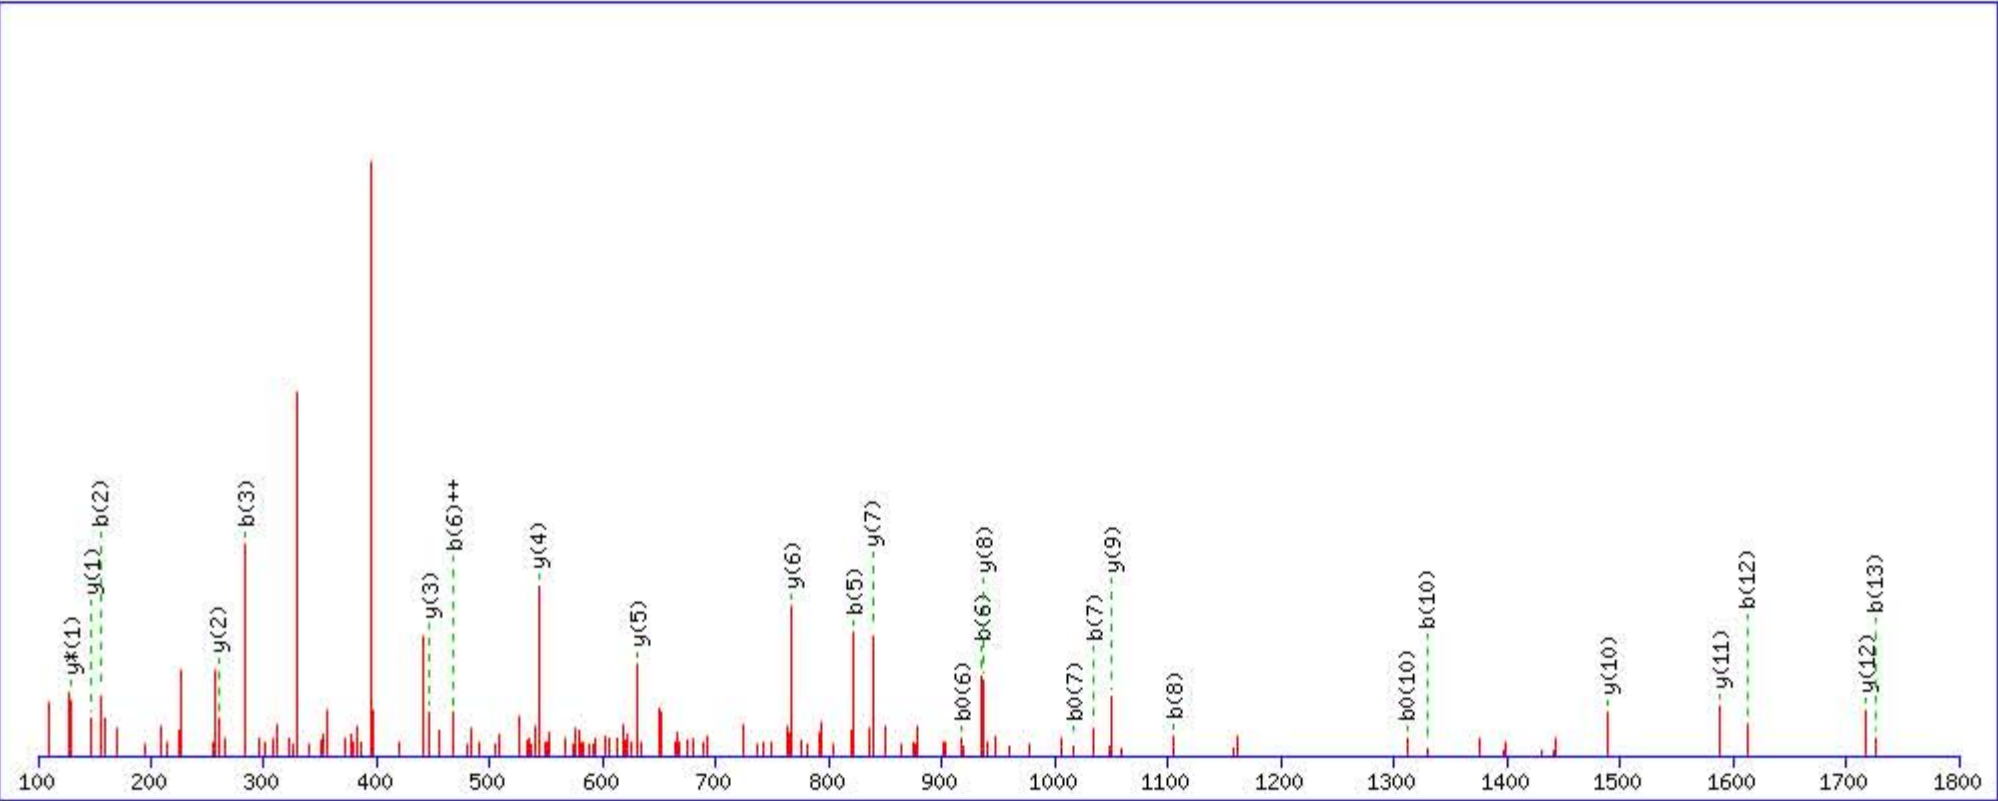

Monoisotopic mass of neutral peptide Mr(calc): 1871.012756  
Fixed modifications: Carbamidomethyl (C) (apply to specified residues or termini only)  
Variable modifications:  
Q5 : Biotin:Thermo-21345 (Q)  
Ions Score: 57 Expect: 6.9e-006  
Matches : 26/136 fragment ions using 65 most intense peaks [\(help\)](#)

| #  | b           | b <sup>++</sup> | b <sup>+</sup> | b <sup>++</sup> | b <sup>0</sup> | b <sup>0++</sup> | Seq. | y           | y <sup>++</sup> | y <sup>+</sup> | y <sup>++</sup> | y <sup>0</sup> | y <sup>0++</sup> | #  |
|----|-------------|-----------------|----------------|-----------------|----------------|------------------|------|-------------|-----------------|----------------|-----------------|----------------|------------------|----|
| 1  | 58.028740   | 29.518008       |                |                 |                |                  | G    |             |                 |                |                 |                |                  | 14 |
| 2  | 155.081504  | 78.044390       |                |                 |                |                  | P    | 1814.998574 | 908.002925      | 1797.972025    | 899.489651      | 1796.988009    | 898.997643       | 13 |
| 3  | 284.124097  | 142.565687      |                |                 | 266.113532     | 133.560404       | E    | 1717.945810 | 859.476543      | 1700.919261    | 850.963269      | 1699.935245    | 850.471261       | 12 |
| 4  | 383.192511  | 192.099894      |                |                 | 365.181946     | 183.094611       | V    | 1588.903217 | 794.955247      | 1571.876668    | 786.441972      | 1570.892652    | 785.949964       | 11 |
| 5  | 822.417837  | 411.712557      | 805.391288     | 403.199282      | 804.407272     | 402.707274       | Q    | 1489.834803 | 745.421040      | 1472.808254    | 736.907765      | 1471.824238    | 736.415757       | 10 |
| 6  | 935.501901  | 468.254589      | 918.475352     | 459.741314      | 917.491336     | 459.249306       | L    | 1050.609477 | 525.808377      | 1033.582928    | 517.295102      | 1032.598912    | 516.803094       | 9  |
| 7  | 1034.570315 | 517.788796      | 1017.543766    | 509.275521      | 1016.559750    | 508.783513       | V    | 937.525413  | 469.266345      | 920.498864     | 460.753070      | 919.514848     | 460.261062       | 8  |
| 8  | 1105.607429 | 553.307353      | 1088.580880    | 544.794078      | 1087.596864    | 544.302070       | A    | 838.456999  | 419.732138      | 821.430450     | 411.218863      | 820.446434     | 410.726855       | 7  |
| 9  | 1242.666341 | 621.836809      | 1225.639792    | 613.323534      | 1224.655776    | 612.831526       | H    | 767.419885  | 384.213581      | 750.393336     | 375.700306      | 749.409320     | 375.208298       | 6  |
| 10 | 1329.698369 | 665.352823      | 1312.671820    | 656.839548      | 1311.687804    | 656.347540       | S    | 630.360973  | 315.684125      | 613.334424     | 307.170850      | 612.350408     | 306.678842       | 5  |
| 11 | 1426.751133 | 713.879205      | 1409.724584    | 705.365930      | 1408.740568    | 704.873922       | P    | 543.328945  | 272.168111      | 526.302396     | 263.654836      |                |                  | 4  |
| 12 | 1612.830446 | 806.918861      | 1595.803897    | 798.405587      | 1594.819881    | 797.913579       | W    | 446.276181  | 223.641728      | 429.249632     | 215.128454      |                |                  | 3  |
| 13 | 1725.914510 | 863.460893      | 1708.887961    | 854.947619      | 1707.903945    | 854.455611       | L    | 260.196868  | 130.602072      | 243.170319     | 122.088797      |                |                  | 2  |
| 14 |             |                 |                |                 |                |                  | K    | 147.112804  | 74.060040       | 130.086255     | 65.546765       |                |                  | 1  |

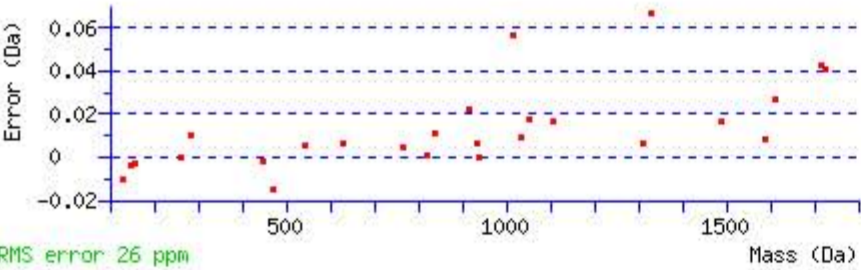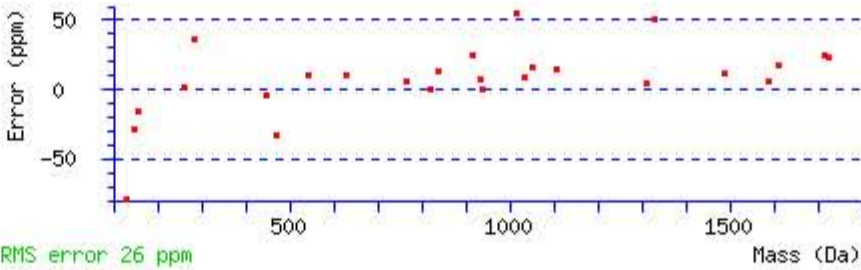

NCBI BLAST search of [GPEVQLVAHSPWLK](#)  
(Parameters: blastp, nr protein database, expect=20000, no filter, PAM30)  
Other BLAST [web gateways](#)

All matches to this query

| Score | Mr(calc):   | Delta     | Sequence                          |
|-------|-------------|-----------|-----------------------------------|
| 57.1  | 1871.012756 | 0.017206  | <a href="#">GPEVQLVAHSPWLK</a>    |
| 1.9   | 1871.037231 | -0.007269 | <a href="#">ISKLLMICQNAGISVPK</a> |
| 0.1   | 1871.037689 | -0.007727 | <a href="#">ILRPDATKNARNDFLK</a>  |

MATRIX

SCIENCE

Mascot Search Results

Peptide View

MS/MS Fragmentation of **HLVPGAPFLLQALVR**  
Found in **CO4A\_HUMAN**, Complement C4-A OS=Homo sapiens GN=C4A PE=1 SV=2

Match to Query 42959: 1941.162702 from(648.061510,3+) rtinseconds(2855) index(55999)  
Title: Locus:1.1.1.2229.5 File:"2013-07-02 CLN FXIII 180 min 2nd F 4.wiff"  
Data file C:\Program Files (x86)\Matrix Science\Mascot Daemon\mgf\8 FXIII 180 min 2nd\mascot\_daemon\_merge.mgf

Click mouse within plot area to zoom in by factor of two about that point  
Or, 

Plot from

100

 to 

1700

 Da 

Full range

  
Label all possible matches ☐ Label matches used for scoring ☒

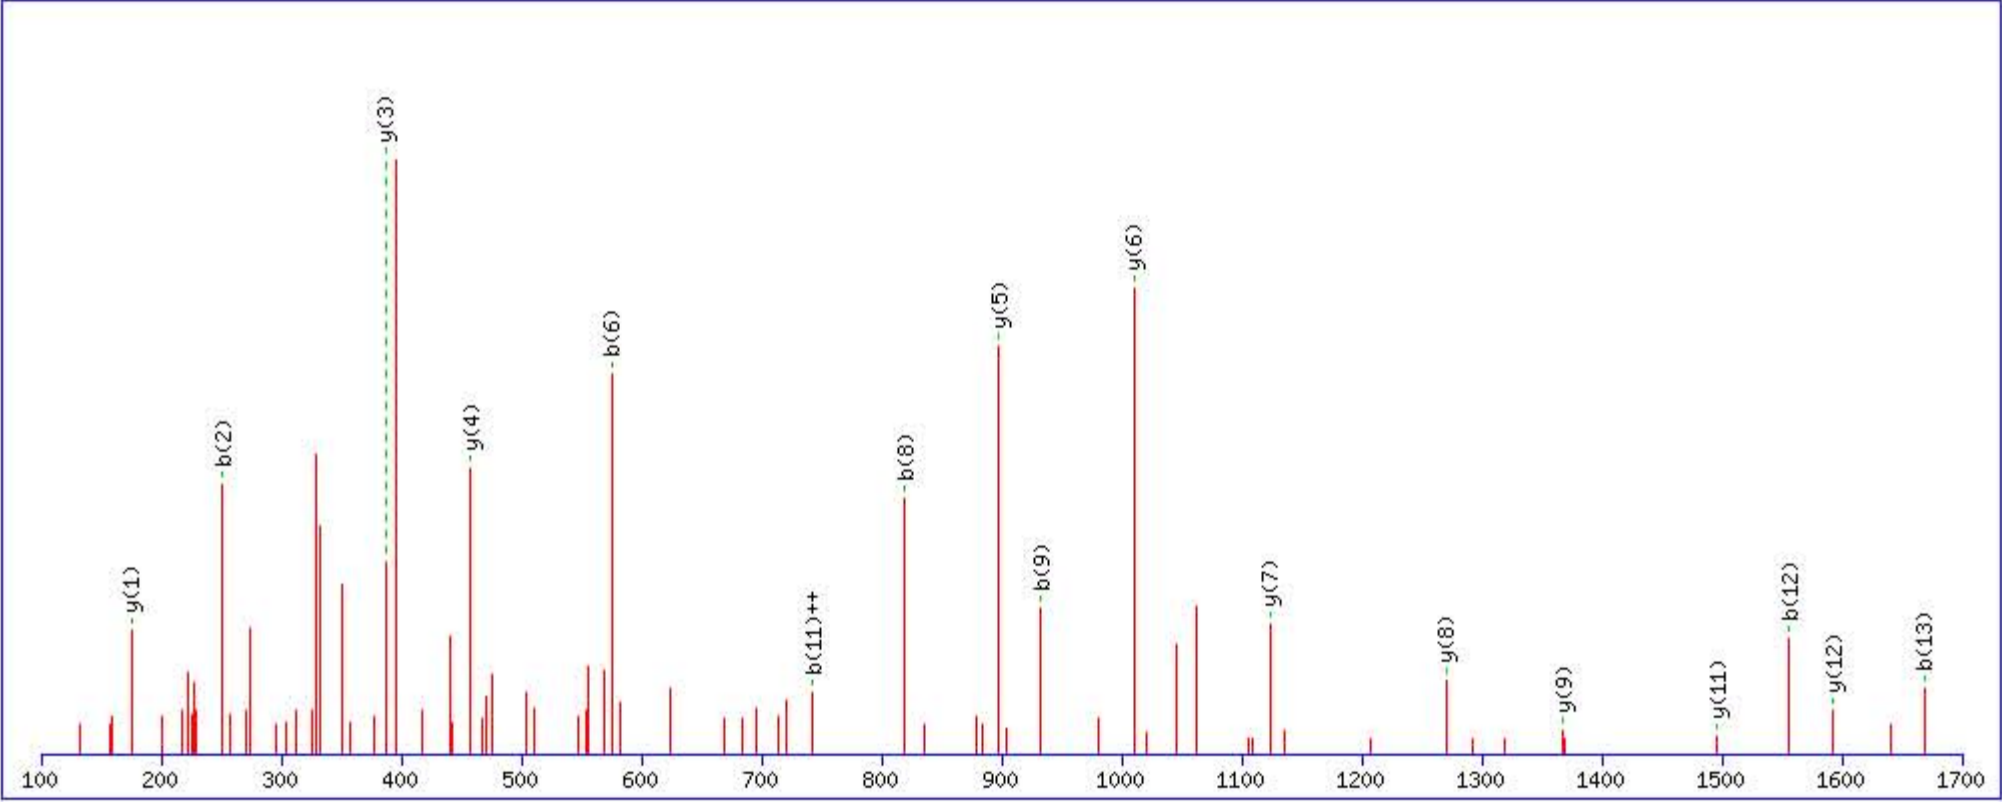

Monoisotopic mass of neutral peptide Mr(calc): 1941.138626  
Fixed modifications: Carbamidomethyl (C) (apply to specified residues or termini only)  
Variable modifications:  
Q11 : Biotin:Thermo-21345 (Q)  
Ions Score: 60 Expect: 1.5e-006  
Matches : 17/92 fragment ions using 31 most intense peaks ([help](#))

| #  | b           | b <sup>++</sup> | b <sup>+</sup> | b <sup>++</sup> | Seq. | y           | y <sup>++</sup> | y <sup>+</sup> | y <sup>++</sup> | #  |
|----|-------------|-----------------|----------------|-----------------|------|-------------|-----------------|----------------|-----------------|----|
| 1  | 138.066188  | 69.536732       |                |                 | H    |             |                 |                |                 | 15 |
| 2  | 251.150252  | 126.078764      |                |                 | L    | 1805.086996 | 903.047136      | 1788.060447    | 894.533862      | 14 |
| 3  | 350.218666  | 175.612971      |                |                 | V    | 1692.002932 | 846.505104      | 1674.976383    | 837.991830      | 13 |
| 4  | 447.271430  | 224.139353      |                |                 | P    | 1592.934518 | 796.970897      | 1575.907969    | 788.457623      | 12 |
| 5  | 504.292894  | 252.650085      |                |                 | G    | 1495.881754 | 748.444515      | 1478.855205    | 739.931241      | 11 |
| 6  | 575.330008  | 288.168642      |                |                 | A    | 1438.860290 | 719.933783      | 1421.833741    | 711.420509      | 10 |
| 7  | 672.382772  | 336.695024      |                |                 | P    | 1367.823176 | 684.415226      | 1350.796627    | 675.901952      | 9  |
| 8  | 819.451186  | 410.229231      |                |                 | F    | 1270.770412 | 635.888844      | 1253.743863    | 627.375570      | 8  |
| 9  | 932.535250  | 466.771263      |                |                 | L    | 1123.701998 | 562.354637      | 1106.675449    | 553.841363      | 7  |
| 10 | 1045.619314 | 523.313295      |                |                 | L    | 1010.617934 | 505.812605      | 993.591385     | 497.299331      | 6  |
| 11 | 1484.844640 | 742.925958      | 1467.818091    | 734.412684      | Q    | 897.533870  | 449.270573      | 880.507321     | 440.757298      | 5  |
| 12 | 1555.881754 | 778.444515      | 1538.855205    | 769.931241      | A    | 458.308544  | 229.657910      | 441.281995     | 221.144635      | 4  |
| 13 | 1668.965818 | 834.986547      | 1651.939269    | 826.473273      | L    | 387.271430  | 194.139353      | 370.244881     | 185.626078      | 3  |
| 14 | 1768.034232 | 884.520754      | 1751.007683    | 876.007480      | V    | 274.187366  | 137.597321      | 257.160817     | 129.084047      | 2  |
| 15 |             |                 |                |                 | R    | 175.118952  | 88.063114       | 158.092403     | 79.549839       | 1  |

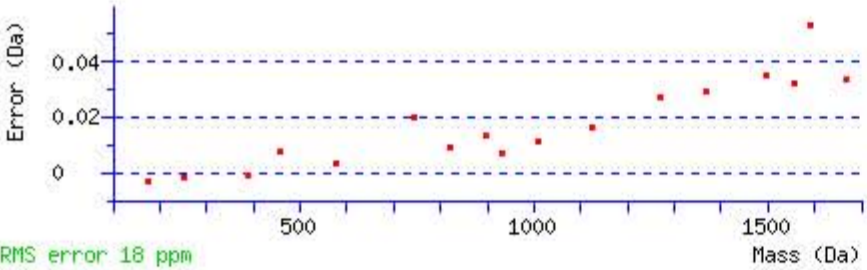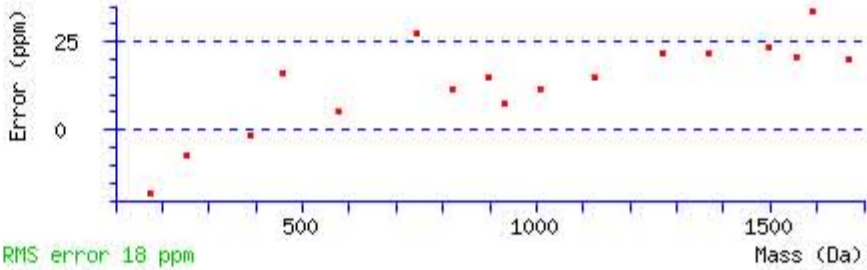

NCBI BLAST search of [HLVPGAPFLLQALVR](#)  
(Parameters: blastp, nr protein database, expect=20000, no filter, PAM30)  
Other BLAST [web gateways](#)

All matches to this query

| Score | Mr(calc):   | Delta    | Sequence                        |
|-------|-------------|----------|---------------------------------|
| 59.8  | 1941.138626 | 0.024076 | <a href="#">HLVPGAPFLLQALVR</a> |

MATRIX

SCIENCE

Mascot Search Results

Peptide View

MS/MS Fragmentation of **EPFLSCCQFAESLR**  
Found in **CO4A\_HUMAN**, Complement C4-A OS=Homo sapiens GN=C4A PE=1 SV=2

Match to Query 45812: 2053.967652 from(685.663160,3+) rtinseconds(2491) index(37010)  
Title: Locus:1.1.1.976.15 File:"2013-07-02 CLN FXIII 180 min 2nd F 3.wiff"  
Data file C:\Program Files (x86)\Matrix Science\Mascot Daemon\mgf\8 FXIII 180 min 2nd\mascot\_daemon\_merge.mgf

Click mouse within plot area to zoom in by factor of two about that point  
Or, 

Plot from

100

 to 

1700

 Da 

Full range

  
Label all possible matches ☐ Label matches used for scoring ☒

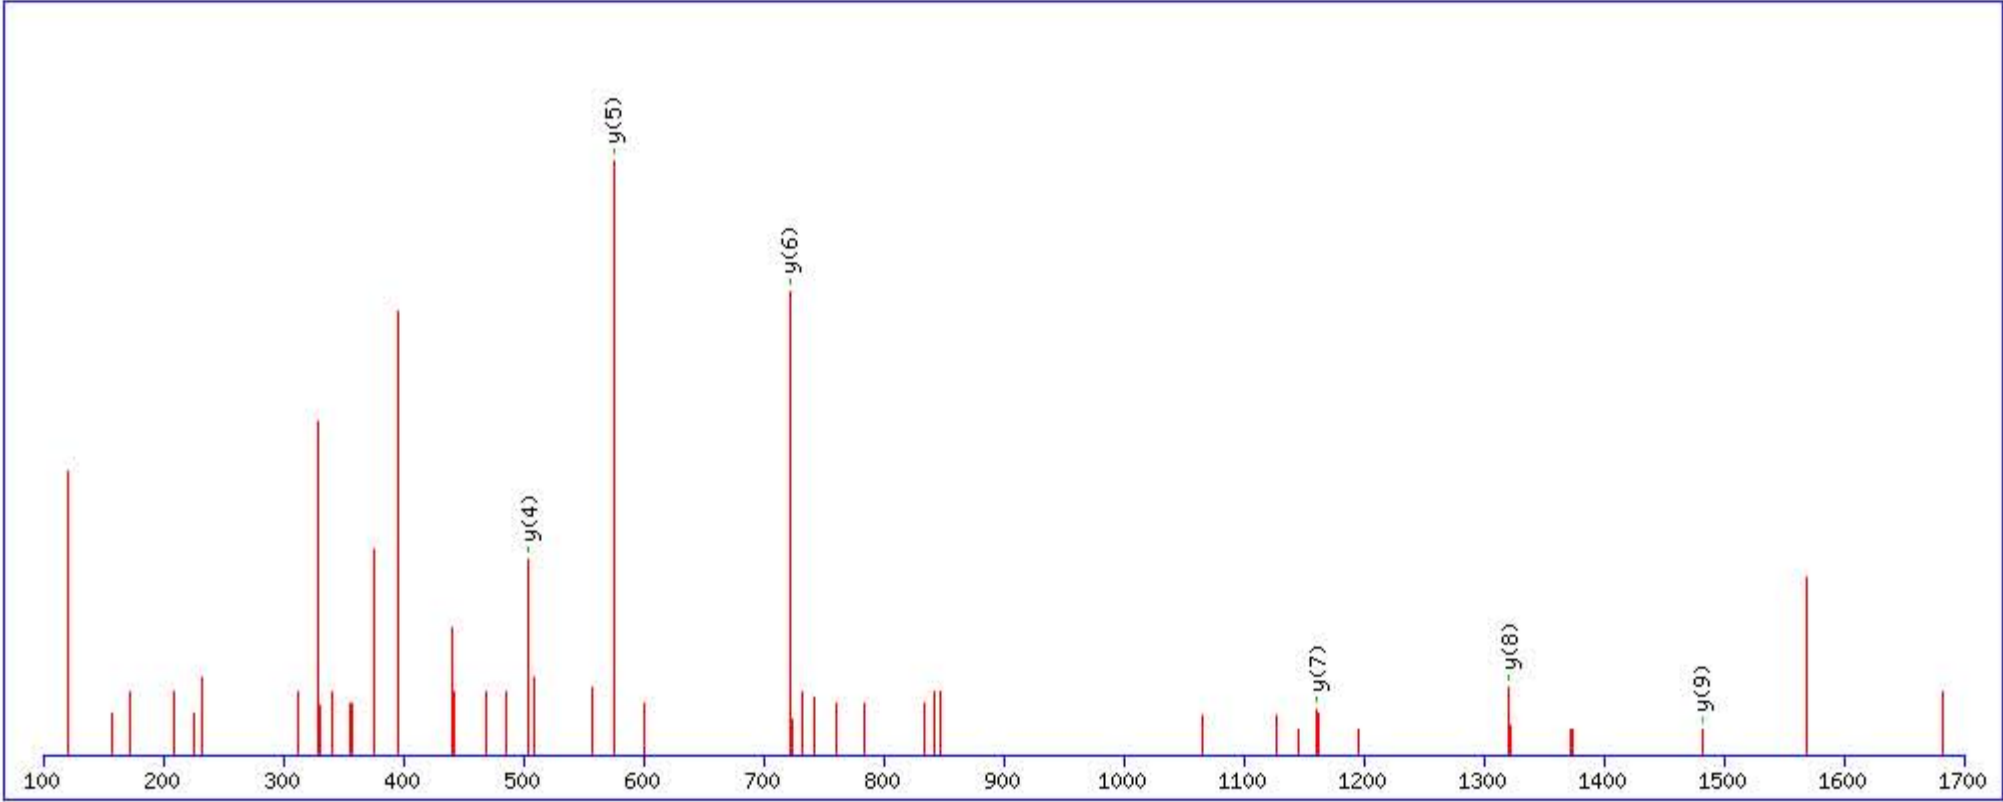

Monoisotopic mass of neutral peptide Mr(calc): 2053.942368  
Fixed modifications: Carbamidomethyl (C) (apply to specified residues or termini only)  
Variable modifications:  
Q8 : Biotin:Thermo-21345 (Q)  
Ions Score: 28 Expect: 0.025  
Matches : 6/138 fragment ions using 13 most intense peaks [\(help\)](#)

| #  | b           | b <sup>++</sup> | b <sup>*</sup> | b <sup>*++</sup> | b <sup>0</sup> | b <sup>0++</sup> | Seq. | y           | y <sup>++</sup> | y <sup>*</sup> | y <sup>*++</sup> | y <sup>0</sup> | y <sup>0++</sup> | #  |
|----|-------------|-----------------|----------------|------------------|----------------|------------------|------|-------------|-----------------|----------------|------------------|----------------|------------------|----|
| 1  | 130.049869  | 65.528572       |                |                  | 112.039304     | 56.523290        | E    |             |                 |                |                  |                |                  | 14 |
| 2  | 227.102633  | 114.054954      |                |                  | 209.092068     | 105.049672       | P    | 1925.907059 | 963.457168      | 1908.880510    | 954.943893       | 1907.896494    | 954.451885       | 13 |
| 3  | 374.171047  | 187.589161      |                |                  | 356.160482     | 178.583879       | F    | 1828.854295 | 914.930786      | 1811.827746    | 906.417511       | 1810.843730    | 905.925503       | 12 |
| 4  | 487.255111  | 244.131193      |                |                  | 469.244546     | 235.125911       | L    | 1681.785881 | 841.396579      | 1664.759332    | 832.883304       | 1663.775316    | 832.391296       | 11 |
| 5  | 574.287139  | 287.647208      |                |                  | 556.276574     | 278.641925       | S    | 1568.701817 | 784.854547      | 1551.675268    | 776.341272       | 1550.691252    | 775.849264       | 10 |
| 6  | 734.317788  | 367.662532      |                |                  | 716.307223     | 358.657250       | C    | 1481.669789 | 741.338533      | 1464.643240    | 732.825258       | 1463.659224    | 732.333250       | 9  |
| 7  | 894.348437  | 447.677857      |                |                  | 876.337872     | 438.672574       | C    | 1321.639140 | 661.323208      | 1304.612591    | 652.809934       | 1303.628575    | 652.317926       | 8  |
| 8  | 1333.573763 | 667.290520      | 1316.547214    | 658.777245       | 1315.563198    | 658.285237       | Q    | 1161.608491 | 581.307884      | 1144.581942    | 572.794609       | 1143.597926    | 572.302601       | 7  |
| 9  | 1480.642177 | 740.824727      | 1463.615628    | 732.311452       | 1462.631612    | 731.819444       | F    | 722.383165  | 361.695221      | 705.356616     | 353.181946       | 704.372600     | 352.689938       | 6  |
| 10 | 1551.679291 | 776.343284      | 1534.652742    | 767.830009       | 1533.668726    | 767.338001       | A    | 575.314751  | 288.161014      | 558.288202     | 279.647739       | 557.304186     | 279.155731       | 5  |
| 11 | 1680.721884 | 840.864580      | 1663.695335    | 832.351306       | 1662.711319    | 831.859298       | E    | 504.277637  | 252.642457      | 487.251088     | 244.129182       | 486.267072     | 243.637174       | 4  |
| 12 | 1767.753912 | 884.380594      | 1750.727363    | 875.867320       | 1749.743347    | 875.375312       | S    | 375.235044  | 188.121160      | 358.208495     | 179.607885       | 357.224479     | 179.115877       | 3  |
| 13 | 1880.837976 | 940.922626      | 1863.811427    | 932.409352       | 1862.827411    | 931.917344       | L    | 288.203016  | 144.605146      | 271.176467     | 136.091871       |                |                  | 2  |
| 14 |             |                 |                |                  |                |                  | R    | 175.118952  | 88.063114       | 158.092403     | 79.549839        |                |                  | 1  |

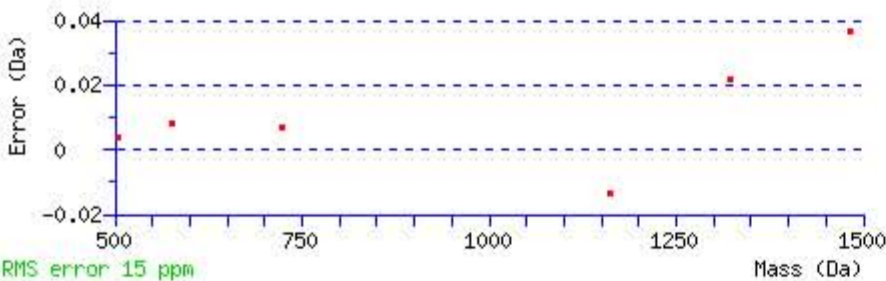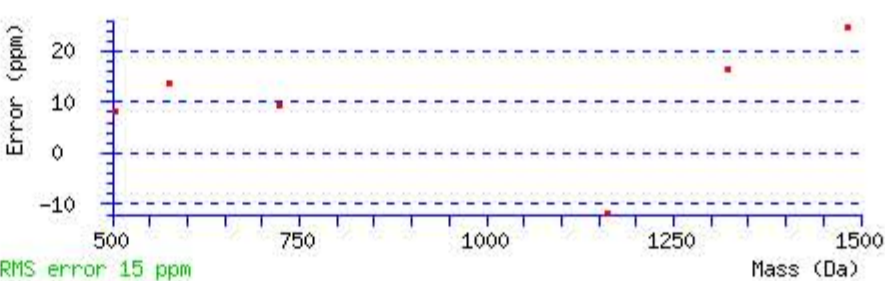

NCBI BLAST search of [EPFLSCCQFAESLR](#)  
(Parameters: blastp, nr protein database, expect=20000, no filter, PAM30)  
Other BLAST [web gateways](#)

All matches to this query

| Score | Mr(calc):   | Delta    | Sequence                       |
|-------|-------------|----------|--------------------------------|
| 28.3  | 2053.942368 | 0.025284 | <a href="#">EPFLSCCQFAESLR</a> |

MATRIX

SCIENCE

Mascot Search Results

Peptide View

MS/MS Fragmentation of **LLATLCSAEVCQCAEGK**  
Found in **CO4A\_HUMAN**, Complement C4-A OS=Homo sapiens GN=C4A PE=1 SV=2

Match to Query 48946: 2220.056982 from(741.026270,3+) rtinseconds(2115) index(67084)  
Title: Locus:1.1.1.2011.11 File:"2013-07-02 CLN FXIII 180 min 2nd FT.wiff"  
Data file C:\Program Files (x86)\Matrix Science\Mascot Daemon\mgf\8 FXIII 180 min 2nd\mascot\_daemon\_merge.mgf

Click mouse within plot area to zoom in by factor of two about that point

Or, 

Plot from

100

 to 

2000

 Da 

Full range

Label all possible matches ☐ Label matches used for scoring ☒

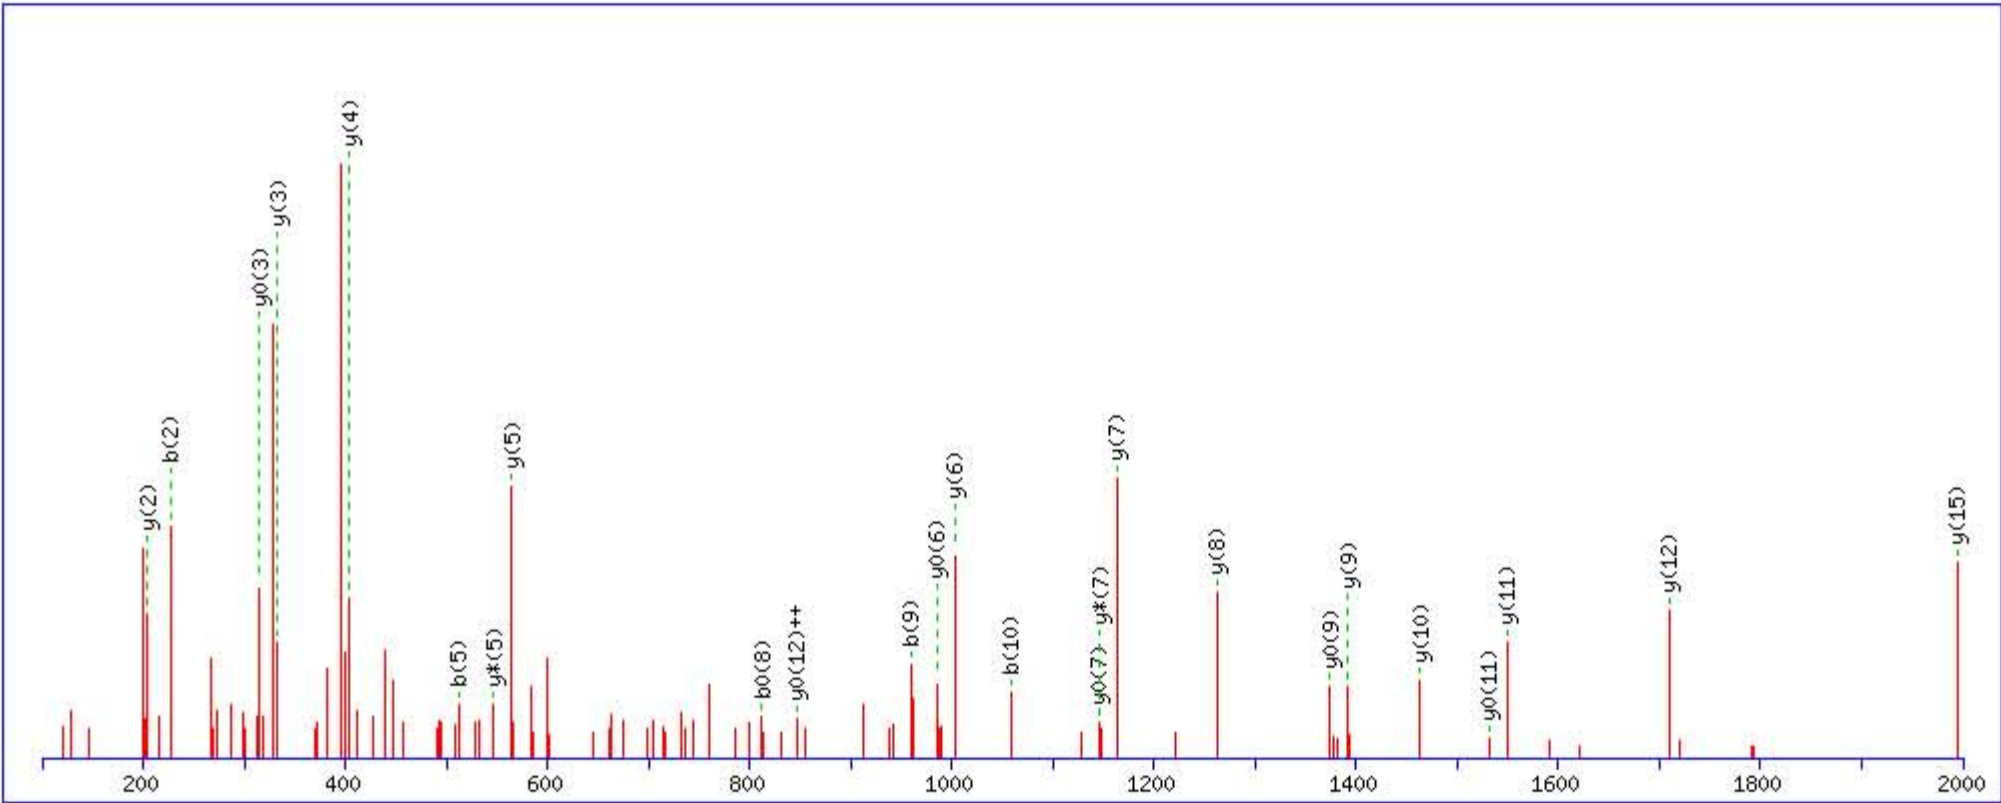

Monoisotopic mass of neutral peptide Mr(calc): 2220.041092  
Fixed modifications: Carbamidomethyl (C) (apply to specified residues or termini only)  
Variable modifications:  
Q12 : Biotin:Thermo-21345 (Q)  
Ions Score: 55 Expect: 2e-005  
Matches : 25/160 fragment ions using 60 most intense peaks [\(help\)](#)

| #  | b           | b <sup>++</sup> | b <sup>*</sup> | b <sup>*++</sup> | b <sup>0</sup> | b <sup>0++</sup> | Seq. | y           | y <sup>++</sup> | y <sup>*</sup> | y <sup>*++</sup> | y <sup>0</sup> | y <sup>0++</sup> | #  |
|----|-------------|-----------------|----------------|------------------|----------------|------------------|------|-------------|-----------------|----------------|------------------|----------------|------------------|----|
| 1  | 114.091340  | 57.549308       |                |                  |                |                  | L    |             |                 |                |                  |                |                  | 17 |
| 2  | 227.175404  | 114.091340      |                |                  |                |                  | L    | 2107.964318 | 1054.485797     | 2090.937769    | 1045.972522      | 2089.953753    | 1045.480514      | 16 |
| 3  | 298.212518  | 149.609897      |                |                  |                |                  | A    | 1994.880254 | 997.943765      | 1977.853705    | 989.430491       | 1976.869689    | 988.938483       | 15 |
| 4  | 399.260197  | 200.133737      |                |                  | 381.249632     | 191.128454       | T    | 1923.843140 | 962.425208      | 1906.816591    | 953.911934       | 1905.832575    | 953.419926       | 14 |
| 5  | 512.344261  | 256.675769      |                |                  | 494.333696     | 247.670486       | L    | 1822.795461 | 911.901369      | 1805.768912    | 903.388094       | 1804.784896    | 902.896086       | 13 |
| 6  | 672.374910  | 336.691093      |                |                  | 654.364345     | 327.685811       | C    | 1709.711397 | 855.359337      | 1692.684848    | 846.846062       | 1691.700832    | 846.354054       | 12 |
| 7  | 759.406938  | 380.207107      |                |                  | 741.396373     | 371.201825       | S    | 1549.680748 | 775.344012      | 1532.654199    | 766.830738       | 1531.670183    | 766.338730       | 11 |
| 8  | 830.444052  | 415.725664      |                |                  | 812.433487     | 406.720382       | A    | 1462.648720 | 731.827998      | 1445.622171    | 723.314724       | 1444.638155    | 722.822716       | 10 |
| 9  | 959.486645  | 480.246961      |                |                  | 941.476080     | 471.241678       | E    | 1391.611606 | 696.309441      | 1374.585057    | 687.796167       | 1373.601041    | 687.304159       | 9  |
| 10 | 1058.555059 | 529.781168      |                |                  | 1040.544494    | 520.775885       | V    | 1262.569013 | 631.788145      | 1245.542464    | 623.274870       | 1244.558448    | 622.782862       | 8  |
| 11 | 1218.585708 | 609.796492      |                |                  | 1200.575143    | 600.791210       | C    | 1163.500599 | 582.253938      | 1146.474050    | 573.740663       | 1145.490034    | 573.248655       | 7  |
| 12 | 1657.811034 | 829.409155      | 1640.784485    | 820.895881       | 1639.800469    | 820.403873       | Q    | 1003.469950 | 502.238613      | 986.443401     | 493.725339       | 985.459385     | 493.233331       | 6  |
| 13 | 1817.841683 | 909.424480      | 1800.815134    | 900.911205       | 1799.831118    | 900.419197       | C    | 564.244624  | 282.625950      | 547.218075     | 274.112676       | 546.234059     | 273.620668       | 5  |
| 14 | 1888.878797 | 944.943037      | 1871.852248    | 936.429762       | 1870.868232    | 935.937754       | A    | 404.213975  | 202.610626      | 387.187426     | 194.097351       | 386.203410     | 193.605343       | 4  |
| 15 | 2017.921390 | 1009.464333     | 2000.894841    | 1000.951059      | 1999.910825    | 1000.459051      | E    | 333.176861  | 167.092069      | 316.150312     | 158.578794       | 315.166296     | 158.086786       | 3  |
| 16 | 2074.942854 | 1037.975065     | 2057.916305    | 1029.461790      | 2056.932289    | 1028.969782      | G    | 204.134268  | 102.570772      | 187.107719     | 94.057497        |                |                  | 2  |
| 17 |             |                 |                |                  |                |                  | K    | 147.112804  | 74.060040       | 130.086255     | 65.546765        |                |                  | 1  |

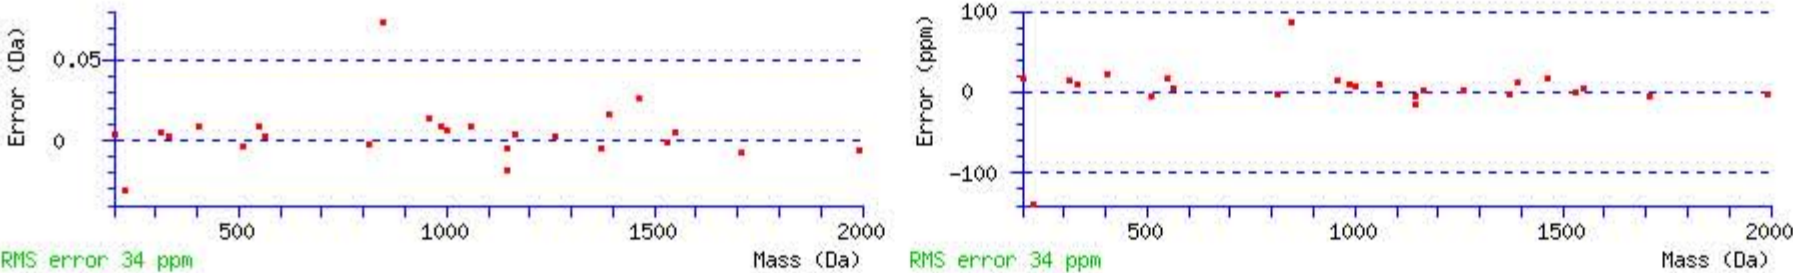

NCBI BLAST search of [LLATLCSAEVCQCAEGK](#)  
(Parameters: blastp, nr protein database, expect=20000, no filter, PAM30)  
Other BLAST [web gateways](#)

All matches to this query

| Score | Mr(calc):   | Delta    | Sequence                           |
|-------|-------------|----------|------------------------------------|
| 54.6  | 2220.041092 | 0.015890 | <a href="#">LLATLCSAEVCQCAEGK</a>  |
| 4.5   | 2220.048080 | 0.008902 | <a href="#">EPQEGAELPEATGTTSHR</a> |

MATRIX

SCIENCE

Mascot Search Results

Peptide View

MS/MS Fragmentation of **AAANQMR**  
Found in **CO4A\_HUMAN**, Complement C4-A OS=Homo sapiens GN=C4A PE=1 SV=2

Match to Query 15686: 1071.535968 from(536.775260,2+) rtinseconds(1375) index(30281)  
Title: Locus:1.1.1.587.15 File:"2013-07-02 CLN FXIII 180 min 2nd F 3.wiff"  
Data file C:\Program Files (x86)\Matrix Science\Mascot Daemon\mgf\8 FXIII 180 min 2nd\mascot\_daemon\_merge.mgf

Click mouse within plot area to zoom in by factor of two about that point  
Or, 

Plot from

100

 to 

1050

 Da 

Full range

  
Label all possible matches ☐ Label matches used for scoring ☒



Monoisotopic mass of neutral peptide Mr(calc): 1071.531723  
Fixed modifications: Carbamidomethyl (C) (apply to specified residues or termini only)  
Variable modifications:  
Q5 : Biotin:Thermo-21345 (Q)  
Ions Score: 39 Expect: 0.0026  
Matches : 10/42 fragment ions using 17 most intense peaks ([help](#))

| # | b          | b <sup>++</sup> | b <sup>*</sup> | b <sup>*++</sup> | Seq. | y           | y <sup>++</sup> | y <sup>*</sup> | y <sup>*++</sup> | # |
|---|------------|-----------------|----------------|------------------|------|-------------|-----------------|----------------|------------------|---|
| 1 | 72.044390  | 36.525833       |                |                  | A    |             |                 |                |                  | 7 |
| 2 | 143.081504 | 72.044390       |                |                  | A    | 1001.501918 | 501.254597      | 984.475369     | 492.741323       | 6 |
| 3 | 214.118618 | 107.562947      |                |                  | A    | 930.464804  | 465.736040      | 913.438255     | 457.222766       | 5 |
| 4 | 328.161545 | 164.584410      | 311.134996     | 156.071136       | N    | 859.427690  | 430.217483      | 842.401141     | 421.704209       | 4 |
| 5 | 767.386871 | 384.197074      | 750.360322     | 375.683799       | Q    | 745.384763  | 373.196020      | 728.358214     | 364.682745       | 3 |
| 6 | 898.427356 | 449.717316      | 881.400807     | 441.204042       | M    | 306.159437  | 153.583357      | 289.132888     | 145.070082       | 2 |
| 7 |            |                 |                |                  | R    | 175.118952  | 88.063114       | 158.092403     | 79.549840        | 1 |



NCBI BLAST search of [AAANQMR](#)  
(Parameters: blastp, nr protein database, expect=20000, no filter, PAM30)  
Other BLAST [web gateways](#)

All matches to this query

| Score | Mr(calc):   | Delta    | Sequence                    |
|-------|-------------|----------|-----------------------------|
| 38.7  | 1071.531723 | 0.004245 | <a href="#">AAANQMR</a>     |
| 19.7  | 1071.530853 | 0.005115 | <a href="#">AAEESGAKGPR</a> |

MATRIX

SCIENCE

Mascot Search Results

Peptide View

MS/MS Fragmentation of **VQQPDCR**  
Found in **CO4A\_HUMAN**, Complement C4-A OS=Homo sapiens GN=C4A PE=1 SV=2

Match to Query 20808: 1212.580108 from(607.297330,2+) rtinseconds(1289) index(45674)  
Title: Locus:1.1.1.1686.18 File:"2013-07-02 CLN FXIII 180 min 2nd F 4.wiff"  
Data file C:\Program Files (x86)\Matrix Science\Mascot Daemon\mgf\8 FXIII 180 min 2nd\mascot\_daemon\_merge.mgf

Click mouse within plot area to zoom in by factor of two about that point  
Or,   to  Da   
Label all possible matches ☐ Label matches used for scoring ☒

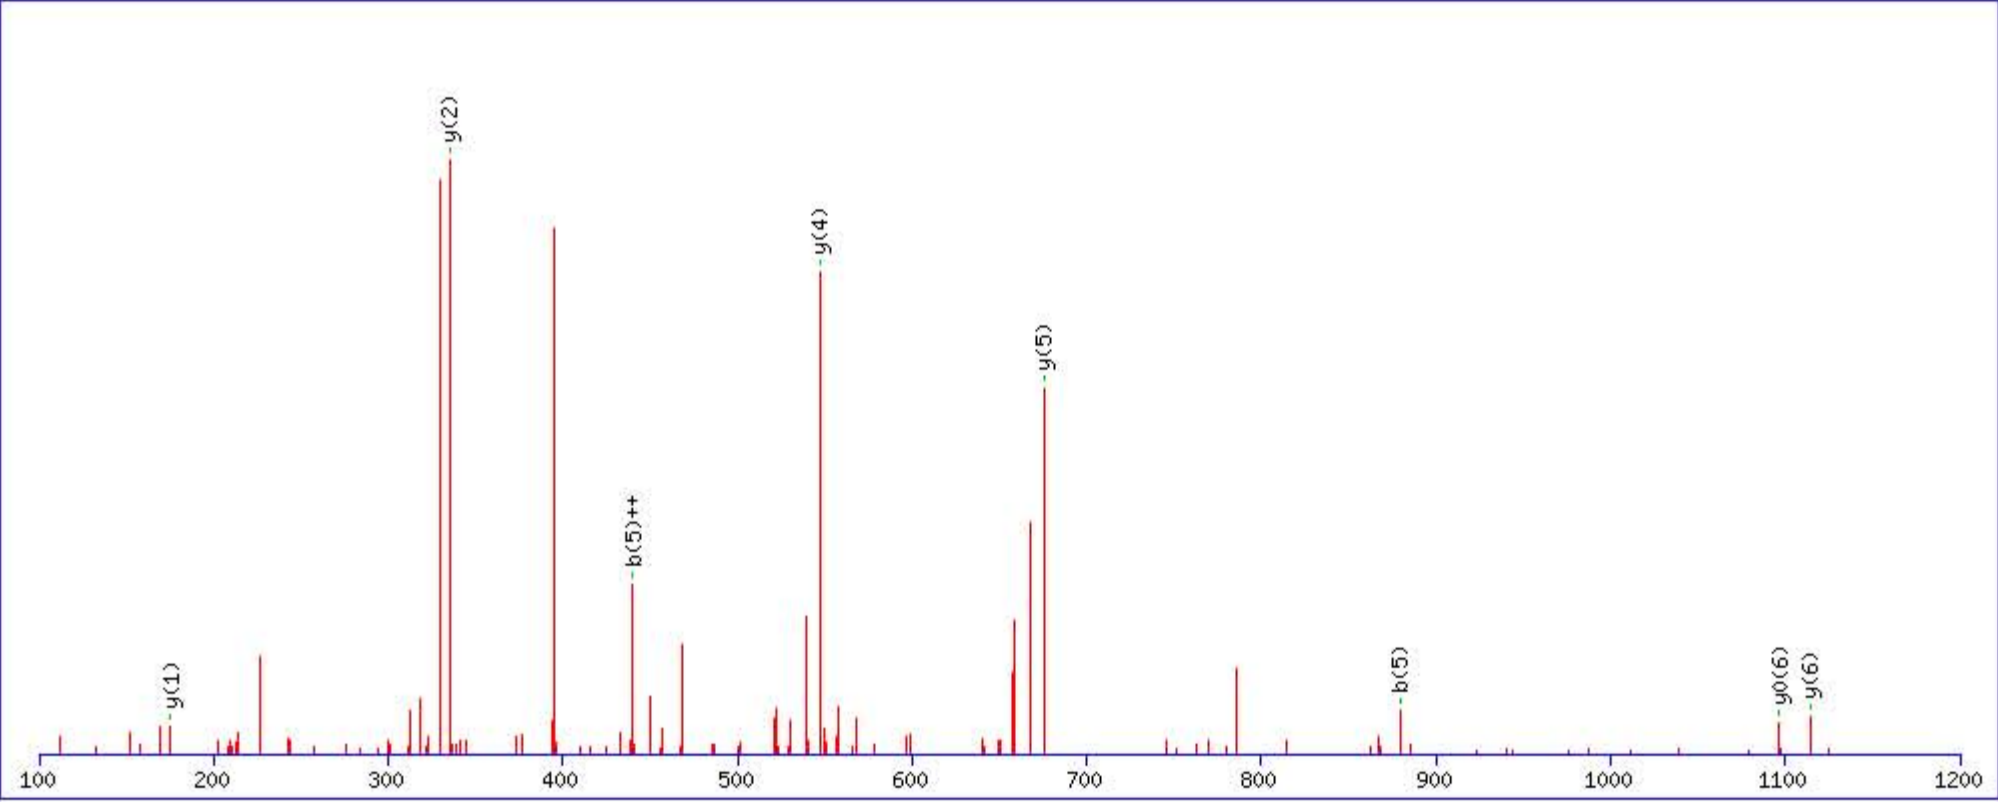

Monoisotopic mass of neutral peptide Mr(calc): 1212.574356  
Fixed modifications: Carbamidomethyl (C) (apply to specified residues or termini only)  
Variable modifications:  
Q2 : Biotin:Thermo-21345 (Q)  
Ions Score: 36 Expect: 0.003  
Matches : 8/58 fragment ions using 11 most intense peaks ([help](#))

| # | b           | b <sup>++</sup> | b <sup>*</sup> | b <sup>*++</sup> | b <sup>0</sup> | b <sup>0++</sup> | Seq. | y           | y <sup>++</sup> | y <sup>*</sup> | y <sup>*++</sup> | y <sup>0</sup> | y <sup>0++</sup> | # |
|---|-------------|-----------------|----------------|------------------|----------------|------------------|------|-------------|-----------------|----------------|------------------|----------------|------------------|---|
| 1 | 100.075690  | 50.541483       |                |                  |                |                  | V    |             |                 |                |                  |                |                  | 7 |
| 2 | 539.301016  | 270.154146      | 522.274467     | 261.640872       |                |                  | Q    | 1114.513212 | 557.760244      | 1097.486663    | 549.246970       | 1096.502647    | 548.754962       | 6 |
| 3 | 667.359594  | 334.183435      | 650.333045     | 325.670161       |                |                  | Q    | 675.287886  | 338.147581      | 658.261337     | 329.634307       | 657.277321     | 329.142299       | 5 |
| 4 | 764.412358  | 382.709817      | 747.385809     | 374.196543       |                |                  | P    | 547.229308  | 274.118292      | 530.202759     | 265.605018       | 529.218743     | 265.113010       | 4 |
| 5 | 879.439301  | 440.223289      | 862.412752     | 431.710014       | 861.428736     | 431.218006       | D    | 450.176544  | 225.591910      | 433.149995     | 217.078635       | 432.165979     | 216.586627       | 3 |
| 6 | 1039.469950 | 520.238613      | 1022.443401    | 511.725339       | 1021.459385    | 511.233331       | C    | 335.149601  | 168.078438      | 318.123052     | 159.565164       |                |                  | 2 |
| 7 |             |                 |                |                  |                |                  | R    | 175.118952  | 88.063114       | 158.092403     | 79.549839        |                |                  | 1 |



NCBI **BLAST** search of [VQQPDCR](#)  
(Parameters: blastp, nr protein database, expect=20000, no filter, PAM30)  
Other BLAST [web gateways](#)

All matches to this query

| Score | Mr(calc):   | Delta     | Sequence                    |
|-------|-------------|-----------|-----------------------------|
| 36.4  | 1212.574356 | 0.005752  | <a href="#">VQQPDCR</a>     |
| 22.6  | 1212.574356 | 0.005752  | <a href="#">VQQPDCR</a>     |
| 11.5  | 1212.596115 | -0.016007 | <a href="#">YFVEAGAMAVR</a> |
| 4.5   | 1212.592102 | -0.011994 | <a href="#">VQEDQQR</a>     |
| 1.1   | 1212.592758 | -0.012650 | <a href="#">IYYVDHFTR</a>   |
| 0.8   | 1212.562241 | 0.017867  | <a href="#">TTAQYDQASTK</a> |
| 0.6   | 1212.582199 | -0.002091 | <a href="#">GRMPPSEFHR</a>  |

MATRIX

SCIENCE

Mascot Search Results

Peptide View

MS/MS Fragmentation of **VEYGFQVK**  
Found in **CO4A\_HUMAN**, Complement C4-A OS=Homo sapiens GN=C4A PE=1 SV=2

Match to Query 22737: 1279.673408 from(640.843980,2+) rtinseconds(1984) index(34172)  
Title: Locus:1.1.1.799.18 File:"2013-07-02 CLN FXIII 180 min 2nd F 3.wiff"  
Data file C:\Program Files (x86)\Matrix Science\Mascot Daemon\mgf\8 FXIII 180 min 2nd\mascot\_daemon\_merge.mgf

Click mouse within plot area to zoom in by factor of two about that point  
Or, 

Plot from

100

 to 

1300

 Da 

Full range

  
Label all possible matches ☐ Label matches used for scoring ☒



Monoisotopic mass of neutral peptide Mr(calc): 1279.663483  
Fixed modifications: Carbamidomethyl (C) (apply to specified residues or termini only)  
Variable modifications:  
Q6 : Biotin:Thermo-21345 (Q)  
Ions Score: 31 Expect: 0.016  
Matches : 13/60 fragment ions using 23 most intense peaks [\(help\)](#)

| # | b           | b <sup>++</sup> | b <sup>*</sup> | b <sup>+++</sup> | b <sup>0</sup> | b <sup>0++</sup> | Seq. | y           | y <sup>++</sup> | y <sup>*</sup> | y <sup>+++</sup> | y <sup>0</sup> | y <sup>0++</sup> | # |
|---|-------------|-----------------|----------------|------------------|----------------|------------------|------|-------------|-----------------|----------------|------------------|----------------|------------------|---|
| 1 | 100.075690  | 50.541483       |                |                  |                |                  | V    |             |                 |                |                  |                |                  | 8 |
| 2 | 229.118283  | 115.062780      |                |                  | 211.107718     | 106.057497       | E    | 1181.602344 | 591.304810      | 1164.575795    | 582.791536       | 1163.591779    | 582.299528       | 7 |
| 3 | 392.181612  | 196.594444      |                |                  | 374.171047     | 187.589162       | Y    | 1052.559751 | 526.783514      | 1035.533202    | 518.270239       |                |                  | 6 |
| 4 | 449.203076  | 225.105176      |                |                  | 431.192511     | 216.099894       | G    | 889.496422  | 445.251849      | 872.469873     | 436.738575       |                |                  | 5 |
| 5 | 596.271490  | 298.639383      |                |                  | 578.260925     | 289.634101       | F    | 832.474958  | 416.741117      | 815.448409     | 408.227843       |                |                  | 4 |
| 6 | 1035.496816 | 518.252046      | 1018.470267    | 509.738772       | 1017.486251    | 509.246764       | Q    | 685.406544  | 343.206910      | 668.379995     | 334.693636       |                |                  | 3 |
| 7 | 1134.565230 | 567.786253      | 1117.538681    | 559.272979       | 1116.554665    | 558.780971       | V    | 246.181218  | 123.594247      | 229.154669     | 115.080973       |                |                  | 2 |
| 8 |             |                 |                |                  |                |                  | K    | 147.112804  | 74.060040       | 130.086255     | 65.546765        |                |                  | 1 |



NCBI BLAST search of [VEYGFQVK](#)  
(Parameters: blastp, nr protein database, expect=20000, no filter, PAM30)  
Other BLAST [web gateways](#)

All matches to this query

| Score | Mr(calc):   | Delta     | Sequence                     |
|-------|-------------|-----------|------------------------------|
| 30.6  | 1279.663483 | 0.009925  | <a href="#">VEYGFQVK</a>     |
| 12.3  | 1279.663483 | 0.009925  | <a href="#">QFVGYLDK</a>     |
| 7.1   | 1279.659470 | 0.013938  | <a href="#">VCSFGKQVVEK</a>  |
| 3.3   | 1279.684601 | -0.011193 | <a href="#">TKPLMTEFSVK</a>  |
| 3.1   | 1279.684601 | -0.011193 | <a href="#">MSASAVFILDVK</a> |
| 3.0   | 1279.681229 | -0.007821 | <a href="#">EVTVKEWYVK</a>   |
| 0.9   | 1279.670670 | 0.002738  | <a href="#">VEHKSNOQK</a>    |
| 0.6   | 1279.677200 | -0.003792 | <a href="#">EYVGKTSLVER</a>  |

MATRIX

SCIENCE

Mascot Search Results

Peptide View

MS/MS Fragmentation of **DKGQAGLQR**  
Found in **CO4A\_HUMAN**, Complement C4-A OS=Homo sapiens GN=C4A PE=1 SV=2

Match to Query 22931: 1282.691548 from(642.353050,2+) rtinseconds(1340) index(46002)  
Title: Locus:1.1.1.1704.11 File:"2013-07-02 CLN FXIII 180 min 2nd F 4.wiff"  
Data file C:\Program Files (x86)\Matrix Science\Mascot Daemon\mgf\8 FXIII 180 min 2nd\mascot\_daemon\_merge.mgf

Click mouse within plot area to zoom in by factor of two about that point  
Or, 

Plot from

100

 to 

1800

 Da 

Full range

  
Label all possible matches ☐ Label matches used for scoring ☒



Monoisotopic mass of neutral peptide Mr(calc): 1282.681580  
Fixed modifications: Carbamidomethyl (C) (apply to specified residues or termini only)  
Variable modifications:  
Q8 : Biotin:Thermo-21345 (Q)  
Ions Score: 55 Expect: 6.8e-005  
Matches : 8/78 fragment ions using 12 most intense peaks [\(help\)](#)

| # | b           | b <sup>++</sup> | b <sup>*</sup> | b <sup>*++</sup> | b <sup>0</sup> | b <sup>0++</sup> | Seq. | y           | y <sup>++</sup> | y <sup>*</sup> | y <sup>*++</sup> | # |
|---|-------------|-----------------|----------------|------------------|----------------|------------------|------|-------------|-----------------|----------------|------------------|---|
| 1 | 116.034219  | 58.520748       |                |                  | 98.023654      | 49.515465        | D    |             |                 |                |                  | 9 |
| 2 | 244.129182  | 122.568229      | 227.102633     | 114.054955       | 226.118617     | 113.562947       | K    | 1168.661925 | 584.834600      | 1151.635376    | 576.321326       | 8 |
| 3 | 301.150646  | 151.078961      | 284.124097     | 142.565687       | 283.140081     | 142.073679       | G    | 1040.566962 | 520.787119      | 1023.540413    | 512.273844       | 7 |
| 4 | 429.209224  | 215.108250      | 412.182675     | 206.594976       | 411.198659     | 206.102968       | Q    | 983.545498  | 492.276387      | 966.518949     | 483.763112       | 6 |
| 5 | 500.246338  | 250.626807      | 483.219789     | 242.113532       | 482.235773     | 241.621524       | A    | 855.486920  | 428.247098      | 838.460371     | 419.733823       | 5 |
| 6 | 557.267802  | 279.137539      | 540.241253     | 270.624265       | 539.257237     | 270.132257       | G    | 784.449806  | 392.728541      | 767.423257     | 384.215266       | 4 |
| 7 | 670.351866  | 335.679571      | 653.325317     | 327.166297       | 652.341301     | 326.674289       | L    | 727.428342  | 364.217809      | 710.401793     | 355.704534       | 3 |
| 8 | 1109.577192 | 555.292234      | 1092.550643    | 546.778960       | 1091.566627    | 546.286951       | Q    | 614.344278  | 307.675777      | 597.317729     | 299.162502       | 2 |
| 9 |             |                 |                |                  |                |                  | R    | 175.118952  | 88.063114       | 158.092403     | 79.549839        | 1 |



NCBI BLAST search of [DKGQAGLQR](#)  
(Parameters: blastp, nr protein database, expect=20000, no filter, PAM30)  
Other BLAST [web gateways](#)

All matches to this query

| Score | Mr(calc):   | Delta     | Sequence                     |
|-------|-------------|-----------|------------------------------|
| 55.1  | 1282.681580 | 0.009968  | <a href="#">DKGQAGLQR</a>    |
| 15.1  | 1282.674194 | 0.017354  | <a href="#">QGEGQSRLVPGR</a> |
| 12.0  | 1282.706711 | -0.015163 | <a href="#">KDIAELQR</a>     |
| 7.6   | 1282.681580 | 0.009968  | <a href="#">DKGQAGLQR</a>    |
| 7.4   | 1282.706711 | -0.015163 | <a href="#">DKALQELR</a>     |
| 6.6   | 1282.706726 | -0.015178 | <a href="#">ELGISVAQR</a>    |
| 4.7   | 1282.674164 | 0.017384  | <a href="#">NEGKKLGPNKNR</a> |
| 3.7   | 1282.688095 | 0.003453  | <a href="#">KPTKPESQSPGK</a> |
| 3.3   | 1282.706711 | -0.015163 | <a href="#">DKLQAIER</a>     |
| 2.9   | 1282.676834 | 0.014714  | <a href="#">KALEDEKPEPK</a>  |

MATRIX

SCIENCE

Mascot Search Results

Peptide View

MS/MS Fragmentation of **VVEEQESR**  
Found in **CO4A\_HUMAN**, Complement C4-A OS=Homo sapiens GN=C4A PE=1 SV=2

Match to Query 23024: 1285.640788 from(643.827670,2+) rtinseconds(1376) index(30286)  
Title: Locus:1.1.1.587.20 File:"2013-07-02 CLN FXIII 180 min 2nd F 3.wiff"  
Data file C:\Program Files (x86)\Matrix Science\Mascot Daemon\mgf\8 FXIII 180 min 2nd\mascot\_daemon\_merge.mgf

Click mouse within plot area to zoom in by factor of two about that point  
Or,   to  Da   
Label all possible matches ☐ Label matches used for scoring ☒

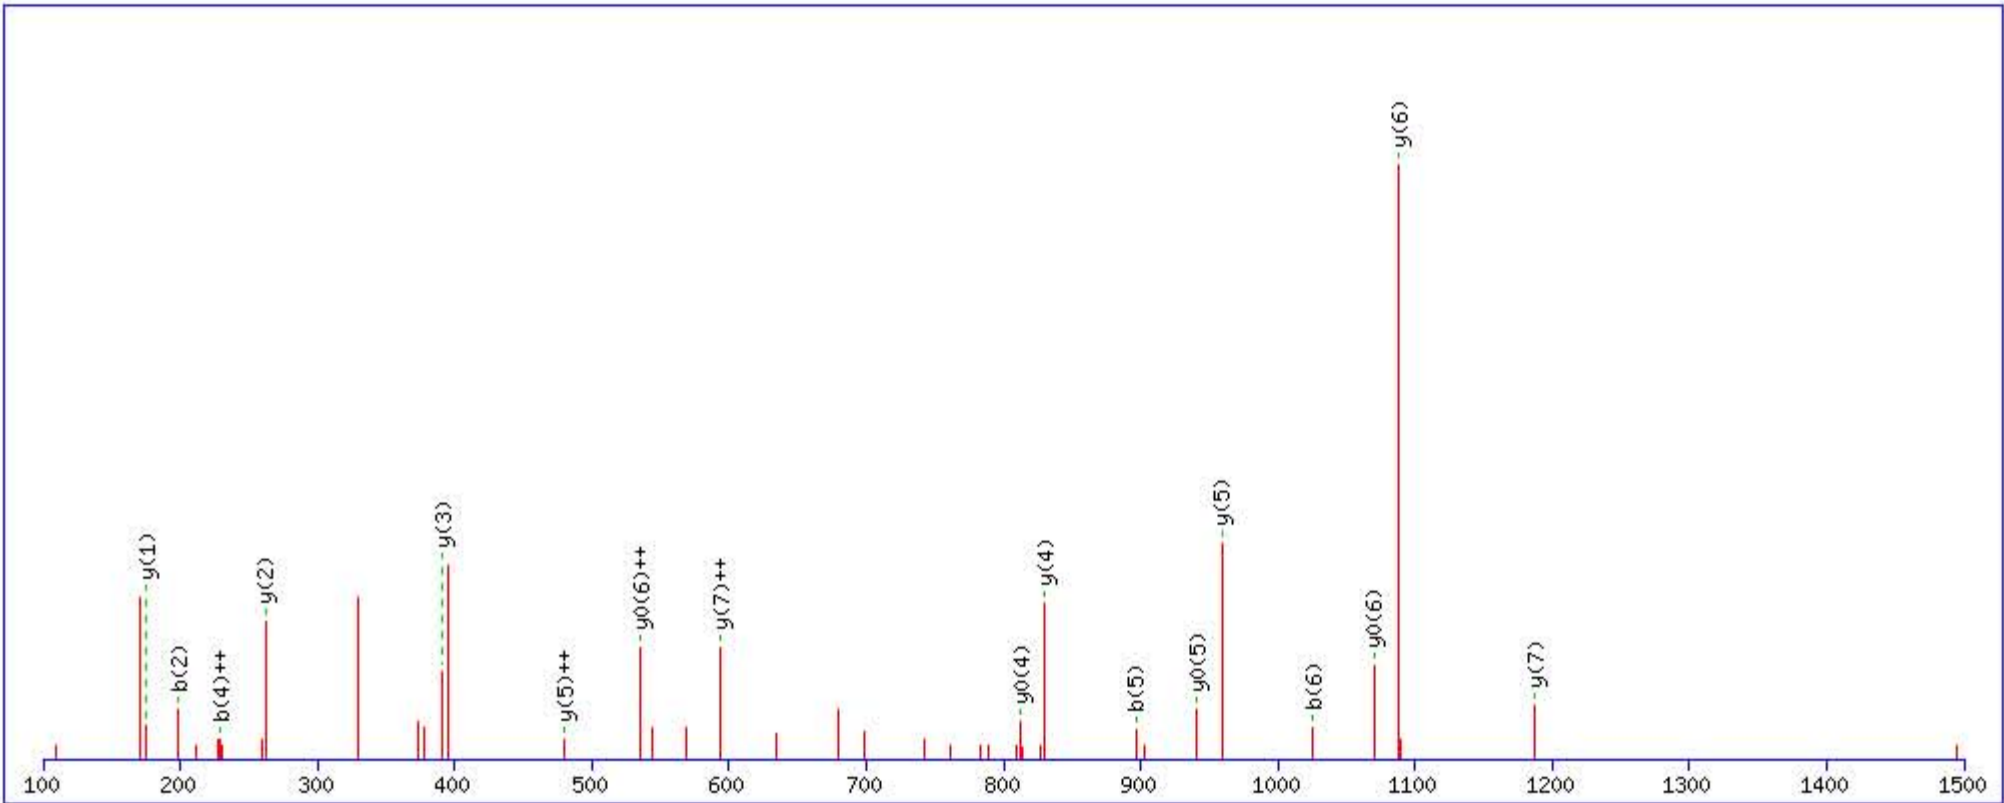

Monoisotopic mass of neutral peptide Mr(calc): 1285.633621  
Fixed modifications: Carbamidomethyl (C) (apply to specified residues or termini only)  
Variable modifications:  
Q5 : Biotin:Thermo-21345 (Q)  
Ions Score: 47 Expect: 0.00042  
Matches : 17/70 fragment ions using 28 most intense peaks [\(help\)](#)

| # | b           | b <sup>++</sup> | b <sup>*</sup> | b <sup>++</sup> * | b <sup>0</sup> | b <sup>0++</sup> | Seq. | y           | y <sup>++</sup> | y <sup>*</sup> | y <sup>++</sup> * | y <sup>0</sup> | y <sup>0++</sup> | # |
|---|-------------|-----------------|----------------|-------------------|----------------|------------------|------|-------------|-----------------|----------------|-------------------|----------------|------------------|---|
| 1 | 100.075690  | 50.541483       |                |                   |                |                  | V    |             |                 |                |                   |                |                  | 8 |
| 2 | 199.144104  | 100.075690      |                |                   |                |                  | V    | 1187.572499 | 594.289888      | 1170.545950    | 585.776613        | 1169.561934    | 585.284605       | 7 |
| 3 | 328.186697  | 164.596987      |                |                   | 310.176132     | 155.591704       | E    | 1088.504085 | 544.755681      | 1071.477536    | 536.242406        | 1070.493520    | 535.750398       | 6 |
| 4 | 457.229290  | 229.118283      |                |                   | 439.218725     | 220.113001       | E    | 959.461492  | 480.234384      | 942.434943     | 471.721110        | 941.450927     | 471.229102       | 5 |
| 5 | 896.454616  | 448.730946      | 879.428067     | 440.217672        | 878.444051     | 439.725664       | Q    | 830.418899  | 415.713088      | 813.392350     | 407.199813        | 812.408334     | 406.707805       | 4 |
| 6 | 1025.497209 | 513.252243      | 1008.470660    | 504.738968        | 1007.486644    | 504.246960       | E    | 391.193573  | 196.100425      | 374.167024     | 187.587150        | 373.183008     | 187.095142       | 3 |
| 7 | 1112.529237 | 556.768257      | 1095.502688    | 548.254982        | 1094.518672    | 547.762974       | S    | 262.150980  | 131.579128      | 245.124431     | 123.065854        | 244.140415     | 122.573846       | 2 |
| 8 |             |                 |                |                   |                |                  | R    | 175.118952  | 88.063114       | 158.092403     | 79.549839         |                |                  | 1 |

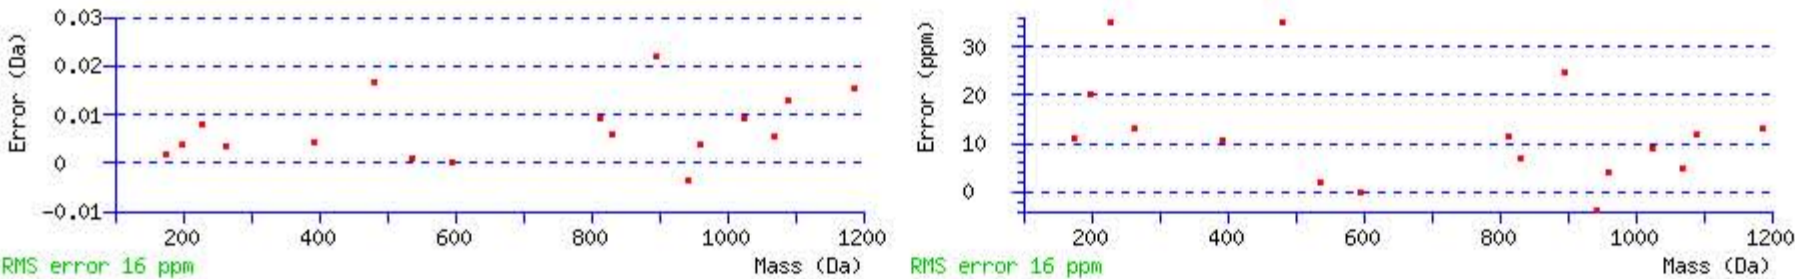

NCBI BLAST search of [VVEEQESR](#)  
(Parameters: blastp, nr protein database, expect=20000, no filter, PAM30)  
Other BLAST [web gateways](#)

All matches to this query

| Score | Mr(calc):   | Delta    | Sequence                 |
|-------|-------------|----------|--------------------------|
| 46.8  | 1285.633621 | 0.007167 | <a href="#">VVEEQESR</a> |

MATRIX

SCIENCE

Mascot Search Results

Peptide View

MS/MS Fragmentation of **CCQDGVTR**  
Found in **CO4A\_HUMAN**, Complement C4-A OS=Homo sapiens GN=C4A PE=1 SV=2

Match to Query 23417: 1305.571108 from(653.792830,2+) rtinseconds(1381) index(46230)  
Title: Locus:1.1.1.1718.14 File:"2013-07-02 CLN FXIII 180 min 2nd F 4.wiff"  
Data file C:\Program Files (x86)\Matrix Science\Mascot Daemon\mgf\8 FXIII 180 min 2nd\mascot\_daemon\_merge.mgf

Click mouse within plot area to zoom in by factor of two about that point  
Or,   to  Da   
Label all possible matches ☐ Label matches used for scoring ☒



Monoisotopic mass of neutral peptide Mr(calc): 1305.562820  
Fixed modifications: Carbamidomethyl (C) (apply to specified residues or termini only)  
Variable modifications:  
Q3 : Biotin:Thermo-21345 (Q)  
Ions Score: 50 Expect: 4.4e-005  
Matches : 9/72 fragment ions using 12 most intense peaks [\(help\)](#)

| # | b           | b <sup>++</sup> | b <sup>*</sup> | b <sup>+++</sup> | b <sup>0</sup> | b <sup>0++</sup> | Seq. | y           | y <sup>++</sup> | y <sup>*</sup> | y <sup>+++</sup> | y <sup>0</sup> | y <sup>0++</sup> | # |
|---|-------------|-----------------|----------------|------------------|----------------|------------------|------|-------------|-----------------|----------------|------------------|----------------|------------------|---|
| 1 | 161.037925  | 81.022600       |                |                  |                |                  | C    |             |                 |                |                  |                |                  | 8 |
| 2 | 321.068574  | 161.037925      |                |                  |                |                  | C    | 1146.539427 | 573.773352      | 1129.512878    | 565.260077       | 1128.528862    | 564.768069       | 7 |
| 3 | 760.293900  | 380.650588      | 743.267351     | 372.137314       |                |                  | Q    | 986.508778  | 493.758027      | 969.482229     | 485.244753       | 968.498213     | 484.752745       | 6 |
| 4 | 875.320843  | 438.164060      | 858.294294     | 429.650785       | 857.310278     | 429.158777       | D    | 547.283452  | 274.145364      | 530.256903     | 265.632090       | 529.272887     | 265.140082       | 5 |
| 5 | 932.342307  | 466.674792      | 915.315758     | 458.161517       | 914.331742     | 457.669509       | G    | 432.256509  | 216.631893      | 415.229960     | 208.118618       | 414.245944     | 207.626610       | 4 |
| 6 | 1031.410721 | 516.208999      | 1014.384172    | 507.695724       | 1013.400156    | 507.203716       | V    | 375.235045  | 188.121161      | 358.208496     | 179.607886       | 357.224480     | 179.115878       | 3 |
| 7 | 1132.458400 | 566.732838      | 1115.431851    | 558.219564       | 1114.447835    | 557.727556       | T    | 276.166631  | 138.586953      | 259.140082     | 130.073679       | 258.156066     | 129.581671       | 2 |
| 8 |             |                 |                |                  |                |                  | R    | 175.118952  | 88.063114       | 158.092403     | 79.549839        |                |                  | 1 |



NCBI BLAST search of [CCQDGVTR](#)  
(Parameters: blastp, nr protein database, expect=20000, no filter, PAM30)  
Other BLAST [web gateways](#)

All matches to this query

| Score | Mr(calc):   | Delta     | Sequence                     |
|-------|-------------|-----------|------------------------------|
| 50.4  | 1305.562820 | 0.008288  | <a href="#">CCQDGVTR</a>     |
| 19.7  | 1305.588409 | -0.017301 | <a href="#">CRSSTPADAWR</a>  |
| 9.1   | 1305.577194 | -0.006086 | <a href="#">CDAGWLADGSVR</a> |
| 5.1   | 1305.562805 | 0.008303  | <a href="#">CCTSPSQR</a>     |
| 1.6   | 1305.556061 | 0.015047  | <a href="#">CSFSPWTEHR</a>   |
| 0.3   | 1305.583679 | -0.012571 | <a href="#">EQEPDFEEKR</a>   |
| 0.1   | 1305.588409 | -0.017301 | <a href="#">DGMEDFKRHR</a>   |

MATRIX

SCIENCE

Mascot Search Results

Peptide View

MS/MS Fragmentation of **LGQYASPTAK**  
Found in **CO4A\_HUMAN**, Complement C4-A OS=Homo sapiens GN=C4A PE=1 SV=2

Match to Query 24292: 1345.715168 from(673.864860,2+) rtinseconds(1618) index(47773)  
Title: Locus:1.1.1.1801.12 File:"2013-07-02 CLN FXIII 180 min 2nd F 4.wiff"  
Data file C:\Program Files (x86)\Matrix Science\Mascot Daemon\mgf\8 FXIII 180 min 2nd\mascot\_daemon\_merge.mgf

Click mouse within plot area to zoom in by factor of two about that point  
Or, 

Plot from

100

 to 

1400

 Da 

Full range

  
Label all possible matches ☐ Label matches used for scoring ☒



Monoisotopic mass of neutral peptide Mr(calc): 1345.706390  
Fixed modifications: Carbamidomethyl (C) (apply to specified residues or termini only)  
Variable modifications:  
Q3 : Biotin:Thermo-21345 (Q)  
Ions Score: 58 Expect: 3.9e-005  
Matches : 19/90 fragment ions using 36 most intense peaks [\(help\)](#)

| #  | b           | b <sup>++</sup> | b <sup>*</sup> | b <sup>*++</sup> | b <sup>0</sup> | b <sup>0++</sup> | Seq. | y           | y <sup>++</sup> | y <sup>*</sup> | y <sup>*++</sup> | y <sup>0</sup> | y <sup>0++</sup> | #  |
|----|-------------|-----------------|----------------|------------------|----------------|------------------|------|-------------|-----------------|----------------|------------------|----------------|------------------|----|
| 1  | 114.091340  | 57.549308       |                |                  |                |                  | L    |             |                 |                |                  |                |                  | 10 |
| 2  | 171.112804  | 86.060040       |                |                  |                |                  | G    | 1233.629622 | 617.318449      | 1216.603073    | 608.805175       | 1215.619057    | 608.313167       | 9  |
| 3  | 610.338130  | 305.672703      | 593.311581     | 297.159429       |                |                  | Q    | 1176.608158 | 588.807717      | 1159.581609    | 580.294443       | 1158.597593    | 579.802435       | 8  |
| 4  | 773.401459  | 387.204368      | 756.374910     | 378.691093       |                |                  | Y    | 737.382832  | 369.195054      | 720.356283     | 360.681780       | 719.372267     | 360.189772       | 7  |
| 5  | 844.438573  | 422.722925      | 827.412024     | 414.209650       |                |                  | A    | 574.319503  | 287.663389      | 557.292954     | 279.150115       | 556.308938     | 278.658107       | 6  |
| 6  | 931.470601  | 466.238939      | 914.444052     | 457.725664       | 913.460036     | 457.233656       | S    | 503.282389  | 252.144832      | 486.255840     | 243.631558       | 485.271824     | 243.139550       | 5  |
| 7  | 1028.523365 | 514.765321      | 1011.496816    | 506.252046       | 1010.512800    | 505.760038       | P    | 416.250361  | 208.628818      | 399.223812     | 200.115544       | 398.239796     | 199.623536       | 4  |
| 8  | 1129.571044 | 565.289160      | 1112.544495    | 556.775886       | 1111.560479    | 556.283878       | T    | 319.197597  | 160.102436      | 302.171048     | 151.589162       | 301.187032     | 151.097154       | 3  |
| 9  | 1200.608158 | 600.807717      | 1183.581609    | 592.294443       | 1182.597593    | 591.802435       | A    | 218.149918  | 109.578597      | 201.123369     | 101.065322       |                |                  | 2  |
| 10 |             |                 |                |                  |                |                  | K    | 147.112804  | 74.060040       | 130.086255     | 65.546765        |                |                  | 1  |

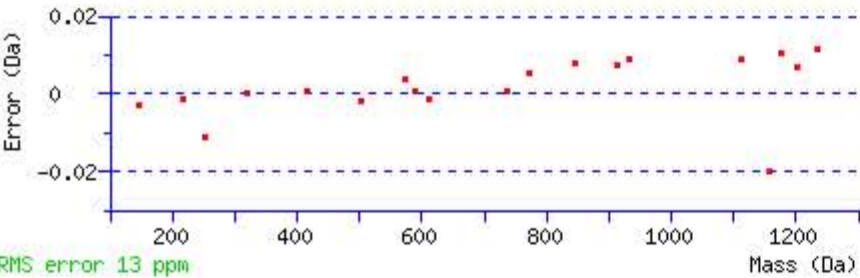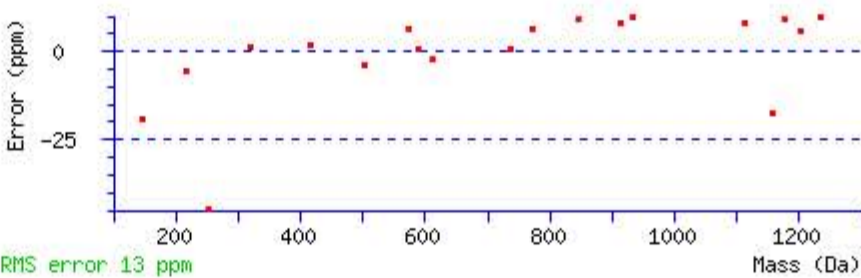

NCBI BLAST search of [LGQYASPTAK](#)  
(Parameters: blastp, nr protein database, expect=20000, no filter, PAM30)  
Other BLAST [web gateways](#)

All matches to this query

| Score | Mr(calc):   | Delta     | Sequence                       |
|-------|-------------|-----------|--------------------------------|
| 58.1  | 1345.706390 | 0.008778  | <a href="#">LGQYASPTAK</a>     |
| 11.1  | 1345.706390 | 0.008778  | <a href="#">LGQYDQALK</a>      |
| 10.1  | 1345.724182 | -0.009014 | <a href="#">LGAVPATSGPTTFK</a> |
| 9.0   | 1345.727509 | -0.012341 | <a href="#">DKLKMEVDQLK</a>    |
| 8.2   | 1345.727509 | -0.012341 | <a href="#">LGLMDNEIKVAK</a>   |
| 7.9   | 1345.706406 | 0.008762  | <a href="#">QGLYTPQTK</a>      |
| 2.5   | 1345.724152 | -0.008984 | <a href="#">QPLQTDIYGLAK</a>   |
| 1.7   | 1345.717636 | -0.002468 | <a href="#">QMPQPTFTLRK</a>    |
| 1.3   | 1345.713608 | 0.001560  | <a href="#">NGMLLTGGGKDRK</a>  |
| 0.7   | 1345.720993 | -0.005825 | <a href="#">QVGMICERLLK</a>    |

MATRIX

SCIENCE

Mascot Search Results

Peptide View

MS/MS Fragmentation of **GLQDEDGYR**  
Found in **CO4A\_HUMAN**, Complement C4-A OS=Homo sapiens GN=C4A PE=1 SV=2

Match to Query 25943: 1362.632588 from(682.323570,2+) rtinseconds(1718) index(48398)  
Title: Locus:1.1.1.1836.9 File:"2013-07-02 CLN FXIII 180 min 2nd F 4.wiff"  
Data file C:\Program Files (x86)\Matrix Science\Mascot Daemon\mgf\8 FXIII 180 min 2nd\mascot\_daemon\_merge.mgf

Click mouse within plot area to zoom in by factor of two about that point  
Or, 

Plot from

100

 to 

2000

 Da 

Full range

  
Label all possible matches ☐ Label matches used for scoring ☒



Monoisotopic mass of neutral peptide Mr(calc): 1362.623795  
Fixed modifications: Carbamidomethyl (C) (apply to specified residues or termini only)  
Variable modifications:  
Q3 : Biotin:Thermo-21345 (Q)  
Ions Score: 47 Expect: 0.00014  
Matches : 9/80 fragment ions using 13 most intense peaks ([help](#))

| # | b           | b <sup>++</sup> | b <sup>*</sup> | b <sup>*++</sup> | b <sup>0</sup> | b <sup>0++</sup> | Seq. | y           | y <sup>++</sup> | y <sup>*</sup> | y <sup>*++</sup> | y <sup>0</sup> | y <sup>0++</sup> | # |
|---|-------------|-----------------|----------------|------------------|----------------|------------------|------|-------------|-----------------|----------------|------------------|----------------|------------------|---|
| 1 | 58.028740   | 29.518008       |                |                  |                |                  | G    |             |                 |                |                  |                |                  | 9 |
| 2 | 171.112804  | 86.060040       |                |                  |                |                  | L    | 1306.609614 | 653.808445      | 1289.583065    | 645.295171       | 1288.599049    | 644.803163       | 8 |
| 3 | 610.338130  | 305.672703      | 593.311581     | 297.159429       |                |                  | Q    | 1193.525550 | 597.266413      | 1176.499001    | 588.753139       | 1175.514985    | 588.261131       | 7 |
| 4 | 725.365073  | 363.186175      | 708.338524     | 354.672900       | 707.354508     | 354.180892       | D    | 754.300224  | 377.653750      | 737.273675     | 369.140476       | 736.289659     | 368.648468       | 6 |
| 5 | 854.407666  | 427.707471      | 837.381117     | 419.194197       | 836.397101     | 418.702189       | E    | 639.273281  | 320.140279      | 622.246732     | 311.627004       | 621.262716     | 311.134996       | 5 |
| 6 | 969.434609  | 485.220943      | 952.408060     | 476.707668       | 951.424044     | 476.215660       | D    | 510.230688  | 255.618982      | 493.204139     | 247.105707       | 492.220123     | 246.613700       | 4 |
| 7 | 1026.456073 | 513.731675      | 1009.429524    | 505.218400       | 1008.445508    | 504.726392       | G    | 395.203745  | 198.105511      | 378.177196     | 189.592236       |                |                  | 3 |
| 8 | 1189.519402 | 595.263339      | 1172.492853    | 586.750065       | 1171.508837    | 586.258057       | Y    | 338.182281  | 169.594778      | 321.155732     | 161.081504       |                |                  | 2 |
| 9 |             |                 |                |                  |                |                  | R    | 175.118952  | 88.063114       | 158.092403     | 79.549839        |                |                  | 1 |

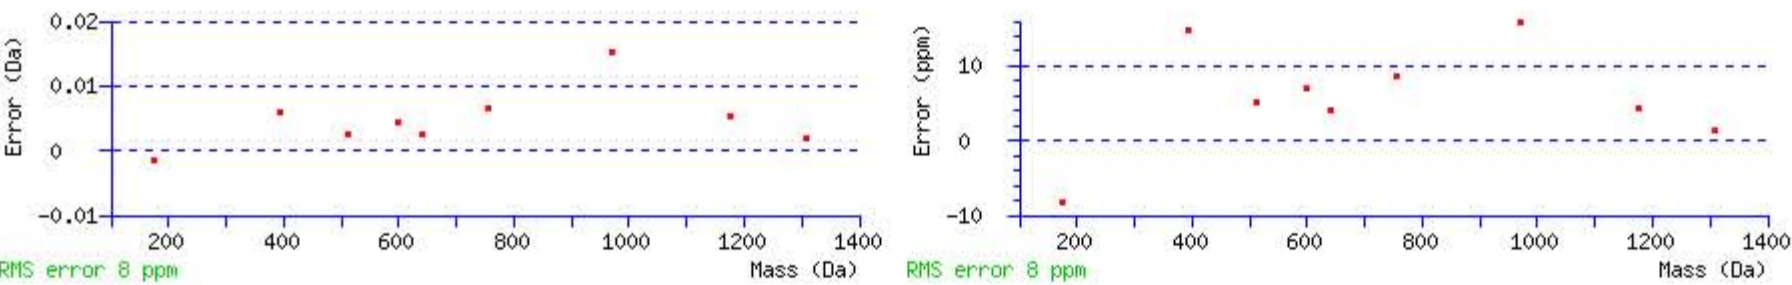

NCBI BLAST search of [GLQDEDGYR](#)  
(Parameters: blastp, nr protein database, expect=20000, no filter, PAM30)  
Other BLAST [web gateways](#)

All matches to this query

| Score | Mr(calc):   | Delta     | Sequence                      |
|-------|-------------|-----------|-------------------------------|
| 46.8  | 1362.623795 | 0.008793  | <a href="#">GLQDEDGYR</a>     |
| 5.3   | 1362.652756 | -0.020168 | <a href="#">GLAADERAEFER</a>  |
| 3.0   | 1362.642883 | -0.010295 | <a href="#">GDRVYSPYNHR</a>   |
| 2.2   | 1362.623795 | 0.008793  | <a href="#">TGFLEIDEHMR</a>   |
| 0.6   | 1362.623795 | 0.008793  | <a href="#">GPAFPGMGSEELR</a> |

MATRIX

SCIENCE

Mascot Search Results

Peptide View

MS/MS Fragmentation of **ITQVLHFTK**  
Found in **CO4A\_HUMAN**, Complement C4-A OS=Homo sapiens GN=C4A PE=1 SV=2

Match to Query 27226: 1396.790862 from(466.604230,3+) rtinseconds(1948) index(49973)  
Title: Locus:1.1.1.1916.6 File:"2013-07-02 CLN FXIII 180 min 2nd F 4.wiff"  
Data file C:\Program Files (x86)\Matrix Science\Mascot Daemon\mgf\8 FXIII 180 min 2nd\mascot\_daemon\_merge.mgf

Click mouse within plot area to zoom in by factor of two about that point  
Or, 

Plot from

100

 to 

1300

 Da 

Full range

  
Label all possible matches ☐ Label matches used for scoring ☒



Monoisotopic mass of neutral peptide Mr(calc): 1396.790085  
Fixed modifications: Carbamidomethyl (C) (apply to specified residues or termini only)  
Variable modifications:  
Q3 : Biotin:Thermo-21345 (Q)  
Ions Score: 34 Expect: 0.0015  
Matches : 6/88 fragment ions using 12 most intense peaks [\(help\)](#)

| # | b           | b <sup>++</sup> | b <sup>*</sup> | b <sup>*++</sup> | b <sup>0</sup> | b <sup>0++</sup> | Seq. | y           | y <sup>++</sup> | y <sup>*</sup> | y <sup>*++</sup> | y <sup>0</sup> | y <sup>0++</sup> | # |
|---|-------------|-----------------|----------------|------------------|----------------|------------------|------|-------------|-----------------|----------------|------------------|----------------|------------------|---|
| 1 | 114.091340  | 57.549308       |                |                  |                |                  | I    |             |                 |                |                  |                |                  | 9 |
| 2 | 215.139019  | 108.073147      |                |                  | 197.128454     | 99.067865        | T    | 1284.713292 | 642.860284      | 1267.686743    | 634.347010       | 1266.702727    | 633.855002       | 8 |
| 3 | 654.364345  | 327.685811      | 637.337796     | 319.172536       | 636.353780     | 318.680528       | Q    | 1183.665613 | 592.336445      | 1166.639064    | 583.823170       | 1165.655048    | 583.331162       | 7 |
| 4 | 753.432759  | 377.220018      | 736.406210     | 368.706743       | 735.422194     | 368.214735       | V    | 744.440287  | 372.723782      | 727.413738     | 364.210507       | 726.429722     | 363.718499       | 6 |
| 5 | 866.516823  | 433.762050      | 849.490274     | 425.248775       | 848.506258     | 424.756767       | L    | 645.371873  | 323.189575      | 628.345324     | 314.676300       | 627.361308     | 314.184292       | 5 |
| 6 | 1003.575735 | 502.291506      | 986.549186     | 493.778231       | 985.565170     | 493.286223       | H    | 532.287809  | 266.647543      | 515.261260     | 258.134268       | 514.277244     | 257.642260       | 4 |
| 7 | 1150.644149 | 575.825713      | 1133.617600    | 567.312438       | 1132.633584    | 566.820430       | F    | 395.228897  | 198.118086      | 378.202348     | 189.604812       | 377.218332     | 189.112804       | 3 |
| 8 | 1251.691828 | 626.349552      | 1234.665279    | 617.836278       | 1233.681263    | 617.344270       | T    | 248.160483  | 124.583879      | 231.133934     | 116.070605       | 230.149918     | 115.578597       | 2 |
| 9 |             |                 |                |                  |                |                  | K    | 147.112804  | 74.060040       | 130.086255     | 65.546765        |                |                  | 1 |



NCBI BLAST search of [ITQVLHFTK](#)  
(Parameters: blastp, nr protein database, expect=20000, no filter, PAM30)  
Other BLAST [web gateways](#)

All matches to this query

| Score | Mr(calc):   | Delta     | Sequence                     |
|-------|-------------|-----------|------------------------------|
| 33.7  | 1396.790085 | 0.000777  | <a href="#">ITQVLHFTK</a>    |
| 3.5   | 1396.792557 | -0.001695 | <a href="#">LLGELQEQIVQK</a> |
| 1.8   | 1396.774796 | 0.016066  | <a href="#">LLQEGIAQSK</a>   |
| 1.2   | 1396.778625 | 0.012237  | <a href="#">LIENGVAERQR</a>  |



MATRIX

SCIENCE

Mascot Search Results

Peptide View

MS/MS Fragmentation of **VLSLAQEQVGGSP**EK  
Found in **CO4A\_HUMAN**, Complement C4-A OS=Homo sapiens GN=C4A PE=1 SV=2

Match to Query 41289: 1851.988242 from(618.336690,3+) rtinseconds(1981) index(50251)  
Title: Locus:1.1.1.1927.9 File:"2013-07-02 CLN FXIII 180 min 2nd F 4.wiff"  
Data file C:\Program Files (x86)\Matrix Science\Mascot Daemon\mgf\8 FXIII 180 min 2nd\mascot\_daemon\_merge.mgf

Click mouse within plot area to zoom in by factor of two about that point  
Or,   to  Da   
Label all possible matches ☐ Label matches used for scoring ☒



Monoisotopic mass of neutral peptide Mr(calc): 1851.976425  
Fixed modifications: Carbamidomethyl (C) (apply to specified residues or termini only)  
Variable modifications:  
Q8 : Biotin:Thermo-21345 (Q)  
Ions Score: 58 Expect: 3.5e-005  
Matches : 36/152 fragment ions using 83 most intense peaks [\(help\)](#)

| #  | b           | b <sup>++</sup> | b <sup>*</sup> | b <sup>++</sup> * | b <sup>0</sup> | b <sup>0++</sup> | Seq. | y           | y <sup>++</sup> | y <sup>*</sup> | y <sup>++</sup> * | y <sup>0</sup> | y <sup>0++</sup> | #  |
|----|-------------|-----------------|----------------|-------------------|----------------|------------------|------|-------------|-----------------|----------------|-------------------|----------------|------------------|----|
| 1  | 100.075690  | 50.541483       |                |                   |                |                  | V    |             |                 |                |                   |                |                  | 15 |
| 2  | 213.159754  | 107.083515      |                |                   |                |                  | L    | 1753.915298 | 877.461287      | 1736.888749    | 868.948013        | 1735.904733    | 868.456004       | 14 |
| 3  | 300.191782  | 150.599529      |                |                   | 282.181217     | 141.594247       | S    | 1640.831234 | 820.919255      | 1623.804685    | 812.405981        | 1622.820669    | 811.913973       | 13 |
| 4  | 413.275846  | 207.141561      |                |                   | 395.265281     | 198.136279       | L    | 1553.799206 | 777.403241      | 1536.772657    | 768.889967        | 1535.788641    | 768.397958       | 12 |
| 5  | 484.312960  | 242.660118      |                |                   | 466.302395     | 233.654836       | A    | 1440.715142 | 720.861209      | 1423.688593    | 712.347935        | 1422.704577    | 711.855927       | 11 |
| 6  | 612.371538  | 306.689407      | 595.344989     | 298.176133        | 594.360973     | 297.684125       | Q    | 1369.678028 | 685.342652      | 1352.651479    | 676.829378        | 1351.667463    | 676.337370       | 10 |
| 7  | 741.414131  | 371.210704      | 724.387582     | 362.697429        | 723.403566     | 362.205421       | E    | 1241.619450 | 621.313363      | 1224.592901    | 612.800089        | 1223.608885    | 612.308080       | 9  |
| 8  | 1180.639457 | 590.823367      | 1163.612908    | 582.310092        | 1162.628892    | 581.818084       | Q    | 1112.576857 | 556.792066      | 1095.550308    | 548.278792        | 1094.566292    | 547.786784       | 8  |
| 9  | 1279.707871 | 640.357574      | 1262.681322    | 631.844299        | 1261.697306    | 631.352291       | V    | 673.351531  | 337.179404      | 656.324982     | 328.666129        | 655.340966     | 328.174121       | 7  |
| 10 | 1336.729335 | 668.868306      | 1319.702786    | 660.355031        | 1318.718770    | 659.863023       | G    | 574.283117  | 287.645197      | 557.256568     | 279.131922        | 556.272552     | 278.639914       | 6  |
| 11 | 1393.750799 | 697.379037      | 1376.724250    | 688.865763        | 1375.740234    | 688.373755       | G    | 517.261653  | 259.134465      | 500.235104     | 250.621190        | 499.251088     | 250.129182       | 5  |
| 12 | 1480.782827 | 740.895052      | 1463.756278    | 732.381777        | 1462.772262    | 731.889769       | S    | 460.240189  | 230.623732      | 443.213640     | 222.110458        | 442.229624     | 221.618450       | 4  |
| 13 | 1577.835591 | 789.421434      | 1560.809042    | 780.908159        | 1559.825026    | 780.416151       | P    | 373.208161  | 187.107718      | 356.181612     | 178.594444        | 355.197596     | 178.102436       | 3  |
| 14 | 1706.878184 | 853.942730      | 1689.851635    | 845.429456        | 1688.867619    | 844.937447       | E    | 276.155397  | 138.581336      | 259.128848     | 130.068062        | 258.144832     | 129.576054       | 2  |
| 15 |             |                 |                |                   |                |                  | K    | 147.112804  | 74.060040       | 130.086255     | 65.546765         |                |                  | 1  |

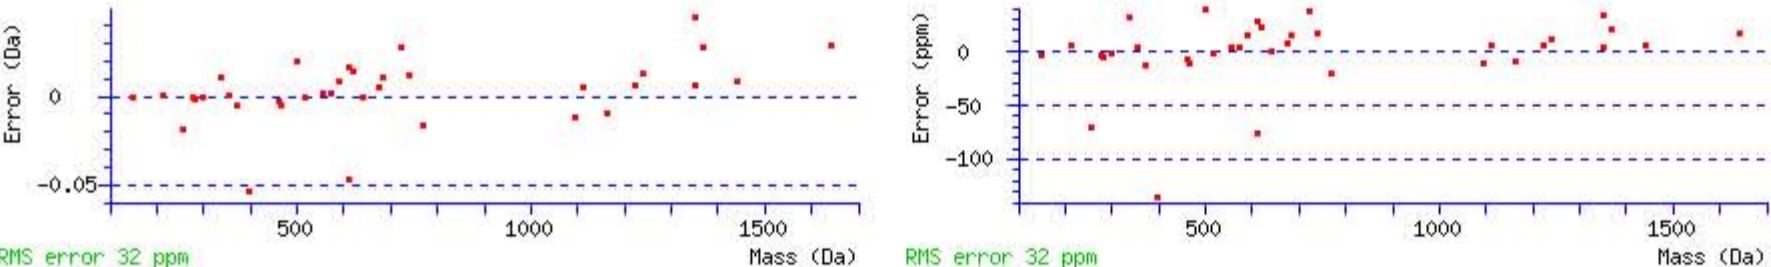

NCBI BLAST search of [VLSLAQEQVGGSP](#)EK  
(Parameters: blastp, nr protein database, expect=20000, no filter, PAM30)  
Other BLAST [web gateways](#)

All matches to this query

| Score | Mr(calc):   | Delta    | Sequence                         |
|-------|-------------|----------|----------------------------------|
| 58.2  | 1851.976425 | 0.011817 | <a href="#">VLSLAQEQVGGSP</a> EK |
| 35.4  | 1851.976425 | 0.011817 | <a href="#">VLSLAQEQVGGSP</a> EK |

MATRIX

SCIENCE

Mascot Search Results

Peptide View

MS/MS Fragmentation of **GPEVQLVAHSPWLK**  
Found in **CO4A\_HUMAN**, Complement C4-A OS=Homo sapiens GN=C4A PE=1 SV=2

Match to Query 41721: 1871.029962 from(624.683930,3+) rtinseconds(2228) index(51842)  
Title: Locus:1.1.1.2013.8 File:"2013-07-02 CLN FXIII 180 min 2nd F 4.wiff"  
Data file C:\Program Files (x86)\Matrix Science\Mascot Daemon\mgf\8 FXIII 180 min 2nd\mascot\_daemon\_merge.mgf

Click mouse within plot area to zoom in by factor of two about that point  
Or, 

Plot from

100

 to 

1800

 Da 

Full range

  
Label all possible matches ☐ Label matches used for scoring ☒



Monoisotopic mass of neutral peptide Mr(calc): 1871.012756  
Fixed modifications: Carbamidomethyl (C) (apply to specified residues or termini only)  
Variable modifications:  
Q5 : Biotin:Thermo-21345 (Q)  
Ions Score: 57 Expect: 6.9e-006  
Matches : 26/136 fragment ions using 65 most intense peaks [\(help\)](#)

| #  | b           | b <sup>++</sup> | b <sup>+</sup> | b <sup>++</sup> | b <sup>0</sup> | b <sup>0++</sup> | Seq. | y           | y <sup>++</sup> | y <sup>+</sup> | y <sup>++</sup> | y <sup>0</sup> | y <sup>0++</sup> | #  |
|----|-------------|-----------------|----------------|-----------------|----------------|------------------|------|-------------|-----------------|----------------|-----------------|----------------|------------------|----|
| 1  | 58.028740   | 29.518008       |                |                 |                |                  | G    |             |                 |                |                 |                |                  | 14 |
| 2  | 155.081504  | 78.044390       |                |                 |                |                  | P    | 1814.998574 | 908.002925      | 1797.972025    | 899.489651      | 1796.988009    | 898.997643       | 13 |
| 3  | 284.124097  | 142.565687      |                |                 | 266.113532     | 133.560404       | E    | 1717.945810 | 859.476543      | 1700.919261    | 850.963269      | 1699.935245    | 850.471261       | 12 |
| 4  | 383.192511  | 192.099894      |                |                 | 365.181946     | 183.094611       | V    | 1588.903217 | 794.955247      | 1571.876668    | 786.441972      | 1570.892652    | 785.949964       | 11 |
| 5  | 822.417837  | 411.712557      | 805.391288     | 403.199282      | 804.407272     | 402.707274       | Q    | 1489.834803 | 745.421040      | 1472.808254    | 736.907765      | 1471.824238    | 736.415757       | 10 |
| 6  | 935.501901  | 468.254589      | 918.475352     | 459.741314      | 917.491336     | 459.249306       | L    | 1050.609477 | 525.808377      | 1033.582928    | 517.295102      | 1032.598912    | 516.803094       | 9  |
| 7  | 1034.570315 | 517.788796      | 1017.543766    | 509.275521      | 1016.559750    | 508.783513       | V    | 937.525413  | 469.266345      | 920.498864     | 460.753070      | 919.514848     | 460.261062       | 8  |
| 8  | 1105.607429 | 553.307353      | 1088.580880    | 544.794078      | 1087.596864    | 544.302070       | A    | 838.456999  | 419.732138      | 821.430450     | 411.218863      | 820.446434     | 410.726855       | 7  |
| 9  | 1242.666341 | 621.836809      | 1225.639792    | 613.323534      | 1224.655776    | 612.831526       | H    | 767.419885  | 384.213581      | 750.393336     | 375.700306      | 749.409320     | 375.208298       | 6  |
| 10 | 1329.698369 | 665.352823      | 1312.671820    | 656.839548      | 1311.687804    | 656.347540       | S    | 630.360973  | 315.684125      | 613.334424     | 307.170850      | 612.350408     | 306.678842       | 5  |
| 11 | 1426.751133 | 713.879205      | 1409.724584    | 705.365930      | 1408.740568    | 704.873922       | P    | 543.328945  | 272.168111      | 526.302396     | 263.654836      |                |                  | 4  |
| 12 | 1612.830446 | 806.918861      | 1595.803897    | 798.405587      | 1594.819881    | 797.913579       | W    | 446.276181  | 223.641728      | 429.249632     | 215.128454      |                |                  | 3  |
| 13 | 1725.914510 | 863.460893      | 1708.887961    | 854.947619      | 1707.903945    | 854.455611       | L    | 260.196868  | 130.602072      | 243.170319     | 122.088797      |                |                  | 2  |
| 14 |             |                 |                |                 |                |                  | K    | 147.112804  | 74.060040       | 130.086255     | 65.546765       |                |                  | 1  |



NCBI BLAST search of [GPEVQLVAHSPWLK](#)  
(Parameters: blastp, nr protein database, expect=20000, no filter, PAM30)  
Other BLAST [web gateways](#)

All matches to this query

| Score | Mr(calc):   | Delta     | Sequence                          |
|-------|-------------|-----------|-----------------------------------|
| 57.1  | 1871.012756 | 0.017206  | <a href="#">GPEVQLVAHSPWLK</a>    |
| 1.9   | 1871.037231 | -0.007269 | <a href="#">ISKLLMICQNAGISVPK</a> |
| 0.1   | 1871.037689 | -0.007727 | <a href="#">ILRPDATKNARNDFLK</a>  |

MATRIX

SCIENCE

Mascot Search Results

Peptide View

MS/MS Fragmentation of **HLVPGAPFLLQALVR**  
Found in **CO4A\_HUMAN**, Complement C4-A OS=Homo sapiens GN=C4A PE=1 SV=2

Match to Query 42959: 1941.162702 from(648.061510,3+) rtinseconds(2855) index(55999)  
Title: Locus:1.1.1.2229.5 File:"2013-07-02 CLN FXIII 180 min 2nd F 4.wiff"  
Data file C:\Program Files (x86)\Matrix Science\Mascot Daemon\mgf\8 FXIII 180 min 2nd\mascot\_daemon\_merge.mgf

Click mouse within plot area to zoom in by factor of two about that point  
Or, 

Plot from

100

 to 

1700

 Da 

Full range

  
Label all possible matches ☐ Label matches used for scoring ☒



Monoisotopic mass of neutral peptide Mr(calc): 1941.138626  
Fixed modifications: Carbamidomethyl (C) (apply to specified residues or termini only)  
Variable modifications:  
Q11 : Biotin:Thermo-21345 (Q)  
Ions Score: 60 Expect: 1.5e-006  
Matches : 17/92 fragment ions using 31 most intense peaks [\(help\)](#)

| #  | b           | b <sup>++</sup> | b <sup>+</sup> | b <sup>++</sup> * | Seq. | y           | y <sup>++</sup> | y <sup>+</sup> * | y <sup>++</sup> * | #  |
|----|-------------|-----------------|----------------|-------------------|------|-------------|-----------------|------------------|-------------------|----|
| 1  | 138.066188  | 69.536732       |                |                   | H    |             |                 |                  |                   | 15 |
| 2  | 251.150252  | 126.078764      |                |                   | L    | 1805.086996 | 903.047136      | 1788.060447      | 894.533862        | 14 |
| 3  | 350.218666  | 175.612971      |                |                   | V    | 1692.002932 | 846.505104      | 1674.976383      | 837.991830        | 13 |
| 4  | 447.271430  | 224.139353      |                |                   | P    | 1592.934518 | 796.970897      | 1575.907969      | 788.457623        | 12 |
| 5  | 504.292894  | 252.650085      |                |                   | G    | 1495.881754 | 748.444515      | 1478.855205      | 739.931241        | 11 |
| 6  | 575.330008  | 288.168642      |                |                   | A    | 1438.860290 | 719.933783      | 1421.833741      | 711.420509        | 10 |
| 7  | 672.382772  | 336.695024      |                |                   | P    | 1367.823176 | 684.415226      | 1350.796627      | 675.901952        | 9  |
| 8  | 819.451186  | 410.229231      |                |                   | F    | 1270.770412 | 635.888844      | 1253.743863      | 627.375570        | 8  |
| 9  | 932.535250  | 466.771263      |                |                   | L    | 1123.701998 | 562.354637      | 1106.675449      | 553.841363        | 7  |
| 10 | 1045.619314 | 523.313295      |                |                   | L    | 1010.617934 | 505.812605      | 993.591385       | 497.299331        | 6  |
| 11 | 1484.844640 | 742.925958      | 1467.818091    | 734.412684        | Q    | 897.533870  | 449.270573      | 880.507321       | 440.757298        | 5  |
| 12 | 1555.881754 | 778.444515      | 1538.855205    | 769.931241        | A    | 458.308544  | 229.657910      | 441.281995       | 221.144635        | 4  |
| 13 | 1668.965818 | 834.986547      | 1651.939269    | 826.473273        | L    | 387.271430  | 194.139353      | 370.244881       | 185.626078        | 3  |
| 14 | 1768.034232 | 884.520754      | 1751.007683    | 876.007480        | V    | 274.187366  | 137.597321      | 257.160817       | 129.084047        | 2  |
| 15 |             |                 |                |                   | R    | 175.118952  | 88.063114       | 158.092403       | 79.549839         | 1  |



NCBI BLAST search of [HLVPGAPFLLQALVR](#)  
(Parameters: blastp, nr protein database, expect=20000, no filter, PAM30)  
Other BLAST [web gateways](#)

All matches to this query

| Score | Mr(calc):   | Delta    | Sequence                        |
|-------|-------------|----------|---------------------------------|
| 59.8  | 1941.138626 | 0.024076 | <a href="#">HLVPGAPFLLQALVR</a> |

MATRIX

SCIENCE

Mascot Search Results

Peptide View

MS/MS Fragmentation of **EPFLSCCQFAESLR**  
Found in **CO4A\_HUMAN**, Complement C4-A OS=Homo sapiens GN=C4A PE=1 SV=2

Match to Query 45812: 2053.967652 from(685.663160,3+) rtinseconds(2491) index(37010)  
Title: Locus:1.1.1.976.15 File:"2013-07-02 CLN FXIII 180 min 2nd F 3.wiff"  
Data file C:\Program Files (x86)\Matrix Science\Mascot Daemon\mgf\8 FXIII 180 min 2nd\mascot\_daemon\_merge.mgf

Click mouse within plot area to zoom in by factor of two about that point  
Or, 

Plot from

100

 to 

1700

 Da 

Full range

  
Label all possible matches ☐ Label matches used for scoring ☒



Monoisotopic mass of neutral peptide Mr(calc): 2053.942368  
Fixed modifications: Carbamidomethyl (C) (apply to specified residues or termini only)  
Variable modifications:  
Q8 : Biotin:Thermo-21345 (Q)  
Ions Score: 28 Expect: 0.025  
Matches : 6/138 fragment ions using 13 most intense peaks [\(help\)](#)

| #  | b           | b <sup>++</sup> | b <sup>*</sup> | b <sup>*++</sup> | b <sup>0</sup> | b <sup>0++</sup> | Seq. | y           | y <sup>++</sup> | y <sup>*</sup> | y <sup>*++</sup> | y <sup>0</sup> | y <sup>0++</sup> | #  |
|----|-------------|-----------------|----------------|------------------|----------------|------------------|------|-------------|-----------------|----------------|------------------|----------------|------------------|----|
| 1  | 130.049869  | 65.528572       |                |                  | 112.039304     | 56.523290        | E    |             |                 |                |                  |                |                  | 14 |
| 2  | 227.102633  | 114.054954      |                |                  | 209.092068     | 105.049672       | P    | 1925.907059 | 963.457168      | 1908.880510    | 954.943893       | 1907.896494    | 954.451885       | 13 |
| 3  | 374.171047  | 187.589161      |                |                  | 356.160482     | 178.583879       | F    | 1828.854295 | 914.930786      | 1811.827746    | 906.417511       | 1810.843730    | 905.925503       | 12 |
| 4  | 487.255111  | 244.131193      |                |                  | 469.244546     | 235.125911       | L    | 1681.785881 | 841.396579      | 1664.759332    | 832.883304       | 1663.775316    | 832.391296       | 11 |
| 5  | 574.287139  | 287.647208      |                |                  | 556.276574     | 278.641925       | S    | 1568.701817 | 784.854547      | 1551.675268    | 776.341272       | 1550.691252    | 775.849264       | 10 |
| 6  | 734.317788  | 367.662532      |                |                  | 716.307223     | 358.657250       | C    | 1481.669789 | 741.338533      | 1464.643240    | 732.825258       | 1463.659224    | 732.333250       | 9  |
| 7  | 894.348437  | 447.677857      |                |                  | 876.337872     | 438.672574       | C    | 1321.639140 | 661.323208      | 1304.612591    | 652.809934       | 1303.628575    | 652.317926       | 8  |
| 8  | 1333.573763 | 667.290520      | 1316.547214    | 658.777245       | 1315.563198    | 658.285237       | Q    | 1161.608491 | 581.307884      | 1144.581942    | 572.794609       | 1143.597926    | 572.302601       | 7  |
| 9  | 1480.642177 | 740.824727      | 1463.615628    | 732.311452       | 1462.631612    | 731.819444       | F    | 722.383165  | 361.695221      | 705.356616     | 353.181946       | 704.372600     | 352.689938       | 6  |
| 10 | 1551.679291 | 776.343284      | 1534.652742    | 767.830009       | 1533.668726    | 767.338001       | A    | 575.314751  | 288.161014      | 558.288202     | 279.647739       | 557.304186     | 279.155731       | 5  |
| 11 | 1680.721884 | 840.864580      | 1663.695335    | 832.351306       | 1662.711319    | 831.859298       | E    | 504.277637  | 252.642457      | 487.251088     | 244.129182       | 486.267072     | 243.637174       | 4  |
| 12 | 1767.753912 | 884.380594      | 1750.727363    | 875.867320       | 1749.743347    | 875.375312       | S    | 375.235044  | 188.121160      | 358.208495     | 179.607885       | 357.224479     | 179.115877       | 3  |
| 13 | 1880.837976 | 940.922626      | 1863.811427    | 932.409352       | 1862.827411    | 931.917344       | L    | 288.203016  | 144.605146      | 271.176467     | 136.091871       |                |                  | 2  |
| 14 |             |                 |                |                  |                |                  | R    | 175.118952  | 88.063114       | 158.092403     | 79.549839        |                |                  | 1  |

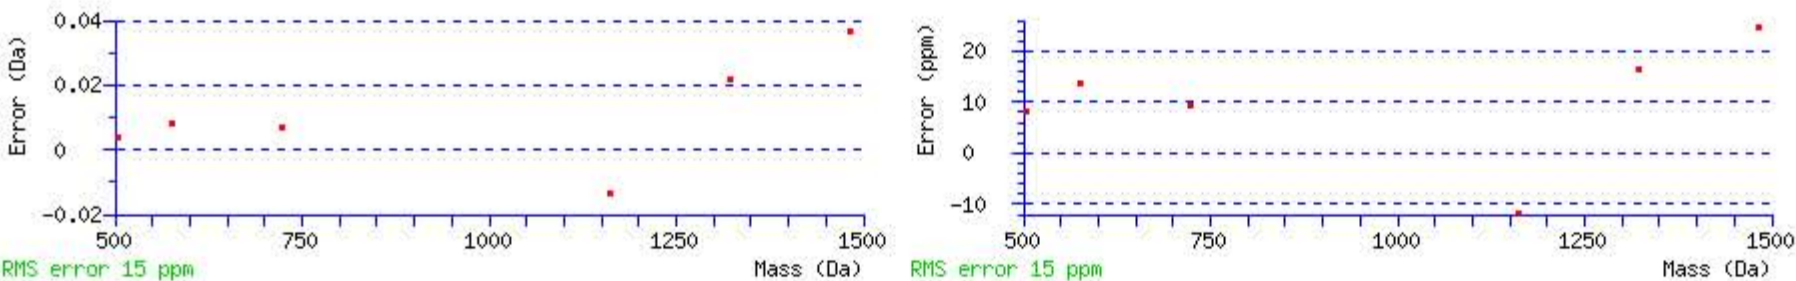

NCBI BLAST search of [EPFLSCCQFAESLR](#)  
(Parameters: blastp, nr protein database, expect=20000, no filter, PAM30)  
Other BLAST [web gateways](#)

All matches to this query

| Score | Mr(calc):   | Delta    | Sequence                       |
|-------|-------------|----------|--------------------------------|
| 28.3  | 2053.942368 | 0.025284 | <a href="#">EPFLSCCQFAESLR</a> |

M

A

T

R

I

X

S

C

I

E

N

C

E

Mascot Search Results

Peptide View

MS/MS Fragmentation of **LLATLCSAEVCQCAEGK**  
Found in **CO4A\_HUMAN**, Complement C4-A OS=Homo sapiens GN=C4A PE=1 SV=2

Match to Query 48946: 2220.056982 from(741.026270,3+) rtinseconds(2115) index(67084)  
Title: Locus:1.1.1.2011.11 File:"2013-07-02 CLN FXIII 180 min 2nd FT.wiff"  
Data file C:\Program Files (x86)\Matrix Science\Mascot Daemon\mgf\8 FXIII 180 min 2nd\mascot\_daemon\_merge.mgf

Click mouse within plot area to zoom in by factor of two about that point

Or, 

Plot from

100

 to 

2000

 Da 

Full range

Label all possible matches ☐ Label matches used for scoring ☒



Monoisotopic mass of neutral peptide Mr(calc): 2220.041092  
Fixed modifications: Carbamidomethyl (C) (apply to specified residues or termini only)  
Variable modifications:  
Q12 : Biotin:Thermo-21345 (Q)  
Ions Score: 55 Expect: 2e-005  
Matches : 25/160 fragment ions using 60 most intense peaks [\(help\)](#)

| #  | b           | b <sup>++</sup> | b <sup>*</sup> | b <sup>+++</sup> | b <sup>0</sup> | b <sup>0++</sup> | Seq. | y           | y <sup>++</sup> | y <sup>*</sup> | y <sup>+++</sup> | y <sup>0</sup> | y <sup>0++</sup> | #  |
|----|-------------|-----------------|----------------|------------------|----------------|------------------|------|-------------|-----------------|----------------|------------------|----------------|------------------|----|
| 1  | 114.091340  | 57.549308       |                |                  |                |                  | L    |             |                 |                |                  |                |                  | 17 |
| 2  | 227.175404  | 114.091340      |                |                  |                |                  | L    | 2107.964318 | 1054.485797     | 2090.937769    | 1045.972522      | 2089.953753    | 1045.480514      | 16 |
| 3  | 298.212518  | 149.609897      |                |                  |                |                  | A    | 1994.880254 | 997.943765      | 1977.853705    | 989.430491       | 1976.869689    | 988.938483       | 15 |
| 4  | 399.260197  | 200.133737      |                |                  | 381.249632     | 191.128454       | T    | 1923.843140 | 962.425208      | 1906.816591    | 953.911934       | 1905.832575    | 953.419926       | 14 |
| 5  | 512.344261  | 256.675769      |                |                  | 494.333696     | 247.670486       | L    | 1822.795461 | 911.901369      | 1805.768912    | 903.388094       | 1804.784896    | 902.896086       | 13 |
| 6  | 672.374910  | 336.691093      |                |                  | 654.364345     | 327.685811       | C    | 1709.711397 | 855.359337      | 1692.684848    | 846.846062       | 1691.700832    | 846.354054       | 12 |
| 7  | 759.406938  | 380.207107      |                |                  | 741.396373     | 371.201825       | S    | 1549.680748 | 775.344012      | 1532.654199    | 766.830738       | 1531.670183    | 766.338730       | 11 |
| 8  | 830.444052  | 415.725664      |                |                  | 812.433487     | 406.720382       | A    | 1462.648720 | 731.827998      | 1445.622171    | 723.314724       | 1444.638155    | 722.822716       | 10 |
| 9  | 959.486645  | 480.246961      |                |                  | 941.476080     | 471.241678       | E    | 1391.611606 | 696.309441      | 1374.585057    | 687.796167       | 1373.601041    | 687.304159       | 9  |
| 10 | 1058.555059 | 529.781168      |                |                  | 1040.544494    | 520.775885       | V    | 1262.569013 | 631.788145      | 1245.542464    | 623.274870       | 1244.558448    | 622.782862       | 8  |
| 11 | 1218.585708 | 609.796492      |                |                  | 1200.575143    | 600.791210       | C    | 1163.500599 | 582.253938      | 1146.474050    | 573.740663       | 1145.490034    | 573.248655       | 7  |
| 12 | 1657.811034 | 829.409155      | 1640.784485    | 820.895881       | 1639.800469    | 820.403873       | Q    | 1003.469950 | 502.238613      | 986.443401     | 493.725339       | 985.459385     | 493.233331       | 6  |
| 13 | 1817.841683 | 909.424480      | 1800.815134    | 900.911205       | 1799.831118    | 900.419197       | C    | 564.244624  | 282.625950      | 547.218075     | 274.112676       | 546.234059     | 273.620668       | 5  |
| 14 | 1888.878797 | 944.943037      | 1871.852248    | 936.429762       | 1870.868232    | 935.937754       | A    | 404.213975  | 202.610626      | 387.187426     | 194.097351       | 386.203410     | 193.605343       | 4  |
| 15 | 2017.921390 | 1009.464333     | 2000.894841    | 1000.951059      | 1999.910825    | 1000.459051      | E    | 333.176861  | 167.092069      | 316.150312     | 158.578794       | 315.166296     | 158.086786       | 3  |
| 16 | 2074.942854 | 1037.975065     | 2057.916305    | 1029.461790      | 2056.932289    | 1028.969782      | G    | 204.134268  | 102.570772      | 187.107719     | 94.057497        |                |                  | 2  |
| 17 |             |                 |                |                  |                |                  | K    | 147.112804  | 74.060040       | 130.086255     | 65.546765        |                |                  | 1  |



NCBI BLAST search of [LLATLCSAEVCQCAEGK](#)  
(Parameters: blastp, nr protein database, expect=20000, no filter, PAM30)  
Other BLAST [web gateways](#)

All matches to this query

| Score | Mr(calc):   | Delta    | Sequence                           |
|-------|-------------|----------|------------------------------------|
| 54.6  | 2220.041092 | 0.015890 | <a href="#">LLATLCSAEVCQCAEGK</a>  |
| 4.5   | 2220.048080 | 0.008902 | <a href="#">EPQEGAELPEATGTTSHR</a> |

MATRIX

SCIENCE

Mascot Search Results

Peptide View

MS/MS Fragmentation of **GEQIQLK**  
Found in **COS\_HUMAN**, Complement C5 OS=Homo sapiens GN=C5 PE=1 SV=4

Match to Query 17487: 1125.627408 from(563.820980,2+) rtinseconds(1761) index(32668)  
Title: Locus:1.1.1.722.9 File:"2013-07-02 CLN FXIII 180 min 2nd F 3.wiff"  
Data file C:\Program Files (x86)\Matrix Science\Mascot Daemon\mgf\8 FXIII 180 min 2nd\mascot\_daemon\_merge.mgf

Click mouse within plot area to zoom in by factor of two about that point  
Or,   to  Da   
Label all possible matches ☐ Label matches used for scoring ☒

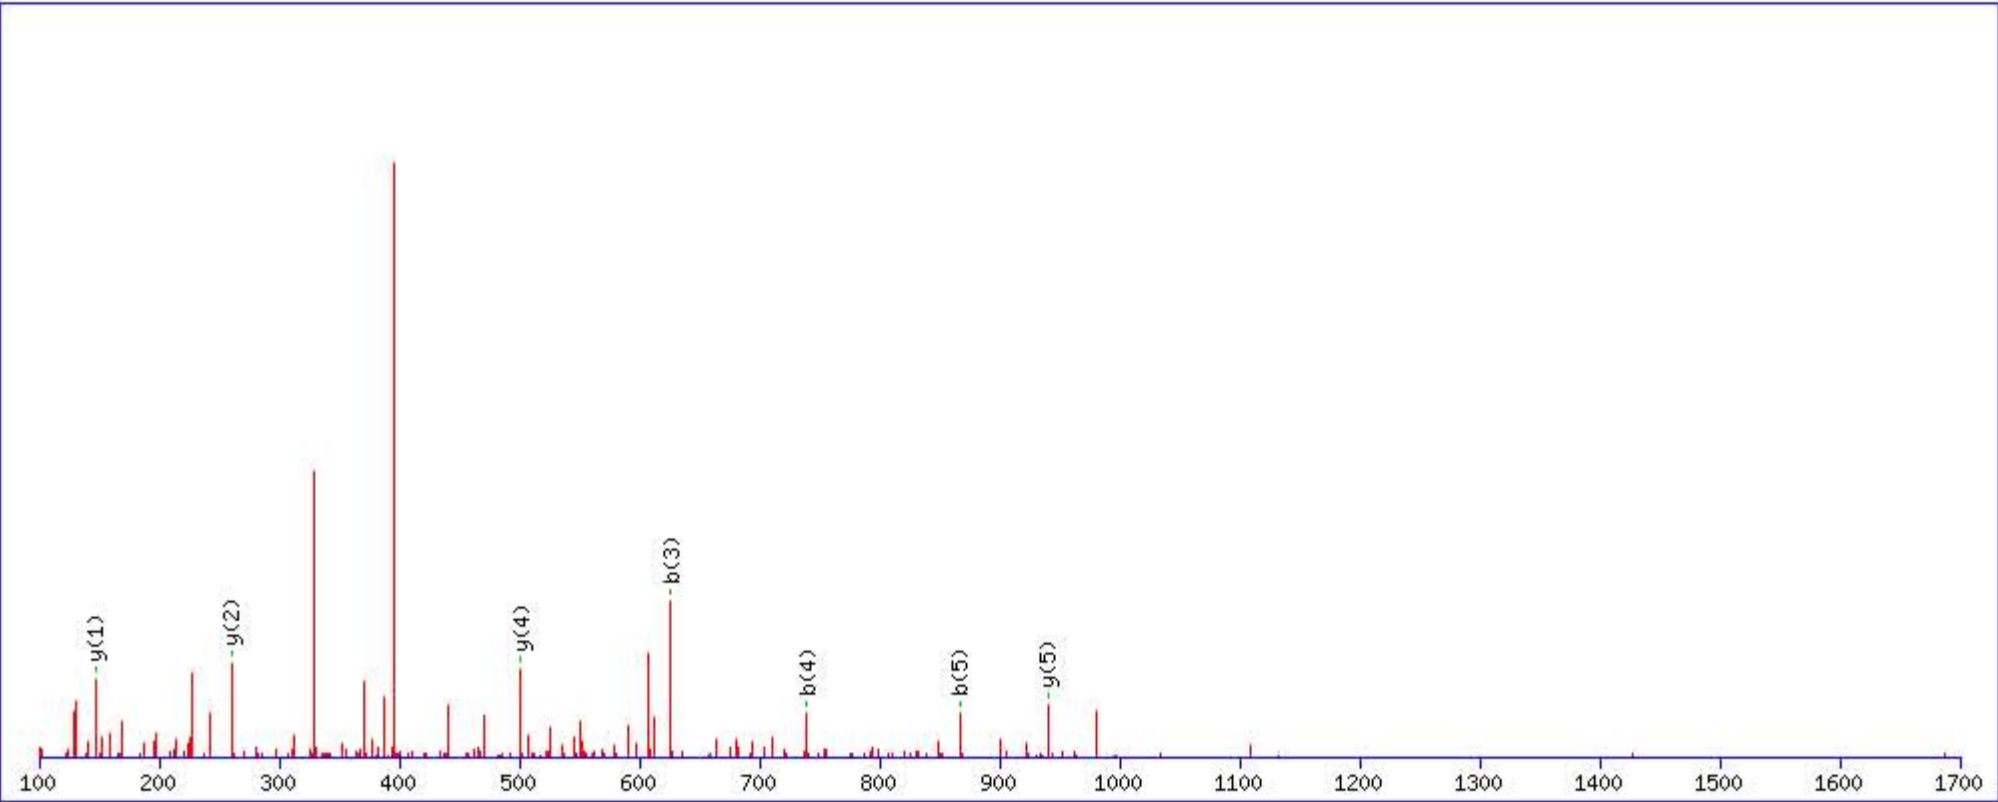

Monoisotopic mass of neutral peptide Mr(calc): 1125.621597  
Fixed modifications: Carbamidomethyl (C) (apply to specified residues or termini only)  
Variable modifications:  
Q3 : Biotin:Thermo-21345 (Q)  
Ions Score: 25 Expect: 0.055  
Matches : 7/56 fragment ions using 11 most intense peaks ([help](#))

| # | b          | b <sup>++</sup> | b <sup>*</sup> | b <sup>++*</sup> | b <sup>0</sup> | b <sup>0++</sup> | Seq. | y           | y <sup>++</sup> | y <sup>*</sup> | y <sup>++*</sup> | y <sup>0</sup> | y <sup>0++</sup> | # |
|---|------------|-----------------|----------------|------------------|----------------|------------------|------|-------------|-----------------|----------------|------------------|----------------|------------------|---|
| 1 | 58.028740  | 29.518008       |                |                  |                |                  | G    |             |                 |                |                  |                |                  | 7 |
| 2 | 187.071333 | 94.039305       |                |                  | 169.060768     | 85.034022        | E    | 1069.607429 | 535.307353      | 1052.580880    | 526.794078       | 1051.596864    | 526.302070       | 6 |
| 3 | 626.296659 | 313.651968      | 609.270110     | 305.138693       | 608.286094     | 304.646685       | Q    | 940.564836  | 470.786056      | 923.538287     | 462.272782       |                |                  | 5 |
| 4 | 739.380723 | 370.194000      | 722.354174     | 361.680725       | 721.370158     | 361.188717       | I    | 501.339510  | 251.173393      | 484.312961     | 242.660119       |                |                  | 4 |
| 5 | 867.439301 | 434.223289      | 850.412752     | 425.710014       | 849.428736     | 425.218006       | Q    | 388.255446  | 194.631361      | 371.228897     | 186.118087       |                |                  | 3 |
| 6 | 980.523365 | 490.765321      | 963.496816     | 482.252046       | 962.512800     | 481.760038       | L    | 260.196868  | 130.602072      | 243.170319     | 122.088798       |                |                  | 2 |
| 7 |            |                 |                |                  |                |                  | K    | 147.112804  | 74.060040       | 130.086255     | 65.546766        |                |                  | 1 |

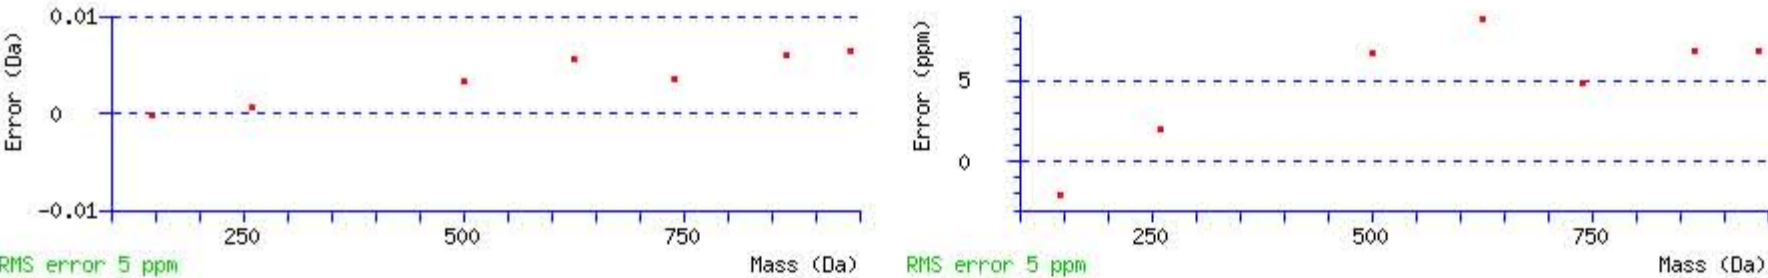

NCBI BLAST search of [GEQIQLK](#)  
(Parameters: blastp, nr protein database, expect=20000, no filter, PAM30)  
Other BLAST [web gateways](#)

All matches to this query

| Score | Mr(calc):   | Delta     | Sequence                   |
|-------|-------------|-----------|----------------------------|
| 25.2  | 1125.621597 | 0.005811  | <a href="#">GEQIQLK</a>    |
| 11.1  | 1125.632828 | -0.005420 | <a href="#">KLCLSHLQK</a>  |
| 9.9   | 1125.621597 | 0.005811  | <a href="#">EQVAQLK</a>    |
| 9.6   | 1125.632813 | -0.005404 | <a href="#">EQAARLK</a>    |
| 8.8   | 1125.636856 | -0.009448 | <a href="#">WAAQVIK</a>    |
| 7.0   | 1125.629486 | -0.002078 | <a href="#">RVDGWPVGLK</a> |
| 5.8   | 1125.644073 | -0.016665 | <a href="#">MKRVVQHTK</a>  |
| 5.6   | 1125.621597 | 0.005811  | <a href="#">GEQIQLK</a>    |
| 5.6   | 1125.633499 | -0.006091 | <a href="#">VSHFLPWIK</a>  |
| 5.3   | 1125.621597 | 0.005811  | <a href="#">GQELIQK</a>    |

MATRIX

SCIENCE

Mascot Search Results

Peptide View

MS/MS Fragmentation of **QYLIMGK**  
Found in **CO5\_HUMAN**, Complement C5 OS=Homo sapiens GN=C5 PE=1 SV=4

Match to Query 19345: 1162.631648 from(582.323100,2+) rtinseconds(2109) index(34909)  
Title: Locus:1.1.1.843.5 File:"2013-07-02 CLN FXIII 180 min 2nd F 3.wiff"  
Data file C:\Program Files (x86)\Matrix Science\Mascot Daemon\mgf\8 FXIII 180 min 2nd\mascot\_daemon\_merge.mgf

Click mouse within plot area to zoom in by factor of two about that point  
Or, 

Plot from

100

 to 

1300

 Da 

Full range

  
Label all possible matches ☐ Label matches used for scoring ☒

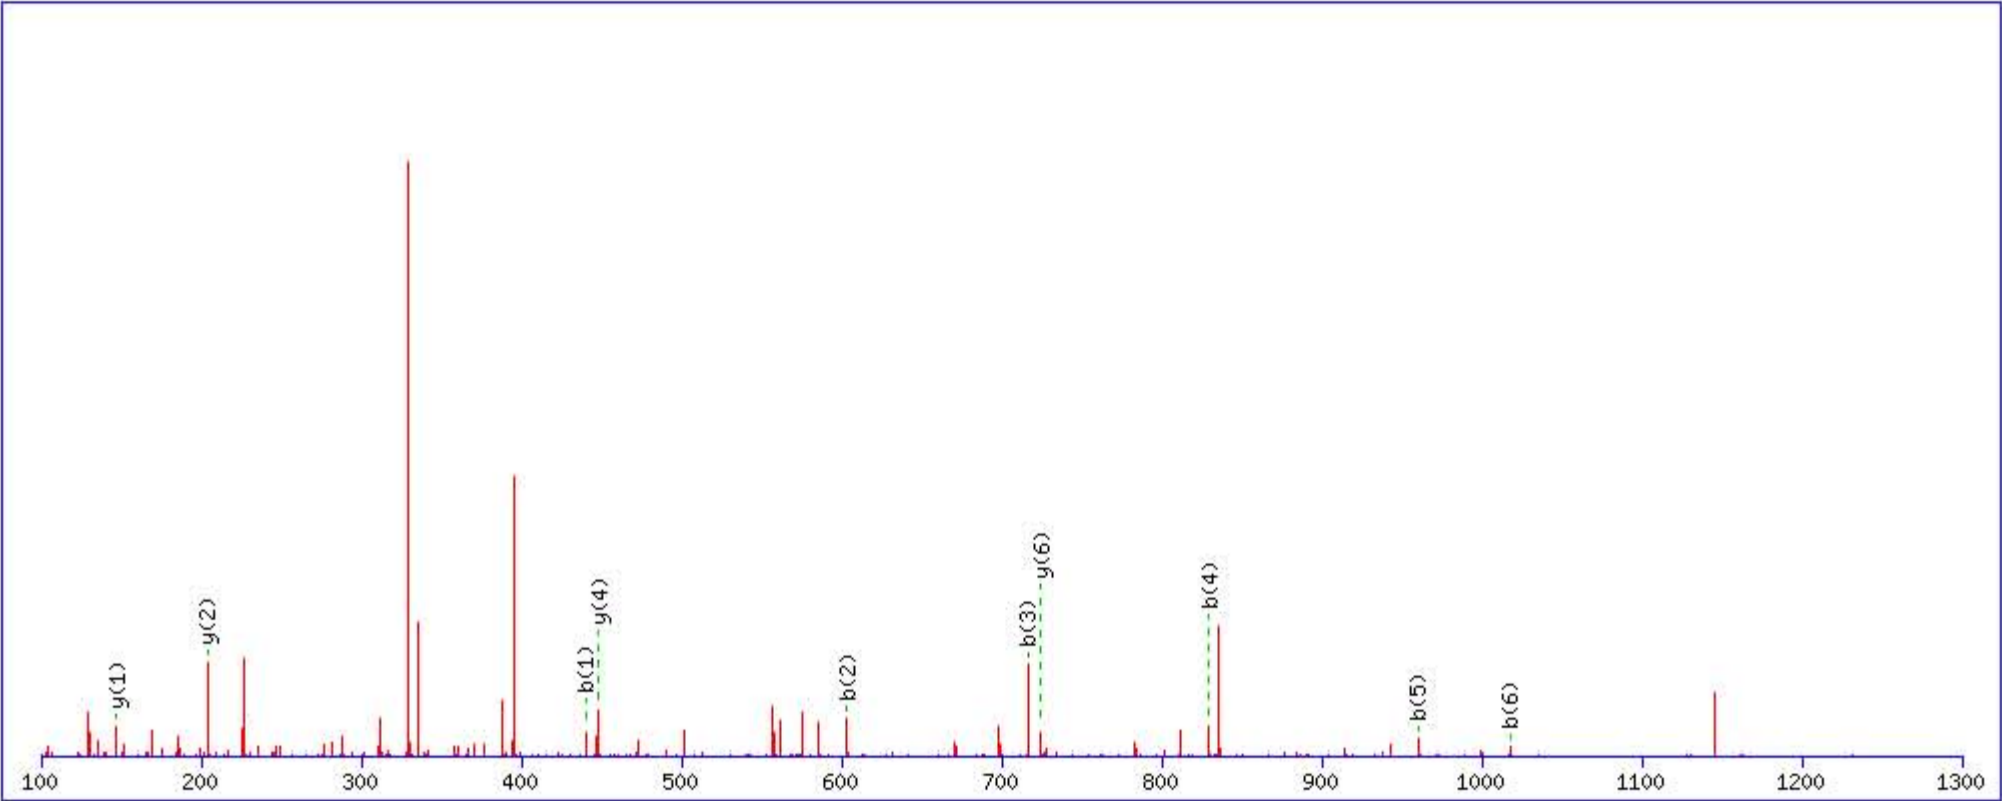

Monoisotopic mass of neutral peptide Mr(calc): 1162.624237  
Fixed modifications: Carbamidomethyl (C) (apply to specified residues or termini only)  
Variable modifications:  
Q1 : Biotin:Thermo-21345 (Q)  
Ions Score: 30 Expect: 0.015  
Matches : 10/48 fragment ions using 22 most intense peaks [\(help\)](#)

| # | b           | b <sup>++</sup> | b <sup>*</sup> | b <sup>+++</sup> | Seq. | y          | y <sup>++</sup> | y <sup>*</sup> | y <sup>+++</sup> | # |
|---|-------------|-----------------|----------------|------------------|------|------------|-----------------|----------------|------------------|---|
| 1 | 440.232602  | 220.619939      | 423.206053     | 212.106664       | Q    |            |                 |                |                  | 7 |
| 2 | 603.295931  | 302.151604      | 586.269382     | 293.638329       | Y    | 724.406210 | 362.706743      | 707.379661     | 354.193469       | 6 |
| 3 | 716.379995  | 358.693636      | 699.353446     | 350.180361       | L    | 561.342881 | 281.175079      | 544.316332     | 272.661804       | 5 |
| 4 | 829.464059  | 415.235668      | 812.437510     | 406.722393       | I    | 448.258817 | 224.633046      | 431.232268     | 216.119772       | 4 |
| 5 | 960.504544  | 480.755910      | 943.477995     | 472.242636       | M    | 335.174753 | 168.091014      | 318.148204     | 159.577740       | 3 |
| 6 | 1017.526008 | 509.266642      | 1000.499459    | 500.753368       | G    | 204.134268 | 102.570772      | 187.107719     | 94.057497        | 2 |
| 7 |             |                 |                |                  | K    | 147.112804 | 74.060040       | 130.086255     | 65.546765        | 1 |

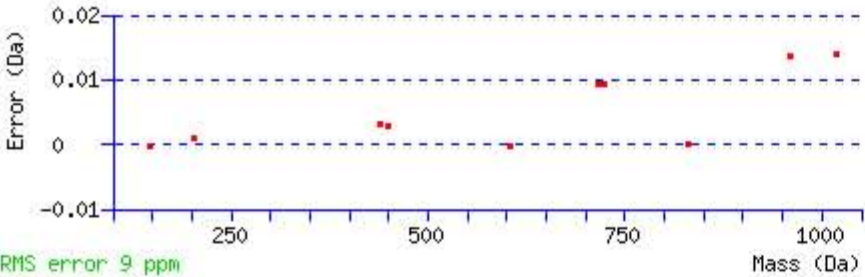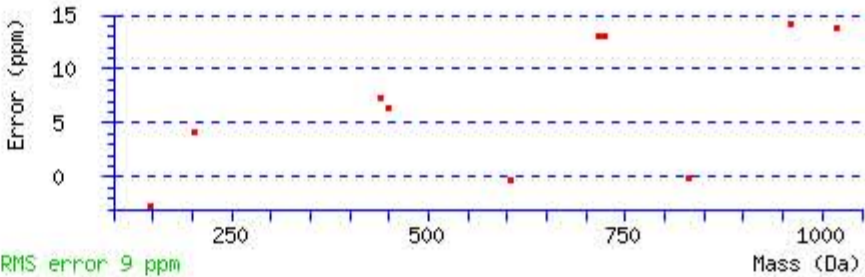

NCBI BLAST search of [QYLIMGK](#)  
(Parameters: blastp, nr protein database, expect=20000, no filter, PAM30)  
Other BLAST [web gateways](#)

All matches to this query

| Score | Mr(calc):   | Delta     | Sequence                   |
|-------|-------------|-----------|----------------------------|
| 30.1  | 1162.624237 | 0.007411  | <a href="#">QYLIMGK</a>    |
| 14.9  | 1162.641998 | -0.010350 | <a href="#">QYLTSLK</a>    |
| 5.6   | 1162.634598 | -0.002950 | <a href="#">YRVLAIGDEK</a> |
| 5.3   | 1162.624069 | 0.007579  | <a href="#">VGRCRSLSTK</a> |
| 5.2   | 1162.626724 | 0.004924  | <a href="#">KVEIAEMSLK</a> |
| 4.8   | 1162.623383 | 0.008265  | <a href="#">FDGLQLELTK</a> |
| 4.5   | 1162.639313 | -0.007665 | <a href="#">QRHLNGK</a>    |
| 4.1   | 1162.616852 | 0.014796  | <a href="#">QKAQSPVFK</a>  |
| 3.8   | 1162.626740 | 0.004908  | <a href="#">EVLKMDTSIK</a> |
| 3.4   | 1162.635956 | -0.004308 | <a href="#">WGGFLGRRSK</a> |

MATRIX

SCIENCE

Mascot Search Results

Peptide View

MS/MS Fragmentation of **WLSEEQR**  
Found in **CO5\_HUMAN**, Complement C5 OS=Homo sapiens GN=C5 PE=1 SV=4

Match to Query 22085: 1257.625908 from(629.820230,2+) rtinseconds(1813) index(33000)  
Title: Locus:1.1.1.740.8 File:"2013-07-02 CLN FXIII 180 min 2nd F 3.wiff"  
Data file C:\Program Files (x86)\Matrix Science\Mascot Daemon\mgf\8 FXIII 180 min 2nd\mascot\_daemon\_merge.mgf

Click mouse within plot area to zoom in by factor of two about that point  
Or, 

Plot from

100

to

1200

Da

Full range

  
Label all possible matches ☐ Label matches used for scoring ☒

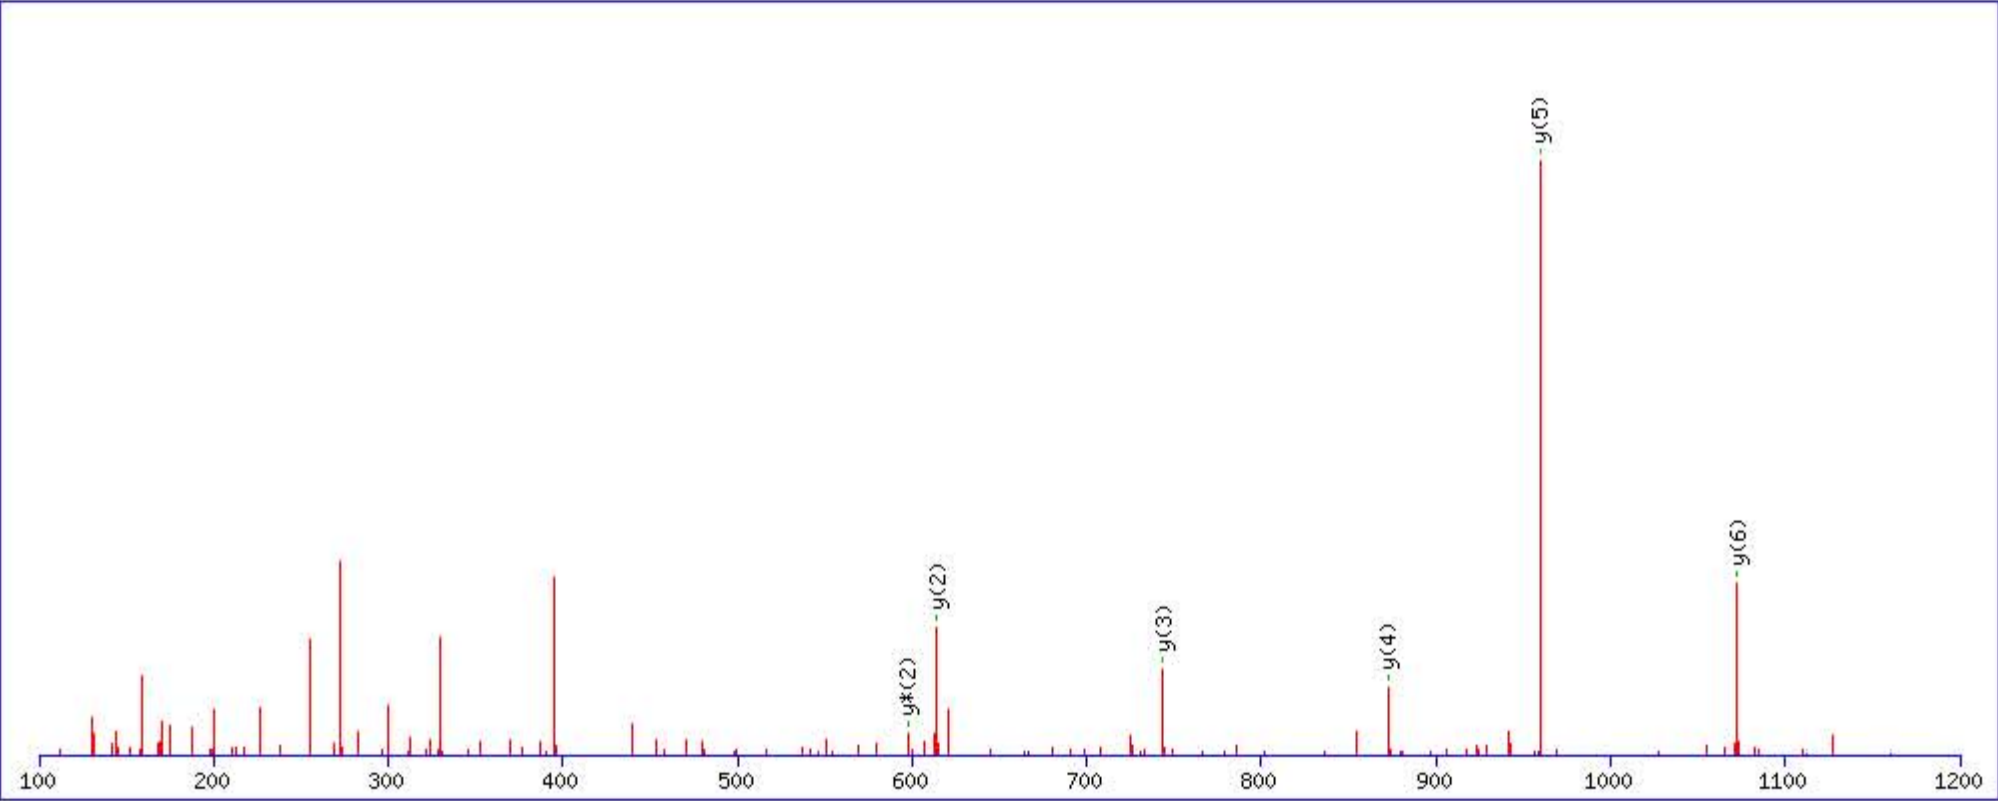

Monoisotopic mass of neutral peptide Mr(calc): 1257.617569  
Fixed modifications: Carbamidomethyl (C) (apply to specified residues or termini only)  
Variable modifications:  
Q6 : Biotin:Thermo-21345 (Q)  
Ions Score: 30 Expect: 0.0073  
Matches : 6/54 fragment ions using 11 most intense peaks [\(help\)](#)

| # | b           | b <sup>++</sup> | b <sup>*</sup> | b <sup>*++</sup> | b <sup>0</sup> | b <sup>0++</sup> | Seq. | y           | y <sup>++</sup> | y <sup>*</sup> | y <sup>*++</sup> | y <sup>0</sup> | y <sup>0++</sup> | # |
|---|-------------|-----------------|----------------|------------------|----------------|------------------|------|-------------|-----------------|----------------|------------------|----------------|------------------|---|
| 1 | 187.086589  | 94.046932       |                |                  |                |                  | W    |             |                 |                |                  |                |                  | 7 |
| 2 | 300.170653  | 150.588965      |                |                  |                |                  | L    | 1072.545556 | 536.776416      | 1055.519007    | 528.263142       | 1054.534991    | 527.771134       | 6 |
| 3 | 387.202681  | 194.104979      |                |                  | 369.192116     | 185.099696       | S    | 959.461492  | 480.234384      | 942.434943     | 471.721109       | 941.450927     | 471.229101       | 5 |
| 4 | 516.245274  | 258.626275      |                |                  | 498.234709     | 249.620993       | E    | 872.429464  | 436.718370      | 855.402915     | 428.205095       | 854.418899     | 427.713087       | 4 |
| 5 | 645.287867  | 323.147572      |                |                  | 627.277302     | 314.142289       | E    | 743.386871  | 372.197073      | 726.360322     | 363.683799       | 725.376306     | 363.191791       | 3 |
| 6 | 1084.513193 | 542.760235      | 1067.486644    | 534.246960       | 1066.502628    | 533.754952       | Q    | 614.344278  | 307.675777      | 597.317729     | 299.162502       |                |                  | 2 |
| 7 |             |                 |                |                  |                |                  | R    | 175.118952  | 88.063114       | 158.092403     | 79.549839        |                |                  | 1 |

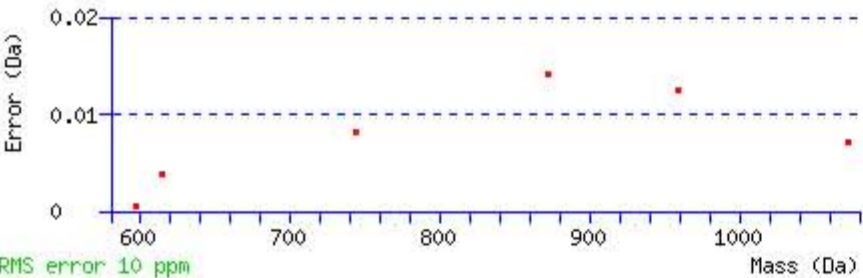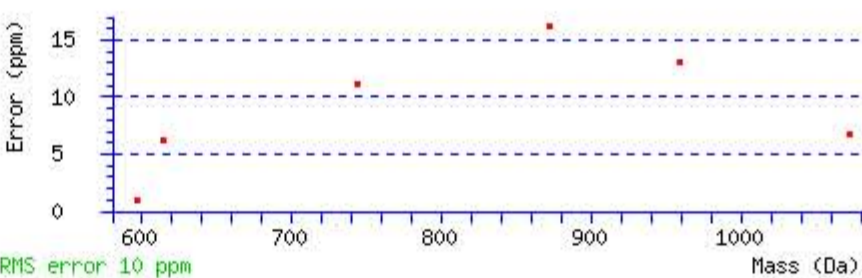

NCBI **BLAST** search of [WLSEEQR](#)  
(Parameters: blastp, nr protein database, expect=20000, no filter, PAM30)  
Other BLAST [web gateways](#)

All matches to this query

| Score | Mr(calc):   | Delta     | Sequence                     |
|-------|-------------|-----------|------------------------------|
| 29.6  | 1257.617569 | 0.008339  | <a href="#">WLSEEQR</a>      |
| 6.5   | 1257.620071 | 0.005837  | <a href="#">EGLEEGDQILR</a>  |
| 3.2   | 1257.617584 | 0.008324  | <a href="#">SVMEAPFPAPGR</a> |
| 2.3   | 1257.638687 | -0.012779 | <a href="#">EGEMALLSKHK</a>  |
| 1.3   | 1257.613541 | 0.012367  | <a href="#">DHVKAMEERK</a>   |
| 1.1   | 1257.617599 | 0.008309  | <a href="#">QADVFPDR</a>     |

MATRIX

SCIENCE

Mascot Search Results

Peptide View

MS/MS Fragmentation of **AFTECCVVASQLR**  
Found in **COS\_HUMAN**, Complement C5 OS=Homo sapiens GN=C5 PE=1 SV=4

Match to Query 41277: 1850.906468 from(926.460510,2+) rtinseconds(2172) index(51552)  
Title: Locus:1.1.1.1993.21 File:"2013-07-02 CLN FXIII 180 min 2nd F 4.wiff"  
Data file C:\Program Files (x86)\Matrix Science\Mascot Daemon\mgf\8 FXIII 180 min 2nd\mascot\_daemon\_merge.mgf

Click mouse within plot area to zoom in by factor of two about that point  
Or, 

Plot from

0

 to 

2800

 Da 

Full range

  
Label all possible matches ☐ Label matches used for scoring ☒

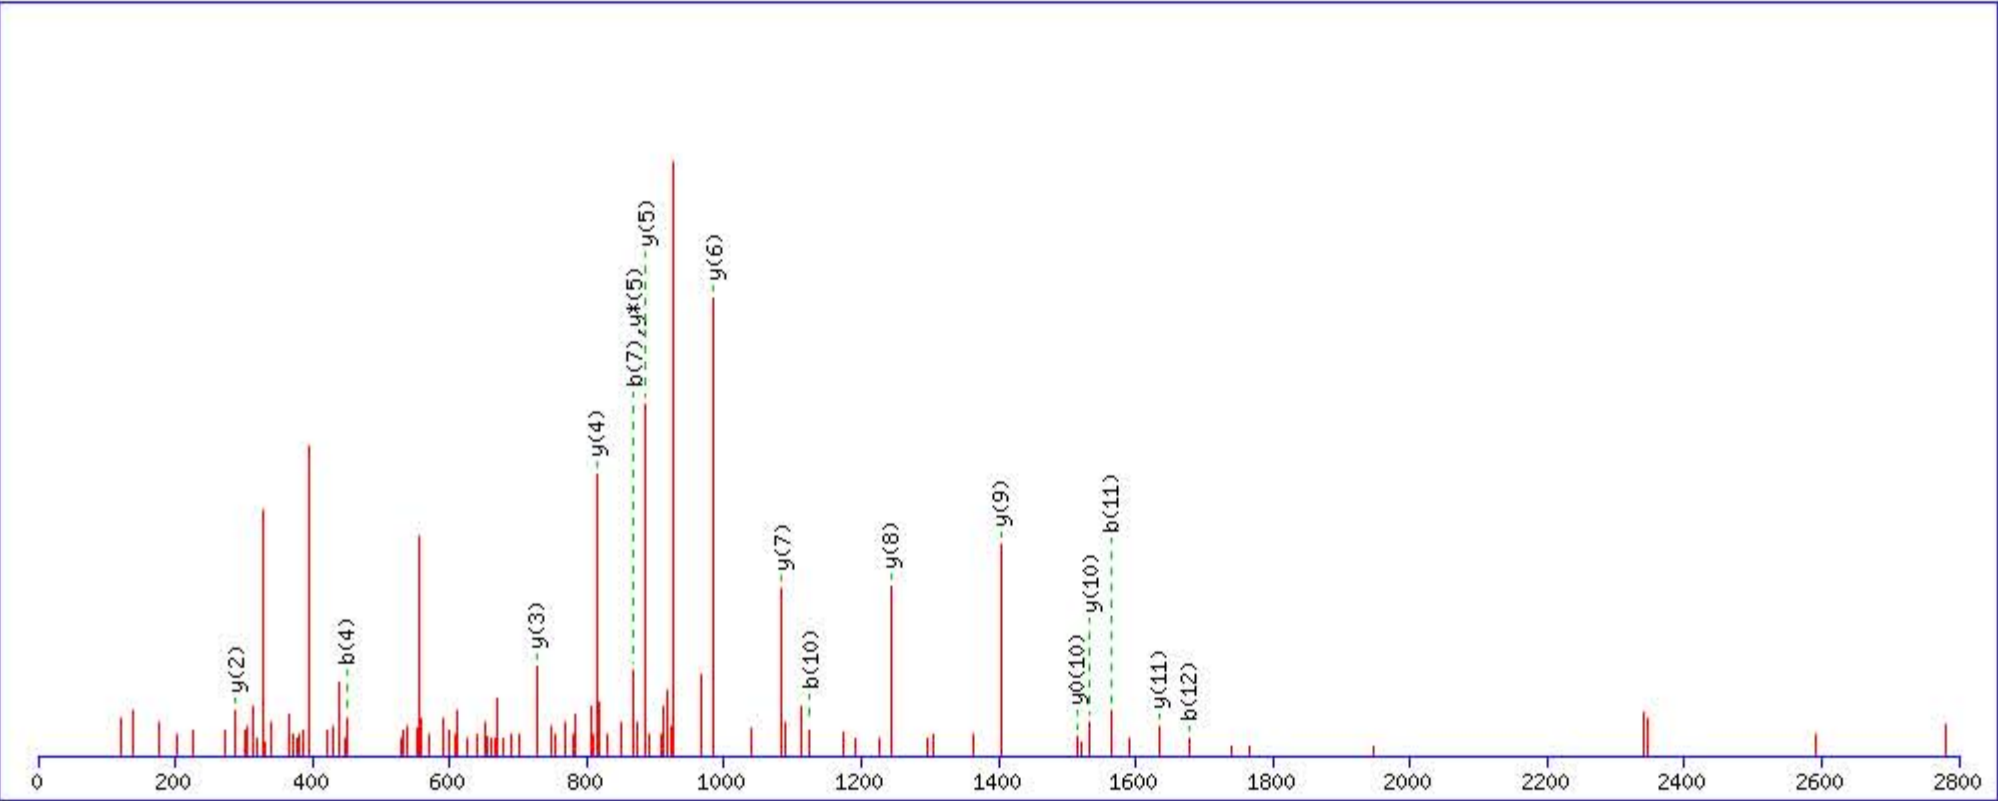

Monoisotopic mass of neutral peptide Mr(calc): 1850.884140  
Fixed modifications: Carbamidomethyl (C) (apply to specified residues or termini only)  
Variable modifications:  
Q11 : Biotin:Thermo-21345 (Q)  
Ions Score: 57 Expect: 4.9e-005  
Matches : 17/114 fragment ions using 33 most intense peaks [\(help\)](#)

| #  | b           | b <sup>++</sup> | b <sup>+</sup> | b <sup>++</sup> | b <sup>0</sup> | b <sup>0++</sup> | Seq. | y           | y <sup>++</sup> | y <sup>+</sup> | y <sup>++</sup> | y <sup>0</sup> | y <sup>0++</sup> | #  |
|----|-------------|-----------------|----------------|-----------------|----------------|------------------|------|-------------|-----------------|----------------|-----------------|----------------|------------------|----|
| 1  | 72.044390   | 36.525833       |                |                 |                |                  | A    |             |                 |                |                 |                |                  | 13 |
| 2  | 219.112804  | 110.060040      |                |                 |                |                  | F    | 1780.854296 | 890.930786      | 1763.827747    | 882.417512      | 1762.843731    | 881.925504       | 12 |
| 3  | 320.160483  | 160.583879      |                |                 | 302.149918     | 151.578597       | T    | 1633.785882 | 817.396579      | 1616.759333    | 808.883305      | 1615.775317    | 808.391297       | 11 |
| 4  | 449.203076  | 225.105176      |                |                 | 431.192511     | 216.099894       | E    | 1532.738203 | 766.872740      | 1515.711654    | 758.359465      | 1514.727638    | 757.867457       | 10 |
| 5  | 609.233725  | 305.120501      |                |                 | 591.223160     | 296.115218       | C    | 1403.695610 | 702.351443      | 1386.669061    | 693.838169      | 1385.685045    | 693.346161       | 9  |
| 6  | 769.264374  | 385.135825      |                |                 | 751.253809     | 376.130543       | C    | 1243.664961 | 622.336119      | 1226.638412    | 613.822844      | 1225.654396    | 613.330836       | 8  |
| 7  | 868.332788  | 434.670032      |                |                 | 850.322223     | 425.664750       | V    | 1083.634312 | 542.320794      | 1066.607763    | 533.807520      | 1065.623747    | 533.315512       | 7  |
| 8  | 967.401202  | 484.204239      |                |                 | 949.390637     | 475.198957       | V    | 984.565898  | 492.786587      | 967.539349     | 484.273313      | 966.555333     | 483.781305       | 6  |
| 9  | 1038.438316 | 519.722796      |                |                 | 1020.427751    | 510.717514       | A    | 885.497484  | 443.252380      | 868.470935     | 434.739106      | 867.486919     | 434.247098       | 5  |
| 10 | 1125.470344 | 563.238810      |                |                 | 1107.459779    | 554.233528       | S    | 814.460370  | 407.733823      | 797.433821     | 399.220549      | 796.449805     | 398.728541       | 4  |
| 11 | 1564.695670 | 782.851473      | 1547.669121    | 774.338199      | 1546.685105    | 773.846191       | Q    | 727.428342  | 364.217809      | 710.401793     | 355.704535      |                |                  | 3  |
| 12 | 1677.779734 | 839.393505      | 1660.753185    | 830.880231      | 1659.769169    | 830.388223       | L    | 288.203016  | 144.605146      | 271.176467     | 136.091871      |                |                  | 2  |
| 13 |             |                 |                |                 |                |                  | R    | 175.118952  | 88.063114       | 158.092403     | 79.549839       |                |                  | 1  |

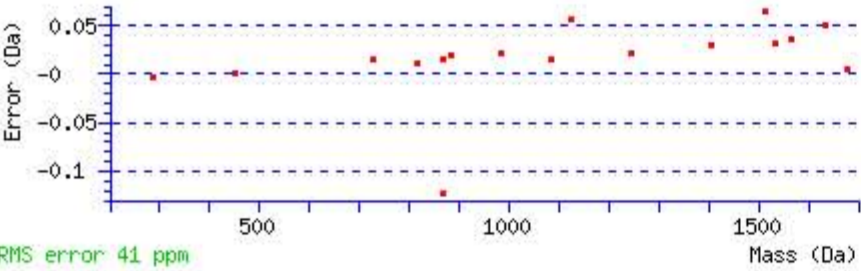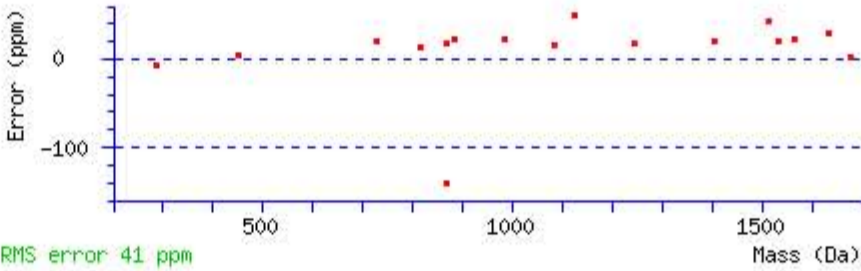

NCBI BLAST search of [AFTECCVVASQLR](#)  
(Parameters: blastp, nr protein database, expect=20000, no filter, PAM30)  
Other BLAST [web gateways](#)

All matches to this query

| Score | Mr(calc):   | Delta     | Sequence                        |
|-------|-------------|-----------|---------------------------------|
| 57.3  | 1850.884140 | 0.022328  | <a href="#">AFTECCVVASQLR</a>   |
| 10.7  | 1850.901901 | 0.004567  | <a href="#">QDDSGQDVPLR</a>     |
| 2.5   | 1850.920303 | -0.013835 | <a href="#">EDYFVTADQLWVPLR</a> |
| 2.1   | 1850.930847 | -0.024379 | <a href="#">DQAPAEEDARGEIIR</a> |

MATRIX

SCIENCE

Mascot Search Results

Peptide View

MS/MS Fragmentation of **ALVEGVDQLFTDYQIK**  
Found in **CO5\_HUMAN**, Complement C5 OS=Homo sapiens GN=C5 PE=1 SV=4

Match to Query 47393: 2149.144902 from(717.388910,3+) rtinseconds(2846) index(39431)  
Title: Locus:1.1.1.1098.6 File:"2013-07-02 CLN FXIII 180 min 2nd F 3.wiff"  
Data file C:\Program Files (x86)\Matrix Science\Mascot Daemon\mgf\8 FXIII 180 min 2nd\mascot\_daemon\_merge.mgf

Click mouse within plot area to zoom in by factor of two about that point  
Or,   to  Da   
Label all possible matches ☐ Label matches used for scoring ☒

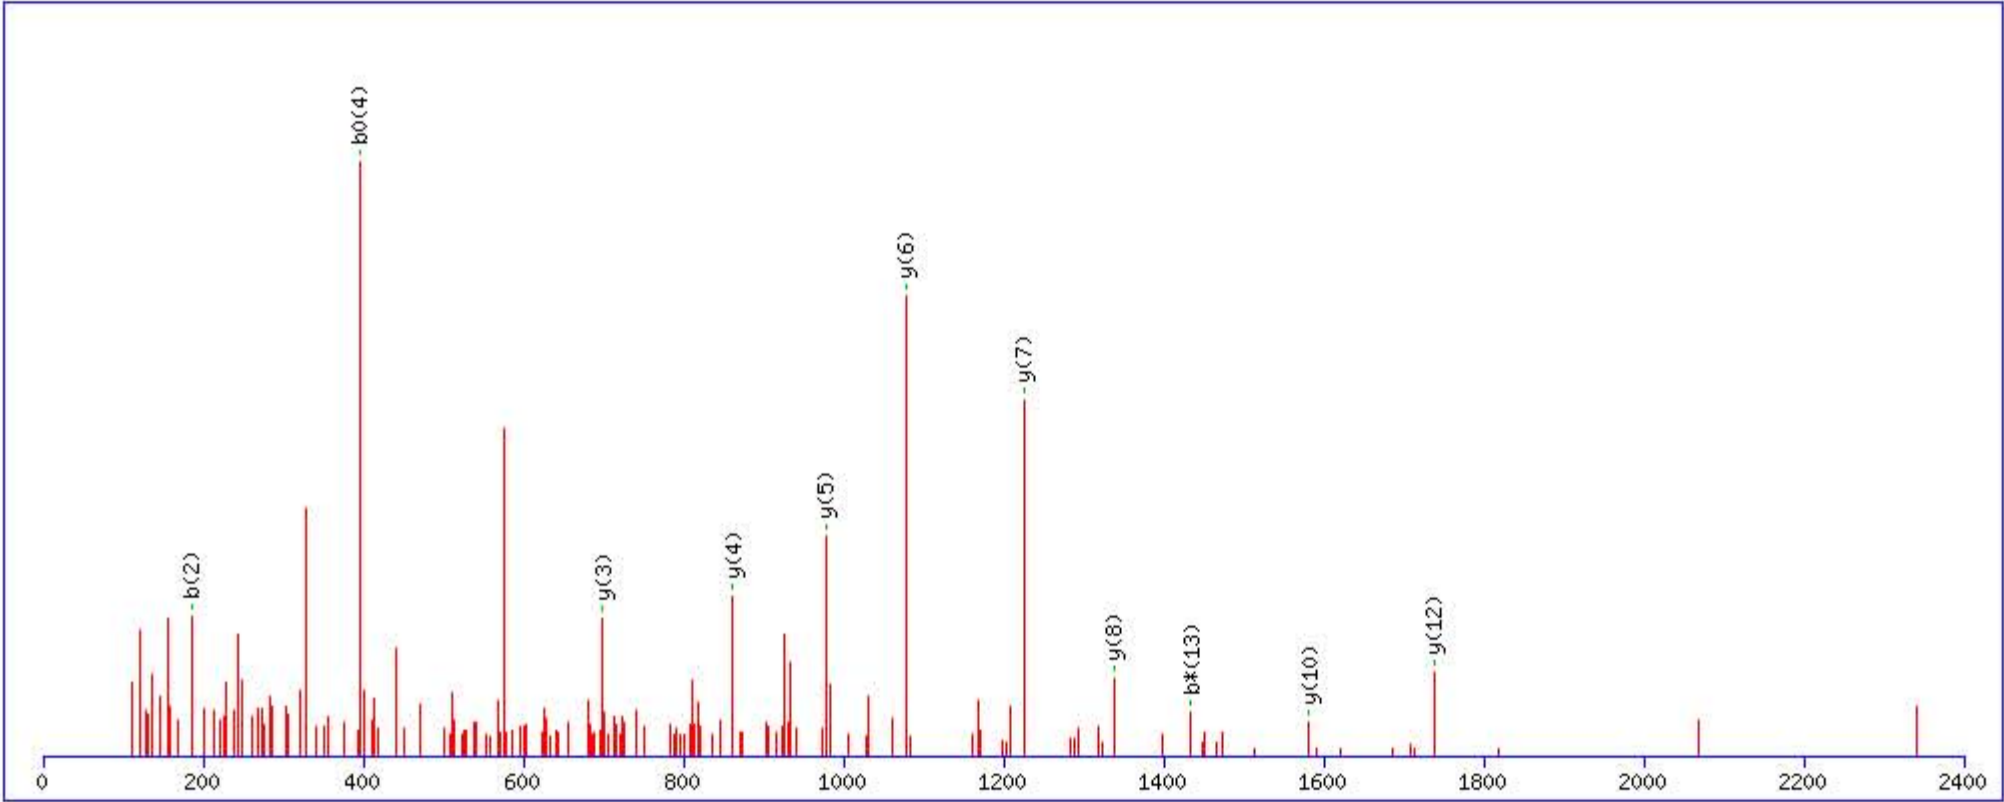

Monoisotopic mass of neutral peptide Mr(calc): 2149.112930  
Fixed modifications: Carbamidomethyl (C) (apply to specified residues or termini only)  
Variable modifications:  
Q14 : Biotin:Thermo-21345 (Q)  
Ions Score: 39 Expect: 0.0033  
Matches : 11/152 fragment ions using 19 most intense peaks [\(help\)](#)

| #  | b           | b <sup>++</sup> | b <sup>*</sup> | b <sup>+++</sup> | b <sup>0</sup> | b <sup>0++</sup> | Seq. | y           | y <sup>++</sup> | y <sup>*</sup> | y <sup>+++</sup> | y <sup>0</sup> | y <sup>0++</sup> | #  |
|----|-------------|-----------------|----------------|------------------|----------------|------------------|------|-------------|-----------------|----------------|------------------|----------------|------------------|----|
| 1  | 72.044390   | 36.525833       |                |                  |                |                  | A    |             |                 |                |                  |                |                  | 16 |
| 2  | 185.128454  | 93.067865       |                |                  |                |                  | L    | 2079.083093 | 1040.045184     | 2062.056544    | 1031.531910      | 2061.072528    | 1031.039902      | 15 |
| 3  | 284.196868  | 142.602072      |                |                  |                |                  | V    | 1965.999029 | 983.503153      | 1948.972480    | 974.989878       | 1947.988464    | 974.497870       | 14 |
| 4  | 413.239461  | 207.123369      |                |                  | 395.228896     | 198.118086       | E    | 1866.930615 | 933.968946      | 1849.904066    | 925.455671       | 1848.920050    | 924.963663       | 13 |
| 5  | 470.260925  | 235.634100      |                |                  | 452.250360     | 226.628818       | G    | 1737.888022 | 869.447649      | 1720.861473    | 860.934375       | 1719.877457    | 860.442367       | 12 |
| 6  | 569.329339  | 285.168308      |                |                  | 551.318774     | 276.163025       | V    | 1680.866558 | 840.936917      | 1663.840009    | 832.423643       | 1662.855993    | 831.931635       | 11 |
| 7  | 684.356282  | 342.681779      |                |                  | 666.345717     | 333.676496       | D    | 1581.798144 | 791.402710      | 1564.771595    | 782.889436       | 1563.787579    | 782.397428       | 10 |
| 8  | 812.414860  | 406.711068      | 795.388311     | 398.197793       | 794.404295     | 397.705785       | Q    | 1466.771201 | 733.889239      | 1449.744652    | 725.375964       | 1448.760636    | 724.883956       | 9  |
| 9  | 925.498924  | 463.253100      | 908.472375     | 454.739825       | 907.488359     | 454.247818       | L    | 1338.712623 | 669.859950      | 1321.686074    | 661.346675       | 1320.702058    | 660.854667       | 8  |
| 10 | 1072.567338 | 536.787307      | 1055.540789    | 528.274033       | 1054.556773    | 527.782025       | F    | 1225.628559 | 613.317918      | 1208.602010    | 604.804643       | 1207.617994    | 604.312635       | 7  |
| 11 | 1173.615017 | 587.311147      | 1156.588468    | 578.797872       | 1155.604452    | 578.305864       | T    | 1078.560145 | 539.783711      | 1061.533596    | 531.270436       | 1060.549580    | 530.778428       | 6  |
| 12 | 1288.641960 | 644.824618      | 1271.615411    | 636.311344       | 1270.631395    | 635.819336       | D    | 977.512466  | 489.259871      | 960.485917     | 480.746597       | 959.501901     | 480.254589       | 5  |
| 13 | 1451.705289 | 726.356283      | 1434.678740    | 717.843008       | 1433.694724    | 717.351000       | Y    | 862.485523  | 431.746400      | 845.458974     | 423.233125       |                |                  | 4  |
| 14 | 1890.930615 | 945.968946      | 1873.904066    | 937.455671       | 1872.920050    | 936.963663       | Q    | 699.422194  | 350.214735      | 682.395645     | 341.701461       |                |                  | 3  |
| 15 | 2004.014679 | 1002.510978     | 1986.988130    | 993.997703       | 1986.004114    | 993.505695       | I    | 260.196868  | 130.602072      | 243.170319     | 122.088797       |                |                  | 2  |
| 16 |             |                 |                |                  |                |                  | K    | 147.112804  | 74.060040       | 130.086255     | 65.546765        |                |                  | 1  |

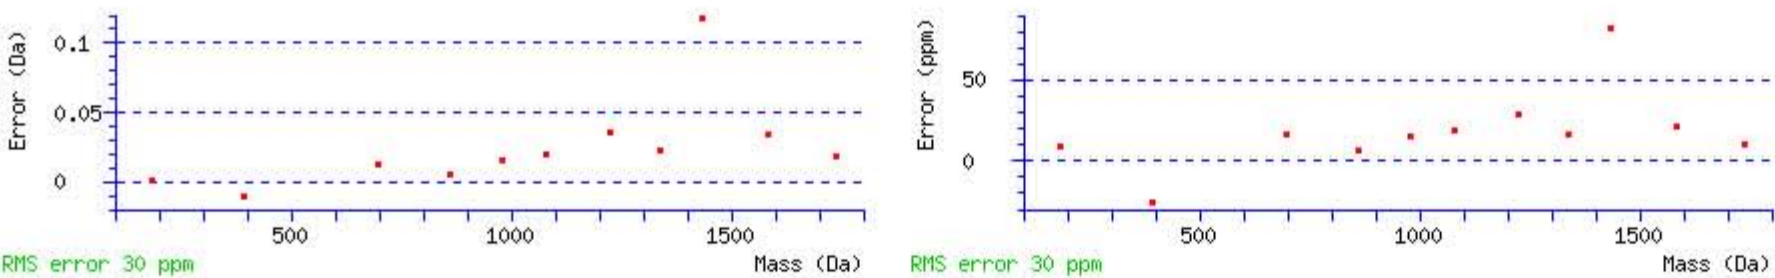

NCBI BLAST search of [ALVEGVDQLFTDYQIK](#)  
(Parameters: blastp, nr protein database, expect=20000, no filter, PAM30)  
Other BLAST [web gateways](#)

All matches to this query

| Score | Mr(calc):   | Delta    | Sequence                         |
|-------|-------------|----------|----------------------------------|
| 38.5  | 2149.112930 | 0.031972 | <a href="#">ALVEGVDQLFTDYQIK</a> |
| 2.6   | 2149.112930 | 0.031972 | <a href="#">ALVEGVDQLFTDYQIK</a> |

M

A

T

R

I

X

S

C

I

E

N

C

E

Mascot Search Results

Peptide View

MS/MS Fragmentation of **MSAVEGICTSESPVIDHQGTK**  
Found in **CO5\_HUMAN**, Complement C5 OS=Homo sapiens GN=C5 PE=1 SV=4

Match to Query 55016: 2556.232092 from(853.084640,3+) rtinseconds(1952) index(33917)  
Title: Locus:1.1.1.788.24 File:"2013-07-02 CLN FXIII 180 min 2nd F 3.wiff"  
Data file C:\Program Files (x86)\Matrix Science\Mascot Daemon\mgf\8 FXIII 180 min 2nd\mascot\_daemon\_merge.mgf

Click mouse within plot area to zoom in by factor of two about that point  
Or, 

Plot from

0

 to 

2400

 Da 

Full range

  
Label all possible matches ☐ Label matches used for scoring ☒

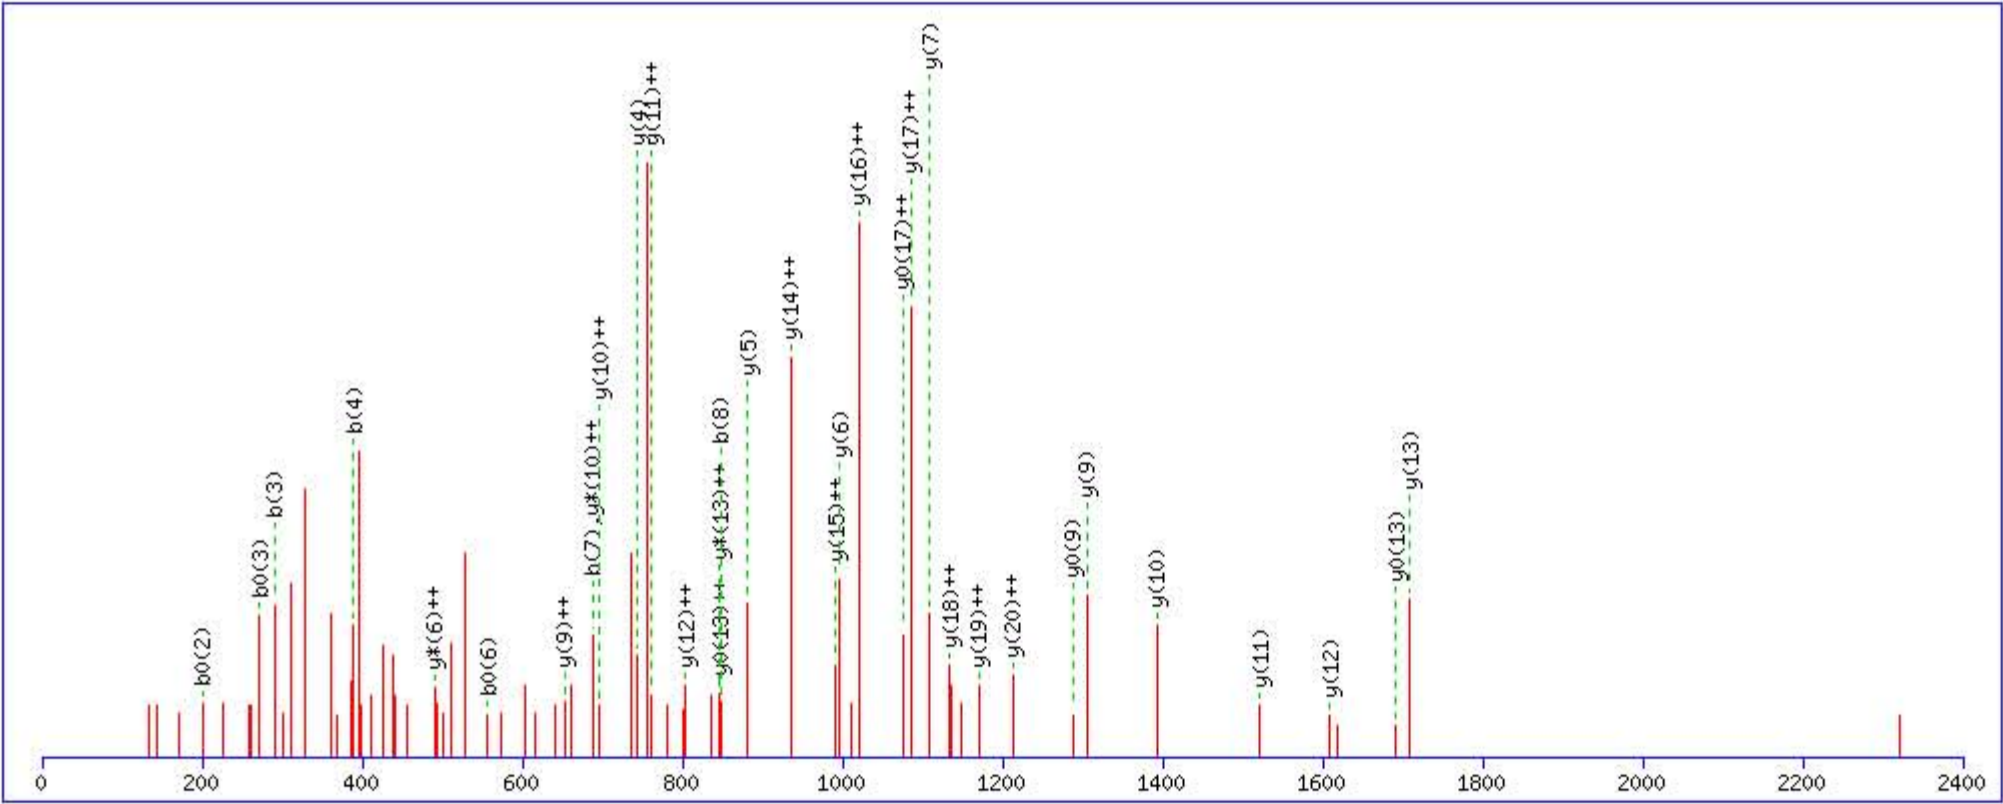

Monoisotopic mass of neutral peptide Mr(calc): 2556.202240  
Fixed modifications: Carbamidomethyl (C) (apply to specified residues or termini only)  
Variable modifications:  
Q18 : Biotin:Thermo-21345 (Q)  
Ions Score: 58 Expect: 4e-005  
Matches : 34/202 fragment ions using 70 most intense peaks [\(help\)](#)

| #  | b           | b <sup>++</sup> | b <sup>*</sup> | b <sup>*++</sup> | b <sup>0</sup> | b <sup>0++</sup> | Seq. | y           | y <sup>++</sup> | y <sup>*</sup> | y <sup>*++</sup> | y <sup>0</sup> | y <sup>0++</sup> | #  |
|----|-------------|-----------------|----------------|------------------|----------------|------------------|------|-------------|-----------------|----------------|------------------|----------------|------------------|----|
| 1  | 132.047761  | 66.527518       |                |                  |                |                  | M    |             |                 |                |                  |                |                  | 21 |
| 2  | 219.079789  | 110.043532      |                |                  | 201.069224     | 101.038250       | S    | 2426.169024 | 1213.588150     | 2409.142475    | 1205.074875      | 2408.158459    | 1204.582867      | 20 |
| 3  | 290.116903  | 145.562089      |                |                  | 272.106338     | 136.556807       | A    | 2339.136996 | 1170.072136     | 2322.110447    | 1161.558861      | 2321.126431    | 1161.066853      | 19 |
| 4  | 389.185317  | 195.096296      |                |                  | 371.174752     | 186.091014       | V    | 2268.099882 | 1134.553579     | 2251.073333    | 1126.040304      | 2250.089317    | 1125.548296      | 18 |
| 5  | 518.227910  | 259.617593      |                |                  | 500.217345     | 250.612311       | E    | 2169.031468 | 1085.019372     | 2152.004919    | 1076.506097      | 2151.020903    | 1076.014089      | 17 |
| 6  | 575.249374  | 288.128325      |                |                  | 557.238809     | 279.123043       | G    | 2039.988875 | 1020.498076     | 2022.962326    | 1011.984801      | 2021.978310    | 1011.492793      | 16 |
| 7  | 688.333438  | 344.670357      |                |                  | 670.322873     | 335.665075       | I    | 1982.967411 | 991.987343      | 1965.940862    | 983.474069       | 1964.956846    | 982.982061       | 15 |
| 8  | 848.364087  | 424.685682      |                |                  | 830.353522     | 415.680399       | C    | 1869.883347 | 935.445312      | 1852.856798    | 926.932037       | 1851.872782    | 926.440029       | 14 |
| 9  | 949.411766  | 475.209521      |                |                  | 931.401201     | 466.204239       | T    | 1709.852698 | 855.429987      | 1692.826149    | 846.916713       | 1691.842133    | 846.424704       | 13 |
| 10 | 1036.443794 | 518.725535      |                |                  | 1018.433229    | 509.720253       | S    | 1608.805019 | 804.906147      | 1591.778470    | 796.392873       | 1590.794454    | 795.900865       | 12 |
| 11 | 1165.486387 | 583.246832      |                |                  | 1147.475822    | 574.241549       | E    | 1521.772991 | 761.390133      | 1504.746442    | 752.876859       | 1503.762426    | 752.384851       | 11 |
| 12 | 1252.518415 | 626.762846      |                |                  | 1234.507850    | 617.757563       | S    | 1392.730398 | 696.868837      | 1375.703849    | 688.355563       | 1374.719833    | 687.863554       | 10 |
| 13 | 1349.571179 | 675.289228      |                |                  | 1331.560614    | 666.283945       | P    | 1305.698370 | 653.352823      | 1288.671821    | 644.839548       | 1287.687805    | 644.347540       | 9  |
| 14 | 1448.639593 | 724.823435      |                |                  | 1430.629028    | 715.818152       | V    | 1208.645606 | 604.826441      | 1191.619057    | 596.313166       | 1190.635041    | 595.821158       | 8  |
| 15 | 1561.723657 | 781.365467      |                |                  | 1543.713092    | 772.360184       | I    | 1109.577192 | 555.292234      | 1092.550643    | 546.778959       | 1091.566627    | 546.286951       | 7  |
| 16 | 1676.750600 | 838.878938      |                |                  | 1658.740035    | 829.873656       | D    | 996.493128  | 498.750202      | 979.466579     | 490.236927       | 978.482563     | 489.744919       | 6  |
| 17 | 1813.809512 | 907.408394      |                |                  | 1795.798947    | 898.403112       | H    | 881.466185  | 441.236730      | 864.439636     | 432.723456       | 863.455620     | 432.231448       | 5  |
| 18 | 2253.034838 | 1127.021057     | 2236.008289    | 1118.507782      | 2235.024273    | 1118.015774      | Q    | 744.407273  | 372.707274      | 727.380724     | 364.194000       | 726.396708     | 363.701992       | 4  |
| 19 | 2310.056302 | 1155.531789     | 2293.029753    | 1147.018514      | 2292.045737    | 1146.526506      | G    | 305.181947  | 153.094611      | 288.155398     | 144.581337       | 287.171382     | 144.089329       | 3  |
| 20 | 2411.103981 | 1206.055628     | 2394.077432    | 1197.542354      | 2393.093416    | 1197.050346      | T    | 248.160483  | 124.583879      | 231.133934     | 116.070605       | 230.149918     | 115.578597       | 2  |
| 21 |             |                 |                |                  |                |                  | K    | 147.112804  | 74.060040       | 130.086255     | 65.546765        |                |                  | 1  |

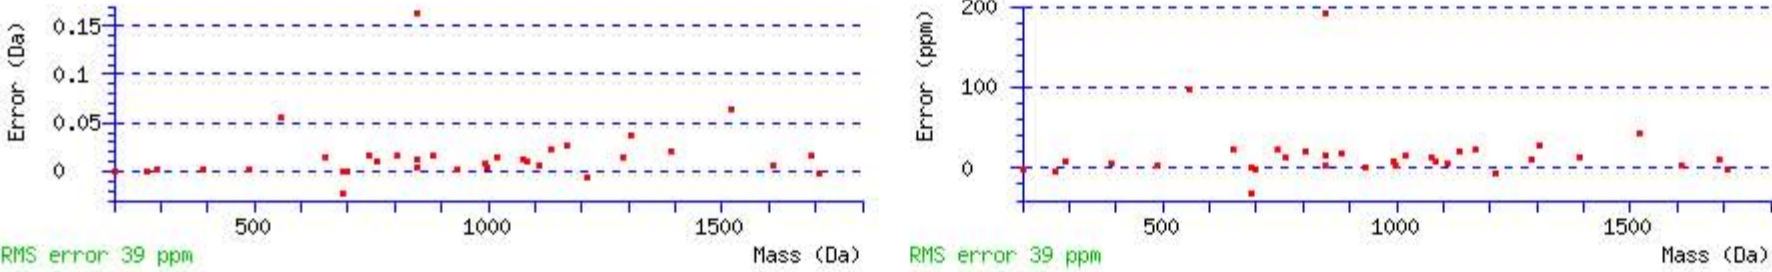

NCBI BLAST search of [MSAVEGICTSESPVIDHQGTK](#)  
(Parameters: blastp, nr protein database, expect=20000, no filter, PAM30)  
Other BLAST [web gateways](#)

All matches to this query

| Score | Mr(calc):   | Delta    | Sequence                              |
|-------|-------------|----------|---------------------------------------|
| 57.8  | 2556.202240 | 0.029852 | <a href="#">MSAVEGICTSESPVIDHQGTK</a> |

MATRIX

SCIENCE

Mascot Search Results

Peptide View

MS/MS Fragmentation of **QGDVECQR**  
Found in **CO6\_HUMAN**, Complement component C6 OS=Homo sapiens GN=C6 PE=1 SV=3

Match to Query 23357: 1301.592968 from(651.803760,2+) rtinseconds(1332) index(15745)  
Title: Locus:1.1.1.2846.15 File:"2013-07-02 CLN FXIII 180 min 2nd F 2.wiff"  
Data file C:\Program Files (x86)\Matrix Science\Mascot Daemon\mgf\8 FXIII 180 min 2nd\mascot\_daemon\_merge.mgf

Click mouse within plot area to zoom in by factor of two about that point  
Or, 

Plot from

100

 to 

1400

 Da 

Full range

  
Label all possible matches ☐ Label matches used for scoring ☒

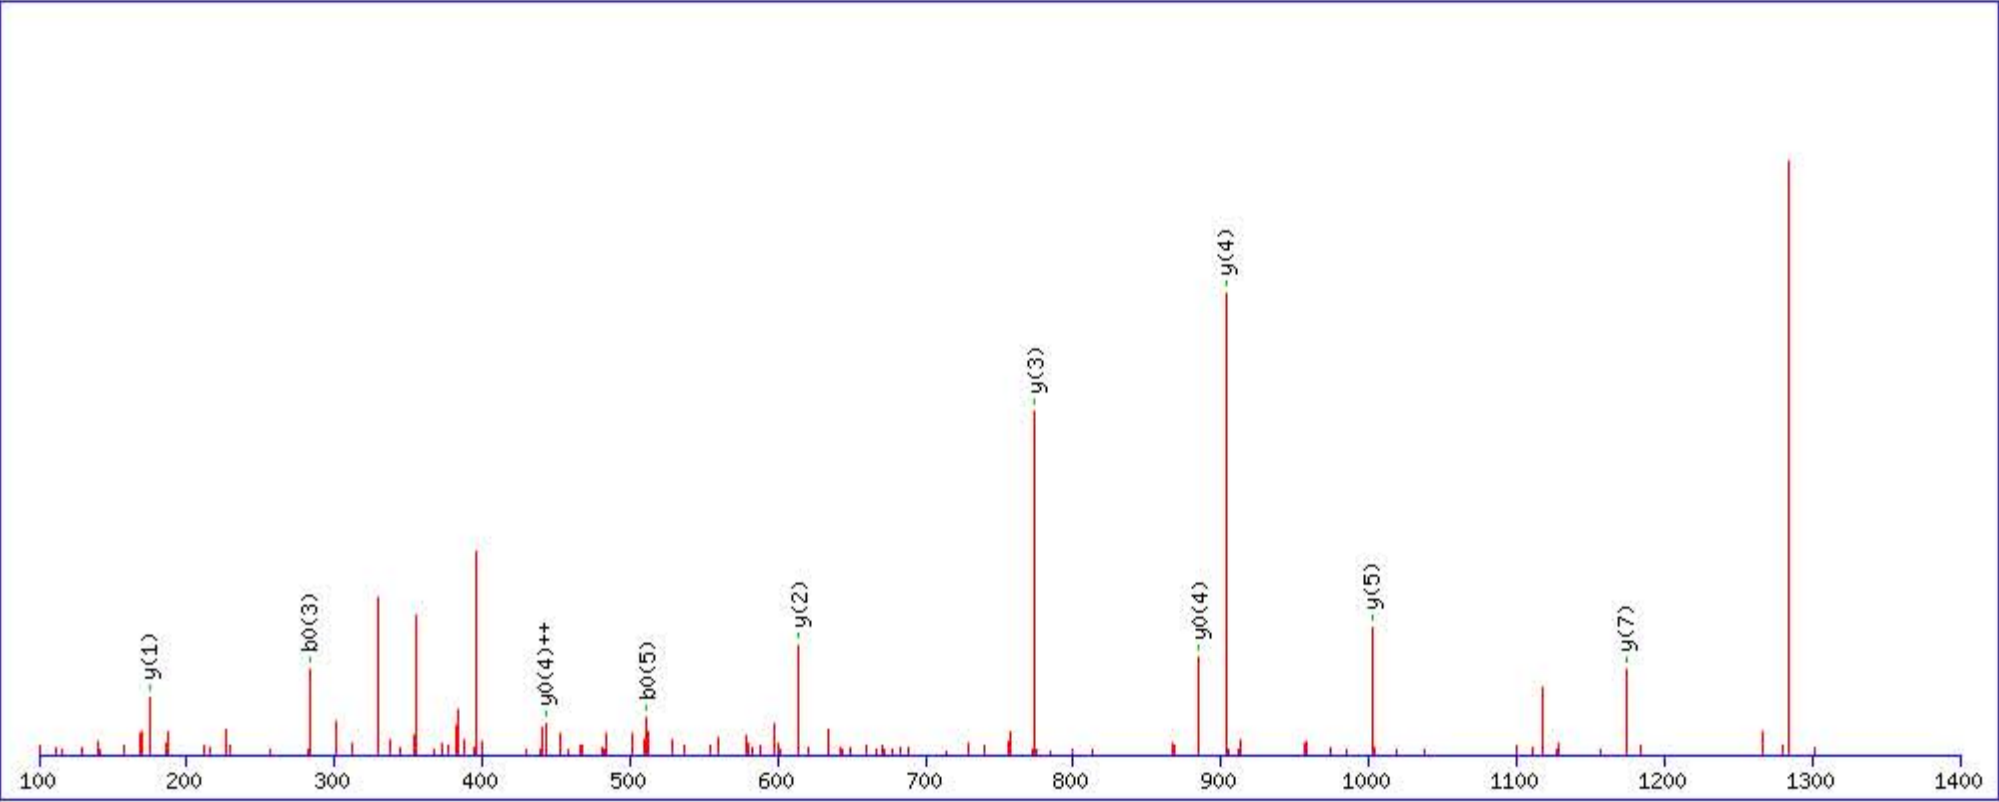

Monoisotopic mass of neutral peptide Mr(calc): 1301.585648  
Fixed modifications: Carbamidomethyl (C) (apply to specified residues or termini only)  
Variable modifications:  
Q7 : Biotin:Thermo-21345 (Q)  
Ions Score: 49 Expect: 0.0002  
Matches : 10/74 fragment ions using 12 most intense peaks (help)

| # | b           | b <sup>++</sup> | b <sup>*</sup> | b <sup>*++</sup> | b <sup>0</sup> | b <sup>0++</sup> | Seq. | y           | y <sup>++</sup> | y <sup>*</sup> | y <sup>*++</sup> | y <sup>0</sup> | y <sup>0++</sup> | # |
|---|-------------|-----------------|----------------|------------------|----------------|------------------|------|-------------|-----------------|----------------|------------------|----------------|------------------|---|
| 1 | 129.065854  | 65.036565       | 112.039305     | 56.523291        |                |                  | Q    |             |                 |                |                  |                |                  | 8 |
| 2 | 186.087318  | 93.547297       | 169.060769     | 85.034023        |                |                  | G    | 1174.534341 | 587.770809      | 1157.507792    | 579.257534       | 1156.523776    | 578.765526       | 7 |
| 3 | 301.114261  | 151.060768      | 284.087712     | 142.547494       | 283.103696     | 142.055486       | D    | 1117.512877 | 559.260077      | 1100.486328    | 550.746802       | 1099.502312    | 550.254794       | 6 |
| 4 | 400.182675  | 200.594976      | 383.156126     | 192.081701       | 382.172110     | 191.589693       | V    | 1002.485934 | 501.746605      | 985.459385     | 493.233331       | 984.475369     | 492.741323       | 5 |
| 5 | 529.225268  | 265.116272      | 512.198719     | 256.602998       | 511.214703     | 256.110990       | E    | 903.417520  | 452.212398      | 886.390971     | 443.699124       | 885.406955     | 443.207116       | 4 |
| 6 | 689.255917  | 345.131597      | 672.229368     | 336.618322       | 671.245352     | 336.126314       | C    | 774.374927  | 387.691102      | 757.348378     | 379.177827       |                |                  | 3 |
| 7 | 1128.481243 | 564.744260      | 1111.454694    | 556.230985       | 1110.470678    | 555.738977       | Q    | 614.344278  | 307.675777      | 597.317729     | 299.162503       |                |                  | 2 |
| 8 |             |                 |                |                  |                |                  | R    | 175.118952  | 88.063114       | 158.092403     | 79.549839        |                |                  | 1 |

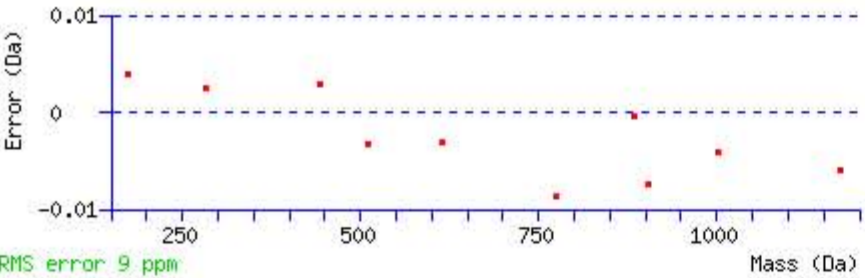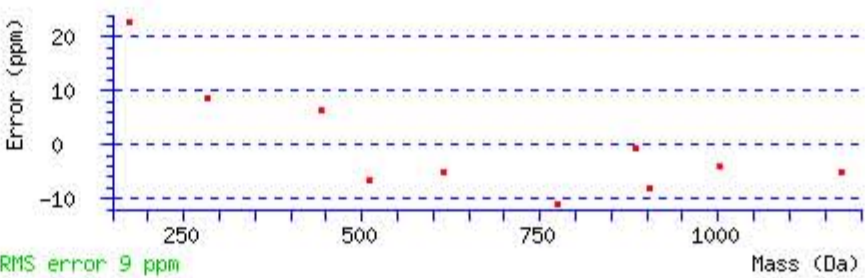

NCBI BLAST search of [QGDVECQR](#)  
(Parameters: blastp, nr protein database, expect=20000, no filter, PAM30)  
Other BLAST [web gateways](#)

All matches to this query

| Score | Mr(calc):   | Delta     | Sequence                      |
|-------|-------------|-----------|-------------------------------|
| 48.5  | 1301.585648 | 0.007320  | <a href="#">QGDVECQR</a>      |
| 8.0   | 1301.584747 | 0.008221  | <a href="#">QESPSQENIDR</a>   |
| 7.1   | 1301.584763 | 0.008205  | <a href="#">KATEDAEGGDGPR</a> |
| 6.4   | 1301.604721 | -0.011753 | <a href="#">QSSTYHRHMR</a>    |
| 6.2   | 1301.609894 | -0.016926 | <a href="#">GAAEELASTPNDK</a> |
| 5.9   | 1301.604263 | -0.011295 | <a href="#">CPAAMTVMHLR</a>   |
| 5.9   | 1301.604263 | -0.011295 | <a href="#">CPAAMTVMHLR</a>   |

MATRIX

SCIENCE

Mascot Search Results

Peptide View

MS/MS Fragmentation of **TCNSGTQSR**  
Found in **CO6\_HUMAN**, Complement component C6 OS=Homo sapiens GN=C6 PE=1 SV=3

Match to Query 23654: 1320.591408 from(661.302980,2+) rtinseconds(1067) index(14687)  
Title: Locus:1.1.1.2753.16 File:"2013-07-02 CLN FXIII 180 min 2nd F 2.wiff"  
Data file C:\Program Files (x86)\Matrix Science\Mascot Daemon\mgf\8 FXIII 180 min 2nd\mascot\_daemon\_merge.mgf

Click mouse within plot area to zoom in by factor of two about that point  
Or, 

Plot from

100

 to 

1400

 Da 

Full range

  
Label all possible matches ☐ Label matches used for scoring ☒

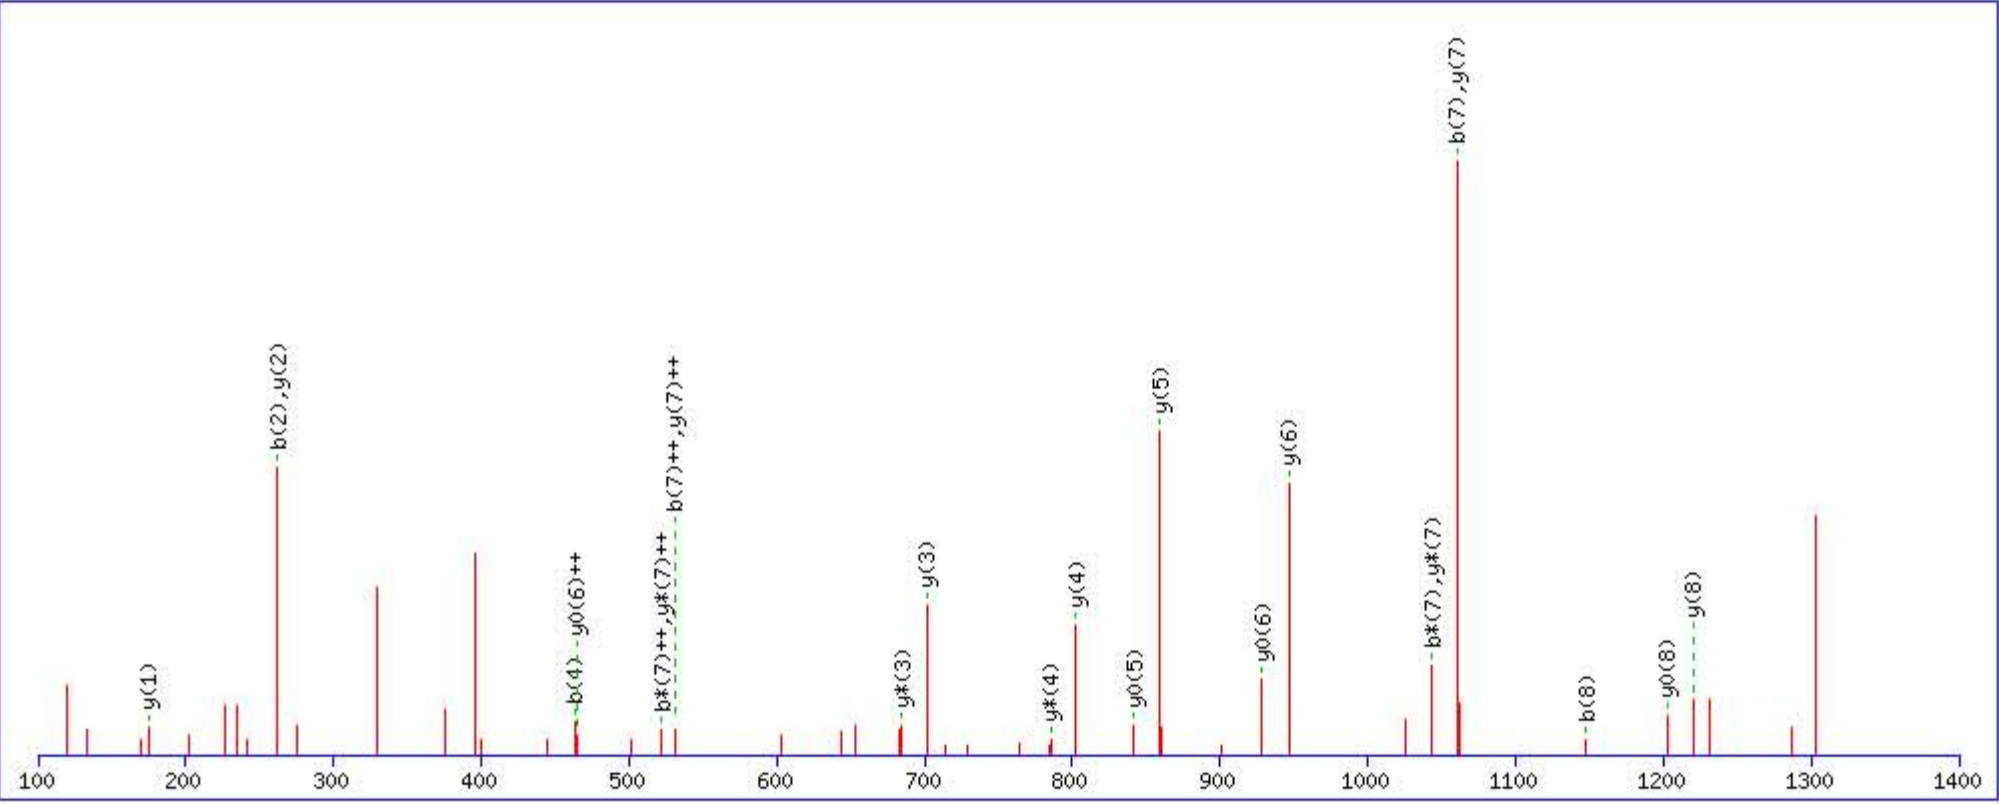

Monoisotopic mass of neutral peptide Mr(calc): 1320.591461  
Fixed modifications: Carbamidomethyl (C) (apply to specified residues or termini only)  
Variable modifications:  
Q7 : Biotin:Thermo-21345 (Q)  
Ions Score: 70 Expect: 6.7e-007  
Matches : 24/90 fragment ions using 24 most intense peaks [\(help\)](#)

| # | b           | b <sup>++</sup> | b <sup>*</sup> | b <sup>*++</sup> | b <sup>0</sup> | b <sup>0++</sup> | Seq. | y           | y <sup>++</sup> | y <sup>*</sup> | y <sup>*++</sup> | y <sup>0</sup> | y <sup>0++</sup> | # |
|---|-------------|-----------------|----------------|------------------|----------------|------------------|------|-------------|-----------------|----------------|------------------|----------------|------------------|---|
| 1 | 102.054955  | 51.531116       |                |                  | 84.044390      | 42.525833        | T    |             |                 |                |                  |                |                  | 9 |
| 2 | 262.085604  | 131.546440      |                |                  | 244.075039     | 122.541158       | C    | 1220.551053 | 610.779165      | 1203.524504    | 602.265890       | 1202.540488    | 601.773882       | 8 |
| 3 | 376.128531  | 188.567904      | 359.101982     | 180.054629       | 358.117966     | 179.562621       | N    | 1060.520404 | 530.763840      | 1043.493855    | 522.250566       | 1042.509839    | 521.758558       | 7 |
| 4 | 463.160559  | 232.083917      | 446.134010     | 223.570643       | 445.149994     | 223.078635       | S    | 946.477477  | 473.742377      | 929.450928     | 465.229102       | 928.466912     | 464.737094       | 6 |
| 5 | 520.182023  | 260.594650      | 503.155474     | 252.081375       | 502.171458     | 251.589367       | G    | 859.445449  | 430.226363      | 842.418900     | 421.713088       | 841.434884     | 421.221080       | 5 |
| 6 | 621.229702  | 311.118489      | 604.203153     | 302.605215       | 603.219137     | 302.113207       | T    | 802.423985  | 401.715631      | 785.397436     | 393.202356       | 784.413420     | 392.710348       | 4 |
| 7 | 1060.455028 | 530.731152      | 1043.428479    | 522.217878       | 1042.444463    | 521.725870       | Q    | 701.376306  | 351.191791      | 684.349757     | 342.678517       | 683.365741     | 342.186509       | 3 |
| 8 | 1147.487056 | 574.247166      | 1130.460507    | 565.733892       | 1129.476491    | 565.241884       | S    | 262.150980  | 131.579128      | 245.124431     | 123.065854       | 244.140415     | 122.573846       | 2 |
| 9 |             |                 |                |                  |                |                  | R    | 175.118952  | 88.063114       | 158.092403     | 79.549839        |                |                  | 1 |

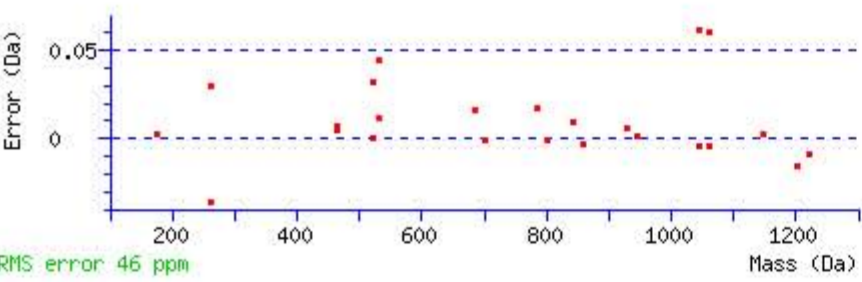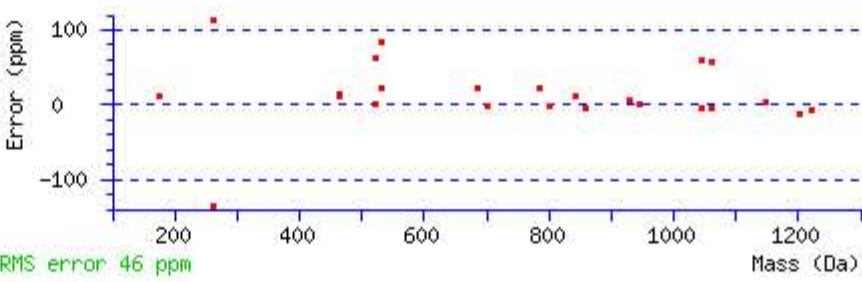

NCBI BLAST search of [TCNSGTQSR](#)  
(Parameters: blastp, nr protein database, expect=20000, no filter, PAM30)  
Other BLAST [web gateways](#)

All matches to this query

| Score | Mr(calc):   | Delta     | Sequence                     |
|-------|-------------|-----------|------------------------------|
| 70.4  | 1320.591461 | -0.000053 | <a href="#">TCNSGTQSR</a>    |
| 10.5  | 1320.599289 | -0.007881 | <a href="#">NELPMHHNSSR</a>  |
| 10.4  | 1320.609192 | -0.017784 | <a href="#">MTSERAPSPSSR</a> |
| 9.7   | 1320.584045 | 0.007363  | <a href="#">SQGCSREASPSR</a> |
| 9.0   | 1320.597946 | -0.006538 | <a href="#">LMNTNDLEESR</a>  |
| 6.8   | 1320.605804 | -0.014396 | <a href="#">TSAHYEENKSR</a>  |
| 2.1   | 1320.605835 | -0.014427 | <a href="#">EDTWSSRTPSR</a>  |
| 1.6   | 1320.587616 | 0.003792  | <a href="#">MTCVEQDK</a>     |
| 1.3   | 1320.579330 | 0.012078  | <a href="#">DSDLENSEGLSR</a> |
| 1.2   | 1320.605362 | -0.013954 | <a href="#">SSSDMDLQK</a>    |

MATRIX

SCIENCE

Mascot Search Results

Peptide View

MS/MS Fragmentation of **QLEWGLER**  
Found in **CO6\_HUMAN**, Complement component C6 OS=Homo sapiens GN=C6 PE=1 SV=3

Match to Query 24137: 1340.699648 from(671.357100,2+) rtinseconds(2225) index(21636)  
Title: Locus:1.1.1.3157.11 File:"2013-07-02 CLN FXIII 180 min 2nd F 2.wiff"  
Data file C:\Program Files (x86)\Matrix Science\Mascot Daemon\mgf\8 FXIII 180 min 2nd\mascot\_daemon\_merge.mgf

Click mouse within plot area to zoom in by factor of two about that point  
Or,   to  Da   
Label all possible matches ☐ Label matches used for scoring ☒

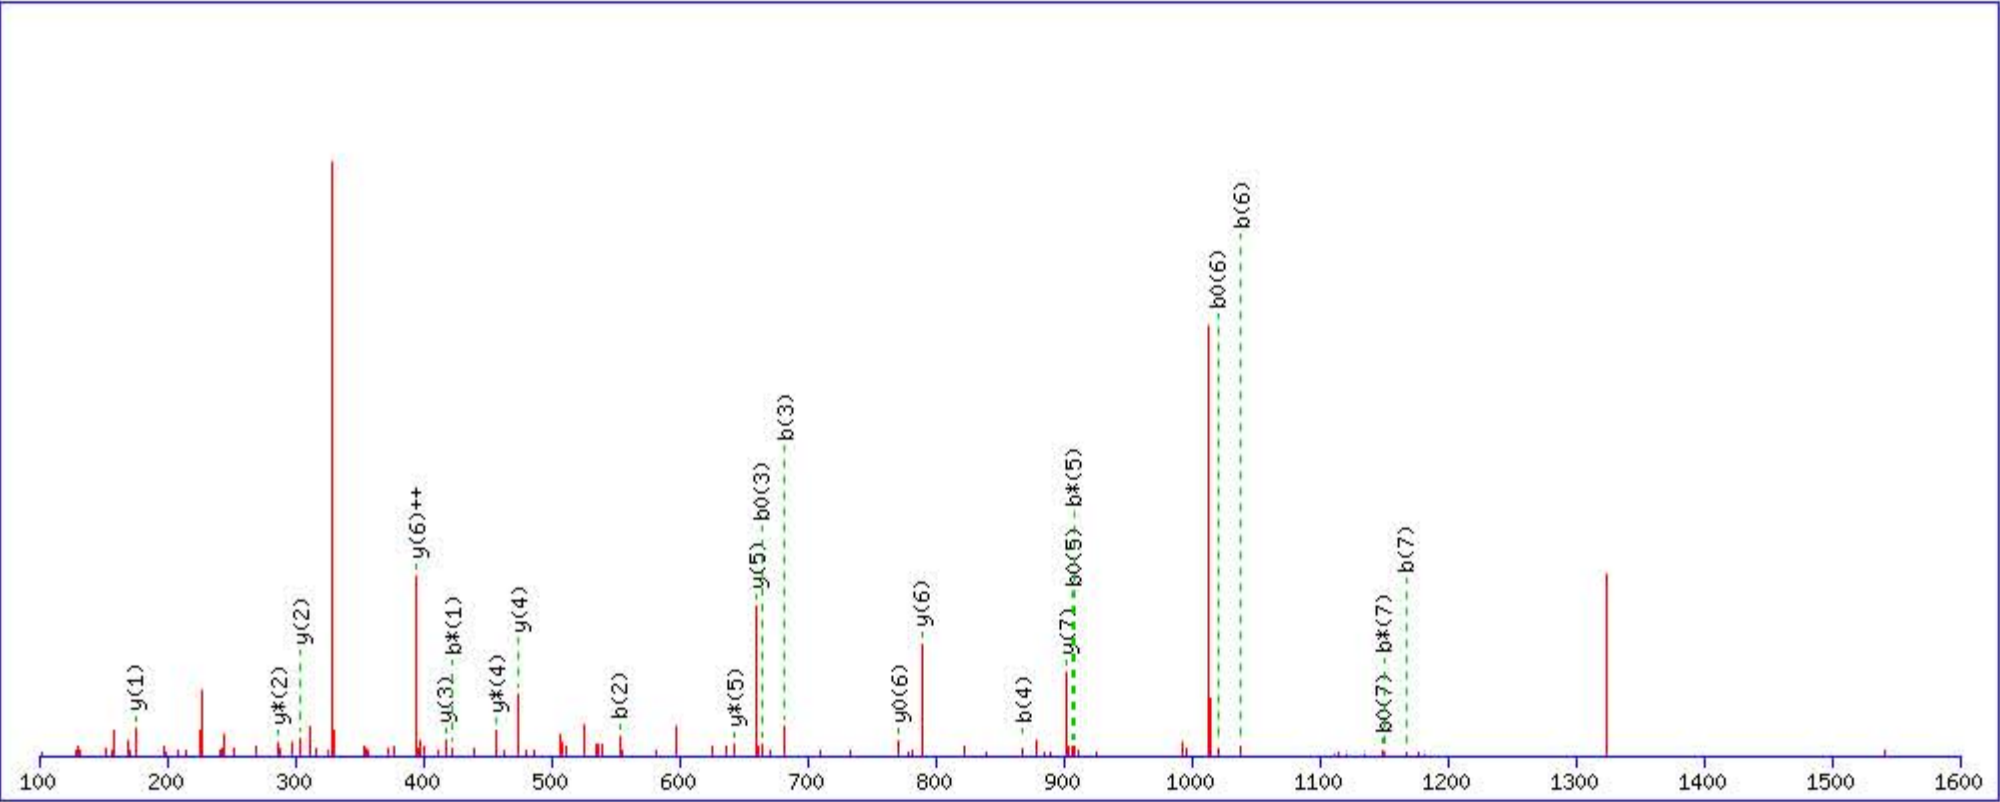

Monoisotopic mass of neutral peptide Mr(calc): 1340.691071  
Fixed modifications: Carbamidomethyl (C) (apply to specified residues or termini only)  
Variable modifications:  
Q1 : Biotin:Thermo-21345 (Q)  
Ions Score: 27 Expect: 0.044  
Matches : 24/78 fragment ions using 55 most intense peaks [\(help\)](#)

| # | b           | b <sup>++</sup> | b <sup>*</sup> | b <sup>++</sup> | b <sup>0</sup> | b <sup>0++</sup> | Seq. | y          | y <sup>++</sup> | y <sup>*</sup> | y <sup>++</sup> | y <sup>0</sup> | y <sup>0++</sup> | # |
|---|-------------|-----------------|----------------|-----------------|----------------|------------------|------|------------|-----------------|----------------|-----------------|----------------|------------------|---|
| 1 | 440.232602  | 220.619939      | 423.206053     | 212.106664      |                |                  | Q    |            |                 |                |                 |                |                  | 8 |
| 2 | 553.316666  | 277.161971      | 536.290117     | 268.648697      |                |                  | L    | 902.473043 | 451.740160      | 885.446494     | 443.226885      | 884.462478     | 442.734877       | 7 |
| 3 | 682.359259  | 341.683268      | 665.332710     | 333.169993      | 664.348694     | 332.677985       | E    | 789.388979 | 395.198128      | 772.362430     | 386.684853      | 771.378414     | 386.192845       | 6 |
| 4 | 868.438572  | 434.722924      | 851.412023     | 426.209650      | 850.428007     | 425.717642       | W    | 660.346386 | 330.676831      | 643.319837     | 322.163556      | 642.335821     | 321.671548       | 5 |
| 5 | 925.460036  | 463.233656      | 908.433487     | 454.720382      | 907.449471     | 454.228374       | G    | 474.267073 | 237.637174      | 457.240524     | 229.123900      | 456.256508     | 228.631892       | 4 |
| 6 | 1038.544100 | 519.775688      | 1021.517551    | 511.262414      | 1020.533535    | 510.770406       | L    | 417.245609 | 209.126442      | 400.219060     | 200.613168      | 399.235044     | 200.121160       | 3 |
| 7 | 1167.586693 | 584.296985      | 1150.560144    | 575.783710      | 1149.576128    | 575.291702       | E    | 304.161545 | 152.584410      | 287.134996     | 144.071136      | 286.150980     | 143.579128       | 2 |
| 8 |             |                 |                |                 |                |                  | R    | 175.118952 | 88.063114       | 158.092403     | 79.549839       |                |                  | 1 |

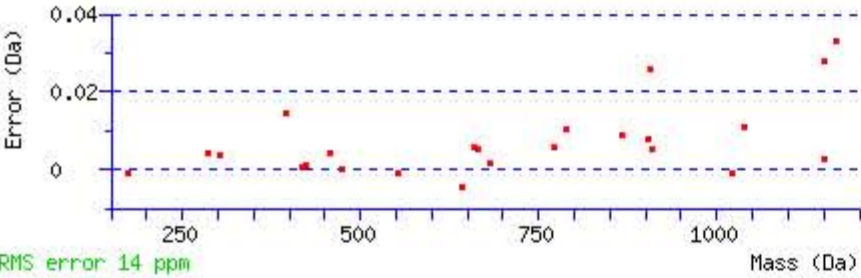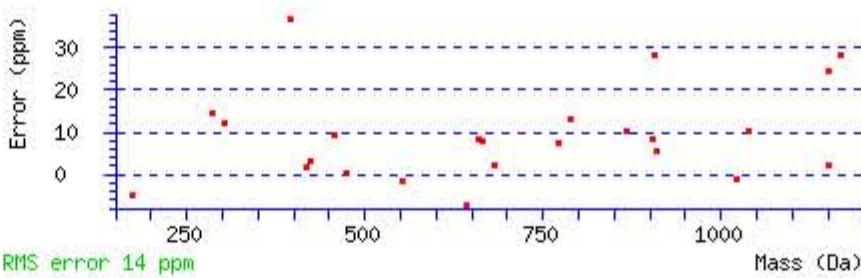

NCBI BLAST search of [QLEWGLER](#)  
(Parameters: blastp, nr protein database, expect=20000, no filter, PAM30)  
Other BLAST [web gateways](#)

All matches to this query

| Score | Mr(calc):   | Delta     | Sequence                     |
|-------|-------------|-----------|------------------------------|
| 27.4  | 1340.691071 | 0.008577  | <a href="#">QLEWGLER</a>     |
| 18.7  | 1340.712204 | -0.012556 | <a href="#">QLDSLGER</a>     |
| 9.8   | 1340.687042 | 0.012606  | <a href="#">QINDSANLR</a>    |
| 7.0   | 1340.687057 | 0.012591  | <a href="#">GSSPKQSPSR</a>   |
| 5.0   | 1340.687027 | 0.012621  | <a href="#">QEIEERAR</a>     |
| 4.9   | 1340.716019 | -0.016371 | <a href="#">EAKAQALQAQQR</a> |
| 4.7   | 1340.683655 | 0.015993  | <a href="#">IYYLSQERNR</a>   |
| 4.6   | 1340.687027 | 0.012621  | <a href="#">QLREEAER</a>     |
| 4.5   | 1340.690872 | 0.008776  | <a href="#">SSEHRLAGSRNK</a> |
| 4.0   | 1340.691071 | 0.008577  | <a href="#">QWLEDALR</a>     |

MATRIX

SCIENCE

Mascot Search Results

Peptide View

MS/MS Fragmentation of **YYQENFCEQICK**  
Found in **CO6\_HUMAN**, Complement component C6 OS=Homo sapiens GN=C6 PE=1 SV=3

Match to Query 46225: 2078.912288 from(1040.463420,2+) rtinseconds(2022) index(20369)  
Title: Locus:1.1.1.3086.12 File:"2013-07-02 CLN FXIII 180 min 2nd F 2.wiff"  
Data file C:\Program Files (x86)\Matrix Science\Mascot Daemon\mgf\8 FXIII 180 min 2nd\mascot\_daemon\_merge.mgf

Click mouse within plot area to zoom in by factor of two about that point  
Or, 

Plot from

0

 to 

2600

 Da 

Full range

  
Label all possible matches ☐ Label matches used for scoring ☒

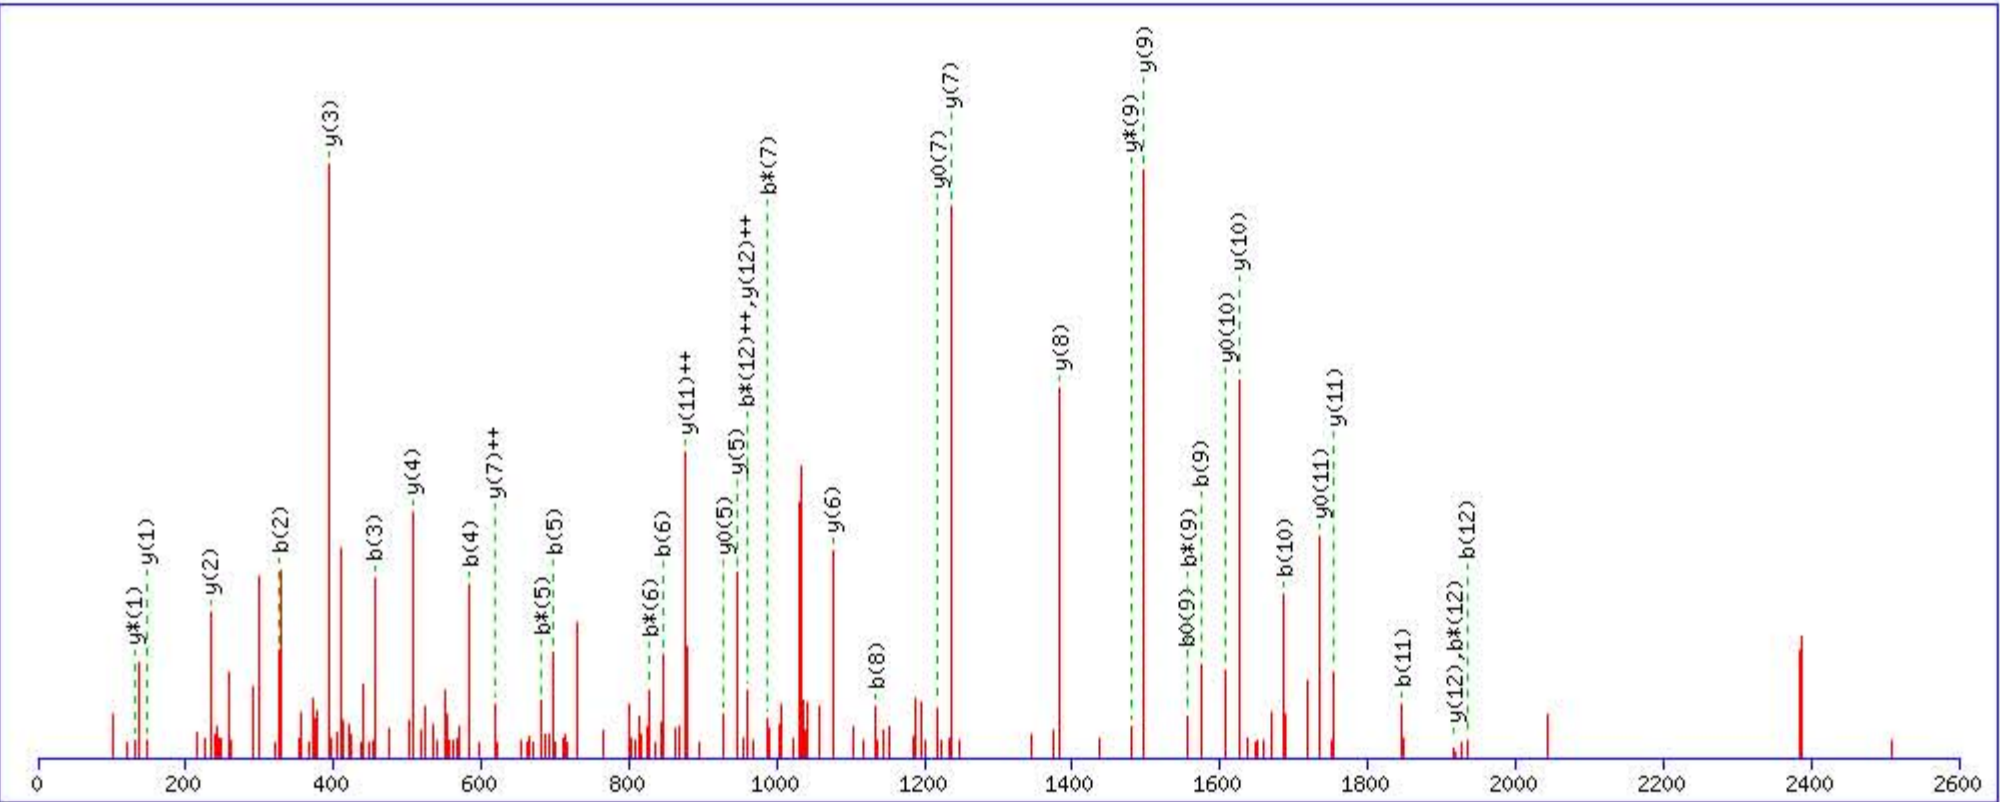

Monoisotopic mass of neutral peptide Mr(calc): 2078.889984  
Fixed modifications: Carbamidomethyl (C) (apply to specified residues or termini only)  
Variable modifications:  
Q9 : Biotin:Thermo-21345 (Q)  
Ions Score: 64 Expect: 2.2e-006  
Matches : 38/132 fragment ions using 75 most intense peaks [\(help\)](#)

| #  | b           | b <sup>++</sup> | b <sup>*</sup> | b <sup>+++</sup> | b <sup>0</sup> | b <sup>0++</sup> | Seq. | y           | y <sup>++</sup> | y <sup>*</sup> | y <sup>+++</sup> | y <sup>0</sup> | y <sup>0++</sup> | #  |
|----|-------------|-----------------|----------------|------------------|----------------|------------------|------|-------------|-----------------|----------------|------------------|----------------|------------------|----|
| 1  | 164.070605  | 82.538940       |                |                  |                |                  | Y    |             |                 |                |                  |                |                  | 13 |
| 2  | 327.133934  | 164.070605      |                |                  |                |                  | Y    | 1916.833954 | 958.920615      | 1899.807405    | 950.407341       | 1898.823389    | 949.915333       | 12 |
| 3  | 455.192512  | 228.099894      | 438.165963     | 219.586620       |                |                  | Q    | 1753.770625 | 877.388951      | 1736.744076    | 868.875676       | 1735.760060    | 868.383668       | 11 |
| 4  | 584.235105  | 292.621191      | 567.208556     | 284.107916       | 566.224540     | 283.615908       | E    | 1625.712047 | 813.359662      | 1608.685498    | 804.846387       | 1607.701482    | 804.354379       | 10 |
| 5  | 698.278032  | 349.642654      | 681.251483     | 341.129380       | 680.267467     | 340.637372       | N    | 1496.669454 | 748.838365      | 1479.642905    | 740.325091       | 1478.658889    | 739.833083       | 9  |
| 6  | 845.346446  | 423.176861      | 828.319897     | 414.663587       | 827.335881     | 414.171579       | F    | 1382.626527 | 691.816902      | 1365.599978    | 683.303627       | 1364.615962    | 682.811619       | 8  |
| 7  | 1005.377095 | 503.192186      | 988.350546     | 494.678911       | 987.366530     | 494.186903       | C    | 1235.558113 | 618.282695      | 1218.531564    | 609.769420       | 1217.547548    | 609.277412       | 7  |
| 8  | 1134.419688 | 567.713482      | 1117.393139    | 559.200208       | 1116.409123    | 558.708200       | E    | 1075.527464 | 538.267370      | 1058.500915    | 529.754096       | 1057.516899    | 529.262088       | 6  |
| 9  | 1573.645014 | 787.326145      | 1556.618465    | 778.812871       | 1555.634449    | 778.320863       | Q    | 946.484871  | 473.746074      | 929.458322     | 465.232799       | 928.474306     | 464.740791       | 5  |
| 10 | 1686.729078 | 843.868177      | 1669.702529    | 835.354903       | 1668.718513    | 834.862895       | I    | 507.259545  | 254.133411      | 490.232996     | 245.620136       | 489.248980     | 245.128128       | 4  |
| 11 | 1846.759727 | 923.883502      | 1829.733178    | 915.370227       | 1828.749162    | 914.878219       | C    | 394.175481  | 197.591379      | 377.148932     | 189.078104       | 376.164916     | 188.586096       | 3  |
| 12 | 1933.791755 | 967.399516      | 1916.765206    | 958.886241       | 1915.781190    | 958.394233       | S    | 234.144832  | 117.576054      | 217.118283     | 109.062780       | 216.134267     | 108.570772       | 2  |
| 13 |             |                 |                |                  |                |                  | K    | 147.112804  | 74.060040       | 130.086255     | 65.546765        |                |                  | 1  |

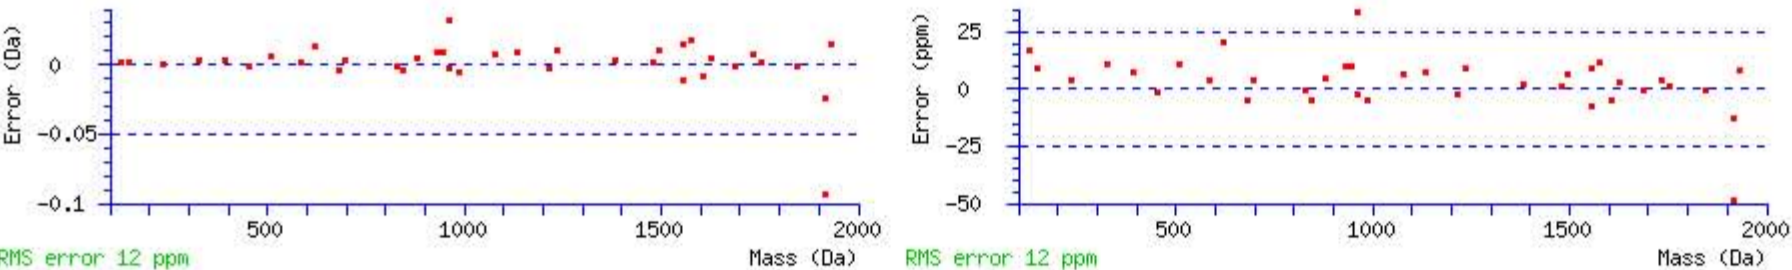

NCBI BLAST search of [YYQENFCEQICK](#)  
(Parameters: blastp, nr protein database, expect=20000, no filter, PAM30)  
Other BLAST [web gateways](#)

All matches to this query

| Score | Mr(calc):   | Delta     | Sequence                       |
|-------|-------------|-----------|--------------------------------|
| 64.4  | 2078.889984 | 0.022304  | <a href="#">YYQENFCEQICK</a>   |
| 10.4  | 2078.889984 | 0.022304  | <a href="#">YYQENFCEQICK</a>   |
| 4.9   | 2078.932907 | -0.020619 | <a href="#">EYTLQSFGEADSFK</a> |

MATRIX

SCIENCE

Mascot Search Results

Peptide View

MS/MS Fragmentation of **SFGGQCR**  
Found in **CO7\_HUMAN**, Complement component C7 OS=Homo sapiens GN=C7 PE=1 SV=2

Match to Query 17383: 1121.512888 from(561.763720,2+) rtinseconds(1509) index(2693)  
Title: Locus:1.1.1.1802.10 File:"2013-07-02 CLN FXIII 180 min 2nd F 1.wiff"  
Data file C:\Program Files (x86)\Matrix Science\Mascot Daemon\mgf\8 FXIII 180 min 2nd\mascot\_daemon\_merge.mgf

Click mouse within plot area to zoom in by factor of two about that point  
Or, 

Plot from

100

 to 

1200

 Da 

Full range

  
Label all possible matches ☐ Label matches used for scoring ☒

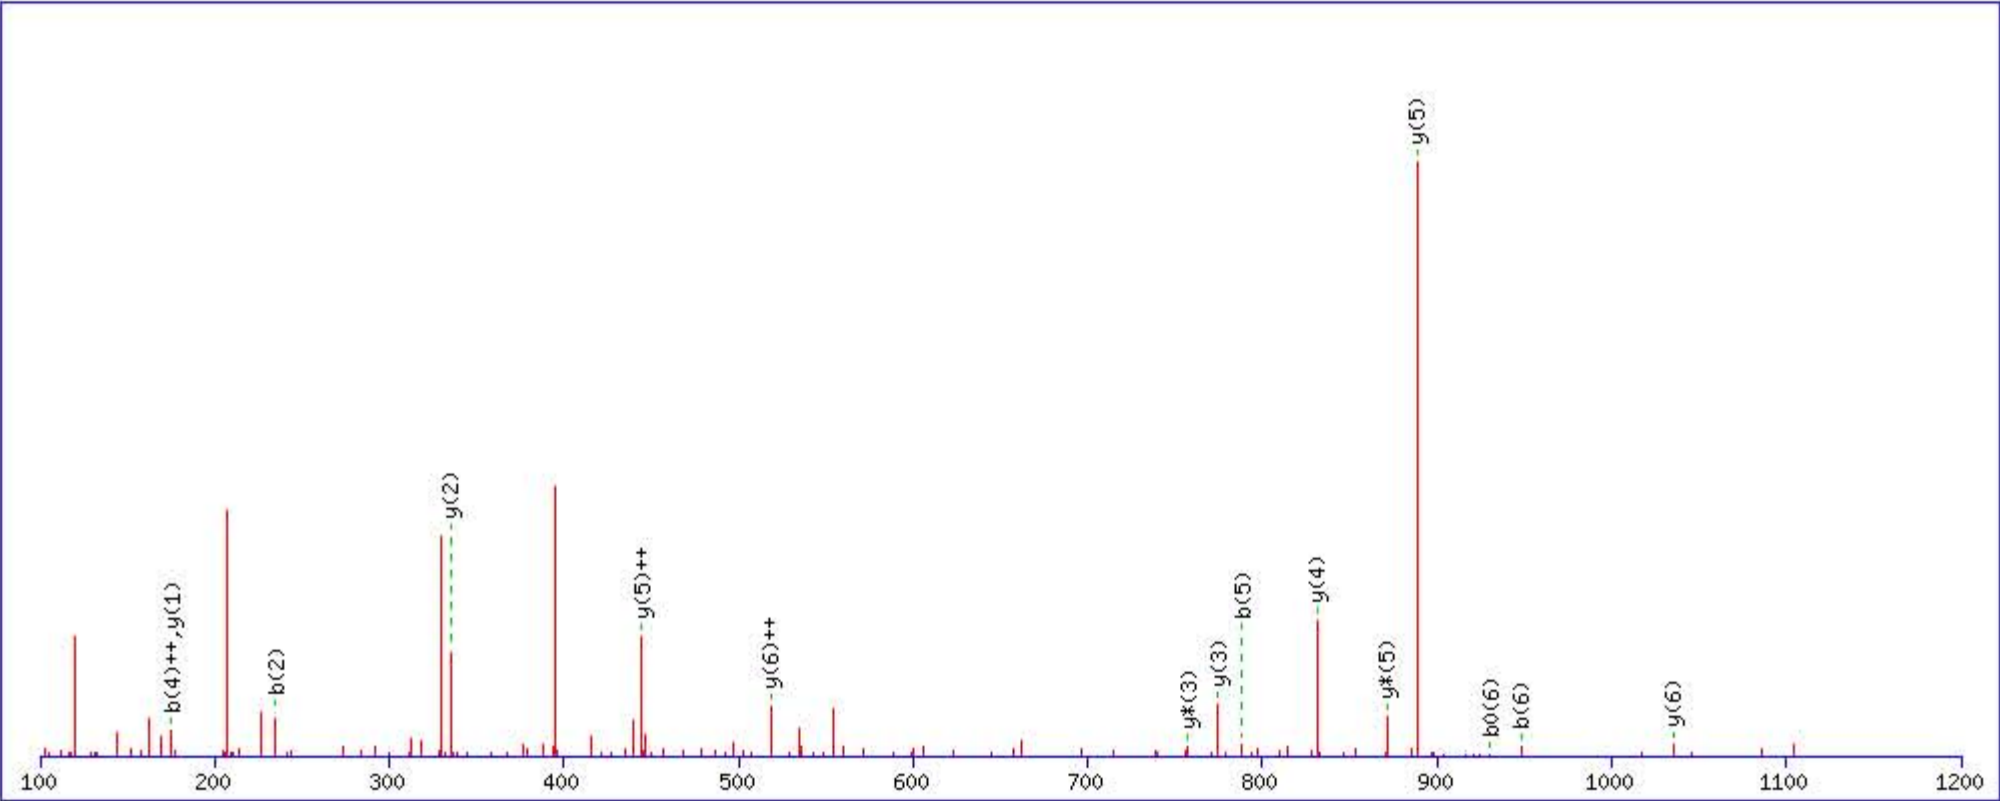

Monoisotopic mass of neutral peptide Mr(calc): 1121.511032  
Fixed modifications: Carbamidomethyl (C) (apply to specified residues or termini only)  
Variable modifications:  
Q5 : Biotin:Thermo-21345 (Q)  
Ions Score: 32 Expect: 0.0029  
Matches : 15/52 fragment ions using 31 most intense peaks [\(help\)](#)

| # | b          | b <sup>++</sup> | b <sup>*</sup> | b <sup>*++</sup> | b <sup>0</sup> | b <sup>0++</sup> | Seq. | y           | y <sup>++</sup> | y <sup>*</sup> | y <sup>*++</sup> | # |
|---|------------|-----------------|----------------|------------------|----------------|------------------|------|-------------|-----------------|----------------|------------------|---|
| 1 | 88.039304  | 44.523290       |                |                  | 70.028739      | 35.518008        | S    |             |                 |                |                  | 7 |
| 2 | 235.107718 | 118.057497      |                |                  | 217.097153     | 109.052214       | F    | 1035.486269 | 518.246773      | 1018.459720    | 509.733498       | 6 |
| 3 | 292.129182 | 146.568229      |                |                  | 274.118617     | 137.562946       | G    | 888.417855  | 444.712566      | 871.391306     | 436.199291       | 5 |
| 4 | 349.150646 | 175.078961      |                |                  | 331.140081     | 166.073678       | G    | 831.396391  | 416.201834      | 814.369842     | 407.688559       | 4 |
| 5 | 788.375972 | 394.691624      | 771.349423     | 386.178350       | 770.365407     | 385.686342       | Q    | 774.374927  | 387.691102      | 757.348378     | 379.177827       | 3 |
| 6 | 948.406621 | 474.706949      | 931.380072     | 466.193674       | 930.396056     | 465.701666       | C    | 335.149601  | 168.078438      | 318.123052     | 159.565164       | 2 |
| 7 |            |                 |                |                  |                |                  | R    | 175.118952  | 88.063114       | 158.092403     | 79.549839        | 1 |

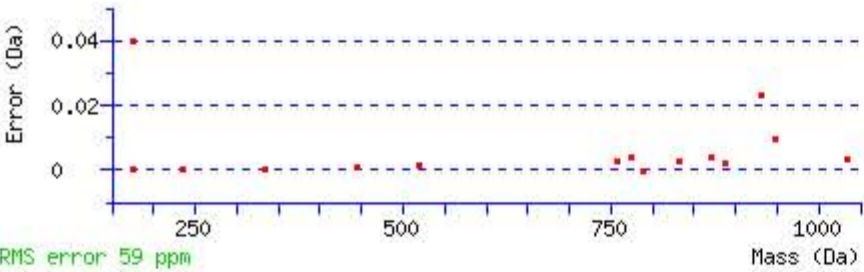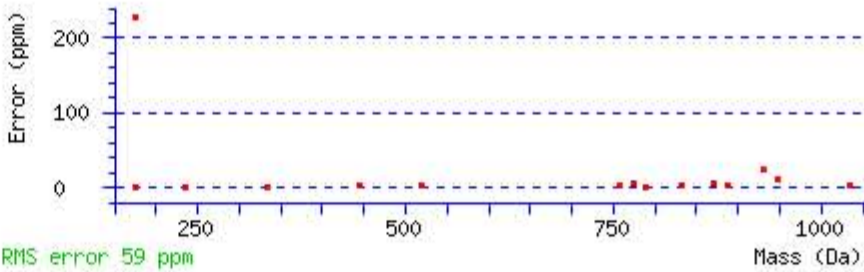

NCBI BLAST search of [SFGGQCR](#)  
(Parameters: blastp, nr protein database, expect=20000, no filter, PAM30)  
Other BLAST [web gateways](#)

All matches to this query

| Score | Mr(calc):   | Delta    | Sequence                  |
|-------|-------------|----------|---------------------------|
| 31.6  | 1121.511032 | 0.001856 | <a href="#">SFGGQCR</a>   |
| 4.3   | 1121.500259 | 0.012629 | <a href="#">HPGFHQEDR</a> |
| 2.1   | 1121.502274 | 0.010614 | <a href="#">MSVEEQIDR</a> |

MATRIX

SCIENCE

Mascot Search Results

Peptide View

MS/MS Fragmentation of **CFSGQCISK**  
Found in **CO7\_HUMAN**, Complement component C7 OS=Homo sapiens GN=C7 PE=1 SV=2

Match to Query 27214: 1396.634528 from(699.324540,2+) rtinseconds(1627) index(3407)  
Title: Locus:1.1.1.1843.7 File:"2013-07-02 CLN FXIII 180 min 2nd F 1.wiff"  
Data file C:\Program Files (x86)\Matrix Science\Mascot Daemon\mgf\8 FXIII 180 min 2nd\mascot\_daemon\_merge.mgf

Click mouse within plot area to zoom in by factor of two about that point  
Or, 

Plot from

100

 to 

2100

 Da 

Full range

  
Label all possible matches ☐ Label matches used for scoring ☒

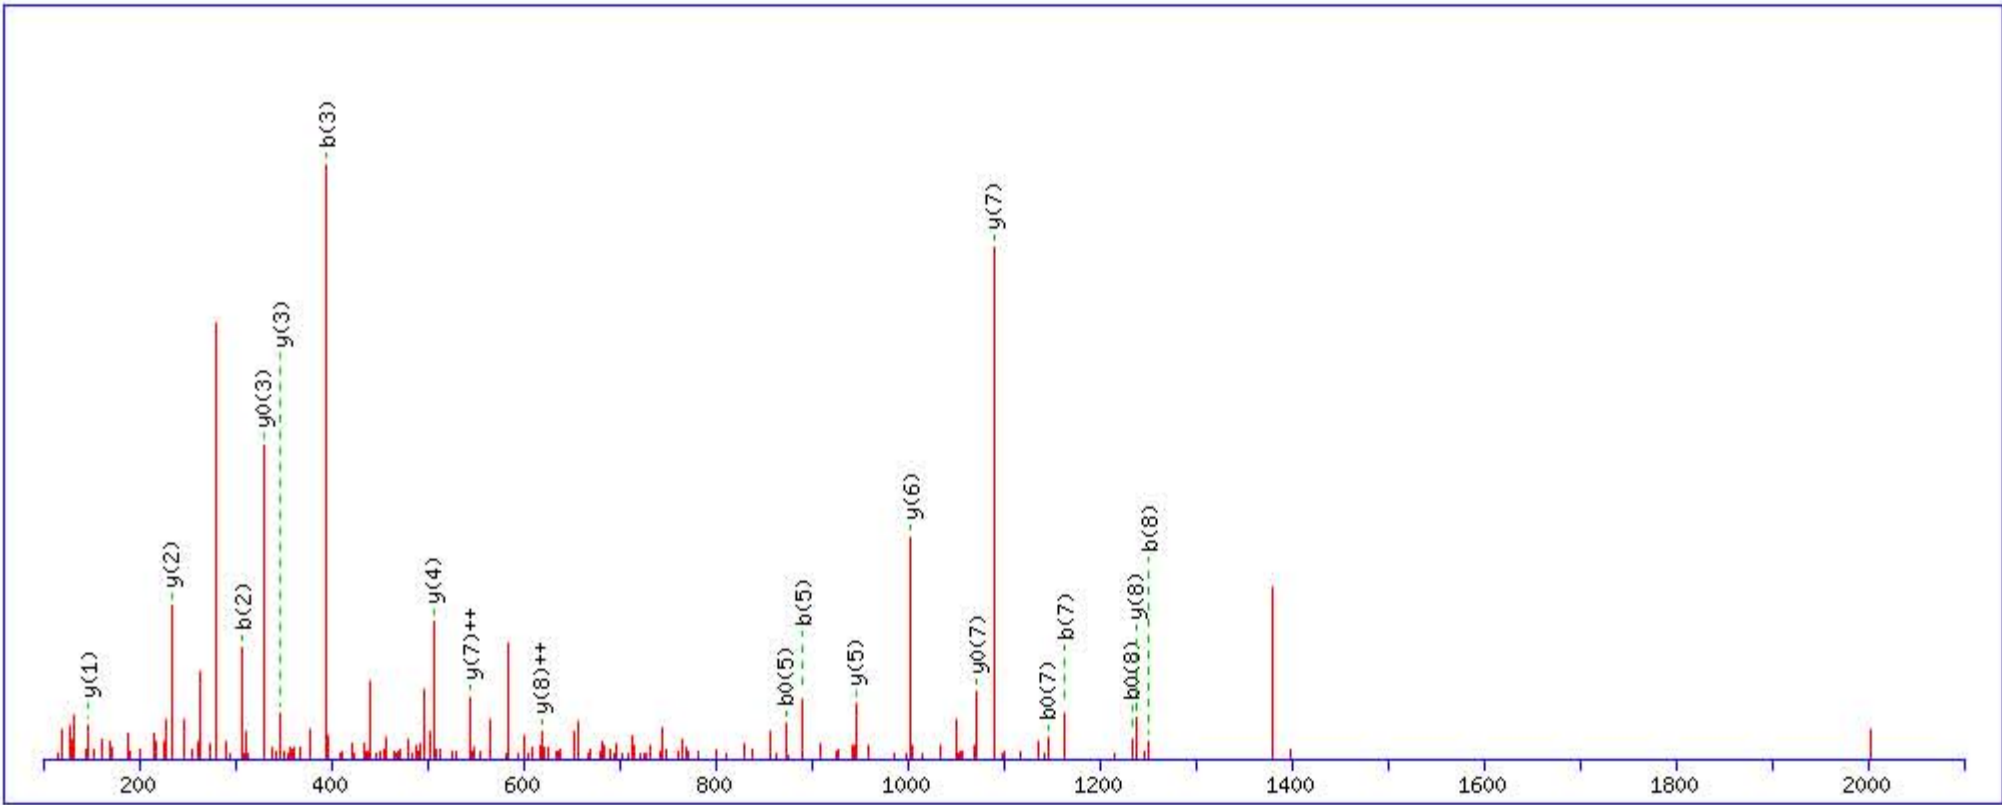

Monoisotopic mass of neutral peptide Mr(calc): 1396.630157  
Fixed modifications: Carbamidomethyl (C) (apply to specified residues or termini only)  
Variable modifications:  
Q5 : Biotin:Thermo-21345 (Q)  
Ions Score: 49 Expect: 9.7e-005  
Matches : 20/82 fragment ions using 37 most intense peaks ([help](#))

| # | b           | b <sup>++</sup> | b <sup>*</sup> | b <sup>*++</sup> | b <sup>0</sup> | b <sup>0++</sup> | Seq. | y           | y <sup>++</sup> | y <sup>*</sup> | y <sup>*++</sup> | y <sup>0</sup> | y <sup>0++</sup> | # |
|---|-------------|-----------------|----------------|------------------|----------------|------------------|------|-------------|-----------------|----------------|------------------|----------------|------------------|---|
| 1 | 161.037925  | 81.022600       |                |                  |                |                  | C    |             |                 |                |                  |                |                  | 9 |
| 2 | 308.106339  | 154.556807      |                |                  |                |                  | F    | 1237.606777 | 619.307027      | 1220.580228    | 610.793752       | 1219.596212    | 610.301744       | 8 |
| 3 | 395.138367  | 198.072821      |                |                  | 377.127802     | 189.067539       | S    | 1090.538363 | 545.772819      | 1073.511814    | 537.259545       | 1072.527798    | 536.767537       | 7 |
| 4 | 452.159831  | 226.583553      |                |                  | 434.149266     | 217.578271       | G    | 1003.506335 | 502.256806      | 986.479786     | 493.743531       | 985.495770     | 493.251523       | 6 |
| 5 | 891.385157  | 446.196217      | 874.358608     | 437.682942       | 873.374592     | 437.190934       | Q    | 946.484871  | 473.746074      | 929.458322     | 465.232799       | 928.474306     | 464.740791       | 5 |
| 6 | 1051.415806 | 526.211541      | 1034.389257    | 517.698267       | 1033.405241    | 517.206258       | C    | 507.259545  | 254.133410      | 490.232996     | 245.620136       | 489.248980     | 245.128128       | 4 |
| 7 | 1164.499870 | 582.753573      | 1147.473321    | 574.240298       | 1146.489305    | 573.748290       | I    | 347.228896  | 174.118086      | 330.202347     | 165.604811       | 329.218331     | 165.112803       | 3 |
| 8 | 1251.531898 | 626.269587      | 1234.505349    | 617.756313       | 1233.521333    | 617.264304       | S    | 234.144832  | 117.576054      | 217.118283     | 109.062780       | 216.134267     | 108.570772       | 2 |
| 9 |             |                 |                |                  |                |                  | K    | 147.112804  | 74.060040       | 130.086255     | 65.546765        |                |                  | 1 |

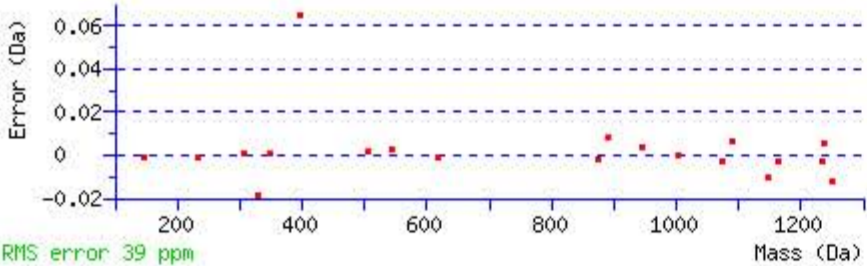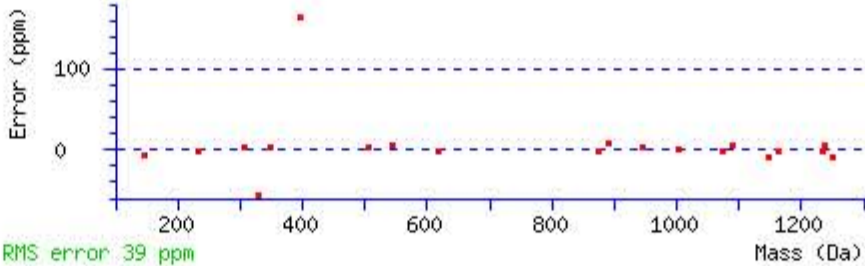

NCBI BLAST search of [CFSGQCISK](#)  
(Parameters: blastp, nr protein database, expect=20000, no filter, PAM30)  
Other BLAST [web gateways](#)

All matches to this query

| Score | Mr(calc):   | Delta    | Sequence                     |
|-------|-------------|----------|------------------------------|
| 49.5  | 1396.630157 | 0.004371 | <a href="#">CFSGQCISK</a>    |
| 17.9  | 1396.629272 | 0.005256 | <a href="#">QLSQAEATDFCK</a> |
| 2.5   | 1396.629257 | 0.005271 | <a href="#">FDNLMNQKEDK</a>  |

MATRIX

SCIENCE

Mascot Search Results

Peptide View

MS/MS Fragmentation of **AASGTQNNVLR**  
Found in **CO7\_HUMAN**, Complement component C7 OS=Homo sapiens GN=C7 PE=1 SV=2

Match to Query 29389: 1440.752748 from(721.383650,2+) rtinseconds(1571) index(17434)  
Title: Locus:1.1.1.2929.20 File:"2013-07-02 CLN FXIII 180 min 2nd F 2.wiff"  
Data file C:\Program Files (x86)\Matrix Science\Mascot Daemon\mgf\8 FXIII 180 min 2nd\mascot\_daemon\_merge.mgf

Click mouse within plot area to zoom in by factor of two about that point  
Or, 

Plot from

100

 to 

1500

 Da 

Full range

  
Label all possible matches ☐ Label matches used for scoring ☒

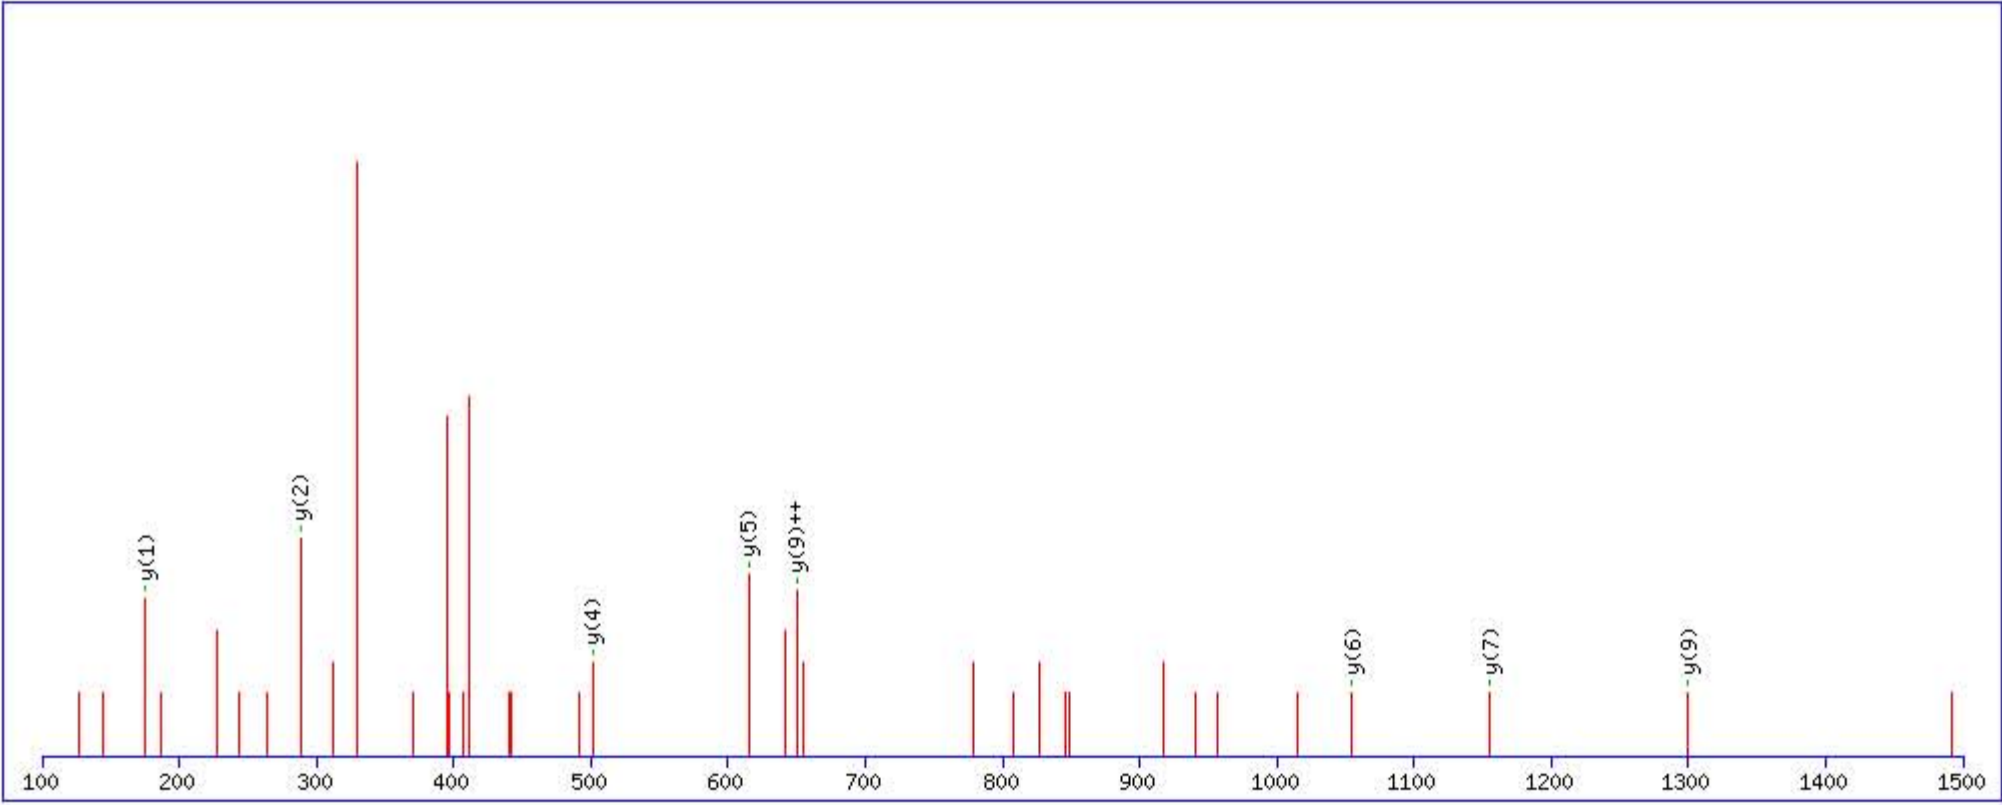

Monoisotopic mass of neutral peptide Mr(calc): 1440.750717  
Fixed modifications: Carbamidomethyl (C) (apply to specified residues or termini only)  
Variable modifications:  
Q6 : Biotin:Thermo-21345 (Q)  
Ions Score: 51 Expect: 4.1e-005  
Matches : 8/94 fragment ions using 12 most intense peaks [\(help\)](#)

| #  | b           | b <sup>++</sup> | b <sup>+</sup> | b <sup>⋆++</sup> | b <sup>0</sup> | b <sup>0++</sup> | Seq. | y           | y <sup>++</sup> | y <sup>+</sup> | y <sup>⋆++</sup> | y <sup>0</sup> | y <sup>0++</sup> | #  |
|----|-------------|-----------------|----------------|------------------|----------------|------------------|------|-------------|-----------------|----------------|------------------|----------------|------------------|----|
| 1  | 72.044390   | 36.525833       |                |                  |                |                  | A    |             |                 |                |                  |                |                  | 11 |
| 2  | 143.081504  | 72.044390       |                |                  |                |                  | A    | 1370.720895 | 685.864086      | 1353.694346    | 677.350811       | 1352.710330    | 676.858803       | 10 |
| 3  | 230.113532  | 115.560404      |                |                  | 212.102967     | 106.555121       | S    | 1299.683781 | 650.345529      | 1282.657232    | 641.832254       | 1281.673216    | 641.340246       | 9  |
| 4  | 287.134996  | 144.071136      |                |                  | 269.124431     | 135.065854       | G    | 1212.651753 | 606.829515      | 1195.625204    | 598.316240       | 1194.641188    | 597.824232       | 8  |
| 5  | 388.182675  | 194.594976      |                |                  | 370.172110     | 185.589693       | T    | 1155.630289 | 578.318783      | 1138.603740    | 569.805508       | 1137.619724    | 569.313500       | 7  |
| 6  | 827.408001  | 414.207639      | 810.381452     | 405.694364       | 809.397436     | 405.202356       | Q    | 1054.582610 | 527.794943      | 1037.556061    | 519.281669       |                |                  | 6  |
| 7  | 941.450928  | 471.229102      | 924.424379     | 462.715828       | 923.440363     | 462.223820       | N    | 615.357284  | 308.182280      | 598.330735     | 299.669006       |                |                  | 5  |
| 8  | 1055.493855 | 528.250566      | 1038.467306    | 519.737291       | 1037.483290    | 519.245283       | N    | 501.314357  | 251.160816      | 484.287808     | 242.647542       |                |                  | 4  |
| 9  | 1154.562269 | 577.784773      | 1137.535720    | 569.271498       | 1136.551704    | 568.779490       | V    | 387.271430  | 194.139353      | 370.244881     | 185.626078       |                |                  | 3  |
| 10 | 1267.646333 | 634.326805      | 1250.619784    | 625.813530       | 1249.635768    | 625.321522       | L    | 288.203016  | 144.605146      | 271.176467     | 136.091871       |                |                  | 2  |
| 11 |             |                 |                |                  |                |                  | R    | 175.118952  | 88.063114       | 158.092403     | 79.549839        |                |                  | 1  |

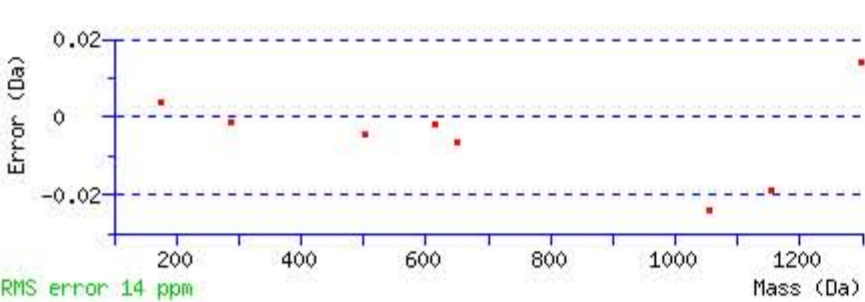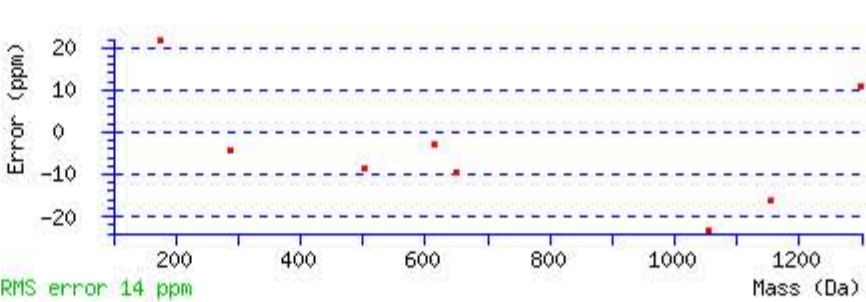

NCBI BLAST search of [AASGTQNNVLR](#)  
(Parameters: blastp, nr protein database, expect=20000, no filter, PAM30)  
Other BLAST [web gateways](#)

All matches to this query

| Score | Mr(calc):   | Delta    | Sequence                    |
|-------|-------------|----------|-----------------------------|
| 51.3  | 1440.750717 | 0.002031 | <a href="#">AASGTQNNVLR</a> |
| 4.5   | 1440.739487 | 0.013261 | <a href="#">AAVTGQDEAIR</a> |

MATRIX

SCIENCE

Mascot Search Results

Peptide View

MS/MS Fragmentation of **WLVGEMHCQK**  
Found in **CO7\_HUMAN**, Complement component C7 OS=Homo sapiens GN=C7 PE=1 SV=2

Match to Query 34632: 1597.775528 from(799.895040,2+) rtinseconds(1874) index(4726)  
Title: Locus:1.1.1.1929.25 File:"2013-07-02 CLN FXIII 180 min 2nd F 1.wiff"  
Data file C:\Program Files (x86)\Matrix Science\Mascot Daemon\mgf\8 FXIII 180 min 2nd\mascot\_daemon\_merge.mgf

Click mouse within plot area to zoom in by factor of two about that point  
Or, 

Plot from

100

 to 

1600

 Da 

Full range

  
Label all possible matches ☐ Label matches used for scoring ☒

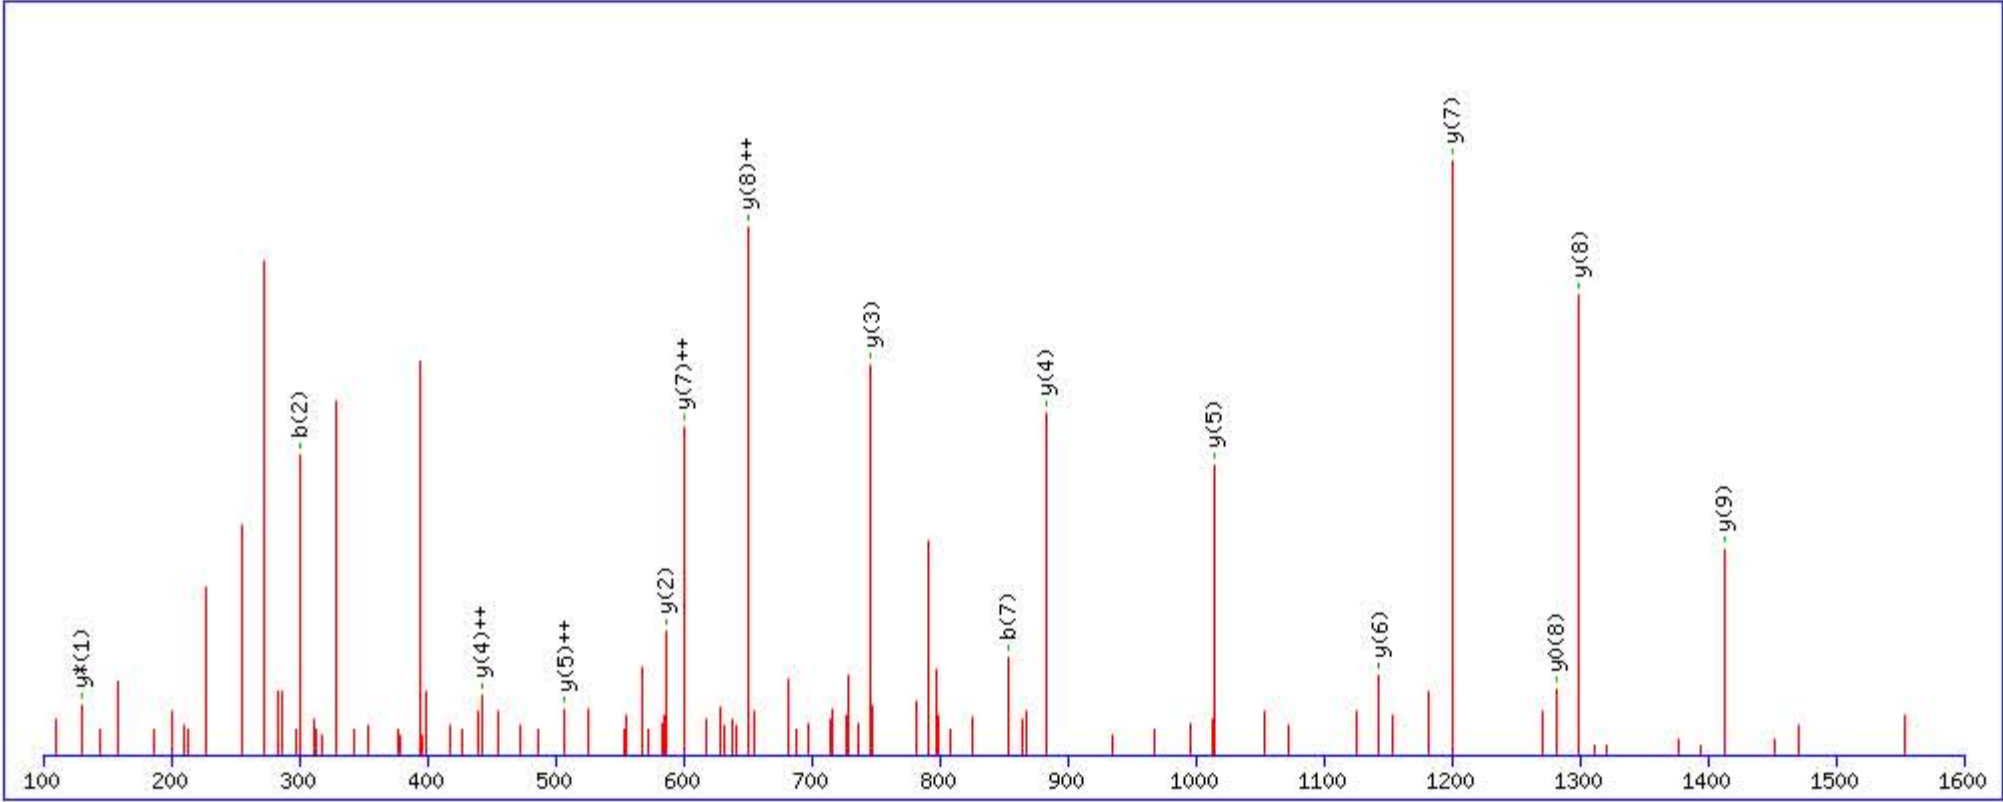

Monoisotopic mass of neutral peptide Mr(calc): 1597.756744  
Fixed modifications: Carbamidomethyl (C) (apply to specified residues or termini only)  
Variable modifications:  
Q9 : Biotin:Thermo-21345 (Q)  
Ions Score: 50 Expect: 9.5e-005  
Matches : 16/74 fragment ions using 29 most intense peaks [\(help\)](#)

| #  | b           | b <sup>++</sup> | b <sup>*</sup> | b <sup>*++</sup> | b <sup>0</sup> | b <sup>0++</sup> | Seq. | y           | y <sup>++</sup> | y <sup>*</sup> | y <sup>*++</sup> | y <sup>0</sup> | y <sup>0++</sup> | #  |
|----|-------------|-----------------|----------------|------------------|----------------|------------------|------|-------------|-----------------|----------------|------------------|----------------|------------------|----|
| 1  | 187.086589  | 94.046932       |                |                  |                |                  | W    |             |                 |                |                  |                |                  | 10 |
| 2  | 300.170653  | 150.588965      |                |                  |                |                  | L    | 1412.684711 | 706.845994      | 1395.658162    | 698.332719       | 1394.674146    | 697.840711       | 9  |
| 3  | 399.239067  | 200.123172      |                |                  |                |                  | V    | 1299.600647 | 650.303962      | 1282.574098    | 641.790687       | 1281.590082    | 641.298679       | 8  |
| 4  | 456.260531  | 228.633904      |                |                  |                |                  | G    | 1200.532233 | 600.769755      | 1183.505684    | 592.256480       | 1182.521668    | 591.764472       | 7  |
| 5  | 585.303124  | 293.155200      |                |                  | 567.292559     | 284.149918       | E    | 1143.510769 | 572.259023      | 1126.484220    | 563.745748       | 1125.500204    | 563.253740       | 6  |
| 6  | 716.343609  | 358.675443      |                |                  | 698.333044     | 349.670160       | M    | 1014.468176 | 507.737726      | 997.441627     | 499.224452       |                |                  | 5  |
| 7  | 853.402521  | 427.204899      |                |                  | 835.391956     | 418.199616       | H    | 883.427691  | 442.217484      | 866.401142     | 433.704209       |                |                  | 4  |
| 8  | 1013.433170 | 507.220223      |                |                  | 995.422605     | 498.214941       | C    | 746.368779  | 373.688028      | 729.342230     | 365.174753       |                |                  | 3  |
| 9  | 1452.658496 | 726.832886      | 1435.631947    | 718.319612       | 1434.647931    | 717.827604       | Q    | 586.338130  | 293.672703      | 569.311581     | 285.159429       |                |                  | 2  |
| 10 |             |                 |                |                  |                |                  | K    | 147.112804  | 74.060040       | 130.086255     | 65.546765        |                |                  | 1  |

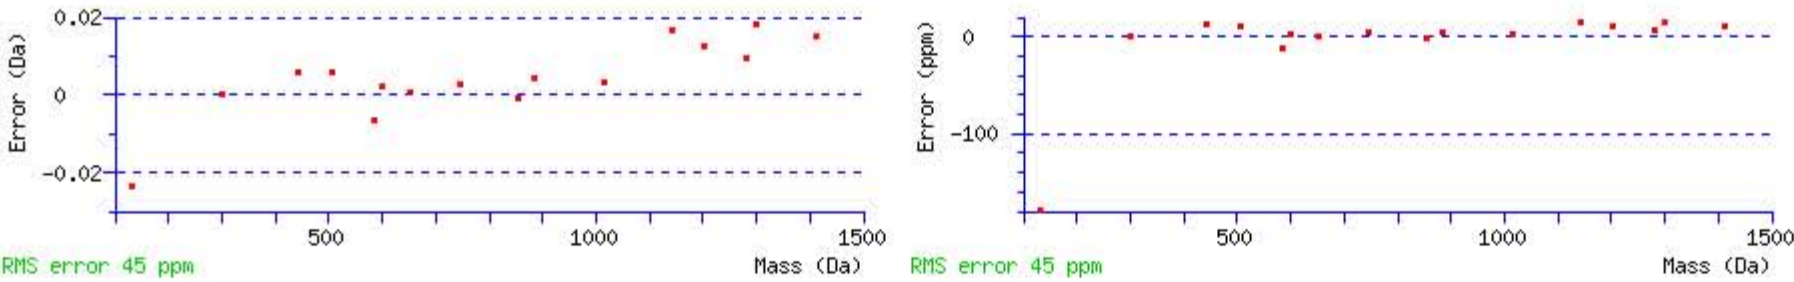

NCBI BLAST search of [WLVGEMHCQK](#)  
(Parameters: blastp, nr protein database, expect=20000, no filter, PAM30)  
Other BLAST [web gateways](#)

All matches to this query

| Score | Mr(calc):   | Delta     | Sequence                        |
|-------|-------------|-----------|---------------------------------|
| 49.7  | 1597.756744 | 0.018784  | <a href="#">WLVGEMHCQK</a>      |
| 6.4   | 1597.763718 | 0.011810  | <a href="#">LWKDEGRWEHDK</a>    |
| 4.9   | 1597.751846 | 0.023682  | <a href="#">NPEDDGCLLKQGPR</a>  |
| 3.5   | 1597.763062 | 0.012466  | <a href="#">RDAELIQAGHMDSR</a>  |
| 0.5   | 1597.784393 | -0.008865 | <a href="#">GAMGIMLVYDITNGK</a> |

MATRIX

SCIENCE

Mascot Search Results

Peptide View

MS/MS Fragmentation of **LSGNVLSYTFQVK**  
Found in **CO7\_HUMAN**, Complement component C7 OS=Homo sapiens GN=C7 PE=1 SV=2

Match to Query 39470: 1765.952742 from(589.658190,3+) rtinseconds(2481) index(8193)  
Title: Locus:1.1.1.2141.6 File:"2013-07-02 CLN FXIII 180 min 2nd F 1.wiff"  
Data file C:\Program Files (x86)\Matrix Science\Mascot Daemon\mgf\8 FXIII 180 min 2nd\mascot\_daemon\_merge.mgf

Click mouse within plot area to zoom in by factor of two about that point  
Or, 

Plot from

100

 to 

1800

 Da 

Full range

  
Label all possible matches ☐ Label matches used for scoring ☒

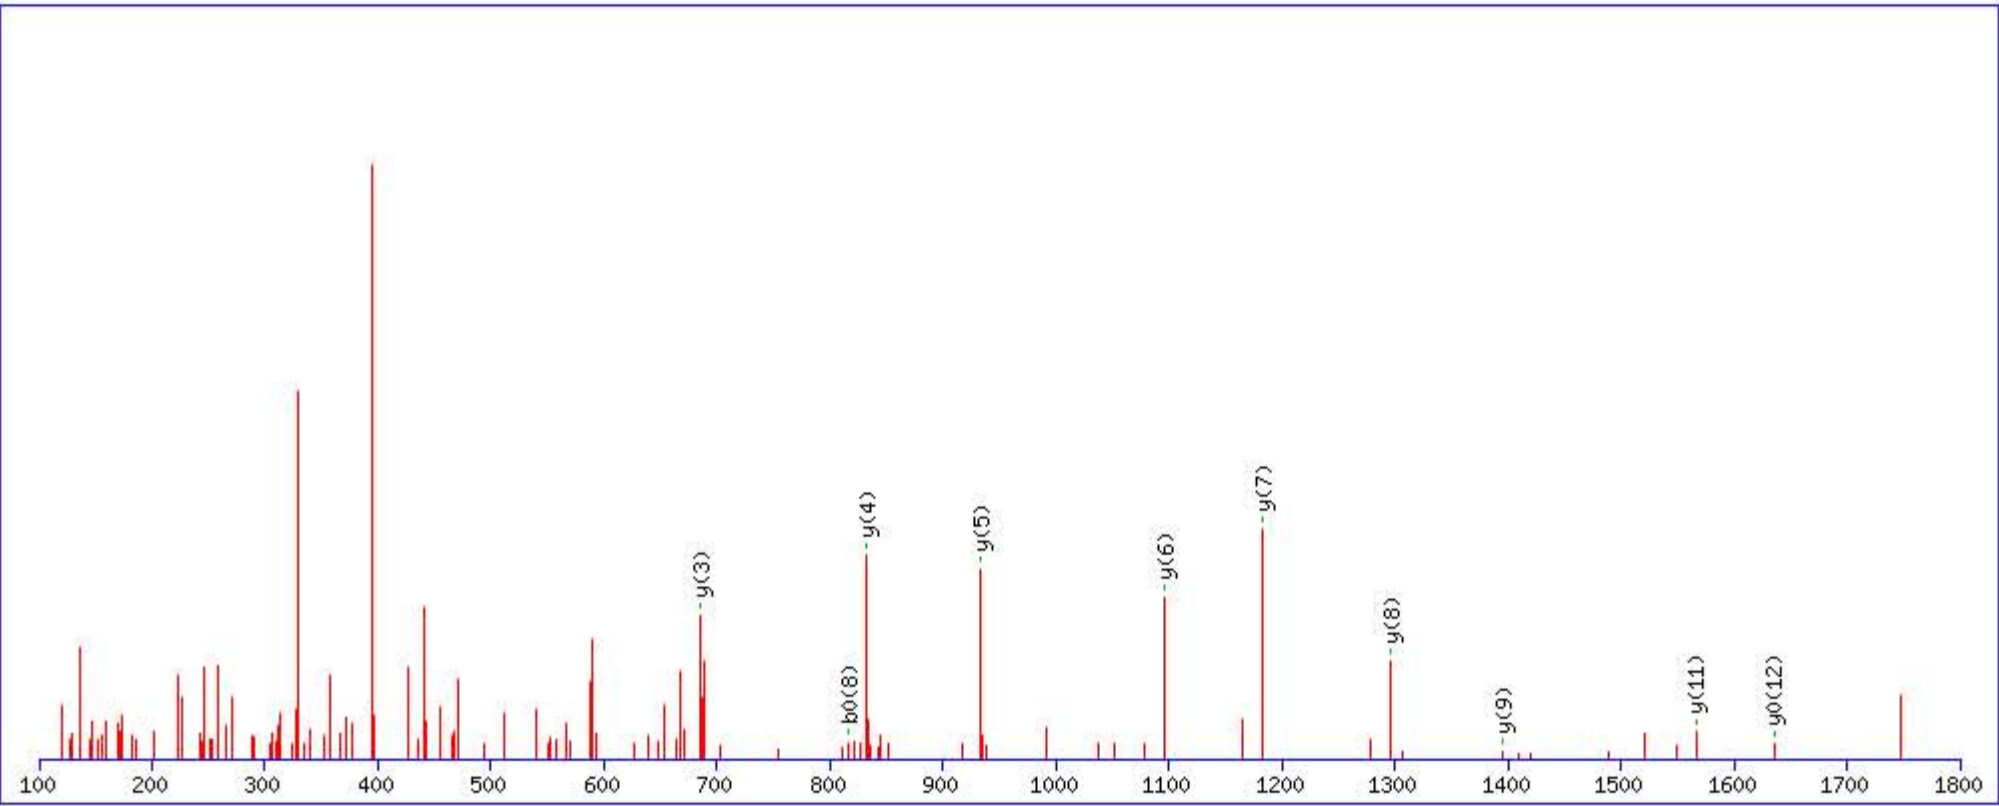

Monoisotopic mass of neutral peptide Mr(calc): 1765.943680  
Fixed modifications: Carbamidomethyl (C) (apply to specified residues or termini only)  
Variable modifications:  
Q11 : Biotin:Thermo-21345 (Q)  
Ions Score: 48 Expect: 3.5e-005  
Matches : 10/128 fragment ions using 17 most intense peaks [\(help\)](#)

| #  | b           | b <sup>++</sup> | b <sup>*</sup> | b <sup>*++</sup> | b <sup>0</sup> | b <sup>0++</sup> | Seq. | y           | y <sup>++</sup> | y <sup>*</sup> | y <sup>*++</sup> | y <sup>0</sup> | y <sup>0++</sup> | #  |
|----|-------------|-----------------|----------------|------------------|----------------|------------------|------|-------------|-----------------|----------------|------------------|----------------|------------------|----|
| 1  | 114.091340  | 57.549308       |                |                  |                |                  | L    |             |                 |                |                  |                |                  | 13 |
| 2  | 201.123368  | 101.065322      |                |                  | 183.112803     | 92.060039        | S    | 1653.866891 | 827.437084      | 1636.840342    | 818.923809       | 1635.856326    | 818.431801       | 12 |
| 3  | 258.144832  | 129.576054      |                |                  | 240.134267     | 120.570771       | G    | 1566.834863 | 783.921070      | 1549.808314    | 775.407795       | 1548.824298    | 774.915787       | 11 |
| 4  | 372.187759  | 186.597517      | 355.161210     | 178.084243       | 354.177194     | 177.592235       | N    | 1509.813399 | 755.410338      | 1492.786850    | 746.897063       | 1491.802834    | 746.405055       | 10 |
| 5  | 471.256173  | 236.131724      | 454.229624     | 227.618450       | 453.245608     | 227.126442       | V    | 1395.770472 | 698.388874      | 1378.743923    | 689.875600       | 1377.759907    | 689.383592       | 9  |
| 6  | 584.340237  | 292.673757      | 567.313688     | 284.160482       | 566.329672     | 283.668474       | L    | 1296.702058 | 648.854667      | 1279.675509    | 640.341393       | 1278.691493    | 639.849385       | 8  |
| 7  | 671.372265  | 336.189771      | 654.345716     | 327.676496       | 653.361700     | 327.184488       | S    | 1183.617994 | 592.312635      | 1166.591445    | 583.799361       | 1165.607429    | 583.307353       | 7  |
| 8  | 834.435594  | 417.721435      | 817.409045     | 409.208161       | 816.425029     | 408.716153       | Y    | 1096.585966 | 548.796621      | 1079.559417    | 540.283347       | 1078.575401    | 539.791339       | 6  |
| 9  | 935.483273  | 468.245275      | 918.456724     | 459.732000       | 917.472708     | 459.239992       | T    | 933.522637  | 467.264957      | 916.496088     | 458.751682       | 915.512072     | 458.259674       | 5  |
| 10 | 1082.551687 | 541.779482      | 1065.525138    | 533.266207       | 1064.541122    | 532.774199       | F    | 832.474958  | 416.741117      | 815.448409     | 408.227843       |                |                  | 4  |
| 11 | 1521.777013 | 761.392145      | 1504.750464    | 752.878870       | 1503.766448    | 752.386862       | Q    | 685.406544  | 343.206910      | 668.379995     | 334.693636       |                |                  | 3  |
| 12 | 1620.845427 | 810.926352      | 1603.818878    | 802.413077       | 1602.834862    | 801.921069       | V    | 246.181218  | 123.594247      | 229.154669     | 115.080973       |                |                  | 2  |
| 13 |             |                 |                |                  |                |                  | K    | 147.112804  | 74.060040       | 130.086255     | 65.546765        |                |                  | 1  |

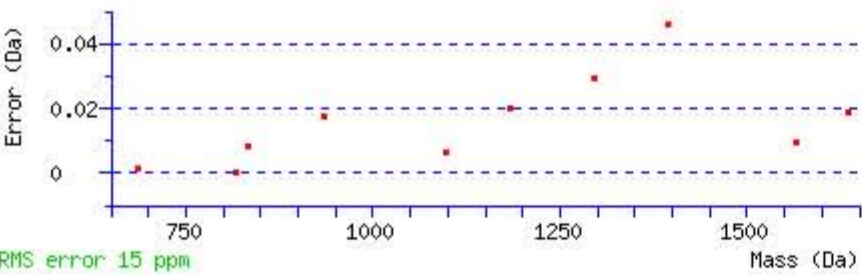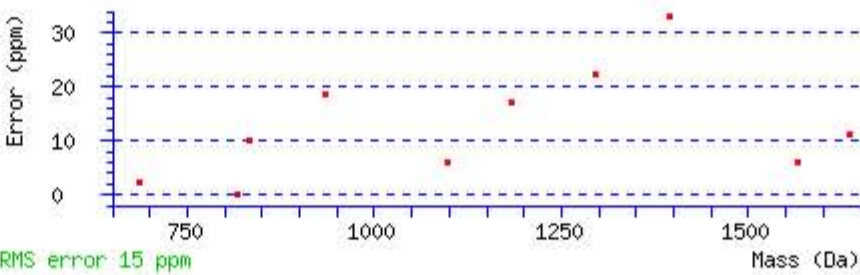

NCBI BLAST search of **LSGNVLSYTFQVK**  
(Parameters: blastp, nr protein database, expect=20000, no filter, PAM30)  
Other BLAST [web gateways](#)

All matches to this query

| Score | Mr(calc):   | Delta    | Sequence                         |
|-------|-------------|----------|----------------------------------|
| 47.7  | 1765.943680 | 0.009062 | <a href="#">LSGNVLSYTFQVK</a>    |
| 0.2   | 1765.950882 | 0.001860 | <a href="#">VTGNVSKKINYLVNMR</a> |

MATRIX

SCIENCE

Mascot Search Results

Peptide View

MS/MS Fragmentation of **EQTMSECEAGALR**  
Found in **CO7\_HUMAN**, Complement component C7 OS=Homo sapiens GN=C7 PE=1 SV=2

Match to Query 40100: 1791.798102 from(598.273310,3+) rtinseconds(1752) index(4102)  
Title: Locus:1.1.1.1887.9 File:"2013-07-02 CLN FXIII 180 min 2nd F 1.wiff"  
Data file C:\Program Files (x86)\Matrix Science\Mascot Daemon\mgf\8 FXIII 180 min 2nd\mascot\_daemon\_merge.mgf

Click mouse within plot area to zoom in by factor of two about that point  
Or, 

Plot from

100

 to 

1400

 Da 

Full range

  
Label all possible matches ☐ Label matches used for scoring ☒

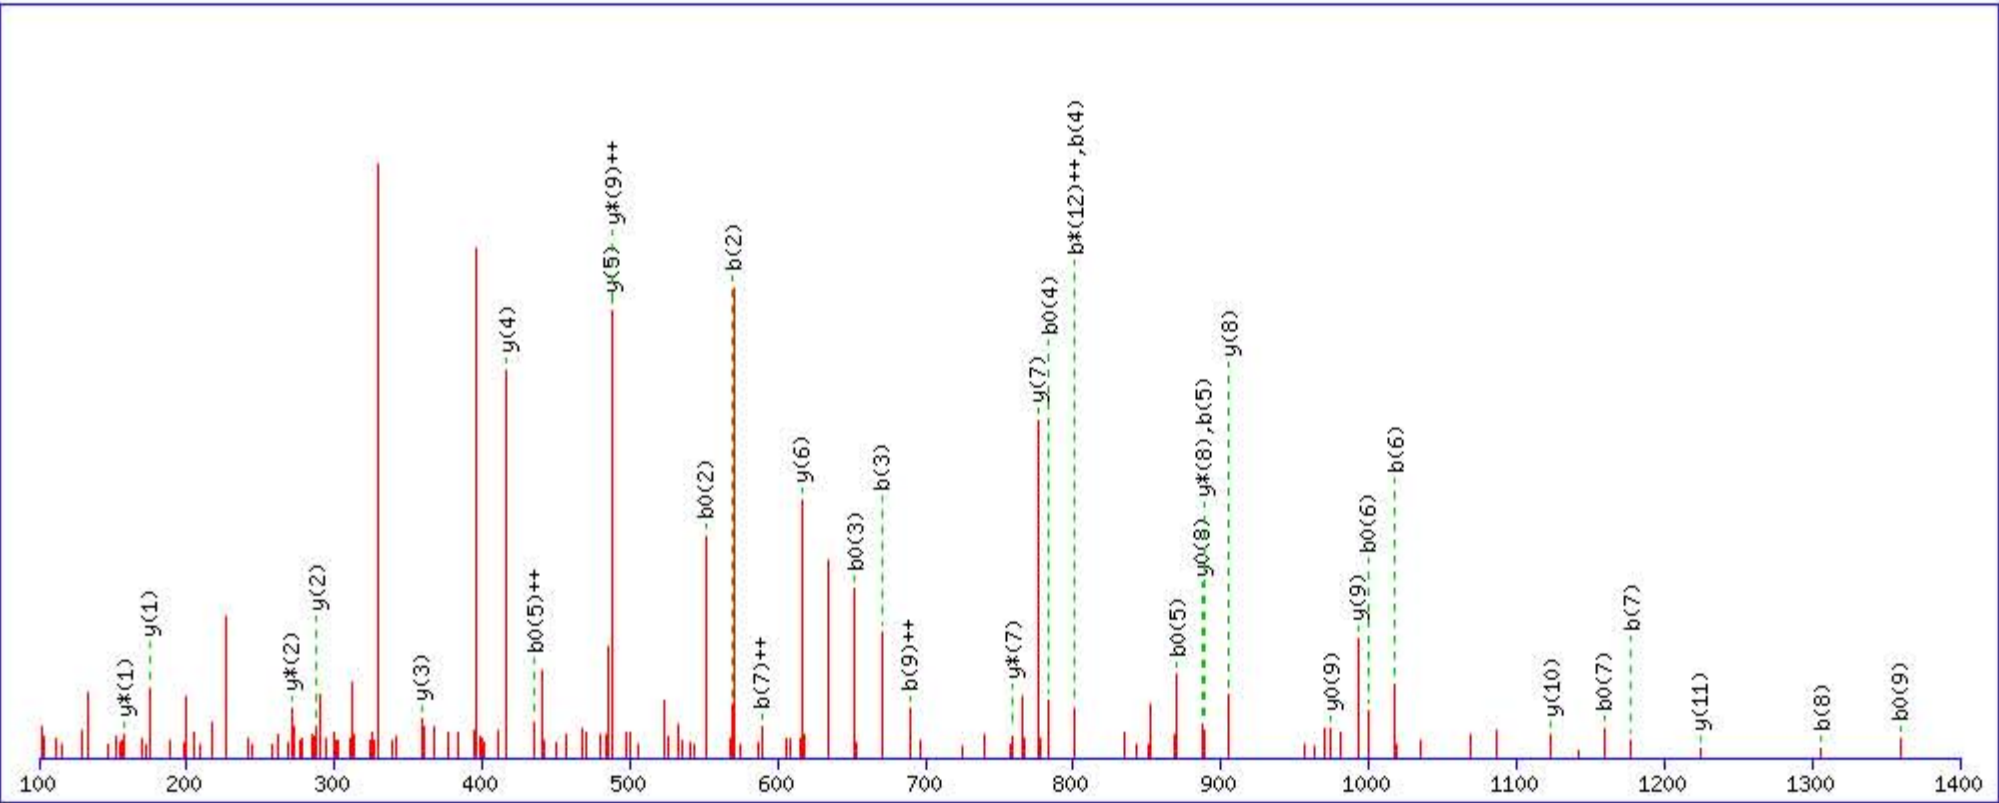

Monoisotopic mass of neutral peptide Mr(calc): 1791.795349  
Fixed modifications: Carbamidomethyl (C) (apply to specified residues or termini only)  
Variable modifications:  
Q2 : Biotin:Thermo-21345 (Q)  
Ions Score: 59 Expect: 9.2e-006  
Matches : 36/132 fragment ions using 66 most intense peaks ([help](#))

| #  | b           | b <sup>++</sup> | b <sup>*</sup> | b <sup>*++</sup> | b <sup>0</sup> | b <sup>0++</sup> | Seq. | y           | y <sup>++</sup> | y <sup>*</sup> | y <sup>*++</sup> | y <sup>0</sup> | y <sup>0++</sup> | #  |
|----|-------------|-----------------|----------------|------------------|----------------|------------------|------|-------------|-----------------|----------------|------------------|----------------|------------------|----|
| 1  | 130.049869  | 65.528572       |                |                  | 112.039304     | 56.523290        | E    |             |                 |                |                  |                |                  | 13 |
| 2  | 569.275195  | 285.141236      | 552.248646     | 276.627961       | 551.264630     | 276.135953       | Q    | 1663.760061 | 832.383668      | 1646.733512    | 823.870394       | 1645.749496    | 823.378386       | 12 |
| 3  | 670.322874  | 335.665075      | 653.296325     | 327.151801       | 652.312309     | 326.659793       | T    | 1224.534735 | 612.771005      | 1207.508186    | 604.257731       | 1206.524170    | 603.765723       | 11 |
| 4  | 801.363359  | 401.185318      | 784.336810     | 392.672043       | 783.352794     | 392.180035       | M    | 1123.487056 | 562.247166      | 1106.460507    | 553.733891       | 1105.476491    | 553.241883       | 10 |
| 5  | 888.395387  | 444.701332      | 871.368838     | 436.188057       | 870.384822     | 435.696049       | S    | 992.446571  | 496.726923      | 975.420022     | 488.213649       | 974.436006     | 487.721641       | 9  |
| 6  | 1017.437980 | 509.222628      | 1000.411431    | 500.709354       | 999.427415     | 500.217346       | E    | 905.414543  | 453.210909      | 888.387994     | 444.697635       | 887.403978     | 444.205627       | 8  |
| 7  | 1177.468629 | 589.237953      | 1160.442080    | 580.724678       | 1159.458064    | 580.232670       | C    | 776.371950  | 388.689613      | 759.345401     | 380.176338       | 758.361385     | 379.684330       | 7  |
| 8  | 1306.511222 | 653.759249      | 1289.484673    | 645.245974       | 1288.500657    | 644.753966       | E    | 616.341301  | 308.674288      | 599.314752     | 300.161014       | 598.330736     | 299.669006       | 6  |
| 9  | 1377.548336 | 689.277806      | 1360.521787    | 680.764531       | 1359.537771    | 680.272523       | A    | 487.298708  | 244.152992      | 470.272159     | 235.639717       |                |                  | 5  |
| 10 | 1434.569800 | 717.788538      | 1417.543251    | 709.275263       | 1416.559235    | 708.783255       | G    | 416.261594  | 208.634435      | 399.235045     | 200.121160       |                |                  | 4  |
| 11 | 1505.606914 | 753.307095      | 1488.580365    | 744.793820       | 1487.596349    | 744.301812       | A    | 359.240130  | 180.123703      | 342.213581     | 171.610428       |                |                  | 3  |
| 12 | 1618.690978 | 809.849127      | 1601.664429    | 801.335852       | 1600.680413    | 800.843844       | L    | 288.203016  | 144.605146      | 271.176467     | 136.091871       |                |                  | 2  |
| 13 |             |                 |                |                  |                |                  | R    | 175.118952  | 88.063114       | 158.092403     | 79.549839        |                |                  | 1  |

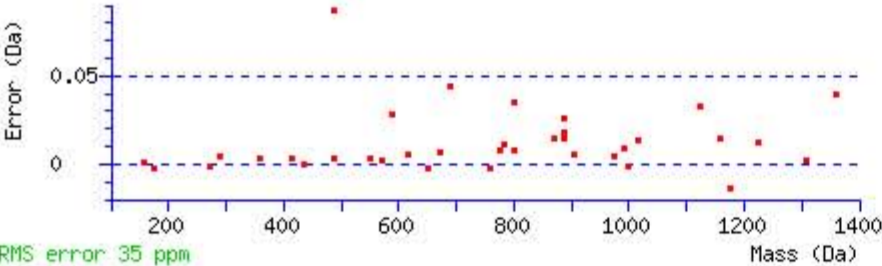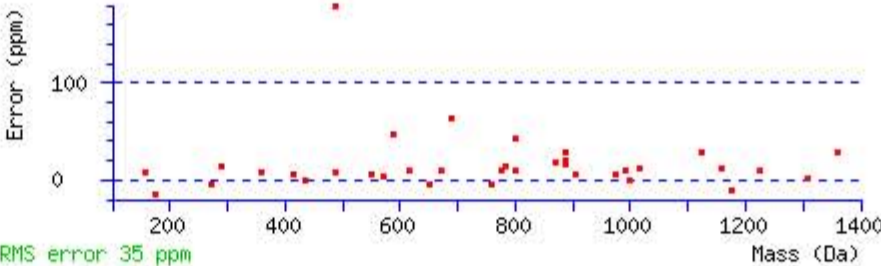

NCBI BLAST search of [EQTMSECEAGALR](#)  
(Parameters: blastp, nr protein database, expect=20000, no filter, PAM30)  
Other BLAST [web gateways](#)

All matches to this query

| Score | Mr(calc):   | Delta    | Sequence                      |
|-------|-------------|----------|-------------------------------|
| 59.4  | 1791.795349 | 0.002753 | <a href="#">EQTMSECEAGALR</a> |

MATRIX

SCIENCE

Mascot Search Results

Peptide View

MS/MS Fragmentation of **YSAWAESVTNLPQVIK**  
Found in **CO7\_HUMAN**, Complement component C7 OS=Homo sapiens GN=C7 PE=1 SV=2

Match to Query 46851: 2116.115262 from(706.379030,3+) rtinseconds(2593) index(8710)  
Title: Locus:1.1.1.2180.9 File:"2013-07-02 CLN FXIII 180 min 2nd F 1.wiff"  
Data file C:\Program Files (x86)\Matrix Science\Mascot Daemon\mgf\8 FXIII 180 min 2nd\mascot\_daemon\_merge.mgf

Click mouse within plot area to zoom in by factor of two about that point  
Or, 

Plot from

100

 to 

2000

 Da 

Full range

  
Label all possible matches ☐ Label matches used for scoring ☒

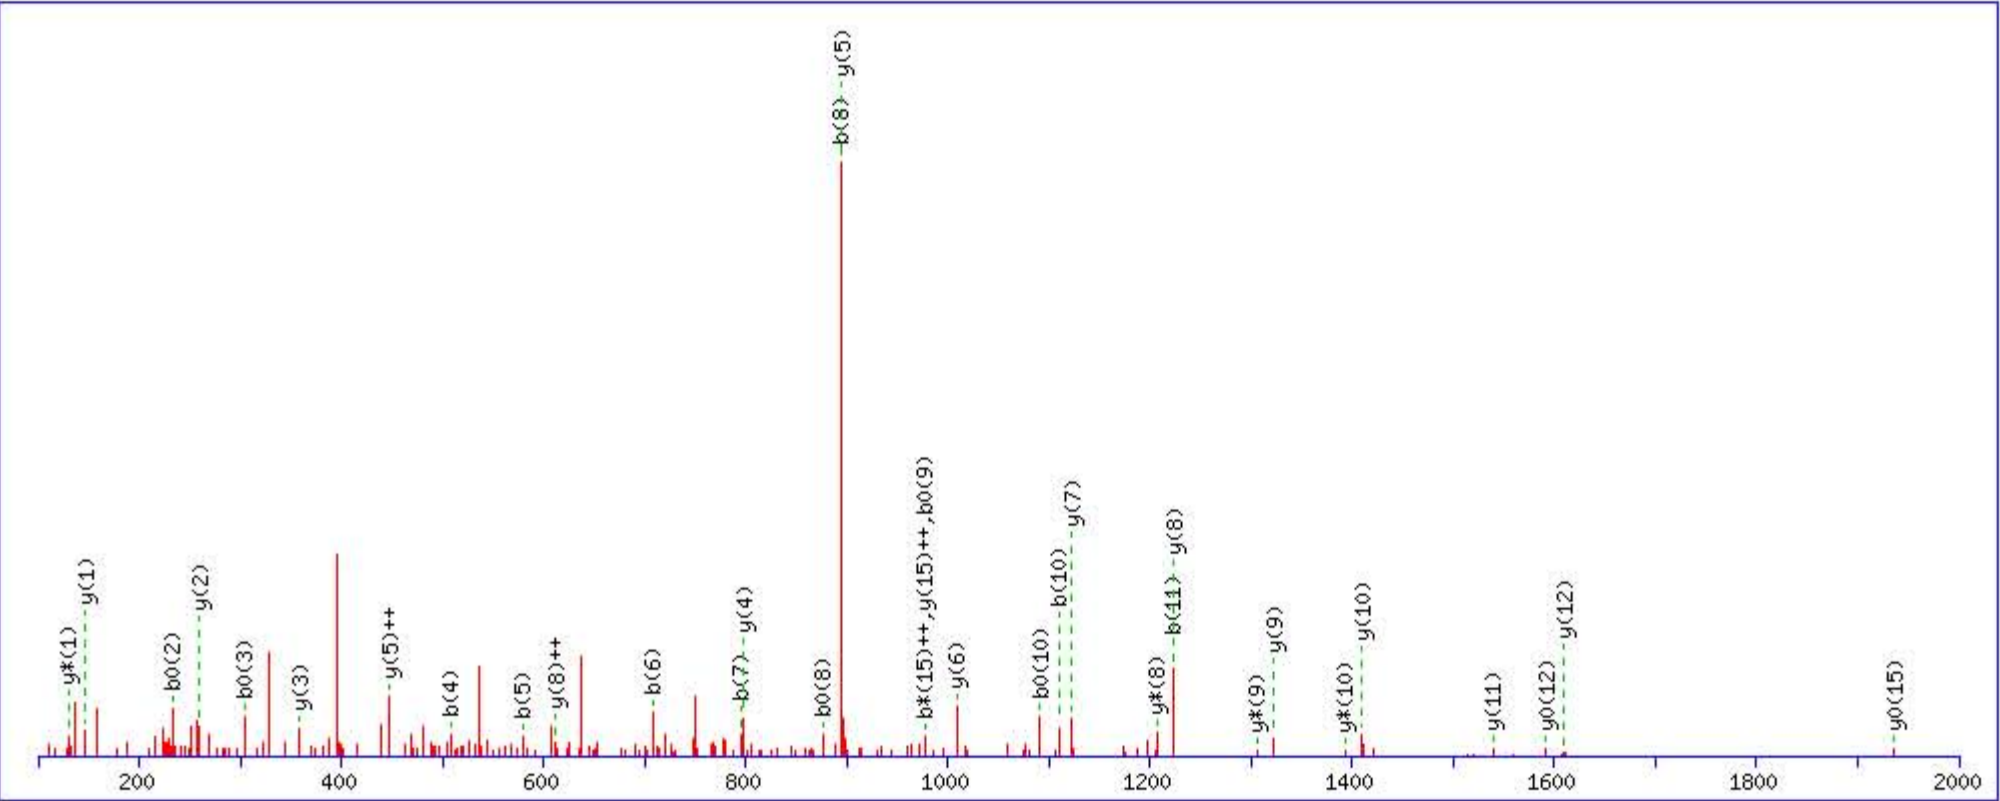

Monoisotopic mass of neutral peptide Mr(calc): 2116.102676  
Fixed modifications: Carbamidomethyl (C) (apply to specified residues or termini only)  
Variable modifications:  
Q13 : Biotin:Thermo-21345 (Q)  
Ions Score: 68 Expect: 4.3e-006  
Matches : 34/146 fragment ions using 59 most intense peaks [\(help\)](#)

| #  | b           | b <sup>++</sup> | b <sup>*</sup> | b <sup>*++</sup> | b <sup>0</sup> | b <sup>0++</sup> | Seq. | y           | y <sup>++</sup> | y <sup>*</sup> | y <sup>*++</sup> | y <sup>0</sup> | y <sup>0++</sup> | #  |
|----|-------------|-----------------|----------------|------------------|----------------|------------------|------|-------------|-----------------|----------------|------------------|----------------|------------------|----|
| 1  | 164.070605  | 82.538940       |                |                  |                |                  | Y    |             |                 |                |                  |                |                  | 16 |
| 2  | 251.102633  | 126.054954      |                |                  | 233.092068     | 117.049672       | S    | 1954.046646 | 977.526961      | 1937.020097    | 969.013687       | 1936.036081    | 968.521679       | 15 |
| 3  | 322.139747  | 161.573512      |                |                  | 304.129182     | 152.568229       | A    | 1867.014618 | 934.010947      | 1849.988069    | 925.497673       | 1849.004053    | 925.005665       | 14 |
| 4  | 508.219060  | 254.613168      |                |                  | 490.208495     | 245.607886       | W    | 1795.977504 | 898.492390      | 1778.950955    | 889.979116       | 1777.966939    | 889.487108       | 13 |
| 5  | 579.256174  | 290.131725      |                |                  | 561.245609     | 281.126443       | A    | 1609.898191 | 805.452734      | 1592.871642    | 796.939459       | 1591.887626    | 796.447451       | 12 |
| 6  | 708.298767  | 354.653022      |                |                  | 690.288202     | 345.647739       | E    | 1538.861077 | 769.934177      | 1521.834528    | 761.420902       | 1520.850512    | 760.928894       | 11 |
| 7  | 795.330795  | 398.169036      |                |                  | 777.320230     | 389.163753       | S    | 1409.818484 | 705.412880      | 1392.791935    | 696.899606       | 1391.807919    | 696.407598       | 10 |
| 8  | 894.399209  | 447.703243      |                |                  | 876.388644     | 438.697960       | V    | 1322.786456 | 661.896866      | 1305.759907    | 653.383592       | 1304.775891    | 652.891584       | 9  |
| 9  | 995.446888  | 498.227082      |                |                  | 977.436323     | 489.221800       | T    | 1223.718042 | 612.362659      | 1206.691493    | 603.849385       | 1205.707477    | 603.357377       | 8  |
| 10 | 1109.489815 | 555.248546      | 1092.463266    | 546.735271       | 1091.479250    | 546.243263       | N    | 1122.670363 | 561.838820      | 1105.643814    | 553.325545       |                |                  | 7  |
| 11 | 1222.573879 | 611.790578      | 1205.547330    | 603.277303       | 1204.563314    | 602.785295       | L    | 1008.627436 | 504.817356      | 991.600887     | 496.304082       |                |                  | 6  |
| 12 | 1319.626643 | 660.316960      | 1302.600094    | 651.803685       | 1301.616078    | 651.311677       | P    | 895.543372  | 448.275324      | 878.516823     | 439.762050       |                |                  | 5  |
| 13 | 1758.851969 | 879.929623      | 1741.825420    | 871.416348       | 1740.841404    | 870.924340       | Q    | 798.490608  | 399.748942      | 781.464059     | 391.235668       |                |                  | 4  |
| 14 | 1857.920383 | 929.463830      | 1840.893834    | 920.950555       | 1839.909818    | 920.458547       | V    | 359.265282  | 180.136279      | 342.238733     | 171.623004       |                |                  | 3  |
| 15 | 1971.004447 | 986.005862      | 1953.977898    | 977.492587       | 1952.993882    | 977.000579       | I    | 260.196868  | 130.602072      | 243.170319     | 122.088797       |                |                  | 2  |
| 16 |             |                 |                |                  |                |                  | K    | 147.112804  | 74.060040       | 130.086255     | 65.546765        |                |                  | 1  |

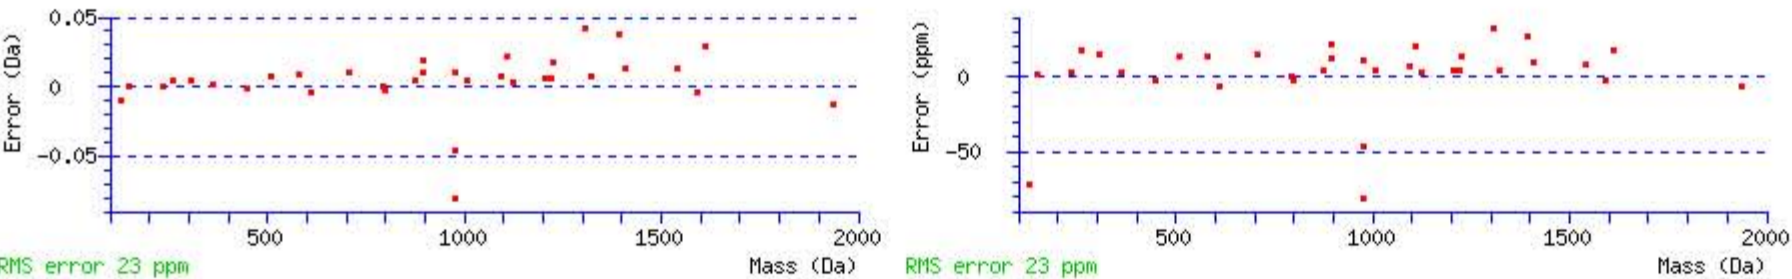

NCBI BLAST search of [YSAWAESVTNLPQVIK](#)  
(Parameters: blastp, nr protein database, expect=20000, no filter, PAM30)  
Other BLAST [web gateways](#)

All matches to this query

| Score | Mr(calc):   | Delta    | Sequence                         |
|-------|-------------|----------|----------------------------------|
| 67.9  | 2116.102676 | 0.012586 | <a href="#">YSAWAESVTNLPQVIK</a> |

MATRIX

SCIENCE

Mascot Search Results

Peptide View

MS/MS Fragmentation of **MPYECGPSLDVCAQDER**  
Found in **CO7\_HUMAN**, Complement component C7 OS=Homo sapiens GN=C7 PE=1 SV=2

Match to Query 51199: 2337.007482 from(780.009770,3+) rtinseconds(2112) index(6252)  
Title: Locus:1.1.1.2012.11 File:"2013-07-02 CLN FXIII 180 min 2nd F 1.wiff"  
Data file C:\Program Files (x86)\Matrix Science\Mascot Daemon\mgf\8 FXIII 180 min 2nd\mascot\_daemon\_merge.mgf

Click mouse within plot area to zoom in by factor of two about that point  
Or, 

Plot from

100

 to 

2000

 Da 

Full range

  
Label all possible matches ☐ Label matches used for scoring ☒

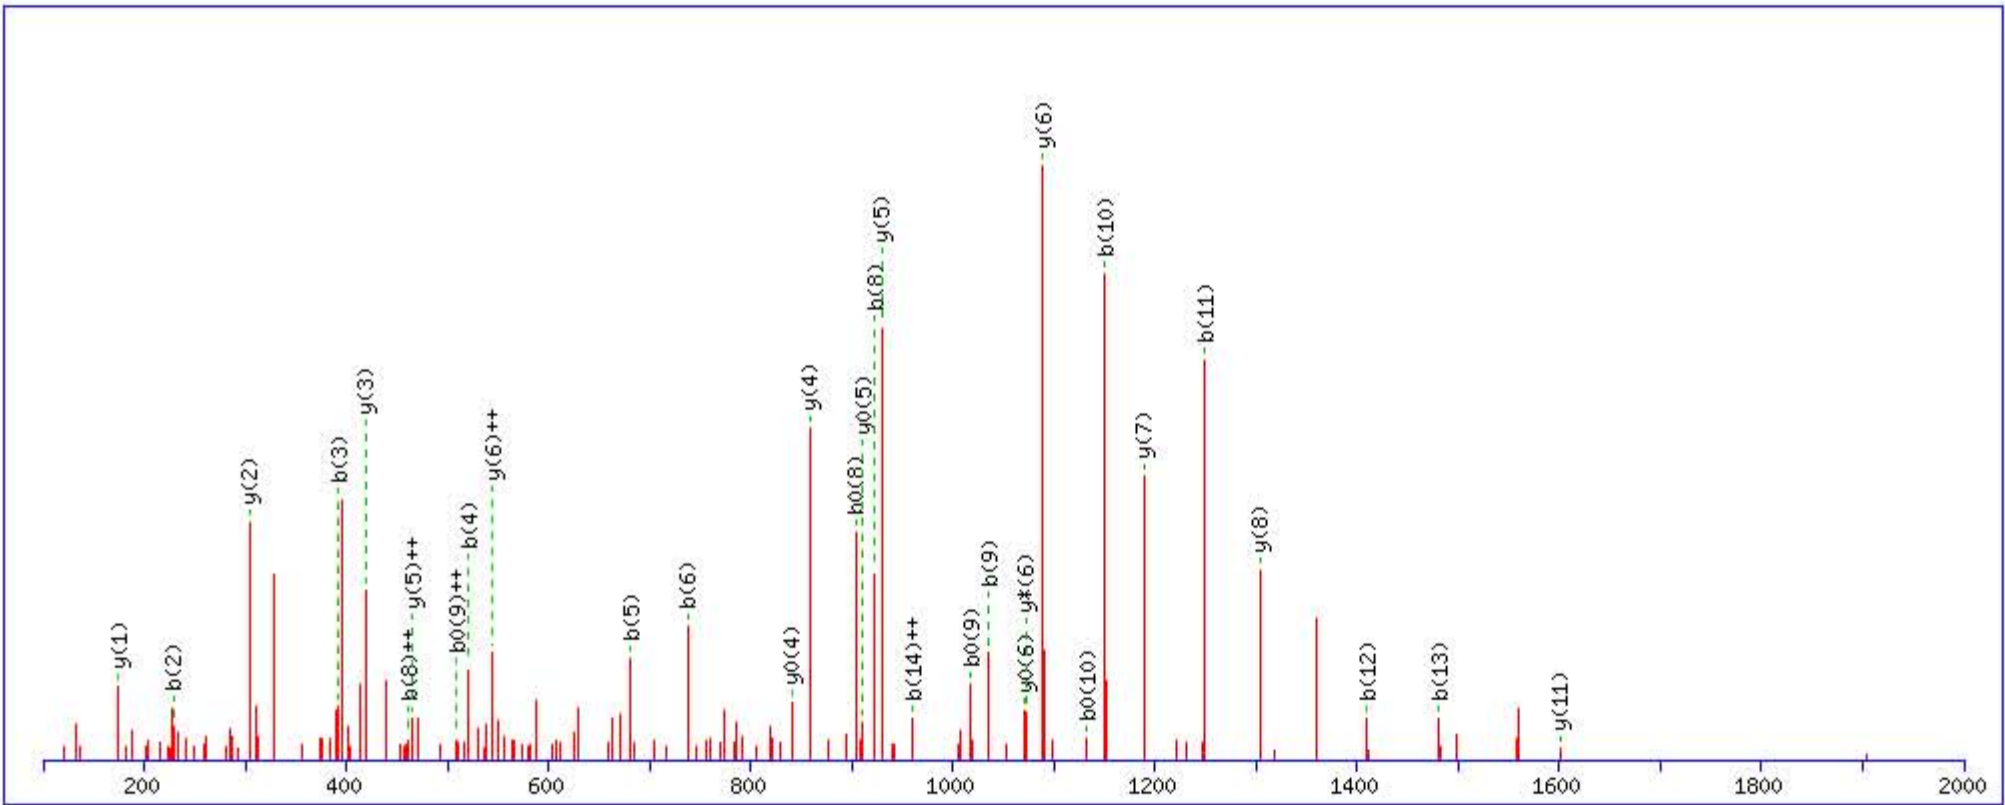

Monoisotopic mass of neutral peptide Mr(calc): 2336.989792  
Fixed modifications: Carbamidomethyl (C) (apply to specified residues or termini only)  
Variable modifications:  
Q14 : Biotin:Thermo-21345 (Q)  
Ions Score: 55 Expect: 1.4e-005  
Matches : 32/158 fragment ions using 69 most intense peaks [\(help\)](#)

| #  | b           | b <sup>++</sup> | b <sup>*</sup> | b <sup>*++</sup> | b <sup>0</sup> | b <sup>0++</sup> | Seq. | y           | y <sup>++</sup> | y <sup>*</sup> | y <sup>*++</sup> | y <sup>0</sup> | y <sup>0++</sup> | #  |
|----|-------------|-----------------|----------------|------------------|----------------|------------------|------|-------------|-----------------|----------------|------------------|----------------|------------------|----|
| 1  | 132.047761  | 66.527518       |                |                  |                |                  | M    |             |                 |                |                  |                |                  | 17 |
| 2  | 229.100525  | 115.053900      |                |                  |                |                  | P    | 2206.956589 | 1103.981932     | 2189.930040    | 1095.468658      | 2188.946024    | 1094.976650      | 16 |
| 3  | 392.163854  | 196.585565      |                |                  |                |                  | Y    | 2109.903825 | 1055.455550     | 2092.877276    | 1046.942276      | 2091.893260    | 1046.450268      | 15 |
| 4  | 521.206447  | 261.106862      |                |                  | 503.195882     | 252.101579       | E    | 1946.840496 | 973.923886      | 1929.813947    | 965.410612       | 1928.829931    | 964.918604       | 14 |
| 5  | 681.237096  | 341.122186      |                |                  | 663.226531     | 332.116904       | C    | 1817.797903 | 909.402590      | 1800.771354    | 900.889315       | 1799.787338    | 900.397307       | 13 |
| 6  | 738.258560  | 369.632918      |                |                  | 720.247995     | 360.627636       | G    | 1657.767254 | 829.387265      | 1640.740705    | 820.873991       | 1639.756689    | 820.381983       | 12 |
| 7  | 835.311324  | 418.159300      |                |                  | 817.300759     | 409.154018       | P    | 1600.745790 | 800.876533      | 1583.719241    | 792.363259       | 1582.735225    | 791.871251       | 11 |
| 8  | 922.343352  | 461.675314      |                |                  | 904.332787     | 452.670032       | S    | 1503.693026 | 752.350151      | 1486.666477    | 743.836877       | 1485.682461    | 743.344869       | 10 |
| 9  | 1035.427416 | 518.217346      |                |                  | 1017.416851    | 509.212064       | L    | 1416.660998 | 708.834137      | 1399.634449    | 700.320863       | 1398.650433    | 699.828855       | 9  |
| 10 | 1150.454359 | 575.730818      |                |                  | 1132.443794    | 566.725535       | D    | 1303.576934 | 652.292105      | 1286.550385    | 643.778831       | 1285.566369    | 643.286823       | 8  |
| 11 | 1249.522773 | 625.265025      |                |                  | 1231.512208    | 616.259742       | V    | 1188.549991 | 594.778634      | 1171.523442    | 586.265359       | 1170.539426    | 585.773351       | 7  |
| 12 | 1409.553422 | 705.280349      |                |                  | 1391.542857    | 696.275067       | C    | 1089.481577 | 545.244427      | 1072.455028    | 536.731152       | 1071.471012    | 536.239144       | 6  |
| 13 | 1480.590536 | 740.798906      |                |                  | 1462.579971    | 731.793624       | A    | 929.450928  | 465.229102      | 912.424379     | 456.715827       | 911.440363     | 456.223819       | 5  |
| 14 | 1919.815862 | 960.411569      | 1902.789313    | 951.898295       | 1901.805297    | 951.406287       | Q    | 858.413814  | 429.710545      | 841.387265     | 421.197271       | 840.403249     | 420.705263       | 4  |
| 15 | 2034.842805 | 1017.925041     | 2017.816256    | 1009.411766      | 2016.832240    | 1008.919758      | D    | 419.188488  | 210.097882      | 402.161939     | 201.584607       | 401.177923     | 201.092599       | 3  |
| 16 | 2163.885398 | 1082.446337     | 2146.858849    | 1073.933062      | 2145.874833    | 1073.441054      | E    | 304.161545  | 152.584410      | 287.134996     | 144.071136       | 286.150980     | 143.579128       | 2  |
| 17 |             |                 |                |                  |                |                  | R    | 175.118952  | 88.063114       | 158.092403     | 79.549839        |                |                  | 1  |

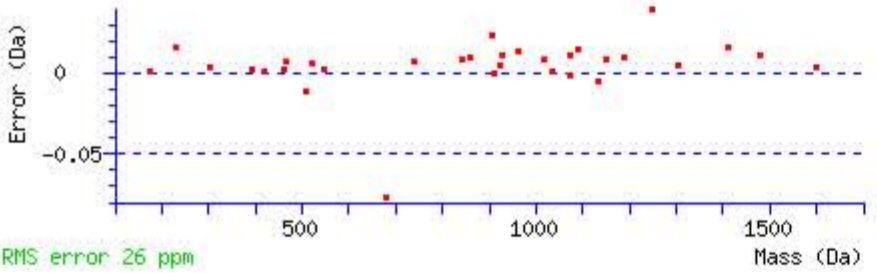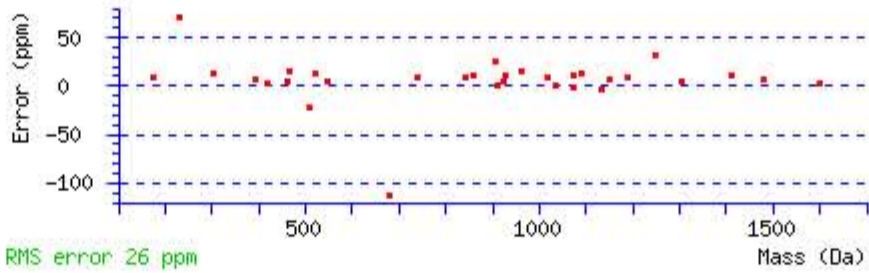

NCBI BLAST search of [MPYECGPSLDVCAQDER](#)  
(Parameters: blastp, nr protein database, expect=20000, no filter, PAM30)  
Other BLAST [web gateways](#)

All matches to this query

| Score | Mr(calc):   | Delta    | Sequence                          |
|-------|-------------|----------|-----------------------------------|
| 54.6  | 2336.989792 | 0.017690 | <a href="#">MPYECGPSLDVCAQDER</a> |

M

A

T

R

I

X

S

C

I

E

N

C

E

Mascot Search Results

Peptide View

MS/MS Fragmentation of **LIDQYGTHYLQSGSLGGEYR**  
Found in **CO7\_HUMAN**, Complement component C7 OS=Homo sapiens GN=C7 PE=1 SV=2

Match to Query 55108: 2567.271176 from(642.825070,4+) rtinseconds(2123) index(6302)  
Title: Locus:1.1.1.2016.5 File:"2013-07-02 CLN FXIII 180 min 2nd F 1.wiff"  
Data file C:\Program Files (x86)\Matrix Science\Mascot Daemon\mgf\8 FXIII 180 min 2nd\mascot\_daemon\_merge.mgf

Click mouse within plot area to zoom in by factor of two about that point  
Or,   to  Da   
Label all possible matches ☐ Label matches used for scoring ☒

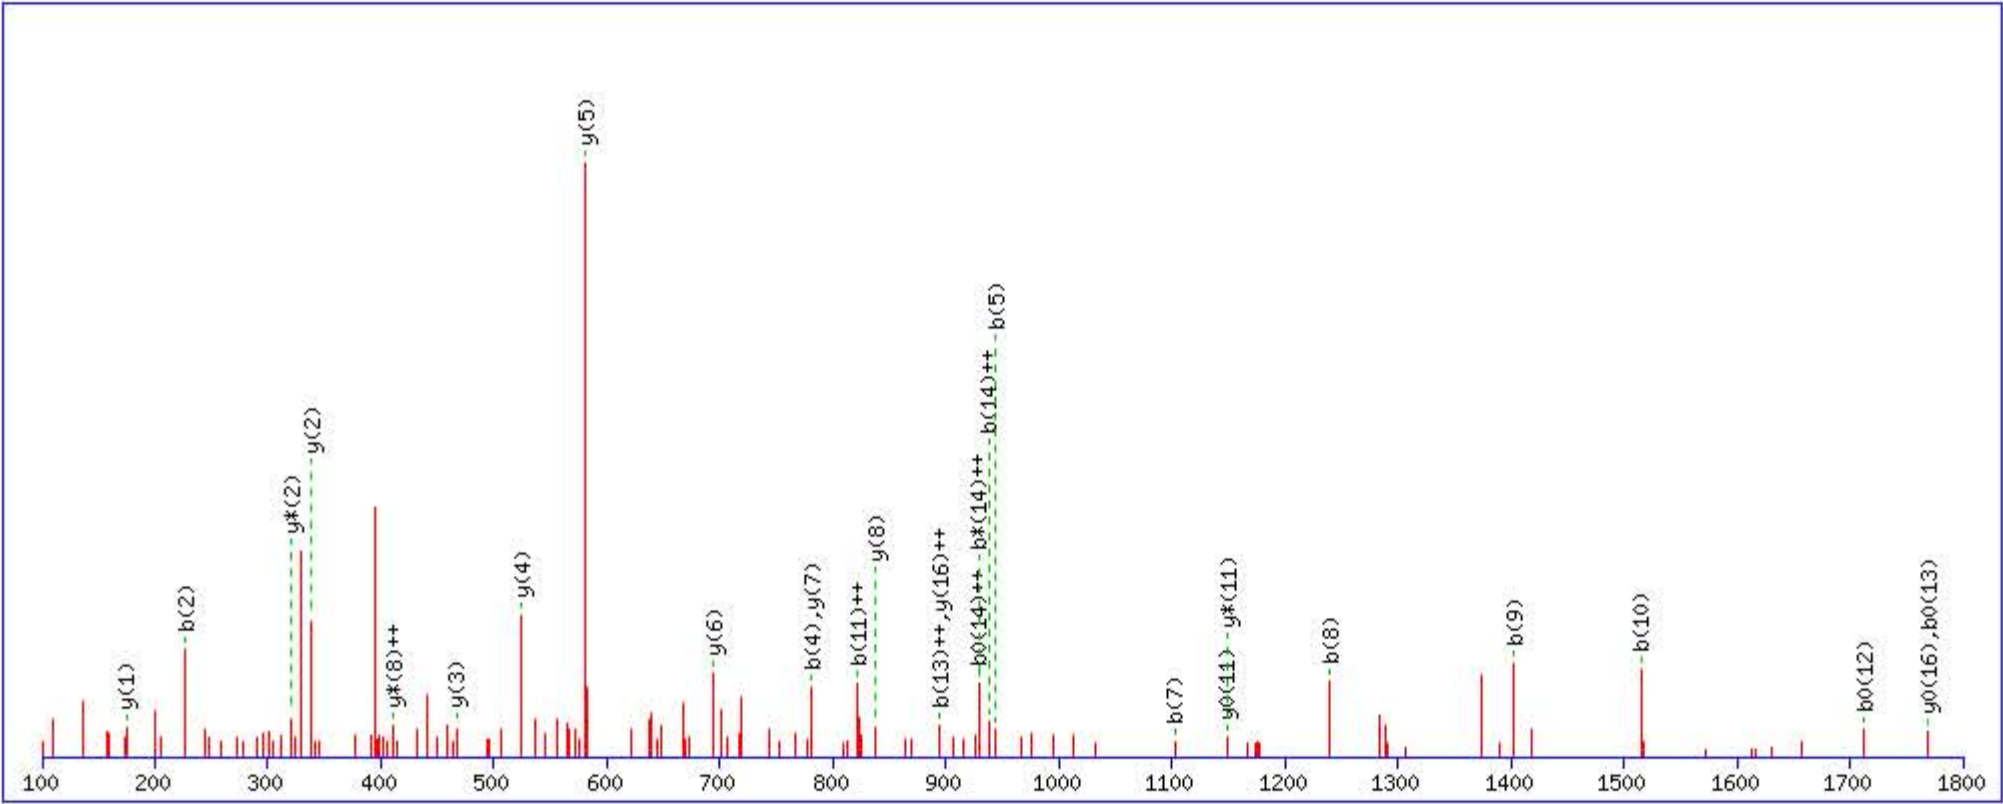

Monoisotopic mass of neutral peptide Mr(calc): 2567.247849  
Fixed modifications: Carbamidomethyl (C) (apply to specified residues or termini only)  
Variable modifications:  
Q4 : Biotin:Thermo-21345 (Q)  
Ions Score: 38 Expect: 0.004  
Matches : 28/214 fragment ions using 60 most intense peaks [\(help\)](#)

| #  | b           | b <sup>++</sup> | b <sup>*</sup> | b <sup>*++</sup> | b <sup>0</sup> | b <sup>0++</sup> | Seq. | y           | y <sup>++</sup> | y <sup>*</sup> | y <sup>*++</sup> | y <sup>0</sup> | y <sup>0++</sup> | #  |
|----|-------------|-----------------|----------------|------------------|----------------|------------------|------|-------------|-----------------|----------------|------------------|----------------|------------------|----|
| 1  | 114.091340  | 57.549308       |                |                  |                |                  | L    |             |                 |                |                  |                |                  | 20 |
| 2  | 227.175404  | 114.091340      |                |                  |                |                  | I    | 2455.171074 | 1228.089175     | 2438.144525    | 1219.575900      | 2437.160509    | 1219.083892      | 19 |
| 3  | 342.202347  | 171.604811      |                |                  | 324.191782     | 162.599529       | D    | 2342.087010 | 1171.547143     | 2325.060461    | 1163.033868      | 2324.076445    | 1162.541860      | 18 |
| 4  | 781.427673  | 391.217475      | 764.401124     | 382.704200       | 763.417108     | 382.212192       | Q    | 2227.060067 | 1114.033671     | 2210.033518    | 1105.520397      | 2209.049502    | 1105.028389      | 17 |
| 5  | 944.491002  | 472.749139      | 927.464453     | 464.235864       | 926.480437     | 463.743856       | Y    | 1787.834741 | 894.421009      | 1770.808192    | 885.907734       | 1769.824176    | 885.415726       | 16 |
| 6  | 1001.512466 | 501.259871      | 984.485917     | 492.746597       | 983.501901     | 492.254589       | G    | 1624.771412 | 812.889344      | 1607.744863    | 804.376070       | 1606.760847    | 803.884062       | 15 |
| 7  | 1102.560145 | 551.783710      | 1085.533596    | 543.270436       | 1084.549580    | 542.778428       | T    | 1567.749948 | 784.378612      | 1550.723399    | 775.865338       | 1549.739383    | 775.373330       | 14 |
| 8  | 1239.619057 | 620.313166      | 1222.592508    | 611.799892       | 1221.608492    | 611.307884       | H    | 1466.702269 | 733.854773      | 1449.675720    | 725.341498       | 1448.691704    | 724.849490       | 13 |
| 9  | 1402.682386 | 701.844831      | 1385.655837    | 693.331557       | 1384.671821    | 692.839548       | Y    | 1329.643357 | 665.325317      | 1312.616808    | 656.812042       | 1311.632792    | 656.320034       | 12 |
| 10 | 1515.766450 | 758.386863      | 1498.739901    | 749.873588       | 1497.755885    | 749.381580       | L    | 1166.580028 | 583.793652      | 1149.553479    | 575.280378       | 1148.569463    | 574.788370       | 11 |
| 11 | 1643.825028 | 822.416152      | 1626.798479    | 813.902878       | 1625.814463    | 813.410869       | Q    | 1053.495964 | 527.251620      | 1036.469415    | 518.738346       | 1035.485399    | 518.246338       | 10 |
| 12 | 1730.857056 | 865.932166      | 1713.830507    | 857.418892       | 1712.846491    | 856.926884       | S    | 925.437386  | 463.222331      | 908.410837     | 454.709057       | 907.426821     | 454.217049       | 9  |
| 13 | 1787.878520 | 894.442898      | 1770.851971    | 885.929624       | 1769.867955    | 885.437615       | G    | 838.405358  | 419.706317      | 821.378809     | 411.193043       | 820.394793     | 410.701035       | 8  |
| 14 | 1874.910548 | 937.958912      | 1857.883999    | 929.445638       | 1856.899983    | 928.953630       | S    | 781.383894  | 391.195585      | 764.357345     | 382.682311       | 763.373329     | 382.190303       | 7  |
| 15 | 1987.994612 | 994.500944      | 1970.968063    | 985.987670       | 1969.984047    | 985.495661       | L    | 694.351866  | 347.679571      | 677.325317     | 339.166297       | 676.341301     | 338.674289       | 6  |
| 16 | 2045.016076 | 1023.011676     | 2027.989527    | 1014.498402      | 2027.005511    | 1014.006393      | G    | 581.267802  | 291.137539      | 564.241253     | 282.624265       | 563.257237     | 282.132257       | 5  |
| 17 | 2102.037540 | 1051.522408     | 2085.010991    | 1043.009133      | 2084.026975    | 1042.517125      | G    | 524.246338  | 262.626807      | 507.219789     | 254.113533       | 506.235773     | 253.621525       | 4  |
| 18 | 2231.080133 | 1116.043704     | 2214.053584    | 1107.530430      | 2213.069568    | 1107.038422      | E    | 467.224874  | 234.116075      | 450.198325     | 225.602801       | 449.214309     | 225.110793       | 3  |
| 19 | 2394.143462 | 1197.575369     | 2377.116913    | 1189.062094      | 2376.132897    | 1188.570086      | Y    | 338.182281  | 169.594778      | 321.155732     | 161.081504       |                |                  | 2  |
| 20 |             |                 |                |                  |                |                  | R    | 175.118952  | 88.063114       | 158.092403     | 79.549839        |                |                  | 1  |

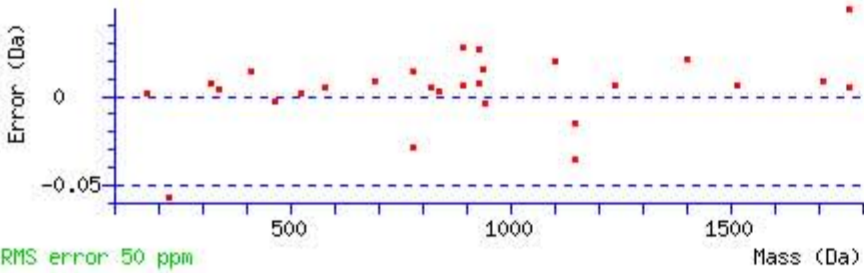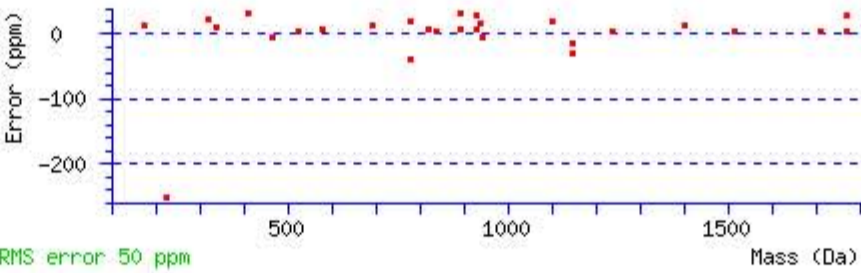

NCBI BLAST search of [LIDQYGTHYLQSGSLGGEYR](#)  
(Parameters: blastp, nr protein database, expect=20000, no filter, PAM30)  
Other BLAST [web gateways](#)

All matches to this query

| Score | Mr(calc):   | Delta    | Sequence                             |
|-------|-------------|----------|--------------------------------------|
| 38.3  | 2567.247849 | 0.023327 | <a href="#">LIDQYGTHYLQSGSLGGEYR</a> |
| 12.0  | 2567.247849 | 0.023327 | <a href="#">LIDQYGTHYLQSGSLGGEYR</a> |

M

A

T

R

I

X

S

C

I

E

N

C

E

Mascot Search Results

Peptide View

MS/MS Fragmentation of **LIDQYGTHYLQSGSLGGEYR**  
Found in **CO7\_HUMAN**, Complement component C7 OS=Homo sapiens GN=C7 PE=1 SV=2

Match to Query 55109: 2567.275902 from(856.765910,3+) rtinseconds(2104) index(6210)  
Title: Locus:1.1.1.2009.12 File:"2013-07-02 CLN FXIII 180 min 2nd F 1.wiff"  
Data file C:\Program Files (x86)\Matrix Science\Mascot Daemon\mgf\8 FXIII 180 min 2nd\mascot\_daemon\_merge.mgf

Click mouse within plot area to zoom in by factor of two about that point  
Or, 

Plot from

0

 to 

2600

 Da 

Full range

  
Label all possible matches ☐ Label matches used for scoring ☒

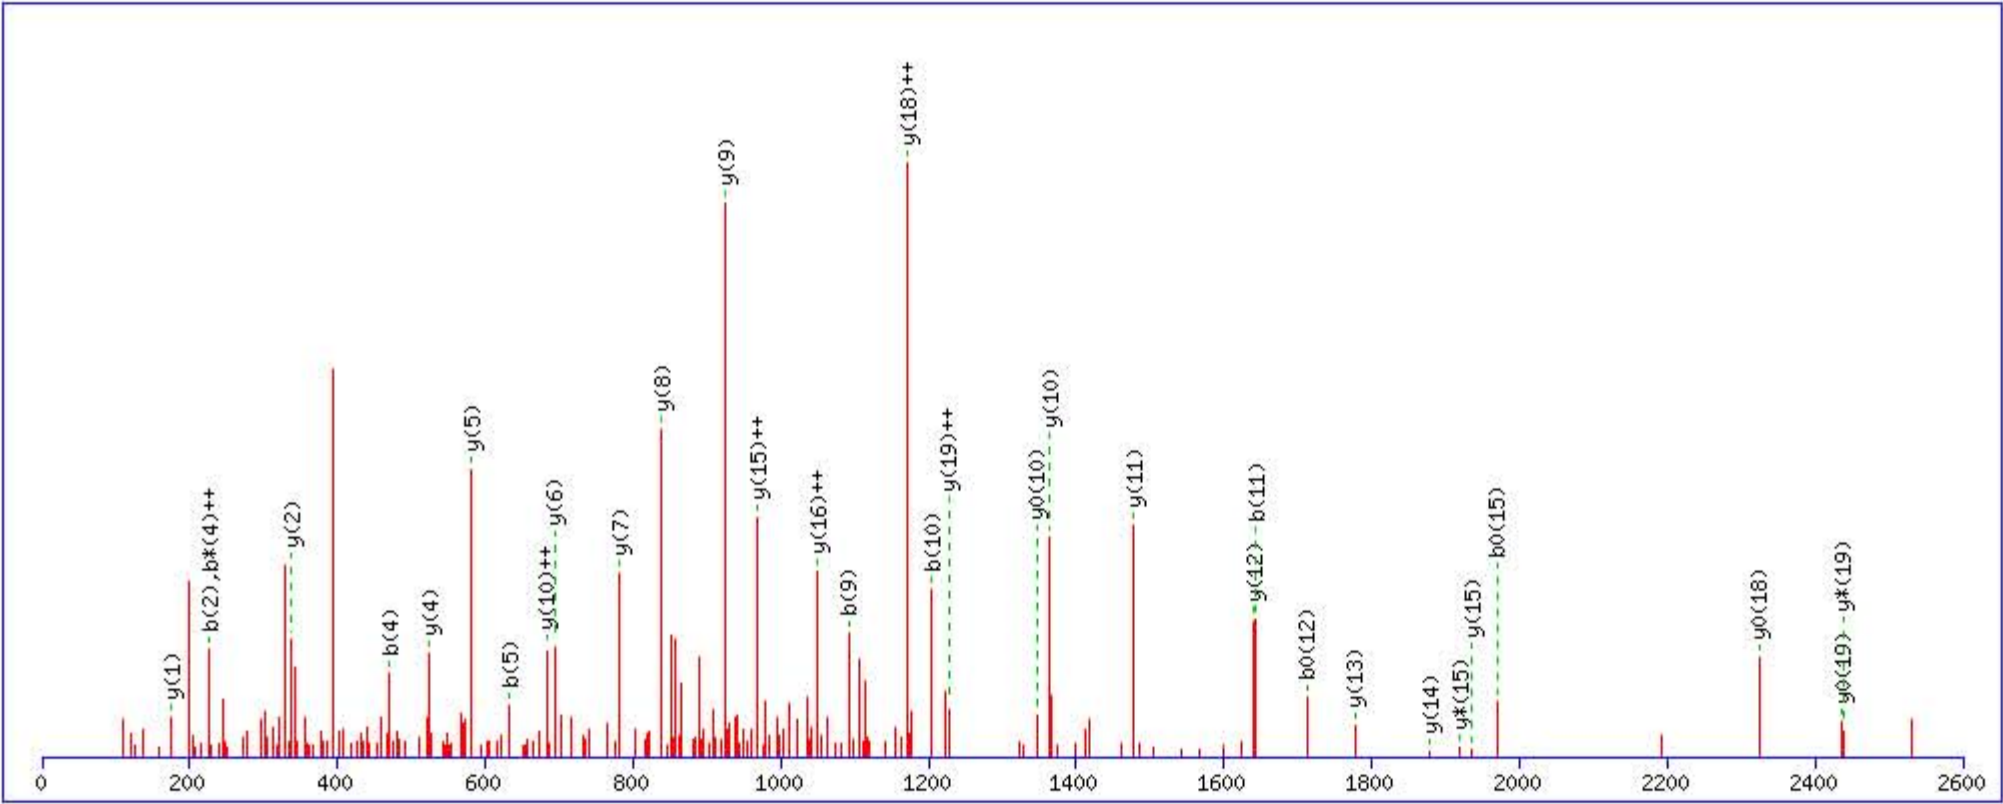

Monoisotopic mass of neutral peptide Mr(calc): 2567.247849  
Fixed modifications: Carbamidomethyl (C) (apply to specified residues or termini only)  
Variable modifications:  
Q11 : Biotin:Thermo-21345 (Q)  
Ions Score: 82 Expect: 1.9e-007  
Matches : 33/214 fragment ions using 60 most intense peaks [\(help\)](#)

| #  | b           | b <sup>++</sup> | b <sup>*</sup> | b <sup>*++</sup> | b <sup>0</sup> | b <sup>0++</sup> | Seq. | y           | y <sup>++</sup> | y <sup>*</sup> | y <sup>*++</sup> | y <sup>0</sup> | y <sup>0++</sup> | #  |
|----|-------------|-----------------|----------------|------------------|----------------|------------------|------|-------------|-----------------|----------------|------------------|----------------|------------------|----|
| 1  | 114.091340  | 57.549308       |                |                  |                |                  | L    |             |                 |                |                  |                |                  | 20 |
| 2  | 227.175404  | 114.091340      |                |                  |                |                  | I    | 2455.171074 | 1228.089175     | 2438.144525    | 1219.575900      | 2437.160509    | 1219.083892      | 19 |
| 3  | 342.202347  | 171.604811      |                |                  | 324.191782     | 162.599529       | D    | 2342.087010 | 1171.547143     | 2325.060461    | 1163.033868      | 2324.076445    | 1162.541860      | 18 |
| 4  | 470.260925  | 235.634100      | 453.234376     | 227.120826       | 452.250360     | 226.628818       | Q    | 2227.060067 | 1114.033671     | 2210.033518    | 1105.520397      | 2209.049502    | 1105.028389      | 17 |
| 5  | 633.324254  | 317.165765      | 616.297705     | 308.652491       | 615.313689     | 308.160483       | Y    | 2099.001489 | 1050.004382     | 2081.974940    | 1041.491108      | 2080.990924    | 1040.999100      | 16 |
| 6  | 690.345718  | 345.676497      | 673.319169     | 337.163223       | 672.335153     | 336.671215       | G    | 1935.938160 | 968.472718      | 1918.911611    | 959.959444       | 1917.927595    | 959.467436       | 15 |
| 7  | 791.393397  | 396.200337      | 774.366848     | 387.687062       | 773.382832     | 387.195054       | T    | 1878.916696 | 939.961986      | 1861.890147    | 931.448712       | 1860.906131    | 930.956704       | 14 |
| 8  | 928.452309  | 464.729793      | 911.425760     | 456.216518       | 910.441744     | 455.724510       | H    | 1777.869017 | 889.438147      | 1760.842468    | 880.924872       | 1759.858452    | 880.432864       | 13 |
| 9  | 1091.515638 | 546.261457      | 1074.489089    | 537.748183       | 1073.505073    | 537.256175       | Y    | 1640.810105 | 820.908691      | 1623.783556    | 812.395416       | 1622.799540    | 811.903408       | 12 |
| 10 | 1204.599702 | 602.803489      | 1187.573153    | 594.290215       | 1186.589137    | 593.798206       | L    | 1477.746776 | 739.377026      | 1460.720227    | 730.863752       | 1459.736211    | 730.371744       | 11 |
| 11 | 1643.825028 | 822.416152      | 1626.798479    | 813.902878       | 1625.814463    | 813.410869       | Q    | 1364.662712 | 682.834994      | 1347.636163    | 674.321720       | 1346.652147    | 673.829712       | 10 |
| 12 | 1730.857056 | 865.932166      | 1713.830507    | 857.418892       | 1712.846491    | 856.926884       | S    | 925.437386  | 463.222331      | 908.410837     | 454.709057       | 907.426821     | 454.217049       | 9  |
| 13 | 1787.878520 | 894.442898      | 1770.851971    | 885.929624       | 1769.867955    | 885.437615       | G    | 838.405358  | 419.706317      | 821.378809     | 411.193043       | 820.394793     | 410.701035       | 8  |
| 14 | 1874.910548 | 937.958912      | 1857.883999    | 929.445638       | 1856.899983    | 928.953630       | S    | 781.383894  | 391.195585      | 764.357345     | 382.682311       | 763.373329     | 382.190303       | 7  |
| 15 | 1987.994612 | 994.500944      | 1970.968063    | 985.987670       | 1969.984047    | 985.495661       | L    | 694.351866  | 347.679571      | 677.325317     | 339.166297       | 676.341301     | 338.674289       | 6  |
| 16 | 2045.016076 | 1023.011676     | 2027.989527    | 1014.498402      | 2027.005511    | 1014.006393      | G    | 581.267802  | 291.137539      | 564.241253     | 282.624265       | 563.257237     | 282.132257       | 5  |
| 17 | 2102.037540 | 1051.522408     | 2085.010991    | 1043.009133      | 2084.026975    | 1042.517125      | G    | 524.246338  | 262.626807      | 507.219789     | 254.113533       | 506.235773     | 253.621525       | 4  |
| 18 | 2231.080133 | 1116.043704     | 2214.053584    | 1107.530430      | 2213.069568    | 1107.038422      | E    | 467.224874  | 234.116075      | 450.198325     | 225.602801       | 449.214309     | 225.110793       | 3  |
| 19 | 2394.143462 | 1197.575369     | 2377.116913    | 1189.062094      | 2376.132897    | 1188.570086      | Y    | 338.182281  | 169.594778      | 321.155732     | 161.081504       |                |                  | 2  |
| 20 |             |                 |                |                  |                |                  | R    | 175.118952  | 88.063114       | 158.092403     | 79.549839        |                |                  | 1  |

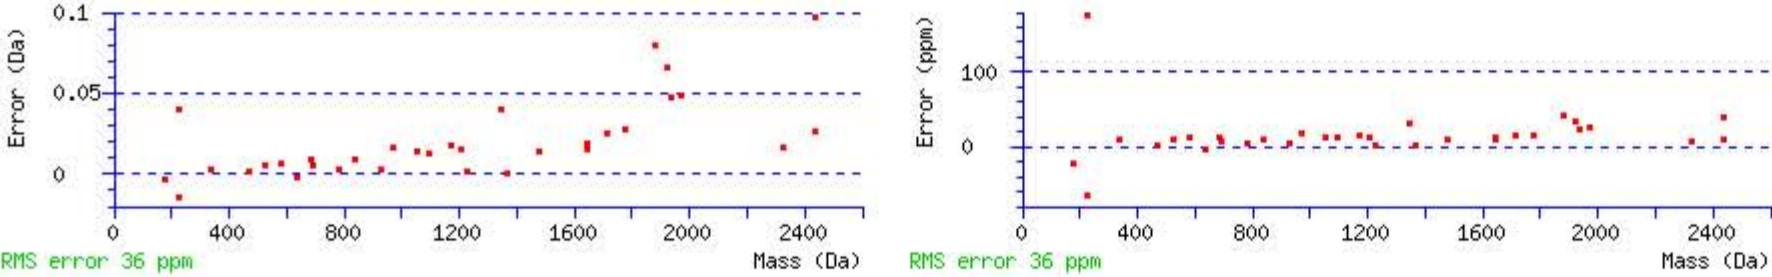

NCBI BLAST search of [LIDQYGTHYLQSGSLGGEYR](#)  
(Parameters: blastp, nr protein database, expect=20000, no filter, PAM30)  
Other BLAST [web gateways](#)

All matches to this query

| Score | Mr(calc):   | Delta    | Sequence                             |
|-------|-------------|----------|--------------------------------------|
| 81.6  | 2567.247849 | 0.028053 | <a href="#">LIDQYGTHYLQSGSLGGEYR</a> |
| 20.5  | 2567.247849 | 0.028053 | <a href="#">LIDQYGTHYLQSGSLGGEYR</a> |

M

A

T

R

I

X

S

C

I

E

N

C

E

Mascot Search Results

Peptide View

MS/MS Fragmentation of **SCVGETTESTQCEDEELEHLR**  
Found in **CO7\_HUMAN**, Complement component C7 OS=Homo sapiens GN=C7 PE=1 SV=2

Match to Query 57841: 2819.219936 from(705.812260,4+) rtinseconds(1896) index(4924)  
Title: Locus:1.1.1.1937.24 File:"2013-07-02 CLN FXIII 180 min 2nd F 1.wiff"  
Data file C:\Program Files (x86)\Matrix Science\Mascot Daemon\mgf\8 FXIII 180 min 2nd\mascot\_daemon\_merge.mgf

Click mouse within plot area to zoom in by factor of two about that point  
Or, 

Plot from

0

 to 

2200

 Da 

Full range

  
Label all possible matches ☐ Label matches used for scoring ☒

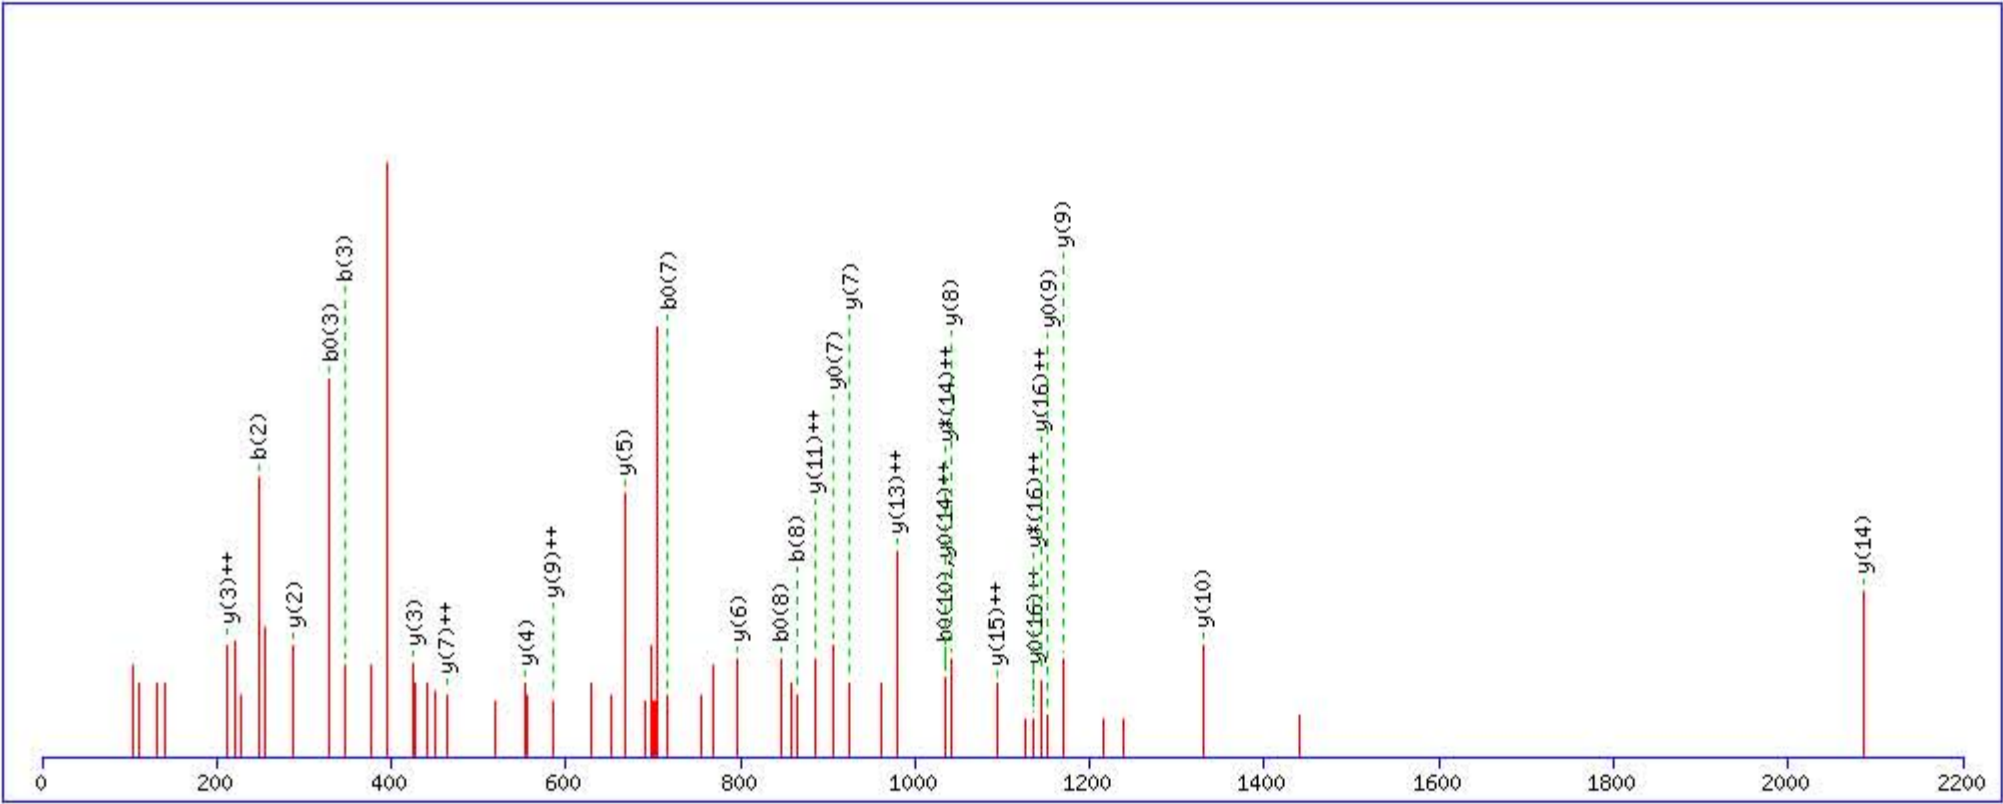

Monoisotopic mass of neutral peptide Mr(calc): 2819.204803  
Fixed modifications: Carbamidomethyl (C) (apply to specified residues or termini only)  
Variable modifications:  
Q11 : Biotin:Thermo-21345 (Q)  
Ions Score: 44 Expect: 0.00016  
Matches : 30/214 fragment ions using 62 most intense peaks [\(help\)](#)

| #  | b           | b <sup>++</sup> | b <sup>*</sup> | b <sup>*++</sup> | b <sup>0</sup> | b <sup>0++</sup> | Seq. | y           | y <sup>++</sup> | y <sup>*</sup> | y <sup>*++</sup> | y <sup>0</sup> | y <sup>0++</sup> | #  |
|----|-------------|-----------------|----------------|------------------|----------------|------------------|------|-------------|-----------------|----------------|------------------|----------------|------------------|----|
| 1  | 88.039304   | 44.523290       |                |                  | 70.028739      | 35.518008        | S    |             |                 |                |                  |                |                  | 21 |
| 2  | 248.069953  | 124.538614      |                |                  | 230.059388     | 115.533332       | C    | 2733.180060 | 1367.093668     | 2716.153511    | 1358.580393      | 2715.169495    | 1358.088385      | 20 |
| 3  | 347.138367  | 174.072822      |                |                  | 329.127802     | 165.067539       | V    | 2573.149411 | 1287.078343     | 2556.122862    | 1278.565069      | 2555.138846    | 1278.073061      | 19 |
| 4  | 404.159831  | 202.583553      |                |                  | 386.149266     | 193.578271       | G    | 2474.080997 | 1237.544136     | 2457.054448    | 1229.030862      | 2456.070432    | 1228.538854      | 18 |
| 5  | 533.202424  | 267.104850      |                |                  | 515.191859     | 258.099568       | E    | 2417.059533 | 1209.033404     | 2400.032984    | 1200.520130      | 2399.048968    | 1200.028122      | 17 |
| 6  | 634.250103  | 317.628690      |                |                  | 616.239538     | 308.623407       | T    | 2288.016940 | 1144.512108     | 2270.990391    | 1135.998833      | 2270.006375    | 1135.506825      | 16 |
| 7  | 735.297782  | 368.152529      |                |                  | 717.287217     | 359.147247       | T    | 2186.969261 | 1093.988268     | 2169.942712    | 1085.474994      | 2168.958696    | 1084.982986      | 15 |
| 8  | 864.340375  | 432.673826      |                |                  | 846.329810     | 423.668543       | E    | 2085.921582 | 1043.464429     | 2068.895033    | 1034.951154      | 2067.911017    | 1034.459146      | 14 |
| 9  | 951.372403  | 476.189840      |                |                  | 933.361838     | 467.184557       | S    | 1956.878989 | 978.943133      | 1939.852440    | 970.429858       | 1938.868424    | 969.937850       | 13 |
| 10 | 1052.420082 | 526.713679      |                |                  | 1034.409517    | 517.708397       | T    | 1869.846961 | 935.427119      | 1852.820412    | 926.913844       | 1851.836396    | 926.421836       | 12 |
| 11 | 1491.645408 | 746.326342      | 1474.618859    | 737.813068       | 1473.634843    | 737.321060       | Q    | 1768.799282 | 884.903279      | 1751.772733    | 876.390005       | 1750.788717    | 875.897997       | 11 |
| 12 | 1651.676057 | 826.341667      | 1634.649508    | 817.828392       | 1633.665492    | 817.336384       | C    | 1329.573956 | 665.290616      | 1312.547407    | 656.777342       | 1311.563391    | 656.285334       | 10 |
| 13 | 1780.718650 | 890.862963      | 1763.692101    | 882.349689       | 1762.708085    | 881.857681       | E    | 1169.543307 | 585.275292      | 1152.516758    | 576.762017       | 1151.532742    | 576.270009       | 9  |
| 14 | 1895.745593 | 948.376435      | 1878.719044    | 939.863160       | 1877.735028    | 939.371152       | D    | 1040.500714 | 520.753995      | 1023.474165    | 512.240721       | 1022.490149    | 511.748713       | 8  |
| 15 | 2024.788186 | 1012.897731     | 2007.761637    | 1004.384457      | 2006.777621    | 1003.892449      | E    | 925.473771  | 463.240524      | 908.447222     | 454.727249       | 907.463206     | 454.235241       | 7  |
| 16 | 2153.830779 | 1077.419027     | 2136.804230    | 1068.905753      | 2135.820214    | 1068.413745      | E    | 796.431178  | 398.719227      | 779.404629     | 390.205953       | 778.420613     | 389.713945       | 6  |
| 17 | 2266.914843 | 1133.961059     | 2249.888294    | 1125.447785      | 2248.904278    | 1124.955777      | L    | 667.388585  | 334.197931      | 650.362036     | 325.684656       | 649.378020     | 325.192648       | 5  |
| 18 | 2395.957436 | 1198.482356     | 2378.930887    | 1189.969081      | 2377.946871    | 1189.477074      | E    | 554.304521  | 277.655899      | 537.277972     | 269.142624       | 536.293956     | 268.650616       | 4  |
| 19 | 2533.016348 | 1267.011812     | 2515.989799    | 1258.498537      | 2515.005783    | 1258.006529      | H    | 425.261928  | 213.134602      | 408.235379     | 204.621328       |                |                  | 3  |
| 20 | 2646.100412 | 1323.553844     | 2629.073863    | 1315.040569      | 2628.089847    | 1314.548562      | L    | 288.203016  | 144.605146      | 271.176467     | 136.091872       |                |                  | 2  |
| 21 |             |                 |                |                  |                |                  | R    | 175.118952  | 88.063114       | 158.092403     | 79.549839        |                |                  | 1  |

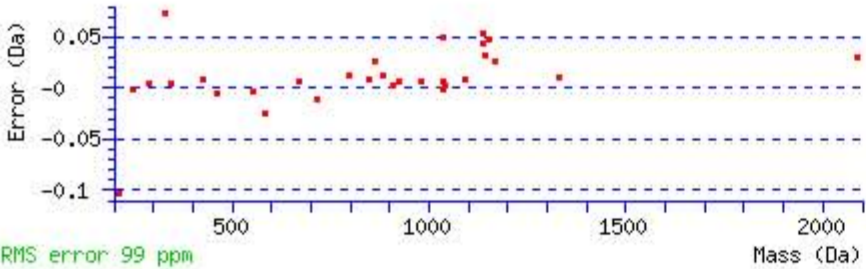

NCBI BLAST search of [SCVGETTESTQCEDEELEHLR](#)  
(Parameters: blastp, nr protein database, expect=20000, no filter, PAM30)  
Other BLAST [web gateways](#)

All matches to this query

| Score | Mr(calc):   | Delta    | Sequence                              |
|-------|-------------|----------|---------------------------------------|
| 44.3  | 2819.204803 | 0.015133 | <a href="#">SCVGETTESTQCEDEELEHLR</a> |

MATRIX

SCIENCE

Mascot Search Results

Peptide View

MS/MS Fragmentation of **IACVLPVLMDSHPQKPFYTVGEK**  
Found in **CO7\_HUMAN**, Complement component C7 OS=Homo sapiens GN=C7 PE=1 SV=2

Match to Query 63493: 3253.703736 from(814.433210,4+) rtinseconds(2379) index(7730)  
Title: Locus:1.1.1.2105.17 File:"2013-07-02 CLN FXIII 180 min 2nd F 1.wiff"  
Data file C:\Program Files (x86)\Matrix Science\Mascot Daemon\mgf\8 FXIII 180 min 2nd\mascot\_daemon\_merge.mgf

Click mouse within plot area to zoom in by factor of two about that point  
Or, 

Plot from

0

 to 

3000

 Da 

Full range

  
Label all possible matches ☐ Label matches used for scoring ☒

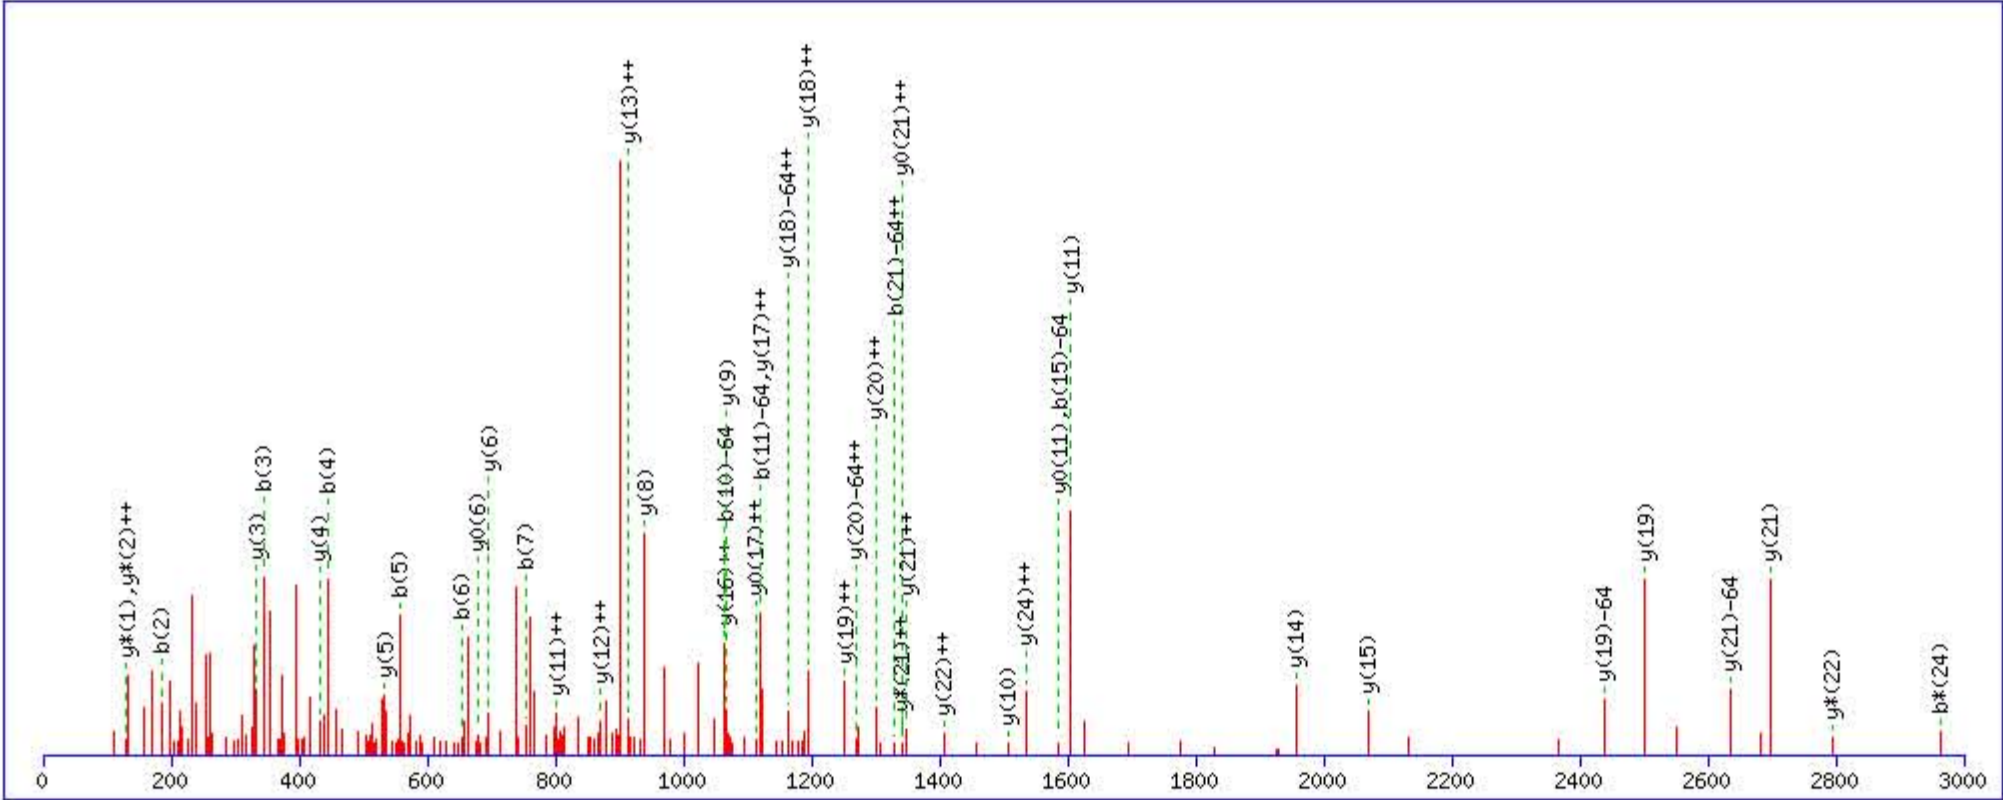

Monoisotopic mass of neutral peptide Mr(calc): 3253.670181  
Fixed modifications: Carbamidomethyl (C) (apply to specified residues or termini only)  
Variable modifications:  
M9 : Oxidation (M), with neutral losses 0.000000(shown in table), 63.998285  
Q17 : Biotin:Thermo-21345 (Q)  
Ions Score: 44 Expect: 0.00083  
Matches : 46/396 fragment ions using 127 most intense peaks ([help](#))

| #                  | b                 | b <sup>++</sup> | b <sup>*</sup>     | b <sup>++</sup> | b <sup>0</sup> | b <sup>0++</sup> | Seq. | y                  | y <sup>++</sup>    | y <sup>*</sup>     | y <sup>++</sup>    | y <sup>0</sup>     | y <sup>0++</sup>   | #                  |
|--------------------|-------------------|-----------------|--------------------|-----------------|----------------|------------------|------|--------------------|--------------------|--------------------|--------------------|--------------------|--------------------|--------------------|
| <a href="#">1</a>  | 114.091340        | 57.549308       |                    |                 |                |                  | I    |                    |                    |                    |                    |                    |                    | <a href="#">26</a> |
| <a href="#">2</a>  | <b>185.128454</b> | 93.067865       |                    |                 |                |                  | A    | 3141.593386        | 1571.300331        | 3124.566837        | 1562.787056        | 3123.582821        | 1562.295048        | <a href="#">25</a> |
| <a href="#">3</a>  | <b>345.159103</b> | 173.083190      |                    |                 |                |                  | C    | 3070.556272        | <b>1535.781774</b> | 3053.529723        | 1527.268499        | 3052.545707        | 1526.776491        | <a href="#">24</a> |
| <a href="#">4</a>  | <b>444.227517</b> | 222.617397      |                    |                 |                |                  | V    | 2910.525623        | 1455.766449        | 2893.499074        | 1447.253175        | 2892.515058        | 1446.761167        | <a href="#">23</a> |
| <a href="#">5</a>  | <b>557.311581</b> | 279.159429      |                    |                 |                |                  | L    | 2811.457209        | <b>1406.232242</b> | <b>2794.430660</b> | 1397.718968        | 2793.446644        | 1397.226960        | <a href="#">22</a> |
| <a href="#">6</a>  | <b>654.364345</b> | 327.685811      |                    |                 |                |                  | P    | <b>2698.373145</b> | <b>1349.690210</b> | 2681.346596        | <b>1341.176936</b> | 2680.362580        | <b>1340.684928</b> | <a href="#">21</a> |
| <a href="#">7</a>  | <b>753.432759</b> | 377.220018      |                    |                 |                |                  | V    | 2601.320381        | <b>1301.163828</b> | 2584.293832        | 1292.650554        | 2583.309816        | 1292.158546        | <a href="#">20</a> |
| <a href="#">8</a>  | 866.516823        | 433.762050      |                    |                 |                |                  | L    | <b>2502.251967</b> | <b>1251.629621</b> | 2485.225418        | 1243.116347        | 2484.241402        | 1242.624339        | <a href="#">19</a> |
| <a href="#">9</a>  | 1013.552223       | 507.279750      |                    |                 |                |                  | M    | 2389.167903        | <b>1195.087589</b> | 2372.141354        | 1186.574315        | 2371.157338        | 1186.082307        | <a href="#">18</a> |
| <a href="#">10</a> | 1128.579166       | 564.793221      |                    |                 | 1110.568601    | 555.787939       | D    | 2242.132503        | <b>1121.569889</b> | 2225.105954        | 1113.056615        | 2224.121938        | <b>1112.564607</b> | <a href="#">17</a> |
| <a href="#">11</a> | 1185.600630       | 593.303953      |                    |                 | 1167.590065    | 584.298670       | G    | 2127.105560        | <b>1064.056418</b> | 2110.079011        | 1055.543143        | 2109.094995        | 1055.051135        | <a href="#">16</a> |
| <a href="#">12</a> | 1298.684694       | 649.845985      |                    |                 | 1280.674129    | 640.840702       | I    | <b>2070.084096</b> | 1035.545686        | 2053.057547        | 1027.032411        | 2052.073531        | 1026.540403        | <a href="#">15</a> |
| <a href="#">13</a> | 1426.743272       | 713.875274      | 1409.716723        | 705.362000      | 1408.732707    | 704.869991       | Q    | <b>1957.000032</b> | 979.003654         | 1939.973483        | 970.490380         | 1938.989467        | 969.998372         | <a href="#">14</a> |
| <a href="#">14</a> | 1513.775300       | 757.391288      | 1496.748751        | 748.878014      | 1495.764735    | 748.386006       | S    | 1828.941454        | <b>914.974365</b>  | 1811.914905        | 906.461091         | 1810.930889        | 905.969083         | <a href="#">13</a> |
| <a href="#">15</a> | 1650.834212       | 825.920744      | 1633.807663        | 817.407470      | 1632.823647    | 816.915461       | H    | 1741.909426        | <b>871.458351</b>  | 1724.882877        | 862.945077         | 1723.898861        | 862.453068         | <a href="#">12</a> |
| <a href="#">16</a> | 1747.886976       | 874.447126      | 1730.860427        | 865.933852      | 1729.876411    | 865.441844       | P    | <b>1604.850514</b> | <b>802.928895</b>  | 1587.823965        | 794.415621         | <b>1586.839949</b> | 793.923612         | <a href="#">11</a> |
| <a href="#">17</a> | 2187.112302       | 1094.059789     | 2170.085753        | 1085.546514     | 2169.101737    | 1085.054506      | Q    | <b>1507.797750</b> | 754.402513         | 1490.771201        | 745.889239         | 1489.787185        | 745.397230         | <a href="#">10</a> |
| <a href="#">18</a> | 2315.207265       | 1158.107270     | 2298.180716        | 1149.593996     | 2297.196700    | 1149.101988      | K    | <b>1068.572424</b> | 534.789850         | 1051.545875        | 526.276575         | 1050.561859        | 525.784567         | <a href="#">9</a>  |
| <a href="#">19</a> | 2412.260029       | 1206.633652     | 2395.233480        | 1198.120378     | 2394.249464    | 1197.628370      | P    | <b>940.477461</b>  | 470.742368         | 923.450912         | 462.229094         | 922.466896         | 461.737086         | <a href="#">8</a>  |
| <a href="#">20</a> | 2559.328443       | 1280.167859     | 2542.301894        | 1271.654585     | 2541.317878    | 1271.162577      | F    | 843.424697         | 422.215986         | 826.398148         | 413.702712         | 825.414132         | 413.210704         | <a href="#">7</a>  |
| <a href="#">21</a> | 2722.391772       | 1361.699524     | 2705.365223        | 1353.186249     | 2704.381207    | 1352.694241      | Y    | <b>696.356283</b>  | 348.681779         | 679.329734         | 340.168505         | <b>678.345718</b>  | 339.676497         | <a href="#">6</a>  |
| <a href="#">22</a> | 2823.439451       | 1412.223363     | 2806.412902        | 1403.710089     | 2805.428886    | 1403.218081      | T    | <b>533.292954</b>  | 267.150115         | 516.266405         | 258.636840         | 515.282389         | 258.144832         | <a href="#">5</a>  |
| <a href="#">23</a> | 2922.507865       | 1461.757570     | 2905.481316        | 1453.244296     | 2904.497300    | 1452.752288      | V    | <b>432.245275</b>  | 216.626275         | 415.218726         | 208.113001         | 414.234710         | 207.620993         | <a href="#">4</a>  |
| <a href="#">24</a> | 2979.529329       | 1490.268302     | <b>2962.502780</b> | 1481.755028     | 2961.518764    | 1481.263020      | G    | <b>333.176861</b>  | 167.092069         | 316.150312         | 158.578794         | 315.166296         | 158.086786         | <a href="#">3</a>  |
| <a href="#">25</a> | 3108.571922       | 1554.789599     | 3091.545373        | 1546.276324     | 3090.561357    | 1545.784316      | E    | 276.155397         | 138.581337         | 259.128848         | <b>130.068062</b>  | 258.144832         | 129.576054         | <a href="#">2</a>  |
| <a href="#">26</a> |                   |                 |                    |                 |                |                  | K    | 147.112804         | 74.060040          | <b>130.086255</b>  | 65.546765          |                    |                    | <a href="#">1</a>  |

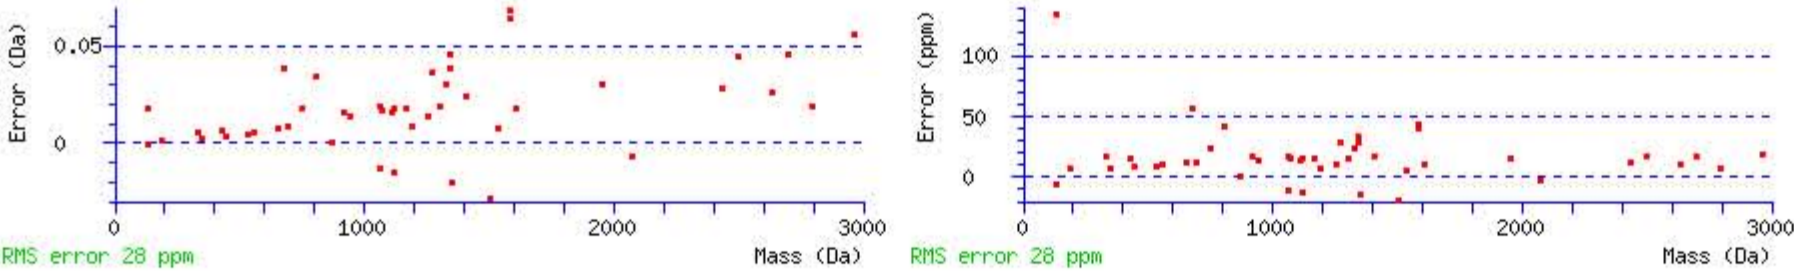

NCBI BLAST search of [IACVLPVLMDSHPQKPFYTVGEK](#)  
(Parameters: blastp, nr protein database, expect=20000, no filter, PAM30)  
Other BLAST [web gateways](#)

All matches to this query

| Score | Mr(calc):   | Delta    | Sequence                                |
|-------|-------------|----------|-----------------------------------------|
| 44.2  | 3253.670181 | 0.033555 | <a href="#">IACVLPVLMDSHPQKPFYTVGEK</a> |
| 26.1  | 3253.670181 | 0.033555 | <a href="#">IACVLPVLMDSHPQKPFYTVGEK</a> |

MATRIX

SCIENCE

Mascot Search Results

Peptide View

MS/MS Fragmentation of **SVAVYGQYGGQPCVGN****AFETQSCEPTR**  
Found in **CO7\_HUMAN**, Complement component C7 OS=Homo sapiens GN=C7 PE=1 SV=2

Match to Query 63987: 3272.493816 from(819.130730,4+) rtinseconds(2163) index(6560)  
Title: Locus:1.1.1.2030.21 File:"2013-07-02 CLN FXIII 180 min 2nd F 1.wiff"  
Data file C:\Program Files (x86)\Matrix Science\Mascot Daemon\mgf\8 FXIII 180 min 2nd\mascot\_daemon\_merge.mgf

Click mouse within plot area to zoom in by factor of two about that point  
Or, 

Plot from

0

 to 

3000

 Da 

Full range

  
Label all possible matches ☐ Label matches used for scoring ☒

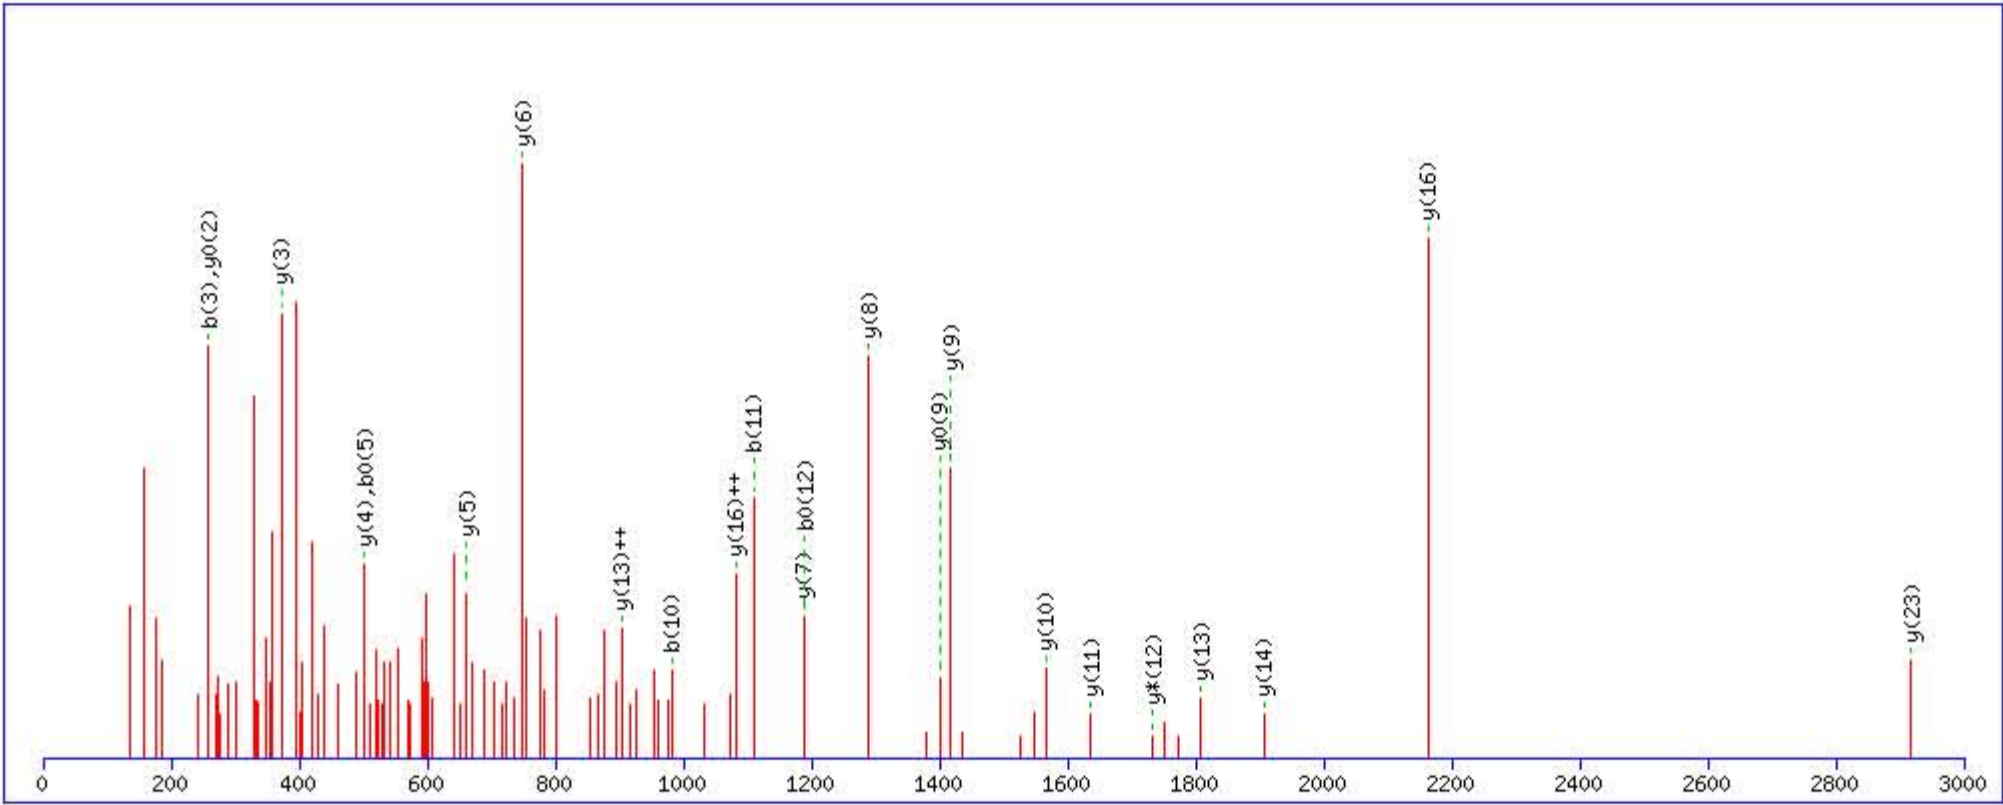

Monoisotopic mass of neutral peptide Mr(calc): 3272.468933  
Fixed modifications: Carbamidomethyl (C) (apply to specified residues or termini only)  
Variable modifications:  
Q21 : Biotin:Thermo-21345 (Q)  
Ions Score: 76 Expect: 2.7e-007  
Matches : 23/298 fragment ions using 36 most intense peaks [\(help\)](#)

| #  | b           | b <sup>++</sup> | b <sup>*</sup> | b <sup>*++</sup> | b <sup>0</sup> | b <sup>0++</sup> | Seq. | y           | y <sup>++</sup> | y <sup>*</sup> | y <sup>*++</sup> | y <sup>0</sup> | y <sup>0++</sup> | #  |
|----|-------------|-----------------|----------------|------------------|----------------|------------------|------|-------------|-----------------|----------------|------------------|----------------|------------------|----|
| 1  | 88.039304   | 44.523290       |                |                  | 70.028739      | 35.518008        | S    |             |                 |                |                  |                |                  | 27 |
| 2  | 187.107718  | 94.057497       |                |                  | 169.097153     | 85.052214        | V    | 3186.444157 | 1593.725716     | 3169.417608    | 1585.212442      | 3168.433592    | 1584.720434      | 26 |
| 3  | 258.144832  | 129.576054      |                |                  | 240.134267     | 120.570772       | A    | 3087.375743 | 1544.191509     | 3070.349194    | 1535.678235      | 3069.365178    | 1535.186227      | 25 |
| 4  | 357.213246  | 179.110261      |                |                  | 339.202681     | 170.104979       | V    | 3016.338629 | 1508.672952     | 2999.312080    | 1500.159678      | 2998.328064    | 1499.667670      | 24 |
| 5  | 520.276575  | 260.641926      |                |                  | 502.266010     | 251.636643       | Y    | 2917.270215 | 1459.138745     | 2900.243666    | 1450.625471      | 2899.259650    | 1450.133463      | 23 |
| 6  | 577.298039  | 289.152658      |                |                  | 559.287474     | 280.147375       | G    | 2754.206886 | 1377.607081     | 2737.180337    | 1369.093806      | 2736.196321    | 1368.601798      | 22 |
| 7  | 705.356617  | 353.181947      | 688.330068     | 344.668672       | 687.346052     | 344.176664       | Q    | 2697.185422 | 1349.096349     | 2680.158873    | 1340.583074      | 2679.174857    | 1340.091066      | 21 |
| 8  | 868.419946  | 434.713611      | 851.393397     | 426.200337       | 850.409381     | 425.708329       | Y    | 2569.126844 | 1285.067060     | 2552.100295    | 1276.553785      | 2551.116279    | 1276.061777      | 20 |
| 9  | 925.441410  | 463.224343      | 908.414861     | 454.711069       | 907.430845     | 454.219061       | G    | 2406.063515 | 1203.535395     | 2389.036966    | 1195.022121      | 2388.052950    | 1194.530113      | 19 |
| 10 | 982.462874  | 491.735075      | 965.436325     | 483.221801       | 964.452309     | 482.729793       | G    | 2349.042051 | 1175.024663     | 2332.015502    | 1166.511389      | 2331.031486    | 1166.019381      | 18 |
| 11 | 1110.521452 | 555.764364      | 1093.494903    | 547.251090       | 1092.510887    | 546.759082       | Q    | 2292.020587 | 1146.513931     | 2274.994038    | 1138.000657      | 2274.010022    | 1137.508649      | 17 |
| 12 | 1207.574216 | 604.290746      | 1190.547667    | 595.777472       | 1189.563651    | 595.285464       | P    | 2163.962009 | 1082.484642     | 2146.935460    | 1073.971368      | 2145.951444    | 1073.479360      | 16 |
| 13 | 1367.604865 | 684.306071      | 1350.578316    | 675.792796       | 1349.594300    | 675.300788       | C    | 2066.909245 | 1033.958260     | 2049.882696    | 1025.444986      | 2048.898680    | 1024.952978      | 15 |
| 14 | 1466.673279 | 733.840278      | 1449.646730    | 725.327003       | 1448.662714    | 724.834995       | V    | 1906.878596 | 953.942936      | 1889.852047    | 945.429662       | 1888.868031    | 944.937654       | 14 |
| 15 | 1523.694743 | 762.351010      | 1506.668194    | 753.837735       | 1505.684178    | 753.345727       | G    | 1807.810182 | 904.408729      | 1790.783633    | 895.895455       | 1789.799617    | 895.403446       | 13 |
| 16 | 1637.737670 | 819.372473      | 1620.711121    | 810.859199       | 1619.727105    | 810.367191       | N    | 1750.788718 | 875.897997      | 1733.762169    | 867.384723       | 1732.778153    | 866.892715       | 12 |
| 17 | 1708.774784 | 854.891030      | 1691.748235    | 846.377756       | 1690.764219    | 845.885748       | A    | 1636.745791 | 818.876534      | 1619.719242    | 810.363259       | 1618.735226    | 809.871251       | 11 |
| 18 | 1855.843198 | 928.425237      | 1838.816649    | 919.911963       | 1837.832633    | 919.419955       | F    | 1565.708677 | 783.357977      | 1548.682128    | 774.844702       | 1547.698112    | 774.352694       | 10 |
| 19 | 1984.885791 | 992.946534      | 1967.859242    | 984.433259       | 1966.875226    | 983.941251       | E    | 1418.640263 | 709.823770      | 1401.613714    | 701.310495       | 1400.629698    | 700.818487       | 9  |
| 20 | 2085.933470 | 1043.470373     | 2068.906921    | 1034.957098      | 2067.922905    | 1034.465090      | T    | 1289.597670 | 645.302473      | 1272.571121    | 636.789199       | 1271.587105    | 636.297190       | 8  |
| 21 | 2525.158796 | 1263.083036     | 2508.132247    | 1254.569761      | 2507.148231    | 1254.077754      | Q    | 1188.549991 | 594.778634      | 1171.523442    | 586.265359       | 1170.539426    | 585.773351       | 7  |
| 22 | 2612.190824 | 1306.599050     | 2595.164275    | 1298.085776      | 2594.180259    | 1297.593768      | S    | 749.324665  | 375.165970      | 732.298116     | 366.652696       | 731.314100     | 366.160688       | 6  |
| 23 | 2772.221473 | 1386.614374     | 2755.194924    | 1378.101100      | 2754.210908    | 1377.609092      | C    | 662.292637  | 331.649956      | 645.266088     | 323.136682       | 644.282072     | 322.644674       | 5  |
| 24 | 2901.264066 | 1451.135671     | 2884.237517    | 1442.622396      | 2883.253501    | 1442.130389      | E    | 502.261988  | 251.634632      | 485.235439     | 243.121357       | 484.251423     | 242.629349       | 4  |
| 25 | 2998.316830 | 1499.662053     | 2981.290281    | 1491.148778      | 2980.306265    | 1490.656771      | P    | 373.219395  | 187.113335      | 356.192846     | 178.600061       | 355.208830     | 178.108053       | 3  |
| 26 | 3099.364509 | 1550.185892     | 3082.337960    | 1541.672618      | 3081.353944    | 1541.180610      | T    | 276.166631  | 138.586953      | 259.140082     | 130.073679       | 258.156066     | 129.581671       | 2  |
| 27 |             |                 |                |                  |                |                  | R    | 175.118952  | 88.063114       | 158.092403     | 79.549839        |                |                  | 1  |

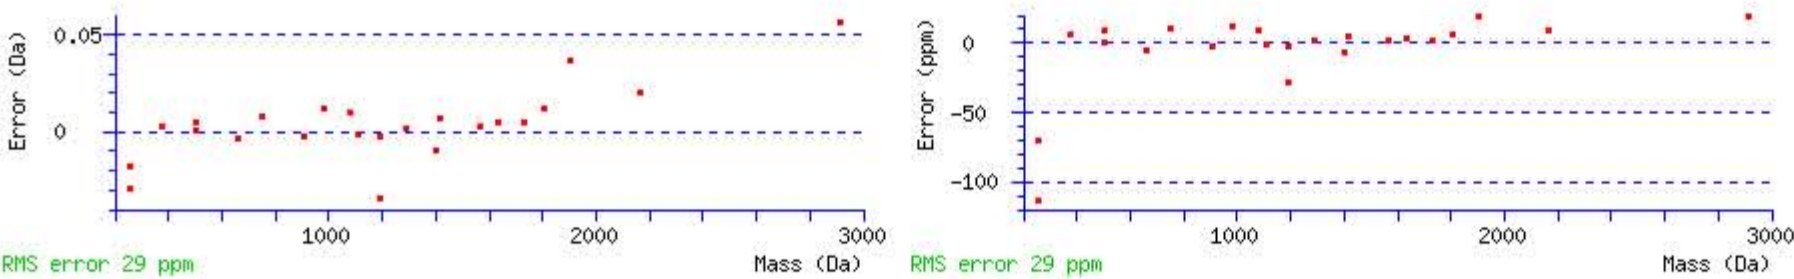

NCBI BLAST search of **SVAVYGQYGGQPCVGN****AFETQSCEPTR**  
(Parameters: blastp, nr protein database, expect=20000, no filter, PAM30)  
Other BLAST [web gateways](#)

All matches to this query

| Score | Mr(calc):   | Delta    | Sequence                                            |
|-------|-------------|----------|-----------------------------------------------------|
| 76.2  | 3272.468933 | 0.024883 | <a href="#">SVAVYGQYGGQPCVGN</a> <b>AFETQSCEPTR</b> |
| 10.0  | 3272.468933 | 0.024883 | <a href="#">SVAVYGQYGGQPCVGN</a> <b>AFETQSCEPTR</b> |
| 2.0   | 3272.468933 | 0.024883 | <a href="#">SVAVYGQYGGQPCVGN</a> <b>AFETQSCEPTR</b> |

MATRIX

SCIENCE

Mascot Search Results

Peptide View

MS/MS Fragmentation of **AGIQR**  
Found in **CO8A\_HUMAN**, Complement component C8 alpha chain OS=Homo sapiens GN=C8A PE=1 SV=2

Match to Query 13178: 983.522828 from(492.768690,2+) rtinseconds(1400) index(16257)  
Title: Locus:1.1.1.2870.6 File:"2013-07-02 CLN FXIII 180 min 2nd F 2.wiff"  
Data file C:\Program Files (x86)\Matrix Science\Mascot Daemon\mgf\8 FXIII 180 min 2nd\mascot\_daemon\_merge.mgf

Click mouse within plot area to zoom in by factor of two about that point  
Or, 

Plot from

100

 to 

950

 Da 

Full range

  
Label all possible matches ☐ Label matches used for scoring ☒

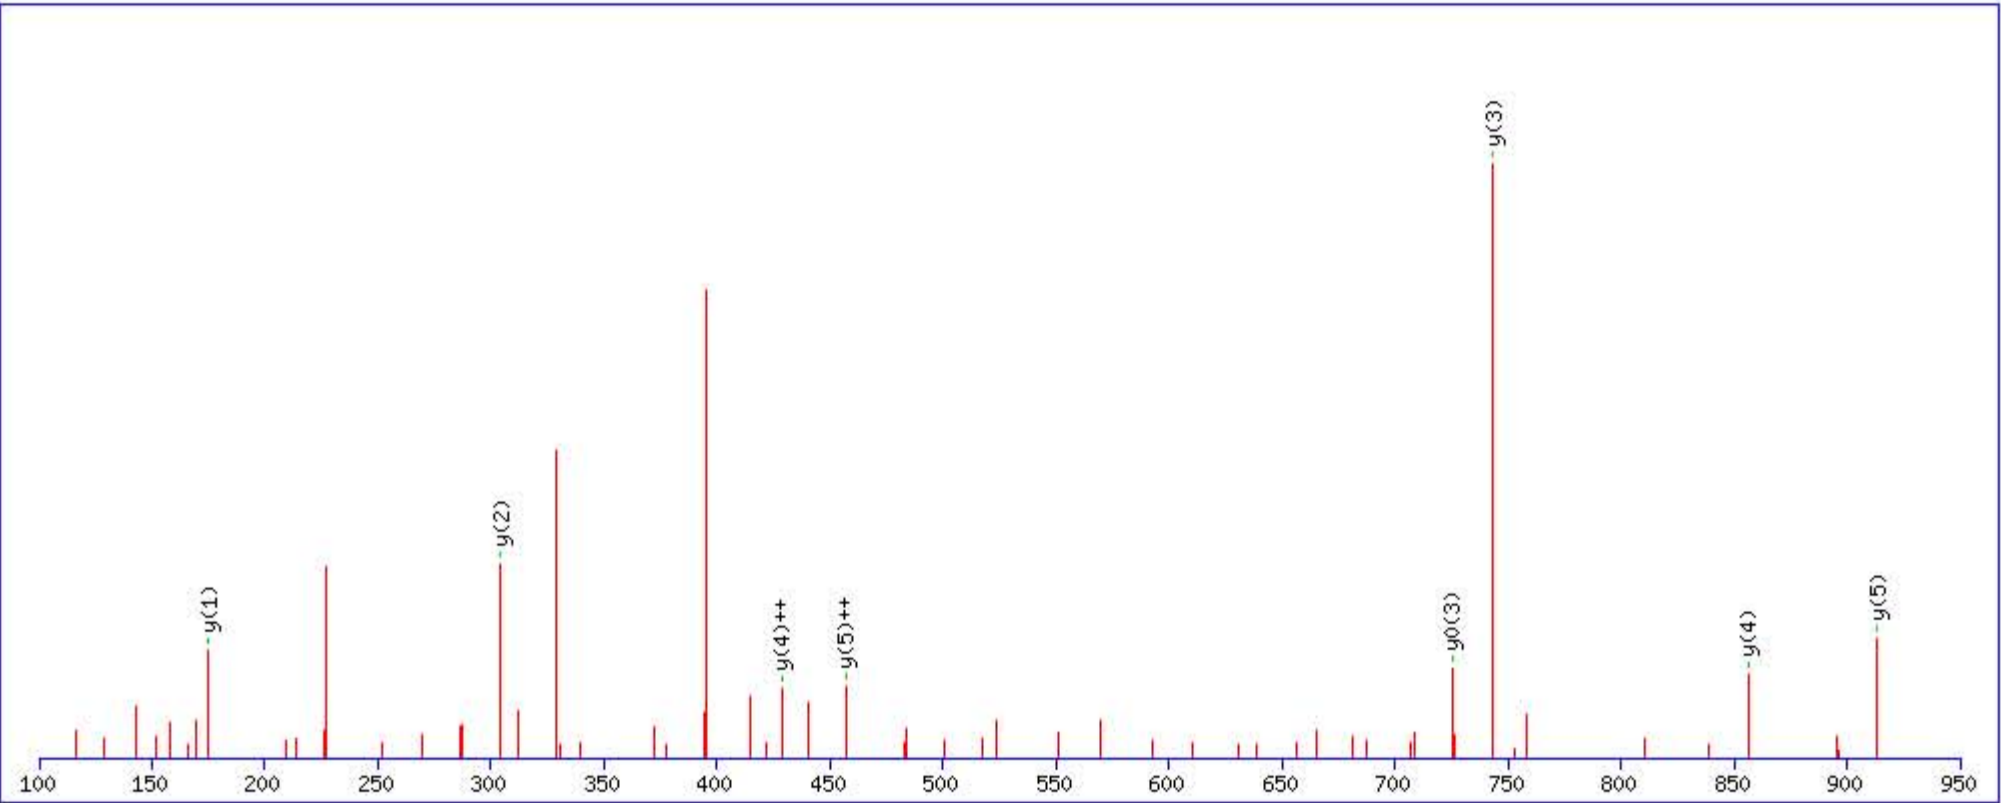

Monoisotopic mass of neutral peptide Mr(calc): 983.522217  
Fixed modifications: Carbamidomethyl (C) (apply to specified residues or termini only)  
Variable modifications:  
Q4 : Biotin:Thermo-21345 (Q)  
Ions Score: 29 Expect: 0.024  
Matches : 8/44 fragment ions using 16 most intense peaks [\(help\)](#)

| # | b          | b <sup>++</sup> | b <sup>*</sup> | b <sup>+++</sup> | b <sup>0</sup> | b <sup>0++</sup> | Seq. | y          | y <sup>++</sup> | y <sup>*</sup> | y <sup>+++</sup> | y <sup>0</sup> | y <sup>0++</sup> | # |
|---|------------|-----------------|----------------|------------------|----------------|------------------|------|------------|-----------------|----------------|------------------|----------------|------------------|---|
| 1 | 72.044390  | 36.525833       |                |                  |                |                  | A    |            |                 |                |                  |                |                  | 6 |
| 2 | 129.065854 | 65.036565       |                |                  |                |                  | G    | 913.492399 | 457.249838      | 896.465850     | 448.736563       | 895.481834     | 448.244555       | 5 |
| 3 | 242.149918 | 121.578597      |                |                  |                |                  | I    | 856.470935 | 428.739106      | 839.444386     | 420.225831       | 838.460370     | 419.733823       | 4 |
| 4 | 681.375244 | 341.191260      | 664.348695     | 332.677986       |                |                  | Q    | 743.386871 | 372.197074      | 726.360322     | 363.683799       | 725.376306     | 363.191791       | 3 |
| 5 | 810.417837 | 405.712557      | 793.391288     | 397.199282       | 792.407272     | 396.707274       | E    | 304.161545 | 152.584411      | 287.134996     | 144.071136       | 286.150980     | 143.579128       | 2 |
| 6 |            |                 |                |                  |                |                  | R    | 175.118952 | 88.063114       | 158.092403     | 79.549840        |                |                  | 1 |

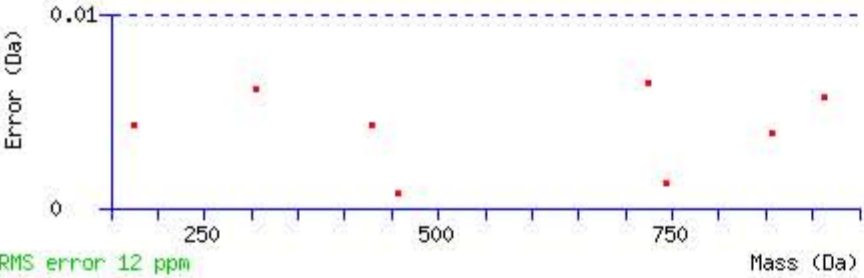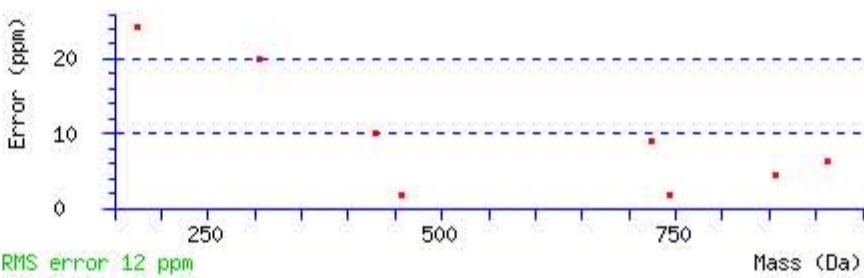

NCBI BLAST search of [AGIQR](#)  
(Parameters: blastp, nr protein database, expect=20000, no filter, PAM30)  
Other BLAST [web gateways](#)

All matches to this query

| Score | Mr(calc):  | Delta    | Sequence                 |
|-------|------------|----------|--------------------------|
| 29.1  | 983.522217 | 0.000611 | <a href="#">AGIQR</a>    |
| 17.5  | 983.522217 | 0.000611 | <a href="#">AGLEQR</a>   |
| 14.0  | 983.522217 | 0.000611 | <a href="#">QIQER</a>    |
| 14.0  | 983.522217 | 0.000611 | <a href="#">QLQER</a>    |
| 10.8  | 983.522217 | 0.000611 | <a href="#">IQQER</a>    |
| 10.8  | 983.522217 | 0.000611 | <a href="#">LQQER</a>    |
| 10.5  | 983.522217 | 0.000611 | <a href="#">AAQVER</a>   |
| 9.5   | 983.514816 | 0.008012 | <a href="#">QPVREAER</a> |
| 5.9   | 983.522202 | 0.000626 | <a href="#">KLMENPPR</a> |
| 5.7   | 983.522217 | 0.000611 | <a href="#">QLEQR</a>    |

MATRIX

SCIENCE

Mascot Search Results

Peptide View

MS/MS Fragmentation of **LGSLGAACEQTQTEGAK**  
Found in **CO8A\_HUMAN**, Complement component C8 alpha chain OS=Homo sapiens GN=C8A PE=1 SV=2

Match to Query 45284: 2031.005628 from(1016.510090,2+) rtinseconds(1727) index(32450)  
Title: Locus:1.1.1.710.13 File:"2013-07-02 CLN FXIII 180 min 2nd F 3.wiff"  
Data file C:\Program Files (x86)\Matrix Science\Mascot Daemon\mgf\8 FXIII 180 min 2nd\mascot\_daemon\_merge.mgf

Click mouse within plot area to zoom in by factor of two about that point  
Or, 

Plot from

100

 to 

1900

 Da 

Full range

  
Label all possible matches ☐ Label matches used for scoring ☒

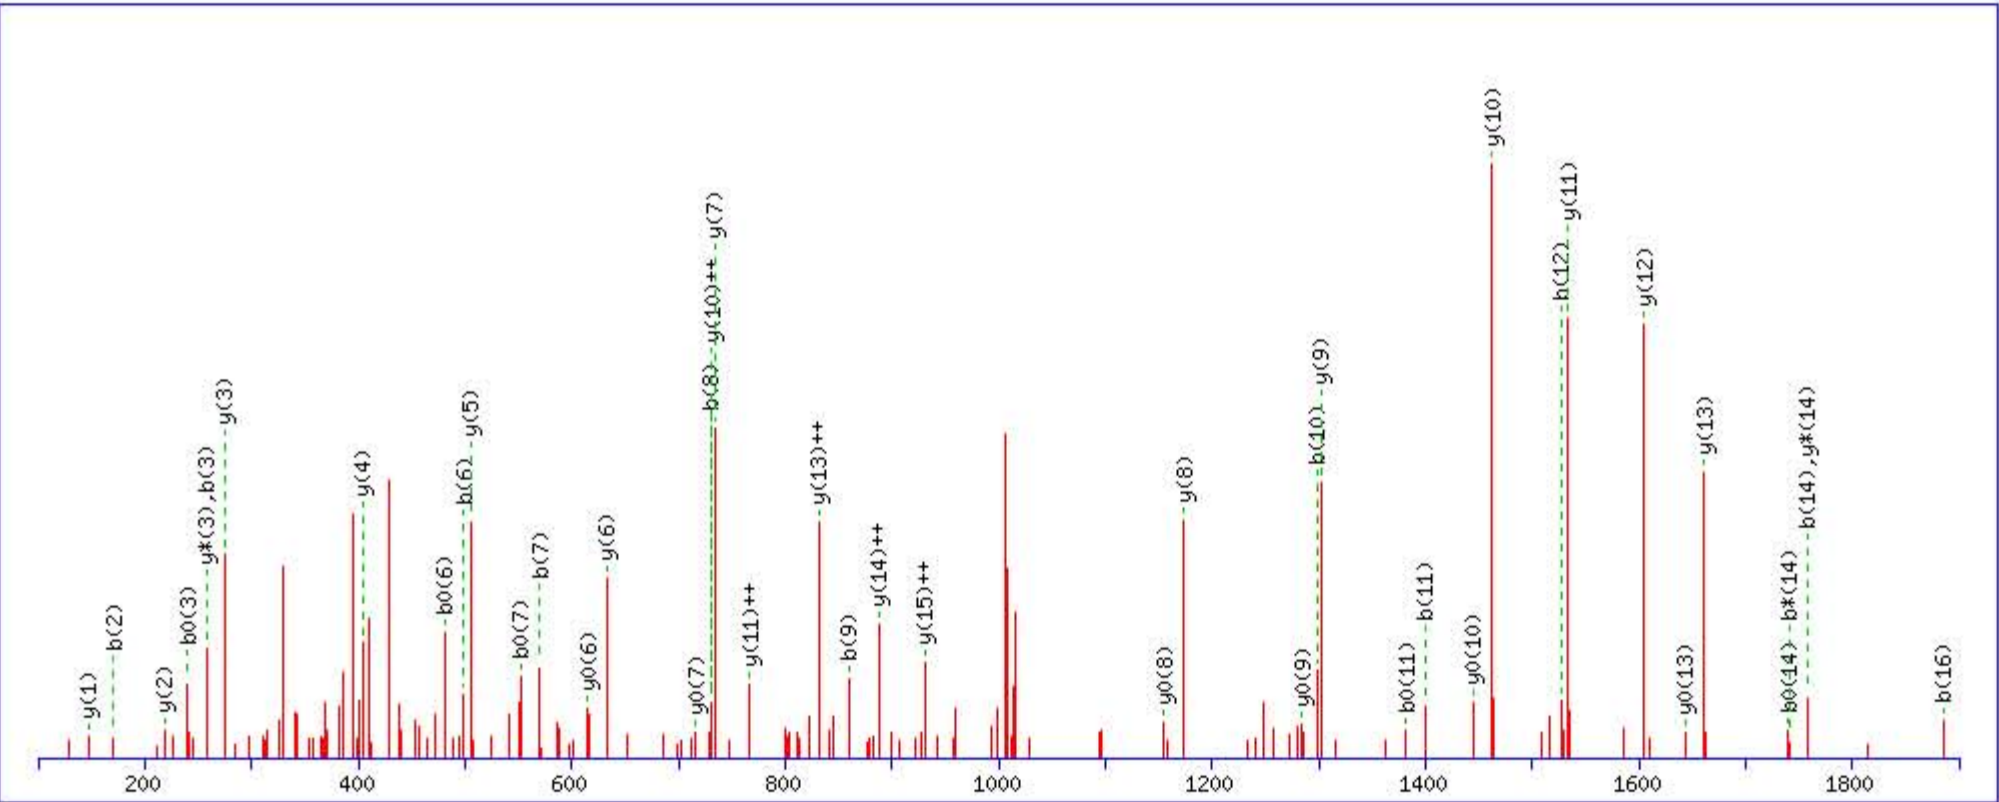

Monoisotopic mass of neutral peptide Mr(calc): 2030.976501  
Fixed modifications: Carbamidomethyl (C) (apply to specified residues or termini only)  
Variable modifications:  
Q10 : Biotin:Thermo-21345 (Q)  
Ions Score: 90 Expect: 1.1e-008  
Matches : 43/164 fragment ions using 66 most intense peaks [\(help\)](#)

| #  | b           | b <sup>++</sup> | b <sup>*</sup> | b <sup>*++</sup> | b <sup>0</sup> | b <sup>0++</sup> | Seq. | y           | y <sup>++</sup> | y <sup>*</sup> | y <sup>*++</sup> | y <sup>0</sup> | y <sup>0++</sup> | #  |
|----|-------------|-----------------|----------------|------------------|----------------|------------------|------|-------------|-----------------|----------------|------------------|----------------|------------------|----|
| 1  | 114.091340  | 57.549308       |                |                  |                |                  | L    |             |                 |                |                  |                |                  | 17 |
| 2  | 171.112804  | 86.060040       |                |                  |                |                  | G    | 1918.899727 | 959.953502      | 1901.873178    | 951.440227       | 1900.889162    | 950.948219       | 16 |
| 3  | 258.144832  | 129.576054      |                |                  | 240.134267     | 120.570772       | S    | 1861.878263 | 931.442770      | 1844.851714    | 922.929495       | 1843.867698    | 922.437487       | 15 |
| 4  | 371.228896  | 186.118086      |                |                  | 353.218331     | 177.112804       | L    | 1774.846235 | 887.926756      | 1757.819686    | 879.413481       | 1756.835670    | 878.921473       | 14 |
| 5  | 428.250360  | 214.628818      |                |                  | 410.239795     | 205.623536       | G    | 1661.762171 | 831.384724      | 1644.735622    | 822.871449       | 1643.751606    | 822.379441       | 13 |
| 6  | 499.287474  | 250.147375      |                |                  | 481.276909     | 241.142093       | A    | 1604.740707 | 802.873992      | 1587.714158    | 794.360717       | 1586.730142    | 793.868709       | 12 |
| 7  | 570.324588  | 285.665932      |                |                  | 552.314023     | 276.660650       | A    | 1533.703593 | 767.355435      | 1516.677044    | 758.842160       | 1515.693028    | 758.350152       | 11 |
| 8  | 730.355237  | 365.681257      |                |                  | 712.344672     | 356.675974       | C    | 1462.666479 | 731.836878      | 1445.639930    | 723.323603       | 1444.655914    | 722.831595       | 10 |
| 9  | 859.397830  | 430.202553      |                |                  | 841.387265     | 421.197271       | E    | 1302.635830 | 651.821553      | 1285.609281    | 643.308279       | 1284.625265    | 642.816270       | 9  |
| 10 | 1298.623156 | 649.815216      | 1281.596607    | 641.301942       | 1280.612591    | 640.809934       | Q    | 1173.593237 | 587.300257      | 1156.566688    | 578.786982       | 1155.582672    | 578.294974       | 8  |
| 11 | 1399.670835 | 700.339056      | 1382.644286    | 691.825781       | 1381.660270    | 691.333773       | T    | 734.367911  | 367.687594      | 717.341362     | 359.174319       | 716.357346     | 358.682311       | 7  |
| 12 | 1527.729413 | 764.368345      | 1510.702864    | 755.855070       | 1509.718848    | 755.363062       | Q    | 633.320232  | 317.163754      | 616.293683     | 308.650480       | 615.309667     | 308.158472       | 6  |
| 13 | 1628.777092 | 814.892184      | 1611.750543    | 806.378910       | 1610.766527    | 805.886902       | T    | 505.261654  | 253.134465      | 488.235105     | 244.621190       | 487.251089     | 244.129182       | 5  |
| 14 | 1757.819685 | 879.413481      | 1740.793136    | 870.900206       | 1739.809120    | 870.408198       | E    | 404.213975  | 202.610625      | 387.187426     | 194.097351       | 386.203410     | 193.605343       | 4  |
| 15 | 1814.841149 | 907.924213      | 1797.814600    | 899.410938       | 1796.830584    | 898.918930       | G    | 275.171382  | 138.089329      | 258.144833     | 129.576054       |                |                  | 3  |
| 16 | 1885.878263 | 943.442770      | 1868.851714    | 934.929495       | 1867.867698    | 934.437487       | A    | 218.149918  | 109.578597      | 201.123369     | 101.065322       |                |                  | 2  |
| 17 |             |                 |                |                  |                |                  | K    | 147.112804  | 74.060040       | 130.086255     | 65.546765        |                |                  | 1  |

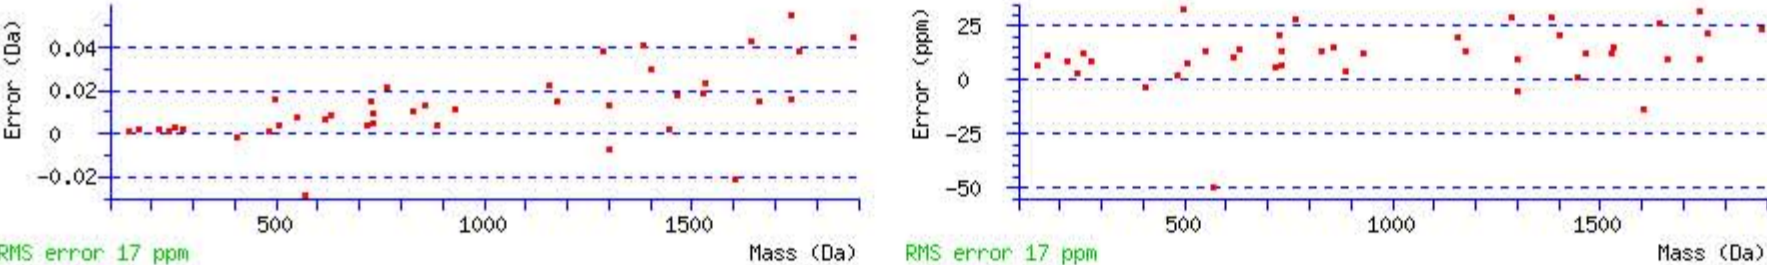

NCBI BLAST search of [LGSLGAACEQTQTEGAK](#)  
(Parameters: blastp, nr protein database, expect=20000, no filter, PAM30)  
Other BLAST [web gateways](#)

All matches to this query

| Score | Mr(calc):   | Delta     | Sequence                            |
|-------|-------------|-----------|-------------------------------------|
| 89.8  | 2030.976501 | 0.029127  | <a href="#">LGSLGAACEQTQTEGAK</a>   |
| 59.6  | 2030.976501 | 0.029127  | <a href="#">LGSLGAACEQTQTEGAK</a>   |
| 4.7   | 2031.000748 | 0.004880  | <a href="#">LEQQVEDLESSLEQKK</a>    |
| 3.8   | 2031.012863 | -0.007235 | <a href="#">KLETLLHSMEVAQNGBMAK</a> |

Peptide View

MS/MS Fragmentation of **AIEDDCSQYEPIPGSQK**  
Found in **CO8A\_HUMAN**, Complement component C8 alpha chain OS=Homo sapiens GN=C8A PE=1 SV=2

Match to Query 49399: 2247.050268 from(1124.532410,2+) rtinseconds(1893) index(19546)  
Title: Locus:1.1.1.3041.26 File:"2013-07-02 CLN FXIII 180 min 2nd F 2.wiff"  
Data file C:\Program Files (x86)\Matrix Science\Mascot Daemon\mgf\8 FXIII 180 min 2nd\mascot\_daemon\_merge.mgf

Click mouse within plot area to zoom in by factor of two about that point  
Or, 

Plot from

0

 to 

3400

 Da 

Full range

  
Label all possible matches ☐ Label matches used for scoring ☒

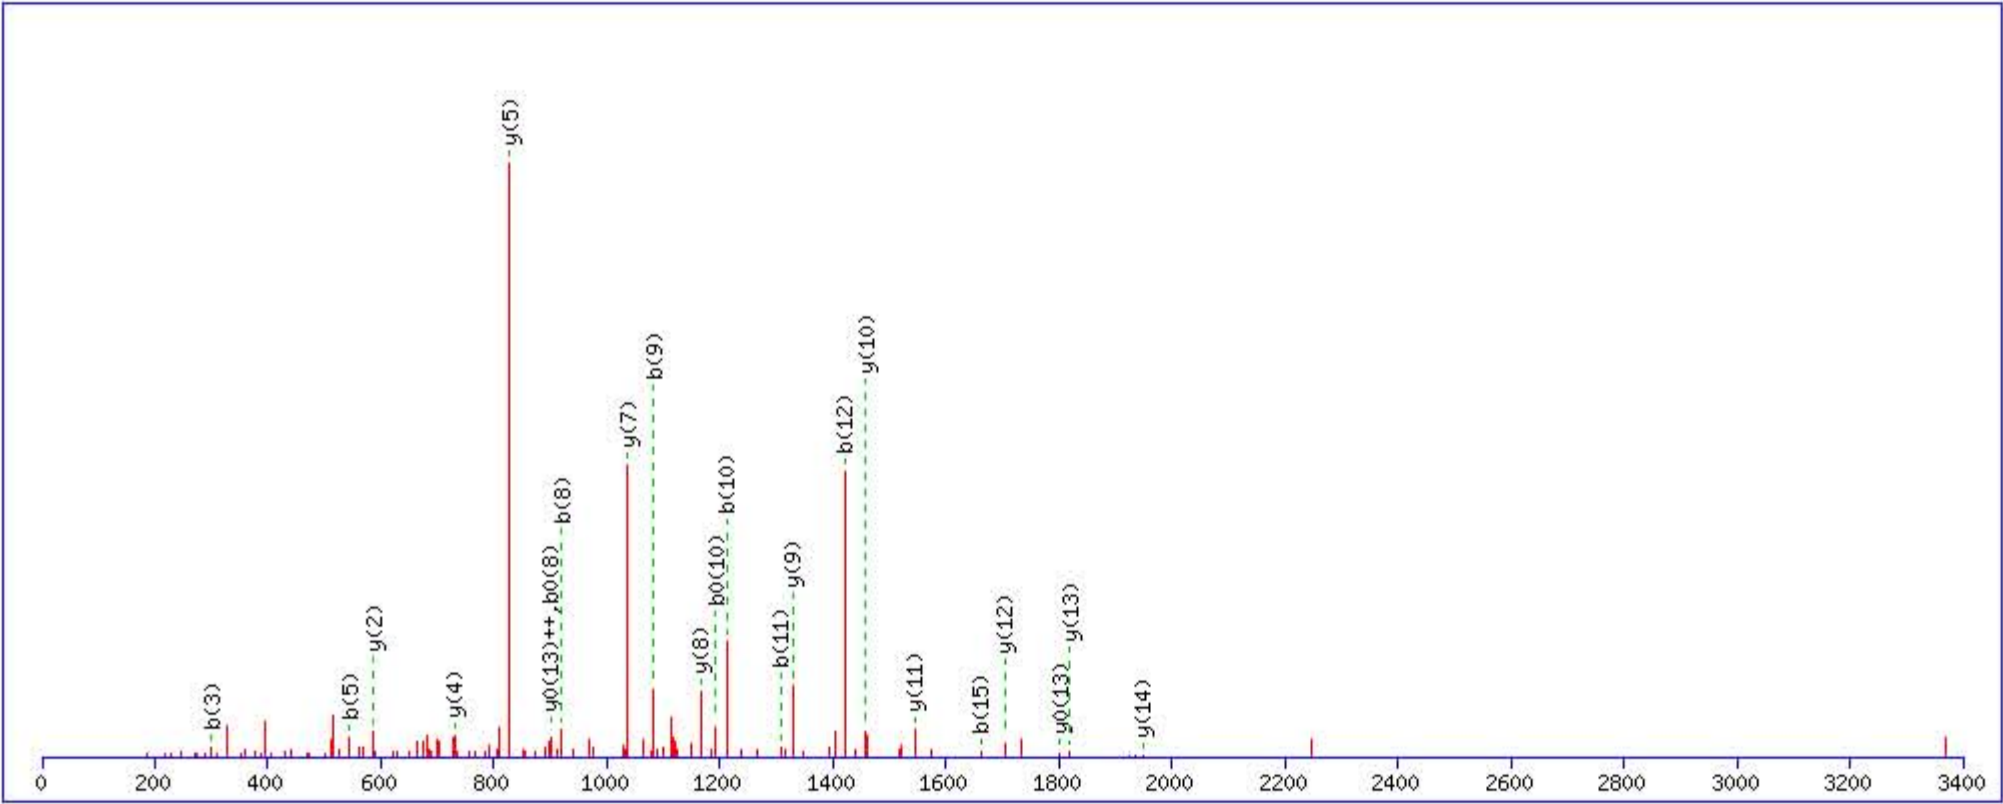

Monoisotopic mass of neutral peptide Mr(calc): 2247.018753  
Fixed modifications: Carbamidomethyl (C) (apply to specified residues or termini only)  
Variable modifications:  
Q16 : Biotin:Thermo-21345 (Q)  
Ions Score: 76 Expect: 2e-007  
Matches : 23/170 fragment ions using 35 most intense peaks [\(help\)](#)

| #  | b           | b <sup>++</sup> | b <sup>*</sup> | b <sup>*++</sup> | b <sup>0</sup> | b <sup>0++</sup> | Seq. | y           | y <sup>++</sup> | y <sup>*</sup> | y <sup>*++</sup> | y <sup>0</sup> | y <sup>0++</sup> | #  |
|----|-------------|-----------------|----------------|------------------|----------------|------------------|------|-------------|-----------------|----------------|------------------|----------------|------------------|----|
| 1  | 72.044390   | 36.525833       |                |                  |                |                  | A    |             |                 |                |                  |                |                  | 17 |
| 2  | 185.128454  | 93.067865       |                |                  |                |                  | I    | 2176.988934 | 1088.998105     | 2159.962385    | 1080.484830      | 2158.978369    | 1079.992822      | 16 |
| 3  | 300.155397  | 150.581336      |                |                  | 282.144832     | 141.576054       | D    | 2063.904870 | 1032.456073     | 2046.878321    | 1023.942798      | 2045.894305    | 1023.450790      | 15 |
| 4  | 429.197990  | 215.102633      |                |                  | 411.187425     | 206.097351       | E    | 1948.877927 | 974.942602      | 1931.851378    | 966.429327       | 1930.867362    | 965.937319       | 14 |
| 5  | 544.224933  | 272.616105      |                |                  | 526.214368     | 263.610822       | D    | 1819.835334 | 910.421305      | 1802.808785    | 901.908031       | 1801.824769    | 901.416022       | 13 |
| 6  | 704.255582  | 352.631429      |                |                  | 686.245017     | 343.626147       | C    | 1704.808391 | 852.907833      | 1687.781842    | 844.394559       | 1686.797826    | 843.902551       | 12 |
| 7  | 791.287610  | 396.147443      |                |                  | 773.277045     | 387.142161       | S    | 1544.777742 | 772.892509      | 1527.751193    | 764.379235       | 1526.767177    | 763.887227       | 11 |
| 8  | 919.346188  | 460.176732      | 902.319639     | 451.663458       | 901.335623     | 451.171450       | Q    | 1457.745714 | 729.376495      | 1440.719165    | 720.863221       | 1439.735149    | 720.371212       | 10 |
| 9  | 1082.409517 | 541.708397      | 1065.382968    | 533.195122       | 1064.398952    | 532.703114       | Y    | 1329.687136 | 665.347206      | 1312.660587    | 656.833931       | 1311.676571    | 656.341923       | 9  |
| 10 | 1211.452110 | 606.229693      | 1194.425561    | 597.716419       | 1193.441545    | 597.224410       | E    | 1166.623807 | 583.815541      | 1149.597258    | 575.302267       | 1148.613242    | 574.810259       | 8  |
| 11 | 1308.504874 | 654.756075      | 1291.478325    | 646.242801       | 1290.494309    | 645.750792       | P    | 1037.581214 | 519.294245      | 1020.554665    | 510.780971       | 1019.570649    | 510.288963       | 7  |
| 12 | 1421.588938 | 711.298107      | 1404.562389    | 702.784832       | 1403.578373    | 702.292824       | I    | 940.528450  | 470.767863      | 923.501901     | 462.254589       | 922.517885     | 461.762581       | 6  |
| 13 | 1518.641702 | 759.824489      | 1501.615153    | 751.311215       | 1500.631137    | 750.819206       | P    | 827.444386  | 414.225831      | 810.417837     | 405.712557       | 809.433821     | 405.220549       | 5  |
| 14 | 1575.663166 | 788.335221      | 1558.636617    | 779.821946       | 1557.652601    | 779.329938       | G    | 730.391622  | 365.699449      | 713.365073     | 357.186175       | 712.381057     | 356.694167       | 4  |
| 15 | 1662.695194 | 831.851235      | 1645.668645    | 823.337961       | 1644.684629    | 822.845952       | S    | 673.370158  | 337.188717      | 656.343609     | 328.675443       | 655.359593     | 328.183435       | 3  |
| 16 | 2101.920520 | 1051.463898     | 2084.893971    | 1042.950623      | 2083.909955    | 1042.458615      | Q    | 586.338130  | 293.672703      | 569.311581     | 285.159429       |                |                  | 2  |
| 17 |             |                 |                |                  |                |                  | K    | 147.112804  | 74.060040       | 130.086255     | 65.546765        |                |                  | 1  |

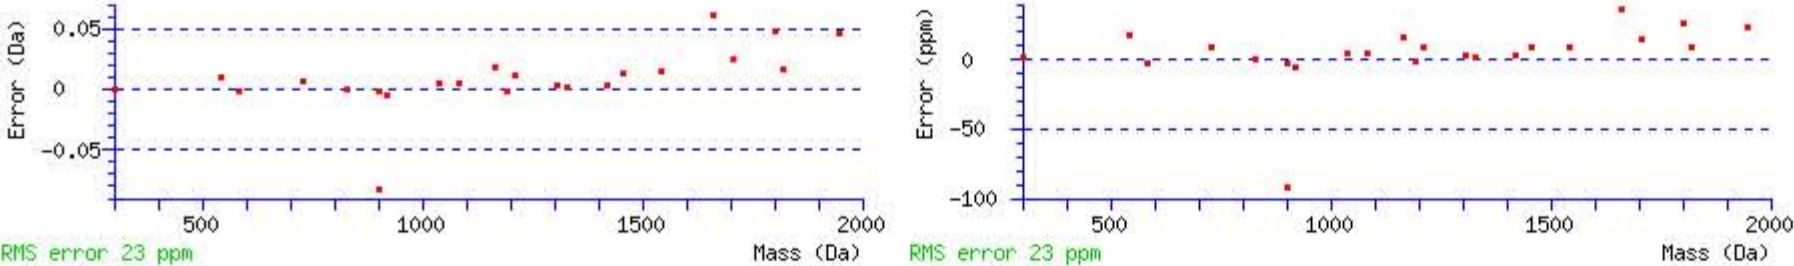

NCBI BLAST search of [AIEDDCSQYEPIPGSQK](#)  
(Parameters: blastp, nr protein database, expect=20000, no filter, PAM30)  
Other BLAST [web gateways](#)

All matches to this query

| Score | Mr(calc):   | Delta     | Sequence                           |
|-------|-------------|-----------|------------------------------------|
| 75.8  | 2247.018753 | 0.031515  | <a href="#">AIEDDCSQYEPIPGSQK</a>  |
| 17.4  | 2247.018753 | 0.031515  | <a href="#">AIEDDCSQYEPIPGSQK</a>  |
| 4.1   | 2247.051773 | -0.001505 | <a href="#">EVMQDYRDELKDFFAVDK</a> |
| 0.3   | 2247.063034 | -0.012766 | <a href="#">VTDANDNPPVFSQDVYR</a>  |

MATRIX

SCIENCE

Mascot Search Results

Peptide View

MS/MS Fragmentation of **LGSLGAACEQTQTEGAK**  
Found in **CO8A\_HUMAN**, Complement component C8 alpha chain OS=Homo sapiens GN=C8A PE=1 SV=2

Match to Query 51246: 2342.159352 from(781.727060,3+) rtinseconds(1995) index(20210)  
Title: Locus:1.1.1.3077.10 File:"2013-07-02 CLN FXIII 180 min 2nd F 2.wiff"  
Data file C:\Program Files (x86)\Matrix Science\Mascot Daemon\mgf\8 FXIII 180 min 2nd\mascot\_daemon\_merge.mgf

Click mouse within plot area to zoom in by factor of two about that point  
Or, 

Plot from

0

 to 

2800

 Da 

Full range

  
Label all possible matches ☐ Label matches used for scoring ☒

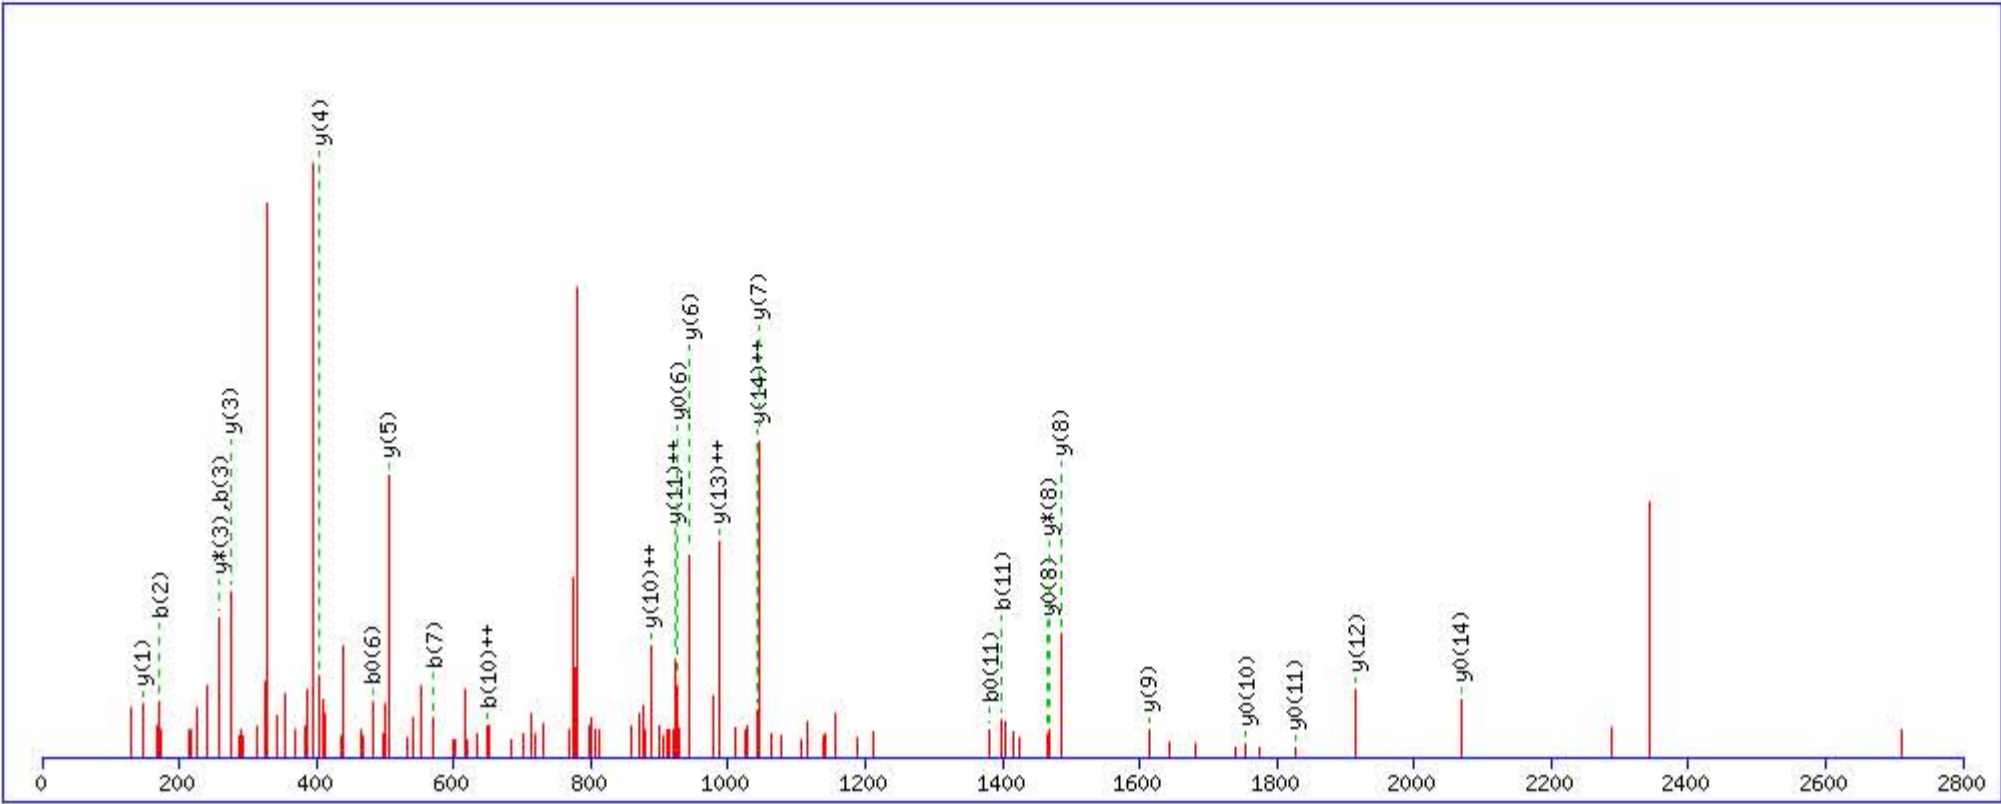

Monoisotopic mass of neutral peptide Mr(calc): 2342.143250  
Fixed modifications: Carbamidomethyl (C) (apply to specified residues or termini only)  
Variable modifications:  
Q10 : Biotin:Thermo-21345 (Q)  
Q12 : Biotin:Thermo-21345 (Q)  
Ions Score: 42 Expect: 0.0017  
Matches : 27/164 fragment ions using 48 most intense peaks [\(help\)](#)

| #  | b           | b <sup>++</sup> | b <sup>*</sup> | b <sup>+++</sup> | b <sup>0</sup> | b <sup>0++</sup> | Seq. | y           | y <sup>++</sup> | y <sup>*</sup> | y <sup>+++</sup> | y <sup>0</sup> | y <sup>0++</sup> | #  |
|----|-------------|-----------------|----------------|------------------|----------------|------------------|------|-------------|-----------------|----------------|------------------|----------------|------------------|----|
| 1  | 114.091340  | 57.549308       |                |                  |                |                  | L    |             |                 |                |                  |                |                  | 17 |
| 2  | 171.112804  | 86.060040       |                |                  |                |                  | G    | 2230.066475 | 1115.536875     | 2213.039926    | 1107.023601      | 2212.055910    | 1106.531593      | 16 |
| 3  | 258.144832  | 129.576054      |                |                  | 240.134267     | 120.570772       | S    | 2173.045011 | 1087.026143     | 2156.018462    | 1078.512869      | 2155.034446    | 1078.020861      | 15 |
| 4  | 371.228896  | 186.118086      |                |                  | 353.218331     | 177.112804       | L    | 2086.012983 | 1043.510129     | 2068.986434    | 1034.996855      | 2068.002418    | 1034.504847      | 14 |
| 5  | 428.250360  | 214.628818      |                |                  | 410.239795     | 205.623536       | G    | 1972.928919 | 986.968098      | 1955.902370    | 978.454823       | 1954.918354    | 977.962815       | 13 |
| 6  | 499.287474  | 250.147375      |                |                  | 481.276909     | 241.142093       | A    | 1915.907455 | 958.457366      | 1898.880906    | 949.944091       | 1897.896890    | 949.452083       | 12 |
| 7  | 570.324588  | 285.665932      |                |                  | 552.314023     | 276.660650       | A    | 1844.870341 | 922.938809      | 1827.843792    | 914.425534       | 1826.859776    | 913.933526       | 11 |
| 8  | 730.355237  | 365.681257      |                |                  | 712.344672     | 356.675974       | C    | 1773.833227 | 887.420252      | 1756.806678    | 878.906977       | 1755.822662    | 878.414969       | 10 |
| 9  | 859.397830  | 430.202553      |                |                  | 841.387265     | 421.197271       | E    | 1613.802578 | 807.404927      | 1596.776029    | 798.891653       | 1595.792013    | 798.399645       | 9  |
| 10 | 1298.623156 | 649.815216      | 1281.596607    | 641.301942       | 1280.612591    | 640.809934       | Q    | 1484.759985 | 742.883631      | 1467.733436    | 734.370356       | 1466.749420    | 733.878348       | 8  |
| 11 | 1399.670835 | 700.339056      | 1382.644286    | 691.825781       | 1381.660270    | 691.333773       | T    | 1045.534659 | 523.270968      | 1028.508110    | 514.757693       | 1027.524094    | 514.265685       | 7  |
| 12 | 1838.896161 | 919.951719      | 1821.869612    | 911.438444       | 1820.885596    | 910.946436       | Q    | 944.486980  | 472.747128      | 927.460431     | 464.233854       | 926.476415     | 463.741846       | 6  |
| 13 | 1939.943840 | 970.475558      | 1922.917291    | 961.962284       | 1921.933275    | 961.470276       | T    | 505.261654  | 253.134465      | 488.235105     | 244.621191       | 487.251089     | 244.129183       | 5  |
| 14 | 2068.986433 | 1034.996854     | 2051.959884    | 1026.483580      | 2050.975868    | 1025.991572      | E    | 404.213975  | 202.610626      | 387.187426     | 194.097351       | 386.203410     | 193.605343       | 4  |
| 15 | 2126.007897 | 1063.507586     | 2108.981348    | 1054.994312      | 2107.997332    | 1054.502304      | G    | 275.171382  | 138.089329      | 258.144833     | 129.576055       |                |                  | 3  |
| 16 | 2197.045011 | 1099.026144     | 2180.018462    | 1090.512869      | 2179.034446    | 1090.020861      | A    | 218.149918  | 109.578597      | 201.123369     | 101.065323       |                |                  | 2  |
| 17 |             |                 |                |                  |                |                  | K    | 147.112804  | 74.060040       | 130.086255     | 65.546765        |                |                  | 1  |

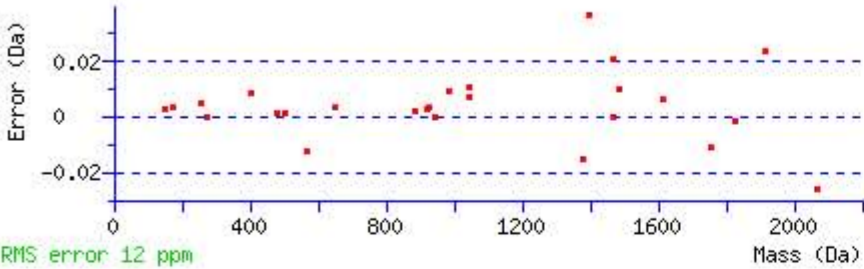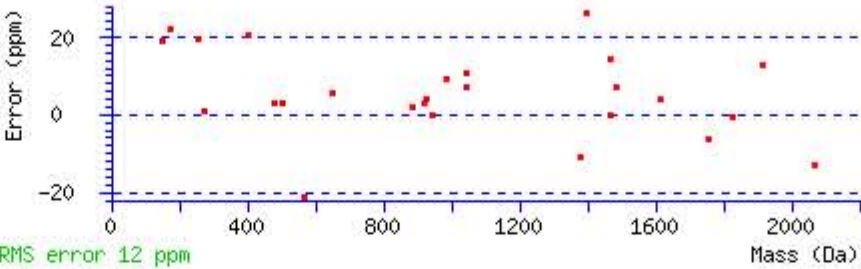

NCBI BLAST search of **LGSLGAACEQTQTEGAK**  
(Parameters: blastp, nr protein database, expect=20000, no filter, PAM30)  
Other BLAST [web gateways](#)

All matches to this query

| Score | Mr(calc):   | Delta    | Sequence                          |
|-------|-------------|----------|-----------------------------------|
| 42.4  | 2342.143250 | 0.016102 | <a href="#">LGSLGAACEQTQTEGAK</a> |

M

A

T

R

I

X

S

C

I

E

N

C

E

Mascot Search Results

Peptide View

MS/MS Fragmentation of **FGGTICSGDIWDQASCSSTTCVR**  
Found in **CO8A\_HUMAN**, Complement component C8 alpha chain OS=Homo sapiens GN=C8A PE=1 SV=2

Match to Query 59805: 2962.315696 from(741.586200,4+) rtinseconds(2373) index(36446)  
Title: Locus:1.1.1.935.9 File:"2013-07-02 CLN FXIII 180 min 2nd F 3.wiff"  
Data file C:\Program Files (x86)\Matrix Science\Mascot Daemon\mgf\8 FXIII 180 min 2nd\mascot\_daemon\_merge.mgf

Click mouse within plot area to zoom in by factor of two about that point  
Or, 

Plot from

0

 to 

3000

 Da 

Full range

  
Label all possible matches ☐ Label matches used for scoring ☒

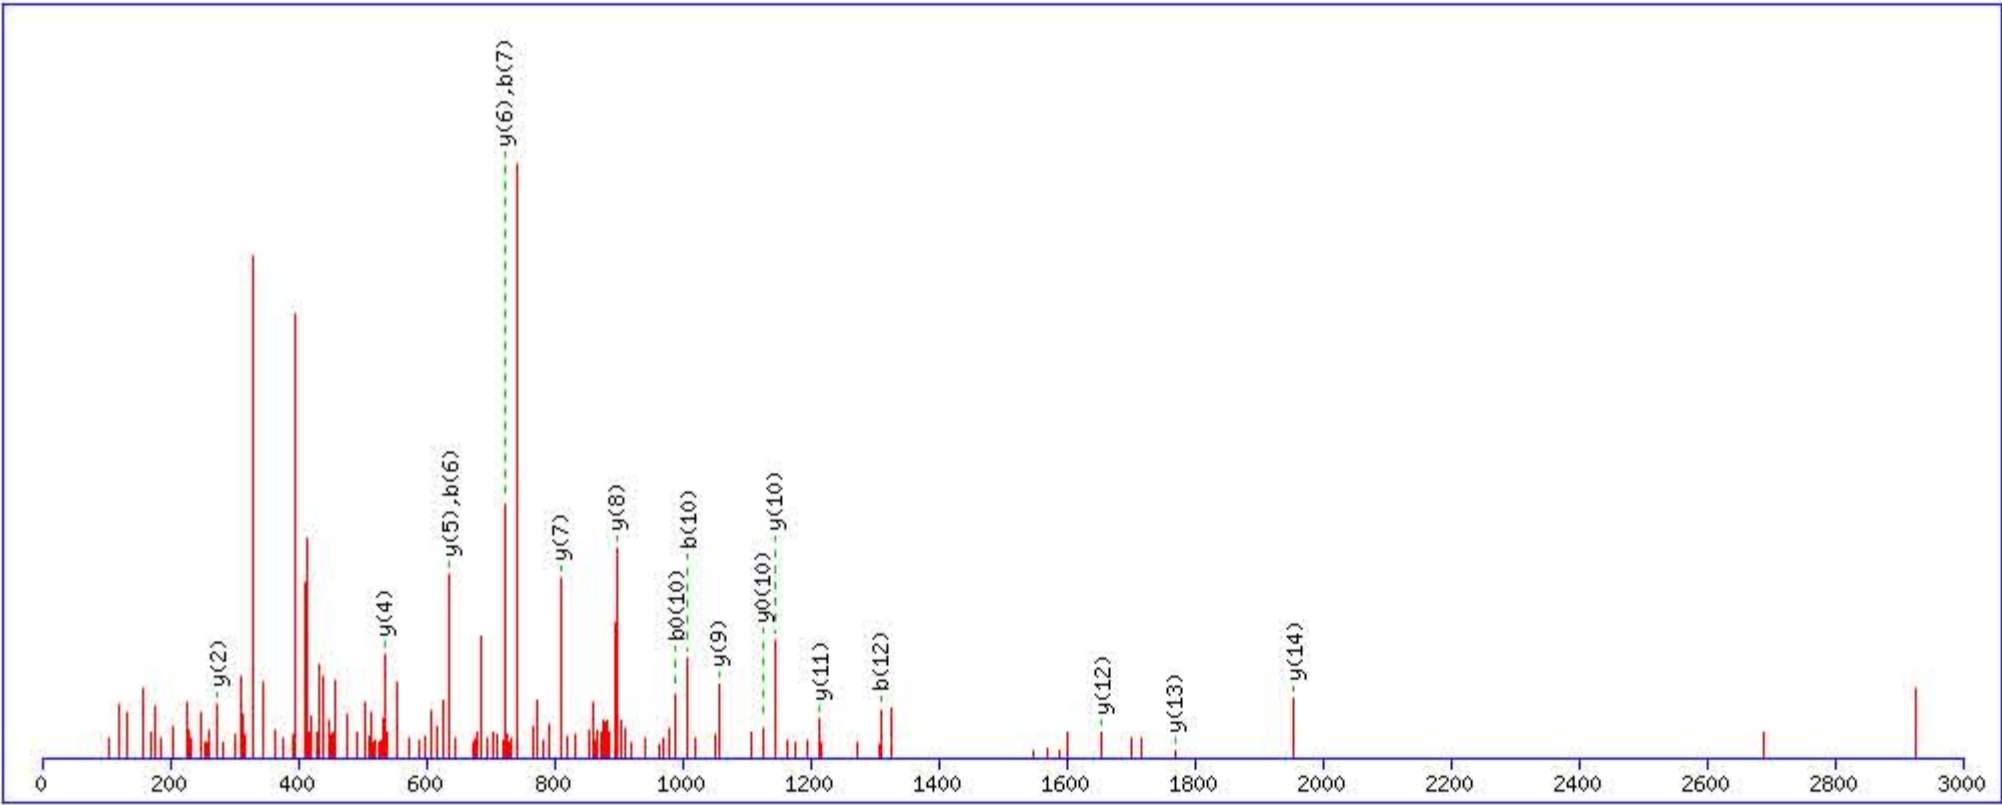

Monoisotopic mass of neutral peptide Mr(calc): 2962.271835  
Fixed modifications: Carbamidomethyl (C) (apply to specified residues or termini only)  
Variable modifications:  
Q13 : Biotin:Thermo-21345 (Q)  
Ions Score: 60 Expect: 7.1e-006  
Matches : 18/240 fragment ions using 35 most intense peaks ([help](#))

| #  | b           | b <sup>++</sup> | b <sup>*</sup> | b <sup>*++</sup> | b <sup>0</sup> | b <sup>0++</sup> | Seq. | y           | y <sup>++</sup> | y <sup>*</sup> | y <sup>*++</sup> | y <sup>0</sup> | y <sup>0++</sup> | #  |
|----|-------------|-----------------|----------------|------------------|----------------|------------------|------|-------------|-----------------|----------------|------------------|----------------|------------------|----|
| 1  | 148.075690  | 74.541483       |                |                  |                |                  | F    |             |                 |                |                  |                |                  | 24 |
| 2  | 205.097154  | 103.052215      |                |                  |                |                  | G    | 2816.210649 | 1408.608962     | 2799.184100    | 1400.095688      | 2798.200084    | 1399.603680      | 23 |
| 3  | 262.118618  | 131.562947      |                |                  |                |                  | G    | 2759.189185 | 1380.098230     | 2742.162636    | 1371.584956      | 2741.178620    | 1371.092948      | 22 |
| 4  | 363.166297  | 182.086786      |                |                  | 345.155732     | 173.081504       | T    | 2702.167721 | 1351.587498     | 2685.141172    | 1343.074224      | 2684.157156    | 1342.582216      | 21 |
| 5  | 476.250361  | 238.628818      |                |                  | 458.239796     | 229.623536       | I    | 2601.120042 | 1301.063659     | 2584.093493    | 1292.550384      | 2583.109477    | 1292.058376      | 20 |
| 6  | 636.281010  | 318.644143      |                |                  | 618.270445     | 309.638861       | C    | 2488.035978 | 1244.521627     | 2471.009429    | 1236.008352      | 2470.025413    | 1235.516344      | 19 |
| 7  | 723.313038  | 362.160157      |                |                  | 705.302473     | 353.154875       | S    | 2328.005329 | 1164.506302     | 2310.978780    | 1155.993028      | 2309.994764    | 1155.501020      | 18 |
| 8  | 780.334502  | 390.670889      |                |                  | 762.323937     | 381.665607       | G    | 2240.973301 | 1120.990288     | 2223.946752    | 1112.477014      | 2222.962736    | 1111.985006      | 17 |
| 9  | 895.361445  | 448.184361      |                |                  | 877.350880     | 439.179078       | D    | 2183.951837 | 1092.479556     | 2166.925288    | 1083.966282      | 2165.941272    | 1083.474274      | 16 |
| 10 | 1008.445509 | 504.726393      |                |                  | 990.434944     | 495.721110       | I    | 2068.924894 | 1034.966085     | 2051.898345    | 1026.452810      | 2050.914329    | 1025.960802      | 15 |
| 11 | 1194.524822 | 597.766049      |                |                  | 1176.514257    | 588.760767       | W    | 1955.840830 | 978.424053      | 1938.814281    | 969.910778       | 1937.830265    | 969.418770       | 14 |
| 12 | 1309.551765 | 655.279521      |                |                  | 1291.541200    | 646.274238       | D    | 1769.761517 | 885.384396      | 1752.734968    | 876.871122       | 1751.750952    | 876.379114       | 13 |
| 13 | 1748.777091 | 874.892184      | 1731.750542    | 866.378909       | 1730.766526    | 865.886901       | Q    | 1654.734574 | 827.870925      | 1637.708025    | 819.357650       | 1636.724009    | 818.865642       | 12 |
| 14 | 1819.814205 | 910.410741      | 1802.787656    | 901.897466       | 1801.803640    | 901.405458       | A    | 1215.509248 | 608.258262      | 1198.482699    | 599.744987       | 1197.498683    | 599.252979       | 11 |
| 15 | 1906.846233 | 953.926755      | 1889.819684    | 945.413480       | 1888.835668    | 944.921472       | S    | 1144.472134 | 572.739705      | 1127.445585    | 564.226430       | 1126.461569    | 563.734422       | 10 |
| 16 | 2066.876882 | 1033.942079     | 2049.850333    | 1025.428804      | 2048.866317    | 1024.936796      | C    | 1057.440106 | 529.223691      | 1040.413557    | 520.710416       | 1039.429541    | 520.218408       | 9  |
| 17 | 2153.908910 | 1077.458093     | 2136.882361    | 1068.944818      | 2135.898345    | 1068.452810      | S    | 897.409457  | 449.208366      | 880.382908     | 440.695092       | 879.398892     | 440.203084       | 8  |
| 18 | 2240.940938 | 1120.974107     | 2223.914389    | 1112.460832      | 2222.930373    | 1111.968825      | S    | 810.377429  | 405.692352      | 793.350880     | 397.179078       | 792.366864     | 396.687070       | 7  |
| 19 | 2327.972966 | 1164.490121     | 2310.946417    | 1155.976847      | 2309.962401    | 1155.484839      | S    | 723.345401  | 362.176338      | 706.318852     | 353.663064       | 705.334836     | 353.171056       | 6  |
| 20 | 2429.020645 | 1215.013960     | 2411.994096    | 1206.500686      | 2411.010080    | 1206.008678      | T    | 636.313373  | 318.660324      | 619.286824     | 310.147050       | 618.302808     | 309.655042       | 5  |
| 21 | 2530.068324 | 1265.537800     | 2513.041775    | 1257.024525      | 2512.057759    | 1256.532517      | T    | 535.265694  | 268.136485      | 518.239145     | 259.623210       | 517.255129     | 259.131202       | 4  |
| 22 | 2690.098973 | 1345.553124     | 2673.072424    | 1337.039850      | 2672.088408    | 1336.547842      | C    | 434.218015  | 217.612645      | 417.191466     | 209.099371       |                |                  | 3  |
| 23 | 2789.167387 | 1395.087331     | 2772.140838    | 1386.574057      | 2771.156822    | 1386.082049      | V    | 274.187366  | 137.597321      | 257.160817     | 129.084046       |                |                  | 2  |
| 24 |             |                 |                |                  |                |                  | R    | 175.118952  | 88.063114       | 158.092403     | 79.549839        |                |                  | 1  |

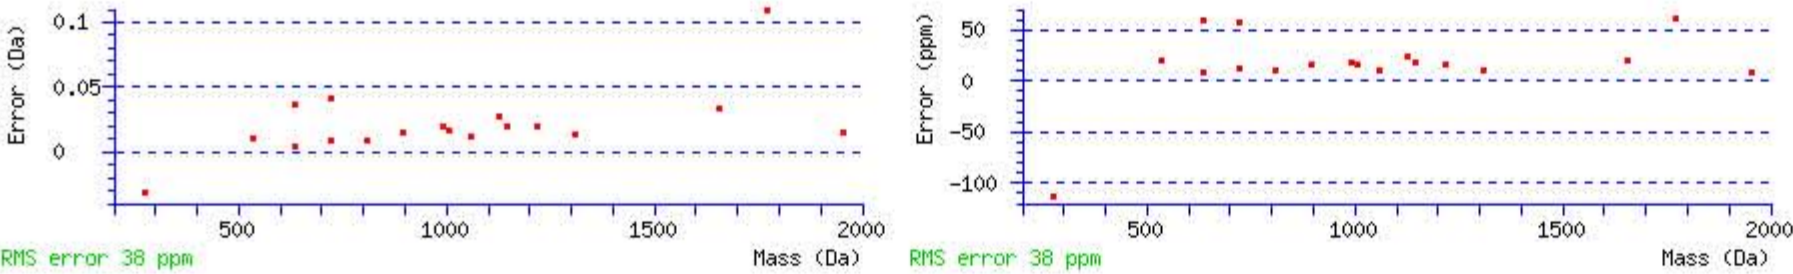

NCBI BLAST search of [FGGTICSGDIWDQASCSSTTCVR](#)  
(Parameters: blastp, nr protein database, expect=20000, no filter, PAM30)  
Other BLAST [web gateways](#)

All matches to this query

| Score | Mr(calc):   | Delta    | Sequence                                |
|-------|-------------|----------|-----------------------------------------|
| 60.5  | 2962.271835 | 0.043861 | <a href="#">FGGTICSGDIWDQASCSSTTCVR</a> |

MATRIX

SCIENCE

Mascot Search Results

Peptide View

MS/MS Fragmentation of **QALEEFQK**  
Found in **CO8B\_HUMAN**, Complement component C8 beta chain OS=Homo sapiens GN=C8B PE=1 SV=3

Match to Query 23374: 1302.666908 from(652.340730,2+) rtinseconds(1874) index(19378)  
Title: Locus:1.1.1.3035.8 File:"2013-07-02 CLN FXIII 180 min 2nd F 2.wiff"  
Data file C:\Program Files (x86)\Matrix Science\Mascot Daemon\mgf\8 FXIII 180 min 2nd\mascot\_daemon\_merge.mgf

Click mouse within plot area to zoom in by factor of two about that point  
Or, 

Plot from

100

 to 

1600

 Da 

Full range

  
Label all possible matches ☐ Label matches used for scoring ☒

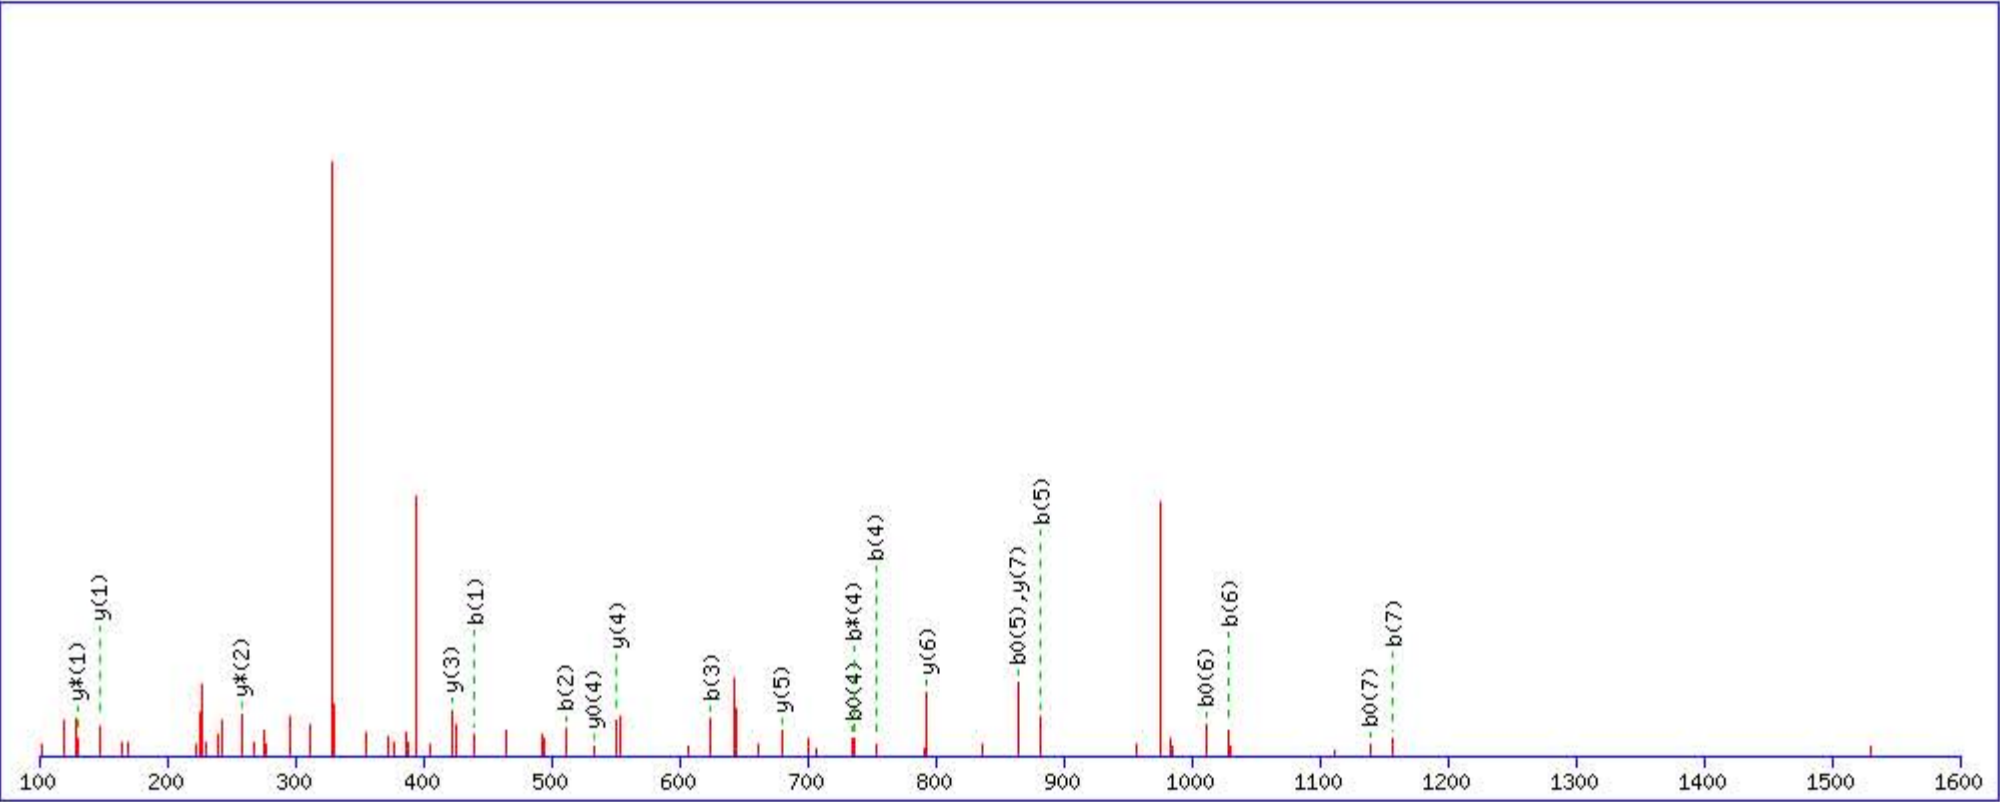

Monoisotopic mass of neutral peptide Mr(calc): 1302.664185  
Fixed modifications: Carbamidomethyl (C) (apply to specified residues or termini only)  
Variable modifications:  
Q1 : Biotin:Thermo-21345 (Q)  
Ions Score: 35 Expect: 0.0072  
Matches : 21/72 fragment ions using 41 most intense peaks [\(help\)](#)

| # | b           | b <sup>++</sup> | b <sup>*</sup> | b <sup>++</sup> * | b <sup>0</sup> | b <sup>0++</sup> | Seq. | y          | y <sup>++</sup> | y <sup>*</sup> | y <sup>++</sup> * | y <sup>0</sup> | y <sup>0++</sup> | # |
|---|-------------|-----------------|----------------|-------------------|----------------|------------------|------|------------|-----------------|----------------|-------------------|----------------|------------------|---|
| 1 | 440.232602  | 220.619939      | 423.206053     | 212.106664        |                |                  | Q    |            |                 |                |                   |                |                  | 8 |
| 2 | 511.269716  | 256.138496      | 494.243167     | 247.625221        |                |                  | A    | 864.446160 | 432.726718      | 847.419611     | 424.213443        | 846.435595     | 423.721435       | 7 |
| 3 | 624.353780  | 312.680528      | 607.327231     | 304.167254        |                |                  | L    | 793.409046 | 397.208161      | 776.382497     | 388.694887        | 775.398481     | 388.202879       | 6 |
| 4 | 753.396373  | 377.201825      | 736.369824     | 368.688550        | 735.385808     | 368.196542       | E    | 680.324982 | 340.666129      | 663.298433     | 332.152854        | 662.314417     | 331.660846       | 5 |
| 5 | 882.438966  | 441.723121      | 865.412417     | 433.209847        | 864.428401     | 432.717839       | E    | 551.282389 | 276.144833      | 534.255840     | 267.631558        | 533.271824     | 267.139550       | 4 |
| 6 | 1029.507380 | 515.257328      | 1012.480831    | 506.744054        | 1011.496815    | 506.252046       | F    | 422.239796 | 211.623536      | 405.213247     | 203.110261        |                |                  | 3 |
| 7 | 1157.565958 | 579.286617      | 1140.539409    | 570.773343        | 1139.555393    | 570.281334       | Q    | 275.171382 | 138.089329      | 258.144833     | 129.576054        |                |                  | 2 |
| 8 |             |                 |                |                   |                |                  | K    | 147.112804 | 74.060040       | 130.086255     | 65.546765         |                |                  | 1 |

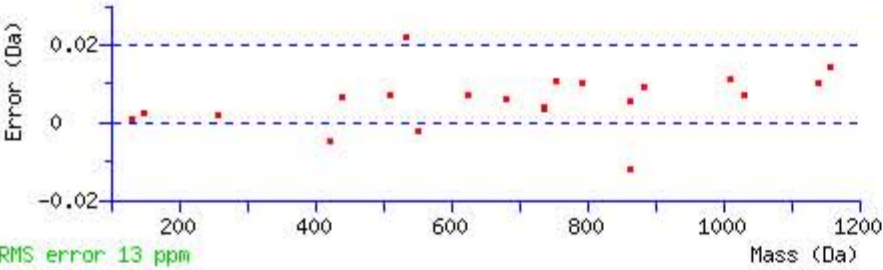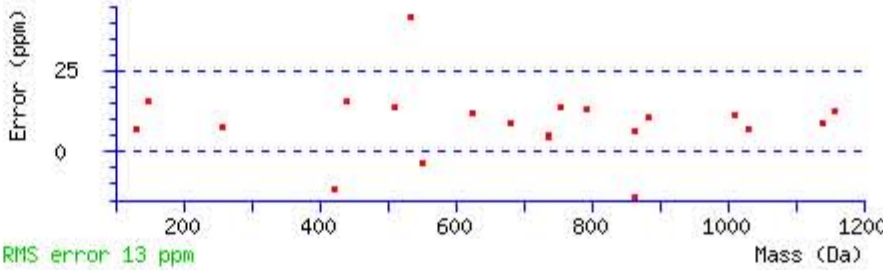

NCBI BLAST search of [QALEEFQK](#)  
(Parameters: blastp, nr protein database, expect=20000, no filter, PAM30)  
Other BLAST [web gateways](#)

All matches to this query

| Score | Mr(calc):   | Delta     | Sequence                       |
|-------|-------------|-----------|--------------------------------|
| 35.4  | 1302.664185 | 0.002723  | <a href="#">QALEEFQK</a>       |
| 12.8  | 1302.667542 | -0.000634 | <a href="#">KEALMQEK</a>       |
| 9.6   | 1302.666641 | 0.000267  | <a href="#">EKEAELKEAEK</a>    |
| 8.4   | 1302.660141 | 0.006767  | <a href="#">EAEGKLAAQMOK</a>   |
| 8.2   | 1302.668045 | -0.001137 | <a href="#">QPAGPASATPPGPR</a> |
| 7.1   | 1302.649582 | 0.017326  | <a href="#">FYSLLDPSYAK</a>    |
| 6.5   | 1302.666672 | 0.000236  | <a href="#">AQEELEKVTEK</a>    |
| 5.7   | 1302.667542 | -0.000634 | <a href="#">QKEMESLK</a>       |
| 5.1   | 1302.677917 | -0.011009 | <a href="#">SSATIQNTPKK</a>    |
| 4.5   | 1302.656799 | 0.010109  | <a href="#">QSIEPSPGIYGR</a>   |

MATRIX

SCIENCE

Mascot Search Results

Peptide View

MS/MS Fragmentation of **CEGFVCAQTGR**  
Found in **CO8B\_HUMAN**, Complement component C8 beta chain OS=Homo sapiens GN=C8B PE=1 SV=3

Match to Query 34383: 1594.711728 from(798.363140,2+) rtinseconds(1772) index(18698)  
Title: Locus:1.1.1.2999.18 File:"2013-07-02 CLN FXIII 180 min 2nd F 2.wiff"  
Data file C:\Program Files (x86)\Matrix Science\Mascot Daemon\mgf\8 FXIII 180 min 2nd\mascot\_daemon\_merge.mgf

Click mouse within plot area to zoom in by factor of two about that point  
Or, 

Plot from

100

 to 

1700

 Da 

Full range

  
Label all possible matches ☐ Label matches used for scoring ☒

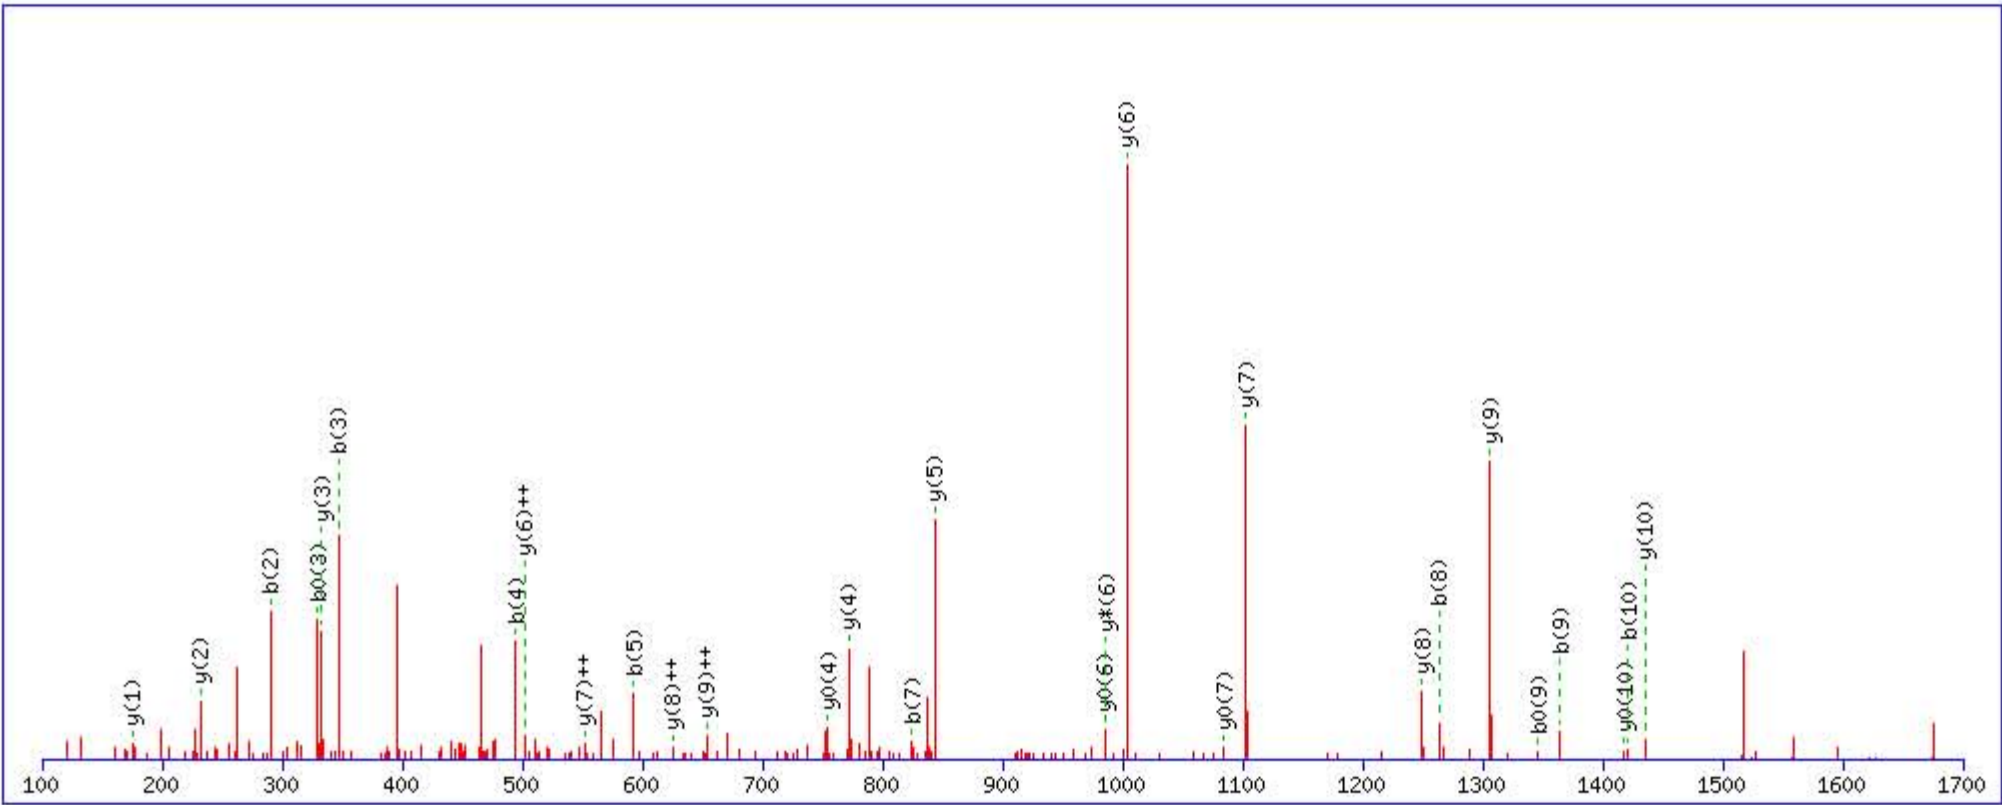

Monoisotopic mass of neutral peptide **Mr(calc):** 1594.705460  
Fixed modifications: Carbamidomethyl (C) (apply to specified residues or termini only)  
Variable modifications:  
Q8 : Biotin:Thermo-21345 (Q)  
Ions Score: 58 Expect: 1.2e-005  
Matches : 29/100 fragment ions using 60 most intense peaks ([help](#))

| #  | b           | b <sup>++</sup> | b <sup>*</sup> | b <sup>*++</sup> | b <sup>0</sup> | b <sup>0++</sup> | Seq. | y           | y <sup>++</sup> | y <sup>*</sup> | y <sup>*++</sup> | y <sup>0</sup> | y <sup>0++</sup> | #  |
|----|-------------|-----------------|----------------|------------------|----------------|------------------|------|-------------|-----------------|----------------|------------------|----------------|------------------|----|
| 1  | 161.037925  | 81.022600       |                |                  |                |                  | C    |             |                 |                |                  |                |                  | 11 |
| 2  | 290.080518  | 145.543897      |                |                  | 272.069953     | 136.538615       | E    | 1435.682069 | 718.344673      | 1418.655520    | 709.831398       | 1417.671504    | 709.339390       | 10 |
| 3  | 347.101982  | 174.054629      |                |                  | 329.091417     | 165.049347       | G    | 1306.639476 | 653.823376      | 1289.612927    | 645.310102       | 1288.628911    | 644.818094       | 9  |
| 4  | 494.170396  | 247.588836      |                |                  | 476.159831     | 238.583554       | F    | 1249.618012 | 625.312644      | 1232.591463    | 616.799370       | 1231.607447    | 616.307361       | 8  |
| 5  | 593.238810  | 297.123043      |                |                  | 575.228245     | 288.117761       | V    | 1102.549598 | 551.778437      | 1085.523049    | 543.265162       | 1084.539033    | 542.773154       | 7  |
| 6  | 753.269459  | 377.138368      |                |                  | 735.258894     | 368.133085       | C    | 1003.481184 | 502.244230      | 986.454635     | 493.730955       | 985.470619     | 493.238947       | 6  |
| 7  | 824.306573  | 412.656925      |                |                  | 806.296008     | 403.651642       | A    | 843.450535  | 422.228906      | 826.423986     | 413.715631       | 825.439970     | 413.223623       | 5  |
| 8  | 1263.531899 | 632.269588      | 1246.505350    | 623.756313       | 1245.521334    | 623.264305       | Q    | 772.413421  | 386.710349      | 755.386872     | 378.197074       | 754.402856     | 377.705066       | 4  |
| 9  | 1364.579578 | 682.793427      | 1347.553029    | 674.280153       | 1346.569013    | 673.788145       | T    | 333.188095  | 167.097685      | 316.161546     | 158.584411       | 315.177530     | 158.092403       | 3  |
| 10 | 1421.601042 | 711.304159      | 1404.574493    | 702.790885       | 1403.590477    | 702.298877       | G    | 232.140416  | 116.573846      | 215.113867     | 108.060571       |                |                  | 2  |
| 11 |             |                 |                |                  |                |                  | R    | 175.118952  | 88.063114       | 158.092403     | 79.549839        |                |                  | 1  |

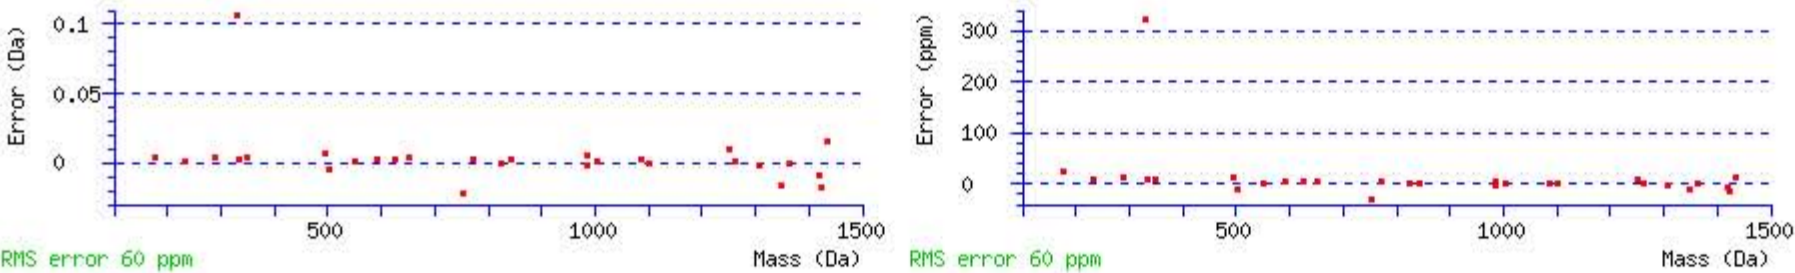

NCBI BLAST search of [CEGFVCAQTGR](#)  
(Parameters: blastp, nr protein database, expect=20000, no filter, PAM30)  
Other BLAST [web gateways](#)

All matches to this query

| Score | Mr(calc):   | Delta    | Sequence                    |
|-------|-------------|----------|-----------------------------|
| 57.8  | 1594.705460 | 0.006268 | <a href="#">CEGFVCAQTGR</a> |

MATRIX

SCIENCE

Mascot Search Results

Peptide View

MS/MS Fragmentation of **IPGIFELGISSQSDR**  
Found in **CO8B\_HUMAN**, Complement component C8 beta chain OS=Homo sapiens GN=C8B PE=1 SV=3

Match to Query 42694: 1929.023022 from(644.014950,3+) rtinseconds(2683) index(24160)  
Title: Locus:1.1.1.3316.10 File:"2013-07-02 CLN FXIII 180 min 2nd F 2.wiff"  
Data file C:\Program Files (x86)\Matrix Science\Mascot Daemon\mgf\8 FXIII 180 min 2nd\mascot\_daemon\_merge.mgf

Click mouse within plot area to zoom in by factor of two about that point  
Or, 

Plot from

100

 to 

1600

 Da 

Full range

  
Label all possible matches ☐ Label matches used for scoring ☒

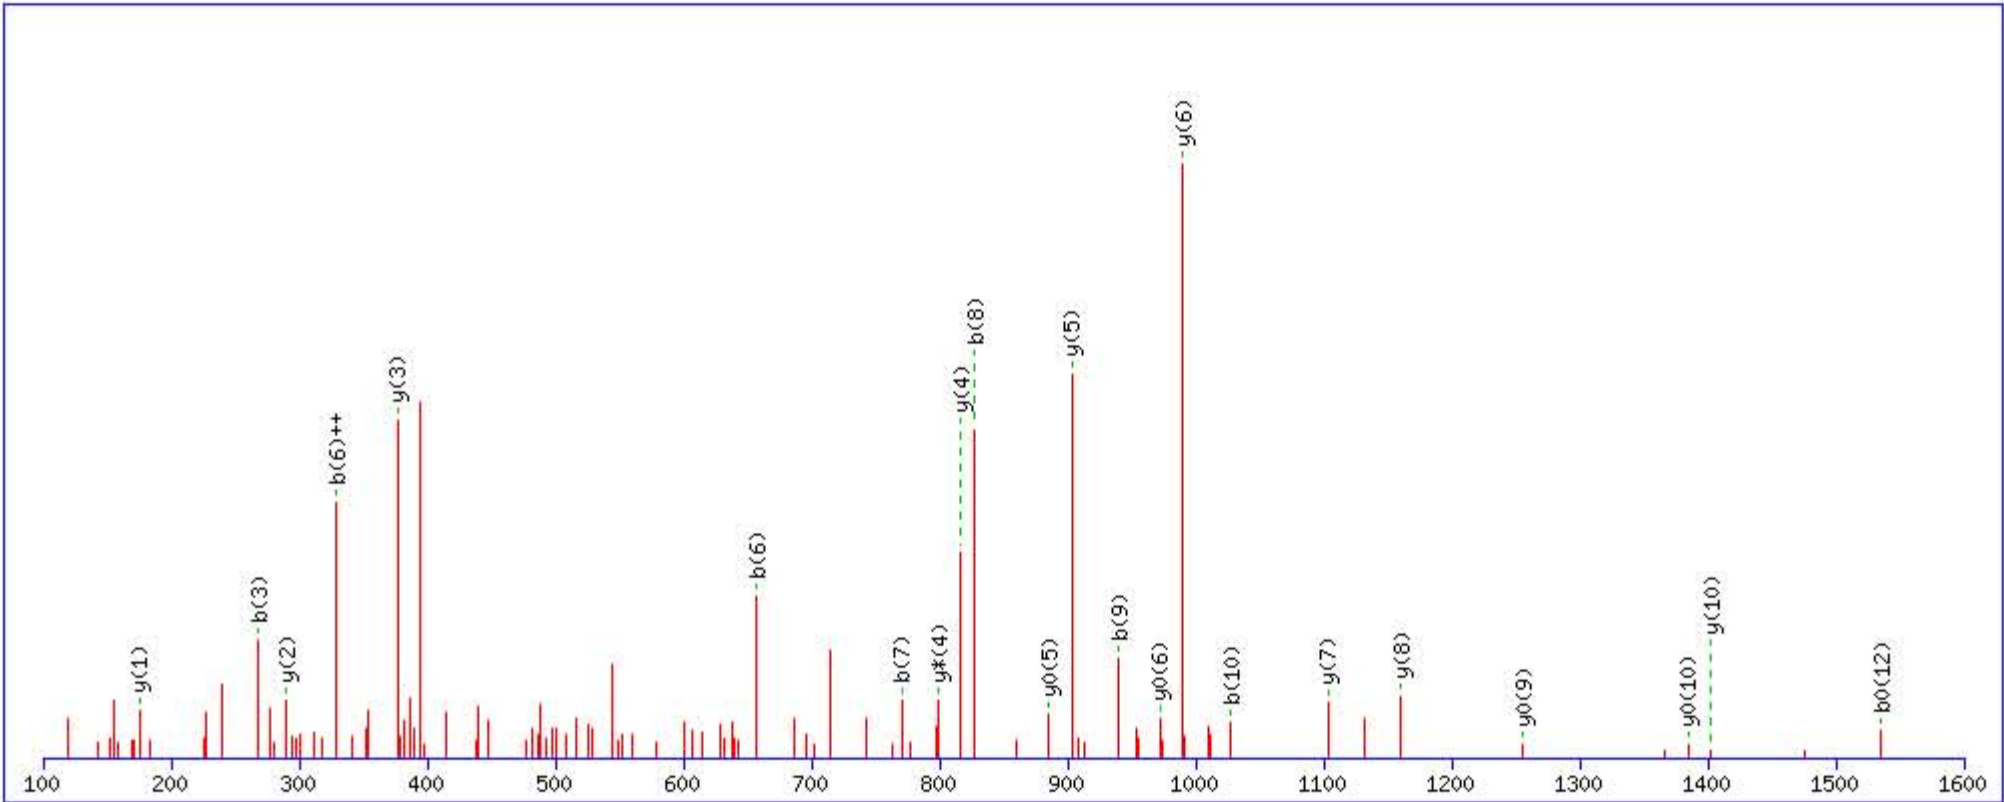

Monoisotopic mass of neutral peptide Mr(calc): 1929.002975  
Fixed modifications: Carbamidomethyl (C) (apply to specified residues or termini only)  
Variable modifications:  
Q12 : Biotin:Thermo-21345 (Q)  
Ions Score: 52 Expect: 7.5e-005  
Matches : 22/134 fragment ions using 37 most intense peaks [\(help\)](#)

| #  | b           | b <sup>++</sup> | b <sup>*</sup> | b <sup>++</sup> | b <sup>0</sup> | b <sup>0++</sup> | Seq. | y           | y <sup>++</sup> | y <sup>*</sup> | y <sup>++</sup> | y <sup>0</sup> | y <sup>0++</sup> | #  |
|----|-------------|-----------------|----------------|-----------------|----------------|------------------|------|-------------|-----------------|----------------|-----------------|----------------|------------------|----|
| 1  | 114.091340  | 57.549308       |                |                 |                |                  | I    |             |                 |                |                 |                |                  | 15 |
| 2  | 211.144104  | 106.075690      |                |                 |                |                  | P    | 1816.926196 | 908.966736      | 1799.899647    | 900.453462      | 1798.915631    | 899.961454       | 14 |
| 3  | 268.165568  | 134.586422      |                |                 |                |                  | G    | 1719.873432 | 860.440354      | 1702.846883    | 851.927080      | 1701.862867    | 851.435072       | 13 |
| 4  | 381.249632  | 191.128454      |                |                 |                |                  | I    | 1662.851968 | 831.929622      | 1645.825419    | 823.416348      | 1644.841403    | 822.924340       | 12 |
| 5  | 528.318046  | 264.662661      |                |                 |                |                  | F    | 1549.767904 | 775.387590      | 1532.741355    | 766.874316      | 1531.757339    | 766.382308       | 11 |
| 6  | 657.360639  | 329.183958      |                |                 | 639.350074     | 320.178675       | E    | 1402.699490 | 701.853383      | 1385.672941    | 693.340109      | 1384.688925    | 692.848101       | 10 |
| 7  | 770.444703  | 385.725990      |                |                 | 752.434138     | 376.720707       | L    | 1273.656897 | 637.332087      | 1256.630348    | 628.818812      | 1255.646332    | 628.326804       | 9  |
| 8  | 827.466167  | 414.236722      |                |                 | 809.455602     | 405.231439       | G    | 1160.572833 | 580.790055      | 1143.546284    | 572.276780      | 1142.562268    | 571.784772       | 8  |
| 9  | 940.550231  | 470.778754      |                |                 | 922.539666     | 461.773471       | I    | 1103.551369 | 552.279323      | 1086.524820    | 543.766048      | 1085.540804    | 543.274040       | 7  |
| 10 | 1027.582259 | 514.294768      |                |                 | 1009.571694    | 505.289485       | S    | 990.467305  | 495.737291      | 973.440756     | 487.224016      | 972.456740     | 486.732008       | 6  |
| 11 | 1114.614287 | 557.810782      |                |                 | 1096.603722    | 548.805499       | S    | 903.435277  | 452.221277      | 886.408728     | 443.708002      | 885.424712     | 443.215994       | 5  |
| 12 | 1553.839613 | 777.423445      | 1536.813064    | 768.910170      | 1535.829048    | 768.418162       | Q    | 816.403249  | 408.705263      | 799.376700     | 400.191988      | 798.392684     | 399.699980       | 4  |
| 13 | 1640.871641 | 820.939459      | 1623.845092    | 812.426184      | 1622.861076    | 811.934176       | S    | 377.177923  | 189.092600      | 360.151374     | 180.579325      | 359.167358     | 180.087317       | 3  |
| 14 | 1755.898584 | 878.452930      | 1738.872035    | 869.939656      | 1737.888019    | 869.447648       | D    | 290.145895  | 145.576585      | 273.119346     | 137.063311      | 272.135330     | 136.571303       | 2  |
| 15 |             |                 |                |                 |                |                  | R    | 175.118952  | 88.063114       | 158.092403     | 79.549839       |                |                  | 1  |

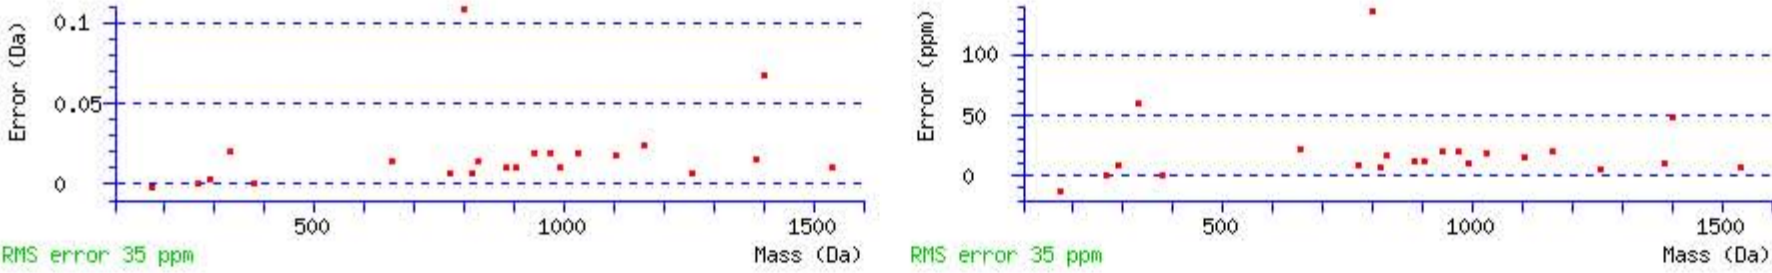

NCBI BLAST search of [IPGIFELGISSQSDR](#)  
(Parameters: blastp, nr protein database, expect=20000, no filter, PAM30)  
Other BLAST [web gateways](#)

All matches to this query

| Score | Mr(calc):   | Delta     | Sequence                            |
|-------|-------------|-----------|-------------------------------------|
| 52.1  | 1929.002975 | 0.020047  | <a href="#">IPGIFELGISSQSDR</a>     |
| 7.7   | 1929.041840 | -0.018818 | <a href="#">ADEVLAEVTVSAQASAKIK</a> |
| 7.5   | 1929.018219 | 0.004803  | <a href="#">LPEFLVQLYSYMRVR</a>     |
| 7.0   | 1928.996445 | 0.026577  | <a href="#">QCQVILNFLAAEGR</a>      |
| 1.9   | 1929.012833 | 0.010189  | <a href="#">EMEERTITIEIPEVLK</a>    |
| 1.3   | 1929.020721 | 0.002301  | <a href="#">RELEELSVGSDGVLIWK</a>   |

MATRIX

SCIENCE

Mascot Search Results

Peptide View

MS/MS Fragmentation of **KPYNVESYTPQTQGK**  
Found in **CO8B\_HUMAN**, Complement component C8 beta chain OS=Homo sapiens GN=C8B PE=1 SV=3

Match to Query 45758: 2050.024068 from(1026.019310,2+) rtinseconds(1600) index(17615)  
Title: Locus:1.1.1.2939.22 File:"2013-07-02 CLN FXIII 180 min 2nd F 2.wiff"  
Data file C:\Program Files (x86)\Matrix Science\Mascot Daemon\mgf\8 FXIII 180 min 2nd\mascot\_daemon\_merge.mgf

Click mouse within plot area to zoom in by factor of two about that point  
Or,   to  Da   
Label all possible matches ☐ Label matches used for scoring ☒

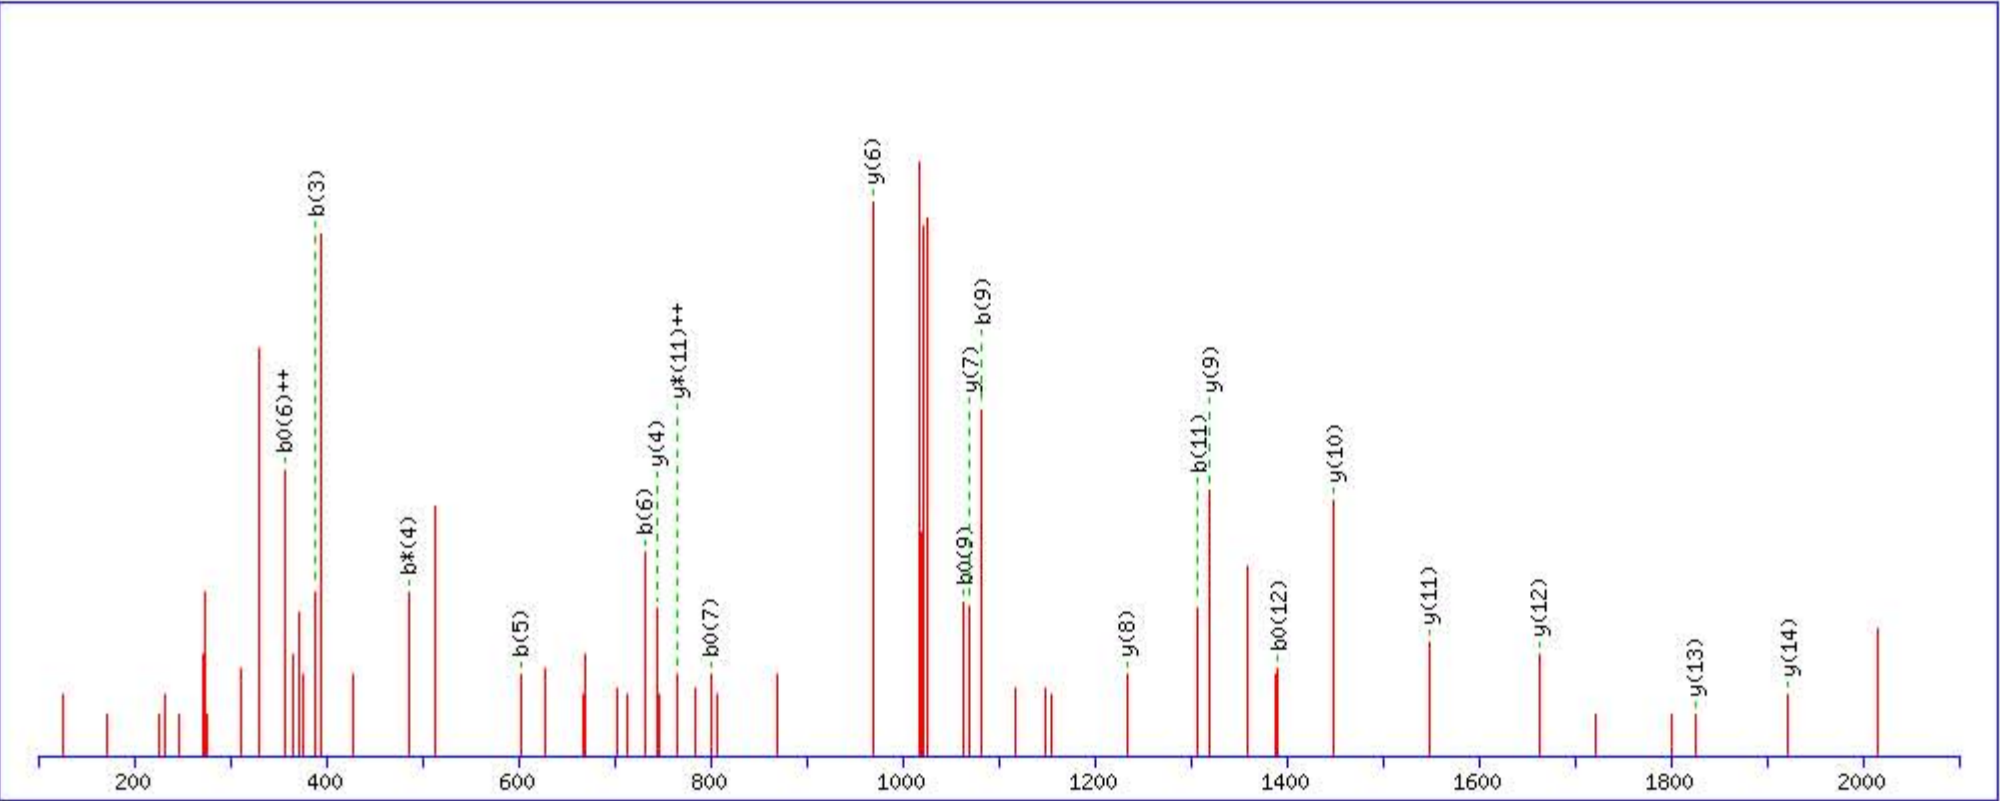

Monoisotopic mass of neutral peptide Mr(calc): 2050.019348  
Fixed modifications: Carbamidomethyl (C) (apply to specified residues or termini only)  
Variable modifications:  
Q13 : Biotin:Thermo-21345 (Q)  
Ions Score: 50 Expect: 0.00025  
Matches : 21/152 fragment ions using 47 most intense peaks [\(help\)](#)

| #  | b           | b <sup>++</sup> | b <sup>*</sup> | b <sup>*++</sup> | b <sup>0</sup> | b <sup>0++</sup> | Seq. | y           | y <sup>++</sup> | y <sup>*</sup> | y <sup>*++</sup> | y <sup>0</sup> | y <sup>0++</sup> | #  |
|----|-------------|-----------------|----------------|------------------|----------------|------------------|------|-------------|-----------------|----------------|------------------|----------------|------------------|----|
| 1  | 129.102239  | 65.054757       | 112.075690     | 56.541483        |                |                  | K    |             |                 |                |                  |                |                  | 15 |
| 2  | 226.155003  | 113.581139      | 209.128454     | 105.067865       |                |                  | P    | 1922.931678 | 961.969477      | 1905.905129    | 953.456203       | 1904.921113    | 952.964195       | 14 |
| 3  | 389.218332  | 195.112804      | 372.191783     | 186.599529       |                |                  | Y    | 1825.878914 | 913.443095      | 1808.852365    | 904.929821       | 1807.868349    | 904.437813       | 13 |
| 4  | 503.261259  | 252.134267      | 486.234710     | 243.620993       |                |                  | N    | 1662.815585 | 831.911431      | 1645.789036    | 823.398156       | 1644.805020    | 822.906148       | 12 |
| 5  | 602.329673  | 301.668475      | 585.303124     | 293.155200       |                |                  | V    | 1548.772658 | 774.889967      | 1531.746109    | 766.376693       | 1530.762093    | 765.884685       | 11 |
| 6  | 731.372266  | 366.189771      | 714.345717     | 357.676497       | 713.361701     | 357.184489       | E    | 1449.704244 | 725.355760      | 1432.677695    | 716.842486       | 1431.693679    | 716.350478       | 10 |
| 7  | 818.404294  | 409.705785      | 801.377745     | 401.192511       | 800.393729     | 400.700503       | S    | 1320.661651 | 660.834464      | 1303.635102    | 652.321189       | 1302.651086    | 651.829181       | 9  |
| 8  | 981.467623  | 491.237450      | 964.441074     | 482.724175       | 963.457058     | 482.232167       | Y    | 1233.629623 | 617.318450      | 1216.603074    | 608.805175       | 1215.619058    | 608.313167       | 8  |
| 9  | 1082.515302 | 541.761289      | 1065.488753    | 533.248015       | 1064.504737    | 532.756007       | T    | 1070.566294 | 535.786785      | 1053.539745    | 527.273511       | 1052.555729    | 526.781503       | 7  |
| 10 | 1179.568066 | 590.287671      | 1162.541517    | 581.774397       | 1161.557501    | 581.282389       | P    | 969.518615  | 485.262946      | 952.492066     | 476.749671       | 951.508050     | 476.257663       | 6  |
| 11 | 1307.626644 | 654.316960      | 1290.600095    | 645.803686       | 1289.616079    | 645.311678       | Q    | 872.465851  | 436.736564      | 855.439302     | 428.223289       | 854.455286     | 427.731281       | 5  |
| 12 | 1408.674323 | 704.840800      | 1391.647774    | 696.327525       | 1390.663758    | 695.835517       | T    | 744.407273  | 372.707275      | 727.380724     | 364.194000       | 726.396708     | 363.701992       | 4  |
| 13 | 1847.899649 | 924.453463      | 1830.873100    | 915.940188       | 1829.889084    | 915.448180       | Q    | 643.359594  | 322.183435      | 626.333045     | 313.670161       |                |                  | 3  |
| 14 | 1904.921113 | 952.964195      | 1887.894564    | 944.450920       | 1886.910548    | 943.958912       | G    | 204.134268  | 102.570772      | 187.107719     | 94.057497        |                |                  | 2  |
| 15 |             |                 |                |                  |                |                  | K    | 147.112804  | 74.060040       | 130.086255     | 65.546765        |                |                  | 1  |

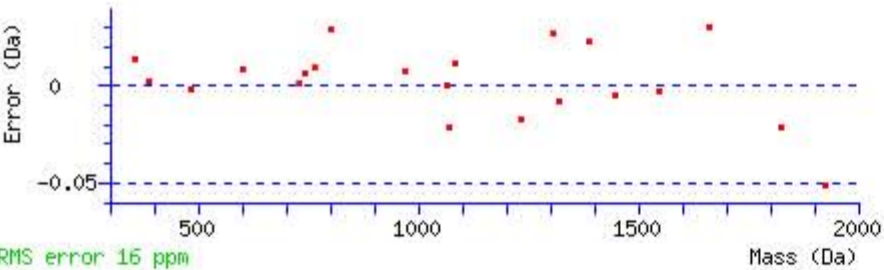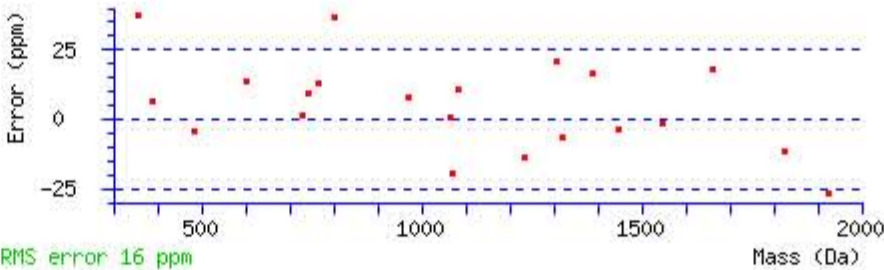

NCBI BLAST search of [KPYNVESYTPQTQGK](#)  
(Parameters: blastp, nr protein database, expect=20000, no filter, PAM30)  
Other BLAST [web gateways](#)

All matches to this query

| Score | Mr(calc):   | Delta    | Sequence                        |
|-------|-------------|----------|---------------------------------|
| 50.2  | 2050.019348 | 0.004720 | <a href="#">KPYNVESYTPQTQGK</a> |
| 37.2  | 2050.019348 | 0.004720 | <a href="#">KPYNVESYTPQTQGK</a> |

MATRIX

SCIENCE

Mascot Search Results

Peptide View

MS/MS Fragmentation of **KPYNVESYTPQTQ GK**  
Found in **CO8B\_HUMAN**, Complement component C8 beta chain OS=Homo sapiens GN=C8B PE=1 SV=3

Match to Query 51470: 2361.190872 from(788.070900,3+) rtinseconds(1901) index(19610)  
Title: Locus:1.1.1.3044.15 File:"2013-07-02 CLN FXIII 180 min 2nd F 2.wiff"  
Data file C:\Program Files (x86)\Matrix Science\Mascot Daemon\mgf\8 FXIII 180 min 2nd\mascot\_daemon\_merge.mgf

Click mouse within plot area to zoom in by factor of two about that point  
Or,   to  Da

Label all possible matches ☐ Label matches used for scoring ☒

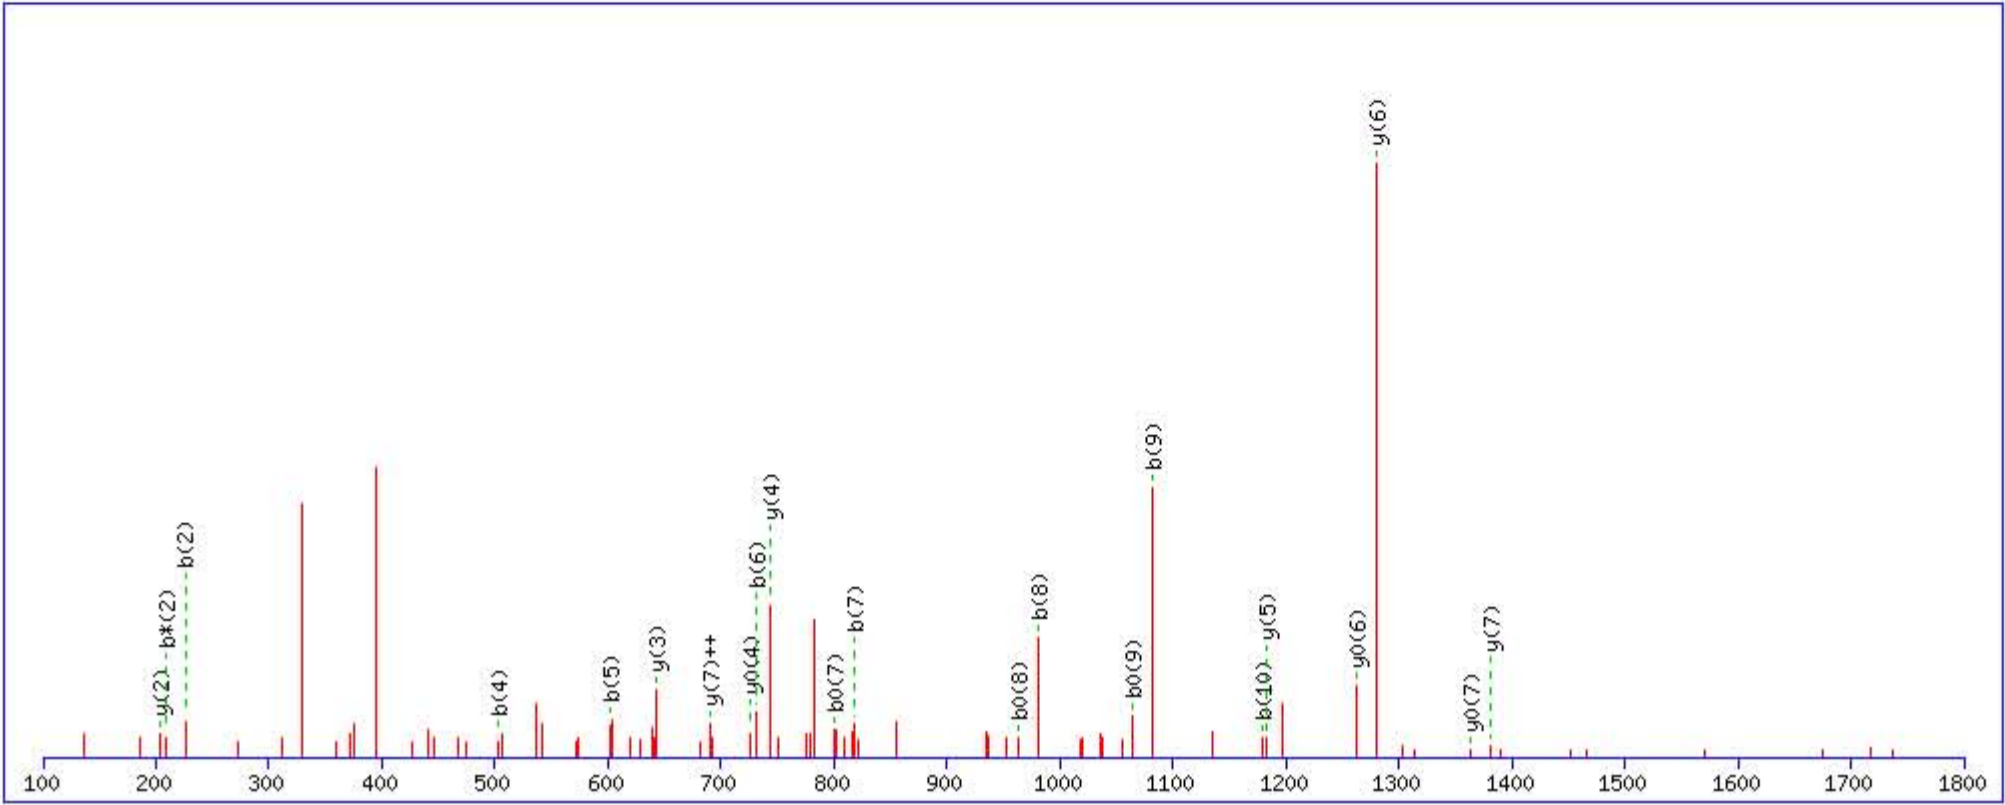

Monoisotopic mass of neutral peptide Mr(calc): 2361.186096  
Fixed modifications: Carbamidomethyl (C) (apply to specified residues or termini only)  
Variable modifications:  
Q11 : Biotin:Thermo-21345 (Q)  
Q13 : Biotin:Thermo-21345 (Q)  
Ions Score: 25 Expect: 0.0067  
Matches : 22/152 fragment ions using 61 most intense peaks [\(help\)](#)

| #  | b           | b <sup>++</sup> | b <sup>*</sup> | b <sup>*++</sup> | b <sup>0</sup> | b <sup>0++</sup> | Seq. | y           | y <sup>++</sup> | y <sup>*</sup> | y <sup>*++</sup> | y <sup>0</sup> | y <sup>0++</sup> | #  |
|----|-------------|-----------------|----------------|------------------|----------------|------------------|------|-------------|-----------------|----------------|------------------|----------------|------------------|----|
| 1  | 129.102239  | 65.054757       | 112.075690     | 56.541483        |                |                  | K    |             |                 |                |                  |                |                  | 15 |
| 2  | 226.155003  | 113.581139      | 209.128454     | 105.067865       |                |                  | P    | 2234.098426 | 1117.552851     | 2217.071877    | 1109.039576      | 2216.087861    | 1108.547568      | 14 |
| 3  | 389.218332  | 195.112804      | 372.191783     | 186.599529       |                |                  | Y    | 2137.045662 | 1069.026469     | 2120.019113    | 1060.513194      | 2119.035097    | 1060.021186      | 13 |
| 4  | 503.261259  | 252.134267      | 486.234710     | 243.620993       |                |                  | N    | 1973.982333 | 987.494805      | 1956.955784    | 978.981530       | 1955.971768    | 978.489522       | 12 |
| 5  | 602.329673  | 301.668475      | 585.303124     | 293.155200       |                |                  | V    | 1859.939406 | 930.473341      | 1842.912857    | 921.960067       | 1841.928841    | 921.468059       | 11 |
| 6  | 731.372266  | 366.189771      | 714.345717     | 357.676497       | 713.361701     | 357.184489       | E    | 1760.870992 | 880.939134      | 1743.844443    | 872.425860       | 1742.860427    | 871.933852       | 10 |
| 7  | 818.404294  | 409.705785      | 801.377745     | 401.192511       | 800.393729     | 400.700503       | S    | 1631.828399 | 816.417838      | 1614.801850    | 807.904563       | 1613.817834    | 807.412555       | 9  |
| 8  | 981.467623  | 491.237450      | 964.441074     | 482.724175       | 963.457058     | 482.232167       | Y    | 1544.796371 | 772.901824      | 1527.769822    | 764.388549       | 1526.785806    | 763.896541       | 8  |
| 9  | 1082.515302 | 541.761289      | 1065.488753    | 533.248015       | 1064.504737    | 532.756007       | T    | 1381.733042 | 691.370159      | 1364.706493    | 682.856885       | 1363.722477    | 682.364877       | 7  |
| 10 | 1179.568066 | 590.287671      | 1162.541517    | 581.774397       | 1161.557501    | 581.282389       | P    | 1280.685363 | 640.846320      | 1263.658814    | 632.333045       | 1262.674798    | 631.841037       | 6  |
| 11 | 1618.793392 | 809.900334      | 1601.766843    | 801.387060       | 1600.782827    | 800.895052       | Q    | 1183.632599 | 592.319938      | 1166.606050    | 583.806663       | 1165.622034    | 583.314655       | 5  |
| 12 | 1719.841071 | 860.424174      | 1702.814522    | 851.910899       | 1701.830506    | 851.418891       | T    | 744.407273  | 372.707275      | 727.380724     | 364.194000       | 726.396708     | 363.701992       | 4  |
| 13 | 2159.066397 | 1080.036836     | 2142.039848    | 1071.523562      | 2141.055832    | 1071.031554      | Q    | 643.359594  | 322.183435      | 626.333045     | 313.670161       |                |                  | 3  |
| 14 | 2216.087861 | 1108.547568     | 2199.061312    | 1100.034294      | 2198.077296    | 1099.542286      | G    | 204.134268  | 102.570772      | 187.107719     | 94.057497        |                |                  | 2  |
| 15 |             |                 |                |                  |                |                  | K    | 147.112804  | 74.060040       | 130.086255     | 65.546765        |                |                  | 1  |

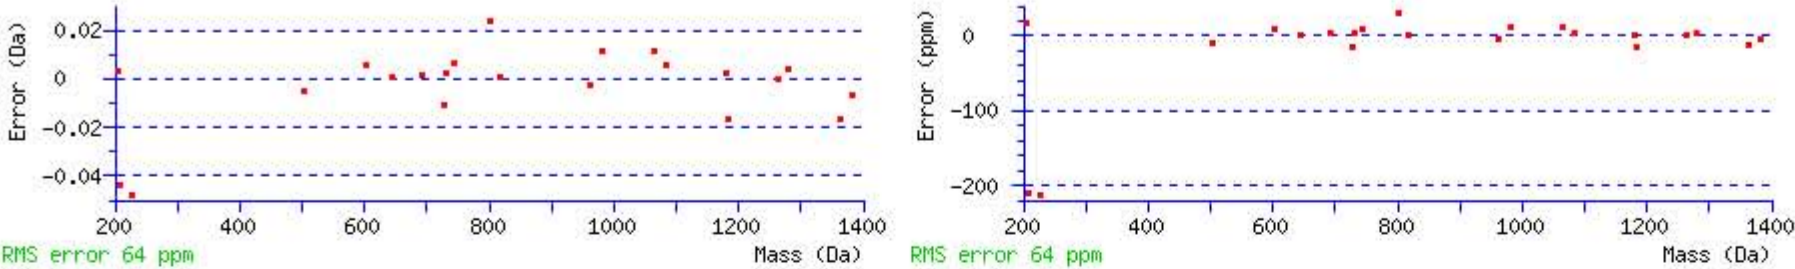

NCBI BLAST search of [KPYNVESYTPQTQ GK](#)  
(Parameters: blastp, nr protein database, expect=20000, no filter, PAM30)  
Other BLAST [web gateways](#)

All matches to this query

| Score | Mr(calc):   | Delta     | Sequence                               |
|-------|-------------|-----------|----------------------------------------|
| 25.3  | 2361.186096 | 0.004776  | <a href="#">KPYNVESYTPQTQ GK</a>       |
| 2.1   | 2361.199814 | -0.008942 | <a href="#">AAQALAKLTITSNPEMTFPGER</a> |
| 1.8   | 2361.203217 | -0.012345 | <a href="#">SVLDDLTSC TTSLRQINK</a>    |

M

A

T

R

I

X

S

C

I

E

N

C

E

Mascot Search Results

Peptide View

MS/MS Fragmentation of **CDCICPVGSQGLACEVSYR**  
Found in **CO8B\_HUMAN**, Complement component C8 beta chain OS=Homo sapiens GN=C8B PE=1 SV=3

Match to Query 54890: 2541.117102 from(848.046310,3+) rtinseconds(2154) index(21227)  
Title: Locus:1.1.1.3132.22 File:"2013-07-02 CLN FXIII 180 min 2nd F 2.wiff"  
Data file C:\Program Files (x86)\Matrix Science\Mascot Daemon\mgf\8 FXIII 180 min 2nd\mascot\_daemon\_merge.mgf

Click mouse within plot area to zoom in by factor of two about that point  
Or, 

Plot from

100

 to 

1900

 Da 

Full range

  
Label all possible matches ☐ Label matches used for scoring ☒

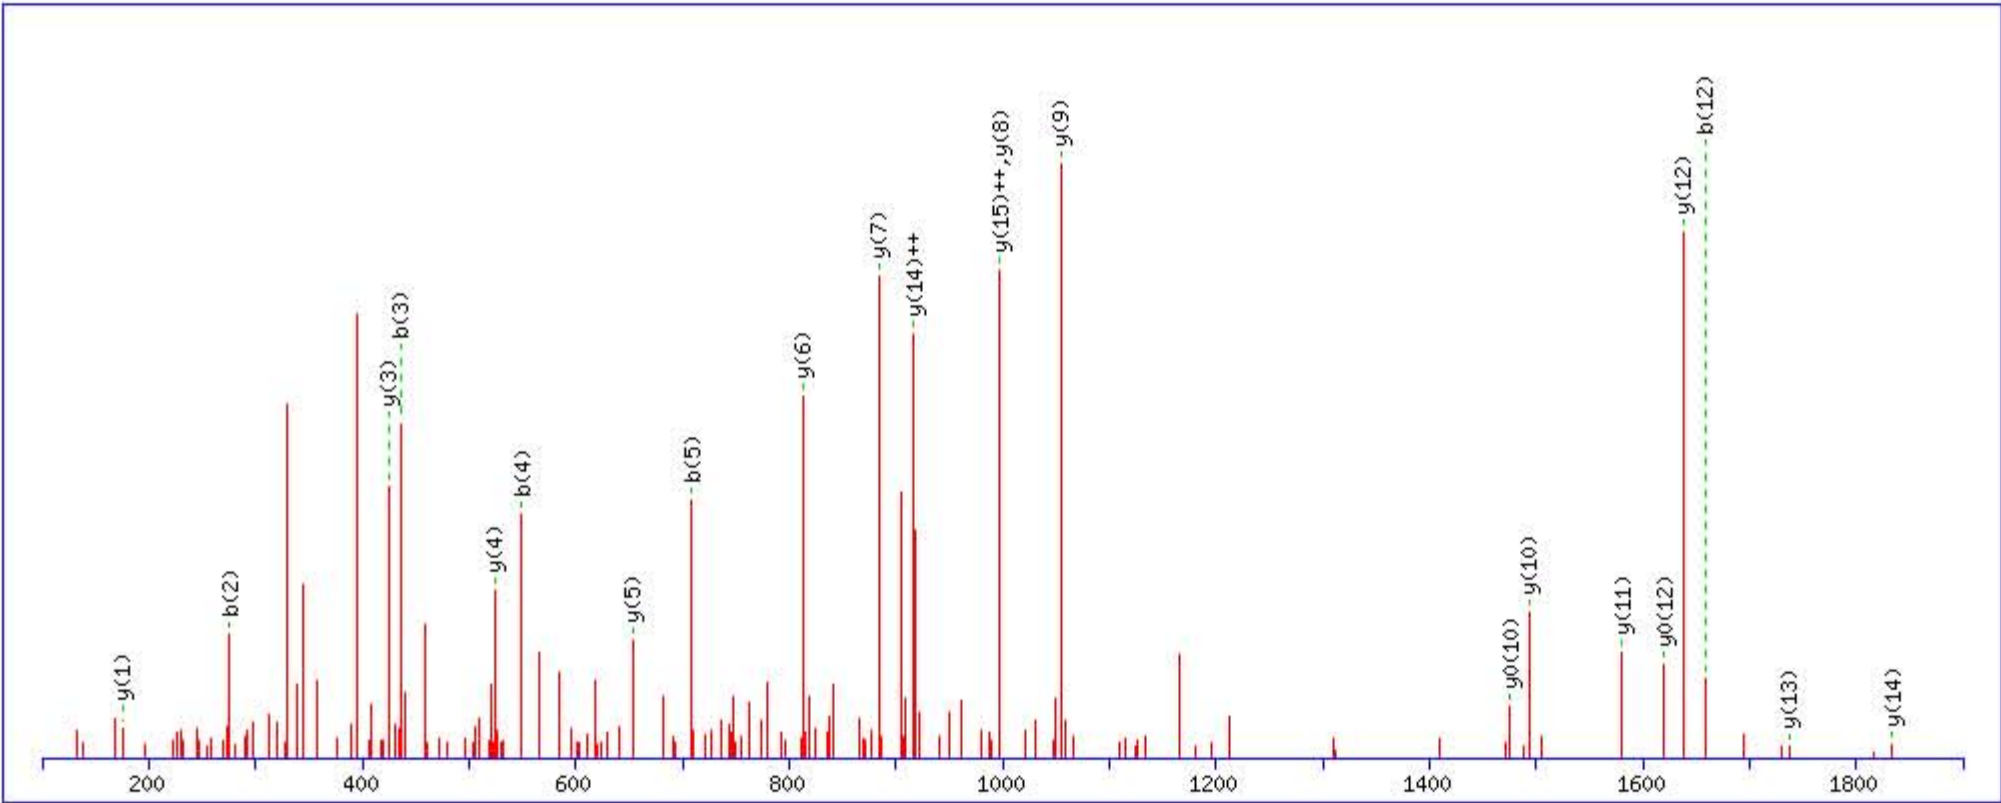

Monoisotopic mass of neutral peptide Mr(calc): 2541.094299  
Fixed modifications: Carbamidomethyl (C) (apply to specified residues or termini only)  
Variable modifications:  
Q10 : Biotin:Thermo-21345 (Q)  
Ions Score: 90 Expect: 5.6e-009  
Matches : 22/192 fragment ions using 34 most intense peaks [\(help\)](#)

| #  | b           | b <sup>++</sup> | b <sup>+</sup> | b <sup>+++</sup> | b <sup>0</sup> | b <sup>0++</sup> | Seq. | y           | y <sup>++</sup> | y <sup>+</sup> | y <sup>+++</sup> | y <sup>0</sup> | y <sup>0++</sup> | #  |
|----|-------------|-----------------|----------------|------------------|----------------|------------------|------|-------------|-----------------|----------------|------------------|----------------|------------------|----|
| 1  | 161.037925  | 81.022600       |                |                  |                |                  | C    |             |                 |                |                  |                |                  | 19 |
| 2  | 276.064868  | 138.536072      |                |                  | 258.054303     | 129.530790       | D    | 2382.070908 | 1191.539092     | 2365.044359    | 1183.025817      | 2364.060343    | 1182.533809      | 18 |
| 3  | 436.095517  | 218.551397      |                |                  | 418.084952     | 209.546114       | C    | 2267.043965 | 1134.025620     | 2250.017416    | 1125.512346      | 2249.033400    | 1125.020338      | 17 |
| 4  | 549.179581  | 275.093429      |                |                  | 531.169016     | 266.088146       | I    | 2107.013316 | 1054.010296     | 2089.986767    | 1045.497021      | 2089.002751    | 1045.005013      | 16 |
| 5  | 709.210230  | 355.108753      |                |                  | 691.199665     | 346.103471       | C    | 1993.929252 | 997.468264      | 1976.902703    | 988.954990       | 1975.918687    | 988.462982       | 15 |
| 6  | 806.262994  | 403.635135      |                |                  | 788.252429     | 394.629853       | P    | 1833.898603 | 917.452940      | 1816.872054    | 908.939665       | 1815.888038    | 908.447657       | 14 |
| 7  | 905.331408  | 453.169342      |                |                  | 887.320843     | 444.164060       | V    | 1736.845839 | 868.926558      | 1719.819290    | 860.413283       | 1718.835274    | 859.921275       | 13 |
| 8  | 962.352872  | 481.680074      |                |                  | 944.342307     | 472.674792       | G    | 1637.777425 | 819.392351      | 1620.750876    | 810.879076       | 1619.766860    | 810.387068       | 12 |
| 9  | 1049.384900 | 525.196088      |                |                  | 1031.374335    | 516.190806       | S    | 1580.755961 | 790.881619      | 1563.729412    | 782.368344       | 1562.745396    | 781.876336       | 11 |
| 10 | 1488.610226 | 744.808751      | 1471.583677    | 736.295477       | 1470.599661    | 735.803469       | Q    | 1493.723933 | 747.365605      | 1476.697384    | 738.852330       | 1475.713368    | 738.360322       | 10 |
| 11 | 1545.631690 | 773.319483      | 1528.605141    | 764.806209       | 1527.621125    | 764.314201       | G    | 1054.498607 | 527.752941      | 1037.472058    | 519.239667       | 1036.488042    | 518.747659       | 9  |
| 12 | 1658.715754 | 829.861515      | 1641.689205    | 821.348241       | 1640.705189    | 820.856233       | L    | 997.477143  | 499.242209      | 980.450594     | 490.728935       | 979.466578     | 490.236927       | 8  |
| 13 | 1729.752868 | 865.380072      | 1712.726319    | 856.866798       | 1711.742303    | 856.374790       | A    | 884.393079  | 442.700178      | 867.366530     | 434.186903       | 866.382514     | 433.694895       | 7  |
| 14 | 1889.783517 | 945.395397      | 1872.756968    | 936.882122       | 1871.772952    | 936.390114       | C    | 813.355965  | 407.181621      | 796.329416     | 398.668346       | 795.345400     | 398.176338       | 6  |
| 15 | 2018.826110 | 1009.916693     | 2001.799561    | 1001.403419      | 2000.815545    | 1000.911411      | E    | 653.325316  | 327.166296      | 636.298767     | 318.653021       | 635.314751     | 318.161013       | 5  |
| 16 | 2117.894524 | 1059.450900     | 2100.867975    | 1050.937625      | 2099.883959    | 1050.445617      | V    | 524.282723  | 262.645000      | 507.256174     | 254.131725       | 506.272158     | 253.639717       | 4  |
| 17 | 2204.926552 | 1102.966914     | 2187.900003    | 1094.453639      | 2186.915987    | 1093.961631      | S    | 425.214309  | 213.110793      | 408.187760     | 204.597518       | 407.203744     | 204.105510       | 3  |
| 18 | 2367.989881 | 1184.498578     | 2350.963332    | 1175.985304      | 2349.979316    | 1175.493296      | Y    | 338.182281  | 169.594778      | 321.155732     | 161.081504       |                |                  | 2  |
| 19 |             |                 |                |                  |                |                  | R    | 175.118952  | 88.063114       | 158.092403     | 79.549839        |                |                  | 1  |

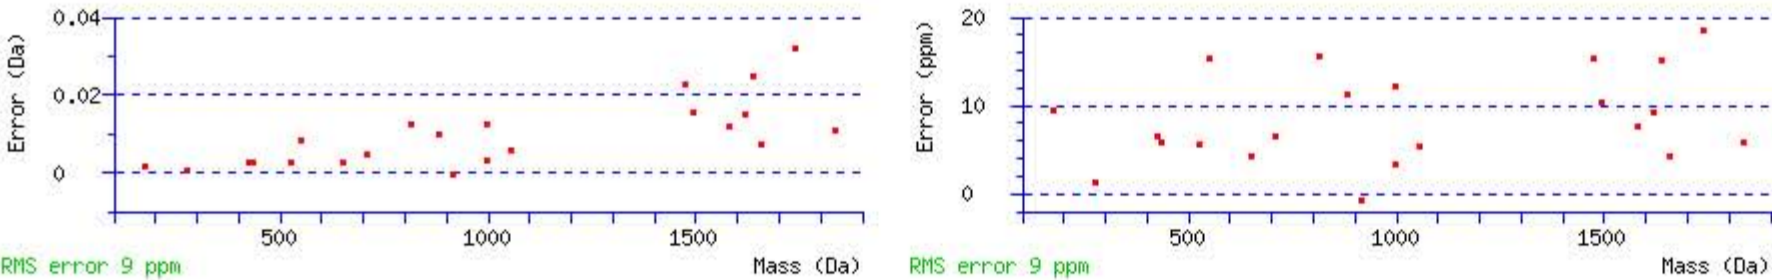

NCBI BLAST search of [CDCICPVGSQGLACEVSYR](#)  
(Parameters: blastp, nr protein database, expect=20000, no filter, PAM30)  
Other BLAST [web gateways](#)

All matches to this query

| Score | Mr(calc):   | Delta    | Sequence                            |
|-------|-------------|----------|-------------------------------------|
| 90.2  | 2541.094299 | 0.022803 | <a href="#">CDCICPVGSQGLACEVSYR</a> |

***MATRIX***  
***SCIENCE***

# Mascot Search Results

Peptide View

MS/MS Fragmentation of **FLQEQGHR**  
Found in **CO8G\_HUMAN**, Complement component C8 gamma chain OS=Homo sapiens GN=C8G PE=1 SV=3

Match to Query 23757: 1324.680428 from(663.347490,2+) rtinseconds(1524) index(31225)  
Title: Locus:1.1.1.639.15 File:"2013-07-02 CLN FXIII 180 min 2nd F 3.wiff"  
Data file C:\Program Files (x86)\Matrix Science\Mascot Daemon\mgf\8 FXIII 180 min 2nd\mascot\_daemon\_merge.mgf

Click mouse within plot area to zoom in by factor of two about that point  
Or,   to  Da   
Label all possible matches ☐ Label matches used for scoring ☒

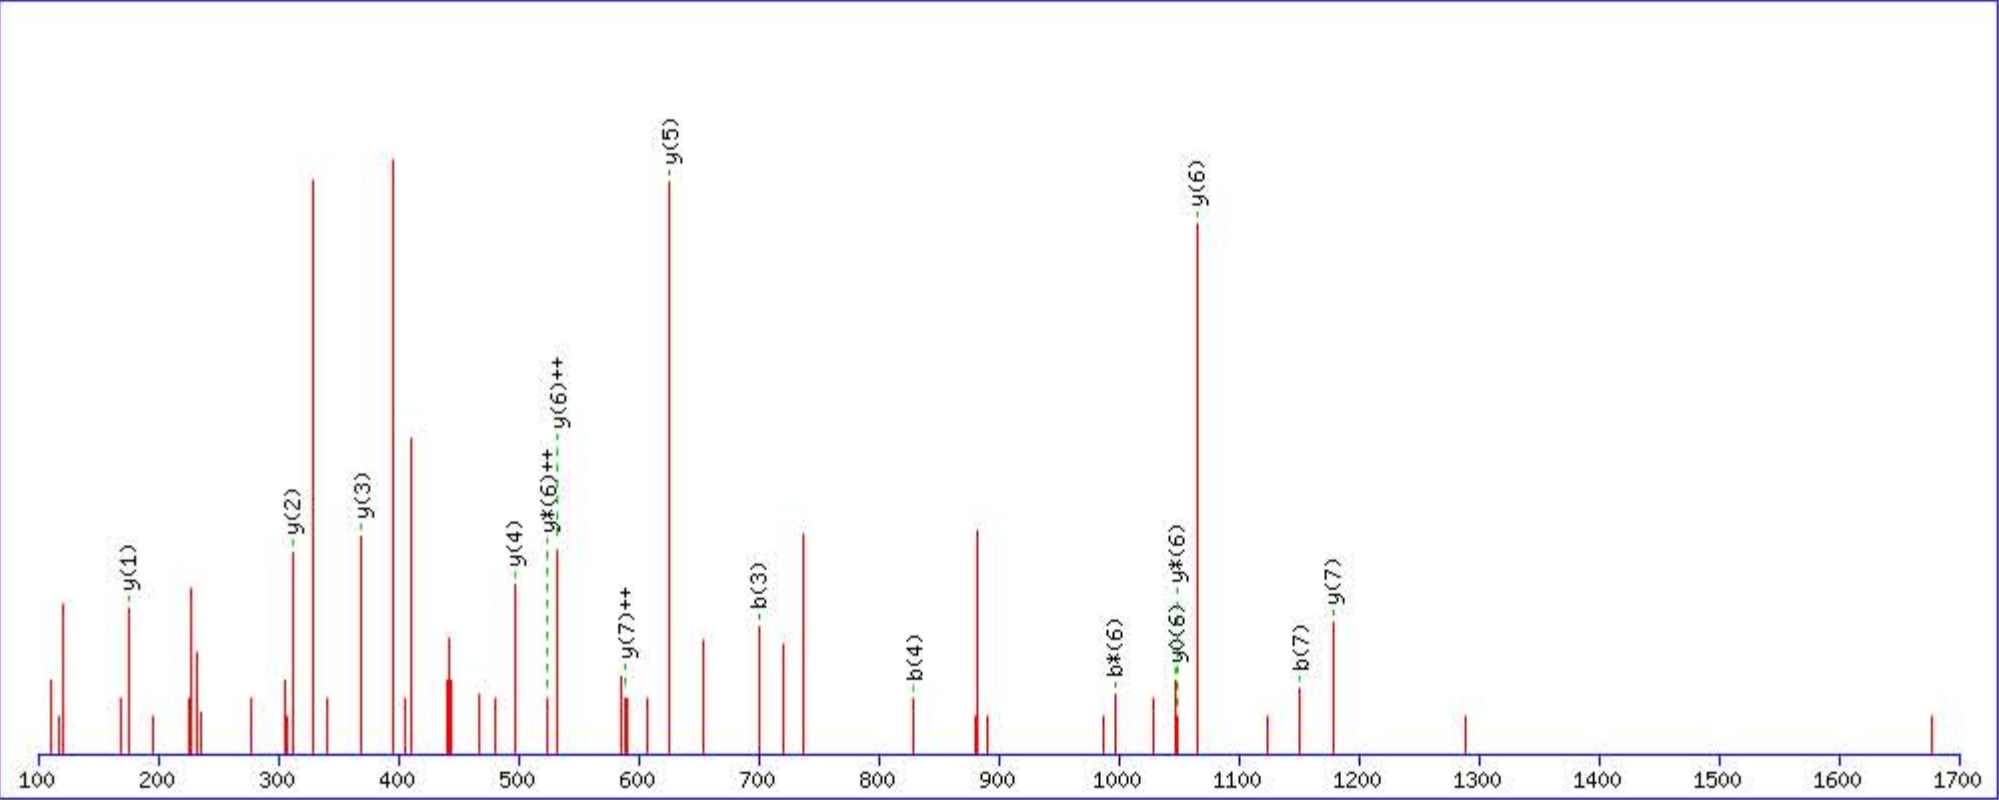

Monoisotopic mass of neutral peptide Mr(calc): 1324.671021  
Fixed modifications: Carbamidomethyl (C) (apply to specified residues or termini only)  
Variable modifications:  
Q3 : Biotin:Thermo-21345 (Q)  
Ions Score: 34 Expect: 0.0039  
Matches : 16/66 fragment ions using 39 most intense peaks ([help](#))

| # | b           | b <sup>++</sup> | b <sup>*</sup> | b <sup>***</sup> | b <sup>0</sup> | b <sup>0++</sup> | Seq. | y           | y <sup>++</sup> | y <sup>*</sup> | y <sup>***</sup> | y <sup>0</sup> | y <sup>0++</sup> | # |
|---|-------------|-----------------|----------------|------------------|----------------|------------------|------|-------------|-----------------|----------------|------------------|----------------|------------------|---|
| 1 | 148.075690  | 74.541483       |                |                  |                |                  | F    |             |                 |                |                  |                |                  | 8 |
| 2 | 261.159754  | 131.083515      |                |                  |                |                  | L    | 1178.609889 | 589.808583      | 1161.583340    | 581.295308       | 1160.599324    | 580.803300       | 7 |
| 3 | 700.385080  | 350.696178      | 683.358531     | 342.182904       |                |                  | Q    | 1065.525825 | 533.266551      | 1048.499276    | 524.753276       | 1047.515260    | 524.261268       | 6 |
| 4 | 829.427673  | 415.217475      | 812.401124     | 406.704200       | 811.417108     | 406.212192       | E    | 626.300499  | 313.653888      | 609.273950     | 305.140613       | 608.289934     | 304.648605       | 5 |
| 5 | 957.486251  | 479.246764      | 940.459702     | 470.733489       | 939.475686     | 470.241481       | Q    | 497.257906  | 249.132591      | 480.231357     | 240.619317       |                |                  | 4 |
| 6 | 1014.507715 | 507.757496      | 997.481166     | 499.244221       | 996.497150     | 498.752213       | G    | 369.199328  | 185.103302      | 352.172779     | 176.590028       |                |                  | 3 |
| 7 | 1151.566627 | 576.286952      | 1134.540078    | 567.773677       | 1133.556062    | 567.281669       | H    | 312.177864  | 156.592570      | 295.151315     | 148.079296       |                |                  | 2 |
| 8 |             |                 |                |                  |                |                  | R    | 175.118952  | 88.063114       | 158.092403     | 79.549839        |                |                  | 1 |

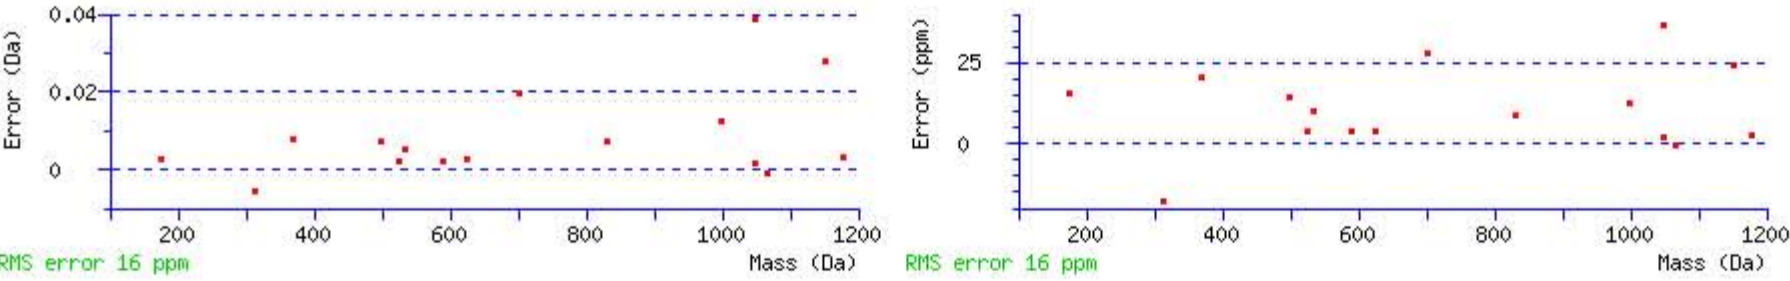

NCBI BLAST search of [FLQEQGHR](#)  
(Parameters: blastp, nr protein database, expect=20000, no filter, PAM30)  
Other BLAST [web gateways](#)

All matches to this query

| Score | Mr(calc):   | Delta     | Sequence                      |
|-------|-------------|-----------|-------------------------------|
| 34.3  | 1324.671021 | 0.009407  | <a href="#">FLQEQGHR</a>      |
| 10.4  | 1324.671021 | 0.009407  | <a href="#">FLQEQGHR</a>      |
| 8.3   | 1324.669647 | 0.010781  | <a href="#">MKEIAEAYLG GK</a> |
| 3.3   | 1324.692795 | -0.012367 | <a href="#">YLDFSLFKHR</a>    |

MATRIX

SCIENCE

Mascot Search Results

Peptide View

MS/MS Fragmentation of **KLDGICWQVR**  
Found in **CO8G\_HUMAN**, Complement component C8 gamma chain OS=Homo sapiens GN=C8G PE=1 SV=3

Match to Query 33984: 1584.845828 from(793.430190,2+) rtinseconds(2084) index(34759)  
Title: Locus:1.1.1.834.13 File:"2013-07-02 CLN FXIII 180 min 2nd F 3.wiff"  
Data file C:\Program Files (x86)\Matrix Science\Mascot Daemon\mgf\8 FXIII 180 min 2nd\mascot\_daemon\_merge.mgf

Click mouse within plot area to zoom in by factor of two about that point  
Or, 

Plot from

0

 to 

2200

 Da 

Full range

  
Label all possible matches ☐ Label matches used for scoring ☒

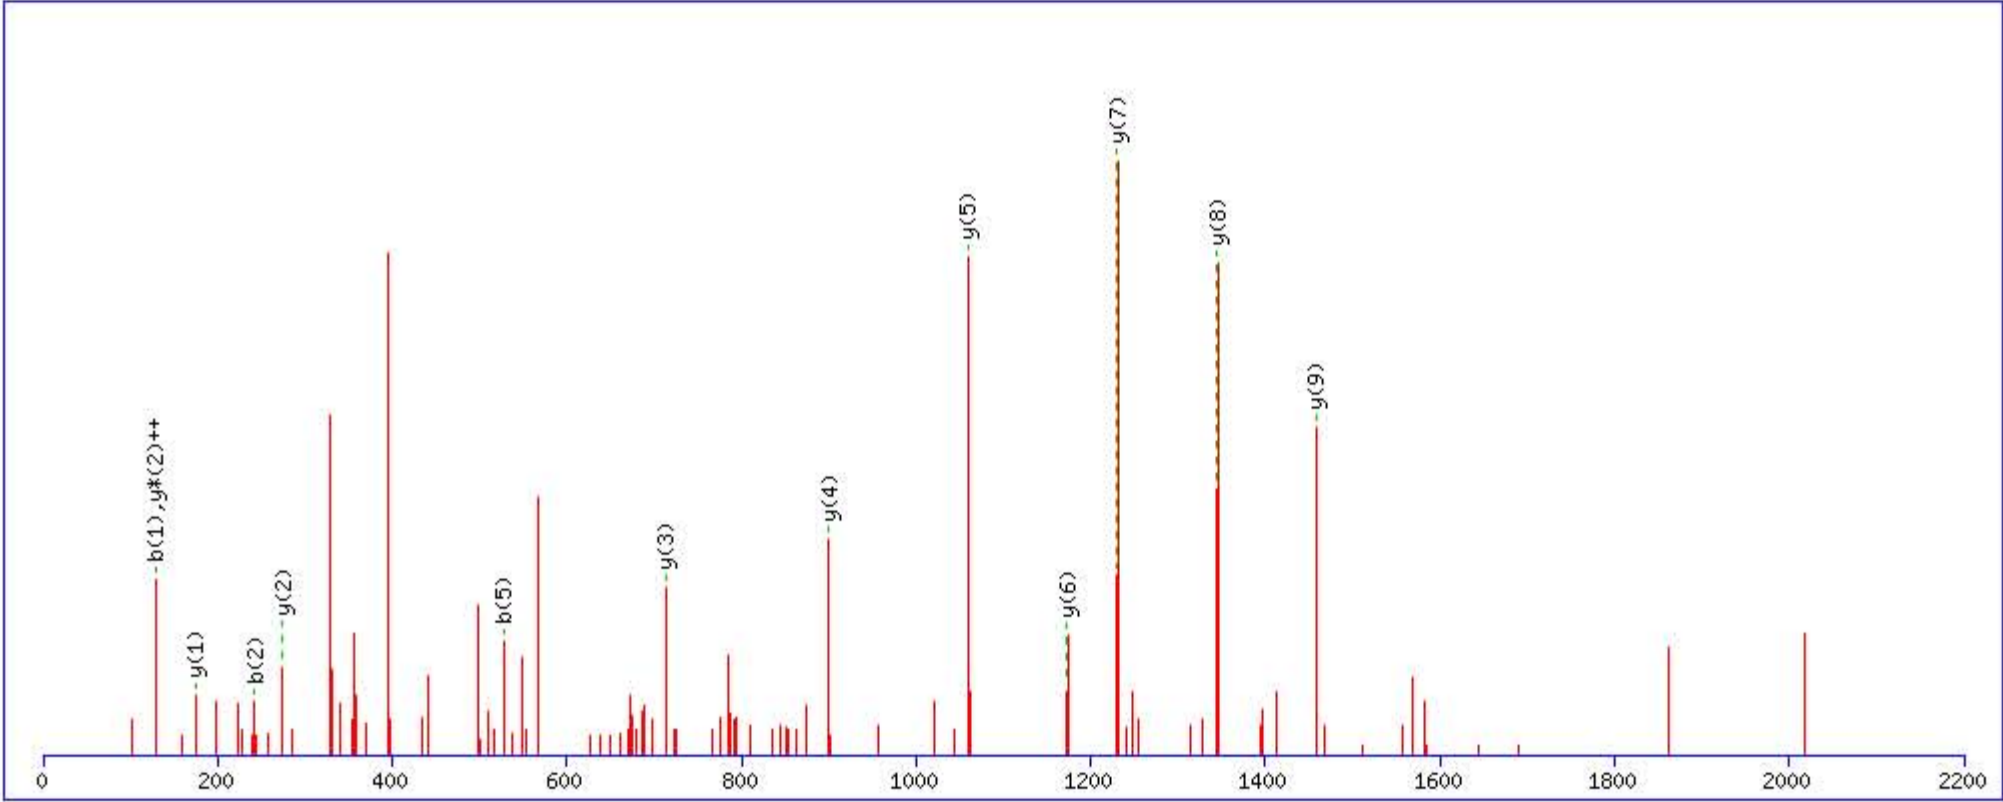

Monoisotopic mass of neutral peptide Mr(calc): 1584.826874  
Fixed modifications: Carbamidomethyl (C) (apply to specified residues or termini only)  
Variable modifications:  
Q8 : Biotin:Thermo-21345 (Q)  
Ions Score: 47 Expect: 0.00049  
Matches : 13/90 fragment ions using 30 most intense peaks [\(help\)](#)

| #  | b           | b <sup>++</sup> | b <sup>*</sup> | b <sup>*++</sup> | b <sup>0</sup> | b <sup>0++</sup> | Seq. | y           | y <sup>++</sup> | y <sup>*</sup> | y <sup>*++</sup> | y <sup>0</sup> | y <sup>0++</sup> | #  |
|----|-------------|-----------------|----------------|------------------|----------------|------------------|------|-------------|-----------------|----------------|------------------|----------------|------------------|----|
| 1  | 129.102239  | 65.054757       | 112.075690     | 56.541483        |                |                  | K    |             |                 |                |                  |                |                  | 10 |
| 2  | 242.186303  | 121.596790      | 225.159754     | 113.083515       |                |                  | L    | 1457.739189 | 729.373233      | 1440.712640    | 720.859958       | 1439.728624    | 720.367950       | 9  |
| 3  | 357.213246  | 179.110261      | 340.186697     | 170.596987       | 339.202681     | 170.104979       | D    | 1344.655125 | 672.831201      | 1327.628576    | 664.317926       | 1326.644560    | 663.825918       | 8  |
| 4  | 414.234710  | 207.620993      | 397.208161     | 199.107719       | 396.224145     | 198.615711       | G    | 1229.628182 | 615.317729      | 1212.601633    | 606.804455       |                |                  | 7  |
| 5  | 527.318774  | 264.163025      | 510.292225     | 255.649751       | 509.308209     | 255.157743       | I    | 1172.606718 | 586.806997      | 1155.580169    | 578.293723       |                |                  | 6  |
| 6  | 687.349423  | 344.178350      | 670.322874     | 335.665075       | 669.338858     | 335.173067       | C    | 1059.522654 | 530.264965      | 1042.496105    | 521.751691       |                |                  | 5  |
| 7  | 873.428736  | 437.218006      | 856.402187     | 428.704732       | 855.418171     | 428.212724       | W    | 899.492005  | 450.249641      | 882.465456     | 441.736366       |                |                  | 4  |
| 8  | 1312.654062 | 656.830669      | 1295.627513    | 648.317395       | 1294.643497    | 647.825387       | Q    | 713.412692  | 357.209984      | 696.386143     | 348.696710       |                |                  | 3  |
| 9  | 1411.722476 | 706.364876      | 1394.695927    | 697.851602       | 1393.711911    | 697.359594       | V    | 274.187366  | 137.597321      | 257.160817     | 129.084047       |                |                  | 2  |
| 10 |             |                 |                |                  |                |                  | R    | 175.118952  | 88.063114       | 158.092403     | 79.549839        |                |                  | 1  |

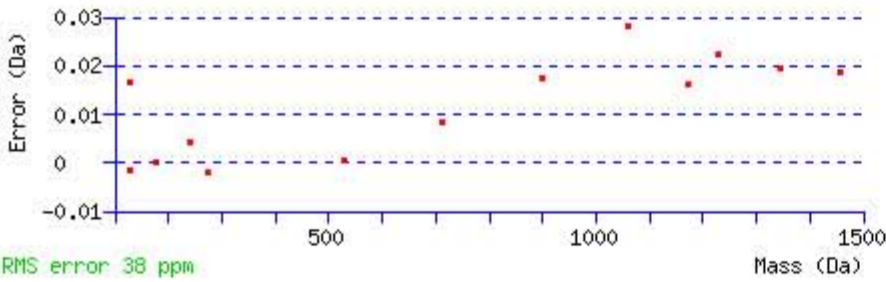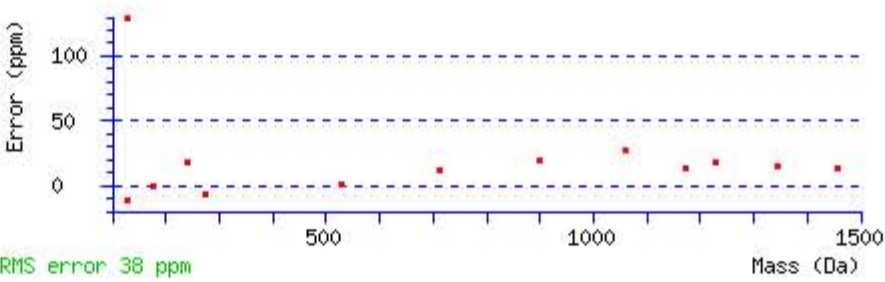

NCBI BLAST search of [KLDGICWQVR](#)  
(Parameters: blastp, nr protein database, expect=20000, no filter, PAM30)  
Other BLAST [web gateways](#)

All matches to this query

| Score | Mr(calc):   | Delta     | Sequence                        |
|-------|-------------|-----------|---------------------------------|
| 46.7  | 1584.826874 | 0.018954  | <a href="#">KLDGICWQVR</a>      |
| 10.9  | 1584.858353 | -0.012525 | <a href="#">QLDGLAGLKGEGRGK</a> |
| 4.2   | 1584.865738 | -0.019910 | <a href="#">KLNMDQVLDQILR</a>   |
| 3.2   | 1584.858337 | -0.012509 | <a href="#">LKSNDGEERLAVVR</a>  |
| 2.9   | 1584.822830 | 0.022998  | <a href="#">QLDQKCKQAR</a>      |

MATRIX

SCIENCE

Mascot Search Results

Peptide View

MS/MS Fragmentation of **SLPVSDSVLSGF<sup>+</sup>EQ<sup>+</sup>R**  
Found in **CO8G\_HUMAN**, Complement component C8 gamma chain OS=Homo sapiens GN=C8G PE=1 SV=3

Match to Query 42720: 1931.002752 from(644.674860,3+) rtinseconds(2512) index(23248)  
Title: Locus:1.1.1.3257.9 File:"2013-07-02 CLN FXIII 180 min 2nd F 2.wiff"  
Data file C:\Program Files (x86)\Matrix Science\Mascot Daemon\mgf\8 FXIII 180 min 2nd\mascot\_daemon\_merge.mgf

Click mouse within plot area to zoom in by factor of two about that point  
Or,   to  Da   
Label all possible matches ☐ Label matches used for scoring ☒

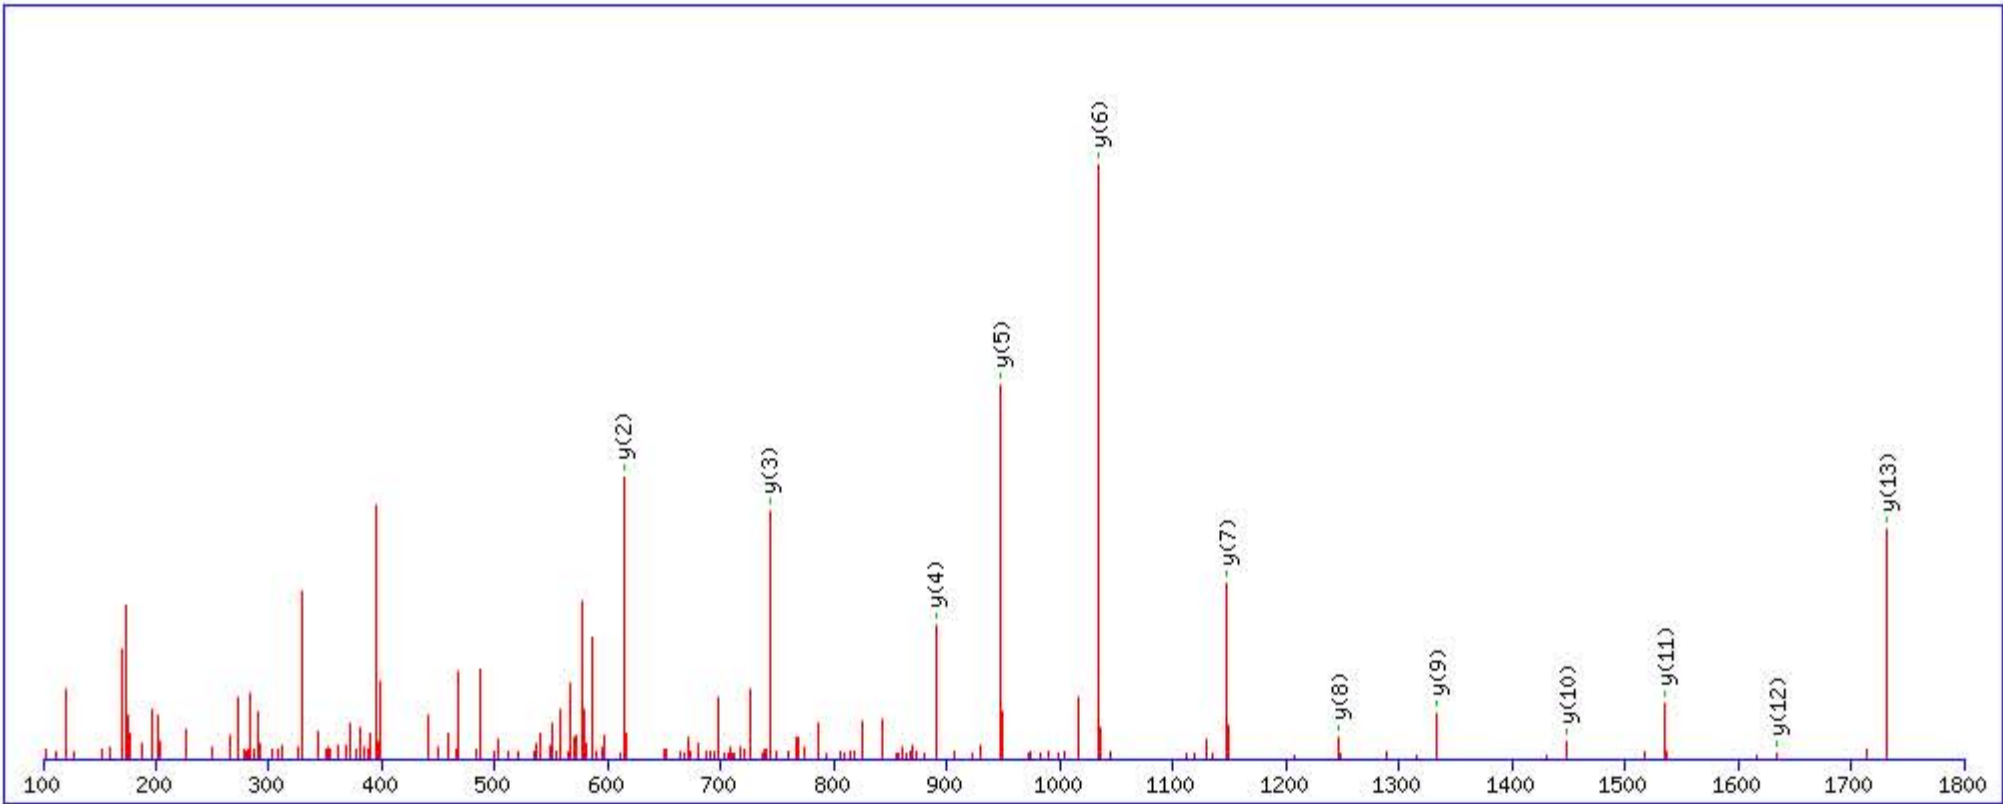

Monoisotopic mass of neutral peptide Mr(calc): 1930.982254  
Fixed modifications: Carbamidomethyl (C) (apply to specified residues or termini only)  
Variable modifications:  
Q14 : Biotin:Thermo-21345 (Q)  
Ions Score: 104 Expect: 2.8e-010  
Matches : 12/138 fragment ions using 17 most intense peaks [\(help\)](#)

| #  | b           | b <sup>++</sup> | b <sup>*</sup> | b <sup>++*</sup> | b <sup>0</sup> | b <sup>0++</sup> | Seq. | y           | y <sup>++</sup> | y <sup>*</sup> | y <sup>++*</sup> | y <sup>0</sup> | y <sup>0++</sup> | #  |
|----|-------------|-----------------|----------------|------------------|----------------|------------------|------|-------------|-----------------|----------------|------------------|----------------|------------------|----|
| 1  | 88.039304   | 44.523290       |                |                  | 70.028739      | 35.518008        | S    |             |                 |                |                  |                |                  | 15 |
| 2  | 201.123368  | 101.065322      |                |                  | 183.112803     | 92.060039        | L    | 1844.957496 | 922.982386      | 1827.930947    | 914.469112       | 1826.946931    | 913.977104       | 14 |
| 3  | 298.176132  | 149.591704      |                |                  | 280.165567     | 140.586422       | P    | 1731.873432 | 866.440354      | 1714.846883    | 857.927080       | 1713.862867    | 857.435072       | 13 |
| 4  | 397.244546  | 199.125911      |                |                  | 379.233981     | 190.120629       | V    | 1634.820668 | 817.913972      | 1617.794119    | 809.400698       | 1616.810103    | 808.908690       | 12 |
| 5  | 484.276574  | 242.641925      |                |                  | 466.266009     | 233.636643       | S    | 1535.752254 | 768.379765      | 1518.725705    | 759.866491       | 1517.741689    | 759.374483       | 11 |
| 6  | 599.303517  | 300.155397      |                |                  | 581.292952     | 291.150114       | D    | 1448.720226 | 724.863751      | 1431.693677    | 716.350477       | 1430.709661    | 715.858469       | 10 |
| 7  | 686.335545  | 343.671411      |                |                  | 668.324980     | 334.666128       | S    | 1333.693283 | 667.350280      | 1316.666734    | 658.837005       | 1315.682718    | 658.344997       | 9  |
| 8  | 785.403959  | 393.205618      |                |                  | 767.393394     | 384.200335       | V    | 1246.661255 | 623.834266      | 1229.634706    | 615.320991       | 1228.650690    | 614.828983       | 8  |
| 9  | 898.488023  | 449.747650      |                |                  | 880.477458     | 440.742367       | L    | 1147.592841 | 574.300059      | 1130.566292    | 565.786784       | 1129.582276    | 565.294776       | 7  |
| 10 | 985.520051  | 493.263664      |                |                  | 967.509486     | 484.258381       | S    | 1034.508777 | 517.758027      | 1017.482228    | 509.244752       | 1016.498212    | 508.752744       | 6  |
| 11 | 1042.541515 | 521.774395      |                |                  | 1024.530950    | 512.769113       | G    | 947.476749  | 474.242013      | 930.450200     | 465.728738       | 929.466184     | 465.236730       | 5  |
| 12 | 1189.609929 | 595.308603      |                |                  | 1171.599364    | 586.303320       | F    | 890.455285  | 445.731281      | 873.428736     | 437.218006       | 872.444720     | 436.725998       | 4  |
| 13 | 1318.652522 | 659.829899      |                |                  | 1300.641957    | 650.824617       | E    | 743.386871  | 372.197074      | 726.360322     | 363.683799       | 725.376306     | 363.191791       | 3  |
| 14 | 1757.877848 | 879.442562      | 1740.851299    | 870.929288       | 1739.867283    | 870.437280       | Q    | 614.344278  | 307.675777      | 597.317729     | 299.162503       |                |                  | 2  |
| 15 |             |                 |                |                  |                |                  | R    | 175.118952  | 88.063114       | 158.092403     | 79.549839        |                |                  | 1  |

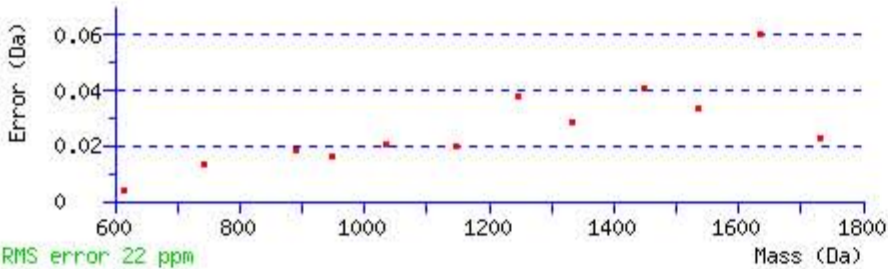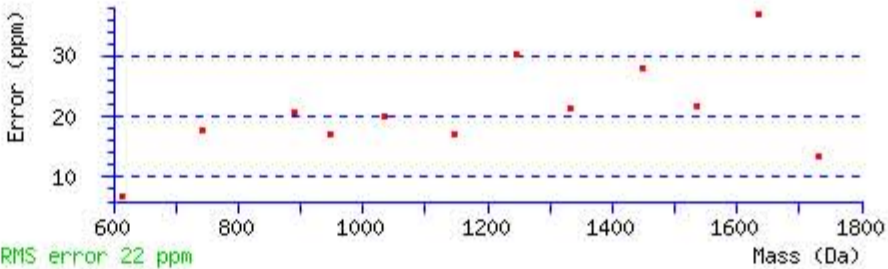

NCBI BLAST search of [SLPVSDSVLSGF<sup>+</sup>EQ<sup>+</sup>R](#)  
(Parameters: blastp, nr protein database, expect=20000, no filter, PAM30)  
Other BLAST [web gateways](#)

All matches to this query

| Score | Mr(calc):   | Delta    | Sequence                                                |
|-------|-------------|----------|---------------------------------------------------------|
| 104.2 | 1930.982254 | 0.020498 | <a href="#">SLPVSDSVLSGF<sup>+</sup>EQ<sup>+</sup>R</a> |
| 2.2   | 1930.978195 | 0.024557 | <a href="#">VALSNISKDGNLMETAPR</a>                      |
| 1.5   | 1931.000885 | 0.001867 | <a href="#">LSPVTACAGQTLQFK</a>                         |
| 0.4   | 1930.989410 | 0.013342 | <a href="#">EAQSQLIKSDEMQRLLR</a>                       |

MATRIX

SCIENCE

Mascot Search Results

Peptide View

MS/MS Fragmentation of **VQEAHLTEDQIFYFPK**  
Found in **CO8G\_HUMAN**, Complement component C8 gamma chain OS=Homo sapiens GN=C8G PE=1 SV=3

Match to Query 50078: 2275.161492 from(759.394440,3+) rtinseconds(2378) index(22503)  
Title: Locus:1.1.1.3210.15 File:"2013-07-02 CLN FXIII 180 min 2nd F 2.wiff"  
Data file C:\Program Files (x86)\Matrix Science\Mascot Daemon\mgf\8 FXIII 180 min 2nd\mascot\_daemon\_merge.mgf

Click mouse within plot area to zoom in by factor of two about that point  
Or,   to  Da   
Label all possible matches ☐ Label matches used for scoring ☒

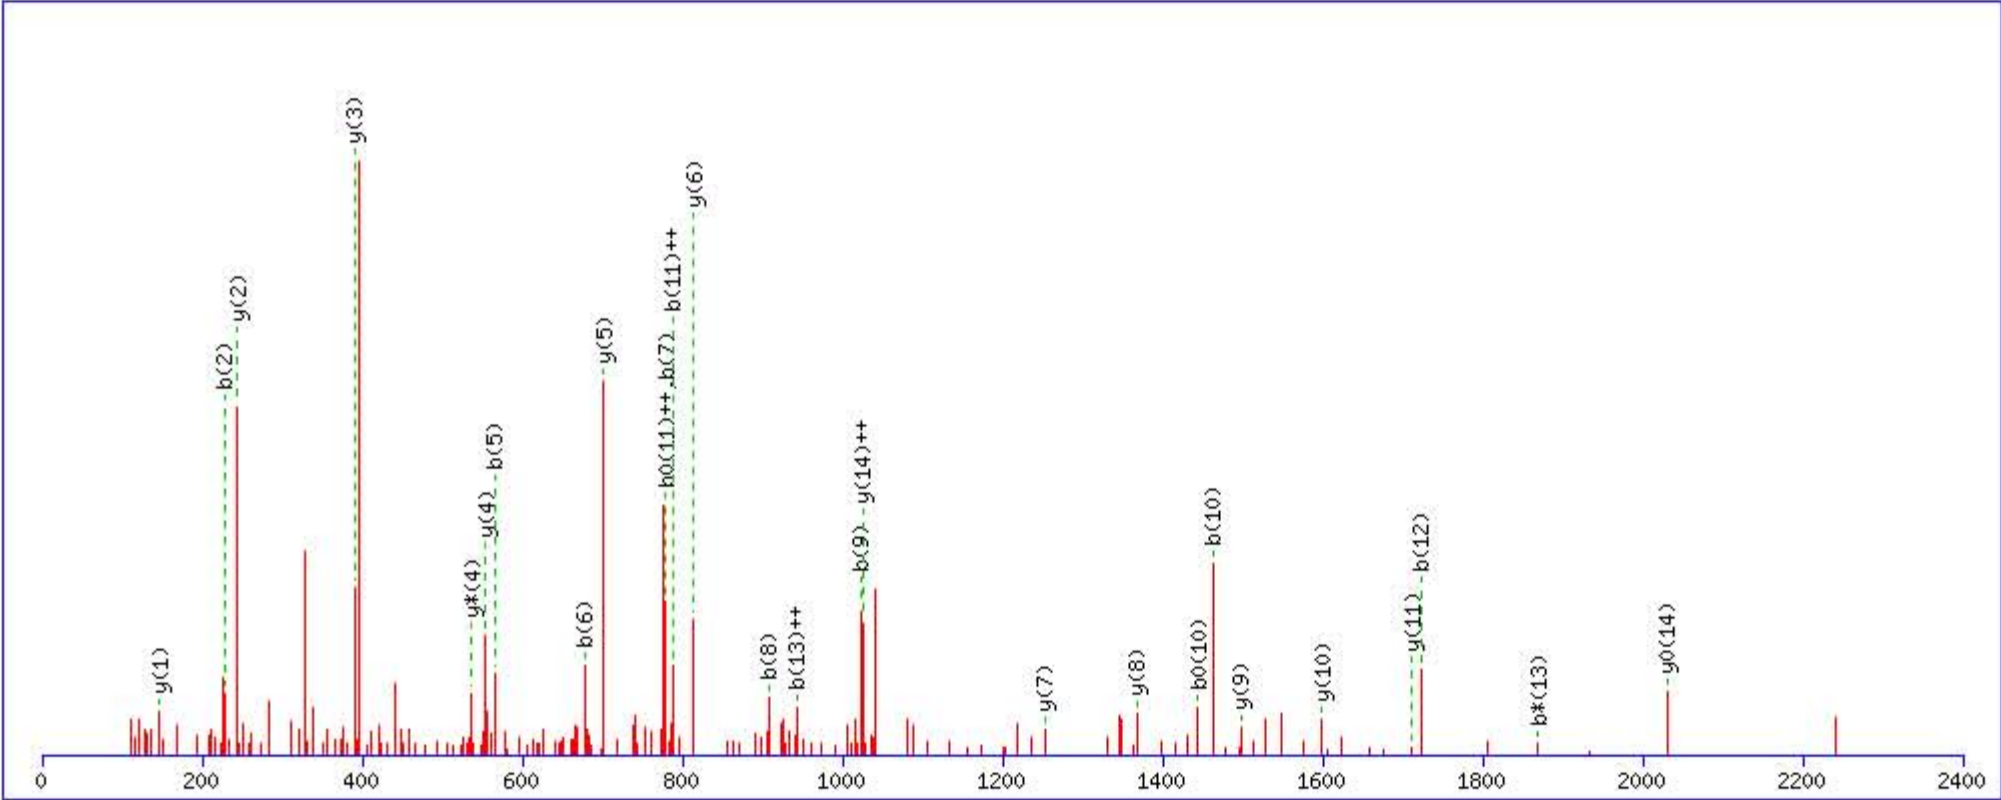

Monoisotopic mass of neutral peptide Mr(calc): 2275.134720  
Fixed modifications: Carbamidomethyl (C) (apply to specified residues or termini only)  
Variable modifications:  
Q10 : Biotin:Thermo-21345 (Q)  
Ions Score: 52 Expect: 1.4e-005  
Matches : 27/160 fragment ions using 55 most intense peaks [\(help\)](#)

| #  | b           | b <sup>++</sup> | b <sup>*</sup> | b <sup>+++</sup> | b <sup>0</sup> | b <sup>0++</sup> | Seq. | y           | y <sup>++</sup> | y <sup>*</sup> | y <sup>+++</sup> | y <sup>0</sup> | y <sup>0++</sup> | #  |
|----|-------------|-----------------|----------------|------------------|----------------|------------------|------|-------------|-----------------|----------------|------------------|----------------|------------------|----|
| 1  | 100.075690  | 50.541483       |                |                  |                |                  | V    |             |                 |                |                  |                |                  | 16 |
| 2  | 228.134268  | 114.570772      | 211.107719     | 106.057498       |                |                  | Q    | 2177.073591 | 1089.040433     | 2160.047042    | 1080.527159      | 2159.063026    | 1080.035151      | 15 |
| 3  | 357.176861  | 179.092069      | 340.150312     | 170.578794       | 339.166296     | 170.086786       | E    | 2049.015013 | 1025.011144     | 2031.988464    | 1016.497870      | 2031.004448    | 1016.005862      | 14 |
| 4  | 428.213975  | 214.610626      | 411.187426     | 206.097351       | 410.203410     | 205.605343       | A    | 1919.972420 | 960.489848      | 1902.945871    | 951.976573       | 1901.961855    | 951.484565       | 13 |
| 5  | 565.272887  | 283.140082      | 548.246338     | 274.626807       | 547.262322     | 274.134799       | H    | 1848.935306 | 924.971291      | 1831.908757    | 916.458016       | 1830.924741    | 915.966008       | 12 |
| 6  | 678.356951  | 339.682114      | 661.330402     | 331.168839       | 660.346386     | 330.676831       | L    | 1711.876394 | 856.441835      | 1694.849845    | 847.928561       | 1693.865829    | 847.436552       | 11 |
| 7  | 779.404630  | 390.205953      | 762.378081     | 381.692679       | 761.394065     | 381.200671       | T    | 1598.792330 | 799.899803      | 1581.765781    | 791.386529       | 1580.781765    | 790.894521       | 10 |
| 8  | 908.447223  | 454.727250      | 891.420674     | 446.213975       | 890.436658     | 445.721967       | E    | 1497.744651 | 749.375963      | 1480.718102    | 740.862689       | 1479.734086    | 740.370681       | 9  |
| 9  | 1023.474166 | 512.240721      | 1006.447617    | 503.727447       | 1005.463601    | 503.235439       | D    | 1368.702058 | 684.854667      | 1351.675509    | 676.341392       | 1350.691493    | 675.849384       | 8  |
| 10 | 1462.699492 | 731.853384      | 1445.672943    | 723.340110       | 1444.688927    | 722.848101       | Q    | 1253.675115 | 627.341195      | 1236.648566    | 618.827921       |                |                  | 7  |
| 11 | 1575.783556 | 788.395416      | 1558.757007    | 779.882141       | 1557.772991    | 779.390133       | I    | 814.449789  | 407.728533      | 797.423240     | 399.215258       |                |                  | 6  |
| 12 | 1722.851970 | 861.929623      | 1705.825421    | 853.416349       | 1704.841405    | 852.924340       | F    | 701.365725  | 351.186501      | 684.339176     | 342.673226       |                |                  | 5  |
| 13 | 1885.915299 | 943.461288      | 1868.888750    | 934.948013       | 1867.904734    | 934.456005       | Y    | 554.297311  | 277.652294      | 537.270762     | 269.139019       |                |                  | 4  |
| 14 | 2032.983713 | 1016.995495     | 2015.957164    | 1008.482220      | 2014.973148    | 1007.990212      | F    | 391.233982  | 196.120629      | 374.207433     | 187.607354       |                |                  | 3  |
| 15 | 2130.036477 | 1065.521876     | 2113.009928    | 1057.008602      | 2112.025912    | 1056.516594      | P    | 244.165568  | 122.586422      | 227.139019     | 114.073147       |                |                  | 2  |
| 16 |             |                 |                |                  |                |                  | K    | 147.112804  | 74.060040       | 130.086255     | 65.546765        |                |                  | 1  |

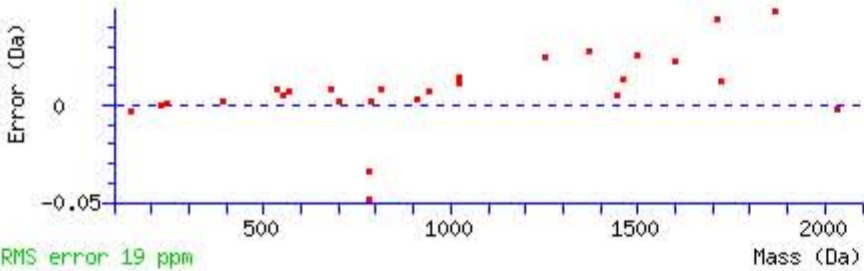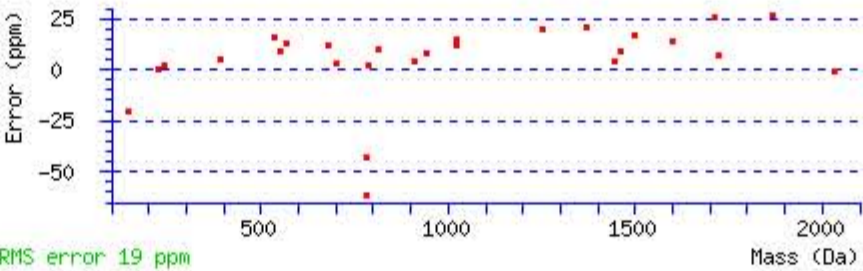

NCBI BLAST search of [VQEAHLTEDQIFYFPK](#)  
(Parameters: blastp, nr protein database, expect=20000, no filter, PAM30)  
Other BLAST [web gateways](#)

All matches to this query

| Score | Mr(calc):   | Delta    | Sequence                            |
|-------|-------------|----------|-------------------------------------|
| 52.4  | 2275.134720 | 0.026772 | <a href="#">VQEAHLTEDQIFYFPK</a>    |
| 16.1  | 2275.134720 | 0.026772 | <a href="#">VQEAHLTEDQIFYFPK</a>    |
| 0.8   | 2275.160538 | 0.000954 | <a href="#">VLPYCWKGMTPEQQAAIRK</a> |

Peptide View

MS/MS Fragmentation of **YGFCEAADQFHVLDEV**R  
Found in **CO8G\_HUMAN**, Complement component C8 gamma chain OS=Homo sapiens GN=C8G PE=1 SV=3

Match to Query 51513: 2366.115132 from(789.712320,3+) rtinseconds(2568) index(23538)  
Title: Locus:1.1.1.3276.5 File:"2013-07-02 CLN FXIII 180 min 2nd F 2.wiff"  
Data file C:\Program Files (x86)\Matrix Science\Mascot Daemon\mgf\8 FXIII 180 min 2nd\mascot\_daemon\_merge.mgf

Click mouse within plot area to zoom in by factor of two about that point  
Or, 

Plot from

100

 to 

2000

 Da 

Full range

  
Label all possible matches ☐ Label matches used for scoring ☒

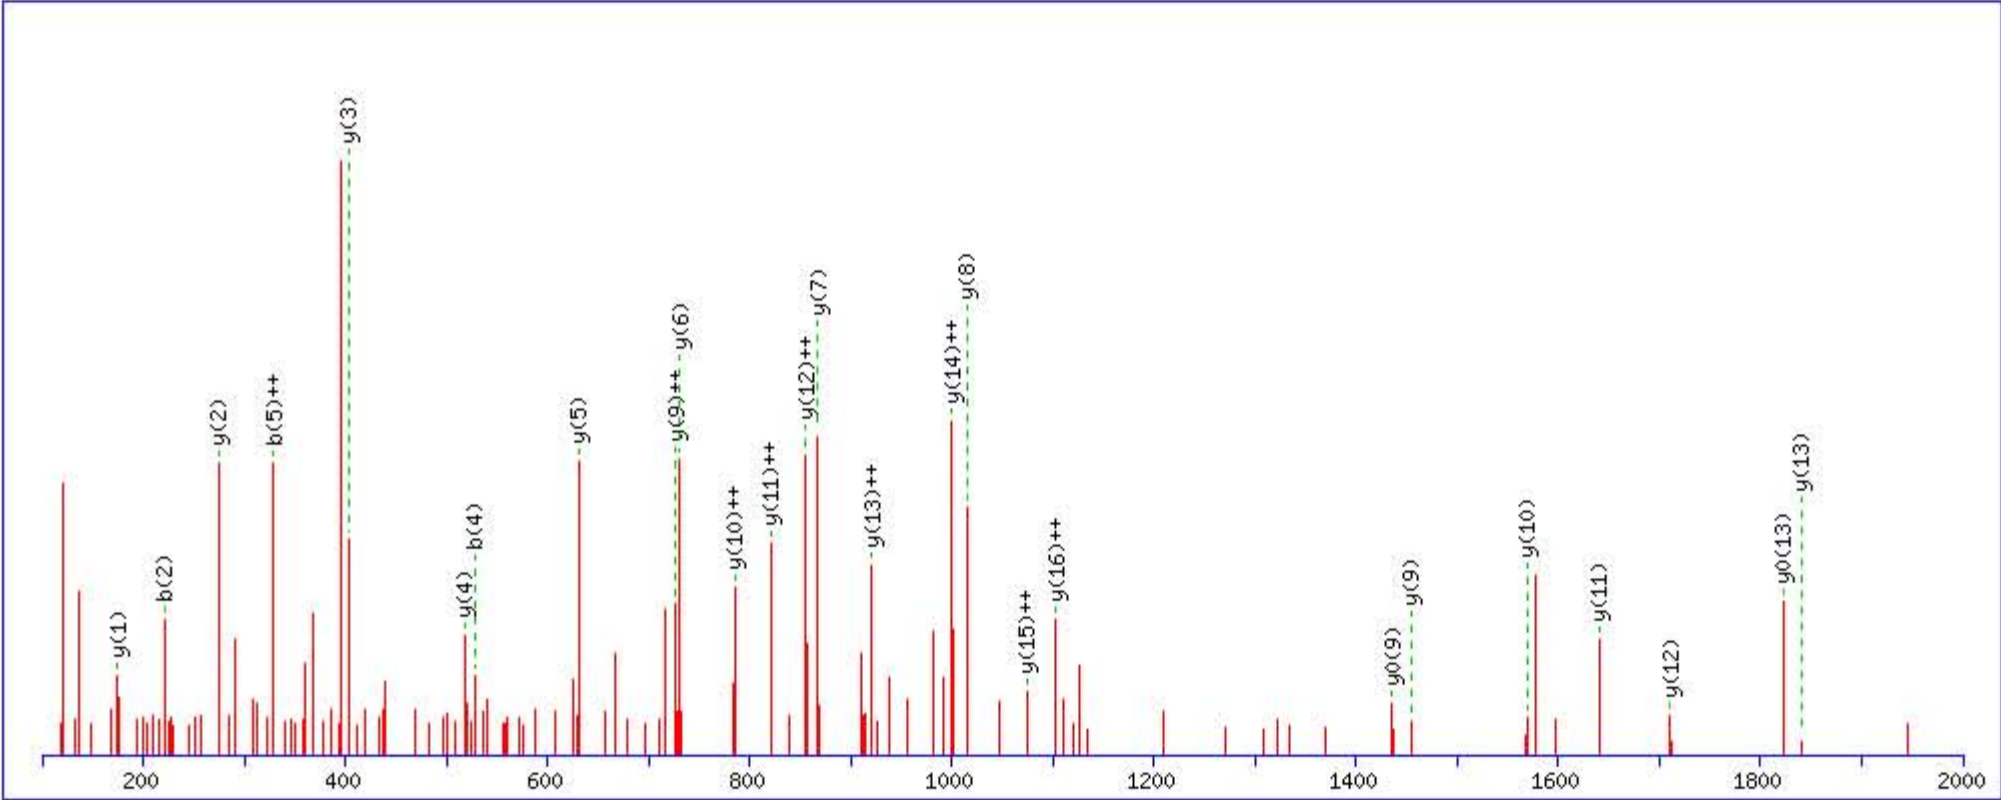

Monoisotopic mass of neutral peptide Mr(calc): 2366.082382  
Fixed modifications: Carbamidomethyl (C) (apply to specified residues or termini only)  
Variable modifications:  
Q9 : Biotin:Thermo-21345 (Q)  
Ions Score: 73 Expect: 2.3e-007  
Matches : 26/164 fragment ions using 50 most intense peaks [\(help\)](#)

| #  | b           | b <sup>++</sup> | b <sup>*</sup> | b <sup>+++</sup> | b <sup>0</sup> | b <sup>0++</sup> | Seq. | y           | y <sup>++</sup> | y <sup>*</sup> | y <sup>+++</sup> | y <sup>0</sup> | y <sup>0++</sup> | #  |
|----|-------------|-----------------|----------------|------------------|----------------|------------------|------|-------------|-----------------|----------------|------------------|----------------|------------------|----|
| 1  | 164.070605  | 82.538940       |                |                  |                |                  | Y    |             |                 |                |                  |                |                  | 17 |
| 2  | 221.092069  | 111.049673      |                |                  |                |                  | G    | 2204.026323 | 1102.516799     | 2186.999774    | 1094.003525      | 2186.015758    | 1093.511517      | 16 |
| 3  | 368.160483  | 184.583879      |                |                  |                |                  | F    | 2147.004859 | 1074.006067     | 2129.978310    | 1065.492793      | 2128.994294    | 1065.000785      | 15 |
| 4  | 528.191132  | 264.599204      |                |                  |                |                  | C    | 1999.936445 | 1000.471860     | 1982.909896    | 991.958586       | 1981.925880    | 991.466578       | 14 |
| 5  | 657.233725  | 329.120501      |                |                  | 639.223160     | 320.115218       | E    | 1839.905796 | 920.456536      | 1822.879247    | 911.943261       | 1821.895231    | 911.451253       | 13 |
| 6  | 728.270839  | 364.639058      |                |                  | 710.260274     | 355.633775       | A    | 1710.863203 | 855.935239      | 1693.836654    | 847.421965       | 1692.852638    | 846.929957       | 12 |
| 7  | 799.307953  | 400.157615      |                |                  | 781.297388     | 391.152332       | A    | 1639.826089 | 820.416682      | 1622.799540    | 811.903408       | 1621.815524    | 811.411400       | 11 |
| 8  | 914.334896  | 457.671086      |                |                  | 896.324331     | 448.665803       | D    | 1568.788975 | 784.898125      | 1551.762426    | 776.384851       | 1550.778410    | 775.892843       | 10 |
| 9  | 1353.560222 | 677.283749      | 1336.533673    | 668.770474       | 1335.549657    | 668.278466       | Q    | 1453.762032 | 727.384654      | 1436.735483    | 718.871379       | 1435.751467    | 718.379371       | 9  |
| 10 | 1500.628636 | 750.817956      | 1483.602087    | 742.304682       | 1482.618071    | 741.812673       | F    | 1014.536706 | 507.771991      | 997.510157     | 499.258717       | 996.526141     | 498.766709       | 8  |
| 11 | 1637.687548 | 819.347412      | 1620.660999    | 810.834138       | 1619.676983    | 810.342129       | H    | 867.468292  | 434.237784      | 850.441743     | 425.724510       | 849.457727     | 425.232502       | 7  |
| 12 | 1736.755962 | 868.881619      | 1719.729413    | 860.368345       | 1718.745397    | 859.876336       | V    | 730.409380  | 365.708328      | 713.382831     | 357.195054       | 712.398815     | 356.703046       | 6  |
| 13 | 1849.840026 | 925.423651      | 1832.813477    | 916.910376       | 1831.829461    | 916.418368       | L    | 631.340966  | 316.174121      | 614.314417     | 307.660846       | 613.330401     | 307.168838       | 5  |
| 14 | 1964.866969 | 982.937122      | 1947.840420    | 974.423848       | 1946.856404    | 973.931840       | D    | 518.256902  | 259.632089      | 501.230353     | 251.118815       | 500.246337     | 250.626807       | 4  |
| 15 | 2093.909562 | 1047.458419     | 2076.883013    | 1038.945144      | 2075.898997    | 1038.453136      | E    | 403.229959  | 202.118617      | 386.203410     | 193.605343       | 385.219394     | 193.113335       | 3  |
| 16 | 2192.977976 | 1096.992626     | 2175.951427    | 1088.479351      | 2174.967411    | 1087.987343      | V    | 274.187366  | 137.597321      | 257.160817     | 129.084046       |                |                  | 2  |
| 17 |             |                 |                |                  |                |                  | R    | 175.118952  | 88.063114       | 158.092403     | 79.549839        |                |                  | 1  |

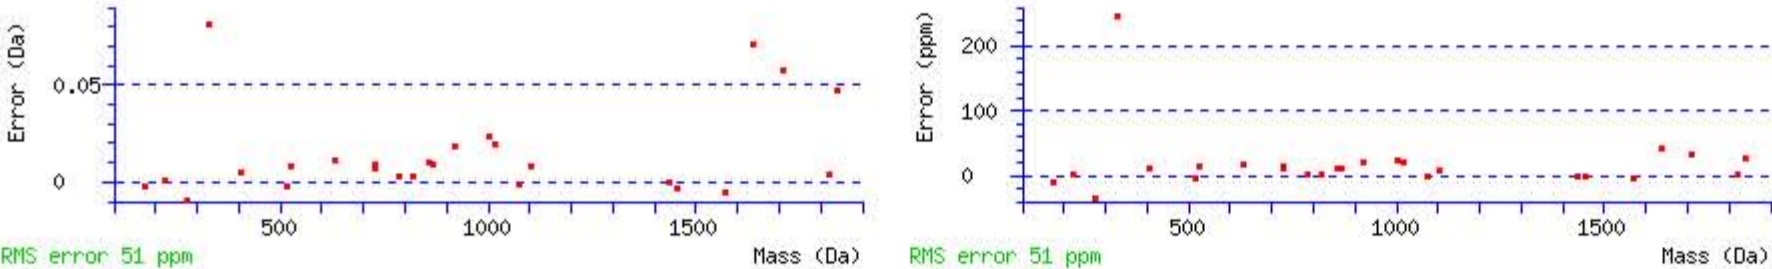

NCBI BLAST search of **YGFCEAADQFHVLDEV**R  
(Parameters: blastp, nr protein database, expect=20000, no filter, PAM30)  
Other BLAST [web gateways](#)

All matches to this query

| Score | Mr(calc):   | Delta    | Sequence                                |
|-------|-------------|----------|-----------------------------------------|
| 73.5  | 2366.082382 | 0.032750 | <a href="#">YGFCEAADQFHVLDEV</a> R      |
| 2.7   | 2366.109802 | 0.005330 | <a href="#">EEAETPAEATGKPQR</a> DEAGPQR |

M

A

T

R

I

X

S

C

I

E

N

C

E

Mascot Search Results

Peptide View

MS/MS Fragmentation of **AEATTLHVAPQGTAMAVSTFR**  
Found in **CO8G\_HUMAN**, Complement component C8 gamma chain OS=Homo sapiens GN=C8G PE=1 SV=3

Match to Query 53464: 2469.287562 from(824.103130,3+) rtinseconds(2128) index(21038)  
Title: Locus:1.1.1.3123.13 File:"2013-07-02 CLN FXIII 180 min 2nd F 2.wiff"  
Data file C:\Program Files (x86)\Matrix Science\Mascot Daemon\mgf\8 FXIII 180 min 2nd\mascot\_daemon\_merge.mgf

Click mouse within plot area to zoom in by factor of two about that point  
Or, 

Plot from

100

 to 

2000

 Da 

Full range

  
Label all possible matches ☐ Label matches used for scoring ☒

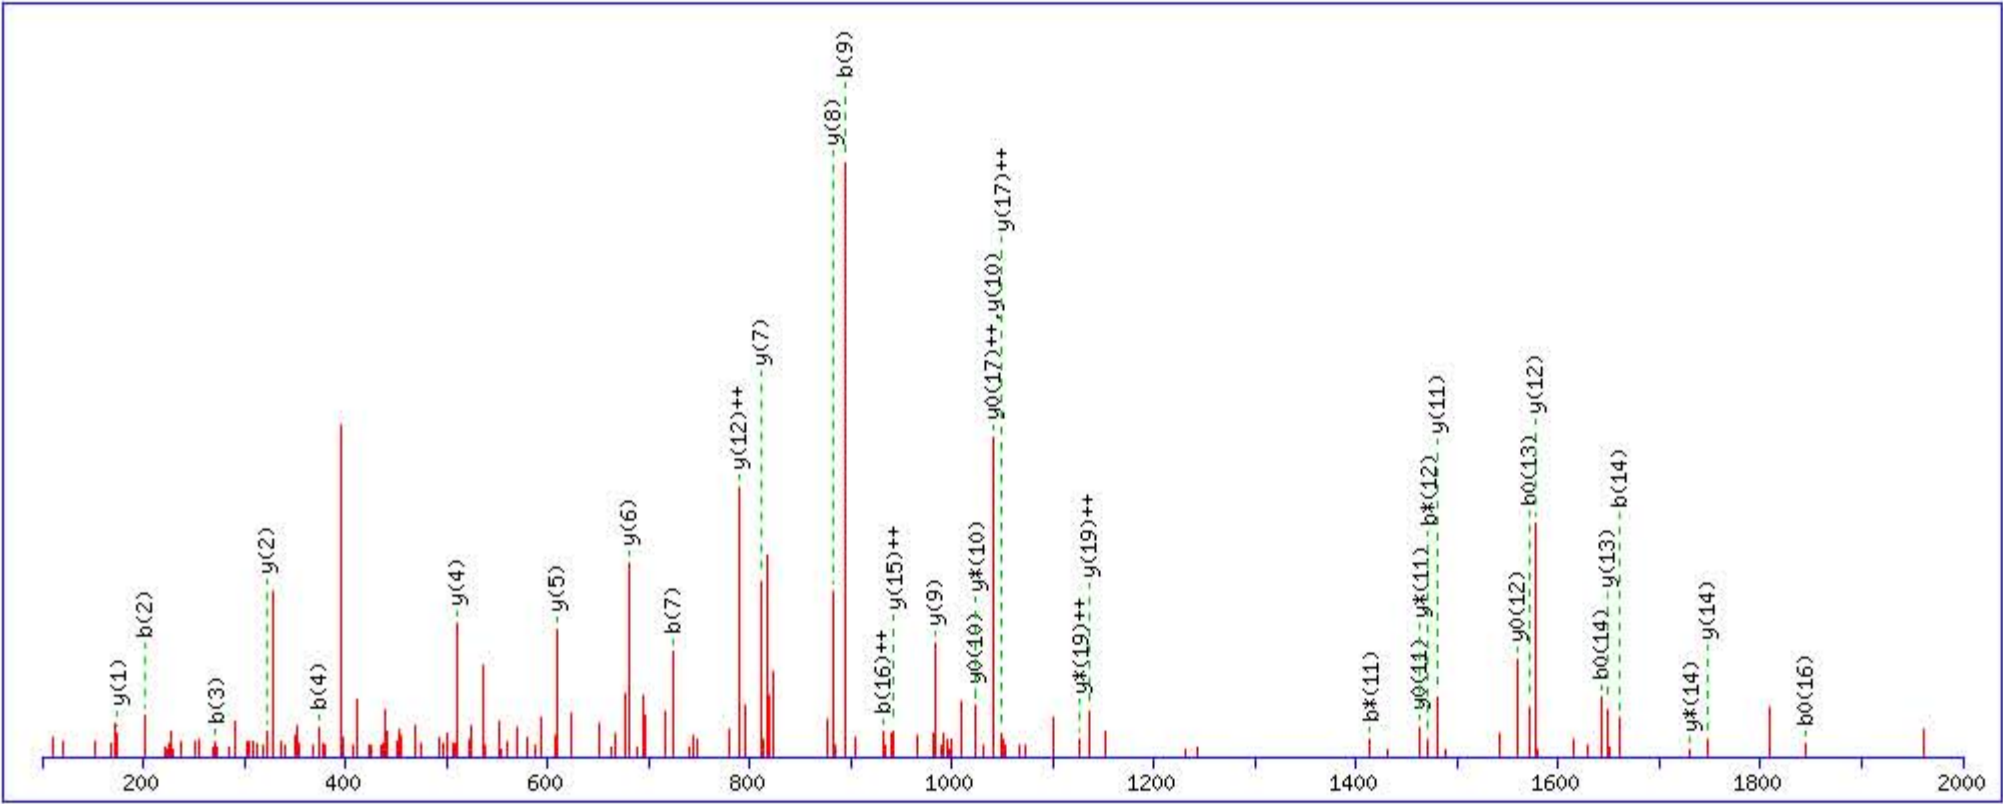

Monoisotopic mass of neutral peptide Mr(calc): 2469.250839  
Fixed modifications: Carbamidomethyl (C) (apply to specified residues or termini only)  
Variable modifications:  
Q11 : Biotin:Thermo-21345 (Q)  
Ions Score: 59 Expect: 3.6e-005  
Matches : 37/214 fragment ions using 78 most intense peaks [\(help\)](#)

| #  | b           | b <sup>++</sup> | b <sup>*</sup> | b <sup>*++</sup> | b <sup>0</sup> | b <sup>0++</sup> | Seq. | y           | y <sup>++</sup> | y <sup>*</sup> | y <sup>*++</sup> | y <sup>0</sup> | y <sup>0++</sup> | #  |
|----|-------------|-----------------|----------------|------------------|----------------|------------------|------|-------------|-----------------|----------------|------------------|----------------|------------------|----|
| 1  | 72.044390   | 36.525833       |                |                  |                |                  | A    |             |                 |                |                  |                |                  | 21 |
| 2  | 201.086983  | 101.047130      |                |                  | 183.076418     | 92.041847        | E    | 2399.221002 | 1200.114139     | 2382.194453    | 1191.600864      | 2381.210437    | 1191.108856      | 20 |
| 3  | 272.124097  | 136.565687      |                |                  | 254.113532     | 127.560404       | A    | 2270.178409 | 1135.592842     | 2253.151860    | 1127.079568      | 2252.167844    | 1126.587560      | 19 |
| 4  | 373.171776  | 187.089526      |                |                  | 355.161211     | 178.084244       | T    | 2199.141295 | 1100.074285     | 2182.114746    | 1091.561011      | 2181.130730    | 1091.069003      | 18 |
| 5  | 474.219455  | 237.613366      |                |                  | 456.208890     | 228.608083       | T    | 2098.093616 | 1049.550446     | 2081.067067    | 1041.037171      | 2080.083051    | 1040.545163      | 17 |
| 6  | 587.303519  | 294.155398      |                |                  | 569.292954     | 285.150115       | L    | 1997.045937 | 999.026606      | 1980.019388    | 990.513332       | 1979.035372    | 990.021324       | 16 |
| 7  | 724.362431  | 362.684854      |                |                  | 706.351866     | 353.679571       | H    | 1883.961873 | 942.484574      | 1866.935324    | 933.971300       | 1865.951308    | 933.479292       | 15 |
| 8  | 823.430845  | 412.219061      |                |                  | 805.420280     | 403.213778       | V    | 1746.902961 | 873.955118      | 1729.876412    | 865.441844       | 1728.892396    | 864.949836       | 14 |
| 9  | 894.467959  | 447.737618      |                |                  | 876.457394     | 438.732335       | A    | 1647.834547 | 824.420911      | 1630.807998    | 815.907637       | 1629.823982    | 815.415629       | 13 |
| 10 | 991.520723  | 496.264000      |                |                  | 973.510158     | 487.258717       | P    | 1576.797433 | 788.902355      | 1559.770884    | 780.389080       | 1558.786868    | 779.897072       | 12 |
| 11 | 1430.746049 | 715.876663      | 1413.719500    | 707.363388       | 1412.735484    | 706.871380       | Q    | 1479.744669 | 740.375972      | 1462.718120    | 731.862698       | 1461.734104    | 731.370690       | 11 |
| 12 | 1487.767513 | 744.387395      | 1470.740964    | 735.874120       | 1469.756948    | 735.382112       | G    | 1040.519343 | 520.763309      | 1023.492794    | 512.250035       | 1022.508778    | 511.758027       | 10 |
| 13 | 1588.815192 | 794.911234      | 1571.788643    | 786.397960       | 1570.804627    | 785.905952       | T    | 983.497879  | 492.252577      | 966.471330     | 483.739303       | 965.487314     | 483.247295       | 9  |
| 14 | 1659.852306 | 830.429791      | 1642.825757    | 821.916517       | 1641.841741    | 821.424509       | A    | 882.450200  | 441.728738      | 865.423651     | 433.215463       | 864.439635     | 432.723455       | 8  |
| 15 | 1790.892791 | 895.950034      | 1773.866242    | 887.436759       | 1772.882226    | 886.944751       | M    | 811.413086  | 406.210181      | 794.386537     | 397.696906       | 793.402521     | 397.204898       | 7  |
| 16 | 1861.929905 | 931.468591      | 1844.903356    | 922.955316       | 1843.919340    | 922.463308       | A    | 680.372601  | 340.689938      | 663.346052     | 332.176664       | 662.362036     | 331.684656       | 6  |
| 17 | 1960.998319 | 981.002798      | 1943.971770    | 972.489523       | 1942.987754    | 971.997515       | V    | 609.335487  | 305.171381      | 592.308938     | 296.658107       | 591.324922     | 296.166099       | 5  |
| 18 | 2048.030347 | 1024.518812     | 2031.003798    | 1016.005537      | 2030.019782    | 1015.513529      | S    | 510.267073  | 255.637174      | 493.240524     | 247.123900       | 492.256508     | 246.631892       | 4  |
| 19 | 2149.078026 | 1075.042651     | 2132.051477    | 1066.529376      | 2131.067461    | 1066.037368      | T    | 423.235045  | 212.121160      | 406.208496     | 203.607886       | 405.224480     | 203.115878       | 3  |
| 20 | 2296.146440 | 1148.576858     | 2279.119891    | 1140.063583      | 2278.135875    | 1139.571575      | F    | 322.187366  | 161.597321      | 305.160817     | 153.084046       |                |                  | 2  |
| 21 |             |                 |                |                  |                |                  | R    | 175.118952  | 88.063114       | 158.092403     | 79.549839        |                |                  | 1  |

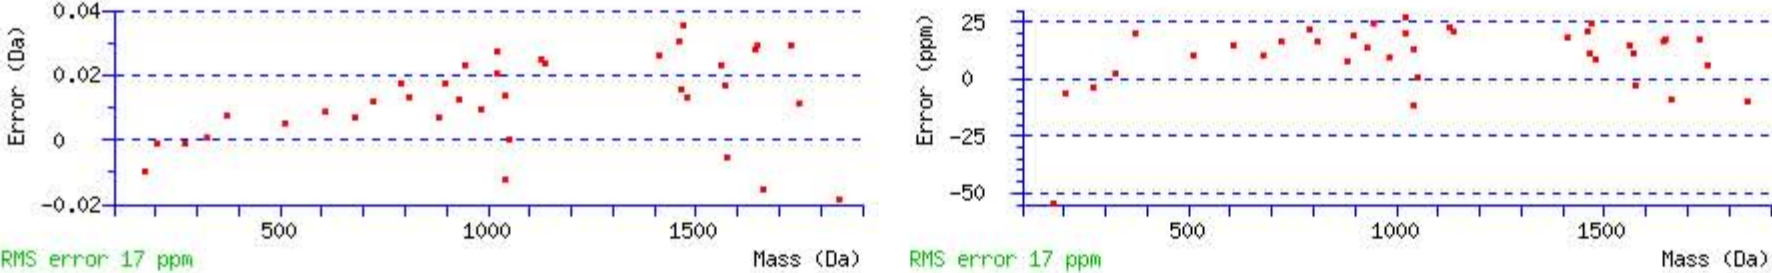

NCBI BLAST search of [AEATTLHVAPQGTAMAVSTFR](#)  
(Parameters: blastp, nr protein database, expect=20000, no filter, PAM30)  
Other BLAST [web gateways](#)

All matches to this query

| Score | Mr(calc):   | Delta    | Sequence                              |
|-------|-------------|----------|---------------------------------------|
| 58.9  | 2469.250839 | 0.036723 | <a href="#">AEATTLHVAPQGTAMAVSTFR</a> |

MATRIX

SCIENCE

Mascot Search Results

Peptide View

MS/MS Fragmentation of **TEHYEEQIEAFK**  
Found in **CO9\_HUMAN**, Complement component C9 OS=Homo sapiens GN=C9 PE=1 SV=2

Match to Query 40951: 1833.873192 from(612.298340,3+) rtinseconds(1978) index(50226)  
Title: Locus:1.1.1.1926.9 File:"2013-07-02 CLN FXIII 180 min 2nd F 4.wiff"  
Data file C:\Program Files (x86)\Matrix Science\Mascot Daemon\mgf\8 FXIII 180 min 2nd\mascot\_daemon\_merge.mgf

Click mouse within plot area to zoom in by factor of two about that point  
Or,   to  Da   
Label all possible matches ☐ Label matches used for scoring ☒

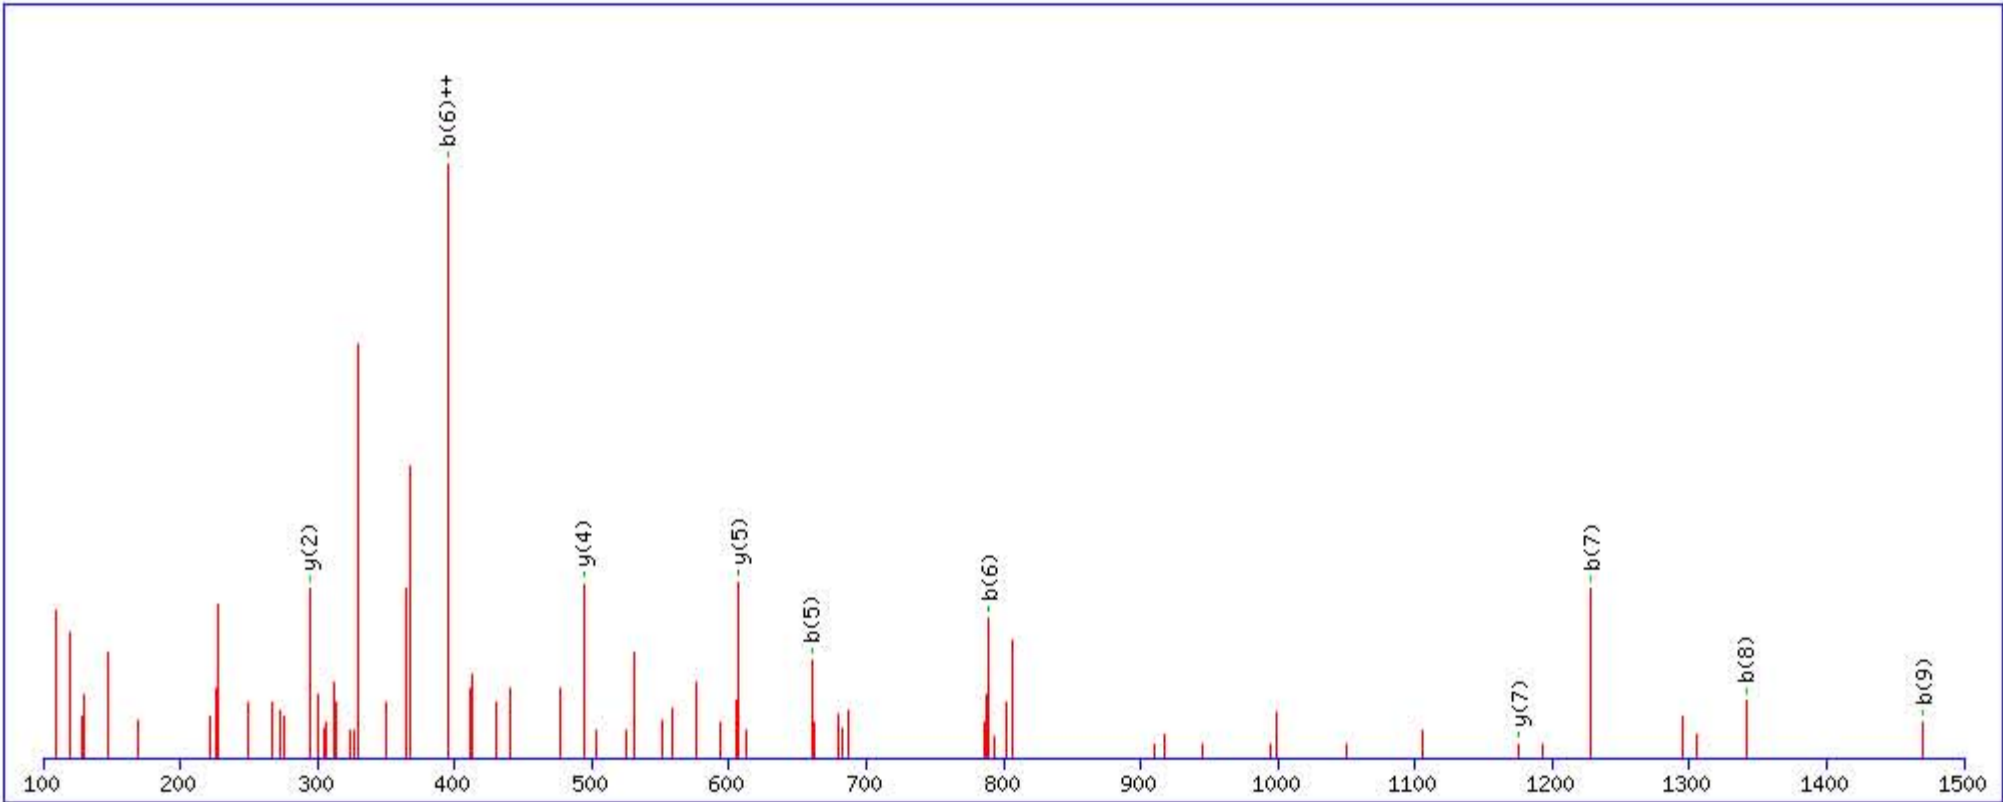

Monoisotopic mass of neutral peptide Mr(calc): 1833.860703  
Fixed modifications: Carbamidomethyl (C) (apply to specified residues or termini only)  
Variable modifications:  
Q7 : Biotin:Thermo-21345 (Q)  
Ions Score: 34 Expect: 0.0008  
Matches : 10/114 fragment ions using 13 most intense peaks [\(help\)](#)

| #  | b           | b <sup>++</sup> | b <sup>+</sup> | b <sup>+++</sup> | b <sup>0</sup> | b <sup>0++</sup> | Seq. | y           | y <sup>++</sup> | y <sup>+</sup> | y <sup>+++</sup> | y <sup>0</sup> | y <sup>0++</sup> | #  |
|----|-------------|-----------------|----------------|------------------|----------------|------------------|------|-------------|-----------------|----------------|------------------|----------------|------------------|----|
| 1  | 102.054955  | 51.531116       |                |                  | 84.044390      | 42.525833        | T    |             |                 |                |                  |                |                  | 12 |
| 2  | 231.097548  | 116.052412      |                |                  | 213.086983     | 107.047130       | E    | 1733.820335 | 867.413805      | 1716.793786    | 858.900531       | 1715.809770    | 858.408523       | 11 |
| 3  | 368.156460  | 184.581868      |                |                  | 350.145895     | 175.576585       | H    | 1604.777742 | 802.892509      | 1587.751193    | 794.379235       | 1586.767177    | 793.887227       | 10 |
| 4  | 531.219789  | 266.113533      |                |                  | 513.209224     | 257.108250       | Y    | 1467.718830 | 734.363053      | 1450.692281    | 725.849779       | 1449.708265    | 725.357771       | 9  |
| 5  | 660.262382  | 330.634829      |                |                  | 642.251817     | 321.629547       | E    | 1304.655501 | 652.831389      | 1287.628952    | 644.318114       | 1286.644936    | 643.826106       | 8  |
| 6  | 789.304975  | 395.156126      |                |                  | 771.294410     | 386.150843       | E    | 1175.612908 | 588.310092      | 1158.586359    | 579.796817       | 1157.602343    | 579.304809       | 7  |
| 7  | 1228.530301 | 614.768789      | 1211.503752    | 606.255514       | 1210.519736    | 605.763506       | Q    | 1046.570315 | 523.788795      | 1029.543766    | 515.275521       | 1028.559750    | 514.783513       | 6  |
| 8  | 1341.614365 | 671.310820      | 1324.587816    | 662.797546       | 1323.603800    | 662.305538       | I    | 607.344989  | 304.176132      | 590.318440     | 295.662858       | 589.334424     | 295.170850       | 5  |
| 9  | 1470.656958 | 735.832117      | 1453.630409    | 727.318842       | 1452.646393    | 726.826834       | E    | 494.260925  | 247.634100      | 477.234376     | 239.120826       | 476.250360     | 238.628818       | 4  |
| 10 | 1541.694072 | 771.350674      | 1524.667523    | 762.837399       | 1523.683507    | 762.345391       | A    | 365.218332  | 183.112804      | 348.191783     | 174.599530       |                |                  | 3  |
| 11 | 1688.762486 | 844.884881      | 1671.735937    | 836.371606       | 1670.751921    | 835.879598       | F    | 294.181218  | 147.594247      | 277.154669     | 139.080973       |                |                  | 2  |
| 12 |             |                 |                |                  |                |                  | K    | 147.112804  | 74.060040       | 130.086255     | 65.546765        |                |                  | 1  |

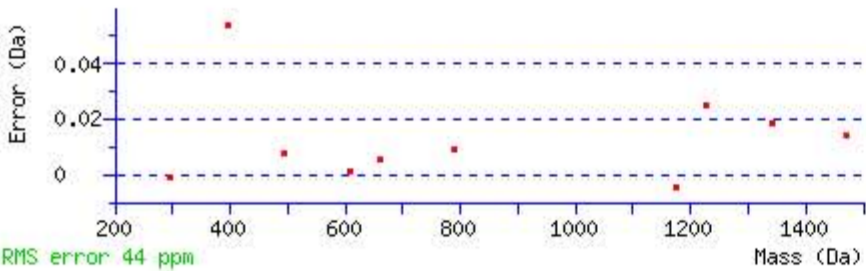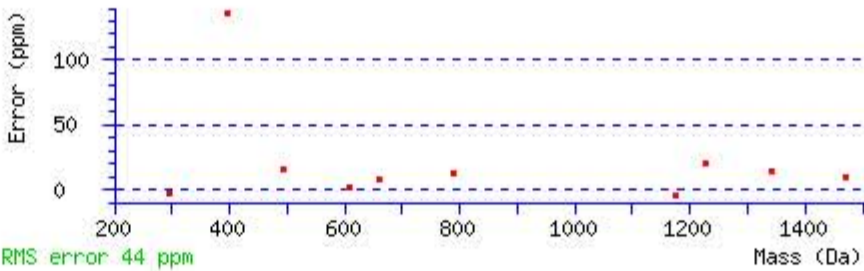

NCBI BLAST search of [TEHYEEQIEAFK](#)  
(Parameters: blastp, nr protein database, expect=20000, no filter, PAM30)  
Other BLAST [web gateways](#)

All matches to this query

| Score | Mr(calc):   | Delta     | Sequence                          |
|-------|-------------|-----------|-----------------------------------|
| 34.5  | 1833.860703 | 0.012489  | <a href="#">TEHYEEQIEAFK</a>      |
| 1.4   | 1833.878510 | -0.005318 | <a href="#">EGSGYFFLNTSTADVVK</a> |
| 1.2   | 1833.881805 | -0.008613 | <a href="#">EAYDQKIAEEEA</a> K    |
| 1.1   | 1833.848831 | 0.024361  | <a href="#">IIQDESTQEDAMK</a>     |

MATRIX

SCIENCE

Mascot Search Results

Peptide View

MS/MS Fragmentation of **AEQCCEETASSISLHGK**  
Found in **CO9\_HUMAN**, Complement component C9 OS=Homo sapiens GN=C9 PE=1 SV=2

Match to Query 48860: 2217.002382 from(740.008070,3+) rtinseconds(1611) index(31820)  
Title: Locus1.1.1.669.23 File:"2013-07-02 CLN FXIII 180 min 2nd F 3.wiff"  
Data file C:\Program Files (x86)\Matrix Science\Mascot Daemon\mgf\8 FXIII 180 min 2nd\mascot\_daemon\_merge.mgf

Click mouse within plot area to zoom in by factor of two about that point  
Or, 

Plot from

100

 to 

1500

 Da 

Full range

  
Label all possible matches ☐ Label matches used for scoring ☒

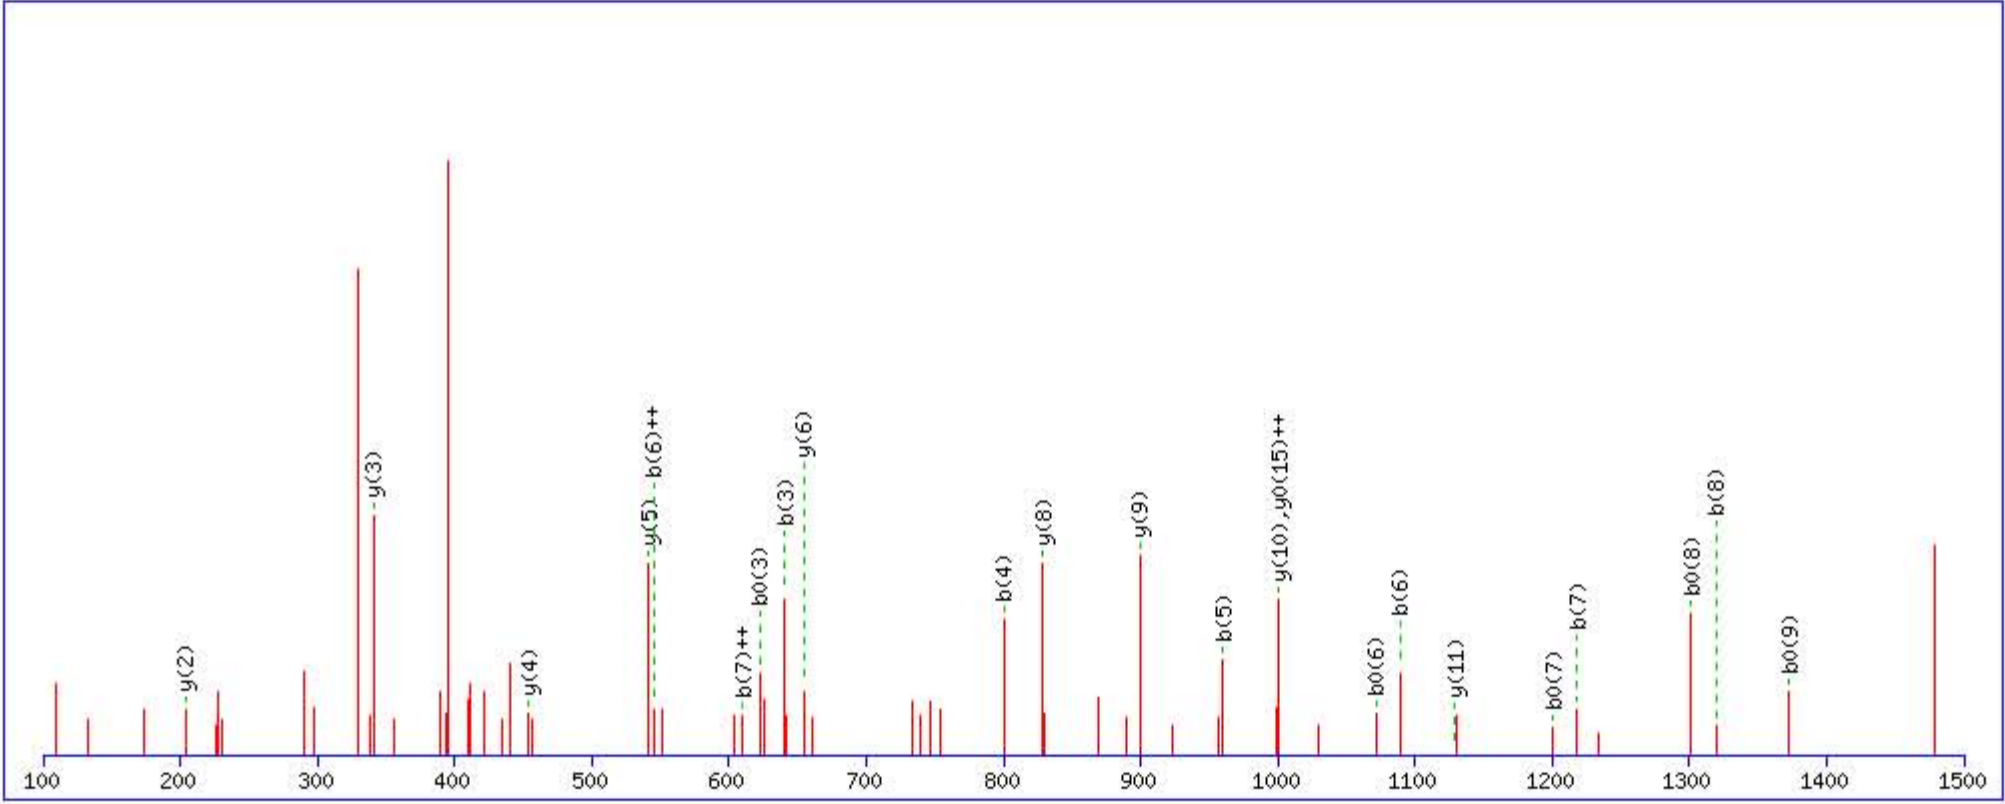

Monoisotopic mass of neutral peptide Mr(calc): 2216.986404  
Fixed modifications: Carbamidomethyl (C) (apply to specified residues or termini only)  
Variable modifications:  
Q3 : Biotin:Thermo-21345 (Q)  
Ions Score: 43 Expect: 0.00063  
Matches : 23/178 fragment ions using 47 most intense peaks [\(help\)](#)

| #  | b           | b <sup>++</sup> | b <sup>*</sup> | b <sup>*++</sup> | b <sup>0</sup> | b <sup>0++</sup> | Seq. | y           | y <sup>++</sup> | y <sup>*</sup> | y <sup>*++</sup> | y <sup>0</sup> | y <sup>0++</sup> | #  |
|----|-------------|-----------------|----------------|------------------|----------------|------------------|------|-------------|-----------------|----------------|------------------|----------------|------------------|----|
| 1  | 72.044390   | 36.525833       |                |                  |                |                  | A    |             |                 |                |                  |                |                  | 17 |
| 2  | 201.086983  | 101.047130      |                |                  | 183.076418     | 92.041847        | E    | 2146.956588 | 1073.981932     | 2129.930039    | 1065.468657      | 2128.946023    | 1064.976649      | 16 |
| 3  | 640.312309  | 320.659793      | 623.285760     | 312.146518       | 622.301744     | 311.654510       | Q    | 2017.913995 | 1009.460636     | 2000.887446    | 1000.947361      | 1999.903430    | 1000.455353      | 15 |
| 4  | 800.342958  | 400.675117      | 783.316409     | 392.161843       | 782.332393     | 391.669835       | C    | 1578.688669 | 789.847972      | 1561.662120    | 781.334698       | 1560.678104    | 780.842690       | 14 |
| 5  | 960.373607  | 480.690442      | 943.347058     | 472.177167       | 942.363042     | 471.685159       | C    | 1418.658020 | 709.832648      | 1401.631471    | 701.319374       | 1400.647455    | 700.827366       | 13 |
| 6  | 1089.416200 | 545.211738      | 1072.389651    | 536.698464       | 1071.405635    | 536.206456       | E    | 1258.627371 | 629.817323      | 1241.600822    | 621.304049       | 1240.616806    | 620.812041       | 12 |
| 7  | 1218.458793 | 609.733035      | 1201.432244    | 601.219760       | 1200.448228    | 600.727752       | E    | 1129.584778 | 565.296027      | 1112.558229    | 556.782753       | 1111.574213    | 556.290744       | 11 |
| 8  | 1319.506472 | 660.256874      | 1302.479923    | 651.743600       | 1301.495907    | 651.251592       | T    | 1000.542185 | 500.774731      | 983.515636     | 492.261456       | 982.531620     | 491.769448       | 10 |
| 9  | 1390.543586 | 695.775431      | 1373.517037    | 687.262157       | 1372.533021    | 686.770149       | A    | 899.494506  | 450.250891      | 882.467957     | 441.737617       | 881.483941     | 441.245609       | 9  |
| 10 | 1477.575614 | 739.291445      | 1460.549065    | 730.778171       | 1459.565049    | 730.286163       | S    | 828.457392  | 414.732334      | 811.430843     | 406.219060       | 810.446827     | 405.727052       | 8  |
| 11 | 1564.607642 | 782.807459      | 1547.581093    | 774.294185       | 1546.597077    | 773.802177       | S    | 741.425364  | 371.216320      | 724.398815     | 362.703045       | 723.414799     | 362.211037       | 7  |
| 12 | 1677.691706 | 839.349491      | 1660.665157    | 830.836217       | 1659.681141    | 830.344209       | I    | 654.393336  | 327.700306      | 637.366787     | 319.187031       | 636.382771     | 318.695023       | 6  |
| 13 | 1764.723734 | 882.865505      | 1747.697185    | 874.352231       | 1746.713169    | 873.860223       | S    | 541.309272  | 271.158274      | 524.282723     | 262.644999       | 523.298707     | 262.152991       | 5  |
| 14 | 1877.807798 | 939.407537      | 1860.781249    | 930.894263       | 1859.797233    | 930.402255       | L    | 454.277244  | 227.642260      | 437.250695     | 219.128985       |                |                  | 4  |
| 15 | 2014.866710 | 1007.936993     | 1997.840161    | 999.423719       | 1996.856145    | 998.931711       | H    | 341.193180  | 171.100228      | 324.166631     | 162.586953       |                |                  | 3  |
| 16 | 2071.888174 | 1036.447725     | 2054.861625    | 1027.934450      | 2053.877609    | 1027.442442      | G    | 204.134268  | 102.570772      | 187.107719     | 94.057497        |                |                  | 2  |
| 17 |             |                 |                |                  |                |                  | K    | 147.112804  | 74.060040       | 130.086255     | 65.546765        |                |                  | 1  |

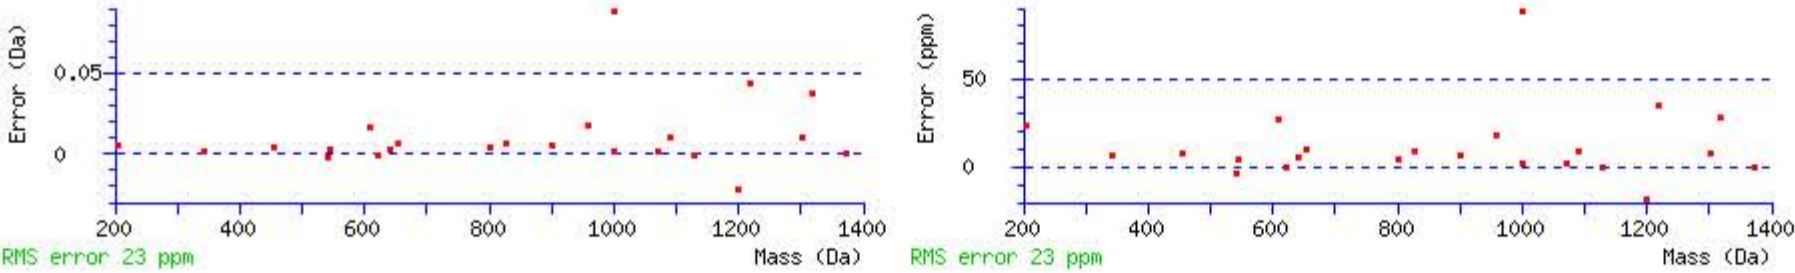

NCBI BLAST search of [AEQCCEETASSISLHGK](#)  
(Parameters: blastp, nr protein database, expect=20000, no filter, PAM30)  
Other BLAST [web gateways](#)

All matches to this query

| Score | Mr(calc):   | Delta    | Sequence                          |
|-------|-------------|----------|-----------------------------------|
| 42.7  | 2216.986404 | 0.015978 | <a href="#">AEQCCEETASSISLHGK</a> |

MATRIX

SCIENCE

Mascot Search Results

Peptide View

MS/MS Fragmentation of **VGSQYR**  
Found in **CFAB\_HUMAN**, Complement factor B OS=Homo sapiens GN=CFB PE=1 SV=2

Match to Query 14271: 1019.521628 from(510.768090,2+) rtinseconds(1376) index(62617)  
Title:Locus:1.1.1.1754.15 File:"2013-07-02 CLN FXIII 180 min 2nd FT.wiff"  
Data file C:\Program Files (x86)\Matrix Science\Mascot Daemon\mgf\8 FXIII 180 min 2nd\mascot\_daemon\_merge.mgf

Click mouse within plot area to zoom in by factor of two about that point  
Or, 

Plot from

100

 to 

1050

 Da 

Full range

  
Label all possible matches ☐ Label matches used for scoring ☒

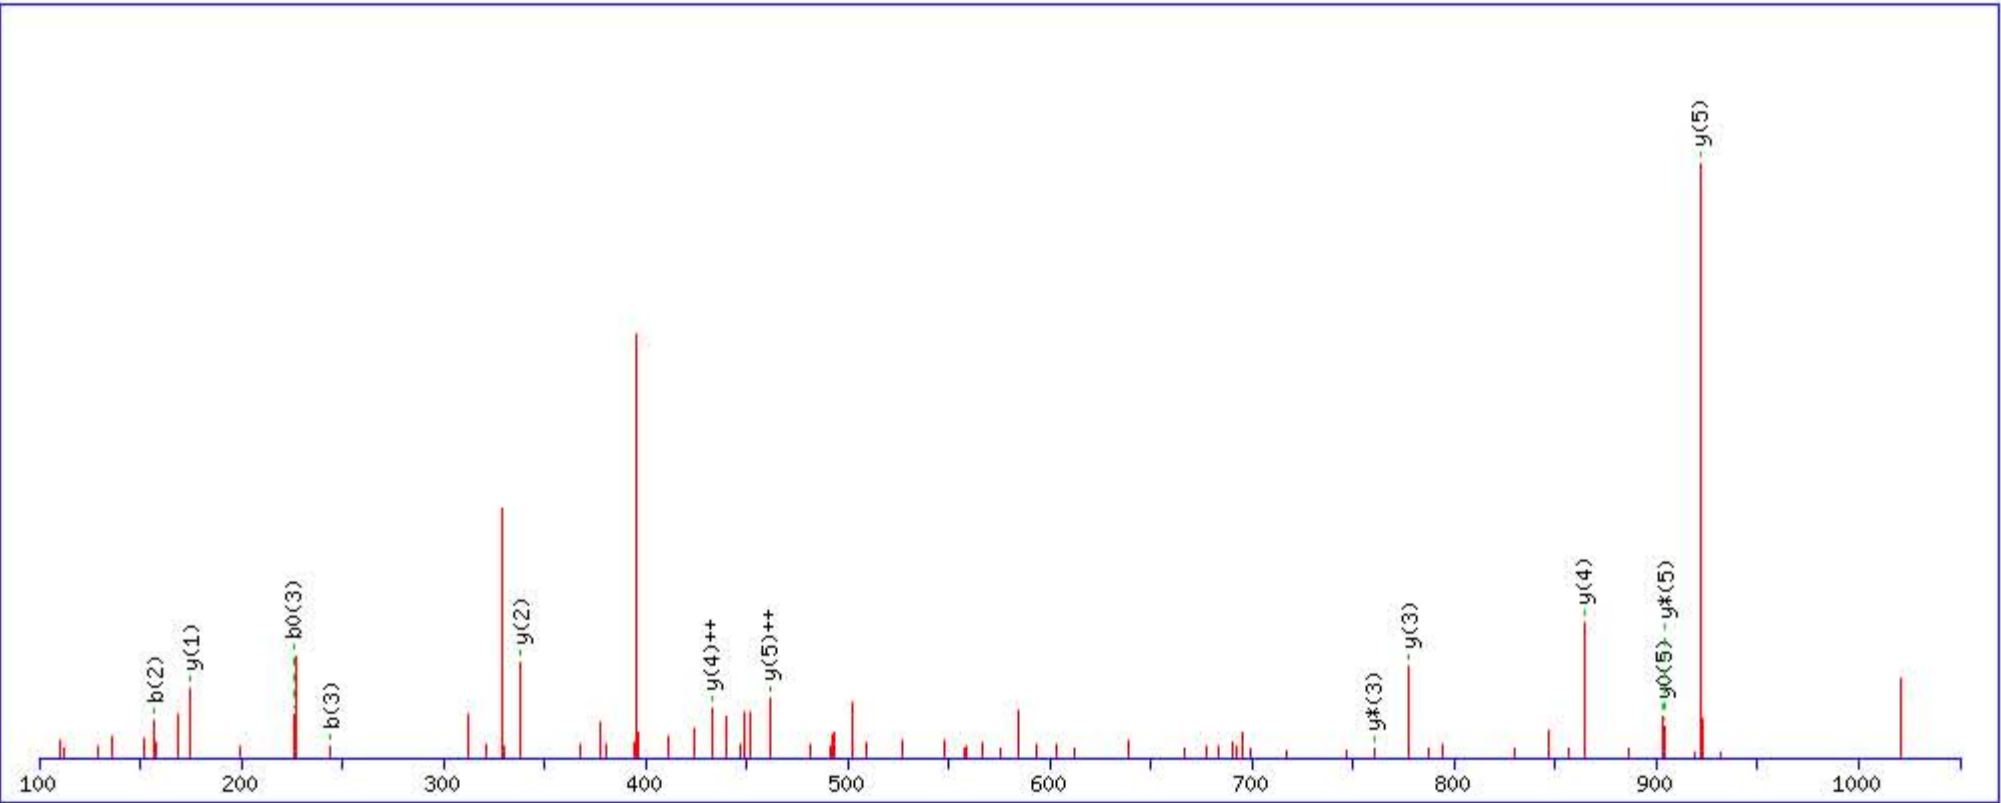

Monoisotopic mass of neutral peptide Mr(calc): 1019.522232  
Fixed modifications: Carbamidomethyl (C) (apply to specified residues or termini only)  
Variable modifications:  
Q4 : Biotin:Thermo-21345 (Q)  
Ions Score: 25 Expect: 0.06  
Matches : 13/44 fragment ions using 27 most intense peaks [\(help\)](#)

| # | b          | b <sup>++</sup> | b <sup>*</sup> | b <sup>+++</sup> | b <sup>0</sup> | b <sup>0++</sup> | Seq. | y          | y <sup>++</sup> | y <sup>*</sup> | y <sup>+++</sup> | y <sup>0</sup> | y <sup>0++</sup> | # |
|---|------------|-----------------|----------------|------------------|----------------|------------------|------|------------|-----------------|----------------|------------------|----------------|------------------|---|
| 1 | 100.075690 | 50.541483       |                |                  |                |                  | V    |            |                 |                |                  |                |                  | 6 |
| 2 | 157.097154 | 79.052215       |                |                  |                |                  | G    | 921.461099 | 461.234188      | 904.434550     | 452.720913       | 903.450534     | 452.228905       | 5 |
| 3 | 244.129182 | 122.568229      |                |                  | 226.118617     | 113.562946       | S    | 864.439635 | 432.723456      | 847.413086     | 424.210181       | 846.429070     | 423.718173       | 4 |
| 4 | 683.354508 | 342.180892      | 666.327959     | 333.667618       | 665.343943     | 333.175610       | Q    | 777.407607 | 389.207442      | 760.381058     | 380.694167       |                |                  | 3 |
| 5 | 846.417837 | 423.712557      | 829.391288     | 415.199282       | 828.407272     | 414.707274       | Y    | 338.182281 | 169.594778      | 321.155732     | 161.081504       |                |                  | 2 |
| 6 |            |                 |                |                  |                |                  | R    | 175.118952 | 88.063114       | 158.092403     | 79.549839        |                |                  | 1 |

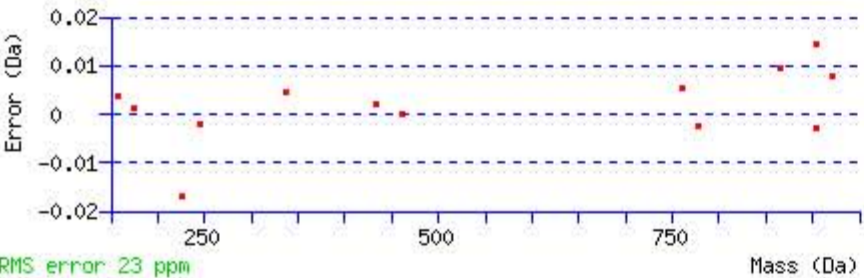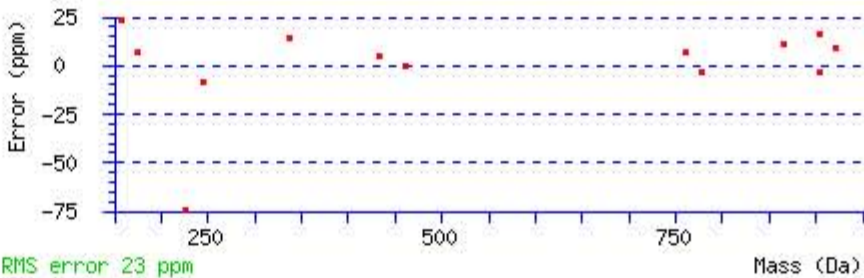

NCBI BLAST search of [VGSQYR](#)  
(Parameters: blastp, nr protein database, expect=20000, no filter, PAM30)  
Other BLAST [web gateways](#)

All matches to this query

| Score | Mr(calc):   | Delta     | Sequence                    |
|-------|-------------|-----------|-----------------------------|
| 25.1  | 1019.522232 | -0.000604 | <a href="#">VGSQYR</a>      |
| 11.3  | 1019.510818 | 0.010810  | <a href="#">RSSVSSGGAGR</a> |
| 10.3  | 1019.533447 | -0.011819 | <a href="#">RSQYR</a>       |
| 6.1   | 1019.512146 | 0.009482  | <a href="#">RSRGHHDR</a>    |
| 5.6   | 1019.506973 | 0.014655  | <a href="#">SSMPVIQSR</a>   |
| 2.7   | 1019.533463 | -0.011835 | <a href="#">VSLMWRGR</a>    |
| 2.5   | 1019.526047 | -0.004419 | <a href="#">SRERGPYR</a>    |
| 2.1   | 1019.506973 | 0.014655  | <a href="#">TLAQGMDR</a>    |
| 1.3   | 1019.526077 | -0.004449 | <a href="#">VPQAGGQHAR</a>  |
| 0.6   | 1019.506989 | 0.014639  | <a href="#">SVGEVMGIGR</a>  |

*MATRIX*  
*SCIENCE*

# Mascot Search Results

Peptide View

MS/MS Fragmentation of **DAQYAPGYDK**  
Found in **CFAB\_HUMAN**, Complement factor B OS=Homo sapiens GN=CFB PE=1 SV=2

Match to Query 29294: 1437.659868 from(719.837210,2+) rtinseconds(1627) index(64215)  
Title: Locus:1.1.1.1841.9 File:"2013-07-02 CLN FXIII 180 min 2nd FT.wiff"  
Data file C:\Program Files (x86)\Matrix Science\Mascot Daemon\mgf\8 FXIII 180 min 2nd\mascot\_daemon\_merge.mgf

Click mouse within plot area to zoom in by factor of two about that point  
Or, Plot from  to  Da   
Label all possible matches ☐ Label matches used for scoring ☒

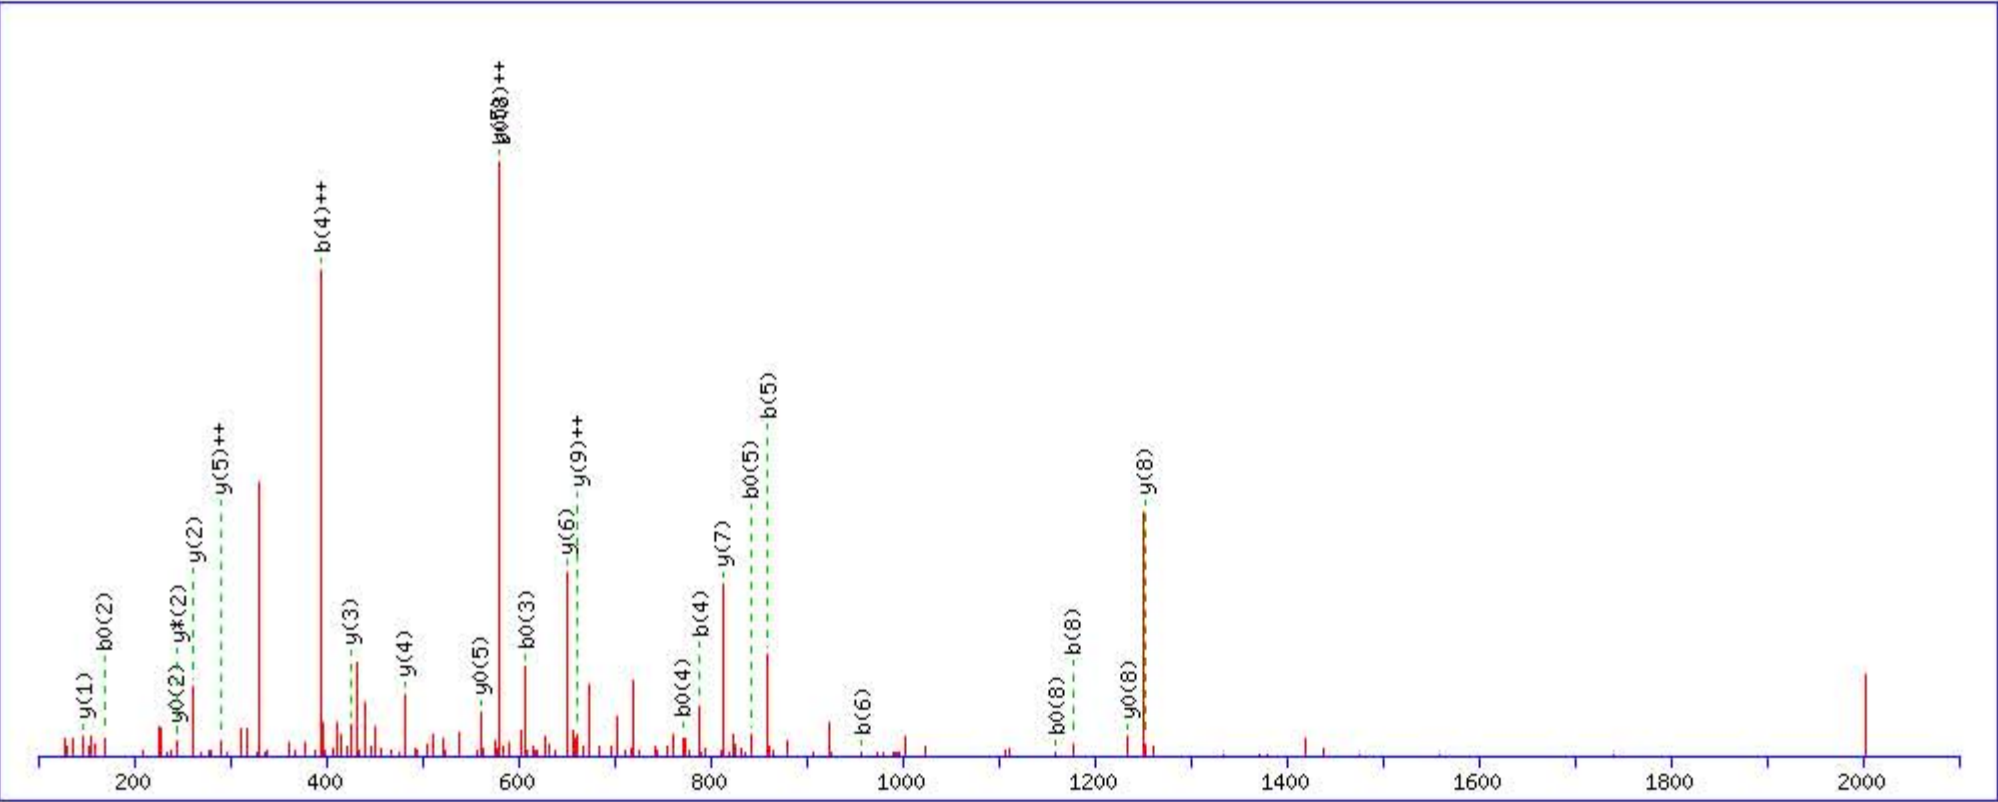

Monoisotopic mass of neutral peptide Mr(calc): 1437.659836  
Fixed modifications: Carbamidomethyl (C) (apply to specified residues or termini only)  
Variable modifications:  
Q3 : Biotin:Thermo-21345 (Q)  
Ions Score: 32 Expect: 0.012  
Matches : 25/102 fragment ions using 67 most intense peaks [\(help\)](#)

| #  | b           | b <sup>++</sup> | b <sup>+</sup> | b <sup>∗++</sup> | b <sup>0</sup> | b <sup>0++</sup> | Seq. | y           | y <sup>++</sup> | y <sup>+</sup> | y <sup>∗++</sup> | y <sup>0</sup> | y <sup>0++</sup> | #  |
|----|-------------|-----------------|----------------|------------------|----------------|------------------|------|-------------|-----------------|----------------|------------------|----------------|------------------|----|
| 1  | 116.034219  | 58.520748       |                |                  | 98.023654      | 49.515465        | D    |             |                 |                |                  |                |                  | 10 |
| 2  | 187.071333  | 94.039304       |                |                  | 169.060768     | 85.034022        | A    | 1323.640187 | 662.323732      | 1306.613638    | 653.810457       | 1305.629622    | 653.318449       | 9  |
| 3  | 626.296659  | 313.651968      | 609.270110     | 305.138693       | 608.286094     | 304.646685       | Q    | 1252.603073 | 626.805175      | 1235.576524    | 618.291900       | 1234.592508    | 617.799892       | 8  |
| 4  | 789.359988  | 395.183632      | 772.333439     | 386.670358       | 771.349423     | 386.178350       | Y    | 813.377747  | 407.192512      | 796.351198     | 398.679237       | 795.367182     | 398.187229       | 7  |
| 5  | 860.397102  | 430.702189      | 843.370553     | 422.188915       | 842.386537     | 421.696907       | A    | 650.314418  | 325.660847      | 633.287869     | 317.147573       | 632.303853     | 316.655565       | 6  |
| 6  | 957.449866  | 479.228571      | 940.423317     | 470.715297       | 939.439301     | 470.223289       | P    | 579.277304  | 290.142290      | 562.250755     | 281.629016       | 561.266739     | 281.137008       | 5  |
| 7  | 1014.471330 | 507.739303      | 997.444781     | 499.226029       | 996.460765     | 498.734021       | G    | 482.224540  | 241.615908      | 465.197991     | 233.102634       | 464.213975     | 232.610626       | 4  |
| 8  | 1177.534659 | 589.270968      | 1160.508110    | 580.757693       | 1159.524094    | 580.265685       | Y    | 425.203076  | 213.105176      | 408.176527     | 204.591902       | 407.192511     | 204.099894       | 3  |
| 9  | 1292.561602 | 646.784439      | 1275.535053    | 638.271165       | 1274.551037    | 637.779157       | D    | 262.139747  | 131.573512      | 245.113198     | 123.060237       | 244.129182     | 122.568229       | 2  |
| 10 |             |                 |                |                  |                |                  | K    | 147.112804  | 74.060040       | 130.086255     | 65.546765        |                |                  | 1  |

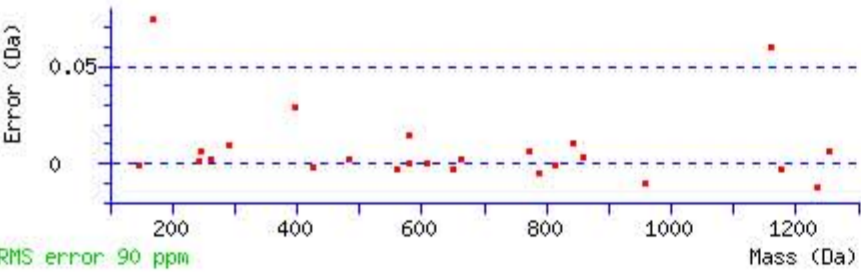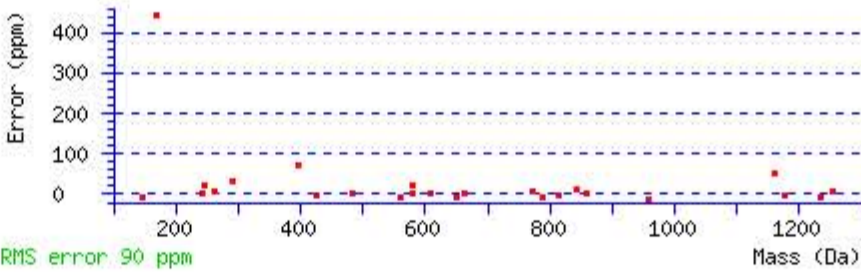

NCBI BLAST search of [DAQYAPGYDK](#)  
(Parameters: blastp, nr protein database, expect=20000, no filter, PAM30)  
Other BLAST [web gateways](#)

All matches to this query

| Score | Mr(calc):   | Delta    | Sequence                       |
|-------|-------------|----------|--------------------------------|
| 32.3  | 1437.659836 | 0.000032 | <a href="#">DAQYAPGYDK</a>     |
| 11.7  | 1437.659164 | 0.000704 | <a href="#">LAEAEQMALMGSR</a>  |
| 3.3   | 1437.647064 | 0.012804 | <a href="#">ASSDLSIASSEEDK</a> |

MATRIX

SCIENCE

Mascot Search Results

Peptide View

MS/MS Fragmentation of **EELLPAQDIK**  
Found in **CFAB\_HUMAN**, Complement factor B OS=Homo sapiens GN=CFB PE=1 SV=2

Match to Query 30136: 1465.798708 from(733.906630,2+) rtinseconds(2152) index(6462)  
Title: Locus:1.1.1.2026.23 File:"2013-07-02 CLN FXIII 180 min 2nd F 1.wiff"  
Data file C:\Program Files (x86)\Matrix Science\Mascot Daemon\mgf\8 FXIII 180 min 2nd\mascot\_daemon\_merge.mgf

Click mouse within plot area to zoom in by factor of two about that point  
Or, 

Plot from

100

 to 

1500

 Da 

Full range

  
Label all possible matches ☐ Label matches used for scoring ☒

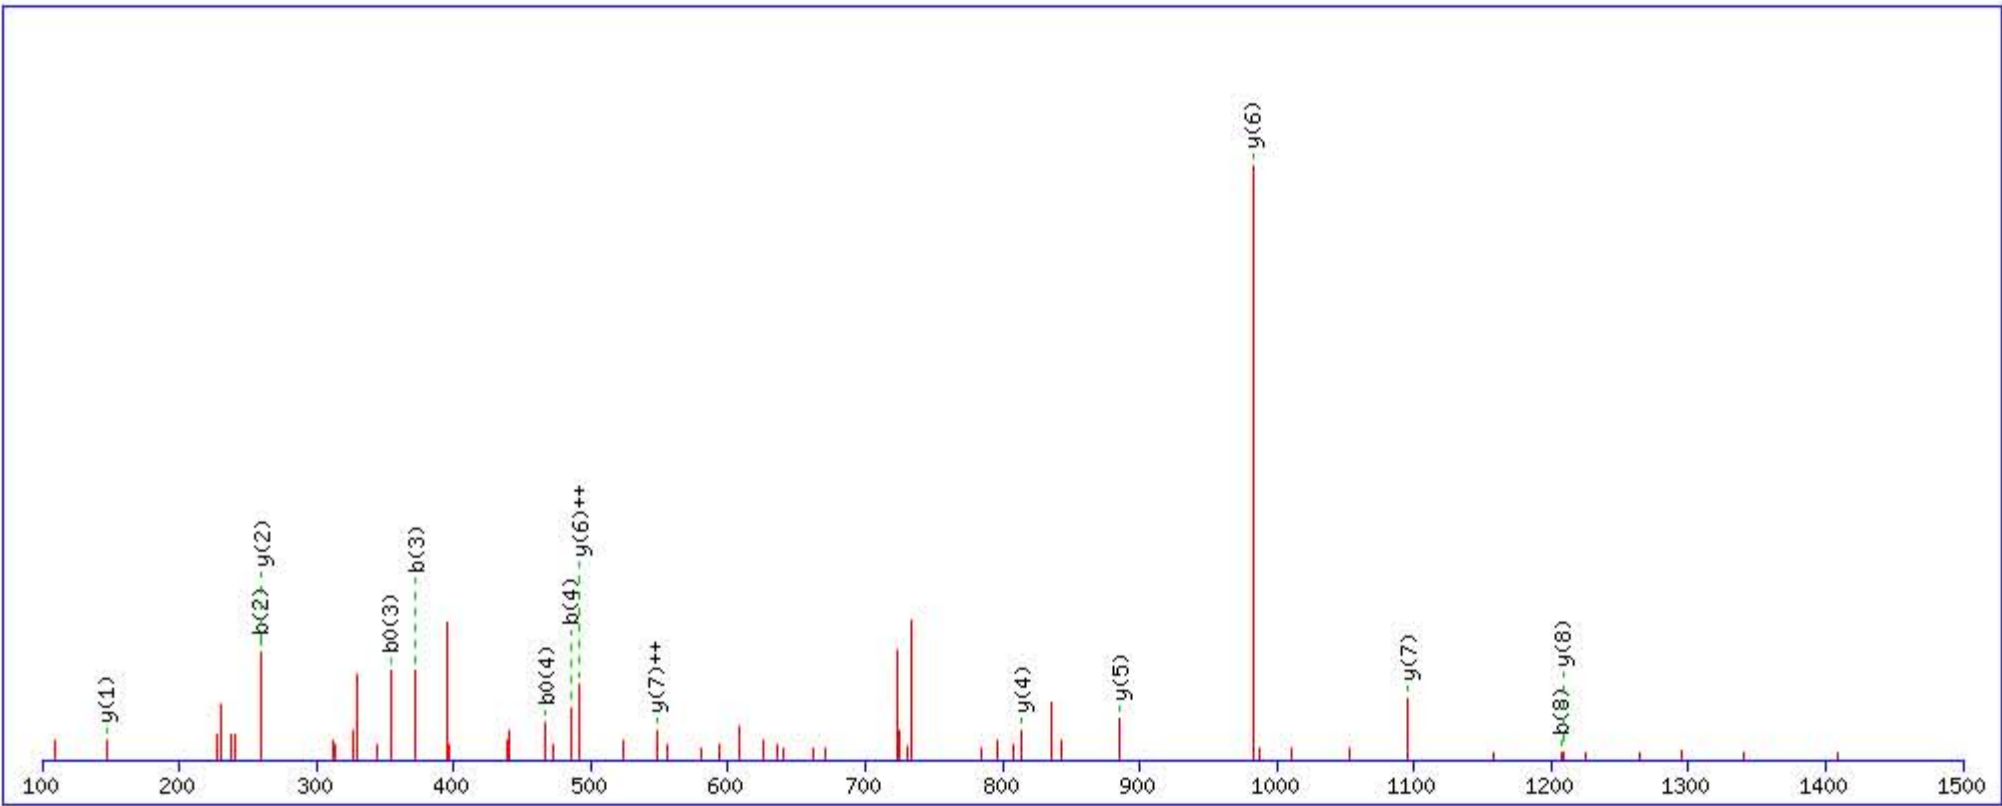

Monoisotopic mass of neutral peptide Mr(calc): 1465.785019  
Fixed modifications: Carbamidomethyl (C) (apply to specified residues or termini only)  
Variable modifications:  
Q7 : Biotin:Thermo-21345 (Q)  
Ions Score: 32 Expect: 0.0023  
Matches : 15/92 fragment ions using 37 most intense peaks [\(help\)](#)

| #  | b           | b <sup>++</sup> | b <sup>+</sup> | b <sup>++</sup> * | b <sup>0</sup> | b <sup>0++</sup> | Seq. | y           | y <sup>++</sup> | y <sup>+</sup> | y <sup>++</sup> * | y <sup>0</sup> | y <sup>0++</sup> | #  |
|----|-------------|-----------------|----------------|-------------------|----------------|------------------|------|-------------|-----------------|----------------|-------------------|----------------|------------------|----|
| 1  | 130.049869  | 65.528572       |                |                   | 112.039304     | 56.523290        | E    |             |                 |                |                   |                |                  | 10 |
| 2  | 259.092462  | 130.049869      |                |                   | 241.081897     | 121.044587       | E    | 1337.749736 | 669.378506      | 1320.723187    | 660.865232        | 1319.739171    | 660.373223       | 9  |
| 3  | 372.176526  | 186.591901      |                |                   | 354.165961     | 177.586619       | L    | 1208.707143 | 604.857210      | 1191.680594    | 596.343935        | 1190.696578    | 595.851927       | 8  |
| 4  | 485.260590  | 243.133933      |                |                   | 467.250025     | 234.128651       | L    | 1095.623079 | 548.315178      | 1078.596530    | 539.801903        | 1077.612514    | 539.309895       | 7  |
| 5  | 582.313354  | 291.660315      |                |                   | 564.302789     | 282.655033       | P    | 982.539015  | 491.773146      | 965.512466     | 483.259871        | 964.528450     | 482.767863       | 6  |
| 6  | 653.350468  | 327.178872      |                |                   | 635.339903     | 318.173590       | A    | 885.486251  | 443.246764      | 868.459702     | 434.733489        | 867.475686     | 434.241481       | 5  |
| 7  | 1092.575794 | 546.791535      | 1075.549245    | 538.278261        | 1074.565229    | 537.786253       | Q    | 814.449137  | 407.728207      | 797.422588     | 399.214932        | 796.438572     | 398.722924       | 4  |
| 8  | 1207.602737 | 604.305007      | 1190.576188    | 595.791732        | 1189.592172    | 595.299724       | D    | 375.223811  | 188.115543      | 358.197262     | 179.602269        | 357.213246     | 179.110261       | 3  |
| 9  | 1320.686801 | 660.847039      | 1303.660252    | 652.333764        | 1302.676236    | 651.841756       | I    | 260.196868  | 130.602072      | 243.170319     | 122.088797        |                |                  | 2  |
| 10 |             |                 |                |                   |                |                  | K    | 147.112804  | 74.060040       | 130.086255     | 65.546765         |                |                  | 1  |

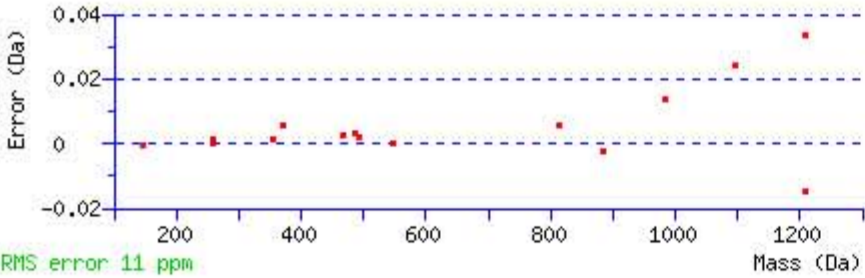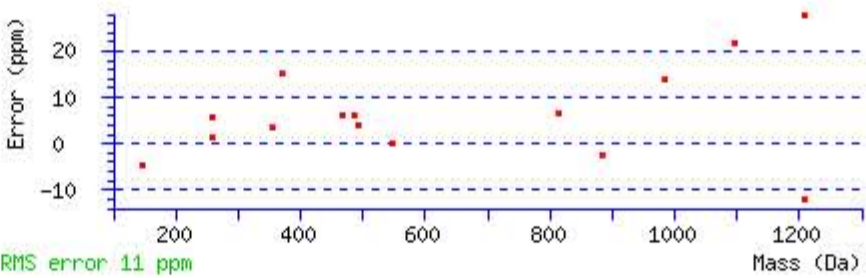

NCBI BLAST search of [EELLPAQDIK](#)  
(Parameters: blastp, nr protein database, expect=20000, no filter, PAM30)  
Other BLAST [web gateways](#)

All matches to this query

| Score | Mr(calc):   | Delta    | Sequence                     |
|-------|-------------|----------|------------------------------|
| 31.5  | 1465.785019 | 0.013689 | <a href="#">EELLPAQDIK</a>   |
| 3.2   | 1465.789734 | 0.008974 | <a href="#">TAAALGMHQKK</a>  |
| 0.1   | 1465.794235 | 0.004473 | <a href="#">KWGIGYHLSLHR</a> |

MATRIX

SCIENCE

Mascot Search Results

Peptide View

MS/MS Fragmentation of **LPPTTTCQQQK**  
Found in **CFAB\_HUMAN**, Complement factor B OS=Homo sapiens GN=CFB PE=1 SV=2

Match to Query 35191: 1611.808932 from(538.276920,3+) rtinseconds(1420) index(62950)  
Title: Locus:1.1.1.1769.18 File:"2013-07-02 CLN FXIII 180 min 2nd FT.wiff"  
Data file C:\Program Files (x86)\Matrix Science\Mascot Daemon\mgf\8 FXIII 180 min 2nd\mascot\_daemon\_merge.mgf

Click mouse within plot area to zoom in by factor of two about that point  
Or,   to  Da   
Label all possible matches ☐ Label matches used for scoring ☒

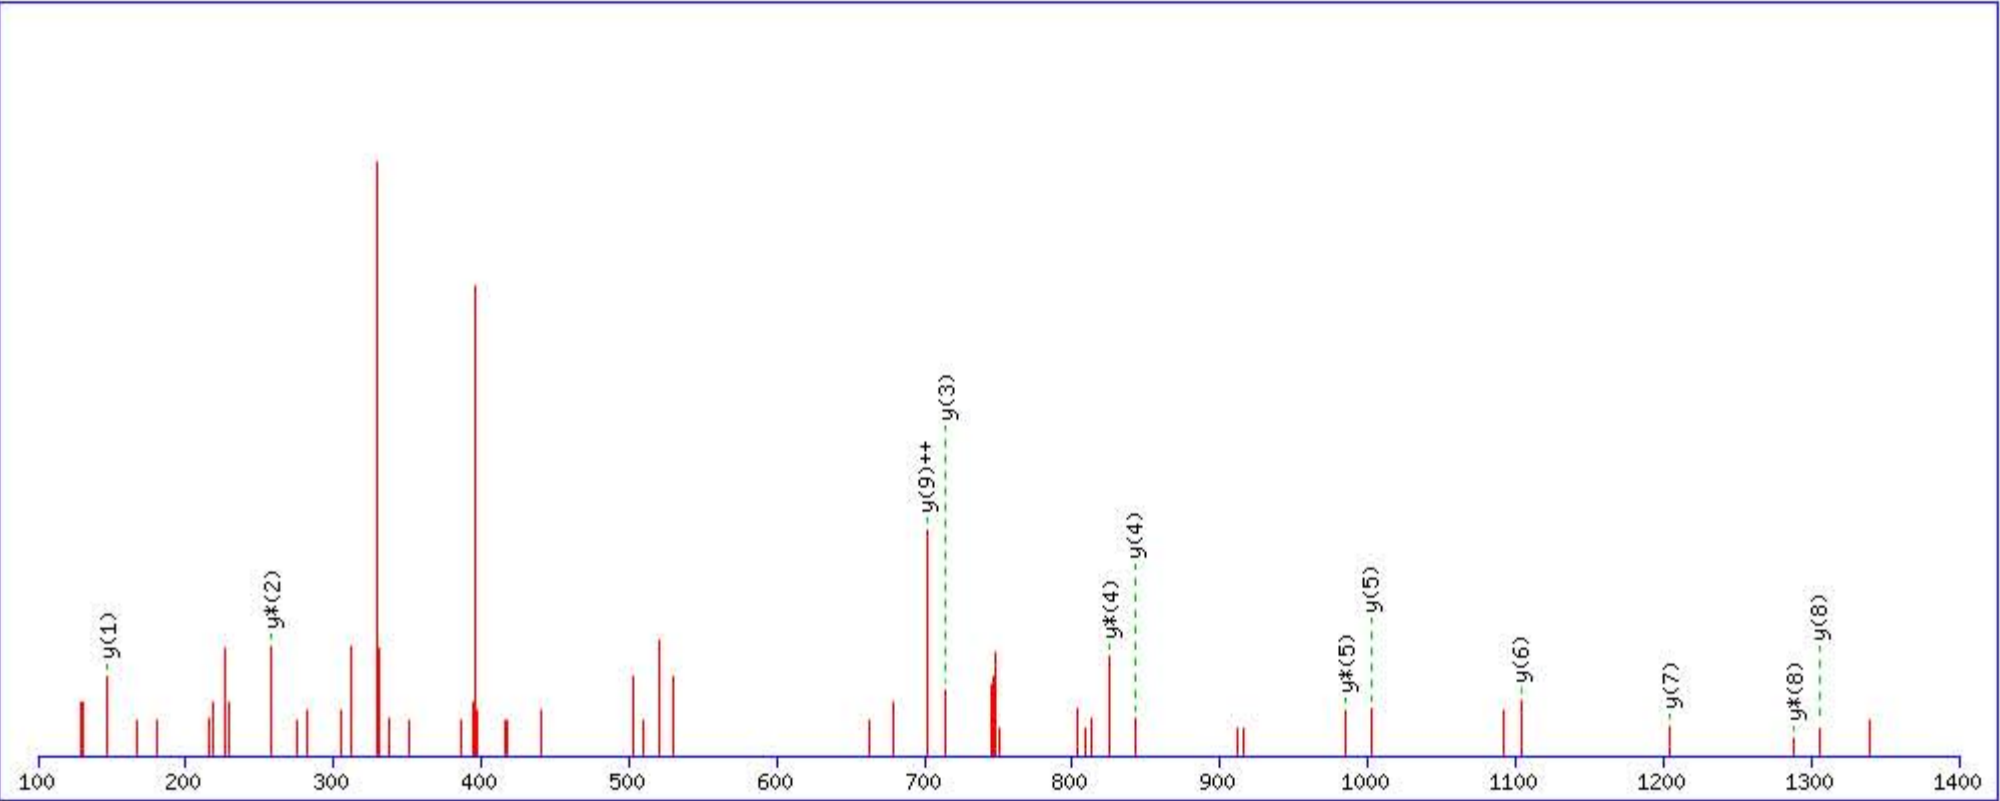

Monoisotopic mass of neutral peptide Mr(calc): 1611.811295  
Fixed modifications: Carbamidomethyl (C) (apply to specified residues or termini only)  
Variable modifications:  
Q9 : Biotin:Thermo-21345 (Q)  
Ions Score: 32 Expect: 0.006  
Matches : 12/90 fragment ions using 24 most intense peaks [\(help\)](#)

| #  | b           | b <sup>++</sup> | b <sup>*</sup> | b <sup>*++</sup> | b <sup>0</sup> | b <sup>0++</sup> | Seq. | y           | y <sup>++</sup> | y <sup>*</sup> | y <sup>*++</sup> | y <sup>0</sup> | y <sup>0++</sup> | #  |
|----|-------------|-----------------|----------------|------------------|----------------|------------------|------|-------------|-----------------|----------------|------------------|----------------|------------------|----|
| 1  | 114.091340  | 57.549308       |                |                  |                |                  | L    |             |                 |                |                  |                |                  | 11 |
| 2  | 211.144104  | 106.075690      |                |                  |                |                  | P    | 1499.734500 | 750.370888      | 1482.707951    | 741.857614       | 1481.723935    | 741.365606       | 10 |
| 3  | 308.196868  | 154.602072      |                |                  |                |                  | P    | 1402.681736 | 701.844506      | 1385.655187    | 693.331232       | 1384.671171    | 692.839224       | 9  |
| 4  | 409.244547  | 205.125911      |                |                  | 391.233982     | 196.120629       | T    | 1305.628972 | 653.318124      | 1288.602423    | 644.804850       | 1287.618407    | 644.312842       | 8  |
| 5  | 510.292226  | 255.649751      |                |                  | 492.281661     | 246.644468       | T    | 1204.581293 | 602.794285      | 1187.554744    | 594.281010       | 1186.570728    | 593.789002       | 7  |
| 6  | 611.339905  | 306.173591      |                |                  | 593.329340     | 297.168308       | T    | 1103.533614 | 552.270445      | 1086.507065    | 543.757171       | 1085.523049    | 543.265163       | 6  |
| 7  | 771.370554  | 386.188915      |                |                  | 753.359989     | 377.183633       | C    | 1002.485935 | 501.746606      | 985.459386     | 493.233331       |                |                  | 5  |
| 8  | 899.429132  | 450.218204      | 882.402583     | 441.704930       | 881.418567     | 441.212922       | Q    | 842.455286  | 421.731281      | 825.428737     | 413.218007       |                |                  | 4  |
| 9  | 1338.654458 | 669.830867      | 1321.627909    | 661.317593       | 1320.643893    | 660.825585       | Q    | 714.396708  | 357.701992      | 697.370159     | 349.188718       |                |                  | 3  |
| 10 | 1466.713036 | 733.860156      | 1449.686487    | 725.346882       | 1448.702471    | 724.854874       | Q    | 275.171382  | 138.089329      | 258.144833     | 129.576055       |                |                  | 2  |
| 11 |             |                 |                |                  |                |                  | K    | 147.112804  | 74.060040       | 130.086255     | 65.546765        |                |                  | 1  |

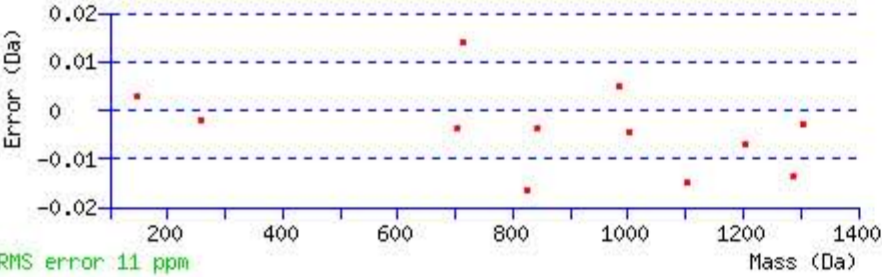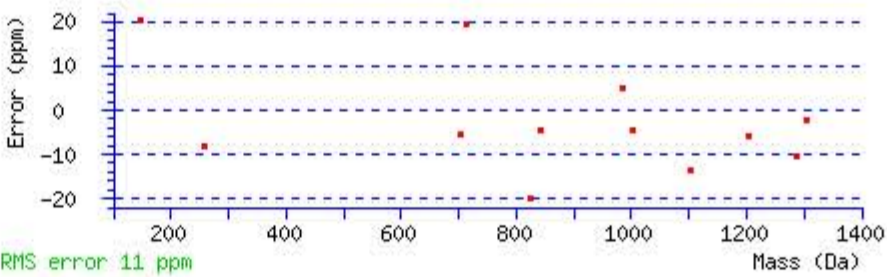

NCBI BLAST search of **LPPTTTCQQQK**  
(Parameters: blastp, nr protein database, expect=20000, no filter, PAM30)  
Other BLAST [web gateways](#)

All matches to this query

| Score | Mr(calc):   | Delta     | Sequence                        |
|-------|-------------|-----------|---------------------------------|
| 32.2  | 1611.811295 | -0.002363 | <a href="#">LPPTTTCQQQK</a>     |
| 29.6  | 1611.811295 | -0.002363 | <a href="#">LPPTTTCQQQK</a>     |
| 21.9  | 1611.811295 | -0.002363 | <a href="#">LPPTTTCQQQK</a>     |
| 8.2   | 1611.803406 | 0.005526  | <a href="#">TPIKMGISASTMTMK</a> |
| 5.0   | 1611.803406 | 0.005526  | <a href="#">TPIKMGISASTMTMK</a> |
| 3.4   | 1611.815094 | -0.006162 | <a href="#">NDVEGAKMHLRQAK</a>  |

MATRIX

SCIENCE

Mascot Search Results

Peptide View

MS/MS Fragmentation of **LPPTTTCQQQK**  
Found in **CFAB\_HUMAN**, Complement factor B OS=Homo sapiens GN=CFB PE=1 SV=2

Match to Query 35196: 1611.812292 from(538.278040,3+) rtinseconds(1438) index(2236)  
Title: Locus:1.1.1.1777.17 File:"2013-07-02 CLN FXIII 180 min 2nd F 1.wiff"  
Data file C:\Program Files (x86)\Matrix Science\Mascot Daemon\mgf\8 FXIII 180 min 2nd\mascot\_daemon\_merge.mgf

Click mouse within plot area to zoom in by factor of two about that point  
Or, 

Plot from

100

 to 

1500

 Da 

Full range

  
Label all possible matches ☐ Label matches used for scoring ☒

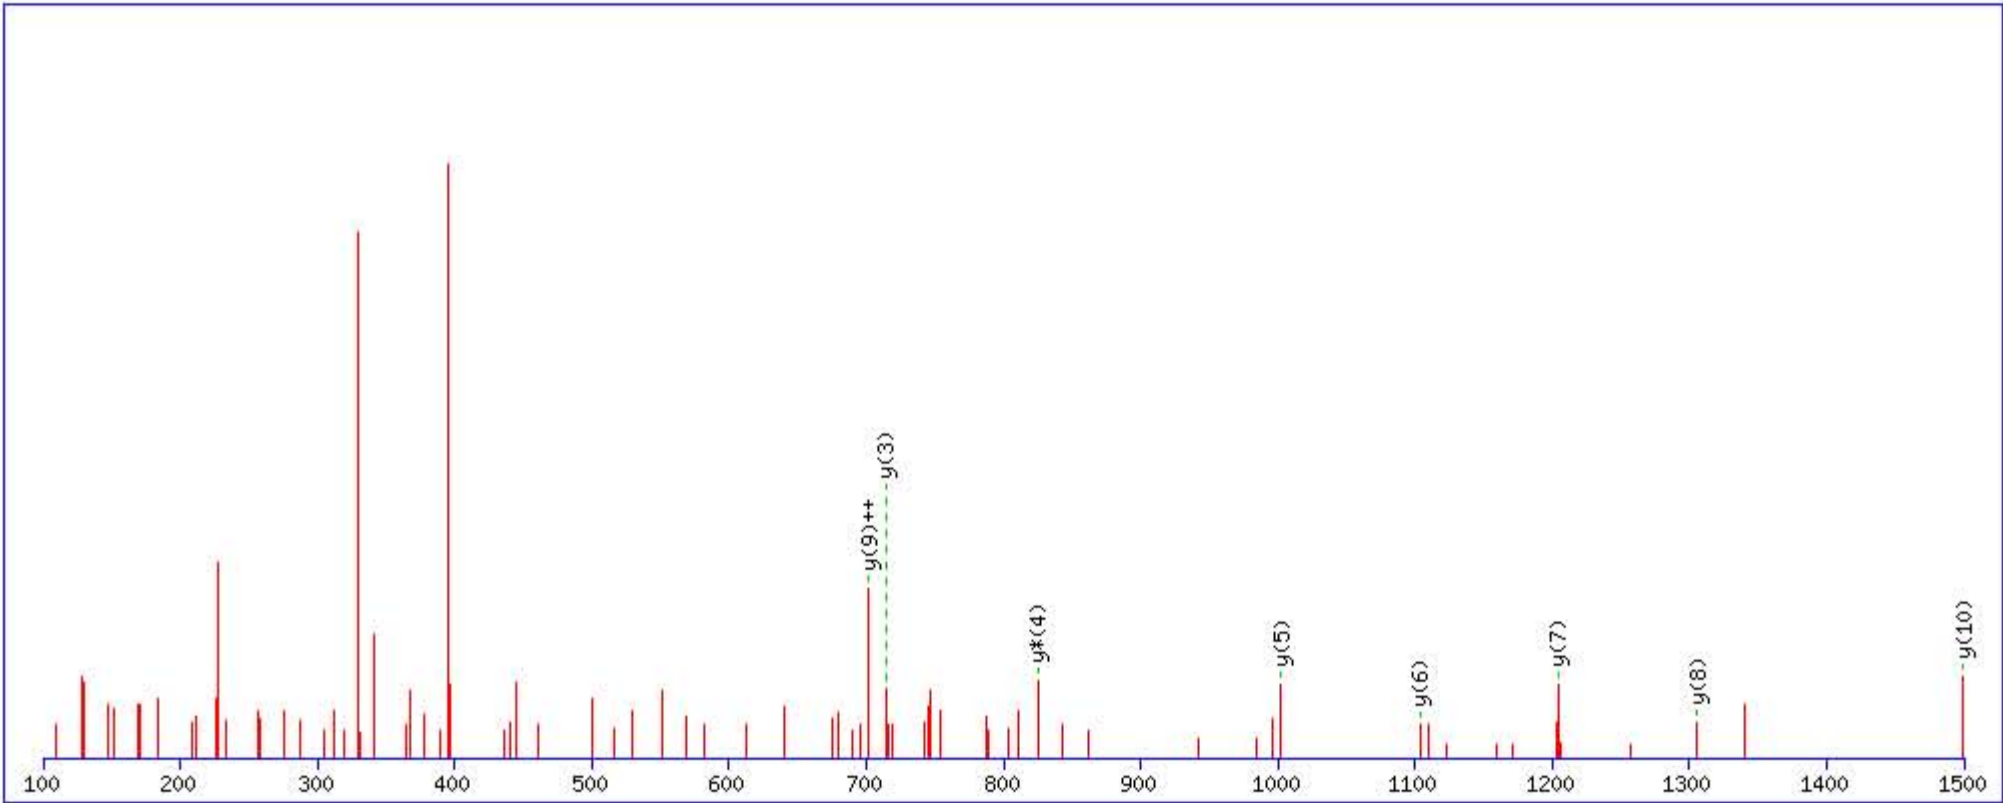

Monoisotopic mass of neutral peptide Mr(calc): 1611.811295  
Fixed modifications: Carbamidomethyl (C) (apply to specified residues or termini only)  
Variable modifications:  
Q10 : Biotin:Thermo-21345 (Q)  
Ions Score: 31 Expect: 0.021  
Matches : 8/90 fragment ions using 14 most intense peaks [\(help\)](#)

| #  | b           | b <sup>++</sup> | b <sup>*</sup> | b <sup>*++</sup> | b <sup>0</sup> | b <sup>0++</sup> | Seq. | y           | y <sup>++</sup> | y <sup>*</sup> | y <sup>*++</sup> | y <sup>0</sup> | y <sup>0++</sup> | #  |
|----|-------------|-----------------|----------------|------------------|----------------|------------------|------|-------------|-----------------|----------------|------------------|----------------|------------------|----|
| 1  | 114.091340  | 57.549308       |                |                  |                |                  | L    |             |                 |                |                  |                |                  | 11 |
| 2  | 211.144104  | 106.075690      |                |                  |                |                  | P    | 1499.734500 | 750.370888      | 1482.707951    | 741.857614       | 1481.723935    | 741.365606       | 10 |
| 3  | 308.196868  | 154.602072      |                |                  |                |                  | P    | 1402.681736 | 701.844506      | 1385.655187    | 693.331232       | 1384.671171    | 692.839224       | 9  |
| 4  | 409.244547  | 205.125911      |                |                  | 391.233982     | 196.120629       | T    | 1305.628972 | 653.318124      | 1288.602423    | 644.804850       | 1287.618407    | 644.312842       | 8  |
| 5  | 510.292226  | 255.649751      |                |                  | 492.281661     | 246.644468       | T    | 1204.581293 | 602.794285      | 1187.554744    | 594.281010       | 1186.570728    | 593.789002       | 7  |
| 6  | 611.339905  | 306.173591      |                |                  | 593.329340     | 297.168308       | T    | 1103.533614 | 552.270445      | 1086.507065    | 543.757171       | 1085.523049    | 543.265163       | 6  |
| 7  | 771.370554  | 386.188915      |                |                  | 753.359989     | 377.183633       | C    | 1002.485935 | 501.746606      | 985.459386     | 493.233331       |                |                  | 5  |
| 8  | 899.429132  | 450.218204      | 882.402583     | 441.704930       | 881.418567     | 441.212922       | Q    | 842.455286  | 421.731281      | 825.428737     | 413.218007       |                |                  | 4  |
| 9  | 1027.487710 | 514.247493      | 1010.461161    | 505.734219       | 1009.477145    | 505.242211       | Q    | 714.396708  | 357.701992      | 697.370159     | 349.188718       |                |                  | 3  |
| 10 | 1466.713036 | 733.860156      | 1449.686487    | 725.346882       | 1448.702471    | 724.854874       | Q    | 586.338130  | 293.672703      | 569.311581     | 285.159429       |                |                  | 2  |
| 11 |             |                 |                |                  |                |                  | K    | 147.112804  | 74.060040       | 130.086255     | 65.546765        |                |                  | 1  |

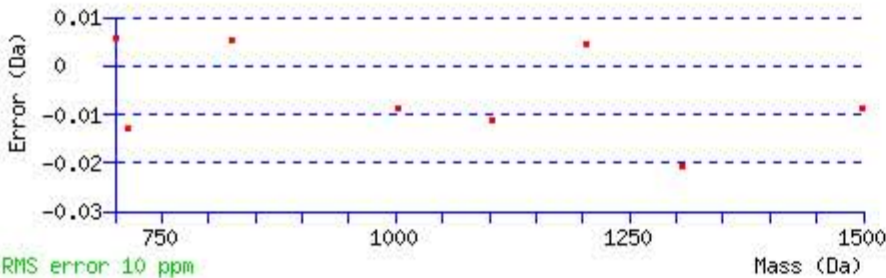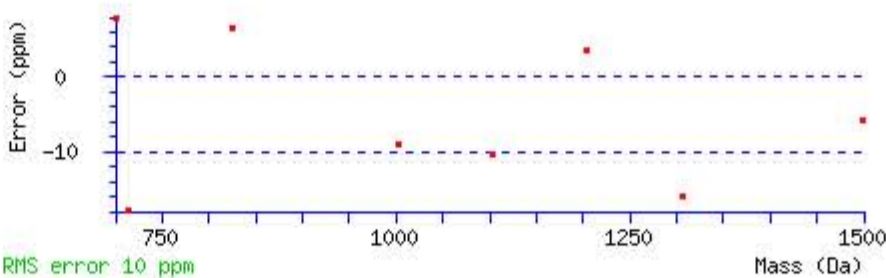

NCBI BLAST search of [LPPTTTCQQQK](#)  
(Parameters: blastp, nr protein database, expect=20000, no filter, PAM30)  
Other BLAST [web gateways](#)

All matches to this query

| Score | Mr(calc):   | Delta    | Sequence                    |
|-------|-------------|----------|-----------------------------|
| 31.0  | 1611.811295 | 0.000997 | <a href="#">LPPTTTCQQQK</a> |
| 31.0  | 1611.811295 | 0.000997 | <a href="#">LPPTTTCQQQK</a> |
| 19.3  | 1611.811295 | 0.000997 | <a href="#">LPPTTTCQQQK</a> |

MATRIX

SCIENCE

Mascot Search Results

Peptide View

MS/MS Fragmentation of **LPPTTTCQQQK**  
Found in **CFAB\_HUMAN**, Complement factor B OS=Homo sapiens GN=CFB PE=1 SV=2

Match to Query 42579: 1922.981682 from(642.001170,3+) rtinseconds(1772) index(65025)  
Title: Locus:1.1.1.1892.13 File:"2013-07-02 CLN FXIII 180 min 2nd FT.wiff"  
Data file C:\Program Files (x86)\Matrix Science\Mascot Daemon\mgf\8 FXIII 180 min 2nd\mascot\_daemon\_merge.mgf

Click mouse within plot area to zoom in by factor of two about that point  
Or, 

Plot from

100

 to 

2000

 Da 

Full range

  
Label all possible matches ☐ Label matches used for scoring ☒

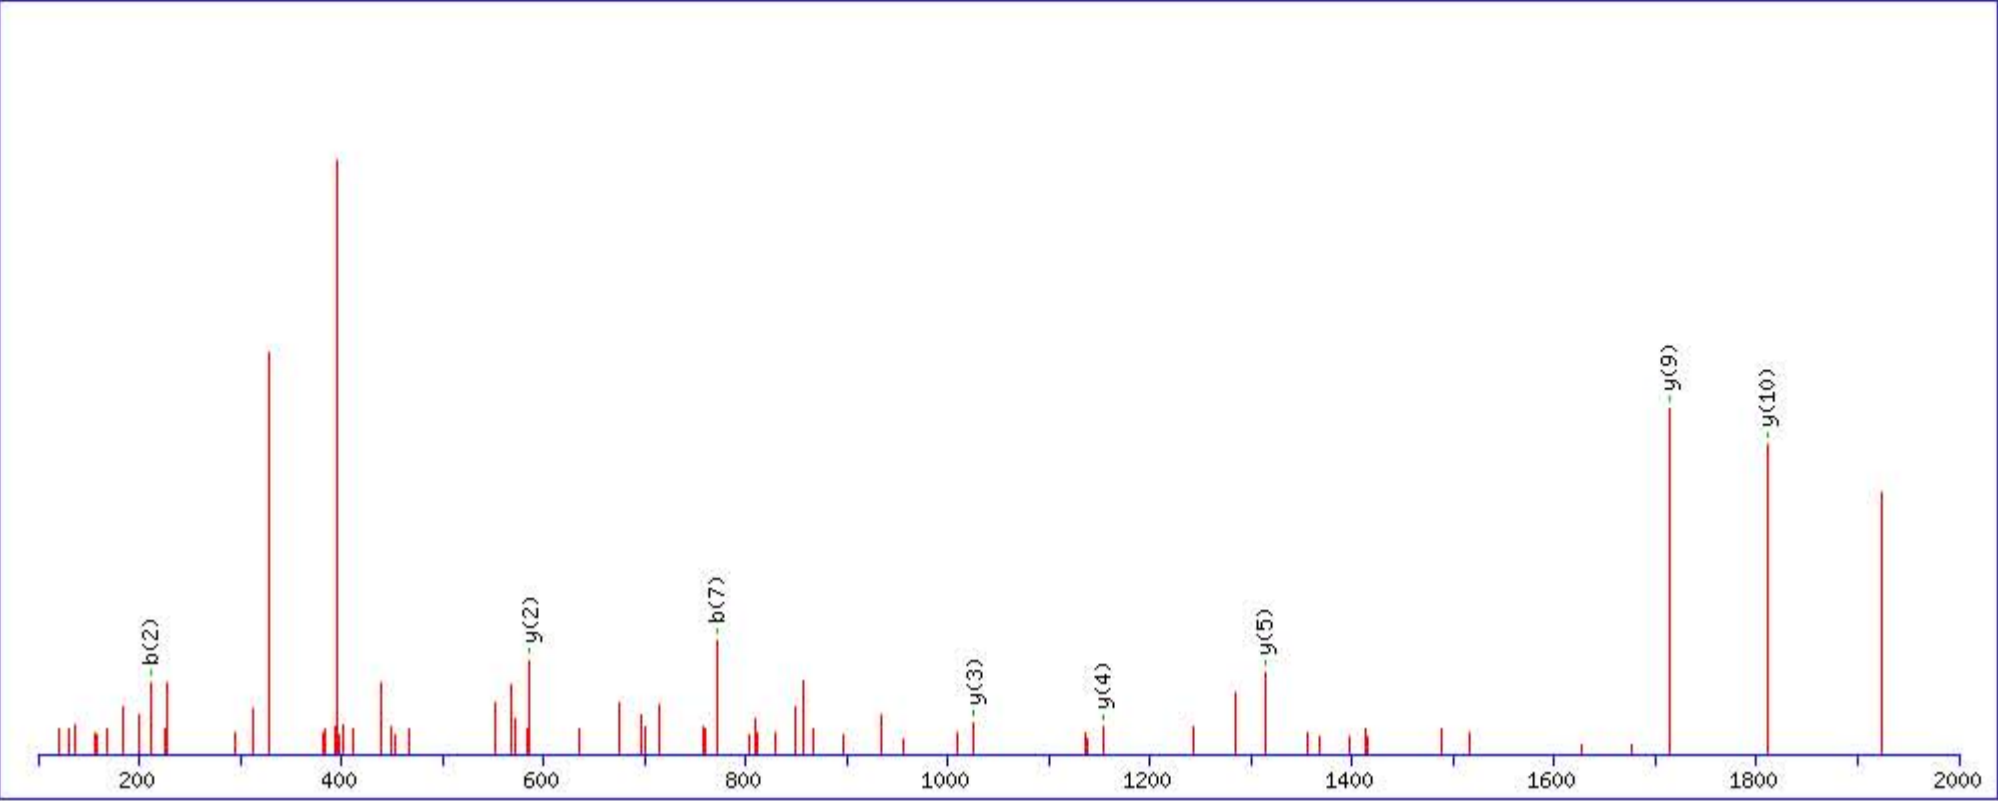

Monoisotopic mass of neutral peptide Mr(calc): 1922.978043  
Fixed modifications: Carbamidomethyl (C) (apply to specified residues or termini only)  
Variable modifications:  
Q9 : Biotin:Thermo-21345 (Q)  
Q10 : Biotin:Thermo-21345 (Q)  
Ions Score: 28 Expect: 0.024  
Matches : 8/90 fragment ions using 16 most intense peaks [\(help\)](#)

| #  | b           | b <sup>++</sup> | b <sup>+</sup> | b <sup>+++</sup> | b <sup>0</sup> | b <sup>0++</sup> | Seq. | y           | y <sup>++</sup> | y <sup>+</sup> | y <sup>+++</sup> | y <sup>0</sup> | y <sup>0++</sup> | #  |
|----|-------------|-----------------|----------------|------------------|----------------|------------------|------|-------------|-----------------|----------------|------------------|----------------|------------------|----|
| 1  | 114.091340  | 57.549308       |                |                  |                |                  | L    |             |                 |                |                  |                |                  | 11 |
| 2  | 211.144104  | 106.075690      |                |                  |                |                  | P    | 1810.901248 | 905.954262      | 1793.874699    | 897.440988       | 1792.890683    | 896.948980       | 10 |
| 3  | 308.196868  | 154.602072      |                |                  |                |                  | P    | 1713.848484 | 857.427880      | 1696.821935    | 848.914606       | 1695.837919    | 848.422598       | 9  |
| 4  | 409.244547  | 205.125911      |                |                  | 391.233982     | 196.120629       | T    | 1616.795720 | 808.901498      | 1599.769171    | 800.388224       | 1598.785155    | 799.896216       | 8  |
| 5  | 510.292226  | 255.649751      |                |                  | 492.281661     | 246.644468       | T    | 1515.748041 | 758.377659      | 1498.721492    | 749.864384       | 1497.737476    | 749.372376       | 7  |
| 6  | 611.339905  | 306.173591      |                |                  | 593.329340     | 297.168308       | T    | 1414.700362 | 707.853819      | 1397.673813    | 699.340545       | 1396.689797    | 698.848537       | 6  |
| 7  | 771.370554  | 386.188915      |                |                  | 753.359989     | 377.183633       | C    | 1313.652683 | 657.329980      | 1296.626134    | 648.816705       |                |                  | 5  |
| 8  | 899.429132  | 450.218204      | 882.402583     | 441.704930       | 881.418567     | 441.212922       | Q    | 1153.622034 | 577.314655      | 1136.595485    | 568.801381       |                |                  | 4  |
| 9  | 1338.654458 | 669.830867      | 1321.627909    | 661.317593       | 1320.643893    | 660.825585       | Q    | 1025.563456 | 513.285366      | 1008.536907    | 504.772092       |                |                  | 3  |
| 10 | 1777.879784 | 889.443530      | 1760.853235    | 880.930256       | 1759.869219    | 880.438248       | Q    | 586.338130  | 293.672703      | 569.311581     | 285.159429       |                |                  | 2  |
| 11 |             |                 |                |                  |                |                  | K    | 147.112804  | 74.060040       | 130.086255     | 65.546765        |                |                  | 1  |

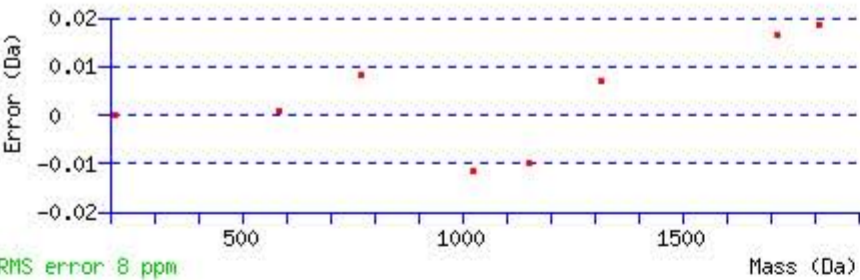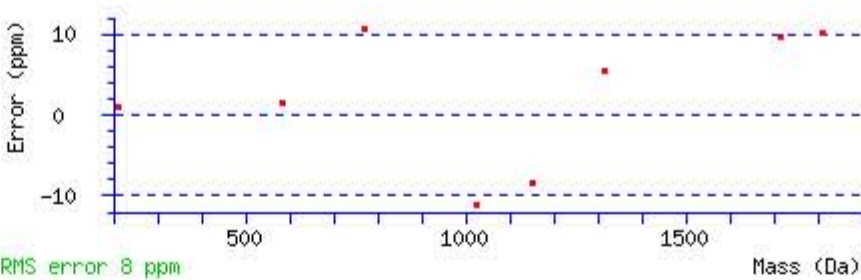

NCBI BLAST search of [LPPTTTCQQQK](#)  
(Parameters: blastp, nr protein database, expect=20000, no filter, PAM30)  
Other BLAST [web gateways](#)

All matches to this query

| Score | Mr(calc):   | Delta     | Sequence                         |
|-------|-------------|-----------|----------------------------------|
| 28.3  | 1922.978043 | 0.003639  | <a href="#">LPPTTTCQQQK</a>      |
| 24.6  | 1922.978043 | 0.003639  | <a href="#">LPPTTTCQQQK</a>      |
| 16.5  | 1922.978043 | 0.003639  | <a href="#">LPPTTTCQQQK</a>      |
| 10.4  | 1922.981842 | -0.000160 | <a href="#">NDVEGAKMHLRQAK</a>   |
| 1.6   | 1922.970612 | 0.011070  | <a href="#">HQEMEDVIRLAQK</a>    |
| 0.9   | 1923.003632 | -0.021950 | <a href="#">AKELHVNQVHMYLPTK</a> |

M

A

T

R

I

X

S

C

I

E

N

C

E

Mascot Search Results

Peptide View

MS/MS Fragmentation of **YGQTI****R**PICLPCTEG**T****T****R**  
Found in **CFAB\_HUMAN**, Complement factor B OS=Homo sapiens GN=CFB PE=1 SV=2

Match to Query 52704: 2433.212802 from(812.078210,3+) rtinseconds(2066) index(66815)  
Title: Locus1.1.1.1994.10 File:"2013-07-02 CLN FXIII 180 min 2nd FT.wiff"  
Data file C:\Program Files (x86)\Matrix Science\Mascot Daemon\mgf\8 FXIII 180 min 2nd\mascot\_daemon\_merge.mgf

Click mouse within plot area to zoom in by factor of two about that point  
Or, 

Plot from

100

 to 

1900

 Da 

Full range

  
Label all possible matches ☐ Label matches used for scoring ☒

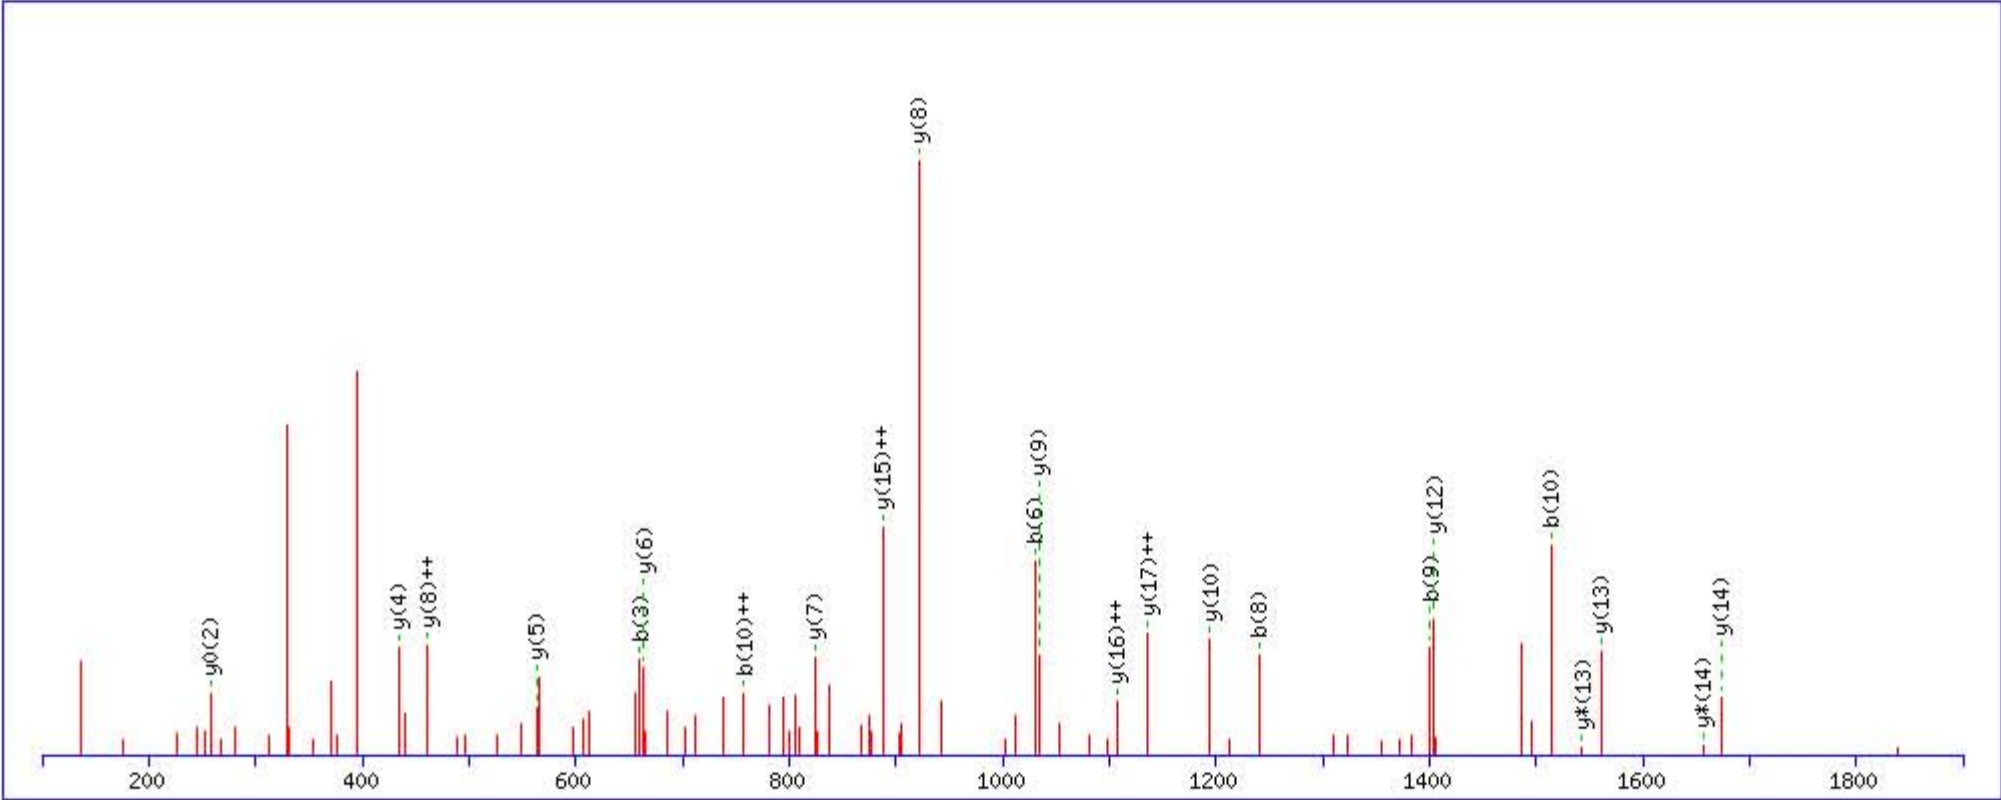

Monoisotopic mass of neutral peptide Mr(calc): 2433.196701  
Fixed modifications: Carbamidomethyl (C) (apply to specified residues or termini only)  
Variable modifications:  
Q3 : Biotin:Thermo-21345 (Q)  
Ions Score: 65 Expect: 1e-005  
Matches : 23/192 fragment ions using 33 most intense peaks [\(help\)](#)

| #  | b           | b <sup>++</sup> | b <sup>*</sup> | b <sup>+++</sup> | b <sup>0</sup> | b <sup>0++</sup> | Seq. | y           | y <sup>++</sup> | y <sup>*</sup> | y <sup>+++</sup> | y <sup>0</sup> | y <sup>0++</sup> | #  |
|----|-------------|-----------------|----------------|------------------|----------------|------------------|------|-------------|-----------------|----------------|------------------|----------------|------------------|----|
| 1  | 164.070605  | 82.538940       |                |                  |                |                  | Y    |             |                 |                |                  |                |                  | 18 |
| 2  | 221.092069  | 111.049673      |                |                  |                |                  | G    | 2271.140644 | 1136.073960     | 2254.114095    | 1127.560685      | 2253.130079    | 1127.068677      | 17 |
| 3  | 660.317395  | 330.662336      | 643.290846     | 322.149061       |                |                  | Q    | 2214.119180 | 1107.563228     | 2197.092631    | 1099.049953      | 2196.108615    | 1098.557945      | 16 |
| 4  | 761.365074  | 381.186175      | 744.338525     | 372.672901       | 743.354509     | 372.180893       | T    | 1774.893854 | 887.950565      | 1757.867305    | 879.437290       | 1756.883289    | 878.945282       | 15 |
| 5  | 874.449138  | 437.728207      | 857.422589     | 429.214933       | 856.438573     | 428.722925       | I    | 1673.846175 | 837.426725      | 1656.819626    | 828.913451       | 1655.835610    | 828.421443       | 14 |
| 6  | 1030.550249 | 515.778763      | 1013.523700    | 507.265488       | 1012.539684    | 506.773480       | R    | 1560.762111 | 780.884693      | 1543.735562    | 772.371419       | 1542.751546    | 771.879411       | 13 |
| 7  | 1127.603013 | 564.305145      | 1110.576464    | 555.791870       | 1109.592448    | 555.299862       | P    | 1404.661000 | 702.834138      | 1387.634451    | 694.320863       | 1386.650435    | 693.828855       | 12 |
| 8  | 1240.687077 | 620.847177      | 1223.660528    | 612.333902       | 1222.676512    | 611.841894       | I    | 1307.608236 | 654.307756      | 1290.581687    | 645.794481       | 1289.597671    | 645.302473       | 11 |
| 9  | 1400.717726 | 700.862501      | 1383.691177    | 692.349227       | 1382.707161    | 691.857219       | C    | 1194.524172 | 597.765724      | 1177.497623    | 589.252449       | 1176.513607    | 588.760441       | 10 |
| 10 | 1513.801790 | 757.404533      | 1496.775241    | 748.891259       | 1495.791225    | 748.399250       | L    | 1034.493523 | 517.750399      | 1017.466974    | 509.237125       | 1016.482958    | 508.745117       | 9  |
| 11 | 1610.854554 | 805.930915      | 1593.828005    | 797.417641       | 1592.843989    | 796.925633       | P    | 921.409459  | 461.208367      | 904.382910     | 452.695093       | 903.398894     | 452.203085       | 8  |
| 12 | 1770.885203 | 885.946240      | 1753.858654    | 877.432965       | 1752.874638    | 876.940957       | C    | 824.356695  | 412.681985      | 807.330146     | 404.168711       | 806.346130     | 403.676703       | 7  |
| 13 | 1871.932882 | 936.470079      | 1854.906333    | 927.956805       | 1853.922317    | 927.464797       | T    | 664.326046  | 332.666661      | 647.299497     | 324.153386       | 646.315481     | 323.661378       | 6  |
| 14 | 2000.975475 | 1000.991376     | 1983.948926    | 992.478101       | 1982.964910    | 991.986093       | E    | 563.278367  | 282.142821      | 546.251818     | 273.629547       | 545.267802     | 273.137539       | 5  |
| 15 | 2057.996939 | 1029.502107     | 2040.970390    | 1020.988833      | 2039.986374    | 1020.496825      | G    | 434.235774  | 217.621525      | 417.209225     | 209.108250       | 416.225209     | 208.616242       | 4  |
| 16 | 2159.044618 | 1080.025947     | 2142.018069    | 1071.512672      | 2141.034053    | 1071.020664      | T    | 377.214310  | 189.110793      | 360.187761     | 180.597518       | 359.203745     | 180.105510       | 3  |
| 17 | 2260.092297 | 1130.549786     | 2243.065748    | 1122.036512      | 2242.081732    | 1121.544504      | T    | 276.166631  | 138.586953      | 259.140082     | 130.073679       | 258.156066     | 129.581671       | 2  |
| 18 |             |                 |                |                  |                |                  | R    | 175.118952  | 88.063114       | 158.092403     | 79.549839        |                |                  | 1  |

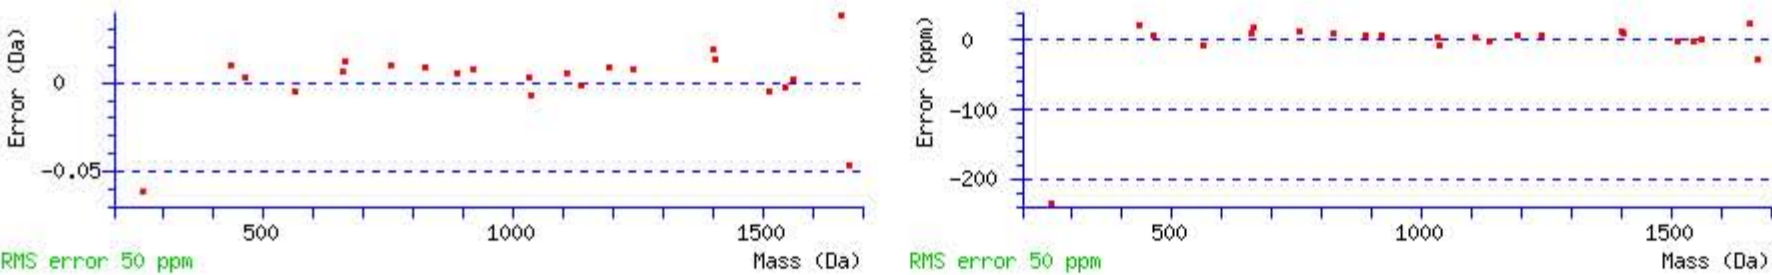

NCBI BLAST search of [YGQTI](#)[R](#)PICLPCTEG**T****T****R**  
(Parameters: blastp, nr protein database, expect=20000, no filter, PAM30)  
Other BLAST [web gateways](#)

All matches to this query

| Score | Mr(calc):   | Delta    | Sequence                                                                     |
|-------|-------------|----------|------------------------------------------------------------------------------|
| 64.6  | 2433.196701 | 0.016101 | <a href="#">YGQTI</a> <a href="#">R</a> PICLPCTEG <b>T</b> <b>T</b> <b>R</b> |

MATRIX

SCIENCE

Mascot Search Results

Peptide View

MS/MS Fragmentation of **LLQEGQALEYVCPSGFYPPVQTR**  
Found in **CFAB\_HUMAN**, Complement factor B OS=Homo sapiens GN=CFB PE=1 SV=2

Match to Query 61045: 3125.570382 from(1042.864070,3+) rtinseconds(2669) index(9074)  
Title: Locus:1.1.1.2206.19 File:"2013-07-02 CLN FXIII 180 min 2nd F 1.wiff"  
Data file C:\Program Files (x86)\Matrix Science\Mascot Daemon\mgf\8 FXIII 180 min 2nd\mascot\_daemon\_merge.mgf

Click mouse within plot area to zoom in by factor of two about that point  
Or, 

Plot from

0

 to 

2800

 Da 

Full range

  
Label all possible matches ☐ Label matches used for scoring ☒

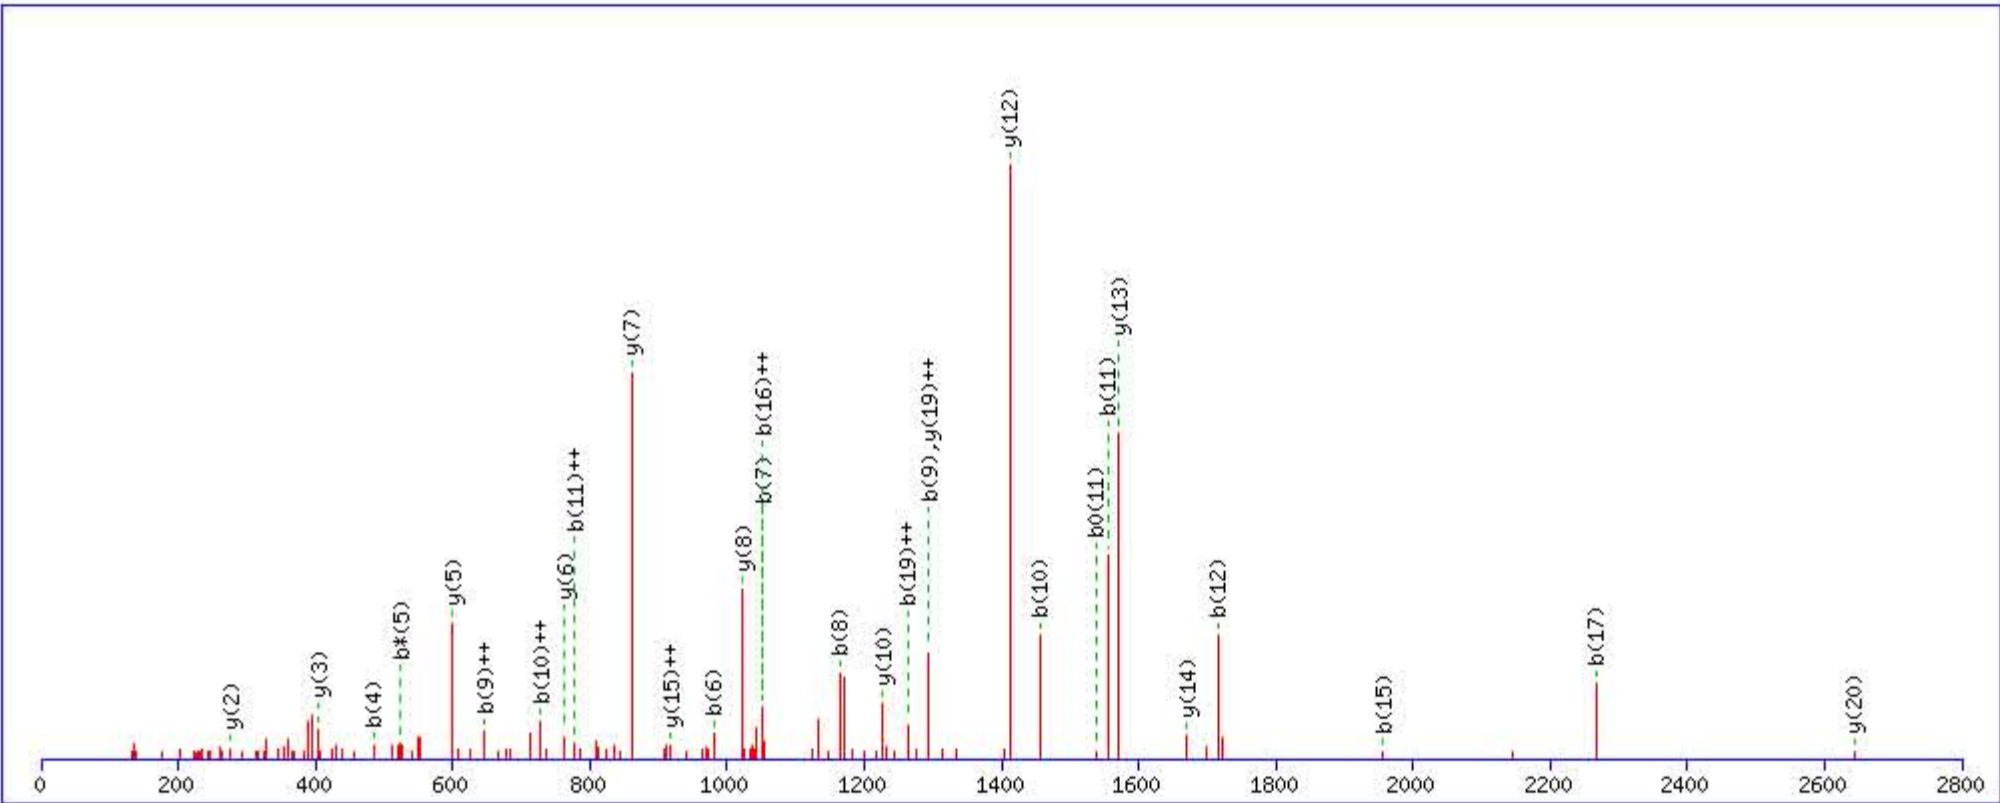

Monoisotopic mass of neutral peptide Mr(calc): 3125.535446  
Fixed modifications: Carbamidomethyl (C) (apply to specified residues or termini only)  
Variable modifications:  
Q6 : Biotin:Thermo-21345 (Q)  
Ions Score: 66 Expect: 7.1e-006  
Matches : 30/264 fragment ions using 52 most intense peaks [\(help\)](#)

| #  | b           | b <sup>++</sup> | b <sup>*</sup> | b <sup>++</sup> | b <sup>0</sup> | b <sup>0++</sup> | Seq. | y           | y <sup>++</sup> | y <sup>*</sup> | y <sup>++</sup> | y <sup>0</sup> | y <sup>0++</sup> | #  |
|----|-------------|-----------------|----------------|-----------------|----------------|------------------|------|-------------|-----------------|----------------|-----------------|----------------|------------------|----|
| 1  | 114.091340  | 57.549308       |                |                 |                |                  | L    |             |                 |                |                 |                |                  | 24 |
| 2  | 227.175404  | 114.091340      |                |                 |                |                  | L    | 3013.458667 | 1507.232971     | 2996.432118    | 1498.719697     | 2995.448102    | 1498.227689      | 23 |
| 3  | 355.233982  | 178.120629      | 338.207433     | 169.607355      |                |                  | Q    | 2900.374603 | 1450.690939     | 2883.348054    | 1442.177665     | 2882.364038    | 1441.685657      | 22 |
| 4  | 484.276575  | 242.641926      | 467.250026     | 234.128651      | 466.266010     | 233.636643       | E    | 2772.316025 | 1386.661650     | 2755.289476    | 1378.148376     | 2754.305460    | 1377.656368      | 21 |
| 5  | 541.298039  | 271.152658      | 524.271490     | 262.639383      | 523.287474     | 262.147375       | G    | 2643.273432 | 1322.140354     | 2626.246883    | 1313.627079     | 2625.262867    | 1313.135071      | 20 |
| 6  | 980.523365  | 490.765321      | 963.496816     | 482.252046      | 962.512800     | 481.760038       | Q    | 2586.251968 | 1293.629622     | 2569.225419    | 1285.116347     | 2568.241403    | 1284.624339      | 19 |
| 7  | 1051.560479 | 526.283878      | 1034.533930    | 517.770603      | 1033.549914    | 517.278595       | A    | 2147.026642 | 1074.016959     | 2130.000093    | 1065.503684     | 2129.016077    | 1065.011676      | 18 |
| 8  | 1164.644543 | 582.825910      | 1147.617994    | 574.312635      | 1146.633978    | 573.820627       | L    | 2075.989528 | 1038.498402     | 2058.962979    | 1029.985127     | 2057.978963    | 1029.493119      | 17 |
| 9  | 1293.687136 | 647.347206      | 1276.660587    | 638.833932      | 1275.676571    | 638.341924       | E    | 1962.905464 | 981.956370      | 1945.878915    | 973.443096      | 1944.894899    | 972.951088       | 16 |
| 10 | 1456.750465 | 728.878871      | 1439.723916    | 720.365596      | 1438.739900    | 719.873588       | Y    | 1833.862871 | 917.435074      | 1816.836322    | 908.921799      | 1815.852306    | 908.429791       | 15 |
| 11 | 1555.818879 | 778.413078      | 1538.792330    | 769.899803      | 1537.808314    | 769.407795       | V    | 1670.799542 | 835.903409      | 1653.772993    | 827.390135      | 1652.788977    | 826.898126       | 14 |
| 12 | 1715.849528 | 858.428402      | 1698.822979    | 849.915128      | 1697.838963    | 849.423120       | C    | 1571.731128 | 786.369202      | 1554.704579    | 777.855928      | 1553.720563    | 777.363919       | 13 |
| 13 | 1812.902292 | 906.954784      | 1795.875743    | 898.441510      | 1794.891727    | 897.949502       | P    | 1411.700479 | 706.353877      | 1394.673930    | 697.840603      | 1393.689914    | 697.348595       | 12 |
| 14 | 1899.934320 | 950.470798      | 1882.907771    | 941.957524      | 1881.923755    | 941.465516       | S    | 1314.647715 | 657.827495      | 1297.621166    | 649.314221      | 1296.637150    | 648.822213       | 11 |
| 15 | 1956.955784 | 978.981530      | 1939.929235    | 970.468256      | 1938.945219    | 969.976248       | G    | 1227.615687 | 614.311481      | 1210.589138    | 605.798207      | 1209.605122    | 605.306199       | 10 |
| 16 | 2104.024198 | 1052.515737     | 2086.997649    | 1044.002462     | 2086.013633    | 1043.510454      | F    | 1170.594223 | 585.800749      | 1153.567674    | 577.287475      | 1152.583658    | 576.795467       | 9  |
| 17 | 2267.087527 | 1134.047402     | 2250.060978    | 1125.534127     | 2249.076962    | 1125.042119      | Y    | 1023.525809 | 512.266543      | 1006.499260    | 503.753268      | 1005.515244    | 503.261260       | 8  |
| 18 | 2364.140291 | 1182.573784     | 2347.113742    | 1174.060509     | 2346.129726    | 1173.568501      | P    | 860.462480  | 430.734878      | 843.435931     | 422.221603      | 842.451915     | 421.729595       | 7  |
| 19 | 2527.203620 | 1264.105448     | 2510.177071    | 1255.592173     | 2509.193055    | 1255.100166      | Y    | 763.409716  | 382.208496      | 746.383167     | 373.695221      | 745.399151     | 373.203213       | 6  |
| 20 | 2624.256384 | 1312.631830     | 2607.229835    | 1304.118556     | 2606.245819    | 1303.626548      | P    | 600.346387  | 300.676831      | 583.319838     | 292.163557      | 582.335822     | 291.671549       | 5  |
| 21 | 2723.324798 | 1362.166037     | 2706.298249    | 1353.652762     | 2705.314233    | 1353.160754      | V    | 503.293623  | 252.150449      | 486.267074     | 243.637175      | 485.283058     | 243.145167       | 4  |
| 22 | 2851.383376 | 1426.195326     | 2834.356827    | 1417.682051     | 2833.372811    | 1417.190044      | Q    | 404.225209  | 202.616242      | 387.198660     | 194.102968      | 386.214644     | 193.610960       | 3  |
| 23 | 2952.431055 | 1476.719165     | 2935.404506    | 1468.205891     | 2934.420490    | 1467.713883      | T    | 276.166631  | 138.586953      | 259.140082     | 130.073679      | 258.156066     | 129.581671       | 2  |
| 24 |             |                 |                |                 |                |                  | R    | 175.118952  | 88.063114       | 158.092403     | 79.549839       |                |                  | 1  |

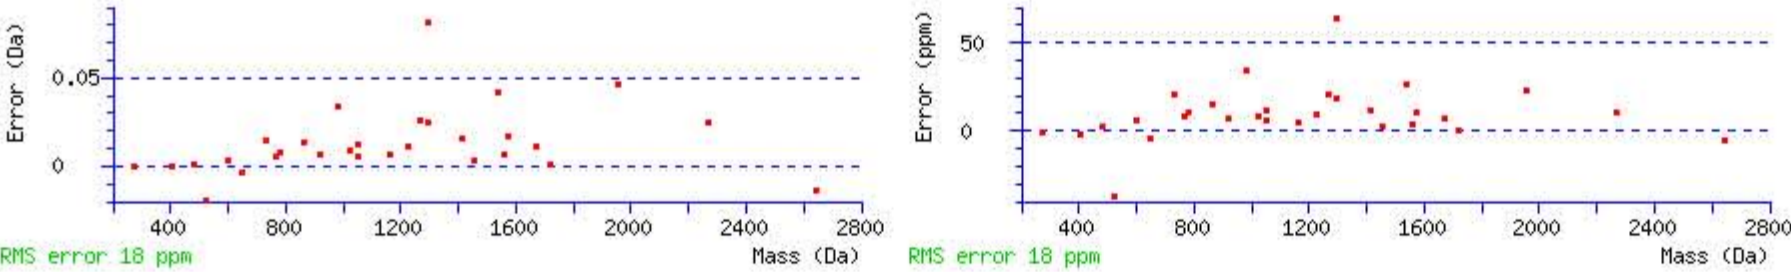

NCBI BLAST search of **LLQEGQALEYVCPSGFYPPVQTR**  
(Parameters: blastp, nr protein database, expect=20000, no filter, PAM30)  
Other BLAST [web gateways](#)

All matches to this query

| Score | Mr(calc):   | Delta    | Sequence                                |
|-------|-------------|----------|-----------------------------------------|
| 66.1  | 3125.535446 | 0.034936 | <a href="#">LLQEGQALEYVCPSGFYPPVQTR</a> |
| 57.3  | 3125.535446 | 0.034936 | <a href="#">LLQEGQALEYVCPSGFYPPVQTR</a> |
| 5.3   | 3125.535446 | 0.034936 | <a href="#">LLQEGQALEYVCPSGFYPPVQTR</a> |

MATRIX

SCIENCE

Mascot Search Results

Peptide View

MS/MS Fragmentation of **RPDSLQHVLLPVLDR**  
Found in **CFAD\_HUMAN**, Complement factor D OS=Homo sapiens GN=CFD PE=1 SV=5

Match to Query 46056: 2068.175056 from(518.051040,4+) rtinseconds(2372) index(68592)  
Title: Locus:1.1.1.2101.5 File:"2013-07-02 CLN FXIII 180 min 2nd FT.wiff"  
Data file C:\Program Files (x86)\Matrix Science\Mascot Daemon\mgf\8 FXIII 180 min 2nd\mascot\_daemon\_merge.mgf

Click mouse within plot area to zoom in by factor of two about that point  
Or, 

Plot from

100

 to 

1400

 Da 

Full range

  
Label all possible matches ☐ Label matches used for scoring ☒

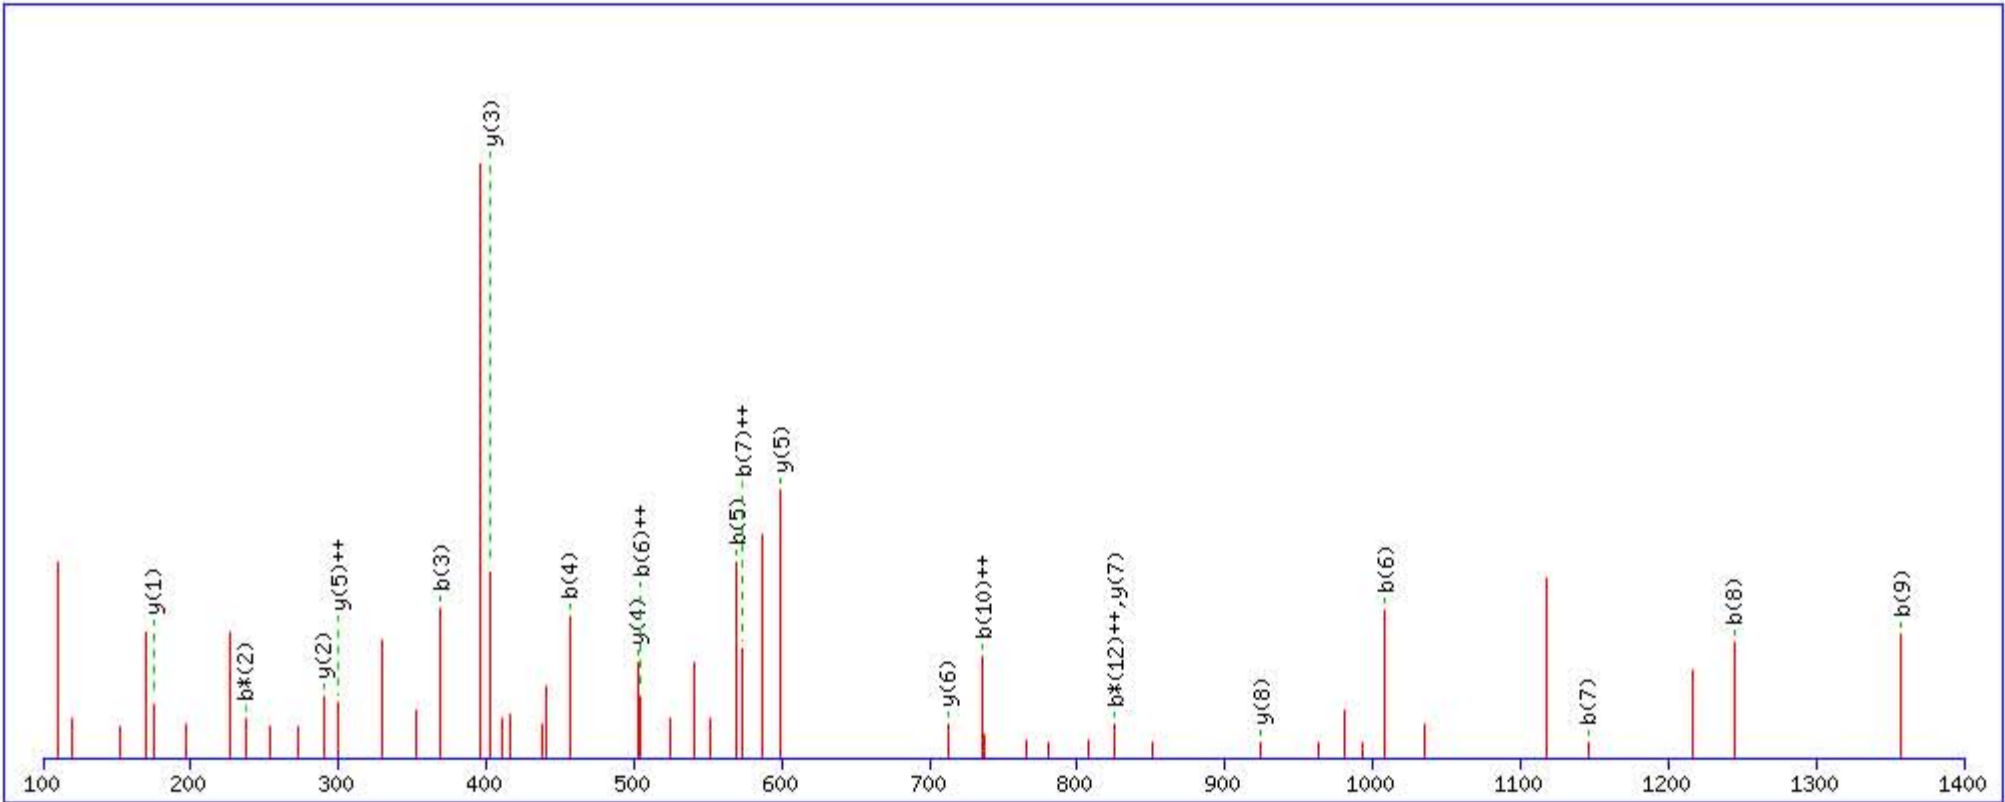

Monoisotopic mass of neutral peptide Mr(calc): 2068.161545  
Fixed modifications: Carbamidomethyl (C) (apply to specified residues or termini only)  
Variable modifications:  
Q6 : Biotin:Thermo-21345 (Q)  
Ions Score: 52 Expect: 5.3e-005  
Matches : 21/162 fragment ions using 36 most intense peaks [\(help\)](#)

| #  | b           | b <sup>++</sup> | b <sup>+</sup> | b <sup>++</sup> | b <sup>0</sup> | b <sup>0++</sup> | Seq. | y           | y <sup>++</sup> | y <sup>+</sup> | y <sup>++</sup> | y <sup>0</sup> | y <sup>0++</sup> | #  |
|----|-------------|-----------------|----------------|-----------------|----------------|------------------|------|-------------|-----------------|----------------|-----------------|----------------|------------------|----|
| 1  | 157.108387  | 79.057831       | 140.081838     | 70.544557       |                |                  | R    |             |                 |                |                 |                |                  | 15 |
| 2  | 254.161151  | 127.584213      | 237.134602     | 119.070939      |                |                  | P    | 1913.067716 | 957.037496      | 1896.041167    | 948.524222      | 1895.057151    | 948.032214       | 14 |
| 3  | 369.188094  | 185.097685      | 352.161545     | 176.584410      | 351.177529     | 176.092402       | D    | 1816.014952 | 908.511114      | 1798.988403    | 899.997840      | 1798.004387    | 899.505832       | 13 |
| 4  | 456.220122  | 228.613699      | 439.193573     | 220.100425      | 438.209557     | 219.608417       | S    | 1700.988009 | 850.997643      | 1683.961460    | 842.484368      | 1682.977444    | 841.992360       | 12 |
| 5  | 569.304186  | 285.155731      | 552.277637     | 276.642457      | 551.293621     | 276.150449       | L    | 1613.955981 | 807.481629      | 1596.929432    | 798.968354      | 1595.945416    | 798.476346       | 11 |
| 6  | 1008.529512 | 504.768394      | 991.502963     | 496.255120      | 990.518947     | 495.763112       | Q    | 1500.871917 | 750.939597      | 1483.845368    | 742.426322      | 1482.861352    | 741.934314       | 10 |
| 7  | 1145.588424 | 573.297850      | 1128.561875    | 564.784576      | 1127.577859    | 564.292568       | H    | 1061.646591 | 531.326934      | 1044.620042    | 522.813659      | 1043.636026    | 522.321651       | 9  |
| 8  | 1244.656838 | 622.832057      | 1227.630289    | 614.318783      | 1226.646273    | 613.826775       | V    | 924.587679  | 462.797478      | 907.561130     | 454.284203      | 906.577114     | 453.792195       | 8  |
| 9  | 1357.740902 | 679.374089      | 1340.714353    | 670.860815      | 1339.730337    | 670.368807       | L    | 825.519265  | 413.263271      | 808.492716     | 404.749996      | 807.508700     | 404.257988       | 7  |
| 10 | 1470.824966 | 735.916121      | 1453.798417    | 727.402847      | 1452.814401    | 726.910838       | L    | 712.435201  | 356.721239      | 695.408652     | 348.207964      | 694.424636     | 347.715956       | 6  |
| 11 | 1567.877730 | 784.442503      | 1550.851181    | 775.929229      | 1549.867165    | 775.437220       | P    | 599.351137  | 300.179207      | 582.324588     | 291.665932      | 581.340572     | 291.173924       | 5  |
| 12 | 1666.946144 | 833.976710      | 1649.919595    | 825.463436      | 1648.935579    | 824.971428       | V    | 502.298373  | 251.652825      | 485.271824     | 243.139550      | 484.287808     | 242.647542       | 4  |
| 13 | 1780.030208 | 890.518742      | 1763.003659    | 882.005468      | 1762.019643    | 881.513459       | L    | 403.229959  | 202.118618      | 386.203410     | 193.605343      | 385.219394     | 193.113335       | 3  |
| 14 | 1895.057151 | 948.032214      | 1878.030602    | 939.518939      | 1877.046586    | 939.026931       | D    | 290.145895  | 145.576586      | 273.119346     | 137.063311      | 272.135330     | 136.571303       | 2  |
| 15 |             |                 |                |                 |                |                  | R    | 175.118952  | 88.063114       | 158.092403     | 79.549840       |                |                  | 1  |

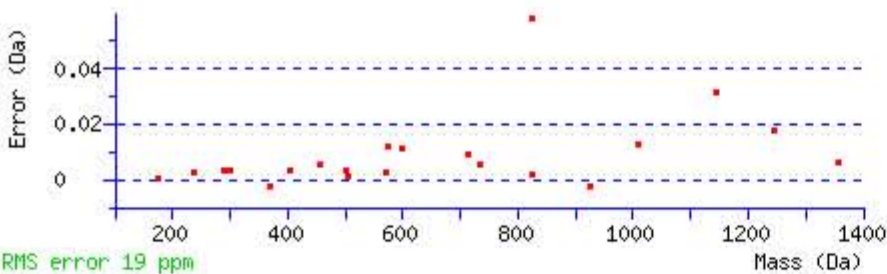

NCBI BLAST search of [RPDSLQHVLLPVLDR](#)  
(Parameters: blastp, nr protein database, expect=20000, no filter, PAM30)  
Other BLAST [web gateways](#)

All matches to this query

| Score | Mr(calc):   | Delta    | Sequence                        |
|-------|-------------|----------|---------------------------------|
| 51.7  | 2068.161545 | 0.013511 | <a href="#">RPDSLQHVLLPVLDR</a> |

MATRIX

SCIENCE

Mascot Search Results

Peptide View

MS/MS Fragmentation of **VQVLLGAHSLSQPEPSK**  
Found in **CFAD\_HUMAN**, Complement factor D OS=Homo sapiens GN=CFD PE=1 SV=5

Match to Query 46596: 2100.152202 from(701.058010,3+) rtinseconds(1963) index(66234)  
Title: Locus:1.1.1.1958.20 File:"2013-07-02 CLN FXIII 180 min 2nd FT.wiff"  
Data file C:\Program Files (x86)\Matrix Science\Mascot Daemon\mgf\8 FXIII 180 min 2nd\mascot\_daemon\_merge.mgf

Click mouse within plot area to zoom in by factor of two about that point  
Or,   to  Da   
Label all possible matches ☐ Label matches used for scoring ☒

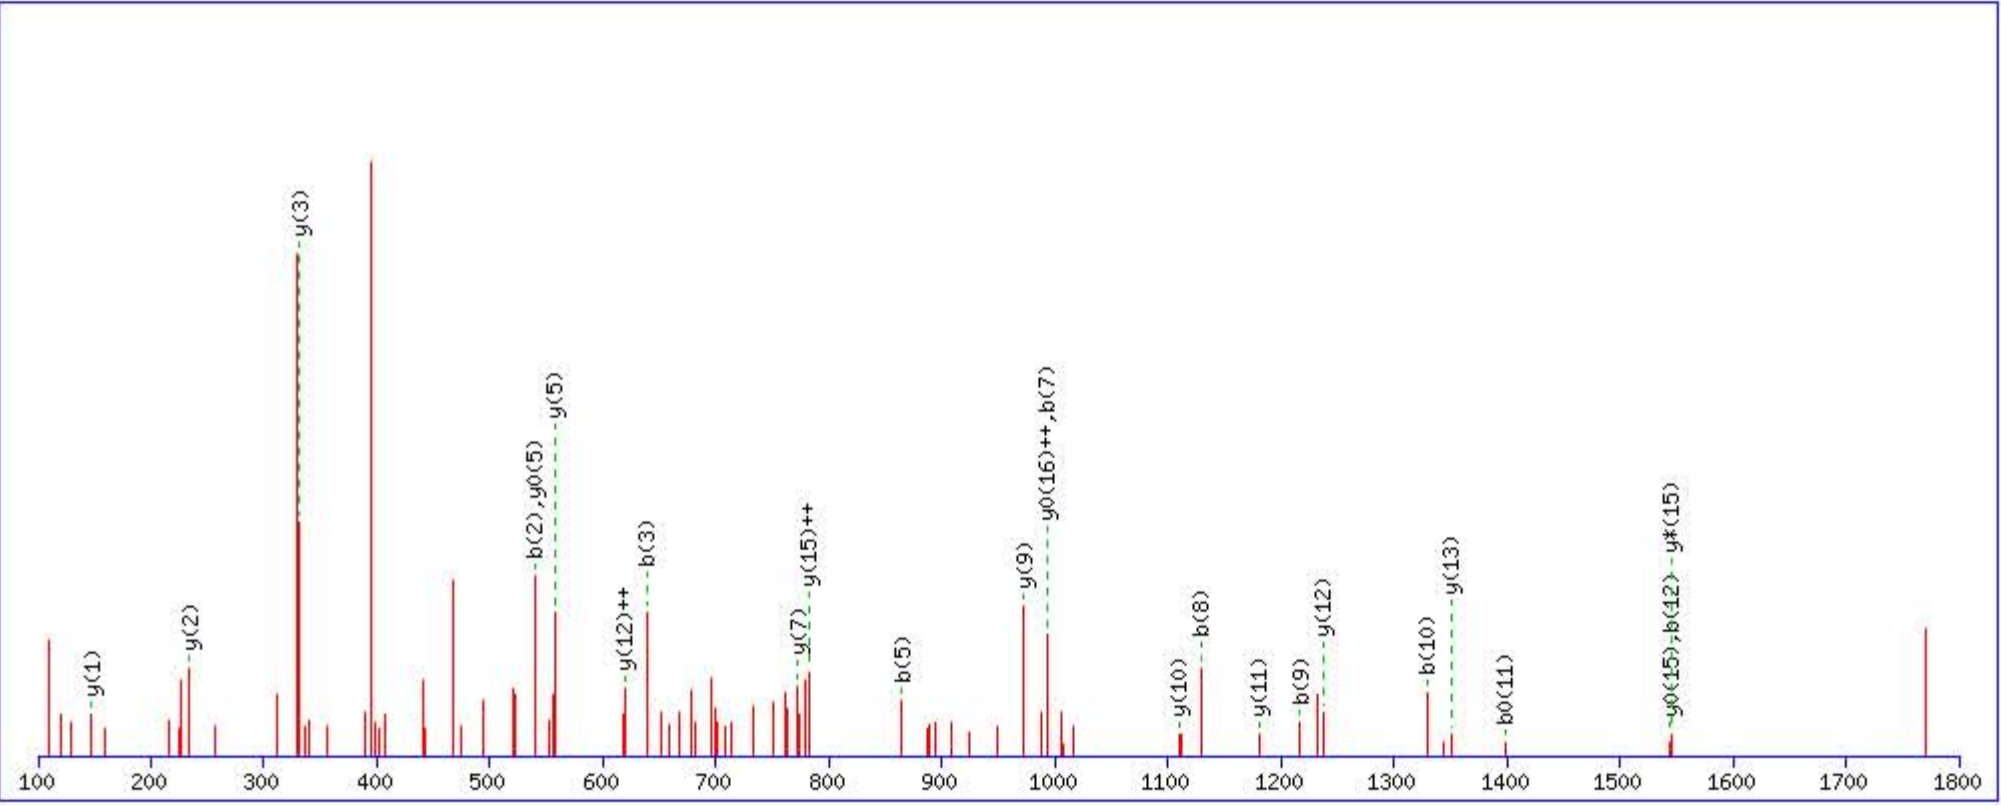

Monoisotopic mass of neutral peptide Mr(calc): 2100.140137  
Fixed modifications: Carbamidomethyl (C) (apply to specified residues or termini only)  
Variable modifications:  
Q2 : Biotin:Thermo-21345 (Q)  
Ions Score: 61 Expect: 1.3e-005  
Matches : 25/172 fragment ions using 41 most intense peaks [\(help\)](#)

| #  | b           | b <sup>++</sup> | b <sup>*</sup> | b <sup>+++</sup> | b <sup>0</sup> | b <sup>0++</sup> | Seq. | y           | y <sup>++</sup> | y <sup>*</sup> | y <sup>+++</sup> | y <sup>0</sup> | y <sup>0++</sup> | #  |
|----|-------------|-----------------|----------------|------------------|----------------|------------------|------|-------------|-----------------|----------------|------------------|----------------|------------------|----|
| 1  | 100.075690  | 50.541483       |                |                  |                |                  | V    |             |                 |                |                  |                |                  | 17 |
| 2  | 539.301016  | 270.154146      | 522.274467     | 261.640872       |                |                  | Q    | 2002.079009 | 1001.543143     | 1985.052460    | 993.029868       | 1984.068444    | 992.537860       | 16 |
| 3  | 638.369430  | 319.688353      | 621.342881     | 311.175079       |                |                  | V    | 1562.853683 | 781.930480      | 1545.827134    | 773.417205       | 1544.843118    | 772.925197       | 15 |
| 4  | 751.453494  | 376.230385      | 734.426945     | 367.717111       |                |                  | L    | 1463.785269 | 732.396273      | 1446.758720    | 723.882998       | 1445.774704    | 723.390990       | 14 |
| 5  | 864.537558  | 432.772417      | 847.511009     | 424.259143       |                |                  | L    | 1350.701205 | 675.854241      | 1333.674656    | 667.340966       | 1332.690640    | 666.848958       | 13 |
| 6  | 921.559022  | 461.283149      | 904.532473     | 452.769875       |                |                  | G    | 1237.617141 | 619.312209      | 1220.590592    | 610.798934       | 1219.606576    | 610.306926       | 12 |
| 7  | 992.596136  | 496.801706      | 975.569587     | 488.288432       |                |                  | A    | 1180.595677 | 590.801477      | 1163.569128    | 582.288202       | 1162.585112    | 581.796194       | 11 |
| 8  | 1129.655048 | 565.331162      | 1112.628499    | 556.817888       |                |                  | H    | 1109.558563 | 555.282920      | 1092.532014    | 546.769645       | 1091.547998    | 546.277637       | 10 |
| 9  | 1216.687076 | 608.847176      | 1199.660527    | 600.333902       | 1198.676511    | 599.841894       | S    | 972.499651  | 486.753464      | 955.473102     | 478.240189       | 954.489086     | 477.748181       | 9  |
| 10 | 1329.771140 | 665.389208      | 1312.744591    | 656.875934       | 1311.760575    | 656.383926       | L    | 885.467623  | 443.237450      | 868.441074     | 434.724175       | 867.457058     | 434.232167       | 8  |
| 11 | 1416.803168 | 708.905222      | 1399.776619    | 700.391948       | 1398.792603    | 699.899940       | S    | 772.383559  | 386.695418      | 755.357010     | 378.182143       | 754.372994     | 377.690135       | 7  |
| 12 | 1544.861746 | 772.934511      | 1527.835197    | 764.421237       | 1526.851181    | 763.929229       | Q    | 685.351531  | 343.179404      | 668.324982     | 334.666129       | 667.340966     | 334.174121       | 6  |
| 13 | 1641.914510 | 821.460893      | 1624.887961    | 812.947619       | 1623.903945    | 812.455611       | P    | 557.292953  | 279.150115      | 540.266404     | 270.636840       | 539.282388     | 270.144832       | 5  |
| 14 | 1770.957103 | 885.982190      | 1753.930554    | 877.468915       | 1752.946538    | 876.976907       | E    | 460.240189  | 230.623733      | 443.213640     | 222.110458       | 442.229624     | 221.618450       | 4  |
| 15 | 1868.009867 | 934.508572      | 1850.983318    | 925.995297       | 1849.999302    | 925.503289       | P    | 331.197596  | 166.102436      | 314.171047     | 157.589162       | 313.187031     | 157.097154       | 3  |
| 16 | 1955.041895 | 978.024586      | 1938.015346    | 969.511311       | 1937.031330    | 969.019303       | S    | 234.144832  | 117.576054      | 217.118283     | 109.062780       | 216.134267     | 108.570772       | 2  |
| 17 |             |                 |                |                  |                |                  | K    | 147.112804  | 74.060040       | 130.086255     | 65.546765        |                |                  | 1  |

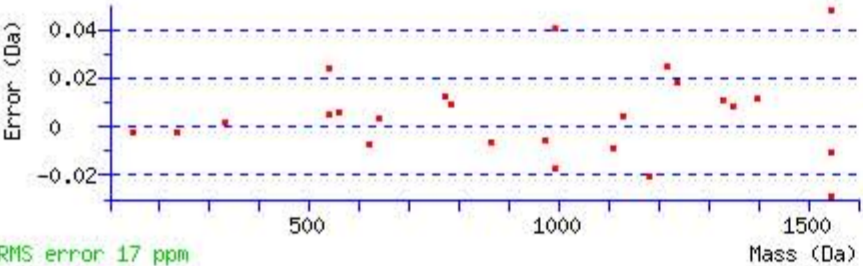

NCBI BLAST search of [VQVLLGAHSLSQPEPSK](#)  
(Parameters: blastp, nr protein database, expect=20000, no filter, PAM30)  
Other BLAST [web gateways](#)

All matches to this query

| Score | Mr(calc):   | Delta    | Sequence                          |
|-------|-------------|----------|-----------------------------------|
| 61.0  | 2100.140137 | 0.012065 | <a href="#">VQVLLGAHSLSQPEPSK</a> |

MATRIX

SCIENCE

Mascot Search Results

Peptide View

MS/MS Fragmentation of **SSQESYAHGTK**  
Found in **CFAH\_HUMAN**, Complement factor H OS=Homo sapiens GN=CFH PE=1 SV=4

Match to Query 31209: 1504.698042 from(502.573290,3+) rtinseconds(1201) index(15147)  
Title: Locus:1.1.1.2800.8 File:"2013-07-02 CLN FXIII 180 min 2nd F 2.wiff"  
Data file C:\Program Files (x86)\Matrix Science\Mascot Daemon\mgf\8 FXIII 180 min 2nd\mascot\_daemon\_merge.mgf

Click mouse within plot area to zoom in by factor of two about that point  
Or, 

Plot from

100

 to 

1500

 Da 

Full range

  
Label all possible matches ☐ Label matches used for scoring ☒

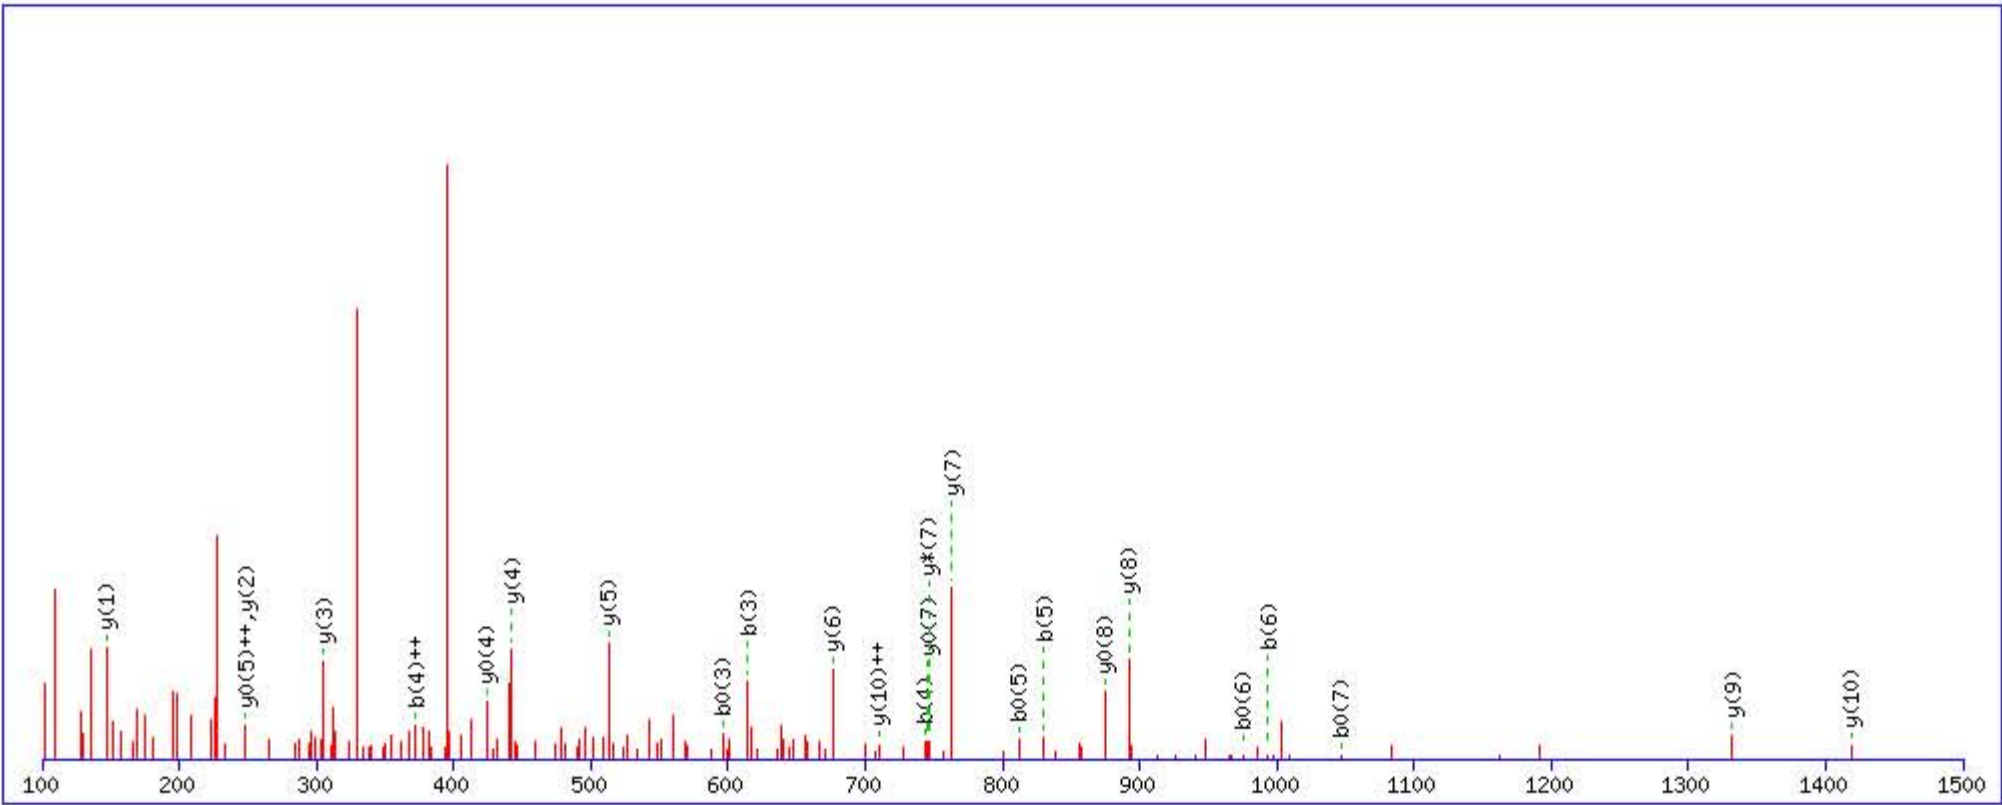

Monoisotopic mass of neutral peptide **Mr(calc):** 1504.698013  
Fixed modifications: Carbamidomethyl (C) (apply to specified residues or termini only)  
Variable modifications:  
Q3 : Biotin:Thermo-21345 (Q)  
Ions Score: 50 Expect: 0.00015  
Matches : 25/114 fragment ions using 53 most intense peaks ([help](#))

| #  | b           | b <sup>++</sup> | b <sup>*</sup> | b <sup>*++</sup> | b <sup>0</sup> | b <sup>0++</sup> | Seq. | y           | y <sup>++</sup> | y <sup>*</sup> | y <sup>*++</sup> | y <sup>0</sup> | y <sup>0++</sup> | #  |
|----|-------------|-----------------|----------------|------------------|----------------|------------------|------|-------------|-----------------|----------------|------------------|----------------|------------------|----|
| 1  | 88.039304   | 44.523290       |                |                  | 70.028739      | 35.518008        | S    |             |                 |                |                  |                |                  | 11 |
| 2  | 175.071332  | 88.039304       |                |                  | 157.060767     | 79.034021        | S    | 1418.673277 | 709.840276      | 1401.646728    | 701.327002       | 1400.662712    | 700.834994       | 10 |
| 3  | 614.296658  | 307.651967      | 597.270109     | 299.138692       | 596.286093     | 298.646684       | Q    | 1331.641249 | 666.324263      | 1314.614700    | 657.810988       | 1313.630684    | 657.318980       | 9  |
| 4  | 743.339251  | 372.173264      | 726.312702     | 363.659989       | 725.328686     | 363.167981       | E    | 892.415923  | 446.711600      | 875.389374     | 438.198325       | 874.405358     | 437.706317       | 8  |
| 5  | 830.371279  | 415.689278      | 813.344730     | 407.176003       | 812.360714     | 406.683995       | S    | 763.373330  | 382.190303      | 746.346781     | 373.677029       | 745.362765     | 373.185021       | 7  |
| 6  | 993.434608  | 497.220942      | 976.408059     | 488.707668       | 975.424043     | 488.215660       | Y    | 676.341302  | 338.674289      | 659.314753     | 330.161015       | 658.330737     | 329.669007       | 6  |
| 7  | 1064.471722 | 532.739499      | 1047.445173    | 524.226225       | 1046.461157    | 523.734217       | A    | 513.277973  | 257.142625      | 496.251424     | 248.629350       | 495.267408     | 248.137342       | 5  |
| 8  | 1201.530634 | 601.268955      | 1184.504085    | 592.755681       | 1183.520069    | 592.263672       | H    | 442.240859  | 221.624067      | 425.214310     | 213.110793       | 424.230294     | 212.618785       | 4  |
| 9  | 1258.552098 | 629.779687      | 1241.525549    | 621.266413       | 1240.541533    | 620.774404       | G    | 305.181947  | 153.094611      | 288.155398     | 144.581337       | 287.171382     | 144.089329       | 3  |
| 10 | 1359.599777 | 680.303526      | 1342.573228    | 671.790252       | 1341.589212    | 671.298244       | T    | 248.160483  | 124.583879      | 231.133934     | 116.070605       | 230.149918     | 115.578597       | 2  |
| 11 |             |                 |                |                  |                |                  | K    | 147.112804  | 74.060040       | 130.086255     | 65.546765        |                |                  | 1  |

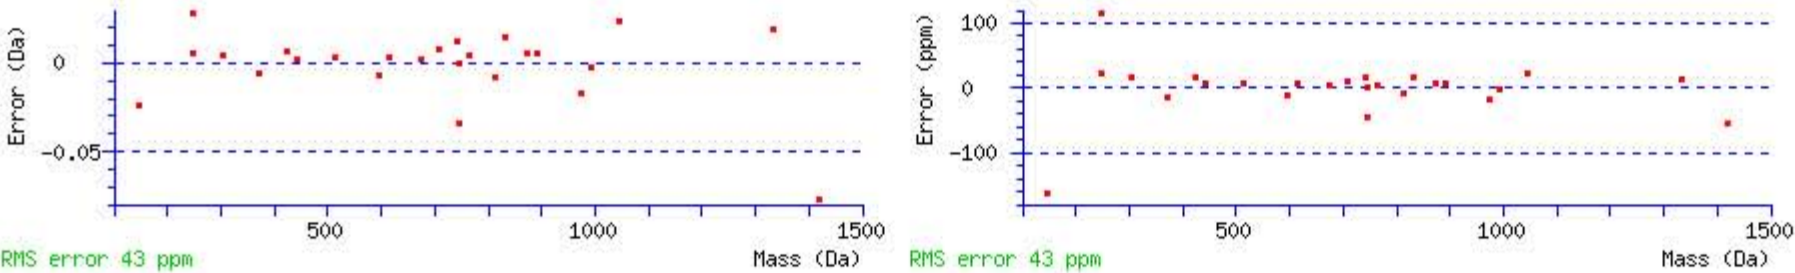

NCBI BLAST search of **SSQESYAHGTK**  
(Parameters: blastp, nr protein database, expect=20000, no filter, PAM30)  
Other BLAST [web gateways](#)

All matches to this query

| Score | Mr(calc):   | Delta    | Sequence                    |
|-------|-------------|----------|-----------------------------|
| 49.7  | 1504.698013 | 0.000029 | <a href="#">SSQESYAHGTK</a> |

MATRIX

SCIENCE

Mascot Search Results

Peptide View

MS/MS Fragmentation of **TGDEITYQCR**  
Found in **CFAH\_HUMAN**, Complement factor H OS=Homo sapiens GN=CFH PE=1 SV=4

Match to Query 32540: 1552.704428 from(777.359490,2+) rtinseconds(1673) index(18041)  
Title: Locus:1.1.1.2965.9 File:"2013-07-02 CLN FXIII 180 min 2nd F 2.wiff"  
Data file C:\Program Files (x86)\Matrix Science\Mascot Daemon\mgf\8 FXIII 180 min 2nd\mascot\_daemon\_merge.mgf

Click mouse within plot area to zoom in by factor of two about that point  
Or,   to  Da   
Label all possible matches ☐ Label matches used for scoring ☒

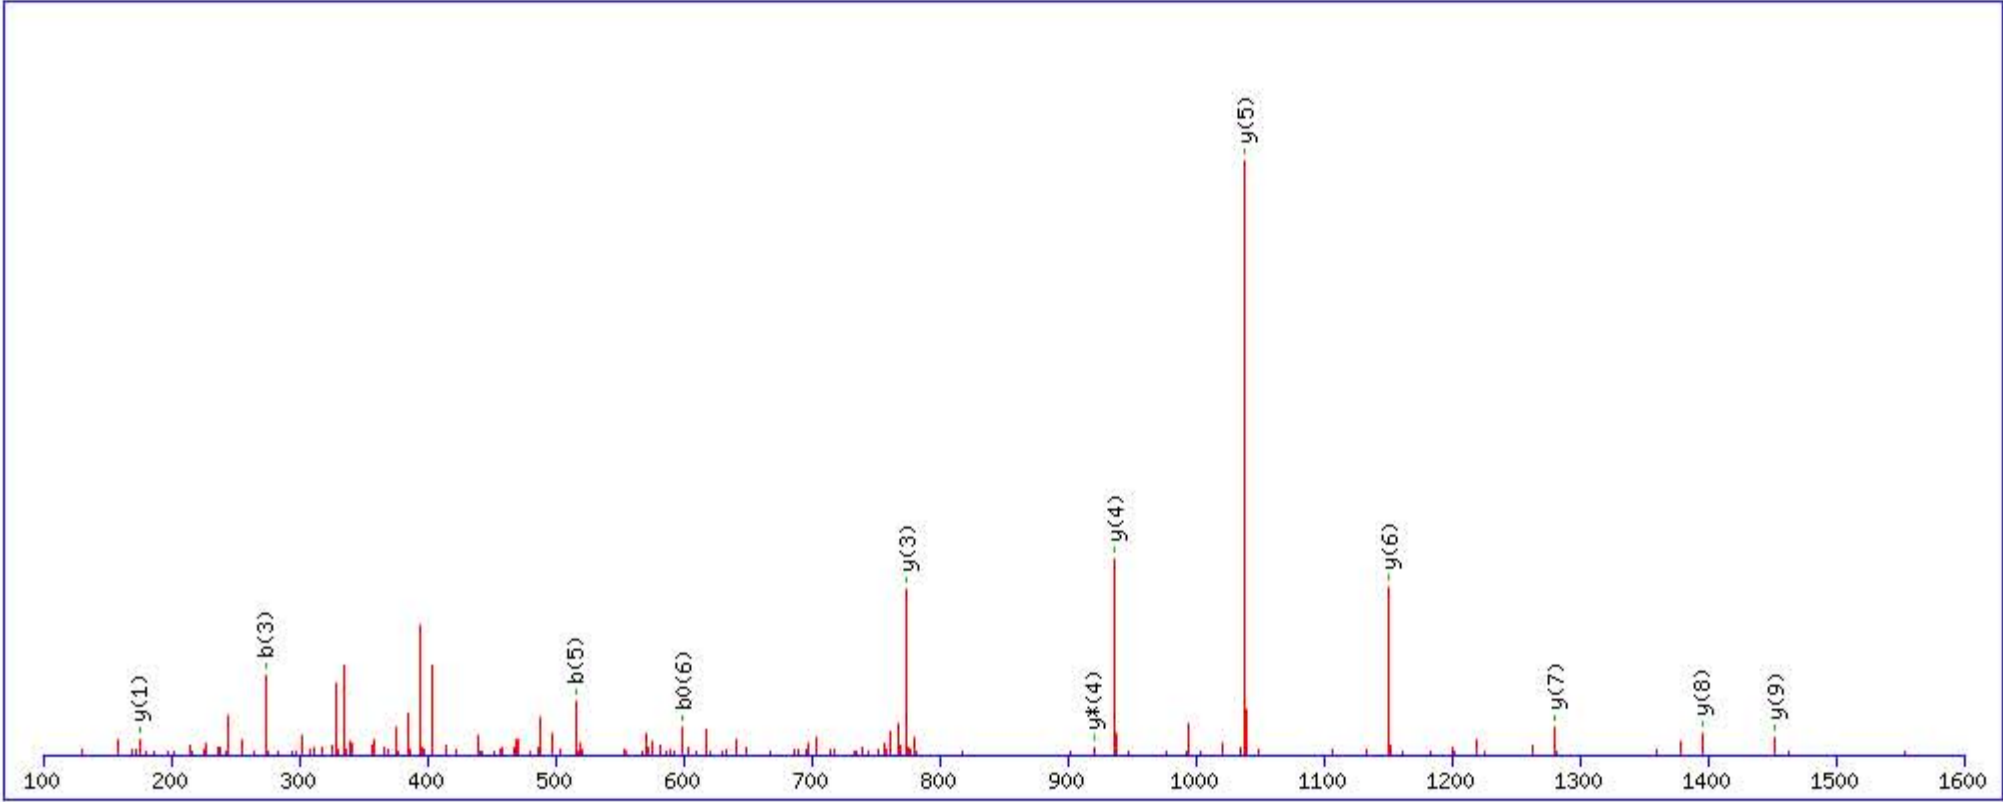

Monoisotopic mass of neutral peptide Mr(calc): 1552.701401  
Fixed modifications: Carbamidomethyl (C) (apply to specified residues or termini only)  
Variable modifications:  
Q8 : Biotin:Thermo-21345 (Q)  
Ions Score: 74 Expect: 4e-007  
Matches : 12/86 fragment ions using 14 most intense peaks [\(help\)](#)

| #  | b           | b <sup>++</sup> | b <sup>*</sup> | b <sup>*++</sup> | b <sup>0</sup> | b <sup>0++</sup> | Seq. | y           | y <sup>++</sup> | y <sup>*</sup> | y <sup>*++</sup> | y <sup>0</sup> | y <sup>0++</sup> | #  |
|----|-------------|-----------------|----------------|------------------|----------------|------------------|------|-------------|-----------------|----------------|------------------|----------------|------------------|----|
| 1  | 102.054955  | 51.531116       |                |                  | 84.044390      | 42.525833        | T    |             |                 |                |                  |                |                  | 10 |
| 2  | 159.076419  | 80.041847       |                |                  | 141.065854     | 71.036565        | G    | 1452.660999 | 726.834138      | 1435.634450    | 718.320863       | 1434.650434    | 717.828855       | 9  |
| 3  | 274.103362  | 137.555319      |                |                  | 256.092797     | 128.550037       | D    | 1395.639535 | 698.323406      | 1378.612986    | 689.810131       | 1377.628970    | 689.318123       | 8  |
| 4  | 403.145955  | 202.076616      |                |                  | 385.135390     | 193.071333       | E    | 1280.612592 | 640.809934      | 1263.586043    | 632.296660       | 1262.602027    | 631.804652       | 7  |
| 5  | 516.230019  | 258.618648      |                |                  | 498.219454     | 249.613365       | I    | 1151.569999 | 576.288638      | 1134.543450    | 567.775363       | 1133.559434    | 567.283355       | 6  |
| 6  | 617.277698  | 309.142487      |                |                  | 599.267133     | 300.137205       | T    | 1038.485935 | 519.746606      | 1021.459386    | 511.233331       | 1020.475370    | 510.741323       | 5  |
| 7  | 780.341027  | 390.674152      |                |                  | 762.330462     | 381.668869       | Y    | 937.438256  | 469.222766      | 920.411707     | 460.709492       |                |                  | 4  |
| 8  | 1219.566353 | 610.286815      | 1202.539804    | 601.773540       | 1201.555788    | 601.281532       | Q    | 774.374927  | 387.691102      | 757.348378     | 379.177827       |                |                  | 3  |
| 9  | 1379.597002 | 690.302139      | 1362.570453    | 681.788865       | 1361.586437    | 681.296857       | C    | 335.149601  | 168.078438      | 318.123052     | 159.565164       |                |                  | 2  |
| 10 |             |                 |                |                  |                |                  | R    | 175.118952  | 88.063114       | 158.092403     | 79.549839        |                |                  | 1  |

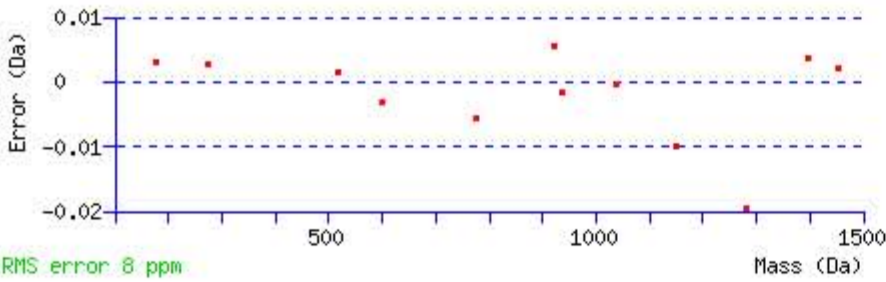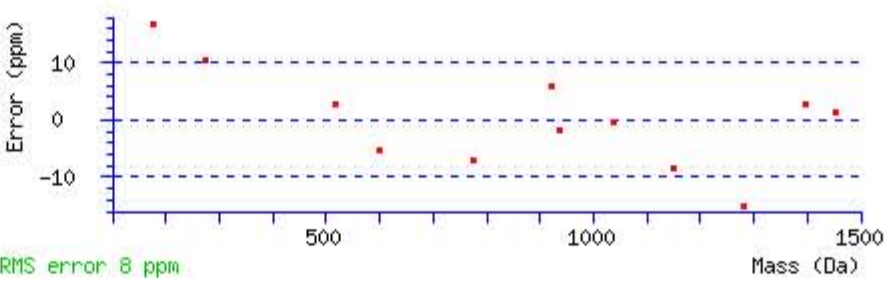

NCBI BLAST search of [TGDEITYQCR](#)  
(Parameters: blastp, nr protein database, expect=20000, no filter, PAM30)  
Other BLAST [web gateways](#)

All matches to this query

| Score | Mr(calc):   | Delta     | Sequence                        |
|-------|-------------|-----------|---------------------------------|
| 73.7  | 1552.701401 | 0.003027  | <a href="#">TGDEITYQCR</a>      |
| 9.1   | 1552.715149 | -0.010721 | <a href="#">LTNGSSSCSGTVEVR</a> |
| 7.3   | 1552.712616 | -0.008188 | <a href="#">NVGMPVAHMESPER</a>  |
| 6.8   | 1552.715820 | -0.011392 | <a href="#">AVFDALDGDGDGFVR</a> |
| 6.1   | 1552.716629 | -0.012201 | <a href="#">NEQPYLYCR</a>       |

MATRIX

SCIENCE

Mascot Search Results

Peptide View

MS/MS Fragmentation of **WSSPPQCEGLPCK**  
Found in **CFAH\_HUMAN**, Complement factor H OS=Homo sapiens GN=CFH PE=1 SV=4

Match to Query 41487: 1855.851282 from(619.624370,3+) rtinseconds(1915) index(19735)  
Title: Locus:1.1.1.3049.15 File:"2013-07-02 CLN FXIII 180 min 2nd F 2.wiff"  
Data file C:\Program Files (x86)\Matrix Science\Mascot Daemon\mgf\8 FXIII 180 min 2nd\mascot\_daemon\_merge.mgf

Click mouse within plot area to zoom in by factor of two about that point  
Or,   to  Da   
Label all possible matches ☐ Label matches used for scoring ☒

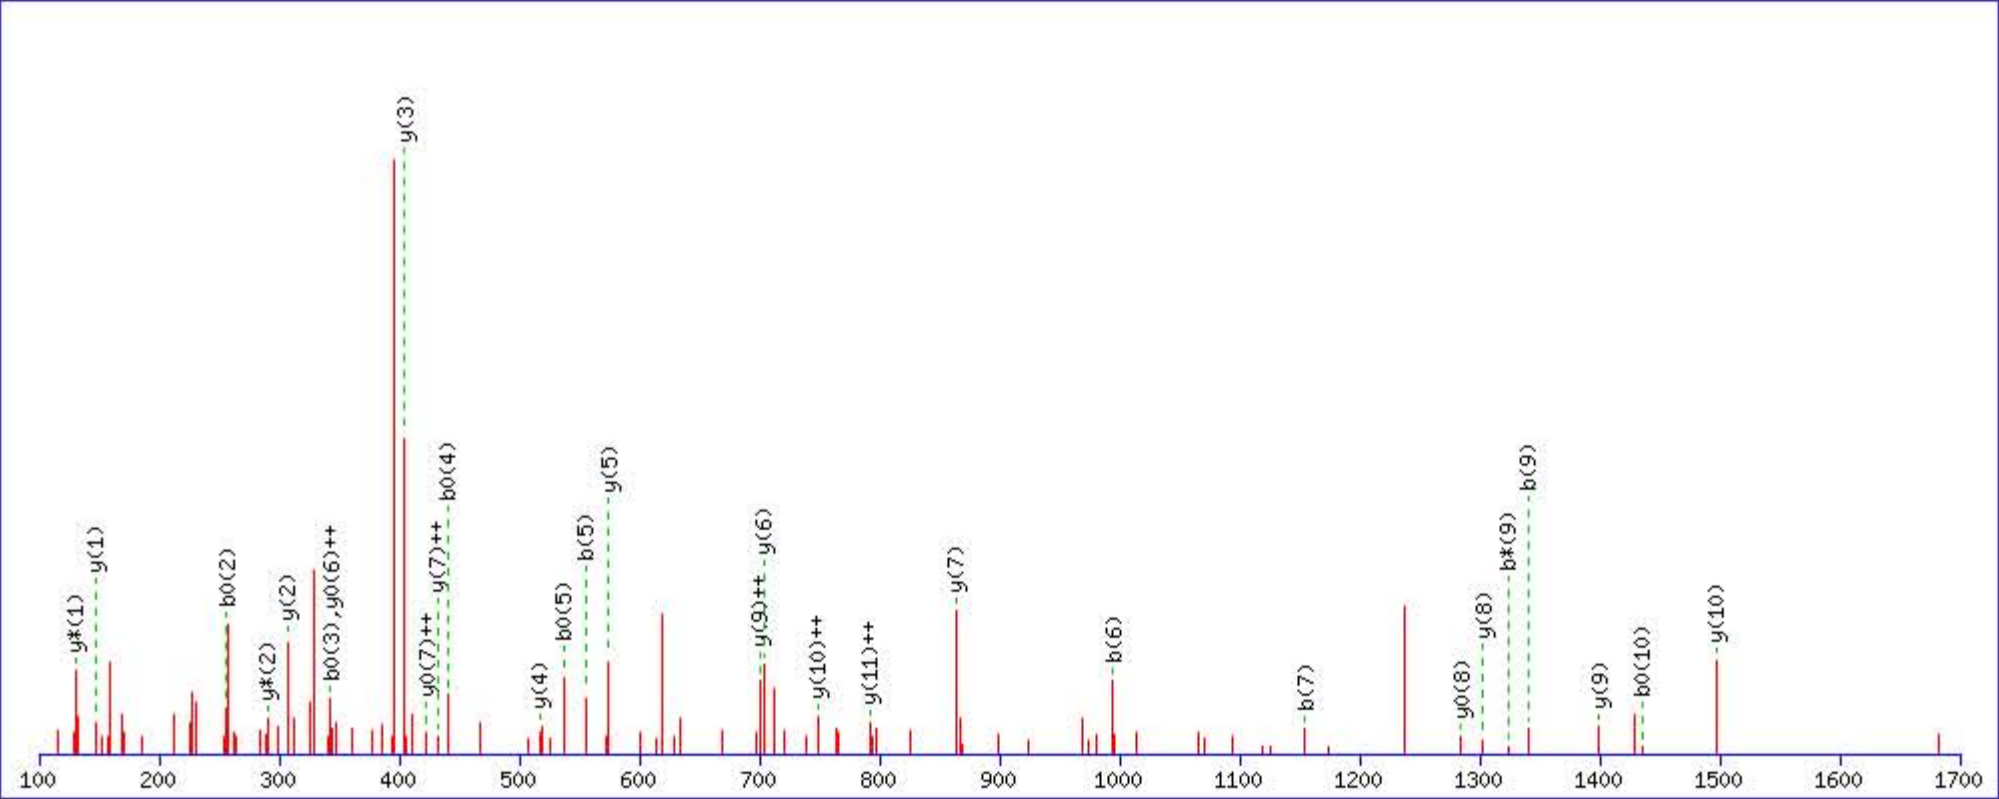

Monoisotopic mass of neutral peptide Mr(calc): 1855.841934  
Fixed modifications: Carbamidomethyl (C) (apply to specified residues or termini only)  
Variable modifications:  
Q6 : Biotin:Thermo-21345 (Q)  
Ions Score: 40 Expect: 0.0012  
Matches : 29/122 fragment ions using 71 most intense peaks [\(help\)](#)

| #  | b           | b <sup>++</sup> | b <sup>*</sup> | b <sup>*++</sup> | b <sup>0</sup> | b <sup>0++</sup> | Seq. | y           | y <sup>++</sup> | y <sup>*</sup> | y <sup>*++</sup> | y <sup>0</sup> | y <sup>0++</sup> | #  |
|----|-------------|-----------------|----------------|------------------|----------------|------------------|------|-------------|-----------------|----------------|------------------|----------------|------------------|----|
| 1  | 187.086589  | 94.046932       |                |                  |                |                  | W    |             |                 |                |                  |                |                  | 13 |
| 2  | 274.118617  | 137.562947      |                |                  | 256.108052     | 128.557664       | S    | 1670.769897 | 835.888587      | 1653.743348    | 827.375312       | 1652.759332    | 826.883304       | 12 |
| 3  | 361.150645  | 181.078960      |                |                  | 343.140080     | 172.073678       | S    | 1583.737869 | 792.372573      | 1566.711320    | 783.859298       | 1565.727304    | 783.367290       | 11 |
| 4  | 458.203409  | 229.605343      |                |                  | 440.192844     | 220.600060       | P    | 1496.705841 | 748.856559      | 1479.679292    | 740.343284       | 1478.695276    | 739.851276       | 10 |
| 5  | 555.256173  | 278.131725      |                |                  | 537.245608     | 269.126442       | P    | 1399.653077 | 700.330177      | 1382.626528    | 691.816902       | 1381.642512    | 691.324894       | 9  |
| 6  | 994.481499  | 497.744388      | 977.454950     | 489.231113       | 976.470934     | 488.739105       | Q    | 1302.600313 | 651.803795      | 1285.573764    | 643.290520       | 1284.589748    | 642.798512       | 8  |
| 7  | 1154.512148 | 577.759712      | 1137.485599    | 569.246438       | 1136.501583    | 568.754430       | C    | 863.374987  | 432.191132      | 846.348438     | 423.677857       | 845.364422     | 423.185849       | 7  |
| 8  | 1283.554741 | 642.281009      | 1266.528192    | 633.767734       | 1265.544176    | 633.275726       | E    | 703.344338  | 352.175807      | 686.317789     | 343.662533       | 685.333773     | 343.170525       | 6  |
| 9  | 1340.576205 | 670.791741      | 1323.549656    | 662.278466       | 1322.565640    | 661.786458       | G    | 574.301745  | 287.654511      | 557.275196     | 279.141236       |                |                  | 5  |
| 10 | 1453.660269 | 727.333773      | 1436.633720    | 718.820498       | 1435.649704    | 718.328490       | L    | 517.280281  | 259.143779      | 500.253732     | 250.630504       |                |                  | 4  |
| 11 | 1550.713033 | 775.860155      | 1533.686484    | 767.346880       | 1532.702468    | 766.854872       | P    | 404.196217  | 202.601747      | 387.169668     | 194.088472       |                |                  | 3  |
| 12 | 1710.743682 | 855.875479      | 1693.717133    | 847.362205       | 1692.733117    | 846.870197       | C    | 307.143453  | 154.075365      | 290.116904     | 145.562090       |                |                  | 2  |
| 13 |             |                 |                |                  |                |                  | K    | 147.112804  | 74.060040       | 130.086255     | 65.546765        |                |                  | 1  |

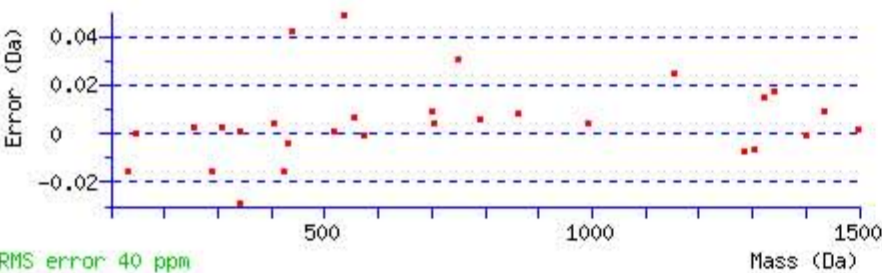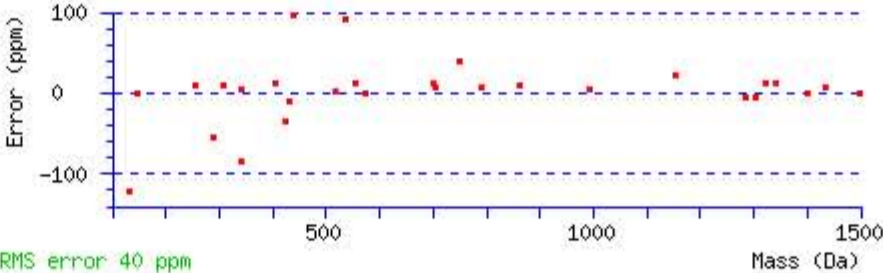

NCBI BLAST search of [WSSPPQCEGLPCK](#)  
(Parameters: blastp, nr protein database, expect=20000, no filter, PAM30)  
Other BLAST [web gateways](#)

All matches to this query

| Score | Mr(calc):   | Delta    | Sequence                      |
|-------|-------------|----------|-------------------------------|
| 39.6  | 1855.841934 | 0.009348 | <a href="#">WSSPPQCEGLPCK</a> |

MATRIX

SCIENCE

Mascot Search Results

Peptide View

MS/MS Fragmentation of **AGEQVTYTCATYYK**  
Found in **CFAH\_HUMAN**, Complement factor H OS=Homo sapiens GN=CFH PE=1 SV=4

Match to Query 43462: 1964.919168 from(983.466860,2+) rtinseconds(1858) index(19254)  
Title: Locus:1.1.1.3029.25 File:"2013-07-02 CLN FXIII 180 min 2nd F 2.wiff"  
Data file C:\Program Files (x86)\Matrix Science\Mascot Daemon\mgf\8 FXIII 180 min 2nd\mascot\_daemon\_merge.mgf

Click mouse within plot area to zoom in by factor of two about that point  
Or, 

Plot from

100

 to 

2000

 Da 

Full range

  
Label all possible matches ☐ Label matches used for scoring ☒

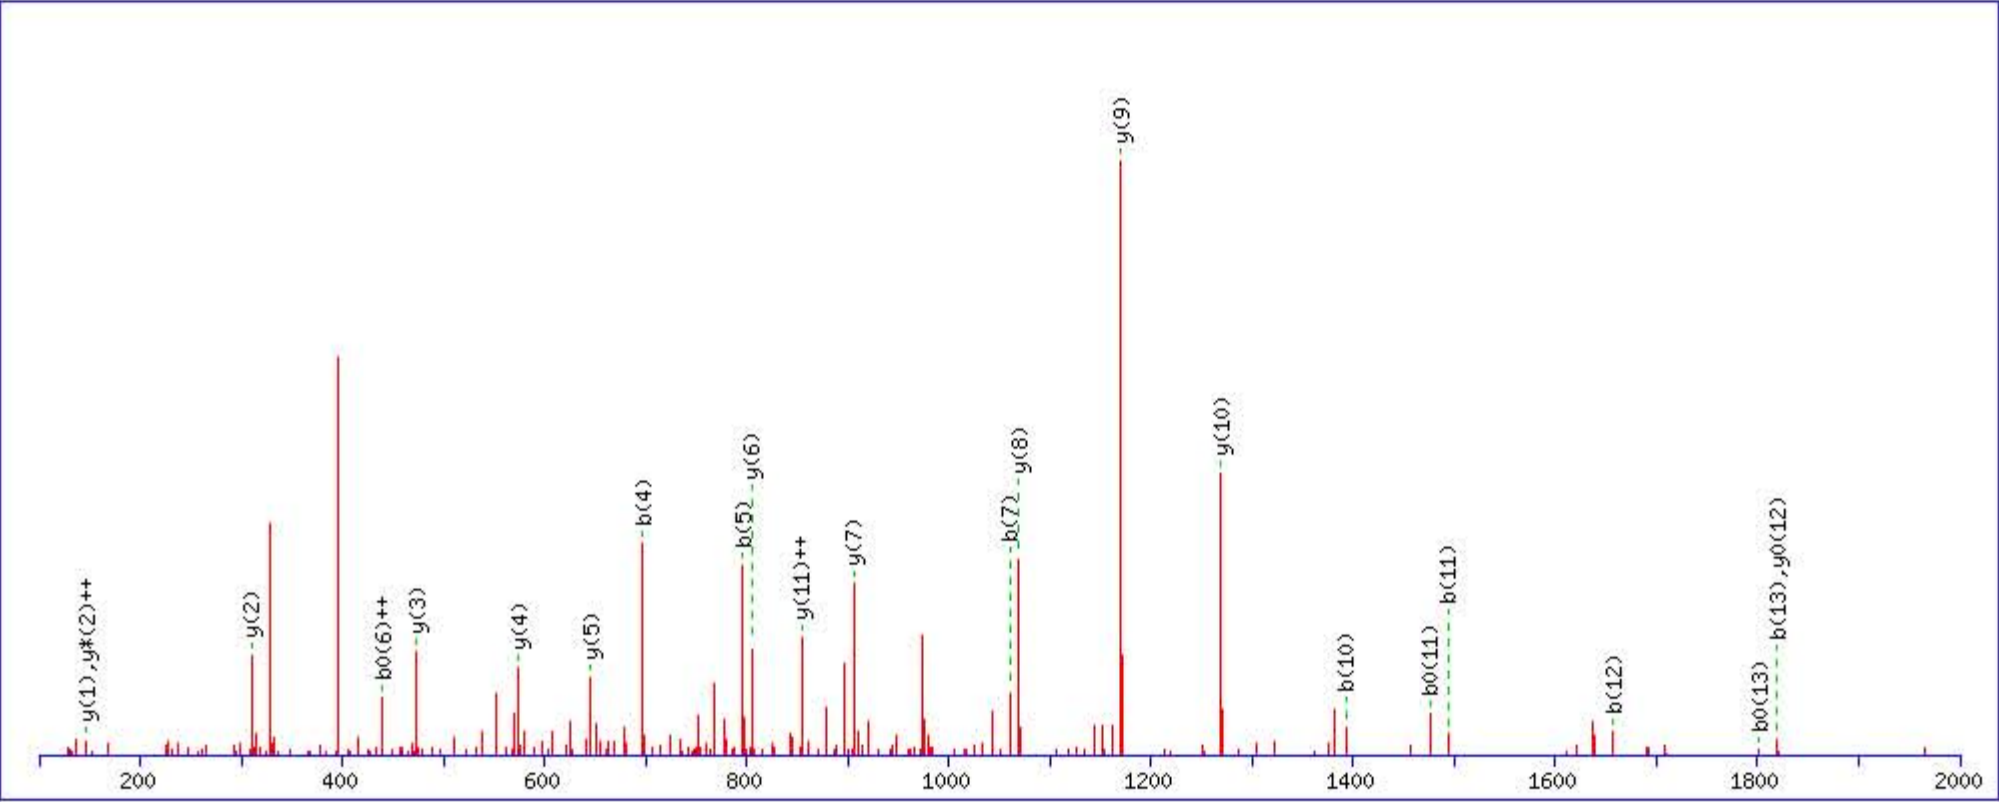

Monoisotopic mass of neutral peptide Mr(calc): 1964.901215  
Fixed modifications: Carbamidomethyl (C) (apply to specified residues or termini only)  
Variable modifications:  
Q4 : Biotin:Thermo-21345 (Q)  
Ions Score: 66 Expect: 3.3e-006  
Matches : 23/140 fragment ions using 35 most intense peaks [\(help\)](#)

| #  | b           | b <sup>++</sup> | b <sup>*</sup> | b <sup>*++</sup> | b <sup>0</sup> | b <sup>0++</sup> | Seq. | y           | y <sup>++</sup> | y <sup>*</sup> | y <sup>*++</sup> | y <sup>0</sup> | y <sup>0++</sup> | #  |
|----|-------------|-----------------|----------------|------------------|----------------|------------------|------|-------------|-----------------|----------------|------------------|----------------|------------------|----|
| 1  | 72.044390   | 36.525833       |                |                  |                |                  | A    |             |                 |                |                  |                |                  | 14 |
| 2  | 129.065854  | 65.036565       |                |                  |                |                  | G    | 1894.871388 | 947.939332      | 1877.844839    | 939.426058       | 1876.860823    | 938.934050       | 13 |
| 3  | 258.108447  | 129.557862      |                |                  | 240.097882     | 120.552579       | E    | 1837.849924 | 919.428600      | 1820.823375    | 910.915326       | 1819.839359    | 910.423318       | 12 |
| 4  | 697.333773  | 349.170525      | 680.307224     | 340.657250       | 679.323208     | 340.165242       | Q    | 1708.807331 | 854.907304      | 1691.780782    | 846.394029       | 1690.796766    | 845.902021       | 11 |
| 5  | 796.402187  | 398.704732      | 779.375638     | 390.191457       | 778.391622     | 389.699449       | V    | 1269.582005 | 635.294641      | 1252.555456    | 626.781366       | 1251.571440    | 626.289358       | 10 |
| 6  | 897.449866  | 449.228571      | 880.423317     | 440.715297       | 879.439301     | 440.223289       | T    | 1170.513591 | 585.760434      | 1153.487042    | 577.247159       | 1152.503026    | 576.755151       | 9  |
| 7  | 1060.513195 | 530.760236      | 1043.486646    | 522.246961       | 1042.502630    | 521.754953       | Y    | 1069.465912 | 535.236594      | 1052.439363    | 526.723320       | 1051.455347    | 526.231312       | 8  |
| 8  | 1161.560874 | 581.284075      | 1144.534325    | 572.770801       | 1143.550309    | 572.278793       | T    | 906.402583  | 453.704930      | 889.376034     | 445.191655       | 888.392018     | 444.699647       | 7  |
| 9  | 1321.591523 | 661.299400      | 1304.564974    | 652.786125       | 1303.580958    | 652.294117       | C    | 805.354904  | 403.181090      | 788.328355     | 394.667816       | 787.344339     | 394.175808       | 6  |
| 10 | 1392.628637 | 696.817957      | 1375.602088    | 688.304682       | 1374.618072    | 687.812674       | A    | 645.324255  | 323.165766      | 628.297706     | 314.652491       | 627.313690     | 314.160483       | 5  |
| 11 | 1493.676316 | 747.341796      | 1476.649767    | 738.828522       | 1475.665751    | 738.336514       | T    | 574.287141  | 287.647209      | 557.260592     | 279.133934       | 556.276576     | 278.641926       | 4  |
| 12 | 1656.739645 | 828.873461      | 1639.713096    | 820.360186       | 1638.729080    | 819.868178       | Y    | 473.239462  | 237.123369      | 456.212913     | 228.610095       |                |                  | 3  |
| 13 | 1819.802974 | 910.405125      | 1802.776425    | 901.891851       | 1801.792409    | 901.399843       | Y    | 310.176133  | 155.591705      | 293.149584     | 147.078430       |                |                  | 2  |
| 14 |             |                 |                |                  |                |                  | K    | 147.112804  | 74.060040       | 130.086255     | 65.546765        |                |                  | 1  |

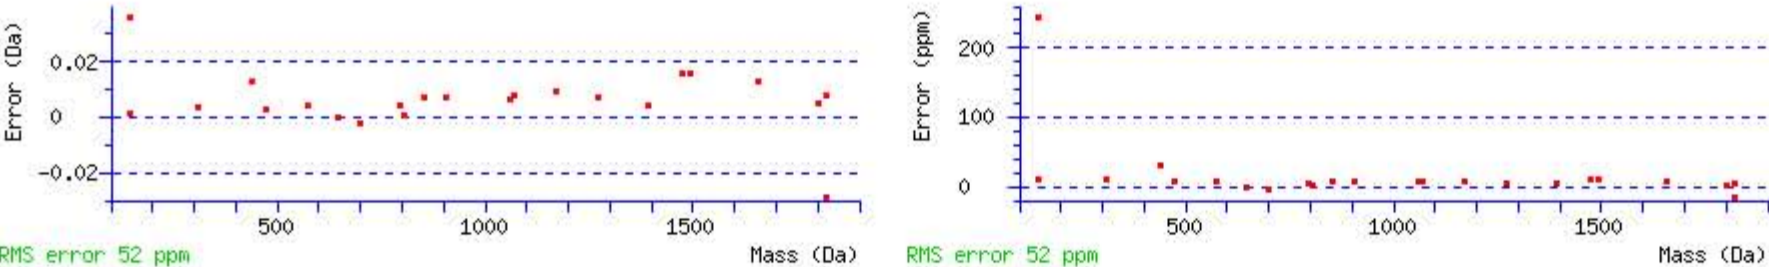

NCBI BLAST search of [AGEQVTYTCATYYK](#)  
(Parameters: blastp, nr protein database, expect=20000, no filter, PAM30)  
Other BLAST [web gateways](#)

All matches to this query

| Score | Mr(calc):   | Delta    | Sequence                       |
|-------|-------------|----------|--------------------------------|
| 66.4  | 1964.901215 | 0.017953 | <a href="#">AGEQVTYTCATYYK</a> |

MATRIX

SCIENCE

Mascot Search Results

Peptide View

MS/MS Fragmentation of **DTSCVNPPTVQNAYIVSR**  
Found in **CFAH\_HUMAN**, Complement factor H OS=Homo sapiens GN=CFH PE=1 SV=4

Match to Query 51112: 2331.158352 from(778.060060,3+) rtinseconds(2111) index(20911)  
Title: Locus:1.1.1.3117.18 File:"2013-07-02 CLN FXIII 180 min 2nd F 2.wiff"  
Data file C:\Program Files (x86)\Matrix Science\Mascot Daemon\mgf\8 FXIII 180 min 2nd\mascot\_daemon\_merge.mgf

Click mouse within plot area to zoom in by factor of two about that point  
Or, 

Plot from

0

 to 

2400

 Da 

Full range

  
Label all possible matches ☐ Label matches used for scoring ☒

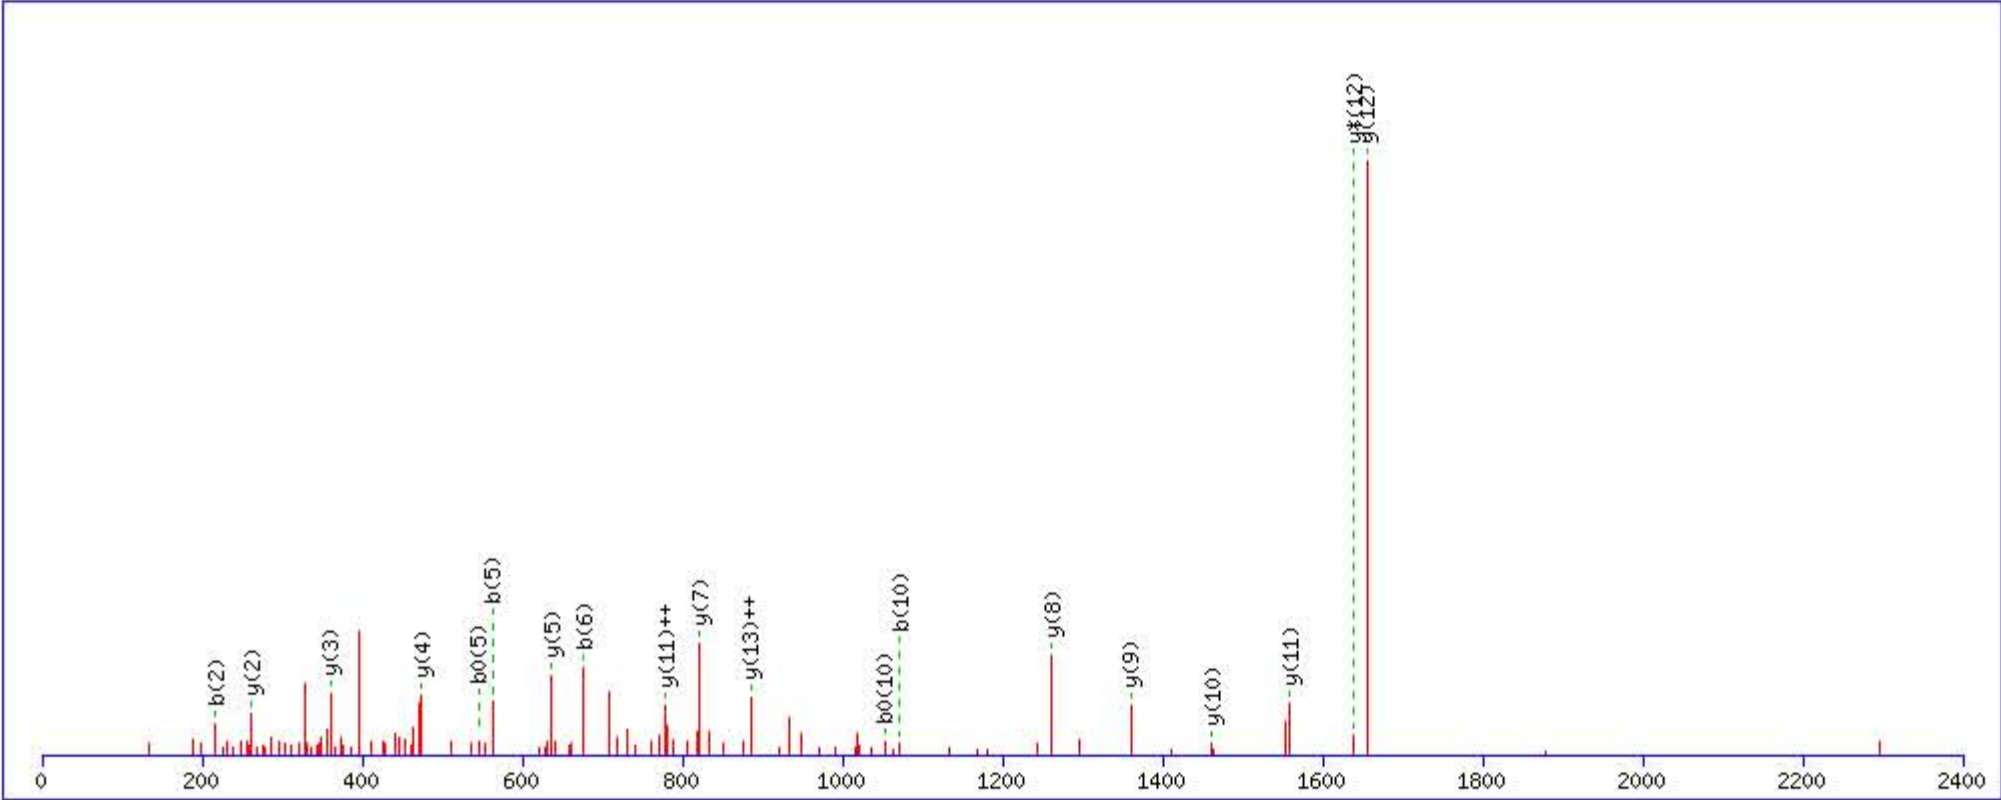

Monoisotopic mass of neutral peptide Mr(calc): 2331.135147  
Fixed modifications: Carbamidomethyl (C) (apply to specified residues or termini only)  
Variable modifications:  
Q11 : Biotin:Thermo-21345 (Q)  
Ions Score: 59 Expect: 3.3e-005  
Matches : 19/192 fragment ions using 34 most intense peaks [\(help\)](#)

| #  | b           | b <sup>++</sup> | b <sup>*</sup> | b <sup>+++</sup> | b <sup>0</sup> | b <sup>0++</sup> | Seq. | y           | y <sup>++</sup> | y <sup>*</sup> | y <sup>+++</sup> | y <sup>0</sup> | y <sup>0++</sup> | #  |
|----|-------------|-----------------|----------------|------------------|----------------|------------------|------|-------------|-----------------|----------------|------------------|----------------|------------------|----|
| 1  | 116.034219  | 58.520748       |                |                  | 98.023654      | 49.515465        | D    |             |                 |                |                  |                |                  | 18 |
| 2  | 217.081898  | 109.044587      |                |                  | 199.071333     | 100.039304       | T    | 2217.115472 | 1109.061374     | 2200.088923    | 1100.548099      | 2199.104907    | 1100.056091      | 17 |
| 3  | 304.113926  | 152.560601      |                |                  | 286.103361     | 143.555319       | S    | 2116.067793 | 1058.537534     | 2099.041244    | 1050.024260      | 2098.057228    | 1049.532252      | 16 |
| 4  | 464.144575  | 232.575925      |                |                  | 446.134010     | 223.570643       | C    | 2029.035765 | 1015.021521     | 2012.009216    | 1006.508246      | 2011.025200    | 1006.016238      | 15 |
| 5  | 563.212989  | 282.110133      |                |                  | 545.202424     | 273.104850       | V    | 1869.005116 | 935.006196      | 1851.978567    | 926.492922       | 1850.994551    | 926.000914       | 14 |
| 6  | 677.255916  | 339.131596      | 660.229367     | 330.618321       | 659.245351     | 330.126313       | N    | 1769.936702 | 885.471989      | 1752.910153    | 876.958715       | 1751.926137    | 876.466707       | 13 |
| 7  | 774.308680  | 387.657978      | 757.282131     | 379.144703       | 756.298115     | 378.652695       | P    | 1655.893775 | 828.450526      | 1638.867226    | 819.937251       | 1637.883210    | 819.445243       | 12 |
| 8  | 871.361444  | 436.184360      | 854.334895     | 427.671086       | 853.350879     | 427.179078       | P    | 1558.841011 | 779.924144      | 1541.814462    | 771.410869       | 1540.830446    | 770.918861       | 11 |
| 9  | 972.409123  | 486.708200      | 955.382574     | 478.194925       | 954.398558     | 477.702917       | T    | 1461.788247 | 731.397762      | 1444.761698    | 722.884487       | 1443.777682    | 722.392479       | 10 |
| 10 | 1071.477537 | 536.242407      | 1054.450988    | 527.729132       | 1053.466972    | 527.237124       | V    | 1360.740568 | 680.873922      | 1343.714019    | 672.360648       | 1342.730003    | 671.868639       | 9  |
| 11 | 1510.702863 | 755.855070      | 1493.676314    | 747.341795       | 1492.692298    | 746.849787       | Q    | 1261.672154 | 631.339715      | 1244.645605    | 622.826441       | 1243.661589    | 622.334433       | 8  |
| 12 | 1624.745790 | 812.876533      | 1607.719241    | 804.363259       | 1606.735225    | 803.871251       | N    | 822.446828  | 411.727052      | 805.420279     | 403.213777       | 804.436263     | 402.721769       | 7  |
| 13 | 1695.782904 | 848.395090      | 1678.756355    | 839.881816       | 1677.772339    | 839.389808       | A    | 708.403901  | 354.705588      | 691.377352     | 346.192314       | 690.393336     | 345.700306       | 6  |
| 14 | 1858.846233 | 929.926755      | 1841.819684    | 921.413480       | 1840.835668    | 920.921472       | Y    | 637.366787  | 319.187031      | 620.340238     | 310.673757       | 619.356222     | 310.181749       | 5  |
| 15 | 1971.930297 | 986.468787      | 1954.903748    | 977.955512       | 1953.919732    | 977.463504       | I    | 474.303458  | 237.655367      | 457.276909     | 229.142092       | 456.292893     | 228.650084       | 4  |
| 16 | 2070.998711 | 1036.002993     | 2053.972162    | 1027.489719      | 2052.988146    | 1026.997711      | V    | 361.219394  | 181.113335      | 344.192845     | 172.600060       | 343.208829     | 172.108052       | 3  |
| 17 | 2158.030739 | 1079.519007     | 2141.004190    | 1071.005733      | 2140.020174    | 1070.513725      | S    | 262.150980  | 131.579128      | 245.124431     | 123.065854       | 244.140415     | 122.573846       | 2  |
| 18 |             |                 |                |                  |                |                  | R    | 175.118952  | 88.063114       | 158.092403     | 79.549839        |                |                  | 1  |

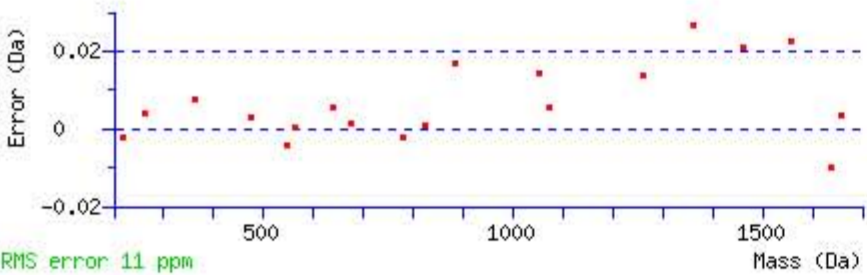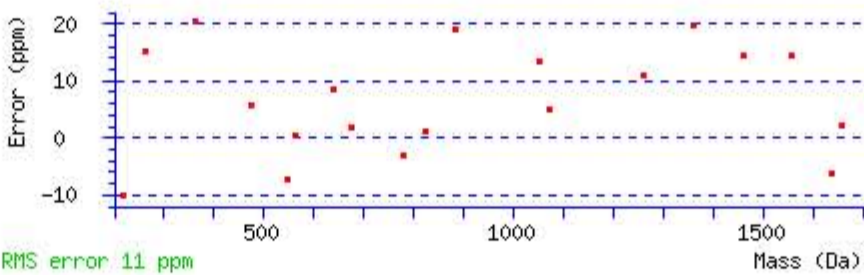

NCBI BLAST search of [DTSCVNPPTVQNAYIVSR](#)  
(Parameters: blastp, nr protein database, expect=20000, no filter, PAM30)  
Other BLAST [web gateways](#)

All matches to this query

| Score | Mr(calc):   | Delta    | Sequence                           |
|-------|-------------|----------|------------------------------------|
| 59.2  | 2331.135147 | 0.023205 | <a href="#">DTSCVNPPTVQNAYIVSR</a> |

M

A

T

R

I

X

S

C

I

E

N

C

E

Mascot Search Results

Peptide View

MS/MS Fragmentation of **IVSSAMEPDREYHFGQAVR**  
Found in **CFAH\_HUMAN**, Complement factor H OS=Homo sapiens GN=CFH PE=1 SV=4

Match to Query 54663: 2518.210856 from(630.559990,4+) rtinseconds(1673) index(18039)  
Title: Locus:1.1.1.2965.7 File:"2013-07-02 CLN FXIII 180 min 2nd F 2.wiff"  
Data file C:\Program Files (x86)\Matrix Science\Mascot Daemon\mgf\8 FXIII 180 min 2nd\mascot\_daemon\_merge.mgf

Click mouse within plot area to zoom in by factor of two about that point  
Or, Plot from 0 to 2600 Da Full range  
Label all possible matches ☐ Label matches used for scoring ☒

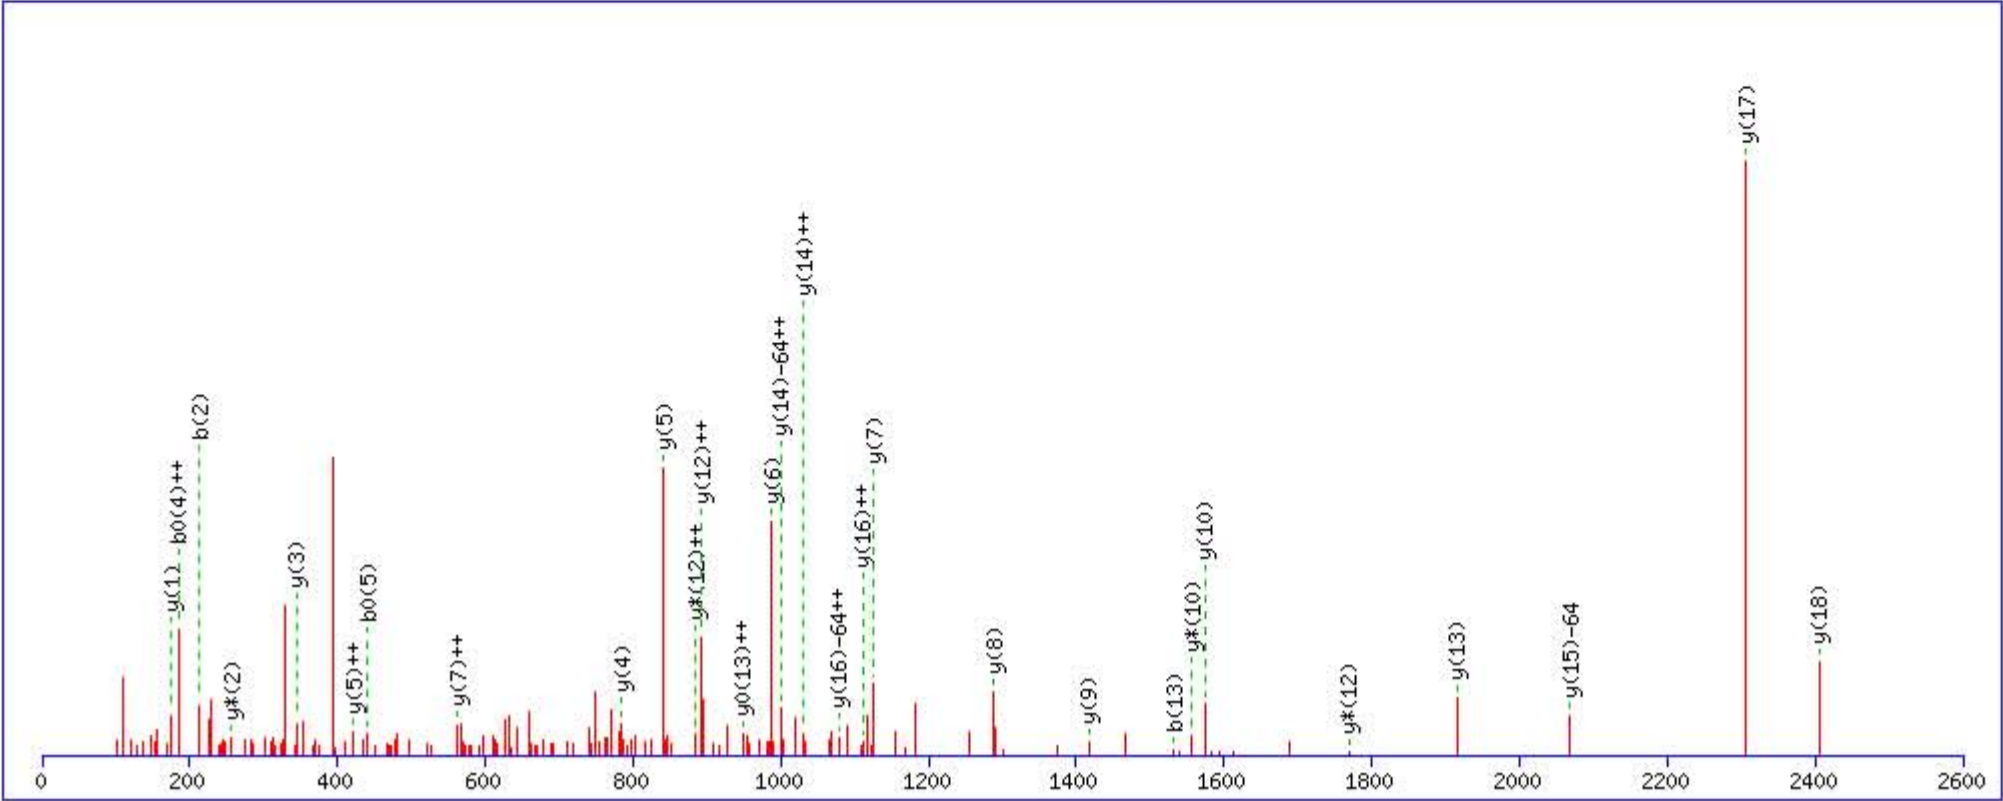

Monoisotopic mass of neutral peptide Mr(calc): 2518.209686  
Fixed modifications: Carbamidomethyl (C) (apply to specified residues or termini only)  
Variable modifications:  
M6 : Oxidation (M), with neutral losses 0.000000 (shown in table), 63.998285  
Q16 : Biotin:Thermo-21345 (Q)  
Ions Score: 47 Expect: 0.00051  
Matches : 29/278 fragment ions using 74 most intense peaks [\(help\)](#)

| #  | b           | b <sup>++</sup> | b <sup>*</sup> | b <sup>*++</sup> | b <sup>0</sup> | b <sup>0++</sup> | Seq. | y           | y <sup>++</sup> | y <sup>*</sup> | y <sup>*++</sup> | y <sup>0</sup> | y <sup>0++</sup> | #  |
|----|-------------|-----------------|----------------|------------------|----------------|------------------|------|-------------|-----------------|----------------|------------------|----------------|------------------|----|
| 1  | 114.091340  | 57.549308       |                |                  |                |                  | I    |             |                 |                |                  |                |                  | 19 |
| 2  | 213.159754  | 107.083515      |                |                  |                |                  | V    | 2406.132913 | 1203.570094     | 2389.106364    | 1195.056820      | 2388.122348    | 1194.564812      | 18 |
| 3  | 300.191782  | 150.599529      |                |                  | 282.181217     | 141.594247       | S    | 2307.064499 | 1154.035887     | 2290.037950    | 1145.522613      | 2289.053934    | 1145.030605      | 17 |
| 4  | 387.223810  | 194.115543      |                |                  | 369.213245     | 185.110261       | S    | 2220.032471 | 1110.519873     | 2203.005922    | 1102.006599      | 2202.021906    | 1101.514591      | 16 |
| 5  | 458.260924  | 229.634100      |                |                  | 440.250359     | 220.628818       | A    | 2133.000443 | 1067.003859     | 2115.973894    | 1058.490585      | 2114.989878    | 1057.998577      | 15 |
| 6  | 605.296324  | 303.151800      |                |                  | 587.285759     | 294.146518       | M    | 2061.963329 | 1031.485302     | 2044.936780    | 1022.972028      | 2043.952764    | 1022.480020      | 14 |
| 7  | 734.338917  | 367.673097      |                |                  | 716.328352     | 358.667814       | E    | 1914.927929 | 957.967603      | 1897.901380    | 949.454328       | 1896.917364    | 948.962320       | 13 |
| 8  | 831.391681  | 416.199479      |                |                  | 813.381116     | 407.194196       | P    | 1785.885336 | 893.446306      | 1768.858787    | 884.933032       | 1767.874771    | 884.441024       | 12 |
| 9  | 946.418624  | 473.712950      |                |                  | 928.408059     | 464.707668       | D    | 1688.832572 | 844.919924      | 1671.806023    | 836.406650       | 1670.822007    | 835.914642       | 11 |
| 10 | 1102.519735 | 551.763506      | 1085.493186    | 543.250231       | 1084.509170    | 542.758223       | R    | 1573.805629 | 787.406453      | 1556.779080    | 778.893178       | 1555.795064    | 778.401170       | 10 |
| 11 | 1231.562328 | 616.284802      | 1214.535779    | 607.771528       | 1213.551763    | 607.279520       | E    | 1417.704518 | 709.355897      | 1400.677969    | 700.842623       | 1399.693953    | 700.350615       | 9  |
| 12 | 1394.625657 | 697.816467      | 1377.599108    | 689.303192       | 1376.615092    | 688.811184       | Y    | 1288.661925 | 644.834601      | 1271.635376    | 636.321326       |                |                  | 8  |
| 13 | 1531.684569 | 766.345923      | 1514.658020    | 757.832648       | 1513.674004    | 757.340640       | H    | 1125.598596 | 563.302936      | 1108.572047    | 554.789662       |                |                  | 7  |
| 14 | 1678.752983 | 839.880130      | 1661.726434    | 831.366855       | 1660.742418    | 830.874847       | F    | 988.539684  | 494.773480      | 971.513135     | 486.260206       |                |                  | 6  |
| 15 | 1735.774447 | 868.390862      | 1718.747898    | 859.877587       | 1717.763882    | 859.385579       | G    | 841.471270  | 421.239273      | 824.444721     | 412.725999       |                |                  | 5  |
| 16 | 2174.999773 | 1088.003524     | 2157.973224    | 1079.490250      | 2156.989208    | 1078.998242      | Q    | 784.449806  | 392.728541      | 767.423257     | 384.215267       |                |                  | 4  |
| 17 | 2246.036887 | 1123.522082     | 2229.010338    | 1115.008807      | 2228.026322    | 1114.516799      | A    | 345.224480  | 173.115878      | 328.197931     | 164.602603       |                |                  | 3  |
| 18 | 2345.105301 | 1173.056288     | 2328.078752    | 1164.543014      | 2327.094736    | 1164.051006      | V    | 274.187366  | 137.597321      | 257.160817     | 129.084046       |                |                  | 2  |
| 19 |             |                 |                |                  |                |                  | R    | 175.118952  | 88.063114       | 158.092403     | 79.549839        |                |                  | 1  |

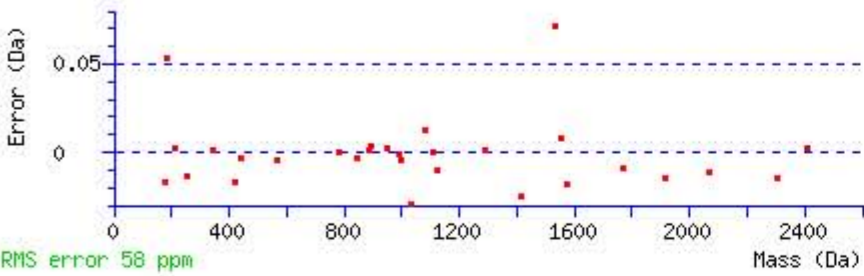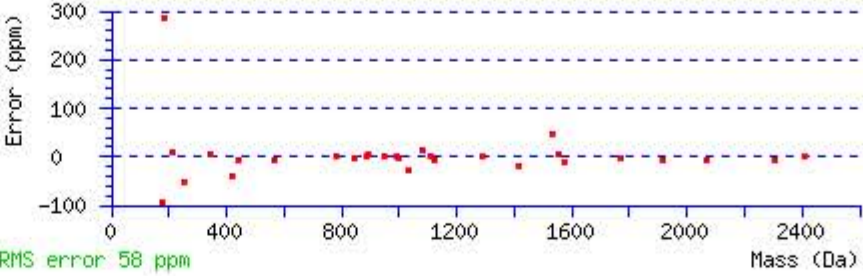

NCBI BLAST search of [IVSSAMEPDREYHFGQAVR](#)  
(Parameters: blastp, nr protein database, expect=20000, no filter, PAM30)  
Other BLAST [web gateways](#)

All matches to this query

| Score | Mr(calc):   | Delta    | Sequence                            |
|-------|-------------|----------|-------------------------------------|
| 46.7  | 2518.209686 | 0.001170 | <a href="#">IVSSAMEPDREYHFGQAVR</a> |

MATRIX

SCIENCE

Mascot Search Results

Peptide View

MS/MS Fragmentation of **SITCIHGVWTQLPQCVAIDK**  
Found in **CFAH\_HUMAN**, Complement factor H OS=Homo sapiens GN=CFH PE=1 SV=4

Match to Query 55804: 2636.363742 from(879.795190,3+) rtinseconds(2353) index(22365)  
Title: Locus:1.1.1.3201.24 File:"2013-07-02 CLN FXIII 180 min 2nd F 2.wiff"  
Data file C:\Program Files (x86)\Matrix Science\Mascot Daemon\mgf\8 FXIII 180 min 2nd\mascot\_daemon\_merge.mgf

Click mouse within plot area to zoom in by factor of two about that point  
Or, 

Plot from 

0

 to 

2800

 Da 

Full range

Label all possible matches ☐ Label matches used for scoring ☒

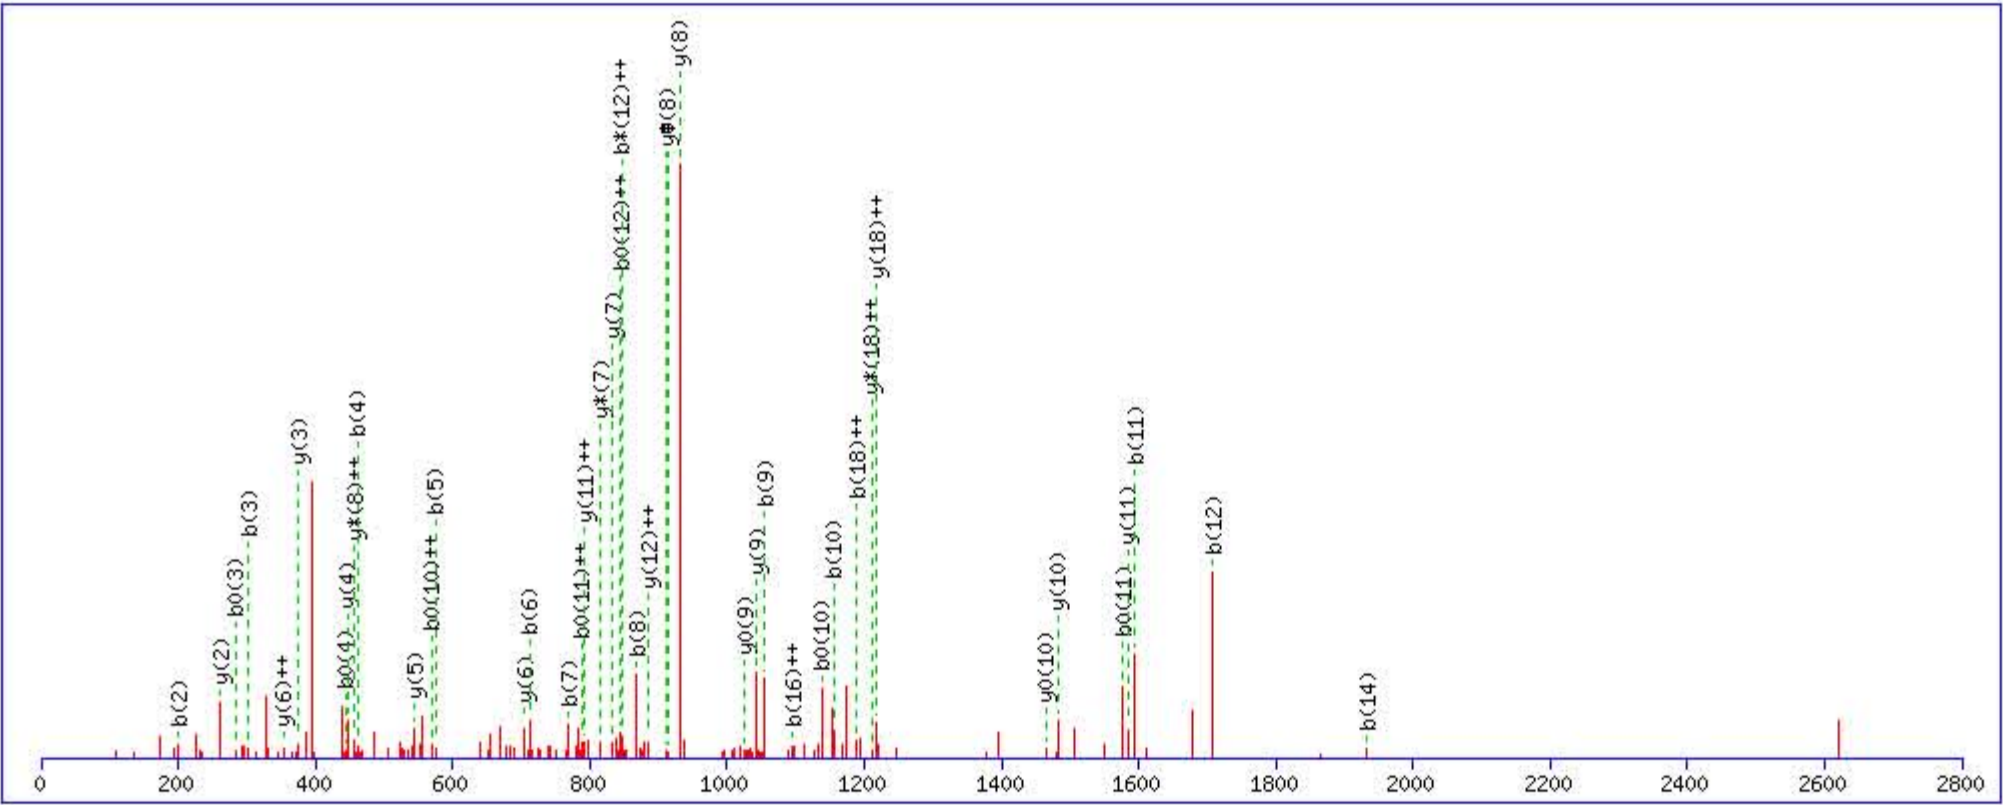

Monoisotopic mass of neutral peptide Mr(calc): 2636.327728  
Fixed modifications: Carbamidomethyl (C) (apply to specified residues or termini only)  
Variable modifications:  
Q11 : Biotin:Thermo-21345 (Q)  
Ions Score: 53 Expect: 1.9e-005  
Matches : 43/206 fragment ions using 106 most intense peaks [\(help\)](#)

| #  | b           | b <sup>++</sup> | b <sup>*</sup> | b <sup>+++</sup> | b <sup>0</sup> | b <sup>0++</sup> | Seq. | y           | y <sup>++</sup> | y <sup>*</sup> | y <sup>+++</sup> | y <sup>0</sup> | y <sup>0++</sup> | #  |
|----|-------------|-----------------|----------------|------------------|----------------|------------------|------|-------------|-----------------|----------------|------------------|----------------|------------------|----|
| 1  | 88.039304   | 44.523290       |                |                  | 70.028739      | 35.518008        | S    |             |                 |                |                  |                |                  | 20 |
| 2  | 201.123368  | 101.065322      |                |                  | 183.112803     | 92.060039        | I    | 2550.302958 | 1275.655117     | 2533.276409    | 1267.141842      | 2532.292393    | 1266.649834      | 19 |
| 3  | 302.171047  | 151.589161      |                |                  | 284.160482     | 142.583879       | T    | 2437.218894 | 1219.113085     | 2420.192345    | 1210.599810      | 2419.208329    | 1210.107802      | 18 |
| 4  | 462.201696  | 231.604486      |                |                  | 444.191131     | 222.599204       | C    | 2336.171215 | 1168.589245     | 2319.144666    | 1160.075971      | 2318.160650    | 1159.583963      | 17 |
| 5  | 575.285760  | 288.146518      |                |                  | 557.275195     | 279.141236       | I    | 2176.140566 | 1088.573921     | 2159.114017    | 1080.060646      | 2158.130001    | 1079.568638      | 16 |
| 6  | 712.344672  | 356.675974      |                |                  | 694.334107     | 347.670692       | H    | 2063.056502 | 1032.031889     | 2046.029953    | 1023.518614      | 2045.045937    | 1023.026606      | 15 |
| 7  | 769.366136  | 385.186706      |                |                  | 751.355571     | 376.181424       | G    | 1925.997590 | 963.502433      | 1908.971041    | 954.989159       | 1907.987025    | 954.497151       | 14 |
| 8  | 868.434550  | 434.720913      |                |                  | 850.423985     | 425.715631       | V    | 1868.976126 | 934.991701      | 1851.949577    | 926.478427       | 1850.965561    | 925.986419       | 13 |
| 9  | 1054.513863 | 527.760570      |                |                  | 1036.503298    | 518.755287       | W    | 1769.907712 | 885.457494      | 1752.881163    | 876.944220       | 1751.897147    | 876.452211       | 12 |
| 10 | 1155.561542 | 578.284409      |                |                  | 1137.550977    | 569.279127       | T    | 1583.828399 | 792.417838      | 1566.801850    | 783.904563       | 1565.817834    | 783.412555       | 11 |
| 11 | 1594.786868 | 797.897072      | 1577.760319    | 789.383798       | 1576.776303    | 788.891790       | Q    | 1482.780720 | 741.893998      | 1465.754171    | 733.380724       | 1464.770155    | 732.888715       | 10 |
| 12 | 1707.870932 | 854.439104      | 1690.844383    | 845.925830       | 1689.860367    | 845.433822       | L    | 1043.555394 | 522.281335      | 1026.528845    | 513.768060       | 1025.544829    | 513.276052       | 9  |
| 13 | 1804.923696 | 902.965486      | 1787.897147    | 894.452212       | 1786.913131    | 893.960204       | P    | 930.471330  | 465.739303      | 913.444781     | 457.226028       | 912.460765     | 456.734020       | 8  |
| 14 | 1932.982274 | 966.994775      | 1915.955725    | 958.481501       | 1914.971709    | 957.989493       | Q    | 833.418566  | 417.212921      | 816.392017     | 408.699646       | 815.408001     | 408.207638       | 7  |
| 15 | 2093.012923 | 1047.010099     | 2075.986374    | 1038.496825      | 2075.002358    | 1038.004817      | C    | 705.359988  | 353.183632      | 688.333439     | 344.670357       | 687.349423     | 344.178349       | 6  |
| 16 | 2192.081337 | 1096.544306     | 2175.054788    | 1088.031032      | 2174.070772    | 1087.539024      | V    | 545.329339  | 273.168308      | 528.302790     | 264.655033       | 527.318774     | 264.163025       | 5  |
| 17 | 2263.118451 | 1132.062863     | 2246.091902    | 1123.549589      | 2245.107886    | 1123.057581      | A    | 446.260925  | 223.634101      | 429.234376     | 215.120826       | 428.250360     | 214.628818       | 4  |
| 18 | 2376.202515 | 1188.604895     | 2359.175966    | 1180.091621      | 2358.191950    | 1179.599613      | I    | 375.223811  | 188.115543      | 358.197262     | 179.602269       | 357.213246     | 179.110261       | 3  |
| 19 | 2491.229458 | 1246.118367     | 2474.202909    | 1237.605092      | 2473.218893    | 1237.113084      | D    | 262.139747  | 131.573511      | 245.113198     | 123.060237       | 244.129182     | 122.568229       | 2  |
| 20 |             |                 |                |                  |                |                  | K    | 147.112804  | 74.060040       | 130.086255     | 65.546765        |                |                  | 1  |

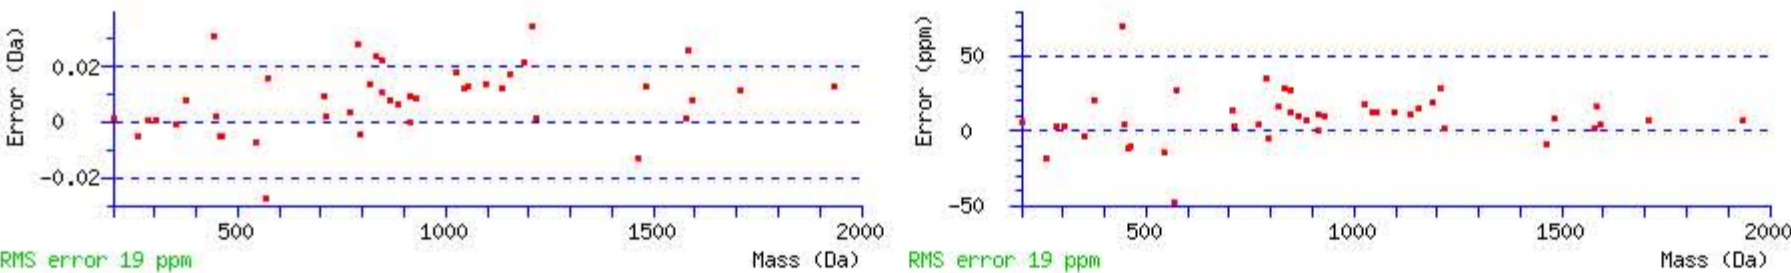

NCBI BLAST search of **SITCIHGVWTQLPQCVAIDK**  
(Parameters: blastp, nr protein database, expect=20000, no filter, PAM30)  
Other BLAST [web gateways](#)

All matches to this query

| Score | Mr(calc):   | Delta     | Sequence                                 |
|-------|-------------|-----------|------------------------------------------|
| 53.4  | 2636.327728 | 0.036014  | <a href="#">SITCIHGVWTQLPQCVAIDK</a>     |
| 23.2  | 2636.327728 | 0.036014  | <a href="#">SITCIHGVWTQLPQCVAIDK</a>     |
| 2.8   | 2636.344574 | 0.019168  | <a href="#">IEGWELTTEPSLIHNSSGLLSPLR</a> |
| 1.1   | 2636.338226 | 0.025516  | <a href="#">QFQSLKEFYETEIPQK</a>         |
| 1.0   | 2636.346130 | 0.017612  | <a href="#">QRGAGSNAGASQSTQRK</a>        |
| 0.2   | 2636.376648 | -0.012906 | <a href="#">FHTIYRQLHSLCQRR</a>          |

M

A

T

R

I

X

S

C

I

E

N

C

E

Mascot Search Results

Peptide View

MS/MS Fragmentation of **SITCIHGVWTQLPQCVAIDK**  
Found in **CFAH\_HUMAN**, Complement factor H OS=Homo sapiens GN=CFH PE=1 SV=4

Match to Query 55808: 2636.366502 from(879.796110,3+) rtinseconds(2387) index(22577)  
Title: Locus:1.1.1.3213.14 File:"2013-07-02 CLN FXIII 180 min 2nd F 2.wiff"  
Data file C:\Program Files (x86)\Matrix Science\Mascot Daemon\mgf\8 FXIII 180 min 2nd\mascot\_daemon\_merge.mgf

Click mouse within plot area to zoom in by factor of two about that point  
Or, 

Plot from

0

 to 

2400

 Da 

Full range

  
Label all possible matches ☐ Label matches used for scoring ☒

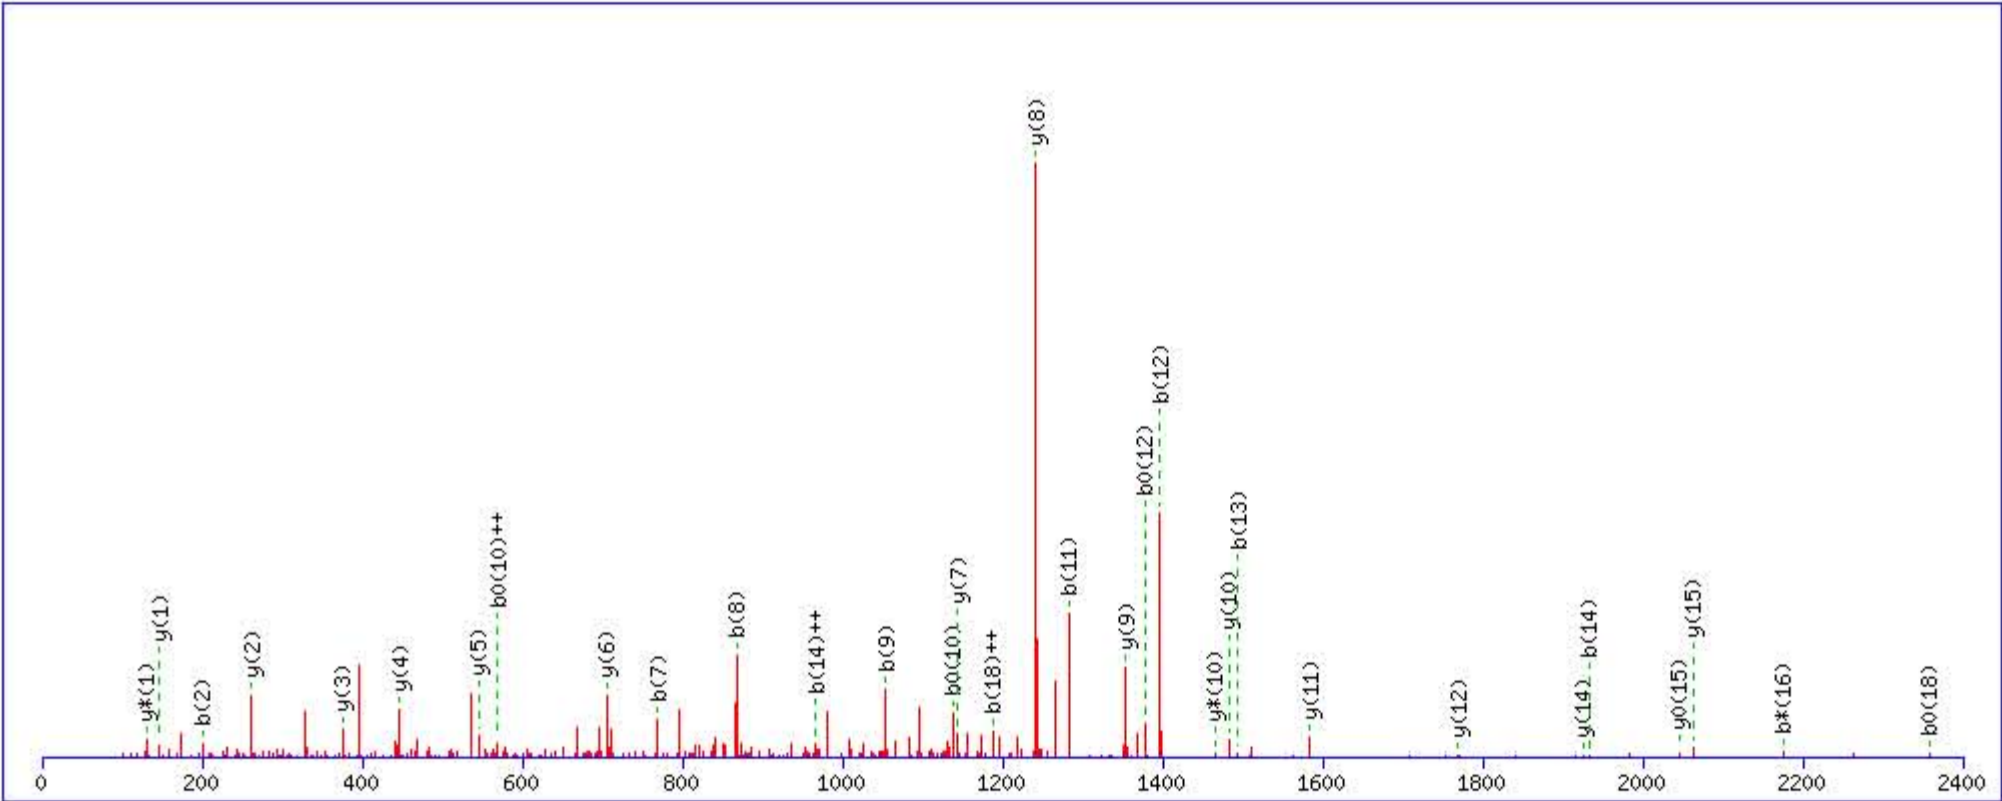

Monoisotopic mass of neutral peptide Mr(calc): 2636.327728  
Fixed modifications: Carbamidomethyl (C) (apply to specified residues or termini only)  
Variable modifications:  
Q14 : Biotin:Thermo-21345 (Q)  
Ions Score: 84 Expect: 1.6e-008  
Matches : 32/206 fragment ions using 57 most intense peaks [\(help\)](#)

| #  | b           | b <sup>++</sup> | b <sup>*</sup> | b <sup>*++</sup> | b <sup>0</sup> | b <sup>0++</sup> | Seq. | y           | y <sup>++</sup> | y <sup>*</sup> | y <sup>*++</sup> | y <sup>0</sup> | y <sup>0++</sup> | #  |
|----|-------------|-----------------|----------------|------------------|----------------|------------------|------|-------------|-----------------|----------------|------------------|----------------|------------------|----|
| 1  | 88.039304   | 44.523290       |                |                  | 70.028739      | 35.518008        | S    |             |                 |                |                  |                |                  | 20 |
| 2  | 201.123368  | 101.065322      |                |                  | 183.112803     | 92.060039        | I    | 2550.302958 | 1275.655117     | 2533.276409    | 1267.141842      | 2532.292393    | 1266.649834      | 19 |
| 3  | 302.171047  | 151.589161      |                |                  | 284.160482     | 142.583879       | T    | 2437.218894 | 1219.113085     | 2420.192345    | 1210.599810      | 2419.208329    | 1210.107802      | 18 |
| 4  | 462.201696  | 231.604486      |                |                  | 444.191131     | 222.599204       | C    | 2336.171215 | 1168.589245     | 2319.144666    | 1160.075971      | 2318.160650    | 1159.583963      | 17 |
| 5  | 575.285760  | 288.146518      |                |                  | 557.275195     | 279.141236       | I    | 2176.140566 | 1088.573921     | 2159.114017    | 1080.060646      | 2158.130001    | 1079.568638      | 16 |
| 6  | 712.344672  | 356.675974      |                |                  | 694.334107     | 347.670692       | H    | 2063.056502 | 1032.031889     | 2046.029953    | 1023.518614      | 2045.045937    | 1023.026606      | 15 |
| 7  | 769.366136  | 385.186706      |                |                  | 751.355571     | 376.181424       | G    | 1925.997590 | 963.502433      | 1908.971041    | 954.989159       | 1907.987025    | 954.497151       | 14 |
| 8  | 868.434550  | 434.720913      |                |                  | 850.423985     | 425.715631       | V    | 1868.976126 | 934.991701      | 1851.949577    | 926.478427       | 1850.965561    | 925.986419       | 13 |
| 9  | 1054.513863 | 527.760570      |                |                  | 1036.503298    | 518.755287       | W    | 1769.907712 | 885.457494      | 1752.881163    | 876.944220       | 1751.897147    | 876.452211       | 12 |
| 10 | 1155.561542 | 578.284409      |                |                  | 1137.550977    | 569.279127       | T    | 1583.828399 | 792.417838      | 1566.801850    | 783.904563       | 1565.817834    | 783.412555       | 11 |
| 11 | 1283.620120 | 642.313698      | 1266.593571    | 633.800424       | 1265.609555    | 633.308416       | Q    | 1482.780720 | 741.893998      | 1465.754171    | 733.380724       | 1464.770155    | 732.888715       | 10 |
| 12 | 1396.704184 | 698.855730      | 1379.677635    | 690.342456       | 1378.693619    | 689.850448       | L    | 1354.722142 | 677.864709      | 1337.695593    | 669.351434       | 1336.711577    | 668.859426       | 9  |
| 13 | 1493.756948 | 747.382112      | 1476.730399    | 738.868838       | 1475.746383    | 738.376830       | P    | 1241.638078 | 621.322677      | 1224.611529    | 612.809403       | 1223.627513    | 612.317394       | 8  |
| 14 | 1932.982274 | 966.994775      | 1915.955725    | 958.481501       | 1914.971709    | 957.989493       | Q    | 1144.585314 | 572.796295      | 1127.558765    | 564.283021       | 1126.574749    | 563.791012       | 7  |
| 15 | 2093.012923 | 1047.010099     | 2075.986374    | 1038.496825      | 2075.002358    | 1038.004817      | C    | 705.359988  | 353.183632      | 688.333439     | 344.670357       | 687.349423     | 344.178349       | 6  |
| 16 | 2192.081337 | 1096.544306     | 2175.054788    | 1088.031032      | 2174.070772    | 1087.539024      | V    | 545.329339  | 273.168308      | 528.302790     | 264.655033       | 527.318774     | 264.163025       | 5  |
| 17 | 2263.118451 | 1132.062863     | 2246.091902    | 1123.549589      | 2245.107886    | 1123.057581      | A    | 446.260925  | 223.634101      | 429.234376     | 215.120826       | 428.250360     | 214.628818       | 4  |
| 18 | 2376.202515 | 1188.604895     | 2359.175966    | 1180.091621      | 2358.191950    | 1179.599613      | I    | 375.223811  | 188.115543      | 358.197262     | 179.602269       | 357.213246     | 179.110261       | 3  |
| 19 | 2491.229458 | 1246.118367     | 2474.202909    | 1237.605092      | 2473.218893    | 1237.113084      | D    | 262.139747  | 131.573511      | 245.113198     | 123.060237       | 244.129182     | 122.568229       | 2  |
| 20 |             |                 |                |                  |                |                  | K    | 147.112804  | 74.060040       | 130.086255     | 65.546765        |                |                  | 1  |

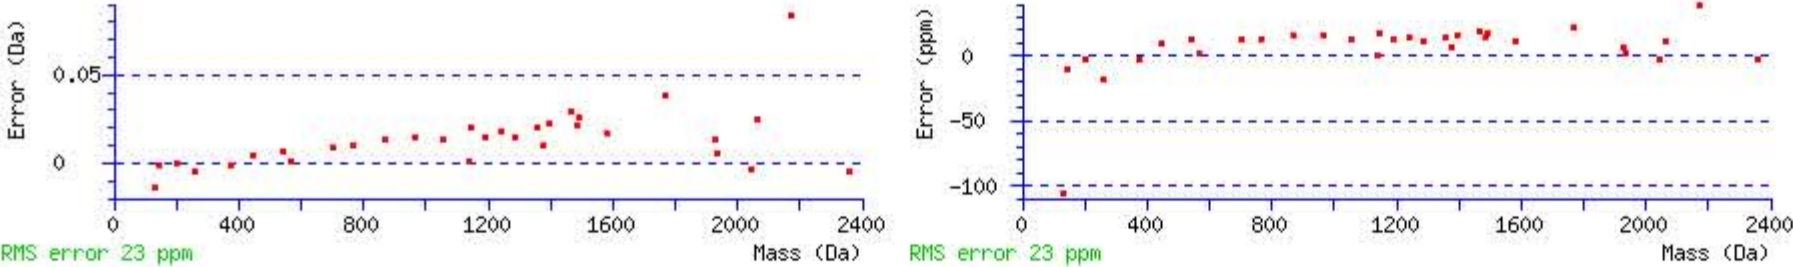

NCBI BLAST search of [SITCIHGVWTQLPQCVAIDK](#)  
(Parameters: blastp, nr protein database, expect=20000, no filter, PAM30)  
Other BLAST [web gateways](#)

All matches to this query

| Score | Mr(calc):   | Delta     | Sequence                                 |
|-------|-------------|-----------|------------------------------------------|
| 84.1  | 2636.327728 | 0.038774  | <a href="#">SITCIHGVWTQLPQCVAIDK</a>     |
| 43.5  | 2636.327728 | 0.038774  | <a href="#">SITCIHGVWTQLPQCVAIDK</a>     |
| 1.1   | 2636.366592 | -0.000090 | <a href="#">ASKTTDLRIPASVCTMFNVLVDAK</a> |

Peptide View

MS/MS Fragmentation of **VSVLCQENYLIQEGEEITCK**  
Found in **CFAH\_HUMAN**, Complement factor H OS=Homo sapiens GN=CFH PE=1 SV=4

Match to Query 56621: 2722.328776 from(681.589470,4+) rtinseconds(2757) index(24785)  
Title: Locus:1.1.1.3341.12 File:"2013-07-02 CLN FXIII 180 min 2nd F 2.wiff"  
Data file C:\Program Files (x86)\Matrix Science\Mascot Daemon\mgf\8 FXIII 180 min 2nd\mascot\_daemon\_merge.mgf

Click mouse within plot area to zoom in by factor of two about that point  
Or, 

Plot from

100

 to 

1600

 Da 

Full range

  
Label all possible matches ☐ Label matches used for scoring ☒

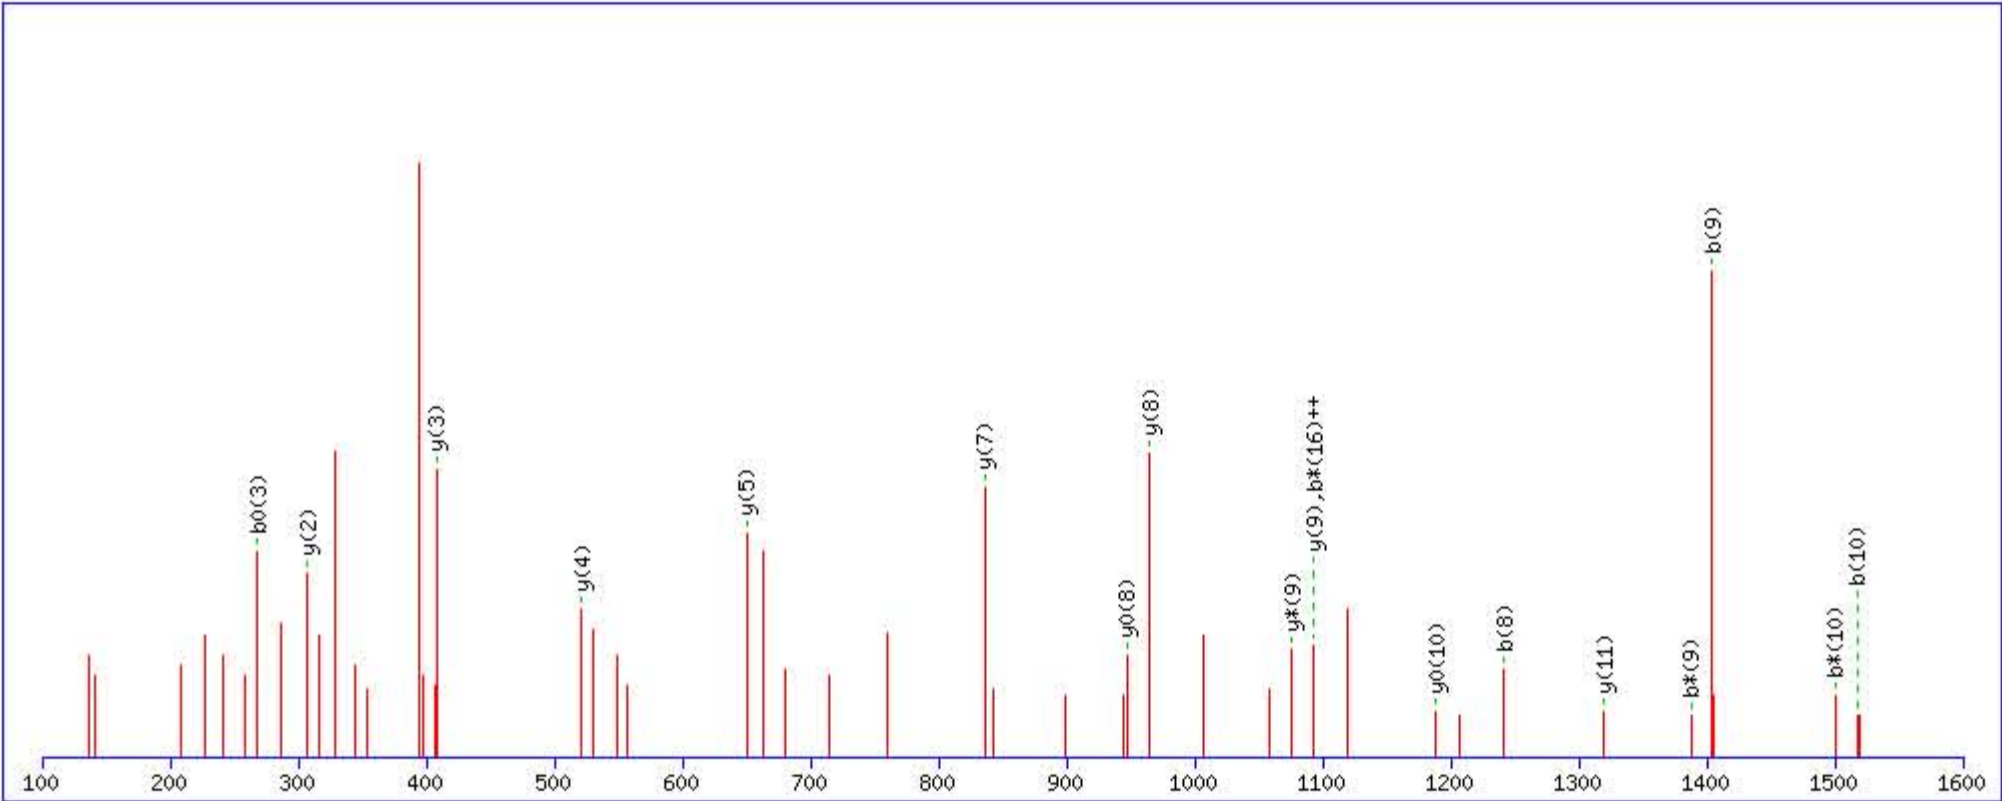

Monoisotopic mass of neutral peptide Mr(calc): 2722.301590  
Fixed modifications: Carbamidomethyl (C) (apply to specified residues or termini only)  
Variable modifications:  
Q6 : Biotin:Thermo-21345 (Q)  
Ions Score: 32 Expect: 0.0021  
Matches : 18/212 fragment ions using 36 most intense peaks [\(help\)](#)

| #  | b           | b <sup>++</sup> | b <sup>*</sup> | b <sup>*++</sup> | b <sup>0</sup> | b <sup>0++</sup> | Seq. | y           | y <sup>++</sup> | y <sup>*</sup> | y <sup>*++</sup> | y <sup>0</sup> | y <sup>0++</sup> | #  |
|----|-------------|-----------------|----------------|------------------|----------------|------------------|------|-------------|-----------------|----------------|------------------|----------------|------------------|----|
| 1  | 100.075690  | 50.541483       |                |                  |                |                  | V    |             |                 |                |                  |                |                  | 20 |
| 2  | 187.107718  | 94.057497       |                |                  | 169.097153     | 85.052214        | S    | 2624.240475 | 1312.623875     | 2607.213926    | 1304.110601      | 2606.229910    | 1303.618593      | 19 |
| 3  | 286.176132  | 143.591704      |                |                  | 268.165567     | 134.586422       | V    | 2537.208447 | 1269.107861     | 2520.181898    | 1260.594587      | 2519.197882    | 1260.102579      | 18 |
| 4  | 399.260196  | 200.133736      |                |                  | 381.249631     | 191.128454       | L    | 2438.140033 | 1219.573654     | 2421.113484    | 1211.060380      | 2420.129468    | 1210.568372      | 17 |
| 5  | 559.290845  | 280.149061      |                |                  | 541.280280     | 271.143778       | C    | 2325.055969 | 1163.031622     | 2308.029420    | 1154.518348      | 2307.045404    | 1154.026340      | 16 |
| 6  | 998.516171  | 499.761724      | 981.489622     | 491.248449       | 980.505606     | 490.756441       | Q    | 2165.025320 | 1083.016298     | 2147.998771    | 1074.503023      | 2147.014755    | 1074.011015      | 15 |
| 7  | 1127.558764 | 564.283020      | 1110.532215    | 555.769746       | 1109.548199    | 555.277738       | E    | 1725.799994 | 863.403635      | 1708.773445    | 854.890361       | 1707.789429    | 854.398353       | 14 |
| 8  | 1241.601691 | 621.304484      | 1224.575142    | 612.791209       | 1223.591126    | 612.299201       | N    | 1596.757401 | 798.882339      | 1579.730852    | 790.369064       | 1578.746836    | 789.877056       | 13 |
| 9  | 1404.665020 | 702.836148      | 1387.638471    | 694.322874       | 1386.654455    | 693.830866       | Y    | 1482.714474 | 741.860875      | 1465.687925    | 733.347601       | 1464.703909    | 732.855593       | 12 |
| 10 | 1517.749084 | 759.378180      | 1500.722535    | 750.864906       | 1499.738519    | 750.372898       | L    | 1319.651145 | 660.329211      | 1302.624596    | 651.815936       | 1301.640580    | 651.323928       | 11 |
| 11 | 1630.833148 | 815.920212      | 1613.806599    | 807.406938       | 1612.822583    | 806.914929       | I    | 1206.567081 | 603.787179      | 1189.540532    | 595.273904       | 1188.556516    | 594.781896       | 10 |
| 12 | 1758.891726 | 879.949501      | 1741.865177    | 871.436227       | 1740.881161    | 870.944219       | Q    | 1093.483017 | 547.245147      | 1076.456468    | 538.731872       | 1075.472452    | 538.239864       | 9  |
| 13 | 1887.934319 | 944.470798      | 1870.907770    | 935.957523       | 1869.923754    | 935.465515       | E    | 965.424439  | 483.215858      | 948.397890     | 474.702583       | 947.413874     | 474.210575       | 8  |
| 14 | 1944.955783 | 972.981530      | 1927.929234    | 964.468255       | 1926.945218    | 963.976247       | G    | 836.381846  | 418.694561      | 819.355297     | 410.181287       | 818.371281     | 409.689279       | 7  |
| 15 | 2073.998376 | 1037.502826     | 2056.971827    | 1028.989551      | 2055.987811    | 1028.497543      | E    | 779.360382  | 390.183829      | 762.333833     | 381.670555       | 761.349817     | 381.178547       | 6  |
| 16 | 2203.040969 | 1102.024123     | 2186.014420    | 1093.510848      | 2185.030404    | 1093.018840      | E    | 650.317789  | 325.662533      | 633.291240     | 317.149258       | 632.307224     | 316.657250       | 5  |
| 17 | 2316.125033 | 1158.566155     | 2299.098484    | 1150.052880      | 2298.114468    | 1149.560872      | I    | 521.275196  | 261.141236      | 504.248647     | 252.627961       | 503.264631     | 252.135953       | 4  |
| 18 | 2417.172712 | 1209.089994     | 2400.146163    | 1200.576719      | 2399.162147    | 1200.084711      | T    | 408.191132  | 204.599204      | 391.164583     | 196.085929       | 390.180567     | 195.593921       | 3  |
| 19 | 2577.203361 | 1289.105318     | 2560.176812    | 1280.592044      | 2559.192796    | 1280.100036      | C    | 307.143453  | 154.075364      | 290.116904     | 145.562090       |                |                  | 2  |
| 20 |             |                 |                |                  |                |                  | K    | 147.112804  | 74.060040       | 130.086255     | 65.546765        |                |                  | 1  |

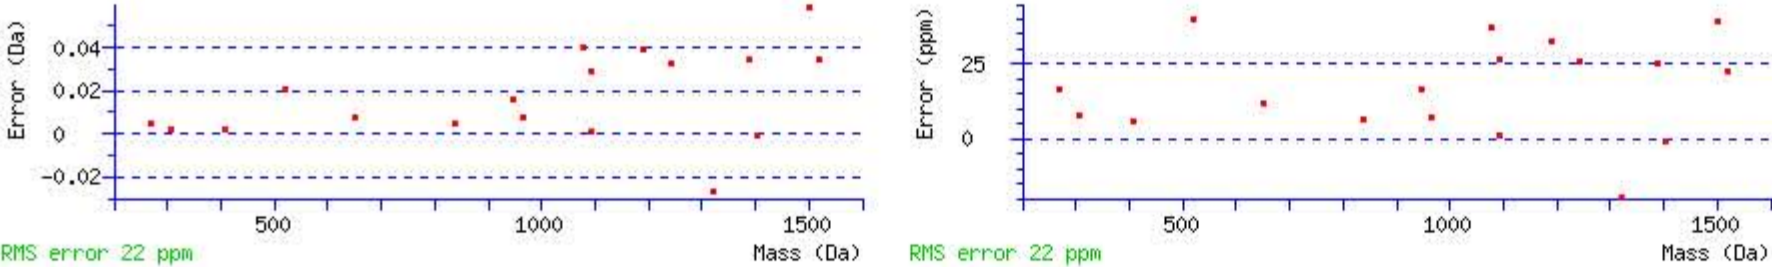

NCBI BLAST search of [VSVLCQENYLIQEGEEITCK](#)  
(Parameters: blastp, nr protein database, expect=20000, no filter, PAM30)  
Other BLAST [web gateways](#)

All matches to this query

| Score | Mr(calc):   | Delta    | Sequence                                  |
|-------|-------------|----------|-------------------------------------------|
| 31.7  | 2722.301590 | 0.027186 | <a href="#">VSVLCQENYLIQEGEEITCK</a>      |
| 30.1  | 2722.301590 | 0.027186 | <a href="#">VSVLCQENYLIQEGEEITCK</a>      |
| 3.0   | 2722.309433 | 0.019343 | <a href="#">GMNWLANLYEQGINGILADEMGLGK</a> |

MATRIX

SCIENCE

Mascot Search Results

Peptide View

MS/MS Fragmentation of **VFCQPWQR**  
Found in **CFAL\_HUMAN**, Complement factor I OS=Homo sapiens GN=CFI PE=1 SV=2

Match to Query 29075: 1430.703788 from(716.359170,2+) rtinseconds(2034) index(66613)  
Title: Locus:1.1.1.1983.9 File:"2013-07-02 CLN FXIII 180 min 2nd FT.wiff"  
Data file C:\Program Files (x86)\Matrix Science\Mascot Daemon\mgf\8 FXIII 180 min 2nd\mascot\_daemon\_merge.mgf

Click mouse within plot area to zoom in by factor of two about that point  
Or, 

Plot from

0

 to 

2800

 Da 

Full range

  
Label all possible matches ☐ Label matches used for scoring ☒

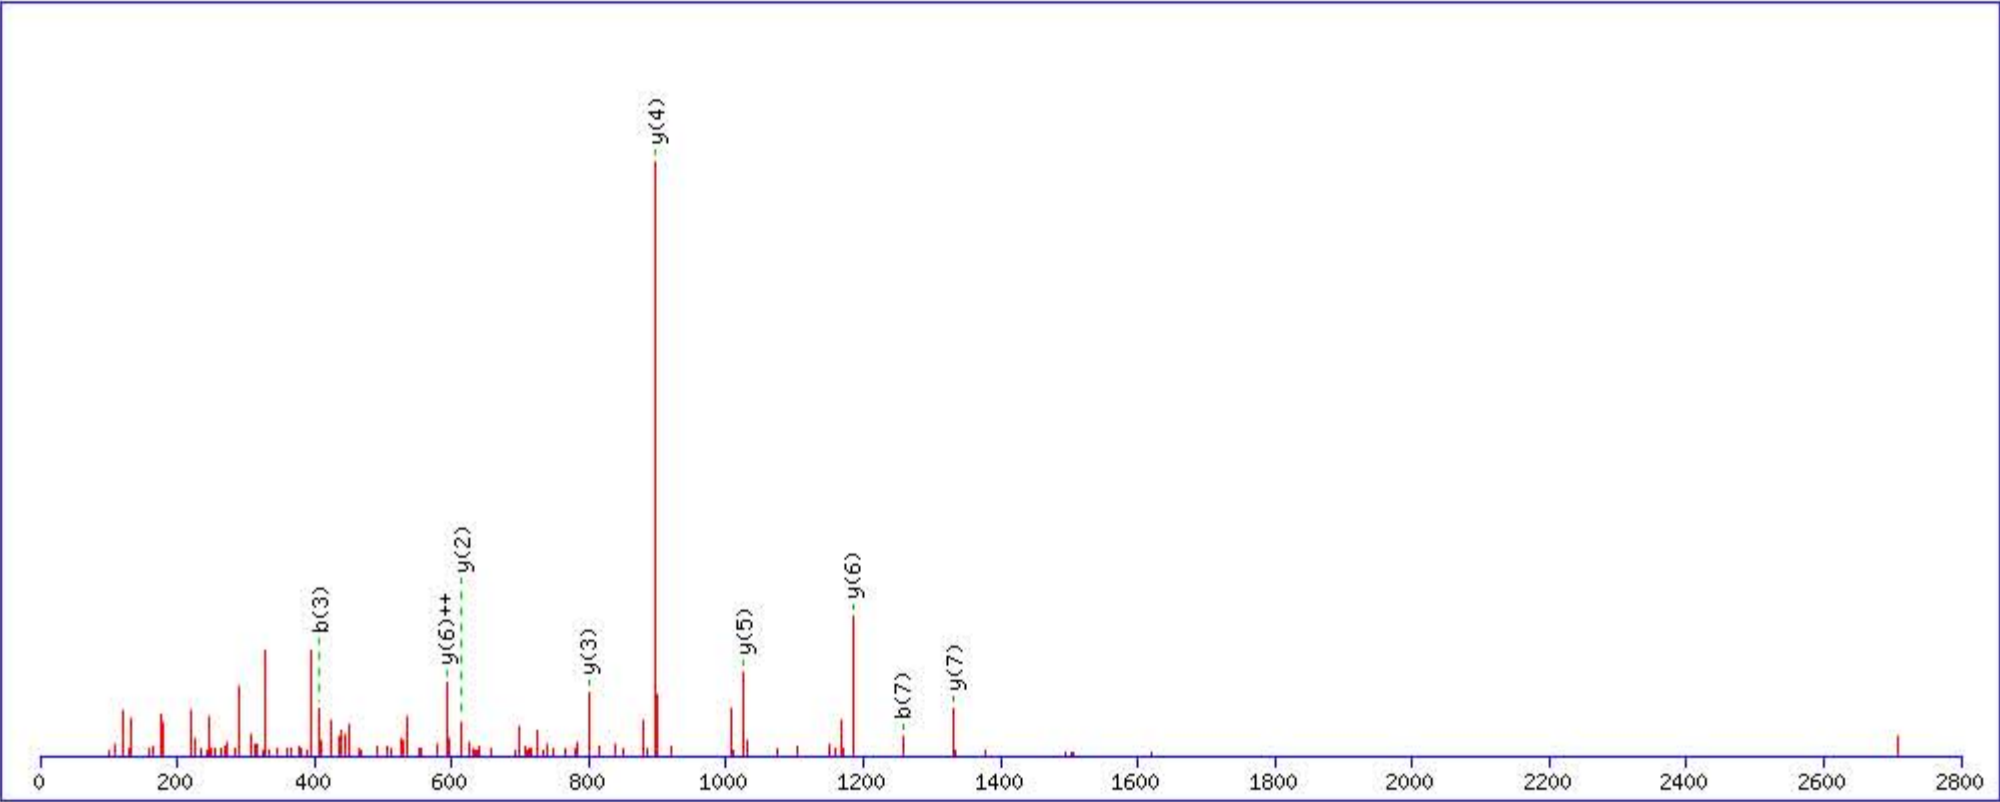

Monoisotopic mass of neutral peptide Mr(calc): 1430.695145  
Fixed modifications: Carbamidomethyl (C) (apply to specified residues or termini only)  
Variable modifications:  
Q7 : Biotin:Thermo-21345 (Q)  
Ions Score: 43 Expect: 0.00032  
Matches : 9/50 fragment ions using 13 most intense peaks [\(help\)](#)

| # | b           | b <sup>++</sup> | b <sup>+</sup> | b <sup>+++</sup> | Seq. | y           | y <sup>++</sup> | y <sup>+</sup> | y <sup>+++</sup> | # |
|---|-------------|-----------------|----------------|------------------|------|-------------|-----------------|----------------|------------------|---|
| 1 | 100.075690  | 50.541483       |                |                  | V    |             |                 |                |                  | 8 |
| 2 | 247.144104  | 124.075690      |                |                  | F    | 1332.633996 | 666.820636      | 1315.607447    | 658.307362       | 7 |
| 3 | 407.174753  | 204.091014      |                |                  | C    | 1185.565582 | 593.286429      | 1168.539033    | 584.773155       | 6 |
| 4 | 535.233331  | 268.120304      | 518.206782     | 259.607029       | Q    | 1025.534933 | 513.271105      | 1008.508384    | 504.757830       | 5 |
| 5 | 632.286095  | 316.646686      | 615.259546     | 308.133411       | P    | 897.476355  | 449.241816      | 880.449806     | 440.728541       | 4 |
| 6 | 818.365408  | 409.686342      | 801.338859     | 401.173068       | W    | 800.423591  | 400.715434      | 783.397042     | 392.202159       | 3 |
| 7 | 1257.590734 | 629.299005      | 1240.564185    | 620.785731       | Q    | 614.344278  | 307.675777      | 597.317729     | 299.162503       | 2 |
| 8 |             |                 |                |                  | R    | 175.118952  | 88.063114       | 158.092403     | 79.549839        | 1 |

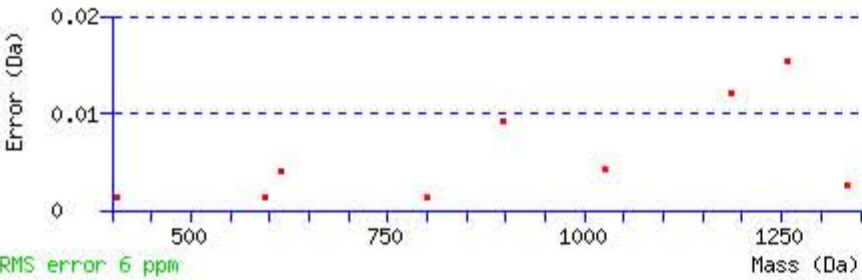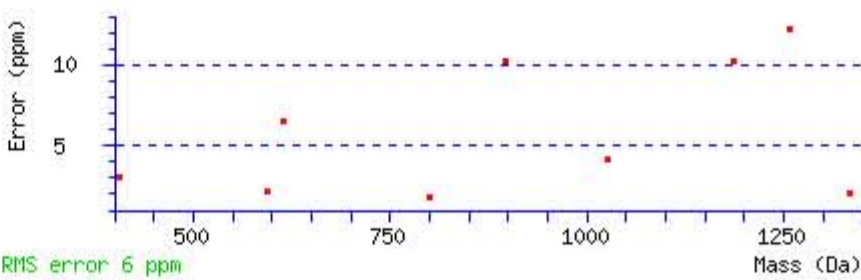

NCBI BLAST search of [VFCQPWQR](#)  
(Parameters: blastp, nr protein database, expect=20000, no filter, PAM30)  
Other BLAST [web gateways](#)

All matches to this query

| Score | Mr(calc):   | Delta     | Sequence                      |
|-------|-------------|-----------|-------------------------------|
| 43.2  | 1430.695145 | 0.008643  | <a href="#">VFCQPWQR</a>      |
| 7.3   | 1430.695145 | 0.008643  | <a href="#">VFCQPWQR</a>      |
| 5.5   | 1430.700989 | 0.002799  | <a href="#">NMPQADAMVLVAR</a> |
| 3.4   | 1430.693619 | 0.010169  | <a href="#">QLQTLSPGGGGNR</a> |
| 0.1   | 1430.711319 | -0.007531 | <a href="#">RAKAEDENETLR</a>  |

MATRIX

SCIENCE

Mascot Search Results

Peptide View

MS/MS Fragmentation of **VTYTSQEDLVEK**  
Found in **CFAI\_HUMAN**, Complement factor I OS=Homo sapiens GN=CFI PE=1 SV=2

Match to Query 38440: 1721.870868 from(861.942710,2+) rtinseconds(1879) index(65521)  
Title: Locus:1.1.1.1929.26 File:"2013-07-02 CLN FXIII 180 min 2nd FT.wiff"  
Data file C:\Program Files (x86)\Matrix Science\Mascot Daemon\mgf\8 FXIII 180 min 2nd\mascot\_daemon\_merge.mgf

Click mouse within plot area to zoom in by factor of two about that point

Or, 

Plot from

100

 to 

1700

 Da 

Full range

Label all possible matches ☐ Label matches used for scoring ☒

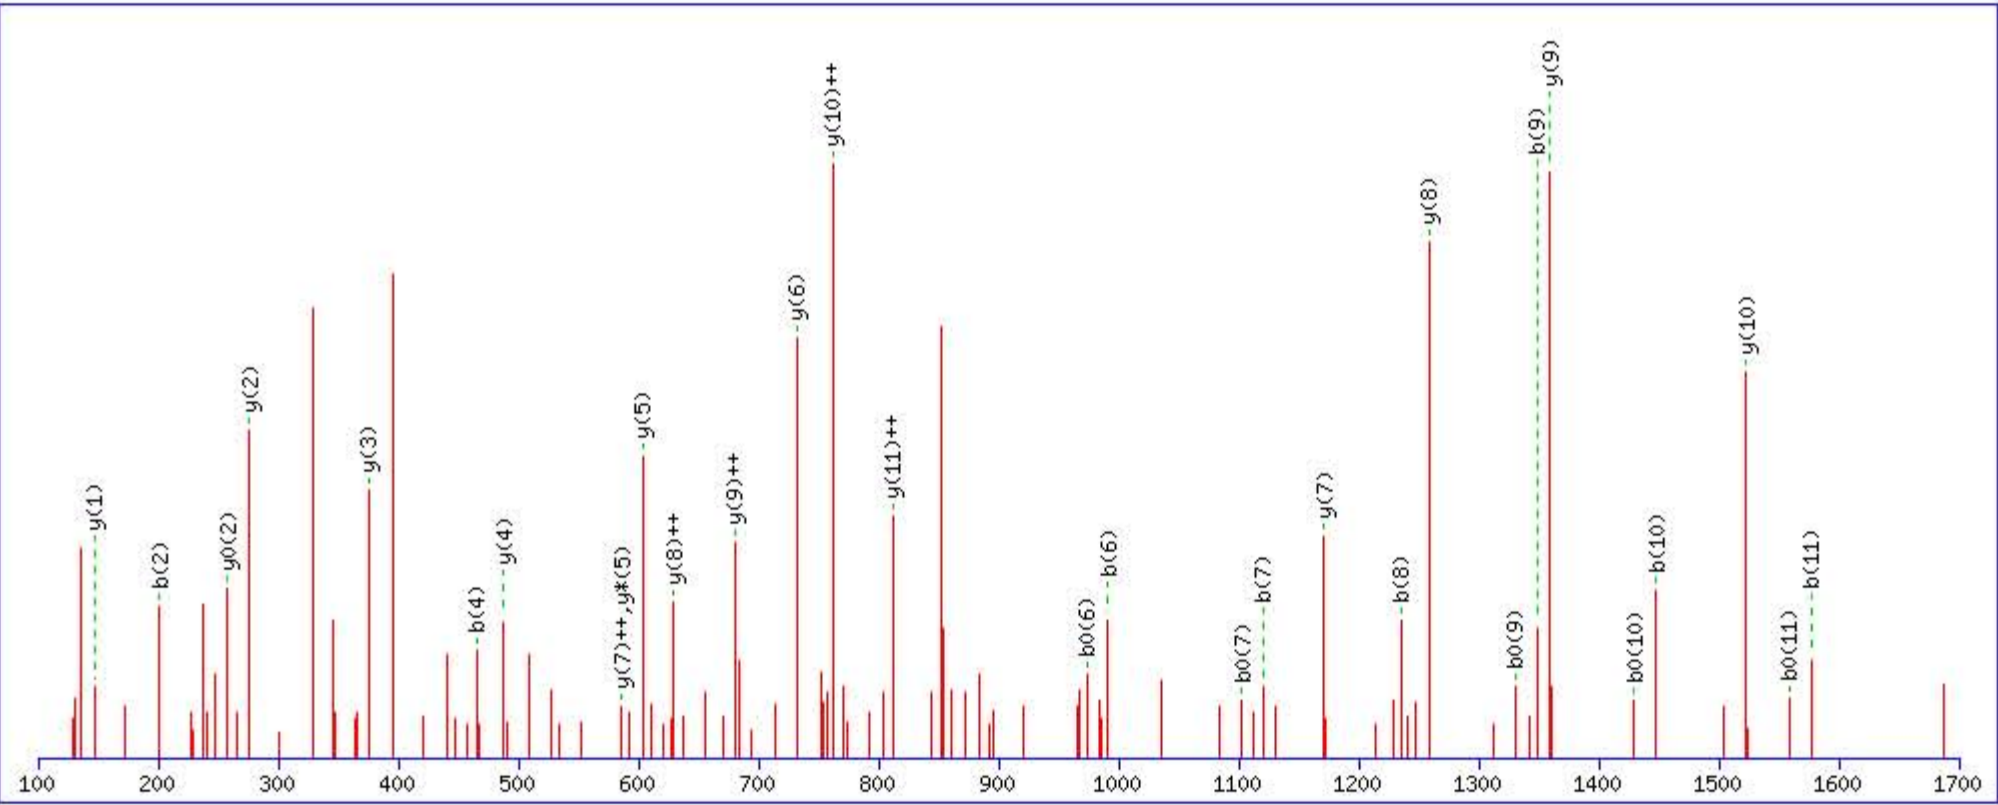

Monoisotopic mass of neutral peptide Mr(calc): 1721.854584  
Fixed modifications: Carbamidomethyl (C) (apply to specified residues or termini only)  
Variable modifications:  
Q6 : Biotin:Thermo-21345 (Q)  
Ions Score: 73 Expect: 1.8e-006  
Matches : 30/118 fragment ions using 45 most intense peaks [\(help\)](#)

| #  | b           | b <sup>++</sup> | b <sup>*</sup> | b <sup>*++</sup> | b <sup>0</sup> | b <sup>0++</sup> | Seq. | y           | y <sup>++</sup> | y <sup>*</sup> | y <sup>*++</sup> | y <sup>0</sup> | y <sup>0++</sup> | #  |
|----|-------------|-----------------|----------------|------------------|----------------|------------------|------|-------------|-----------------|----------------|------------------|----------------|------------------|----|
| 1  | 100.075690  | 50.541483       |                |                  |                |                  | V    |             |                 |                |                  |                |                  | 12 |
| 2  | 201.123369  | 101.065322      |                |                  | 183.112804     | 92.060040        | T    | 1623.793452 | 812.400364      | 1606.766903    | 803.887090       | 1605.782887    | 803.395081       | 11 |
| 3  | 364.186698  | 182.596987      |                |                  | 346.176133     | 173.591705       | Y    | 1522.745773 | 761.876524      | 1505.719224    | 753.363250       | 1504.735208    | 752.871242       | 10 |
| 4  | 465.234377  | 233.120827      |                |                  | 447.223812     | 224.115544       | T    | 1359.682444 | 680.344860      | 1342.655895    | 671.831585       | 1341.671879    | 671.339577       | 9  |
| 5  | 552.266405  | 276.636841      |                |                  | 534.255840     | 267.631558       | S    | 1258.634765 | 629.821021      | 1241.608216    | 621.307746       | 1240.624200    | 620.815738       | 8  |
| 6  | 991.491731  | 496.249504      | 974.465182     | 487.736229       | 973.481166     | 487.244221       | Q    | 1171.602737 | 586.305006      | 1154.576188    | 577.791732       | 1153.592172    | 577.299724       | 7  |
| 7  | 1120.534324 | 560.770800      | 1103.507775    | 552.257526       | 1102.523759    | 551.765517       | E    | 732.377411  | 366.692343      | 715.350862     | 358.179069       | 714.366846     | 357.687061       | 6  |
| 8  | 1235.561267 | 618.284272      | 1218.534718    | 609.770997       | 1217.550702    | 609.278989       | D    | 603.334818  | 302.171047      | 586.308269     | 293.657773       | 585.324253     | 293.165765       | 5  |
| 9  | 1348.645331 | 674.826303      | 1331.618782    | 666.313029       | 1330.634766    | 665.821021       | L    | 488.307875  | 244.657575      | 471.281326     | 236.144301       | 470.297310     | 235.652293       | 4  |
| 10 | 1447.713745 | 724.360511      | 1430.687196    | 715.847236       | 1429.703180    | 715.355228       | V    | 375.223811  | 188.115543      | 358.197262     | 179.602269       | 357.213246     | 179.110261       | 3  |
| 11 | 1576.756338 | 788.881807      | 1559.729789    | 780.368533       | 1558.745773    | 779.876524       | E    | 276.155397  | 138.581336      | 259.128848     | 130.068062       | 258.144832     | 129.576054       | 2  |
| 12 |             |                 |                |                  |                |                  | K    | 147.112804  | 74.060040       | 130.086255     | 65.546765        |                |                  | 1  |

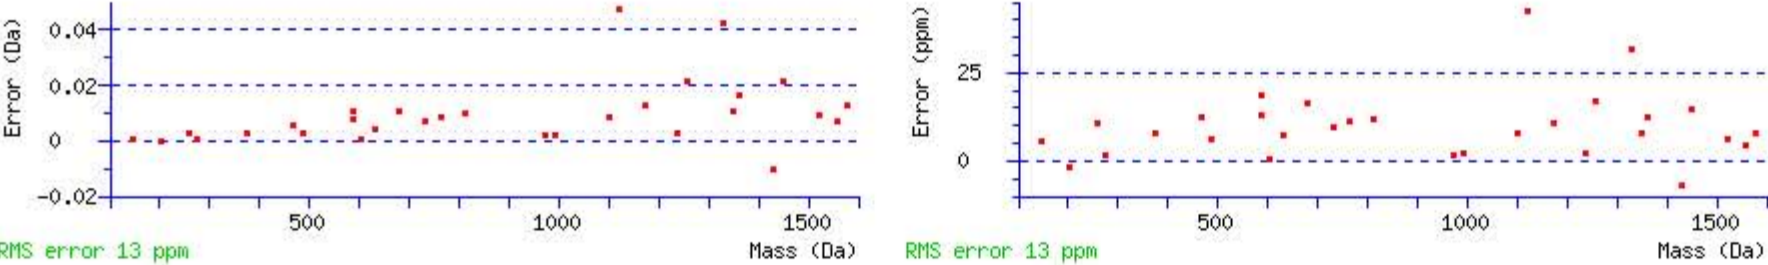

NCBI BLAST search of [VTYTSQEDLVEK](#)  
(Parameters: blastp, nr protein database, expect=20000, no filter, PAM30)  
Other BLAST [web gateways](#)

All matches to this query

| Score | Mr(calc):   | Delta     | Sequence                          |
|-------|-------------|-----------|-----------------------------------|
| 72.7  | 1721.854584 | 0.016284  | <a href="#">VTYTSQEDLVEK</a>      |
| 10.7  | 1721.883560 | -0.012692 | <a href="#">SLPPADISDIIHSTEK</a>  |
| 7.5   | 1721.858414 | 0.012454  | <a href="#">DRVYQVTEQQISEK</a>    |
| 3.2   | 1721.858414 | 0.012454  | <a href="#">ESEKPVDSLHPGAGTAK</a> |
| 3.1   | 1721.847122 | 0.023746  | <a href="#">EAYDQKIAEEEAKAK</a>   |
| 2.7   | 1721.850510 | 0.020358  | <a href="#">LLEAMGTSKKNEEEK</a>   |
| 2.5   | 1721.888275 | -0.017407 | <a href="#">DVMRETRNLASVGK</a>    |
| 2.0   | 1721.869186 | 0.001682  | <a href="#">CDVTLTLKELQQMK</a>    |
| 1.7   | 1721.859283 | 0.011585  | <a href="#">SLRTMEQQQFQK</a>      |

MATRIX

SCIENCE

Mascot Search Results

Peptide View

MS/MS Fragmentation of **AQLGDLPWQVAIK**  
Found in **CFAL\_HUMAN**, Complement factor I OS=Homo sapiens GN=CFI PE=1 SV=2

Match to Query 39079: 1748.990488 from(875.502520,2+) rtinseconds(2656) index(70203)  
Title: Locus:1.1.1.2200.9 File:"2013-07-02 CLN FXIII 180 min 2nd FT.wiff"  
Data file C:\Program Files (x86)\Matrix Science\Mascot Daemon\mgf\8 FXIII 180 min 2nd\mascot\_daemon\_merge.mgf

Click mouse within plot area to zoom in by factor of two about that point  
Or, 

Plot from

100

 to 

1800

 Da 

Full range

  
Label all possible matches ☐ Label matches used for scoring ☒

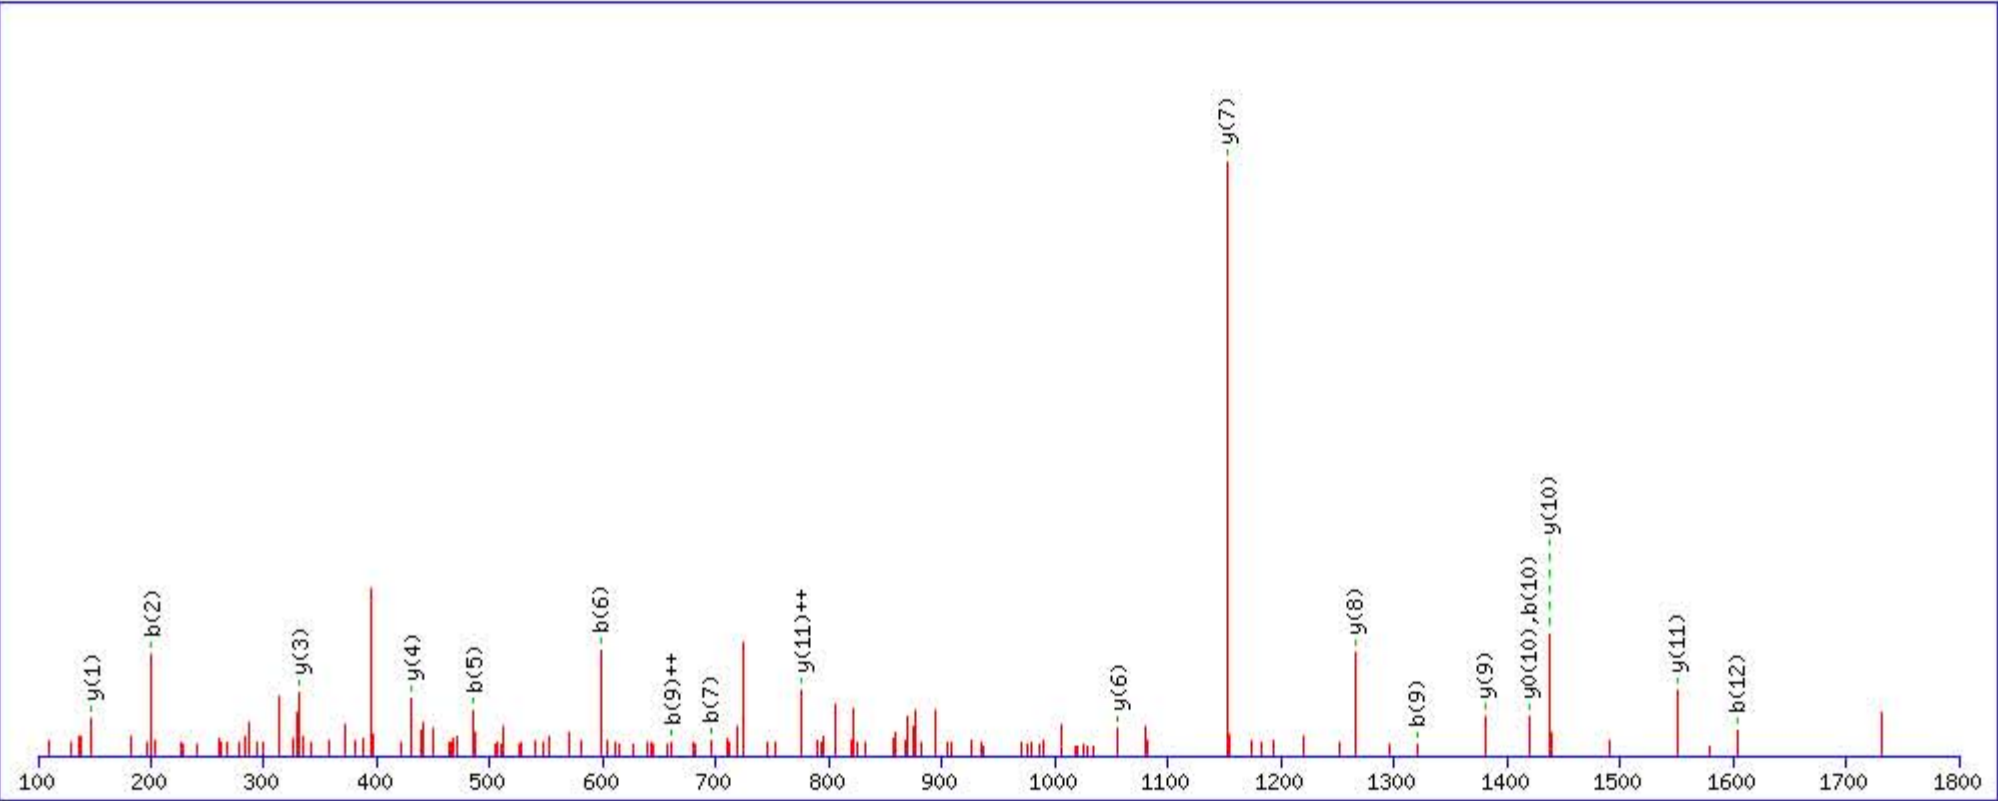

Monoisotopic mass of neutral peptide Mr(calc): 1748.964737  
Fixed modifications: Carbamidomethyl (C) (apply to specified residues or termini only)  
Variable modifications:  
Q9 : Biotin:Thermo-21345 (Q)  
Ions Score: 55 Expect: 1.4e-005  
Matches : 19/118 fragment ions using 31 most intense peaks [\(help\)](#)

| #  | b           | b <sup>++</sup> | b <sup>*</sup> | b <sup>*++</sup> | b <sup>0</sup> | b <sup>0++</sup> | Seq. | y           | y <sup>++</sup> | y <sup>*</sup> | y <sup>*++</sup> | y <sup>0</sup> | y <sup>0++</sup> | #  |
|----|-------------|-----------------|----------------|------------------|----------------|------------------|------|-------------|-----------------|----------------|------------------|----------------|------------------|----|
| 1  | 72.044390   | 36.525833       |                |                  |                |                  | A    |             |                 |                |                  |                |                  | 13 |
| 2  | 200.102968  | 100.555122      | 183.076419     | 92.041848        |                |                  | Q    | 1678.934912 | 839.971094      | 1661.908363    | 831.457820       | 1660.924347    | 830.965812       | 12 |
| 3  | 313.187032  | 157.097154      | 296.160483     | 148.583879       |                |                  | L    | 1550.876334 | 775.941805      | 1533.849785    | 767.428531       | 1532.865769    | 766.936523       | 11 |
| 4  | 370.208496  | 185.607886      | 353.181947     | 177.094611       |                |                  | G    | 1437.792270 | 719.399773      | 1420.765721    | 710.886499       | 1419.781705    | 710.394491       | 10 |
| 5  | 485.235439  | 243.121357      | 468.208890     | 234.608083       | 467.224874     | 234.116075       | D    | 1380.770806 | 690.889041      | 1363.744257    | 682.375767       | 1362.760241    | 681.883759       | 9  |
| 6  | 598.319503  | 299.663390      | 581.292954     | 291.150115       | 580.308938     | 290.658107       | L    | 1265.743863 | 633.375570      | 1248.717314    | 624.862295       |                |                  | 8  |
| 7  | 695.372267  | 348.189772      | 678.345718     | 339.676497       | 677.361702     | 339.184489       | P    | 1152.659799 | 576.833538      | 1135.633250    | 568.320263       |                |                  | 7  |
| 8  | 881.451580  | 441.229428      | 864.425031     | 432.716154       | 863.441015     | 432.224146       | W    | 1055.607035 | 528.307156      | 1038.580486    | 519.793881       |                |                  | 6  |
| 9  | 1320.676906 | 660.842091      | 1303.650357    | 652.328817       | 1302.666341    | 651.836809       | Q    | 869.527722  | 435.267499      | 852.501173     | 426.754225       |                |                  | 5  |
| 10 | 1419.745320 | 710.376298      | 1402.718771    | 701.863024       | 1401.734755    | 701.371016       | V    | 430.302396  | 215.654836      | 413.275847     | 207.141561       |                |                  | 4  |
| 11 | 1490.782434 | 745.894855      | 1473.755885    | 737.381581       | 1472.771869    | 736.889573       | A    | 331.233982  | 166.120629      | 314.207433     | 157.607354       |                |                  | 3  |
| 12 | 1603.866498 | 802.436887      | 1586.839949    | 793.923613       | 1585.855933    | 793.431605       | I    | 260.196868  | 130.602072      | 243.170319     | 122.088797       |                |                  | 2  |
| 13 |             |                 |                |                  |                |                  | K    | 147.112804  | 74.060040       | 130.086255     | 65.546765        |                |                  | 1  |

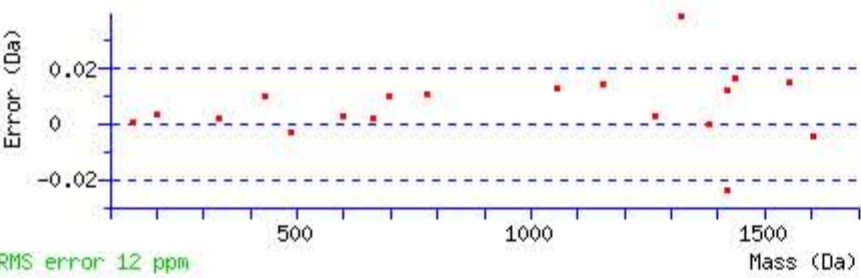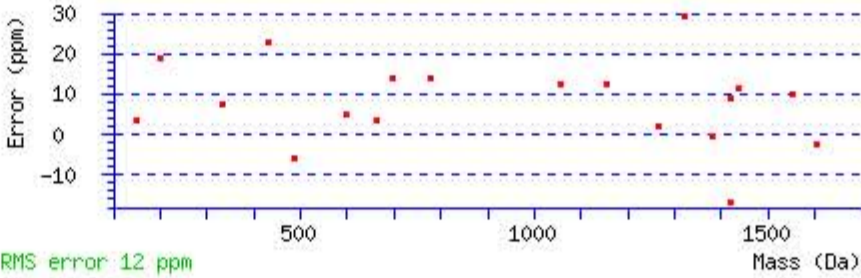

NCBI BLAST search of [AQLGDLPWQVAIK](#)  
(Parameters: blastp, nr protein database, expect=20000, no filter, PAM30)  
Other BLAST [web gateways](#)

All matches to this query

| Score | Mr(calc):   | Delta    | Sequence                            |
|-------|-------------|----------|-------------------------------------|
| 54.8  | 1748.964737 | 0.025751 | <a href="#">AQLGDLPWQVAIK</a>       |
| 5.6   | 1748.964737 | 0.025751 | <a href="#">AQLGDLPWQVAIK</a>       |
| 2.9   | 1748.978500 | 0.011988 | <a href="#">VSAPGVQGDVKGPPQVALK</a> |
| 1.1   | 1748.978439 | 0.012049 | <a href="#">YARKISGTTALQEALK</a>    |

MATRIX

SCIENCE

Mascot Search Results

Peptide View

MS/MS Fragmentation of **TMGYQDFADVVCYTQK**  
Found in **CFAI\_HUMAN**, Complement factor I OS=Homo sapiens GN=CFI PE=1 SV=2

Match to Query 49227: 2236.024542 from(746.348790,3+) rtinseconds(2514) index(69413)  
Title: Locus:1.1.1.2150.17 File:"2013-07-02 CLN FXIII 180 min 2nd FT.wiff"  
Data file C:\Program Files (x86)\Matrix Science\Mascot Daemon\mgf8 FXIII 180 min 2nd\mascot\_daemon\_merge.mgf

Click mouse within plot area to zoom in by factor of two about that point  
Or, 

Plot from

0

 to 

3600

 Da 

Full range

  
Label all possible matches ☐ Label matches used for scoring ☒

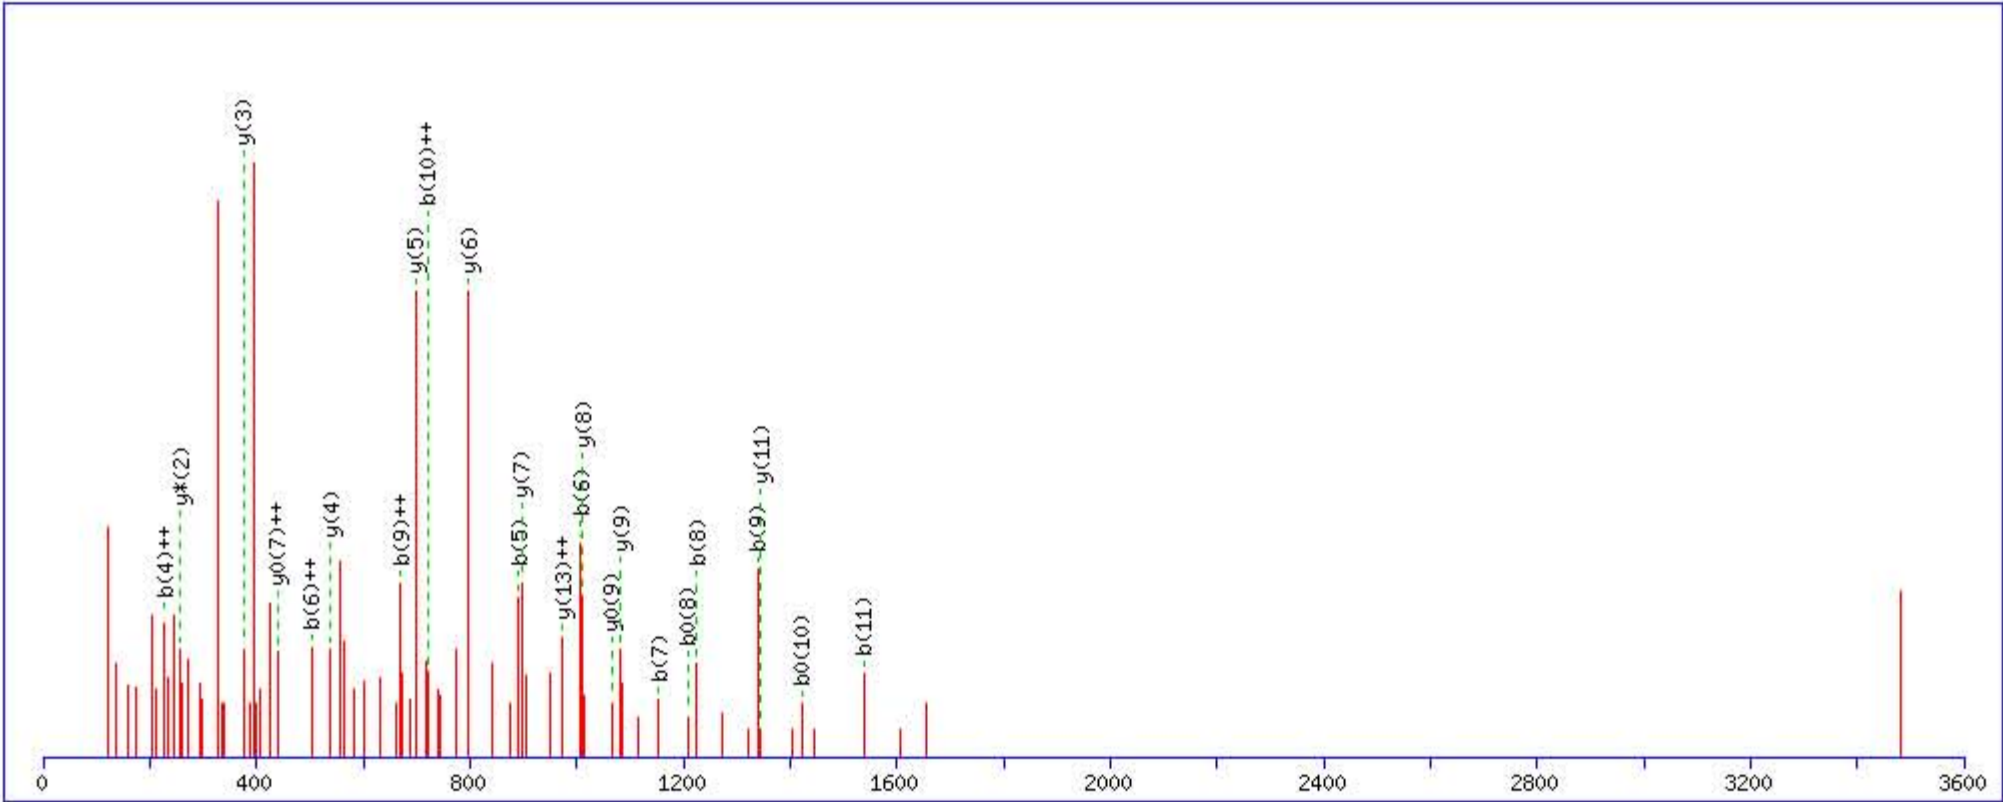

Monoisotopic mass of neutral peptide Mr(calc): 2236.000305  
Fixed modifications: Carbamidomethyl (C) (apply to specified residues or termini only)  
Variable modifications:  
Q5 : Biotin:Thermo-21345 (Q)  
Ions Score: 36 Expect: 0.0029  
Matches : 24/168 fragment ions using 42 most intense peaks [\(help\)](#)

| #  | b           | b <sup>++</sup> | b <sup>*</sup> | b <sup>+++</sup> | b <sup>0</sup> | b <sup>0++</sup> | Seq. | y           | y <sup>++</sup> | y <sup>*</sup> | y <sup>+++</sup> | y <sup>0</sup> | y <sup>0++</sup> | #  |
|----|-------------|-----------------|----------------|------------------|----------------|------------------|------|-------------|-----------------|----------------|------------------|----------------|------------------|----|
| 1  | 102.054955  | 51.531116       |                |                  | 84.044390      | 42.525833        | T    |             |                 |                |                  |                |                  | 16 |
| 2  | 233.095440  | 117.051358      |                |                  | 215.084875     | 108.046076       | M    | 2135.959885 | 1068.483580     | 2118.933336    | 1059.970306      | 2117.949320    | 1059.478298      | 15 |
| 3  | 290.116904  | 145.562090      |                |                  | 272.106339     | 136.556807       | G    | 2004.919400 | 1002.963338     | 1987.892851    | 994.450064       | 1986.908835    | 993.958056       | 14 |
| 4  | 453.180233  | 227.093754      |                |                  | 435.169668     | 218.088472       | Y    | 1947.897936 | 974.452606      | 1930.871387    | 965.939332       | 1929.887371    | 965.447324       | 13 |
| 5  | 892.405559  | 446.706418      | 875.379010     | 438.193143       | 874.394994     | 437.701135       | Q    | 1784.834607 | 892.920942      | 1767.808058    | 884.407667       | 1766.824042    | 883.915659       | 12 |
| 6  | 1007.432502 | 504.219889      | 990.405953     | 495.706615       | 989.421937     | 495.214607       | D    | 1345.609281 | 673.308279      | 1328.582732    | 664.795004       | 1327.598716    | 664.302996       | 11 |
| 7  | 1154.500916 | 577.754096      | 1137.474367    | 569.240822       | 1136.490351    | 568.748813       | F    | 1230.582338 | 615.794807      | 1213.555789    | 607.281533       | 1212.571773    | 606.789525       | 10 |
| 8  | 1225.538030 | 613.272653      | 1208.511481    | 604.759379       | 1207.527465    | 604.267370       | A    | 1083.513924 | 542.260600      | 1066.487375    | 533.747326       | 1065.503359    | 533.255318       | 9  |
| 9  | 1340.564973 | 670.786125      | 1323.538424    | 662.272850       | 1322.554408    | 661.780842       | D    | 1012.476810 | 506.742043      | 995.450261     | 498.228769       | 994.466245     | 497.736761       | 8  |
| 10 | 1439.633387 | 720.320332      | 1422.606838    | 711.807057       | 1421.622822    | 711.315049       | V    | 897.449867  | 449.228572      | 880.423318     | 440.715297       | 879.439302     | 440.223289       | 7  |
| 11 | 1538.701801 | 769.854539      | 1521.675252    | 761.341264       | 1520.691236    | 760.849256       | V    | 798.381453  | 399.694365      | 781.354904     | 391.181090       | 780.370888     | 390.689082       | 6  |
| 12 | 1698.732450 | 849.869863      | 1681.705901    | 841.356589       | 1680.721885    | 840.864581       | C    | 699.313039  | 350.160158      | 682.286490     | 341.646883       | 681.302474     | 341.154875       | 5  |
| 13 | 1861.795779 | 931.401528      | 1844.769230    | 922.888253       | 1843.785214    | 922.396245       | Y    | 539.282390  | 270.144833      | 522.255841     | 261.631559       | 521.271825     | 261.139551       | 4  |
| 14 | 1962.843458 | 981.925367      | 1945.816909    | 973.412093       | 1944.832893    | 972.920085       | T    | 376.219061  | 188.613168      | 359.192512     | 180.099894       | 358.208496     | 179.607886       | 3  |
| 15 | 2090.902036 | 1045.954656     | 2073.875487    | 1037.441381      | 2072.891471    | 1036.949373      | Q    | 275.171382  | 138.089329      | 258.144833     | 129.576054       |                |                  | 2  |
| 16 |             |                 |                |                  |                |                  | K    | 147.112804  | 74.060040       | 130.086255     | 65.546765        |                |                  | 1  |

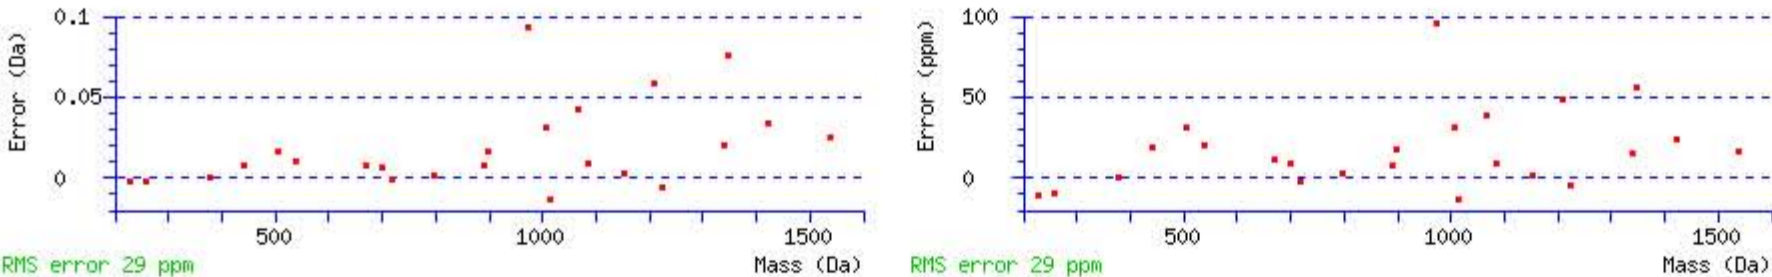

NCBI BLAST search of [TMGYQDFADVVCYTQK](#)  
(Parameters: blastp, nr protein database, expect=20000, no filter, PAM30)  
Other BLAST [web gateways](#)

All matches to this query

| Score | Mr(calc):   | Delta    | Sequence                         |
|-------|-------------|----------|----------------------------------|
| 36.1  | 2236.000305 | 0.024237 | <a href="#">TMGYQDFADVVCYTQK</a> |

MATRIX

SCIENCE

Mascot Search Results

Peptide View

MS/MS Fragmentation of **TMGYQDFADVVCYTQK**  
Found in **CFAI\_HUMAN**, Complement factor I OS=Homo sapiens GN=CFI PE=1 SV=2

Match to Query 49229: 2236.031442 from(746.351090,3+) rtinseconds(2574) index(69653)  
Title: Locus:1.1.1.2172.8 File:"2013-07-02 CLN FXIII 180 min 2nd FT.wiff"  
Data file C:\Program Files (x86)\Matrix Science\Mascot Daemon\mgf\8 FXIII 180 min 2nd\mascot\_daemon\_merge.mgf

Click mouse within plot area to zoom in by factor of two about that point

Or, 

Plot from

100

 to 

1700

 Da 

Full range

Label all possible matches ☐ Label matches used for scoring ☒

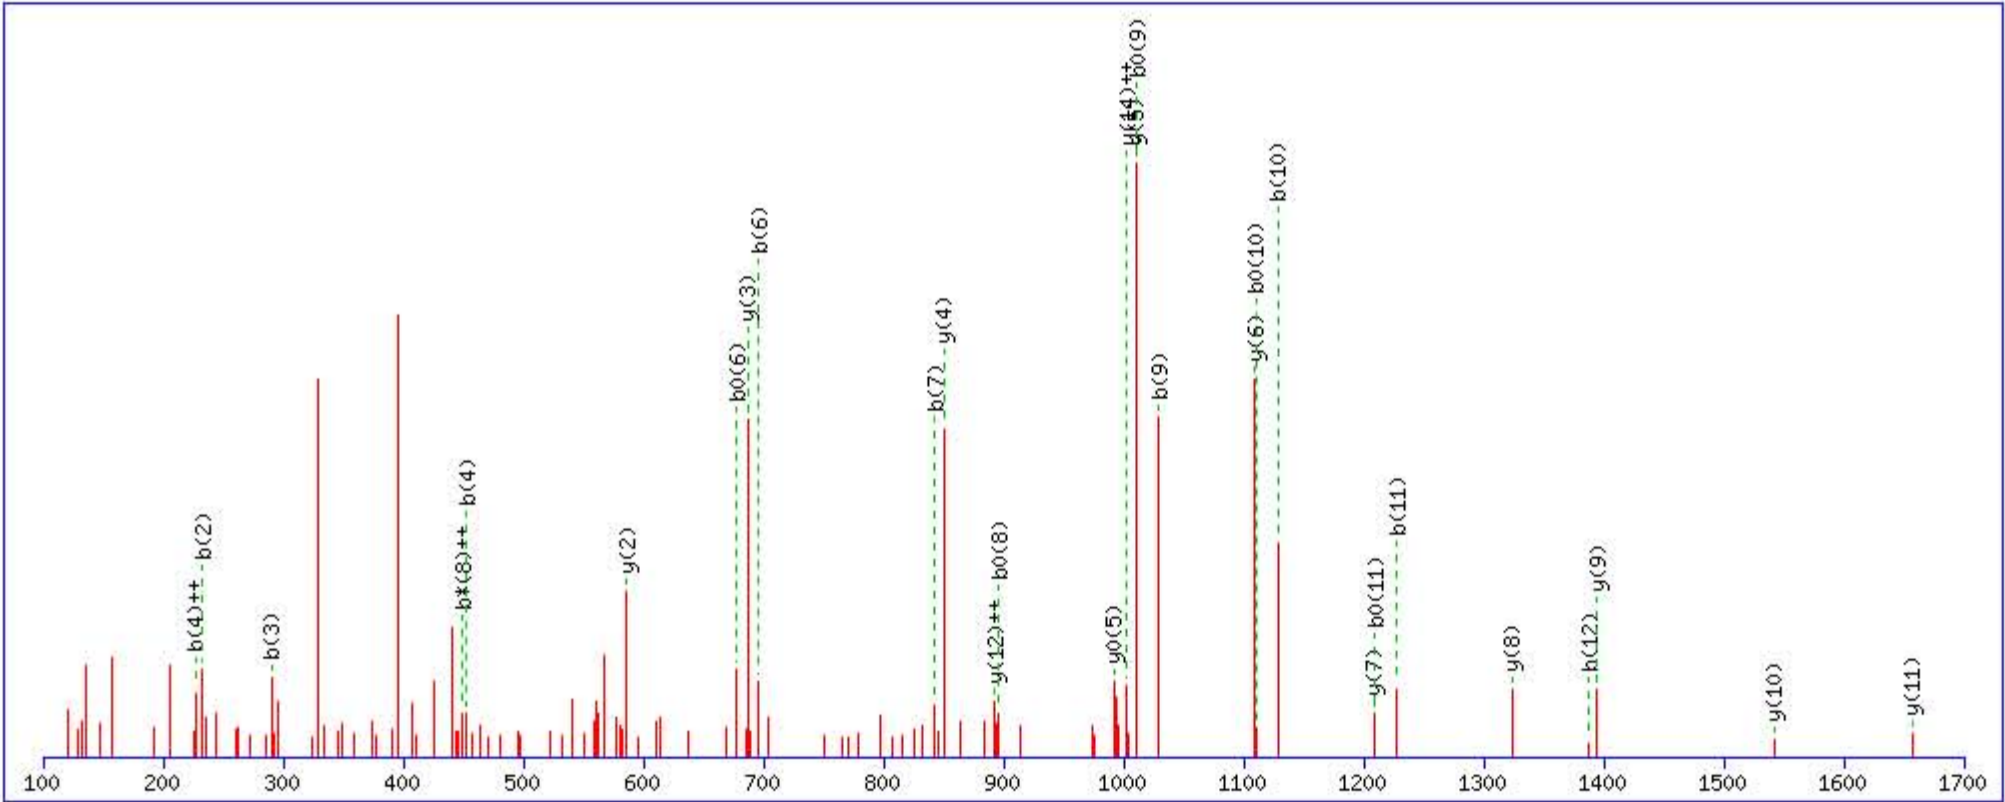

Monoisotopic mass of neutral peptide Mr(calc): 2236.000305  
Fixed modifications: Carbamidomethyl (C) (apply to specified residues or termini only)  
Variable modifications:  
Q15 : Biotin:Thermo-21345 (Q)  
Ions Score: 62 Expect: 7.2e-006  
Matches : 29/168 fragment ions using 49 most intense peaks [\(help\)](#)

| #  | b           | b <sup>++</sup> | b <sup>+</sup> | b <sup>+++</sup> | b <sup>0</sup> | b <sup>0++</sup> | Seq. | y           | y <sup>++</sup> | y <sup>+</sup> | y <sup>+++</sup> | y <sup>0</sup> | y <sup>0++</sup> | #  |
|----|-------------|-----------------|----------------|------------------|----------------|------------------|------|-------------|-----------------|----------------|------------------|----------------|------------------|----|
| 1  | 102.054955  | 51.531116       |                |                  | 84.044390      | 42.525833        | T    |             |                 |                |                  |                |                  | 16 |
| 2  | 233.095440  | 117.051358      |                |                  | 215.084875     | 108.046076       | M    | 2135.959885 | 1068.483580     | 2118.933336    | 1059.970306      | 2117.949320    | 1059.478298      | 15 |
| 3  | 290.116904  | 145.562090      |                |                  | 272.106339     | 136.556807       | G    | 2004.919400 | 1002.963338     | 1987.892851    | 994.450064       | 1986.908835    | 993.958056       | 14 |
| 4  | 453.180233  | 227.093754      |                |                  | 435.169668     | 218.088472       | Y    | 1947.897936 | 974.452606      | 1930.871387    | 965.939332       | 1929.887371    | 965.447324       | 13 |
| 5  | 581.238811  | 291.123044      | 564.212262     | 282.609769       | 563.228246     | 282.117761       | Q    | 1784.834607 | 892.920942      | 1767.808058    | 884.407667       | 1766.824042    | 883.915659       | 12 |
| 6  | 696.265754  | 348.636515      | 679.239205     | 340.123241       | 678.255189     | 339.631233       | D    | 1656.776029 | 828.891653      | 1639.749480    | 820.378378       | 1638.765464    | 819.886370       | 11 |
| 7  | 843.334168  | 422.170722      | 826.307619     | 413.657447       | 825.323603     | 413.165439       | F    | 1541.749086 | 771.378181      | 1524.722537    | 762.864907       | 1523.738521    | 762.372899       | 10 |
| 8  | 914.371282  | 457.689279      | 897.344733     | 449.176004       | 896.360717     | 448.683996       | A    | 1394.680672 | 697.843974      | 1377.654123    | 689.330700       | 1376.670107    | 688.838692       | 9  |
| 9  | 1029.398225 | 515.202750      | 1012.371676    | 506.689476       | 1011.387660    | 506.197468       | D    | 1323.643558 | 662.325417      | 1306.617009    | 653.812143       | 1305.632993    | 653.320135       | 8  |
| 10 | 1128.466639 | 564.736958      | 1111.440090    | 556.223683       | 1110.456074    | 555.731675       | V    | 1208.616615 | 604.811946      | 1191.590066    | 596.298671       | 1190.606050    | 595.806663       | 7  |
| 11 | 1227.535053 | 614.271165      | 1210.508504    | 605.757890       | 1209.524488    | 605.265882       | V    | 1109.548201 | 555.277739      | 1092.521652    | 546.764464       | 1091.537636    | 546.272456       | 6  |
| 12 | 1387.565702 | 694.286489      | 1370.539153    | 685.773215       | 1369.555137    | 685.281207       | C    | 1010.479787 | 505.743532      | 993.453238     | 497.230257       | 992.469222     | 496.738249       | 5  |
| 13 | 1550.629031 | 775.818154      | 1533.602482    | 767.304879       | 1532.618466    | 766.812871       | Y    | 850.449138  | 425.728207      | 833.422589     | 417.214933       | 832.438573     | 416.722925       | 4  |
| 14 | 1651.676710 | 826.341993      | 1634.650161    | 817.828719       | 1633.666145    | 817.336711       | T    | 687.385809  | 344.196543      | 670.359260     | 335.683268       | 669.375244     | 335.191260       | 3  |
| 15 | 2090.902036 | 1045.954656     | 2073.875487    | 1037.441381      | 2072.891471    | 1036.949373      | Q    | 586.338130  | 293.672703      | 569.311581     | 285.159429       |                |                  | 2  |
| 16 |             |                 |                |                  |                |                  | K    | 147.112804  | 74.060040       | 130.086255     | 65.546765        |                |                  | 1  |

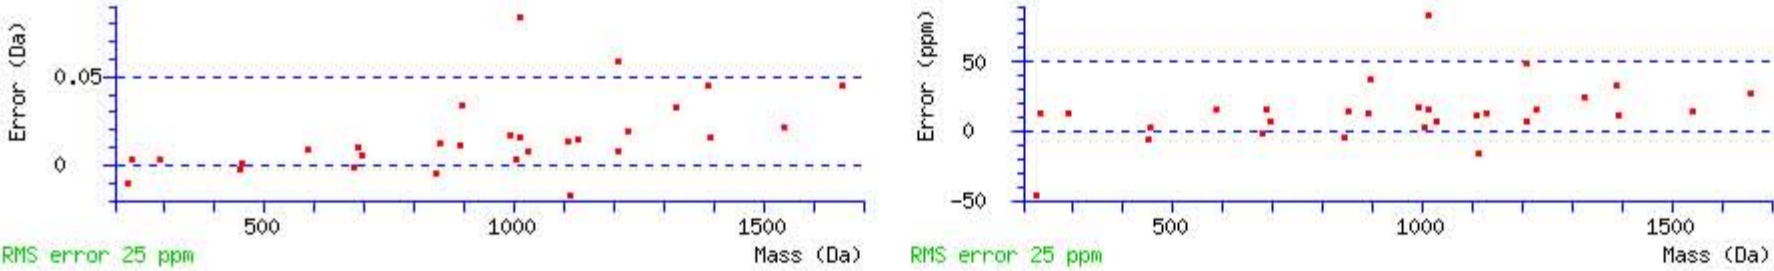

NCBI BLAST search of [TMGYQDFADVVCYTQK](#)  
(Parameters: blastp, nr protein database, expect=20000, no filter, PAM30)  
Other BLAST [web gateways](#)

All matches to this query

| Score | Mr(calc):   | Delta    | Sequence                         |
|-------|-------------|----------|----------------------------------|
| 62.5  | 2236.000305 | 0.031137 | <a href="#">TMGYQDFADVVCYTQK</a> |

MATRIX

SCIENCE

Mascot Search Results

Peptide View

MS/MS Fragmentation of **RGEQCVDIDECTIPPYCHQR**  
Found in **FBLN3\_HUMAN**, EGF-containing fibulin-like extracellular matrix protein 1 OS=Homo sapiens GN=EFEMP1 PE=1 SV=2

Match to Query 28447: 2843.269016 from(711.824530,4+) rtinseconds(1777) index(32785)  
Title: Locus:1.1.1.727.19 File:"2013-07-02 CLN FXIII 180 min 2nd F 3.wiff"  
Data file C:\Program Files (x86)\Matrix Science\Mascot Daemon\mgf\8 FXIII 180 min 2nd\mascot\_daemon\_merge.mgf

Click mouse within plot area to zoom in by factor of two about that point  
Or, 

Plot from

100

 to 

1700

 Da 

Full range

  
Label all possible matches ☐ Label matches used for scoring ☒

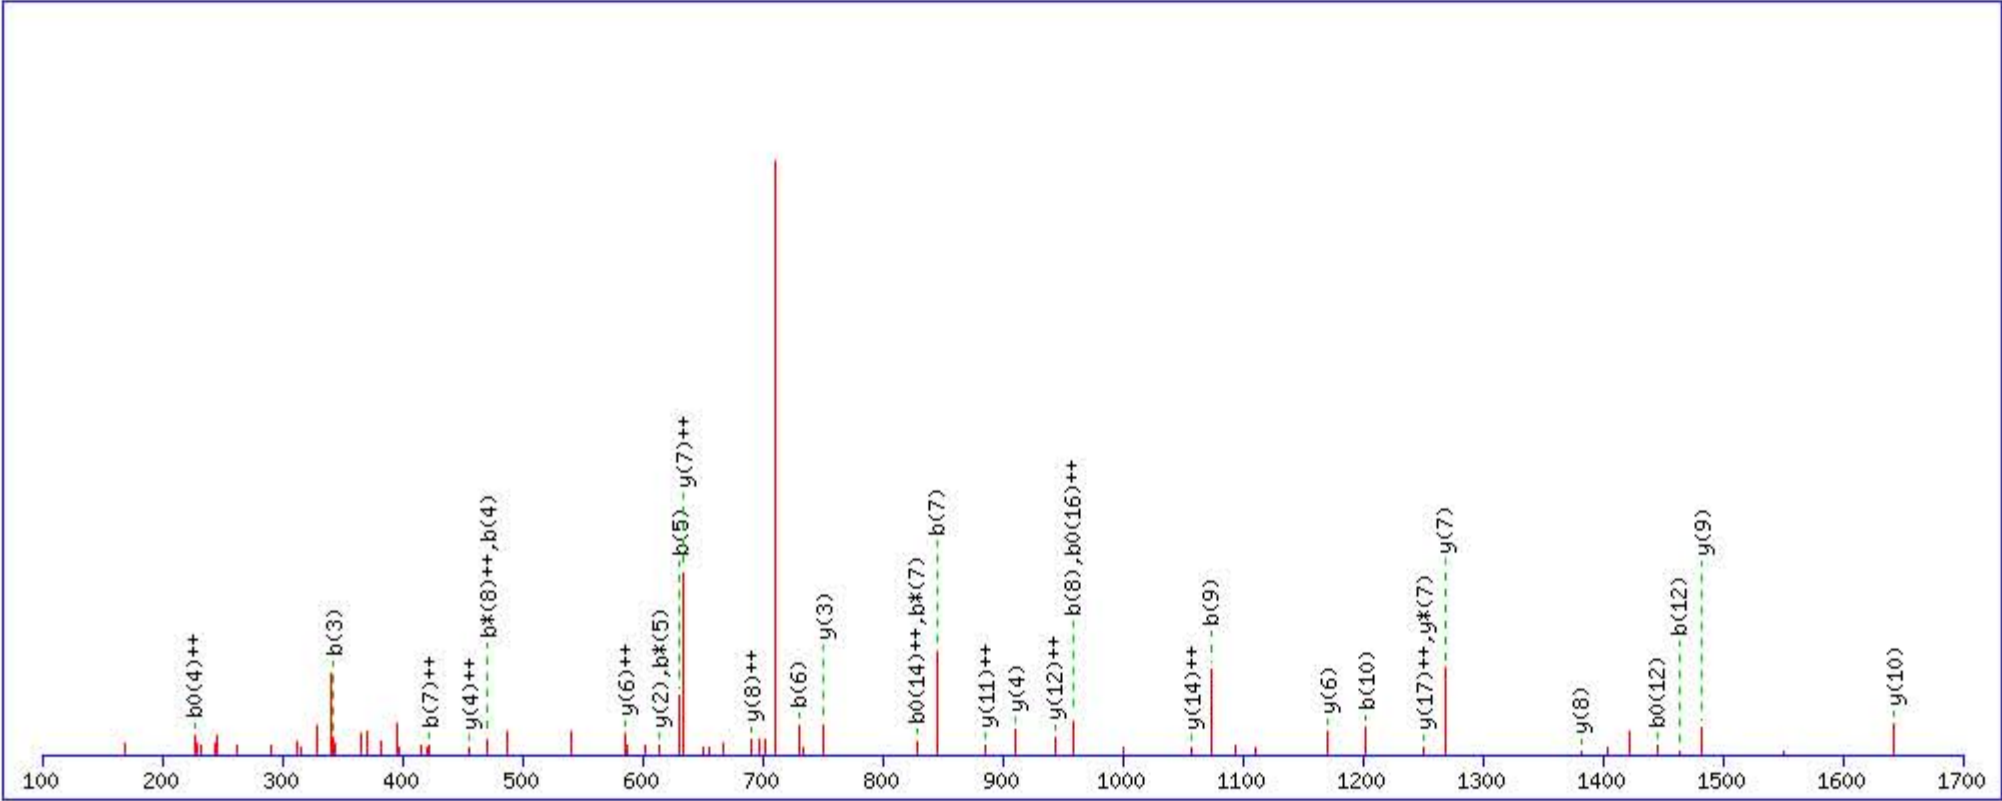

Monoisotopic mass of neutral peptide Mr(calc): 2843.261169  
Fixed modifications: Carbamidomethyl (C) (apply to specified residues or termini only)  
Variable modifications:  
Q19 : Biotin:Thermo-21345 (Q)  
Ions Score: 53 Expect: 7.4e-005  
Matches : 34/208 fragment ions using 57 most intense peaks [\(help\)](#)

| #  | b           | b <sup>++</sup> | b <sup>*</sup> | b <sup>*++</sup> | b <sup>0</sup> | b <sup>0++</sup> | Seq. | y           | y <sup>++</sup> | y <sup>*</sup> | y <sup>*++</sup> | y <sup>0</sup> | y <sup>0++</sup> | #  |
|----|-------------|-----------------|----------------|------------------|----------------|------------------|------|-------------|-----------------|----------------|------------------|----------------|------------------|----|
| 1  | 157.108387  | 79.057831       | 140.081838     | 70.544557        |                |                  | R    |             |                 |                |                  |                |                  | 20 |
| 2  | 214.129851  | 107.568564      | 197.103302     | 99.055289        |                |                  | G    | 2688.167329 | 1344.587302     | 2671.140780    | 1336.074028      | 2670.156764    | 1335.582020      | 19 |
| 3  | 343.172444  | 172.089860      | 326.145895     | 163.576585       | 325.161879     | 163.084577       | E    | 2631.145865 | 1316.076570     | 2614.119316    | 1307.563296      | 2613.135300    | 1307.071288      | 18 |
| 4  | 471.231022  | 236.119149      | 454.204473     | 227.605875       | 453.220457     | 227.113867       | Q    | 2502.103272 | 1251.555274     | 2485.076723    | 1243.041999      | 2484.092707    | 1242.549991      | 17 |
| 5  | 631.261671  | 316.134474      | 614.235122     | 307.621199       | 613.251106     | 307.129191       | C    | 2374.044694 | 1187.525985     | 2357.018145    | 1179.012710      | 2356.034129    | 1178.520702      | 16 |
| 6  | 730.330085  | 365.668681      | 713.303536     | 357.155406       | 712.319520     | 356.663398       | V    | 2214.014045 | 1107.510660     | 2196.987496    | 1098.997386      | 2196.003480    | 1098.505378      | 15 |
| 7  | 845.357028  | 423.182152      | 828.330479     | 414.668878       | 827.346463     | 414.176870       | D    | 2114.945631 | 1057.976453     | 2097.919082    | 1049.463179      | 2096.935066    | 1048.971171      | 14 |
| 8  | 958.441092  | 479.724184      | 941.414543     | 471.210910       | 940.430527     | 470.718902       | I    | 1999.918688 | 1000.462982     | 1982.892139    | 991.949708       | 1981.908123    | 991.457700       | 13 |
| 9  | 1073.468035 | 537.237656      | 1056.441486    | 528.724381       | 1055.457470    | 528.232373       | D    | 1886.834624 | 943.920950      | 1869.808075    | 935.407676       | 1868.824059    | 934.915668       | 12 |
| 10 | 1202.510628 | 601.758952      | 1185.484079    | 593.245678       | 1184.500063    | 592.753670       | E    | 1771.807681 | 886.407479      | 1754.781132    | 877.894204       | 1753.797116    | 877.402196       | 11 |
| 11 | 1362.541277 | 681.774277      | 1345.514728    | 673.261002       | 1344.530712    | 672.768994       | C    | 1642.765088 | 821.886182      | 1625.738539    | 813.372908       | 1624.754523    | 812.880900       | 10 |
| 12 | 1463.588956 | 732.298116      | 1446.562407    | 723.784842       | 1445.578391    | 723.292834       | T    | 1482.734439 | 741.870858      | 1465.707890    | 733.357583       | 1464.723874    | 732.865575       | 9  |
| 13 | 1576.673020 | 788.840148      | 1559.646471    | 780.326874       | 1558.662455    | 779.834866       | I    | 1381.686760 | 691.347018      | 1364.660211    | 682.833744       |                |                  | 8  |
| 14 | 1673.725784 | 837.366530      | 1656.699235    | 828.853256       | 1655.715219    | 828.361248       | P    | 1268.602696 | 634.804986      | 1251.576147    | 626.291712       |                |                  | 7  |
| 15 | 1770.778548 | 885.892912      | 1753.751999    | 877.379638       | 1752.767983    | 876.887630       | P    | 1171.549932 | 586.278604      | 1154.523383    | 577.765330       |                |                  | 6  |
| 16 | 1933.841877 | 967.424577      | 1916.815328    | 958.911302       | 1915.831312    | 958.419294       | Y    | 1074.497168 | 537.752222      | 1057.470619    | 529.238948       |                |                  | 5  |
| 17 | 2093.872526 | 1047.439901     | 2076.845977    | 1038.926626      | 2075.861961    | 1038.434618      | C    | 911.433839  | 456.220558      | 894.407290     | 447.707283       |                |                  | 4  |
| 18 | 2230.931438 | 1115.969357     | 2213.904889    | 1107.456082      | 2212.920873    | 1106.964074      | H    | 751.403190  | 376.205233      | 734.376641     | 367.691959       |                |                  | 3  |
| 19 | 2670.156764 | 1335.582020     | 2653.130215    | 1327.068746      | 2652.146199    | 1326.576738      | Q    | 614.344278  | 307.675777      | 597.317729     | 299.162503       |                |                  | 2  |
| 20 |             |                 |                |                  |                |                  | R    | 175.118952  | 88.063114       | 158.092403     | 79.549839        |                |                  | 1  |

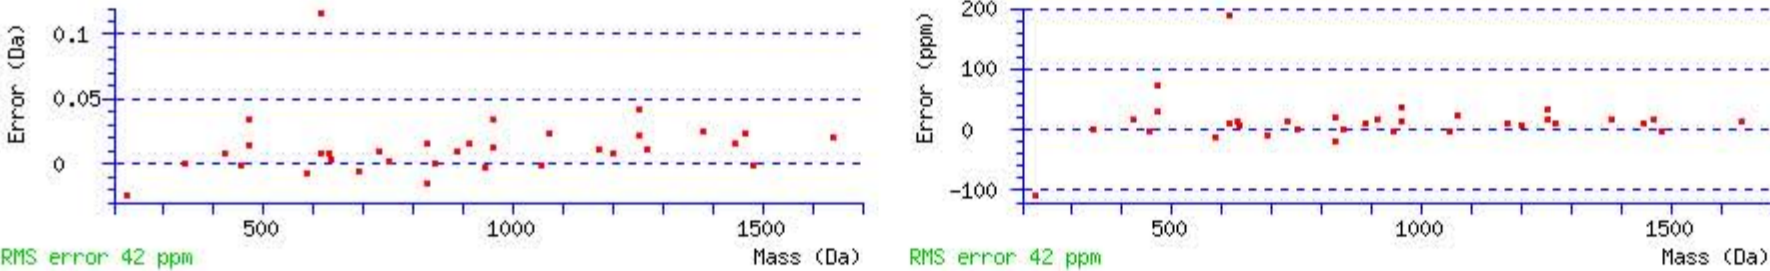

NCBI BLAST search of [RGEQCVDIDECTIPPYCHQR](#)  
(Parameters: blastp, nr protein database, expect=20000, no filter, PAM30)  
Other BLAST [web gateways](#)

All matches to this query

| Score | Mr(calc):   | Delta    | Sequence                             |
|-------|-------------|----------|--------------------------------------|
| 52.8  | 2843.261169 | 0.007847 | <a href="#">RGEQCVDIDECTIPPYCHQR</a> |

MATRIX

SCIENCE

Mascot Search Results

Peptide View

MS/MS Fragmentation of **LLPAQLPAEK**  
Found in **ECM1\_HUMAN**, Extracellular matrix protein 1 OS=Homo sapiens GN=ECM1 PE=1 SV=2

Match to Query 26911: 1389.811268 from(695.912910,2+) rtinseconds(2004) index(20271)  
Title: Locus:1.1.1.3080.8 File:"2013-07-02 CLN FXIII 180 min 2nd F 2.wiff"  
Data file C:\Program Files (x86)\Matrix Science\Mascot Daemon\mgf\8 FXIII 180 min 2nd\mascot\_daemon\_merge.mgf

Click mouse within plot area to zoom in by factor of two about that point  
Or, 

Plot from

100

 to 

1700

 Da 

Full range

  
Label all possible matches ☐ Label matches used for scoring ☒

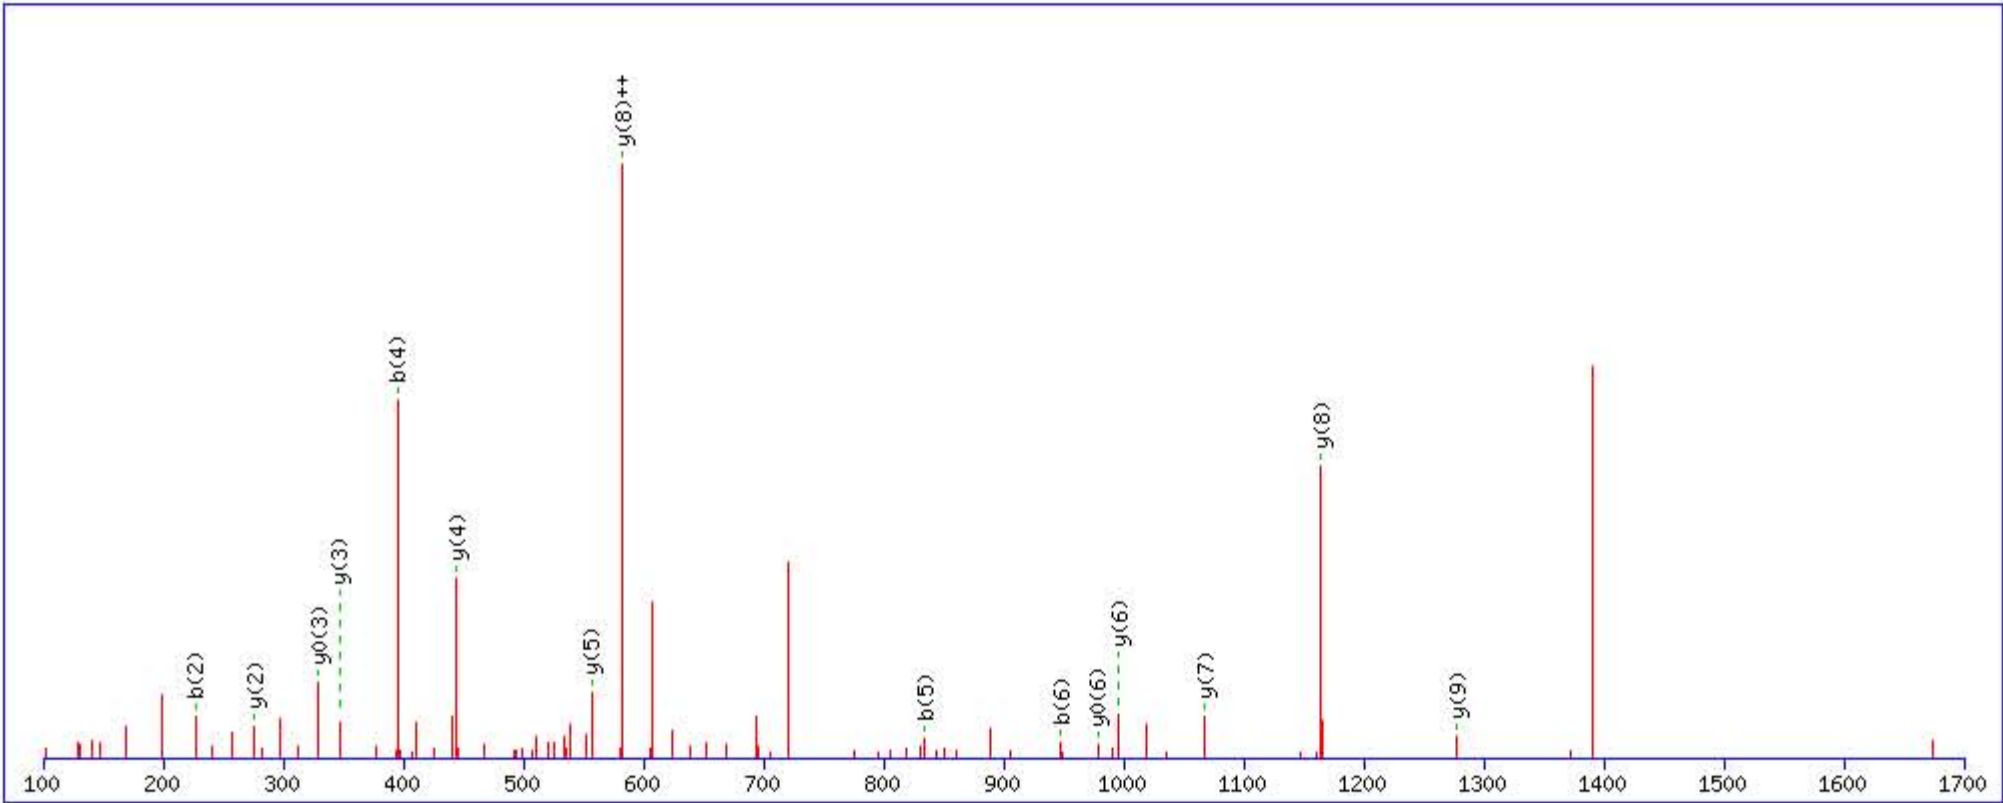

Monoisotopic mass of neutral peptide Mr(calc): 1389.805359  
Fixed modifications: Carbamidomethyl (C) (apply to specified residues or termini only)  
Variable modifications:  
Q5 : Biotin:Thermo-21345 (Q)  
Ions Score: 42 Expect: 0.00039  
Matches : 15/82 fragment ions using 35 most intense peaks [\(help\)](#)

| #  | b           | b <sup>++</sup> | b <sup>*</sup> | b <sup>*++</sup> | b <sup>0</sup> | b <sup>0++</sup> | Seq. | y           | y <sup>++</sup> | y <sup>*</sup> | y <sup>*++</sup> | y <sup>0</sup> | y <sup>0++</sup> | #  |
|----|-------------|-----------------|----------------|------------------|----------------|------------------|------|-------------|-----------------|----------------|------------------|----------------|------------------|----|
| 1  | 114.091340  | 57.549308       |                |                  |                |                  | L    |             |                 |                |                  |                |                  | 10 |
| 2  | 227.175404  | 114.091340      |                |                  |                |                  | L    | 1277.728607 | 639.367942      | 1260.702058    | 630.854667       | 1259.718042    | 630.362659       | 9  |
| 3  | 324.228168  | 162.617722      |                |                  |                |                  | P    | 1164.644543 | 582.825909      | 1147.617994    | 574.312635       | 1146.633978    | 573.820627       | 8  |
| 4  | 395.265282  | 198.136279      |                |                  |                |                  | A    | 1067.591779 | 534.299527      | 1050.565230    | 525.786253       | 1049.581214    | 525.294245       | 7  |
| 5  | 834.490608  | 417.748942      | 817.464059     | 409.235668       |                |                  | Q    | 996.554665  | 498.780970      | 979.528116     | 490.267696       | 978.544100     | 489.775688       | 6  |
| 6  | 947.574672  | 474.290974      | 930.548123     | 465.777700       |                |                  | L    | 557.329339  | 279.168307      | 540.302790     | 270.655033       | 539.318774     | 270.163025       | 5  |
| 7  | 1044.627436 | 522.817356      | 1027.600887    | 514.304082       |                |                  | P    | 444.245275  | 222.626275      | 427.218726     | 214.113001       | 426.234710     | 213.620993       | 4  |
| 8  | 1115.664550 | 558.335913      | 1098.638001    | 549.822639       |                |                  | A    | 347.192511  | 174.099893      | 330.165962     | 165.586619       | 329.181946     | 165.094611       | 3  |
| 9  | 1244.707143 | 622.857209      | 1227.680594    | 614.343935       | 1226.696578    | 613.851927       | E    | 276.155397  | 138.581336      | 259.128848     | 130.068062       | 258.144832     | 129.576054       | 2  |
| 10 |             |                 |                |                  |                |                  | K    | 147.112804  | 74.060040       | 130.086255     | 65.546765        |                |                  | 1  |

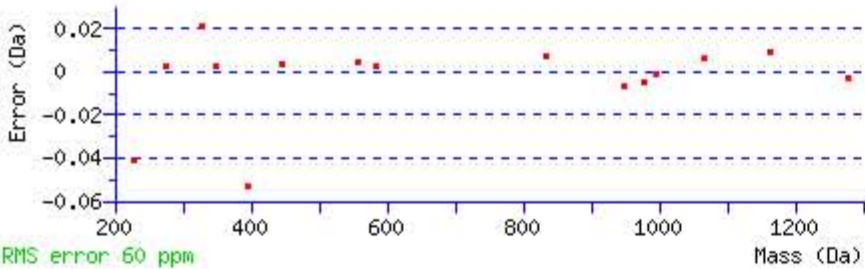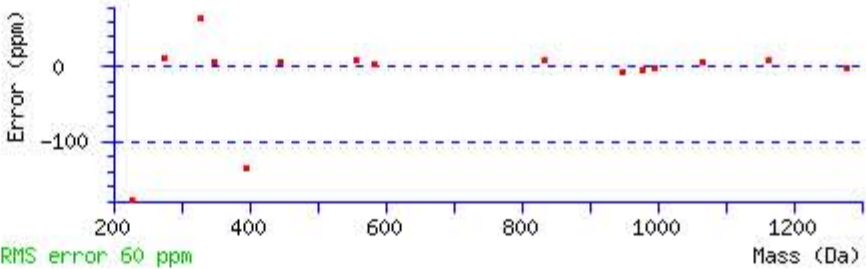

NCBI BLAST search of [LLPAQLPAEK](#)  
(Parameters: blastp, nr protein database, expect=20000, no filter, PAM30)  
Other BLAST [web gateways](#)

All matches to this query

| Score | Mr(calc):   | Delta     | Sequence                     |
|-------|-------------|-----------|------------------------------|
| 42.4  | 1389.805359 | 0.005909  | <a href="#">LLPAQLPAEK</a>   |
| 10.3  | 1389.809189 | 0.002079  | <a href="#">LIKRLDLSYNR</a>  |
| 2.6   | 1389.820450 | -0.009182 | <a href="#">LINRTHATVPIR</a> |
| 1.5   | 1389.823135 | -0.011867 | <a href="#">ILIVITDGQKYK</a> |
| 1.5   | 1389.813232 | -0.001964 | <a href="#">LIQAPSKFAFLR</a> |
| 1.5   | 1389.797989 | 0.013279  | <a href="#">LLNLQSLFVTSR</a> |
| 1.4   | 1389.816605 | -0.005337 | <a href="#">ILGPLPKHMIQK</a> |
| 0.3   | 1389.797974 | 0.013294  | <a href="#">ILLYRGADKDVK</a> |
| 0.3   | 1389.805359 | 0.005909  | <a href="#">LLSSYLQKK</a>    |
| 0.3   | 1389.809204 | 0.002064  | <a href="#">LLTYLRLQSQR</a>  |

MATRIX

SCIENCE

Mascot Search Results

Peptide View

MS/MS Fragmentation of **NLPATDPLQR**  
Found in **ECM1\_HUMAN**, Extracellular matrix protein 1 OS=Homo sapiens GN=ECM1 PE=1 SV=2

Match to Query 29253: 1434.769288 from(718.391920,2+) rtinseconds(1991) index(5582)  
Title: Locus:1.1.1.1970.8 File:"2013-07-02 CLN FXIII 180 min 2nd F 1.wiff"  
Data file C:\Program Files (x86)\Matrix Science\Mascot Daemon\mgf\8 FXIII 180 min 2nd\mascot\_daemon\_merge.mgf

Click mouse within plot area to zoom in by factor of two about that point  
Or, 

Plot from

100

 to 

1700

 Da 

Full range

  
Label all possible matches ☐ Label matches used for scoring ☒

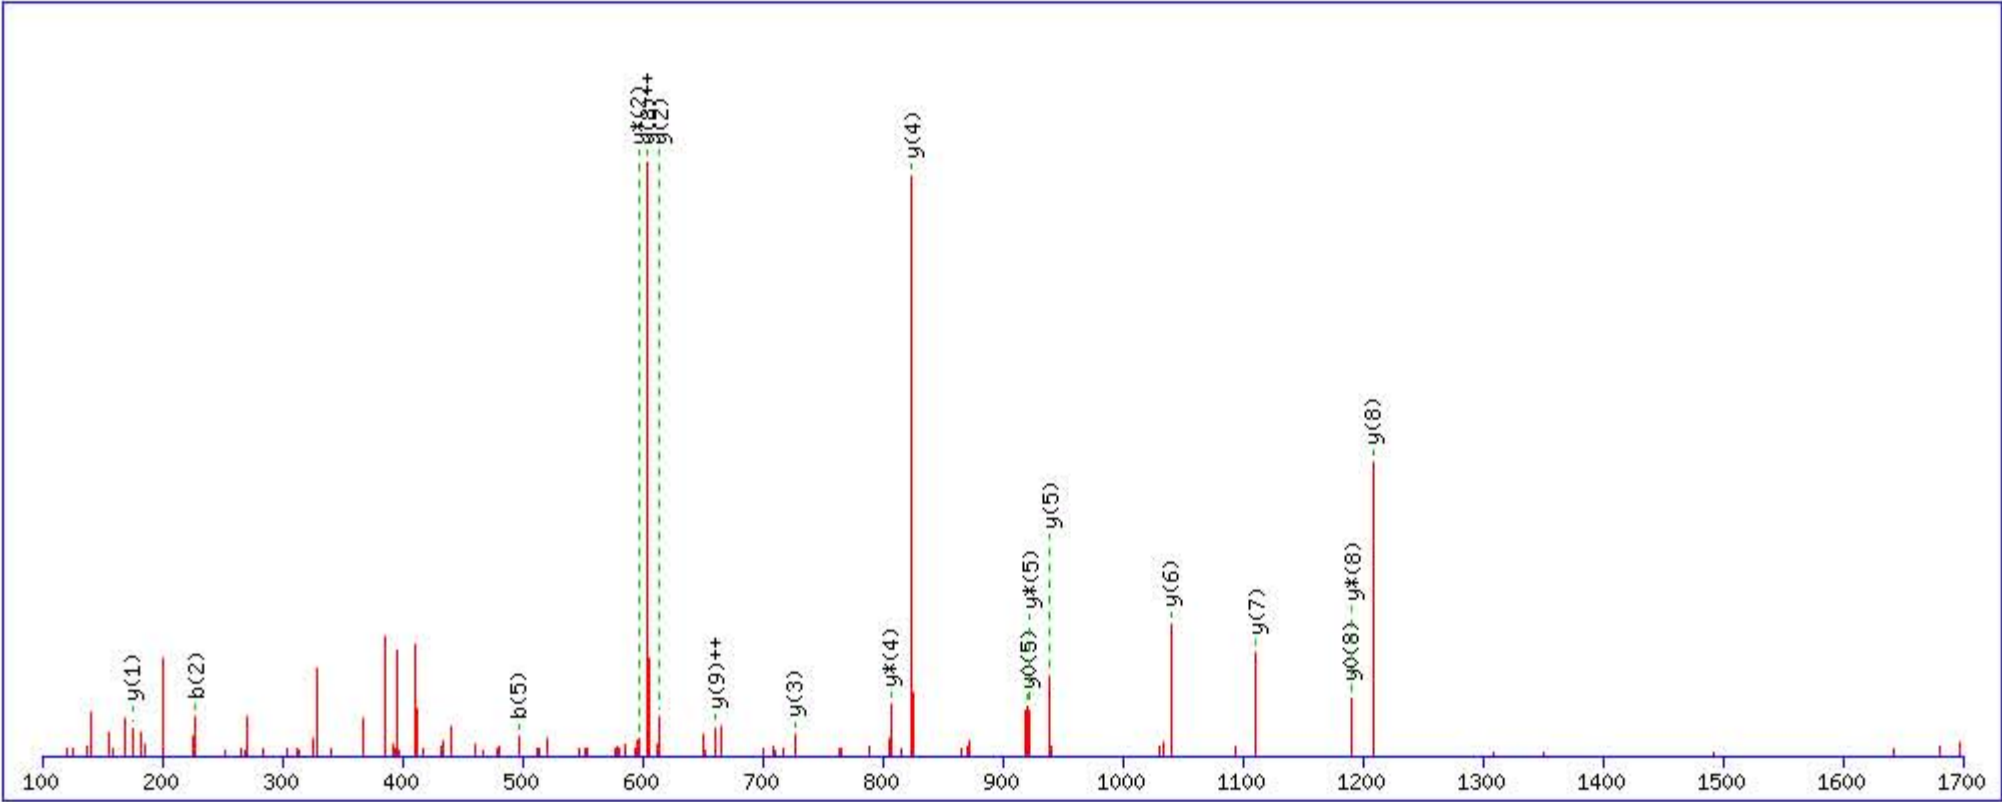

Monoisotopic mass of neutral peptide Mr(calc): 1434.765305  
Fixed modifications: Carbamidomethyl (C) (apply to specified residues or termini only)  
Variable modifications:  
Q9 : Biotin:Thermo-21345 (Q)  
Ions Score: 38 Expect: 0.0011  
Matches : 18/92 fragment ions using 46 most intense peaks [\(help\)](#)

| #  | b           | b <sup>++</sup> | b <sup>+</sup> | b <sup>+++</sup> | b <sup>0</sup> | b <sup>0++</sup> | Seq. | y           | y <sup>++</sup> | y <sup>+</sup> | y <sup>+++</sup> | y <sup>0</sup> | y <sup>0++</sup> | #  |
|----|-------------|-----------------|----------------|------------------|----------------|------------------|------|-------------|-----------------|----------------|------------------|----------------|------------------|----|
| 1  | 115.050203  | 58.028740       | 98.023654      | 49.515465        |                |                  | N    |             |                 |                |                  |                |                  | 10 |
| 2  | 228.134267  | 114.570771      | 211.107718     | 106.057497       |                |                  | L    | 1321.729670 | 661.368473      | 1304.703121    | 652.855199       | 1303.719105    | 652.363190       | 9  |
| 3  | 325.187031  | 163.097153      | 308.160482     | 154.583879       |                |                  | P    | 1208.645606 | 604.826441      | 1191.619057    | 596.313166       | 1190.635041    | 595.821158       | 8  |
| 4  | 396.224145  | 198.615710      | 379.197596     | 190.102436       |                |                  | A    | 1111.592842 | 556.300059      | 1094.566293    | 547.786784       | 1093.582277    | 547.294776       | 7  |
| 5  | 497.271824  | 249.139550      | 480.245275     | 240.626275       | 479.261259     | 240.134267       | T    | 1040.555728 | 520.781502      | 1023.529179    | 512.268227       | 1022.545163    | 511.776220       | 6  |
| 6  | 612.298767  | 306.653022      | 595.272218     | 298.139747       | 594.288202     | 297.647739       | D    | 939.508049  | 470.257662      | 922.481500     | 461.744388       | 921.497484     | 461.252380       | 5  |
| 7  | 709.351531  | 355.179404      | 692.324982     | 346.666129       | 691.340966     | 346.174121       | P    | 824.481106  | 412.744191      | 807.454557     | 404.230916       |                |                  | 4  |
| 8  | 822.435595  | 411.721436      | 805.409046     | 403.208161       | 804.425030     | 402.716153       | L    | 727.428342  | 364.217809      | 710.401793     | 355.704534       |                |                  | 3  |
| 9  | 1261.660921 | 631.334098      | 1244.634372    | 622.820824       | 1243.650356    | 622.328816       | Q    | 614.344278  | 307.675777      | 597.317729     | 299.162502       |                |                  | 2  |
| 10 |             |                 |                |                  |                |                  | R    | 175.118952  | 88.063114       | 158.092403     | 79.549839        |                |                  | 1  |

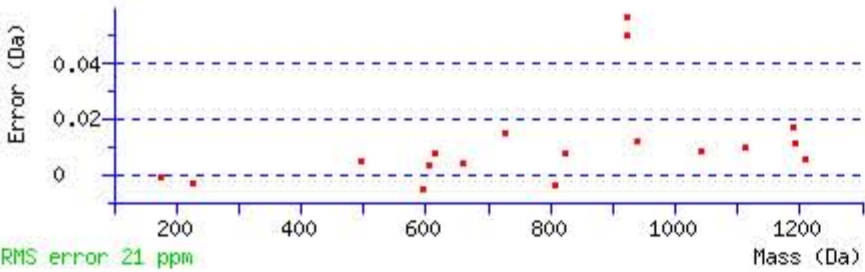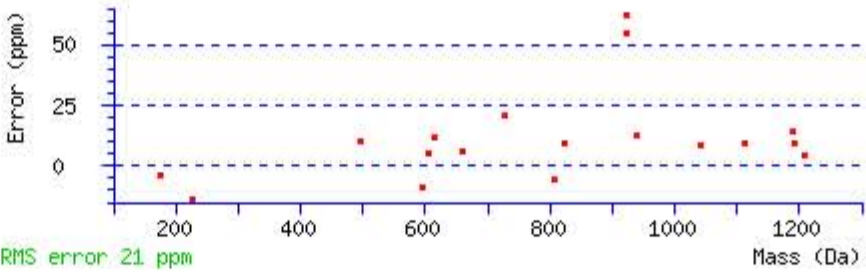

NCBI BLAST search of [NLPATDPLQR](#)  
(Parameters: blastp, nr protein database, expect=20000, no filter, PAM30)  
Other BLAST [web gateways](#)

All matches to this query

| Score | Mr(calc):   | Delta    | Sequence                     |
|-------|-------------|----------|------------------------------|
| 38.2  | 1434.765305 | 0.003983 | <a href="#">NLPATDPLQR</a>   |
| 6.1   | 1434.757889 | 0.011399 | <a href="#">NLIRQISSGEYR</a> |
| 0.1   | 1434.761932 | 0.007356 | <a href="#">NLDYPFGNVLRK</a> |

MATRIX

SCIENCE

Mascot Search Results

Peptide View

MS/MS Fragmentation of **ELLALIQLER**  
Found in **ECM1\_HUMAN**, Extracellular matrix protein 1 OS=Homo sapiens GN=ECM1 PE=1 SV=2

Match to Query 31405: 1507.895268 from(754.954910,2+) rtinseconds(2746) index(9580)  
Title: Locus:1.1.1.2233.15 File:"2013-07-02 CLN FXIII 180 min 2nd F 1.wiff"  
Data file C:\Program Files (x86)\Matrix Science\Mascot Daemon\mgf\8 FXIII 180 min 2nd\mascot\_daemon\_merge.mgf

Click mouse within plot area to zoom in by factor of two about that point  
Or,   to  Da   
Label all possible matches ☐ Label matches used for scoring ☒

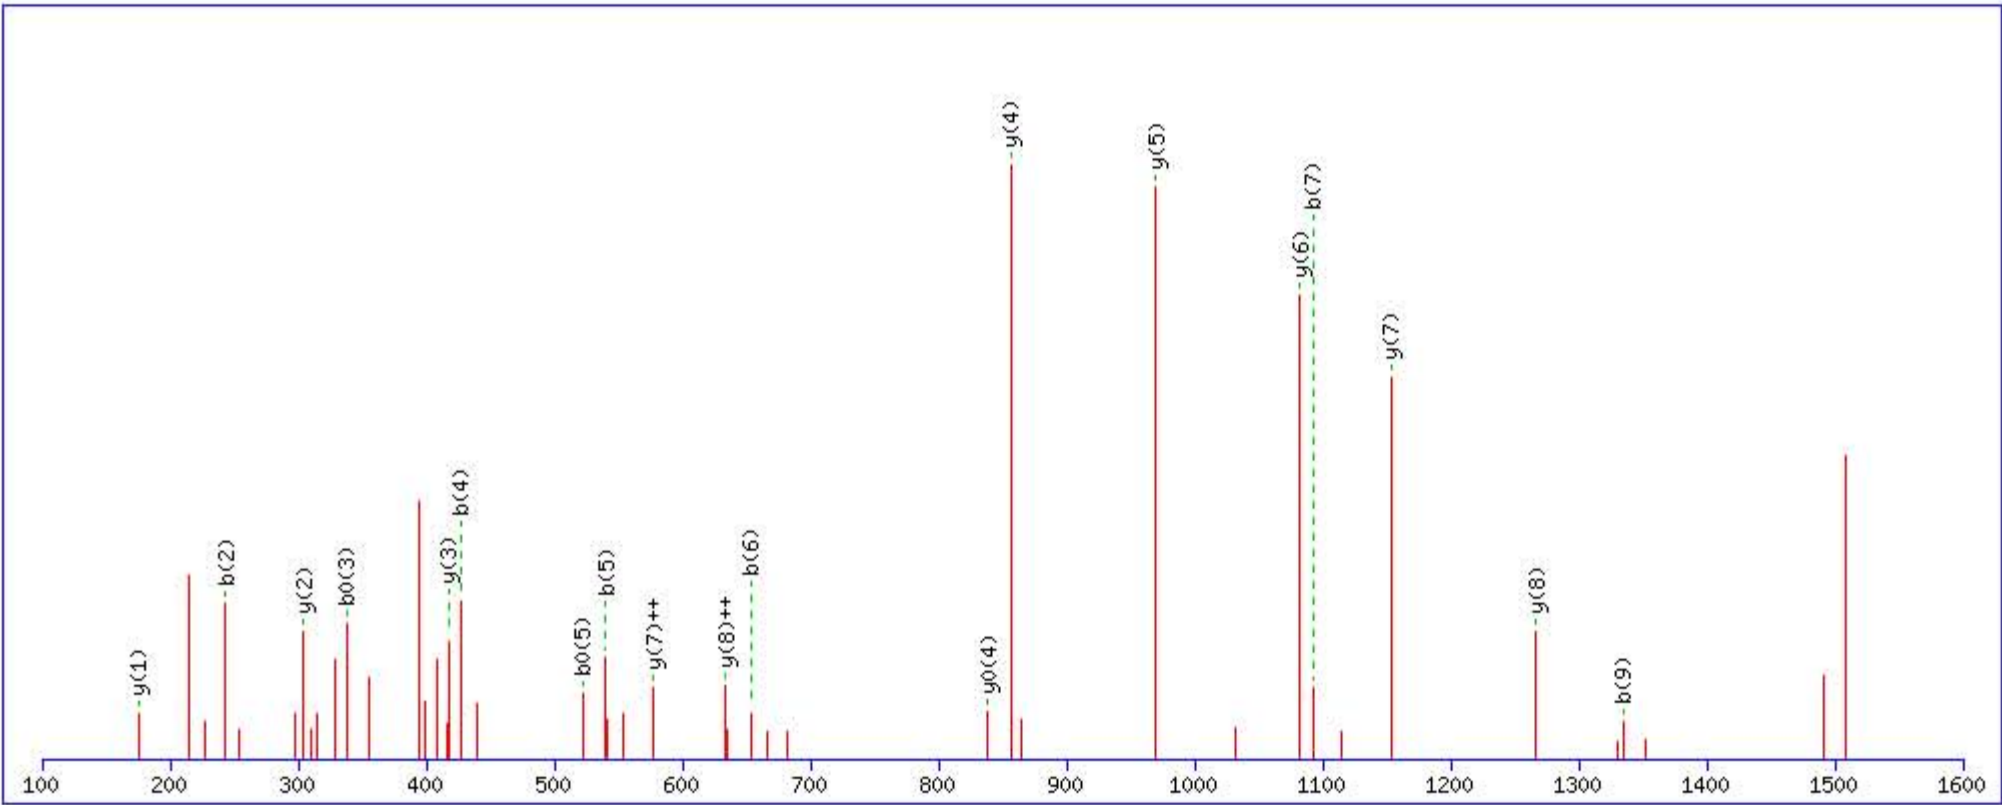

Monoisotopic mass of neutral peptide **Mr(calc):** 1507.879578  
Fixed modifications: Carbamidomethyl (C) (apply to specified residues or termini only)  
Variable modifications:  
Q7 : Biotin:Thermo-21345 (Q)  
Ions Score: 59 Expect: 3.4e-006  
Matches : 19/94 fragment ions using 29 most intense peaks ([help](#))

| #  | b           | b <sup>++</sup> | b <sup>*</sup> | b <sup>*++</sup> | b <sup>0</sup> | b <sup>0++</sup> | Seq. | y           | y <sup>++</sup> | y <sup>*</sup> | y <sup>*++</sup> | y <sup>0</sup> | y <sup>0++</sup> | #  |
|----|-------------|-----------------|----------------|------------------|----------------|------------------|------|-------------|-----------------|----------------|------------------|----------------|------------------|----|
| 1  | 130.049869  | 65.528572       |                |                  | 112.039304     | 56.523290        | E    |             |                 |                |                  |                |                  | 10 |
| 2  | 243.133933  | 122.070605      |                |                  | 225.123368     | 113.065322       | L    | 1379.844305 | 690.425790      | 1362.817756    | 681.912516       | 1361.833740    | 681.420508       | 9  |
| 3  | 356.217997  | 178.612637      |                |                  | 338.207432     | 169.607354       | L    | 1266.760241 | 633.883759      | 1249.733692    | 625.370484       | 1248.749676    | 624.878476       | 8  |
| 4  | 427.255111  | 214.131193      |                |                  | 409.244546     | 205.125911       | A    | 1153.676177 | 577.341727      | 1136.649628    | 568.828452       | 1135.665612    | 568.336444       | 7  |
| 5  | 540.339175  | 270.673226      |                |                  | 522.328610     | 261.667943       | L    | 1082.639063 | 541.823169      | 1065.612514    | 533.309895       | 1064.628498    | 532.817887       | 6  |
| 6  | 653.423239  | 327.215258      |                |                  | 635.412674     | 318.209975       | I    | 969.554999  | 485.281138      | 952.528450     | 476.767863       | 951.544434     | 476.275855       | 5  |
| 7  | 1092.648565 | 546.827921      | 1075.622016    | 538.314646       | 1074.638000    | 537.822638       | Q    | 856.470935  | 428.739105      | 839.444386     | 420.225831       | 838.460370     | 419.733823       | 4  |
| 8  | 1205.732629 | 603.369953      | 1188.706080    | 594.856678       | 1187.722064    | 594.364670       | L    | 417.245609  | 209.126442      | 400.219060     | 200.613168       | 399.235044     | 200.121160       | 3  |
| 9  | 1334.775222 | 667.891249      | 1317.748673    | 659.377975       | 1316.764657    | 658.885966       | E    | 304.161545  | 152.584410      | 287.134996     | 144.071136       | 286.150980     | 143.579128       | 2  |
| 10 |             |                 |                |                  |                |                  | R    | 175.118952  | 88.063114       | 158.092403     | 79.549839        |                |                  | 1  |

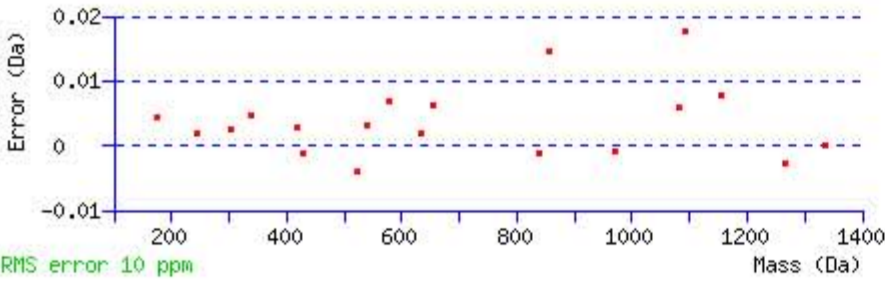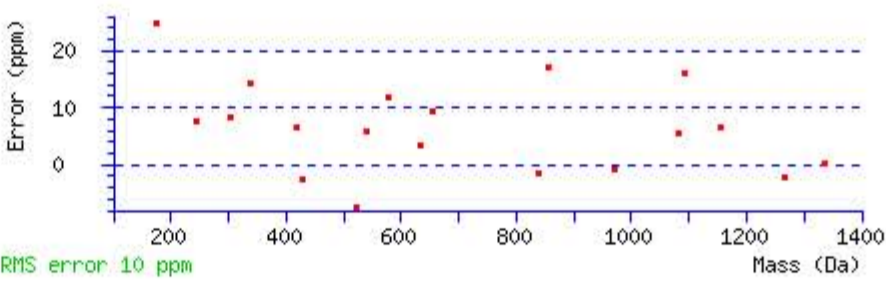

NCBI BLAST search of [ELLALIQLER](#)  
(Parameters: blastp, nr protein database, expect=20000, no filter, PAM30)  
Other BLAST [web gateways](#)

All matches to this query

| Score | Mr(calc):   | Delta    | Sequence                   |
|-------|-------------|----------|----------------------------|
| 58.8  | 1507.879578 | 0.015690 | <a href="#">ELLALIQLER</a> |
| 0.4   | 1507.879608 | 0.015660 | <a href="#">LVVELVQELR</a> |

MATRIX

SCIENCE

Mascot Search Results

Peptide View

MS/MS Fragmentation of **ELPSLQHPNEQK**  
Found in **ECM1\_HUMAN**, Extracellular matrix protein 1 OS=Homo sapiens GN=ECM1 PE=1 SV=2

Match to Query 38609: 1729.882542 from(577.634790,3+) rtinseconds(1624) index(3397)  
Title: Locus:1.1.1.1842.11 File:"2013-07-02 CLN FXIII 180 min 2nd F 1.wiff"  
Data file C:\Program Files (x86)\Matrix Science\Mascot Daemon\mgf\8 FXIII 180 min 2nd\mascot\_daemon\_merge.mgf

Click mouse within plot area to zoom in by factor of two about that point  
Or,  Plot from  to  Da   
Label all possible matches ☐ Label matches used for scoring ☒

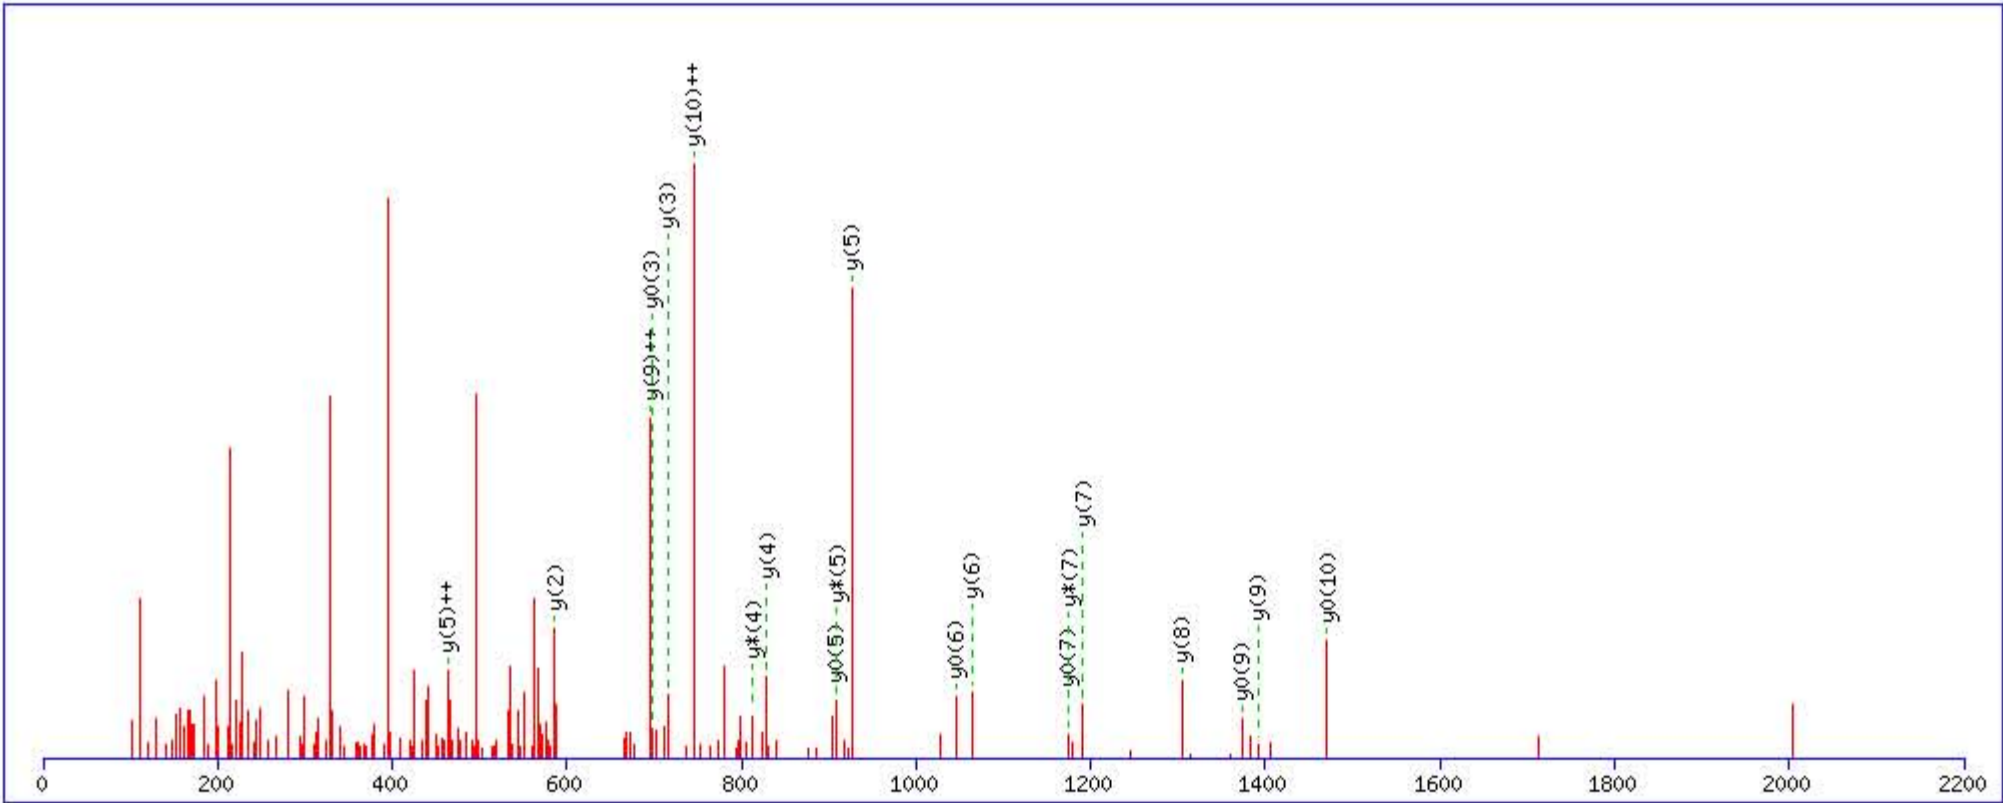

Monoisotopic mass of neutral peptide Mr(calc): 1729.882111  
Fixed modifications: Carbamidomethyl (C) (apply to specified residues or termini only)  
Variable modifications:  
Q11 : Biotin:Thermo-21345 (Q)  
Ions Score: 30 Expect: 0.03  
Matches : 20/118 fragment ions using 52 most intense peaks ([help](#))

| #  | b           | b <sup>++</sup> | b <sup>*</sup> | b <sup>*++</sup> | b <sup>0</sup> | b <sup>0++</sup> | Seq. | y           | y <sup>++</sup> | y <sup>*</sup> | y <sup>*++</sup> | y <sup>0</sup> | y <sup>0++</sup> | #  |
|----|-------------|-----------------|----------------|------------------|----------------|------------------|------|-------------|-----------------|----------------|------------------|----------------|------------------|----|
| 1  | 130.049869  | 65.528572       |                |                  | 112.039304     | 56.523290        | E    |             |                 |                |                  |                |                  | 12 |
| 2  | 243.133933  | 122.070605      |                |                  | 225.123368     | 113.065322       | L    | 1601.846824 | 801.427050      | 1584.820275    | 792.913776       | 1583.836259    | 792.421767       | 11 |
| 3  | 340.186697  | 170.596987      |                |                  | 322.176132     | 161.591704       | P    | 1488.762760 | 744.885018      | 1471.736211    | 736.371744       | 1470.752195    | 735.879736       | 10 |
| 4  | 427.218725  | 214.113001      |                |                  | 409.208160     | 205.107718       | S    | 1391.709996 | 696.358636      | 1374.683447    | 687.845362       | 1373.699431    | 687.353354       | 9  |
| 5  | 540.302789  | 270.655033      |                |                  | 522.292224     | 261.649750       | L    | 1304.677968 | 652.842622      | 1287.651419    | 644.329348       | 1286.667403    | 643.837340       | 8  |
| 6  | 668.361367  | 334.684322      | 651.334818     | 326.171047       | 650.350802     | 325.679039       | Q    | 1191.593904 | 596.300590      | 1174.567355    | 587.787316       | 1173.583339    | 587.295308       | 7  |
| 7  | 805.420279  | 403.213778      | 788.393730     | 394.700503       | 787.409714     | 394.208495       | H    | 1063.535326 | 532.271301      | 1046.508777    | 523.758027       | 1045.524761    | 523.266018       | 6  |
| 8  | 902.473043  | 451.740160      | 885.446494     | 443.226885       | 884.462478     | 442.734877       | P    | 926.476414  | 463.741845      | 909.449865     | 455.228571       | 908.465849     | 454.736563       | 5  |
| 9  | 1016.515970 | 508.761623      | 999.489421     | 500.248349       | 998.505405     | 499.756341       | N    | 829.423650  | 415.215463      | 812.397101     | 406.702189       | 811.413085     | 406.210181       | 4  |
| 10 | 1145.558563 | 573.282920      | 1128.532014    | 564.769645       | 1127.547998    | 564.277637       | E    | 715.380723  | 358.194000      | 698.354174     | 349.680725       | 697.370158     | 349.188717       | 3  |
| 11 | 1584.783889 | 792.895583      | 1567.757340    | 784.382308       | 1566.773324    | 783.890300       | Q    | 586.338130  | 293.672703      | 569.311581     | 285.159429       |                |                  | 2  |
| 12 |             |                 |                |                  |                |                  | K    | 147.112804  | 74.060040       | 130.086255     | 65.546765        |                |                  | 1  |

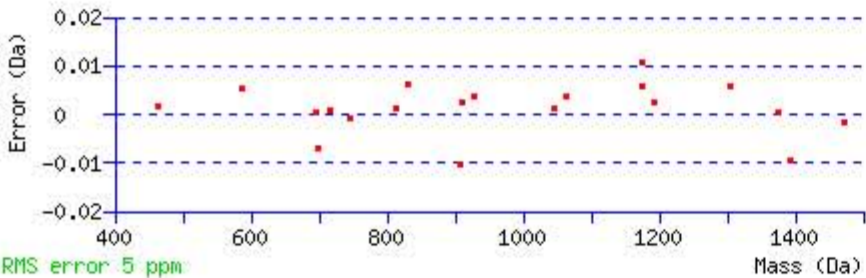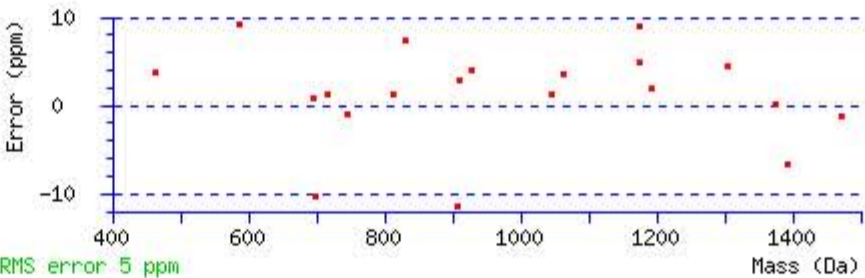

NCBI BLAST search of [ELPSLQHPNEQK](#)  
(Parameters: blastp, nr protein database, expect=20000, no filter, PAM30)  
Other BLAST [web gateways](#)

All matches to this query

| Score | Mr(calc):   | Delta    | Sequence                     |
|-------|-------------|----------|------------------------------|
| 29.8  | 1729.882111 | 0.000431 | <a href="#">ELPSLQHPNEQK</a> |
| 2.8   | 1729.882111 | 0.000431 | <a href="#">ELPSLQHPNEQK</a> |

MATRIX

SCIENCE

Mascot Search Results

Peptide View

MS/MS Fragmentation of **VTPNLMGHLCGNQR**  
Found in **ECM1\_HUMAN**, Extracellular matrix protein 1 OS=Homo sapiens GN=ECM1 PE=1 SV=2

Match to Query 42265: 1906.939272 from(636.653700,3+) rtinseconds(1887) index(4843)  
Title: Locus:1.1.1.1934.18 File:"2013-07-02 CLN FXIII 180 min 2nd F 1.wiff"  
Data file C:\Program Files (x86)\Matrix Science\Mascot Daemon\mgf\8 FXIII 180 min 2nd\mascot\_daemon\_merge.mgf

Click mouse within plot area to zoom in by factor of two about that point  
Or, 

Plot from

0

 to 

2600

 Da 

Full range

  
Label all possible matches ☐ Label matches used for scoring ☒

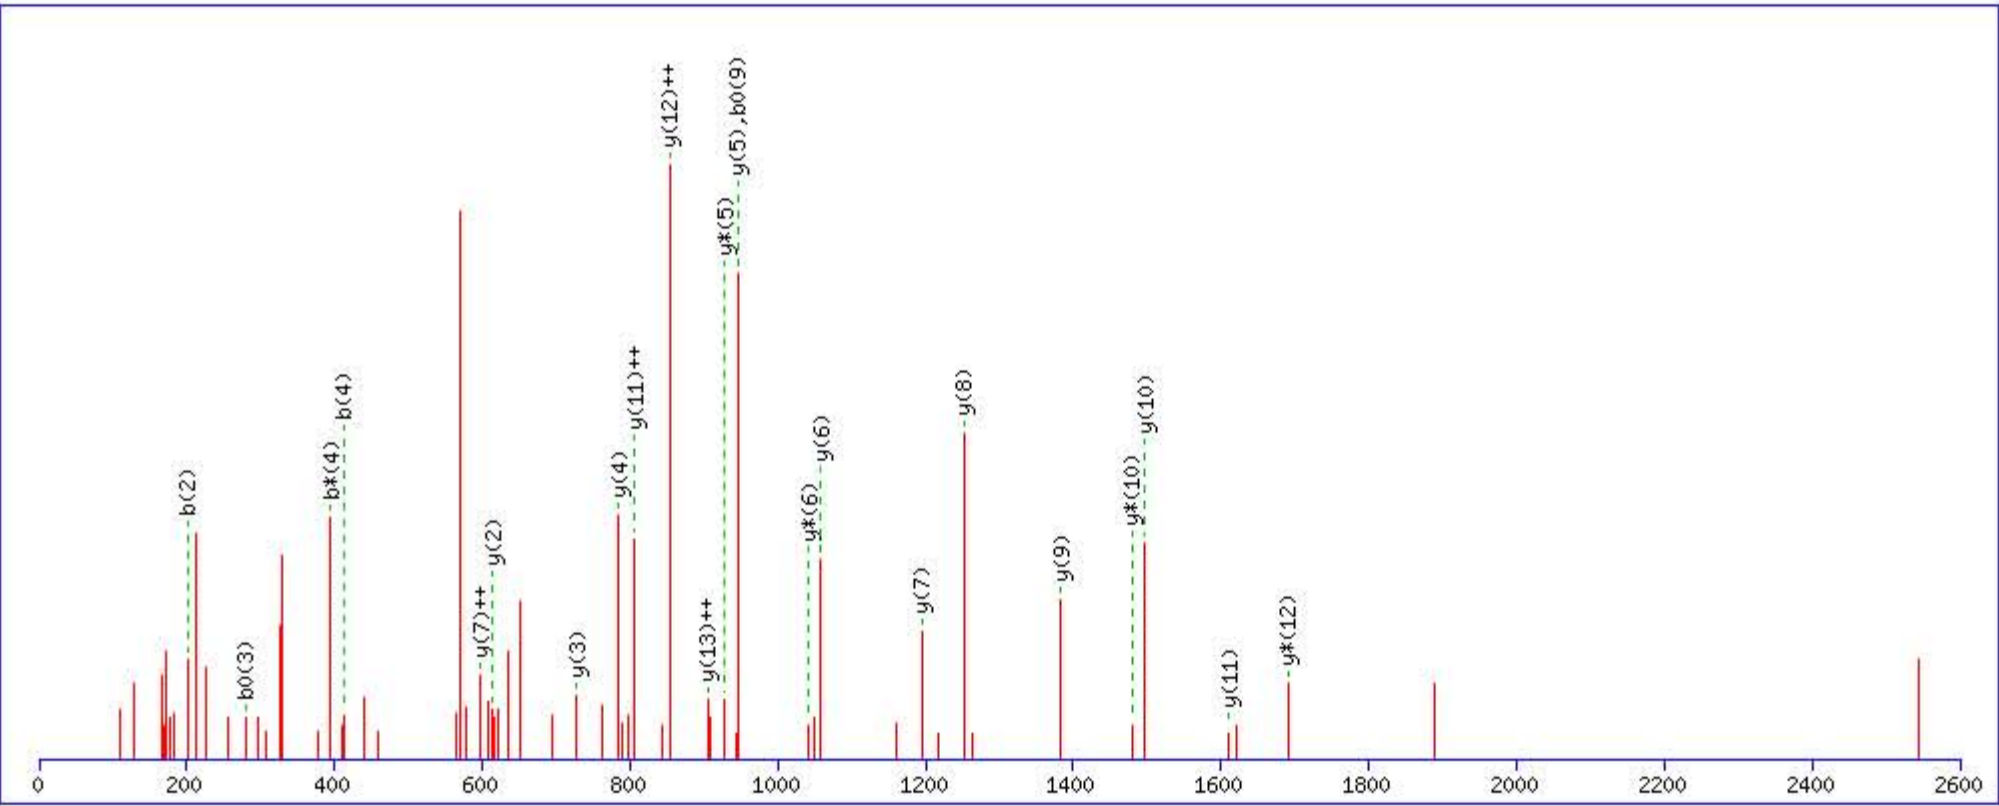

Monoisotopic mass of neutral peptide Mr(calc): 1906.932816  
Fixed modifications: Carbamidomethyl (C) (apply to specified residues or termini only)  
Variable modifications:  
Q13 : Biotin:Thermo-21345 (Q)  
Ions Score: 48 Expect: 0.00034  
Matches : 23/124 fragment ions using 51 most intense peaks [\(help\)](#)

| #  | b           | b <sup>++</sup> | b <sup>*</sup> | b <sup>*++</sup> | b <sup>0</sup> | b <sup>0++</sup> | Seq. | y           | y <sup>++</sup> | y <sup>*</sup> | y <sup>*++</sup> | y <sup>0</sup> | y <sup>0++</sup> | #  |
|----|-------------|-----------------|----------------|------------------|----------------|------------------|------|-------------|-----------------|----------------|------------------|----------------|------------------|----|
| 1  | 100.075690  | 50.541483       |                |                  |                |                  | V    |             |                 |                |                  |                |                  | 14 |
| 2  | 201.123369  | 101.065322      |                |                  | 183.112804     | 92.060040        | T    | 1808.871677 | 904.939477      | 1791.845128    | 896.426202       | 1790.861112    | 895.934194       | 13 |
| 3  | 298.176133  | 149.591704      |                |                  | 280.165568     | 140.586422       | P    | 1707.823998 | 854.415637      | 1690.797449    | 845.902363       |                |                  | 12 |
| 4  | 412.219060  | 206.613168      | 395.192511     | 198.099894       | 394.208495     | 197.607886       | N    | 1610.771234 | 805.889255      | 1593.744685    | 797.375981       |                |                  | 11 |
| 5  | 525.303124  | 263.155200      | 508.276575     | 254.641926       | 507.292559     | 254.149918       | L    | 1496.728307 | 748.867792      | 1479.701758    | 740.354517       |                |                  | 10 |
| 6  | 656.343609  | 328.675443      | 639.317060     | 320.162168       | 638.333044     | 319.670160       | M    | 1383.644243 | 692.325760      | 1366.617694    | 683.812485       |                |                  | 9  |
| 7  | 713.365073  | 357.186175      | 696.338524     | 348.672900       | 695.354508     | 348.180892       | G    | 1252.603758 | 626.805517      | 1235.577209    | 618.292243       |                |                  | 8  |
| 8  | 850.423985  | 425.715631      | 833.397436     | 417.202356       | 832.413420     | 416.710348       | H    | 1195.582294 | 598.294785      | 1178.555745    | 589.781511       |                |                  | 7  |
| 9  | 963.508049  | 482.257663      | 946.481500     | 473.744388       | 945.497484     | 473.252380       | L    | 1058.523382 | 529.765329      | 1041.496833    | 521.252055       |                |                  | 6  |
| 10 | 1123.538698 | 562.272987      | 1106.512149    | 553.759713       | 1105.528133    | 553.267705       | C    | 945.439318  | 473.223297      | 928.412769     | 464.710023       |                |                  | 5  |
| 11 | 1180.560162 | 590.783719      | 1163.533613    | 582.270445       | 1162.549597    | 581.778437       | G    | 785.408669  | 393.207973      | 768.382120     | 384.694698       |                |                  | 4  |
| 12 | 1294.603089 | 647.805183      | 1277.576540    | 639.291908       | 1276.592524    | 638.799900       | N    | 728.387205  | 364.697241      | 711.360656     | 356.183966       |                |                  | 3  |
| 13 | 1733.828415 | 867.417846      | 1716.801866    | 858.904571       | 1715.817850    | 858.412563       | Q    | 614.344278  | 307.675777      | 597.317729     | 299.162503       |                |                  | 2  |
| 14 |             |                 |                |                  |                |                  | R    | 175.118952  | 88.063114       | 158.092403     | 79.549839        |                |                  | 1  |

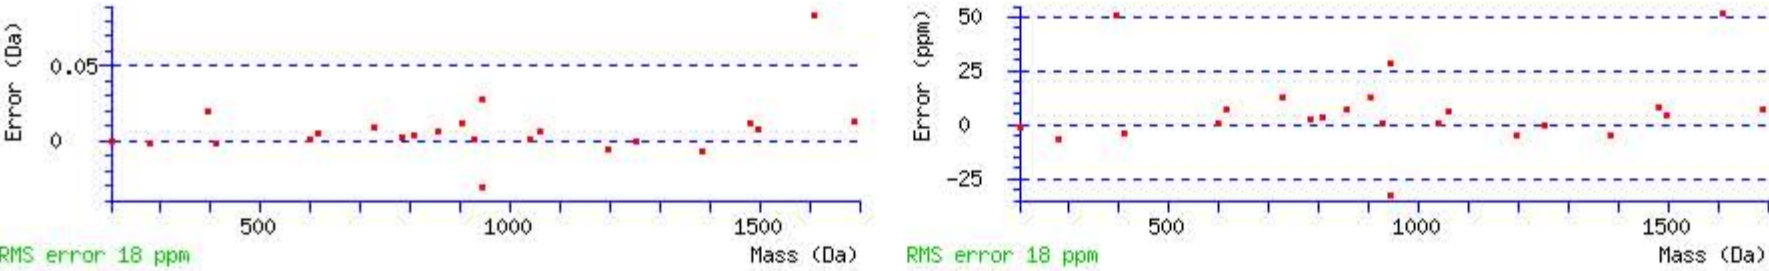

NCBI BLAST search of [VTPNLMGHLCGNQR](#)  
(Parameters: blastp, nr protein database, expect=20000, no filter, PAM30)  
Other BLAST [web gateways](#)

All matches to this query

| Score | Mr(calc):   | Delta    | Sequence                       |
|-------|-------------|----------|--------------------------------|
| 48.4  | 1906.932816 | 0.006456 | <a href="#">VTPNLMGHLCGNQR</a> |

MATRIX

SCIENCE

Mascot Search Results

Peptide View

MS/MS Fragmentation of **EVGPPLPQEAVPLQK**  
Found in **ECM1\_HUMAN**, Extracellular matrix protein 1 OS=Homo sapiens GN=ECM1 PE=1 SV=2

Match to Query 42406: 1912.058742 from(638.360190,3+) rtinseconds(2216) index(6832)  
Title: Locus:1.1.1.2049.8 File:"2013-07-02 CLN FXIII 180 min 2nd F 1.wiff"  
Data file C:\Program Files (x86)\Matrix Science\Mascot Daemon\mgf\8 FXIII 180 min 2nd\mascot\_daemon\_merge.mgf

Click mouse within plot area to zoom in by factor of two about that point  
Or, 

Plot from

100

 to 

1700

 Da 

Full range

Label all possible matches

Label matches used for scoring

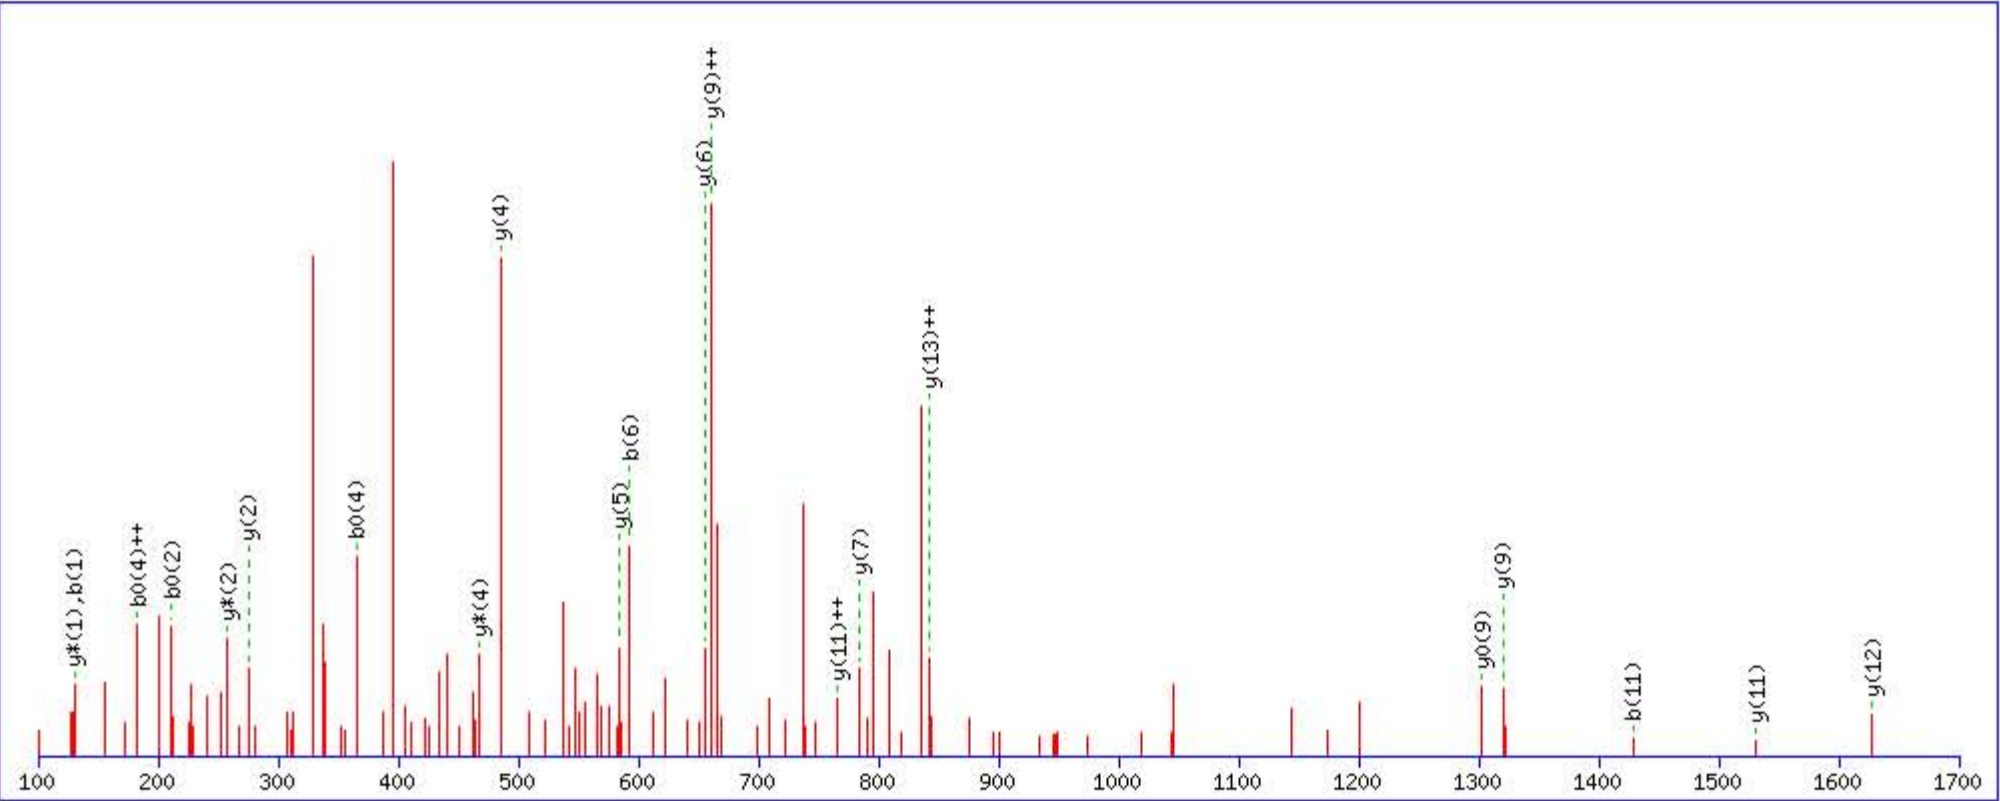

Monoisotopic mass of neutral peptide Mr(calc): 1912.049194  
Fixed modifications: Carbamidomethyl (C) (apply to specified residues or termini only)  
Variable modifications:  
Q8 : Biotin:Thermo-21345 (Q)  
Ions Score: 29 Expect: 0.018  
Matches : 21/142 fragment ions using 48 most intense peaks [\(help\)](#)

| #  | b           | b <sup>++</sup> | b <sup>+</sup> | b <sup>++</sup> | b <sup>0</sup> | b <sup>0++</sup> | Seq. | y           | y <sup>++</sup> | y <sup>+</sup> | y <sup>++</sup> | y <sup>0</sup> | y <sup>0++</sup> | #  |
|----|-------------|-----------------|----------------|-----------------|----------------|------------------|------|-------------|-----------------|----------------|-----------------|----------------|------------------|----|
| 1  | 130.049869  | 65.528572       |                |                 | 112.039304     | 56.523290        | E    |             |                 |                |                 |                |                  | 15 |
| 2  | 229.118283  | 115.062780      |                |                 | 211.107718     | 106.057497       | V    | 1784.013891 | 892.510583      | 1766.987342    | 883.997309      | 1766.003326    | 883.505301       | 14 |
| 3  | 286.139747  | 143.573512      |                |                 | 268.129182     | 134.568229       | G    | 1684.945477 | 842.976377      | 1667.918928    | 834.463102      | 1666.934912    | 833.971094       | 13 |
| 4  | 383.192511  | 192.099894      |                |                 | 365.181946     | 183.094611       | P    | 1627.924013 | 814.465645      | 1610.897464    | 805.952370      | 1609.913448    | 805.460362       | 12 |
| 5  | 480.245275  | 240.626276      |                |                 | 462.234710     | 231.620993       | P    | 1530.871249 | 765.939263      | 1513.844700    | 757.425988      | 1512.860684    | 756.933980       | 11 |
| 6  | 593.329339  | 297.168308      |                |                 | 575.318774     | 288.163025       | L    | 1433.818485 | 717.412881      | 1416.791936    | 708.899606      | 1415.807920    | 708.407598       | 10 |
| 7  | 690.382103  | 345.694690      |                |                 | 672.371538     | 336.689407       | P    | 1320.734421 | 660.870848      | 1303.707872    | 652.357574      | 1302.723856    | 651.865566       | 9  |
| 8  | 1129.607429 | 565.307353      | 1112.580880    | 556.794078      | 1111.596864    | 556.302070       | Q    | 1223.681657 | 612.344466      | 1206.655108    | 603.831192      | 1205.671092    | 603.339184       | 8  |
| 9  | 1258.650022 | 629.828649      | 1241.623473    | 621.315375      | 1240.639457    | 620.823367       | E    | 784.456331  | 392.731803      | 767.429782     | 384.218529      | 766.445766     | 383.726521       | 7  |
| 10 | 1329.687136 | 665.347206      | 1312.660587    | 656.833932      | 1311.676571    | 656.341924       | A    | 655.413738  | 328.210507      | 638.387189     | 319.697232      |                |                  | 6  |
| 11 | 1428.755550 | 714.881413      | 1411.729001    | 706.368139      | 1410.744985    | 705.876131       | V    | 584.376624  | 292.691950      | 567.350075     | 284.178676      |                |                  | 5  |
| 12 | 1525.808314 | 763.407795      | 1508.781765    | 754.894521      | 1507.797749    | 754.402513       | P    | 485.308210  | 243.157743      | 468.281661     | 234.644468      |                |                  | 4  |
| 13 | 1638.892378 | 819.949827      | 1621.865829    | 811.436553      | 1620.881813    | 810.944545       | L    | 388.255446  | 194.631361      | 371.228897     | 186.118086      |                |                  | 3  |
| 14 | 1766.950956 | 883.979116      | 1749.924407    | 875.465842      | 1748.940391    | 874.973833       | Q    | 275.171382  | 138.089329      | 258.144833     | 129.576054      |                |                  | 2  |
| 15 |             |                 |                |                 |                |                  | K    | 147.112804  | 74.060040       | 130.086255     | 65.546765       |                |                  | 1  |

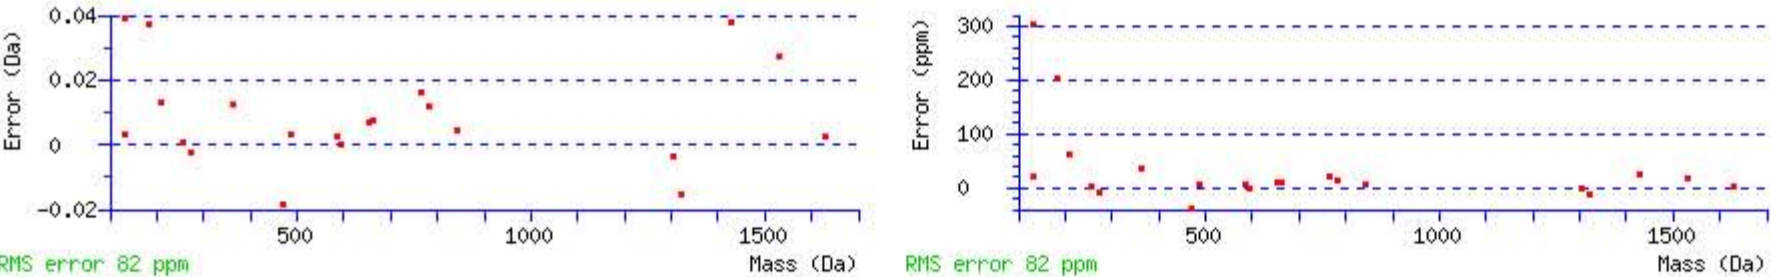

NCBI BLAST search of [EVGPPLPQEAVPLQK](#)  
(Parameters: blastp, nr protein database, expect=20000, no filter, PAM30)  
Other BLAST [web gateways](#)

All matches to this query

| Score | Mr(calc):   | Delta    | Sequence                        |
|-------|-------------|----------|---------------------------------|
| 29.4  | 1912.049194 | 0.009548 | <a href="#">EVGPPLPQEAVPLQK</a> |
| 10.8  | 1912.049194 | 0.009548 | <a href="#">EVGPPLPQEAVPLQK</a> |

MATRIX

SCIENCE

Mascot Search Results

Peptide View

MS/MS Fragmentation of **ELPSLQHPNEQK**  
Found in **ECM1\_HUMAN**, Extracellular matrix protein 1 OS=Homo sapiens GN=ECM1 PE=1 SV=2

Match to Query 45487: 2041.064148 from(1021.539350,2+) rtinseconds(1986) index(5564)  
Title: Locus:1.1.1.1968.18 File:"2013-07-02 CLN FXIII 180 min 2nd F 1.wiff"  
Data file C:\Program Files (x86)\Matrix Science\Mascot Daemon\mgf\8 FXIII 180 min 2nd\mascot\_daemon\_merge.mgf

Click mouse within plot area to zoom in by factor of two about that point  
Or, 

Plot from

100

 to 

1800

 Da 

Full range

  
Label all possible matches ☐ Label matches used for scoring ☒

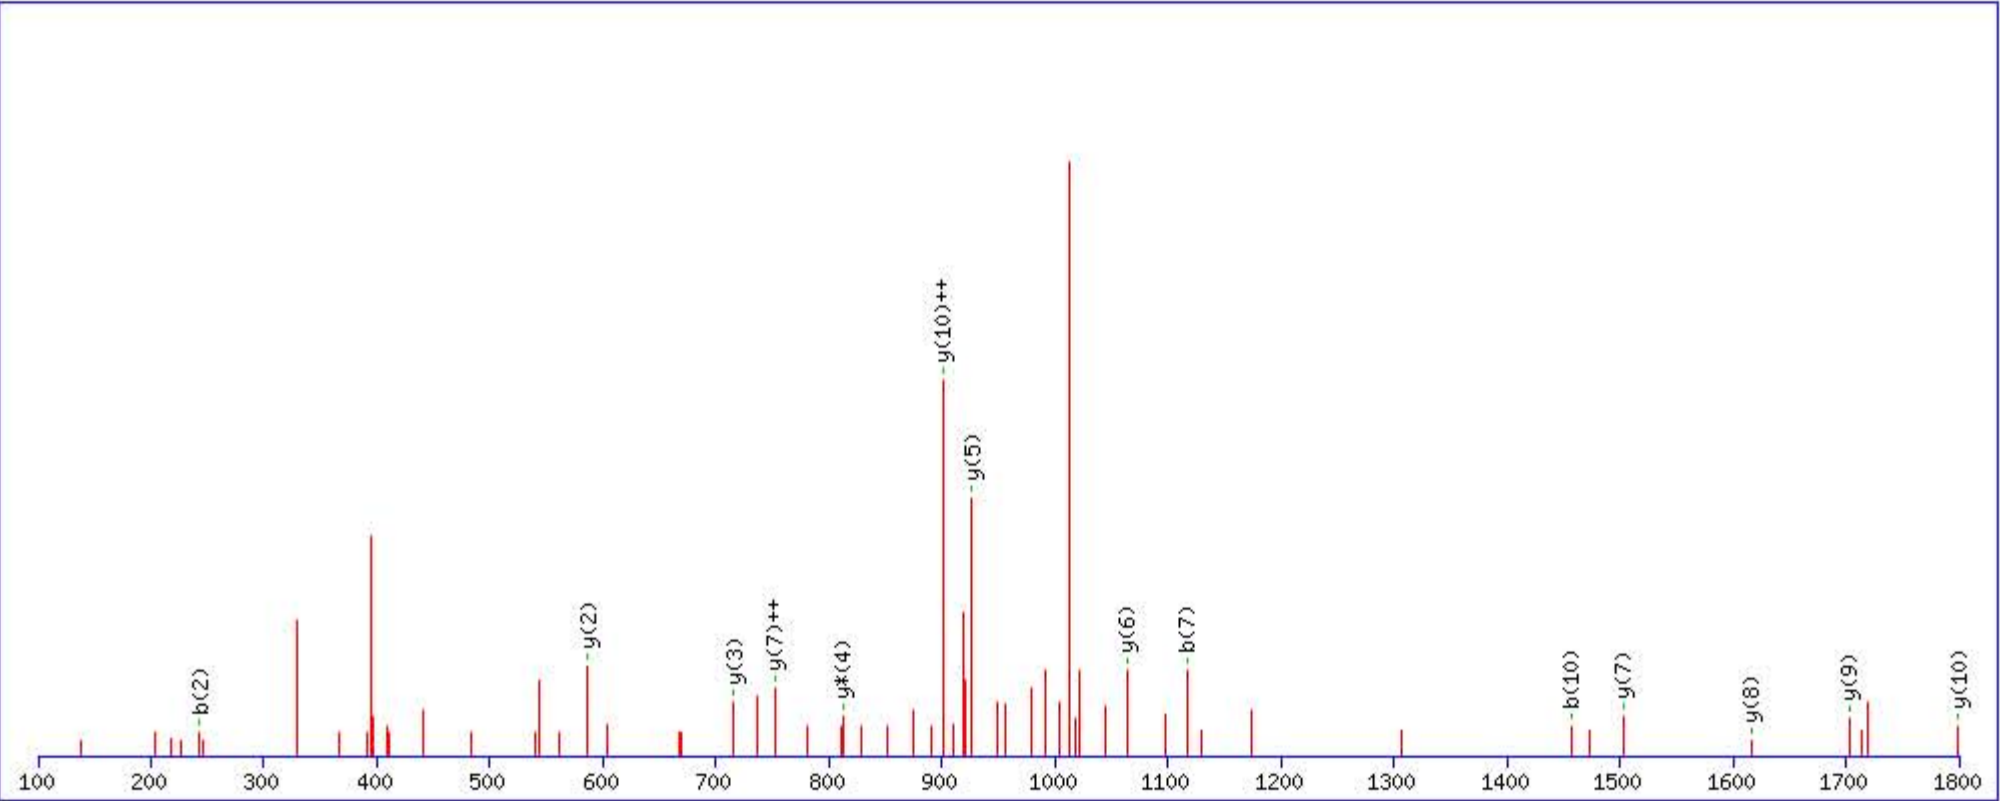

Monoisotopic mass of neutral peptide **Mr(calc)**: 2041.048859  
Fixed modifications: Carbamidomethyl (C) (apply to specified residues or termini only)  
Variable modifications:  
Q6 : Biotin:Thermo-21345 (Q)  
Q11 : Biotin:Thermo-21345 (Q)  
Ions Score: 45 Expect: 6.5e-005  
Matches : 14/118 fragment ions using 28 most intense peaks [\(help\)](#)

| #  | b           | b <sup>++</sup> | b <sup>+</sup> | b <sup>++</sup> | b <sup>0</sup> | b <sup>0++</sup> | Seq. | y           | y <sup>++</sup> | y <sup>+</sup> | y <sup>++</sup> | y <sup>0</sup> | y <sup>0++</sup> | #  |
|----|-------------|-----------------|----------------|-----------------|----------------|------------------|------|-------------|-----------------|----------------|-----------------|----------------|------------------|----|
| 1  | 130.049869  | 65.528572       |                |                 | 112.039304     | 56.523290        | E    |             |                 |                |                 |                |                  | 12 |
| 2  | 243.133933  | 122.070605      |                |                 | 225.123368     | 113.065322       | L    | 1913.013572 | 957.010424      | 1895.987023    | 948.497150      | 1895.003007    | 948.005142       | 11 |
| 3  | 340.186697  | 170.596987      |                |                 | 322.176132     | 161.591704       | P    | 1799.929508 | 900.468392      | 1782.902959    | 891.955118      | 1781.918943    | 891.463110       | 10 |
| 4  | 427.218725  | 214.113001      |                |                 | 409.208160     | 205.107718       | S    | 1702.876744 | 851.942010      | 1685.850195    | 843.428736      | 1684.866179    | 842.936728       | 9  |
| 5  | 540.302789  | 270.655033      |                |                 | 522.292224     | 261.649750       | L    | 1615.844716 | 808.425996      | 1598.818167    | 799.912722      | 1597.834151    | 799.420714       | 8  |
| 6  | 979.528115  | 490.267696      | 962.501566     | 481.754421      | 961.517550     | 481.262413       | Q    | 1502.760652 | 751.883964      | 1485.734103    | 743.370690      | 1484.750087    | 742.878682       | 7  |
| 7  | 1116.587027 | 558.797152      | 1099.560478    | 550.283877      | 1098.576462    | 549.791869       | H    | 1063.535326 | 532.271301      | 1046.508777    | 523.758027      | 1045.524761    | 523.266019       | 6  |
| 8  | 1213.639791 | 607.323534      | 1196.613242    | 598.810259      | 1195.629226    | 598.318251       | P    | 926.476414  | 463.741845      | 909.449865     | 455.228571      | 908.465849     | 454.736563       | 5  |
| 9  | 1327.682718 | 664.344997      | 1310.656169    | 655.831723      | 1309.672153    | 655.339715       | N    | 829.423650  | 415.215463      | 812.397101     | 406.702189      | 811.413085     | 406.210181       | 4  |
| 10 | 1456.725311 | 728.866293      | 1439.698762    | 720.353019      | 1438.714746    | 719.861011       | E    | 715.380723  | 358.194000      | 698.354174     | 349.680725      | 697.370158     | 349.188717       | 3  |
| 11 | 1895.950637 | 948.478957      | 1878.924088    | 939.965682      | 1877.940072    | 939.473674       | Q    | 586.338130  | 293.672703      | 569.311581     | 285.159429      |                |                  | 2  |
| 12 |             |                 |                |                 |                |                  | K    | 147.112804  | 74.060040       | 130.086255     | 65.546765       |                |                  | 1  |

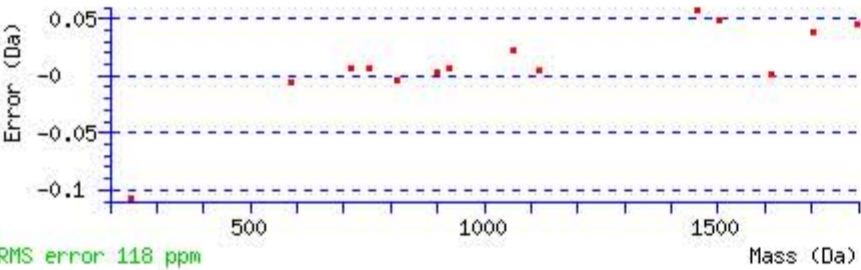

RMS error 118 ppm

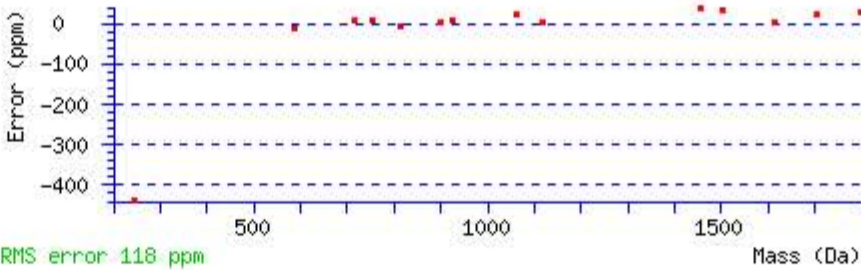

RMS error 118 ppm

NCBI BLAST search of [ELPSLQHPNEQK](#)  
(Parameters: blastp, nr protein database, expect=20000, no filter, PAM30)  
Other BLAST [web gateways](#)

All matches to this query

| Score | Mr(calc):   | Delta     | Sequence                            |
|-------|-------------|-----------|-------------------------------------|
| 44.8  | 2041.048859 | 0.015289  | <a href="#">ELPSLQHPNEQK</a>        |
| 0.2   | 2041.044830 | 0.019318  | <a href="#">ELTEMRLQDQQLAR</a>      |
| 0.2   | 2041.044830 | 0.019318  | <a href="#">ELTEMRLQDQQLAR</a>      |
| 0.1   | 2041.094269 | -0.030121 | <a href="#">KPITKSSPSLLIESDSPDK</a> |

Peptide View

MS/MS Fragmentation of **EVGPPLPQEAVPLQK**  
Found in **ECM1\_HUMAN**, Extracellular matrix protein 1 OS=Homo sapiens GN=ECM1 PE=1 SV=2

Match to Query 49010: 2223.237048 from(1112.625800,2+) rtinseconds(2453) index(8095)  
Title: Locus:1.1.1.2131.9 File:"2013-07-02 CLN FXIII 180 min 2nd F 1.wiff"  
Data file C:\Program Files (x86)\Matrix Science\Mascot Daemon\mgf\8 FXIII 180 min 2nd\mascot\_daemon\_merge.mgf

Click mouse within plot area to zoom in by factor of two about that point  
Or, 

Plot from

0

 to 

2400

 Da 

Full range

  
Label all possible matches ☐ Label matches used for scoring ☒

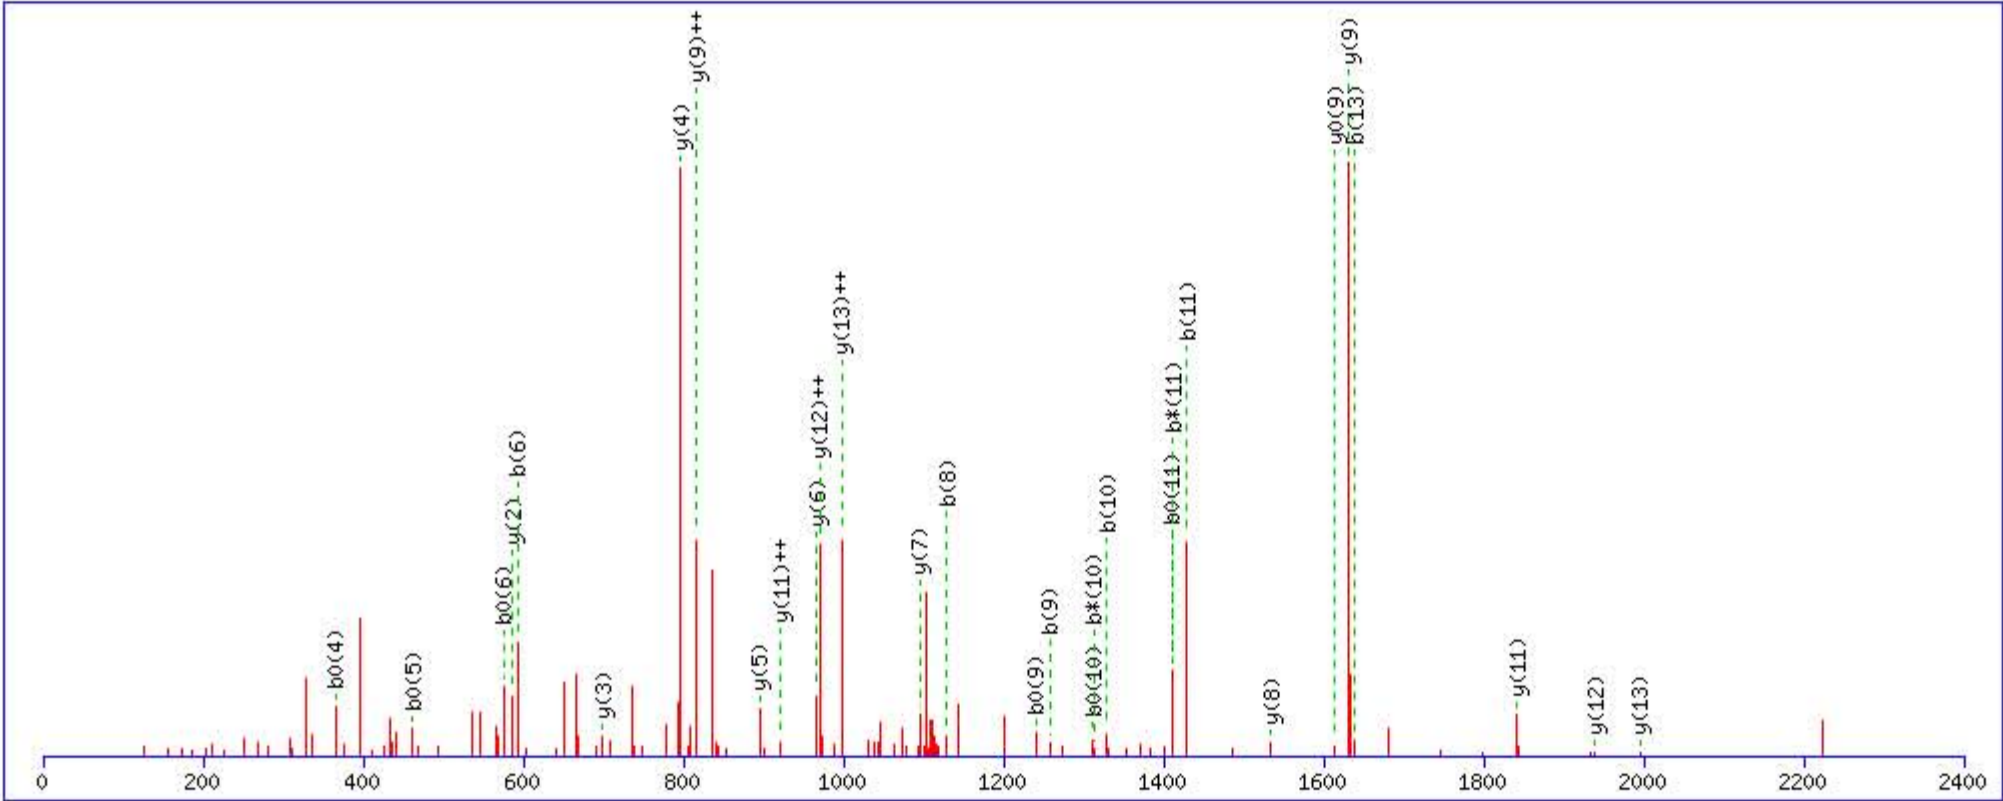

Monoisotopic mass of neutral peptide Mr(calc): 2223.215942  
Fixed modifications: Carbamidomethyl (C) (apply to specified residues or termini only)  
Variable modifications:  
Q8 : Biotin:Thermo-21345 (Q)  
Q14 : Biotin:Thermo-21345 (Q)  
Ions Score: 42 Expect: 0.0012  
Matches : 30/142 fragment ions using 80 most intense peaks [\(help\)](#)

| #  | b           | b <sup>++</sup> | b <sup>+</sup> | b <sup>+++</sup> | b <sup>0</sup> | b <sup>0++</sup> | Seq. | y           | y <sup>++</sup> | y <sup>+</sup> | y <sup>+++</sup> | y <sup>0</sup> | y <sup>0++</sup> | #  |
|----|-------------|-----------------|----------------|------------------|----------------|------------------|------|-------------|-----------------|----------------|------------------|----------------|------------------|----|
| 1  | 130.049869  | 65.528572       |                |                  | 112.039304     | 56.523290        | E    |             |                 |                |                  |                |                  | 15 |
| 2  | 229.118283  | 115.062780      |                |                  | 211.107718     | 106.057497       | V    | 2095.180639 | 1048.093957     | 2078.154090    | 1039.580683      | 2077.170074    | 1039.088675      | 14 |
| 3  | 286.139747  | 143.573512      |                |                  | 268.129182     | 134.568229       | G    | 1996.112225 | 998.559751      | 1979.085676    | 990.046476       | 1978.101660    | 989.554468       | 13 |
| 4  | 383.192511  | 192.099894      |                |                  | 365.181946     | 183.094611       | P    | 1939.090761 | 970.049019      | 1922.064212    | 961.535744       | 1921.080196    | 961.043736       | 12 |
| 5  | 480.245275  | 240.626276      |                |                  | 462.234710     | 231.620993       | P    | 1842.037997 | 921.522637      | 1825.011448    | 913.009362       | 1824.027432    | 912.517354       | 11 |
| 6  | 593.329339  | 297.168308      |                |                  | 575.318774     | 288.163025       | L    | 1744.985233 | 872.996255      | 1727.958684    | 864.482980       | 1726.974668    | 863.990972       | 10 |
| 7  | 690.382103  | 345.694690      |                |                  | 672.371538     | 336.689407       | P    | 1631.901169 | 816.454223      | 1614.874620    | 807.940948       | 1613.890604    | 807.448940       | 9  |
| 8  | 1129.607429 | 565.307353      | 1112.580880    | 556.794078       | 1111.596864    | 556.302070       | Q    | 1534.848405 | 767.927841      | 1517.821856    | 759.414566       | 1516.837840    | 758.922558       | 8  |
| 9  | 1258.650022 | 629.828649      | 1241.623473    | 621.315375       | 1240.639457    | 620.823367       | E    | 1095.623079 | 548.315178      | 1078.596530    | 539.801903       | 1077.612514    | 539.309895       | 7  |
| 10 | 1329.687136 | 665.347206      | 1312.660587    | 656.833932       | 1311.676571    | 656.341924       | A    | 966.580486  | 483.793881      | 949.553937     | 475.280607       |                |                  | 6  |
| 11 | 1428.755550 | 714.881413      | 1411.729001    | 706.368139       | 1410.744985    | 705.876131       | V    | 895.543372  | 448.275324      | 878.516823     | 439.762050       |                |                  | 5  |
| 12 | 1525.808314 | 763.407795      | 1508.781765    | 754.894521       | 1507.797749    | 754.402513       | P    | 796.474958  | 398.741117      | 779.448409     | 390.227843       |                |                  | 4  |
| 13 | 1638.892378 | 819.949827      | 1621.865829    | 811.436553       | 1620.881813    | 810.944545       | L    | 699.422194  | 350.214735      | 682.395645     | 341.701461       |                |                  | 3  |
| 14 | 2078.117704 | 1039.562490     | 2061.091155    | 1031.049215      | 2060.107139    | 1030.557207      | Q    | 586.338130  | 293.672703      | 569.311581     | 285.159429       |                |                  | 2  |
| 15 |             |                 |                |                  |                |                  | K    | 147.112804  | 74.060040       | 130.086255     | 65.546765        |                |                  | 1  |

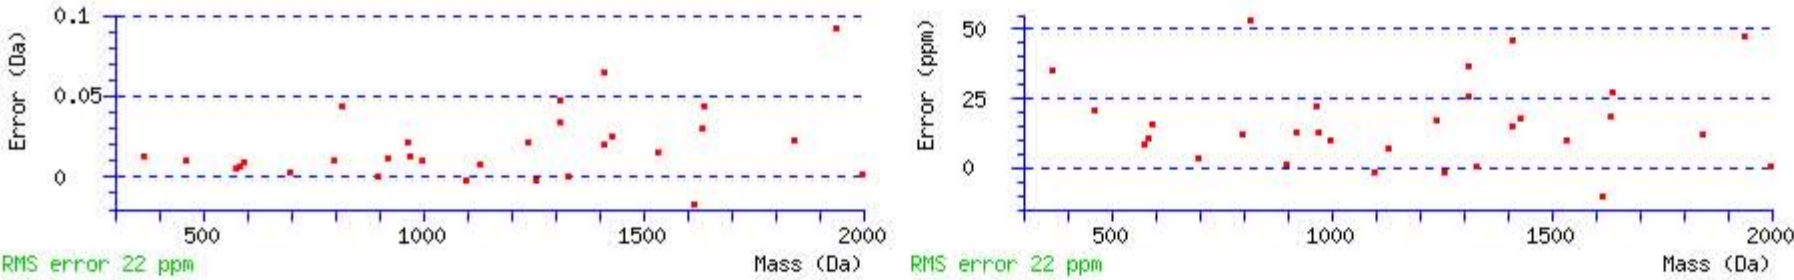

NCBI BLAST search of [EVGPPLPQEAVPLQK](#)  
(Parameters: blastp, nr protein database, expect=20000, no filter, PAM30)  
Other BLAST [web gateways](#)

All matches to this query

| Score | Mr(calc):   | Delta    | Sequence                        |
|-------|-------------|----------|---------------------------------|
| 42.1  | 2223.215942 | 0.021106 | <a href="#">EVGPPLPQEAVPLQK</a> |

MATRIX

SCIENCE

Mascot Search Results

Peptide View

MS/MS Fragmentation of **FSCFQEEAPQPHYQLR**  
Found in **ECM1\_HUMAN**, Extracellular matrix protein 1 OS=Homo sapiens GN=ECM1 PE=1 SV=2

Match to Query 51296: 2347.101462 from(783.374430,3+) rtinseconds(1946) index(5348)  
Title: Locus:1.1.1.1954.26 File:"2013-07-02 CLN FXIII 180 min 2nd F 1.wiff"  
Data file C:\Program Files (x86)\Matrix Science\Mascot Daemon\mgf\8 FXIII 180 min 2nd\mascot\_daemon\_merge.mgf

Click mouse within plot area to zoom in by factor of two about that point  
Or, 

Plot from

100

 to 

1600

 Da 

Full range

  
Label all possible matches ☐ Label matches used for scoring ☒

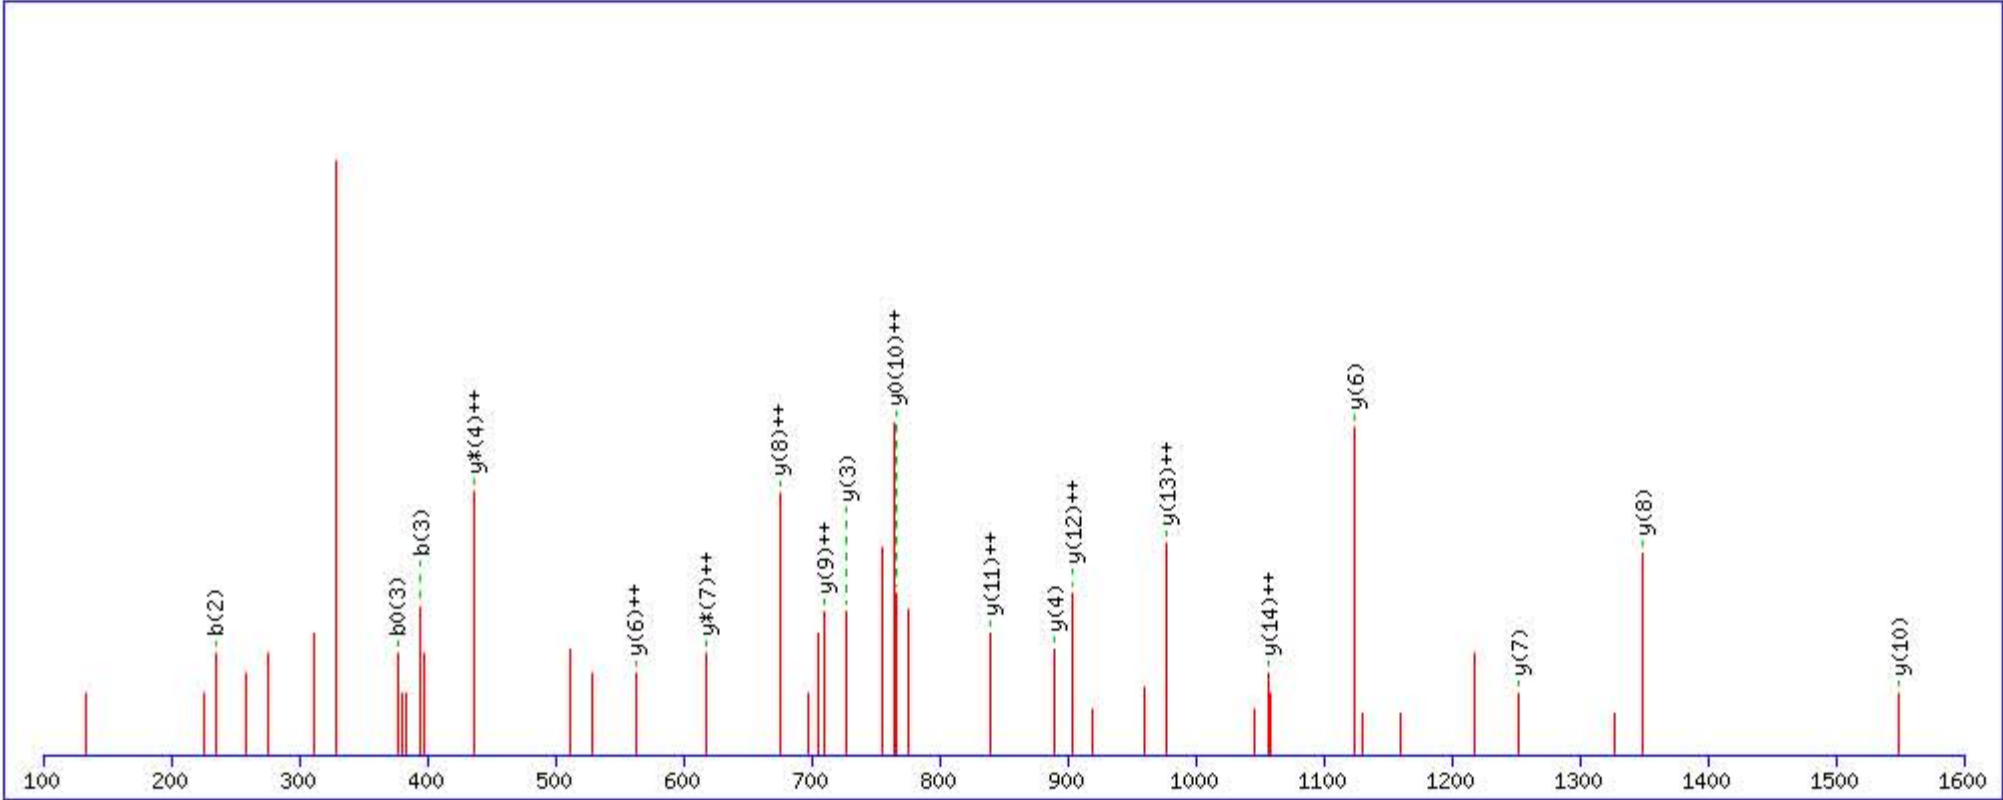

Monoisotopic mass of neutral peptide Mr(calc): 2347.087784  
Fixed modifications: Carbamidomethyl (C) (apply to specified residues or termini only)  
Variable modifications:  
Q14 : Biotin:Thermo-21345 (Q)  
Ions Score: 44 Expect: 0.00068  
Matches : 19/152 fragment ions using 33 most intense peaks ([help](#))

| #  | b           | b <sup>++</sup> | b <sup>*</sup> | b <sup>*++</sup> | b <sup>0</sup> | b <sup>0++</sup> | Seq. | y           | y <sup>++</sup> | y <sup>*</sup> | y <sup>*++</sup> | y <sup>0</sup> | y <sup>0++</sup> | #  |
|----|-------------|-----------------|----------------|------------------|----------------|------------------|------|-------------|-----------------|----------------|------------------|----------------|------------------|----|
| 1  | 148.075690  | 74.541483       |                |                  |                |                  | F    |             |                 |                |                  |                |                  | 16 |
| 2  | 235.107718  | 118.057497      |                |                  | 217.097153     | 109.052214       | S    | 2201.026658 | 1101.016967     | 2184.000109    | 1092.503692      | 2183.016093    | 1092.011684      | 15 |
| 3  | 395.138367  | 198.072821      |                |                  | 377.127802     | 189.067539       | C    | 2113.994630 | 1057.500953     | 2096.968081    | 1048.987678      | 2095.984065    | 1048.495670      | 14 |
| 4  | 542.206781  | 271.607029      |                |                  | 524.196216     | 262.601746       | F    | 1953.963981 | 977.485629      | 1936.937432    | 968.972354       | 1935.953416    | 968.480346       | 13 |
| 5  | 670.265359  | 335.636318      | 653.238810     | 327.123043       | 652.254794     | 326.631035       | Q    | 1806.895567 | 903.951422      | 1789.869018    | 895.438147       | 1788.885002    | 894.946139       | 12 |
| 6  | 799.307952  | 400.157614      | 782.281403     | 391.644340       | 781.297387     | 391.152332       | E    | 1678.836989 | 839.922133      | 1661.810440    | 831.408858       | 1660.826424    | 830.916850       | 11 |
| 7  | 928.350545  | 464.678911      | 911.323996     | 456.165636       | 910.339980     | 455.673628       | E    | 1549.794396 | 775.400836      | 1532.767847    | 766.887562       | 1531.783831    | 766.395554       | 10 |
| 8  | 999.387659  | 500.197468      | 982.361110     | 491.684193       | 981.377094     | 491.192185       | A    | 1420.751803 | 710.879540      | 1403.725254    | 702.366265       |                |                  | 9  |
| 9  | 1096.440423 | 548.723850      | 1079.413874    | 540.210575       | 1078.429858    | 539.718567       | P    | 1349.714689 | 675.360983      | 1332.688140    | 666.847708       |                |                  | 8  |
| 10 | 1224.499001 | 612.753138      | 1207.472452    | 604.239864       | 1206.488436    | 603.747856       | Q    | 1252.661925 | 626.834601      | 1235.635376    | 618.321326       |                |                  | 7  |
| 11 | 1321.551765 | 661.279520      | 1304.525216    | 652.766246       | 1303.541200    | 652.274238       | P    | 1124.603347 | 562.805312      | 1107.576798    | 554.292037       |                |                  | 6  |
| 12 | 1458.610677 | 729.808976      | 1441.584128    | 721.295702       | 1440.600112    | 720.803694       | H    | 1027.550583 | 514.278930      | 1010.524034    | 505.765655       |                |                  | 5  |
| 13 | 1621.674006 | 811.340641      | 1604.647457    | 802.827367       | 1603.663441    | 802.335358       | Y    | 890.491671  | 445.749474      | 873.465122     | 437.236199       |                |                  | 4  |
| 14 | 2060.899332 | 1030.953304     | 2043.872783    | 1022.440030      | 2042.888767    | 1021.948022      | Q    | 727.428342  | 364.217809      | 710.401793     | 355.704535       |                |                  | 3  |
| 15 | 2173.983396 | 1087.495336     | 2156.956847    | 1078.982061      | 2155.972831    | 1078.490053      | L    | 288.203016  | 144.605146      | 271.176467     | 136.091872       |                |                  | 2  |
| 16 |             |                 |                |                  |                |                  | R    | 175.118952  | 88.063114       | 158.092403     | 79.549839        |                |                  | 1  |

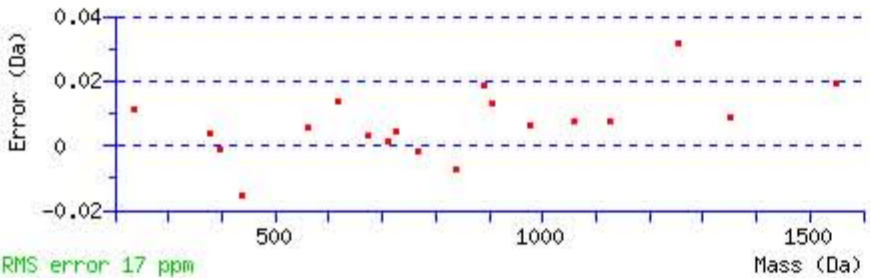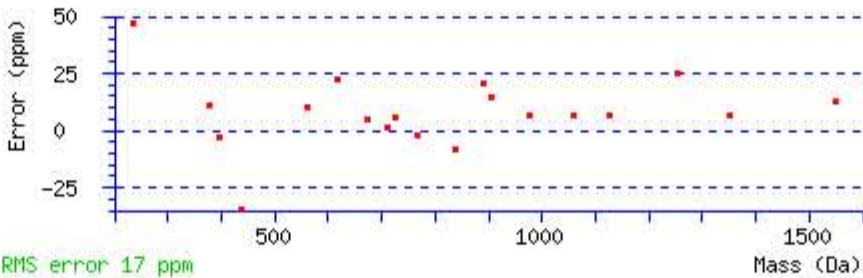

NCBI BLAST search of [FSCFQEEAPQPHYQLR](#)  
(Parameters: blastp, nr protein database, expect=20000, no filter, PAM30)  
Other BLAST [web gateways](#)

All matches to this query

| Score | Mr(calc):   | Delta    | Sequence                         |
|-------|-------------|----------|----------------------------------|
| 44.0  | 2347.087784 | 0.013678 | <a href="#">FSCFQEEAPQPHYQLR</a> |
| 21.0  | 2347.087784 | 0.013678 | <a href="#">FSCFQEEAPQPHYQLR</a> |

***{MATRIX}***  
***{SCIENCE}*** Mascot Search Results

Peptide View

MS/MS Fragmentation of **VNDAQEYR**  
Found in **FETUB\_HUMAN**, Fetuin-B OS=Homo sapiens GN=FETUB PE=1 SV=2

Match to Query 23404: 1304.619188 from(653.316870,2+) rtinseconds(1458) index(63247)  
Title: Locus:1.1.1.1782.24 File:"2013-07-02 CLN FXIII 180 min 2nd FT.wiff"  
Data file C:\Program Files (x86)\Matrix Science\Mascot Daemon\mgf\8 FXIII 180 min 2nd\mascot\_daemon\_merge.mgf

Click mouse within plot area to zoom in by factor of two about that point  
Or,   to  Da   
Label all possible matches ☐ Label matches used for scoring ☒

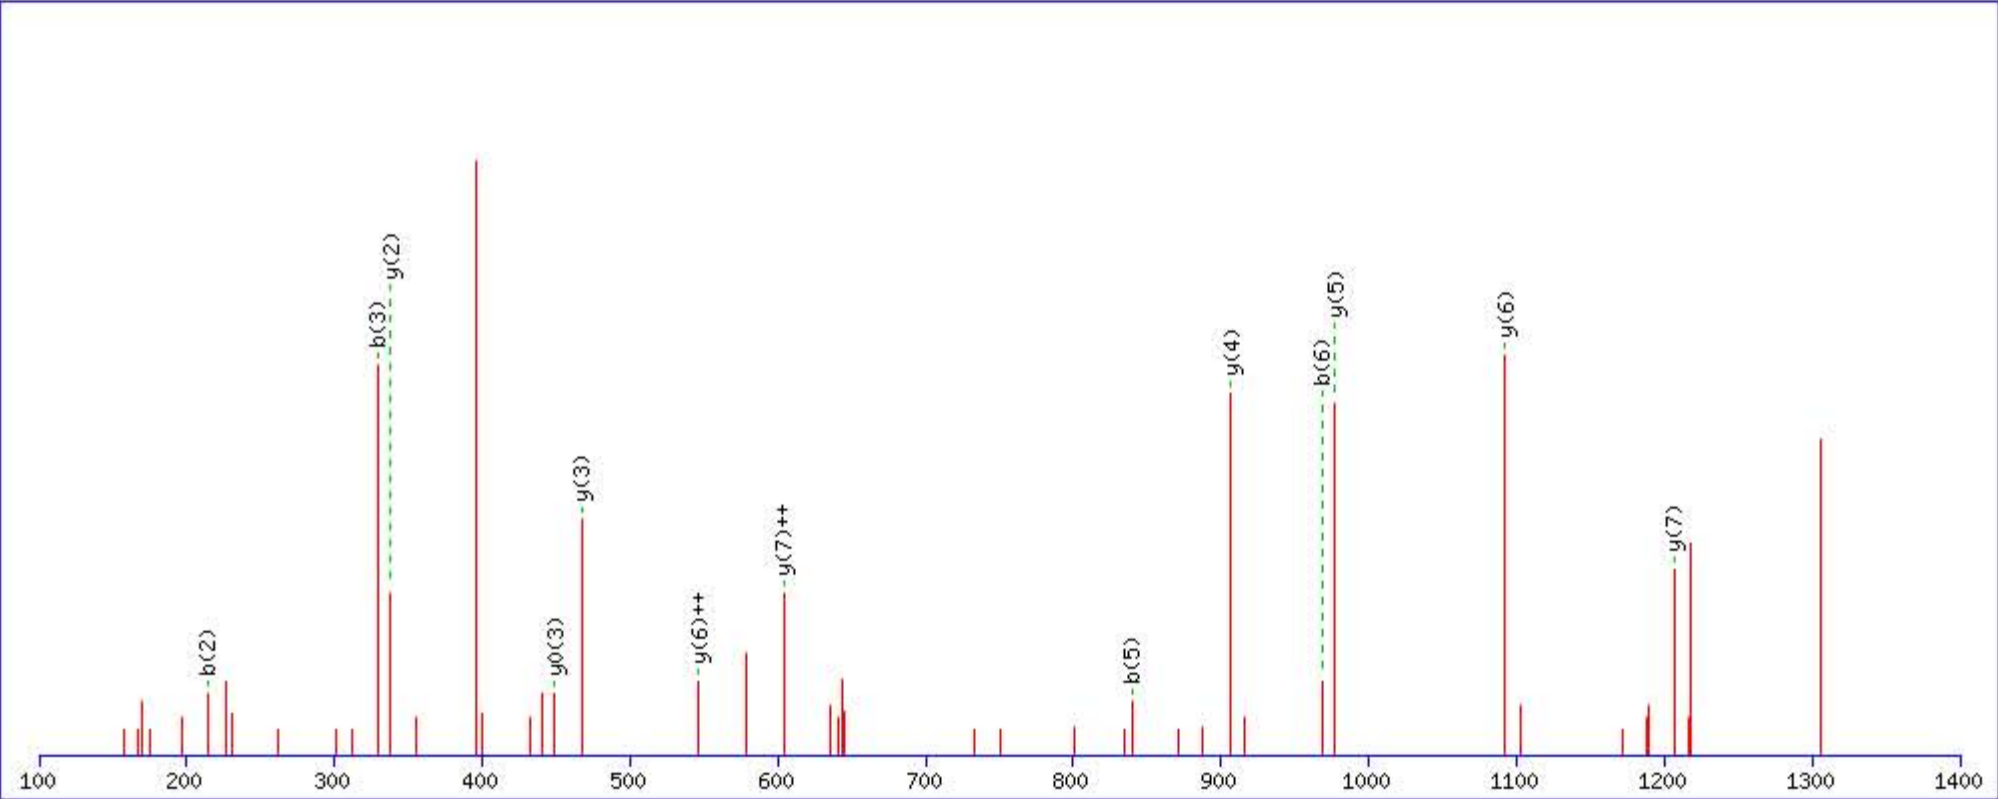

Monoisotopic mass of neutral peptide Mr(calc): 1304.618301  
Fixed modifications: Carbamidomethyl (C) (apply to specified residues or termini only)  
Variable modifications:  
Q5 : Biotin:Thermo-21345 (Q)  
Ions Score: 37 Expect: 0.0026  
Matches : 13/74 fragment ions using 22 most intense peaks [\(help\)](#)

| # | b           | b <sup>++</sup> | b <sup>*</sup> | b <sup>++</sup> * | b <sup>0</sup> | b <sup>0++</sup> | Seq. | y           | y <sup>++</sup> | y <sup>*</sup> | y <sup>++</sup> * | y <sup>0</sup> | y <sup>0++</sup> | # |
|---|-------------|-----------------|----------------|-------------------|----------------|------------------|------|-------------|-----------------|----------------|-------------------|----------------|------------------|---|
| 1 | 100.075690  | 50.541483       |                |                   |                |                  | V    |             |                 |                |                   |                |                  | 8 |
| 2 | 214.118617  | 107.562947      | 197.092068     | 99.049672         |                |                  | N    | 1206.557184 | 603.782230      | 1189.530635    | 595.268956        | 1188.546619    | 594.776948       | 7 |
| 3 | 329.145560  | 165.076418      | 312.119011     | 156.563144        | 311.134995     | 156.071136       | D    | 1092.514257 | 546.760767      | 1075.487708    | 538.247492        | 1074.503692    | 537.755484       | 6 |
| 4 | 400.182674  | 200.594975      | 383.156125     | 192.081700        | 382.172109     | 191.589692       | A    | 977.487314  | 489.247295      | 960.460765     | 480.734021        | 959.476749     | 480.242013       | 5 |
| 5 | 839.408000  | 420.207638      | 822.381451     | 411.694364        | 821.397435     | 411.202356       | Q    | 906.450200  | 453.728738      | 889.423651     | 445.215464        | 888.439635     | 444.723456       | 4 |
| 6 | 968.450593  | 484.728935      | 951.424044     | 476.215660        | 950.440028     | 475.723652       | E    | 467.224874  | 234.116075      | 450.198325     | 225.602801        | 449.214309     | 225.110793       | 3 |
| 7 | 1131.513922 | 566.260599      | 1114.487373    | 557.747325        | 1113.503357    | 557.255317       | Y    | 338.182281  | 169.594778      | 321.155732     | 161.081504        |                |                  | 2 |
| 8 |             |                 |                |                   |                |                  | R    | 175.118952  | 88.063114       | 158.092403     | 79.549839         |                |                  | 1 |

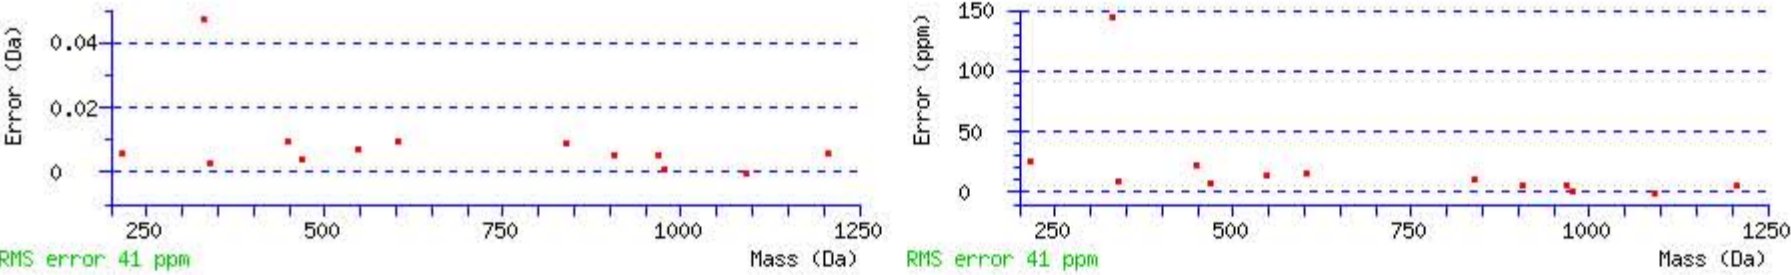

NCBI BLAST search of [VNDAQEYR](#)  
(Parameters: blastp, nr protein database, expect=20000, no filter, PAM30)  
Other BLAST [web gateways](#)

All matches to this query

| Score | Mr(calc):   | Delta    | Sequence                 |
|-------|-------------|----------|--------------------------|
| 37.4  | 1304.618301 | 0.000887 | <a href="#">VNDAQEYR</a> |

MATRIX

SCIENCE

Mascot Search Results

Peptide View

MS/MS Fragmentation of **IFFESVYGQCK**  
Found in **FETUB\_HUMAN**, Fetuin-B OS=Homo sapiens GN=FETUB PE=1 SV=2

Match to Query 37707: 1687.821012 from(563.614280,3+) rtinseconds(2319) index(68258)  
Title: Locus:1.1.1.2082.9 File:"2013-07-02 CLN FXIII 180 min 2nd FT.wiff"  
Data file C:\Program Files (x86)\Matrix Science\Mascot Daemon\mgf\8 FXIII 180 min 2nd\mascot\_daemon\_merge.mgf

Click mouse within plot area to zoom in by factor of two about that point  
Or, 

Plot from

100

 to 

1500

 Da 

Full range

  
Label all possible matches ☐ Label matches used for scoring ☒

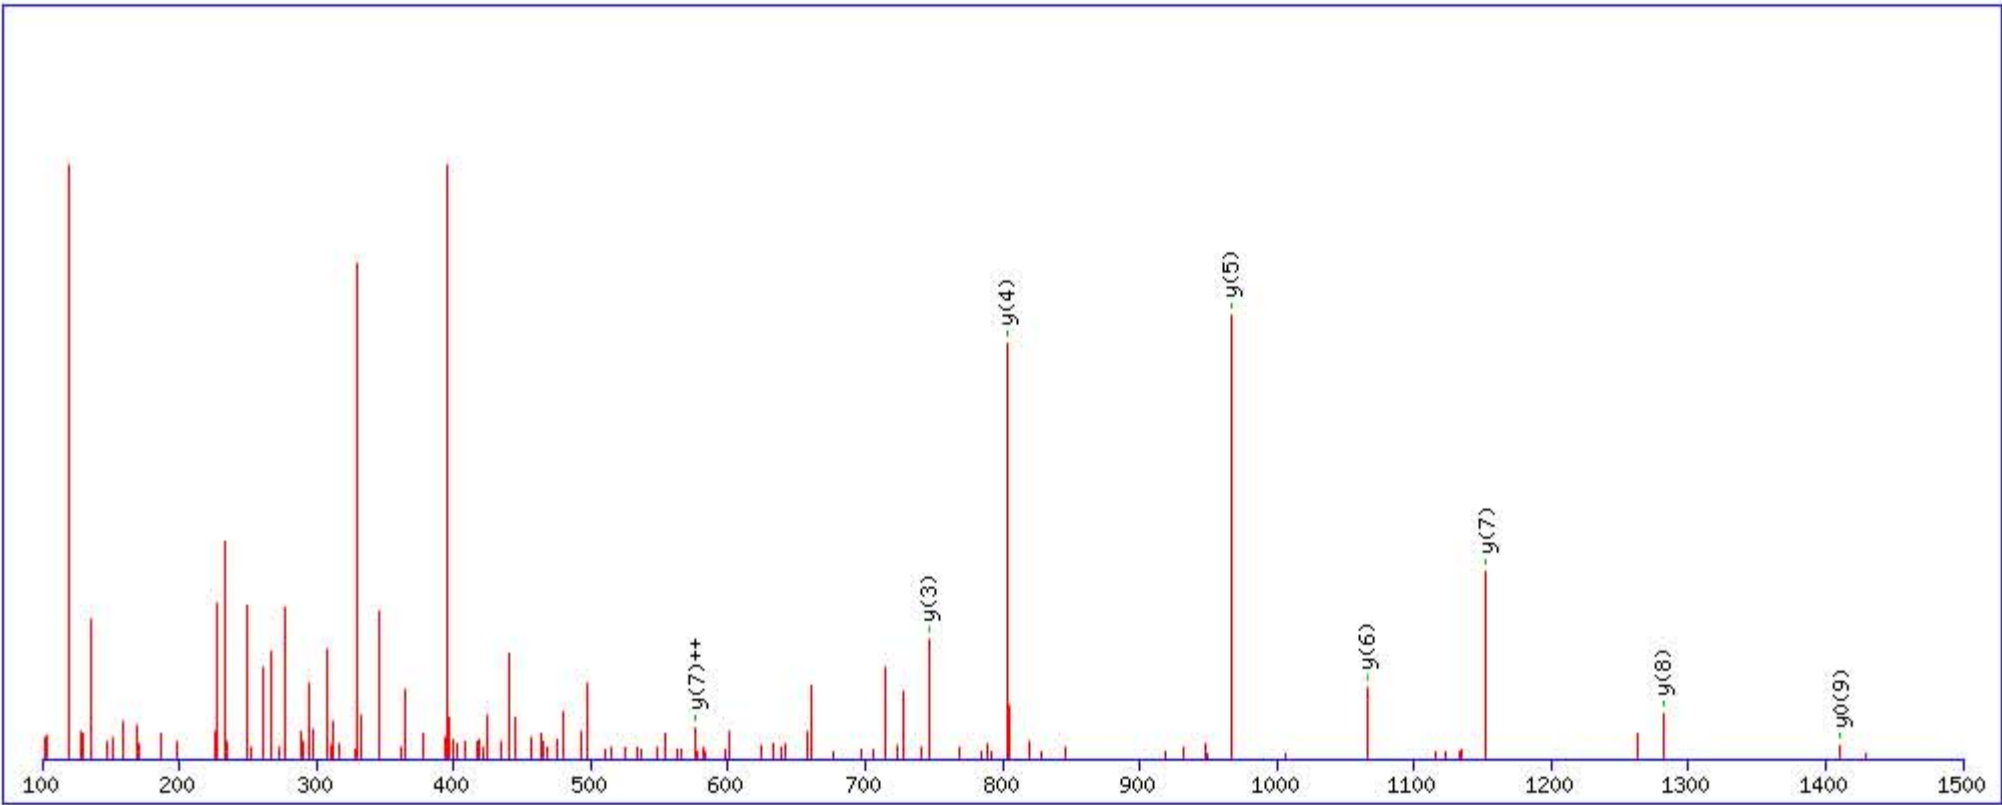

Monoisotopic mass of neutral peptide **Mr(calc):** 1687.810226  
Fixed modifications: Carbamidomethyl (C) (apply to specified residues or termini only)  
Variable modifications:  
Q9 : Biotin:Thermo-21345 (Q)  
Ions Score: 35 Expect: 0.0073  
Matches : 8/86 fragment ions using 13 most intense peaks [\(help\)](#)

| #  | b           | b <sup>++</sup> | b <sup>*</sup> | b <sup>*++</sup> | b <sup>0</sup> | b <sup>0++</sup> | Seq. | y           | y <sup>++</sup> | y <sup>*</sup> | y <sup>*++</sup> | y <sup>0</sup> | y <sup>0++</sup> | #  |
|----|-------------|-----------------|----------------|------------------|----------------|------------------|------|-------------|-----------------|----------------|------------------|----------------|------------------|----|
| 1  | 114.091340  | 57.549308       |                |                  |                |                  | I    |             |                 |                |                  |                |                  | 11 |
| 2  | 261.159754  | 131.083515      |                |                  |                |                  | F    | 1575.733435 | 788.370356      | 1558.706886    | 779.857081       | 1557.722870    | 779.365073       | 10 |
| 3  | 408.228168  | 204.617722      |                |                  |                |                  | F    | 1428.665021 | 714.836149      | 1411.638472    | 706.322874       | 1410.654456    | 705.830866       | 9  |
| 4  | 537.270761  | 269.139019      |                |                  | 519.260196     | 260.133736       | E    | 1281.596607 | 641.301942      | 1264.570058    | 632.788667       | 1263.586042    | 632.296659       | 8  |
| 5  | 624.302789  | 312.655033      |                |                  | 606.292224     | 303.649750       | S    | 1152.554014 | 576.780645      | 1135.527465    | 568.267371       | 1134.543449    | 567.775363       | 7  |
| 6  | 723.371203  | 362.189239      |                |                  | 705.360638     | 353.183957       | V    | 1065.521986 | 533.264631      | 1048.495437    | 524.751357       |                |                  | 6  |
| 7  | 886.434532  | 443.720904      |                |                  | 868.423967     | 434.715622       | Y    | 966.453572  | 483.730424      | 949.427023     | 475.217150       |                |                  | 5  |
| 8  | 943.455996  | 472.231636      |                |                  | 925.445431     | 463.226354       | G    | 803.390243  | 402.198760      | 786.363694     | 393.685485       |                |                  | 4  |
| 9  | 1382.681322 | 691.844299      | 1365.654773    | 683.331025       | 1364.670757    | 682.839017       | Q    | 746.368779  | 373.688028      | 729.342230     | 365.174753       |                |                  | 3  |
| 10 | 1542.711971 | 771.859624      | 1525.685422    | 763.346349       | 1524.701406    | 762.854341       | C    | 307.143453  | 154.075365      | 290.116904     | 145.562090       |                |                  | 2  |
| 11 |             |                 |                |                  |                |                  | K    | 147.112804  | 74.060040       | 130.086255     | 65.546765        |                |                  | 1  |

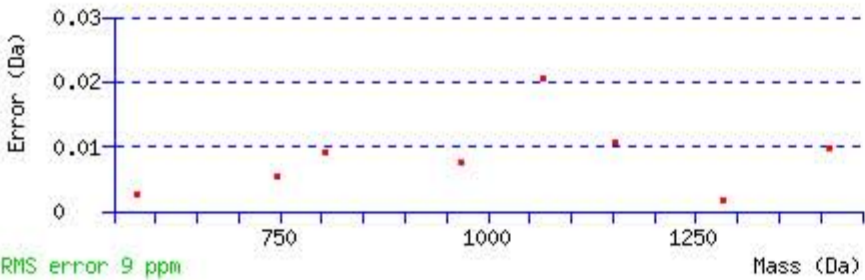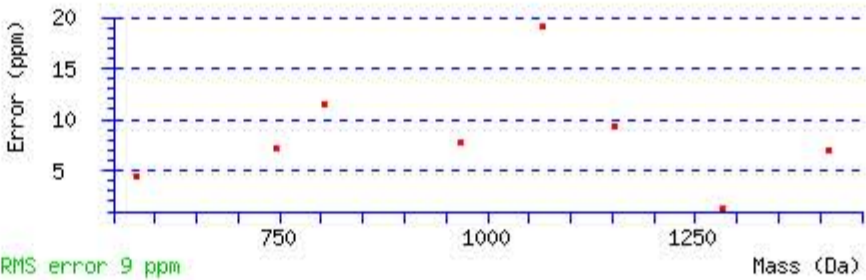

NCBI BLAST search of [IFFESVYGQCK](#)  
(Parameters: blastp, nr protein database, expect=20000, no filter, PAM30)  
Other BLAST [web gateways](#)

All matches to this query

| Score | Mr(calc):   | Delta    | Sequence                    |
|-------|-------------|----------|-----------------------------|
| 34.6  | 1687.810226 | 0.010786 | <a href="#">IFFESVYGQCK</a> |

MATRIX

SCIENCE

Mascot Search Results

Peptide View

MS/MS Fragmentation of **QLEQVIAK**  
Found in **FIBA\_HUMAN**, Fibrinogen alpha chain OS=Homo sapiens GN=FGA PE=1 SV=2

Match to Query 21515: 1238.706568 from(620.360560,2+) rtinseconds(1756) index(18604)  
Title: Locus:1.1.1.2994.8 File:"2013-07-02 CLN FXIII 180 min 2nd F 2.wiff"  
Data file C:\Program Files (x86)\Matrix Science\Mascot Daemon\mgf\8 FXIII 180 min 2nd\mascot\_daemon\_merge.mgf

Click mouse within plot area to zoom in by factor of two about that point  
Or, 

Plot from

100

 to 

1400

 Da 

Full range

  
Label all possible matches ☐ Label matches used for scoring ☒

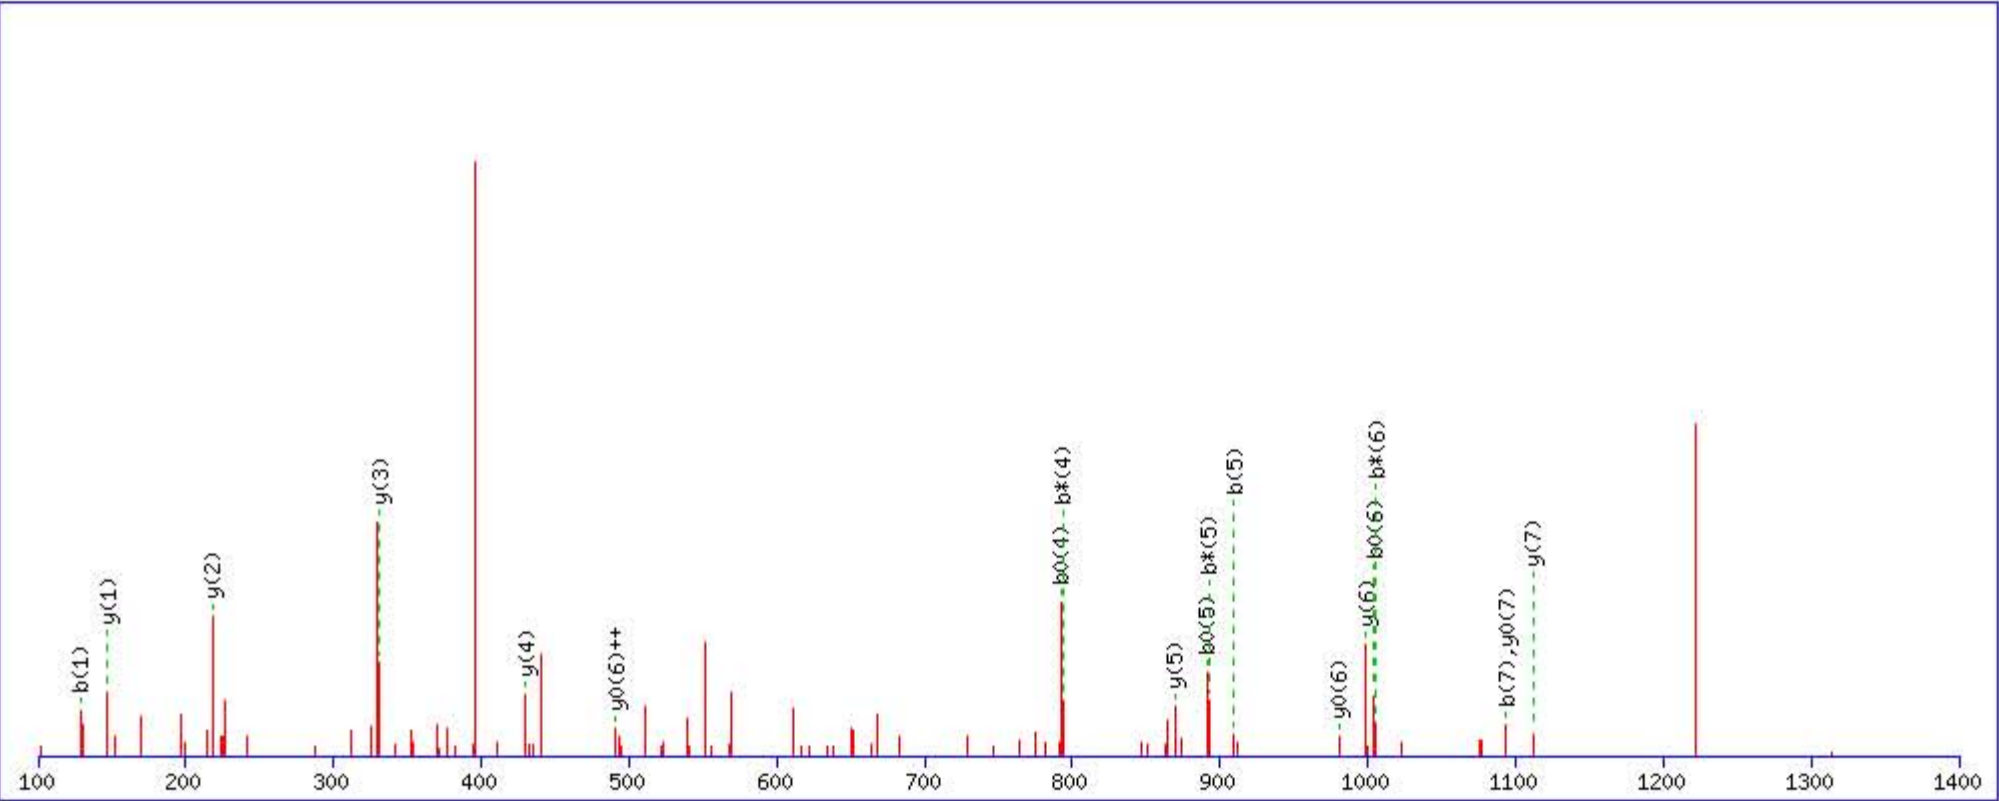

Monoisotopic mass of neutral peptide Mr(calc): 1238.705658  
Fixed modifications: Carbamidomethyl (C) (apply to specified residues or termini only)  
Variable modifications:  
Q4 : Biotin:Thermo-21345 (Q)  
Ions Score: 44 Expect: 0.0006  
Matches : 19/70 fragment ions using 32 most intense peaks [\(help\)](#)

| # | b           | b <sup>++</sup> | b <sup>*</sup> | b <sup>*++</sup> | b <sup>0</sup> | b <sup>0++</sup> | Seq. | y           | y <sup>++</sup> | y <sup>*</sup> | y <sup>*++</sup> | y <sup>0</sup> | y <sup>0++</sup> | # |
|---|-------------|-----------------|----------------|------------------|----------------|------------------|------|-------------|-----------------|----------------|------------------|----------------|------------------|---|
| 1 | 129.065854  | 65.036565       | 112.039305     | 56.523291        |                |                  | Q    |             |                 |                |                  |                |                  | 8 |
| 2 | 242.149918  | 121.578597      | 225.123369     | 113.065323       |                |                  | L    | 1111.654379 | 556.330828      | 1094.627830    | 547.817553       | 1093.643814    | 547.325545       | 7 |
| 3 | 371.192511  | 186.099894      | 354.165962     | 177.586619       | 353.181946     | 177.094611       | E    | 998.570315  | 499.788796      | 981.543766     | 491.275521       | 980.559750     | 490.783513       | 6 |
| 4 | 810.417837  | 405.712557      | 793.391288     | 397.199282       | 792.407272     | 396.707274       | Q    | 869.527722  | 435.267499      | 852.501173     | 426.754225       |                |                  | 5 |
| 5 | 909.486251  | 455.246764      | 892.459702     | 446.733489       | 891.475686     | 446.241481       | V    | 430.302396  | 215.654836      | 413.275847     | 207.141562       |                |                  | 4 |
| 6 | 1022.570315 | 511.788796      | 1005.543766    | 503.275521       | 1004.559750    | 502.783513       | I    | 331.233982  | 166.120629      | 314.207433     | 157.607355       |                |                  | 3 |
| 7 | 1093.607429 | 547.307353      | 1076.580880    | 538.794078       | 1075.596864    | 538.302070       | A    | 218.149918  | 109.578597      | 201.123369     | 101.065323       |                |                  | 2 |
| 8 |             |                 |                |                  |                |                  | K    | 147.112804  | 74.060040       | 130.086255     | 65.546765        |                |                  | 1 |

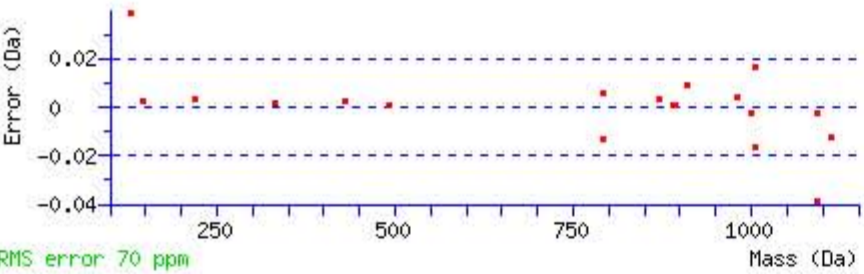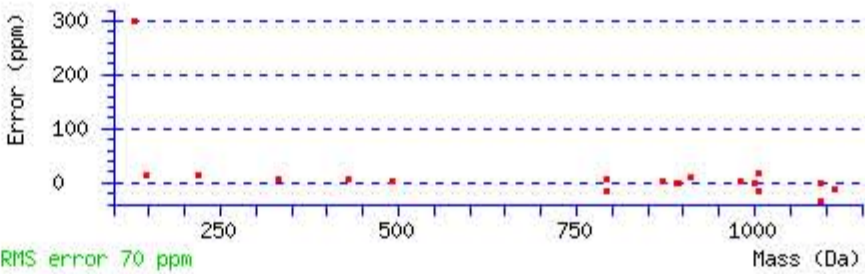

NCBI BLAST search of [QLEQVIAK](#)  
(Parameters: blastp, nr protein database, expect=20000, no filter, PAM30)  
Other BLAST [web gateways](#)

All matches to this query

| Score | Mr(calc):   | Delta     | Sequence                     |
|-------|-------------|-----------|------------------------------|
| 44.1  | 1238.705658 | 0.000910  | <a href="#">QLEQVIAK</a>     |
| 13.6  | 1238.705658 | 0.000910  | <a href="#">QLEQVIAK</a>     |
| 11.3  | 1238.698257 | 0.008311  | <a href="#">IHADASSKVLAK</a> |
| 10.8  | 1238.716904 | -0.010336 | <a href="#">DRVQVAIK</a>     |
| 6.3   | 1238.705658 | 0.000910  | <a href="#">QIAQEIVK</a>     |
| 5.5   | 1238.698273 | 0.008295  | <a href="#">GHVTQLKESLK</a>  |
| 5.4   | 1238.702301 | 0.004267  | <a href="#">DVFKKGFSIAK</a>  |
| 5.3   | 1238.716888 | -0.010320 | <a href="#">KRILCPLDPK</a>   |
| 4.8   | 1238.709473 | -0.002905 | <a href="#">NDLRPANKLAK</a>  |
| 3.3   | 1238.691040 | 0.015528  | <a href="#">LYKEFIDLAK</a>   |

MATRIX

SCIENCE

Mascot Search Results

Peptide View

MS/MS Fragmentation of **NSLF<sup>+</sup>EYQK**  
Found in **FIBA\_HUMAN**, Fibrinogen alpha chain OS=Homo sapiens GN=FGA PE=1 SV=2

Match to Query 24061: 1338.672688 from(670.343620,2+) rtinseconds(2044) index(20483)  
Title: Locus:1.1.1.3094.10 File:"2013-07-02 CLN FXIII 180 min 2nd F 2.wiff"  
Data file C:\Program Files (x86)\Matrix Science\Mascot Daemon\mgf\8 FXIII 180 min 2nd\mascot\_daemon\_merge.mgf

Click mouse within plot area to zoom in by factor of two about that point  
Or, 

Plot from

100

 to 

1400

 Da 

Full range

  
Label all possible matches ☐ Label matches used for scoring ☒

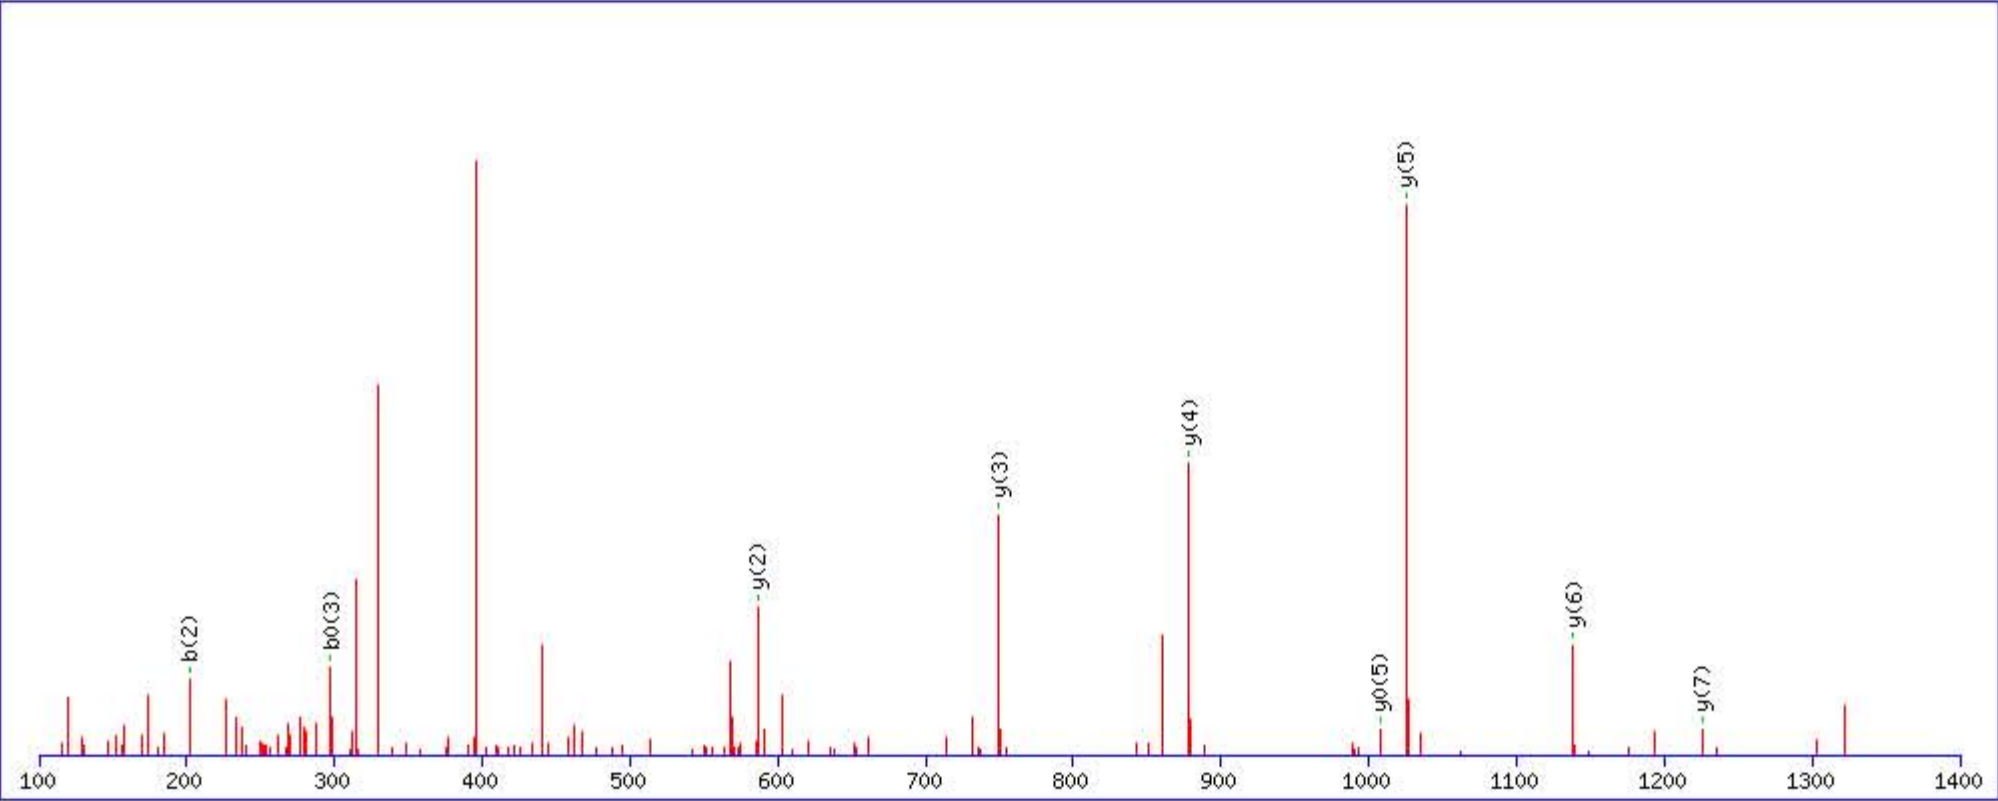

Monoisotopic mass of neutral peptide Mr(calc): 1338.664185  
Fixed modifications: Carbamidomethyl (C) (apply to specified residues or termini only)  
Variable modifications:  
Q7 : Biotin:Thermo-21345 (Q)  
Ions Score: 49 Expect: 0.00023  
Matches : 9/76 fragment ions using 13 most intense peaks [\(help\)](#)

| # | b           | b <sup>++</sup> | b <sup>+</sup> | b <sup>++</sup> * | b <sup>0</sup> | b <sup>0++</sup> | Seq. | y           | y <sup>++</sup> | y <sup>+</sup> | y <sup>++</sup> * | y <sup>0</sup> | y <sup>0++</sup> | # |
|---|-------------|-----------------|----------------|-------------------|----------------|------------------|------|-------------|-----------------|----------------|-------------------|----------------|------------------|---|
| 1 | 115.050203  | 58.028740       | 98.023654      | 49.515465         |                |                  | N    |             |                 |                |                   |                |                  | 8 |
| 2 | 202.082231  | 101.544753      | 185.055682     | 93.031479         | 184.071666     | 92.539471        | S    | 1225.628558 | 613.317917      | 1208.602009    | 604.804643        | 1207.617993    | 604.312635       | 7 |
| 3 | 315.166295  | 158.086785      | 298.139746     | 149.573511        | 297.155730     | 149.081503       | L    | 1138.596530 | 569.801903      | 1121.569981    | 561.288629        | 1120.585965    | 560.796621       | 6 |
| 4 | 462.234709  | 231.620993      | 445.208160     | 223.107718        | 444.224144     | 222.615710       | F    | 1025.512466 | 513.259871      | 1008.485917    | 504.746597        | 1007.501901    | 504.254589       | 5 |
| 5 | 591.277302  | 296.142289      | 574.250753     | 287.629015        | 573.266737     | 287.137007       | E    | 878.444052  | 439.725664      | 861.417503     | 431.212390        | 860.433487     | 430.720382       | 4 |
| 6 | 754.340631  | 377.673954      | 737.314082     | 369.160679        | 736.330066     | 368.668671       | Y    | 749.401459  | 375.204368      | 732.374910     | 366.691093        |                |                  | 3 |
| 7 | 1193.565957 | 597.286617      | 1176.539408    | 588.773342        | 1175.555392    | 588.281334       | Q    | 586.338130  | 293.672703      | 569.311581     | 285.159429        |                |                  | 2 |
| 8 |             |                 |                |                   |                |                  | K    | 147.112804  | 74.060040       | 130.086255     | 65.546765         |                |                  | 1 |

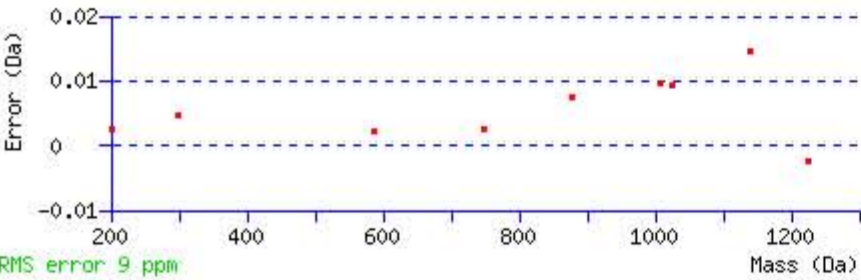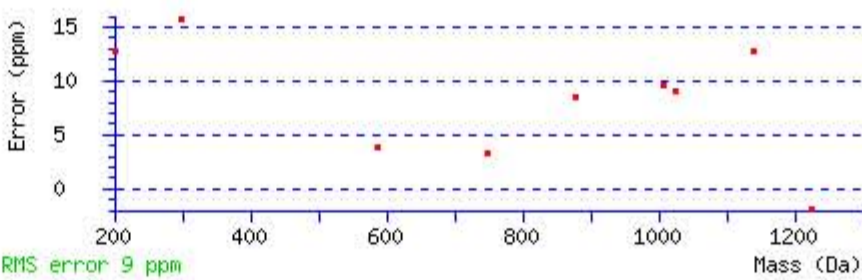

NCBI BLAST search of [NSLF<sup>+</sup>EYQK](#)  
(Parameters: blastp, nr protein database, expect=20000, no filter, PAM30)  
Other BLAST [web gateways](#)

All matches to this query

| Score | Mr(calc):   | Delta     | Sequence                             |
|-------|-------------|-----------|--------------------------------------|
| 49.1  | 1338.664185 | 0.008503  | <a href="#">NSLF<sup>+</sup>EYQK</a> |
| 11.2  | 1338.660172 | 0.012516  | <a href="#">NSMFTAGKGVAEK</a>        |
| 8.0   | 1338.660172 | 0.012516  | <a href="#">BTVYLQMBSLR</a>          |
| 2.4   | 1338.682632 | -0.009944 | <a href="#">NLSRMQSRFGK</a>          |
| 1.5   | 1338.686188 | -0.013500 | <a href="#">TVKMMYQK</a>             |

MATRIX

SCIENCE

Mascot Search Results

Peptide View

MS/MS Fragmentation of **ALTDMPQMR**  
Found in **FIBA\_HUMAN**, Fibrinogen alpha chain OS=Homo sapiens GN=FGA PE=1 SV=2

Match to Query 26760: 1388.662008 from(695.338280,2+) rtinseconds(1659) index(17930)  
Title: Locus:1.1.1.2960.12 File:"2013-07-02 CLN FXIII 180 min 2nd F 2.wiff"  
Data file C:\Program Files (x86)\Matrix Science\Mascot Daemon\mgf\8 FXIII 180 min 2nd\mascot\_daemon\_merge.mgf

Click mouse within plot area to zoom in by factor of two about that point  
Or, 

Plot from

100

 to 

1700

 Da 

Full range

  
Label all possible matches ☐ Label matches used for scoring ☒

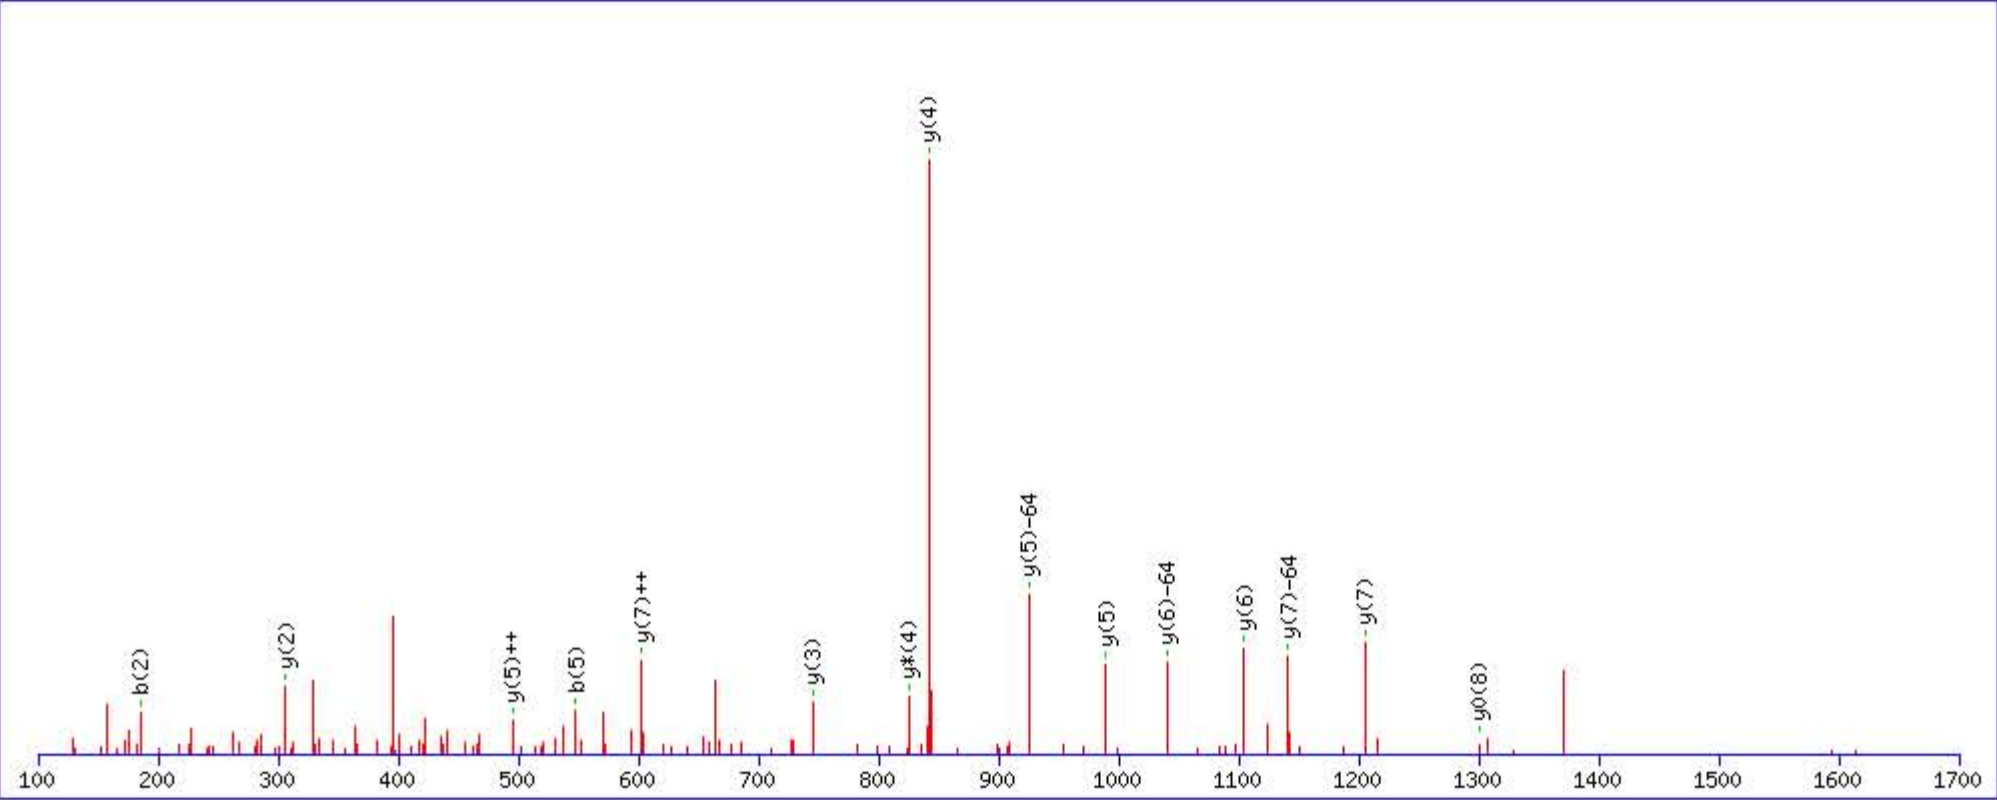

Monoisotopic mass of neutral peptide Mr(calc): 1388.661438  
Fixed modifications: Carbamidomethyl (C) (apply to specified residues or termini only)  
Variable modifications:  
M5 : Oxidation (M), with neutral losses 0.000000 (shown in table), 63.998285  
Q7 : Biotin:Thermo-21345 (Q)  
Ions Score: 41 Expect: 0.00031  
Matches : 15/112 fragment ions using 25 most intense peaks [\(help\)](#)

| # | b           | b <sup>++</sup> | b <sup>*</sup> | b <sup>*++</sup> | b <sup>0</sup> | b <sup>0++</sup> | Seq. | y           | y <sup>++</sup> | y <sup>*</sup> | y <sup>*++</sup> | y <sup>0</sup> | y <sup>0++</sup> | # |
|---|-------------|-----------------|----------------|------------------|----------------|------------------|------|-------------|-----------------|----------------|------------------|----------------|------------------|---|
| 1 | 72.044390   | 36.525833       |                |                  |                |                  | A    |             |                 |                |                  |                |                  | 9 |
| 2 | 185.128454  | 93.067865       |                |                  |                |                  | L    | 1318.631613 | 659.819445      | 1301.605064    | 651.306170       | 1300.621048    | 650.814162       | 8 |
| 3 | 286.176133  | 143.591704      |                |                  | 268.165568     | 134.586422       | T    | 1205.547549 | 603.277413      | 1188.521000    | 594.764138       | 1187.536984    | 594.272130       | 7 |
| 4 | 401.203076  | 201.105176      |                |                  | 383.192511     | 192.099894       | D    | 1104.499870 | 552.753573      | 1087.473321    | 544.240298       | 1086.489305    | 543.748290       | 6 |
| 5 | 548.238476  | 274.622876      |                |                  | 530.227911     | 265.617594       | M    | 989.472927  | 495.240102      | 972.446378     | 486.726827       |                |                  | 5 |
| 6 | 645.291240  | 323.149258      |                |                  | 627.280675     | 314.143976       | P    | 842.437527  | 421.722402      | 825.410978     | 413.209127       |                |                  | 4 |
| 7 | 1084.516566 | 542.761921      | 1067.490017    | 534.248647       | 1066.506001    | 533.756639       | Q    | 745.384763  | 373.196020      | 728.358214     | 364.682745       |                |                  | 3 |
| 8 | 1215.557051 | 608.282164      | 1198.530502    | 599.768889       | 1197.546486    | 599.276881       | M    | 306.159437  | 153.583356      | 289.132888     | 145.070082       |                |                  | 2 |
| 9 |             |                 |                |                  |                |                  | R    | 175.118952  | 88.063114       | 158.092403     | 79.549839        |                |                  | 1 |

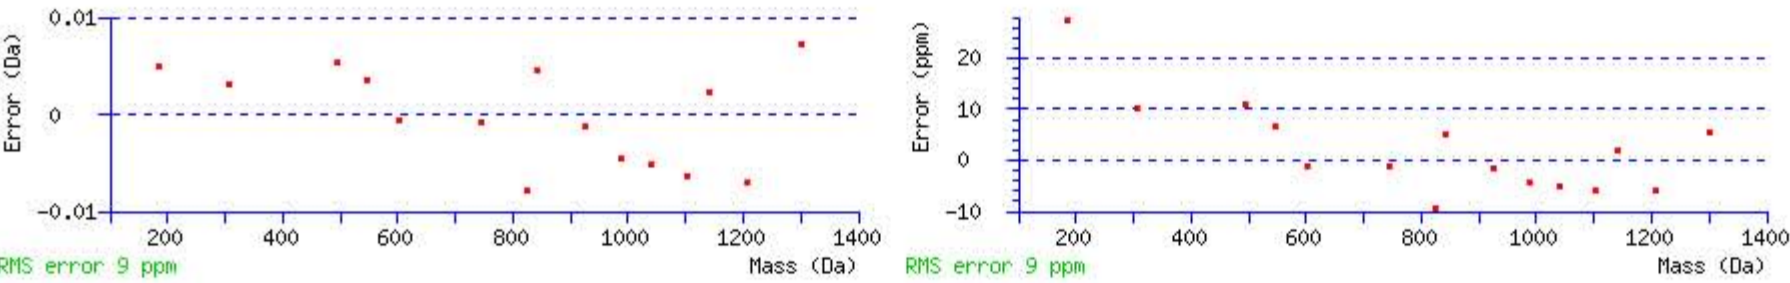

NCBI BLAST search of [ALTDMPQMR](#)  
(Parameters: blastp, nr protein database, expect=20000, no filter, PAM30)  
Other BLAST [web gateways](#)

All matches to this query

| Score | Mr(calc):   | Delta    | Sequence                  |
|-------|-------------|----------|---------------------------|
| 40.9  | 1388.661438 | 0.000570 | <a href="#">ALTDMPQMR</a> |
| 9.2   | 1388.661438 | 0.000570 | <a href="#">ALTDMPQMR</a> |

MATRIX

SCIENCE

Mascot Search Results

Peptide View

MS/MS Fragmentation of **QFTSSTSYNR**  
Found in **FIBA\_HUMAN**, Fibrinogen alpha chain OS=Homo sapiens GN=FGA PE=1 SV=2

Match to Query 31048: 1500.706068 from(751.360310,2+) rtinseconds(1570) index(63947)  
Title: Locus:1.1.1.1821.19 File:"2013-07-02 CLN FXIII 180 min 2nd FT.wiff"  
Data file C:\Program Files (x86)\Matrix Science\Mascot Daemon\mgf\8 FXIII 180 min 2nd\mascot\_daemon\_merge.mgf

Click mouse within plot area to zoom in by factor of two about that point  
Or, 

Plot from

100

 to 

1600

 Da 

Full range

  
Label all possible matches ☐ Label matches used for scoring ☒

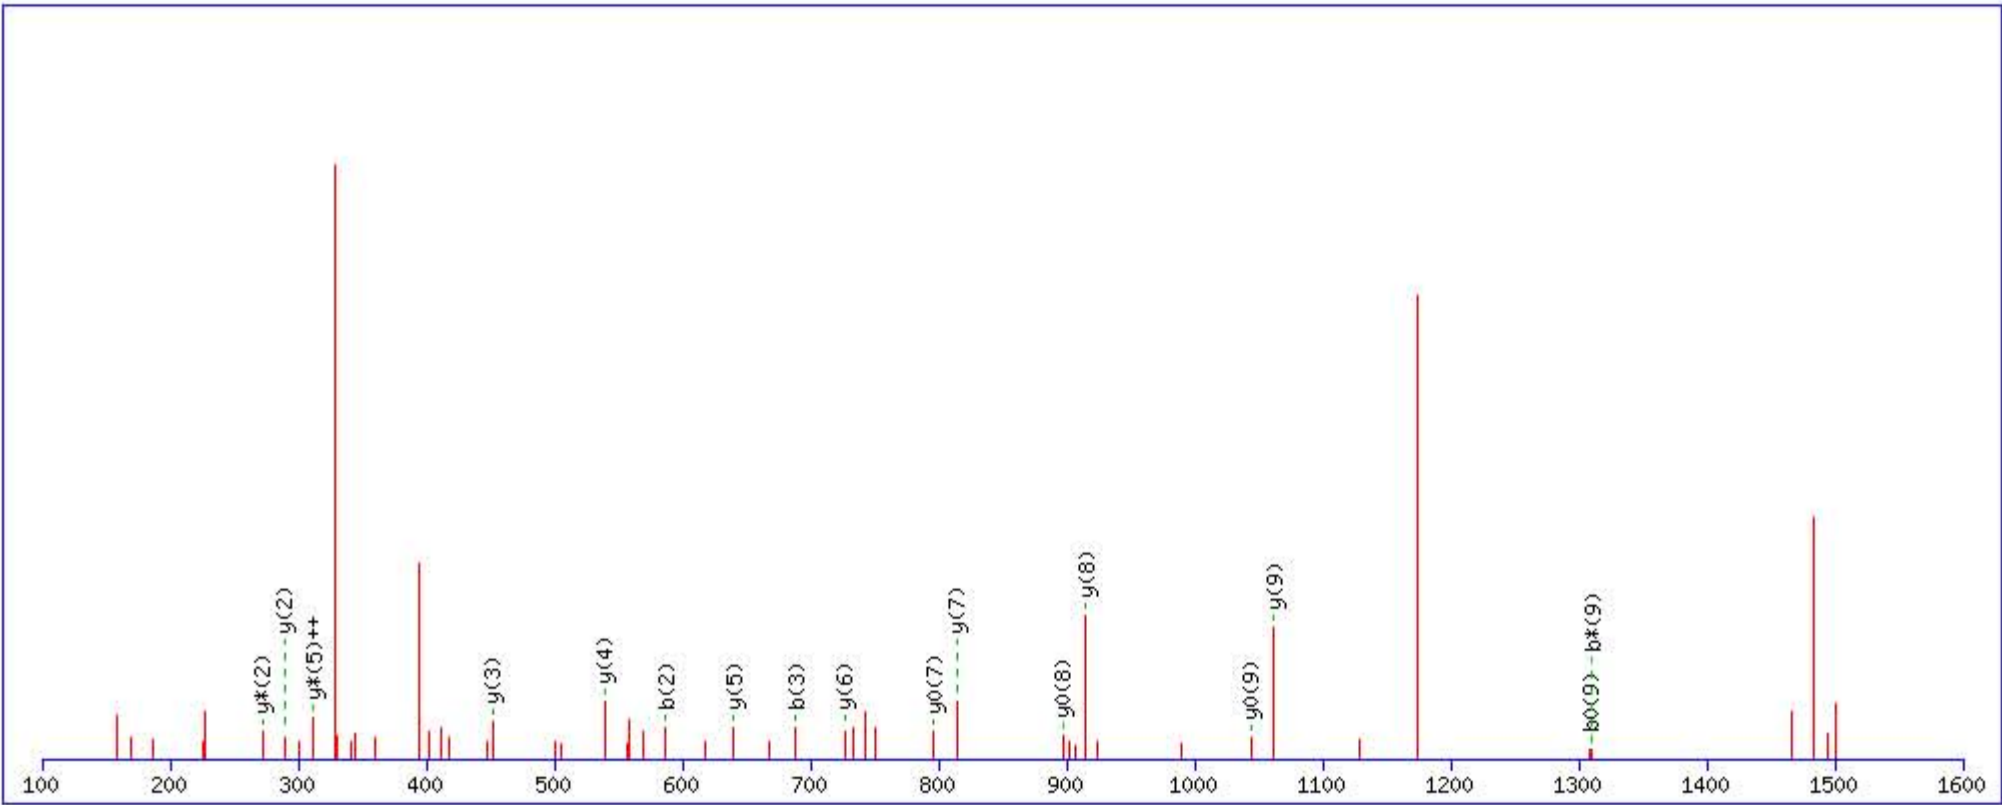

Monoisotopic mass of neutral peptide **Mr(calc):** 1500.703110  
Fixed modifications: Carbamidomethyl (C) (apply to specified residues or termini only)  
Variable modifications:  
Q1 : Biotin:Thermo-21345 (Q)  
Ions Score: 33 Expect: 0.0015  
Matches : 17/98 fragment ions using 52 most intense peaks ([help](#))

| #  | b           | b <sup>++</sup> | b <sup>*</sup> | b <sup>*++</sup> | b <sup>0</sup> | b <sup>0++</sup> | Seq. | y           | y <sup>++</sup> | y <sup>*</sup> | y <sup>*++</sup> | y <sup>0</sup> | y <sup>0++</sup> | #  |
|----|-------------|-----------------|----------------|------------------|----------------|------------------|------|-------------|-----------------|----------------|------------------|----------------|------------------|----|
| 1  | 440.232602  | 220.619939      | 423.206053     | 212.106664       |                |                  | Q    |             |                 |                |                  |                |                  | 10 |
| 2  | 587.301016  | 294.154146      | 570.274467     | 285.640872       |                |                  | F    | 1062.485064 | 531.746170      | 1045.458515    | 523.232896       | 1044.474499    | 522.740887       | 9  |
| 3  | 688.348695  | 344.677986      | 671.322146     | 336.164711       | 670.338130     | 335.672703       | T    | 915.416650  | 458.211963      | 898.390101     | 449.698689       | 897.406085     | 449.206681       | 8  |
| 4  | 775.380723  | 388.194000      | 758.354174     | 379.680725       | 757.370158     | 379.188717       | S    | 814.368971  | 407.688124      | 797.342422     | 399.174849       | 796.358406     | 398.682841       | 7  |
| 5  | 862.412751  | 431.710014      | 845.386202     | 423.196739       | 844.402186     | 422.704731       | S    | 727.336943  | 364.172110      | 710.310394     | 355.658835       | 709.326378     | 355.166827       | 6  |
| 6  | 963.460430  | 482.233853      | 946.433881     | 473.720578       | 945.449865     | 473.228570       | T    | 640.304915  | 320.656096      | 623.278366     | 312.142821       | 622.294350     | 311.650813       | 5  |
| 7  | 1050.492458 | 525.749867      | 1033.465909    | 517.236593       | 1032.481893    | 516.744584       | S    | 539.257236  | 270.132256      | 522.230687     | 261.618982       | 521.246671     | 261.126974       | 4  |
| 8  | 1213.555787 | 607.281532      | 1196.529238    | 598.768257       | 1195.545222    | 598.276249       | Y    | 452.225208  | 226.616242      | 435.198659     | 218.102967       |                |                  | 3  |
| 9  | 1327.598714 | 664.302995      | 1310.572165    | 655.789721       | 1309.588149    | 655.297712       | N    | 289.161879  | 145.084577      | 272.135330     | 136.571303       |                |                  | 2  |
| 10 |             |                 |                |                  |                |                  | R    | 175.118952  | 88.063114       | 158.092403     | 79.549839        |                |                  | 1  |

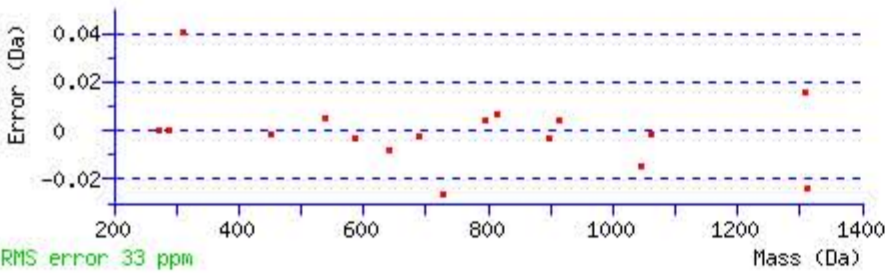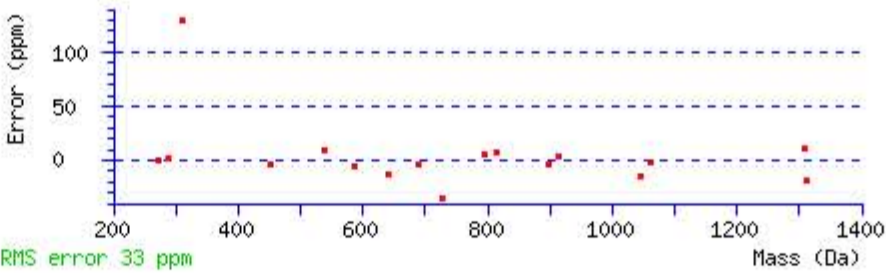

NCBI BLAST search of [QFTSSTSYNR](#)  
(Parameters: blastp, nr protein database, expect=20000, no filter, PAM30)  
Other BLAST [web gateways](#)

All matches to this query

| Score | Mr(calc):   | Delta     | Sequence                     |
|-------|-------------|-----------|------------------------------|
| 32.6  | 1500.703110 | 0.002958  | <a href="#">QFTSSTSYNR</a>   |
| 2.6   | 1500.724869 | -0.018801 | <a href="#">SKIEDYFPEFAR</a> |

MATRIX

SCIENCE

Mascot Search Results

Peptide View

MS/MS Fragmentation of **QLEQVIAK**  
Found in **FIBA\_HUMAN**, Fibrinogen alpha chain OS=Homo sapiens GN=FGA PE=1 SV=2

Match to Query 32511: 1549.859708 from(775.937130,2+) rtinseconds(2117) index(51117)  
Title: Locus:1.1.1.1974.20 File:"2013-07-02 CLN FXIII 180 min 2nd F 4.wiff"  
Data file C:\Program Files (x86)\Matrix Science\Mascot Daemon\mgf\8 FXIII 180 min 2nd\mascot\_daemon\_merge.mgf

Click mouse within plot area to zoom in by factor of two about that point  
Or, 

Plot from

100

 to 

1700

 Da 

Full range

  
Label all possible matches ☐ Label matches used for scoring ☒

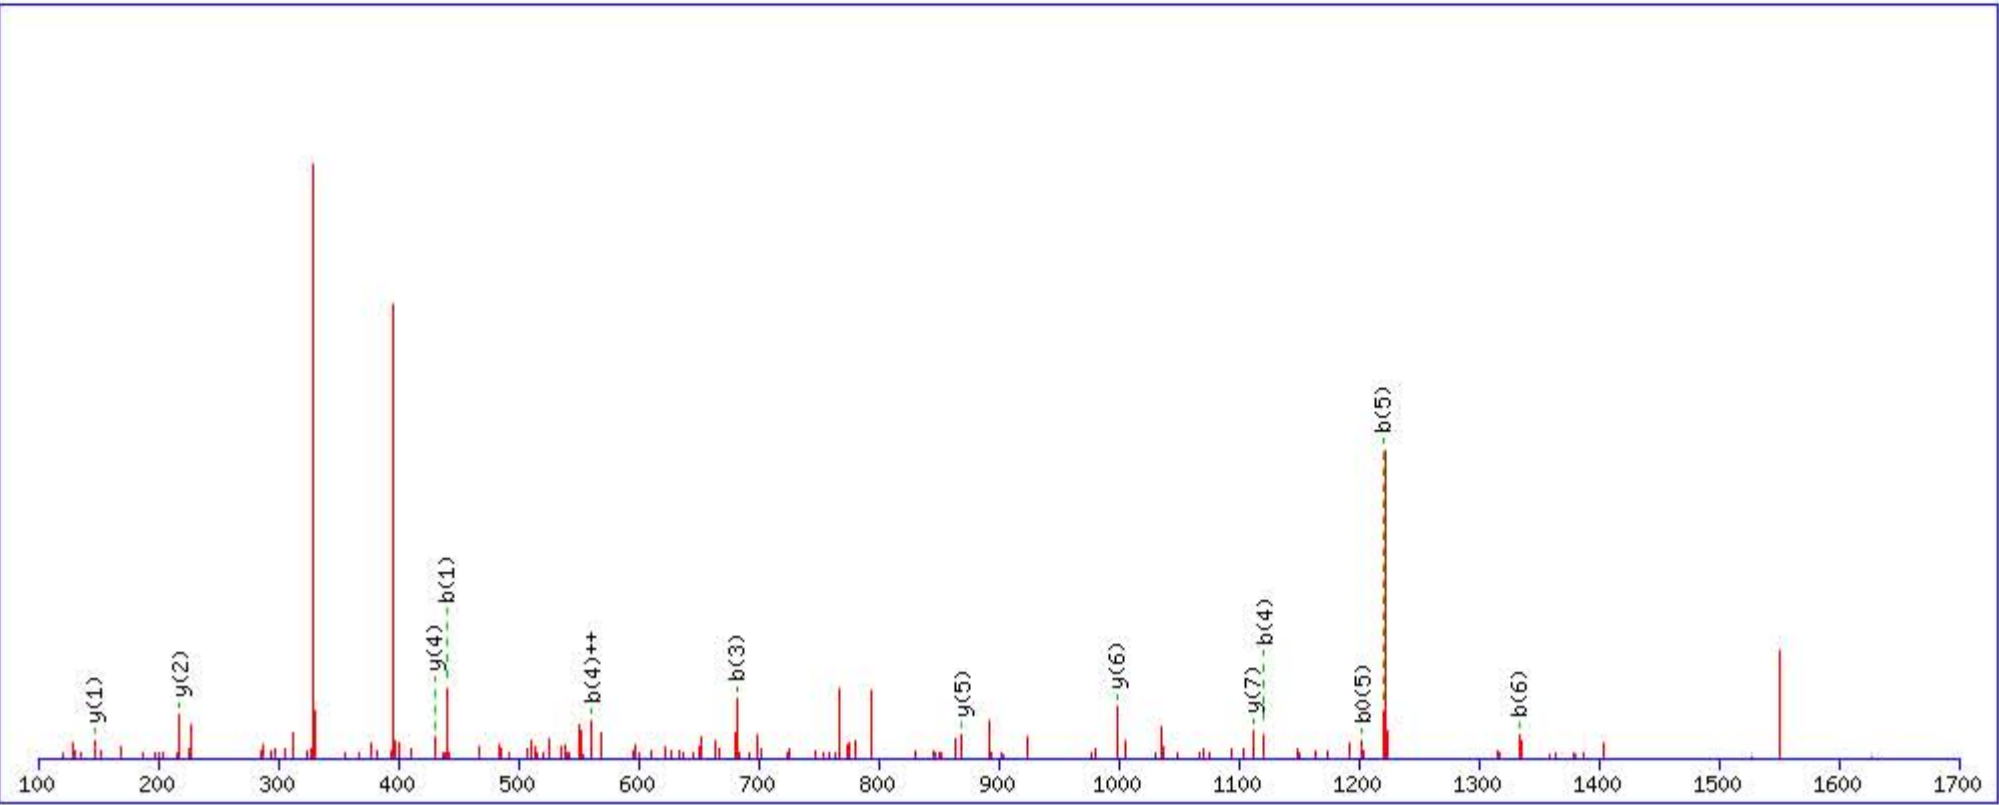

Monoisotopic mass of neutral peptide Mr(calc): 1549.872406  
Fixed modifications: Carbamidomethyl (C) (apply to specified residues or termini only)  
Variable modifications:  
Q1 : Biotin:Thermo-21345 (Q)  
Q4 : Biotin:Thermo-21345 (Q)  
Ions Score: 25 Expect: 0.015  
Matches : 13/70 fragment ions using 27 most intense peaks [\(help\)](#)

| # | b           | b <sup>++</sup> | b <sup>*</sup> | b <sup>+++</sup> | b <sup>0</sup> | b <sup>0++</sup> | Seq. | y           | y <sup>++</sup> | y <sup>*</sup> | y <sup>+++</sup> | y <sup>0</sup> | y <sup>0++</sup> | # |
|---|-------------|-----------------|----------------|------------------|----------------|------------------|------|-------------|-----------------|----------------|------------------|----------------|------------------|---|
| 1 | 440.232602  | 220.619939      | 423.206053     | 212.106664       |                |                  | Q    |             |                 |                |                  |                |                  | 8 |
| 2 | 553.316666  | 277.161971      | 536.290117     | 268.648697       |                |                  | L    | 1111.654379 | 556.330828      | 1094.627830    | 547.817553       | 1093.643814    | 547.325545       | 7 |
| 3 | 682.359259  | 341.683268      | 665.332710     | 333.169993       | 664.348694     | 332.677985       | E    | 998.570315  | 499.788796      | 981.543766     | 491.275521       | 980.559750     | 490.783513       | 6 |
| 4 | 1121.584585 | 561.295931      | 1104.558036    | 552.782656       | 1103.574020    | 552.290648       | Q    | 869.527722  | 435.267499      | 852.501173     | 426.754225       |                |                  | 5 |
| 5 | 1220.652999 | 610.830138      | 1203.626450    | 602.316863       | 1202.642434    | 601.824855       | V    | 430.302396  | 215.654836      | 413.275847     | 207.141561       |                |                  | 4 |
| 6 | 1333.737063 | 667.372170      | 1316.710514    | 658.858895       | 1315.726498    | 658.366887       | I    | 331.233982  | 166.120629      | 314.207433     | 157.607354       |                |                  | 3 |
| 7 | 1404.774177 | 702.890727      | 1387.747628    | 694.377452       | 1386.763612    | 693.885444       | A    | 218.149918  | 109.578597      | 201.123369     | 101.065322       |                |                  | 2 |
| 8 |             |                 |                |                  |                |                  | K    | 147.112804  | 74.060040       | 130.086255     | 65.546765        |                |                  | 1 |

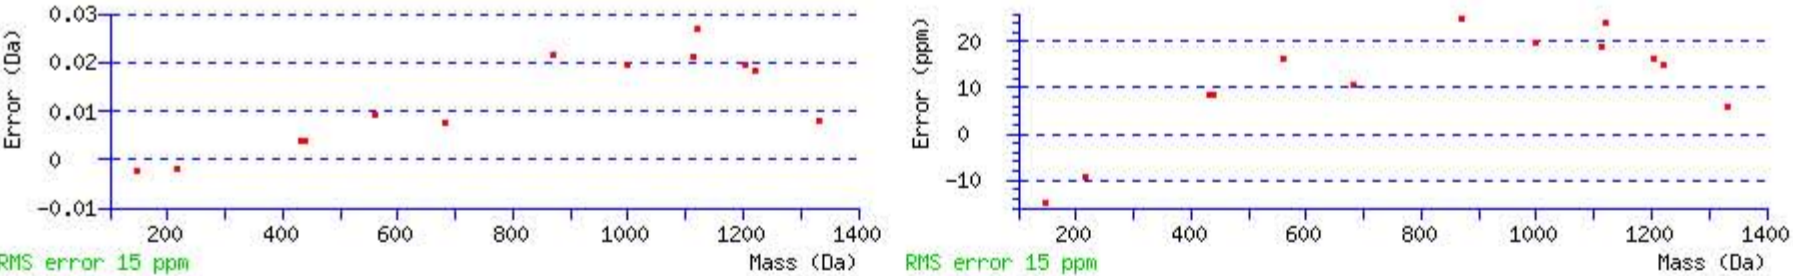

NCBI BLAST search of [QLEQVIAK](#)  
(Parameters: blastp, nr protein database, expect=20000, no filter, PAM30)  
Other BLAST [web gateways](#)

All matches to this query

| Score | Mr(calc):   | Delta     | Sequence                       |
|-------|-------------|-----------|--------------------------------|
| 25.4  | 1549.872406 | -0.012698 | <a href="#">QLEQVIAK</a>       |
| 5.5   | 1549.861633 | -0.001925 | <a href="#">KLSRPFQSEIFAK</a>  |
| 4.2   | 1549.865005 | -0.005297 | <a href="#">KSLAGMLTPYVARK</a> |
| 3.6   | 1549.846359 | 0.013349  | <a href="#">ATEQLETYRKLAKE</a> |
| 2.3   | 1549.857605 | 0.002103  | <a href="#">RIEVENKEVLHGK</a>  |
| 1.3   | 1549.861618 | -0.001910 | <a href="#">TAEKLYRTAWIAK</a>  |
| 0.9   | 1549.855148 | 0.004560  | <a href="#">QSFVPVRPGPR</a>    |
| 0.9   | 1549.862991 | -0.003283 | <a href="#">AAWLRVFQHLGPR</a>  |
| 0.0   | 1549.857620 | 0.002088  | <a href="#">TRAADLLVNPLDPR</a> |

MATRIX

SCIENCE

Mascot Search Results

Peptide View

MS/MS Fragmentation of **EVDLKDYEDQQK**  
Found in **FIBA\_HUMAN**, Fibrinogen alpha chain OS=Homo sapiens GN=FGA PE=1 SV=2

Match to Query 40727: 1819.877982 from(607.633270,3+) rtinseconds(1781) index(48861)  
Title: Locus:1.1.1.1858.7 File:"2013-07-02 CLN FXIII 180 min 2nd F 4.wiff"  
Data file C:\Program Files (x86)\Matrix Science\Mascot Daemon\mgf\8 FXIII 180 min 2nd\mascot\_daemon\_merge.mgf

Click mouse within plot area to zoom in by factor of two about that point  
Or, 

Plot from

100

 to 

1900

 Da 

Full range

  
Label all possible matches ☐ Label matches used for scoring ☒

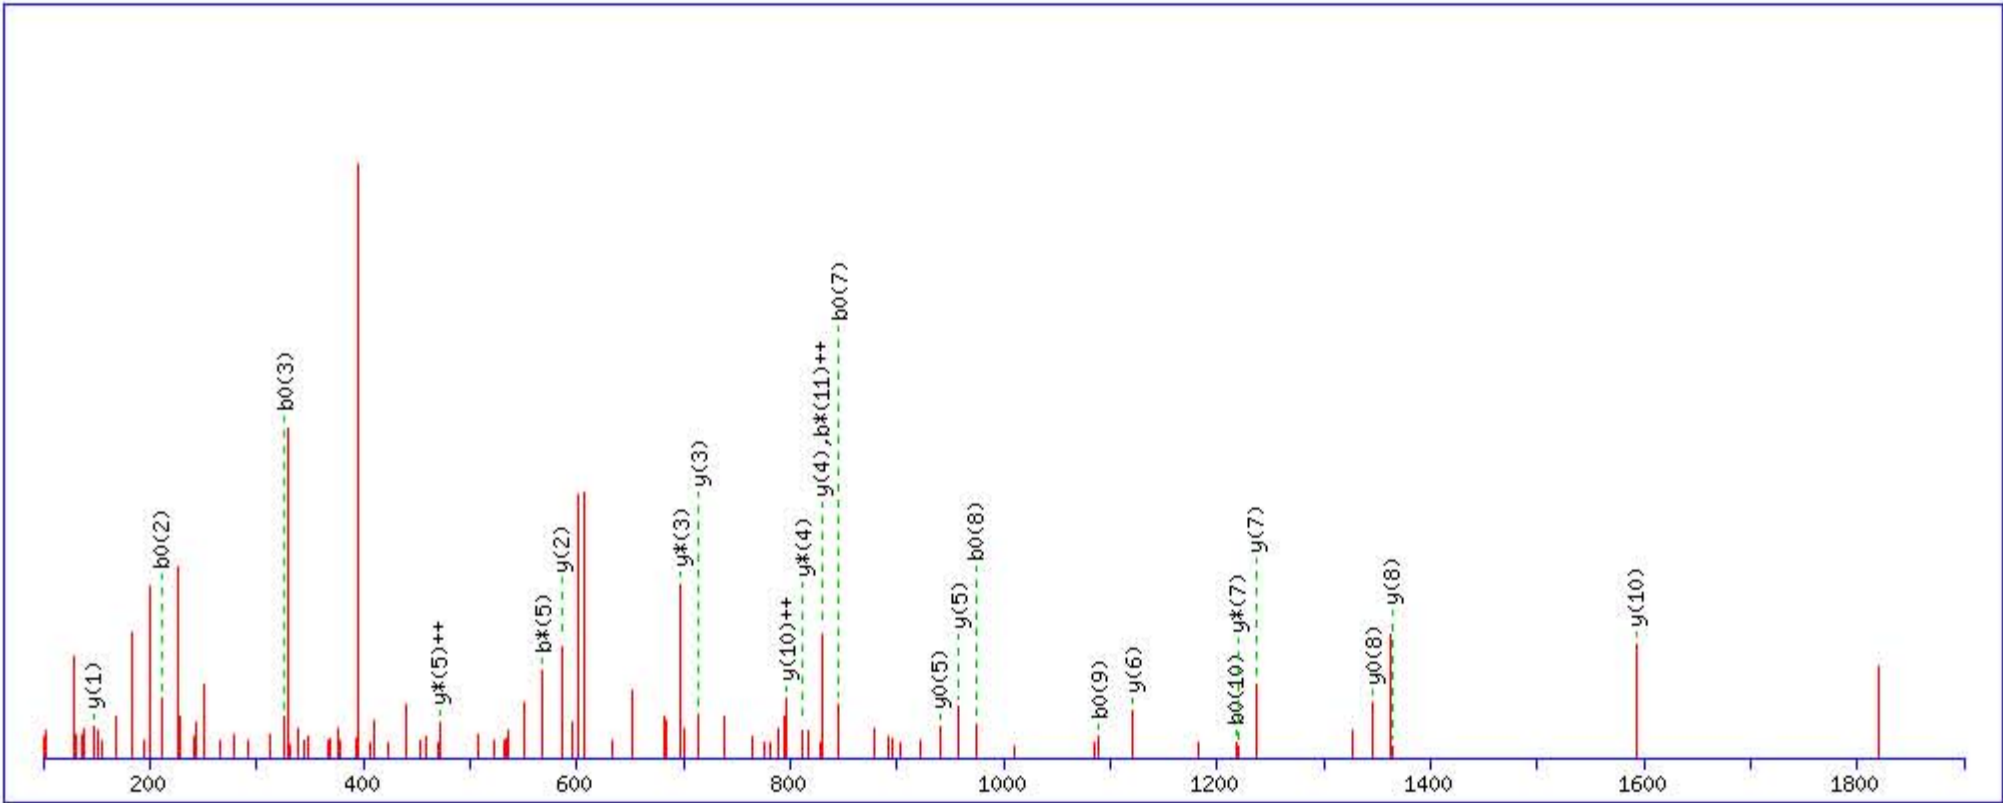

Monoisotopic mass of neutral peptide Mr(calc): 1819.866196  
Fixed modifications: Carbamidomethyl (C) (apply to specified residues or termini only)  
Variable modifications:  
Q11 : Biotin:Thermo-21345 (Q)  
Ions Score: 29 Expect: 0.026  
Matches : 24/118 fragment ions using 49 most intense peaks [\(help\)](#)

| #  | b           | b <sup>++</sup> | b <sup>*</sup> | b <sup>*++</sup> | b <sup>0</sup> | b <sup>0++</sup> | Seq. | y           | y <sup>++</sup> | y <sup>*</sup> | y <sup>*++</sup> | y <sup>0</sup> | y <sup>0++</sup> | #  |
|----|-------------|-----------------|----------------|------------------|----------------|------------------|------|-------------|-----------------|----------------|------------------|----------------|------------------|----|
| 1  | 130.049869  | 65.528572       |                |                  | 112.039304     | 56.523290        | E    |             |                 |                |                  |                |                  | 12 |
| 2  | 229.118283  | 115.062780      |                |                  | 211.107718     | 106.057497       | V    | 1691.830900 | 846.419088      | 1674.804351    | 837.905814       | 1673.820335    | 837.413806       | 11 |
| 3  | 344.145226  | 172.576251      |                |                  | 326.134661     | 163.570969       | D    | 1592.762486 | 796.884881      | 1575.735937    | 788.371607       | 1574.751921    | 787.879599       | 10 |
| 4  | 457.229290  | 229.118283      |                |                  | 439.218725     | 220.113001       | L    | 1477.735543 | 739.371410      | 1460.708994    | 730.858135       | 1459.724978    | 730.366127       | 9  |
| 5  | 585.324253  | 293.165765      | 568.297704     | 284.652490       | 567.313688     | 284.160482       | K    | 1364.651479 | 682.829378      | 1347.624930    | 674.316103       | 1346.640914    | 673.824095       | 8  |
| 6  | 700.351196  | 350.679236      | 683.324647     | 342.165962       | 682.340631     | 341.673954       | D    | 1236.556516 | 618.781896      | 1219.529967    | 610.268622       | 1218.545951    | 609.776614       | 7  |
| 7  | 863.414525  | 432.210901      | 846.387976     | 423.697626       | 845.403960     | 423.205618       | Y    | 1121.529573 | 561.268425      | 1104.503024    | 552.755150       | 1103.519008    | 552.263142       | 6  |
| 8  | 992.457118  | 496.732197      | 975.430569     | 488.218923       | 974.446553     | 487.726915       | E    | 958.466244  | 479.736760      | 941.439695     | 471.223486       | 940.455679     | 470.731478       | 5  |
| 9  | 1107.484061 | 554.245669      | 1090.457512    | 545.732394       | 1089.473496    | 545.240386       | D    | 829.423651  | 415.215464      | 812.397102     | 406.702189       | 811.413086     | 406.210181       | 4  |
| 10 | 1235.542639 | 618.274958      | 1218.516090    | 609.761683       | 1217.532074    | 609.269675       | Q    | 714.396708  | 357.701992      | 697.370159     | 349.188718       |                |                  | 3  |
| 11 | 1674.767965 | 837.887621      | 1657.741416    | 829.374346       | 1656.757400    | 828.882338       | Q    | 586.338130  | 293.672703      | 569.311581     | 285.159429       |                |                  | 2  |
| 12 |             |                 |                |                  |                |                  | K    | 147.112804  | 74.060040       | 130.086255     | 65.546765        |                |                  | 1  |

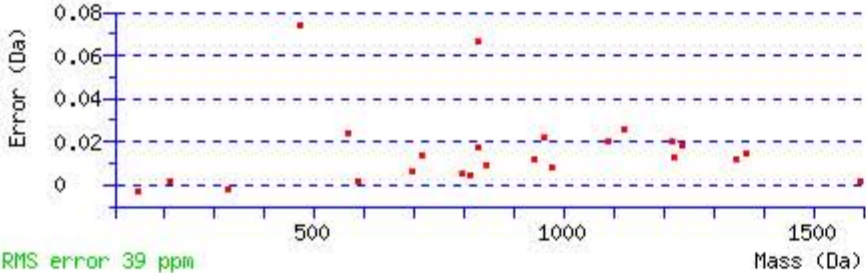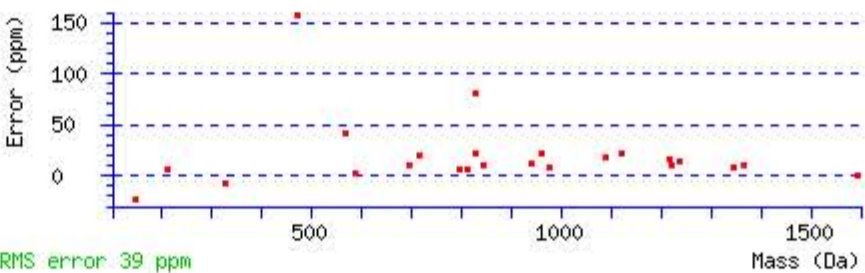

NCBI BLAST search of [EVDLKDYEDQQK](#)  
(Parameters: blastp, nr protein database, expect=20000, no filter, PAM30)  
Other BLAST [web gateways](#)

All matches to this query

| Score | Mr(calc):   | Delta    | Sequence                     |
|-------|-------------|----------|------------------------------|
| 29.0  | 1819.866196 | 0.011786 | <a href="#">EVDLKDYEDQQK</a> |
| 20.6  | 1819.866196 | 0.011786 | <a href="#">EVDLKDYEDQQK</a> |





MATRIX

SCIENCE

Mascot Search Results

Peptide View

MS/MS Fragmentation of **ISQLTR**  
Found in **FIBB\_HUMAN**, Fibrinogen beta chain OS=Homo sapiens GN=FGB PE=1 SV=2

Match to Query 14528: 1027.585328 from(514.799940,2+) rtinseconds(1581) index(17491)  
Title: Locus:1.1.1.2933.5 File:"2013-07-02 CLN FXIII 180 min 2nd F 2.wiff"  
Data file C:\Program Files (x86)\Matrix Science\Mascot Daemon\mgf\8 FXIII 180 min 2nd\mascot\_daemon\_merge.mgf

Click mouse within plot area to zoom in by factor of two about that point  
Or,   to  Da   
Label all possible matches ☐ Label matches used for scoring ☒

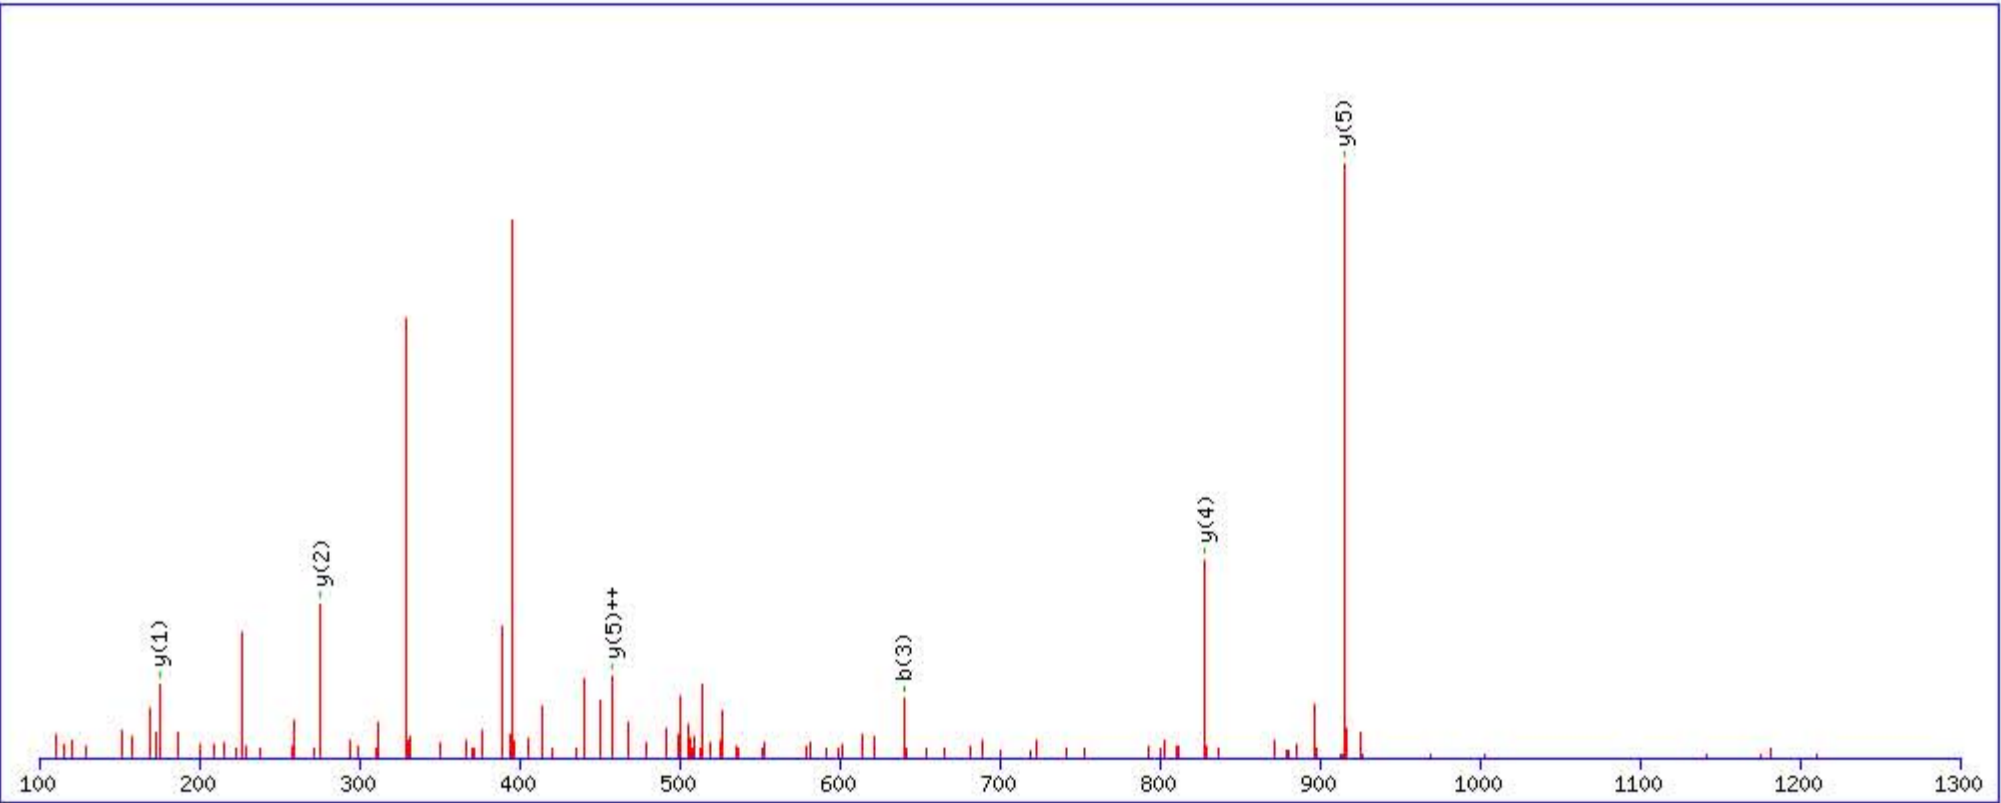

Monoisotopic mass of neutral peptide Mr(calc): 1027.584824  
Fixed modifications: Carbamidomethyl (C) (apply to specified residues or termini only)  
Variable modifications:  
Q3 : Biotin:Thermo-21345 (Q)  
Ions Score: 25 Expect: 0.061  
Matches : 6/52 fragment ions using 9 most intense peaks ([help](#))

| # | b          | b <sup>++</sup> | b <sup>*</sup> | b <sup>+++</sup> | b <sup>0</sup> | b <sup>0++</sup> | Seq. | y          | y <sup>++</sup> | y <sup>*</sup> | y <sup>+++</sup> | y <sup>0</sup> | y <sup>0++</sup> | # |
|---|------------|-----------------|----------------|------------------|----------------|------------------|------|------------|-----------------|----------------|------------------|----------------|------------------|---|
| 1 | 114.091340 | 57.549308       |                |                  |                |                  | I    |            |                 |                |                  |                |                  | 6 |
| 2 | 201.123368 | 101.065322      |                |                  | 183.112803     | 92.060039        | S    | 915.508049 | 458.257663      | 898.481500     | 449.744388       | 897.497484     | 449.252380       | 5 |
| 3 | 640.348694 | 320.677985      | 623.322145     | 312.164711       | 622.338129     | 311.672703       | Q    | 828.476021 | 414.741649      | 811.449472     | 406.228374       | 810.465456     | 405.736366       | 4 |
| 4 | 753.432758 | 377.220017      | 736.406209     | 368.706743       | 735.422193     | 368.214735       | L    | 389.250695 | 195.128986      | 372.224146     | 186.615711       | 371.240130     | 186.123703       | 3 |
| 5 | 854.480437 | 427.743857      | 837.453888     | 419.230582       | 836.469872     | 418.738574       | T    | 276.166631 | 138.586954      | 259.140082     | 130.073679       | 258.156066     | 129.581671       | 2 |
| 6 |            |                 |                |                  |                |                  | R    | 175.118952 | 88.063114       | 158.092403     | 79.549840        |                |                  | 1 |

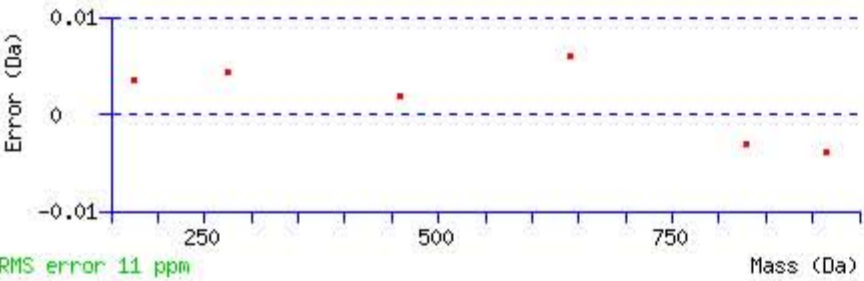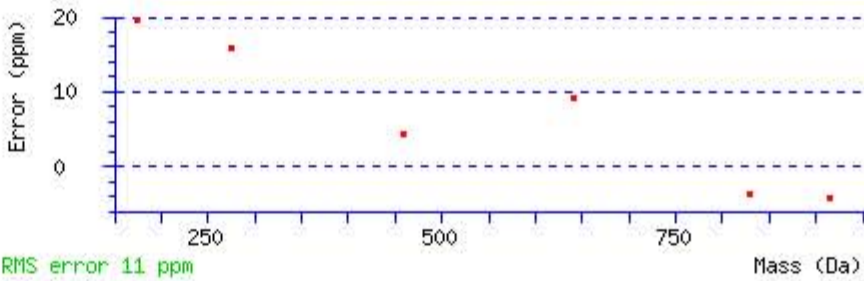

NCBI BLAST search of [ISQLTR](#)  
(Parameters: blastp, nr protein database, expect=20000, no filter, PAM30)  
Other BLAST [web gateways](#)

All matches to this query

| Score | Mr(calc):   | Delta     | Sequence                  |
|-------|-------------|-----------|---------------------------|
| 25.2  | 1027.584824 | 0.000504  | <a href="#">ISQLTR</a>    |
| 21.4  | 1027.584824 | 0.000504  | <a href="#">ILSQTR</a>    |
| 13.4  | 1027.573578 | 0.011750  | <a href="#">ISQLEK</a>    |
| 10.6  | 1027.584839 | 0.000489  | <a href="#">LQTVTR</a>    |
| 10.6  | 1027.592682 | -0.007354 | <a href="#">LRLSWPTR</a>  |
| 10.4  | 1027.584824 | 0.000504  | <a href="#">IISTQR</a>    |
| 10.3  | 1027.573578 | 0.011750  | <a href="#">ILQVPAMEK</a> |
| 10.3  | 1027.573578 | 0.011750  | <a href="#">ILSQEK</a>    |
| 10.3  | 1027.573578 | 0.011750  | <a href="#">LLSQEK</a>    |
| 9.9   | 1027.592667 | -0.007339 | <a href="#">IYQAHKR</a>   |

MATRIX

SCIENCE

Mascot Search Results

Peptide View

MS/MS Fragmentation of **YQISVNK**  
Found in **FIBB\_HUMAN**, Fibrinogen beta chain OS=Homo sapiens GN=FGB PE=1 SV=2

Match to Query 19317: 1161.623408 from(581.818980,2+) rtinseconds(1670) index(18016)  
Title: Locus:1.1.1.2964.4 File:"2013-07-02 CLN FXIII 180 min 2nd F 2.wiff"  
Data file C:\Program Files (x86)\Matrix Science\Mascot Daemon\mgf\8 FXIII 180 min 2nd\mascot\_daemon\_merge.mgf

Click mouse within plot area to zoom in by factor of two about that point  
Or, 

Plot from

100

 to 

2100

 Da 

Full range

  
Label all possible matches ☐ Label matches used for scoring ☒

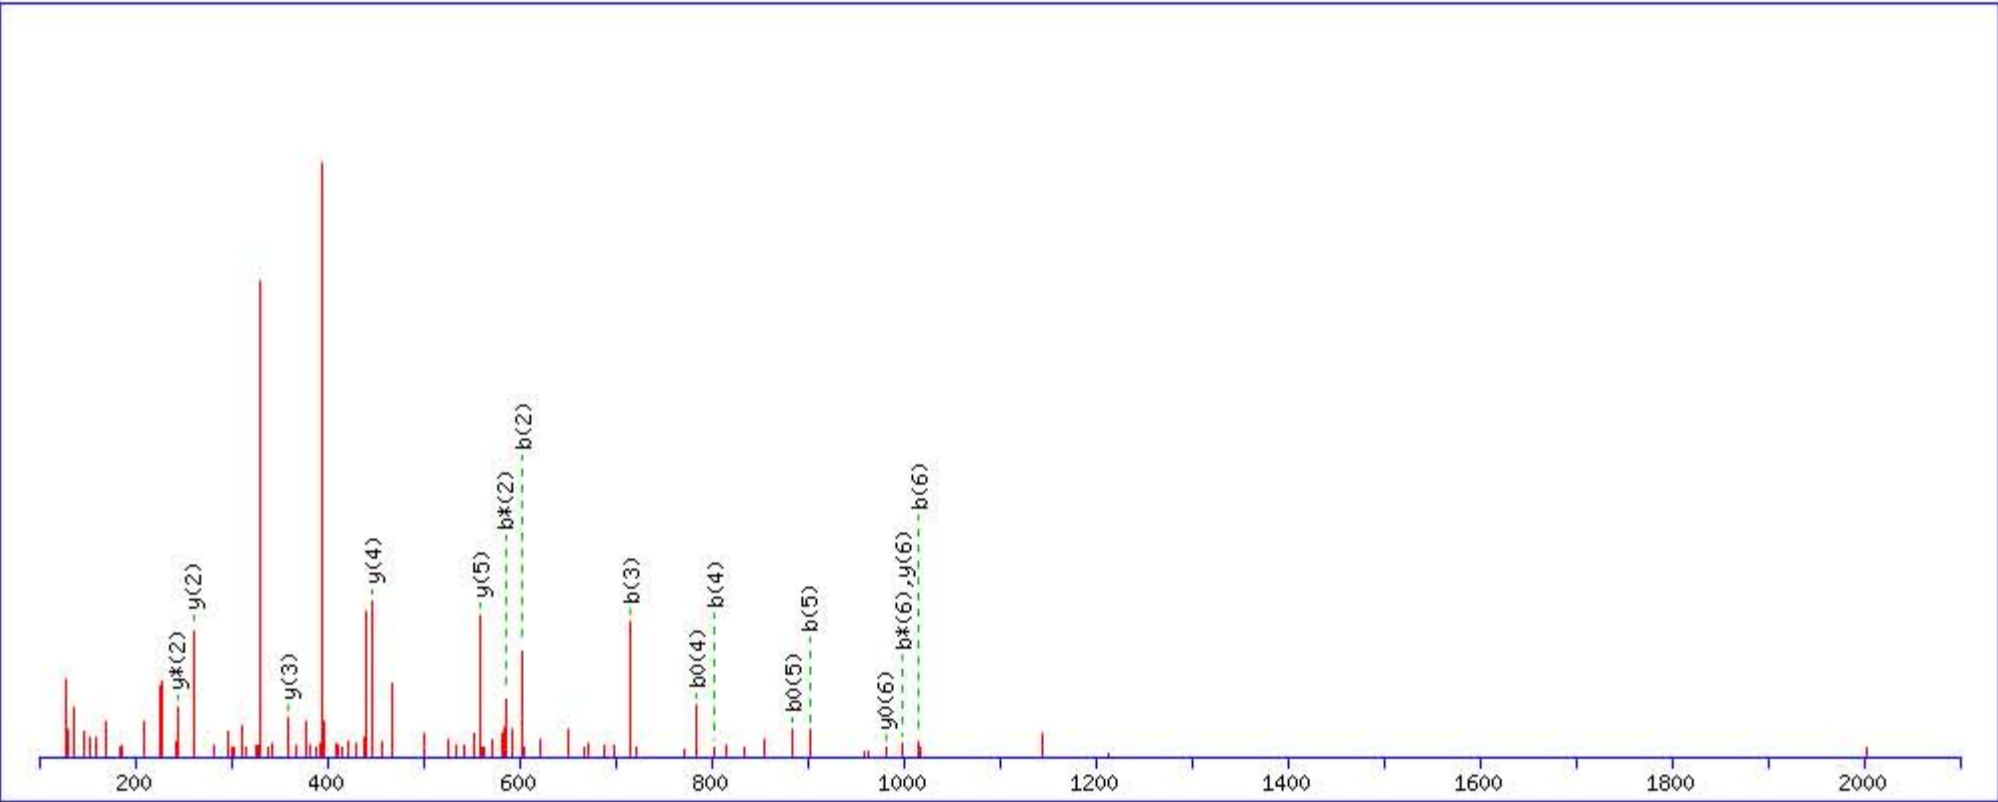

Monoisotopic mass of neutral peptide Mr(calc): 1161.621597  
Fixed modifications: Carbamidomethyl (C) (apply to specified residues or termini only)  
Variable modifications:  
Q2 : Biotin:Thermo-21345 (Q)  
Ions Score: 27 Expect: 0.012  
Matches : 16/58 fragment ions using 28 most intense peaks [\(help\)](#)

| # | b           | b <sup>++</sup> | b <sup>*</sup> | b <sup>+++</sup> | b <sup>0</sup> | b <sup>0++</sup> | Seq. | y          | y <sup>++</sup> | y <sup>*</sup> | y <sup>+++</sup> | y <sup>0</sup> | y <sup>0++</sup> | # |
|---|-------------|-----------------|----------------|------------------|----------------|------------------|------|------------|-----------------|----------------|------------------|----------------|------------------|---|
| 1 | 164.070605  | 82.538940       |                |                  |                |                  | Y    |            |                 |                |                  |                |                  | 7 |
| 2 | 603.295931  | 302.151604      | 586.269382     | 293.638329       |                |                  | Q    | 999.565563 | 500.286419      | 982.539014     | 491.773145       | 981.554998     | 491.281137       | 6 |
| 3 | 716.379995  | 358.693636      | 699.353446     | 350.180361       |                |                  | I    | 560.340237 | 280.673756      | 543.313688     | 272.160482       | 542.329672     | 271.668474       | 5 |
| 4 | 803.412023  | 402.209650      | 786.385474     | 393.696375       | 785.401458     | 393.204367       | S    | 447.256173 | 224.131724      | 430.229624     | 215.618450       | 429.245608     | 215.126442       | 4 |
| 5 | 902.480437  | 451.743857      | 885.453888     | 443.230582       | 884.469872     | 442.738574       | V    | 360.224145 | 180.615710      | 343.197596     | 172.102436       |                |                  | 3 |
| 6 | 1016.523364 | 508.765320      | 999.496815     | 500.252046       | 998.512799     | 499.760038       | N    | 261.155731 | 131.081503      | 244.129182     | 122.568229       |                |                  | 2 |
| 7 |             |                 |                |                  |                |                  | K    | 147.112804 | 74.060040       | 130.086255     | 65.546765        |                |                  | 1 |

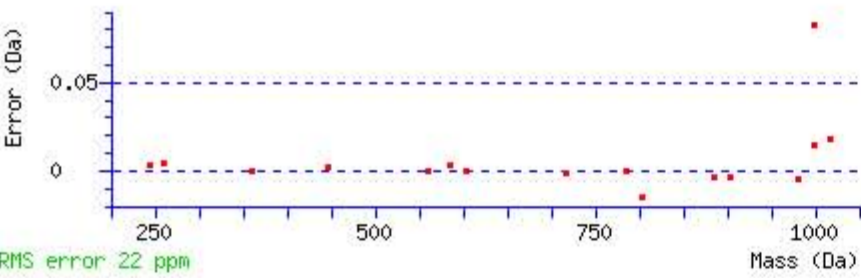

NCBI BLAST search of [YQISVNK](#)  
(Parameters: blastp, nr protein database, expect=20000, no filter, PAM30)  
Other BLAST [web gateways](#)

All matches to this query

| Score | Mr(calc):   | Delta     | Sequence                    |
|-------|-------------|-----------|-----------------------------|
| 27.4  | 1161.621597 | 0.001811  | <a href="#">YQISVNK</a>     |
| 26.1  | 1161.629456 | -0.006048 | <a href="#">DFALRLWNK</a>   |
| 6.4   | 1161.606323 | 0.017085  | <a href="#">MEIKGEQISK</a>  |
| 6.2   | 1161.639359 | -0.015951 | <a href="#">FLDKDGLINK</a>  |
| 4.5   | 1161.611694 | 0.011714  | <a href="#">WMIRNWIK</a>    |
| 4.4   | 1161.614197 | 0.009211  | <a href="#">YDISVKPANR</a>  |
| 4.2   | 1161.610168 | 0.013240  | <a href="#">RATESRDLSK</a>  |
| 2.8   | 1161.625443 | -0.002035 | <a href="#">ENVIHLPGQR</a>  |
| 2.7   | 1161.635330 | -0.011922 | <a href="#">IESVLSSSGKR</a> |
| 1.7   | 1161.628128 | -0.004720 | <a href="#">LESLDIPFTK</a>  |

MATRIX

SCIENCE

Mascot Search Results

Peptide View

MS/MS Fragmentation of **QDGSVDFGR**  
Found in **FIBB\_HUMAN**, Fibrinogen beta chain OS=Homo sapiens GN=FGB PE=1 SV=2

Match to Query 23167: 1290.615128 from(646.314840,2+) rtinseconds(1778) index(48843)  
Title: Locus:1.1.1.1857.9 File:"2013-07-02 CLN FXIII 180 min 2nd F 4.wiff"  
Data file C:\Program Files (x86)\Matrix Science\Mascot Daemon\mgf\8 FXIII 180 min 2nd\mascot\_daemon\_merge.mgf

Click mouse within plot area to zoom in by factor of two about that point  
Or, 

Plot from

0

 to 

2200

 Da 

Full range

  
Label all possible matches ☐ Label matches used for scoring ☒

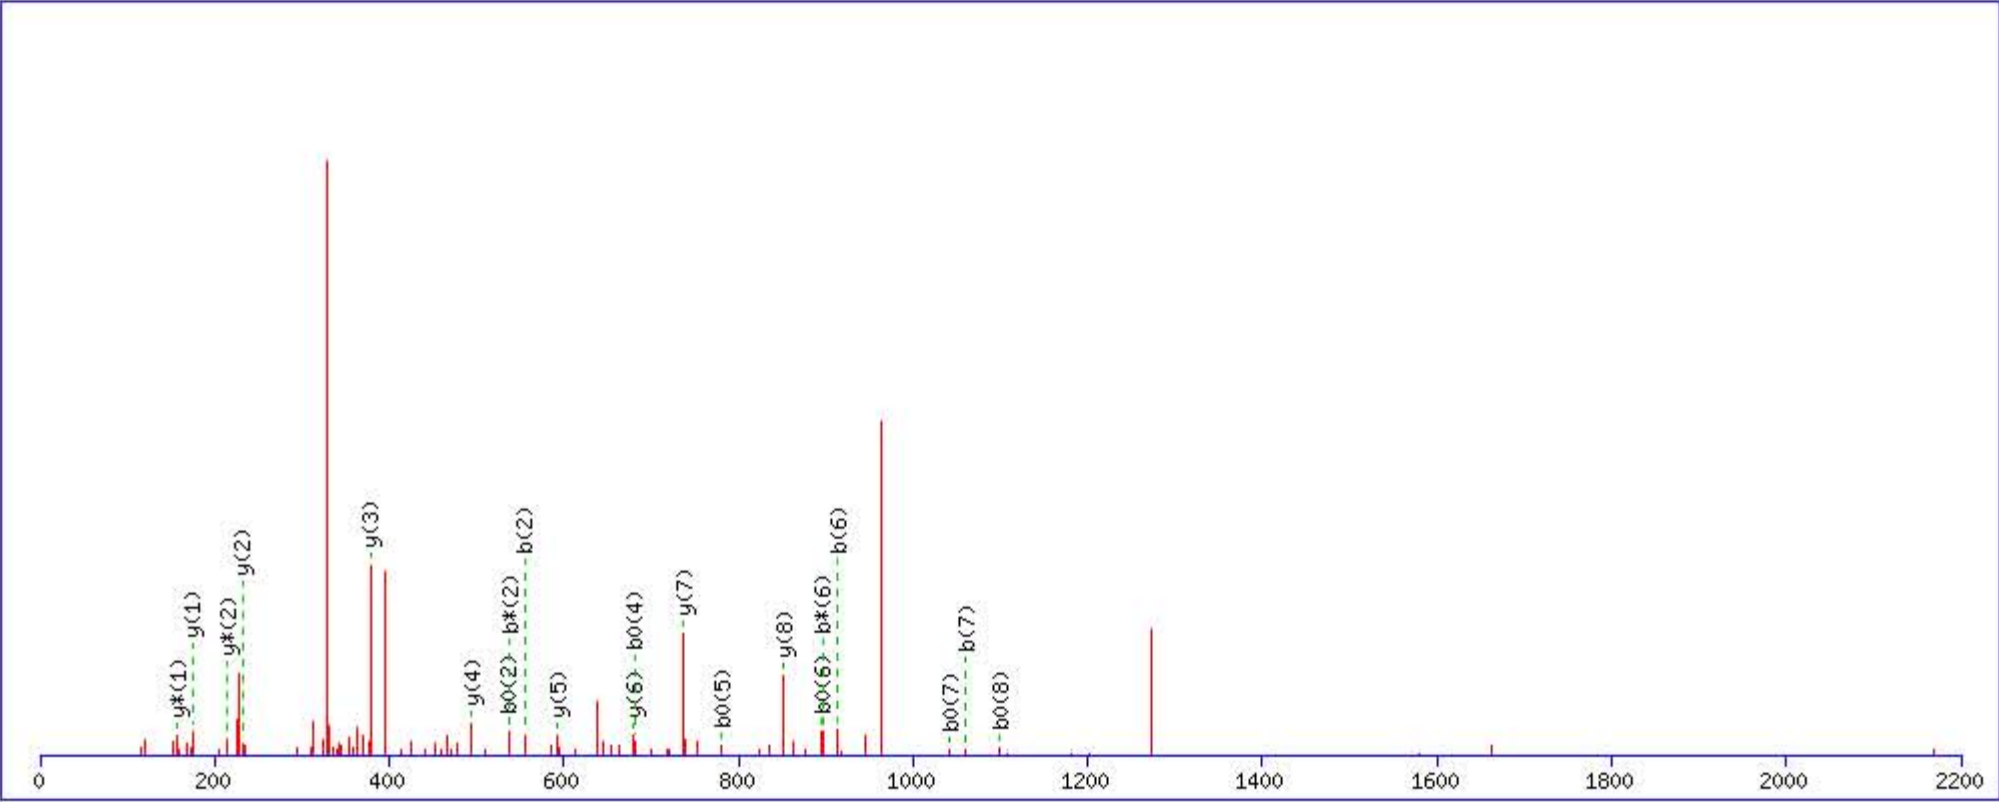

Monoisotopic mass of neutral peptide Mr(calc): 1290.602692  
Fixed modifications: Carbamidomethyl (C) (apply to specified residues or termini only)  
Variable modifications:  
Q1 : Biotin:Thermo-21345 (Q)  
Ions Score: 45 Expect: 0.00036  
Matches : 21/88 fragment ions using 43 most intense peaks [\(help\)](#)

| # | b           | b <sup>++</sup> | b <sup>*</sup> | b <sup>++</sup> * | b <sup>0</sup> | b <sup>0++</sup> | Seq. | y          | y <sup>++</sup> | y <sup>*</sup> | y <sup>++</sup> * | y <sup>0</sup> | y <sup>0++</sup> | # |
|---|-------------|-----------------|----------------|-------------------|----------------|------------------|------|------------|-----------------|----------------|-------------------|----------------|------------------|---|
| 1 | 440.232602  | 220.619939      | 423.206053     | 212.106664        |                |                  | Q    |            |                 |                |                   |                |                  | 9 |
| 2 | 555.259545  | 278.133411      | 538.232996     | 269.620136        | 537.248980     | 269.128128       | D    | 852.384622 | 426.695949      | 835.358073     | 418.182674        | 834.374057     | 417.690666       | 8 |
| 3 | 612.281009  | 306.644143      | 595.254460     | 298.130868        | 594.270444     | 297.638860       | G    | 737.357679 | 369.182477      | 720.331130     | 360.669203        | 719.347114     | 360.177195       | 7 |
| 4 | 699.313037  | 350.160157      | 682.286488     | 341.646882        | 681.302472     | 341.154874       | S    | 680.336215 | 340.671745      | 663.309666     | 332.158471        | 662.325650     | 331.666463       | 6 |
| 5 | 798.381451  | 399.694364      | 781.354902     | 391.181089        | 780.370886     | 390.689081       | V    | 593.304187 | 297.155731      | 576.277638     | 288.642457        | 575.293622     | 288.150449       | 5 |
| 6 | 913.408394  | 457.207835      | 896.381845     | 448.694560        | 895.397829     | 448.202552       | D    | 494.235773 | 247.621524      | 477.209224     | 239.108250        | 476.225208     | 238.616242       | 4 |
| 7 | 1060.476808 | 530.742042      | 1043.450259    | 522.228768        | 1042.466243    | 521.736759       | F    | 379.208830 | 190.108053      | 362.182281     | 181.594778        |                |                  | 3 |
| 8 | 1117.498272 | 559.252774      | 1100.471723    | 550.739499        | 1099.487707    | 550.247491       | G    | 232.140416 | 116.573846      | 215.113867     | 108.060571        |                |                  | 2 |
| 9 |             |                 |                |                   |                |                  | R    | 175.118952 | 88.063114       | 158.092403     | 79.549839         |                |                  | 1 |

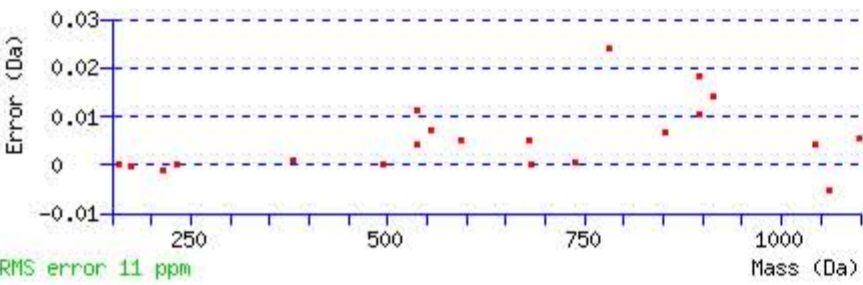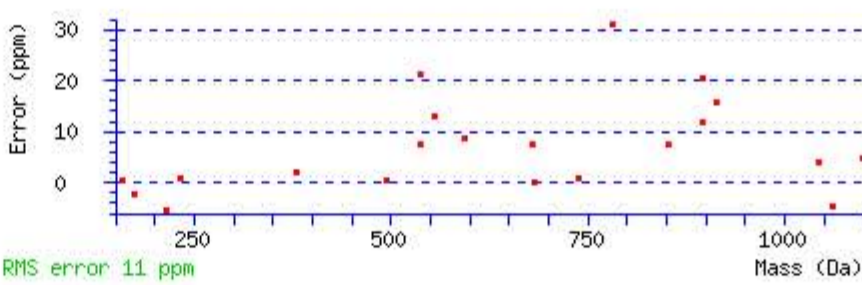

NCBI BLAST search of [QDGSVDFGR](#)  
(Parameters: blastp, nr protein database, expect=20000, no filter, PAM30)  
Other BLAST [web gateways](#)

All matches to this query

| Score | Mr(calc):   | Delta     | Sequence                       |
|-------|-------------|-----------|--------------------------------|
| 45.4  | 1290.602692 | 0.012436  | <a href="#">QDGSVDFGR</a>      |
| 8.3   | 1290.631668 | -0.016540 | <a href="#">GAKGEPGPDGPPGR</a> |
| 3.4   | 1290.632507 | -0.017379 | <a href="#">RGDNWMLMLR</a>     |

MATRIX

SCIENCE

Mascot Search Results

Peptide View

MS/MS Fragmentation of **IRPFFPQQ**  
Found in **FIBB\_HUMAN**, Fibrinogen beta chain OS=Homo sapiens GN=FGB PE=1 SV=2

Match to Query 24179: 1342.732848 from(672.373700,2+) rtinseconds(2279) index(7203)  
Title: Locus:1.1.1.2071.4 File:"2013-07-02 CLN FXIII 180 min 2nd F 1.wiff"  
Data file C:\Program Files (x86)\Matrix Science\Mascot Daemon\mgf\8 FXIII 180 min 2nd\mascot\_daemon\_merge.mgf

Click mouse within plot area to zoom in by factor of two about that point

Or,   to  Da

Label all possible matches ☐ Label matches used for scoring ☒

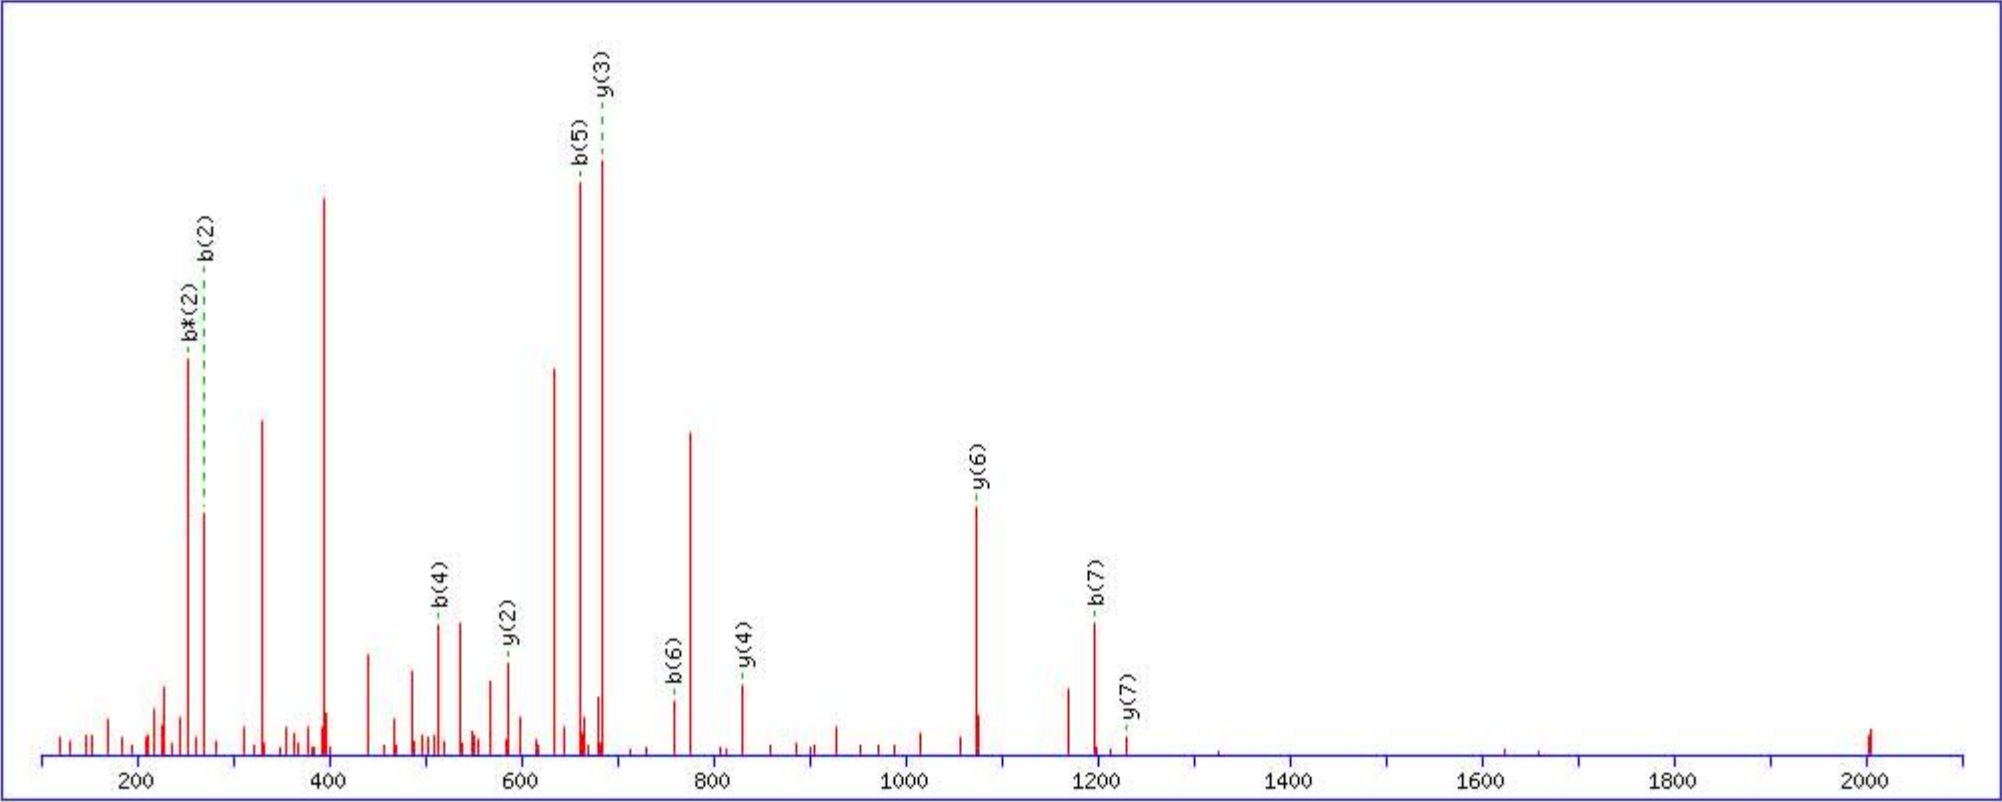

Monoisotopic mass of neutral peptide Mr(calc): 1342.722000  
Fixed modifications: Carbamidomethyl (C) (apply to specified residues or termini only)  
Variable modifications:  
Q7 : Biotin:Thermo-21345 (Q)  
Ions Score: 26 Expect: 0.017  
Matches : 11/54 fragment ions using 24 most intense peaks [\(help\)](#)

| # | b           | b <sup>++</sup> | b <sup>*</sup> | b <sup>++</sup> * | Seq. | y           | y <sup>++</sup> | y <sup>*</sup> | y <sup>++</sup> * | # |
|---|-------------|-----------------|----------------|-------------------|------|-------------|-----------------|----------------|-------------------|---|
| 1 | 114.091340  | 57.549308       |                |                   | I    |             |                 |                |                   | 8 |
| 2 | 270.192451  | 135.599864      | 253.165902     | 127.086589        | R    | 1230.645212 | 615.826244      | 1213.618663    | 607.312970        | 7 |
| 3 | 367.245215  | 184.126245      | 350.218666     | 175.612971        | P    | 1074.544101 | 537.775689      | 1057.517552    | 529.262414        | 6 |
| 4 | 514.313629  | 257.660453      | 497.287080     | 249.147178        | F    | 977.491337  | 489.249307      | 960.464788     | 480.736032        | 5 |
| 5 | 661.382043  | 331.194660      | 644.355494     | 322.681385        | F    | 830.422923  | 415.715100      | 813.396374     | 407.201825        | 4 |
| 6 | 758.434807  | 379.721042      | 741.408258     | 371.207767        | P    | 683.354509  | 342.180893      | 666.327960     | 333.667618        | 3 |
| 7 | 1197.660133 | 599.333705      | 1180.633584    | 590.820430        | Q    | 586.301745  | 293.654511      | 569.275196     | 285.141236        | 2 |
| 8 |             |                 |                |                   | Q    | 147.076419  | 74.041848       | 130.049870     | 65.528573         | 1 |

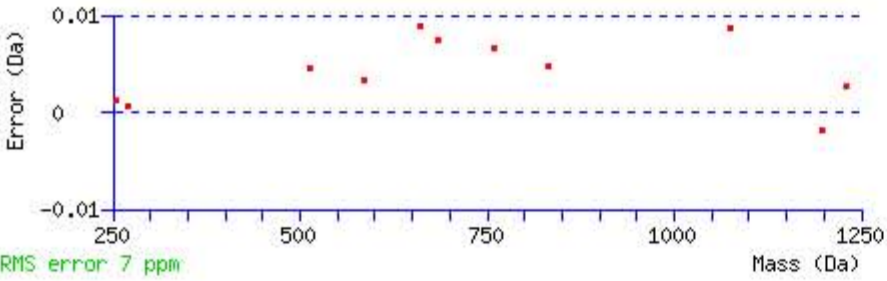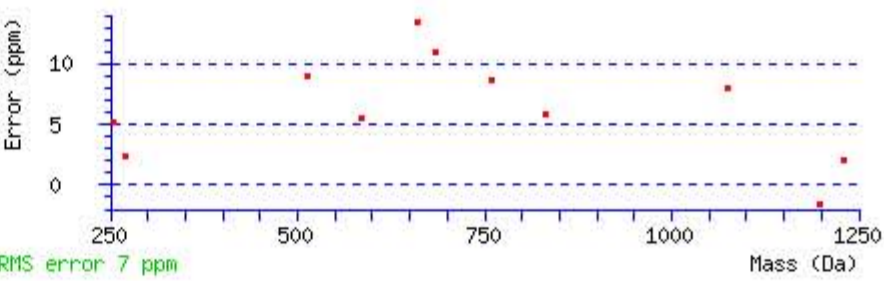

NCBI BLAST search of [IRPFFPQQ](#)  
(Parameters: blastp, nr protein database, expect=20000, no filter, PAM30)  
Other BLAST [web gateways](#)

All matches to this query

| Score | Mr(calc):   | Delta     | Sequence                     |
|-------|-------------|-----------|------------------------------|
| 26.4  | 1342.722000 | 0.010848  | <a href="#">IRPFFPQQ</a>     |
| 20.8  | 1342.722000 | 0.010848  | <a href="#">IRPFFPQQ</a>     |
| 7.2   | 1342.716629 | 0.016219  | <a href="#">LLSVTEDQK</a>    |
| 5.9   | 1342.746918 | -0.014070 | <a href="#">RIYNNIPANLR</a>  |
| 5.2   | 1342.743103 | -0.010255 | <a href="#">IRYVPEQK</a>     |
| 5.0   | 1342.727829 | 0.005019  | <a href="#">LNPASAEIMLLR</a> |
| 2.5   | 1342.729187 | 0.003661  | <a href="#">QPHRPIER</a>     |

MATRIX

SCIENCE

Mascot Search Results

Peptide View

MS/MS Fragmentation of **YLQEIYNSNNQK**  
Found in **FIBG\_HUMAN**, Fibrinogen gamma chain OS=Homo sapiens GN=FGG PE=1 SV=3

Match to Query 40782: 1823.897262 from(608.973030,3+) rtinseconds(1852) index(49258)  
Title: Locus:1.1.1.1883.5 File:"2013-07-02 CLN FXIII 180 min 2nd F 4.wiff"  
Data file C:\Program Files (x86)\Matrix Science\Mascot Daemon\mgf\8 FXIII 180 min 2nd\mascot\_daemon\_merge.mgf

Click mouse within plot area to zoom in by factor of two about that point  
Or, 

Plot from

100

 to 

1700

 Da 

Full range

  
Label all possible matches ☐ Label matches used for scoring ☒

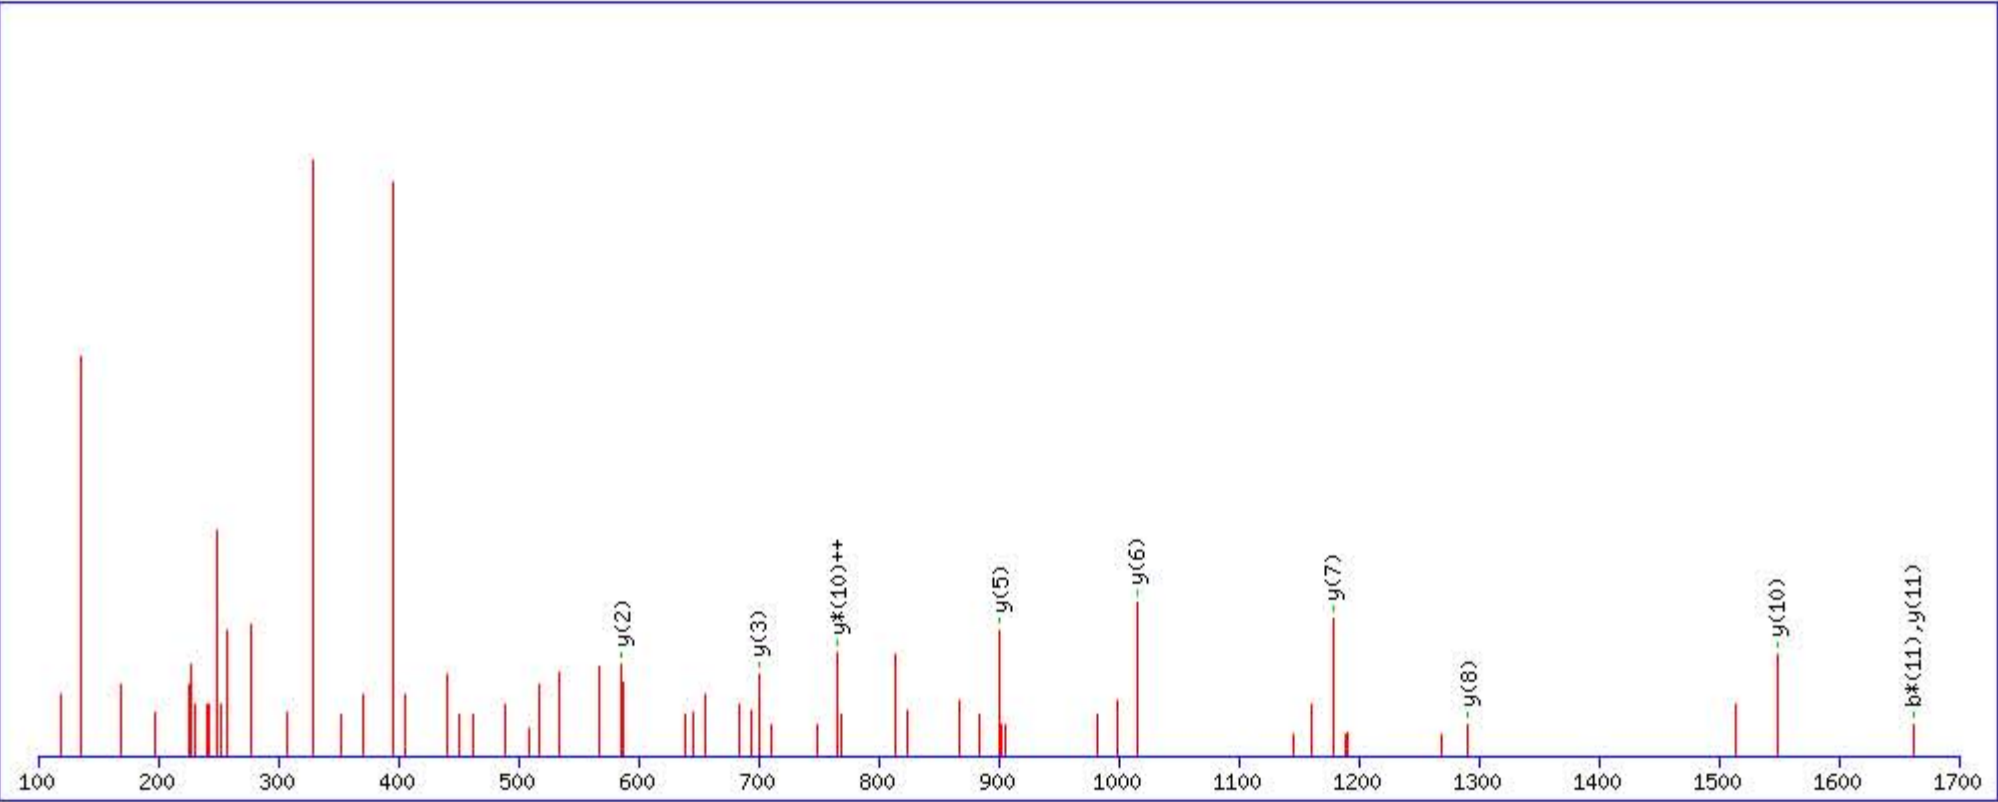

Monoisotopic mass of neutral peptide Mr(calc): 1823.887573  
Fixed modifications: Carbamidomethyl (C) (apply to specified residues or termini only)  
Variable modifications:  
Q11 : Biotin:Thermo-21345 (Q)  
Ions Score: 53 Expect: 0.00011  
Matches : 10/114 fragment ions using 14 most intense peaks [\(help\)](#)

| #  | b           | b <sup>++</sup> | b <sup>+</sup> | b <sup>∗++</sup> | b <sup>0</sup> | b <sup>0++</sup> | Seq. | y           | y <sup>++</sup> | y <sup>+</sup> | y <sup>∗++</sup> | y <sup>0</sup> | y <sup>0++</sup> | #  |
|----|-------------|-----------------|----------------|------------------|----------------|------------------|------|-------------|-----------------|----------------|------------------|----------------|------------------|----|
| 1  | 164.070605  | 82.538940       |                |                  |                |                  | Y    |             |                 |                |                  |                |                  | 12 |
| 2  | 277.154669  | 139.080973      |                |                  |                |                  | L    | 1661.831567 | 831.419422      | 1644.805018    | 822.906147       | 1643.821002    | 822.414139       | 11 |
| 3  | 405.213247  | 203.110262      | 388.186698     | 194.596987       |                |                  | Q    | 1548.747503 | 774.877390      | 1531.720954    | 766.364115       | 1530.736938    | 765.872107       | 10 |
| 4  | 534.255840  | 267.631558      | 517.229291     | 259.118284       | 516.245275     | 258.626276       | E    | 1420.688925 | 710.848100      | 1403.662376    | 702.334826       | 1402.678360    | 701.842818       | 9  |
| 5  | 647.339904  | 324.173590      | 630.313355     | 315.660316       | 629.329339     | 315.168308       | I    | 1291.646332 | 646.326804      | 1274.619783    | 637.813530       | 1273.635767    | 637.321522       | 8  |
| 6  | 810.403233  | 405.705255      | 793.376684     | 397.191980       | 792.392668     | 396.699972       | Y    | 1178.562268 | 589.784772      | 1161.535719    | 581.271498       | 1160.551703    | 580.779489       | 7  |
| 7  | 924.446160  | 462.726718      | 907.419611     | 454.213443       | 906.435595     | 453.721435       | N    | 1015.498939 | 508.253108      | 998.472390     | 499.739833       | 997.488374     | 499.247825       | 6  |
| 8  | 1011.478188 | 506.242732      | 994.451639     | 497.729457       | 993.467623     | 497.237449       | S    | 901.456012  | 451.231644      | 884.429463     | 442.718370       | 883.445447     | 442.226362       | 5  |
| 9  | 1125.521115 | 563.264196      | 1108.494566    | 554.750921       | 1107.510550    | 554.258913       | N    | 814.423984  | 407.715630      | 797.397435     | 399.202356       |                |                  | 4  |
| 10 | 1239.564042 | 620.285659      | 1222.537493    | 611.772385       | 1221.553477    | 611.280376       | N    | 700.381057  | 350.694167      | 683.354508     | 342.180892       |                |                  | 3  |
| 11 | 1678.789368 | 839.898322      | 1661.762819    | 831.385048       | 1660.778803    | 830.893039       | Q    | 586.338130  | 293.672703      | 569.311581     | 285.159429       |                |                  | 2  |
| 12 |             |                 |                |                  |                |                  | K    | 147.112804  | 74.060040       | 130.086255     | 65.546765        |                |                  | 1  |

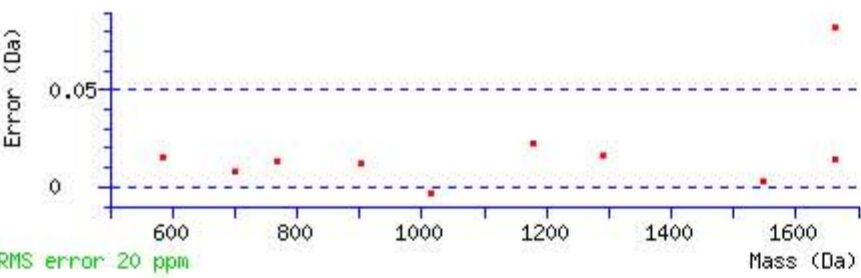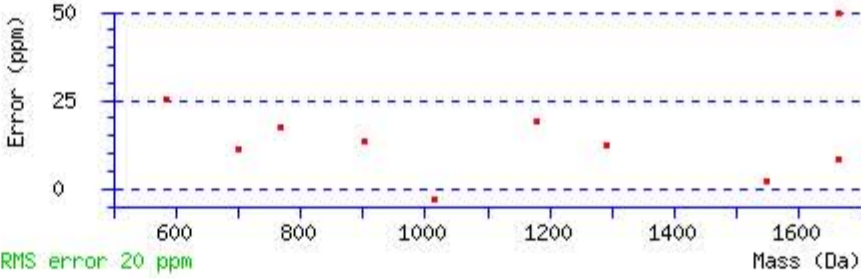

NCBI BLAST search of [YLQEIYNSNNQK](#)  
(Parameters: blastp, nr protein database, expect=20000, no filter, PAM30)  
Other BLAST [web gateways](#)

All matches to this query

| Score | Mr(calc):   | Delta    | Sequence                     |
|-------|-------------|----------|------------------------------|
| 53.0  | 1823.887573 | 0.009689 | <a href="#">YLQEIYNSNNQK</a> |

MATRIX

SCIENCE

Mascot Search Results

Peptide View

MS/MS Fragmentation of **LTIGEGQQHHLGGAK**  
Found in **FIBG\_HUMAN**, Fibrinogen gamma chain OS=Homo sapiens GN=FGG PE=1 SV=3

Match to Query 41495: 1855.970656 from(464.999940,4+) rtinseconds(1503) index(2658)  
Title: Locus:1.1.1.1800.8 File:"2013-07-02 CLN FXIII 180 min 2nd F 1.wiff"  
Data file C:\Program Files (x86)\Matrix Science\Mascot Daemon\mgf\8 FXIII 180 min 2nd\mascot\_daemon\_merge.mgf

Click mouse within plot area to zoom in by factor of two about that point  
Or, 

Plot from

100

 to 

1600

 Da 

Full range

Label all possible matches

Label matches used for scoring

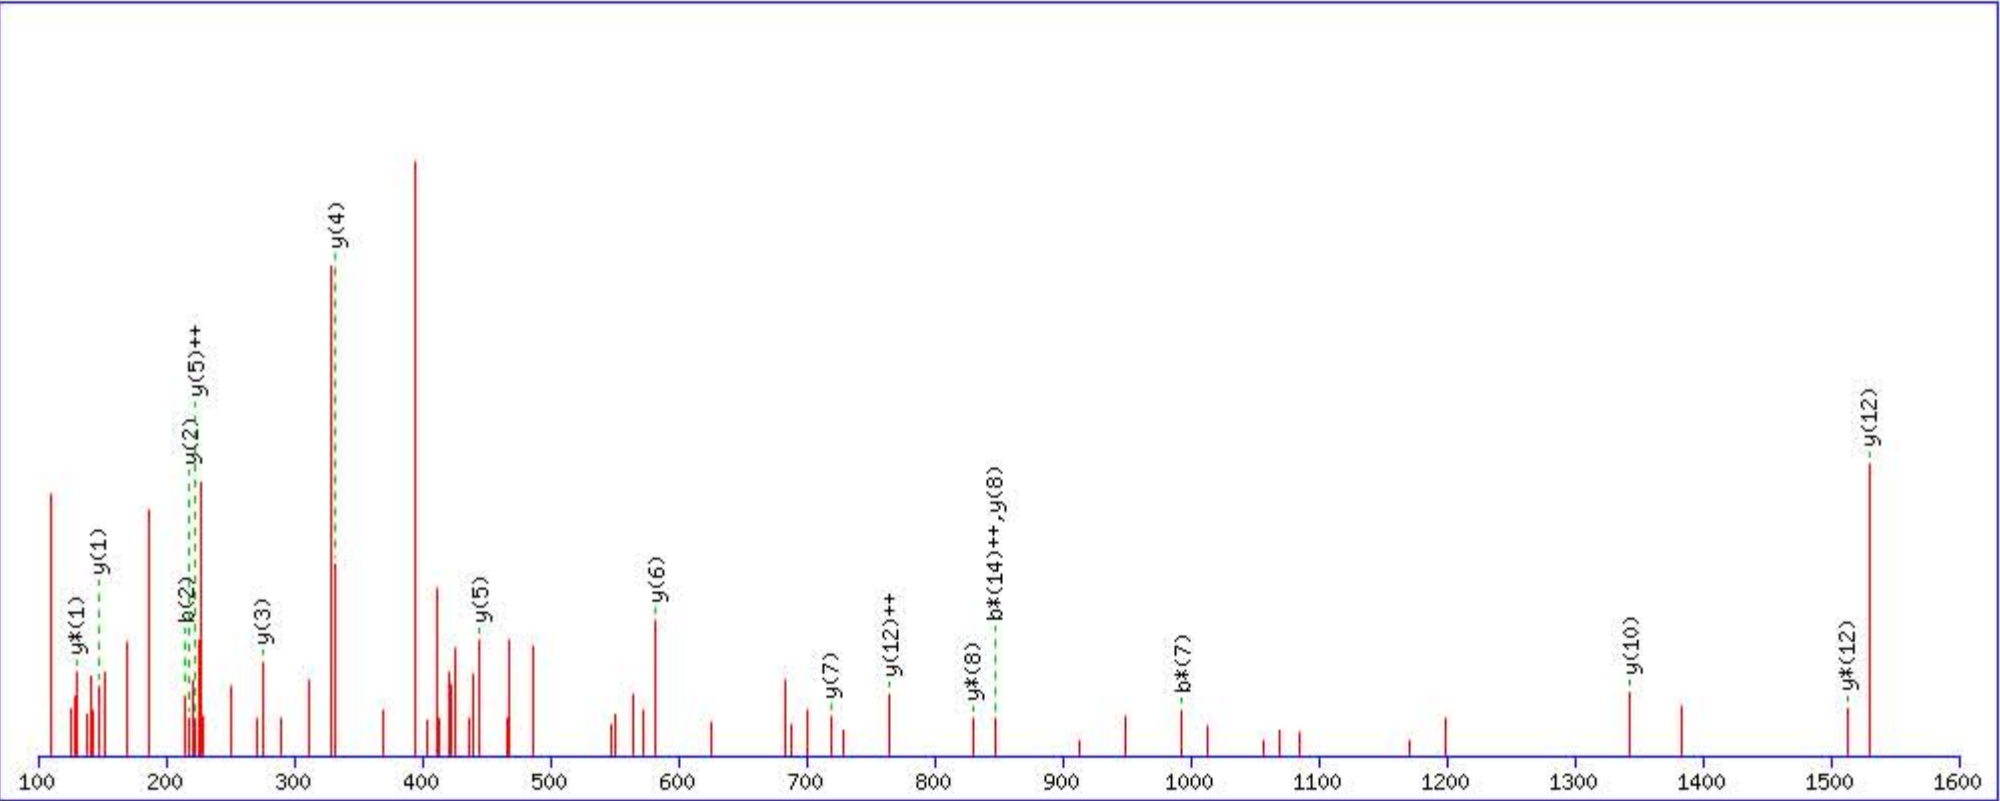

Monoisotopic mass of neutral peptide Mr(calc): 1855.972687  
Fixed modifications: Carbamidomethyl (C) (apply to specified residues or termini only)  
Variable modifications:  
Q7 : Biotin:Thermo-21345 (Q)  
Ions Score: 28 Expect: 0.046  
Matches : 18/134 fragment ions using 61 most intense peaks [\(help\)](#)

| #  | b           | b <sup>++</sup> | b <sup>*</sup> | b <sup>*++</sup> | b <sup>0</sup> | b <sup>0++</sup> | Seq. | y           | y <sup>++</sup> | y <sup>*</sup> | y <sup>*++</sup> | y <sup>0</sup> | y <sup>0++</sup> | #  |
|----|-------------|-----------------|----------------|------------------|----------------|------------------|------|-------------|-----------------|----------------|------------------|----------------|------------------|----|
| 1  | 114.091340  | 57.549308       |                |                  |                |                  | L    |             |                 |                |                  |                |                  | 15 |
| 2  | 215.139019  | 108.073147      |                |                  | 197.128454     | 99.067865        | T    | 1743.895902 | 872.451589      | 1726.869353    | 863.938314       | 1725.885337    | 863.446306       | 14 |
| 3  | 328.223083  | 164.615179      |                |                  | 310.212518     | 155.609897       | I    | 1642.848223 | 821.927749      | 1625.821674    | 813.414475       | 1624.837658    | 812.922467       | 13 |
| 4  | 385.244547  | 193.125911      |                |                  | 367.233982     | 184.120629       | G    | 1529.764159 | 765.385717      | 1512.737610    | 756.872443       | 1511.753594    | 756.380435       | 12 |
| 5  | 514.287140  | 257.647208      |                |                  | 496.276575     | 248.641926       | E    | 1472.742695 | 736.874985      | 1455.716146    | 728.361711       | 1454.732130    | 727.869703       | 11 |
| 6  | 571.308604  | 286.157940      |                |                  | 553.298039     | 277.152658       | G    | 1343.700102 | 672.353689      | 1326.673553    | 663.840414       |                |                  | 10 |
| 7  | 1010.533930 | 505.770603      | 993.507381     | 497.257329       | 992.523365     | 496.765321       | Q    | 1286.678638 | 643.842957      | 1269.652089    | 635.329682       |                |                  | 9  |
| 8  | 1138.592508 | 569.799892      | 1121.565959    | 561.286618       | 1120.581943    | 560.794609       | Q    | 847.453312  | 424.230294      | 830.426763     | 415.717019       |                |                  | 8  |
| 9  | 1275.651420 | 638.329348      | 1258.624871    | 629.816074       | 1257.640855    | 629.324065       | H    | 719.394734  | 360.201005      | 702.368185     | 351.687730       |                |                  | 7  |
| 10 | 1412.710332 | 706.858804      | 1395.683783    | 698.345530       | 1394.699767    | 697.853521       | H    | 582.335822  | 291.671549      | 565.309273     | 283.158274       |                |                  | 6  |
| 11 | 1525.794396 | 763.400836      | 1508.767847    | 754.887561       | 1507.783831    | 754.395553       | L    | 445.276910  | 223.142093      | 428.250361     | 214.628818       |                |                  | 5  |
| 12 | 1582.815860 | 791.911568      | 1565.789311    | 783.398293       | 1564.805295    | 782.906285       | G    | 332.192846  | 166.600061      | 315.166297     | 158.086786       |                |                  | 4  |
| 13 | 1639.837324 | 820.422300      | 1622.810775    | 811.909025       | 1621.826759    | 811.417017       | G    | 275.171382  | 138.089329      | 258.144833     | 129.576054       |                |                  | 3  |
| 14 | 1710.874438 | 855.940857      | 1693.847889    | 847.427582       | 1692.863873    | 846.935574       | A    | 218.149918  | 109.578597      | 201.123369     | 101.065322       |                |                  | 2  |
| 15 |             |                 |                |                  |                |                  | K    | 147.112804  | 74.060040       | 130.086255     | 65.546765        |                |                  | 1  |

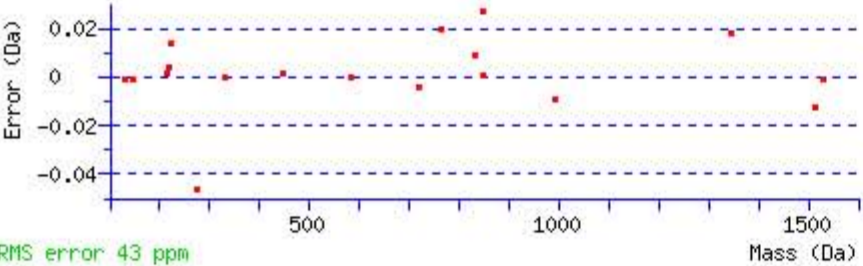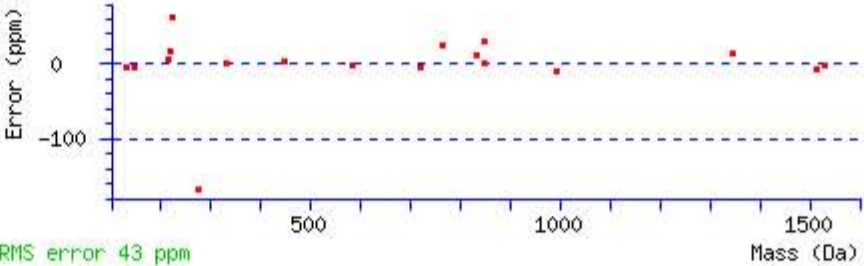

NCBI BLAST search of [LTIGEGQQHHLGGAK](#)  
(Parameters: blastp, nr protein database, expect=20000, no filter, PAM30)  
Other BLAST [web gateways](#)

All matches to this query

| Score | Mr(calc):   | Delta     | Sequence                        |
|-------|-------------|-----------|---------------------------------|
| 27.8  | 1855.972687 | -0.002031 | <a href="#">LTIGEGQQHHLGGAK</a> |
| 18.8  | 1855.972687 | -0.002031 | <a href="#">LTIGEGQQHHLGGAK</a> |

MATRIX

SCIENCE

Mascot Search Results

Peptide View

MS/MS Fragmentation of **LTIGEGQQHHLGGA**K****  
Found in **FIBG\_HUMAN**, Fibrinogen gamma chain OS=Homo sapiens GN=FGG PE=1 SV=3

Match to Query 41508: 1855.975032 from(619.665620,3+) rtinseconds(1503) index(2662)  
Title: Locus:1.1.1.1800.12 File:"2013-07-02 CLN FXIII 180 min 2nd F 1.wiff"  
Data file C:\Program Files (x86)\Matrix Science\Mascot Daemon\mgf\8 FXIII 180 min 2nd\mascot\_daemon\_merge.mgf

Click mouse within plot area to zoom in by factor of two about that point  
Or, 

Plot from

100

 to 

1800

 Da 

Full range

  
Label all possible matches ☐ Label matches used for scoring ☒

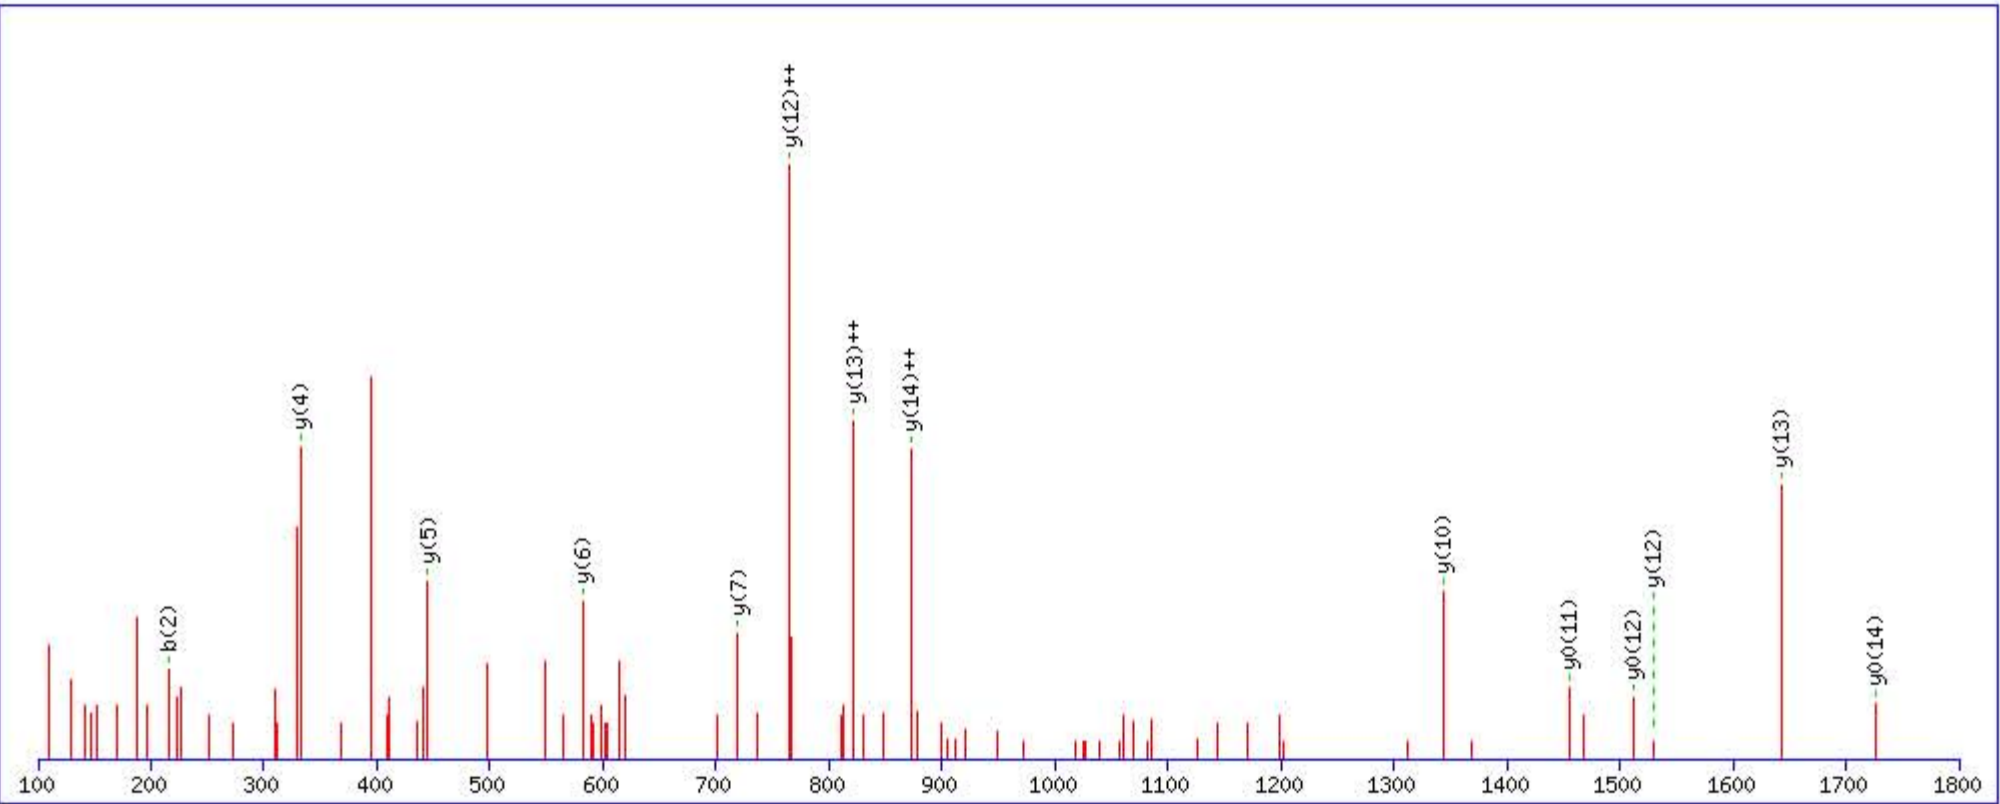

Monoisotopic mass of neutral peptide Mr(calc): 1855.972687  
Fixed modifications: Carbamidomethyl (C) (apply to specified residues or termini only)  
Variable modifications:  
Q8 : Biotin:Thermo-21345 (Q)  
Ions Score: 32 Expect: 0.0011  
Matches : 14/134 fragment ions using 30 most intense peaks [\(help\)](#)

| #  | b           | b <sup>++</sup> | b <sup>*</sup> | b <sup>*++</sup> | b <sup>0</sup> | b <sup>0++</sup> | Seq. | y           | y <sup>++</sup> | y <sup>*</sup> | y <sup>*++</sup> | y <sup>0</sup> | y <sup>0++</sup> | #  |
|----|-------------|-----------------|----------------|------------------|----------------|------------------|------|-------------|-----------------|----------------|------------------|----------------|------------------|----|
| 1  | 114.091340  | 57.549308       |                |                  |                |                  | L    |             |                 |                |                  |                |                  | 15 |
| 2  | 215.139019  | 108.073147      |                |                  | 197.128454     | 99.067865        | T    | 1743.895902 | 872.451589      | 1726.869353    | 863.938314       | 1725.885337    | 863.446306       | 14 |
| 3  | 328.223083  | 164.615179      |                |                  | 310.212518     | 155.609897       | I    | 1642.848223 | 821.927749      | 1625.821674    | 813.414475       | 1624.837658    | 812.922467       | 13 |
| 4  | 385.244547  | 193.125911      |                |                  | 367.233982     | 184.120629       | G    | 1529.764159 | 765.385717      | 1512.737610    | 756.872443       | 1511.753594    | 756.380435       | 12 |
| 5  | 514.287140  | 257.647208      |                |                  | 496.276575     | 248.641926       | E    | 1472.742695 | 736.874985      | 1455.716146    | 728.361711       | 1454.732130    | 727.869703       | 11 |
| 6  | 571.308604  | 286.157940      |                |                  | 553.298039     | 277.152658       | G    | 1343.700102 | 672.353689      | 1326.673553    | 663.840414       |                |                  | 10 |
| 7  | 699.367182  | 350.187229      | 682.340633     | 341.673955       | 681.356617     | 341.181947       | Q    | 1286.678638 | 643.842957      | 1269.652089    | 635.329682       |                |                  | 9  |
| 8  | 1138.592508 | 569.799892      | 1121.565959    | 561.286618       | 1120.581943    | 560.794609       | Q    | 1158.620060 | 579.813668      | 1141.593511    | 571.300393       |                |                  | 8  |
| 9  | 1275.651420 | 638.329348      | 1258.624871    | 629.816074       | 1257.640855    | 629.324065       | H    | 719.394734  | 360.201005      | 702.368185     | 351.687730       |                |                  | 7  |
| 10 | 1412.710332 | 706.858804      | 1395.683783    | 698.345530       | 1394.699767    | 697.853521       | H    | 582.335822  | 291.671549      | 565.309273     | 283.158274       |                |                  | 6  |
| 11 | 1525.794396 | 763.400836      | 1508.767847    | 754.887561       | 1507.783831    | 754.395553       | L    | 445.276910  | 223.142093      | 428.250361     | 214.628818       |                |                  | 5  |
| 12 | 1582.815860 | 791.911568      | 1565.789311    | 783.398293       | 1564.805295    | 782.906285       | G    | 332.192846  | 166.600061      | 315.166297     | 158.086786       |                |                  | 4  |
| 13 | 1639.837324 | 820.422300      | 1622.810775    | 811.909025       | 1621.826759    | 811.417017       | G    | 275.171382  | 138.089329      | 258.144833     | 129.576054       |                |                  | 3  |
| 14 | 1710.874438 | 855.940857      | 1693.847889    | 847.427582       | 1692.863873    | 846.935574       | A    | 218.149918  | 109.578597      | 201.123369     | 101.065322       |                |                  | 2  |
| 15 |             |                 |                |                  |                |                  | K    | 147.112804  | 74.060040       | 130.086255     | 65.546765        |                |                  | 1  |

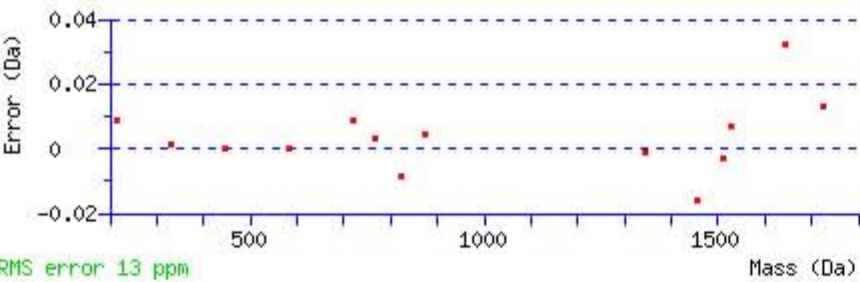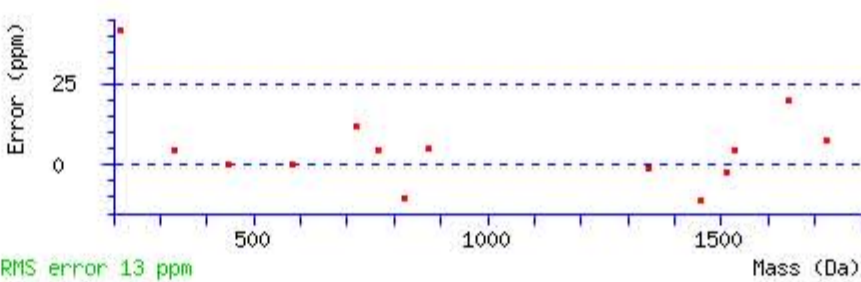

NCBI BLAST search of [LTIGEGQQHHLGGA\*\*K\*\*](#)  
(Parameters: blastp, nr protein database, expect=20000, no filter, PAM30)  
Other BLAST [web gateways](#)

All matches to this query

| Score | Mr(calc):   | Delta     | Sequence                               |
|-------|-------------|-----------|----------------------------------------|
| 31.7  | 1855.972687 | 0.002345  | <a href="#">LTIGEGQQHHLGGA<b>K</b></a> |
| 31.7  | 1855.972687 | 0.002345  | <a href="#">LTIGEGQQHHLGGA<b>K</b></a> |
| 0.0   | 1855.979202 | -0.004170 | <a href="#">ITIVENVGSVEGLAYHR</a>      |

MATRIX

SCIENCE

Mascot Search Results

Peptide View

MS/MS Fragmentation of **LTIGEGQQHHLGGAK**  
Found in **FIBG\_HUMAN**, Fibrinogen gamma chain OS=Homo sapiens GN=FGG PE=1 SV=3

Match to Query 47801: 2167.140936 from(542.792510,4+) rtinseconds(1790) index(4320)  
Title: Locus:1.1.1.1900.7 File:"2013-07-02 CLN FXIII 180 min 2nd F 1.wiff"  
Data file C:\Program Files (x86)\Matrix Science\Mascot Daemon\mgf\8 FXIII 180 min 2nd\mascot\_daemon\_merge.mgf

Click mouse within plot area to zoom in by factor of two about that point  
Or,   to  Da   
Label all possible matches ☐ Label matches used for scoring ☒

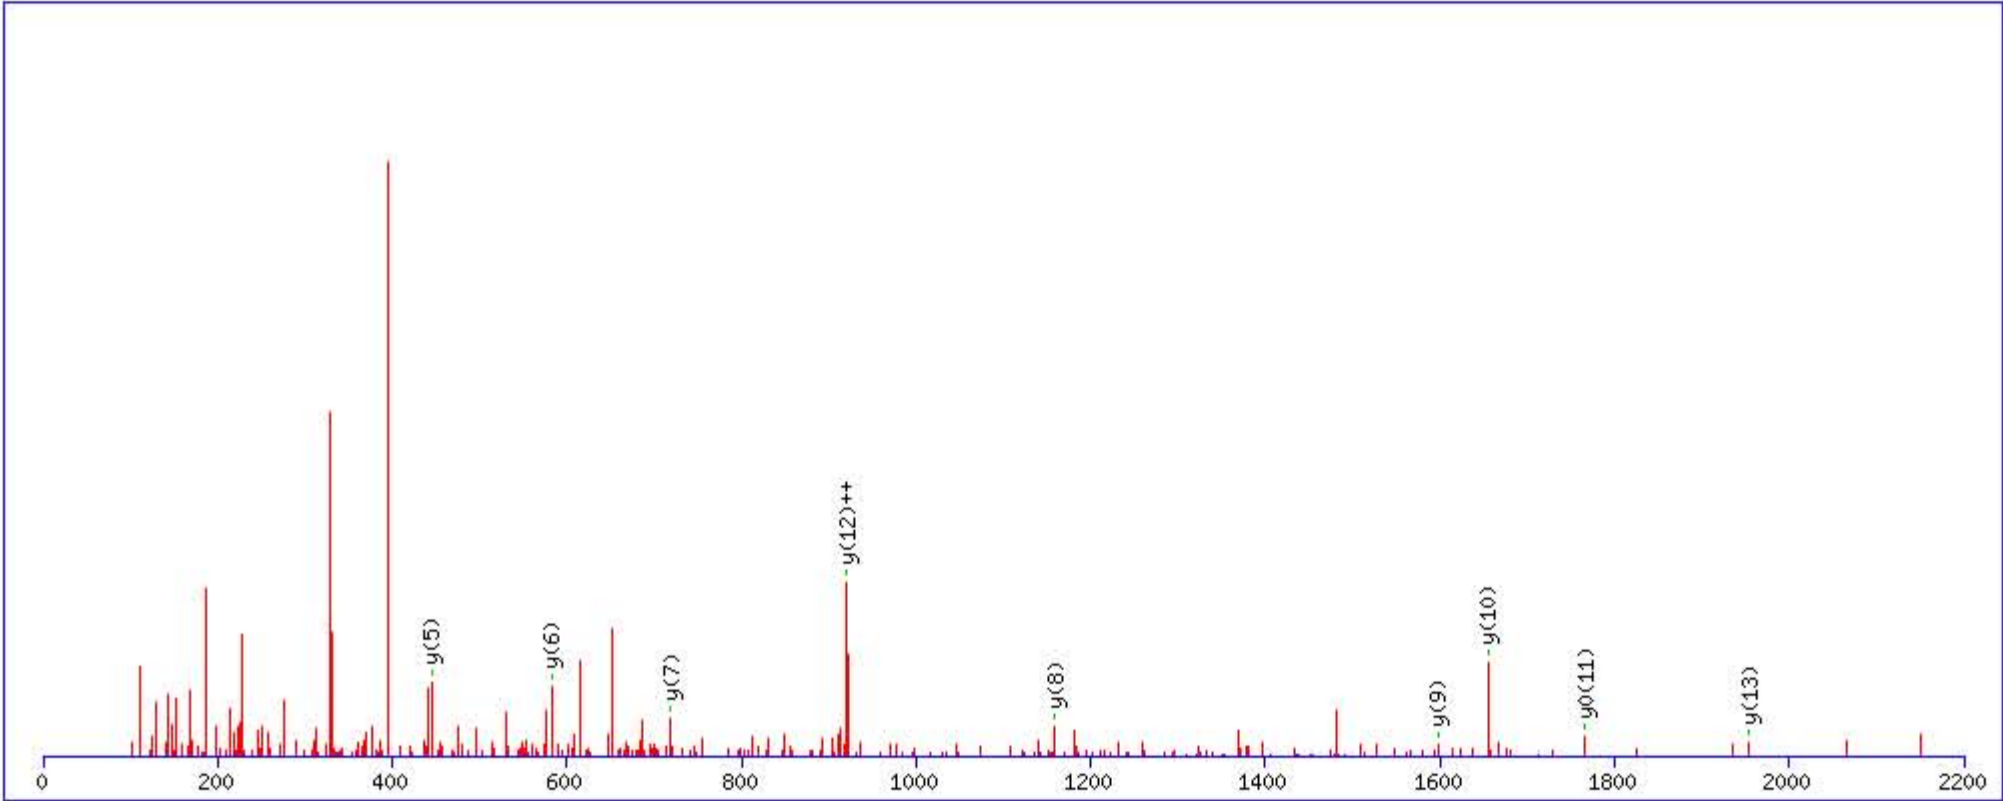

Monoisotopic mass of neutral peptide Mr(calc): 2167.139435  
Fixed modifications: Carbamidomethyl (C) (apply to specified residues or termini only)  
Variable modifications:  
Q7 : Biotin:Thermo-21345 (Q)  
Q8 : Biotin:Thermo-21345 (Q)  
Ions Score: 26 Expect: 0.065  
Matches : 9/134 fragment ions using 21 most intense peaks [\(help\)](#)

| #  | b           | b <sup>++</sup> | b <sup>+</sup> | b <sup>+++</sup> | b <sup>0</sup> | b <sup>0++</sup> | Seq. | y           | y <sup>++</sup> | y <sup>+</sup> | y <sup>+++</sup> | y <sup>0</sup> | y <sup>0++</sup> | #  |
|----|-------------|-----------------|----------------|------------------|----------------|------------------|------|-------------|-----------------|----------------|------------------|----------------|------------------|----|
| 1  | 114.091340  | 57.549308       |                |                  |                |                  | L    |             |                 |                |                  |                |                  | 15 |
| 2  | 215.139019  | 108.073147      |                |                  | 197.128454     | 99.067865        | T    | 2055.062650 | 1028.034963     | 2038.036101    | 1019.521688      | 2037.052085    | 1019.029680      | 14 |
| 3  | 328.223083  | 164.615179      |                |                  | 310.212518     | 155.609897       | I    | 1954.014971 | 977.511123      | 1936.988422    | 968.997849       | 1936.004406    | 968.505841       | 13 |
| 4  | 385.244547  | 193.125911      |                |                  | 367.233982     | 184.120629       | G    | 1840.930907 | 920.969091      | 1823.904358    | 912.455817       | 1822.920342    | 911.963809       | 12 |
| 5  | 514.287140  | 257.647208      |                |                  | 496.276575     | 248.641926       | E    | 1783.909443 | 892.458359      | 1766.882894    | 883.945085       | 1765.898878    | 883.453077       | 11 |
| 6  | 571.308604  | 286.157940      |                |                  | 553.298039     | 277.152658       | G    | 1654.866850 | 827.937063      | 1637.840301    | 819.423788       |                |                  | 10 |
| 7  | 1010.533930 | 505.770603      | 993.507381     | 497.257329       | 992.523365     | 496.765321       | Q    | 1597.845386 | 799.426331      | 1580.818837    | 790.913056       |                |                  | 9  |
| 8  | 1449.759256 | 725.383266      | 1432.732707    | 716.869992       | 1431.748691    | 716.377984       | Q    | 1158.620060 | 579.813668      | 1141.593511    | 571.300393       |                |                  | 8  |
| 9  | 1586.818168 | 793.912722      | 1569.791619    | 785.399448       | 1568.807603    | 784.907440       | H    | 719.394734  | 360.201005      | 702.368185     | 351.687730       |                |                  | 7  |
| 10 | 1723.877080 | 862.442178      | 1706.850531    | 853.928904       | 1705.866515    | 853.436895       | H    | 582.335822  | 291.671549      | 565.309273     | 283.158274       |                |                  | 6  |
| 11 | 1836.961144 | 918.984210      | 1819.934595    | 910.470936       | 1818.950579    | 909.978927       | L    | 445.276910  | 223.142093      | 428.250361     | 214.628818       |                |                  | 5  |
| 12 | 1893.982608 | 947.494942      | 1876.956059    | 938.981667       | 1875.972043    | 938.489659       | G    | 332.192846  | 166.600061      | 315.166297     | 158.086786       |                |                  | 4  |
| 13 | 1951.004072 | 976.005674      | 1933.977523    | 967.492399       | 1932.993507    | 967.000391       | G    | 275.171382  | 138.089329      | 258.144833     | 129.576054       |                |                  | 3  |
| 14 | 2022.041186 | 1011.524231     | 2005.014637    | 1003.010956      | 2004.030621    | 1002.518948      | A    | 218.149918  | 109.578597      | 201.123369     | 101.065322       |                |                  | 2  |
| 15 |             |                 |                |                  |                |                  | K    | 147.112804  | 74.060040       | 130.086255     | 65.546765        |                |                  | 1  |

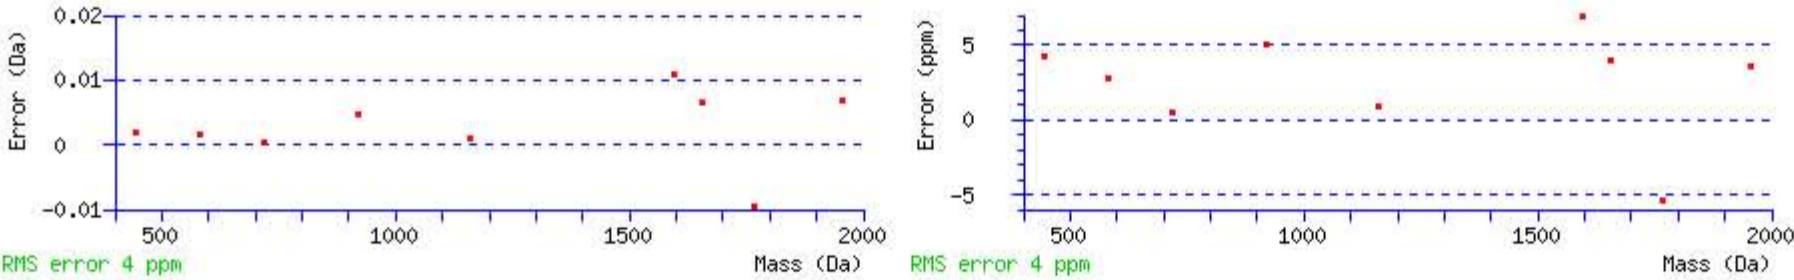

NCBI BLAST search of [LTIGEGQQHHLGGAK](#)  
(Parameters: blastp, nr protein database, expect=20000, no filter, PAM30)  
Other BLAST [web gateways](#)

All matches to this query

| Score | Mr(calc):   | Delta    | Sequence                        |
|-------|-------------|----------|---------------------------------|
| 25.8  | 2167.139435 | 0.001501 | <a href="#">LTIGEGQQHHLGGAK</a> |

MATRIX

SCIENCE

Mascot Search Results

Peptide View

MS/MS Fragmentation of **VAQLEAQCQEPCKDTVQIHDITGK**  
Found in **FIBG\_HUMAN**, Fibrinogen gamma chain OS=Homo sapiens GN=FGG PE=1 SV=3

Match to Query 64876: 3389.708016 from(848.434280,4+) rtinseconds(2041) index(50592)  
Title: Locus:1.1.1.1948.11 File:"2013-07-02 CLN FXIII 180 min 2nd F 4.wiff"  
Data file C:\Program Files (x86)\Matrix Science\Mascot Daemon\mgf\8 FXIII 180 min 2nd\mascot\_daemon\_merge.mgf

Click mouse within plot area to zoom in by factor of two about that point  
Or, 

Plot from

0

 to 

3800

 Da 

Full range

  
Label all possible matches ☐ Label matches used for scoring ☒

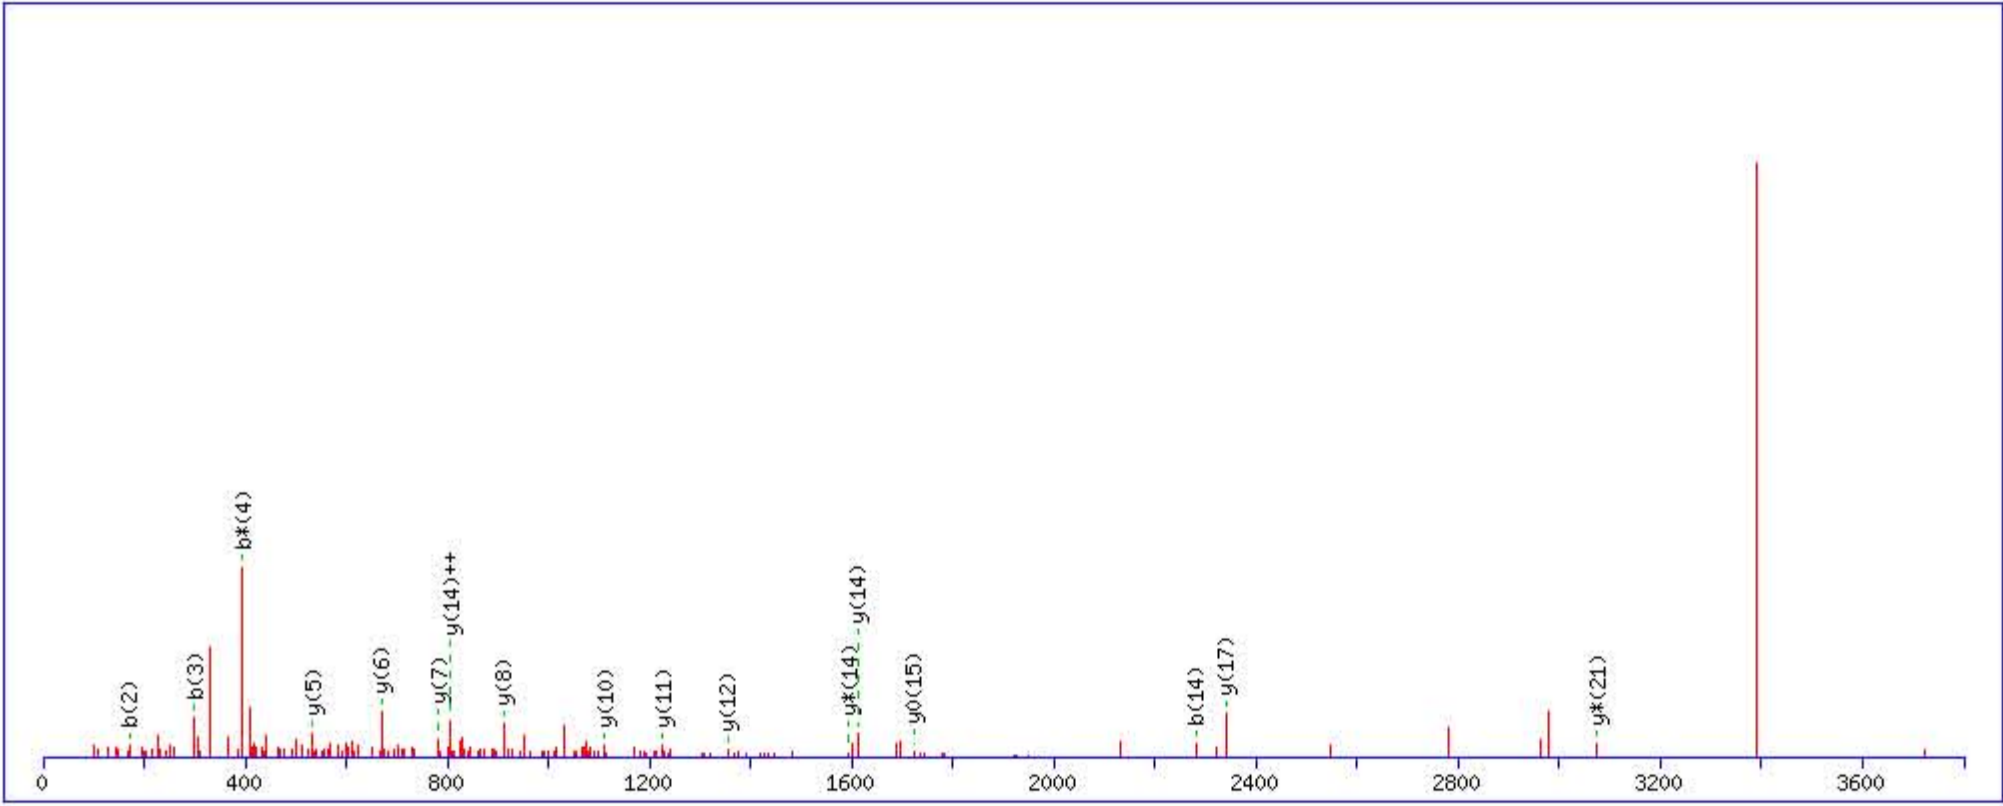

Monoisotopic mass of neutral peptide Mr(calc): 3389.660416  
Fixed modifications: Carbamidomethyl (C) (apply to specified residues or termini only)  
Variable modifications:  
Q7 : Biotin:Thermo-21345 (Q)  
Q9 : Biotin:Thermo-21345 (Q)  
Ions Score: 48 Expect: 0.00049  
Matches : 17/260 fragment ions using 25 most intense peaks [\(help\)](#)

| #  | b           | b <sup>++</sup> | b <sup>*</sup> | b <sup>*++</sup> | b <sup>0</sup> | b <sup>0++</sup> | Seq. | y           | y <sup>++</sup> | y <sup>*</sup> | y <sup>*++</sup> | y <sup>0</sup> | y <sup>0++</sup> | #  |
|----|-------------|-----------------|----------------|------------------|----------------|------------------|------|-------------|-----------------|----------------|------------------|----------------|------------------|----|
| 1  | 100.075690  | 50.541483       |                |                  |                |                  | V    |             |                 |                |                  |                |                  | 24 |
| 2  | 171.112804  | 86.060040       |                |                  |                |                  | A    | 3291.599277 | 1646.303276     | 3274.572728    | 1637.790002      | 3273.588712    | 1637.297994      | 23 |
| 3  | 299.171382  | 150.089329      | 282.144833     | 141.576055       |                |                  | Q    | 3220.562163 | 1610.784719     | 3203.535614    | 1602.271445      | 3202.551598    | 1601.779437      | 22 |
| 4  | 412.255446  | 206.631361      | 395.228897     | 198.118087       |                |                  | L    | 3092.503585 | 1546.755430     | 3075.477036    | 1538.242156      | 3074.493020    | 1537.750148      | 21 |
| 5  | 541.298039  | 271.152658      | 524.271490     | 262.639383       | 523.287474     | 262.147375       | E    | 2979.419521 | 1490.213398     | 2962.392972    | 1481.700124      | 2961.408956    | 1481.208116      | 20 |
| 6  | 612.335153  | 306.671215      | 595.308604     | 298.157940       | 594.324588     | 297.665932       | A    | 2850.376928 | 1425.692102     | 2833.350379    | 1417.178827      | 2832.366363    | 1416.686819      | 19 |
| 7  | 1051.560479 | 526.283878      | 1034.533930    | 517.770603       | 1033.549914    | 517.278595       | Q    | 2779.339814 | 1390.173545     | 2762.313265    | 1381.660270      | 2761.329249    | 1381.168262      | 18 |
| 8  | 1211.591128 | 606.299202      | 1194.564579    | 597.785928       | 1193.580563    | 597.293920       | C    | 2340.114488 | 1170.560882     | 2323.087939    | 1162.047607      | 2322.103923    | 1161.555599      | 17 |
| 9  | 1650.816454 | 825.911865      | 1633.789905    | 817.398591       | 1632.805889    | 816.906583       | Q    | 2180.083839 | 1090.545557     | 2163.057290    | 1082.032283      | 2162.073274    | 1081.540275      | 16 |
| 10 | 1779.859047 | 890.433162      | 1762.832498    | 881.919887       | 1761.848482    | 881.427879       | E    | 1740.858513 | 870.932894      | 1723.831964    | 862.419620       | 1722.847948    | 861.927612       | 15 |
| 11 | 1876.911811 | 938.959544      | 1859.885262    | 930.446269       | 1858.901246    | 929.954261       | P    | 1611.815920 | 806.411598      | 1594.789371    | 797.898323       | 1593.805355    | 797.406315       | 14 |
| 12 | 2036.942460 | 1018.974868     | 2019.915911    | 1010.461594      | 2018.931895    | 1009.969586      | C    | 1514.763156 | 757.885216      | 1497.736607    | 749.371941       | 1496.752591    | 748.879933       | 13 |
| 13 | 2165.037423 | 1083.022350     | 2148.010874    | 1074.509075      | 2147.026858    | 1074.017067      | K    | 1354.732507 | 677.869891      | 1337.705958    | 669.356617       | 1336.721942    | 668.864609       | 12 |
| 14 | 2280.064366 | 1140.535821     | 2263.037817    | 1132.022546      | 2262.053801    | 1131.530538      | D    | 1226.637544 | 613.822410      | 1209.610995    | 605.309135       | 1208.626979    | 604.817127       | 11 |
| 15 | 2381.112045 | 1191.059660     | 2364.085496    | 1182.546386      | 2363.101480    | 1182.054378      | T    | 1111.610601 | 556.308938      | 1094.584052    | 547.795664       | 1093.600036    | 547.303656       | 10 |
| 16 | 2480.180459 | 1240.593867     | 2463.153910    | 1232.080593      | 2462.169894    | 1231.588585      | V    | 1010.562922 | 505.785099      | 993.536373     | 497.271824       | 992.552357     | 496.779816       | 9  |
| 17 | 2608.239037 | 1304.623156     | 2591.212488    | 1296.109882      | 2590.228472    | 1295.617874      | Q    | 911.494508  | 456.250892      | 894.467959     | 447.737618       | 893.483943     | 447.245610       | 8  |
| 18 | 2721.323101 | 1361.165188     | 2704.296552    | 1352.651914      | 2703.312536    | 1352.159906      | I    | 783.435930  | 392.221603      | 766.409381     | 383.708328       | 765.425365     | 383.216320       | 7  |
| 19 | 2858.382013 | 1429.694644     | 2841.355464    | 1421.181370      | 2840.371448    | 1420.689362      | H    | 670.351866  | 335.679571      | 653.325317     | 327.166296       | 652.341301     | 326.674288       | 6  |
| 20 | 2973.408956 | 1487.208116     | 2956.382407    | 1478.694841      | 2955.398391    | 1478.202833      | D    | 533.292954  | 267.150115      | 516.266405     | 258.636840       | 515.282389     | 258.144832       | 5  |
| 21 | 3086.493020 | 1543.750148     | 3069.466471    | 1535.236873      | 3068.482455    | 1534.744865      | I    | 418.266011  | 209.636643      | 401.239462     | 201.123369       | 400.255446     | 200.631361       | 4  |
| 22 | 3187.540699 | 1594.273987     | 3170.514150    | 1585.760713      | 3169.530134    | 1585.268705      | T    | 305.181947  | 153.094611      | 288.155398     | 144.581337       | 287.171382     | 144.089329       | 3  |
| 23 | 3244.562163 | 1622.784719     | 3227.535614    | 1614.271445      | 3226.551598    | 1613.779437      | G    | 204.134268  | 102.570772      | 187.107719     | 94.057497        |                |                  | 2  |
| 24 |             |                 |                |                  |                |                  | K    | 147.112804  | 74.060040       | 130.086255     | 65.546765        |                |                  | 1  |

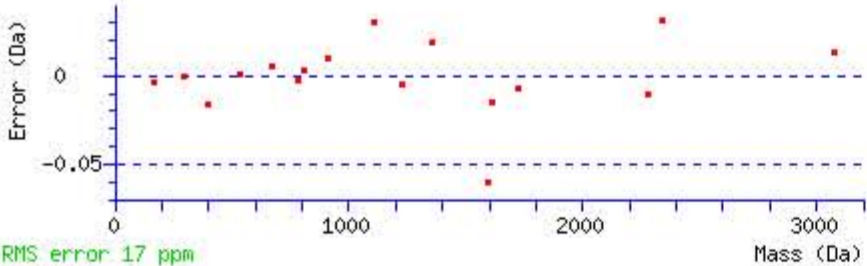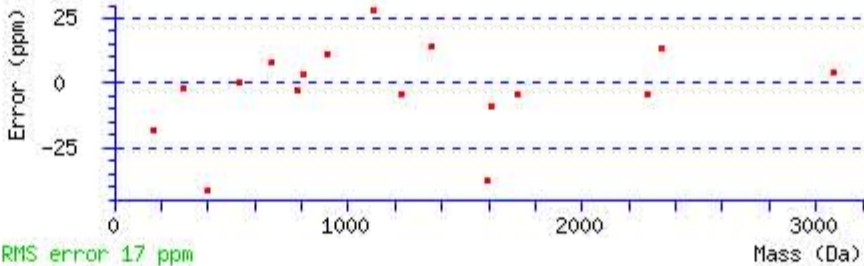

NCBI BLAST search of [VAQLEAQCQEPCKDTVQIHDITGK](#)  
(Parameters: blastp, nr protein database, expect=20000, no filter, PAM30)  
Other BLAST [web gateways](#)

All matches to this query

| Score | Mr(calc):   | Delta    | Sequence                                 |
|-------|-------------|----------|------------------------------------------|
| 47.7  | 3389.660416 | 0.047600 | <a href="#">VAQLEAQCQEPCKDTVQIHDITGK</a> |
| 38.4  | 3389.660416 | 0.047600 | <a href="#">VAQLEAQCQEPCKDTVQIHDITGK</a> |
| 28.3  | 3389.660416 | 0.047600 | <a href="#">VAQLEAQCQEPCKDTVQIHDITGK</a> |
| 5.2   | 3389.660416 | 0.047600 | <a href="#">VAQLEAQCQEPCKDTVQIHDITGK</a> |
| 0.8   | 3389.660416 | 0.047600 | <a href="#">VAQLEAQCQEPCKDTVQIHDITGK</a> |

MATRIX

SCIENCE

Mascot Search Results

Peptide View

MS/MS Fragmentation of **IGDQWDK**  
Found in **FINC\_HUMAN**, Fibronectin OS=Homo sapiens GN=FN1 PE=1 SV=4

Match to Query 19627: 1171.575968 from(586.795260,2+) rtinseconds(1828) index(33080)  
Title: Locus:1.1.1.745.9 File:"2013-07-02 CLN FXIII 180 min 2nd F 3.wiff"  
Data file C:\Program Files (x86)\Matrix Science\Mascot Daemon\mgf\8 FXIII 180 min 2nd\mascot\_daemon\_merge.mgf

Click mouse within plot area to zoom in by factor of two about that point  
Or, 

Plot from

100

 to 

1200

 Da 

Full range

  
Label all possible matches ☐ Label matches used for scoring ☒

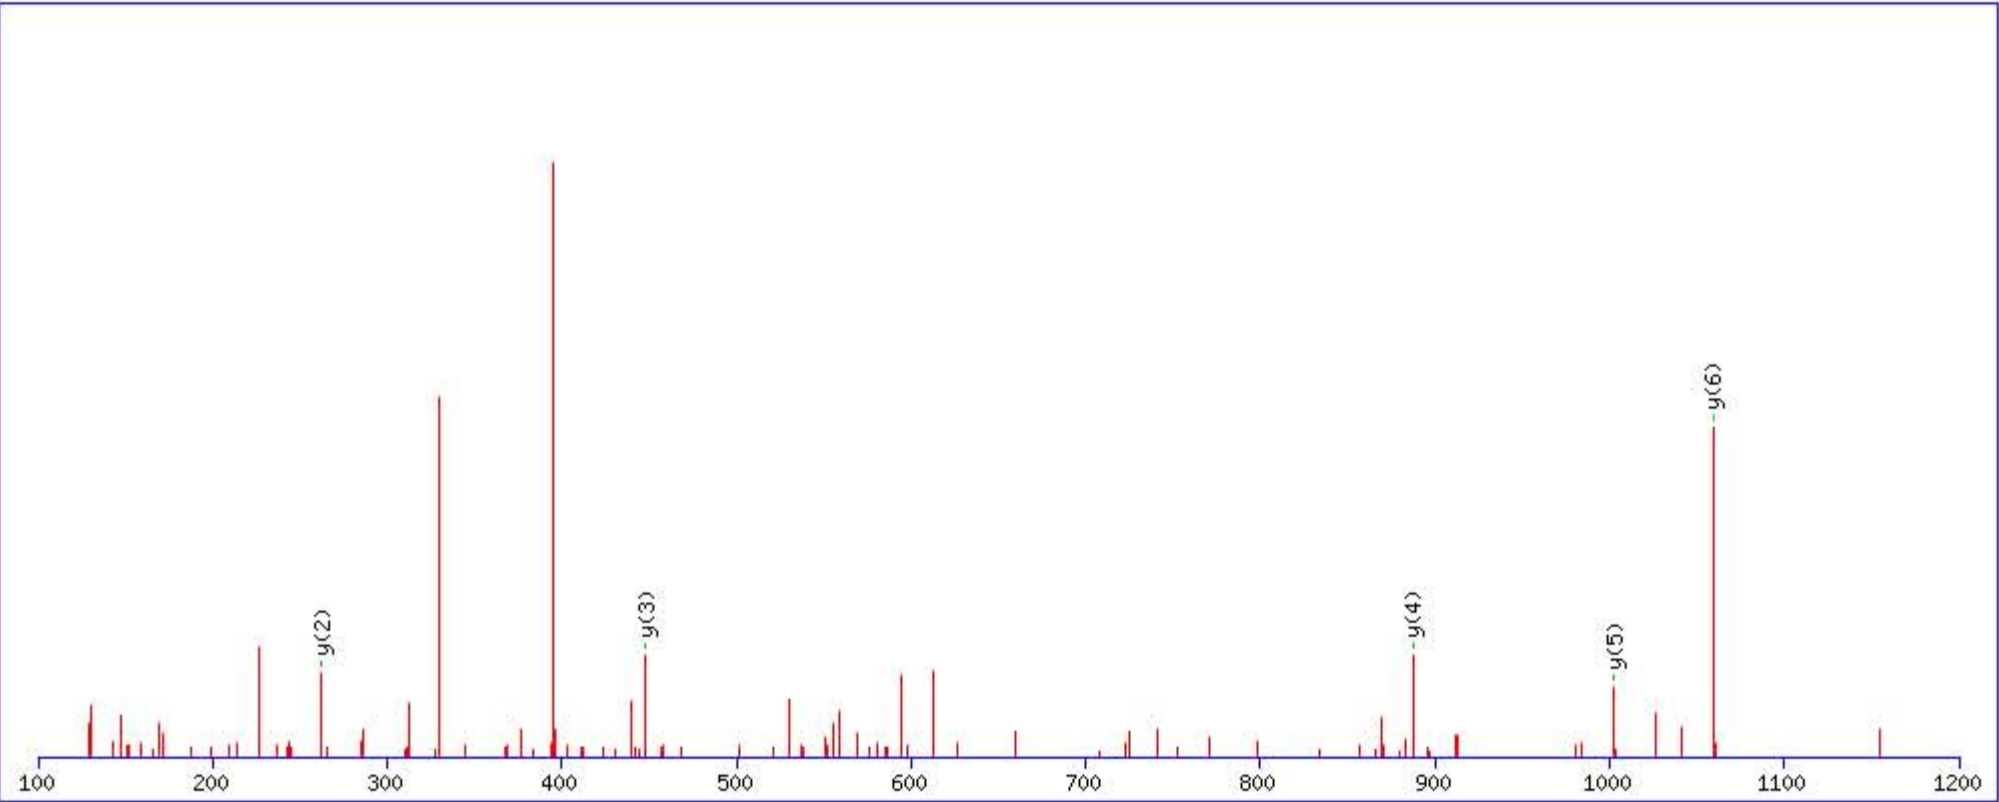

Monoisotopic mass of neutral peptide Mr(calc): 1171.569580  
Fixed modifications: Carbamidomethyl (C) (apply to specified residues or termini only)  
Variable modifications:  
Q4 : Biotin:Thermo-21345 (Q)  
Ions Score: 28 Expect: 0.015  
Matches : 5/60 fragment ions using 11 most intense peaks [\(help\)](#)

| # | b           | b <sup>++</sup> | b <sup>*</sup> | b <sup>*++</sup> | b <sup>0</sup> | b <sup>0++</sup> | Seq. | y           | y <sup>++</sup> | y <sup>*</sup> | y <sup>*++</sup> | y <sup>0</sup> | y <sup>0++</sup> | # |
|---|-------------|-----------------|----------------|------------------|----------------|------------------|------|-------------|-----------------|----------------|------------------|----------------|------------------|---|
| 1 | 114.091340  | 57.549308       |                |                  |                |                  | I    |             |                 |                |                  |                |                  | 7 |
| 2 | 171.112804  | 86.060040       |                |                  |                |                  | G    | 1059.492793 | 530.250035      | 1042.466244    | 521.736760       | 1041.482228    | 521.244752       | 6 |
| 3 | 286.139747  | 143.573512      |                |                  | 268.129182     | 134.568229       | D    | 1002.471329 | 501.739303      | 985.444780     | 493.226028       | 984.460764     | 492.734020       | 5 |
| 4 | 725.365073  | 363.186175      | 708.338524     | 354.672900       | 707.354508     | 354.180892       | Q    | 887.444386  | 444.225831      | 870.417837     | 435.712557       | 869.433821     | 435.220549       | 4 |
| 5 | 911.444386  | 456.225831      | 894.417837     | 447.712557       | 893.433821     | 447.220549       | W    | 448.219060  | 224.613168      | 431.192511     | 216.099894       | 430.208495     | 215.607886       | 3 |
| 6 | 1026.471329 | 513.739303      | 1009.444780    | 505.226028       | 1008.460764    | 504.734020       | D    | 262.139747  | 131.573512      | 245.113198     | 123.060237       | 244.129182     | 122.568229       | 2 |
| 7 |             |                 |                |                  |                |                  | K    | 147.112804  | 74.060040       | 130.086255     | 65.546765        |                |                  | 1 |

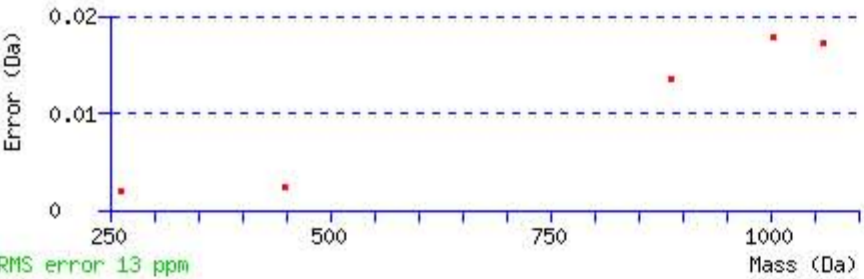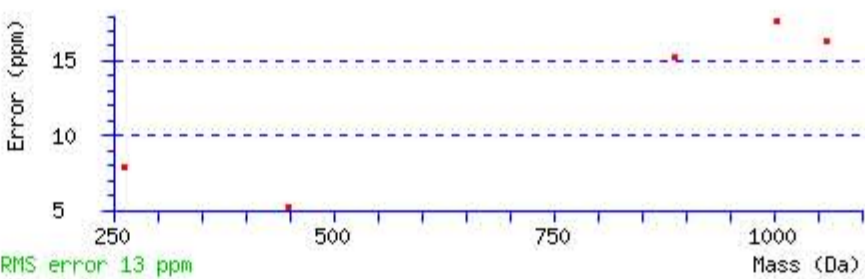

NCBI BLAST search of **IGDQWDK**  
(Parameters: blastp, nr protein database, expect=20000, no filter, PAM30)  
Other BLAST [web gateways](#)

All matches to this query

| Score | Mr(calc):   | Delta     | Sequence                     |
|-------|-------------|-----------|------------------------------|
| 28.3  | 1171.569580 | 0.006388  | <a href="#">IGDQWDK</a>      |
| 8.3   | 1171.583328 | -0.007360 | <a href="#">GEVGDPGQKGTK</a> |
| 6.0   | 1171.590714 | -0.014746 | <a href="#">GEVQVSDK</a>     |
| 5.4   | 1171.576096 | -0.000128 | <a href="#">LYFSDATLDK</a>   |
| 4.3   | 1171.572067 | 0.003901  | <a href="#">LGSGPDGAEEIK</a> |
| 3.5   | 1171.569565 | 0.006403  | <a href="#">LGPEWSQPMK</a>   |
| 3.4   | 1171.590683 | -0.014715 | <a href="#">ELCADNPILK</a>   |
| 2.8   | 1171.590668 | -0.014700 | <a href="#">EKAEQEK</a>      |
| 2.8   | 1171.590668 | -0.014700 | <a href="#">EKAEQEK</a>      |
| 2.5   | 1171.559021 | 0.016947  | <a href="#">SQLHCRMPK</a>    |

MATRIX

SCIENCE

Mascot Search Results

Peptide View

MS/MS Fragmentation of **QHDMGHMMR**  
Found in **FINC\_HUMAN**, Fibronectin OS=Homo sapiens GN=FN1 PE=1 SV=4

Match to Query 29671: 1452.617056 from(364.161540,4+) rtinseconds(1429) index(30593)  
Title: Locus:1.1.1.606.2 File:"2013-07-02 CLN FXIII 180 min 2nd F 3.wiff"  
Data file C:\Program Files (x86)\Matrix Science\Mascot Daemon\mgf\8 FXIII 180 min 2nd\mascot\_daemon\_merge.mgf

Click mouse within plot area to zoom in by factor of two about that point

Or, 

Plot from

100

 to 

900

 Da 

Full range

Label all possible matches ☐ Label matches used for scoring ☒

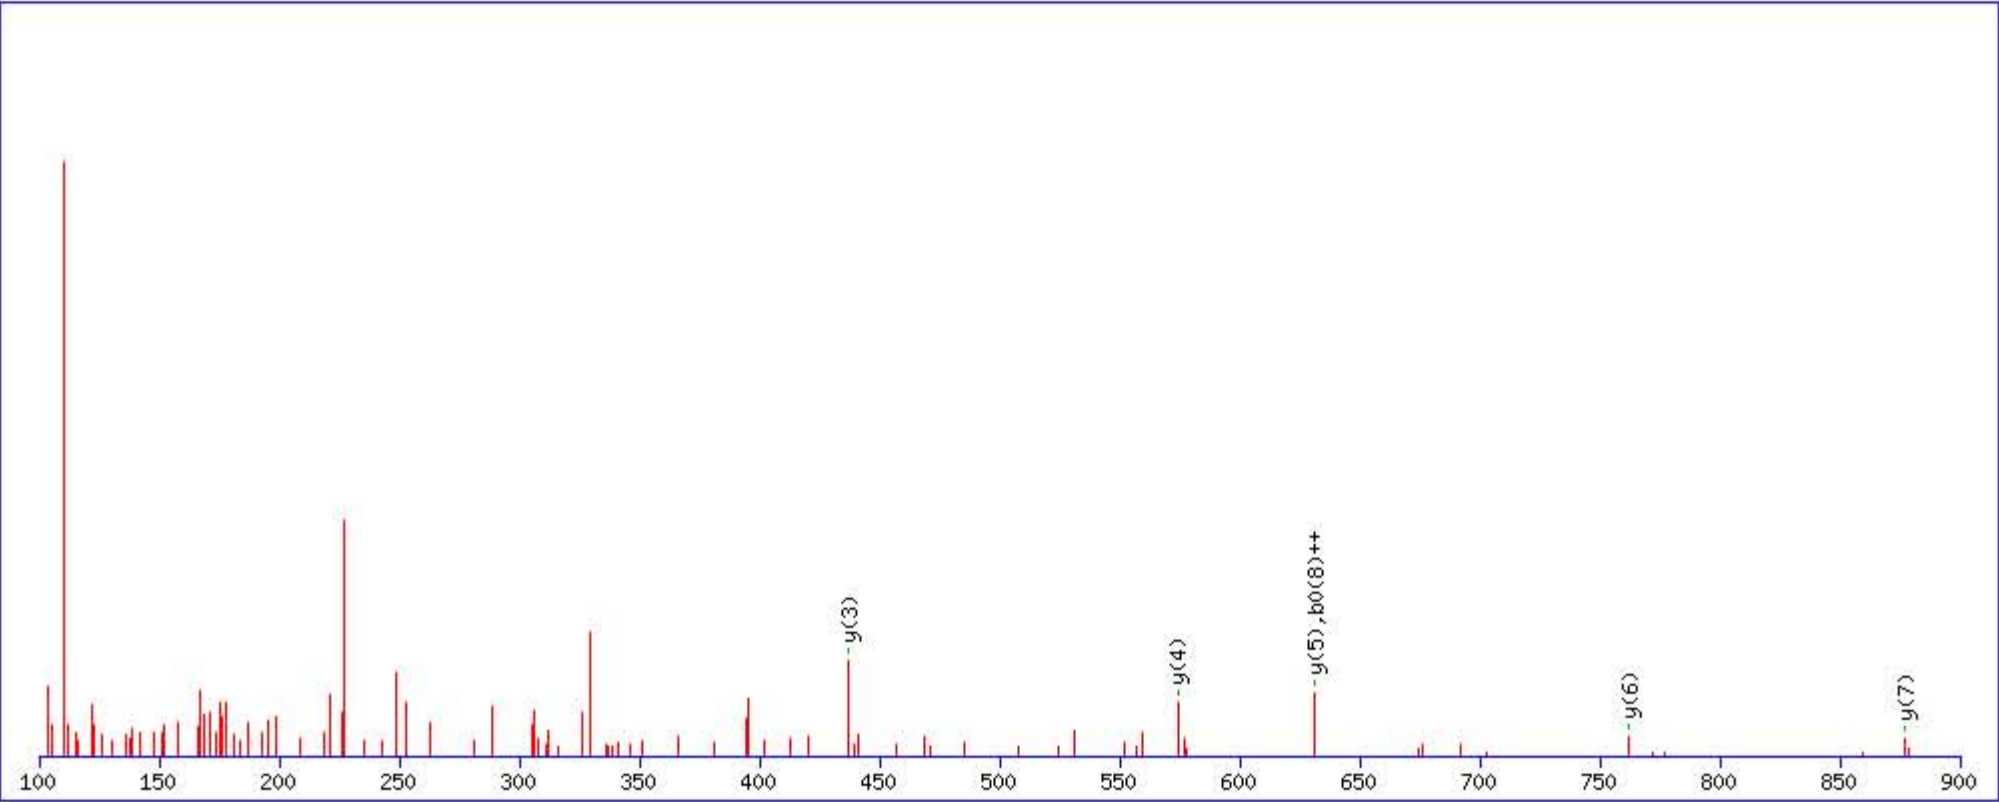

Monoisotopic mass of neutral peptide Mr(calc): 1452.624680  
Fixed modifications: Carbamidomethyl (C) (apply to specified residues or termini only)  
Variable modifications:  
Q1 : Biotin:Thermo-21345 (Q)  
Ions Score: 26 Expect: 0.0092  
Matches : 6/80 fragment ions using 8 most intense peaks [\(help\)](#)

| # | b           | b <sup>++</sup> | b <sup>*</sup> | b <sup>*++</sup> | b <sup>0</sup> | b <sup>0++</sup> | Seq. | y           | y <sup>++</sup> | y <sup>*</sup> | y <sup>*++</sup> | y <sup>0</sup> | y <sup>0++</sup> | # |
|---|-------------|-----------------|----------------|------------------|----------------|------------------|------|-------------|-----------------|----------------|------------------|----------------|------------------|---|
| 1 | 440.232602  | 220.619939      | 423.206053     | 212.106664       |                |                  | Q    |             |                 |                |                  |                |                  | 9 |
| 2 | 577.291514  | 289.149395      | 560.264965     | 280.636121       |                |                  | H    | 1014.406638 | 507.706957      | 997.380089     | 499.193682       | 996.396073     | 498.701674       | 8 |
| 3 | 692.318457  | 346.662867      | 675.291908     | 338.149592       | 674.307892     | 337.657584       | D    | 877.347726  | 439.177501      | 860.321177     | 430.664226       | 859.337161     | 430.172218       | 7 |
| 4 | 823.358942  | 412.183109      | 806.332393     | 403.669834       | 805.348377     | 403.177826       | M    | 762.320783  | 381.664030      | 745.294234     | 373.150755       |                |                  | 6 |
| 5 | 880.380406  | 440.693841      | 863.353857     | 432.180567       | 862.369841     | 431.688559       | G    | 631.280298  | 316.143787      | 614.253749     | 307.630513       |                |                  | 5 |
| 6 | 1017.439318 | 509.223297      | 1000.412769    | 500.710022       | 999.428753     | 500.218014       | H    | 574.258834  | 287.633055      | 557.232285     | 279.119780       |                |                  | 4 |
| 7 | 1148.479803 | 574.743540      | 1131.453254    | 566.230265       | 1130.469238    | 565.738257       | M    | 437.199922  | 219.103599      | 420.173373     | 210.590324       |                |                  | 3 |
| 8 | 1279.520288 | 640.263782      | 1262.493739    | 631.750508       | 1261.509723    | 631.258499       | M    | 306.159437  | 153.583356      | 289.132888     | 145.070082       |                |                  | 2 |
| 9 |             |                 |                |                  |                |                  | R    | 175.118952  | 88.063114       | 158.092403     | 79.549839        |                |                  | 1 |

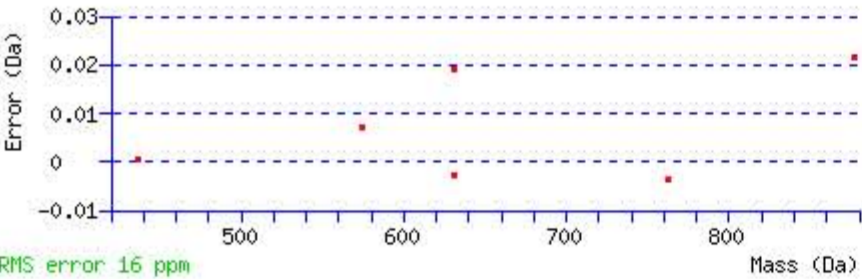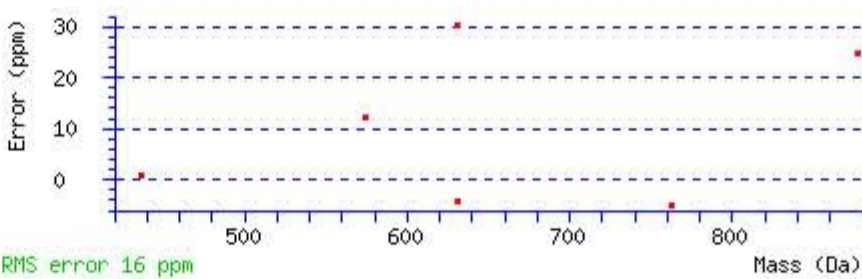

NCBI BLAST search of [QHDMGHMMR](#)  
(Parameters: blastp, nr protein database, expect=20000, no filter, PAM30)  
Other BLAST [web gateways](#)

All matches to this query

| Score | Mr(calc):   | Delta     | Sequence                  |
|-------|-------------|-----------|---------------------------|
| 26.4  | 1452.624680 | -0.007624 | <a href="#">QHDMGHMMR</a> |

MATRIX

SCIENCE

Mascot Search Results

Peptide View

MS/MS Fragmentation of **HYQINQQWER**  
Found in **FINC\_HUMAN**, Fibronectin OS=Homo sapiens GN=FN1 PE=1 SV=4

Match to Query 38230: 1711.849368 from(856.931960,2+) rtinseconds(1774) index(32766)  
Title: Locus:1.1.1.726.20 File:"2013-07-02 CLN FXIII 180 min 2nd F 3.wiff"  
Data file C:\Program Files (x86)\Matrix Science\Mascot Daemon\mgf\8 FXIII 180 min 2nd\mascot\_daemon\_merge.mgf

Click mouse within plot area to zoom in by factor of two about that point  
Or, 

Plot from

0

 to 

2200

 Da 

Full range

  
Label all possible matches ☐ Label matches used for scoring ☒

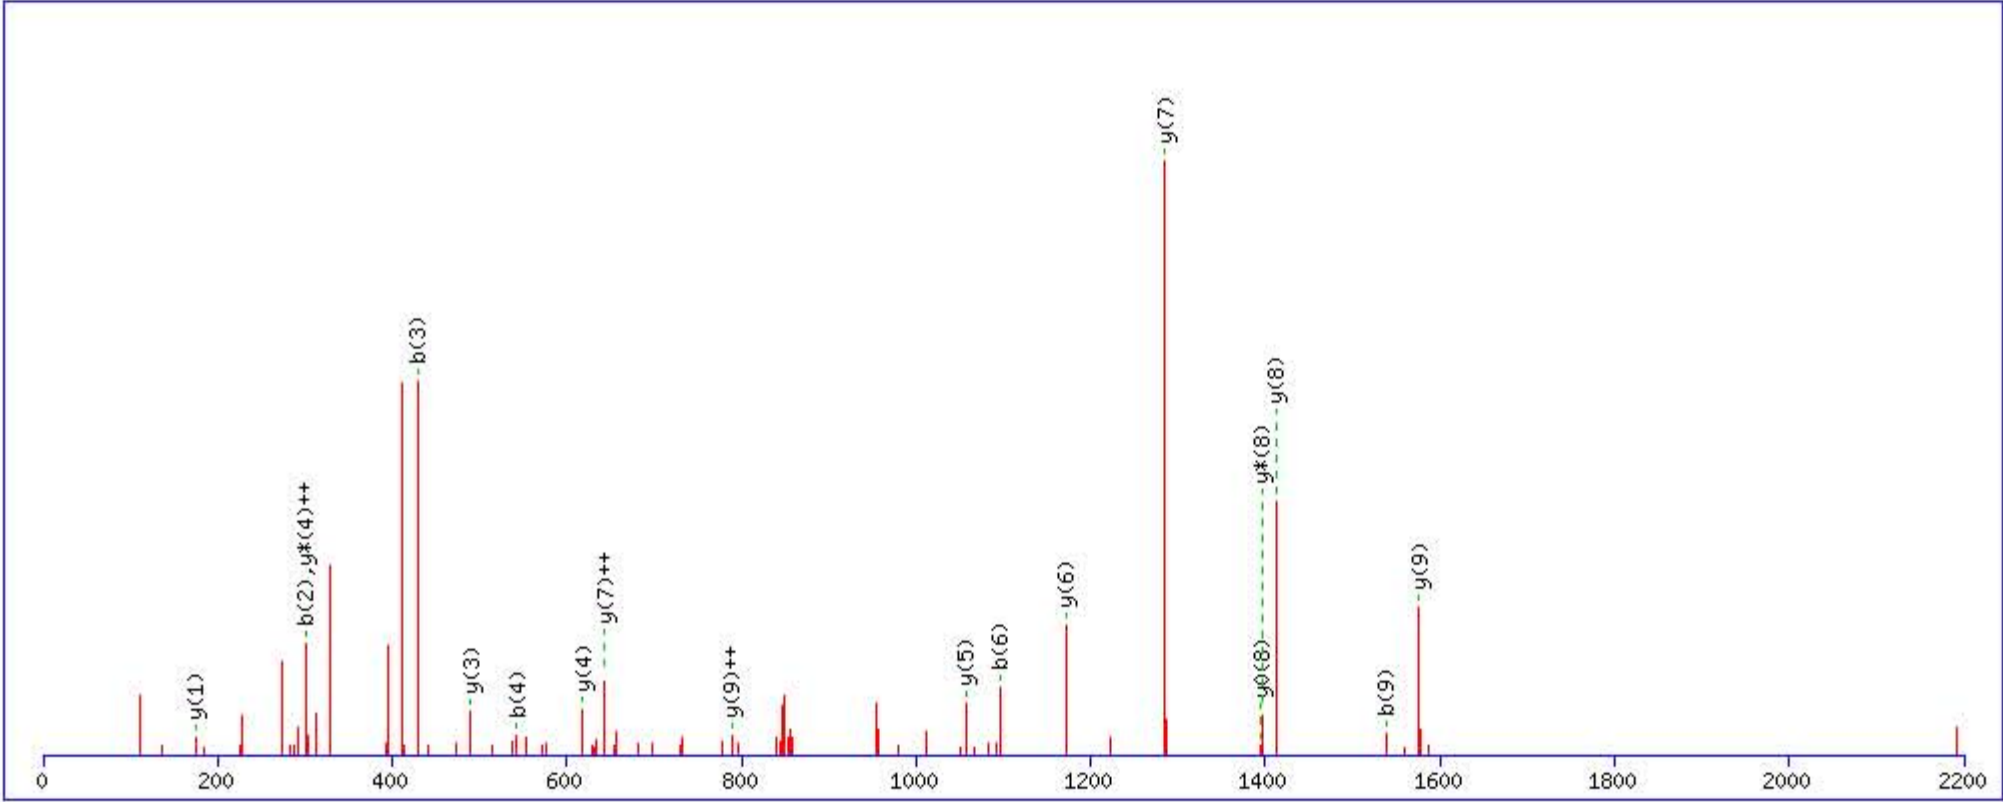

Monoisotopic mass of neutral peptide Mr(calc): 1711.825272  
Fixed modifications: Carbamidomethyl (C) (apply to specified residues or termini only)  
Variable modifications:  
Q6 : Biotin:Thermo-21345 (Q)  
Ions Score: 38 Expect: 0.00053  
Matches : 18/86 fragment ions using 41 most intense peaks [\(help\)](#)

| #  | b           | b <sup>++</sup> | b <sup>*</sup> | b <sup>*++</sup> | b <sup>0</sup> | b <sup>0++</sup> | Seq. | y           | y <sup>++</sup> | y <sup>*</sup> | y <sup>*++</sup> | y <sup>0</sup> | y <sup>0++</sup> | #  |
|----|-------------|-----------------|----------------|------------------|----------------|------------------|------|-------------|-----------------|----------------|------------------|----------------|------------------|----|
| 1  | 138.066188  | 69.536732       |                |                  |                |                  | H    |             |                 |                |                  |                |                  | 10 |
| 2  | 301.129517  | 151.068397      |                |                  |                |                  | Y    | 1575.773660 | 788.390468      | 1558.747111    | 779.877194       | 1557.763095    | 779.385186       | 9  |
| 3  | 429.188095  | 215.097686      | 412.161546     | 206.584411       |                |                  | Q    | 1412.710331 | 706.858804      | 1395.683782    | 698.345529       | 1394.699766    | 697.853521       | 8  |
| 4  | 542.272159  | 271.639718      | 525.245610     | 263.126443       |                |                  | I    | 1284.651753 | 642.829514      | 1267.625204    | 634.316240       | 1266.641188    | 633.824232       | 7  |
| 5  | 656.315086  | 328.661181      | 639.288537     | 320.147907       |                |                  | N    | 1171.567689 | 586.287483      | 1154.541140    | 577.774208       | 1153.557124    | 577.282200       | 6  |
| 6  | 1095.540412 | 548.273844      | 1078.513863    | 539.760570       |                |                  | Q    | 1057.524762 | 529.266019      | 1040.498213    | 520.752745       | 1039.514197    | 520.260737       | 5  |
| 7  | 1223.598990 | 612.303133      | 1206.572441    | 603.789859       |                |                  | Q    | 618.299436  | 309.653356      | 601.272887     | 301.140082       | 600.288871     | 300.648074       | 4  |
| 8  | 1409.678303 | 705.342790      | 1392.651754    | 696.829515       |                |                  | W    | 490.240858  | 245.624067      | 473.214309     | 237.110792       | 472.230293     | 236.618784       | 3  |
| 9  | 1538.720896 | 769.864086      | 1521.694347    | 761.350812       | 1520.710331    | 760.858804       | E    | 304.161545  | 152.584410      | 287.134996     | 144.071136       | 286.150980     | 143.579128       | 2  |
| 10 |             |                 |                |                  |                |                  | R    | 175.118952  | 88.063114       | 158.092403     | 79.549839        |                |                  | 1  |

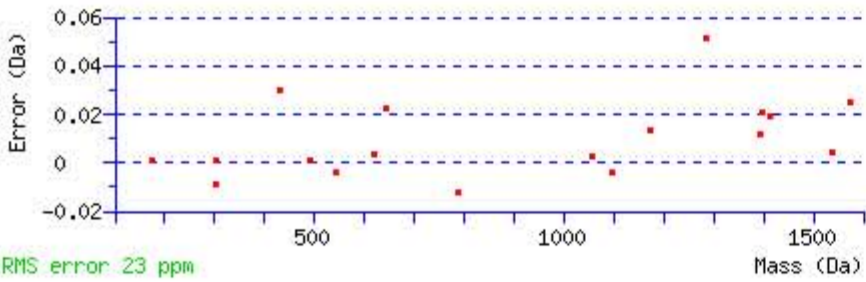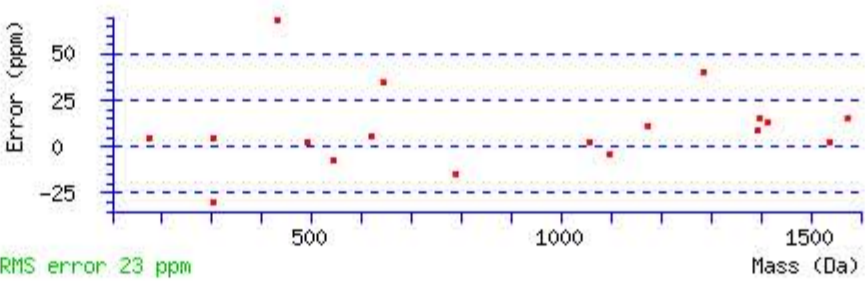

NCBI BLAST search of [HYQINQQWER](#)  
(Parameters: blastp, nr protein database, expect=20000, no filter, PAM30)  
Other BLAST [web gateways](#)

All matches to this query

| Score | Mr(calc):   | Delta     | Sequence                           |
|-------|-------------|-----------|------------------------------------|
| 37.8  | 1711.825272 | 0.024096  | <a href="#">HYQINQQWER</a>         |
| 28.5  | 1711.825272 | 0.024096  | <a href="#">HYQINQQWER</a>         |
| 9.1   | 1711.825272 | 0.024096  | <a href="#">HYQINQQWER</a>         |
| 2.7   | 1711.871368 | -0.022000 | <a href="#">AQTQEGAGARAGAQAVAR</a> |
| 0.1   | 1711.856293 | -0.006925 | <a href="#">LLQGQEKDGEER</a>       |

MATRIX

SCIENCE

Mascot Search Results

Peptide View

MS/MS Fragmentation of **GEWTCIAYSQLR**  
Found in **FINC\_HUMAN**, Fibronectin OS=Homo sapiens GN=FN1 PE=1 SV=4

Match to Query 40139: 1793.879082 from(598.966970,3+) rtinseconds(2364) index(36382)  
Title: Locus:1.1.1.932.9 File:"2013-07-02 CLN FXIII 180 min 2nd F 3.wiff"  
Data file C:\Program Files (x86)\Matrix Science\Mascot Daemon\mgf\8 FXIII 180 min 2nd\mascot\_daemon\_merge.mgf

Click mouse within plot area to zoom in by factor of two about that point  
Or,   to  Da   
Label all possible matches ☐ Label matches used for scoring ☒

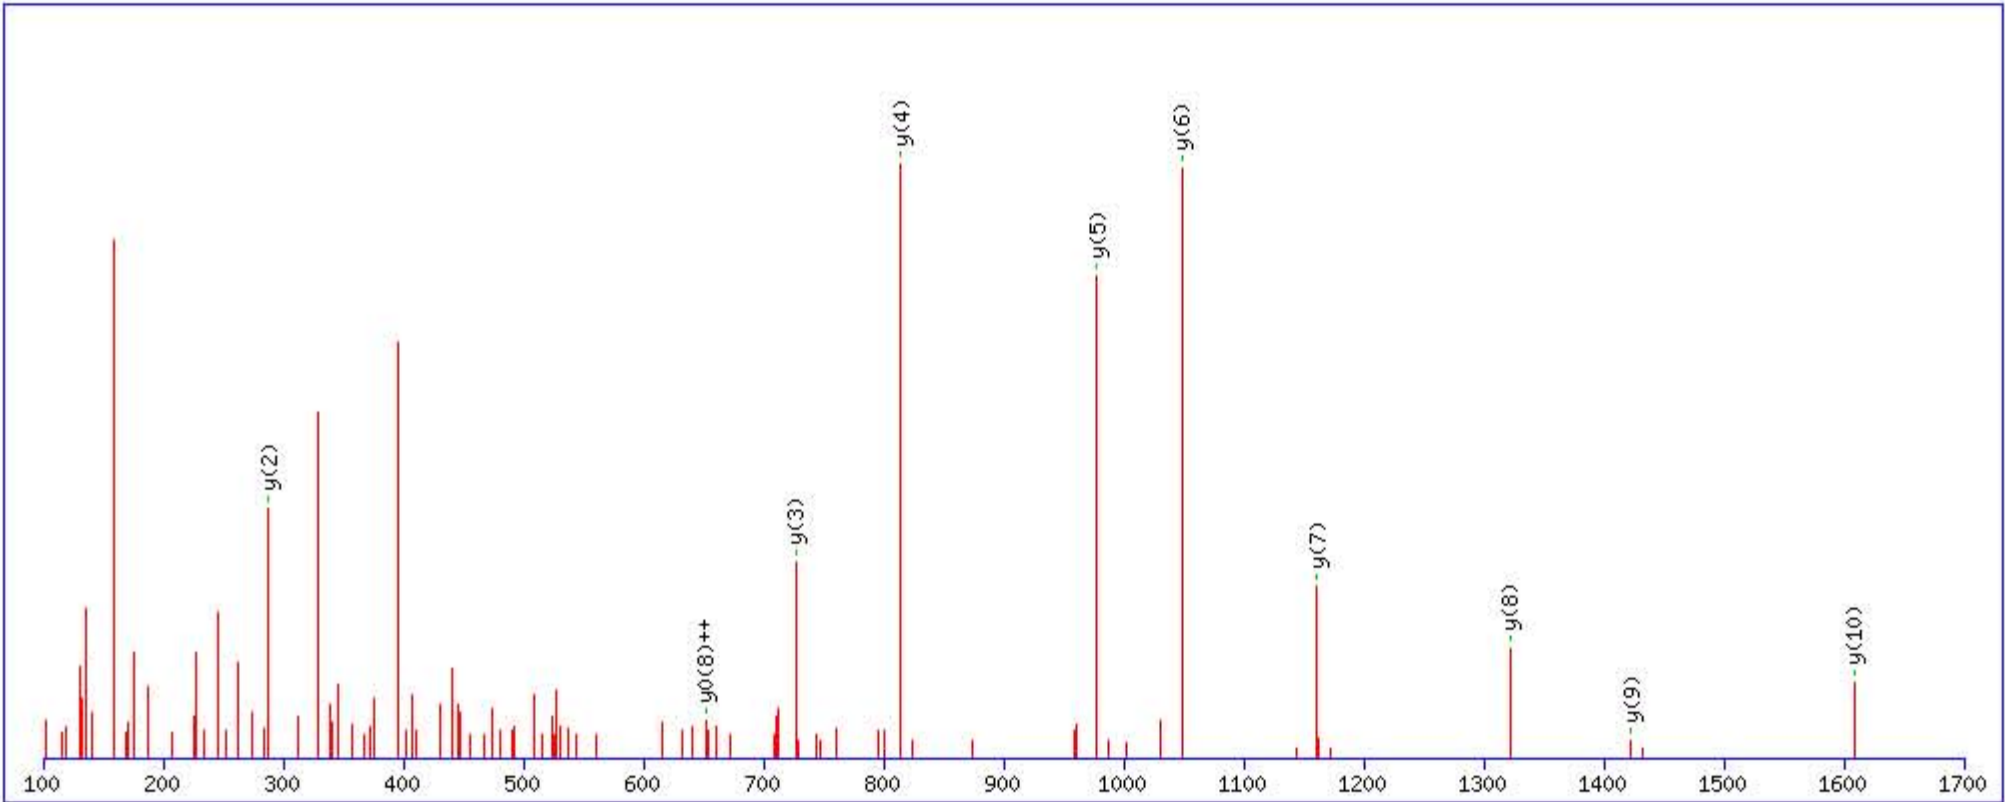

Monoisotopic mass of neutral peptide Mr(calc): 1793.859283  
Fixed modifications: Carbamidomethyl (C) (apply to specified residues or termini only)  
Variable modifications:  
Q10 : Biotin:Thermo-21345 (Q)  
Ions Score: 72 Expect: 4.7e-007  
Matches : 10/106 fragment ions using 14 most intense peaks [\(help\)](#)

| #  | b           | b <sup>++</sup> | b <sup>*</sup> | b <sup>++</sup> | b <sup>0</sup> | b <sup>0++</sup> | Seq. | y           | y <sup>++</sup> | y <sup>*</sup> | y <sup>++</sup> | y <sup>0</sup> | y <sup>0++</sup> | #  |
|----|-------------|-----------------|----------------|-----------------|----------------|------------------|------|-------------|-----------------|----------------|-----------------|----------------|------------------|----|
| 1  | 58.028740   | 29.518008       |                |                 |                |                  | G    |             |                 |                |                 |                |                  | 12 |
| 2  | 187.071333  | 94.039305       |                |                 | 169.060768     | 85.034022        | E    | 1737.845111 | 869.426194      | 1720.818562    | 860.912919      | 1719.834546    | 860.420911       | 11 |
| 3  | 373.150646  | 187.078961      |                |                 | 355.140081     | 178.073679       | W    | 1608.802518 | 804.904897      | 1591.775969    | 796.391623      | 1590.791953    | 795.899614       | 10 |
| 4  | 474.198325  | 237.602801      |                |                 | 456.187760     | 228.597518       | T    | 1422.723205 | 711.865241      | 1405.696656    | 703.351966      | 1404.712640    | 702.859958       | 9  |
| 5  | 634.228974  | 317.618125      |                |                 | 616.218409     | 308.612843       | C    | 1321.675526 | 661.341401      | 1304.648977    | 652.828127      | 1303.664961    | 652.336119       | 8  |
| 6  | 747.313038  | 374.160157      |                |                 | 729.302473     | 365.154875       | I    | 1161.644877 | 581.326077      | 1144.618328    | 572.812802      | 1143.634312    | 572.320794       | 7  |
| 7  | 818.350152  | 409.678714      |                |                 | 800.339587     | 400.673432       | A    | 1048.560813 | 524.784044      | 1031.534264    | 516.270770      | 1030.550248    | 515.778762       | 6  |
| 8  | 981.413481  | 491.210379      |                |                 | 963.402916     | 482.205096       | Y    | 977.523699  | 489.265488      | 960.497150     | 480.752213      | 959.513134     | 480.260205       | 5  |
| 9  | 1068.445509 | 534.726393      |                |                 | 1050.434944    | 525.721110       | S    | 814.460370  | 407.733823      | 797.433821     | 399.220549      | 796.449805     | 398.728541       | 4  |
| 10 | 1507.670835 | 754.339056      | 1490.644286    | 745.825781      | 1489.660270    | 745.333773       | Q    | 727.428342  | 364.217809      | 710.401793     | 355.704534      |                |                  | 3  |
| 11 | 1620.754899 | 810.881088      | 1603.728350    | 802.367813      | 1602.744334    | 801.875805       | L    | 288.203016  | 144.605146      | 271.176467     | 136.091871      |                |                  | 2  |
| 12 |             |                 |                |                 |                |                  | R    | 175.118952  | 88.063114       | 158.092403     | 79.549839       |                |                  | 1  |

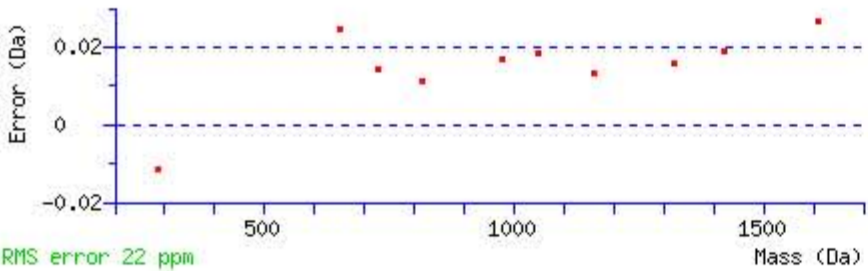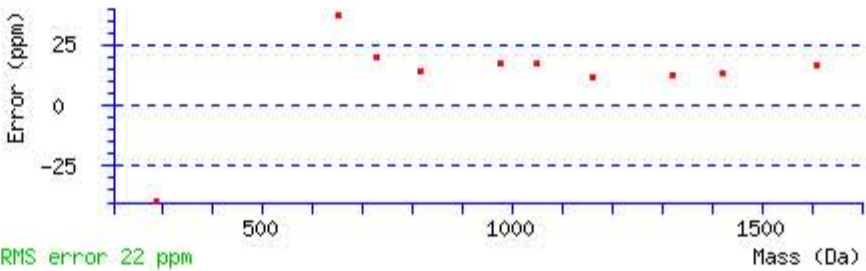

NCBI BLAST search of [GEWTCIAYSQLR](#)  
(Parameters: blastp, nr protein database, expect=20000, no filter, PAM30)  
Other BLAST [web gateways](#)

All matches to this query

| Score | Mr(calc):   | Delta    | Sequence                          |
|-------|-------------|----------|-----------------------------------|
| 71.6  | 1793.859283 | 0.019799 | <a href="#">GEWTCIAYSQLR</a>      |
| 3.9   | 1793.865158 | 0.013924 | <a href="#">ACLECELTSKDVTLR</a>   |
| 2.5   | 1793.873016 | 0.006066 | <a href="#">DQKLFVSESRMPDSR</a>   |
| 0.7   | 1793.873016 | 0.006066 | <a href="#">TCTADSKATAPAYKPGR</a> |

MATRIX

SCIENCE

Mascot Search Results

Peptide View

MS/MS Fragmentation of **WCGTTQNYDADQK**  
Found in **FINC\_HUMAN**, Fibronectin OS=Homo sapiens GN=FN1 PE=1 SV=4

Match to Query 42045: 1896.821472 from(633.281100,3+) rtinseconds(1690) index(32220)  
Title: Locus:1.1.1.697.7 File:"2013-07-02 CLN FXIII 180 min 2nd F 3.wiff"  
Data file C:\Program Files (x86)\Matrix Science\Mascot Daemon\mgf\8 FXIII 180 min 2nd\mascot\_daemon\_merge.mgf

Click mouse within plot area to zoom in by factor of two about that point  
Or, 

Plot from

100

 to 

1700

 Da 

Full range

  
Label all possible matches ☐ Label matches used for scoring ☒

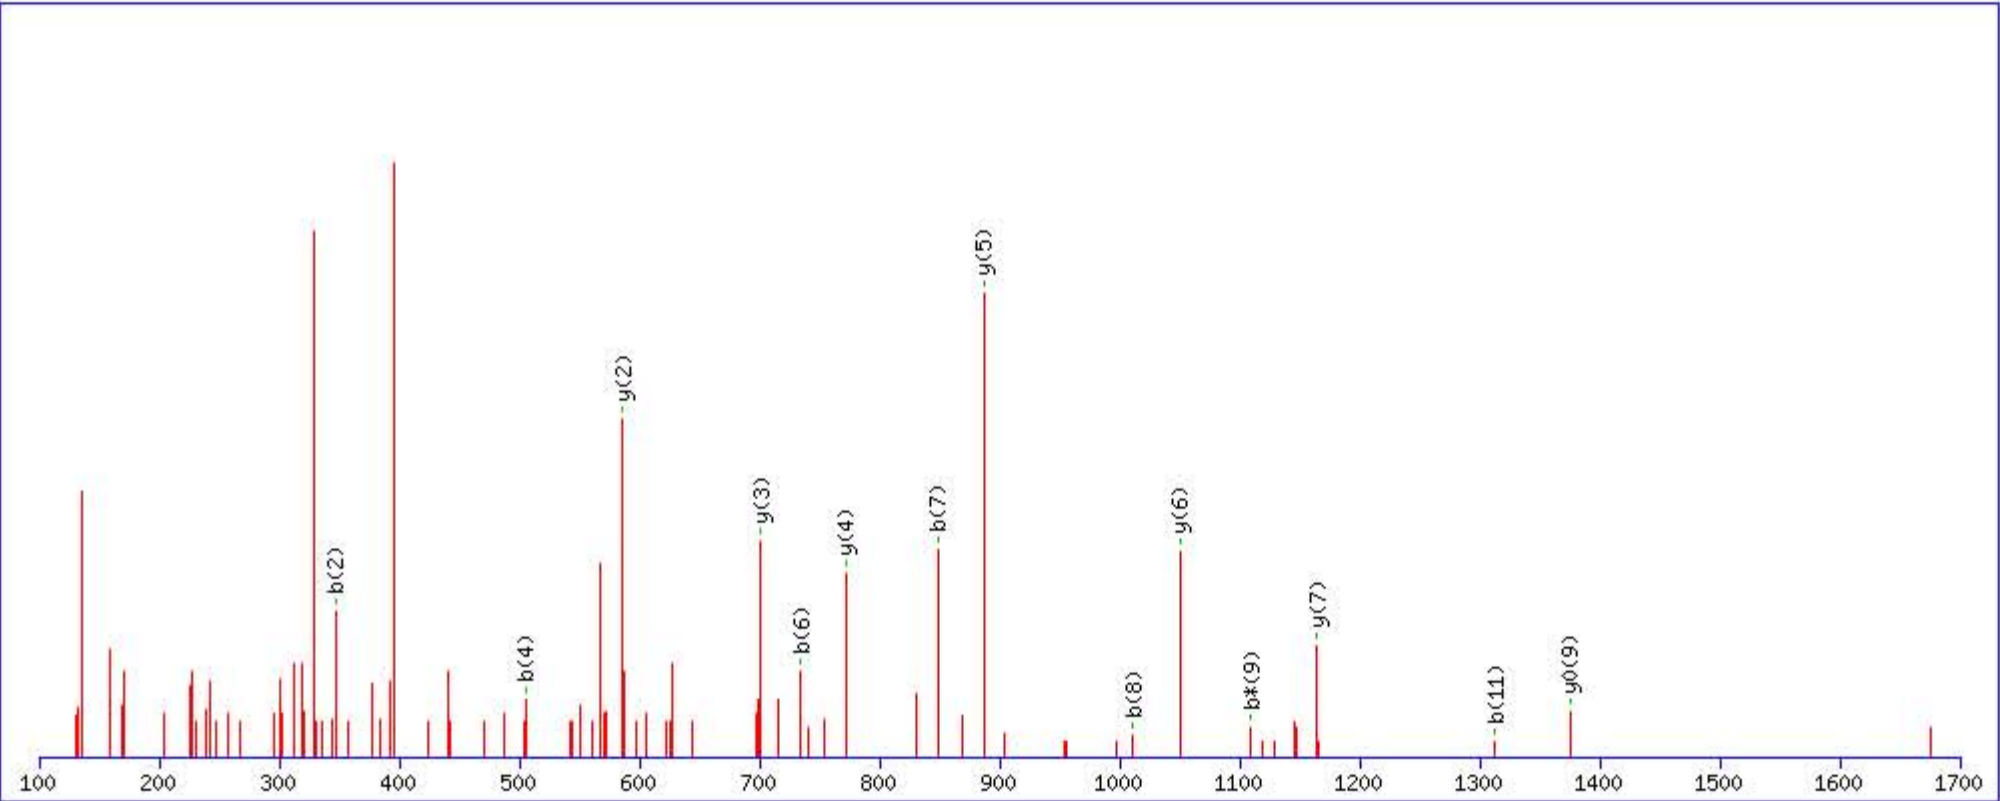

Monoisotopic mass of neutral peptide Mr(calc): 1896.813477  
Fixed modifications: Carbamidomethyl (C) (apply to specified residues or termini only)  
Variable modifications:  
Q12 : Biotin:Thermo-21345 (Q)  
Ions Score: 35 Expect: 0.0014  
Matches : 14/124 fragment ions using 25 most intense peaks [\(help\)](#)

| #  | b           | b <sup>++</sup> | b <sup>*</sup> | b <sup>+++</sup> | b <sup>0</sup> | b <sup>0++</sup> | Seq. | y           | y <sup>++</sup> | y <sup>*</sup> | y <sup>+++</sup> | y <sup>0</sup> | y <sup>0++</sup> | #  |
|----|-------------|-----------------|----------------|------------------|----------------|------------------|------|-------------|-----------------|----------------|------------------|----------------|------------------|----|
| 1  | 187.086589  | 94.046932       |                |                  |                |                  | W    |             |                 |                |                  |                |                  | 13 |
| 2  | 347.117238  | 174.062257      |                |                  |                |                  | C    | 1711.741435 | 856.374356      | 1694.714886    | 847.861081       | 1693.730870    | 847.369073       | 12 |
| 3  | 404.138702  | 202.572989      |                |                  |                |                  | G    | 1551.710786 | 776.359031      | 1534.684237    | 767.845757       | 1533.700221    | 767.353749       | 11 |
| 4  | 505.186381  | 253.096828      |                |                  | 487.175816     | 244.091546       | T    | 1494.689322 | 747.848299      | 1477.662773    | 739.335025       | 1476.678757    | 738.843017       | 10 |
| 5  | 606.234060  | 303.620668      |                |                  | 588.223495     | 294.615386       | T    | 1393.641643 | 697.324460      | 1376.615094    | 688.811185       | 1375.631078    | 688.319177       | 9  |
| 6  | 734.292638  | 367.649957      | 717.266089     | 359.136683       | 716.282073     | 358.644675       | Q    | 1292.593964 | 646.800620      | 1275.567415    | 638.287346       | 1274.583399    | 637.795338       | 8  |
| 7  | 848.335565  | 424.671421      | 831.309016     | 416.158146       | 830.325000     | 415.666138       | N    | 1164.535386 | 582.771331      | 1147.508837    | 574.258057       | 1146.524821    | 573.766049       | 7  |
| 8  | 1011.398894 | 506.203085      | 994.372345     | 497.689810       | 993.388329     | 497.197802       | Y    | 1050.492459 | 525.749868      | 1033.465910    | 517.236593       | 1032.481894    | 516.744585       | 6  |
| 9  | 1126.425837 | 563.716557      | 1109.399288    | 555.203282       | 1108.415272    | 554.711274       | D    | 887.429130  | 444.218203      | 870.402581     | 435.704929       | 869.418565     | 435.212921       | 5  |
| 10 | 1197.462951 | 599.235114      | 1180.436402    | 590.721839       | 1179.452386    | 590.229831       | A    | 772.402187  | 386.704732      | 755.375638     | 378.191457       | 754.391622     | 377.699449       | 4  |
| 11 | 1312.489894 | 656.748585      | 1295.463345    | 648.235311       | 1294.479329    | 647.743303       | D    | 701.365073  | 351.186175      | 684.338524     | 342.672900       | 683.354508     | 342.180892       | 3  |
| 12 | 1751.715220 | 876.361248      | 1734.688671    | 867.847974       | 1733.704655    | 867.355966       | Q    | 586.338130  | 293.672703      | 569.311581     | 285.159429       |                |                  | 2  |
| 13 |             |                 |                |                  |                |                  | K    | 147.112804  | 74.060040       | 130.086255     | 65.546765        |                |                  | 1  |

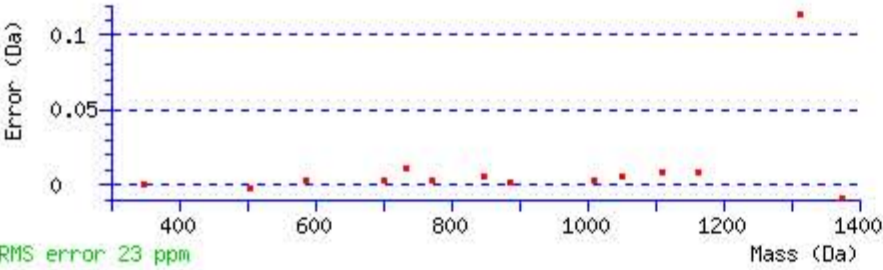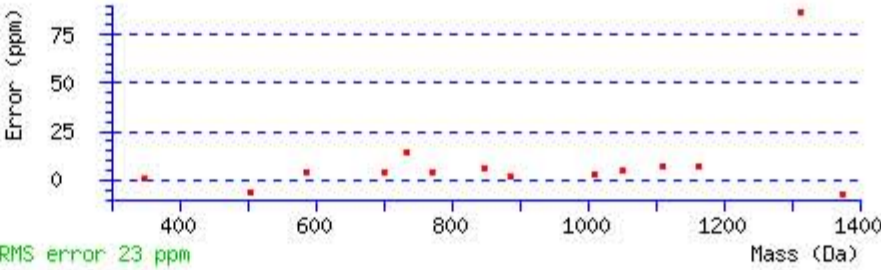

NCBI BLAST search of [WCGTTQNYDADQK](#)  
(Parameters: blastp, nr protein database, expect=20000, no filter, PAM30)  
Other BLAST [web gateways](#)

All matches to this query

| Score | Mr(calc):   | Delta    | Sequence                      |
|-------|-------------|----------|-------------------------------|
| 35.3  | 1896.813477 | 0.007995 | <a href="#">WCGTTQNYDADQK</a> |

Match to Query 43363: 1961.967492 from(654.996440,3+) rtinseconds(2182) index(35378)  
Title: Locus:1.1.1.868.11 File:"2013-07-02 CLN FXIII 180 min 2nd F 3.wiff"  
Data file C:\Program Files (x86)\Matrix Science\Mascot Daemon\mgf\8 FXIII 180 min 2nd\mascot\_daemon\_merge.mgf

| #  | b           | b <sup>++</sup> | b <sup>*</sup> | b <sup>*++</sup> | b <sup>0</sup> | b <sup>0++</sup> | Seq. | y           | y <sup>++</sup> | y <sup>*</sup> | y <sup>*++</sup> | y <sup>0</sup> | y <sup>0++</sup> | #  |
|----|-------------|-----------------|----------------|------------------|----------------|------------------|------|-------------|-----------------|----------------|------------------|----------------|------------------|----|
| 1  | 114.091340  | 57.549308       |                |                  |                |                  | L    |             |                 |                |                  |                |                  | 14 |
| 2  | 227.175404  | 114.091340      |                |                  |                |                  | L    | 1849.865864 | 925.436570      | 1832.839315    | 916.923296       | 1831.855299    | 916.431288       | 13 |
| 3  | 387.206053  | 194.106664      |                |                  |                |                  | C    | 1736.781800 | 868.894538      | 1719.755251    | 860.381264       | 1718.771235    | 859.889255       | 12 |
| 4  | 826.431379  | 413.719328      | 809.404830     | 405.206053       |                |                  | Q    | 1576.751151 | 788.879213      | 1559.724602    | 780.365939       | 1558.740586    | 779.873931       | 11 |
| 5  | 986.462028  | 493.734652      | 969.435479     | 485.221378       |                |                  | C    | 1137.525825 | 569.266550      | 1120.499276    | 560.753276       | 1119.515260    | 560.261268       | 10 |
| 6  | 1099.546092 | 550.276684      | 1082.519543    | 541.763410       |                |                  | L    | 977.495176  | 489.251226      | 960.468627     | 480.737952       | 959.484611     | 480.245944       | 9  |
| 7  | 1156.567556 | 578.787416      | 1139.541007    | 570.274142       |                |                  | G    | 864.411112  | 432.709194      | 847.384563     | 424.195920       | 846.400547     | 423.703912       | 8  |
| 8  | 1303.635970 | 652.321623      | 1286.609421    | 643.808349       |                |                  | F    | 807.389648  | 404.198462      | 790.363099     | 395.685188       | 789.379083     | 395.193180       | 7  |
| 9  | 1360.657434 | 680.832355      | 1343.630885    | 672.319081       |                |                  | G    | 660.321234  | 330.664255      | 643.294685     | 322.150981       | 642.310669     | 321.658973       | 6  |
| 10 | 1447.689462 | 724.348369      | 1430.662913    | 715.835095       | 1429.678897    | 715.343087       | S    | 603.299770  | 302.153523      | 586.273221     | 293.640249       | 585.289205     | 293.148241       | 5  |
| 11 | 1504.710926 | 752.859101      | 1487.684377    | 744.345827       | 1486.700361    | 743.853818       | G    | 516.267742  | 258.637509      | 499.241193     | 250.124235       |                |                  | 4  |
| 12 | 1641.769838 | 821.388557      | 1624.743289    | 812.875283       | 1623.759273    | 812.383274       | H    | 459.246278  | 230.126777      | 442.219729     | 221.613502       |                |                  | 3  |
| 13 | 1788.838252 | 894.922764      | 1771.811703    | 886.409490       | 1770.827687    | 885.917482       | F    | 322.187366  | 161.597321      | 305.160817     | 153.084047       |                |                  | 2  |
| 14 |             |                 |                |                  |                |                  | R    | 175.118952  | 88.063114       | 158.092403     | 79.549839        |                |                  | 1  |

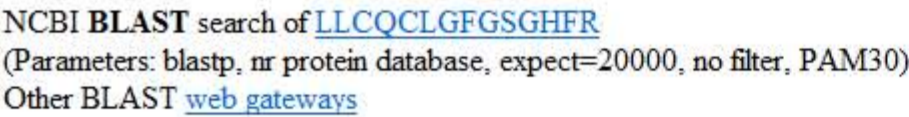

### All matches to this query

| Score | Mr(calc):   | Delta    | Sequence                       |
|-------|-------------|----------|--------------------------------|
| 40.7  | 1961.942673 | 0.024819 | <a href="#">LLCQCLGFSGSHFR</a> |

MATRIX

SCIENCE

Mascot Search Results

Peptide View

MS/MS Fragmentation of **YSFCTDHTVLVQTR**  
Found in **FINC\_HUMAN**, Fibronectin OS=Homo sapiens GN=FN1 PE=1 SV=4

Match to Query 45400: 2036.995482 from(680.005770,3+) rtinseconds(2023) index(34416)  
Title: Locus:1.1.1.813.12 File:"2013-07-02 CLN FXIII 180 min 2nd F 3.wiff"  
Data file C:\Program Files (x86)\Matrix Science\Mascot Daemon\mgf\8 FXIII 180 min 2nd\mascot\_daemon\_merge.mgf

Click mouse within plot area to zoom in by factor of two about that point  
Or, 

Plot from

0

 to 

2200

 Da 

Full range

  
Label all possible matches ☐ Label matches used for scoring ☒

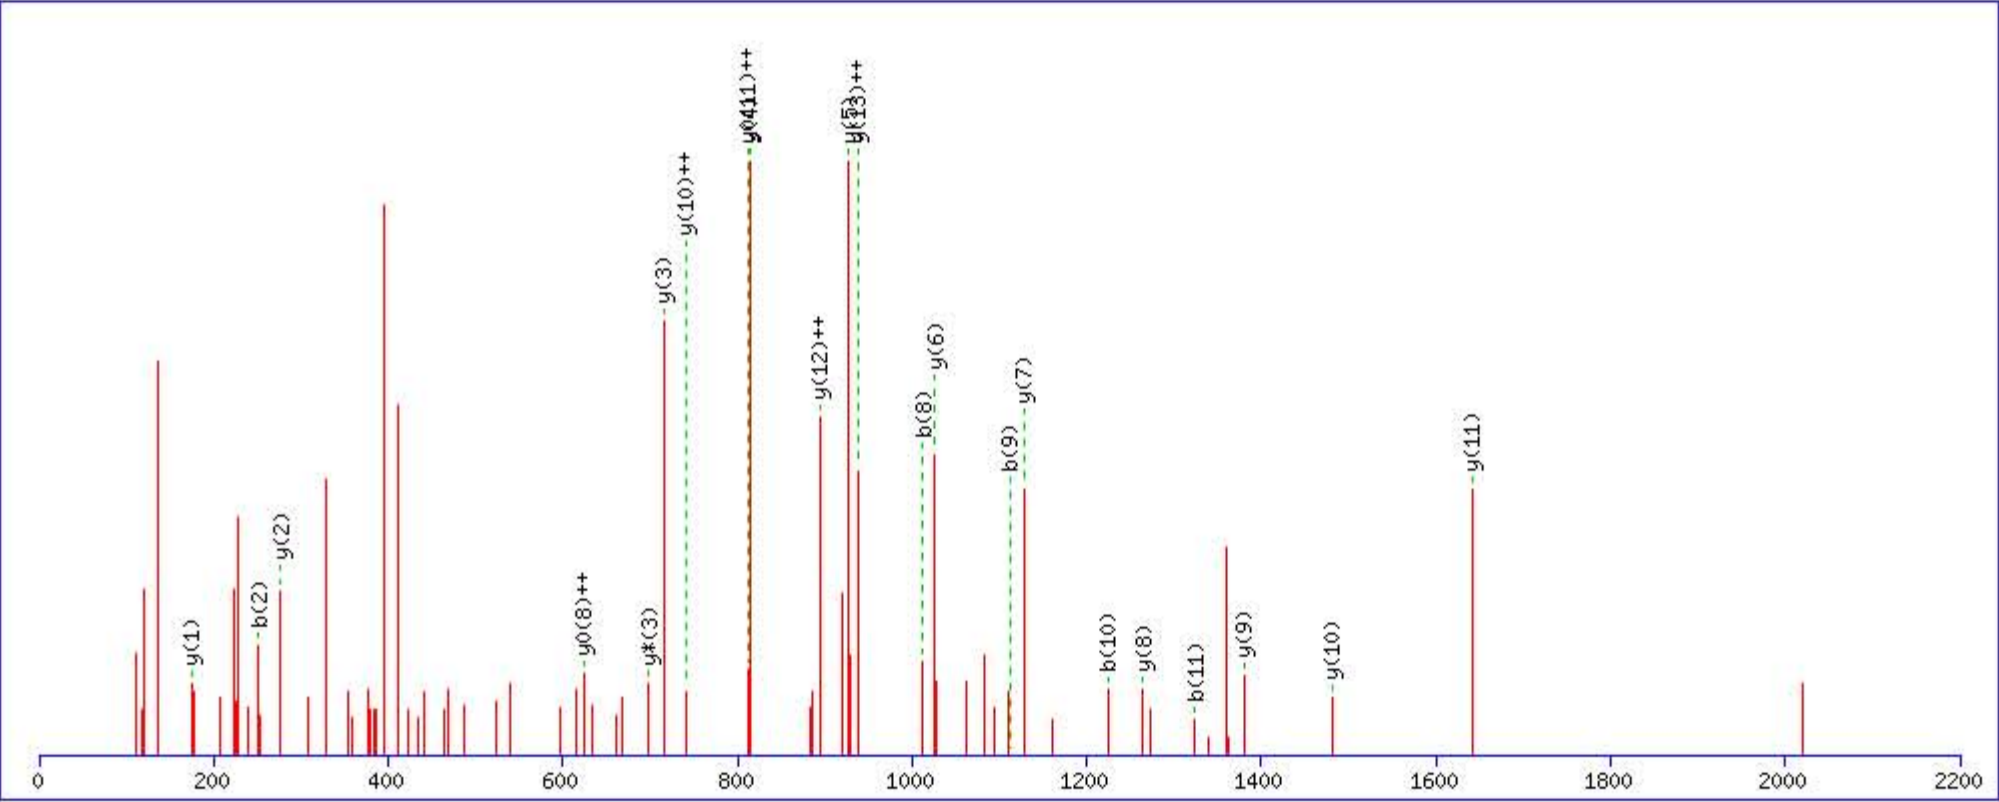

Monoisotopic mass of neutral peptide Mr(calc): 2036.981232  
Fixed modifications: Carbamidomethyl (C) (apply to specified residues or termini only)  
Variable modifications:  
Q12 : Biotin:Thermo-21345 (Q)  
Ions Score: 54 Expect: 8.5e-005  
Matches : 22/130 fragment ions using 52 most intense peaks [\(help\)](#)

| #  | b           | b <sup>++</sup> | b <sup>*</sup> | b <sup>*++</sup> | b <sup>0</sup> | b <sup>0++</sup> | Seq. | y           | y <sup>++</sup> | y <sup>*</sup> | y <sup>*++</sup> | y <sup>0</sup> | y <sup>0++</sup> | #  |
|----|-------------|-----------------|----------------|------------------|----------------|------------------|------|-------------|-----------------|----------------|------------------|----------------|------------------|----|
| 1  | 164.070605  | 82.538940       |                |                  |                |                  | Y    |             |                 |                |                  |                |                  | 14 |
| 2  | 251.102633  | 126.054954      |                |                  | 233.092068     | 117.049672       | S    | 1874.925153 | 937.966215      | 1857.898604    | 929.452940       | 1856.914588    | 928.960932       | 13 |
| 3  | 398.171047  | 199.589161      |                |                  | 380.160482     | 190.583879       | F    | 1787.893125 | 894.450201      | 1770.866576    | 885.936926       | 1769.882560    | 885.444918       | 12 |
| 4  | 558.201696  | 279.604486      |                |                  | 540.191131     | 270.599204       | C    | 1640.824711 | 820.915994      | 1623.798162    | 812.402719       | 1622.814146    | 811.910711       | 11 |
| 5  | 659.249375  | 330.128326      |                |                  | 641.238810     | 321.123043       | T    | 1480.794062 | 740.900669      | 1463.767513    | 732.387395       | 1462.783497    | 731.895387       | 10 |
| 6  | 774.276318  | 387.641797      |                |                  | 756.265753     | 378.636515       | D    | 1379.746383 | 690.376830      | 1362.719834    | 681.863555       | 1361.735818    | 681.371547       | 9  |
| 7  | 911.335230  | 456.171253      |                |                  | 893.324665     | 447.165971       | H    | 1264.719440 | 632.863358      | 1247.692891    | 624.350084       | 1246.708875    | 623.858076       | 8  |
| 8  | 1012.382909 | 506.695093      |                |                  | 994.372344     | 497.689810       | T    | 1127.660528 | 564.333902      | 1110.633979    | 555.820628       | 1109.649963    | 555.328620       | 7  |
| 9  | 1111.451323 | 556.229300      |                |                  | 1093.440758    | 547.224017       | V    | 1026.612849 | 513.810063      | 1009.586300    | 505.296788       | 1008.602284    | 504.804780       | 6  |
| 10 | 1224.535387 | 612.771331      |                |                  | 1206.524822    | 603.766049       | L    | 927.544435  | 464.275856      | 910.517886     | 455.762581       | 909.533870     | 455.270573       | 5  |
| 11 | 1323.603801 | 662.305539      |                |                  | 1305.593236    | 653.300256       | V    | 814.460371  | 407.733824      | 797.433822     | 399.220549       | 796.449806     | 398.728541       | 4  |
| 12 | 1762.829127 | 881.918202      | 1745.802578    | 873.404927       | 1744.818562    | 872.912919       | Q    | 715.391957  | 358.199617      | 698.365408     | 349.686342       | 697.381392     | 349.194334       | 3  |
| 13 | 1863.876806 | 932.442041      | 1846.850257    | 923.928767       | 1845.866241    | 923.436759       | T    | 276.166631  | 138.586953      | 259.140082     | 130.073679       | 258.156066     | 129.581671       | 2  |
| 14 |             |                 |                |                  |                |                  | R    | 175.118952  | 88.063114       | 158.092403     | 79.549839        |                |                  | 1  |

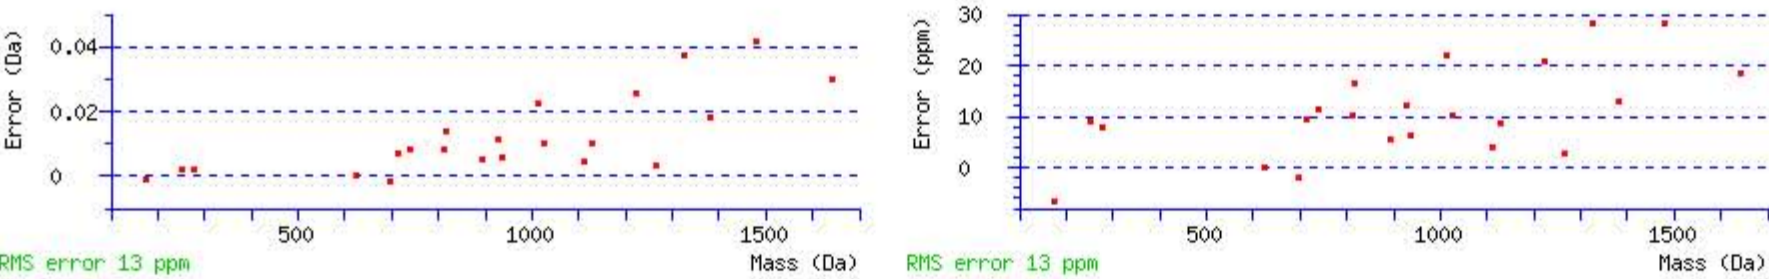

NCBI BLAST search of [YSFCTDHTVLVQTR](#)  
(Parameters: blastp, nr protein database, expect=20000, no filter, PAM30)  
Other BLAST [web gateways](#)

All matches to this query

| Score | Mr(calc):   | Delta    | Sequence                       |
|-------|-------------|----------|--------------------------------|
| 54.2  | 2036.981232 | 0.014250 | <a href="#">YSFCTDHTVLVQTR</a> |

MATRIX

SCIENCE

Mascot Search Results

Peptide View

MS/MS Fragmentation of **HTSVQTTSSGSGPFTDVR**  
Found in **FINC\_HUMAN**, Fibronectin OS=Homo sapiens GN=FN1 PE=1 SV=4

Match to Query 47972: 2174.057082 from(725.692970,3+) rtinseconds(1695) index(48223)  
Title: Locus:1.1.1.1828.10 File:"2013-07-02 CLN FXIII 180 min 2nd F 4.wiff"  
Data file C:\Program Files (x86)\Matrix Science\Mascot Daemon\mgf\8 FXIII 180 min 2nd\mascot\_daemon\_merge.mgf

Click mouse within plot area to zoom in by factor of two about that point  
Or,   to  Da   
Label all possible matches ☐ Label matches used for scoring ☒

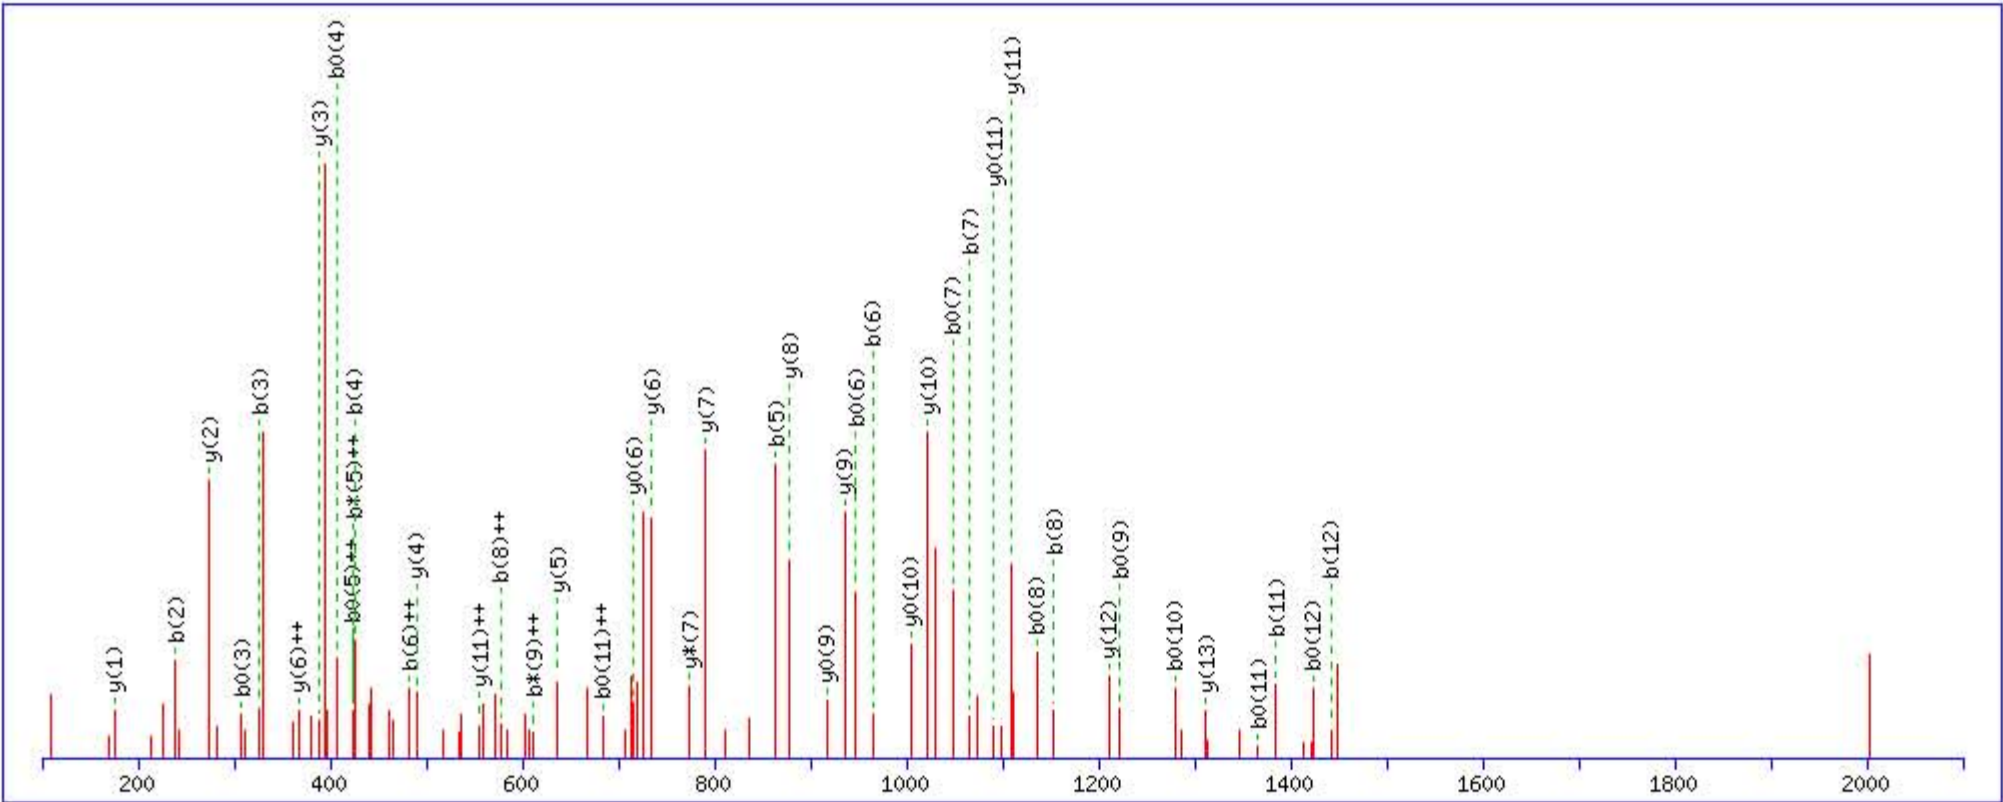

Monoisotopic mass of neutral peptide Mr(calc): 2174.042664  
Fixed modifications: Carbamidomethyl (C) (apply to specified residues or termini only)  
Variable modifications:  
Q5 : Biotin:Thermo-21345 (Q)  
Ions Score: 70 Expect: 5.9e-007  
Matches : 44/190 fragment ions using 85 most intense peaks [\(help\)](#)

| #  | b           | b <sup>++</sup> | b <sup>*</sup> | b <sup>+++</sup> | b <sup>0</sup> | b <sup>0++</sup> | Seq. | y           | y <sup>++</sup> | y <sup>*</sup> | y <sup>+++</sup> | y <sup>0</sup> | y <sup>0++</sup> | #  |
|----|-------------|-----------------|----------------|------------------|----------------|------------------|------|-------------|-----------------|----------------|------------------|----------------|------------------|----|
| 1  | 138.066188  | 69.536732       |                |                  |                |                  | H    |             |                 |                |                  |                |                  | 18 |
| 2  | 239.113867  | 120.060571      |                |                  | 221.103302     | 111.055289       | T    | 2037.990983 | 1019.499130     | 2020.964434    | 1010.985855      | 2019.980418    | 1010.493847      | 17 |
| 3  | 326.145895  | 163.576585      |                |                  | 308.135330     | 154.571303       | S    | 1936.943304 | 968.975290      | 1919.916755    | 960.462016       | 1918.932739    | 959.970008       | 16 |
| 4  | 425.214309  | 213.110792      |                |                  | 407.203744     | 204.105510       | V    | 1849.911276 | 925.459276      | 1832.884727    | 916.946002       | 1831.900711    | 916.453994       | 15 |
| 5  | 864.439635  | 432.723456      | 847.413086     | 424.210181       | 846.429070     | 423.718173       | Q    | 1750.842862 | 875.925069      | 1733.816313    | 867.411795       | 1732.832297    | 866.919787       | 14 |
| 6  | 965.487314  | 483.247295      | 948.460765     | 474.734021       | 947.476749     | 474.242013       | T    | 1311.617536 | 656.312406      | 1294.590987    | 647.799132       | 1293.606971    | 647.307124       | 13 |
| 7  | 1066.534993 | 533.771135      | 1049.508444    | 525.257860       | 1048.524428    | 524.765852       | T    | 1210.569857 | 605.788567      | 1193.543308    | 597.275292       | 1192.559292    | 596.783284       | 12 |
| 8  | 1153.567021 | 577.287149      | 1136.540472    | 568.773874       | 1135.556456    | 568.281866       | S    | 1109.522178 | 555.264727      | 1092.495629    | 546.751453       | 1091.511613    | 546.259445       | 11 |
| 9  | 1240.599049 | 620.803163      | 1223.572500    | 612.289888       | 1222.588484    | 611.797880       | S    | 1022.490150 | 511.748713      | 1005.463601    | 503.235439       | 1004.479585    | 502.743431       | 10 |
| 10 | 1297.620513 | 649.313895      | 1280.593964    | 640.800620       | 1279.609948    | 640.308612       | G    | 935.458122  | 468.232699      | 918.431573     | 459.719425       | 917.447557     | 459.227417       | 9  |
| 11 | 1384.652541 | 692.829909      | 1367.625992    | 684.316634       | 1366.641976    | 683.824626       | S    | 878.436658  | 439.721967      | 861.410109     | 431.208693       | 860.426093     | 430.716685       | 8  |
| 12 | 1441.674005 | 721.340641      | 1424.647456    | 712.827366       | 1423.663440    | 712.335358       | G    | 791.404630  | 396.205953      | 774.378081     | 387.692679       | 773.394065     | 387.200671       | 7  |
| 13 | 1538.726769 | 769.867023      | 1521.700220    | 761.353748       | 1520.716204    | 760.861740       | P    | 734.383166  | 367.695221      | 717.356617     | 359.181947       | 716.372601     | 358.689939       | 6  |
| 14 | 1685.795183 | 843.401230      | 1668.768634    | 834.887955       | 1667.784618    | 834.395947       | F    | 637.330402  | 319.168839      | 620.303853     | 310.655565       | 619.319837     | 310.163557       | 5  |
| 15 | 1786.842862 | 893.925069      | 1769.816313    | 885.411795       | 1768.832297    | 884.919787       | T    | 490.261988  | 245.634632      | 473.235439     | 237.121358       | 472.251423     | 236.629350       | 4  |
| 16 | 1901.869805 | 951.438541      | 1884.843256    | 942.925266       | 1883.859240    | 942.433258       | D    | 389.214309  | 195.110793      | 372.187760     | 186.597518       | 371.203744     | 186.105510       | 3  |
| 17 | 2000.938219 | 1000.972748     | 1983.911670    | 992.459473       | 1982.927654    | 991.967465       | V    | 274.187366  | 137.597321      | 257.160817     | 129.084047       |                |                  | 2  |
| 18 |             |                 |                |                  |                |                  | R    | 175.118952  | 88.063114       | 158.092403     | 79.549839        |                |                  | 1  |

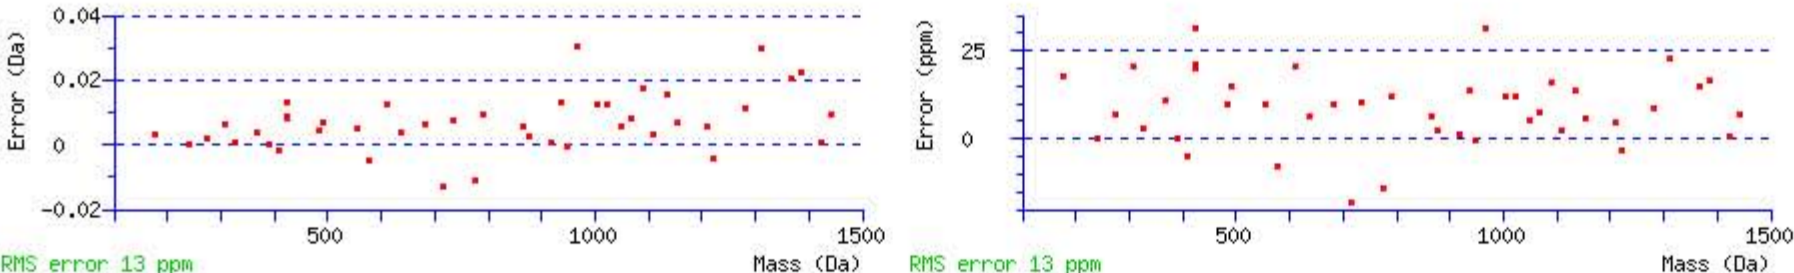

NCBI BLAST search of [HTSVQTTSSGSGPFTDVR](#)  
(Parameters: blastp, nr protein database, expect=20000, no filter, PAM30)  
Other BLAST [web gateways](#)

All matches to this query

| Score | Mr(calc):   | Delta    | Sequence                           |
|-------|-------------|----------|------------------------------------|
| 69.9  | 2174.042664 | 0.014418 | <a href="#">HTSVQTTSSGSGPFTDVR</a> |
| 3.4   | 2174.034729 | 0.022353 | <a href="#">QNKAEGLGMVTEEGSGEK</a> |

MATRIX

SCIENCE

Mascot Search Results

Peptide View

MS/MS Fragmentation of **QDGHLWCSTTSNYEQDQK**  
Found in **FINC\_HUMAN**, Fibronectin OS=Homo sapiens GN=FN1 PE=1 SV=4

Match to Query 54484: 2507.111412 from(836.711080,3+) rtinseconds(1777) index(32792)  
Title: Locus:1.1.1.727.26 File:"2013-07-02 CLN FXIII 180 min 2nd F 3.wiff"  
Data file C:\Program Files (x86)\Matrix Science\Mascot Daemon\mgf\8 FXIII 180 min 2nd\mascot\_daemon\_merge.mgf

Click mouse within plot area to zoom in by factor of two about that point  
Or,   to  Da   
Label all possible matches ☐ Label matches used for scoring ☒

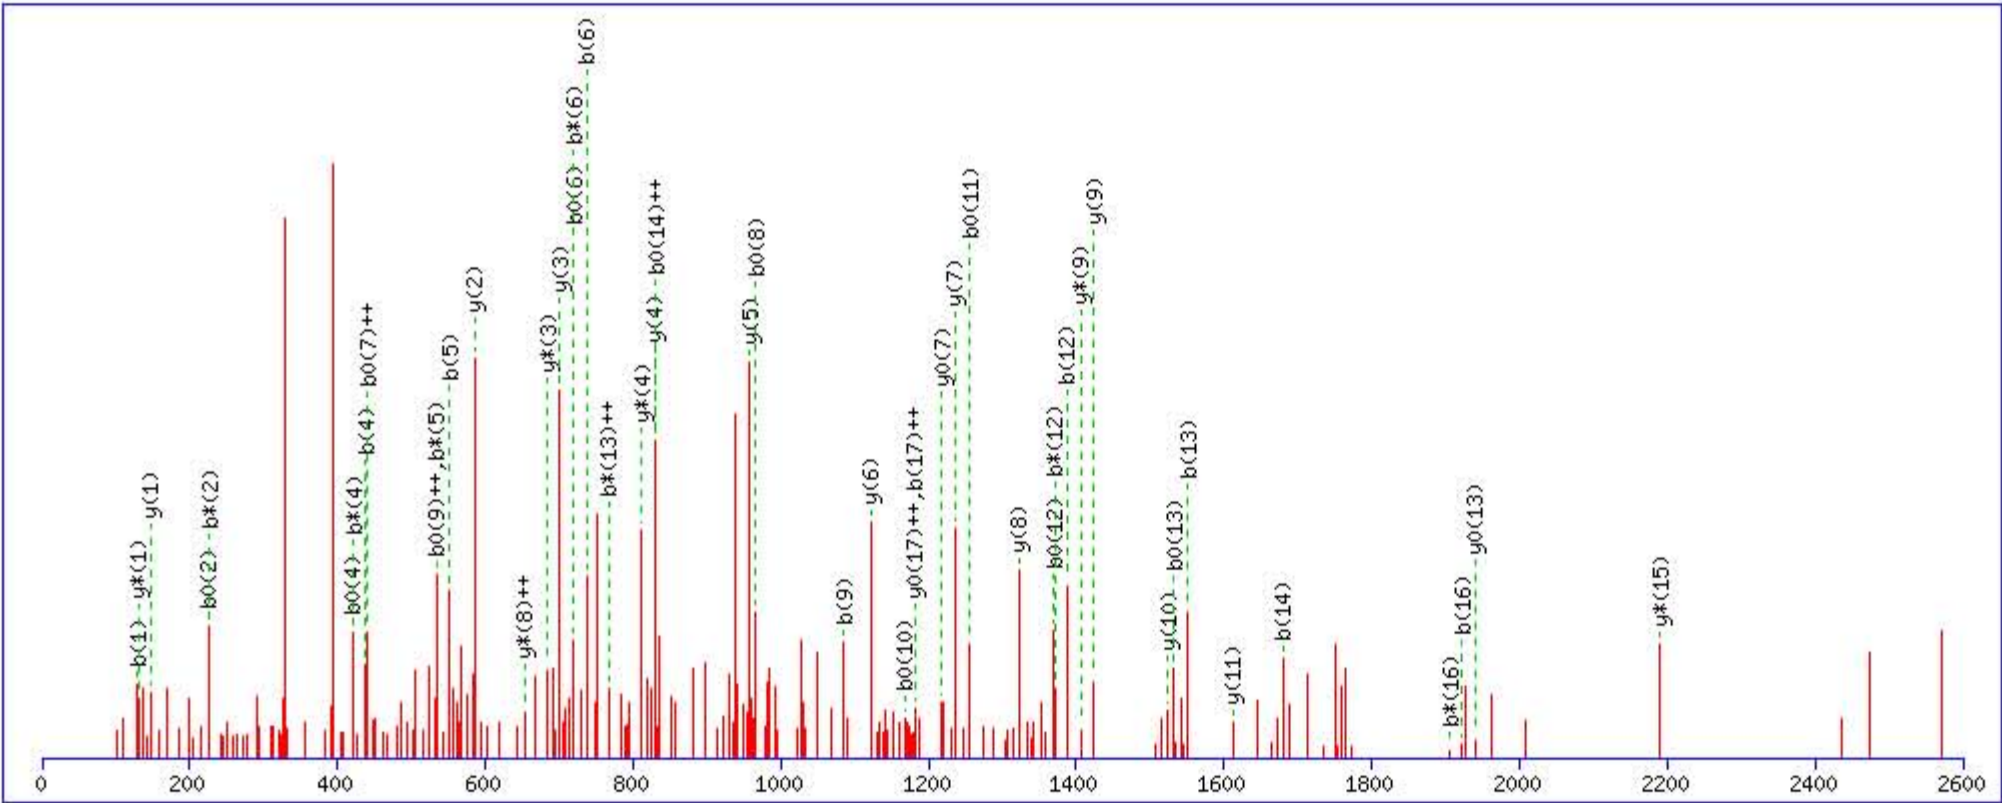

Monoisotopic mass of neutral peptide Mr(calc): 2507.084564  
Fixed modifications: Carbamidomethyl (C) (apply to specified residues or termini only)  
Variable modifications:  
Q17 : Biotin:Thermo-21345 (Q)  
Ions Score: 53 Expect: 3.2e-005  
Matches : 48/198 fragment ions using 91 most intense peaks [\(help\)](#)

| #  | b           | b <sup>++</sup> | b <sup>*</sup> | b <sup>++</sup> | b <sup>0</sup> | b <sup>0++</sup> | Seq. | y           | y <sup>++</sup> | y <sup>*</sup> | y <sup>++</sup> | y <sup>0</sup> | y <sup>0++</sup> | #  |
|----|-------------|-----------------|----------------|-----------------|----------------|------------------|------|-------------|-----------------|----------------|-----------------|----------------|------------------|----|
| 1  | 129.065854  | 65.036565       | 112.039305     | 56.523291       |                |                  | Q    |             |                 |                |                 |                |                  | 18 |
| 2  | 244.092797  | 122.550037      | 227.066248     | 114.036762      | 226.082232     | 113.544754       | D    | 2380.033259 | 1190.520267     | 2363.006710    | 1182.006993     | 2362.022694    | 1181.514985      | 17 |
| 3  | 301.114261  | 151.060768      | 284.087712     | 142.547494      | 283.103696     | 142.055486       | G    | 2265.006316 | 1133.006796     | 2247.979767    | 1124.493521     | 2246.995751    | 1124.001513      | 16 |
| 4  | 438.173173  | 219.590224      | 421.146624     | 211.076950      | 420.162608     | 210.584942       | H    | 2207.984852 | 1104.496064     | 2190.958303    | 1095.982789     | 2189.974287    | 1095.490781      | 15 |
| 5  | 551.257237  | 276.132257      | 534.230688     | 267.618982      | 533.246672     | 267.126974       | L    | 2070.925940 | 1035.966608     | 2053.899391    | 1027.453333     | 2052.915375    | 1026.961325      | 14 |
| 6  | 737.336550  | 369.171913      | 720.310001     | 360.658639      | 719.325985     | 360.166631       | W    | 1957.841876 | 979.424576      | 1940.815327    | 970.911302      | 1939.831311    | 970.419294       | 13 |
| 7  | 897.367199  | 449.187238      | 880.340650     | 440.673963      | 879.356634     | 440.181955       | C    | 1771.762563 | 886.384920      | 1754.736014    | 877.871645      | 1753.751998    | 877.379637       | 12 |
| 8  | 984.399227  | 492.703252      | 967.372678     | 484.189977      | 966.388662     | 483.697969       | S    | 1611.731914 | 806.369595      | 1594.705365    | 797.856321      | 1593.721349    | 797.364313       | 11 |
| 9  | 1085.446906 | 543.227091      | 1068.420357    | 534.713817      | 1067.436341    | 534.221808       | T    | 1524.699886 | 762.853581      | 1507.673337    | 754.340307      | 1506.689321    | 753.848299       | 10 |
| 10 | 1186.494585 | 593.750930      | 1169.468036    | 585.237656      | 1168.484020    | 584.745648       | T    | 1423.652207 | 712.329742      | 1406.625658    | 703.816467      | 1405.641642    | 703.324459       | 9  |
| 11 | 1273.526613 | 637.266945      | 1256.500064    | 628.753670      | 1255.516048    | 628.261662       | S    | 1322.604528 | 661.805902      | 1305.577979    | 653.292628      | 1304.593963    | 652.800620       | 8  |
| 12 | 1387.569540 | 694.288408      | 1370.542991    | 685.775134      | 1369.558975    | 685.283125       | N    | 1235.572500 | 618.289888      | 1218.545951    | 609.776614      | 1217.561935    | 609.284606       | 7  |
| 13 | 1550.632869 | 775.820073      | 1533.606320    | 767.306798      | 1532.622304    | 766.814790       | Y    | 1121.529573 | 561.268425      | 1104.503024    | 552.755150      | 1103.519008    | 552.263142       | 6  |
| 14 | 1679.675462 | 840.341369      | 1662.648913    | 831.828095      | 1661.664897    | 831.336086       | E    | 958.466244  | 479.736760      | 941.439695     | 471.223486      | 940.455679     | 470.731478       | 5  |
| 15 | 1807.734040 | 904.370658      | 1790.707491    | 895.857384      | 1789.723475    | 895.365376       | Q    | 829.423651  | 415.215464      | 812.397102     | 406.702189      | 811.413086     | 406.210181       | 4  |
| 16 | 1922.760983 | 961.884130      | 1905.734434    | 953.370855      | 1904.750418    | 952.878847       | D    | 701.365073  | 351.186175      | 684.338524     | 342.672900      | 683.354508     | 342.180892       | 3  |
| 17 | 2361.986309 | 1181.496792     | 2344.959760    | 1172.983518     | 2343.975744    | 1172.491510      | Q    | 586.338130  | 293.672703      | 569.311581     | 285.159429      |                |                  | 2  |
| 18 |             |                 |                |                 |                |                  | K    | 147.112804  | 74.060040       | 130.086255     | 65.546765       |                |                  | 1  |

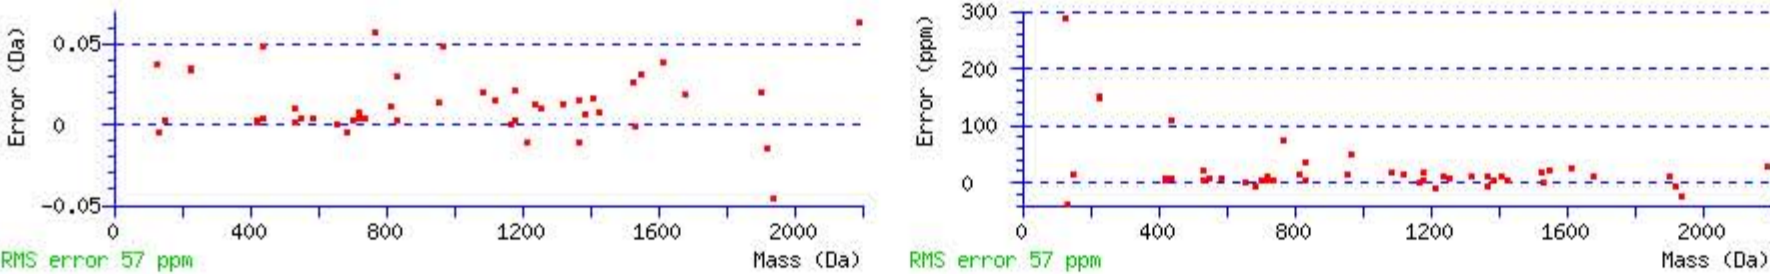

NCBI BLAST search of **QDGHLWCSTTSNYEQDQK**  
(Parameters: blastp, nr protein database, expect=20000, no filter, PAM30)  
Other BLAST [web gateways](#)

All matches to this query

| Score | Mr(calc):   | Delta    | Sequence                           |
|-------|-------------|----------|------------------------------------|
| 53.2  | 2507.084564 | 0.026848 | <a href="#">QDGHLWCSTTSNYEQDQK</a> |
| 38.7  | 2507.084564 | 0.026848 | <a href="#">QDGHLWCSTTSNYEQDQK</a> |

M

A

T

R

I

X

S

C

I

E

N

C

E

Mascot Search Results

Peptide View

MS/MS Fragmentation of **RPGGEPSPEGTTGQSYNQYSQR**  
Found in **FINC\_HUMAN**, Fibronectin OS=Homo sapiens GN=FN1 PE=1 SV=4

Match to Query 56391: 2706.278172 from(903.100000,3+) rtinseconds(1540) index(31319)  
Title: Locus:1.1.1.644.15 File:"2013-07-02 CLN FXIII 180 min 2nd F 3.wiff"  
Data file C:\Program Files (x86)\Matrix Science\Mascot Daemon\mgf\8 FXIII 180 min 2nd\mascot\_daemon\_merge.mgf

Click mouse within plot area to zoom in by factor of two about that point  
Or, 

Plot from

0

 to 

2800

 Da 

Full range

  
Label all possible matches ☐ Label matches used for scoring ☒

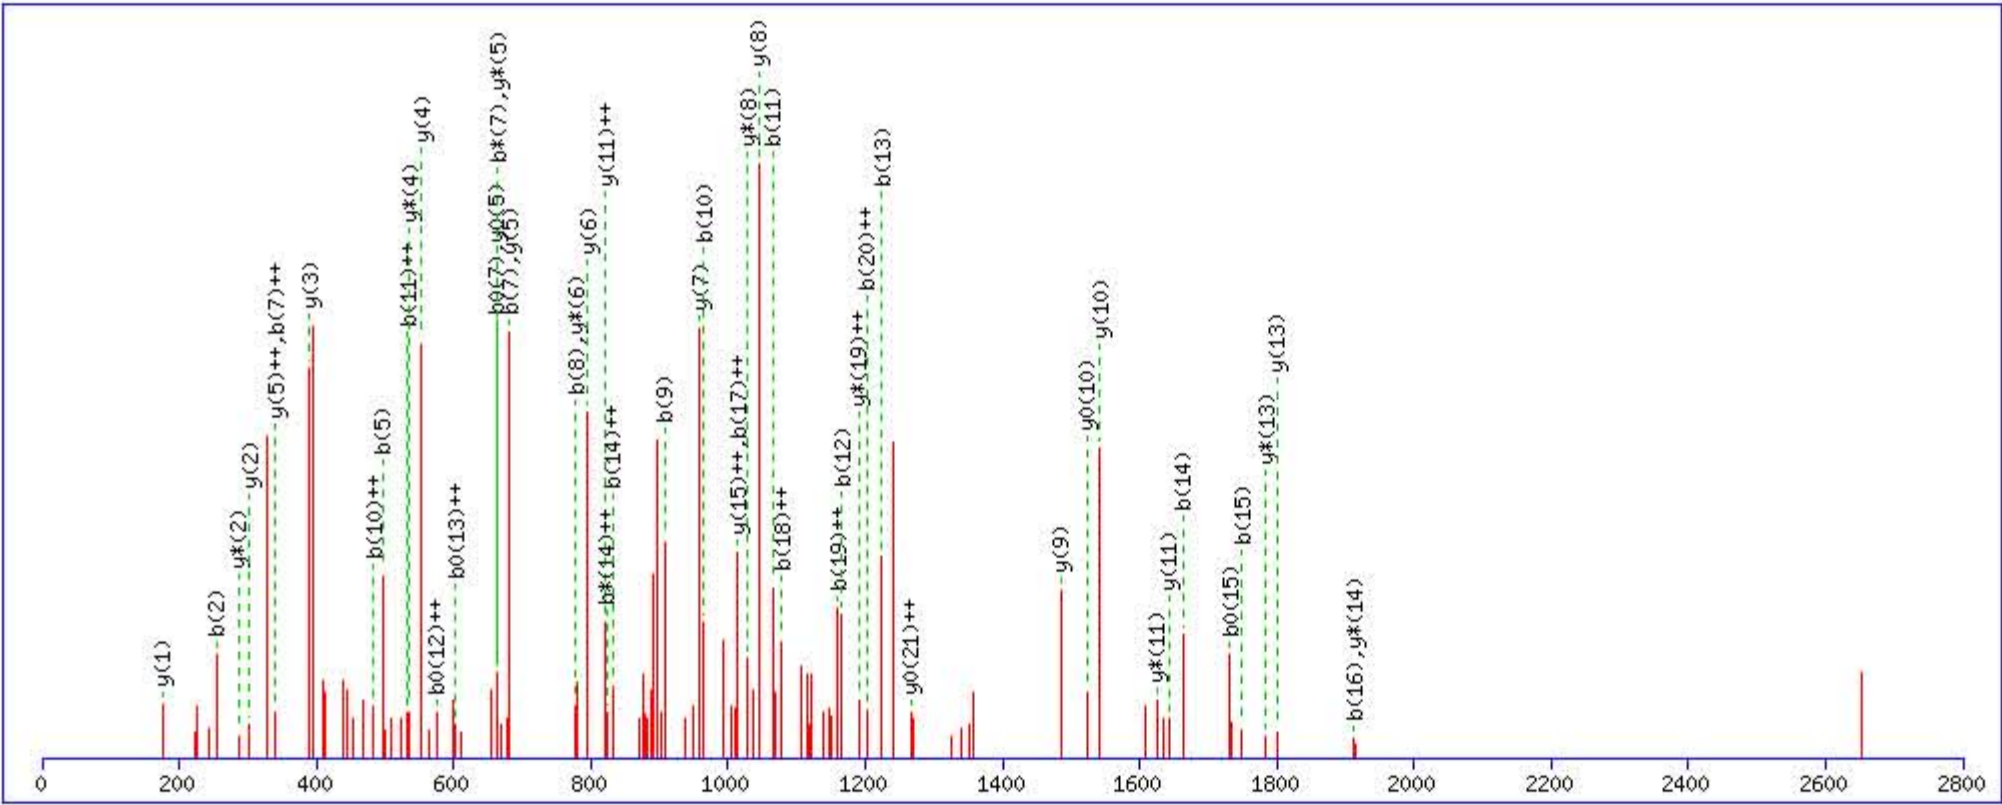

Monoisotopic mass of neutral peptide Mr(calc): 2706.245621  
Fixed modifications: Carbamidomethyl (C) (apply to specified residues or termini only)  
Variable modifications:  
Q14 : Biotin:Thermo-21345 (Q)  
Ions Score: 68 Expect: 3e-006  
Matches : 54/240 fragment ions using 85 most intense peaks [\(help\)](#)

| #  | b           | b <sup>++</sup> | b <sup>*</sup> | b <sup>*++</sup> | b <sup>0</sup> | b <sup>0++</sup> | Seq. | y           | y <sup>++</sup> | y <sup>*</sup> | y <sup>*++</sup> | y <sup>0</sup> | y <sup>0++</sup> | #  |
|----|-------------|-----------------|----------------|------------------|----------------|------------------|------|-------------|-----------------|----------------|------------------|----------------|------------------|----|
| 1  | 157.108387  | 79.057831       | 140.081838     | 70.544557        |                |                  | R    |             |                 |                |                  |                |                  | 22 |
| 2  | 254.161151  | 127.584213      | 237.134602     | 119.070939       |                |                  | P    | 2551.151795 | 1276.079535     | 2534.125246    | 1267.566261      | 2533.141230    | 1267.074253      | 21 |
| 3  | 311.182615  | 156.094945      | 294.156066     | 147.581671       |                |                  | G    | 2454.099031 | 1227.553153     | 2437.072482    | 1219.039879      | 2436.088466    | 1218.547871      | 20 |
| 4  | 368.204079  | 184.605677      | 351.177530     | 176.092403       |                |                  | G    | 2397.077567 | 1199.042421     | 2380.051018    | 1190.529147      | 2379.067002    | 1190.037139      | 19 |
| 5  | 497.246672  | 249.126974      | 480.220123     | 240.613700       | 479.236107     | 240.121692       | E    | 2340.056103 | 1170.531689     | 2323.029554    | 1162.018415      | 2322.045538    | 1161.526407      | 18 |
| 6  | 594.299436  | 297.653356      | 577.272887     | 289.140082       | 576.288871     | 288.648074       | P    | 2211.013510 | 1106.010393     | 2193.986961    | 1097.497118      | 2193.002945    | 1097.005110      | 17 |
| 7  | 681.331464  | 341.169370      | 664.304915     | 332.656095       | 663.320899     | 332.164087       | S    | 2113.960746 | 1057.484011     | 2096.934197    | 1048.970736      | 2095.950181    | 1048.478728      | 16 |
| 8  | 778.384228  | 389.695752      | 761.357679     | 381.182478       | 760.373663     | 380.690470       | P    | 2026.928718 | 1013.967997     | 2009.902169    | 1005.454723      | 2008.918153    | 1004.962715      | 15 |
| 9  | 907.426821  | 454.217049      | 890.400272     | 445.703774       | 889.416256     | 445.211766       | E    | 1929.875954 | 965.441615      | 1912.849405    | 956.928341       | 1911.865389    | 956.436333       | 14 |
| 10 | 964.448285  | 482.727781      | 947.421736     | 474.214506       | 946.437720     | 473.722498       | G    | 1800.833361 | 900.920319      | 1783.806812    | 892.407044       | 1782.822796    | 891.915036       | 13 |
| 11 | 1065.495964 | 533.251620      | 1048.469415    | 524.738346       | 1047.485399    | 524.246337       | T    | 1743.811897 | 872.409587      | 1726.785348    | 863.896312       | 1725.801332    | 863.404304       | 12 |
| 12 | 1166.543643 | 583.775460      | 1149.517094    | 575.262185       | 1148.533078    | 574.770177       | T    | 1642.764218 | 821.885747      | 1625.737669    | 813.372473       | 1624.753653    | 812.880465       | 11 |
| 13 | 1223.565107 | 612.286191      | 1206.538558    | 603.772917       | 1205.554542    | 603.280909       | G    | 1541.716539 | 771.361908      | 1524.689990    | 762.848633       | 1523.705974    | 762.356625       | 10 |
| 14 | 1662.790433 | 831.898854      | 1645.763884    | 823.385580       | 1644.779868    | 822.893572       | Q    | 1484.695075 | 742.851176      | 1467.668526    | 734.337901       | 1466.684510    | 733.845893       | 9  |
| 15 | 1749.822461 | 875.414869      | 1732.795912    | 866.901594       | 1731.811896    | 866.409586       | S    | 1045.469749 | 523.238513      | 1028.443200    | 514.725238       | 1027.459184    | 514.233230       | 8  |
| 16 | 1912.885790 | 956.946533      | 1895.859241    | 948.433259       | 1894.875225    | 947.941251       | Y    | 958.437721  | 479.722499      | 941.411172     | 471.209224       | 940.427156     | 470.717216       | 7  |
| 17 | 2026.928717 | 1013.967997     | 2009.902168    | 1005.454722      | 2008.918152    | 1004.962714      | N    | 795.374392  | 398.190834      | 778.347843     | 389.677560       | 777.363827     | 389.185552       | 6  |
| 18 | 2154.987295 | 1077.997285     | 2137.960746    | 1069.484011      | 2136.976730    | 1068.992003      | Q    | 681.331465  | 341.169371      | 664.304916     | 332.656096       | 663.320900     | 332.164088       | 5  |
| 19 | 2318.050624 | 1159.528950     | 2301.024075    | 1151.015675      | 2300.040059    | 1150.523667      | Y    | 553.272887  | 277.140082      | 536.246338     | 268.626807       | 535.262322     | 268.134799       | 4  |
| 20 | 2405.082652 | 1203.044964     | 2388.056103    | 1194.531689      | 2387.072087    | 1194.039681      | S    | 390.209558  | 195.608417      | 373.183009     | 187.095143       | 372.198993     | 186.603135       | 3  |
| 21 | 2533.141230 | 1267.074253     | 2516.114681    | 1258.560978      | 2515.130665    | 1258.068971      | Q    | 303.177530  | 152.092403      | 286.150981     | 143.579129       |                |                  | 2  |
| 22 |             |                 |                |                  |                |                  | R    | 175.118952  | 88.063114       | 158.092403     | 79.549839        |                |                  | 1  |

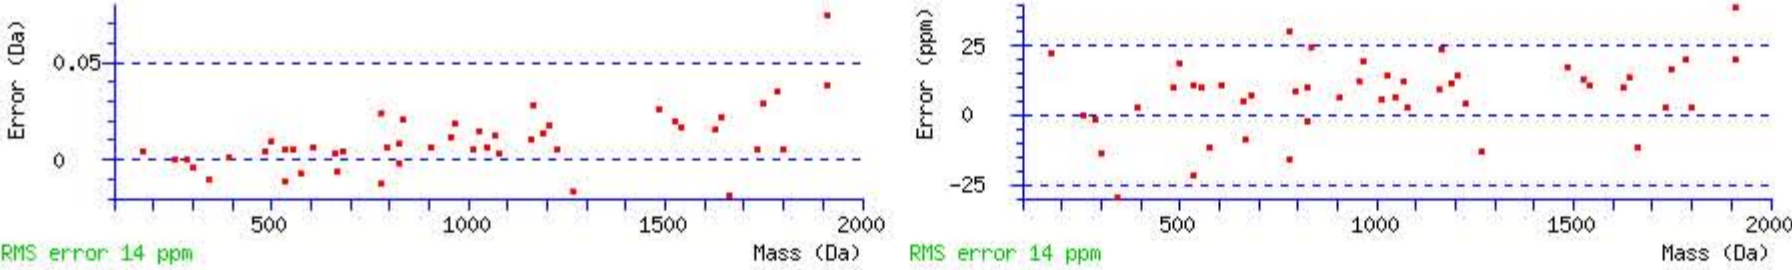

NCBI BLAST search of [RPGGEPSPEGTTGQSYNQYSQR](#)  
(Parameters: blastp, nr protein database, expect=20000, no filter, PAM30)  
Other BLAST [web gateways](#)

All matches to this query

| Score | Mr(calc):   | Delta    | Sequence                               |
|-------|-------------|----------|----------------------------------------|
| 67.9  | 2706.245621 | 0.032551 | <a href="#">RPGGEPSPEGTTGQSYNQYSQR</a> |
| 55.2  | 2706.245621 | 0.032551 | <a href="#">RPGGEPSPEGTTGQSYNQYSQR</a> |
| 31.0  | 2706.245621 | 0.032551 | <a href="#">RPGGEPSPEGTTGQSYNQYSQR</a> |

M

A

T

R

I

X

S

C

I

E

N

C

E

Mascot Search Results

Peptide View

MS/MS Fragmentation of **TEIDKPSQMQVTDVQDNSISVK**  
Found in **FINC\_HUMAN**, Fibronectin OS=Homo sapiens GN=FN1 PE=1 SV=4

Match to Query 57231: 2772.391696 from(694.105200,4+) rtinseconds(1964) index(34012)  
Title: Locus:1.1.1.792.19 File:"2013-07-02 CLN FXIII 180 min 2nd F 3.wiff"  
Data file C:\Program Files (x86)\Matrix Science\Mascot Daemon\mgf\8 FXIII 180 min 2nd\mascot\_daemon\_merge.mgf

Click mouse within plot area to zoom in by factor of two about that point  
Or, 

Plot from

100

 to 

1800

 Da 

Full range

  
Label all possible matches ☐ Label matches used for scoring ☒

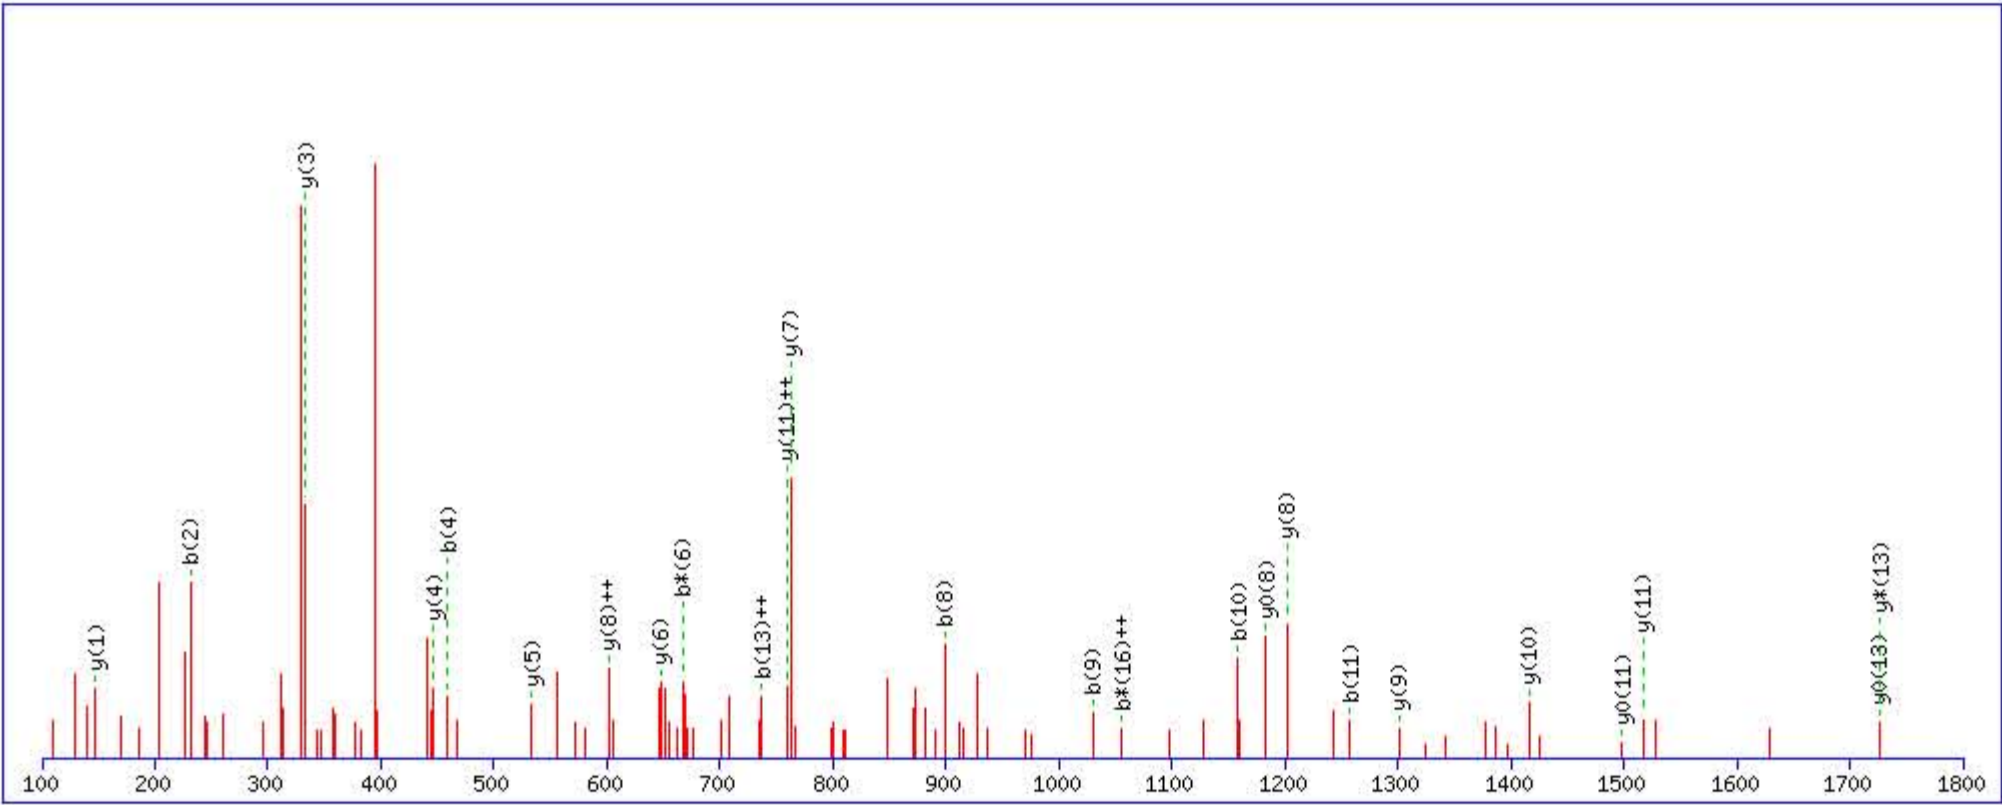

Monoisotopic mass of neutral peptide Mr(calc): 2772.367386  
Fixed modifications: Carbamidomethyl (C) (apply to specified residues or termini only)  
Variable modifications:  
Q15 : Biotin:Thermo-21345 (Q)  
Ions Score: 53 Expect: 0.00013  
Matches : 25/240 fragment ions using 48 most intense peaks [\(help\)](#)

| #  | b           | b <sup>++</sup> | b <sup>*</sup> | b <sup>++*</sup> | b <sup>0</sup> | b <sup>0++</sup> | Seq. | y           | y <sup>++</sup> | y <sup>*</sup> | y <sup>++*</sup> | y <sup>0</sup> | y <sup>0++</sup> | #  |
|----|-------------|-----------------|----------------|------------------|----------------|------------------|------|-------------|-----------------|----------------|------------------|----------------|------------------|----|
| 1  | 102.054955  | 51.531116       |                |                  | 84.044390      | 42.525833        | T    |             |                 |                |                  |                |                  | 22 |
| 2  | 231.097548  | 116.052412      |                |                  | 213.086983     | 107.047130       | E    | 2672.326980 | 1336.667128     | 2655.300431    | 1328.153854      | 2654.316415    | 1327.661846      | 21 |
| 3  | 344.181612  | 172.594444      |                |                  | 326.171047     | 163.589162       | I    | 2543.284387 | 1272.145832     | 2526.257838    | 1263.632557      | 2525.273822    | 1263.140549      | 20 |
| 4  | 459.208555  | 230.107916      |                |                  | 441.197990     | 221.102633       | D    | 2430.200323 | 1215.603799     | 2413.173774    | 1207.090525      | 2412.189758    | 1206.598517      | 19 |
| 5  | 587.303518  | 294.155397      | 570.276969     | 285.642123       | 569.292953     | 285.150115       | K    | 2315.173380 | 1158.090328     | 2298.146831    | 1149.577053      | 2297.162815    | 1149.085046      | 18 |
| 6  | 684.356282  | 342.681779      | 667.329733     | 334.168505       | 666.345717     | 333.676497       | P    | 2187.078417 | 1094.042847     | 2170.051868    | 1085.529572      | 2169.067852    | 1085.037564      | 17 |
| 7  | 771.388310  | 386.197793      | 754.361761     | 377.684519       | 753.377745     | 377.192511       | S    | 2090.025653 | 1045.516465     | 2072.999104    | 1037.003190      | 2072.015088    | 1036.511182      | 16 |
| 8  | 899.446888  | 450.227082      | 882.420339     | 441.713808       | 881.436323     | 441.221800       | Q    | 2002.993625 | 1002.000451     | 1985.967076    | 993.487176       | 1984.983060    | 992.995168       | 15 |
| 9  | 1030.487373 | 515.747325      | 1013.460824    | 507.234050       | 1012.476808    | 506.742042       | M    | 1874.935047 | 937.971162      | 1857.908498    | 929.457887       | 1856.924482    | 928.965879       | 14 |
| 10 | 1158.545951 | 579.776614      | 1141.519402    | 571.263339       | 1140.535386    | 570.771331       | Q    | 1743.894562 | 872.450919      | 1726.868013    | 863.937645       | 1725.883997    | 863.445637       | 13 |
| 11 | 1257.614365 | 629.310821      | 1240.587816    | 620.797546       | 1239.603800    | 620.305538       | V    | 1615.835984 | 808.421630      | 1598.809435    | 799.908356       | 1597.825419    | 799.416348       | 12 |
| 12 | 1358.662044 | 679.834660      | 1341.635495    | 671.321386       | 1340.651479    | 670.829378       | T    | 1516.767570 | 758.887423      | 1499.741021    | 750.374149       | 1498.757005    | 749.882141       | 11 |
| 13 | 1473.688987 | 737.348132      | 1456.662438    | 728.834857       | 1455.678422    | 728.342849       | D    | 1415.719891 | 708.363584      | 1398.693342    | 699.850309       | 1397.709326    | 699.358301       | 10 |
| 14 | 1572.757401 | 786.882339      | 1555.730852    | 778.369064       | 1554.746836    | 777.877056       | V    | 1300.692948 | 650.850112      | 1283.666399    | 642.336838       | 1282.682383    | 641.844830       | 9  |
| 15 | 2011.982727 | 1006.495002     | 1994.956178    | 997.981727       | 1993.972162    | 997.489719       | Q    | 1201.624534 | 601.315905      | 1184.597985    | 592.802631       | 1183.613969    | 592.310623       | 8  |
| 16 | 2127.009670 | 1064.008473     | 2109.983121    | 1055.495199      | 2108.999105    | 1055.003191      | D    | 762.399208  | 381.703242      | 745.372659     | 373.189968       | 744.388643     | 372.697960       | 7  |
| 17 | 2241.052597 | 1121.029937     | 2224.026048    | 1112.516662      | 2223.042032    | 1112.024654      | N    | 647.372265  | 324.189771      | 630.345716     | 315.676496       | 629.361700     | 315.184488       | 6  |
| 18 | 2328.084625 | 1164.545951     | 2311.058076    | 1156.032676      | 2310.074060    | 1155.540668      | S    | 533.329338  | 267.168307      | 516.302789     | 258.655033       | 515.318773     | 258.163025       | 5  |
| 19 | 2441.168689 | 1221.087983     | 2424.142140    | 1212.574708      | 2423.158124    | 1212.082700      | I    | 446.297310  | 223.652293      | 429.270761     | 215.139019       | 428.286745     | 214.647011       | 4  |
| 20 | 2528.200717 | 1264.603997     | 2511.174168    | 1256.090722      | 2510.190152    | 1255.598714      | S    | 333.213246  | 167.110261      | 316.186697     | 158.596986       | 315.202681     | 158.104978       | 3  |
| 21 | 2627.269131 | 1314.138204     | 2610.242582    | 1305.624929      | 2609.258566    | 1305.132921      | V    | 246.181218  | 123.594247      | 229.154669     | 115.080972       |                |                  | 2  |
| 22 |             |                 |                |                  |                |                  | K    | 147.112804  | 74.060040       | 130.086255     | 65.546765        |                |                  | 1  |

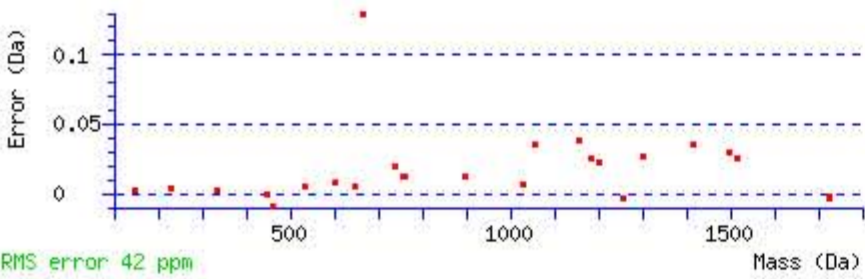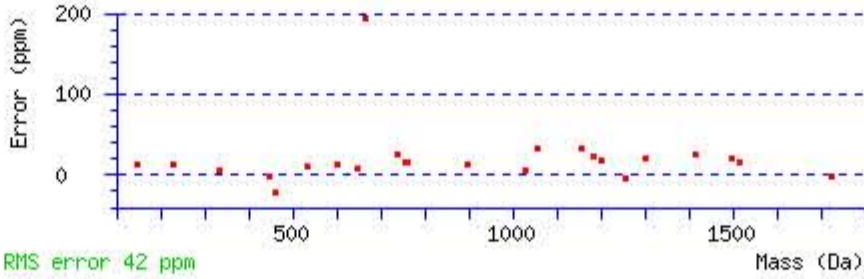

NCBI BLAST search of [TEIDKPSQMQVTDVQDNSISVK](#)  
(Parameters: blastp, nr protein database, expect=20000, no filter, PAM30)  
Other BLAST [web gateways](#)

All matches to this query

| Score | Mr(calc):   | Delta    | Sequence                               |
|-------|-------------|----------|----------------------------------------|
| 53.2  | 2772.367386 | 0.024310 | <a href="#">TEIDKPSQMQVTDVQDNSISVK</a> |
| 13.7  | 2772.367386 | 0.024310 | <a href="#">TEIDKPSQMQVTDVQDNSISVK</a> |
| 7.0   | 2772.367386 | 0.024310 | <a href="#">TEIDKPSQMQVTDVQDNSISVK</a> |

Peptide View

MS/MS Fragmentation of **HRPRPYPPNVGEEIQIGHIPR**  
Found in **FINC\_HUMAN**, Fibronectin OS=Homo sapiens GN=FN1 PE=1 SV=4

Match to Query 57234: 2772.500296 from(694.132350,4+) rtinseconds(1771) index(32740)  
Title: Locus:1.1.1.725.16 File:"2013-07-02 CLN FXIII 180 min 2nd F 3.wiff"  
Data file C:\Program Files (x86)\Matrix Science\Mascot Daemon\mgf\8 FXIII 180 min 2nd\mascot\_daemon\_merge.mgf

Click mouse within plot area to zoom in by factor of two about that point  
Or,   to  Da   
Label all possible matches ☐ Label matches used for scoring ☒

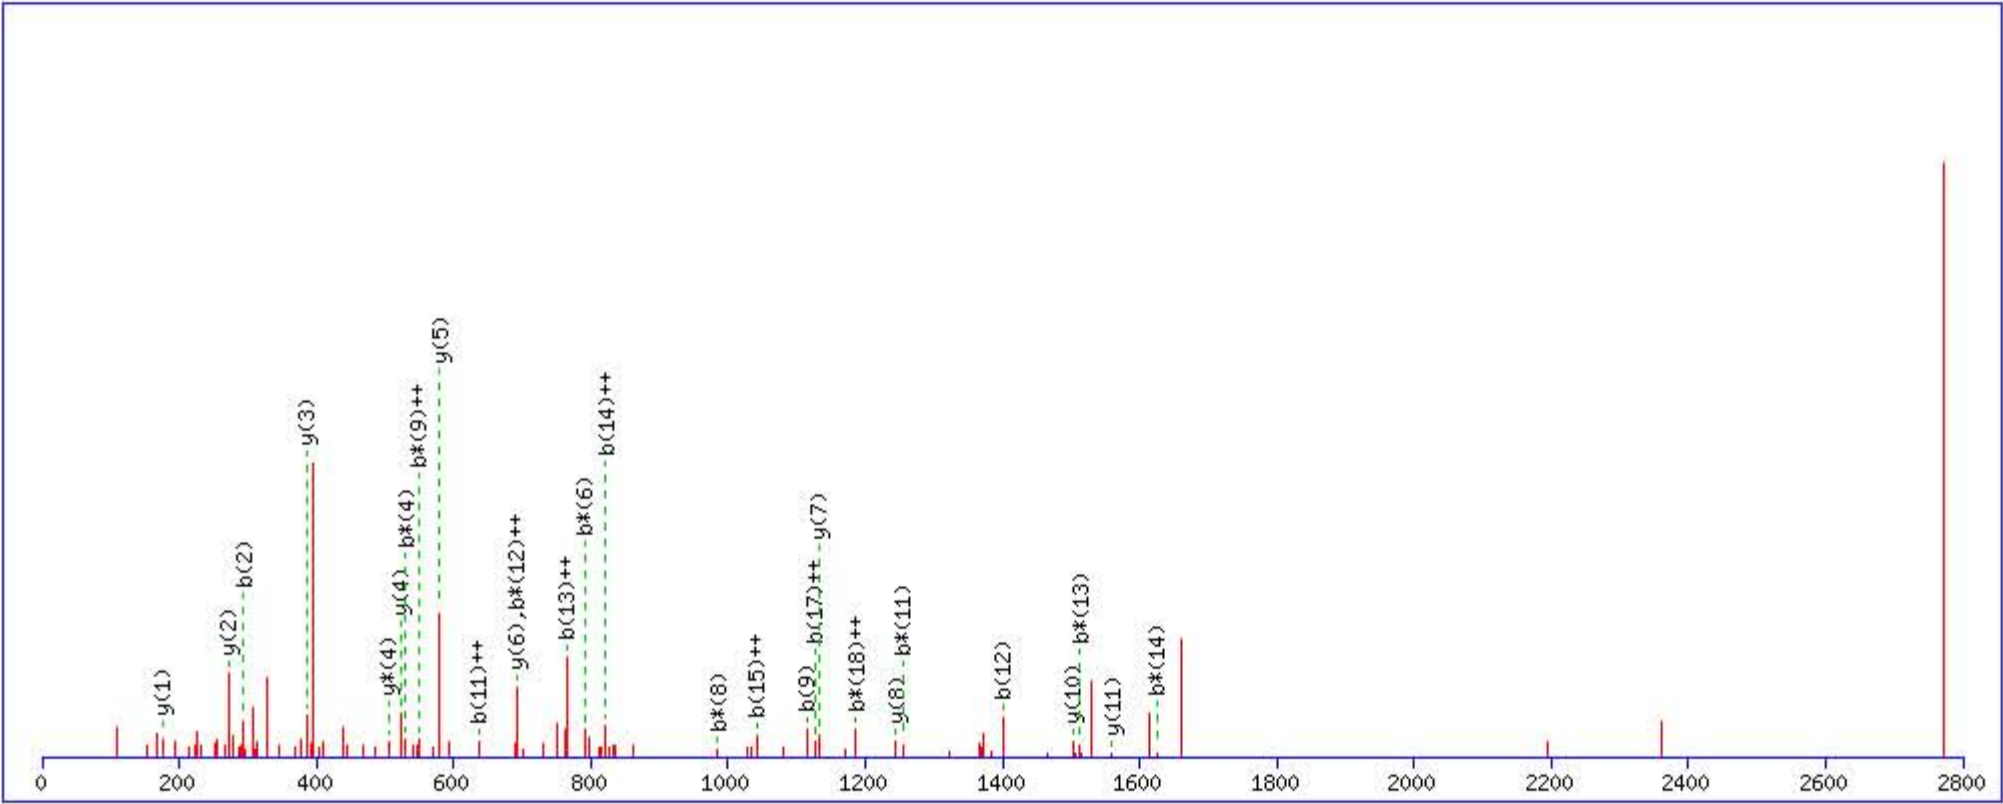

Monoisotopic mass of neutral peptide Mr(calc): 2772.475815  
Fixed modifications: Carbamidomethyl (C) (apply to specified residues or termini only)  
Variable modifications:  
Q15 : Biotin:Thermo-21345 (Q)  
Ions Score: 38 Expect: 0.0025  
Matches : 28/200 fragment ions using 60 most intense peaks [\(help\)](#)

| #  | b           | b <sup>++</sup> | b <sup>*</sup> | b <sup>*++</sup> | b <sup>0</sup> | b <sup>0++</sup> | Seq. | y           | y <sup>++</sup> | y <sup>*</sup> | y <sup>*++</sup> | y <sup>0</sup> | y <sup>0++</sup> | #  |
|----|-------------|-----------------|----------------|------------------|----------------|------------------|------|-------------|-----------------|----------------|------------------|----------------|------------------|----|
| 1  | 138.066188  | 69.536732       |                |                  |                |                  | H    |             |                 |                |                  |                |                  | 21 |
| 2  | 294.167299  | 147.587288      | 277.140750     | 139.074013       |                |                  | R    | 2636.424208 | 1318.715742     | 2619.397659    | 1310.202467      | 2618.413643    | 1309.710459      | 20 |
| 3  | 391.220063  | 196.113670      | 374.193514     | 187.600395       |                |                  | P    | 2480.323097 | 1240.665186     | 2463.296548    | 1232.151912      | 2462.312532    | 1231.659904      | 19 |
| 4  | 547.321174  | 274.164225      | 530.294625     | 265.650951       |                |                  | R    | 2383.270333 | 1192.138804     | 2366.243784    | 1183.625530      | 2365.259768    | 1183.133522      | 18 |
| 5  | 644.373938  | 322.690607      | 627.347389     | 314.177333       |                |                  | P    | 2227.169222 | 1114.088249     | 2210.142673    | 1105.574974      | 2209.158657    | 1105.082966      | 17 |
| 6  | 807.437267  | 404.222272      | 790.410718     | 395.708997       |                |                  | Y    | 2130.116458 | 1065.561867     | 2113.089909    | 1057.048592      | 2112.105893    | 1056.556584      | 16 |
| 7  | 904.490031  | 452.748654      | 887.463482     | 444.235379       |                |                  | P    | 1967.053129 | 984.030203      | 1950.026580    | 975.516928       | 1949.042564    | 975.024920       | 15 |
| 8  | 1001.542795 | 501.275036      | 984.516246     | 492.761761       |                |                  | P    | 1870.000365 | 935.503821      | 1852.973816    | 926.990546       | 1851.989800    | 926.498538       | 14 |
| 9  | 1115.585722 | 558.296499      | 1098.559173    | 549.783225       |                |                  | N    | 1772.947601 | 886.977439      | 1755.921052    | 878.464164       | 1754.937036    | 877.972156       | 13 |
| 10 | 1214.654136 | 607.830706      | 1197.627587    | 599.317432       |                |                  | V    | 1658.904674 | 829.955975      | 1641.878125    | 821.442701       | 1640.894109    | 820.950693       | 12 |
| 11 | 1271.675600 | 636.341438      | 1254.649051    | 627.828164       |                |                  | G    | 1559.836260 | 780.421768      | 1542.809711    | 771.908494       | 1541.825695    | 771.416486       | 11 |
| 12 | 1400.718193 | 700.862735      | 1383.691644    | 692.349460       | 1382.707628    | 691.857452       | E    | 1502.814796 | 751.911036      | 1485.788247    | 743.397762       | 1484.804231    | 742.905754       | 10 |
| 13 | 1529.760786 | 765.384031      | 1512.734237    | 756.870757       | 1511.750221    | 756.378749       | E    | 1373.772203 | 687.389740      | 1356.745654    | 678.876465       | 1355.761638    | 678.384457       | 9  |
| 14 | 1642.844850 | 821.926063      | 1625.818301    | 813.412789       | 1624.834285    | 812.920781       | I    | 1244.729610 | 622.868443      | 1227.703061    | 614.355169       |                |                  | 8  |
| 15 | 2082.070176 | 1041.538726     | 2065.043627    | 1033.025451      | 2064.059611    | 1032.533444      | Q    | 1131.645546 | 566.326411      | 1114.618997    | 557.813137       |                |                  | 7  |
| 16 | 2195.154240 | 1098.080758     | 2178.127691    | 1089.567484      | 2177.143675    | 1089.075476      | I    | 692.420220  | 346.713748      | 675.393671     | 338.200474       |                |                  | 6  |
| 17 | 2252.175704 | 1126.591490     | 2235.149155    | 1118.078215      | 2234.165139    | 1117.586208      | G    | 579.336156  | 290.171716      | 562.309607     | 281.658442       |                |                  | 5  |
| 18 | 2389.234616 | 1195.120946     | 2372.208067    | 1186.607671      | 2371.224051    | 1186.115664      | H    | 522.314692  | 261.660984      | 505.288143     | 253.147710       |                |                  | 4  |
| 19 | 2502.318680 | 1251.662978     | 2485.292131    | 1243.149704      | 2484.308115    | 1242.657696      | I    | 385.255780  | 193.131528      | 368.229231     | 184.618254       |                |                  | 3  |
| 20 | 2599.371444 | 1300.189360     | 2582.344895    | 1291.676086      | 2581.360879    | 1291.184078      | P    | 272.171716  | 136.589496      | 255.145167     | 128.076221       |                |                  | 2  |
| 21 |             |                 |                |                  |                |                  | R    | 175.118952  | 88.063114       | 158.092403     | 79.549839        |                |                  | 1  |

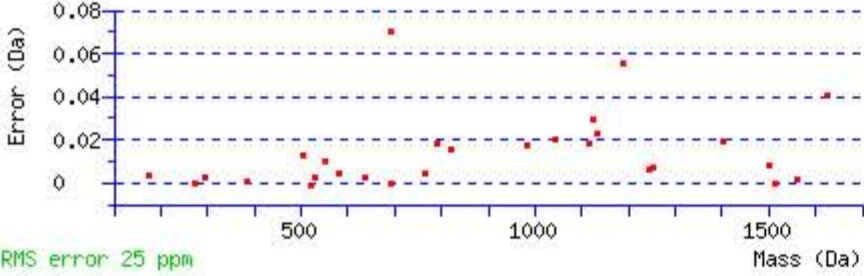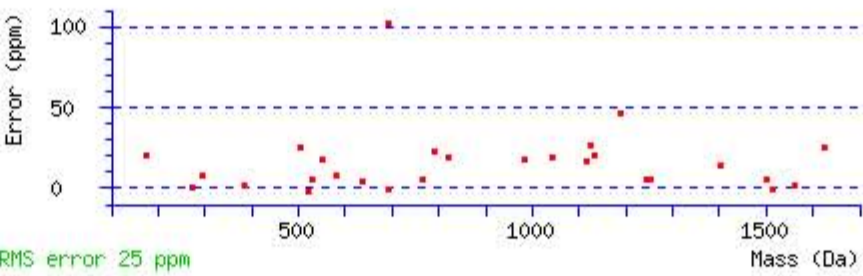

NCBI BLAST search of [HRPRPYPPNVGEEIQIGHIPR](#)  
(Parameters: blastp, nr protein database, expect=20000, no filter, PAM30)  
Other BLAST [web gateways](#)

All matches to this query

| Score | Mr(calc):   | Delta    | Sequence                              |
|-------|-------------|----------|---------------------------------------|
| 38.0  | 2772.475815 | 0.024481 | <a href="#">HRPRPYPPNVGEEIQIGHIPR</a> |

MATRIX

SCIENCE

Mascot Search Results

Peptide View

MS/MS Fragmentation of **RPGGEPSPGTTGQSYNQYSQR**  
Found in **FINC\_HUMAN**, Fibronectin OS=Homo sapiens GN=FN1 PE=1 SV=4

Match to Query 60239: 3017.446776 from(755.368970,4+) rtinseconds(1820) index(33046)  
Title: Locus:1.1.1.742.12 File:"2013-07-02 CLN FXIII 180 min 2nd F 3.wiff"  
Data file C:\Program Files (x86)\Matrix Science\Mascot Daemon\mgf\8 FXIII 180 min 2nd\mascot\_daemon\_merge.mgf

Click mouse within plot area to zoom in by factor of two about that point  
Or, 

Plot from

0

to

3000

Da

Full range

Label all possible matches

☐

Label matches used for scoring

☒

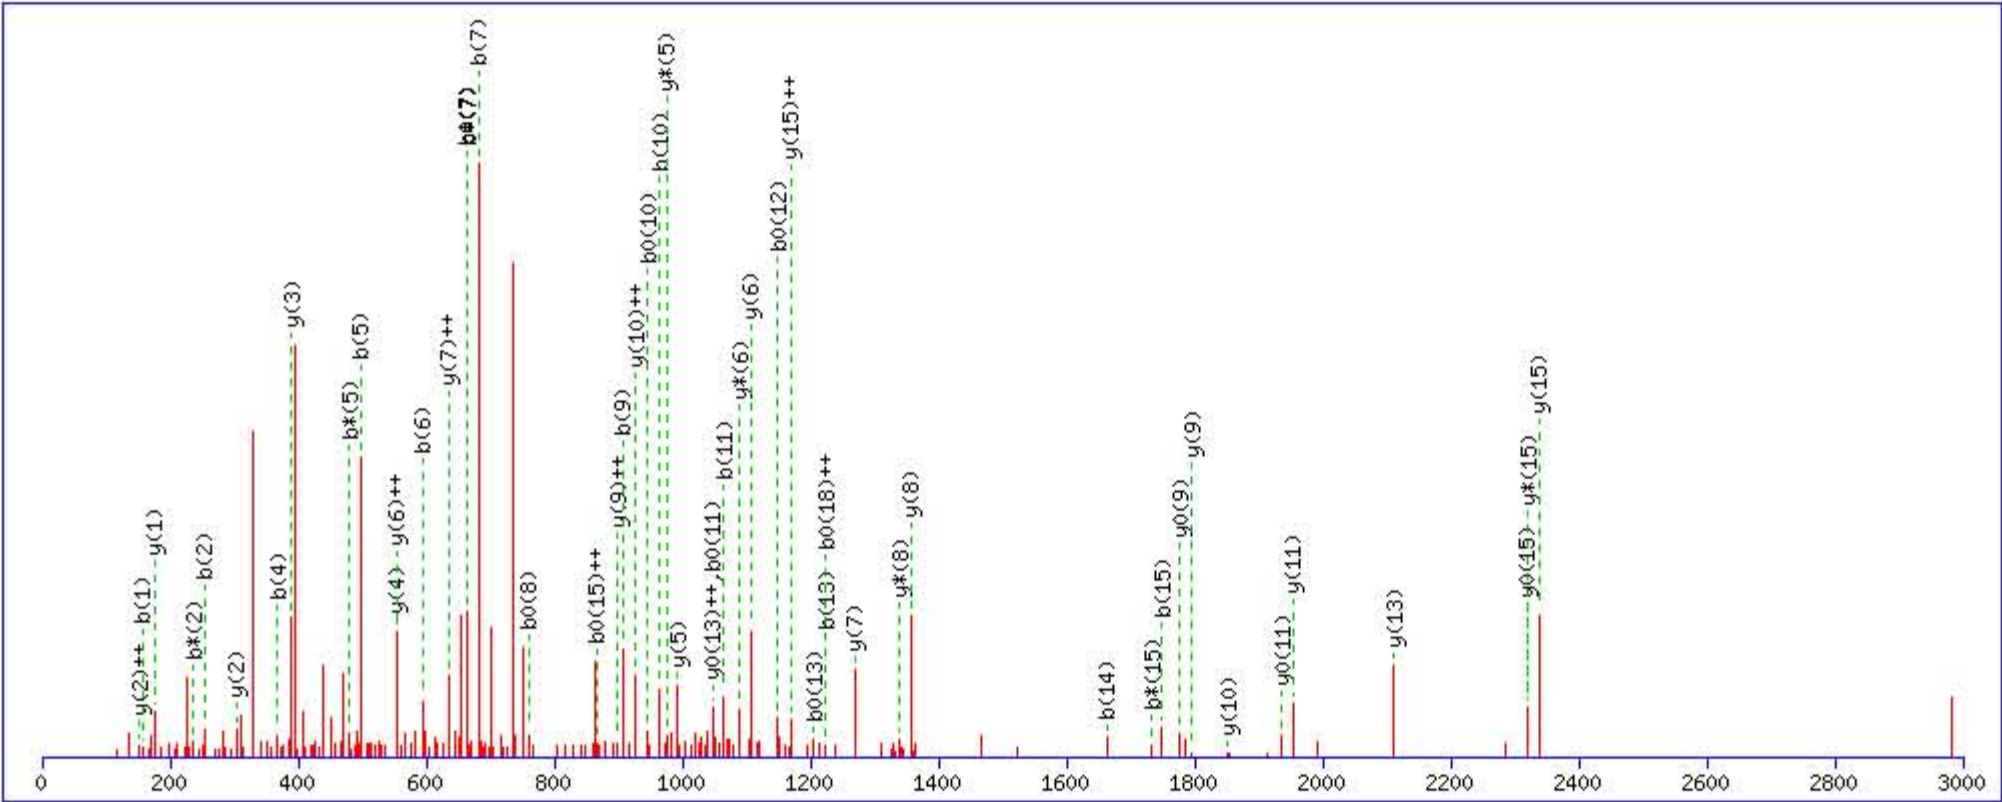

Monoisotopic mass of neutral peptide Mr(calc): 3017.412369  
Fixed modifications: Carbamidomethyl (C) (apply to specified residues or termini only)  
Variable modifications:  
Q14 : Biotin:Thermo-21345 (Q)  
Q18 : Biotin:Thermo-21345 (Q)  
Ions Score: 61 Expect: 1.6e-005  
Matches : 51/240 fragment ions using 114 most intense peaks [\(help\)](#)

| #  | b           | b <sup>++</sup> | b <sup>+</sup> | b <sup>++</sup> * | b <sup>0</sup> | b <sup>0++</sup> | Seq. | y           | y <sup>++</sup> | y <sup>+</sup> * | y <sup>++</sup> * | y <sup>0</sup> | y <sup>0++</sup> | #  |
|----|-------------|-----------------|----------------|-------------------|----------------|------------------|------|-------------|-----------------|------------------|-------------------|----------------|------------------|----|
| 1  | 157.108387  | 79.057831       | 140.081838     | 70.544557         |                |                  | R    |             |                 |                  |                   |                |                  | 22 |
| 2  | 254.161151  | 127.584213      | 237.134602     | 119.070939        |                |                  | P    | 2862.318543 | 1431.662909     | 2845.291994      | 1423.149635       | 2844.307978    | 1422.657627      | 21 |
| 3  | 311.182615  | 156.094945      | 294.156066     | 147.581671        |                |                  | G    | 2765.265779 | 1383.136527     | 2748.239230      | 1374.623253       | 2747.255214    | 1374.131245      | 20 |
| 4  | 368.204079  | 184.605677      | 351.177530     | 176.092403        |                |                  | G    | 2708.244315 | 1354.625795     | 2691.217766      | 1346.112521       | 2690.233750    | 1345.620513      | 19 |
| 5  | 497.246672  | 249.126974      | 480.220123     | 240.613700        | 479.236107     | 240.121692       | E    | 2651.222851 | 1326.115063     | 2634.196302      | 1317.601789       | 2633.212286    | 1317.109781      | 18 |
| 6  | 594.299436  | 297.653356      | 577.272887     | 289.140082        | 576.288871     | 288.648074       | P    | 2522.180258 | 1261.593767     | 2505.153709      | 1253.080492       | 2504.169693    | 1252.588484      | 17 |
| 7  | 681.331464  | 341.169370      | 664.304915     | 332.656095        | 663.320899     | 332.164087       | S    | 2425.127494 | 1213.067385     | 2408.100945      | 1204.554110       | 2407.116929    | 1204.062102      | 16 |
| 8  | 778.384228  | 389.695752      | 761.357679     | 381.182478        | 760.373663     | 380.690470       | P    | 2338.095466 | 1169.551371     | 2321.068917      | 1161.038096       | 2320.084901    | 1160.546088      | 15 |
| 9  | 907.426821  | 454.217049      | 890.400272     | 445.703774        | 889.416256     | 445.211766       | E    | 2241.042702 | 1121.024989     | 2224.016153      | 1112.511714       | 2223.032137    | 1112.019706      | 14 |
| 10 | 964.448285  | 482.727781      | 947.421736     | 474.214506        | 946.437720     | 473.722498       | G    | 2112.000109 | 1056.503692     | 2094.973560      | 1047.990418       | 2093.989544    | 1047.498410      | 13 |
| 11 | 1065.495964 | 533.251620      | 1048.469415    | 524.738346        | 1047.485399    | 524.246337       | T    | 2054.978645 | 1027.992960     | 2037.952096      | 1019.479686       | 2036.968080    | 1018.987678      | 12 |
| 12 | 1166.543643 | 583.775460      | 1149.517094    | 575.262185        | 1148.533078    | 574.770177       | T    | 1953.930966 | 977.469121      | 1936.904417      | 968.955847        | 1935.920401    | 968.463839       | 11 |
| 13 | 1223.565107 | 612.286191      | 1206.538558    | 603.772917        | 1205.554542    | 603.280909       | G    | 1852.883287 | 926.945282      | 1835.856738      | 918.432007        | 1834.872722    | 917.939999       | 10 |
| 14 | 1662.790433 | 831.898854      | 1645.763884    | 823.385580        | 1644.779868    | 822.893572       | Q    | 1795.861823 | 898.434550      | 1778.835274      | 889.921275        | 1777.851258    | 889.429267       | 9  |
| 15 | 1749.822461 | 875.414869      | 1732.795912    | 866.901594        | 1731.811896    | 866.409586       | S    | 1356.636497 | 678.821887      | 1339.609948      | 670.308612        | 1338.625932    | 669.816604       | 8  |
| 16 | 1912.885790 | 956.946533      | 1895.859241    | 948.433259        | 1894.875225    | 947.941251       | Y    | 1269.604469 | 635.305873      | 1252.577920      | 626.792598        | 1251.593904    | 626.300590       | 7  |
| 17 | 2026.928717 | 1013.967997     | 2009.902168    | 1005.454722       | 2008.918152    | 1004.962714      | N    | 1106.541140 | 553.774208      | 1089.514591      | 545.260934        | 1088.530575    | 544.768926       | 6  |
| 18 | 2466.154043 | 1233.580659     | 2449.127494    | 1225.067385       | 2448.143478    | 1224.575377      | Q    | 992.498213  | 496.752745      | 975.471664       | 488.239470        | 974.487648     | 487.747462       | 5  |
| 19 | 2629.217372 | 1315.112324     | 2612.190823    | 1306.599049       | 2611.206807    | 1306.107041      | Y    | 553.272887  | 277.140082      | 536.246338       | 268.626807        | 535.262322     | 268.134799       | 4  |
| 20 | 2716.249400 | 1358.628338     | 2699.222851    | 1350.115063       | 2698.238835    | 1349.623056      | S    | 390.209558  | 195.608417      | 373.183009       | 187.095143        | 372.198993     | 186.603135       | 3  |
| 21 | 2844.307978 | 1422.657627     | 2827.281429    | 1414.144353       | 2826.297413    | 1413.652345      | Q    | 303.177530  | 152.092403      | 286.150981       | 143.579129        |                |                  | 2  |
| 22 |             |                 |                |                   |                |                  | R    | 175.118952  | 88.063114       | 158.092403       | 79.549839         |                |                  | 1  |

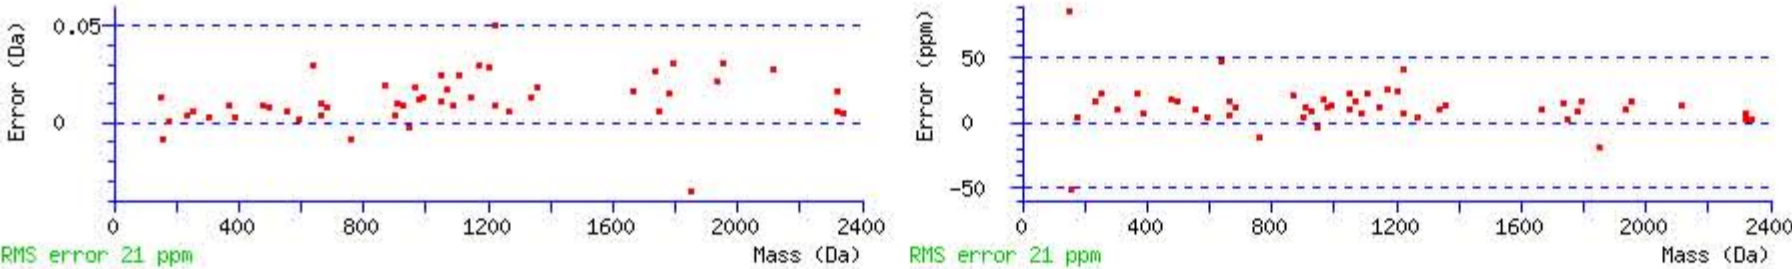

NCBI BLAST search of [RPGGEPSPGTTGQSYNQYSQR](#)  
(Parameters: blastp, nr protein database, expect=20000, no filter, PAM30)  
Other BLAST [web gateways](#)

All matches to this query

| Score | Mr(calc):   | Delta    | Sequence                              |
|-------|-------------|----------|---------------------------------------|
| 61.5  | 3017.412369 | 0.034407 | <a href="#">RPGGEPSPGTTGQSYNQYSQR</a> |
| 59.6  | 3017.412369 | 0.034407 | <a href="#">RPGGEPSPGTTGQSYNQYSQR</a> |
| 26.9  | 3017.412369 | 0.034407 | <a href="#">RPGGEPSPGTTGQSYNQYSQR</a> |

MATRIX

SCIENCE

Mascot Search Results

Peptide View

MS/MS Fragmentation of **TEIDKPSQMQVTDVQDNSISVK**  
Found in **FINC\_HUMAN**, Fibronectin OS=Homo sapiens GN=FN1 PE=1 SV=4

Match to Query 60759: 3083.578536 from(771.901910,4+) rtinseconds(2170) index(35288)  
Title: Locus:1.1.1.864.21 File:"2013-07-02 CLN FXIII 180 min 2nd F 3.wiff"  
Data file C:\Program Files (x86)\Matrix Science\Mascot Daemon\mgf\8 FXIII 180 min 2nd\mascot\_daemon\_merge.mgf

Click mouse within plot area to zoom in by factor of two about that point  
Or, 

Plot from

0

to

3800

Da

Full range

Label all possible matches

Label matches used for scoring

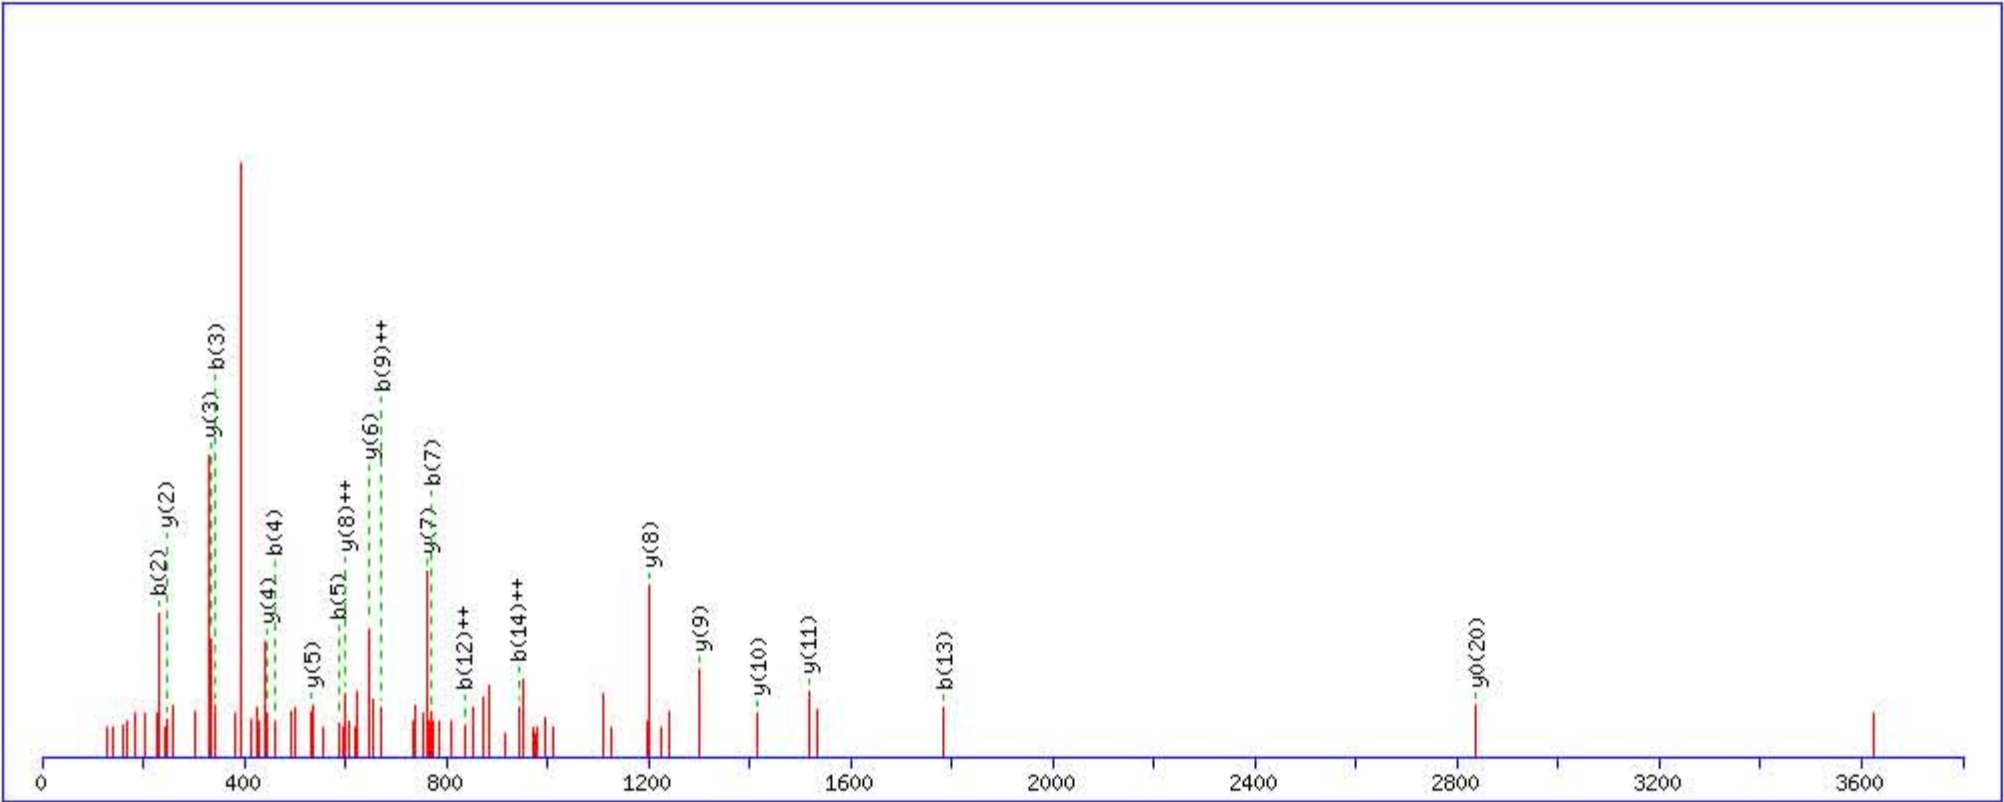

Monoisotopic mass of neutral peptide Mr(calc): 3083.534134  
Fixed modifications: Carbamidomethyl (C) (apply to specified residues or termini only)  
Variable modifications:  
Q8 : Biotin:Thermo-21345 (Q)  
Q15 : Biotin:Thermo-21345 (Q)  
Ions Score: 32 Expect: 0.016  
Matches : 21/240 fragment ions using 63 most intense peaks [\(help\)](#)

| #  | b           | b <sup>++</sup> | b <sup>+</sup> | b <sup>+++</sup> | b <sup>0</sup> | b <sup>0++</sup> | Seq. | y           | y <sup>++</sup> | y <sup>+</sup> | y <sup>+++</sup> | y <sup>0</sup> | y <sup>0++</sup> | #  |
|----|-------------|-----------------|----------------|------------------|----------------|------------------|------|-------------|-----------------|----------------|------------------|----------------|------------------|----|
| 1  | 102.054955  | 51.531116       |                |                  | 84.044390      | 42.525833        | T    |             |                 |                |                  |                |                  | 22 |
| 2  | 231.097548  | 116.052412      |                |                  | 213.086983     | 107.047130       | E    | 2983.493728 | 1492.250502     | 2966.467179    | 1483.737228      | 2965.483163    | 1483.245220      | 21 |
| 3  | 344.181612  | 172.594444      |                |                  | 326.171047     | 163.589162       | I    | 2854.451135 | 1427.729206     | 2837.424586    | 1419.215931      | 2836.440570    | 1418.723923      | 20 |
| 4  | 459.208555  | 230.107916      |                |                  | 441.197990     | 221.102633       | D    | 2741.367071 | 1371.187174     | 2724.340522    | 1362.673899      | 2723.356506    | 1362.181891      | 19 |
| 5  | 587.303518  | 294.155397      | 570.276969     | 285.642123       | 569.292953     | 285.150115       | K    | 2626.340128 | 1313.673702     | 2609.313579    | 1305.160428      | 2608.329563    | 1304.668420      | 18 |
| 6  | 684.356282  | 342.681779      | 667.329733     | 334.168505       | 666.345717     | 333.676497       | P    | 2498.245165 | 1249.626220     | 2481.218616    | 1241.112946      | 2480.234600    | 1240.620938      | 17 |
| 7  | 771.388310  | 386.197793      | 754.361761     | 377.684519       | 753.377745     | 377.192511       | S    | 2401.192401 | 1201.099838     | 2384.165852    | 1192.586564      | 2383.181836    | 1192.094556      | 16 |
| 8  | 1210.613636 | 605.810456      | 1193.587087    | 597.297182       | 1192.603071    | 596.805174       | Q    | 2314.160373 | 1157.583825     | 2297.133824    | 1149.070550      | 2296.149808    | 1148.578542      | 15 |
| 9  | 1341.654121 | 671.330699      | 1324.627572    | 662.817424       | 1323.643556    | 662.325416       | M    | 1874.935047 | 937.971162      | 1857.908498    | 929.457887       | 1856.924482    | 928.965879       | 14 |
| 10 | 1469.712699 | 735.359988      | 1452.686150    | 726.846713       | 1451.702134    | 726.354705       | Q    | 1743.894562 | 872.450919      | 1726.868013    | 863.937645       | 1725.883997    | 863.445637       | 13 |
| 11 | 1568.781113 | 784.894195      | 1551.754564    | 776.380920       | 1550.770548    | 775.888912       | V    | 1615.835984 | 808.421630      | 1598.809435    | 799.908356       | 1597.825419    | 799.416348       | 12 |
| 12 | 1669.828792 | 835.418034      | 1652.802243    | 826.904760       | 1651.818227    | 826.412752       | T    | 1516.767570 | 758.887423      | 1499.741021    | 750.374149       | 1498.757005    | 749.882141       | 11 |
| 13 | 1784.855735 | 892.931506      | 1767.829186    | 884.418231       | 1766.845170    | 883.926223       | D    | 1415.719891 | 708.363584      | 1398.693342    | 699.850309       | 1397.709326    | 699.358301       | 10 |
| 14 | 1883.924149 | 942.465713      | 1866.897600    | 933.952438       | 1865.913584    | 933.460430       | V    | 1300.692948 | 650.850112      | 1283.666399    | 642.336838       | 1282.682383    | 641.844830       | 9  |
| 15 | 2323.149475 | 1162.078376     | 2306.122926    | 1153.565101      | 2305.138910    | 1153.073093      | Q    | 1201.624534 | 601.315905      | 1184.597985    | 592.802631       | 1183.613969    | 592.310623       | 8  |
| 16 | 2438.176418 | 1219.591847     | 2421.149869    | 1211.078573      | 2420.165853    | 1210.586565      | D    | 762.399208  | 381.703242      | 745.372659     | 373.189968       | 744.388643     | 372.697960       | 7  |
| 17 | 2552.219345 | 1276.613311     | 2535.192796    | 1268.100036      | 2534.208780    | 1267.608028      | N    | 647.372265  | 324.189771      | 630.345716     | 315.676496       | 629.361700     | 315.184488       | 6  |
| 18 | 2639.251373 | 1320.129325     | 2622.224824    | 1311.616050      | 2621.240808    | 1311.124042      | S    | 533.329338  | 267.168307      | 516.302789     | 258.655033       | 515.318773     | 258.163025       | 5  |
| 19 | 2752.335437 | 1376.671357     | 2735.308888    | 1368.158082      | 2734.324872    | 1367.666074      | I    | 446.297310  | 223.652293      | 429.270761     | 215.139019       | 428.286745     | 214.647011       | 4  |
| 20 | 2839.367465 | 1420.187371     | 2822.340916    | 1411.674096      | 2821.356900    | 1411.182088      | S    | 333.213246  | 167.110261      | 316.186697     | 158.596986       | 315.202681     | 158.104978       | 3  |
| 21 | 2938.435879 | 1469.721578     | 2921.409330    | 1461.208303      | 2920.425314    | 1460.716295      | V    | 246.181218  | 123.594247      | 229.154669     | 115.080972       |                |                  | 2  |
| 22 |             |                 |                |                  |                |                  | K    | 147.112804  | 74.060040       | 130.086255     | 65.546765        |                |                  | 1  |

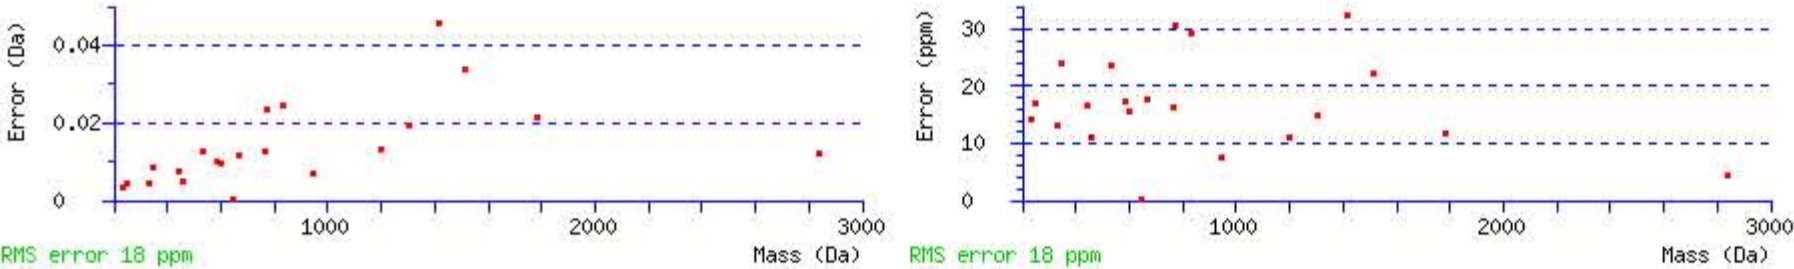

NCBI BLAST search of [TEIDKPSQMQVTDVQDNSISVK](#)  
(Parameters: blastp, nr protein database, expect=20000, no filter, PAM30)  
Other BLAST [web gateways](#)

All matches to this query

| Score | Mr(calc):   | Delta    | Sequence                               |
|-------|-------------|----------|----------------------------------------|
| 32.1  | 3083.534134 | 0.044402 | <a href="#">TEIDKPSQMQVTDVQDNSISVK</a> |
| 30.8  | 3083.534134 | 0.044402 | <a href="#">TEIDKPSQMQVTDVQDNSISVK</a> |
| 7.4   | 3083.534134 | 0.044402 | <a href="#">TEIDKPSQMQVTDVQDNSISVK</a> |

MATRIX

SCIENCE

Mascot Search Results

Peptide View

MS/MS Fragmentation of **KTDELPQLVTLPHPNLHGPEILDVPSTVQK**  
Found in **FINC\_HUMAN**, Fibronectin OS=Homo sapiens GN=FN1 PE=1 SV=4

Match to Query 66809: 3626.007820 from(726.208840,5+) rtinseconds(2471) index(36881)  
Title: Locus:1.1.1.969.8 File:"2013-07-02 CLN FXIII 180 min 2nd F 3.wiff"  
Data file C:\Program Files (x86)\Matrix Science\Mascot Daemon\mgf\8 FXIII 180 min 2nd\mascot\_daemon\_merge.mgf

Click mouse within plot area to zoom in by factor of two about that point

Or, 

Plot from

0

 to 

2600

 Da 

Full range

Label all possible matches ☐ Label matches used for scoring ☒

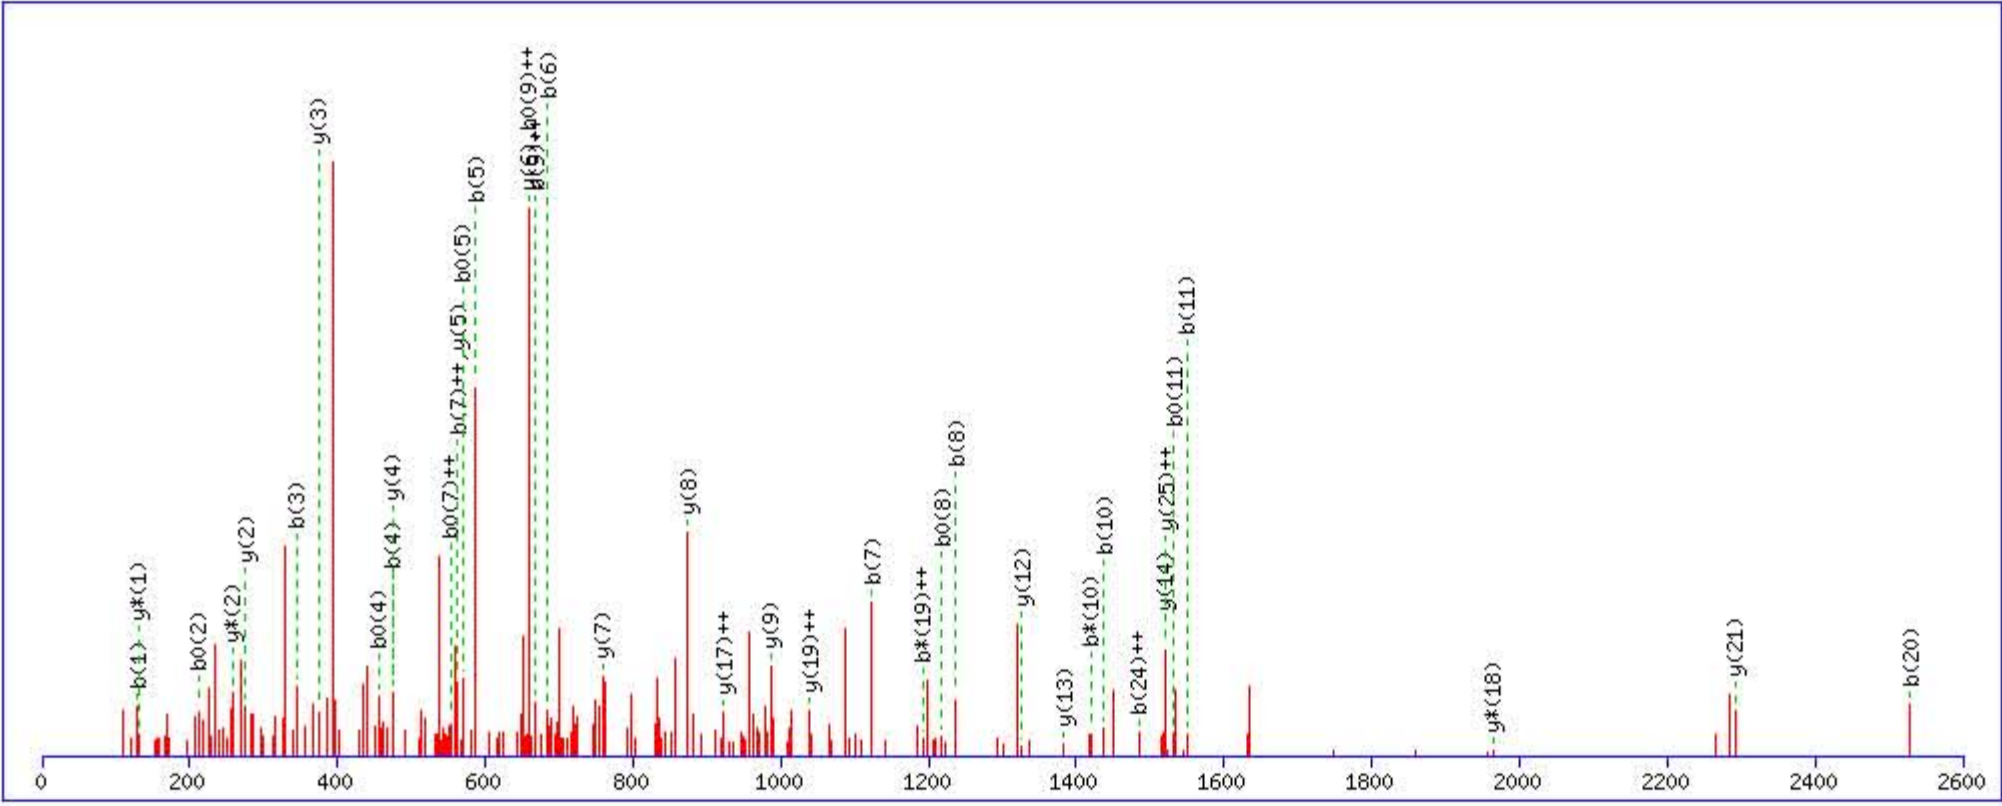

Monoisotopic mass of neutral peptide Mr(calc): 3625.954193  
Fixed modifications: Carbamidomethyl (C) (apply to specified residues or termini only)  
Variable modifications:  
Q7 : Biotin:Thermo-21345 (Q)  
Ions Score: 40 Expect: 0.0004  
Matches : 40/340 fragment ions using 123 most intense peaks [\(help\)](#)

| #  | b                  | b <sup>++</sup>    | b <sup>*</sup>     | b <sup>*++</sup>   | b <sup>0</sup>     | b <sup>0++</sup>  | Seq.     | y                  | y <sup>++</sup>    | y <sup>*</sup>     | y <sup>*++</sup> | y <sup>0</sup> | y <sup>0++</sup> | #  |
|----|--------------------|--------------------|--------------------|--------------------|--------------------|-------------------|----------|--------------------|--------------------|--------------------|------------------|----------------|------------------|----|
| 1  | <b>129.102239</b>  | 65.054757          | 112.075690         | 56.541483          |                    |                   | <b>K</b> |                    |                    |                    |                  |                |                  | 30 |
| 2  | 230.149918         | 115.578597         | 213.123369         | 107.065323         | <b>212.139353</b>  | 106.573315        | <b>T</b> | 3498.866506        | 1749.936891        | 3481.839957        | 1741.423616      | 3480.855941    | 1740.931608      | 29 |
| 3  | <b>345.176861</b>  | 173.092069         | 328.150312         | 164.578794         | 327.166296         | 164.086786        | <b>D</b> | 3397.818827        | 1699.413051        | 3380.792278        | 1690.899777      | 3379.808262    | 1690.407769      | 28 |
| 4  | <b>474.219454</b>  | 237.613365         | 457.192905         | 229.100091         | <b>456.208889</b>  | 228.608083        | <b>E</b> | 3282.791884        | 1641.899580        | 3265.765335        | 1633.386305      | 3264.781319    | 1632.894297      | 27 |
| 5  | <b>587.303518</b>  | 294.155397         | 570.276969         | 285.642123         | <b>569.292953</b>  | 285.150115        | <b>L</b> | 3153.749291        | 1577.378283        | 3136.722742        | 1568.865009      | 3135.738726    | 1568.373001      | 26 |
| 6  | <b>684.356282</b>  | 342.681779         | 667.329733         | 334.168505         | 666.345717         | 333.676497        | <b>P</b> | 3040.665227        | <b>1520.836251</b> | 3023.638678        | 1512.322977      | 3022.654662    | 1511.830969      | 25 |
| 7  | <b>1123.581608</b> | <b>562.294442</b>  | 1106.555059        | 553.781168         | 1105.571043        | <b>553.289160</b> | <b>Q</b> | 2943.612463        | 1472.309869        | 2926.585914        | 1463.796595      | 2925.601898    | 1463.304587      | 24 |
| 8  | <b>1236.665672</b> | 618.836474         | 1219.639123        | 610.323200         | <b>1218.655107</b> | 609.831192        | <b>L</b> | 2504.387137        | 1252.697206        | 2487.360588        | 1244.183932      | 2486.376572    | 1243.691924      | 23 |
| 9  | 1335.734086        | <b>668.370681</b>  | 1318.707537        | 659.857407         | 1317.723521        | <b>659.365399</b> | <b>V</b> | 2391.303073        | 1196.155174        | 2374.276524        | 1187.641900      | 2373.292508    | 1187.149892      | 22 |
| 10 | <b>1436.781765</b> | 718.894521         | <b>1419.755216</b> | 710.381246         | 1418.771200        | 709.889238        | <b>T</b> | <b>2292.234659</b> | 1146.620967        | 2275.208110        | 1138.107693      | 2274.224094    | 1137.615685      | 21 |
| 11 | <b>1549.865829</b> | 775.436553         | 1532.839280        | 766.923278         | <b>1531.855264</b> | 766.431270        | <b>L</b> | 2191.186980        | 1096.097128        | 2174.160431        | 1087.583853      | 2173.176415    | 1087.091845      | 20 |
| 12 | 1646.918593        | 823.962935         | 1629.892044        | 815.449660         | 1628.908028        | 814.957652        | <b>P</b> | 2078.102916        | <b>1039.555096</b> | 2061.076367        | 1031.041821      | 2060.092351    | 1030.549813      | 19 |
| 13 | 1783.977505        | 892.492391         | 1766.950956        | 883.979116         | 1765.966940        | 883.487108        | <b>H</b> | 1981.050152        | 991.028714         | <b>1964.023603</b> | 982.515440       | 1963.039587    | 982.023432       | 18 |
| 14 | 1881.030269        | 941.018773         | 1864.003720        | 932.505498         | 1863.019704        | 932.013490        | <b>P</b> | 1843.991240        | <b>922.499258</b>  | 1826.964691        | 913.985984       | 1825.980675    | 913.493976       | 17 |
| 15 | 1995.073196        | 998.040236         | 1978.046647        | 989.526962         | 1977.062631        | 989.034954        | <b>N</b> | 1746.938476        | 873.972876         | 1729.911927        | 865.459602       | 1728.927911    | 864.967594       | 16 |
| 16 | 2108.157260        | 1054.582268        | 2091.130711        | 1046.068993        | 2090.146695        | 1045.576985       | <b>L</b> | 1632.895549        | 816.951413         | 1615.869000        | 808.438138       | 1614.884984    | 807.946130       | 15 |
| 17 | 2245.216172        | 1123.111724        | 2228.189623        | 1114.598449        | 2227.205607        | 1114.106441       | <b>H</b> | <b>1519.811485</b> | 760.409381         | 1502.784936        | 751.896106       | 1501.800920    | 751.404098       | 14 |
| 18 | 2302.237636        | 1151.622456        | 2285.211087        | 1143.109181        | 2284.227071        | 1142.617173       | <b>G</b> | <b>1382.752573</b> | 691.879925         | 1365.726024        | 683.366650       | 1364.742008    | 682.874642       | 13 |
| 19 | 2399.290400        | 1200.148838        | 2382.263851        | <b>1191.635563</b> | 2381.279835        | 1191.143555       | <b>P</b> | <b>1325.731109</b> | 663.369193         | 1308.704560        | 654.855918       | 1307.720544    | 654.363910       | 12 |
| 20 | <b>2528.332993</b> | 1264.670134        | 2511.306444        | 1256.156860        | 2510.322428        | 1255.664852       | <b>E</b> | 1228.678345        | 614.842811         | 1211.651796        | 606.329536       | 1210.667780    | 605.837528       | 11 |
| 21 | 2641.417057        | 1321.212167        | 2624.390508        | 1312.698892        | 2623.406492        | 1312.206884       | <b>I</b> | 1099.635752        | 550.321514         | 1082.609203        | 541.808240       | 1081.625187    | 541.316231       | 10 |
| 22 | 2754.501121        | 1377.754199        | 2737.474572        | 1369.240924        | 2736.490556        | 1368.748916       | <b>L</b> | <b>986.551688</b>  | 493.779482         | 969.525139         | 485.266207       | 968.541123     | 484.774199       | 9  |
| 23 | 2869.528064        | 1435.267670        | 2852.501515        | 1426.754395        | 2851.517499        | 1426.262387       | <b>D</b> | <b>873.467624</b>  | 437.237450         | 856.441075         | 428.724175       | 855.457059     | 428.232167       | 8  |
| 24 | 2968.596478        | <b>1484.801877</b> | 2951.569929        | 1476.288602        | 2950.585913        | 1475.796594       | <b>V</b> | <b>758.440681</b>  | 379.723978         | 741.414132         | 371.210704       | 740.430116     | 370.718696       | 7  |
| 25 | 3065.649242        | 1533.328259        | 3048.622693        | 1524.814984        | 3047.638677        | 1524.322976       | <b>P</b> | <b>659.372267</b>  | 330.189772         | 642.345718         | 321.676497       | 641.361702     | 321.184489       | 6  |
| 26 | 3152.681270        | 1576.844273        | 3135.654721        | 1568.330998        | 3134.670705        | 1567.838990       | <b>S</b> | <b>562.319503</b>  | 281.663389         | 545.292954         | 273.150115       | 544.308938     | 272.658107       | 5  |
| 27 | 3253.728949        | 1627.368112        | 3236.702400        | 1618.854838        | 3235.718384        | 1618.362830       | <b>T</b> | <b>475.287475</b>  | 238.147375         | 458.260926         | 229.634101       | 457.276910     | 229.142093       | 4  |
| 28 | 3352.797363        | 1676.902319        | 3335.770814        | 1668.389045        | 3334.786798        | 1667.897037       | <b>V</b> | <b>374.239796</b>  | 187.623536         | 357.213247         | 179.110261       |                |                  | 3  |
| 29 | 3480.855941        | 1740.931608        | 3463.829392        | 1732.418334        | 3462.845376        | 1731.926326       | <b>Q</b> | <b>275.171382</b>  | 138.089329         | <b>258.144833</b>  | 129.576055       |                |                  | 2  |
| 30 |                    |                    |                    |                    |                    |                   | <b>K</b> | 147.112804         | 74.060040          | <b>130.086255</b>  | 65.546765        |                |                  | 1  |

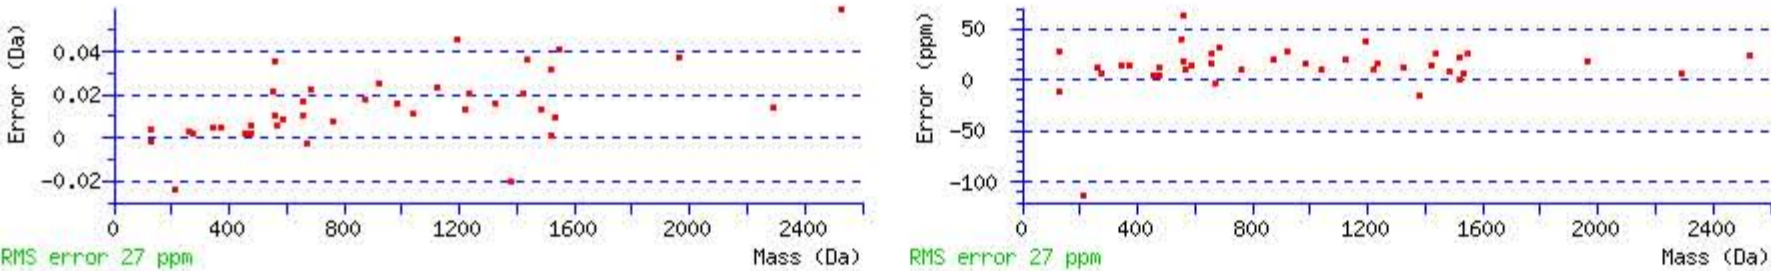

NCBI BLAST search of **KTDELPQLVTLPHPNLHGPEILDVPSTVQK**  
(Parameters: blastp, nr protein database, expect=20000, no filter, PAM30)  
Other BLAST [web gateways](#)

All matches to this query

| Score | Mr(calc):   | Delta    | Sequence                                       |
|-------|-------------|----------|------------------------------------------------|
| 40.3  | 3625.954193 | 0.053627 | <a href="#">KTDELPQLVTLPHPNLHGPEILDVPSTVQK</a> |

Mascot: <http://www.matrixscience.com/>

MATRIX

SCIENCE

Mascot Search Results

Peptide View

MS/MS Fragmentation of **SAATLQQEK**  
Found in **FBLN1\_HUMAN**, Fibulin-1 OS=Homo sapiens GN=FBLN1 PE=1 SV=4

Match to Query 23030: 1285.678528 from(643.846540,2+) rtinseconds(1510) index(47025)  
Title: Locus:1.1.1.1763.11 File:"2013-07-02 CLN FXIII 180 min 2nd F 4.wiff"  
Data file C:\Program Files (x86)\Matrix Science\Mascot Daemon\mgf\8 FXIII 180 min 2nd\mascot\_daemon\_merge.mgf

Click mouse within plot area to zoom in by factor of two about that point  
Or, 

Plot from

100

 to 

1600

 Da 

Full range

  
Label all possible matches ☐ Label matches used for scoring ☒

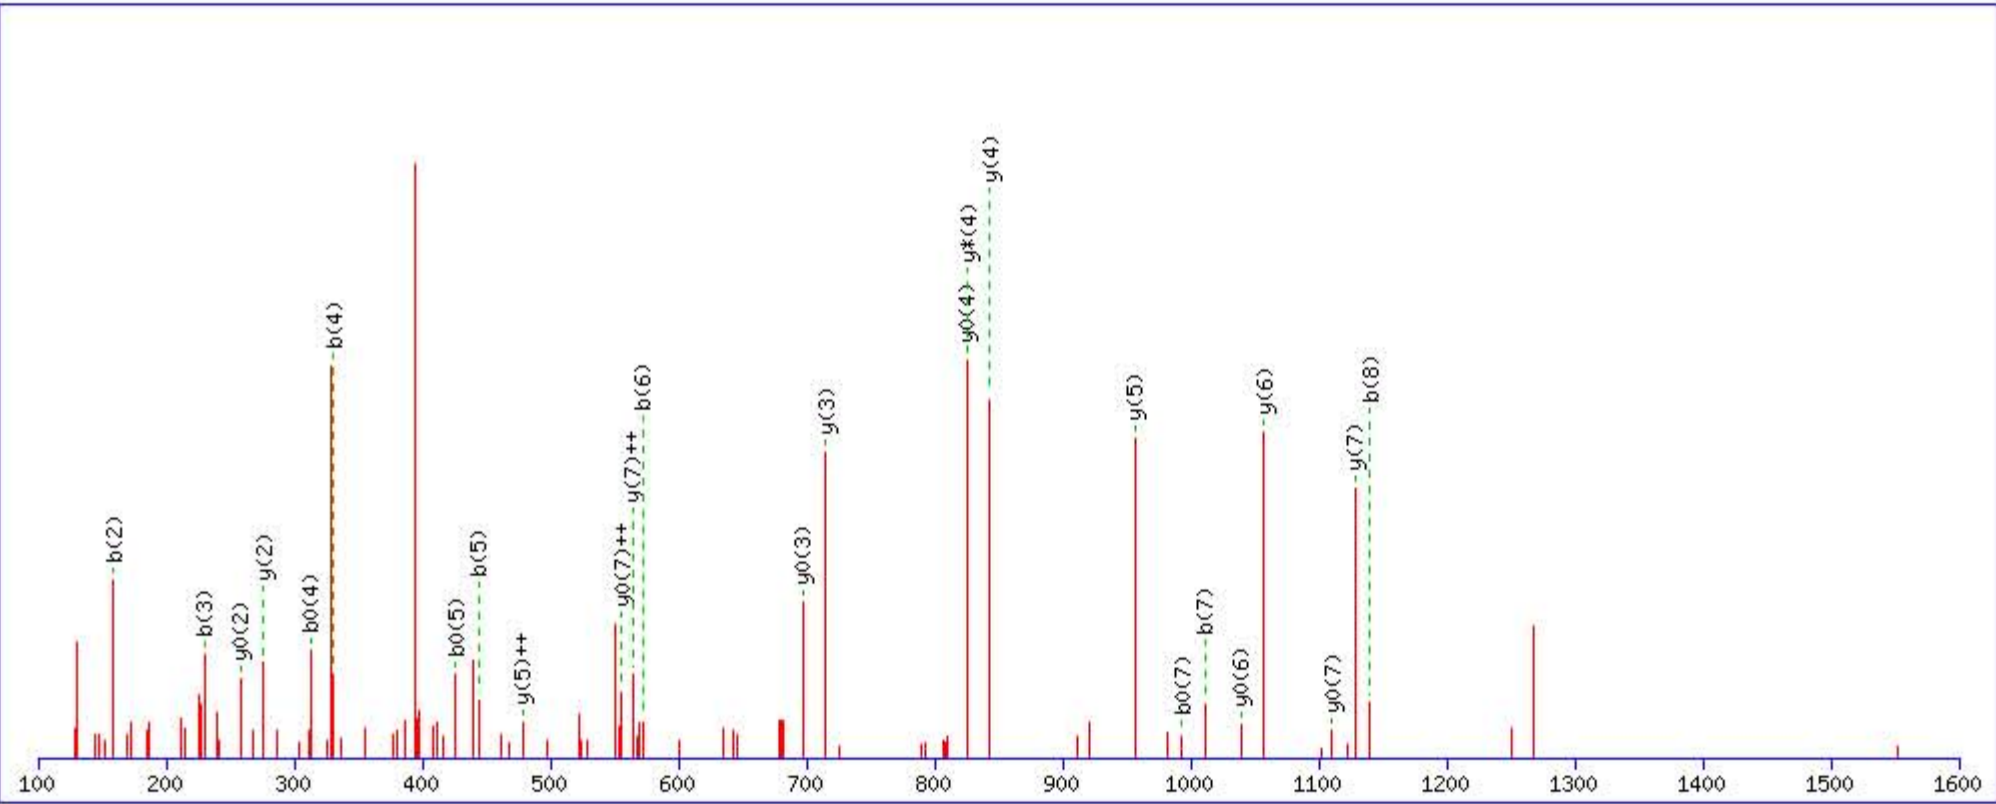

Monoisotopic mass of neutral peptide Mr(calc): 1285.669998  
Fixed modifications: Carbamidomethyl (C) (apply to specified residues or termini only)  
Variable modifications:  
Q7 : Biotin:Thermo-21345 (Q)  
Ions Score: 44 Expect: 0.00043  
Matches : 25/84 fragment ions using 42 most intense peaks [\(help\)](#)

| # | b           | b <sup>++</sup> | b <sup>*</sup> | b <sup>*++</sup> | b <sup>0</sup> | b <sup>0++</sup> | Seq. | y           | y <sup>++</sup> | y <sup>*</sup> | y <sup>*++</sup> | y <sup>0</sup> | y <sup>0++</sup> | # |
|---|-------------|-----------------|----------------|------------------|----------------|------------------|------|-------------|-----------------|----------------|------------------|----------------|------------------|---|
| 1 | 88.039304   | 44.523290       |                |                  | 70.028739      | 35.518008        | S    |             |                 |                |                  |                |                  | 9 |
| 2 | 159.076418  | 80.041847       |                |                  | 141.065853     | 71.036564        | A    | 1199.645272 | 600.326274      | 1182.618723    | 591.813000       | 1181.634707    | 591.320991       | 8 |
| 3 | 230.113532  | 115.560404      |                |                  | 212.102967     | 106.555121       | A    | 1128.608158 | 564.807717      | 1111.581609    | 556.294443       | 1110.597593    | 555.802435       | 7 |
| 4 | 331.161211  | 166.084243      |                |                  | 313.150646     | 157.078961       | T    | 1057.571044 | 529.289160      | 1040.544495    | 520.775886       | 1039.560479    | 520.283878       | 6 |
| 5 | 444.245275  | 222.626275      |                |                  | 426.234710     | 213.620993       | L    | 956.523365  | 478.765321      | 939.496816     | 470.252046       | 938.512800     | 469.760038       | 5 |
| 6 | 572.303853  | 286.655565      | 555.277304     | 278.142290       | 554.293288     | 277.650282       | Q    | 843.439301  | 422.223289      | 826.412752     | 413.710014       | 825.428736     | 413.218006       | 4 |
| 7 | 1011.529179 | 506.268228      | 994.502630     | 497.754953       | 993.518614     | 497.262945       | Q    | 715.380723  | 358.194000      | 698.354174     | 349.680725       | 697.370158     | 349.188717       | 3 |
| 8 | 1140.571772 | 570.789524      | 1123.545223    | 562.276250       | 1122.561207    | 561.784242       | E    | 276.155397  | 138.581336      | 259.128848     | 130.068062       | 258.144832     | 129.576054       | 2 |
| 9 |             |                 |                |                  |                |                  | K    | 147.112804  | 74.060040       | 130.086255     | 65.546765        |                |                  | 1 |

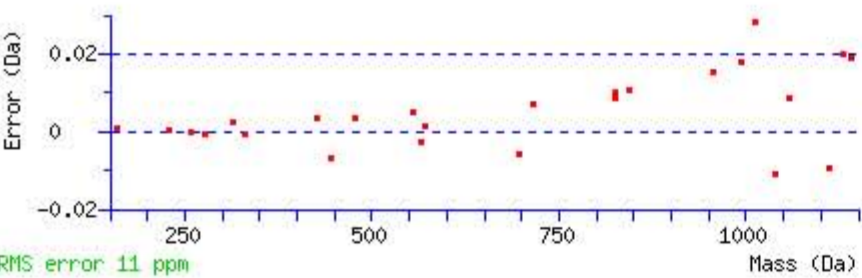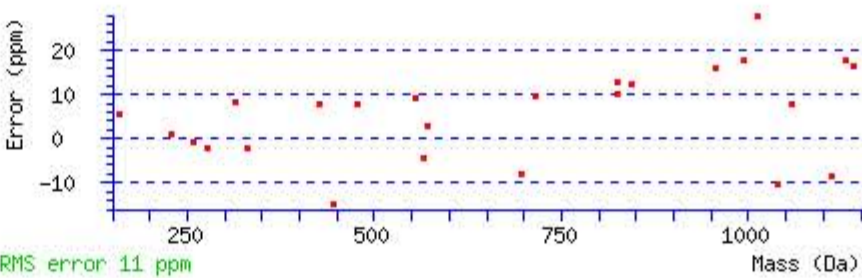

NCBI BLAST search of [SAATLQQEK](#)  
(Parameters: blastp, nr protein database, expect=20000, no filter, PAM30)  
Other BLAST [web gateways](#)

All matches to this query

| Score | Mr(calc):   | Delta     | Sequence                    |
|-------|-------------|-----------|-----------------------------|
| 43.8  | 1285.669998 | 0.008530  | <a href="#">SAATLQQEK</a>   |
| 31.2  | 1285.669998 | 0.008530  | <a href="#">SAATLQQEK</a>   |
| 7.4   | 1285.688614 | -0.010086 | <a href="#">SMANQLLAK</a>   |
| 6.9   | 1285.669998 | 0.008530  | <a href="#">ASLDQGKEK</a>   |
| 5.5   | 1285.670013 | 0.008515  | <a href="#">QLQETQTK</a>    |
| 3.5   | 1285.688614 | -0.010086 | <a href="#">QKEIQAMK</a>    |
| 2.9   | 1285.671326 | 0.007202  | <a href="#">MRRLANTAPAW</a> |
| 2.1   | 1285.662598 | 0.015930  | <a href="#">EARSQVKPEK</a>  |
| 1.6   | 1285.670013 | 0.008515  | <a href="#">QLQETQTK</a>    |
| 1.6   | 1285.669998 | 0.008530  | <a href="#">KQEEVQK</a>     |

MATRIX

SCIENCE

Mascot Search Results

Peptide View

MS/MS Fragmentation of **MCVDVNECQR**  
Found in **FBLN1\_HUMAN**, Fibulin-1 OS=Homo sapiens GN=FBLN1 PE=1 SV=4

Match to Query 35494: 1620.690342 from(541.237390,3+) rtinseconds(1724) index(48434)  
Title: Locus:1.1.1.1838.8 File:"2013-07-02 CLN FXIII 180 min 2nd F 4.wiff"  
Data file C:\Program Files (x86)\Matrix Science\Mascot Daemon\mgf\8 FXIII 180 min 2nd\mascot\_daemon\_merge.mgf

Click mouse within plot area to zoom in by factor of two about that point  
Or, 

Plot from

100

 to 

1300

 Da 

Full range

  
Label all possible matches ☐ Label matches used for scoring ☒

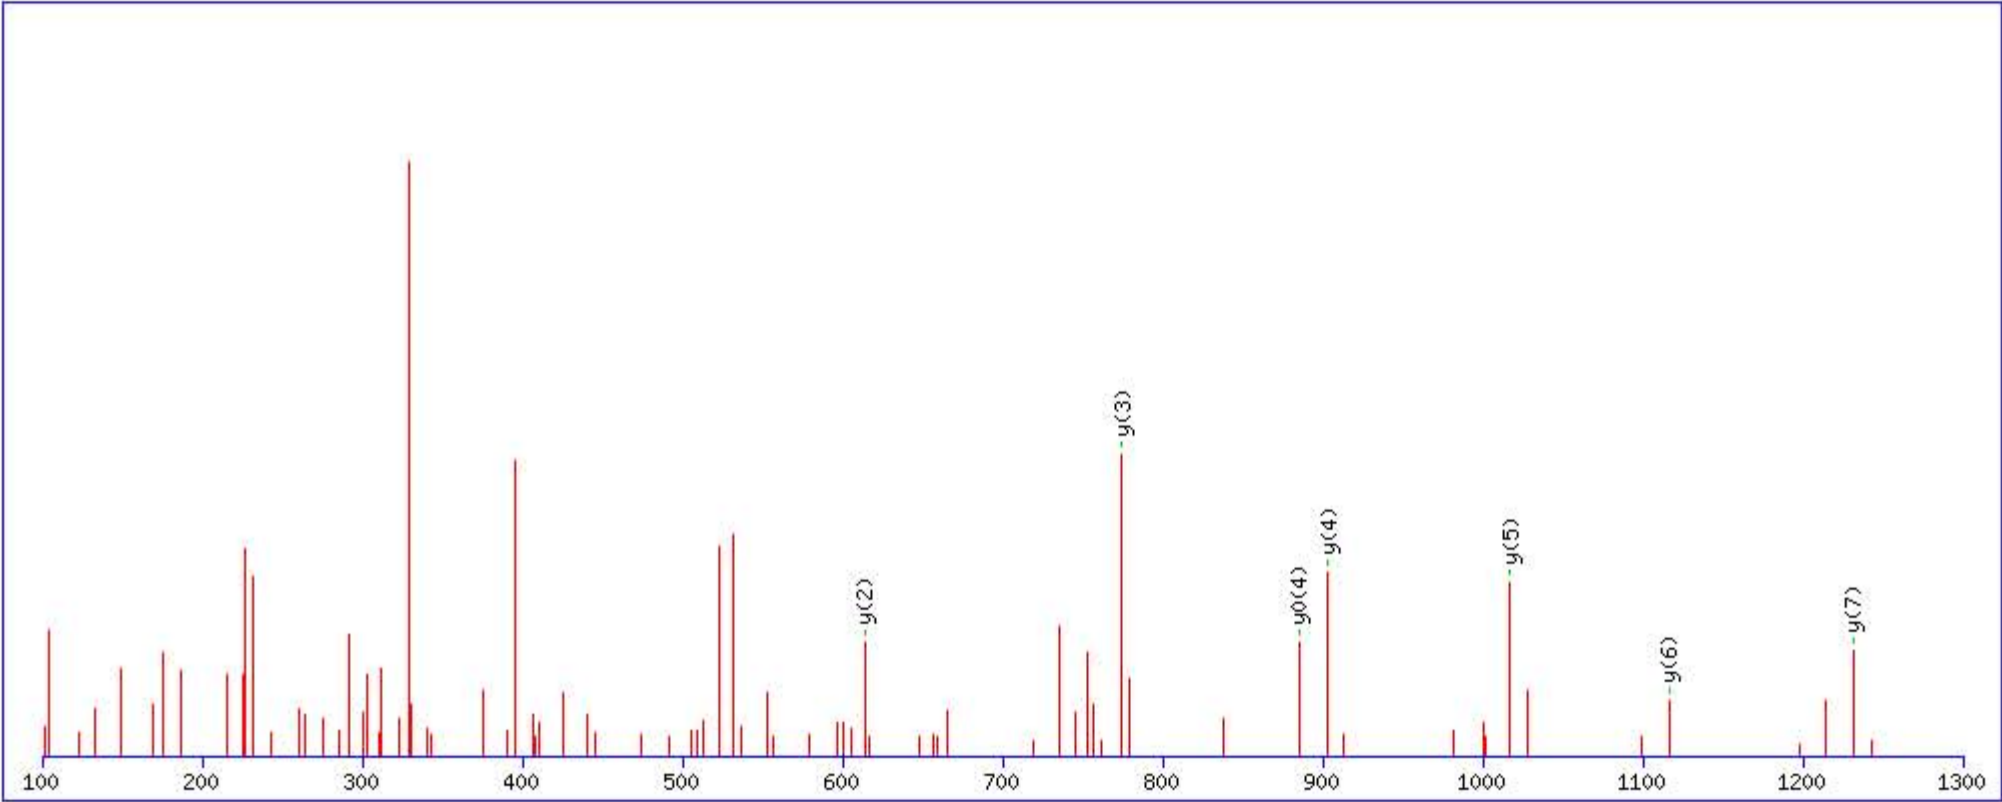

Monoisotopic mass of neutral peptide Mr(calc): 1620.688080  
Fixed modifications: Carbamidomethyl (C) (apply to specified residues or termini only)  
Variable modifications:  
Q9 : Biotin:Thermo-21345 (Q)  
Ions Score: 34 Expect: 0.0017  
Matches : 7/86 fragment ions using 12 most intense peaks [\(help\)](#)

| #  | b           | b <sup>++</sup> | b <sup>*</sup> | b <sup>+++</sup> | b <sup>0</sup> | b <sup>0++</sup> | Seq. | y           | y <sup>++</sup> | y <sup>*</sup> | y <sup>+++</sup> | y <sup>0</sup> | y <sup>0++</sup> | #  |
|----|-------------|-----------------|----------------|------------------|----------------|------------------|------|-------------|-----------------|----------------|------------------|----------------|------------------|----|
| 1  | 132.047761  | 66.527518       |                |                  |                |                  | M    |             |                 |                |                  |                |                  | 10 |
| 2  | 292.078410  | 146.542843      |                |                  |                |                  | C    | 1490.654867 | 745.831072      | 1473.628318    | 737.317797       | 1472.644302    | 736.825789       | 9  |
| 3  | 391.146824  | 196.077050      |                |                  |                |                  | V    | 1330.624218 | 665.815747      | 1313.597669    | 657.302473       | 1312.613653    | 656.810464       | 8  |
| 4  | 506.173767  | 253.590522      |                |                  | 488.163202     | 244.585239       | D    | 1231.555804 | 616.281540      | 1214.529255    | 607.768265       | 1213.545239    | 607.276257       | 7  |
| 5  | 605.242181  | 303.124729      |                |                  | 587.231616     | 294.119446       | V    | 1116.528861 | 558.768069      | 1099.502312    | 550.254794       | 1098.518296    | 549.762786       | 6  |
| 6  | 719.285108  | 360.146192      | 702.258559     | 351.632918       | 701.274543     | 351.140910       | N    | 1017.460447 | 509.233861      | 1000.433898    | 500.720587       | 999.449882     | 500.228579       | 5  |
| 7  | 848.327701  | 424.667489      | 831.301152     | 416.154214       | 830.317136     | 415.662206       | E    | 903.417520  | 452.212398      | 886.390971     | 443.699123       | 885.406955     | 443.207115       | 4  |
| 8  | 1008.358350 | 504.682813      | 991.331801     | 496.169539       | 990.347785     | 495.677531       | C    | 774.374927  | 387.691102      | 757.348378     | 379.177827       |                |                  | 3  |
| 9  | 1447.583676 | 724.295476      | 1430.557127    | 715.782202       | 1429.573111    | 715.290193       | Q    | 614.344278  | 307.675777      | 597.317729     | 299.162502       |                |                  | 2  |
| 10 |             |                 |                |                  |                |                  | R    | 175.118952  | 88.063114       | 158.092403     | 79.549839        |                |                  | 1  |

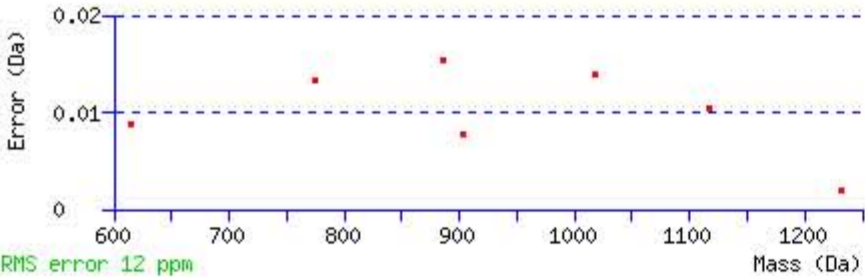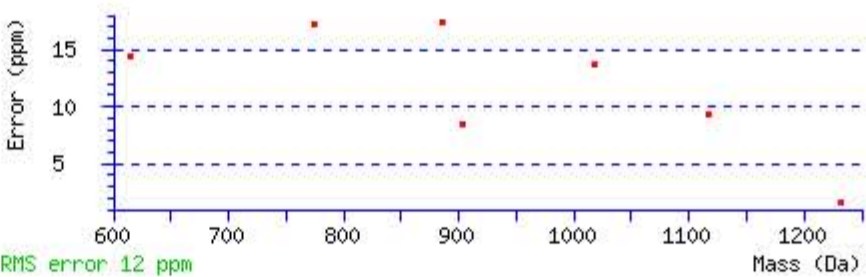

NCBI BLAST search of [MCVDVNECQR](#)  
(Parameters: blastp, nr protein database, expect=20000, no filter, PAM30)  
Other BLAST [web gateways](#)

All matches to this query

| Score | Mr(calc):   | Delta    | Sequence                   |
|-------|-------------|----------|----------------------------|
| 34.2  | 1620.688080 | 0.002262 | <a href="#">MCVDVNECQR</a> |

MATRIX

SCIENCE

Mascot Search Results

Peptide View

MS/MS Fragmentation of **AITPPHPASQANIIFDITEGNLR**  
Found in **FBLN1\_HUMAN**, Fibulin-1 OS=Homo sapiens GN=FBLN1 PE=1 SV=4

Match to Query 57343: 2785.491696 from(697.380200,4+) rtinseconds(2710) index(54778)  
Title: Locus:1.1.1.2180.9 File:"2013-07-02 CLN FXIII 180 min 2nd F 4.wiff"  
Data file C:\Program Files (x86)\Matrix Science\Mascot Daemon\mgf\8 FXIII 180 min 2nd\mascot\_daemon\_merge.mgf

Click mouse within plot area to zoom in by factor of two about that point  
Or, 

Plot from

100

 to 

1700

 Da 

Full range

  
Label all possible matches ☐ Label matches used for scoring ☒

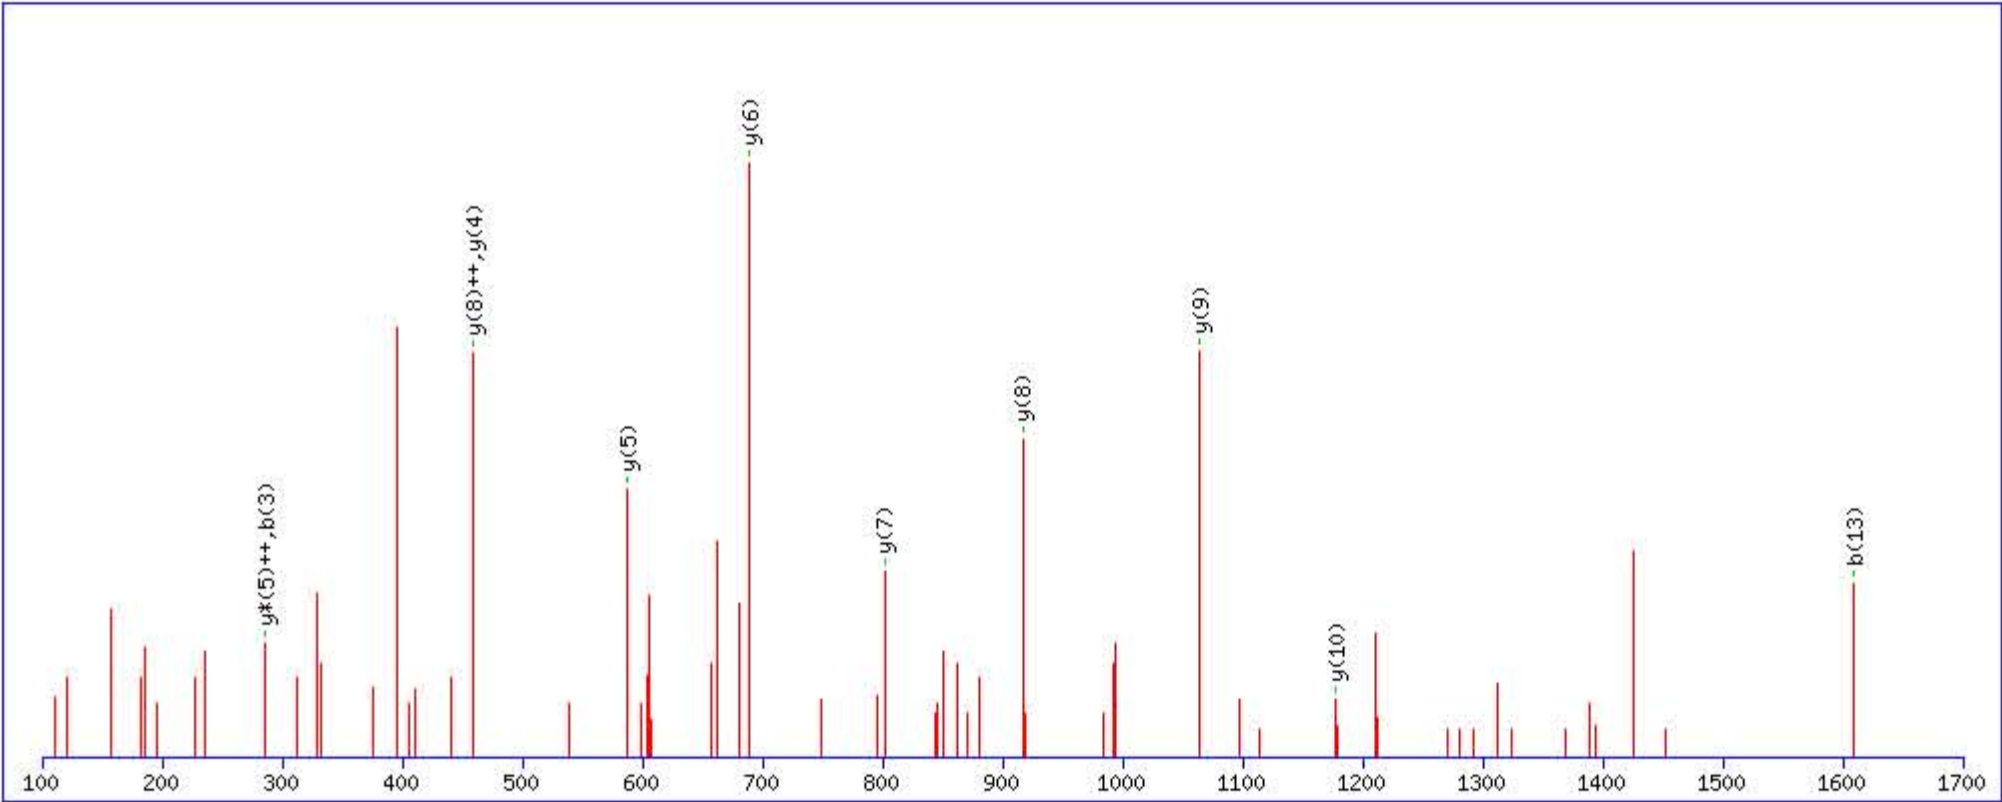

Monoisotopic mass of neutral peptide Mr(calc): 2785.458496  
Fixed modifications: Carbamidomethyl (C) (apply to specified residues or termini only)  
Variable modifications:  
Q10 : Biotin:Thermo-21345 (Q)  
Ions Score: 38 Expect: 0.003  
Matches : 11/234 fragment ions using 15 most intense peaks [\(help\)](#)

| #  | b           | b <sup>++</sup> | b <sup>*</sup> | b <sup>*++</sup> | b <sup>0</sup> | b <sup>0++</sup> | Seq. | y           | y <sup>++</sup> | y <sup>*</sup> | y <sup>*++</sup> | y <sup>0</sup> | y <sup>0++</sup> | #  |
|----|-------------|-----------------|----------------|------------------|----------------|------------------|------|-------------|-----------------|----------------|------------------|----------------|------------------|----|
| 1  | 72.044390   | 36.525833       |                |                  |                |                  | A    |             |                 |                |                  |                |                  | 23 |
| 2  | 185.128454  | 93.067865       |                |                  |                |                  | I    | 2715.428684 | 1358.217980     | 2698.402135    | 1349.704705      | 2697.418119    | 1349.212697      | 22 |
| 3  | 286.176133  | 143.591704      |                |                  | 268.165568     | 134.586422       | T    | 2602.344620 | 1301.675948     | 2585.318071    | 1293.162673      | 2584.334055    | 1292.670665      | 21 |
| 4  | 383.228897  | 192.118087      |                |                  | 365.218332     | 183.112804       | P    | 2501.296941 | 1251.152108     | 2484.270392    | 1242.638834      | 2483.286376    | 1242.146826      | 20 |
| 5  | 480.281661  | 240.644469      |                |                  | 462.271096     | 231.639186       | P    | 2404.244177 | 1202.625726     | 2387.217628    | 1194.112452      | 2386.233612    | 1193.620444      | 19 |
| 6  | 617.340573  | 309.173925      |                |                  | 599.330008     | 300.168642       | H    | 2307.191413 | 1154.099344     | 2290.164864    | 1145.586070      | 2289.180848    | 1145.094062      | 18 |
| 7  | 714.393337  | 357.700307      |                |                  | 696.382772     | 348.695024       | P    | 2170.132501 | 1085.569888     | 2153.105952    | 1077.056614      | 2152.121936    | 1076.564606      | 17 |
| 8  | 785.430451  | 393.218864      |                |                  | 767.419886     | 384.213581       | A    | 2073.079737 | 1037.043506     | 2056.053188    | 1028.530232      | 2055.069172    | 1028.038224      | 16 |
| 9  | 872.462479  | 436.734878      |                |                  | 854.451914     | 427.729595       | S    | 2002.042623 | 1001.524950     | 1985.016074    | 993.011675       | 1984.032058    | 992.519667       | 15 |
| 10 | 1311.687805 | 656.347541      | 1294.661256    | 647.834266       | 1293.677240    | 647.342258       | Q    | 1915.010595 | 958.008936      | 1897.984046    | 949.495661       | 1897.000030    | 949.003653       | 14 |
| 11 | 1382.724919 | 691.866098      | 1365.698370    | 683.352823       | 1364.714354    | 682.860815       | A    | 1475.785269 | 738.396273      | 1458.758720    | 729.882998       | 1457.774704    | 729.390990       | 13 |
| 12 | 1496.767846 | 748.887561      | 1479.741297    | 740.374287       | 1478.757281    | 739.882278       | N    | 1404.748155 | 702.877716      | 1387.721606    | 694.364441       | 1386.737590    | 693.872433       | 12 |
| 13 | 1609.851910 | 805.429593      | 1592.825361    | 796.916318       | 1591.841345    | 796.424310       | I    | 1290.705228 | 645.856252      | 1273.678679    | 637.342978       | 1272.694663    | 636.850970       | 11 |
| 14 | 1722.935974 | 861.971625      | 1705.909425    | 853.458350       | 1704.925409    | 852.966342       | I    | 1177.621164 | 589.314220      | 1160.594615    | 580.800946       | 1159.610599    | 580.308938       | 10 |
| 15 | 1870.004388 | 935.505832      | 1852.977839    | 926.992557       | 1851.993823    | 926.500549       | F    | 1064.537100 | 532.772188      | 1047.510551    | 524.258914       | 1046.526535    | 523.766906       | 9  |
| 16 | 1985.031331 | 993.019303      | 1968.004782    | 984.506029       | 1967.020766    | 984.014021       | D    | 917.468686  | 459.237981      | 900.442137     | 450.724707       | 899.458121     | 450.232699       | 8  |
| 17 | 2098.115395 | 1049.561335     | 2081.088846    | 1041.048061      | 2080.104830    | 1040.556053      | I    | 802.441743  | 401.724510      | 785.415194     | 393.211235       | 784.431178     | 392.719227       | 7  |
| 18 | 2199.163074 | 1100.085175     | 2182.136525    | 1091.571900      | 2181.152509    | 1091.079892      | T    | 689.357679  | 345.182478      | 672.331130     | 336.669203       | 671.347114     | 336.177195       | 6  |
| 19 | 2328.205667 | 1164.606471     | 2311.179118    | 1156.093197      | 2310.195102    | 1155.601189      | E    | 588.310000  | 294.658638      | 571.283451     | 286.145364       | 570.299435     | 285.653356       | 5  |
| 20 | 2385.227131 | 1193.117203     | 2368.200582    | 1184.603929      | 2367.216566    | 1184.111921      | G    | 459.267407  | 230.137341      | 442.240858     | 221.624067       |                |                  | 4  |
| 21 | 2499.270058 | 1250.138667     | 2482.243509    | 1241.625392      | 2481.259493    | 1241.133384      | N    | 402.245943  | 201.626610      | 385.219394     | 193.113335       |                |                  | 3  |
| 22 | 2612.354122 | 1306.680699     | 2595.327573    | 1298.167424      | 2594.343557    | 1297.675416      | L    | 288.203016  | 144.605146      | 271.176467     | 136.091872       |                |                  | 2  |
| 23 |             |                 |                |                  |                |                  | R    | 175.118952  | 88.063114       | 158.092403     | 79.549839        |                |                  | 1  |

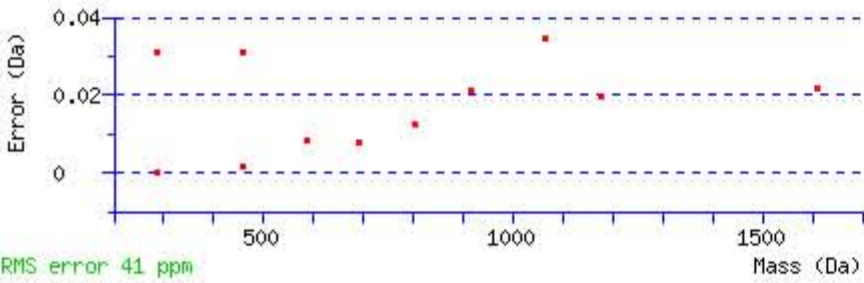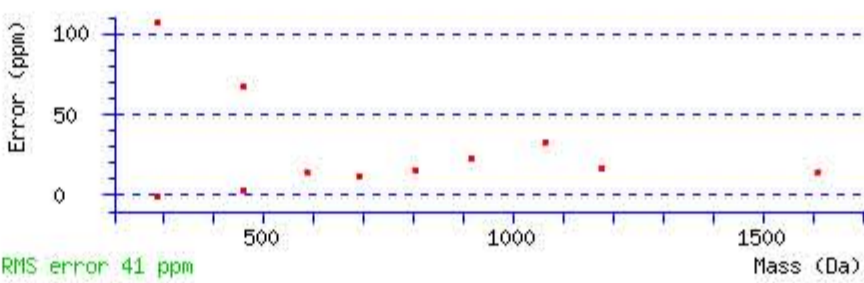

NCBI BLAST search of [AITPPHPASQANIIFDITEGNLR](#)  
(Parameters: blastp, nr protein database, expect=20000, no filter, PAM30)  
Other BLAST [web gateways](#)

All matches to this query

| Score | Mr(calc):   | Delta    | Sequence                                |
|-------|-------------|----------|-----------------------------------------|
| 38.0  | 2785.458496 | 0.033200 | <a href="#">AITPPHPASQANIIFDITEGNLR</a> |

M

A

T

R

I

X

S

C

I

E

N

C

E

Mascot Search Results

Peptide View

MS/MS Fragmentation of **MVQEQCCHSQLEELHCATGISLANEQDR**  
Found in **FBLN1\_HUMAN**, Fibulin-1 OS=Homo sapiens GN=FBLN1 PE=1 SV=4

Match to Query 66976: 3653.666016 from(914.423780,4+) rtinseconds(1990) index(34228)  
Title: Locus:1.1.1.801.24 File:"2013-07-02 CLN FXIII 180 min 2nd F 3.wiff"  
Data file C:\Program Files (x86)\Matrix Science\Mascot Daemon\mgf\8 FXIII 180 min 2nd\mascot\_daemon\_merge.mgf

Click mouse within plot area to zoom in by factor of two about that point  
Or, 

Plot from

0

 to 

2800

 Da 

Full range

  
Label all possible matches ☐ Label matches used for scoring ☒

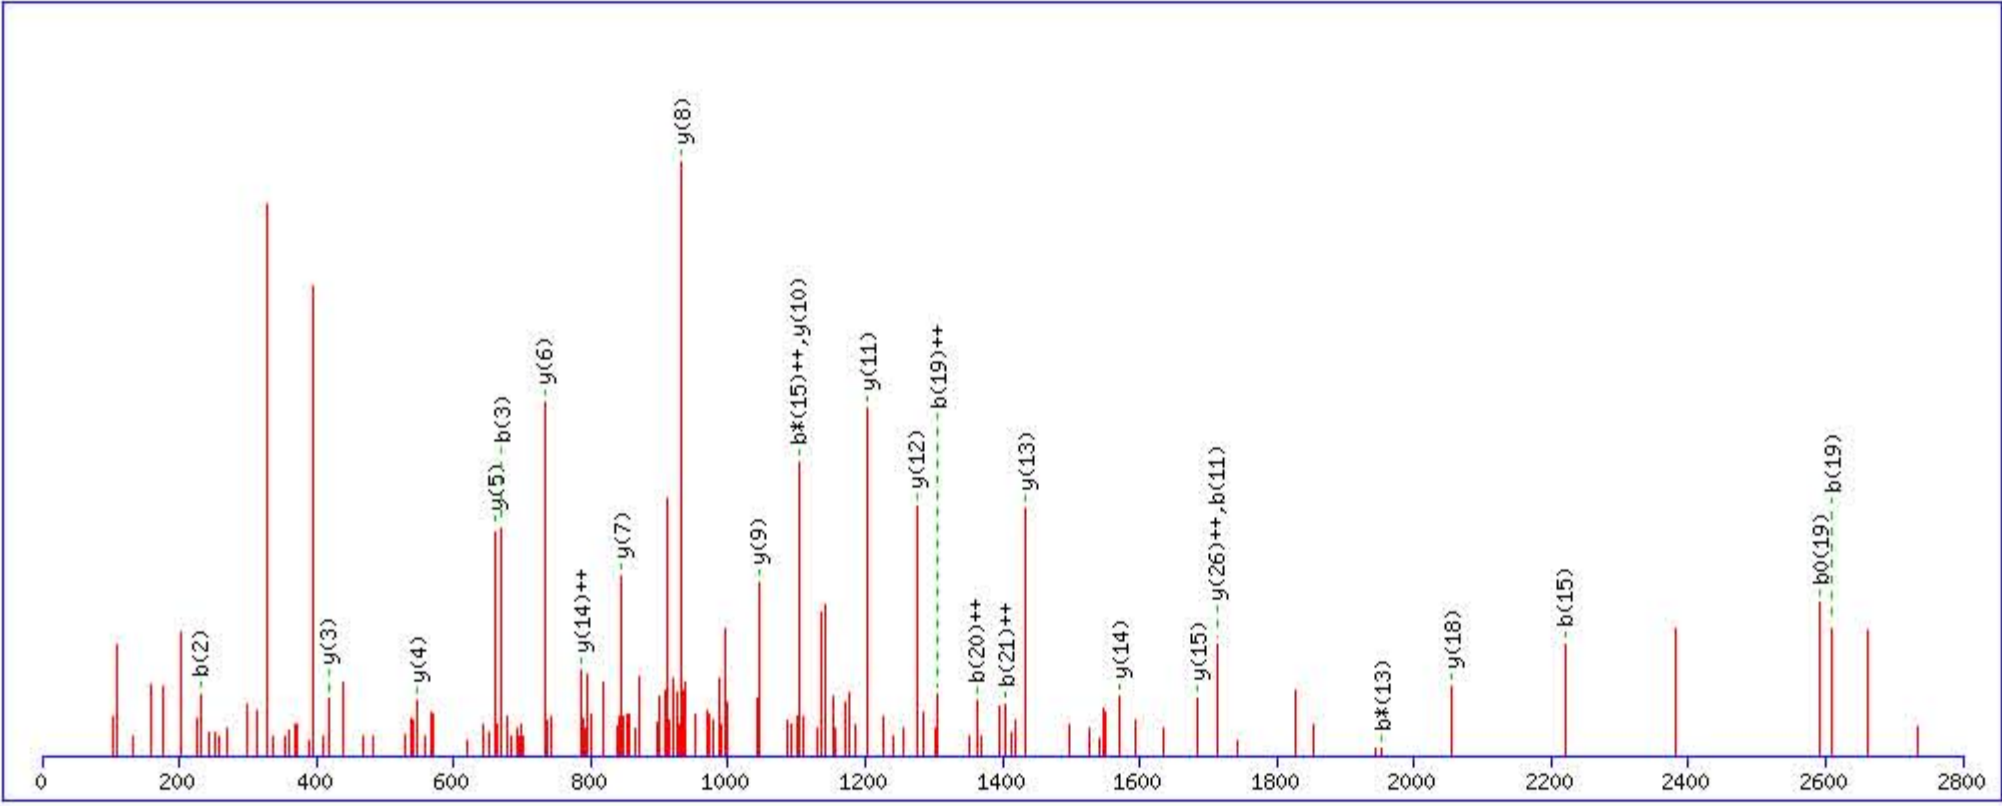

Monoisotopic mass of neutral peptide Mr(calc): 3653.615311  
Fixed modifications: Carbamidomethyl (C) (apply to specified residues or termini only)  
Variable modifications:  
Q3 : Biotin:Thermo-21345 (Q)  
Ions Score: 76 Expect: 3.1e-007  
Matches : 27/312 fragment ions using 45 most intense peaks [\(help\)](#)

| #  | b           | b <sup>++</sup> | b <sup>*</sup> | b <sup>*++</sup> | b <sup>0</sup> | b <sup>0++</sup> | Seq. | y           | y <sup>++</sup> | y <sup>*</sup> | y <sup>*++</sup> | y <sup>0</sup> | y <sup>0++</sup> | #  |
|----|-------------|-----------------|----------------|------------------|----------------|------------------|------|-------------|-----------------|----------------|------------------|----------------|------------------|----|
| 1  | 132.047761  | 66.527518       |                |                  |                |                  | M    |             |                 |                |                  |                |                  | 28 |
| 2  | 231.116175  | 116.061725      |                |                  |                |                  | V    | 3523.582122 | 1762.294699     | 3506.555573    | 1753.781424      | 3505.571557    | 1753.289416      | 27 |
| 3  | 670.341501  | 335.674389      | 653.314952     | 327.161114       |                |                  | Q    | 3424.513708 | 1712.760492     | 3407.487159    | 1704.247217      | 3406.503143    | 1703.755209      | 26 |
| 4  | 799.384094  | 400.195685      | 782.357545     | 391.682411       | 781.373529     | 391.190403       | E    | 2985.288382 | 1493.147829     | 2968.261833    | 1484.634554      | 2967.277817    | 1484.142546      | 25 |
| 5  | 927.442672  | 464.224974      | 910.416123     | 455.711700       | 909.432107     | 455.219692       | Q    | 2856.245789 | 1428.626532     | 2839.219240    | 1420.113258      | 2838.235224    | 1419.621250      | 24 |
| 6  | 1087.473321 | 544.240299      | 1070.446772    | 535.727024       | 1069.462756    | 535.235016       | C    | 2728.187211 | 1364.597243     | 2711.160662    | 1356.083969      | 2710.176646    | 1355.591961      | 23 |
| 7  | 1247.503970 | 624.255623      | 1230.477421    | 615.742349       | 1229.493405    | 615.250341       | C    | 2568.156562 | 1284.581919     | 2551.130013    | 1276.068644      | 2550.145997    | 1275.576636      | 22 |
| 8  | 1384.562882 | 692.785079      | 1367.536333    | 684.271805       | 1366.552317    | 683.779797       | H    | 2408.125913 | 1204.566594     | 2391.099364    | 1196.053320      | 2390.115348    | 1195.561312      | 21 |
| 9  | 1471.594910 | 736.301093      | 1454.568361    | 727.787819       | 1453.584345    | 727.295811       | S    | 2271.067001 | 1136.037138     | 2254.040452    | 1127.523864      | 2253.056436    | 1127.031856      | 20 |
| 10 | 1599.653488 | 800.330382      | 1582.626939    | 791.817108       | 1581.642923    | 791.325100       | Q    | 2184.034973 | 1092.521124     | 2167.008424    | 1084.007850      | 2166.024408    | 1083.515842      | 19 |
| 11 | 1712.737552 | 856.872414      | 1695.711003    | 848.359140       | 1694.726987    | 847.867132       | L    | 2055.976395 | 1028.491835     | 2038.949846    | 1019.978561      | 2037.965830    | 1019.486553      | 18 |
| 12 | 1841.780145 | 921.393711      | 1824.753596    | 912.880436       | 1823.769580    | 912.388428       | E    | 1942.892331 | 971.949804      | 1925.865782    | 963.436529       | 1924.881766    | 962.944521       | 17 |
| 13 | 1970.822738 | 985.915007      | 1953.796189    | 977.401733       | 1952.812173    | 976.909725       | E    | 1813.849738 | 907.428507      | 1796.823189    | 898.915233       | 1795.839173    | 898.423225       | 16 |
| 14 | 2083.906802 | 1042.457039     | 2066.880253    | 1033.943764      | 2065.896237    | 1033.451756      | L    | 1684.807145 | 842.907211      | 1667.780596    | 834.393936       | 1666.796580    | 833.901928       | 15 |
| 15 | 2220.965714 | 1110.986495     | 2203.939165    | 1102.473220      | 2202.955149    | 1101.981212      | H    | 1571.723081 | 786.365179      | 1554.696532    | 777.851904       | 1553.712516    | 777.359896       | 14 |
| 16 | 2380.996363 | 1191.001819     | 2363.969814    | 1182.488545      | 2362.985798    | 1181.996537      | C    | 1434.664169 | 717.835723      | 1417.637620    | 709.322448       | 1416.653604    | 708.830440       | 13 |
| 17 | 2452.033477 | 1226.520376     | 2435.006928    | 1218.007102      | 2434.022912    | 1217.515094      | A    | 1274.633520 | 637.820398      | 1257.606971    | 629.307124       | 1256.622955    | 628.815116       | 12 |
| 18 | 2553.081156 | 1277.044216     | 2536.054607    | 1268.530941      | 2535.070591    | 1268.038933      | T    | 1203.596406 | 602.301841      | 1186.569857    | 593.788567       | 1185.585841    | 593.296559       | 11 |
| 19 | 2610.102620 | 1305.554948     | 2593.076071    | 1297.041673      | 2592.092055    | 1296.549665      | G    | 1102.548727 | 551.778002      | 1085.522178    | 543.264727       | 1084.538162    | 542.772719       | 10 |
| 20 | 2723.186684 | 1362.096980     | 2706.160135    | 1353.583705      | 2705.176119    | 1353.091697      | I    | 1045.527263 | 523.267270      | 1028.500714    | 514.753995       | 1027.516698    | 514.261987       | 9  |
| 21 | 2810.218712 | 1405.612994     | 2793.192163    | 1397.099719      | 2792.208147    | 1396.607711      | S    | 932.443199  | 466.725238      | 915.416650     | 458.211963       | 914.432634     | 457.719955       | 8  |
| 22 | 2923.302776 | 1462.155026     | 2906.276227    | 1453.641751      | 2905.292211    | 1453.149743      | L    | 845.411171  | 423.209224      | 828.384622     | 414.695949       | 827.400606     | 414.203941       | 7  |
| 23 | 2994.339890 | 1497.673583     | 2977.313341    | 1489.160308      | 2976.329325    | 1488.668301      | A    | 732.327107  | 366.667192      | 715.300558     | 358.153917       | 714.316542     | 357.661909       | 6  |
| 24 | 3108.382817 | 1554.695047     | 3091.356268    | 1546.181772      | 3090.372252    | 1545.689764      | N    | 661.289993  | 331.148635      | 644.263444     | 322.635360       | 643.279428     | 322.143352       | 5  |
| 25 | 3237.425410 | 1619.216343     | 3220.398861    | 1610.703069      | 3219.414845    | 1610.211061      | E    | 547.247066  | 274.127171      | 530.220517     | 265.613897       | 529.236501     | 265.121889       | 4  |
| 26 | 3365.483988 | 1683.245632     | 3348.457439    | 1674.732358      | 3347.473423    | 1674.240350      | Q    | 418.204473  | 209.605874      | 401.177924     | 201.092600       | 400.193908     | 200.600592       | 3  |
| 27 | 3480.510931 | 1740.759104     | 3463.484382    | 1732.245829      | 3462.500366    | 1731.753821      | D    | 290.145895  | 145.576585      | 273.119346     | 137.063311       | 272.135330     | 136.571303       | 2  |
| 28 |             |                 |                |                  |                |                  | R    | 175.118952  | 88.063114       | 158.092403     | 79.549839        |                |                  | 1  |

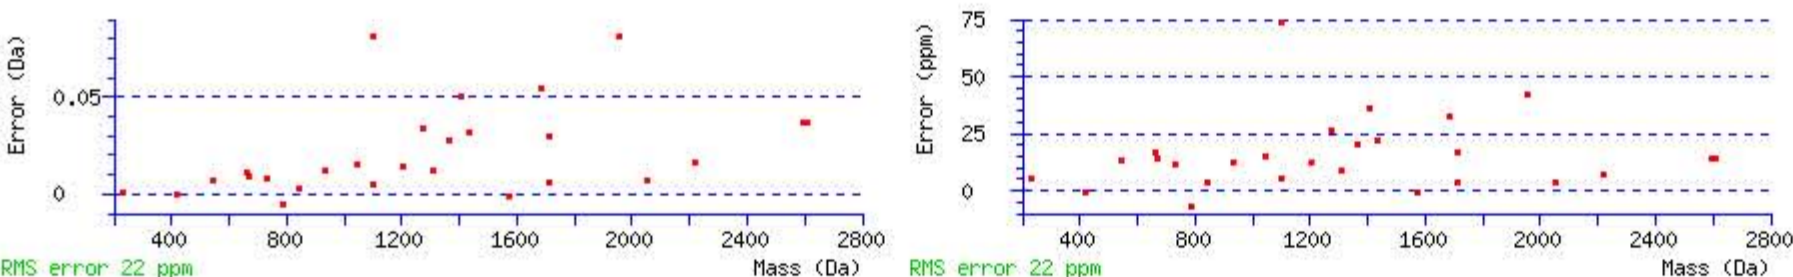

NCBI BLAST search of [MVQEQCCHSQLEELHCATGISLANEQDR](#)  
(Parameters: blastp, nr protein database, expect=20000, no filter, PAM30)  
Other BLAST [web gateways](#)

All matches to this query

| Score | Mr(calc):   | Delta    | Sequence                                     |
|-------|-------------|----------|----------------------------------------------|
| 75.8  | 3653.615311 | 0.050705 | <a href="#">MVQEQCCHSQLEELHCATGISLANEQDR</a> |
| 75.7  | 3653.615311 | 0.050705 | <a href="#">MVQEQCCHSQLEELHCATGISLANEQDR</a> |
| 73.5  | 3653.615311 | 0.050705 | <a href="#">MVQEQCCHSQLEELHCATGISLANEQDR</a> |

MATRIX

SCIENCE

Mascot Search Results

Peptide View

MS/MS Fragmentation of **LLGEVDHYQLALGK**  
Found in **FCN3\_HUMAN**, Ficolin-3 OS=Homo sapiens GN=FCN3 PE=1 SV=2

Match to Query 41620: 1866.012612 from(623.011480,3+) rtinseconds(2203) index(6769)  
Title: Locus:1.1.1.2044.7 File:"2013-07-02 CLN FXIII 180 min 2nd F 1.wiff"  
Data file C:\Program Files (x86)\Matrix Science\Mascot Daemon\mgf\8 FXIII 180 min 2nd\mascot\_daemon\_merge.mgf

Click mouse within plot area to zoom in by factor of two about that point  
Or, 

Plot from

100

 to 

1700

 Da 

Full range

  
Label all possible matches ☐ Label matches used for scoring ☒

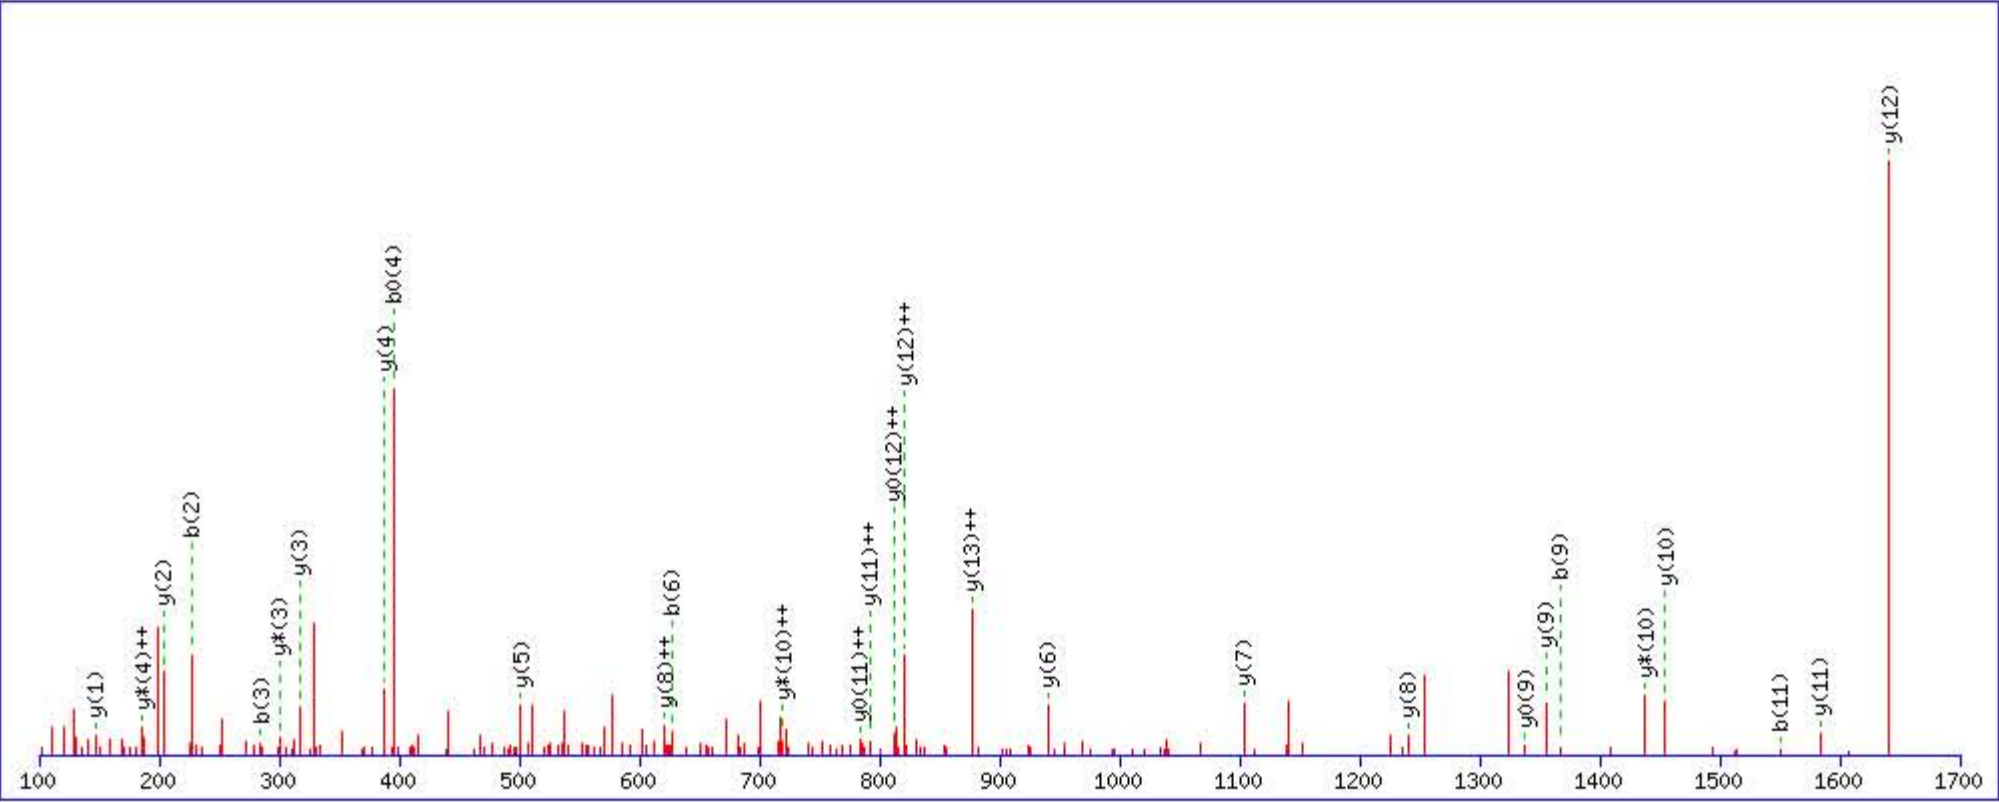

Monoisotopic mass of neutral peptide Mr(calc): 1866.007324  
Fixed modifications: Carbamidomethyl (C) (apply to specified residues or termini only)  
Variable modifications:  
Q9 : Biotin:Thermo-21345 (Q)  
Ions Score: 51 Expect: 0.00017  
Matches : 29/118 fragment ions using 84 most intense peaks [\(help\)](#)

| #  | b           | b <sup>++</sup> | b <sup>*</sup> | b <sup>*++</sup> | b <sup>0</sup> | b <sup>0++</sup> | Seq. | y           | y <sup>++</sup> | y <sup>*</sup> | y <sup>*++</sup> | y <sup>0</sup> | y <sup>0++</sup> | #  |
|----|-------------|-----------------|----------------|------------------|----------------|------------------|------|-------------|-----------------|----------------|------------------|----------------|------------------|----|
| 1  | 114.091340  | 57.549308       |                |                  |                |                  | L    |             |                 |                |                  |                |                  | 14 |
| 2  | 227.175404  | 114.091340      |                |                  |                |                  | L    | 1753.930555 | 877.468916      | 1736.904006    | 868.955641       | 1735.919990    | 868.463633       | 13 |
| 3  | 284.196868  | 142.602072      |                |                  |                |                  | G    | 1640.846491 | 820.926884      | 1623.819942    | 812.413609       | 1622.835926    | 811.921601       | 12 |
| 4  | 413.239461  | 207.123369      |                |                  | 395.228896     | 198.118086       | E    | 1583.825027 | 792.416152      | 1566.798478    | 783.902877       | 1565.814462    | 783.410869       | 11 |
| 5  | 512.307875  | 256.657576      |                |                  | 494.297310     | 247.652293       | V    | 1454.782434 | 727.894855      | 1437.755885    | 719.381581       | 1436.771869    | 718.889572       | 10 |
| 6  | 627.334818  | 314.171047      |                |                  | 609.324253     | 305.165765       | D    | 1355.714020 | 678.360648      | 1338.687471    | 669.847374       | 1337.703455    | 669.355366       | 9  |
| 7  | 764.393730  | 382.700503      |                |                  | 746.383165     | 373.695221       | H    | 1240.687077 | 620.847177      | 1223.660528    | 612.333902       |                |                  | 8  |
| 8  | 927.457059  | 464.232168      |                |                  | 909.446494     | 455.226885       | Y    | 1103.628165 | 552.317721      | 1086.601616    | 543.804446       |                |                  | 7  |
| 9  | 1366.682385 | 683.844831      | 1349.655836    | 675.331556       | 1348.671820    | 674.839548       | Q    | 940.564836  | 470.786056      | 923.538287     | 462.272782       |                |                  | 6  |
| 10 | 1479.766449 | 740.386863      | 1462.739900    | 731.873588       | 1461.755884    | 731.381580       | L    | 501.339510  | 251.173393      | 484.312961     | 242.660118       |                |                  | 5  |
| 11 | 1550.803563 | 775.905420      | 1533.777014    | 767.392145       | 1532.792998    | 766.900137       | A    | 388.255446  | 194.631361      | 371.228897     | 186.118086       |                |                  | 4  |
| 12 | 1663.887627 | 832.447452      | 1646.861078    | 823.934177       | 1645.877062    | 823.442169       | L    | 317.218332  | 159.112804      | 300.191783     | 150.599529       |                |                  | 3  |
| 13 | 1720.909091 | 860.958184      | 1703.882542    | 852.444909       | 1702.898526    | 851.952901       | G    | 204.134268  | 102.570772      | 187.107719     | 94.057497        |                |                  | 2  |
| 14 |             |                 |                |                  |                |                  | K    | 147.112804  | 74.060040       | 130.086255     | 65.546765        |                |                  | 1  |

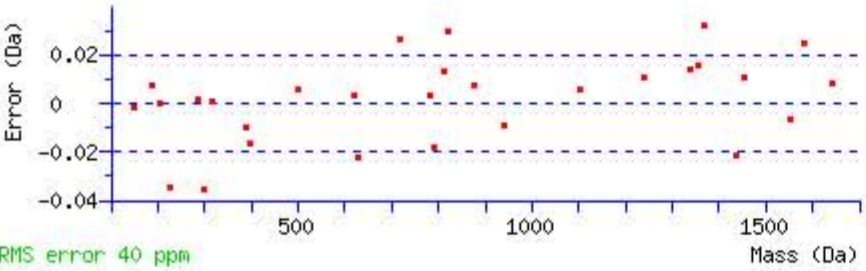

RMS error 40 ppm

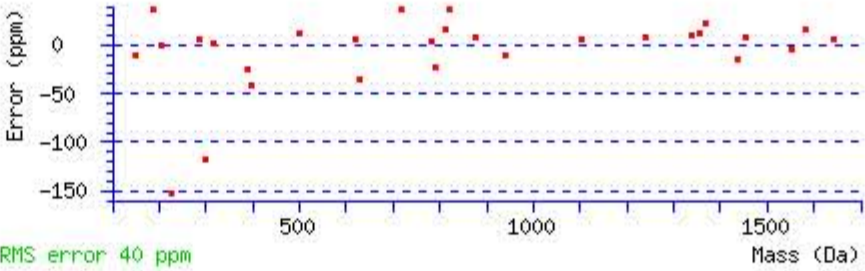

RMS error 40 ppm

NCBI BLAST search of [LLGEVDHYQLALGK](#)  
(Parameters: blastp, nr protein database, expect=20000, no filter, PAM30)  
Other BLAST [web gateways](#)

All matches to this query

| Score | Mr(calc):   | Delta    | Sequence                       |
|-------|-------------|----------|--------------------------------|
| 50.6  | 1866.007324 | 0.005288 | <a href="#">LLGEVDHYQLALGK</a> |

MATRIX

SCIENCE

Mascot Search Results

Peptide View

MS/MS Fragmentation of **KSQLVYQSR**  
Found in **LG3BP\_HUMAN**, Galectin-3-binding protein OS=Homo sapiens GN=LGALS3BP PE=1 SV=1

Match to Query 28344: 1418.782988 from(710.398770,2+) rtinseconds(1512) index(47044)  
Title: Locus:1.1.1.1764.18 File:"2013-07-02 CLN FXIII 180 min 2nd F 4.wiff"  
Data file C:\Program Files (x86)\Matrix Science\Mascot Daemon\mgf\8 FXIII 180 min 2nd\mascot\_daemon\_merge.mgf

Click mouse within plot area to zoom in by factor of two about that point  
Or,   to  Da   
Label all possible matches ☐ Label matches used for scoring ☒

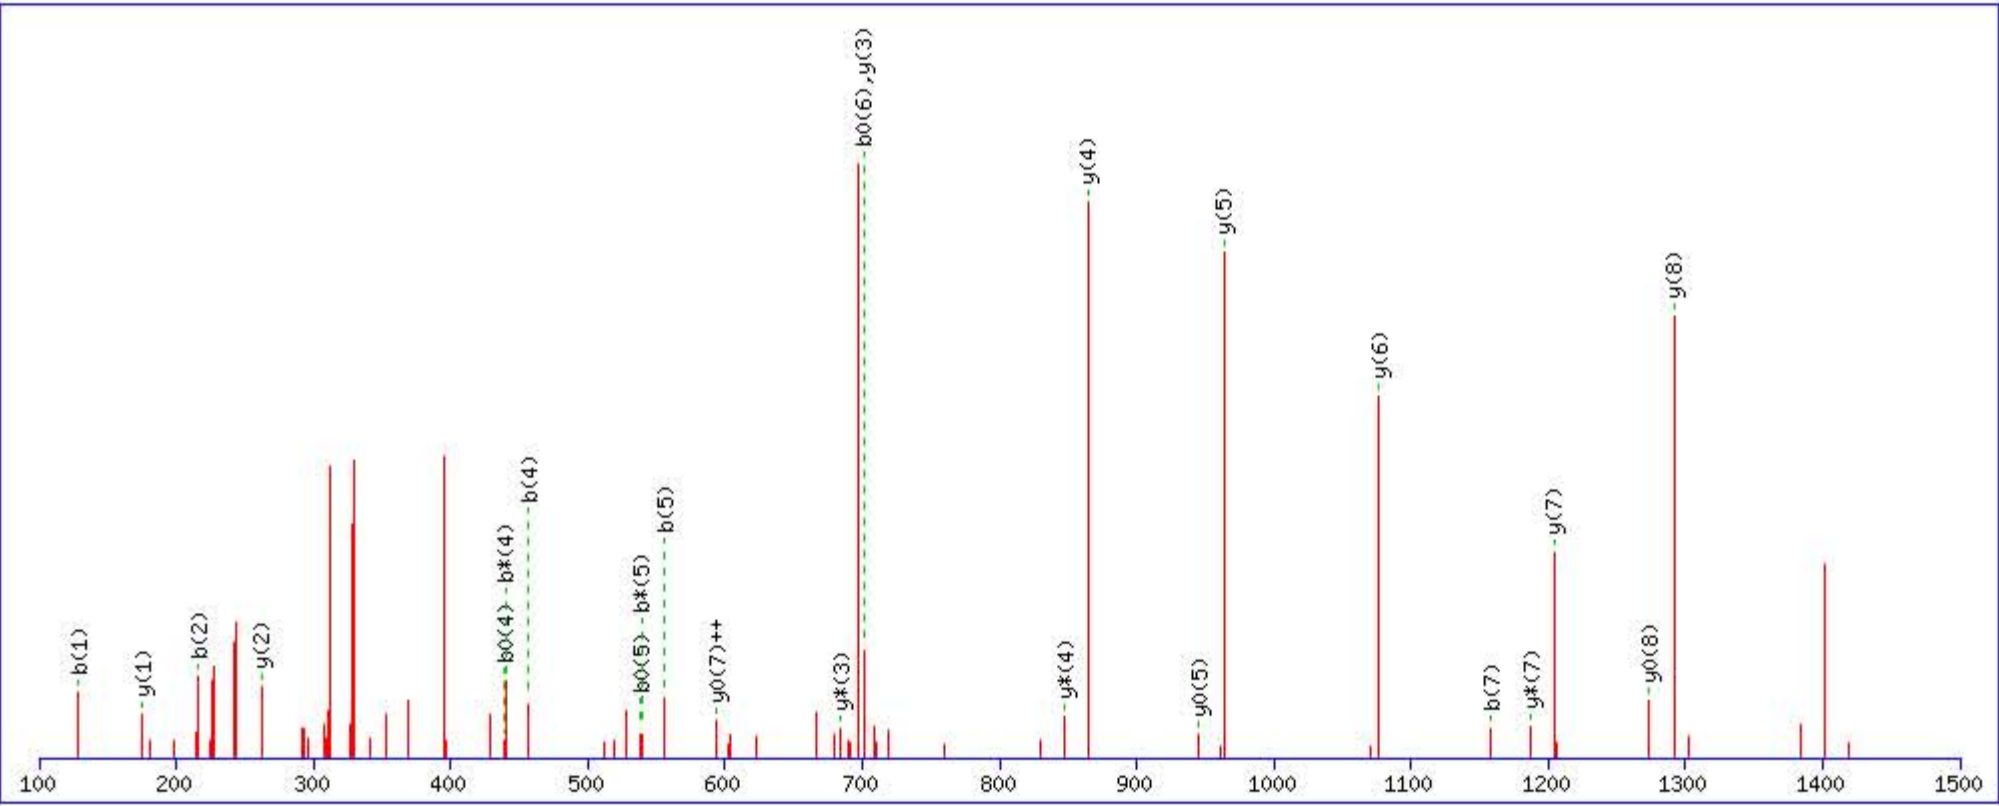

Monoisotopic mass of neutral peptide Mr(calc): 1418.770386  
Fixed modifications: Carbamidomethyl (C) (apply to specified residues or termini only)  
Variable modifications:  
Q7 : Biotin:Thermo-21345 (Q)  
Ions Score: 40 Expect: 0.0013  
Matches : 24/92 fragment ions using 52 most intense peaks [\(help\)](#)

| # | b           | b <sup>++</sup> | b <sup>*</sup> | b <sup>++</sup> * | b <sup>0</sup> | b <sup>0++</sup> | Seq. | y           | y <sup>++</sup> | y <sup>*</sup> | y <sup>++</sup> * | y <sup>0</sup> | y <sup>0++</sup> | # |
|---|-------------|-----------------|----------------|-------------------|----------------|------------------|------|-------------|-----------------|----------------|-------------------|----------------|------------------|---|
| 1 | 129.102239  | 65.054757       | 112.075690     | 56.541483         |                |                  | K    |             |                 |                |                   |                |                  | 9 |
| 2 | 216.134267  | 108.570771      | 199.107718     | 100.057497        | 198.123702     | 99.565489        | S    | 1291.682719 | 646.344998      | 1274.656170    | 637.831723        | 1273.672154    | 637.339715       | 8 |
| 3 | 344.192845  | 172.600060      | 327.166296     | 164.086786        | 326.182280     | 163.594778       | Q    | 1204.650691 | 602.828984      | 1187.624142    | 594.315709        | 1186.640126    | 593.823701       | 7 |
| 4 | 457.276909  | 229.142092      | 440.250360     | 220.628818        | 439.266344     | 220.136810       | L    | 1076.592113 | 538.799695      | 1059.565564    | 530.286420        | 1058.581548    | 529.794412       | 6 |
| 5 | 556.345323  | 278.676300      | 539.318774     | 270.163025        | 538.334758     | 269.671017       | V    | 963.508049  | 482.257663      | 946.481500     | 473.744388        | 945.497484     | 473.252380       | 5 |
| 6 | 719.408652  | 360.207964      | 702.382103     | 351.694690        | 701.398087     | 351.202682       | Y    | 864.439635  | 432.723456      | 847.413086     | 424.210181        | 846.429070     | 423.718173       | 4 |
| 7 | 1158.633978 | 579.820627      | 1141.607429    | 571.307353        | 1140.623413    | 570.815345       | Q    | 701.376306  | 351.191791      | 684.349757     | 342.678517        | 683.365741     | 342.186509       | 3 |
| 8 | 1245.666006 | 623.336641      | 1228.639457    | 614.823367        | 1227.655441    | 614.331359       | S    | 262.150980  | 131.579128      | 245.124431     | 123.065854        | 244.140415     | 122.573846       | 2 |
| 9 |             |                 |                |                   |                |                  | R    | 175.118952  | 88.063114       | 158.092403     | 79.549839         |                |                  | 1 |

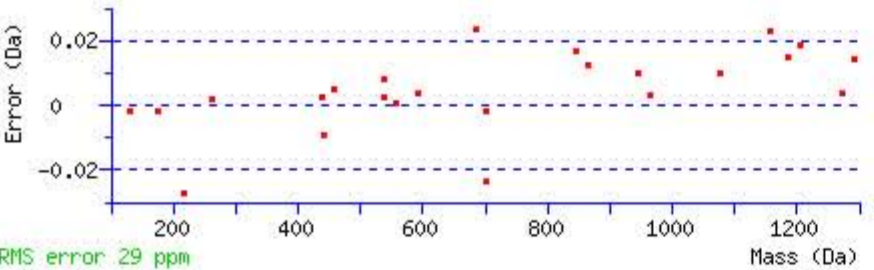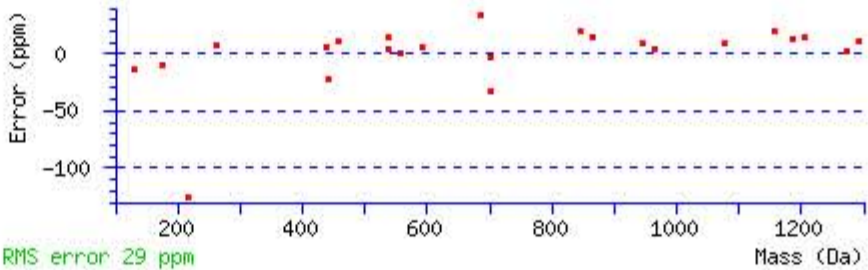

NCBI BLAST search of [KSQLVYQSR](#)  
(Parameters: blastp, nr protein database, expect=20000, no filter, PAM30)  
Other BLAST [web gateways](#)

All matches to this query

| Score | Mr(calc):   | Delta     | Sequence                       |
|-------|-------------|-----------|--------------------------------|
| 40.1  | 1418.770386 | 0.012602  | <a href="#">KSQLVYQSR</a>      |
| 9.1   | 1418.780273 | 0.002715  | <a href="#">TNQLMETLKTIK</a>   |
| 7.3   | 1418.788147 | -0.005159 | <a href="#">QSQVDRLYVALK</a>   |
| 5.0   | 1418.763000 | 0.019988  | <a href="#">IKGEQGAPGLQGHK</a> |
| 4.6   | 1418.799362 | -0.016374 | <a href="#">QLRIPEPPNLSR</a>   |
| 4.6   | 1418.776886 | 0.006102  | <a href="#">EKAKALEDLAGFK</a>  |
| 3.1   | 1418.770386 | 0.012602  | <a href="#">KSQLVYQSR</a>      |

MATRIX

SCIENCE

Mascot Search Results

Peptide View

MS/MS Fragmentation of **SQLVYQSR**  
Found in **LG3BP\_HUMAN**, Galectin-3-binding protein OS=Homo sapiens GN=LGALS3BP PE=1 SV=1

Match to Query 34755: 1601.862168 from(801.938360,2+) rtinseconds(2067) index(50766)  
Title: Locus:1.1.1.1957.6 File:"2013-07-02 CLN FXIII 180 min 2nd F 4.wiff"  
Data file C:\Program Files (x86)\Matrix Science\Mascot Daemon\mgf\8 FXIII 180 min 2nd\mascot\_daemon\_merge.mgf

Click mouse within plot area to zoom in by factor of two about that point  
Or, 

Plot from

100

 to 

1700

 Da 

Full range

  
Label all possible matches ☐ Label matches used for scoring ☒

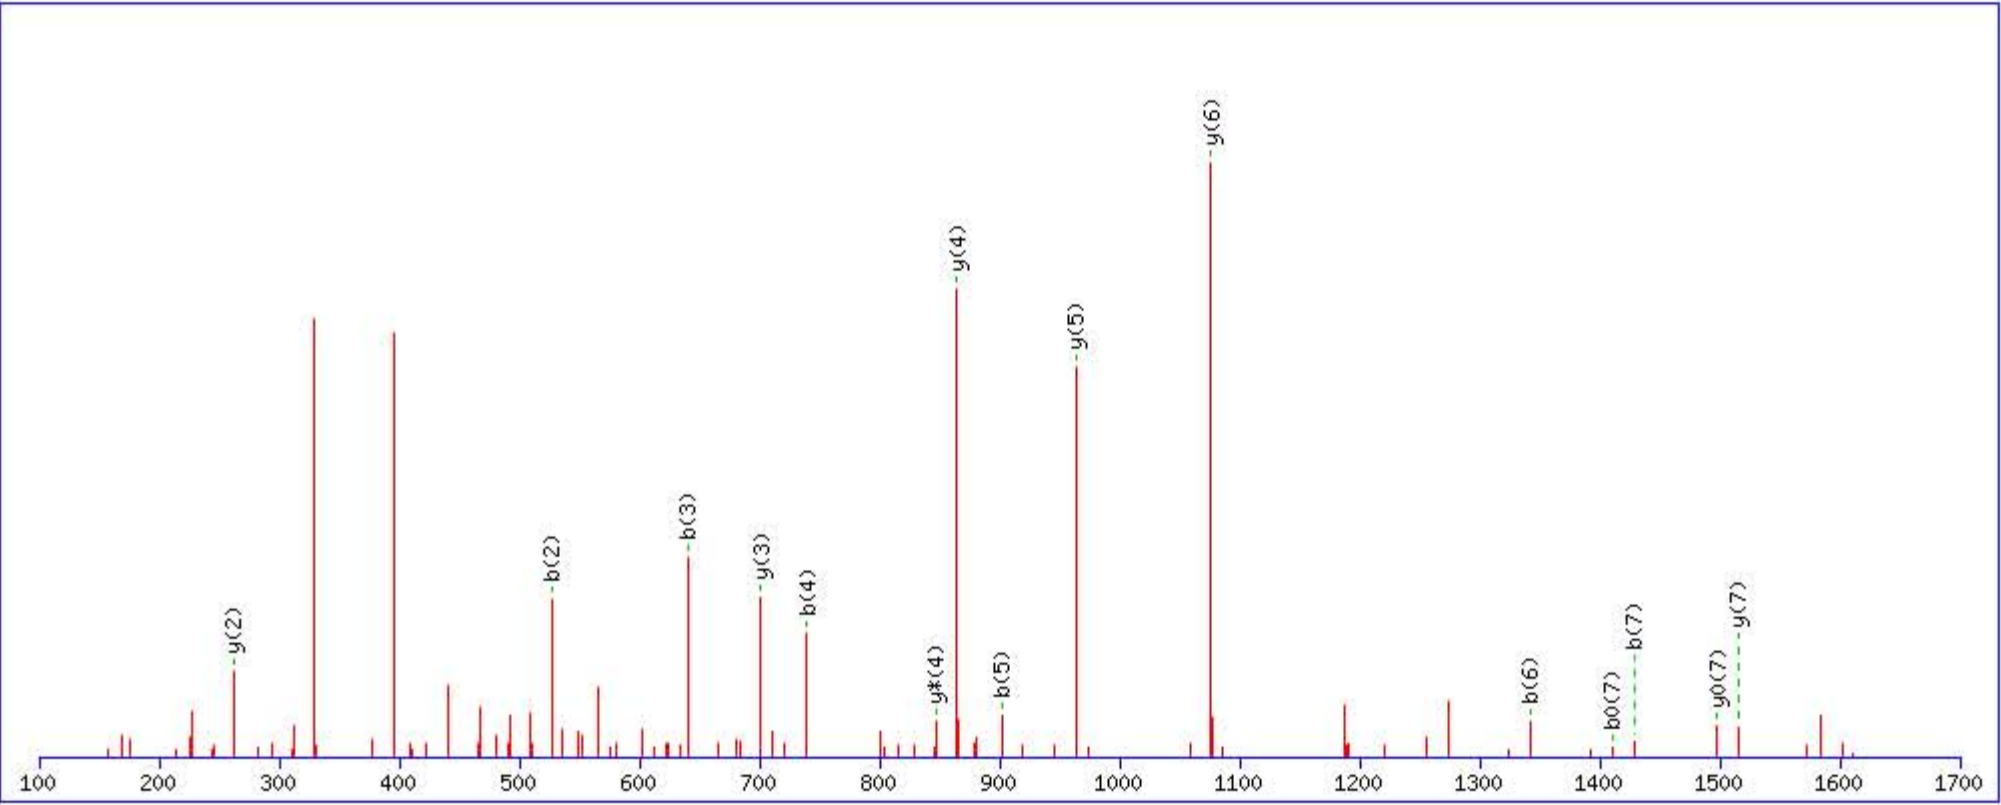

Monoisotopic mass of neutral peptide Mr(calc): 1601.842178  
Fixed modifications: Carbamidomethyl (C) (apply to specified residues or termini only)  
Variable modifications:  
Q2 : Biotin:Thermo-21345 (Q)  
Q6 : Biotin:Thermo-21345 (Q)  
Ions Score: 33 Expect: 0.0042  
Matches : 15/80 fragment ions using 30 most intense peaks ([help](#))

| # | b           | b <sup>++</sup> | b <sup>*</sup> | b <sup>+++</sup> | b <sup>0</sup> | b <sup>0++</sup> | Seq. | y           | y <sup>++</sup> | y <sup>*</sup> | y <sup>+++</sup> | y <sup>0</sup> | y <sup>0++</sup> | # |
|---|-------------|-----------------|----------------|------------------|----------------|------------------|------|-------------|-----------------|----------------|------------------|----------------|------------------|---|
| 1 | 88.039304   | 44.523290       |                |                  | 70.028739      | 35.518008        | S    |             |                 |                |                  |                |                  | 8 |
| 2 | 527.264630  | 264.135953      | 510.238081     | 255.622679       | 509.254065     | 255.130671       | Q    | 1515.817439 | 758.412358      | 1498.790890    | 749.899083       | 1497.806874    | 749.407075       | 7 |
| 3 | 640.348694  | 320.677985      | 623.322145     | 312.164711       | 622.338129     | 311.672703       | L    | 1076.592113 | 538.799695      | 1059.565564    | 530.286420       | 1058.581548    | 529.794412       | 6 |
| 4 | 739.417108  | 370.212192      | 722.390559     | 361.698917       | 721.406543     | 361.206909       | V    | 963.508049  | 482.257663      | 946.481500     | 473.744388       | 945.497484     | 473.252380       | 5 |
| 5 | 902.480437  | 451.743856      | 885.453888     | 443.230582       | 884.469872     | 442.738574       | Y    | 864.439635  | 432.723456      | 847.413086     | 424.210181       | 846.429070     | 423.718173       | 4 |
| 6 | 1341.705763 | 671.356520      | 1324.679214    | 662.843245       | 1323.695198    | 662.351237       | Q    | 701.376306  | 351.191791      | 684.349757     | 342.678517       | 683.365741     | 342.186509       | 3 |
| 7 | 1428.737791 | 714.872534      | 1411.711242    | 706.359259       | 1410.727226    | 705.867251       | S    | 262.150980  | 131.579128      | 245.124431     | 123.065854       | 244.140415     | 122.573846       | 2 |
| 8 |             |                 |                |                  |                |                  | R    | 175.118952  | 88.063114       | 158.092403     | 79.549839        |                |                  | 1 |

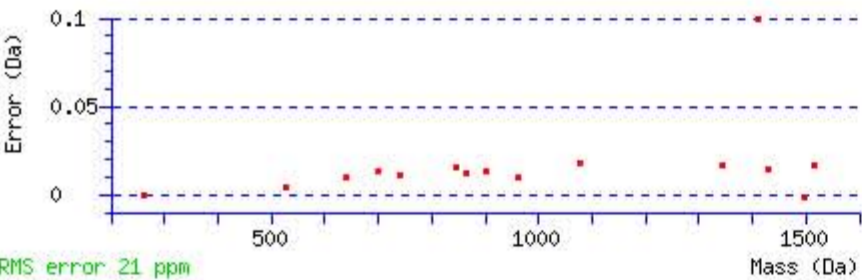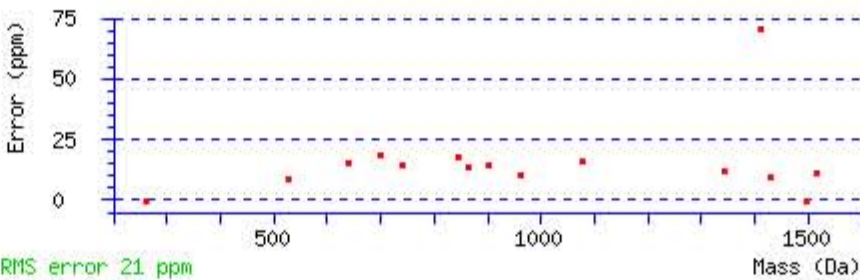

NCBI BLAST search of [SQLVYQSR](#)  
(Parameters: blastp, nr protein database, expect=20000, no filter, PAM30)  
Other BLAST [web gateways](#)

All matches to this query

| Score | Mr(calc):   | Delta    | Sequence                       |
|-------|-------------|----------|--------------------------------|
| 33.1  | 1601.842178 | 0.019990 | <a href="#">SQLVYQSR</a>       |
| 7.4   | 1601.846024 | 0.016144 | <a href="#">RFVLSCSLLSHQR</a>  |
| 2.0   | 1601.852051 | 0.010117 | <a href="#">SQISELNLLMK</a>    |
| 1.8   | 1601.841995 | 0.020173 | <a href="#">RPGTMTLQDGRKSR</a> |
| 1.5   | 1601.855881 | 0.006287 | <a href="#">ELQRLQQAETMKK</a>  |

MATRIX

SCIENCE

Mascot Search Results

Peptide View

MS/MS Fragmentation of **ELSEALGQIFDSQR**  
Found in **LG3BP\_HUMAN**, Galectin-3-binding protein OS=Homo sapiens GN=LGALS3BP PE=1 SV=1

Match to Query 42158: 1902.972462 from(635.331430,3+) rtinseconds(2690) index(54611)  
Title: Locus:1.1.1.2173.7 File:"2013-07-02 CLN FXIII 180 min 2nd F 4.wiff"  
Data file C:\Program Files (x86)\Matrix Science\Mascot Daemon\mgf\8 FXIII 180 min 2nd\mascot\_daemon\_merge.mgf

Click mouse within plot area to zoom in by factor of two about that point  
Or,   to  Da   
Label all possible matches ☐ Label matches used for scoring ☒

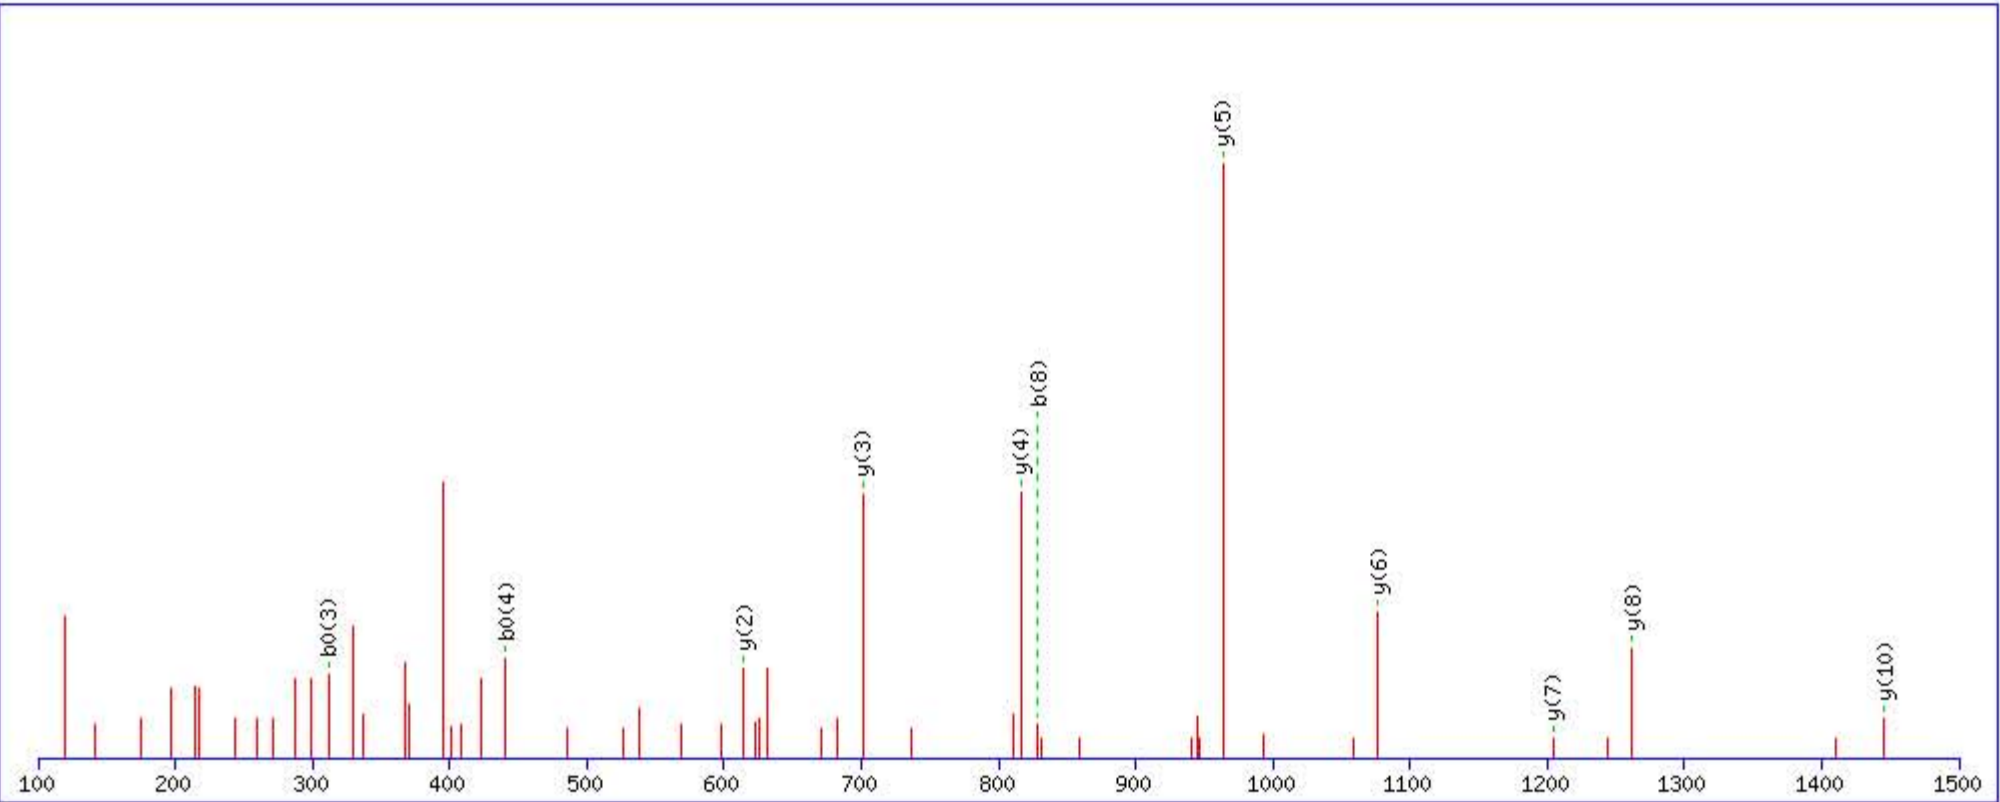

Monoisotopic mass of neutral peptide Mr(calc): 1902.950928  
Fixed modifications: Carbamidomethyl (C) (apply to specified residues or termini only)  
Variable modifications:  
Q13 : Biotin:Thermo-21345 (Q)  
Ions Score: 64 Expect: 1.4e-006  
Matches : 11/138 fragment ions using 14 most intense peaks [\(help\)](#)

| #  | b           | b <sup>++</sup> | b <sup>+</sup> | b <sup>+++</sup> | b <sup>0</sup> | b <sup>0++</sup> | Seq. | y           | y <sup>++</sup> | y <sup>+</sup> | y <sup>+++</sup> | y <sup>0</sup> | y <sup>0++</sup> | #  |
|----|-------------|-----------------|----------------|------------------|----------------|------------------|------|-------------|-----------------|----------------|------------------|----------------|------------------|----|
| 1  | 130.049869  | 65.528572       |                |                  | 112.039304     | 56.523290        | E    |             |                 |                |                  |                |                  | 14 |
| 2  | 243.133933  | 122.070605      |                |                  | 225.123368     | 113.065322       | L    | 1774.915632 | 887.961454      | 1757.889083    | 879.448180       | 1756.905067    | 878.956172       | 13 |
| 3  | 330.165961  | 165.586618      |                |                  | 312.155396     | 156.581336       | S    | 1661.831568 | 831.419422      | 1644.805019    | 822.906148       | 1643.821003    | 822.414140       | 12 |
| 4  | 459.208554  | 230.107915      |                |                  | 441.197989     | 221.102633       | E    | 1574.799540 | 787.903408      | 1557.772991    | 779.390134       | 1556.788975    | 778.898126       | 11 |
| 5  | 530.245668  | 265.626472      |                |                  | 512.235103     | 256.621190       | A    | 1445.756947 | 723.382112      | 1428.730398    | 714.868837       | 1427.746382    | 714.376829       | 10 |
| 6  | 643.329732  | 322.168504      |                |                  | 625.319167     | 313.163222       | L    | 1374.719833 | 687.863555      | 1357.693284    | 679.350280       | 1356.709268    | 678.858272       | 9  |
| 7  | 700.351196  | 350.679236      |                |                  | 682.340631     | 341.673954       | G    | 1261.635769 | 631.321523      | 1244.609220    | 622.808248       | 1243.625204    | 622.316240       | 8  |
| 8  | 828.409774  | 414.708525      | 811.383225     | 406.195251       | 810.399209     | 405.703243       | Q    | 1204.614305 | 602.810791      | 1187.587756    | 594.297516       | 1186.603740    | 593.805508       | 7  |
| 9  | 941.493838  | 471.250557      | 924.467289     | 462.737283       | 923.483273     | 462.245275       | I    | 1076.555727 | 538.781502      | 1059.529178    | 530.268227       | 1058.545162    | 529.776219       | 6  |
| 10 | 1088.562252 | 544.784764      | 1071.535703    | 536.271490       | 1070.551687    | 535.779482       | F    | 963.471663  | 482.239470      | 946.445114     | 473.726195       | 945.461098     | 473.234187       | 5  |
| 11 | 1203.589195 | 602.298236      | 1186.562646    | 593.784961       | 1185.578630    | 593.292953       | D    | 816.403249  | 408.705263      | 799.376700     | 400.191988       | 798.392684     | 399.699980       | 4  |
| 12 | 1290.621223 | 645.814250      | 1273.594674    | 637.300975       | 1272.610658    | 636.808967       | S    | 701.376306  | 351.191791      | 684.349757     | 342.678517       | 683.365741     | 342.186509       | 3  |
| 13 | 1729.846549 | 865.426913      | 1712.820000    | 856.913638       | 1711.835984    | 856.421630       | Q    | 614.344278  | 307.675777      | 597.317729     | 299.162503       |                |                  | 2  |
| 14 |             |                 |                |                  |                |                  | R    | 175.118952  | 88.063114       | 158.092403     | 79.549839        |                |                  | 1  |

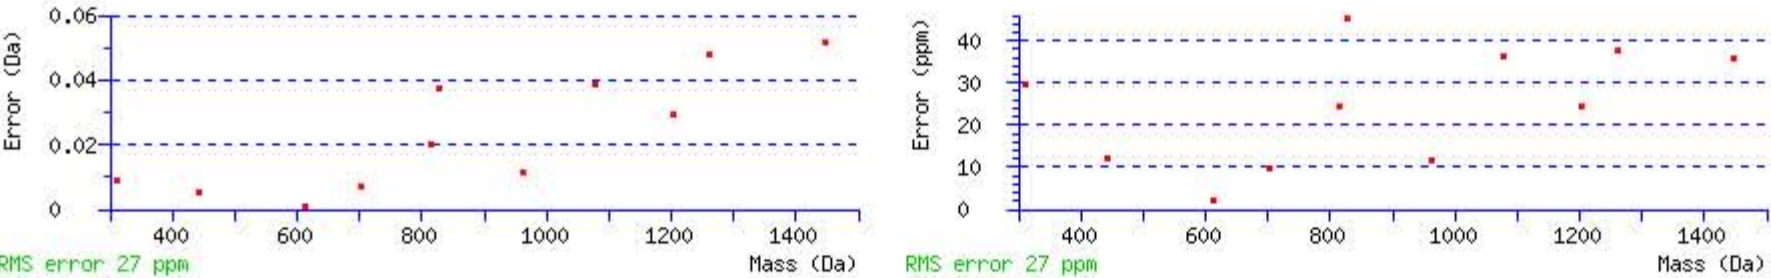

NCBI BLAST search of [ELSEALGQIFDSQR](#)  
(Parameters: blastp, nr protein database, expect=20000, no filter, PAM30)  
Other BLAST [web gateways](#)

All matches to this query

| Score | Mr(calc):   | Delta    | Sequence                       |
|-------|-------------|----------|--------------------------------|
| 63.8  | 1902.950928 | 0.021534 | <a href="#">ELSEALGQIFDSQR</a> |
| 1.3   | 1902.947739 | 0.024723 | <a href="#">MKEQLRE MENLR</a>  |

MATRIX

SCIENCE

Mascot Search Results

Peptide View

MS/MS Fragmentation of **YSSDYFQAPSDYR**  
Found in **LG3BP\_HUMAN**, Galectin-3-binding protein OS=Homo sapiens GN=LGALS3BP PE=1 SV=1

Match to Query 42285: 1908.849462 from(637.290430,3+) rtinseconds(2090) index(50915)  
Title: Locus:1.1.1.1965.7 File:"2013-07-02 CLN FXIII 180 min 2nd F 4.wiff"  
Data file C:\Program Files (x86)\Matrix Science\Mascot Daemon\mgf\8 FXIII 180 min 2nd\mascot\_daemon\_merge.mgf

Click mouse within plot area to zoom in by factor of two about that point  
Or,   to  Da   
Label all possible matches ☐ Label matches used for scoring ☒

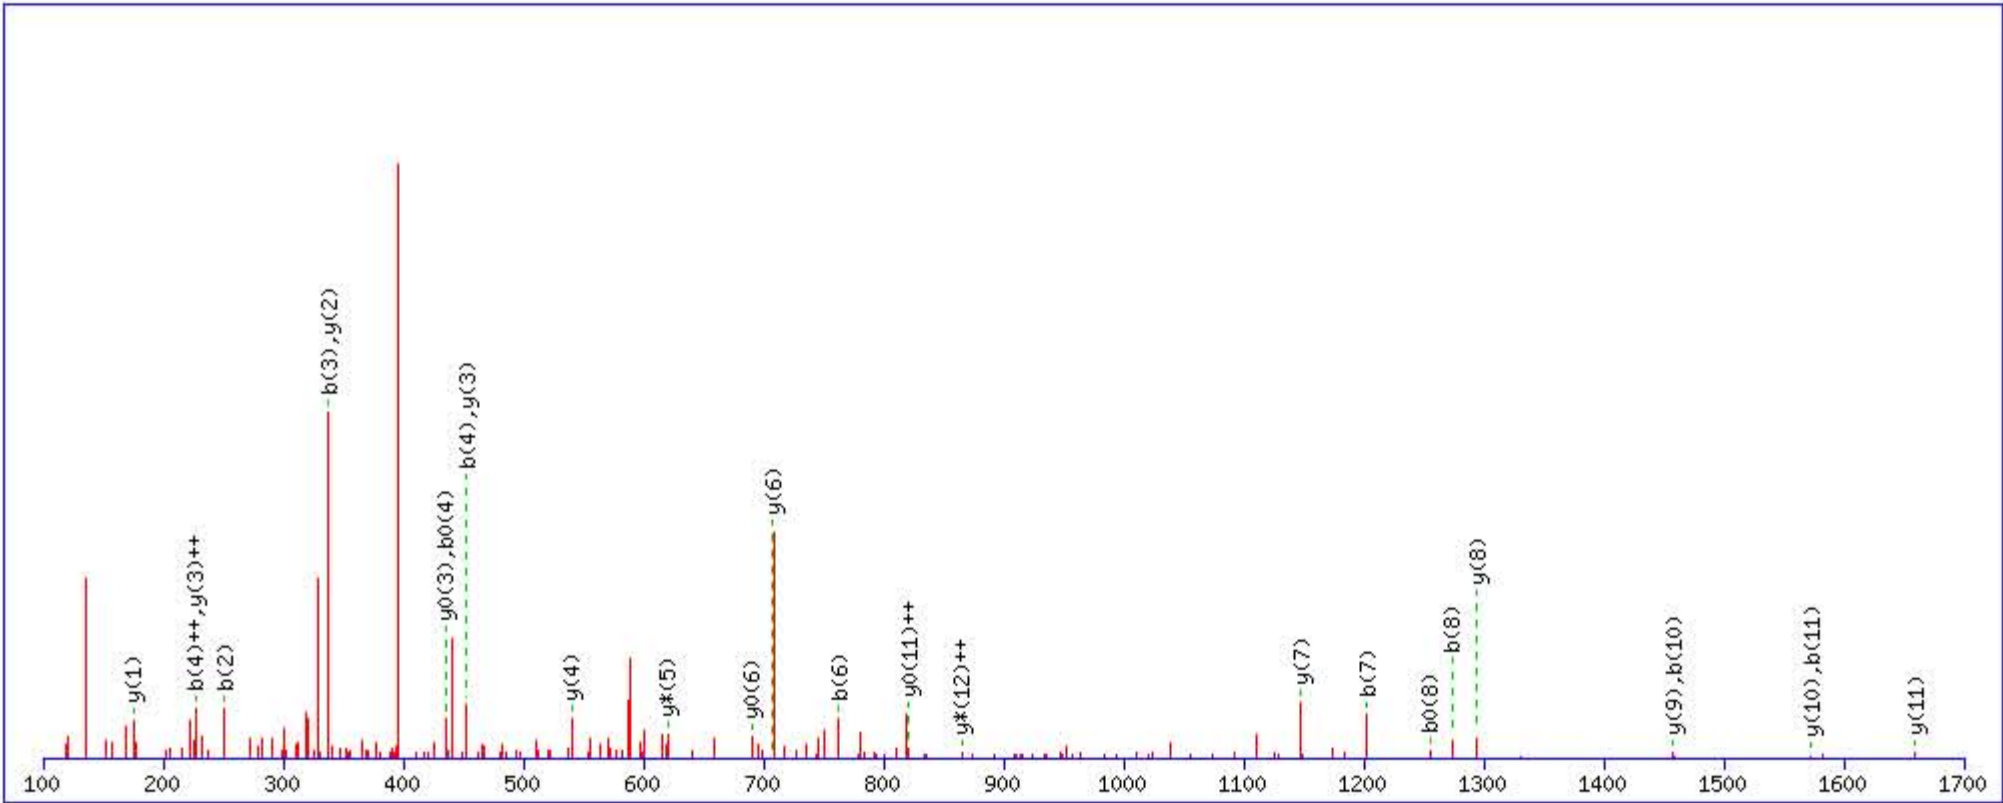

Monoisotopic mass of neutral peptide Mr(calc): 1908.835236  
Fixed modifications: Carbamidomethyl (C) (apply to specified residues or termini only)  
Variable modifications:  
Q7 : Biotin:Thermo-21345 (Q)  
Ions Score: 51 Expect: 5.7e-005  
Matches : 27/126 fragment ions using 42 most intense peaks [\(help\)](#)

| #  | b           | b <sup>++</sup> | b <sup>*</sup> | b <sup>++</sup> | b <sup>0</sup> | b <sup>0++</sup> | Seq. | y           | y <sup>++</sup> | y <sup>*</sup> | y <sup>++</sup> | y <sup>0</sup> | y <sup>0++</sup> | #  |
|----|-------------|-----------------|----------------|-----------------|----------------|------------------|------|-------------|-----------------|----------------|-----------------|----------------|------------------|----|
| 1  | 164.070605  | 82.538940       |                |                 |                |                  | Y    |             |                 |                |                 |                |                  | 13 |
| 2  | 251.102633  | 126.054954      |                |                 | 233.092068     | 117.049672       | S    | 1746.779198 | 873.893237      | 1729.752649    | 865.379963      | 1728.768633    | 864.887955       | 12 |
| 3  | 338.134661  | 169.570968      |                |                 | 320.124096     | 160.565686       | S    | 1659.747170 | 830.377223      | 1642.720621    | 821.863949      | 1641.736605    | 821.371941       | 11 |
| 4  | 453.161604  | 227.084440      |                |                 | 435.151039     | 218.079158       | D    | 1572.715142 | 786.861209      | 1555.688593    | 778.347935      | 1554.704577    | 777.855927       | 10 |
| 5  | 616.224933  | 308.616105      |                |                 | 598.214368     | 299.610822       | Y    | 1457.688199 | 729.347738      | 1440.661650    | 720.834463      | 1439.677634    | 720.342455       | 9  |
| 6  | 763.293347  | 382.150312      |                |                 | 745.282782     | 373.145029       | F    | 1294.624870 | 647.816073      | 1277.598321    | 639.302799      | 1276.614305    | 638.810791       | 8  |
| 7  | 1202.518673 | 601.762975      | 1185.492124    | 593.249700      | 1184.508108    | 592.757692       | Q    | 1147.556456 | 574.281866      | 1130.529907    | 565.768592      | 1129.545891    | 565.276584       | 7  |
| 8  | 1273.555787 | 637.281532      | 1256.529238    | 628.768257      | 1255.545222    | 628.276249       | A    | 708.331130  | 354.669203      | 691.304581     | 346.155929      | 690.320565     | 345.663921       | 6  |
| 9  | 1370.608551 | 685.807914      | 1353.582002    | 677.294639      | 1352.597986    | 676.802631       | P    | 637.294016  | 319.150646      | 620.267467     | 310.637372      | 619.283451     | 310.145364       | 5  |
| 10 | 1457.640579 | 729.323928      | 1440.614030    | 720.810653      | 1439.630014    | 720.318645       | S    | 540.241252  | 270.624264      | 523.214703     | 262.110990      | 522.230687     | 261.618982       | 4  |
| 11 | 1572.667522 | 786.837399      | 1555.640973    | 778.324125      | 1554.656957    | 777.832117       | D    | 453.209224  | 227.108250      | 436.182675     | 218.594976      | 435.198659     | 218.102968       | 3  |
| 12 | 1735.730851 | 868.369064      | 1718.704302    | 859.855789      | 1717.720286    | 859.363781       | Y    | 338.182281  | 169.594778      | 321.155732     | 161.081504      |                |                  | 2  |
| 13 |             |                 |                |                 |                |                  | R    | 175.118952  | 88.063114       | 158.092403     | 79.549839       |                |                  | 1  |

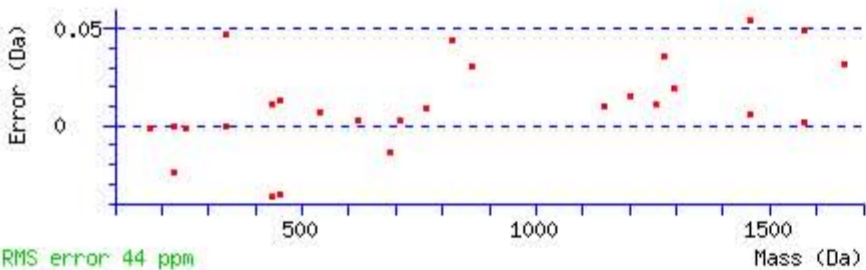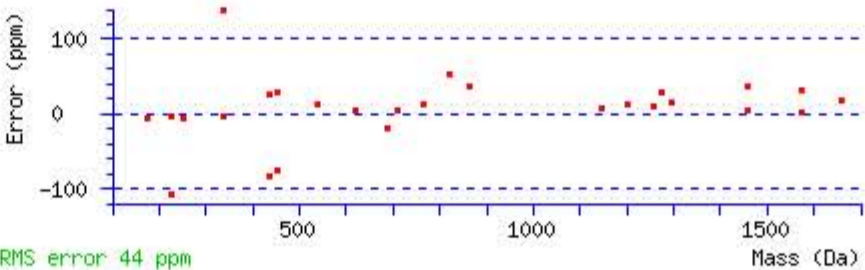

NCBI BLAST search of [YSSDYFQAPSDYR](#)  
(Parameters: blastp, nr protein database, expect=20000, no filter, PAM30)  
Other BLAST [web gateways](#)

All matches to this query

| Score | Mr(calc):   | Delta    | Sequence                      |
|-------|-------------|----------|-------------------------------|
| 51.1  | 1908.835236 | 0.014226 | <a href="#">YSSDYFQAPSDYR</a> |

MATRIX

SCIENCE

Mascot Search Results

Peptide View

MS/MS Fragmentation of **TGAQELLR**  
Found in **GELS\_HUMAN**, Gelsolin OS=Homo sapiens GN=GSN PE=1 SV=1

Match to Query 20501: 1197.658968 from(599.836760,2+) rtinseconds(1896) index(4916)  
Title: Locus:1.1.1.1937.16 File:"2013-07-02 CLN FXIII 180 min 2nd F 1.wiff"  
Data file C:\Program Files (x86)\Matrix Science\Mascot Daemon\mgf\8 FXIII 180 min 2nd\mascot\_daemon\_merge.mgf

Click mouse within plot area to zoom in by factor of two about that point  
Or, 

Plot from

150

 to 

1100

 Da 

Full range

  
Label all possible matches ☐ Label matches used for scoring ☒

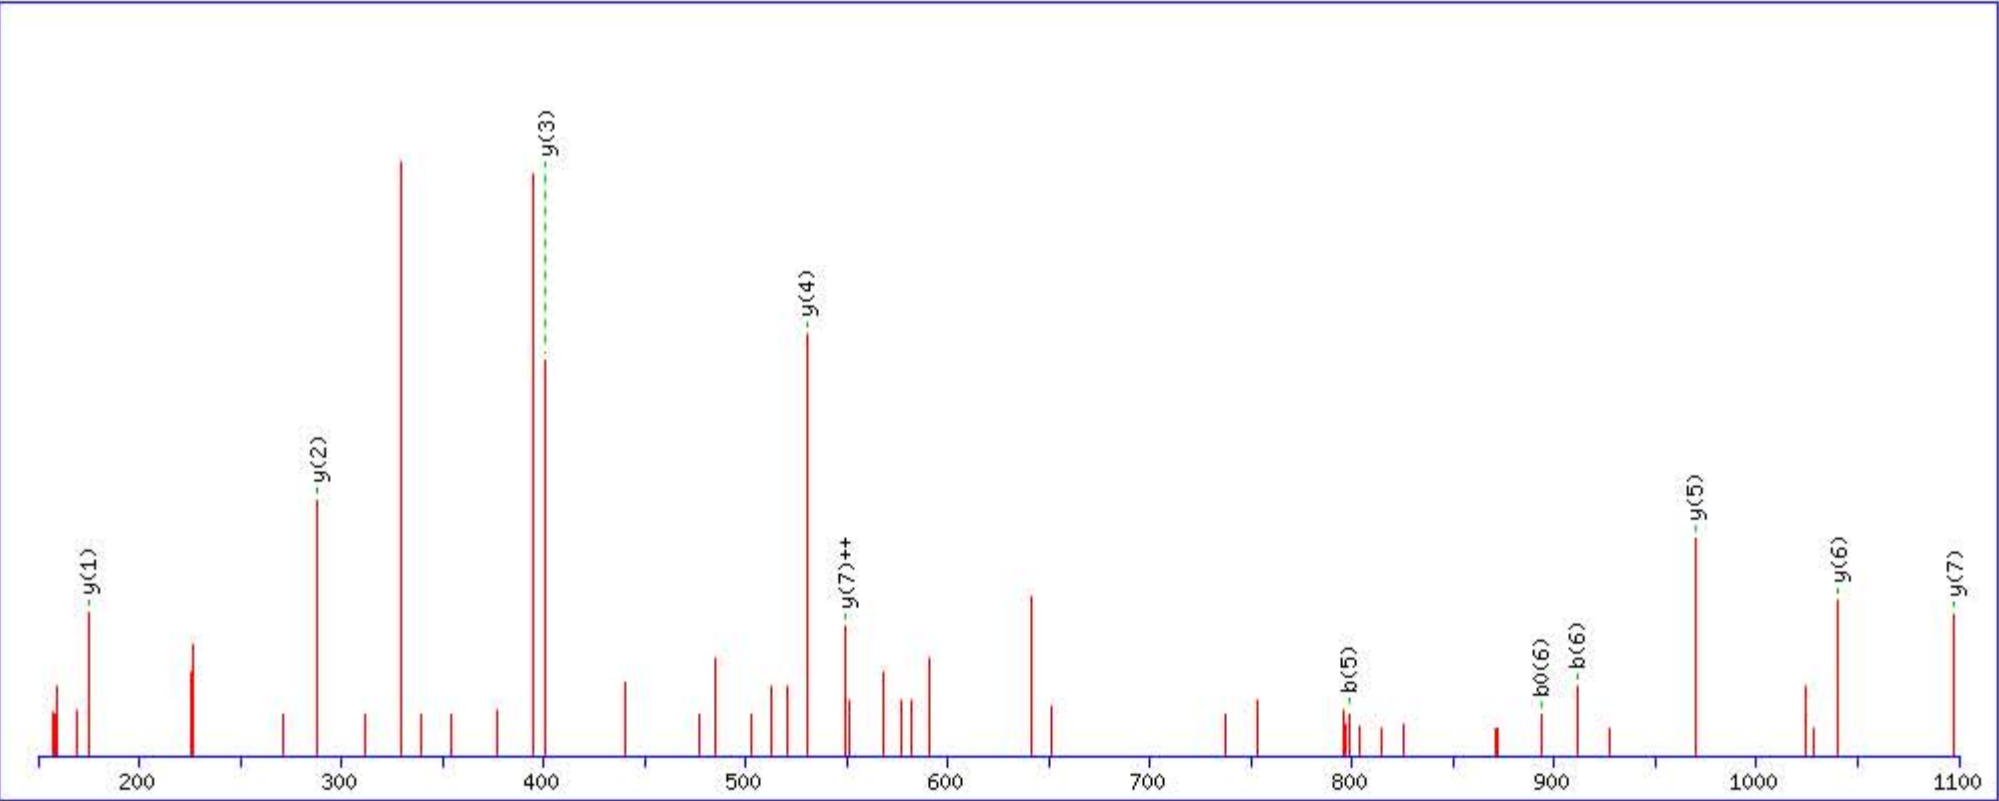

Monoisotopic mass of neutral peptide Mr(calc): 1197.653961  
Fixed modifications: Carbamidomethyl (C) (apply to specified residues or termini only)  
Variable modifications:  
Q4 : Biotin:Thermo-21345 (Q)  
Ions Score: 49 Expect: 0.00031  
Matches : 11/72 fragment ions using 19 most intense peaks [\(help\)](#)

| # | b           | b <sup>++</sup> | b <sup>*</sup> | b <sup>*++</sup> | b <sup>0</sup> | b <sup>0++</sup> | Seq. | y           | y <sup>++</sup> | y <sup>*</sup> | y <sup>*++</sup> | y <sup>0</sup> | y <sup>0++</sup> | # |
|---|-------------|-----------------|----------------|------------------|----------------|------------------|------|-------------|-----------------|----------------|------------------|----------------|------------------|---|
| 1 | 102.054955  | 51.531116       |                |                  | 84.044390      | 42.525833        | T    |             |                 |                |                  |                |                  | 8 |
| 2 | 159.076419  | 80.041847       |                |                  | 141.065854     | 71.036565        | G    | 1097.613577 | 549.310427      | 1080.587028    | 540.797152       | 1079.603012    | 540.305144       | 7 |
| 3 | 230.113533  | 115.560404      |                |                  | 212.102968     | 106.555122       | A    | 1040.592113 | 520.799695      | 1023.565564    | 512.286420       | 1022.581548    | 511.794412       | 6 |
| 4 | 669.338859  | 335.173068      | 652.312310     | 326.659793       | 651.328294     | 326.167785       | Q    | 969.554999  | 485.281138      | 952.528450     | 476.767863       | 951.544434     | 476.275855       | 5 |
| 5 | 798.381452  | 399.694364      | 781.354903     | 391.181090       | 780.370887     | 390.689082       | E    | 530.329673  | 265.668475      | 513.303124     | 257.155200       | 512.319108     | 256.663192       | 4 |
| 6 | 911.465516  | 456.236396      | 894.438967     | 447.723122       | 893.454951     | 447.231114       | L    | 401.287080  | 201.147178      | 384.260531     | 192.633903       |                |                  | 3 |
| 7 | 1024.549580 | 512.778428      | 1007.523031    | 504.265153       | 1006.539015    | 503.773145       | L    | 288.203016  | 144.605146      | 271.176467     | 136.091871       |                |                  | 2 |
| 8 |             |                 |                |                  |                |                  | R    | 175.118952  | 88.063114       | 158.092403     | 79.549839        |                |                  | 1 |

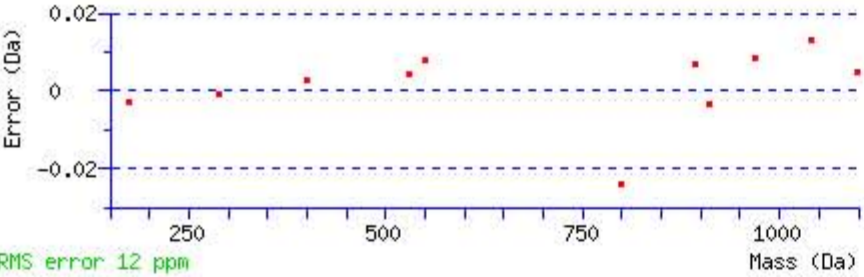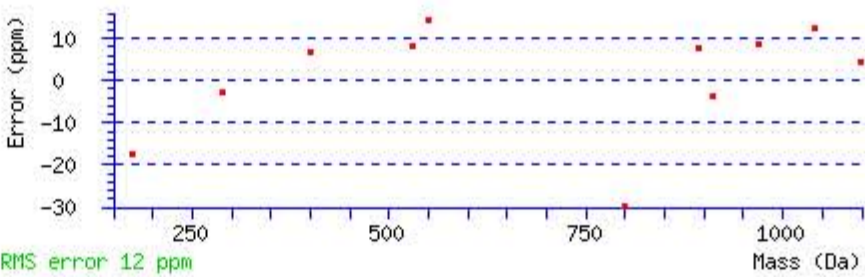

NCBI BLAST search of [TGAQELLR](#)  
(Parameters: blastp, nr protein database, expect=20000, no filter, PAM30)  
Other BLAST [web gateways](#)

All matches to this query

| Score | Mr(calc):   | Delta     | Sequence                  |
|-------|-------------|-----------|---------------------------|
| 48.8  | 1197.653961 | 0.005007  | <a href="#">TGAQELLR</a>  |
| 23.9  | 1197.653961 | 0.005007  | <a href="#">QTQEILR</a>   |
| 16.4  | 1197.653961 | 0.005007  | <a href="#">QTQEILR</a>   |
| 15.6  | 1197.646545 | 0.012423  | <a href="#">RSPQEAELR</a> |
| 15.1  | 1197.653961 | 0.005007  | <a href="#">TQQLLR</a>    |
| 13.4  | 1197.669220 | -0.010252 | <a href="#">TLWAQLR</a>   |
| 13.2  | 1197.653961 | 0.005007  | <a href="#">QTEQLLR</a>   |
| 11.2  | 1197.653961 | 0.005007  | <a href="#">QTEQLLR</a>   |
| 11.0  | 1197.669220 | -0.010252 | <a href="#">WTLQAIR</a>   |
| 9.8   | 1197.669220 | -0.010252 | <a href="#">QWTALIR</a>   |

MATRIX

SCIENCE

Mascot Search Results

Peptide View

MS/MS Fragmentation of **GASQAGAPQGR**  
Found in **GELS\_HUMAN**, Gelsolin OS=Homo sapiens GN=GSN PE=1 SV=1

Match to Query 23488: 1309.659868 from(655.837210,2+) rtinseconds(1249) index(1079)  
Title: Locus:1.1.1.1711.23 File:"2013-07-02 CLN FXIII 180 min 2nd F 1.wiff"  
Data file C:\Program Files (x86)\Matrix Science\Mascot Daemon\mgf\8 FXIII 180 min 2nd\mascot\_daemon\_merge.mgf

Click mouse within plot area to zoom in by factor of two about that point  
Or,   to  Da   
Label all possible matches ☐ Label matches used for scoring ☒

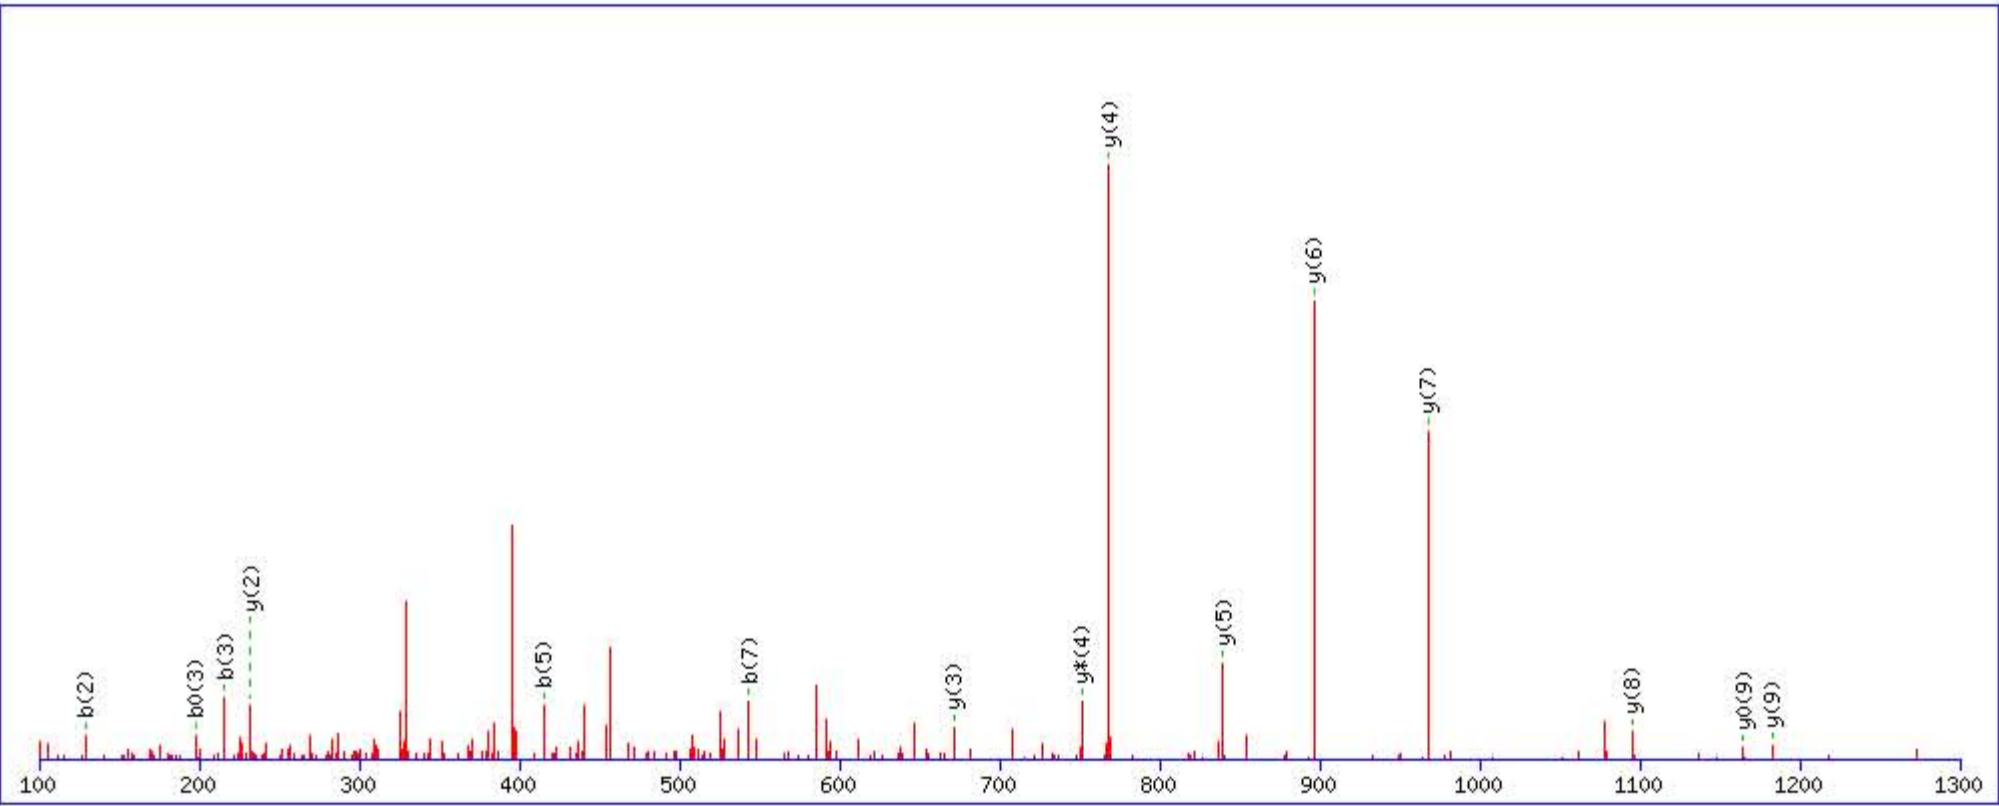

Monoisotopic mass of neutral peptide Mr(calc): 1309.656097  
Fixed modifications: Carbamidomethyl (C) (apply to specified residues or termini only)  
Variable modifications:  
Q9 : Biotin:Thermo-21345 (Q)  
Ions Score: 62 Expect: 8.8e-006  
Matches : 15/94 fragment ions using 24 most intense peaks [\(help\)](#)

| #  | b           | b <sup>++</sup> | b <sup>+</sup> | b <sup>++</sup> | b <sup>0</sup> | b <sup>0++</sup> | Seq. | y           | y <sup>++</sup> | y <sup>+</sup> | y <sup>++</sup> | y <sup>0</sup> | y <sup>0++</sup> | #  |
|----|-------------|-----------------|----------------|-----------------|----------------|------------------|------|-------------|-----------------|----------------|-----------------|----------------|------------------|----|
| 1  | 58.028740   | 29.518008       |                |                 |                |                  | G    |             |                 |                |                 |                |                  | 11 |
| 2  | 129.065854  | 65.036565       |                |                 |                |                  | A    | 1253.641918 | 627.324597      | 1236.615369    | 618.811323      | 1235.631353    | 618.319315       | 10 |
| 3  | 216.097882  | 108.552579      |                |                 | 198.087317     | 99.547296        | S    | 1182.604804 | 591.806040      | 1165.578255    | 583.292765      | 1164.594239    | 582.800757       | 9  |
| 4  | 344.156460  | 172.581868      | 327.129911     | 164.068593      | 326.145895     | 163.576585       | Q    | 1095.572776 | 548.290026      | 1078.546227    | 539.776752      |                |                  | 8  |
| 5  | 415.193574  | 208.100425      | 398.167025     | 199.587150      | 397.183009     | 199.095142       | A    | 967.514198  | 484.260737      | 950.487649     | 475.747462      |                |                  | 7  |
| 6  | 472.215038  | 236.611157      | 455.188489     | 228.097882      | 454.204473     | 227.605874       | G    | 896.477084  | 448.742180      | 879.450535     | 440.228906      |                |                  | 6  |
| 7  | 543.252152  | 272.129714      | 526.225603     | 263.616440      | 525.241587     | 263.124432       | A    | 839.455620  | 420.231448      | 822.429071     | 411.718173      |                |                  | 5  |
| 8  | 640.304916  | 320.656096      | 623.278367     | 312.142822      | 622.294351     | 311.650814       | P    | 768.418506  | 384.712891      | 751.391957     | 376.199616      |                |                  | 4  |
| 9  | 1079.530242 | 540.268759      | 1062.503693    | 531.755485      | 1061.519677    | 531.263477       | Q    | 671.365742  | 336.186509      | 654.339193     | 327.673234      |                |                  | 3  |
| 10 | 1136.551706 | 568.779491      | 1119.525157    | 560.266217      | 1118.541141    | 559.774208       | G    | 232.140416  | 116.573846      | 215.113867     | 108.060571      |                |                  | 2  |
| 11 |             |                 |                |                 |                |                  | R    | 175.118952  | 88.063114       | 158.092403     | 79.549839       |                |                  | 1  |

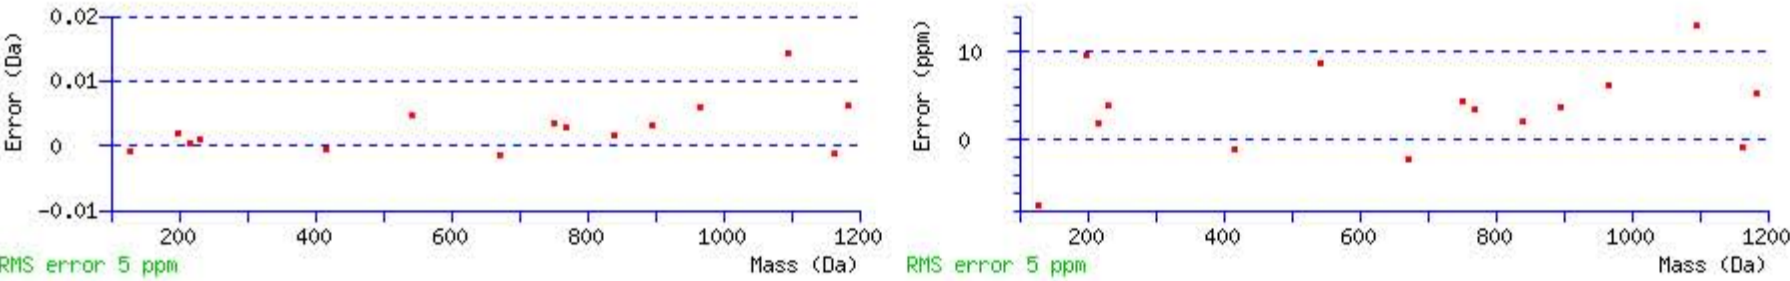

NCBI BLAST search of [GASQAGAPQGR](#)  
(Parameters: blastp, nr protein database, expect=20000, no filter, PAM30)  
Other BLAST [web gateways](#)

All matches to this query

| Score | Mr(calc):   | Delta    | Sequence                     |
|-------|-------------|----------|------------------------------|
| 61.6  | 1309.656097 | 0.003771 | <a href="#">GASQAGAPQGR</a>  |
| 19.4  | 1309.656097 | 0.003771 | <a href="#">GASQAGAPQGR</a>  |
| 7.2   | 1309.648682 | 0.011186 | <a href="#">KSTHRNPEDAR</a>  |
| 0.0   | 1309.654739 | 0.005129 | <a href="#">LTESNSAMVKSK</a> |

M

A

T

R

I

X

S

C

I

E

N

C

E

Mascot Search Results

Peptide View

MS/MS Fragmentation of **QTQVSVLPEGGETPLFK**  
Found in **GELS\_HUMAN**, Gelsolin OS=Homo sapiens GN=GSN PE=1 SV=1

Match to Query 53014: 2451.312012 from(818.111280,3+) rtinseconds(2608) index(8836)  
Title: Locus:1.1.1.2185.20 File:"2013-07-02 CLN FXIII 180 min 2nd F 1.wiff"  
Data file C:\Program Files (x86)\Matrix Science\Mascot Daemon\mgf\8 FXIII 180 min 2nd\mascot\_daemon\_merge.mgf

Click mouse within plot area to zoom in by factor of two about that point  
Or,   to  Da   
Label all possible matches ☐ Label matches used for scoring ☒

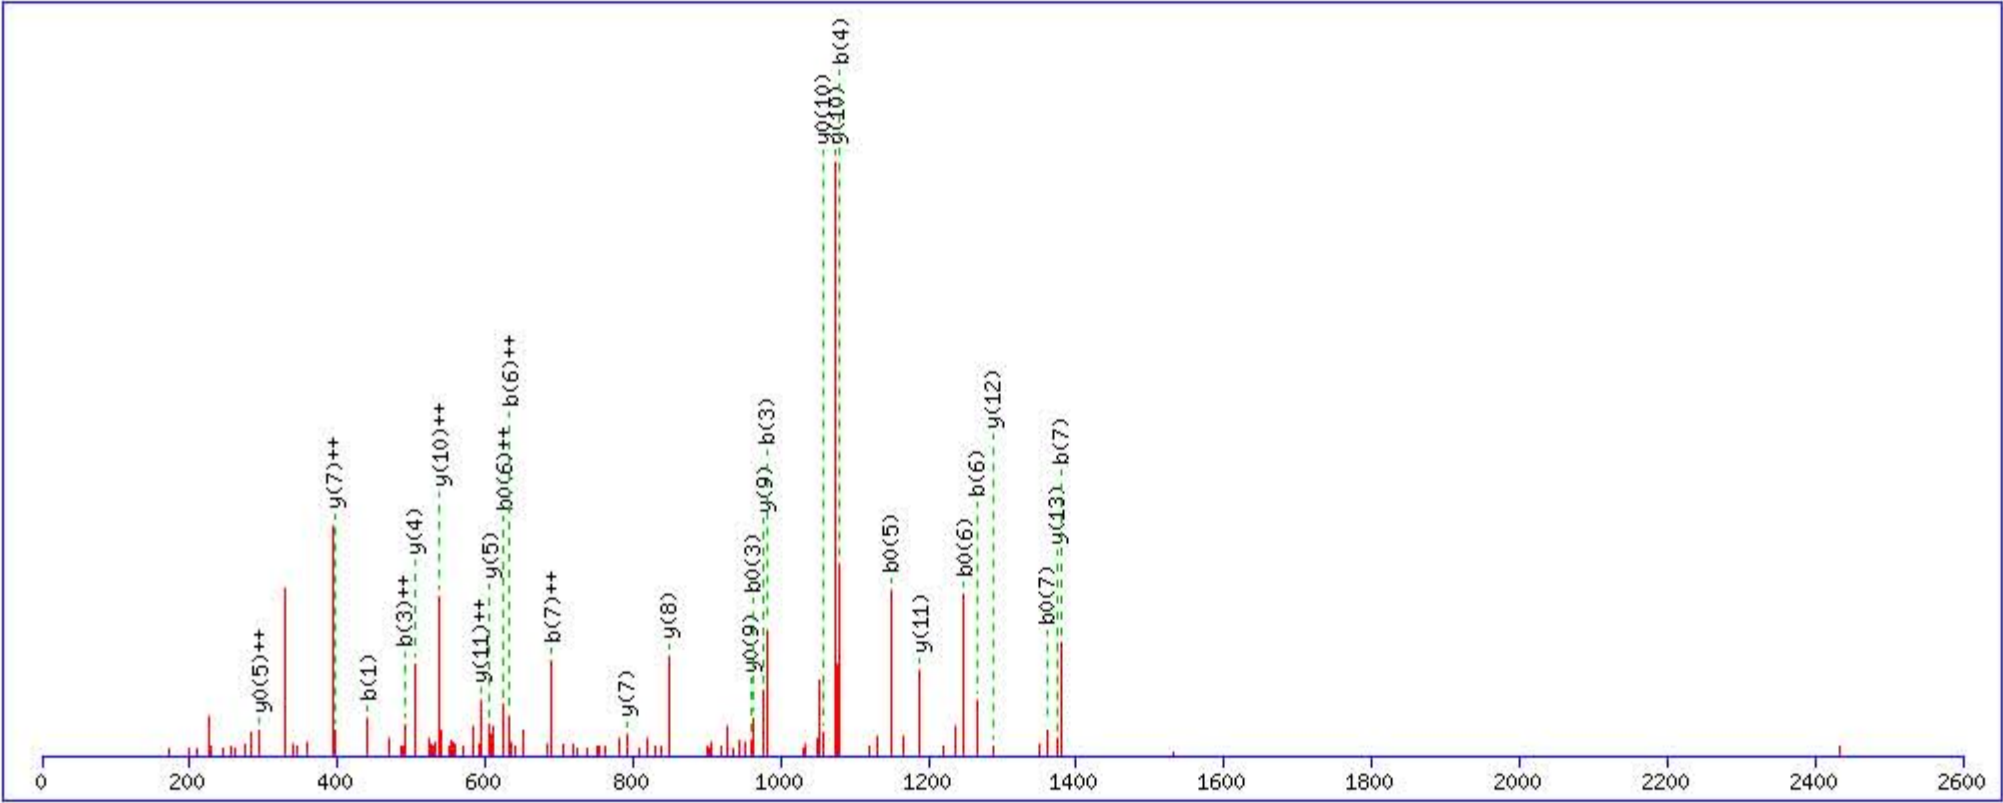

Monoisotopic mass of neutral peptide Mr(calc): 2451.290588  
Fixed modifications: Carbamidomethyl (C) (apply to specified residues or termini only)  
Variable modifications:  
Q1 : Biotin:Thermo-21345 (Q)  
Q3 : Biotin:Thermo-21345 (Q)  
Ions Score: 50 Expect: 0.00017  
Matches : 29/182 fragment ions using 52 most intense peaks [\(help\)](#)

| #  | b           | b <sup>++</sup> | b <sup>+</sup> | b <sup>+++</sup> | b <sup>0</sup> | b <sup>0++</sup> | Seq. | y           | y <sup>++</sup> | y <sup>+</sup> | y <sup>+++</sup> | y <sup>0</sup> | y <sup>0++</sup> | #  |
|----|-------------|-----------------|----------------|------------------|----------------|------------------|------|-------------|-----------------|----------------|------------------|----------------|------------------|----|
| 1  | 440.232602  | 220.619939      | 423.206053     | 212.106664       |                |                  | Q    |             |                 |                |                  |                |                  | 17 |
| 2  | 541.280281  | 271.143779      | 524.253732     | 262.630504       | 523.269716     | 262.138496       | T    | 2013.072528 | 1007.039902     | 1996.045979    | 998.526628       | 1995.061963    | 998.034620       | 16 |
| 3  | 980.505607  | 490.756442      | 963.479058     | 482.243167       | 962.495042     | 481.751159       | Q    | 1912.024849 | 956.516063      | 1894.998300    | 948.002788       | 1894.014284    | 947.510780       | 15 |
| 4  | 1079.574021 | 540.290649      | 1062.547472    | 531.777374       | 1061.563456    | 531.285366       | V    | 1472.799523 | 736.903400      | 1455.772974    | 728.390125       | 1454.788958    | 727.898117       | 14 |
| 5  | 1166.606049 | 583.806663      | 1149.579500    | 575.293388       | 1148.595484    | 574.801380       | S    | 1373.731109 | 687.369193      | 1356.704560    | 678.855918       | 1355.720544    | 678.363910       | 13 |
| 6  | 1265.674463 | 633.340870      | 1248.647914    | 624.827595       | 1247.663898    | 624.335587       | V    | 1286.699081 | 643.853179      | 1269.672532    | 635.339904       | 1268.688516    | 634.847896       | 12 |
| 7  | 1378.758527 | 689.882902      | 1361.731978    | 681.369627       | 1360.747962    | 680.877619       | L    | 1187.630667 | 594.318971      | 1170.604118    | 585.805697       | 1169.620102    | 585.313689       | 11 |
| 8  | 1475.811291 | 738.409284      | 1458.784742    | 729.896009       | 1457.800726    | 729.404001       | P    | 1074.546603 | 537.776940      | 1057.520054    | 529.263665       | 1056.536038    | 528.771657       | 10 |
| 9  | 1604.853884 | 802.930580      | 1587.827335    | 794.417306       | 1586.843319    | 793.925298       | E    | 977.493839  | 489.250558      | 960.467290     | 480.737283       | 959.483274     | 480.245275       | 9  |
| 10 | 1661.875348 | 831.441312      | 1644.848799    | 822.928038       | 1643.864783    | 822.436030       | G    | 848.451246  | 424.729261      | 831.424697     | 416.215986       | 830.440681     | 415.723978       | 8  |
| 11 | 1718.896812 | 859.952044      | 1701.870263    | 851.438770       | 1700.886247    | 850.946762       | G    | 791.429782  | 396.218529      | 774.403233     | 387.705254       | 773.419217     | 387.213246       | 7  |
| 12 | 1847.939405 | 924.473341      | 1830.912856    | 915.960066       | 1829.928840    | 915.468058       | E    | 734.408318  | 367.707797      | 717.381769     | 359.194523       | 716.397753     | 358.702515       | 6  |
| 13 | 1948.987084 | 974.997180      | 1931.960535    | 966.483906       | 1930.976519    | 965.991898       | T    | 605.365725  | 303.186500      | 588.339176     | 294.673226       | 587.355160     | 294.181218       | 5  |
| 14 | 2046.039848 | 1023.523562     | 2029.013299    | 1015.010288      | 2028.029283    | 1014.518280      | P    | 504.318046  | 252.662661      | 487.291497     | 244.149386       |                |                  | 4  |
| 15 | 2159.123912 | 1080.065594     | 2142.097363    | 1071.552319      | 2141.113347    | 1071.060311      | L    | 407.265282  | 204.136279      | 390.238733     | 195.623004       |                |                  | 3  |
| 16 | 2306.192326 | 1153.599801     | 2289.165777    | 1145.086526      | 2288.181761    | 1144.594518      | F    | 294.181218  | 147.594247      | 277.154669     | 139.080972       |                |                  | 2  |
| 17 |             |                 |                |                  |                |                  | K    | 147.112804  | 74.060040       | 130.086255     | 65.546765        |                |                  | 1  |

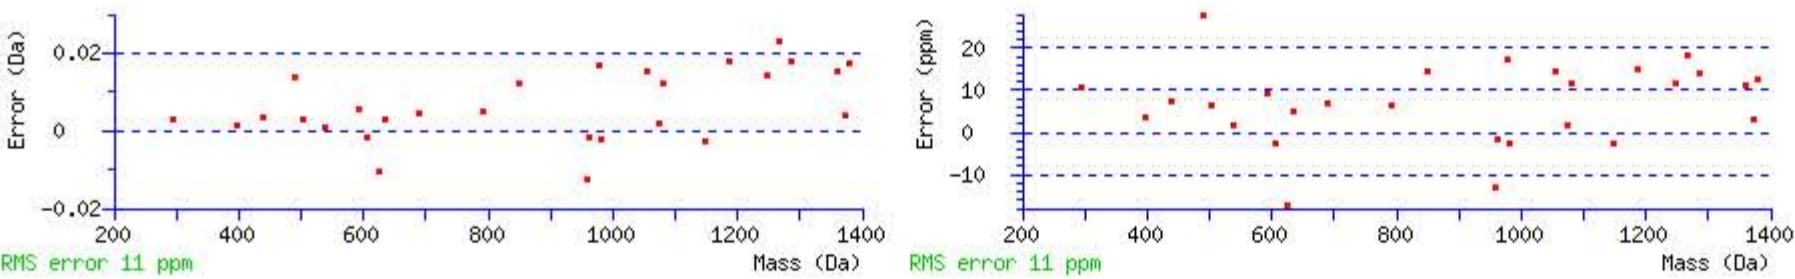

NCBI BLAST search of **QTQVSVLPEGGETPLFK**  
(Parameters: blastp, nr protein database, expect=20000, no filter, PAM30)  
Other BLAST [web gateways](#)

All matches to this query

| Score | Mr(calc):   | Delta     | Sequence                              |
|-------|-------------|-----------|---------------------------------------|
| 50.4  | 2451.290588 | 0.021424  | <a href="#">QTQVSVLPEGGETPLFK</a>     |
| 9.7   | 2451.277130 | 0.034882  | <a href="#">GFPSDTQLLDLRRNHFPSVPR</a> |
| 1.7   | 2451.330780 | -0.018768 | <a href="#">RQFQSQLADLQQLPDILK</a>    |
| 1.7   | 2451.330780 | -0.018768 | <a href="#">RQFQSQLADLQQLPDILK</a>    |

Match to Query 56330: 2697.340152 from(900.120660,3+) rtinseconds(2565) index(8607)  
Title: Locus:1.1.1.2170.8 File:"2013-07-02 CLN FXIII 180 min 2nd F 1.wiff"  
Data file C:\Program Files (x86)\Matrix Science\Mascot Daemon\mgf\8 FXIII 180 min 2nd\mascot\_daemon\_merge.mgf

| #  | b           | b <sup>++</sup> | b <sup>*</sup> | b <sup>*++</sup> | b <sup>0</sup> | b <sup>0++</sup> | Seq. | y           | y <sup>++</sup> | y <sup>*</sup> | y <sup>*++</sup> | y <sup>0</sup> | y <sup>0++</sup> | #  |
|----|-------------|-----------------|----------------|------------------|----------------|------------------|------|-------------|-----------------|----------------|------------------|----------------|------------------|----|
| 1  | 116.034219  | 58.520748       |                |                  | 98.023654      | 49.515465        | D    |             |                 |                |                  |                |                  | 22 |
| 2  | 213.086983  | 107.047129      |                |                  | 195.076418     | 98.041847        | P    | 2583.287164 | 1292.147220     | 2566.260615    | 1283.633945      | 2565.276599    | 1283.141937      | 21 |
| 3  | 328.113926  | 164.560601      |                |                  | 310.103361     | 155.555319       | D    | 2486.234400 | 1243.620838     | 2469.207851    | 1235.107563      | 2468.223835    | 1234.615555      | 20 |
| 4  | 767.339252  | 384.173264      | 750.312703     | 375.659989       | 749.328687     | 375.167982       | Q    | 2371.207457 | 1186.107366     | 2354.180908    | 1177.594092      | 2353.196892    | 1177.102084      | 19 |
| 5  | 868.386931  | 434.697104      | 851.360382     | 426.183829       | 850.376366     | 425.691821       | T    | 1931.982131 | 966.494704      | 1914.955582    | 957.981429       | 1913.971566    | 957.489421       | 18 |
| 6  | 983.413874  | 492.210575      | 966.387325     | 483.697300       | 965.403309     | 483.205292       | D    | 1830.934452 | 915.970864      | 1813.907903    | 907.457590       | 1812.923887    | 906.965581       | 17 |
| 7  | 1040.435338 | 520.721307      | 1023.408789    | 512.208032       | 1022.424773    | 511.716025       | G    | 1715.907509 | 858.457392      | 1698.880960    | 849.944118       | 1697.896944    | 849.452110       | 16 |
| 8  | 1153.519402 | 577.263339      | 1136.492853    | 568.750065       | 1135.508837    | 568.258056       | L    | 1658.886045 | 829.946661      | 1641.859496    | 821.433386       | 1640.875480    | 820.941378       | 15 |
| 9  | 1210.540866 | 605.774071      | 1193.514317    | 597.260796       | 1192.530301    | 596.768788       | G    | 1545.801981 | 773.404629      | 1528.775432    | 764.891354       | 1527.791416    | 764.399346       | 14 |
| 10 | 1323.624930 | 662.316103      | 1306.598381    | 653.802828       | 1305.614365    | 653.310820       | L    | 1488.780517 | 744.893897      | 1471.753968    | 736.380622       | 1470.769952    | 735.888614       | 13 |
| 11 | 1410.656958 | 705.832117      | 1393.630409    | 697.318842       | 1392.646393    | 696.826834       | S    | 1375.696453 | 688.351865      | 1358.669904    | 679.838590       | 1357.685888    | 679.346582       | 12 |
| 12 | 1573.720287 | 787.363781      | 1556.693738    | 778.850507       | 1555.709722    | 778.358499       | Y    | 1288.664425 | 644.835851      | 1271.637876    | 636.322576       | 1270.653860    | 635.830568       | 11 |
| 13 | 1686.804351 | 843.905813      | 1669.777802    | 835.392539       | 1668.793786    | 834.900531       | L    | 1125.601096 | 563.304186      | 1108.574547    | 554.790912       | 1107.590531    | 554.298904       | 10 |
| 14 | 1773.836379 | 887.421827      | 1756.809830    | 878.908553       | 1755.825814    | 878.416545       | S    | 1012.517032 | 506.762154      | 995.490483     | 498.248880       | 994.506467     | 497.756872       | 9  |
| 15 | 1860.868407 | 930.937841      | 1843.841858    | 922.424567       | 1842.857842    | 921.932559       | S    | 925.485004  | 463.246140      | 908.458455     | 454.732866       | 907.474439     | 454.240858       | 8  |
| 16 | 1997.927319 | 999.467297      | 1980.900770    | 990.954023       | 1979.916754    | 990.462015       | H    | 838.452976  | 419.730126      | 821.426427     | 411.216852       | 820.442411     | 410.724844       | 7  |
| 17 | 2111.011383 | 1056.009329     | 2093.984834    | 1047.496055      | 2093.000818    | 1047.004047      | I    | 701.394064  | 351.200670      | 684.367515     | 342.687396       | 683.383499     | 342.195388       | 6  |
| 18 | 2182.048497 | 1091.527886     | 2165.021948    | 1083.014612      | 2164.037932    | 1082.522604      | A    | 588.310000  | 294.658638      | 571.283451     | 286.145364       | 570.299435     | 285.653356       | 5  |
| 19 | 2296.091424 | 1148.549350     | 2279.064875    | 1140.036075      | 2278.080859    | 1139.544067      | N    | 517.272886  | 259.140081      | 500.246337     | 250.626806       | 499.262321     | 250.134798       | 4  |
| 20 | 2395.159838 | 1198.083557     | 2378.133289    | 1189.570282      | 2377.149273    | 1189.078274      | V    | 403.229959  | 202.118617      | 386.203410     |                  |                |                  |    |

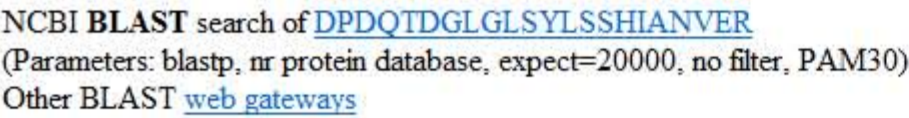

### All matches to this query

| Score | Mr(calc):   | Delta    | Sequence                               |
|-------|-------------|----------|----------------------------------------|
| 133.7 | 2697.306824 | 0.033328 | <a href="#">DPDQTDGLGLSYLSSHIANVER</a> |

MATRIX

SCIENCE

Mascot Search Results

Peptide View

MS/MS Fragmentation of **VPFDAATLHTSTAMAAQHGMDDDG**TGQK****  
Found in **GELS\_HUMAN**, Gelsolin OS=Homo sapiens GN=GSN PE=1 SV=1

Match to Query 61546: 3183.465256 from(796.873590,4+) rtinseconds(1968) index(5482)  
Title: Locus:1.1.1.1962.8 File:"2013-07-02 CLN FXIII 180 min 2nd F 1.wiff"  
Data file C:\Program Files (x86)\Matrix Science\Mascot Daemon\mgf\8 FXIII 180 min 2nd\mascot\_daemon\_merge.mgf

Click mouse within plot area to zoom in by factor of two about that point  
Or, 

Plot from

0

 to 

3000

 Da 

Full range

  
Label all possible matches ☐ Label matches used for scoring ☒

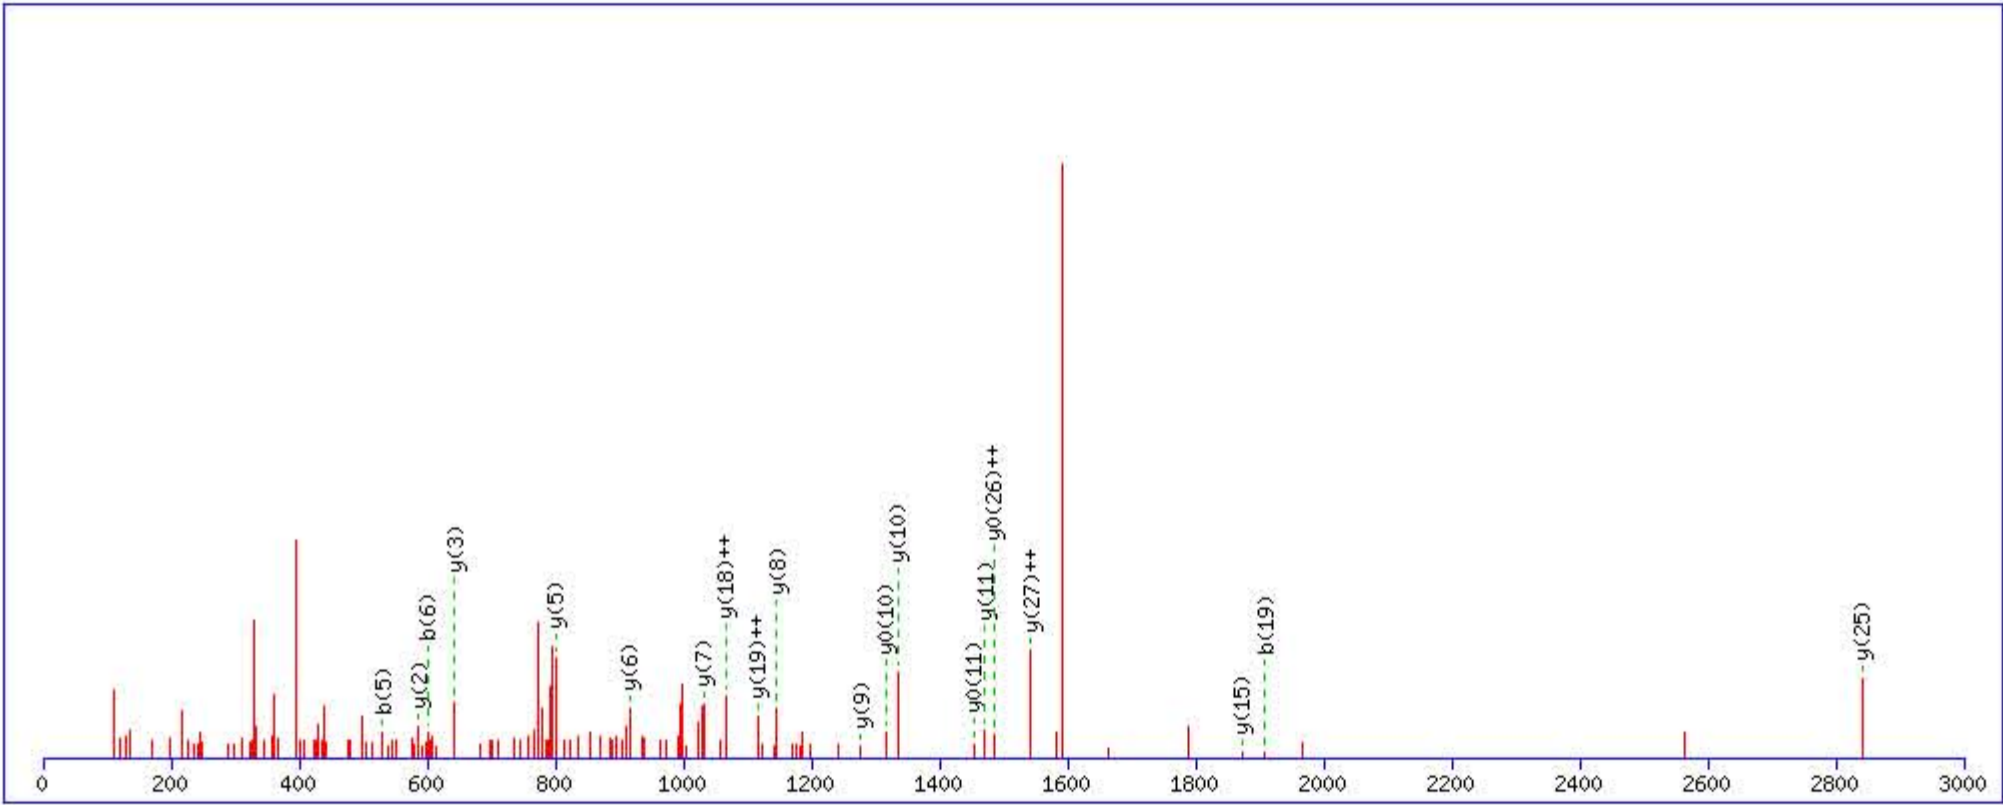

Monoisotopic mass of neutral peptide Mr(calc): 3183.442383  
Fixed modifications: Carbamidomethyl (C) (apply to specified residues or termini only)  
Variable modifications:  
Q27 : Biotin:Thermo-21345 (Q)  
Ions Score: 41 Expect: 0.001  
Matches : 20/280 fragment ions using 50 most intense peaks [\(help\)](#)

| #  | b           | b <sup>++</sup> | b <sup>*</sup> | b <sup>*++</sup> | b <sup>0</sup> | b <sup>0++</sup> | Seq. | y           | y <sup>++</sup> | y <sup>*</sup> | y <sup>*++</sup> | y <sup>0</sup> | y <sup>0++</sup> | #  |
|----|-------------|-----------------|----------------|------------------|----------------|------------------|------|-------------|-----------------|----------------|------------------|----------------|------------------|----|
| 1  | 100.075690  | 50.541483       |                |                  |                |                  | V    |             |                 |                |                  |                |                  | 28 |
| 2  | 197.128454  | 99.067865       |                |                  |                |                  | P    | 3085.381222 | 1543.194249     | 3068.354673    | 1534.680974      | 3067.370657    | 1534.188966      | 27 |
| 3  | 344.196868  | 172.602072      |                |                  |                |                  | F    | 2988.328458 | 1494.667867     | 2971.301909    | 1486.154592      | 2970.317893    | 1485.662584      | 26 |
| 4  | 459.223811  | 230.115543      |                |                  | 441.213246     | 221.110261       | D    | 2841.260044 | 1421.133660     | 2824.233495    | 1412.620385      | 2823.249479    | 1412.128377      | 25 |
| 5  | 530.260925  | 265.634101      |                |                  | 512.250360     | 256.628818       | A    | 2726.233101 | 1363.620188     | 2709.206552    | 1355.106914      | 2708.222536    | 1354.614906      | 24 |
| 6  | 601.298039  | 301.152658      |                |                  | 583.287474     | 292.147375       | A    | 2655.195987 | 1328.101631     | 2638.169438    | 1319.588357      | 2637.185422    | 1319.096349      | 23 |
| 7  | 702.345718  | 351.676497      |                |                  | 684.335153     | 342.671215       | T    | 2584.158873 | 1292.583074     | 2567.132324    | 1284.069800      | 2566.148308    | 1283.577792      | 22 |
| 8  | 815.429782  | 408.218529      |                |                  | 797.419217     | 399.213247       | L    | 2483.111194 | 1242.059235     | 2466.084645    | 1233.545960      | 2465.100629    | 1233.053952      | 21 |
| 9  | 952.488694  | 476.747985      |                |                  | 934.478129     | 467.742703       | H    | 2370.027130 | 1185.517203     | 2353.000581    | 1177.003928      | 2352.016565    | 1176.511920      | 20 |
| 10 | 1053.536373 | 527.271824      |                |                  | 1035.525808    | 518.266542       | T    | 2232.968218 | 1116.987747     | 2215.941669    | 1108.474472      | 2214.957653    | 1107.982464      | 19 |
| 11 | 1140.568401 | 570.787839      |                |                  | 1122.557836    | 561.782556       | S    | 2131.920539 | 1066.463907     | 2114.893990    | 1057.950633      | 2113.909974    | 1057.458625      | 18 |
| 12 | 1241.616080 | 621.311678      |                |                  | 1223.605515    | 612.306396       | T    | 2044.888511 | 1022.947893     | 2027.861962    | 1014.434619      | 2026.877946    | 1013.942611      | 17 |
| 13 | 1312.653194 | 656.830235      |                |                  | 1294.642629    | 647.824952       | A    | 1943.840832 | 972.424054      | 1926.814283    | 963.910779       | 1925.830267    | 963.418771       | 16 |
| 14 | 1443.693679 | 722.350478      |                |                  | 1425.683114    | 713.345195       | M    | 1872.803718 | 936.905497      | 1855.777169    | 928.392222       | 1854.793153    | 927.900214       | 15 |
| 15 | 1514.730793 | 757.869035      |                |                  | 1496.720228    | 748.863752       | A    | 1741.763233 | 871.385254      | 1724.736684    | 862.871980       | 1723.752668    | 862.379972       | 14 |
| 16 | 1585.767907 | 793.387591      |                |                  | 1567.757342    | 784.382309       | A    | 1670.726119 | 835.866697      | 1653.699570    | 827.353423       | 1652.715554    | 826.861415       | 13 |
| 17 | 1713.826485 | 857.416880      | 1696.799936    | 848.903606       | 1695.815920    | 848.411598       | Q    | 1599.689005 | 800.348140      | 1582.662456    | 791.834866       | 1581.678440    | 791.342858       | 12 |
| 18 | 1850.885397 | 925.946336      | 1833.858848    | 917.433062       | 1832.874832    | 916.941054       | H    | 1471.630427 | 736.318851      | 1454.603878    | 727.805577       | 1453.619862    | 727.313569       | 11 |
| 19 | 1907.906861 | 954.457068      | 1890.880312    | 945.943794       | 1889.896296    | 945.451786       | G    | 1334.571515 | 667.789395      | 1317.544966    | 659.276121       | 1316.560950    | 658.784113       | 10 |
| 20 | 2038.947346 | 1019.977311     | 2021.920797    | 1011.464036      | 2020.936781    | 1010.972028      | M    | 1277.550051 | 639.278663      | 1260.523502    | 630.765389       | 1259.539486    | 630.273381       | 9  |
| 21 | 2153.974289 | 1077.490782     | 2136.947740    | 1068.977508      | 2135.963724    | 1068.485500      | D    | 1146.509566 | 573.758421      | 1129.483017    | 565.245146       | 1128.499001    | 564.753138       | 8  |
| 22 | 2269.001232 | 1135.004254     | 2251.974683    | 1126.490979      | 2250.990667    | 1125.998971      | D    | 1031.482623 | 516.244949      | 1014.456074    | 507.731675       | 1013.472058    | 507.239667       | 7  |
| 23 | 2384.028175 | 1192.517725     | 2367.001626    | 1184.004451      | 2366.017610    | 1183.512443      | D    | 916.455680  | 458.731478      | 899.429131     | 450.218203       | 898.445115     | 449.726195       | 6  |
| 24 | 2441.049639 | 1221.028457     | 2424.023090    | 1212.515183      | 2423.039074    | 1212.023175      | G    | 801.428737  | 401.218007      | 784.402188     | 392.704732       | 783.418172     | 392.212724       | 5  |
| 25 | 2542.097318 | 1271.552297     | 2525.070769    | 1263.039022      | 2524.086753    | 1262.547014      | T    | 744.407273  | 372.707275      | 727.380724     | 364.194000       | 726.396708     | 363.701992       | 4  |
| 26 | 2599.118782 | 1300.063029     | 2582.092233    | 1291.549754      | 2581.108217    | 1291.057746      | G    | 643.359594  | 322.183435      | 626.333045     | 313.670161       |                |                  | 3  |
| 27 | 3038.344108 | 1519.675692     | 3021.317559    | 1511.162417      | 3020.333543    | 1510.670409      | Q    | 586.338130  | 293.672703      | 569.311581     | 285.159429       |                |                  | 2  |
| 28 |             |                 |                |                  |                |                  | K    | 147.112804  | 74.060040       | 130.086255     | 65.546765        |                |                  | 1  |

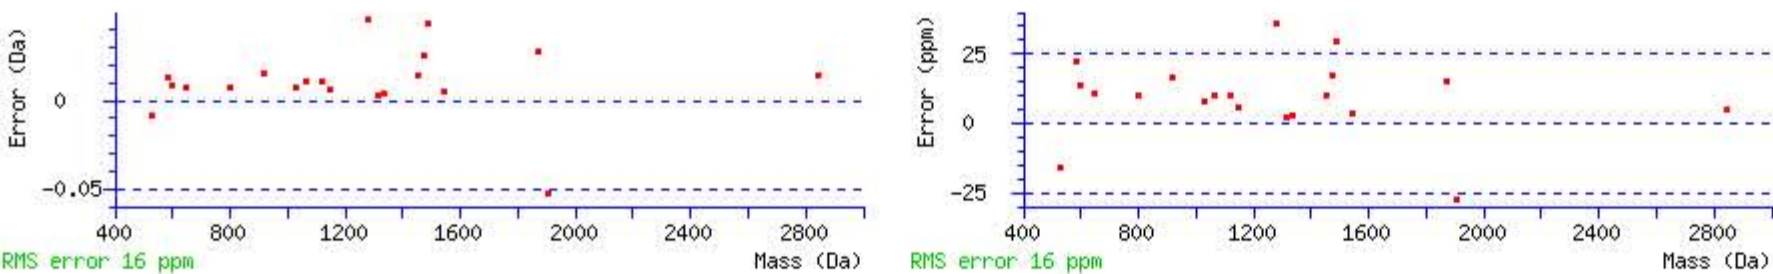

NCBI BLAST search of **VPFDAATLHTSTAMAAQHGMDDDG**TGQK****  
(Parameters: blastp, nr protein database, expect=20000, no filter, PAM30)  
Other BLAST [web gateways](#)

All matches to this query

| Score | Mr(calc):   | Delta    | Sequence                                            |
|-------|-------------|----------|-----------------------------------------------------|
| 41.2  | 3183.442383 | 0.022873 | <a href="#">VPFDAATLHTSTAMAAQHGMDDDG<b>TGQK</b></a> |
| 9.6   | 3183.442383 | 0.022873 | <a href="#">VPFDAATLHTSTAMAAQHGMDDDG<b>TGQK</b></a> |

MATRIX

SCIENCE

Mascot Search Results

Peptide View

MS/MS Fragmentation of **SLEDQVEMLR**  
Found in **GLU2B\_HUMAN**, Glucosidase 2 subunit beta OS=Homo sapiens GN=PRKCSH PE=1 SV=2

Match to Query 32031: 1529.780108 from(765.897330,2+) rtinseconds(2367) index(52662)  
Title: Locus:1.1.1.2061.17 File:"2013-07-02 CLN FXIII 180 min 2nd F 4.wiff"  
Data file C:\Program Files (x86)\Matrix Science\Mascot Daemon\mgf\8 FXIII 180 min 2nd\mascot\_daemon\_merge.mgf

Click mouse within plot area to zoom in by factor of two about that point  
Or,   to  Da   
Label all possible matches ☐ Label matches used for scoring ☒

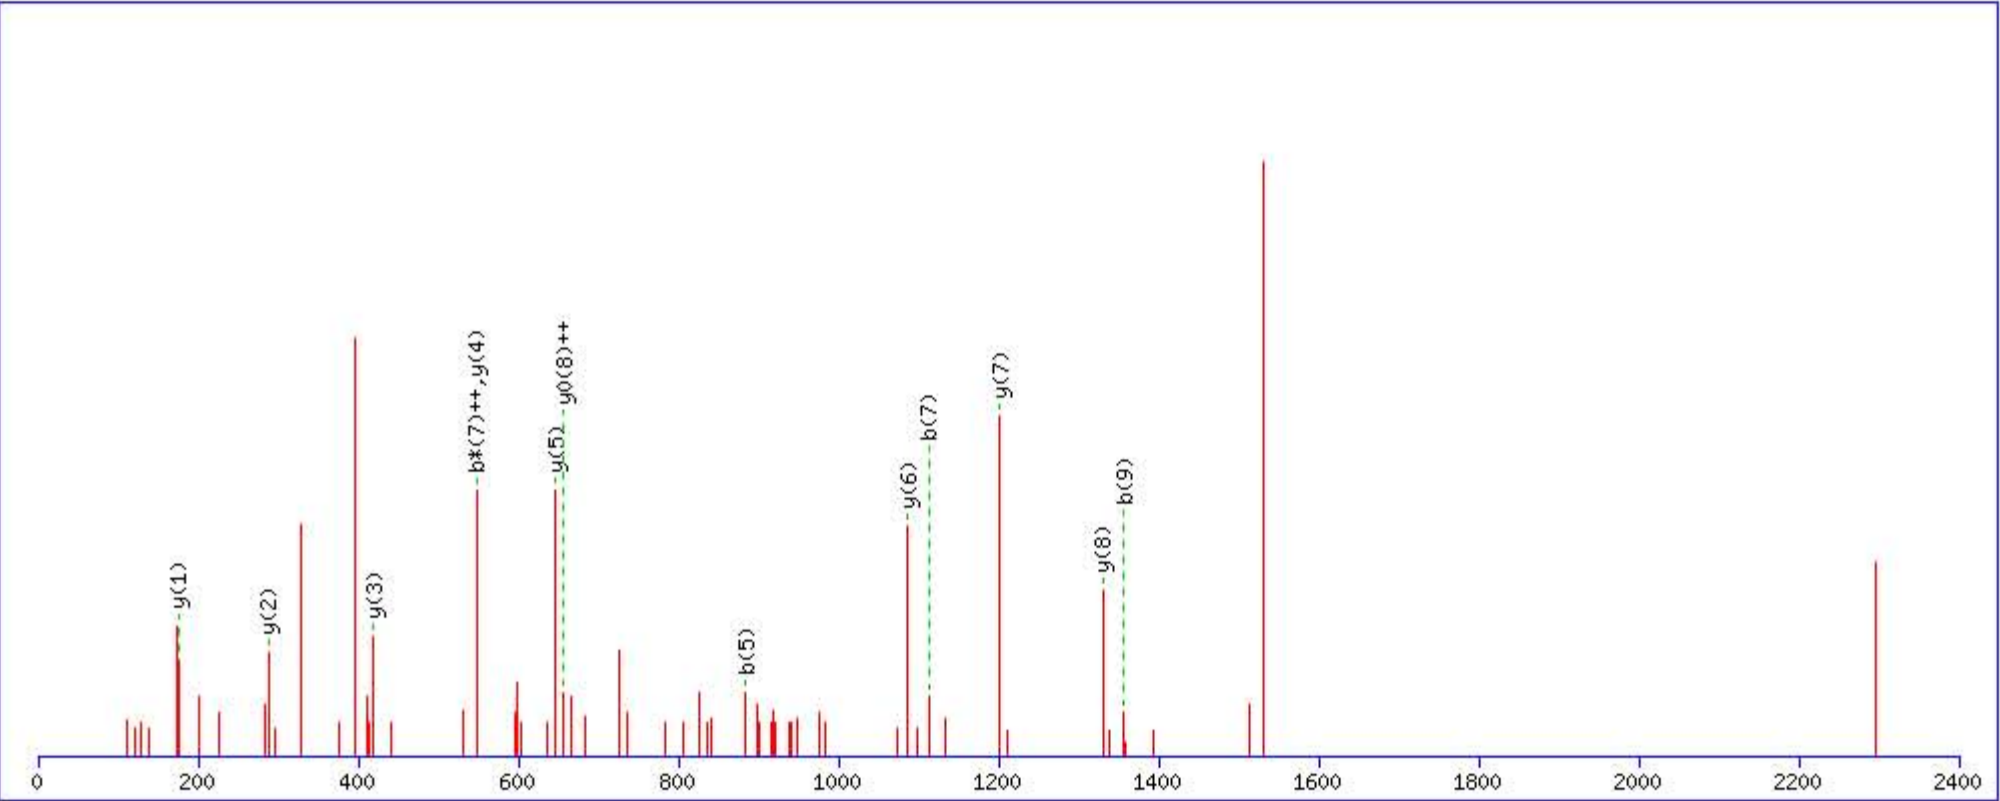

Monoisotopic mass of neutral peptide Mr(calc): 1529.758163  
Fixed modifications: Carbamidomethyl (C) (apply to specified residues or termini only)  
Variable modifications:  
Q5 : Biotin:Thermo-21345 (Q)  
Ions Score: 47 Expect: 0.00033  
Matches : 13/94 fragment ions using 26 most intense peaks [\(help\)](#)

| #  | b           | b <sup>++</sup> | b <sup>*</sup> | b <sup>*++</sup> | b <sup>0</sup> | b <sup>0++</sup> | Seq. | y           | y <sup>++</sup> | y <sup>*</sup> | y <sup>*++</sup> | y <sup>0</sup> | y <sup>0++</sup> | #  |
|----|-------------|-----------------|----------------|------------------|----------------|------------------|------|-------------|-----------------|----------------|------------------|----------------|------------------|----|
| 1  | 88.039304   | 44.523290       |                |                  | 70.028739      | 35.518008        | S    |             |                 |                |                  |                |                  | 10 |
| 2  | 201.123368  | 101.065322      |                |                  | 183.112803     | 92.060039        | L    | 1443.733434 | 722.370355      | 1426.706885    | 713.857080       | 1425.722869    | 713.365072       | 9  |
| 3  | 330.165961  | 165.586618      |                |                  | 312.155396     | 156.581336       | E    | 1330.649370 | 665.828323      | 1313.622821    | 657.315048       | 1312.638805    | 656.823040       | 8  |
| 4  | 445.192904  | 223.100090      |                |                  | 427.182339     | 214.094808       | D    | 1201.606777 | 601.307026      | 1184.580228    | 592.793752       | 1183.596212    | 592.301744       | 7  |
| 5  | 884.418230  | 442.712753      | 867.391681     | 434.199479       | 866.407665     | 433.707471       | Q    | 1086.579834 | 543.793555      | 1069.553285    | 535.280281       | 1068.569269    | 534.788272       | 6  |
| 6  | 983.486644  | 492.246960      | 966.460095     | 483.733686       | 965.476079     | 483.241678       | V    | 647.354508  | 324.180892      | 630.327959     | 315.667617       | 629.343943     | 315.175609       | 5  |
| 7  | 1112.529237 | 556.768257      | 1095.502688    | 548.254982       | 1094.518672    | 547.762974       | E    | 548.286094  | 274.646685      | 531.259545     | 266.133410       | 530.275529     | 265.641402       | 4  |
| 8  | 1243.569722 | 622.288499      | 1226.543173    | 613.775225       | 1225.559157    | 613.283216       | M    | 419.243501  | 210.125388      | 402.216952     | 201.612114       |                |                  | 3  |
| 9  | 1356.653786 | 678.830531      | 1339.627237    | 670.317256       | 1338.643221    | 669.825248       | L    | 288.203016  | 144.605146      | 271.176467     | 136.091871       |                |                  | 2  |
| 10 |             |                 |                |                  |                |                  | R    | 175.118952  | 88.063114       | 158.092403     | 79.549839        |                |                  | 1  |

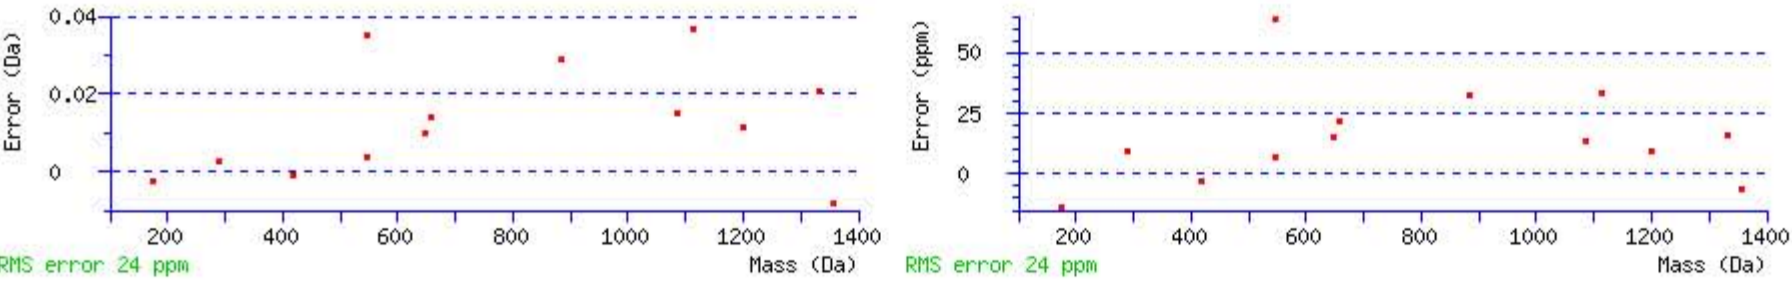

NCBI BLAST search of [SLEDQVEMLR](#)  
(Parameters: blastp, nr protein database, expect=20000, no filter, PAM30)  
Other BLAST [web gateways](#)

All matches to this query

| Score | Mr(calc):   | Delta     | Sequence                       |
|-------|-------------|-----------|--------------------------------|
| 47.0  | 1529.758163 | 0.021945  | <a href="#">SLEDQVEMLR</a>     |
| 9.4   | 1529.798386 | -0.018278 | <a href="#">SSLMPLRNDVDKR</a>  |
| 3.3   | 1529.780640 | -0.000532 | <a href="#">ATMVSQPSARR</a>    |
| 3.1   | 1529.798355 | -0.018247 | <a href="#">AEDLRREMIELR</a>   |
| 1.3   | 1529.787827 | -0.007719 | <a href="#">LSAFVDVGLYQYR</a>  |
| 0.9   | 1529.784637 | -0.004529 | <a href="#">FINSKCAKYMLR</a>   |
| 0.7   | 1529.772568 | 0.007540  | <a href="#">LSEDDTTTHFKLPK</a> |

MATRIX

SCIENCE

Mascot Search Results

Peptide View

MS/MS Fragmentation of **VIHDNFGIVEGLMTTVHAITATQK**  
Found in **G3P\_HUMAN**, Glyceraldehyde-3-phosphate dehydrogenase OS=Homo sapiens GN=GAPDH PE=1 SV=3

Match to Query 59134: 2905.559936 from(727.397260,4+) rtinseconds(3114) index(57835)  
Title: Locus:1.1.1.2317.13 File:"2013-07-02 CLN FXIII 180 min 2nd F 4.wiff"  
Data file C:\Program Files (x86)\Matrix Science\Mascot Daemon\mgf\8 FXIII 180 min 2nd\mascot\_daemon\_merge.mgf

Click mouse within plot area to zoom in by factor of two about that point  
Or, 

Plot from

100

 to 

1800

 Da 

Full range

  
Label all possible matches ☐ Label matches used for scoring ☒

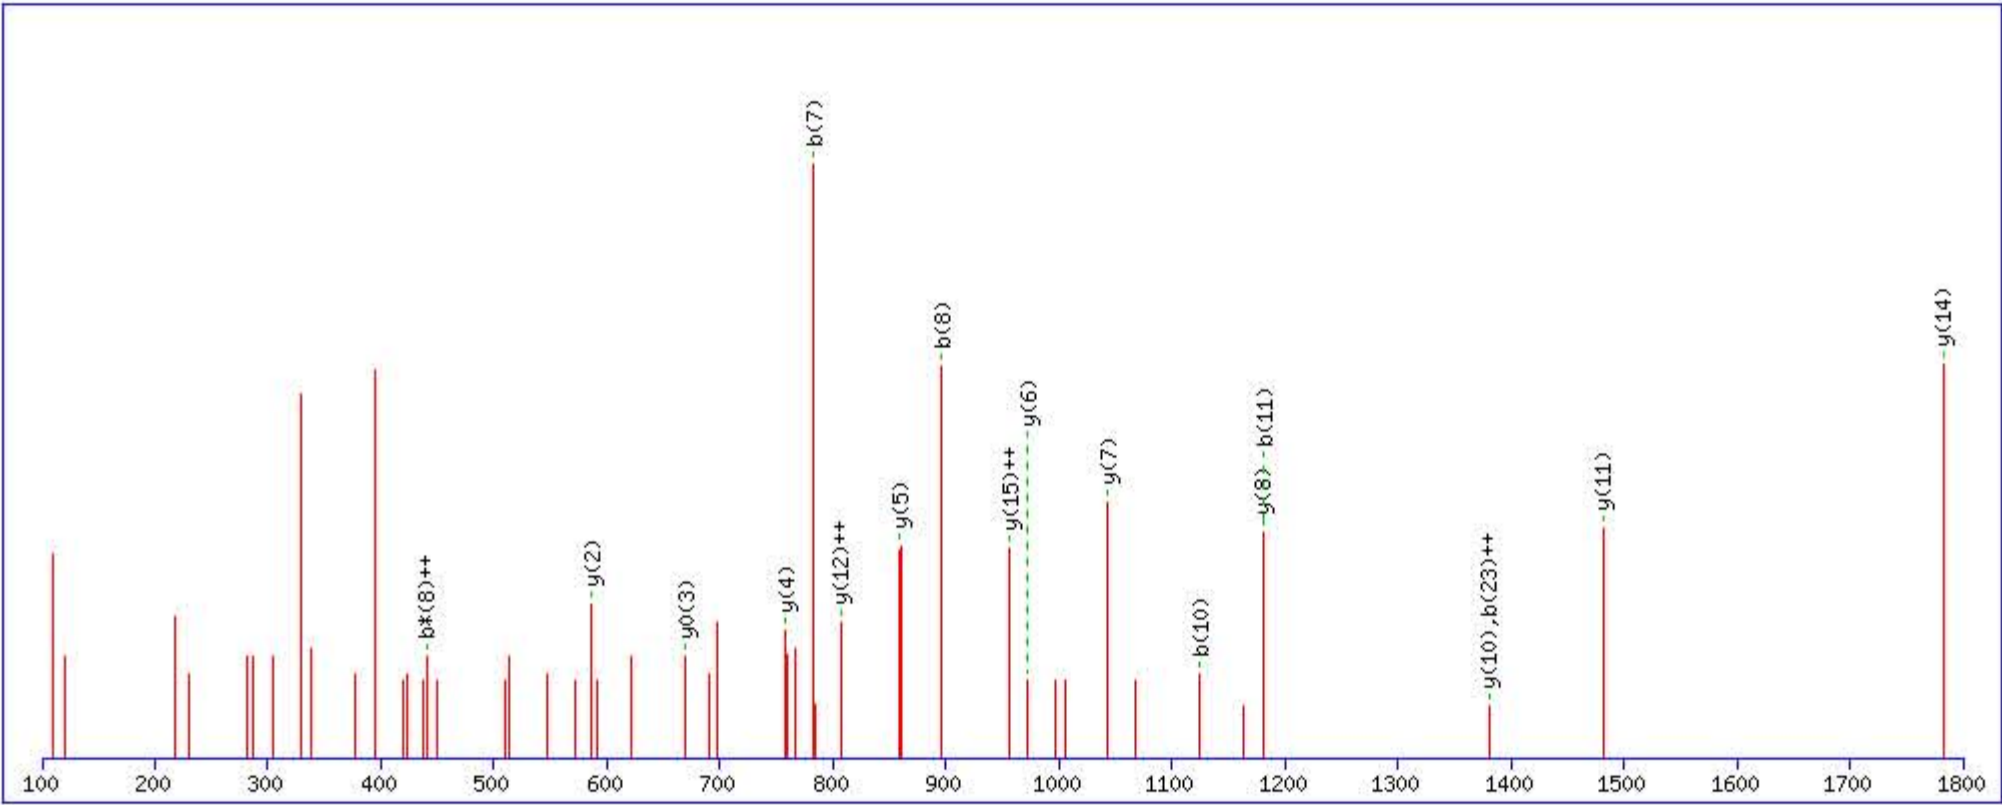

Monoisotopic mass of neutral peptide Mr(calc): 2905.519424  
Fixed modifications: Carbamidomethyl (C) (apply to specified residues or termini only)  
Variable modifications:  
Q23 : Biotin:Thermo-21345 (Q)  
Ions Score: 40 Expect: 0.0015  
Matches : 18/258 fragment ions using 34 most intense peaks [\(help\)](#)

| #  | b           | b <sup>++</sup> | b <sup>*</sup> | b <sup>*++</sup> | b <sup>0</sup> | b <sup>0++</sup> | Seq. | y           | y <sup>++</sup> | y <sup>*</sup> | y <sup>*++</sup> | y <sup>0</sup> | y <sup>0++</sup> | #  |
|----|-------------|-----------------|----------------|------------------|----------------|------------------|------|-------------|-----------------|----------------|------------------|----------------|------------------|----|
| 1  | 100.075690  | 50.541483       |                |                  |                |                  | V    |             |                 |                |                  |                |                  | 24 |
| 2  | 213.159754  | 107.083515      |                |                  |                |                  | I    | 2807.458272 | 1404.232774     | 2790.431723    | 1395.719499      | 2789.447707    | 1395.227491      | 23 |
| 3  | 350.218666  | 175.612971      |                |                  |                |                  | H    | 2694.374208 | 1347.690742     | 2677.347659    | 1339.177467      | 2676.363643    | 1338.685459      | 22 |
| 4  | 465.245609  | 233.126443      |                |                  | 447.235044     | 224.121160       | D    | 2557.315296 | 1279.161286     | 2540.288747    | 1270.648011      | 2539.304731    | 1270.156003      | 21 |
| 5  | 579.288536  | 290.147906      | 562.261987     | 281.634632       | 561.277971     | 281.142624       | N    | 2442.288353 | 1221.647814     | 2425.261804    | 1213.134540      | 2424.277788    | 1212.642532      | 20 |
| 6  | 726.356950  | 363.682113      | 709.330401     | 355.168838       | 708.346385     | 354.676830       | F    | 2328.245426 | 1164.626351     | 2311.218877    | 1156.113076      | 2310.234861    | 1155.621068      | 19 |
| 7  | 783.378414  | 392.192845      | 766.351865     | 383.679571       | 765.367849     | 383.187563       | G    | 2181.177012 | 1091.092144     | 2164.150463    | 1082.578869      | 2163.166447    | 1082.086861      | 18 |
| 8  | 896.462478  | 448.734877      | 879.435929     | 440.221603       | 878.451913     | 439.729595       | I    | 2124.155548 | 1062.581412     | 2107.128999    | 1054.068137      | 2106.144983    | 1053.576129      | 17 |
| 9  | 995.530892  | 498.269084      | 978.504343     | 489.755810       | 977.520327     | 489.263802       | V    | 2011.071484 | 1006.039380     | 1994.044935    | 997.526105       | 1993.060919    | 997.034097       | 16 |
| 10 | 1124.573485 | 562.790381      | 1107.546936    | 554.277106       | 1106.562920    | 553.785098       | E    | 1912.003070 | 956.505173      | 1894.976521    | 947.991899       | 1893.992505    | 947.499890       | 15 |
| 11 | 1181.594949 | 591.301113      | 1164.568400    | 582.787838       | 1163.584384    | 582.295830       | G    | 1782.960477 | 891.983876      | 1765.933928    | 883.470602       | 1764.949912    | 882.978594       | 14 |
| 12 | 1294.679013 | 647.843144      | 1277.652464    | 639.329870       | 1276.668448    | 638.837862       | L    | 1725.939013 | 863.473144      | 1708.912464    | 854.959870       | 1707.928448    | 854.467862       | 13 |
| 13 | 1425.719498 | 713.363387      | 1408.692949    | 704.850113       | 1407.708933    | 704.358104       | M    | 1612.854949 | 806.931113      | 1595.828400    | 798.417838       | 1594.844384    | 797.925830       | 12 |
| 14 | 1526.767177 | 763.887227      | 1509.740628    | 755.373952       | 1508.756612    | 754.881944       | T    | 1481.814464 | 741.410870      | 1464.787915    | 732.897596       | 1463.803899    | 732.405588       | 11 |
| 15 | 1627.814856 | 814.411066      | 1610.788307    | 805.897792       | 1609.804291    | 805.405783       | T    | 1380.766785 | 690.887031      | 1363.740236    | 682.373756       | 1362.756220    | 681.881748       | 10 |
| 16 | 1726.883270 | 863.945273      | 1709.856721    | 855.431999       | 1708.872705    | 854.939991       | V    | 1279.719106 | 640.363191      | 1262.692557    | 631.849917       | 1261.708541    | 631.357909       | 9  |
| 17 | 1863.942182 | 932.474729      | 1846.915633    | 923.961455       | 1845.931617    | 923.469447       | H    | 1180.650692 | 590.828984      | 1163.624143    | 582.315710       | 1162.640127    | 581.823701       | 8  |
| 18 | 1934.979296 | 967.993286      | 1917.952747    | 959.480012       | 1916.968731    | 958.988003       | A    | 1043.591780 | 522.299528      | 1026.565231    | 513.786254       | 1025.581215    | 513.294245       | 7  |
| 19 | 2048.063360 | 1024.535318     | 2031.036811    | 1016.022044      | 2030.052795    | 1015.530036      | I    | 972.554666  | 486.780971      | 955.528117     | 478.267697       | 954.544101     | 477.775689       | 6  |
| 20 | 2149.111039 | 1075.059157     | 2132.084490    | 1066.545883      | 2131.100474    | 1066.053875      | T    | 859.470602  | 430.238939      | 842.444053     | 421.725665       | 841.460037     | 421.233657       | 5  |
| 21 | 2220.148153 | 1110.577714     | 2203.121604    | 1102.064440      | 2202.137588    | 1101.572432      | A    | 758.422923  | 379.715100      | 741.396374     | 371.201825       | 740.412358     | 370.709817       | 4  |
| 22 | 2321.195832 | 1161.101554     | 2304.169283    | 1152.588279      | 2303.185267    | 1152.096271      | T    | 687.385809  | 344.196543      | 670.359260     | 335.683268       | 669.375244     | 335.191260       | 3  |
| 23 | 2760.421158 | 1380.714217     | 2743.394609    | 1372.200942      | 2742.410593    | 1371.708934      | Q    | 586.338130  | 293.672703      | 569.311581     | 285.159429       |                |                  | 2  |
| 24 |             |                 |                |                  |                |                  | K    | 147.112804  | 74.060040       | 130.086255     | 65.546765        |                |                  | 1  |

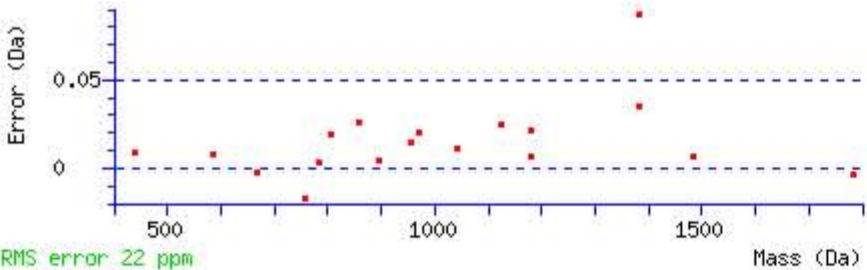

NCBI BLAST search of [VIHDNFGIVEGLMTTVHAITATQK](#)  
(Parameters: blastp, nr protein database, expect=20000, no filter, PAM30)  
Other BLAST [web gateways](#)

All matches to this query

| Score | Mr(calc):   | Delta    | Sequence                                 |
|-------|-------------|----------|------------------------------------------|
| 40.4  | 2905.519424 | 0.040512 | <a href="#">VIHDNFGIVEGLMTTVHAITATQK</a> |

MATRIX

SCIENCE

Mascot Search Results

Peptide View

MS/MS Fragmentation of **YVMLPVADQDQCIR**  
Found in **HPT\_HUMAN**, Haptoglobin OS=Homo sapiens GN=HP PE=1 SV=1

Match to Query 45031: 2017.998192 from(673.673340,3+) rtinseconds(2311) index(22075)  
Title: Locus:1.1.1.3187.10 File:"2013-07-02 CLN FXIII 180 min 2nd F 2.wiff"  
Data file C:\Program Files (x86)\Matrix Science\Mascot Daemon\mgf\8 FXIII 180 min 2nd\mascot\_daemon\_merge.mgf

Click mouse within plot area to zoom in by factor of two about that point  
Or, 

Plot from

100

 to 

1600

 Da 

Full range

  
Label all possible matches ☐ Label matches used for scoring ☒

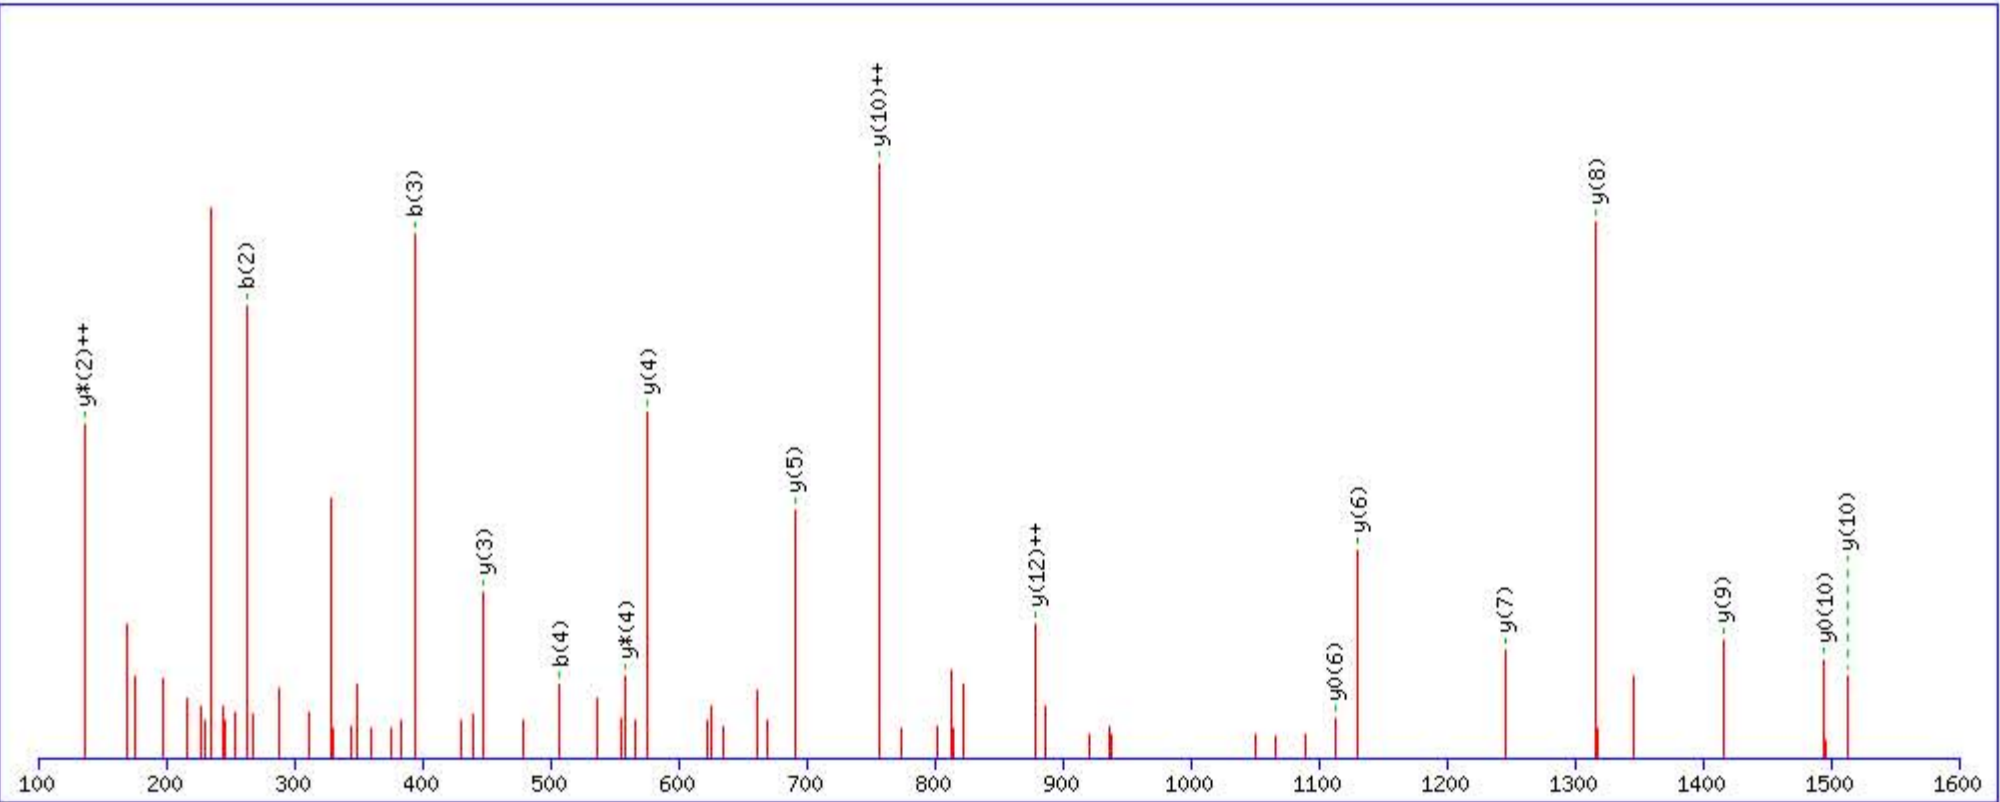

Monoisotopic mass of neutral peptide Mr(calc): 2017.978760  
Fixed modifications: Carbamidomethyl (C) (apply to specified residues or termini only)  
Variable modifications:  
Q9 : Biotin:Thermo-21345 (Q)  
Ions Score: 50 Expect: 0.00024  
Matches : 17/118 fragment ions using 26 most intense peaks [\(help\)](#)

| #  | b           | b <sup>++</sup> | b <sup>*</sup> | b <sup>+++</sup> | b <sup>0</sup> | b <sup>0++</sup> | Seq. | y           | y <sup>++</sup> | y <sup>*</sup> | y <sup>+++</sup> | y <sup>0</sup> | y <sup>0++</sup> | #  |
|----|-------------|-----------------|----------------|------------------|----------------|------------------|------|-------------|-----------------|----------------|------------------|----------------|------------------|----|
| 1  | 164.070605  | 82.538940       |                |                  |                |                  | Y    |             |                 |                |                  |                |                  | 14 |
| 2  | 263.139019  | 132.073148      |                |                  |                |                  | V    | 1855.922710 | 928.464993      | 1838.896161    | 919.951719       | 1837.912145    | 919.459711       | 13 |
| 3  | 394.179504  | 197.593390      |                |                  |                |                  | M    | 1756.854296 | 878.930786      | 1739.827747    | 870.417512       | 1738.843731    | 869.925504       | 12 |
| 4  | 507.263568  | 254.135422      |                |                  |                |                  | L    | 1625.813811 | 813.410544      | 1608.787262    | 804.897269       | 1607.803246    | 804.405261       | 11 |
| 5  | 604.316332  | 302.661804      |                |                  |                |                  | P    | 1512.729747 | 756.868512      | 1495.703198    | 748.355237       | 1494.719182    | 747.863229       | 10 |
| 6  | 703.384746  | 352.196011      |                |                  |                |                  | V    | 1415.676983 | 708.342130      | 1398.650434    | 699.828855       | 1397.666418    | 699.336847       | 9  |
| 7  | 774.421860  | 387.714568      |                |                  |                |                  | A    | 1316.608569 | 658.807923      | 1299.582020    | 650.294648       | 1298.598004    | 649.802640       | 8  |
| 8  | 889.448803  | 445.228040      |                |                  | 871.438238     | 436.222757       | D    | 1245.571455 | 623.289366      | 1228.544906    | 614.776091       | 1227.560890    | 614.284083       | 7  |
| 9  | 1328.674129 | 664.840703      | 1311.647580    | 656.327428       | 1310.663564    | 655.835420       | Q    | 1130.544512 | 565.775894      | 1113.517963    | 557.262620       | 1112.533947    | 556.770612       | 6  |
| 10 | 1443.701072 | 722.354174      | 1426.674523    | 713.840900       | 1425.690507    | 713.348892       | D    | 691.319186  | 346.163231      | 674.292637     | 337.649957       | 673.308621     | 337.157949       | 5  |
| 11 | 1571.759650 | 786.383463      | 1554.733101    | 777.870189       | 1553.749085    | 777.378181       | Q    | 576.292243  | 288.649760      | 559.265694     | 280.136485       |                |                  | 4  |
| 12 | 1731.790299 | 866.398788      | 1714.763750    | 857.885513       | 1713.779734    | 857.393505       | C    | 448.233665  | 224.620470      | 431.207116     | 216.107196       |                |                  | 3  |
| 13 | 1844.874363 | 922.940820      | 1827.847814    | 914.427545       | 1826.863798    | 913.935537       | I    | 288.203016  | 144.605146      | 271.176467     | 136.091871       |                |                  | 2  |
| 14 |             |                 |                |                  |                |                  | R    | 175.118952  | 88.063114       | 158.092403     | 79.549839        |                |                  | 1  |

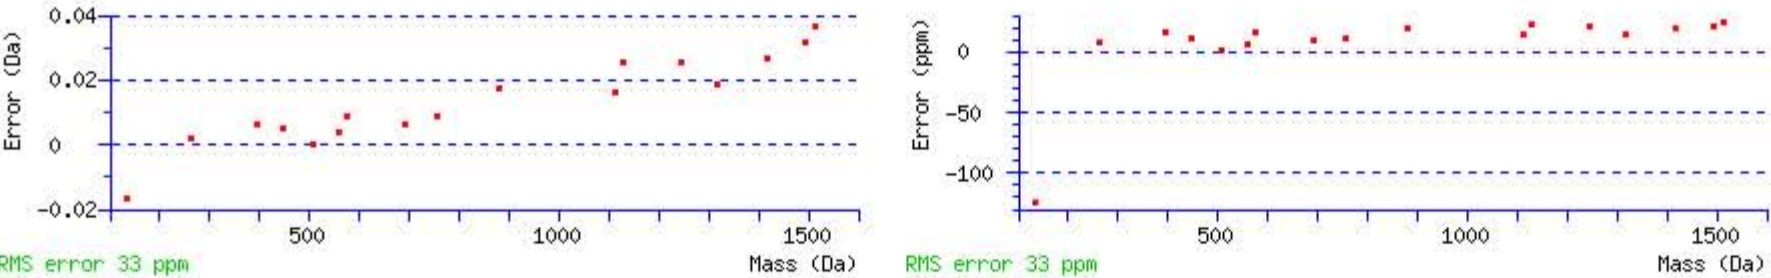

NCBI BLAST search of [YVMLPVADQDQCIR](#)  
(Parameters: blastp, nr protein database, expect=20000, no filter, PAM30)  
Other BLAST [web gateways](#)

All matches to this query

| Score | Mr(calc):   | Delta    | Sequence                       |
|-------|-------------|----------|--------------------------------|
| 50.2  | 2017.978760 | 0.019432 | <a href="#">YVMLPVADQDQCIR</a> |
| 38.0  | 2017.978760 | 0.019432 | <a href="#">YVMLPVADQDQCIR</a> |

MATRIX

SCIENCE

Mascot Search Results

Peptide View

MS/MS Fragmentation of **YVMLPVADQDQCIR**  
Found in **HPT\_HUMAN**, Haptoglobin OS=Homo sapiens GN=HP PE=1 SV=1

Match to Query 45033: 2018.003128 from(1010.008840,2+) rtinseconds(2290) index(7262)  
Title: Locus:1.1.1.2074.18 File:"2013-07-02 CLN FXIII 180 min 2nd F 1.wiff"  
Data file C:\Program Files (x86)\Matrix Science\Mascot Daemon\mgf\8 FXIII 180 min 2nd\mascot\_daemon\_merge.mgf

Click mouse within plot area to zoom in by factor of two about that point

Or, 

Plot from

0

 to 

3400

 Da 

Full range

Label all possible matches ☐ Label matches used for scoring ☒

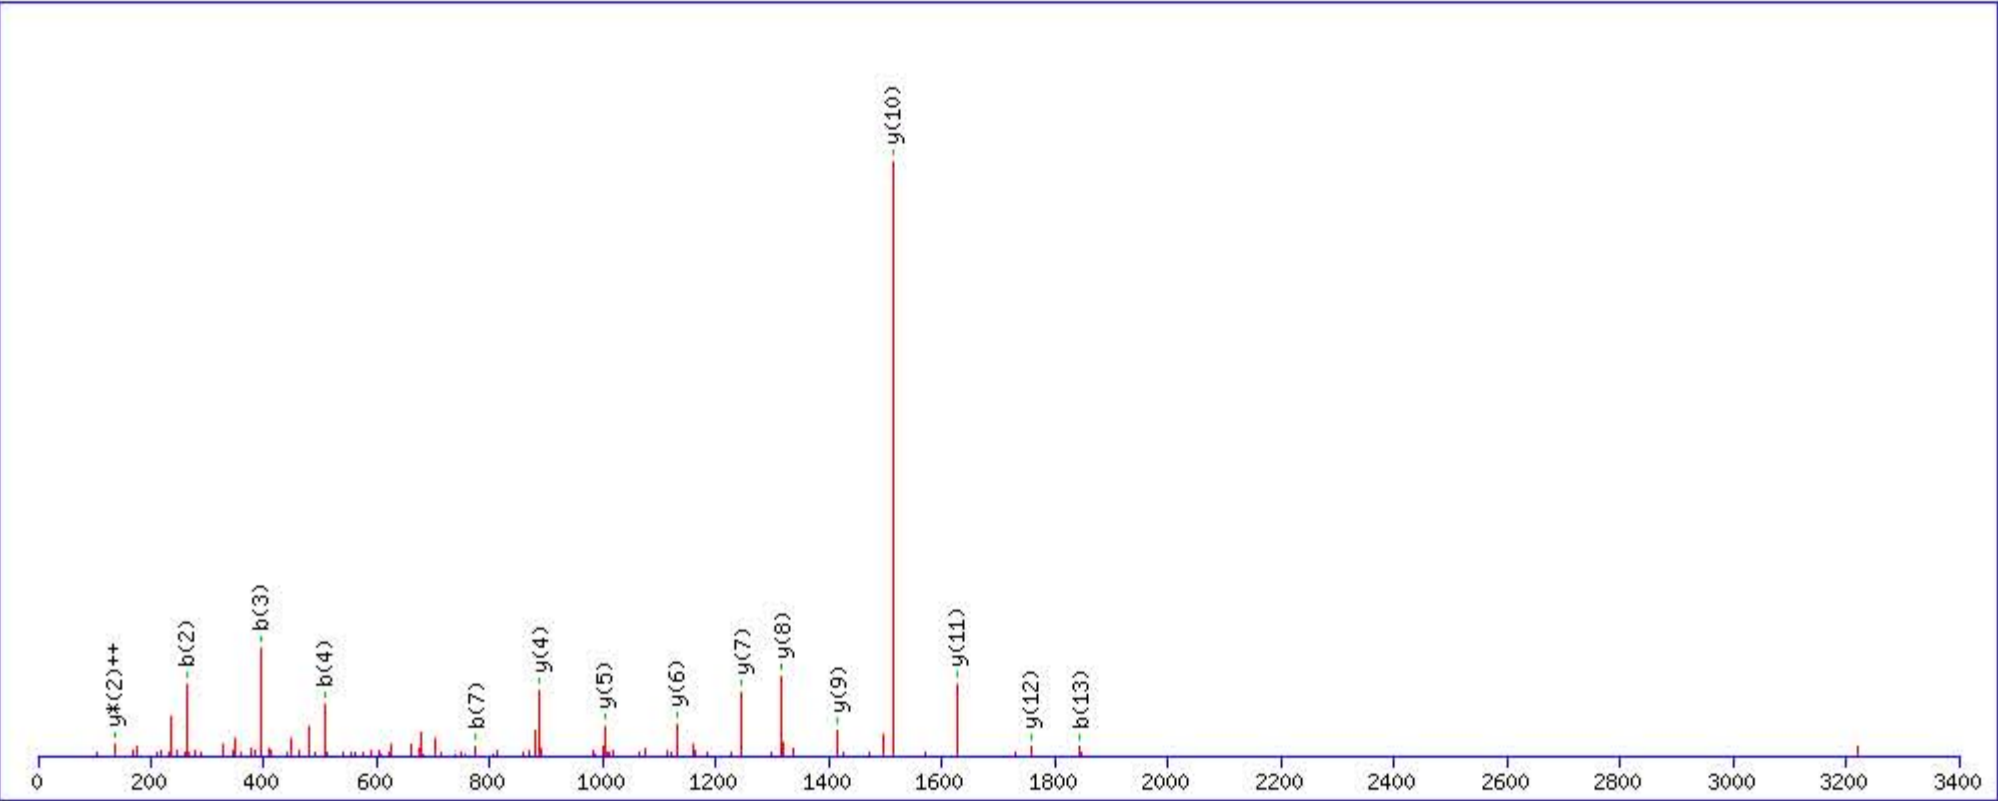

Monoisotopic mass of neutral peptide Mr(calc): 2017.978760  
Fixed modifications: Carbamidomethyl (C) (apply to specified residues or termini only)  
Variable modifications:  
Q11 : Biotin:Thermo-21345 (Q)  
Ions Score: 77 Expect: 7.4e-008  
Matches : 15/118 fragment ions using 18 most intense peaks [\(help\)](#)

| #  | b           | b <sup>++</sup> | b <sup>*</sup> | b <sup>*++</sup> | b <sup>0</sup> | b <sup>0++</sup> | Seq. | y           | y <sup>++</sup> | y <sup>*</sup> | y <sup>*++</sup> | y <sup>0</sup> | y <sup>0++</sup> | #  |
|----|-------------|-----------------|----------------|------------------|----------------|------------------|------|-------------|-----------------|----------------|------------------|----------------|------------------|----|
| 1  | 164.070605  | 82.538940       |                |                  |                |                  | Y    |             |                 |                |                  |                |                  | 14 |
| 2  | 263.139019  | 132.073148      |                |                  |                |                  | V    | 1855.922710 | 928.464993      | 1838.896161    | 919.951719       | 1837.912145    | 919.459711       | 13 |
| 3  | 394.179504  | 197.593390      |                |                  |                |                  | M    | 1756.854296 | 878.930786      | 1739.827747    | 870.417512       | 1738.843731    | 869.925504       | 12 |
| 4  | 507.263568  | 254.135422      |                |                  |                |                  | L    | 1625.813811 | 813.410544      | 1608.787262    | 804.897269       | 1607.803246    | 804.405261       | 11 |
| 5  | 604.316332  | 302.661804      |                |                  |                |                  | P    | 1512.729747 | 756.868512      | 1495.703198    | 748.355237       | 1494.719182    | 747.863229       | 10 |
| 6  | 703.384746  | 352.196011      |                |                  |                |                  | V    | 1415.676983 | 708.342130      | 1398.650434    | 699.828855       | 1397.666418    | 699.336847       | 9  |
| 7  | 774.421860  | 387.714568      |                |                  |                |                  | A    | 1316.608569 | 658.807923      | 1299.582020    | 650.294648       | 1298.598004    | 649.802640       | 8  |
| 8  | 889.448803  | 445.228040      |                |                  | 871.438238     | 436.222757       | D    | 1245.571455 | 623.289366      | 1228.544906    | 614.776091       | 1227.560890    | 614.284083       | 7  |
| 9  | 1017.507381 | 509.257329      | 1000.480832    | 500.744054       | 999.496816     | 500.252046       | Q    | 1130.544512 | 565.775894      | 1113.517963    | 557.262620       | 1112.533947    | 556.770612       | 6  |
| 10 | 1132.534324 | 566.770800      | 1115.507775    | 558.257526       | 1114.523759    | 557.765517       | D    | 1002.485934 | 501.746605      | 985.459385     | 493.233331       | 984.475369     | 492.741323       | 5  |
| 11 | 1571.759650 | 786.383463      | 1554.733101    | 777.870189       | 1553.749085    | 777.378181       | Q    | 887.458991  | 444.233134      | 870.432442     | 435.719859       |                |                  | 4  |
| 12 | 1731.790299 | 866.398788      | 1714.763750    | 857.885513       | 1713.779734    | 857.393505       | C    | 448.233665  | 224.620470      | 431.207116     | 216.107196       |                |                  | 3  |
| 13 | 1844.874363 | 922.940820      | 1827.847814    | 914.427545       | 1826.863798    | 913.935537       | I    | 288.203016  | 144.605146      | 271.176467     | 136.091871       |                |                  | 2  |
| 14 |             |                 |                |                  |                |                  | R    | 175.118952  | 88.063114       | 158.092403     | 79.549839        |                |                  | 1  |

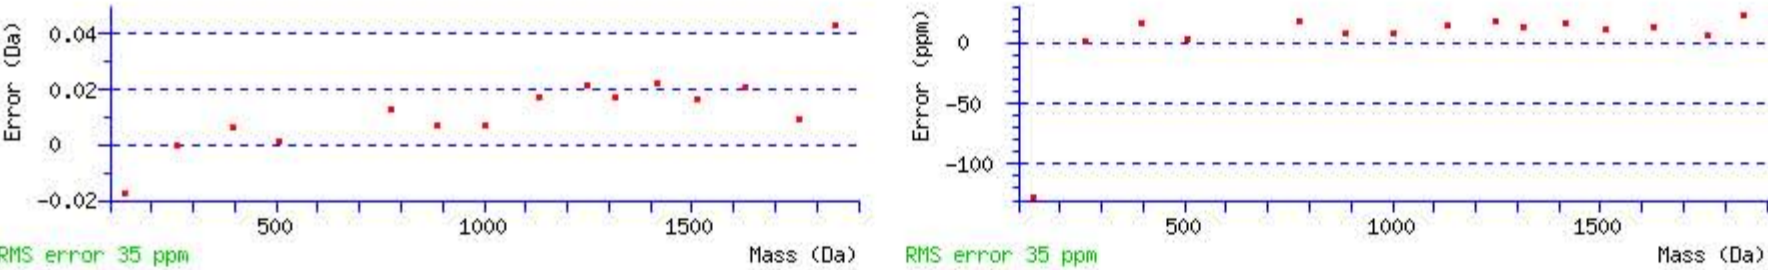

NCBI BLAST search of [YVMLPVADQDQCIR](#)  
(Parameters: blastp, nr protein database, expect=20000, no filter, PAM30)  
Other BLAST [web gateways](#)

All matches to this query

| Score | Mr(calc):   | Delta    | Sequence                           |
|-------|-------------|----------|------------------------------------|
| 76.6  | 2017.978760 | 0.024368 | <a href="#">YVMLPVADQDQCIR</a>     |
| 49.4  | 2017.978760 | 0.024368 | <a href="#">YVMLPVADQDQCIR</a>     |
| 0.5   | 2017.977875 | 0.025253 | <a href="#">ITLTDLFENAYGSSMKGR</a> |
| 0.1   | 2017.977875 | 0.025253 | <a href="#">ETIYPHLLCSTSVQENK</a>  |

***MATRIX***  
***SCIENCE***

# Mascot Search Results

Peptide View

MS/MS Fragmentation of **SQIHDIVLVGGSTR**  
Found in **HSP7C\_HUMAN**, Heat shock cognate 71 kDa protein OS=Homo sapiens GN=HSPA8 PE=1 SV=1

Match to Query 40109: 1791.982152 from(598.334660,3+) rtinseconds(1983) index(20142)  
Title: Locus:1.1.1.3073.5 File:"2013-07-02 CLN FXIII 180 min 2nd F 2.wiff"  
Data file C:\Program Files (x86)\Matrix Science\Mascot Daemon\mgf\8 FXIII 180 min 2nd\mascot\_daemon\_merge.mgf

Click mouse within plot area to zoom in by factor of two about that point  
Or,   to  Da   
Label all possible matches ☐ Label matches used for scoring ☒

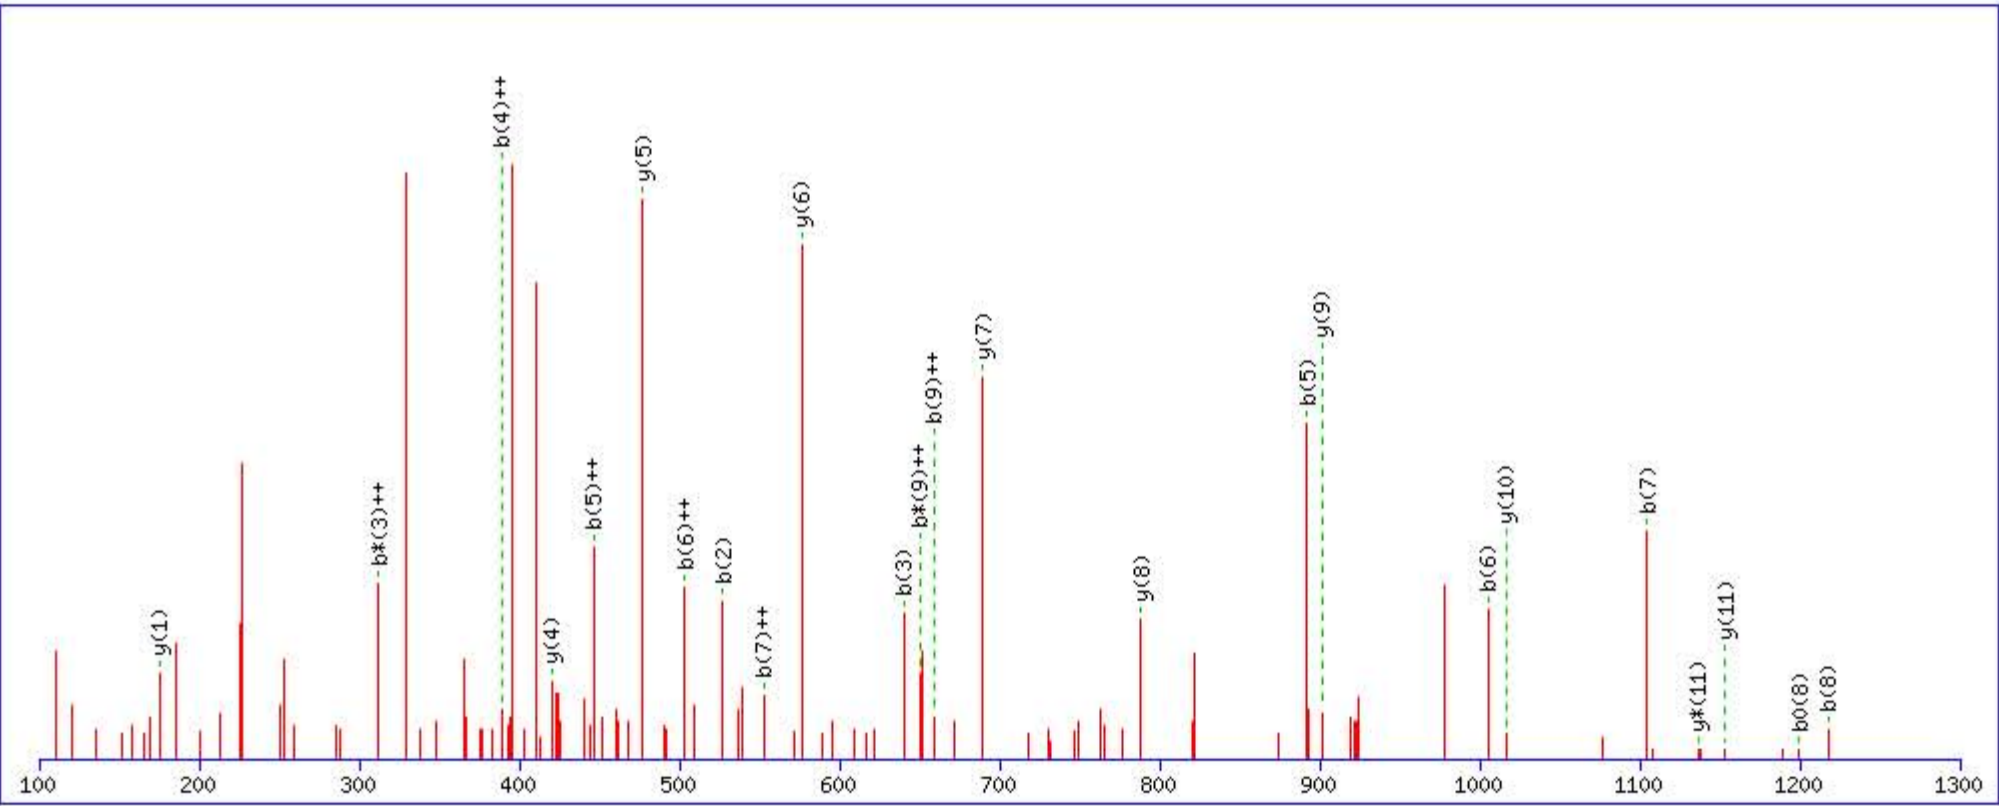

Monoisotopic mass of neutral peptide Mr(calc): 1791.966553  
Fixed modifications: Carbamidomethyl (C) (apply to specified residues or termini only)  
Variable modifications:  
Q2 : Biotin:Thermo-21345 (Q)  
Ions Score: 38 Expect: 0.003  
Matches : 24/152 fragment ions using 56 most intense peaks [\(help\)](#)

| #  | b           | b <sup>++</sup> | b <sup>*</sup> | b <sup>*++</sup> | b <sup>0</sup> | b <sup>0++</sup> | Seq. | y           | y <sup>++</sup> | y <sup>*</sup> | y <sup>*++</sup> | y <sup>0</sup> | y <sup>0++</sup> | #  |
|----|-------------|-----------------|----------------|------------------|----------------|------------------|------|-------------|-----------------|----------------|------------------|----------------|------------------|----|
| 1  | 88.039304   | 44.523290       |                |                  | 70.028739      | 35.518008        | S    |             |                 |                |                  |                |                  | 14 |
| 2  | 527.264630  | 264.135953      | 510.238081     | 255.622679       | 509.254065     | 255.130671       | Q    | 1705.941788 | 853.474532      | 1688.915239    | 844.961257       | 1687.931223    | 844.469249       | 13 |
| 3  | 640.348694  | 320.677985      | 623.322145     | 312.164711       | 622.338129     | 311.672703       | I    | 1266.716462 | 633.861869      | 1249.689913    | 625.348595       | 1248.705897    | 624.856587       | 12 |
| 4  | 777.407606  | 389.207441      | 760.381057     | 380.694166       | 759.397041     | 380.202159       | H    | 1153.632398 | 577.319837      | 1136.605849    | 568.806563       | 1135.621833    | 568.314554       | 11 |
| 5  | 892.434549  | 446.720913      | 875.408000     | 438.207638       | 874.423984     | 437.715630       | D    | 1016.573486 | 508.790381      | 999.546937     | 500.277107       | 998.562921     | 499.785099       | 10 |
| 6  | 1005.518613 | 503.262945      | 988.492064     | 494.749670       | 987.508048     | 494.257662       | I    | 901.546543  | 451.276910      | 884.519994     | 442.763635       | 883.535978     | 442.271627       | 9  |
| 7  | 1104.587027 | 552.797152      | 1087.560478    | 544.283877       | 1086.576462    | 543.791869       | V    | 788.462479  | 394.734878      | 771.435930     | 386.221603       | 770.451914     | 385.729595       | 8  |
| 8  | 1217.671091 | 609.339183      | 1200.644542    | 600.825909       | 1199.660526    | 600.333901       | L    | 689.394065  | 345.200671      | 672.367516     | 336.687396       | 671.383500     | 336.195388       | 7  |
| 9  | 1316.739505 | 658.873391      | 1299.712956    | 650.360116       | 1298.728940    | 649.868108       | V    | 576.310001  | 288.658639      | 559.283452     | 280.145364       | 558.299436     | 279.653356       | 6  |
| 10 | 1373.760969 | 687.384122      | 1356.734420    | 678.870848       | 1355.750404    | 678.378840       | G    | 477.241587  | 239.124431      | 460.215038     | 230.611157       | 459.231022     | 230.119149       | 5  |
| 11 | 1430.782433 | 715.894854      | 1413.755884    | 707.381580       | 1412.771868    | 706.889572       | G    | 420.220123  | 210.613699      | 403.193574     | 202.100425       | 402.209558     | 201.608417       | 4  |
| 12 | 1517.814461 | 759.410868      | 1500.787912    | 750.897594       | 1499.803896    | 750.405586       | S    | 363.198659  | 182.102968      | 346.172110     | 173.589693       | 345.188094     | 173.097685       | 3  |
| 13 | 1618.862140 | 809.934708      | 1601.835591    | 801.421434       | 1600.851575    | 800.929425       | T    | 276.166631  | 138.586953      | 259.140082     | 130.073679       | 258.156066     | 129.581671       | 2  |
| 14 |             |                 |                |                  |                |                  | R    | 175.118952  | 88.063114       | 158.092403     | 79.549839        |                |                  | 1  |

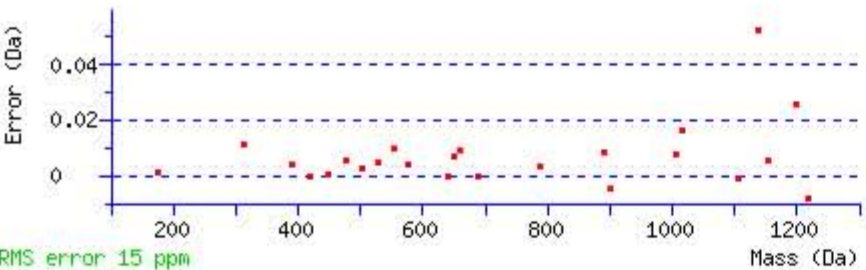

RMS error 15 ppm

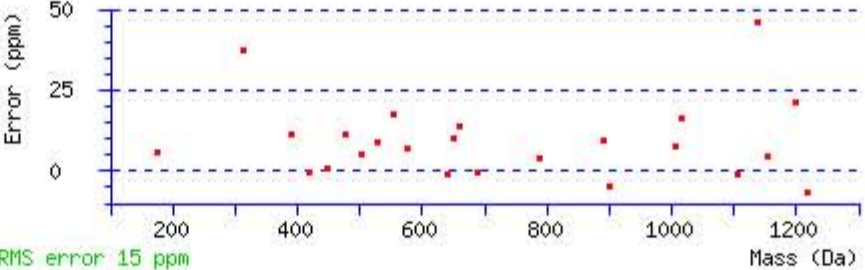

RMS error 15 ppm

NCBI BLAST search of [SQIHDIVLVGGSTR](#)  
(Parameters: blastp, nr protein database, expect=20000, no filter, PAM30)  
Other BLAST [web gateways](#)

All matches to this query

| Score | Mr(calc):   | Delta    | Sequence                       |
|-------|-------------|----------|--------------------------------|
| 37.9  | 1791.966553 | 0.015599 | <a href="#">SQIHDIVLVGGSTR</a> |

MATRIX

SCIENCE

Mascot Search Results

Peptide View

MS/MS Fragmentation of **TYFPHFDLSHGSAQVK**  
Found in **HBA\_HUMAN**, Hemoglobin subunit alpha OS=Homo sapiens GN=HBA1 PE=1 SV=2

Match to Query 47302: 2144.056136 from(537.021310,4+) rtinseconds(2070) index(6048)  
Title: Locus:1.1.1.1998.6 File:"2013-07-02 CLN FXIII 180 min 2nd F 1.wiff"  
Data file C:\Program Files (x86)\Matrix Science\Mascot Daemon\mgf\8 FXIII 180 min 2nd\mascot\_daemon\_merge.mgf

Click mouse within plot area to zoom in by factor of two about that point  
Or, 

Plot from

0

 to 

2200

 Da 

Full range

  
Label all possible matches ☐ Label matches used for scoring ☒

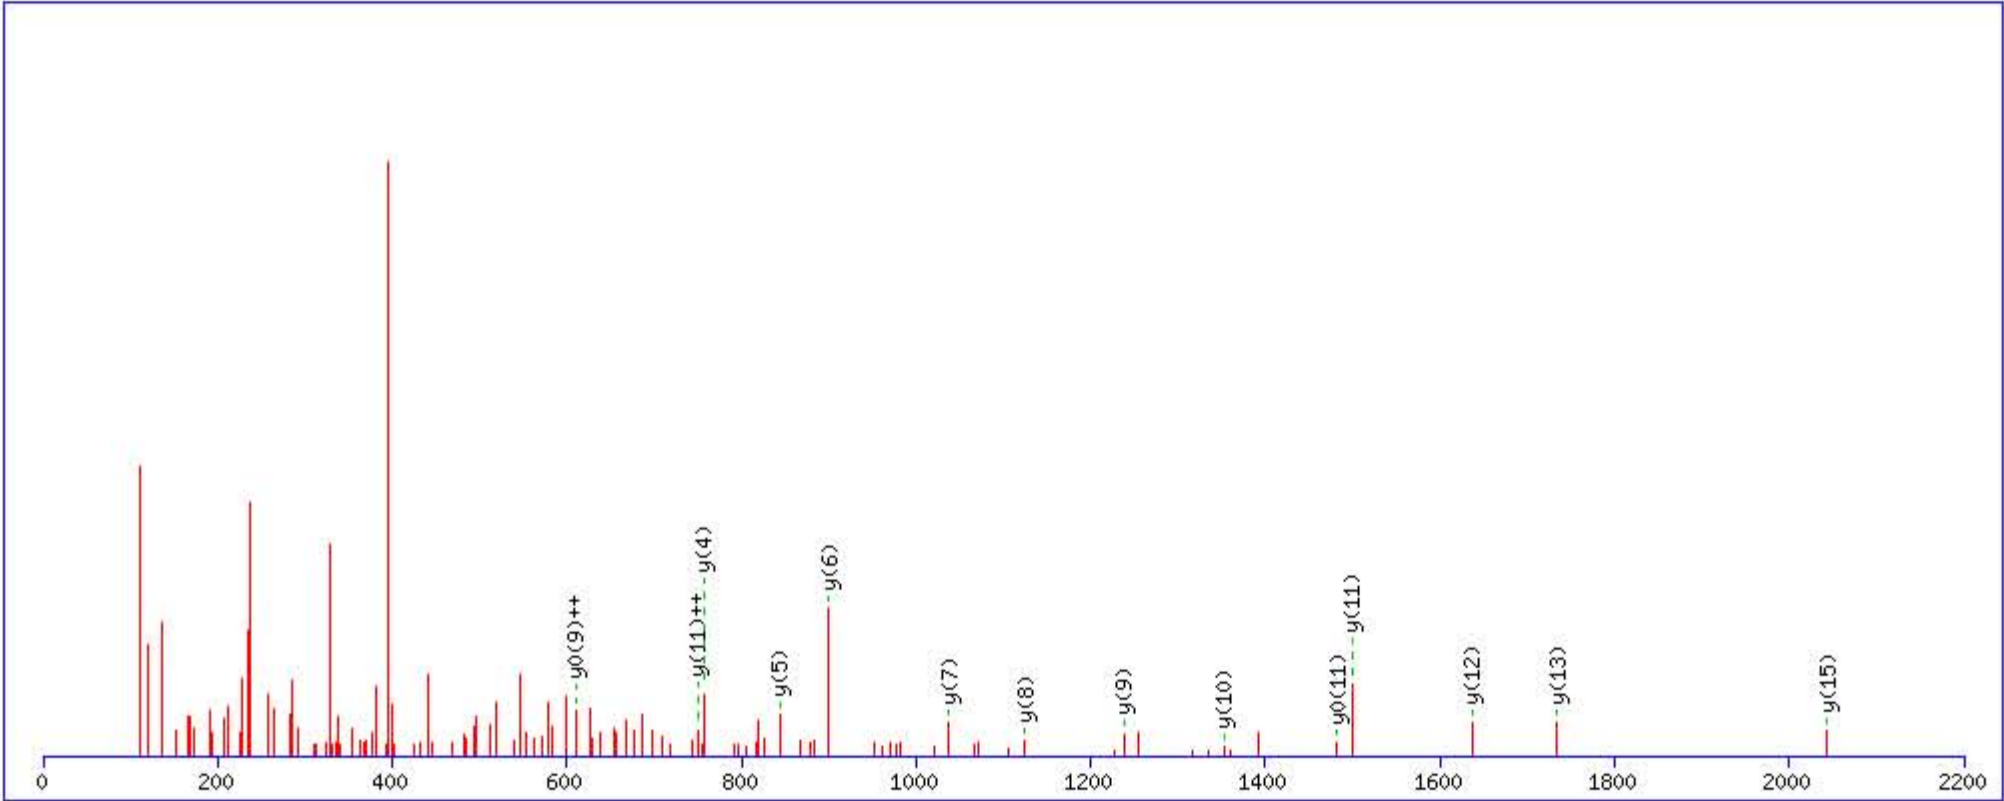

Monoisotopic mass of neutral peptide Mr(calc): 2144.051346  
Fixed modifications: Carbamidomethyl (C) (apply to specified residues or termini only)  
Variable modifications:  
Q14 : Biotin:Thermo-21345 (Q)  
Ions Score: 56 Expect: 6.8e-005  
Matches : 14/146 fragment ions using 30 most intense peaks [\(help\)](#)

| #  | b           | b <sup>++</sup> | b <sup>*</sup> | b <sup>*++</sup> | b <sup>0</sup> | b <sup>0++</sup> | Seq. | y           | y <sup>++</sup> | y <sup>*</sup> | y <sup>*++</sup> | y <sup>0</sup> | y <sup>0++</sup> | #  |
|----|-------------|-----------------|----------------|------------------|----------------|------------------|------|-------------|-----------------|----------------|------------------|----------------|------------------|----|
| 1  | 102.054955  | 51.531116       |                |                  | 84.044390      | 42.525833        | T    |             |                 |                |                  |                |                  | 16 |
| 2  | 265.118284  | 133.062780      |                |                  | 247.107719     | 124.057498       | Y    | 2044.010930 | 1022.509103     | 2026.984381    | 1013.995829      | 2026.000365    | 1013.503821      | 15 |
| 3  | 412.186698  | 206.596987      |                |                  | 394.176133     | 197.591705       | F    | 1880.947601 | 940.977438      | 1863.921052    | 932.464164       | 1862.937036    | 931.972156       | 14 |
| 4  | 509.239462  | 255.123369      |                |                  | 491.228897     | 246.118087       | P    | 1733.879187 | 867.443231      | 1716.852638    | 858.929957       | 1715.868622    | 858.437949       | 13 |
| 5  | 646.298374  | 323.652825      |                |                  | 628.287809     | 314.647543       | H    | 1636.826423 | 818.916849      | 1619.799874    | 810.403575       | 1618.815858    | 809.911567       | 12 |
| 6  | 793.366788  | 397.187032      |                |                  | 775.356223     | 388.181750       | F    | 1499.767511 | 750.387393      | 1482.740962    | 741.874119       | 1481.756946    | 741.382111       | 11 |
| 7  | 908.393731  | 454.700504      |                |                  | 890.383166     | 445.695221       | D    | 1352.699097 | 676.853186      | 1335.672548    | 668.339912       | 1334.688532    | 667.847904       | 10 |
| 8  | 1021.477795 | 511.242536      |                |                  | 1003.467230    | 502.237253       | L    | 1237.672154 | 619.339715      | 1220.645605    | 610.826441       | 1219.661589    | 610.334433       | 9  |
| 9  | 1108.509823 | 554.758550      |                |                  | 1090.499258    | 545.753267       | S    | 1124.588090 | 562.797683      | 1107.561541    | 554.284409       | 1106.577525    | 553.792400       | 8  |
| 10 | 1245.568735 | 623.288006      |                |                  | 1227.558170    | 614.282723       | H    | 1037.556062 | 519.281669      | 1020.529513    | 510.768394       | 1019.545497    | 510.276386       | 7  |
| 11 | 1302.590199 | 651.798738      |                |                  | 1284.579634    | 642.793455       | G    | 900.497150  | 450.752213      | 883.470601     | 442.238938       | 882.486585     | 441.746930       | 6  |
| 12 | 1389.622227 | 695.314752      |                |                  | 1371.611662    | 686.309469       | S    | 843.475686  | 422.241481      | 826.449137     | 413.728207       | 825.465121     | 413.236199       | 5  |
| 13 | 1460.659341 | 730.833309      |                |                  | 1442.648776    | 721.828026       | A    | 756.443658  | 378.725467      | 739.417109     | 370.212192       |                |                  | 4  |
| 14 | 1899.884667 | 950.445972      | 1882.858118    | 941.932697       | 1881.874102    | 941.440689       | Q    | 685.406544  | 343.206910      | 668.379995     | 334.693635       |                |                  | 3  |
| 15 | 1998.953081 | 999.980179      | 1981.926532    | 991.466904       | 1980.942516    | 990.974896       | V    | 246.181218  | 123.594247      | 229.154669     | 115.080972       |                |                  | 2  |
| 16 |             |                 |                |                  |                |                  | K    | 147.112804  | 74.060040       | 130.086255     | 65.546765        |                |                  | 1  |

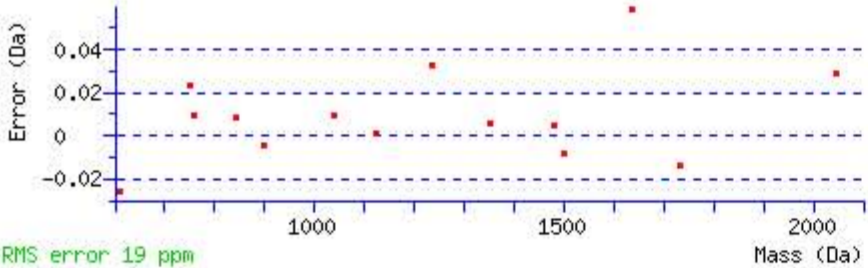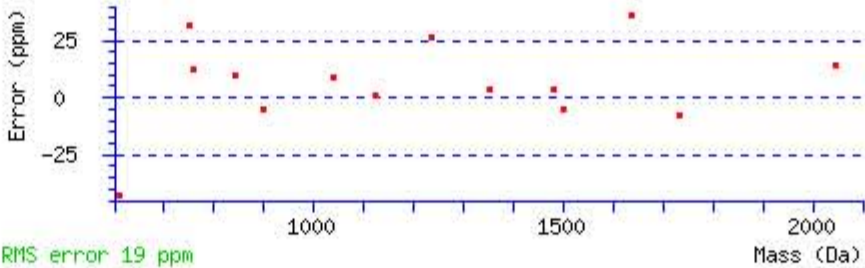

NCBI **BLAST** search of [TYFPHFDLSHGSAQVK](#)  
(Parameters: blastp, nr protein database, expect=20000, no filter, PAM30)  
Other BLAST [web gateways](#)

All matches to this query

| Score | Mr(calc):   | Delta    | Sequence                         |
|-------|-------------|----------|----------------------------------|
| 55.6  | 2144.051346 | 0.004790 | <a href="#">TYFPHFDLSHGSAQVK</a> |

MATRIX

SCIENCE

Mascot Search Results

Peptide View

MS/MS Fragmentation of **EFTPPVQAAYQK**  
Found in **HBB\_HUMAN**, Hemoglobin subunit beta OS=Homo sapiens GN=HBB PE=1 SV=2

Match to Query 37725: 1688.877228 from(845.445890,2+) rtinseconds(1999) index(5620)  
Title: Locus:1.1.1.1973.9 File:"2013-07-02 CLN FXIII 180 min 2nd F 1.wiff"  
Data file C:\Program Files (x86)\Matrix Science\Mascot Daemon\mgf\8 FXIII 180 min 2nd\mascot\_daemon\_merge.mgf

Click mouse within plot area to zoom in by factor of two about that point  
Or,   to  Da   
Label all possible matches ☐ Label matches used for scoring ☒

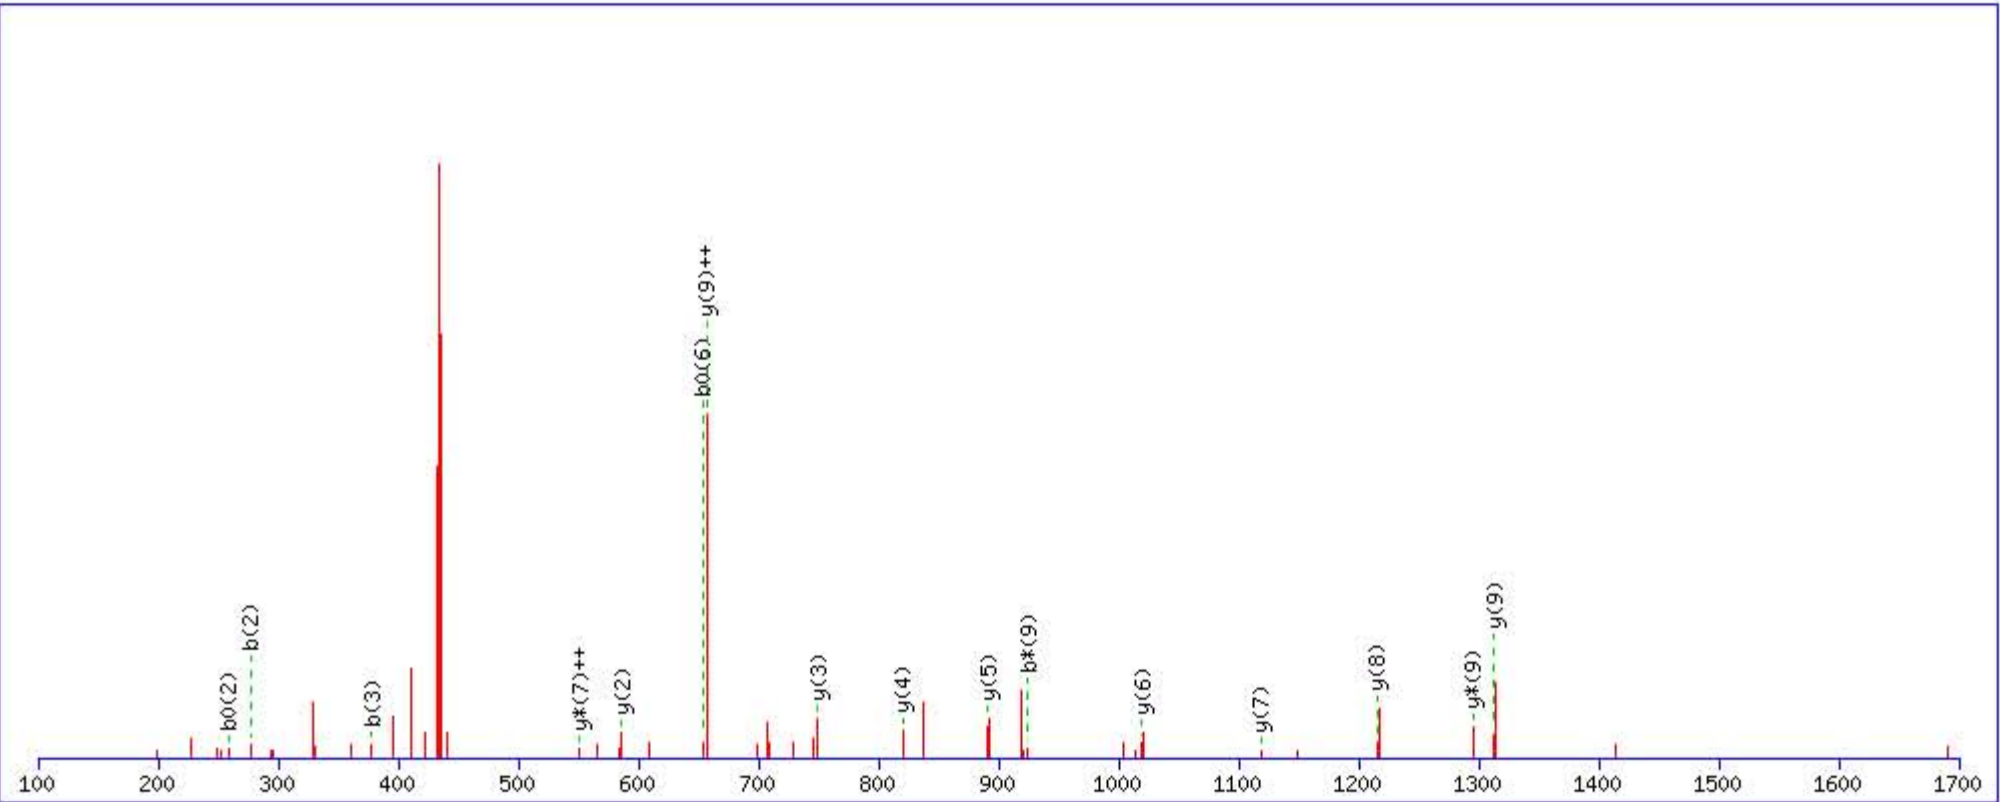

Monoisotopic mass of neutral peptide Mr(calc): 1688.859604  
Fixed modifications: Carbamidomethyl (C) (apply to specified residues or termini only)  
Variable modifications:  
Q11 : Biotin:Thermo-21345 (Q)  
Ions Score: 26 Expect: 0.031  
Matches : 16/102 fragment ions using 44 most intense peaks [\(help\)](#)

| #  | b           | b <sup>++</sup> | b <sup>*</sup> | b <sup>+++</sup> | b <sup>0</sup> | b <sup>0++</sup> | Seq. | y           | y <sup>++</sup> | y <sup>*</sup> | y <sup>+++</sup> | y <sup>0</sup> | y <sup>0++</sup> | #  |
|----|-------------|-----------------|----------------|------------------|----------------|------------------|------|-------------|-----------------|----------------|------------------|----------------|------------------|----|
| 1  | 130.049869  | 65.528572       |                |                  | 112.039304     | 56.523290        | E    |             |                 |                |                  |                |                  | 12 |
| 2  | 277.118283  | 139.062779      |                |                  | 259.107718     | 130.057497       | F    | 1560.824300 | 780.915788      | 1543.797751    | 772.402514       | 1542.813735    | 771.910506       | 11 |
| 3  | 378.165962  | 189.586619      |                |                  | 360.155397     | 180.581336       | T    | 1413.755886 | 707.381581      | 1396.729337    | 698.868307       | 1395.745321    | 698.376299       | 10 |
| 4  | 475.218726  | 238.113001      |                |                  | 457.208161     | 229.107719       | P    | 1312.708207 | 656.857742      | 1295.681658    | 648.344467       |                |                  | 9  |
| 5  | 572.271490  | 286.639383      |                |                  | 554.260925     | 277.634101       | P    | 1215.655443 | 608.331360      | 1198.628894    | 599.818085       |                |                  | 8  |
| 6  | 671.339904  | 336.173590      |                |                  | 653.329339     | 327.168308       | V    | 1118.602679 | 559.804978      | 1101.576130    | 551.291703       |                |                  | 7  |
| 7  | 799.398482  | 400.202879      | 782.371933     | 391.689605       | 781.387917     | 391.197597       | Q    | 1019.534265 | 510.270771      | 1002.507716    | 501.757496       |                |                  | 6  |
| 8  | 870.435596  | 435.721436      | 853.409047     | 427.208162       | 852.425031     | 426.716154       | A    | 891.475687  | 446.241482      | 874.449138     | 437.728207       |                |                  | 5  |
| 9  | 941.472710  | 471.239993      | 924.446161     | 462.726719       | 923.462145     | 462.234711       | A    | 820.438573  | 410.722925      | 803.412024     | 402.209650       |                |                  | 4  |
| 10 | 1104.536039 | 552.771658      | 1087.509490    | 544.258383       | 1086.525474    | 543.766375       | Y    | 749.401459  | 375.204368      | 732.374910     | 366.691093       |                |                  | 3  |
| 11 | 1543.761365 | 772.384321      | 1526.734816    | 763.871046       | 1525.750800    | 763.379038       | Q    | 586.338130  | 293.672703      | 569.311581     | 285.159429       |                |                  | 2  |
| 12 |             |                 |                |                  |                |                  | K    | 147.112804  | 74.060040       | 130.086255     | 65.546765        |                |                  | 1  |

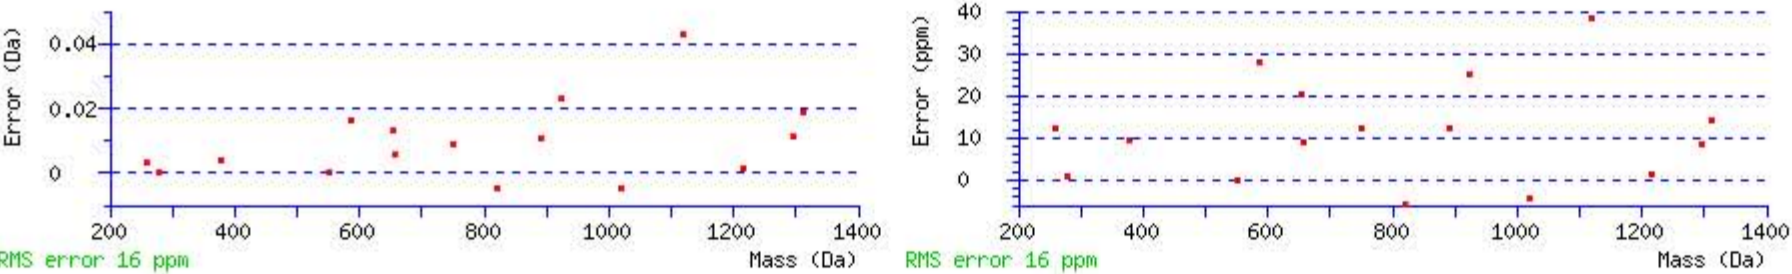

NCBI BLAST search of [EFTPPVQAAYQK](#)  
(Parameters: blastp, nr protein database, expect=20000, no filter, PAM30)  
Other BLAST [web gateways](#)

All matches to this query

| Score | Mr(calc):   | Delta     | Sequence                        |
|-------|-------------|-----------|---------------------------------|
| 25.8  | 1688.859604 | 0.017624  | <a href="#">EFTPPVQAAYQK</a>    |
| 9.2   | 1688.885437 | -0.008209 | <a href="#">MKTPFGKAAAGQR</a>   |
| 2.1   | 1688.891983 | -0.014755 | <a href="#">KFTCQGPVDVNILAK</a> |
| 1.6   | 1688.878036 | -0.000808 | <a href="#">GRDLAPRVSYTPAMR</a> |

MATRIX

SCIENCE

Mascot Search Results

Peptide View

MS/MS Fragmentation of **YYCFQGNQFLR**  
Found in **HEMO\_HUMAN**, Hemopexin OS=Homo sapiens GN=HPX PE=1 SV=2

Match to Query 40356: 1805.854908 from(903.934730,2+) rtinseconds(2296) index(68143)  
Title: Locus:1.1.1.2074.16 File:"2013-07-02 CLN FXIII 180 min 2nd FT.wiff"  
Data file C:\Program Files (x86)\Matrix Science\Mascot Daemon\mgf\8 FXIII 180 min 2nd\mascot\_daemon\_merge.mgf

Click mouse within plot area to zoom in by factor of two about that point  
Or, 

Plot from

0

 to 

3400

 Da 

Full range

  
Label all possible matches ☐ Label matches used for scoring ☒

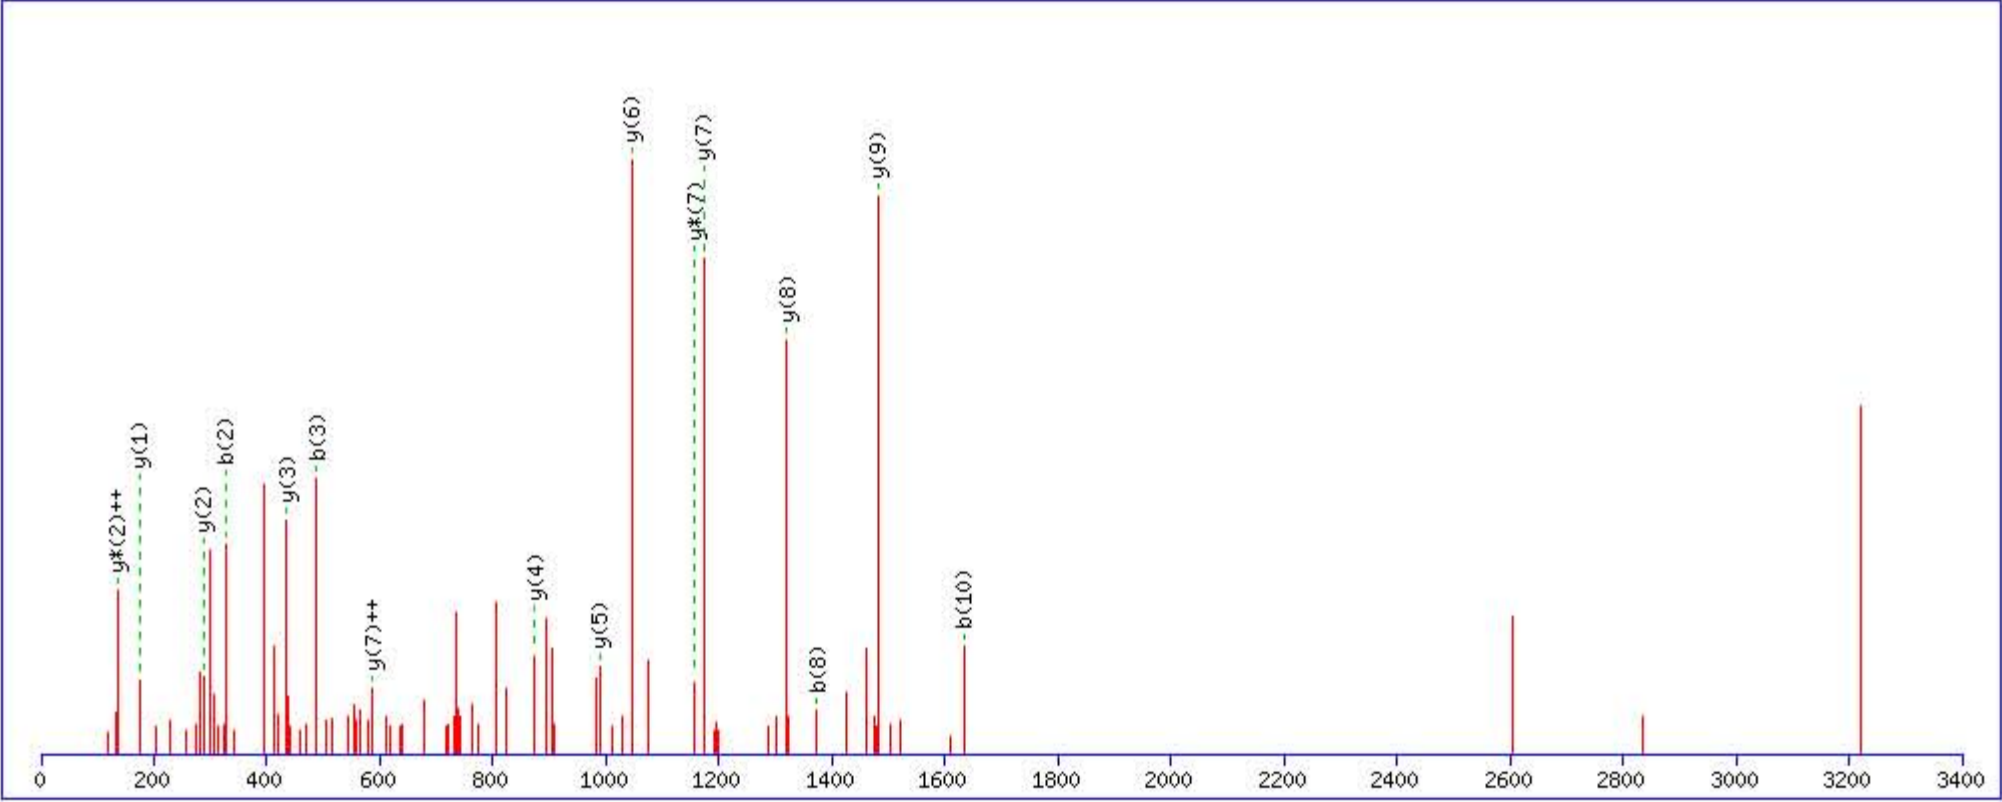

Monoisotopic mass of neutral peptide Mr(calc): 1805.838165  
Fixed modifications: Carbamidomethyl (C) (apply to specified residues or termini only)  
Variable modifications:  
Q8 : Biotin:Thermo-21345 (Q)  
Ions Score: 38 Expect: 0.0016  
Matches : 16/72 fragment ions using 43 most intense peaks [\(help\)](#)

| #  | b           | b <sup>++</sup> | b <sup>+</sup> | b <sup>++</sup> | Seq. | y           | y <sup>++</sup> | y <sup>+</sup> | y <sup>++</sup> | #  |
|----|-------------|-----------------|----------------|-----------------|------|-------------|-----------------|----------------|-----------------|----|
| 1  | 164.070605  | 82.538940       |                |                 | Y    |             |                 |                |                 | 11 |
| 2  | 327.133934  | 164.070605      |                |                 | Y    | 1643.782117 | 822.394697      | 1626.755568    | 813.881422      | 10 |
| 3  | 487.164583  | 244.085930      |                |                 | C    | 1480.718788 | 740.863032      | 1463.692239    | 732.349758      | 9  |
| 4  | 634.232997  | 317.620137      |                |                 | F    | 1320.688139 | 660.847708      | 1303.661590    | 652.334433      | 8  |
| 5  | 762.291575  | 381.649426      | 745.265026     | 373.136151      | Q    | 1173.619725 | 587.313501      | 1156.593176    | 578.800226      | 7  |
| 6  | 819.313039  | 410.160158      | 802.286490     | 401.646883      | G    | 1045.561147 | 523.284212      | 1028.534598    | 514.770937      | 6  |
| 7  | 933.355966  | 467.181621      | 916.329417     | 458.668347      | N    | 988.539683  | 494.773480      | 971.513134     | 486.260205      | 5  |
| 8  | 1372.581292 | 686.794284      | 1355.554743    | 678.281010      | Q    | 874.496756  | 437.752016      | 857.470207     | 429.238742      | 4  |
| 9  | 1519.649706 | 760.328491      | 1502.623157    | 751.815217      | F    | 435.271430  | 218.139353      | 418.244881     | 209.626078      | 3  |
| 10 | 1632.733770 | 816.870523      | 1615.707221    | 808.357249      | L    | 288.203016  | 144.605146      | 271.176467     | 136.091871      | 2  |
| 11 |             |                 |                |                 | R    | 175.118952  | 88.063114       | 158.092403     | 79.549839       | 1  |

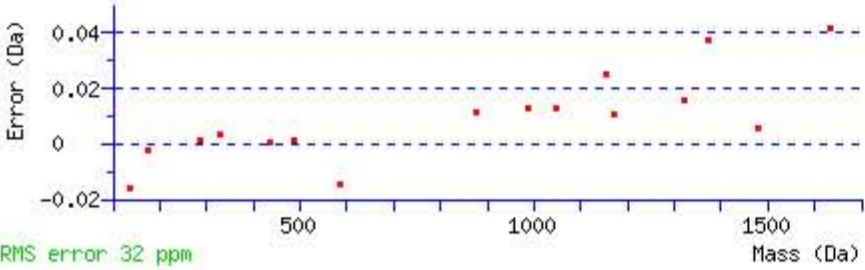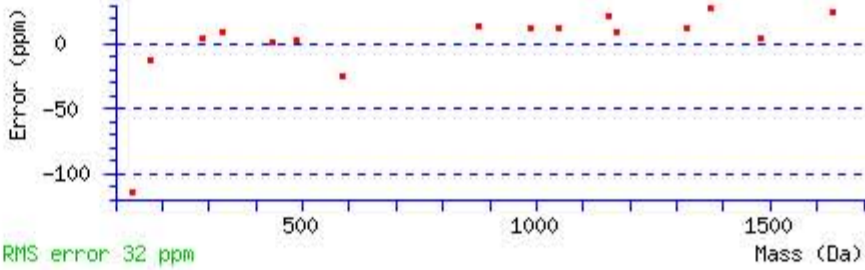

NCBI BLAST search of [YYCFQGNQFLR](#)  
(Parameters: blastp, nr protein database, expect=20000, no filter, PAM30)  
Other BLAST [web gateways](#)

All matches to this query

| Score | Mr(calc):   | Delta     | Sequence                         |
|-------|-------------|-----------|----------------------------------|
| 38.2  | 1805.838165 | 0.016743  | <a href="#">YYCFQGNQFLR</a>      |
| 29.9  | 1805.838165 | 0.016743  | <a href="#">YYCFQGNQFLR</a>      |
| 7.9   | 1805.873886 | -0.018978 | <a href="#">QMFQERSSR</a>        |
| 5.2   | 1805.845383 | 0.009525  | <a href="#">WGTRGGFNGQMER</a>    |
| 1.8   | 1805.844055 | 0.010853  | <a href="#">LLQAPFTDCGDGPMLR</a> |

MATRIX

SCIENCE

Mascot Search Results

Peptide View

MS/MS Fragmentation of **GECQAEGVLFFQGDR**  
Found in **HEMO\_HUMAN**, Hemopexin OS=Homo sapiens GN=HPX PE=1 SV=2

Match to Query 45111: 2022.956488 from(1012.485520,2+) rtinseconds(2413) index(68802)  
Title: Locus:1.1.1.2115.10 File:"2013-07-02 CLN FXIII 180 min 2nd FT.wiff"  
Data file C:\Program Files (x86)\Matrix Science\Mascot Daemon\mgf\8 FXIII 180 min 2nd\mascot\_daemon\_merge.mgf

Click mouse within plot area to zoom in by factor of two about that point  
Or,   to  Da   
Label all possible matches ☐ Label matches used for scoring ☒

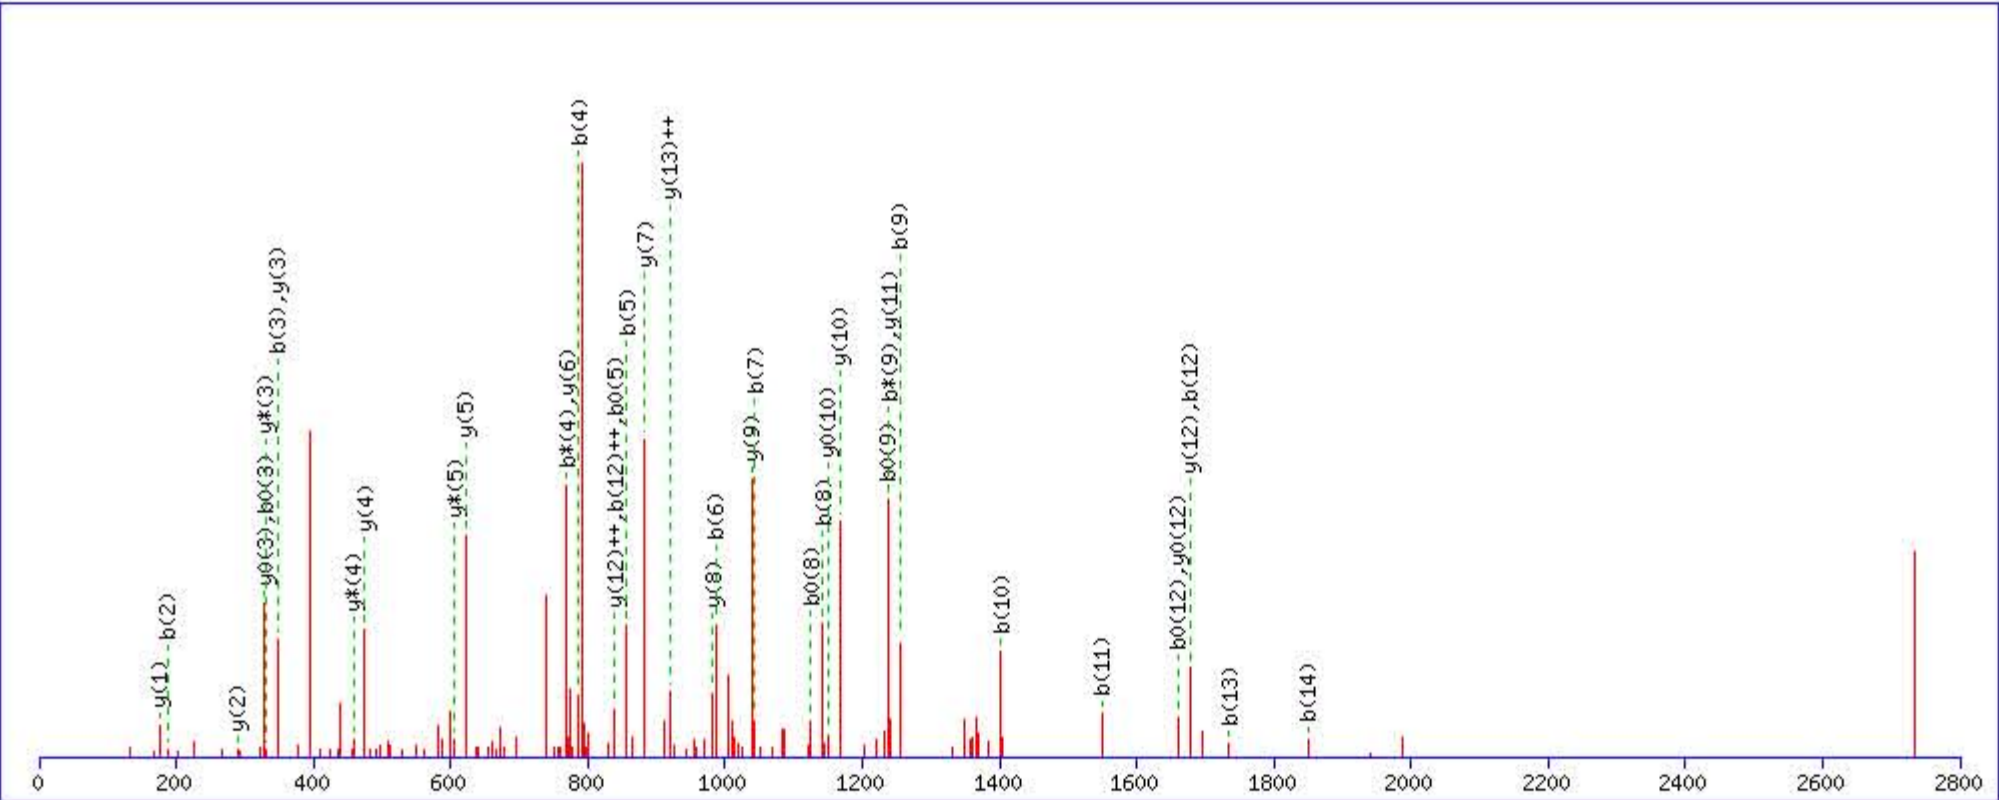

Monoisotopic mass of neutral peptide Mr(calc): 2022.929184  
Fixed modifications: Carbamidomethyl (C) (apply to specified residues or termini only)  
Variable modifications:  
Q4 : Biotin:Thermo-21345 (Q)  
Ions Score: 70 Expect: 1.6e-006  
Matches : 41/158 fragment ions using 75 most intense peaks [\(help\)](#)

| #  | b           | b <sup>++</sup> | b <sup>*</sup> | b <sup>++</sup> * | b <sup>0</sup> | b <sup>0++</sup> | Seq. | y           | y <sup>++</sup> | y <sup>*</sup> | y <sup>++</sup> * | y <sup>0</sup> | y <sup>0++</sup> | #  |
|----|-------------|-----------------|----------------|-------------------|----------------|------------------|------|-------------|-----------------|----------------|-------------------|----------------|------------------|----|
| 1  | 58.028740   | 29.518008       |                |                   |                |                  | G    |             |                 |                |                   |                |                  | 15 |
| 2  | 187.071333  | 94.039305       |                |                   | 169.060768     | 85.034022        | E    | 1966.914982 | 983.961129      | 1949.888433    | 975.447855        | 1948.904417    | 974.955847       | 14 |
| 3  | 347.101982  | 174.054629      |                |                   | 329.091417     | 165.049347       | C    | 1837.872389 | 919.439833      | 1820.845840    | 910.926558        | 1819.861824    | 910.434550       | 13 |
| 4  | 786.327308  | 393.667292      | 769.300759     | 385.154018        | 768.316743     | 384.662010       | Q    | 1677.841740 | 839.424508      | 1660.815191    | 830.911234        | 1659.831175    | 830.419226       | 12 |
| 5  | 857.364422  | 429.185849      | 840.337873     | 420.672575        | 839.353857     | 420.180567       | A    | 1238.616414 | 619.811845      | 1221.589865    | 611.298571        | 1220.605849    | 610.806563       | 11 |
| 6  | 986.407015  | 493.707146      | 969.380466     | 485.193871        | 968.396450     | 484.701863       | E    | 1167.579300 | 584.293288      | 1150.552751    | 575.780014        | 1149.568735    | 575.288006       | 10 |
| 7  | 1043.428479 | 522.217878      | 1026.401930    | 513.704603        | 1025.417914    | 513.212595       | G    | 1038.536707 | 519.771992      | 1021.510158    | 511.258717        | 1020.526142    | 510.766709       | 9  |
| 8  | 1142.496893 | 571.752085      | 1125.470344    | 563.238810        | 1124.486328    | 562.746802       | V    | 981.515243  | 491.261260      | 964.488694     | 482.747985        | 963.504678     | 482.255977       | 8  |
| 9  | 1255.580957 | 628.294117      | 1238.554408    | 619.780842        | 1237.570392    | 619.288834       | L    | 882.446829  | 441.727053      | 865.420280     | 433.213778        | 864.436264     | 432.721770       | 7  |
| 10 | 1402.649371 | 701.828324      | 1385.622822    | 693.315049        | 1384.638806    | 692.823041       | F    | 769.362765  | 385.185021      | 752.336216     | 376.671746        | 751.352200     | 376.179738       | 6  |
| 11 | 1549.717785 | 775.362531      | 1532.691236    | 766.849256        | 1531.707220    | 766.357248       | F    | 622.294351  | 311.650814      | 605.267802     | 303.137539        | 604.283786     | 302.645531       | 5  |
| 12 | 1677.776363 | 839.391820      | 1660.749814    | 830.878545        | 1659.765798    | 830.386537       | Q    | 475.225937  | 238.116606      | 458.199388     | 229.603332        | 457.215372     | 229.111324       | 4  |
| 13 | 1734.797827 | 867.902552      | 1717.771278    | 859.389277        | 1716.787262    | 858.897269       | G    | 347.167359  | 174.087317      | 330.140810     | 165.574043        | 329.156794     | 165.082035       | 3  |
| 14 | 1849.824770 | 925.416023      | 1832.798221    | 916.902749        | 1831.814205    | 916.410741       | D    | 290.145895  | 145.576585      | 273.119346     | 137.063311        | 272.135330     | 136.571303       | 2  |
| 15 |             |                 |                |                   |                |                  | R    | 175.118952  | 88.063114       | 158.092403     | 79.549839         |                |                  | 1  |

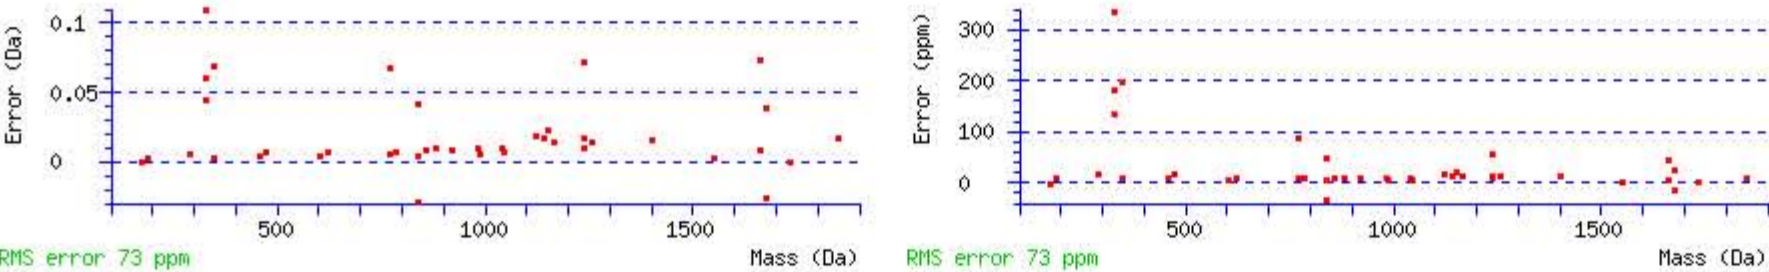

NCBI BLAST search of [GECQAEGVLFFQGDR](#)  
(Parameters: blastp, nr protein database, expect=20000, no filter, PAM30)  
Other BLAST [web gateways](#)

All matches to this query

| Score | Mr(calc):   | Delta     | Sequence                          |
|-------|-------------|-----------|-----------------------------------|
| 70.5  | 2022.929184 | 0.027304  | <a href="#">GECQAEGVLFFQGDR</a>   |
| 15.9  | 2022.929184 | 0.027304  | <a href="#">GECQAEGVLFFQGDR</a>   |
| 9.2   | 2022.950317 | 0.006171  | <a href="#">NMSFVNDLTVTQDGR</a>   |
| 5.5   | 2022.980133 | -0.023645 | <a href="#">QHMEQKEQTAR</a>       |
| 4.9   | 2022.980133 | -0.023645 | <a href="#">QHMEQKEQTAR</a>       |
| 1.3   | 2022.986664 | -0.030176 | <a href="#">QQGQEEQVQEAK</a>      |
| 1.0   | 2022.986664 | -0.030176 | <a href="#">QQGQEEQVQEAK</a>      |
| 0.9   | 2022.961548 | -0.005060 | <a href="#">VMQVSPDGQHILASGDR</a> |

MATRIX

SCIENCE

Mascot Search Results

Peptide View

MS/MS Fragmentation of **SGAQATWTLPWPHEK**  
Found in **HEMO\_HUMAN**, Hemopexin OS=Homo sapiens GN=HPX PE=1 SV=2

Match to Query 47366: 2148.065082 from(717.028970,3+) rtinseconds(2315) index(68245)  
Title: Locus:1.1.1.2081.7 File:"2013-07-02 CLN FXIII 180 min 2nd FT.wiff"  
Data file C:\Program Files (x86)\Matrix Science\Mascot Daemon\mgf\8 FXIII 180 min 2nd\mascot\_daemon\_merge.mgf

Click mouse within plot area to zoom in by factor of two about that point  
Or,   to  Da   
Label all possible matches ☐ Label matches used for scoring ☒

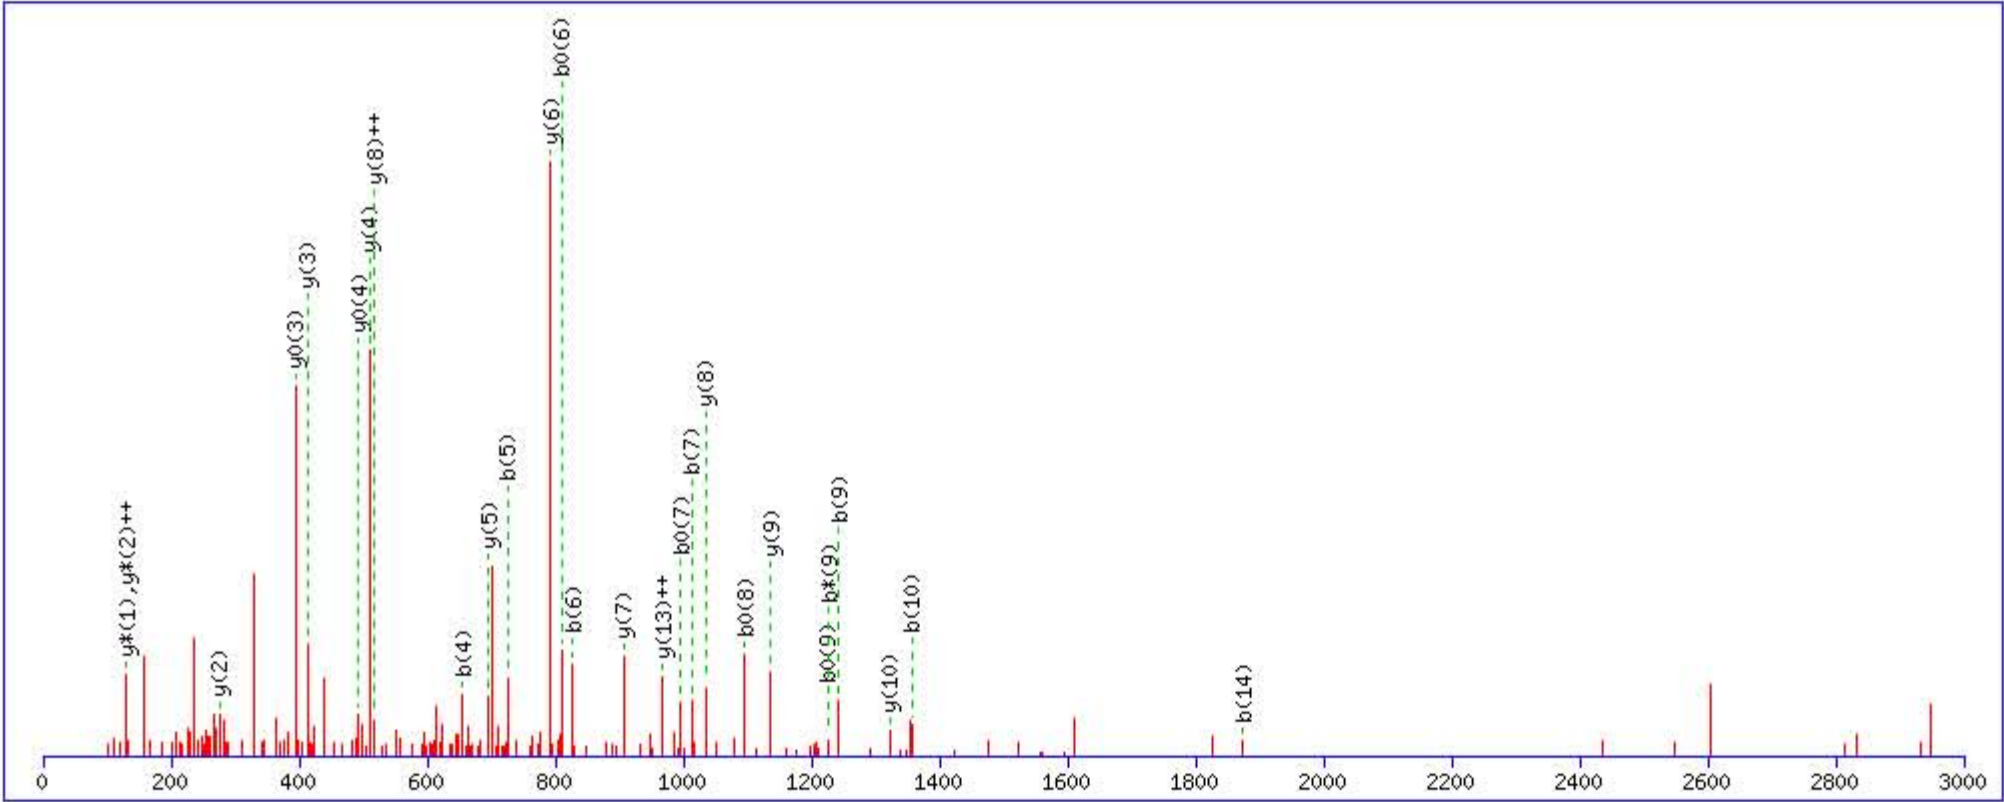

Monoisotopic mass of neutral peptide Mr(calc): 2148.046234  
Fixed modifications: Carbamidomethyl (C) (apply to specified residues or termini only)  
Variable modifications:  
Q4 : Biotin:Thermo-21345 (Q)  
Ions Score: 47 Expect: 4.7e-005  
Matches : 27/172 fragment ions using 48 most intense peaks [\(help\)](#)

| #  | b           | b <sup>++</sup> | b <sup>*</sup> | b <sup>++</sup> | b <sup>0</sup> | b <sup>0++</sup> | Seq. | y           | y <sup>++</sup> | y <sup>*</sup> | y <sup>++</sup> | y <sup>0</sup> | y <sup>0++</sup> | #  |
|----|-------------|-----------------|----------------|-----------------|----------------|------------------|------|-------------|-----------------|----------------|-----------------|----------------|------------------|----|
| 1  | 88.039304   | 44.523290       |                |                 | 70.028739      | 35.518008        | S    |             |                 |                |                 |                |                  | 16 |
| 2  | 145.060768  | 73.034022       |                |                 | 127.050203     | 64.028740        | G    | 2062.021496 | 1031.514386     | 2044.994947    | 1023.001111     | 2044.010931    | 1022.509103      | 15 |
| 3  | 216.097882  | 108.552579      |                |                 | 198.087317     | 99.547296        | A    | 2005.000032 | 1003.003654     | 1987.973483    | 994.490380      | 1986.989467    | 993.998372       | 14 |
| 4  | 655.323208  | 328.165242      | 638.296659     | 319.651968      | 637.312643     | 319.159960       | Q    | 1933.962918 | 967.485097      | 1916.936369    | 958.971823      | 1915.952353    | 958.479815       | 13 |
| 5  | 726.360322  | 363.683799      | 709.333773     | 355.170525      | 708.349757     | 354.678517       | A    | 1494.737592 | 747.872434      | 1477.711043    | 739.359160      | 1476.727027    | 738.867152       | 12 |
| 6  | 827.408001  | 414.207639      | 810.381452     | 405.694364      | 809.397436     | 405.202356       | T    | 1423.700478 | 712.353877      | 1406.673929    | 703.840603      | 1405.689913    | 703.348595       | 11 |
| 7  | 1013.487314 | 507.247295      | 996.460765     | 498.734020      | 995.476749     | 498.242012       | W    | 1322.652799 | 661.830038      | 1305.626250    | 653.316763      | 1304.642234    | 652.824755       | 10 |
| 8  | 1114.534993 | 557.771135      | 1097.508444    | 549.257860      | 1096.524428    | 548.765852       | T    | 1136.573486 | 568.790381      | 1119.546937    | 560.277107      | 1118.562921    | 559.785099       | 9  |
| 9  | 1243.577586 | 622.292431      | 1226.551037    | 613.779157      | 1225.567021    | 613.287149       | E    | 1035.525807 | 518.266542      | 1018.499258    | 509.753267      | 1017.515242    | 509.261259       | 8  |
| 10 | 1356.661650 | 678.834463      | 1339.635101    | 670.321189      | 1338.651085    | 669.829181       | L    | 906.483214  | 453.745245      | 889.456665     | 445.231971      | 888.472649     | 444.739963       | 7  |
| 11 | 1453.714414 | 727.360845      | 1436.687865    | 718.847571      | 1435.703849    | 718.355563       | P    | 793.399150  | 397.203213      | 776.372601     | 388.689939      | 775.388585     | 388.197931       | 6  |
| 12 | 1639.793727 | 820.400502      | 1622.767178    | 811.887227      | 1621.783162    | 811.395219       | W    | 696.346386  | 348.676831      | 679.319837     | 340.163557      | 678.335821     | 339.671549       | 5  |
| 13 | 1736.846491 | 868.926884      | 1719.819942    | 860.413609      | 1718.835926    | 859.921601       | P    | 510.267073  | 255.637175      | 493.240524     | 247.123900      | 492.256508     | 246.631892       | 4  |
| 14 | 1873.905403 | 937.456340      | 1856.878854    | 928.943065      | 1855.894838    | 928.451057       | H    | 413.214309  | 207.110793      | 396.187760     | 198.597518      | 395.203744     | 198.105510       | 3  |
| 15 | 2002.947996 | 1001.977636     | 1985.921447    | 993.464362      | 1984.937431    | 992.972354       | E    | 276.155397  | 138.581337      | 259.128848     | 130.068062      | 258.144832     | 129.576054       | 2  |
| 16 |             |                 |                |                 |                |                  | K    | 147.112804  | 74.060040       | 130.086255     | 65.546765       |                |                  | 1  |

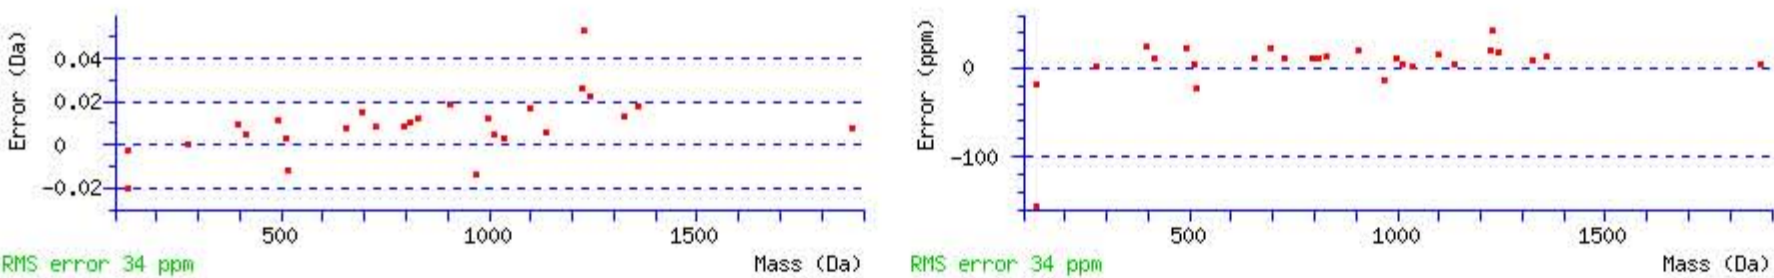

NCBI BLAST search of [SGAQATWTLPWPHEK](#)  
(Parameters: blastp, nr protein database, expect=20000, no filter, PAM30)  
Other BLAST [web gateways](#)

All matches to this query

| Score | Mr(calc):   | Delta     | Sequence                             |
|-------|-------------|-----------|--------------------------------------|
| 46.8  | 2148.046234 | 0.018848  | <a href="#">SGAQATWTLPWPHEK</a>      |
| 0.7   | 2148.073898 | -0.008816 | <a href="#">FVETSPSGLDPNASVYQPLK</a> |

M

A

T

R

I

X

S

C

I

E

N

C

E

Mascot Search Results

Peptide View

MS/MS Fragmentation of **LLQDEFPGIPSPLDAAVECHR**  
Found in **HEMO\_HUMAN**, Hemopexin OS=Homo sapiens GN=HPX PE=1 SV=2

Match to Query 56140: 2674.354722 from(892.458850,3+) rtinseconds(2663) index(9042)  
Title: Locus:1.1.1.2204.11 File:"2013-07-02 CLN FXIII 180 min 2nd F 1.wiff"  
Data file C:\Program Files (x86)\Matrix Science\Mascot Daemon\mgf\8 FXIII 180 min 2nd\mascot\_daemon\_merge.mgf

Click mouse within plot area to zoom in by factor of two about that point  
Or,   to  Da   
Label all possible matches ☐ Label matches used for scoring ☒

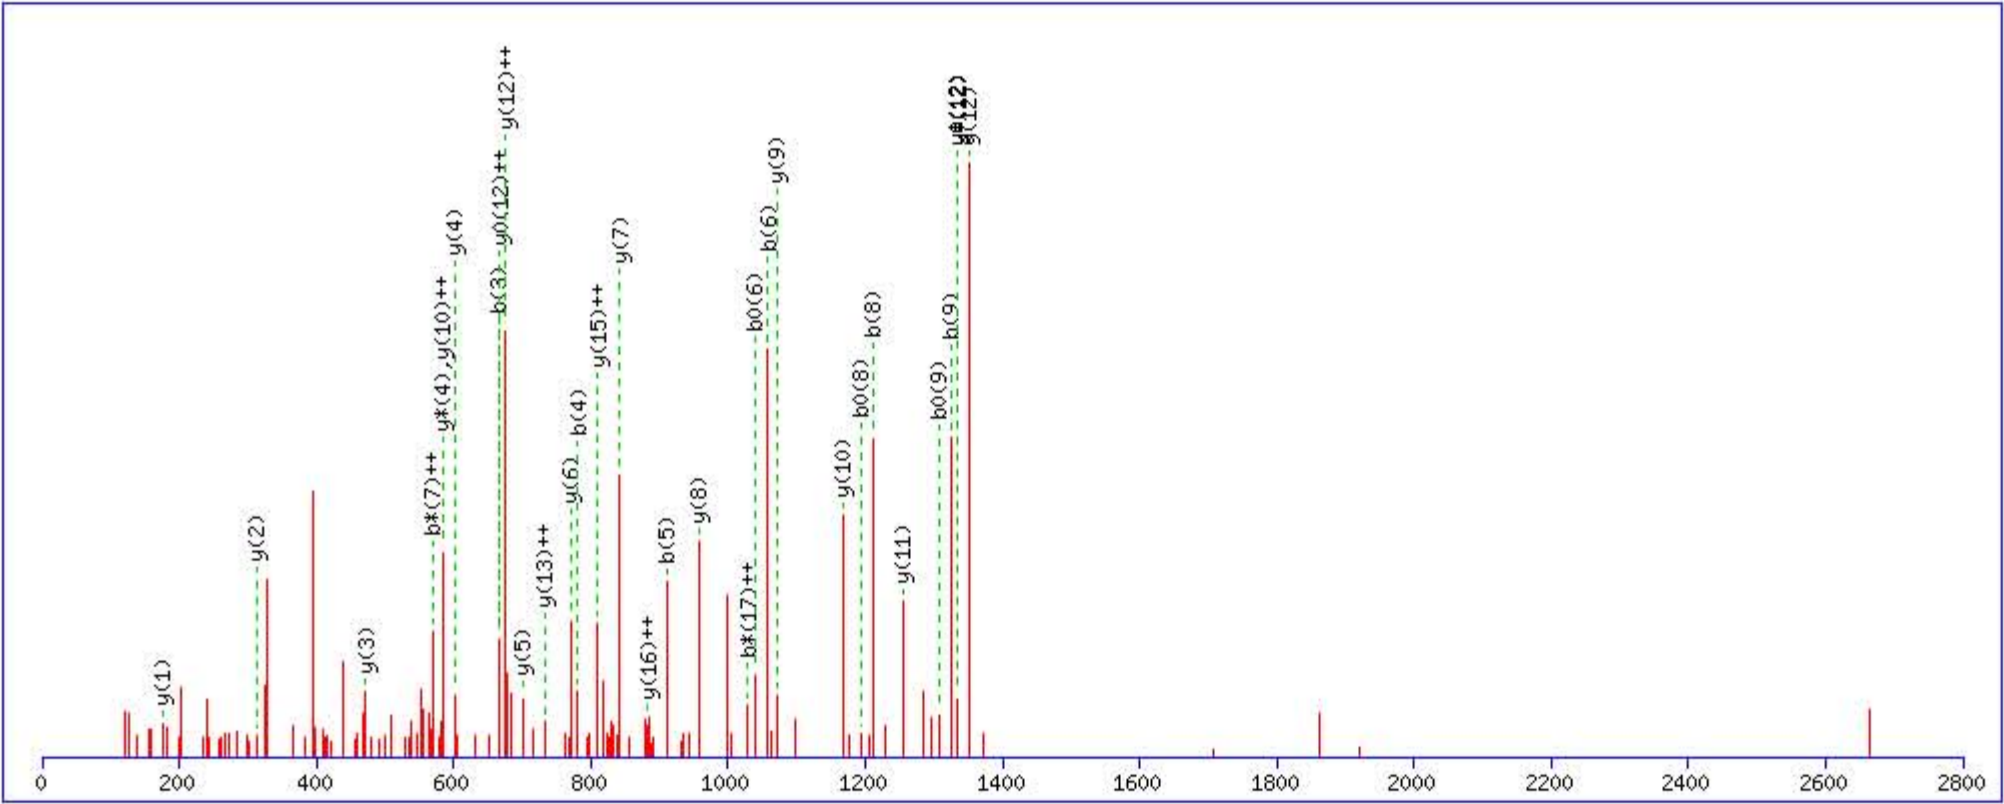

Monoisotopic mass of neutral peptide Mr(calc): 2674.324722  
Fixed modifications: Carbamidomethyl (C) (apply to specified residues or termini only)  
Variable modifications:  
Q3 : Biotin:Thermo-21345 (Q)  
Ions Score: 48 Expect: 0.00042  
Matches : 32/224 fragment ions using 81 most intense peaks ([help](#))

| #  | b           | b <sup>++</sup> | b <sup>*</sup> | b <sup>*++</sup> | b <sup>0</sup> | b <sup>0++</sup> | Seq. | y           | y <sup>++</sup> | y <sup>*</sup> | y <sup>*++</sup> | y <sup>0</sup> | y <sup>0++</sup> | #  |
|----|-------------|-----------------|----------------|------------------|----------------|------------------|------|-------------|-----------------|----------------|------------------|----------------|------------------|----|
| 1  | 114.091340  | 57.549308       |                |                  |                |                  | L    |             |                 |                |                  |                |                  | 21 |
| 2  | 227.175404  | 114.091340      |                |                  |                |                  | L    | 2562.247943 | 1281.627609     | 2545.221394    | 1273.114335      | 2544.237378    | 1272.622327      | 20 |
| 3  | 666.400730  | 333.704003      | 649.374181     | 325.190729       |                |                  | Q    | 2449.163879 | 1225.085577     | 2432.137330    | 1216.572303      | 2431.153314    | 1216.080295      | 19 |
| 4  | 781.427673  | 391.217475      | 764.401124     | 382.704200       | 763.417108     | 382.212192       | D    | 2009.938553 | 1005.472914     | 1992.912004    | 996.959640       | 1991.927988    | 996.467632       | 18 |
| 5  | 910.470266  | 455.738771      | 893.443717     | 447.225497       | 892.459701     | 446.733489       | E    | 1894.911610 | 947.959443      | 1877.885061    | 939.446169       | 1876.901045    | 938.954160       | 17 |
| 6  | 1057.538680 | 529.272978      | 1040.512131    | 520.759704       | 1039.528115    | 520.267696       | F    | 1765.869017 | 883.438146      | 1748.842468    | 874.924872       | 1747.858452    | 874.432864       | 16 |
| 7  | 1154.591444 | 577.799360      | 1137.564895    | 569.286086       | 1136.580879    | 568.794078       | P    | 1618.800603 | 809.903939      | 1601.774054    | 801.390665       | 1600.790038    | 800.898657       | 15 |
| 8  | 1211.612908 | 606.310092      | 1194.586359    | 597.796818       | 1193.602343    | 597.304810       | G    | 1521.747839 | 761.377557      | 1504.721290    | 752.864283       | 1503.737274    | 752.372275       | 14 |
| 9  | 1324.696972 | 662.852124      | 1307.670423    | 654.338850       | 1306.686407    | 653.846841       | I    | 1464.726375 | 732.866825      | 1447.699826    | 724.353551       | 1446.715810    | 723.861543       | 13 |
| 10 | 1421.749736 | 711.378506      | 1404.723187    | 702.865232       | 1403.739171    | 702.373223       | P    | 1351.642311 | 676.324793      | 1334.615762    | 667.811519       | 1333.631746    | 667.319511       | 12 |
| 11 | 1508.781764 | 754.894520      | 1491.755215    | 746.381246       | 1490.771199    | 745.889238       | S    | 1254.589547 | 627.798411      | 1237.562998    | 619.285137       | 1236.578982    | 618.793129       | 11 |
| 12 | 1605.834528 | 803.420902      | 1588.807979    | 794.907628       | 1587.823963    | 794.415620       | P    | 1167.557519 | 584.282397      | 1150.530970    | 575.769123       | 1149.546954    | 575.277115       | 10 |
| 13 | 1718.918592 | 859.962934      | 1701.892043    | 851.449660       | 1700.908027    | 850.957652       | L    | 1070.504755 | 535.756015      | 1053.478206    | 527.242741       | 1052.494190    | 526.750733       | 9  |
| 14 | 1833.945535 | 917.476406      | 1816.918986    | 908.963131       | 1815.934970    | 908.471123       | D    | 957.420691  | 479.213983      | 940.394142     | 470.700709       | 939.410126     | 470.208701       | 8  |
| 15 | 1904.982649 | 952.994963      | 1887.956100    | 944.481688       | 1886.972084    | 943.989680       | A    | 842.393748  | 421.700512      | 825.367199     | 413.187237       | 824.383183     | 412.695229       | 7  |
| 16 | 1976.019763 | 988.513520      | 1958.993214    | 980.000245       | 1958.009198    | 979.508237       | A    | 771.356634  | 386.181955      | 754.330085     | 377.668680       | 753.346069     | 377.176672       | 6  |
| 17 | 2075.088177 | 1038.047726     | 2058.061628    | 1029.534452      | 2057.077612    | 1029.042444      | V    | 700.319520  | 350.663398      | 683.292971     | 342.150123       | 682.308955     | 341.658115       | 5  |
| 18 | 2204.130770 | 1102.569023     | 2187.104221    | 1094.055748      | 2186.120205    | 1093.563740      | E    | 601.251106  | 301.129191      | 584.224557     | 292.615916       | 583.240541     | 292.123908       | 4  |
| 19 | 2364.161419 | 1182.584347     | 2347.134870    | 1174.071073      | 2346.150854    | 1173.579065      | C    | 472.208513  | 236.607894      | 455.181964     | 228.094620       |                |                  | 3  |
| 20 | 2501.220331 | 1251.113803     | 2484.193782    | 1242.600529      | 2483.209766    | 1242.108521      | H    | 312.177864  | 156.592570      | 295.151315     | 148.079295       |                |                  | 2  |
| 21 |             |                 |                |                  |                |                  | R    | 175.118952  | 88.063114       | 158.092403     | 79.549839        |                |                  | 1  |

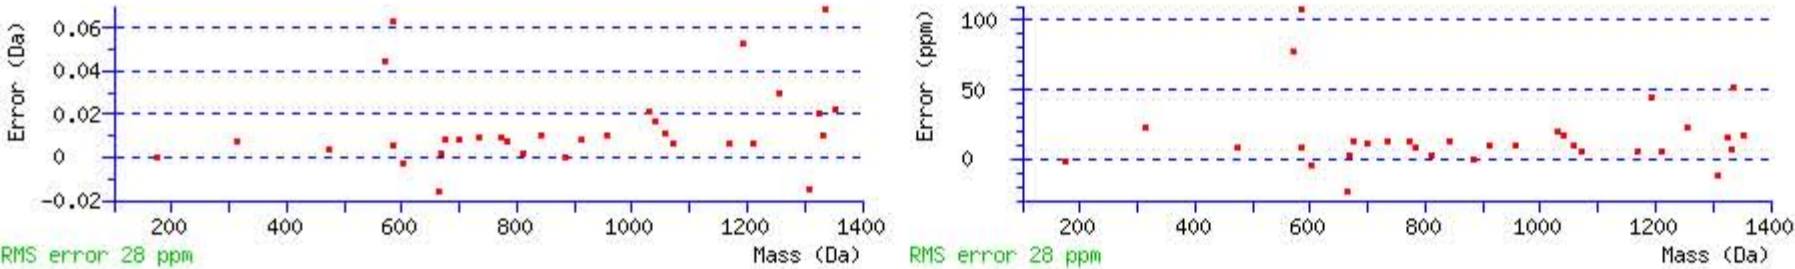

NCBI BLAST search of [LLQDEFPGIPSPLDAAVECHR](#)  
(Parameters: blastp, nr protein database, expect=20000, no filter, PAM30)  
Other BLAST [web gateways](#)

All matches to this query

| Score | Mr(calc):   | Delta    | Sequence                              |
|-------|-------------|----------|---------------------------------------|
| 48.4  | 2674.324722 | 0.030000 | <a href="#">LLQDEFPGIPSPLDAAVECHR</a> |

MATRIX

SCIENCE

Mascot Search Results

Peptide View

MS/MS Fragmentation of **GPLDQLEK**  
Found in **HEP2\_HUMAN**, Heparin cofactor 2 OS=Homo sapiens GN=SERPIND1 PE=1 SV=3

Match to Query 20769: 1209.652948 from(605.833750,2+) rtinseconds(2092) index(34814)  
Title: Locus:1.1.1.837.10 File:"2013-07-02 CLN FXIII 180 min 2nd F 3.wiff"  
Data file C:\Program Files (x86)\Matrix Science\Mascot Daemon\mgf\8 FXIII 180 min 2nd\mascot\_daemon\_merge.mgf

Click mouse within plot area to zoom in by factor of two about that point  
Or,   to  Da   
Label all possible matches ☐ Label matches used for scoring ☒

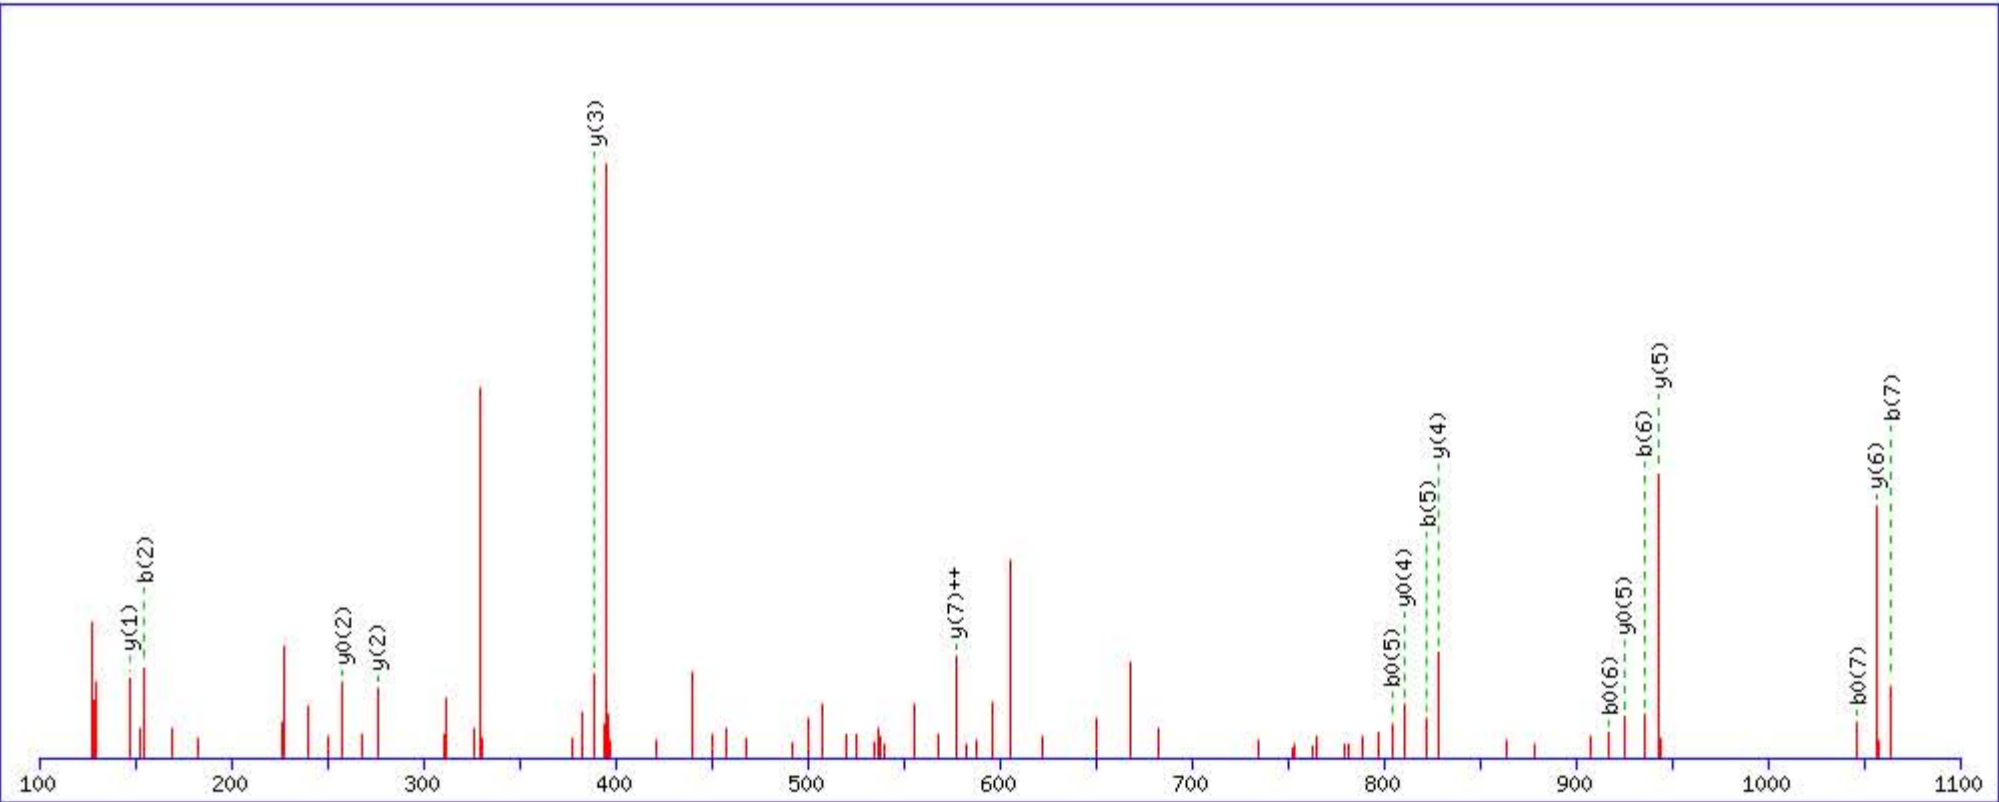

Monoisotopic mass of neutral peptide Mr(calc): 1209.642731  
Fixed modifications: Carbamidomethyl (C) (apply to specified residues or termini only)  
Variable modifications:  
Q5 : Biotin:Thermo-21345 (Q)  
Ions Score: 33 Expect: 0.0055  
Matches : 17/68 fragment ions using 30 most intense peaks [\(help\)](#)

| # | b           | b <sup>++</sup> | b <sup>*</sup> | b <sup>+++</sup> | b <sup>0</sup> | b <sup>0++</sup> | Seq. | y           | y <sup>++</sup> | y <sup>*</sup> | y <sup>+++</sup> | y <sup>0</sup> | y <sup>0++</sup> | # |
|---|-------------|-----------------|----------------|------------------|----------------|------------------|------|-------------|-----------------|----------------|------------------|----------------|------------------|---|
| 1 | 58.028740   | 29.518008       |                |                  |                |                  | G    |             |                 |                |                  |                |                  | 8 |
| 2 | 155.081504  | 78.044390       |                |                  |                |                  | P    | 1153.628558 | 577.317917      | 1136.602009    | 568.804643       | 1135.617993    | 568.312635       | 7 |
| 3 | 268.165568  | 134.586422      |                |                  |                |                  | L    | 1056.575794 | 528.791535      | 1039.549245    | 520.278261       | 1038.565229    | 519.786253       | 6 |
| 4 | 383.192511  | 192.099894      |                |                  | 365.181946     | 183.094611       | D    | 943.491730  | 472.249503      | 926.465181     | 463.736228       | 925.481165     | 463.244220       | 5 |
| 5 | 822.417837  | 411.712557      | 805.391288     | 403.199282       | 804.407272     | 402.707274       | Q    | 828.464787  | 414.736032      | 811.438238     | 406.222757       | 810.454222     | 405.730749       | 4 |
| 6 | 935.501901  | 468.254589      | 918.475352     | 459.741314       | 917.491336     | 459.249306       | L    | 389.239461  | 195.123368      | 372.212912     | 186.610094       | 371.228896     | 186.118086       | 3 |
| 7 | 1064.544494 | 532.775885      | 1047.517945    | 524.262611       | 1046.533929    | 523.770603       | E    | 276.155397  | 138.581336      | 259.128848     | 130.068062       | 258.144832     | 129.576054       | 2 |
| 8 |             |                 |                |                  |                |                  | K    | 147.112804  | 74.060040       | 130.086255     | 65.546765        |                |                  | 1 |

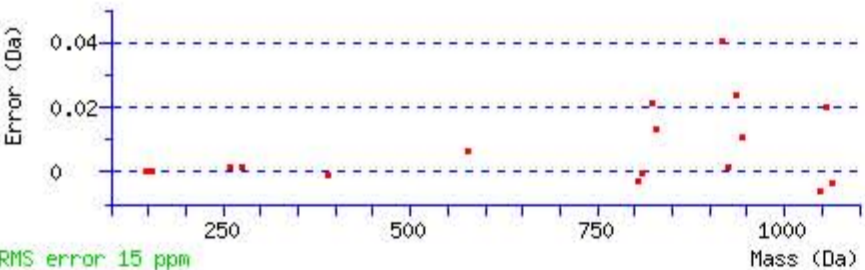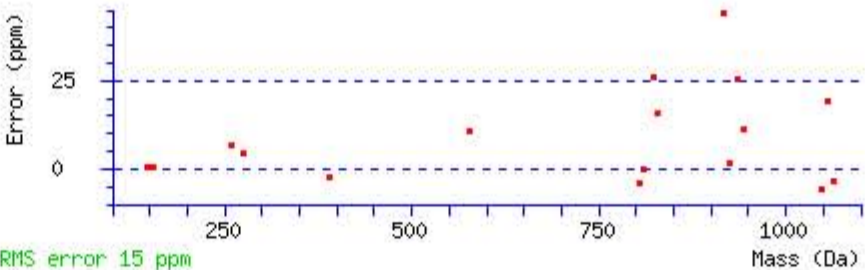

NCBI BLAST search of [GPLDQLEK](#)  
(Parameters: blastp, nr protein database, expect=20000, no filter, PAM30)  
Other BLAST [web gateways](#)

All matches to this query

| Score | Mr(calc):   | Delta     | Sequence                    |
|-------|-------------|-----------|-----------------------------|
| 32.9  | 1209.642731 | 0.010217  | <a href="#">GPLDQLEK</a>    |
| 8.4   | 1209.646545 | 0.006403  | <a href="#">EHNRLATELK</a>  |
| 5.3   | 1209.661835 | -0.008887 | <a href="#">QQLHKGPQFK</a>  |
| 4.5   | 1209.639343 | 0.013605  | <a href="#">AFAKGFLAEEK</a> |
| 4.5   | 1209.664505 | -0.011557 | <a href="#">LLGEYEVIFK</a>  |
| 2.8   | 1209.665192 | -0.012244 | <a href="#">GQGKPREK</a>    |
| 2.7   | 1209.635300 | 0.017648  | <a href="#">ANHKIEELEK</a>  |
| 2.1   | 1209.653976 | -0.001028 | <a href="#">GPDGLKGQK</a>   |

MATRIX

SCIENCE

Mascot Search Results

Peptide View

MS/MS Fragmentation of **TLEAQLTPR**  
Found in **HEP2\_HUMAN**, Heparin cofactor 2 OS=Homo sapiens GN=SERPIND1 PE=1 SV=3

Match to Query 24070: 1338.742968 from(670.378760,2+) rtinseconds(1957) index(33958)  
Title: Locus:1.1.1.790.15 File:"2013-07-02 CLN FXIII 180 min 2nd F 3.wiff"  
Data file C:\Program Files (x86)\Matrix Science\Mascot Daemon\mgf\8 FXIII 180 min 2nd\mascot\_daemon\_merge.mgf

Click mouse within plot area to zoom in by factor of two about that point  
Or, 

Plot from

100

 to 

1200

 Da 

Full range

  
Label all possible matches ☐ Label matches used for scoring ☒

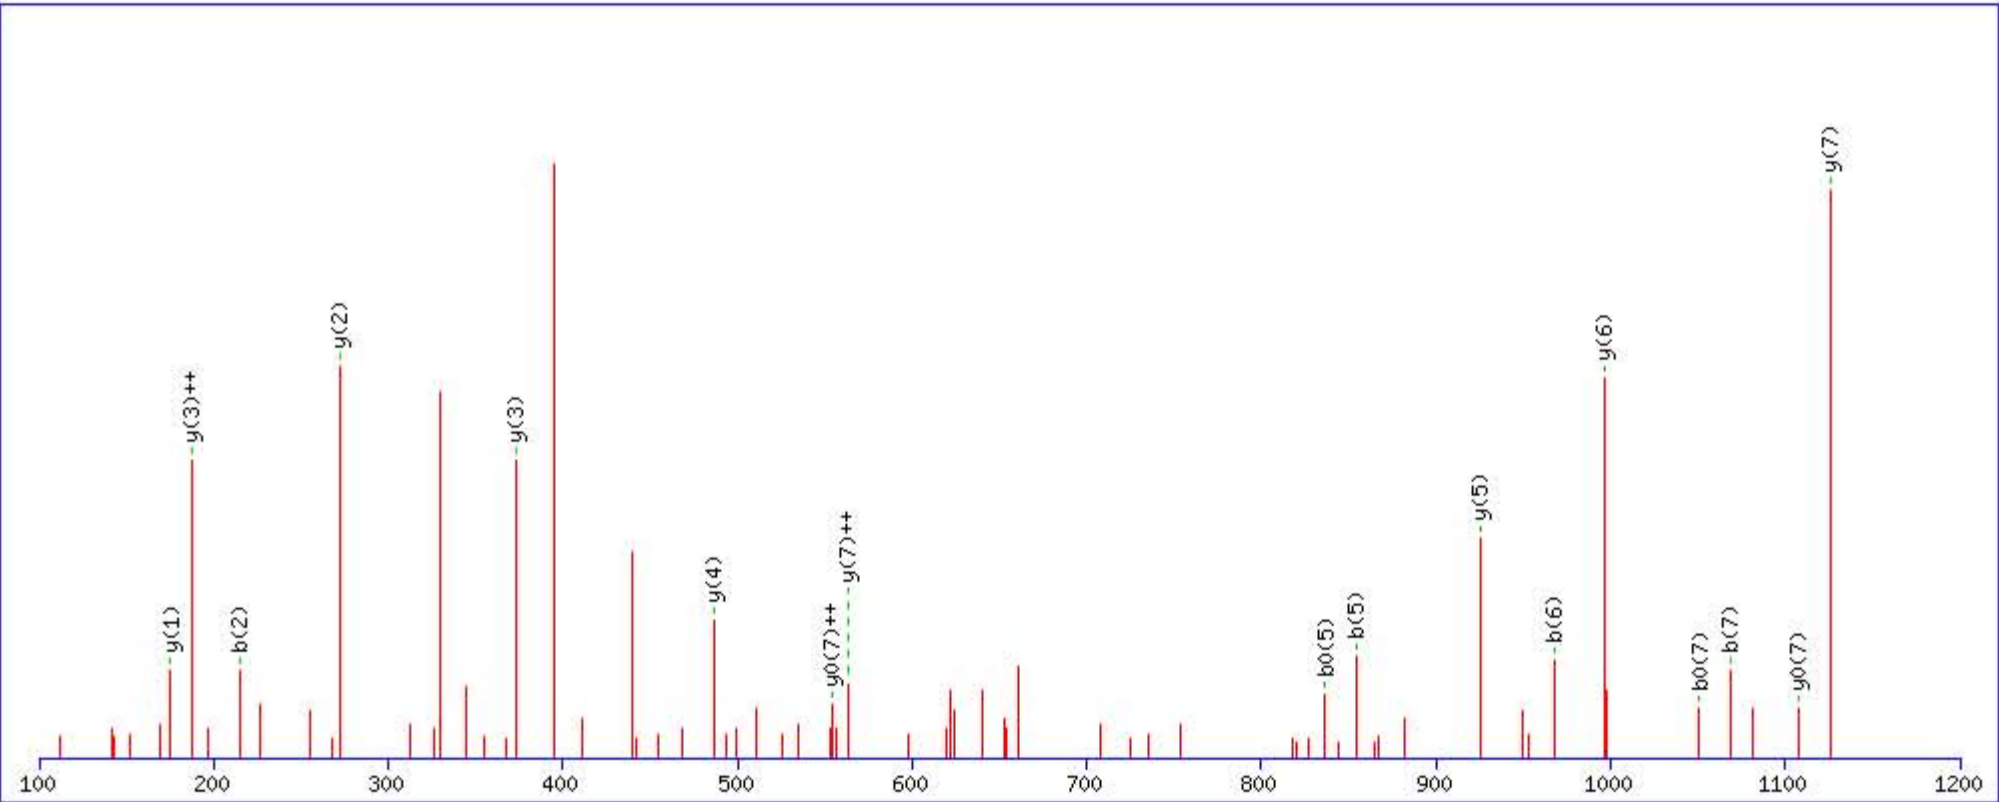

Monoisotopic mass of neutral peptide Mr(calc): 1338.732941  
Fixed modifications: Carbamidomethyl (C) (apply to specified residues or termini only)  
Variable modifications:  
Q5 : Biotin:Thermo-21345 (Q)  
Ions Score: 41 Expect: 0.0015  
Matches : 17/84 fragment ions using 32 most intense peaks [\(help\)](#)

| # | b           | b <sup>++</sup> | b <sup>*</sup> | b <sup>*++</sup> | b <sup>0</sup> | b <sup>0++</sup> | Seq. | y           | y <sup>++</sup> | y <sup>*</sup> | y <sup>*++</sup> | y <sup>0</sup> | y <sup>0++</sup> | # |
|---|-------------|-----------------|----------------|------------------|----------------|------------------|------|-------------|-----------------|----------------|------------------|----------------|------------------|---|
| 1 | 102.054955  | 51.531116       |                |                  | 84.044390      | 42.525833        | T    |             |                 |                |                  |                |                  | 9 |
| 2 | 215.139019  | 108.073147      |                |                  | 197.128454     | 99.067865        | L    | 1238.692556 | 619.849916      | 1221.666007    | 611.336642       | 1220.681991    | 610.844633       | 8 |
| 3 | 344.181612  | 172.594444      |                |                  | 326.171047     | 163.589162       | E    | 1125.608492 | 563.307884      | 1108.581943    | 554.794610       | 1107.597927    | 554.302602       | 7 |
| 4 | 415.218726  | 208.113001      |                |                  | 397.208161     | 199.107719       | A    | 996.565899  | 498.786588      | 979.539350     | 490.273313       | 978.555334     | 489.781305       | 6 |
| 5 | 854.444052  | 427.725664      | 837.417503     | 419.212390       | 836.433487     | 418.720382       | Q    | 925.528785  | 463.268031      | 908.502236     | 454.754756       | 907.518220     | 454.262748       | 5 |
| 6 | 967.528116  | 484.267696      | 950.501567     | 475.754422       | 949.517551     | 475.262414       | L    | 486.303459  | 243.655367      | 469.276910     | 235.142093       | 468.292894     | 234.650085       | 4 |
| 7 | 1068.575795 | 534.791536      | 1051.549246    | 526.278261       | 1050.565230    | 525.786253       | T    | 373.219395  | 187.113335      | 356.192846     | 178.600061       | 355.208830     | 178.108053       | 3 |
| 8 | 1165.628559 | 583.317918      | 1148.602010    | 574.804643       | 1147.617994    | 574.312635       | P    | 272.171716  | 136.589496      | 255.145167     | 128.076221       |                |                  | 2 |
| 9 |             |                 |                |                  |                |                  | R    | 175.118952  | 88.063114       | 158.092403     | 79.549839        |                |                  | 1 |

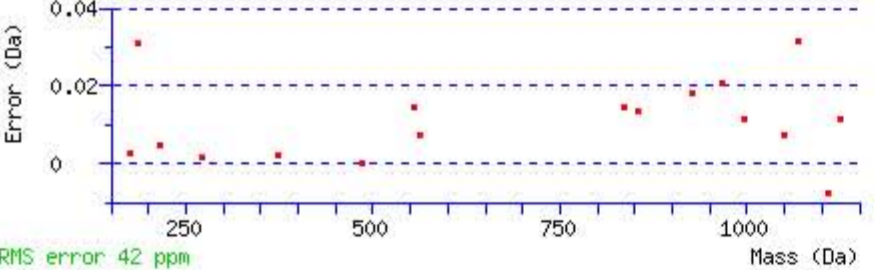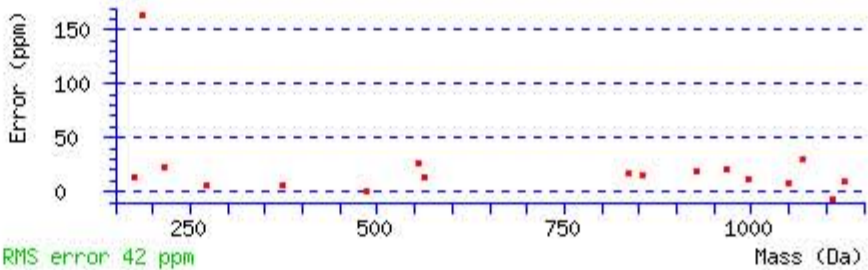

NCBI BLAST search of [TLEAQLTPR](#)  
(Parameters: blastp, nr protein database, expect=20000, no filter, PAM30)  
Other BLAST [web gateways](#)

All matches to this query

| Score | Mr(calc):   | Delta     | Sequence                        |
|-------|-------------|-----------|---------------------------------|
| 40.8  | 1338.732941 | 0.010027  | <a href="#">TLEAQLTPR</a>       |
| 10.2  | 1338.732956 | 0.010012  | <a href="#">VDLQSLPTR</a>       |
| 4.8   | 1338.761932 | -0.018964 | <a href="#">LTVLREDQIPR</a>     |
| 4.5   | 1338.725555 | 0.017413  | <a href="#">VDTVAAEHLTRK</a>    |
| 3.1   | 1338.725555 | 0.017413  | <a href="#">RSPTVEPSTLPR</a>    |
| 1.3   | 1338.744171 | -0.001203 | <a href="#">MKEALHQIVVR</a>     |
| 0.7   | 1338.740829 | 0.002139  | <a href="#">GPAGPPGLLGPPGPR</a> |

MATRIX

SCIENCE

Mascot Search Results

Peptide View

MS/MS Fragmentation of **SVNDLYIQK**  
Found in **HEP2\_HUMAN**, Heparin cofactor 2 OS=Homo sapiens GN=SERPIND1 PE=1 SV=3

Match to Query 26910: 1389.744968 from(695.879760,2+) rtinseconds(1960) index(33985)  
Title: Locus:1.1.1.791.17 File:"2013-07-02 CLN FXIII 180 min 2nd F 3.wiff"  
Data file C:\Program Files (x86)\Matrix Science\Mascot Daemon\mgf\8 FXIII 180 min 2nd\mascot\_daemon\_merge.mgf

Click mouse within plot area to zoom in by factor of two about that point  
Or,   to  Da   
Label all possible matches ☐ Label matches used for scoring ☒

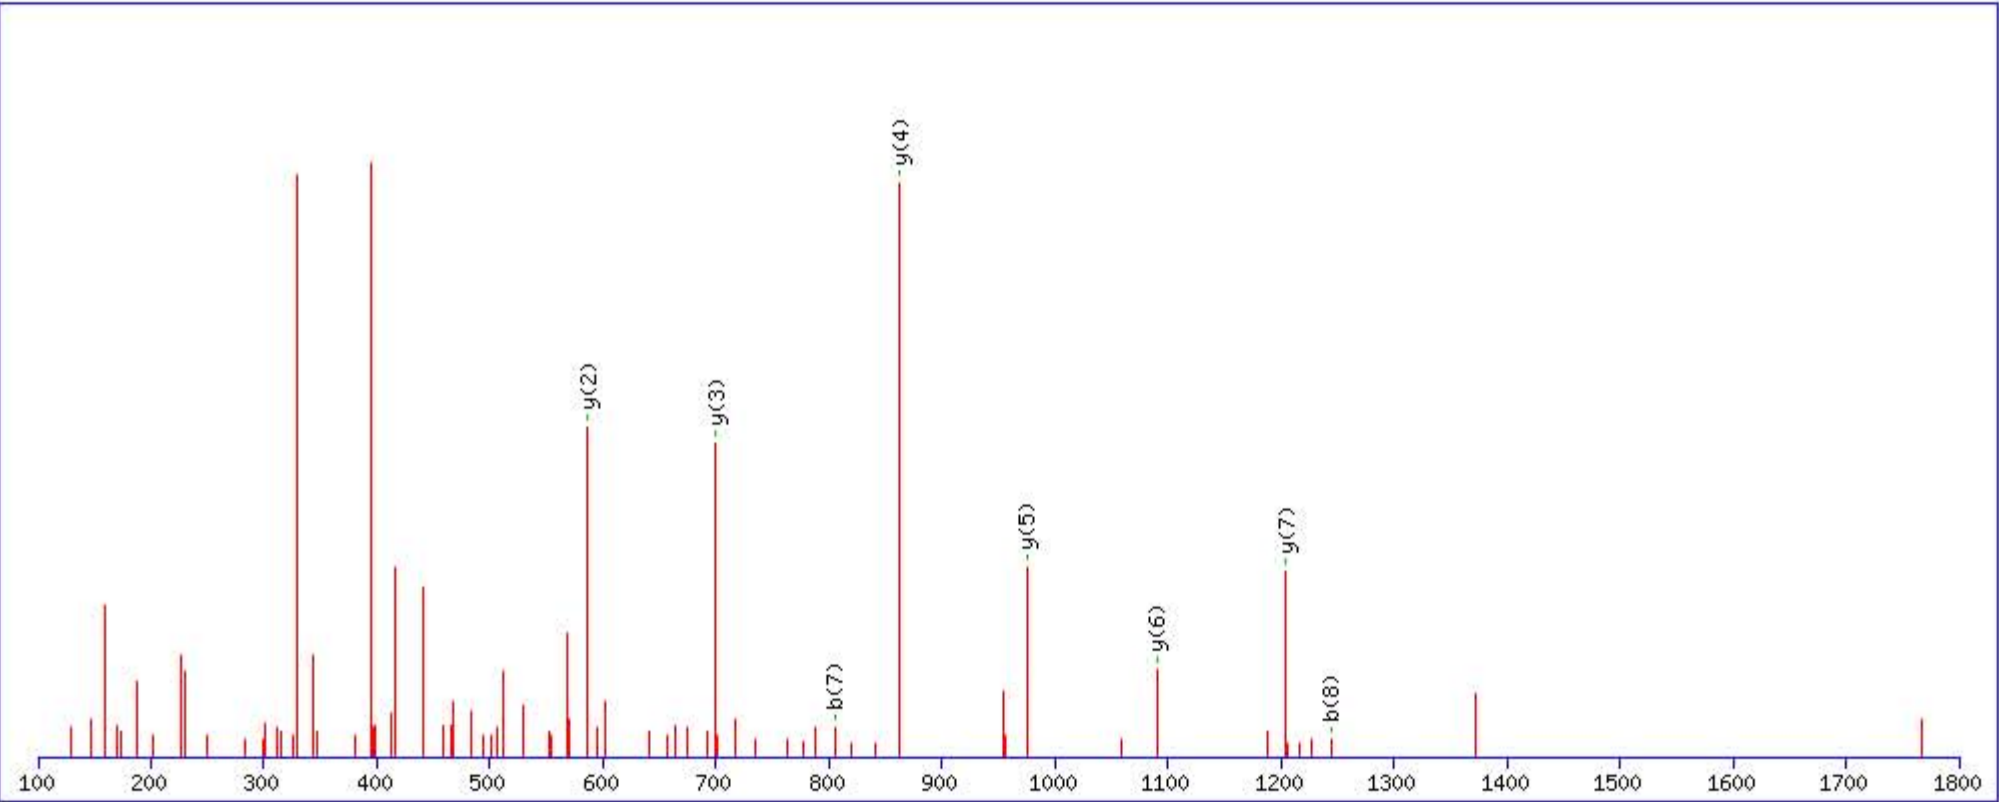

Monoisotopic mass of neutral peptide Mr(calc): 1389.732605  
Fixed modifications: Carbamidomethyl (C) (apply to specified residues or termini only)  
Variable modifications:  
Q8 : Biotin:Thermo-21345 (Q)  
Ions Score: 42 Expect: 0.0004  
Matches : 8/82 fragment ions using 13 most intense peaks [\(help\)](#)

| # | b           | b <sup>++</sup> | b <sup>*</sup> | b <sup>*++</sup> | b <sup>0</sup> | b <sup>0++</sup> | Seq. | y           | y <sup>++</sup> | y <sup>*</sup> | y <sup>*++</sup> | y <sup>0</sup> | y <sup>0++</sup> | # |
|---|-------------|-----------------|----------------|------------------|----------------|------------------|------|-------------|-----------------|----------------|------------------|----------------|------------------|---|
| 1 | 88.039304   | 44.523290       |                |                  | 70.028739      | 35.518008        | S    |             |                 |                |                  |                |                  | 9 |
| 2 | 187.107718  | 94.057497       |                |                  | 169.097153     | 85.052214        | V    | 1303.707871 | 652.357573      | 1286.681322    | 643.844299       | 1285.697306    | 643.352291       | 8 |
| 3 | 301.150645  | 151.078960      | 284.124096     | 142.565686       | 283.140080     | 142.073678       | N    | 1204.639457 | 602.823367      | 1187.612908    | 594.310092       | 1186.628892    | 593.818084       | 7 |
| 4 | 416.177588  | 208.592432      | 399.151039     | 200.079158       | 398.167023     | 199.587150       | D    | 1090.596530 | 545.801903      | 1073.569981    | 537.288629       | 1072.585965    | 536.796621       | 6 |
| 5 | 529.261652  | 265.134464      | 512.235103     | 256.621190       | 511.251087     | 256.129182       | L    | 975.569587  | 488.288432      | 958.543038     | 479.775157       |                |                  | 5 |
| 6 | 692.324981  | 346.666129      | 675.298432     | 338.152854       | 674.314416     | 337.660846       | Y    | 862.485523  | 431.746400      | 845.458974     | 423.233125       |                |                  | 4 |
| 7 | 805.409045  | 403.208161      | 788.382496     | 394.694886       | 787.398480     | 394.202878       | I    | 699.422194  | 350.214735      | 682.395645     | 341.701461       |                |                  | 3 |
| 8 | 1244.634371 | 622.820823      | 1227.607822    | 614.307549       | 1226.623806    | 613.815541       | Q    | 586.338130  | 293.672703      | 569.311581     | 285.159428       |                |                  | 2 |
| 9 |             |                 |                |                  |                |                  | K    | 147.112804  | 74.060040       | 130.086255     | 65.546765        |                |                  | 1 |

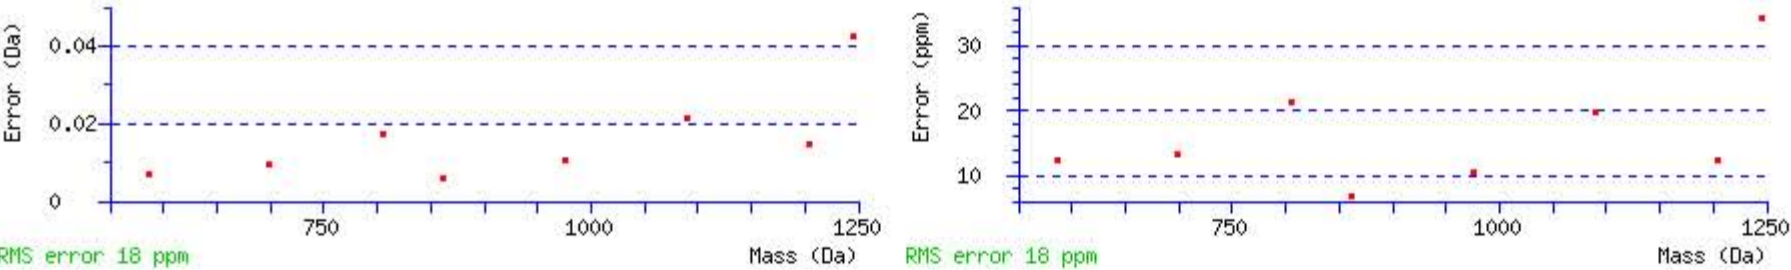

NCBI BLAST search of [SVNDLYIQK](#)  
(Parameters: blastp, nr protein database, expect=20000, no filter, PAM30)  
Other BLAST [web gateways](#)

All matches to this query

| Score | Mr(calc):   | Delta     | Sequence                      |
|-------|-------------|-----------|-------------------------------|
| 42.1  | 1389.732605 | 0.012363  | <a href="#">SVNDLYIQK</a>     |
| 5.5   | 1389.735107 | 0.009861  | <a href="#">ATGDIKVTESEIK</a> |
| 4.3   | 1389.746307 | -0.001339 | <a href="#">SEKATSLQAKAEK</a> |
| 4.3   | 1389.746323 | -0.001355 | <a href="#">TAKATLEQDSAKK</a> |
| 3.7   | 1389.728577 | 0.016391  | <a href="#">NMLTESLVALQR</a>  |
| 3.3   | 1389.751236 | -0.006268 | <a href="#">QTLALMFQK</a>     |
| 2.6   | 1389.732605 | 0.012363  | <a href="#">KDVEINGMFIPK</a>  |
| 1.0   | 1389.761612 | -0.016644 | <a href="#">SGVGNIFVKNLDK</a> |

M

A

T

R

I

X

S

C

I

E

N

C

E

Mascot Search Results

Peptide View

MS/MS Fragmentation of **GGETAQSADPQWEQLNNK**  
Found in **HEP2\_HUMAN**, Heparin cofactor 2 OS=Homo sapiens GN=SERPIND1 PE=1 SV=3

Match to Query 50211: 2283.077682 from(762.033170,3+) rtinseconds(1941) index(33814)  
Title: Locus:1.1.1.784.21 File:"2013-07-02 CLN FXIII 180 min 2nd F 3.wiff"  
Data file C:\Program Files (x86)\Matrix Science\Mascot Daemon\mgf\8 FXIII 180 min 2nd\mascot\_daemon\_merge.mgf

Click mouse within plot area to zoom in by factor of two about that point  
Or, 

Plot from

100

 to 

1700

 Da 

Full range

  
Label all possible matches ☐ Label matches used for scoring ☒

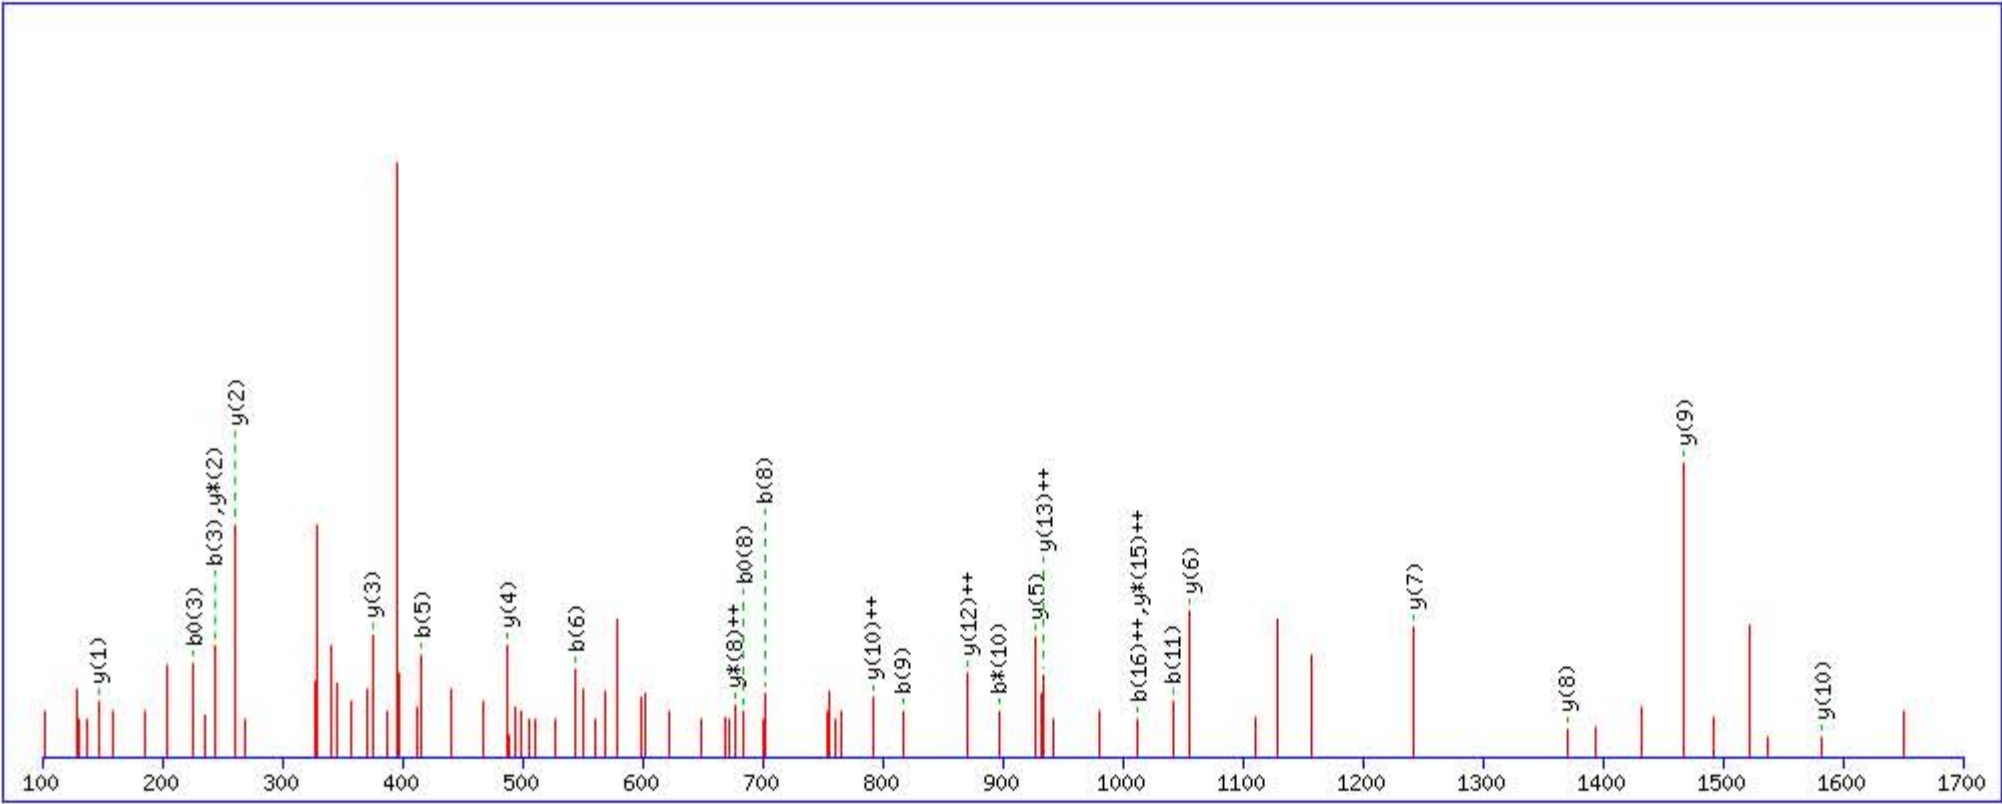

Monoisotopic mass of neutral peptide Mr(calc): 2283.058975  
Fixed modifications: Carbamidomethyl (C) (apply to specified residues or termini only)  
Variable modifications:  
Q14 : Biotin:Thermo-21345 (Q)  
Ions Score: 55 Expect: 5.9e-005  
Matches : 26/180 fragment ions using 43 most intense peaks [\(help\)](#)

| #  | b           | b <sup>++</sup> | b <sup>*</sup> | b <sup>+++</sup> | b <sup>0</sup> | b <sup>0++</sup> | Seq. | y           | y <sup>++</sup> | y <sup>*</sup> | y <sup>+++</sup> | y <sup>0</sup> | y <sup>0++</sup> | #  |
|----|-------------|-----------------|----------------|------------------|----------------|------------------|------|-------------|-----------------|----------------|------------------|----------------|------------------|----|
| 1  | 58.028740   | 29.518008       |                |                  |                |                  | G    |             |                 |                |                  |                |                  | 18 |
| 2  | 115.050204  | 58.028740       |                |                  |                |                  | G    | 2227.044809 | 1114.026042     | 2210.018260    | 1105.512768      | 2209.034244    | 1105.020760      | 17 |
| 3  | 244.092797  | 122.550037      |                |                  | 226.082232     | 113.544754       | E    | 2170.023345 | 1085.515310     | 2152.996796    | 1077.002036      | 2152.012780    | 1076.510028      | 16 |
| 4  | 345.140476  | 173.073876      |                |                  | 327.129911     | 164.068594       | T    | 2040.980752 | 1020.994014     | 2023.954203    | 1012.480740      | 2022.970187    | 1011.988732      | 15 |
| 5  | 416.177590  | 208.592433      |                |                  | 398.167025     | 199.587151       | A    | 1939.933073 | 970.470175      | 1922.906524    | 961.956900       | 1921.922508    | 961.464892       | 14 |
| 6  | 544.236168  | 272.621722      | 527.209619     | 264.108448       | 526.225603     | 263.616440       | Q    | 1868.895959 | 934.951618      | 1851.869410    | 926.438343       | 1850.885394    | 925.946335       | 13 |
| 7  | 631.268196  | 316.137736      | 614.241647     | 307.624462       | 613.257631     | 307.132454       | S    | 1740.837381 | 870.922329      | 1723.810832    | 862.409054       | 1722.826816    | 861.917046       | 12 |
| 8  | 702.305310  | 351.656293      | 685.278761     | 343.143019       | 684.294745     | 342.651011       | A    | 1653.805353 | 827.406315      | 1636.778804    | 818.893040       | 1635.794788    | 818.401032       | 11 |
| 9  | 817.332253  | 409.169765      | 800.305704     | 400.656490       | 799.321688     | 400.164482       | D    | 1582.768239 | 791.887758      | 1565.741690    | 783.374483       | 1564.757674    | 782.882475       | 10 |
| 10 | 914.385017  | 457.696147      | 897.358468     | 449.182872       | 896.374452     | 448.690864       | P    | 1467.741296 | 734.374286      | 1450.714747    | 725.861012       | 1449.730731    | 725.369004       | 9  |
| 11 | 1042.443595 | 521.725436      | 1025.417046    | 513.212161       | 1024.433030    | 512.720153       | Q    | 1370.688532 | 685.847904      | 1353.661983    | 677.334630       | 1352.677967    | 676.842622       | 8  |
| 12 | 1228.522908 | 614.765092      | 1211.496359    | 606.251818       | 1210.512343    | 605.759809       | W    | 1242.629954 | 621.818615      | 1225.603405    | 613.305341       | 1224.619389    | 612.813333       | 7  |
| 13 | 1357.565501 | 679.286388      | 1340.538952    | 670.773114       | 1339.554936    | 670.281106       | E    | 1056.550641 | 528.778959      | 1039.524092    | 520.265684       | 1038.540076    | 519.773676       | 6  |
| 14 | 1796.790827 | 898.899052      | 1779.764278    | 890.385777       | 1778.780262    | 889.893769       | Q    | 927.508048  | 464.257662      | 910.481499     | 455.744388       |                |                  | 5  |
| 15 | 1909.874891 | 955.441083      | 1892.848342    | 946.927809       | 1891.864326    | 946.435801       | L    | 488.282722  | 244.644999      | 471.256173     | 236.131725       |                |                  | 4  |
| 16 | 2023.917818 | 1012.462547     | 2006.891269    | 1003.949273      | 2005.907253    | 1003.457265      | N    | 375.198658  | 188.102967      | 358.172109     | 179.589693       |                |                  | 3  |
| 17 | 2137.960745 | 1069.484010     | 2120.934196    | 1060.970736      | 2119.950180    | 1060.478728      | N    | 261.155731  | 131.081504      | 244.129182     | 122.568229       |                |                  | 2  |
| 18 |             |                 |                |                  |                |                  | K    | 147.112804  | 74.060040       | 130.086255     | 65.546765        |                |                  | 1  |

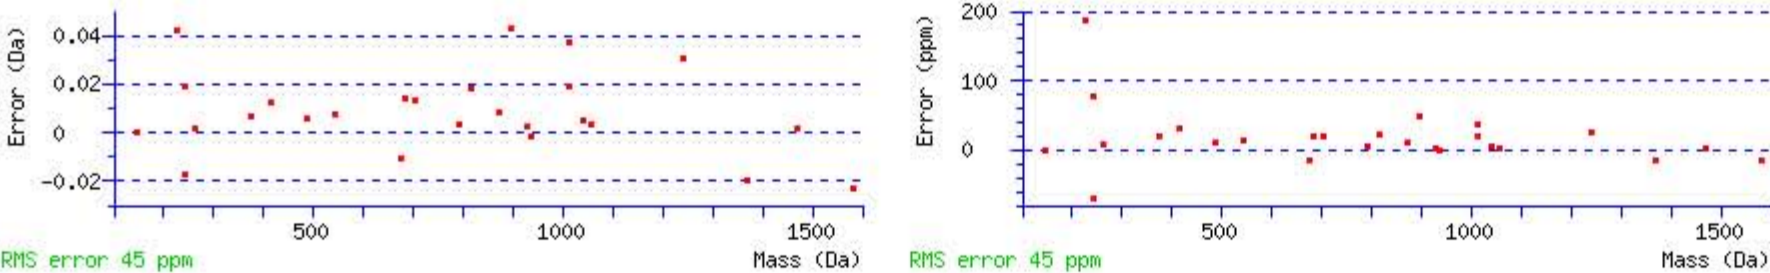

NCBI BLAST search of [GGETAQSADPQWEQLNNK](#)  
(Parameters: blastp, nr protein database, expect=20000, no filter, PAM30)  
Other BLAST [web gateways](#)

All matches to this query

| Score | Mr(calc):   | Delta    | Sequence                           |
|-------|-------------|----------|------------------------------------|
| 54.6  | 2283.058975 | 0.018707 | <a href="#">GGETAQSADPQWEQLNNK</a> |
| 30.6  | 2283.058975 | 0.018707 | <a href="#">GGETAQSADPQWEQLNNK</a> |
| 6.0   | 2283.058975 | 0.018707 | <a href="#">GGETAQSADPQWEQLNNK</a> |

M

A

T

R

I

X

S

C

I

E

N

C

E

Mascot Search Results

Peptide View

MS/MS Fragmentation of **GGETAQSADPQWEQLNNK**  
Found in **HEP2\_HUMAN**, Heparin cofactor 2 OS=Homo sapiens GN=SERPIND1 PE=1 SV=3

Match to Query 50213: 2283.087342 from(762.036390,3+) rtinseconds(1912) index(33568)  
Title: Locus:1.1.1.774.25 File:"2013-07-02 CLN FXIII 180 min 2nd F 3.wiff"  
Data file C:\Program Files (x86)\Matrix Science\Mascot Daemon\mgf\8 FXIII 180 min 2nd\mascot\_daemon\_merge.mgf

Click mouse within plot area to zoom in by factor of two about that point  
Or, 

Plot from100to1800Da

Full range

  
Label all possible matches ☐ Label matches used for scoring ☒

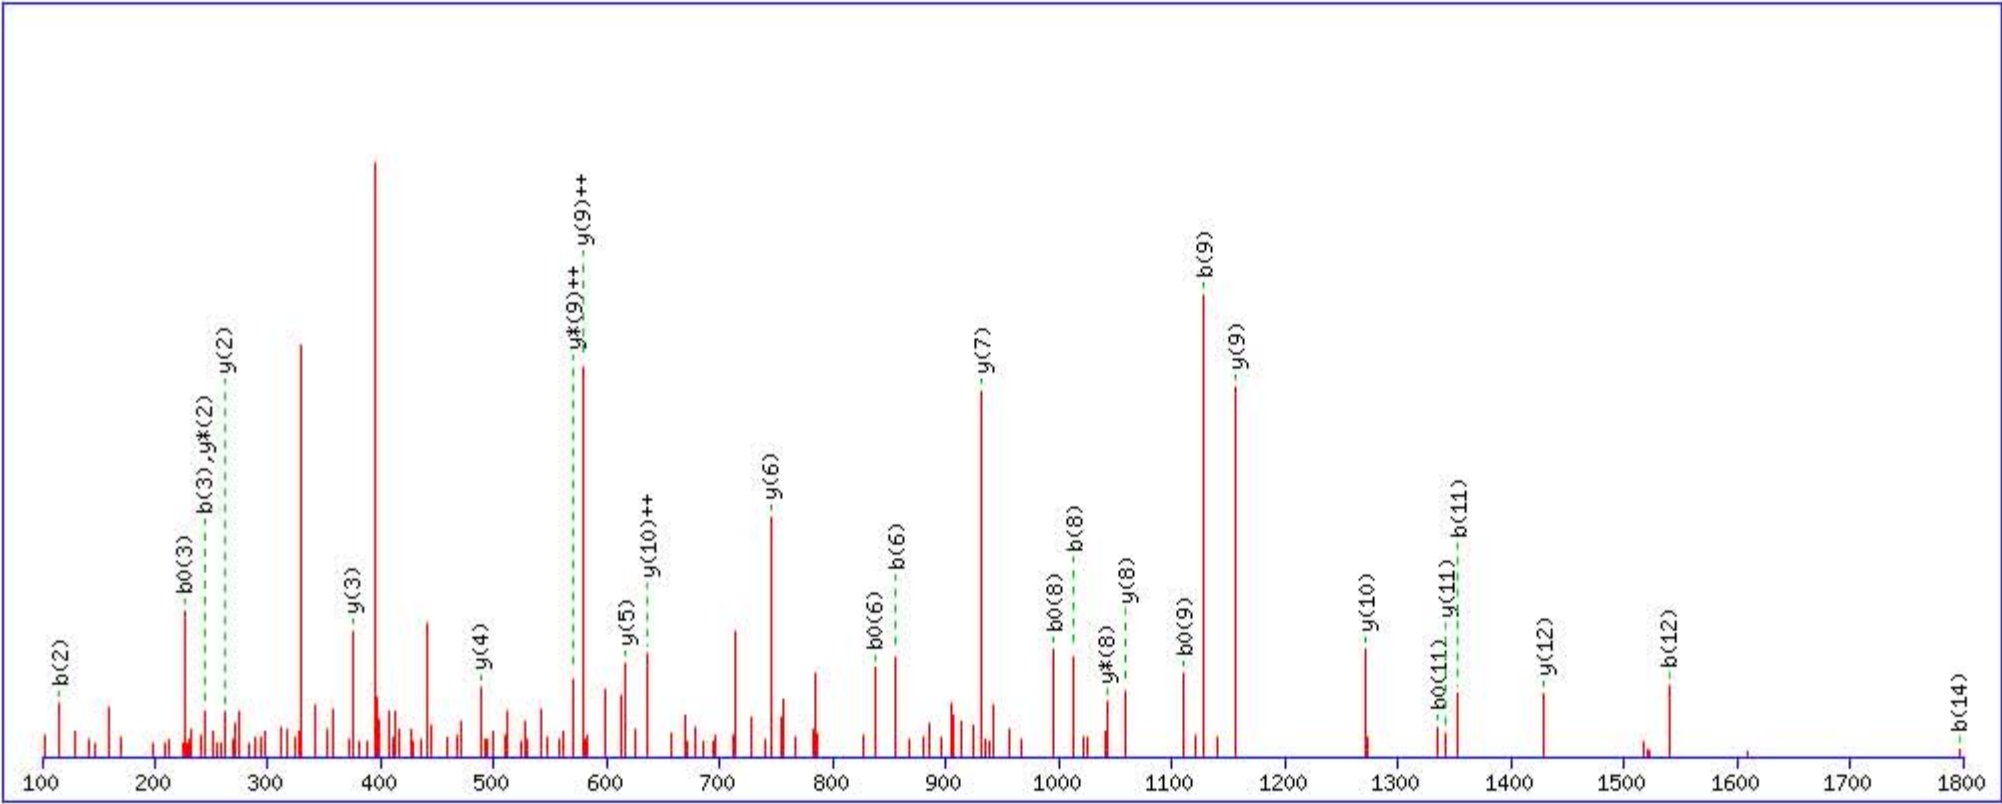

Monoisotopic mass of neutral peptide Mr(calc): 2283.058975  
Fixed modifications: Carbamidomethyl (C) (apply to specified residues or termini only)  
Variable modifications:  
Q6 : Biotin:Thermo-21345 (Q)  
Ions Score: 69 Expect: 3.8e-007  
Matches : 29/180 fragment ions using 44 most intense peaks [\(help\)](#)

| #  | b           | b <sup>++</sup> | b <sup>*</sup> | b <sup>++</sup> * | b <sup>0</sup> | b <sup>0++</sup> | Seq. | y           | y <sup>++</sup> | y <sup>*</sup> | y <sup>++</sup> * | y <sup>0</sup> | y <sup>0++</sup> | #  |
|----|-------------|-----------------|----------------|-------------------|----------------|------------------|------|-------------|-----------------|----------------|-------------------|----------------|------------------|----|
| 1  | 58.028740   | 29.518008       |                |                   |                |                  | G    |             |                 |                |                   |                |                  | 18 |
| 2  | 115.050204  | 58.028740       |                |                   |                |                  | G    | 2227.044809 | 1114.026042     | 2210.018260    | 1105.512768       | 2209.034244    | 1105.020760      | 17 |
| 3  | 244.092797  | 122.550037      |                |                   | 226.082232     | 113.544754       | E    | 2170.023345 | 1085.515310     | 2152.996796    | 1077.002036       | 2152.012780    | 1076.510028      | 16 |
| 4  | 345.140476  | 173.073876      |                |                   | 327.129911     | 164.068594       | T    | 2040.980752 | 1020.994014     | 2023.954203    | 1012.480740       | 2022.970187    | 1011.988732      | 15 |
| 5  | 416.177590  | 208.592433      |                |                   | 398.167025     | 199.587151       | A    | 1939.933073 | 970.470175      | 1922.906524    | 961.956900        | 1921.922508    | 961.464892       | 14 |
| 6  | 855.402916  | 428.205096      | 838.376367     | 419.691822        | 837.392351     | 419.199814       | Q    | 1868.895959 | 934.951618      | 1851.869410    | 926.438343        | 1850.885394    | 925.946335       | 13 |
| 7  | 942.434944  | 471.721110      | 925.408395     | 463.207836        | 924.424379     | 462.715828       | S    | 1429.670633 | 715.338955      | 1412.644084    | 706.825680        | 1411.660068    | 706.333672       | 12 |
| 8  | 1013.472058 | 507.239667      | 996.445509     | 498.726393        | 995.461493     | 498.234385       | A    | 1342.638605 | 671.822941      | 1325.612056    | 663.309666        | 1324.628040    | 662.817658       | 11 |
| 9  | 1128.499001 | 564.753139      | 1111.472452    | 556.239864        | 1110.488436    | 555.747856       | D    | 1271.601491 | 636.304384      | 1254.574942    | 627.791109        | 1253.590926    | 627.299101       | 10 |
| 10 | 1225.551765 | 613.279521      | 1208.525216    | 604.766246        | 1207.541200    | 604.274238       | P    | 1156.574548 | 578.790912      | 1139.547999    | 570.277638        | 1138.563983    | 569.785630       | 9  |
| 11 | 1353.610343 | 677.308810      | 1336.583794    | 668.795535        | 1335.599778    | 668.303527       | Q    | 1059.521784 | 530.264530      | 1042.495235    | 521.751256        | 1041.511219    | 521.259248       | 8  |
| 12 | 1539.689656 | 770.348466      | 1522.663107    | 761.835192        | 1521.679091    | 761.343184       | W    | 931.463206  | 466.235241      | 914.436657     | 457.721967        | 913.452641     | 457.229959       | 7  |
| 13 | 1668.732249 | 834.869762      | 1651.705700    | 826.356488        | 1650.721684    | 825.864480       | E    | 745.383893  | 373.195585      | 728.357344     | 364.682310        | 727.373328     | 364.190302       | 6  |
| 14 | 1796.790827 | 898.899052      | 1779.764278    | 890.385777        | 1778.780262    | 889.893769       | Q    | 616.341300  | 308.674288      | 599.314751     | 300.161014        |                |                  | 5  |
| 15 | 1909.874891 | 955.441083      | 1892.848342    | 946.927809        | 1891.864326    | 946.435801       | L    | 488.282722  | 244.644999      | 471.256173     | 236.131725        |                |                  | 4  |
| 16 | 2023.917818 | 1012.462547     | 2006.891269    | 1003.949273       | 2005.907253    | 1003.457265      | N    | 375.198658  | 188.102967      | 358.172109     | 179.589693        |                |                  | 3  |
| 17 | 2137.960745 | 1069.484010     | 2120.934196    | 1060.970736       | 2119.950180    | 1060.478728      | N    | 261.155731  | 131.081504      | 244.129182     | 122.568229        |                |                  | 2  |
| 18 |             |                 |                |                   |                |                  | K    | 147.112804  | 74.060040       | 130.086255     | 65.546765         |                |                  | 1  |

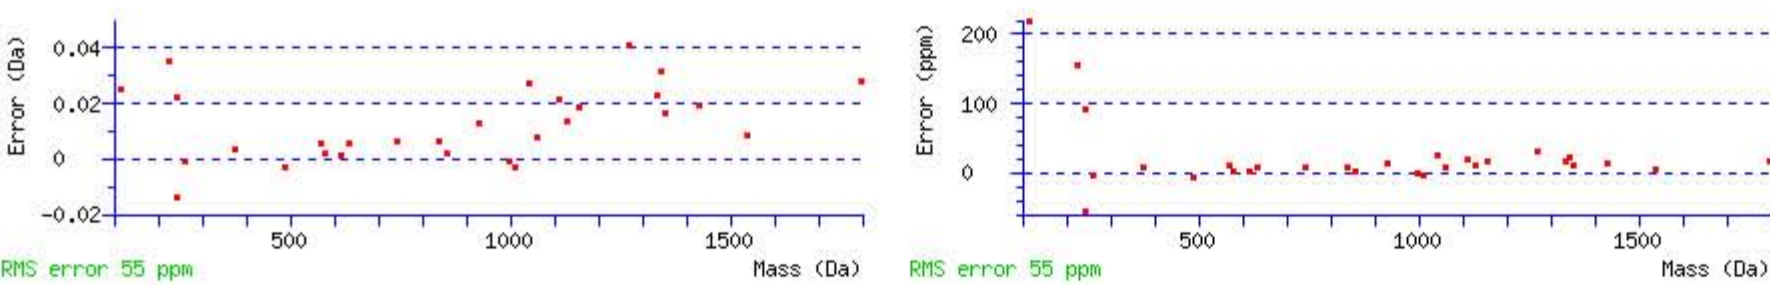

NCBI BLAST search of **GGETAQSADPQWEQLNNK**  
(Parameters: blastp, nr protein database, expect=20000, no filter, PAM30)  
Other BLAST [web gateways](#)

All matches to this query

| Score | Mr(calc):   | Delta    | Sequence                             |
|-------|-------------|----------|--------------------------------------|
| 69.4  | 2283.058975 | 0.028367 | <a href="#">GGETAQSADPQWEQLNNK</a>   |
| 15.1  | 2283.058975 | 0.028367 | <a href="#">GGETAQSADPQWEQLNNK</a>   |
| 0.9   | 2283.080109 | 0.007233 | <a href="#">RGVEKMVDPGEEQPTQENPK</a> |
| 0.3   | 2283.058975 | 0.028367 | <a href="#">GGETAQSADPQWEQLNNK</a>   |

MATRIX

SCIENCE

Mascot Search Results

Peptide View

MS/MS Fragmentation of **QGHVEQCECFGGR**  
Found in **HGFA\_HUMAN**, Hepatocyte growth factor activator OS=Homo sapiens GN=HGFA<sup>C</sup> PE=1 SV=1

Match to Query 41763: 1873.814262 from(625.612030,3+) rtinseconds(1540) index(47213)  
Title: Locus:1.1.1.1774.10 File:"2013-07-02 CLN FXIII 180 min 2nd F 4.wiff"  
Data file C:\Program Files (x86)\Matrix Science\Mascot Daemon\mgf\8 FXIII 180 min 2nd\mascot\_daemon\_merge.mgf

Click mouse within plot area to zoom in by factor of two about that point  
Or, 

Plot from

100

 to 

1900

 Da 

Full range

  
Label all possible matches ☐ Label matches used for scoring ☒

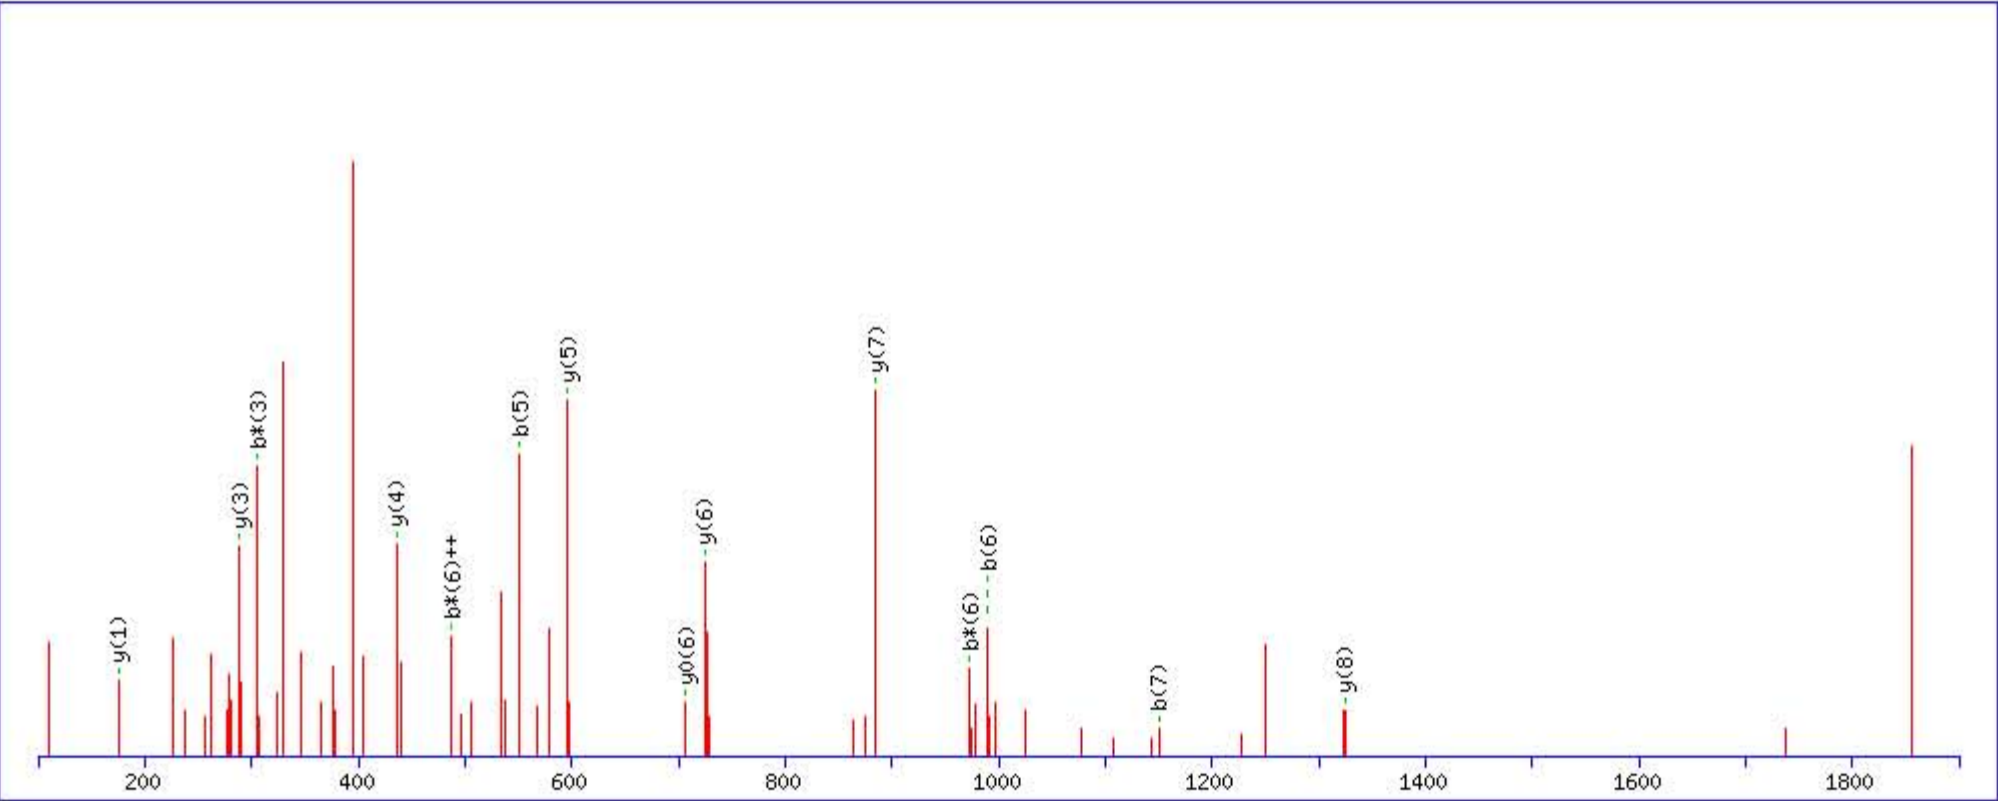

Monoisotopic mass of neutral peptide Mr(calc): 1873.802216  
Fixed modifications: Carbamidomethyl (C) (apply to specified residues or termini only)  
Variable modifications:  
Q6 : Biotin:Thermo-21345 (Q)  
Ions Score: 37 Expect: 0.00037  
Matches : 14/126 fragment ions using 27 most intense peaks [\(help\)](#)

| #  | b           | b <sup>++</sup> | b <sup>*</sup> | b <sup>++</sup> * | b <sup>0</sup> | b <sup>0++</sup> | Seq. | y           | y <sup>++</sup> | y <sup>*</sup> | y <sup>++</sup> * | y <sup>0</sup> | y <sup>0++</sup> | #  |
|----|-------------|-----------------|----------------|-------------------|----------------|------------------|------|-------------|-----------------|----------------|-------------------|----------------|------------------|----|
| 1  | 129.065854  | 65.036565       | 112.039305     | 56.523291         |                |                  | Q    |             |                 |                |                   |                |                  | 13 |
| 2  | 186.087318  | 93.547297       | 169.060769     | 85.034023         |                |                  | G    | 1746.750894 | 873.879085      | 1729.724345    | 865.365811        | 1728.740329    | 864.873803       | 12 |
| 3  | 323.146230  | 162.076753      | 306.119681     | 153.563479        |                |                  | H    | 1689.729430 | 845.368353      | 1672.702881    | 836.855079        | 1671.718865    | 836.363071       | 11 |
| 4  | 422.214644  | 211.610960      | 405.188095     | 203.097686        |                |                  | V    | 1552.670518 | 776.838897      | 1535.643969    | 768.325623        | 1534.659953    | 767.833615       | 10 |
| 5  | 551.257237  | 276.132257      | 534.230688     | 267.618982        | 533.246672     | 267.126974       | E    | 1453.602104 | 727.304690      | 1436.575555    | 718.791416        | 1435.591539    | 718.299408       | 9  |
| 6  | 990.482563  | 495.744920      | 973.456014     | 487.231645        | 972.471998     | 486.739637       | Q    | 1324.559511 | 662.783394      | 1307.532962    | 654.270119        | 1306.548946    | 653.778111       | 8  |
| 7  | 1150.513212 | 575.760244      | 1133.486663    | 567.246970        | 1132.502647    | 566.754962       | C    | 885.334185  | 443.170731      | 868.307636     | 434.657456        | 867.323620     | 434.165448       | 7  |
| 8  | 1279.555805 | 640.281541      | 1262.529256    | 631.768266        | 1261.545240    | 631.276258       | E    | 725.303536  | 363.155406      | 708.276987     | 354.642132        | 707.292971     | 354.150124       | 6  |
| 9  | 1439.586454 | 720.296865      | 1422.559905    | 711.783591        | 1421.575889    | 711.291583       | C    | 596.260943  | 298.634110      | 579.234394     | 290.120835        |                |                  | 5  |
| 10 | 1586.654868 | 793.831072      | 1569.628319    | 785.317798        | 1568.644303    | 784.825790       | F    | 436.230294  | 218.618785      | 419.203745     | 210.105510        |                |                  | 4  |
| 11 | 1643.676332 | 822.341804      | 1626.649783    | 813.828530        | 1625.665767    | 813.336522       | G    | 289.161880  | 145.084578      | 272.135331     | 136.571303        |                |                  | 3  |
| 12 | 1700.697796 | 850.852536      | 1683.671247    | 842.339262        | 1682.687231    | 841.847254       | G    | 232.140416  | 116.573846      | 215.113867     | 108.060571        |                |                  | 2  |
| 13 |             |                 |                |                   |                |                  | R    | 175.118952  | 88.063114       | 158.092403     | 79.549839         |                |                  | 1  |

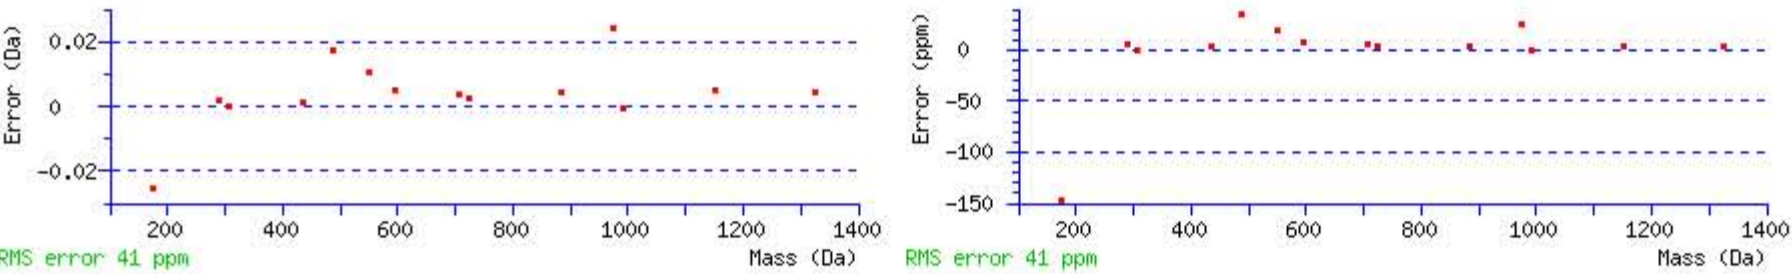

NCBI BLAST search of [QGHVEQCECFGGR](#)  
(Parameters: blastp, nr protein database, expect=20000, no filter, PAM30)  
Other BLAST [web gateways](#)

All matches to this query

| Score | Mr(calc):   | Delta     | Sequence                          |
|-------|-------------|-----------|-----------------------------------|
| 36.8  | 1873.802216 | 0.012046  | <a href="#">QGHVEQCECFGGR</a>     |
| 32.2  | 1873.802216 | 0.012046  | <a href="#">QGHVEQCECFGGR</a>     |
| 0.1   | 1873.841080 | -0.026818 | <a href="#">MDTTMEADLGATGHRPR</a> |
| 0.1   | 1873.841080 | -0.026818 | <a href="#">MDTTMEADLGATGHRPR</a> |

M

A

T

R

I

X

S

C

I

E

N

C

E

Mascot Search Results

Peptide View

MS/MS Fragmentation of **VQLSPDLLATLPEPASPGR**  
Found in **HGFA\_HUMAN**, Hepatocyte growth factor activator OS=Homo sapiens GN=HGFAC PE=1 SV=1

Match to Query 49941: 2271.249342 from(758.090390,3+) rtinseconds(2682) index(9175)  
Title: Locus:1.1.1.2211.15 File:"2013-07-02 CLN FXIII 180 min 2nd F 1.wiff"  
Data file C:\Program Files (x86)\Matrix Science\Mascot Daemon\mgf\8 FXIII 180 min 2nd\mascot\_daemon\_merge.mgf

Click mouse within plot area to zoom in by factor of two about that point  
Or, 

Plot from

100

 to 

1700

 Da 

Full range

Label all possible matches ☐ Label matches used for scoring ☒

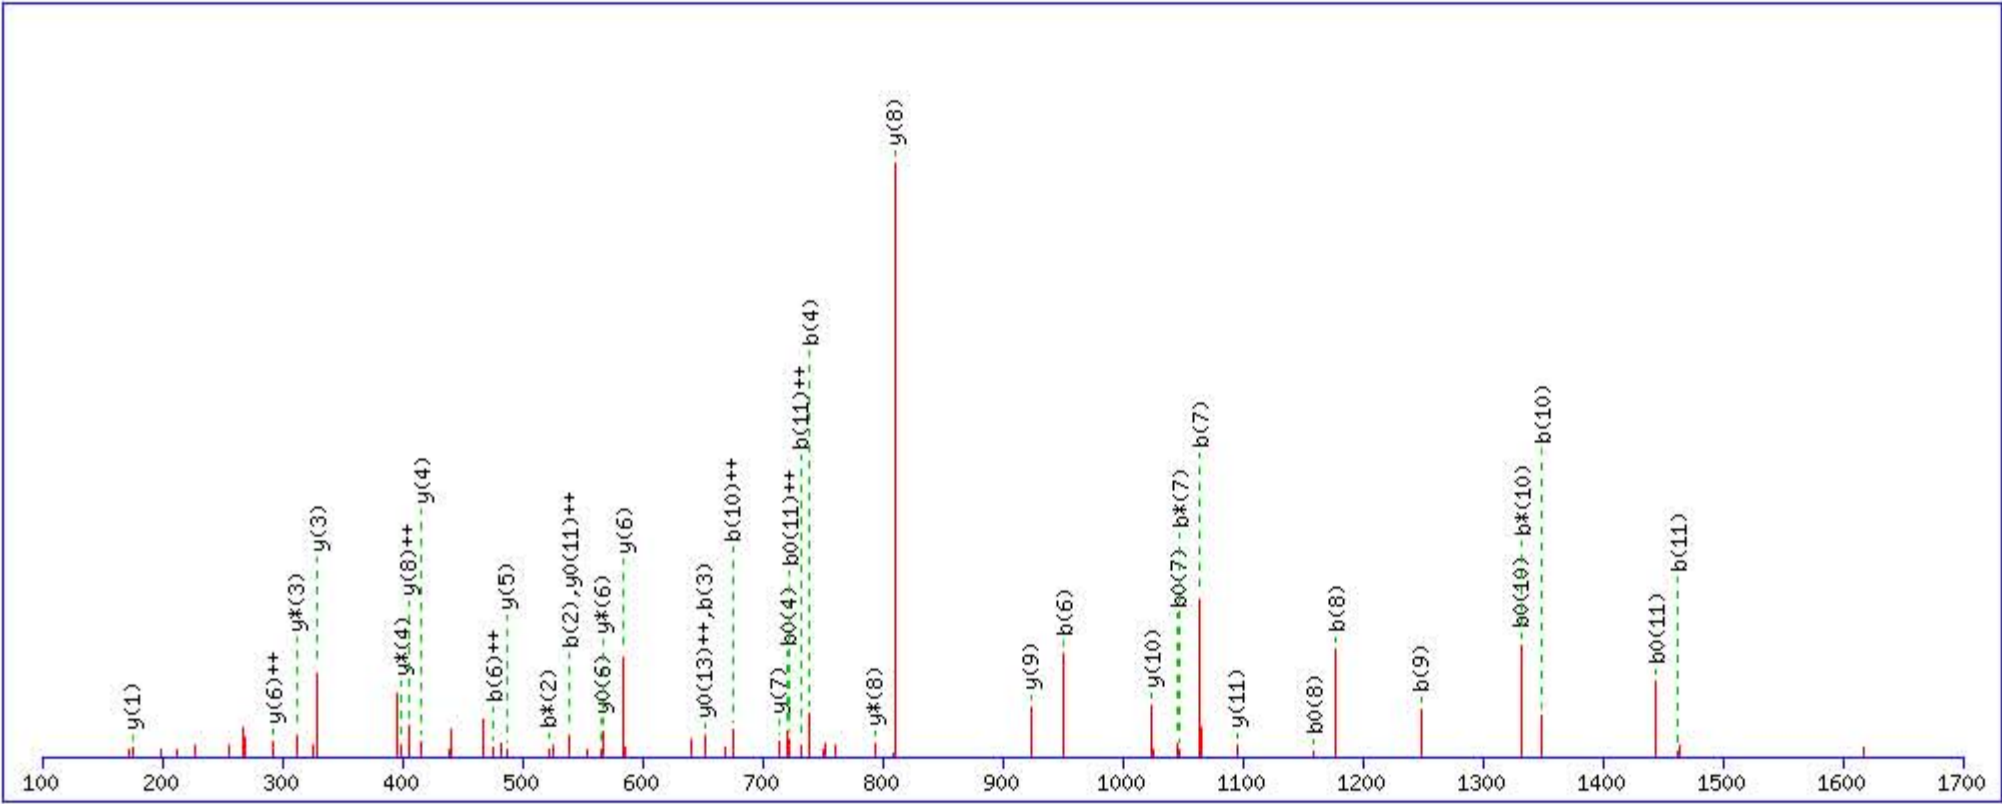

Monoisotopic mass of neutral peptide Mr(calc): 2271.229675  
Fixed modifications: Carbamidomethyl (C) (apply to specified residues or termini only)  
Variable modifications:  
Q2 : Biotin:Thermo-21345 (Q)  
Ions Score: 70 Expect: 4.5e-007  
Matches : 40/202 fragment ions using 64 most intense peaks [\(help\)](#)

| #  | b           | b <sup>++</sup> | b <sup>*</sup> | b <sup>*++</sup> | b <sup>0</sup> | b <sup>0++</sup> | Seq. | y           | y <sup>++</sup> | y <sup>*</sup> | y <sup>*++</sup> | y <sup>0</sup> | y <sup>0++</sup> | #  |
|----|-------------|-----------------|----------------|------------------|----------------|------------------|------|-------------|-----------------|----------------|------------------|----------------|------------------|----|
| 1  | 100.075690  | 50.541483       |                |                  |                |                  | V    |             |                 |                |                  |                |                  | 19 |
| 2  | 539.301016  | 270.154146      | 522.274467     | 261.640872       |                |                  | Q    | 2173.168553 | 1087.087914     | 2156.142004    | 1078.574640      | 2155.157988    | 1078.082632      | 18 |
| 3  | 652.385080  | 326.696178      | 635.358531     | 318.182904       |                |                  | L    | 1733.943227 | 867.475252      | 1716.916678    | 858.961977       | 1715.932662    | 858.469969       | 17 |
| 4  | 739.417108  | 370.212192      | 722.390559     | 361.698918       | 721.406543     | 361.206910       | S    | 1620.859163 | 810.933219      | 1603.832614    | 802.419945       | 1602.848598    | 801.927937       | 16 |
| 5  | 836.469872  | 418.738574      | 819.443323     | 410.225300       | 818.459307     | 409.733292       | P    | 1533.827135 | 767.417206      | 1516.800586    | 758.903931       | 1515.816570    | 758.411923       | 15 |
| 6  | 951.496815  | 476.252046      | 934.470266     | 467.738771       | 933.486250     | 467.246763       | D    | 1436.774371 | 718.890824      | 1419.747822    | 710.377549       | 1418.763806    | 709.885541       | 14 |
| 7  | 1064.580879 | 532.794078      | 1047.554330    | 524.280803       | 1046.570314    | 523.788795       | L    | 1321.747428 | 661.377352      | 1304.720879    | 652.864078       | 1303.736863    | 652.372069       | 13 |
| 8  | 1177.664943 | 589.336110      | 1160.638394    | 580.822835       | 1159.654378    | 580.330827       | L    | 1208.663364 | 604.835320      | 1191.636815    | 596.322046       | 1190.652799    | 595.830038       | 12 |
| 9  | 1248.702057 | 624.854667      | 1231.675508    | 616.341392       | 1230.691492    | 615.849384       | A    | 1095.579300 | 548.293288      | 1078.552751    | 539.780014       | 1077.568735    | 539.288006       | 11 |
| 10 | 1349.749736 | 675.378506      | 1332.723187    | 666.865232       | 1331.739171    | 666.373223       | T    | 1024.542186 | 512.774731      | 1007.515637    | 504.261456       | 1006.531621    | 503.769448       | 10 |
| 11 | 1462.833800 | 731.920538      | 1445.807251    | 723.407264       | 1444.823235    | 722.915255       | L    | 923.494507  | 462.250892      | 906.467958     | 453.737617       | 905.483942     | 453.245609       | 9  |
| 12 | 1559.886564 | 780.446920      | 1542.860015    | 771.933646       | 1541.875999    | 771.441637       | P    | 810.410443  | 405.708860      | 793.383894     | 397.195585       | 792.399878     | 396.703577       | 8  |
| 13 | 1688.929157 | 844.968216      | 1671.902608    | 836.454942       | 1670.918592    | 835.962934       | E    | 713.357679  | 357.182478      | 696.331130     | 348.669203       | 695.347114     | 348.177195       | 7  |
| 14 | 1785.981921 | 893.494598      | 1768.955372    | 884.981324       | 1767.971356    | 884.489316       | P    | 584.315086  | 292.661181      | 567.288537     | 284.147907       | 566.304521     | 283.655899       | 6  |
| 15 | 1857.019035 | 929.013155      | 1839.992486    | 920.499881       | 1839.008470    | 920.007873       | A    | 487.262322  | 244.134799      | 470.235773     | 235.621525       | 469.251757     | 235.129517       | 5  |
| 16 | 1944.051063 | 972.529169      | 1927.024514    | 964.015895       | 1926.040498    | 963.523887       | S    | 416.225208  | 208.616242      | 399.198659     | 200.102968       | 398.214643     | 199.610960       | 4  |
| 17 | 2041.103827 | 1021.055552     | 2024.077278    | 1012.542277      | 2023.093262    | 1012.050269      | P    | 329.193180  | 165.100228      | 312.166631     | 156.586954       |                |                  | 3  |
| 18 | 2098.125291 | 1049.566283     | 2081.098742    | 1041.053009      | 2080.114726    | 1040.561001      | G    | 232.140416  | 116.573846      | 215.113867     | 108.060572       |                |                  | 2  |
| 19 |             |                 |                |                  |                |                  | R    | 175.118952  | 88.063114       | 158.092403     | 79.549839        |                |                  | 1  |

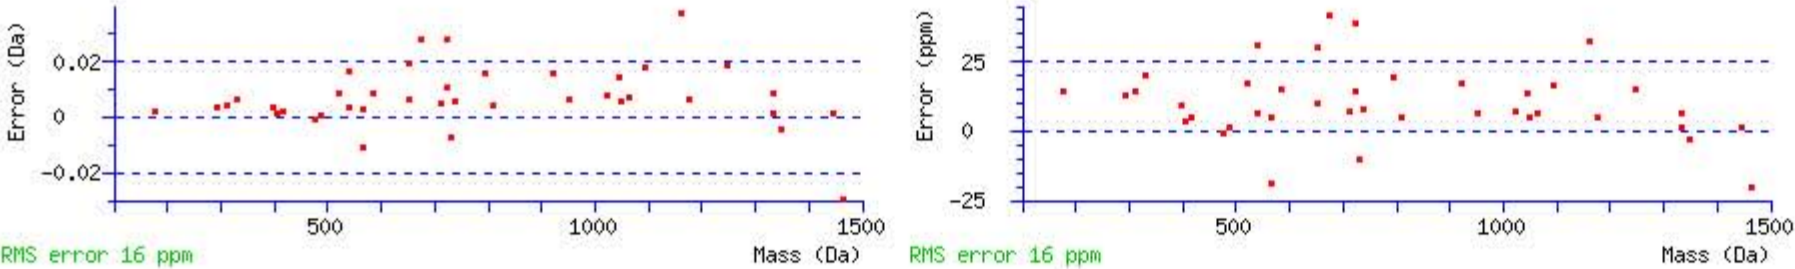

NCBI BLAST search of [VQLSPDLLATLPEPASPGR](#)  
(Parameters: blastp, nr protein database, expect=20000, no filter, PAM30)  
Other BLAST [web gateways](#)

All matches to this query

| Score | Mr(calc):   | Delta     | Sequence                             |
|-------|-------------|-----------|--------------------------------------|
| 69.8  | 2271.229675 | 0.019667  | <a href="#">VQLSPDLLATLPEPASPGR</a>  |
| 1.9   | 2271.226303 | 0.023039  | <a href="#">IAKSDPPTLLTPSKWSVEFR</a> |
| 0.3   | 2271.277283 | -0.027941 | <a href="#">IIQGDIIASNGLLHILDR</a>   |

MATRIX

SCIENCE

Mascot Search Results

Peptide View

MS/MS Fragmentation of **AAFCYQIR**  
Found in **HGFL\_HUMAN**, Hepatocyte growth factor-like protein OS=Homo sapiens GN=MST1 PE=1 SV=2

Match to Query 24058: 1338.665088 from(670.339820,2+) rtinseconds(2010) index(66474)  
Title: Locus:1.1.1.1975.7 File:"2013-07-02 CLN FXIII 180 min 2nd FT.wiff"  
Data file C:\Program Files (x86)\Matrix Science\Mascot Daemon\mgf\8 FXIII 180 min 2nd\mascot\_daemon\_merge.mgf

Click mouse within plot area to zoom in by factor of two about that point  
Or, 

Plot from

100

 to 

1400

 Da 

Full range

  
Label all possible matches ☐ Label matches used for scoring ☒

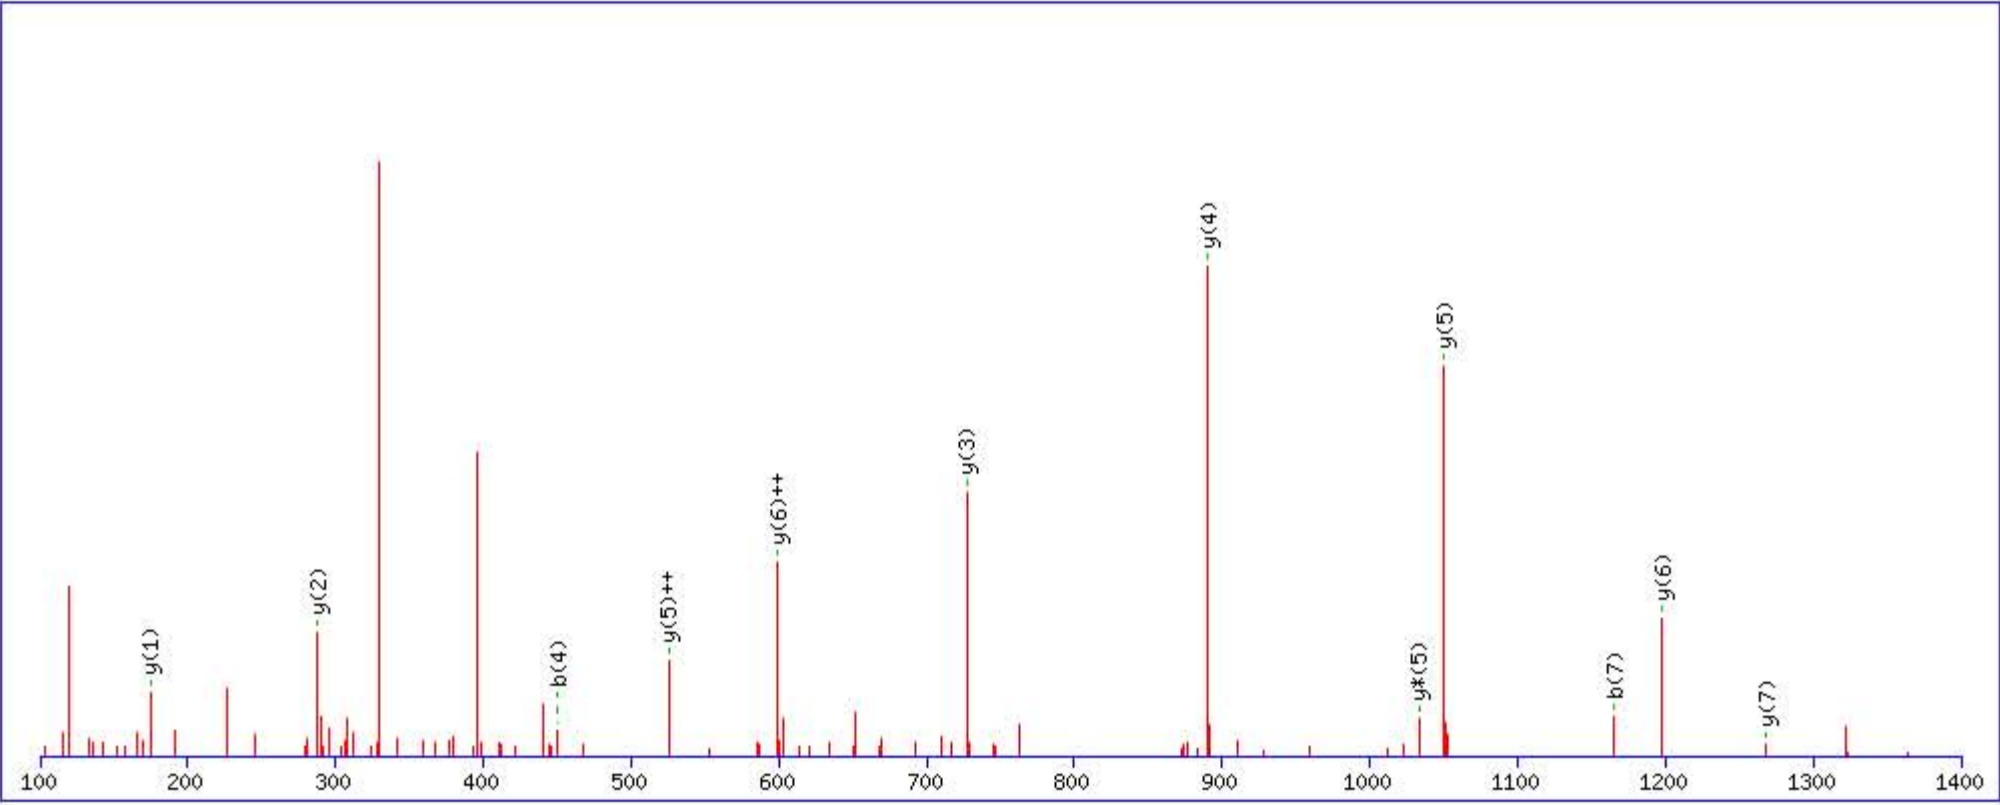

Monoisotopic mass of neutral peptide Mr(calc): 1338.657669  
Fixed modifications: Carbamidomethyl (C) (apply to specified residues or termini only)  
Variable modifications:  
Q6 : Biotin:Thermo-21345 (Q)  
Ions Score: 41 Expect: 0.0007  
Matches : 12/46 fragment ions using 25 most intense peaks (help)

| # | b           | b <sup>++</sup> | b <sup>*</sup> | b <sup>++*</sup> | Seq. | y           | y <sup>++</sup> | y <sup>*</sup> | y <sup>++*</sup> | # |
|---|-------------|-----------------|----------------|------------------|------|-------------|-----------------|----------------|------------------|---|
| 1 | 72.044390   | 36.525833       |                |                  | A    |             |                 |                |                  | 8 |
| 2 | 143.081504  | 72.044390       |                |                  | A    | 1268.627848 | 634.817562      | 1251.601299    | 626.304288       | 7 |
| 3 | 290.149918  | 145.578597      |                |                  | F    | 1197.590734 | 599.299005      | 1180.564185    | 590.785731       | 6 |
| 4 | 450.180567  | 225.593922      |                |                  | C    | 1050.522320 | 525.764798      | 1033.495771    | 517.251524       | 5 |
| 5 | 613.243896  | 307.125586      |                |                  | Y    | 890.491671  | 445.749474      | 873.465122     | 437.236199       | 4 |
| 6 | 1052.469222 | 526.738249      | 1035.442673    | 518.224975       | Q    | 727.428342  | 364.217809      | 710.401793     | 355.704534       | 3 |
| 7 | 1165.553286 | 583.280281      | 1148.526737    | 574.767007       | I    | 288.203016  | 144.605146      | 271.176467     | 136.091871       | 2 |
| 8 |             |                 |                |                  | R    | 175.118952  | 88.063114       | 158.092403     | 79.549839        | 1 |

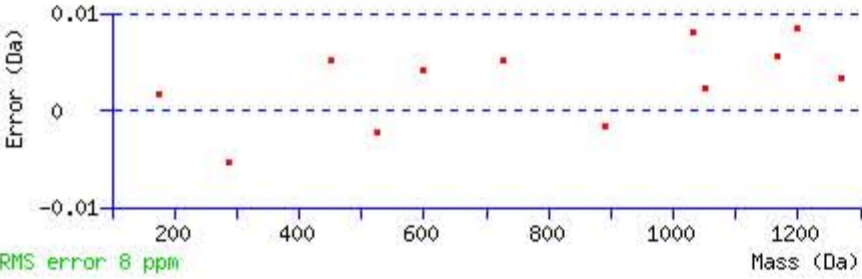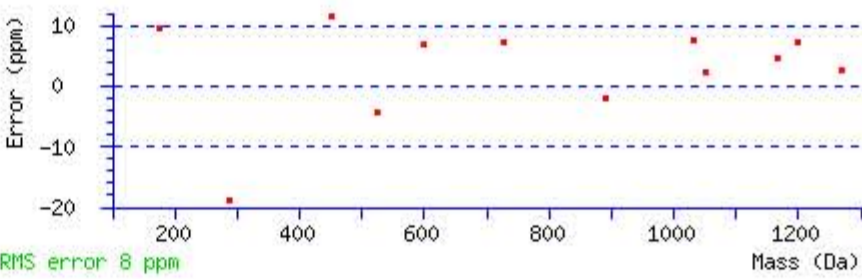

NCBI BLAST search of [AAFCYQIR](#)  
(Parameters: blastp, nr protein database, expect=20000, no filter, PAM30)  
Other BLAST [web gateways](#)

All matches to this query

| Score | Mr(calc):   | Delta    | Sequence                 |
|-------|-------------|----------|--------------------------|
| 40.7  | 1338.657669 | 0.007419 | <a href="#">AAFCYQIR</a> |
| 7.1   | 1338.657669 | 0.007419 | <a href="#">AAFLQYCR</a> |

MATRIX

SCIENCE

Mascot Search Results

Peptide View

MS/MS Fragmentation of **SPLNDFQVLR**  
Found in **HGFL\_HUMAN**, Hepatocyte growth factor-like protein OS=Homo sapiens GN=MST1 PE=1 SV=2

Match to Query 31006: 1498.808088 from(750.411320,2+) rtinseconds(2367) index(68554)  
Title: Locus:1.1.1.2099.17 File:"2013-07-02 CLN FXIII 180 min 2nd FT.wiff"  
Data file C:\Program Files (x86)\Matrix Science\Mascot Daemon\mgf\8 FXIII 180 min 2nd\mascot\_daemon\_merge.mgf

Click mouse within plot area to zoom in by factor of two about that point  
Or, 

Plot from

100

 to 

1600

 Da 

Full range

  
Label all possible matches ☐ Label matches used for scoring ☒

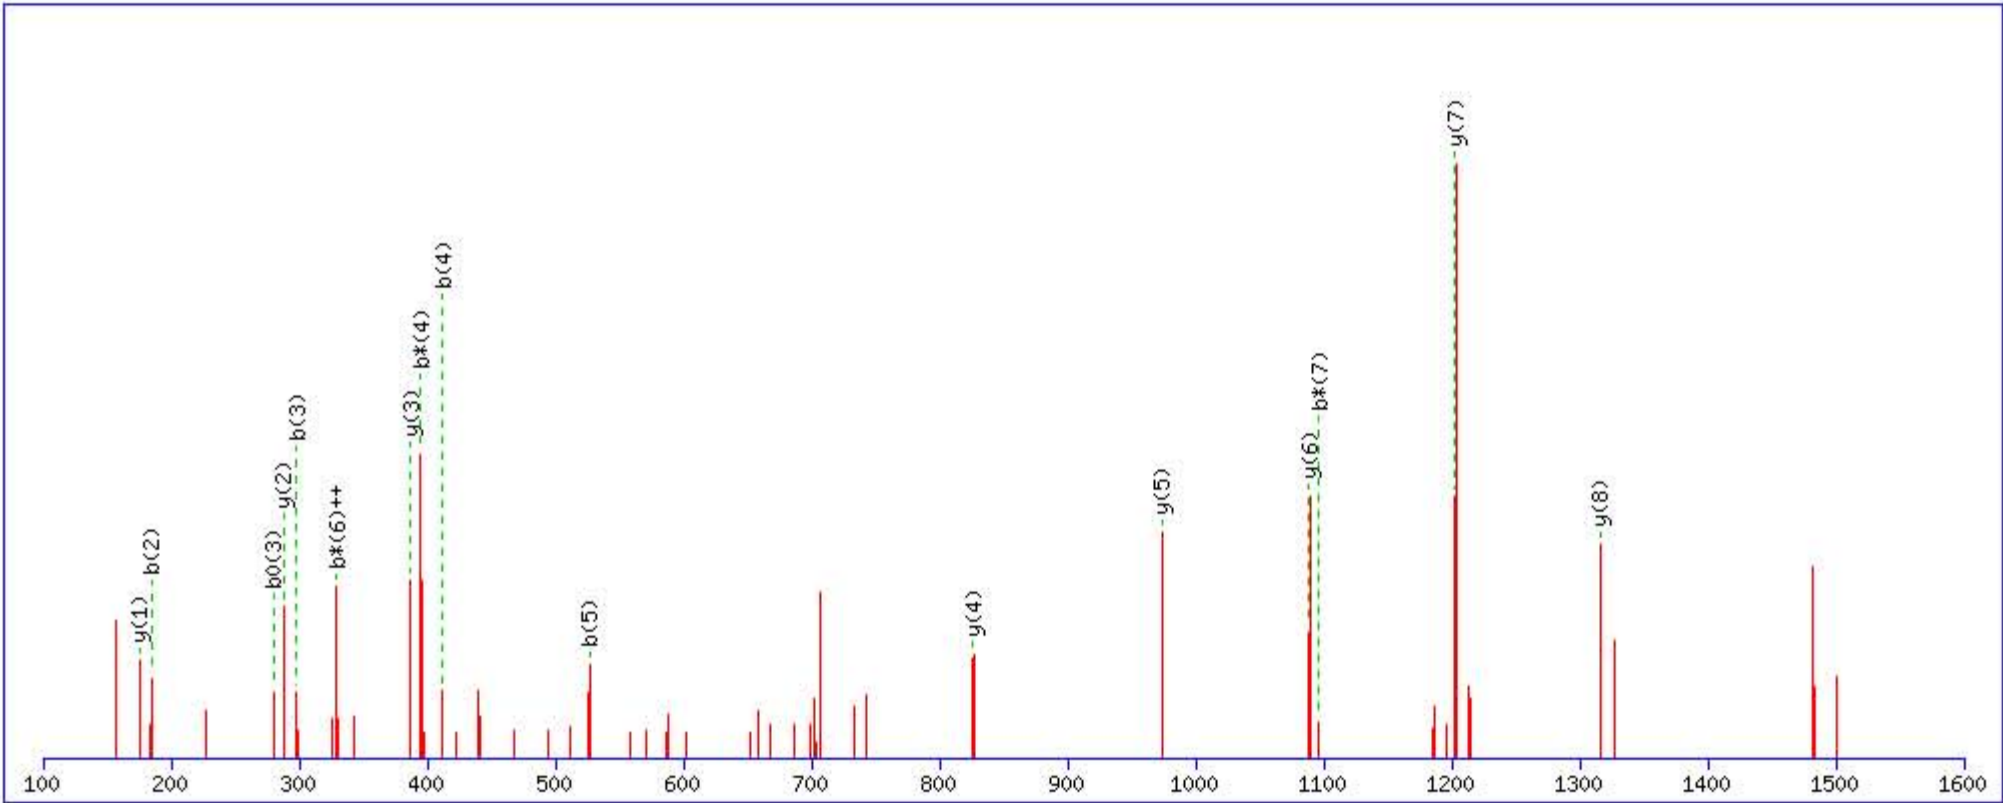

Monoisotopic mass of neutral peptide Mr(calc): 1498.796616  
Fixed modifications: Carbamidomethyl (C) (apply to specified residues or termini only)  
Variable modifications:  
Q7 : Biotin:Thermo-21345 (Q)  
Ions Score: 36 Expect: 0.0045  
Matches : 16/92 fragment ions using 41 most intense peaks ([help](#))

| #  | b           | b <sup>++</sup> | b <sup>*</sup> | b <sup>*++</sup> | b <sup>0</sup> | b <sup>0++</sup> | Seq. | y           | y <sup>++</sup> | y <sup>*</sup> | y <sup>*++</sup> | y <sup>0</sup> | y <sup>0++</sup> | #  |
|----|-------------|-----------------|----------------|------------------|----------------|------------------|------|-------------|-----------------|----------------|------------------|----------------|------------------|----|
| 1  | 88.039304   | 44.523290       |                |                  | 70.028739      | 35.518008        | S    |             |                 |                |                  |                |                  | 10 |
| 2  | 185.092068  | 93.049672       |                |                  | 167.081503     | 84.044389        | P    | 1412.771868 | 706.889572      | 1395.745319    | 698.376298       | 1394.761303    | 697.884290       | 9  |
| 3  | 298.176132  | 149.591704      |                |                  | 280.165567     | 140.586422       | L    | 1315.719104 | 658.363190      | 1298.692555    | 649.849916       | 1297.708539    | 649.357908       | 8  |
| 4  | 412.219059  | 206.613168      | 395.192510     | 198.099893       | 394.208494     | 197.607885       | N    | 1202.635040 | 601.821158      | 1185.608491    | 593.307884       | 1184.624475    | 592.815876       | 7  |
| 5  | 527.246002  | 264.126639      | 510.219453     | 255.613365       | 509.235437     | 255.121357       | D    | 1088.592113 | 544.799695      | 1071.565564    | 536.286420       | 1070.581548    | 535.794412       | 6  |
| 6  | 674.314416  | 337.660846      | 657.287867     | 329.147572       | 656.303851     | 328.655564       | F    | 973.565170  | 487.286223      | 956.538621     | 478.772949       |                |                  | 5  |
| 7  | 1113.539742 | 557.273509      | 1096.513193    | 548.760235       | 1095.529177    | 548.268227       | Q    | 826.496756  | 413.752016      | 809.470207     | 405.238742       |                |                  | 4  |
| 8  | 1212.608156 | 606.807716      | 1195.581607    | 598.294442       | 1194.597591    | 597.802434       | V    | 387.271430  | 194.139353      | 370.244881     | 185.626078       |                |                  | 3  |
| 9  | 1325.692220 | 663.349748      | 1308.665671    | 654.836474       | 1307.681655    | 654.344466       | L    | 288.203016  | 144.605146      | 271.176467     | 136.091871       |                |                  | 2  |
| 10 |             |                 |                |                  |                |                  | R    | 175.118952  | 88.063114       | 158.092403     | 79.549839        |                |                  | 1  |

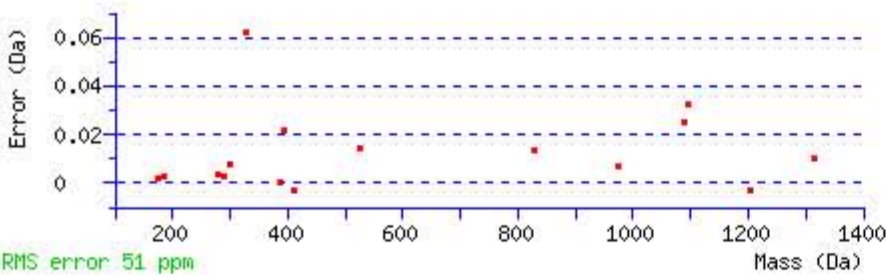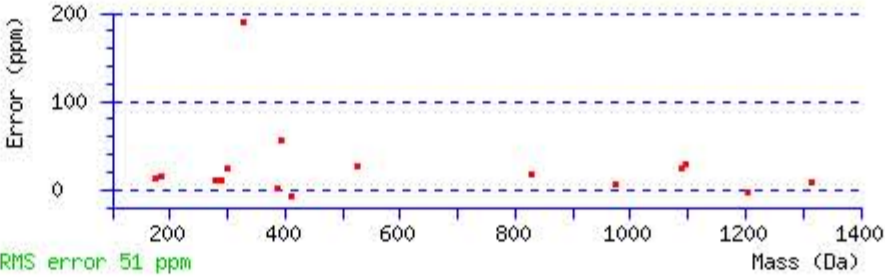

NCBI BLAST search of [SPLNDFQVLR](#)  
(Parameters: blastp, nr protein database, expect=20000, no filter, PAM30)  
Other BLAST [web gateways](#)

All matches to this query

| Score | Mr(calc):   | Delta    | Sequence                        |
|-------|-------------|----------|---------------------------------|
| 36.4  | 1498.796616 | 0.011472 | <a href="#">SPLNDFQVLR</a>      |
| 10.8  | 1498.799103 | 0.008985 | <a href="#">ALLNLPGTQTSGEAK</a> |
| 2.6   | 1498.792572 | 0.015516 | <a href="#">ALNITSLQMHSLR</a>   |
| 1.9   | 1498.799973 | 0.008115 | <a href="#">ALLDQLMG TAR</a>    |

Peptide View

MS/MS Fragmentation of **QEATTVSCFR**  
Found in **HGFL\_HUMAN**, Hepatocyte growth factor-like protein OS=Homo sapiens GN=MST1 PE=1 SV=2

Match to Query 31440: 1508.716668 from(755.365610,2+) rtinseconds(1744) index(64846)  
Title: Locus:1.1.1.1882.12 File:"2013-07-02 CLN FXIII 180 min 2nd FT.wiff"  
Data file C:\Program Files (x86)\Matrix Science\Mascot Daemon\mgf\8 FXIII 180 min 2nd\mascot\_daemon\_merge.mgf

Click mouse within plot area to zoom in by factor of two about that point  
Or, 

Plot from

100

 to 

1600

 Da 

Full range

  
Label all possible matches ☐ Label matches used for scoring ☒

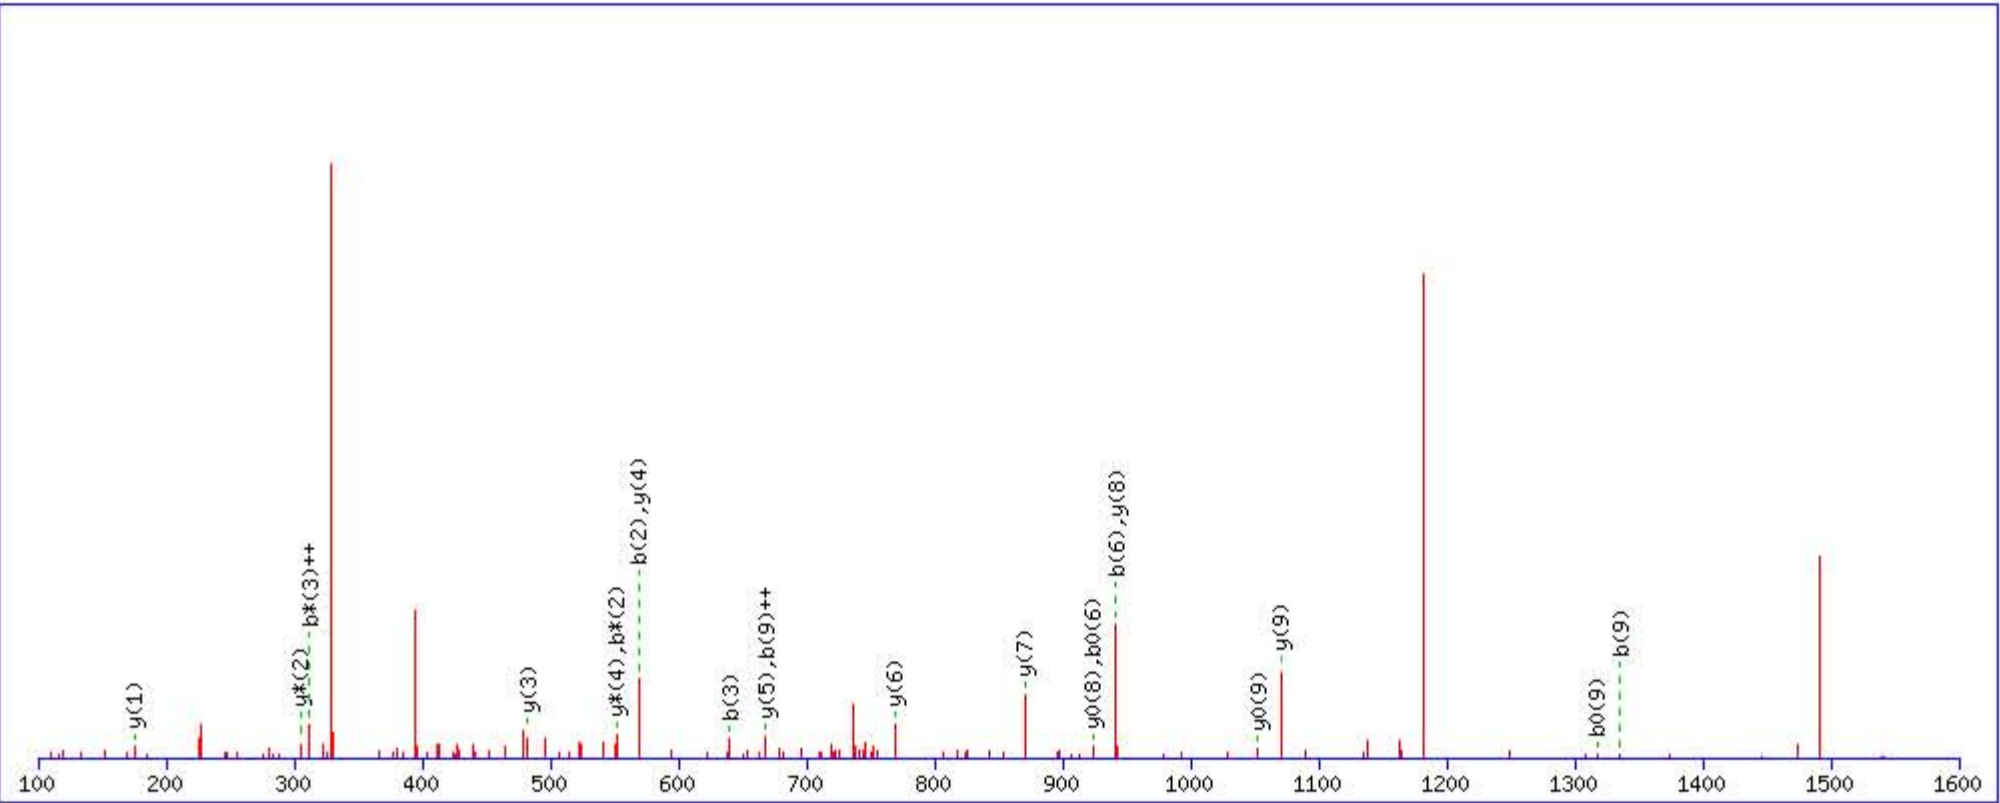

Monoisotopic mass of neutral peptide Mr(calc): 1508.711578  
Fixed modifications: Carbamidomethyl (C) (apply to specified residues or termini only)  
Variable modifications:  
Q1 : Biotin:Thermo-21345 (Q)  
Ions Score: 40 Expect: 0.0018  
Matches : 21/100 fragment ions using 41 most intense peaks [\(help\)](#)

| #  | b           | b <sup>++</sup> | b <sup>*</sup> | b <sup>*,++</sup> | b <sup>0</sup> | b <sup>0++</sup> | Seq. | y           | y <sup>++</sup> | y <sup>*</sup> | y <sup>*,++</sup> | y <sup>0</sup> | y <sup>0++</sup> | #  |
|----|-------------|-----------------|----------------|-------------------|----------------|------------------|------|-------------|-----------------|----------------|-------------------|----------------|------------------|----|
| 1  | 440.232602  | 220.619939      | 423.206053     | 212.106664        |                |                  | Q    |             |                 |                |                   |                |                  | 10 |
| 2  | 569.275195  | 285.141236      | 552.248646     | 276.627961        | 551.264630     | 276.135953       | E    | 1070.493522 | 535.750399      | 1053.466973    | 527.237125        | 1052.482957    | 526.745117       | 9  |
| 3  | 640.312309  | 320.659793      | 623.285760     | 312.146518        | 622.301744     | 311.654510       | A    | 941.450929  | 471.229103      | 924.424380     | 462.715828        | 923.440364     | 462.223820       | 8  |
| 4  | 741.359988  | 371.183632      | 724.333439     | 362.670358        | 723.349423     | 362.178350       | T    | 870.413815  | 435.710546      | 853.387266     | 427.197271        | 852.403250     | 426.705263       | 7  |
| 5  | 842.407667  | 421.707472      | 825.381118     | 413.194197        | 824.397102     | 412.702189       | T    | 769.366136  | 385.186706      | 752.339587     | 376.673432        | 751.355571     | 376.181424       | 6  |
| 6  | 941.476081  | 471.241679      | 924.449532     | 462.728404        | 923.465516     | 462.236396       | V    | 668.318457  | 334.662867      | 651.291908     | 326.149592        | 650.307892     | 325.657584       | 5  |
| 7  | 1028.508109 | 514.757693      | 1011.481560    | 506.244418        | 1010.497544    | 505.752410       | S    | 569.250043  | 285.128660      | 552.223494     | 276.615385        | 551.239478     | 276.123377       | 4  |
| 8  | 1188.538758 | 594.773017      | 1171.512209    | 586.259743        | 1170.528193    | 585.767735       | C    | 482.218015  | 241.612646      | 465.191466     | 233.099371        |                |                  | 3  |
| 9  | 1335.607172 | 668.307224      | 1318.580623    | 659.793950        | 1317.596607    | 659.301942       | F    | 322.187366  | 161.597321      | 305.160817     | 153.084047        |                |                  | 2  |
| 10 |             |                 |                |                   |                |                  | R    | 175.118952  | 88.063114       | 158.092403     | 79.549839         |                |                  | 1  |

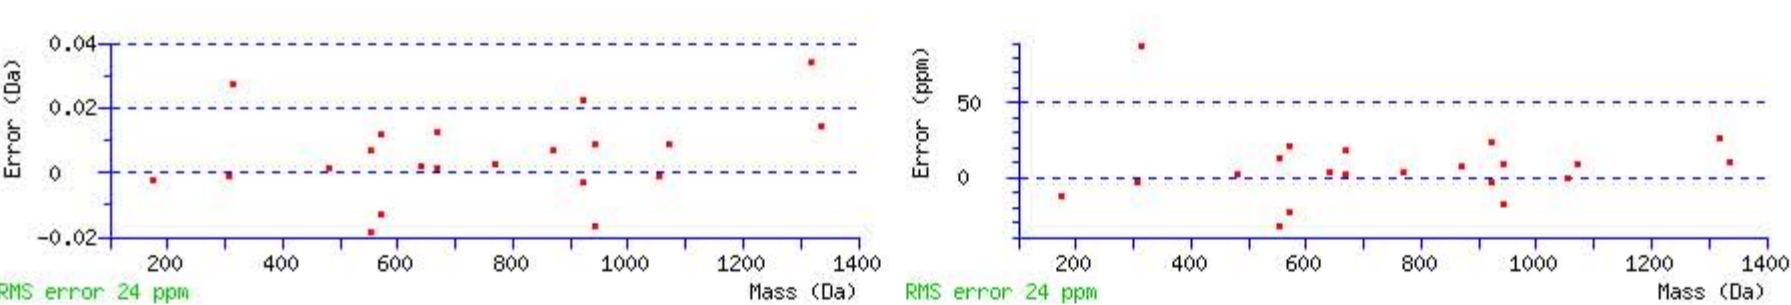

NCBI BLAST search of [QEATTVSCFR](#)  
(Parameters: blastp, nr protein database, expect=20000, no filter, PAM30)  
Other BLAST [web gateways](#)

All matches to this query

| Score | Mr(calc):   | Delta     | Sequence                        |
|-------|-------------|-----------|---------------------------------|
| 39.5  | 1508.711578 | 0.005090  | <a href="#">QEATTVSCFR</a>      |
| 12.8  | 1508.711380 | 0.005288  | <a href="#">RTASGGRTEQGMSR</a>  |
| 8.3   | 1508.708191 | 0.008477  | <a href="#">EYGSMYTVHLGPR</a>   |
| 7.0   | 1508.726624 | -0.009956 | <a href="#">RDGQLQRMNYGR</a>    |
| 5.4   | 1508.733154 | -0.016486 | <a href="#">APGSRLSSGGTNYSR</a> |
| 2.6   | 1508.703461 | 0.013207  | <a href="#">LKSFTYEYEDSK</a>    |
| 2.5   | 1508.715378 | 0.001290  | <a href="#">QRGHEAEESR</a>      |
| 2.2   | 1508.736710 | -0.020042 | <a href="#">LKSSQMEQFT</a>      |
| 1.9   | 1508.710648 | 0.006020  | <a href="#">DEEAAEKKFEASR</a>   |
| 1.4   | 1508.711548 | 0.005120  | <a href="#">QMSKYPSEGR</a>      |

MATRIX

SCIENCE

Mascot Search Results

Peptide View

MS/MS Fragmentation of **FLDQGLDDNYCR**  
Found in **HGFL\_HUMAN**, Hepatocyte growth factor-like protein OS=Homo sapiens GN=MST1 PE=1 SV=2

Match to Query 40804: 1825.830088 from(913.922320,2+) rtinseconds(2159) index(67402)  
Title: Locus:1.1.1.2026.25 File:"2013-07-02 CLN FXIII 180 min 2nd FT.wiff"  
Data file C:\Program Files (x86)\Matrix Science\Mascot Daemon\mgf\8 FXIII 180 min 2nd\mascot\_daemon\_merge.mgf

Click mouse within plot area to zoom in by factor of two about that point  
Or, 

Plot from

100

 to 

1900

 Da 

Full range

  
Label all possible matches ☐ Label matches used for scoring ☒

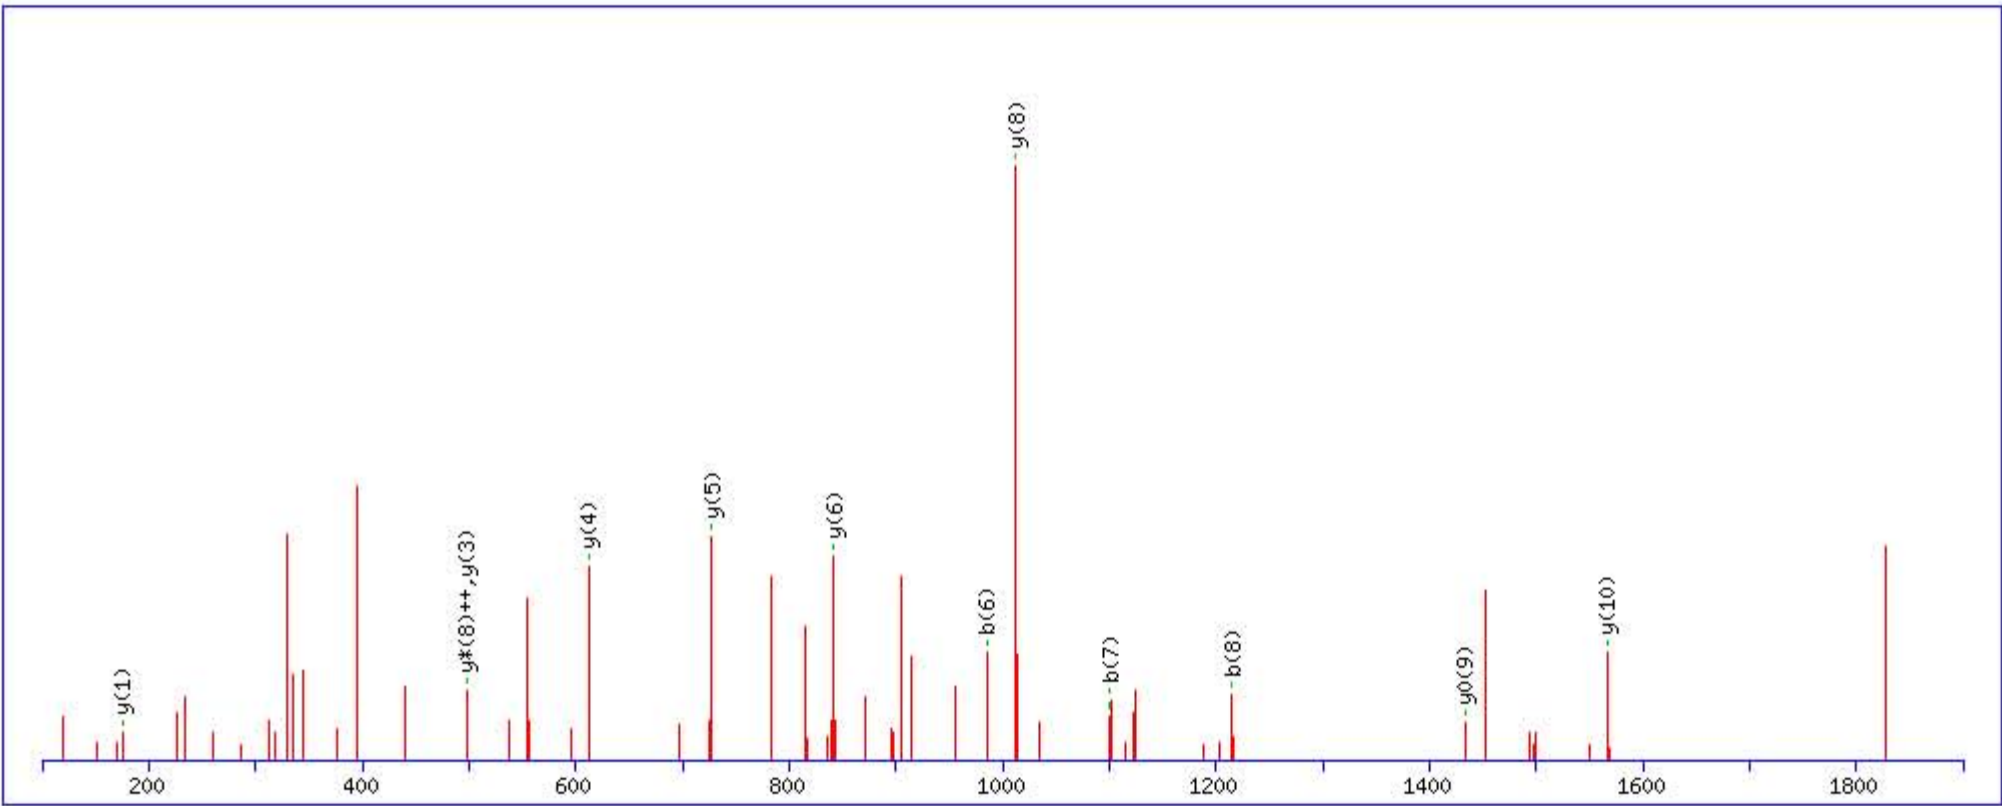

Monoisotopic mass of neutral peptide Mr(calc): 1825.812744  
Fixed modifications: Carbamidomethyl (C) (apply to specified residues or termini only)  
Variable modifications:  
Q4 : Biotin:Thermo-21345 (Q)  
Ions Score: 33 Expect: 0.0051  
Matches : 12/114 fragment ions using 25 most intense peaks [\(help\)](#)

| #  | b           | b <sup>++</sup> | b <sup>+</sup> | b <sup>+++</sup> | b <sup>0</sup> | b <sup>0++</sup> | Seq. | y           | y <sup>++</sup> | y <sup>+</sup> | y <sup>+++</sup> | y <sup>0</sup> | y <sup>0++</sup> | #  |
|----|-------------|-----------------|----------------|------------------|----------------|------------------|------|-------------|-----------------|----------------|------------------|----------------|------------------|----|
| 1  | 148.075690  | 74.541483       |                |                  |                |                  | F    |             |                 |                |                  |                |                  | 12 |
| 2  | 261.159754  | 131.083515      |                |                  |                |                  | L    | 1679.751604 | 840.379440      | 1662.725055    | 831.866166       | 1661.741039    | 831.374158       | 11 |
| 3  | 376.186697  | 188.596986      |                |                  | 358.176132     | 179.591704       | D    | 1566.667540 | 783.837408      | 1549.640991    | 775.324134       | 1548.656975    | 774.832126       | 10 |
| 4  | 815.412023  | 408.209650      | 798.385474     | 399.696375       | 797.401458     | 399.204367       | Q    | 1451.640597 | 726.323937      | 1434.614048    | 717.810662       | 1433.630032    | 717.318654       | 9  |
| 5  | 872.433487  | 436.720382      | 855.406938     | 428.207107       | 854.422922     | 427.715099       | G    | 1012.415271 | 506.711274      | 995.388722     | 498.197999       | 994.404706     | 497.705991       | 8  |
| 6  | 985.517551  | 493.262414      | 968.491002     | 484.749139       | 967.506986     | 484.257131       | L    | 955.393807  | 478.200542      | 938.367258     | 469.687267       | 937.383242     | 469.195259       | 7  |
| 7  | 1100.544494 | 550.775885      | 1083.517945    | 542.262611       | 1082.533929    | 541.770603       | D    | 842.309743  | 421.658510      | 825.283194     | 413.145235       | 824.299178     | 412.653227       | 6  |
| 8  | 1215.571437 | 608.289357      | 1198.544888    | 599.776082       | 1197.560872    | 599.284074       | D    | 727.282800  | 364.145038      | 710.256251     | 355.631764       | 709.272235     | 355.139756       | 5  |
| 9  | 1329.614364 | 665.310820      | 1312.587815    | 656.797546       | 1311.603799    | 656.305538       | N    | 612.255857  | 306.631567      | 595.229308     | 298.118292       |                |                  | 4  |
| 10 | 1492.677693 | 746.842485      | 1475.651144    | 738.329210       | 1474.667128    | 737.837202       | Y    | 498.212930  | 249.610103      | 481.186381     | 241.096829       |                |                  | 3  |
| 11 | 1652.708342 | 826.857809      | 1635.681793    | 818.344535       | 1634.697777    | 817.852527       | C    | 335.149601  | 168.078438      | 318.123052     | 159.565164       |                |                  | 2  |
| 12 |             |                 |                |                  |                |                  | R    | 175.118952  | 88.063114       | 158.092403     | 79.549839        |                |                  | 1  |

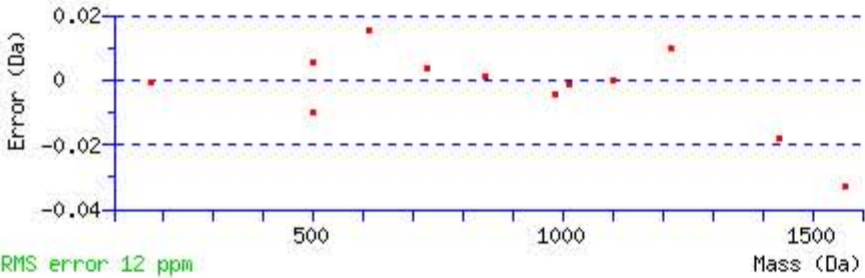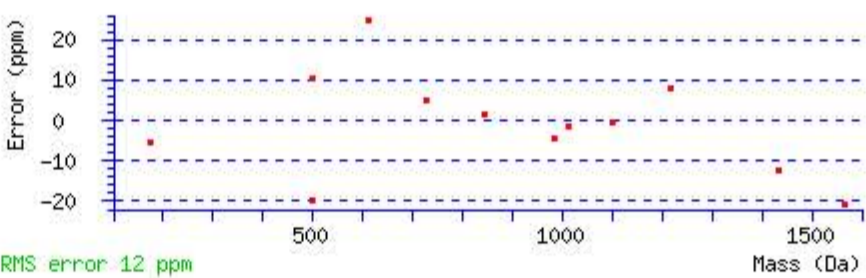

NCBI BLAST search of [FLDQGLDDNYCR](#)  
(Parameters: blastp, nr protein database, expect=20000, no filter, PAM30)  
Other BLAST [web gateways](#)

All matches to this query

| Score | Mr(calc):   | Delta    | Sequence                     |
|-------|-------------|----------|------------------------------|
| 33.0  | 1825.812744 | 0.017344 | <a href="#">FLDQGLDDNYCR</a> |

MATRIX

SCIENCE

Mascot Search Results

Peptide View

MS/MS Fragmentation of **WDLQHPHQHPFEPGK**  
Found in **HGFL\_HUMAN**, Hepatocyte growth factor-like protein OS=Homo sapiens GN=MST1 PE=1 SV=2

Match to Query 47659: 2163.054132 from(722.025320,3+) rtinseconds(1726) index(64730)  
Title: Locus:1.1.1.1876.14 File:"2013-07-02 CLN FXIII 180 min 2nd FT.wiff"  
Data file C:\Program Files (x86)\Matrix Science\Mascot Daemon\mgf\8 FXIII 180 min 2nd\mascot\_daemon\_merge.mgf

Click mouse within plot area to zoom in by factor of two about that point  
Or, 

Plot from

100

 to 

2000

 Da 

Full range

  
Label all possible matches ☐ Label matches used for scoring ☒

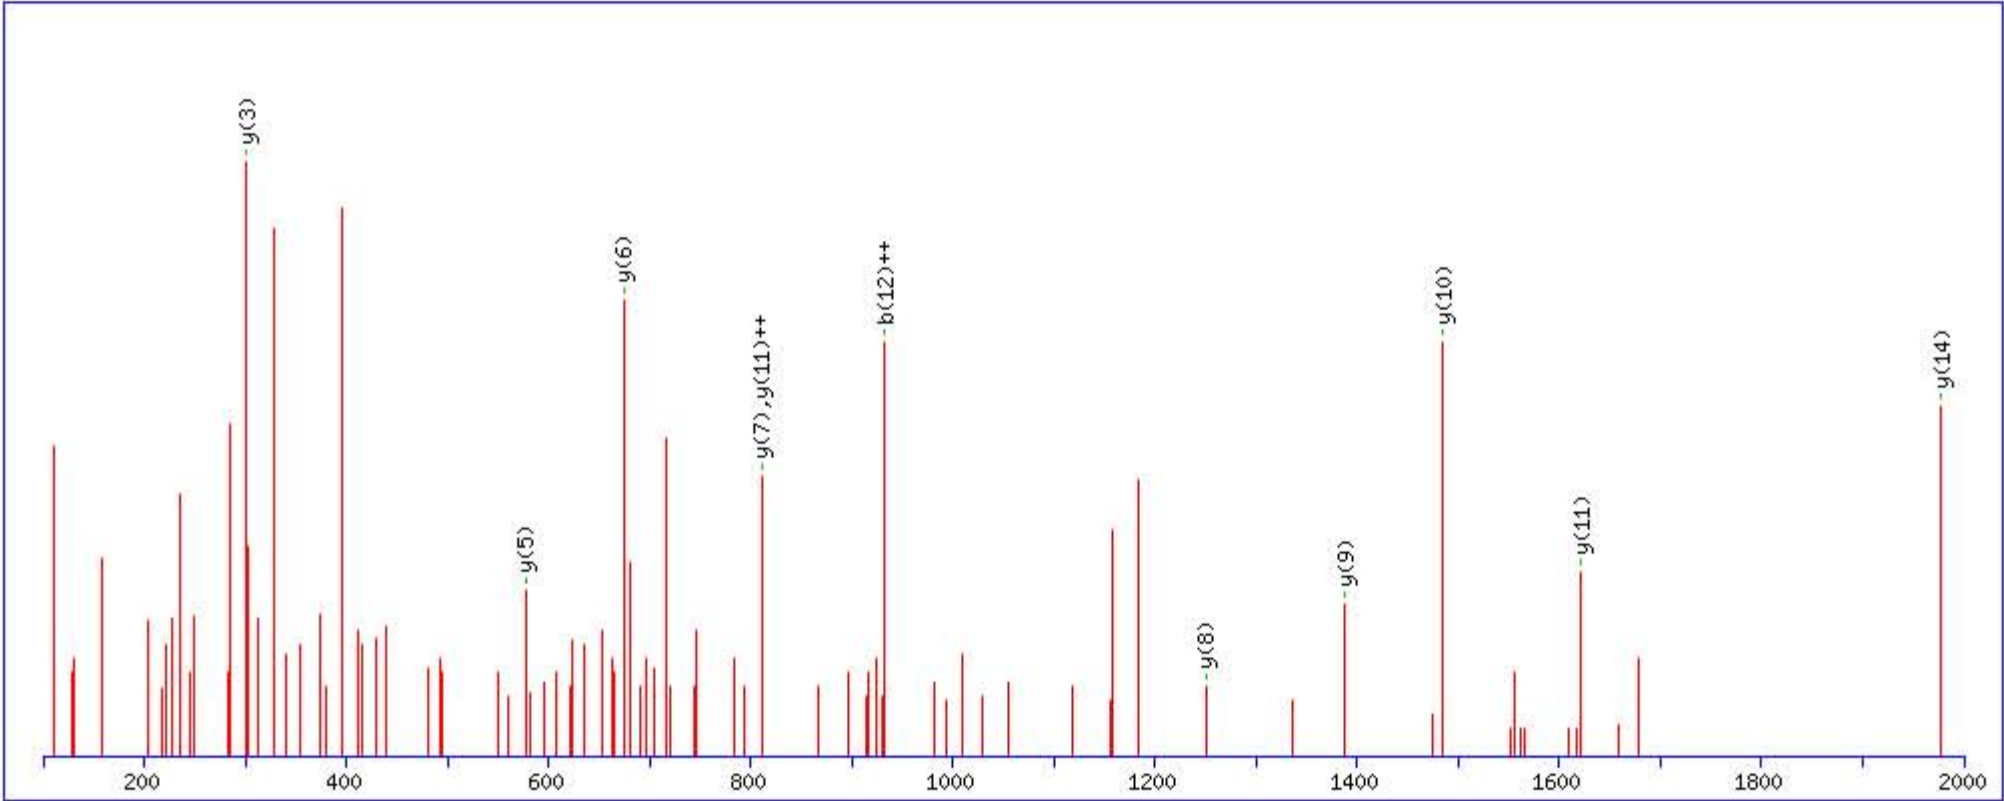

Monoisotopic mass of neutral peptide Mr(calc): 2163.047256  
Fixed modifications: Carbamidomethyl (C) (apply to specified residues or termini only)  
Variable modifications:  
Q8 : Biotin:Thermo-21345 (Q)  
Ions Score: 53 Expect: 0.00011  
Matches : 11/154 fragment ions using 17 most intense peaks [\(help\)](#)

| #  | b           | b <sup>++</sup> | b <sup>*</sup> | b <sup>++</sup> * | b <sup>0</sup> | b <sup>0++</sup> | Seq. | y           | y <sup>++</sup> | y <sup>*</sup> | y <sup>++</sup> * | y <sup>0</sup> | y <sup>0++</sup> | #  |
|----|-------------|-----------------|----------------|-------------------|----------------|------------------|------|-------------|-----------------|----------------|-------------------|----------------|------------------|----|
| 1  | 187.086589  | 94.046932       |                |                   |                |                  | W    |             |                 |                |                   |                |                  | 15 |
| 2  | 302.113532  | 151.560404      |                |                   | 284.102967     | 142.555122       | D    | 1977.975214 | 989.491245      | 1960.948665    | 980.977971        | 1959.964649    | 980.485963       | 14 |
| 3  | 415.197596  | 208.102436      |                |                   | 397.187031     | 199.097154       | L    | 1862.948271 | 931.977774      | 1845.921722    | 923.464499        | 1844.937706    | 922.972491       | 13 |
| 4  | 543.256174  | 272.131725      | 526.229625     | 263.618451        | 525.245609     | 263.126443       | Q    | 1749.864207 | 875.435741      | 1732.837658    | 866.922467        | 1731.853642    | 866.430459       | 12 |
| 5  | 680.315086  | 340.661181      | 663.288537     | 332.147907        | 662.304521     | 331.655899       | H    | 1621.805629 | 811.406453      | 1604.779080    | 802.893178        | 1603.795064    | 802.401170       | 11 |
| 6  | 777.367850  | 389.187563      | 760.341301     | 380.674289        | 759.357285     | 380.182281       | P    | 1484.746717 | 742.876997      | 1467.720168    | 734.363722        | 1466.736152    | 733.871714       | 10 |
| 7  | 914.426762  | 457.717019      | 897.400213     | 449.203745        | 896.416197     | 448.711737       | H    | 1387.693953 | 694.350615      | 1370.667404    | 685.837340        | 1369.683388    | 685.345332       | 9  |
| 8  | 1353.652088 | 677.329682      | 1336.625539    | 668.816408        | 1335.641523    | 668.324400       | Q    | 1250.635041 | 625.821159      | 1233.608492    | 617.307884        | 1232.624476    | 616.815876       | 8  |
| 9  | 1490.711000 | 745.859138      | 1473.684451    | 737.345864        | 1472.700435    | 736.853856       | H    | 811.409715  | 406.208496      | 794.383166     | 397.695221        | 793.399150     | 397.203213       | 7  |
| 10 | 1587.763764 | 794.385520      | 1570.737215    | 785.872246        | 1569.753199    | 785.380238       | P    | 674.350803  | 337.679040      | 657.324254     | 329.165765        | 656.340238     | 328.673757       | 6  |
| 11 | 1734.832178 | 867.919727      | 1717.805629    | 859.406453        | 1716.821613    | 858.914445       | F    | 577.298039  | 289.152658      | 560.271490     | 280.639383        | 559.287474     | 280.147375       | 5  |
| 12 | 1863.874771 | 932.441024      | 1846.848222    | 923.927749        | 1845.864206    | 923.435741       | E    | 430.229625  | 215.618450      | 413.203076     | 207.105176        | 412.219060     | 206.613168       | 4  |
| 13 | 1960.927535 | 980.967406      | 1943.900986    | 972.454131        | 1942.916970    | 971.962123       | P    | 301.187032  | 151.097154      | 284.160483     | 142.583879        |                |                  | 3  |
| 14 | 2017.948999 | 1009.478138     | 2000.922450    | 1000.964863       | 1999.938434    | 1000.472855      | G    | 204.134268  | 102.570772      | 187.107719     | 94.057497         |                |                  | 2  |
| 15 |             |                 |                |                   |                |                  | K    | 147.112804  | 74.060040       | 130.086255     | 65.546765         |                |                  | 1  |

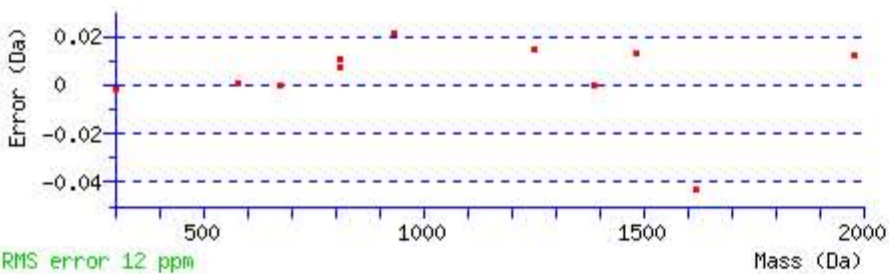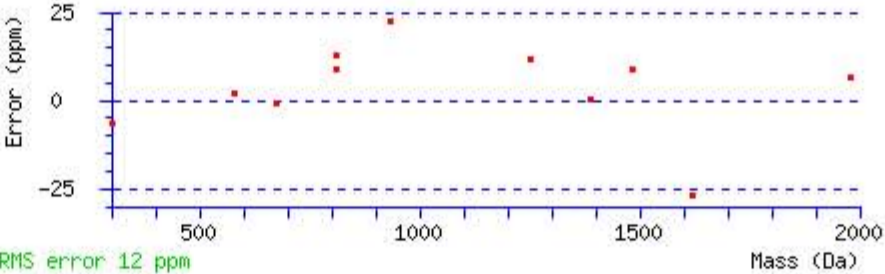

NCBI BLAST search of [WDLQHPHQHPFEPGK](#)  
(Parameters: blastp, nr protein database, expect=20000, no filter, PAM30)  
Other BLAST [web gateways](#)

All matches to this query

| Score | Mr(calc):   | Delta    | Sequence                        |
|-------|-------------|----------|---------------------------------|
| 53.5  | 2163.047256 | 0.006876 | <a href="#">WDLQHPHQHPFEPGK</a> |
| 11.6  | 2163.047256 | 0.006876 | <a href="#">WDLQHPHQHPFEPGK</a> |

### Peptide View

Match to Query 65765: 3494.715656 from(874.686190,4+) rtinseconds(2818) index(71509)  
Title: Locus:1.1.1.2255.16 File:"2013-07-02 CLN FXIII 180 min 2nd FT.wiff"  
Data file C:\Program Files (x86)\Matrix Science\Mascot Daemon\mgf\8 FXIII 180 min 2nd\mascot\_daemon\_merge.mgf

| #  | b           | b <sup>++</sup> | b <sup>*</sup> | b <sup>*++</sup> | b <sup>0</sup> | b <sup>0++</sup> | Seq. | y           | y <sup>++</sup> | y <sup>*</sup> | y <sup>*++</sup> | y <sup>0</sup> | y <sup>0++</sup> | #  |
|----|-------------|-----------------|----------------|------------------|----------------|------------------|------|-------------|-----------------|----------------|------------------|----------------|------------------|----|
| 1  | 58.028740   | 29.518008       |                |                  |                |                  | G    |             |                 |                |                  |                |                  | 29 |
| 2  | 159.076419  | 80.041847       |                |                  | 141.065854     | 71.036565        | T    | 3438.656925 | 1719.832100     | 3421.630376    | 1711.318826      | 3420.646360    | 1710.826818      | 28 |
| 3  | 288.119012  | 144.563144      |                |                  | 270.108447     | 135.557862       | E    | 3337.609246 | 1669.308261     | 3320.582697    | 1660.794986      | 3319.598681    | 1660.302978      | 27 |
| 4  | 401.203076  | 201.105176      |                |                  | 383.192511     | 192.099894       | L    | 3208.566653 | 1604.786964     | 3191.540104    | 1596.273690      | 3190.556088    | 1595.781682      | 26 |
| 5  | 840.428402  | 420.717839      | 823.401853     | 412.204565       | 822.417837     | 411.712557       | Q    | 3095.482589 | 1548.244932     | 3078.456040    | 1539.731658      | 3077.472024    | 1539.239650      | 25 |
| 6  | 977.487314  | 489.247295      | 960.460765     | 480.734021       | 959.476749     | 480.242013       | H    | 2656.257263 | 1328.632269     | 2639.230714    | 1320.118995      | 2638.246698    | 1319.626987      | 24 |
| 7  | 1090.571378 | 545.789327      | 1073.544829    | 537.276053       | 1072.560813    | 536.784045       | L    | 2519.198351 | 1260.102813     | 2502.171802    | 1251.589539      | 2501.187786    | 1251.097531      | 23 |
| 8  | 1203.655442 | 602.331359      | 1186.628893    | 593.818085       | 1185.644877    | 593.326077       | L    | 2406.114287 | 1203.560781     | 2389.087738    | 1195.047507      | 2388.103722    | 1194.555499      | 22 |
| 9  | 1340.714354 | 670.860815      | 1323.687805    | 662.347541       | 1322.703789    | 661.855532       | H    | 2293.030223 | 1147.018749     | 2276.003674    | 1138.505475      | 2275.019658    | 1138.013467      | 21 |
| 10 | 1411.751468 | 706.379372      | 1394.724919    | 697.866098       | 1393.740903    | 697.374089       | A    | 2155.971311 | 1078.489293     | 2138.944762    | 1069.976019      | 2137.960746    | 1069.484011      | 20 |
| 11 | 1510.819882 | 755.913579      | 1493.793333    | 747.400305       | 1492.809317    | 746.908297       | V    | 2084.934197 | 1042.970736     | 2067.907648    | 1034.457462      | 2066.923632    | 1033.965454      | 19 |
| 12 | 1609.888296 | 805.447786      | 1592.861747    | 796.934512       | 1591.877731    | 796.442504       | V    | 1985.865783 | 993.436530      | 1968.839234    | 984.923255       | 1967.855218    | 984.431247       | 18 |
| 13 | 1706.941060 | 853.974168      | 1689.914511    | 845.460894       | 1688.930495    | 844.968886       | P    | 1886.797369 | 943.902323      | 1869.770820    | 935.389048       | 1868.786804    | 934.897040       | 17 |
| 14 | 1763.962524 | 882.484900      | 1746.935975    | 873.971626       | 1745.951959    | 873.479618       | G    | 1789.744605 | 895.375941      | 1772.718056    | 886.862666       | 1771.734040    | 886.370658       | 16 |
| 15 | 1861.015288 | 931.011282      | 1843.988739    | 922.498008       | 1843.004723    | 922.006000       | P    | 1732.723141 | 866.865209      | 1715.696592    | 858.351934       | 1714.712576    | 857.859926       | 15 |
| 16 | 2047.094601 | 1024.050939     | 2030.068052    | 1015.537664      | 2029.084036    | 1015.045656      | W    | 1635.670377 | 818.338827      | 1618.643828    | 809.825552       | 1617.659812    | 809.333544       | 14 |
| 17 | 2175.153179 | 1088.080227     | 2158.126630    | 1079.566953      | 2157.142614    | 1079.074945      | Q    | 1449.591064 | 725.299170      | 1432.564515    | 716.785896       | 1431.580499    | 716.293888       | 13 |
| 18 | 2304.195772 | 1152.601524     | 2287.169223    | 1144.088249      | 2286.185207    | 1143.596241      | E    | 1321.532486 | 661.269881      | 1304.505937    | 652.756607       | 1303.521921    | 652.264599       | 12 |
| 19 | 2419.222715 | 1210.114995     | 2402.196166    | 1201.601721      | 2401.212150    | 1201.109713      | D    | 1192.489893 | 596.748585      | 1175.463344    | 588.235310       | 1174.479328    | 587.743302       | 11 |
| 20 | 2518.291129 | 1259.649202     | 2501.264580    | 1251.135928      | 2500.280564    | 1250.643920      | V    | 1077.462950 | 539.235113      | 1060.43        |                  |                |                  |    |

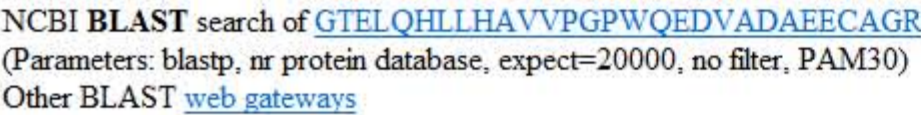

| Score | Mr(calc):   | Delta    | Sequence                                      |
|-------|-------------|----------|-----------------------------------------------|
| 82.0  | 3494.671112 | 0.044544 | <a href="#">GTQLQHLLHAVVPGPWQEDVADAEECAGR</a> |
| 57.9  | 3494.671112 | 0.044544 | <a href="#">GTQLQHLLHAVVPGPWQEDVADAEECAGR</a> |

MATRIX

SCIENCE

Mascot Search Results

Peptide View

MS/MS Fragmentation of **WSAETPHKPQFTFTSEPHAQLEENFCR**  
Found in **HGFL\_HUMAN**, Hepatocyte growth factor-like protein OS=Homo sapiens GN=MST1 PE=1 SV=2

Match to Query 66620: 3584.687770 from(717.944830,5+) rtinseconds(2014) index(66496)  
Title: Locus:1.1.1.1976.11 File:"2013-07-02 CLN FXIII 180 min 2nd FT.wiff"  
Data file C:\Program Files (x86)\Matrix Science\Mascot Daemon\mgf\8 FXIII 180 min 2nd\mascot\_daemon\_merge.mgf

Click mouse within plot area to zoom in by factor of two about that point  
Or, 

Plot from

0

 to 

3400

 Da 

Full range

  
Label all possible matches ☐ Label matches used for scoring ☒

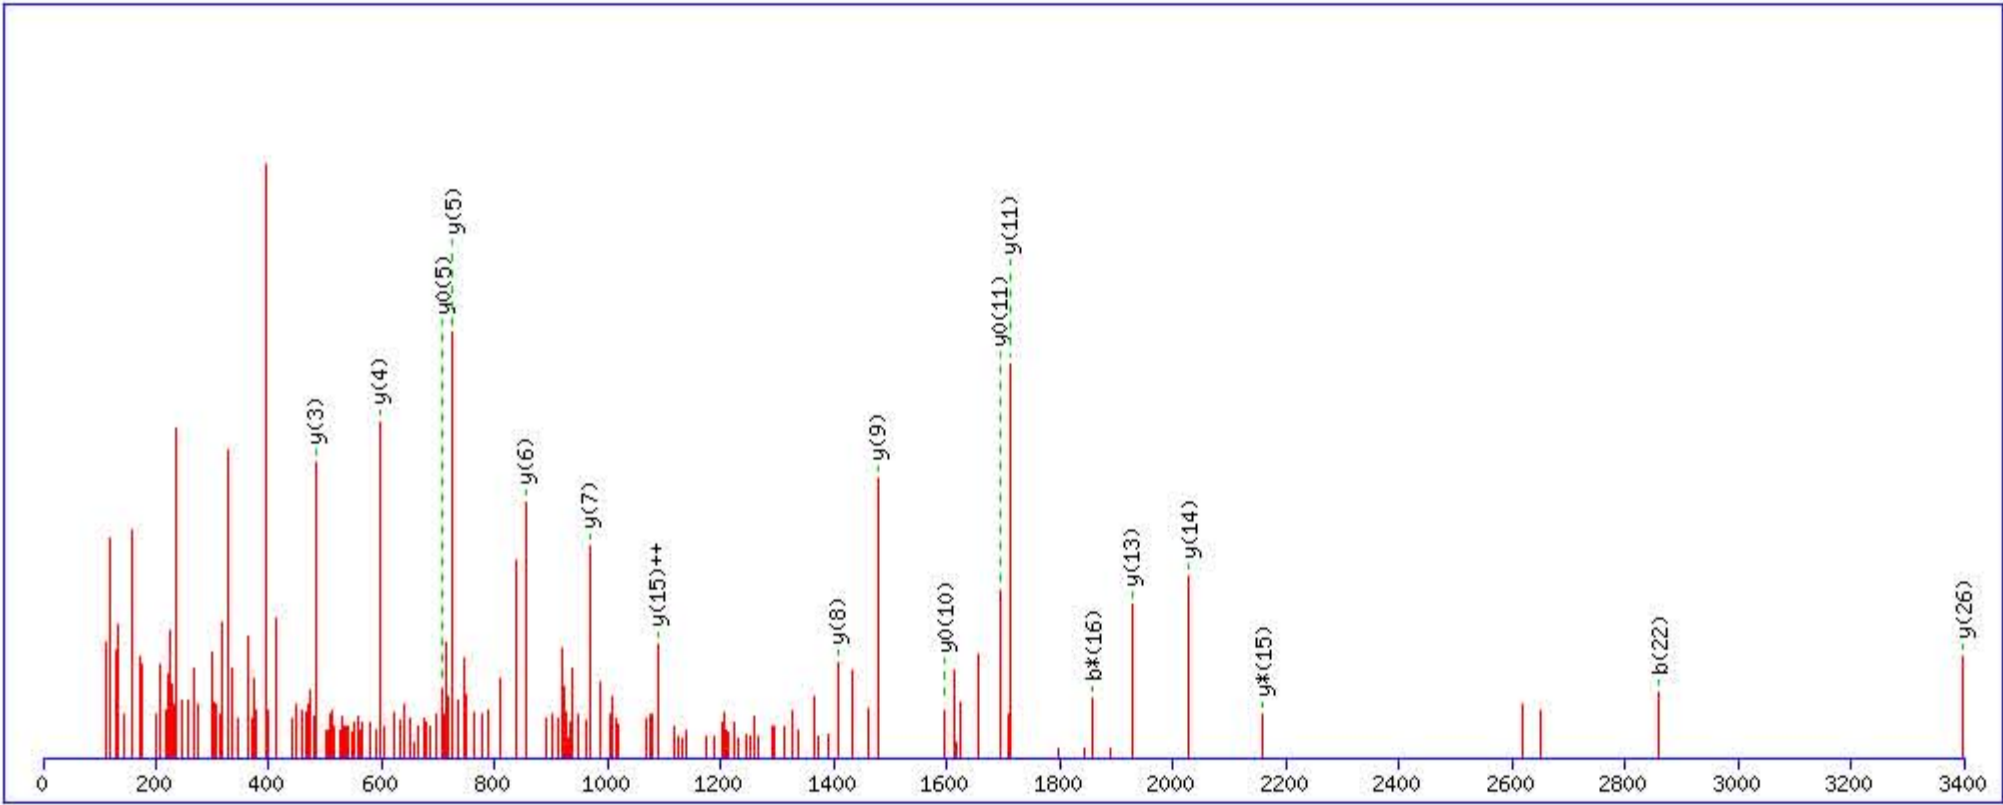

Monoisotopic mass of neutral peptide Mr(calc): 3584.660538  
Fixed modifications: Carbamidomethyl (C) (apply to specified residues or termini only)  
Variable modifications:  
Q20 : Biotin:Thermo-21345 (Q)  
Ions Score: 64 Expect: 7.3e-006  
Matches : 18/288 fragment ions using 24 most intense peaks [\(help\)](#)

| #  | b           | b <sup>++</sup> | b <sup>*</sup> | b <sup>++</sup> | b <sup>0</sup> | b <sup>0++</sup> | Seq. | y           | y <sup>++</sup> | y <sup>*</sup> | y <sup>++</sup> | y <sup>0</sup> | y <sup>0++</sup> | #  |
|----|-------------|-----------------|----------------|-----------------|----------------|------------------|------|-------------|-----------------|----------------|-----------------|----------------|------------------|----|
| 1  | 187.086589  | 94.046932       |                |                 |                |                  | W    |             |                 |                |                 |                |                  | 27 |
| 2  | 274.118617  | 137.562947      |                |                 | 256.108052     | 128.557664       | S    | 3399.588510 | 1700.297893     | 3382.561961    | 1691.784618     | 3381.577945    | 1691.292610      | 26 |
| 3  | 345.155731  | 173.081504      |                |                 | 327.145166     | 164.076221       | A    | 3312.556482 | 1656.781879     | 3295.529933    | 1648.268605     | 3294.545917    | 1647.776597      | 25 |
| 4  | 474.198324  | 237.602800      |                |                 | 456.187759     | 228.597518       | E    | 3241.519368 | 1621.263322     | 3224.492819    | 1612.750047     | 3223.508803    | 1612.258040      | 24 |
| 5  | 575.246003  | 288.126640      |                |                 | 557.235438     | 279.121357       | T    | 3112.476775 | 1556.742026     | 3095.450226    | 1548.228751     | 3094.466210    | 1547.736743      | 23 |
| 6  | 672.298767  | 336.653022      |                |                 | 654.288202     | 327.647739       | P    | 3011.429096 | 1506.218186     | 2994.402547    | 1497.704912     | 2993.418531    | 1497.212904      | 22 |
| 7  | 809.357679  | 405.182478      |                |                 | 791.347114     | 396.177195       | H    | 2914.376332 | 1457.691804     | 2897.349783    | 1449.178530     | 2896.365767    | 1448.686522      | 21 |
| 8  | 937.452642  | 469.229959      | 920.426093     | 460.716685      | 919.442077     | 460.224677       | K    | 2777.317420 | 1389.162348     | 2760.290871    | 1380.649074     | 2759.306855    | 1380.157066      | 20 |
| 9  | 1034.505406 | 517.756341      | 1017.478857    | 509.243067      | 1016.494841    | 508.751059       | P    | 2649.222457 | 1325.114867     | 2632.195908    | 1316.601592     | 2631.211892    | 1316.109584      | 19 |
| 10 | 1162.563984 | 581.785630      | 1145.537435    | 573.272356      | 1144.553419    | 572.780348       | Q    | 2552.169693 | 1276.588485     | 2535.143144    | 1268.075210     | 2534.159128    | 1267.583202      | 18 |
| 11 | 1309.632398 | 655.319837      | 1292.605849    | 646.806563      | 1291.621833    | 646.314555       | F    | 2424.111115 | 1212.559196     | 2407.084566    | 1204.045921     | 2406.100550    | 1203.553913      | 17 |
| 12 | 1410.680077 | 705.843677      | 1393.653528    | 697.330402      | 1392.669512    | 696.838394       | T    | 2277.042701 | 1139.024988     | 2260.016152    | 1130.511714     | 2259.032136    | 1130.019706      | 16 |
| 13 | 1557.748491 | 779.377884      | 1540.721942    | 770.864609      | 1539.737926    | 770.372601       | F    | 2175.995022 | 1088.501149     | 2158.968473    | 1079.987874     | 2157.984457    | 1079.495866      | 15 |
| 14 | 1658.796170 | 829.901723      | 1641.769621    | 821.388449      | 1640.785605    | 820.896441       | T    | 2028.926608 | 1014.966942     | 2011.900059    | 1006.453668     | 2010.916043    | 1005.961660      | 14 |
| 15 | 1745.828198 | 873.417737      | 1728.801649    | 864.904463      | 1727.817633    | 864.412455       | S    | 1927.878929 | 964.443103      | 1910.852380    | 955.929828      | 1909.868364    | 955.437820       | 13 |
| 16 | 1874.870791 | 937.939034      | 1857.844242    | 929.425759      | 1856.860226    | 928.933751       | E    | 1840.846901 | 920.927089      | 1823.820352    | 912.413814      | 1822.836336    | 911.921806       | 12 |
| 17 | 1971.923555 | 986.465416      | 1954.897006    | 977.952141      | 1953.912990    | 977.460133       | P    | 1711.804308 | 856.405792      | 1694.777759    | 847.892518      | 1693.793743    | 847.400510       | 11 |
| 18 | 2108.982467 | 1054.994872     | 2091.955918    | 1046.481597     | 2090.971902    | 1045.989589      | H    | 1614.751544 | 807.879410      | 1597.724995    | 799.366136      | 1596.740979    | 798.874128       | 10 |
| 19 | 2180.019581 | 1090.513429     | 2162.993032    | 1082.000154     | 2162.009016    | 1081.508146      | A    | 1477.692632 | 739.349954      | 1460.666083    | 730.836680      | 1459.682067    | 730.344672       | 9  |
| 20 | 2619.244907 | 1310.126092     | 2602.218358    | 1301.612817     | 2601.234342    | 1301.120809      | Q    | 1406.655518 | 703.831397      | 1389.628969    | 695.318123      | 1388.644953    | 694.826115       | 8  |
| 21 | 2732.328971 | 1366.668124     | 2715.302422    | 1358.154849     | 2714.318406    | 1357.662841      | L    | 967.430192  | 484.218734      | 950.403643     | 475.705460      | 949.419627     | 475.213452       | 7  |
| 22 | 2861.371564 | 1431.189420     | 2844.345015    | 1422.676146     | 2843.360999    | 1422.184138      | E    | 854.346128  | 427.676702      | 837.319579     | 419.163427      | 836.335563     | 418.671419       | 6  |
| 23 | 2990.414157 | 1495.710717     | 2973.387608    | 1487.197442     | 2972.403592    | 1486.705434      | E    | 725.303535  | 363.155405      | 708.276986     | 354.642131      | 707.292970     | 354.150123       | 5  |
| 24 | 3104.457084 | 1552.732180     | 3087.430535    | 1544.218906     | 3086.446519    | 1543.726898      | N    | 596.260942  | 298.634109      | 579.234393     | 290.120834      |                |                  | 4  |
| 25 | 3251.525498 | 1626.266387     | 3234.498949    | 1617.753113     | 3233.514933    | 1617.261105      | F    | 482.218015  | 241.612645      | 465.191466     | 233.099371      |                |                  | 3  |
| 26 | 3411.556147 | 1706.281712     | 3394.529598    | 1697.768437     | 3393.545582    | 1697.276429      | C    | 335.149601  | 168.078438      | 318.123052     | 159.565164      |                |                  | 2  |
| 27 |             |                 |                |                 |                |                  | R    | 175.118952  | 88.063114       | 158.092403     | 79.549839       |                |                  | 1  |

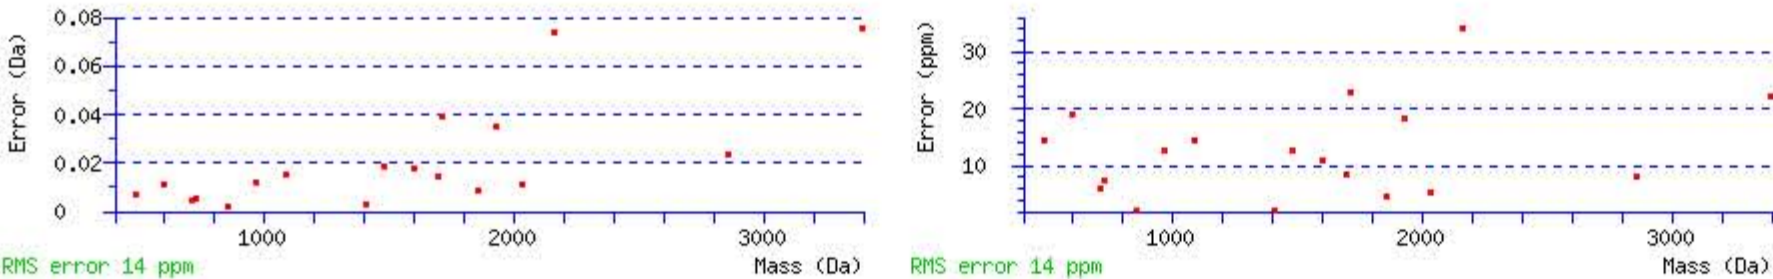

NCBI BLAST search of [WSAETPHKPQFTFTSEPHAQLEENFCR](#)  
(Parameters: blastp, nr protein database, expect=20000, no filter, PAM30)  
Other BLAST [web gateways](#)

All matches to this query

| Score | Mr(calc):   | Delta    | Sequence                                    |
|-------|-------------|----------|---------------------------------------------|
| 63.6  | 3584.660538 | 0.027232 | <a href="#">WSAETPHKPQFTFTSEPHAQLEENFCR</a> |
| 8.1   | 3584.660538 | 0.027232 | <a href="#">WSAETPHKPQFTFTSEPHAQLEENFCR</a> |

MATRIX

SCIENCE

Mascot Search Results

Peptide View

MS/MS Fragmentation of **VVLGDQDLK**  
Found in **HABP2\_HUMAN**, Hyaluronan-binding protein 2 OS=Homo sapiens GN=HABP2 PE=1 SV=1

Match to Query 23261: 1296.721428 from(649.367990,2+) rtinseconds(1975) index(50200)  
Title: Locus:1.1.1.1925.8 File:"2013-07-02 CLN FXIII 180 min 2nd F 4.wiff"  
Data file C:\Program Files (x86)\Matrix Science\Mascot Daemon\mgf\8 FXIII 180 min 2nd\mascot\_daemon\_merge.mgf

Click mouse within plot area to zoom in by factor of two about that point  
Or,   to  Da   
Label all possible matches ☐ Label matches used for scoring ☒

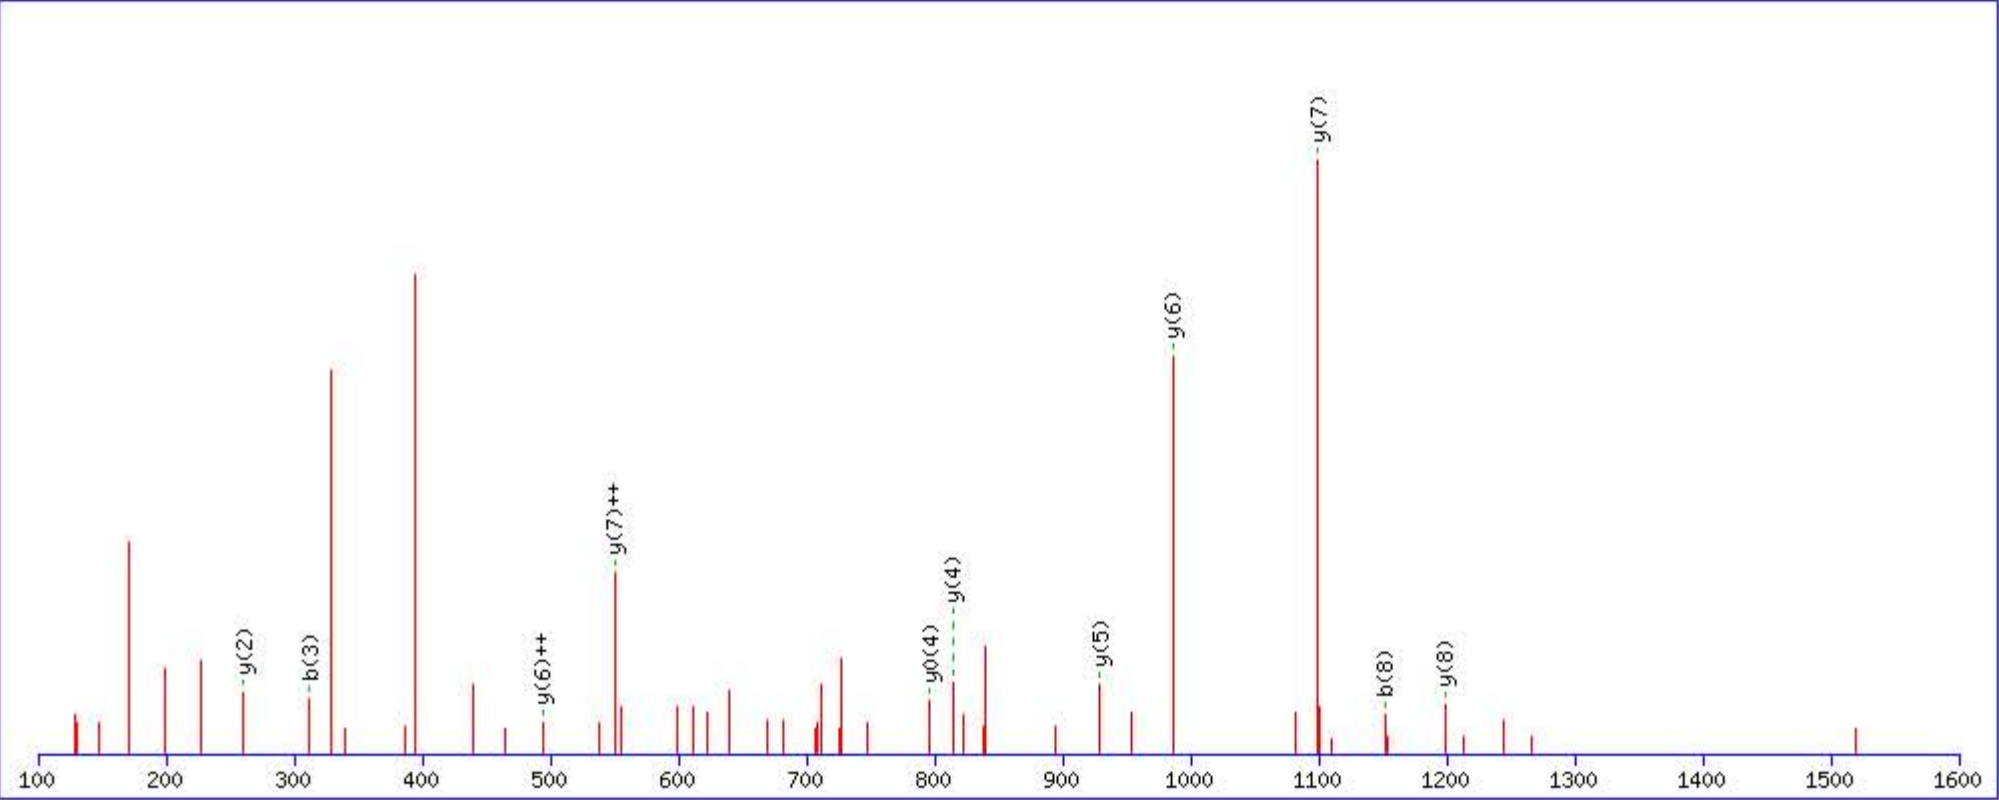

Monoisotopic mass of neutral peptide Mr(calc): 1296.711166  
Fixed modifications: Carbamidomethyl (C) (apply to specified residues or termini only)  
Variable modifications:  
Q6 : Biotin:Thermo-21345 (Q)  
Ions Score: 30 Expect: 0.0053  
Matches : 11/74 fragment ions using 24 most intense peaks [\(help\)](#)

| # | b           | b <sup>++</sup> | b <sup>*</sup> | b <sup>*++</sup> | b <sup>0</sup> | b <sup>0++</sup> | Seq. | y           | y <sup>++</sup> | y <sup>*</sup> | y <sup>*++</sup> | y <sup>0</sup> | y <sup>0++</sup> | # |
|---|-------------|-----------------|----------------|------------------|----------------|------------------|------|-------------|-----------------|----------------|------------------|----------------|------------------|---|
| 1 | 100.075690  | 50.541483       |                |                  |                |                  | V    |             |                 |                |                  |                |                  | 9 |
| 2 | 199.144104  | 100.075690      |                |                  |                |                  | V    | 1198.650022 | 599.828649      | 1181.623473    | 591.315374       | 1180.639457    | 590.823366       | 8 |
| 3 | 312.228168  | 156.617722      |                |                  |                |                  | L    | 1099.581608 | 550.294442      | 1082.555059    | 541.781168       | 1081.571043    | 541.289159       | 7 |
| 4 | 369.249632  | 185.128454      |                |                  |                |                  | G    | 986.497544  | 493.752410      | 969.470995     | 485.239135       | 968.486979     | 484.747127       | 6 |
| 5 | 484.276575  | 242.641925      |                |                  | 466.266010     | 233.636643       | D    | 929.476080  | 465.241678      | 912.449531     | 456.728403       | 911.465515     | 456.236395       | 5 |
| 6 | 923.501901  | 462.254589      | 906.475352     | 453.741314       | 905.491336     | 453.249306       | Q    | 814.449137  | 407.728206      | 797.422588     | 399.214932       | 796.438572     | 398.722924       | 4 |
| 7 | 1038.528844 | 519.768060      | 1021.502295    | 511.254785       | 1020.518279    | 510.762777       | D    | 375.223811  | 188.115543      | 358.197262     | 179.602269       | 357.213246     | 179.110261       | 3 |
| 8 | 1151.612908 | 576.310092      | 1134.586359    | 567.796817       | 1133.602343    | 567.304809       | L    | 260.196868  | 130.602072      | 243.170319     | 122.088797       |                |                  | 2 |
| 9 |             |                 |                |                  |                |                  | K    | 147.112804  | 74.060040       | 130.086255     | 65.546765        |                |                  | 1 |

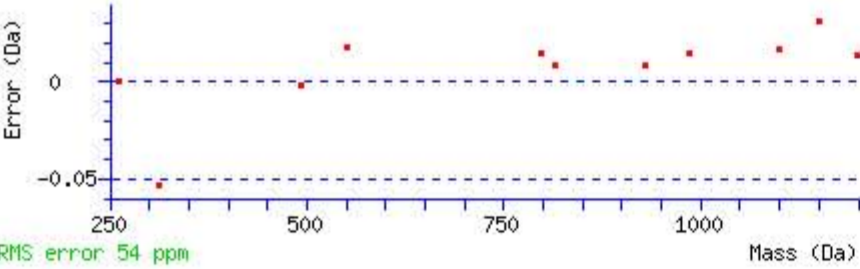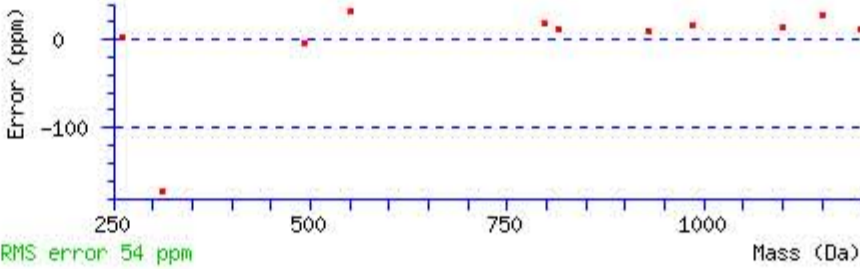

NCBI BLAST search of [VVLGDQDLK](#)  
(Parameters: blastp, nr protein database, expect=20000, no filter, PAM30)  
Other BLAST [web gateways](#)

All matches to this query

| Score | Mr(calc):   | Delta    | Sequence                    |
|-------|-------------|----------|-----------------------------|
| 29.6  | 1296.711166 | 0.010262 | <a href="#">VVLGDQDLK</a>   |
| 5.0   | 1296.719025 | 0.002403 | <a href="#">VVSIHQDPKFK</a> |
| 0.5   | 1296.704636 | 0.016792 | <a href="#">VVAVSPQMR</a>   |

MATRIX

SCIENCE

Mascot Search Results

Peptide View

MS/MS Fragmentation of **FTCACPDQFK**  
Found in **HABP2\_HUMAN**, Hyaluronan-binding protein 2 OS=Homo sapiens GN=HABP2 PE=1 SV=1

Match to Query 33915: 1583.698782 from(528.906870,3+) rtinseconds(1887) index(49456)  
Title: Locus:1.1.1.1895.9 File:"2013-07-02 CLN FXIII 180 min 2nd F 4.wiff"  
Data file C:\Program Files (x86)\Matrix Science\Mascot Daemon\mgf\8 FXIII 180 min 2nd\mascot\_daemon\_merge.mgf

Click mouse within plot area to zoom in by factor of two about that point  
Or, 

Plot from

100

 to 

1400

 Da 

Full range

  
Label all possible matches ☐ Label matches used for scoring ☒

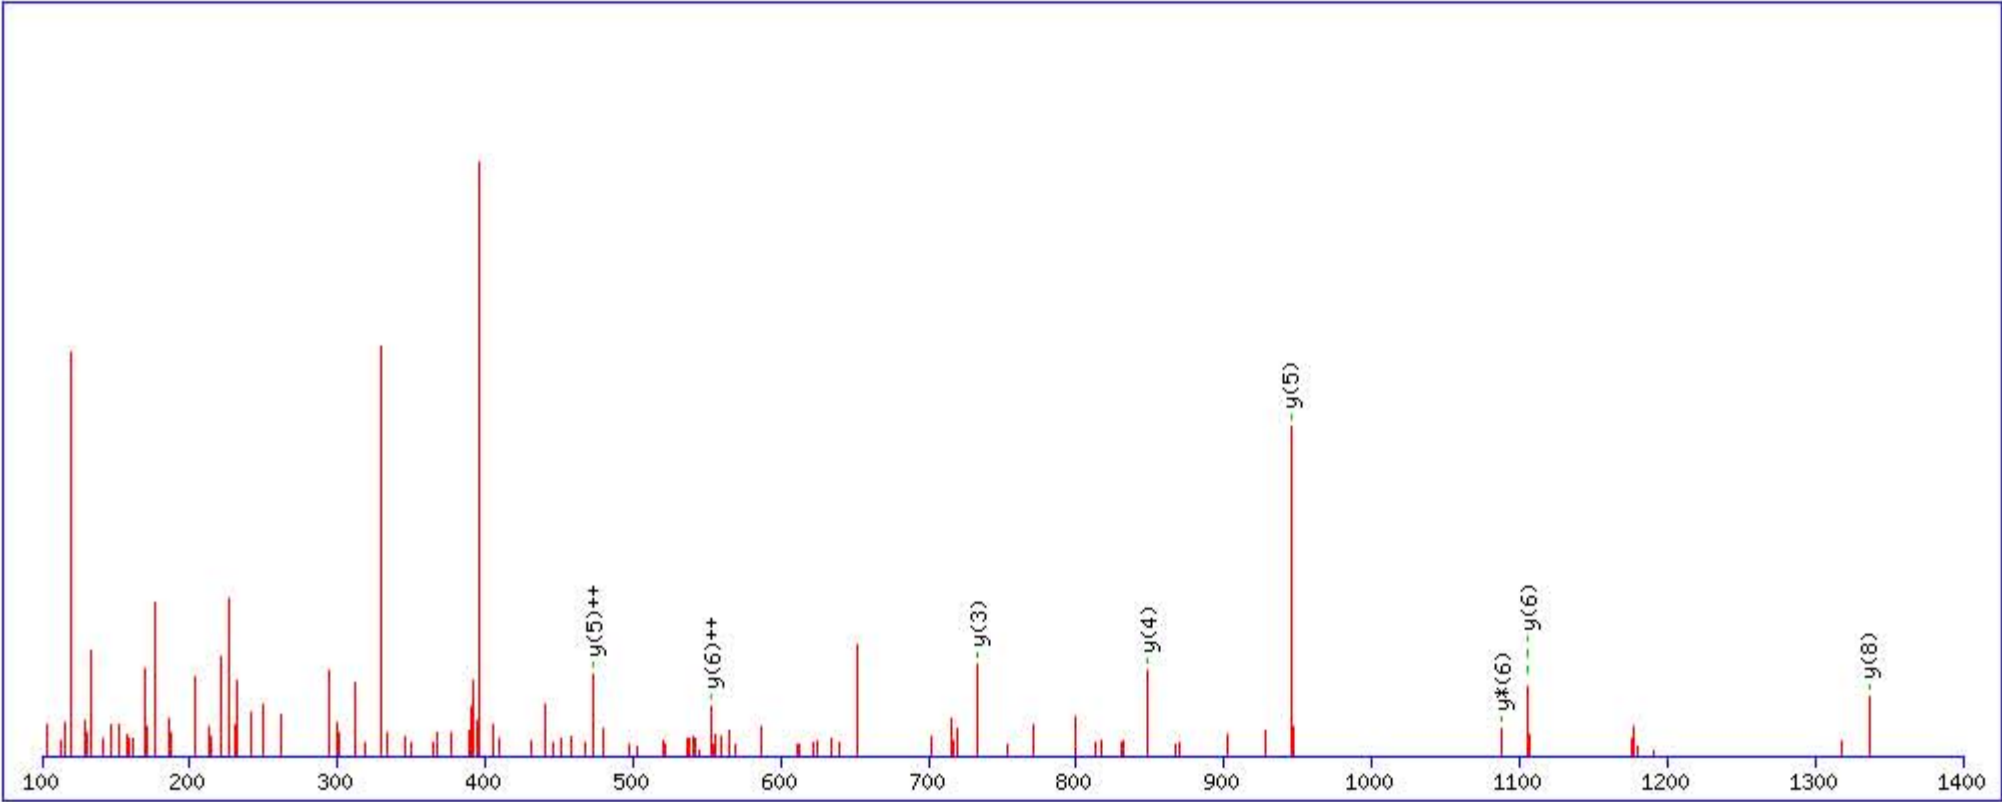

Monoisotopic mass of neutral peptide Mr(calc): 1583.693497  
Fixed modifications: Carbamidomethyl (C) (apply to specified residues or termini only)  
Variable modifications:  
Q8 : Biotin:Thermo-21345 (Q)  
Ions Score: 27 Expect: 0.014  
Matches : 8/86 fragment ions using 12 most intense peaks ([help](#))

| #  | b           | b <sup>++</sup> | b <sup>*</sup> | b <sup>*++</sup> | b <sup>0</sup> | b <sup>0++</sup> | Seq. | y           | y <sup>++</sup> | y <sup>*</sup> | y <sup>*++</sup> | y <sup>0</sup> | y <sup>0++</sup> | #  |
|----|-------------|-----------------|----------------|------------------|----------------|------------------|------|-------------|-----------------|----------------|------------------|----------------|------------------|----|
| 1  | 148.075690  | 74.541483       |                |                  |                |                  | F    |             |                 |                |                  |                |                  | 10 |
| 2  | 249.123369  | 125.065322      |                |                  | 231.112804     | 116.060040       | T    | 1437.632342 | 719.319809      | 1420.605793    | 710.806535       | 1419.621777    | 710.314527       | 9  |
| 3  | 409.154018  | 205.080647      |                |                  | 391.143453     | 196.075365       | C    | 1336.584663 | 668.795970      | 1319.558114    | 660.282695       | 1318.574098    | 659.790687       | 8  |
| 4  | 480.191132  | 240.599204      |                |                  | 462.180567     | 231.593921       | A    | 1176.554014 | 588.780645      | 1159.527465    | 580.267371       | 1158.543449    | 579.775363       | 7  |
| 5  | 640.221781  | 320.614529      |                |                  | 622.211216     | 311.609246       | C    | 1105.516900 | 553.262088      | 1088.490351    | 544.748814       | 1087.506335    | 544.256806       | 6  |
| 6  | 737.274545  | 369.140911      |                |                  | 719.263980     | 360.135628       | P    | 945.486251  | 473.246764      | 928.459702     | 464.733489       | 927.475686     | 464.241481       | 5  |
| 7  | 852.301488  | 426.654382      |                |                  | 834.290923     | 417.649100       | D    | 848.433487  | 424.720382      | 831.406938     | 416.207107       | 830.422922     | 415.715099       | 4  |
| 8  | 1291.526814 | 646.267045      | 1274.500265    | 637.753771       | 1273.516249    | 637.261763       | Q    | 733.406544  | 367.206910      | 716.379995     | 358.693636       |                |                  | 3  |
| 9  | 1438.595228 | 719.801252      | 1421.568679    | 711.287978       | 1420.584663    | 710.795970       | F    | 294.181218  | 147.594247      | 277.154669     | 139.080973       |                |                  | 2  |
| 10 |             |                 |                |                  |                |                  | K    | 147.112804  | 74.060040       | 130.086255     | 65.546765        |                |                  | 1  |

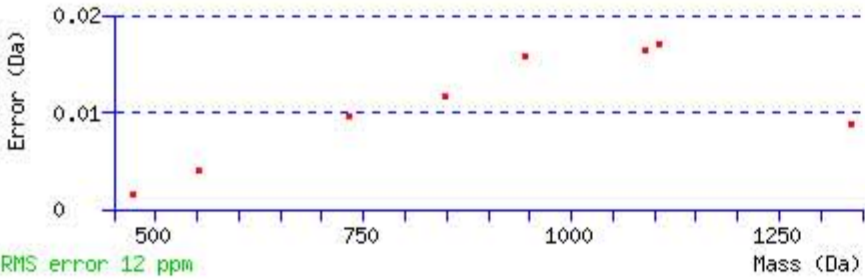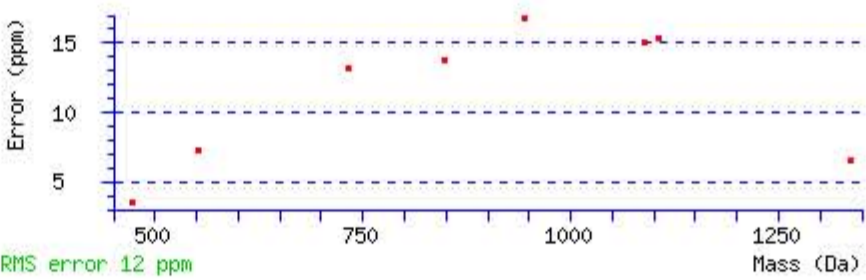

NCBI BLAST search of [FTCACPDQFK](#)  
(Parameters: blastp, nr protein database, expect=20000, no filter, PAM30)  
Other BLAST [web gateways](#)

All matches to this query

| Score | Mr(calc):   | Delta    | Sequence                   |
|-------|-------------|----------|----------------------------|
| 26.9  | 1583.693497 | 0.005285 | <a href="#">FTCACPDQFK</a> |

MATRIX

SCIENCE

Mascot Search Results

Peptide View

MS/MS Fragmentation of **KEEFHEQSFR**  
Found in **HABP2\_HUMAN**, Hyaluronan-binding protein 2 OS=Homo sapiens GN=HABP2 PE=1 SV=1

Match to Query 36784: 1646.793852 from(549.938560,3+) rtinseconds(1529) index(47148)  
Title: Locus:1.1.1.1770.10 File:"2013-07-02 CLN FXIII 180 min 2nd F 4.wiff"  
Data file C:\Program Files (x86)\Matrix Science\Mascot Daemon\mgf\8 FXIII 180 min 2nd\mascot\_daemon\_merge.mgf

Click mouse within plot area to zoom in by factor of two about that point  
Or, 

Plot from

100

 to 

1600

 Da 

Full range

  
Label all possible matches ☐ Label matches used for scoring ☒

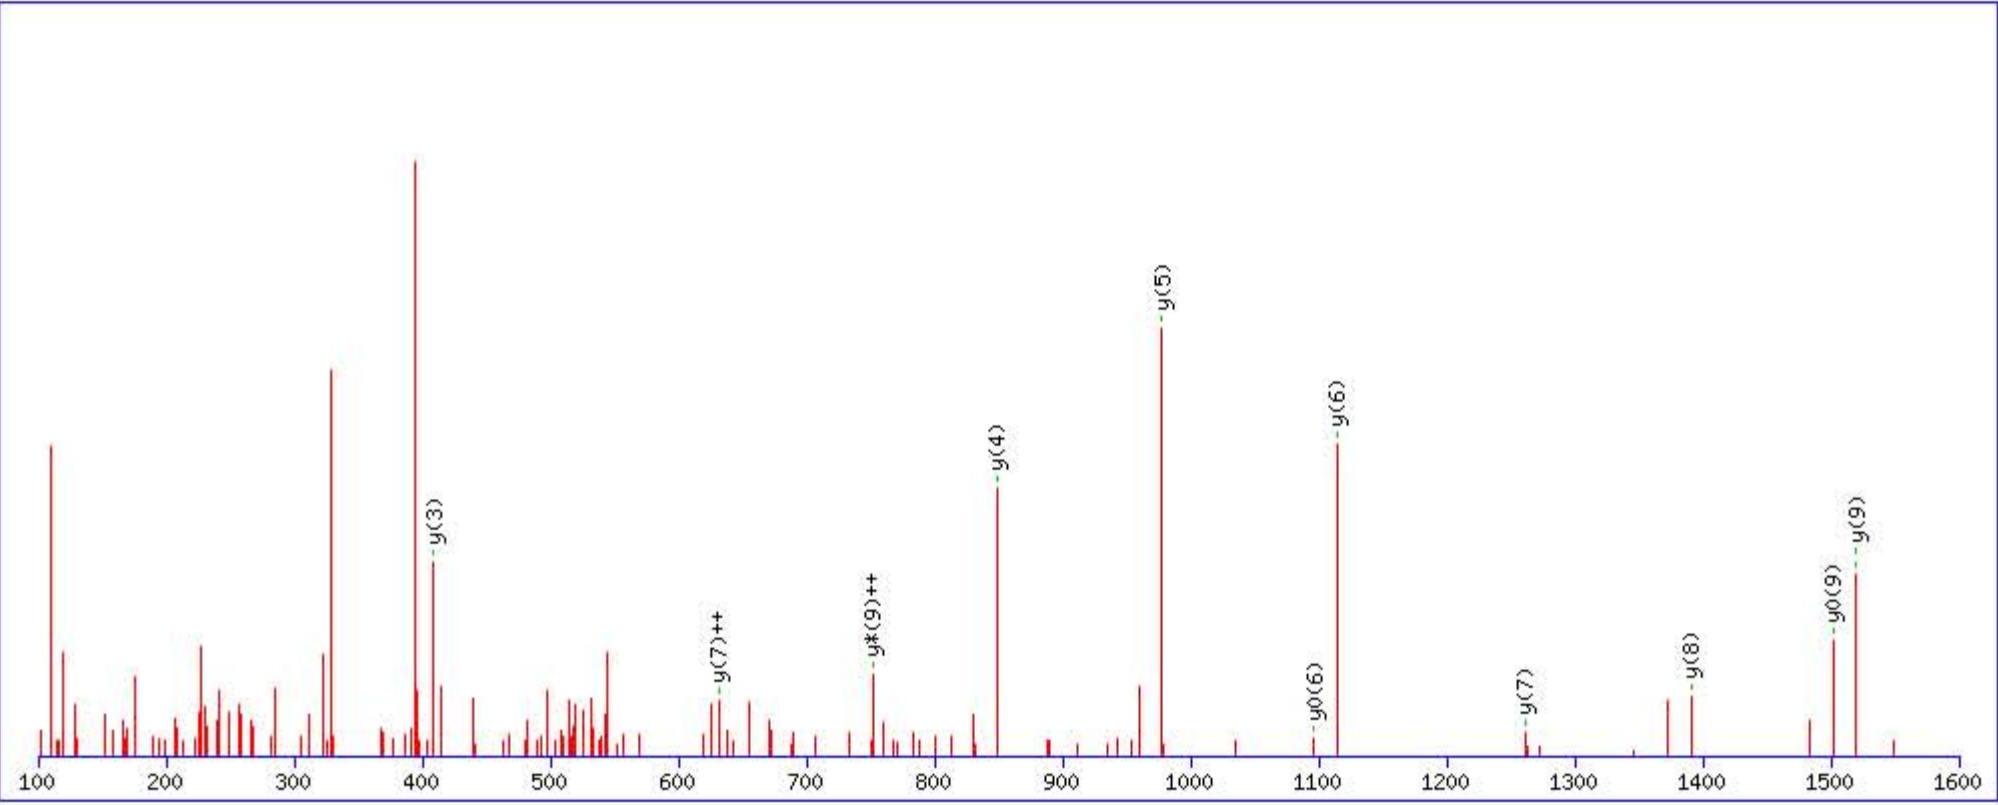

Monoisotopic mass of neutral peptide Mr(calc): 1646.787491  
Fixed modifications: Carbamidomethyl (C) (apply to specified residues or termini only)  
Variable modifications:  
Q7 : Biotin:Thermo-21345 (Q)  
Ions Score: 48 Expect: 0.00012  
Matches : 11/102 fragment ions using 15 most intense peaks (help)

| #  | b           | b <sup>++</sup> | b <sup>+</sup> | b <sup>+++</sup> | b <sup>0</sup> | b <sup>0++</sup> | Seq. | y           | y <sup>++</sup> | y <sup>+</sup> | y <sup>+++</sup> | y <sup>0</sup> | y <sup>0++</sup> | #  |
|----|-------------|-----------------|----------------|------------------|----------------|------------------|------|-------------|-----------------|----------------|------------------|----------------|------------------|----|
| 1  | 129.102239  | 65.054757       | 112.075690     | 56.541483        |                |                  | K    |             |                 |                |                  |                |                  | 10 |
| 2  | 258.144832  | 129.576054      | 241.118283     | 121.062780       | 240.134267     | 120.570772       | E    | 1519.699825 | 760.353551      | 1502.673276    | 751.840276       | 1501.689260    | 751.348268       | 9  |
| 3  | 387.187425  | 194.097351      | 370.160876     | 185.584076       | 369.176860     | 185.092068       | E    | 1390.657232 | 695.832254      | 1373.630683    | 687.318980       | 1372.646667    | 686.826972       | 8  |
| 4  | 534.255839  | 267.631558      | 517.229290     | 259.118283       | 516.245274     | 258.626275       | F    | 1261.614639 | 631.310958      | 1244.588090    | 622.797683       | 1243.604074    | 622.305675       | 7  |
| 5  | 671.314751  | 336.161014      | 654.288202     | 327.647739       | 653.304186     | 327.155731       | H    | 1114.546225 | 557.776751      | 1097.519676    | 549.263476       | 1096.535660    | 548.771468       | 6  |
| 6  | 800.357344  | 400.682310      | 783.330795     | 392.169036       | 782.346779     | 391.677028       | E    | 977.487313  | 489.247295      | 960.460764     | 480.734020       | 959.476748     | 480.242012       | 5  |
| 7  | 1239.582670 | 620.294973      | 1222.556121    | 611.781699       | 1221.572105    | 611.289691       | Q    | 848.444720  | 424.725998      | 831.418171     | 416.212724       | 830.434155     | 415.720716       | 4  |
| 8  | 1326.614698 | 663.810987      | 1309.588149    | 655.297713       | 1308.604133    | 654.805705       | S    | 409.219394  | 205.113335      | 392.192845     | 196.600061       | 391.208829     | 196.108053       | 3  |
| 9  | 1473.683112 | 737.345194      | 1456.656563    | 728.831920       | 1455.672547    | 728.339912       | F    | 322.187366  | 161.597321      | 305.160817     | 153.084047       |                |                  | 2  |
| 10 |             |                 |                |                  |                |                  | R    | 175.118952  | 88.063114       | 158.092403     | 79.549839        |                |                  | 1  |

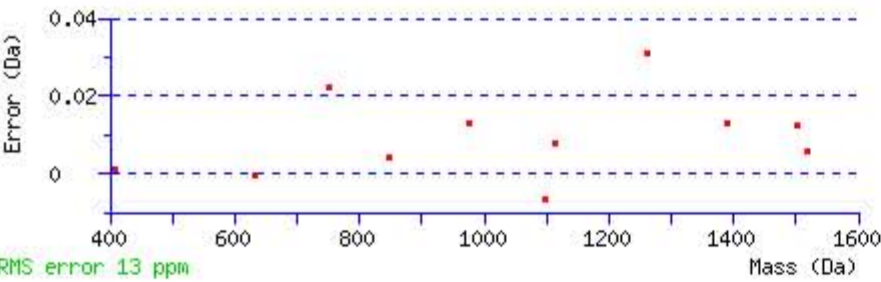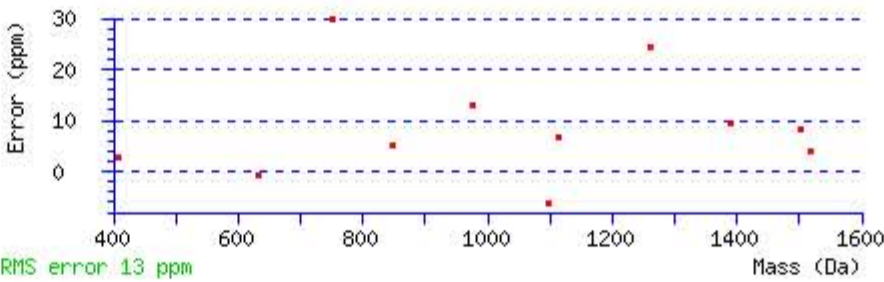

NCBI BLAST search of [KEEFHEQSFR](#)  
(Parameters: blastp, nr protein database, expect=20000, no filter, PAM30)  
Other BLAST [web gateways](#)

All matches to this query

| Score | Mr(calc):   | Delta     | Sequence                        |
|-------|-------------|-----------|---------------------------------|
| 47.8  | 1646.787491 | 0.006361  | <a href="#">KEEFHEQSFR</a>      |
| 6.0   | 1646.818497 | -0.024645 | <a href="#">QLDDAKEGEMALLSK</a> |
| 4.5   | 1646.812469 | -0.018617 | <a href="#">QEERLGRGGLDDFR</a>  |

MATRIX

SCIENCE

Mascot Search Results

Peptide View

MS/MS Fragmentation of **GQCLITQSPPYR**  
Found in **HABP2\_HUMAN**, Hyaluronan-binding protein 2 OS=Homo sapiens GN=HABP2 PE=1 SV=1

Match to Query 41995: 1892.941872 from(631.987900,3+) rtinseconds(2087) index(50888)  
Title: Locus:1.1.1.1964.5 File:"2013-07-02 CLN FXIII 180 min 2nd F 4.wiff"  
Data file C:\Program Files (x86)\Matrix Science\Mascot Daemon\mgf\8 FXIII 180 min 2nd\mascot\_daemon\_merge.mgf

Click mouse within plot area to zoom in by factor of two about that point  
Or, 

Plot from

100

 to 

1400

 Da 

Full range

  
Label all possible matches ☐ Label matches used for scoring ☒

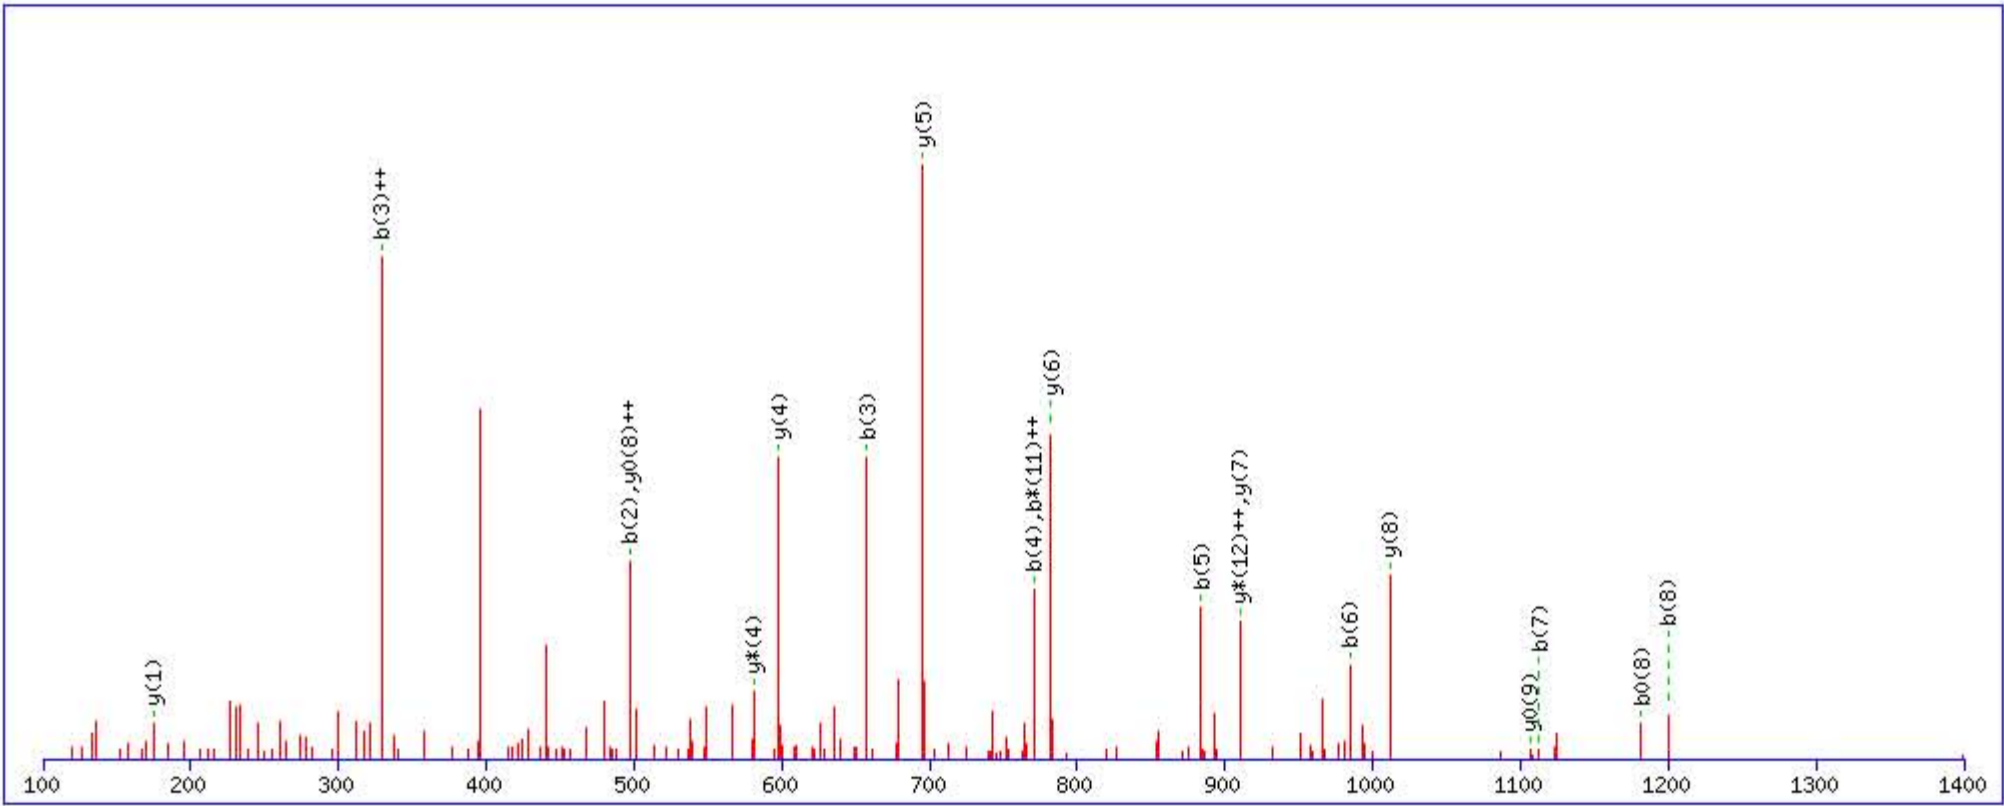

Monoisotopic mass of neutral peptide Mr(calc): 1892.927704  
Fixed modifications: Carbamidomethyl (C) (apply to specified residues or termini only)  
Variable modifications:  
Q2 : Biotin:Thermo-21345 (Q)  
Ions Score: 52 Expect: 0.00015  
Matches : 20/122 fragment ions using 23 most intense peaks [\(help\)](#)

| #  | b           | b <sup>++</sup> | b <sup>*</sup> | b <sup>+++</sup> | b <sup>0</sup> | b <sup>0++</sup> | Seq. | y           | y <sup>++</sup> | y <sup>*</sup> | y <sup>+++</sup> | y <sup>0</sup> | y <sup>0++</sup> | #  |
|----|-------------|-----------------|----------------|------------------|----------------|------------------|------|-------------|-----------------|----------------|------------------|----------------|------------------|----|
| 1  | 58.028740   | 29.518008       |                |                  |                |                  | G    |             |                 |                |                  |                |                  | 13 |
| 2  | 497.254066  | 249.130671      | 480.227517     | 240.617397       |                |                  | Q    | 1836.913526 | 918.960401      | 1819.886977    | 910.447127       | 1818.902961    | 909.955119       | 12 |
| 3  | 657.284715  | 329.145996      | 640.258166     | 320.632721       |                |                  | C    | 1397.688200 | 699.347738      | 1380.661651    | 690.834464       | 1379.677635    | 690.342456       | 11 |
| 4  | 770.368779  | 385.688028      | 753.342230     | 377.174753       |                |                  | L    | 1237.657551 | 619.332414      | 1220.631002    | 610.819139       | 1219.646986    | 610.327131       | 10 |
| 5  | 883.452843  | 442.230060      | 866.426294     | 433.716785       |                |                  | I    | 1124.573487 | 562.790382      | 1107.546938    | 554.277107       | 1106.562922    | 553.785099       | 9  |
| 6  | 984.500522  | 492.753899      | 967.473973     | 484.240625       | 966.489957     | 483.748617       | T    | 1011.489423 | 506.248350      | 994.462874     | 497.735075       | 993.478858     | 497.243067       | 8  |
| 7  | 1112.559100 | 556.783188      | 1095.532551    | 548.269914       | 1094.548535    | 547.777906       | Q    | 910.441744  | 455.724510      | 893.415195     | 447.211236       | 892.431179     | 446.719228       | 7  |
| 8  | 1199.591128 | 600.299202      | 1182.564579    | 591.785928       | 1181.580563    | 591.293920       | S    | 782.383166  | 391.695221      | 765.356617     | 383.181947       | 764.372601     | 382.689939       | 6  |
| 9  | 1296.643892 | 648.825584      | 1279.617343    | 640.312310       | 1278.633327    | 639.820302       | P    | 695.351138  | 348.179207      | 678.324589     | 339.665933       |                |                  | 5  |
| 10 | 1393.696656 | 697.351966      | 1376.670107    | 688.838692       | 1375.686091    | 688.346684       | P    | 598.298374  | 299.652825      | 581.271825     | 291.139551       |                |                  | 4  |
| 11 | 1556.759985 | 778.883631      | 1539.733436    | 770.370356       | 1538.749420    | 769.878348       | Y    | 501.245610  | 251.126443      | 484.219061     | 242.613169       |                |                  | 3  |
| 12 | 1719.823314 | 860.415295      | 1702.796765    | 851.902021       | 1701.812749    | 851.410013       | Y    | 338.182281  | 169.594778      | 321.155732     | 161.081504       |                |                  | 2  |
| 13 |             |                 |                |                  |                |                  | R    | 175.118952  | 88.063114       | 158.092403     | 79.549839        |                |                  | 1  |

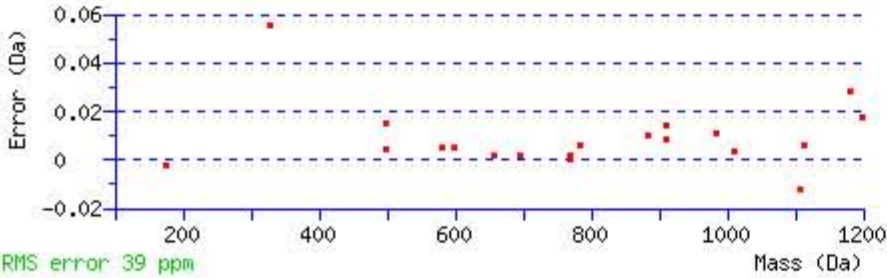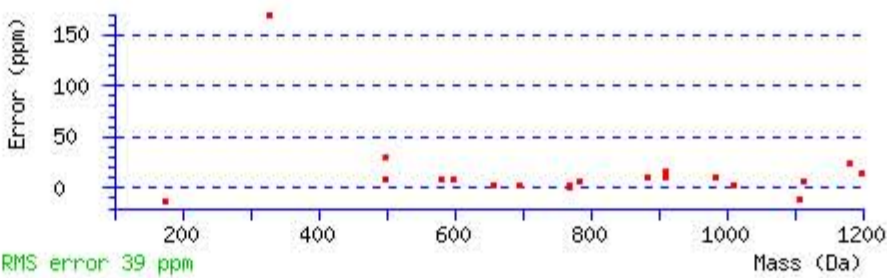

NCBI BLAST search of [GQCLITQSPPYR](#)  
(Parameters: blastp, nr protein database, expect=20000, no filter, PAM30)  
Other BLAST [web gateways](#)

All matches to this query

| Score | Mr(calc):   | Delta    | Sequence                     |
|-------|-------------|----------|------------------------------|
| 51.8  | 1892.927704 | 0.014168 | <a href="#">GQCLITQSPPYR</a> |
| 12.4  | 1892.927704 | 0.014168 | <a href="#">GQCLITQSPPYR</a> |

MATRIX

SCIENCE

Mascot Search Results

Peptide View

MS/MS Fragmentation of **WLQGSQELPR**  
Found in **IGHA1\_HUMAN**, Ig alpha-1 chain C region OS=Homo sapiens GN=IGHA1 PE=1 SV=2

Match to Query 31932: 1523.804548 from(762.909550,2+) rtinseconds(2070) index(34688)  
Title: Locus:1.1.1.829.11 File:"2013-07-02 CLN FXIII 180 min 2nd F 3.wiff"  
Data file C:\Program Files (x86)\Matrix Science\Mascot Daemon\mgf\8 FXIII 180 min 2nd\mascot\_daemon\_merge.mgf

Click mouse within plot area to zoom in by factor of two about that point  
Or, 

Plot from

100

 to 

1400

 Da 

Full range

  
Label all possible matches ☐ Label matches used for scoring ☒

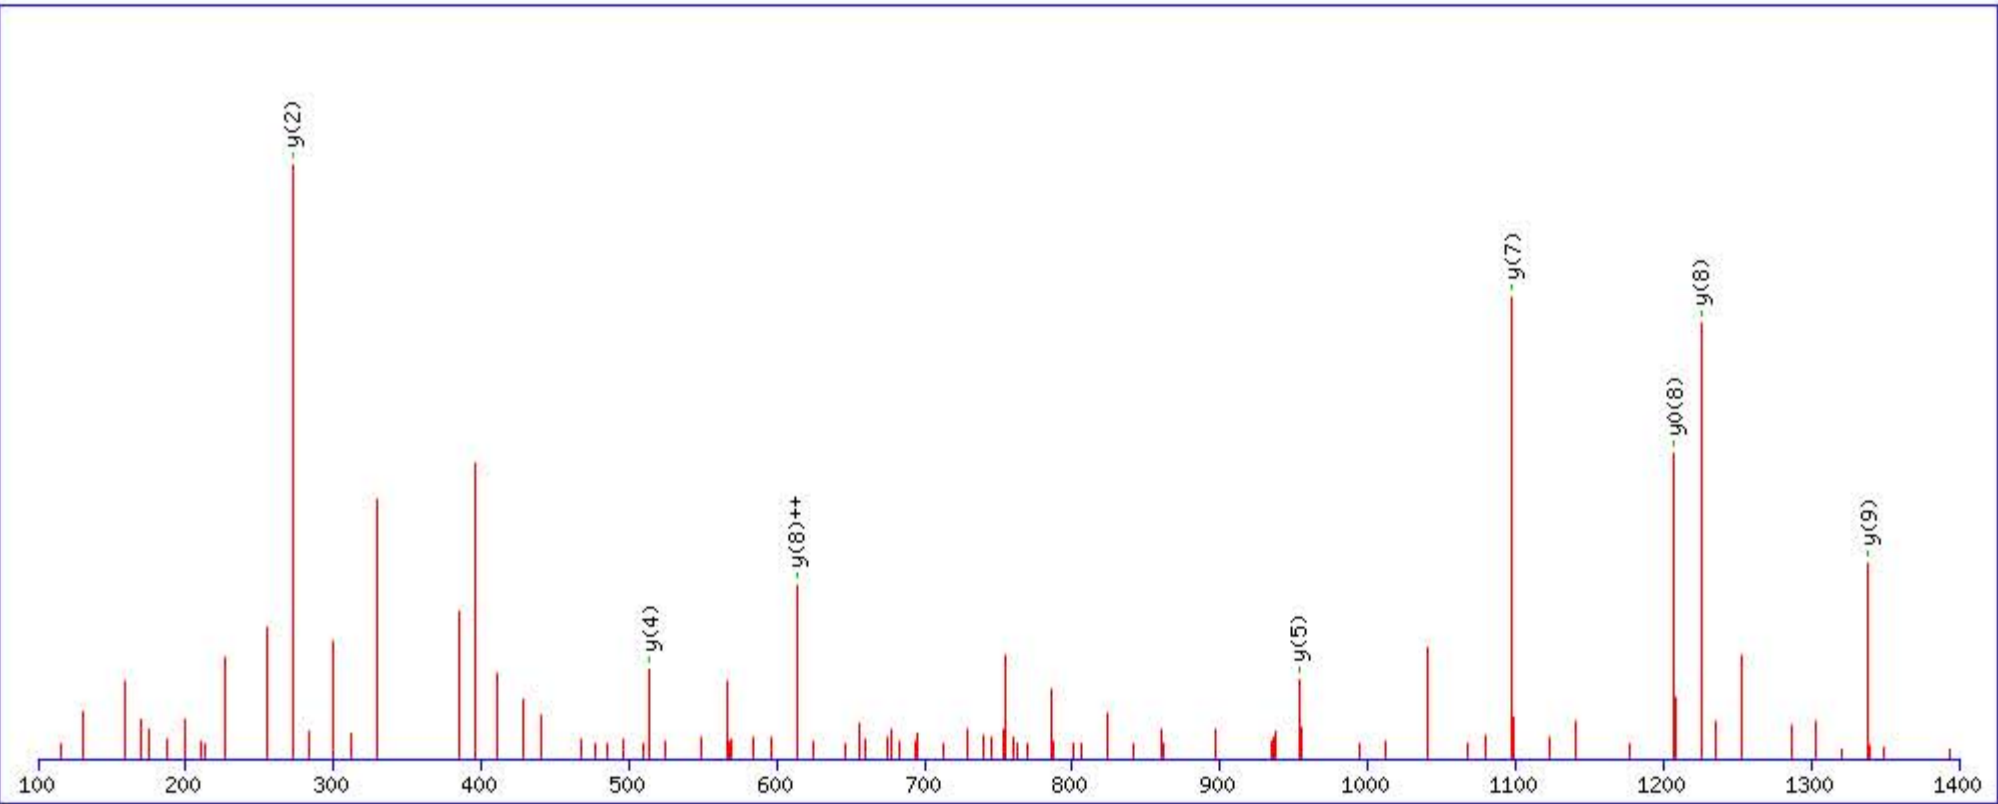

Monoisotopic mass of neutral peptide Mr(calc): 1523.791855  
Fixed modifications: Carbamidomethyl (C) (apply to specified residues or termini only)  
Variable modifications:  
Q6 : Biotin:Thermo-21345 (Q)  
Ions Score: 42 Expect: 0.0015  
Matches : 8/90 fragment ions using 13 most intense peaks [\(help\)](#)

| #  | b           | b <sup>++</sup> | b <sup>*</sup> | b <sup>+++</sup> | b <sup>0</sup> | b <sup>0++</sup> | Seq. | y           | y <sup>++</sup> | y <sup>*</sup> | y <sup>+++</sup> | y <sup>0</sup> | y <sup>0++</sup> | #  |
|----|-------------|-----------------|----------------|------------------|----------------|------------------|------|-------------|-----------------|----------------|------------------|----------------|------------------|----|
| 1  | 187.086589  | 94.046932       |                |                  |                |                  | W    |             |                 |                |                  |                |                  | 10 |
| 2  | 300.170653  | 150.588965      |                |                  |                |                  | L    | 1338.719833 | 669.863554      | 1321.693284    | 661.350280       | 1320.709268    | 660.858272       | 9  |
| 3  | 428.229231  | 214.618254      | 411.202682     | 206.104979       |                |                  | Q    | 1225.635769 | 613.321522      | 1208.609220    | 604.808248       | 1207.625204    | 604.316240       | 8  |
| 4  | 485.250695  | 243.128986      | 468.224146     | 234.615711       |                |                  | G    | 1097.577191 | 549.292233      | 1080.550642    | 540.778959       | 1079.566626    | 540.286951       | 7  |
| 5  | 572.282723  | 286.645000      | 555.256174     | 278.131725       | 554.272158     | 277.639717       | S    | 1040.555727 | 520.781501      | 1023.529178    | 512.268227       | 1022.545162    | 511.776219       | 6  |
| 6  | 1011.508049 | 506.257663      | 994.481500     | 497.744388       | 993.497484     | 497.252380       | Q    | 953.523699  | 477.265487      | 936.497150     | 468.752213       | 935.513134     | 468.260205       | 5  |
| 7  | 1140.550642 | 570.778959      | 1123.524093    | 562.265685       | 1122.540077    | 561.773676       | E    | 514.298373  | 257.652824      | 497.271824     | 249.139550       | 496.287808     | 248.647542       | 4  |
| 8  | 1253.634706 | 627.320991      | 1236.608157    | 618.807716       | 1235.624141    | 618.315708       | L    | 385.255780  | 193.131528      | 368.229231     | 184.618253       |                |                  | 3  |
| 9  | 1350.687470 | 675.847373      | 1333.660921    | 667.334098       | 1332.676905    | 666.842090       | P    | 272.171716  | 136.589496      | 255.145167     | 128.076221       |                |                  | 2  |
| 10 |             |                 |                |                  |                |                  | R    | 175.118952  | 88.063114       | 158.092403     | 79.549839        |                |                  | 1  |

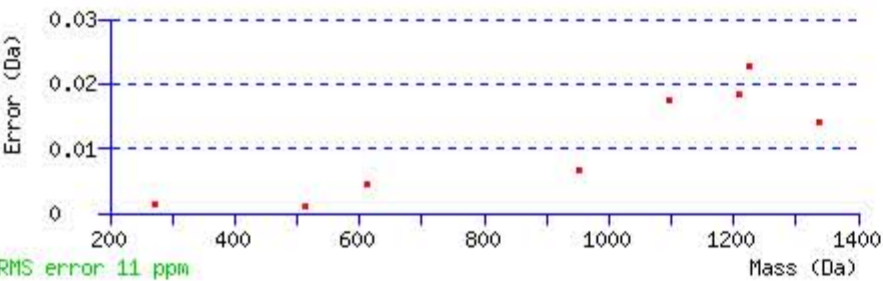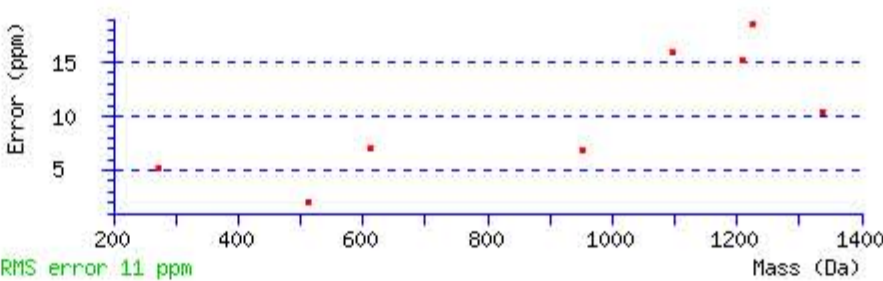

NCBI BLAST search of [WLQGSQELPR](#)  
(Parameters: blastp, nr protein database, expect=20000, no filter, PAM30)  
Other BLAST [web gateways](#)

All matches to this query

| Score | Mr(calc):   | Delta     | Sequence                        |
|-------|-------------|-----------|---------------------------------|
| 42.2  | 1523.791855 | 0.012693  | <a href="#">WLQGSQELPR</a>      |
| 26.5  | 1523.791855 | 0.012693  | <a href="#">WLQGSQELPR</a>      |
| 21.8  | 1523.816833 | -0.012285 | <a href="#">KGLGEGVPSSQRGPR</a> |
| 6.9   | 1523.824219 | -0.019671 | <a href="#">SVQIRTEAGPR</a>     |
| 5.0   | 1523.812988 | -0.008440 | <a href="#">EGQGIKTDIPR</a>     |
| 4.4   | 1523.813644 | -0.009096 | <a href="#">WIPTSNPLPQPFK</a>   |
| 0.9   | 1523.784470 | 0.020078  | <a href="#">SVLENHHISSVFR</a>   |
| 0.2   | 1523.801743 | 0.002805  | <a href="#">ASLDMKLIFLDSR</a>   |

M

A

T

R

I

X

S

C

I

E

N

C

E

Mascot Search Results

Peptide View

MS/MS Fragmentation of **QEPSQGTTTFAVTSILR**  
Found in **IGHA1\_HUMAN**, Ig alpha-1 chain C region OS=Homo sapiens GN=IGHA1 PE=1 SV=2

Match to Query 47325: 2146.129302 from(716.383710,3+) rtinseconds(2492) index(8262)  
Title: Locus:1.1.1.2145.14 File:"2013-07-02 CLN FXIII 180 min 2nd F 1.wiff"  
Data file C:\Program Files (x86)\Matrix Science\Mascot Daemon\mgf\8 FXIII 180 min 2nd\mascot\_daemon\_merge.mgf

Click mouse within plot area to zoom in by factor of two about that point  
Or,   to  Da   
Label all possible matches ☐ Label matches used for scoring ☒

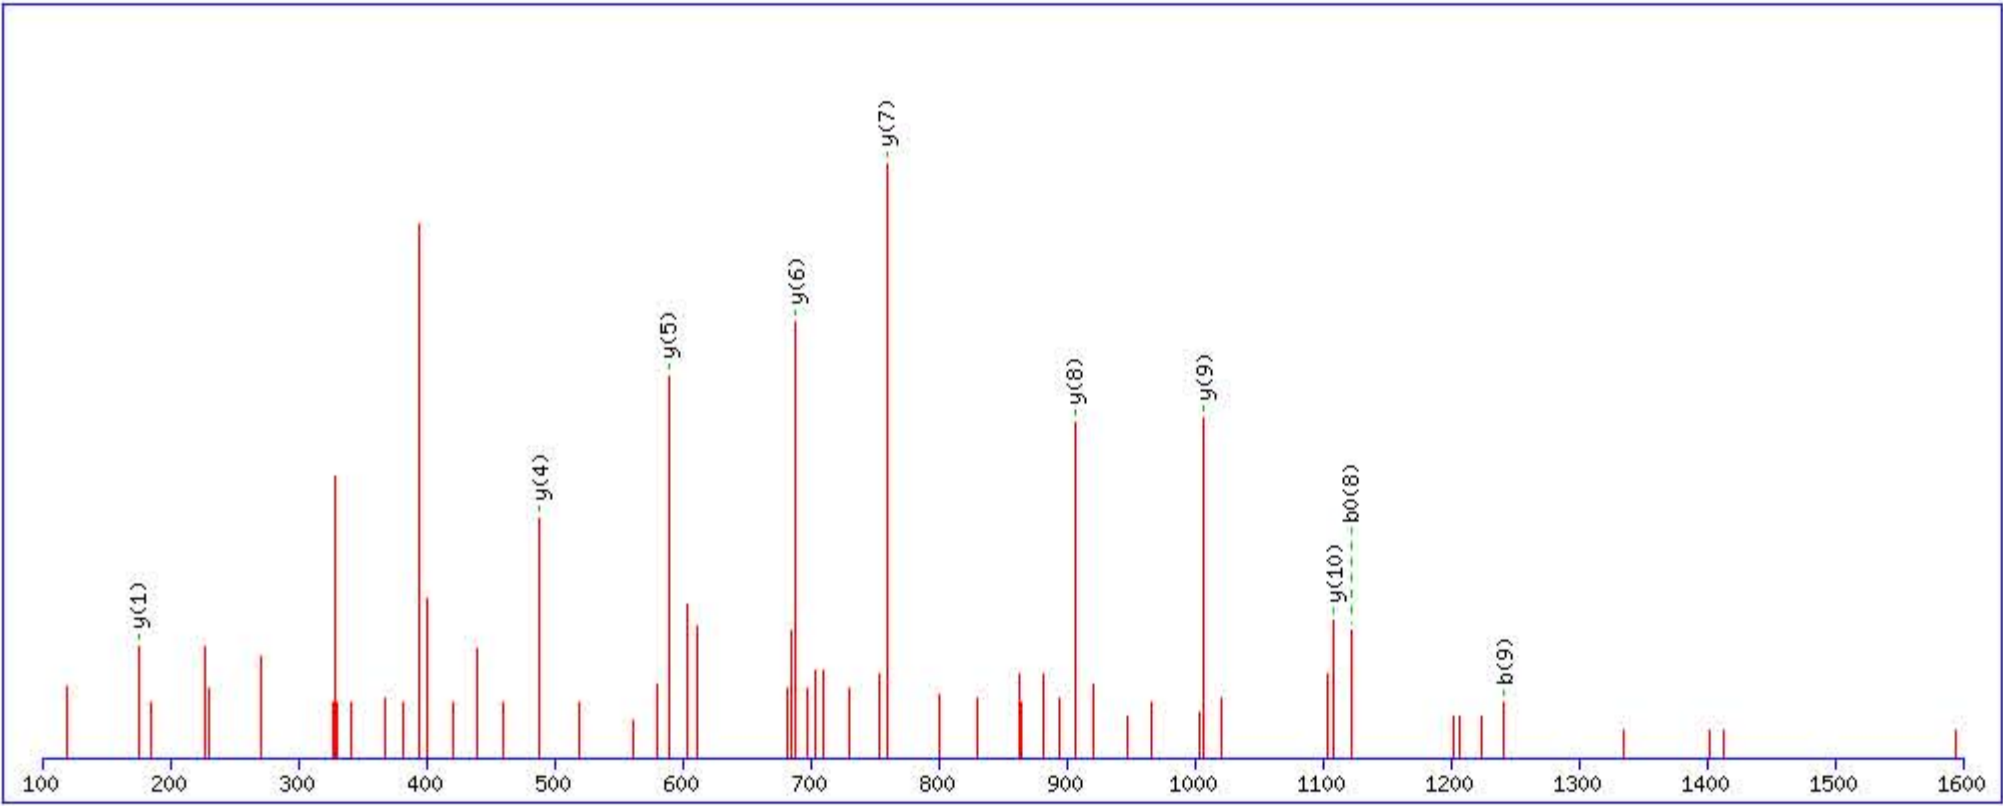

Monoisotopic mass of neutral peptide Mr(calc): 2146.109253  
Fixed modifications: Carbamidomethyl (C) (apply to specified residues or termini only)  
Variable modifications:  
Q5 : Biotin:Thermo-21345 (Q)  
Ions Score: 58 Expect: 1.5e-005  
Matches : 10/184 fragment ions using 14 most intense peaks ([help](#))

| #  | b           | b <sup>++</sup> | b <sup>*</sup> | b <sup>+++</sup> | b <sup>0</sup> | b <sup>0++</sup> | Seq. | y           | y <sup>++</sup> | y <sup>*</sup> | y <sup>+++</sup> | y <sup>0</sup> | y <sup>0++</sup> | #  |
|----|-------------|-----------------|----------------|------------------|----------------|------------------|------|-------------|-----------------|----------------|------------------|----------------|------------------|----|
| 1  | 129.065854  | 65.036565       | 112.039305     | 56.523291        |                |                  | Q    |             |                 |                |                  |                |                  | 17 |
| 2  | 258.108447  | 129.557862      | 241.081898     | 121.044587       | 240.097882     | 120.552579       | E    | 2019.057941 | 1010.032609     | 2002.031392    | 1001.519334      | 2001.047376    | 1001.027326      | 16 |
| 3  | 355.161211  | 178.084244      | 338.134662     | 169.570969       | 337.150646     | 169.078961       | P    | 1890.015348 | 945.511312      | 1872.988799    | 936.998038       | 1872.004783    | 936.506030       | 15 |
| 4  | 442.193239  | 221.600258      | 425.166690     | 213.086983       | 424.182674     | 212.594975       | S    | 1792.962584 | 896.984930      | 1775.936035    | 888.471656       | 1774.952019    | 887.979648       | 14 |
| 5  | 881.418565  | 441.212921      | 864.392016     | 432.699646       | 863.408000     | 432.207638       | Q    | 1705.930556 | 853.468916      | 1688.904007    | 844.955642       | 1687.919991    | 844.463634       | 13 |
| 6  | 938.440029  | 469.723653      | 921.413480     | 461.210378       | 920.429464     | 460.718370       | G    | 1266.705230 | 633.856253      | 1249.678681    | 625.342979       | 1248.694665    | 624.850971       | 12 |
| 7  | 1039.487708 | 520.247492      | 1022.461159    | 511.734218       | 1021.477143    | 511.242210       | T    | 1209.683766 | 605.345521      | 1192.657217    | 596.832247       | 1191.673201    | 596.340239       | 11 |
| 8  | 1140.535387 | 570.771332      | 1123.508838    | 562.258057       | 1122.524822    | 561.766049       | T    | 1108.636087 | 554.821682      | 1091.609538    | 546.308407       | 1090.625522    | 545.816399       | 10 |
| 9  | 1241.583066 | 621.295171      | 1224.556517    | 612.781897       | 1223.572501    | 612.289889       | T    | 1007.588408 | 504.297842      | 990.561859     | 495.784568       | 989.577843     | 495.292560       | 9  |
| 10 | 1388.651480 | 694.829378      | 1371.624931    | 686.316104       | 1370.640915    | 685.824096       | F    | 906.540729  | 453.774003      | 889.514180     | 445.260728       | 888.530164     | 444.768720       | 8  |
| 11 | 1459.688594 | 730.347935      | 1442.662045    | 721.834661       | 1441.678029    | 721.342653       | A    | 759.472315  | 380.239796      | 742.445766     | 371.726521       | 741.461750     | 371.234513       | 7  |
| 12 | 1558.757008 | 779.882142      | 1541.730459    | 771.368868       | 1540.746443    | 770.876860       | V    | 688.435201  | 344.721239      | 671.408652     | 336.207964       | 670.424636     | 335.715956       | 6  |
| 13 | 1659.804687 | 830.405982      | 1642.778138    | 821.892707       | 1641.794122    | 821.400699       | T    | 589.366787  | 295.187032      | 572.340238     | 286.673757       | 571.356222     | 286.181749       | 5  |
| 14 | 1746.836715 | 873.921996      | 1729.810166    | 865.408721       | 1728.826150    | 864.916713       | S    | 488.319108  | 244.663192      | 471.292559     | 236.149918       | 470.308543     | 235.657910       | 4  |
| 15 | 1859.920779 | 930.464028      | 1842.894230    | 921.950753       | 1841.910214    | 921.458745       | I    | 401.287080  | 201.147178      | 384.260531     | 192.633903       |                |                  | 3  |
| 16 | 1973.004843 | 987.006060      | 1955.978294    | 978.492785       | 1954.994278    | 978.000777       | L    | 288.203016  | 144.605146      | 271.176467     | 136.091872       |                |                  | 2  |
| 17 |             |                 |                |                  |                |                  | R    | 175.118952  | 88.063114       | 158.092403     | 79.549840        |                |                  | 1  |

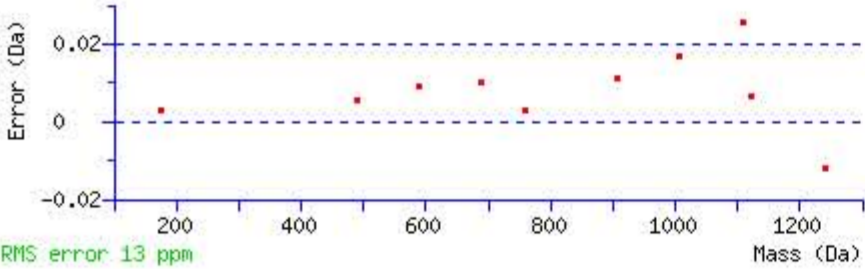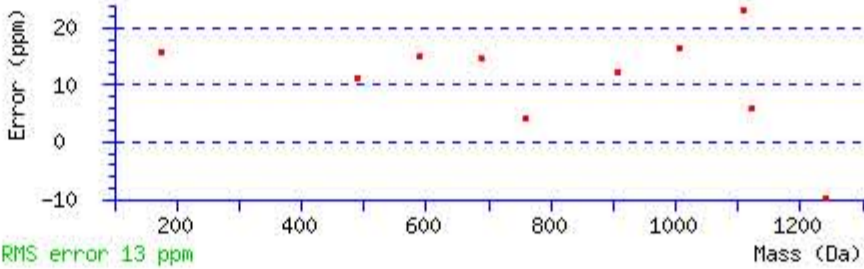

NCBI BLAST search of [QEPSQGTTTFAVTSILR](#)  
(Parameters: blastp, nr protein database, expect=20000, no filter, PAM30)  
Other BLAST [web gateways](#)

All matches to this query

| Score | Mr(calc):   | Delta     | Sequence                            |
|-------|-------------|-----------|-------------------------------------|
| 57.5  | 2146.109253 | 0.020049  | <a href="#">QEPSQGTTTFAVTSILR</a>   |
| 57.5  | 2146.109253 | 0.020049  | <a href="#">QEPSQGTTTFAVTSILR</a>   |
| 5.7   | 2146.125351 | 0.003951  | <a href="#">LQKMGPFPQPMNIFLR</a>    |
| 3.6   | 2146.121124 | 0.008178  | <a href="#">DPFAHLPKSTFVLDEFKR</a>  |
| 1.1   | 2146.142929 | -0.013627 | <a href="#">TKRPAPARPTMPPQVSGSR</a> |
| 0.1   | 2146.131683 | -0.002381 | <a href="#">FCLGLLSNVNRNAAVELTR</a> |

MATRIX

SCIENCE

Mascot Search Results

Peptide View

MS/MS Fragmentation of **QEPSQGTTTFAVTSILR**  
Found in **IGHA1\_HUMAN**, Ig alpha-1 chain C region OS=Homo sapiens GN=IGHA1 PE=1 SV=2

Match to Query 47326: 2146.136562 from(716.386130,3+) rtinseconds(2507) index(23201)  
Title: Locus:1.1.1.3255.12 File:"2013-07-02 CLN FXIII 180 min 2nd F 2.wiff"  
Data file C:\Program Files (x86)\Matrix Science\Mascot Daemon\mgf\8 FXIII 180 min 2nd\mascot\_daemon\_merge.mgf

Click mouse within plot area to zoom in by factor of two about that point  
Or, 

Plot from

100

 to 

1600

 Da 

Full range

  
Label all possible matches ☐ Label matches used for scoring ☒

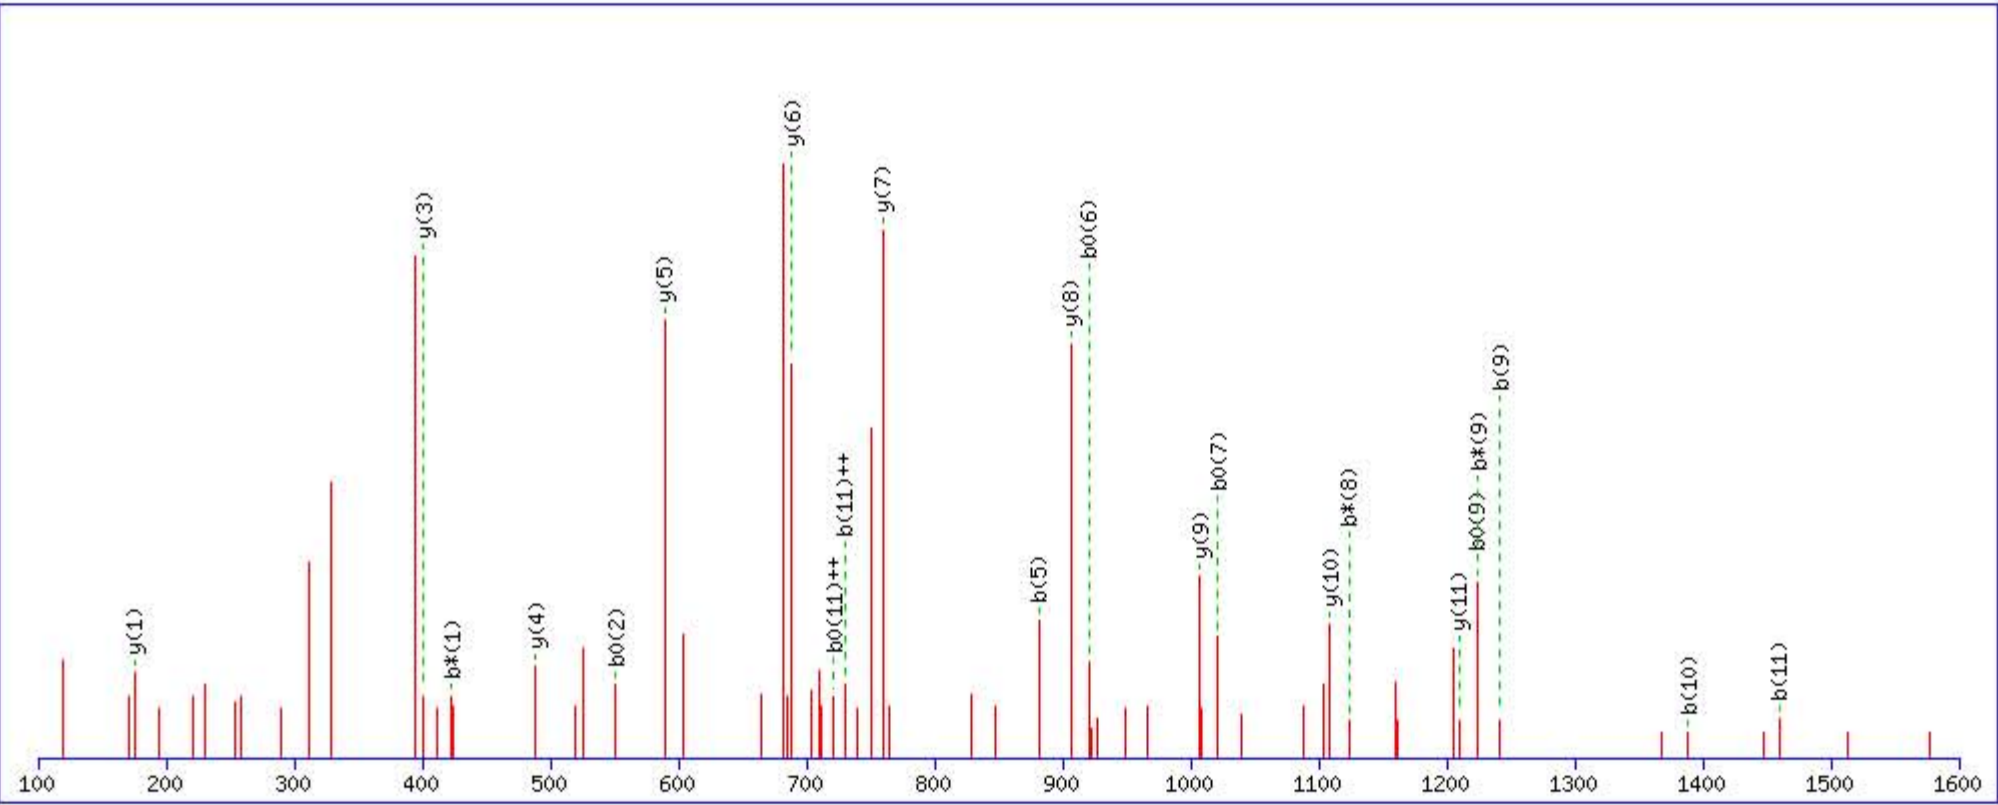

Monoisotopic mass of neutral peptide Mr(calc): 2146.109253  
Fixed modifications: Carbamidomethyl (C) (apply to specified residues or termini only)  
Variable modifications:  
Q1 : Biotin:Thermo-21345 (Q)  
Ions Score: 43 Expect: 0.00043  
Matches : 23/184 fragment ions using 52 most intense peaks [\(help\)](#)

| #  | b           | b <sup>++</sup> | b <sup>*</sup> | b <sup>++</sup> * | b <sup>0</sup> | b <sup>0++</sup> | Seq. | y           | y <sup>++</sup> | y <sup>*</sup> | y <sup>++</sup> * | y <sup>0</sup> | y <sup>0++</sup> | #  |
|----|-------------|-----------------|----------------|-------------------|----------------|------------------|------|-------------|-----------------|----------------|-------------------|----------------|------------------|----|
| 1  | 440.232602  | 220.619939      | 423.206053     | 212.106664        |                |                  | Q    |             |                 |                |                   |                |                  | 17 |
| 2  | 569.275195  | 285.141236      | 552.248646     | 276.627961        | 551.264630     | 276.135953       | E    | 1707.891193 | 854.449235      | 1690.864644    | 845.935960        | 1689.880628    | 845.443952       | 16 |
| 3  | 666.327959  | 333.667618      | 649.301410     | 325.154343        | 648.317394     | 324.662335       | P    | 1578.848600 | 789.927938      | 1561.822051    | 781.414664        | 1560.838035    | 780.922656       | 15 |
| 4  | 753.359987  | 377.183632      | 736.333438     | 368.670357        | 735.349422     | 368.178349       | S    | 1481.795836 | 741.401556      | 1464.769287    | 732.888282        | 1463.785271    | 732.396274       | 14 |
| 5  | 881.418565  | 441.212921      | 864.392016     | 432.699646        | 863.408000     | 432.207638       | Q    | 1394.763808 | 697.885542      | 1377.737259    | 689.372268        | 1376.753243    | 688.880260       | 13 |
| 6  | 938.440029  | 469.723653      | 921.413480     | 461.210378        | 920.429464     | 460.718370       | G    | 1266.705230 | 633.856253      | 1249.678681    | 625.342979        | 1248.694665    | 624.850971       | 12 |
| 7  | 1039.487708 | 520.247492      | 1022.461159    | 511.734218        | 1021.477143    | 511.242210       | T    | 1209.683766 | 605.345521      | 1192.657217    | 596.832247        | 1191.673201    | 596.340239       | 11 |
| 8  | 1140.535387 | 570.771332      | 1123.508838    | 562.258057        | 1122.524822    | 561.766049       | T    | 1108.636087 | 554.821682      | 1091.609538    | 546.308407        | 1090.625522    | 545.816399       | 10 |
| 9  | 1241.583066 | 621.295171      | 1224.556517    | 612.781897        | 1223.572501    | 612.289889       | T    | 1007.588408 | 504.297842      | 990.561859     | 495.784568        | 989.577843     | 495.292560       | 9  |
| 10 | 1388.651480 | 694.829378      | 1371.624931    | 686.316104        | 1370.640915    | 685.824096       | F    | 906.540729  | 453.774003      | 889.514180     | 445.260728        | 888.530164     | 444.768720       | 8  |
| 11 | 1459.688594 | 730.347935      | 1442.662045    | 721.834661        | 1441.678029    | 721.342653       | A    | 759.472315  | 380.239796      | 742.445766     | 371.726521        | 741.461750     | 371.234513       | 7  |
| 12 | 1558.757008 | 779.882142      | 1541.730459    | 771.368868        | 1540.746443    | 770.876860       | V    | 688.435201  | 344.721239      | 671.408652     | 336.207964        | 670.424636     | 335.715956       | 6  |
| 13 | 1659.804687 | 830.405982      | 1642.778138    | 821.892707        | 1641.794122    | 821.400699       | T    | 589.366787  | 295.187032      | 572.340238     | 286.673757        | 571.356222     | 286.181749       | 5  |
| 14 | 1746.836715 | 873.921996      | 1729.810166    | 865.408721        | 1728.826150    | 864.916713       | S    | 488.319108  | 244.663192      | 471.292559     | 236.149918        | 470.308543     | 235.657910       | 4  |
| 15 | 1859.920779 | 930.464028      | 1842.894230    | 921.950753        | 1841.910214    | 921.458745       | I    | 401.287080  | 201.147178      | 384.260531     | 192.633903        |                |                  | 3  |
| 16 | 1973.004843 | 987.006060      | 1955.978294    | 978.492785        | 1954.994278    | 978.000777       | L    | 288.203016  | 144.605146      | 271.176467     | 136.091872        |                |                  | 2  |
| 17 |             |                 |                |                   |                |                  | R    | 175.118952  | 88.063114       | 158.092403     | 79.549840         |                |                  | 1  |

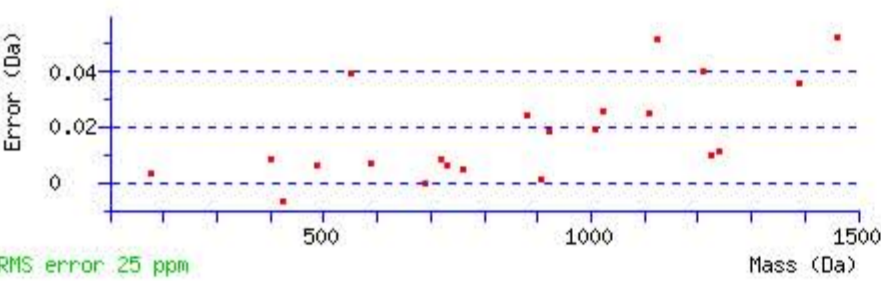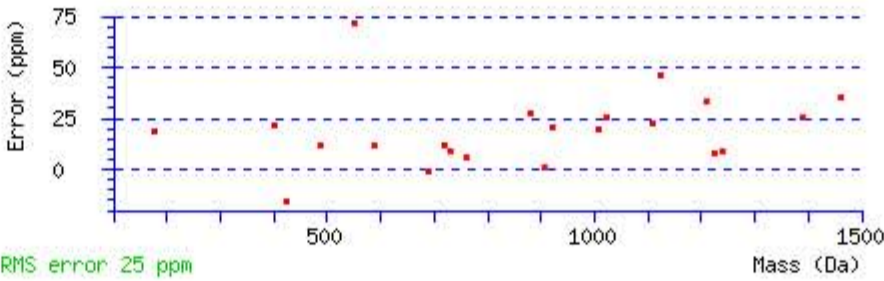

NCBI BLAST search of [QEPSQGTTTFAVTSILR](#)  
(Parameters: blastp, nr protein database, expect=20000, no filter, PAM30)  
Other BLAST [web gateways](#)

All matches to this query

| Score | Mr(calc):   | Delta     | Sequence                             |
|-------|-------------|-----------|--------------------------------------|
| 42.9  | 2146.109253 | 0.027309  | <a href="#">QEPSQGTTTFAVTSILR</a>    |
| 42.9  | 2146.109253 | 0.027309  | <a href="#">QEPSQGTTTFAVTSILR</a>    |
| 6.7   | 2146.142929 | -0.006367 | <a href="#">TKRPAPARPTMPPPQVSGSR</a> |
| 2.3   | 2146.164688 | -0.028126 | <a href="#">VQEDIILLRELHVNHYR</a>    |

M

A

T

R

I

X

S

C

I

E

N

C

E

Mascot Search Results

Peptide View

MS/MS Fragmentation of **KGDTFSCMVGHEALPLAFTQK**  
Found in **IGHA1\_HUMAN**, Ig alpha-1 chain C region OS=Homo sapiens GN=IGHA1 PE=1 SV=2

Match to Query 55880: 2647.317016 from(662.836530,4+) rtinseconds(2361) index(68505)  
Title: Locus:1.1.1.2097.18 File:"2013-07-02 CLN FXIII 180 min 2nd FT.wiff"  
Data file C:\Program Files (x86)\Matrix Science\Mascot Daemon\mgf\8 FXIII 180 min 2nd\mascot\_daemon\_merge.mgf

Click mouse within plot area to zoom in by factor of two about that point  
Or, 

Plot from

0

 to 

2800

 Da 

Full range

  
Label all possible matches ☐ Label matches used for scoring ☒

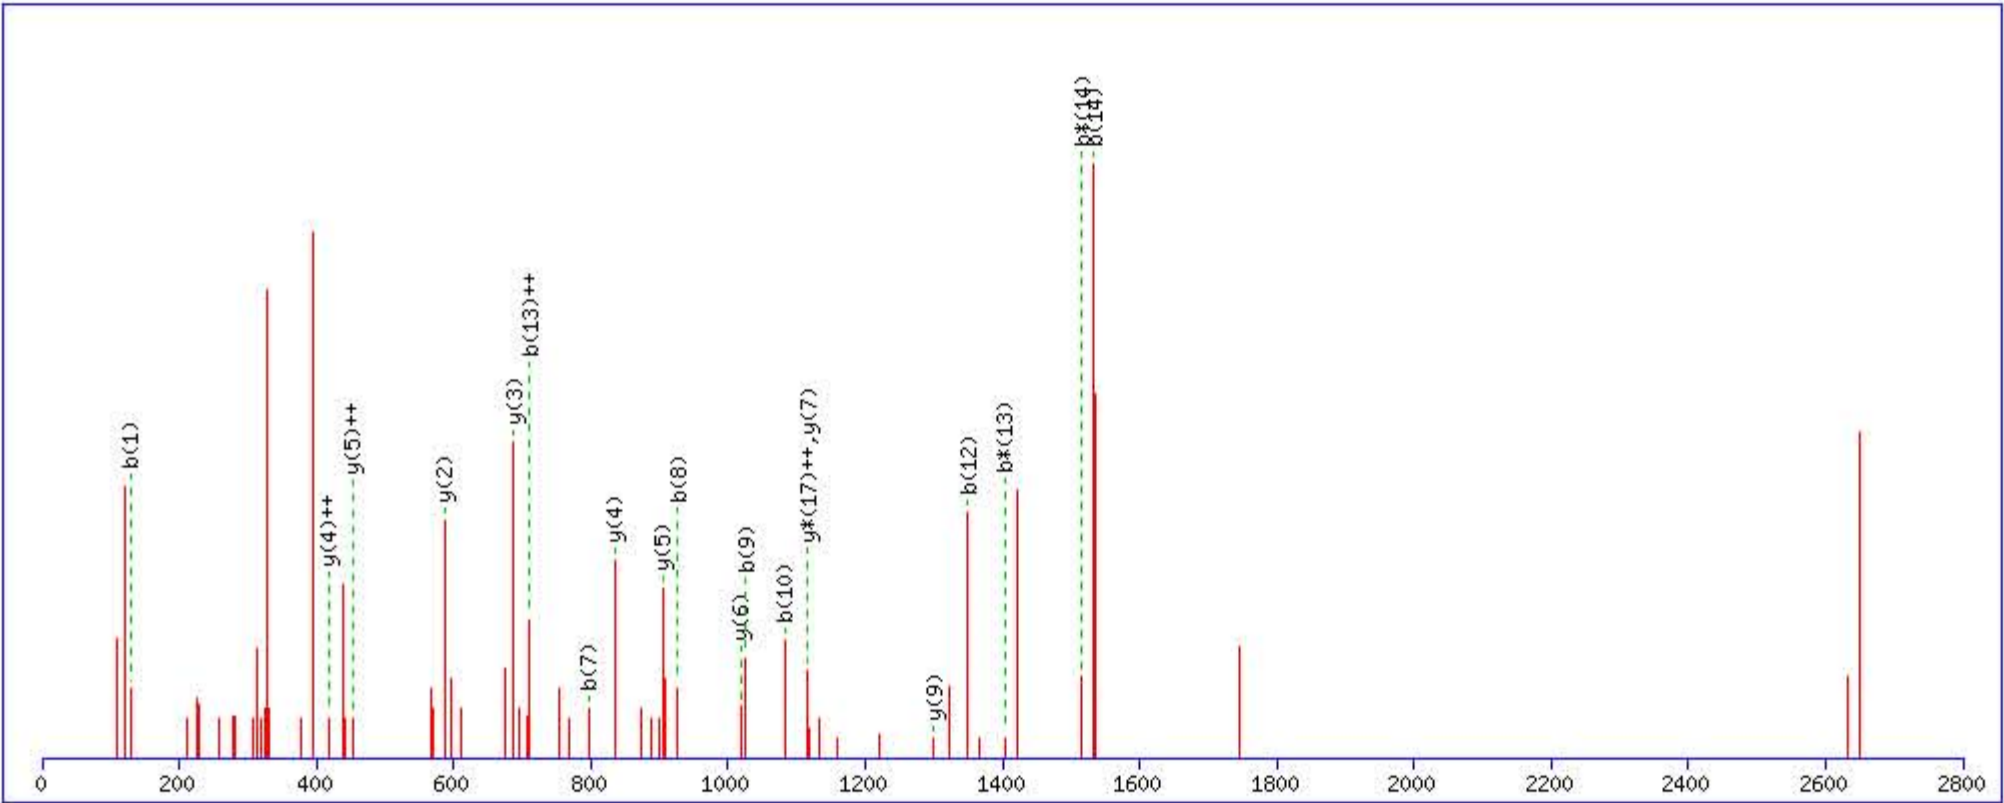

Monoisotopic mass of neutral peptide Mr(calc): 2647.296082  
Fixed modifications: Carbamidomethyl (C) (apply to specified residues or termini only)  
Variable modifications:  
Q20 : Biotin:Thermo-21345 (Q)  
Ions Score: 28 Expect: 0.0028  
Matches : 20/232 fragment ions using 52 most intense peaks [\(help\)](#)

| #  | b                  | b <sup>++</sup>   | b <sup>*</sup>     | b <sup>+++</sup> | b <sup>0</sup> | b <sup>0++</sup> | Seq.     | y                  | y <sup>++</sup>   | y <sup>*</sup> | y <sup>+++</sup>   | y <sup>0</sup> | y <sup>0++</sup> | #         |
|----|--------------------|-------------------|--------------------|------------------|----------------|------------------|----------|--------------------|-------------------|----------------|--------------------|----------------|------------------|-----------|
| 1  | <b>129.102239</b>  | 65.054757         | 112.075690         | 56.541483        |                |                  | <b>K</b> |                    |                   |                |                    |                |                  | <b>21</b> |
| 2  | 186.123703         | 93.565489         | 169.097154         | 85.052215        |                |                  | <b>G</b> | 2520.208388        | 1260.607832       | 2503.181839    | 1252.094557        | 2502.197823    | 1251.602549      | <b>20</b> |
| 3  | 301.150646         | 151.078961        | 284.124097         | 142.565687       | 283.140081     | 142.073679       | <b>D</b> | 2463.186924        | 1232.097100       | 2446.160375    | 1223.583825        | 2445.176359    | 1223.091817      | <b>19</b> |
| 4  | 402.198325         | 201.602801        | 385.171776         | 193.089526       | 384.187760     | 192.597518       | <b>T</b> | 2348.159981        | 1174.583628       | 2331.133432    | 1166.070354        | 2330.149416    | 1165.578346      | <b>18</b> |
| 5  | 549.266739         | 275.137008        | 532.240190         | 266.623733       | 531.256174     | 266.131725       | <b>F</b> | 2247.112302        | 1124.059789       | 2230.085753    | <b>1115.546514</b> | 2229.101737    | 1115.054506      | <b>17</b> |
| 6  | 636.298767         | 318.653022        | 619.272218         | 310.139747       | 618.288202     | 309.647739       | <b>S</b> | 2100.043888        | 1050.525582       | 2083.017339    | 1042.012307        | 2082.033323    | 1041.520299      | <b>16</b> |
| 7  | <b>796.329416</b>  | 398.668346        | 779.302867         | 390.155072       | 778.318851     | 389.663064       | <b>C</b> | 2013.011860        | 1007.009568       | 1995.985311    | 998.496294         | 1995.001295    | 998.004286       | <b>15</b> |
| 8  | <b>927.369901</b>  | 464.188589        | 910.343352         | 455.675314       | 909.359336     | 455.183306       | <b>M</b> | 1852.981211        | 926.994244        | 1835.954662    | 918.480969         | 1834.970646    | 917.988961       | <b>14</b> |
| 9  | <b>1026.438315</b> | 513.722796        | 1009.411766        | 505.209521       | 1008.427750    | 504.717513       | <b>V</b> | 1721.940726        | 861.474001        | 1704.914177    | 852.960727         | 1703.930161    | 852.468719       | <b>13</b> |
| 10 | <b>1083.459779</b> | 542.233528        | 1066.433230        | 533.720253       | 1065.449214    | 533.228245       | <b>G</b> | 1622.872312        | 811.939794        | 1605.845763    | 803.426520         | 1604.861747    | 802.934512       | <b>12</b> |
| 11 | 1220.518691        | 610.762984        | 1203.492142        | 602.249709       | 1202.508126    | 601.757701       | <b>H</b> | 1565.850848        | 783.429062        | 1548.824299    | 774.915788         | 1547.840283    | 774.423780       | <b>11</b> |
| 12 | <b>1349.561284</b> | 675.284280        | 1332.534735        | 666.771006       | 1331.550719    | 666.278998       | <b>E</b> | 1428.791936        | 714.899606        | 1411.765387    | 706.386332         | 1410.781371    | 705.894324       | <b>10</b> |
| 13 | 1420.598398        | <b>710.802837</b> | <b>1403.571849</b> | 702.289563       | 1402.587833    | 701.797555       | <b>A</b> | <b>1299.749343</b> | 650.378310        | 1282.722794    | 641.865035         | 1281.738778    | 641.373027       | <b>9</b>  |
| 14 | <b>1533.682462</b> | 767.344869        | <b>1516.655913</b> | 758.831595       | 1515.671897    | 758.339587       | <b>L</b> | 1228.712229        | 614.859753        | 1211.685680    | 606.346478         | 1210.701664    | 605.854470       | <b>8</b>  |
| 15 | 1630.735226        | 815.871251        | 1613.708677        | 807.357977       | 1612.724661    | 806.865969       | <b>P</b> | <b>1115.628165</b> | 558.317721        | 1098.601616    | 549.804446         | 1097.617600    | 549.312438       | <b>7</b>  |
| 16 | 1743.819290        | 872.413283        | 1726.792741        | 863.900009       | 1725.808725    | 863.408000       | <b>L</b> | <b>1018.575401</b> | 509.791339        | 1001.548852    | 501.278064         | 1000.564836    | 500.786056       | <b>6</b>  |
| 17 | 1814.856404        | 907.931840        | 1797.829855        | 899.418566       | 1796.845839    | 898.926557       | <b>A</b> | <b>905.491337</b>  | <b>453.249307</b> | 888.464788     | 444.736032         | 887.480772     | 444.244024       | <b>5</b>  |
| 18 | 1961.924818        | 981.466047        | 1944.898269        | 972.952773       | 1943.914253    | 972.460764       | <b>F</b> | <b>834.454223</b>  | <b>417.730750</b> | 817.427674     | 409.217475         | 816.443658     | 408.725467       | <b>4</b>  |
| 19 | 2062.972497        | 1031.989886       | 2045.945948        | 1023.476612      | 2044.961932    | 1022.984604      | <b>T</b> | <b>687.385809</b>  | 344.196543        | 670.359260     | 335.683268         | 669.375244     | 335.191260       | <b>3</b>  |
| 20 | 2502.197823        | 1251.602549       | 2485.171274        | 1243.089275      | 2484.187258    | 1242.597267      | <b>Q</b> | <b>586.338130</b>  | 293.672703        | 569.311581     | 285.159429         |                |                  | <b>2</b>  |
| 21 |                    |                   |                    |                  |                |                  | <b>K</b> | 147.112804         | 74.060040         | 130.086255     | 65.546765          |                |                  | <b>1</b>  |

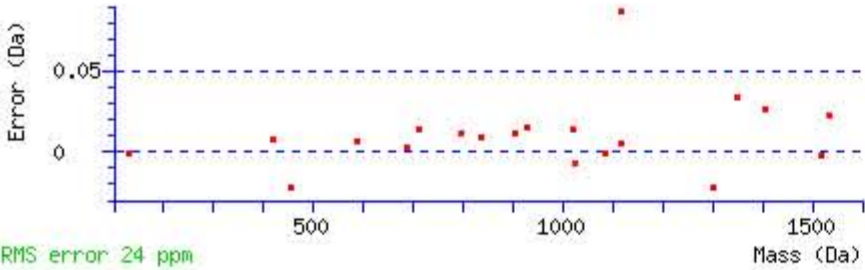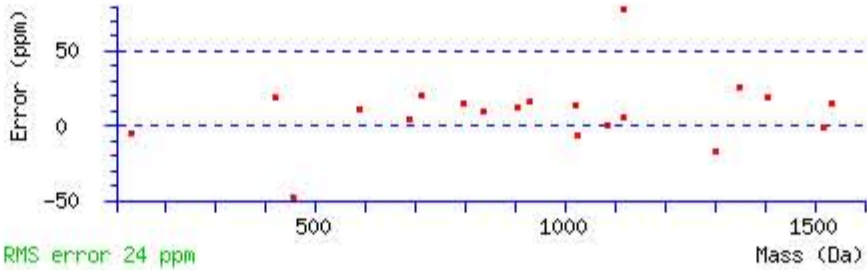

NCBI BLAST search of [KGDTFSCMVGHEALPLAFTQK](#)  
(Parameters: blastp, nr protein database, expect=20000, no filter, PAM30)  
Other BLAST [web gateways](#)

All matches to this query

| Score | Mr(calc):   | Delta    | Sequence                                |
|-------|-------------|----------|-----------------------------------------|
| 28.4  | 2647.296082 | 0.020934 | <a href="#">KGDTFSCMVGHEALPLAFTQK</a>   |
| 1.0   | 2647.279907 | 0.037109 | <a href="#">QMLRAADDFLEDLPLEETGAIER</a> |
| 0.1   | 2647.281662 | 0.035354 | <a href="#">AAVLACQACCMLAIFLSMLVSYR</a> |

MATRIX

SCIENCE

Mascot Search Results

Peptide View

MS/MS Fragmentation of **NFPPSQDASGDLYTTSSQLTLPATQCLAGK**  
Found in **IGHA1\_HUMAN**, Ig alpha-1 chain C region OS=Homo sapiens GN=IGHA1 PE=1 SV=2

Match to Query 65579: 3478.711096 from(870.685050,4+) rtinseconds(2579) index(8646)  
Title: Locus:1.1.1.2175.7 File:"2013-07-02 CLN FXIII 180 min 2nd F 1.wiff"  
Data file C:\Program Files (x86)\Matrix Science\Mascot Daemon\mgf\8 FXIII 180 min 2nd\mascot\_daemon\_merge.mgf

Click mouse within plot area to zoom in by factor of two about that point  
Or, 

Plot from

0

 to 

2800

 Da 

Full range

Label all possible matches ☐ Label matches used for scoring ☒

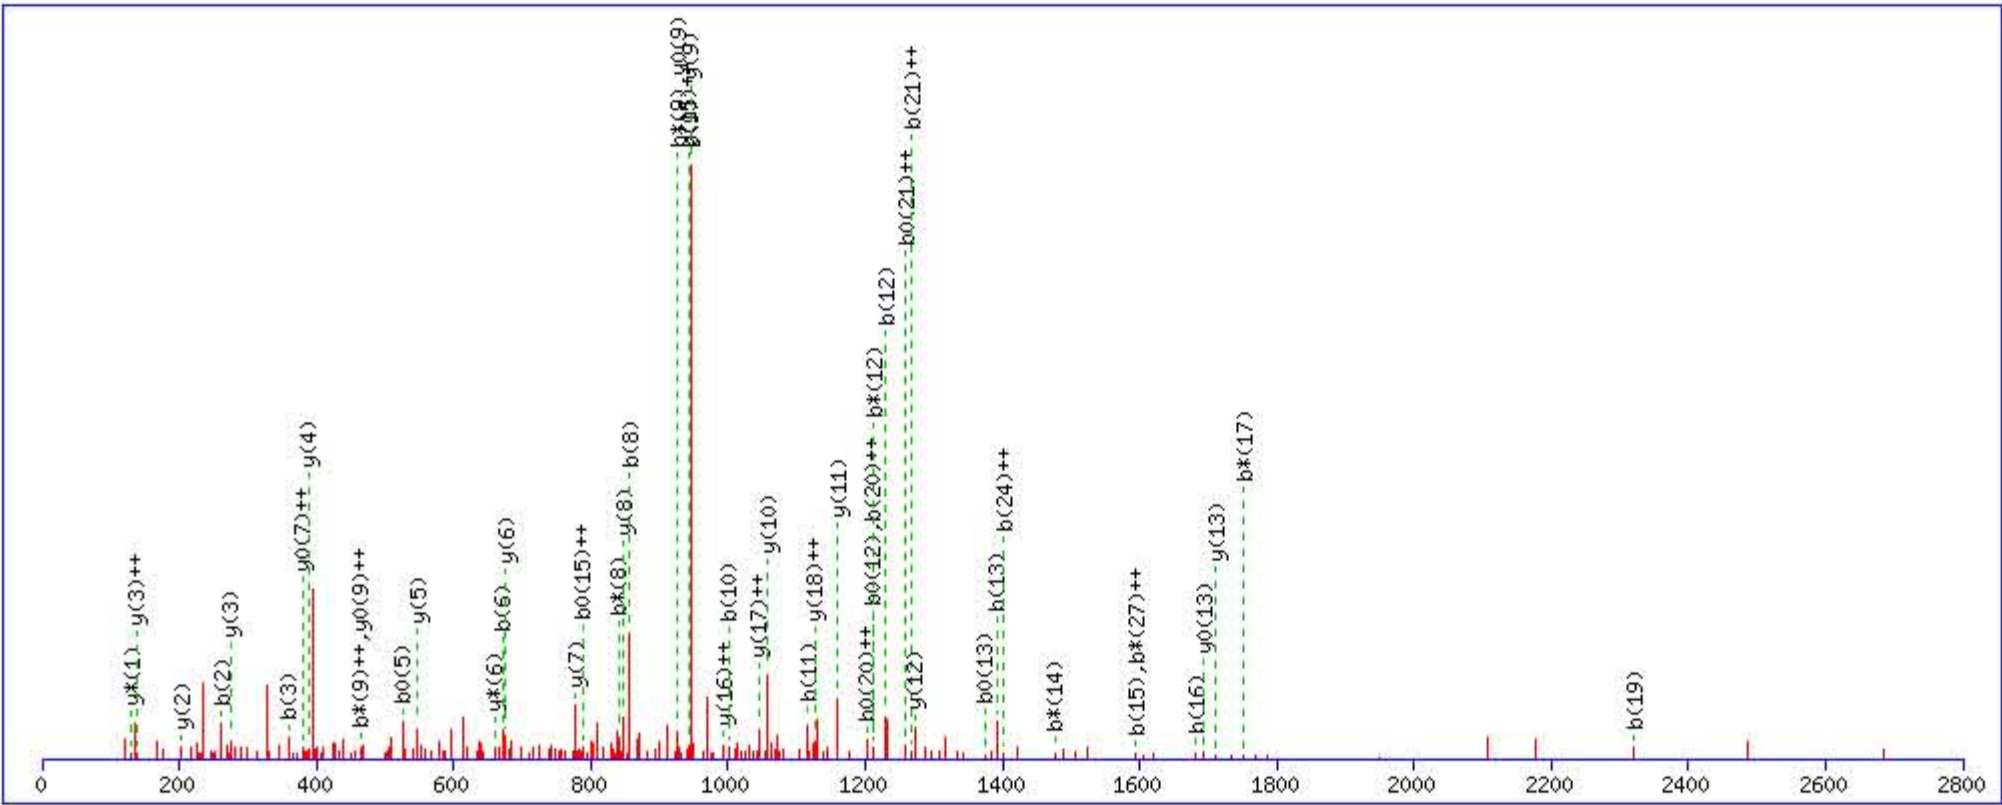

Monoisotopic mass of neutral peptide Mr(calc): 3478.674866  
Fixed modifications: Carbamidomethyl (C) (apply to specified residues or termini only)  
Variable modifications:  
Q18 : Biotin:Thermo-21345 (Q)  
Ions Score: 50 Expect: 0.00028  
Matches : 51/328 fragment ions using 148 most intense peaks [\(help\)](#)

| #  | b           | b <sup>++</sup> | b <sup>*</sup> | b <sup>++</sup> * | b <sup>0</sup> | b <sup>0++</sup> | Seq. | y           | y <sup>++</sup> | y <sup>*</sup> | y <sup>++</sup> * | y <sup>0</sup> | y <sup>0++</sup> | #  |
|----|-------------|-----------------|----------------|-------------------|----------------|------------------|------|-------------|-----------------|----------------|-------------------|----------------|------------------|----|
| 1  | 115.050203  | 58.028740       | 98.023654      | 49.515465         |                |                  | N    |             |                 |                |                   |                |                  | 30 |
| 2  | 262.118617  | 131.562946      | 245.092068     | 123.049672        |                |                  | F    | 3365.639210 | 1683.323243     | 3348.612661    | 1674.809968       | 3347.628645    | 1674.317960      | 29 |
| 3  | 359.171381  | 180.089328      | 342.144832     | 171.576054        |                |                  | P    | 3218.570796 | 1609.789036     | 3201.544247    | 1601.275761       | 3200.560231    | 1600.783753      | 28 |
| 4  | 456.224145  | 228.615710      | 439.197596     | 220.102436        |                |                  | P    | 3121.518032 | 1561.262654     | 3104.491483    | 1552.749379       | 3103.507467    | 1552.257371      | 27 |
| 5  | 543.256173  | 272.131725      | 526.229624     | 263.618450        | 525.245608     | 263.126442       | S    | 3024.465268 | 1512.736272     | 3007.438719    | 1504.222997       | 3006.454703    | 1503.730989      | 26 |
| 6  | 671.314751  | 336.161014      | 654.288202     | 327.647739        | 653.304186     | 327.155731       | Q    | 2937.433240 | 1469.220258     | 2920.406691    | 1460.706983       | 2919.422675    | 1460.214975      | 25 |
| 7  | 786.341694  | 393.674485      | 769.315145     | 385.161210        | 768.331129     | 384.669202       | D    | 2809.374662 | 1405.190969     | 2792.348113    | 1396.677694       | 2791.364097    | 1396.185686      | 24 |
| 8  | 857.378808  | 429.193042      | 840.352259     | 420.679767        | 839.368243     | 420.187759       | A    | 2694.347719 | 1347.677497     | 2677.321170    | 1339.164223       | 2676.337154    | 1338.672215      | 23 |
| 9  | 944.410836  | 472.709056      | 927.384287     | 464.195781        | 926.400271     | 463.703773       | S    | 2623.310605 | 1312.158941     | 2606.284056    | 1303.645666       | 2605.300040    | 1303.153658      | 22 |
| 10 | 1001.432300 | 501.219788      | 984.405751     | 492.706513        | 983.421735     | 492.214505       | G    | 2536.278577 | 1268.642926     | 2519.252028    | 1260.129652       | 2518.268012    | 1259.637644      | 21 |
| 11 | 1116.459243 | 558.733260      | 1099.432694    | 550.219985        | 1098.448678    | 549.727977       | D    | 2479.257113 | 1240.132195     | 2462.230564    | 1231.618920       | 2461.246548    | 1231.126912      | 20 |
| 12 | 1229.543307 | 615.275291      | 1212.516758    | 606.762017        | 1211.532742    | 606.270009       | L    | 2364.230170 | 1182.618723     | 2347.203621    | 1174.105448       | 2346.219605    | 1173.613440      | 19 |
| 13 | 1392.606636 | 696.806956      | 1375.580087    | 688.293682        | 1374.596071    | 687.801673       | Y    | 2251.146106 | 1126.076691     | 2234.119557    | 1117.563416       | 2233.135541    | 1117.071408      | 18 |
| 14 | 1493.654315 | 747.330796      | 1476.627766    | 738.817521        | 1475.643750    | 738.325513       | T    | 2088.082777 | 1044.545026     | 2071.056228    | 1036.031752       | 2070.072212    | 1035.539744      | 17 |
| 15 | 1594.701994 | 797.854635      | 1577.675445    | 789.341361        | 1576.691429    | 788.849353       | T    | 1987.035098 | 994.021187      | 1970.008549    | 985.507913        | 1969.024533    | 985.015905       | 16 |
| 16 | 1681.734022 | 841.370649      | 1664.707473    | 832.857375        | 1663.723457    | 832.365367       | S    | 1885.987419 | 943.497348      | 1868.960870    | 934.984073        | 1867.976854    | 934.492065       | 15 |
| 17 | 1768.766050 | 884.886663      | 1751.739501    | 876.373389        | 1750.755485    | 875.881381       | S    | 1798.955391 | 899.981334      | 1781.928842    | 891.468059        | 1780.944826    | 890.976051       | 14 |
| 18 | 2207.991376 | 1104.499326     | 2190.964827    | 1095.986051       | 2189.980811    | 1095.494043      | Q    | 1711.923363 | 856.465320      | 1694.896814    | 847.952045        | 1693.912798    | 847.460037       | 13 |
| 19 | 2321.075440 | 1161.041358     | 2304.048891    | 1152.528083       | 2303.064875    | 1152.036075      | L    | 1272.698037 | 636.852657      | 1255.671488    | 628.339382        | 1254.687472    | 627.847374       | 12 |
| 20 | 2422.123119 | 1211.565197     | 2405.096570    | 1203.051923       | 2404.112554    | 1202.559915      | T    | 1159.613973 | 580.310625      | 1142.587424    | 571.797350        | 1141.603408    | 571.305342       | 11 |
| 21 | 2535.207183 | 1268.107229     | 2518.180634    | 1259.593955       | 2517.196618    | 1259.101947      | L    | 1058.566294 | 529.786785      | 1041.539745    | 521.273511        | 1040.555729    | 520.781503       | 10 |
| 22 | 2632.259947 | 1316.633611     | 2615.233398    | 1308.120337       | 2614.249382    | 1307.628329      | P    | 945.482230  | 473.244753      | 928.455681     | 464.731479        | 927.471665     | 464.239471       | 9  |
| 23 | 2703.297061 | 1352.152169     | 2686.270512    | 1343.638894       | 2685.286496    | 1343.146886      | A    | 848.429466  | 424.718371      | 831.402917     | 416.205097        | 830.418901     | 415.713089       | 8  |
| 24 | 2804.344740 | 1402.676008     | 2787.318191    | 1394.162733       | 2786.334175    | 1393.670725      | T    | 777.392352  | 389.199814      | 760.365803     | 380.686540        | 759.381787     | 380.194532       | 7  |
| 25 | 2932.403318 | 1466.705297     | 2915.376769    | 1458.192022       | 2914.392753    | 1457.700015      | Q    | 676.344673  | 338.675975      | 659.318124     | 330.162700        |                |                  | 6  |
| 26 | 3092.433967 | 1546.720621     | 3075.407418    | 1538.207347       | 3074.423402    | 1537.715339      | C    | 548.286095  | 274.646686      | 531.259546     | 266.133411        |                |                  | 5  |
| 27 | 3205.518031 | 1603.262653     | 3188.491482    | 1594.749379       | 3187.507466    | 1594.257371      | L    | 388.255446  | 194.631361      | 371.228897     | 186.118087        |                |                  | 4  |
| 28 | 3276.555145 | 1638.781211     | 3259.528596    | 1630.267936       | 3258.544580    | 1629.775928      | A    | 275.171382  | 138.089329      | 258.144833     | 129.576055        |                |                  | 3  |
| 29 | 3333.576609 | 1667.291943     | 3316.550060    | 1658.778668       | 3315.566044    | 1658.286660      | G    | 204.134268  | 102.570772      | 187.107719     | 94.057497         |                |                  | 2  |
| 30 |             |                 |                |                   |                |                  | K    | 147.112804  | 74.060040       | 130.086255     | 65.546765         |                |                  | 1  |

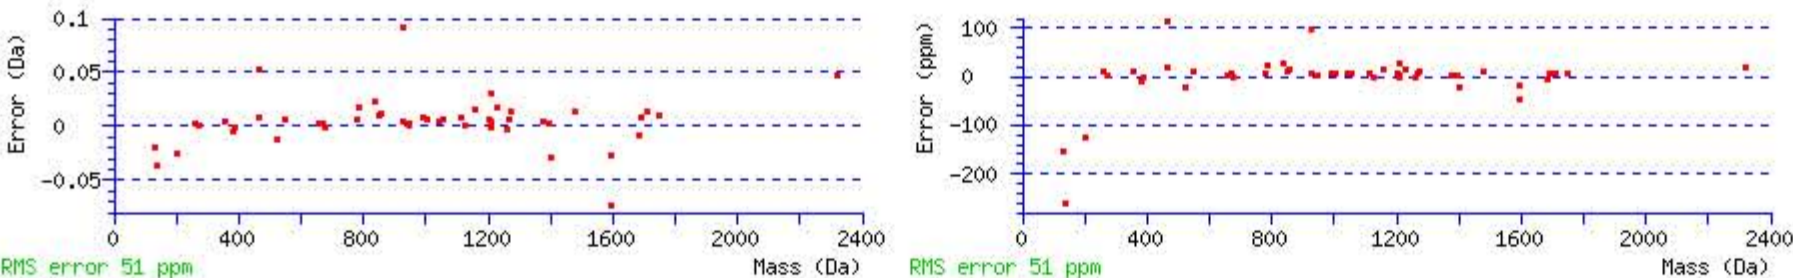

NCBI BLAST search of **NFPPSQDASGDLYTTSSQLTLPATQCLAGK**  
(Parameters: blastp, nr protein database, expect=20000, no filter, PAM30)  
Other BLAST [web gateways](#)

All matches to this query

| Score | Mr(calc):   | Delta    | Sequence                                       |
|-------|-------------|----------|------------------------------------------------|
| 49.7  | 3478.674866 | 0.036230 | <a href="#">NFPPSQDASGDLYTTSSQLTLPATQCLAGK</a> |
| 17.1  | 3478.674866 | 0.036230 | <a href="#">NFPPSQDASGDLYTTSSQLTLPATQCLAGK</a> |
| 12.4  | 3478.674866 | 0.036230 | <a href="#">NFPPSQDASGDLYTTSSQLTLPATQCLAGK</a> |

***{MATRIX}***  
***{SCIENCE}***

# Mascot Search Results

Peptide View

MS/MS Fragmentation of **TFPEIQR**  
Found in **IGHD\_HUMAN**, Ig delta chain C region OS=Homo sapiens GN=IGHD PE=1 SV=2

Match to Query 20564: 1200.633508 from(601.324030,2+) rtinseconds(1951) index(5389)  
Title: Locus:1.1.1.1956.17 File:"2013-07-02 CLN FXIII 180 min 2nd F 1.wiff"  
Data file C:\Program Files (x86)\Matrix Science\Mascot Daemon\mgf\8 FXIII 180 min 2nd\mascot\_daemon\_merge.mgf

Click mouse within plot area to zoom in by factor of two about that point  
Or,   to  Da   
Label all possible matches ☐ Label matches used for scoring ☒

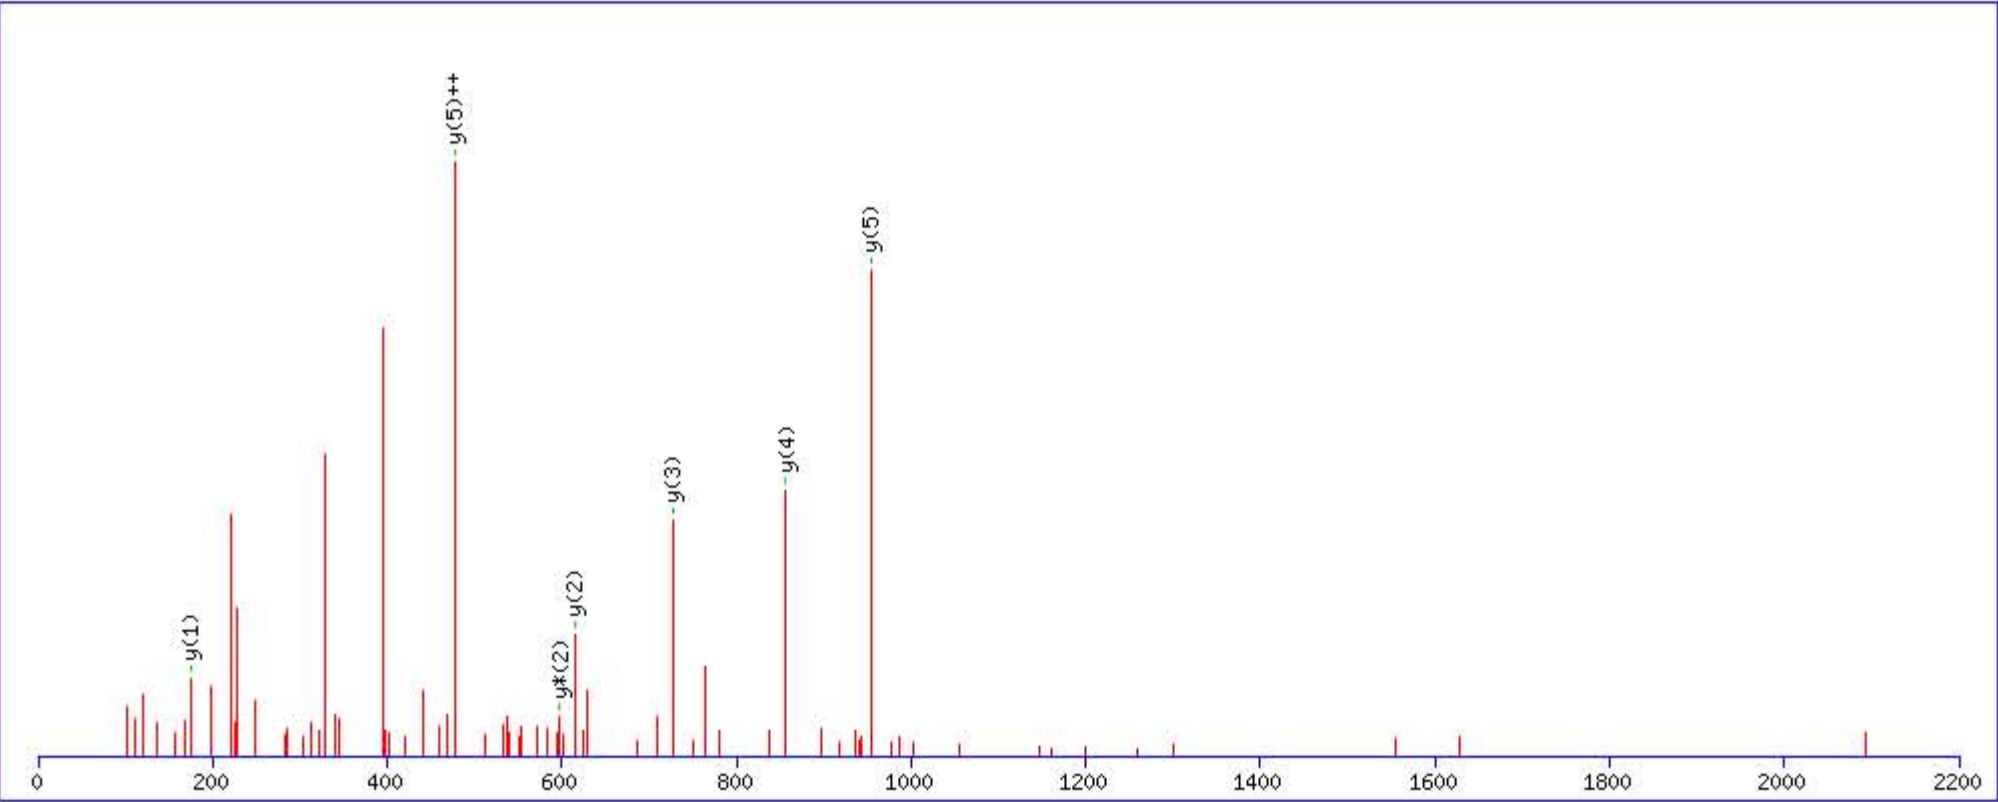

Monoisotopic mass of neutral peptide Mr(calc): 1200.632507  
Fixed modifications: Carbamidomethyl (C) (apply to specified residues or termini only)  
Variable modifications:  
Q6 : Biotin:Thermo-21345 (Q)  
Ions Score: 34 Expect: 0.0018  
Matches : 7/56 fragment ions using 11 most intense peaks [\(help\)](#)

| # | b           | b <sup>++</sup> | b <sup>*</sup> | b <sup>***</sup> | b <sup>0</sup> | b <sup>0++</sup> | Seq. | y           | y <sup>++</sup> | y <sup>*</sup> | y <sup>***</sup> | y <sup>0</sup> | y <sup>0++</sup> | # |
|---|-------------|-----------------|----------------|------------------|----------------|------------------|------|-------------|-----------------|----------------|------------------|----------------|------------------|---|
| 1 | 102.054955  | 51.531116       |                |                  | 84.044390      | 42.525833        | T    |             |                 |                |                  |                |                  | 7 |
| 2 | 249.123369  | 125.065322      |                |                  | 231.112804     | 116.060040       | F    | 1100.592113 | 550.799695      | 1083.565564    | 542.286420       | 1082.581548    | 541.794412       | 6 |
| 3 | 346.176133  | 173.591704      |                |                  | 328.165568     | 164.586422       | P    | 953.523699  | 477.265488      | 936.497150     | 468.752213       | 935.513134     | 468.260205       | 5 |
| 4 | 475.218726  | 238.113001      |                |                  | 457.208161     | 229.107719       | E    | 856.470935  | 428.739106      | 839.444386     | 420.225831       | 838.460370     | 419.733823       | 4 |
| 5 | 588.302790  | 294.655033      |                |                  | 570.292225     | 285.649751       | I    | 727.428342  | 364.217809      | 710.401793     | 355.704535       |                |                  | 3 |
| 6 | 1027.528116 | 514.267696      | 1010.501567    | 505.754422       | 1009.517551    | 505.262414       | Q    | 614.344278  | 307.675777      | 597.317729     | 299.162503       |                |                  | 2 |
| 7 |             |                 |                |                  |                |                  | R    | 175.118952  | 88.063114       | 158.092403     | 79.549839        |                |                  | 1 |

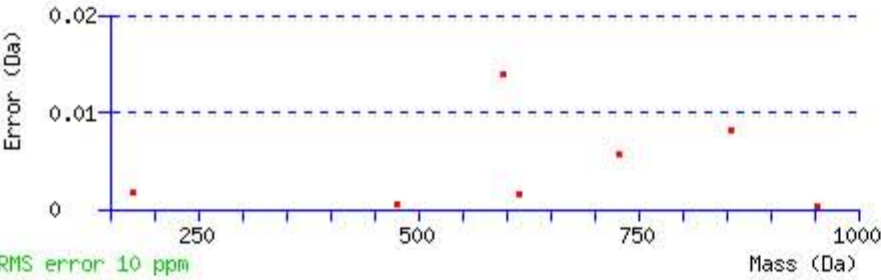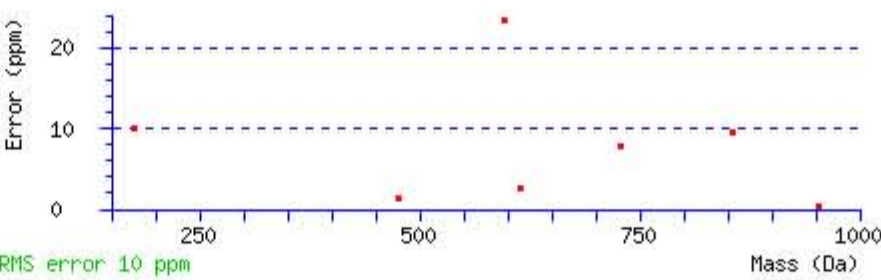

NCBI BLAST search of [TFPEIQR](#)  
(Parameters: blastp, nr protein database, expect=20000, no filter, PAM30)  
Other BLAST [web gateways](#)

All matches to this query

| Score | Mr(calc):   | Delta     | Sequence                   |
|-------|-------------|-----------|----------------------------|
| 33.8  | 1200.632507 | 0.001001  | <a href="#">TFPEIQR</a>    |
| 4.4   | 1200.628464 | 0.005044  | <a href="#">LLQLQEMGNR</a> |
| 1.7   | 1200.650269 | -0.016761 | <a href="#">ETDKPPFVIR</a> |

MATRIX

SCIENCE

Mascot Search Results

Peptide View

MS/MS Fragmentation of **EPAAQAPVK**  
Found in **IGHD\_HUMAN**, Ig delta chain C region OS=Homo sapiens GN=IGHD PE=1 SV=2

Match to Query 20992: 1220.659248 from(611.336900,2+) rtinseconds(1426) index(63003)  
Title: Locus:1.1.1.1771.21 File:"2013-07-02 CLN FXIII 180 min 2nd FT.wiff"  
Data file C:\Program Files (x86)\Matrix Science\Mascot Daemon\mgf\8 FXIII 180 min 2nd\mascot\_daemon\_merge.mgf

Click mouse within plot area to zoom in by factor of two about that point  
Or, 

Plot from

100

 to 

1100

 Da 

Full range

  
Label all possible matches ☐ Label matches used for scoring ☒

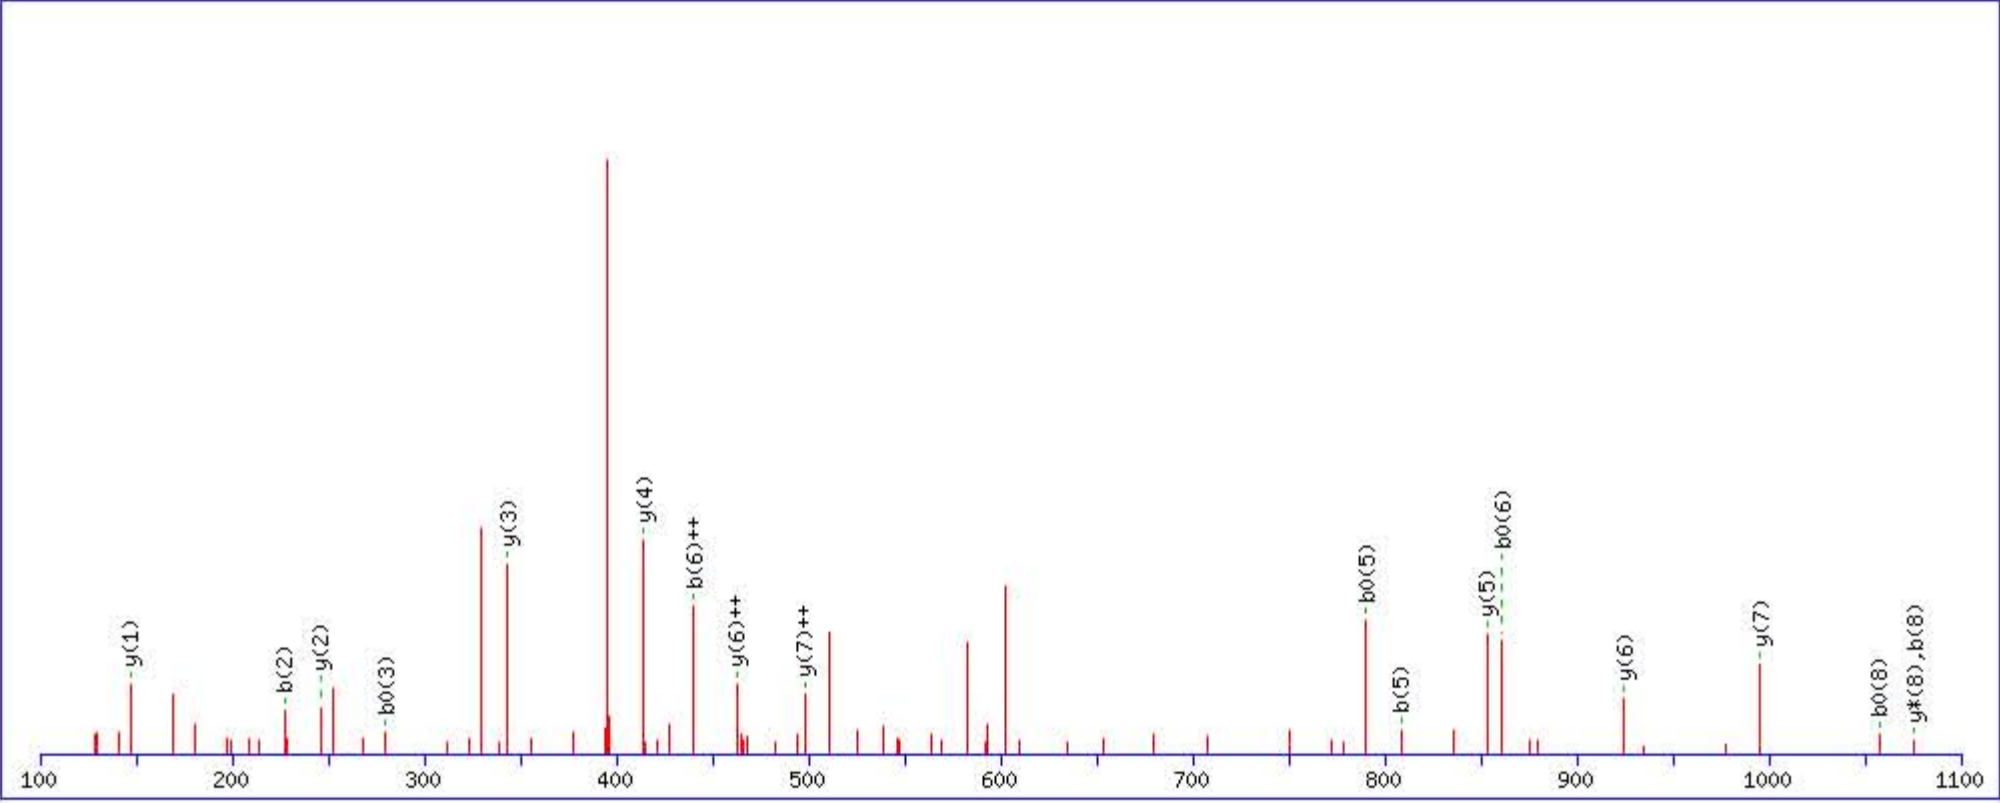

Monoisotopic mass of neutral peptide Mr(calc): 1220.658707  
Fixed modifications: Carbamidomethyl (C) (apply to specified residues or termini only)  
Variable modifications:  
Q5 : Biotin:Thermo-21345 (Q)  
Ions Score: 38 Expect: 0.0028  
Matches : 18/72 fragment ions using 37 most intense peaks [\(help\)](#)

| # | b           | b <sup>++</sup> | b <sup>*</sup> | b <sup>*++</sup> | b <sup>0</sup> | b <sup>0++</sup> | Seq. | y           | y <sup>++</sup> | y <sup>*</sup> | y <sup>*++</sup> | # |
|---|-------------|-----------------|----------------|------------------|----------------|------------------|------|-------------|-----------------|----------------|------------------|---|
| 1 | 130.049869  | 65.528572       |                |                  | 112.039304     | 56.523290        | E    |             |                 |                |                  | 9 |
| 2 | 227.102633  | 114.054954      |                |                  | 209.092068     | 105.049672       | P    | 1092.623414 | 546.815345      | 1075.596865    | 538.302071       | 8 |
| 3 | 298.139747  | 149.573512      |                |                  | 280.129182     | 140.568229       | A    | 995.570650  | 498.288963      | 978.544101     | 489.775689       | 7 |
| 4 | 369.176861  | 185.092068      |                |                  | 351.166296     | 176.086786       | A    | 924.533536  | 462.770406      | 907.506987     | 454.257132       | 6 |
| 5 | 808.402187  | 404.704732      | 791.375638     | 396.191457       | 790.391622     | 395.699449       | Q    | 853.496422  | 427.251849      | 836.469873     | 418.738575       | 5 |
| 6 | 879.439301  | 440.223289      | 862.412752     | 431.710014       | 861.428736     | 431.218006       | A    | 414.271096  | 207.639186      | 397.244547     | 199.125911       | 4 |
| 7 | 976.492065  | 488.749671      | 959.465516     | 480.236396       | 958.481500     | 479.744388       | P    | 343.233982  | 172.120629      | 326.207433     | 163.607354       | 3 |
| 8 | 1075.560479 | 538.283878      | 1058.533930    | 529.770603       | 1057.549914    | 529.278595       | V    | 246.181218  | 123.594247      | 229.154669     | 115.080972       | 2 |
| 9 |             |                 |                |                  |                |                  | K    | 147.112804  | 74.060040       | 130.086255     | 65.546765        | 1 |

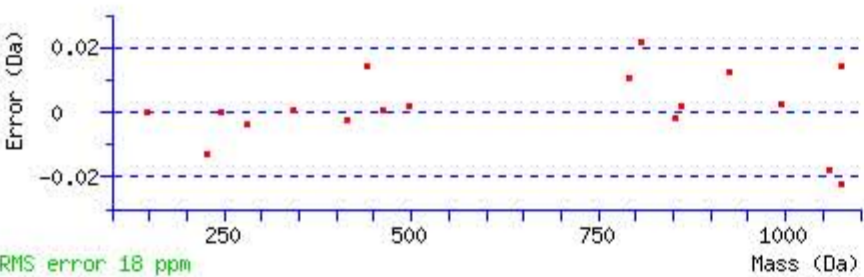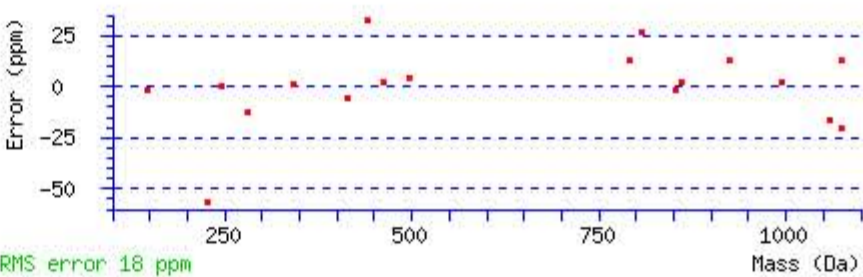

NCBI BLAST search of [EPAAQAPVK](#)  
(Parameters: blastp, nr protein database, expect=20000, no filter, PAM30)  
Other BLAST [web gateways](#)

All matches to this query

| Score | Mr(calc):   | Delta     | Sequence                     |
|-------|-------------|-----------|------------------------------|
| 38.1  | 1220.658707 | 0.000541  | <a href="#">EPAAQAPVK</a>    |
| 11.3  | 1220.658722 | 0.000526  | <a href="#">EQNVPVPK</a>     |
| 11.1  | 1220.676468 | -0.017220 | <a href="#">AEPPPSKPTVAK</a> |
| 4.3   | 1220.658722 | 0.000526  | <a href="#">QPNLPDVK</a>     |
| 3.6   | 1220.654678 | 0.004570  | <a href="#">SVRMLSGSKEK</a>  |
| 3.5   | 1220.644806 | 0.014442  | <a href="#">GGHVQREK</a>     |
| 2.8   | 1220.676468 | -0.017220 | <a href="#">EKAATVFNTLK</a>  |
| 2.5   | 1220.669952 | -0.010704 | <a href="#">QTGKKPFKCK</a>   |
| 1.7   | 1220.647476 | 0.011772  | <a href="#">LEMYVLNPVK</a>   |
| 1.7   | 1220.658722 | 0.000526  | <a href="#">NLQDPVPK</a>     |

MATRIX

SCIENCE

Mascot Search Results

Peptide View

MS/MS Fragmentation of **SLWNAGTSVTCTLNHPSLPPQR**  
Found in **IGHD\_HUMAN**, Ig delta chain C region OS=Homo sapiens GN=IGHD PE=1 SV=2

Match to Query 56903: 2746.384696 from(687.603450,4+) rtinseconds(2237) index(7006)  
Title: Locus:1.1.1.2056.13 File:"2013-07-02 CLN FXIII 180 min 2nd F 1.wiff"  
Data file C:\Program Files (x86)\Matrix Science\Mascot Daemon\mgf\8 FXIII 180 min 2nd\mascot\_daemon\_merge.mgf

Click mouse within plot area to zoom in by factor of two about that point  
Or, 

Plot from

0

 to 

2200

 Da 

Full range

  
Label all possible matches ☐ Label matches used for scoring ☒

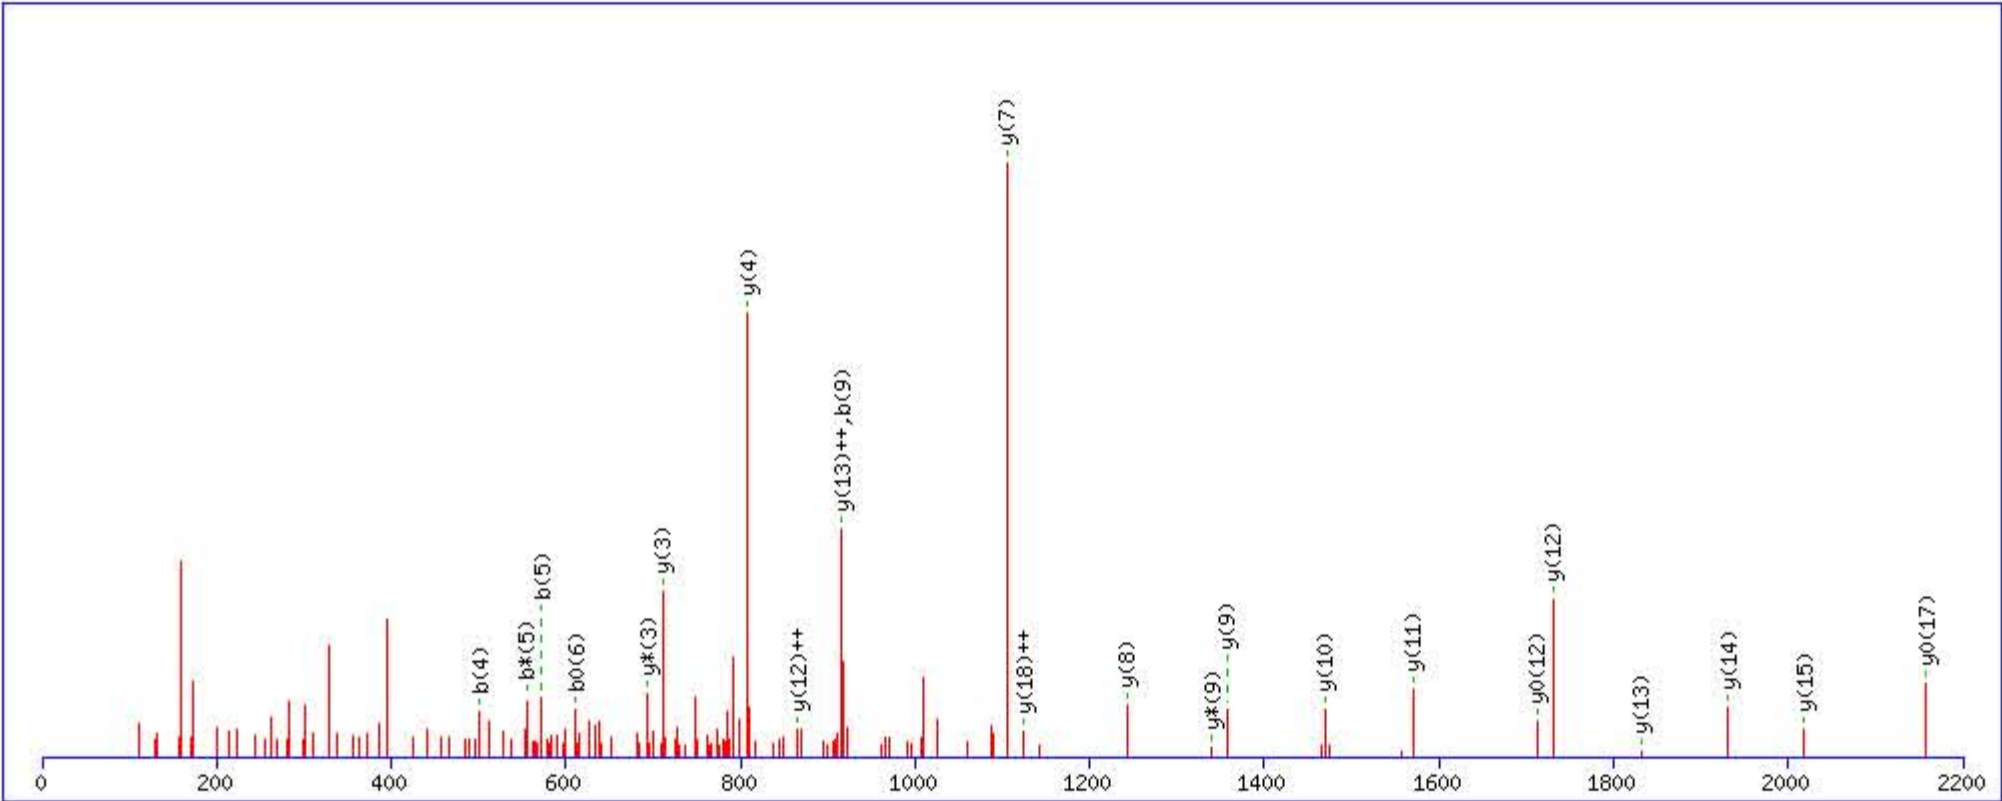

Monoisotopic mass of neutral peptide Mr(calc): 2746.368332  
Fixed modifications: Carbamidomethyl (C) (apply to specified residues or termini only)  
Variable modifications:  
Q21 : Biotin:Thermo-21345 (Q)  
Ions Score: 64 Expect: 1.2e-005  
Matches : 23/236 fragment ions using 37 most intense peaks [\(help\)](#)

| #  | b           | b <sup>++</sup> | b <sup>*</sup> | b <sup>*++</sup> | b <sup>0</sup> | b <sup>0++</sup> | Seq. | y           | y <sup>++</sup> | y <sup>*</sup> | y <sup>*++</sup> | y <sup>0</sup> | y <sup>0++</sup> | #  |
|----|-------------|-----------------|----------------|------------------|----------------|------------------|------|-------------|-----------------|----------------|------------------|----------------|------------------|----|
| 1  | 88.039304   | 44.523290       |                |                  | 70.028739      | 35.518008        | S    |             |                 |                |                  |                |                  | 22 |
| 2  | 201.123368  | 101.065322      |                |                  | 183.112803     | 92.060039        | L    | 2660.343575 | 1330.675425     | 2643.317026    | 1322.162151      | 2642.333010    | 1321.670143      | 21 |
| 3  | 387.202681  | 194.104978      |                |                  | 369.192116     | 185.099696       | W    | 2547.259511 | 1274.133393     | 2530.232962    | 1265.620119      | 2529.248946    | 1265.128111      | 20 |
| 4  | 501.245608  | 251.126442      | 484.219059     | 242.613168       | 483.235043     | 242.121160       | N    | 2361.180198 | 1181.093737     | 2344.153649    | 1172.580462      | 2343.169633    | 1172.088454      | 19 |
| 5  | 572.282722  | 286.644999      | 555.256173     | 278.131725       | 554.272157     | 277.639717       | A    | 2247.137271 | 1124.072273     | 2230.110722    | 1115.558999      | 2229.126706    | 1115.066991      | 18 |
| 6  | 629.304186  | 315.155731      | 612.277637     | 306.642457       | 611.293621     | 306.150449       | G    | 2176.100157 | 1088.553716     | 2159.073608    | 1080.040442      | 2158.089592    | 1079.548434      | 17 |
| 7  | 730.351865  | 365.679571      | 713.325316     | 357.166296       | 712.341300     | 356.674288       | T    | 2119.078693 | 1060.042984     | 2102.052144    | 1051.529710      | 2101.068128    | 1051.037702      | 16 |
| 8  | 817.383893  | 409.195585      | 800.357344     | 400.682310       | 799.373328     | 400.190302       | S    | 2018.031014 | 1009.519145     | 2001.004465    | 1001.005871      | 2000.020449    | 1000.513863      | 15 |
| 9  | 916.452307  | 458.729792      | 899.425758     | 450.216517       | 898.441742     | 449.724509       | V    | 1930.998986 | 966.003131      | 1913.972437    | 957.489857       | 1912.988421    | 956.997849       | 14 |
| 10 | 1017.499986 | 509.253631      | 1000.473437    | 500.740357       | 999.489421     | 500.248349       | T    | 1831.930572 | 916.468924      | 1814.904023    | 907.955650       | 1813.920007    | 907.463642       | 13 |
| 11 | 1177.530635 | 589.268956      | 1160.504086    | 580.755681       | 1159.520070    | 580.263673       | C    | 1730.882893 | 865.945085      | 1713.856344    | 857.431810       | 1712.872328    | 856.939802       | 12 |
| 12 | 1278.578314 | 639.792795      | 1261.551765    | 631.279521       | 1260.567749    | 630.787513       | T    | 1570.852244 | 785.929760      | 1553.825695    | 777.416486       | 1552.841679    | 776.924478       | 11 |
| 13 | 1391.662378 | 696.334827      | 1374.635829    | 687.821553       | 1373.651813    | 687.329545       | L    | 1469.804565 | 735.405921      | 1452.778016    | 726.892646       | 1451.794000    | 726.400638       | 10 |
| 14 | 1505.705305 | 753.356291      | 1488.678756    | 744.843016       | 1487.694740    | 744.351008       | N    | 1356.720501 | 678.863889      | 1339.693952    | 670.350614       | 1338.709936    | 669.858606       | 9  |
| 15 | 1642.764217 | 821.885746      | 1625.737668    | 813.372472       | 1624.753652    | 812.880464       | H    | 1242.677574 | 621.842425      | 1225.651025    | 613.329151       | 1224.667009    | 612.837143       | 8  |
| 16 | 1739.816981 | 870.412128      | 1722.790432    | 861.898854       | 1721.806416    | 861.406846       | P    | 1105.618662 | 553.312969      | 1088.592113    | 544.799695       | 1087.608097    | 544.307687       | 7  |
| 17 | 1826.849009 | 913.928143      | 1809.822460    | 905.414868       | 1808.838444    | 904.922860       | S    | 1008.565898 | 504.786587      | 991.539349     | 496.273313       | 990.555333     | 495.781305       | 6  |
| 18 | 1939.933073 | 970.470174      | 1922.906524    | 961.956900       | 1921.922508    | 961.464892       | L    | 921.533870  | 461.270573      | 904.507321     | 452.757299       |                |                  | 5  |
| 19 | 2036.985837 | 1018.996557     | 2019.959288    | 1010.483282      | 2018.975272    | 1009.991274      | P    | 808.449806  | 404.728541      | 791.423257     | 396.215267       |                |                  | 4  |
| 20 | 2134.038601 | 1067.522938     | 2117.012052    | 1059.009664      | 2116.028036    | 1058.517656      | P    | 711.397042  | 356.202159      | 694.370493     | 347.688885       |                |                  | 3  |
| 21 | 2573.263927 | 1287.135601     | 2556.237378    | 1278.622327      | 2555.253362    | 1278.130319      | Q    | 614.344278  | 307.675777      | 597.317729     | 299.162503       |                |                  | 2  |
| 22 |             |                 |                |                  |                |                  | R    | 175.118952  | 88.063114       | 158.092403     | 79.549839        |                |                  | 1  |

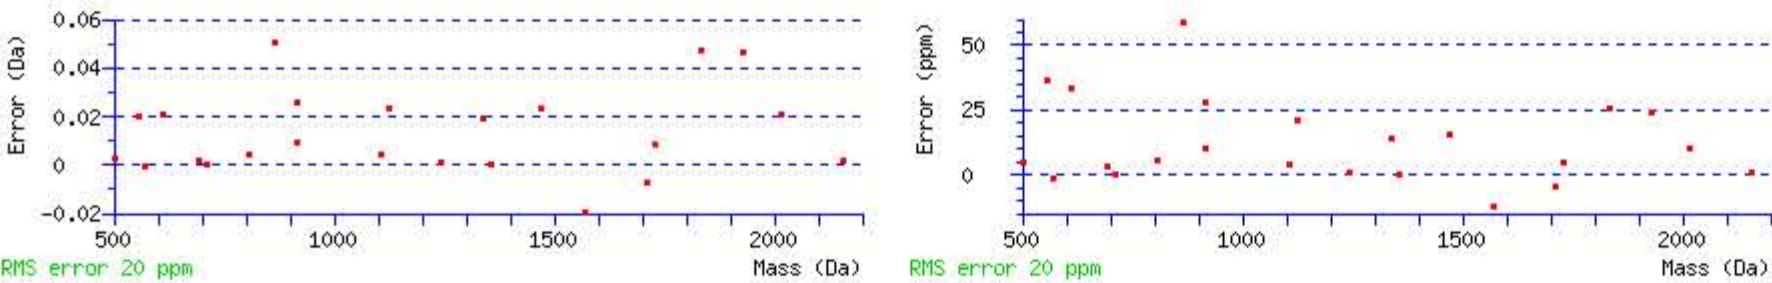

NCBI BLAST search of [SLWNAGTSVTCTLNHPSLPPQR](#)  
(Parameters: blastp, nr protein database, expect=20000, no filter, PAM30)  
Other BLAST [web gateways](#)

All matches to this query

| Score | Mr(calc):   | Delta    | Sequence                               |
|-------|-------------|----------|----------------------------------------|
| 63.8  | 2746.368332 | 0.016364 | <a href="#">SLWNAGTSVTCTLNHPSLPPQR</a> |

MATRIX

SCIENCE

Mascot Search Results

Peptide View

MS/MS Fragmentation of **NQVSLTCLVK**  
Found in **IGHG1\_HUMAN**, Ig gamma-1 chain C region OS=Homo sapiens GN=IGHG1 PE=1 SV=1

Match to Query 30278: 1471.795568 from(736.905060,2+) rtinseconds(2229) index(6944)  
Title: Locus:1.1.1.2053.20 File:"2013-07-02 CLN FXIII 180 min 2nd F 1.wiff"  
Data file C:\Program Files (x86)\Matrix Science\Mascot Daemon\mgf\8 FXIII 180 min 2nd\mascot\_daemon\_merge.mgf

Click mouse within plot area to zoom in by factor of two about that point  
Or, 

Plot from

100

 to 

1700

 Da 

Full range

  
Label all possible matches ☐ Label matches used for scoring ☒

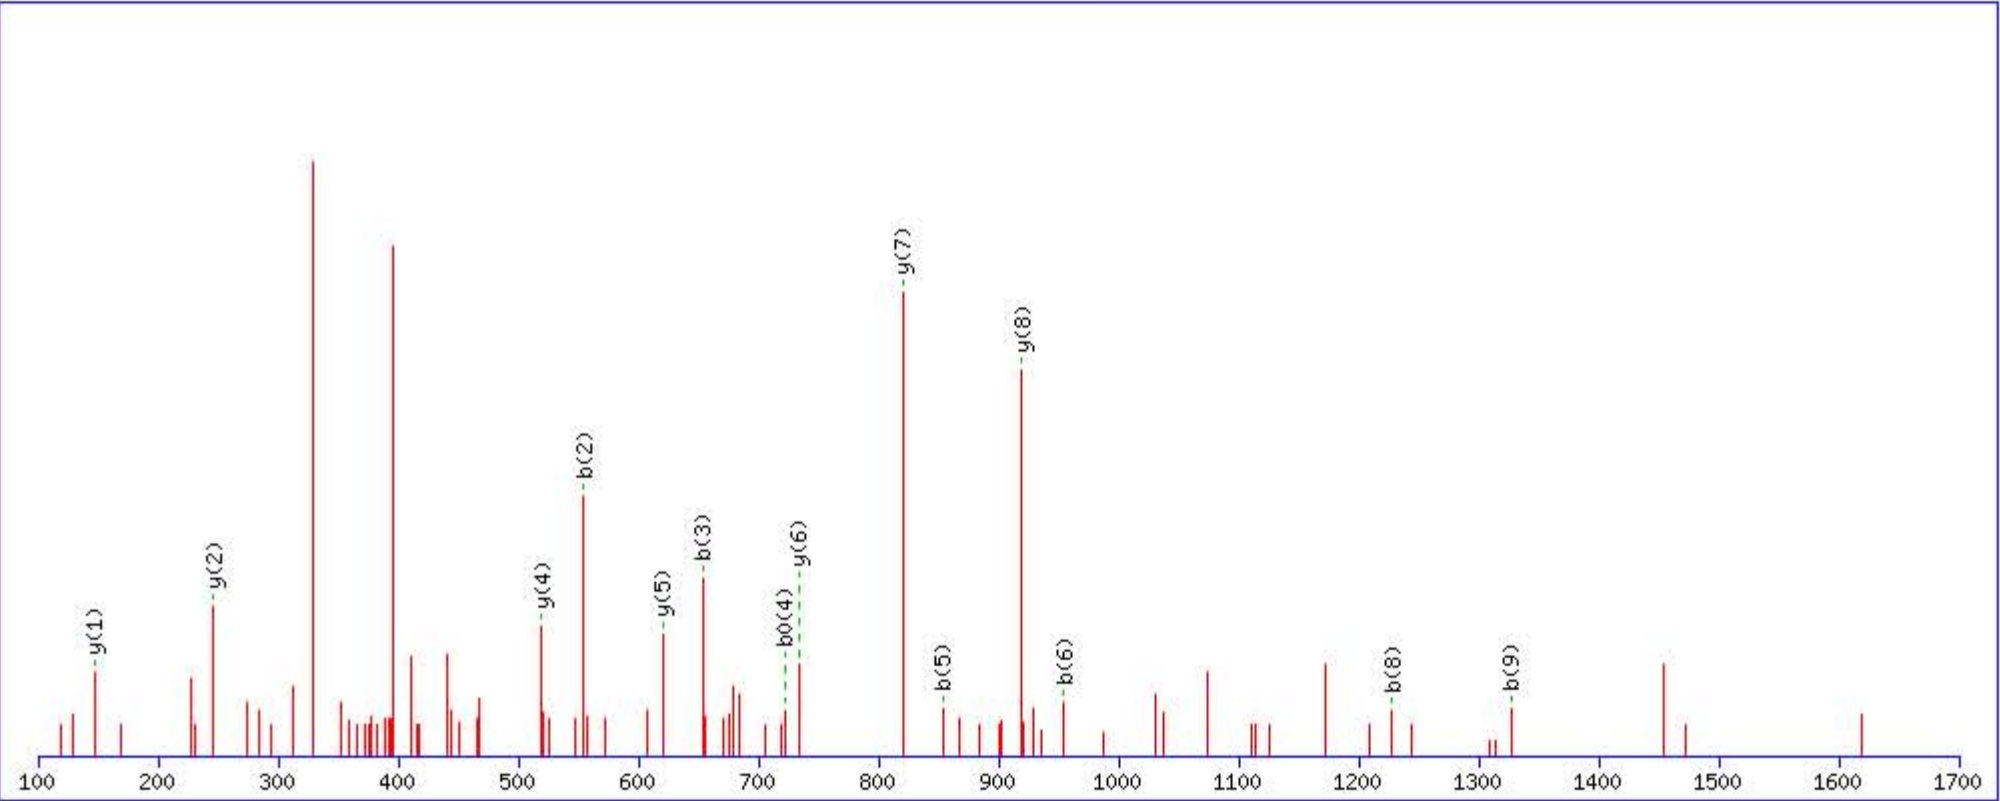

Monoisotopic mass of neutral peptide Mr(calc): 1471.789093  
Fixed modifications: Carbamidomethyl (C) (apply to specified residues or termini only)  
Variable modifications:  
Q2 : Biotin:Thermo-21345 (Q)  
Ions Score: 39 Expect: 0.0026  
Matches : 14/94 fragment ions using 27 most intense peaks [\(help\)](#)

| #  | b           | b <sup>++</sup> | b <sup>*</sup> | b <sup>++</sup> * | b <sup>0</sup> | b <sup>0++</sup> | Seq. | y           | y <sup>++</sup> | y <sup>*</sup> | y <sup>++</sup> * | y <sup>0</sup> | y <sup>0++</sup> | #  |
|----|-------------|-----------------|----------------|-------------------|----------------|------------------|------|-------------|-----------------|----------------|-------------------|----------------|------------------|----|
| 1  | 115.050203  | 58.028740       | 98.023654      | 49.515465         |                |                  | N    |             |                 |                |                   |                |                  | 10 |
| 2  | 554.275529  | 277.641403      | 537.248980     | 269.128128        |                |                  | Q    | 1358.753442 | 679.880359      | 1341.726893    | 671.367085        | 1340.742877    | 670.875076       | 9  |
| 3  | 653.343943  | 327.175610      | 636.317394     | 318.662335        |                |                  | V    | 919.528116  | 460.267696      | 902.501567     | 451.754421        | 901.517551     | 451.262413       | 8  |
| 4  | 740.375971  | 370.691623      | 723.349422     | 362.178349        | 722.365406     | 361.686341       | S    | 820.459702  | 410.733489      | 803.433153     | 402.220215        | 802.449137     | 401.728207       | 7  |
| 5  | 853.460035  | 427.233656      | 836.433486     | 418.720381        | 835.449470     | 418.228373       | L    | 733.427674  | 367.217475      | 716.401125     | 358.704201        | 715.417109     | 358.212193       | 6  |
| 6  | 954.507714  | 477.757495      | 937.481165     | 469.244220        | 936.497149     | 468.752212       | T    | 620.343610  | 310.675443      | 603.317061     | 302.162169        | 602.333045     | 301.670161       | 5  |
| 7  | 1114.538363 | 557.772819      | 1097.511814    | 549.259545        | 1096.527798    | 548.767537       | C    | 519.295931  | 260.151604      | 502.269382     | 251.638329        |                |                  | 4  |
| 8  | 1227.622427 | 614.314851      | 1210.595878    | 605.801577        | 1209.611862    | 605.309569       | L    | 359.265282  | 180.136279      | 342.238733     | 171.623004        |                |                  | 3  |
| 9  | 1326.690841 | 663.849058      | 1309.664292    | 655.335784        | 1308.680276    | 654.843776       | V    | 246.181218  | 123.594247      | 229.154669     | 115.080973        |                |                  | 2  |
| 10 |             |                 |                |                   |                |                  | K    | 147.112804  | 74.060040       | 130.086255     | 65.546765         |                |                  | 1  |

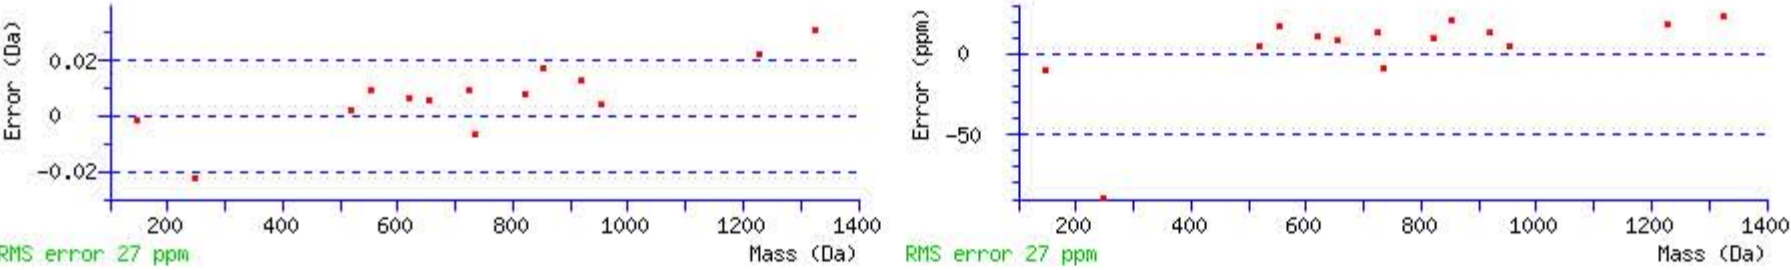

NCBI BLAST search of [NQVSLTCLVK](#)  
(Parameters: blastp, nr protein database, expect=20000, no filter, PAM30)  
Other BLAST [web gateways](#)

All matches to this query

| Score | Mr(calc):   | Delta     | Sequence                        |
|-------|-------------|-----------|---------------------------------|
| 39.5  | 1471.789093 | 0.006475  | <a href="#">NQVSLTCLVK</a>      |
| 12.6  | 1471.778305 | 0.017263  | <a href="#">WNVSRPSLLADSK</a>   |
| 7.5   | 1471.777847 | 0.017721  | <a href="#">QLDMELVSVK</a>      |
| 4.9   | 1471.797592 | -0.002024 | <a href="#">KYFWDRAFLVK</a>     |
| 3.0   | 1471.806793 | -0.011225 | <a href="#">AAALLAKQAEME VK</a> |
| 3.0   | 1471.796951 | -0.001383 | <a href="#">QRAAQFDVVK</a>      |
| 1.6   | 1471.814713 | -0.019145 | <a href="#">RQVIVGTWGESLK</a>   |

MATRIX

SCIENCE

Mascot Search Results

Peptide View

MS/MS Fragmentation of **EPQVYTLPPSR**  
Found in **IGHG1\_HUMAN**, Ig gamma-1 chain C region OS=Homo sapiens GN=IGHG1 PE=1 SV=1

Match to Query 34615: 1596.841748 from(799.428150,2+) rtinseconds(1923) index(65896)  
Title: Locus:1.1.1.1944.26 File:"2013-07-02 CLN FXIII 180 min 2nd FT.wiff"  
Data file C:\Program Files (x86)\Matrix Science\Mascot Daemon\mgf\8 FXIII 180 min 2nd\mascot\_daemon\_merge.mgf

Click mouse within plot area to zoom in by factor of two about that point  
Or, 

Plot from

0

 to 

2400

 Da 

Full range

  
Label all possible matches ☐ Label matches used for scoring ☒

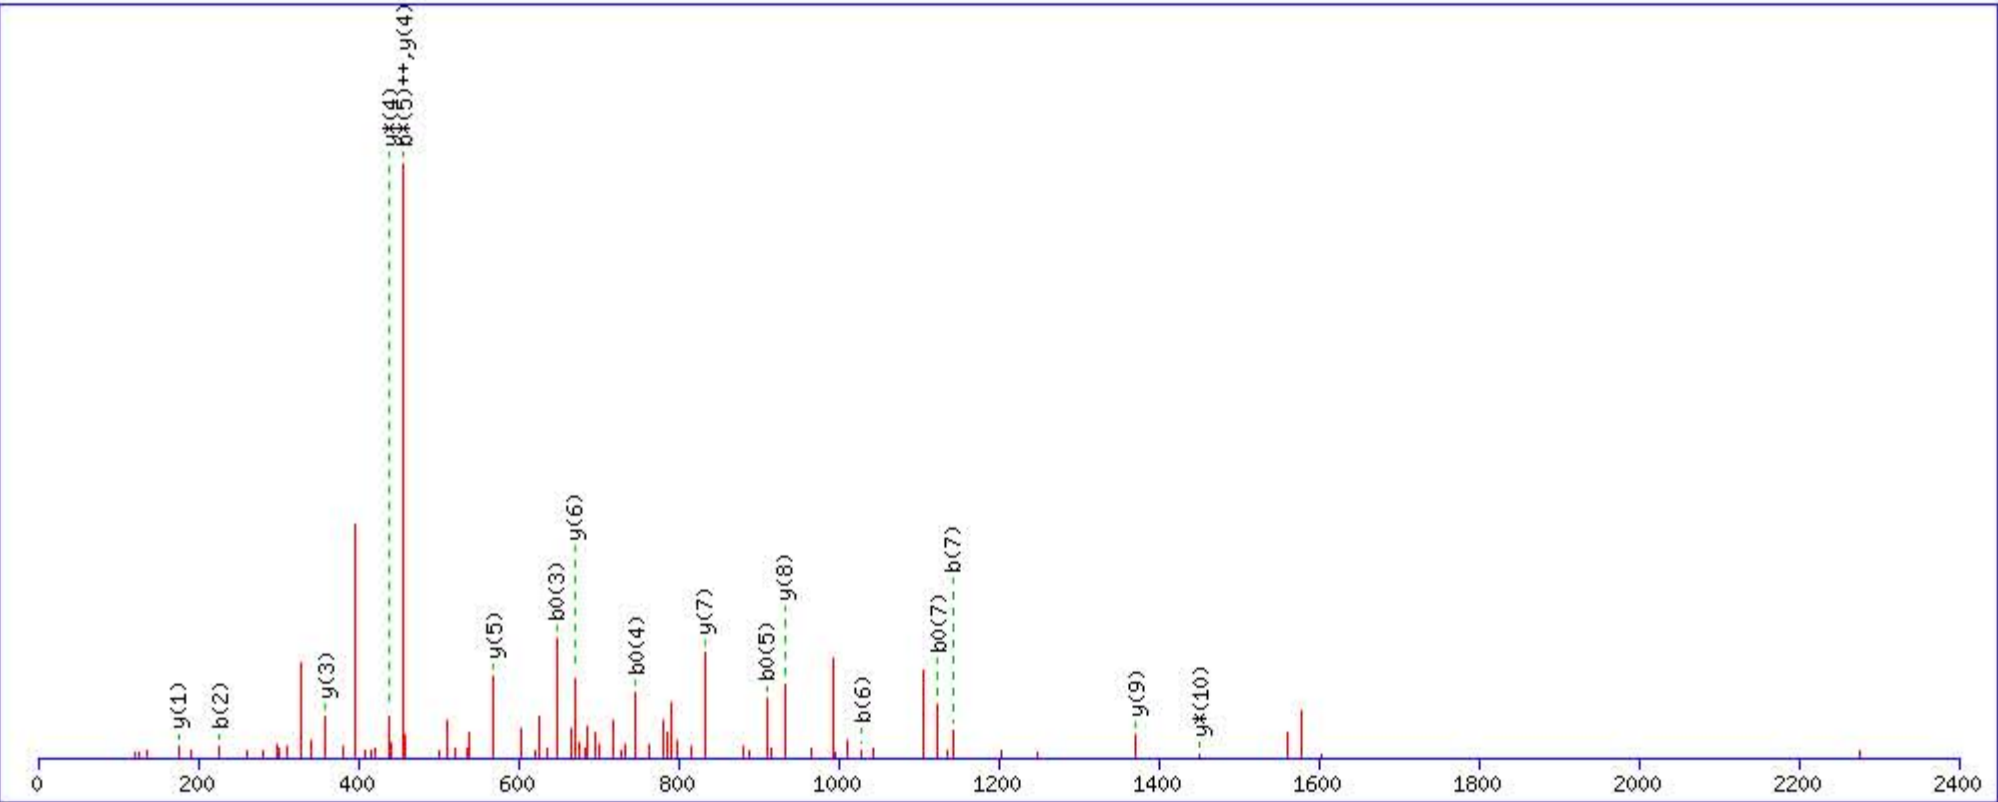

Monoisotopic mass of neutral peptide Mr(calc): 1596.833389  
Fixed modifications: Carbamidomethyl (C) (apply to specified residues or termini only)  
Variable modifications:  
Q3 : Biotin:Thermo-21345 (Q)  
Ions Score: 45 Expect: 0.00031  
Matches : 18/114 fragment ions using 38 most intense peaks [\(help\)](#)

| #  | b           | b <sup>++</sup> | b <sup>*</sup> | b <sup>++</sup> * | b <sup>0</sup> | b <sup>0++</sup> | Seq. | y           | y <sup>++</sup> | y <sup>*</sup> | y <sup>++</sup> * | y <sup>0</sup> | y <sup>0++</sup> | #  |
|----|-------------|-----------------|----------------|-------------------|----------------|------------------|------|-------------|-----------------|----------------|-------------------|----------------|------------------|----|
| 1  | 130.049869  | 65.528572       |                |                   | 112.039304     | 56.523290        | E    |             |                 |                |                   |                |                  | 11 |
| 2  | 227.102633  | 114.054954      |                |                   | 209.092068     | 105.049672       | P    | 1468.798084 | 734.902680      | 1451.771535    | 726.389406        | 1450.787519    | 725.897398       | 10 |
| 3  | 666.327959  | 333.667618      | 649.301410     | 325.154343        | 648.317394     | 324.662335       | Q    | 1371.745320 | 686.376298      | 1354.718771    | 677.863024        | 1353.734755    | 677.371016       | 9  |
| 4  | 765.396373  | 383.201825      | 748.369824     | 374.688550        | 747.385808     | 374.196542       | V    | 932.519994  | 466.763635      | 915.493445     | 458.250361        | 914.509429     | 457.758353       | 8  |
| 5  | 928.459702  | 464.733489      | 911.433153     | 456.220215        | 910.449137     | 455.728207       | Y    | 833.451580  | 417.229428      | 816.425031     | 408.716154        | 815.441015     | 408.224146       | 7  |
| 6  | 1029.507381 | 515.257329      | 1012.480832    | 506.744054        | 1011.496816    | 506.252046       | T    | 670.388251  | 335.697764      | 653.361702     | 327.184489        | 652.377686     | 326.692481       | 6  |
| 7  | 1142.591445 | 571.799361      | 1125.564896    | 563.286086        | 1124.580880    | 562.794078       | L    | 569.340572  | 285.173924      | 552.314023     | 276.660650        | 551.330007     | 276.168642       | 5  |
| 8  | 1239.644209 | 620.325743      | 1222.617660    | 611.812468        | 1221.633644    | 611.320460       | P    | 456.256508  | 228.631892      | 439.229959     | 220.118618        | 438.245943     | 219.626610       | 4  |
| 9  | 1336.696973 | 668.852125      | 1319.670424    | 660.338850        | 1318.686408    | 659.846842       | P    | 359.203744  | 180.105510      | 342.177195     | 171.592236        | 341.193179     | 171.100228       | 3  |
| 10 | 1423.729001 | 712.368139      | 1406.702452    | 703.854864        | 1405.718436    | 703.362856       | S    | 262.150980  | 131.579128      | 245.124431     | 123.065854        | 244.140415     | 122.573846       | 2  |
| 11 |             |                 |                |                   |                |                  | R    | 175.118952  | 88.063114       | 158.092403     | 79.549839         |                |                  | 1  |

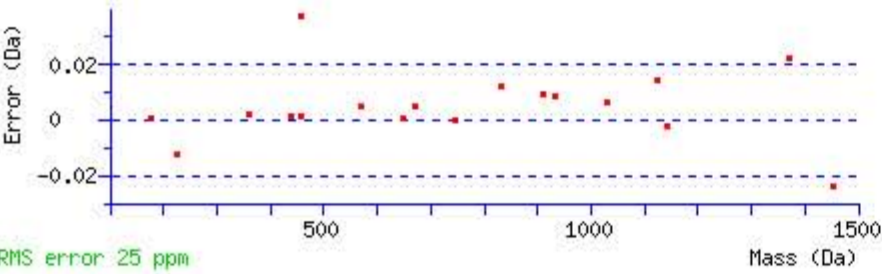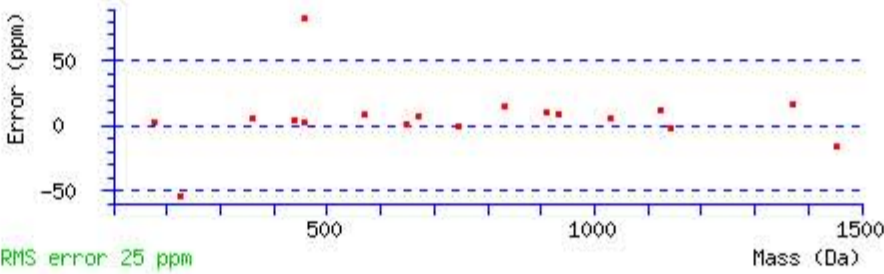

NCBI BLAST search of [EPQVYTLPPSR](#)  
(Parameters: blastp, nr protein database, expect=20000, no filter, PAM30)  
Other BLAST [web gateways](#)

All matches to this query

| Score | Mr(calc):   | Delta     | Sequence                          |
|-------|-------------|-----------|-----------------------------------|
| 45.2  | 1596.833389 | 0.008359  | <a href="#">EPQVYTLPPSR</a>       |
| 7.3   | 1596.847122 | -0.005374 | <a href="#">ATPSSSPGTATALPALR</a> |
| 5.4   | 1596.825974 | 0.015774  | <a href="#">KLSDLAQWAPSPR</a>     |
| 1.7   | 1596.835876 | 0.005872  | <a href="#">TLHQGEESLLELTK</a>    |
| 0.5   | 1596.854507 | -0.012759 | <a href="#">EQLVTKDPASAK</a>      |

MATRIX

SCIENCE

Mascot Search Results

Peptide View

MS/MS Fragmentation of **WQQGNVFSCSVMEALHNHYTQK**  
Found in **IGHG1\_HUMAN**, Ig gamma-1 chain C region OS=Homo sapiens GN=IGHG1 PE=1 SV=1

Match to Query 60915: 3111.440870 from(623.295450,5+) rtinseconds(2037) index(66628)  
Title: Locus:1.1.1.1984.10 File:"2013-07-02 CLN FXIII 180 min 2nd FT.wiff"  
Data file C:\Program Files (x86)\Matrix Science\Mascot Daemon\mgf\8 FXIII 180 min 2nd\mascot\_daemon\_merge.mgf

Click mouse within plot area to zoom in by factor of two about that point  
Or, 

Plot from

0

 to 

2400

 Da 

Full range

  
Label all possible matches ☐ Label matches used for scoring ☒

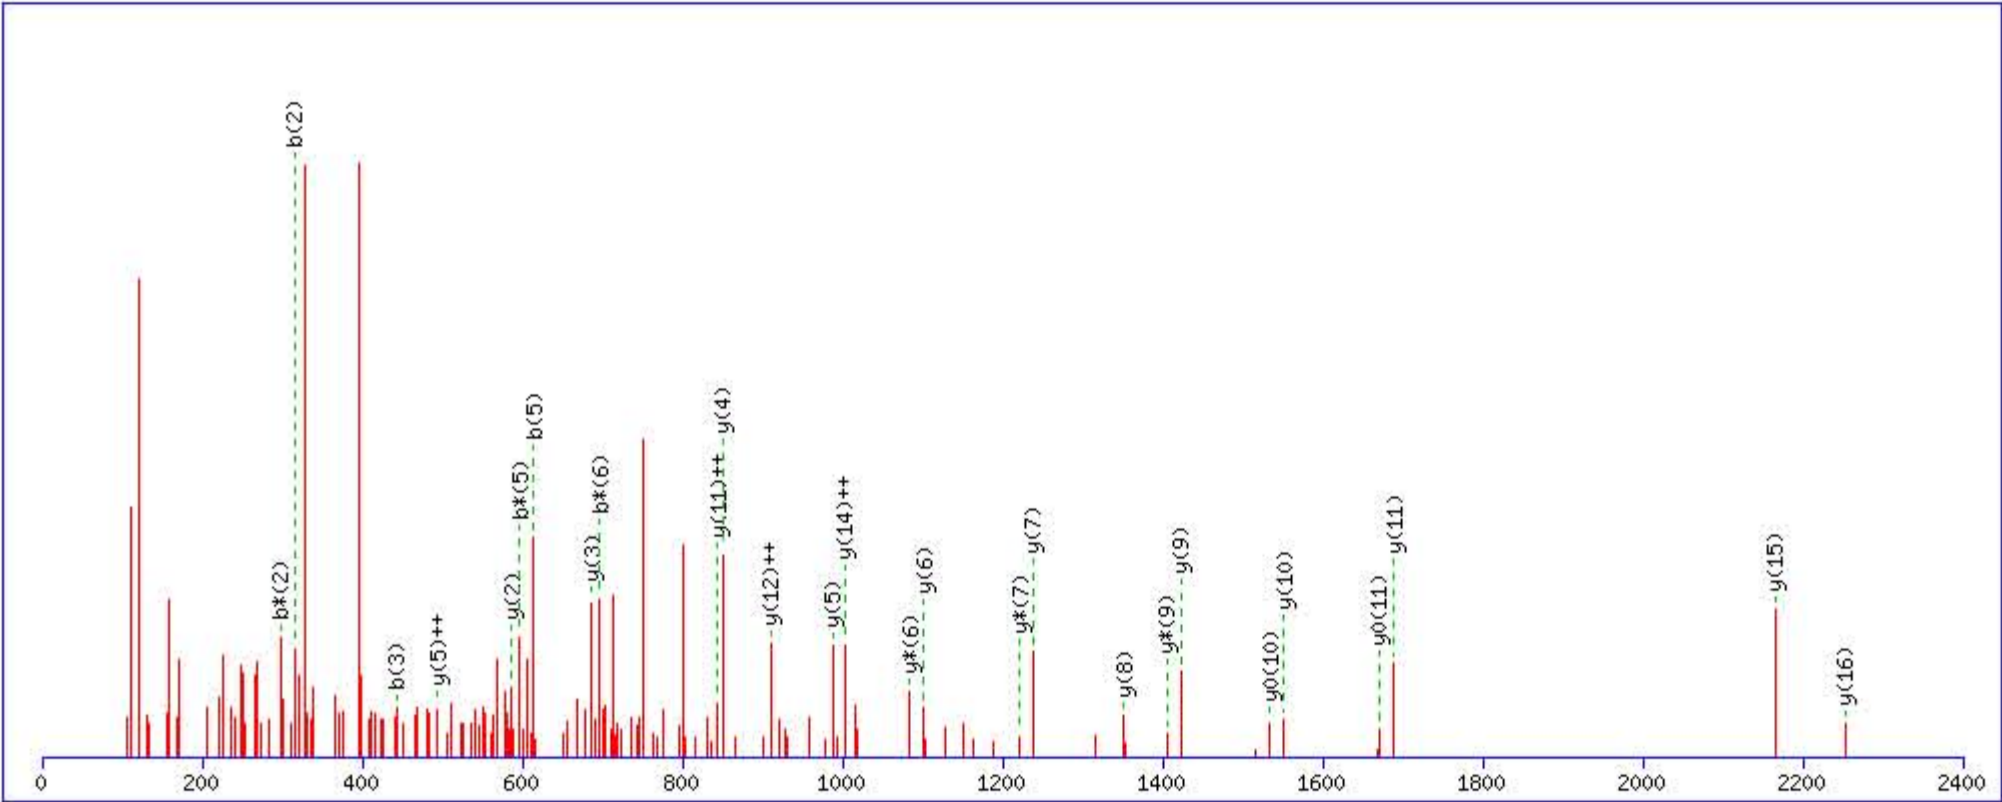

Monoisotopic mass of neutral peptide Mr(calc): 3111.426590  
Fixed modifications: Carbamidomethyl (C) (apply to specified residues or termini only)  
Variable modifications:  
Q22 : Biotin:Thermo-21345 (Q)  
Ions Score: 60 Expect: 1.6e-005  
Matches : 27/244 fragment ions using 48 most intense peaks [\(help\)](#)

| #  | b           | b <sup>++</sup> | b <sup>*</sup> | b <sup>*++</sup> | b <sup>0</sup> | b <sup>0++</sup> | Seq. | y           | y <sup>++</sup> | y <sup>*</sup> | y <sup>*++</sup> | y <sup>0</sup> | y <sup>0++</sup> | #  |
|----|-------------|-----------------|----------------|------------------|----------------|------------------|------|-------------|-----------------|----------------|------------------|----------------|------------------|----|
| 1  | 187.086589  | 94.046932       |                |                  |                |                  | W    |             |                 |                |                  |                |                  | 23 |
| 2  | 315.145167  | 158.076222      | 298.118618     | 149.562947       |                |                  | Q    | 2926.354551 | 1463.680913     | 2909.328002    | 1455.167639      | 2908.343986    | 1454.675631      | 22 |
| 3  | 443.203745  | 222.105511      | 426.177196     | 213.592236       |                |                  | Q    | 2798.295973 | 1399.651624     | 2781.269424    | 1391.138350      | 2780.285408    | 1390.646342      | 21 |
| 4  | 500.225209  | 250.616243      | 483.198660     | 242.102968       |                |                  | G    | 2670.237395 | 1335.622335     | 2653.210846    | 1327.109061      | 2652.226830    | 1326.617053      | 20 |
| 5  | 614.268136  | 307.637706      | 597.241587     | 299.124432       |                |                  | N    | 2613.215931 | 1307.111603     | 2596.189382    | 1298.598329      | 2595.205366    | 1298.106321      | 19 |
| 6  | 713.336550  | 357.171913      | 696.310001     | 348.658639       |                |                  | V    | 2499.173004 | 1250.090140     | 2482.146455    | 1241.576865      | 2481.162439    | 1241.084857      | 18 |
| 7  | 860.404964  | 430.706120      | 843.378415     | 422.192845       |                |                  | F    | 2400.104590 | 1200.555933     | 2383.078041    | 1192.042658      | 2382.094025    | 1191.550650      | 17 |
| 8  | 947.436992  | 474.222134      | 930.410443     | 465.708859       | 929.426427     | 465.216851       | S    | 2253.036176 | 1127.021726     | 2236.009627    | 1118.508451      | 2235.025611    | 1118.016443      | 16 |
| 9  | 1107.467641 | 554.237459      | 1090.441092    | 545.724184       | 1089.457076    | 545.232176       | C    | 2166.004148 | 1083.505712     | 2148.977599    | 1074.992437      | 2147.993583    | 1074.500429      | 15 |
| 10 | 1194.499669 | 597.753473      | 1177.473120    | 589.240198       | 1176.489104    | 588.748190       | S    | 2005.973499 | 1003.490388     | 1988.946950    | 994.977113       | 1987.962934    | 994.485105       | 14 |
| 11 | 1293.568083 | 647.287680      | 1276.541534    | 638.774405       | 1275.557518    | 638.282397       | V    | 1918.941471 | 959.974373      | 1901.914922    | 951.461099       | 1900.930906    | 950.969091       | 13 |
| 12 | 1424.608568 | 712.807922      | 1407.582019    | 704.294648       | 1406.598003    | 703.802640       | M    | 1819.873057 | 910.440166      | 1802.846508    | 901.926892       | 1801.862492    | 901.434884       | 12 |
| 13 | 1561.667480 | 781.337378      | 1544.640931    | 772.824104       | 1543.656915    | 772.332096       | H    | 1688.832572 | 844.919924      | 1671.806023    | 836.406649       | 1670.822007    | 835.914641       | 11 |
| 14 | 1690.710073 | 845.858675      | 1673.683524    | 837.345400       | 1672.699508    | 836.853392       | E    | 1551.773660 | 776.390468      | 1534.747111    | 767.877193       | 1533.763095    | 767.385185       | 10 |
| 15 | 1761.747187 | 881.377231      | 1744.720638    | 872.863957       | 1743.736622    | 872.371949       | A    | 1422.731067 | 711.869171      | 1405.704518    | 703.355897       | 1404.720502    | 702.863889       | 9  |
| 16 | 1874.831251 | 937.919263      | 1857.804702    | 929.405989       | 1856.820686    | 928.913981       | L    | 1351.693953 | 676.350615      | 1334.667404    | 667.837340       | 1333.683388    | 667.345332       | 8  |
| 17 | 2011.890163 | 1006.448719     | 1994.863614    | 997.935445       | 1993.879598    | 997.443437       | H    | 1238.609889 | 619.808583      | 1221.583340    | 611.295308       | 1220.599324    | 610.803300       | 7  |
| 18 | 2125.933090 | 1063.470183     | 2108.906541    | 1054.956908      | 2107.922525    | 1054.464900      | N    | 1101.550977 | 551.279127      | 1084.524428    | 542.765852       | 1083.540412    | 542.273844       | 6  |
| 19 | 2262.992002 | 1131.999639     | 2245.965453    | 1123.486364      | 2244.981437    | 1122.994356      | H    | 987.508050  | 494.257663      | 970.481501     | 485.744389       | 969.497485     | 485.252381       | 5  |
| 20 | 2426.055331 | 1213.531303     | 2409.028782    | 1205.018029      | 2408.044766    | 1204.526021      | Y    | 850.449138  | 425.728207      | 833.422589     | 417.214933       | 832.438573     | 416.722925       | 4  |
| 21 | 2527.103010 | 1264.055143     | 2510.076461    | 1255.541868      | 2509.092445    | 1255.049860      | T    | 687.385809  | 344.196543      | 670.359260     | 335.683268       | 669.375244     | 335.191260       | 3  |
| 22 | 2966.328336 | 1483.667806     | 2949.301787    | 1475.154531      | 2948.317771    | 1474.662523      | Q    | 586.338130  | 293.672703      | 569.311581     | 285.159429       |                |                  | 2  |
| 23 |             |                 |                |                  |                |                  | K    | 147.112804  | 74.060040       | 130.086255     | 65.546765        |                |                  | 1  |

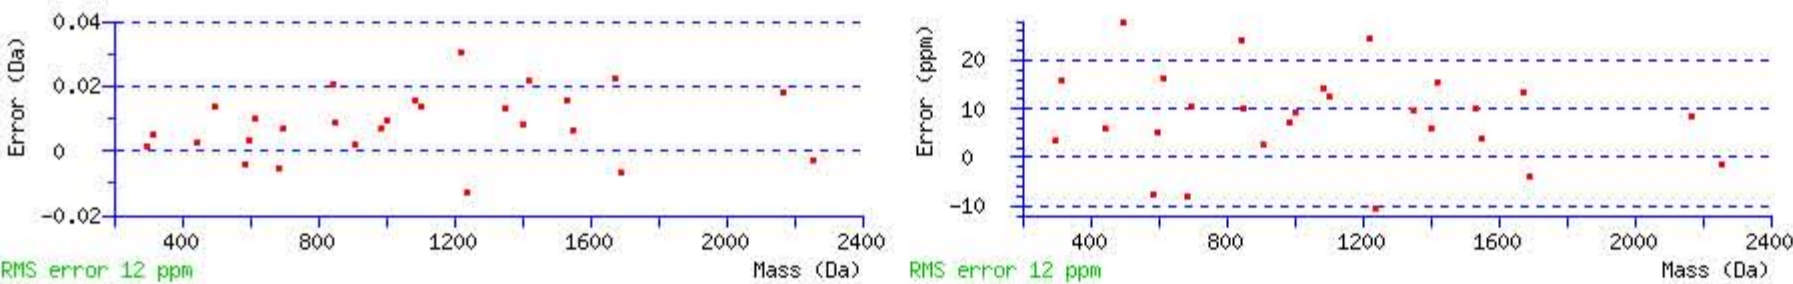

NCBI BLAST search of **WQQGNVFSCSVMEALHNHYTQK**  
(Parameters: blastp, nr protein database, expect=20000, no filter, PAM30)  
Other BLAST [web gateways](#)

All matches to this query

| Score | Mr(calc):   | Delta    | Sequence                               |
|-------|-------------|----------|----------------------------------------|
| 59.7  | 3111.426590 | 0.014280 | <a href="#">WQQGNVFSCSVMEALHNHYTQK</a> |

MATRIX

SCIENCE

Mascot Search Results

Peptide View

MS/MS Fragmentation of **NQVSLTCLVK**  
Found in **IGHG1\_HUMAN**, Ig gamma-1 chain C region OS=Homo sapiens GN=IGHG1 PE=1 SV=1

Match to Query 30278: 1471.795568 from(736.905060,2+) rtinseconds(2229) index(6944)  
Title: Locus:1.1.1.2053.20 File:"2013-07-02 CLN FXIII 180 min 2nd F 1.wiff"  
Data file C:\Program Files (x86)\Matrix Science\Mascot Daemon\mgf\8 FXIII 180 min 2nd\mascot\_daemon\_merge.mgf

Click mouse within plot area to zoom in by factor of two about that point  
Or, 

Plot from

100

 to 

1700

 Da 

Full range

  
Label all possible matches ☐ Label matches used for scoring ☒



Monoisotopic mass of neutral peptide Mr(calc): 1471.789093  
Fixed modifications: Carbamidomethyl (C) (apply to specified residues or termini only)  
Variable modifications:  
Q2 : Biotin:Thermo-21345 (Q)  
Ions Score: 39 Expect: 0.0026  
Matches : 14/94 fragment ions using 27 most intense peaks [\(help\)](#)

| #  | b           | b <sup>++</sup> | b <sup>*</sup> | b <sup>++</sup> * | b <sup>0</sup> | b <sup>0++</sup> | Seq. | y           | y <sup>++</sup> | y <sup>*</sup> | y <sup>++</sup> * | y <sup>0</sup> | y <sup>0++</sup> | #  |
|----|-------------|-----------------|----------------|-------------------|----------------|------------------|------|-------------|-----------------|----------------|-------------------|----------------|------------------|----|
| 1  | 115.050203  | 58.028740       | 98.023654      | 49.515465         |                |                  | N    |             |                 |                |                   |                |                  | 10 |
| 2  | 554.275529  | 277.641403      | 537.248980     | 269.128128        |                |                  | Q    | 1358.753442 | 679.880359      | 1341.726893    | 671.367085        | 1340.742877    | 670.875076       | 9  |
| 3  | 653.343943  | 327.175610      | 636.317394     | 318.662335        |                |                  | V    | 919.528116  | 460.267696      | 902.501567     | 451.754421        | 901.517551     | 451.262413       | 8  |
| 4  | 740.375971  | 370.691623      | 723.349422     | 362.178349        | 722.365406     | 361.686341       | S    | 820.459702  | 410.733489      | 803.433153     | 402.220215        | 802.449137     | 401.728207       | 7  |
| 5  | 853.460035  | 427.233656      | 836.433486     | 418.720381        | 835.449470     | 418.228373       | L    | 733.427674  | 367.217475      | 716.401125     | 358.704201        | 715.417109     | 358.212193       | 6  |
| 6  | 954.507714  | 477.757495      | 937.481165     | 469.244220        | 936.497149     | 468.752212       | T    | 620.343610  | 310.675443      | 603.317061     | 302.162169        | 602.333045     | 301.670161       | 5  |
| 7  | 1114.538363 | 557.772819      | 1097.511814    | 549.259545        | 1096.527798    | 548.767537       | C    | 519.295931  | 260.151604      | 502.269382     | 251.638329        |                |                  | 4  |
| 8  | 1227.622427 | 614.314851      | 1210.595878    | 605.801577        | 1209.611862    | 605.309569       | L    | 359.265282  | 180.136279      | 342.238733     | 171.623004        |                |                  | 3  |
| 9  | 1326.690841 | 663.849058      | 1309.664292    | 655.335784        | 1308.680276    | 654.843776       | V    | 246.181218  | 123.594247      | 229.154669     | 115.080973        |                |                  | 2  |
| 10 |             |                 |                |                   |                |                  | K    | 147.112804  | 74.060040       | 130.086255     | 65.546765         |                |                  | 1  |

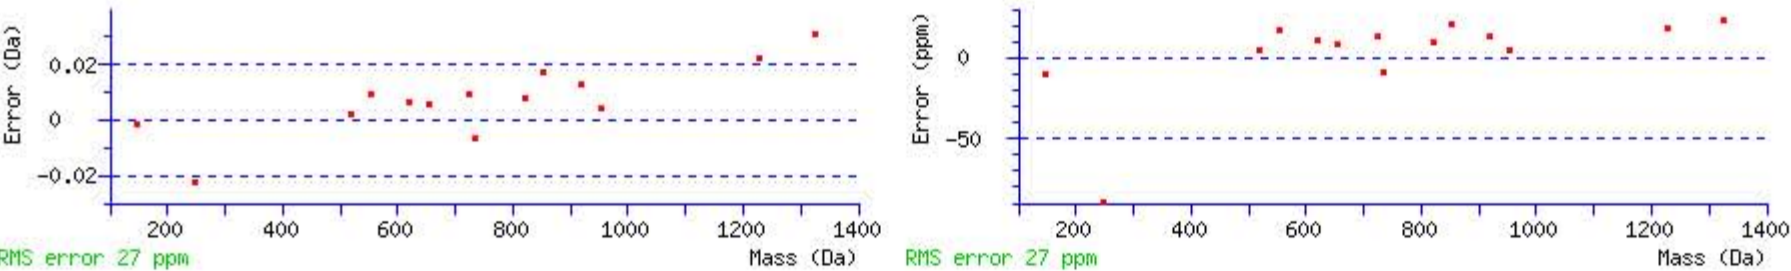

NCBI BLAST search of [NQVSLTCLVK](#)  
(Parameters: blastp, nr protein database, expect=20000, no filter, PAM30)  
Other BLAST [web gateways](#)

All matches to this query

| Score | Mr(calc):   | Delta     | Sequence                        |
|-------|-------------|-----------|---------------------------------|
| 39.5  | 1471.789093 | 0.006475  | <a href="#">NQVSLTCLVK</a>      |
| 12.6  | 1471.778305 | 0.017263  | <a href="#">WNVSRPSLLADSK</a>   |
| 7.5   | 1471.777847 | 0.017721  | <a href="#">QLDMELVSVK</a>      |
| 4.9   | 1471.797592 | -0.002024 | <a href="#">KYFWDRAFLVK</a>     |
| 3.0   | 1471.806793 | -0.011225 | <a href="#">AAALLAKQAEME VK</a> |
| 3.0   | 1471.796951 | -0.001383 | <a href="#">QRAAQFDVVK</a>      |
| 1.6   | 1471.814713 | -0.019145 | <a href="#">RQVIVGTWGESLK</a>   |

MATRIX

SCIENCE

Mascot Search Results

Peptide View

MS/MS Fragmentation of **EPQVYTLPPSR**  
Found in **IGHG1\_HUMAN**, Ig gamma-1 chain C region OS=Homo sapiens GN=IGHG1 PE=1 SV=1

Match to Query 34615: 1596.841748 from(799.428150,2+) rtinseconds(1923) index(65896)  
Title: Locus:1.1.1.1944.26 File:"2013-07-02 CLN FXIII 180 min 2nd FT.wiff"  
Data file C:\Program Files (x86)\Matrix Science\Mascot Daemon\mgf\8 FXIII 180 min 2nd\mascot\_daemon\_merge.mgf

Click mouse within plot area to zoom in by factor of two about that point  
Or, 

Plot from

0

 to 

2400

 Da 

Full range

  
Label all possible matches ☐ Label matches used for scoring ☒



Monoisotopic mass of neutral peptide Mr(calc): 1596.833389  
Fixed modifications: Carbamidomethyl (C) (apply to specified residues or termini only)  
Variable modifications:  
Q3 : Biotin:Thermo-21345 (Q)  
Ions Score: 45 Expect: 0.00031  
Matches : 18/114 fragment ions using 38 most intense peaks [\(help\)](#)

| #  | b           | b <sup>++</sup> | b <sup>+</sup> | b <sup>+++</sup> | b <sup>0</sup> | b <sup>0++</sup> | Seq. | y           | y <sup>++</sup> | y <sup>+</sup> | y <sup>+++</sup> | y <sup>0</sup> | y <sup>0++</sup> | #  |
|----|-------------|-----------------|----------------|------------------|----------------|------------------|------|-------------|-----------------|----------------|------------------|----------------|------------------|----|
| 1  | 130.049869  | 65.528572       |                |                  | 112.039304     | 56.523290        | E    |             |                 |                |                  |                |                  | 11 |
| 2  | 227.102633  | 114.054954      |                |                  | 209.092068     | 105.049672       | P    | 1468.798084 | 734.902680      | 1451.771535    | 726.389406       | 1450.787519    | 725.897398       | 10 |
| 3  | 666.327959  | 333.667618      | 649.301410     | 325.154343       | 648.317394     | 324.662335       | Q    | 1371.745320 | 686.376298      | 1354.718771    | 677.863024       | 1353.734755    | 677.371016       | 9  |
| 4  | 765.396373  | 383.201825      | 748.369824     | 374.688550       | 747.385808     | 374.196542       | V    | 932.519994  | 466.763635      | 915.493445     | 458.250361       | 914.509429     | 457.758353       | 8  |
| 5  | 928.459702  | 464.733489      | 911.433153     | 456.220215       | 910.449137     | 455.728207       | Y    | 833.451580  | 417.229428      | 816.425031     | 408.716154       | 815.441015     | 408.224146       | 7  |
| 6  | 1029.507381 | 515.257329      | 1012.480832    | 506.744054       | 1011.496816    | 506.252046       | T    | 670.388251  | 335.697764      | 653.361702     | 327.184489       | 652.377686     | 326.692481       | 6  |
| 7  | 1142.591445 | 571.799361      | 1125.564896    | 563.286086       | 1124.580880    | 562.794078       | L    | 569.340572  | 285.173924      | 552.314023     | 276.660650       | 551.330007     | 276.168642       | 5  |
| 8  | 1239.644209 | 620.325743      | 1222.617660    | 611.812468       | 1221.633644    | 611.320460       | P    | 456.256508  | 228.631892      | 439.229959     | 220.118618       | 438.245943     | 219.626610       | 4  |
| 9  | 1336.696973 | 668.852125      | 1319.670424    | 660.338850       | 1318.686408    | 659.846842       | P    | 359.203744  | 180.105510      | 342.177195     | 171.592236       | 341.193179     | 171.100228       | 3  |
| 10 | 1423.729001 | 712.368139      | 1406.702452    | 703.854864       | 1405.718436    | 703.362856       | S    | 262.150980  | 131.579128      | 245.124431     | 123.065854       | 244.140415     | 122.573846       | 2  |
| 11 |             |                 |                |                  |                |                  | R    | 175.118952  | 88.063114       | 158.092403     | 79.549839        |                |                  | 1  |



NCBI BLAST search of [EPQVYTLPPSR](#)  
(Parameters: blastp, nr protein database, expect=20000, no filter, PAM30)  
Other BLAST [web gateways](#)

All matches to this query

| Score | Mr(calc):   | Delta     | Sequence                          |
|-------|-------------|-----------|-----------------------------------|
| 45.2  | 1596.833389 | 0.008359  | <a href="#">EPQVYTLPPSR</a>       |
| 7.3   | 1596.847122 | -0.005374 | <a href="#">ATPSSSPGTATALPALR</a> |
| 5.4   | 1596.825974 | 0.015774  | <a href="#">KLSDLAQWAPSPR</a>     |
| 1.7   | 1596.835876 | 0.005872  | <a href="#">TLHQGEESLLELTK</a>    |
| 0.5   | 1596.854507 | -0.012759 | <a href="#">EQLVTKDPASAK</a>      |

MATRIX

SCIENCE

Mascot Search Results

Peptide View

MS/MS Fragmentation of **WQQGNVFSCSVMEALHNHYTQK**  
Found in **IGHG1\_HUMAN**, Ig gamma-1 chain C region OS=Homo sapiens GN=IGHG1 PE=1 SV=1

Match to Query 60915: 3111.440870 from(623.295450,5+) rtinseconds(2037) index(66628)  
Title: Locus:1.1.1.1984.10 File:"2013-07-02 CLN FXIII 180 min 2nd FT.wiff"  
Data file C:\Program Files (x86)\Matrix Science\Mascot Daemon\mgf\8 FXIII 180 min 2nd\mascot\_daemon\_merge.mgf

Click mouse within plot area to zoom in by factor of two about that point  
Or, 

Plot from

0

 to 

2400

 Da 

Full range

  
Label all possible matches ☐ Label matches used for scoring ☒



Monoisotopic mass of neutral peptide Mr(calc): 3111.426590  
Fixed modifications: Carbamidomethyl (C) (apply to specified residues or termini only)  
Variable modifications:  
Q22 : Biotin:Thermo-21345 (Q)  
Ions Score: 60 Expect: 1.6e-005  
Matches : 27/244 fragment ions using 48 most intense peaks [\(help\)](#)

| #  | b           | b <sup>++</sup> | b <sup>*</sup> | b <sup>*++</sup> | b <sup>0</sup> | b <sup>0++</sup> | Seq. | y           | y <sup>++</sup> | y <sup>*</sup> | y <sup>*++</sup> | y <sup>0</sup> | y <sup>0++</sup> | #  |
|----|-------------|-----------------|----------------|------------------|----------------|------------------|------|-------------|-----------------|----------------|------------------|----------------|------------------|----|
| 1  | 187.086589  | 94.046932       |                |                  |                |                  | W    |             |                 |                |                  |                |                  | 23 |
| 2  | 315.145167  | 158.076222      | 298.118618     | 149.562947       |                |                  | Q    | 2926.354551 | 1463.680913     | 2909.328002    | 1455.167639      | 2908.343986    | 1454.675631      | 22 |
| 3  | 443.203745  | 222.105511      | 426.177196     | 213.592236       |                |                  | Q    | 2798.295973 | 1399.651624     | 2781.269424    | 1391.138350      | 2780.285408    | 1390.646342      | 21 |
| 4  | 500.225209  | 250.616243      | 483.198660     | 242.102968       |                |                  | G    | 2670.237395 | 1335.622335     | 2653.210846    | 1327.109061      | 2652.226830    | 1326.617053      | 20 |
| 5  | 614.268136  | 307.637706      | 597.241587     | 299.124432       |                |                  | N    | 2613.215931 | 1307.111603     | 2596.189382    | 1298.598329      | 2595.205366    | 1298.106321      | 19 |
| 6  | 713.336550  | 357.171913      | 696.310001     | 348.658639       |                |                  | V    | 2499.173004 | 1250.090140     | 2482.146455    | 1241.576865      | 2481.162439    | 1241.084857      | 18 |
| 7  | 860.404964  | 430.706120      | 843.378415     | 422.192845       |                |                  | F    | 2400.104590 | 1200.555933     | 2383.078041    | 1192.042658      | 2382.094025    | 1191.550650      | 17 |
| 8  | 947.436992  | 474.222134      | 930.410443     | 465.708859       | 929.426427     | 465.216851       | S    | 2253.036176 | 1127.021726     | 2236.009627    | 1118.508451      | 2235.025611    | 1118.016443      | 16 |
| 9  | 1107.467641 | 554.237459      | 1090.441092    | 545.724184       | 1089.457076    | 545.232176       | C    | 2166.004148 | 1083.505712     | 2148.977599    | 1074.992437      | 2147.993583    | 1074.500429      | 15 |
| 10 | 1194.499669 | 597.753473      | 1177.473120    | 589.240198       | 1176.489104    | 588.748190       | S    | 2005.973499 | 1003.490388     | 1988.946950    | 994.977113       | 1987.962934    | 994.485105       | 14 |
| 11 | 1293.568083 | 647.287680      | 1276.541534    | 638.774405       | 1275.557518    | 638.282397       | V    | 1918.941471 | 959.974373      | 1901.914922    | 951.461099       | 1900.930906    | 950.969091       | 13 |
| 12 | 1424.608568 | 712.807922      | 1407.582019    | 704.294648       | 1406.598003    | 703.802640       | M    | 1819.873057 | 910.440166      | 1802.846508    | 901.926892       | 1801.862492    | 901.434884       | 12 |
| 13 | 1561.667480 | 781.337378      | 1544.640931    | 772.824104       | 1543.656915    | 772.332096       | H    | 1688.832572 | 844.919924      | 1671.806023    | 836.406649       | 1670.822007    | 835.914641       | 11 |
| 14 | 1690.710073 | 845.858675      | 1673.683524    | 837.345400       | 1672.699508    | 836.853392       | E    | 1551.773660 | 776.390468      | 1534.747111    | 767.877193       | 1533.763095    | 767.385185       | 10 |
| 15 | 1761.747187 | 881.377231      | 1744.720638    | 872.863957       | 1743.736622    | 872.371949       | A    | 1422.731067 | 711.869171      | 1405.704518    | 703.355897       | 1404.720502    | 702.863889       | 9  |
| 16 | 1874.831251 | 937.919263      | 1857.804702    | 929.405989       | 1856.820686    | 928.913981       | L    | 1351.693953 | 676.350615      | 1334.667404    | 667.837340       | 1333.683388    | 667.345332       | 8  |
| 17 | 2011.890163 | 1006.448719     | 1994.863614    | 997.935445       | 1993.879598    | 997.443437       | H    | 1238.609889 | 619.808583      | 1221.583340    | 611.295308       | 1220.599324    | 610.803300       | 7  |
| 18 | 2125.933090 | 1063.470183     | 2108.906541    | 1054.956908      | 2107.922525    | 1054.464900      | N    | 1101.550977 | 551.279127      | 1084.524428    | 542.765852       | 1083.540412    | 542.273844       | 6  |
| 19 | 2262.992002 | 1131.999639     | 2245.965453    | 1123.486364      | 2244.981437    | 1122.994356      | H    | 987.508050  | 494.257663      | 970.481501     | 485.744389       | 969.497485     | 485.252381       | 5  |
| 20 | 2426.055331 | 1213.531303     | 2409.028782    | 1205.018029      | 2408.044766    | 1204.526021      | Y    | 850.449138  | 425.728207      | 833.422589     | 417.214933       | 832.438573     | 416.722925       | 4  |
| 21 | 2527.103010 | 1264.055143     | 2510.076461    | 1255.541868      | 2509.092445    | 1255.049860      | T    | 687.385809  | 344.196543      | 670.359260     | 335.683268       | 669.375244     | 335.191260       | 3  |
| 22 | 2966.328336 | 1483.667806     | 2949.301787    | 1475.154531      | 2948.317771    | 1474.662523      | Q    | 586.338130  | 293.672703      | 569.311581     | 285.159429       |                |                  | 2  |
| 23 |             |                 |                |                  |                |                  | K    | 147.112804  | 74.060040       | 130.086255     | 65.546765        |                |                  | 1  |



NCBI BLAST search of **WQQGNVFSCSVMEALHNHYTQK**  
(Parameters: blastp, nr protein database, expect=20000, no filter, PAM30)  
Other BLAST [web gateways](#)

All matches to this query

| Score | Mr(calc):   | Delta    | Sequence                               |
|-------|-------------|----------|----------------------------------------|
| 59.7  | 3111.426590 | 0.014280 | <a href="#">WQQGNVFSCSVMEALHNHYTQK</a> |

MATRIX

SCIENCE

Mascot Search Results

Peptide View

MS/MS Fragmentation of **NQVSLTCLVK**  
Found in **IGHG1\_HUMAN**, Ig gamma-1 chain C region OS=Homo sapiens GN=IGHG1 PE=1 SV=1

Match to Query 30278: 1471.795568 from(736.905060,2+) rtinseconds(2229) index(6944)  
Title: Locus:1.1.1.2053.20 File:"2013-07-02 CLN FXIII 180 min 2nd F 1.wiff"  
Data file C:\Program Files (x86)\Matrix Science\Mascot Daemon\mgf\8 FXIII 180 min 2nd\mascot\_daemon\_merge.mgf

Click mouse within plot area to zoom in by factor of two about that point  
Or, 

Plot from

100

 to 

1700

 Da 

Full range

  
Label all possible matches ☐ Label matches used for scoring ☒



Monoisotopic mass of neutral peptide Mr(calc): 1471.789093  
Fixed modifications: Carbamidomethyl (C) (apply to specified residues or termini only)  
Variable modifications:  
Q2 : Biotin:Thermo-21345 (Q)  
Ions Score: 39 Expect: 0.0026  
Matches : 14/94 fragment ions using 27 most intense peaks [\(help\)](#)

| #  | b           | b <sup>++</sup> | b <sup>*</sup> | b <sup>++</sup> * | b <sup>0</sup> | b <sup>0++</sup> | Seq. | y           | y <sup>++</sup> | y <sup>*</sup> | y <sup>++</sup> * | y <sup>0</sup> | y <sup>0++</sup> | #  |
|----|-------------|-----------------|----------------|-------------------|----------------|------------------|------|-------------|-----------------|----------------|-------------------|----------------|------------------|----|
| 1  | 115.050203  | 58.028740       | 98.023654      | 49.515465         |                |                  | N    |             |                 |                |                   |                |                  | 10 |
| 2  | 554.275529  | 277.641403      | 537.248980     | 269.128128        |                |                  | Q    | 1358.753442 | 679.880359      | 1341.726893    | 671.367085        | 1340.742877    | 670.875076       | 9  |
| 3  | 653.343943  | 327.175610      | 636.317394     | 318.662335        |                |                  | V    | 919.528116  | 460.267696      | 902.501567     | 451.754421        | 901.517551     | 451.262413       | 8  |
| 4  | 740.375971  | 370.691623      | 723.349422     | 362.178349        | 722.365406     | 361.686341       | S    | 820.459702  | 410.733489      | 803.433153     | 402.220215        | 802.449137     | 401.728207       | 7  |
| 5  | 853.460035  | 427.233656      | 836.433486     | 418.720381        | 835.449470     | 418.228373       | L    | 733.427674  | 367.217475      | 716.401125     | 358.704201        | 715.417109     | 358.212193       | 6  |
| 6  | 954.507714  | 477.757495      | 937.481165     | 469.244220        | 936.497149     | 468.752212       | T    | 620.343610  | 310.675443      | 603.317061     | 302.162169        | 602.333045     | 301.670161       | 5  |
| 7  | 1114.538363 | 557.772819      | 1097.511814    | 549.259545        | 1096.527798    | 548.767537       | C    | 519.295931  | 260.151604      | 502.269382     | 251.638329        |                |                  | 4  |
| 8  | 1227.622427 | 614.314851      | 1210.595878    | 605.801577        | 1209.611862    | 605.309569       | L    | 359.265282  | 180.136279      | 342.238733     | 171.623004        |                |                  | 3  |
| 9  | 1326.690841 | 663.849058      | 1309.664292    | 655.335784        | 1308.680276    | 654.843776       | V    | 246.181218  | 123.594247      | 229.154669     | 115.080973        |                |                  | 2  |
| 10 |             |                 |                |                   |                |                  | K    | 147.112804  | 74.060040       | 130.086255     | 65.546765         |                |                  | 1  |

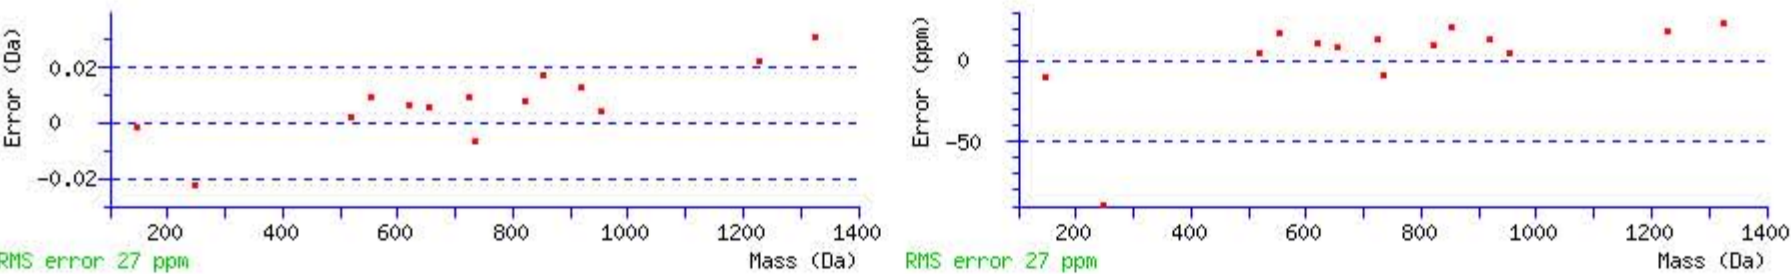

NCBI BLAST search of [NQVSLTCLVK](#)  
(Parameters: blastp, nr protein database, expect=20000, no filter, PAM30)  
Other BLAST [web gateways](#)

All matches to this query

| Score | Mr(calc):   | Delta     | Sequence                        |
|-------|-------------|-----------|---------------------------------|
| 39.5  | 1471.789093 | 0.006475  | <a href="#">NQVSLTCLVK</a>      |
| 12.6  | 1471.778305 | 0.017263  | <a href="#">WNVSRPSLLADSK</a>   |
| 7.5   | 1471.777847 | 0.017721  | <a href="#">QLDMELVSVK</a>      |
| 4.9   | 1471.797592 | -0.002024 | <a href="#">KYFWDRAFLVK</a>     |
| 3.0   | 1471.806793 | -0.011225 | <a href="#">AAALLAKQAEME VK</a> |
| 3.0   | 1471.796951 | -0.001383 | <a href="#">QRAAQFDVVK</a>      |
| 1.6   | 1471.814713 | -0.019145 | <a href="#">RQVIVGTWGESLK</a>   |

MATRIX

SCIENCE

Mascot Search Results

Peptide View

MS/MS Fragmentation of **EPQVYTLPPSR**  
Found in **IGHG1\_HUMAN**, Ig gamma-1 chain C region OS=Homo sapiens GN=IGHG1 PE=1 SV=1

Match to Query 34615: 1596.841748 from(799.428150,2+) rtinseconds(1923) index(65896)  
Title: Locus:1.1.1.1944.26 File:"2013-07-02 CLN FXIII 180 min 2nd FT.wiff"  
Data file C:\Program Files (x86)\Matrix Science\Mascot Daemon\mgf\8 FXIII 180 min 2nd\mascot\_daemon\_merge.mgf

Click mouse within plot area to zoom in by factor of two about that point  
Or, 

Plot from

0

 to 

2400

 Da 

Full range

  
Label all possible matches ☐ Label matches used for scoring ☒

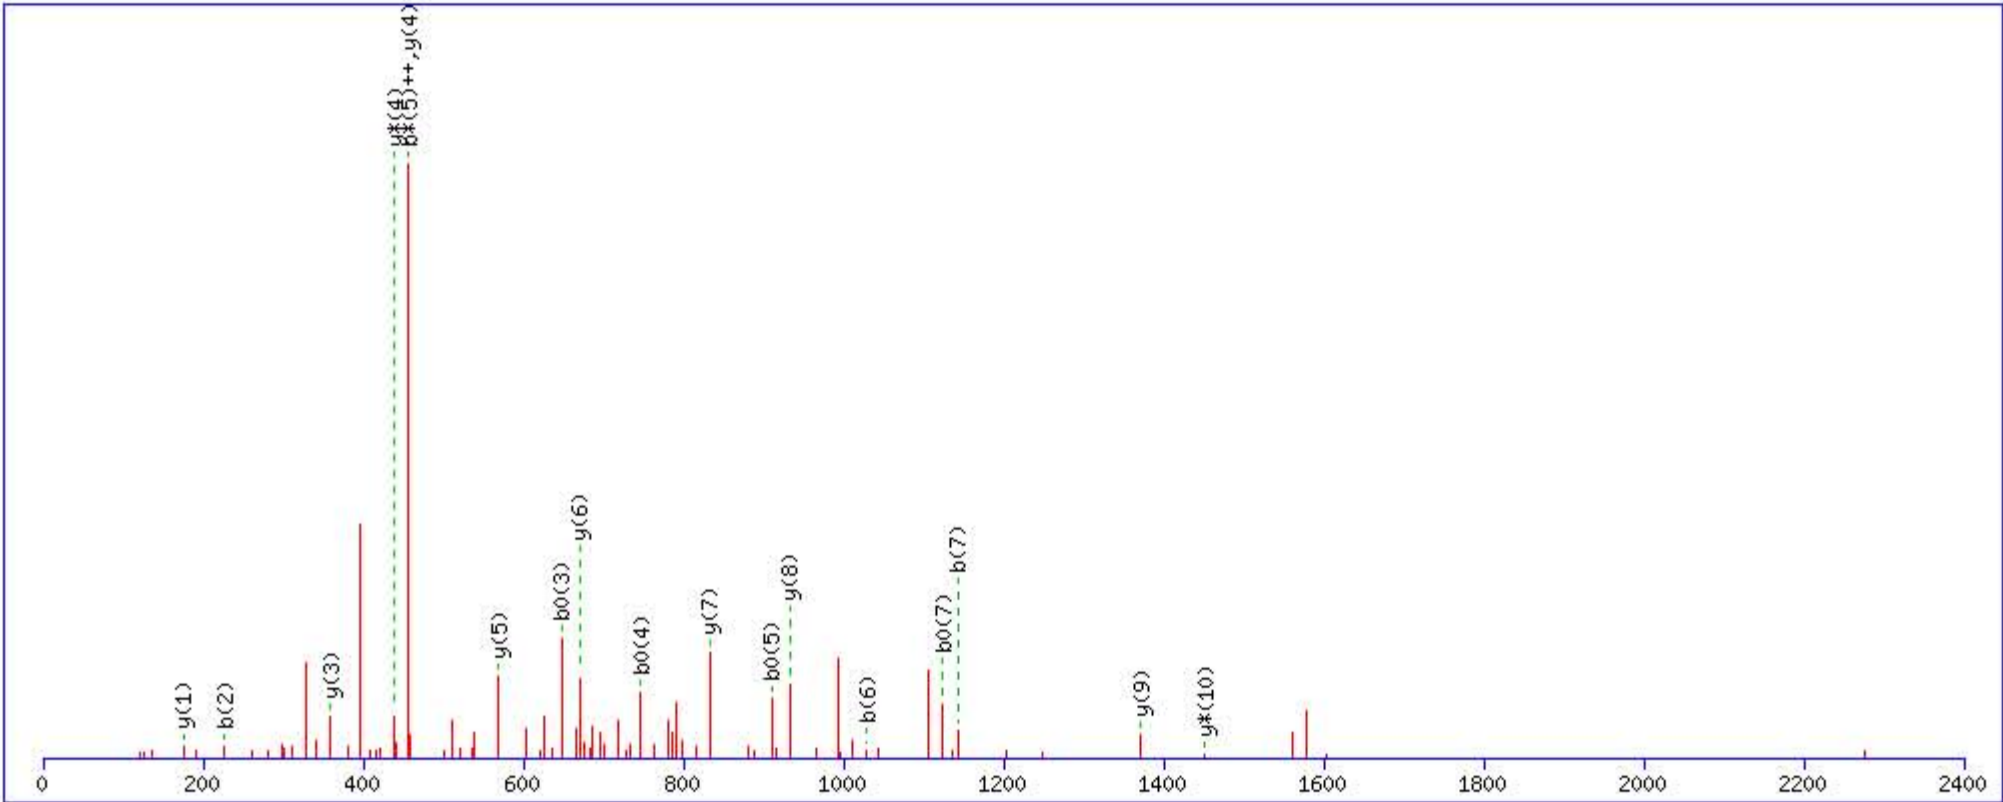

Monoisotopic mass of neutral peptide Mr(calc): 1596.833389  
Fixed modifications: Carbamidomethyl (C) (apply to specified residues or termini only)  
Variable modifications:  
Q3 : Biotin:Thermo-21345 (Q)  
Ions Score: 45 Expect: 0.00031  
Matches : 18/114 fragment ions using 38 most intense peaks [\(help\)](#)

| #  | b           | b <sup>++</sup> | b <sup>+</sup> | b <sup>+++</sup> | b <sup>0</sup> | b <sup>0++</sup> | Seq. | y           | y <sup>++</sup> | y <sup>+</sup> | y <sup>+++</sup> | y <sup>0</sup> | y <sup>0++</sup> | #  |
|----|-------------|-----------------|----------------|------------------|----------------|------------------|------|-------------|-----------------|----------------|------------------|----------------|------------------|----|
| 1  | 130.049869  | 65.528572       |                |                  | 112.039304     | 56.523290        | E    |             |                 |                |                  |                |                  | 11 |
| 2  | 227.102633  | 114.054954      |                |                  | 209.092068     | 105.049672       | P    | 1468.798084 | 734.902680      | 1451.771535    | 726.389406       | 1450.787519    | 725.897398       | 10 |
| 3  | 666.327959  | 333.667618      | 649.301410     | 325.154343       | 648.317394     | 324.662335       | Q    | 1371.745320 | 686.376298      | 1354.718771    | 677.863024       | 1353.734755    | 677.371016       | 9  |
| 4  | 765.396373  | 383.201825      | 748.369824     | 374.688550       | 747.385808     | 374.196542       | V    | 932.519994  | 466.763635      | 915.493445     | 458.250361       | 914.509429     | 457.758353       | 8  |
| 5  | 928.459702  | 464.733489      | 911.433153     | 456.220215       | 910.449137     | 455.728207       | Y    | 833.451580  | 417.229428      | 816.425031     | 408.716154       | 815.441015     | 408.224146       | 7  |
| 6  | 1029.507381 | 515.257329      | 1012.480832    | 506.744054       | 1011.496816    | 506.252046       | T    | 670.388251  | 335.697764      | 653.361702     | 327.184489       | 652.377686     | 326.692481       | 6  |
| 7  | 1142.591445 | 571.799361      | 1125.564896    | 563.286086       | 1124.580880    | 562.794078       | L    | 569.340572  | 285.173924      | 552.314023     | 276.660650       | 551.330007     | 276.168642       | 5  |
| 8  | 1239.644209 | 620.325743      | 1222.617660    | 611.812468       | 1221.633644    | 611.320460       | P    | 456.256508  | 228.631892      | 439.229959     | 220.118618       | 438.245943     | 219.626610       | 4  |
| 9  | 1336.696973 | 668.852125      | 1319.670424    | 660.338850       | 1318.686408    | 659.846842       | P    | 359.203744  | 180.105510      | 342.177195     | 171.592236       | 341.193179     | 171.100228       | 3  |
| 10 | 1423.729001 | 712.368139      | 1406.702452    | 703.854864       | 1405.718436    | 703.362856       | S    | 262.150980  | 131.579128      | 245.124431     | 123.065854       | 244.140415     | 122.573846       | 2  |
| 11 |             |                 |                |                  |                |                  | R    | 175.118952  | 88.063114       | 158.092403     | 79.549839        |                |                  | 1  |

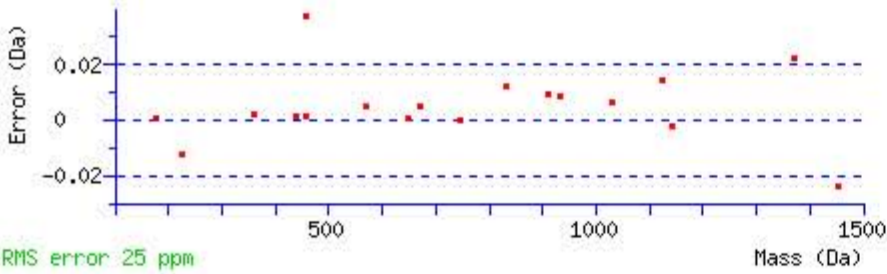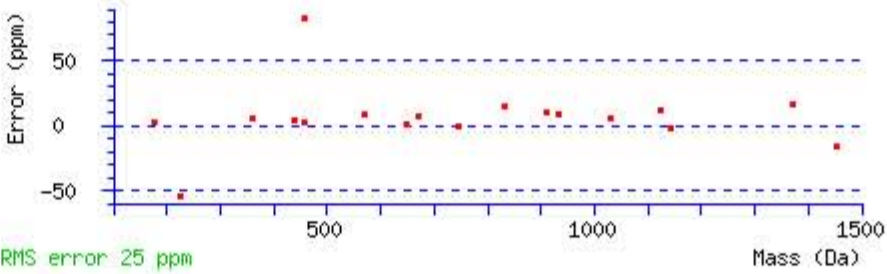

NCBI BLAST search of [EPQVYTLPPSR](#)  
(Parameters: blastp, nr protein database, expect=20000, no filter, PAM30)  
Other BLAST [web gateways](#)

All matches to this query

| Score | Mr(calc):   | Delta     | Sequence                          |
|-------|-------------|-----------|-----------------------------------|
| 45.2  | 1596.833389 | 0.008359  | <a href="#">EPQVYTLPPSR</a>       |
| 7.3   | 1596.847122 | -0.005374 | <a href="#">ATPSSSPGTATALPALR</a> |
| 5.4   | 1596.825974 | 0.015774  | <a href="#">KLSDLAQWAPSPR</a>     |
| 1.7   | 1596.835876 | 0.005872  | <a href="#">TLHQGEESLLELTK</a>    |
| 0.5   | 1596.854507 | -0.012759 | <a href="#">EQLVTKDPASAK</a>      |

MATRIX

SCIENCE

Mascot Search Results

Peptide View

MS/MS Fragmentation of **NQVSLTCLVK**  
Found in **IGHG1\_HUMAN**, Ig gamma-1 chain C region OS=Homo sapiens GN=IGHG1 PE=1 SV=1

Match to Query 30278: 1471.795568 from(736.905060,2+) rtinseconds(2229) index(6944)  
Title: Locus:1.1.1.2053.20 File:"2013-07-02 CLN FXIII 180 min 2nd F 1.wiff"  
Data file C:\Program Files (x86)\Matrix Science\Mascot Daemon\mgf\8 FXIII 180 min 2nd\mascot\_daemon\_merge.mgf

Click mouse within plot area to zoom in by factor of two about that point  
Or, 

Plot from

100

 to 

1700

 Da 

Full range

  
Label all possible matches ☐ Label matches used for scoring ☒



Monoisotopic mass of neutral peptide Mr(calc): 1471.789093  
Fixed modifications: Carbamidomethyl (C) (apply to specified residues or termini only)  
Variable modifications:  
Q2 : Biotin:Thermo-21345 (Q)  
Ions Score: 39 Expect: 0.0026  
Matches : 14/94 fragment ions using 27 most intense peaks [\(help\)](#)

| #  | b           | b <sup>++</sup> | b <sup>*</sup> | b <sup>++</sup> * | b <sup>0</sup> | b <sup>0++</sup> | Seq. | y           | y <sup>++</sup> | y <sup>*</sup> | y <sup>++</sup> * | y <sup>0</sup> | y <sup>0++</sup> | #  |
|----|-------------|-----------------|----------------|-------------------|----------------|------------------|------|-------------|-----------------|----------------|-------------------|----------------|------------------|----|
| 1  | 115.050203  | 58.028740       | 98.023654      | 49.515465         |                |                  | N    |             |                 |                |                   |                |                  | 10 |
| 2  | 554.275529  | 277.641403      | 537.248980     | 269.128128        |                |                  | Q    | 1358.753442 | 679.880359      | 1341.726893    | 671.367085        | 1340.742877    | 670.875076       | 9  |
| 3  | 653.343943  | 327.175610      | 636.317394     | 318.662335        |                |                  | V    | 919.528116  | 460.267696      | 902.501567     | 451.754421        | 901.517551     | 451.262413       | 8  |
| 4  | 740.375971  | 370.691623      | 723.349422     | 362.178349        | 722.365406     | 361.686341       | S    | 820.459702  | 410.733489      | 803.433153     | 402.220215        | 802.449137     | 401.728207       | 7  |
| 5  | 853.460035  | 427.233656      | 836.433486     | 418.720381        | 835.449470     | 418.228373       | L    | 733.427674  | 367.217475      | 716.401125     | 358.704201        | 715.417109     | 358.212193       | 6  |
| 6  | 954.507714  | 477.757495      | 937.481165     | 469.244220        | 936.497149     | 468.752212       | T    | 620.343610  | 310.675443      | 603.317061     | 302.162169        | 602.333045     | 301.670161       | 5  |
| 7  | 1114.538363 | 557.772819      | 1097.511814    | 549.259545        | 1096.527798    | 548.767537       | C    | 519.295931  | 260.151604      | 502.269382     | 251.638329        |                |                  | 4  |
| 8  | 1227.622427 | 614.314851      | 1210.595878    | 605.801577        | 1209.611862    | 605.309569       | L    | 359.265282  | 180.136279      | 342.238733     | 171.623004        |                |                  | 3  |
| 9  | 1326.690841 | 663.849058      | 1309.664292    | 655.335784        | 1308.680276    | 654.843776       | V    | 246.181218  | 123.594247      | 229.154669     | 115.080973        |                |                  | 2  |
| 10 |             |                 |                |                   |                |                  | K    | 147.112804  | 74.060040       | 130.086255     | 65.546765         |                |                  | 1  |



NCBI BLAST search of [NQVSLTCLVK](#)  
(Parameters: blastp, nr protein database, expect=20000, no filter, PAM30)  
Other BLAST [web gateways](#)

All matches to this query

| Score | Mr(calc):   | Delta     | Sequence                        |
|-------|-------------|-----------|---------------------------------|
| 39.5  | 1471.789093 | 0.006475  | <a href="#">NQVSLTCLVK</a>      |
| 12.6  | 1471.778305 | 0.017263  | <a href="#">WNVSRPSLLADSK</a>   |
| 7.5   | 1471.777847 | 0.017721  | <a href="#">QLDMELVSVK</a>      |
| 4.9   | 1471.797592 | -0.002024 | <a href="#">KYFWDRAFLVK</a>     |
| 3.0   | 1471.806793 | -0.011225 | <a href="#">AAALLAKQAEME VK</a> |
| 3.0   | 1471.796951 | -0.001383 | <a href="#">QRAAQFDVVK</a>      |
| 1.6   | 1471.814713 | -0.019145 | <a href="#">RQVIVGTWGESLK</a>   |

MATRIX

SCIENCE

Mascot Search Results

Peptide View

MS/MS Fragmentation of **EVQLVESGGGLVQPGGSLR**  
Found in **HV305\_HUMAN**, Ig heavy chain V-III region BRO OS=Homo sapiens PE=1 SV=1

Match to Query 48333: 2192.179362 from(731.733730,3+) rtinseconds(2213) index(21553)  
Title: Locus:1.1.1.3153.7 File:"2013-07-02 CLN FXIII 180 min 2nd F 2.wiff"  
Data file C:\Program Files (x86)\Matrix Science\Mascot Daemon\mgf\8 FXIII 180 min 2nd\mascot\_daemon\_merge.mgf

Click mouse within plot area to zoom in by factor of two about that point  
Or,  0  2200 Da   
Label all possible matches ☐ Label matches used for scoring ☒

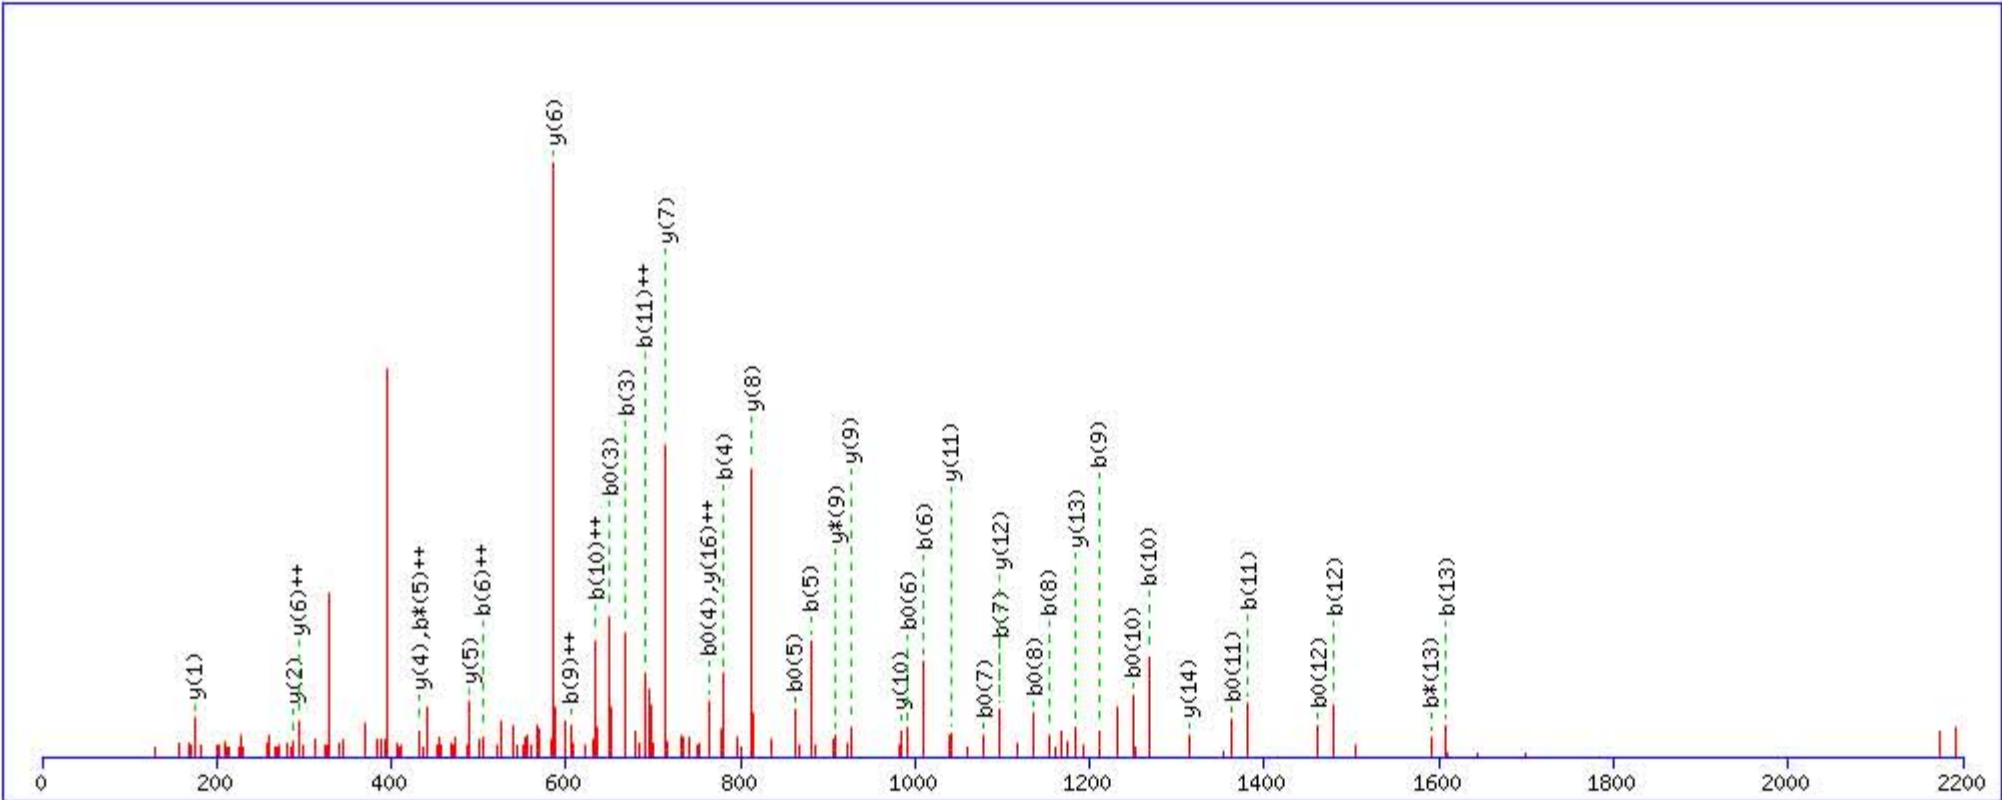

Monoisotopic mass of neutral peptide Mr(calc): 2192.162354  
Fixed modifications: Carbamidomethyl (C) (apply to specified residues or termini only)  
Variable modifications:  
Q3 : Biotin:Thermo-21345 (Q)  
Ions Score: 75 Expect: 1.3e-007  
Matches : 42/208 fragment ions using 74 most intense peaks [\(help\)](#)

| #  | b           | b <sup>++</sup> | b <sup>*</sup> | b <sup>++</sup> | b <sup>0</sup> | b <sup>0++</sup> | Seq. | y           | y <sup>++</sup> | y <sup>*</sup> | y <sup>++</sup> | y <sup>0</sup> | y <sup>0++</sup> | #  |
|----|-------------|-----------------|----------------|-----------------|----------------|------------------|------|-------------|-----------------|----------------|-----------------|----------------|------------------|----|
| 1  | 130.049869  | 65.528572       |                |                 | 112.039304     | 56.523290        | E    |             |                 |                |                 |                |                  | 19 |
| 2  | 229.118283  | 115.062780      |                |                 | 211.107718     | 106.057497       | V    | 2064.127023 | 1032.567149     | 2047.100474    | 1024.053875     | 2046.116458    | 1023.561867      | 18 |
| 3  | 668.343609  | 334.675443      | 651.317060     | 326.162168      | 650.333044     | 325.670160       | Q    | 1965.058609 | 983.032942      | 1948.032060    | 974.519668      | 1947.048044    | 974.027660       | 17 |
| 4  | 781.427673  | 391.217475      | 764.401124     | 382.704200      | 763.417108     | 382.212192       | L    | 1525.833283 | 763.420279      | 1508.806734    | 754.907005      | 1507.822718    | 754.414997       | 16 |
| 5  | 880.496087  | 440.751682      | 863.469538     | 432.238407      | 862.485522     | 431.746399       | V    | 1412.749219 | 706.878248      | 1395.722670    | 698.364973      | 1394.738654    | 697.872965       | 15 |
| 6  | 1009.538680 | 505.272978      | 992.512131     | 496.759704      | 991.528115     | 496.267696       | E    | 1313.680805 | 657.344041      | 1296.654256    | 648.830766      | 1295.670240    | 648.338758       | 14 |
| 7  | 1096.570708 | 548.788992      | 1079.544159    | 540.275718      | 1078.560143    | 539.783709       | S    | 1184.638212 | 592.822744      | 1167.611663    | 584.309470      | 1166.627647    | 583.817462       | 13 |
| 8  | 1153.592172 | 577.299724      | 1136.565623    | 568.786450      | 1135.581607    | 568.294441       | G    | 1097.606184 | 549.306730      | 1080.579635    | 540.793456      | 1079.595619    | 540.301447       | 12 |
| 9  | 1210.613636 | 605.810456      | 1193.587087    | 597.297181      | 1192.603071    | 596.805173       | G    | 1040.584720 | 520.795998      | 1023.558171    | 512.282723      | 1022.574155    | 511.790716       | 11 |
| 10 | 1267.635100 | 634.321188      | 1250.608551    | 625.807913      | 1249.624535    | 625.315905       | G    | 983.563256  | 492.285266      | 966.536707     | 483.771992      | 965.552691     | 483.279984       | 10 |
| 11 | 1380.719164 | 690.863220      | 1363.692615    | 682.349945      | 1362.708599    | 681.857937       | L    | 926.541792  | 463.774534      | 909.515243     | 455.261260      | 908.531227     | 454.769252       | 9  |
| 12 | 1479.787578 | 740.397427      | 1462.761029    | 731.884152      | 1461.777013    | 731.392144       | V    | 813.457728  | 407.232502      | 796.431179     | 398.719228      | 795.447163     | 398.227220       | 8  |
| 13 | 1607.846156 | 804.426716      | 1590.819607    | 795.913441      | 1589.835591    | 795.421433       | Q    | 714.389314  | 357.698295      | 697.362765     | 349.185021      | 696.378749     | 348.693013       | 7  |
| 14 | 1704.898920 | 852.953098      | 1687.872371    | 844.439823      | 1686.888355    | 843.947815       | P    | 586.330736  | 293.669006      | 569.304187     | 285.155732      | 568.320171     | 284.663724       | 6  |
| 15 | 1761.920384 | 881.463830      | 1744.893835    | 872.950555      | 1743.909819    | 872.458547       | G    | 489.277972  | 245.142624      | 472.251423     | 236.629349      | 471.267407     | 236.137341       | 5  |
| 16 | 1818.941848 | 909.974562      | 1801.915299    | 901.461287      | 1800.931283    | 900.969279       | G    | 432.256508  | 216.631892      | 415.229959     | 208.118618      | 414.245943     | 207.626610       | 4  |
| 17 | 1905.973876 | 953.490576      | 1888.947327    | 944.977301      | 1887.963311    | 944.485293       | S    | 375.235044  | 188.121160      | 358.208495     | 179.607886      | 357.224479     | 179.115878       | 3  |
| 18 | 2019.057940 | 1010.032608     | 2002.031391    | 1001.519333     | 2001.047375    | 1001.027325      | L    | 288.203016  | 144.605146      | 271.176467     | 136.091872      |                |                  | 2  |
| 19 |             |                 |                |                 |                |                  | R    | 175.118952  | 88.063114       | 158.092403     | 79.549840       |                |                  | 1  |

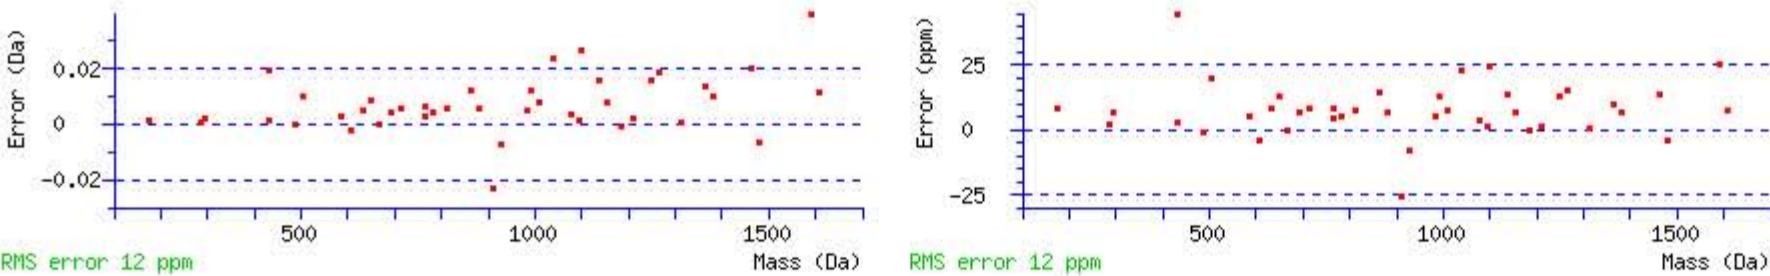

NCBI BLAST search of [EVQLVESGGGLVQPGGSLR](#)  
(Parameters: blastp, nr protein database, expect=20000, no filter, PAM30)  
Other BLAST [web gateways](#)

All matches to this query

| Score | Mr(calc):   | Delta     | Sequence                            |
|-------|-------------|-----------|-------------------------------------|
| 74.6  | 2192.162354 | 0.017008  | <a href="#">EVQLVESGGGLVQPGGSLR</a> |
| 1.3   | 2192.196228 | -0.016866 | <a href="#">TVQTLWQQLVAQR</a>       |

MATRIX

SCIENCE

Mascot Search Results

Peptide View

MS/MS Fragmentation of **VYACEVTHQGLSSPVTK**  
Found in **IGKC\_HUMAN**, Ig kappa chain C region OS=Homo sapiens GN=IGKC PE=1 SV=1

Match to Query 48222: 2186.083602 from(729.701810,3+) rtinseconds(1770) index(4211)  
Title: Locus:1.1.1.1893.14 File:"2013-07-02 CLN FXIII 180 min 2nd F 1.wiff"  
Data file C:\Program Files (x86)\Matrix Science\Mascot Daemon\mgf\8 FXIII 180 min 2nd\mascot\_daemon\_merge.mgf

Click mouse within plot area to zoom in by factor of two about that point  
Or, 

Plot from

0

 to 

2200

 Da 

Full range

  
Label all possible matches ☐ Label matches used for scoring ☒

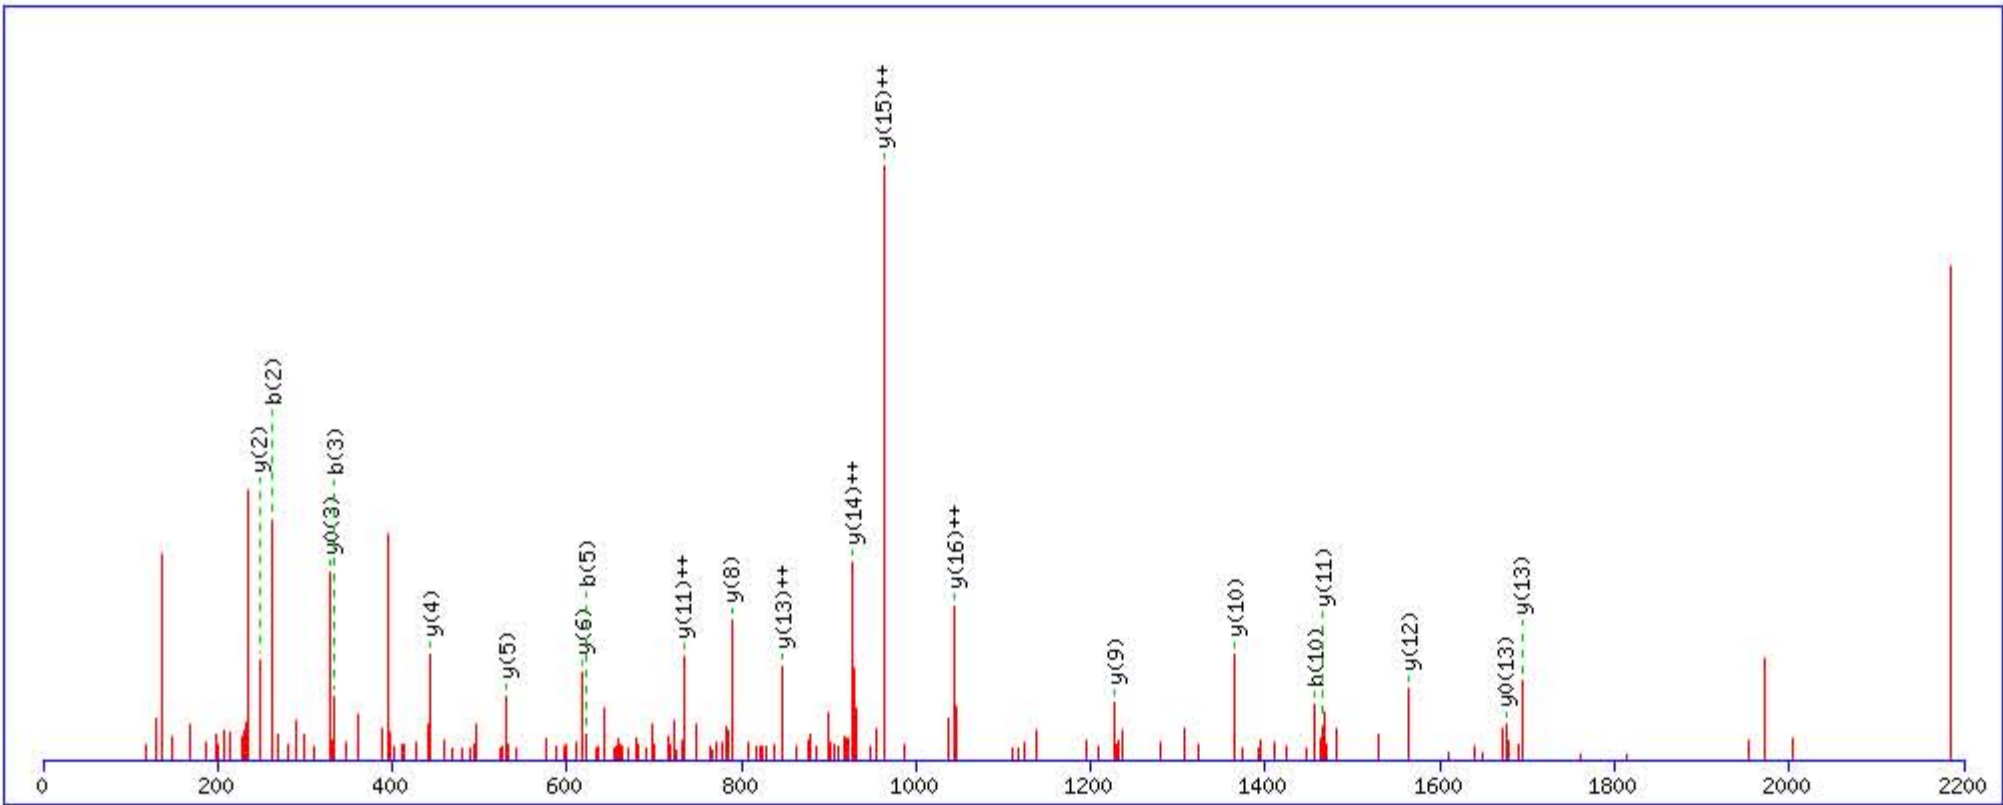

Monoisotopic mass of neutral peptide Mr(calc): 2186.086411  
Fixed modifications: Carbamidomethyl (C) (apply to specified residues or termini only)  
Variable modifications:  
Q9 : Biotin:Thermo-21345 (Q)  
Ions Score: 41 Expect: 0.0024  
Matches : 21/166 fragment ions using 53 most intense peaks [\(help\)](#)

| #  | b           | b <sup>++</sup> | b <sup>*</sup> | b <sup>++</sup> | b <sup>0</sup> | b <sup>0++</sup> | Seq. | y           | y <sup>++</sup> | y <sup>*</sup> | y <sup>++</sup> | y <sup>0</sup> | y <sup>0++</sup> | #  |
|----|-------------|-----------------|----------------|-----------------|----------------|------------------|------|-------------|-----------------|----------------|-----------------|----------------|------------------|----|
| 1  | 100.075690  | 50.541483       |                |                 |                |                  | V    |             |                 |                |                 |                |                  | 17 |
| 2  | 263.139019  | 132.073148      |                |                 |                |                  | Y    | 2088.025261 | 1044.516268     | 2070.998712    | 1036.002994     | 2070.014696    | 1035.510986      | 16 |
| 3  | 334.176133  | 167.591704      |                |                 |                |                  | A    | 1924.961932 | 962.984604      | 1907.935383    | 954.471330      | 1906.951367    | 953.979322       | 15 |
| 4  | 494.206782  | 247.607029      |                |                 |                |                  | C    | 1853.924818 | 927.466047      | 1836.898269    | 918.952773      | 1835.914253    | 918.460765       | 14 |
| 5  | 623.249375  | 312.128326      |                |                 | 605.238810     | 303.123043       | E    | 1693.894169 | 847.450723      | 1676.867620    | 838.937448      | 1675.883604    | 838.445440       | 13 |
| 6  | 722.317789  | 361.662533      |                |                 | 704.307224     | 352.657250       | V    | 1564.851576 | 782.929426      | 1547.825027    | 774.416152      | 1546.841011    | 773.924144       | 12 |
| 7  | 823.365468  | 412.186372      |                |                 | 805.354903     | 403.181090       | T    | 1465.783162 | 733.395219      | 1448.756613    | 724.881945      | 1447.772597    | 724.389937       | 11 |
| 8  | 960.424380  | 480.715828      |                |                 | 942.413815     | 471.710546       | H    | 1364.735483 | 682.871380      | 1347.708934    | 674.358105      | 1346.724918    | 673.866097       | 10 |
| 9  | 1399.649706 | 700.328491      | 1382.623157    | 691.815217      | 1381.639141    | 691.323208       | Q    | 1227.676571 | 614.341924      | 1210.650022    | 605.828649      | 1209.666006    | 605.336641       | 9  |
| 10 | 1456.671170 | 728.839223      | 1439.644621    | 720.325948      | 1438.660605    | 719.833940       | G    | 788.451245  | 394.729261      | 771.424696     | 386.215986      | 770.440680     | 385.723978       | 8  |
| 11 | 1569.755234 | 785.381255      | 1552.728685    | 776.867980      | 1551.744669    | 776.375972       | L    | 731.429781  | 366.218529      | 714.403232     | 357.705254      | 713.419216     | 357.213246       | 7  |
| 12 | 1656.787262 | 828.897269      | 1639.760713    | 820.383994      | 1638.776697    | 819.891986       | S    | 618.345717  | 309.676497      | 601.319168     | 301.163222      | 600.335152     | 300.671214       | 6  |
| 13 | 1743.819290 | 872.413283      | 1726.792741    | 863.900009      | 1725.808725    | 863.408000       | S    | 531.313689  | 266.160483      | 514.287140     | 257.647208      | 513.303124     | 257.155200       | 5  |
| 14 | 1840.872054 | 920.939665      | 1823.845505    | 912.426391      | 1822.861489    | 911.934382       | P    | 444.281661  | 222.644469      | 427.255112     | 214.131194      | 426.271096     | 213.639186       | 4  |
| 15 | 1939.940468 | 970.473872      | 1922.913919    | 961.960598      | 1921.929903    | 961.468590       | V    | 347.228897  | 174.118087      | 330.202348     | 165.604812      | 329.218332     | 165.112804       | 3  |
| 16 | 2040.988147 | 1020.997712     | 2023.961598    | 1012.484437     | 2022.977582    | 1011.992429      | T    | 248.160483  | 124.583880      | 231.133934     | 116.070605      | 230.149918     | 115.578597       | 2  |
| 17 |             |                 |                |                 |                |                  | K    | 147.112804  | 74.060040       | 130.086255     | 65.546766       |                |                  | 1  |

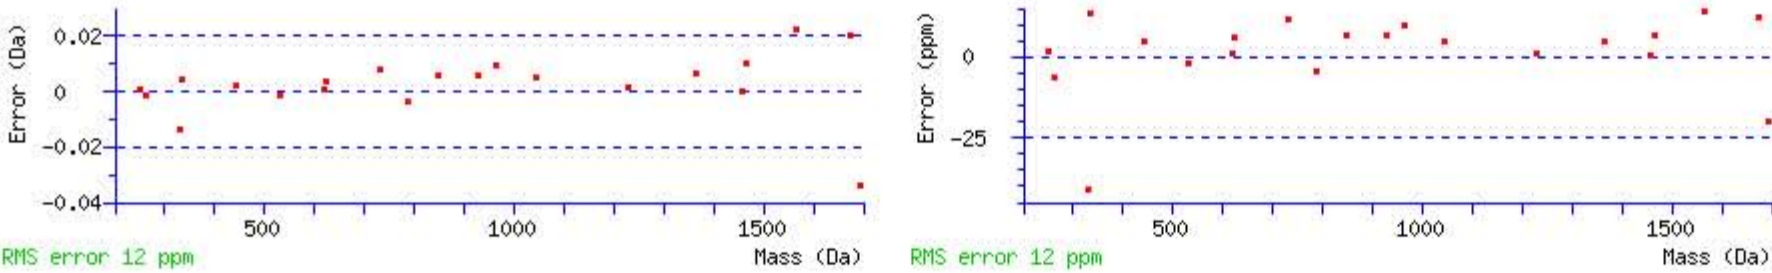

NCBI **BLAST** search of [VYACEVTHQGLSSPVTK](#)  
(Parameters: blastp, nr protein database, expect=20000, no filter, PAM30)  
Other BLAST [web gateways](#)

All matches to this query

| Score | Mr(calc):   | Delta     | Sequence                          |
|-------|-------------|-----------|-----------------------------------|
| 40.5  | 2186.086411 | -0.002809 | <a href="#">VYACEVTHQGLSSPVTK</a> |

M

A

T

R

I

X

S

C

I

E

N

C

E

Mascot Search Results

Peptide View

MS/MS Fragmentation of **TVAAPSVFIFPPSDEQLK**  
Found in **IGKC\_HUMAN**, Ig kappa chain C region OS=Homo sapiens GN=IGKC PE=1 SV=1

Match to Query 49580: 2256.207552 from(753.076460,3+) rtinseconds(2671) index(9093)  
Title: Locus:1.1.1.2207.20 File:"2013-07-02 CLN FXIII 180 min 2nd F 1.wiff"  
Data file C:\Program Files (x86)\Matrix Science\Mascot Daemon\mgf\8 FXIII 180 min 2nd\mascot\_daemon\_merge.mgf

Click mouse within plot area to zoom in by factor of two about that point  
Or,   to  Da

Label all possible matches ☐ Label matches used for scoring ☒

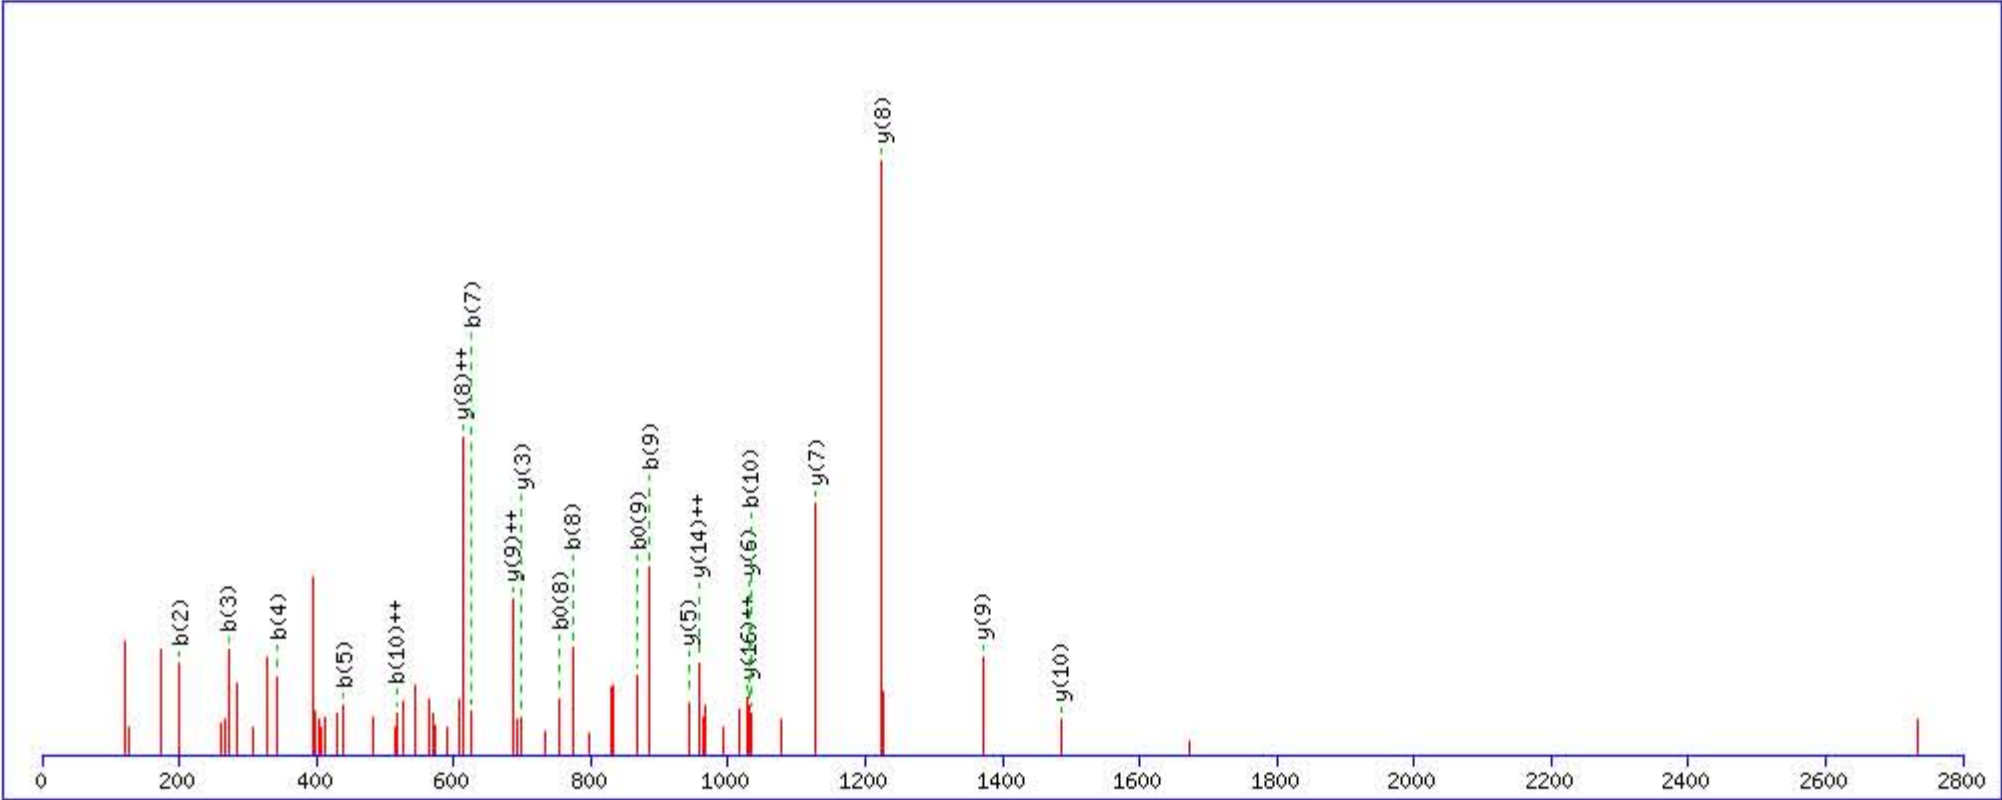

Monoisotopic mass of neutral peptide Mr(calc): 2256.186432  
Fixed modifications: Carbamidomethyl (C) (apply to specified residues or termini only)  
Variable modifications:  
Q16 : Biotin:Thermo-21345 (Q)  
Ions Score: 52 Expect: 0.00012  
Matches : 22/168 fragment ions using 37 most intense peaks [\(help\)](#)

| #  | b           | b <sup>++</sup> | b <sup>*</sup> | b <sup>++</sup> | b <sup>0</sup> | b <sup>0++</sup> | Seq. | y           | y <sup>++</sup> | y <sup>*</sup> | y <sup>++</sup> | y <sup>0</sup> | y <sup>0++</sup> | #  |
|----|-------------|-----------------|----------------|-----------------|----------------|------------------|------|-------------|-----------------|----------------|-----------------|----------------|------------------|----|
| 1  | 102.054955  | 51.531116       |                |                 | 84.044390      | 42.525833        | T    |             |                 |                |                 |                |                  | 18 |
| 2  | 201.123369  | 101.065322      |                |                 | 183.112804     | 92.060040        | V    | 2156.146026 | 1078.576651     | 2139.119477    | 1070.063377     | 2138.135461    | 1069.571369      | 17 |
| 3  | 272.160483  | 136.583879      |                |                 | 254.149918     | 127.578597       | A    | 2057.077612 | 1029.042444     | 2040.051063    | 1020.529170     | 2039.067047    | 1020.037162      | 16 |
| 4  | 343.197597  | 172.102437      |                |                 | 325.187032     | 163.097154       | A    | 1986.040498 | 993.523887      | 1969.013949    | 985.010613      | 1968.029933    | 984.518605       | 15 |
| 5  | 440.250361  | 220.628819      |                |                 | 422.239796     | 211.623536       | P    | 1915.003384 | 958.005330      | 1897.976835    | 949.492056      | 1896.992819    | 949.000048       | 14 |
| 6  | 527.282389  | 264.144833      |                |                 | 509.271824     | 255.139550       | S    | 1817.950620 | 909.478948      | 1800.924071    | 900.965674      | 1799.940055    | 900.473666       | 13 |
| 7  | 626.350803  | 313.679040      |                |                 | 608.340238     | 304.673757       | V    | 1730.918592 | 865.962934      | 1713.892043    | 857.449660      | 1712.908027    | 856.957652       | 12 |
| 8  | 773.419217  | 387.213247      |                |                 | 755.408652     | 378.207964       | F    | 1631.850178 | 816.428727      | 1614.823629    | 807.915453      | 1613.839613    | 807.423445       | 11 |
| 9  | 886.503281  | 443.755279      |                |                 | 868.492716     | 434.749996       | I    | 1484.781764 | 742.894520      | 1467.755215    | 734.381246      | 1466.771199    | 733.889238       | 10 |
| 10 | 1033.571695 | 517.289486      |                |                 | 1015.561130    | 508.284203       | F    | 1371.697700 | 686.352488      | 1354.671151    | 677.839214      | 1353.687135    | 677.347206       | 9  |
| 11 | 1130.624459 | 565.815868      |                |                 | 1112.613894    | 556.810585       | P    | 1224.629286 | 612.818281      | 1207.602737    | 604.305007      | 1206.618721    | 603.812999       | 8  |
| 12 | 1227.677223 | 614.342250      |                |                 | 1209.666658    | 605.336967       | P    | 1127.576522 | 564.291899      | 1110.549973    | 555.778625      | 1109.565957    | 555.286617       | 7  |
| 13 | 1314.709251 | 657.858264      |                |                 | 1296.698686    | 648.852981       | S    | 1030.523758 | 515.765517      | 1013.497209    | 507.252243      | 1012.513193    | 506.760235       | 6  |
| 14 | 1429.736194 | 715.371735      |                |                 | 1411.725629    | 706.366453       | D    | 943.491730  | 472.249503      | 926.465181     | 463.736229      | 925.481165     | 463.244221       | 5  |
| 15 | 1558.778787 | 779.893032      |                |                 | 1540.768222    | 770.887749       | E    | 828.464787  | 414.736032      | 811.438238     | 406.222757      | 810.454222     | 405.730749       | 4  |
| 16 | 1998.004113 | 999.505695      | 1980.977564    | 990.992420      | 1979.993548    | 990.500412       | Q    | 699.422194  | 350.214735      | 682.395645     | 341.701461      |                |                  | 3  |
| 17 | 2111.088177 | 1056.047727     | 2094.061628    | 1047.534452     | 2093.077612    | 1047.042444      | L    | 260.196868  | 130.602072      | 243.170319     | 122.088798      |                |                  | 2  |
| 18 |             |                 |                |                 |                |                  | K    | 147.112804  | 74.060040       | 130.086255     | 65.546765       |                |                  | 1  |

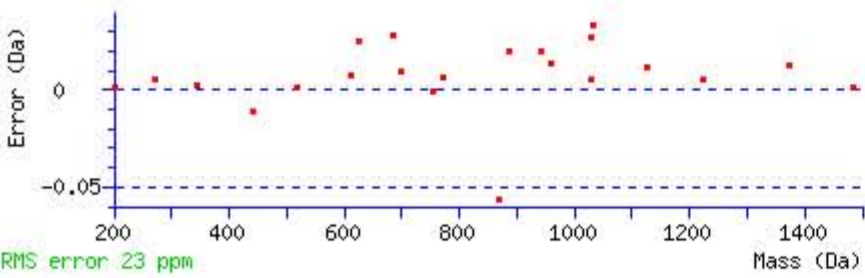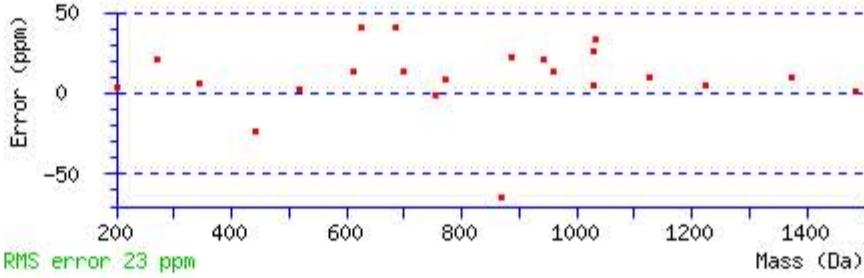

NCBI BLAST search of [TVAAPSVFIFPPSDEQLK](#)  
(Parameters: blastp, nr protein database, expect=20000, no filter, PAM30)  
Other BLAST [web gateways](#)

All matches to this query

| Score | Mr(calc):   | Delta    | Sequence                           |
|-------|-------------|----------|------------------------------------|
| 52.5  | 2256.186432 | 0.021120 | <a href="#">TVAAPSVFIFPPSDEQLK</a> |

MATRIX

SCIENCE

Mascot Search Results

Peptide View

MS/MS Fragmentation of **SYSCQVTHEGSTVEK**  
Found in **IGLL5\_HUMAN**, Immunoglobulin lambda-like polypeptide 5 OS=Homo sapiens GN=IGLL5 PE=2 SV=2

Match to Query 45088: 2021.920212 from(674.980680,3+) rtinseconds(1377) index(62628)  
Title: Locus:1.1.1.1754.26 File:"2013-07-02 CLN FXIII 180 min 2nd FT.wiff"  
Data file C:\Program Files (x86)\Matrix Science\Mascot Daemon\mgf\8 FXIII 180 min 2nd\mascot\_daemon\_merge.mgf

Click mouse within plot area to zoom in by factor of two about that point  
Or,   to  Da   
Label all possible matches ☐ Label matches used for scoring ☒

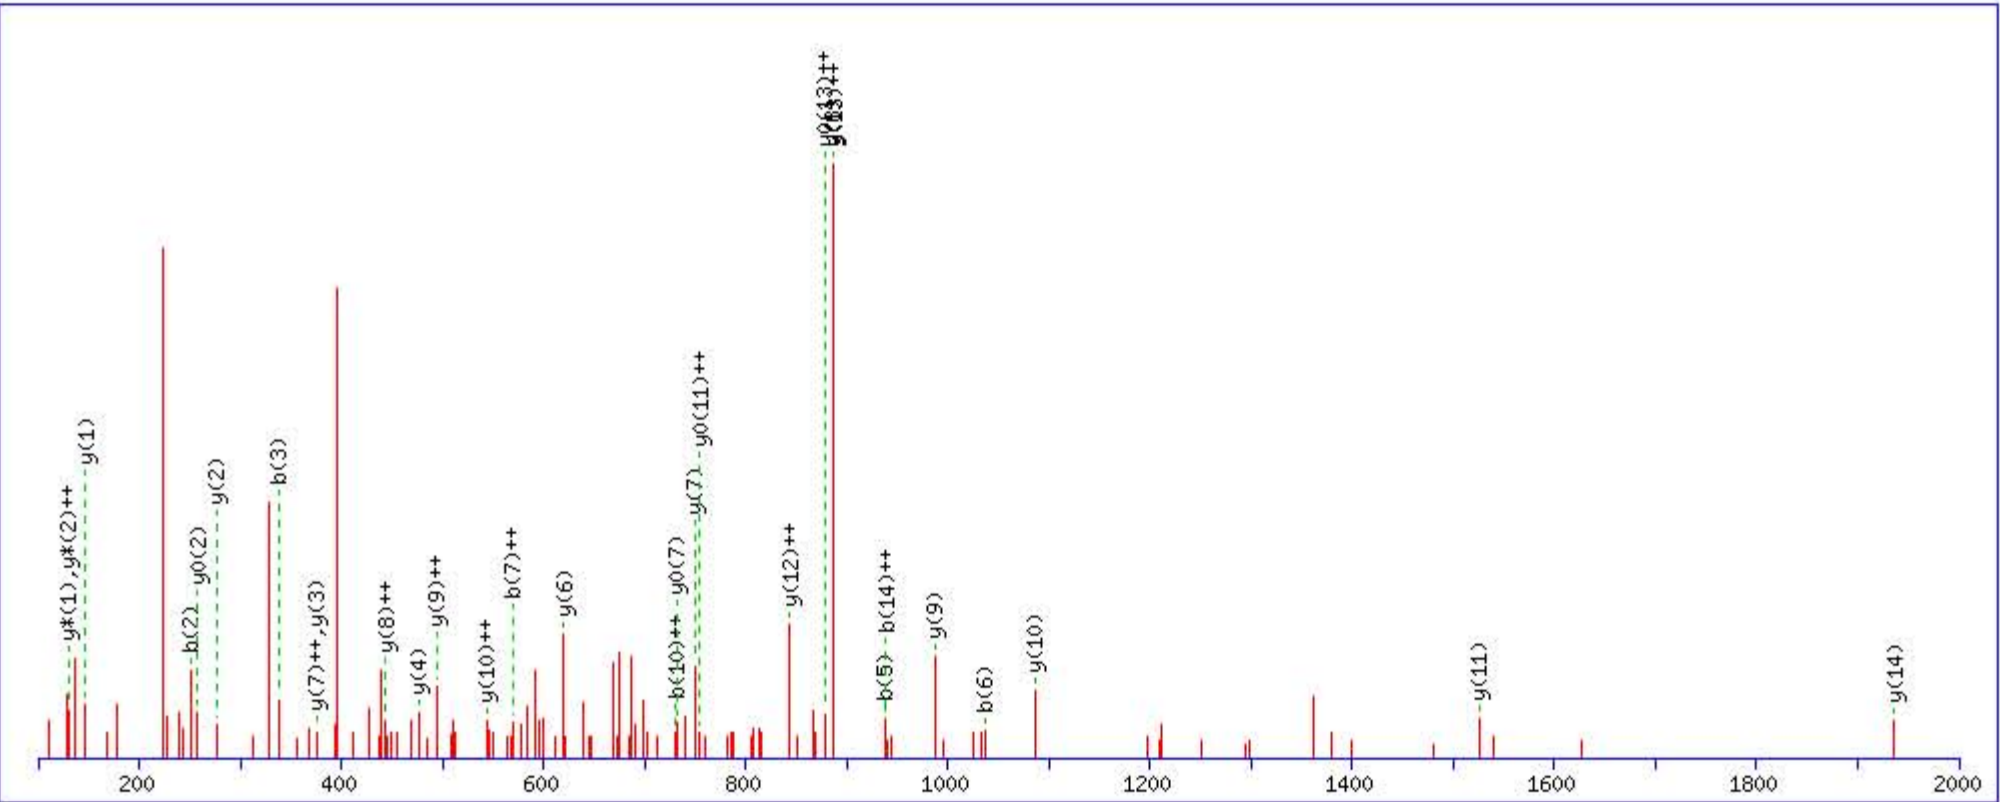

Monoisotopic mass of neutral peptide Mr(calc): 2021.918671  
Fixed modifications: Carbamidomethyl (C) (apply to specified residues or termini only)  
Variable modifications:  
Q5 : Biotin:Thermo-21345 (Q)  
Ions Score: 39 Expect: 0.0015  
Matches : 30/158 fragment ions using 80 most intense peaks [\(help\)](#)

| #  | b           | b <sup>++</sup> | b <sup>+</sup> | b <sup>+++</sup> | b <sup>0</sup> | b <sup>0++</sup> | Seq. | y           | y <sup>++</sup> | y <sup>+</sup> | y <sup>+++</sup> | y <sup>0</sup> | y <sup>0++</sup> | #  |
|----|-------------|-----------------|----------------|------------------|----------------|------------------|------|-------------|-----------------|----------------|------------------|----------------|------------------|----|
| 1  | 88.039304   | 44.523290       |                |                  | 70.028739      | 35.518008        | S    |             |                 |                |                  |                |                  | 15 |
| 2  | 251.102633  | 126.054954      |                |                  | 233.092068     | 117.049672       | Y    | 1935.893912 | 968.450594      | 1918.867363    | 959.937320       | 1917.883347    | 959.445312       | 14 |
| 3  | 338.134661  | 169.570968      |                |                  | 320.124096     | 160.565686       | S    | 1772.830583 | 886.918930      | 1755.804034    | 878.405655       | 1754.820018    | 877.913647       | 13 |
| 4  | 498.165310  | 249.586293      |                |                  | 480.154745     | 240.581011       | C    | 1685.798555 | 843.402916      | 1668.772006    | 834.889641       | 1667.787990    | 834.397633       | 12 |
| 5  | 937.390636  | 469.198956      | 920.364087     | 460.685682       | 919.380071     | 460.193674       | Q    | 1525.767906 | 763.387591      | 1508.741357    | 754.874317       | 1507.757341    | 754.382309       | 11 |
| 6  | 1036.459050 | 518.733163      | 1019.432501    | 510.219889       | 1018.448485    | 509.727881       | V    | 1086.542580 | 543.774928      | 1069.516031    | 535.261654       | 1068.532015    | 534.769646       | 10 |
| 7  | 1137.506729 | 569.257003      | 1120.480180    | 560.743728       | 1119.496164    | 560.251720       | T    | 987.474166  | 494.240721      | 970.447617     | 485.727447       | 969.463601     | 485.235439       | 9  |
| 8  | 1274.565641 | 637.786459      | 1257.539092    | 629.273184       | 1256.555076    | 628.781176       | H    | 886.426487  | 443.716882      | 869.399938     | 435.203607       | 868.415922     | 434.711599       | 8  |
| 9  | 1403.608234 | 702.307755      | 1386.581685    | 693.794481       | 1385.597669    | 693.302473       | E    | 749.367575  | 375.187426      | 732.341026     | 366.674151       | 731.357010     | 366.182143       | 7  |
| 10 | 1460.629698 | 730.818487      | 1443.603149    | 722.305213       | 1442.619133    | 721.813204       | G    | 620.324982  | 310.666129      | 603.298433     | 302.152855       | 602.314417     | 301.660847       | 6  |
| 11 | 1547.661726 | 774.334501      | 1530.635177    | 765.821227       | 1529.651161    | 765.329219       | S    | 563.303518  | 282.155397      | 546.276969     | 273.642123       | 545.292953     | 273.150115       | 5  |
| 12 | 1648.709405 | 824.858341      | 1631.682856    | 816.345066       | 1630.698840    | 815.853058       | T    | 476.271490  | 238.639383      | 459.244941     | 230.126109       | 458.260925     | 229.634101       | 4  |
| 13 | 1747.777819 | 874.392548      | 1730.751270    | 865.879273       | 1729.767254    | 865.387265       | V    | 375.223811  | 188.115544      | 358.197262     | 179.602269       | 357.213246     | 179.110261       | 3  |
| 14 | 1876.820412 | 938.913844      | 1859.793863    | 930.400570       | 1858.809847    | 929.908562       | E    | 276.155397  | 138.581337      | 259.128848     | 130.068062       | 258.144832     | 129.576054       | 2  |
| 15 |             |                 |                |                  |                |                  | K    | 147.112804  | 74.060040       | 130.086255     | 65.546765        |                |                  | 1  |

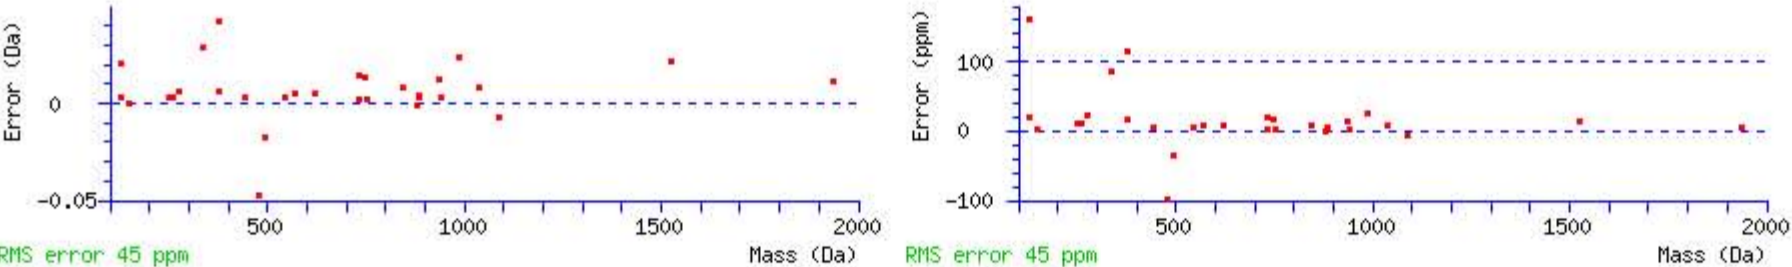

NCBI BLAST search of [SYSCQVTHEGSTVEK](#)  
(Parameters: blastp, nr protein database, expect=20000, no filter, PAM30)  
Other BLAST [web gateways](#)

All matches to this query

| Score | Mr(calc):   | Delta    | Sequence                        |
|-------|-------------|----------|---------------------------------|
| 38.7  | 2021.918671 | 0.001541 | <a href="#">SYSCQVTHEGSTVEK</a> |

MATRIX

SCIENCE

Mascot Search Results

Peptide View

MS/MS Fragmentation of **QIQVSWLR**  
Found in **IGHM\_HUMAN**, Ig mu chain C region OS=Homo sapiens GN=IGHM PE=1 SV=3

Match to Query 24109: 1339.762728 from(670.888640,2+) rtinseconds(2359) index(36346)  
Title: Locus:1.1.1.930.11 File:"2013-07-02 CLN FXIII 180 min 2nd F 3.wiff"  
Data file C:\Program Files (x86)\Matrix Science\Mascot Daemon\mgf\8 FXIII 180 min 2nd\mascot\_daemon\_merge.mgf

Click mouse within plot area to zoom in by factor of two about that point  
Or, 

Plot from

100

 to 

1400

 Da 

Full range

  
Label all possible matches ☐ Label matches used for scoring ☒

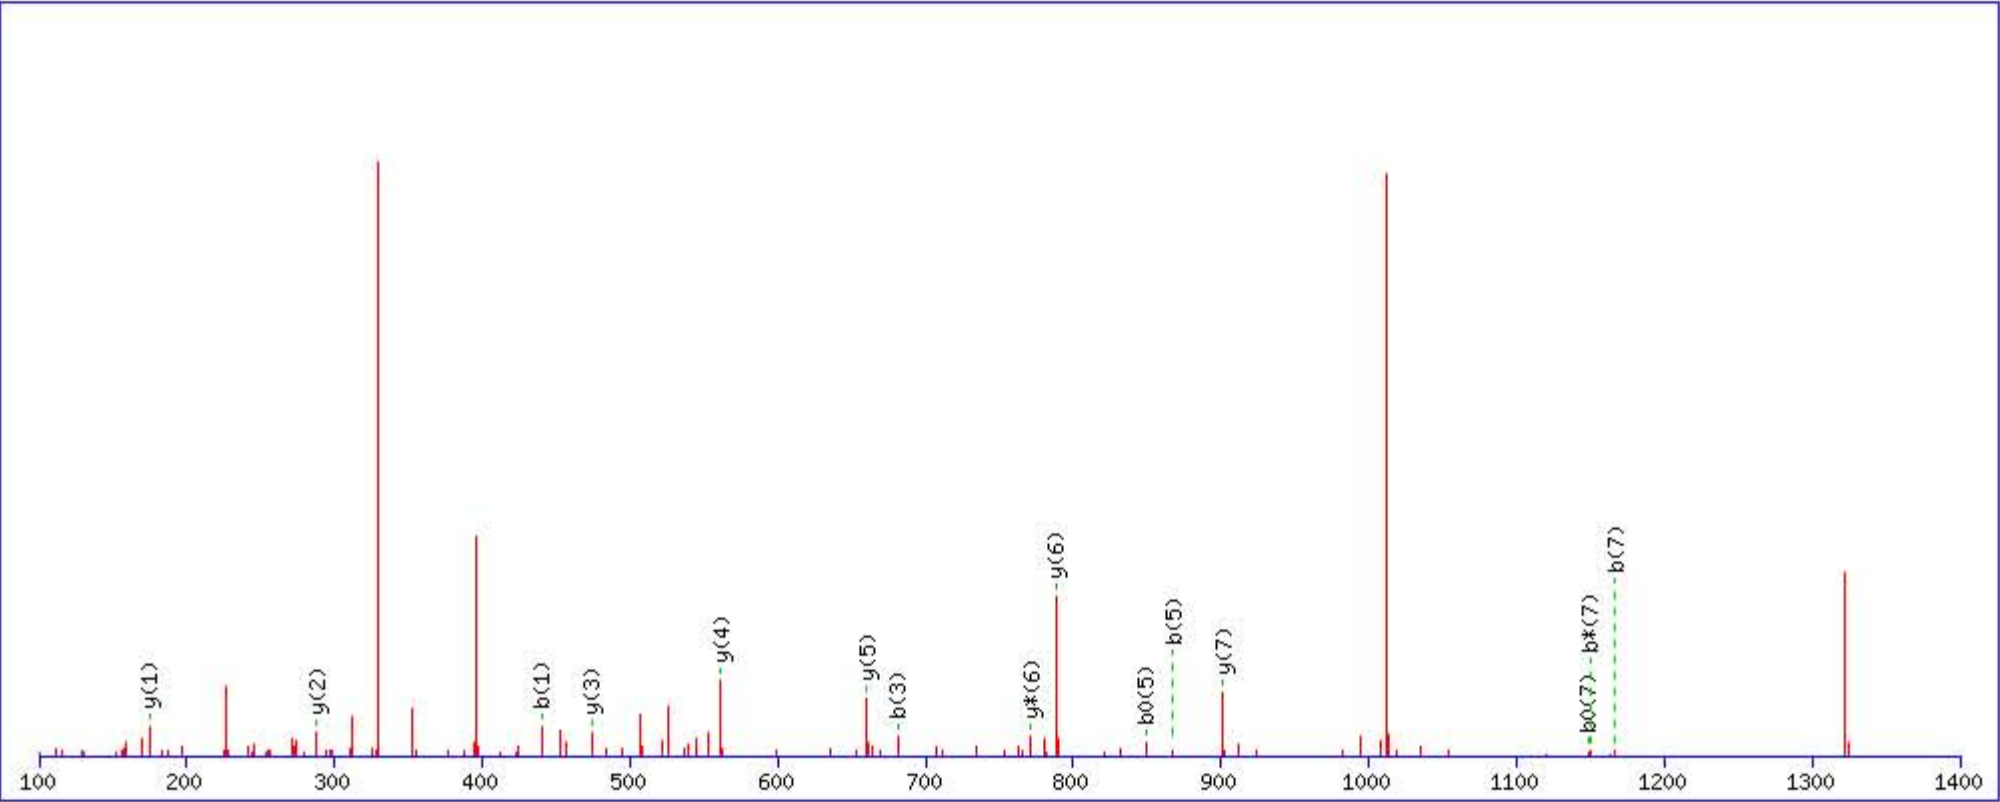

Monoisotopic mass of neutral peptide Mr(calc): 1339.743454  
Fixed modifications: Carbamidomethyl (C) (apply to specified residues or termini only)  
Variable modifications:  
Q1 : Biotin:Thermo-21345 (Q)  
Ions Score: 33 Expect: 0.0093  
Matches : 15/70 fragment ions using 35 most intense peaks [\(help\)](#)

| # | b           | b <sup>++</sup> | b <sup>*</sup> | b <sup>*++</sup> | b <sup>0</sup> | b <sup>0++</sup> | Seq. | y          | y <sup>++</sup> | y <sup>*</sup> | y <sup>*++</sup> | y <sup>0</sup> | y <sup>0++</sup> | # |
|---|-------------|-----------------|----------------|------------------|----------------|------------------|------|------------|-----------------|----------------|------------------|----------------|------------------|---|
| 1 | 440.232602  | 220.619939      | 423.206053     | 212.106664       |                |                  | Q    |            |                 |                |                  |                |                  | 8 |
| 2 | 553.316666  | 277.161971      | 536.290117     | 268.648697       |                |                  | I    | 901.525413 | 451.266344      | 884.498864     | 442.753070       | 883.514848     | 442.261062       | 7 |
| 3 | 681.375244  | 341.191260      | 664.348695     | 332.677986       |                |                  | Q    | 788.441349 | 394.724312      | 771.414800     | 386.211038       | 770.430784     | 385.719030       | 6 |
| 4 | 780.443658  | 390.725467      | 763.417109     | 382.212193       |                |                  | V    | 660.382771 | 330.695023      | 643.356222     | 322.181749       | 642.372206     | 321.689741       | 5 |
| 5 | 867.475686  | 434.241481      | 850.449137     | 425.728207       | 849.465121     | 425.236199       | S    | 561.314357 | 281.160816      | 544.287808     | 272.647542       | 543.303792     | 272.155534       | 4 |
| 6 | 1053.554999 | 527.281138      | 1036.528450    | 518.767863       | 1035.544434    | 518.275855       | W    | 474.282329 | 237.644802      | 457.255780     | 229.131528       |                |                  | 3 |
| 7 | 1166.639063 | 583.823169      | 1149.612514    | 575.309895       | 1148.628498    | 574.817887       | L    | 288.203016 | 144.605146      | 271.176467     | 136.091871       |                |                  | 2 |
| 8 |             |                 |                |                  |                |                  | R    | 175.118952 | 88.063114       | 158.092403     | 79.549839        |                |                  | 1 |

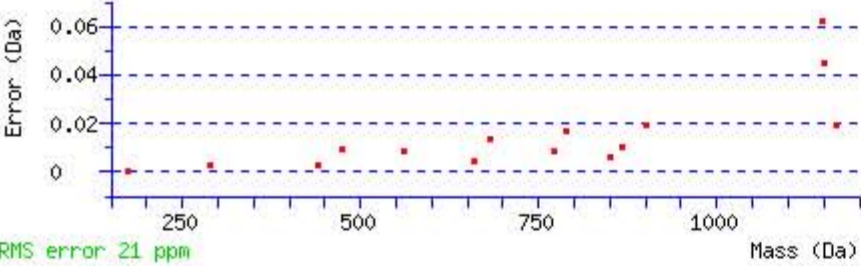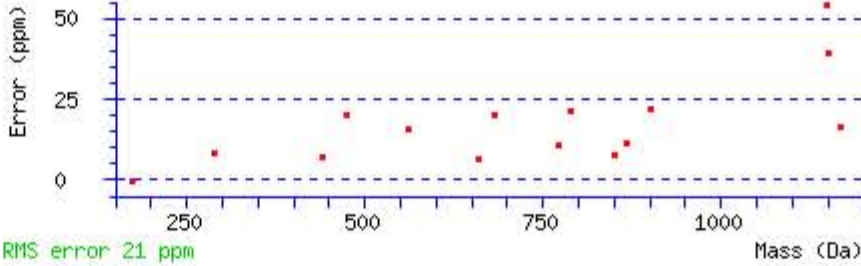

NCBI BLAST search of [QIQVSWLR](#)  
(Parameters: blastp, nr protein database, expect=20000, no filter, PAM30)  
Other BLAST [web gateways](#)

All matches to this query

| Score | Mr(calc):   | Delta     | Sequence                      |
|-------|-------------|-----------|-------------------------------|
| 32.6  | 1339.743454 | 0.019274  | <a href="#">QIQVSWLR</a>      |
| 15.8  | 1339.765915 | -0.003187 | <a href="#">QRLRFGPR</a>      |
| 12.7  | 1339.743454 | 0.019274  | <a href="#">QIQVSWLR</a>      |
| 11.1  | 1339.753326 | 0.009402  | <a href="#">QLQISIAEK</a>     |
| 9.9   | 1339.764557 | -0.001829 | <a href="#">AKETIQALR</a>     |
| 7.5   | 1339.775787 | -0.013059 | <a href="#">QLRSIEKR</a>      |
| 7.5   | 1339.743439 | 0.019289  | <a href="#">QLSWLINR</a>      |
| 7.5   | 1339.743454 | 0.019274  | <a href="#">QLTWLVNR</a>      |
| 5.8   | 1339.764557 | -0.001829 | <a href="#">LQKEIDKR</a>      |
| 5.3   | 1339.745941 | 0.016787  | <a href="#">KAELEGVAVTAPR</a> |

MATRIX

SCIENCE

Mascot Search Results

Peptide View

MS/MS Fragmentation of **LICQATGFSPR**  
Found in **IGHM\_HUMAN**, Ig mu chain C region OS=Homo sapiens GN=IGHM PE=1 SV=3

Match to Query 32763: 1559.813228 from(780.913890,2+) rtinseconds(1992) index(50341)  
Title: Locus:1.1.1.1931.6 File:"2013-07-02 CLN FXIII 180 min 2nd F 4.wiff"  
Data file C:\Program Files (x86)\Matrix Science\Mascot Daemon\mgf\8 FXIII 180 min 2nd\mascot\_daemon\_merge.mgf

Click mouse within plot area to zoom in by factor of two about that point  
Or,   to  Da   
Label all possible matches ☐ Label matches used for scoring ☒

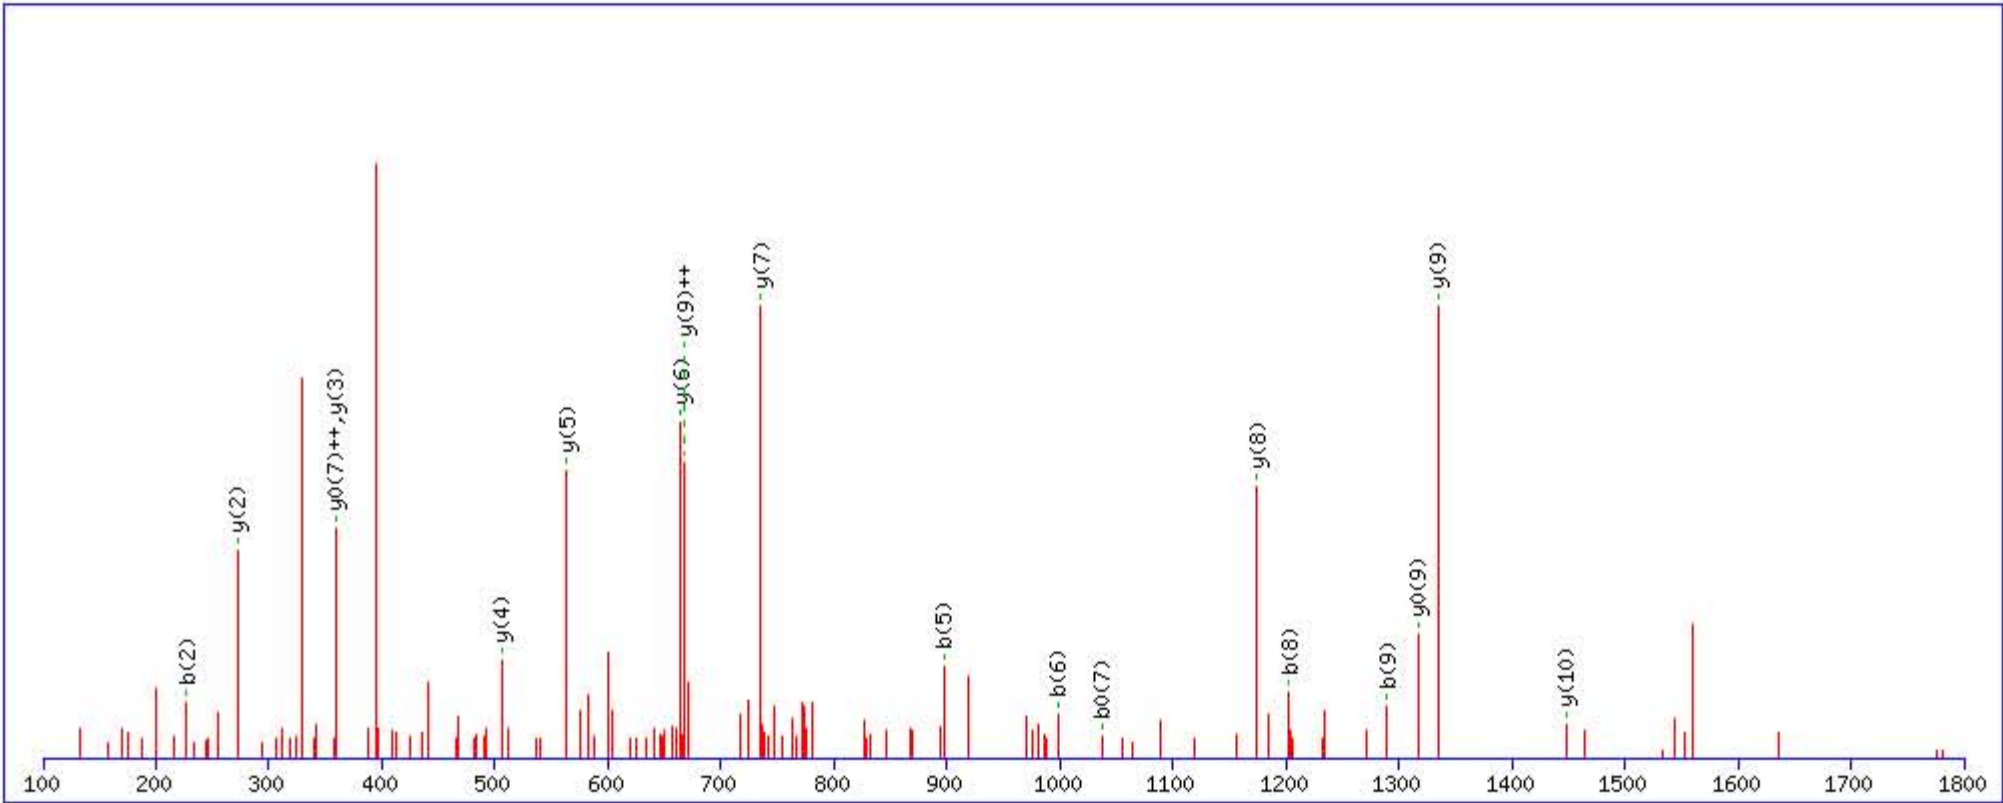

Monoisotopic mass of neutral peptide Mr(calc): 1559.795242  
Fixed modifications: Carbamidomethyl (C) (apply to specified residues or termini only)  
Variable modifications:  
Q4 : Biotin:Thermo-21345 (Q)  
Ions Score: 58 Expect: 2.1e-005  
Matches : 18/100 fragment ions using 30 most intense peaks ([help](#))

| #  | b           | b <sup>++</sup> | b <sup>*</sup> | b <sup>*++</sup> | b <sup>0</sup> | b <sup>0++</sup> | Seq. | y           | y <sup>++</sup> | y <sup>*</sup> | y <sup>*++</sup> | y <sup>0</sup> | y <sup>0++</sup> | #  |
|----|-------------|-----------------|----------------|------------------|----------------|------------------|------|-------------|-----------------|----------------|------------------|----------------|------------------|----|
| 1  | 114.091340  | 57.549308       |                |                  |                |                  | L    |             |                 |                |                  |                |                  | 11 |
| 2  | 227.175404  | 114.091340      |                |                  |                |                  | I    | 1447.718454 | 724.362865      | 1430.691905    | 715.849591       | 1429.707889    | 715.357583       | 10 |
| 3  | 387.206053  | 194.106664      |                |                  |                |                  | C    | 1334.634390 | 667.820833      | 1317.607841    | 659.307559       | 1316.623825    | 658.815551       | 9  |
| 4  | 826.431379  | 413.719328      | 809.404830     | 405.206053       |                |                  | Q    | 1174.603741 | 587.805509      | 1157.577192    | 579.292234       | 1156.593176    | 578.800226       | 8  |
| 5  | 897.468493  | 449.237885      | 880.441944     | 440.724610       |                |                  | A    | 735.378415  | 368.192846      | 718.351866     | 359.679571       | 717.367850     | 359.187563       | 7  |
| 6  | 998.516172  | 499.761724      | 981.489623     | 491.248449       | 980.505607     | 490.756441       | T    | 664.341301  | 332.674289      | 647.314752     | 324.161014       | 646.330736     | 323.669006       | 6  |
| 7  | 1055.537636 | 528.272456      | 1038.511087    | 519.759182       | 1037.527071    | 519.267174       | G    | 563.293622  | 282.150449      | 546.267073     | 273.637175       | 545.283057     | 273.145167       | 5  |
| 8  | 1202.606050 | 601.806663      | 1185.579501    | 593.293389       | 1184.595485    | 592.801381       | F    | 506.272158  | 253.639717      | 489.245609     | 245.126443       | 488.261593     | 244.634435       | 4  |
| 9  | 1289.638078 | 645.322677      | 1272.611529    | 636.809403       | 1271.627513    | 636.317395       | S    | 359.203744  | 180.105510      | 342.177195     | 171.592236       | 341.193179     | 171.100228       | 3  |
| 10 | 1386.690842 | 693.849059      | 1369.664293    | 685.335785       | 1368.680277    | 684.843777       | P    | 272.171716  | 136.589496      | 255.145167     | 128.076221       |                |                  | 2  |
| 11 |             |                 |                |                  |                |                  | R    | 175.118952  | 88.063114       | 158.092403     | 79.549839        |                |                  | 1  |

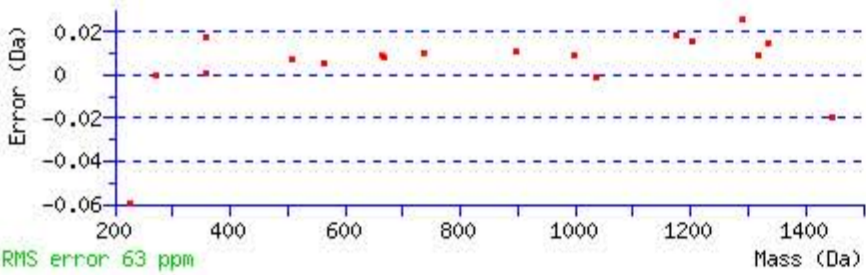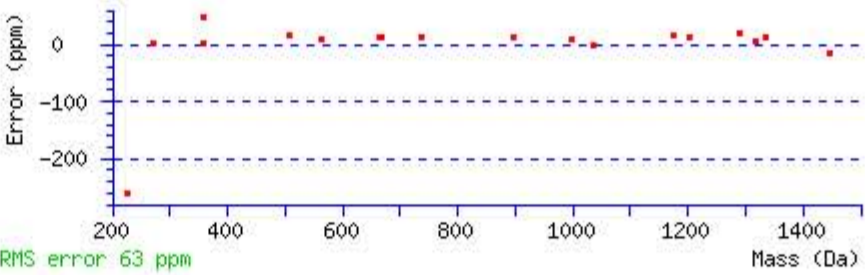

NCBI BLAST search of [LICQATGFSPR](#)  
(Parameters: blastp, nr protein database, expect=20000, no filter, PAM30)  
Other BLAST [web gateways](#)

All matches to this query

| Score | Mr(calc):   | Delta     | Sequence                       |
|-------|-------------|-----------|--------------------------------|
| 58.1  | 1559.795242 | 0.017986  | <a href="#">LICQATGFSPR</a>    |
| 8.2   | 1559.808960 | 0.004268  | <a href="#">LDRLSGLADQMVAR</a> |
| 5.4   | 1559.820190 | -0.006962 | <a href="#">MTRSATQAAKQVPR</a> |

MATRIX

SCIENCE

Mascot Search Results

Peptide View

MS/MS Fragmentation of **YAATSQVLLPSK**  
Found in **IGHM\_HUMAN**, Ig mu chain C region OS=Homo sapiens GN=IGHM PE=1 SV=3

Match to Query 34094: 1587.885168 from(794.949860,2+) rtinseconds(2036) index(50559)  
Title: Locus:1.1.1.1946.15 File:"2013-07-02 CLN FXIII 180 min 2nd F 4.wiff"  
Data file C:\Program Files (x86)\Matrix Science\Mascot Daemon\mgf\8 FXIII 180 min 2nd\mascot\_daemon\_merge.mgf

Click mouse within plot area to zoom in by factor of two about that point  
Or,   to  Da   
Label all possible matches ☐ Label matches used for scoring ☒

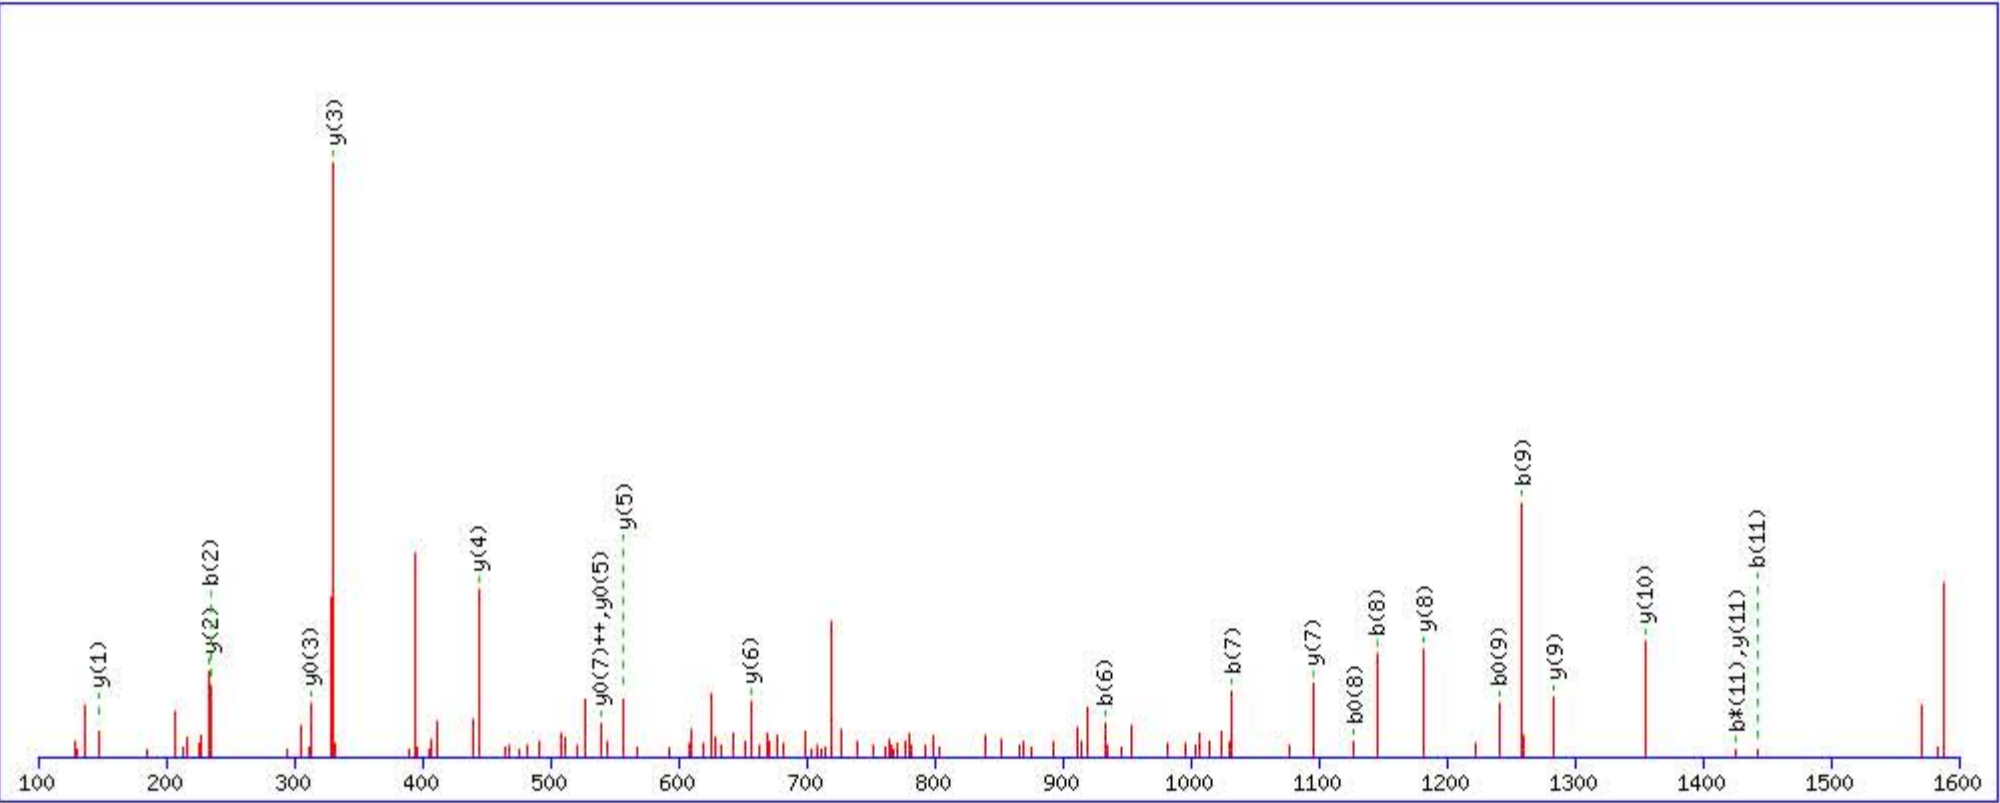

Monoisotopic mass of neutral peptide Mr(calc): 1587.869431  
Fixed modifications: Carbamidomethyl (C) (apply to specified residues or termini only)  
Variable modifications:  
Q6 : Biotin:Thermo-21345 (Q)  
Ions Score: 74 Expect: 7.2e-007  
Matches : 23/114 fragment ions using 41 most intense peaks [\(help\)](#)

| #  | b           | b <sup>++</sup> | b <sup>*</sup> | b <sup>+++</sup> | b <sup>0</sup> | b <sup>0++</sup> | Seq. | y           | y <sup>++</sup> | y <sup>*</sup> | y <sup>+++</sup> | y <sup>0</sup> | y <sup>0++</sup> | #  |
|----|-------------|-----------------|----------------|------------------|----------------|------------------|------|-------------|-----------------|----------------|------------------|----------------|------------------|----|
| 1  | 164.070605  | 82.538940       |                |                  |                |                  | Y    |             |                 |                |                  |                |                  | 12 |
| 2  | 235.107719  | 118.057498      |                |                  |                |                  | A    | 1425.813399 | 713.410337      | 1408.786850    | 704.897063       | 1407.802834    | 704.405055       | 11 |
| 3  | 306.144833  | 153.576055      |                |                  |                |                  | A    | 1354.776285 | 677.891780      | 1337.749736    | 669.378506       | 1336.765720    | 668.886498       | 10 |
| 4  | 407.192512  | 204.099894      |                |                  | 389.181947     | 195.094612       | T    | 1283.739171 | 642.373223      | 1266.712622    | 633.859949       | 1265.728606    | 633.367941       | 9  |
| 5  | 494.224540  | 247.615908      |                |                  | 476.213975     | 238.610626       | S    | 1182.691492 | 591.849384      | 1165.664943    | 583.336110       | 1164.680927    | 582.844101       | 8  |
| 6  | 933.449866  | 467.228571      | 916.423317     | 458.715297       | 915.439301     | 458.223289       | Q    | 1095.659464 | 548.333370      | 1078.632915    | 539.820096       | 1077.648899    | 539.328088       | 7  |
| 7  | 1032.518280 | 516.762778      | 1015.491731    | 508.249504       | 1014.507715    | 507.757496       | V    | 656.434138  | 328.720707      | 639.407589     | 320.207432       | 638.423573     | 319.715424       | 6  |
| 8  | 1145.602344 | 573.304810      | 1128.575795    | 564.791536       | 1127.591779    | 564.299527       | L    | 557.365724  | 279.186500      | 540.339175     | 270.673226       | 539.355159     | 270.181218       | 5  |
| 9  | 1258.686408 | 629.846842      | 1241.659859    | 621.333567       | 1240.675843    | 620.841559       | L    | 444.281660  | 222.644468      | 427.255111     | 214.131193       | 426.271095     | 213.639186       | 4  |
| 10 | 1355.739172 | 678.373224      | 1338.712623    | 669.859949       | 1337.728607    | 669.367941       | P    | 331.197596  | 166.102436      | 314.171047     | 157.589162       | 313.187031     | 157.097154       | 3  |
| 11 | 1442.771200 | 721.889238      | 1425.744651    | 713.375964       | 1424.760635    | 712.883955       | S    | 234.144832  | 117.576054      | 217.118283     | 109.062780       | 216.134267     | 108.570772       | 2  |
| 12 |             |                 |                |                  |                |                  | K    | 147.112804  | 74.060040       | 130.086255     | 65.546765        |                |                  | 1  |

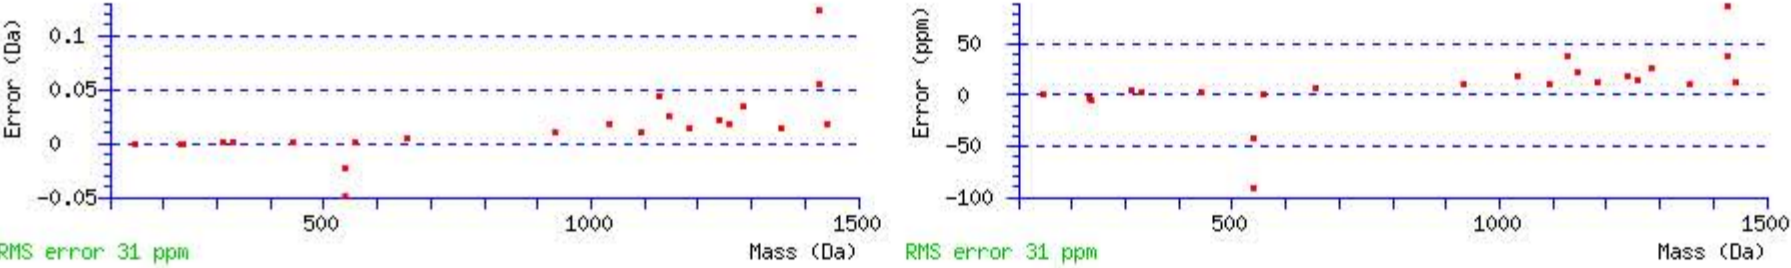

NCBI BLAST search of [YAATSQVLLPSK](#)  
(Parameters: blastp, nr protein database, expect=20000, no filter, PAM30)  
Other BLAST [web gateways](#)

All matches to this query

| Score | Mr(calc):   | Delta     | Sequence                        |
|-------|-------------|-----------|---------------------------------|
| 73.9  | 1587.869431 | 0.015737  | <a href="#">YAATSQVLLPSK</a>    |
| 8.7   | 1587.862045 | 0.023123  | <a href="#">VTGQNQEQFLLAK</a>   |
| 8.0   | 1587.862030 | 0.023138  | <a href="#">EDAKLSFKHVSSLK</a>  |
| 6.0   | 1587.865402 | 0.019766  | <a href="#">ENGLRDILAVLTMK</a>  |
| 3.8   | 1587.891220 | -0.006052 | <a href="#">TIQTIVFLYSLYK</a>   |
| 2.2   | 1587.862045 | 0.023123  | <a href="#">SKDLTAADVVKQWK</a>  |
| 2.1   | 1587.870773 | 0.014395  | <a href="#">FSWMKLLAHKVGR</a>   |
| 2.0   | 1587.884018 | 0.001150  | <a href="#">TKTKMSAAQALK</a>    |
| 1.6   | 1587.880646 | 0.004522  | <a href="#">RIQAEYVSALK</a>     |
| 0.9   | 1587.890533 | -0.005365 | <a href="#">EPTTKAEMLKIIISK</a> |

MATRIX

SCIENCE

Mascot Search Results

Peptide View

MS/MS Fragmentation of **DVMQGTDEHVVCK**  
Found in **IGHM\_HUMAN**, Ig mu chain C region OS=Homo sapiens GN=IGHM PE=1 SV=3

Match to Query 40852: 1827.840042 from(610.287290,3+) rtinseconds(1640) index(31997)  
Title: Locus:1.1.1.679.8 File:"2013-07-02 CLN FXIII 180 min 2nd F 3.wiff"  
Data file C:\Program Files (x86)\Matrix Science\Mascot Daemon\mgf\8 FXIII 180 min 2nd\mascot\_daemon\_merge.mgf

Click mouse within plot area to zoom in by factor of two about that point  
Or, 

Plot from

100

 to 

2100

 Da 

Full range

  
Label all possible matches ☐ Label matches used for scoring ☒

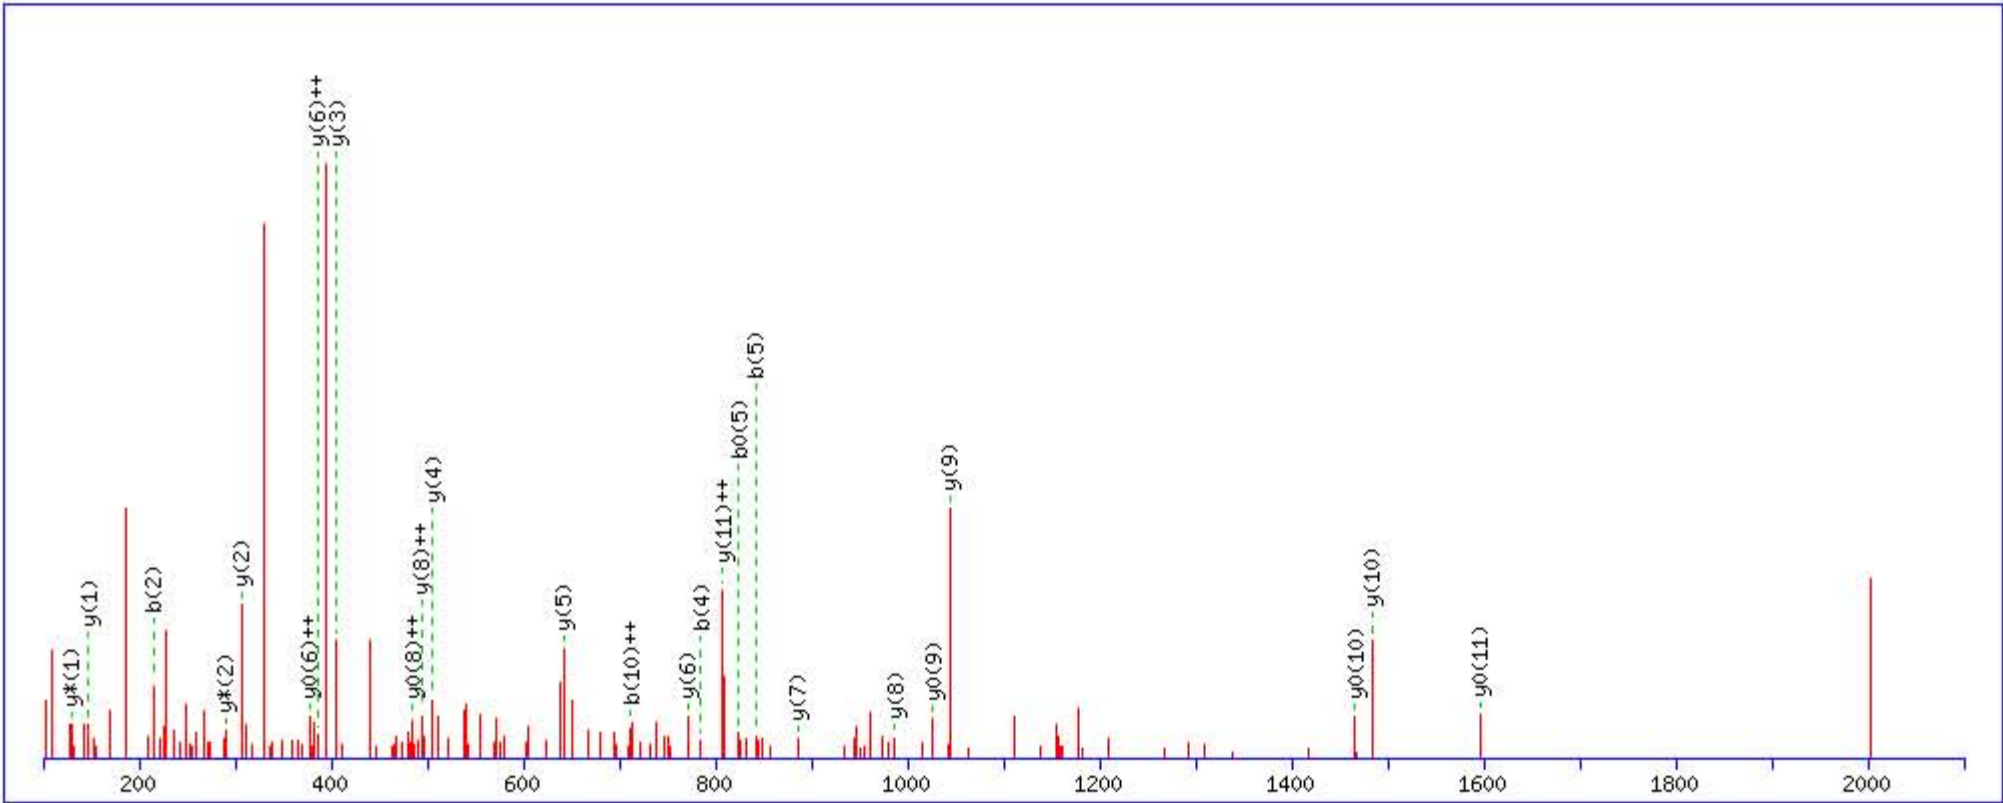

Monoisotopic mass of neutral peptide Mr(calc): 1827.831787  
Fixed modifications: Carbamidomethyl (C) (apply to specified residues or termini only)  
Variable modifications:  
Q4 : Biotin:Thermo-21345 (Q)  
Ions Score: 26 Expect: 0.028  
Matches : 25/128 fragment ions using 87 most intense peaks [\(help\)](#)

| #  | b           | b <sup>++</sup> | b <sup>*</sup> | b <sup>*++</sup> | b <sup>0</sup> | b <sup>0++</sup> | Seq. | y           | y <sup>++</sup> | y <sup>*</sup> | y <sup>*++</sup> | y <sup>0</sup> | y <sup>0++</sup> | #  |
|----|-------------|-----------------|----------------|------------------|----------------|------------------|------|-------------|-----------------|----------------|------------------|----------------|------------------|----|
| 1  | 116.034219  | 58.520748       |                |                  | 98.023654      | 49.515465        | D    |             |                 |                |                  |                |                  | 13 |
| 2  | 215.102633  | 108.054954      |                |                  | 197.092068     | 99.049672        | V    | 1713.812097 | 857.409687      | 1696.785548    | 848.896412       | 1695.801532    | 848.404404       | 12 |
| 3  | 346.143118  | 173.575197      |                |                  | 328.132553     | 164.569915       | M    | 1614.743683 | 807.875480      | 1597.717134    | 799.362205       | 1596.733118    | 798.870197       | 11 |
| 4  | 785.368444  | 393.187860      | 768.341895     | 384.674586       | 767.357879     | 384.182578       | Q    | 1483.703198 | 742.355237      | 1466.676649    | 733.841963       | 1465.692633    | 733.349955       | 10 |
| 5  | 842.389908  | 421.698592      | 825.363359     | 413.185318       | 824.379343     | 412.693310       | G    | 1044.477872 | 522.742574      | 1027.451323    | 514.229300       | 1026.467307    | 513.737292       | 9  |
| 6  | 943.437587  | 472.222432      | 926.411038     | 463.709157       | 925.427022     | 463.217149       | T    | 987.456408  | 494.231842      | 970.429859     | 485.718568       | 969.445843     | 485.226560       | 8  |
| 7  | 1058.464530 | 529.735903      | 1041.437981    | 521.222629       | 1040.453965    | 520.730621       | D    | 886.408729  | 443.708003      | 869.382180     | 435.194728       | 868.398164     | 434.702720       | 7  |
| 8  | 1187.507123 | 594.257200      | 1170.480574    | 585.743925       | 1169.496558    | 585.251917       | E    | 771.381786  | 386.194531      | 754.355237     | 377.681257       | 753.371221     | 377.189249       | 6  |
| 9  | 1324.566035 | 662.786656      | 1307.539486    | 654.273381       | 1306.555470    | 653.781373       | H    | 642.339193  | 321.673235      | 625.312644     | 313.159960       |                |                  | 5  |
| 10 | 1423.634449 | 712.320863      | 1406.607900    | 703.807588       | 1405.623884    | 703.315580       | V    | 505.280281  | 253.143779      | 488.253732     | 244.630504       |                |                  | 4  |
| 11 | 1522.702863 | 761.855070      | 1505.676314    | 753.341795       | 1504.692298    | 752.849787       | V    | 406.211867  | 203.609572      | 389.185318     | 195.096297       |                |                  | 3  |
| 12 | 1682.733512 | 841.870394      | 1665.706963    | 833.357120       | 1664.722947    | 832.865112       | C    | 307.143453  | 154.075365      | 290.116904     | 145.562090       |                |                  | 2  |
| 13 |             |                 |                |                  |                |                  | K    | 147.112804  | 74.060040       | 130.086255     | 65.546765        |                |                  | 1  |

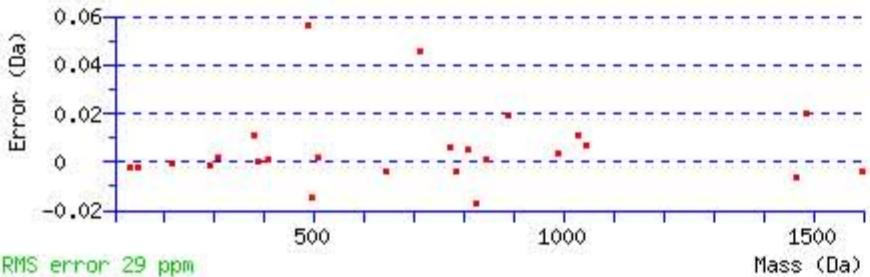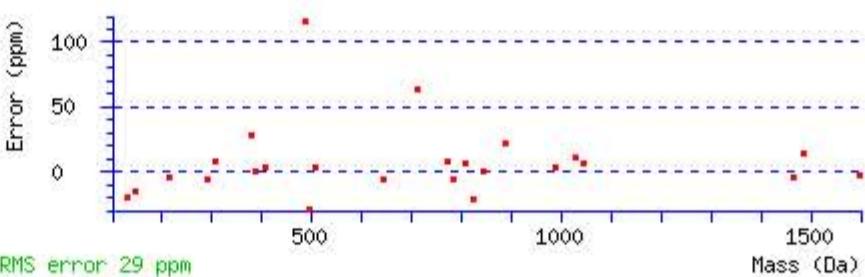

NCBI BLAST search of **DVMQGTDEHVVCK**  
(Parameters: blastp, nr protein database, expect=20000, no filter, PAM30)  
Other BLAST [web gateways](#)

All matches to this query

| Score | Mr(calc):   | Delta    | Sequence                      |
|-------|-------------|----------|-------------------------------|
| 26.4  | 1827.831787 | 0.008255 | <a href="#">DVMQGTDEHVVCK</a> |

MATRIX

SCIENCE

Mascot Search Results

Peptide View

MS/MS Fragmentation of **YVTSAPMPEPQAPGR**  
Found in **IGHM\_HUMAN**, Ig mu chain C region OS=Homo sapiens GN=IGHM PE=1 SV=3

Match to Query 42356: 1910.947692 from(637.989840,3+) rtinseconds(1891) index(33386)  
Title: Locus:1.1.1.767.15 File:"2013-07-02 CLN FXIII 180 min 2nd F 3.wiff"  
Data file C:\Program Files (x86)\Matrix Science\Mascot Daemon\mgf\8 FXIII 180 min 2nd\mascot\_daemon\_merge.mgf

Click mouse within plot area to zoom in by factor of two about that point  
Or, 

Plot from

100

 to 

1700

 Da 

Full range

  
Label all possible matches ☐ Label matches used for scoring ☒

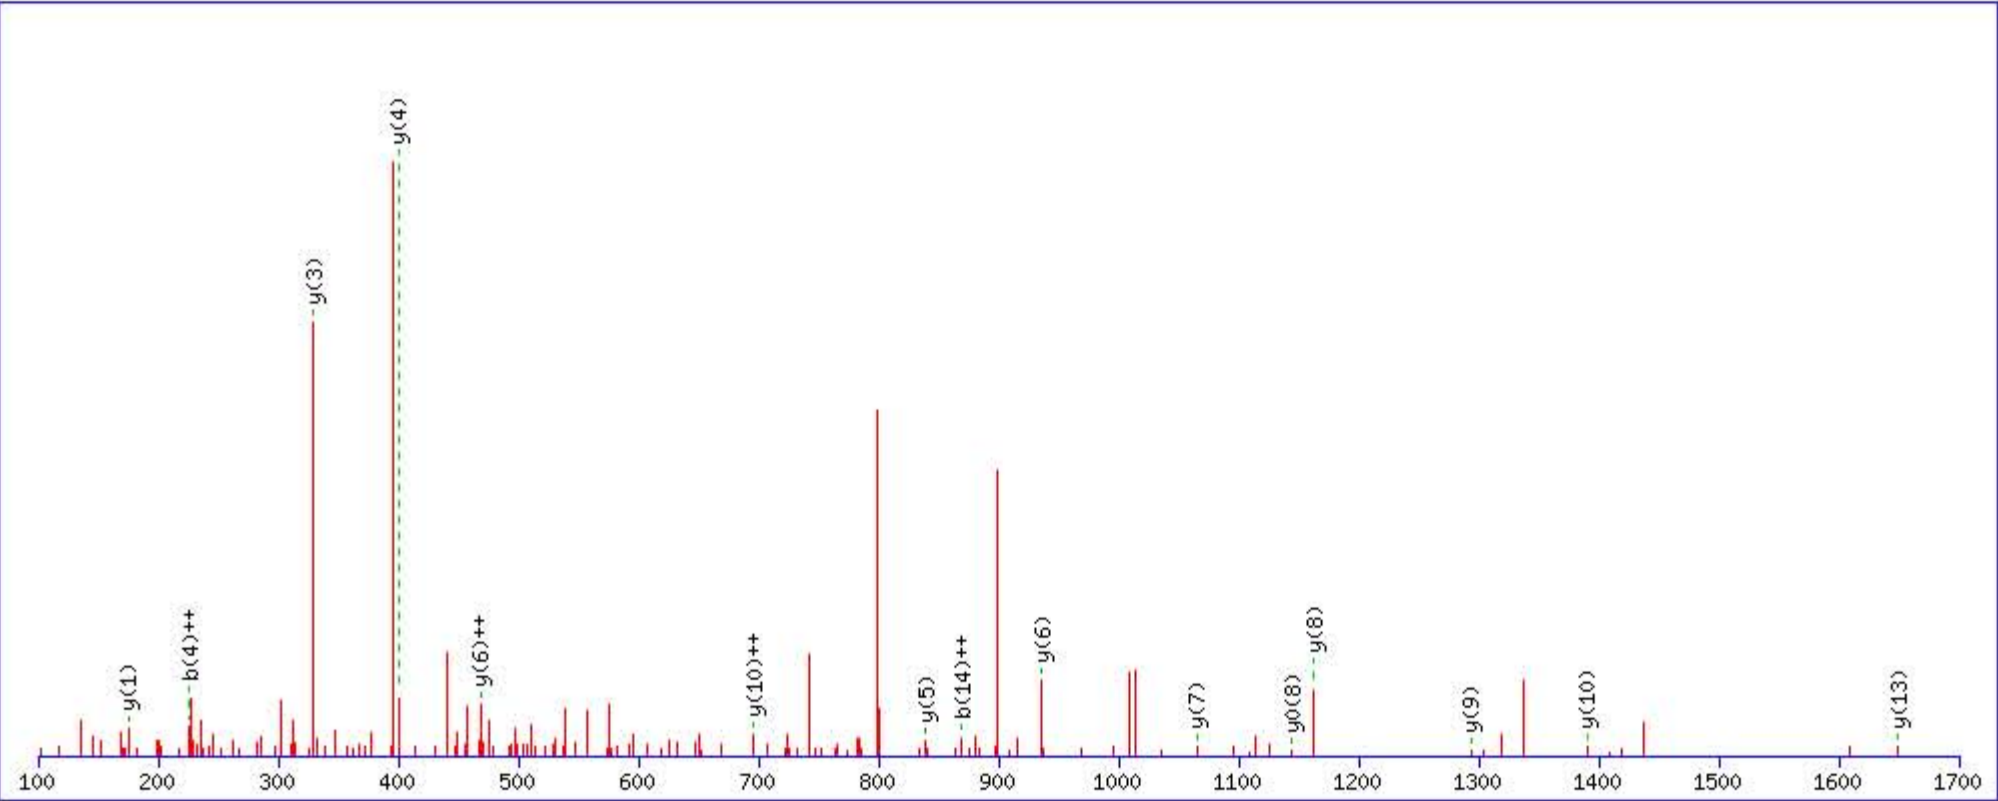

Monoisotopic mass of neutral peptide Mr(calc): 1910.938263  
Fixed modifications: Carbamidomethyl (C) (apply to specified residues or termini only)  
Variable modifications:  
Q11 : Biotin:Thermo-21345 (Q)  
Ions Score: 30 Expect: 0.022  
Matches : 15/132 fragment ions using 54 most intense peaks [\(help\)](#)

| #  | b           | b <sup>++</sup> | b <sup>*</sup> | b <sup>*++</sup> | b <sup>0</sup> | b <sup>0++</sup> | Seq. | y           | y <sup>++</sup> | y <sup>*</sup> | y <sup>*++</sup> | y <sup>0</sup> | y <sup>0++</sup> | #  |
|----|-------------|-----------------|----------------|------------------|----------------|------------------|------|-------------|-----------------|----------------|------------------|----------------|------------------|----|
| 1  | 164.070605  | 82.538940       |                |                  |                |                  | Y    |             |                 |                |                  |                |                  | 15 |
| 2  | 263.139019  | 132.073148      |                |                  |                |                  | V    | 1748.882225 | 874.944750      | 1731.855676    | 866.431476       | 1730.871660    | 865.939468       | 14 |
| 3  | 364.186698  | 182.596987      |                |                  | 346.176133     | 173.591705       | T    | 1649.813811 | 825.410543      | 1632.787262    | 816.897269       | 1631.803246    | 816.405261       | 13 |
| 4  | 451.218726  | 226.113001      |                |                  | 433.208161     | 217.107719       | S    | 1548.766132 | 774.886704      | 1531.739583    | 766.373430       | 1530.755567    | 765.881421       | 12 |
| 5  | 522.255840  | 261.631558      |                |                  | 504.245275     | 252.626276       | A    | 1461.734104 | 731.370690      | 1444.707555    | 722.857416       | 1443.723539    | 722.365407       | 11 |
| 6  | 619.308604  | 310.157940      |                |                  | 601.298039     | 301.152658       | P    | 1390.696990 | 695.852133      | 1373.670441    | 687.338859       | 1372.686425    | 686.846850       | 10 |
| 7  | 750.349089  | 375.678183      |                |                  | 732.338524     | 366.672900       | M    | 1293.644226 | 647.325751      | 1276.617677    | 638.812477       | 1275.633661    | 638.320468       | 9  |
| 8  | 847.401853  | 424.204565      |                |                  | 829.391288     | 415.199282       | P    | 1162.603741 | 581.805508      | 1145.577192    | 573.292234       | 1144.593176    | 572.800226       | 8  |
| 9  | 976.444446  | 488.725861      |                |                  | 958.433881     | 479.720579       | E    | 1065.550977 | 533.279126      | 1048.524428    | 524.765852       | 1047.540412    | 524.273844       | 7  |
| 10 | 1073.497210 | 537.252243      |                |                  | 1055.486645    | 528.246961       | P    | 936.508384  | 468.757830      | 919.481835     | 460.244555       |                |                  | 6  |
| 11 | 1512.722536 | 756.864906      | 1495.695987    | 748.351632       | 1494.711971    | 747.859624       | Q    | 839.455620  | 420.231448      | 822.429071     | 411.718173       |                |                  | 5  |
| 12 | 1583.759650 | 792.383463      | 1566.733101    | 783.870189       | 1565.749085    | 783.378180       | A    | 400.230294  | 200.618785      | 383.203745     | 192.105510       |                |                  | 4  |
| 13 | 1680.812414 | 840.909845      | 1663.785865    | 832.396571       | 1662.801849    | 831.904563       | P    | 329.193180  | 165.100228      | 312.166631     | 156.586953       |                |                  | 3  |
| 14 | 1737.833878 | 869.420577      | 1720.807329    | 860.907303       | 1719.823313    | 860.415294       | G    | 232.140416  | 116.573846      | 215.113867     | 108.060571       |                |                  | 2  |
| 15 |             |                 |                |                  |                |                  | R    | 175.118952  | 88.063114       | 158.092403     | 79.549839        |                |                  | 1  |

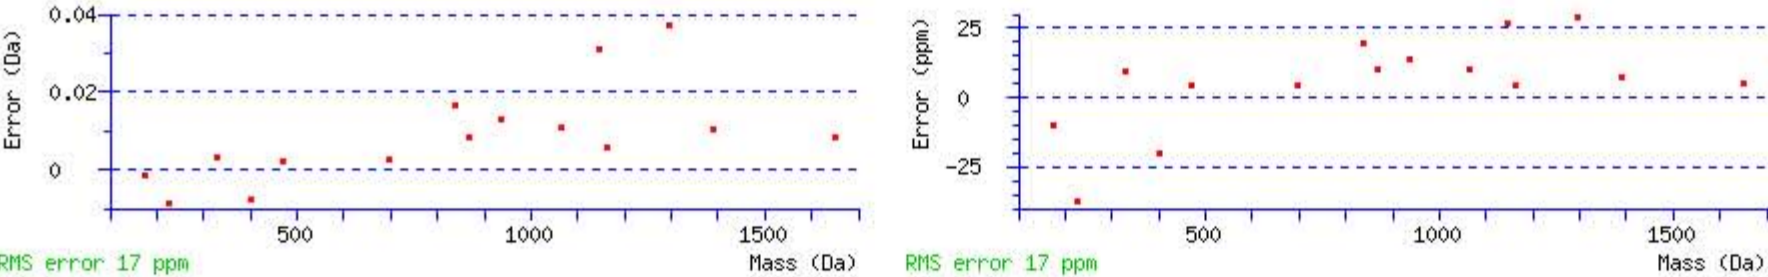

NCBI BLAST search of [YVTSAPMPEPQAPGR](#)  
(Parameters: blastp, nr protein database, expect=20000, no filter, PAM30)  
Other BLAST [web gateways](#)

All matches to this query

| Score | Mr(calc):   | Delta    | Sequence                        |
|-------|-------------|----------|---------------------------------|
| 30.4  | 1910.938263 | 0.009429 | <a href="#">YVTSAPMPEPQAPGR</a> |
| 22.5  | 1910.934265 | 0.013427 | <a href="#">SGSDEVQVGQQR</a>    |
| 21.1  | 1910.934265 | 0.013427 | <a href="#">SGSDEVQVGQQR</a>    |

MATRIX

SCIENCE

Mascot Search Results

Peptide View

MS/MS Fragmentation of **YVTSAPMPEPQAPGR**  
Found in **IGHM\_HUMAN**, Ig mu chain C region OS=Homo sapiens GN=IGHM PE=1 SV=3

Match to Query 42357: 1910.947692 from(637.989840,3+) rtinseconds(1882) index(33320)  
Title: Locus:1.1.1.764.9 File:"2013-07-02 CLN FXIII 180 min 2nd F 3.wiff"  
Data file C:\Program Files (x86)\Matrix Science\Mascot Daemon\mgf\8 FXIII 180 min 2nd\mascot\_daemon\_merge.mgf

Click mouse within plot area to zoom in by factor of two about that point  
Or,   to  Da   
Label all possible matches ☐ Label matches used for scoring ☒

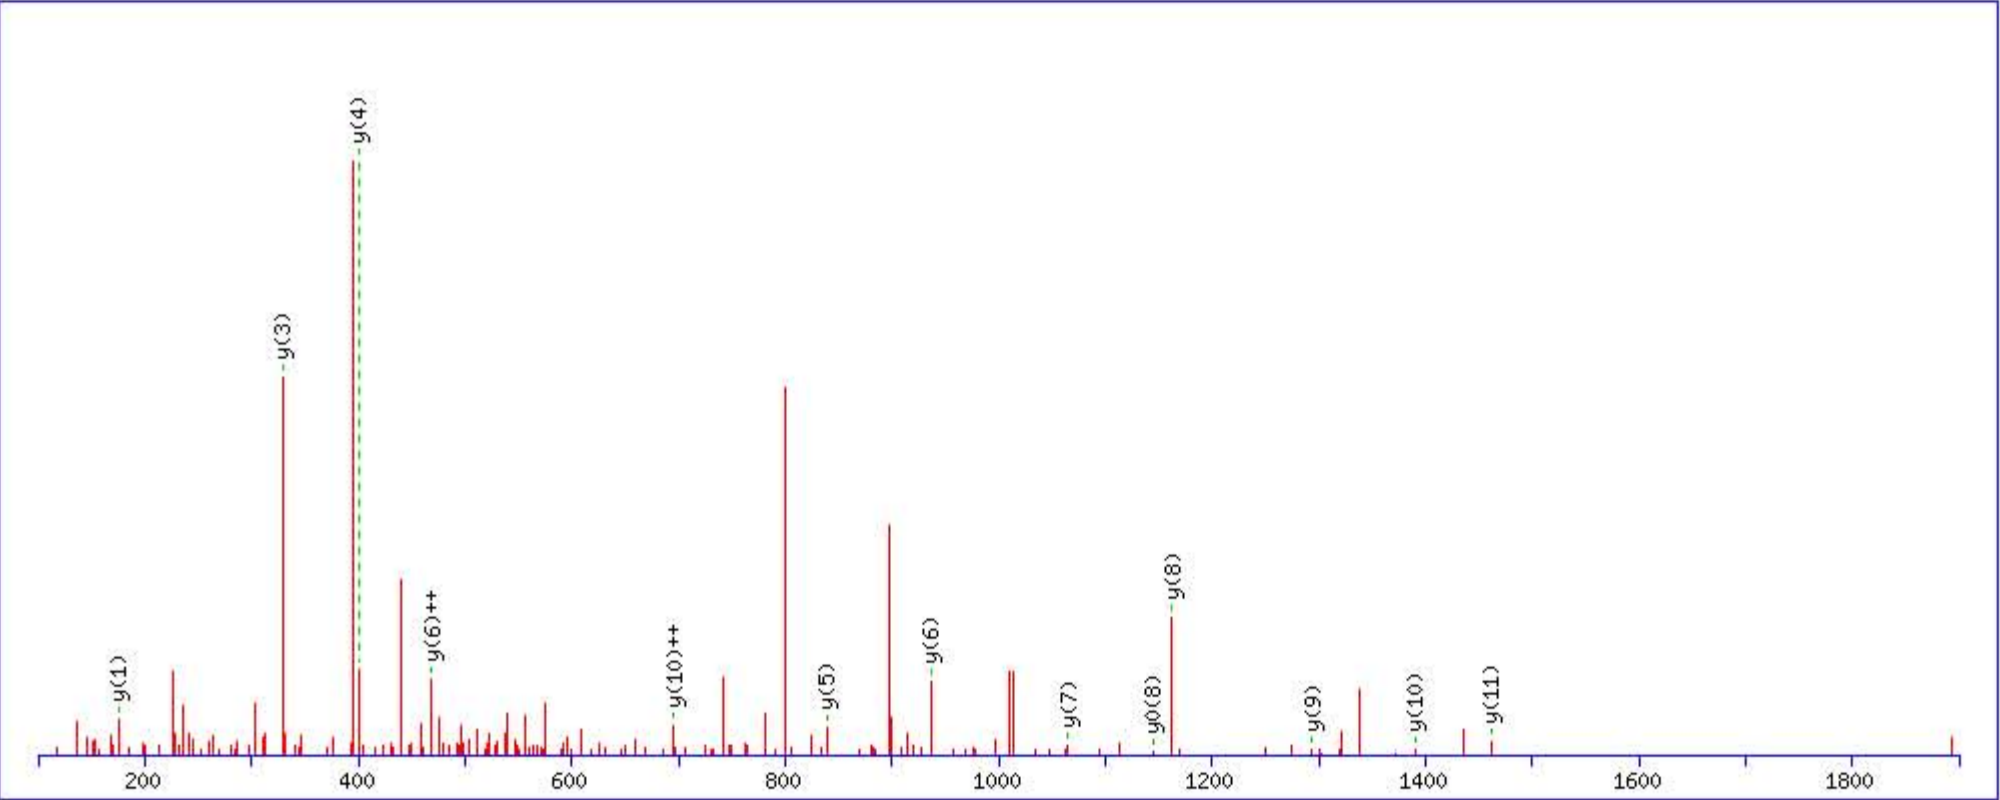

Monoisotopic mass of neutral peptide Mr(calc): 1910.938263  
Fixed modifications: Carbamidomethyl (C) (apply to specified residues or termini only)  
Variable modifications:  
Q11 : Biotin:Thermo-21345 (Q)  
Ions Score: 39 Expect: 0.0031  
Matches : 13/132 fragment ions using 42 most intense peaks [\(help\)](#)

| #                  | b           | b <sup>++</sup> | b <sup>*</sup> | b <sup>*++</sup> | b <sup>0</sup> | b <sup>0++</sup> | Seq.     | y                  | y <sup>++</sup>   | y <sup>*</sup> | y <sup>*++</sup> | y <sup>0</sup>     | y <sup>0++</sup> | #                  |
|--------------------|-------------|-----------------|----------------|------------------|----------------|------------------|----------|--------------------|-------------------|----------------|------------------|--------------------|------------------|--------------------|
| <a href="#">1</a>  | 164.070605  | 82.538940       |                |                  |                |                  | <b>Y</b> |                    |                   |                |                  |                    |                  | <a href="#">15</a> |
| <a href="#">2</a>  | 263.139019  | 132.073148      |                |                  |                |                  | <b>V</b> | 1748.882225        | 874.944750        | 1731.855676    | 866.431476       | 1730.871660        | 865.939468       | <a href="#">14</a> |
| <a href="#">3</a>  | 364.186698  | 182.596987      |                |                  | 346.176133     | 173.591705       | <b>T</b> | 1649.813811        | 825.410543        | 1632.787262    | 816.897269       | 1631.803246        | 816.405261       | <a href="#">13</a> |
| <a href="#">4</a>  | 451.218726  | 226.113001      |                |                  | 433.208161     | 217.107719       | <b>S</b> | 1548.766132        | 774.886704        | 1531.739583    | 766.373430       | 1530.755567        | 765.881421       | <a href="#">12</a> |
| <a href="#">5</a>  | 522.255840  | 261.631558      |                |                  | 504.245275     | 252.626276       | <b>A</b> | <i>1461.734104</i> | 731.370690        | 1444.707555    | 722.857416       | 1443.723539        | 722.365407       | <a href="#">11</a> |
| <a href="#">6</a>  | 619.308604  | 310.157940      |                |                  | 601.298039     | 301.152658       | <b>P</b> | <i>1390.696990</i> | <i>695.852133</i> | 1373.670441    | 687.338859       | 1372.686425        | 686.846850       | <a href="#">10</a> |
| <a href="#">7</a>  | 750.349089  | 375.678183      |                |                  | 732.338524     | 366.672900       | <b>M</b> | <i>1293.644226</i> | 647.325751        | 1276.617677    | 638.812477       | 1275.633661        | 638.320468       | <a href="#">9</a>  |
| <a href="#">8</a>  | 847.401853  | 424.204565      |                |                  | 829.391288     | 415.199282       | <b>P</b> | <i>1162.603741</i> | 581.805508        | 1145.577192    | 573.292234       | <i>1144.593176</i> | 572.800226       | <a href="#">8</a>  |
| <a href="#">9</a>  | 976.444446  | 488.725861      |                |                  | 958.433881     | 479.720579       | <b>E</b> | <i>1065.550977</i> | 533.279126        | 1048.524428    | 524.765852       | 1047.540412        | 524.273844       | <a href="#">7</a>  |
| <a href="#">10</a> | 1073.497210 | 537.252243      |                |                  | 1055.486645    | 528.246961       | <b>P</b> | <i>936.508384</i>  | <i>468.757830</i> | 919.481835     | 460.244555       |                    |                  | <a href="#">6</a>  |
| <a href="#">11</a> | 1512.722536 | 756.864906      | 1495.695987    | 748.351632       | 1494.711971    | 747.859624       | <b>Q</b> | <i>839.455620</i>  | 420.231448        | 822.429071     | 411.718173       |                    |                  | <a href="#">5</a>  |
| <a href="#">12</a> | 1583.759650 | 792.383463      | 1566.733101    | 783.870189       | 1565.749085    | 783.378180       | <b>A</b> | <i>400.230294</i>  | 200.618785        | 383.203745     | 192.105510       |                    |                  | <a href="#">4</a>  |
| <a href="#">13</a> | 1680.812414 | 840.909845      | 1663.785865    | 832.396571       | 1662.801849    | 831.904563       | <b>P</b> | <i>329.193180</i>  | 165.100228        | 312.166631     | 156.586953       |                    |                  | <a href="#">3</a>  |
| <a href="#">14</a> | 1737.833878 | 869.420577      | 1720.807329    | 860.907303       | 1719.823313    | 860.415294       | <b>G</b> | 232.140416         | 116.573846        | 215.113867     | 108.060571       |                    |                  | <a href="#">2</a>  |
| <a href="#">15</a> |             |                 |                |                  |                |                  | <b>R</b> | <i>175.118952</i>  | 88.063114         | 158.092403     | 79.549839        |                    |                  | <a href="#">1</a>  |

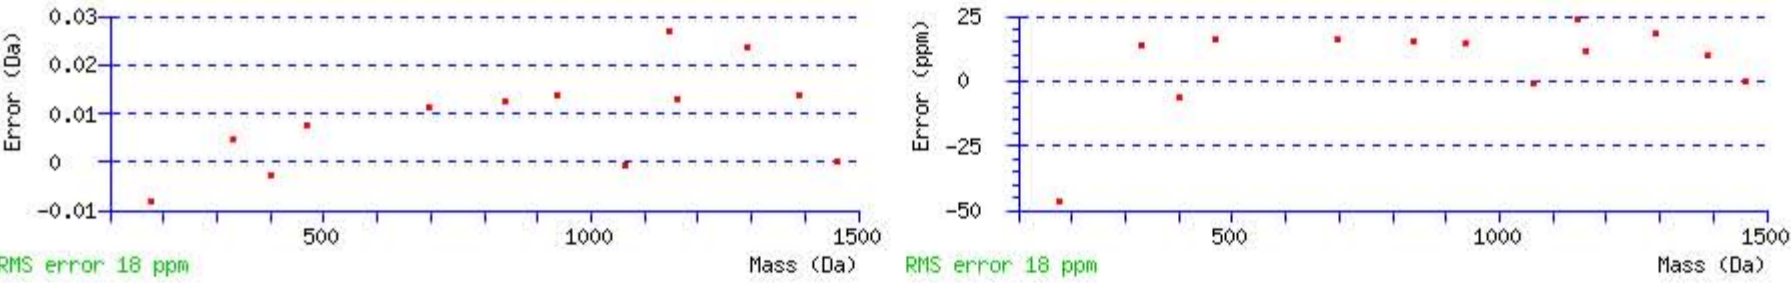

NCBI BLAST search of [YVTSAPMPEPQAPGR](#)  
(Parameters: blastp, nr protein database, expect=20000, no filter, PAM30)  
Other BLAST [web gateways](#)

All matches to this query

| Score | Mr(calc):   | Delta     | Sequence                           |
|-------|-------------|-----------|------------------------------------|
| 38.9  | 1910.938263 | 0.009429  | <a href="#">YVTSAPMPEPQAPGR</a>    |
| 30.9  | 1910.934265 | 0.013427  | <a href="#">SGSDEVQVGQQR</a>       |
| 21.9  | 1910.934265 | 0.013427  | <a href="#">SGSDEVQVGQQR</a>       |
| 1.6   | 1910.971970 | -0.024278 | <a href="#">KAPMG TARFGHHMAVLR</a> |

MATRIX

SCIENCE

Mascot Search Results

Peptide View

MS/MS Fragmentation of **LVDPQGPLK**  
Found in **FCGBP\_HUMAN**, IgGf $\alpha$ -binding protein OS=Homo sapiens GN=FCGBP PE=1 SV=3

Match to Query 22640: 1276.730548 from(639.372550,2+) rtinseconds(1897) index(33434)  
Title: Locus:1.1.1.769.16 File:"2013-07-02 CLN FXIII 180 min 2nd F 3.wiff"  
Data file C:\Program Files (x86)\Matrix Science\Mascot Daemon\mgf\8 FXIII 180 min 2nd\mascot\_daemon\_merge.mgf

Click mouse within plot area to zoom in by factor of two about that point  
Or, 

Plot from

100

 to 

1700

 Da 

Full range

  
Label all possible matches ☐ Label matches used for scoring ☒

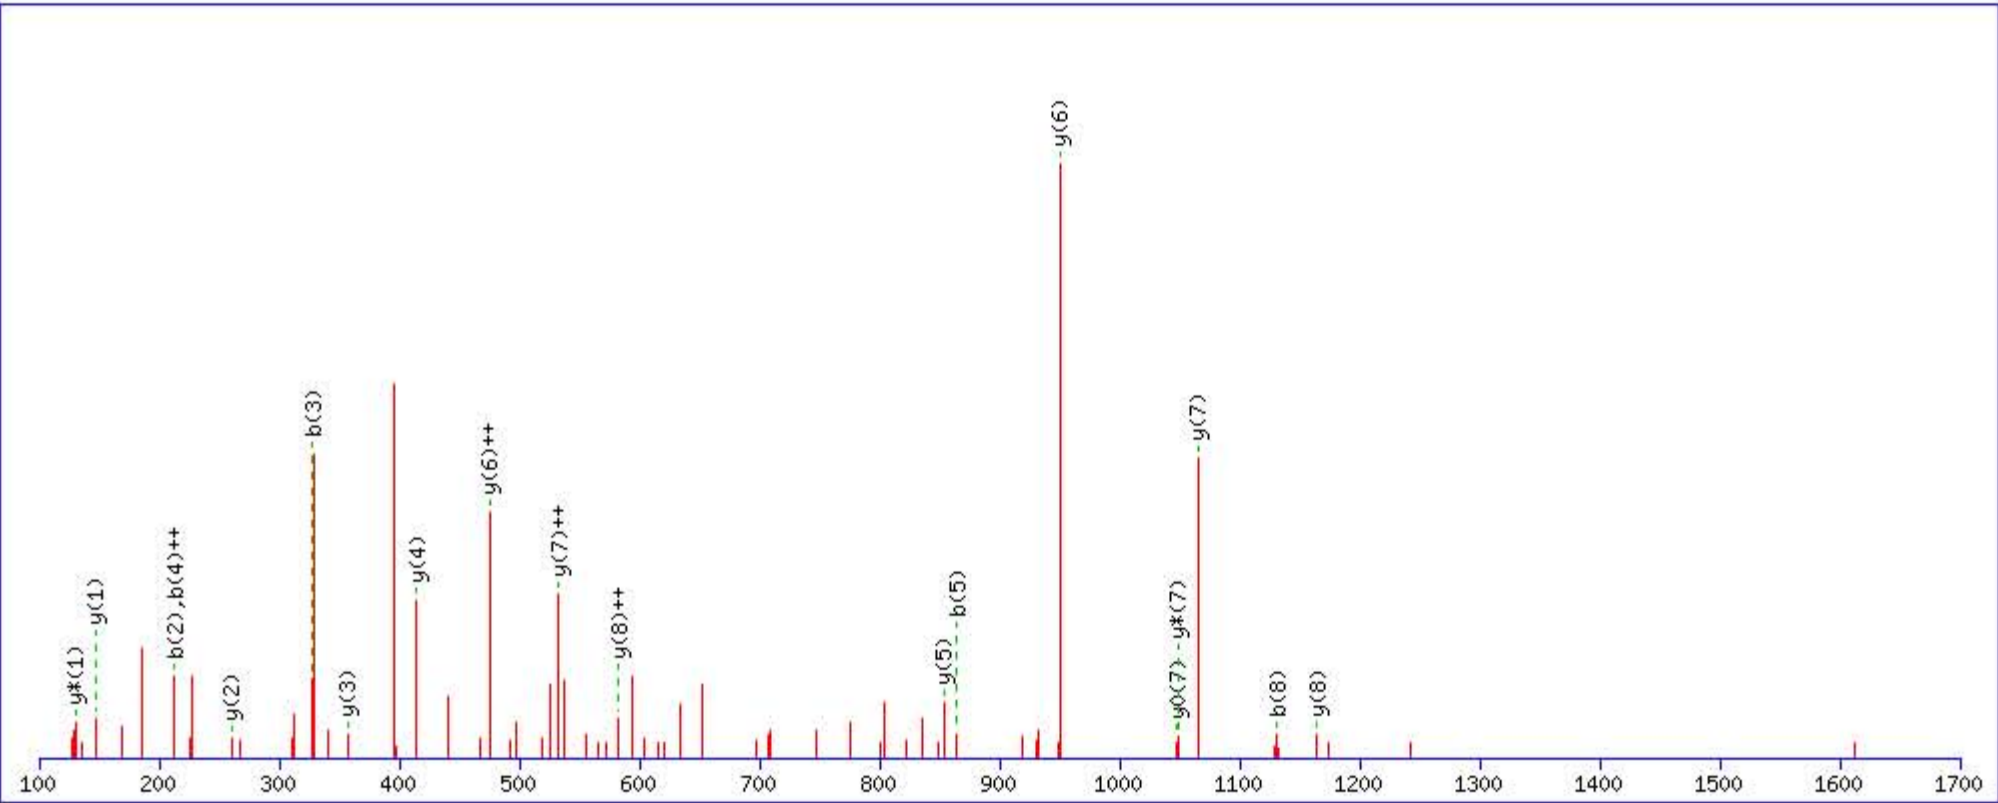

Monoisotopic mass of neutral peptide Mr(calc): 1276.721329  
Fixed modifications: Carbamidomethyl (C) (apply to specified residues or termini only)  
Variable modifications:  
Q5 : Biotin:Thermo-21345 (Q)  
Ions Score: 31 Expect: 0.0037  
Matches : 19/72 fragment ions using 59 most intense peaks ([help](#))

| # | b           | b <sup>++</sup> | b <sup>*</sup> | b <sup>++</sup> * | b <sup>0</sup> | b <sup>0++</sup> | Seq. | y           | y <sup>++</sup> | y <sup>*</sup> | y <sup>++</sup> * | y <sup>0</sup> | y <sup>0++</sup> | # |
|---|-------------|-----------------|----------------|-------------------|----------------|------------------|------|-------------|-----------------|----------------|-------------------|----------------|------------------|---|
| 1 | 114.091340  | 57.549308       |                |                   |                |                  | L    |             |                 |                |                   |                |                  | 9 |
| 2 | 213.159754  | 107.083515      |                |                   |                |                  | V    | 1164.644543 | 582.825910      | 1147.617994    | 574.312635        | 1146.633978    | 573.820627       | 8 |
| 3 | 328.186697  | 164.596986      |                |                   | 310.176132     | 155.591704       | D    | 1065.576129 | 533.291703      | 1048.549580    | 524.778428        | 1047.565564    | 524.286420       | 7 |
| 4 | 425.239461  | 213.123368      |                |                   | 407.228896     | 204.118086       | P    | 950.549186  | 475.778231      | 933.522637     | 467.264956        |                |                  | 6 |
| 5 | 864.464787  | 432.736032      | 847.438238     | 424.222757        | 846.454222     | 423.730749       | Q    | 853.496422  | 427.251849      | 836.469873     | 418.738575        |                |                  | 5 |
| 6 | 921.486251  | 461.246764      | 904.459702     | 452.733489        | 903.475686     | 452.241481       | G    | 414.271096  | 207.639186      | 397.244547     | 199.125911        |                |                  | 4 |
| 7 | 1018.539015 | 509.773146      | 1001.512466    | 501.259871        | 1000.528450    | 500.767863       | P    | 357.249632  | 179.128454      | 340.223083     | 170.615179        |                |                  | 3 |
| 8 | 1131.623079 | 566.315178      | 1114.596530    | 557.801903        | 1113.612514    | 557.309895       | L    | 260.196868  | 130.602072      | 243.170319     | 122.088797        |                |                  | 2 |
| 9 |             |                 |                |                   |                |                  | K    | 147.112804  | 74.060040       | 130.086255     | 65.546765         |                |                  | 1 |

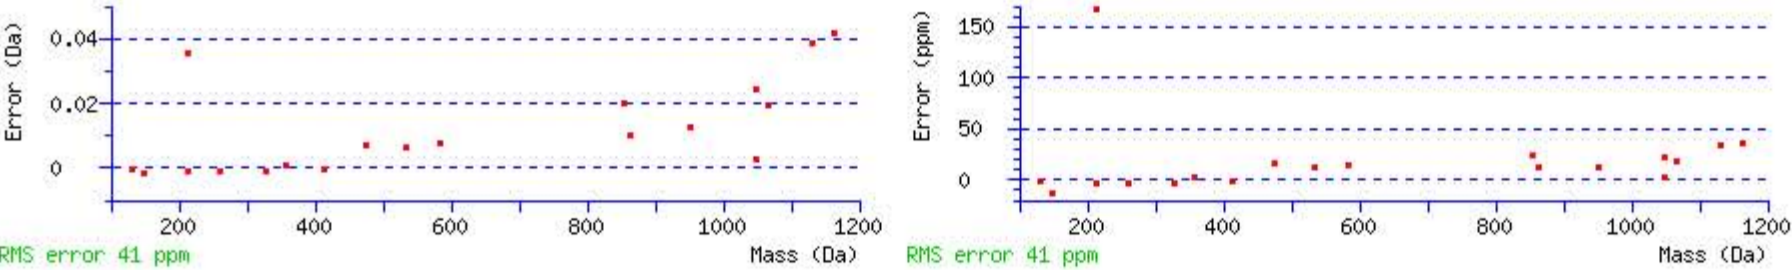

NCBI BLAST search of [LVDPQGPLK](#)  
(Parameters: blastp, nr protein database, expect=20000, no filter, PAM30)  
Other BLAST [web gateways](#)

All matches to this query

| Score | Mr(calc):   | Delta     | Sequence                     |
|-------|-------------|-----------|------------------------------|
| 30.6  | 1276.721329 | 0.009219  | <a href="#">LVDPQGPLK</a>    |
| 4.4   | 1276.725174 | 0.005374  | <a href="#">LVLGDQHQLVR</a>  |
| 2.7   | 1276.739075 | -0.008527 | <a href="#">AGTPSLVTYLKK</a> |
| 2.5   | 1276.713913 | 0.016635  | <a href="#">VIDAKFETKAR</a>  |
| 0.8   | 1276.732529 | -0.001981 | <a href="#">EKALLQHK</a>     |

MATRIX

SCIENCE

Mascot Search Results

Peptide View

MS/MS Fragmentation of **LEDGVQACHATGCGR**  
Found in **FCGBP\_HUMAN**, IgGfC-binding protein OS=Homo sapiens GN=FCGBP PE=1 SV=3

Match to Query 42939: 1940.881602 from(647.967810,3+) rtinseconds(1445) index(30661)  
Title: Locus:1.1.1.611.12 File:"2013-07-02 CLN FXIII 180 min 2nd F 3.wiff"  
Data file C:\Program Files (x86)\Matrix Science\Mascot Daemon\mgf\8 FXIII 180 min 2nd\mascot\_daemon\_merge.mgf

Click mouse within plot area to zoom in by factor of two about that point  
Or,   to  Da   
Label all possible matches ☐ Label matches used for scoring ☒

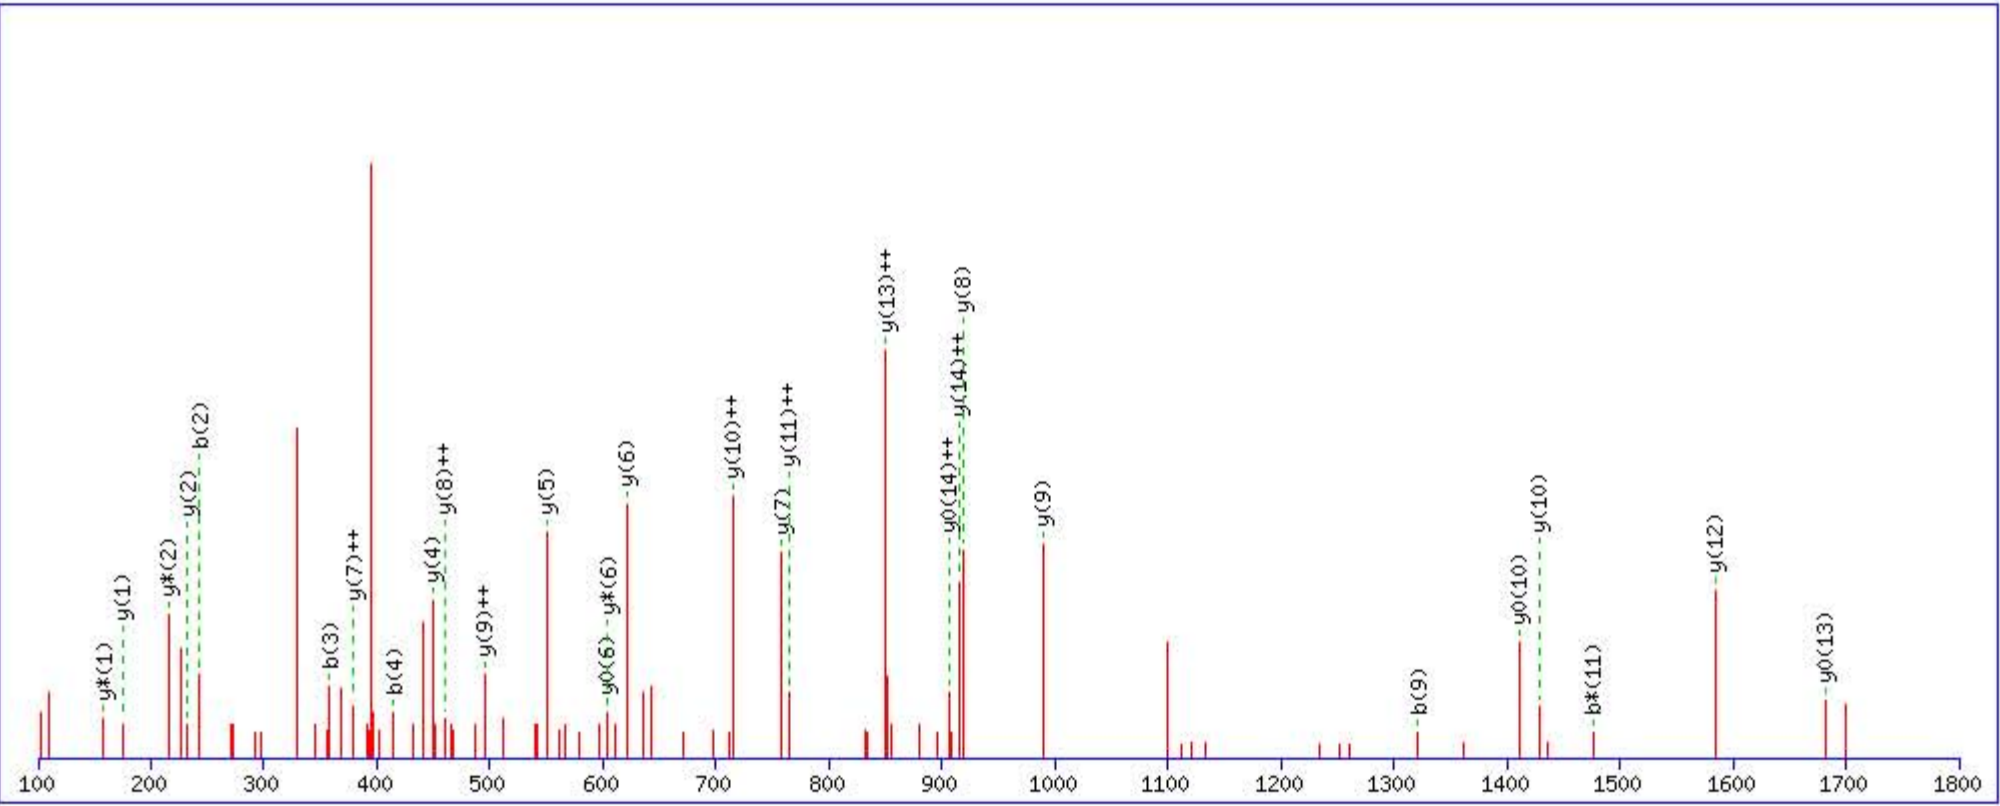

Monoisotopic mass of neutral peptide Mr(calc): 1940.865540  
Fixed modifications: Carbamidomethyl (C) (apply to specified residues or termini only)  
Variable modifications:  
Q6 : Biotin:Thermo-21345 (Q)  
Ions Score: 52 Expect: 5.5e-005  
Matches : 29/148 fragment ions using 60 most intense peaks [\(help\)](#)

| #  | b           | b <sup>++</sup> | b <sup>+</sup> | b <sup>+++</sup> | b <sup>0</sup> | b <sup>0++</sup> | Seq. | y           | y <sup>++</sup> | y <sup>+</sup> | y <sup>+++</sup> | y <sup>0</sup> | y <sup>0++</sup> | #  |
|----|-------------|-----------------|----------------|------------------|----------------|------------------|------|-------------|-----------------|----------------|------------------|----------------|------------------|----|
| 1  | 114.091340  | 57.549308       |                |                  |                |                  | L    |             |                 |                |                  |                |                  | 15 |
| 2  | 243.133933  | 122.070605      |                |                  | 225.123368     | 113.065322       | E    | 1828.788737 | 914.898006      | 1811.762188    | 906.384732       | 1810.778172    | 905.892724       | 14 |
| 3  | 358.160876  | 179.584076      |                |                  | 340.150311     | 170.578794       | D    | 1699.746144 | 850.376710      | 1682.719595    | 841.863435       | 1681.735579    | 841.371427       | 13 |
| 4  | 415.182340  | 208.094808      |                |                  | 397.171775     | 199.089526       | G    | 1584.719201 | 792.863238      | 1567.692652    | 784.349964       | 1566.708636    | 783.857956       | 12 |
| 5  | 514.250754  | 257.629015      |                |                  | 496.240189     | 248.623733       | V    | 1527.697737 | 764.352506      | 1510.671188    | 755.839232       | 1509.687172    | 755.347224       | 11 |
| 6  | 953.476080  | 477.241678      | 936.449531     | 468.728404       | 935.465515     | 468.236396       | Q    | 1428.629323 | 714.818299      | 1411.602774    | 706.305025       | 1410.618758    | 705.813017       | 10 |
| 7  | 1024.513194 | 512.760235      | 1007.486645    | 504.246960       | 1006.502629    | 503.754952       | A    | 989.403997  | 495.205636      | 972.377448     | 486.692362       | 971.393432     | 486.200354       | 9  |
| 8  | 1184.543843 | 592.775559      | 1167.517294    | 584.262285       | 1166.533278    | 583.770277       | C    | 918.366883  | 459.687079      | 901.340334     | 451.173805       | 900.356318     | 450.681797       | 8  |
| 9  | 1321.602755 | 661.305015      | 1304.576206    | 652.791741       | 1303.592190    | 652.299733       | H    | 758.336234  | 379.671755      | 741.309685     | 371.158480       | 740.325669     | 370.666472       | 7  |
| 10 | 1392.639869 | 696.823572      | 1375.613320    | 688.310298       | 1374.629304    | 687.818290       | A    | 621.277322  | 311.142299      | 604.250773     | 302.629024       | 603.266757     | 302.137016       | 6  |
| 11 | 1493.687548 | 747.347412      | 1476.660999    | 738.834138       | 1475.676983    | 738.342129       | T    | 550.240208  | 275.623742      | 533.213659     | 267.110467       | 532.229643     | 266.618459       | 5  |
| 12 | 1550.709012 | 775.858144      | 1533.682463    | 767.344869       | 1532.698447    | 766.852861       | G    | 449.192529  | 225.099902      | 432.165980     | 216.586628       |                |                  | 4  |
| 13 | 1710.739661 | 855.873468      | 1693.713112    | 847.360194       | 1692.729096    | 846.868186       | C    | 392.171065  | 196.589170      | 375.144516     | 188.075896       |                |                  | 3  |
| 14 | 1767.761125 | 884.384200      | 1750.734576    | 875.870926       | 1749.750560    | 875.378918       | G    | 232.140416  | 116.573846      | 215.113867     | 108.060571       |                |                  | 2  |
| 15 |             |                 |                |                  |                |                  | R    | 175.118952  | 88.063114       | 158.092403     | 79.549839        |                |                  | 1  |

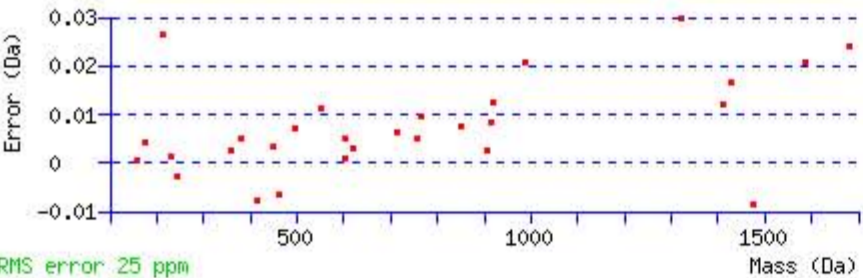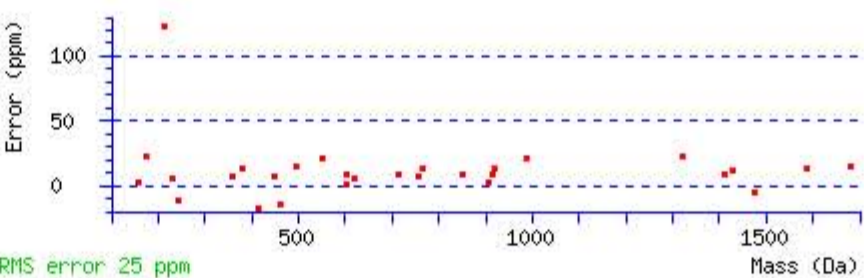

NCBI BLAST search of **LEDGVQACHATGCGR**  
(Parameters: blastp, nr protein database, expect=20000, no filter, PAM30)  
Other BLAST [web gateways](#)

All matches to this query

| Score | Mr(calc):   | Delta    | Sequence                        |
|-------|-------------|----------|---------------------------------|
| 52.1  | 1940.865540 | 0.016062 | <a href="#">LEDGVQACHATGCGR</a> |

MATRIX

SCIENCE

Mascot Search Results

Peptide View

MS/MS Fragmentation of **VVVCQEHSCKPGQVCQPSGGILSCVTK**  
Found in **FCGBP\_HUMAN**, IgGFc-binding protein OS=Homo sapiens GN=FCGBP PE=1 SV=3

Match to Query 66866: 3635.807736 from(909.959210,4+) rtinseconds(2001) index(34298)  
Title: Locus:1.1.1.805.16 File:"2013-07-02 CLN FXIII 180 min 2nd F 3.wiff"  
Data file C:\Program Files (x86)\Matrix Science\Mascot Daemon\mgf\8 FXIII 180 min 2nd\mascot\_daemon\_merge.mgf

Click mouse within plot area to zoom in by factor of two about that point  
Or, 

Plot from

0

 to 

2800

 Da 

Full range

Label all possible matches ☐ Label matches used for scoring ☒

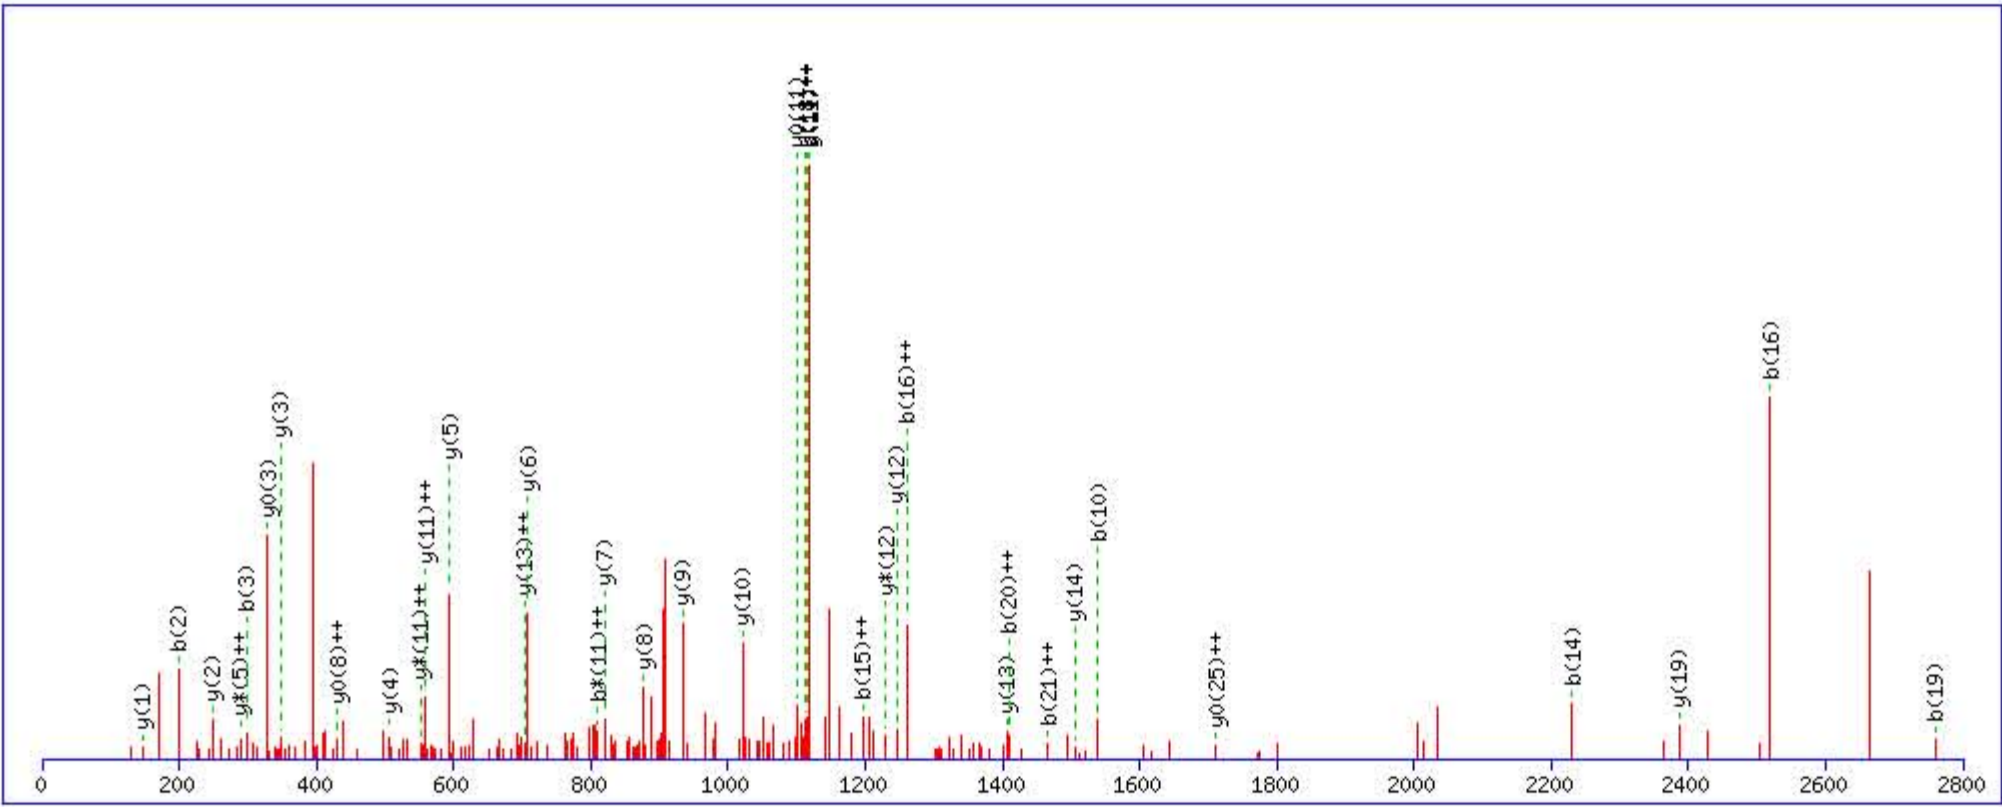

Monoisotopic mass of neutral peptide Mr(calc): 3635.757751  
Fixed modifications: Carbamidomethyl (C) (apply to specified residues or termini only)  
Variable modifications:  
Q5 : Biotin:Thermo-21345 (Q)  
Q13 : Biotin:Thermo-21345 (Q)  
Ions Score: 46 Expect: 0.00054  
Matches : 37/292 fragment ions using 105 most intense peaks [\(help\)](#)

| #  | b           | b <sup>++</sup> | b <sup>*</sup> | b <sup>*++</sup> | b <sup>0</sup> | b <sup>0++</sup> | Seq. | y           | y <sup>++</sup> | y <sup>*</sup> | y <sup>*++</sup> | y <sup>0</sup> | y <sup>0++</sup> | #  |
|----|-------------|-----------------|----------------|------------------|----------------|------------------|------|-------------|-----------------|----------------|------------------|----------------|------------------|----|
| 1  | 100.075690  | 50.541483       |                |                  |                |                  | V    |             |                 |                |                  |                |                  | 27 |
| 2  | 199.144104  | 100.075690      |                |                  |                |                  | V    | 3537.696565 | 1769.351920     | 3520.670016    | 1760.838646      | 3519.686000    | 1760.346638      | 26 |
| 3  | 298.212518  | 149.609897      |                |                  |                |                  | V    | 3438.628151 | 1719.817713     | 3421.601602    | 1711.304439      | 3420.617586    | 1710.812431      | 25 |
| 4  | 458.243167  | 229.625222      |                |                  |                |                  | C    | 3339.559737 | 1670.283506     | 3322.533188    | 1661.770232      | 3321.549172    | 1661.278224      | 24 |
| 5  | 897.468493  | 449.237885      | 880.441944     | 440.724610       |                |                  | Q    | 3179.529088 | 1590.268182     | 3162.502539    | 1581.754907      | 3161.518523    | 1581.262899      | 23 |
| 6  | 1026.511086 | 513.759181      | 1009.484537    | 505.245907       | 1008.500521    | 504.753899       | E    | 2740.303762 | 1370.655519     | 2723.277213    | 1362.142244      | 2722.293197    | 1361.650236      | 22 |
| 7  | 1163.569998 | 582.288637      | 1146.543449    | 573.775363       | 1145.559433    | 573.283355       | H    | 2611.261169 | 1306.134222     | 2594.234620    | 1297.620948      | 2593.250604    | 1297.128940      | 21 |
| 8  | 1250.602026 | 625.804651      | 1233.575477    | 617.291377       | 1232.591461    | 616.799369       | S    | 2474.202257 | 1237.604766     | 2457.175708    | 1229.091492      | 2456.191692    | 1228.599484      | 20 |
| 9  | 1410.632675 | 705.819976      | 1393.606126    | 697.306701       | 1392.622110    | 696.814693       | C    | 2387.170229 | 1194.088752     | 2370.143680    | 1185.575478      | 2369.159664    | 1185.083470      | 19 |
| 10 | 1538.727638 | 769.867457      | 1521.701089    | 761.354183       | 1520.717073    | 760.862175       | K    | 2227.139580 | 1114.073428     | 2210.113031    | 1105.560153      | 2209.129015    | 1105.068145      | 18 |
| 11 | 1635.780402 | 818.393839      | 1618.753853    | 809.880565       | 1617.769837    | 809.388557       | P    | 2099.044617 | 1050.025946     | 2082.018068    | 1041.512672      | 2081.034052    | 1041.020664      | 17 |
| 12 | 1692.801866 | 846.904571      | 1675.775317    | 838.391297       | 1674.791301    | 837.899289       | G    | 2001.991853 | 1001.499564     | 1984.965304    | 992.986290       | 1983.981288    | 992.494282       | 16 |
| 13 | 2132.027192 | 1066.517234     | 2115.000643    | 1058.003959      | 2114.016627    | 1057.511951      | Q    | 1944.970389 | 972.988832      | 1927.943840    | 964.475558       | 1926.959824    | 963.983550       | 15 |
| 14 | 2231.095606 | 1116.051441     | 2214.069057    | 1107.538166      | 2213.085041    | 1107.046158      | V    | 1505.745063 | 753.376169      | 1488.718514    | 744.862895       | 1487.734498    | 744.370887       | 14 |
| 15 | 2391.126255 | 1196.066765     | 2374.099706    | 1187.553491      | 2373.115690    | 1187.061483      | C    | 1406.676649 | 703.841962      | 1389.650100    | 695.328688       | 1388.666084    | 694.836680       | 13 |
| 16 | 2519.184833 | 1260.096054     | 2502.158284    | 1251.582780      | 2501.174268    | 1251.090772      | Q    | 1246.646000 | 623.826638      | 1229.619451    | 615.313364       | 1228.635435    | 614.821355       | 12 |
| 17 | 2616.237597 | 1308.622436     | 2599.211048    | 1300.109162      | 2598.227032    | 1299.617154      | P    | 1118.587422 | 559.797349      | 1101.560873    | 551.284074       | 1100.576857    | 550.792066       | 11 |
| 18 | 2703.269625 | 1352.138450     | 2686.243076    | 1343.625176      | 2685.259060    | 1343.133168      | S    | 1021.534658 | 511.270967      | 1004.508109    | 502.757692       | 1003.524093    | 502.265684       | 10 |
| 19 | 2760.291089 | 1380.649182     | 2743.264540    | 1372.135908      | 2742.280524    | 1371.643900      | G    | 934.502630  | 467.754953      | 917.476081     | 459.241678       | 916.492065     | 458.749670       | 9  |
| 20 | 2817.312553 | 1409.159914     | 2800.286004    | 1400.646640      | 2799.301988    | 1400.154632      | G    | 877.481166  | 439.244221      | 860.454617     | 430.730946       | 859.470601     | 430.238938       | 8  |
| 21 | 2930.396617 | 1465.701946     | 2913.370068    | 1457.188672      | 2912.386052    | 1456.696664      | I    | 820.459702  | 410.733489      | 803.433153     | 402.220214       | 802.449137     | 401.728206       | 7  |
| 22 | 3043.480681 | 1522.243978     | 3026.454132    | 1513.730704      | 3025.470116    | 1513.238696      | L    | 707.375638  | 354.191457      | 690.349089     | 345.678182       | 689.365073     | 345.186174       | 6  |
| 23 | 3130.512709 | 1565.759993     | 3113.486160    | 1557.246718      | 3112.502144    | 1556.754710      | S    | 594.291574  | 297.649425      | 577.265025     | 289.136150       | 576.281009     | 288.644142       | 5  |
| 24 | 3290.543358 | 1645.775317     | 3273.516809    | 1637.262042      | 3272.532793    | 1636.770034      | C    | 507.259546  | 254.133411      | 490.232997     | 245.620136       | 489.248981     | 245.128128       | 4  |
| 25 | 3389.611772 | 1695.309524     | 3372.585223    | 1686.796249      | 3371.601207    | 1686.304241      | V    | 347.228897  | 174.118086      | 330.202348     | 165.604812       | 329.218332     | 165.112804       | 3  |
| 26 | 3490.659451 | 1745.833363     | 3473.632902    | 1737.320089      | 3472.648886    | 1736.828081      | T    | 248.160483  | 124.583879      | 231.133934     | 116.070605       | 230.149918     | 115.578597       | 2  |
| 27 |             |                 |                |                  |                |                  | K    | 147.112804  | 74.060040       | 130.086255     | 65.546765        |                |                  | 1  |

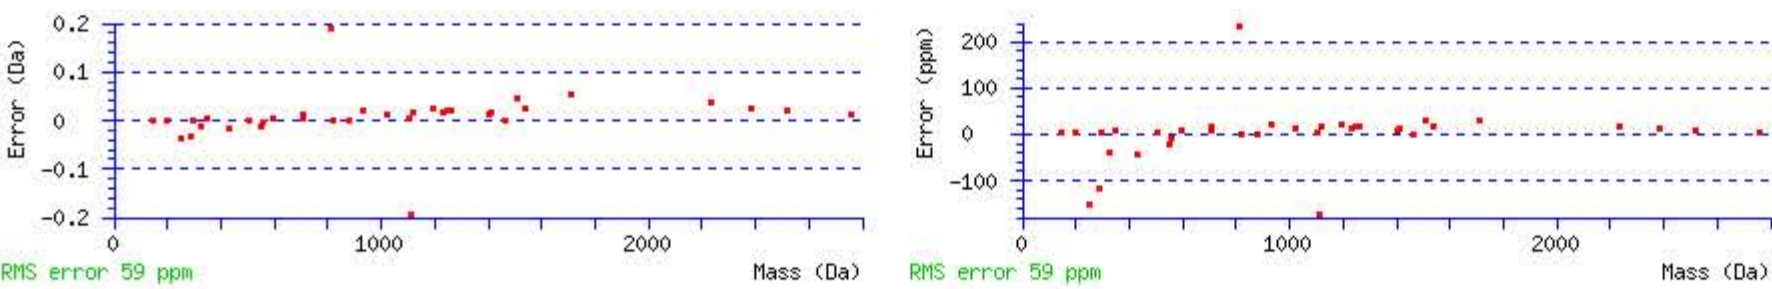

NCBI BLAST search of **VVVCQEHSCKPGQVCQPSGGILSCVTK**  
(Parameters: blastp, nr protein database, expect=20000, no filter, PAM30)  
Other BLAST [web gateways](#)

All matches to this query

| Score | Mr(calc):   | Delta    | Sequence                                    |
|-------|-------------|----------|---------------------------------------------|
| 46.5  | 3635.757751 | 0.049985 | <a href="#">VVVCQEHSCKPGQVCQPSGGILSCVTK</a> |
| 28.5  | 3635.757751 | 0.049985 | <a href="#">VVVCQEHSCKPGQVCQPSGGILSCVTK</a> |
| 19.4  | 3635.757751 | 0.049985 | <a href="#">VVVCQEHSCKPGQVCQPSGGILSCVTK</a> |

MATRIX

SCIENCE

Mascot Search Results

Peptide View

MS/MS Fragmentation of **HLDSVLQQLQTEVYR**  
Found in **IBP6\_HUMAN**, Insulin-like growth factor-binding protein 6 OS=Homo sapiens GN=IGFBP6 PE=1 SV=1

Match to Query 47255: 2139.136032 from(714.052620,3+) rtinseconds(2580) index(69703)  
Title: Locus:1.1.1.2174.8 File:"2013-07-02 CLN FXIII 180 min 2nd FT.wiff"  
Data file C:\Program Files (x86)\Matrix Science\Mascot Daemon\mgf\8 FXIII 180 min 2nd\mascot\_daemon\_merge.mgf

Click mouse within plot area to zoom in by factor of two about that point  
Or,   to  Da   
Label all possible matches ☐ Label matches used for scoring ☒

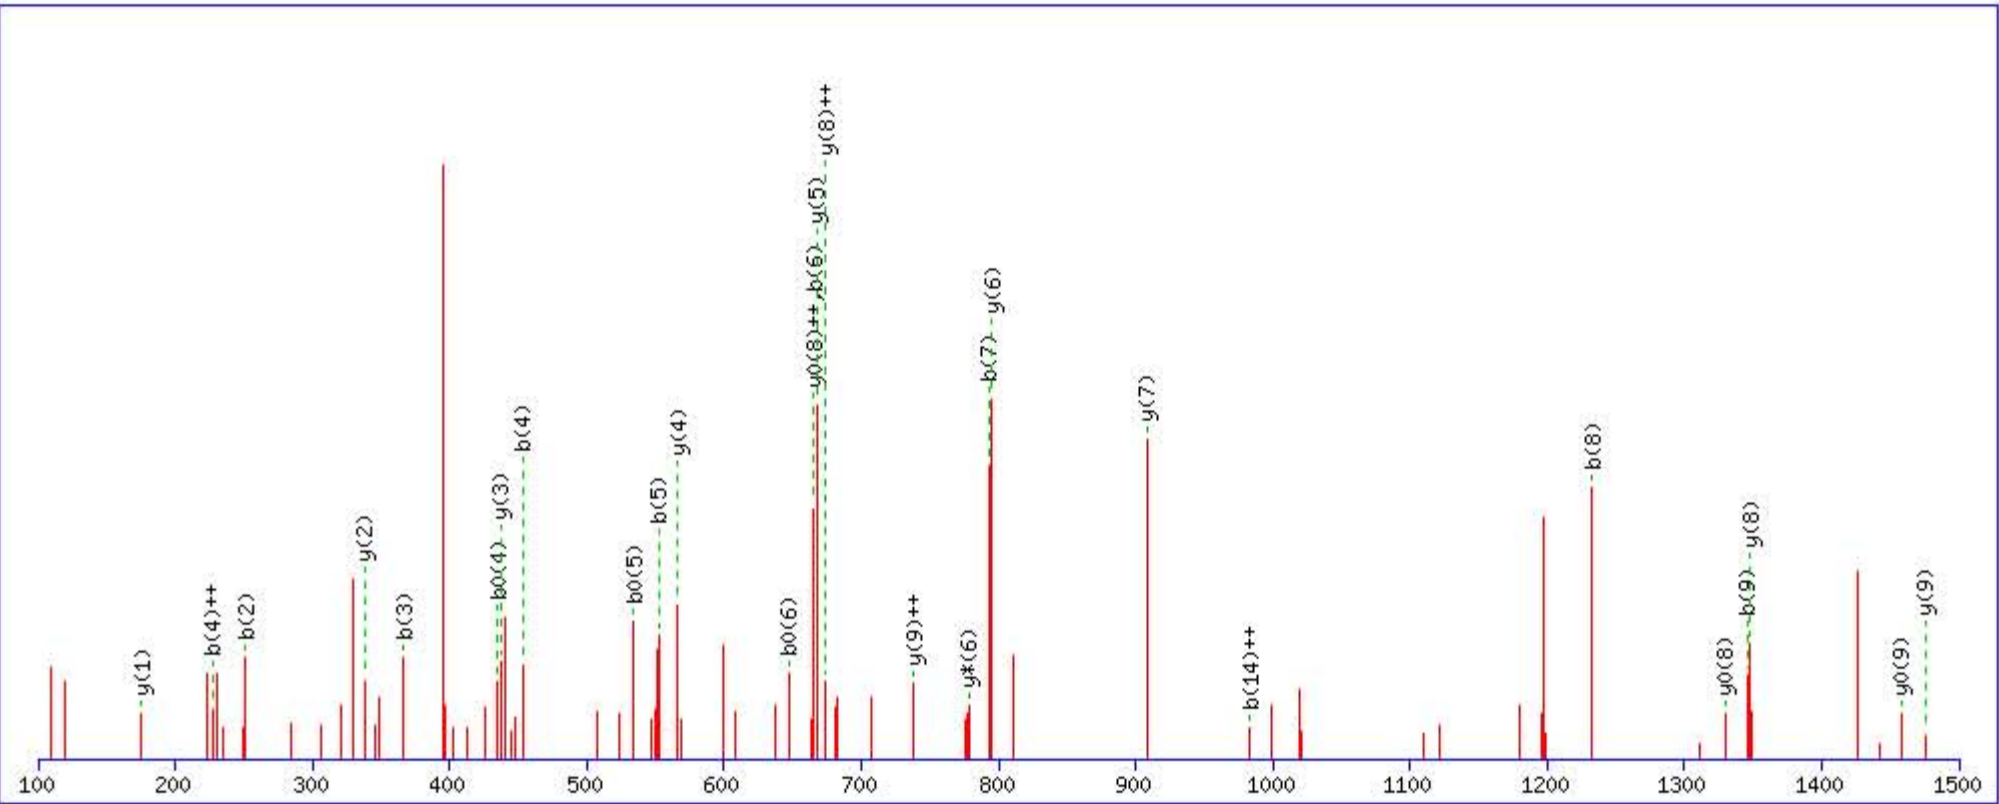

Monoisotopic mass of neutral peptide Mr(calc): 2139.114655  
Fixed modifications: Carbamidomethyl (C) (apply to specified residues or termini only)  
Variable modifications:  
Q8 : Biotin:Thermo-21345 (Q)  
Ions Score: 59 Expect: 3.6e-006  
Matches : 28/146 fragment ions using 47 most intense peaks [\(help\)](#)

| #  | b           | b <sup>++</sup> | b <sup>*</sup> | b <sup>*++</sup> | b <sup>0</sup> | b <sup>0++</sup> | Seq. | y           | y <sup>++</sup> | y <sup>*</sup> | y <sup>*++</sup> | y <sup>0</sup> | y <sup>0++</sup> | #  |
|----|-------------|-----------------|----------------|------------------|----------------|------------------|------|-------------|-----------------|----------------|------------------|----------------|------------------|----|
| 1  | 138.066188  | 69.536732       |                |                  |                |                  | H    |             |                 |                |                  |                |                  | 15 |
| 2  | 251.150252  | 126.078764      |                |                  |                |                  | L    | 2003.063026 | 1002.035151     | 1986.036477    | 993.521877       | 1985.052461    | 993.029869       | 14 |
| 3  | 366.177195  | 183.592235      |                |                  | 348.166630     | 174.586953       | D    | 1889.978962 | 945.493119      | 1872.952413    | 936.979845       | 1871.968397    | 936.487836       | 13 |
| 4  | 453.209223  | 227.108250      |                |                  | 435.198658     | 218.102967       | S    | 1774.952019 | 887.979648      | 1757.925470    | 879.466373       | 1756.941454    | 878.974365       | 12 |
| 5  | 552.277637  | 276.642457      |                |                  | 534.267072     | 267.637174       | V    | 1687.919991 | 844.463634      | 1670.893442    | 835.950359       | 1669.909426    | 835.458351       | 11 |
| 6  | 665.361701  | 333.184489      |                |                  | 647.351136     | 324.179206       | L    | 1588.851577 | 794.929427      | 1571.825028    | 786.416152       | 1570.841012    | 785.924144       | 10 |
| 7  | 793.420279  | 397.213778      | 776.393730     | 388.700503       | 775.409714     | 388.208495       | Q    | 1475.767513 | 738.387395      | 1458.740964    | 729.874120       | 1457.756948    | 729.382112       | 9  |
| 8  | 1232.645605 | 616.826440      | 1215.619056    | 608.313166       | 1214.635040    | 607.821158       | Q    | 1347.708935 | 674.358105      | 1330.682386    | 665.844831       | 1329.698370    | 665.352823       | 8  |
| 9  | 1345.729669 | 673.368472      | 1328.703120    | 664.855198       | 1327.719104    | 664.363190       | L    | 908.483609  | 454.745443      | 891.457060     | 446.232168       | 890.473044     | 445.740160       | 7  |
| 10 | 1473.788247 | 737.397761      | 1456.761698    | 728.884487       | 1455.777682    | 728.392479       | Q    | 795.399545  | 398.203411      | 778.372996     | 389.690136       | 777.388980     | 389.198128       | 6  |
| 11 | 1574.835926 | 787.921601      | 1557.809377    | 779.408326       | 1556.825361    | 778.916318       | T    | 667.340967  | 334.174122      | 650.314418     | 325.660847       | 649.330402     | 325.168839       | 5  |
| 12 | 1703.878519 | 852.442897      | 1686.851970    | 843.929623       | 1685.867954    | 843.437615       | E    | 566.293288  | 283.650282      | 549.266739     | 275.137008       | 548.282723     | 274.645000       | 4  |
| 13 | 1802.946933 | 901.977104      | 1785.920384    | 893.463830       | 1784.936368    | 892.971822       | V    | 437.250695  | 219.128986      | 420.224146     | 210.615711       |                |                  | 3  |
| 14 | 1966.010262 | 983.508769      | 1948.983713    | 974.995494       | 1947.999697    | 974.503486       | Y    | 338.182281  | 169.594779      | 321.155732     | 161.081504       |                |                  | 2  |
| 15 |             |                 |                |                  |                |                  | R    | 175.118952  | 88.063114       | 158.092403     | 79.549840        |                |                  | 1  |

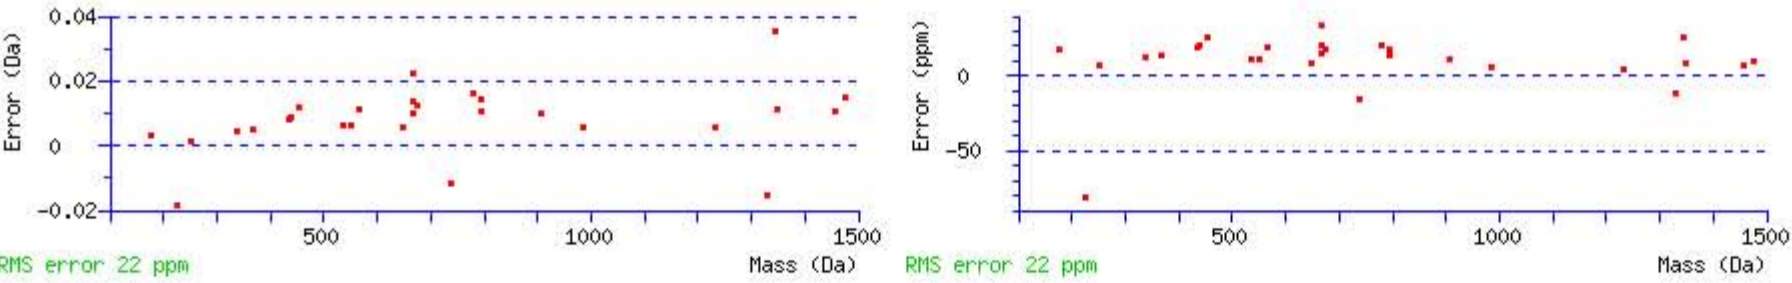

NCBI BLAST search of [HLDSVLQQLQTEVYR](#)  
(Parameters: blastp, nr protein database, expect=20000, no filter, PAM30)  
Other BLAST [web gateways](#)

All matches to this query

| Score | Mr(calc):   | Delta    | Sequence                         |
|-------|-------------|----------|----------------------------------|
| 59.1  | 2139.114655 | 0.021377 | <a href="#">HLDSVLQQLQTEVYR</a>  |
| 43.9  | 2139.114655 | 0.021377 | <a href="#">HLDSVLQQLQTEVYR</a>  |
| 33.6  | 2139.114655 | 0.021377 | <a href="#">HLDSVLQQLQTEVYR</a>  |
| 1.0   | 2139.122025 | 0.014007 | <a href="#">FNVETMAQLLNIPPNK</a> |

MATRIX

SCIENCE

Mascot Search Results

Peptide View

MS/MS Fragmentation of **DFALQNPSAVPR**  
Found in **ALS\_HUMAN**, Insulin-like growth factor-binding protein complex acid labile subunit OS=Homo sapiens GN=IGFALS PE=1 SV=1

Match to Query 35734: 1624.860088 from(813.437320,2+) rtinseconds(2179) index(35361)  
Title: Locus:1.1.1.867.19 File:"2013-07-02 CLN FXIII 180 min 2nd F 3.wiff"  
Data file C:\Program Files (x86)\Matrix Science\Mascot Daemon\mgf\8 FXIII 180 min 2nd\mascot\_daemon\_merge.mgf

Click mouse within plot area to zoom in by factor of two about that point  
Or, 

Plot from

0

 to 

3000

 Da 

Full range

  
Label all possible matches ☐ Label matches used for scoring ☒

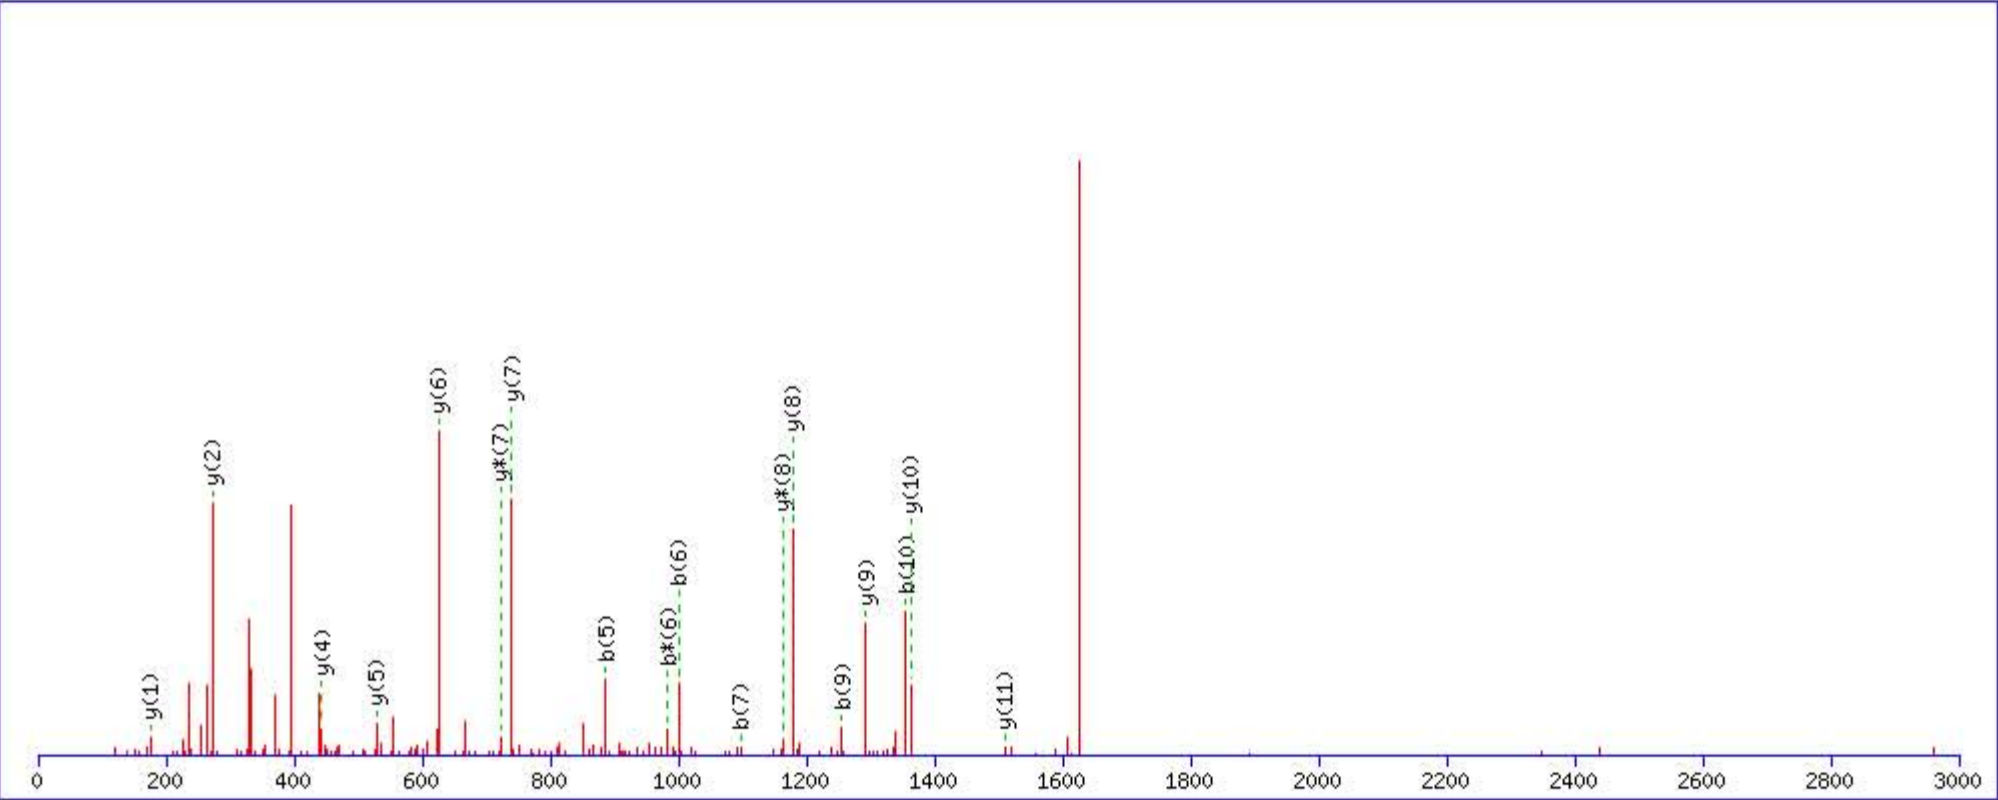

Monoisotopic mass of neutral peptide Mr(calc): 1624.839539  
Fixed modifications: Carbamidomethyl (C) (apply to specified residues or termini only)  
Variable modifications:  
Q5 : Biotin:Thermo-21345 (Q)  
Ions Score: 79 Expect: 3.2e-007  
Matches : 18/116 fragment ions using 29 most intense peaks [\(help\)](#)

| #  | b           | b <sup>++</sup> | b <sup>*</sup> | b <sup>+++</sup> | b <sup>0</sup> | b <sup>0++</sup> | Seq. | y           | y <sup>++</sup> | y <sup>*</sup> | y <sup>+++</sup> | y <sup>0</sup> | y <sup>0++</sup> | #  |
|----|-------------|-----------------|----------------|------------------|----------------|------------------|------|-------------|-----------------|----------------|------------------|----------------|------------------|----|
| 1  | 116.034219  | 58.520748       |                |                  | 98.023654      | 49.515465        | D    |             |                 |                |                  |                |                  | 12 |
| 2  | 263.102633  | 132.054954      |                |                  | 245.092068     | 123.049672       | F    | 1510.819881 | 755.913579      | 1493.793332    | 747.400304       | 1492.809316    | 746.908296       | 11 |
| 3  | 334.139747  | 167.573512      |                |                  | 316.129182     | 158.568229       | A    | 1363.751467 | 682.379372      | 1346.724918    | 673.866097       | 1345.740902    | 673.374089       | 10 |
| 4  | 447.223811  | 224.115544      |                |                  | 429.213246     | 215.110261       | L    | 1292.714353 | 646.860815      | 1275.687804    | 638.347540       | 1274.703788    | 637.855532       | 9  |
| 5  | 886.449137  | 443.728207      | 869.422588     | 435.214932       | 868.438572     | 434.722924       | Q    | 1179.630289 | 590.318783      | 1162.603740    | 581.805508       | 1161.619724    | 581.313500       | 8  |
| 6  | 1000.492064 | 500.749670      | 983.465515     | 492.236396       | 982.481499     | 491.744388       | N    | 740.404963  | 370.706120      | 723.378414     | 362.192845       | 722.394398     | 361.700837       | 7  |
| 7  | 1097.544828 | 549.276052      | 1080.518279    | 540.762778       | 1079.534263    | 540.270770       | P    | 626.362036  | 313.684656      | 609.335487     | 305.171382       | 608.351471     | 304.679374       | 6  |
| 8  | 1184.576856 | 592.792066      | 1167.550307    | 584.278792       | 1166.566291    | 583.786784       | S    | 529.309272  | 265.158274      | 512.282723     | 256.645000       | 511.298707     | 256.152992       | 5  |
| 9  | 1255.613970 | 628.310623      | 1238.587421    | 619.797349       | 1237.603405    | 619.305341       | A    | 442.277244  | 221.642260      | 425.250695     | 213.128986       |                |                  | 4  |
| 10 | 1354.682384 | 677.844830      | 1337.655835    | 669.331556       | 1336.671819    | 668.839548       | V    | 371.240130  | 186.123703      | 354.213581     | 177.610429       |                |                  | 3  |
| 11 | 1451.735148 | 726.371212      | 1434.708599    | 717.857938       | 1433.724583    | 717.365930       | P    | 272.171716  | 136.589496      | 255.145167     | 128.076221       |                |                  | 2  |
| 12 |             |                 |                |                  |                |                  | R    | 175.118952  | 88.063114       | 158.092403     | 79.549839        |                |                  | 1  |

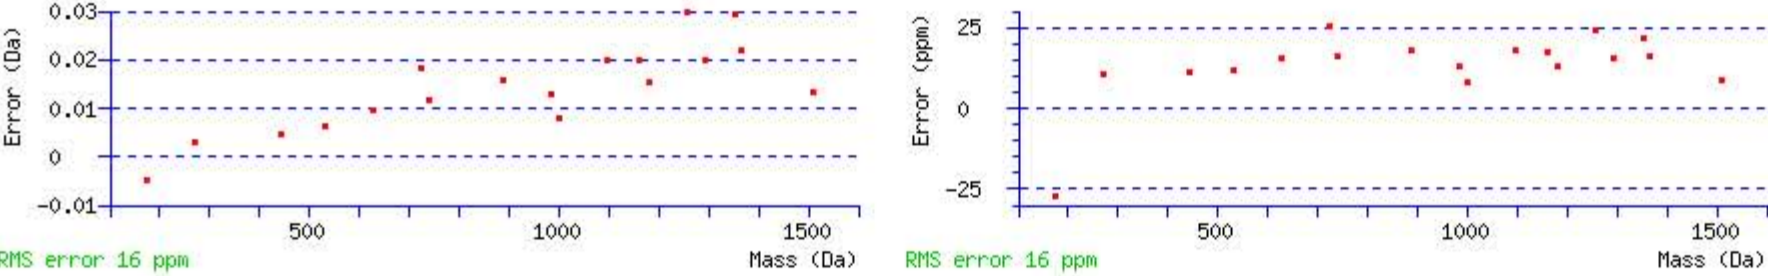

NCBI BLAST search of [DFALQNPSAVPR](#)  
(Parameters: blastp, nr protein database, expect=20000, no filter, PAM30)  
Other BLAST [web gateways](#)

All matches to this query

| Score | Mr(calc):   | Delta     | Sequence                         |
|-------|-------------|-----------|----------------------------------|
| 78.9  | 1624.839539 | 0.020549  | <a href="#">DFALQNPSAVPR</a>     |
| 18.8  | 1624.860672 | -0.000584 | <a href="#">VGDCVIIENPLIQR</a>   |
| 12.1  | 1624.853271 | 0.006817  | <a href="#">ASDPVRTGSEGLALPR</a> |
| 7.7   | 1624.864471 | -0.004383 | <a href="#">RELRSQETPEKPR</a>    |
| 6.6   | 1624.871887 | -0.011799 | <a href="#">RTSSEQAVALPR</a>     |
| 3.2   | 1624.875916 | -0.015828 | <a href="#">QWLEATIQLGR</a>      |
| 1.5   | 1624.854813 | 0.005275  | <a href="#">QWVAAGGHITFK</a>     |
| 1.2   | 1624.839554 | 0.020534  | <a href="#">DRNFLFVGVMTAQK</a>   |
| 0.7   | 1624.850296 | 0.009792  | <a href="#">QQLQMEVK</a>         |

MATRIX

SCIENCE

Mascot Search Results

Peptide View

MS/MS Fragmentation of **LAELPADALGPLQR**  
Found in **ALS\_HUMAN**, Insulin-like growth factor-binding protein complex acid labile subunit OS=Homo sapiens GN=IGFALS PE=1 SV=1

Match to Query 39764: 1773.998472 from(592.340100,3+) rtinseconds(2466) index(22911)  
Title: Locus:1.1.1.3241.2 File:"2013-07-02 CLN FXIII 180 min 2nd F 2.wiff"  
Data file C:\Program Files (x86)\Matrix Science\Mascot Daemon\mgf\8 FXIII 180 min 2nd\mascot\_daemon\_merge.mgf

Click mouse within plot area to zoom in by factor of two about that point  
Or, 

Plot from

100

 to 

1500

 Da 

Full range

  
Label all possible matches ☐ Label matches used for scoring ☒

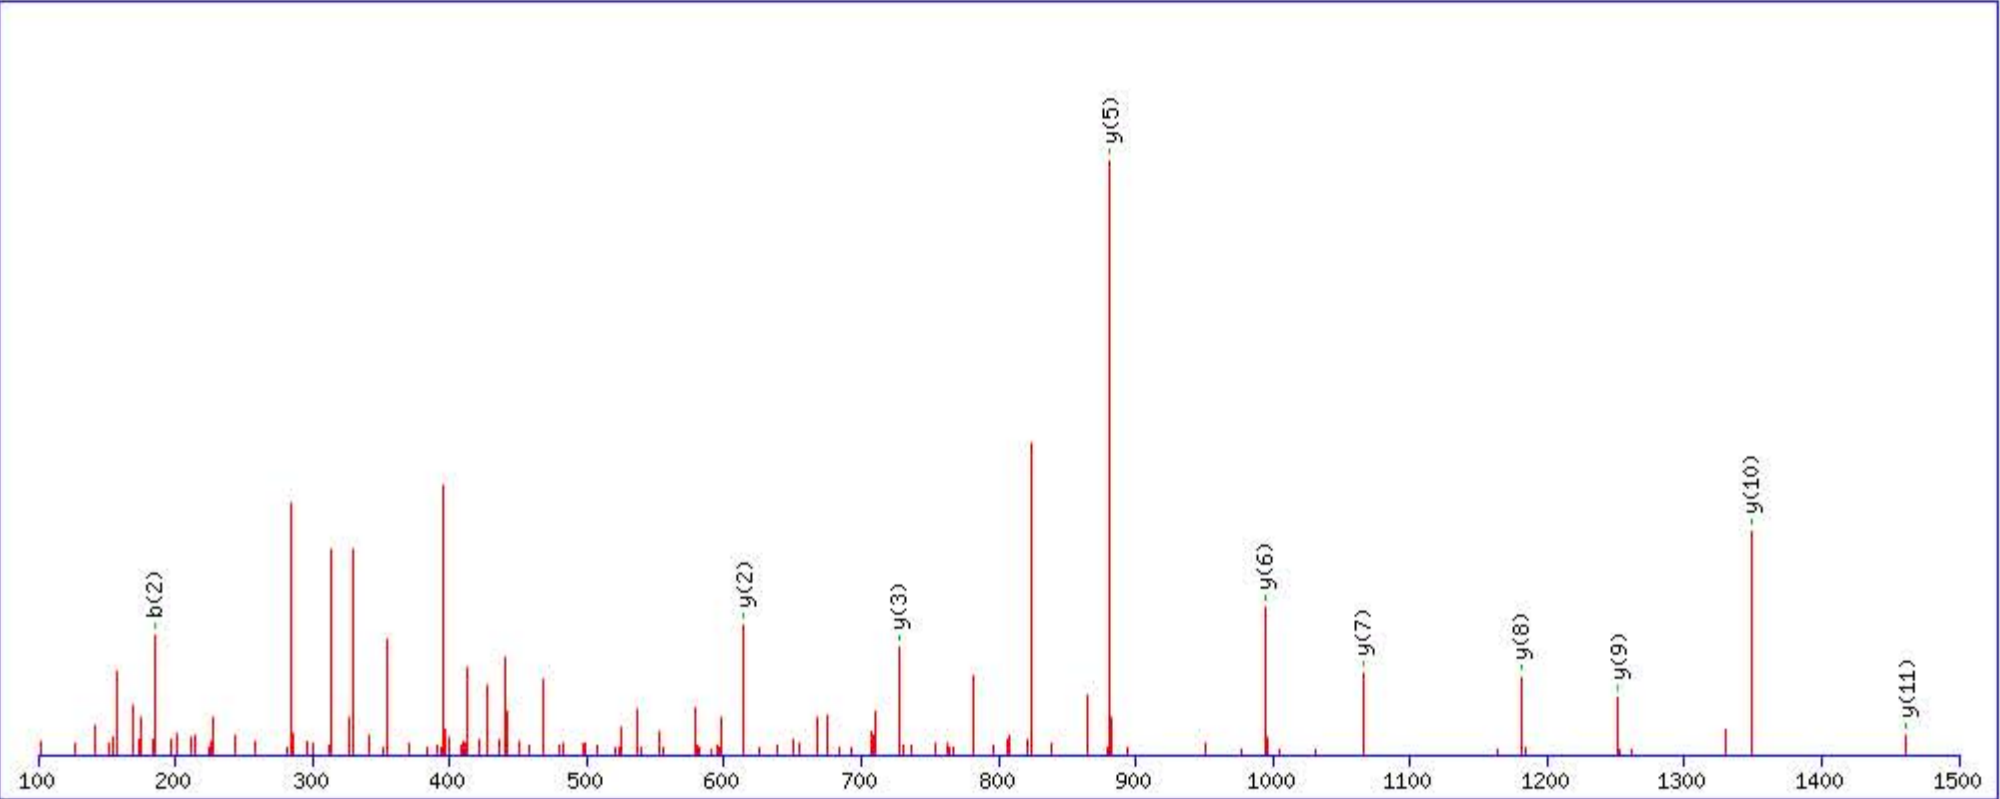

Monoisotopic mass of neutral peptide Mr(calc): 1773.981094  
Fixed modifications: Carbamidomethyl (C) (apply to specified residues or termini only)  
Variable modifications:  
Q13 : Biotin:Thermo-21345 (Q)  
Ions Score: 73 Expect: 3.1e-007  
Matches : 10/114 fragment ions using 14 most intense peaks [\(help\)](#)

| #  | b           | b <sup>++</sup> | b <sup>+</sup> | b <sup>+++</sup> | b <sup>0</sup> | b <sup>0++</sup> | Seq. | y           | y <sup>++</sup> | y <sup>+</sup> | y <sup>+++</sup> | y <sup>0</sup> | y <sup>0++</sup> | #  |
|----|-------------|-----------------|----------------|------------------|----------------|------------------|------|-------------|-----------------|----------------|------------------|----------------|------------------|----|
| 1  | 114.091340  | 57.549308       |                |                  |                |                  | L    |             |                 |                |                  |                |                  | 14 |
| 2  | 185.128454  | 93.067865       |                |                  |                |                  | A    | 1661.904340 | 831.455808      | 1644.877791    | 822.942534       | 1643.893775    | 822.450526       | 13 |
| 3  | 314.171047  | 157.589161      |                |                  | 296.160482     | 148.583879       | E    | 1590.867226 | 795.937251      | 1573.840677    | 787.423977       | 1572.856661    | 786.931969       | 12 |
| 4  | 427.255111  | 214.131193      |                |                  | 409.244546     | 205.125911       | L    | 1461.824633 | 731.415955      | 1444.798084    | 722.902680       | 1443.814068    | 722.410672       | 11 |
| 5  | 524.307875  | 262.657576      |                |                  | 506.297310     | 253.652293       | P    | 1348.740569 | 674.873922      | 1331.714020    | 666.360648       | 1330.730004    | 665.868640       | 10 |
| 6  | 595.344989  | 298.176133      |                |                  | 577.334424     | 289.170850       | A    | 1251.687805 | 626.347540      | 1234.661256    | 617.834266       | 1233.677240    | 617.342258       | 9  |
| 7  | 710.371932  | 355.689604      |                |                  | 692.361367     | 346.684322       | D    | 1180.650691 | 590.828984      | 1163.624142    | 582.315709       | 1162.640126    | 581.823701       | 8  |
| 8  | 781.409046  | 391.208161      |                |                  | 763.398481     | 382.202879       | A    | 1065.623748 | 533.315512      | 1048.597199    | 524.802238       |                |                  | 7  |
| 9  | 894.493110  | 447.750193      |                |                  | 876.482545     | 438.744911       | L    | 994.586634  | 497.796955      | 977.560085     | 489.283681       |                |                  | 6  |
| 10 | 951.514574  | 476.260925      |                |                  | 933.504009     | 467.255643       | G    | 881.502570  | 441.254923      | 864.476021     | 432.741649       |                |                  | 5  |
| 11 | 1048.567338 | 524.787307      |                |                  | 1030.556773    | 515.782025       | P    | 824.481106  | 412.744191      | 807.454557     | 404.230916       |                |                  | 4  |
| 12 | 1161.651402 | 581.329339      |                |                  | 1143.640837    | 572.324056       | L    | 727.428342  | 364.217809      | 710.401793     | 355.704534       |                |                  | 3  |
| 13 | 1600.876728 | 800.942002      | 1583.850179    | 792.428728       | 1582.866163    | 791.936719       | Q    | 614.344278  | 307.675777      | 597.317729     | 299.162503       |                |                  | 2  |
| 14 |             |                 |                |                  |                |                  | R    | 175.118952  | 88.063114       | 158.092403     | 79.549839        |                |                  | 1  |

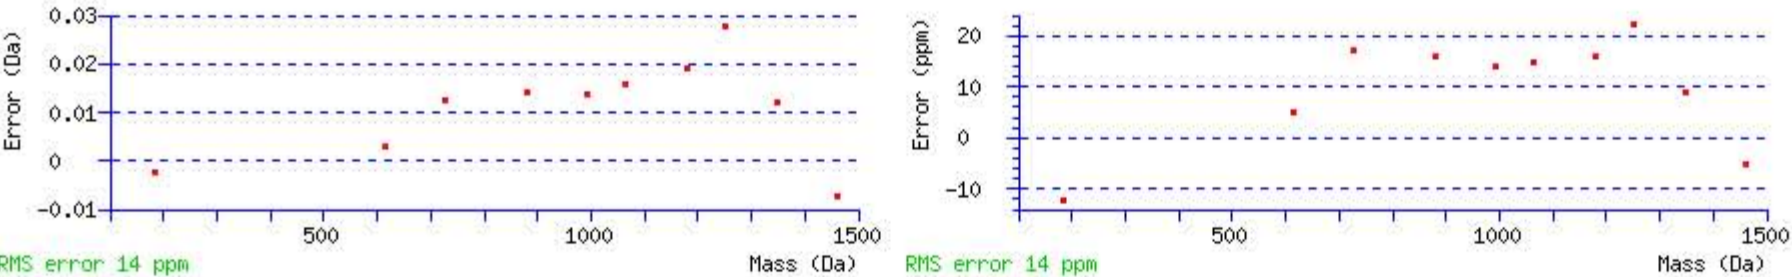

NCBI BLAST search of [LAELPADALGPLQR](#)  
(Parameters: blastp, nr protein database, expect=20000, no filter, PAM30)  
Other BLAST [web gateways](#)

All matches to this query

| Score | Mr(calc):   | Delta     | Sequence                        |
|-------|-------------|-----------|---------------------------------|
| 72.5  | 1773.981094 | 0.017378  | <a href="#">LAELPADALGPLQR</a>  |
| 3.0   | 1774.014099 | -0.015627 | <a href="#">LLLQEALWPEGKLNK</a> |

MATRIX

SCIENCE

Mascot Search Results

Peptide View

MS/MS Fragmentation of **SFEGLGQLEVLTLTDHNQLQEVK**  
Found in **ALS\_HUMAN**, Insulin-like growth factor-binding protein complex acid labile subunit OS=Homo sapiens GN=IGFALS PE=1 SV=1

Match to Query 57684: 2807.477142 from(936.832990,3+) rtinseconds(2709) index(9409)  
Title: Locus:1.1.1.2220.24 File:"2013-07-02 CLN FXIII 180 min 2nd F 1.wiff"  
Data file C:\Program Files (x86)\Matrix Science\Mascot Daemon\mgf\8 FXIII 180 min 2nd\mascot\_daemon\_merge.mgf

Click mouse within plot area to zoom in by factor of two about that point  
Or, 

Plot from 200 to 1800 Da 

Full range

  
Label all possible matches ☐ Label matches used for scoring ☒

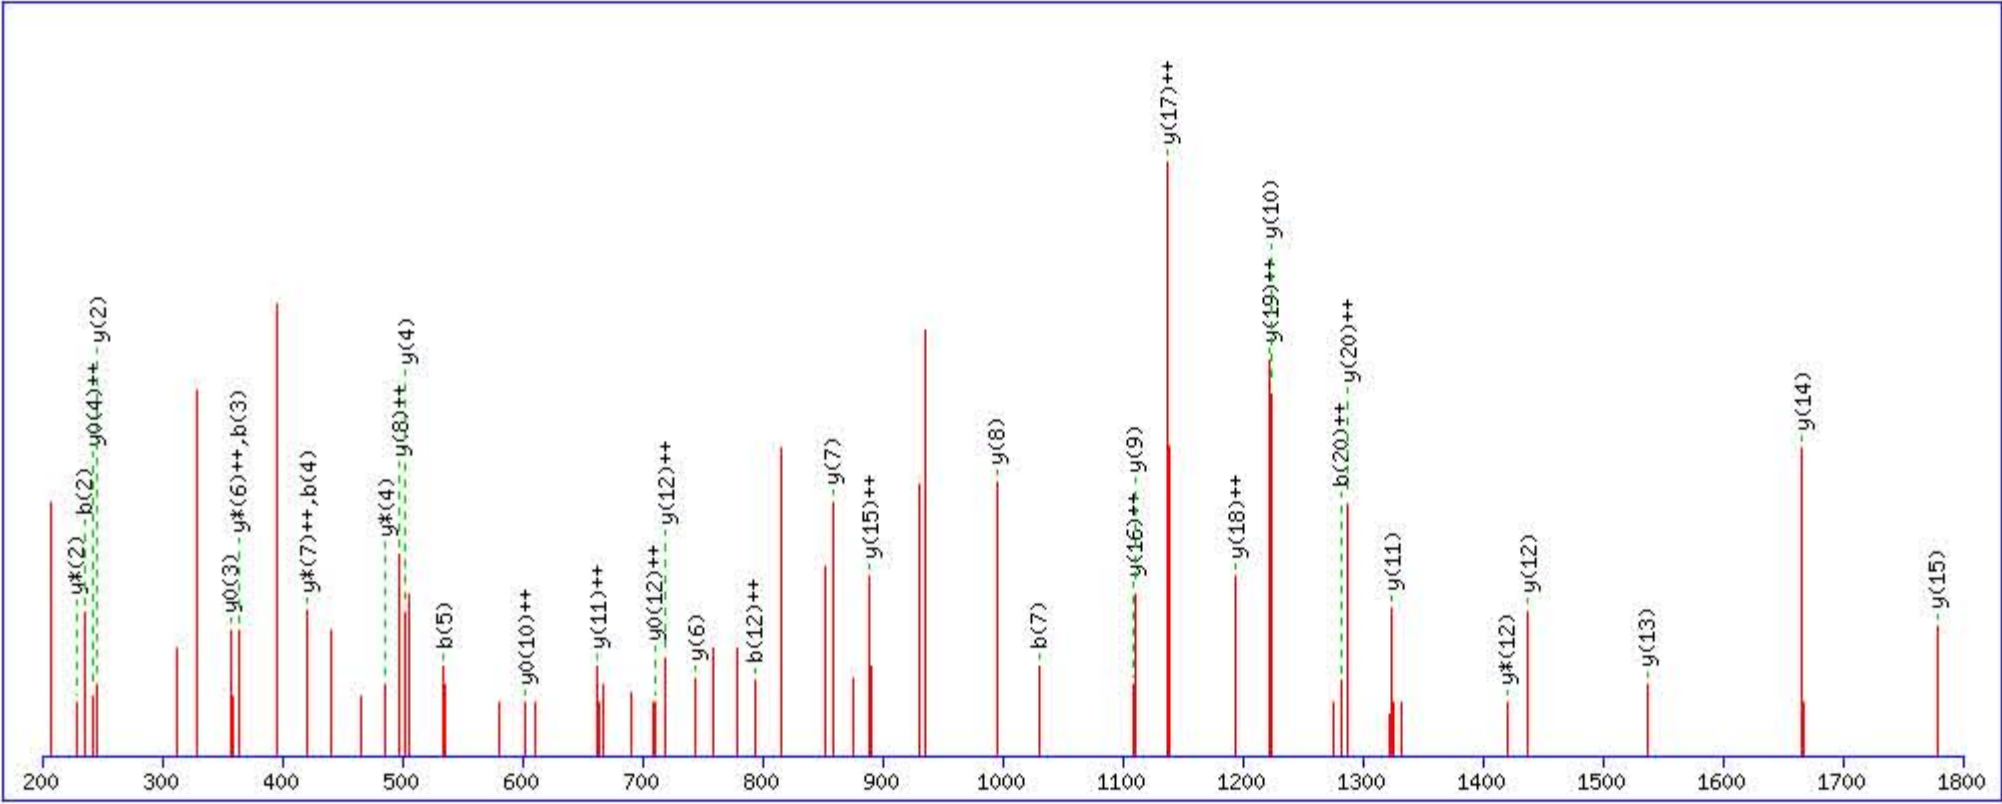

Monoisotopic mass of neutral peptide Mr(calc): 2807.452759  
Fixed modifications: Carbamidomethyl (C) (apply to specified residues or termini only)  
Variable modifications:  
Q7 : Biotin:Thermo-21345 (Q)  
Ions Score: 65 Expect: 6.8e-006  
Matches : 37/236 fragment ions using 69 most intense peaks [\(help\)](#)

| #  | b           | b <sup>++</sup> | b <sup>*</sup> | b <sup>***</sup> | b <sup>0</sup> | b <sup>0++</sup> | Seq. | y           | y <sup>++</sup> | y <sup>*</sup> | y <sup>***</sup> | y <sup>0</sup> | y <sup>0++</sup> | #  |
|----|-------------|-----------------|----------------|------------------|----------------|------------------|------|-------------|-----------------|----------------|------------------|----------------|------------------|----|
| 1  | 88.039304   | 44.523290       |                |                  | 70.028739      | 35.518008        | S    |             |                 |                |                  |                |                  | 22 |
| 2  | 235.107718  | 118.057497      |                |                  | 217.097153     | 109.052214       | F    | 2721.428016 | 1361.217646     | 2704.401467    | 1352.704371      | 2703.417451    | 1352.212363      | 21 |
| 3  | 364.150311  | 182.578793      |                |                  | 346.139746     | 173.573511       | E    | 2574.359602 | 1287.683439     | 2557.333053    | 1279.170164      | 2556.349037    | 1278.678156      | 20 |
| 4  | 421.171775  | 211.089525      |                |                  | 403.161210     | 202.084243       | G    | 2445.317009 | 1223.162142     | 2428.290460    | 1214.648868      | 2427.306444    | 1214.156860      | 19 |
| 5  | 534.255839  | 267.631558      |                |                  | 516.245274     | 258.626275       | L    | 2388.295545 | 1194.651410     | 2371.268996    | 1186.138136      | 2370.284980    | 1185.646128      | 18 |
| 6  | 591.277303  | 296.142290      |                |                  | 573.266738     | 287.137007       | G    | 2275.211481 | 1138.109378     | 2258.184932    | 1129.596104      | 2257.200916    | 1129.104096      | 17 |
| 7  | 1030.502629 | 515.754953      | 1013.476080    | 507.241678       | 1012.492064    | 506.749670       | Q    | 2218.190017 | 1109.598646     | 2201.163468    | 1101.085372      | 2200.179452    | 1100.593364      | 16 |
| 8  | 1143.586693 | 572.296985      | 1126.560144    | 563.783710       | 1125.576128    | 563.291702       | L    | 1778.964691 | 889.985984      | 1761.938142    | 881.472709       | 1760.954126    | 880.980701       | 15 |
| 9  | 1272.629286 | 636.818281      | 1255.602737    | 628.305007       | 1254.618721    | 627.812999       | E    | 1665.880627 | 833.443952      | 1648.854078    | 824.930677       | 1647.870062    | 824.438669       | 14 |
| 10 | 1371.697700 | 686.352488      | 1354.671151    | 677.839214       | 1353.687135    | 677.347206       | V    | 1536.838034 | 768.922655      | 1519.811485    | 760.409381       | 1518.827469    | 759.917373       | 13 |
| 11 | 1484.781764 | 742.894520      | 1467.755215    | 734.381246       | 1466.771199    | 733.889238       | L    | 1437.769620 | 719.388448      | 1420.743071    | 710.875174       | 1419.759055    | 710.383166       | 12 |
| 12 | 1585.829443 | 793.418360      | 1568.802894    | 784.905085       | 1567.818878    | 784.413077       | T    | 1324.685556 | 662.846416      | 1307.659007    | 654.333142       | 1306.674991    | 653.841134       | 11 |
| 13 | 1698.913507 | 849.960392      | 1681.886958    | 841.447117       | 1680.902942    | 840.955109       | L    | 1223.637877 | 612.322577      | 1206.611328    | 603.809302       | 1205.627312    | 603.317294       | 10 |
| 14 | 1813.940450 | 907.473863      | 1796.913901    | 898.960589       | 1795.929885    | 898.468581       | D    | 1110.553813 | 555.780545      | 1093.527264    | 547.267270       | 1092.543248    | 546.775262       | 9  |
| 15 | 1950.999362 | 976.003319      | 1933.972813    | 967.490045       | 1932.988797    | 966.998037       | H    | 995.526870  | 498.267073      | 978.500321     | 489.753799       | 977.516305     | 489.261791       | 8  |
| 16 | 2065.042289 | 1033.024782     | 2048.015740    | 1024.511508      | 2047.031724    | 1024.019500      | N    | 858.467958  | 429.737617      | 841.441409     | 421.224343       | 840.457393     | 420.732335       | 7  |
| 17 | 2193.100867 | 1097.054072     | 2176.074318    | 1088.540797      | 2175.090302    | 1088.048789      | Q    | 744.425031  | 372.716154      | 727.398482     | 364.202879       | 726.414466     | 363.710871       | 6  |
| 18 | 2306.184931 | 1153.596104     | 2289.158382    | 1145.082829      | 2288.174366    | 1144.590821      | L    | 616.366453  | 308.686865      | 599.339904     | 300.173590       | 598.355888     | 299.681582       | 5  |
| 19 | 2434.243509 | 1217.625393     | 2417.216960    | 1209.112118      | 2416.232944    | 1208.620110      | Q    | 503.282389  | 252.144833      | 486.255840     | 243.631558       | 485.271824     | 243.139550       | 4  |
| 20 | 2563.286102 | 1282.146689     | 2546.259553    | 1273.633415      | 2545.275537    | 1273.141407      | E    | 375.223811  | 188.115543      | 358.197262     | 179.602269       | 357.213246     | 179.110261       | 3  |
| 21 | 2662.354516 | 1331.680896     | 2645.327967    | 1323.167622      | 2644.343951    | 1322.675614      | V    | 246.181218  | 123.594247      | 229.154669     | 115.080972       |                |                  | 2  |
| 22 |             |                 |                |                  |                |                  | K    | 147.112804  | 74.060040       | 130.086255     | 65.546765        |                |                  | 1  |

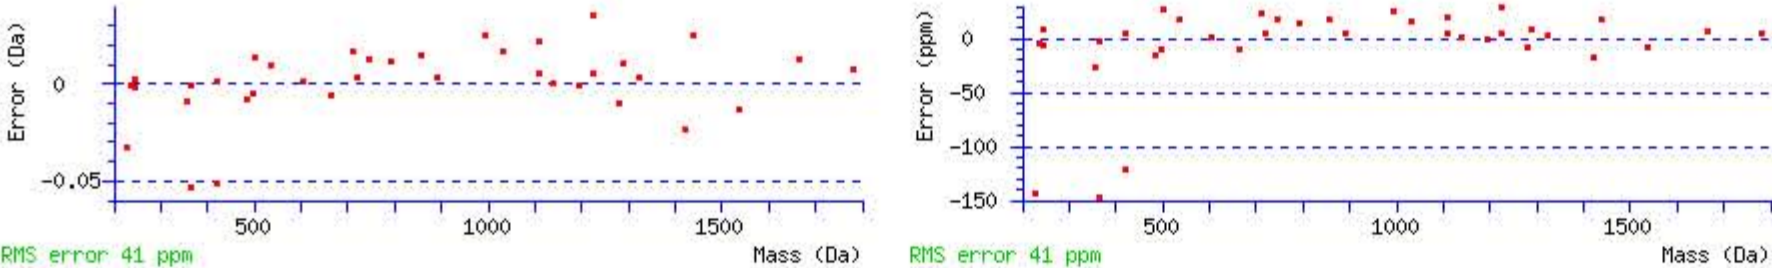

NCBI BLAST search of [SFEGLGQLEVLTLTDHNQLQEVK](#)  
(Parameters: blastp, nr protein database, expect=20000, no filter, PAM30)  
Other BLAST [web gateways](#)

All matches to this query

| Score | Mr(calc):   | Delta    | Sequence                                |
|-------|-------------|----------|-----------------------------------------|
| 65.2  | 2807.452759 | 0.024383 | <a href="#">SFEGLGQLEVLTLTDHNQLQEVK</a> |
| 4.5   | 2807.452759 | 0.024383 | <a href="#">SFEGLGQLEVLTLTDHNQLQEVK</a> |
| 0.7   | 2807.452759 | 0.024383 | <a href="#">SFEGLGQLEVLTLTDHNQLQEVK</a> |

MATRIX

SCIENCE

Mascot Search Results

Peptide View

MS/MS Fragmentation of **ELAAQTIK**  
Found in **ITIH1\_HUMAN**, Inter-alpha-trypsin inhibitor heavy chain H1 OS=Homo sapiens GN=ITIH1 PE=1 SV=3

Match to Query 20131: 1183.669448 from(592.842000,2+) rtinseconds(1741) index(48562)  
Title: Locus:1.1.1.1844.7 File:"2013-07-02 CLN FXIII 180 min 2nd F 4.wiff"  
Data file C:\Program Files (x86)\Matrix Science\Mascot Daemon\mgf\8 FXIII 180 min 2nd\mascot\_daemon\_merge.mgf

Click mouse within plot area to zoom in by factor of two about that point  
Or, 

Plot from

100

 to 

1100

 Da 

Full range

  
Label all possible matches ☐ Label matches used for scoring ☒

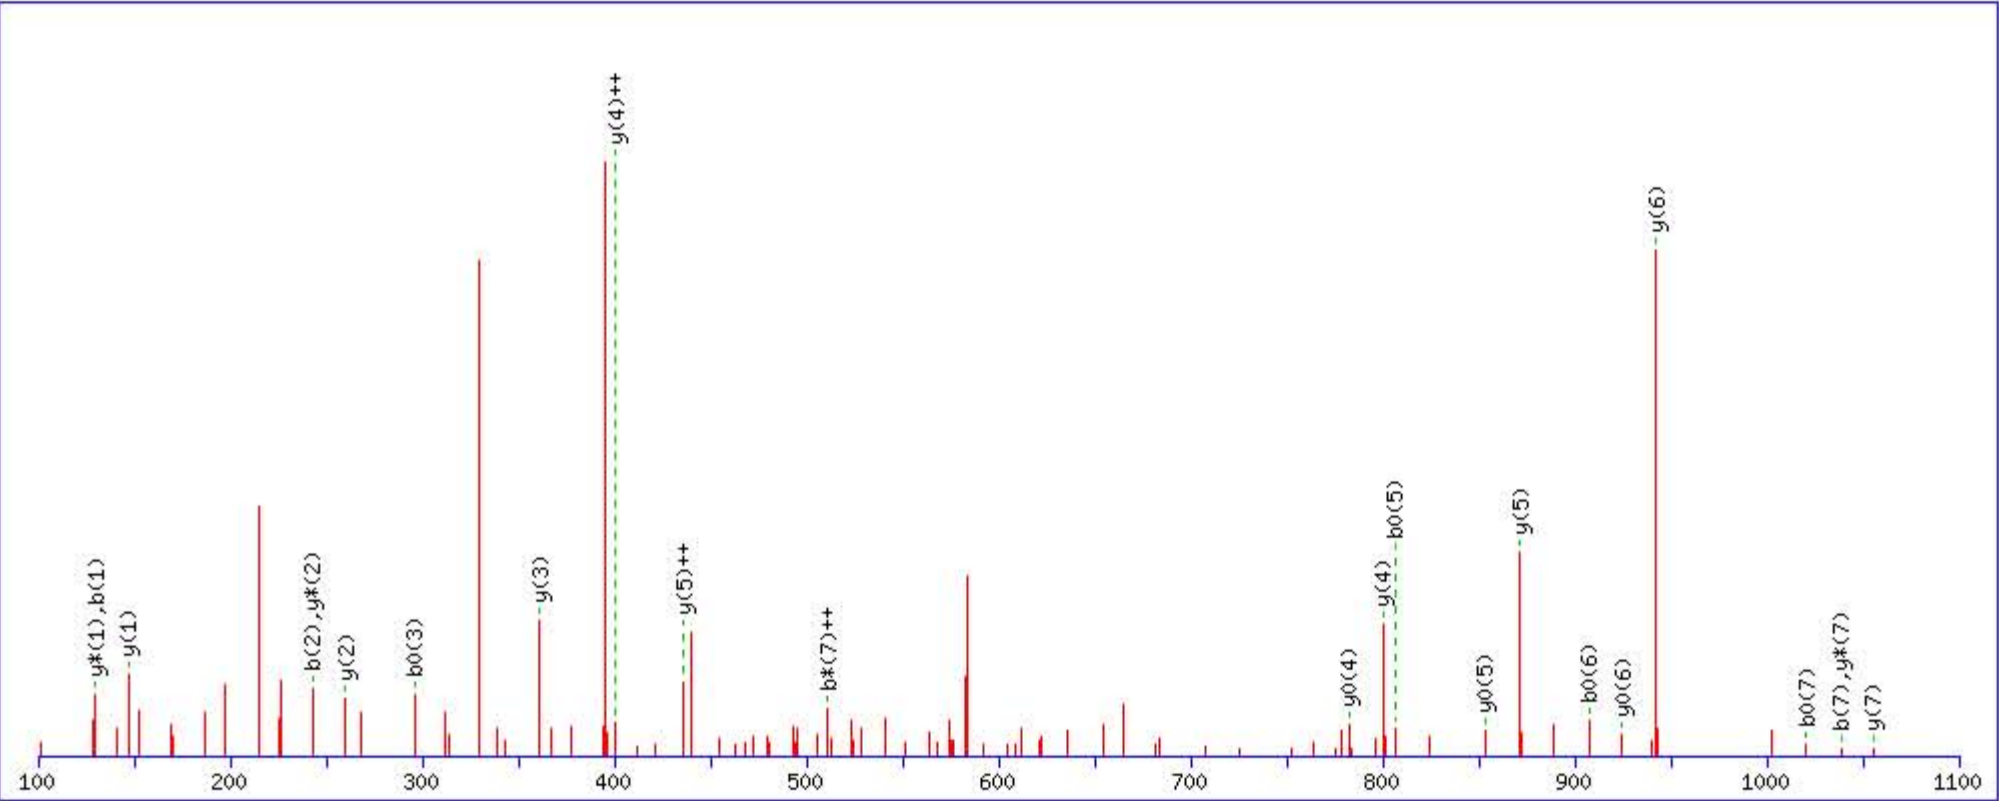

Monoisotopic mass of neutral peptide Mr(calc): 1183.663452  
Fixed modifications: Carbamidomethyl (C) (apply to specified residues or termini only)  
Variable modifications:  
Q5 : Biotin:Thermo-21345 (Q)  
Ions Score: 31 Expect: 0.015  
Matches : 23/72 fragment ions using 49 most intense peaks [\(help\)](#)

| # | b           | b <sup>++</sup> | b <sup>*</sup> | b <sup>+++</sup> | b <sup>0</sup> | b <sup>0++</sup> | Seq. | y           | y <sup>++</sup> | y <sup>*</sup> | y <sup>+++</sup> | y <sup>0</sup> | y <sup>0++</sup> | # |
|---|-------------|-----------------|----------------|------------------|----------------|------------------|------|-------------|-----------------|----------------|------------------|----------------|------------------|---|
| 1 | 130.049869  | 65.528572       |                |                  | 112.039304     | 56.523290        | E    |             |                 |                |                  |                |                  | 8 |
| 2 | 243.133933  | 122.070605      |                |                  | 225.123368     | 113.065322       | L    | 1055.628165 | 528.317720      | 1038.601616    | 519.804446       | 1037.617600    | 519.312438       | 7 |
| 3 | 314.171047  | 157.589161      |                |                  | 296.160482     | 148.583879       | A    | 942.544101  | 471.775689      | 925.517552     | 463.262414       | 924.533536     | 462.770406       | 6 |
| 4 | 385.208161  | 193.107718      |                |                  | 367.197596     | 184.102436       | A    | 871.506987  | 436.257132      | 854.480438     | 427.743857       | 853.496422     | 427.251849       | 5 |
| 5 | 824.433487  | 412.720382      | 807.406938     | 404.207107       | 806.422922     | 403.715099       | Q    | 800.469873  | 400.738575      | 783.443324     | 392.225300       | 782.459308     | 391.733292       | 4 |
| 6 | 925.481166  | 463.244221      | 908.454617     | 454.730947       | 907.470601     | 454.238939       | T    | 361.244547  | 181.125911      | 344.217998     | 172.612637       | 343.233982     | 172.120629       | 3 |
| 7 | 1038.565230 | 519.786253      | 1021.538681    | 511.272978       | 1020.554665    | 510.780970       | I    | 260.196868  | 130.602072      | 243.170319     | 122.088797       |                |                  | 2 |
| 8 |             |                 |                |                  |                |                  | K    | 147.112804  | 74.060040       | 130.086255     | 65.546765        |                |                  | 1 |

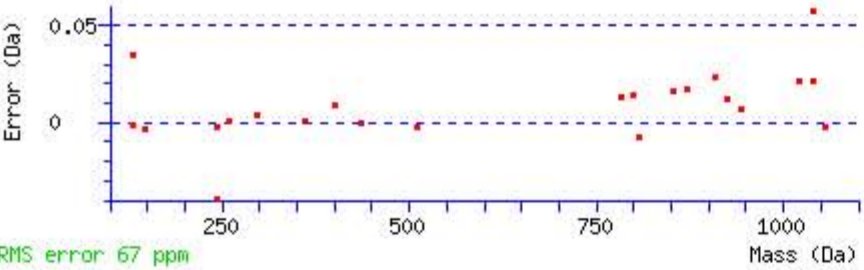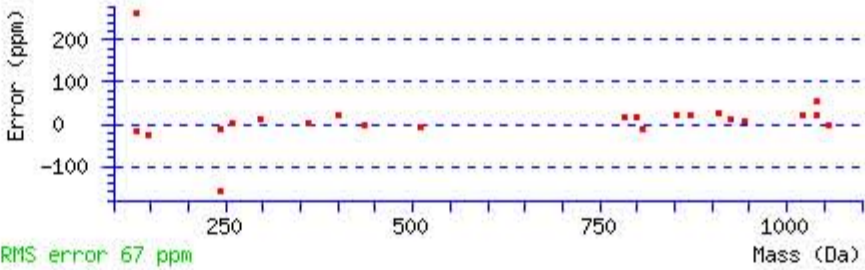

NCBI BLAST search of [ELAAQTIK](#)  
(Parameters: blastp, nr protein database, expect=20000, no filter, PAM30)  
Other BLAST [web gateways](#)

All matches to this query

| Score | Mr(calc):   | Delta     | Sequence                     |
|-------|-------------|-----------|------------------------------|
| 31.3  | 1183.663452 | 0.005996  | <a href="#">ELAAQTIK</a>     |
| 27.1  | 1183.663452 | 0.005996  | <a href="#">ELAAQITK</a>     |
| 8.0   | 1183.681198 | -0.011750 | <a href="#">LEALLEAAGIGK</a> |
| 6.3   | 1183.660080 | 0.009368  | <a href="#">AIEAVAISPWK</a>  |
| 6.3   | 1183.667282 | 0.002166  | <a href="#">GKQASEPALRK</a>  |
| 5.5   | 1183.667297 | 0.002151  | <a href="#">EPTGRVEIRK</a>   |
| 5.0   | 1183.663452 | 0.005996  | <a href="#">LEQAATLK</a>     |
| 3.9   | 1183.667282 | 0.002166  | <a href="#">ELQRLQAAQK</a>   |
| 3.9   | 1183.674683 | -0.005235 | <a href="#">ELRQLSK</a>      |
| 3.3   | 1183.667282 | 0.002166  | <a href="#">QLLRALLEGR</a>   |

MATRIX

SCIENCE

Mascot Search Results

Peptide View

MS/MS Fragmentation of **LDAQASFLPK**  
Found in **ITIH1\_HUMAN**, Inter-alpha-trypsin inhibitor heavy chain H1 OS=Homo sapiens GN=ITIH1 PE=1 SV=3

Match to Query 27298: 1399.770668 from(700.892610,2+) rtinseconds(2217) index(51780)  
Title: Locus:1.1.1.2009.11 File:"2013-07-02 CLN FXIII 180 min 2nd F 4.wiff"  
Data file C:\Program Files (x86)\Matrix Science\Mascot Daemon\mgf\8 FXIII 180 min 2nd\mascot\_daemon\_merge.mgf

Click mouse within plot area to zoom in by factor of two about that point  
Or, 

Plot from

100

 to 

1500

 Da 

Full range

  
Label all possible matches ☐ Label matches used for scoring ☒

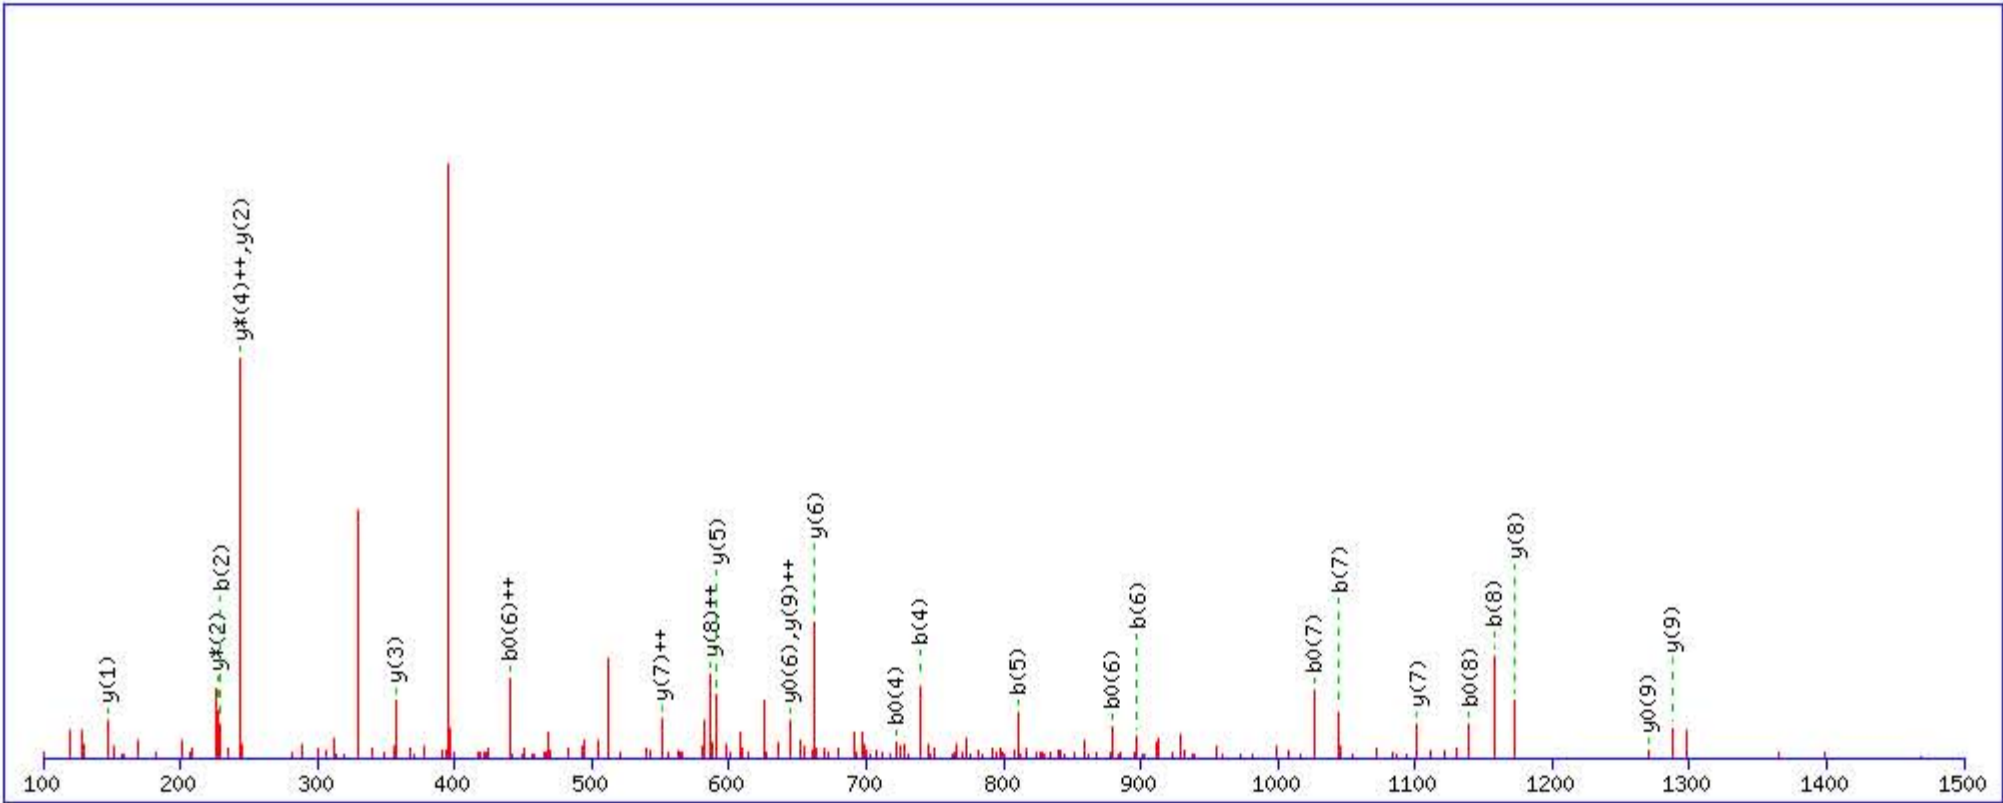

Monoisotopic mass of neutral peptide Mr(calc): 1399.753342  
Fixed modifications: Carbamidomethyl (C) (apply to specified residues or termini only)  
Variable modifications:  
Q4 : Biotin:Thermo-21345 (Q)  
Ions Score: 42 Expect: 0.00041  
Matches : 26/92 fragment ions using 49 most intense peaks [\(help\)](#)

| #  | b           | b <sup>++</sup> | b <sup>*</sup> | b <sup>++</sup> * | b <sup>0</sup> | b <sup>0++</sup> | Seq. | y           | y <sup>++</sup> | y <sup>*</sup> | y <sup>++</sup> * | y <sup>0</sup> | y <sup>0++</sup> | #  |
|----|-------------|-----------------|----------------|-------------------|----------------|------------------|------|-------------|-----------------|----------------|-------------------|----------------|------------------|----|
| 1  | 114.091340  | 57.549308       |                |                   |                |                  | L    |             |                 |                |                   |                |                  | 10 |
| 2  | 229.118283  | 115.062779      |                |                   | 211.107718     | 106.057497       | D    | 1287.676571 | 644.341924      | 1270.650022    | 635.828649        | 1269.666006    | 635.336641       | 9  |
| 3  | 300.155397  | 150.581336      |                |                   | 282.144832     | 141.576054       | A    | 1172.649628 | 586.828452      | 1155.623079    | 578.315178        | 1154.639063    | 577.823169       | 8  |
| 4  | 739.380723  | 370.194000      | 722.354174     | 361.680725        | 721.370158     | 361.188717       | Q    | 1101.612514 | 551.309895      | 1084.585965    | 542.796621        | 1083.601949    | 542.304612       | 7  |
| 5  | 810.417837  | 405.712557      | 793.391288     | 397.199282        | 792.407272     | 396.707274       | A    | 662.387188  | 331.697232      | 645.360639     | 323.183957        | 644.376623     | 322.691949       | 6  |
| 6  | 897.449865  | 449.228570      | 880.423316     | 440.715296        | 879.439300     | 440.223288       | S    | 591.350074  | 296.178675      | 574.323525     | 287.665400        | 573.339509     | 287.173392       | 5  |
| 7  | 1044.518279 | 522.762777      | 1027.491730    | 514.249503        | 1026.507714    | 513.757495       | F    | 504.318046  | 252.662661      | 487.291497     | 244.149386        |                |                  | 4  |
| 8  | 1157.602343 | 579.304809      | 1140.575794    | 570.791535        | 1139.591778    | 570.299527       | L    | 357.249632  | 179.128454      | 340.223083     | 170.615179        |                |                  | 3  |
| 9  | 1254.655107 | 627.831191      | 1237.628558    | 619.317917        | 1236.644542    | 618.825909       | P    | 244.165568  | 122.586422      | 227.139019     | 114.073148        |                |                  | 2  |
| 10 |             |                 |                |                   |                |                  | K    | 147.112804  | 74.060040       | 130.086255     | 65.546765         |                |                  | 1  |

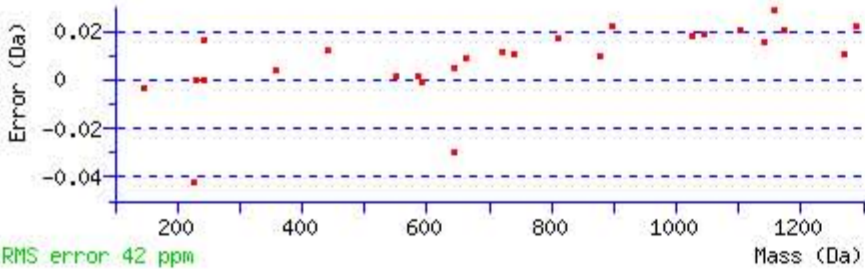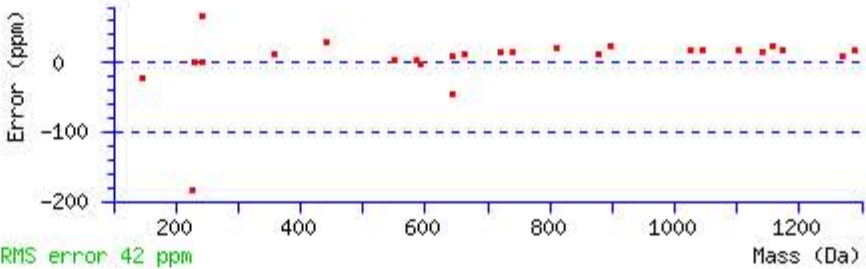

NCBI BLAST search of [LDAQASFLPK](#)  
(Parameters: blastp, nr protein database, expect=20000, no filter, PAM30)  
Other BLAST [web gateways](#)

All matches to this query

| Score | Mr(calc):   | Delta     | Sequence                      |
|-------|-------------|-----------|-------------------------------|
| 41.8  | 1399.753342 | 0.017326  | <a href="#">LDAQASFLPK</a>    |
| 5.3   | 1399.753342 | 0.017326  | <a href="#">LLDFAASQPK</a>    |
| 5.3   | 1399.755859 | 0.014809  | <a href="#">LSTPDILTQISPK</a> |
| 4.7   | 1399.755814 | 0.014854  | <a href="#">KTELGPLKEEEK</a>  |
| 3.6   | 1399.767059 | 0.003609  | <a href="#">EKAVTDEKPKQK</a>  |
| 2.2   | 1399.771973 | -0.001305 | <a href="#">IWQGMLTIK</a>     |
| 2.2   | 1399.756714 | 0.013954  | <a href="#">LSQVPMSALK</a>    |
| 2.1   | 1399.771103 | -0.000435 | <a href="#">QKEPSVLFEVPK</a>  |
| 1.7   | 1399.785660 | -0.014992 | <a href="#">LNENIKNAMLIK</a>  |
| 0.3   | 1399.772430 | -0.001762 | <a href="#">QHAFKQAFAPK</a>   |

M

A

T

R

I

X

S

C

I

E

N

C

E

Mascot Search Results

Peptide View

MS/MS Fragmentation of **GSLVQASEANLQAAQDFVR**  
Found in **ITIH1\_HUMAN**, Inter-alpha-trypsin inhibitor heavy chain H1 OS=Homo sapiens GN=ITIH1 PE=1 SV=3

Match to Query 50766: 2314.198782 from(772.406870,3+) rtinseconds(2640) index(54213)  
Title: Locus:1.1.1.2156.13 File:"2013-07-02 CLN FXIII 180 min 2nd F 4.wiff"  
Data file C:\Program Files (x86)\Matrix Science\Mascot Daemon\mgf\8 FXIII 180 min 2nd\mascot\_daemon\_merge.mgf

Click mouse within plot area to zoom in by factor of two about that point  
Or,   to  Da

Label all possible matches ☐ Label matches used for scoring ☒

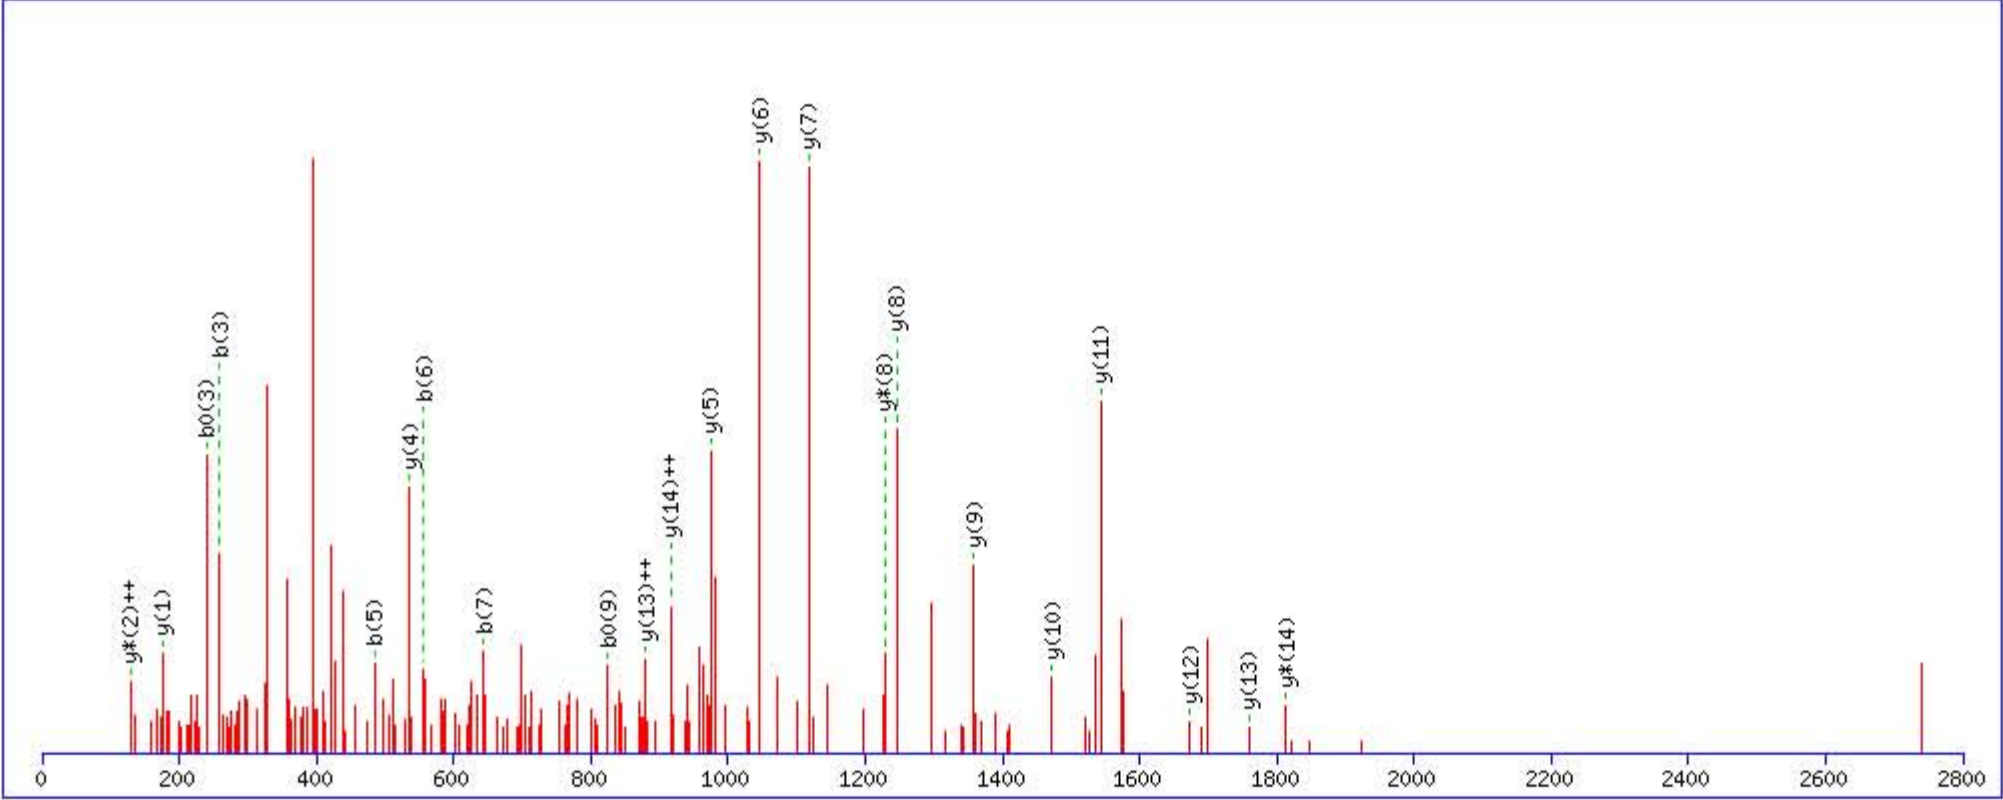

Monoisotopic mass of neutral peptide Mr(calc): 2314.173950  
Fixed modifications: Carbamidomethyl (C) (apply to specified residues or termini only)  
Variable modifications:  
Q15 : Biotin:Thermo-21345 (Q)  
Ions Score: 69 Expect: 3.2e-006  
Matches : 22/200 fragment ions using 36 most intense peaks [\(help\)](#)

| #  | b           | b <sup>++</sup> | b <sup>*</sup> | b <sup>*++</sup> | b <sup>0</sup> | b <sup>0++</sup> | Seq. | y           | y <sup>++</sup> | y <sup>*</sup> | y <sup>*++</sup> | y <sup>0</sup> | y <sup>0++</sup> | #  |
|----|-------------|-----------------|----------------|------------------|----------------|------------------|------|-------------|-----------------|----------------|------------------|----------------|------------------|----|
| 1  | 58.028740   | 29.518008       |                |                  |                |                  | G    |             |                 |                |                  |                |                  | 19 |
| 2  | 145.060768  | 73.034022       |                |                  | 127.050203     | 64.028740        | S    | 2258.159779 | 1129.583527     | 2241.133230    | 1121.070253      | 2240.149214    | 1120.578245      | 18 |
| 3  | 258.144832  | 129.576054      |                |                  | 240.134267     | 120.570772       | L    | 2171.127751 | 1086.067513     | 2154.101202    | 1077.554239      | 2153.117186    | 1077.062231      | 17 |
| 4  | 357.213246  | 179.110261      |                |                  | 339.202681     | 170.104979       | V    | 2058.043687 | 1029.525481     | 2041.017138    | 1021.012207      | 2040.033122    | 1020.520199      | 16 |
| 5  | 485.271824  | 243.139550      | 468.245275     | 234.626276       | 467.261259     | 234.134268       | Q    | 1958.975273 | 979.991275      | 1941.948724    | 971.478000       | 1940.964708    | 970.985992       | 15 |
| 6  | 556.308938  | 278.658107      | 539.282389     | 270.144833       | 538.298373     | 269.652825       | A    | 1830.916695 | 915.961986      | 1813.890146    | 907.448711       | 1812.906130    | 906.956703       | 14 |
| 7  | 643.340966  | 322.174121      | 626.314417     | 313.660847       | 625.330401     | 313.168839       | S    | 1759.879581 | 880.443429      | 1742.853032    | 871.930154       | 1741.869016    | 871.438146       | 13 |
| 8  | 772.383559  | 386.695418      | 755.357010     | 378.182143       | 754.372994     | 377.690135       | E    | 1672.847553 | 836.927415      | 1655.821004    | 828.414140       | 1654.836988    | 827.922132       | 12 |
| 9  | 843.420673  | 422.213975      | 826.394124     | 413.700700       | 825.410108     | 413.208692       | A    | 1543.804960 | 772.406118      | 1526.778411    | 763.892844       | 1525.794395    | 763.400836       | 11 |
| 10 | 957.463600  | 479.235438      | 940.437051     | 470.722164       | 939.453035     | 470.230156       | N    | 1472.767846 | 736.887561      | 1455.741297    | 728.374287       | 1454.757281    | 727.882279       | 10 |
| 11 | 1070.547664 | 535.777470      | 1053.521115    | 527.264196       | 1052.537099    | 526.772187       | L    | 1358.724919 | 679.866098      | 1341.698370    | 671.352823       | 1340.714354    | 670.860815       | 9  |
| 12 | 1198.606242 | 599.806759      | 1181.579693    | 591.293485       | 1180.595677    | 590.801477       | Q    | 1245.640855 | 623.324066      | 1228.614306    | 614.810791       | 1227.630290    | 614.318783       | 8  |
| 13 | 1269.643356 | 635.325316      | 1252.616807    | 626.812042       | 1251.632791    | 626.320034       | A    | 1117.582277 | 559.294777      | 1100.555728    | 550.781502       | 1099.571712    | 550.289494       | 7  |
| 14 | 1340.680470 | 670.843873      | 1323.653921    | 662.330599       | 1322.669905    | 661.838591       | A    | 1046.545163 | 523.776220      | 1029.518614    | 515.262945       | 1028.534598    | 514.770937       | 6  |
| 15 | 1779.905796 | 890.456536      | 1762.879247    | 881.943262       | 1761.895231    | 881.451254       | Q    | 975.508049  | 488.257663      | 958.481500     | 479.744388       | 957.497484     | 479.252380       | 5  |
| 16 | 1894.932739 | 947.970008      | 1877.906190    | 939.456733       | 1876.922174    | 938.964725       | D    | 536.282723  | 268.645000      | 519.256174     | 260.131725       | 518.272158     | 259.639717       | 4  |
| 17 | 2042.001153 | 1021.504215     | 2024.974604    | 1012.990940      | 2023.990588    | 1012.498932      | F    | 421.255780  | 211.131528      | 404.229231     | 202.618253       |                |                  | 3  |
| 18 | 2141.069567 | 1071.038421     | 2124.043018    | 1062.525147      | 2123.059002    | 1062.033139      | V    | 274.187366  | 137.597321      | 257.160817     | 129.084046       |                |                  | 2  |
| 19 |             |                 |                |                  |                |                  | R    | 175.118952  | 88.063114       | 158.092403     | 79.549839        |                |                  | 1  |

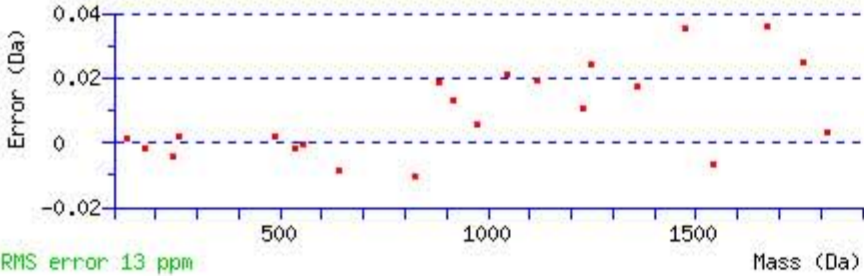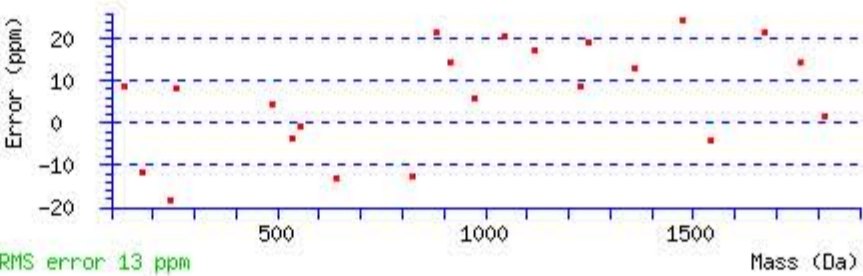

NCBI BLAST search of [GSLVQASEANLQAAQDFVR](#)  
(Parameters: blastp, nr protein database, expect=20000, no filter, PAM30)  
Other BLAST [web gateways](#)

All matches to this query

| Score | Mr(calc):   | Delta    | Sequence                            |
|-------|-------------|----------|-------------------------------------|
| 69.4  | 2314.173950 | 0.024832 | <a href="#">GSLVQASEANLQAAQDFVR</a> |
| 37.0  | 2314.173950 | 0.024832 | <a href="#">GSLVQASEANLQAAQDFVR</a> |

Peptide View

MS/MS Fragmentation of **GSLVQASEANLQAAQDFVR**  
Found in **ITIH1\_HUMAN**, Inter-alpha-trypsin inhibitor heavy chain H1 OS=Homo sapiens GN=ITIH1 PE=1 SV=3

Match to Query 50767: 2314.206372 from(772.409400,3+) rtinseconds(2533) index(53557)  
Title: Locus:1.1.1.2119.8 File:"2013-07-02 CLN FXIII 180 min 2nd F 4.wiff"  
Data file C:\Program Files (x86)\Matrix Science\Mascot Daemon\mgf\8 FXIII 180 min 2nd\mascot\_daemon\_merge.mgf

Click mouse within plot area to zoom in by factor of two about that point  
Or, 

Plot from

0

 to 

4000

 Da 

Full range

  
Label all possible matches ☐ Label matches used for scoring ☒

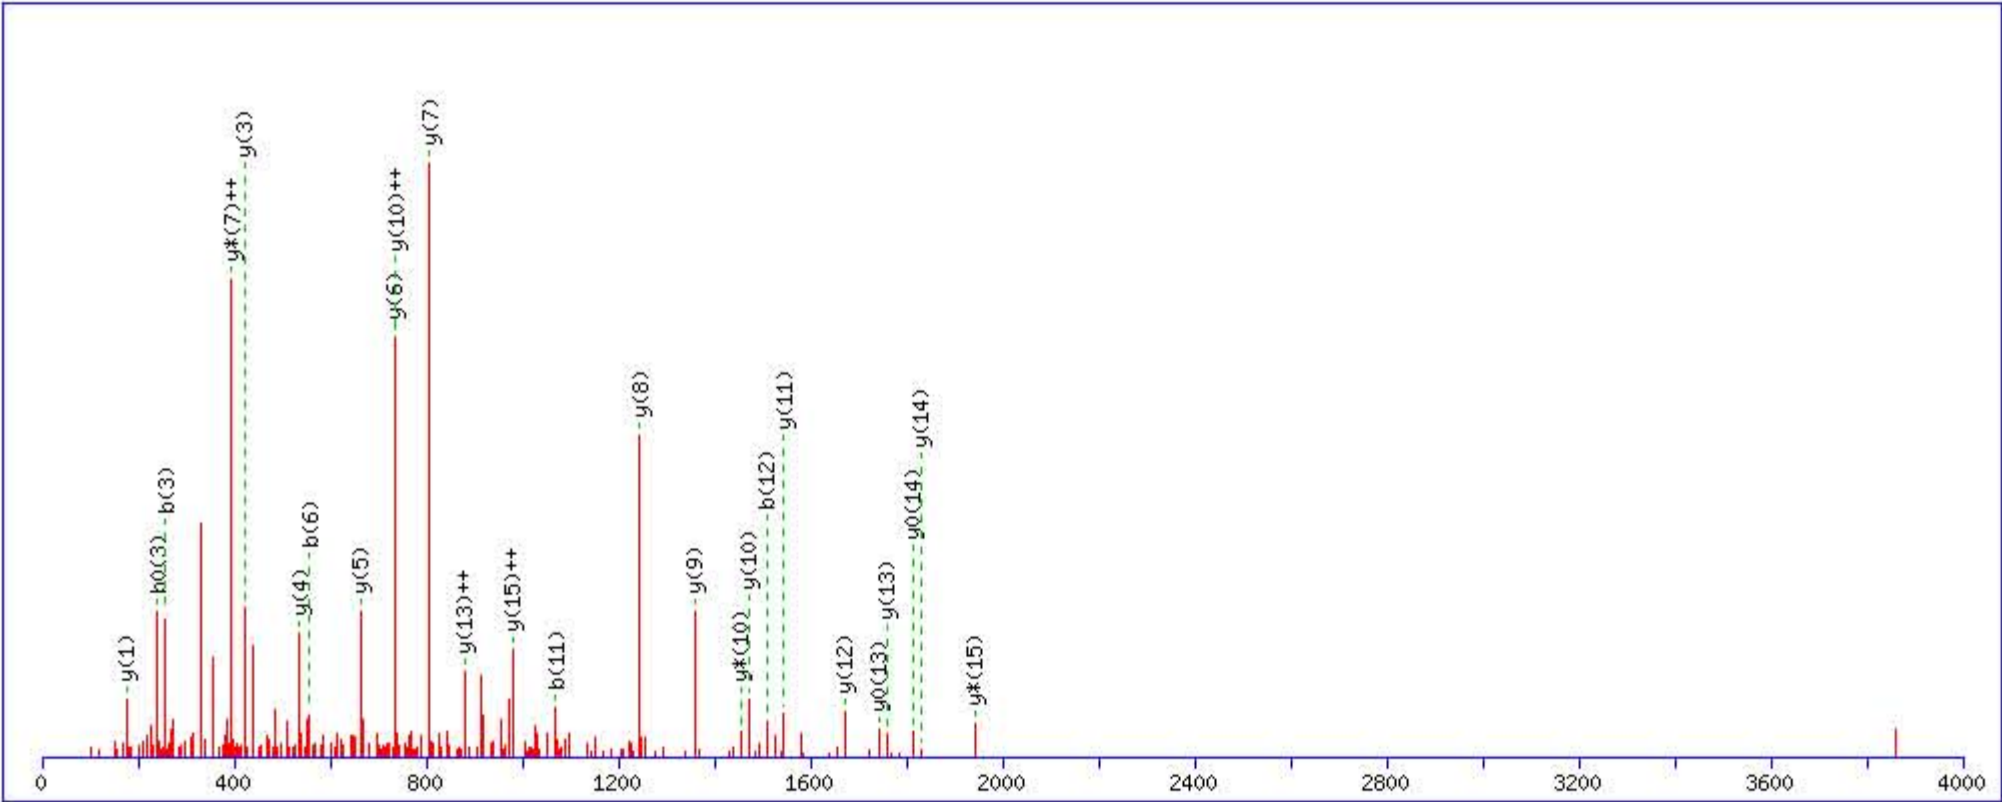

Monoisotopic mass of neutral peptide Mr(calc): 2314.173950  
Fixed modifications: Carbamidomethyl (C) (apply to specified residues or termini only)  
Variable modifications:  
Q12 : Biotin:Thermo-21345 (Q)  
Ions Score: 101 Expect: 1.3e-009  
Matches : 26/200 fragment ions using 37 most intense peaks [\(help\)](#)

| #  | b           | b <sup>++</sup> | b <sup>*</sup> | b <sup>*++</sup> | b <sup>0</sup> | b <sup>0++</sup> | Seq. | y           | y <sup>++</sup> | y <sup>*</sup> | y <sup>*++</sup> | y <sup>0</sup> | y <sup>0++</sup> | #  |
|----|-------------|-----------------|----------------|------------------|----------------|------------------|------|-------------|-----------------|----------------|------------------|----------------|------------------|----|
| 1  | 58.028740   | 29.518008       |                |                  |                |                  | G    |             |                 |                |                  |                |                  | 19 |
| 2  | 145.060768  | 73.034022       |                |                  | 127.050203     | 64.028740        | S    | 2258.159779 | 1129.583527     | 2241.133230    | 1121.070253      | 2240.149214    | 1120.578245      | 18 |
| 3  | 258.144832  | 129.576054      |                |                  | 240.134267     | 120.570772       | L    | 2171.127751 | 1086.067513     | 2154.101202    | 1077.554239      | 2153.117186    | 1077.062231      | 17 |
| 4  | 357.213246  | 179.110261      |                |                  | 339.202681     | 170.104979       | V    | 2058.043687 | 1029.525481     | 2041.017138    | 1021.012207      | 2040.033122    | 1020.520199      | 16 |
| 5  | 485.271824  | 243.139550      | 468.245275     | 234.626276       | 467.261259     | 234.134268       | Q    | 1958.975273 | 979.991275      | 1941.948724    | 971.478000       | 1940.964708    | 970.985992       | 15 |
| 6  | 556.308938  | 278.658107      | 539.282389     | 270.144833       | 538.298373     | 269.652825       | A    | 1830.916695 | 915.961986      | 1813.890146    | 907.448711       | 1812.906130    | 906.956703       | 14 |
| 7  | 643.340966  | 322.174121      | 626.314417     | 313.660847       | 625.330401     | 313.168839       | S    | 1759.879581 | 880.443429      | 1742.853032    | 871.930154       | 1741.869016    | 871.438146       | 13 |
| 8  | 772.383559  | 386.695418      | 755.357010     | 378.182143       | 754.372994     | 377.690135       | E    | 1672.847553 | 836.927415      | 1655.821004    | 828.414140       | 1654.836988    | 827.922132       | 12 |
| 9  | 843.420673  | 422.213975      | 826.394124     | 413.700700       | 825.410108     | 413.208692       | A    | 1543.804960 | 772.406118      | 1526.778411    | 763.892844       | 1525.794395    | 763.400836       | 11 |
| 10 | 957.463600  | 479.235438      | 940.437051     | 470.722164       | 939.453035     | 470.230156       | N    | 1472.767846 | 736.887561      | 1455.741297    | 728.374287       | 1454.757281    | 727.882279       | 10 |
| 11 | 1070.547664 | 535.777470      | 1053.521115    | 527.264196       | 1052.537099    | 526.772187       | L    | 1358.724919 | 679.866098      | 1341.698370    | 671.352823       | 1340.714354    | 670.860815       | 9  |
| 12 | 1509.772990 | 755.390133      | 1492.746441    | 746.876859       | 1491.762425    | 746.384851       | Q    | 1245.640855 | 623.324066      | 1228.614306    | 614.810791       | 1227.630290    | 614.318783       | 8  |
| 13 | 1580.810104 | 790.908690      | 1563.783555    | 782.395416       | 1562.799539    | 781.903408       | A    | 806.415529  | 403.711403      | 789.388980     | 395.198128       | 788.404964     | 394.706120       | 7  |
| 14 | 1651.847218 | 826.427247      | 1634.820669    | 817.913973       | 1633.836653    | 817.421965       | A    | 735.378415  | 368.192846      | 718.351866     | 359.679571       | 717.367850     | 359.187563       | 6  |
| 15 | 1779.905796 | 890.456536      | 1762.879247    | 881.943262       | 1761.895231    | 881.451254       | Q    | 664.341301  | 332.674289      | 647.314752     | 324.161014       | 646.330736     | 323.669006       | 5  |
| 16 | 1894.932739 | 947.970008      | 1877.906190    | 939.456733       | 1876.922174    | 938.964725       | D    | 536.282723  | 268.645000      | 519.256174     | 260.131725       | 518.272158     | 259.639717       | 4  |
| 17 | 2042.001153 | 1021.504215     | 2024.974604    | 1012.990940      | 2023.990588    | 1012.498932      | F    | 421.255780  | 211.131528      | 404.229231     | 202.618253       |                |                  | 3  |
| 18 | 2141.069567 | 1071.038421     | 2124.043018    | 1062.525147      | 2123.059002    | 1062.033139      | V    | 274.187366  | 137.597321      | 257.160817     | 129.084046       |                |                  | 2  |
| 19 |             |                 |                |                  |                |                  | R    | 175.118952  | 88.063114       | 158.092403     | 79.549839        |                |                  | 1  |

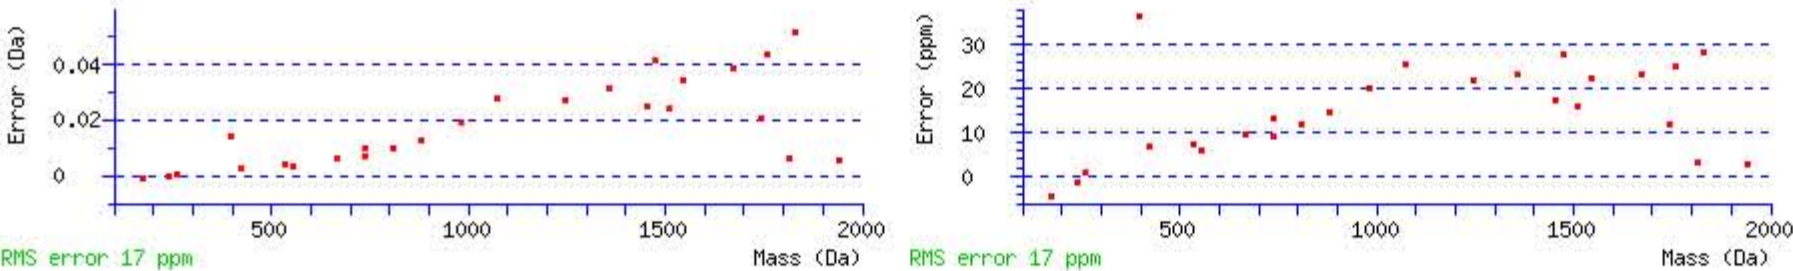

NCBI BLAST search of [GSLVQASEANLQAAQDFVR](#)  
(Parameters: blastp, nr protein database, expect=20000, no filter, PAM30)  
Other BLAST [web gateways](#)

All matches to this query

| Score | Mr(calc):   | Delta     | Sequence                            |
|-------|-------------|-----------|-------------------------------------|
| 100.5 | 2314.173950 | 0.032422  | <a href="#">GSLVQASEANLQAAQDFVR</a> |
| 54.8  | 2314.173950 | 0.032422  | <a href="#">GSLVQASEANLQAAQDFVR</a> |
| 23.7  | 2314.173950 | 0.032422  | <a href="#">GSLVQASEANLQAAQDFVR</a> |
| 5.7   | 2314.240173 | -0.033801 | <a href="#">IMERIQEVAAQSGFIRR</a>   |
| 3.6   | 2314.178635 | 0.027737  | <a href="#">NKDRPAMQLYQPGARSR</a>   |

M

A

T

R

I

X

S

C

I

E

N

C

E

Mascot Search Results

Peptide View

MS/MS Fragmentation of **FAHYVVTSQVVNTANEAR**  
Found in **ITIH1\_HUMAN**, Inter-alpha-trypsin inhibitor heavy chain H1 OS=Homo sapiens GN=ITIH1 PE=1 SV=3

Match to Query 50794: 2316.193932 from(773.071920,3+) rtinseconds(1950) index(49990)  
Title: Locus:1.1.1.1916.23 File:"2013-07-02 CLN FXIII 180 min 2nd F 4.wiff"  
Data file C:\Program Files (x86)\Matrix Science\Mascot Daemon\mgf\8 FXIII 180 min 2nd\mascot\_daemon\_merge.mgf

Click mouse within plot area to zoom in by factor of two about that point

Or, 

Plot from

100

 to 

1700

 Da 

Full range

Label all possible matches ☐ Label matches used for scoring ☒

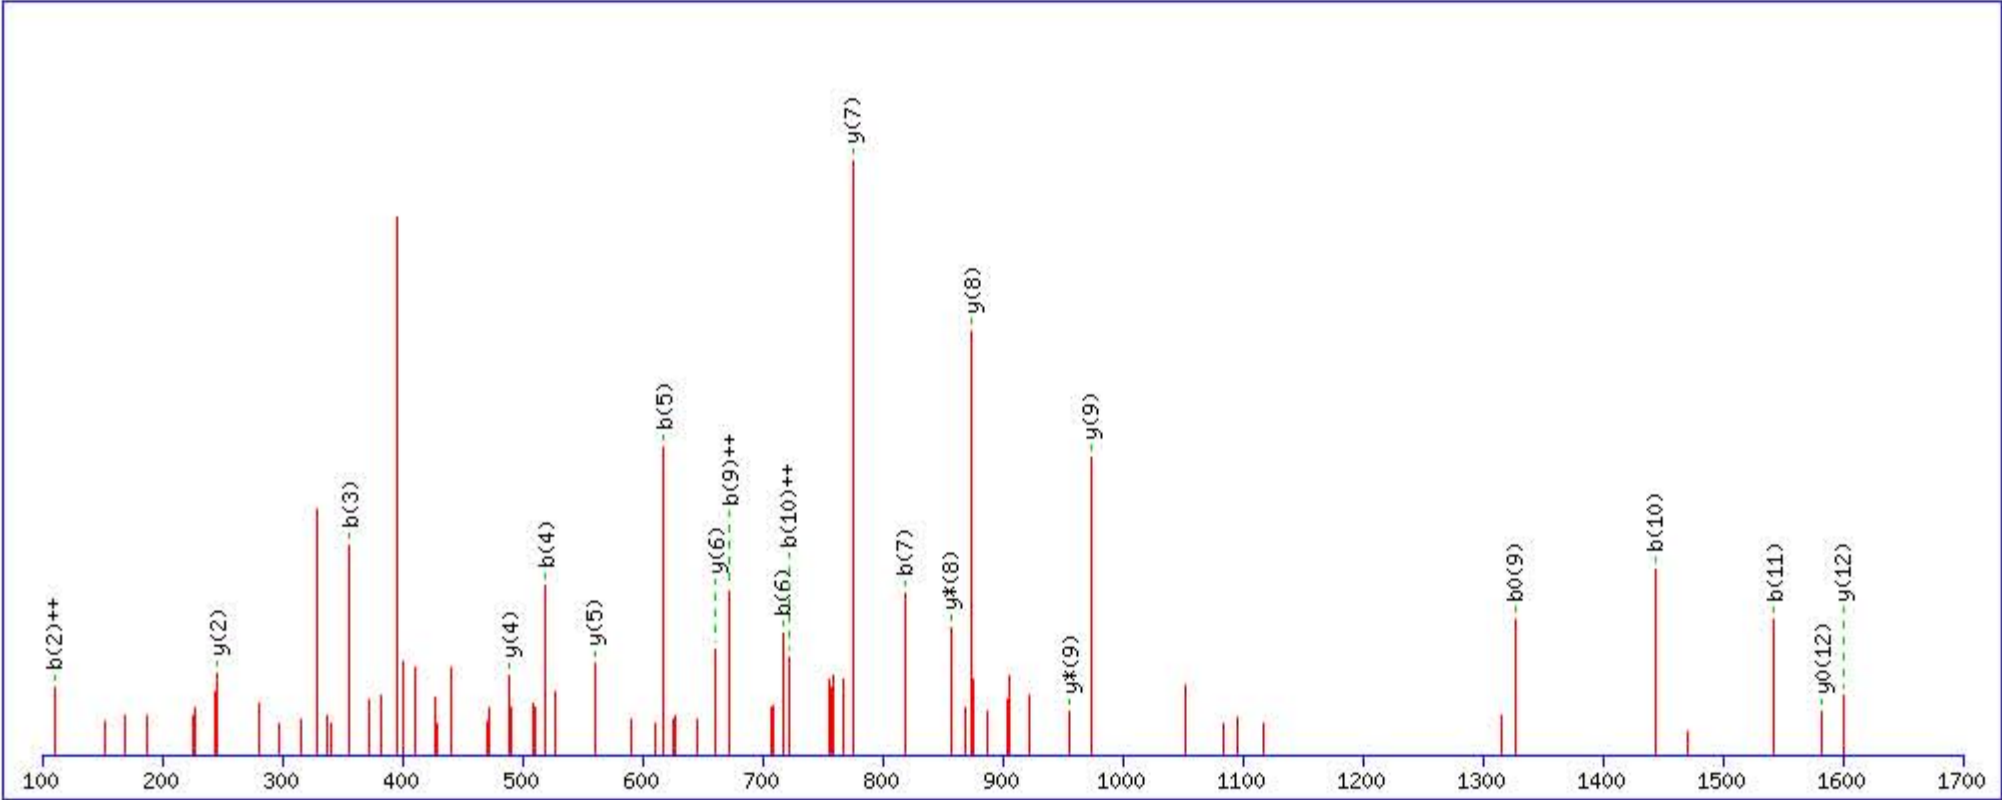

Monoisotopic mass of neutral peptide Mr(calc): 2316.168488  
Fixed modifications: Carbamidomethyl (C) (apply to specified residues or termini only)  
Variable modifications:  
Q9 : Biotin:Thermo-21345 (Q)  
Ions Score: 53 Expect: 0.00015  
Matches : 22/172 fragment ions using 38 most intense peaks [\(help\)](#)

| #  | b           | b <sup>++</sup> | b <sup>*</sup> | b <sup>++</sup> | b <sup>0</sup> | b <sup>0++</sup> | Seq. | y           | y <sup>++</sup> | y <sup>*</sup> | y <sup>++</sup> | y <sup>0</sup> | y <sup>0++</sup> | #  |
|----|-------------|-----------------|----------------|-----------------|----------------|------------------|------|-------------|-----------------|----------------|-----------------|----------------|------------------|----|
| 1  | 148.075690  | 74.541483       |                |                 |                |                  | F    |             |                 |                |                 |                |                  | 18 |
| 2  | 219.112804  | 110.060040      |                |                 |                |                  | A    | 2170.107350 | 1085.557313     | 2153.080801    | 1077.044038     | 2152.096785    | 1076.552030      | 17 |
| 3  | 356.171716  | 178.589496      |                |                 |                |                  | H    | 2099.070236 | 1050.038756     | 2082.043687    | 1041.525481     | 2081.059671    | 1041.033473      | 16 |
| 4  | 519.235045  | 260.121161      |                |                 |                |                  | Y    | 1962.011324 | 981.509300      | 1944.984775    | 972.996026      | 1944.000759    | 972.504018       | 15 |
| 5  | 618.303459  | 309.655368      |                |                 |                |                  | V    | 1798.947995 | 899.977636      | 1781.921446    | 891.464361      | 1780.937430    | 890.972353       | 14 |
| 6  | 717.371873  | 359.189575      |                |                 |                |                  | V    | 1699.879581 | 850.443429      | 1682.853032    | 841.930154      | 1681.869016    | 841.438146       | 13 |
| 7  | 818.419552  | 409.713414      |                |                 | 800.408987     | 400.708132       | T    | 1600.811167 | 800.909222      | 1583.784618    | 792.395947      | 1582.800602    | 791.903939       | 12 |
| 8  | 905.451580  | 453.229428      |                |                 | 887.441015     | 444.224146       | S    | 1499.763488 | 750.385382      | 1482.736939    | 741.872108      | 1481.752923    | 741.380100       | 11 |
| 9  | 1344.676906 | 672.842091      | 1327.650357    | 664.328817      | 1326.666341    | 663.836808       | Q    | 1412.731460 | 706.869368      | 1395.704911    | 698.356094      | 1394.720895    | 697.864086       | 10 |
| 10 | 1443.745320 | 722.376298      | 1426.718771    | 713.863024      | 1425.734755    | 713.371016       | V    | 973.506134  | 487.256705      | 956.479585     | 478.743431      | 955.495569     | 478.251423       | 9  |
| 11 | 1542.813734 | 771.910505      | 1525.787185    | 763.397231      | 1524.803169    | 762.905223       | V    | 874.437720  | 437.722498      | 857.411171     | 429.209224      | 856.427155     | 428.717216       | 8  |
| 12 | 1656.856661 | 828.931969      | 1639.830112    | 820.418694      | 1638.846096    | 819.926686       | N    | 775.369306  | 388.188291      | 758.342757     | 379.675017      | 757.358741     | 379.183009       | 7  |
| 13 | 1757.904340 | 879.455808      | 1740.877791    | 870.942534      | 1739.893775    | 870.450526       | T    | 661.326379  | 331.166828      | 644.299830     | 322.653553      | 643.315814     | 322.161545       | 6  |
| 14 | 1828.941454 | 914.974365      | 1811.914905    | 906.461091      | 1810.930889    | 905.969083       | A    | 560.278700  | 280.642988      | 543.252151     | 272.129714      | 542.268135     | 271.637706       | 5  |
| 15 | 1942.984381 | 971.995829      | 1925.957832    | 963.482554      | 1924.973816    | 962.990546       | N    | 489.241586  | 245.124431      | 472.215037     | 236.611157      | 471.231021     | 236.119149       | 4  |
| 16 | 2072.026974 | 1036.517125     | 2055.000425    | 1028.003850     | 2054.016409    | 1027.511842      | E    | 375.198659  | 188.102968      | 358.172110     | 179.589693      | 357.188094     | 179.097685       | 3  |
| 17 | 2143.064088 | 1072.035682     | 2126.037539    | 1063.522407     | 2125.053523    | 1063.030399      | A    | 246.156066  | 123.581671      | 229.129517     | 115.068397      |                |                  | 2  |
| 18 |             |                 |                |                 |                |                  | R    | 175.118952  | 88.063114       | 158.092403     | 79.549839       |                |                  | 1  |

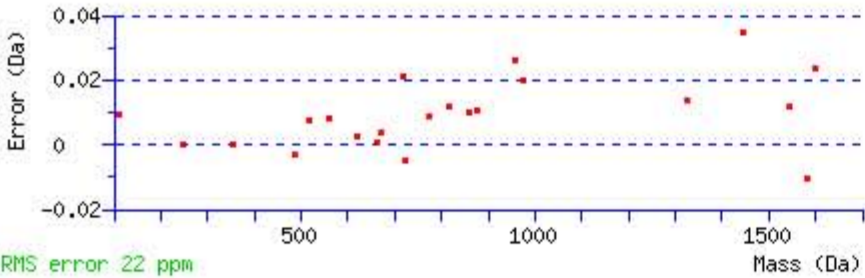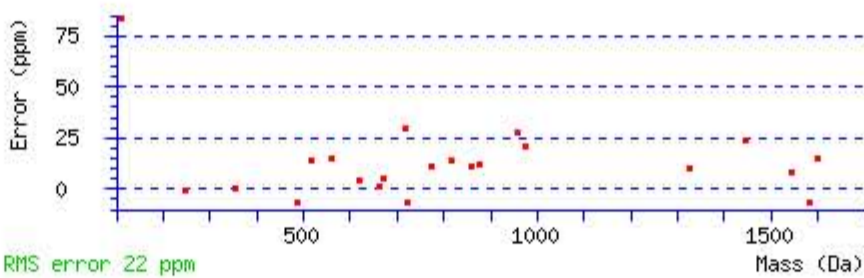

NCBI BLAST search of [FAHYVVTSQVVNTANEAR](#)  
(Parameters: blastp, nr protein database, expect=20000, no filter, PAM30)  
Other BLAST [web gateways](#)

All matches to this query

| Score | Mr(calc):   | Delta    | Sequence                           |
|-------|-------------|----------|------------------------------------|
| 52.5  | 2316.168488 | 0.025444 | <a href="#">FAHYVVTSQVVNTANEAR</a> |

M

A

T

R

I

X

S

C

I

E

N

C

E

Mascot Search Results

Peptide View

MS/MS Fragmentation of **GSLVQASEANLQAAQDFVR**  
Found in **ITIH1\_HUMAN**, Inter-alpha-trypsin inhibitor heavy chain H1 OS=Homo sapiens GN=ITIH1 PE=1 SV=3

Match to Query 55730: 2625.379302 from(876.133710,3+) rtinseconds(2732) index(54964)  
Title: Locus:1.1.1.2187.20 File:"2013-07-02 CLN FXIII 180 min 2nd F 4.wiff"  
Data file C:\Program Files (x86)\Matrix Science\Mascot Daemon\mgf\8 FXIII 180 min 2nd\mascot\_daemon\_merge.mgf

Click mouse within plot area to zoom in by factor of two about that point  
Or, 

Plot from

100

 to 

1900

 Da 

Full range

  
Label all possible matches ☐ Label matches used for scoring ☒

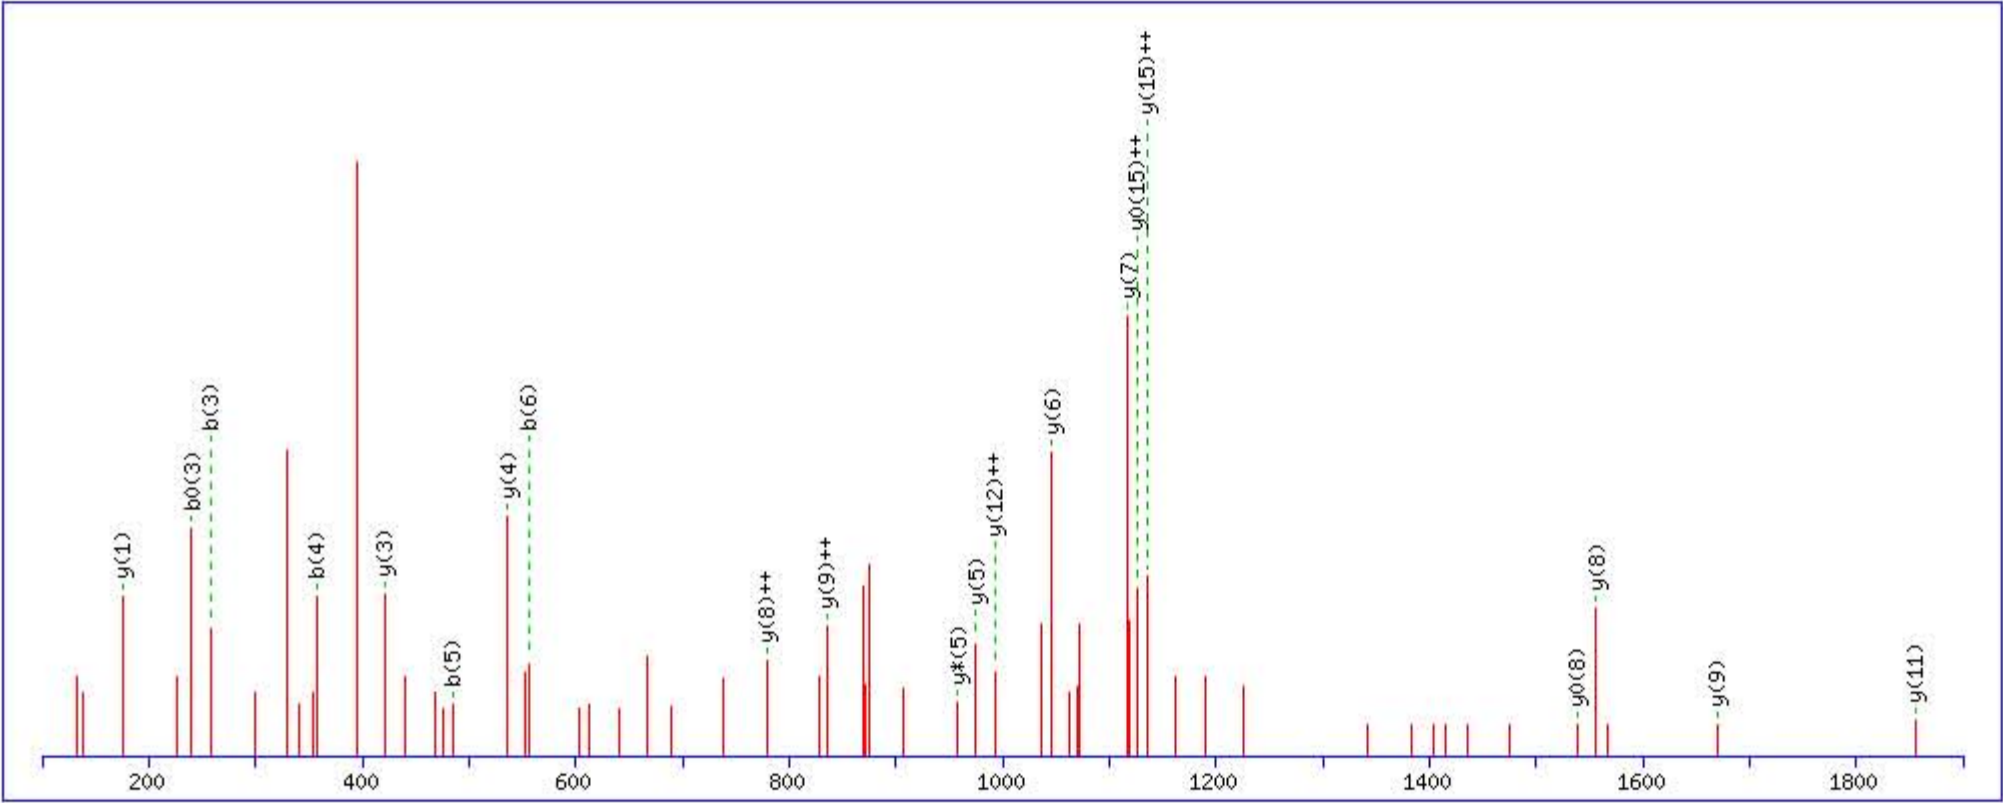

Monoisotopic mass of neutral peptide Mr(calc): 2625.340698  
Fixed modifications: Carbamidomethyl (C) (apply to specified residues or termini only)  
Variable modifications:  
Q12 : Biotin:Thermo-21345 (Q)  
Q15 : Biotin:Thermo-21345 (Q)  
Ions Score: 41 Expect: 0.0019  
Matches : 21/200 fragment ions using 43 most intense peaks [\(help\)](#)

| #  | b           | b <sup>++</sup> | b <sup>*</sup> | b <sup>*++</sup> | b <sup>0</sup> | b <sup>0++</sup> | Seq. | y           | y <sup>++</sup> | y <sup>*</sup> | y <sup>*++</sup> | y <sup>0</sup> | y <sup>0++</sup> | #  |
|----|-------------|-----------------|----------------|------------------|----------------|------------------|------|-------------|-----------------|----------------|------------------|----------------|------------------|----|
| 1  | 58.028740   | 29.518008       |                |                  |                |                  | G    |             |                 |                |                  |                |                  | 19 |
| 2  | 145.060768  | 73.034022       |                |                  | 127.050203     | 64.028740        | S    | 2569.326527 | 1285.166901     | 2552.299978    | 1276.653627      | 2551.315962    | 1276.161619      | 18 |
| 3  | 258.144832  | 129.576054      |                |                  | 240.134267     | 120.570772       | L    | 2482.294499 | 1241.650887     | 2465.267950    | 1233.137613      | 2464.283934    | 1232.645605      | 17 |
| 4  | 357.213246  | 179.110261      |                |                  | 339.202681     | 170.104979       | V    | 2369.210435 | 1185.108855     | 2352.183886    | 1176.595581      | 2351.199870    | 1176.103573      | 16 |
| 5  | 485.271824  | 243.139550      | 468.245275     | 234.626276       | 467.261259     | 234.134268       | Q    | 2270.142021 | 1135.574648     | 2253.115472    | 1127.061374      | 2252.131456    | 1126.569366      | 15 |
| 6  | 556.308938  | 278.658107      | 539.282389     | 270.144833       | 538.298373     | 269.652825       | A    | 2142.083443 | 1071.545359     | 2125.056894    | 1063.032085      | 2124.072878    | 1062.540077      | 14 |
| 7  | 643.340966  | 322.174121      | 626.314417     | 313.660847       | 625.330401     | 313.168839       | S    | 2071.046329 | 1036.026802     | 2054.019780    | 1027.513528      | 2053.035764    | 1027.021520      | 13 |
| 8  | 772.383559  | 386.695418      | 755.357010     | 378.182143       | 754.372994     | 377.690135       | E    | 1984.014301 | 992.510788      | 1966.987752    | 983.997514       | 1966.003736    | 983.505506       | 12 |
| 9  | 843.420673  | 422.213975      | 826.394124     | 413.700700       | 825.410108     | 413.208692       | A    | 1854.971708 | 927.989492      | 1837.945159    | 919.476217       | 1836.961143    | 918.984209       | 11 |
| 10 | 957.463600  | 479.235438      | 940.437051     | 470.722164       | 939.453035     | 470.230156       | N    | 1783.934594 | 892.470935      | 1766.908045    | 883.957660       | 1765.924029    | 883.465652       | 10 |
| 11 | 1070.547664 | 535.777470      | 1053.521115    | 527.264196       | 1052.537099    | 526.772187       | L    | 1669.891667 | 835.449471      | 1652.865118    | 826.936197       | 1651.881102    | 826.444189       | 9  |
| 12 | 1509.772990 | 755.390133      | 1492.746441    | 746.876859       | 1491.762425    | 746.384851       | Q    | 1556.807603 | 778.907440      | 1539.781054    | 770.394165       | 1538.797038    | 769.902157       | 8  |
| 13 | 1580.810104 | 790.908690      | 1563.783555    | 782.395416       | 1562.799539    | 781.903408       | A    | 1117.582277 | 559.294776      | 1100.555728    | 550.781502       | 1099.571712    | 550.289494       | 7  |
| 14 | 1651.847218 | 826.427247      | 1634.820669    | 817.913973       | 1633.836653    | 817.421965       | A    | 1046.545163 | 523.776219      | 1029.518614    | 515.262945       | 1028.534598    | 514.770937       | 6  |
| 15 | 2091.072544 | 1046.039910     | 2074.045995    | 1037.526635      | 2073.061979    | 1037.034627      | Q    | 975.508049  | 488.257662      | 958.481500     | 479.744388       | 957.497484     | 479.252380       | 5  |
| 16 | 2206.099487 | 1103.553381     | 2189.072938    | 1095.040107      | 2188.088922    | 1094.548099      | D    | 536.282723  | 268.644999      | 519.256174     | 260.131725       | 518.272158     | 259.639717       | 4  |
| 17 | 2353.167901 | 1177.087588     | 2336.141352    | 1168.574314      | 2335.157336    | 1168.082306      | F    | 421.255780  | 211.131528      | 404.229231     | 202.618253       |                |                  | 3  |
| 18 | 2452.236315 | 1226.621795     | 2435.209766    | 1218.108521      | 2434.225750    | 1217.616513      | V    | 274.187366  | 137.597321      | 257.160817     | 129.084046       |                |                  | 2  |
| 19 |             |                 |                |                  |                |                  | R    | 175.118952  | 88.063114       | 158.092403     | 79.549839        |                |                  | 1  |

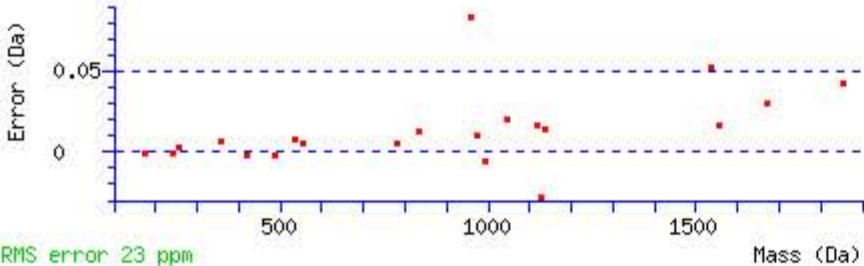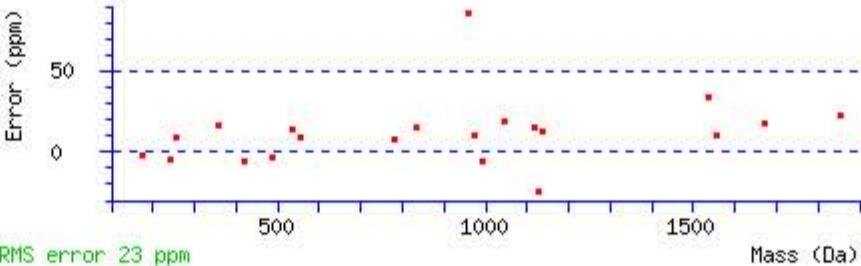

NCBI BLAST search of [GSLVQASEANLQAAQDFVR](#)  
(Parameters: blastp, nr protein database, expect=20000, no filter, PAM30)  
Other BLAST [web gateways](#)

All matches to this query

| Score | Mr(calc):   | Delta    | Sequence                            |
|-------|-------------|----------|-------------------------------------|
| 41.0  | 2625.340698 | 0.038604 | <a href="#">GSLVQASEANLQAAQDFVR</a> |
| 11.2  | 2625.340698 | 0.038604 | <a href="#">GSLVQASEANLQAAQDFVR</a> |

MATRIX

SCIENCE

Mascot Search Results

Peptide View

MS/MS Fragmentation of **GMADQDGLKPTIDKPSEDSPPLEMLGPR**  
Found in **ITIH1\_HUMAN**, Inter-alpha-trypsin inhibitor heavy chain H1 OS=Homo sapiens GN=ITIH1 PE=1 SV=3

Match to Query 64454: 3336.644816 from(835.168480,4+) rtinseconds(1976) index(50210)  
Title: Locus:1.1.1.1925.18 File:"2013-07-02 CLN FXIII 180 min 2nd F 4.wiff"  
Data file C:\Program Files (x86)\Matrix Science\Mascot Daemon\mgf\8 FXIII 180 min 2nd\mascot\_daemon\_merge.mgf

Click mouse within plot area to zoom in by factor of two about that point  
Or, 

Plot from

0

 to 

2600

 Da 

Full range

Label all possible matches

☐

Label matches used for scoring

☒

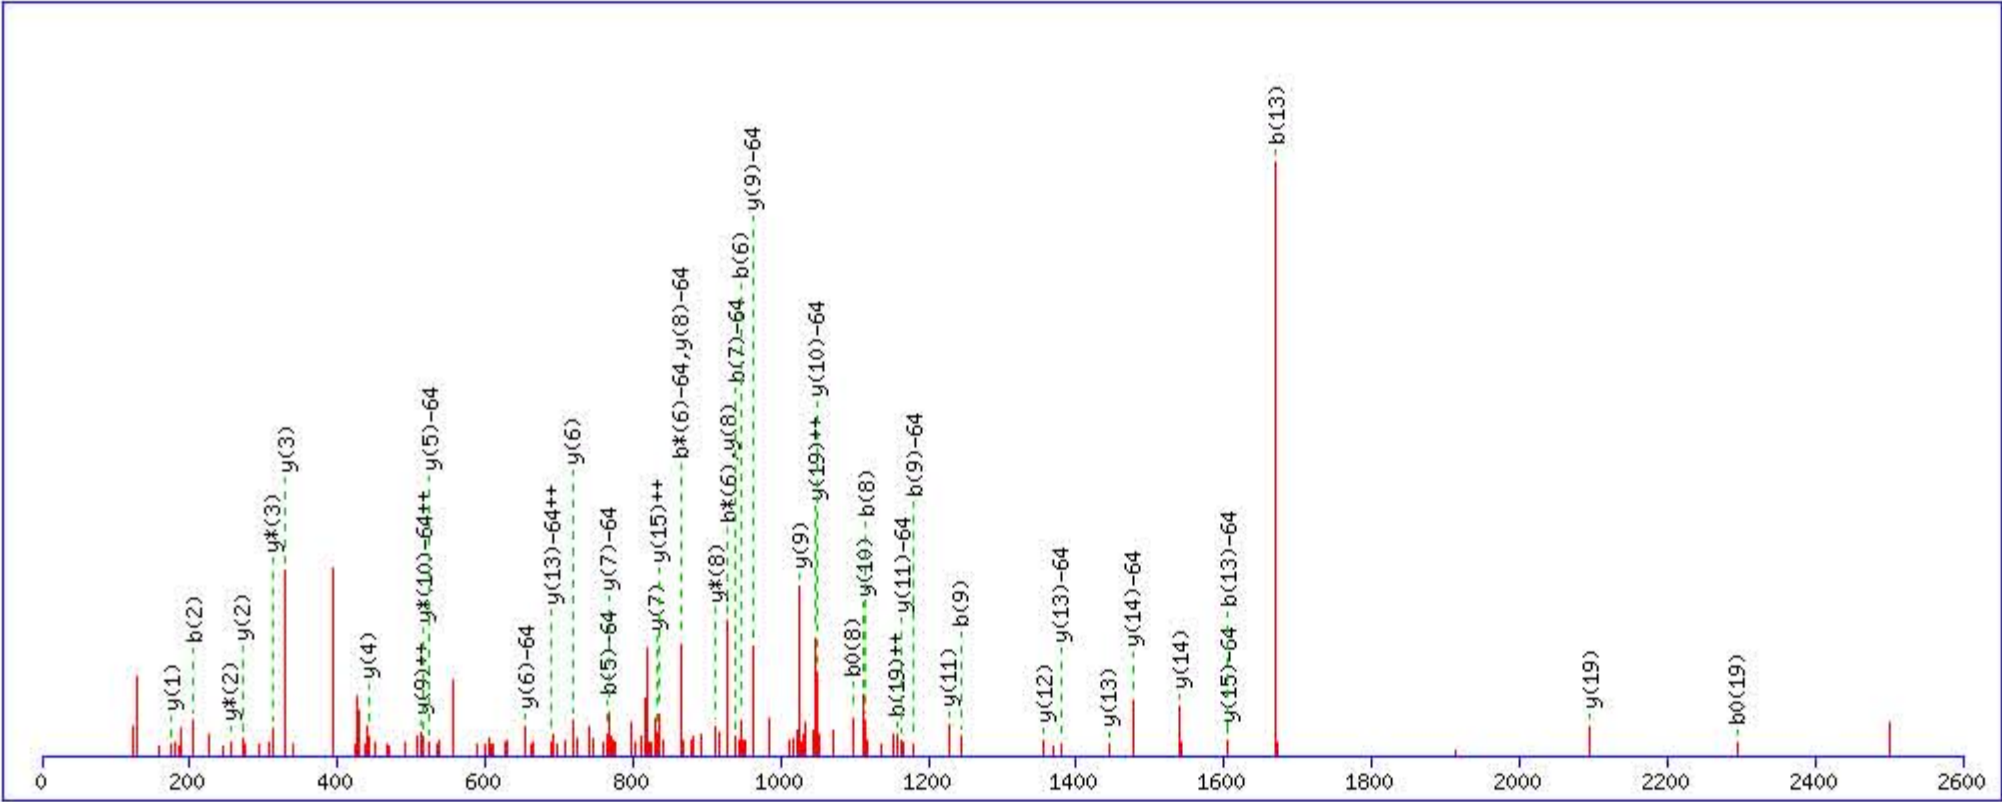

Monoisotopic mass of neutral peptide Mr(calc): 3336.603989  
Fixed modifications: Carbamidomethyl (C) (apply to specified residues or termini only)  
Variable modifications:  
M2 : Oxidation (M), with neutral losses 0.000000(shown in table), 63.998285  
Q5 : Biotin:Thermo-21345 (Q)  
M24 : Oxidation (M), with neutral losses 0.000000(shown in table), 63.998285  
Ions Score: 55 Expect: 9e-005  
Matches : 46/582 fragment ions using 94 most intense peaks [\(help\)](#)

| #  | b           | b <sup>++</sup> | b <sup>*</sup> | b <sup>*++</sup> | b <sup>0</sup> | b <sup>0++</sup> | Seq. | y           | y <sup>++</sup> | y <sup>*</sup> | y <sup>*++</sup> | y <sup>0</sup> | y <sup>0++</sup> | #  |
|----|-------------|-----------------|----------------|------------------|----------------|------------------|------|-------------|-----------------|----------------|------------------|----------------|------------------|----|
| 1  | 58.028740   | 29.518008       |                |                  |                |                  | G    |             |                 |                |                  |                |                  | 28 |
| 2  | 205.064140  | 103.035708      |                |                  |                |                  | M    | 3280.589815 | 1640.798546     | 3263.563266    | 1632.285271      | 3262.579250    | 1631.793263      | 27 |
| 3  | 276.101254  | 138.554265      |                |                  |                |                  | A    | 3133.554415 | 1567.280845     | 3116.527866    | 1558.767571      | 3115.543850    | 1558.275563      | 26 |
| 4  | 391.128197  | 196.067737      |                |                  | 373.117632     | 187.062454       | D    | 3062.517301 | 1531.762289     | 3045.490752    | 1523.249014      | 3044.506736    | 1522.757006      | 25 |
| 5  | 830.353523  | 415.680400      | 813.326974     | 407.167125       | 812.342958     | 406.675117       | Q    | 2947.490358 | 1474.248817     | 2930.463809    | 1465.735542      | 2929.479793    | 1465.243534      | 24 |
| 6  | 945.380466  | 473.193871      | 928.353917     | 464.680597       | 927.369901     | 464.188589       | D    | 2508.265032 | 1254.636154     | 2491.238483    | 1246.122880      | 2490.254467    | 1245.630872      | 23 |
| 7  | 1002.401930 | 501.704603      | 985.375381     | 493.191329       | 984.391365     | 492.699321       | G    | 2393.238089 | 1197.122682     | 2376.211540    | 1188.609408      | 2375.227524    | 1188.117400      | 22 |
| 8  | 1115.485994 | 558.246635      | 1098.459445    | 549.733361       | 1097.475429    | 549.241353       | L    | 2336.216625 | 1168.611950     | 2319.190076    | 1160.098676      | 2318.206060    | 1159.606668      | 21 |
| 9  | 1243.580957 | 622.294117      | 1226.554408    | 613.780842       | 1225.570392    | 613.288834       | K    | 2223.132561 | 1112.069918     | 2206.106012    | 1103.556644      | 2205.121996    | 1103.064636      | 20 |
| 10 | 1340.633721 | 670.820499      | 1323.607172    | 662.307224       | 1322.623156    | 661.815216       | P    | 2095.037598 | 1048.022437     | 2078.011049    | 1039.509163      | 2077.027033    | 1039.017155      | 19 |
| 11 | 1441.681400 | 721.344338      | 1424.654851    | 712.831064       | 1423.670835    | 712.339056       | T    | 1997.984834 | 999.496055      | 1980.958285    | 990.982781       | 1979.974269    | 990.490773       | 18 |
| 12 | 1554.765464 | 777.886370      | 1537.738915    | 769.373096       | 1536.754899    | 768.881088       | I    | 1896.937155 | 948.972216      | 1879.910606    | 940.458941       | 1878.926590    | 939.966933       | 17 |
| 13 | 1669.792407 | 835.399842      | 1652.765858    | 826.886567       | 1651.781842    | 826.394559       | D    | 1783.853091 | 892.430184      | 1766.826542    | 883.916909       | 1765.842526    | 883.424901       | 16 |
| 14 | 1797.887370 | 899.447323      | 1780.860821    | 890.934049       | 1779.876805    | 890.442041       | K    | 1668.826148 | 834.916712      | 1651.799599    | 826.403438       | 1650.815583    | 825.911430       | 15 |
| 15 | 1894.940134 | 947.973705      | 1877.913585    | 939.460431       | 1876.929569    | 938.968423       | P    | 1540.731185 | 770.869231      | 1523.704636    | 762.355956       | 1522.720620    | 761.863948       | 14 |
| 16 | 1981.972162 | 991.489719      | 1964.945613    | 982.976445       | 1963.961597    | 982.484437       | S    | 1443.678421 | 722.342849      | 1426.651872    | 713.829574       | 1425.667856    | 713.337566       | 13 |
| 17 | 2111.014755 | 1056.011016     | 2093.988206    | 1047.497741      | 2093.004190    | 1047.005733      | E    | 1356.646393 | 678.826835      | 1339.619844    | 670.313560       | 1338.635828    | 669.821552       | 12 |
| 18 | 2226.041698 | 1113.524487     | 2209.015149    | 1105.011212      | 2208.031133    | 1104.519204      | D    | 1227.603800 | 614.305538      | 1210.577251    | 605.792264       | 1209.593235    | 605.300256       | 11 |
| 19 | 2313.073726 | 1157.040501     | 2296.047177    | 1148.527226      | 2295.063161    | 1148.035218      | S    | 1112.576857 | 556.792067      | 1095.550308    | 548.278792       | 1094.566292    | 547.786784       | 10 |
| 20 | 2410.126490 | 1205.566883     | 2393.099941    | 1197.053608      | 2392.115925    | 1196.561600      | P    | 1025.544829 | 513.276053      | 1008.518280    | 504.762778       | 1007.534264    | 504.270770       | 9  |
| 21 | 2507.179254 | 1254.093265     | 2490.152705    | 1245.579990      | 2489.168689    | 1245.087983      | P    | 928.492065  | 464.749671      | 911.465516     | 456.236396       | 910.481500     | 455.744388       | 8  |
| 22 | 2620.263318 | 1310.635297     | 2603.236769    | 1302.122023      | 2602.252753    | 1301.630015      | L    | 831.439301  | 416.223289      | 814.412752     | 407.710014       | 813.428736     | 407.218006       | 7  |
| 23 | 2749.305911 | 1375.156594     | 2732.279362    | 1366.643319      | 2731.295346    | 1366.151311      | E    | 718.355237  | 359.681257      | 701.328688     | 351.167982       | 700.344672     | 350.675974       | 6  |
| 24 | 2896.341311 | 1448.674294     | 2879.314762    | 1440.161019      | 2878.330746    | 1439.669011      | M    | 589.312644  | 295.159960      | 572.286095     | 286.646686       |                |                  | 5  |
| 25 | 3009.425375 | 1505.216326     | 2992.398826    | 1496.703051      | 2991.414810    | 1496.211043      | L    | 442.277244  | 221.642260      | 425.250695     | 213.128986       |                |                  | 4  |
| 26 | 3066.446839 | 1533.727058     | 3049.420290    | 1525.213783      | 3048.436274    | 1524.721775      | G    | 329.193180  | 165.100228      | 312.166631     | 156.586953       |                |                  | 3  |
| 27 | 3163.499603 | 1582.253440     | 3146.473054    | 1573.740165      | 3145.489038    | 1573.248157      | P    | 272.171716  | 136.589496      | 255.145167     | 128.076221       |                |                  | 2  |
| 28 |             |                 |                |                  |                |                  | R    | 175.118952  | 88.063114       | 158.092403     | 79.549839        |                |                  | 1  |

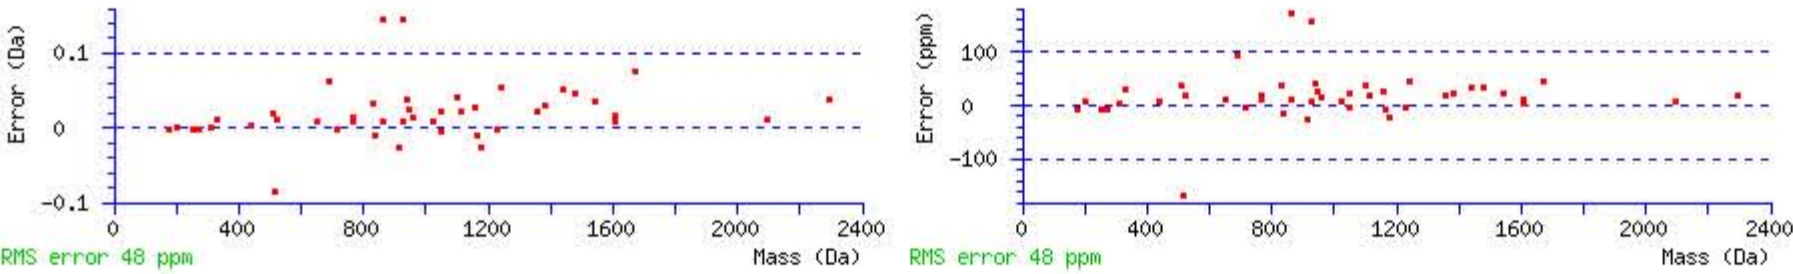

NCBI BLAST search of [GMADQDGLKPTIDKPSEDSPPLEMLGPR](#)  
(Parameters: blastp, nr protein database, expect=20000, no filter, PAM30)  
Other BLAST [web gateways](#)

All matches to this query

| Score | Mr(calc):   | Delta    | Sequence                                     |
|-------|-------------|----------|----------------------------------------------|
| 54.7  | 3336.603989 | 0.040827 | <a href="#">GMADQDGLKPTIDKPSEDSPPLEMLGPR</a> |

**MATRIX  
SCIENCE**

### Peptide View

MS/MS Fragmentation of **GHVLFRTVSQQQSCPTCSTLLNGHFK**

Match to Query 65792: 3496.739170 from(700.355110,5+) rtinseconds(1960) index(50079)

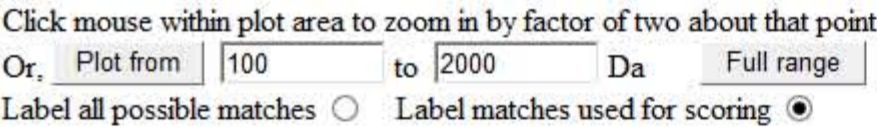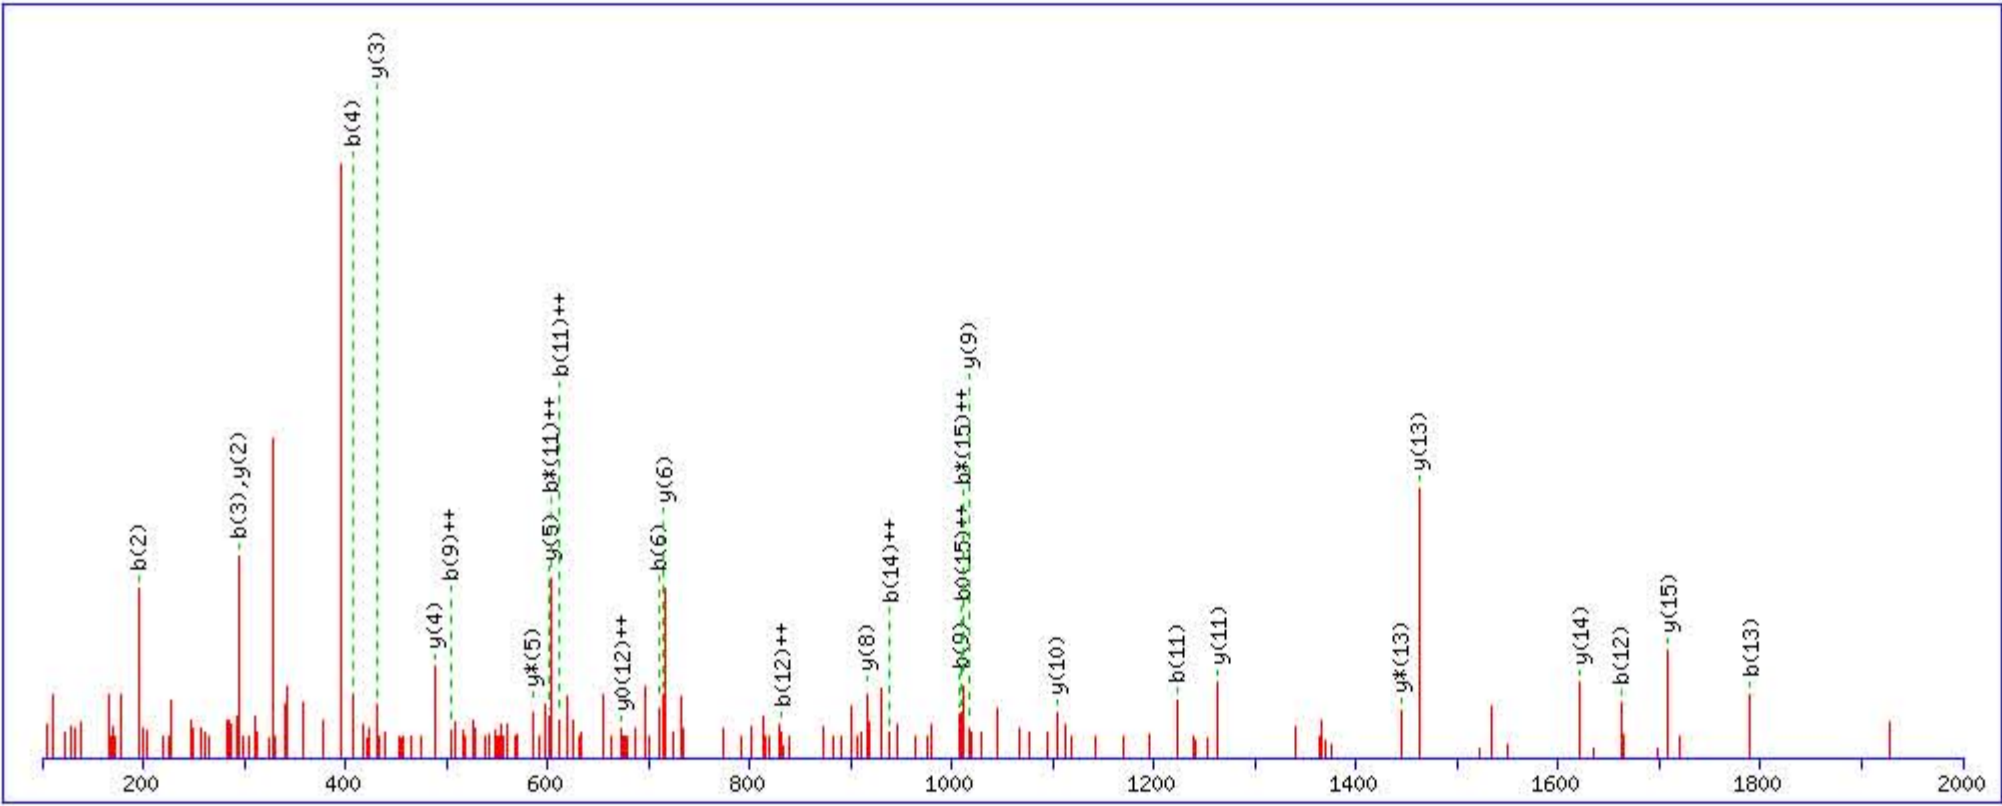

Monoisotopic mass of neutral peptide Mr(calc): 3496.716660  
 Fixed modifications: Carbamidomethyl (C) (apply to specified residues or termini only)  
 Variable modifications:  
 Q12 : Biotin:Thermo-21345 (Q)  
 Ions Score: 32 Expect: 0.0017  
 Matches : 30/286 fragment ions using 100 most intense peaks ([help](#))

| #  | b           | b <sup>++</sup> | b <sup>*</sup> | b <sup>+++</sup> | b <sup>0</sup> | b <sup>0++</sup> | Seq. | y           | y <sup>++</sup> | y <sup>*</sup> | y <sup>+++</sup> | y <sup>0</sup> | y <sup>0++</sup> | #  |
|----|-------------|-----------------|----------------|------------------|----------------|------------------|------|-------------|-----------------|----------------|------------------|----------------|------------------|----|
| 1  | 58.028740   | 29.518008       |                |                  |                |                  | G    |             |                 |                |                  |                |                  | 28 |
| 2  | 195.087652  | 98.047464       |                |                  |                |                  | H    | 3440.702435 | 1720.854855     | 3423.675886    | 1712.341581      | 3422.691870    | 1711.849573      | 27 |
| 3  | 294.156066  | 147.581671      |                |                  |                |                  | V    | 3303.643523 | 1652.325399     | 3286.616974    | 1643.812125      | 3285.632958    | 1643.320117      | 26 |
| 4  | 407.240130  | 204.123703      |                |                  |                |                  | L    | 3204.575109 | 1602.791192     | 3187.548560    | 1594.277918      | 3186.564544    | 1593.785910      | 25 |
| 5  | 554.308544  | 277.657910      |                |                  |                |                  | F    | 3091.491045 | 1546.249160     | 3074.464496    | 1537.735886      | 3073.480480    | 1537.243878      | 24 |
| 6  | 710.409655  | 355.708466      | 693.383106     | 347.195191       |                |                  | R    | 2944.422631 | 1472.714953     | 2927.396082    | 1464.201679      | 2926.412066    | 1463.709671      | 23 |
| 7  | 807.462419  | 404.234848      | 790.435870     | 395.721573       |                |                  | P    | 2788.321520 | 1394.664398     | 2771.294971    | 1386.151123      | 2770.310955    | 1385.659115      | 22 |
| 8  | 908.510098  | 454.758687      | 891.483549     | 446.245413       | 890.499533     | 445.753405       | T    | 2691.268756 | 1346.138016     | 2674.242207    | 1337.624741      | 2673.258191    | 1337.132733      | 21 |
| 9  | 1007.578512 | 504.292894      | 990.551963     | 495.779620       | 989.567947     | 495.287612       | V    | 2590.221077 | 1295.614176     | 2573.194528    | 1287.100902      | 2572.210512    | 1286.608894      | 20 |
| 10 | 1094.610540 | 547.808908      | 1077.583991    | 539.295634       | 1076.599975    | 538.803626       | S    | 2491.152663 | 1246.079969     | 2474.126114    | 1237.566695      | 2473.142098    | 1237.074687      | 19 |
| 11 | 1222.669118 | 611.838197      | 1205.642569    | 603.324923       | 1204.658553    | 602.832915       | Q    | 2404.120635 | 1202.563955     | 2387.094086    | 1194.050681      | 2386.110070    | 1193.558673      | 18 |
| 12 | 1661.894444 | 831.450860      | 1644.867895    | 822.937586       | 1643.883879    | 822.445578       | Q    | 2276.062057 | 1138.534666     | 2259.035508    | 1130.021392      | 2258.051492    | 1129.529384      | 17 |
| 13 | 1789.953022 | 895.480149      | 1772.926473    | 886.966875       | 1771.942457    | 886.474867       | Q    | 1836.836731 | 918.922003      | 1819.810182    | 910.408729       | 1818.826166    | 909.916721       | 16 |
| 14 | 1876.985050 | 938.996163      | 1859.958501    | 930.482889       | 1858.974485    | 929.990881       | S    | 1708.778153 | 854.892714      | 1691.751604    | 846.379440       | 1690.767588    | 845.887432       | 15 |
| 15 | 2037.015699 | 1019.011488     | 2019.989150    | 1010.498213      | 2019.005134    | 1010.006205      | C    | 1621.746125 | 811.376700      | 1604.719576    | 802.863426       | 1603.735560    | 802.371418       | 14 |
| 16 | 2134.068463 | 1067.537869     | 2117.041914    | 1059.024595      | 2116.057898    | 1058.532587      | P    | 1461.715476 | 731.361376      | 1444.688927    | 722.848101       | 1443.704911    | 722.356093       | 13 |
| 17 | 2235.116142 | 1118.061709     | 2218.089593    | 1109.548434      | 2217.105577    | 1109.056426      | T    | 1364.662712 | 682.834994      | 1347.636163    | 674.321719       | 1346.652147    | 673.829711       | 12 |
| 18 | 2395.146791 | 1198.077033     | 2378.120242    | 1189.563759      | 2377.136226    | 1189.071751      | C    | 1263.615033 | 632.311154      | 1246.588484    | 623.797880       | 1245.604468    | 623.305872       | 11 |
| 19 | 2482.178819 | 1241.593047     | 2465.152270    | 1233.079773      | 2464.168254    | 1232.587765      | S    | 1103.584384 | 552.295830      | 1086.557835    | 543.782556       | 1085.573819    | 543.290548       | 10 |
| 20 | 2583.226498 | 1292.116887     | 2566.199949    | 1283.603612      | 2565.215933    | 1283.111604      | T    | 1016.552356 | 508.779816      | 999.525807     | 500.266541       | 998.541791     | 499.774533       | 9  |
| 21 | 2670.258526 | 1335.632901     | 2653.231977    | 1327.119626      | 2652.247961    | 1326.627618      | S    | 915.504677  | 458.255977      | 898.478128     | 449.742702       | 897.494112     | 449.250694       | 8  |
| 22 | 2783.342590 | 1392.174933     | 2766.316041    | 1383.661658      | 2765.332025    | 1383.169650      | L    | 828.472649  | 414.739963      | 811.446100     | 406.226688       |                |                  | 7  |
| 23 | 2896.426654 | 1448.716965     | 2879.400105    | 1440.203690      | 2878.416089    | 1439.711682      | L    | 715.388585  | 358.197930      | 698.362036     | 349.684656       |                |                  | 6  |
| 24 | 3010.469581 | 1505.738428     | 2993.443032    | 1497.225154      | 2992.459016    | 1496.733146      | N    | 602.304521  | 301.655898      | 585.277972     | 293.142624       |                |                  | 5  |
| 25 | 3067.491045 | 1534.249160     | 3050.464496    | 1525.735886      | 3049.480480    | 1525.243878      | G    | 488.261594  | 244.634435      | 471.235045     | 236.121160       |                |                  | 4  |
| 26 | 3204.549957 | 1602.778616     | 3187.523408    | 1594.265342      | 3186.539392    | 1593.773334      | H    | 431.240130  | 216.123703      | 414.213581     | 207.610428       |                |                  | 3  |
| 27 | 3351.618371 | 1676.312823     | 3334.591822    | 1667.799549      | 3333.607806    | 1667.307541      | F    | 294.181218  | 147.594247      | 277.154669     | 139.080972       |                |                  | 2  |
| 28 |             |                 |                |                  |                |                  | K    | 147.112804  | 74.060040       | 130.086255     | 65.546765        |                |                  | 1  |

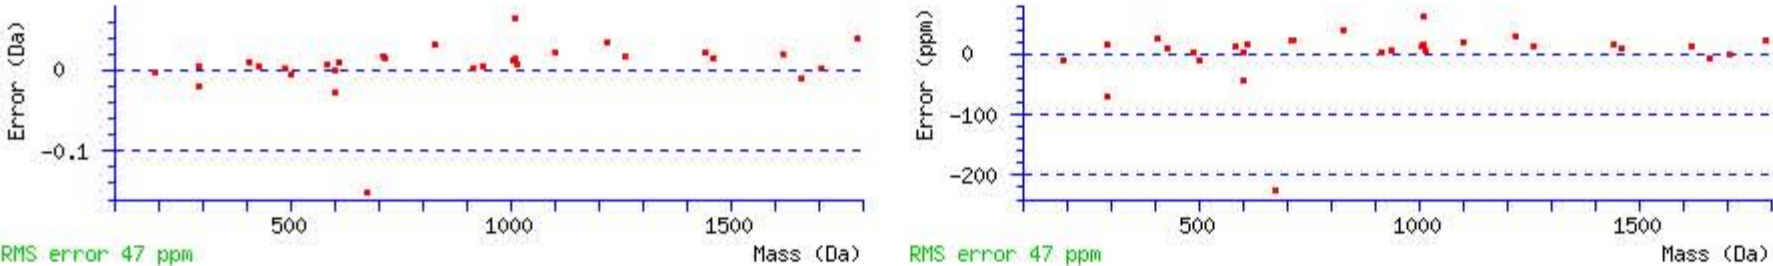

NCBI **BLAST** search of [GHVLFRLPTVSQQQSCPTCSTLLNGHF](#)  
(Parameters: blastp, nr protein database, expect=20000, no filter, PAM30)  
Other BLAST [web gateways](#)

### All matches to this query

| Score | Mr(calc):   | Delta    | Sequence                                                                                     |
|-------|-------------|----------|----------------------------------------------------------------------------------------------|
| 31.7  | 3496.716660 | 0.022510 | <a href="#">GHVLF<sup>1</sup>RP<sup>1</sup>TVSQQQSCPTCSTSL<sup>1</sup>LN<sup>1</sup>GHFK</a> |
| 29.2  | 3496.716660 | 0.022510 | <a href="#">GHVLF<sup>1</sup>RP<sup>1</sup>TVSQQQSCPTCSTSL<sup>1</sup>LN<sup>1</sup>GHFK</a> |
| 26.1  | 3496.716660 | 0.022510 | <a href="#">GHVLF<sup>1</sup>RP<sup>1</sup>TVSQQQSCPTCSTSL<sup>1</sup>LN<sup>1</sup>GHFK</a> |
| 2.2   | 3496.723343 | 0.015827 | <a href="#">NPFLDFLQKGLMISLSTDDPMQFHF<sup>1</sup>TK</a>                                      |

MATRIX

SCIENCE

Mascot Search Results

Peptide View

MS/MS Fragmentation of **TQVADAK**  
Found in **ITIH2\_HUMAN**, Inter-alpha-trypsin inhibitor heavy chain H2 OS=Homo sapiens GN=ITIH2 PE=1 SV=2

Match to Query 14978: 1042.550808 from(522.282680,2+) rtinseconds(1303) index(45747)  
Title: Locus:1.1.1.1691.16 File:"2013-07-02 CLN FXIII 180 min 2nd F 4.wiff"  
Data file C:\Program Files (x86)\Matrix Science\Mascot Daemon\mgf\8 FXIII 180 min 2nd\mascot\_daemon\_merge.mgf

Click mouse within plot area to zoom in by factor of two about that point  
Or, 

Plot from

100

 to 

950

 Da 

Full range

  
Label all possible matches ☐ Label matches used for scoring ☒

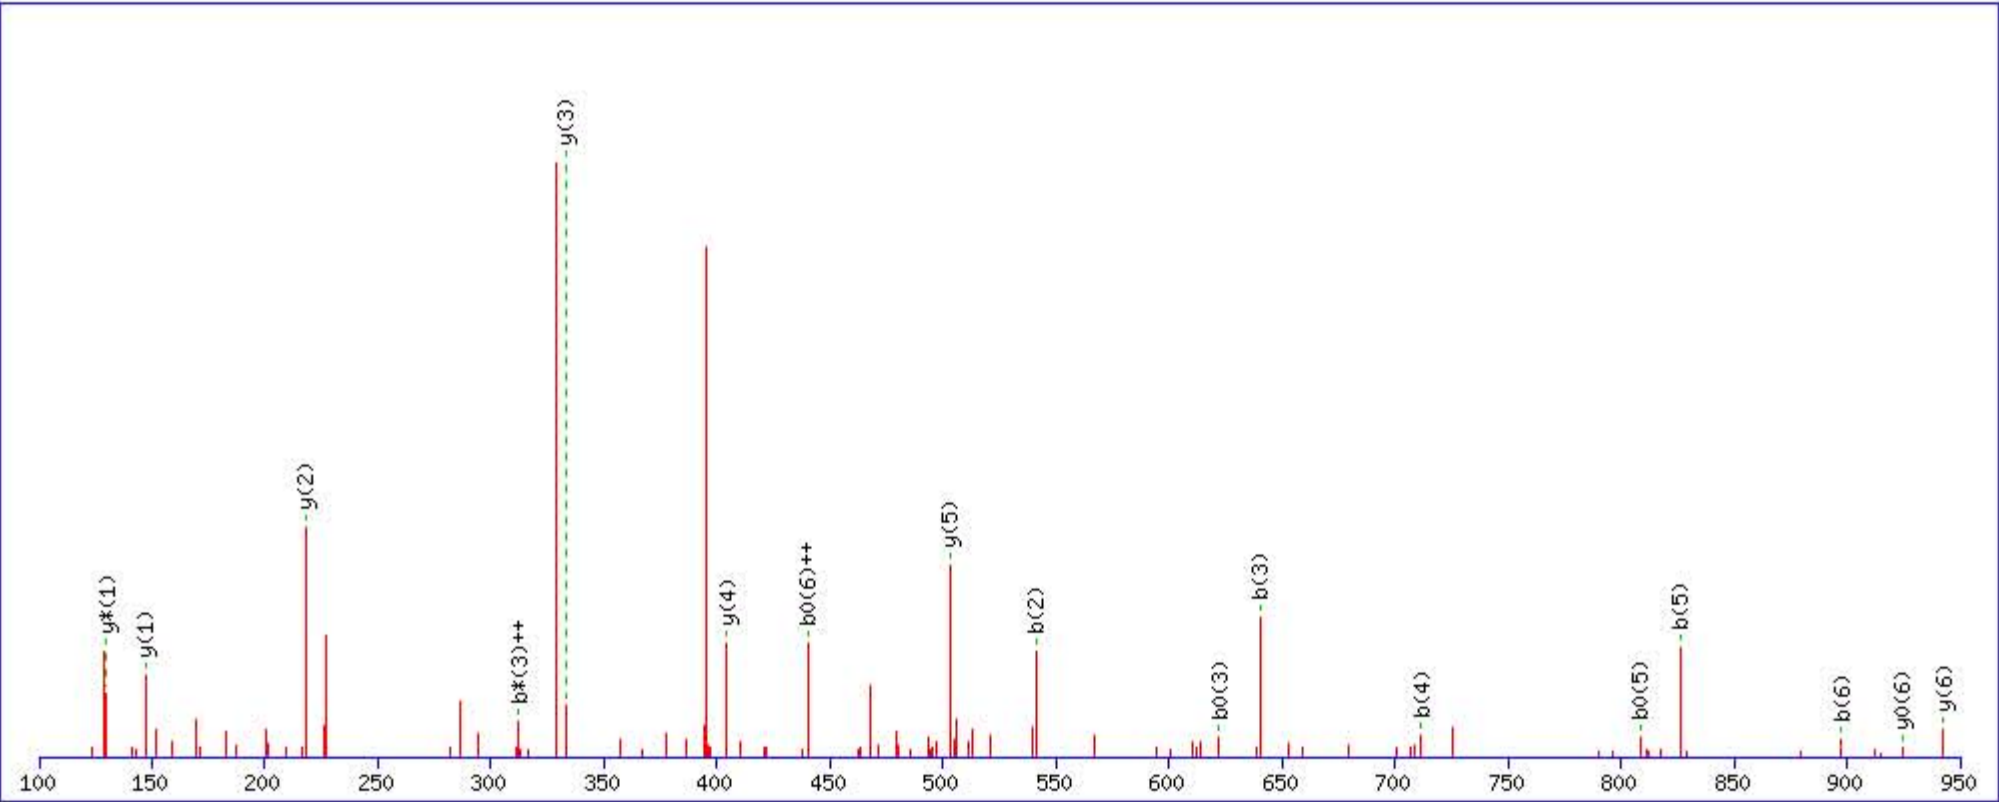

Monoisotopic mass of neutral peptide Mr(calc): 1042.548111  
Fixed modifications: Carbamidomethyl (C) (apply to specified residues or termini only)  
Variable modifications:  
Q2 : Biotin:Thermo-21345 (Q)  
Ions Score: 31 Expect: 0.021  
Matches : 17/66 fragment ions using 34 most intense peaks [\(help\)](#)

| # | b          | b <sup>++</sup> | b <sup>*</sup> | b <sup>*++</sup> | b <sup>0</sup> | b <sup>0++</sup> | Seq. | y          | y <sup>++</sup> | y <sup>*</sup> | y <sup>*++</sup> | y <sup>0</sup> | y <sup>0++</sup> | # |
|---|------------|-----------------|----------------|------------------|----------------|------------------|------|------------|-----------------|----------------|------------------|----------------|------------------|---|
| 1 | 102.054955 | 51.531116       |                |                  | 84.044390      | 42.525833        | T    |            |                 |                |                  |                |                  | 7 |
| 2 | 541.280281 | 271.143779      | 524.253732     | 262.630504       | 523.269716     | 262.138496       | Q    | 942.507715 | 471.757496      | 925.481166     | 463.244221       | 924.497150     | 462.752213       | 6 |
| 3 | 640.348695 | 320.677986      | 623.322146     | 312.164711       | 622.338130     | 311.672703       | V    | 503.282389 | 252.144832      | 486.255840     | 243.631558       | 485.271824     | 243.139550       | 5 |
| 4 | 711.385809 | 356.196543      | 694.359260     | 347.683268       | 693.375244     | 347.191260       | A    | 404.213975 | 202.610625      | 387.187426     | 194.097351       | 386.203410     | 193.605343       | 4 |
| 5 | 826.412752 | 413.710014      | 809.386203     | 405.196739       | 808.402187     | 404.704731       | D    | 333.176861 | 167.092068      | 316.150312     | 158.578794       | 315.166296     | 158.086786       | 3 |
| 6 | 897.449866 | 449.228571      | 880.423317     | 440.715296       | 879.439301     | 440.223288       | A    | 218.149918 | 109.578597      | 201.123369     | 101.065322       |                |                  | 2 |
| 7 |            |                 |                |                  |                |                  | K    | 147.112804 | 74.060040       | 130.086255     | 65.546765        |                |                  | 1 |

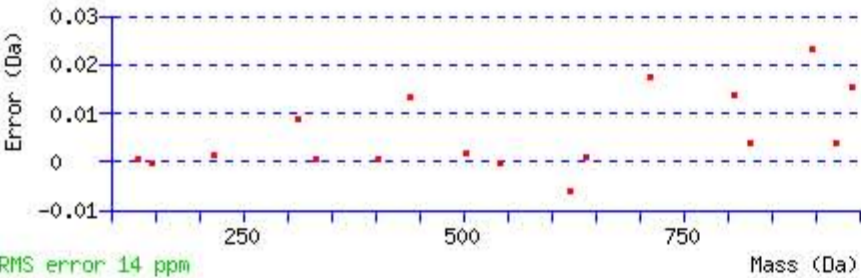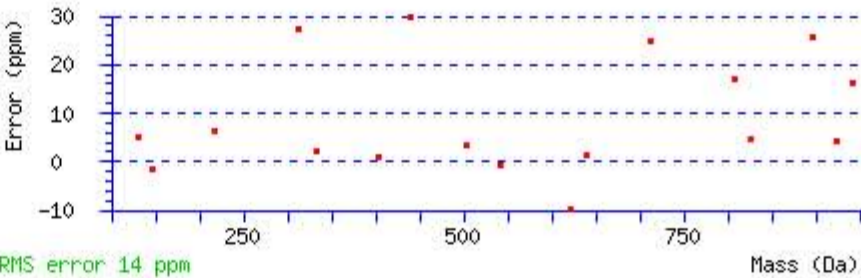

NCBI BLAST search of [TQVADAK](#)  
(Parameters: blastp, nr protein database, expect=20000, no filter, PAM30)  
Other BLAST [web gateways](#)

All matches to this query

| Score | Mr(calc):   | Delta     | Sequence                   |
|-------|-------------|-----------|----------------------------|
| 30.9  | 1042.548111 | 0.002697  | <a href="#">TQVADAK</a>    |
| 13.9  | 1042.540726 | 0.010082  | <a href="#">KPVSEVGDGR</a> |
| 11.2  | 1042.548096 | 0.002712  | <a href="#">SLQADAK</a>    |
| 6.2   | 1042.548080 | 0.002728  | <a href="#">KEQEAK</a>     |
| 6.2   | 1042.548080 | 0.002728  | <a href="#">KQEELAK</a>    |
| 5.8   | 1042.548080 | 0.002728  | <a href="#">KAEEQK</a>     |
| 4.2   | 1042.548096 | 0.002712  | <a href="#">QEAGLSK</a>    |
| 4.2   | 1042.565857 | -0.015049 | <a href="#">QALEGLGDLK</a> |
| 3.0   | 1042.544724 | 0.006084  | <a href="#">ETFYRISK</a>   |
| 2.8   | 1042.563354 | -0.012546 | <a href="#">SLQAWK</a>     |

MATRIX

SCIENCE

Mascot Search Results

Peptide View

MS/MS Fragmentation of **ALYAQAR**  
Found in **ITIH2\_HUMAN**, Inter-alpha-trypsin inhibitor heavy chain H2 OS=Homo sapiens GN=ITIH2 PE=1 SV=2

Match to Query 16271: 1102.598448 from(552.306500,2+) rtinseconds(1649) index(47979)  
Title: Locus:1.1.1.1812.9 File:"2013-07-02 CLN FXIII 180 min 2nd F 4.wiff"  
Data file C:\Program Files (x86)\Matrix Science\Mascot Daemon\mgf\8 FXIII 180 min 2nd\mascot\_daemon\_merge.mgf

Click mouse within plot area to zoom in by factor of two about that point  
Or, 

Plot from

100

 to 

1600

 Da 

Full range

  
Label all possible matches ☐ Label matches used for scoring ☒

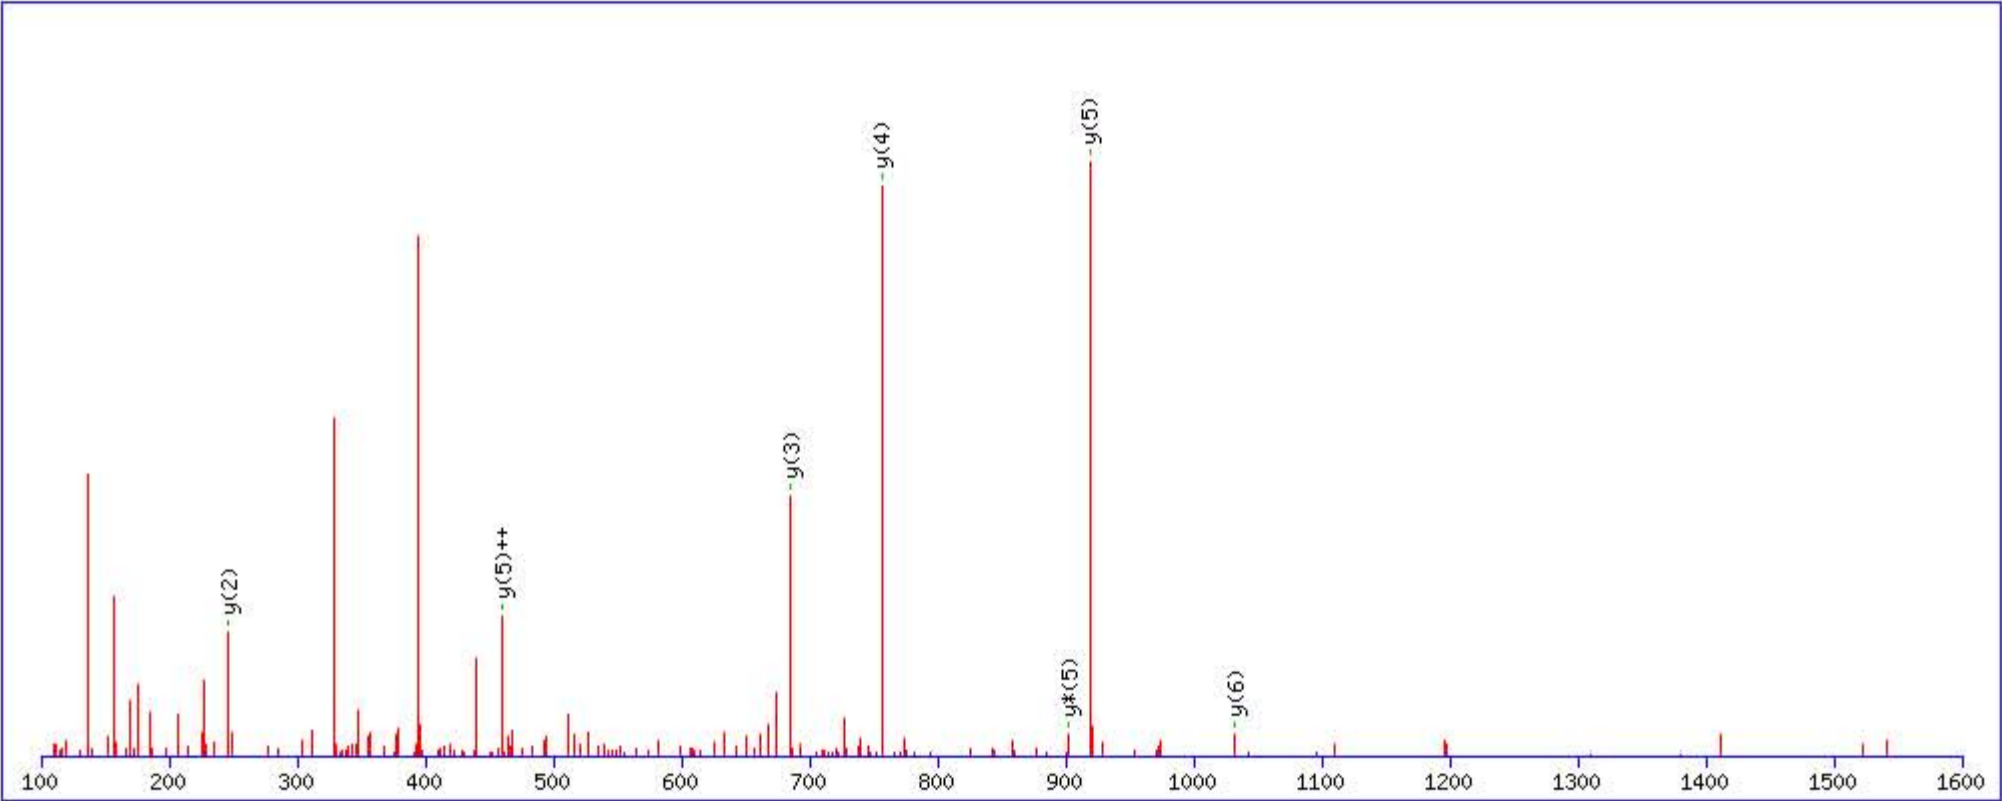

Monoisotopic mass of neutral peptide Mr(calc): 1102.595703  
Fixed modifications: Carbamidomethyl (C) (apply to specified residues or termini only)  
Variable modifications:  
Q5 : Biotin:Thermo-21345 (Q)  
Ions Score: 37 Expect: 0.0035  
Matches : 7/40 fragment ions using 10 most intense peaks [\(help\)](#)

| # | b          | b <sup>++</sup> | b <sup>*</sup> | b <sup>*++</sup> | Seq. | y           | y <sup>++</sup> | y <sup>*</sup> | y <sup>*++</sup> | # |
|---|------------|-----------------|----------------|------------------|------|-------------|-----------------|----------------|------------------|---|
| 1 | 72.044390  | 36.525833       |                |                  | A    |             |                 |                |                  | 7 |
| 2 | 185.128454 | 93.067865       |                |                  | L    | 1032.565899 | 516.786588      | 1015.539350    | 508.273313       | 6 |
| 3 | 348.191783 | 174.599529      |                |                  | Y    | 919.481835  | 460.244556      | 902.455286     | 451.731281       | 5 |
| 4 | 419.228897 | 210.118087      |                |                  | A    | 756.418506  | 378.712891      | 739.391957     | 370.199617       | 4 |
| 5 | 858.454223 | 429.730750      | 841.427674     | 421.217475       | Q    | 685.381392  | 343.194334      | 668.354843     | 334.681060       | 3 |
| 6 | 929.491337 | 465.249307      | 912.464788     | 456.736032       | A    | 246.156066  | 123.581671      | 229.129517     | 115.068397       | 2 |
| 7 |            |                 |                |                  | R    | 175.118952  | 88.063114       | 158.092403     | 79.549840        | 1 |

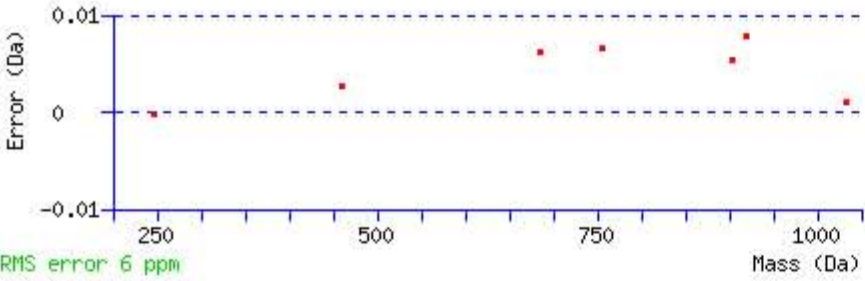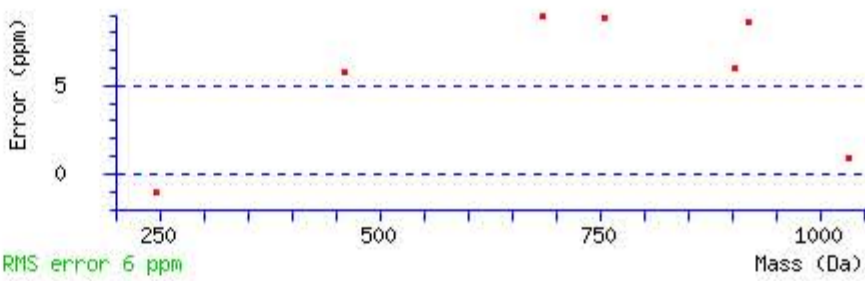

NCBI **BLAST** search of [ALYAQAR](#)  
(Parameters: blastp, nr protein database, expect=20000, no filter, PAM30)  
Other BLAST [web gateways](#)

All matches to this query

| Score | Mr(calc):   | Delta     | Sequence                    |
|-------|-------------|-----------|-----------------------------|
| 37.4  | 1102.595703 | 0.002745  | <a href="#">ALYAQAR</a>     |
| 10.5  | 1102.602234 | -0.003786 | <a href="#">AIELGYNPVK</a>  |
| 3.7   | 1102.613495 | -0.015047 | <a href="#">ALTQGPLTFR</a>  |
| 3.5   | 1102.598221 | 0.000227  | <a href="#">LAGSLATDLSR</a> |
| 2.2   | 1102.602249 | -0.003801 | <a href="#">KEGFDPAIVK</a>  |
| 1.6   | 1102.591675 | 0.006773  | <a href="#">AKQAKMAPSR</a>  |
| 1.6   | 1102.584305 | 0.014143  | <a href="#">QSSQRGLTAR</a>  |
| 1.1   | 1102.588333 | 0.010115  | <a href="#">SPYGLTPRGR</a>  |
| 0.4   | 1102.598221 | 0.000227  | <a href="#">DDLKATLTAR</a>  |
| 0.0   | 1102.613464 | -0.015016 | <a href="#">AIPEKYGAVR</a>  |

MATRIX

SCIENCE

Mascot Search Results

Peptide View

MS/MS Fragmentation of **VQSTITSR**  
Found in **ITIH2\_HUMAN**, Inter-alpha-trypsin inhibitor heavy chain H2 OS=Homo sapiens GN=ITIH2 PE=1 SV=2

Match to Query 20583: 1201.654888 from(601.834720,2+) rtinseconds(1506) index(47009)  
Title: Locus:1.1.1.1762.9 File:"2013-07-02 CLN FXIII 180 min 2nd F 4.wiff"  
Data file C:\Program Files (x86)\Matrix Science\Mascot Daemon\mgf\8 FXIII 180 min 2nd\mascot\_daemon\_merge.mgf

Click mouse within plot area to zoom in by factor of two about that point  
Or, 

Plot from

100

 to 

1600

 Da 

Full range

  
Label all possible matches ☐ Label matches used for scoring ☒

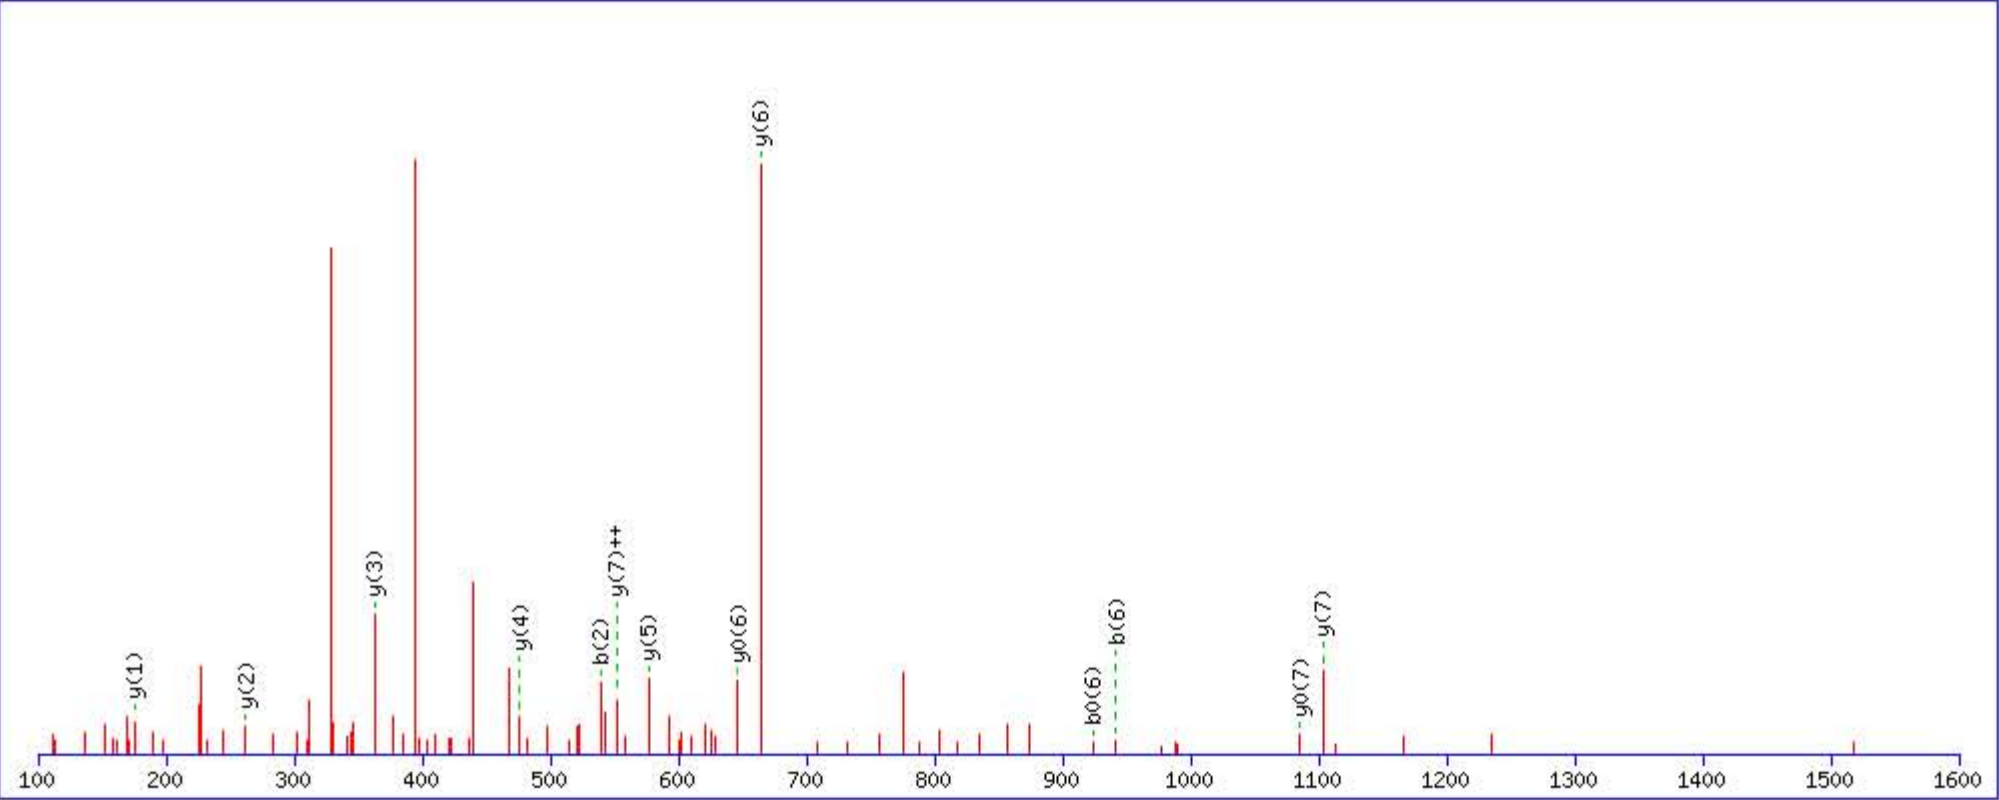

Monoisotopic mass of neutral peptide Mr(calc): 1201.648895  
Fixed modifications: Carbamidomethyl (C) (apply to specified residues or termini only)  
Variable modifications:  
Q2 : Biotin:Thermo-21345 (Q)  
Ions Score: 35 Expect: 0.00065  
Matches : 13/76 fragment ions using 31 most intense peaks [\(help\)](#)

| # | b           | b <sup>++</sup> | b <sup>*</sup> | b <sup>*++</sup> | b <sup>0</sup> | b <sup>0++</sup> | Seq. | y           | y <sup>++</sup> | y <sup>*</sup> | y <sup>*++</sup> | y <sup>0</sup> | y <sup>0++</sup> | # |
|---|-------------|-----------------|----------------|------------------|----------------|------------------|------|-------------|-----------------|----------------|------------------|----------------|------------------|---|
| 1 | 100.075690  | 50.541483       |                |                  |                |                  | V    |             |                 |                |                  |                |                  | 8 |
| 2 | 539.301016  | 270.154146      | 522.274467     | 261.640872       |                |                  | Q    | 1103.587756 | 552.297516      | 1086.561207    | 543.784242       | 1085.577191    | 543.292234       | 7 |
| 3 | 626.333044  | 313.670160      | 609.306495     | 305.156886       | 608.322479     | 304.664878       | S    | 664.362430  | 332.684853      | 647.335881     | 324.171579       | 646.351865     | 323.679571       | 6 |
| 4 | 727.380723  | 364.194000      | 710.354174     | 355.680725       | 709.370158     | 355.188717       | T    | 577.330402  | 289.168839      | 560.303853     | 280.655565       | 559.319837     | 280.163557       | 5 |
| 5 | 840.464787  | 420.736032      | 823.438238     | 412.222757       | 822.454222     | 411.730749       | I    | 476.282723  | 238.645000      | 459.256174     | 230.131725       | 458.272158     | 229.639717       | 4 |
| 6 | 941.512466  | 471.259871      | 924.485917     | 462.746597       | 923.501901     | 462.254589       | T    | 363.198659  | 182.102968      | 346.172110     | 173.589693       | 345.188094     | 173.097685       | 3 |
| 7 | 1028.544494 | 514.775885      | 1011.517945    | 506.262611       | 1010.533929    | 505.770603       | S    | 262.150980  | 131.579128      | 245.124431     | 123.065854       | 244.140415     | 122.573846       | 2 |
| 8 |             |                 |                |                  |                |                  | R    | 175.118952  | 88.063114       | 158.092403     | 79.549839        |                |                  | 1 |

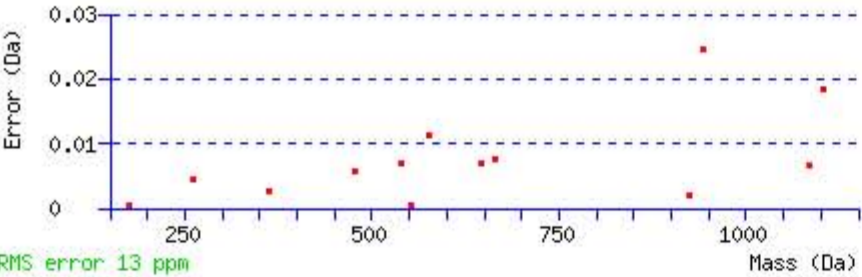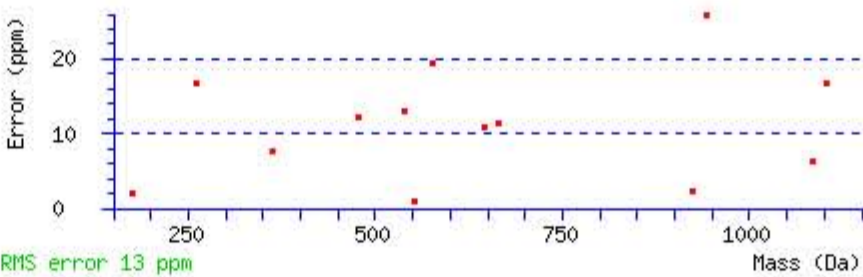

NCBI BLAST search of [VQSTITSR](#)  
(Parameters: blastp, nr protein database, expect=20000, no filter, PAM30)  
Other BLAST [web gateways](#)

All matches to this query

| Score | Mr(calc):   | Delta     | Sequence                    |
|-------|-------------|-----------|-----------------------------|
| 34.9  | 1201.648895 | 0.005993  | <a href="#">VQSTITSR</a>    |
| 0.8   | 1201.660767 | -0.005879 | <a href="#">VWKPQLFER</a>   |
| 0.2   | 1201.638992 | 0.015896  | <a href="#">VQPPSHAR</a>    |
| 0.0   | 1201.641495 | 0.013393  | <a href="#">NLTNVLGTQSR</a> |

MATRIX

SCIENCE

Mascot Search Results

Peptide View

MS/MS Fragmentation of **MATTMIQSK**  
Found in **ITIH2\_HUMAN**, Inter-alpha-trypsin inhibitor heavy chain H2 OS=Homo sapiens GN=ITIH2 PE=1 SV=2

Match to Query 24038: 1336.662008 from(669.338280,2+) rtinseconds(1604) index(47668)  
Title: Locus:1.1.1.1796.15 File:"2013-07-02 CLN FXIII 180 min 2nd F 4.wiff"  
Data file C:\Program Files (x86)\Matrix Science\Mascot Daemon\mgf\8 FXIII 180 min 2nd\mascot\_daemon\_merge.mgf

Click mouse within plot area to zoom in by factor of two about that point  
Or, 

Plot from

100

 to 

1800

 Da 

Full range

  
Label all possible matches ☐ Label matches used for scoring ☒

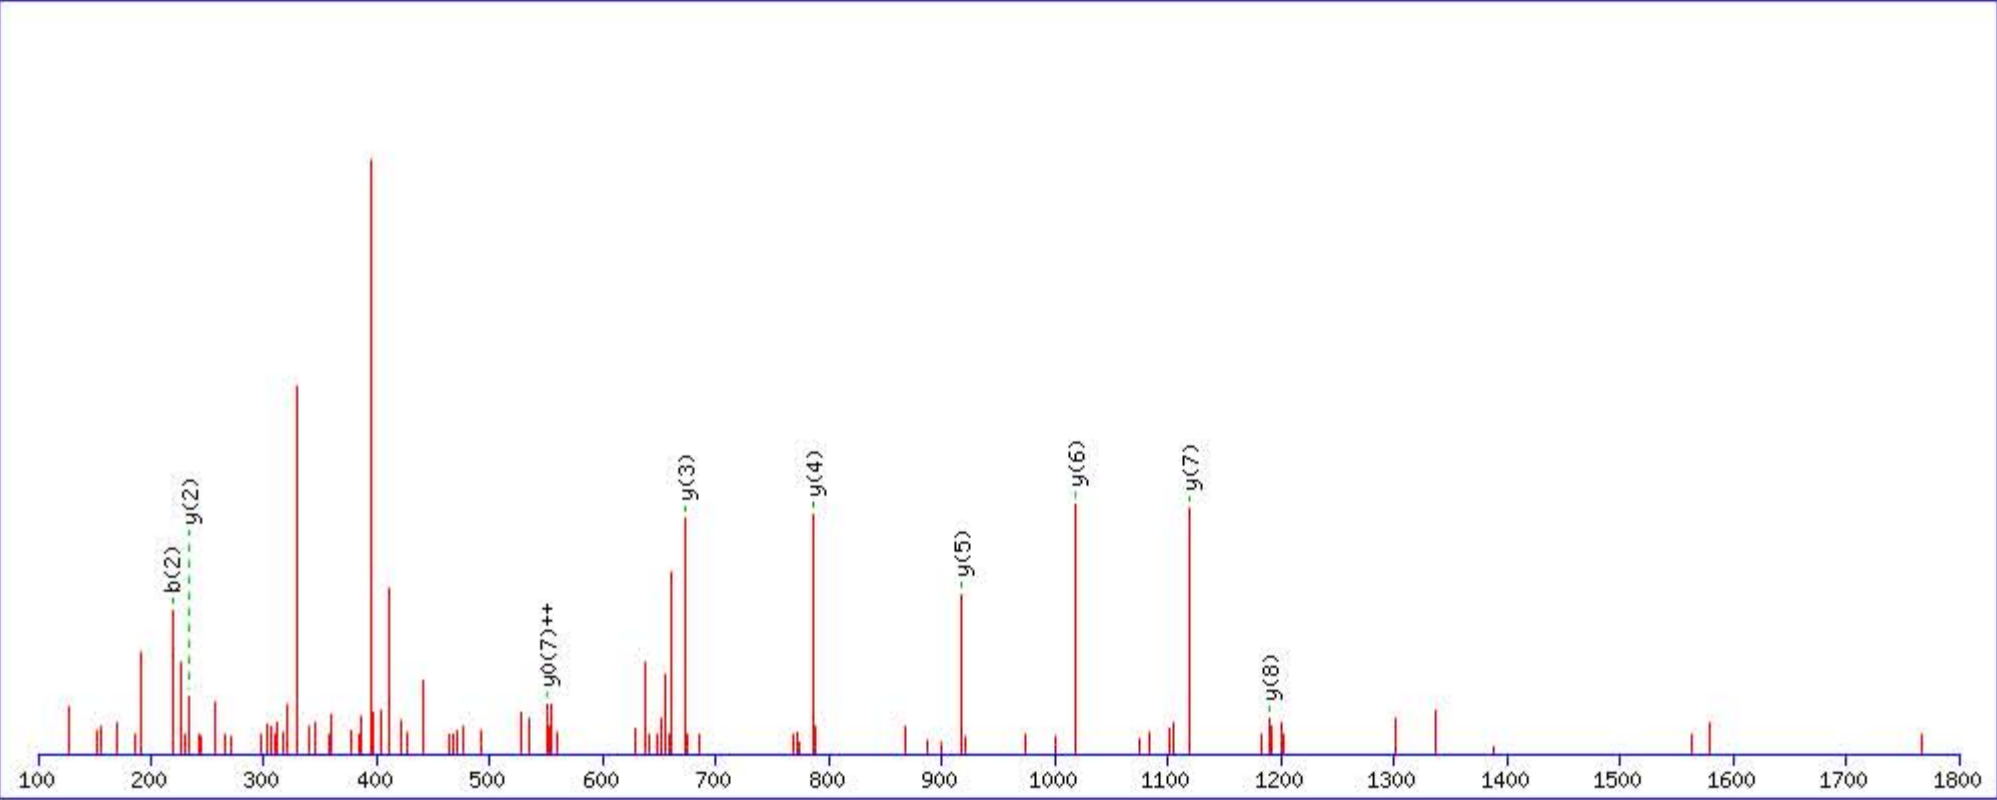

Monoisotopic mass of neutral peptide Mr(calc): 1336.655289  
Fixed modifications: Carbamidomethyl (C) (apply to specified residues or termini only)  
Variable modifications:  
M1 : Oxidation (M), with neutral losses 0.000000 (shown in table), 63.998285  
Q7 : Biotin:Thermo-21345 (Q)  
Ions Score: 60 Expect: 8.7e-006  
Matches : 9/110 fragment ions using 12 most intense peaks [\(help\)](#)

| # | b           | b <sup>++</sup> | b <sup>*</sup> | b <sup>*++</sup> | b <sup>0</sup> | b <sup>0++</sup> | Seq. | y           | y <sup>++</sup> | y <sup>*</sup> | y <sup>*++</sup> | y <sup>0</sup> | y <sup>0++</sup> | # |
|---|-------------|-----------------|----------------|------------------|----------------|------------------|------|-------------|-----------------|----------------|------------------|----------------|------------------|---|
| 1 | 148.042676  | 74.524976       |                |                  |                |                  | M    |             |                 |                |                  |                |                  | 9 |
| 2 | 219.079790  | 110.043533      |                |                  |                |                  | A    | 1190.627179 | 595.817228      | 1173.600630    | 587.303953       | 1172.616614    | 586.811945       | 8 |
| 3 | 320.127469  | 160.567372      |                |                  | 302.116904     | 151.562090       | T    | 1119.590065 | 560.298671      | 1102.563516    | 551.785396       | 1101.579500    | 551.293388       | 7 |
| 4 | 421.175148  | 211.091212      |                |                  | 403.164583     | 202.085929       | T    | 1018.542386 | 509.774831      | 1001.515837    | 501.261557       | 1000.531821    | 500.769549       | 6 |
| 5 | 552.215633  | 276.611455      |                |                  | 534.205068     | 267.606172       | M    | 917.494707  | 459.250992      | 900.468158     | 450.737717       | 899.484142     | 450.245709       | 5 |
| 6 | 665.299697  | 333.153487      |                |                  | 647.289132     | 324.148204       | I    | 786.454222  | 393.730749      | 769.427673     | 385.217475       | 768.443657     | 384.725467       | 4 |
| 7 | 1104.525023 | 552.766149      | 1087.498474    | 544.252875       | 1086.514458    | 543.760867       | Q    | 673.370158  | 337.188717      | 656.343609     | 328.675443       | 655.359593     | 328.183435       | 3 |
| 8 | 1191.557051 | 596.282164      | 1174.530502    | 587.768889       | 1173.546486    | 587.276881       | S    | 234.144832  | 117.576054      | 217.118283     | 109.062780       | 216.134267     | 108.570772       | 2 |
| 9 |             |                 |                |                  |                |                  | K    | 147.112804  | 74.060040       | 130.086255     | 65.546765        |                |                  | 1 |

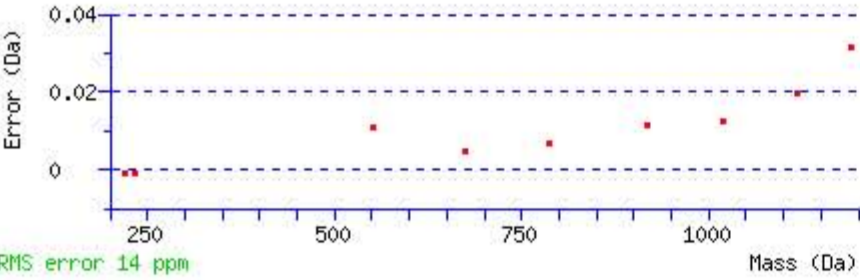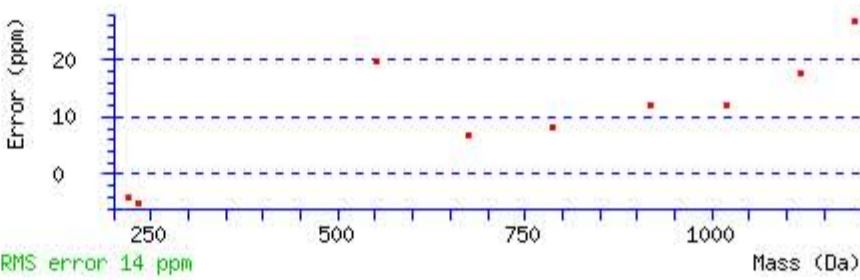

NCBI BLAST search of [MATTMIQSK](#)  
(Parameters: blastp, nr protein database, expect=20000, no filter, PAM30)  
Other BLAST [web gateways](#)

All matches to this query

| Score | Mr(calc):   | Delta     | Sequence                    |
|-------|-------------|-----------|-----------------------------|
| 60.2  | 1336.655289 | 0.006719  | <a href="#">MATTMIQSK</a>   |
| 6.2   | 1336.662277 | -0.000269 | <a href="#">FADTQKDKEQK</a> |

MATRIX

SCIENCE

Mascot Search Results

Peptide View

MS/MS Fragmentation of **LSNENHGIAQR**  
Found in **ITIH2\_HUMAN**, Inter-alpha-trypsin inhibitor heavy chain H2 OS=Homo sapiens GN=ITIH2 PE=1 SV=2

Match to Query 32461: 1548.778002 from(517.266610,3+) rtinseconds(1363) index(15946)  
Title: Locus:1.1.1.2857.13 File:"2013-07-02 CLN FXIII 180 min 2nd F 2.wiff"  
Data file C:\Program Files (x86)\Matrix Science\Mascot Daemon\mgf\8 FXIII 180 min 2nd\mascot\_daemon\_merge.mgf

Click mouse within plot area to zoom in by factor of two about that point  
Or, 

Plot from

100

 to 

1500

 Da 

Full range

  
Label all possible matches ☐ Label matches used for scoring ☒

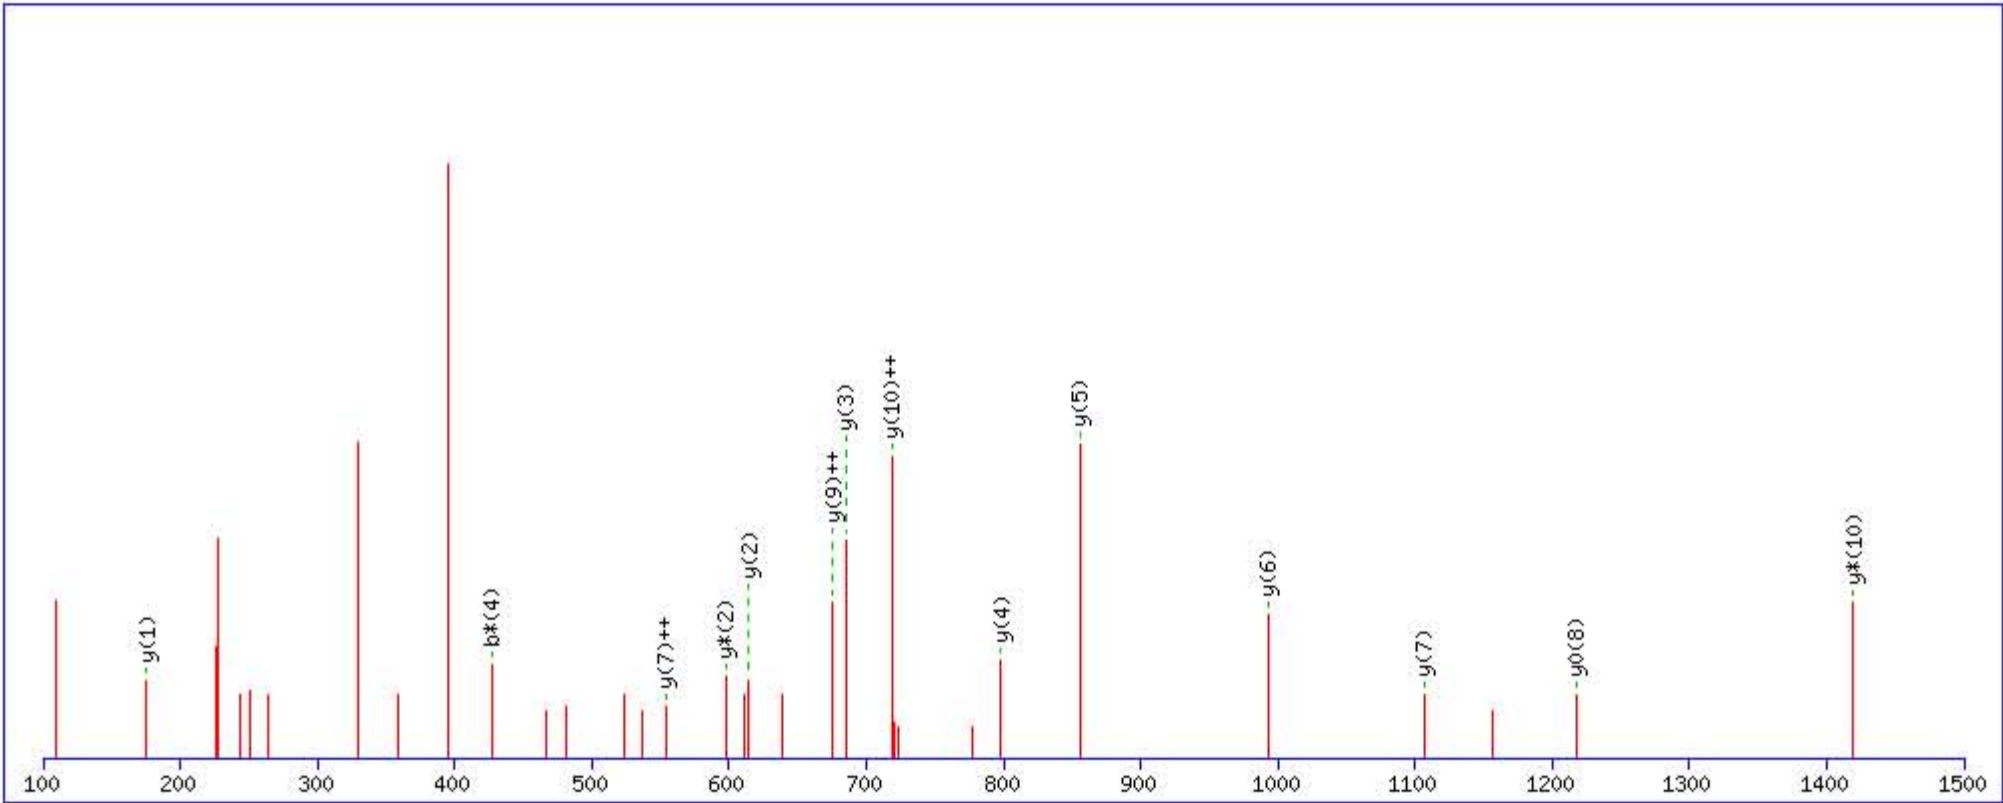

Monoisotopic mass of neutral peptide Mr(calc): 1548.783066  
Fixed modifications: Carbamidomethyl (C) (apply to specified residues or termini only)  
Variable modifications:  
Q10 : Biotin:Thermo-21345 (Q)  
Ions Score: 38 Expect: 0.0007  
Matches : 14/100 fragment ions using 26 most intense peaks [\(help\)](#)

| #  | b           | b <sup>++</sup> | b <sup>*</sup> | b <sup>*++</sup> | b <sup>0</sup> | b <sup>0++</sup> | Seq. | y           | y <sup>++</sup> | y <sup>*</sup> | y <sup>*++</sup> | y <sup>0</sup> | y <sup>0++</sup> | #  |
|----|-------------|-----------------|----------------|------------------|----------------|------------------|------|-------------|-----------------|----------------|------------------|----------------|------------------|----|
| 1  | 114.091340  | 57.549308       |                |                  |                |                  | L    |             |                 |                |                  |                |                  | 11 |
| 2  | 201.123368  | 101.065322      |                |                  | 183.112803     | 92.060039        | S    | 1436.706307 | 718.856792      | 1419.679758    | 710.343517       | 1418.695742    | 709.851509       | 10 |
| 3  | 315.166295  | 158.086785      | 298.139746     | 149.573511       | 297.155730     | 149.081503       | N    | 1349.674279 | 675.340778      | 1332.647730    | 666.827503       | 1331.663714    | 666.335495       | 9  |
| 4  | 444.208888  | 222.608082      | 427.182339     | 214.094808       | 426.198323     | 213.602800       | E    | 1235.631352 | 618.319314      | 1218.604803    | 609.806040       | 1217.620787    | 609.314032       | 8  |
| 5  | 558.251815  | 279.629546      | 541.225266     | 271.116271       | 540.241250     | 270.624263       | N    | 1106.588759 | 553.798018      | 1089.562210    | 545.284743       |                |                  | 7  |
| 6  | 695.310727  | 348.159002      | 678.284178     | 339.645727       | 677.300162     | 339.153719       | H    | 992.545832  | 496.776554      | 975.519283     | 488.263280       |                |                  | 6  |
| 7  | 752.332191  | 376.669734      | 735.305642     | 368.156459       | 734.321626     | 367.664451       | G    | 855.486920  | 428.247098      | 838.460371     | 419.733824       |                |                  | 5  |
| 8  | 865.416255  | 433.211766      | 848.389706     | 424.698491       | 847.405690     | 424.206483       | I    | 798.465456  | 399.736366      | 781.438907     | 391.223092       |                |                  | 4  |
| 9  | 936.453369  | 468.730323      | 919.426820     | 460.217048       | 918.442804     | 459.725040       | A    | 685.381392  | 343.194334      | 668.354843     | 334.681060       |                |                  | 3  |
| 10 | 1375.678695 | 688.342986      | 1358.652146    | 679.829711       | 1357.668130    | 679.337703       | Q    | 614.344278  | 307.675777      | 597.317729     | 299.162503       |                |                  | 2  |
| 11 |             |                 |                |                  |                |                  | R    | 175.118952  | 88.063114       | 158.092403     | 79.549839        |                |                  | 1  |

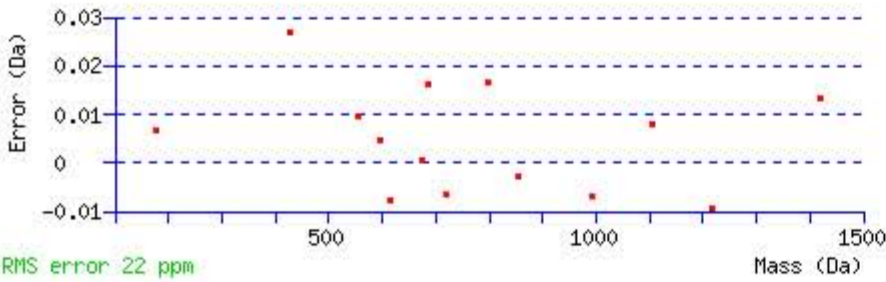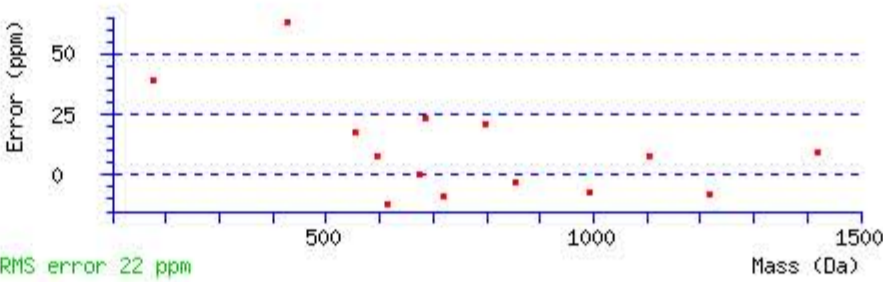

NCBI BLAST search of [LSNENHGIAQR](#)  
(Parameters: blastp, nr protein database, expect=20000, no filter, PAM30)  
Other BLAST [web gateways](#)

All matches to this query

| Score | Mr(calc):   | Delta     | Sequence                        |
|-------|-------------|-----------|---------------------------------|
| 37.8  | 1548.783066 | -0.005064 | <a href="#">LSNENHGIAQR</a>     |
| 3.9   | 1548.798340 | -0.020338 | <a href="#">LSALRCGHLEFGYR</a>  |
| 0.8   | 1548.800827 | -0.022825 | <a href="#">LPKNEPQNATGAPGR</a> |

MATRIX

SCIENCE

Mascot Search Results

Peptide View

MS/MS Fragmentation of **FYNQVSTPLLR**  
Found in **ITIH2\_HUMAN**, Inter-alpha-trypsin inhibitor heavy chain H2 OS=Homo sapiens GN=ITIH2 PE=1 SV=2

Match to Query 36818: 1647.902228 from(824.958390,2+) rtinseconds(2300) index(52281)  
Title: Locus:1.1.1.2038.8 File:"2013-07-02 CLN FXIII 180 min 2nd F 4.wiff"  
Data file C:\Program Files (x86)\Matrix Science\Mascot Daemon\mgf\8 FXIII 180 min 2nd\mascot\_daemon\_merge.mgf

Click mouse within plot area to zoom in by factor of two about that point  
Or,   to  Da   
Label all possible matches ☐ Label matches used for scoring ☒

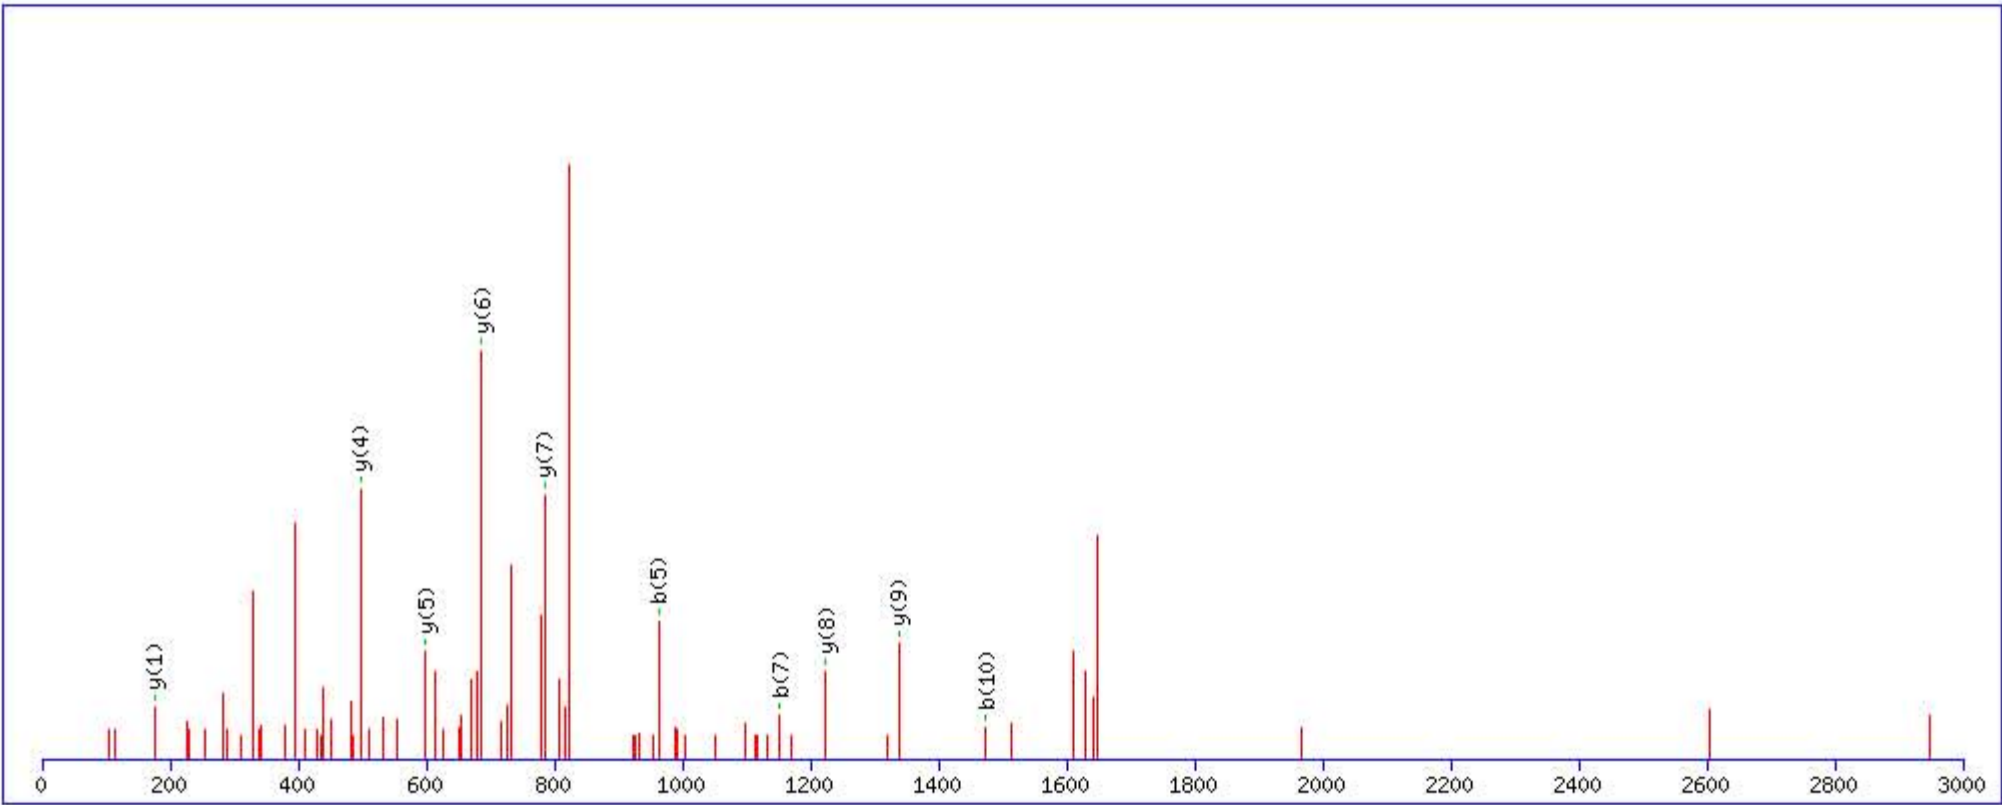

Monoisotopic mass of neutral peptide **Mr(calc):** 1647.880676  
Fixed modifications: Carbamidomethyl (C) (apply to specified residues or termini only)  
Variable modifications:  
Q4 : Biotin:Thermo-21345 (Q)  
Ions Score: 45 Expect: 0.00051  
Matches : 10/98 fragment ions using 16 most intense peaks ([help](#))

| #  | b           | b <sup>++</sup> | b <sup>*</sup> | b <sup>*++</sup> | b <sup>0</sup> | b <sup>0++</sup> | Seq. | y           | y <sup>++</sup> | y <sup>*</sup> | y <sup>*++</sup> | y <sup>0</sup> | y <sup>0++</sup> | #  |
|----|-------------|-----------------|----------------|------------------|----------------|------------------|------|-------------|-----------------|----------------|------------------|----------------|------------------|----|
| 1  | 148.075690  | 74.541483       |                |                  |                |                  | F    |             |                 |                |                  |                |                  | 11 |
| 2  | 311.139019  | 156.073148      |                |                  |                |                  | Y    | 1501.819547 | 751.413411      | 1484.792998    | 742.900137       | 1483.808982    | 742.408129       | 10 |
| 3  | 425.181946  | 213.094611      | 408.155397     | 204.581337       |                |                  | N    | 1338.756218 | 669.881747      | 1321.729669    | 661.368472       | 1320.745653    | 660.876464       | 9  |
| 4  | 864.407272  | 432.707274      | 847.380723     | 424.194000       |                |                  | Q    | 1224.713291 | 612.860283      | 1207.686742    | 604.347009       | 1206.702726    | 603.855001       | 8  |
| 5  | 963.475686  | 482.241481      | 946.449137     | 473.728207       |                |                  | V    | 785.487965  | 393.247620      | 768.461416     | 384.734346       | 767.477400     | 384.242338       | 7  |
| 6  | 1050.507714 | 525.757495      | 1033.481165    | 517.244221       | 1032.497149    | 516.752213       | S    | 686.419551  | 343.713414      | 669.393002     | 335.200139       | 668.408986     | 334.708131       | 6  |
| 7  | 1151.555393 | 576.281335      | 1134.528844    | 567.768060       | 1133.544828    | 567.276052       | T    | 599.387523  | 300.197399      | 582.360974     | 291.684125       | 581.376958     | 291.192117       | 5  |
| 8  | 1248.608157 | 624.807717      | 1231.581608    | 616.294442       | 1230.597592    | 615.802434       | P    | 498.339844  | 249.673560      | 481.313295     | 241.160285       |                |                  | 4  |
| 9  | 1361.692221 | 681.349749      | 1344.665672    | 672.836474       | 1343.681656    | 672.344466       | L    | 401.287080  | 201.147178      | 384.260531     | 192.633903       |                |                  | 3  |
| 10 | 1474.776285 | 737.891780      | 1457.749736    | 729.378506       | 1456.765720    | 728.886498       | L    | 288.203016  | 144.605146      | 271.176467     | 136.091871       |                |                  | 2  |
| 11 |             |                 |                |                  |                |                  | R    | 175.118952  | 88.063114       | 158.092403     | 79.549839        |                |                  | 1  |

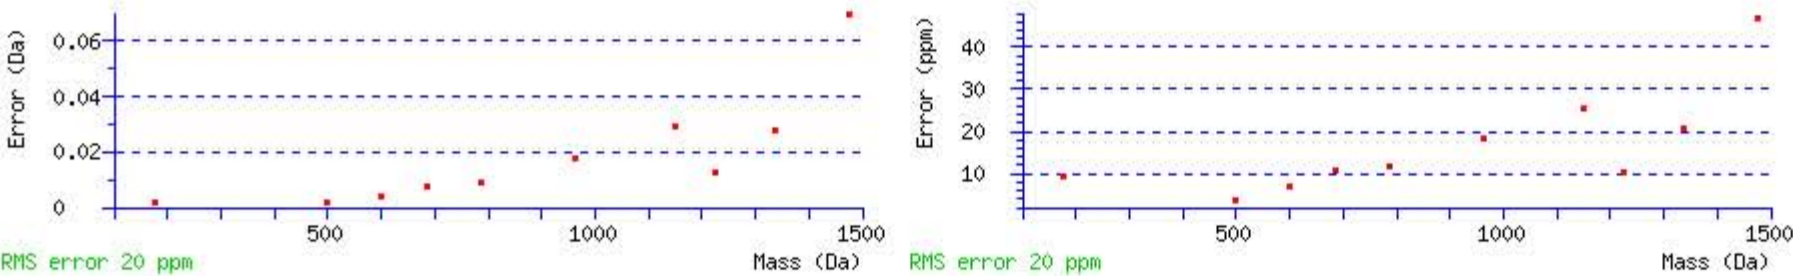

NCBI BLAST search of [FYNQVSTPLLR](#)  
(Parameters: blastp, nr protein database, expect=20000, no filter, PAM30)  
Other BLAST [web gateways](#)

All matches to this query

| Score | Mr(calc):   | Delta    | Sequence                    |
|-------|-------------|----------|-----------------------------|
| 45.3  | 1647.880676 | 0.021552 | <a href="#">FYNQVSTPLLR</a> |

MATRIX

SCIENCE

Mascot Search Results

Peptide View

MS/MS Fragmentation of **IYGNQDTSSQLK**  
Found in **ITIH2\_HUMAN**, Inter-alpha-trypsin inhibitor heavy chain H2 OS=Homo sapiens GN=ITIH2 PE=1 SV=2

Match to Query 37175: 1663.839408 from(832.926980,2+) rtinseconds(1648) index(47971)  
Title: Locus:1.1.1.1811.9 File:"2013-07-02 CLN FXIII 180 min 2nd F 4.wiff"  
Data file C:\Program Files (x86)\Matrix Science\Mascot Daemon\mgf\8 FXIII 180 min 2nd\mascot\_daemon\_merge.mgf

Click mouse within plot area to zoom in by factor of two about that point  
Or,   to  Da   
Label all possible matches ☐ Label matches used for scoring ☒

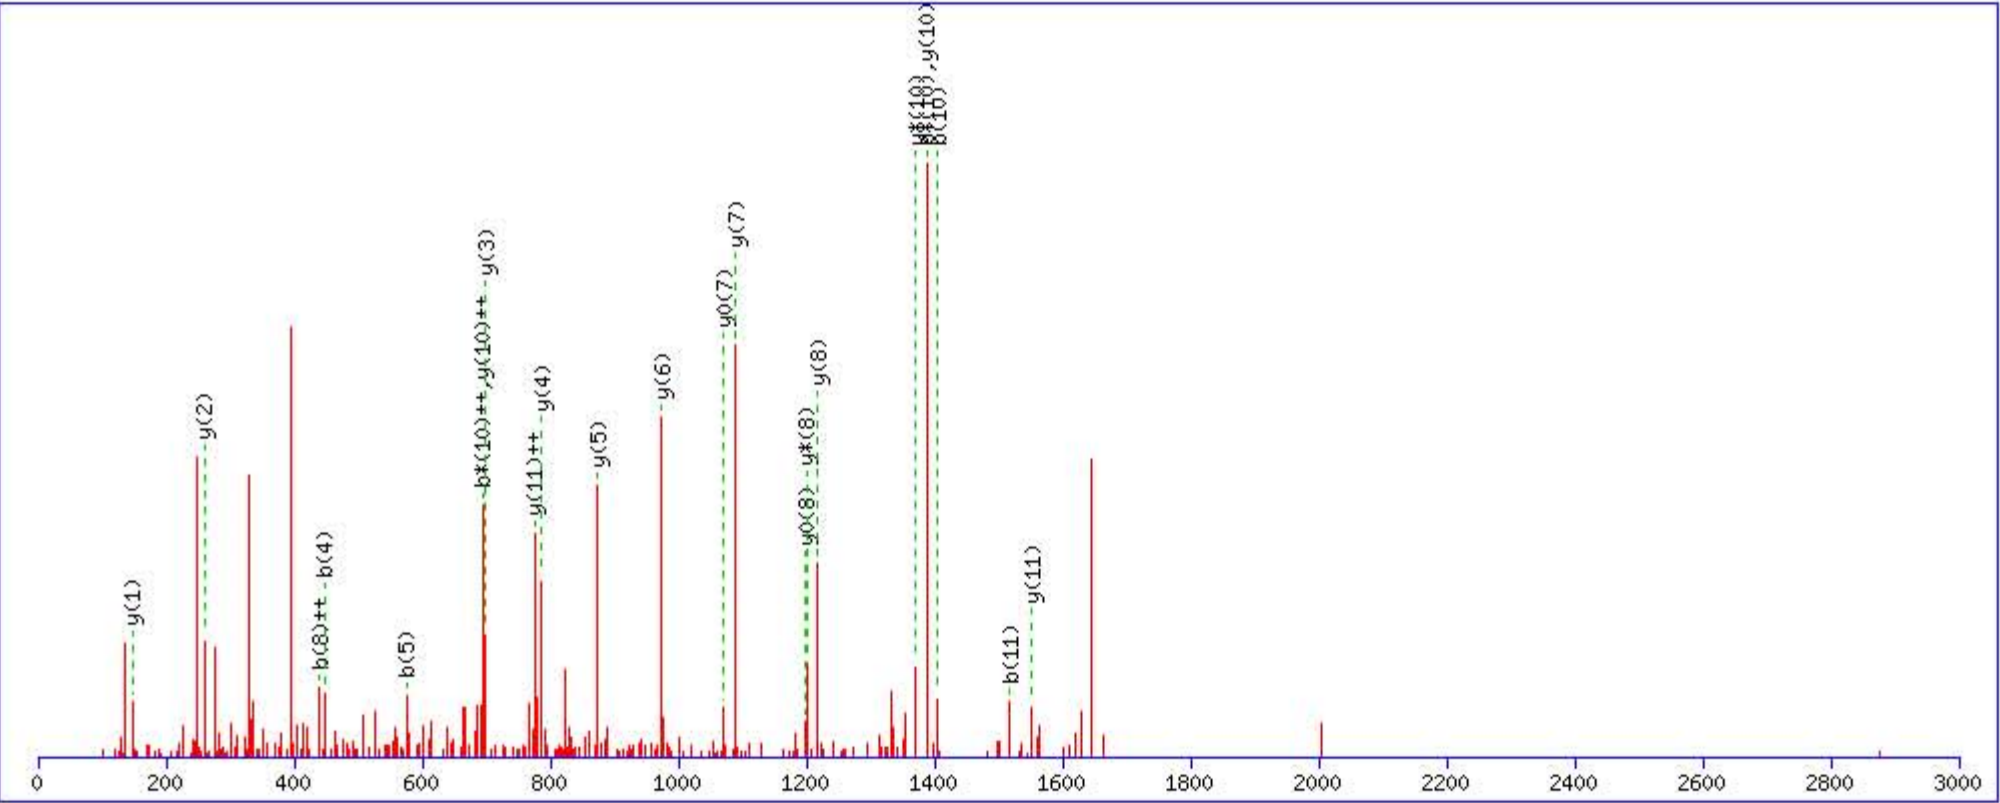

Monoisotopic mass of neutral peptide Mr(calc): 1663.823944  
Fixed modifications: Carbamidomethyl (C) (apply to specified residues or termini only)  
Variable modifications:  
Q10 : Biotin:Thermo-21345 (Q)  
Ions Score: 79 Expect: 2.9e-007  
Matches : 23/110 fragment ions using 32 most intense peaks [\(help\)](#)

| #  | b           | b <sup>++</sup> | b <sup>*</sup> | b <sup>+++</sup> | b <sup>0</sup> | b <sup>0++</sup> | Seq. | y           | y <sup>++</sup> | y <sup>*</sup> | y <sup>+++</sup> | y <sup>0</sup> | y <sup>0++</sup> | #  |
|----|-------------|-----------------|----------------|------------------|----------------|------------------|------|-------------|-----------------|----------------|------------------|----------------|------------------|----|
| 1  | 114.091340  | 57.549308       |                |                  |                |                  | I    |             |                 |                |                  |                |                  | 12 |
| 2  | 277.154669  | 139.080973      |                |                  |                |                  | Y    | 1551.747170 | 776.377223      | 1534.720621    | 767.863948       | 1533.736605    | 767.371940       | 11 |
| 3  | 334.176133  | 167.591704      |                |                  |                |                  | G    | 1388.683841 | 694.845558      | 1371.657292    | 686.332284       | 1370.673276    | 685.840276       | 10 |
| 4  | 448.219060  | 224.613168      | 431.192511     | 216.099894       |                |                  | N    | 1331.662377 | 666.334826      | 1314.635828    | 657.821552       | 1313.651812    | 657.329544       | 9  |
| 5  | 576.277638  | 288.642457      | 559.251089     | 280.129183       |                |                  | Q    | 1217.619450 | 609.313363      | 1200.592901    | 600.800088       | 1199.608885    | 600.308080       | 8  |
| 6  | 691.304581  | 346.155929      | 674.278032     | 337.642654       | 673.294016     | 337.150646       | D    | 1089.560872 | 545.284074      | 1072.534323    | 536.770799       | 1071.550307    | 536.278791       | 7  |
| 7  | 792.352260  | 396.679768      | 775.325711     | 388.166494       | 774.341695     | 387.674486       | T    | 974.533929  | 487.770602      | 957.507380     | 479.257328       | 956.523364     | 478.765320       | 6  |
| 8  | 879.384288  | 440.195782      | 862.357739     | 431.682507       | 861.373723     | 431.190499       | S    | 873.486250  | 437.246763      | 856.459701     | 428.733488       | 855.475685     | 428.241480       | 5  |
| 9  | 966.416316  | 483.711796      | 949.389767     | 475.198521       | 948.405751     | 474.706513       | S    | 786.454222  | 393.730749      | 769.427673     | 385.217474       | 768.443657     | 384.725466       | 4  |
| 10 | 1405.641642 | 703.324459      | 1388.615093    | 694.811184       | 1387.631077    | 694.319176       | Q    | 699.422194  | 350.214735      | 682.395645     | 341.701460       |                |                  | 3  |
| 11 | 1518.725706 | 759.866491      | 1501.699157    | 751.353216       | 1500.715141    | 750.861208       | L    | 260.196868  | 130.602072      | 243.170319     | 122.088797       |                |                  | 2  |
| 12 |             |                 |                |                  |                |                  | K    | 147.112804  | 74.060040       | 130.086255     | 65.546765        |                |                  | 1  |

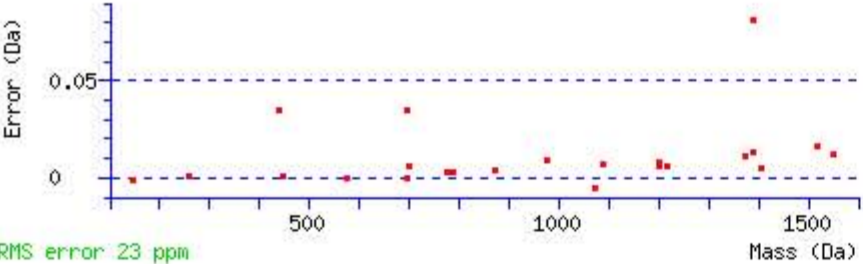

NCBI BLAST search of [IYGNQDTSSQLK](#)  
(Parameters: blastp, nr protein database, expect=20000, no filter, PAM30)  
Other BLAST [web gateways](#)

All matches to this query

| Score | Mr(calc):   | Delta     | Sequence                          |
|-------|-------------|-----------|-----------------------------------|
| 79.4  | 1663.823944 | 0.015464  | <a href="#">IYGNQDTSSQLK</a>      |
| 30.9  | 1663.823944 | 0.015464  | <a href="#">IYGNQDTSSQLK</a>      |
| 11.2  | 1663.863663 | -0.024255 | <a href="#">EAQKEMQKIMTSLK</a>    |
| 6.7   | 1663.861191 | -0.021783 | <a href="#">LMHQEQLK</a>          |
| 4.2   | 1663.827957 | 0.011451  | <a href="#">EEAFLHVAVDMYLK</a>    |
| 4.2   | 1663.821442 | 0.017966  | <a href="#">LYGCFLRVYMQSK</a>     |
| 3.7   | 1663.850433 | -0.011025 | <a href="#">HQIQSWQGELK</a>       |
| 1.7   | 1663.845078 | -0.005670 | <a href="#">LMSGVENS GKVDISTK</a> |
| 0.7   | 1663.860306 | -0.020898 | <a href="#">QETKYSNKDIK</a>       |
| 0.7   | 1663.831345 | 0.008063  | <a href="#">QLTDCISEFLK</a>       |

MATRIX

SCIENCE

Mascot Search Results

Peptide View

MS/MS Fragmentation of **IYGNQDTSSQLK**  
Found in **ITIH2\_HUMAN**, Inter-alpha-trypsin inhibitor heavy chain H2 OS=Homo sapiens GN=ITIH2 PE=1 SV=2

Match to Query 37176: 1663.839568 from(832.927060,2+) rtinseconds(1639) index(47925)  
Title: Locus:1.1.1.1808.25 File:"2013-07-02 CLN FXIII 180 min 2nd F 4.wiff"  
Data file C:\Program Files (x86)\Matrix Science\Mascot Daemon\mgf\8 FXIII 180 min 2nd\mascot\_daemon\_merge.mgf

Click mouse within plot area to zoom in by factor of two about that point  
Or,   to  Da

Label all possible matches ☐ Label matches used for scoring ☒

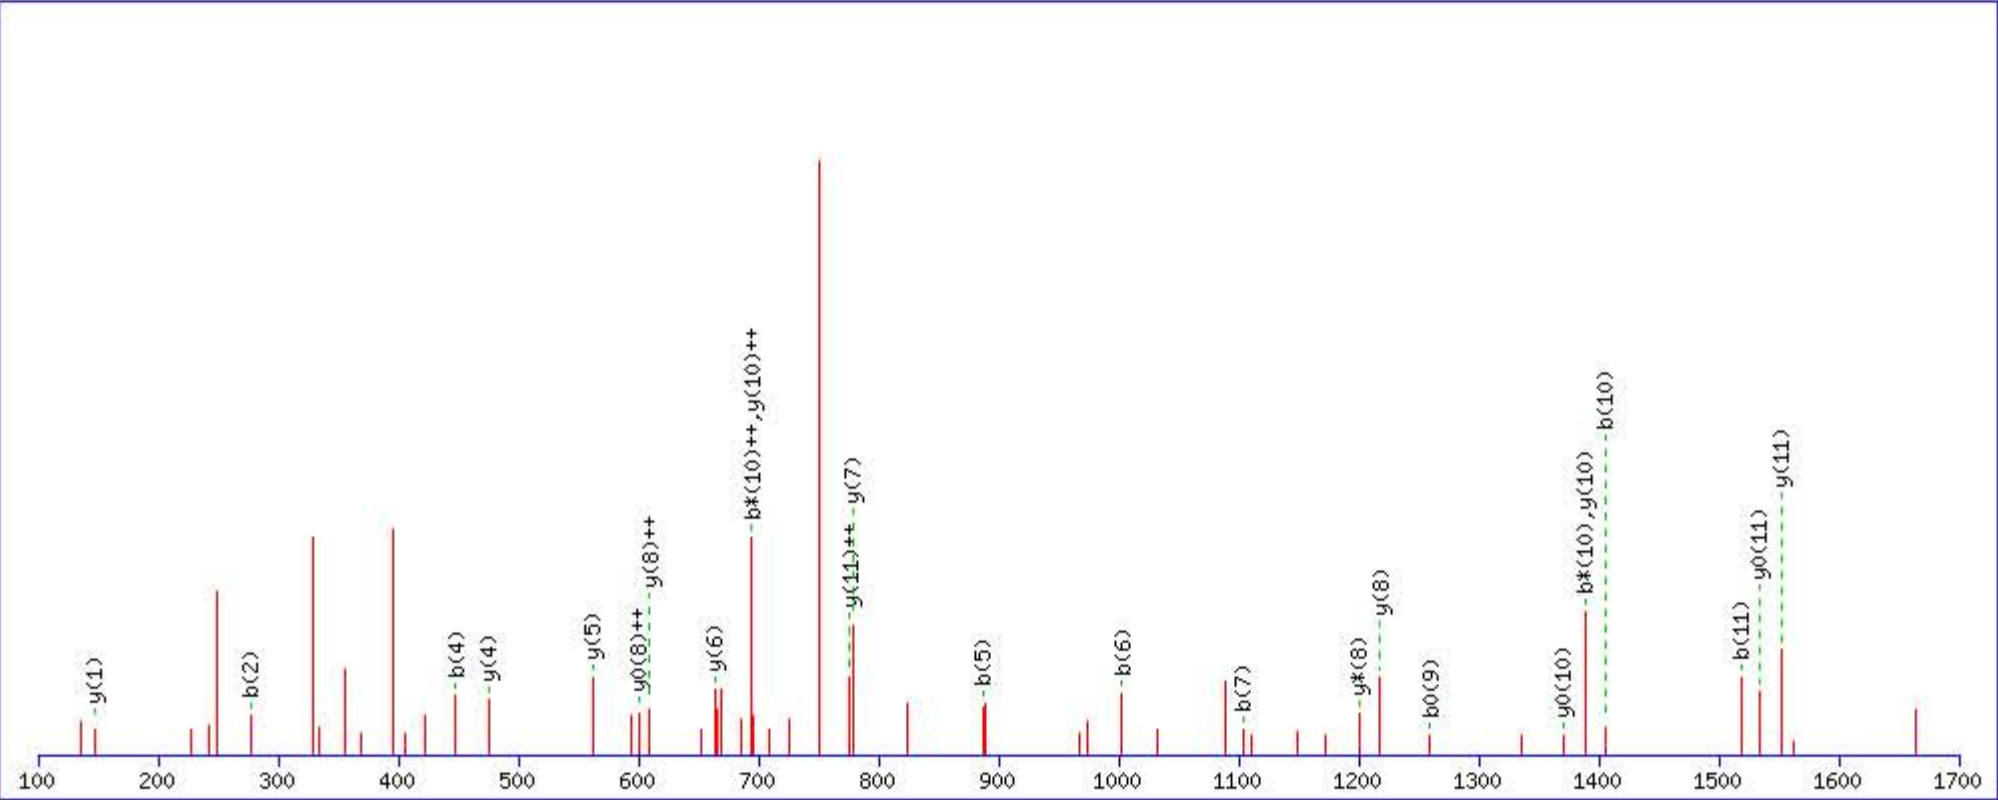

Monoisotopic mass of neutral peptide Mr(calc): 1663.823944  
Fixed modifications: Carbamidomethyl (C) (apply to specified residues or termini only)  
Variable modifications:  
Q5 : Biotin:Thermo-21345 (Q)  
Ions Score: 45 Expect: 0.00036  
Matches : 25/110 fragment ions using 40 most intense peaks [\(help\)](#)

| #  | b           | b <sup>++</sup> | b <sup>*</sup> | b <sup>++</sup> * | b <sup>0</sup> | b <sup>0++</sup> | Seq. | y           | y <sup>++</sup> | y <sup>*</sup> | y <sup>++</sup> * | y <sup>0</sup> | y <sup>0++</sup> | #  |
|----|-------------|-----------------|----------------|-------------------|----------------|------------------|------|-------------|-----------------|----------------|-------------------|----------------|------------------|----|
| 1  | 114.091340  | 57.549308       |                |                   |                |                  | I    |             |                 |                |                   |                |                  | 12 |
| 2  | 277.154669  | 139.080973      |                |                   |                |                  | Y    | 1551.747170 | 776.377223      | 1534.720621    | 767.863949        | 1533.736605    | 767.371941       | 11 |
| 3  | 334.176133  | 167.591704      |                |                   |                |                  | G    | 1388.683841 | 694.845559      | 1371.657292    | 686.332284        | 1370.673276    | 685.840276       | 10 |
| 4  | 448.219060  | 224.613168      | 431.192511     | 216.099894        |                |                  | N    | 1331.662377 | 666.334827      | 1314.635828    | 657.821552        | 1313.651812    | 657.329544       | 9  |
| 5  | 887.444386  | 444.225831      | 870.417837     | 435.712557        |                |                  | Q    | 1217.619450 | 609.313363      | 1200.592901    | 600.800089        | 1199.608885    | 600.308081       | 8  |
| 6  | 1002.471329 | 501.739303      | 985.444780     | 493.226028        | 984.460764     | 492.734020       | D    | 778.394124  | 389.700700      | 761.367575     | 381.187426        | 760.383559     | 380.695418       | 7  |
| 7  | 1103.519008 | 552.263142      | 1086.492459    | 543.749868        | 1085.508443    | 543.257860       | T    | 663.367181  | 332.187229      | 646.340632     | 323.673954        | 645.356616     | 323.181946       | 6  |
| 8  | 1190.551036 | 595.779156      | 1173.524487    | 587.265882        | 1172.540471    | 586.773874       | S    | 562.319502  | 281.663389      | 545.292953     | 273.150115        | 544.308937     | 272.658107       | 5  |
| 9  | 1277.583064 | 639.295170      | 1260.556515    | 630.781896        | 1259.572499    | 630.289888       | S    | 475.287474  | 238.147375      | 458.260925     | 229.634101        | 457.276909     | 229.142093       | 4  |
| 10 | 1405.641642 | 703.324459      | 1388.615093    | 694.811185        | 1387.631077    | 694.319177       | Q    | 388.255446  | 194.631361      | 371.228897     | 186.118087        |                |                  | 3  |
| 11 | 1518.725706 | 759.866491      | 1501.699157    | 751.353217        | 1500.715141    | 750.861209       | L    | 260.196868  | 130.602072      | 243.170319     | 122.088797        |                |                  | 2  |
| 12 |             |                 |                |                   |                |                  | K    | 147.112804  | 74.060040       | 130.086255     | 65.546765         |                |                  | 1  |

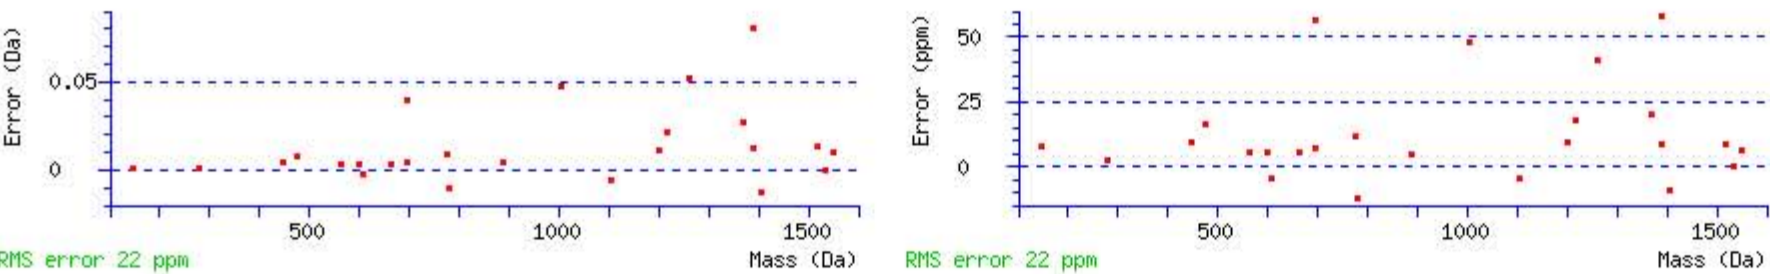

NCBI BLAST search of **IYGNQDTSSQLK**  
(Parameters: blastp, nr protein database, expect=20000, no filter, PAM30)  
Other BLAST [web gateways](#)

All matches to this query

| Score | Mr(calc):   | Delta     | Sequence                         |
|-------|-------------|-----------|----------------------------------|
| 45.2  | 1663.823944 | 0.015624  | <a href="#">IYGNQDTSSQLK</a>     |
| 21.0  | 1663.823944 | 0.015624  | <a href="#">IYGNQDTSSQLK</a>     |
| 8.0   | 1663.863663 | -0.024095 | <a href="#">EAQKEMQKIMTSLK</a>   |
| 6.0   | 1663.860321 | -0.020753 | <a href="#">ISSQMWLQLSQSLK</a>   |
| 3.4   | 1663.821442 | 0.018126  | <a href="#">LYGCFLRVYMQSK</a>    |
| 1.3   | 1663.823944 | 0.015624  | <a href="#">MATGANATPLDFPSKK</a> |
| 1.3   | 1663.856934 | -0.017366 | <a href="#">LKSYENQKPPFDAK</a>   |

MATRIX

SCIENCE

Mascot Search Results

Peptide View

MS/MS Fragmentation of **AHVSFKPTVAQQR**  
Found in **ITIH2\_HUMAN**, Inter-alpha-trypsin inhibitor heavy chain H2 OS=Homo sapiens GN=ITIH2 PE=1 SV=2

Match to Query 39830: 1778.970432 from(593.997420,3+) rtinseconds(1538) index(47200)  
Title: Locus:1.1.1.1773.15 File:"2013-07-02 CLN FXIII 180 min 2nd F 4.wiff"  
Data file C:\Program Files (x86)\Matrix Science\Mascot Daemon\mgf\8 FXIII 180 min 2nd\mascot\_daemon\_merge.mgf

Click mouse within plot area to zoom in by factor of two about that point  
Or, 

Plot from

100

 to 

1800

 Da 

Full range

  
Label all possible matches ☐ Label matches used for scoring ☒

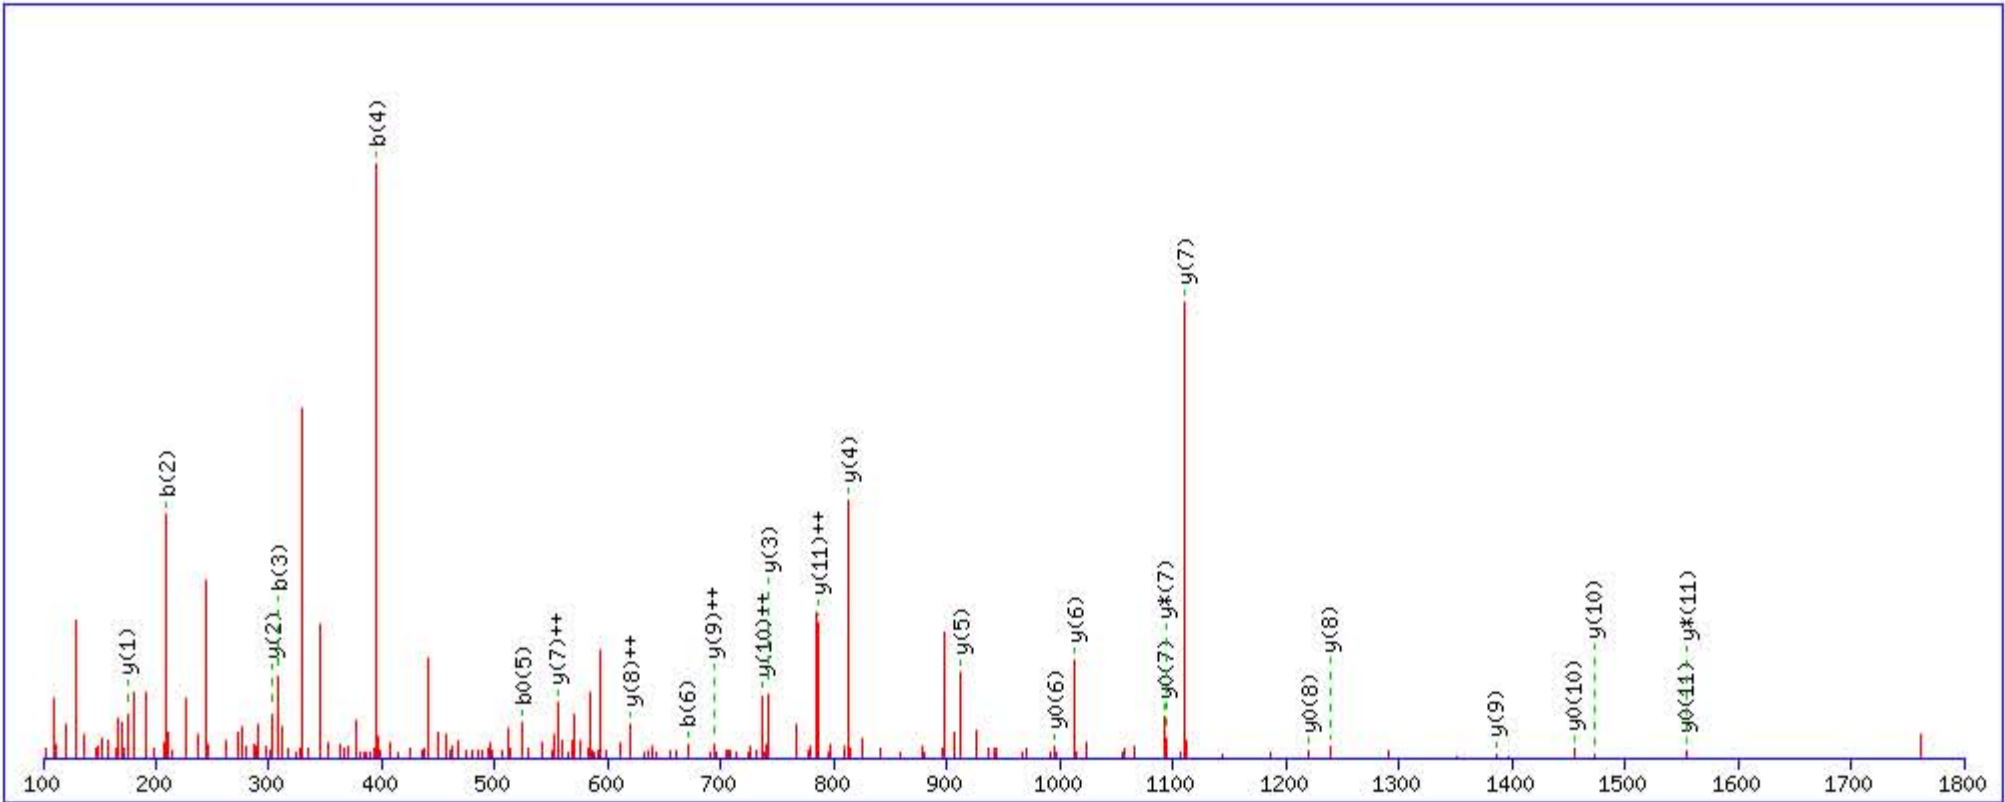

Monoisotopic mass of neutral peptide Mr(calc): 1778.961395  
Fixed modifications: Carbamidomethyl (C) (apply to specified residues or termini only)  
Variable modifications:  
Q11 : Biotin:Thermo-21345 (Q)  
Ions Score: 44 Expect: 0.00024  
Matches : 27/118 fragment ions using 66 most intense peaks [\(help\)](#)

| #  | b           | b <sup>++</sup> | b <sup>*</sup> | b <sup>+++</sup> | b <sup>0</sup> | b <sup>0++</sup> | Seq. | y           | y <sup>++</sup> | y <sup>*</sup> | y <sup>+++</sup> | y <sup>0</sup> | y <sup>0++</sup> | #  |
|----|-------------|-----------------|----------------|------------------|----------------|------------------|------|-------------|-----------------|----------------|------------------|----------------|------------------|----|
| 1  | 72.044390   | 36.525833       |                |                  |                |                  | A    |             |                 |                |                  |                |                  | 13 |
| 2  | 209.103302  | 105.055289      |                |                  |                |                  | H    | 1708.931558 | 854.969417      | 1691.905009    | 846.456143       | 1690.920993    | 845.964135       | 12 |
| 3  | 308.171716  | 154.589496      |                |                  |                |                  | V    | 1571.872646 | 786.439961      | 1554.846097    | 777.926687       | 1553.862081    | 777.434679       | 11 |
| 4  | 395.203744  | 198.105510      |                |                  | 377.193179     | 189.100227       | S    | 1472.804232 | 736.905754      | 1455.777683    | 728.392480       | 1454.793667    | 727.900472       | 10 |
| 5  | 542.272158  | 271.639717      |                |                  | 524.261593     | 262.634435       | F    | 1385.772204 | 693.389740      | 1368.745655    | 684.876466       | 1367.761639    | 684.384458       | 9  |
| 6  | 670.367121  | 335.687199      | 653.340572     | 327.173924       | 652.356556     | 326.681916       | K    | 1238.703790 | 619.855533      | 1221.677241    | 611.342259       | 1220.693225    | 610.850251       | 8  |
| 7  | 767.419885  | 384.213581      | 750.393336     | 375.700306       | 749.409320     | 375.208298       | P    | 1110.608827 | 555.808052      | 1093.582278    | 547.294777       | 1092.598262    | 546.802769       | 7  |
| 8  | 868.467564  | 434.737420      | 851.441015     | 426.224146       | 850.456999     | 425.732138       | T    | 1013.556063 | 507.281670      | 996.529514     | 498.768395       | 995.545498     | 498.276387       | 6  |
| 9  | 967.535978  | 484.271627      | 950.509429     | 475.758353       | 949.525413     | 475.266345       | V    | 912.508384  | 456.757830      | 895.481835     | 448.244556       |                |                  | 5  |
| 10 | 1038.573092 | 519.790184      | 1021.546543    | 511.276910       | 1020.562527    | 510.784902       | A    | 813.439970  | 407.223623      | 796.413421     | 398.710349       |                |                  | 4  |
| 11 | 1477.798418 | 739.402847      | 1460.771869    | 730.889573       | 1459.787853    | 730.397565       | Q    | 742.402856  | 371.705066      | 725.376307     | 363.191792       |                |                  | 3  |
| 12 | 1605.856996 | 803.432136      | 1588.830447    | 794.918862       | 1587.846431    | 794.426854       | Q    | 303.177530  | 152.092403      | 286.150981     | 143.579129       |                |                  | 2  |
| 13 |             |                 |                |                  |                |                  | R    | 175.118952  | 88.063114       | 158.092403     | 79.549839        |                |                  | 1  |

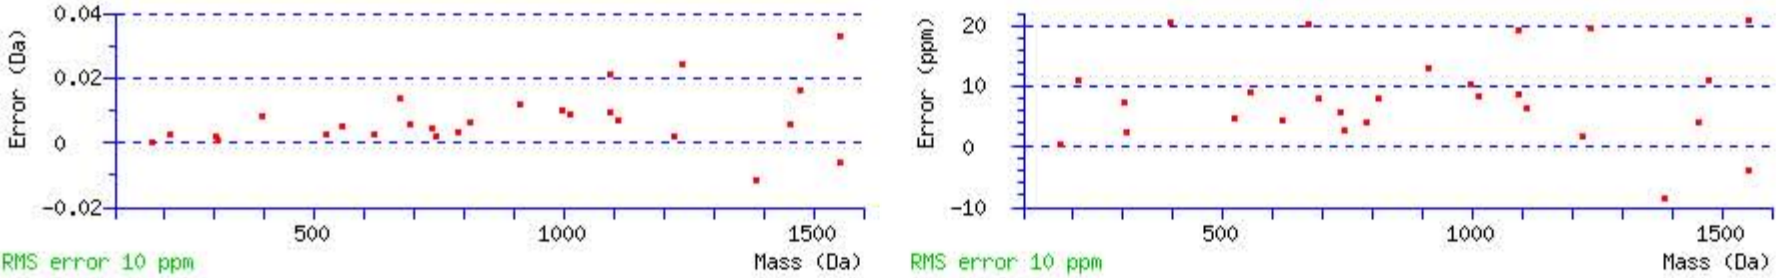

NCBI BLAST search of [AHVSFKPTVAQQR](#)  
(Parameters: blastp, nr protein database, expect=20000, no filter, PAM30)  
Other BLAST [web gateways](#)

All matches to this query

| Score | Mr(calc):   | Delta     | Sequence                         |
|-------|-------------|-----------|----------------------------------|
| 43.8  | 1778.961395 | 0.009037  | <a href="#">AHVSFKPTVAQQR</a>    |
| 37.1  | 1778.961395 | 0.009037  | <a href="#">AHVSFKPTVAQQR</a>    |
| 5.2   | 1778.982498 | -0.012066 | <a href="#">SRDAKLVLLNMPGPPR</a> |

MATRIX

SCIENCE

Mascot Search Results

Peptide View

MS/MS Fragmentation of **AHVSFKPTVAQQR**  
Found in **ITIH2\_HUMAN**, Inter-alpha-trypsin inhibitor heavy chain H2 OS=Homo sapiens GN=ITIH2 PE=1 SV=2

Match to Query 39831: 1778.970852 from(593.997560,3+) rtinseconds(1515) index(47060)  
Title: Locus:1.1.1.1765.10 File:"2013-07-02 CLN FXIII 180 min 2nd F 4.wiff"  
Data file C:\Program Files (x86)\Matrix Science\Mascot Daemon\mgf\8 FXIII 180 min 2nd\mascot\_daemon\_merge.mgf

Click mouse within plot area to zoom in by factor of two about that point  
Or,   to  Da   
Label all possible matches ☐ Label matches used for scoring ☒

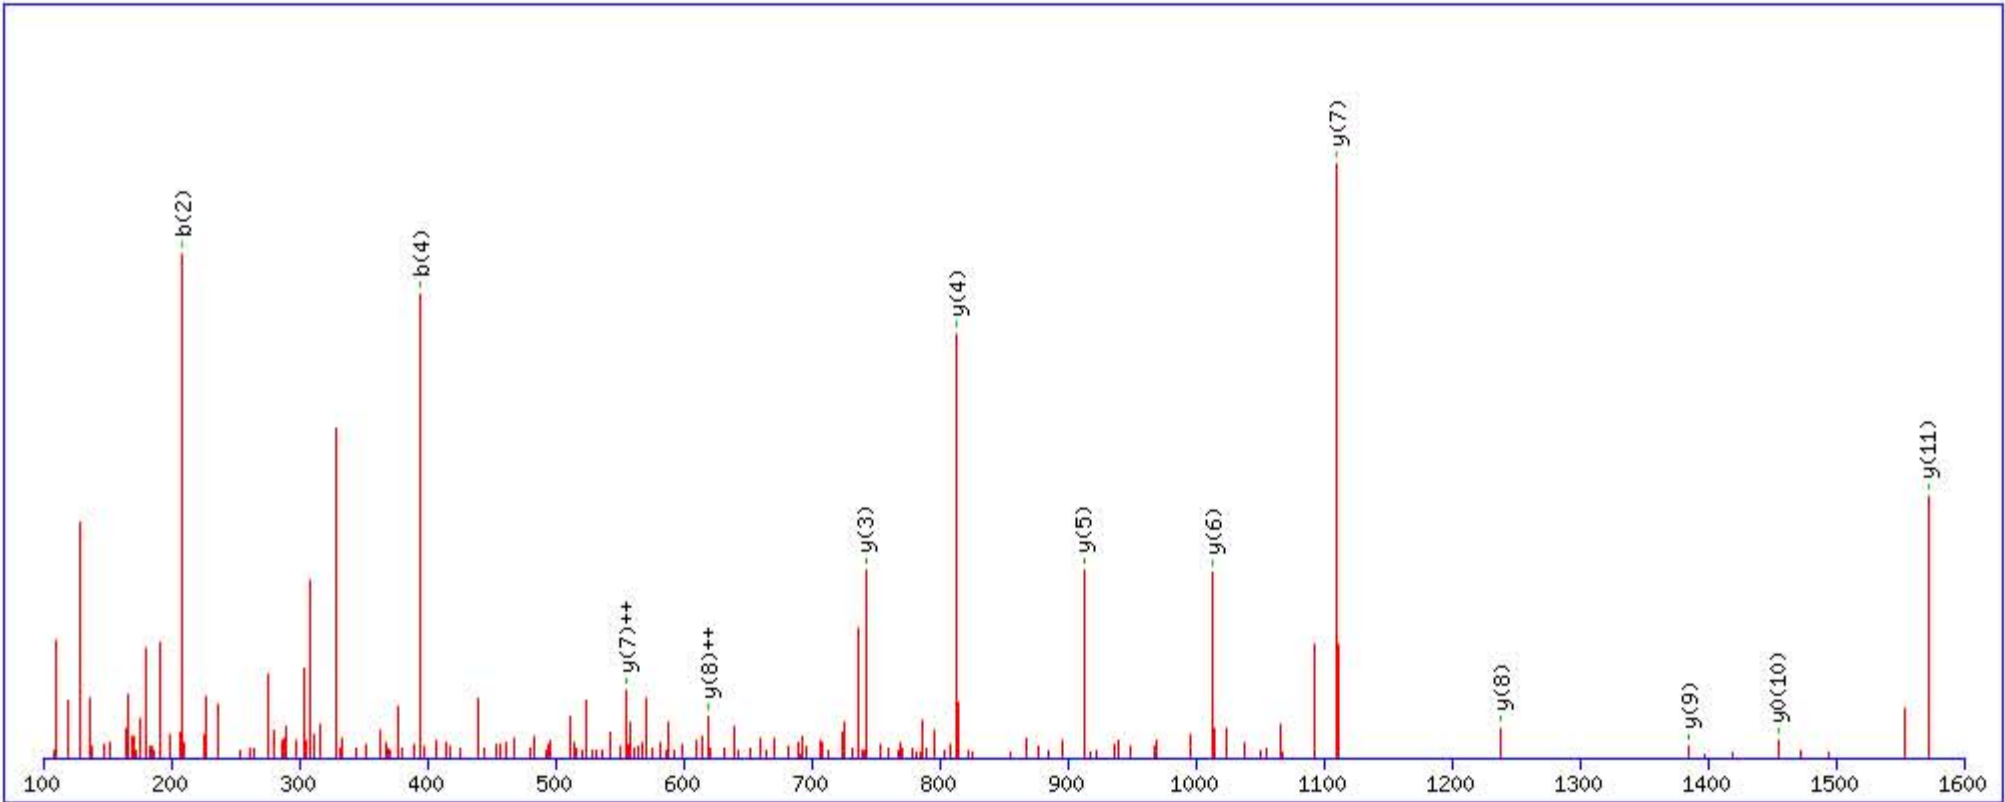

Monoisotopic mass of neutral peptide Mr(calc): 1778.961395  
Fixed modifications: Carbamidomethyl (C) (apply to specified residues or termini only)  
Variable modifications:  
Q12 : Biotin:Thermo-21345 (Q)  
Ions Score: 69 Expect: 3.8e-007  
Matches : 13/118 fragment ions using 15 most intense peaks [\(help\)](#)

| #  | b           | b <sup>++</sup> | b <sup>+</sup> | b <sup>+++</sup> | b <sup>0</sup> | b <sup>0++</sup> | Seq. | y           | y <sup>++</sup> | y <sup>+</sup> | y <sup>+++</sup> | y <sup>0</sup> | y <sup>0++</sup> | #  |
|----|-------------|-----------------|----------------|------------------|----------------|------------------|------|-------------|-----------------|----------------|------------------|----------------|------------------|----|
| 1  | 72.044390   | 36.525833       |                |                  |                |                  | A    |             |                 |                |                  |                |                  | 13 |
| 2  | 209.103302  | 105.055289      |                |                  |                |                  | H    | 1708.931558 | 854.969417      | 1691.905009    | 846.456143       | 1690.920993    | 845.964135       | 12 |
| 3  | 308.171716  | 154.589496      |                |                  |                |                  | V    | 1571.872646 | 786.439961      | 1554.846097    | 777.926687       | 1553.862081    | 777.434679       | 11 |
| 4  | 395.203744  | 198.105510      |                |                  | 377.193179     | 189.100227       | S    | 1472.804232 | 736.905754      | 1455.777683    | 728.392480       | 1454.793667    | 727.900472       | 10 |
| 5  | 542.272158  | 271.639717      |                |                  | 524.261593     | 262.634435       | F    | 1385.772204 | 693.389740      | 1368.745655    | 684.876466       | 1367.761639    | 684.384458       | 9  |
| 6  | 670.367121  | 335.687199      | 653.340572     | 327.173924       | 652.356556     | 326.681916       | K    | 1238.703790 | 619.855533      | 1221.677241    | 611.342259       | 1220.693225    | 610.850251       | 8  |
| 7  | 767.419885  | 384.213581      | 750.393336     | 375.700306       | 749.409320     | 375.208298       | P    | 1110.608827 | 555.808052      | 1093.582278    | 547.294777       | 1092.598262    | 546.802769       | 7  |
| 8  | 868.467564  | 434.737420      | 851.441015     | 426.224146       | 850.456999     | 425.732138       | T    | 1013.556063 | 507.281670      | 996.529514     | 498.768395       | 995.545498     | 498.276387       | 6  |
| 9  | 967.535978  | 484.271627      | 950.509429     | 475.758353       | 949.525413     | 475.266345       | V    | 912.508384  | 456.757830      | 895.481835     | 448.244556       |                |                  | 5  |
| 10 | 1038.573092 | 519.790184      | 1021.546543    | 511.276910       | 1020.562527    | 510.784902       | A    | 813.439970  | 407.223623      | 796.413421     | 398.710349       |                |                  | 4  |
| 11 | 1166.631670 | 583.819473      | 1149.605121    | 575.306199       | 1148.621105    | 574.814191       | Q    | 742.402856  | 371.705066      | 725.376307     | 363.191792       |                |                  | 3  |
| 12 | 1605.856996 | 803.432136      | 1588.830447    | 794.918862       | 1587.846431    | 794.426854       | Q    | 614.344278  | 307.675777      | 597.317729     | 299.162503       |                |                  | 2  |
| 13 |             |                 |                |                  |                |                  | R    | 175.118952  | 88.063114       | 158.092403     | 79.549839        |                |                  | 1  |

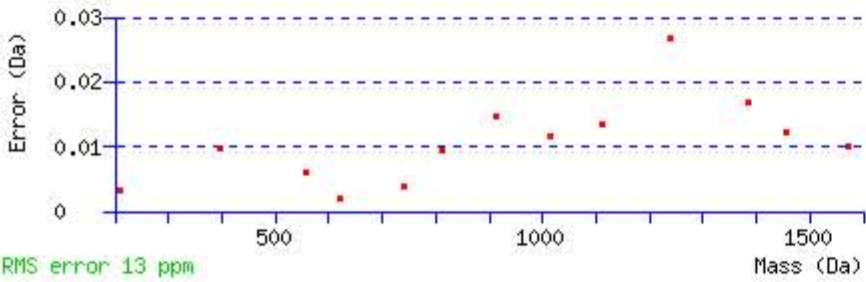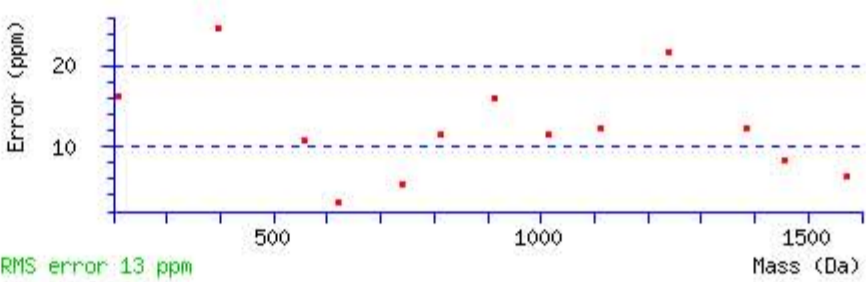

NCBI BLAST search of [AHVSFKPTVAQQR](#)  
(Parameters: blastp, nr protein database, expect=20000, no filter, PAM30)  
Other BLAST [web gateways](#)

All matches to this query

| Score | Mr(calc):   | Delta     | Sequence                         |
|-------|-------------|-----------|----------------------------------|
| 69.2  | 1778.961395 | 0.009457  | <a href="#">AHVSFKPTVAQQR</a>    |
| 69.2  | 1778.961395 | 0.009457  | <a href="#">AHVSFKPTVAQQR</a>    |
| 0.7   | 1778.990372 | -0.019520 | <a href="#">HAEGRVEPIHAVVLPR</a> |

MATRIX

SCIENCE

Mascot Search Results

Peptide View

MS/MS Fragmentation of **IYGNQDTSSQLK**  
Found in **ITIH2\_HUMAN**, Inter-alpha-trypsin inhibitor heavy chain H2 OS=Homo sapiens GN=ITIH2 PE=1 SV=2

Match to Query 43672: 1975.009032 from(659.343620,3+) rtinseconds(1989) index(50324)  
Title: Locus:1.1.1.1930.7 File:"2013-07-02 CLN FXIII 180 min 2nd F 4.wiff"  
Data file C:\Program Files (x86)\Matrix Science\Mascot Daemon\mgf\8 FXIII 180 min 2nd\mascot\_daemon\_merge.mgf

Click mouse within plot area to zoom in by factor of two about that point  
Or, 

Plot from

100

 to 

2000

 Da 

Full range

  
Label all possible matches ☐ Label matches used for scoring ☒

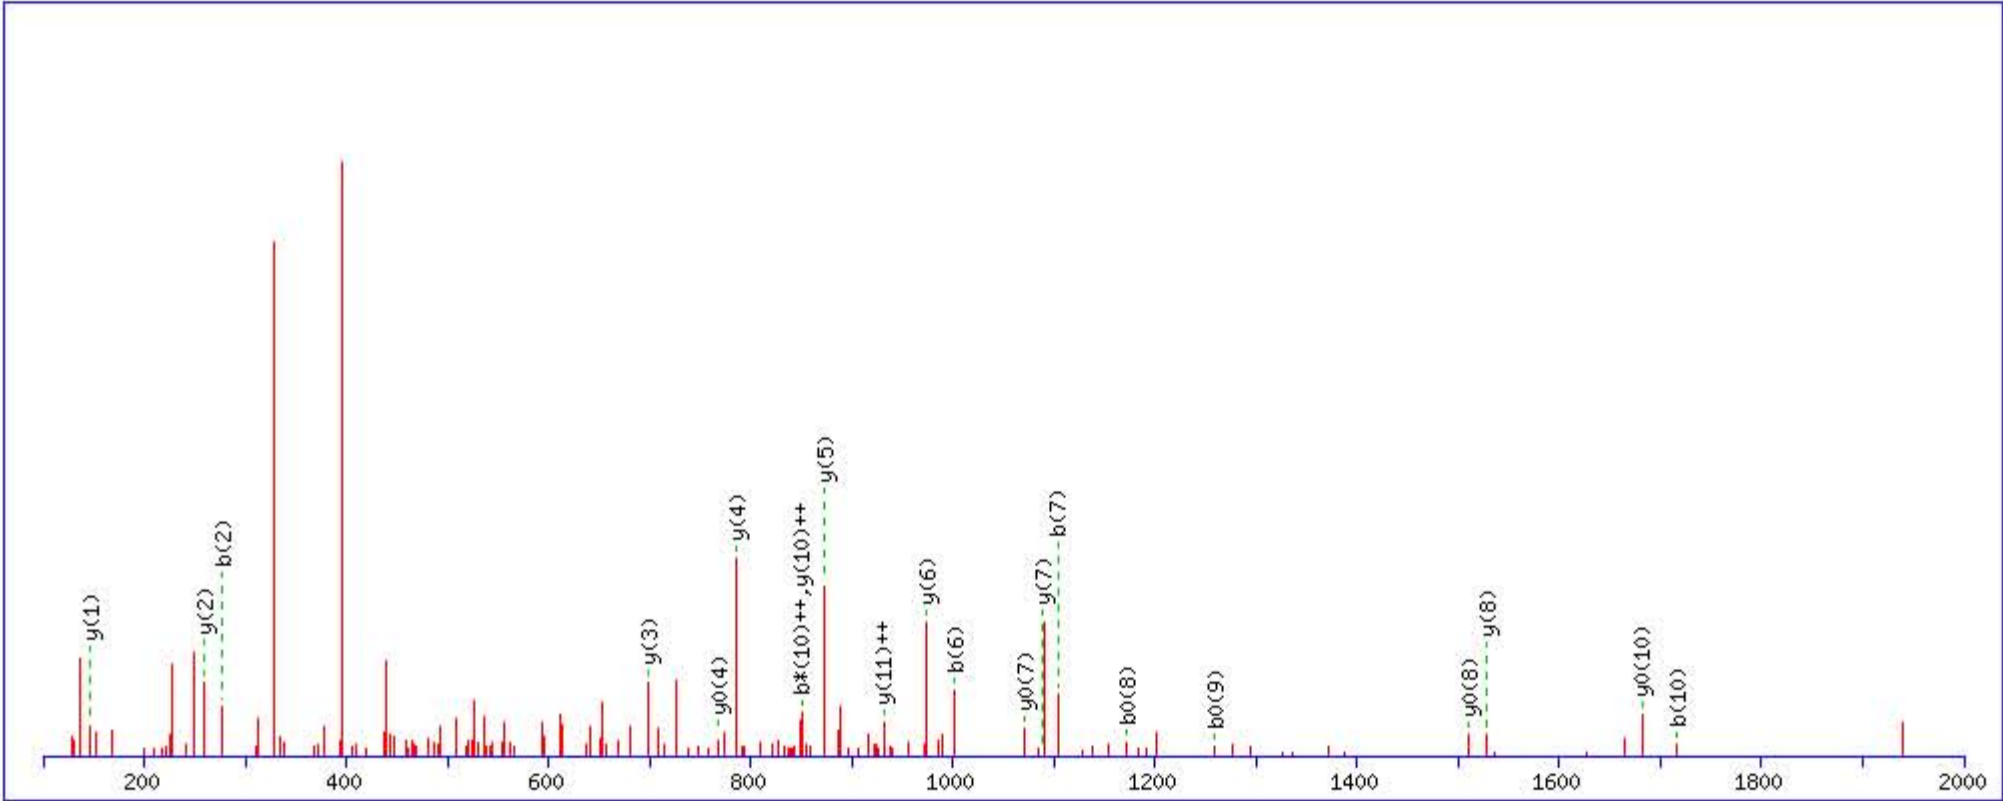

Monoisotopic mass of neutral peptide Mr(calc): 1974.990692  
Fixed modifications: Carbamidomethyl (C) (apply to specified residues or termini only)  
Variable modifications:  
Q5 : Biotin:Thermo-21345 (Q)  
Q10 : Biotin:Thermo-21345 (Q)  
Ions Score: 31 Expect: 0.0026  
Matches : 21/110 fragment ions using 47 most intense peaks [\(help\)](#)

| #  | b           | b <sup>++</sup> | b <sup>+</sup> | b <sup>+++</sup> | b <sup>0</sup> | b <sup>0++</sup> | Seq. | y           | y <sup>++</sup> | y <sup>+</sup> | y <sup>+++</sup> | y <sup>0</sup> | y <sup>0++</sup> | #  |
|----|-------------|-----------------|----------------|------------------|----------------|------------------|------|-------------|-----------------|----------------|------------------|----------------|------------------|----|
| 1  | 114.091340  | 57.549308       |                |                  |                |                  | I    |             |                 |                |                  |                |                  | 12 |
| 2  | 277.154669  | 139.080973      |                |                  |                |                  | Y    | 1862.913918 | 931.960597      | 1845.887369    | 923.447323       | 1844.903353    | 922.955315       | 11 |
| 3  | 334.176133  | 167.591704      |                |                  |                |                  | G    | 1699.850589 | 850.428933      | 1682.824040    | 841.915658       | 1681.840024    | 841.423650       | 10 |
| 4  | 448.219060  | 224.613168      | 431.192511     | 216.099894       |                |                  | N    | 1642.829125 | 821.918201      | 1625.802576    | 813.404926       | 1624.818560    | 812.912918       | 9  |
| 5  | 887.444386  | 444.225831      | 870.417837     | 435.712557       |                |                  | Q    | 1528.786198 | 764.896737      | 1511.759649    | 756.383463       | 1510.775633    | 755.891455       | 8  |
| 6  | 1002.471329 | 501.739303      | 985.444780     | 493.226028       | 984.460764     | 492.734020       | D    | 1089.560872 | 545.284074      | 1072.534323    | 536.770800       | 1071.550307    | 536.278792       | 7  |
| 7  | 1103.519008 | 552.263142      | 1086.492459    | 543.749868       | 1085.508443    | 543.257860       | T    | 974.533929  | 487.770603      | 957.507380     | 479.257328       | 956.523364     | 478.765320       | 6  |
| 8  | 1190.551036 | 595.779156      | 1173.524487    | 587.265882       | 1172.540471    | 586.773874       | S    | 873.486250  | 437.246763      | 856.459701     | 428.733489       | 855.475685     | 428.241481       | 5  |
| 9  | 1277.583064 | 639.295170      | 1260.556515    | 630.781896       | 1259.572499    | 630.289888       | S    | 786.454222  | 393.730749      | 769.427673     | 385.217475       | 768.443657     | 384.725467       | 4  |
| 10 | 1716.808390 | 858.907833      | 1699.781841    | 850.394559       | 1698.797825    | 849.902551       | Q    | 699.422194  | 350.214735      | 682.395645     | 341.701461       |                |                  | 3  |
| 11 | 1829.892454 | 915.449865      | 1812.865905    | 906.936591       | 1811.881889    | 906.444583       | L    | 260.196868  | 130.602072      | 243.170319     | 122.088797       |                |                  | 2  |
| 12 |             |                 |                |                  |                |                  | K    | 147.112804  | 74.060040       | 130.086255     | 65.546765        |                |                  | 1  |

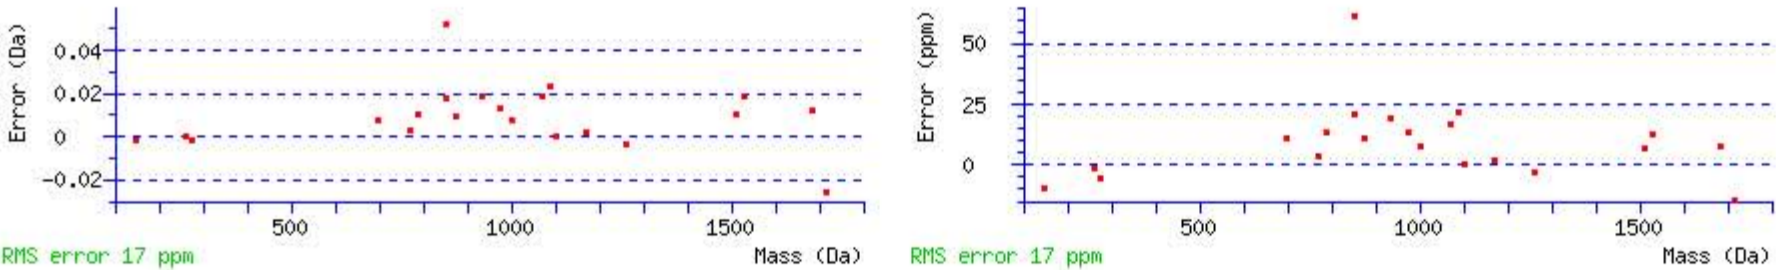

NCBI BLAST search of **IYGNQDTSSQLK**  
(Parameters: blastp, nr protein database, expect=20000, no filter, PAM30)  
Other BLAST [web gateways](#)

All matches to this query

| Score | Mr(calc):   | Delta     | Sequence                          |
|-------|-------------|-----------|-----------------------------------|
| 30.6  | 1974.990692 | 0.018340  | <a href="#">IYGNQDTSSQLK</a>      |
| 2.9   | 1975.027069 | -0.018037 | <a href="#">ISSQMWLQLSQSLK</a>    |
| 0.9   | 1975.031128 | -0.022096 | <a href="#">VCFGDFPTMPKLIPPLK</a> |
| 0.8   | 1975.030411 | -0.021379 | <a href="#">EAQKEMQKIMTSLK</a>    |

MATRIX

SCIENCE

Mascot Search Results

Peptide View

MS/MS Fragmentation of **AHVSFKPTVAQQR**  
Found in **ITIH2\_HUMAN**, Inter-alpha-trypsin inhibitor heavy chain H2 OS=Homo sapiens GN=ITIH2 PE=1 SV=2

Match to Query 46440: 2090.146332 from(697.722720,3+) rtinseconds(1775) index(48823)  
Title: Locus:1.1.1.1856.7 File:"2013-07-02 CLN FXIII 180 min 2nd F 4.wiff"  
Data file C:\Program Files (x86)\Matrix Science\Mascot Daemon\mgf\8 FXIII 180 min 2nd\mascot\_daemon\_merge.mgf

Click mouse within plot area to zoom in by factor of two about that point  
Or, 

Plot from

100

 to 

1800

 Da 

Full range

  
Label all possible matches ☐ Label matches used for scoring ☒

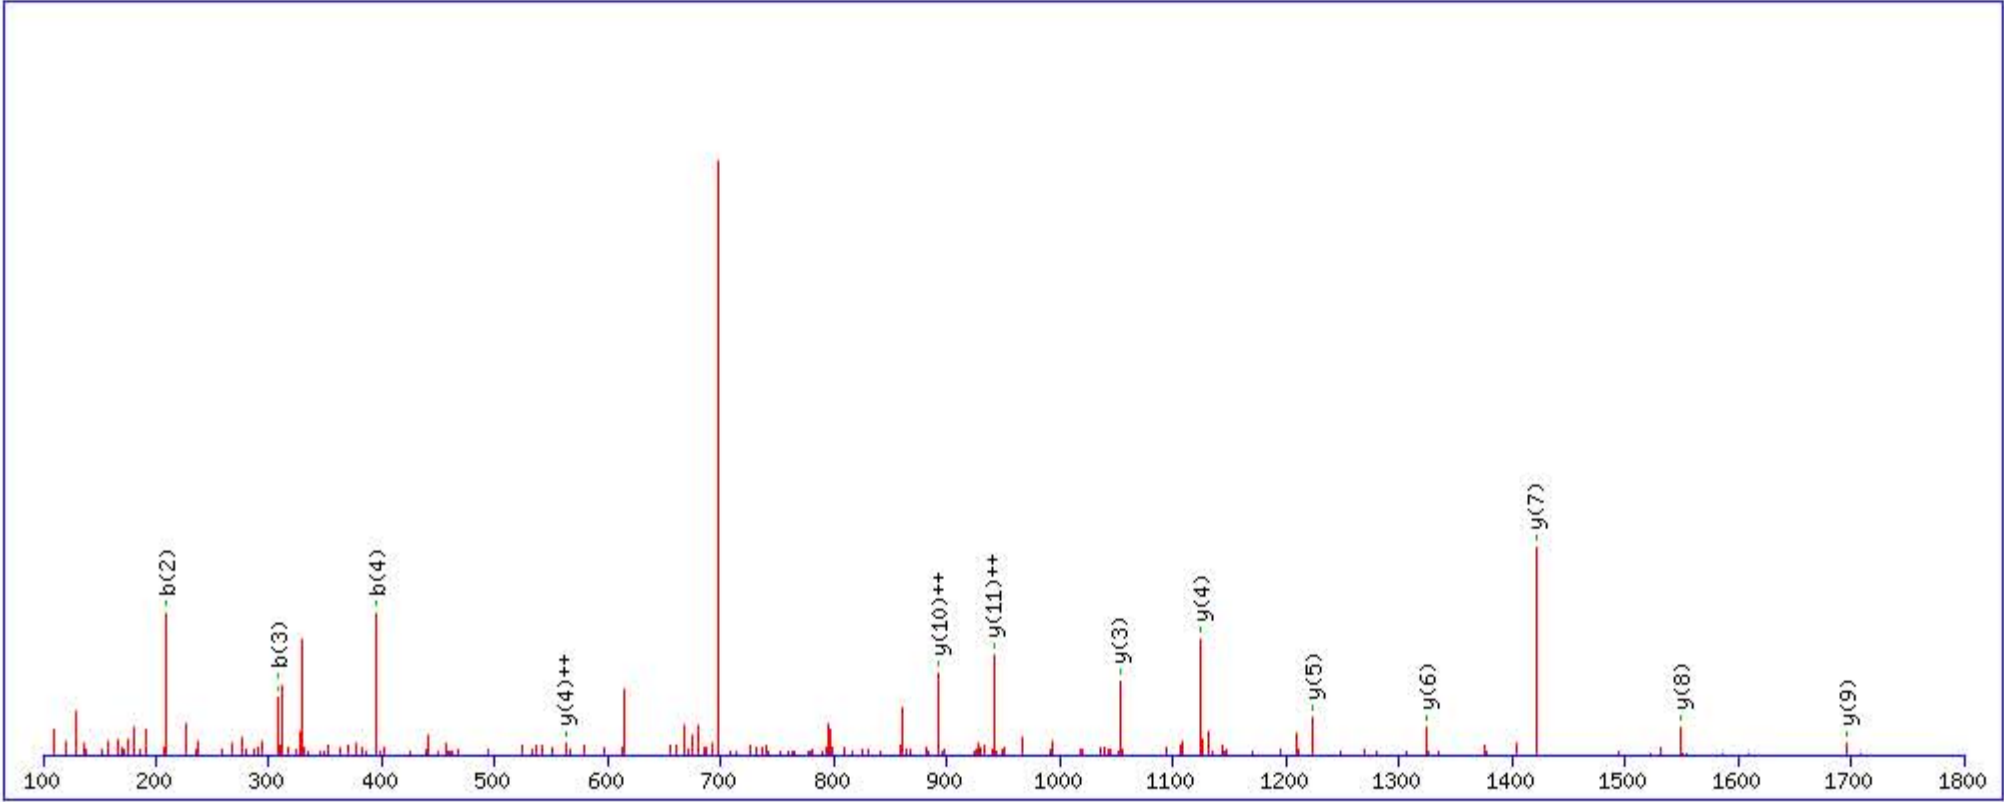

Monoisotopic mass of neutral peptide Mr(calc): 2090.128143  
Fixed modifications: Carbamidomethyl (C) (apply to specified residues or termini only)  
Variable modifications:  
Q11 : Biotin:Thermo-21345 (Q)  
Q12 : Biotin:Thermo-21345 (Q)  
Ions Score: 51 Expect: 0.00013  
Matches : 13/118 fragment ions using 16 most intense peaks (help)

| #  | b           | b <sup>++</sup> | b <sup>*</sup> | b <sup>+++</sup> | b <sup>0</sup> | b <sup>0++</sup> | Seq. | y           | y <sup>++</sup> | y <sup>*</sup> | y <sup>+++</sup> | y <sup>0</sup> | y <sup>0++</sup> | #  |
|----|-------------|-----------------|----------------|------------------|----------------|------------------|------|-------------|-----------------|----------------|------------------|----------------|------------------|----|
| 1  | 72.044390   | 36.525833       |                |                  |                |                  | A    |             |                 |                |                  |                |                  | 13 |
| 2  | 209.103302  | 105.055289      |                |                  |                |                  | H    | 2020.098306 | 1010.552791     | 2003.071757    | 1002.039517      | 2002.087741    | 1001.547509      | 12 |
| 3  | 308.171716  | 154.589496      |                |                  |                |                  | V    | 1883.039394 | 942.023335      | 1866.012845    | 933.510061       | 1865.028829    | 933.018053       | 11 |
| 4  | 395.203744  | 198.105510      |                |                  | 377.193179     | 189.100227       | S    | 1783.970980 | 892.489128      | 1766.944431    | 883.975854       | 1765.960415    | 883.483846       | 10 |
| 5  | 542.272158  | 271.639717      |                |                  | 524.261593     | 262.634435       | F    | 1696.938952 | 848.973114      | 1679.912403    | 840.459840       | 1678.928387    | 839.967832       | 9  |
| 6  | 670.367121  | 335.687199      | 653.340572     | 327.173924       | 652.356556     | 326.681916       | K    | 1549.870538 | 775.438907      | 1532.843989    | 766.925633       | 1531.859973    | 766.433625       | 8  |
| 7  | 767.419885  | 384.213581      | 750.393336     | 375.700306       | 749.409320     | 375.208298       | P    | 1421.775575 | 711.391426      | 1404.749026    | 702.878151       | 1403.765010    | 702.386143       | 7  |
| 8  | 868.467564  | 434.737420      | 851.441015     | 426.224146       | 850.456999     | 425.732138       | T    | 1324.722811 | 662.865044      | 1307.696262    | 654.351769       | 1306.712246    | 653.859761       | 6  |
| 9  | 967.535978  | 484.271627      | 950.509429     | 475.758353       | 949.525413     | 475.266345       | V    | 1223.675132 | 612.341204      | 1206.648583    | 603.827930       |                |                  | 5  |
| 10 | 1038.573092 | 519.790184      | 1021.546543    | 511.276910       | 1020.562527    | 510.784902       | A    | 1124.606718 | 562.806997      | 1107.580169    | 554.293723       |                |                  | 4  |
| 11 | 1477.798418 | 739.402847      | 1460.771869    | 730.889573       | 1459.787853    | 730.397565       | Q    | 1053.569604 | 527.288440      | 1036.543055    | 518.775166       |                |                  | 3  |
| 12 | 1917.023744 | 959.015510      | 1899.997195    | 950.502236       | 1899.013179    | 950.010228       | Q    | 614.344278  | 307.675777      | 597.317729     | 299.162503       |                |                  | 2  |
| 13 |             |                 |                |                  |                |                  | R    | 175.118952  | 88.063114       | 158.092403     | 79.549839        |                |                  | 1  |

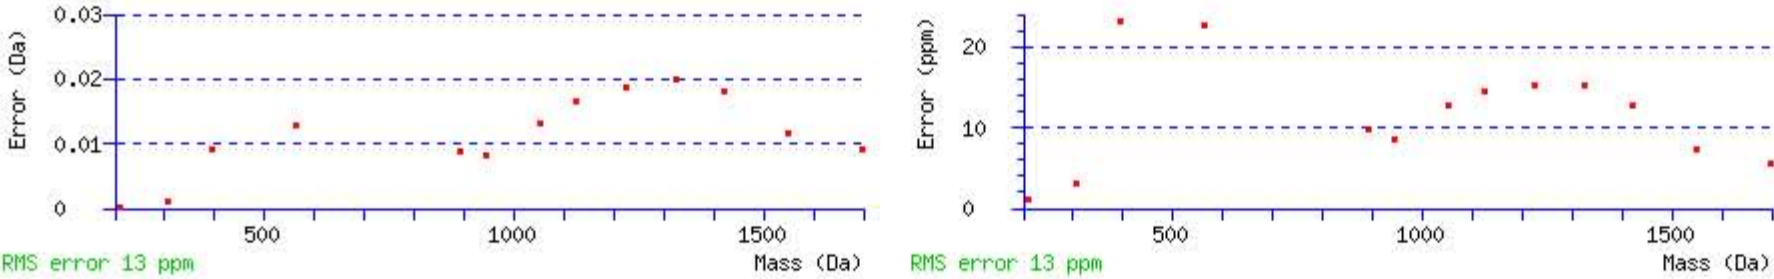

NCBI BLAST search of [AHVSFKPTVAQQR](#)  
(Parameters: blastp, nr protein database, expect=20000, no filter, PAM30)  
Other BLAST [web gateways](#)

All matches to this query

| Score | Mr(calc):   | Delta    | Sequence                      |
|-------|-------------|----------|-------------------------------|
| 51.0  | 2090.128143 | 0.018189 | <a href="#">AHVSFKPTVAQQR</a> |

MATRIX

SCIENCE

Mascot Search Results

Peptide View

MS/MS Fragmentation of **AEDHFSVIDFNQNIR**  
Found in **ITIH2\_HUMAN**, Inter-alpha-trypsin inhibitor heavy chain H2 OS=Homo sapiens GN=ITIH2 PE=1 SV=2

Match to Query 46829: 2115.043932 from(706.021920,3+) rtinseconds(2271) index(52141)  
Title: Locus:1.1.1.2028.9 File:"2013-07-02 CLN FXIII 180 min 2nd F 4.wiff"  
Data file C:\Program Files (x86)\Matrix Science\Mascot Daemon\mgf\8 FXIII 180 min 2nd\mascot\_daemon\_merge.mgf

Click mouse within plot area to zoom in by factor of two about that point  
Or, 

Plot from

100

to

1400

Da

Full range

Label all possible matches ☐Label matches used for scoring ☒

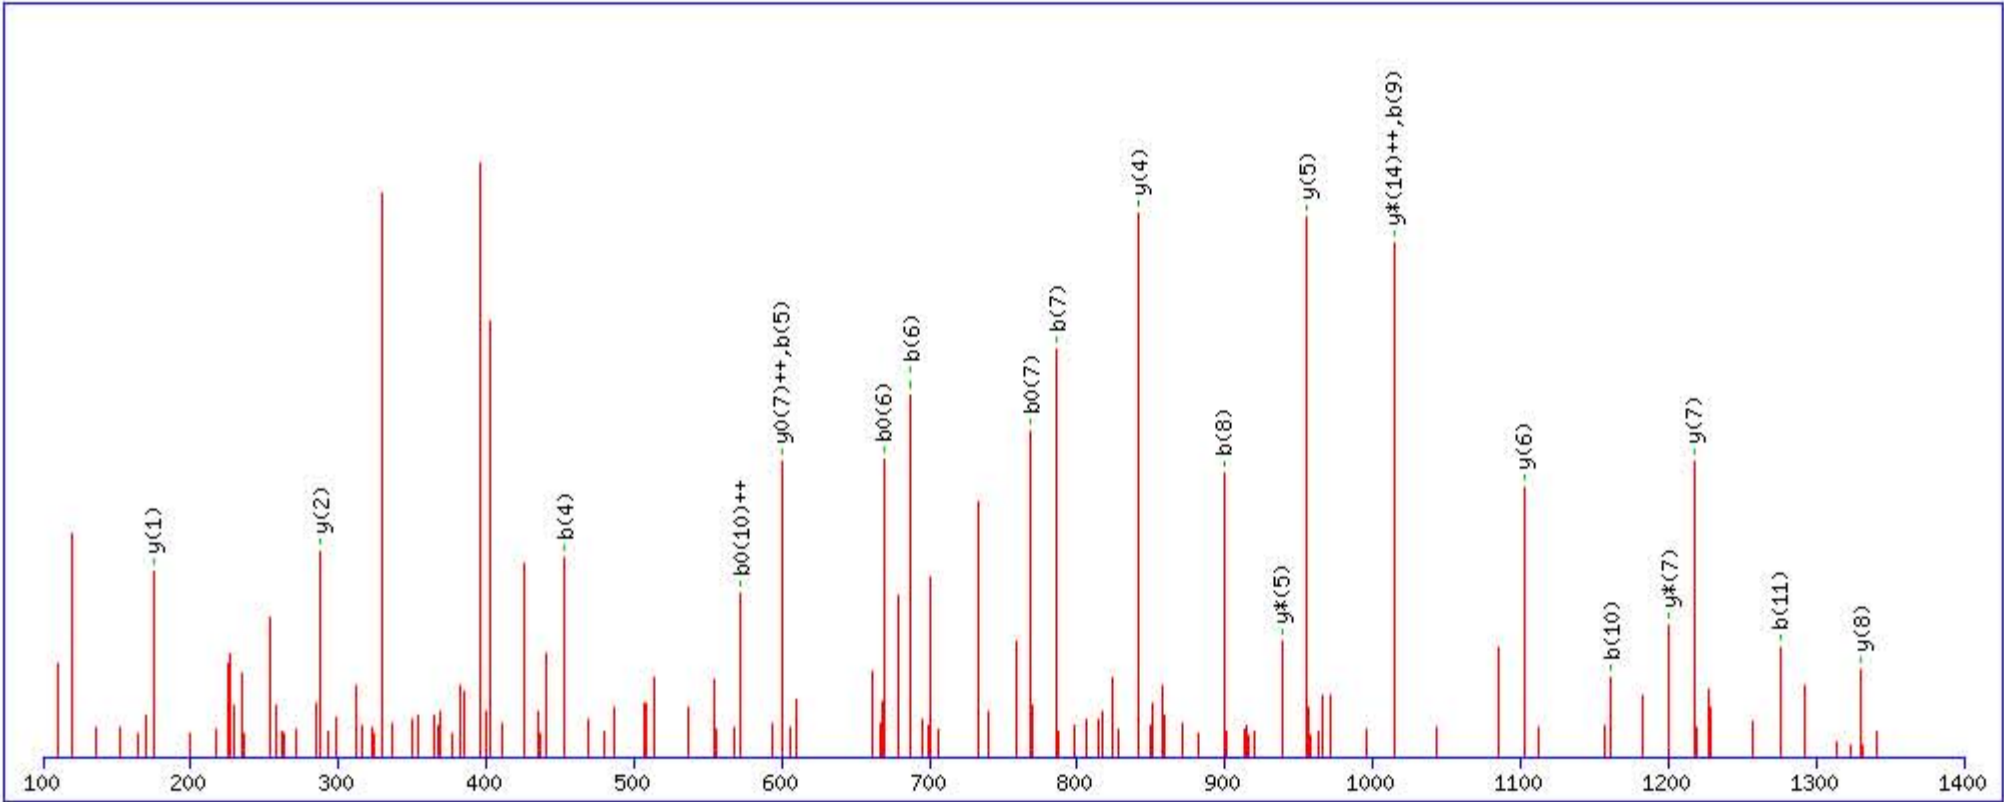

Monoisotopic mass of neutral peptide Mr(calc): 2115.020752  
Fixed modifications: Carbamidomethyl (C) (apply to specified residues or termini only)  
Variable modifications:  
Q12 : Biotin:Thermo-21345 (Q)  
Ions Score: 63 Expect: 5.6e-006  
Matches : 22/134 fragment ions using 26 most intense peaks [\(help\)](#)

| #  | b           | b <sup>++</sup> | b <sup>*</sup> | b <sup>+++</sup> | b <sup>0</sup> | b <sup>0++</sup> | Seq. | y           | y <sup>++</sup> | y <sup>*</sup> | y <sup>+++</sup> | y <sup>0</sup> | y <sup>0++</sup> | #  |
|----|-------------|-----------------|----------------|------------------|----------------|------------------|------|-------------|-----------------|----------------|------------------|----------------|------------------|----|
| 1  | 72.044390   | 36.525833       |                |                  |                |                  | A    |             |                 |                |                  |                |                  | 15 |
| 2  | 201.086983  | 101.047130      |                |                  | 183.076418     | 92.041847        | E    | 2044.990921 | 1022.999099     | 2027.964372    | 1014.485824      | 2026.980356    | 1013.993816      | 14 |
| 3  | 316.113926  | 158.560601      |                |                  | 298.103361     | 149.555319       | D    | 1915.948328 | 958.477802      | 1898.921779    | 949.964528       | 1897.937763    | 949.472519       | 13 |
| 4  | 453.172838  | 227.090057      |                |                  | 435.162273     | 218.084775       | H    | 1800.921385 | 900.964331      | 1783.894836    | 892.451056       | 1782.910820    | 891.959048       | 12 |
| 5  | 600.241252  | 300.624264      |                |                  | 582.230687     | 291.618982       | F    | 1663.862473 | 832.434874      | 1646.835924    | 823.921600       | 1645.851908    | 823.429592       | 11 |
| 6  | 687.273280  | 344.140278      |                |                  | 669.262715     | 335.134996       | S    | 1516.794059 | 758.900668      | 1499.767510    | 750.387393       | 1498.783494    | 749.895385       | 10 |
| 7  | 786.341694  | 393.674485      |                |                  | 768.331129     | 384.669202       | V    | 1429.762031 | 715.384654      | 1412.735482    | 706.871379       | 1411.751466    | 706.379371       | 9  |
| 8  | 899.425758  | 450.216517      |                |                  | 881.415193     | 441.211234       | I    | 1330.693617 | 665.850447      | 1313.667068    | 657.337172       | 1312.683052    | 656.845164       | 8  |
| 9  | 1014.452701 | 507.729988      |                |                  | 996.442136     | 498.724706       | D    | 1217.609553 | 609.308415      | 1200.583004    | 600.795140       | 1199.598988    | 600.303132       | 7  |
| 10 | 1161.521115 | 581.264196      |                |                  | 1143.510550    | 572.258913       | F    | 1102.582610 | 551.794943      | 1085.556061    | 543.281669       |                |                  | 6  |
| 11 | 1275.564042 | 638.285659      | 1258.537493    | 629.772385       | 1257.553477    | 629.280376       | N    | 955.514196  | 478.260736      | 938.487647     | 469.747462       |                |                  | 5  |
| 12 | 1714.789368 | 857.898322      | 1697.762819    | 849.385048       | 1696.778803    | 848.893039       | Q    | 841.471269  | 421.239273      | 824.444720     | 412.725998       |                |                  | 4  |
| 13 | 1828.832295 | 914.919785      | 1811.805746    | 906.406511       | 1810.821730    | 905.914503       | N    | 402.245943  | 201.626610      | 385.219394     | 193.113335       |                |                  | 3  |
| 14 | 1941.916359 | 971.461817      | 1924.889810    | 962.948543       | 1923.905794    | 962.456535       | I    | 288.203016  | 144.605146      | 271.176467     | 136.091872       |                |                  | 2  |
| 15 |             |                 |                |                  |                |                  | R    | 175.118952  | 88.063114       | 158.092403     | 79.549840        |                |                  | 1  |

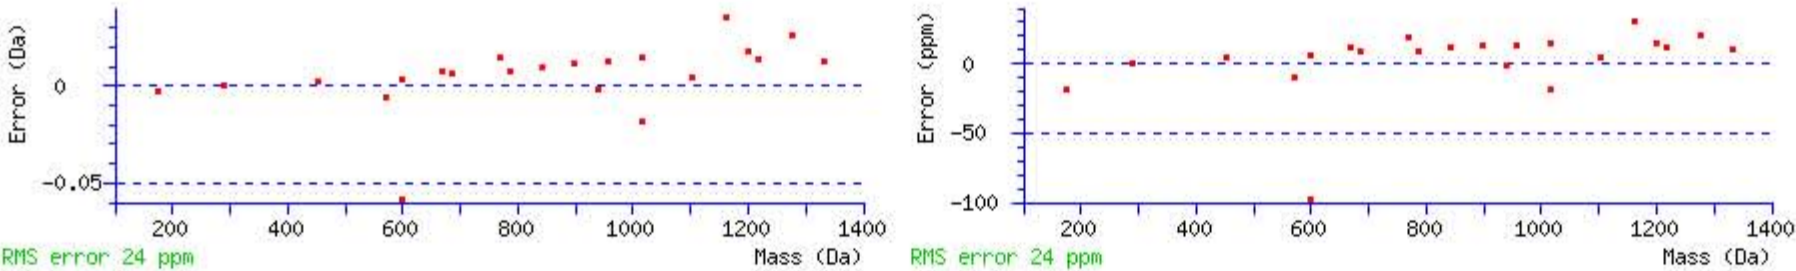

NCBI BLAST search of [AEDHFSVIDFNQNIR](#)  
(Parameters: blastp, nr protein database, expect=20000, no filter, PAM30)  
Other BLAST [web gateways](#)

All matches to this query

| Score | Mr(calc):   | Delta    | Sequence                        |
|-------|-------------|----------|---------------------------------|
| 63.0  | 2115.020752 | 0.023180 | <a href="#">AEDHFSVIDFNQNIR</a> |
| 7.0   | 2115.033981 | 0.009951 | <a href="#">ESADRQVLMQEEIK</a>  |

M

A

T

R

I

X

S

C

I

E

N

C

E

Mascot Search Results

Peptide View

MS/MS Fragmentation of **VVNNSPQPQNVVFDVQIPK**  
Found in **ITIH2\_HUMAN**, Inter-alpha-trypsin inhibitor heavy chain H2 OS=Homo sapiens GN=ITIH2 PE=1 SV=2

Match to Query 52690: 2432.323452 from(811.781760,3+) rtinseconds(2459) index(53146)  
Title: Locus:1.1.1.2093.12 File:"2013-07-02 CLN FXIII 180 min 2nd F 4.wiff"  
Data file C:\Program Files (x86)\Matrix Science\Mascot Daemon\mgf\8 FXIII 180 min 2nd\mascot\_daemon\_merge.mgf

Click mouse within plot area to zoom in by factor of two about that point  
Or,   to  Da   
Label all possible matches ☐ Label matches used for scoring ☒

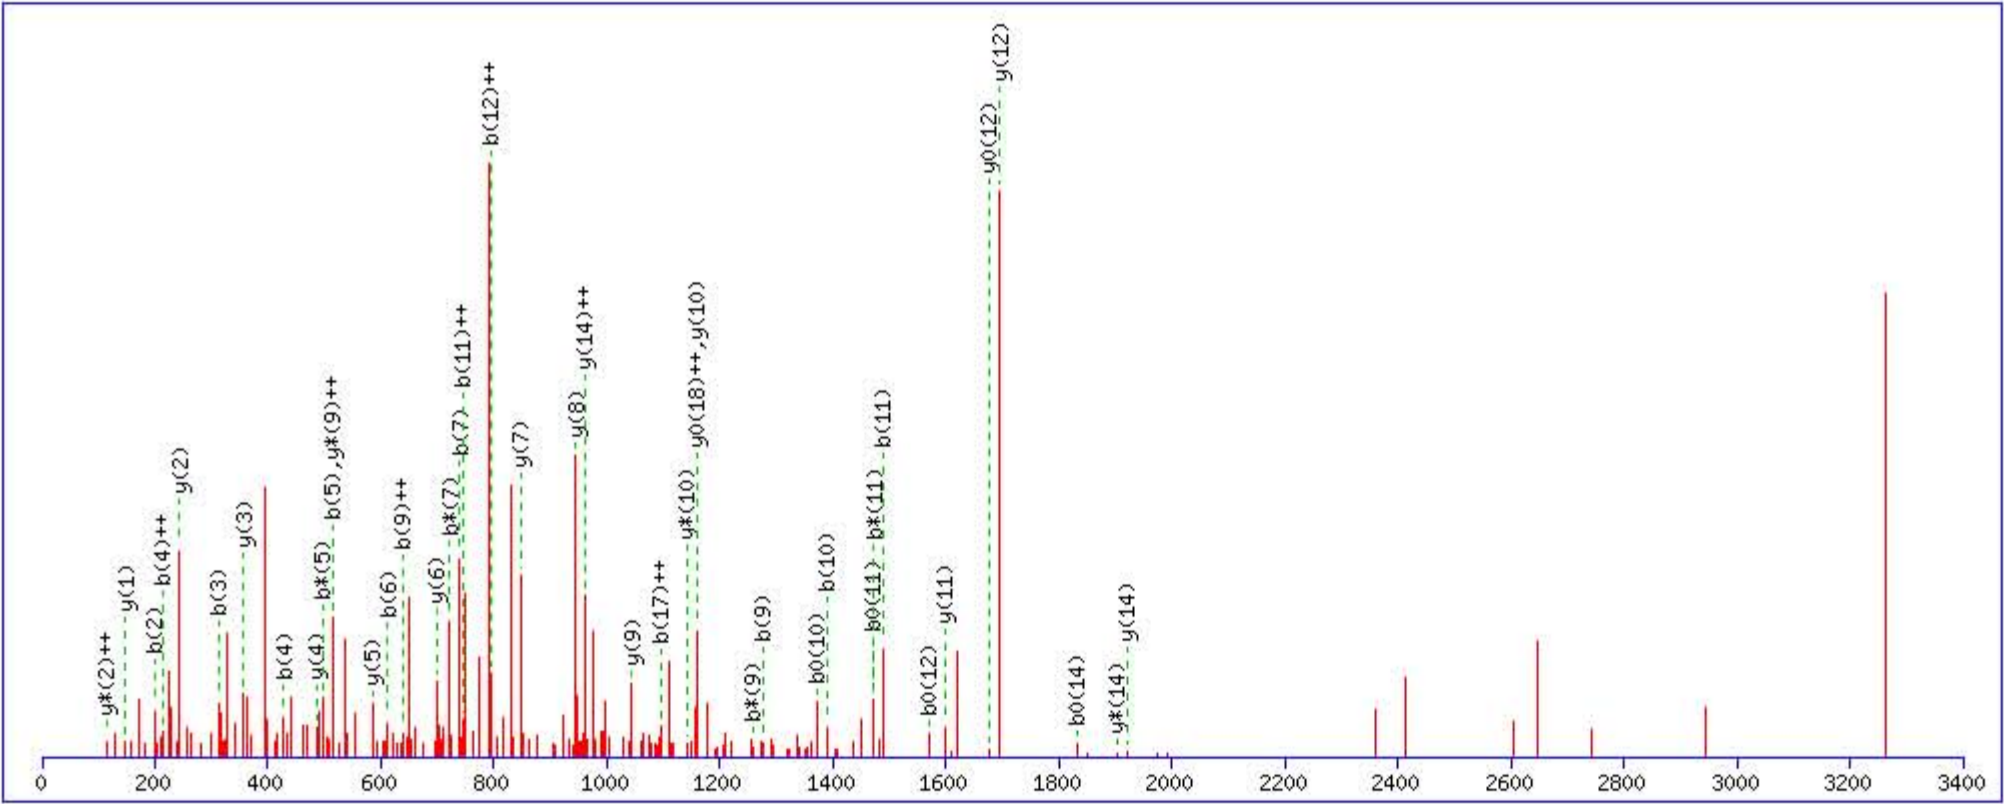

Monoisotopic mass of neutral peptide Mr(calc): 2432.288620  
Fixed modifications: Carbamidomethyl (C) (apply to specified residues or termini only)  
Variable modifications:  
Q9 : Biotin:Thermo-21345 (Q)  
Ions Score: 48 Expect: 0.00023  
Matches : 42/194 fragment ions using 114 most intense peaks [\(help\)](#)

| #  | b           | b <sup>++</sup> | b <sup>*</sup> | b <sup>+++</sup> | b <sup>0</sup> | b <sup>0++</sup> | Seq. | y           | y <sup>++</sup> | y <sup>*</sup> | y <sup>+++</sup> | y <sup>0</sup> | y <sup>0++</sup> | #  |
|----|-------------|-----------------|----------------|------------------|----------------|------------------|------|-------------|-----------------|----------------|------------------|----------------|------------------|----|
| 1  | 100.075690  | 50.541483       |                |                  |                |                  | V    |             |                 |                |                  |                |                  | 19 |
| 2  | 199.144104  | 100.075690      |                |                  |                |                  | V    | 2334.227464 | 1167.617370     | 2317.200915    | 1159.104095      | 2316.216899    | 1158.612087      | 18 |
| 3  | 313.187031  | 157.097153      | 296.160482     | 148.583879       |                |                  | N    | 2235.159050 | 1118.083163     | 2218.132501    | 1109.569888      | 2217.148485    | 1109.077880      | 17 |
| 4  | 427.229958  | 214.118617      | 410.203409     | 205.605343       |                |                  | N    | 2121.116123 | 1061.061699     | 2104.089574    | 1052.548425      | 2103.105558    | 1052.056417      | 16 |
| 5  | 514.261986  | 257.634631      | 497.235437     | 249.121357       | 496.251421     | 248.629349       | S    | 2007.073196 | 1004.040236     | 1990.046647    | 995.526962       | 1989.062631    | 995.034954       | 15 |
| 6  | 611.314750  | 306.161013      | 594.288201     | 297.647739       | 593.304185     | 297.155731       | P    | 1920.041168 | 960.524222      | 1903.014619    | 952.010948       | 1902.030603    | 951.518940       | 14 |
| 7  | 739.373328  | 370.190302      | 722.346779     | 361.677028       | 721.362763     | 361.185020       | Q    | 1822.988404 | 911.997840      | 1805.961855    | 903.484566       | 1804.977839    | 902.992558       | 13 |
| 8  | 836.426092  | 418.716684      | 819.399543     | 410.203410       | 818.415527     | 409.711402       | P    | 1694.929826 | 847.968551      | 1677.903277    | 839.455277       | 1676.919261    | 838.963269       | 12 |
| 9  | 1275.651418 | 638.329347      | 1258.624869    | 629.816073       | 1257.640853    | 629.324065       | Q    | 1597.877062 | 799.442169      | 1580.850513    | 790.928895       | 1579.866497    | 790.436887       | 11 |
| 10 | 1389.694345 | 695.350811      | 1372.667796    | 686.837536       | 1371.683780    | 686.345528       | N    | 1158.651736 | 579.829506      | 1141.625187    | 571.316232       | 1140.641171    | 570.824224       | 10 |
| 11 | 1488.762759 | 744.885018      | 1471.736210    | 736.371743       | 1470.752194    | 735.879735       | V    | 1044.608809 | 522.808043      | 1027.582260    | 514.294768       | 1026.598244    | 513.802760       | 9  |
| 12 | 1587.831173 | 794.419225      | 1570.804624    | 785.905950       | 1569.820608    | 785.413942       | V    | 945.540395  | 473.273836      | 928.513846     | 464.760561       | 927.529830     | 464.268553       | 8  |
| 13 | 1734.899587 | 867.953432      | 1717.873038    | 859.440157       | 1716.889022    | 858.948149       | F    | 846.471981  | 423.739629      | 829.445432     | 415.226354       | 828.461416     | 414.734346       | 7  |
| 14 | 1849.926530 | 925.466903      | 1832.899981    | 916.953629       | 1831.915965    | 916.461621       | D    | 699.403567  | 350.205422      | 682.377018     | 341.692147       | 681.393002     | 341.200139       | 6  |
| 15 | 1948.994944 | 975.001110      | 1931.968395    | 966.487836       | 1930.984379    | 965.995828       | V    | 584.376624  | 292.691950      | 567.350075     | 284.178676       |                |                  | 5  |
| 16 | 2077.053522 | 1039.030399     | 2060.026973    | 1030.517124      | 2059.042957    | 1030.025117      | Q    | 485.308210  | 243.157743      | 468.281661     | 234.644469       |                |                  | 4  |
| 17 | 2190.137586 | 1095.572431     | 2173.111037    | 1087.059157      | 2172.127021    | 1086.567149      | I    | 357.249632  | 179.128454      | 340.223083     | 170.615180       |                |                  | 3  |
| 18 | 2287.190350 | 1144.098813     | 2270.163801    | 1135.585539      | 2269.179785    | 1135.093531      | P    | 244.165568  | 122.586422      | 227.139019     | 114.073148       |                |                  | 2  |
| 19 |             |                 |                |                  |                |                  | K    | 147.112804  | 74.060040       | 130.086255     | 65.546765        |                |                  | 1  |

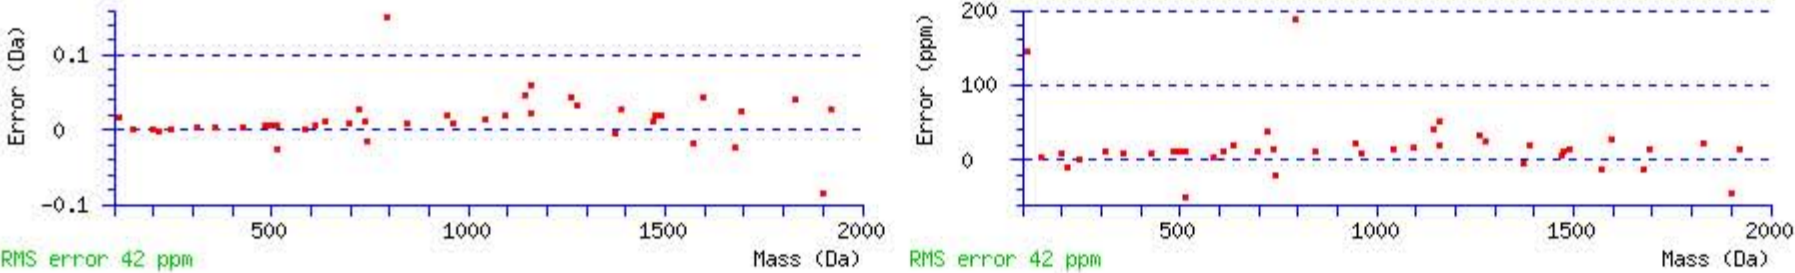

NCBI BLAST search of [VVNNSPQPQNVVFDVQIPK](#)  
(Parameters: blastp, nr protein database, expect=20000, no filter, PAM30)  
Other BLAST [web gateways](#)

All matches to this query

| Score | Mr(calc):   | Delta    | Sequence                            |
|-------|-------------|----------|-------------------------------------|
| 48.4  | 2432.288620 | 0.034832 | <a href="#">VVNNSPQPQNVVFDVQIPK</a> |
| 31.2  | 2432.288620 | 0.034832 | <a href="#">VVNNSPQPQNVVFDVQIPK</a> |
| 16.7  | 2432.288620 | 0.034832 | <a href="#">VVNNSPQPQNVVFDVQIPK</a> |

MATRIX

SCIENCE

Mascot Search Results

Peptide View

MS/MS Fragmentation of **MLADAPPQDPSCCSGALYYGSK**  
Found in **ITIH2\_HUMAN**, Inter-alpha-trypsin inhibitor heavy chain H2 OS=Homo sapiens GN=ITIH2 PE=1 SV=2

Match to Query 56340: 2698.215496 from(675.561150,4+) rtinseconds(2101) index(50985)  
Title: Locus:1.1.1.1969.5 File:"2013-07-02 CLN FXIII 180 min 2nd F 4.wiff"  
Data file C:\Program Files (x86)\Matrix Science\Mascot Daemon\mgf\8 FXIII 180 min 2nd\mascot\_daemon\_merge.mgf

Click mouse within plot area to zoom in by factor of two about that point  
Or, 

Plot from

100

 to 

1800

 Da 

Full range

  
Label all possible matches ☐ Label matches used for scoring ☒

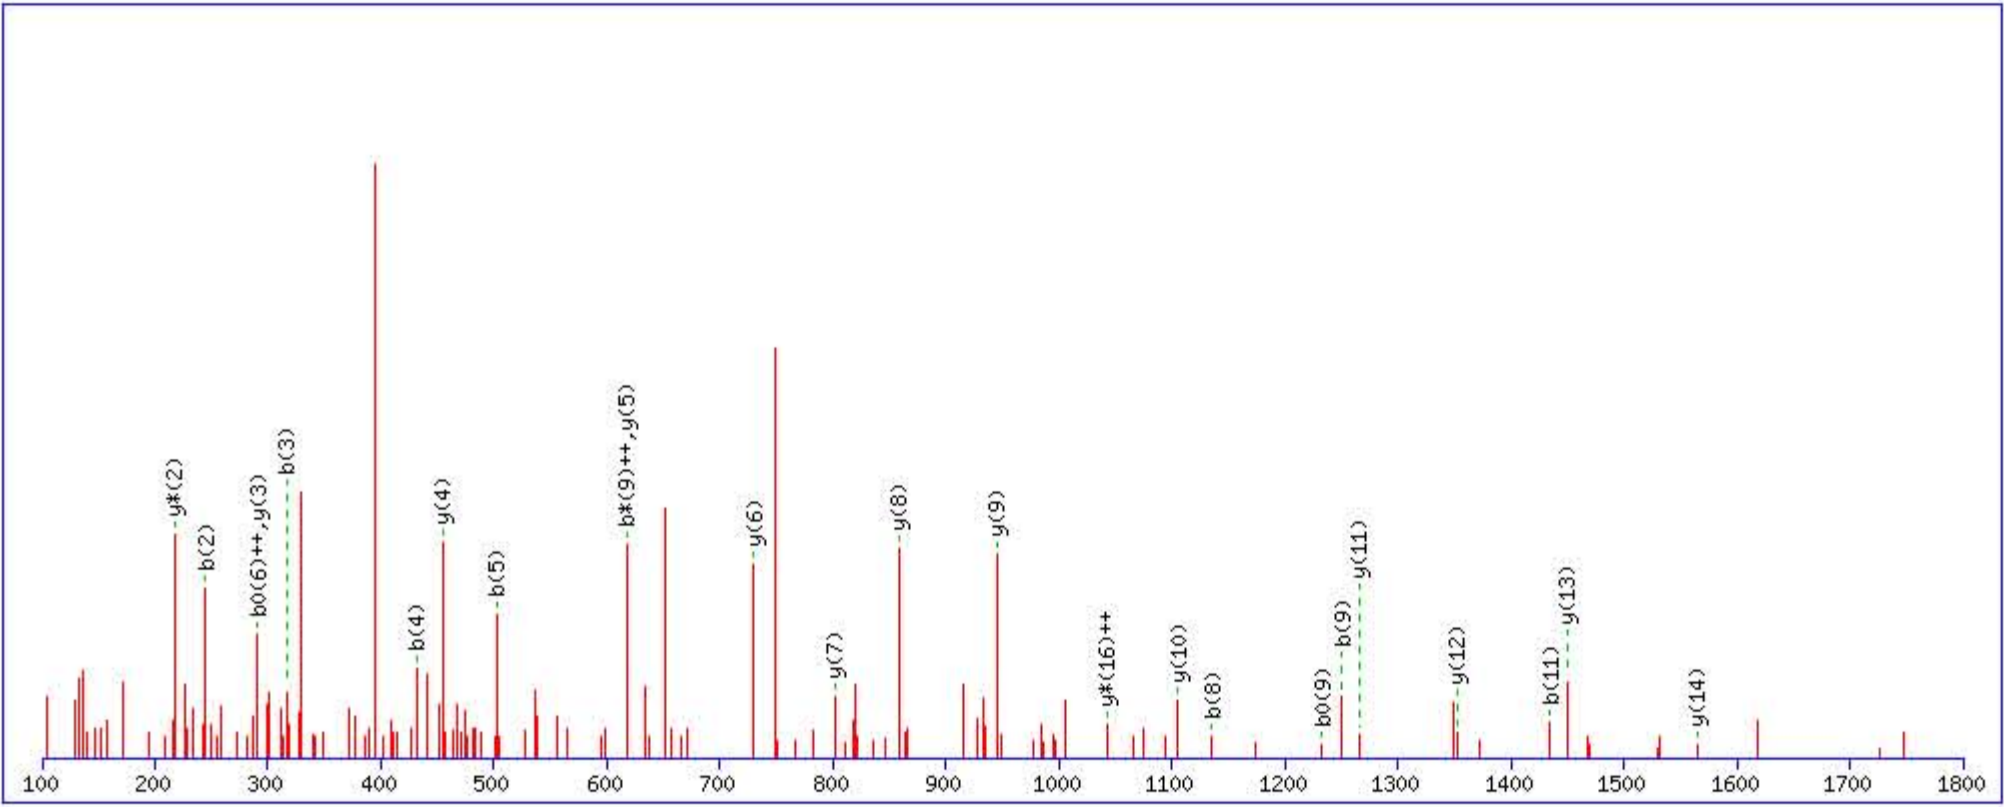

Monoisotopic mass of neutral peptide Mr(calc): 2698.189941  
Fixed modifications: Carbamidomethyl (C) (apply to specified residues or termini only)  
Variable modifications:  
Q8 : Biotin:Thermo-21345 (Q)  
Ions Score: 60 Expect: 9.8e-006  
Matches : 24/230 fragment ions using 48 most intense peaks [\(help\)](#)

| #  | b           | b <sup>++</sup> | b <sup>*</sup> | b <sup>*++</sup> | b <sup>0</sup> | b <sup>0++</sup> | Seq. | y           | y <sup>++</sup> | y <sup>*</sup> | y <sup>*++</sup> | y <sup>0</sup> | y <sup>0++</sup> | #  |
|----|-------------|-----------------|----------------|------------------|----------------|------------------|------|-------------|-----------------|----------------|------------------|----------------|------------------|----|
| 1  | 132.047761  | 66.527518       |                |                  |                |                  | M    |             |                 |                |                  |                |                  | 22 |
| 2  | 245.131825  | 123.069550      |                |                  |                |                  | L    | 2568.156746 | 1284.582011     | 2551.130197    | 1276.068736      | 2550.146181    | 1275.576728      | 21 |
| 3  | 316.168939  | 158.588107      |                |                  |                |                  | A    | 2455.072682 | 1228.039979     | 2438.046133    | 1219.526704      | 2437.062117    | 1219.034696      | 20 |
| 4  | 431.195882  | 216.101579      |                |                  | 413.185317     | 207.096296       | D    | 2384.035568 | 1192.521422     | 2367.009019    | 1184.008148      | 2366.025003    | 1183.516140      | 19 |
| 5  | 502.232996  | 251.620136      |                |                  | 484.222431     | 242.614854       | A    | 2269.008625 | 1135.007950     | 2251.982076    | 1126.494676      | 2250.998060    | 1126.002668      | 18 |
| 6  | 599.285760  | 300.146518      |                |                  | 581.275195     | 291.141236       | P    | 2197.971511 | 1099.489394     | 2180.944962    | 1090.976119      | 2179.960946    | 1090.484111      | 17 |
| 7  | 696.338524  | 348.672900      |                |                  | 678.327959     | 339.667618       | P    | 2100.918747 | 1050.963012     | 2083.892198    | 1042.449737      | 2082.908182    | 1041.957729      | 16 |
| 8  | 1135.563850 | 568.285563      | 1118.537301    | 559.772289       | 1117.553285    | 559.280281       | Q    | 2003.865983 | 1002.436630     | 1986.839434    | 993.923355       | 1985.855418    | 993.431347       | 15 |
| 9  | 1250.590793 | 625.799035      | 1233.564244    | 617.285760       | 1232.580228    | 616.793752       | D    | 1564.640657 | 782.823967      | 1547.614108    | 774.310692       | 1546.630092    | 773.818684       | 14 |
| 10 | 1347.643557 | 674.325417      | 1330.617008    | 665.812142       | 1329.632992    | 665.320134       | P    | 1449.613714 | 725.310495      | 1432.587165    | 716.797221       | 1431.603149    | 716.305213       | 13 |
| 11 | 1434.675585 | 717.841431      | 1417.649036    | 709.328156       | 1416.665020    | 708.836148       | S    | 1352.560950 | 676.784113      | 1335.534401    | 668.270839       | 1334.550385    | 667.778831       | 12 |
| 12 | 1594.706234 | 797.856755      | 1577.679685    | 789.343481       | 1576.695669    | 788.851473       | C    | 1265.528922 | 633.268099      | 1248.502373    | 624.754825       | 1247.518357    | 624.262817       | 11 |
| 13 | 1754.736883 | 877.872080      | 1737.710334    | 869.358805       | 1736.726318    | 868.866797       | C    | 1105.498273 | 553.252775      | 1088.471724    | 544.739500       | 1087.487708    | 544.247492       | 10 |
| 14 | 1841.768911 | 921.388094      | 1824.742362    | 912.874819       | 1823.758346    | 912.382811       | S    | 945.467624  | 473.237450      | 928.441075     | 464.724176       | 927.457059     | 464.232168       | 9  |
| 15 | 1898.790375 | 949.898826      | 1881.763826    | 941.385551       | 1880.779810    | 940.893543       | G    | 858.435596  | 429.721436      | 841.409047     | 421.208162       | 840.425031     | 420.716154       | 8  |
| 16 | 1969.827489 | 985.417383      | 1952.800940    | 976.904108       | 1951.816924    | 976.412100       | A    | 801.414132  | 401.210704      | 784.387583     | 392.697430       | 783.403567     | 392.205422       | 7  |
| 17 | 2082.911553 | 1041.959415     | 2065.885004    | 1033.446140      | 2064.900988    | 1032.954132      | L    | 730.377018  | 365.692147      | 713.350469     | 357.178873       | 712.366453     | 356.686865       | 6  |
| 18 | 2245.974882 | 1123.491079     | 2228.948333    | 1114.977805      | 2227.964317    | 1114.485797      | Y    | 617.292954  | 309.150115      | 600.266405     | 300.636841       | 599.282389     | 300.144833       | 5  |
| 19 | 2409.038211 | 1205.022744     | 2392.011662    | 1196.509469      | 2391.027646    | 1196.017461      | Y    | 454.229625  | 227.618451      | 437.203076     | 219.105176       | 436.219060     | 218.613168       | 4  |
| 20 | 2466.059675 | 1233.533476     | 2449.033126    | 1225.020201      | 2448.049110    | 1224.528193      | G    | 291.166296  | 146.086786      | 274.139747     | 137.573512       | 273.155731     | 137.081504       | 3  |
| 21 | 2553.091703 | 1277.049490     | 2536.065154    | 1268.536215      | 2535.081138    | 1268.044207      | S    | 234.144832  | 117.576054      | 217.118283     | 109.062780       | 216.134267     | 108.570772       | 2  |
| 22 |             |                 |                |                  |                |                  | K    | 147.112804  | 74.060040       | 130.086255     | 65.546765        |                |                  | 1  |

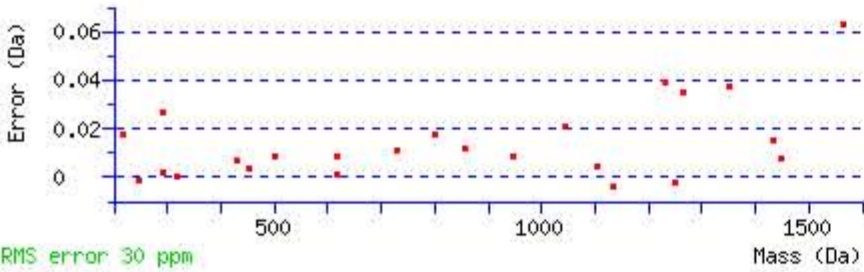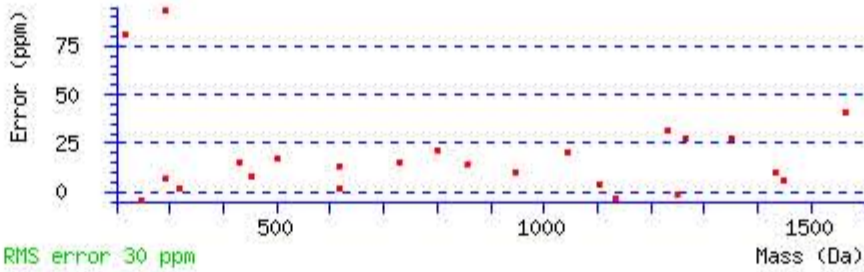

NCBI BLAST search of [MLADAPPQDPSCCSGALYYGSK](#)  
(Parameters: blastp, nr protein database, expect=20000, no filter, PAM30)  
Other BLAST [web gateways](#)

All matches to this query

| Score | Mr(calc):   | Delta    | Sequence                               |
|-------|-------------|----------|----------------------------------------|
| 59.7  | 2698.189941 | 0.025555 | <a href="#">MLADAPPQDPSCCSGALYYGSK</a> |

MATRIX

SCIENCE

Mascot Search Results

Peptide View

MS/MS Fragmentation of **SILQMSLDHHIVTPLTSLVIENEAGDER**  
Found in **ITIH2\_HUMAN**, Inter-alpha-trypsin inhibitor heavy chain H2 OS=Homo sapiens GN=ITIH2 PE=1 SV=2

Match to Query 65343: 3443.787320 from(689.764740,5+) rtinseconds(2657) index(54337)  
Title: Locus:1.1.1.2162.8 File:"2013-07-02 CLN FXIII 180 min 2nd F 4.wiff"  
Data file C:\Program Files (x86)\Matrix Science\Mascot Daemon\mgf\8 FXIII 180 min 2nd\mascot\_daemon\_merge.mgf

Click mouse within plot area to zoom in by factor of two about that point  
Or, 

Plot from

0

 to 

2200

 Da 

Full range

  
Label all possible matches ☐ Label matches used for scoring ☒

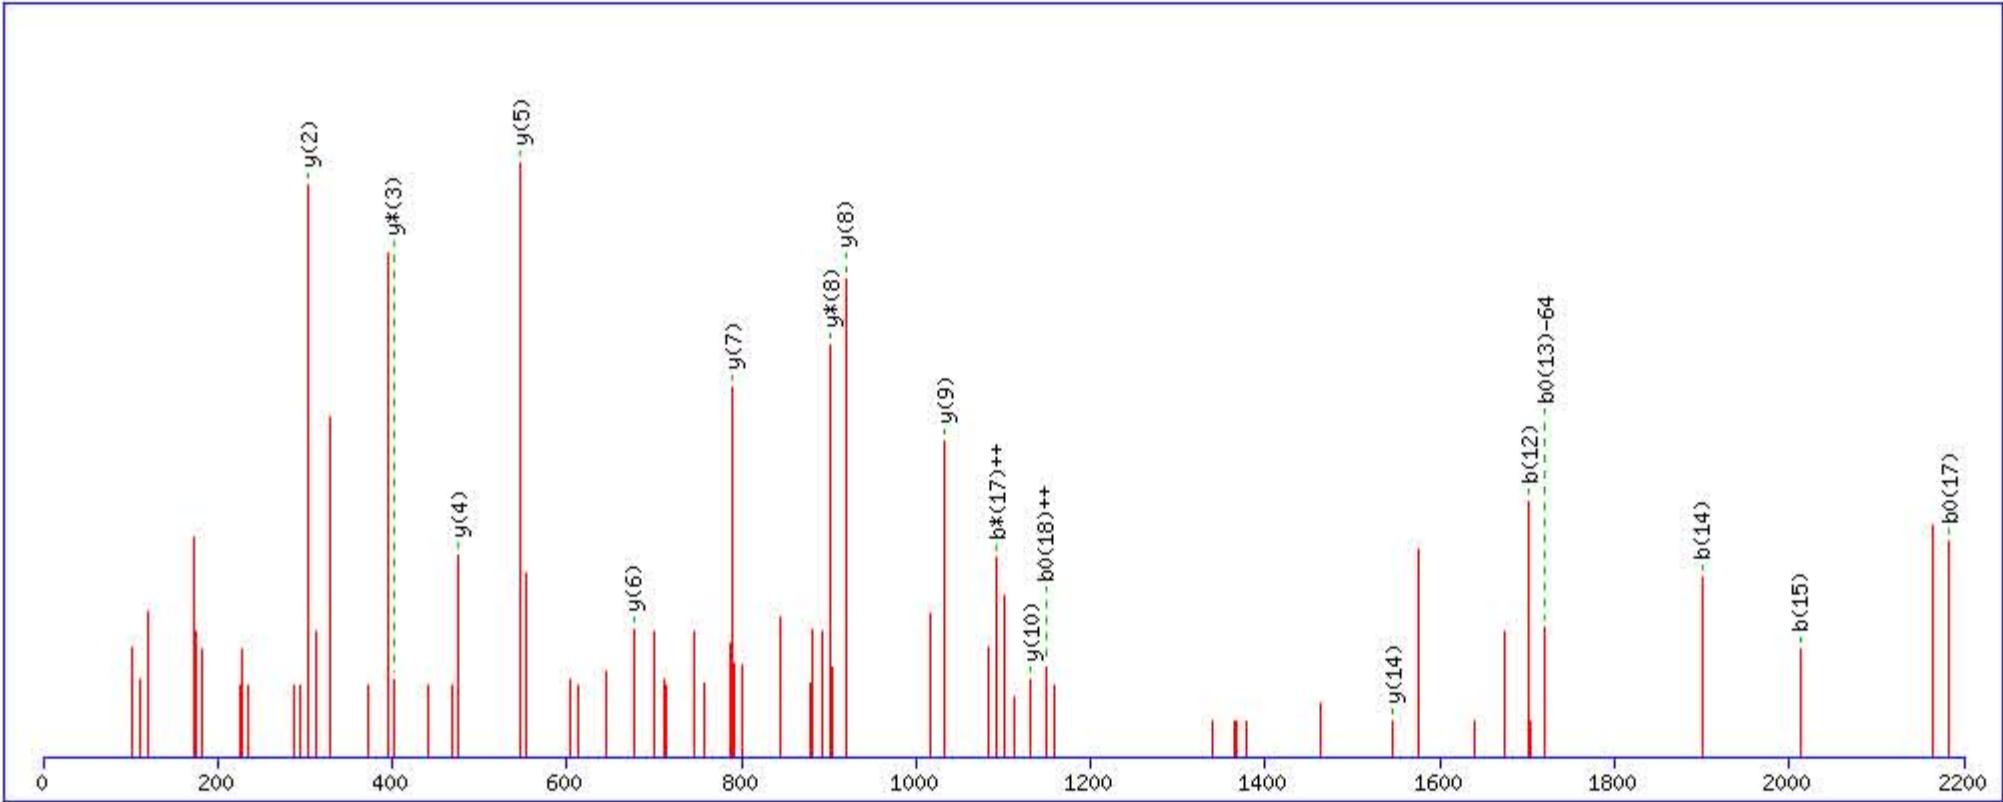

Monoisotopic mass of neutral peptide Mr(calc): 3443.742859  
Fixed modifications: Carbamidomethyl (C) (apply to specified residues or termini only)  
Variable modifications:  
Q4 : Biotin:Thermo-21345 (Q)  
M5 : Oxidation (M), with neutral losses 0.000000(shown in table), 63.998285  
Ions Score: 36 Expect: 0.0062  
Matches : 18/478 fragment ions using 35 most intense peaks [\(help\)](#)

| #  | b           | b <sup>++</sup> | b <sup>*</sup> | b <sup>*++</sup> | b <sup>0</sup> | b <sup>0++</sup> | Seq. | y           | y <sup>++</sup> | y <sup>*</sup> | y <sup>*++</sup> | y <sup>0</sup> | y <sup>0++</sup> | #  |
|----|-------------|-----------------|----------------|------------------|----------------|------------------|------|-------------|-----------------|----------------|------------------|----------------|------------------|----|
| 1  | 88.039304   | 44.523290       |                |                  | 70.028739      | 35.518008        | S    |             |                 |                |                  |                |                  | 28 |
| 2  | 201.123368  | 101.065322      |                |                  | 183.112803     | 92.060039        | I    | 3357.718126 | 1679.362701     | 3340.691577    | 1670.849426      | 3339.707561    | 1670.357418      | 27 |
| 3  | 314.207432  | 157.607354      |                |                  | 296.196867     | 148.602071       | L    | 3244.634062 | 1622.820669     | 3227.607513    | 1614.307394      | 3226.623497    | 1613.815386      | 26 |
| 4  | 753.432758  | 377.220017      | 736.406209     | 368.706743       | 735.422193     | 368.214735       | Q    | 3131.549998 | 1566.278637     | 3114.523449    | 1557.765362      | 3113.539433    | 1557.273354      | 25 |
| 5  | 900.468158  | 450.737717      | 883.441609     | 442.224443       | 882.457593     | 441.732435       | M    | 2692.324672 | 1346.665974     | 2675.298123    | 1338.152699      | 2674.314107    | 1337.660691      | 24 |
| 6  | 987.500186  | 494.253731      | 970.473637     | 485.740456       | 969.489621     | 485.248448       | S    | 2545.289272 | 1273.148274     | 2528.262723    | 1264.634999      | 2527.278707    | 1264.142991      | 23 |
| 7  | 1100.584250 | 550.795763      | 1083.557701    | 542.282489       | 1082.573685    | 541.790480       | L    | 2458.257244 | 1229.632260     | 2441.230695    | 1221.118985      | 2440.246679    | 1220.626977      | 22 |
| 8  | 1215.611193 | 608.309235      | 1198.584644    | 599.795960       | 1197.600628    | 599.303952       | D    | 2345.173180 | 1173.090228     | 2328.146631    | 1164.576953      | 2327.162615    | 1164.084945      | 21 |
| 9  | 1352.670105 | 676.838690      | 1335.643556    | 668.325416       | 1334.659540    | 667.833408       | H    | 2230.146237 | 1115.576756     | 2213.119688    | 1107.063482      | 2212.135672    | 1106.571474      | 20 |
| 10 | 1489.729017 | 745.368146      | 1472.702468    | 736.854872       | 1471.718452    | 736.362864       | H    | 2093.087325 | 1047.047300     | 2076.060776    | 1038.534026      | 2075.076760    | 1038.042018      | 19 |
| 11 | 1602.813081 | 801.910178      | 1585.786532    | 793.396904       | 1584.802516    | 792.904896       | I    | 1956.028413 | 978.517845      | 1939.001864    | 970.004570       | 1938.017848    | 969.512562       | 18 |
| 12 | 1701.881495 | 851.444385      | 1684.854946    | 842.931111       | 1683.870930    | 842.439103       | V    | 1842.944349 | 921.975813      | 1825.917800    | 913.462538       | 1824.933784    | 912.970530       | 17 |
| 13 | 1802.929174 | 901.968225      | 1785.902625    | 893.454951       | 1784.918609    | 892.962942       | T    | 1743.875935 | 872.441606      | 1726.849386    | 863.928331       | 1725.865370    | 863.436323       | 16 |
| 14 | 1899.981938 | 950.494607      | 1882.955389    | 941.981333       | 1881.971373    | 941.489324       | P    | 1642.828256 | 821.917766      | 1625.801707    | 813.404492       | 1624.817691    | 812.912484       | 15 |
| 15 | 2013.066002 | 1007.036639     | 1996.039453    | 998.523364       | 1995.055437    | 998.031356       | L    | 1545.775492 | 773.391384      | 1528.748943    | 764.878110       | 1527.764927    | 764.386102       | 14 |
| 16 | 2114.113681 | 1057.560478     | 2097.087132    | 1049.047204      | 2096.103116    | 1048.555196      | T    | 1432.691428 | 716.849352      | 1415.664879    | 708.336078       | 1414.680863    | 707.844070       | 13 |
| 17 | 2201.145709 | 1101.076492     | 2184.119160    | 1092.563218      | 2183.135144    | 1092.071210      | S    | 1331.643749 | 666.325513      | 1314.617200    | 657.812238       | 1313.633184    | 657.320230       | 12 |
| 18 | 2314.229773 | 1157.618524     | 2297.203224    | 1149.105250      | 2296.219208    | 1148.613242      | L    | 1244.611721 | 622.809499      | 1227.585172    | 614.296224       | 1226.601156    | 613.804216       | 11 |
| 19 | 2413.298187 | 1207.152731     | 2396.271638    | 1198.639457      | 2395.287622    | 1198.147449      | V    | 1131.527657 | 566.267467      | 1114.501108    | 557.754192       | 1113.517092    | 557.262184       | 10 |
| 20 | 2526.382251 | 1263.694763     | 2509.355702    | 1255.181489      | 2508.371686    | 1254.689481      | I    | 1032.459243 | 516.733260      | 1015.432694    | 508.219985       | 1014.448678    | 507.727977       | 9  |
| 21 | 2655.424844 | 1328.216060     | 2638.398295    | 1319.702785      | 2637.414279    | 1319.210777      | E    | 919.375179  | 460.191228      | 902.348630     | 451.677953       | 901.364614     | 451.185945       | 8  |
| 22 | 2769.467771 | 1385.237523     | 2752.441222    | 1376.724249      | 2751.457206    | 1376.232241      | N    | 790.332586  | 395.669931      | 773.306037     | 387.156657       | 772.322021     | 386.664649       | 7  |
| 23 | 2898.510364 | 1449.758820     | 2881.483815    | 1441.245545      | 2880.499799    | 1440.753537      | E    | 676.289659  | 338.648468      | 659.263110     | 330.135193       | 658.279094     | 329.643185       | 6  |
| 24 | 2969.547478 | 1485.277377     | 2952.520929    | 1476.764102      | 2951.536913    | 1476.272094      | A    | 547.247066  | 274.127171      | 530.220517     | 265.613897       | 529.236501     | 265.121889       | 5  |
| 25 | 3026.568942 | 1513.788109     | 3009.542393    | 1505.274834      | 3008.558377    | 1504.782826      | G    | 476.209952  | 238.608614      | 459.183403     | 230.095339       | 458.199387     | 229.603331       | 4  |
| 26 | 3141.595885 | 1571.301580     | 3124.569336    | 1562.788306      | 3123.585320    | 1562.296298      | D    | 419.188488  | 210.097882      | 402.161939     | 201.584607       | 401.177923     | 201.092599       | 3  |
| 27 | 3270.638478 | 1635.822877     | 3253.611929    | 1627.309602      | 3252.627913    | 1626.817594      | E    | 304.161545  | 152.584411      | 287.134996     | 144.071136       | 286.150980     | 143.579128       | 2  |
| 28 |             |                 |                |                  |                |                  | R    | 175.118952  | 88.063114       | 158.092403     | 79.549839        |                |                  | 1  |

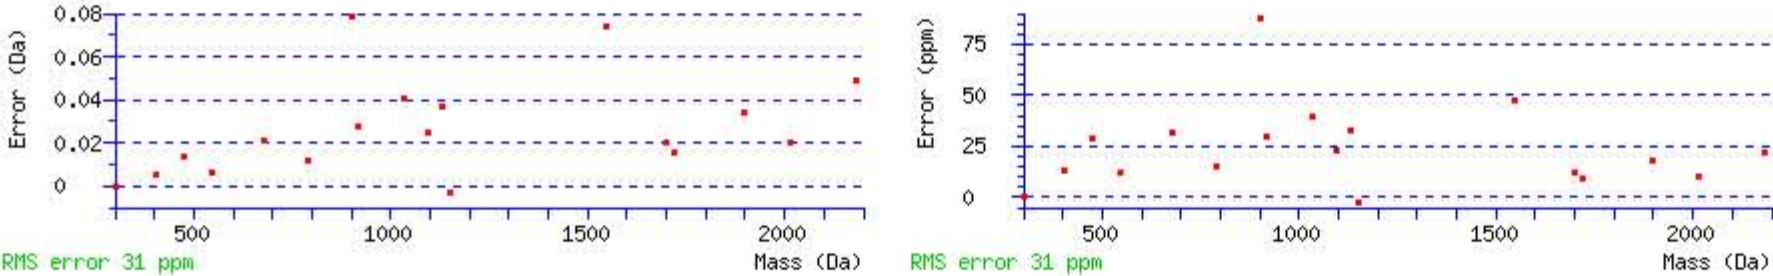

NCBI BLAST search of **SILQMSLDHHIVTPLTSLVIENEAGDER**  
(Parameters: blastp, nr protein database, expect=20000, no filter, PAM30)  
Other BLAST [web gateways](#)

All matches to this query

| Score | Mr(calc):   | Delta    | Sequence                                     |
|-------|-------------|----------|----------------------------------------------|
| 35.9  | 3443.742859 | 0.044461 | <a href="#">SILQMSLDHHIVTPLTSLVIENEAGDER</a> |

MATRIX

SCIENCE

Mascot Search Results

Peptide View

MS/MS Fragmentation of **NVQFNYPHTSVTDVTQNNFHNYPGGSEIVVAGK**  
Found in **ITIH2\_HUMAN**, Inter-alpha-trypsin inhibitor heavy chain H2 OS=Homo sapiens GN=ITIH2 PE=1 SV=2

Match to Query 68599: 3993.962520 from(799.799780,5+) rtinseconds(2384) index(52772)  
Title: Locus:1.1.1.2067.14 File:"2013-07-02 CLN FXIII 180 min 2nd F 4.wiff"  
Data file C:\Program Files (x86)\Matrix Science\Mascot Daemon\mgf\8 FXIII 180 min 2nd\mascot\_daemon\_merge.mgf

Click mouse within plot area to zoom in by factor of two about that point  
Or, 

Plot from

0

 to 

2800

 Da 

Full range

  
Label all possible matches ☐ Label matches used for scoring ☒

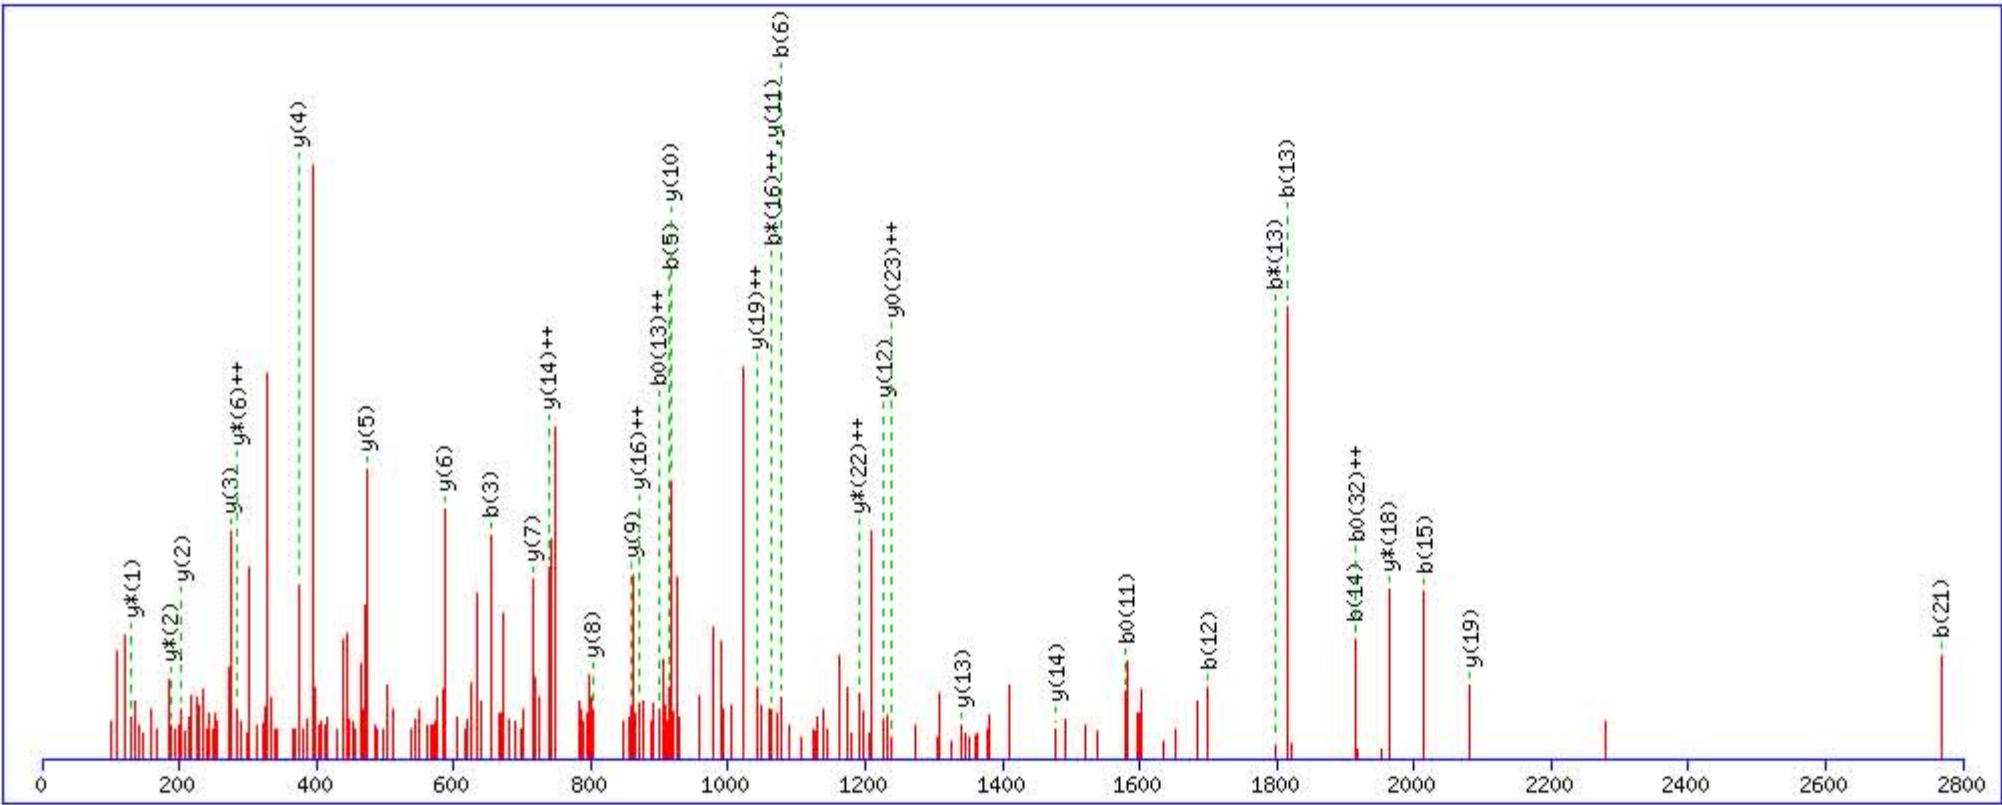

Monoisotopic mass of neutral peptide Mr(calc): 3993.910858  
Fixed modifications: Carbamidomethyl (C) (apply to specified residues or termini only)  
Variable modifications:  
Q3 : Biotin:Thermo-21345 (Q)  
Ions Score: 26 Expect: 0.065  
Matches : 36/356 fragment ions using 142 most intense peaks [\(help\)](#)

| #  | b                  | b <sup>++</sup> | b <sup>*</sup>     | b <sup>*++</sup>   | b <sup>0</sup>     | b <sup>0++</sup>   | Seq. | y                  | y <sup>++</sup>    | y <sup>*</sup>     | y <sup>*++</sup>   | y <sup>0</sup> | y <sup>0++</sup>   | #  |
|----|--------------------|-----------------|--------------------|--------------------|--------------------|--------------------|------|--------------------|--------------------|--------------------|--------------------|----------------|--------------------|----|
| 1  | 115.050203         | 58.028740       | 98.023654          | 49.515465          |                    |                    | N    |                    |                    |                    |                    |                |                    | 33 |
| 2  | 214.118617         | 107.562947      | 197.092068         | 99.049672          |                    |                    | V    | 3880.875173        | 1940.941224        | 3863.848624        | 1932.427950        | 3862.864608    | 1931.935942        | 32 |
| 3  | <b>653.343943</b>  | 327.175610      | 636.317394         | 318.662335         |                    |                    | Q    | 3781.806759        | 1891.407017        | 3764.780210        | 1882.893743        | 3763.796194    | 1882.401735        | 31 |
| 4  | 800.412357         | 400.709817      | 783.385808         | 392.196542         |                    |                    | F    | 3342.581433        | 1671.794354        | 3325.554884        | 1663.281080        | 3324.570868    | 1662.789072        | 30 |
| 5  | <b>914.455284</b>  | 457.731280      | 897.428735         | 449.218006         |                    |                    | N    | 3195.513019        | 1598.260147        | 3178.486470        | 1589.746873        | 3177.502454    | 1589.254865        | 29 |
| 6  | <b>1077.518613</b> | 539.262945      | 1060.492064        | 530.749670         |                    |                    | Y    | 3081.470092        | 1541.238684        | 3064.443543        | 1532.725409        | 3063.459527    | 1532.233401        | 28 |
| 7  | 1174.571377        | 587.789327      | 1157.544828        | 579.276052         |                    |                    | P    | 2918.406763        | 1459.707019        | 2901.380214        | 1451.193745        | 2900.396198    | 1450.701737        | 27 |
| 8  | 1311.630289        | 656.318783      | 1294.603740        | 647.805508         |                    |                    | H    | 2821.353999        | 1411.180637        | 2804.327450        | 1402.667363        | 2803.343434    | 1402.175355        | 26 |
| 9  | 1412.677968        | 706.842622      | 1395.651419        | 698.329348         | 1394.667403        | 697.837339         | T    | 2684.295087        | 1342.651181        | 2667.268538        | 1334.137907        | 2666.284522    | 1333.645899        | 25 |
| 10 | 1499.709996        | 750.358636      | 1482.683447        | 741.845362         | 1481.699431        | 741.353354         | S    | 2583.247408        | 1292.127342        | 2566.220859        | 1283.614067        | 2565.236843    | 1283.122059        | 24 |
| 11 | 1598.778410        | 799.892843      | 1581.751861        | 791.379569         | <b>1580.767845</b> | 790.887561         | V    | 2496.215380        | 1248.611328        | 2479.188831        | 1240.098053        | 2478.204815    | <b>1239.606045</b> | 23 |
| 12 | <b>1699.826089</b> | 850.416683      | 1682.799540        | 841.903408         | 1681.815524        | 841.411400         | T    | 2397.146966        | 1199.077121        | 2380.120417        | <b>1190.563846</b> | 2379.136401    | 1190.071838        | 22 |
| 13 | <b>1814.853032</b> | 907.930154      | <b>1797.826483</b> | 899.416880         | 1796.842467        | <b>898.924872</b>  | D    | 2296.099287        | 1148.553281        | 2279.072738        | 1140.040007        | 2278.088722    | 1139.547999        | 21 |
| 14 | <b>1913.921446</b> | 957.464361      | 1896.894897        | 948.951087         | 1895.910881        | 948.459079         | V    | 2181.072344        | 1091.039810        | 2164.045795        | 1082.526535        | 2163.061779    | 1082.034527        | 20 |
| 15 | <b>2014.969125</b> | 1007.988201     | 1997.942576        | 999.474926         | 1996.958560        | 998.982918         | T    | <b>2082.003930</b> | <b>1041.505603</b> | 2064.977381        | 1032.992328        | 2063.993365    | 1032.500320        | 19 |
| 16 | 2143.027703        | 1072.017490     | 2126.001154        | <b>1063.504215</b> | 2125.017138        | 1063.012207        | Q    | 1980.956251        | 990.981763         | <b>1963.929702</b> | 982.468489         | 1962.945686    | 981.976481         | 18 |
| 17 | 2257.070630        | 1129.038953     | 2240.044081        | 1120.525678        | 2239.060065        | 1120.033671        | N    | 1852.897673        | 926.952474         | 1835.871124        | 918.439200         | 1834.887108    | 917.947192         | 17 |
| 18 | 2371.113557        | 1186.060417     | 2354.087008        | 1177.547142        | 2353.102992        | 1177.055134        | N    | 1738.854746        | <b>869.931011</b>  | 1721.828197        | 861.417736         | 1720.844181    | 860.925728         | 16 |
| 19 | 2518.181971        | 1259.594623     | 2501.155422        | 1251.081349        | 2500.171406        | 1250.589341        | F    | 1624.811819        | 812.909547         | 1607.785270        | 804.396273         | 1606.801254    | 803.904265         | 15 |
| 20 | 2655.240883        | 1328.124079     | 2638.214334        | 1319.610805        | 2637.230318        | 1319.118797        | H    | <b>1477.743405</b> | <b>739.375340</b>  | 1460.716856        | 730.862066         | 1459.732840    | 730.370058         | 14 |
| 21 | <b>2769.283810</b> | 1385.145543     | 2752.257261        | 1376.632268        | 2751.273245        | 1376.140260        | N    | <b>1340.684493</b> | 670.845885         | 1323.657944        | 662.332610         | 1322.673928    | 661.840602         | 13 |
| 22 | 2932.347139        | 1466.677207     | 2915.320590        | 1458.163933        | 2914.336574        | 1457.671925        | Y    | <b>1226.641566</b> | 613.824421         | 1209.615017        | 605.311147         | 1208.631001    | 604.819139         | 12 |
| 23 | 3079.415553        | 1540.211414     | 3062.389004        | 1531.698140        | 3061.404988        | 1531.206132        | F    | <b>1063.578237</b> | 532.292757         | 1046.551688        | 523.779482         | 1045.567672    | 523.287474         | 11 |
| 24 | 3136.437017        | 1568.722146     | 3119.410468        | 1560.208872        | 3118.426452        | 1559.716864        | G    | <b>916.509823</b>  | 458.758550         | 899.483274         | 450.245275         | 898.499258     | 449.753267         | 10 |
| 25 | 3193.458481        | 1597.232878     | 3176.431932        | 1588.719604        | 3175.447916        | 1588.227596        | G    | <b>859.488359</b>  | 430.247818         | 842.461810         | 421.734543         | 841.477794     | 421.242535         | 9  |
| 26 | 3280.490509        | 1640.748892     | 3263.463960        | 1632.235618        | 3262.479944        | 1631.743610        | S    | <b>802.466895</b>  | 401.737086         | 785.440346         | 393.223811         | 784.456330     | 392.731803         | 8  |
| 27 | 3409.533102        | 1705.270189     | 3392.506553        | 1696.756914        | 3391.522537        | 1696.264906        | E    | <b>715.434867</b>  | 358.221072         | 698.408318         | 349.707797         | 697.424302     | 349.215789         | 7  |
| 28 | 3522.617166        | 1761.812221     | 3505.590617        | 1753.298946        | 3504.606601        | 1752.806938        | I    | <b>586.392274</b>  | 293.699775         | 569.365725         | <b>285.186501</b>  |                |                    | 6  |
| 29 | 3621.685580        | 1811.346428     | 3604.659031        | 1802.833153        | 3603.675015        | 1802.341145        | V    | <b>473.308210</b>  | 237.157743         | 456.281661         | 228.644468         |                |                    | 5  |
| 30 | 3720.753994        | 1860.880635     | 3703.727445        | 1852.367360        | 3702.743429        | 1851.875352        | V    | <b>374.239796</b>  | 187.623536         | 357.213247         | 179.110261         |                |                    | 4  |
| 31 | 3791.791108        | 1896.399192     | 3774.764559        | 1887.885917        | 3773.780543        | 1887.393909        | A    | <b>275.171382</b>  | 138.089329         | 258.144833         | 129.576055         |                |                    | 3  |
| 32 | 3848.812572        | 1924.909924     | 3831.786023        | 1916.396649        | 3830.802007        | <b>1915.904641</b> | G    | <b>204.134268</b>  | 102.570772         | <b>187.107719</b>  | 94.057497          |                |                    | 2  |
| 33 |                    |                 |                    |                    |                    |                    | K    | 147.112804         | 74.060040          | <b>130.086255</b>  | 65.546765          |                |                    | 1  |

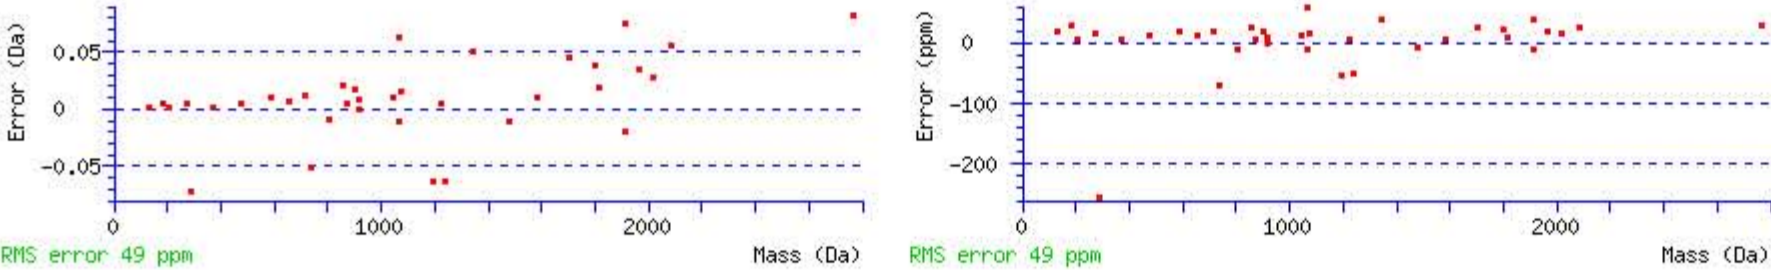

NCBI BLAST search of [NVQFNYPHTSVTDVTQNNFHNYPGGSEIVVAGK](#)  
(Parameters: blastp, nr protein database, expect=20000, no filter, PAM30)  
Other BLAST [web gateways](#)

All matches to this query

| Score | Mr(calc):   | Delta    | Sequence                                          |
|-------|-------------|----------|---------------------------------------------------|
| 25.6  | 3993.910858 | 0.051662 | <a href="#">NVQFNYPHTSVTDVTQNNFHNYPGGSEIVVAGK</a> |
| 3.9   | 3993.910858 | 0.051662 | <a href="#">NVQFNYPHTSVTDVTQNNFHNYPGGSEIVVAGK</a> |

MATRIX

SCIENCE

Mascot Search Results

Peptide View

MS/MS Fragmentation of **GHVSFKPSLDQQR**  
Found in **ITIH3\_HUMAN**, Inter-alpha-trypsin inhibitor heavy chain H3 OS=Homo sapiens GN=ITIH3 PE=1 SV=2

Match to Query 40463: 1808.943612 from(603.988480,3+) rtinseconds(1623) index(47808)  
Title: Locus:1.1.1.1803.10 File:"2013-07-02 CLN FXIII 180 min 2nd F 4.wiff"  
Data file C:\Program Files (x86)\Matrix Science\Mascot Daemon\mgf\8 FXIII 180 min 2nd\mascot\_daemon\_merge.mgf

Click mouse within plot area to zoom in by factor of two about that point  
Or,   to  Da   
Label all possible matches ☐ Label matches used for scoring ☒

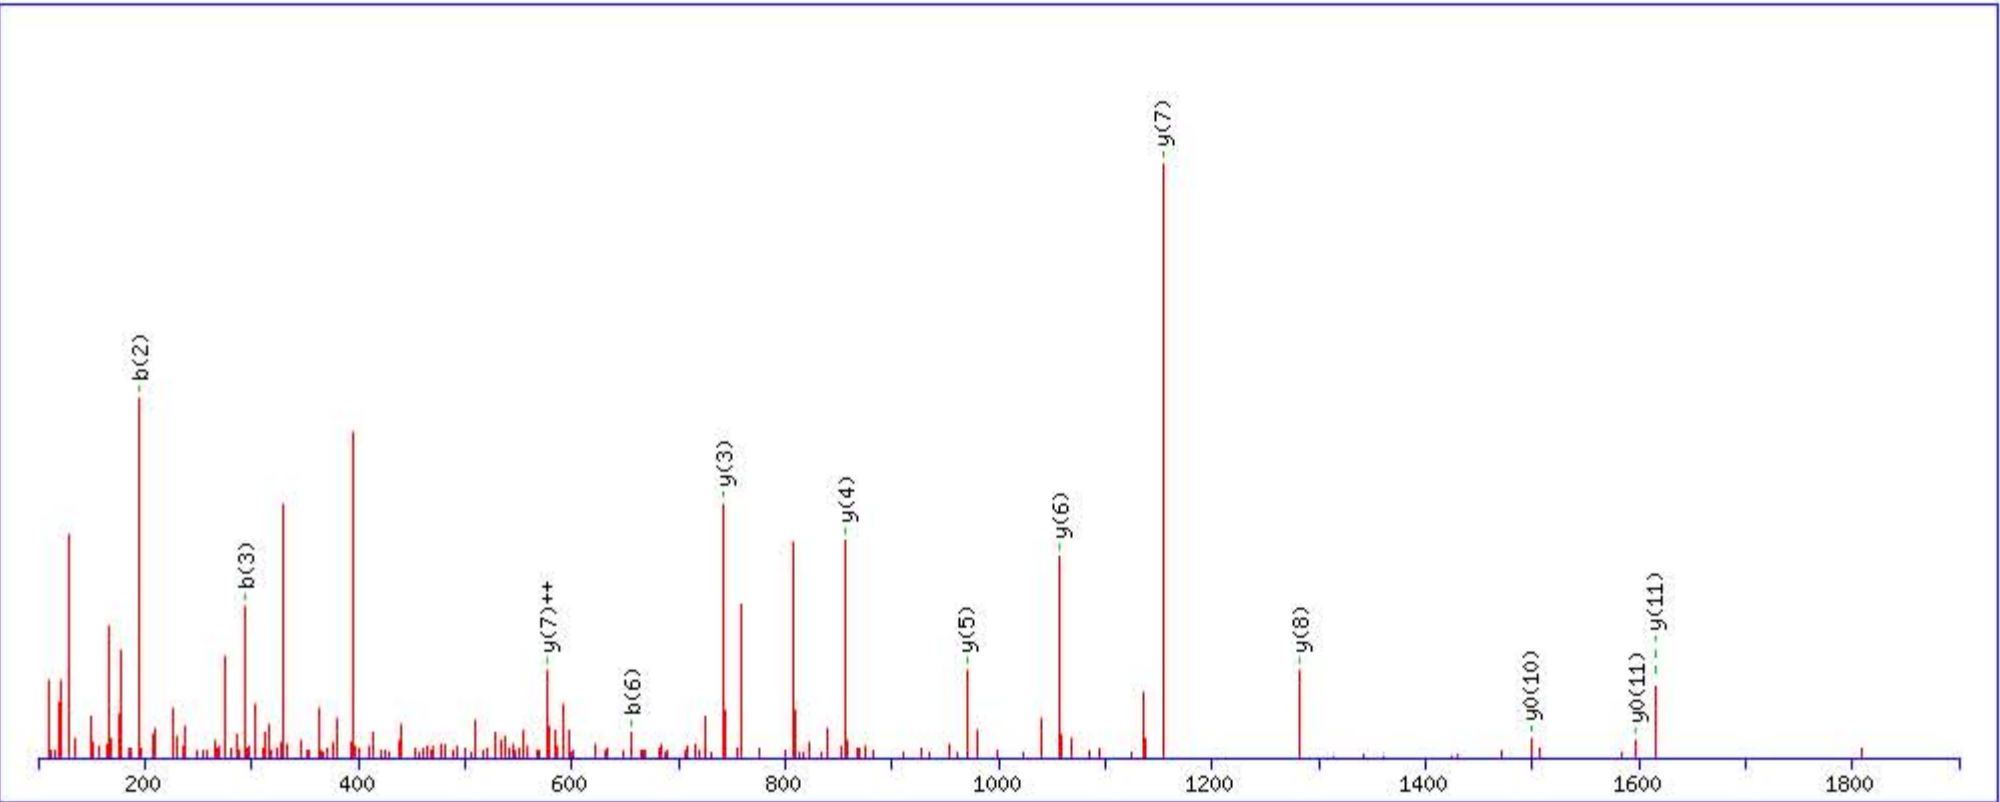

Monoisotopic mass of neutral peptide Mr(calc): 1808.935577  
Fixed modifications: Carbamidomethyl (C) (apply to specified residues or termini only)  
Variable modifications:  
Q12 : Biotin:Thermo-21345 (Q)  
Ions Score: 50 Expect: 2e-005  
Matches : 13/122 fragment ions using 16 most intense peaks [\(help\)](#)

| #  | b           | b <sup>++</sup> | b <sup>*</sup> | b <sup>+++</sup> | b <sup>0</sup> | b <sup>0++</sup> | Seq. | y           | y <sup>++</sup> | y <sup>*</sup> | y <sup>+++</sup> | y <sup>0</sup> | y <sup>0++</sup> | #  |
|----|-------------|-----------------|----------------|------------------|----------------|------------------|------|-------------|-----------------|----------------|------------------|----------------|------------------|----|
| 1  | 58.028740   | 29.518008       |                |                  |                |                  | G    |             |                 |                |                  |                |                  | 13 |
| 2  | 195.087652  | 98.047464       |                |                  |                |                  | H    | 1752.921386 | 876.964331      | 1735.894837    | 868.451057       | 1734.910821    | 867.959049       | 12 |
| 3  | 294.156066  | 147.581671      |                |                  |                |                  | V    | 1615.862474 | 808.434875      | 1598.835925    | 799.921601       | 1597.851909    | 799.429593       | 11 |
| 4  | 381.188094  | 191.097685      |                |                  | 363.177529     | 182.092403       | S    | 1516.794060 | 758.900668      | 1499.767511    | 750.387394       | 1498.783495    | 749.895386       | 10 |
| 5  | 528.256508  | 264.631892      |                |                  | 510.245943     | 255.626610       | F    | 1429.762032 | 715.384654      | 1412.735483    | 706.871380       | 1411.751467    | 706.379372       | 9  |
| 6  | 656.351471  | 328.679374      | 639.324922     | 320.166099       | 638.340906     | 319.674091       | K    | 1282.693618 | 641.850447      | 1265.667069    | 633.337173       | 1264.683053    | 632.845165       | 8  |
| 7  | 753.404235  | 377.205756      | 736.377686     | 368.692481       | 735.393670     | 368.200473       | P    | 1154.598655 | 577.802966      | 1137.572106    | 569.289691       | 1136.588090    | 568.797683       | 7  |
| 8  | 840.436263  | 420.721770      | 823.409714     | 412.208495       | 822.425698     | 411.716487       | S    | 1057.545891 | 529.276584      | 1040.519342    | 520.763309       | 1039.535326    | 520.271301       | 6  |
| 9  | 953.520327  | 477.263802      | 936.493778     | 468.750527       | 935.509762     | 468.258519       | L    | 970.513863  | 485.760570      | 953.487314     | 477.247295       | 952.503298     | 476.755287       | 5  |
| 10 | 1068.547270 | 534.777273      | 1051.520721    | 526.263999       | 1050.536705    | 525.771991       | D    | 857.429799  | 429.218538      | 840.403250     | 420.705263       | 839.419234     | 420.213255       | 4  |
| 11 | 1196.605848 | 598.806562      | 1179.579299    | 590.293288       | 1178.595283    | 589.801279       | Q    | 742.402856  | 371.705066      | 725.376307     | 363.191792       |                |                  | 3  |
| 12 | 1635.831174 | 818.419225      | 1618.804625    | 809.905951       | 1617.820609    | 809.413943       | Q    | 614.344278  | 307.675777      | 597.317729     | 299.162503       |                |                  | 2  |
| 13 |             |                 |                |                  |                |                  | R    | 175.118952  | 88.063114       | 158.092403     | 79.549839        |                |                  | 1  |

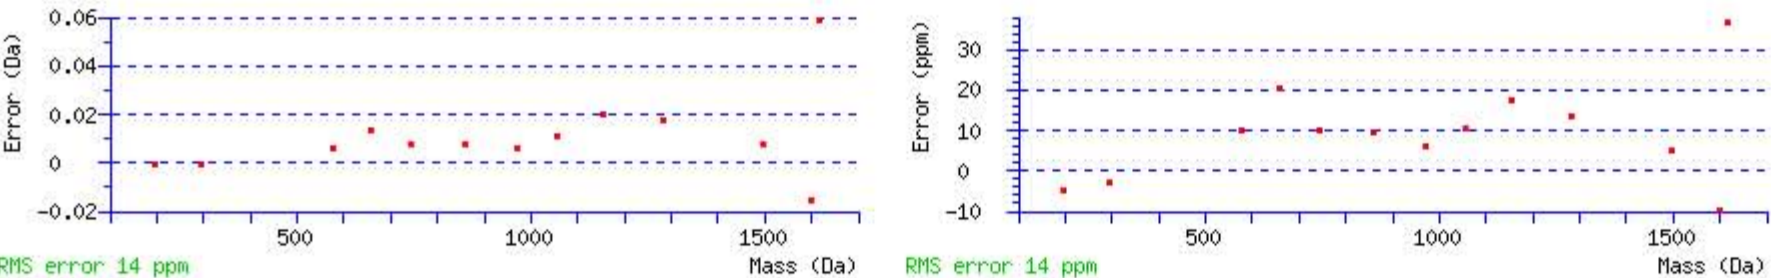

NCBI BLAST search of [GHVSFKPSLDQQR](#)  
(Parameters: blastp, nr protein database, expect=20000, no filter, PAM30)  
Other BLAST [web gateways](#)

All matches to this query

| Score | Mr(calc):   | Delta     | Sequence                      |
|-------|-------------|-----------|-------------------------------|
| 50.3  | 1808.935577 | 0.008035  | <a href="#">GHVSFKPSLDQQR</a> |
| 50.3  | 1808.935577 | 0.008035  | <a href="#">GHVSFKPSLDQQR</a> |
| 0.3   | 1808.946793 | -0.003181 | <a href="#">IFRQNSDLVNHR</a>  |

MATRIX

SCIENCE

Mascot Search Results

Peptide View

MS/MS Fragmentation of **KGHVSFKPSLDQQR**  
Found in **ITIH3\_HUMAN**, Inter-alpha-trypsin inhibitor heavy chain H3 OS=Homo sapiens GN=ITIH3 PE=1 SV=2

Match to Query 42896: 1937.035056 from(485.266040,4+) rtinseconds(1497) index(46944)  
Title: Locus:1.1.1.1759.8 File:"2013-07-02 CLN FXIII 180 min 2nd F 4.wiff"  
Data file C:\Program Files (x86)\Matrix Science\Mascot Daemon\mgf\8 FXIII 180 min 2nd\mascot\_daemon\_merge.mgf

Click mouse within plot area to zoom in by factor of two about that point  
Or,   to  Da   
Label all possible matches ☐ Label matches used for scoring ☒

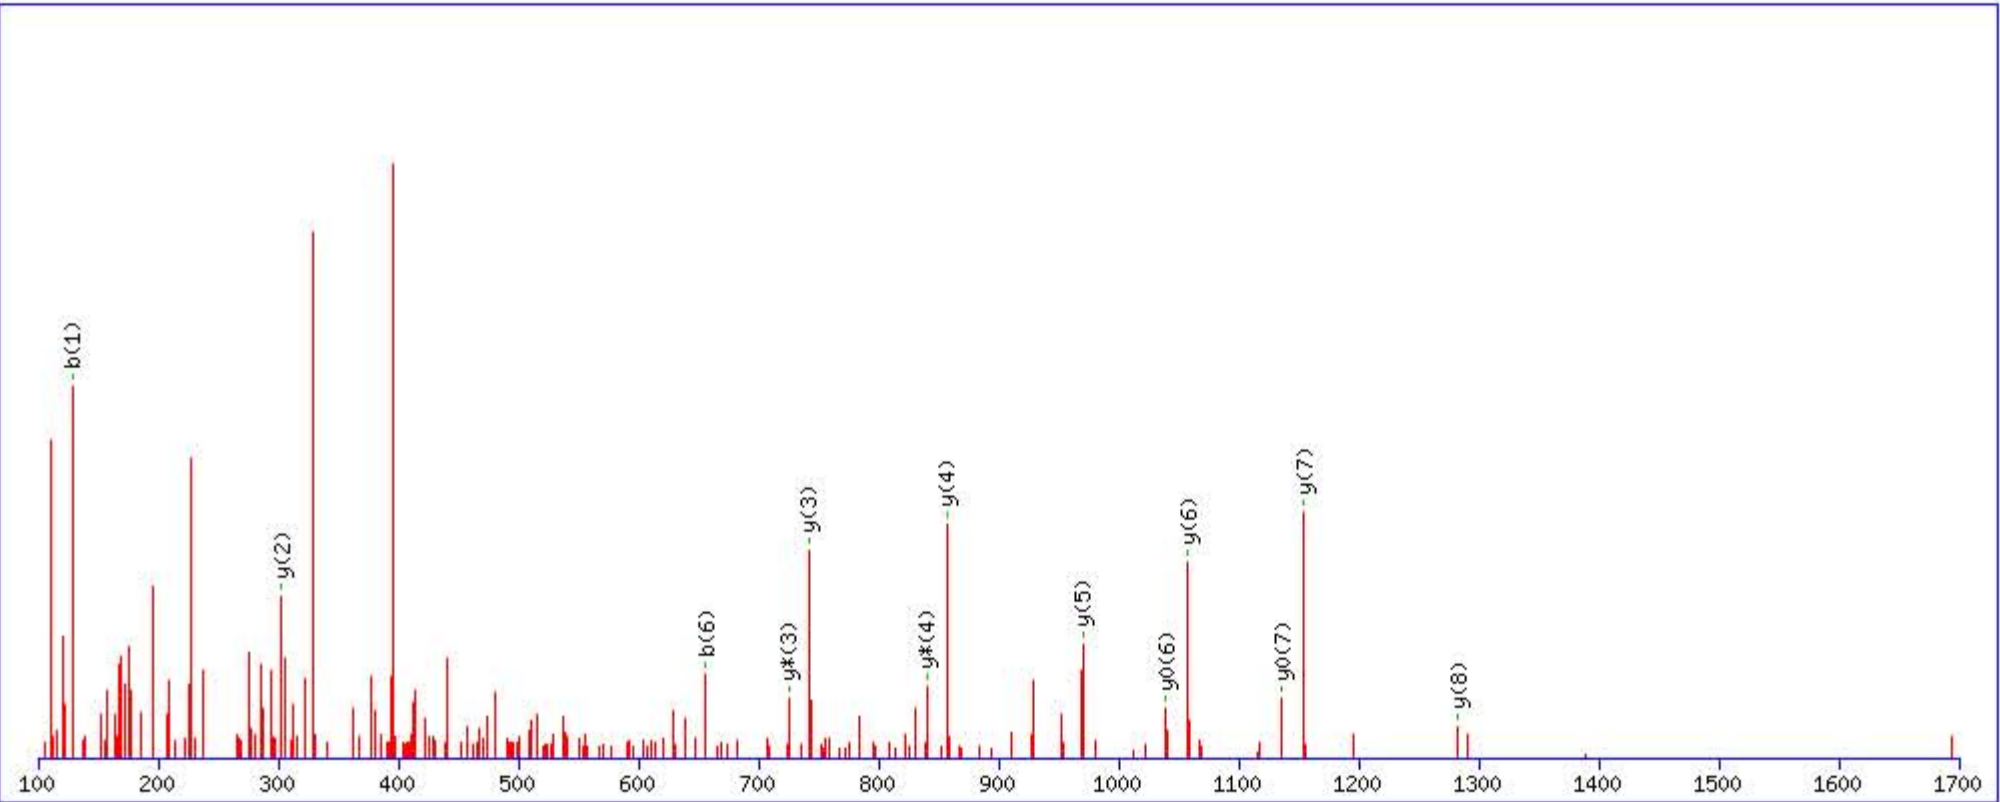

Monoisotopic mass of neutral peptide Mr(calc): 1937.030533  
Fixed modifications: Carbamidomethyl (C) (apply to specified residues or termini only)  
Variable modifications:  
Q12 : Biotin:Thermo-21345 (Q)  
Ions Score: 32 Expect: 0.015  
Matches : 13/142 fragment ions using 26 most intense peaks [\(help\)](#)

| #  | b           | b <sup>++</sup> | b <sup>+</sup> | b <sup>+++</sup> | b <sup>0</sup> | b <sup>0++</sup> | Seq. | y           | y <sup>++</sup> | y <sup>+</sup> | y <sup>+++</sup> | y <sup>0</sup> | y <sup>0++</sup> | #  |
|----|-------------|-----------------|----------------|------------------|----------------|------------------|------|-------------|-----------------|----------------|------------------|----------------|------------------|----|
| 1  | 129.102239  | 65.054757       | 112.075690     | 56.541483        |                |                  | K    |             |                 |                |                  |                |                  | 14 |
| 2  | 186.123703  | 93.565489       | 169.097154     | 85.052215        |                |                  | G    | 1809.942850 | 905.475063      | 1792.916301    | 896.961789       | 1791.932285    | 896.469781       | 13 |
| 3  | 323.182615  | 162.094945      | 306.156066     | 153.581671       |                |                  | H    | 1752.921386 | 876.964331      | 1735.894837    | 868.451057       | 1734.910821    | 867.959049       | 12 |
| 4  | 422.251029  | 211.629153      | 405.224480     | 203.115878       |                |                  | V    | 1615.862474 | 808.434875      | 1598.835925    | 799.921601       | 1597.851909    | 799.429593       | 11 |
| 5  | 509.283057  | 255.145167      | 492.256508     | 246.631892       | 491.272492     | 246.139884       | S    | 1516.794060 | 758.900668      | 1499.767511    | 750.387394       | 1498.783495    | 749.895386       | 10 |
| 6  | 656.351471  | 328.679374      | 639.324922     | 320.166099       | 638.340906     | 319.674091       | F    | 1429.762032 | 715.384654      | 1412.735483    | 706.871380       | 1411.751467    | 706.379372       | 9  |
| 7  | 784.446434  | 392.726855      | 767.419885     | 384.213581       | 766.435869     | 383.721573       | K    | 1282.693618 | 641.850447      | 1265.667069    | 633.337173       | 1264.683053    | 632.845165       | 8  |
| 8  | 881.499198  | 441.253237      | 864.472649     | 432.739963       | 863.488633     | 432.247955       | P    | 1154.598655 | 577.802966      | 1137.572106    | 569.289691       | 1136.588090    | 568.797683       | 7  |
| 9  | 968.531226  | 484.769251      | 951.504677     | 476.255977       | 950.520661     | 475.763969       | S    | 1057.545891 | 529.276584      | 1040.519342    | 520.763309       | 1039.535326    | 520.271301       | 6  |
| 10 | 1081.615290 | 541.311283      | 1064.588741    | 532.798009       | 1063.604725    | 532.306000       | L    | 970.513863  | 485.760570      | 953.487314     | 477.247295       | 952.503298     | 476.755287       | 5  |
| 11 | 1196.642233 | 598.824755      | 1179.615684    | 590.311480       | 1178.631668    | 589.819472       | D    | 857.429799  | 429.218538      | 840.403250     | 420.705263       | 839.419234     | 420.213255       | 4  |
| 12 | 1635.867559 | 818.437418      | 1618.841010    | 809.924143       | 1617.856994    | 809.432135       | Q    | 742.402856  | 371.705066      | 725.376307     | 363.191792       |                |                  | 3  |
| 13 | 1763.926137 | 882.466707      | 1746.899588    | 873.953432       | 1745.915572    | 873.461424       | Q    | 303.177530  | 152.092403      | 286.150981     | 143.579129       |                |                  | 2  |
| 14 |             |                 |                |                  |                |                  | R    | 175.118952  | 88.063114       | 158.092403     | 79.549839        |                |                  | 1  |

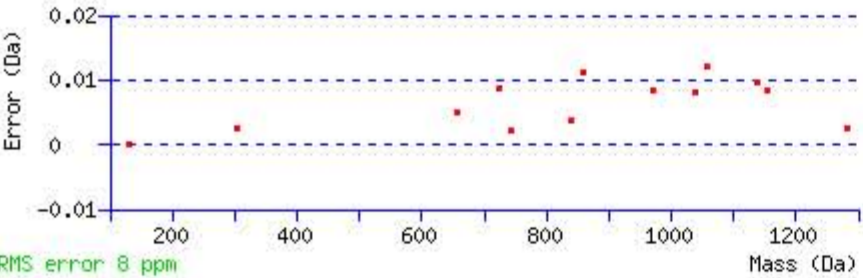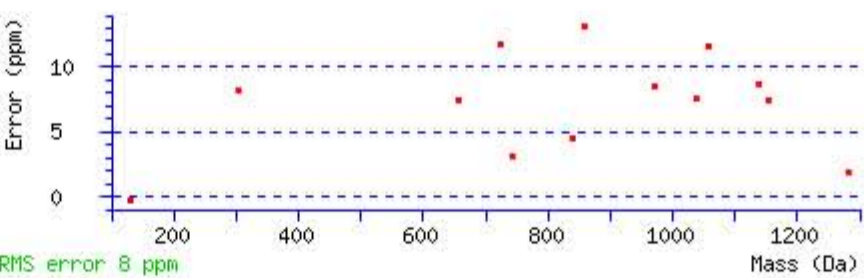

NCBI BLAST search of **KGHVSFKPSLDQQR**  
(Parameters: blastp, nr protein database, expect=20000, no filter, PAM30)  
Other BLAST [web gateways](#)

All matches to this query

| Score | Mr(calc):   | Delta    | Sequence                       |
|-------|-------------|----------|--------------------------------|
| 31.7  | 1937.030533 | 0.004523 | <a href="#">KGHVSFKPSLDQQR</a> |
| 30.6  | 1937.030533 | 0.004523 | <a href="#">KGHVSFKPSLDQQR</a> |

MATRIX

SCIENCE

Mascot Search Results

Peptide View

MS/MS Fragmentation of **EHLVQATPENLQEAR**  
Found in **ITIH3\_HUMAN**, Inter-alpha-trypsin inhibitor heavy chain H3 OS=Homo sapiens GN=ITIH3 PE=1 SV=2

Match to Query 45615: 2045.052612 from(682.691480,3+) rtinseconds(1756) index(48675)  
Title: Locus:1.1.1.1849.16 File:"2013-07-02 CLN FXIII 180 min 2nd F 4.wiff"  
Data file C:\Program Files (x86)\Matrix Science\Mascot Daemon\mgf\8 FXIII 180 min 2nd\mascot\_daemon\_merge.mgf

Click mouse within plot area to zoom in by factor of two about that point  
Or,   to  Da   
Label all possible matches ☐ Label matches used for scoring ☒

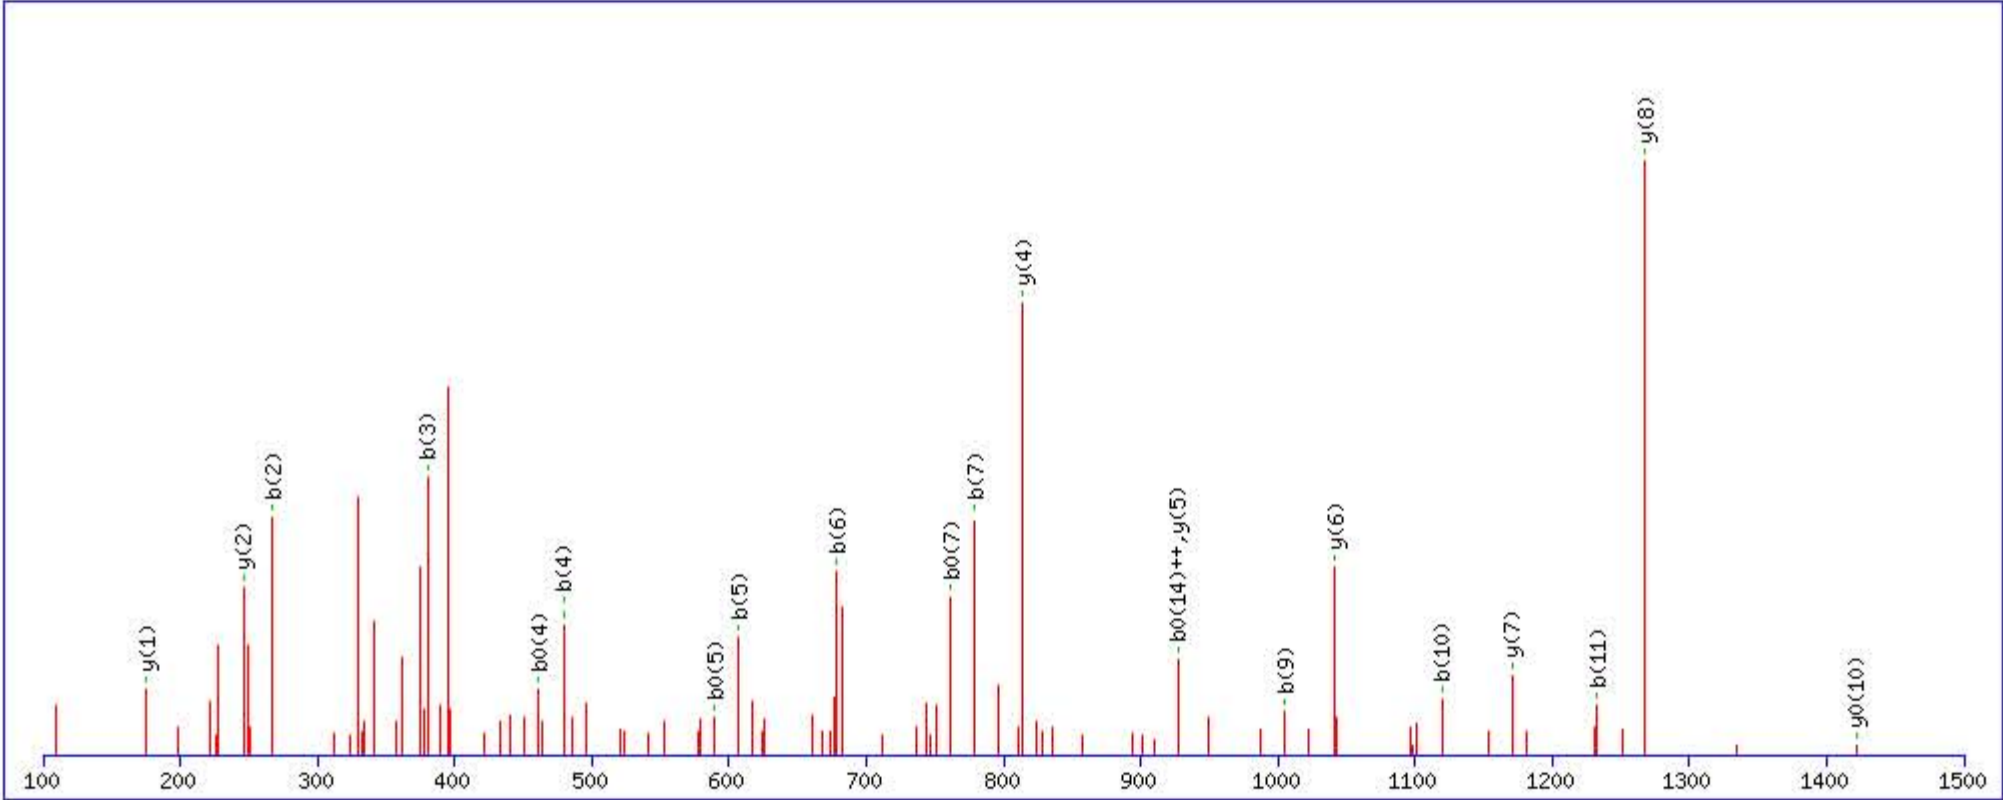

Monoisotopic mass of neutral peptide Mr(calc): 2045.036377  
Fixed modifications: Carbamidomethyl (C) (apply to specified residues or termini only)  
Variable modifications:  
Q12 : Biotin:Thermo-21345 (Q)  
Ions Score: 77 Expect: 2e-007  
Matches : 21/156 fragment ions using 26 most intense peaks [\(help\)](#)

| #  | b           | b <sup>++</sup> | b <sup>*</sup> | b <sup>*++</sup> | b <sup>0</sup> | b <sup>0++</sup> | Seq. | y           | y <sup>++</sup> | y <sup>*</sup> | y <sup>*++</sup> | y <sup>0</sup> | y <sup>0++</sup> | #  |
|----|-------------|-----------------|----------------|------------------|----------------|------------------|------|-------------|-----------------|----------------|------------------|----------------|------------------|----|
| 1  | 130.049869  | 65.528572       |                |                  | 112.039304     | 56.523290        | E    |             |                 |                |                  |                |                  | 15 |
| 2  | 267.108781  | 134.058028      |                |                  | 249.098216     | 125.052746       | H    | 1917.001094 | 959.004185      | 1899.974545    | 950.490911       | 1898.990529    | 949.998903       | 14 |
| 3  | 380.192845  | 190.600060      |                |                  | 362.182280     | 181.594778       | L    | 1779.942182 | 890.474729      | 1762.915633    | 881.961455       | 1761.931617    | 881.469447       | 13 |
| 4  | 479.261259  | 240.134267      |                |                  | 461.250694     | 231.128985       | V    | 1666.858118 | 833.932697      | 1649.831569    | 825.419423       | 1648.847553    | 824.927415       | 12 |
| 5  | 607.319837  | 304.163557      | 590.293288     | 295.650282       | 589.309272     | 295.158274       | Q    | 1567.789704 | 784.398490      | 1550.763155    | 775.885216       | 1549.779139    | 775.393208       | 11 |
| 6  | 678.356951  | 339.682114      | 661.330402     | 331.168839       | 660.346386     | 330.676831       | A    | 1439.731126 | 720.369201      | 1422.704577    | 711.855927       | 1421.720561    | 711.363919       | 10 |
| 7  | 779.404630  | 390.205953      | 762.378081     | 381.692679       | 761.394065     | 381.200671       | T    | 1368.694012 | 684.850644      | 1351.667463    | 676.337370       | 1350.683447    | 675.845362       | 9  |
| 8  | 876.457394  | 438.732335      | 859.430845     | 430.219061       | 858.446829     | 429.727053       | P    | 1267.646333 | 634.326805      | 1250.619784    | 625.813530       | 1249.635768    | 625.321522       | 8  |
| 9  | 1005.499987 | 503.253632      | 988.473438     | 494.740357       | 987.489422     | 494.248349       | E    | 1170.593569 | 585.800423      | 1153.567020    | 577.287148       | 1152.583004    | 576.795140       | 7  |
| 10 | 1119.542914 | 560.275095      | 1102.516365    | 551.761821       | 1101.532349    | 551.269813       | N    | 1041.550976 | 521.279126      | 1024.524427    | 512.765852       | 1023.540411    | 512.273844       | 6  |
| 11 | 1232.626978 | 616.817127      | 1215.600429    | 608.303853       | 1214.616413    | 607.811845       | L    | 927.508049  | 464.257663      | 910.481500     | 455.744388       | 909.497484     | 455.252380       | 5  |
| 12 | 1671.852304 | 836.429790      | 1654.825755    | 827.916516       | 1653.841739    | 827.424508       | Q    | 814.423985  | 407.715631      | 797.397436     | 399.202356       | 796.413420     | 398.710348       | 4  |
| 13 | 1800.894897 | 900.951087      | 1783.868348    | 892.437812       | 1782.884332    | 891.945804       | E    | 375.198659  | 188.102968      | 358.172110     | 179.589693       | 357.188094     | 179.097685       | 3  |
| 14 | 1871.932011 | 936.469644      | 1854.905462    | 927.956369       | 1853.921446    | 927.464361       | A    | 246.156066  | 123.581671      | 229.129517     | 115.068396       |                |                  | 2  |
| 15 |             |                 |                |                  |                |                  | R    | 175.118952  | 88.063114       | 158.092403     | 79.549839        |                |                  | 1  |

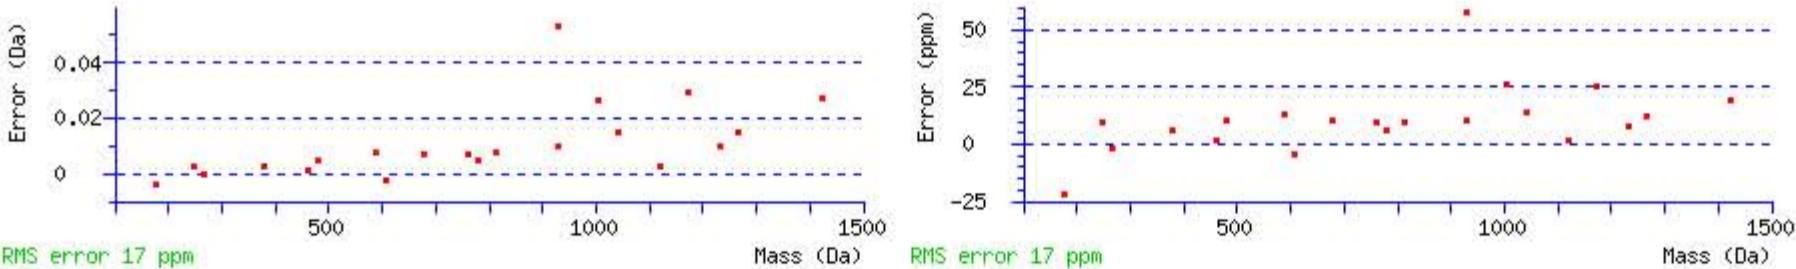

NCBI BLAST search of [EHLVQATPENLQEAR](#)  
(Parameters: blastp, nr protein database, expect=20000, no filter, PAM30)  
Other BLAST [web gateways](#)

All matches to this query

| Score | Mr(calc):   | Delta    | Sequence                          |
|-------|-------------|----------|-----------------------------------|
| 76.5  | 2045.036377 | 0.016235 | <a href="#">EHLVQATPENLQEAR</a>   |
| 4.8   | 2045.022446 | 0.030166 | <a href="#">EHNENMLRNILPSHVAR</a> |
| 2.7   | 2045.036377 | 0.016235 | <a href="#">EHLVQATPENLQEAR</a>   |
| 0.9   | 2045.040421 | 0.012191 | <a href="#">QIEFNFPSQAITSPR</a>   |

MATRIX

SCIENCE

Mascot Search Results

Peptide View

MS/MS Fragmentation of **KGHVSFKPSLDQQR**  
Found in **ITIH3\_HUMAN**, Inter-alpha-trypsin inhibitor heavy chain H3 OS=Homo sapiens GN=ITIH3 PE=1 SV=2

Match to Query 49411: 2248.203496 from(563.058150,4+) rtinseconds(1715) index(48372)  
Title: Locus:1.1.1.1835.4 File:"2013-07-02 CLN FXIII 180 min 2nd F 4.wiff"  
Data file C:\Program Files (x86)\Matrix Science\Mascot Daemon\mgf\8 FXIII 180 min 2nd\mascot\_daemon\_merge.mgf

Click mouse within plot area to zoom in by factor of two about that point  
Or, 

Plot from

0

 to 

2200

 Da 

Full range

  
Label all possible matches ☐ Label matches used for scoring ☒

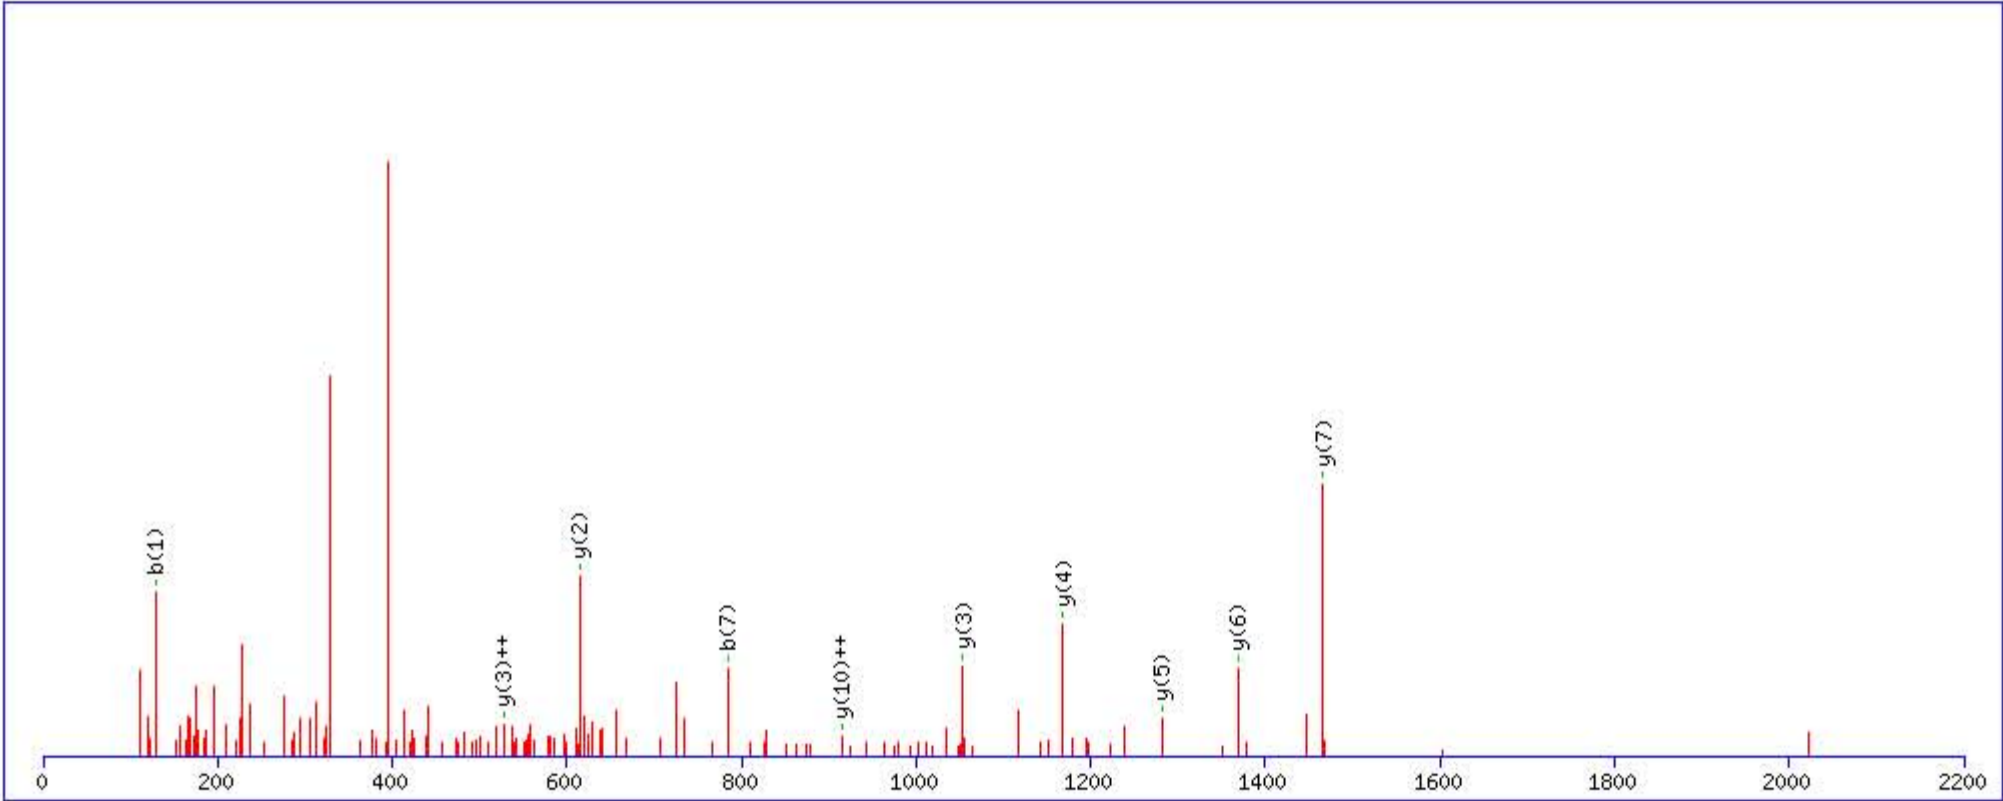

Monoisotopic mass of neutral peptide Mr(calc): 2248.197281  
Fixed modifications: Carbamidomethyl (C) (apply to specified residues or termini only)  
Variable modifications:  
Q12 : Biotin:Thermo-21345 (Q)  
Q13 : Biotin:Thermo-21345 (Q)  
Ions Score: 31 Expect: 0.0027  
Matches : 10/142 fragment ions using 16 most intense peaks [\(help\)](#)

| #  | b           | b <sup>++</sup> | b <sup>+</sup> | b <sup>+++</sup> | b <sup>0</sup> | b <sup>0++</sup> | Seq. | y           | y <sup>++</sup> | y <sup>+</sup> | y <sup>+++</sup> | y <sup>0</sup> | y <sup>0++</sup> | #  |
|----|-------------|-----------------|----------------|------------------|----------------|------------------|------|-------------|-----------------|----------------|------------------|----------------|------------------|----|
| 1  | 129.102239  | 65.054757       | 112.075690     | 56.541483        |                |                  | K    |             |                 |                |                  |                |                  | 14 |
| 2  | 186.123703  | 93.565489       | 169.097154     | 85.052215        |                |                  | G    | 2121.109598 | 1061.058437     | 2104.083049    | 1052.545162      | 2103.099033    | 1052.053154      | 13 |
| 3  | 323.182615  | 162.094945      | 306.156066     | 153.581671       |                |                  | H    | 2064.088134 | 1032.547705     | 2047.061585    | 1024.034430      | 2046.077569    | 1023.542422      | 12 |
| 4  | 422.251029  | 211.629153      | 405.224480     | 203.115878       |                |                  | V    | 1927.029222 | 964.018249      | 1910.002673    | 955.504975       | 1909.018657    | 955.012967       | 11 |
| 5  | 509.283057  | 255.145167      | 492.256508     | 246.631892       | 491.272492     | 246.139884       | S    | 1827.960808 | 914.484042      | 1810.934259    | 905.970768       | 1809.950243    | 905.478760       | 10 |
| 6  | 656.351471  | 328.679374      | 639.324922     | 320.166099       | 638.340906     | 319.674091       | F    | 1740.928780 | 870.968028      | 1723.902231    | 862.454754       | 1722.918215    | 861.962746       | 9  |
| 7  | 784.446434  | 392.726855      | 767.419885     | 384.213581       | 766.435869     | 383.721573       | K    | 1593.860366 | 797.433821      | 1576.833817    | 788.920547       | 1575.849801    | 788.428539       | 8  |
| 8  | 881.499198  | 441.253237      | 864.472649     | 432.739963       | 863.488633     | 432.247955       | P    | 1465.765403 | 733.386340      | 1448.738854    | 724.873065       | 1447.754838    | 724.381057       | 7  |
| 9  | 968.531226  | 484.769251      | 951.504677     | 476.255977       | 950.520661     | 475.763969       | S    | 1368.712639 | 684.859958      | 1351.686090    | 676.346683       | 1350.702074    | 675.854675       | 6  |
| 10 | 1081.615290 | 541.311283      | 1064.588741    | 532.798009       | 1063.604725    | 532.306000       | L    | 1281.680611 | 641.343944      | 1264.654062    | 632.830669       | 1263.670046    | 632.338661       | 5  |
| 11 | 1196.642233 | 598.824755      | 1179.615684    | 590.311480       | 1178.631668    | 589.819472       | D    | 1168.596547 | 584.801912      | 1151.569998    | 576.288637       | 1150.585982    | 575.796629       | 4  |
| 12 | 1635.867559 | 818.437418      | 1618.841010    | 809.924143       | 1617.856994    | 809.432135       | Q    | 1053.569604 | 527.288440      | 1036.543055    | 518.775166       |                |                  | 3  |
| 13 | 2075.092885 | 1038.050080     | 2058.066336    | 1029.536806      | 2057.082320    | 1029.044798      | Q    | 614.344278  | 307.675777      | 597.317729     | 299.162503       |                |                  | 2  |
| 14 |             |                 |                |                  |                |                  | R    | 175.118952  | 88.063114       | 158.092403     | 79.549839        |                |                  | 1  |

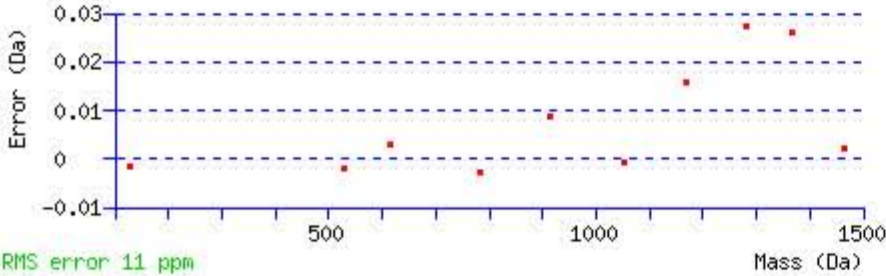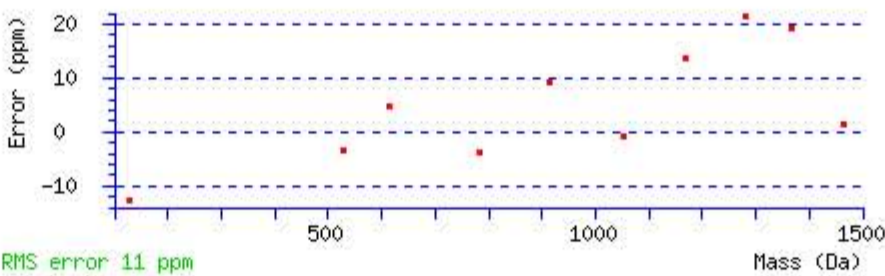

NCBI BLAST search of **KGHVSFKPSLDQQR**  
(Parameters: blastp, nr protein database, expect=20000, no filter, PAM30)  
Other BLAST [web gateways](#)

All matches to this query

| Score | Mr(calc):   | Delta    | Sequence                       |
|-------|-------------|----------|--------------------------------|
| 30.6  | 2248.197281 | 0.006215 | <a href="#">KGHVSFKPSLDQQR</a> |
| 3.3   | 2248.174805 | 0.028691 | <a href="#">QSKETPVGWQELPK</a> |

Match to Query 35413: 1617.817888 from(809.916220,2+) rtinseconds(1588) index(17524)  
Title: Locus:1.1.1.2935.12 File:"2013-07-02 CLN FXIII 180 min 2nd F 2.wiff"  
Data file C:\Program Files (x86)\Matrix Science\Mascot Daemon\mgf8 FXIII 180 min 2nd\mascot\_daemon\_merge.mgf

| #  | $\mathbf{b}$ | $\mathbf{b}^{++}$ | $\mathbf{b}^*$ | $\mathbf{b}^{*++}$ | $\mathbf{b}^0$ | $\mathbf{b}^{0++}$ | Seq. | $\mathbf{y}$ | $\mathbf{y}^{++}$ | $\mathbf{y}^*$ | $\mathbf{y}^{*++}$ | $\mathbf{y}^0$ | $\mathbf{y}^{0++}$ | #  |
|----|--------------|-------------------|----------------|--------------------|----------------|--------------------|------|--------------|-------------------|----------------|--------------------|----------------|--------------------|----|
| 1  | 72.044390    | 36.525833         |                |                    |                |                    | A    |              |                   |                |                    |                |                    | 13 |
| 2  | 201.086983   | 101.047130        |                |                    | 183.076418     | 92.041847          | E    | 1547.788642  | 774.397959        | 1530.762093    | 765.884685         | 1529.778077    | 765.392677         | 12 |
| 3  | 272.124097   | 136.565687        |                |                    | 254.113532     | 127.560404         | A    | 1418.746049  | 709.876663        | 1401.719500    | 701.363388         | 1400.735484    | 700.871380         | 11 |
| 4  | 711.349423   | 356.178350        | 694.322874     | 347.665075         | 693.338858     | 347.173067         | Q    | 1347.708935  | 674.358106        | 1330.682386    | 665.844831         | 1329.698370    | 665.352823         | 10 |
| 5  | 782.386537   | 391.696907        | 765.359988     | 383.183632         | 764.375972     | 382.691624         | A    | 908.483609   | 454.745443        | 891.457060     | 446.232168         | 890.473044     | 445.740160         | 9  |
| 6  | 910.445115   | 455.726196        | 893.418566     | 447.212921         | 892.434550     | 446.720913         | Q    | 837.446495   | 419.226886        | 820.419946     | 410.713611         | 819.435930     | 410.221603         | 8  |
| 7  | 1073.508444  | 537.257860        | 1056.481895    | 528.744586         | 1055.497879    | 528.252578         | Y    | 709.387917   | 355.197597        | 692.361368     | 346.684322         | 691.377352     | 346.192314         | 7  |
| 8  | 1160.540472  | 580.773874        | 1143.513923    | 572.260600         | 1142.529907    | 571.768592         | S    | 546.324588   | 273.665932        | 529.298039     | 265.152658         | 528.314023     | 264.660650         | 6  |
| 9  | 1231.577586  | 616.292431        | 1214.551037    | 607.779157         | 1213.567021    | 607.287149         | A    | 459.292560   | 230.149918        | 442.266011     | 221.636643         |                |                    | 5  |
| 10 | 1302.614700  | 651.810988        | 1285.588151    | 643.297714         | 1284.604135    | 642.805706         | A    | 388.255446   | 194.631361        | 371.228897     | 186.118087         |                |                    | 4  |
| 11 | 1401.683114  | 701.345195        | 1384.656565    | 692.831921         | 1383.672549    | 692.339913         | V    | 317.218332   | 159.112804        | 300.191783     | 150.599530         |                |                    | 3  |
| 12 | 1472.720228  | 736.863752        | 1455.693679    | 728.350478         | 1454.709663    | 727.858470         | A    | 218.149918   | 109.578597        | 201.123369     | 101.065322         |                |                    | 2  |
| 13 |              |                   |                |                    |                |                    | K    | 147.112804   | 74.060040         | 130.086255     | 65.546765          |                |                    | 1  |

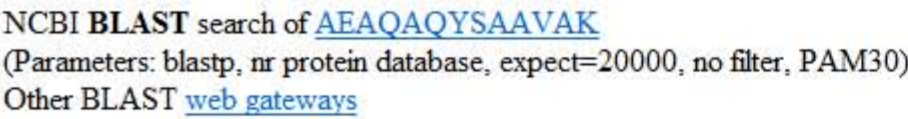

| Score | Mr(calc):   | Delta     | Sequence                        |
|-------|-------------|-----------|---------------------------------|
| 65.2  | 1617.818436 | -0.000548 | <a href="#">AEAQAQYSAAVAK</a>   |
| 48.8  | 1617.818436 | -0.000548 | <a href="#">AEAQAQYSAAVAK</a>   |
| 9.1   | 1617.800690 | 0.017198  | <a href="#">EAAQAIFPSMAR</a>    |
| 4.4   | 1617.803162 | 0.014726  | <a href="#">EATEINMKNEALQK</a>  |
| 4.0   | 1617.823639 | -0.005751 | <a href="#">GLHSWQKAAHGDRR</a>  |
| 2.4   | 1617.823166 | -0.005278 | <a href="#">QLRLHNDMHK</a>      |
| 0.3   | 1617.807236 | 0.010652  | <a href="#">LSGKCFSLVESTYK</a>  |
| 0.0   | 1617.796677 | 0.021211  | <a href="#">GAISSEAVCKPLCAR</a> |

MATRIX

SCIENCE

Mascot Search Results

Peptide View

MS/MS Fragmentation of **AEAQAQYSAAVAK**  
Found in **ITIH4\_HUMAN**, Inter-alpha-trypsin inhibitor heavy chain H4 OS=Homo sapiens GN=ITIH4 PE=1 SV=4

Match to Query 35417: 1617.825588 from(809.920070,2+) rtinseconds(1573) index(3140)  
Title: Locus:1.1.1.1824.21 File:"2013-07-02 CLN FXIII 180 min 2nd F 1.wiff"  
Data file C:\Program Files (x86)\Matrix Science\Mascot Daemon\mgf\8 FXIII 180 min 2nd\mascot\_daemon\_merge.mgf

Click mouse within plot area to zoom in by factor of two about that point  
Or, 

Plot from

0

 to 

3000

 Da 

Full range

  
Label all possible matches ☐ Label matches used for scoring ☒

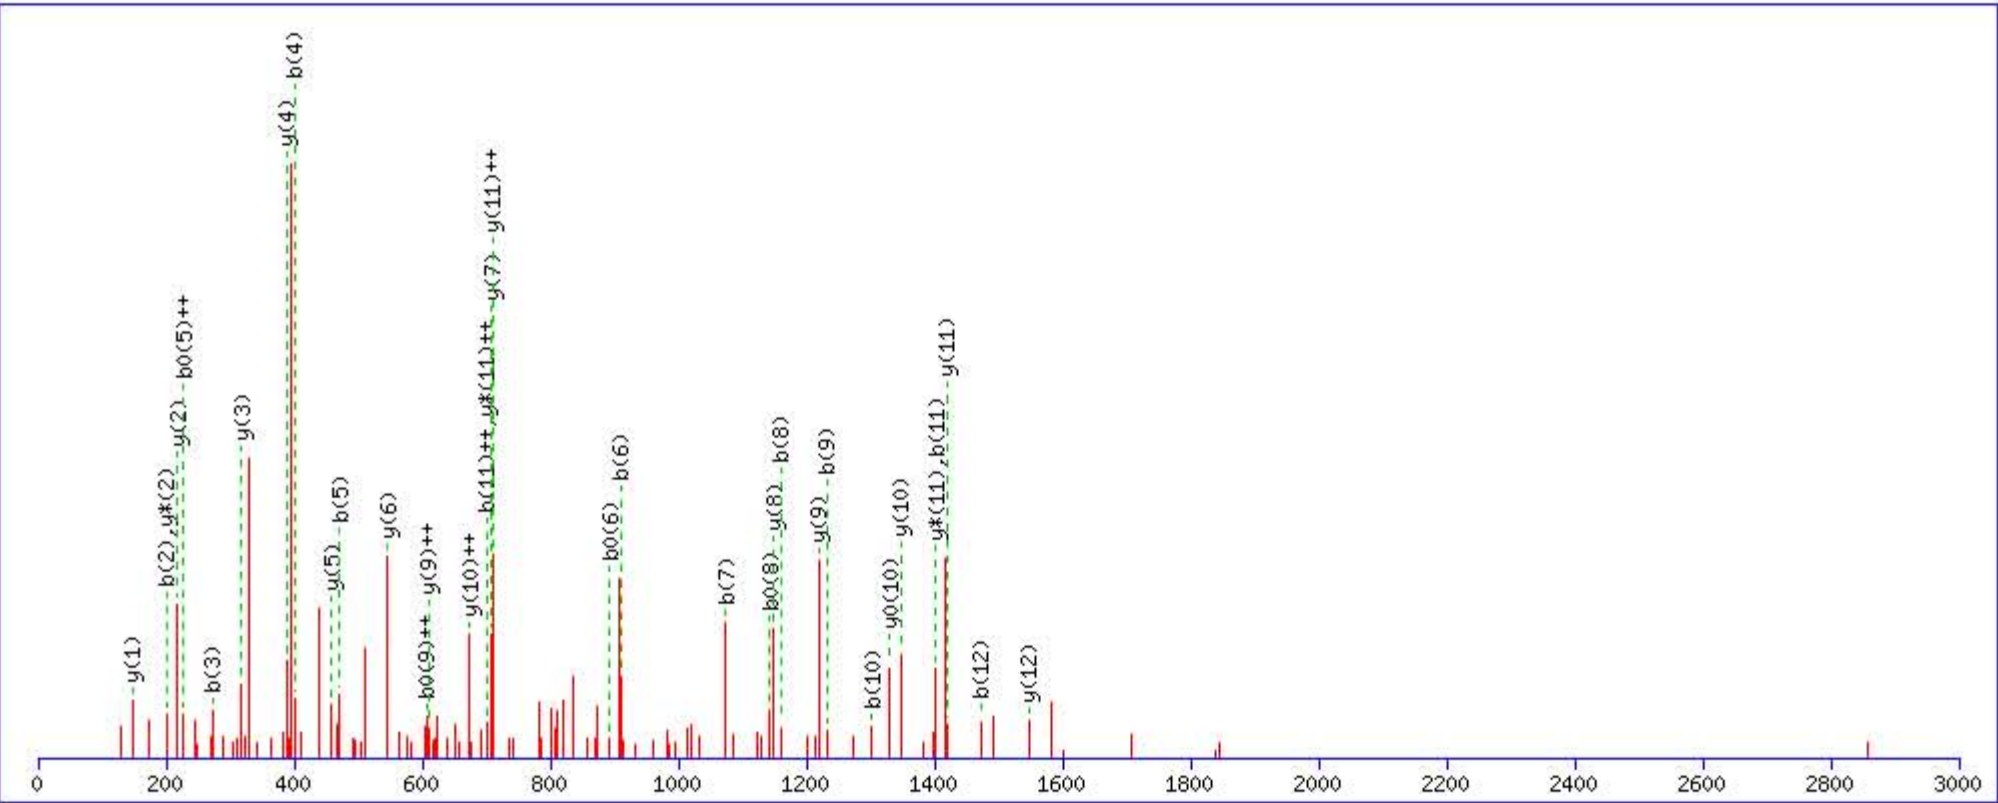

Monoisotopic mass of neutral peptide Mr(calc): 1617.818436  
Fixed modifications: Carbamidomethyl (C) (apply to specified residues or termini only)  
Variable modifications:  
Q6 : Biotin:Thermo-21345 (Q)  
Ions Score: 76 Expect: 3.4e-007  
Matches : 35/126 fragment ions using 67 most intense peaks [\(help\)](#)

| #  | b           | b <sup>++</sup> | b <sup>+</sup> | b <sup>#+</sup> | b <sup>0</sup> | b <sup>0++</sup> | Seq. | y           | y <sup>++</sup> | y <sup>+</sup> | y <sup>#+</sup> | y <sup>0</sup> | y <sup>0++</sup> | #  |
|----|-------------|-----------------|----------------|-----------------|----------------|------------------|------|-------------|-----------------|----------------|-----------------|----------------|------------------|----|
| 1  | 72.044390   | 36.525833       |                |                 |                |                  | A    |             |                 |                |                 |                |                  | 13 |
| 2  | 201.086983  | 101.047130      |                |                 | 183.076418     | 92.041847        | E    | 1547.788642 | 774.397959      | 1530.762093    | 765.884685      | 1529.778077    | 765.392677       | 12 |
| 3  | 272.124097  | 136.565687      |                |                 | 254.113532     | 127.560404       | A    | 1418.746049 | 709.876663      | 1401.719500    | 701.363388      | 1400.735484    | 700.871380       | 11 |
| 4  | 400.182675  | 200.594976      | 383.156126     | 192.081701      | 382.172110     | 191.589693       | Q    | 1347.708935 | 674.358106      | 1330.682386    | 665.844831      | 1329.698370    | 665.352823       | 10 |
| 5  | 471.219789  | 236.113533      | 454.193240     | 227.600258      | 453.209224     | 227.108250       | A    | 1219.650357 | 610.328817      | 1202.623808    | 601.815542      | 1201.639792    | 601.323534       | 9  |
| 6  | 910.445115  | 455.726196      | 893.418566     | 447.212921      | 892.434550     | 446.720913       | Q    | 1148.613243 | 574.810260      | 1131.586694    | 566.296985      | 1130.602678    | 565.804977       | 8  |
| 7  | 1073.508444 | 537.257860      | 1056.481895    | 528.744586      | 1055.497879    | 528.252578       | Y    | 709.387917  | 355.197597      | 692.361368     | 346.684322      | 691.377352     | 346.192314       | 7  |
| 8  | 1160.540472 | 580.773874      | 1143.513923    | 572.260600      | 1142.529907    | 571.768592       | S    | 546.324588  | 273.665932      | 529.298039     | 265.152658      | 528.314023     | 264.660650       | 6  |
| 9  | 1231.577586 | 616.292431      | 1214.551037    | 607.779157      | 1213.567021    | 607.287149       | A    | 459.292560  | 230.149918      | 442.266011     | 221.636643      |                |                  | 5  |
| 10 | 1302.614700 | 651.810988      | 1285.588151    | 643.297714      | 1284.604135    | 642.805706       | A    | 388.255446  | 194.631361      | 371.228897     | 186.118087      |                |                  | 4  |
| 11 | 1401.683114 | 701.345195      | 1384.656565    | 692.831921      | 1383.672549    | 692.339913       | V    | 317.218332  | 159.112804      | 300.191783     | 150.599530      |                |                  | 3  |
| 12 | 1472.720228 | 736.863752      | 1455.693679    | 728.350478      | 1454.709663    | 727.858470       | A    | 218.149918  | 109.578597      | 201.123369     | 101.065322      |                |                  | 2  |
| 13 |             |                 |                |                 |                |                  | K    | 147.112804  | 74.060040       | 130.086255     | 65.546765       |                |                  | 1  |

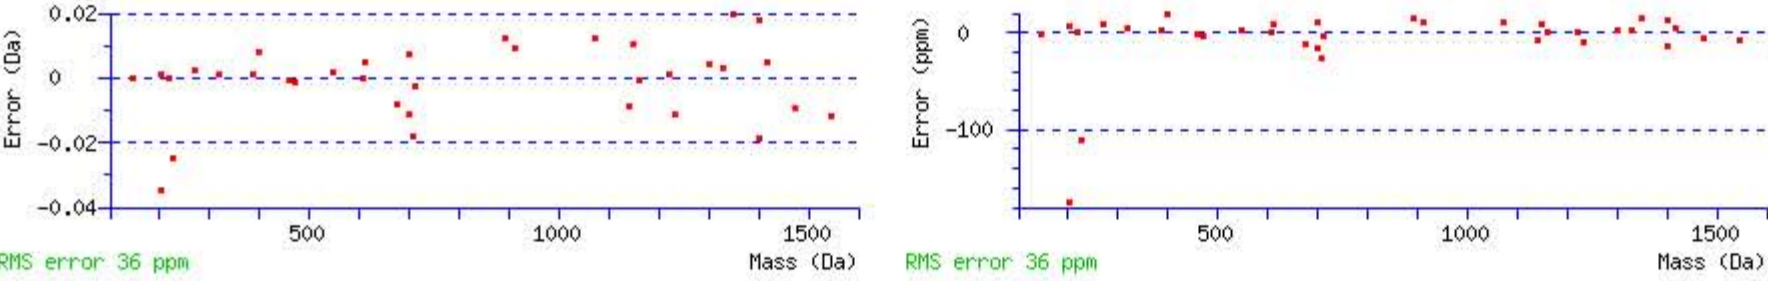

NCBI BLAST search of [AEAQAQYSAAVAK](#)  
(Parameters: blastp, nr protein database, expect=20000, no filter, PAM30)  
Other BLAST [web gateways](#)

All matches to this query

| Score | Mr(calc):   | Delta     | Sequence                         |
|-------|-------------|-----------|----------------------------------|
| 76.2  | 1617.818436 | 0.007152  | <a href="#">AEAQAQYSAAVAK</a>    |
| 74.8  | 1617.818436 | 0.007152  | <a href="#">AEAQAQYSAAVAK</a>    |
| 6.8   | 1617.803162 | 0.022426  | <a href="#">EATEINMKNEALQK</a>   |
| 3.4   | 1617.823639 | 0.001949  | <a href="#">GLHSWQKAAHGDRR</a>   |
| 3.2   | 1617.848358 | -0.022770 | <a href="#">QCVFISKVVVHMR</a>    |
| 1.4   | 1617.818451 | 0.007137  | <a href="#">KKMFDLETNEHVK</a>    |
| 0.7   | 1617.843613 | -0.018025 | <a href="#">SLMESPFPA PGKTIK</a> |

Match to Query 46958: 2122.123542 from(708.381790,3+) rtinseconds(2360) index(7623)  
Title: Locus:1.1.1.2099.14 File:"2013-07-02 CLN FXIII 180 min 2nd F 1.wiff"  
Data file C:\Program Files (x86)\Matrix Science\Mascot Daemon\mgf\8 FXIII 180 min 2nd\mascot\_daemon\_merge.mgf

| #  | b           | b <sup>++</sup> | b <sup>*</sup> | b <sup>*++</sup> | b <sup>0</sup> | b <sup>0++</sup> | Seq. | y           | y <sup>++</sup> | y <sup>*</sup> | y <sup>*++</sup> | y <sup>0</sup> | y <sup>0++</sup> | #  |
|----|-------------|-----------------|----------------|------------------|----------------|------------------|------|-------------|-----------------|----------------|------------------|----------------|------------------|----|
| 1  | 88.039304   | 44.523290       |                |                  | 70.028739      | 35.518008        | S    |             |                 |                |                  |                |                  | 16 |
| 2  | 185.092068  | 93.049672       |                |                  | 167.081503     | 84.044389        | P    | 2036.084489 | 1018.545882     | 2019.057940    | 1010.032608      | 2018.073924    | 1009.540600      | 15 |
| 3  | 314.134661  | 157.570968      |                |                  | 296.124096     | 148.565686       | E    | 1939.031725 | 970.019500      | 1922.005176    | 961.506226       | 1921.021160    | 961.014218       | 14 |
| 4  | 753.359987  | 377.183632      | 736.333438     | 368.670357       | 735.349422     | 368.178349       | Q    | 1809.989132 | 905.498204      | 1792.962583    | 896.984929       | 1791.978567    | 896.492921       | 13 |
| 5  | 881.418565  | 441.212921      | 864.392016     | 432.699646       | 863.408000     | 432.207638       | Q    | 1370.763806 | 685.885541      | 1353.737257    | 677.372266       | 1352.753241    | 676.880258       | 12 |
| 6  | 1010.461158 | 505.734217      | 993.434609     | 497.220943       | 992.450593     | 496.728935       | E    | 1242.705228 | 621.856252      | 1225.678679    | 613.342977       | 1224.694663    | 612.850969       | 11 |
| 7  | 1111.508837 | 556.258057      | 1094.482288    | 547.744782       | 1093.498272    | 547.252774       | T    | 1113.662635 | 557.334955      | 1096.636086    | 548.821681       | 1095.652070    | 548.329673       | 10 |
| 8  | 1210.577251 | 605.792264      | 1193.550702    | 597.278989       | 1192.566686    | 596.786981       | V    | 1012.614956 | 506.811116      | 995.588407     | 498.297841       | 994.604391     | 497.805833       | 9  |
| 9  | 1323.661315 | 662.334296      | 1306.634766    | 653.821021       | 1305.650750    | 653.329013       | L    | 913.546542  | 457.276909      | 896.519993     | 448.763634       | 895.535977     | 448.271626       | 8  |
| 10 | 1438.688258 | 719.847767      | 1421.661709    | 711.334493       | 1420.677693    | 710.842485       | D    | 800.462478  | 400.734877      | 783.435929     | 392.221602       | 782.451913     | 391.729594       | 7  |
| 11 | 1495.709722 | 748.358499      | 1478.683173    | 739.845225       | 1477.699157    | 739.353217       | G    | 685.435535  | 343.221405      | 668.408986     | 334.708131       |                |                  | 6  |
| 12 | 1609.752649 | 805.379963      | 1592.726100    | 796.866688       | 1591.742084    | 796.374680       | N    | 628.414071  | 314.710673      | 611.387522     | 306.197399       |                |                  | 5  |
| 13 | 1722.836713 | 861.921994      | 1705.810164    | 853.408720       | 1704.826148    | 852.916712       | L    | 514.371144  | 257.689210      | 497.344595     | 249.175935       |                |                  | 4  |
| 14 | 1835.920777 | 918.464026      | 1818.894228    | 909.950752       | 1817.910212    | 909.458744       | I    | 401.287080  | 201.147178      | 384.260531     | 192.633903       |                |                  | 3  |
| 15 | 1949.004841 | 975.006058      | 1931.978292    | 966.492784       | 1930.994276    | 966.000776       | I    | 288.203016  | 144.605146      | 271.176467     | 136.091871       |                |                  | 2  |
| 16 |             |                 |                |                  |                |                  | R    | 175.118952  | 88.063114       | 158.092403     | 79.549839        |                |                  | 1  |

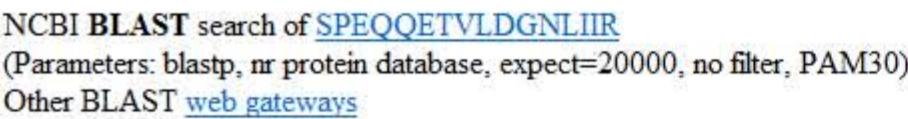

| Score | Mr(calc):   | Delta     | Sequence                            |
|-------|-------------|-----------|-------------------------------------|
| 64.0  | 2122.109222 | 0.014320  | <a href="#">SPEQQETVL DGNLIIR</a>   |
| 54.7  | 2122.109222 | 0.014320  | <a href="#">SPEQQETVL DGNLIIR</a>   |
| 12.2  | 2122.100189 | 0.023353  | <a href="#">MIAPQRWIDAQR</a>        |
| 5.1   | 2122.139053 | -0.015511 | <a href="#">RRVYDALNVL MAMNIISK</a> |
| 3.0   | 2122.149612 | -0.026070 | <a href="#">LPALRLMNATITEELFFK</a>  |
| 2.0   | 2122.143112 | -0.019570 | <a href="#">LYQFLGLL TRGDMR</a>     |
| 1.8   | 2122.135025 | -0.011483 | <a href="#">EPTPFIIIEWIPDILPQSK</a> |
| 1.3   | 2122.117081 | 0.006461  | <a href="#">SFEISPNRVQISLVQYSR</a>  |
| 0.6   | 2122.100204 | 0.023338  | <a href="#">QQGQCLLLWQAR</a>        |
| 0.6   | 2122.100204 | 0.023338  | <a href="#">QQGQCLLLWQAR</a>        |

M

A

T

R

I

X

S

C

I

E

N

C

E

Mascot Search Results

Peptide View

MS/MS Fragmentation of **QLGLPGPPDVPDHAAYHPFR**  
Found in **ITIH4\_HUMAN**, Inter-alpha-trypsin inhibitor heavy chain H4 OS=Homo sapiens GN=ITIH4 PE=1 SV=4

Match to Query 54242: 2494.267896 from(624.574250,4+) rtinseconds(2165) index(6568)  
Title: Locus:1.1.1.2031.4 File:"2013-07-02 CLN FXIII 180 min 2nd F 1.wiff"  
Data file C:\Program Files (x86)\Matrix Science\Mascot Daemon\mgf\8 FXIII 180 min 2nd\mascot\_daemon\_merge.mgf

Click mouse within plot area to zoom in by factor of two about that point  
Or,   to  Da   
Label all possible matches ☐ Label matches used for scoring ☒

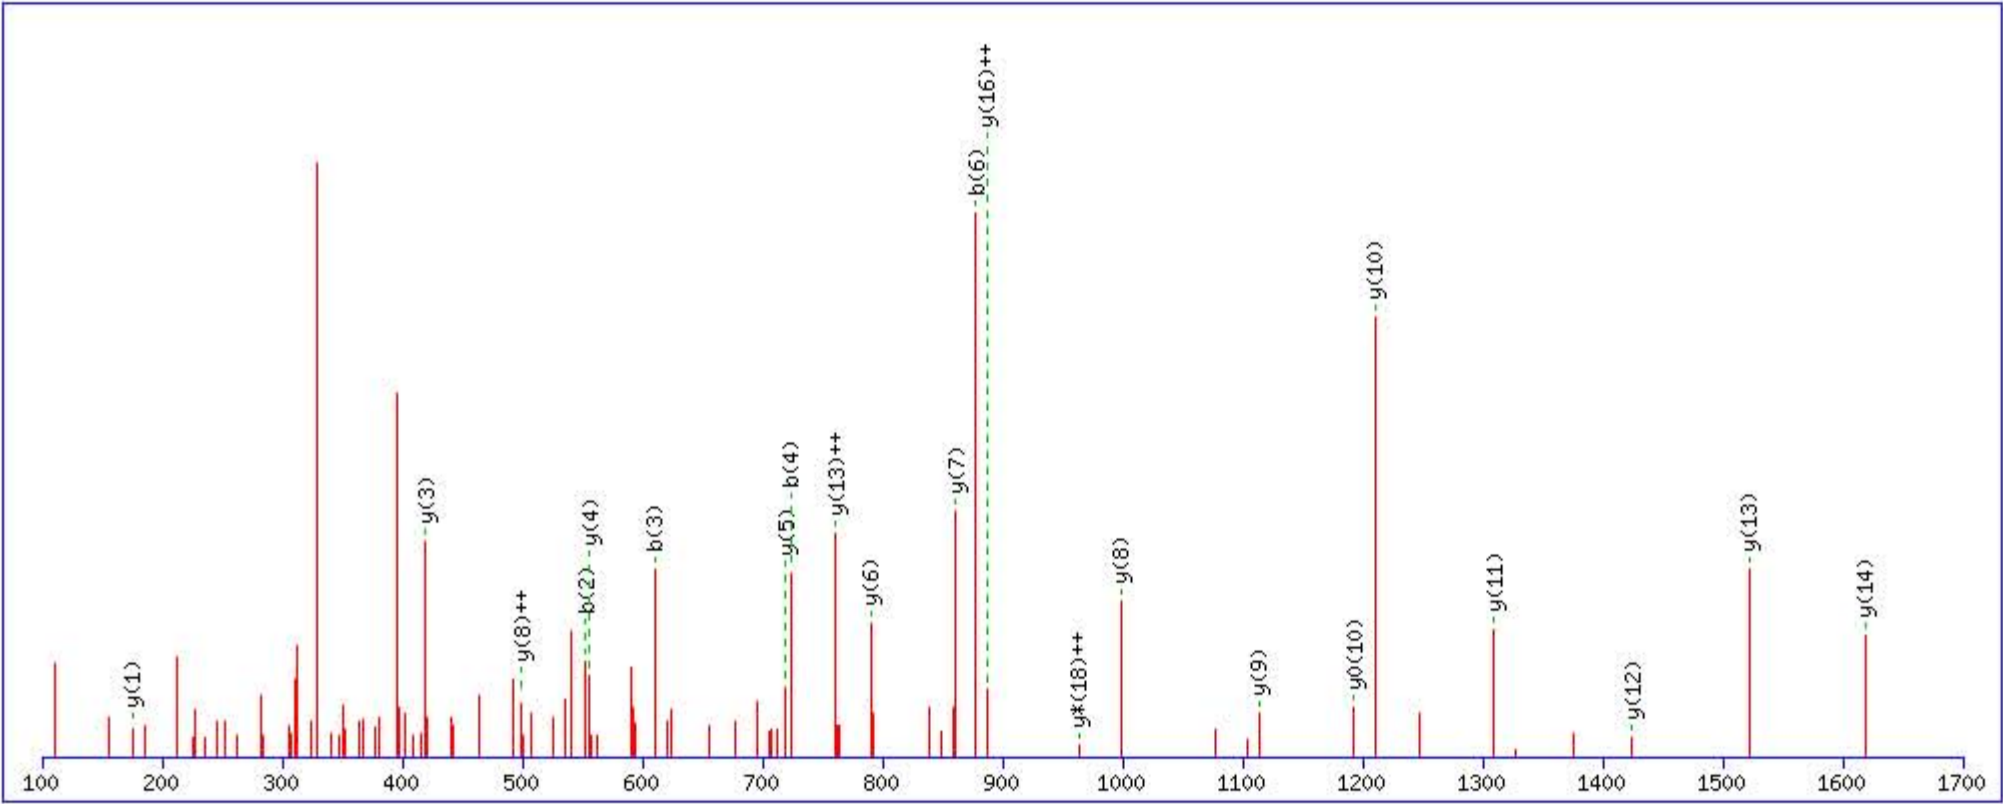

Monoisotopic mass of neutral peptide Mr(calc): 2494.257980  
Fixed modifications: Carbamidomethyl (C) (apply to specified residues or termini only)  
Variable modifications:  
Q1 : Biotin:Thermo-21345 (Q)  
Ions Score: 74 Expect: 1.1e-006  
Matches : 22/196 fragment ions using 46 most intense peaks [\(help\)](#)

| #  | b           | b <sup>++</sup> | b <sup>*</sup> | b <sup>+++</sup> | b <sup>0</sup> | b <sup>0++</sup> | Seq. | y           | y <sup>++</sup> | y <sup>*</sup> | y <sup>+++</sup> | y <sup>0</sup> | y <sup>0++</sup> | #  |
|----|-------------|-----------------|----------------|------------------|----------------|------------------|------|-------------|-----------------|----------------|------------------|----------------|------------------|----|
| 1  | 440.232602  | 220.619939      | 423.206053     | 212.106664       |                |                  | Q    |             |                 |                |                  |                |                  | 20 |
| 2  | 553.316666  | 277.161971      | 536.290117     | 268.648697       |                |                  | L    | 2056.039923 | 1028.523599     | 2039.013374    | 1020.010325      | 2038.029358    | 1019.518317      | 19 |
| 3  | 610.338130  | 305.672703      | 593.311581     | 297.159429       |                |                  | G    | 1942.955859 | 971.981568      | 1925.929310    | 963.468293       | 1924.945294    | 962.976285       | 18 |
| 4  | 723.422194  | 362.214735      | 706.395645     | 353.701461       |                |                  | L    | 1885.934395 | 943.470836      | 1868.907846    | 934.957561       | 1867.923830    | 934.465553       | 17 |
| 5  | 820.474958  | 410.741117      | 803.448409     | 402.227843       |                |                  | P    | 1772.850331 | 886.928804      | 1755.823782    | 878.415529       | 1754.839766    | 877.923521       | 16 |
| 6  | 877.496422  | 439.251849      | 860.469873     | 430.738575       |                |                  | G    | 1675.797567 | 838.402422      | 1658.771018    | 829.889147       | 1657.787002    | 829.397139       | 15 |
| 7  | 974.549186  | 487.778231      | 957.522637     | 479.264957       |                |                  | P    | 1618.776103 | 809.891690      | 1601.749554    | 801.378415       | 1600.765538    | 800.886407       | 14 |
| 8  | 1071.601950 | 536.304613      | 1054.575401    | 527.791339       |                |                  | P    | 1521.723339 | 761.365308      | 1504.696790    | 752.852033       | 1503.712774    | 752.360025       | 13 |
| 9  | 1186.628893 | 593.818085      | 1169.602344    | 585.304810       | 1168.618328    | 584.812802       | D    | 1424.670575 | 712.838926      | 1407.644026    | 704.325651       | 1406.660010    | 703.833643       | 12 |
| 10 | 1285.697307 | 643.352292      | 1268.670758    | 634.839017       | 1267.686742    | 634.347009       | V    | 1309.643632 | 655.325454      | 1292.617083    | 646.812180       | 1291.633067    | 646.320172       | 11 |
| 11 | 1382.750071 | 691.878674      | 1365.723522    | 683.365399       | 1364.739506    | 682.873391       | P    | 1210.575218 | 605.791247      | 1193.548669    | 597.277973       | 1192.564653    | 596.785964       | 10 |
| 12 | 1497.777014 | 749.392145      | 1480.750465    | 740.878871       | 1479.766449    | 740.386863       | D    | 1113.522454 | 557.264865      | 1096.495905    | 548.751591       | 1095.511889    | 548.259582       | 9  |
| 13 | 1634.835926 | 817.921601      | 1617.809377    | 809.408327       | 1616.825361    | 808.916319       | H    | 998.495511  | 499.751393      | 981.468962     | 491.238119       |                |                  | 8  |
| 14 | 1705.873040 | 853.440158      | 1688.846491    | 844.926884       | 1687.862475    | 844.434876       | A    | 861.436599  | 431.221937      | 844.410050     | 422.708663       |                |                  | 7  |
| 15 | 1776.910154 | 888.958715      | 1759.883605    | 880.445441       | 1758.899589    | 879.953433       | A    | 790.399485  | 395.703380      | 773.372936     | 387.190106       |                |                  | 6  |
| 16 | 1939.973483 | 970.490380      | 1922.946934    | 961.977105       | 1921.962918    | 961.485097       | Y    | 719.362371  | 360.184823      | 702.335822     | 351.671549       |                |                  | 5  |
| 17 | 2077.032395 | 1039.019836     | 2060.005846    | 1030.506561      | 2059.021830    | 1030.014553      | H    | 556.299042  | 278.653159      | 539.272493     | 270.139884       |                |                  | 4  |
| 18 | 2174.085159 | 1087.546218     | 2157.058610    | 1079.032943      | 2156.074594    | 1078.540935      | P    | 419.240130  | 210.123703      | 402.213581     | 201.610428       |                |                  | 3  |
| 19 | 2321.153573 | 1161.080424     | 2304.127024    | 1152.567150      | 2303.143008    | 1152.075142      | F    | 322.187366  | 161.597321      | 305.160817     | 153.084046       |                |                  | 2  |
| 20 |             |                 |                |                  |                |                  | R    | 175.118952  | 88.063114       | 158.092403     | 79.549839        |                |                  | 1  |

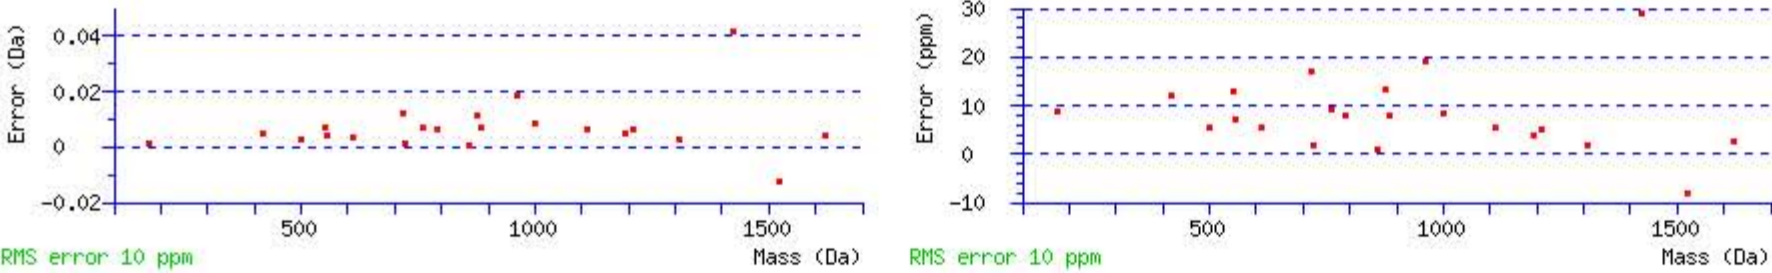

NCBI BLAST search of [QLGLPGPPDVPDHAAYHPFR](#)  
(Parameters: blastp, nr protein database, expect=20000, no filter, PAM30)  
Other BLAST [web gateways](#)

All matches to this query

| Score | Mr(calc):   | Delta    | Sequence                             |
|-------|-------------|----------|--------------------------------------|
| 74.1  | 2494.257980 | 0.009916 | <a href="#">QLGLPGPPDVPDHAAYHPFR</a> |

MATRIX

SCIENCE

Mascot Search Results

Peptide View

MS/MS Fragmentation of **QVILTLQPTLVAVGK**  
Found in **ICAM2\_HUMAN**, Intercellular adhesion molecule 2 OS=Homo sapiens GN=ICAM2 PE=1 SV=2

Match to Query 41962: 1890.147488 from(946.081020,2+) rtinseconds(2651) index(9005)  
Title: Locus:1.1.1.2200.9 File:"2013-07-02 CLN FXIII 180 min 2nd F 1.wiff"  
Data file C:\Program Files (x86)\Matrix Science\Mascot Daemon\mgf\8 FXIII 180 min 2nd\mascot\_daemon\_merge.mgf

Click mouse within plot area to zoom in by factor of two about that point  
Or, 

Plot from

0

 to 

3000

 Da 

Full range

  
Label all possible matches ☐ Label matches used for scoring ☒

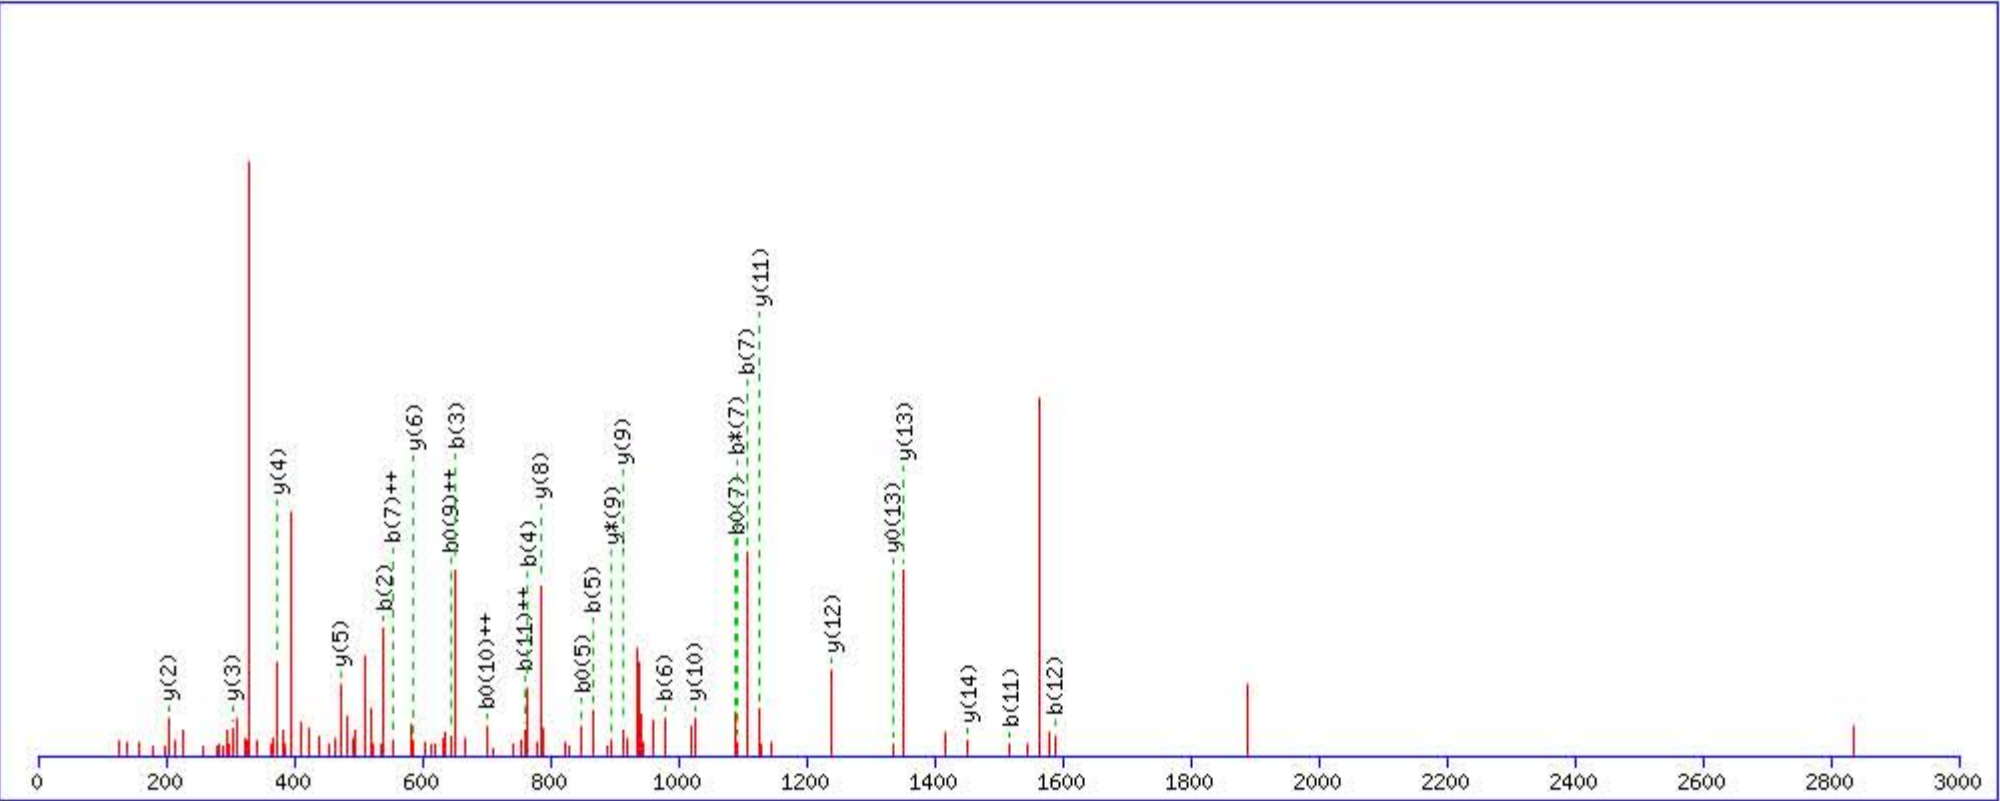

Monoisotopic mass of neutral peptide Mr(calc): 1890.137634  
Fixed modifications: Carbamidomethyl (C) (apply to specified residues or termini only)  
Variable modifications:  
Q1 : Biotin:Thermo-21345 (Q)  
Ions Score: 66 Expect: 1.4e-006  
Matches : 29/148 fragment ions using 63 most intense peaks [\(help\)](#)

| #  | b           | b <sup>++</sup> | b <sup>*</sup> | b <sup>*++</sup> | b <sup>0</sup> | b <sup>0++</sup> | Seq. | y           | y <sup>++</sup> | y <sup>*</sup> | y <sup>*++</sup> | y <sup>0</sup> | y <sup>0++</sup> | #  |
|----|-------------|-----------------|----------------|------------------|----------------|------------------|------|-------------|-----------------|----------------|------------------|----------------|------------------|----|
| 1  | 440.232602  | 220.619939      | 423.206053     | 212.106664       |                |                  | Q    |             |                 |                |                  |                |                  | 15 |
| 2  | 539.301016  | 270.154146      | 522.274467     | 261.640872       |                |                  | V    | 1451.919580 | 726.463428      | 1434.893031    | 717.950154       | 1433.909015    | 717.458146       | 14 |
| 3  | 652.385080  | 326.696178      | 635.358531     | 318.182904       |                |                  | I    | 1352.851166 | 676.929221      | 1335.824617    | 668.415947       | 1334.840601    | 667.923939       | 13 |
| 4  | 765.469144  | 383.238210      | 748.442595     | 374.724936       |                |                  | L    | 1239.767102 | 620.387189      | 1222.740553    | 611.873915       | 1221.756537    | 611.381907       | 12 |
| 5  | 866.516823  | 433.762050      | 849.490274     | 425.248775       | 848.506258     | 424.756767       | T    | 1126.683038 | 563.845157      | 1109.656489    | 555.331883       | 1108.672473    | 554.839874       | 11 |
| 6  | 979.600887  | 490.304082      | 962.574338     | 481.790807       | 961.590322     | 481.298799       | L    | 1025.635359 | 513.321318      | 1008.608810    | 504.808043       | 1007.624794    | 504.316035       | 10 |
| 7  | 1107.659465 | 554.333371      | 1090.632916    | 545.820096       | 1089.648900    | 545.328088       | Q    | 912.551295  | 456.779286      | 895.524746     | 448.266011       | 894.540730     | 447.774003       | 9  |
| 8  | 1204.712229 | 602.859753      | 1187.685680    | 594.346478       | 1186.701664    | 593.854470       | P    | 784.492717  | 392.749997      | 767.466168     | 384.236722       | 766.482152     | 383.744714       | 8  |
| 9  | 1305.759908 | 653.383592      | 1288.733359    | 644.870318       | 1287.749343    | 644.378310       | T    | 687.439953  | 344.223615      | 670.413404     | 335.710340       | 669.429388     | 335.218332       | 7  |
| 10 | 1418.843972 | 709.925624      | 1401.817423    | 701.412350       | 1400.833407    | 700.920341       | L    | 586.392274  | 293.699775      | 569.365725     | 285.186501       |                |                  | 6  |
| 11 | 1517.912386 | 759.459831      | 1500.885837    | 750.946557       | 1499.901821    | 750.454548       | V    | 473.308210  | 237.157743      | 456.281661     | 228.644469       |                |                  | 5  |
| 12 | 1588.949500 | 794.978388      | 1571.922951    | 786.465114       | 1570.938935    | 785.973105       | A    | 374.239796  | 187.623536      | 357.213247     | 179.110261       |                |                  | 4  |
| 13 | 1688.017914 | 844.512595      | 1670.991365    | 835.999321       | 1670.007349    | 835.507313       | V    | 303.202682  | 152.104979      | 286.176133     | 143.591704       |                |                  | 3  |
| 14 | 1745.039378 | 873.023327      | 1728.012829    | 864.510053       | 1727.028813    | 864.018044       | G    | 204.134268  | 102.570772      | 187.107719     | 94.057497        |                |                  | 2  |
| 15 |             |                 |                |                  |                |                  | K    | 147.112804  | 74.060040       | 130.086255     | 65.546765        |                |                  | 1  |

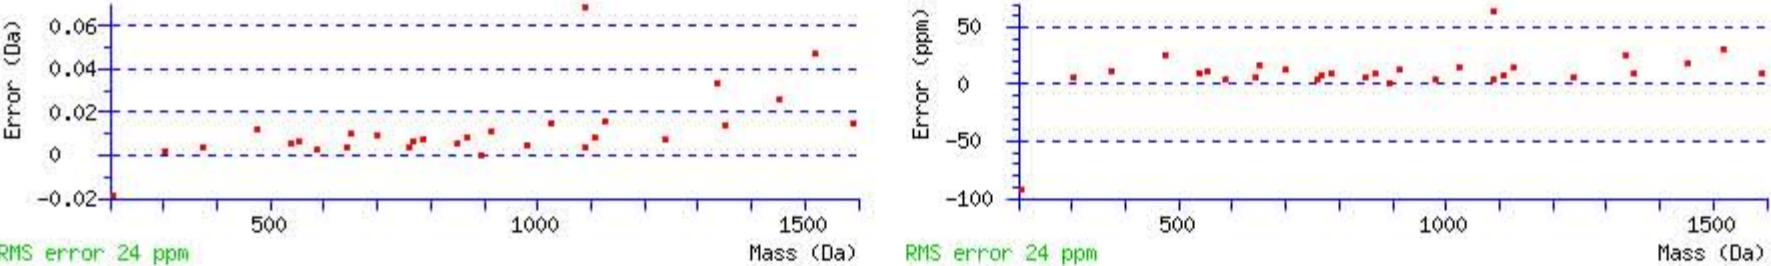

NCBI BLAST search of [QVILTLQPTLVAVGK](#)  
(Parameters: blastp, nr protein database, expect=20000, no filter, PAM30)  
Other BLAST [web gateways](#)

All matches to this query

| Score | Mr(calc):   | Delta    | Sequence                        |
|-------|-------------|----------|---------------------------------|
| 65.9  | 1890.137634 | 0.009854 | <a href="#">QVILTLQPTLVAVGK</a> |
| 9.1   | 1890.137634 | 0.009854 | <a href="#">QVILTLQPTLVAVGK</a> |

MATRIX

SCIENCE

Mascot Search Results

Peptide View

MS/MS Fragmentation of **QVVAGLNFR**  
Found in **KNG1\_HUMAN**, Kininogen-1 OS=Homo sapiens GN=KNG1 PE=1 SV=2

Match to Query 23570: 1313.740828 from(657.877690,2+) rtinseconds(2208) index(21529)  
Title: Locus:1.1.1.3151.10 File:"2013-07-02 CLN FXIII 180 min 2nd F 2.wiff"  
Data file C:\Program Files (x86)\Matrix Science\Mascot Daemon\mgf\8 FXIII 180 min 2nd\mascot\_daemon\_merge.mgf

Click mouse within plot area to zoom in by factor of two about that point

Or, 

Plot from

0

 to 

2200

 Da 

Full range

Label all possible matches ☐ Label matches used for scoring ☒

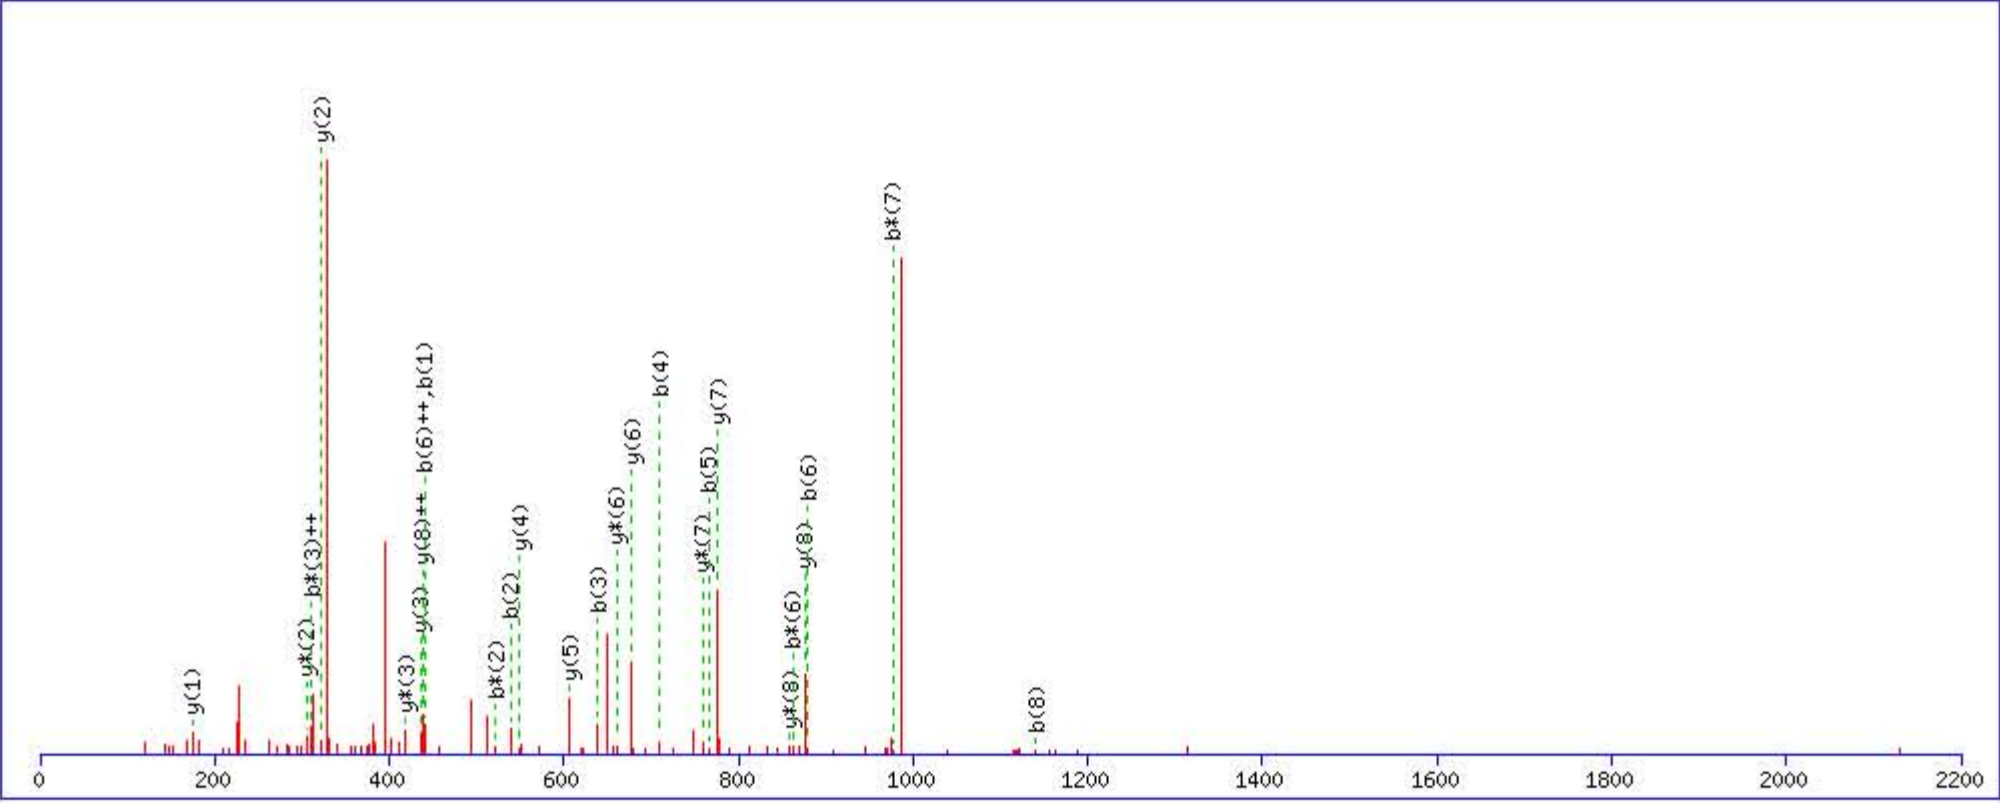

Monoisotopic mass of neutral peptide Mr(calc): 1313.727814  
Fixed modifications: Carbamidomethyl (C) (apply to specified residues or termini only)  
Variable modifications:  
Q1 : Biotin:Thermo-21345 (Q)  
Ions Score: 25 Expect: 0.031  
Matches : 26/64 fragment ions using 79 most intense peaks [\(help\)](#)

| # | b           | b <sup>++</sup> | b <sup>*</sup> | b <sup>*++</sup> | Seq. | y          | y <sup>++</sup> | y <sup>*</sup> | y <sup>*++</sup> | # |
|---|-------------|-----------------|----------------|------------------|------|------------|-----------------|----------------|------------------|---|
| 1 | 440.232602  | 220.619939      | 423.206053     | 212.106664       | Q    |            |                 |                |                  | 9 |
| 2 | 539.301016  | 270.154146      | 522.274467     | 261.640872       | V    | 875.509763 | 438.258520      | 858.483214     | 429.745245       | 8 |
| 3 | 638.369430  | 319.688353      | 621.342881     | 311.175078       | V    | 776.441349 | 388.724313      | 759.414800     | 380.211038       | 7 |
| 4 | 709.406544  | 355.206910      | 692.379995     | 346.693635       | A    | 677.372935 | 339.190106      | 660.346386     | 330.676831       | 6 |
| 5 | 766.428008  | 383.717642      | 749.401459     | 375.204367       | G    | 606.335821 | 303.671549      | 589.309272     | 295.158274       | 5 |
| 6 | 879.512072  | 440.259674      | 862.485523     | 431.746400       | L    | 549.314357 | 275.160817      | 532.287808     | 266.647542       | 4 |
| 7 | 993.554999  | 497.281138      | 976.528450     | 488.767863       | N    | 436.230293 | 218.618784      | 419.203744     | 210.105510       | 3 |
| 8 | 1140.623413 | 570.815345      | 1123.596864    | 562.302070       | F    | 322.187366 | 161.597321      | 305.160817     | 153.084047       | 2 |
| 9 |             |                 |                |                  | R    | 175.118952 | 88.063114       | 158.092403     | 79.549839        | 1 |

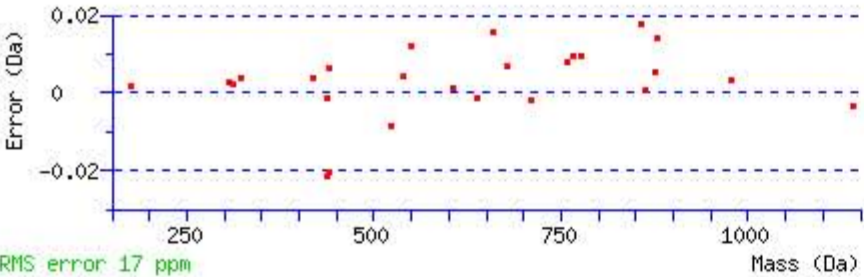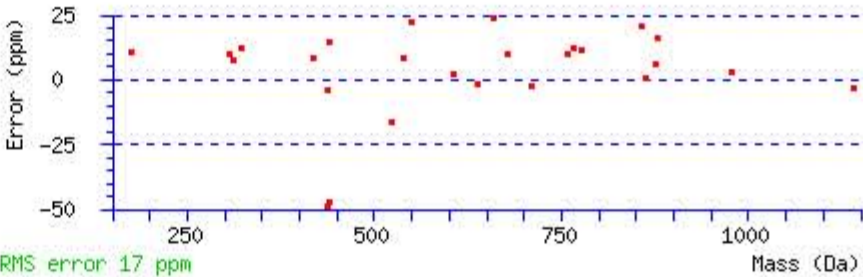

NCBI BLAST search of [QVVAGLNFR](#)  
(Parameters: blastp, nr protein database, expect=20000, no filter, PAM30)  
Other BLAST [web gateways](#)

All matches to this query

| Score | Mr(calc):   | Delta     | Sequence                      |
|-------|-------------|-----------|-------------------------------|
| 25.2  | 1313.727814 | 0.013014  | <a href="#">QVVAGLNFR</a>     |
| 8.6   | 1313.756805 | -0.015977 | <a href="#">KTVTHQFAVKR</a>   |
| 8.4   | 1313.723755 | 0.017073  | <a href="#">SSVKHRLAAMSK</a>  |
| 7.5   | 1313.730301 | 0.010527  | <a href="#">LSQTLQVQLER</a>   |
| 7.5   | 1313.723755 | 0.017073  | <a href="#">SLKMLPERGQR</a>   |
| 5.3   | 1313.731644 | 0.009184  | <a href="#">GEPPPPVRRPGR</a>  |
| 3.0   | 1313.748947 | -0.008119 | <a href="#">VLVQSVCIQIR</a>   |
| 2.7   | 1313.730286 | 0.010542  | <a href="#">AKEDVLQKEVR</a>   |
| 2.7   | 1313.745575 | -0.004747 | <a href="#">GSLALQPFLVGGR</a> |
| 2.7   | 1313.727798 | 0.013030  | <a href="#">KSLSVWQR</a>      |

MATRIX

SCIENCE

Mascot Search Results

Peptide View

MS/MS Fragmentation of **EGDCPVQSGK**  
Found in **KNG1\_HUMAN**, Kininogen-1 OS=Homo sapiens GN=KNG1 PE=1 SV=2

Match to Query 26677: 1386.627968 from(694.321260,2+) rtinseconds(1376) index(16053)  
Title: Locus:1.1.1.2861.25 File:"2013-07-02 CLN FXIII 180 min 2nd F 2.wiff"  
Data file C:\Program Files (x86)\Matrix Science\Mascot Daemon\mgf\8 FXIII 180 min 2nd\mascot\_daemon\_merge.mgf

Click mouse within plot area to zoom in by factor of two about that point  
Or, 

Plot from

100

 to 

1300

 Da 

Full range

  
Label all possible matches ☐ Label matches used for scoring ☒

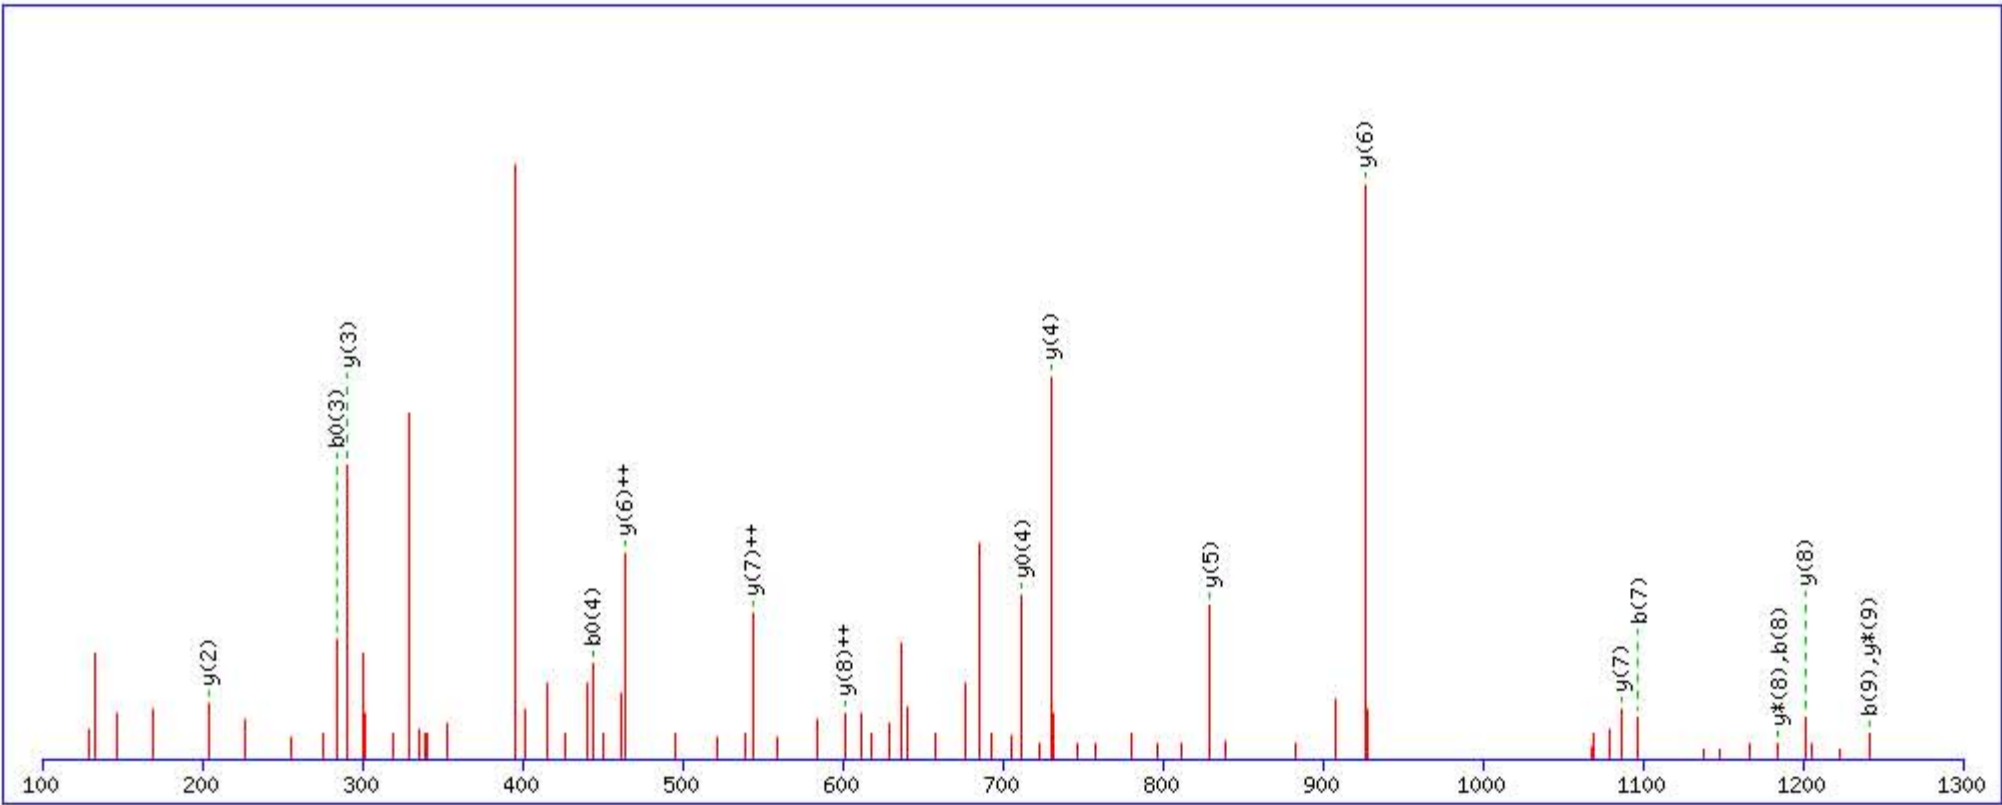

Monoisotopic mass of neutral peptide **Mr(calc):** 1386.627182  
Fixed modifications: Carbamidomethyl (C) (apply to specified residues or termini only)  
Variable modifications:  
Q7 : Biotin:Thermo-21345 (Q)  
Ions Score: 57 Expect: 1.4e-005  
Matches : 18/92 fragment ions using 21 most intense peaks [\(help\)](#)

| #  | b           | b <sup>++</sup> | b <sup>*</sup> | b <sup>++*</sup> | b <sup>0</sup> | b <sup>0++</sup> | Seq. | y           | y <sup>++</sup> | y <sup>*</sup> | y <sup>++*</sup> | y <sup>0</sup> | y <sup>0++</sup> | #  |
|----|-------------|-----------------|----------------|------------------|----------------|------------------|------|-------------|-----------------|----------------|------------------|----------------|------------------|----|
| 1  | 130.049869  | 65.528572       |                |                  | 112.039304     | 56.523290        | E    |             |                 |                |                  |                |                  | 10 |
| 2  | 187.071333  | 94.039305       |                |                  | 169.060768     | 85.034022        | G    | 1258.591856 | 629.799566      | 1241.565307    | 621.286292       | 1240.581291    | 620.794284       | 9  |
| 3  | 302.098276  | 151.552776      |                |                  | 284.087711     | 142.547494       | D    | 1201.570392 | 601.288834      | 1184.543843    | 592.775560       | 1183.559827    | 592.283552       | 8  |
| 4  | 462.128925  | 231.568101      |                |                  | 444.118360     | 222.562818       | C    | 1086.543449 | 543.775363      | 1069.516900    | 535.262088       | 1068.532884    | 534.770080       | 7  |
| 5  | 559.181689  | 280.094483      |                |                  | 541.171124     | 271.089200       | P    | 926.512800  | 463.760038      | 909.486251     | 455.246764       | 908.502235     | 454.754756       | 6  |
| 6  | 658.250103  | 329.628690      |                |                  | 640.239538     | 320.623407       | V    | 829.460036  | 415.233656      | 812.433487     | 406.720382       | 811.449471     | 406.228374       | 5  |
| 7  | 1097.475429 | 549.241353      | 1080.448880    | 540.728078       | 1079.464864    | 540.236070       | Q    | 730.391622  | 365.699449      | 713.365073     | 357.186175       | 712.381057     | 356.694167       | 4  |
| 8  | 1184.507457 | 592.757367      | 1167.480908    | 584.244092       | 1166.496892    | 583.752084       | S    | 291.166296  | 146.086786      | 274.139747     | 137.573512       | 273.155731     | 137.081504       | 3  |
| 9  | 1241.528921 | 621.268099      | 1224.502372    | 612.754824       | 1223.518356    | 612.262816       | G    | 204.134268  | 102.570772      | 187.107719     | 94.057497        |                |                  | 2  |
| 10 |             |                 |                |                  |                |                  | K    | 147.112804  | 74.060040       | 130.086255     | 65.546765        |                |                  | 1  |

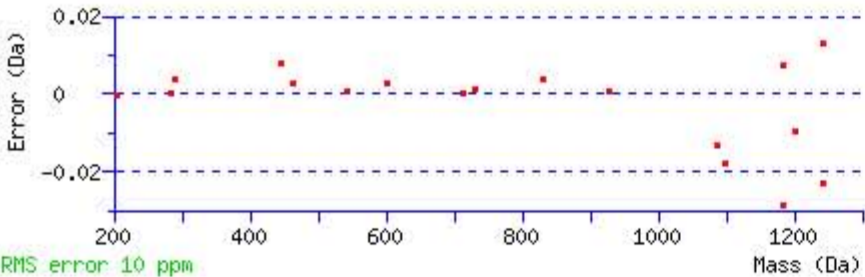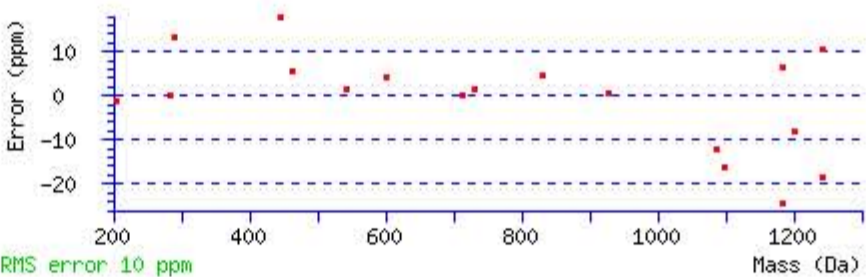

NCBI BLAST search of [EGDCPVQSGK](#)  
(Parameters: blastp, nr protein database, expect=20000, no filter, PAM30)  
Other BLAST [web gateways](#)

All matches to this query

| Score | Mr(calc):   | Delta    | Sequence                               |
|-------|-------------|----------|----------------------------------------|
| 57.1  | 1386.627182 | 0.000786 | <a href="#">EGDCPVQSGK</a>             |
| 7.1   | 1386.619766 | 0.008202 | <a href="#">QMQQQEHD<del>SLK</del></a> |

***{MATRIX}***  
***{SCIENCE}*** Mascot Search Results

Peptide View

MS/MS Fragmentation of **TWQDCEYK**  
Found in **KNG1\_HUMAN**, Kininogen-1 OS=Homo sapiens GN=KNG1 PE=1 SV=2

Match to Query 29331: 1439.626308 from(720.820430,2+) rtinseconds(1751) index(18577)  
Title: Locus:1.1.1.2992.6 File:"2013-07-02 CLN FXIII 180 min 2nd F 2.wiff"  
Data file C:\Program Files (x86)\Matrix Science\Mascot Daemon\mgf\8 FXIII 180 min 2nd\mascot\_daemon\_merge.mgf

Click mouse within plot area to zoom in by factor of two about that point  
Or,   to  Da   
Label all possible matches ☐ Label matches used for scoring ☒

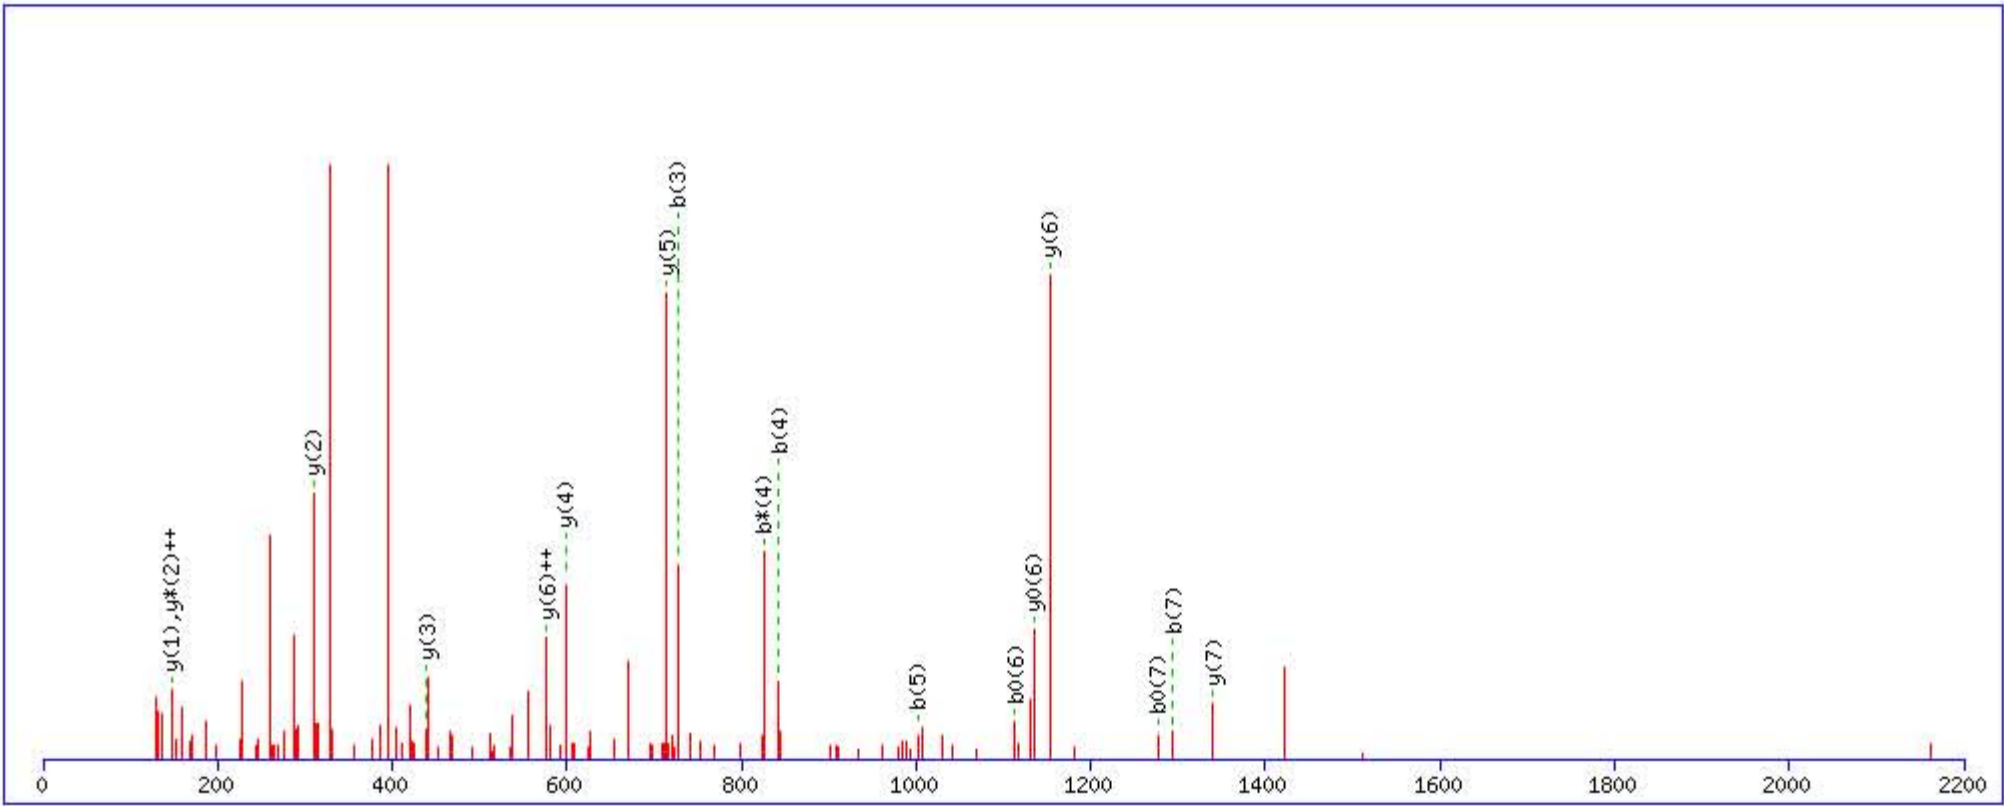

Monoisotopic mass of neutral peptide Mr(calc): 1439.621353  
Fixed modifications: Carbamidomethyl (C) (apply to specified residues or termini only)  
Variable modifications:  
Q3 : Biotin:Thermo-21345 (Q)  
Ions Score: 44 Expect: 0.00017  
Matches : 17/76 fragment ions using 26 most intense peaks [\(help\)](#)

| # | b           | b <sup>++</sup> | b <sup>*</sup> | b <sup>++</sup> * | b <sup>0</sup> | b <sup>0++</sup> | Seq. | y           | y <sup>++</sup> | y <sup>*</sup> | y <sup>++</sup> * | y <sup>0</sup> | y <sup>0++</sup> | # |
|---|-------------|-----------------|----------------|-------------------|----------------|------------------|------|-------------|-----------------|----------------|-------------------|----------------|------------------|---|
| 1 | 102.054955  | 51.531116       |                |                   | 84.044390      | 42.525833        | T    |             |                 |                |                   |                |                  | 8 |
| 2 | 288.134268  | 144.570772      |                |                   | 270.123703     | 135.565490       | W    | 1339.580957 | 670.294117      | 1322.554408    | 661.780842        | 1321.570392    | 661.288834       | 7 |
| 3 | 727.359594  | 364.183435      | 710.333045     | 355.670161        | 709.349029     | 355.178153       | Q    | 1153.501644 | 577.254460      | 1136.475095    | 568.741186        | 1135.491079    | 568.249178       | 6 |
| 4 | 842.386537  | 421.696907      | 825.359988     | 413.183632        | 824.375972     | 412.691624       | D    | 714.276318  | 357.641797      | 697.249769     | 349.128523        | 696.265753     | 348.636515       | 5 |
| 5 | 1002.417186 | 501.712231      | 985.390637     | 493.198957        | 984.406621     | 492.706949       | C    | 599.249375  | 300.128326      | 582.222826     | 291.615051        | 581.238810     | 291.123043       | 4 |
| 6 | 1131.459779 | 566.233528      | 1114.433230    | 557.720253        | 1113.449214    | 557.228245       | E    | 439.218726  | 220.113001      | 422.192177     | 211.599727        | 421.208161     | 211.107719       | 3 |
| 7 | 1294.523108 | 647.765192      | 1277.496559    | 639.251918        | 1276.512543    | 638.759910       | Y    | 310.176133  | 155.591705      | 293.149584     | 147.078430        |                |                  | 2 |
| 8 |             |                 |                |                   |                |                  | K    | 147.112804  | 74.060040       | 130.086255     | 65.546765         |                |                  | 1 |

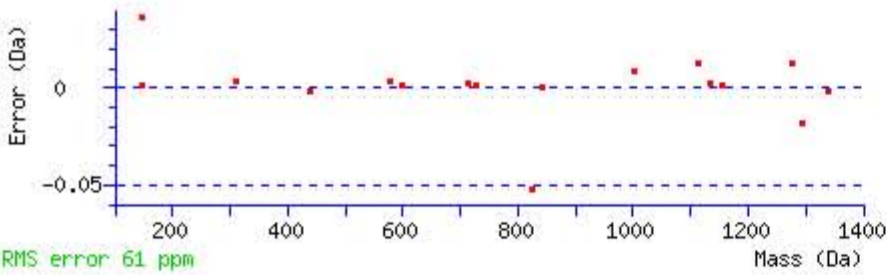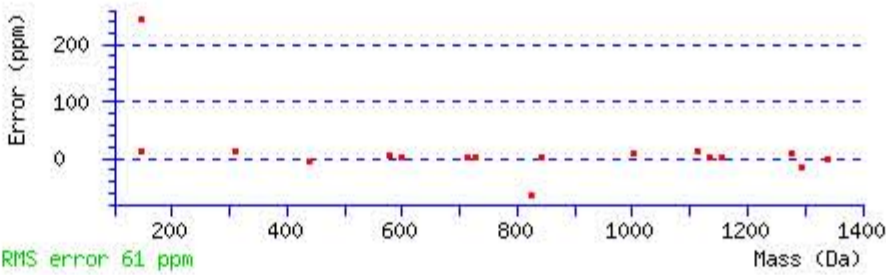

NCBI BLAST search of **TWQDCEYK**  
(Parameters: blastp, nr protein database, expect=20000, no filter, PAM30)  
Other BLAST [web gateways](#)

All matches to this query

| Score | Mr(calc):   | Delta    | Sequence                 |
|-------|-------------|----------|--------------------------|
| 44.3  | 1439.621353 | 0.004955 | <a href="#">TWQDCEYK</a> |

MATRIX

SCIENCE

Mascot Search Results

Peptide View

MS/MS Fragmentation of **SVSEINPTTQMK**  
Found in **KNG1\_HUMAN**, Kininogen-1 OS=Homo sapiens GN=KNG1 PE=1 SV=2

Match to Query 36752: 1644.826002 from(549.282610,3+) rtinseconds(1853) index(33186)  
Title: Locus:1.1.1.754.6 File:"2013-07-02 CLN FXIII 180 min 2nd F 3.wiff"  
Data file C:\Program Files (x86)\Matrix Science\Mascot Daemon\mgf\8 FXIII 180 min 2nd\mascot\_daemon\_merge.mgf

Click mouse within plot area to zoom in by factor of two about that point  
Or, 

Plot from

100

 to 

1500

 Da 

Full range

  
Label all possible matches ☐ Label matches used for scoring ☒

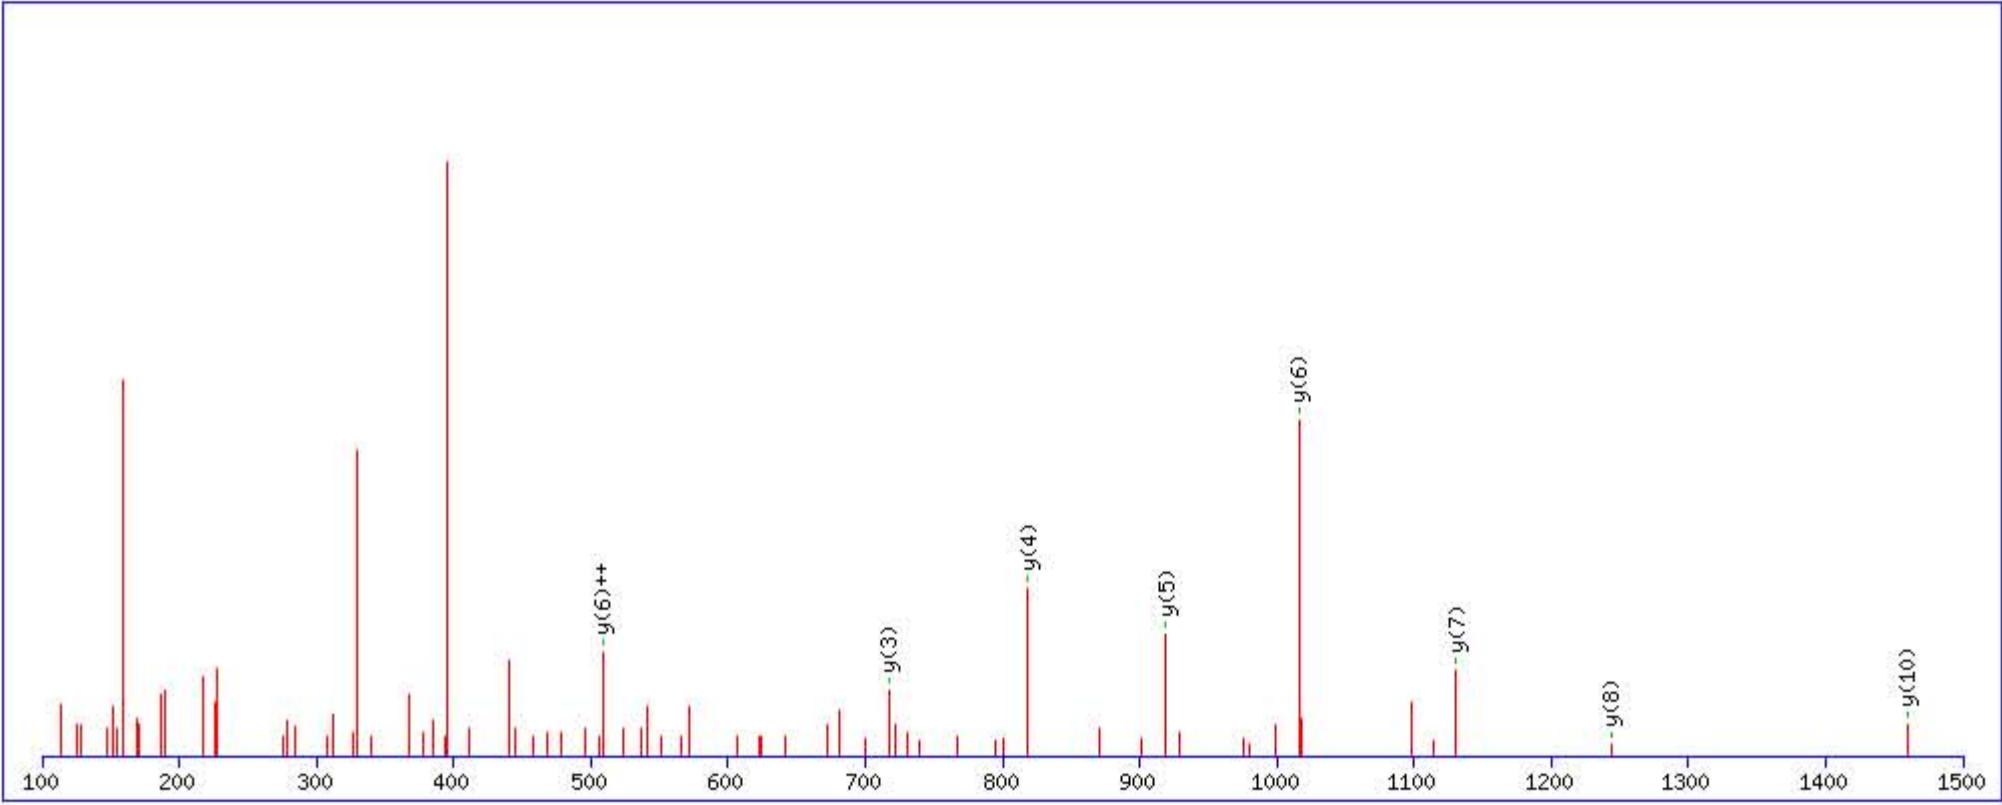

Monoisotopic mass of neutral peptide Mr(calc): 1644.821503  
Fixed modifications: Carbamidomethyl (C) (apply to specified residues or termini only)  
Variable modifications:  
Q10 : Biotin:Thermo-21345 (Q)  
Ions Score: 45 Expect: 0.00071  
Matches : 8/116 fragment ions using 13 most intense peaks [\(help\)](#)

| #                  | b           | b <sup>++</sup> | b <sup>+</sup> | b <sup>⋆++</sup> | b <sup>0</sup> | b <sup>0++</sup> | Seq.     | y                  | y <sup>++</sup>   | y <sup>+</sup> | y <sup>⋆++</sup> | y <sup>0</sup> | y <sup>0++</sup> | #                  |
|--------------------|-------------|-----------------|----------------|------------------|----------------|------------------|----------|--------------------|-------------------|----------------|------------------|----------------|------------------|--------------------|
| <a href="#">1</a>  | 88.039304   | 44.523290       |                |                  | 70.028739      | 35.518008        | <b>S</b> |                    |                   |                |                  |                |                  | <a href="#">12</a> |
| <a href="#">2</a>  | 187.107718  | 94.057497       |                |                  | 169.097153     | 85.052214        | <b>V</b> | 1558.796763        | 779.902020        | 1541.770214    | 771.388745       | 1540.786198    | 770.896737       | <a href="#">11</a> |
| <a href="#">3</a>  | 274.139746  | 137.573511      |                |                  | 256.129181     | 128.568229       | <b>S</b> | <b>1459.728349</b> | 730.367813        | 1442.701800    | 721.854538       | 1441.717784    | 721.362530       | <a href="#">10</a> |
| <a href="#">4</a>  | 403.182339  | 202.094808      |                |                  | 385.171774     | 193.089525       | <b>E</b> | 1372.696321        | 686.851799        | 1355.669772    | 678.338524       | 1354.685756    | 677.846516       | <a href="#">9</a>  |
| <a href="#">5</a>  | 516.266403  | 258.636840      |                |                  | 498.255838     | 249.631557       | <b>I</b> | <b>1243.653728</b> | 622.330502        | 1226.627179    | 613.817228       | 1225.643163    | 613.325220       | <a href="#">8</a>  |
| <a href="#">6</a>  | 630.309330  | 315.658303      | 613.282781     | 307.145029       | 612.298765     | 306.653021       | <b>N</b> | <b>1130.569664</b> | 565.788470        | 1113.543115    | 557.275196       | 1112.559099    | 556.783188       | <a href="#">7</a>  |
| <a href="#">7</a>  | 727.362094  | 364.184685      | 710.335545     | 355.671411       | 709.351529     | 355.179403       | <b>P</b> | <b>1016.526737</b> | <b>508.767007</b> | 999.500188     | 500.253732       | 998.516172     | 499.761724       | <a href="#">6</a>  |
| <a href="#">8</a>  | 828.409773  | 414.708525      | 811.383224     | 406.195250       | 810.399208     | 405.703242       | <b>T</b> | <b>919.473973</b>  | 460.240625        | 902.447424     | 451.727350       | 901.463408     | 451.235342       | <a href="#">5</a>  |
| <a href="#">9</a>  | 929.457452  | 465.232364      | 912.430903     | 456.719090       | 911.446887     | 456.227082       | <b>T</b> | <b>818.426294</b>  | 409.716785        | 801.399745     | 401.203511       | 800.415729     | 400.711503       | <a href="#">4</a>  |
| <a href="#">10</a> | 1368.682778 | 684.845027      | 1351.656229    | 676.331753       | 1350.672213    | 675.839745       | <b>Q</b> | <b>717.378615</b>  | 359.192946        | 700.352066     | 350.679671       |                |                  | <a href="#">3</a>  |
| <a href="#">11</a> | 1499.723263 | 750.365270      | 1482.696714    | 741.851995       | 1481.712698    | 741.359987       | <b>M</b> | 278.153289         | 139.580282        | 261.126740     | 131.067008       |                |                  | <a href="#">2</a>  |
| <a href="#">12</a> |             |                 |                |                  |                |                  | <b>K</b> | 147.112804         | 74.060040         | 130.086255     | 65.546765        |                |                  | <a href="#">1</a>  |

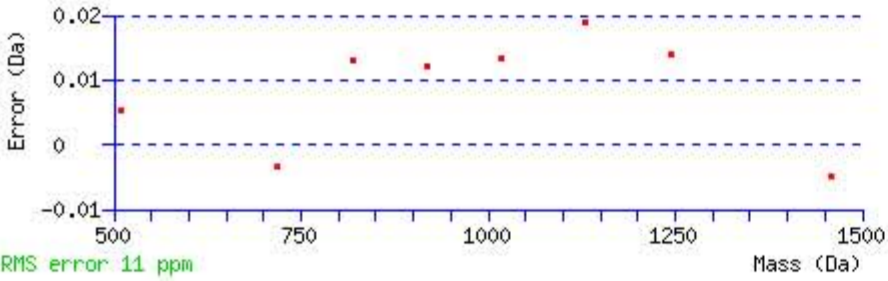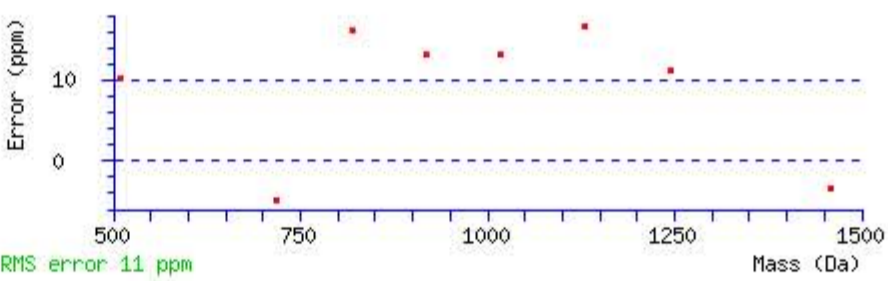

NCBI **BLAST** search of [SVSEINPTTQMK](#)  
(Parameters: blastp, nr protein database, expect=20000, no filter, PAM30)  
Other BLAST [web gateways](#)

All matches to this query

| Score | Mr(calc):   | Delta    | Sequence                     |
|-------|-------------|----------|------------------------------|
| 45.4  | 1644.821503 | 0.004499 | <a href="#">SVSEINPTTQMK</a> |

MATRIX

SCIENCE

Mascot Search Results

Peptide View

MS/MS Fragmentation of **IASFSQNCDIYPGK**  
Found in **KNG1\_HUMAN**, Kininogen-1 OS=Homo sapiens GN=KNG1 PE=1 SV=2

Match to Query 42338: 1909.928328 from(955.971440,2+) rtinseconds(2054) index(20559)  
Title: Locus:1.1.1.3097.21 File:"2013-07-02 CLN FXIII 180 min 2nd F 2.wiff"  
Data file C:\Program Files (x86)\Matrix Science\Mascot Daemon\mgf\8 FXIII 180 min 2nd\mascot\_daemon\_merge.mgf

Click mouse within plot area to zoom in by factor of two about that point  
Or,   to  Da   
Label all possible matches ☐ Label matches used for scoring ☒

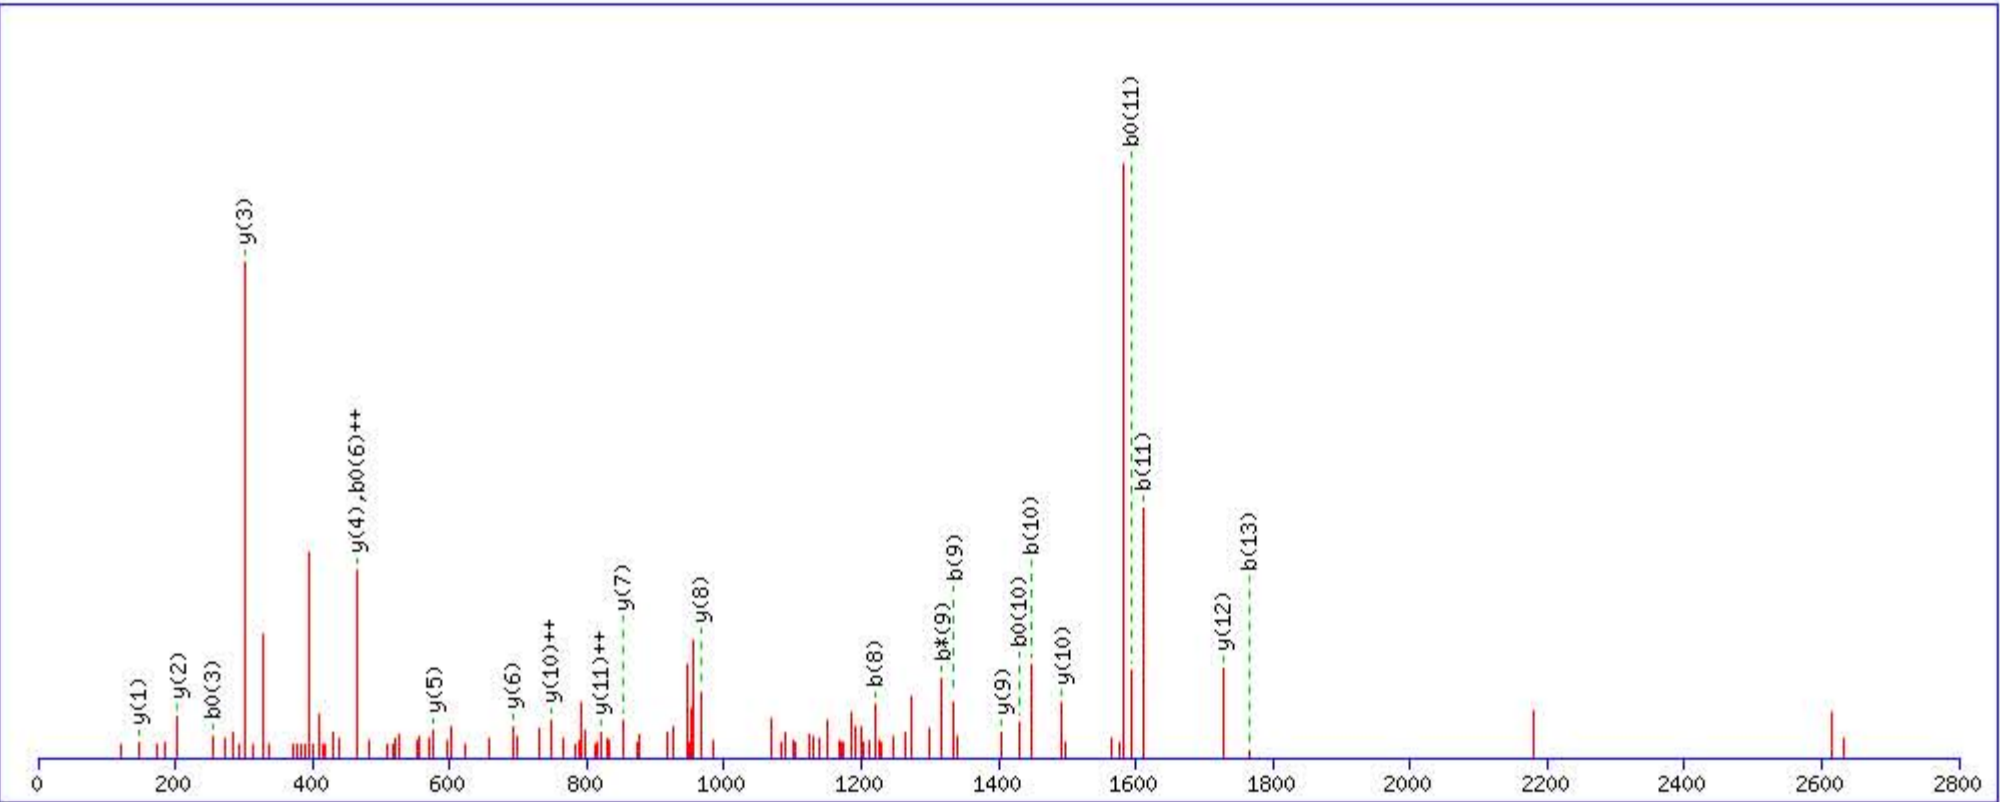

Monoisotopic mass of neutral peptide Mr(calc): 1909.906631  
Fixed modifications: Carbamidomethyl (C) (apply to specified residues or termini only)  
Variable modifications:  
Q6 : Biotin:Thermo-21345 (Q)  
Ions Score: 61 Expect: 2.8e-006  
Matches : 23/132 fragment ions using 47 most intense peaks [\(help\)](#)

| #  | b           | b <sup>++</sup> | b <sup>*</sup> | b <sup>+++</sup> | b <sup>0</sup> | b <sup>0++</sup> | Seq. | y           | y <sup>++</sup> | y <sup>*</sup> | y <sup>+++</sup> | y <sup>0</sup> | y <sup>0++</sup> | #  |
|----|-------------|-----------------|----------------|------------------|----------------|------------------|------|-------------|-----------------|----------------|------------------|----------------|------------------|----|
| 1  | 114.091340  | 57.549308       |                |                  |                |                  | I    |             |                 |                |                  |                |                  | 14 |
| 2  | 185.128454  | 93.067865       |                |                  |                |                  | A    | 1797.829854 | 899.418565      | 1780.803305    | 890.905291       | 1779.819289    | 890.413283       | 13 |
| 3  | 272.160482  | 136.583879      |                |                  | 254.149917     | 127.578596       | S    | 1726.792740 | 863.900008      | 1709.766191    | 855.386734       | 1708.782175    | 854.894726       | 12 |
| 4  | 419.228896  | 210.118086      |                |                  | 401.218331     | 201.112803       | F    | 1639.760712 | 820.383994      | 1622.734163    | 811.870720       | 1621.750147    | 811.378712       | 11 |
| 5  | 506.260924  | 253.634100      |                |                  | 488.250359     | 244.628817       | S    | 1492.692298 | 746.849787      | 1475.665749    | 738.336513       | 1474.681733    | 737.844505       | 10 |
| 6  | 945.486250  | 473.246763      | 928.459701     | 464.733488       | 927.475685     | 464.241480       | Q    | 1405.660270 | 703.333773      | 1388.633721    | 694.820499       | 1387.649705    | 694.328491       | 9  |
| 7  | 1059.529177 | 530.268226      | 1042.502628    | 521.754952       | 1041.518612    | 521.262944       | N    | 966.434944  | 483.721110      | 949.408395     | 475.207836       | 948.424379     | 474.715828       | 8  |
| 8  | 1219.559826 | 610.283551      | 1202.533277    | 601.770277       | 1201.549261    | 601.278268       | C    | 852.392017  | 426.699647      | 835.365468     | 418.186372       | 834.381452     | 417.694364       | 7  |
| 9  | 1334.586769 | 667.797023      | 1317.560220    | 659.283748       | 1316.576204    | 658.791740       | D    | 692.361368  | 346.684322      | 675.334819     | 338.171048       | 674.350803     | 337.679040       | 6  |
| 10 | 1447.670833 | 724.339054      | 1430.644284    | 715.825780       | 1429.660268    | 715.333772       | I    | 577.334425  | 289.170851      | 560.307876     | 280.657576       |                |                  | 5  |
| 11 | 1610.734162 | 805.870719      | 1593.707613    | 797.357445       | 1592.723597    | 796.865436       | Y    | 464.250361  | 232.628818      | 447.223812     | 224.115544       |                |                  | 4  |
| 12 | 1707.786926 | 854.397101      | 1690.760377    | 845.883827       | 1689.776361    | 845.391819       | P    | 301.187032  | 151.097154      | 284.160483     | 142.583879       |                |                  | 3  |
| 13 | 1764.808390 | 882.907833      | 1747.781841    | 874.394559       | 1746.797825    | 873.902550       | G    | 204.134268  | 102.570772      | 187.107719     | 94.057497        |                |                  | 2  |
| 14 |             |                 |                |                  |                |                  | K    | 147.112804  | 74.060040       | 130.086255     | 65.546765        |                |                  | 1  |

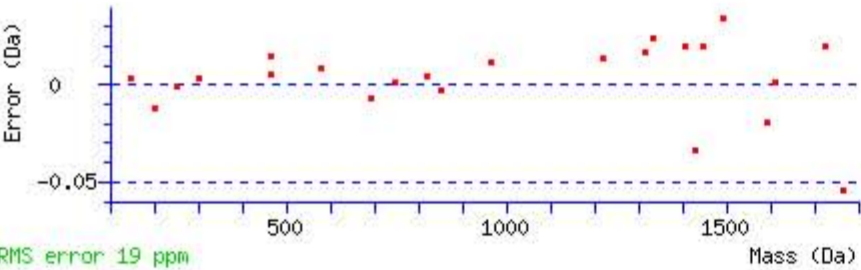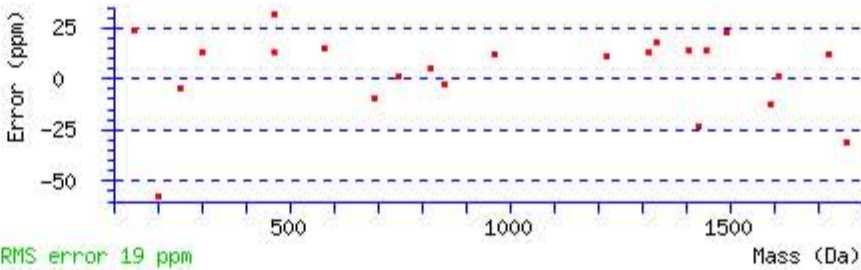

NCBI BLAST search of **IASFSQNCDIYPGK**  
(Parameters: blastp, nr protein database, expect=20000, no filter, PAM30)  
Other BLAST [web gateways](#)

All matches to this query

| Score | Mr(calc):   | Delta    | Sequence                       |
|-------|-------------|----------|--------------------------------|
| 60.6  | 1909.906631 | 0.021697 | <a href="#">IASFSQNCDIYPGK</a> |
| 1.5   | 1909.905975 | 0.022353 | <a href="#">KRMTSQDCLETSK</a>  |

MATRIX

SCIENCE

Mascot Search Results

Peptide View

MS/MS Fragmentation of **YNSQNQSNNQFVLYR**  
Found in **KNG1\_HUMAN**, Kininogen-1 OS=Homo sapiens GN=KNG1 PE=1 SV=2

Match to Query 48190: 2185.054452 from(729.358760,3+) rtinseconds(2030) index(20408)  
Title: Locus:1.1.1.3089.5 File:"2013-07-02 CLN FXIII 180 min 2nd F 2.wiff"  
Data file C:\Program Files (x86)\Matrix Science\Mascot Daemon\mgf\8 FXIII 180 min 2nd\mascot\_daemon\_merge.mgf

Click mouse within plot area to zoom in by factor of two about that point  
Or,   to  Da   
Label all possible matches ☐ Label matches used for scoring ☒

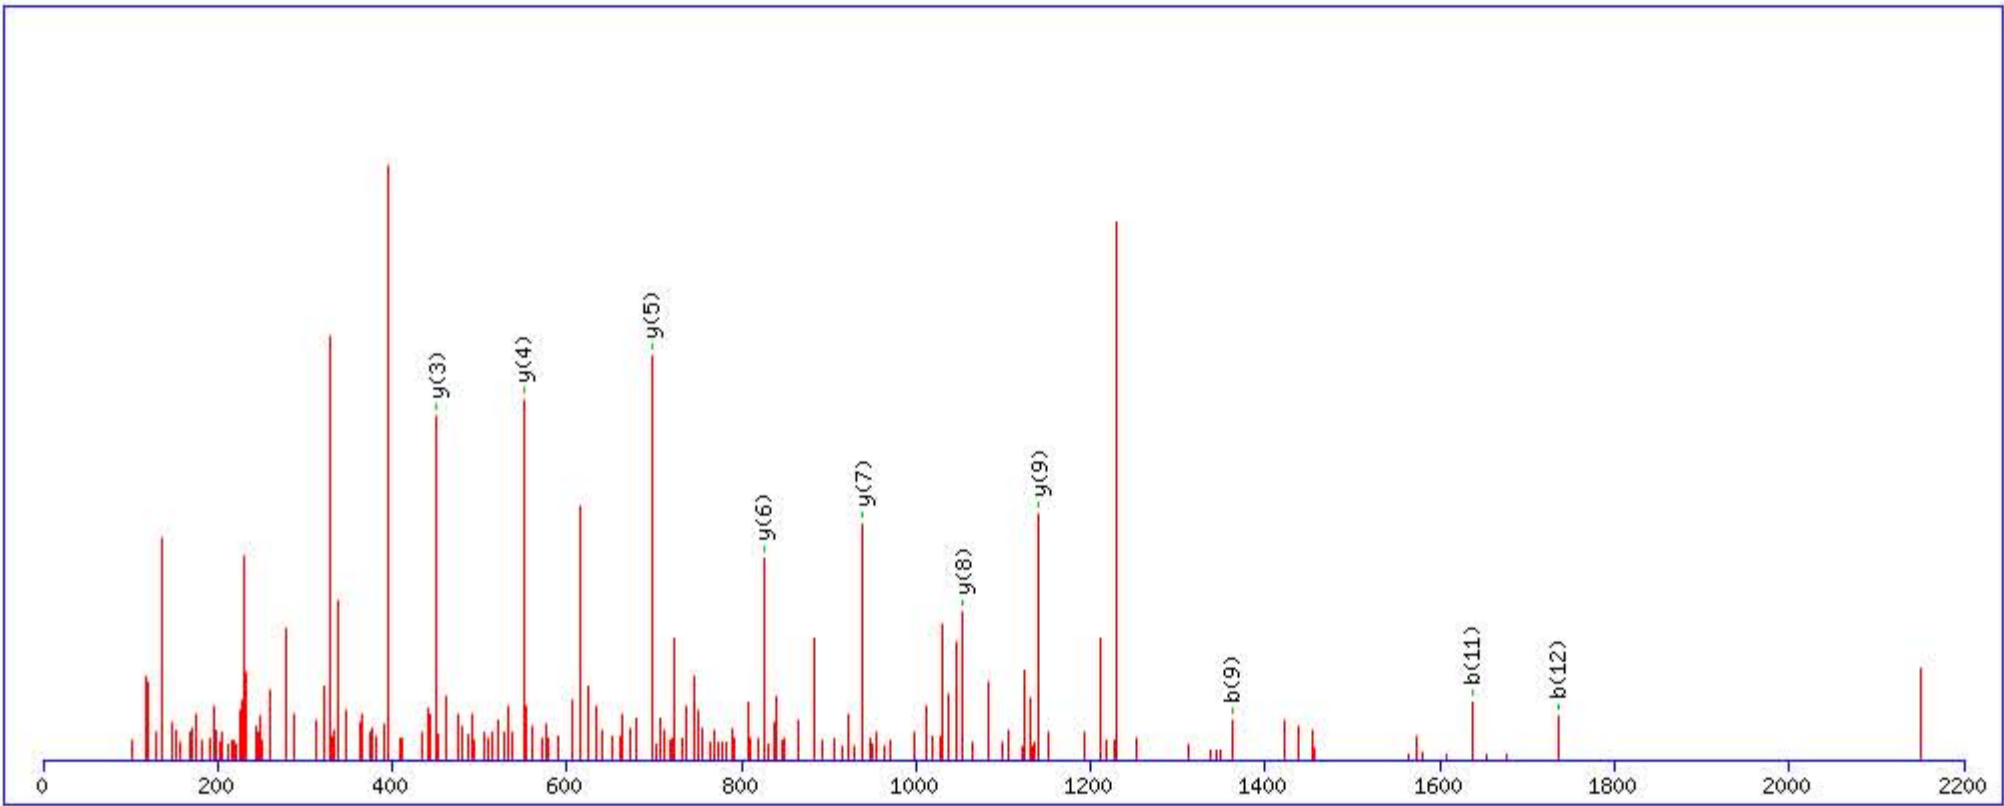

Monoisotopic mass of neutral peptide Mr(calc): 2185.037445  
Fixed modifications: Carbamidomethyl (C) (apply to specified residues or termini only)  
Variable modifications:  
Q6 : Biotin:Thermo-21345 (Q)  
Ions Score: 38 Expect: 0.0031  
Matches : 10/146 fragment ions using 18 most intense peaks [\(help\)](#)

| #  | b           | b <sup>++</sup> | b <sup>*</sup> | b <sup>*++</sup> | b <sup>0</sup> | b <sup>0++</sup> | Seq. | y           | y <sup>++</sup> | y <sup>*</sup> | y <sup>*++</sup> | y <sup>0</sup> | y <sup>0++</sup> | #  |
|----|-------------|-----------------|----------------|------------------|----------------|------------------|------|-------------|-----------------|----------------|------------------|----------------|------------------|----|
| 1  | 164.070605  | 82.538940       |                |                  |                |                  | Y    |             |                 |                |                  |                |                  | 15 |
| 2  | 278.113532  | 139.560404      | 261.086983     | 131.047130       |                |                  | N    | 2022.981419 | 1011.994348     | 2005.954870    | 1003.481073      | 2004.970854    | 1002.989065      | 14 |
| 3  | 365.145560  | 183.076418      | 348.119011     | 174.563144       | 347.134995     | 174.071136       | S    | 1908.938492 | 954.972884      | 1891.911943    | 946.459610       | 1890.927927    | 945.967602       | 13 |
| 4  | 493.204138  | 247.105707      | 476.177589     | 238.592433       | 475.193573     | 238.100425       | Q    | 1821.906464 | 911.456870      | 1804.879915    | 902.943596       | 1803.895899    | 902.451588       | 12 |
| 5  | 607.247065  | 304.127171      | 590.220516     | 295.613896       | 589.236500     | 295.121888       | N    | 1693.847886 | 847.427581      | 1676.821337    | 838.914307       | 1675.837321    | 838.422299       | 11 |
| 6  | 1046.472391 | 523.739834      | 1029.445842    | 515.226559       | 1028.461826    | 514.734551       | Q    | 1579.804959 | 790.406118      | 1562.778410    | 781.892843       | 1561.794394    | 781.400835       | 10 |
| 7  | 1133.504419 | 567.255848      | 1116.477870    | 558.742573       | 1115.493854    | 558.250565       | S    | 1140.579633 | 570.793455      | 1123.553084    | 562.280180       | 1122.569068    | 561.788172       | 9  |
| 8  | 1247.547346 | 624.277311      | 1230.520797    | 615.764037       | 1229.536781    | 615.272029       | N    | 1053.547605 | 527.277441      | 1036.521056    | 518.764166       |                |                  | 8  |
| 9  | 1361.590273 | 681.298775      | 1344.563724    | 672.785500       | 1343.579708    | 672.293492       | N    | 939.504678  | 470.255977      | 922.478129     | 461.742703       |                |                  | 7  |
| 10 | 1489.648851 | 745.328064      | 1472.622302    | 736.814789       | 1471.638286    | 736.322781       | Q    | 825.461751  | 413.234514      | 808.435202     | 404.721239       |                |                  | 6  |
| 11 | 1636.717265 | 818.862271      | 1619.690716    | 810.348996       | 1618.706700    | 809.856988       | F    | 697.403173  | 349.205225      | 680.376624     | 340.691950       |                |                  | 5  |
| 12 | 1735.785679 | 868.396478      | 1718.759130    | 859.883203       | 1717.775114    | 859.391195       | V    | 550.334759  | 275.671018      | 533.308210     | 267.157743       |                |                  | 4  |
| 13 | 1848.869743 | 924.938510      | 1831.843194    | 916.425235       | 1830.859178    | 915.933227       | L    | 451.266345  | 226.136811      | 434.239796     | 217.623536       |                |                  | 3  |
| 14 | 2011.933072 | 1006.470174     | 1994.906523    | 997.956900       | 1993.922507    | 997.464892       | Y    | 338.182281  | 169.594779      | 321.155732     | 161.081504       |                |                  | 2  |
| 15 |             |                 |                |                  |                |                  | R    | 175.118952  | 88.063114       | 158.092403     | 79.549840        |                |                  | 1  |

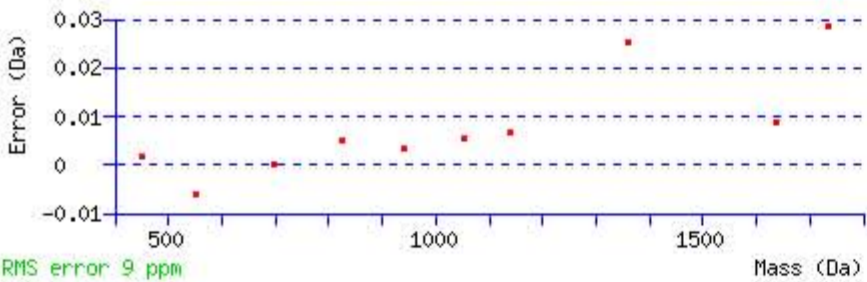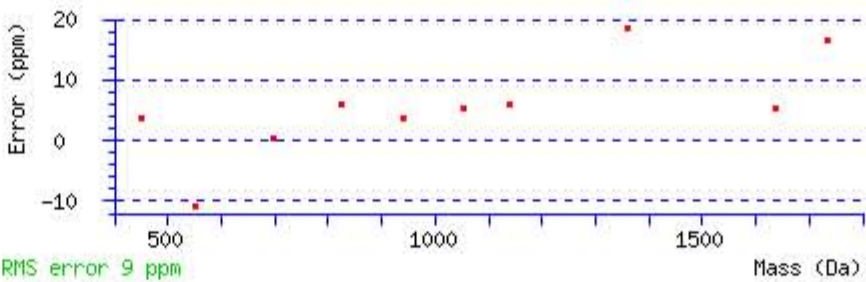

NCBI BLAST search of [YNSQNQSNNQFVLYR](#)  
(Parameters: blastp, nr protein database, expect=20000, no filter, PAM30)  
Other BLAST [web gateways](#)

All matches to this query

| Score | Mr(calc):   | Delta    | Sequence                        |
|-------|-------------|----------|---------------------------------|
| 38.2  | 2185.037445 | 0.017007 | <a href="#">YNSQNQSNNQFVLYR</a> |
| 38.2  | 2185.037445 | 0.017007 | <a href="#">YNSQNQSNNQFVLYR</a> |
| 4.2   | 2185.037445 | 0.017007 | <a href="#">YNSQNQSNNQFVLYR</a> |

MATRIX

SCIENCE

Mascot Search Results

Peptide View

MS/MS Fragmentation of **YNSQNQSNNQFVLYR**  
Found in **KNG1\_HUMAN**, Kininogen-1 OS=Homo sapiens GN=KNG1 PE=1 SV=2

Match to Query 48192: 2185.056162 from(729.359330,3+) rtinseconds(2107) index(20885)  
Title: Locus:1.1.1.3116.10 File:"2013-07-02 CLN FXIII 180 min 2nd F 2.wiff"  
Data file C:\Program Files (x86)\Matrix Science\Mascot Daemon\mgf\8 FXIII 180 min 2nd\mascot\_daemon\_merge.mgf

Click mouse within plot area to zoom in by factor of two about that point  
Or, 

Plot from

100

 to 

1700

 Da 

Full range

  
Label all possible matches ☐ Label matches used for scoring ☒

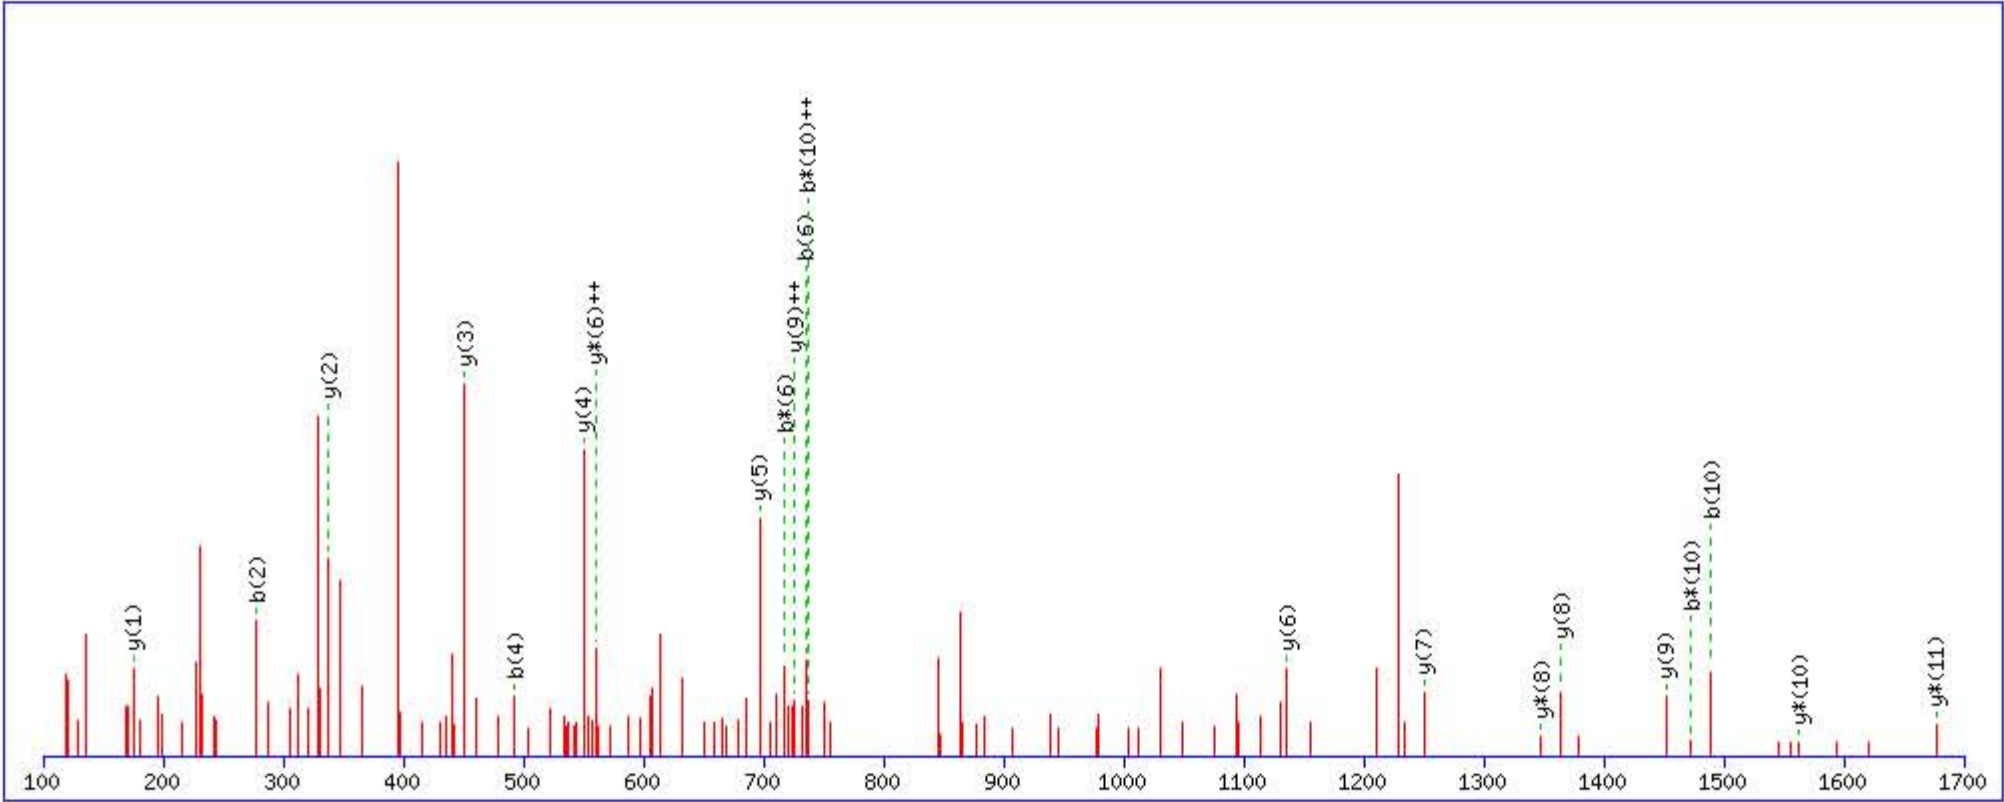

Monoisotopic mass of neutral peptide Mr(calc): 2185.037445  
Fixed modifications: Carbamidomethyl (C) (apply to specified residues or termini only)  
Variable modifications:  
Q10 : Biotin:Thermo-21345 (Q)  
Ions Score: 35 Expect: 0.0065  
Matches : 21/146 fragment ions using 47 most intense peaks [\(help\)](#)

| #  | b           | b <sup>++</sup> | b <sup>*</sup> | b <sup>*++</sup> | b <sup>0</sup> | b <sup>0++</sup> | Seq. | y           | y <sup>++</sup> | y <sup>*</sup> | y <sup>*++</sup> | y <sup>0</sup> | y <sup>0++</sup> | #  |
|----|-------------|-----------------|----------------|------------------|----------------|------------------|------|-------------|-----------------|----------------|------------------|----------------|------------------|----|
| 1  | 164.070605  | 82.538940       |                |                  |                |                  | Y    |             |                 |                |                  |                |                  | 15 |
| 2  | 278.113532  | 139.560404      | 261.086983     | 131.047130       |                |                  | N    | 2022.981419 | 1011.994348     | 2005.954870    | 1003.481073      | 2004.970854    | 1002.989065      | 14 |
| 3  | 365.145560  | 183.076418      | 348.119011     | 174.563144       | 347.134995     | 174.071136       | S    | 1908.938492 | 954.972884      | 1891.911943    | 946.459610       | 1890.927927    | 945.967602       | 13 |
| 4  | 493.204138  | 247.105707      | 476.177589     | 238.592433       | 475.193573     | 238.100425       | Q    | 1821.906464 | 911.456870      | 1804.879915    | 902.943596       | 1803.895899    | 902.451588       | 12 |
| 5  | 607.247065  | 304.127171      | 590.220516     | 295.613896       | 589.236500     | 295.121888       | N    | 1693.847886 | 847.427581      | 1676.821337    | 838.914307       | 1675.837321    | 838.422299       | 11 |
| 6  | 735.305643  | 368.156460      | 718.279094     | 359.643185       | 717.295078     | 359.151177       | Q    | 1579.804959 | 790.406118      | 1562.778410    | 781.892843       | 1561.794394    | 781.400835       | 10 |
| 7  | 822.337671  | 411.672474      | 805.311122     | 403.159199       | 804.327106     | 402.667191       | S    | 1451.746381 | 726.376829      | 1434.719832    | 717.863554       | 1433.735816    | 717.371546       | 9  |
| 8  | 936.380598  | 468.693937      | 919.354049     | 460.180662       | 918.370033     | 459.688654       | N    | 1364.714353 | 682.860815      | 1347.687804    | 674.347540       |                |                  | 8  |
| 9  | 1050.423525 | 525.715400      | 1033.396976    | 517.202126       | 1032.412960    | 516.710118       | N    | 1250.671426 | 625.839351      | 1233.644877    | 617.326077       |                |                  | 7  |
| 10 | 1489.648851 | 745.328064      | 1472.622302    | 736.814789       | 1471.638286    | 736.322781       | Q    | 1136.628499 | 568.817888      | 1119.601950    | 560.304613       |                |                  | 6  |
| 11 | 1636.717265 | 818.862271      | 1619.690716    | 810.348996       | 1618.706700    | 809.856988       | F    | 697.403173  | 349.205225      | 680.376624     | 340.691950       |                |                  | 5  |
| 12 | 1735.785679 | 868.396478      | 1718.759130    | 859.883203       | 1717.775114    | 859.391195       | V    | 550.334759  | 275.671018      | 533.308210     | 267.157743       |                |                  | 4  |
| 13 | 1848.869743 | 924.938510      | 1831.843194    | 916.425235       | 1830.859178    | 915.933227       | L    | 451.266345  | 226.136811      | 434.239796     | 217.623536       |                |                  | 3  |
| 14 | 2011.933072 | 1006.470174     | 1994.906523    | 997.956900       | 1993.922507    | 997.464892       | Y    | 338.182281  | 169.594779      | 321.155732     | 161.081504       |                |                  | 2  |
| 15 |             |                 |                |                  |                |                  | R    | 175.118952  | 88.063114       | 158.092403     | 79.549840        |                |                  | 1  |

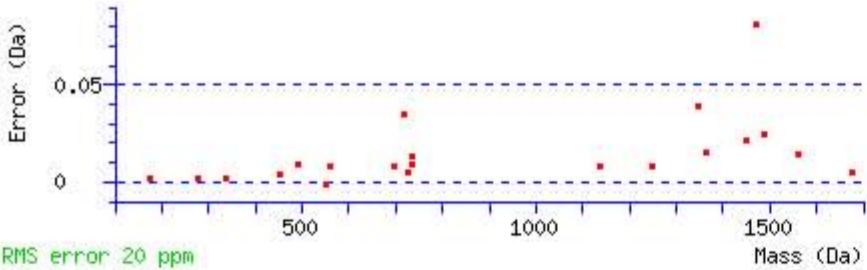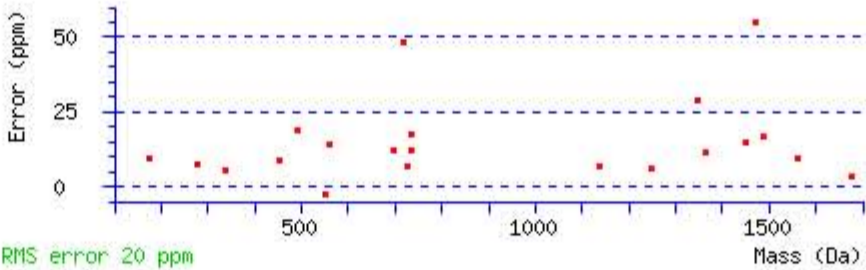

NCBI BLAST search of [YNSQNQSNNQFVLYR](#)  
(Parameters: blastp, nr protein database, expect=20000, no filter, PAM30)  
Other BLAST [web gateways](#)

All matches to this query

| Score | Mr(calc):   | Delta    | Sequence                        |
|-------|-------------|----------|---------------------------------|
| 35.0  | 2185.037445 | 0.018717 | <a href="#">YNSQNQSNNQFVLYR</a> |
| 12.3  | 2185.037445 | 0.018717 | <a href="#">YNSQNQSNNQFVLYR</a> |
| 8.8   | 2185.037445 | 0.018717 | <a href="#">YNSQNQSNNQFVLYR</a> |

M

A

T

R

I

X

S

C

I

E

N

C

E

Mascot Search Results

Peptide View

MS/MS Fragmentation of **KLGQSLDCNAEVYVVPWEK**  
Found in **KNG1\_HUMAN**, Kininogen-1 OS=Homo sapiens GN=KNG1 PE=1 SV=2

Match to Query 54955: 2545.307172 from(849.443000,3+) rtinseconds(2341) index(22265)  
Title: Locus:1.1.1.3197.20 File:"2013-07-02 CLN FXIII 180 min 2nd F 2.wiff"  
Data file C:\Program Files (x86)\Matrix Science\Mascot Daemon\mgf\8 FXIII 180 min 2nd\mascot\_daemon\_merge.mgf

Click mouse within plot area to zoom in by factor of two about that point  
Or, 

Plot from

0

 to 

2800

 Da 

Full range

  
Label all possible matches ☐ Label matches used for scoring ☒

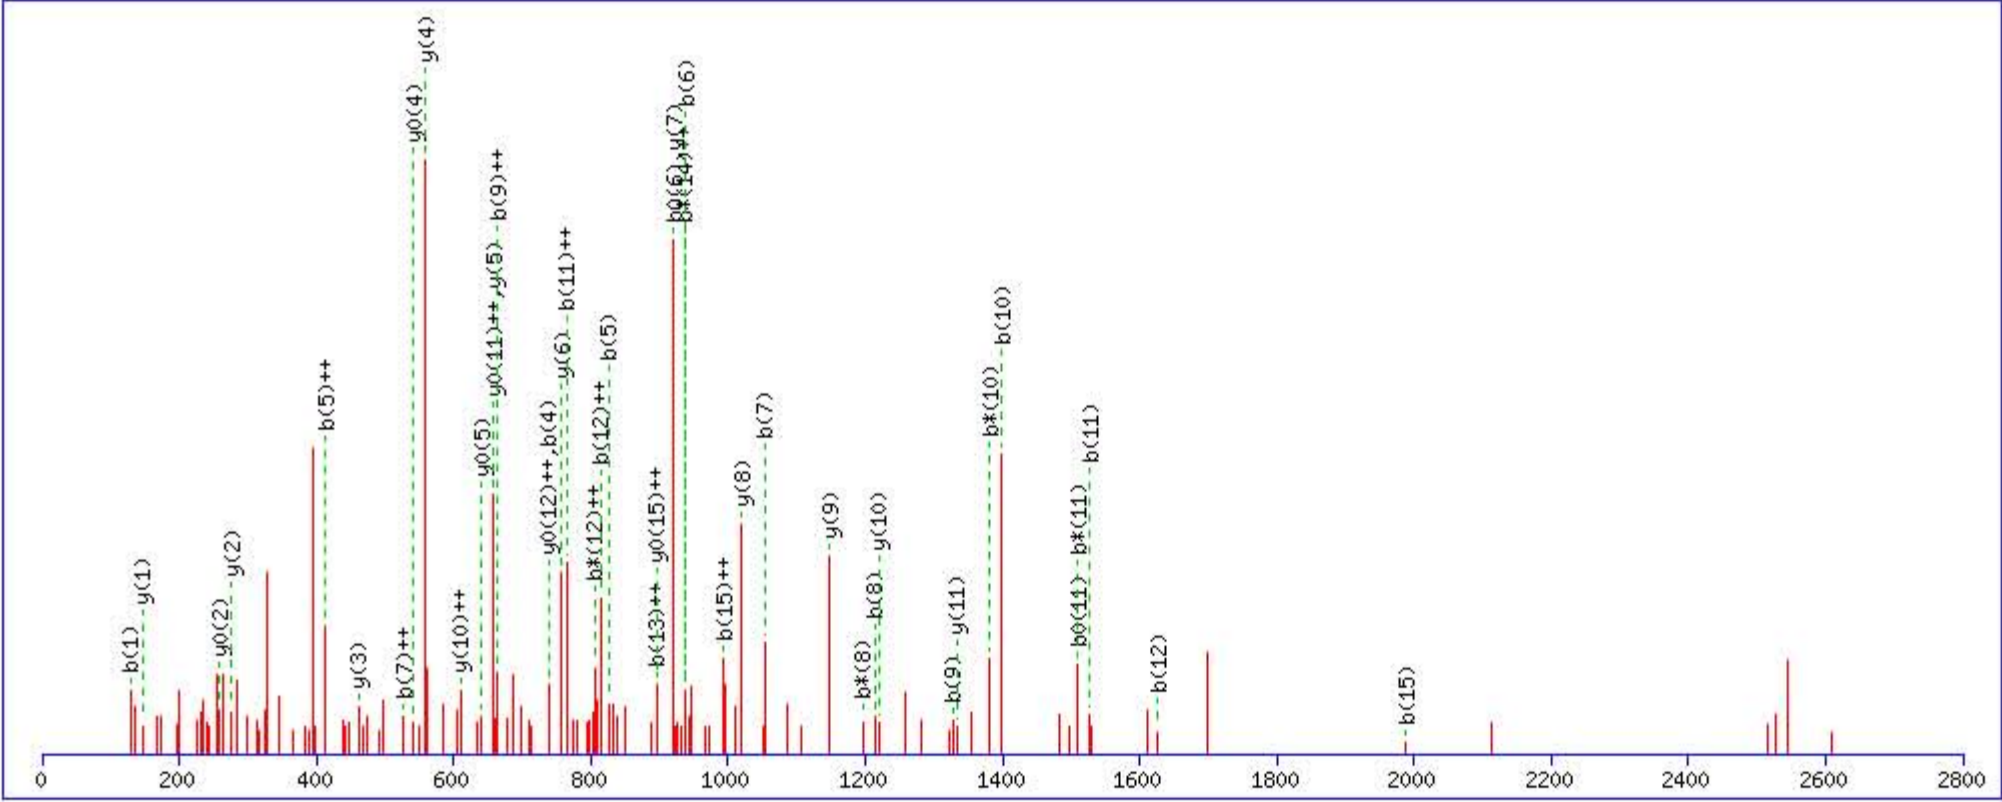

Monoisotopic mass of neutral peptide Mr(calc): 2545.270889  
Fixed modifications: Carbamidomethyl (C) (apply to specified residues or termini only)  
Variable modifications:  
Q4 : Biotin:Thermo-21345 (Q)  
Ions Score: 44 Expect: 0.0011  
Matches : 43/206 fragment ions using 111 most intense peaks [\(help\)](#)

| #  | b                  | b <sup>++</sup>   | b <sup>*</sup>     | b <sup>*++</sup>  | b <sup>0</sup>     | b <sup>0++</sup> | Seq. | y                  | y <sup>++</sup>   | y <sup>*</sup> | y <sup>*++</sup> | y <sup>0</sup>    | y <sup>0++</sup>  | #  |
|----|--------------------|-------------------|--------------------|-------------------|--------------------|------------------|------|--------------------|-------------------|----------------|------------------|-------------------|-------------------|----|
| 1  | <b>129.102239</b>  | 65.054757         | 112.075690         | 56.541483         |                    |                  | K    |                    |                   |                |                  |                   |                   | 19 |
| 2  | 242.186303         | 121.596790        | 225.159754         | 113.083515        |                    |                  | L    | 2418.183217        | 1209.595246       | 2401.156668    | 1201.081972      | 2400.172652       | 1200.589964       | 18 |
| 3  | 299.207767         | 150.107521        | 282.181218         | 141.594247        |                    |                  | G    | 2305.099153        | 1153.053214       | 2288.072604    | 1144.539940      | 2287.088588       | 1144.047932       | 17 |
| 4  | <b>738.433093</b>  | 369.720185        | 721.406544         | 361.206910        |                    |                  | Q    | 2248.077689        | 1124.542482       | 2231.051140    | 1116.029208      | 2230.067124       | 1115.537200       | 16 |
| 5  | <b>825.465121</b>  | <b>413.236199</b> | 808.438572         | 404.722924        | 807.454556         | 404.230916       | S    | 1808.852363        | 904.929820        | 1791.825814    | 896.416545       | 1790.841798       | <b>895.924537</b> | 15 |
| 6  | <b>938.549185</b>  | 469.778231        | 921.522636         | 461.264956        | <b>920.538620</b>  | 460.772948       | L    | 1721.820335        | 861.413806        | 1704.793786    | 852.900531       | 1703.809770       | 852.408523        | 14 |
| 7  | <b>1053.576128</b> | <b>527.291702</b> | 1036.549579        | 518.778428        | 1035.565563        | 518.286420       | D    | 1608.736271        | 804.871774        | 1591.709722    | 796.358499       | 1590.725706       | 795.866491        | 13 |
| 8  | <b>1213.606777</b> | 607.307027        | <b>1196.580228</b> | 598.793752        | 1195.596212        | 598.301744       | C    | 1493.709328        | 747.358302        | 1476.682779    | 738.845028       | 1475.698763       | <b>738.353020</b> | 12 |
| 9  | <b>1327.649704</b> | <b>664.328490</b> | 1310.623155        | 655.815216        | 1309.639139        | 655.323208       | N    | <b>1333.678679</b> | 667.342978        | 1316.652130    | 658.829703       | 1315.668114       | <b>658.337695</b> | 11 |
| 10 | <b>1398.686818</b> | 699.847047        | <b>1381.660269</b> | 691.333773        | 1380.676253        | 690.841765       | A    | <b>1219.635752</b> | <b>610.321514</b> | 1202.609203    | 601.808240       | 1201.625187       | 601.316232        | 10 |
| 11 | <b>1527.729411</b> | <b>764.368344</b> | <b>1510.702862</b> | 755.855069        | <b>1509.718846</b> | 755.363061       | E    | <b>1148.598638</b> | 574.802957        | 1131.572089    | 566.289683       | 1130.588073       | 565.797675        | 9  |
| 12 | <b>1626.797825</b> | <b>813.902551</b> | 1609.771276        | <b>805.389276</b> | 1608.787260        | 804.897268       | V    | <b>1019.556045</b> | 510.281661        | 1002.529496    | 501.768386       | 1001.545480       | 501.276378        | 8  |
| 13 | 1789.861154        | <b>895.434215</b> | 1772.834605        | 886.920941        | 1771.850589        | 886.428933       | Y    | <b>920.487631</b>  | 460.747454        | 903.461082     | 452.234179       | 902.477066        | 451.742171        | 7  |
| 14 | 1888.929568        | 944.968422        | 1871.903019        | <b>936.455148</b> | 1870.919003        | 935.963140       | V    | <b>757.424302</b>  | 379.215789        | 740.397753     | 370.702515       | 739.413737        | 370.210507        | 6  |
| 15 | <b>1987.997982</b> | <b>994.502629</b> | 1970.971433        | 985.989355        | 1969.987417        | 985.497347       | V    | <b>658.355888</b>  | 329.681582        | 641.329339     | 321.168308       | <b>640.345323</b> | 320.676300        | 5  |
| 16 | 2085.050746        | 1043.029011       | 2068.024197        | 1034.515736       | 2067.040181        | 1034.023728      | P    | <b>559.287474</b>  | 280.147375        | 542.260925     | 271.634101       | <b>541.276909</b> | 271.142093        | 4  |
| 17 | 2271.130059        | 1136.068667       | 2254.103510        | 1127.555393       | 2253.119494        | 1127.063385      | W    | <b>462.234710</b>  | 231.620993        | 445.208161     | 223.107719       | 444.224145        | 222.615711        | 3  |
| 18 | 2400.172652        | 1200.589964       | 2383.146103        | 1192.076689       | 2382.162087        | 1191.584682      | E    | <b>276.155397</b>  | 138.581337        | 259.128848     | 130.068062       | <b>258.144832</b> | 129.576054        | 2  |
| 19 |                    |                   |                    |                   |                    |                  | K    | <b>147.112804</b>  | 74.060040         | 130.086255     | 65.546765        |                   |                   | 1  |

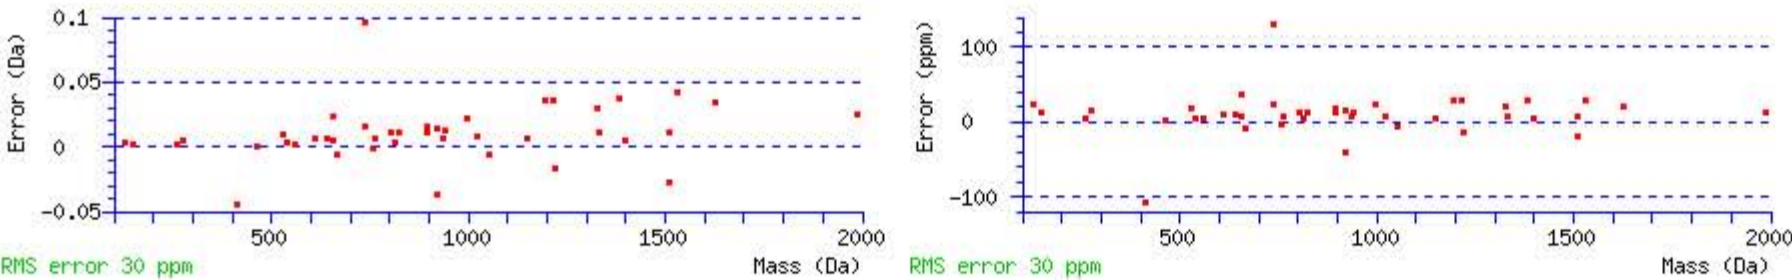

NCBI BLAST search of [KLGQSLDCNAEVYVVPWEK](#)  
(Parameters: blastp, nr protein database, expect=20000, no filter, PAM30)  
Other BLAST [web gateways](#)

All matches to this query

| Score | Mr(calc):   | Delta    | Sequence                            |
|-------|-------------|----------|-------------------------------------|
| 44.0  | 2545.270889 | 0.036283 | <a href="#">KLGQSLDCNAEVYVVPWEK</a> |

MATRIX

SCIENCE

Mascot Search Results

Peptide View

MS/MS Fragmentation of **FSVATQTCQITPAEGPVVTAQYDCLGCVHPISTQSPDLEPILR**  
Found in **KNG1\_HUMAN**, Kininogen-1 OS=Homo sapiens GN=KNG1 PE=1 SV=2

Match to Query 74066: 5066.523820 from(1014.312040,5+) rtinseconds(2663) index(9043)  
Title: Locus:1.1.1.2204.12 File:"2013-07-02 CLN FXIII 180 min 2nd F 1.wiff"  
Data file C:\Program Files (x86)\Matrix Science\Mascot Daemon\mgf\8 FXIII 180 min 2nd\mascot\_daemon\_merge.mgf

Click mouse within plot area to zoom in by factor of two about that point  
Or, Plot from  to  Da   
Label all possible matches ☐ Label matches used for scoring ☒

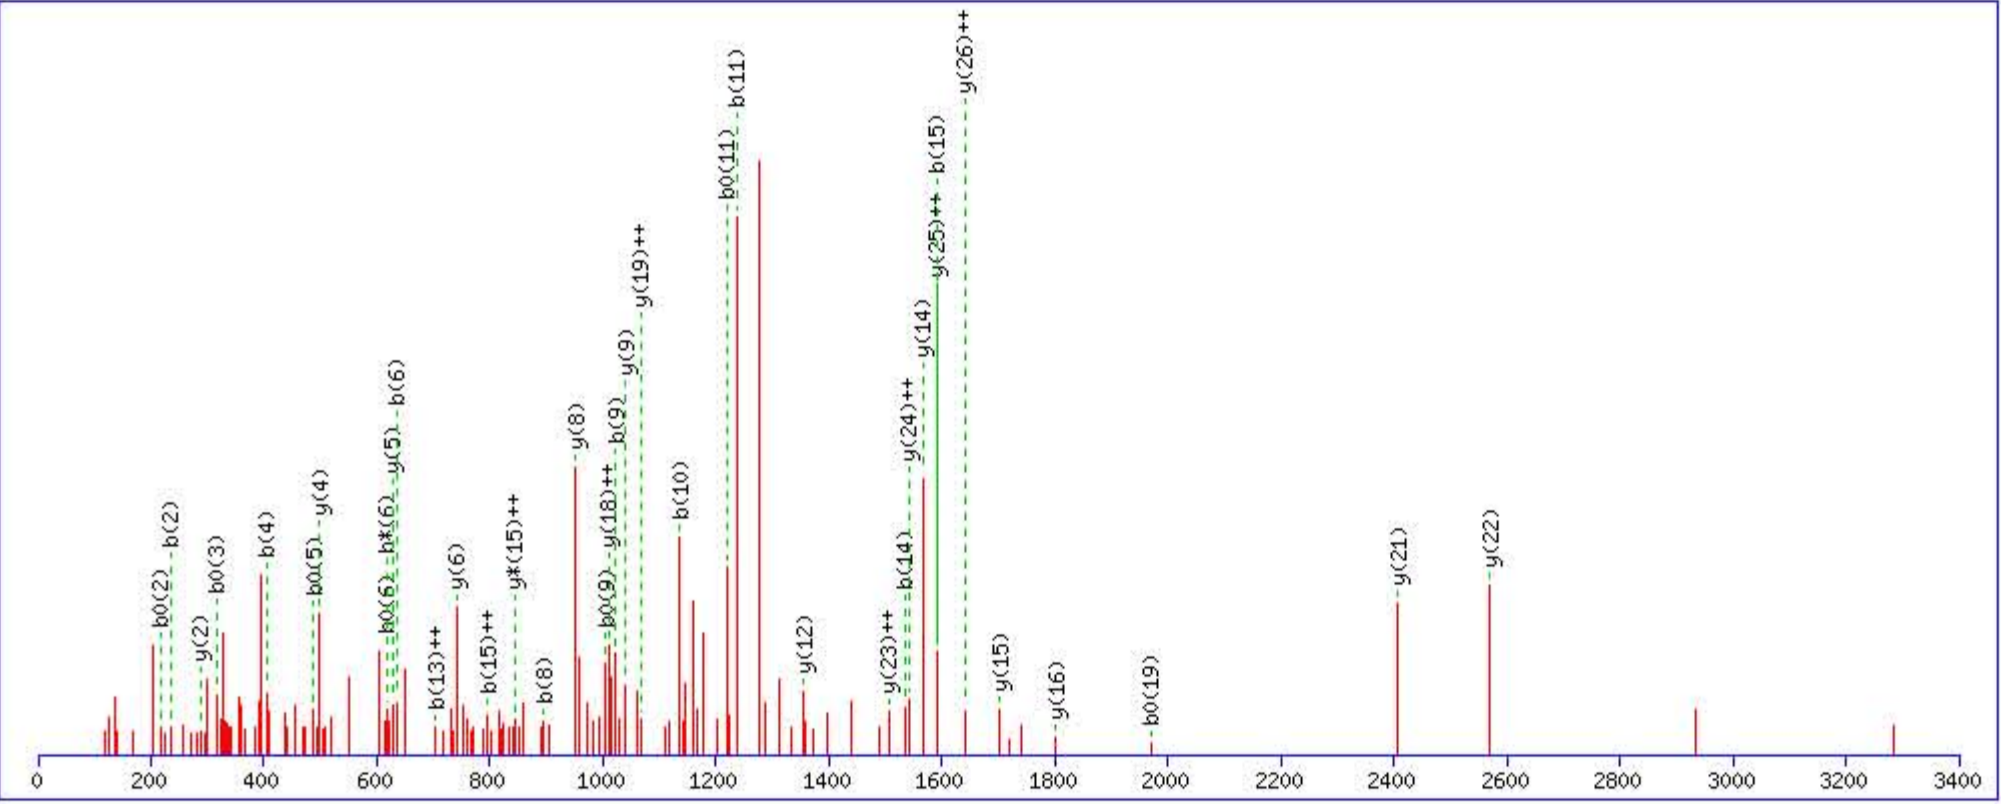

Monoisotopic mass of neutral peptide Mr(calc): 5066.465057  
Fixed modifications: Carbamidomethyl (C) (apply to specified residues or termini only)  
Variable modifications:  
Q21 : Biotin:Thermo-21345 (Q)  
Ions Score: 53 Expect: 9e-005  
Matches : 38/484 fragment ions using 85 most intense peaks [\(help\)](#)

| #  | b           | b <sup>++</sup> | b <sup>*</sup> | b <sup>++</sup> | b <sup>0</sup> | b <sup>0++</sup> | Seq. | y           | y <sup>++</sup> | y <sup>*</sup> | y <sup>++</sup> | y <sup>0</sup> | y <sup>0++</sup> | #  |
|----|-------------|-----------------|----------------|-----------------|----------------|------------------|------|-------------|-----------------|----------------|-----------------|----------------|------------------|----|
| 1  | 148.075690  | 74.541483       |                |                 |                |                  | F    |             |                 |                |                 |                |                  | 43 |
| 2  | 235.107718  | 118.057497      |                |                 | 217.097153     | 109.052214       | S    | 4920.403881 | 2460.705578     | 4903.377332    | 2452.192304     | 4902.393316    | 2451.700296      | 42 |
| 3  | 334.176132  | 167.591704      |                |                 | 316.165567     | 158.586422       | V    | 4833.371853 | 2417.189565     | 4816.345304    | 2408.676290     | 4815.361288    | 2408.184282      | 41 |
| 4  | 405.213246  | 203.110261      |                |                 | 387.202681     | 194.104978       | A    | 4734.303439 | 2367.655357     | 4717.276890    | 2359.142083     | 4716.292874    | 2358.650075      | 40 |
| 5  | 506.260925  | 253.634100      |                |                 | 488.250360     | 244.628818       | T    | 4663.266325 | 2332.136800     | 4646.239776    | 2323.623526     | 4645.255760    | 2323.131518      | 39 |
| 6  | 634.319503  | 317.663390      | 617.292954     | 309.150115      | 616.308938     | 308.658107       | Q    | 4562.218646 | 2281.612961     | 4545.192097    | 2273.099686     | 4544.208081    | 2272.607679      | 38 |
| 7  | 735.367182  | 368.187229      | 718.340633     | 359.673955      | 717.356617     | 359.181947       | T    | 4434.160068 | 2217.583672     | 4417.133519    | 2209.070397     | 4416.149503    | 2208.578390      | 37 |
| 8  | 895.397831  | 448.202554      | 878.371282     | 439.689279      | 877.387266     | 439.197271       | C    | 4333.112389 | 2167.059833     | 4316.085840    | 2158.546558     | 4315.101824    | 2158.054550      | 36 |
| 9  | 1023.456409 | 512.231843      | 1006.429860    | 503.718568      | 1005.445844    | 503.226560       | Q    | 4173.081740 | 2087.044508     | 4156.055191    | 2078.531233     | 4155.071175    | 2078.039226      | 35 |
| 10 | 1136.540473 | 568.773875      | 1119.513924    | 560.260600      | 1118.529908    | 559.768592       | I    | 4045.023162 | 2023.015219     | 4027.996613    | 2014.501944     | 4027.012597    | 2014.009936      | 34 |
| 11 | 1237.588152 | 619.297714      | 1220.561603    | 610.784440      | 1219.577587    | 610.292432       | T    | 3931.939098 | 1966.473187     | 3914.912549    | 1957.959912     | 3913.928533    | 1957.467904      | 33 |
| 12 | 1334.640916 | 667.824096      | 1317.614367    | 659.310822      | 1316.630351    | 658.818814       | P    | 3830.891419 | 1915.949347     | 3813.864870    | 1907.436073     | 3812.880854    | 1906.944065      | 32 |
| 13 | 1405.678030 | 703.342653      | 1388.651481    | 694.829379      | 1387.667465    | 694.337371       | A    | 3733.838655 | 1867.422965     | 3716.812106    | 1858.909691     | 3715.828090    | 1858.417683      | 31 |
| 14 | 1534.720623 | 767.863949      | 1517.694074    | 759.350675      | 1516.710058    | 758.858667       | E    | 3662.801541 | 1831.904408     | 3645.774992    | 1823.391134     | 3644.790976    | 1822.899126      | 30 |
| 15 | 1591.742087 | 796.374681      | 1574.715538    | 787.861407      | 1573.731522    | 787.369399       | G    | 3533.758948 | 1767.383112     | 3516.732399    | 1758.869837     | 3515.748383    | 1758.377829      | 29 |
| 16 | 1688.794851 | 844.901063      | 1671.768302    | 836.387789      | 1670.784286    | 835.895781       | P    | 3476.737484 | 1738.872380     | 3459.710935    | 1730.359105     | 3458.726919    | 1729.867097      | 28 |
| 17 | 1787.863265 | 894.435271      | 1770.836716    | 885.921996      | 1769.852700    | 885.429988       | V    | 3379.684720 | 1690.345998     | 3362.658171    | 1681.832723     | 3361.674155    | 1681.340715      | 27 |
| 18 | 1886.931679 | 943.969478      | 1869.905130    | 935.456203      | 1868.921114    | 934.964195       | V    | 3280.616306 | 1640.811791     | 3263.589757    | 1632.298516     | 3262.605741    | 1631.806508      | 26 |
| 19 | 1987.979358 | 994.493317      | 1970.952809    | 985.980043      | 1969.968793    | 985.488035       | T    | 3181.547892 | 1591.277584     | 3164.521343    | 1582.764309     | 3163.537327    | 1582.272301      | 25 |
| 20 | 2059.016472 | 1030.011874     | 2041.989923    | 1021.498600     | 2041.005907    | 1021.006591      | A    | 3080.500213 | 1540.753744     | 3063.473664    | 1532.240470     | 3062.489648    | 1531.748462      | 24 |
| 21 | 2498.241798 | 1249.624537     | 2481.215249    | 1241.111262     | 2480.231233    | 1240.619254      | Q    | 3009.463099 | 1505.235187     | 2992.436550    | 1496.721913     | 2991.452534    | 1496.229905      | 23 |
| 22 | 2661.305127 | 1331.156202     | 2644.278578    | 1322.642927     | 2643.294562    | 1322.150919      | Y    | 2570.237773 | 1285.622524     | 2553.211224    | 1277.109250     | 2552.227208    | 1276.617242      | 22 |
| 23 | 2776.332070 | 1388.669673     | 2759.305521    | 1380.156398     | 2758.321505    | 1379.664390      | D    | 2407.174444 | 1204.090860     | 2390.147895    | 1195.577585     | 2389.163879    | 1195.085577      | 21 |
| 24 | 2936.362719 | 1468.684997     | 2919.336170    | 1460.171723     | 2918.352154    | 1459.679715      | C    | 2292.147501 | 1146.577388     | 2275.120952    | 1138.064114     | 2274.136936    | 1137.572106      | 20 |
| 25 | 3049.446783 | 1525.227029     | 3032.420234    | 1516.713755     | 3031.436218    | 1516.221747      | L    | 2132.116852 | 1066.562064     | 2115.090303    | 1058.048789     | 2114.106287    | 1057.556781      | 19 |
| 26 | 3106.468247 | 1553.737761     | 3089.441698    | 1545.224487     | 3088.457682    | 1544.732479      | G    | 2019.032788 | 1010.020032     | 2002.006239    | 1001.506757     | 2001.022223    | 1001.014749      | 18 |
| 27 | 3266.498896 | 1633.753086     | 3249.472347    | 1625.239811     | 3248.488331    | 1624.747803      | C    | 1962.011324 | 981.509300      | 1944.984775    | 972.996025      | 1944.000759    | 972.504017       | 17 |
| 28 | 3365.567310 | 1683.287293     | 3348.540761    | 1674.774018     | 3347.556745    | 1674.282010      | V    | 1801.980675 | 901.493975      | 1784.954126    | 892.980701      | 1783.970110    | 892.488693       | 16 |
| 29 | 3502.626222 | 1751.816749     | 3485.599673    | 1743.303474     | 3484.615657    | 1742.811466      | H    | 1702.912261 | 851.959768      | 1685.885712    | 843.446494      | 1684.901696    | 842.954486       | 15 |
| 30 | 3599.678986 | 1800.343131     | 3582.652437    | 1791.829856     | 3581.668421    | 1791.337848      | P    | 1565.853349 | 783.430312      | 1548.826800    | 774.917038      | 1547.842784    | 774.425030       | 14 |
| 31 | 3712.763050 | 1856.885163     | 3695.736501    | 1848.371888     | 3694.752485    | 1847.879880      | I    | 1468.800585 | 734.903930      | 1451.774036    | 726.390656      | 1450.790020    | 725.898648       | 13 |
| 32 | 3799.795078 | 1900.401177     | 3782.768529    | 1891.887902     | 3781.784513    | 1891.395894      | S    | 1355.716521 | 678.361898      | 1338.689972    | 669.848624      | 1337.705956    | 669.356616       | 12 |
| 33 | 3900.842757 | 1950.925016     | 3883.816208    | 1942.411742     | 3882.832192    | 1941.919734      | T    | 1268.684493 | 634.845884      | 1251.657944    | 626.332610      | 1250.673928    | 625.840602       | 11 |
| 34 | 4028.901335 | 2014.954305     | 4011.874786    | 2006.441031     | 4010.890770    | 2005.949023      | Q    | 1167.636814 | 584.322045      | 1150.610265    | 575.808770      | 1149.626249    | 575.316762       | 10 |
| 35 | 4115.933363 | 2058.470320     | 4098.906814    | 2049.957045     | 4097.922798    | 2049.465037      | S    | 1039.578236 | 520.292756      | 1022.551687    | 511.779481      | 1021.567671    | 511.287473       | 9  |
| 36 | 4212.986127 | 2106.996702     | 4195.959578    | 2098.483427     | 4194.975562    | 2097.991419      | P    | 952.546208  | 476.776742      | 935.519659     | 468.263467      | 934.535643     | 467.771459       | 8  |
| 37 | 4328.013070 | 2164.510173     | 4310.986521    | 2155.996899     | 4310.002505    | 2155.504891      | D    | 855.493444  | 428.250360      | 838.466895     | 419.737085      | 837.482879     | 419.245077       | 7  |
| 38 | 4441.097134 | 2221.052205     | 4424.070585    | 2212.538930     | 4423.086569    | 2212.046923      | L    | 740.466501  | 370.736888      | 723.439952     | 362.223614      | 722.455936     | 361.731606       | 6  |
| 39 | 4570.139727 | 2285.573502     | 4553.113178    | 2277.060227     | 4552.129162    | 2276.568219      | E    | 627.382437  | 314.194856      | 610.355888     | 305.681582      | 609.371872     | 305.189574       | 5  |
| 40 | 4667.192491 | 2334.099884     | 4650.165942    | 2325.586609     | 4649.181926    | 2325.094601      | P    | 498.339844  | 249.673560      | 481.313295     | 241.160285      |                |                  | 4  |
| 41 | 4780.276555 | 2390.641915     | 4763.250006    | 2382.128641     | 4762.265990    | 2381.636633      | I    | 401.287080  | 201.147178      | 384.260531     | 192.633903      |                |                  | 3  |
| 42 | 4893.360619 | 2447.183947     | 4876.334070    | 2438.670673     | 4875.350054    | 2438.178665      | L    | 288.203016  | 144.605146      | 271.176467     | 136.091871      |                |                  | 2  |
| 43 |             |                 |                |                 |                |                  | R    | 175.118952  | 88.063114       | 158.092403     | 79.549839       |                |                  | 1  |

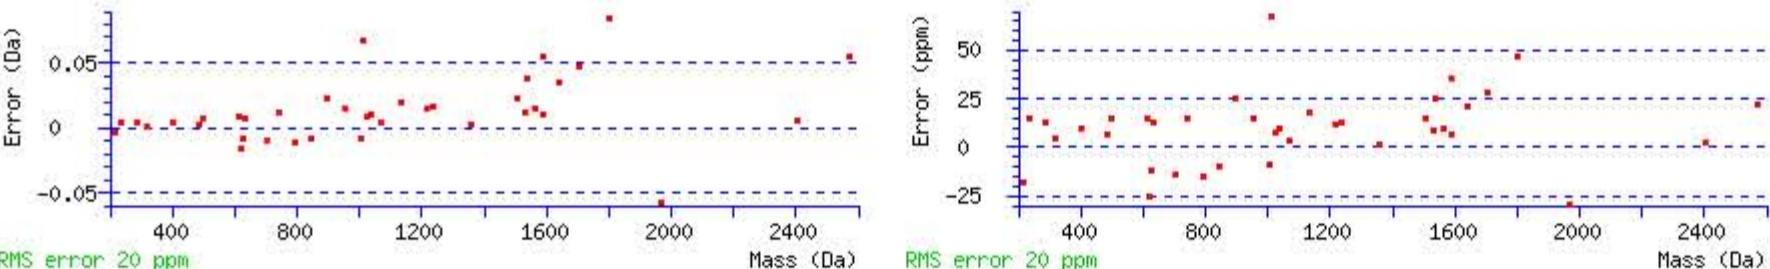

NCBI BLAST search of [FSVATQTCQITPAEGPVVTAQYDCLGCVHPISTQSPDLEPILR](#)  
(Parameters: blastp, nr protein database, expect=20000, no filter, PAM30)  
Other BLAST [web gateways](#)

All matches to this query

| Score | Mr(calc):   | Delta    | Sequence                                                    |
|-------|-------------|----------|-------------------------------------------------------------|
| 53.4  | 5066.465057 | 0.058763 | <a href="#">FSVATQTCQITPAEGPVVTAQYDCLGCVHPISTQSPDLEPILR</a> |
| 23.7  | 5066.465057 | 0.058763 | <a href="#">FSVATQTCQITPAEGPVVTAQYDCLGCVHPISTQSPDLEPILR</a> |
| 22.0  | 5066.465057 | 0.058763 | <a href="#">FSVATQTCQITPAEGPVVTAQYDCLGCVHPISTQSPDLEPILR</a> |
| 17.5  | 5066.465057 | 0.058763 | <a href="#">FSVATQTCQITPAEGPVVTAQYDCLGCVHPISTQSPDLEPILR</a> |

MATRIX

SCIENCE

Mascot Search Results

Peptide View

MS/MS Fragmentation of **SLEYLDLSFNQIAR**  
Found in **LUM\_HUMAN**, Lumican OS=Homo sapiens GN=LUM PE=1 SV=2

Match to Query 43731: 1979.043492 from(660.688440,3+) rtinseconds(2755) index(55154)  
Title: Locus:1.1.1.2195.10 File:"2013-07-02 CLN FXIII 180 min 2nd F 4.wiff"  
Data file C:\Program Files (x86)\Matrix Science\Mascot Daemon\mgf\8 FXIII 180 min 2nd\mascot\_daemon\_merge.mgf

Click mouse within plot area to zoom in by factor of two about that point  
Or, 

Plot from

100

 to 

1500

 Da 

Full range

  
Label all possible matches ☐ Label matches used for scoring ☒

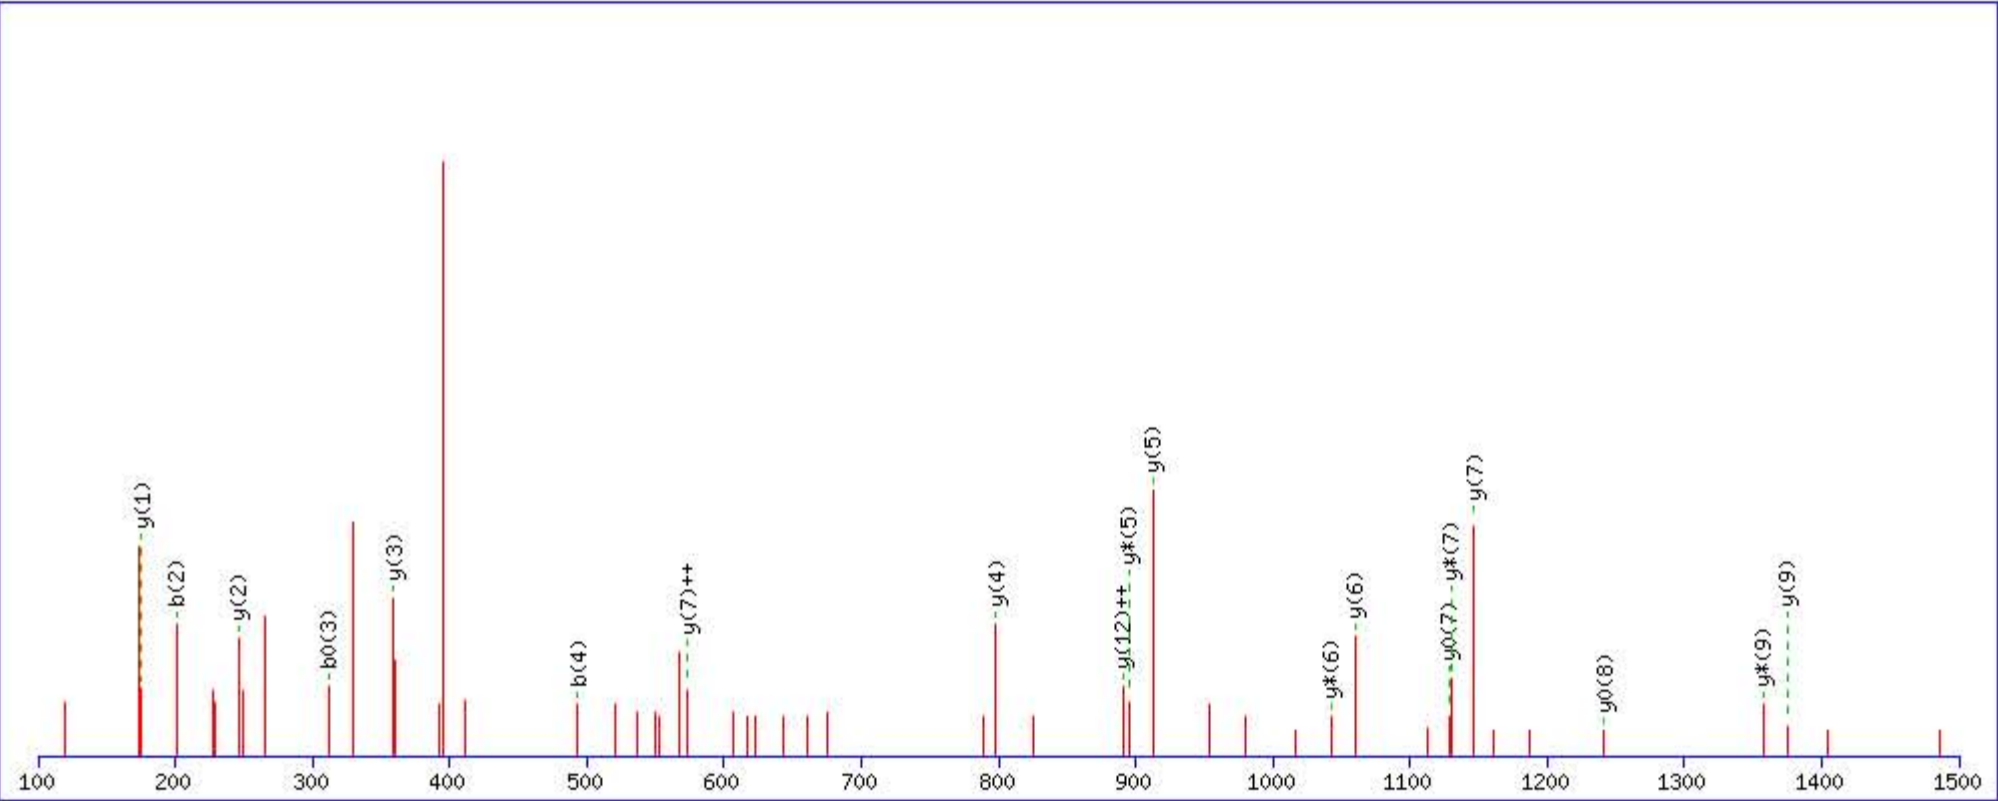

Monoisotopic mass of neutral peptide Mr(calc): 1979.018600  
Fixed modifications: Carbamidomethyl (C) (apply to specified residues or termini only)  
Variable modifications:  
Q11 : Biotin:Thermo-21345 (Q)  
Ions Score: 40 Expect: 0.0018  
Matches : 19/126 fragment ions using 36 most intense peaks [\(help\)](#)

| #  | b           | b <sup>++</sup> | b <sup>*</sup> | b <sup>*++</sup> | b <sup>0</sup> | b <sup>0++</sup> | Seq. | y           | y <sup>++</sup> | y <sup>*</sup> | y <sup>*++</sup> | y <sup>0</sup> | y <sup>0++</sup> | #  |
|----|-------------|-----------------|----------------|------------------|----------------|------------------|------|-------------|-----------------|----------------|------------------|----------------|------------------|----|
| 1  | 88.039304   | 44.523290       |                |                  | 70.028739      | 35.518008        | S    |             |                 |                |                  |                |                  | 14 |
| 2  | 201.123368  | 101.065322      |                |                  | 183.112803     | 92.060039        | L    | 1892.993882 | 947.000579      | 1875.967333    | 938.487305       | 1874.983317    | 937.995296       | 13 |
| 3  | 330.165961  | 165.586618      |                |                  | 312.155396     | 156.581336       | E    | 1779.909818 | 890.458547      | 1762.883269    | 881.945273       | 1761.899253    | 881.453265       | 12 |
| 4  | 493.229290  | 247.118283      |                |                  | 475.218725     | 238.113001       | Y    | 1650.867225 | 825.937251      | 1633.840676    | 817.423976       | 1632.856660    | 816.931968       | 11 |
| 5  | 606.313354  | 303.660315      |                |                  | 588.302789     | 294.655033       | L    | 1487.803896 | 744.405586      | 1470.777347    | 735.892312       | 1469.793331    | 735.400304       | 10 |
| 6  | 721.340297  | 361.173787      |                |                  | 703.329732     | 352.168504       | D    | 1374.719832 | 687.863554      | 1357.693283    | 679.350280       | 1356.709267    | 678.858272       | 9  |
| 7  | 834.424361  | 417.715819      |                |                  | 816.413796     | 408.710536       | L    | 1259.692889 | 630.350083      | 1242.666340    | 621.836808       | 1241.682324    | 621.344800       | 8  |
| 8  | 921.456389  | 461.231833      |                |                  | 903.445824     | 452.226550       | S    | 1146.608825 | 573.808051      | 1129.582276    | 565.294776       | 1128.598260    | 564.802768       | 7  |
| 9  | 1068.524803 | 534.766040      |                |                  | 1050.514238    | 525.760757       | F    | 1059.576797 | 530.292037      | 1042.550248    | 521.778762       |                |                  | 6  |
| 10 | 1182.567730 | 591.787503      | 1165.541181    | 583.274229       | 1164.557165    | 582.782220       | N    | 912.508383  | 456.757830      | 895.481834     | 448.244555       |                |                  | 5  |
| 11 | 1621.793056 | 811.400166      | 1604.766507    | 802.886892       | 1603.782491    | 802.394884       | Q    | 798.465456  | 399.736366      | 781.438907     | 391.223092       |                |                  | 4  |
| 12 | 1734.877120 | 867.942198      | 1717.850571    | 859.428924       | 1716.866555    | 858.936916       | I    | 359.240130  | 180.123703      | 342.213581     | 171.610428       |                |                  | 3  |
| 13 | 1805.914234 | 903.460755      | 1788.887685    | 894.947481       | 1787.903669    | 894.455473       | A    | 246.156066  | 123.581671      | 229.129517     | 115.068396       |                |                  | 2  |
| 14 |             |                 |                |                  |                |                  | R    | 175.118952  | 88.063114       | 158.092403     | 79.549839        |                |                  | 1  |

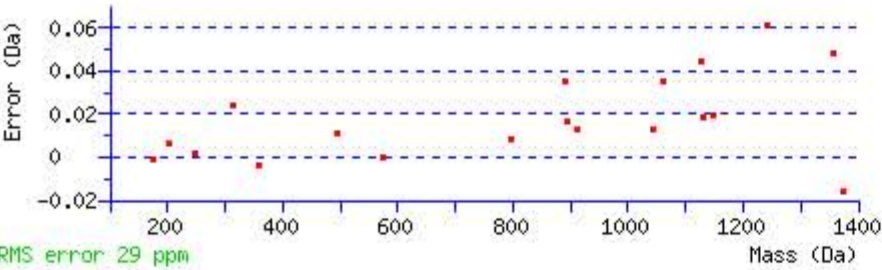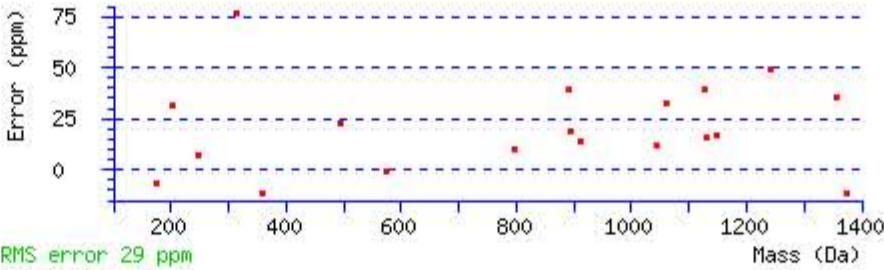

NCBI BLAST search of [SLEYLDLSFNQIAR](#)  
(Parameters: blastp, nr protein database, expect=20000, no filter, PAM30)  
Other BLAST [web gateways](#)

All matches to this query

| Score | Mr(calc):   | Delta     | Sequence                           |
|-------|-------------|-----------|------------------------------------|
| 39.7  | 1979.018600 | 0.024892  | <a href="#">SLEYLDLSFNQIAR</a>     |
| 10.1  | 1979.058838 | -0.015346 | <a href="#">EPAPVPTQTFQNPAKKAR</a> |
| 2.9   | 1979.025787 | 0.017705  | <a href="#">HQNLQEKLAEEMGLAR</a>   |

MATRIX

SCIENCE

Mascot Search Results

Peptide View

MS/MS Fragmentation of **VECSDNLFTQR**  
Found in **MASPI\_HUMAN**, Mannan-binding lectin serine protease 1 OS=Homo sapiens GN=MASP1 PE=1 SV=3

Match to Query 37509: 1678.786902 from(560.602910,3+) rtinseconds(2095) index(50940)  
Title: Locus:1.1.1.1967.3 File:"2013-07-02 CLN FXIII 180 min 2nd F 4.wiff"  
Data file C:\Program Files (x86)\Matrix Science\Mascot Daemon\mgf\8 FXIII 180 min 2nd\mascot\_daemon\_merge.mgf

Click mouse within plot area to zoom in by factor of two about that point  
Or,   to  Da   
Label all possible matches ☐ Label matches used for scoring ☒

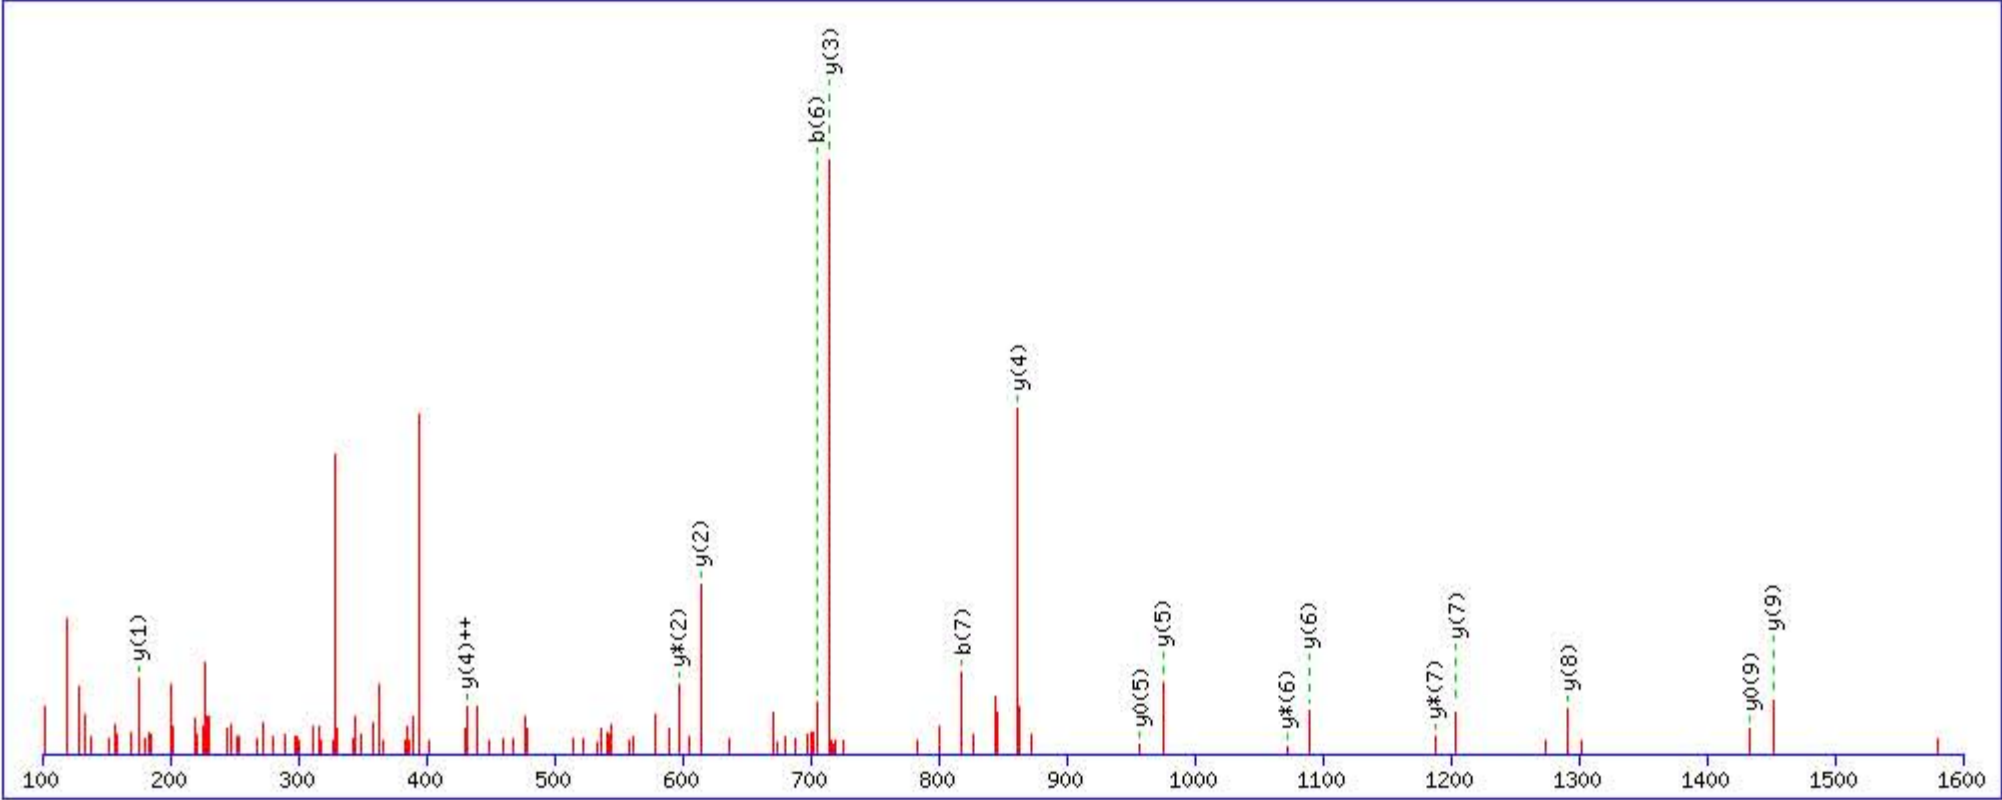

Monoisotopic mass of neutral peptide **Mr(calc):** 1678.780716  
Fixed modifications: Carbamidomethyl (C) (apply to specified residues or termini only)  
Variable modifications:  
Q10 : Biotin:Thermo-21345 (Q)  
Ions Score: 59 Expect: 1.8e-005  
Matches : 17/104 fragment ions using 27 most intense peaks ([help](#))

| #  | b           | b <sup>++</sup> | b <sup>*</sup> | b <sup>*++</sup> | b <sup>0</sup> | b <sup>0++</sup> | Seq. | y           | y <sup>++</sup> | y <sup>*</sup> | y <sup>*++</sup> | y <sup>0</sup> | y <sup>0++</sup> | #  |
|----|-------------|-----------------|----------------|------------------|----------------|------------------|------|-------------|-----------------|----------------|------------------|----------------|------------------|----|
| 1  | 100.075690  | 50.541483       |                |                  |                |                  | V    |             |                 |                |                  |                |                  | 11 |
| 2  | 229.118283  | 115.062780      |                |                  | 211.107718     | 106.057497       | E    | 1580.719575 | 790.863426      | 1563.693026    | 782.350151       | 1562.709010    | 781.858143       | 10 |
| 3  | 389.148932  | 195.078104      |                |                  | 371.138367     | 186.072822       | C    | 1451.676982 | 726.342129      | 1434.650433    | 717.828855       | 1433.666417    | 717.336847       | 9  |
| 4  | 476.180960  | 238.594118      |                |                  | 458.170395     | 229.588835       | S    | 1291.646333 | 646.326805      | 1274.619784    | 637.813530       | 1273.635768    | 637.321522       | 8  |
| 5  | 591.207903  | 296.107590      |                |                  | 573.197338     | 287.102307       | D    | 1204.614305 | 602.810791      | 1187.587756    | 594.297516       | 1186.603740    | 593.805508       | 7  |
| 6  | 705.250830  | 353.129053      | 688.224281     | 344.615778       | 687.240265     | 344.123770       | N    | 1089.587362 | 545.297319      | 1072.560813    | 536.784045       | 1071.576797    | 536.292037       | 6  |
| 7  | 818.334894  | 409.671085      | 801.308345     | 401.157810       | 800.324329     | 400.665802       | L    | 975.544435  | 488.275856      | 958.517886     | 479.762581       | 957.533870     | 479.270573       | 5  |
| 8  | 965.403308  | 483.205292      | 948.376759     | 474.692017       | 947.392743     | 474.200009       | F    | 862.460371  | 431.733824      | 845.433822     | 423.220549       | 844.449806     | 422.728541       | 4  |
| 9  | 1066.450987 | 533.729131      | 1049.424438    | 525.215857       | 1048.440422    | 524.723849       | T    | 715.391957  | 358.199617      | 698.365408     | 349.686342       | 697.381392     | 349.194334       | 3  |
| 10 | 1505.676313 | 753.341795      | 1488.649764    | 744.828520       | 1487.665748    | 744.336512       | Q    | 614.344278  | 307.675777      | 597.317729     | 299.162503       |                |                  | 2  |
| 11 |             |                 |                |                  |                |                  | R    | 175.118952  | 88.063114       | 158.092403     | 79.549839        |                |                  | 1  |

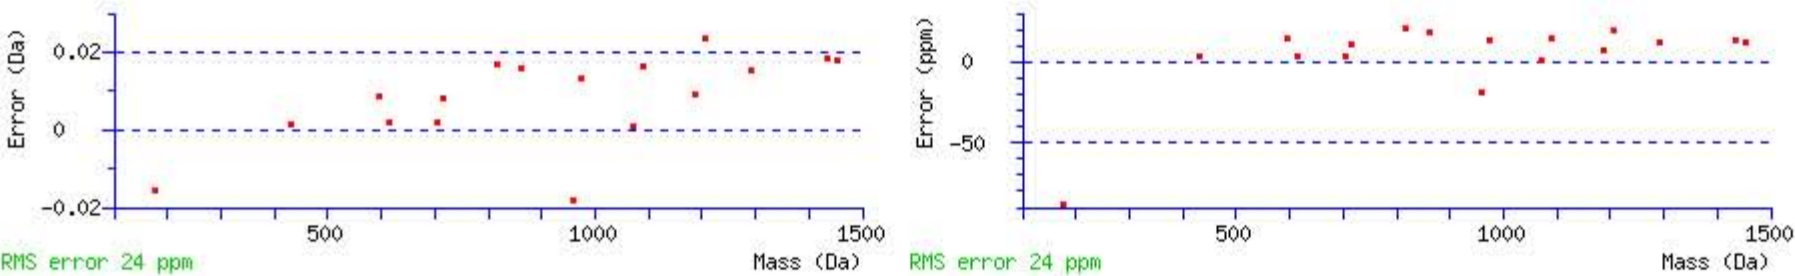

NCBI BLAST search of [VECSDNLFTQR](#)  
(Parameters: blastp, nr protein database, expect=20000, no filter, PAM30)  
Other BLAST [web gateways](#)

All matches to this query

| Score | Mr(calc):   | Delta    | Sequence                    |
|-------|-------------|----------|-----------------------------|
| 58.9  | 1678.780716 | 0.006186 | <a href="#">VECSDNLFTQR</a> |

MATRIX

SCIENCE

Mascot Search Results

Peptide View

MS/MS Fragmentation of **APEPISTQSHSVLILFHSDNSGENR**  
Found in **MASPI\_HUMAN**, Mannan-binding lectin serine protease 1 OS=Homo sapiens GN=MASPI PE=1 SV=3

Match to Query 60489: 3045.543256 from(762.393090,4+) rtinseconds(2252) index(52026)  
Title: Locus:1.1.1.2021.15 File:"2013-07-02 CLN FXIII 180 min 2nd F 4.wiff"  
Data file C:\Program Files (x86)\Matrix Science\Mascot Daemon\mgf\8 FXIII 180 min 2nd\mascot\_daemon\_merge.mgf

Click mouse within plot area to zoom in by factor of two about that point  
Or, 

Plot from 

0

 to 

3000

 Da 

Full range

  
Label all possible matches ☐ Label matches used for scoring ☒

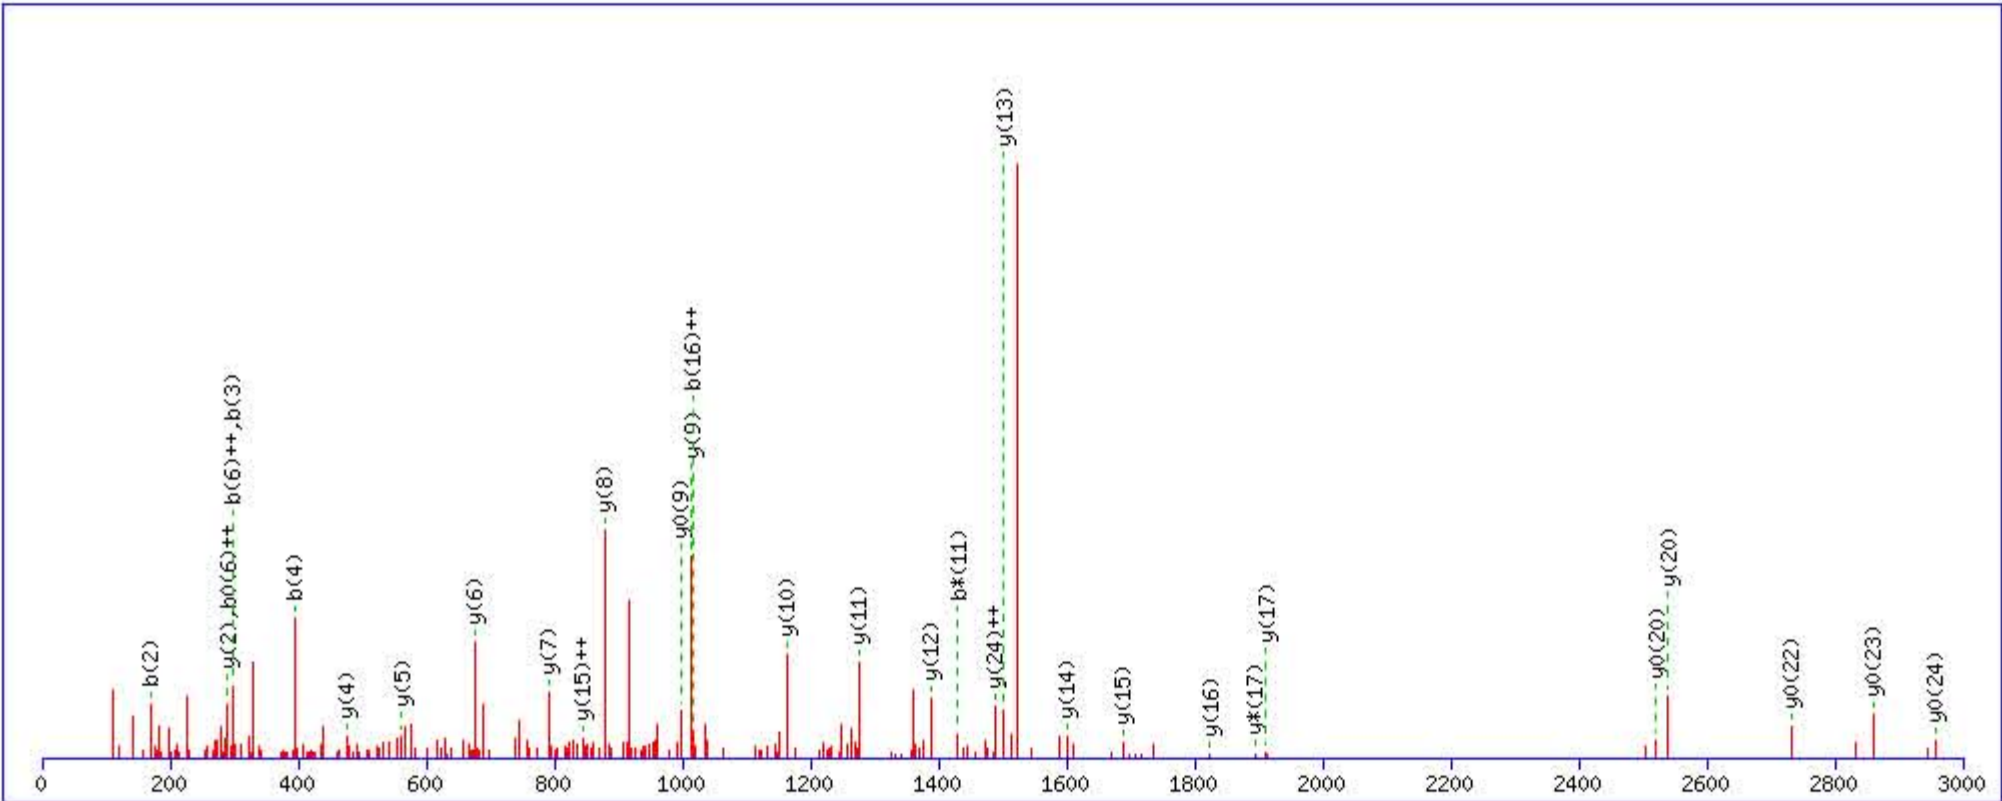

Monoisotopic mass of neutral peptide Mr(calc): 3045.497803  
Fixed modifications: Carbamidomethyl (C) (apply to specified residues or termini only)  
Variable modifications:  
Q8 : Biotin:Thermo-21345 (Q)  
Ions Score: 86 Expect: 6.7e-008  
Matches : 31/266 fragment ions using 64 most intense peaks [\(help\)](#)

| #                  | b                 | b <sup>++</sup>    | b <sup>+</sup>     | b <sup>+++</sup> | b <sup>0</sup> | b <sup>0++</sup>  | Seq.     | y                  | y <sup>++</sup>    | y <sup>+</sup>     | y <sup>+++</sup> | y <sup>0</sup>     | y <sup>0++</sup> | #                  |
|--------------------|-------------------|--------------------|--------------------|------------------|----------------|-------------------|----------|--------------------|--------------------|--------------------|------------------|--------------------|------------------|--------------------|
| <a href="#">1</a>  | 72.044390         | 36.525833          |                    |                  |                |                   | <b>A</b> |                    |                    |                    |                  |                    |                  | <a href="#">25</a> |
| <a href="#">2</a>  | <b>169.097154</b> | 85.052215          |                    |                  |                |                   | <b>P</b> | 2975.467980        | <b>1488.237628</b> | 2958.441431        | 1479.724353      | <b>2957.457415</b> | 1479.232345      | <a href="#">24</a> |
| <a href="#">3</a>  | <b>298.139747</b> | 149.573512         |                    |                  | 280.129182     | 140.568229        | <b>E</b> | 2878.415216        | 1439.711246        | 2861.388667        | 1431.197971      | <b>2860.404651</b> | 1430.705963      | <a href="#">23</a> |
| <a href="#">4</a>  | <b>395.192511</b> | 198.099894         |                    |                  | 377.181946     | 189.094611        | <b>P</b> | 2749.372623        | 1375.189949        | 2732.346074        | 1366.676675      | <b>2731.362058</b> | 1366.184667      | <a href="#">22</a> |
| <a href="#">5</a>  | 508.276575        | 254.641926         |                    |                  | 490.266010     | 245.636643        | <b>I</b> | 2652.319859        | 1326.663567        | 2635.293310        | 1318.150293      | 2634.309294        | 1317.658285      | <a href="#">21</a> |
| <a href="#">6</a>  | 595.308603        | <b>298.157940</b>  |                    |                  | 577.298038     | <b>289.152657</b> | <b>S</b> | <b>2539.235795</b> | 1270.121535        | 2522.209246        | 1261.608261      | <b>2521.225230</b> | 1261.116253      | <a href="#">20</a> |
| <a href="#">7</a>  | 696.356282        | 348.681779         |                    |                  | 678.345717     | 339.676497        | <b>T</b> | 2452.203767        | 1226.605521        | 2435.177218        | 1218.092247      | 2434.193202        | 1217.600239      | <a href="#">19</a> |
| <a href="#">8</a>  | 1135.581608       | 568.294442         | 1118.555059        | 559.781168       | 1117.571043    | 559.289160        | <b>Q</b> | 2351.156088        | 1176.081682        | 2334.129539        | 1167.568407      | 2333.145523        | 1167.076399      | <a href="#">18</a> |
| <a href="#">9</a>  | 1222.613636       | 611.810456         | 1205.587087        | 603.297182       | 1204.603071    | 602.805174        | <b>S</b> | <b>1911.930762</b> | 956.469019         | <b>1894.904213</b> | 947.955745       | 1893.920197        | 947.463737       | <a href="#">17</a> |
| <a href="#">10</a> | 1359.672548       | 680.339912         | 1342.645999        | 671.826638       | 1341.661983    | 671.334630        | <b>H</b> | <b>1824.898734</b> | 912.953005         | 1807.872185        | 904.439731       | 1806.888169        | 903.947723       | <a href="#">16</a> |
| <a href="#">11</a> | 1446.704576       | 723.855926         | <b>1429.678027</b> | 715.342652       | 1428.694011    | 714.850644        | <b>S</b> | <b>1687.839822</b> | <b>844.423549</b>  | 1670.813273        | 835.910275       | 1669.829257        | 835.418267       | <a href="#">15</a> |
| <a href="#">12</a> | 1545.772990       | 773.390133         | 1528.746441        | 764.876859       | 1527.762425    | 764.384851        | <b>V</b> | <b>1600.807794</b> | 800.907535         | 1583.781245        | 792.394261       | 1582.797229        | 791.902253       | <a href="#">14</a> |
| <a href="#">13</a> | 1658.857054       | 829.932165         | 1641.830505        | 821.418891       | 1640.846489    | 820.926883        | <b>L</b> | <b>1501.739380</b> | 751.373328         | 1484.712831        | 742.860054       | 1483.728815        | 742.368045       | <a href="#">13</a> |
| <a href="#">14</a> | 1771.941118       | 886.474197         | 1754.914569        | 877.960923       | 1753.930553    | 877.468915        | <b>I</b> | <b>1388.655316</b> | 694.831296         | 1371.628767        | 686.318022       | 1370.644751        | 685.826014       | <a href="#">12</a> |
| <a href="#">15</a> | 1885.025182       | 943.016229         | 1867.998633        | 934.502955       | 1867.014617    | 934.010947        | <b>L</b> | <b>1275.571252</b> | 638.289264         | 1258.544703        | 629.775990       | 1257.560687        | 629.283982       | <a href="#">11</a> |
| <a href="#">16</a> | 2032.093596       | <b>1016.550436</b> | 2015.067047        | 1008.037162      | 2014.083031    | 1007.545154       | <b>F</b> | <b>1162.487188</b> | 581.747232         | 1145.460639        | 573.233958       | 1144.476623        | 572.741950       | <a href="#">10</a> |
| <a href="#">17</a> | 2169.152508       | 1085.079892        | 2152.125959        | 1076.566617      | 2151.141943    | 1076.074610       | <b>H</b> | <b>1015.418774</b> | 508.213025         | 998.392225         | 499.699751       | <b>997.408209</b>  | 499.207743       | <a href="#">9</a>  |
| <a href="#">18</a> | 2256.184536       | 1128.595906        | 2239.157987        | 1120.082631      | 2238.173971    | 1119.590624       | <b>S</b> | <b>878.359862</b>  | 439.683569         | 861.333313         | 431.170295       | 860.349297         | 430.678287       | <a href="#">8</a>  |
| <a href="#">19</a> | 2371.211479       | 1186.109377        | 2354.184930        | 1177.596103      | 2353.200914    | 1177.104095       | <b>D</b> | <b>791.327834</b>  | 396.167555         | 774.301285         | 387.654280       | 773.317269         | 387.162272       | <a href="#">7</a>  |
| <a href="#">20</a> | 2485.254406       | 1243.130841        | 2468.227857        | 1234.617566      | 2467.243841    | 1234.125558       | <b>N</b> | <b>676.300891</b>  | 338.654084         | 659.274342         | 330.140809       | 658.290326         | 329.648801       | <a href="#">6</a>  |
| <a href="#">21</a> | 2572.286434       | 1286.646855        | 2555.259885        | 1278.133580      | 2554.275869    | 1277.641572       | <b>S</b> | <b>562.257964</b>  | 281.632620         | 545.231415         | 273.119346       | 544.247399         | 272.627338       | <a href="#">5</a>  |
| <a href="#">22</a> | 2629.307898       | 1315.157587        | 2612.281349        | 1306.644312      | 2611.297333    | 1306.152304       | <b>G</b> | <b>475.225936</b>  | 238.116606         | 458.199387         | 229.603331       | 457.215371         | 229.111323       | <a href="#">4</a>  |
| <a href="#">23</a> | 2758.350491       | 1379.678884        | 2741.323942        | 1371.165609      | 2740.339926    | 1370.673601       | <b>E</b> | 418.204472         | 209.605874         | 401.177923         | 201.092600       | 400.193907         | 200.600592       | <a href="#">3</a>  |
| <a href="#">24</a> | 2872.393418       | 1436.700347        | 2855.366869        | 1428.187072      | 2854.382853    | 1427.695064       | <b>N</b> | <b>289.161879</b>  | 145.084577         | 272.135330         | 136.571303       |                    |                  | <a href="#">2</a>  |
| <a href="#">25</a> |                   |                    |                    |                  |                |                   | <b>R</b> | 175.118952         | 88.063114          | 158.092403         | 79.549839        |                    |                  | <a href="#">1</a>  |

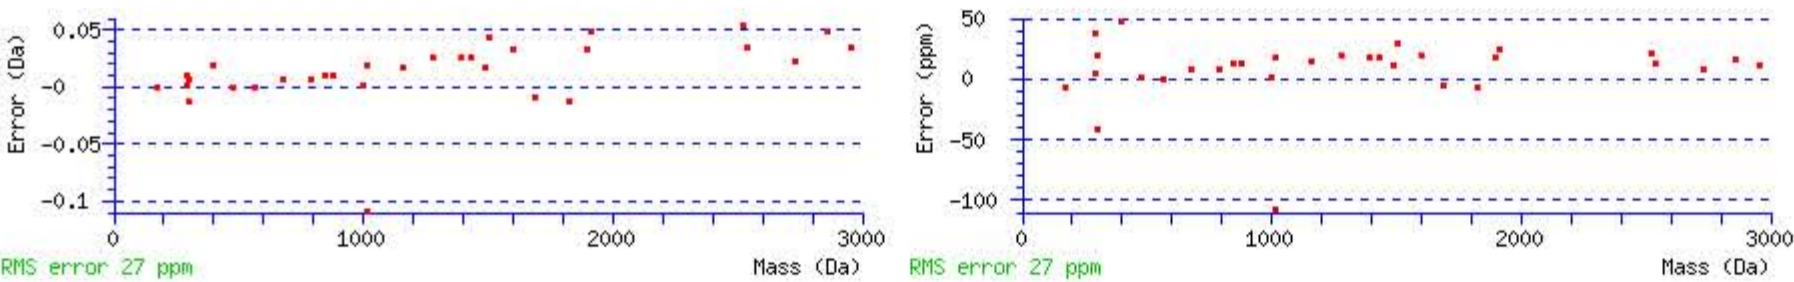

NCBI BLAST search of [APEPISTQSHSVLILFHSDNSGENR](#)  
(Parameters: blastp, nr protein database, expect=20000, no filter, PAM30)  
Other BLAST [web gateways](#)

All matches to this query

| Score | Mr(calc):   | Delta    | Sequence                                  |
|-------|-------------|----------|-------------------------------------------|
| 86.1  | 3045.497803 | 0.045453 | <a href="#">APEPISTQSHSVLILFHSDNSGENR</a> |

Match to Query 50707: 2310.175092 from(771.065640,3+) rtinseconds(1967) index(20059)  
Title: Locus:1.1.1.3067.9 File:"2013-07-02 CLN FXIII 180 min 2nd F 2.wiff"  
Data file C:\Program Files (x86)\Matrix Science\Mascot Daemon\mgf8 FXIII 180 min 2nd\mascot\_daemon\_merge.mgf

| #  | b           | b <sup>++</sup> | b <sup>*</sup> | b <sup>*++</sup> | b <sup>0</sup> | b <sup>0++</sup> | Seq. | y           | y <sup>++</sup> | y <sup>*</sup> | y <sup>*++</sup> | y <sup>0</sup> | y <sup>0++</sup> | #  |
|----|-------------|-----------------|----------------|------------------|----------------|------------------|------|-------------|-----------------|----------------|------------------|----------------|------------------|----|
| 1  | 100.075690  | 50.541483       |                |                  |                |                  | V    |             |                 |                |                  |                |                  | 18 |
| 2  | 213.159754  | 107.083515      |                |                  |                |                  | L    | 2212.100156 | 1106.553716     | 2195.073607    | 1098.040441      | 2194.089591    | 1097.548433      | 17 |
| 3  | 300.191782  | 150.599529      |                |                  | 282.181217     | 141.594247       | S    | 2099.016092 | 1050.011684     | 2081.989543    | 1041.498409      | 2081.005527    | 1041.006401      | 16 |
| 4  | 413.275846  | 207.141561      |                |                  | 395.265281     | 198.136279       | I    | 2011.984064 | 1006.495670     | 1994.957515    | 997.982396       | 1993.973499    | 997.490388       | 15 |
| 5  | 484.312960  | 242.660118      |                |                  | 466.302395     | 233.654836       | A    | 1898.900000 | 949.953638      | 1881.873451    | 941.440364       | 1880.889435    | 940.948356       | 14 |
| 6  | 612.371538  | 306.689407      | 595.344989     | 298.176133       | 594.360973     | 297.684125       | Q    | 1827.862886 | 914.435081      | 1810.836337    | 905.921807       | 1809.852321    | 905.429799       | 13 |
| 7  | 683.408652  | 342.207964      | 666.382103     | 333.694690       | 665.398087     | 333.202682       | A    | 1699.804308 | 850.405792      | 1682.777759    | 841.892518       | 1681.793743    | 841.400510       | 12 |
| 8  | 820.467564  | 410.737420      | 803.441015     | 402.224146       | 802.456999     | 401.732138       | H    | 1628.767194 | 814.887235      | 1611.740645    | 806.373961       | 1610.756629    | 805.881953       | 11 |
| 9  | 907.499592  | 454.253434      | 890.473043     | 445.740160       | 889.489027     | 445.248152       | S    | 1491.708282 | 746.357779      | 1474.681733    | 737.844505       | 1473.697717    | 737.352497       | 10 |
| 10 | 1004.552356 | 502.779816      | 987.525807     | 494.266542       | 986.541791     | 493.774534       | P    | 1404.676254 | 702.841765      | 1387.649705    | 694.328491       | 1386.665689    | 693.836483       | 9  |
| 11 | 1075.589470 | 538.298373      | 1058.562921    | 529.785099       | 1057.578905    | 529.293091       | A    | 1307.623490 | 654.315383      | 1290.596941    | 645.802109       | 1289.612925    | 645.310101       | 8  |
| 12 | 1222.657884 | 611.832580      | 1205.631335    | 603.319306       | 1204.647319    | 602.827298       | F    | 1236.586376 | 618.796826      | 1219.559827    | 610.283552       | 1218.575811    | 609.791544       | 7  |
| 13 | 1309.689912 | 655.348594      | 1292.663363    | 646.835320       | 1291.679347    | 646.343312       | S    | 1089.517962 | 545.262619      | 1072.491413    | 536.749345       | 1071.507397    | 536.257337       | 6  |
| 14 | 1469.720561 | 735.363919      | 1452.694012    | 726.850644       | 1451.709996    | 726.358636       | C    | 1002.485934 | 501.746605      | 985.459385     | 493.233331       | 984.475369     | 492.741323       | 5  |
| 15 | 1598.763154 | 799.885215      | 1581.736605    | 791.371941       | 1580.752589    | 790.879933       | E    | 842.455285  | 421.731281      | 825.428736     | 413.218006       | 824.444720     | 412.725998       | 4  |
| 16 | 2037.988480 | 1019.497878     | 2020.961931    | 1010.984604      | 2019.977915    | 1010.492596      | Q    | 713.412692  | 357.209984      | 696.386143     | 348.696710       |                |                  | 3  |
| 17 | 2137.056894 | 1069.032085     | 2120.030345    | 1060.518811      | 2119.046329    | 1060.026803      | V    | 274.187366  | 137.597321      | 257.160817     | 129.084046       |                |                  | 2  |
| 18 |             |                 |                |                  |                |                  | R    | 175.118952  | 88.063114       | 158.092403     | 79.549839        |                |                  | 1  |

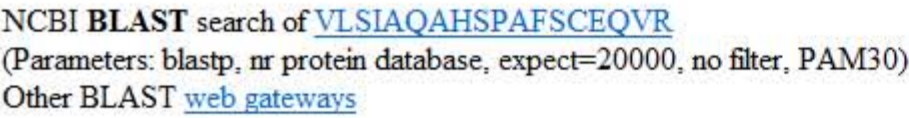

| Score | Mr(calc):   | Delta    | Sequence                           |
|-------|-------------|----------|------------------------------------|
| 55.3  | 2310.161285 | 0.013807 | <a href="#">VLSIAQAHSPAFSCEQVR</a> |
| 3.8   | 2310.161285 | 0.013807 | <a href="#">VLSIAQAHSPAFSCEQVR</a> |

M

A

T

R

I

X

S

C

I

E

N

C

E

Mascot Search Results

Peptide View

MS/MS Fragmentation of **HHGPQTLYLPVTLSSIPVFQR**  
Found in **GANAB\_HUMAN**, Neutral alpha-glucosidase AB OS=Homo sapiens GN=GANAB PE=1 SV=3

Match to Query 56360: 2700.491656 from(676.130190,4+) rtinseconds(2681) index(38166)  
Title: Locus:1.1.1.1042.10 File:"2013-07-02 CLN FXIII 180 min 2nd F 3.wiff"  
Data file C:\Program Files (x86)\Matrix Science\Mascot Daemon\mgf\8 FXIII 180 min 2nd\mascot\_daemon\_merge.mgf

Click mouse within plot area to zoom in by factor of two about that point  
Or, 

Plot from

100

 to 

1900

 Da 

Full range

  
Label all possible matches ☐ Label matches used for scoring ☒

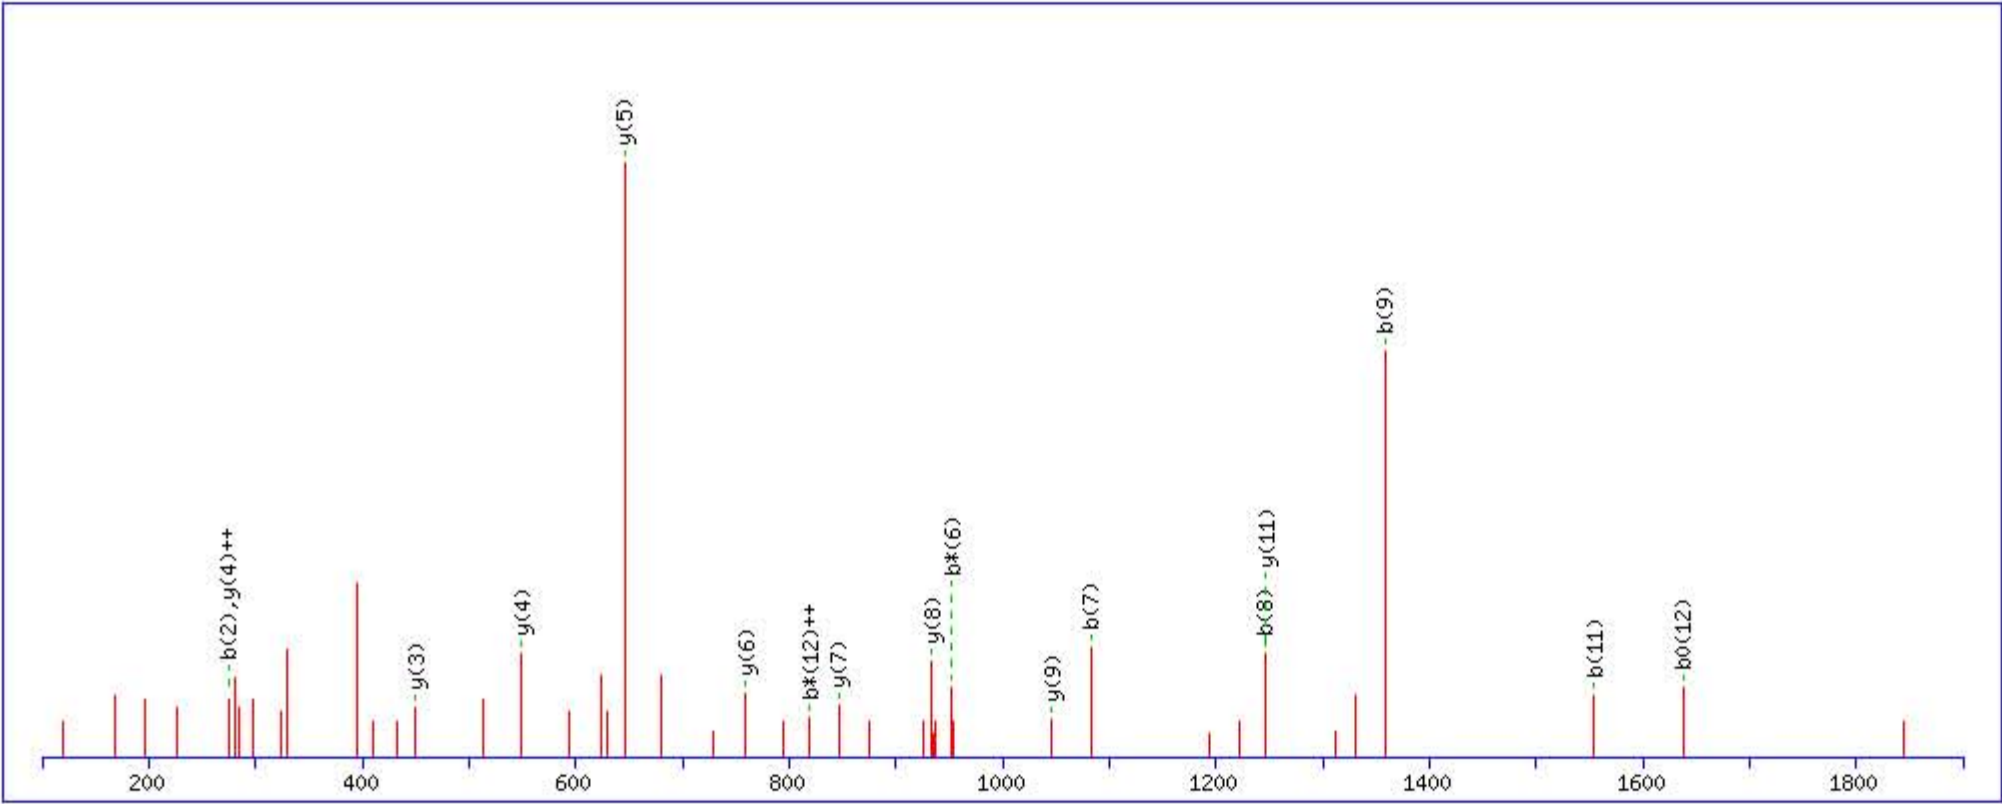

Monoisotopic mass of neutral peptide Mr(calc): 2700.457413  
Fixed modifications: Carbamidomethyl (C) (apply to specified residues or termini only)  
Variable modifications:  
Q5 : Biotin:Thermo-21345 (Q)  
Ions Score: 51 Expect: 8.2e-005  
Matches : 17/210 fragment ions using 28 most intense peaks [\(help\)](#)

| #  | b           | b <sup>++</sup> | b <sup>*</sup> | b <sup>*++</sup> | b <sup>0</sup> | b <sup>0++</sup> | Seq. | y           | y <sup>++</sup> | y <sup>*</sup> | y <sup>*++</sup> | y <sup>0</sup> | y <sup>0++</sup> | #  |
|----|-------------|-----------------|----------------|------------------|----------------|------------------|------|-------------|-----------------|----------------|------------------|----------------|------------------|----|
| 1  | 138.066188  | 69.536732       |                |                  |                |                  | H    |             |                 |                |                  |                |                  | 21 |
| 2  | 275.125100  | 138.066188      |                |                  |                |                  | H    | 2564.405765 | 1282.706520     | 2547.379216    | 1274.193246      | 2546.395200    | 1273.701238      | 20 |
| 3  | 332.146564  | 166.576920      |                |                  |                |                  | G    | 2427.346853 | 1214.177064     | 2410.320304    | 1205.663790      | 2409.336288    | 1205.171782      | 19 |
| 4  | 429.199328  | 215.103302      |                |                  |                |                  | P    | 2370.325389 | 1185.666332     | 2353.298840    | 1177.153058      | 2352.314824    | 1176.661050      | 18 |
| 5  | 868.424654  | 434.715965      | 851.398105     | 426.202691       |                |                  | Q    | 2273.272625 | 1137.139950     | 2256.246076    | 1128.626676      | 2255.262060    | 1128.134668      | 17 |
| 6  | 969.472333  | 485.239805      | 952.445784     | 476.726530       | 951.461768     | 476.234522       | T    | 1834.047299 | 917.527288      | 1817.020750    | 909.014013       | 1816.036734    | 908.522005       | 16 |
| 7  | 1082.556397 | 541.781837      | 1065.529848    | 533.268562       | 1064.545832    | 532.776554       | L    | 1732.999620 | 867.003448      | 1715.973071    | 858.490174       | 1714.989055    | 857.998166       | 15 |
| 8  | 1245.619726 | 623.313501      | 1228.593177    | 614.800227       | 1227.609161    | 614.308219       | Y    | 1619.915556 | 810.461416      | 1602.889007    | 801.948142       | 1601.904991    | 801.456134       | 14 |
| 9  | 1358.703790 | 679.855533      | 1341.677241    | 671.342259       | 1340.693225    | 670.850251       | L    | 1456.852227 | 728.929752      | 1439.825678    | 720.416477       | 1438.841662    | 719.924469       | 13 |
| 10 | 1455.756554 | 728.381915      | 1438.730005    | 719.868641       | 1437.745989    | 719.376633       | P    | 1343.768163 | 672.387720      | 1326.741614    | 663.874445       | 1325.757598    | 663.382437       | 12 |
| 11 | 1554.824968 | 777.916122      | 1537.798419    | 769.402848       | 1536.814403    | 768.910840       | V    | 1246.715399 | 623.861338      | 1229.688850    | 615.348063       | 1228.704834    | 614.856055       | 11 |
| 12 | 1655.872647 | 828.439962      | 1638.846098    | 819.926687       | 1637.862082    | 819.434679       | T    | 1147.646985 | 574.327131      | 1130.620436    | 565.813856       | 1129.636420    | 565.321848       | 10 |
| 13 | 1768.956711 | 884.981994      | 1751.930162    | 876.468719       | 1750.946146    | 875.976711       | L    | 1046.599306 | 523.803291      | 1029.572757    | 515.290017       | 1028.588741    | 514.798009       | 9  |
| 14 | 1855.988739 | 928.498008      | 1838.962190    | 919.984733       | 1837.978174    | 919.492725       | S    | 933.515242  | 467.261259      | 916.488693     | 458.747985       | 915.504677     | 458.255977       | 8  |
| 15 | 1943.020767 | 972.014022      | 1925.994218    | 963.500747       | 1925.010202    | 963.008739       | S    | 846.483214  | 423.745245      | 829.456665     | 415.231971       | 828.472649     | 414.739963       | 7  |
| 16 | 2056.104831 | 1028.556054     | 2039.078282    | 1020.042779      | 2038.094266    | 1019.550771      | I    | 759.451186  | 380.229231      | 742.424637     | 371.715957       |                |                  | 6  |
| 17 | 2153.157595 | 1077.082436     | 2136.131046    | 1068.569161      | 2135.147030    | 1068.077153      | P    | 646.367122  | 323.687199      | 629.340573     | 315.173924       |                |                  | 5  |
| 18 | 2252.226009 | 1126.616642     | 2235.199460    | 1118.103368      | 2234.215444    | 1117.611360      | V    | 549.314358  | 275.160817      | 532.287809     | 266.647542       |                |                  | 4  |
| 19 | 2399.294423 | 1200.150849     | 2382.267874    | 1191.637575      | 2381.283858    | 1191.145567      | F    | 450.245944  | 225.626610      | 433.219395     | 217.113335       |                |                  | 3  |
| 20 | 2527.353001 | 1264.180138     | 2510.326452    | 1255.666864      | 2509.342436    | 1255.174856      | Q    | 303.177530  | 152.092403      | 286.150981     | 143.579129       |                |                  | 2  |
| 21 |             |                 |                |                  |                |                  | R    | 175.118952  | 88.063114       | 158.092403     | 79.549839        |                |                  | 1  |

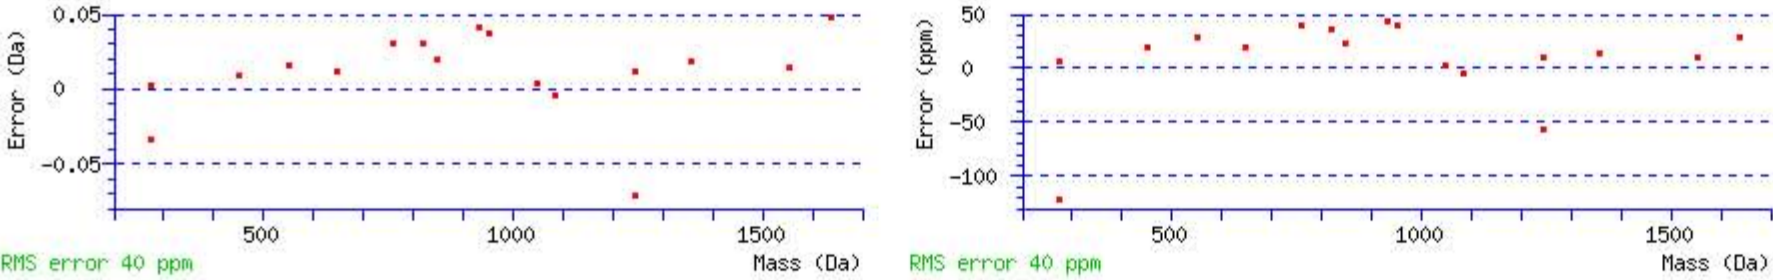

NCBI BLAST search of [HHGPQTLYLPVTLSSIPVFQR](#)  
(Parameters: blastp, nr protein database, expect=20000, no filter, PAM30)  
Other BLAST [web gateways](#)

All matches to this query

| Score | Mr(calc):   | Delta    | Sequence                              |
|-------|-------------|----------|---------------------------------------|
| 50.9  | 2700.457413 | 0.034243 | <a href="#">HHGPQTLYLPVTLSSIPVFQR</a> |

M

A

T

R

I

X

S

C

I

E

N

C

E

Mascot Search Results

Peptide View

MS/MS Fragmentation of **RPYQEGTPCSQCPSGYHCK**  
Found in **P116\_HUMAN**, Peptidase inhibitor 16 OS=Homo sapiens GN=PI16 PE=1 SV=1

Match to Query 55686: 2622.136176 from(656.541320,4+) rtinseconds(1353) index(30150)  
Title: Locus:1.1.1.579.17 File:"2013-07-02 CLN FXIII 180 min 2nd F 3.wiff"  
Data file C:\Program Files (x86)\Matrix Science\Mascot Daemon\mgf\8 FXIII 180 min 2nd\mascot\_daemon\_merge.mgf

Click mouse within plot area to zoom in by factor of two about that point  
Or, 

Plot from

100

 to 

1700

 Da 

Full range

  
Label all possible matches ☐ Label matches used for scoring ☒

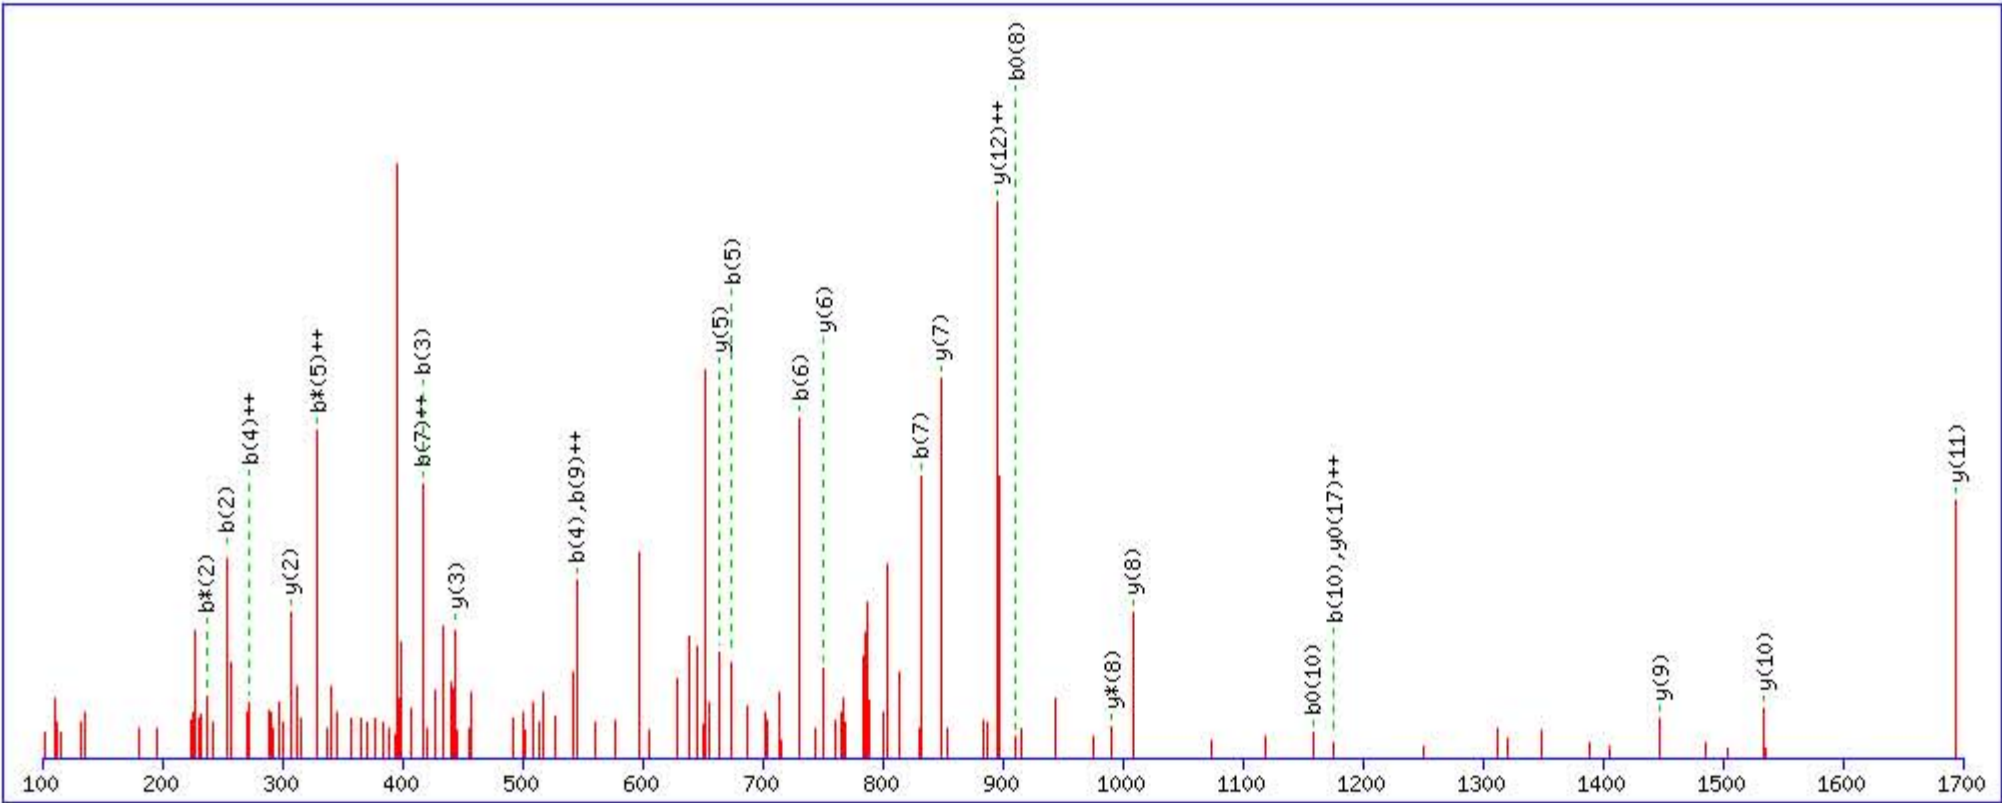

Monoisotopic mass of neutral peptide Mr(calc): 2622.123611  
Fixed modifications: Carbamidomethyl (C) (apply to specified residues or termini only)  
Variable modifications:  
Q11 : Biotin:Thermo-21345 (Q)  
Ions Score: 37 Expect: 0.0011  
Matches : 26/198 fragment ions using 62 most intense peaks [\(help\)](#)

| #  | b                  | b <sup>++</sup>   | b <sup>*</sup>    | b <sup>*++</sup>  | b <sup>0</sup>     | b <sup>0++</sup> | Seq. | y                  | y <sup>++</sup>   | y <sup>*</sup>    | y <sup>*++</sup> | y <sup>0</sup> | y <sup>0++</sup>   | #  |
|----|--------------------|-------------------|-------------------|-------------------|--------------------|------------------|------|--------------------|-------------------|-------------------|------------------|----------------|--------------------|----|
| 1  | 157.108387         | 79.057831         | 140.081838        | 70.544557         |                    |                  | R    |                    |                   |                   |                  |                |                    | 19 |
| 2  | <b>254.161151</b>  | 127.584213        | <b>237.134602</b> | 119.070939        |                    |                  | P    | 2467.029773        | 1234.018524       | 2450.003224       | 1225.505250      | 2449.019208    | 1225.013242        | 18 |
| 3  | <b>417.224480</b>  | 209.115878        | 400.197931        | 200.602604        |                    |                  | Y    | 2369.977009        | 1185.492142       | 2352.950460       | 1176.978868      | 2351.966444    | <b>1176.486860</b> | 17 |
| 4  | <b>545.283058</b>  | <b>273.145167</b> | 528.256509        | 264.631893        |                    |                  | Q    | 2206.913680        | 1103.960478       | 2189.887131       | 1095.447203      | 2188.903115    | 1094.955195        | 16 |
| 5  | <b>674.325651</b>  | 337.666464        | 657.299102        | <b>329.153189</b> | 656.315086         | 328.661181       | E    | 2078.855102        | 1039.931189       | 2061.828553       | 1031.417914      | 2060.844537    | 1030.925906        | 15 |
| 6  | <b>731.347115</b>  | 366.177196        | 714.320566        | 357.663921        | 713.336550         | 357.171913       | G    | 1949.812509        | 975.409892        | 1932.785960       | 966.896618       | 1931.801944    | 966.404610         | 14 |
| 7  | <b>832.394794</b>  | <b>416.701035</b> | 815.368245        | 408.187761        | 814.384229         | 407.695753       | T    | 1892.791045        | 946.899160        | 1875.764496       | 938.385886       | 1874.780480    | 937.893878         | 13 |
| 8  | 929.447558         | 465.227417        | 912.421009        | 456.714143        | <b>911.436993</b>  | 456.222135       | P    | 1791.743366        | <b>896.375321</b> | 1774.716817       | 887.862047       | 1773.732801    | 887.370038         | 12 |
| 9  | 1089.478207        | <b>545.242742</b> | 1072.451658       | 536.729467        | 1071.467642        | 536.237459       | C    | <b>1694.690602</b> | 847.848939        | 1677.664053       | 839.335665       | 1676.680037    | 838.843656         | 11 |
| 10 | <b>1176.510235</b> | 588.758756        | 1159.483686       | 580.245481        | <b>1158.499670</b> | 579.753473       | S    | <b>1534.659953</b> | 767.833614        | 1517.633404       | 759.320340       | 1516.649388    | 758.828332         | 10 |
| 11 | 1615.735561        | 808.371419        | 1598.709012       | 799.858144        | 1597.724996        | 799.366136       | Q    | <b>1447.627925</b> | 724.317600        | 1430.601376       | 715.804326       | 1429.617360    | 715.312318         | 9  |
| 12 | 1775.766210        | 888.386743        | 1758.739661       | 879.873469        | 1757.755645        | 879.381461       | C    | <b>1008.402599</b> | 504.704937        | <b>991.376050</b> | 496.191663       | 990.392034     | 495.699655         | 8  |
| 13 | 1872.818974        | 936.913125        | 1855.792425       | 928.399851        | 1854.808409        | 927.907843       | P    | <b>848.371950</b>  | 424.689613        | 831.345401        | 416.176338       | 830.361385     | 415.684330         | 7  |
| 14 | 1959.851002        | 980.429139        | 1942.824453       | 971.915865        | 1941.840437        | 971.423857       | S    | <b>751.319186</b>  | 376.163231        | 734.292637        | 367.649956       | 733.308621     | 367.157948         | 6  |
| 15 | 2016.872466        | 1008.939871       | 1999.845917       | 1000.426597       | 1998.861901        | 999.934589       | G    | <b>664.287158</b>  | 332.647217        | 647.260609        | 324.133942       |                |                    | 5  |
| 16 | 2179.935795        | 1090.471535       | 2162.909246       | 1081.958261       | 2161.925230        | 1081.466253      | Y    | 607.265694         | 304.136485        | 590.239145        | 295.623210       |                |                    | 4  |
| 17 | 2316.994707        | 1159.000991       | 2299.968158       | 1150.487717       | 2298.984142        | 1149.995709      | H    | <b>444.202365</b>  | 222.604820        | 427.175816        | 214.091546       |                |                    | 3  |
| 18 | 2477.025356        | 1239.016316       | 2459.998807       | 1230.503041       | 2459.014791        | 1230.011033      | C    | <b>307.143453</b>  | 154.075364        | 290.116904        | 145.562090       |                |                    | 2  |
| 19 |                    |                   |                   |                   |                    |                  | K    | 147.112804         | 74.060040         | 130.086255        | 65.546765        |                |                    | 1  |

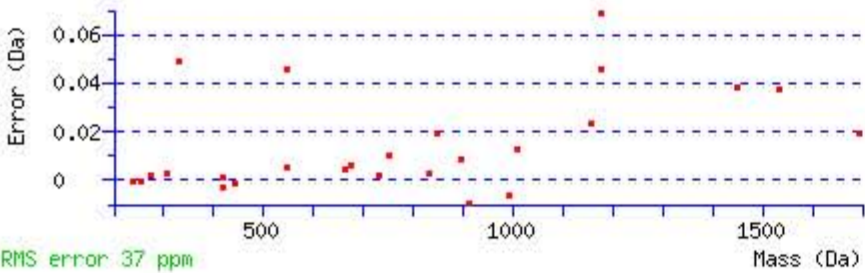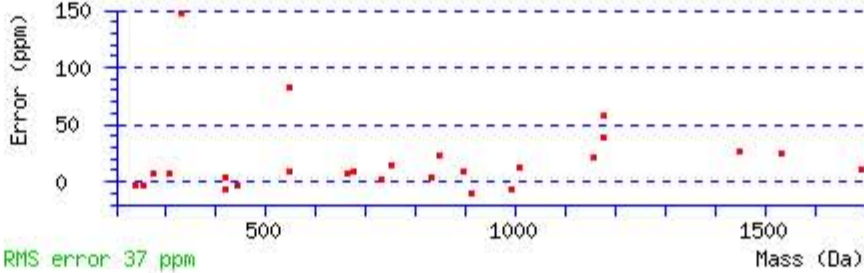

NCBI BLAST search of [RPYQEGTPCSQCPSGYHCK](#)  
(Parameters: blastp, nr protein database, expect=20000, no filter, PAM30)  
Other BLAST [web gateways](#)

All matches to this query

| Score | Mr(calc):   | Delta    | Sequence                            |
|-------|-------------|----------|-------------------------------------|
| 36.5  | 2622.123611 | 0.012565 | <a href="#">RPYQEGTPCSQCPSGYHCK</a> |

MATRIX

SCIENCE

Mascot Search Results

Peptide View

MS/MS Fragmentation of **TMFIGGSQLSQK**  
Found in **PHLD\_HUMAN**, Phosphatidylinositol-glycan-specific phospholipase D OS=Homo sapiens GN=GPLD1 PE=1 SV=3

Match to Query 34893: 1606.828428 from(804.421490,2+) rtinseconds(2121) index(34978)  
Title: Locus:1.1.1.847.16 File:"2013-07-02 CLN FXIII 180 min 2nd F 3.wiff"  
Data file C:\Program Files (x86)\Matrix Science\Mascot Daemon\mgf\8 FXIII 180 min 2nd\mascot\_daemon\_merge.mgf

Click mouse within plot area to zoom in by factor of two about that point  
Or, 

Plot from

0

 to 

3000

 Da 

Full range

  
Label all possible matches ☐ Label matches used for scoring ☒

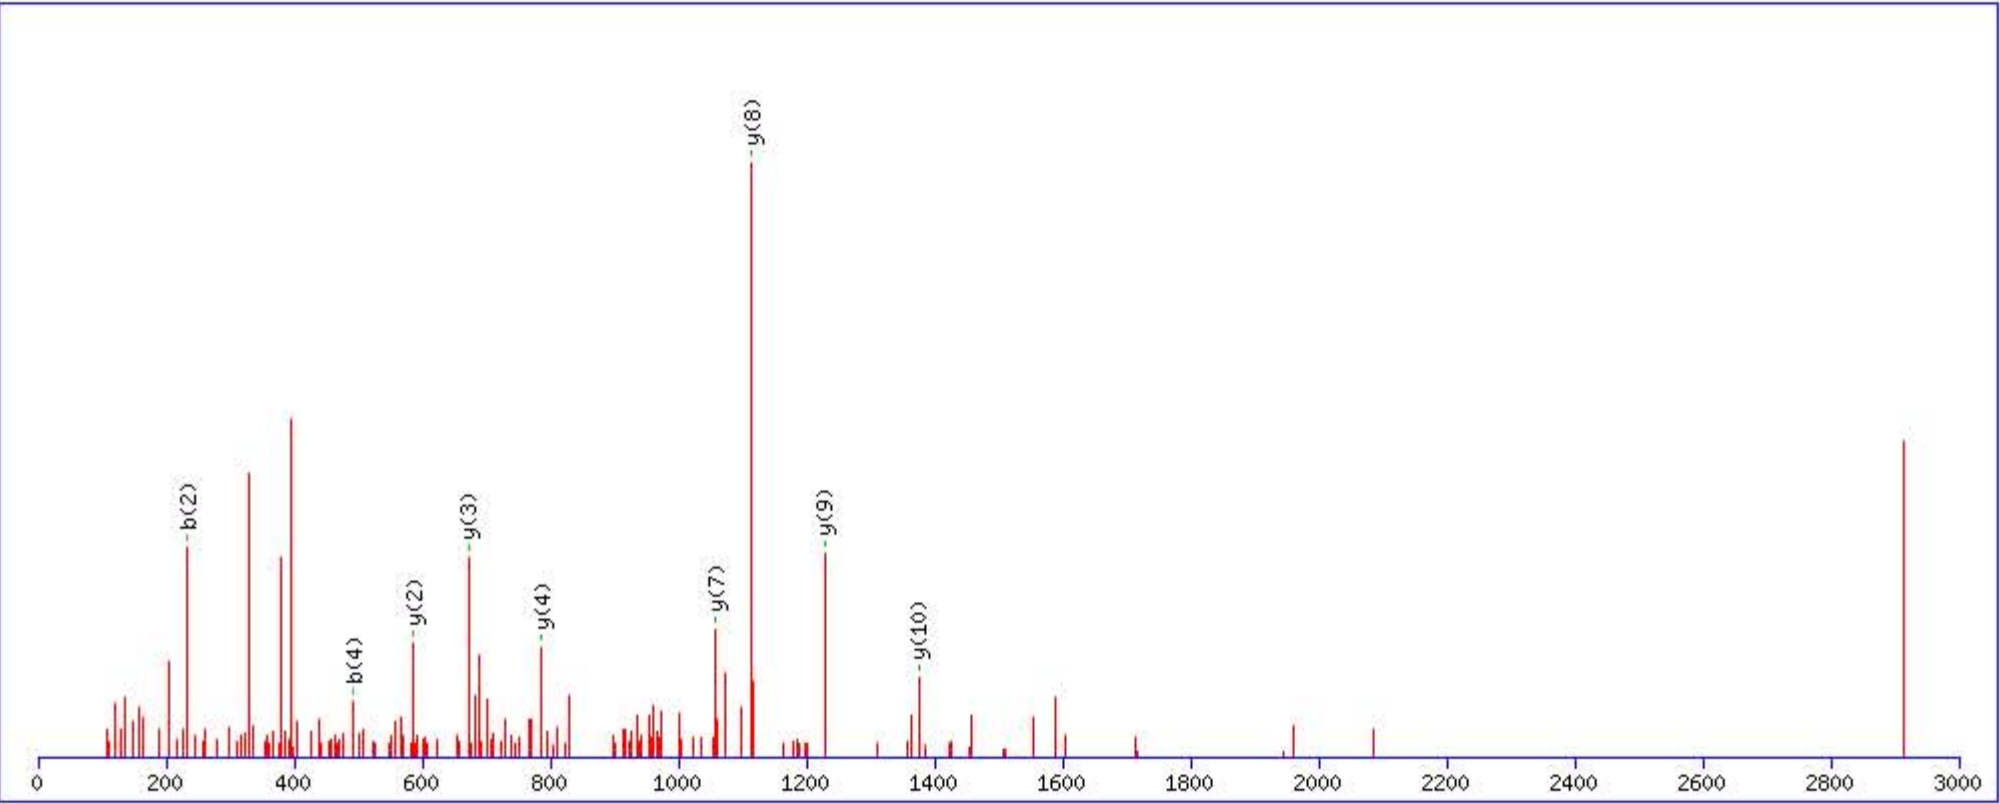

Monoisotopic mass of neutral peptide Mr(calc): 1606.821121  
Fixed modifications: Carbamidomethyl (C) (apply to specified residues or termini only)  
Variable modifications:  
Q11 : Biotin:Thermo-21345 (Q)  
Ions Score: 48 Expect: 3.4e-005  
Matches : 9/114 fragment ions using 15 most intense peaks [\(help\)](#)

| #  | b           | b <sup>++</sup> | b <sup>*</sup> | b <sup>+++</sup> | b <sup>0</sup> | b <sup>0++</sup> | Seq. | y           | y <sup>++</sup> | y <sup>*</sup> | y <sup>+++</sup> | y <sup>0</sup> | y <sup>0++</sup> | #  |
|----|-------------|-----------------|----------------|------------------|----------------|------------------|------|-------------|-----------------|----------------|------------------|----------------|------------------|----|
| 1  | 102.054955  | 51.531116       |                |                  | 84.044390      | 42.525833        | T    |             |                 |                |                  |                |                  | 12 |
| 2  | 233.095440  | 117.051358      |                |                  | 215.084875     | 108.046076       | M    | 1506.780719 | 753.893998      | 1489.754170    | 745.380723       | 1488.770154    | 744.888715       | 11 |
| 3  | 380.163854  | 190.585565      |                |                  | 362.153289     | 181.580282       | F    | 1375.740234 | 688.373755      | 1358.713685    | 679.860481       | 1357.729669    | 679.368473       | 10 |
| 4  | 493.247918  | 247.127597      |                |                  | 475.237353     | 238.122314       | I    | 1228.671820 | 614.839548      | 1211.645271    | 606.326274       | 1210.661255    | 605.834266       | 9  |
| 5  | 550.269382  | 275.638329      |                |                  | 532.258817     | 266.633047       | G    | 1115.587756 | 558.297516      | 1098.561207    | 549.784242       | 1097.577191    | 549.292234       | 8  |
| 6  | 607.290846  | 304.149061      |                |                  | 589.280281     | 295.143779       | G    | 1058.566292 | 529.786784      | 1041.539743    | 521.273510       | 1040.555727    | 520.781502       | 7  |
| 7  | 694.322874  | 347.665075      |                |                  | 676.312309     | 338.659793       | S    | 1001.544828 | 501.276052      | 984.518279     | 492.762778       | 983.534263     | 492.270770       | 6  |
| 8  | 822.381452  | 411.694364      | 805.354903     | 403.181090       | 804.370887     | 402.689082       | Q    | 914.512800  | 457.760038      | 897.486251     | 449.246764       | 896.502235     | 448.754756       | 5  |
| 9  | 935.465516  | 468.236396      | 918.438967     | 459.723122       | 917.454951     | 459.231114       | L    | 786.454222  | 393.730749      | 769.427673     | 385.217475       | 768.443657     | 384.725467       | 4  |
| 10 | 1022.497544 | 511.752410      | 1005.470995    | 503.239136       | 1004.486979    | 502.747128       | S    | 673.370158  | 337.188717      | 656.343609     | 328.675443       | 655.359593     | 328.183435       | 3  |
| 11 | 1461.722870 | 731.365073      | 1444.696321    | 722.851799       | 1443.712305    | 722.359791       | Q    | 586.338130  | 293.672703      | 569.311581     | 285.159429       |                |                  | 2  |
| 12 |             |                 |                |                  |                |                  | K    | 147.112804  | 74.060040       | 130.086255     | 65.546765        |                |                  | 1  |

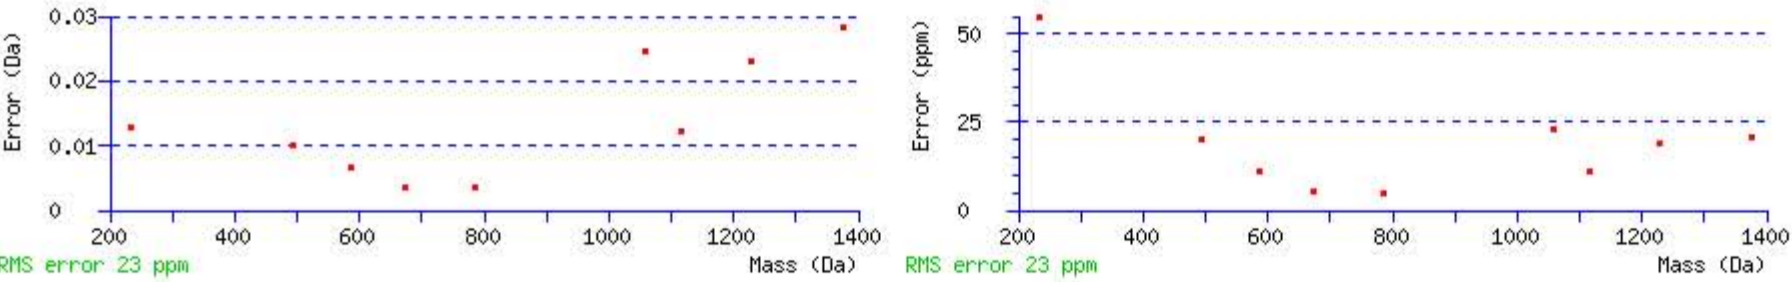

NCBI BLAST search of [TMFIGGSQLSQK](#)  
(Parameters: blastp, nr protein database, expect=20000, no filter, PAM30)  
Other BLAST [web gateways](#)

All matches to this query

| Score | Mr(calc):   | Delta    | Sequence                     |
|-------|-------------|----------|------------------------------|
| 48.1  | 1606.821121 | 0.007307 | <a href="#">TMFIGGSQLSQK</a> |
| 18.7  | 1606.821121 | 0.007307 | <a href="#">TMFIGGSQLSQK</a> |
| 0.4   | 1606.809860 | 0.018568 | <a href="#">AIPEYMTISQK</a>  |

MATRIX

SCIENCE

Mascot Search Results

Peptide View

MS/MS Fragmentation of **QVLLVGAPTYDDVSK**  
Found in **PHLD\_HUMAN**, Phosphatidylinositol-glycan-specific phospholipase D OS=Homo sapiens GN=GPLD1 PE=1 SV=3

Match to Query 42443: 1915.030542 from(639.350790,3+) rtinseconds(2302) index(52288)  
Title: Locus:1.1.1.2039.3 File:"2013-07-02 CLN FXIII 180 min 2nd F 4.wiff"  
Data file C:\Program Files (x86)\Matrix Science\Mascot Daemon\mgf\8 FXIII 180 min 2nd\mascot\_daemon\_merge.mgf

Click mouse within plot area to zoom in by factor of two about that point  
Or, 

Plot from100to1300Da

Full range

  
Label all possible matches ☐ Label matches used for scoring ☒

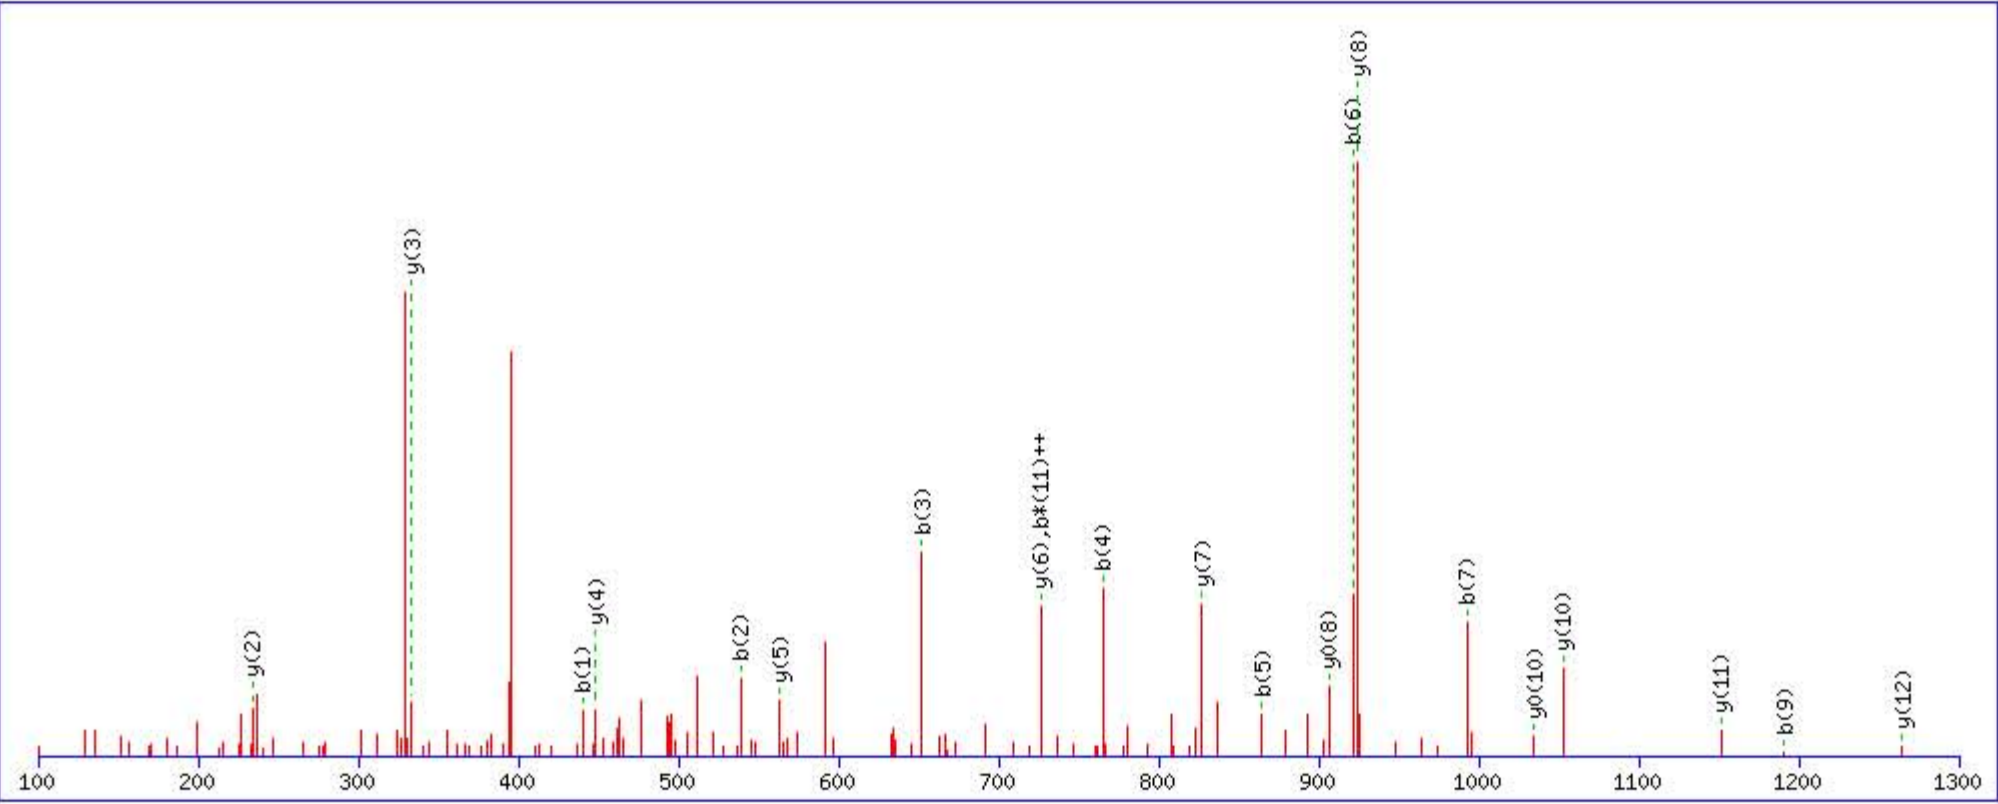

Monoisotopic mass of neutral peptide Mr(calc): 1915.012497  
Fixed modifications: Carbamidomethyl (C) (apply to specified residues or termini only)  
Variable modifications:  
Q1 : Biotin:Thermo-21345 (Q)  
Ions Score: 61 Expect: 2.4e-006  
Matches : 21/150 fragment ions using 41 most intense peaks [\(help\)](#)

| #  | b           | b <sup>++</sup> | b <sup>*</sup> | b <sup>++</sup> * | b <sup>0</sup> | b <sup>0++</sup> | Seq. | y           | y <sup>++</sup> | y <sup>*</sup> | y <sup>++</sup> * | y <sup>0</sup> | y <sup>0++</sup> | #  |
|----|-------------|-----------------|----------------|-------------------|----------------|------------------|------|-------------|-----------------|----------------|-------------------|----------------|------------------|----|
| 1  | 440.232602  | 220.619939      | 423.206053     | 212.106664        |                |                  | Q    |             |                 |                |                   |                |                  | 15 |
| 2  | 539.301016  | 270.154146      | 522.274467     | 261.640872        |                |                  | V    | 1476.794438 | 738.900857      | 1459.767889    | 730.387583        | 1458.783873    | 729.895575       | 14 |
| 3  | 652.385080  | 326.696178      | 635.358531     | 318.182904        |                |                  | L    | 1377.726024 | 689.366650      | 1360.699475    | 680.853376        | 1359.715459    | 680.361368       | 13 |
| 4  | 765.469144  | 383.238210      | 748.442595     | 374.724936        |                |                  | L    | 1264.641960 | 632.824618      | 1247.615411    | 624.311344        | 1246.631395    | 623.819336       | 12 |
| 5  | 864.537558  | 432.772417      | 847.511009     | 424.259143        |                |                  | V    | 1151.557896 | 576.282586      | 1134.531347    | 567.769312        | 1133.547331    | 567.277304       | 11 |
| 6  | 921.559022  | 461.283149      | 904.532473     | 452.769875        |                |                  | G    | 1052.489482 | 526.748379      | 1035.462933    | 518.235105        | 1034.478917    | 517.743097       | 10 |
| 7  | 992.596136  | 496.801706      | 975.569587     | 488.288432        |                |                  | A    | 995.468018  | 498.237647      | 978.441469     | 489.724373        | 977.457453     | 489.232365       | 9  |
| 8  | 1089.648900 | 545.328088      | 1072.622351    | 536.814814        |                |                  | P    | 924.430904  | 462.719090      | 907.404355     | 454.205816        | 906.420339     | 453.713808       | 8  |
| 9  | 1190.696579 | 595.851927      | 1173.670030    | 587.338653        | 1172.686014    | 586.846645       | T    | 827.378140  | 414.192708      | 810.351591     | 405.679434        | 809.367575     | 405.187426       | 7  |
| 10 | 1353.759908 | 677.383592      | 1336.733359    | 668.870318        | 1335.749343    | 668.378310       | Y    | 726.330461  | 363.668869      | 709.303912     | 355.155594        | 708.319896     | 354.663586       | 6  |
| 11 | 1468.786851 | 734.897064      | 1451.760302    | 726.383789        | 1450.776286    | 725.891781       | D    | 563.267132  | 282.137204      | 546.240583     | 273.623930        | 545.256567     | 273.131922       | 5  |
| 12 | 1583.813794 | 792.410535      | 1566.787245    | 783.897261        | 1565.803229    | 783.405253       | D    | 448.240189  | 224.623733      | 431.213640     | 216.110458        | 430.229624     | 215.618450       | 4  |
| 13 | 1682.882208 | 841.944742      | 1665.855659    | 833.431468        | 1664.871643    | 832.939460       | V    | 333.213246  | 167.110261      | 316.186697     | 158.596987        | 315.202681     | 158.104979       | 3  |
| 14 | 1769.914236 | 885.460756      | 1752.887687    | 876.947482        | 1751.903671    | 876.455474       | S    | 234.144832  | 117.576054      | 217.118283     | 109.062780        | 216.134267     | 108.570772       | 2  |
| 15 |             |                 |                |                   |                |                  | K    | 147.112804  | 74.060040       | 130.086255     | 65.546765         |                |                  | 1  |

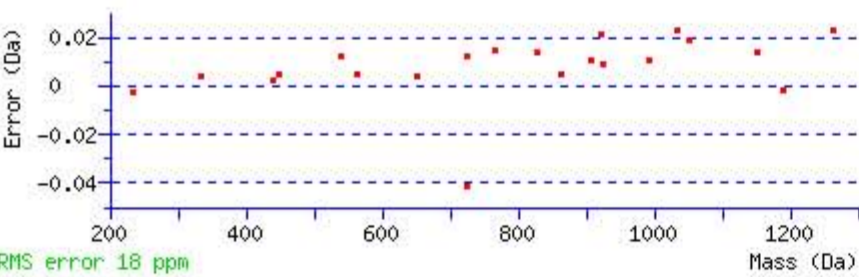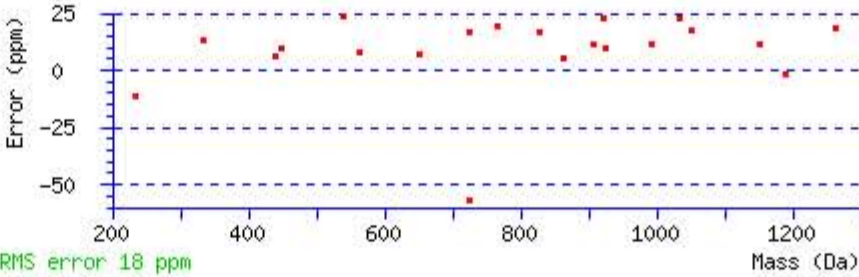

NCBI BLAST search of **QVLLVGAPTYDDVSK**  
(Parameters: blastp, nr protein database, expect=20000, no filter, PAM30)  
Other BLAST [web gateways](#)

All matches to this query

| Score | Mr(calc):   | Delta     | Sequence                          |
|-------|-------------|-----------|-----------------------------------|
| 60.5  | 1915.012497 | 0.018045  | <a href="#">QVLLVGAPTYDDVSK</a>   |
| 0.6   | 1915.048859 | -0.018317 | <a href="#">SSSSYTIFLCILAKVVK</a> |
| 0.6   | 1915.027710 | 0.002832  | <a href="#">DYPIYLLKFKQCLSK</a>   |
| 0.6   | 1915.008438 | 0.022104  | <a href="#">VIQKNQEETTSISK</a>    |

MATRIX

SCIENCE

Mascot Search Results

Peptide View

MS/MS Fragmentation of **FLEQELETITIPDLR**  
Found in **PLTP\_HUMAN**, Phospholipid transfer protein OS=Homo sapiens GN=PLTP PE=1 SV=1

Match to Query 47051: 2127.157688 from(1064.586120,2+) rtinseconds(2894) index(39827)  
Title: Locus:1.1.1.1114.24 File:"2013-07-02 CLN FXIII 180 min 2nd F 3.wiff"  
Data file C:\Program Files (x86)\Matrix Science\Mascot Daemon\mgf\8 FXIII 180 min 2nd\mascot\_daemon\_merge.mgf

Click mouse within plot area to zoom in by factor of two about that point  
Or, 

Plot from

100

 to 

2000

 Da 

Full range

  
Label all possible matches ☐ Label matches used for scoring ☒

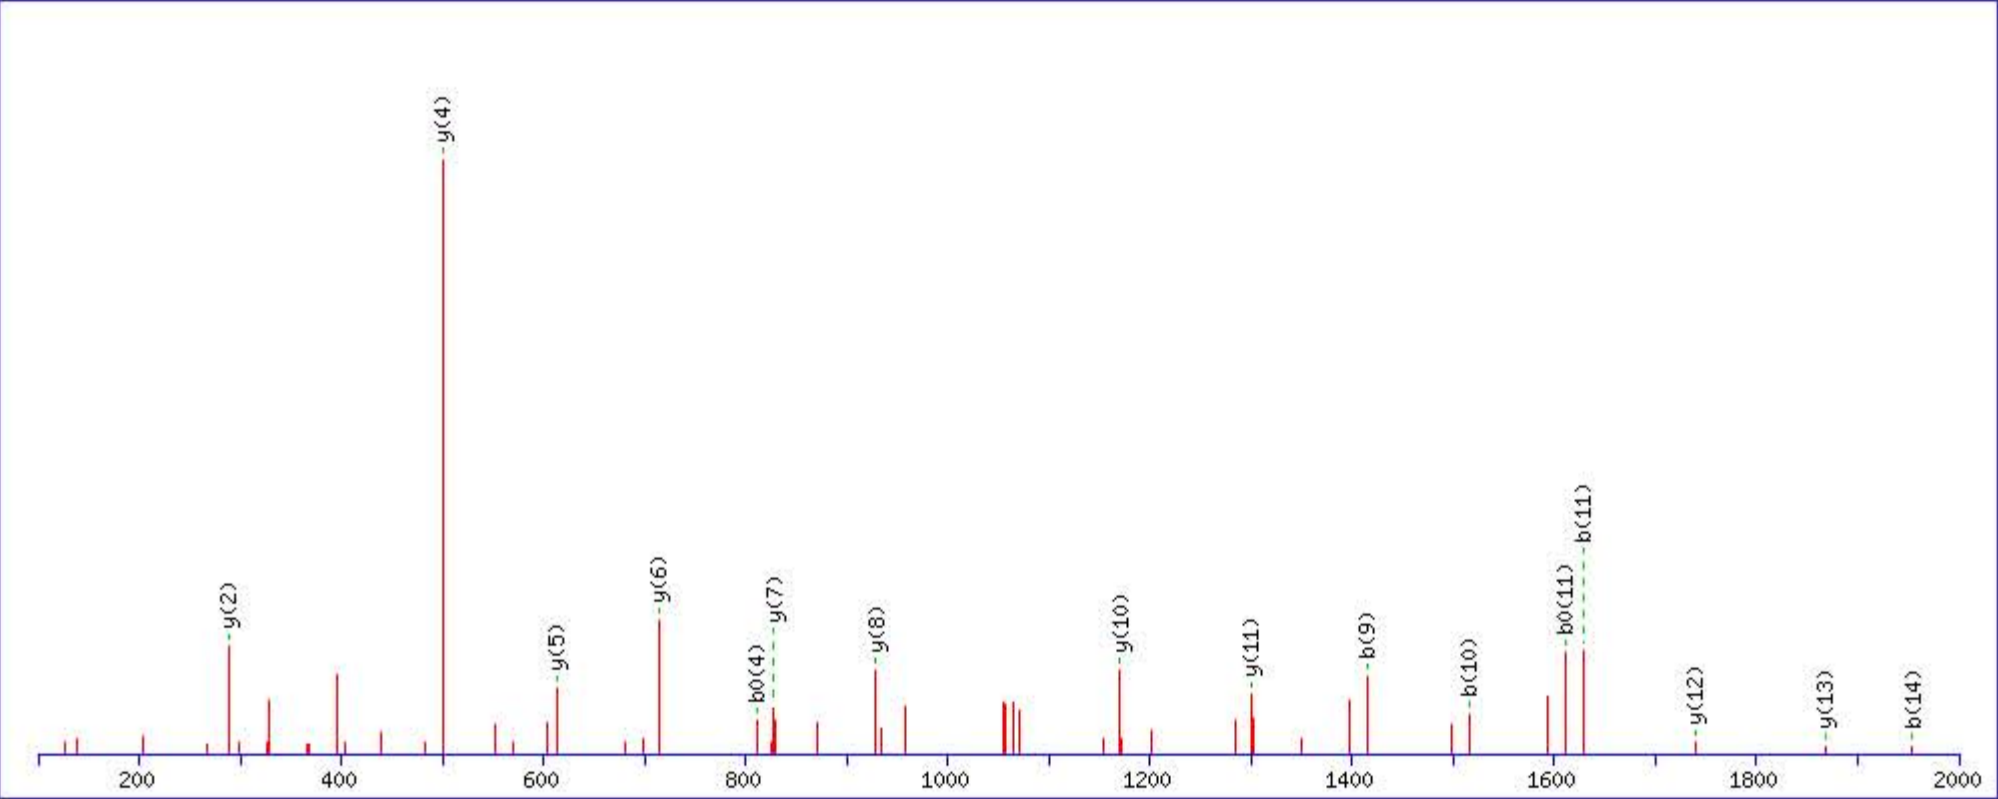

Monoisotopic mass of neutral peptide Mr(calc): 2127.128555  
Fixed modifications: Carbamidomethyl (C) (apply to specified residues or termini only)  
Variable modifications:  
Q4 : Biotin:Thermo-21345 (Q)  
Ions Score: 87 Expect: 3.8e-008  
Matches : 16/154 fragment ions using 19 most intense peaks [\(help\)](#)

| #  | b           | b <sup>++</sup> | b <sup>*</sup> | b <sup>*++</sup> | b <sup>0</sup> | b <sup>0++</sup> | Seq. | y           | y <sup>++</sup> | y <sup>*</sup> | y <sup>*++</sup> | y <sup>0</sup> | y <sup>0++</sup> | #  |
|----|-------------|-----------------|----------------|------------------|----------------|------------------|------|-------------|-----------------|----------------|------------------|----------------|------------------|----|
| 1  | 148.075690  | 74.541483       |                |                  |                |                  | F    |             |                 |                |                  |                |                  | 15 |
| 2  | 261.159754  | 131.083515      |                |                  |                |                  | L    | 1981.067442 | 991.037359      | 1964.040893    | 982.524084       | 1963.056877    | 982.032076       | 14 |
| 3  | 390.202347  | 195.604811      |                |                  | 372.191782     | 186.599529       | E    | 1867.983378 | 934.495327      | 1850.956829    | 925.982052       | 1849.972813    | 925.490044       | 13 |
| 4  | 829.427673  | 415.217475      | 812.401124     | 406.704200       | 811.417108     | 406.212192       | Q    | 1738.940785 | 869.974030      | 1721.914236    | 861.460756       | 1720.930220    | 860.968748       | 12 |
| 5  | 958.470266  | 479.738771      | 941.443717     | 471.225497       | 940.459701     | 470.733489       | E    | 1299.715459 | 650.361367      | 1282.688910    | 641.848093       | 1281.704894    | 641.356085       | 11 |
| 6  | 1071.554330 | 536.280803      | 1054.527781    | 527.767529       | 1053.543765    | 527.275520       | L    | 1170.672866 | 585.840071      | 1153.646317    | 577.326796       | 1152.662301    | 576.834788       | 10 |
| 7  | 1200.596923 | 600.802099      | 1183.570374    | 592.288825       | 1182.586358    | 591.796817       | E    | 1057.588802 | 529.298039      | 1040.562253    | 520.784764       | 1039.578237    | 520.292756       | 9  |
| 8  | 1301.644602 | 651.325939      | 1284.618053    | 642.812664       | 1283.634037    | 642.320656       | T    | 928.546209  | 464.776742      | 911.519660     | 456.263468       | 910.535644     | 455.771460       | 8  |
| 9  | 1414.728666 | 707.867971      | 1397.702117    | 699.354696       | 1396.718101    | 698.862688       | I    | 827.498530  | 414.252903      | 810.471981     | 405.739628       | 809.487965     | 405.247620       | 7  |
| 10 | 1515.776345 | 758.391810      | 1498.749796    | 749.878536       | 1497.765780    | 749.386528       | T    | 714.414466  | 357.710871      | 697.387917     | 349.197596       | 696.403901     | 348.705588       | 6  |
| 11 | 1628.860409 | 814.933842      | 1611.833860    | 806.420568       | 1610.849844    | 805.928560       | I    | 613.366787  | 307.187031      | 596.340238     | 298.673757       | 595.356222     | 298.181749       | 5  |
| 12 | 1725.913173 | 863.460224      | 1708.886624    | 854.946950       | 1707.902608    | 854.454942       | P    | 500.282723  | 250.644999      | 483.256174     | 242.131725       | 482.272158     | 241.639717       | 4  |
| 13 | 1840.940116 | 920.973696      | 1823.913567    | 912.460421       | 1822.929551    | 911.968413       | D    | 403.229959  | 202.118617      | 386.203410     | 193.605343       | 385.219394     | 193.113335       | 3  |
| 14 | 1954.024180 | 977.515728      | 1936.997631    | 969.002453       | 1936.013615    | 968.510445       | L    | 288.203016  | 144.605146      | 271.176467     | 136.091871       |                |                  | 2  |
| 15 |             |                 |                |                  |                |                  | R    | 175.118952  | 88.063114       | 158.092403     | 79.549839        |                |                  | 1  |

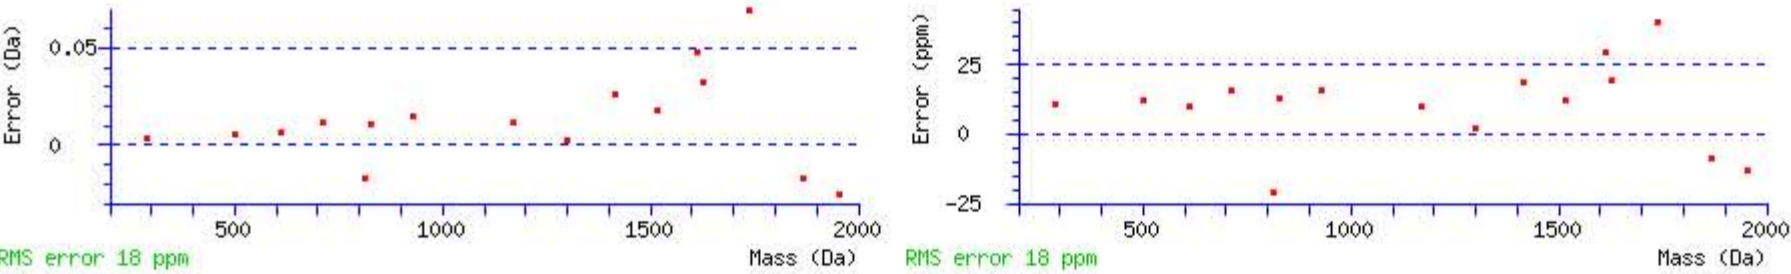

NCBI BLAST search of [FLEQELETITIPDLR](#)  
(Parameters: blastp, nr protein database, expect=20000, no filter, PAM30)  
Other BLAST [web gateways](#)

All matches to this query

| Score | Mr(calc):   | Delta    | Sequence                            |
|-------|-------------|----------|-------------------------------------|
| 86.9  | 2127.128555 | 0.029133 | <a href="#">FLEQELETITIPDLR</a>     |
| 14.6  | 2127.139816 | 0.017872 | <a href="#">QKSIFTSVPDTPDLLR</a>    |
| 11.8  | 2127.125870 | 0.031818 | <a href="#">SLPGYMTRHNNLDLVIIR</a>  |
| 8.8   | 2127.135727 | 0.021961 | <a href="#">EAADMLKALQGASQIAEIR</a> |
| 0.1   | 2127.136429 | 0.021259 | <a href="#">GAFELAYTGFKLTEVLNR</a>  |

MATRIX

SCIENCE

Mascot Search Results

Peptide View

MS/MS Fragmentation of **VSSVEECQK**  
Found in **KLKB1\_HUMAN**, Plasma kallikrein OS=Homo sapiens GN=KLKB1 PE=1 SV=1

Match to Query 26410: 1375.648848 from(688.831700,2+) rtinseconds(1376) index(16052)  
Title: Locus:1.1.1.2861.24 File:"2013-07-02 CLN FXIII 180 min 2nd F 2.wiff"  
Data file C:\Program Files (x86)\Matrix Science\Mascot Daemon\mgf\8 FXIII 180 min 2nd\mascot\_daemon\_merge.mgf

Click mouse within plot area to zoom in by factor of two about that point  
Or, 

Plot from

0

 to 

2800

 Da 

Full range

  
Label all possible matches ☐ Label matches used for scoring ☒

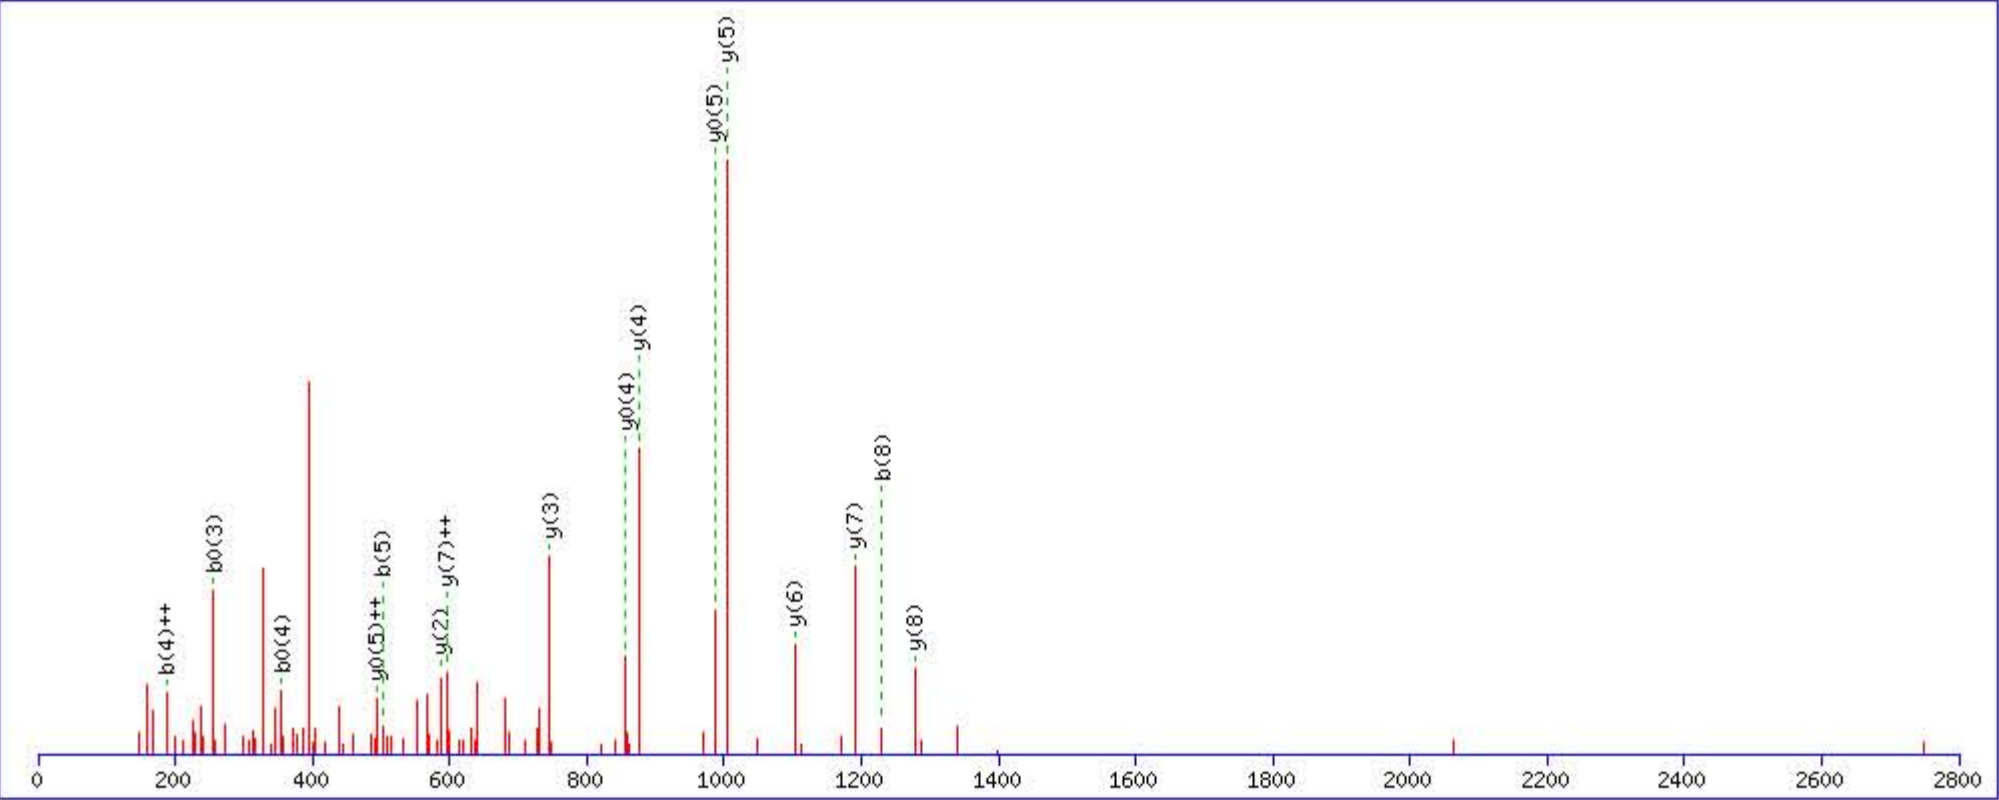

Monoisotopic mass of neutral peptide Mr(calc): 1375.647568  
Fixed modifications: Carbamidomethyl (C) (apply to specified residues or termini only)  
Variable modifications:  
Q8 : Biotin:Thermo-21345 (Q)  
Ions Score: 51 Expect: 5e-005  
Matches : 17/74 fragment ions using 24 most intense peaks [\(help\)](#)

| # | b           | b <sup>++</sup> | b <sup>*</sup> | b <sup>*++</sup> | b <sup>0</sup> | b <sup>0++</sup> | Seq. | y           | y <sup>++</sup> | y <sup>*</sup> | y <sup>*++</sup> | y <sup>0</sup> | y <sup>0++</sup> | # |
|---|-------------|-----------------|----------------|------------------|----------------|------------------|------|-------------|-----------------|----------------|------------------|----------------|------------------|---|
| 1 | 100.075690  | 50.541483       |                |                  |                |                  | V    |             |                 |                |                  |                |                  | 9 |
| 2 | 187.107718  | 94.057497       |                |                  | 169.097153     | 85.052214        | S    | 1277.586435 | 639.296856      | 1260.559886    | 630.783581       | 1259.575870    | 630.291573       | 8 |
| 3 | 274.139746  | 137.573511      |                |                  | 256.129181     | 128.568229       | S    | 1190.554407 | 595.780842      | 1173.527858    | 587.267567       | 1172.543842    | 586.775559       | 7 |
| 4 | 373.208160  | 187.107718      |                |                  | 355.197595     | 178.102436       | V    | 1103.522379 | 552.264828      | 1086.495830    | 543.751553       | 1085.511814    | 543.259545       | 6 |
| 5 | 502.250753  | 251.629015      |                |                  | 484.240188     | 242.623732       | E    | 1004.453965 | 502.730621      | 987.427416     | 494.217346       | 986.443400     | 493.725338       | 5 |
| 6 | 631.293346  | 316.150311      |                |                  | 613.282781     | 307.145029       | E    | 875.411372  | 438.209324      | 858.384823     | 429.696050       | 857.400807     | 429.204042       | 4 |
| 7 | 791.323995  | 396.165636      |                |                  | 773.313430     | 387.160353       | C    | 746.368779  | 373.688028      | 729.342230     | 365.174753       |                |                  | 3 |
| 8 | 1230.549321 | 615.778299      | 1213.522772    | 607.265024       | 1212.538756    | 606.773016       | Q    | 586.338130  | 293.672703      | 569.311581     | 285.159429       |                |                  | 2 |
| 9 |             |                 |                |                  |                |                  | K    | 147.112804  | 74.060040       | 130.086255     | 65.546765        |                |                  | 1 |

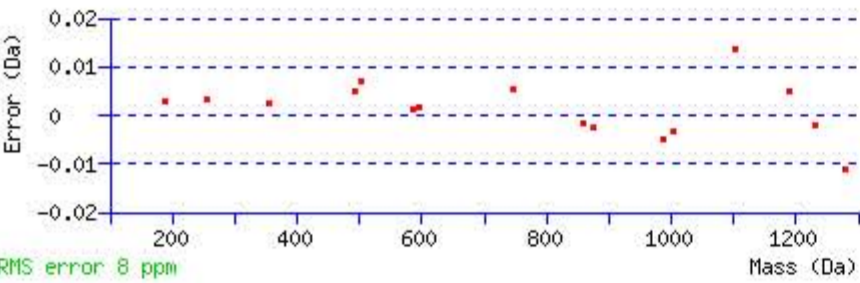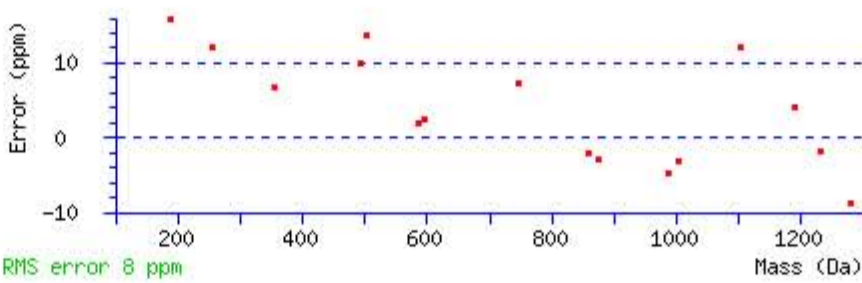

NCBI BLAST search of [VSSVEECQK](#)  
(Parameters: blastp, nr protein database, expect=20000, no filter, PAM30)  
Other BLAST [web gateways](#)

All matches to this query

| Score | Mr(calc):   | Delta     | Sequence                      |
|-------|-------------|-----------|-------------------------------|
| 51.0  | 1375.647568 | 0.001280  | <a href="#">VSSVEECQK</a>     |
| 5.0   | 1375.662827 | -0.013979 | <a href="#">GFSIPECQK</a>     |
| 2.7   | 1375.665329 | -0.016481 | <a href="#">ADVSLPSMQGDLK</a> |

MATRIX

SCIENCE

Mascot Search Results

Peptide View

MS/MS Fragmentation of **GVNVCQETCTK**  
Found in **KLKB1\_HUMAN**, Plasma kallikrein OS=Homo sapiens GN=KLKB1 PE=1 SV=1

Match to Query 34869: 1605.737588 from(803.876070,2+) rtinseconds(1533) index(17150)  
Title: Locus:1.1.1.2916.13 File:"2013-07-02 CLN FXIII 180 min 2nd F 2.wiff"  
Data file C:\Program Files (x86)\Matrix Science\Mascot Daemon\mgf\8 FXIII 180 min 2nd\mascot\_daemon\_merge.mgf

Click mouse within plot area to zoom in by factor of two about that point  
Or,   to  Da   
Label all possible matches ☐ Label matches used for scoring ☒

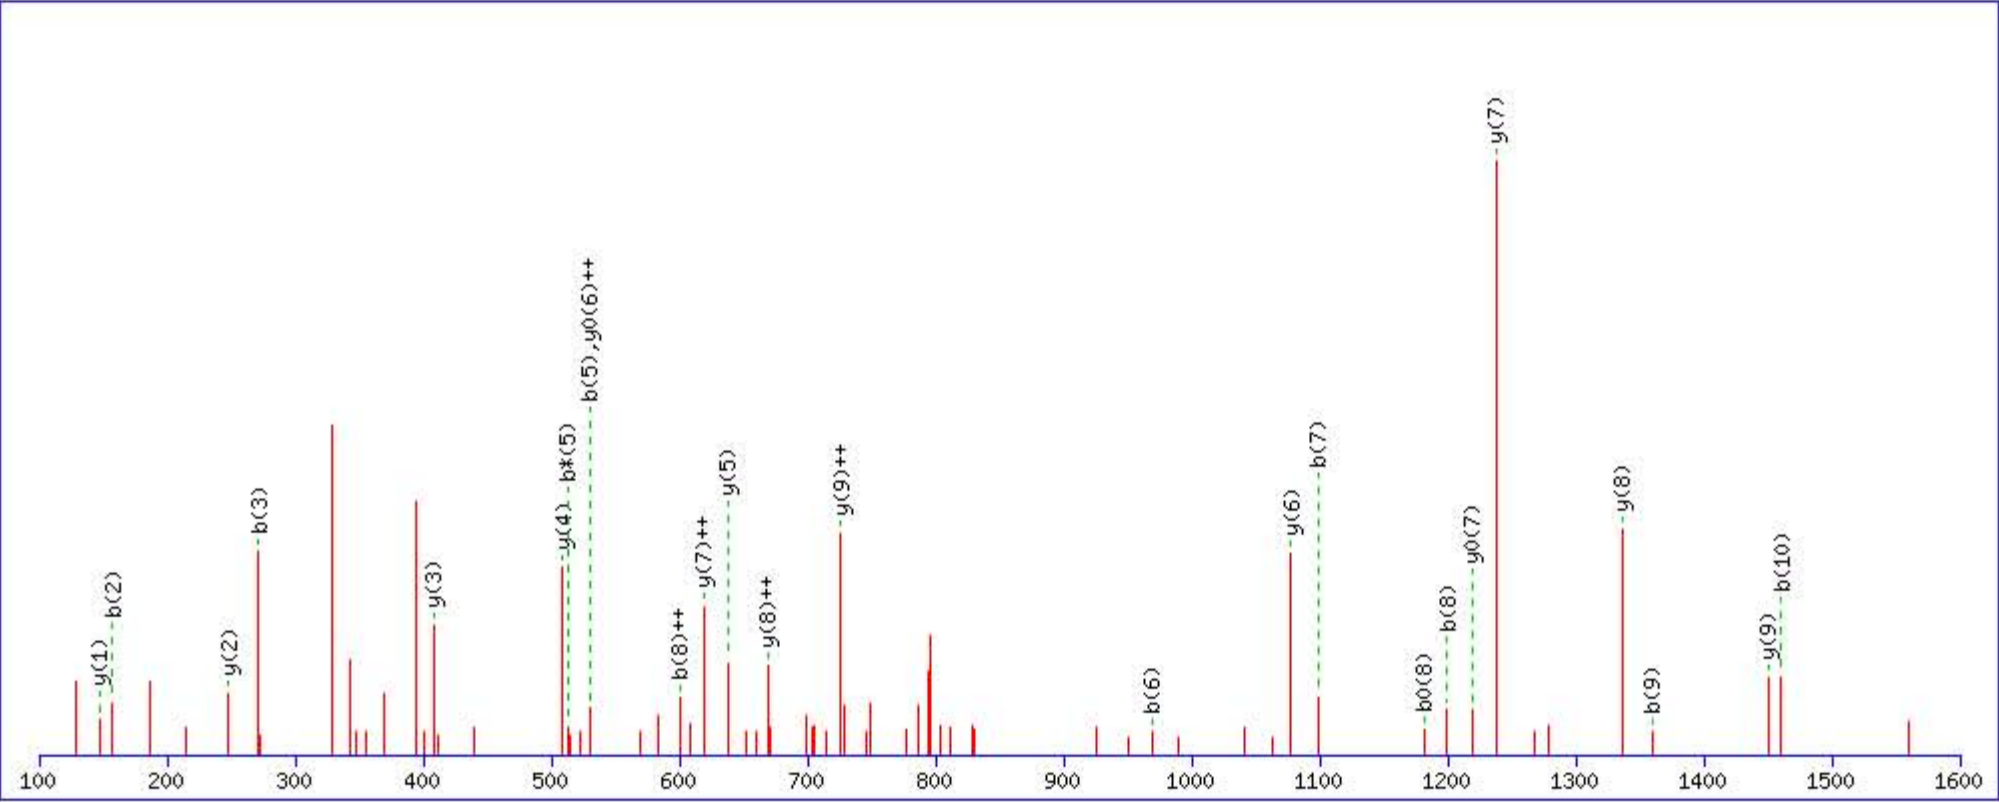

Monoisotopic mass of neutral peptide Mr(calc): 1605.731339  
Fixed modifications: Carbamidomethyl (C) (apply to specified residues or termini only)  
Variable modifications:  
Q6 : Biotin:Thermo-21345 (Q)  
Ions Score: 51 Expect: 3.4e-005  
Matches : 25/102 fragment ions using 47 most intense peaks [\(help\)](#)

| #  | b           | b <sup>++</sup> | b <sup>*</sup> | b <sup>*++</sup> | b <sup>0</sup> | b <sup>0++</sup> | Seq. | y           | y <sup>++</sup> | y <sup>*</sup> | y <sup>*++</sup> | y <sup>0</sup> | y <sup>0++</sup> | #  |
|----|-------------|-----------------|----------------|------------------|----------------|------------------|------|-------------|-----------------|----------------|------------------|----------------|------------------|----|
| 1  | 58.028740   | 29.518008       |                |                  |                |                  | G    |             |                 |                |                  |                |                  | 11 |
| 2  | 157.097154  | 79.052215       |                |                  |                |                  | V    | 1549.717134 | 775.362205      | 1532.690585    | 766.848931       | 1531.706569    | 766.356923       | 10 |
| 3  | 271.140081  | 136.073679      | 254.113532     | 127.560404       |                |                  | N    | 1450.648720 | 725.827998      | 1433.622171    | 717.314724       | 1432.638155    | 716.822716       | 9  |
| 4  | 370.208495  | 185.607886      | 353.181946     | 177.094611       |                |                  | V    | 1336.605793 | 668.806535      | 1319.579244    | 660.293260       | 1318.595228    | 659.801252       | 8  |
| 5  | 530.239144  | 265.623210      | 513.212595     | 257.109936       |                |                  | C    | 1237.537379 | 619.272328      | 1220.510830    | 610.759053       | 1219.526814    | 610.267045       | 7  |
| 6  | 969.464470  | 485.235873      | 952.437921     | 476.722599       |                |                  | Q    | 1077.506730 | 539.257003      | 1060.480181    | 530.743729       | 1059.496165    | 530.251721       | 6  |
| 7  | 1098.507063 | 549.757170      | 1081.480514    | 541.243895       | 1080.496498    | 540.751887       | E    | 638.281404  | 319.644340      | 621.254855     | 311.131066       | 620.270839     | 310.639058       | 5  |
| 8  | 1199.554742 | 600.281009      | 1182.528193    | 591.767735       | 1181.544177    | 591.275727       | T    | 509.238811  | 255.123044      | 492.212262     | 246.609769       | 491.228246     | 246.117761       | 4  |
| 9  | 1359.585391 | 680.296334      | 1342.558842    | 671.783059       | 1341.574826    | 671.291051       | C    | 408.191132  | 204.599204      | 391.164583     | 196.085930       | 390.180567     | 195.593922       | 3  |
| 10 | 1460.633070 | 730.820173      | 1443.606521    | 722.306899       | 1442.622505    | 721.814891       | T    | 248.160483  | 124.583879      | 231.133934     | 116.070605       | 230.149918     | 115.578597       | 2  |
| 11 |             |                 |                |                  |                |                  | K    | 147.112804  | 74.060040       | 130.086255     | 65.546765        |                |                  | 1  |

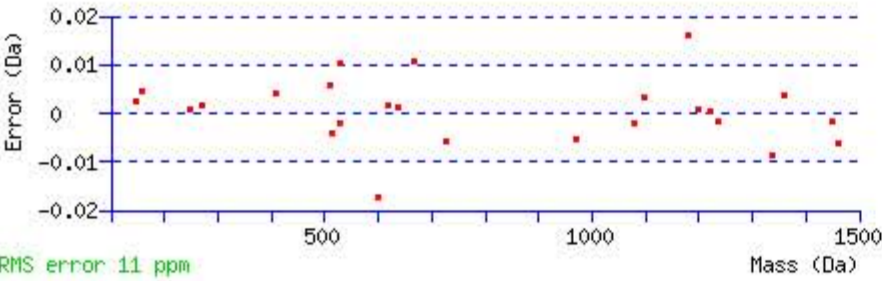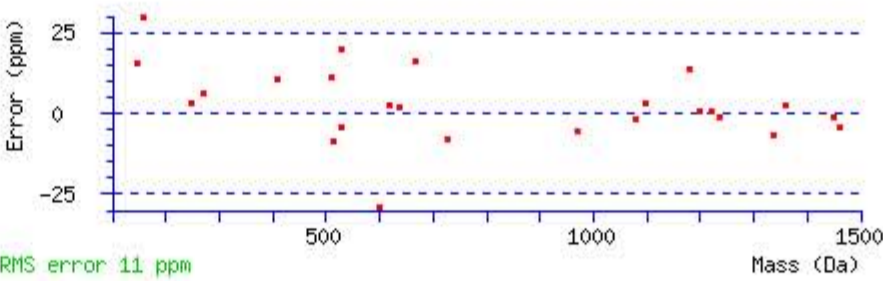

NCBI BLAST search of [GVNVCQETCTK](#)  
(Parameters: blastp, nr protein database, expect=20000, no filter, PAM30)  
Other BLAST [web gateways](#)

All matches to this query

| Score | Mr(calc):   | Delta     | Sequence                       |
|-------|-------------|-----------|--------------------------------|
| 51.2  | 1605.731339 | 0.006249  | <a href="#">GVNVCQETCTK</a>    |
| 3.4   | 1605.716507 | 0.021081  | <a href="#">RNEEAQDLSGGMQR</a> |
| 3.0   | 1605.724121 | 0.013467  | <a href="#">MVFFLEDVMACKT</a>  |
| 1.5   | 1605.760269 | -0.022681 | <a href="#">AKEMQQQELAQMR</a>  |

MATRIX

SCIENCE

Mascot Search Results

Peptide View

MS/MS Fragmentation of **EKGEIQNILQK**  
Found in **KLKB1\_HUMAN**, Plasma kallikrein OS=Homo sapiens GN=KLKB1 PE=1 SV=1

Match to Query 35028: 1609.889982 from(537.637270,3+) rtinseconds(1857) index(19236)  
Title: Locus:1.1.1.3029.7 File:"2013-07-02 CLN FXIII 180 min 2nd F 2.wiff"  
Data file C:\Program Files (x86)\Matrix Science\Mascot Daemon\mgf\8 FXIII 180 min 2nd\mascot\_daemon\_merge.mgf

Click mouse within plot area to zoom in by factor of two about that point  
Or, 

Plot from

100

 to 

1700

 Da 

Full range

  
Label all possible matches ☐ Label matches used for scoring ☒

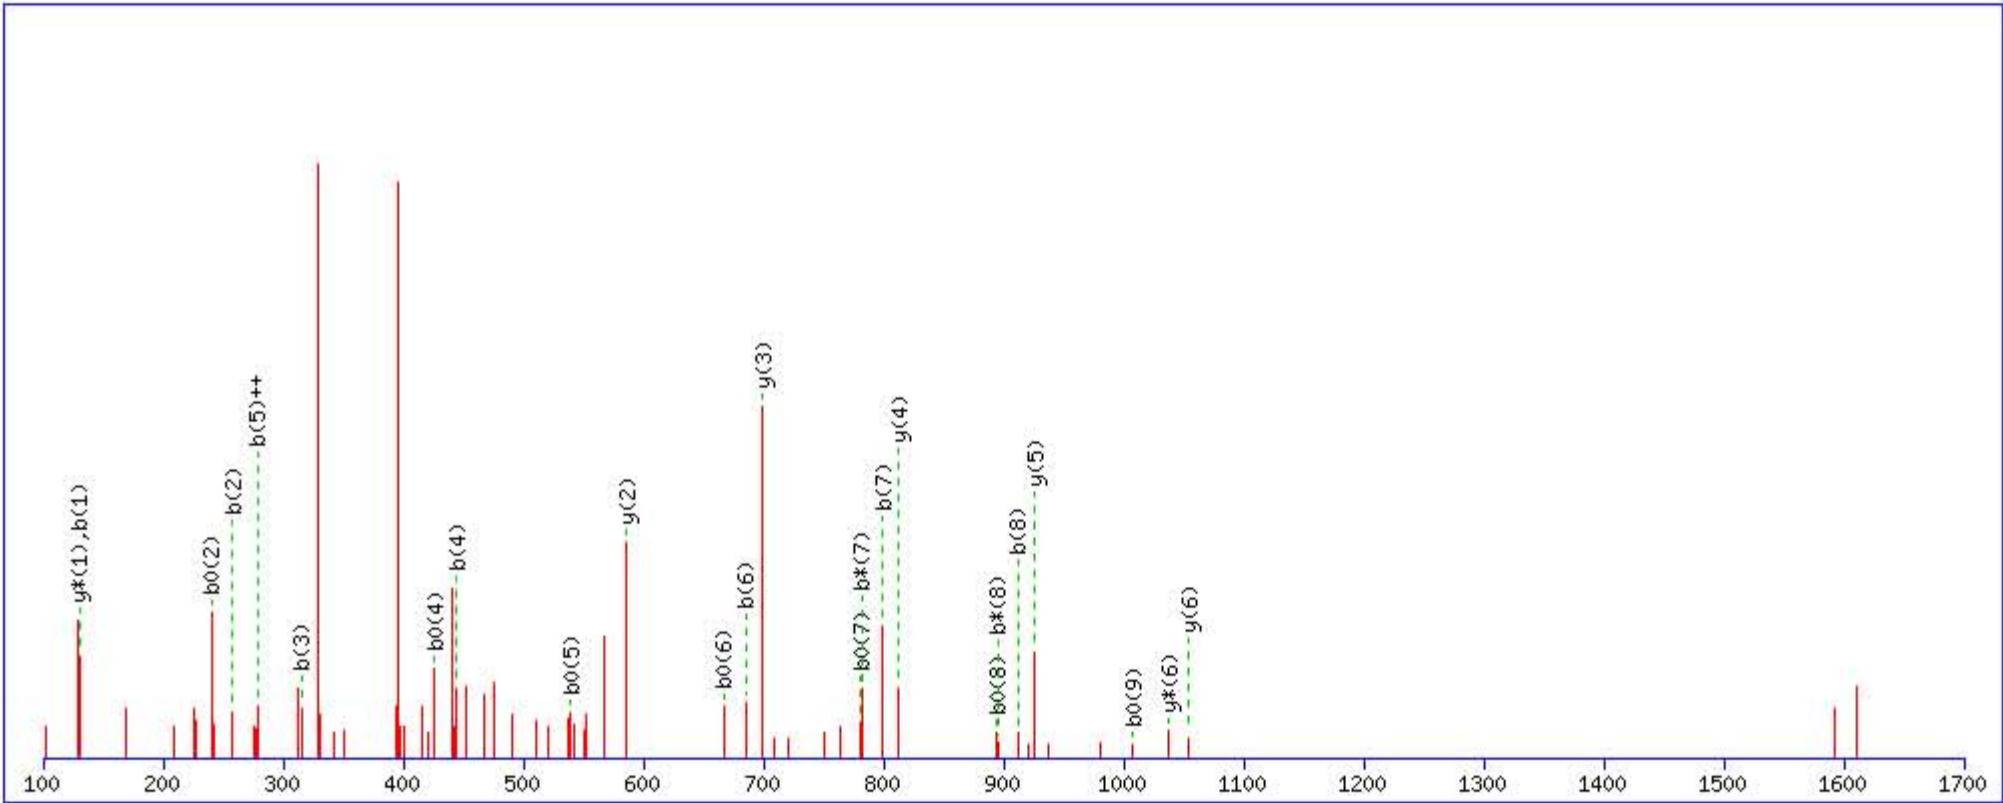

Monoisotopic mass of neutral peptide Mr(calc): 1609.886124  
Fixed modifications: Carbamidomethyl (C) (apply to specified residues or termini only)  
Variable modifications:  
Q10 : Biotin:Thermo-21345 (Q)  
Ions Score: 34 Expect: 0.0074  
Matches : 24/104 fragment ions using 44 most intense peaks [\(help\)](#)

| #  | b           | b <sup>++</sup> | b <sup>*</sup> | b <sup>*++</sup> | b <sup>0</sup> | b <sup>0++</sup> | Seq. | y           | y <sup>++</sup> | y <sup>*</sup> | y <sup>*++</sup> | y <sup>0</sup> | y <sup>0++</sup> | #  |
|----|-------------|-----------------|----------------|------------------|----------------|------------------|------|-------------|-----------------|----------------|------------------|----------------|------------------|----|
| 1  | 130.049869  | 65.528572       |                |                  | 112.039304     | 56.523290        | E    |             |                 |                |                  |                |                  | 11 |
| 2  | 258.144832  | 129.576054      | 241.118283     | 121.062780       | 240.134267     | 120.570772       | K    | 1481.850847 | 741.429061      | 1464.824298    | 732.915787       | 1463.840282    | 732.423779       | 10 |
| 3  | 315.166296  | 158.086786      | 298.139747     | 149.573512       | 297.155731     | 149.081504       | G    | 1353.755884 | 677.381580      | 1336.729335    | 668.868306       | 1335.745319    | 668.376297       | 9  |
| 4  | 444.208889  | 222.608082      | 427.182340     | 214.094808       | 426.198324     | 213.602800       | E    | 1296.734420 | 648.870848      | 1279.707871    | 640.357574       | 1278.723855    | 639.865566       | 8  |
| 5  | 557.292953  | 279.150115      | 540.266404     | 270.636840       | 539.282388     | 270.144832       | I    | 1167.691827 | 584.349552      | 1150.665278    | 575.836277       |                |                  | 7  |
| 6  | 685.351531  | 343.179404      | 668.324982     | 334.666129       | 667.340966     | 334.174121       | Q    | 1054.607763 | 527.807520      | 1037.581214    | 519.294245       |                |                  | 6  |
| 7  | 799.394458  | 400.200867      | 782.367909     | 391.687592       | 781.383893     | 391.195585       | N    | 926.549185  | 463.778231      | 909.522636     | 455.264956       |                |                  | 5  |
| 8  | 912.478522  | 456.742899      | 895.451973     | 448.229625       | 894.467957     | 447.737617       | I    | 812.506258  | 406.756767      | 795.479709     | 398.243493       |                |                  | 4  |
| 9  | 1025.562586 | 513.284931      | 1008.536037    | 504.771657       | 1007.552021    | 504.279649       | L    | 699.422194  | 350.214735      | 682.395645     | 341.701461       |                |                  | 3  |
| 10 | 1464.787912 | 732.897594      | 1447.761363    | 724.384320       | 1446.777347    | 723.892312       | Q    | 586.338130  | 293.672703      | 569.311581     | 285.159429       |                |                  | 2  |
| 11 |             |                 |                |                  |                |                  | K    | 147.112804  | 74.060040       | 130.086255     | 65.546765        |                |                  | 1  |

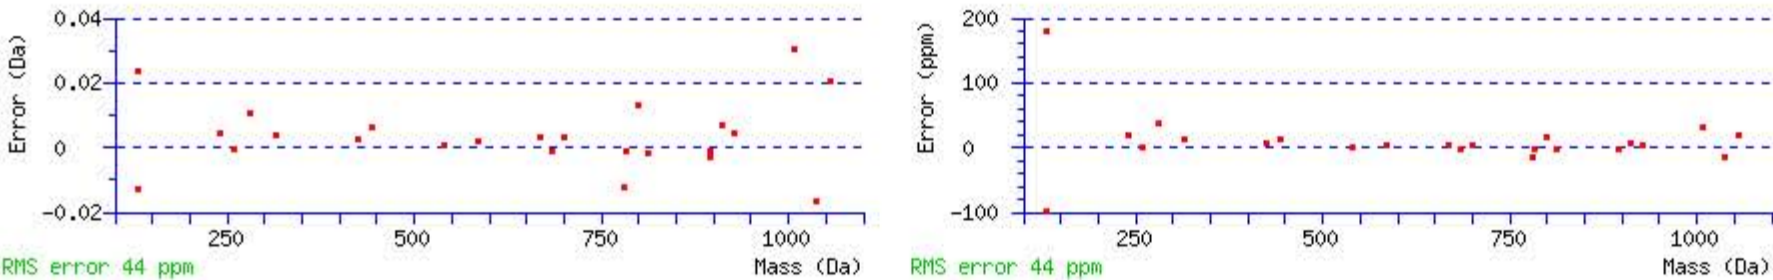

NCBI **BLAST** search of **EKGEIQNILQK**  
(Parameters: blastp, nr protein database, expect=20000, no filter, PAM30)  
Other BLAST [web gateways](#)

All matches to this query

| Score | Mr(calc):   | Delta     | Sequence                        |
|-------|-------------|-----------|---------------------------------|
| 33.8  | 1609.886124 | 0.003858  | <a href="#">EKGEIQNILQK</a>     |
| 10.5  | 1609.872192 | 0.017790  | <a href="#">QEAERALKQAR</a>     |
| 10.0  | 1609.908615 | -0.018633 | <a href="#">QLSQHAMKGVIRVK</a>  |
| 5.3   | 1609.878754 | 0.011228  | <a href="#">AGPLTVNTEAQQLLR</a> |
| 4.8   | 1609.897400 | -0.007418 | <a href="#">TNLRIVDVGGQK</a>    |
| 4.1   | 1609.886154 | 0.003828  | <a href="#">KTVTAMDVVYALKR</a>  |
| 2.6   | 1609.872208 | 0.017774  | <a href="#">AGSLRAQLEAQR</a>    |
| 1.8   | 1609.879623 | 0.010359  | <a href="#">APGSLIKLQGCR</a>    |
| 1.7   | 1609.908630 | -0.018648 | <a href="#">CQGRTVPLAVLQLR</a>  |

MATRIX

SCIENCE

Mascot Search Results

Peptide View

MS/MS Fragmentation of **IAYGTQGSSGYSLR**  
Found in **KLKB1\_HUMAN**, Plasma kallikrein OS=Homo sapiens GN=KLKB1 PE=1 SV=1

Match to Query 39611: 1769.883222 from(590.968350,3+) rtinseconds(1889) index(65608)  
Title: Locus:1.1.1.1933.13 File:"2013-07-02 CLN FXIII 180 min 2nd FT.wiff"  
Data file C:\Program Files (x86)\Matrix Science\Mascot Daemon\mgf\8 FXIII 180 min 2nd\mascot\_daemon\_merge.mgf

Click mouse within plot area to zoom in by factor of two about that point  
Or,   to  Da   
Label all possible matches ☐ Label matches used for scoring ☒

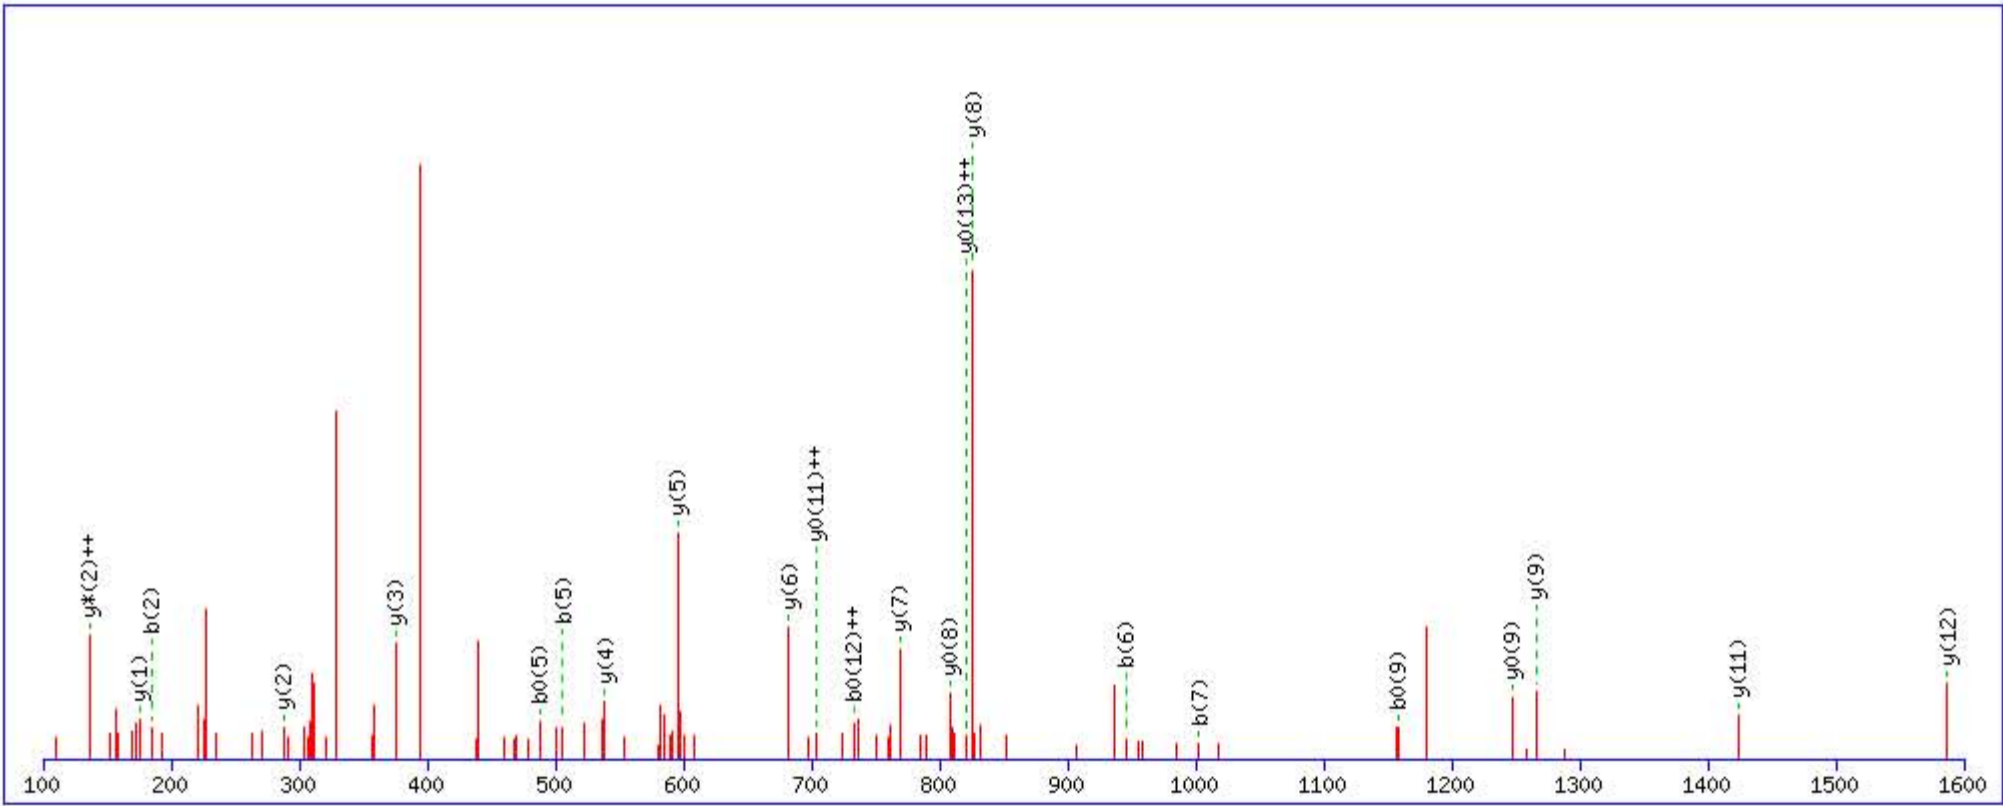

Monoisotopic mass of neutral peptide Mr(calc): 1769.877045  
Fixed modifications: Carbamidomethyl (C) (apply to specified residues or termini only)  
Variable modifications:  
Q6 : Biotin:Thermo-21345 (Q)  
Ions Score: 58 Expect: 4.6e-005  
Matches : 23/134 fragment ions using 53 most intense peaks ([help](#))

| #  | b           | b <sup>++</sup> | b <sup>*</sup> | b <sup>*++</sup> | b <sup>0</sup> | b <sup>0++</sup> | Seq. | y           | y <sup>++</sup> | y <sup>*</sup> | y <sup>*++</sup> | y <sup>0</sup> | y <sup>0++</sup> | #  |
|----|-------------|-----------------|----------------|------------------|----------------|------------------|------|-------------|-----------------|----------------|------------------|----------------|------------------|----|
| 1  | 114.091340  | 57.549308       |                |                  |                |                  | I    |             |                 |                |                  |                |                  | 14 |
| 2  | 185.128454  | 93.067865       |                |                  |                |                  | A    | 1657.800269 | 829.403773      | 1640.773720    | 820.890498       | 1639.789704    | 820.398490       | 13 |
| 3  | 348.191783  | 174.599529      |                |                  |                |                  | Y    | 1586.763155 | 793.885216      | 1569.736606    | 785.371941       | 1568.752590    | 784.879933       | 12 |
| 4  | 405.213247  | 203.110261      |                |                  |                |                  | G    | 1423.699826 | 712.353551      | 1406.673277    | 703.840277       | 1405.689261    | 703.348269       | 11 |
| 5  | 506.260926  | 253.634101      |                |                  | 488.250361     | 244.628818       | T    | 1366.678362 | 683.842819      | 1349.651813    | 675.329545       | 1348.667797    | 674.837537       | 10 |
| 6  | 945.486252  | 473.246764      | 928.459703     | 464.733490       | 927.475687     | 464.241482       | Q    | 1265.630683 | 633.318980      | 1248.604134    | 624.805705       | 1247.620118    | 624.313697       | 9  |
| 7  | 1002.507716 | 501.757496      | 985.481167     | 493.244222       | 984.497151     | 492.752214       | G    | 826.405357  | 413.706317      | 809.378808     | 405.193042       | 808.394792     | 404.701034       | 8  |
| 8  | 1089.539744 | 545.273510      | 1072.513195    | 536.760236       | 1071.529179    | 536.268228       | S    | 769.383893  | 385.195585      | 752.357344     | 376.682310       | 751.373328     | 376.190302       | 7  |
| 9  | 1176.571772 | 588.789524      | 1159.545223    | 580.276250       | 1158.561207    | 579.784242       | S    | 682.351865  | 341.679571      | 665.325316     | 333.166296       | 664.341300     | 332.674288       | 6  |
| 10 | 1233.593236 | 617.300256      | 1216.566687    | 608.786982       | 1215.582671    | 608.294974       | G    | 595.319837  | 298.163557      | 578.293288     | 289.650282       | 577.309272     | 289.158274       | 5  |
| 11 | 1396.656565 | 698.831921      | 1379.630016    | 690.318646       | 1378.646000    | 689.826638       | Y    | 538.298373  | 269.652825      | 521.271824     | 261.139550       | 520.287808     | 260.647542       | 4  |
| 12 | 1483.688593 | 742.347935      | 1466.662044    | 733.834660       | 1465.678028    | 733.342652       | S    | 375.235044  | 188.121160      | 358.208495     | 179.607885       | 357.224479     | 179.115877       | 3  |
| 13 | 1596.772657 | 798.889967      | 1579.746108    | 790.376692       | 1578.762092    | 789.884684       | L    | 288.203016  | 144.605146      | 271.176467     | 136.091871       |                |                  | 2  |
| 14 |             |                 |                |                  |                |                  | R    | 175.118952  | 88.063114       | 158.092403     | 79.549839        |                |                  | 1  |

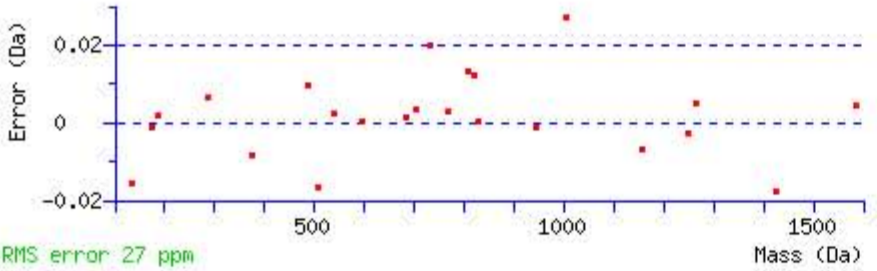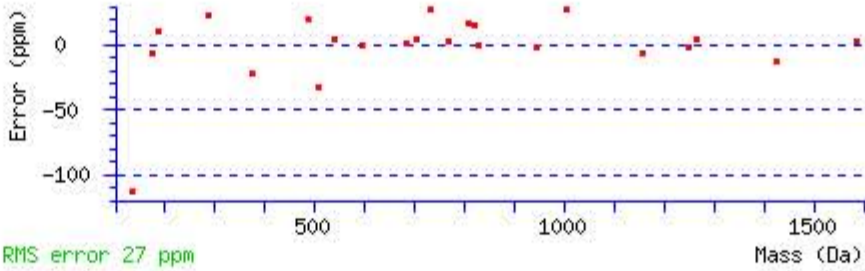

NCBI BLAST search of [IAYGTQGSSGYSLR](#)  
(Parameters: blastp, nr protein database, expect=20000, no filter, PAM30)  
Other BLAST [web gateways](#)

All matches to this query

| Score | Mr(calc):   | Delta    | Sequence                       |
|-------|-------------|----------|--------------------------------|
| 57.8  | 1769.877045 | 0.006177 | <a href="#">IAYGTQGSSGYSLR</a> |

MATRIX

SCIENCE

Mascot Search Results

Peptide View

MS/MS Fragmentation of **VNIPLVTNEECQK**  
Found in **KLKB1\_HUMAN**, Plasma kallikrein OS=Homo sapiens GN=KLKB1 PE=1 SV=1

Match to Query 41441: 1853.948772 from(618.990200,3+) rtinseconds(2149) index(67316)  
Title: Locus:1.1.1.2023.14 File:"2013-07-02 CLN FXIII 180 min 2nd FT.wiff"  
Data file C:\Program Files (x86)\Matrix Science\Mascot Daemon\mgf\8 FXIII 180 min 2nd\mascot\_daemon\_merge.mgf

Click mouse within plot area to zoom in by factor of two about that point  
Or, 

Plot from

100

 to 

1700

 Da 

Full range

  
Label all possible matches ☐ Label matches used for scoring ☒

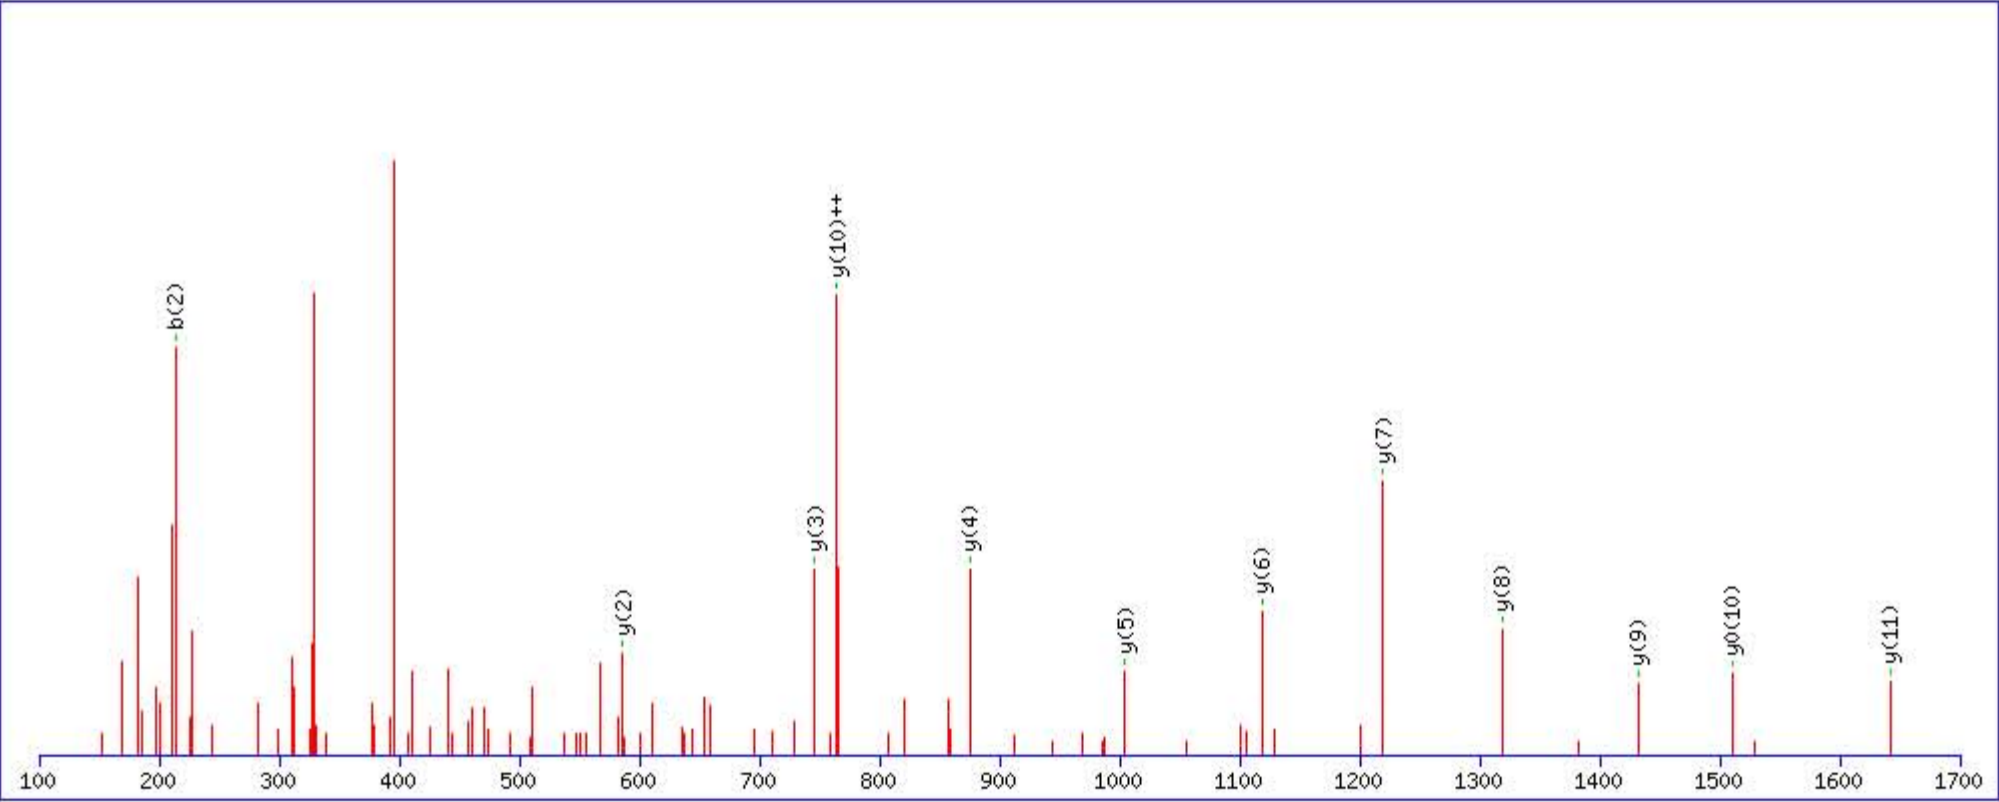

Monoisotopic mass of neutral peptide Mr(calc): 1853.937927  
Fixed modifications: Carbamidomethyl (C) (apply to specified residues or termini only)  
Variable modifications:  
Q12 : Biotin:Thermo-21345 (Q)  
Ions Score: 68 Expect: 1.8e-006  
Matches : 12/124 fragment ions using 15 most intense peaks [\(help\)](#)

| #  | b           | b <sup>++</sup> | b <sup>*</sup> | b <sup>*++</sup> | b <sup>0</sup> | b <sup>0++</sup> | Seq. | y           | y <sup>++</sup> | y <sup>*</sup> | y <sup>*++</sup> | y <sup>0</sup> | y <sup>0++</sup> | #  |
|----|-------------|-----------------|----------------|------------------|----------------|------------------|------|-------------|-----------------|----------------|------------------|----------------|------------------|----|
| 1  | 100.075690  | 50.541483       |                |                  |                |                  | V    |             |                 |                |                  |                |                  | 13 |
| 2  | 214.118617  | 107.562947      | 197.092068     | 99.049672        |                |                  | N    | 1755.876804 | 878.442040      | 1738.850255    | 869.928766       | 1737.866239    | 869.436758       | 12 |
| 3  | 327.202681  | 164.104978      | 310.176132     | 155.591704       |                |                  | I    | 1641.833877 | 821.420577      | 1624.807328    | 812.907302       | 1623.823312    | 812.415294       | 11 |
| 4  | 424.255445  | 212.631360      | 407.228896     | 204.118086       |                |                  | P    | 1528.749813 | 764.878545      | 1511.723264    | 756.365270       | 1510.739248    | 755.873262       | 10 |
| 5  | 537.339509  | 269.173393      | 520.312960     | 260.660118       |                |                  | L    | 1431.697049 | 716.352163      | 1414.670500    | 707.838888       | 1413.686484    | 707.346880       | 9  |
| 6  | 636.407923  | 318.707600      | 619.381374     | 310.194325       |                |                  | V    | 1318.612985 | 659.810131      | 1301.586436    | 651.296856       | 1300.602420    | 650.804848       | 8  |
| 7  | 737.455602  | 369.231439      | 720.429053     | 360.718165       | 719.445037     | 360.226157       | T    | 1219.544571 | 610.275924      | 1202.518022    | 601.762649       | 1201.534006    | 601.270641       | 7  |
| 8  | 851.498529  | 426.252903      | 834.471980     | 417.739628       | 833.487964     | 417.247620       | N    | 1118.496892 | 559.752084      | 1101.470343    | 551.238810       | 1100.486327    | 550.746802       | 6  |
| 9  | 980.541122  | 490.774199      | 963.514573     | 482.260924       | 962.530557     | 481.768916       | E    | 1004.453965 | 502.730621      | 987.427416     | 494.217346       | 986.443400     | 493.725338       | 5  |
| 10 | 1109.583715 | 555.295496      | 1092.557166    | 546.782221       | 1091.573150    | 546.290213       | E    | 875.411372  | 438.209324      | 858.384823     | 429.696050       | 857.400807     | 429.204042       | 4  |
| 11 | 1269.614364 | 635.310820      | 1252.587815    | 626.797546       | 1251.603799    | 626.305538       | C    | 746.368779  | 373.688028      | 729.342230     | 365.174753       |                |                  | 3  |
| 12 | 1708.839690 | 854.923483      | 1691.813141    | 846.410209       | 1690.829125    | 845.918201       | Q    | 586.338130  | 293.672703      | 569.311581     | 285.159429       |                |                  | 2  |
| 13 |             |                 |                |                  |                |                  | K    | 147.112804  | 74.060040       | 130.086255     | 65.546765        |                |                  | 1  |

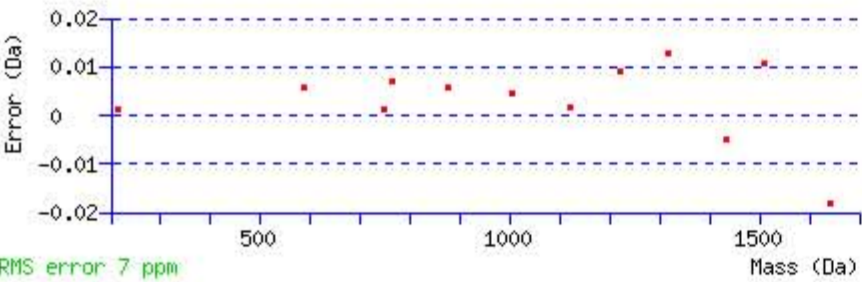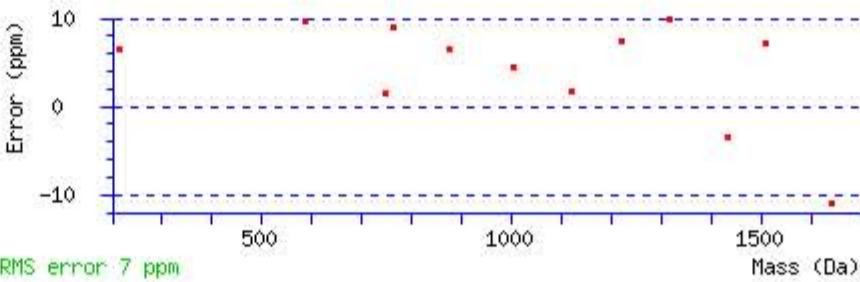

NCBI BLAST search of **VNIPLVTNEECQK**  
(Parameters: blastp, nr protein database, expect=20000, no filter, PAM30)  
Other BLAST [web gateways](#)

All matches to this query

| Score | Mr(calc):   | Delta    | Sequence                         |
|-------|-------------|----------|----------------------------------|
| 67.9  | 1853.937927 | 0.010845 | <a href="#">VNIPLVTNEECQK</a>    |
| 6.8   | 1853.934341 | 0.014431 | <a href="#">RGLSNPNELQAIDSNR</a> |

MATRIX

SCIENCE

Mascot Search Results

Peptide View

MS/MS Fragmentation of **QCGHQISACHR**  
Found in **KLKB1\_HUMAN**, Plasma kallikrein OS=Homo sapiens GN=KLKB1 PE=1 SV=1

Match to Query 43665: 1974.915336 from(494.736110,4+) rtinseconds(1434) index(63039)  
Title: Locus:1.1.1.1774.10 File:"2013-07-02 CLN FXIII 180 min 2nd FT.wiff"  
Data file C:\Program Files (x86)\Matrix Science\Mascot Daemon\mgf\8 FXIII 180 min 2nd\mascot\_daemon\_merge.mgf

Click mouse within plot area to zoom in by factor of two about that point  
Or, 

Plot from

100

 to 

2000

 Da 

Full range

  
Label all possible matches ☐ Label matches used for scoring ☒

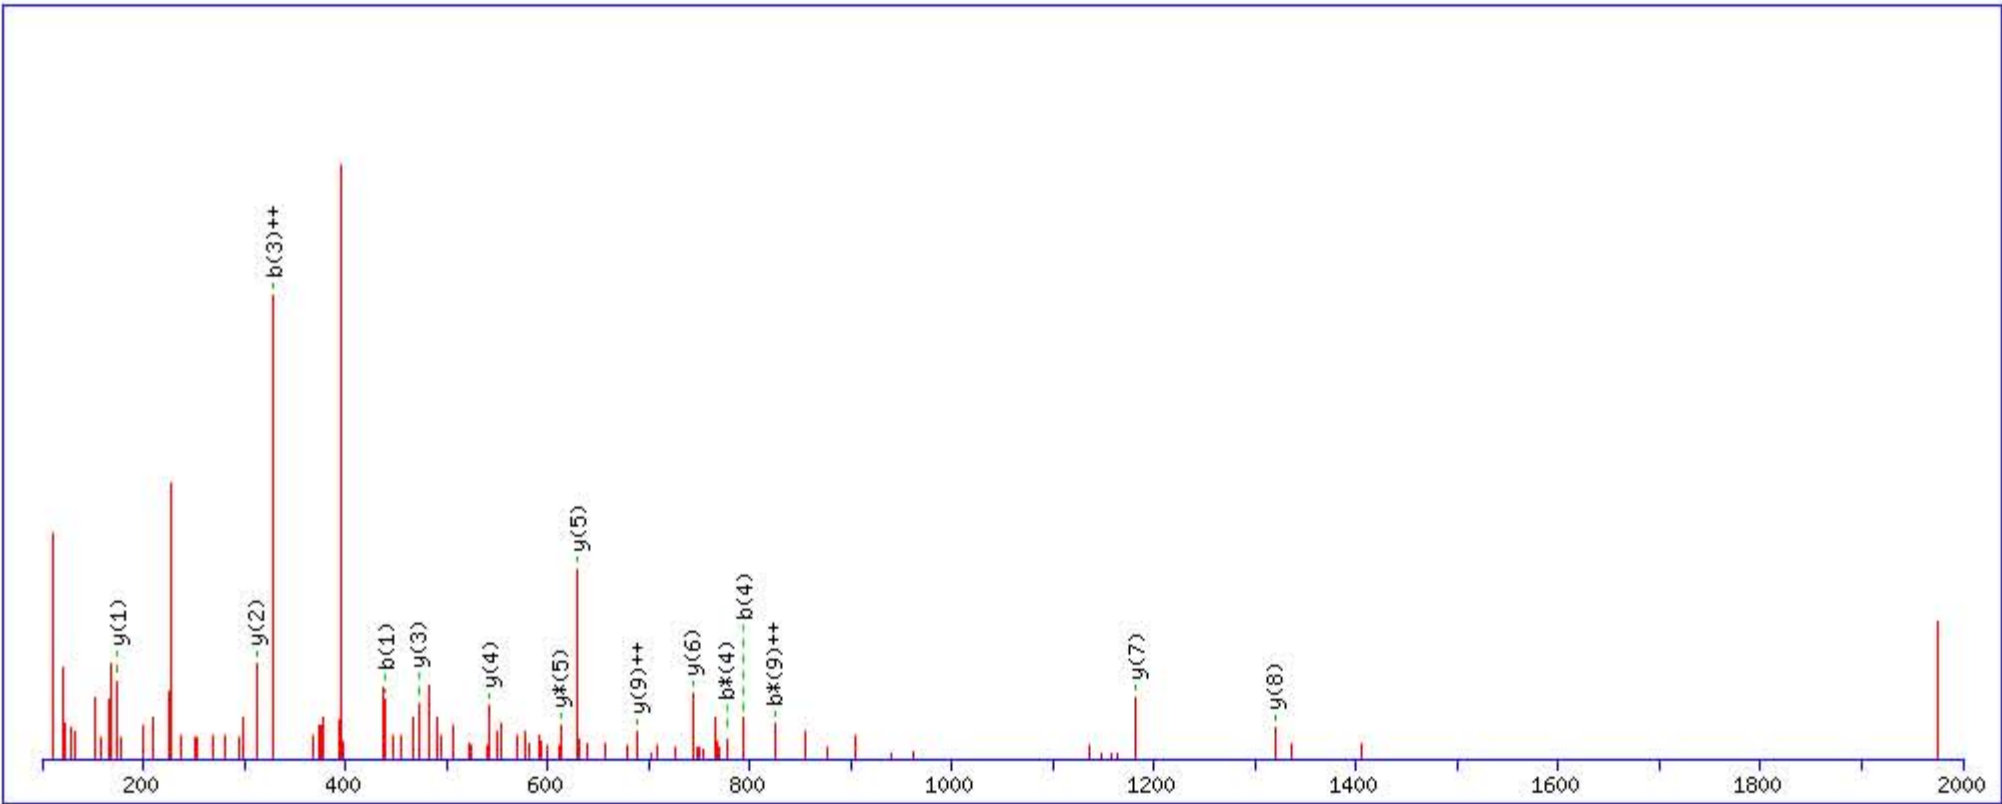

Monoisotopic mass of neutral peptide **Mr(calc):** 1974.916122  
Fixed modifications: Carbamidomethyl (C) (apply to specified residues or termini only)  
Variable modifications:  
Q1 : Biotin:Thermo-21345 (Q)  
Q5 : Biotin:Thermo-21345 (Q)  
Ions Score: 25 Expect: 0.04  
Matches : 15/100 fragment ions using 41 most intense peaks [\(help\)](#)

| #  | b           | b <sup>++</sup> | b <sup>*</sup> | b <sup>++</sup> * | b <sup>0</sup> | b <sup>0++</sup> | Seq. | y           | y <sup>++</sup> | y <sup>*</sup> | y <sup>++</sup> * | y <sup>0</sup> | y <sup>0++</sup> | #  |
|----|-------------|-----------------|----------------|-------------------|----------------|------------------|------|-------------|-----------------|----------------|-------------------|----------------|------------------|----|
| 1  | 440.232602  | 220.619939      | 423.206053     | 212.106664        |                |                  | Q    |             |                 |                |                   |                |                  | 11 |
| 2  | 600.263251  | 300.635264      | 583.236702     | 292.121989        |                |                  | C    | 1536.698070 | 768.852673      | 1519.671521    | 760.339399        | 1518.687505    | 759.847391       | 10 |
| 3  | 657.284715  | 329.145996      | 640.258166     | 320.632721        |                |                  | G    | 1376.667421 | 688.837349      | 1359.640872    | 680.324074        | 1358.656856    | 679.832066       | 9  |
| 4  | 794.343627  | 397.675452      | 777.317078     | 389.162177        |                |                  | H    | 1319.645957 | 660.326617      | 1302.619408    | 651.813342        | 1301.635392    | 651.321334       | 8  |
| 5  | 1233.568953 | 617.288115      | 1216.542404    | 608.774840        |                |                  | Q    | 1182.587045 | 591.797161      | 1165.560496    | 583.283886        | 1164.576480    | 582.791878       | 7  |
| 6  | 1346.653017 | 673.830147      | 1329.626468    | 665.316872        |                |                  | I    | 743.361719  | 372.184498      | 726.335170     | 363.671223        | 725.351154     | 363.179215       | 6  |
| 7  | 1433.685045 | 717.346161      | 1416.658496    | 708.832886        | 1415.674480    | 708.340878       | S    | 630.277655  | 315.642466      | 613.251106     | 307.129191        | 612.267090     | 306.637183       | 5  |
| 8  | 1504.722159 | 752.864718      | 1487.695610    | 744.351443        | 1486.711594    | 743.859435       | A    | 543.245627  | 272.126452      | 526.219078     | 263.613177        |                |                  | 4  |
| 9  | 1664.752808 | 832.880042      | 1647.726259    | 824.366768        | 1646.742243    | 823.874760       | C    | 472.208513  | 236.607894      | 455.181964     | 228.094620        |                |                  | 3  |
| 10 | 1801.811720 | 901.409498      | 1784.785171    | 892.896224        | 1783.801155    | 892.404216       | H    | 312.177864  | 156.592570      | 295.151315     | 148.079295        |                |                  | 2  |
| 11 |             |                 |                |                   |                |                  | R    | 175.118952  | 88.063114       | 158.092403     | 79.549839         |                |                  | 1  |

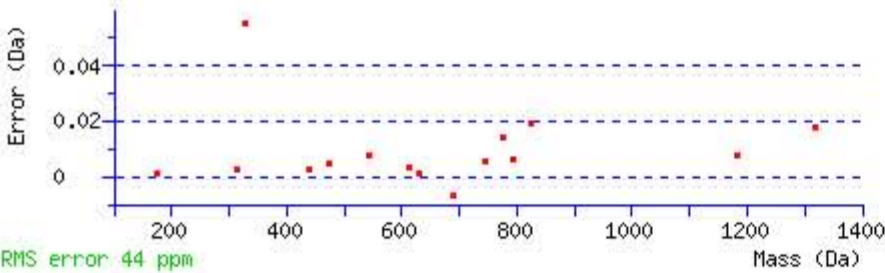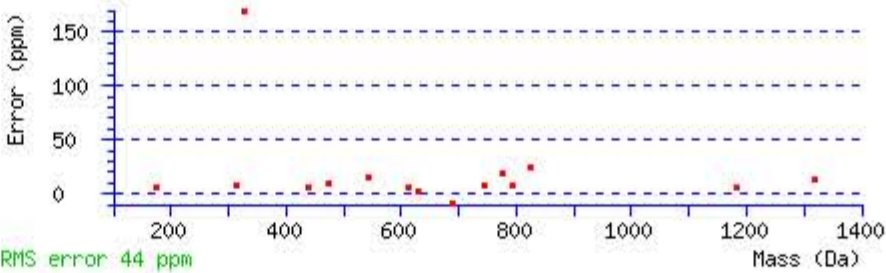

NCBI **BLAST** search of [QCGHQISACHR](#)  
(Parameters: blastp, nr protein database, expect=20000, no filter, PAM30)  
Other BLAST [web gateways](#)

All matches to this query

| Score | Mr(calc):   | Delta     | Sequence                    |
|-------|-------------|-----------|-----------------------------|
| 25.2  | 1974.916122 | -0.000786 | <a href="#">QCGHQISACHR</a> |

Peptide View

MS/MS Fragmentation of **GGDVASMYTPNAQYCQMR**  
Found in **KLKB1\_HUMAN**, Plasma kallikrein OS=Homo sapiens GN=KLKB1 PE=1 SV=1

Match to Query 51445: 2359.046952 from(787.356260,3+) rtinseconds(2046) index(66688)  
Title: Locus:1.1.1.1987.15 File:"2013-07-02 CLN FXIII 180 min 2nd FT.wiff"  
Data file C:\Program Files (x86)\Matrix Science\Mascot Daemon\mgf\8 FXIII 180 min 2nd\mascot\_daemon\_merge.mgf

Click mouse within plot area to zoom in by factor of two about that point  
Or, 

Plot from

0

 to 

2400

 Da 

Full range

  
Label all possible matches ☐ Label matches used for scoring ☒

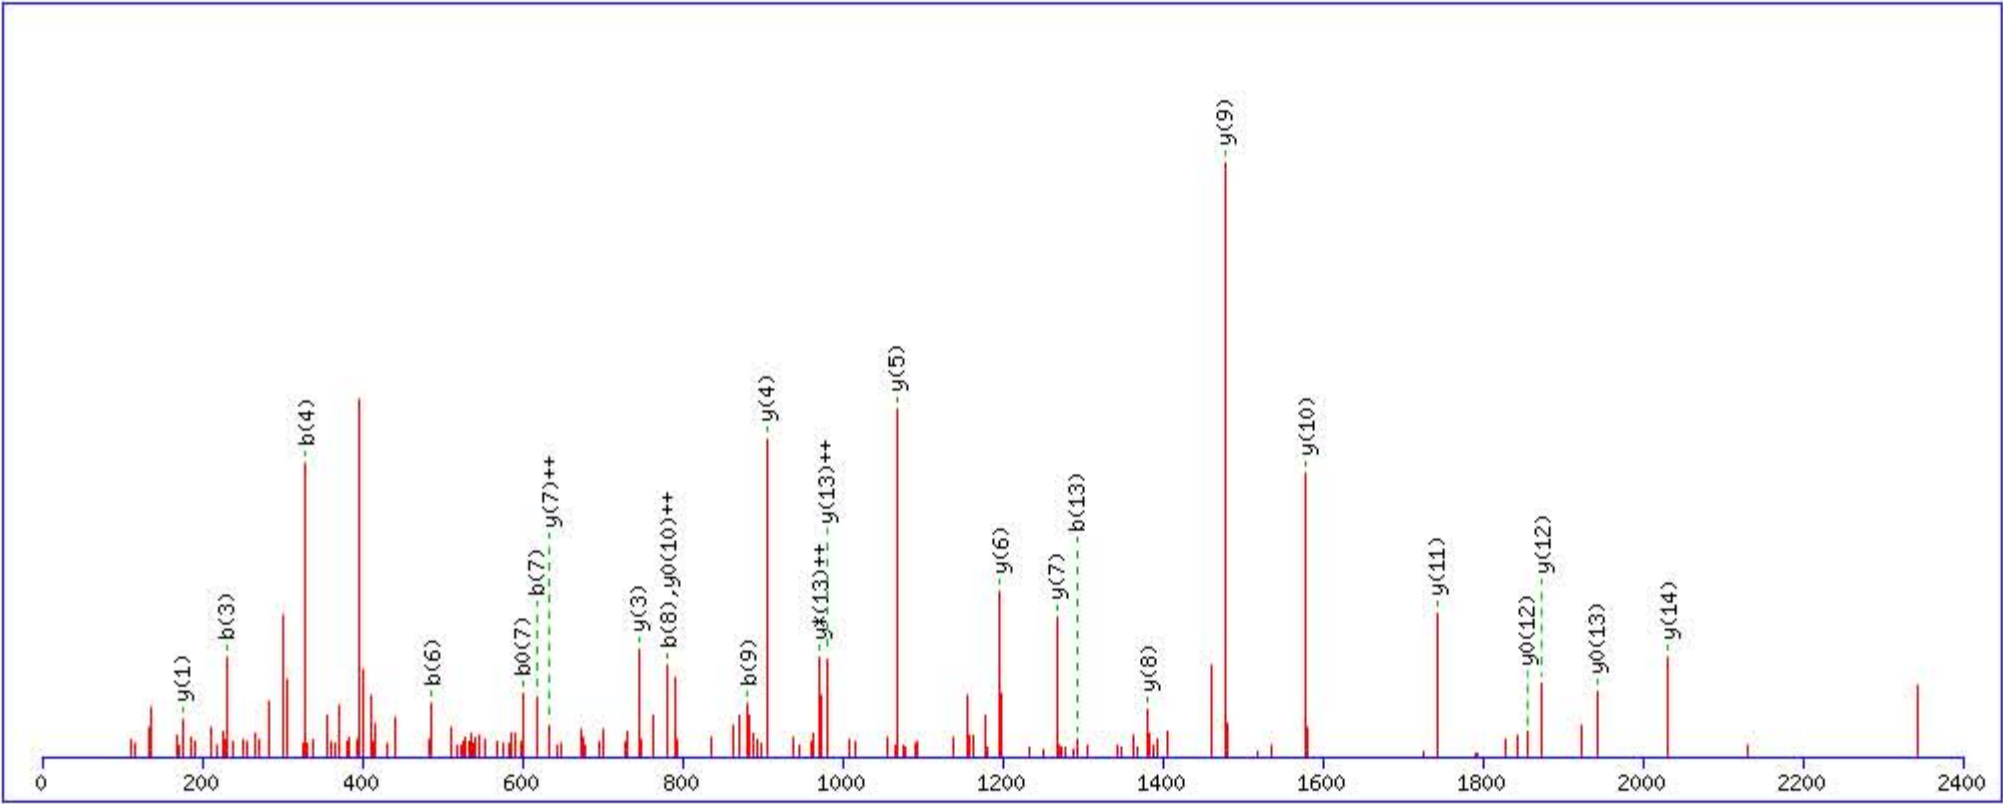

Monoisotopic mass of neutral peptide Mr(calc): 2359.021759  
Fixed modifications: Carbamidomethyl (C) (apply to specified residues or termini only)  
Variable modifications:  
Q16 : Biotin:Thermo-21345 (Q)  
Ions Score: 83 Expect: 3.6e-008  
Matches : 26/162 fragment ions using 39 most intense peaks ([help](#))

| #  | b           | b <sup>++</sup> | b <sup>*</sup> | b <sup>*++</sup> | b <sup>0</sup> | b <sup>0++</sup> | Seq. | y           | y <sup>++</sup> | y <sup>*</sup> | y <sup>*++</sup> | y <sup>0</sup> | y <sup>0++</sup> | #  |
|----|-------------|-----------------|----------------|------------------|----------------|------------------|------|-------------|-----------------|----------------|------------------|----------------|------------------|----|
| 1  | 58.028740   | 29.518008       |                |                  |                |                  | G    |             |                 |                |                  |                |                  | 18 |
| 2  | 115.050204  | 58.028740       |                |                  |                |                  | G    | 2303.007580 | 1152.007428     | 2285.981031    | 1143.494153      | 2284.997015    | 1143.002145      | 17 |
| 3  | 230.077147  | 115.542211      |                |                  | 212.066582     | 106.536929       | D    | 2245.986116 | 1123.496696     | 2228.959567    | 1114.983421      | 2227.975551    | 1114.491413      | 16 |
| 4  | 329.145561  | 165.076418      |                |                  | 311.134996     | 156.071136       | V    | 2130.959173 | 1065.983224     | 2113.932624    | 1057.469950      | 2112.948608    | 1056.977942      | 15 |
| 5  | 400.182675  | 200.594975      |                |                  | 382.172110     | 191.589693       | A    | 2031.890759 | 1016.449018     | 2014.864210    | 1007.935743      | 2013.880194    | 1007.443735      | 14 |
| 6  | 487.214703  | 244.110989      |                |                  | 469.204138     | 235.105707       | S    | 1960.853645 | 980.930461      | 1943.827096    | 972.417186       | 1942.843080    | 971.925178       | 13 |
| 7  | 618.255188  | 309.631232      |                |                  | 600.244623     | 300.625949       | M    | 1873.821617 | 937.414447      | 1856.795068    | 928.901172       | 1855.811052    | 928.409164       | 12 |
| 8  | 781.318517  | 391.162896      |                |                  | 763.307952     | 382.157614       | Y    | 1742.781132 | 871.894204      | 1725.754583    | 863.380930       | 1724.770567    | 862.888922       | 11 |
| 9  | 882.366196  | 441.686736      |                |                  | 864.355631     | 432.681453       | T    | 1579.717803 | 790.362540      | 1562.691254    | 781.849265       | 1561.707238    | 781.357257       | 10 |
| 10 | 979.418960  | 490.213118      |                |                  | 961.408395     | 481.207835       | P    | 1478.670124 | 739.838700      | 1461.643575    | 731.325426       |                |                  | 9  |
| 11 | 1093.461887 | 547.234581      | 1076.435338    | 538.721307       | 1075.451322    | 538.229299       | N    | 1381.617360 | 691.312318      | 1364.590811    | 682.799044       |                |                  | 8  |
| 12 | 1164.499001 | 582.753138      | 1147.472452    | 574.239864       | 1146.488436    | 573.747856       | A    | 1267.574433 | 634.290855      | 1250.547884    | 625.777580       |                |                  | 7  |
| 13 | 1292.557579 | 646.782428      | 1275.531030    | 638.269153       | 1274.547014    | 637.777145       | Q    | 1196.537319 | 598.772298      | 1179.510770    | 590.259023       |                |                  | 6  |
| 14 | 1455.620908 | 728.314092      | 1438.594359    | 719.800818       | 1437.610343    | 719.308810       | Y    | 1068.478741 | 534.743009      | 1051.452192    | 526.229734       |                |                  | 5  |
| 15 | 1615.651557 | 808.329417      | 1598.625008    | 799.816142       | 1597.640992    | 799.324134       | C    | 905.415412  | 453.211344      | 888.388863     | 444.698070       |                |                  | 4  |
| 16 | 2054.876883 | 1027.942079     | 2037.850334    | 1019.428805      | 2036.866318    | 1018.936797      | Q    | 745.384763  | 373.196020      | 728.358214     | 364.682745       |                |                  | 3  |
| 17 | 2185.917368 | 1093.462322     | 2168.890819    | 1084.949047      | 2167.906803    | 1084.457039      | M    | 306.159437  | 153.583356      | 289.132888     | 145.070082       |                |                  | 2  |
| 18 |             |                 |                |                  |                |                  | R    | 175.118952  | 88.063114       | 158.092403     | 79.549839        |                |                  | 1  |

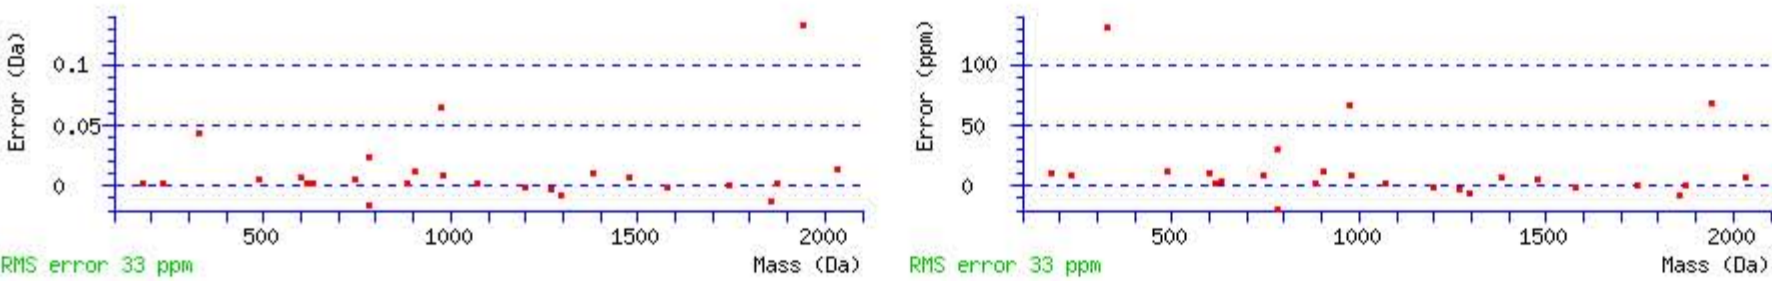

NCBI BLAST search of [GGDVASMYTPNAQYCQMR](#)  
(Parameters: blastp, nr protein database, expect=20000, no filter, PAM30)  
Other BLAST [web gateways](#)

All matches to this query

| Score | Mr(calc):   | Delta     | Sequence                              |
|-------|-------------|-----------|---------------------------------------|
| 82.9  | 2359.021759 | 0.025193  | <a href="#">GGDVASMYTPNAQYCQMR</a>    |
| 45.5  | 2359.021759 | 0.025193  | <a href="#">GGDVASMYTPNAQYCQMR</a>    |
| 9.6   | 2359.079300 | -0.032348 | <a href="#">TPMSVLQQAGGSMMMDGPGPR</a> |
| 3.6   | 2359.079300 | -0.032348 | <a href="#">TPMSVLQQAGGSMMMDGPGPR</a> |

MATRIX

SCIENCE

Mascot Search Results

Peptide View

MS/MS Fragmentation of **DFTCVHQALK**  
Found in **IC1\_HUMAN**, Plasma protease C1 inhibitor OS=Homo sapiens GN=SERPING1 PE=1 SV=2

Match to Query 32006: 1528.757982 from(510.593270,3+) rtinseconds(1824) index(33062)  
Title: Locus:1.1.1.744.7 File:"2013-07-02 CLN FXIII 180 min 2nd F 3.wiff"  
Data file C:\Program Files (x86)\Matrix Science\Mascot Daemon\mgf\8 FXIII 180 min 2nd\mascot\_daemon\_merge.mgf

Click mouse within plot area to zoom in by factor of two about that point  
Or, 

Plot from

100

 to 

1600

 Da 

Full range

  
Label all possible matches ☐ Label matches used for scoring ☒

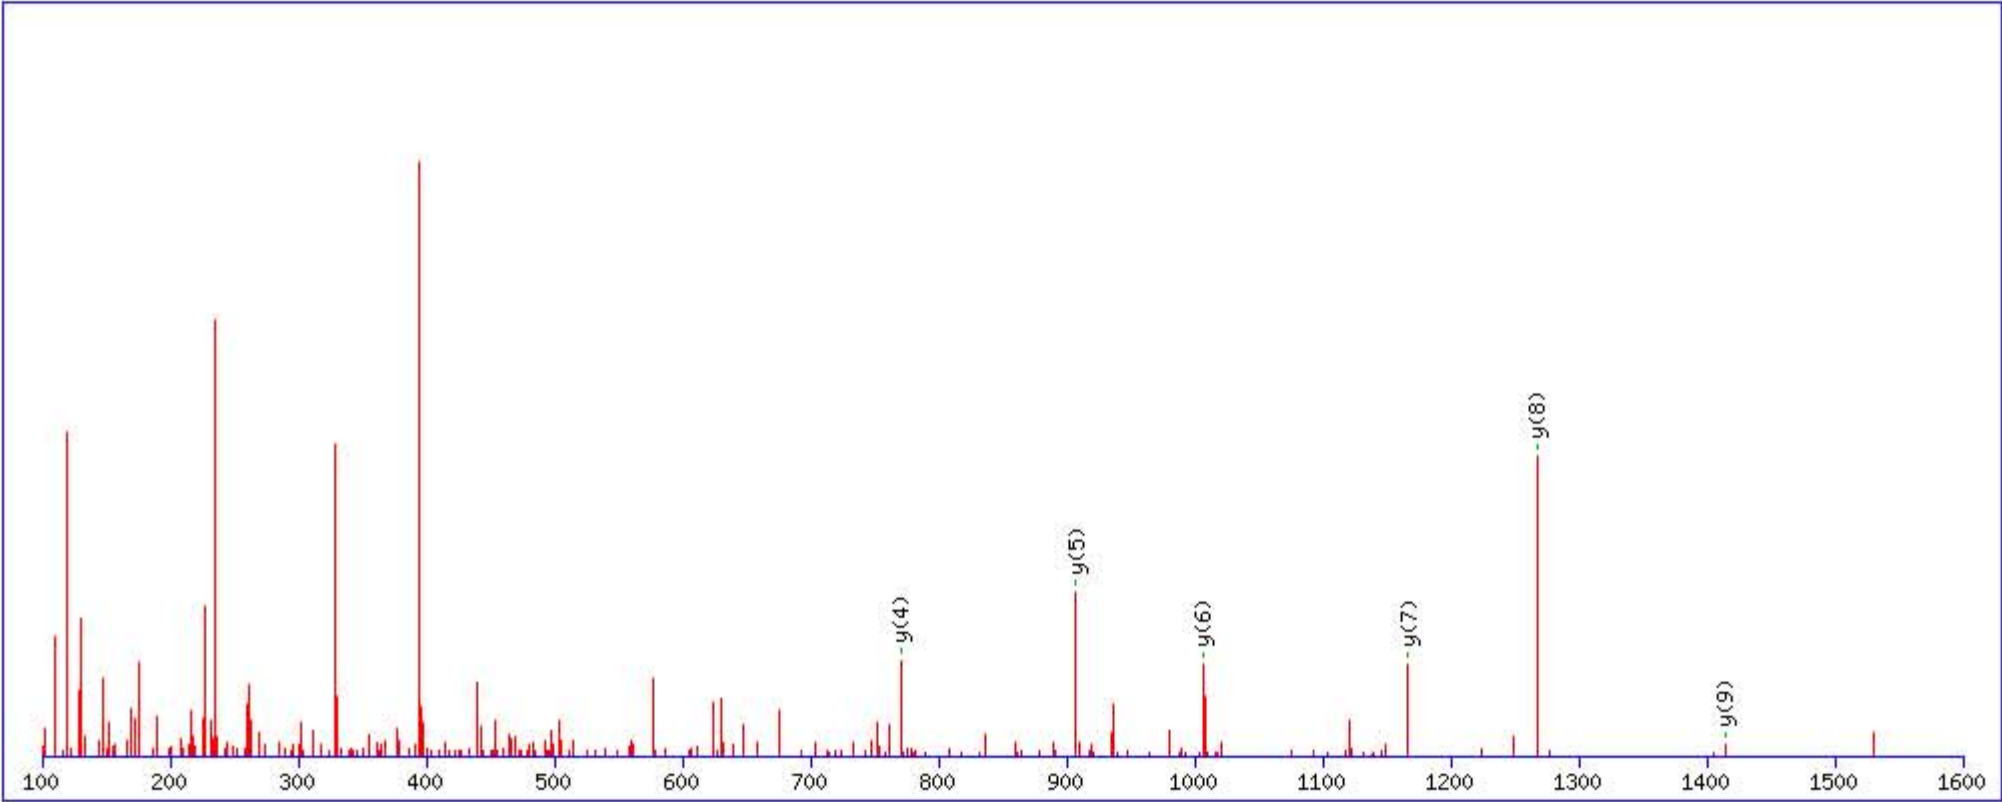

Monoisotopic mass of neutral peptide Mr(calc): 1528.753052  
Fixed modifications: Carbamidomethyl (C) (apply to specified residues or termini only)  
Variable modifications:  
Q7 : Biotin:Thermo-21345 (Q)  
Ions Score: 29 Expect: 0.03  
Matches : 6/82 fragment ions using 13 most intense peaks [\(help\)](#)

| #  | b           | b <sup>++</sup> | b <sup>*</sup> | b <sup>*++</sup> | b <sup>0</sup> | b <sup>0++</sup> | Seq. | y           | y <sup>++</sup> | y <sup>*</sup> | y <sup>*++</sup> | y <sup>0</sup> | y <sup>0++</sup> | #  |
|----|-------------|-----------------|----------------|------------------|----------------|------------------|------|-------------|-----------------|----------------|------------------|----------------|------------------|----|
| 1  | 116.034219  | 58.520748       |                |                  | 98.023654      | 49.515465        | D    |             |                 |                |                  |                |                  | 10 |
| 2  | 263.102633  | 132.054954      |                |                  | 245.092068     | 123.049672       | F    | 1414.733376 | 707.870326      | 1397.706827    | 699.357051       | 1396.722811    | 698.865043       | 9  |
| 3  | 364.150312  | 182.578794      |                |                  | 346.139747     | 173.573512       | T    | 1267.664962 | 634.336119      | 1250.638413    | 625.822844       | 1249.654397    | 625.330836       | 8  |
| 4  | 524.180961  | 262.594119      |                |                  | 506.170396     | 253.588836       | C    | 1166.617283 | 583.812279      | 1149.590734    | 575.299005       |                |                  | 7  |
| 5  | 623.249375  | 312.128326      |                |                  | 605.238810     | 303.123043       | V    | 1006.586634 | 503.796955      | 989.560085     | 495.283680       |                |                  | 6  |
| 6  | 760.308287  | 380.657782      |                |                  | 742.297722     | 371.652499       | H    | 907.518220  | 454.262748      | 890.491671     | 445.749473       |                |                  | 5  |
| 7  | 1199.533613 | 600.270444      | 1182.507064    | 591.757170       | 1181.523048    | 591.265162       | Q    | 770.459308  | 385.733292      | 753.432759     | 377.220017       |                |                  | 4  |
| 8  | 1270.570727 | 635.789001      | 1253.544178    | 627.275727       | 1252.560162    | 626.783719       | A    | 331.233982  | 166.120629      | 314.207433     | 157.607354       |                |                  | 3  |
| 9  | 1383.654791 | 692.331033      | 1366.628242    | 683.817759       | 1365.644226    | 683.325751       | L    | 260.196868  | 130.602072      | 243.170319     | 122.088797       |                |                  | 2  |
| 10 |             |                 |                |                  |                |                  | K    | 147.112804  | 74.060040       | 130.086255     | 65.546765        |                |                  | 1  |

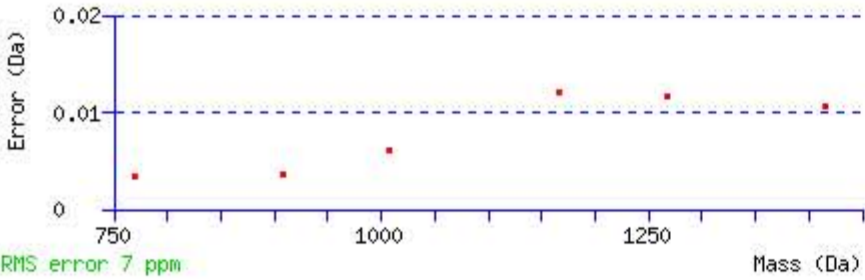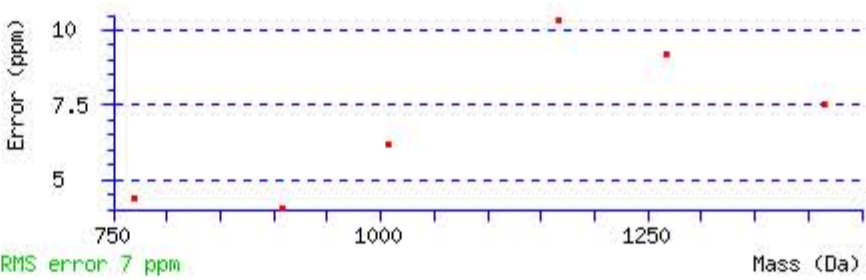

NCBI BLAST search of [DFTCVHQALK](#)  
(Parameters: blastp, nr protein database, expect=20000, no filter, PAM30)  
Other BLAST [web gateways](#)

All matches to this query

| Score | Mr(calc):   | Delta    | Sequence                   |
|-------|-------------|----------|----------------------------|
| 28.8  | 1528.753052 | 0.004930 | <a href="#">DFTCVHQALK</a> |

MATRIX

SCIENCE

Mascot Search Results

Peptide View

MS/MS Fragmentation of **KYPVAHFIDQTLK**  
Found in **IC1\_HUMAN**, Plasma protease C1 inhibitor OS=Homo sapiens GN=SERPING1 PE=1 SV=2

Match to Query 41684: 1870.033602 from(624.351810,3+) rtinseconds(2037) index(34499)  
Title: Locus:1.1.1.818.8 File:"2013-07-02 CLN FXIII 180 min 2nd F 3.wiff"  
Data file C:\Program Files (x86)\Matrix Science\Mascot Daemon\mgf\8 FXIII 180 min 2nd\mascot\_daemon\_merge.mgf

Click mouse within plot area to zoom in by factor of two about that point  
Or,   to  Da   
Label all possible matches ☐ Label matches used for scoring ☒

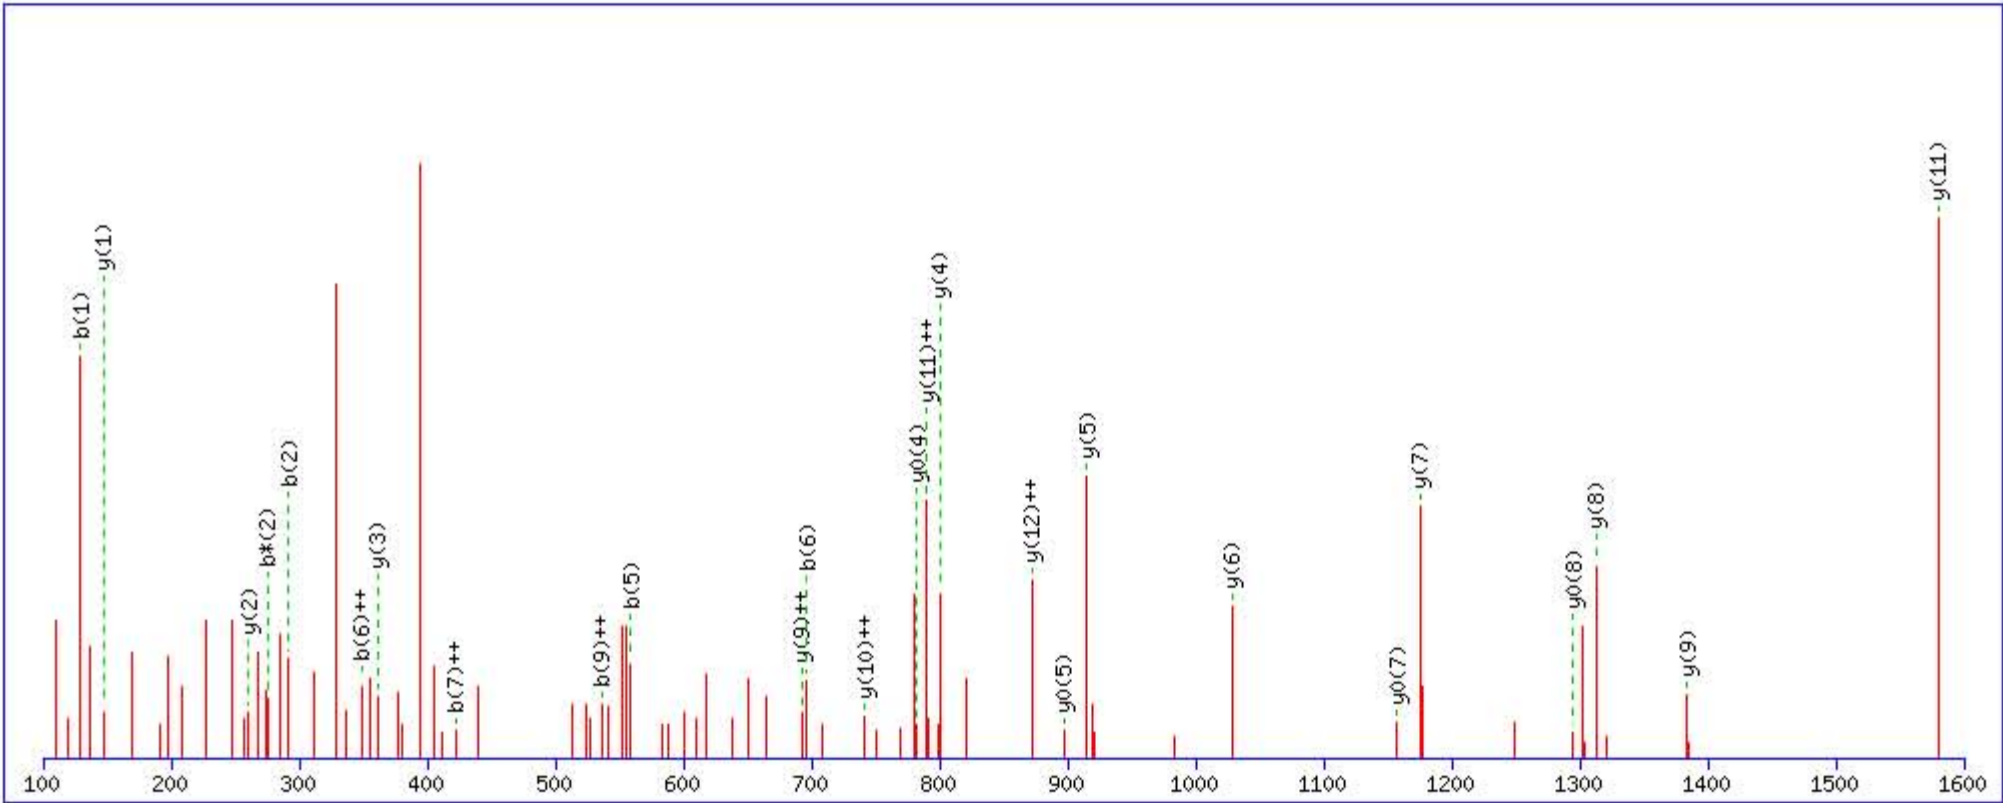

Monoisotopic mass of neutral peptide Mr(calc): 1870.017502  
Fixed modifications: Carbamidomethyl (C) (apply to specified residues or termini only)  
Variable modifications:  
Q10 : Biotin:Thermo-21345 (Q)  
Ions Score: 36 Expect: 0.004  
Matches : 26/124 fragment ions using 74 most intense peaks [\(help\)](#)

| #  | b           | b <sup>++</sup> | b <sup>*</sup> | b <sup>*++</sup> | b <sup>0</sup> | b <sup>0++</sup> | Seq. | y           | y <sup>++</sup> | y <sup>*</sup> | y <sup>*++</sup> | y <sup>0</sup> | y <sup>0++</sup> | #  |
|----|-------------|-----------------|----------------|------------------|----------------|------------------|------|-------------|-----------------|----------------|------------------|----------------|------------------|----|
| 1  | 129.102239  | 65.054757       | 112.075690     | 56.541483        |                |                  | K    |             |                 |                |                  |                |                  | 13 |
| 2  | 292.165568  | 146.586422      | 275.139019     | 138.073148       |                |                  | Y    | 1742.929827 | 871.968552      | 1725.903278    | 863.455277       | 1724.919262    | 862.963269       | 12 |
| 3  | 389.218332  | 195.112804      | 372.191783     | 186.599529       |                |                  | P    | 1579.866498 | 790.436887      | 1562.839949    | 781.923613       | 1561.855933    | 781.431605       | 11 |
| 4  | 488.286746  | 244.647011      | 471.260197     | 236.133737       |                |                  | V    | 1482.813734 | 741.910505      | 1465.787185    | 733.397231       | 1464.803169    | 732.905223       | 10 |
| 5  | 559.323860  | 280.165568      | 542.297311     | 271.652294       |                |                  | A    | 1383.745320 | 692.376298      | 1366.718771    | 683.863024       | 1365.734755    | 683.371016       | 9  |
| 6  | 696.382772  | 348.695024      | 679.356223     | 340.181750       |                |                  | H    | 1312.708206 | 656.857741      | 1295.681657    | 648.344467       | 1294.697641    | 647.852459       | 8  |
| 7  | 843.451186  | 422.229231      | 826.424637     | 413.715957       |                |                  | F    | 1175.649294 | 588.328285      | 1158.622745    | 579.815011       | 1157.638729    | 579.323003       | 7  |
| 8  | 956.535250  | 478.771263      | 939.508701     | 470.257989       |                |                  | I    | 1028.580880 | 514.794078      | 1011.554331    | 506.280804       | 1010.570315    | 505.788796       | 6  |
| 9  | 1071.562193 | 536.284735      | 1054.535644    | 527.771460       | 1053.551628    | 527.279452       | D    | 915.496816  | 458.252046      | 898.470267     | 449.738772       | 897.486251     | 449.246764       | 5  |
| 10 | 1510.787519 | 755.897398      | 1493.760970    | 747.384123       | 1492.776954    | 746.892115       | Q    | 800.469873  | 400.738575      | 783.443324     | 392.225300       | 782.459308     | 391.733292       | 4  |
| 11 | 1611.835198 | 806.421237      | 1594.808649    | 797.907963       | 1593.824633    | 797.415955       | T    | 361.244547  | 181.125911      | 344.217998     | 172.612637       | 343.233982     | 172.120629       | 3  |
| 12 | 1724.919262 | 862.963269      | 1707.892713    | 854.449995       | 1706.908697    | 853.957987       | L    | 260.196868  | 130.602072      | 243.170319     | 122.088797       |                |                  | 2  |
| 13 |             |                 |                |                  |                |                  | K    | 147.112804  | 74.060040       | 130.086255     | 65.546765        |                |                  | 1  |

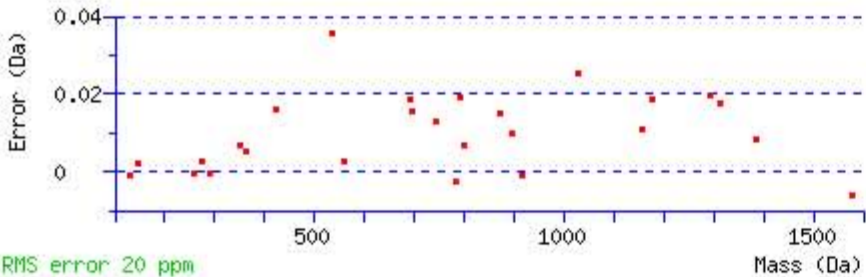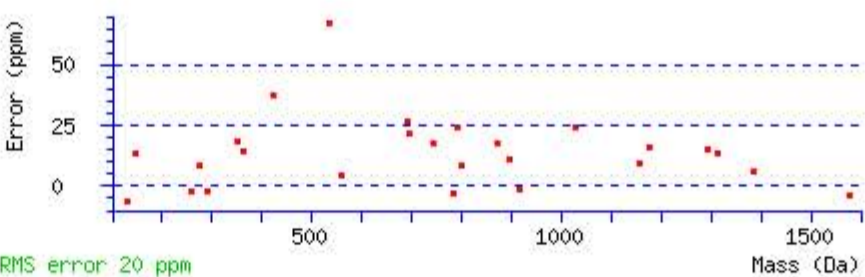

NCBI BLAST search of **KYPVAHFIDQTLK**  
(Parameters: blastp, nr protein database, expect=20000, no filter, PAM30)  
Other BLAST [web gateways](#)

All matches to this query

| Score | Mr(calc):   | Delta    | Sequence                      |
|-------|-------------|----------|-------------------------------|
| 36.2  | 1870.017502 | 0.016100 | <a href="#">KYPVAHFIDQTLK</a> |

MATRIX

SCIENCE

Mascot Search Results

Peptide View

MS/MS Fragmentation of **GVTSVSQIFHSPDLAIR**  
Found in **IC1\_HUMAN**, Plasma protease C1 inhibitor OS=Homo sapiens GN=SERPING1 PE=1 SV=2

Match to Query 47221: 2137.154536 from(535 295910,4+) rtinseconds(2352) index(36300)  
Title: Locus:1.1.1.928.5 File:"2013-07-02 CLN FXIII 180 min 2nd F 3.wiff"  
Data file C:\Program Files (x86)\Matrix Science\Mascot Daemon\mgf\8 FXIII 180 min 2nd\mascot\_daemon\_merge.mgf

Click mouse within plot area to zoom in by factor of two about that point  
Or, 

Plot from

100

 to 

1700

 Da 

Full range

  
Label all possible matches ☐ Label matches used for scoring ☒

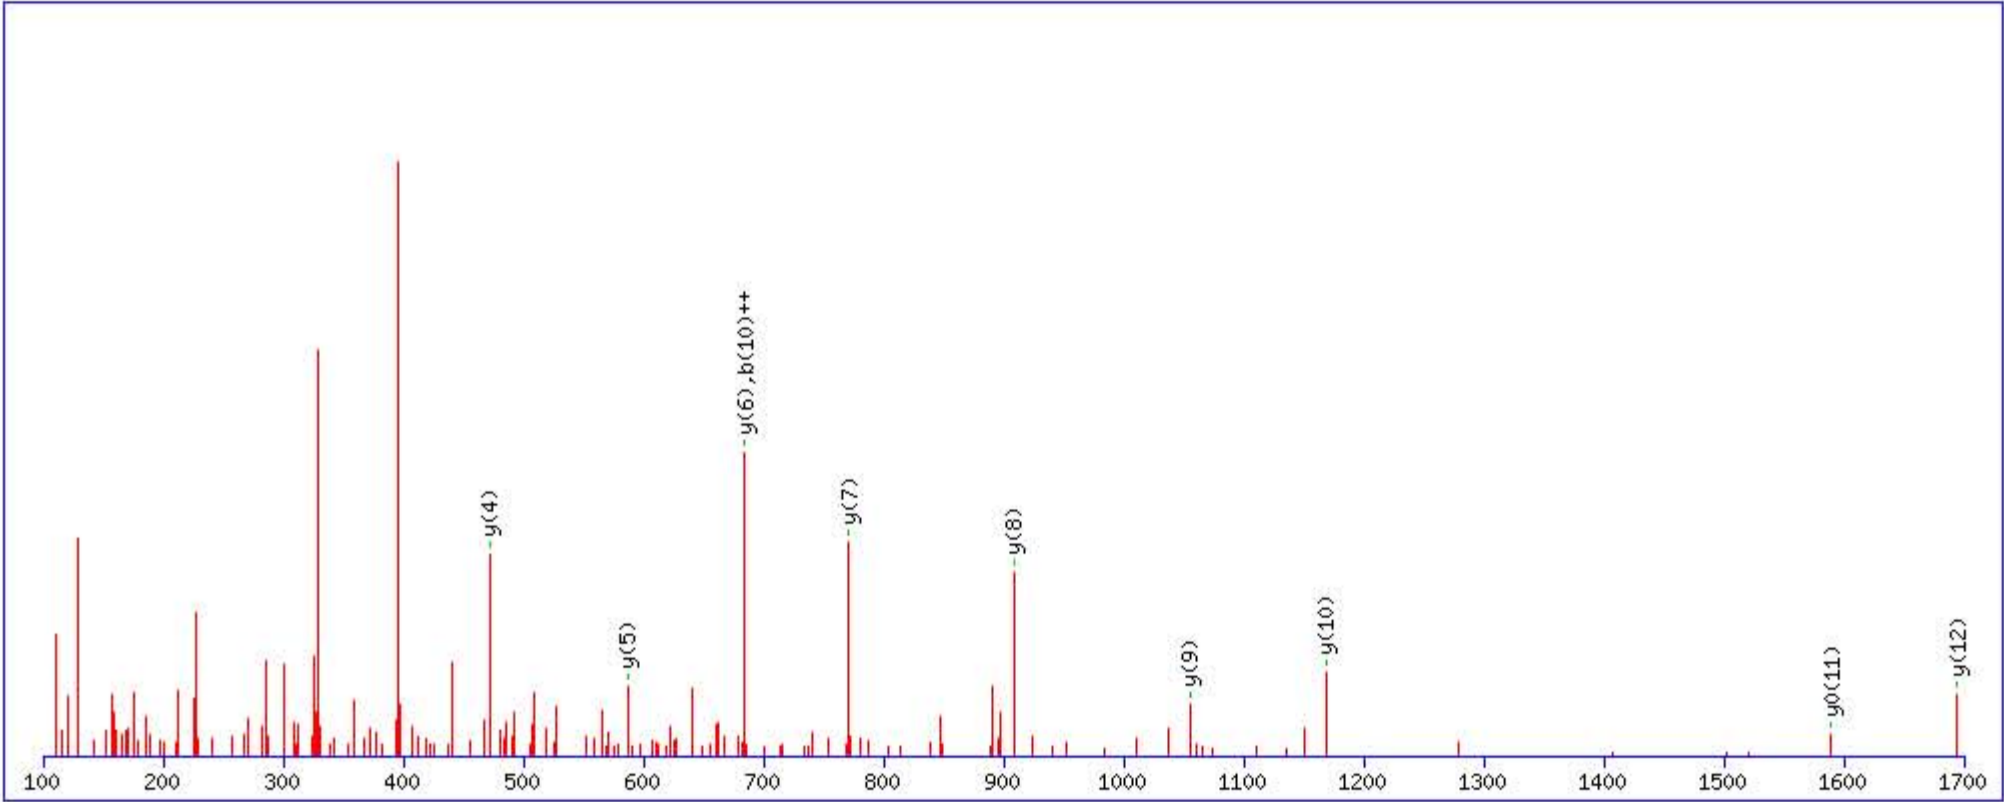

Monoisotopic mass of neutral peptide Mr(calc): 2137.135406  
Fixed modifications: Carbamidomethyl (C) (apply to specified residues or termini only)  
Variable modifications:  
Q7 : Biotin:Thermo-21345 (Q)  
Ions Score: 46 Expect: 0.00047  
Matches : 10/168 fragment ions using 16 most intense peaks [\(help\)](#)

| #  | b           | b <sup>++</sup> | b <sup>*</sup> | b <sup>*++</sup> | b <sup>0</sup> | b <sup>0++</sup> | Seq. | y           | y <sup>++</sup> | y <sup>*</sup> | y <sup>*++</sup> | y <sup>0</sup> | y <sup>0++</sup> | #  |
|----|-------------|-----------------|----------------|------------------|----------------|------------------|------|-------------|-----------------|----------------|------------------|----------------|------------------|----|
| 1  | 58.028740   | 29.518008       |                |                  |                |                  | G    |             |                 |                |                  |                |                  | 17 |
| 2  | 157.097154  | 79.052215       |                |                  |                |                  | V    | 2081.121208 | 1041.064242     | 2064.094659    | 1032.550967      | 2063.110643    | 1032.058959      | 16 |
| 3  | 258.144833  | 129.576055      |                |                  | 240.134268     | 120.570772       | T    | 1982.052794 | 991.530035      | 1965.026245    | 983.016761       | 1964.042229    | 982.524753       | 15 |
| 4  | 345.176861  | 173.092068      |                |                  | 327.166296     | 164.086786       | S    | 1881.005115 | 941.006196      | 1863.978566    | 932.492921       | 1862.994550    | 932.000913       | 14 |
| 5  | 444.245275  | 222.626275      |                |                  | 426.234710     | 213.620993       | V    | 1793.973087 | 897.490182      | 1776.946538    | 888.976907       | 1775.962522    | 888.484899       | 13 |
| 6  | 531.277303  | 266.142290      |                |                  | 513.266738     | 257.137007       | S    | 1694.904673 | 847.955975      | 1677.878124    | 839.442700       | 1676.894108    | 838.950692       | 12 |
| 7  | 970.502629  | 485.754953      | 953.476080     | 477.241678       | 952.492064     | 476.749670       | Q    | 1607.872645 | 804.439961      | 1590.846096    | 795.926686       | 1589.862080    | 795.434678       | 11 |
| 8  | 1083.586693 | 542.296985      | 1066.560144    | 533.783710       | 1065.576128    | 533.291702       | I    | 1168.647319 | 584.827298      | 1151.620770    | 576.314023       | 1150.636754    | 575.822015       | 10 |
| 9  | 1230.655107 | 615.831192      | 1213.628558    | 607.317917       | 1212.644542    | 606.825909       | F    | 1055.563255 | 528.285266      | 1038.536706    | 519.771991       | 1037.552690    | 519.279983       | 9  |
| 10 | 1367.714019 | 684.360648      | 1350.687470    | 675.847373       | 1349.703454    | 675.355365       | H    | 908.494841  | 454.751059      | 891.468292     | 446.237784       | 890.484276     | 445.745776       | 8  |
| 11 | 1454.746047 | 727.876662      | 1437.719498    | 719.363387       | 1436.735482    | 718.871379       | S    | 771.435929  | 386.221603      | 754.409380     | 377.708328       | 753.425364     | 377.216320       | 7  |
| 12 | 1551.798811 | 776.403044      | 1534.772262    | 767.889769       | 1533.788246    | 767.397761       | P    | 684.403901  | 342.705589      | 667.377352     | 334.192314       | 666.393336     | 333.700306       | 6  |
| 13 | 1666.825754 | 833.916515      | 1649.799205    | 825.403241       | 1648.815189    | 824.911233       | D    | 587.351137  | 294.179207      | 570.324588     | 285.665932       | 569.340572     | 285.173924       | 5  |
| 14 | 1779.909818 | 890.458547      | 1762.883269    | 881.945273       | 1761.899253    | 881.453265       | L    | 472.324194  | 236.665735      | 455.297645     | 228.152460       |                |                  | 4  |
| 15 | 1850.946932 | 925.977104      | 1833.920383    | 917.463830       | 1832.936367    | 916.971822       | A    | 359.240130  | 180.123703      | 342.213581     | 171.610429       |                |                  | 3  |
| 16 | 1964.030996 | 982.519136      | 1947.004447    | 974.005862       | 1946.020431    | 973.513853       | I    | 288.203016  | 144.605146      | 271.176467     | 136.091872       |                |                  | 2  |
| 17 |             |                 |                |                  |                |                  | R    | 175.118952  | 88.063114       | 158.092403     | 79.549840        |                |                  | 1  |

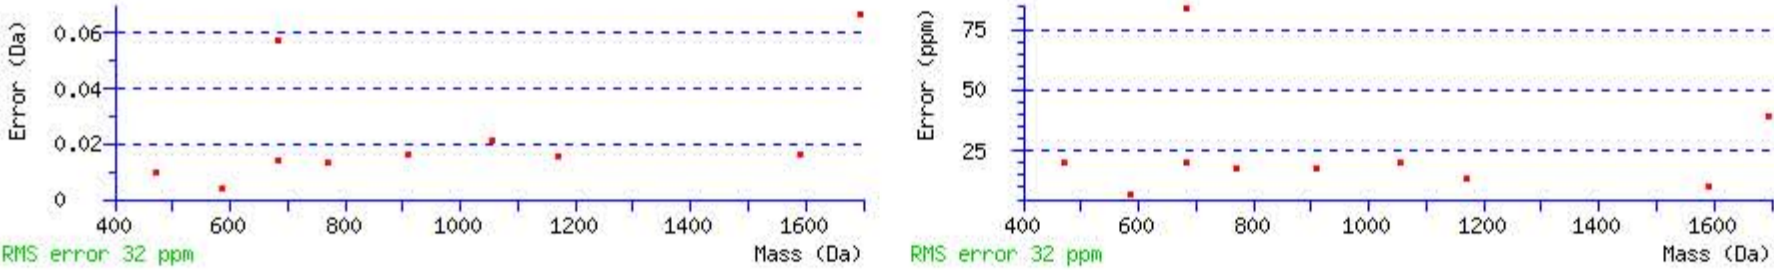

NCBI BLAST search of [GVTSVSQIFHSPDLAIR](#)  
(Parameters: blastp, nr protein database, expect=20000, no filter, PAM30)  
Other BLAST [web gateways](#)

All matches to this query

| Score | Mr(calc):   | Delta    | Sequence                          |
|-------|-------------|----------|-----------------------------------|
| 46.2  | 2137.135406 | 0.019130 | <a href="#">GVTSVSQIFHSPDLAIR</a> |

MATRIX

SCIENCE

Mascot Search Results

Peptide View

MS/MS Fragmentation of **HRLEDMEQALSPSVFK**  
Found in **IC1\_HUMAN**, Plasma protease C1 inhibitor OS=Homo sapiens GN=SERPING1 PE=1 SV=2

Match to Query 48411: 2197.130592 from(733.384140,3+) rtinseconds(2161) index(35219)  
Title: Locus1.1.1.861.12 File:"2013-07-02 CLN FXIII 180 min 2nd F 3.wiff"  
Data file C:\Program Files (x86)\Matrix Science\Mascot Daemon\mgf\8 FXIII 180 min 2nd\mascot\_daemon\_merge.mgf

Click mouse within plot area to zoom in by factor of two about that point  
Or,   to  Da   
Label all possible matches ☐ Label matches used for scoring ☒

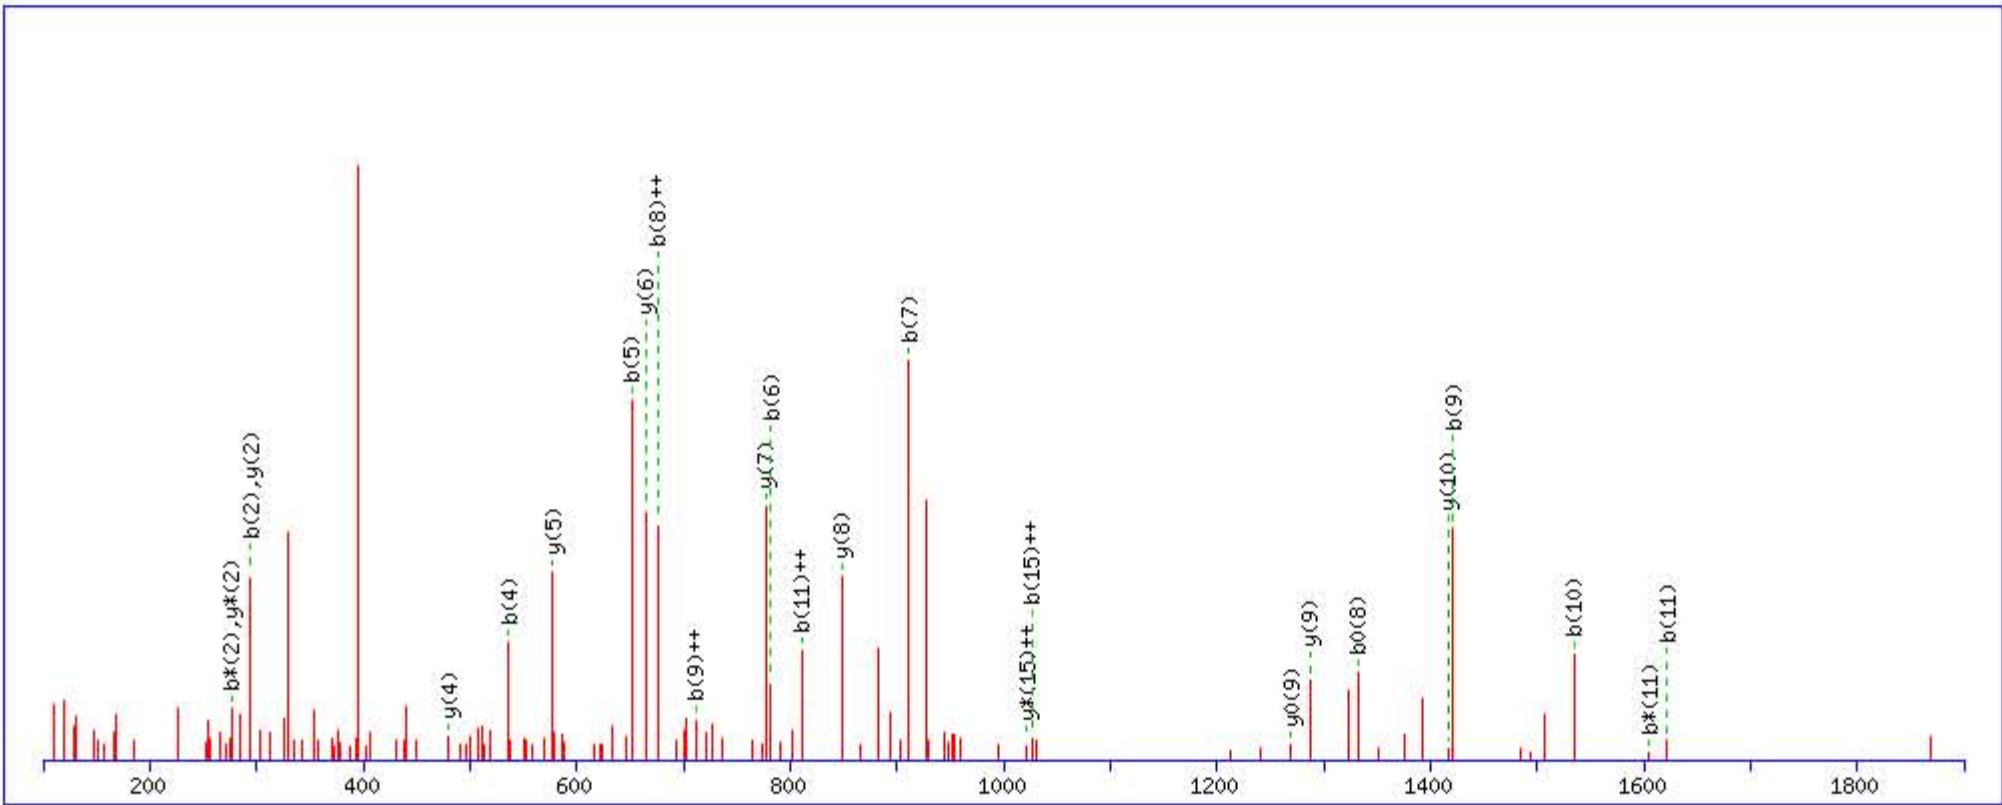

Monoisotopic mass of neutral peptide Mr(calc): 2197.102356  
Fixed modifications: Carbamidomethyl (C) (apply to specified residues or termini only)  
Variable modifications:  
Q8 : Biotin:Thermo-21345 (Q)  
Ions Score: 45 Expect: 7e-005  
Matches : 26/166 fragment ions using 43 most intense peaks [\(help\)](#)

| #  | b           | b <sup>++</sup> | b <sup>*</sup> | b <sup>*++</sup> | b <sup>0</sup> | b <sup>0++</sup> | Seq. | y           | y <sup>++</sup> | y <sup>*</sup> | y <sup>*++</sup> | y <sup>0</sup> | y <sup>0++</sup> | #  |
|----|-------------|-----------------|----------------|------------------|----------------|------------------|------|-------------|-----------------|----------------|------------------|----------------|------------------|----|
| 1  | 138.066188  | 69.536732       |                |                  |                |                  | H    |             |                 |                |                  |                |                  | 16 |
| 2  | 294.167299  | 147.587288      | 277.140750     | 139.074013       |                |                  | R    | 2061.050745 | 1031.029010     | 2044.024196    | 1022.515736      | 2043.040180    | 1022.023728      | 15 |
| 3  | 407.251363  | 204.129320      | 390.224814     | 195.616045       |                |                  | L    | 1904.949634 | 952.978455      | 1887.923085    | 944.465181       | 1886.939069    | 943.973173       | 14 |
| 4  | 536.293956  | 268.650616      | 519.267407     | 260.137342       | 518.283391     | 259.645334       | E    | 1791.865570 | 896.436423      | 1774.839021    | 887.923149       | 1773.855005    | 887.431141       | 13 |
| 5  | 651.320899  | 326.164088      | 634.294350     | 317.650813       | 633.310334     | 317.158805       | D    | 1662.822977 | 831.915127      | 1645.796428    | 823.401852       | 1644.812412    | 822.909844       | 12 |
| 6  | 782.361384  | 391.684330      | 765.334835     | 383.171056       | 764.350819     | 382.679048       | M    | 1547.796034 | 774.401655      | 1530.769485    | 765.888381       | 1529.785469    | 765.396373       | 11 |
| 7  | 911.403977  | 456.205627      | 894.377428     | 447.692352       | 893.393412     | 447.200344       | E    | 1416.755549 | 708.881413      | 1399.729000    | 700.368138       | 1398.744984    | 699.876130       | 10 |
| 8  | 1350.629303 | 675.818289      | 1333.602754    | 667.305015       | 1332.618738    | 666.813007       | Q    | 1287.712956 | 644.360116      | 1270.686407    | 635.846842       | 1269.702391    | 635.354834       | 9  |
| 9  | 1421.666417 | 711.336846      | 1404.639868    | 702.823572       | 1403.655852    | 702.331564       | A    | 848.487630  | 424.747453      | 831.461081     | 416.234179       | 830.477065     | 415.742171       | 8  |
| 10 | 1534.750481 | 767.878878      | 1517.723932    | 759.365604       | 1516.739916    | 758.873596       | L    | 777.450516  | 389.228896      | 760.423967     | 380.715622       | 759.439951     | 380.223614       | 7  |
| 11 | 1621.782509 | 811.394892      | 1604.755960    | 802.881618       | 1603.771944    | 802.389610       | S    | 664.366452  | 332.686864      | 647.339903     | 324.173590       | 646.355887     | 323.681582       | 6  |
| 12 | 1718.835273 | 859.921274      | 1701.808724    | 851.408000       | 1700.824708    | 850.915992       | P    | 577.334424  | 289.170850      | 560.307875     | 280.657576       | 559.323859     | 280.165568       | 5  |
| 13 | 1805.867301 | 903.437289      | 1788.840752    | 894.924014       | 1787.856736    | 894.432006       | S    | 480.281660  | 240.644468      | 463.255111     | 232.131194       | 462.271095     | 231.639186       | 4  |
| 14 | 1904.935715 | 952.971496      | 1887.909166    | 944.458221       | 1886.925150    | 943.966213       | V    | 393.249632  | 197.128454      | 376.223083     | 188.615180       |                |                  | 3  |
| 15 | 2052.004129 | 1026.505702     | 2034.977580    | 1017.992428      | 2033.993564    | 1017.500420      | F    | 294.181218  | 147.594247      | 277.154669     | 139.080973       |                |                  | 2  |
| 16 |             |                 |                |                  |                |                  | K    | 147.112804  | 74.060040       | 130.086255     | 65.546765        |                |                  | 1  |

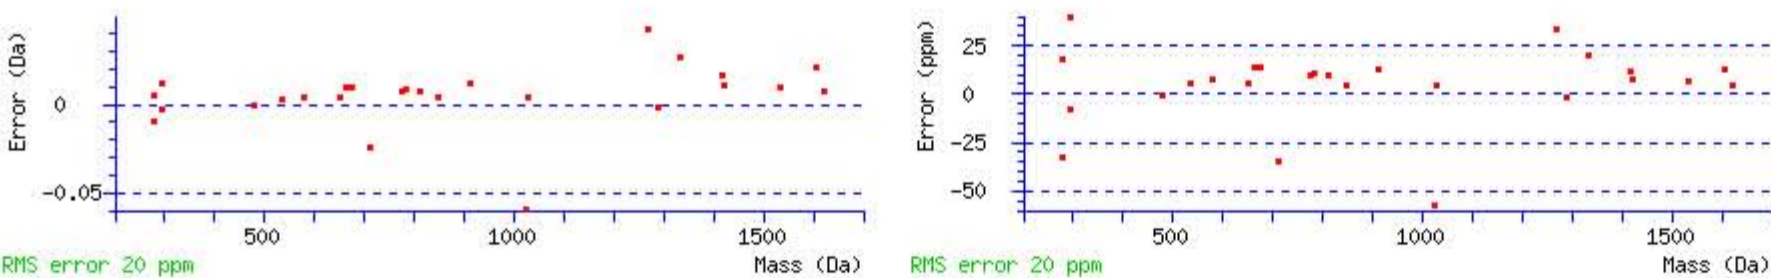

NCBI BLAST search of [HRLEDMEQALSPSVFK](#)  
(Parameters: blastp, nr protein database, expect=20000, no filter, PAM30)  
Other BLAST [web gateways](#)

All matches to this query

| Score | Mr(calc):   | Delta    | Sequence                         |
|-------|-------------|----------|----------------------------------|
| 45.3  | 2197.102356 | 0.028236 | <a href="#">HRLEDMEQALSPSVFK</a> |
| 0.9   | 2197.113602 | 0.016990 | <a href="#">QRPQLSSDSPSAFR</a>   |

MATRIX

SCIENCE

Mascot Search Results

Peptide View

MS/MS Fragmentation of **EAQLPVIENK**  
Found in **PLMN\_HUMAN**, Plasminogen OS=Homo sapiens GN=PLG PE=1 SV=2

Match to Query 29663: 1450.794708 from(726.404630,2+) rtinseconds(1977) index(66323)  
Title: Locus:1.1.1.1963.11 File:"2013-07-02 CLN FXIII 180 min 2nd FT.wiff"  
Data file C:\Program Files (x86)\Matrix Science\Mascot Daemon\mgf\8 FXIII 180 min 2nd\mascot\_daemon\_merge.mgf

Click mouse within plot area to zoom in by factor of two about that point  
Or, 

Plot from

100

 to 

1400

 Da 

Full range

  
Label all possible matches ☐ Label matches used for scoring ☒

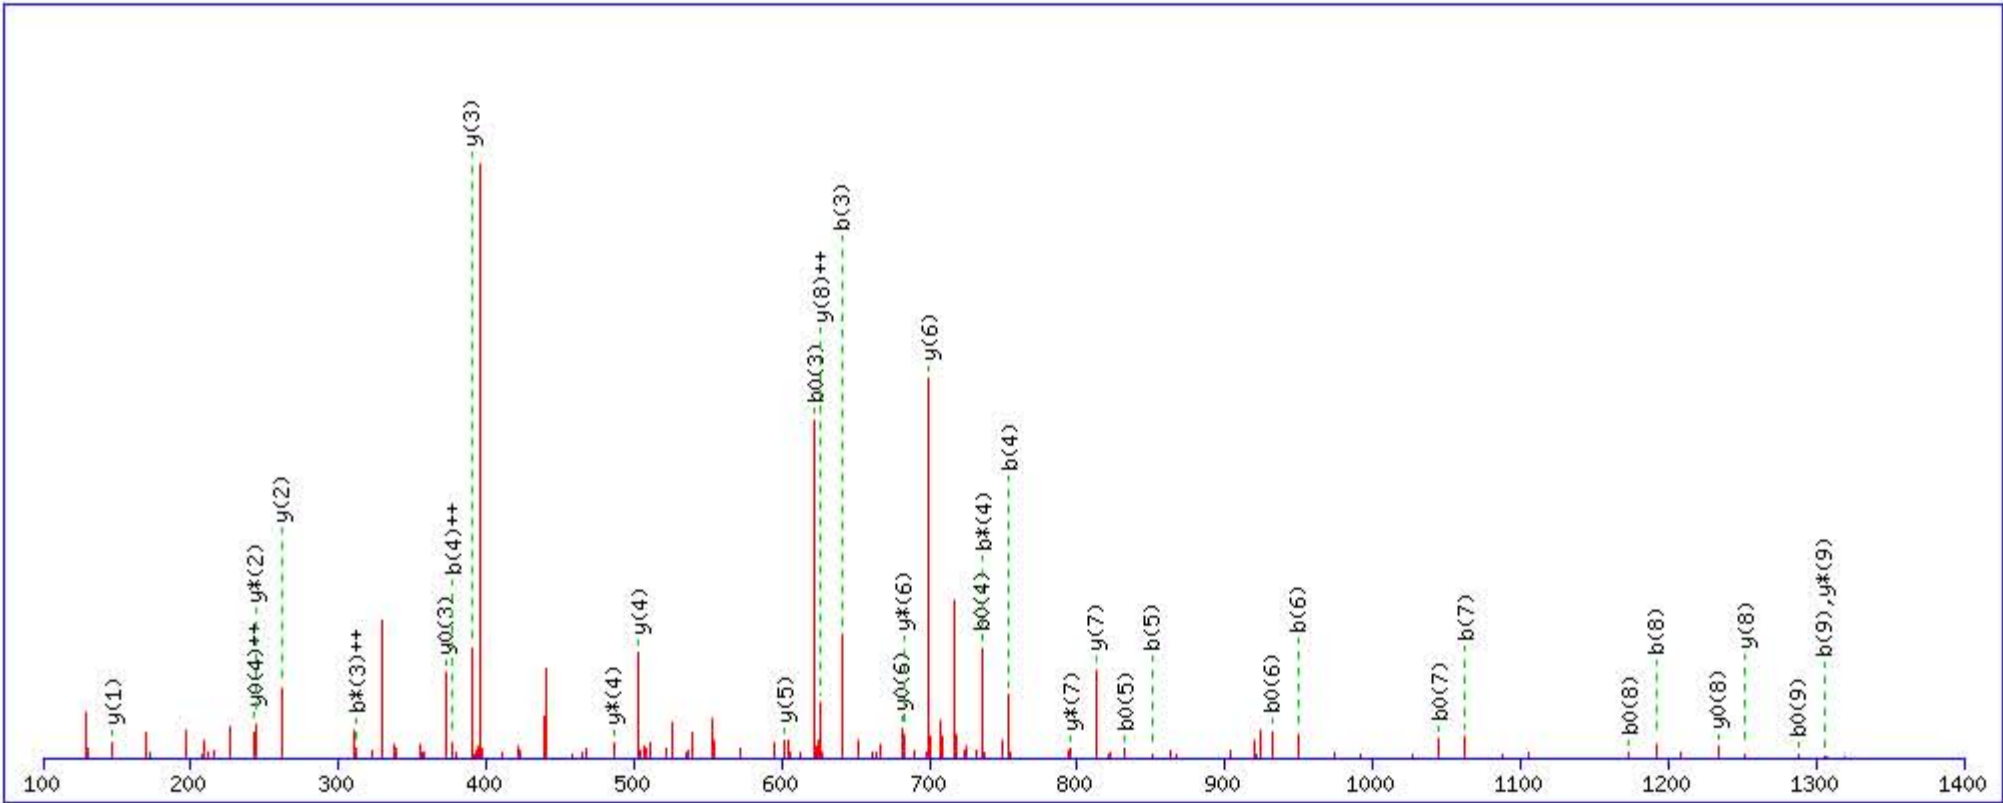

Monoisotopic mass of neutral peptide Mr(calc): 1450.785355  
Fixed modifications: Carbamidomethyl (C) (apply to specified residues or termini only)  
Variable modifications:  
Q3 : Biotin:Thermo-21345 (Q)  
Ions Score: 34 Expect: 0.0016  
Matches : 35/100 fragment ions using 74 most intense peaks [\(help\)](#)

| #  | b           | b <sup>++</sup> | b <sup>*</sup> | b <sup>*++</sup> | b <sup>0</sup> | b <sup>0++</sup> | Seq. | y           | y <sup>++</sup> | y <sup>*</sup> | y <sup>*++</sup> | y <sup>0</sup> | y <sup>0++</sup> | #  |
|----|-------------|-----------------|----------------|------------------|----------------|------------------|------|-------------|-----------------|----------------|------------------|----------------|------------------|----|
| 1  | 130.049869  | 65.528572       |                |                  | 112.039304     | 56.523290        | E    |             |                 |                |                  |                |                  | 10 |
| 2  | 201.086983  | 101.047130      |                |                  | 183.076418     | 92.041847        | A    | 1322.750070 | 661.878673      | 1305.723521    | 653.365398       | 1304.739505    | 652.873390       | 9  |
| 3  | 640.312309  | 320.659793      | 623.285760     | 312.146518       | 622.301744     | 311.654510       | Q    | 1251.712956 | 626.360116      | 1234.686407    | 617.846841       | 1233.702391    | 617.354833       | 8  |
| 4  | 753.396373  | 377.201825      | 736.369824     | 368.688550       | 735.385808     | 368.196542       | L    | 812.487630  | 406.747453      | 795.461081     | 398.234178       | 794.477065     | 397.742170       | 7  |
| 5  | 850.449137  | 425.728207      | 833.422588     | 417.214932       | 832.438572     | 416.722924       | P    | 699.403566  | 350.205421      | 682.377017     | 341.692146       | 681.393001     | 341.200138       | 6  |
| 6  | 949.517551  | 475.262414      | 932.491002     | 466.749139       | 931.506986     | 466.257131       | V    | 602.350802  | 301.679039      | 585.324253     | 293.165764       | 584.340237     | 292.673756       | 5  |
| 7  | 1062.601615 | 531.804446      | 1045.575066    | 523.291171       | 1044.591050    | 522.799163       | I    | 503.282388  | 252.144832      | 486.255839     | 243.631557       | 485.271823     | 243.139549       | 4  |
| 8  | 1191.644208 | 596.325742      | 1174.617659    | 587.812468       | 1173.633643    | 587.320459       | E    | 390.198324  | 195.602800      | 373.171775     | 187.089525       | 372.187759     | 186.597517       | 3  |
| 9  | 1305.687135 | 653.347205      | 1288.660586    | 644.833931       | 1287.676570    | 644.341923       | N    | 261.155731  | 131.081503      | 244.129182     | 122.568229       |                |                  | 2  |
| 10 |             |                 |                |                  |                |                  | K    | 147.112804  | 74.060040       | 130.086255     | 65.546765        |                |                  | 1  |

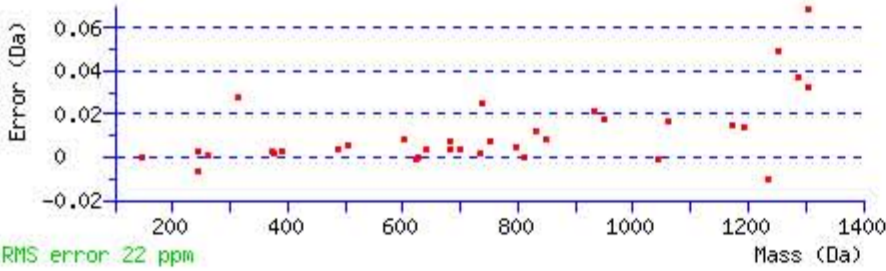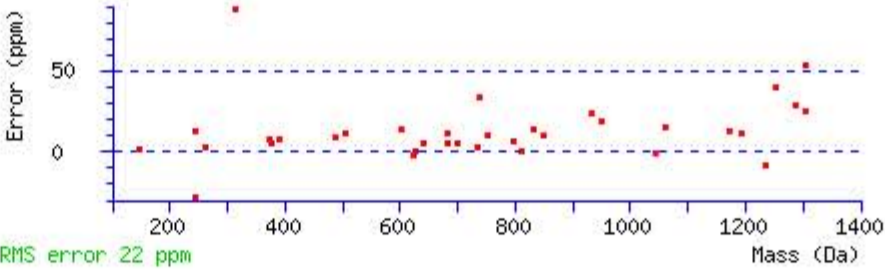

NCBI BLAST search of [EAQLPVIENK](#)  
(Parameters: blastp, nr protein database, expect=20000, no filter, PAM30)  
Other BLAST [web gateways](#)

All matches to this query

| Score | Mr(calc):   | Delta     | Sequence                     |
|-------|-------------|-----------|------------------------------|
| 33.6  | 1450.785355 | 0.009353  | <a href="#">EAQLPVIENK</a>   |
| 3.8   | 1450.807816 | -0.013108 | <a href="#">KKMITNNPHLQK</a> |
| 2.9   | 1450.790527 | 0.004181  | <a href="#">QNIWRHNRLSK</a>  |
| 2.7   | 1450.803986 | -0.009278 | <a href="#">QLAEQIK</a>      |

MATRIX

SCIENCE

Mascot Search Results

Peptide View

MS/MS Fragmentation of **EQQCVIMAENR**  
Found in **PLGB\_HUMAN**, Plasminogen-like protein B OS=Homo sapiens GN=PLGLB1 PE=1 SV=1

Match to Query 37702: 1687.793408 from(844.903980,2+) rtinseconds(1782) index(65083)  
Title: Locus:1.1.1.1895.11 File:"2013-07-02 CLN FXIII 180 min 2nd FT.wiff"  
Data file C:\Program Files (x86)\Matrix Science\Mascot Daemon\mgf\8 FXIII 180 min 2nd\mascot\_daemon\_merge.mgf

Click mouse within plot area to zoom in by factor of two about that point  
Or, 

Plot from

0

 to 

2200

 Da 

Full range

  
Label all possible matches ☐ Label matches used for scoring ☒

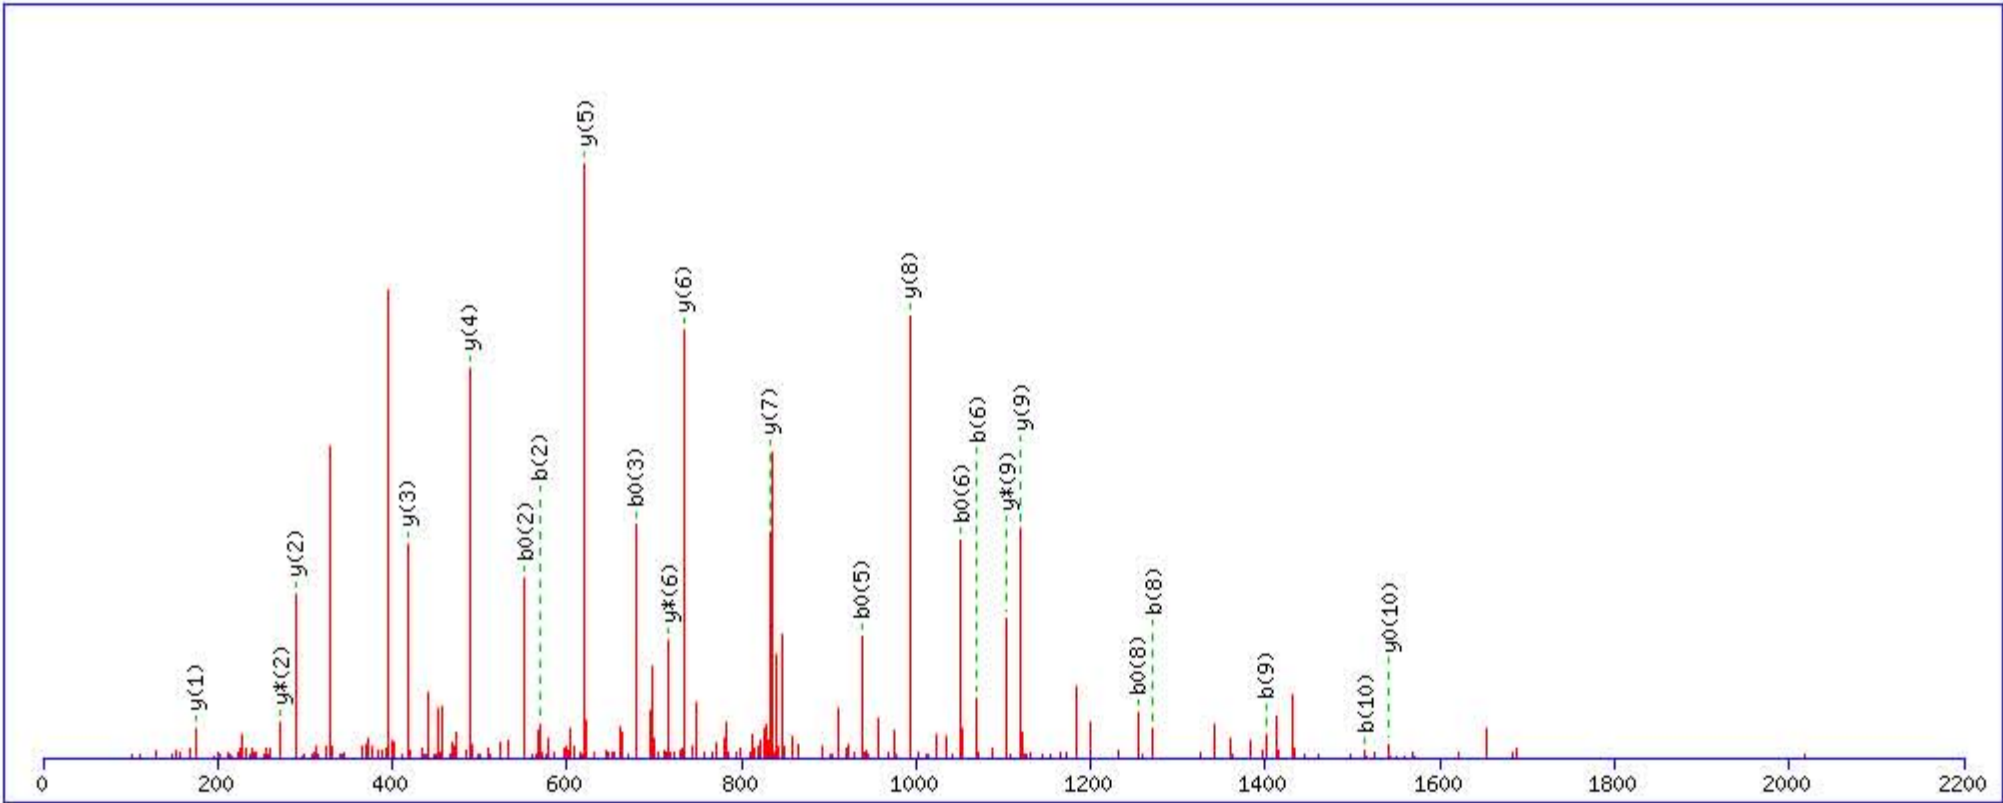

Monoisotopic mass of neutral peptide Mr(calc): 1687.784393  
Fixed modifications: Carbamidomethyl (C) (apply to specified residues or termini only)  
Variable modifications:  
Q2 : Biotin:Thermo-21345 (Q)  
Ions Score: 71 Expect: 7.6e-007  
Matches : 23/114 fragment ions using 32 most intense peaks [\(help\)](#)

| #  | b           | b <sup>++</sup> | b <sup>*</sup> | b <sup>*++</sup> | b <sup>0</sup> | b <sup>0++</sup> | Seq. | y           | y <sup>++</sup> | y <sup>*</sup> | y <sup>*++</sup> | y <sup>0</sup> | y <sup>0++</sup> | #  |
|----|-------------|-----------------|----------------|------------------|----------------|------------------|------|-------------|-----------------|----------------|------------------|----------------|------------------|----|
| 1  | 130.049869  | 65.528572       |                |                  | 112.039304     | 56.523290        | E    |             |                 |                |                  |                |                  | 11 |
| 2  | 569.275195  | 285.141236      | 552.248646     | 276.627961       | 551.264630     | 276.135953       | Q    | 1559.749102 | 780.378189      | 1542.722553    | 771.864915       | 1541.738537    | 771.372907       | 10 |
| 3  | 697.333773  | 349.170525      | 680.307224     | 340.657250       | 679.323208     | 340.165242       | Q    | 1120.523776 | 560.765526      | 1103.497227    | 552.252252       | 1102.513211    | 551.760244       | 9  |
| 4  | 857.364422  | 429.185849      | 840.337873     | 420.672575       | 839.353857     | 420.180567       | C    | 992.465198  | 496.736237      | 975.438649     | 488.222963       | 974.454633     | 487.730955       | 8  |
| 5  | 956.432836  | 478.720056      | 939.406287     | 470.206782       | 938.422271     | 469.714774       | V    | 832.434549  | 416.720913      | 815.408000     | 408.207638       | 814.423984     | 407.715630       | 7  |
| 6  | 1069.516900 | 535.262088      | 1052.490351    | 526.748814       | 1051.506335    | 526.256806       | I    | 733.366135  | 367.186706      | 716.339586     | 358.673431       | 715.355570     | 358.181423       | 6  |
| 7  | 1200.557385 | 600.782331      | 1183.530836    | 592.269056       | 1182.546820    | 591.777048       | M    | 620.282071  | 310.644674      | 603.255522     | 302.131399       | 602.271506     | 301.639391       | 5  |
| 8  | 1271.594499 | 636.300888      | 1254.567950    | 627.787613       | 1253.583934    | 627.295605       | A    | 489.241586  | 245.124431      | 472.215037     | 236.611156       | 471.231021     | 236.119148       | 4  |
| 9  | 1400.637092 | 700.822184      | 1383.610543    | 692.308910       | 1382.626527    | 691.816902       | E    | 418.204472  | 209.605874      | 401.177923     | 201.092600       | 400.193907     | 200.600592       | 3  |
| 10 | 1514.680019 | 757.843648      | 1497.653470    | 749.330373       | 1496.669454    | 748.838365       | N    | 289.161879  | 145.084577      | 272.135330     | 136.571303       |                |                  | 2  |
| 11 |             |                 |                |                  |                |                  | R    | 175.118952  | 88.063114       | 158.092403     | 79.549839        |                |                  | 1  |

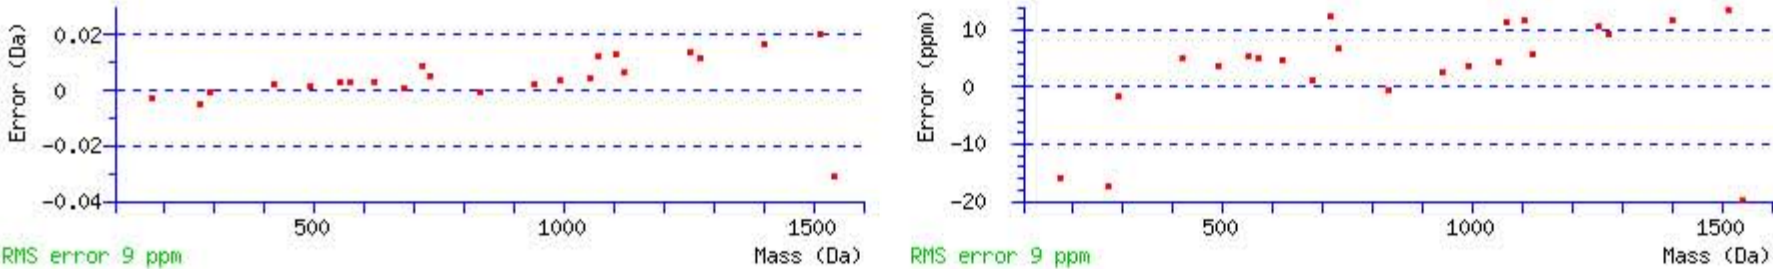

NCBI **BLAST** search of **EQQCVIMAENR**  
(Parameters: blastp, nr protein database, expect=20000, no filter, PAM30)  
Other BLAST [web gateways](#)

All matches to this query

| Score | Mr(calc):   | Delta     | Sequence                          |
|-------|-------------|-----------|-----------------------------------|
| 71.0  | 1687.784393 | 0.009015  | <a href="#">EQQCVIMAENR</a>       |
| 66.0  | 1687.784393 | 0.009015  | <a href="#">EQQCVIMAENR</a>       |
| 5.4   | 1687.781006 | 0.012402  | <a href="#">ELMAWNQAENR</a>       |
| 4.4   | 1687.784882 | 0.008526  | <a href="#">APPPSSSRPPCHGGR</a>   |
| 4.1   | 1687.813370 | -0.019962 | <a href="#">MKQSPALAPEERCR</a>    |
| 3.3   | 1687.809998 | -0.016590 | <a href="#">NMTAQNYTYAIRSR</a>    |
| 3.2   | 1687.773193 | 0.020215  | <a href="#">FGAVCTCMEKATGLK</a>   |
| 2.9   | 1687.776093 | 0.017315  | <a href="#">QQEEAQAAAAAASAESR</a> |
| 0.1   | 1687.817383 | -0.023975 | <a href="#">EQKEK YMEHR</a>       |

MATRIX

SCIENCE

Mascot Search Results

Peptide View

MS/MS Fragmentation of **APWCHTTNSQVR**  
Found in **PLMN\_HUMAN**, Plasminogen OS=Homo sapiens GN=PLG PE=1 SV=2

Match to Query 39497: 1766.835372 from(589.952400,3+) rtinseconds(1509) index(2695)  
Title: Locus:1.1.1.1802.12 File:"2013-07-02 CLN FXIII 180 min 2nd F 1.wiff"  
Data file C:\Program Files (x86)\Matrix Science\Mascot Daemon\mgf\8 FXIII 180 min 2nd\mascot\_daemon\_merge.mgf

Click mouse within plot area to zoom in by factor of two about that point  
Or, 

Plot from

100

 to 

1800

 Da 

Full range

  
Label all possible matches ☐ Label matches used for scoring ☒

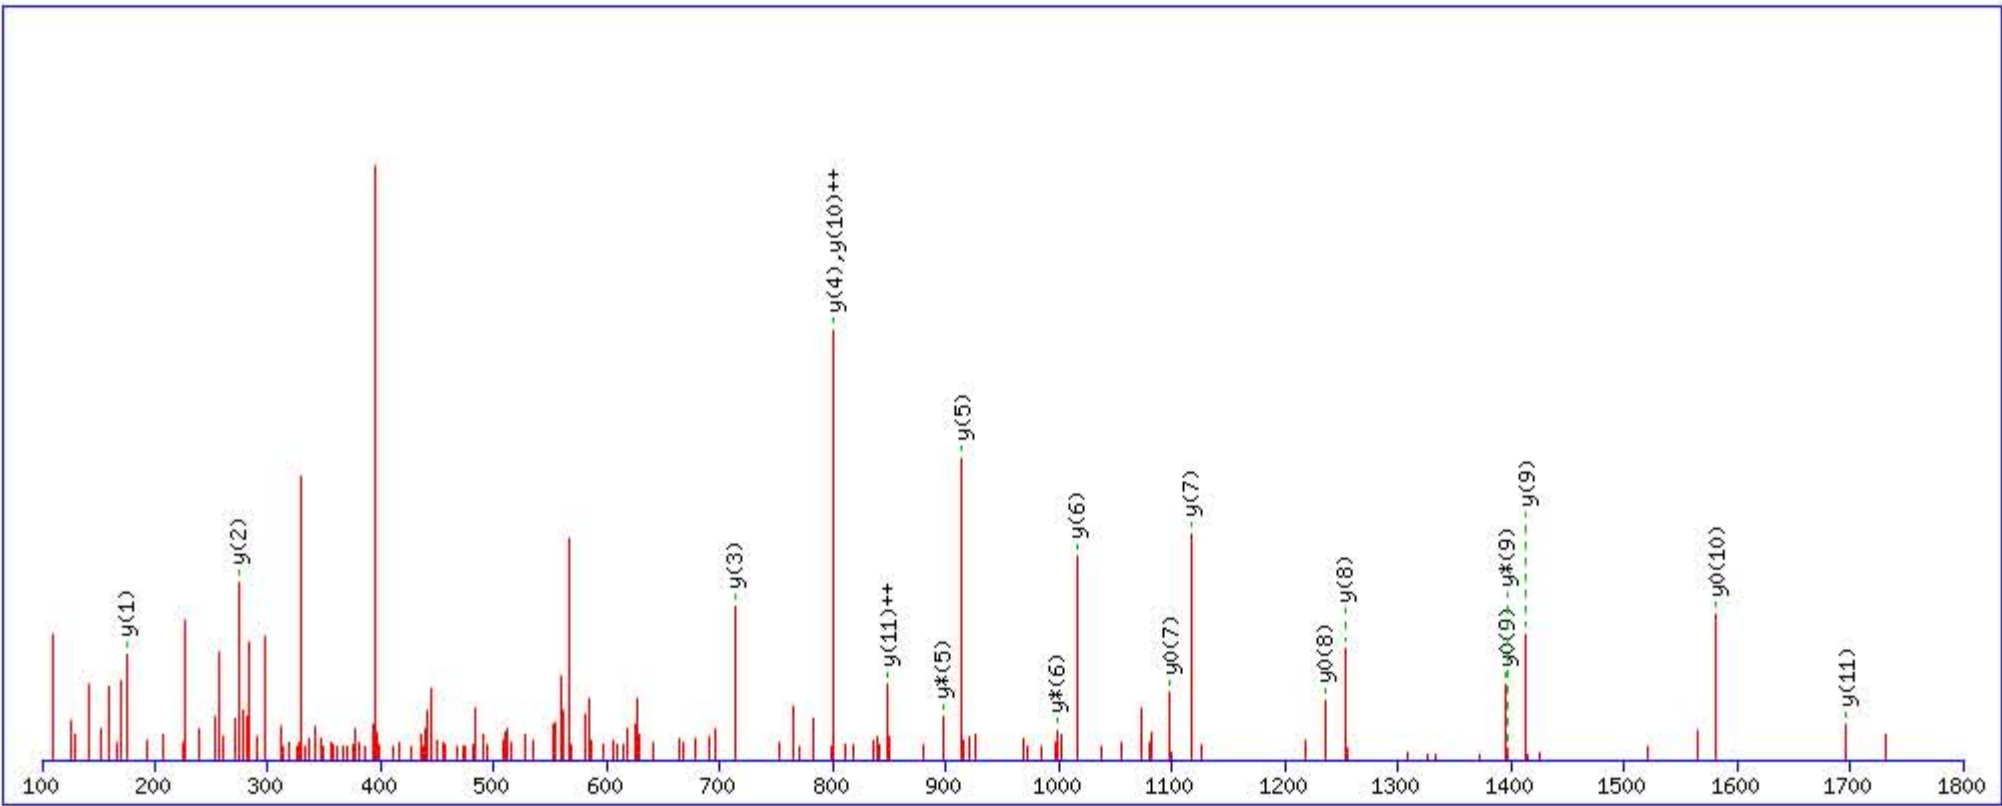

Monoisotopic mass of neutral peptide Mr(calc): 1766.834488  
Fixed modifications: Carbamidomethyl (C) (apply to specified residues or termini only)  
Variable modifications:  
Q10 : Biotin:Thermo-21345 (Q)  
Ions Score: 65 Expect: 5.2e-006  
Matches : 19/102 fragment ions using 32 most intense peaks [\(help\)](#)

| #                  | b           | b <sup>++</sup> | b <sup>+</sup> | b <sup>+++</sup> | b <sup>0</sup> | b <sup>0++</sup> | Seq. | y                           | y <sup>++</sup>            | y <sup>+</sup>              | y <sup>+++</sup> | y <sup>0</sup>              | y <sup>0++</sup> | #                  |
|--------------------|-------------|-----------------|----------------|------------------|----------------|------------------|------|-----------------------------|----------------------------|-----------------------------|------------------|-----------------------------|------------------|--------------------|
| <a href="#">1</a>  | 72.044390   | 36.525833       |                |                  |                |                  | A    |                             |                            |                             |                  |                             |                  | <a href="#">12</a> |
| <a href="#">2</a>  | 169.097154  | 85.052215       |                |                  |                |                  | P    | <a href="#">1696.804643</a> | <a href="#">848.905960</a> | 1679.778094                 | 840.392685       | 1678.794078                 | 839.900677       | <a href="#">11</a> |
| <a href="#">3</a>  | 355.176467  | 178.091872      |                |                  |                |                  | W    | 1599.751879                 | <a href="#">800.379578</a> | 1582.725330                 | 791.866303       | <a href="#">1581.741314</a> | 791.374295       | <a href="#">10</a> |
| <a href="#">4</a>  | 515.207116  | 258.107196      |                |                  |                |                  | C    | <a href="#">1413.672566</a> | 707.339921                 | <a href="#">1396.646017</a> | 698.826647       | <a href="#">1395.662001</a> | 698.334639       | <a href="#">9</a>  |
| <a href="#">5</a>  | 652.266028  | 326.636652      |                |                  |                |                  | H    | <a href="#">1253.641917</a> | 627.324597                 | 1236.615368                 | 618.811322       | <a href="#">1235.631352</a> | 618.319314       | <a href="#">8</a>  |
| <a href="#">6</a>  | 753.313707  | 377.160492      |                |                  | 735.303142     | 368.155209       | T    | <a href="#">1116.583005</a> | 558.795141                 | 1099.556456                 | 550.281866       | <a href="#">1098.572440</a> | 549.789858       | <a href="#">7</a>  |
| <a href="#">7</a>  | 854.361386  | 427.684331      |                |                  | 836.350821     | 418.679049       | T    | <a href="#">1015.535326</a> | 508.271301                 | <a href="#">998.508777</a>  | 499.758027       | 997.524761                  | 499.266019       | <a href="#">6</a>  |
| <a href="#">8</a>  | 968.404313  | 484.705795      | 951.377764     | 476.192520       | 950.393748     | 475.700512       | N    | <a href="#">914.487647</a>  | 457.747462                 | <a href="#">897.461098</a>  | 449.234187       | 896.477082                  | 448.742179       | <a href="#">5</a>  |
| <a href="#">9</a>  | 1055.436341 | 528.221809      | 1038.409792    | 519.708534       | 1037.425776    | 519.216526       | S    | <a href="#">800.444720</a>  | 400.725998                 | 783.418171                  | 392.212724       | 782.434155                  | 391.720716       | <a href="#">4</a>  |
| <a href="#">10</a> | 1494.661667 | 747.834472      | 1477.635118    | 739.321197       | 1476.651102    | 738.829189       | Q    | <a href="#">713.412692</a>  | 357.209984                 | 696.386143                  | 348.696710       |                             |                  | <a href="#">3</a>  |
| <a href="#">11</a> | 1593.730081 | 797.368679      | 1576.703532    | 788.855404       | 1575.719516    | 788.363396       | V    | <a href="#">274.187366</a>  | 137.597321                 | 257.160817                  | 129.084047       |                             |                  | <a href="#">2</a>  |
| <a href="#">12</a> |             |                 |                |                  |                |                  | R    | <a href="#">175.118952</a>  | 88.063114                  | 158.092403                  | 79.549839        |                             |                  | <a href="#">1</a>  |

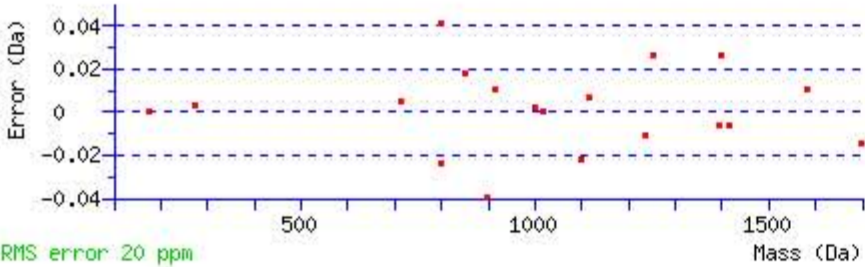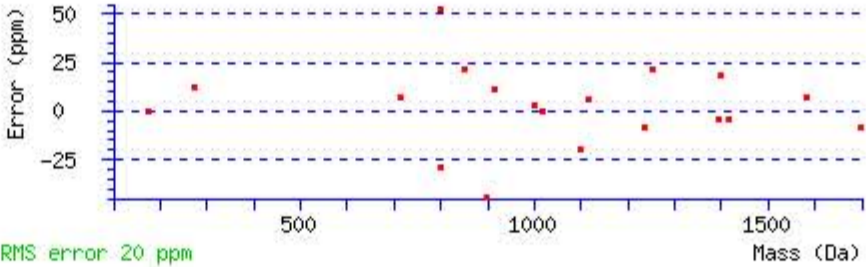

NCBI BLAST search of [APWCHTTNSQVR](#)  
(Parameters: blastp, nr protein database, expect=20000, no filter, PAM30)  
Other BLAST [web gateways](#)

All matches to this query

| Score | Mr(calc):   | Delta    | Sequence                     |
|-------|-------------|----------|------------------------------|
| 64.8  | 1766.834488 | 0.000884 | <a href="#">APWCHTTNSQVR</a> |

MATRIX

SCIENCE

Mascot Search Results

Peptide View

MS/MS Fragmentation of **EQQCVIMAENR**  
Found in **PLGB\_HUMAN**, Plasminogen-like protein B OS=Homo sapiens GN=PLGLB1 PE=1 SV=1

Match to Query 44106: 1998.963642 from(667.328490,3+) rtinseconds(2126) index(67159)  
Title: Locus:1.1.1.2015.16 File:"2013-07-02 CLN FXIII 180 min 2nd FT.wiff"  
Data file C:\Program Files (x86)\Matrix Science\Mascot Daemon\mgf\8 FXIII 180 min 2nd\mascot\_daemon\_merge.mgf

Click mouse within plot area to zoom in by factor of two about that point  
Or, 

Plot from

100

 to 

2000

 Da 

Full range

  
Label all possible matches ☐ Label matches used for scoring ☒

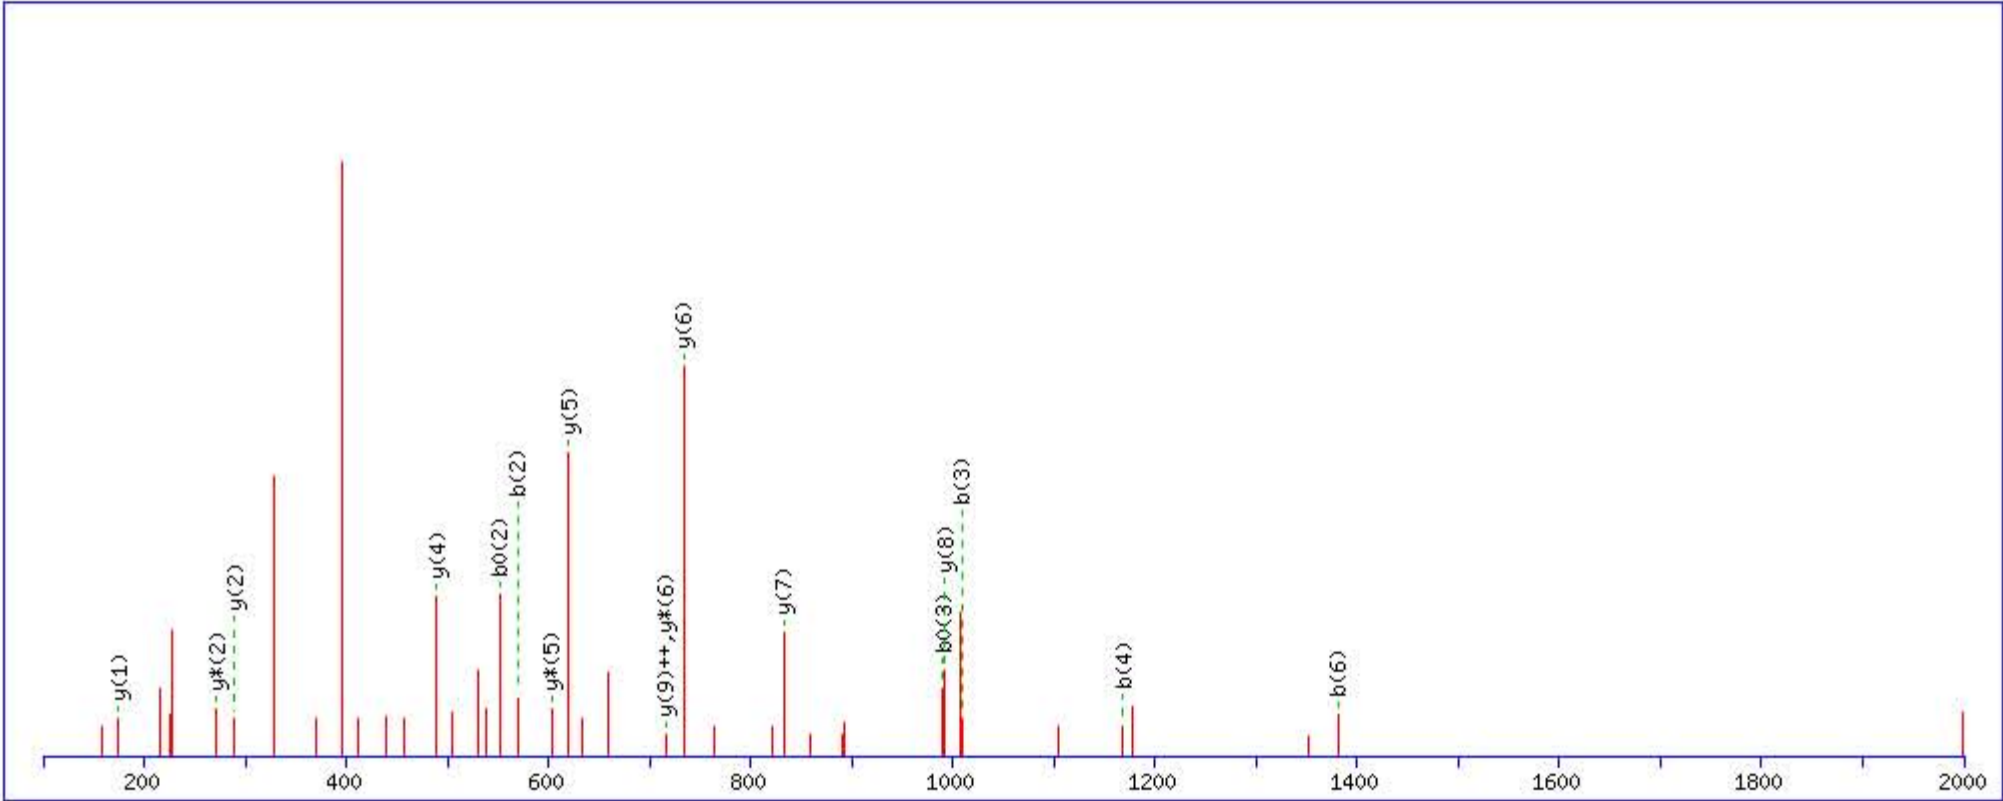

Monoisotopic mass of neutral peptide **Mr(calc):** 1998.951141  
Fixed modifications: Carbamidomethyl (C) (apply to specified residues or termini only)  
Variable modifications:  
Q2 : Biotin:Thermo-21345 (Q)  
Q3 : Biotin:Thermo-21345 (Q)  
Ions Score: 27 Expect: 0.039  
Matches : 17/114 fragment ions using 36 most intense peaks ([help](#))

| #  | b           | b <sup>++</sup> | b <sup>*</sup> | b <sup>+++</sup> | b <sup>0</sup> | b <sup>0++</sup> | Seq. | y           | y <sup>++</sup> | y <sup>*</sup> | y <sup>+++</sup> | y <sup>0</sup> | y <sup>0++</sup> | #  |
|----|-------------|-----------------|----------------|------------------|----------------|------------------|------|-------------|-----------------|----------------|------------------|----------------|------------------|----|
| 1  | 130.049869  | 65.528572       |                |                  | 112.039304     | 56.523290        | E    |             |                 |                |                  |                |                  | 11 |
| 2  | 569.275195  | 285.141236      | 552.248646     | 276.627961       | 551.264630     | 276.135953       | Q    | 1870.915850 | 935.961563      | 1853.889301    | 927.448288       | 1852.905285    | 926.956280       | 10 |
| 3  | 1008.500521 | 504.753899      | 991.473972     | 496.240624       | 990.489956     | 495.748616       | Q    | 1431.690524 | 716.348900      | 1414.663975    | 707.835625       | 1413.679959    | 707.343617       | 9  |
| 4  | 1168.531170 | 584.769223      | 1151.504621    | 576.255949       | 1150.520605    | 575.763940       | C    | 992.465198  | 496.736237      | 975.438649     | 488.222962       | 974.454633     | 487.730954       | 8  |
| 5  | 1267.599584 | 634.303430      | 1250.573035    | 625.790156       | 1249.589019    | 625.298148       | V    | 832.434549  | 416.720912      | 815.408000     | 408.207638       | 814.423984     | 407.715630       | 7  |
| 6  | 1380.683648 | 690.845462      | 1363.657099    | 682.332188       | 1362.673083    | 681.840179       | I    | 733.366135  | 367.186705      | 716.339586     | 358.673431       | 715.355570     | 358.181423       | 6  |
| 7  | 1511.724133 | 756.365704      | 1494.697584    | 747.852430       | 1493.713568    | 747.360422       | M    | 620.282071  | 310.644673      | 603.255522     | 302.131399       | 602.271506     | 301.639391       | 5  |
| 8  | 1582.761247 | 791.884261      | 1565.734698    | 783.370987       | 1564.750682    | 782.878979       | A    | 489.241586  | 245.124431      | 472.215037     | 236.611156       | 471.231021     | 236.119148       | 4  |
| 9  | 1711.803840 | 856.405558      | 1694.777291    | 847.892283       | 1693.793275    | 847.400275       | E    | 418.204472  | 209.605874      | 401.177923     | 201.092599       | 400.193907     | 200.600591       | 3  |
| 10 | 1825.846767 | 913.427021      | 1808.820218    | 904.913747       | 1807.836202    | 904.421739       | N    | 289.161879  | 145.084577      | 272.135330     | 136.571303       |                |                  | 2  |
| 11 |             |                 |                |                  |                |                  | R    | 175.118952  | 88.063114       | 158.092403     | 79.549839        |                |                  | 1  |

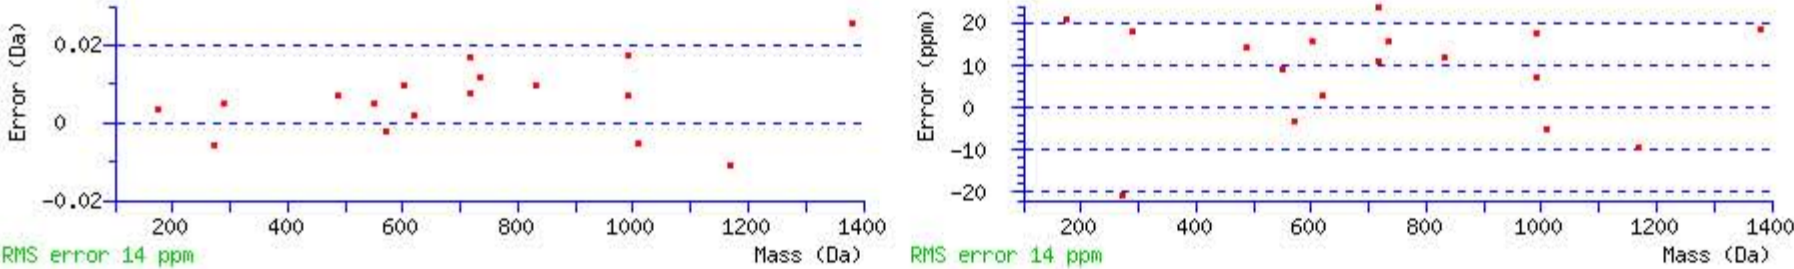

NCBI **BLAST** search of [EQQCVIMAENR](#)  
(Parameters: blastp, nr protein database, expect=20000, no filter, PAM30)  
Other BLAST [web gateways](#)

All matches to this query

| Score | Mr(calc):   | Delta    | Sequence                    |
|-------|-------------|----------|-----------------------------|
| 27.3  | 1998.951141 | 0.012501 | <a href="#">EQQCVIMAENR</a> |

MATRIX

SCIENCE

Mascot Search Results

Peptide View

MS/MS Fragmentation of **CTTPPPSSGPTYQCLK**  
Found in **PLMN\_HUMAN**, Plasminogen OS=Homo sapiens GN=PLG PE=1 SV=2

Match to Query 46698: 2103.985452 from(702.335760,3+) rtinseconds(1729) index(64746)  
Title: Locus:1.1.1.1877.12 File:"2013-07-02 CLN FXIII 180 min 2nd FT.wiff"  
Data file C:\Program Files (x86)\Matrix Science\Mascot Daemon\mgf\8 FXIII 180 min 2nd\mascot\_daemon\_merge.mgf

Click mouse within plot area to zoom in by factor of two about that point  
Or,   to  Da   
Label all possible matches ☐ Label matches used for scoring ☒

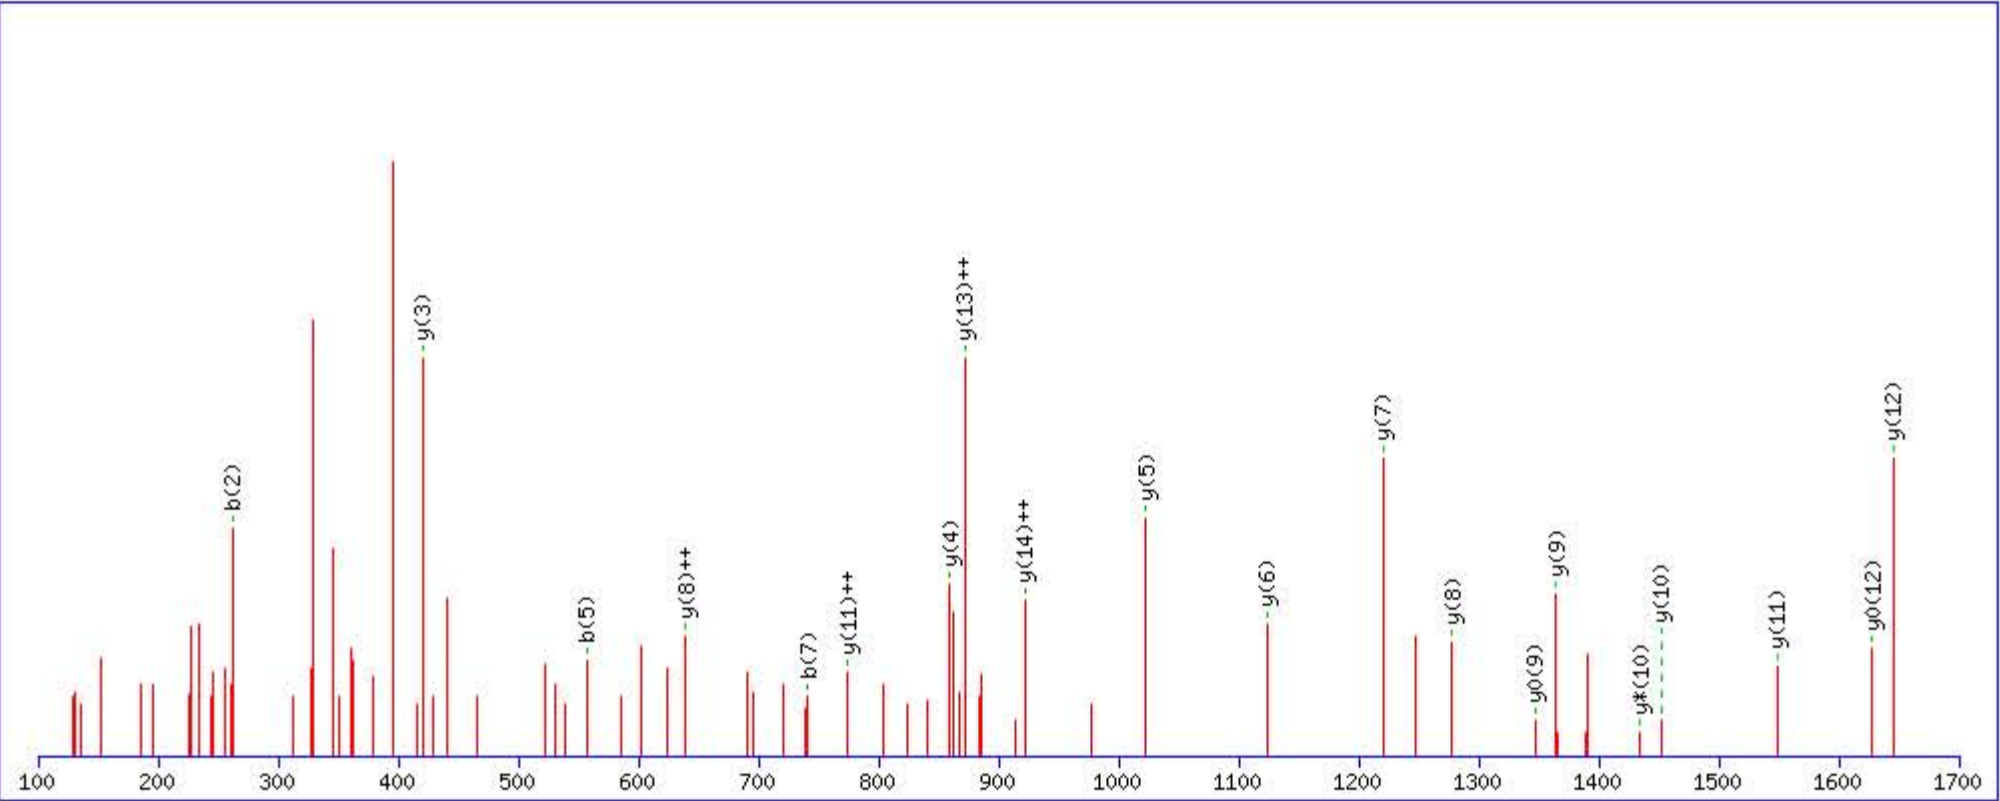

Monoisotopic mass of neutral peptide Mr(calc): 2103.979172  
Fixed modifications: Carbamidomethyl (C) (apply to specified residues or termini only)  
Variable modifications:  
Q13 : Biotin:Thermo-21345 (Q)  
Ions Score: 53 Expect: 8.5e-005  
Matches : 20/144 fragment ions using 40 most intense peaks [\(help\)](#)

| #  | b           | b <sup>++</sup> | b <sup>*</sup> | b <sup>*++</sup> | b <sup>0</sup> | b <sup>0++</sup> | Seq. | y           | y <sup>++</sup> | y <sup>*</sup> | y <sup>*++</sup> | y <sup>0</sup> | y <sup>0++</sup> | #  |
|----|-------------|-----------------|----------------|------------------|----------------|------------------|------|-------------|-----------------|----------------|------------------|----------------|------------------|----|
| 1  | 161.037925  | 81.022600       |                |                  |                |                  | C    |             |                 |                |                  |                |                  | 16 |
| 2  | 262.085604  | 131.546440      |                |                  | 244.075039     | 122.541158       | T    | 1944.955785 | 972.981531      | 1927.929236    | 964.468256       | 1926.945220    | 963.976248       | 15 |
| 3  | 363.133283  | 182.070280      |                |                  | 345.122718     | 173.064997       | T    | 1843.908106 | 922.457691      | 1826.881557    | 913.944417       | 1825.897541    | 913.452409       | 14 |
| 4  | 460.186047  | 230.596661      |                |                  | 442.175482     | 221.591379       | P    | 1742.860427 | 871.933852      | 1725.833878    | 863.420577       | 1724.849862    | 862.928569       | 13 |
| 5  | 557.238811  | 279.123044      |                |                  | 539.228246     | 270.117761       | P    | 1645.807663 | 823.407470      | 1628.781114    | 814.894195       | 1627.797098    | 814.402187       | 12 |
| 6  | 654.291575  | 327.649426      |                |                  | 636.281010     | 318.644143       | P    | 1548.754899 | 774.881088      | 1531.728350    | 766.367813       | 1530.744334    | 765.875805       | 11 |
| 7  | 741.323603  | 371.165440      |                |                  | 723.313038     | 362.160157       | S    | 1451.702135 | 726.354706      | 1434.675586    | 717.841431       | 1433.691570    | 717.349423       | 10 |
| 8  | 828.355631  | 414.681454      |                |                  | 810.345066     | 405.676171       | S    | 1364.670107 | 682.838692      | 1347.643558    | 674.325417       | 1346.659542    | 673.833409       | 9  |
| 9  | 885.377095  | 443.192186      |                |                  | 867.366530     | 434.186903       | G    | 1277.638079 | 639.322678      | 1260.611530    | 630.809403       | 1259.627514    | 630.317395       | 8  |
| 10 | 982.429859  | 491.718568      |                |                  | 964.419294     | 482.713285       | P    | 1220.616615 | 610.811946      | 1203.590066    | 602.298671       | 1202.606050    | 601.806663       | 7  |
| 11 | 1083.477538 | 542.242407      |                |                  | 1065.466973    | 533.237125       | T    | 1123.563851 | 562.285564      | 1106.537302    | 553.772289       | 1105.553286    | 553.280281       | 6  |
| 12 | 1246.540867 | 623.774072      |                |                  | 1228.530302    | 614.768789       | Y    | 1022.516172 | 511.761724      | 1005.489623    | 503.248450       |                |                  | 5  |
| 13 | 1685.766193 | 843.386735      | 1668.739644    | 834.873460       | 1667.755628    | 834.381452       | Q    | 859.452843  | 430.230060      | 842.426294     | 421.716785       |                |                  | 4  |
| 14 | 1845.796842 | 923.402059      | 1828.770293    | 914.888785       | 1827.786277    | 914.396777       | C    | 420.227517  | 210.617396      | 403.200968     | 202.104122       |                |                  | 3  |
| 15 | 1958.880906 | 979.944091      | 1941.854357    | 971.430817       | 1940.870341    | 970.938809       | L    | 260.196868  | 130.602072      | 243.170319     | 122.088797       |                |                  | 2  |
| 16 |             |                 |                |                  |                |                  | K    | 147.112804  | 74.060040       | 130.086255     | 65.546765        |                |                  | 1  |

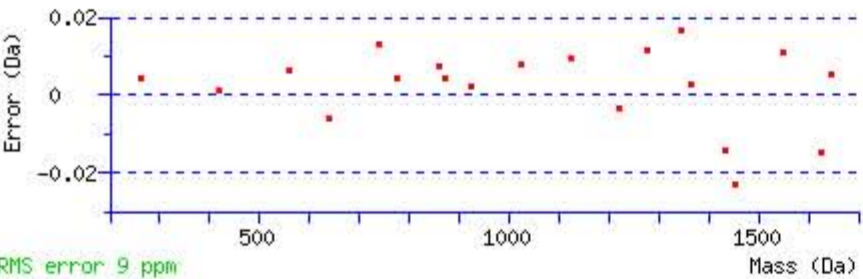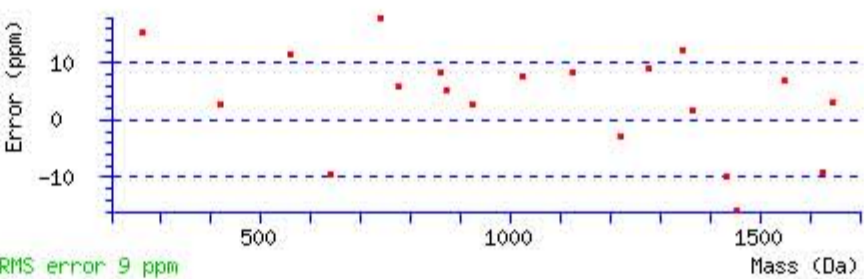

NCBI BLAST search of [CTTPPPSSGPTYQCLK](#)  
(Parameters: blastp, nr protein database, expect=20000, no filter, PAM30)  
Other BLAST [web gateways](#)

All matches to this query

| Score | Mr(calc):   | Delta    | Sequence                         |
|-------|-------------|----------|----------------------------------|
| 53.0  | 2103.979172 | 0.006280 | <a href="#">CTTPPPSSGPTYQCLK</a> |

M

A

T

R

I

X

S

C

I

E

N

C

E

Mascot Search Results

Peptide View

MS/MS Fragmentation of **ATTVTGTPCQDWAAQEPHR**  
Found in **PLMN\_HUMAN**, Plasminogen OS=Homo sapiens GN=PLG PE=1 SV=2

Match to Query 52747: 2436.146322 from(813.056050,3+) rtinseconds(1827) index(65280)  
Title: Locus:1.1.1.1911.11 File:"2013-07-02 CLN FXIII 180 min 2nd FT.wiff"  
Data file C:\Program Files (x86)\Matrix Science\Mascot Daemon\mgf\8 FXIII 180 min 2nd\mascot\_daemon\_merge.mgf

Click mouse within plot area to zoom in by factor of two about that point  
Or, 

Plot from

100

 to 

1900

 Da 

Full range

  
Label all possible matches ☐ Label matches used for scoring ☒

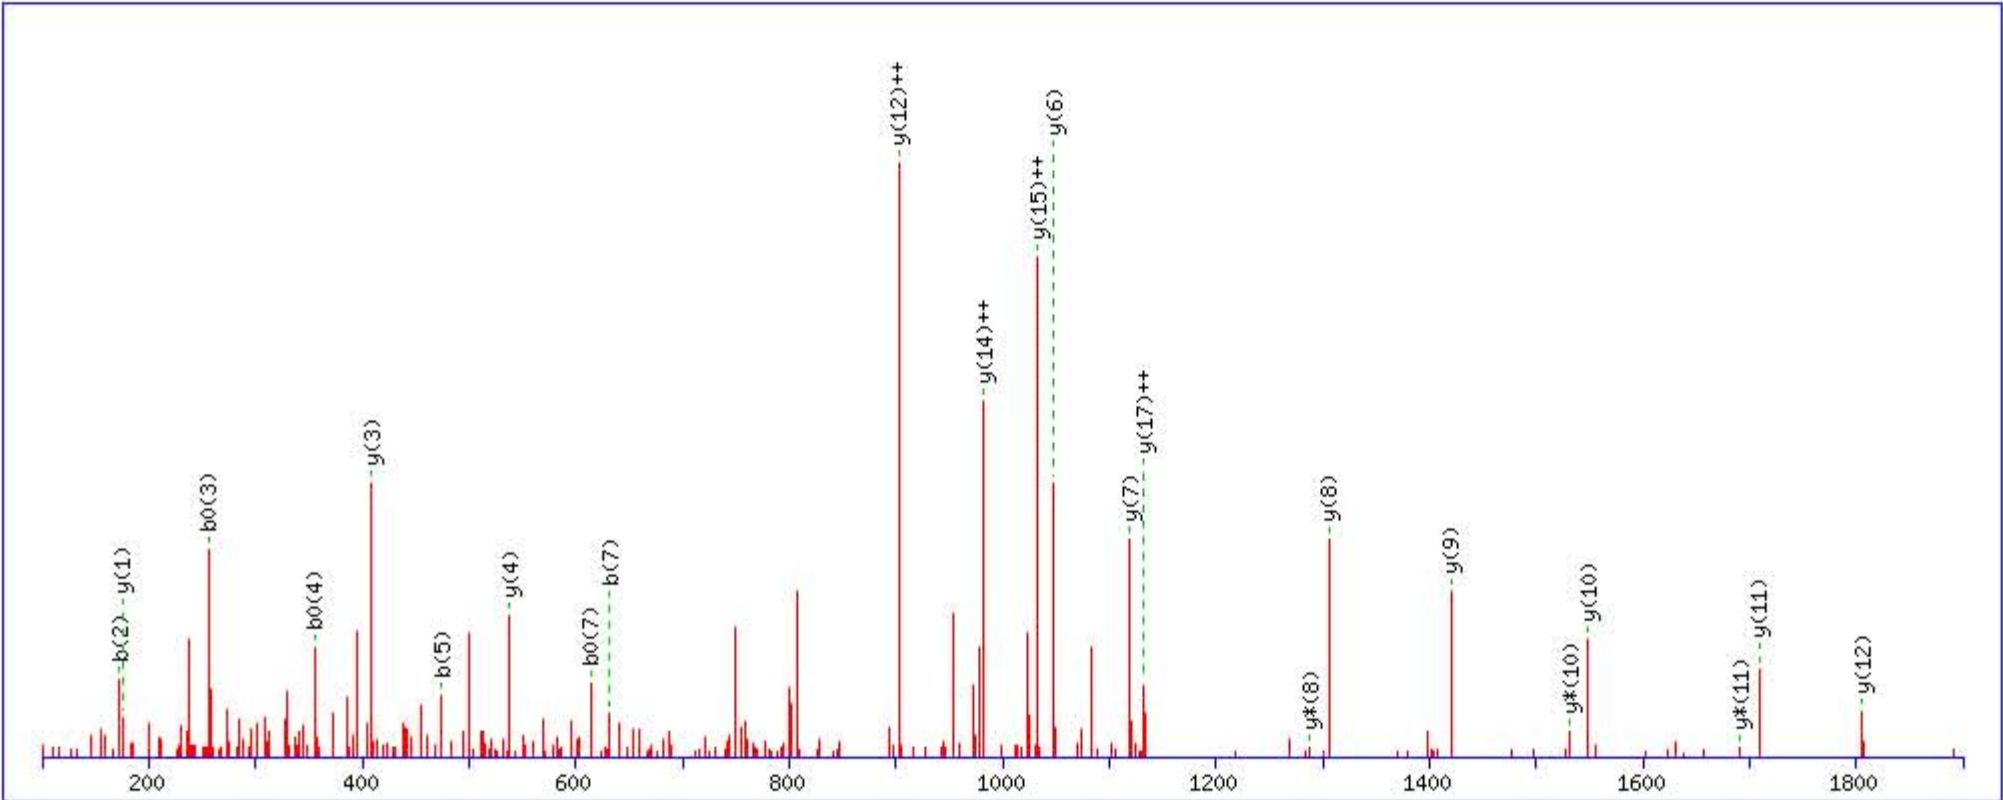

Monoisotopic mass of neutral peptide Mr(calc): 2436.131470  
Fixed modifications: Carbamidomethyl (C) (apply to specified residues or termini only)  
Variable modifications:  
Q15 : Biotin:Thermo-21345 (Q)  
Ions Score: 61 Expect: 1.3e-005  
Matches : 23/190 fragment ions using 36 most intense peaks [\(help\)](#)

| #  | b           | b <sup>++</sup> | b <sup>*</sup> | b <sup>*++</sup> | b <sup>0</sup> | b <sup>0++</sup> | Seq. | y           | y <sup>++</sup> | y <sup>*</sup> | y <sup>*++</sup> | y <sup>0</sup> | y <sup>0++</sup> | #  |
|----|-------------|-----------------|----------------|------------------|----------------|------------------|------|-------------|-----------------|----------------|------------------|----------------|------------------|----|
| 1  | 72.044390   | 36.525833       |                |                  |                |                  | A    |             |                 |                |                  |                |                  | 19 |
| 2  | 173.092069  | 87.049672       |                |                  | 155.081504     | 78.044390        | T    | 2366.101616 | 1183.554446     | 2349.075067    | 1175.041171      | 2348.091051    | 1174.549163      | 18 |
| 3  | 274.139748  | 137.573512      |                |                  | 256.129183     | 128.568230       | T    | 2265.053937 | 1133.030606     | 2248.027388    | 1124.517332      | 2247.043372    | 1124.025324      | 17 |
| 4  | 373.208162  | 187.107719      |                |                  | 355.197597     | 178.102437       | V    | 2164.006258 | 1082.506767     | 2146.979709    | 1073.993492      | 2145.995693    | 1073.501484      | 16 |
| 5  | 474.255841  | 237.631559      |                |                  | 456.245276     | 228.626276       | T    | 2064.937844 | 1032.972560     | 2047.911295    | 1024.459285      | 2046.927279    | 1023.967277      | 15 |
| 6  | 531.277305  | 266.142291      |                |                  | 513.266740     | 257.137008       | G    | 1963.890165 | 982.448721      | 1946.863616    | 973.935446       | 1945.879600    | 973.443438       | 14 |
| 7  | 632.324984  | 316.666130      |                |                  | 614.314419     | 307.660848       | T    | 1906.868701 | 953.937989      | 1889.842152    | 945.424714       | 1888.858136    | 944.932706       | 13 |
| 8  | 729.377748  | 365.192512      |                |                  | 711.367183     | 356.187230       | P    | 1805.821022 | 903.414149      | 1788.794473    | 894.900875       | 1787.810457    | 894.408867       | 12 |
| 9  | 889.408397  | 445.207837      |                |                  | 871.397832     | 436.202554       | C    | 1708.768258 | 854.887767      | 1691.741709    | 846.374493       | 1690.757693    | 845.882485       | 11 |
| 10 | 1017.466975 | 509.237126      | 1000.440426    | 500.723851       | 999.456410     | 500.231843       | Q    | 1548.737609 | 774.872443      | 1531.711060    | 766.359168       | 1530.727044    | 765.867160       | 10 |
| 11 | 1132.493918 | 566.750597      | 1115.467369    | 558.237323       | 1114.483353    | 557.745315       | D    | 1420.679031 | 710.843154      | 1403.652482    | 702.329879       | 1402.668466    | 701.837871       | 9  |
| 12 | 1318.573231 | 659.790254      | 1301.546682    | 651.276979       | 1300.562666    | 650.784971       | W    | 1305.652088 | 653.329682      | 1288.625539    | 644.816408       | 1287.641523    | 644.324400       | 8  |
| 13 | 1389.610345 | 695.308811      | 1372.583796    | 686.795536       | 1371.599780    | 686.303528       | A    | 1119.572775 | 560.290026      | 1102.546226    | 551.776751       | 1101.562210    | 551.284743       | 7  |
| 14 | 1460.647459 | 730.827368      | 1443.620910    | 722.314093       | 1442.636894    | 721.822085       | A    | 1048.535661 | 524.771469      | 1031.509112    | 516.258194       | 1030.525096    | 515.766186       | 6  |
| 15 | 1899.872785 | 950.440031      | 1882.846236    | 941.926756       | 1881.862220    | 941.434748       | Q    | 977.498547  | 489.252912      | 960.471998     | 480.739637       | 959.487982     | 480.247629       | 5  |
| 16 | 2028.915378 | 1014.961327     | 2011.888829    | 1006.448053      | 2010.904813    | 1005.956045      | E    | 538.273221  | 269.640249      | 521.246672     | 261.126974       | 520.262656     | 260.634966       | 4  |
| 17 | 2125.968142 | 1063.487709     | 2108.941593    | 1054.974434      | 2107.957577    | 1054.482427      | P    | 409.230628  | 205.118952      | 392.204079     | 196.605677       |                |                  | 3  |
| 18 | 2263.027054 | 1132.017165     | 2246.000505    | 1123.503890      | 2245.016489    | 1123.011883      | H    | 312.177864  | 156.592570      | 295.151315     | 148.079295       |                |                  | 2  |
| 19 |             |                 |                |                  |                |                  | R    | 175.118952  | 88.063114       | 158.092403     | 79.549839        |                |                  | 1  |

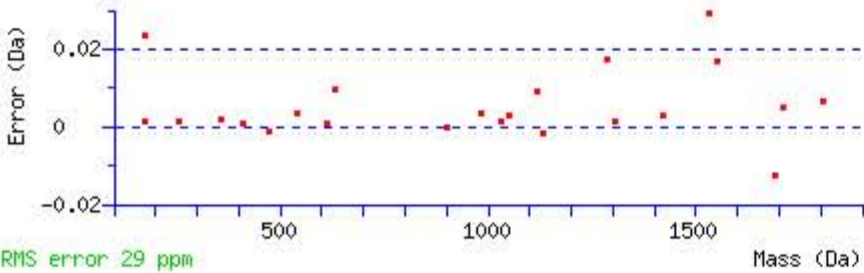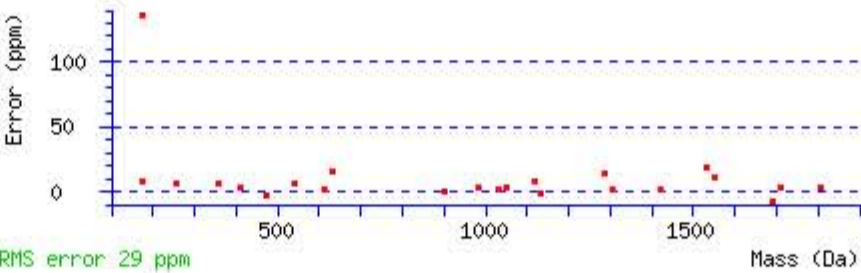

NCBI BLAST search of [ATTVTGTPCQDWAAQEPHR](#)  
(Parameters: blastp, nr protein database, expect=20000, no filter, PAM30)  
Other BLAST [web gateways](#)

All matches to this query

| Score | Mr(calc):   | Delta    | Sequence                            |
|-------|-------------|----------|-------------------------------------|
| 61.1  | 2436.131470 | 0.014852 | <a href="#">ATTVTGTPCQDWAAQEPHR</a> |
| 25.8  | 2436.131470 | 0.014852 | <a href="#">ATTVTGTPCQDWAAQEPHR</a> |

MATRIX

SCIENCE

Mascot Search Results

Peptide View

MS/MS Fragmentation of **VVGGCVAHPHSWPWQVSLR**  
Found in **PLMN\_HUMAN**, Plasminogen OS=Homo sapiens GN=PLG PE=1 SV=2

Match to Query 53789: 2482.274382 from(828.432070,3+) rtinseconds(2201) index(67629)  
Title: Locus:1.1.1.2041.10 File:"2013-07-02 CLN FXIII 180 min 2nd FT.wiff"  
Data file C:\Program Files (x86)\Matrix Science\Mascot Daemon\mgf\8 FXIII 180 min 2nd\mascot\_daemon\_merge.mgf

Click mouse within plot area to zoom in by factor of two about that point  
Or,  0 to  Da   
Label all possible matches ☐ Label matches used for scoring ☒

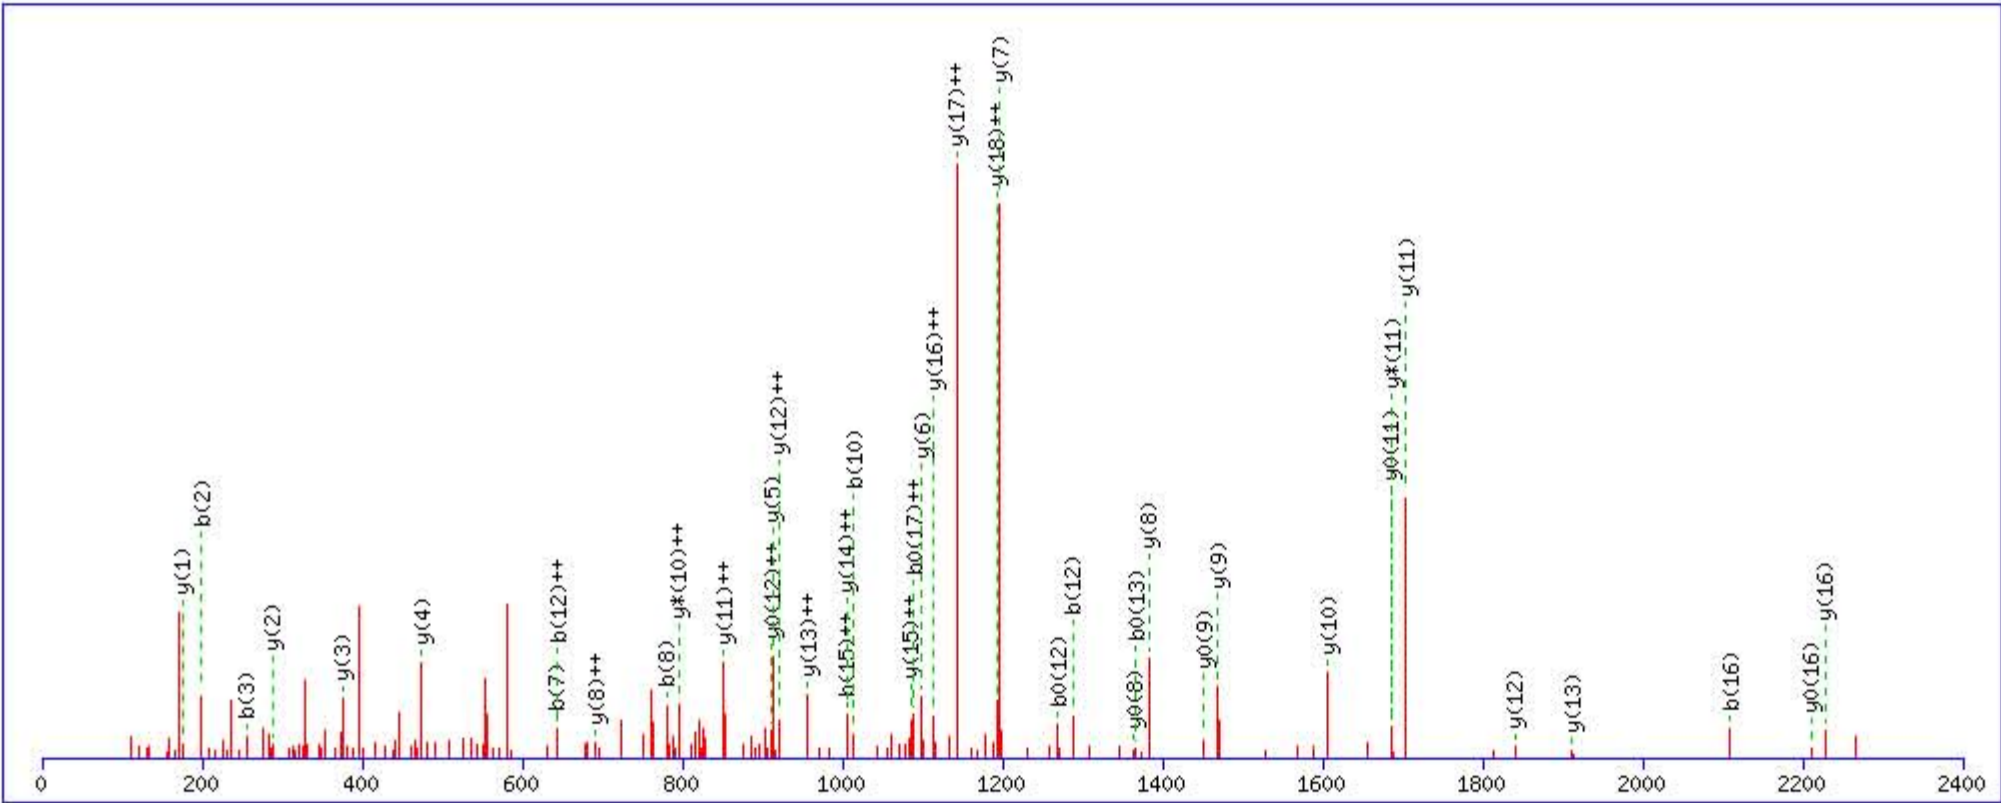

Monoisotopic mass of neutral peptide Mr(calc): 2482.251480  
Fixed modifications: Carbamidomethyl (C) (apply to specified residues or termini only)  
Variable modifications:  
Q15 : Biotin:Thermo-21345 (Q)  
Ions Score: 62 Expect: 1.8e-005  
Matches : 42/164 fragment ions using 101 most intense peaks [\(help\)](#)

| #  | b           | b <sup>++</sup> | b <sup>*</sup> | b <sup>+++</sup> | b <sup>0</sup> | b <sup>0++</sup> | Seq. | y           | y <sup>++</sup> | y <sup>*</sup> | y <sup>+++</sup> | y <sup>0</sup> | y <sup>0++</sup> | #  |
|----|-------------|-----------------|----------------|------------------|----------------|------------------|------|-------------|-----------------|----------------|------------------|----------------|------------------|----|
| 1  | 100.075690  | 50.541483       |                |                  |                |                  | V    |             |                 |                |                  |                |                  | 19 |
| 2  | 199.144104  | 100.075690      |                |                  |                |                  | V    | 2384.190309 | 1192.598792     | 2367.163760    | 1184.085518      | 2366.179744    | 1183.593510      | 18 |
| 3  | 256.165568  | 128.586422      |                |                  |                |                  | G    | 2285.121895 | 1143.064585     | 2268.095346    | 1134.551311      | 2267.111330    | 1134.059303      | 17 |
| 4  | 313.187032  | 157.097154      |                |                  |                |                  | G    | 2228.100431 | 1114.553853     | 2211.073882    | 1106.040579      | 2210.089866    | 1105.548571      | 16 |
| 5  | 473.217681  | 237.112479      |                |                  |                |                  | C    | 2171.078967 | 1086.043121     | 2154.052418    | 1077.529847      | 2153.068402    | 1077.037839      | 15 |
| 6  | 572.286095  | 286.646686      |                |                  |                |                  | V    | 2011.048318 | 1006.027797     | 1994.021769    | 997.514523       | 1993.037753    | 997.022515       | 14 |
| 7  | 643.323209  | 322.165243      |                |                  |                |                  | A    | 1911.979904 | 956.493590      | 1894.953355    | 947.980316       | 1893.969339    | 947.488308       | 13 |
| 8  | 780.382121  | 390.694699      |                |                  |                |                  | H    | 1840.942790 | 920.975033      | 1823.916241    | 912.461759       | 1822.932225    | 911.969751       | 12 |
| 9  | 877.434885  | 439.221081      |                |                  |                |                  | P    | 1703.883878 | 852.445577      | 1686.857329    | 843.932303       | 1685.873313    | 843.440295       | 11 |
| 10 | 1014.493797 | 507.750537      |                |                  |                |                  | H    | 1606.831114 | 803.919195      | 1589.804565    | 795.405921       | 1588.820549    | 794.913913       | 10 |
| 11 | 1101.525825 | 551.266550      |                |                  | 1083.515260    | 542.261268       | S    | 1469.772202 | 735.389739      | 1452.745653    | 726.876465       | 1451.761637    | 726.384457       | 9  |
| 12 | 1287.605138 | 644.306207      |                |                  | 1269.594573    | 635.300924       | W    | 1382.740174 | 691.873725      | 1365.713625    | 683.360451       | 1364.729609    | 682.868443       | 8  |
| 13 | 1384.657902 | 692.832589      |                |                  | 1366.647337    | 683.827306       | P    | 1196.660861 | 598.834069      | 1179.634312    | 590.320794       | 1178.650296    | 589.828786       | 7  |
| 14 | 1570.737215 | 785.872245      |                |                  | 1552.726650    | 776.866963       | W    | 1099.608097 | 550.307687      | 1082.581548    | 541.794412       | 1081.597532    | 541.302404       | 6  |
| 15 | 2009.962541 | 1005.484909     | 1992.935992    | 996.971634       | 1991.951976    | 996.479626       | Q    | 913.528784  | 457.268030      | 896.502235     | 448.754756       | 895.518219     | 448.262748       | 5  |
| 16 | 2109.030955 | 1055.019115     | 2092.004406    | 1046.505841      | 2091.020390    | 1046.013833      | V    | 474.303458  | 237.655367      | 457.276909     | 229.142092       | 456.292893     | 228.650084       | 4  |
| 17 | 2196.062983 | 1098.535129     | 2179.036434    | 1090.021855      | 2178.052418    | 1089.529847      | S    | 375.235044  | 188.121160      | 358.208495     | 179.607886       | 357.224479     | 179.115878       | 3  |
| 18 | 2309.147047 | 1155.077161     | 2292.120498    | 1146.563887      | 2291.136482    | 1146.071879      | L    | 288.203016  | 144.605146      | 271.176467     | 136.091872       |                |                  | 2  |
| 19 |             |                 |                |                  |                |                  | R    | 175.118952  | 88.063114       | 158.092403     | 79.549839        |                |                  | 1  |

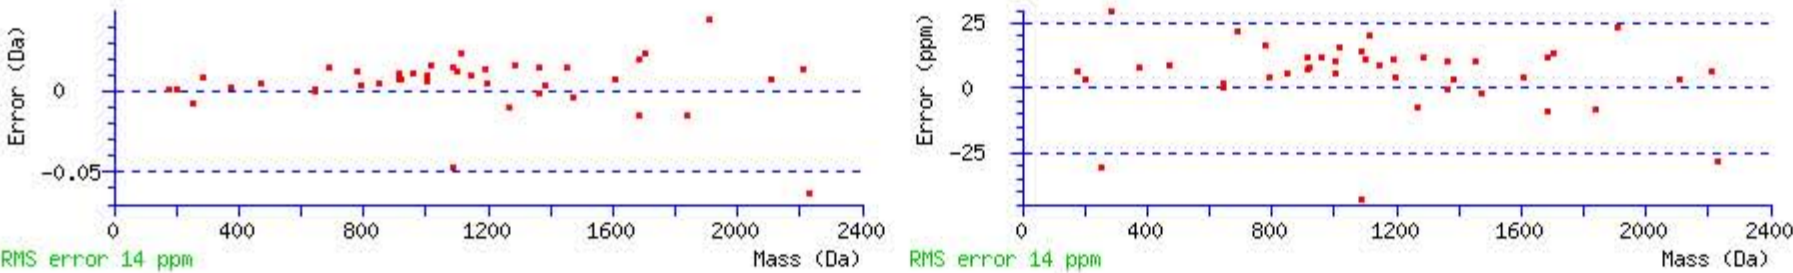

NCBI BLAST search of [VVGGCVAHPHSWPWQVSLR](#)  
(Parameters: blastp, nr protein database, expect=20000, no filter, PAM30)  
Other BLAST [web gateways](#)

All matches to this query

| Score | Mr(calc):   | Delta    | Sequence                            |
|-------|-------------|----------|-------------------------------------|
| 62.3  | 2482.251480 | 0.022902 | <a href="#">VVGGCVAHPHSWPWQVSLR</a> |

M

A

T

R

I

X

S

C

I

E

N

C

E

Mascot Search Results

Peptide View

MS/MS Fragmentation of **NPDNDPQGPWCYTTDPEKR**  
Found in **PLMN\_HUMAN**, Plasminogen OS=Homo sapiens GN=PLG PE=1 SV=2

Match to Query 55507: 2600.161812 from(867.727880,3+) rtinseconds(1946) index(66095)  
Title: Locus:1.1.1.1952.25 File:"2013-07-02 CLN FXIII 180 min 2nd FT.wiff"  
Data file C:\Program Files (x86)\Matrix Science\Mascot Daemon\mgf\8 FXIII 180 min 2nd\mascot\_daemon\_merge.mgf

Click mouse within plot area to zoom in by factor of two about that point  
Or,   to  Da   
Label all possible matches ☐ Label matches used for scoring ☒

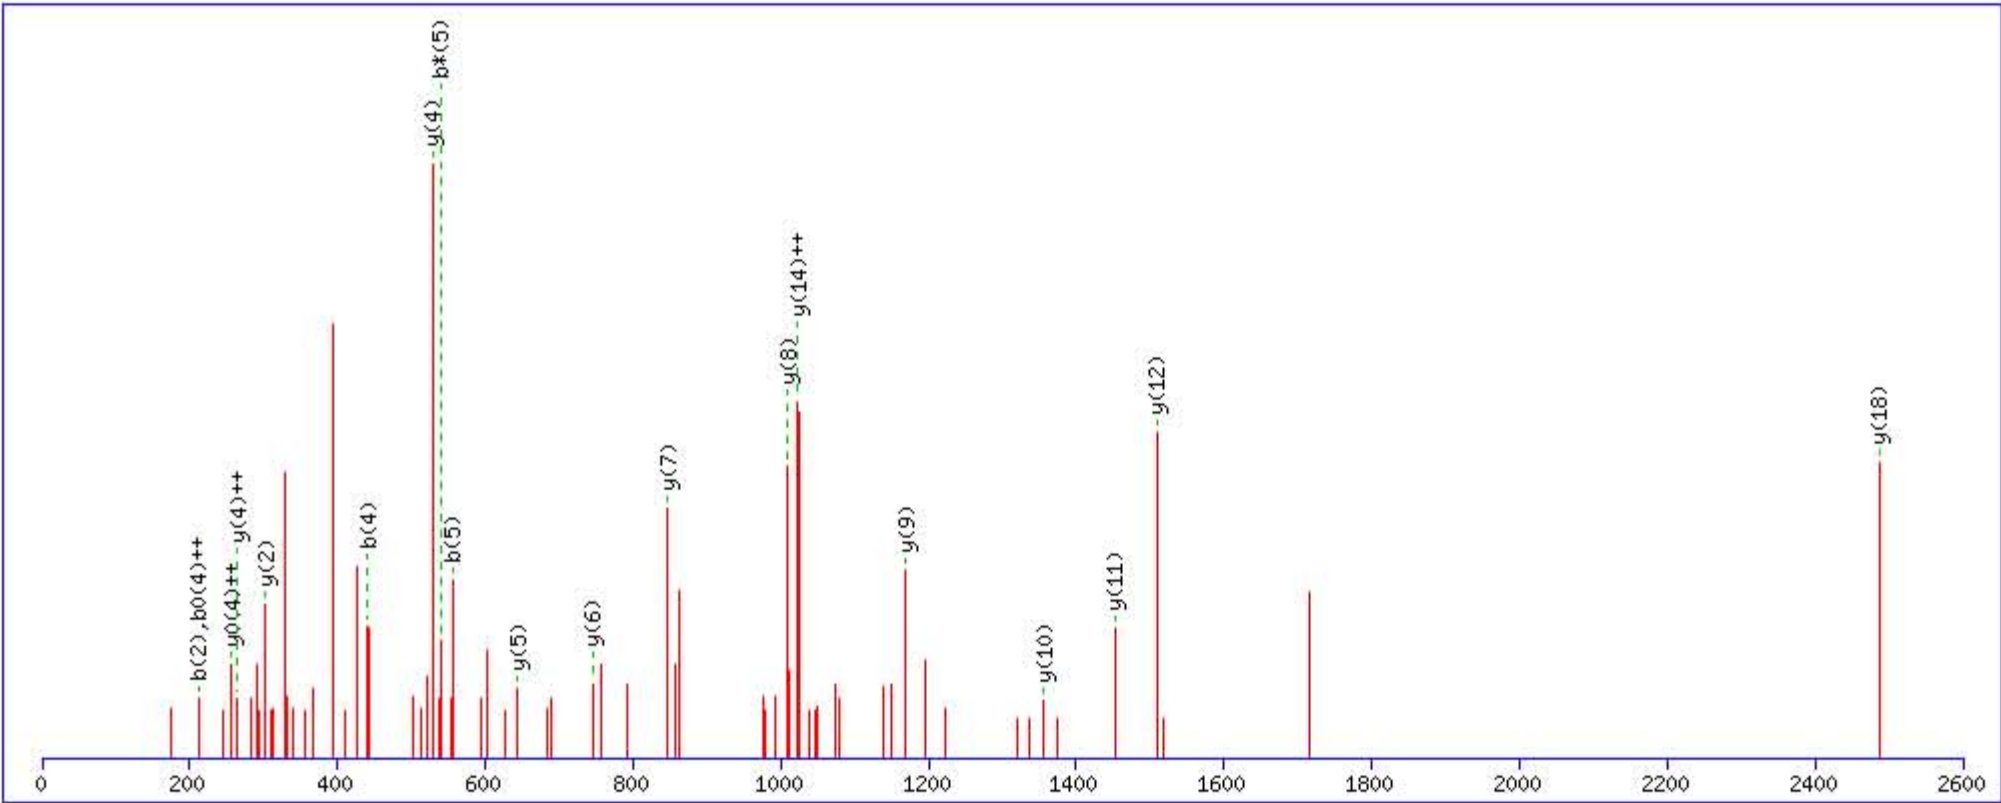

Monoisotopic mass of neutral peptide Mr(calc): 2600.142410  
Fixed modifications: Carbamidomethyl (C) (apply to specified residues or termini only)  
Variable modifications:  
Q7 : Biotin:Thermo-21345 (Q)  
Ions Score: 57 Expect: 1.8e-005  
Matches : 19/208 fragment ions using 37 most intense peaks [\(help\)](#)

| #  | b           | b <sup>++</sup> | b <sup>*</sup> | b <sup>*++</sup> | b <sup>0</sup> | b <sup>0++</sup> | Seq. | y           | y <sup>++</sup> | y <sup>*</sup> | y <sup>*++</sup> | y <sup>0</sup> | y <sup>0++</sup> | #  |
|----|-------------|-----------------|----------------|------------------|----------------|------------------|------|-------------|-----------------|----------------|------------------|----------------|------------------|----|
| 1  | 115.050203  | 58.028740       | 98.023654      | 49.515465        |                |                  | N    |             |                 |                |                  |                |                  | 19 |
| 2  | 212.102967  | 106.555121      | 195.076418     | 98.041847        |                |                  | P    | 2487.106759 | 1244.057017     | 2470.080210    | 1235.543743      | 2469.096194    | 1235.051735      | 18 |
| 3  | 327.129910  | 164.068593      | 310.103361     | 155.555319       | 309.119345     | 155.063311       | D    | 2390.053995 | 1195.530635     | 2373.027446    | 1187.017361      | 2372.043430    | 1186.525353      | 17 |
| 4  | 441.172837  | 221.090057      | 424.146288     | 212.576782       | 423.162272     | 212.084774       | N    | 2275.027052 | 1138.017164     | 2258.000503    | 1129.503889      | 2257.016487    | 1129.011881      | 16 |
| 5  | 556.199780  | 278.603528      | 539.173231     | 270.090254       | 538.189215     | 269.598246       | D    | 2160.984125 | 1080.995700     | 2143.957576    | 1072.482426      | 2142.973560    | 1071.990418      | 15 |
| 6  | 653.252544  | 327.129910      | 636.225995     | 318.616636       | 635.241979     | 318.124628       | P    | 2045.957182 | 1023.482229     | 2028.930633    | 1014.968955      | 2027.946617    | 1014.476946      | 14 |
| 7  | 1092.477870 | 546.742573      | 1075.451321    | 538.229299       | 1074.467305    | 537.737290       | Q    | 1948.904418 | 974.955847      | 1931.877869    | 966.442572       | 1930.893853    | 965.950564       | 13 |
| 8  | 1149.499334 | 575.253305      | 1132.472785    | 566.740030       | 1131.488769    | 566.248022       | G    | 1509.679092 | 755.343184      | 1492.652543    | 746.829910       | 1491.668527    | 746.337902       | 12 |
| 9  | 1246.552098 | 623.779687      | 1229.525549    | 615.266413       | 1228.541533    | 614.774404       | P    | 1452.657628 | 726.832452      | 1435.631079    | 718.319178       | 1434.647063    | 717.827170       | 11 |
| 10 | 1432.631411 | 716.819343      | 1415.604862    | 708.306069       | 1414.620846    | 707.814061       | W    | 1355.604864 | 678.306070      | 1338.578315    | 669.792796       | 1337.594299    | 669.300788       | 10 |
| 11 | 1592.662060 | 796.834668      | 1575.635511    | 788.321394       | 1574.651495    | 787.829385       | C    | 1169.525551 | 585.266414      | 1152.499002    | 576.753139       | 1151.514986    | 576.261131       | 9  |
| 12 | 1755.725389 | 878.366333      | 1738.698840    | 869.853058       | 1737.714824    | 869.361050       | Y    | 1009.494902 | 505.251089      | 992.468353     | 496.737815       | 991.484337     | 496.245807       | 8  |
| 13 | 1856.773068 | 928.890172      | 1839.746519    | 920.376898       | 1838.762503    | 919.884889       | T    | 846.431573  | 423.719425      | 829.405024     | 415.206150       | 828.421008     | 414.714142       | 7  |
| 14 | 1957.820747 | 979.414012      | 1940.794198    | 970.900737       | 1939.810182    | 970.408729       | T    | 745.383894  | 373.195585      | 728.357345     | 364.682311       | 727.373329     | 364.190303       | 6  |
| 15 | 2072.847690 | 1036.927483     | 2055.821141    | 1028.414208      | 2054.837125    | 1027.922200      | D    | 644.336215  | 322.671746      | 627.309666     | 314.158471       | 626.325650     | 313.666463       | 5  |
| 16 | 2169.900454 | 1085.453865     | 2152.873905    | 1076.940590      | 2151.889889    | 1076.448582      | P    | 529.309272  | 265.158274      | 512.282723     | 256.645000       | 511.298707     | 256.152992       | 4  |
| 17 | 2298.943047 | 1149.975161     | 2281.916498    | 1141.461887      | 2280.932482    | 1140.969879      | E    | 432.256508  | 216.631892      | 415.229959     | 208.118618       | 414.245943     | 207.626610       | 3  |
| 18 | 2427.038010 | 1214.022643     | 2410.011461    | 1205.509368      | 2409.027445    | 1205.017360      | K    | 303.213915  | 152.110595      | 286.187366     | 143.597321       |                |                  | 2  |
| 19 |             |                 |                |                  |                |                  | R    | 175.118952  | 88.063114       | 158.092403     | 79.549839        |                |                  | 1  |

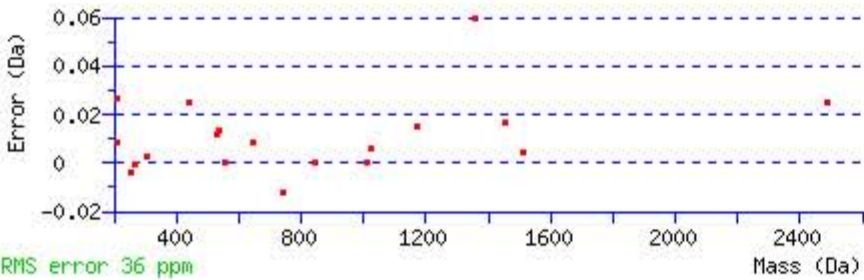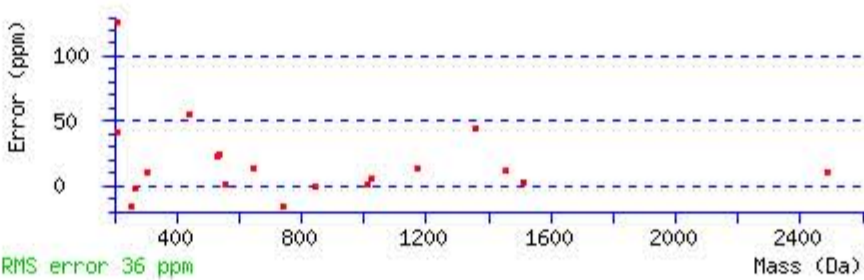

NCBI BLAST search of [NPDNDPQGPWCYTTDPEKR](#)  
(Parameters: blastp, nr protein database, expect=20000, no filter, PAM30)  
Other BLAST [web gateways](#)

All matches to this query

| Score | Mr(calc):   | Delta    | Sequence                            |
|-------|-------------|----------|-------------------------------------|
| 56.6  | 2600.142410 | 0.019402 | <a href="#">NPDNDPQGPWCYTTDPEKR</a> |

MATRIX

SCIENCE

Mascot Search Results

Peptide View

MS/MS Fragmentation of **VILGAHQEVNLEPHVQEIEVSR**  
Found in **PLMN\_HUMAN**, Plasminogen OS=Homo sapiens GN=PLG PE=1 SV=2

Match to Query 57673: 2806.495776 from(702.631220,4+) rtinseconds(2043) index(66669)  
Title: Locus:1.1.1.1986.12 File:"2013-07-02 CLN FXIII 180 min 2nd FT.wiff"  
Data file C:\Program Files (x86)\Matrix Science\Mascot Daemon\mgf\8 FXIII 180 min 2nd\mascot\_daemon\_merge.mgf

Click mouse within plot area to zoom in by factor of two about that point  
Or, 

Plot from

0

 to 

2800

 Da 

Full range

  
Label all possible matches ☐ Label matches used for scoring ☒

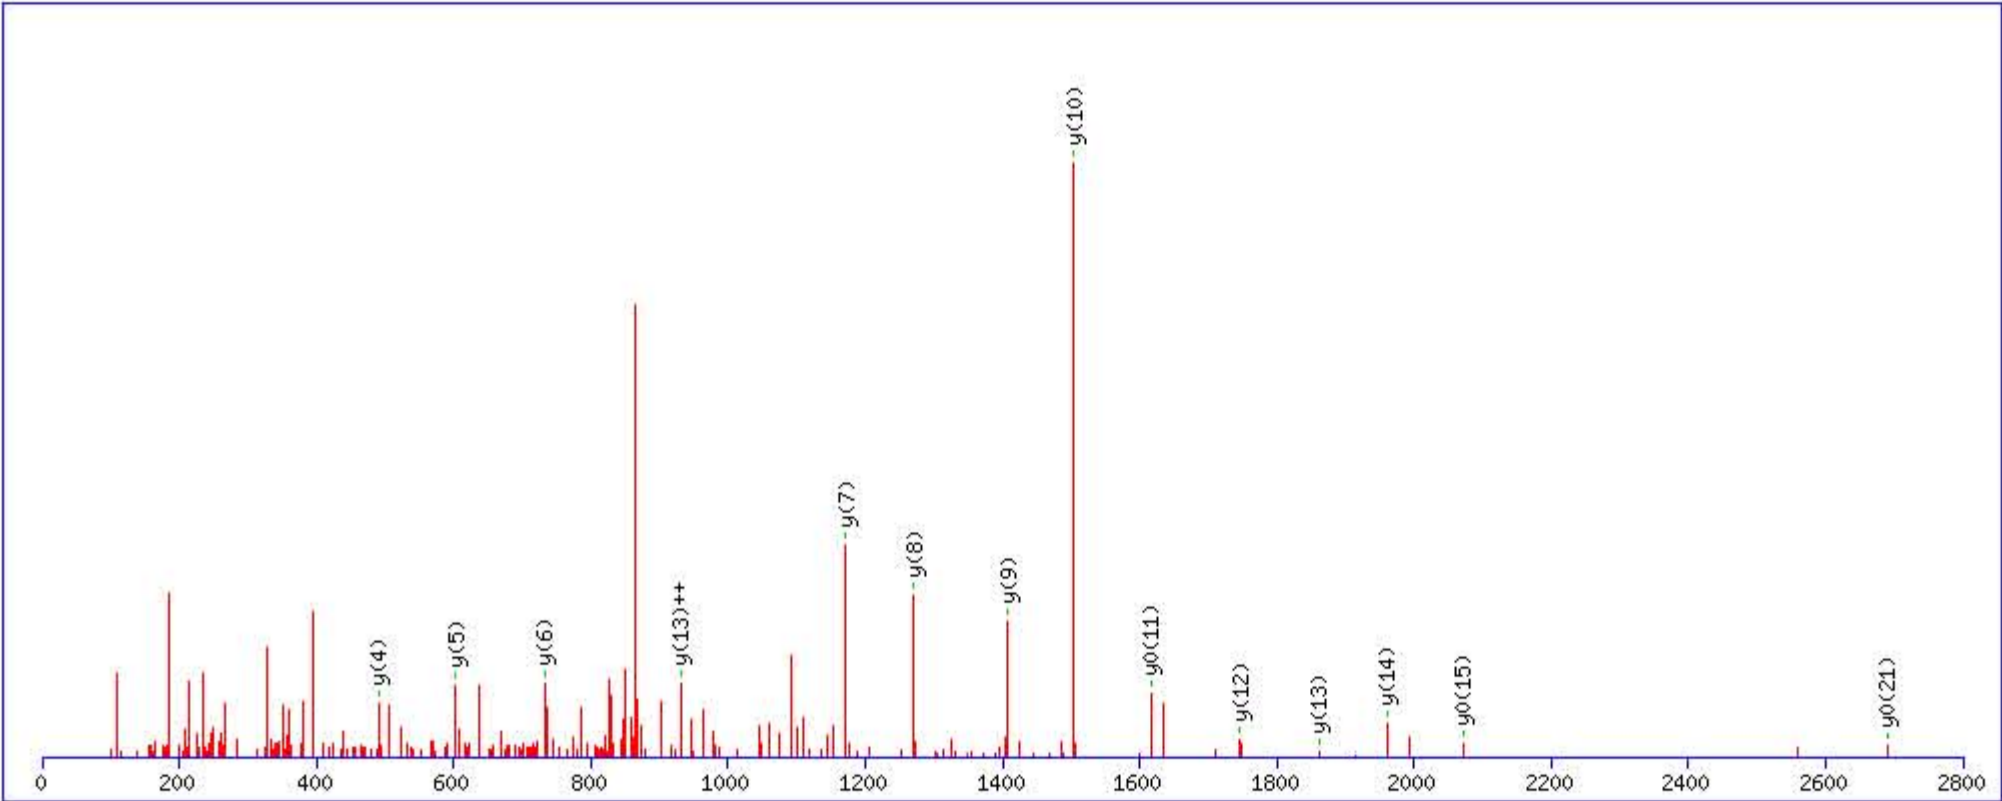

Monoisotopic mass of neutral peptide Mr(calc): 2806.479965  
Fixed modifications: Carbamidomethyl (C) (apply to specified residues or termini only)  
Variable modifications:  
Q16 : Biotin:Thermo-21345 (Q)  
Ions Score: 59 Expect: 2.7e-005  
Matches : 14/224 fragment ions using 22 most intense peaks [\(help\)](#)

| #  | b           | b <sup>++</sup> | b <sup>*</sup> | b <sup>*++</sup> | b <sup>0</sup> | b <sup>0++</sup> | Seq. | y           | y <sup>++</sup> | y <sup>*</sup> | y <sup>*++</sup> | y <sup>0</sup> | y <sup>0++</sup> | #  |
|----|-------------|-----------------|----------------|------------------|----------------|------------------|------|-------------|-----------------|----------------|------------------|----------------|------------------|----|
| 1  | 100.075690  | 50.541483       |                |                  |                |                  | V    |             |                 |                |                  |                |                  | 22 |
| 2  | 213.159754  | 107.083515      |                |                  |                |                  | I    | 2708.418847 | 1354.713061     | 2691.392298    | 1346.199787      | 2690.408282    | 1345.707779      | 21 |
| 3  | 326.243818  | 163.625547      |                |                  |                |                  | L    | 2595.334783 | 1298.171029     | 2578.308234    | 1289.657755      | 2577.324218    | 1289.165747      | 20 |
| 4  | 383.265282  | 192.136279      |                |                  |                |                  | G    | 2482.250719 | 1241.628997     | 2465.224170    | 1233.115723      | 2464.240154    | 1232.623715      | 19 |
| 5  | 454.302396  | 227.654836      |                |                  |                |                  | A    | 2425.229255 | 1213.118265     | 2408.202706    | 1204.604991      | 2407.218690    | 1204.112983      | 18 |
| 6  | 591.361308  | 296.184292      |                |                  |                |                  | H    | 2354.192141 | 1177.599708     | 2337.165592    | 1169.086434      | 2336.181576    | 1168.594426      | 17 |
| 7  | 719.419886  | 360.213581      | 702.393337     | 351.700307       |                |                  | Q    | 2217.133229 | 1109.070252     | 2200.106680    | 1100.556978      | 2199.122664    | 1100.064970      | 16 |
| 8  | 848.462479  | 424.734878      | 831.435930     | 416.221603       | 830.451914     | 415.729595       | E    | 2089.074651 | 1045.040963     | 2072.048102    | 1036.527689      | 2071.064086    | 1036.035681      | 15 |
| 9  | 947.530893  | 474.269085      | 930.504344     | 465.755810       | 929.520328     | 465.263802       | V    | 1960.032058 | 980.519667      | 1943.005509    | 972.006393       | 1942.021493    | 971.514385       | 14 |
| 10 | 1061.573820 | 531.290548      | 1044.547271    | 522.777274       | 1043.563255    | 522.285266       | N    | 1860.963644 | 930.985460      | 1843.937095    | 922.472186       | 1842.953079    | 921.980178       | 13 |
| 11 | 1174.657884 | 587.832580      | 1157.631335    | 579.319306       | 1156.647319    | 578.827297       | L    | 1746.920717 | 873.963997      | 1729.894168    | 865.450722       | 1728.910152    | 864.958714       | 12 |
| 12 | 1303.700477 | 652.353877      | 1286.673928    | 643.840602       | 1285.689912    | 643.348594       | E    | 1633.836653 | 817.421965      | 1616.810104    | 808.908690       | 1615.826088    | 808.416682       | 11 |
| 13 | 1400.753241 | 700.880259      | 1383.726692    | 692.366984       | 1382.742676    | 691.874976       | P    | 1504.794060 | 752.900668      | 1487.767511    | 744.387394       | 1486.783495    | 743.895386       | 10 |
| 14 | 1537.812153 | 769.409715      | 1520.785604    | 760.896440       | 1519.801588    | 760.404432       | H    | 1407.741296 | 704.374286      | 1390.714747    | 695.861012       | 1389.730731    | 695.369004       | 9  |
| 15 | 1636.880567 | 818.943922      | 1619.854018    | 810.430647       | 1618.870002    | 809.938639       | V    | 1270.682384 | 635.844830      | 1253.655835    | 627.331556       | 1252.671819    | 626.839548       | 8  |
| 16 | 2076.105893 | 1038.556584     | 2059.079344    | 1030.043310      | 2058.095328    | 1029.551302      | Q    | 1171.613970 | 586.310623      | 1154.587421    | 577.797349       | 1153.603405    | 577.305341       | 7  |
| 17 | 2205.148486 | 1103.077881     | 2188.121937    | 1094.564606      | 2187.137921    | 1094.072598      | E    | 732.388644  | 366.697960      | 715.362095     | 358.184686       | 714.378079     | 357.692678       | 6  |
| 18 | 2318.232550 | 1159.619913     | 2301.206001    | 1151.106638      | 2300.221985    | 1150.614631      | I    | 603.346051  | 302.176664      | 586.319502     | 293.663389       | 585.335486     | 293.171381       | 5  |
| 19 | 2447.275143 | 1224.141210     | 2430.248594    | 1215.627935      | 2429.264578    | 1215.135927      | E    | 490.261987  | 245.634631      | 473.235438     | 237.121357       | 472.251422     | 236.629349       | 4  |
| 20 | 2546.343557 | 1273.675417     | 2529.317008    | 1265.162142      | 2528.332992    | 1264.670134      | V    | 361.219394  | 181.113335      | 344.192845     | 172.600060       | 343.208829     | 172.108052       | 3  |
| 21 | 2633.375585 | 1317.191431     | 2616.349036    | 1308.678156      | 2615.365020    | 1308.186148      | S    | 262.150980  | 131.579128      | 245.124431     | 123.065854       | 244.140415     | 122.573846       | 2  |
| 22 |             |                 |                |                  |                |                  | R    | 175.118952  | 88.063114       | 158.092403     | 79.549839        |                |                  | 1  |

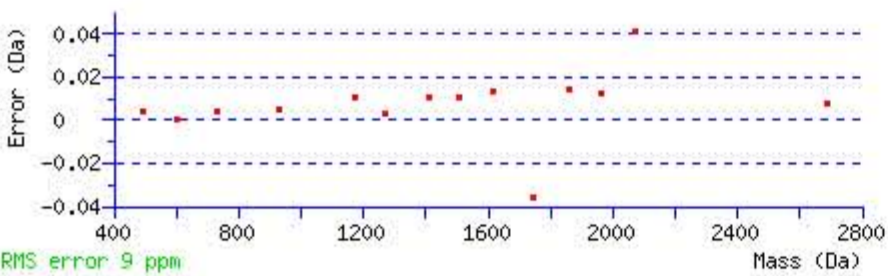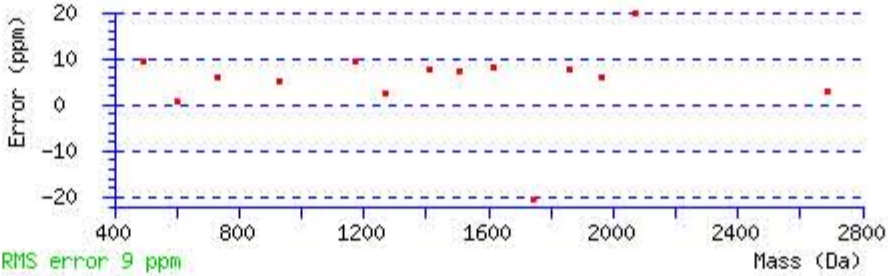

NCBI BLAST search of [VILGAHQEVNLEPHVQEIEVSR](#)  
(Parameters: blastp, nr protein database, expect=20000, no filter, PAM30)  
Other BLAST [web gateways](#)

All matches to this query

| Score | Mr(calc):   | Delta    | Sequence                               |
|-------|-------------|----------|----------------------------------------|
| 58.6  | 2806.479965 | 0.015811 | <a href="#">VILGAHQEVNLEPHVQEIEVSR</a> |

M

A

T

R

I

X

S

C

I

E

N

C

E

Mascot Search Results

Peptide View

MS/MS Fragmentation of **VILGAHQEVNLEPHVQEIEVSR**  
Found in **PLMN\_HUMAN**, Plasminogen OS=Homo sapiens GN=PLG PE=1 SV=2

Match to Query 57675: 2806.496136 from(702.631310,4+) rtinseconds(2091) index(66945)  
Title: Locus:1.1.1.2003.14 File:"2013-07-02 CLN FXIII 180 min 2nd FT.wiff"  
Data file C:\Program Files (x86)\Matrix Science\Mascot Daemon\mgf\8 FXIII 180 min 2nd\mascot\_daemon\_merge.mgf

Click mouse within plot area to zoom in by factor of two about that point  
Or, 

Plot from

0

 to 

2800

 Da 

Full range

  
Label all possible matches ☐ Label matches used for scoring ☒

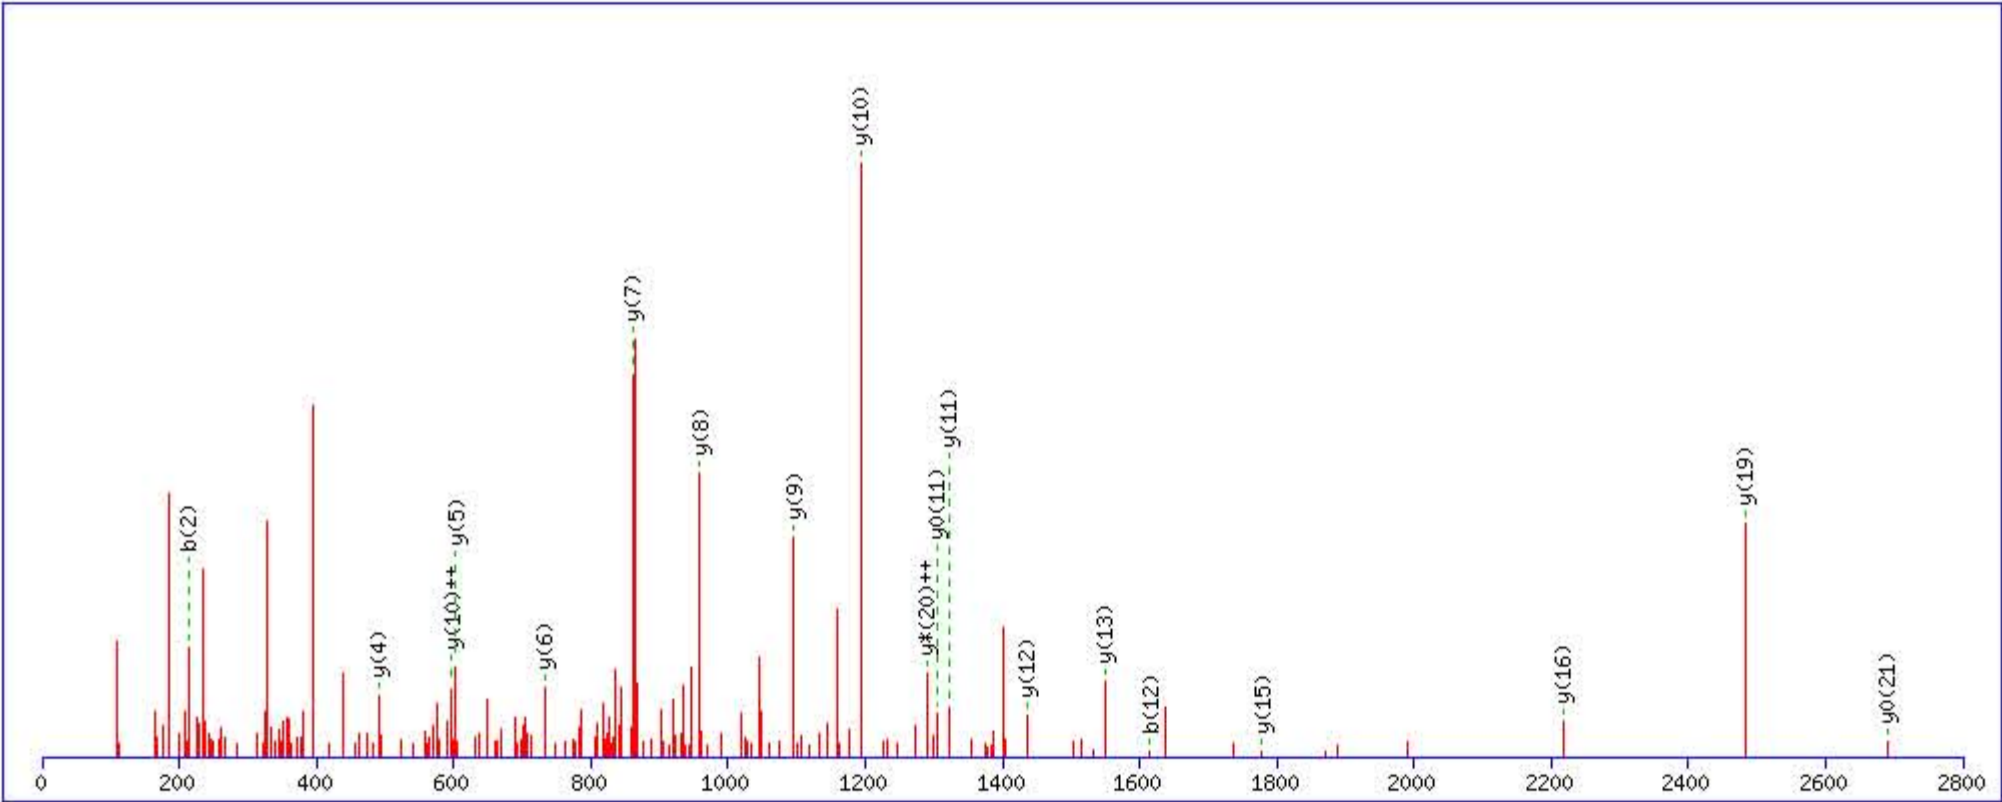

Monoisotopic mass of neutral peptide Mr(calc): 2806.479965  
Fixed modifications: Carbamidomethyl (C) (apply to specified residues or termini only)  
Variable modifications:  
Q7 : Biotin:Thermo-21345 (Q)  
Ions Score: 66 Expect: 4.6e-006  
Matches : 19/224 fragment ions using 40 most intense peaks [\(help\)](#)

| #  | b           | b <sup>++</sup> | b <sup>*</sup> | b <sup>*++</sup> | b <sup>0</sup> | b <sup>0++</sup> | Seq. | y           | y <sup>++</sup> | y <sup>*</sup> | y <sup>*++</sup> | y <sup>0</sup> | y <sup>0++</sup> | #  |
|----|-------------|-----------------|----------------|------------------|----------------|------------------|------|-------------|-----------------|----------------|------------------|----------------|------------------|----|
| 1  | 100.075690  | 50.541483       |                |                  |                |                  | V    |             |                 |                |                  |                |                  | 22 |
| 2  | 213.159754  | 107.083515      |                |                  |                |                  | I    | 2708.418847 | 1354.713061     | 2691.392298    | 1346.199787      | 2690.408282    | 1345.707779      | 21 |
| 3  | 326.243818  | 163.625547      |                |                  |                |                  | L    | 2595.334783 | 1298.171029     | 2578.308234    | 1289.657755      | 2577.324218    | 1289.165747      | 20 |
| 4  | 383.265282  | 192.136279      |                |                  |                |                  | G    | 2482.250719 | 1241.628997     | 2465.224170    | 1233.115723      | 2464.240154    | 1232.623715      | 19 |
| 5  | 454.302396  | 227.654836      |                |                  |                |                  | A    | 2425.229255 | 1213.118265     | 2408.202706    | 1204.604991      | 2407.218690    | 1204.112983      | 18 |
| 6  | 591.361308  | 296.184292      |                |                  |                |                  | H    | 2354.192141 | 1177.599708     | 2337.165592    | 1169.086434      | 2336.181576    | 1168.594426      | 17 |
| 7  | 1030.586634 | 515.796955      | 1013.560085    | 507.283681       |                |                  | Q    | 2217.133229 | 1109.070252     | 2200.106680    | 1100.556978      | 2199.122664    | 1100.064970      | 16 |
| 8  | 1159.629227 | 580.318252      | 1142.602678    | 571.804977       | 1141.618662    | 571.312969       | E    | 1777.907903 | 889.457590      | 1760.881354    | 880.944315       | 1759.897338    | 880.452307       | 15 |
| 9  | 1258.697641 | 629.852459      | 1241.671092    | 621.339184       | 1240.687076    | 620.847176       | V    | 1648.865310 | 824.936293      | 1631.838761    | 816.423019       | 1630.854745    | 815.931011       | 14 |
| 10 | 1372.740568 | 686.873922      | 1355.714019    | 678.360648       | 1354.730003    | 677.868640       | N    | 1549.796896 | 775.402086      | 1532.770347    | 766.888812       | 1531.786331    | 766.396804       | 13 |
| 11 | 1485.824632 | 743.415954      | 1468.798083    | 734.902680       | 1467.814067    | 734.410672       | L    | 1435.753969 | 718.380623      | 1418.727420    | 709.867348       | 1417.743404    | 709.375340       | 12 |
| 12 | 1614.867225 | 807.937251      | 1597.840676    | 799.423976       | 1596.856660    | 798.931968       | E    | 1322.669905 | 661.838591      | 1305.643356    | 653.325316       | 1304.659340    | 652.833308       | 11 |
| 13 | 1711.919989 | 856.463633      | 1694.893440    | 847.950358       | 1693.909424    | 847.458350       | P    | 1193.627312 | 597.317294      | 1176.600763    | 588.804020       | 1175.616747    | 588.312012       | 10 |
| 14 | 1848.978901 | 924.993089      | 1831.952352    | 916.479814       | 1830.968336    | 915.987806       | H    | 1096.574548 | 548.790912      | 1079.547999    | 540.277638       | 1078.563983    | 539.785630       | 9  |
| 15 | 1948.047315 | 974.527296      | 1931.020766    | 966.014021       | 1930.036750    | 965.522013       | V    | 959.515636  | 480.261456      | 942.489087     | 471.748182       | 941.505071     | 471.256174       | 8  |
| 16 | 2076.105893 | 1038.556584     | 2059.079344    | 1030.043310      | 2058.095328    | 1029.551302      | Q    | 860.447222  | 430.727249      | 843.420673     | 422.213975       | 842.436657     | 421.721967       | 7  |
| 17 | 2205.148486 | 1103.077881     | 2188.121937    | 1094.564606      | 2187.137921    | 1094.072598      | E    | 732.388644  | 366.697960      | 715.362095     | 358.184686       | 714.378079     | 357.692678       | 6  |
| 18 | 2318.232550 | 1159.619913     | 2301.206001    | 1151.106638      | 2300.221985    | 1150.614631      | I    | 603.346051  | 302.176664      | 586.319502     | 293.663389       | 585.335486     | 293.171381       | 5  |
| 19 | 2447.275143 | 1224.141210     | 2430.248594    | 1215.627935      | 2429.264578    | 1215.135927      | E    | 490.261987  | 245.634631      | 473.235438     | 237.121357       | 472.251422     | 236.629349       | 4  |
| 20 | 2546.343557 | 1273.675417     | 2529.317008    | 1265.162142      | 2528.332992    | 1264.670134      | V    | 361.219394  | 181.113335      | 344.192845     | 172.600060       | 343.208829     | 172.108052       | 3  |
| 21 | 2633.375585 | 1317.191431     | 2616.349036    | 1308.678156      | 2615.365020    | 1308.186148      | S    | 262.150980  | 131.579128      | 245.124431     | 123.065854       | 244.140415     | 122.573846       | 2  |
| 22 |             |                 |                |                  |                |                  | R    | 175.118952  | 88.063114       | 158.092403     | 79.549839        |                |                  | 1  |

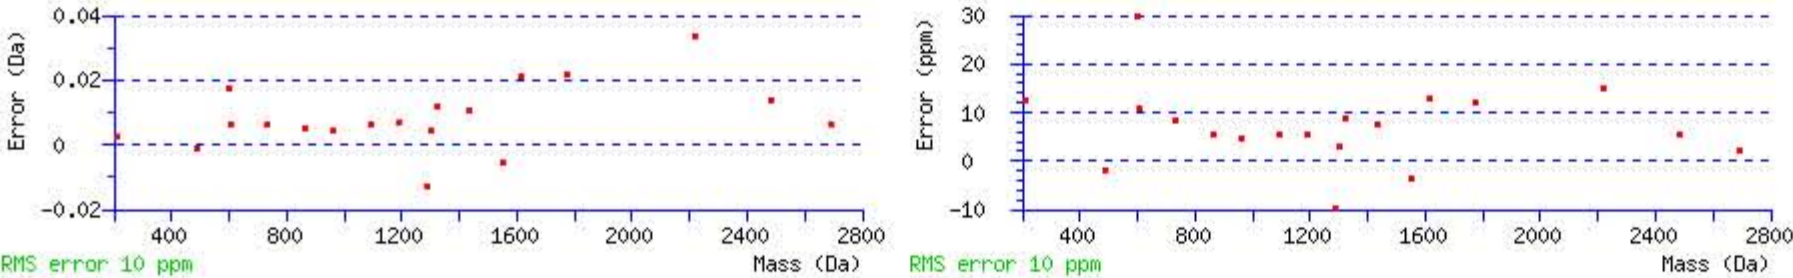

NCBI BLAST search of [VILGAHQEVNLEPHVQEIEVSR](#)  
(Parameters: blastp, nr protein database, expect=20000, no filter, PAM30)  
Other BLAST [web gateways](#)

All matches to this query

| Score | Mr(calc):   | Delta    | Sequence                               |
|-------|-------------|----------|----------------------------------------|
| 66.3  | 2806.479965 | 0.016171 | <a href="#">VILGAHQEVNLEPHVQEIEVSR</a> |
| 11.4  | 2806.479965 | 0.016171 | <a href="#">VILGAHQEVNLEPHVQEIEVSR</a> |

MATRIX

SCIENCE

Mascot Search Results

Peptide View

MS/MS Fragmentation of **TMSGLECAWDSQSPHAHGYIPSK**  
Found in **PLMN\_HUMAN**, Plasminogen OS=Homo sapiens GN=PLG PE=1 SV=2

Match to Query 60084: 2997.375376 from(750.351120,4+) rtinseconds(1963) index(66237)  
Title: Locus:1.1.1.1958.23 File:"2013-07-02 CLN FXIII 180 min 2nd FT.wiff"  
Data file C:\Program Files (x86)\Matrix Science\Mascot Daemon\mgf\8 FXIII 180 min 2nd\mascot\_daemon\_merge.mgf

Click mouse within plot area to zoom in by factor of two about that point  
Or, 

Plot from 

0

 to 

2800

 Da 

Full range

  
Label all possible matches ☐ Label matches used for scoring ☒

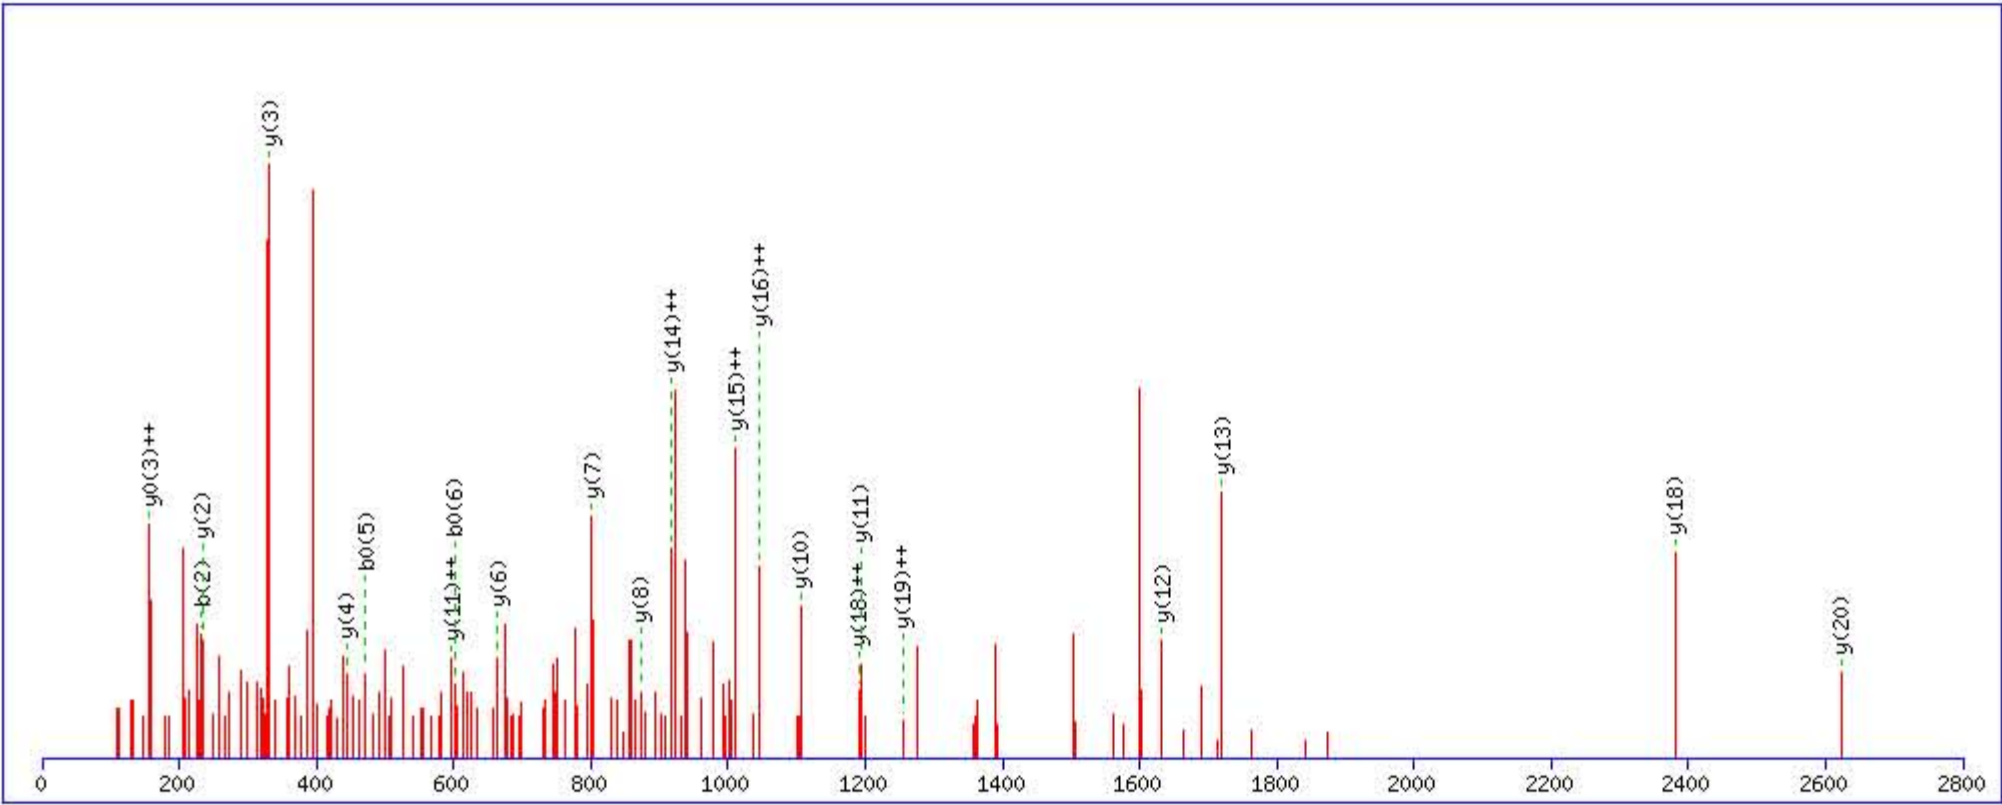

Monoisotopic mass of neutral peptide Mr(calc): 2997.357162  
Fixed modifications: Carbamidomethyl (C) (apply to specified residues or termini only)  
Variable modifications:  
Q13 : Biotin:Thermo-21345 (Q)  
Ions Score: 33 Expect: 0.0058  
Matches : 22/260 fragment ions using 66 most intense peaks [\(help\)](#)

| #                  | b                 | b <sup>++</sup> | b <sup>+</sup> | b <sup>+++</sup> | b <sup>0</sup>    | b <sup>0++</sup> | Seq.     | y                  | y <sup>++</sup>    | y <sup>+</sup> | y <sup>+++</sup> | y <sup>0</sup> | y <sup>0++</sup>  | #                  |
|--------------------|-------------------|-----------------|----------------|------------------|-------------------|------------------|----------|--------------------|--------------------|----------------|------------------|----------------|-------------------|--------------------|
| <a href="#">1</a>  | 102.054955        | 51.531116       |                |                  | 84.044390         | 42.525833        | <b>T</b> |                    |                    |                |                  |                |                   | <a href="#">24</a> |
| <a href="#">2</a>  | <b>233.095440</b> | 117.051358      |                |                  | 215.084875        | 108.046076       | <b>M</b> | 2897.316768        | 1449.162022        | 2880.290219    | 1440.648748      | 2879.306203    | 1440.156740       | <a href="#">23</a> |
| <a href="#">3</a>  | 320.127468        | 160.567372      |                |                  | 302.116903        | 151.562089       | <b>S</b> | 2766.276283        | 1383.641780        | 2749.249734    | 1375.128505      | 2748.265718    | 1374.636497       | <a href="#">22</a> |
| <a href="#">4</a>  | 377.148932        | 189.078104      |                |                  | 359.138367        | 180.072821       | <b>G</b> | 2679.244255        | 1340.125766        | 2662.217706    | 1331.612491      | 2661.233690    | 1331.120483       | <a href="#">21</a> |
| <a href="#">5</a>  | 490.232996        | 245.620136      |                |                  | <b>472.222431</b> | 236.614853       | <b>L</b> | <b>2622.222791</b> | 1311.615034        | 2605.196242    | 1303.101759      | 2604.212226    | 1302.609751       | <a href="#">20</a> |
| <a href="#">6</a>  | 619.275589        | 310.141433      |                |                  | <b>601.265024</b> | 301.136150       | <b>E</b> | 2509.138727        | <b>1255.073002</b> | 2492.112178    | 1246.559727      | 2491.128162    | 1246.067719       | <a href="#">19</a> |
| <a href="#">7</a>  | 779.306238        | 390.156757      |                |                  | 761.295673        | 381.151475       | <b>C</b> | <b>2380.096134</b> | <b>1190.551705</b> | 2363.069585    | 1182.038431      | 2362.085569    | 1181.546423       | <a href="#">18</a> |
| <a href="#">8</a>  | 907.364816        | 454.186046      | 890.338267     | 445.672772       | 889.354251        | 445.180764       | <b>Q</b> | 2220.065485        | 1110.536381        | 2203.038936    | 1102.023106      | 2202.054920    | 1101.531098       | <a href="#">17</a> |
| <a href="#">9</a>  | 978.401930        | 489.704603      | 961.375381     | 481.191329       | 960.391365        | 480.699321       | <b>A</b> | 2092.006907        | <b>1046.507092</b> | 2074.980358    | 1037.993817      | 2073.996342    | 1037.501809       | <a href="#">16</a> |
| <a href="#">10</a> | 1164.481243       | 582.744260      | 1147.454694    | 574.230985       | 1146.470678       | 573.738977       | <b>W</b> | 2020.969793        | <b>1010.988535</b> | 2003.943244    | 1002.475260      | 2002.959228    | 1001.983252       | <a href="#">15</a> |
| <a href="#">11</a> | 1279.508186       | 640.257731      | 1262.481637    | 631.744457       | 1261.497621       | 631.252449       | <b>D</b> | 1834.890480        | <b>917.948878</b>  | 1817.863931    | 909.435604       | 1816.879915    | 908.943596        | <a href="#">14</a> |
| <a href="#">12</a> | 1366.540214       | 683.773745      | 1349.513665    | 675.260471       | 1348.529649       | 674.768463       | <b>S</b> | <b>1719.863537</b> | 860.435407         | 1702.836988    | 851.922132       | 1701.852972    | 851.430124        | <a href="#">13</a> |
| <a href="#">13</a> | 1805.765540       | 903.386408      | 1788.738991    | 894.873134       | 1787.754975       | 894.381126       | <b>Q</b> | <b>1632.831509</b> | 816.919393         | 1615.804960    | 808.406118       | 1614.820944    | 807.914110        | <a href="#">12</a> |
| <a href="#">14</a> | 1892.797568       | 946.902422      | 1875.771019    | 938.389148       | 1874.787003       | 937.897140       | <b>S</b> | <b>1193.606183</b> | <b>597.306730</b>  | 1176.579634    | 588.793455       | 1175.595618    | 588.301447        | <a href="#">11</a> |
| <a href="#">15</a> | 1989.850332       | 995.428804      | 1972.823783    | 986.915530       | 1971.839767       | 986.423522       | <b>P</b> | <b>1106.574155</b> | 553.790716         | 1089.547606    | 545.277441       | 1088.563590    | 544.785433        | <a href="#">10</a> |
| <a href="#">16</a> | 2126.909244       | 1063.958260     | 2109.882695    | 1055.444986      | 2108.898679       | 1054.952978      | <b>H</b> | 1009.521391        | 505.264334         | 992.494842     | 496.751059       | 991.510826     | 496.259051        | <a href="#">9</a>  |
| <a href="#">17</a> | 2197.946358       | 1099.476817     | 2180.919809    | 1090.963543      | 2179.935793       | 1090.471535      | <b>A</b> | <b>872.462479</b>  | 436.734878         | 855.435930     | 428.221603       | 854.451914     | 427.729595        | <a href="#">8</a>  |
| <a href="#">18</a> | 2335.005270       | 1168.006273     | 2317.978721    | 1159.492999      | 2316.994705       | 1159.000991      | <b>H</b> | <b>801.425365</b>  | 401.216321         | 784.398816     | 392.703046       | 783.414800     | 392.211038        | <a href="#">7</a>  |
| <a href="#">19</a> | 2392.026734       | 1196.517005     | 2375.000185    | 1188.003731      | 2374.016169       | 1187.511723      | <b>G</b> | <b>664.366453</b>  | 332.686865         | 647.339904     | 324.173590       | 646.355888     | 323.681582        | <a href="#">6</a>  |
| <a href="#">20</a> | 2555.090063       | 1278.048670     | 2538.063514    | 1269.535395      | 2537.079498       | 1269.043387      | <b>Y</b> | 607.344989         | 304.176133         | 590.318440     | 295.662858       | 589.334424     | 295.170850        | <a href="#">5</a>  |
| <a href="#">21</a> | 2668.174127       | 1334.590702     | 2651.147578    | 1326.077427      | 2650.163562       | 1325.585419      | <b>I</b> | <b>444.281660</b>  | 222.644468         | 427.255111     | 214.131194       | 426.271095     | 213.639186        | <a href="#">4</a>  |
| <a href="#">22</a> | 2765.226891       | 1383.117084     | 2748.200342    | 1374.603809      | 2747.216326       | 1374.111801      | <b>P</b> | <b>331.197596</b>  | 166.102436         | 314.171047     | 157.589162       | 313.187031     | <b>157.097154</b> | <a href="#">3</a>  |
| <a href="#">23</a> | 2852.258919       | 1426.633098     | 2835.232370    | 1418.119823      | 2834.248354       | 1417.627815      | <b>S</b> | <b>234.144832</b>  | 117.576054         | 217.118283     | 109.062780       | 216.134267     | 108.570772        | <a href="#">2</a>  |
| <a href="#">24</a> |                   |                 |                |                  |                   |                  | <b>K</b> | 147.112804         | 74.060040          | 130.086255     | 65.546765        |                |                   | <a href="#">1</a>  |

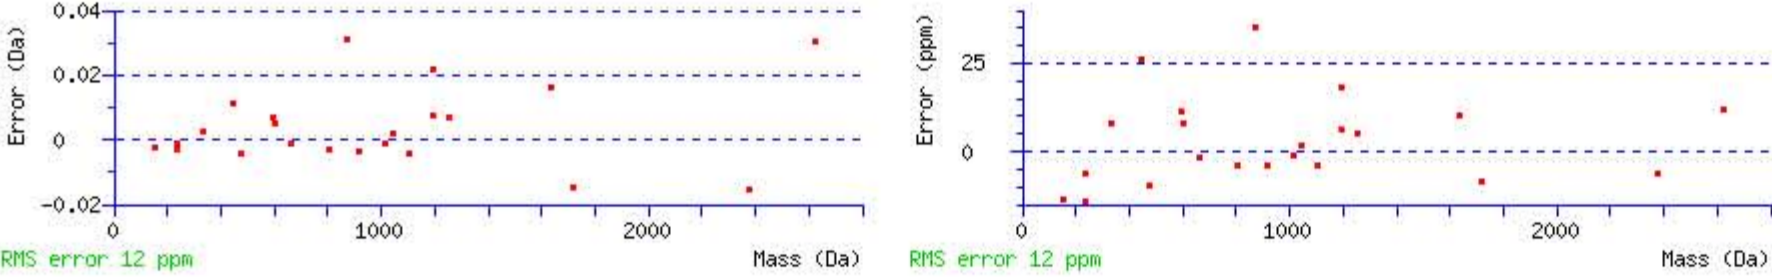

NCBI BLAST search of [TMSGLECAWDSQSPHAHGYIPSK](#)  
(Parameters: blastp, nr protein database, expect=20000, no filter, PAM30)  
Other BLAST [web gateways](#)

All matches to this query

| Score | Mr(calc):   | Delta    | Sequence                                |
|-------|-------------|----------|-----------------------------------------|
| 33.5  | 2997.357162 | 0.018214 | <a href="#">TMSGLECAWDSQSPHAHGYIPSK</a> |
| 16.9  | 2997.357162 | 0.018214 | <a href="#">TMSGLECAWDSQSPHAHGYIPSK</a> |

M

A

T

R

I

X

S

C

I

E

N

C

E

Mascot Search Results

Peptide View

MS/MS Fragmentation of **GNVAVTVSGHTCQHWSAQTPHTHNR**  
Found in **PLMN\_HUMAN**, Plasminogen OS=Homo sapiens GN=PLG PE=1 SV=2

Match to Query 60818: 3092.456970 from(619.498670,5+) rtinseconds(1380) index(62652)  
Title: Locus:1.1.1.1755.25 File:"2013-07-02 CLN FXIII 180 min 2nd FT.wiff"  
Data file C:\Program Files (x86)\Matrix Science\Mascot Daemon\mgf\8 FXIII 180 min 2nd\mascot\_daemon\_merge.mgf

Click mouse within plot area to zoom in by factor of two about that point  
Or, 

Plot from

100

 to 

1500

 Da 

Full range

  
Label all possible matches ☐ Label matches used for scoring ☒

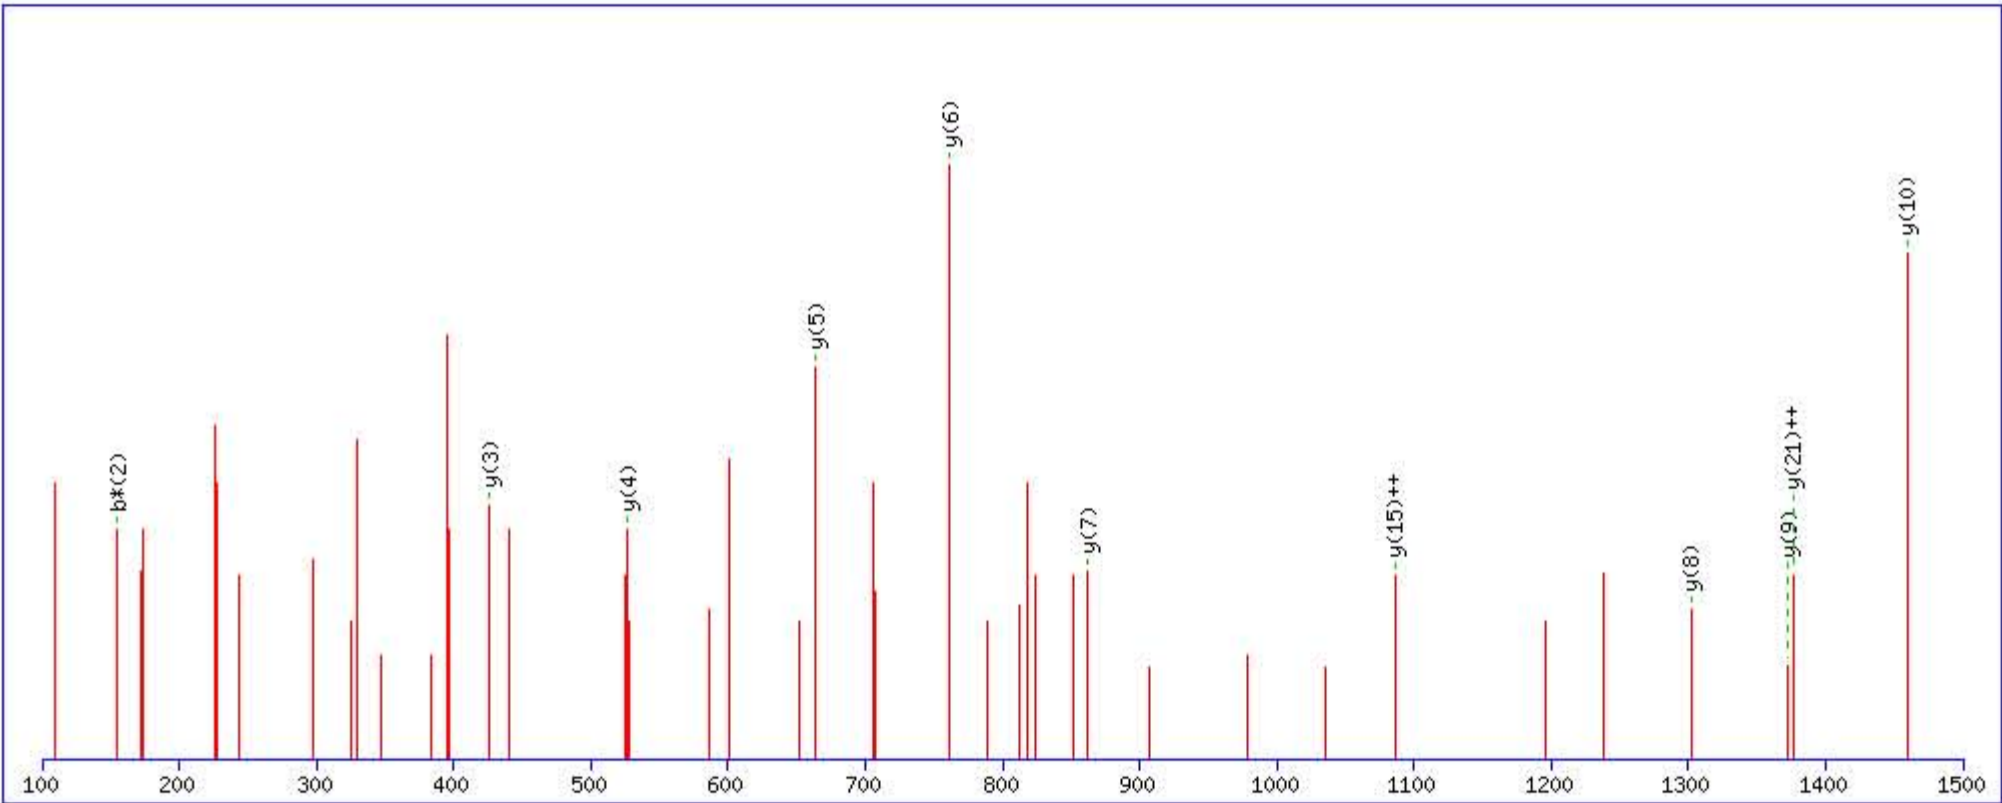

Monoisotopic mass of neutral peptide Mr(calc): 3092.457016  
Fixed modifications: Carbamidomethyl (C) (apply to specified residues or termini only)  
Variable modifications:  
Q18 : Biotin:Thermo-21345 (Q)  
Ions Score: 29 Expect: 0.022  
Matches : 11/270 fragment ions using 25 most intense peaks [\(help\)](#)

| #  | b           | b <sup>++</sup> | b <sup>*</sup> | b <sup>*++</sup> | b <sup>0</sup> | b <sup>0++</sup> | Seq. | y           | y <sup>++</sup> | y <sup>*</sup> | y <sup>*++</sup> | y <sup>0</sup> | y <sup>0++</sup> | #  |
|----|-------------|-----------------|----------------|------------------|----------------|------------------|------|-------------|-----------------|----------------|------------------|----------------|------------------|----|
| 1  | 58.028740   | 29.518008       |                |                  |                |                  | G    |             |                 |                |                  |                |                  | 25 |
| 2  | 172.071667  | 86.539471       | 155.045118     | 78.026197        |                |                  | N    | 3036.442790 | 1518.725033     | 3019.416241    | 1510.211758      | 3018.432225    | 1509.719750      | 24 |
| 3  | 271.140081  | 136.073679      | 254.113532     | 127.560404       |                |                  | V    | 2922.399863 | 1461.703569     | 2905.373314    | 1453.190295      | 2904.389298    | 1452.698287      | 23 |
| 4  | 342.177195  | 171.592236      | 325.150646     | 163.078961       |                |                  | A    | 2823.331449 | 1412.169362     | 2806.304900    | 1403.656088      | 2805.320884    | 1403.164080      | 22 |
| 5  | 441.245609  | 221.126443      | 424.219060     | 212.613168       |                |                  | V    | 2752.294335 | 1376.650805     | 2735.267786    | 1368.137531      | 2734.283770    | 1367.645523      | 21 |
| 6  | 542.293288  | 271.650282      | 525.266739     | 263.137008       | 524.282723     | 262.645000       | T    | 2653.225921 | 1327.116598     | 2636.199372    | 1318.603324      | 2635.215356    | 1318.111316      | 20 |
| 7  | 641.361702  | 321.184489      | 624.335153     | 312.671215       | 623.351137     | 312.179207       | V    | 2552.178242 | 1276.592759     | 2535.151693    | 1268.079484      | 2534.167677    | 1267.587476      | 19 |
| 8  | 728.393730  | 364.700503      | 711.367181     | 356.187229       | 710.383165     | 355.695221       | S    | 2453.109828 | 1227.058552     | 2436.083279    | 1218.545277      | 2435.099263    | 1218.053269      | 18 |
| 9  | 785.415194  | 393.211235      | 768.388645     | 384.697961       | 767.404629     | 384.205953       | G    | 2366.077800 | 1183.542538     | 2349.051251    | 1175.029263      | 2348.067235    | 1174.537255      | 17 |
| 10 | 922.474106  | 461.740691      | 905.447557     | 453.227417       | 904.463541     | 452.735409       | H    | 2309.056336 | 1155.031806     | 2292.029787    | 1146.518531      | 2291.045771    | 1146.026523      | 16 |
| 11 | 1023.521785 | 512.264530      | 1006.495236    | 503.751256       | 1005.511220    | 503.259248       | T    | 2171.997424 | 1086.502350     | 2154.970875    | 1077.989075      | 2153.986859    | 1077.497067      | 15 |
| 12 | 1183.552434 | 592.279855      | 1166.525885    | 583.766581       | 1165.541869    | 583.274572       | C    | 2070.949745 | 1035.978510     | 2053.923196    | 1027.465236      | 2052.939180    | 1026.973228      | 14 |
| 13 | 1311.611012 | 656.309144      | 1294.584463    | 647.795870       | 1293.600447    | 647.303862       | Q    | 1910.919096 | 955.963186      | 1893.892547    | 947.449911       | 1892.908531    | 946.957903       | 13 |
| 14 | 1448.669924 | 724.838600      | 1431.643375    | 716.325326       | 1430.659359    | 715.833318       | H    | 1782.860518 | 891.933897      | 1765.833969    | 883.420622       | 1764.849953    | 882.928614       | 12 |
| 15 | 1634.749237 | 817.878257      | 1617.722688    | 809.364982       | 1616.738672    | 808.872974       | W    | 1645.801606 | 823.404441      | 1628.775057    | 814.891166       | 1627.791041    | 814.399158       | 11 |
| 16 | 1721.781265 | 861.394271      | 1704.754716    | 852.880996       | 1703.770700    | 852.388988       | S    | 1459.722293 | 730.364784      | 1442.695744    | 721.851510       | 1441.711728    | 721.359502       | 10 |
| 17 | 1792.818379 | 896.912828      | 1775.791830    | 888.399553       | 1774.807814    | 887.907545       | A    | 1372.690265 | 686.848770      | 1355.663716    | 678.335496       | 1354.679700    | 677.843488       | 9  |
| 18 | 2232.043705 | 1116.525490     | 2215.017156    | 1108.012216      | 2214.033140    | 1107.520208      | Q    | 1301.653151 | 651.330213      | 1284.626602    | 642.816939       | 1283.642586    | 642.324931       | 8  |
| 19 | 2333.091384 | 1167.049330     | 2316.064835    | 1158.536055      | 2315.080819    | 1158.044047      | T    | 862.427825  | 431.717550      | 845.401276     | 423.204276       | 844.417260     | 422.712268       | 7  |
| 20 | 2430.144148 | 1215.575712     | 2413.117599    | 1207.062437      | 2412.133583    | 1206.570429      | P    | 761.380146  | 381.193711      | 744.353597     | 372.680436       | 743.369581     | 372.188428       | 6  |
| 21 | 2567.203060 | 1284.105168     | 2550.176511    | 1275.591893      | 2549.192495    | 1275.099885      | H    | 664.327382  | 332.667329      | 647.300833     | 324.154054       | 646.316817     | 323.662046       | 5  |
| 22 | 2668.250739 | 1334.629007     | 2651.224190    | 1326.115733      | 2650.240174    | 1325.623725      | T    | 527.268470  | 264.137873      | 510.241921     | 255.624598       | 509.257905     | 255.132590       | 4  |
| 23 | 2805.309651 | 1403.158463     | 2788.283102    | 1394.645189      | 2787.299086    | 1394.153181      | H    | 426.220791  | 213.614033      | 409.194242     | 205.100759       |                |                  | 3  |
| 24 | 2919.352578 | 1460.179927     | 2902.326029    | 1451.666652      | 2901.342013    | 1451.174644      | N    | 289.161879  | 145.084577      | 272.135330     | 136.571303       |                |                  | 2  |
| 25 |             |                 |                |                  |                |                  | R    | 175.118952  | 88.063114       | 158.092403     | 79.549839        |                |                  | 1  |

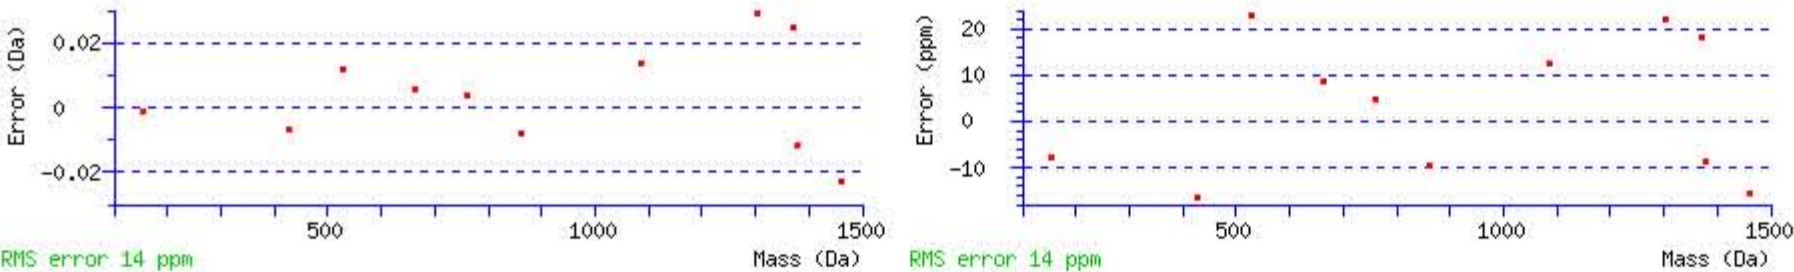

NCBI BLAST search of [GNVAVTVSGHTCQHWSAQTPHTHNR](#)  
(Parameters: blastp, nr protein database, expect=20000, no filter, PAM30)  
Other BLAST [web gateways](#)

All matches to this query

| Score | Mr(calc):   | Delta     | Sequence                                  |
|-------|-------------|-----------|-------------------------------------------|
| 29.2  | 3092.457016 | -0.000046 | <a href="#">GNVAVTVSGHTCQHWSAQTPHTHNR</a> |
| 6.6   | 3092.457016 | -0.000046 | <a href="#">GNVAVTVSGHTCQHWSAQTPHTHNR</a> |

Peptide View

MS/MS Fragmentation of **VILGAHQEVNLEPHVQEIEVSR**  
Found in **PLMN\_HUMAN**, Plasminogen OS=Homo sapiens GN=PLG PE=1 SV=2

Match to Query 60947: 3117.671016 from(780.425030,4+) rtinseconds(2221) index(67736)  
Title: Locus:1.1.1.2048.22 File:"2013-07-02 CLN FXIII 180 min 2nd FT.wiff"  
Data file C:\Program Files (x86)\Matrix Science\Mascot Daemon\mgf\8 FXIII 180 min 2nd\mascot\_daemon\_merge.mgf

Click mouse within plot area to zoom in by factor of two about that point  
Or, 

Plot from

0

 to 

3200

 Da 

Full range

  
Label all possible matches ☐ Label matches used for scoring ☒

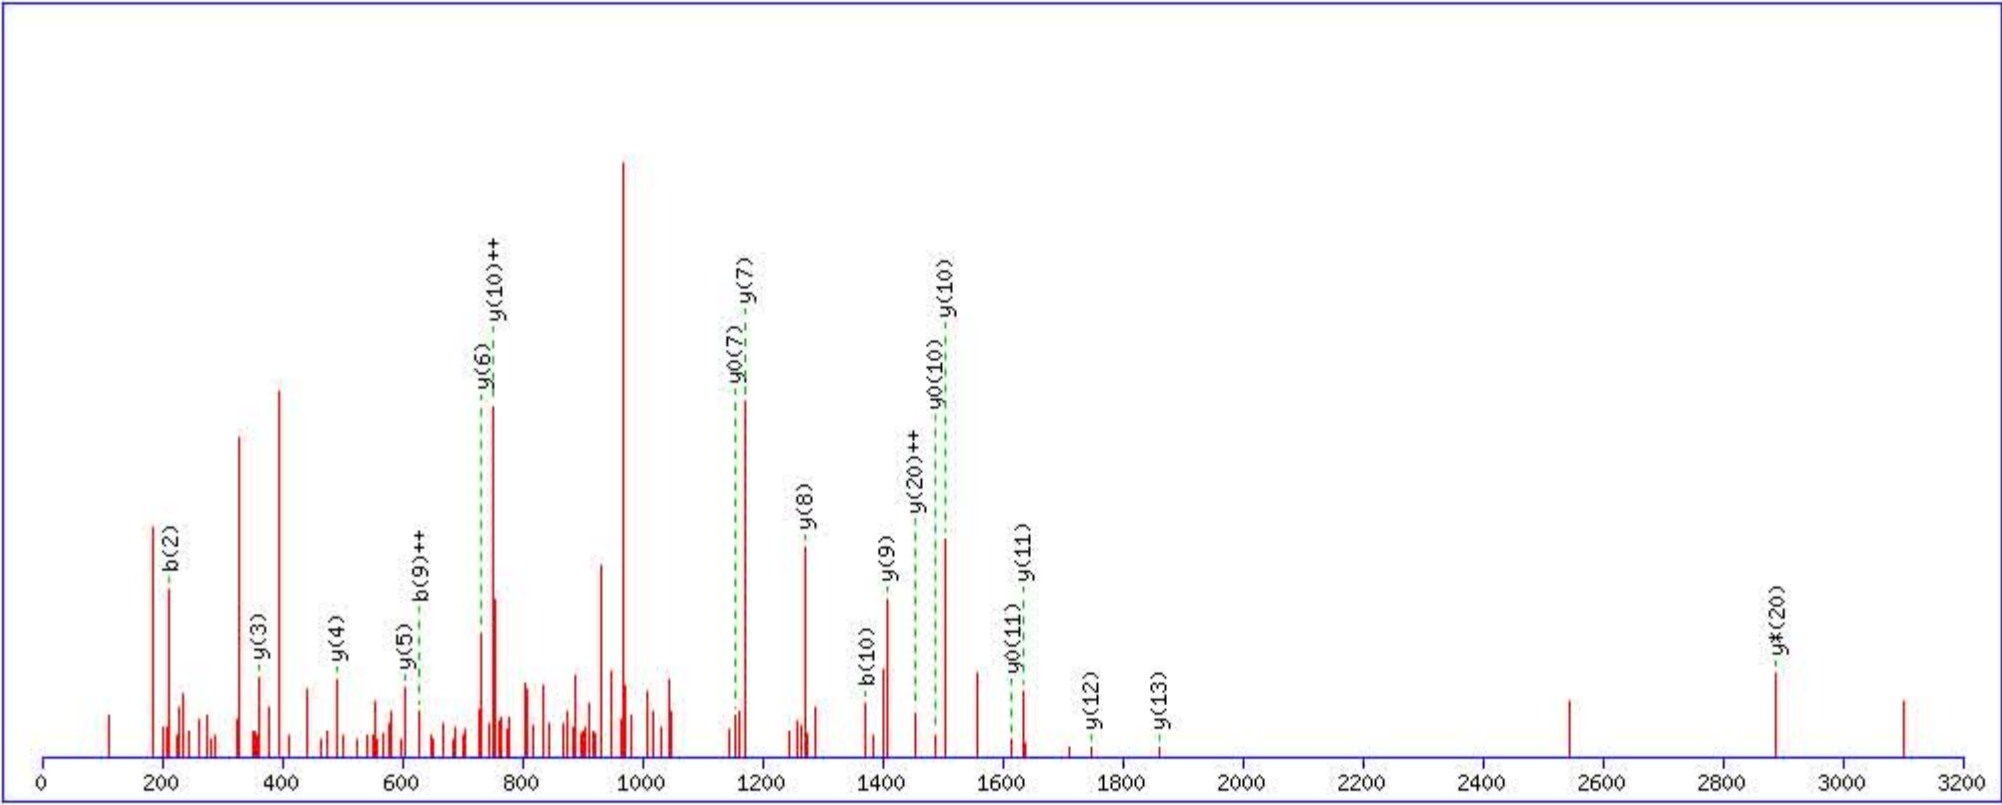

Monoisotopic mass of neutral peptide Mr(calc): 3117.646713  
Fixed modifications: Carbamidomethyl (C) (apply to specified residues or termini only)  
Variable modifications:  
Q7 : Biotin:Thermo-21345 (Q)  
Q16 : Biotin:Thermo-21345 (Q)  
Ions Score: 38 Expect: 0.0025  
Matches : 20/224 fragment ions using 53 most intense peaks [\(help\)](#)

| #  | b           | b <sup>++</sup> | b <sup>*</sup> | b <sup>*++</sup> | b <sup>0</sup> | b <sup>0++</sup> | Seq. | y           | y <sup>++</sup> | y <sup>*</sup> | y <sup>*++</sup> | y <sup>0</sup> | y <sup>0++</sup> | #  |
|----|-------------|-----------------|----------------|------------------|----------------|------------------|------|-------------|-----------------|----------------|------------------|----------------|------------------|----|
| 1  | 100.075690  | 50.541483       |                |                  |                |                  | V    |             |                 |                |                  |                |                  | 22 |
| 2  | 213.159754  | 107.083515      |                |                  |                |                  | I    | 3019.585595 | 1510.296435     | 3002.559046    | 1501.783161      | 3001.575030    | 1501.291153      | 21 |
| 3  | 326.243818  | 163.625547      |                |                  |                |                  | L    | 2906.501531 | 1453.754403     | 2889.474982    | 1445.241129      | 2888.490966    | 1444.749121      | 20 |
| 4  | 383.265282  | 192.136279      |                |                  |                |                  | G    | 2793.417467 | 1397.212371     | 2776.390918    | 1388.699097      | 2775.406902    | 1388.207089      | 19 |
| 5  | 454.302396  | 227.654836      |                |                  |                |                  | A    | 2736.396003 | 1368.701639     | 2719.369454    | 1360.188365      | 2718.385438    | 1359.696357      | 18 |
| 6  | 591.361308  | 296.184292      |                |                  |                |                  | H    | 2665.358889 | 1333.183082     | 2648.332340    | 1324.669808      | 2647.348324    | 1324.177800      | 17 |
| 7  | 1030.586634 | 515.796955      | 1013.560085    | 507.283681       |                |                  | Q    | 2528.299977 | 1264.653627     | 2511.273428    | 1256.140352      | 2510.289412    | 1255.648344      | 16 |
| 8  | 1159.629227 | 580.318252      | 1142.602678    | 571.804977       | 1141.618662    | 571.312969       | E    | 2089.074651 | 1045.040963     | 2072.048102    | 1036.527689      | 2071.064086    | 1036.035681      | 15 |
| 9  | 1258.697641 | 629.852459      | 1241.671092    | 621.339184       | 1240.687076    | 620.847176       | V    | 1960.032058 | 980.519667      | 1943.005509    | 972.006393       | 1942.021493    | 971.514385       | 14 |
| 10 | 1372.740568 | 686.873922      | 1355.714019    | 678.360648       | 1354.730003    | 677.868640       | N    | 1860.963644 | 930.985460      | 1843.937095    | 922.472186       | 1842.953079    | 921.980178       | 13 |
| 11 | 1485.824632 | 743.415954      | 1468.798083    | 734.902680       | 1467.814067    | 734.410672       | L    | 1746.920717 | 873.963997      | 1729.894168    | 865.450722       | 1728.910152    | 864.958714       | 12 |
| 12 | 1614.867225 | 807.937251      | 1597.840676    | 799.423976       | 1596.856660    | 798.931968       | E    | 1633.836653 | 817.421965      | 1616.810104    | 808.908690       | 1615.826088    | 808.416682       | 11 |
| 13 | 1711.919989 | 856.463633      | 1694.893440    | 847.950358       | 1693.909424    | 847.458350       | P    | 1504.794060 | 752.900668      | 1487.767511    | 744.387394       | 1486.783495    | 743.895386       | 10 |
| 14 | 1848.978901 | 924.993089      | 1831.952352    | 916.479814       | 1830.968336    | 915.987806       | H    | 1407.741296 | 704.374286      | 1390.714747    | 695.861012       | 1389.730731    | 695.369004       | 9  |
| 15 | 1948.047315 | 974.527296      | 1931.020766    | 966.014021       | 1930.036750    | 965.522013       | V    | 1270.682384 | 635.844830      | 1253.655835    | 627.331556       | 1252.671819    | 626.839548       | 8  |
| 16 | 2387.272641 | 1194.139958     | 2370.246092    | 1185.626684      | 2369.262076    | 1185.134676      | Q    | 1171.613970 | 586.310623      | 1154.587421    | 577.797349       | 1153.603405    | 577.305341       | 7  |
| 17 | 2516.315234 | 1258.661255     | 2499.288685    | 1250.147980      | 2498.304669    | 1249.655973      | E    | 732.388644  | 366.697960      | 715.362095     | 358.184686       | 714.378079     | 357.692678       | 6  |
| 18 | 2629.399298 | 1315.203287     | 2612.372749    | 1306.690013      | 2611.388733    | 1306.198005      | I    | 603.346051  | 302.176664      | 586.319502     | 293.663389       | 585.335486     | 293.171381       | 5  |
| 19 | 2758.441891 | 1379.724584     | 2741.415342    | 1371.211309      | 2740.431326    | 1370.719301      | E    | 490.261987  | 245.634631      | 473.235438     | 237.121357       | 472.251422     | 236.629349       | 4  |
| 20 | 2857.510305 | 1429.258791     | 2840.483756    | 1420.745516      | 2839.499740    | 1420.253508      | V    | 361.219394  | 181.113335      | 344.192845     | 172.600060       | 343.208829     | 172.108052       | 3  |
| 21 | 2944.542333 | 1472.774805     | 2927.515784    | 1464.261530      | 2926.531768    | 1463.769522      | S    | 262.150980  | 131.579128      | 245.124431     | 123.065854       | 244.140415     | 122.573846       | 2  |
| 22 |             |                 |                |                  |                |                  | R    | 175.118952  | 88.063114       | 158.092403     | 79.549839        |                |                  | 1  |

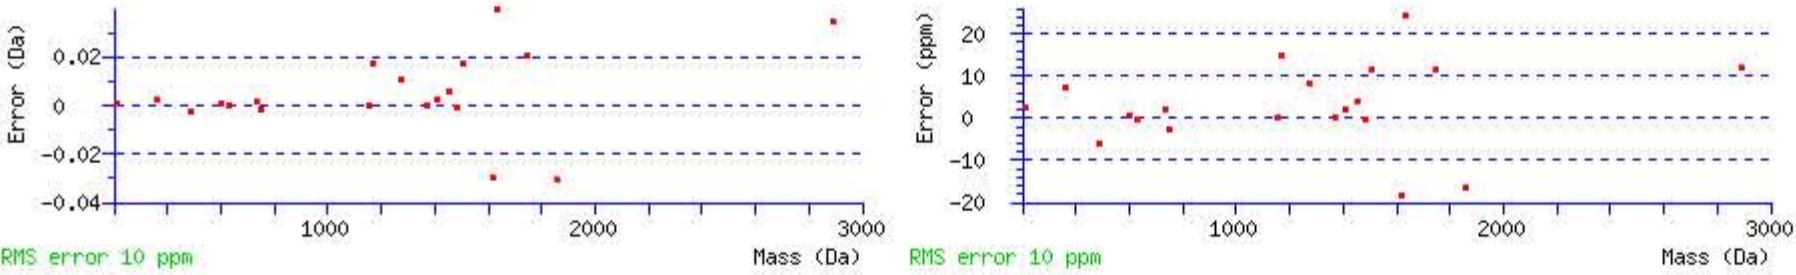

NCBI BLAST search of [VILGAHQEVNLEPHVQEIEVSR](#)  
(Parameters: blastp, nr protein database, expect=20000, no filter, PAM30)  
Other BLAST [web gateways](#)

All matches to this query

| Score | Mr(calc):   | Delta    | Sequence                               |
|-------|-------------|----------|----------------------------------------|
| 37.7  | 3117.646713 | 0.024303 | <a href="#">VILGAHQEVNLEPHVQEIEVSR</a> |

MATRIX

SCIENCE

Mascot Search Results

Peptide View

MS/MS Fragmentation of **KLYDYCDVPQCAAPSFDCGKPQVEPK**  
Found in **PLMN\_HUMAN**, Plasminogen OS=Homo sapiens GN=PLG PE=1 SV=2

Match to Query 64791: 3382.570776 from(846.649970,4+) rtinseconds(1920) index(65869)  
Title: Locus:1.1.1.1943.24 File:"2013-07-02 CLN FXIII 180 min 2nd FT.wiff"  
Data file C:\Program Files (x86)\Matrix Science\Mascot Daemon\mgf\8 FXIII 180 min 2nd\mascot\_daemon\_merge.mgf

Click mouse within plot area to zoom in by factor of two about that point  
Or, 

Plot from 

0

 to 

2400

 Da 

Full range

Label all possible matches ☐ Label matches used for scoring ☒

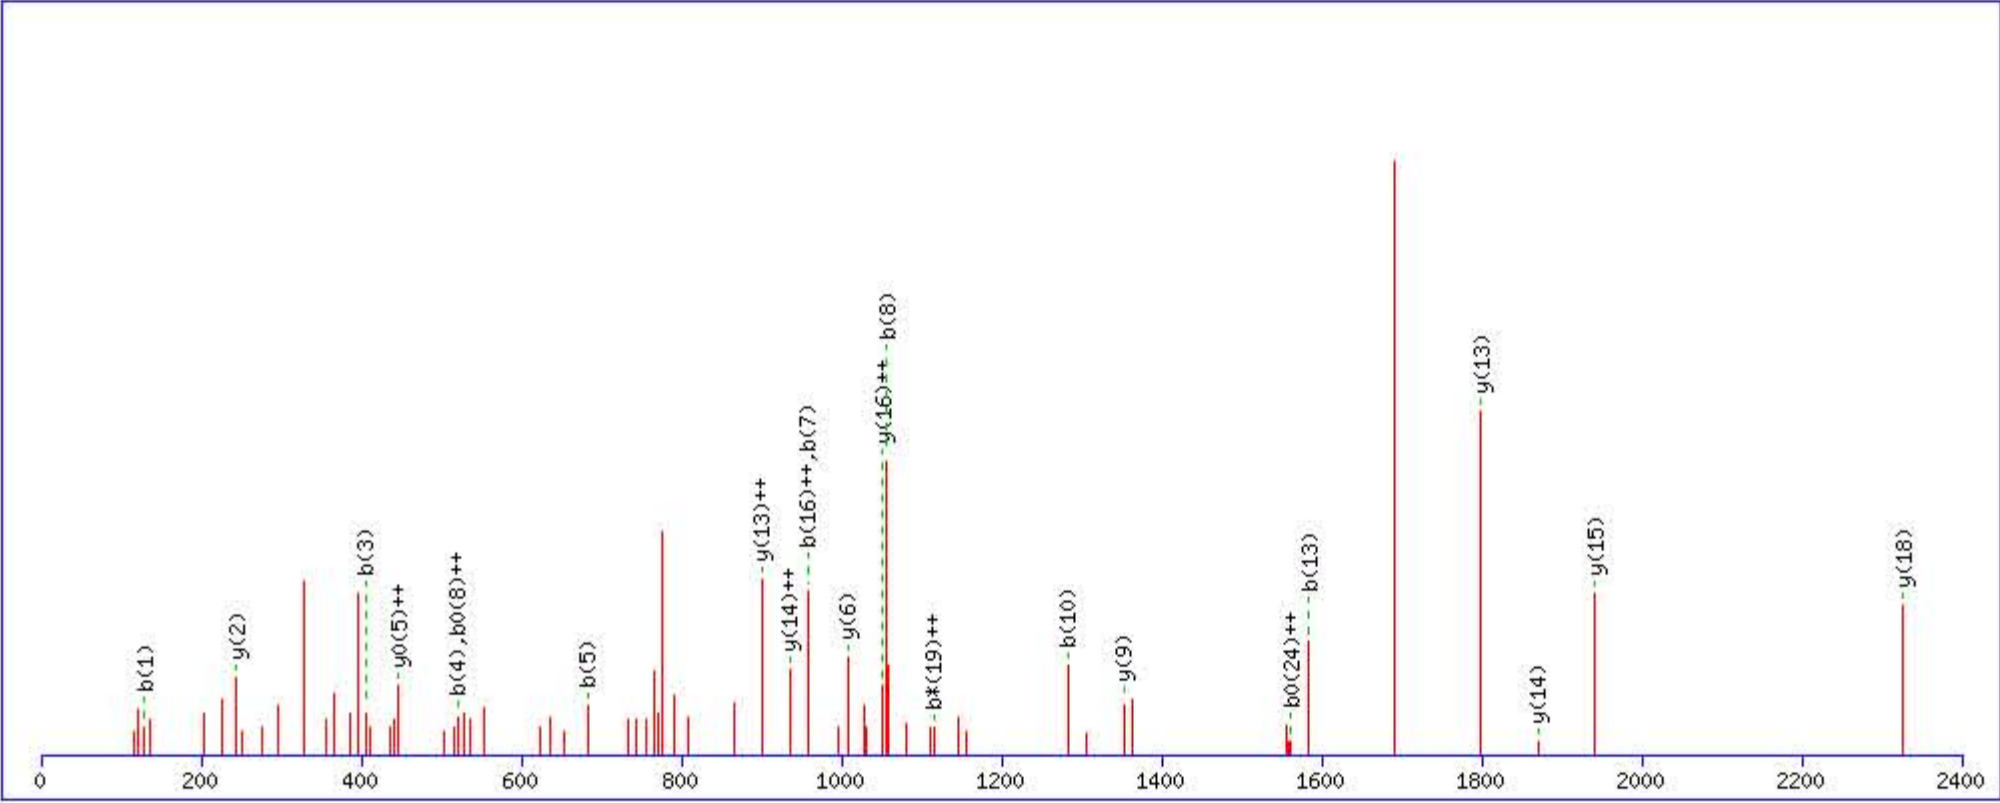

Monoisotopic mass of neutral peptide Mr(calc): 3382.549469  
Fixed modifications: Carbamidomethyl (C) (apply to specified residues or termini only)  
Variable modifications:  
Q22 : Biotin:Thermo-21345 (Q)  
Ions Score: 29 Expect: 0.018  
Matches : 23/290 fragment ions using 57 most intense peaks [\(help\)](#)

| #  | b                  | b <sup>++</sup>   | b <sup>*</sup> | b <sup>+++</sup>   | b <sup>0</sup> | b <sup>0++</sup>   | Seq.     | y                  | y <sup>++</sup>    | y <sup>*</sup> | y <sup>+++</sup> | y <sup>0</sup> | y <sup>0++</sup>  | #  |
|----|--------------------|-------------------|----------------|--------------------|----------------|--------------------|----------|--------------------|--------------------|----------------|------------------|----------------|-------------------|----|
| 1  | <b>129.102239</b>  | 65.054757         | 112.075690     | 56.541483          |                |                    | <b>K</b> |                    |                    |                |                  |                |                   | 26 |
| 2  | 242.186303         | 121.596790        | 225.159754     | 113.083515         |                |                    | <b>L</b> | 3255.461780        | 1628.234528        | 3238.435231    | 1619.721253      | 3237.451215    | 1619.229245       | 25 |
| 3  | <b>405.249632</b>  | 203.128454        | 388.223083     | 194.615180         |                |                    | <b>Y</b> | 3142.377716        | 1571.692496        | 3125.351167    | 1563.179221      | 3124.367151    | 1562.687213       | 24 |
| 4  | <b>520.276575</b>  | 260.641926        | 503.250026     | 252.128651         | 502.266010     | 251.636643         | <b>D</b> | 2979.314387        | 1490.160831        | 2962.287838    | 1481.647557      | 2961.303822    | 1481.155549       | 23 |
| 5  | <b>683.339904</b>  | 342.173590        | 666.313355     | 333.660316         | 665.329339     | 333.168308         | <b>Y</b> | 2864.287444        | 1432.647360        | 2847.260895    | 1424.134085      | 2846.276879    | 1423.642077       | 22 |
| 6  | 843.370553         | 422.188915        | 826.344004     | 413.675640         | 825.359988     | 413.183632         | <b>C</b> | 2701.224115        | 1351.115695        | 2684.197566    | 1342.602421      | 2683.213550    | 1342.110413       | 21 |
| 7  | <b>958.397496</b>  | 479.702386        | 941.370947     | 471.189112         | 940.386931     | 470.697104         | <b>D</b> | 2541.193466        | 1271.100371        | 2524.166917    | 1262.587096      | 2523.182901    | 1262.095089       | 20 |
| 8  | <b>1057.465910</b> | 529.236593        | 1040.439361    | 520.723319         | 1039.455345    | <b>520.231311</b>  | <b>V</b> | 2426.166523        | 1213.586899        | 2409.139974    | 1205.073625      | 2408.155958    | 1204.581617       | 19 |
| 9  | 1154.518674        | 577.762975        | 1137.492125    | 569.249701         | 1136.508109    | 568.757693         | <b>P</b> | <b>2327.098109</b> | 1164.052692        | 2310.071560    | 1155.539418      | 2309.087544    | 1155.047410       | 18 |
| 10 | <b>1282.577252</b> | 641.792264        | 1265.550703    | 633.278990         | 1264.566687    | 632.786982         | <b>Q</b> | 2230.045345        | 1115.526310        | 2213.018796    | 1107.013036      | 2212.034780    | 1106.521028       | 17 |
| 11 | 1442.607901        | 721.807589        | 1425.581352    | 713.294314         | 1424.597336    | 712.802306         | <b>C</b> | 2101.986767        | <b>1051.497021</b> | 2084.960218    | 1042.983747      | 2083.976202    | 1042.491739       | 16 |
| 12 | 1513.645015        | 757.326146        | 1496.618466    | 748.812871         | 1495.634450    | 748.320863         | <b>A</b> | <b>1941.956118</b> | 971.481697         | 1924.929569    | 962.968423       | 1923.945553    | 962.476415        | 15 |
| 13 | <b>1584.682129</b> | 792.844703        | 1567.655580    | 784.331428         | 1566.671564    | 783.839420         | <b>A</b> | <b>1870.919004</b> | <b>935.963140</b>  | 1853.892455    | 927.449866       | 1852.908439    | 926.957858        | 14 |
| 14 | 1681.734893        | 841.371085        | 1664.708344    | 832.857810         | 1663.724328    | 832.365802         | <b>P</b> | <b>1799.881890</b> | <b>900.444583</b>  | 1782.855341    | 891.931309       | 1781.871325    | 891.439301        | 13 |
| 15 | 1768.766921        | 884.887099        | 1751.740372    | 876.373824         | 1750.756356    | 875.881816         | <b>S</b> | 1702.829126        | 851.918201         | 1685.802577    | 843.404927       | 1684.818561    | 842.912919        | 12 |
| 16 | 1915.835335        | <b>958.421306</b> | 1898.808786    | 949.908031         | 1897.824770    | 949.416023         | <b>F</b> | 1615.797098        | 808.402187         | 1598.770549    | 799.888913       | 1597.786533    | 799.396905        | 11 |
| 17 | 2030.862278        | 1015.934777       | 2013.835729    | 1007.421503        | 2012.851713    | 1006.929495        | <b>D</b> | 1468.728684        | 734.867980         | 1451.702135    | 726.354706       | 1450.718119    | 725.862698        | 10 |
| 18 | 2190.892927        | 1095.950102       | 2173.866378    | 1087.436827        | 2172.882362    | 1086.944819        | <b>C</b> | <b>1353.701741</b> | 677.354509         | 1336.675192    | 668.841234       | 1335.691176    | 668.349226        | 9  |
| 19 | 2247.914391        | 1124.460834       | 2230.887842    | <b>1115.947559</b> | 2229.903826    | 1115.455551        | <b>G</b> | 1193.671092        | 597.339184         | 1176.644543    | 588.825910       | 1175.660527    | 588.333902        | 8  |
| 20 | 2376.009354        | 1188.508315       | 2358.982805    | 1179.995041        | 2357.998789    | 1179.503033        | <b>K</b> | 1136.649628        | 568.828452         | 1119.623079    | 560.315178       | 1118.639063    | 559.823170        | 7  |
| 21 | 2473.062118        | 1237.034697       | 2456.035569    | 1228.521423        | 2455.051553    | 1228.029415        | <b>P</b> | <b>1008.554665</b> | 504.780971         | 991.528116     | 496.267696       | 990.544100     | 495.775688        | 6  |
| 22 | 2912.287444        | 1456.647360       | 2895.260895    | 1448.134086        | 2894.276879    | 1447.642078        | <b>Q</b> | 911.501901         | 456.254589         | 894.475352     | 447.741314       | 893.491336     | <b>447.249306</b> | 5  |
| 23 | 3011.355858        | 1506.181567       | 2994.329309    | 1497.668293        | 2993.345293    | 1497.176285        | <b>V</b> | 472.276575         | 236.641925         | 455.250026     | 228.128651       | 454.266010     | 227.636643        | 4  |
| 24 | 3140.398451        | 1570.702864       | 3123.371902    | 1562.189589        | 3122.387886    | <b>1561.697581</b> | <b>E</b> | 373.208161         | 187.107719         | 356.181612     | 178.594444       | 355.197596     | 178.102436        | 3  |
| 25 | 3237.451215        | 1619.229246       | 3220.424666    | 1610.715971        | 3219.440650    | 1610.223963        | <b>P</b> | <b>244.165568</b>  | 122.586422         | 227.139019     | 114.073148       |                |                   | 2  |
| 26 |                    |                   |                |                    |                |                    | <b>K</b> | 147.112804         | 74.060040          | 130.086255     | 65.546765        |                |                   | 1  |

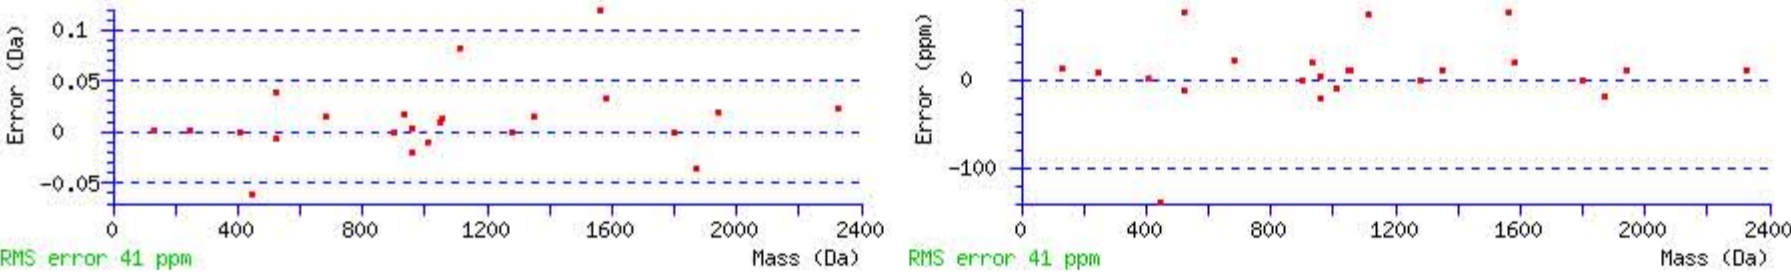

NCBI BLAST search of [KLYDYCDVPQCAAPSFDCGKPQVEPK](#)  
(Parameters: blastp, nr protein database, expect=20000, no filter, PAM30)  
Other BLAST [web gateways](#)

All matches to this query

| Score | Mr(calc):   | Delta    | Sequence                                   |
|-------|-------------|----------|--------------------------------------------|
| 28.8  | 3382.549469 | 0.021307 | <a href="#">KLYDYCDVPQCAAPSFDCGKPQVEPK</a> |

MATRIX

SCIENCE

Mascot Search Results

Peptide View

MS/MS Fragmentation of **KLYDYCDVPQCAAPSFDCGKPQVEPK**  
Found in **PLMN\_HUMAN**, Plasminogen OS=Homo sapiens GN=PLG PE=1 SV=2

Match to Query 64792: 3382.575176 from(846.651070,4+) rtinseconds(1972) index(5503)  
Title: Locus:1.1.1.1963.18 File:"2013-07-02 CLN FXIII 180 min 2nd F 1.wiff"  
Data file C:\Program Files (x86)\Matrix Science\Mascot Daemon\mgf\8 FXIII 180 min 2nd\mascot\_daemon\_merge.mgf

Click mouse within plot area to zoom in by factor of two about that point  
Or, Plot from 0 to 2800 Da Full range  
Label all possible matches Label matches used for scoring

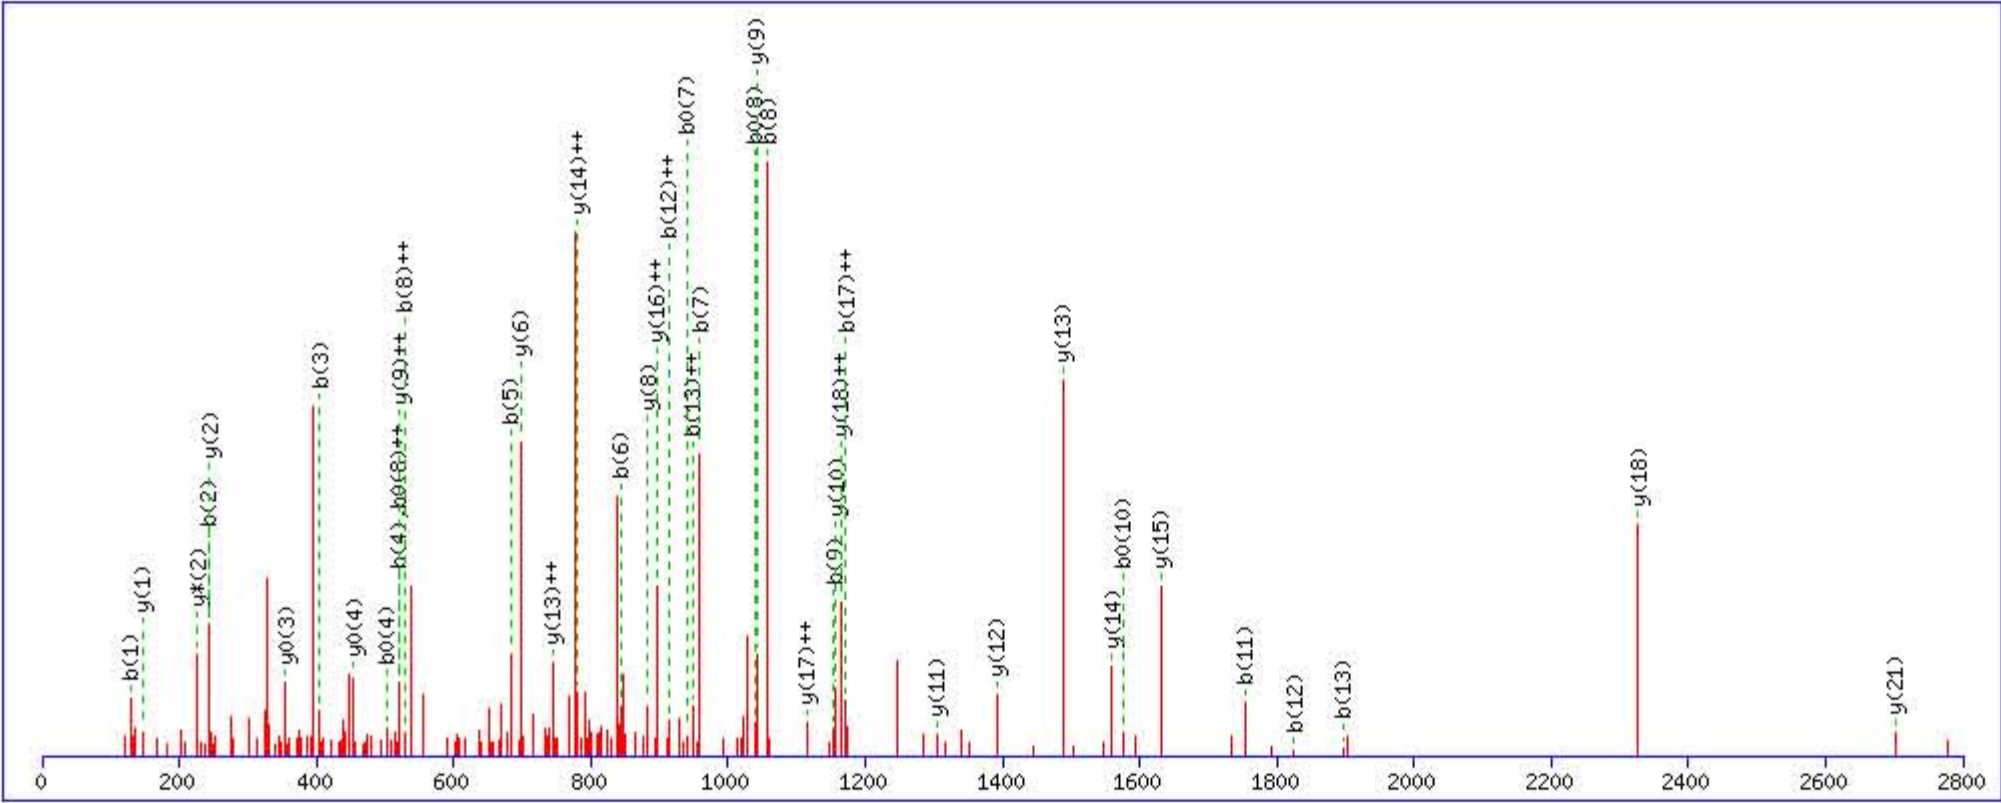

Monoisotopic mass of neutral peptide Mr(calc): 3382.549469  
Fixed modifications: Carbamidomethyl (C) (apply to specified residues or termini only)  
Variable modifications:  
Q10 : Biotin:Thermo-21345 (Q)  
Ions Score: 60 Expect: 1.6e-005  
Matches : 43/290 fragment ions using 103 most intense peaks (help)

| #  | b           | b <sup>++</sup> | b <sup>*</sup> | b <sup>+++</sup> | b <sup>0</sup> | b <sup>0++</sup> | Seq. | y           | y <sup>++</sup> | y <sup>*</sup> | y <sup>+++</sup> | y <sup>0</sup> | y <sup>0++</sup> | #  |
|----|-------------|-----------------|----------------|------------------|----------------|------------------|------|-------------|-----------------|----------------|------------------|----------------|------------------|----|
| 1  | 129.102239  | 65.054757       | 112.075690     | 56.541483        |                |                  | K    |             |                 |                |                  |                |                  | 26 |
| 2  | 242.186303  | 121.596790      | 225.159754     | 113.083515       |                |                  | L    | 3255.461780 | 1628.234528     | 3238.435231    | 1619.721253      | 3237.451215    | 1619.229245      | 25 |
| 3  | 405.249632  | 203.128454      | 388.223083     | 194.615180       |                |                  | Y    | 3142.377716 | 1571.692496     | 3125.351167    | 1563.179221      | 3124.367151    | 1562.687213      | 24 |
| 4  | 520.276575  | 260.641926      | 503.250026     | 252.128651       | 502.266010     | 251.636643       | D    | 2979.314387 | 1490.160831     | 2962.287838    | 1481.647557      | 2961.303822    | 1481.155549      | 23 |
| 5  | 683.339904  | 342.173590      | 666.313355     | 333.660316       | 665.329339     | 333.168308       | Y    | 2864.287444 | 1432.647360     | 2847.260895    | 1424.134085      | 2846.276879    | 1423.642077      | 22 |
| 6  | 843.370553  | 422.188915      | 826.344004     | 413.675640       | 825.359988     | 413.183632       | C    | 2701.224115 | 1351.115695     | 2684.197566    | 1342.602421      | 2683.213550    | 1342.110413      | 21 |
| 7  | 958.397496  | 479.702386      | 941.370947     | 471.189112       | 940.386931     | 470.697104       | D    | 2541.193466 | 1271.100371     | 2524.166917    | 1262.587096      | 2523.182901    | 1262.095088      | 20 |
| 8  | 1057.465910 | 529.236593      | 1040.439361    | 520.723319       | 1039.455345    | 520.231311       | V    | 2426.166523 | 1213.586899     | 2409.139974    | 1205.073625      | 2408.155958    | 1204.581617      | 19 |
| 9  | 1154.518674 | 577.762975      | 1137.492125    | 569.249701       | 1136.508109    | 568.757693       | P    | 2327.098109 | 1164.052692     | 2310.071560    | 1155.539418      | 2309.087544    | 1155.047410      | 18 |
| 10 | 1593.744000 | 797.375638      | 1576.717451    | 788.862364       | 1575.733435    | 788.370356       | Q    | 2230.045345 | 1115.526310     | 2213.018796    | 1107.013036      | 2212.034780    | 1106.521028      | 17 |
| 11 | 1753.774649 | 877.390963      | 1736.748100    | 868.877688       | 1735.764084    | 868.385680       | C    | 1790.820019 | 895.913647      | 1773.793470    | 887.400373       | 1772.809454    | 886.908365       | 16 |
| 12 | 1824.811763 | 912.909520      | 1807.785214    | 904.396245       | 1806.801198    | 903.904237       | A    | 1630.789370 | 815.898323      | 1613.762821    | 807.385048       | 1612.778805    | 806.893040       | 15 |
| 13 | 1895.848877 | 948.428077      | 1878.822328    | 939.914802       | 1877.838312    | 939.422794       | A    | 1559.752256 | 780.379766      | 1542.725707    | 771.866491       | 1541.741691    | 771.374483       | 14 |
| 14 | 1992.901641 | 996.954459      | 1975.875092    | 988.441184       | 1974.891076    | 987.949176       | P    | 1488.715142 | 744.861209      | 1471.688593    | 736.347934       | 1470.704577    | 735.855926       | 13 |
| 15 | 2079.933669 | 1040.470472     | 2062.907120    | 1031.957198      | 2061.923104    | 1031.465190      | S    | 1391.662378 | 696.334827      | 1374.635829    | 687.821552       | 1373.651813    | 687.329544       | 12 |
| 16 | 2227.002083 | 1114.004679     | 2209.975534    | 1105.491405      | 2208.991518    | 1104.999397      | F    | 1304.630350 | 652.818813      | 1287.603801    | 644.305538       | 1286.619785    | 643.813530       | 11 |
| 17 | 2342.029026 | 1171.518151     | 2325.002477    | 1163.004876      | 2324.018461    | 1162.512868      | D    | 1157.561936 | 579.284606      | 1140.535387    | 570.771331       | 1139.551371    | 570.279323       | 10 |
| 18 | 2502.059675 | 1251.533475     | 2485.033126    | 1243.020201      | 2484.049110    | 1242.528193      | C    | 1042.534993 | 521.771135      | 1025.508444    | 513.257860       | 1024.524428    | 512.765852       | 9  |
| 19 | 2559.081139 | 1280.044207     | 2542.054590    | 1271.530933      | 2541.070574    | 1271.038925      | G    | 882.504344  | 441.755810      | 865.477795     | 433.242536       | 864.493779     | 432.750528       | 8  |
| 20 | 2687.176102 | 1344.091689     | 2670.149553    | 1335.578414      | 2669.165537    | 1335.086406      | K    | 825.482880  | 413.245078      | 808.456331     | 404.731804       | 807.472315     | 404.239796       | 7  |
| 21 | 2784.228866 | 1392.618071     | 2767.202317    | 1384.104796      | 2766.218301    | 1383.612788      | P    | 697.387917  | 349.197597      | 680.361368     | 340.684322       | 679.377352     | 340.192314       | 6  |
| 22 | 2912.287444 | 1456.647360     | 2895.260895    | 1448.134085      | 2894.276879    | 1447.642077      | Q    | 600.335153  | 300.671215      | 583.308604     | 292.157940       | 582.324588     | 291.665932       | 5  |
| 23 | 3011.355858 | 1506.181567     | 2994.329309    | 1497.668292      | 2993.345293    | 1497.176284      | V    | 472.276575  | 236.641925      | 455.250026     | 228.128651       | 454.266010     | 227.636643       | 4  |
| 24 | 3140.398451 | 1570.702863     | 3123.371902    | 1562.189589      | 3122.387886    | 1561.697581      | E    | 373.208161  | 187.107719      | 356.181612     | 178.594444       | 355.197596     | 178.102436       | 3  |
| 25 | 3237.451215 | 1619.229245     | 3220.424666    | 1610.715971      | 3219.440650    | 1610.223963      | P    | 244.165568  | 122.586422      | 227.139019     | 114.073148       |                |                  | 2  |
| 26 |             |                 |                |                  |                |                  | K    | 147.112804  | 74.060040       | 130.086255     | 65.546765        |                |                  | 1  |

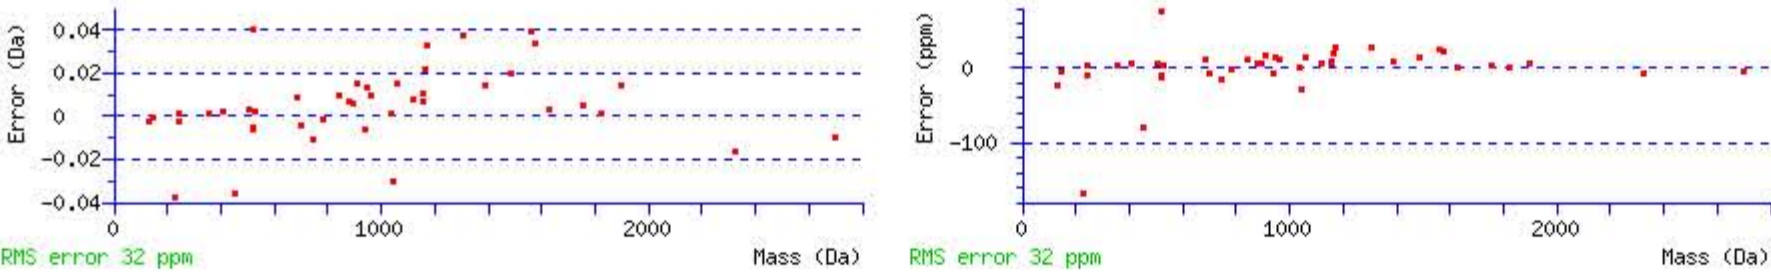

NCBI BLAST search of **KLYDYCDVPQCAAPSFDCGKPQVEPK**  
(Parameters: blastp, nr protein database, expect=20000, no filter, PAM30)  
Other BLAST [web gateways](#)

All matches to this query

| Score | Mr(calc):   | Delta    | Sequence                                   |
|-------|-------------|----------|--------------------------------------------|
| 59.6  | 3382.549469 | 0.025707 | <a href="#">KLYDYCDVPQCAAPSFDCGKPQVEPK</a> |
| 8.5   | 3382.549469 | 0.025707 | <a href="#">KLYDYCDVPQCAAPSFDCGKPQVEPK</a> |

MATRIX

SCIENCE

Mascot Search Results

Peptide View

MS/MS Fragmentation of **VQSTELCAGHLAGGTDSCQGDSGGPLVCFEK**  
Found in **PLMN\_HUMAN**, Plasminogen OS=Homo sapiens GN=PLG PE=1 SV=2

Match to Query 66147: 3547.615736 from(887.911210,4+) rtinseconds(2160) index(67416)  
Title: Locus:1.1.1.2027.14 File:"2013-07-02 CLN FXIII 180 min 2nd FT.wiff"  
Data file C:\Program Files (x86)\Matrix Science\Mascot Daemon\mgf\8 FXIII 180 min 2nd\mascot\_daemon\_merge.mgf

Click mouse within plot area to zoom in by factor of two about that point  
Or, Plot from  to  Da

Label all possible matches ☐ Label matches used for scoring ☒

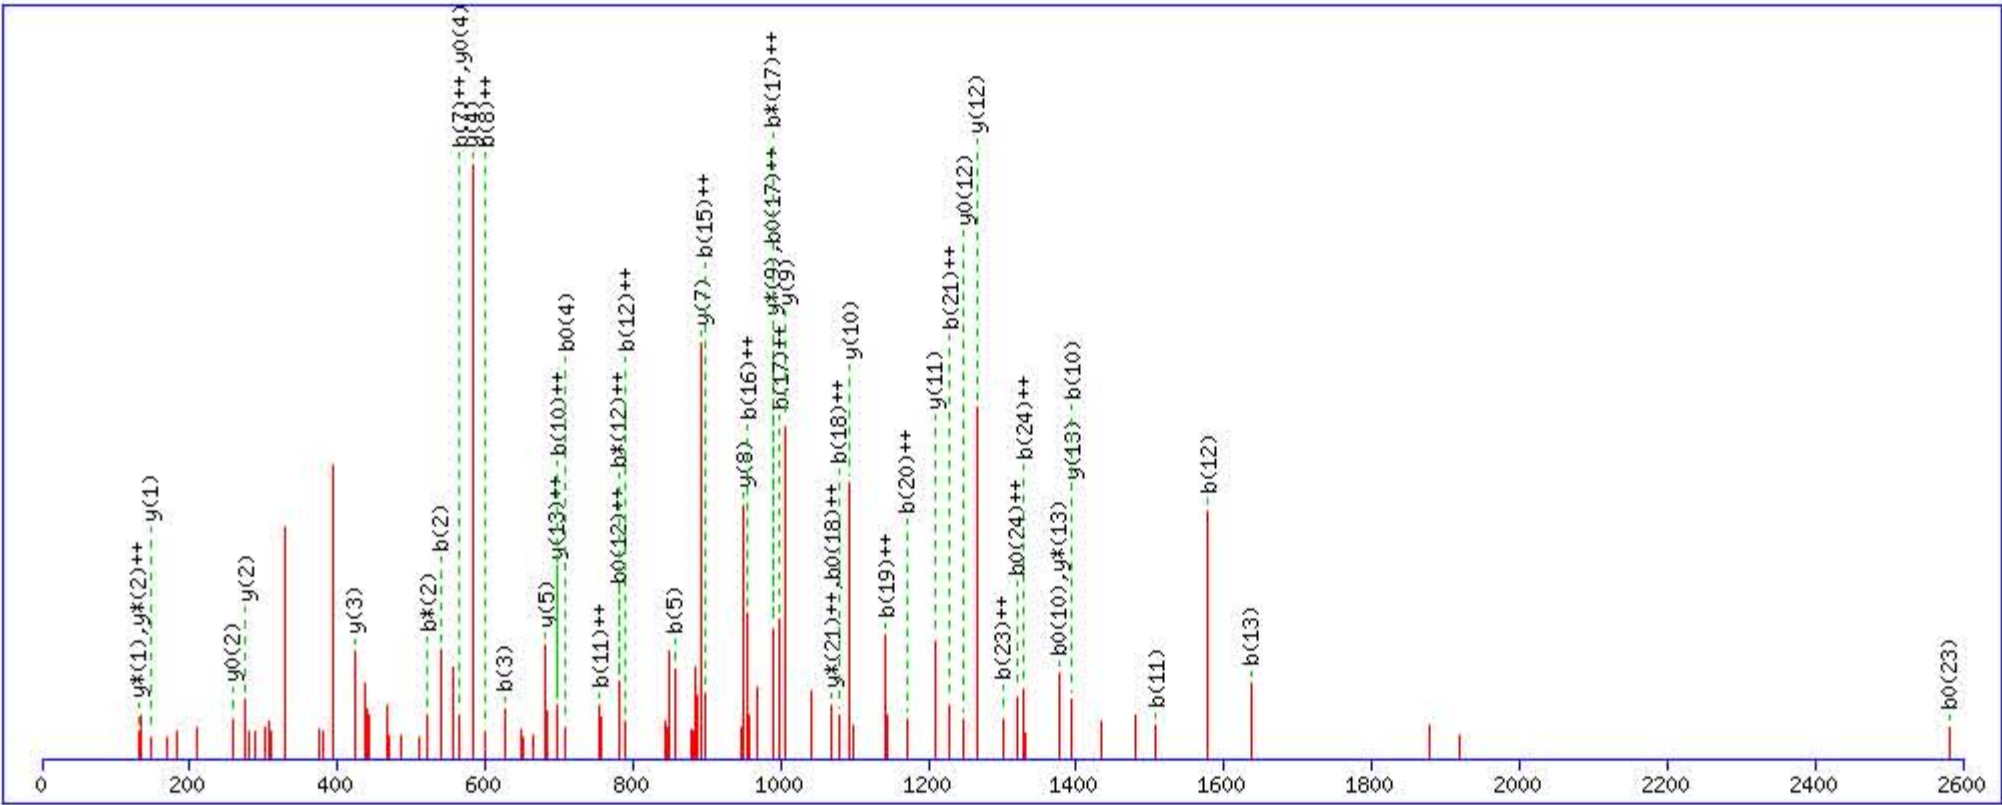

Monoisotopic mass of neutral peptide Mr(calc): 3547.584061  
Fixed modifications: Carbamidomethyl (C) (apply to specified residues or termini only)  
Variable modifications:  
Q2 : Biotin:Thermo-21345 (Q)  
Ions Score: 83 Expect: 5.5e-008  
Matches : 52/352 fragment ions using 83 most intense peaks [\(help\)](#)

| #  | b           | b <sup>++</sup> | b <sup>*</sup> | b <sup>+++</sup> | b <sup>0</sup> | b <sup>0++</sup> | Seq. | y           | y <sup>++</sup> | y <sup>*</sup> | y <sup>+++</sup> | y <sup>0</sup> | y <sup>0++</sup> | #  |
|----|-------------|-----------------|----------------|------------------|----------------|------------------|------|-------------|-----------------|----------------|------------------|----------------|------------------|----|
| 1  | 100.075690  | 50.541483       |                |                  |                |                  | V    |             |                 |                |                  |                |                  | 31 |
| 2  | 539.301016  | 270.154146      | 522.274467     | 261.640872       |                |                  | Q    | 3449.522877 | 1725.265076     | 3432.496328    | 1716.751802      | 3431.512312    | 1716.259794      | 30 |
| 3  | 626.333044  | 313.670160      | 609.306495     | 305.156886       | 608.322479     | 304.664878       | S    | 3010.297551 | 1505.652413     | 2993.271002    | 1497.139139      | 2992.286986    | 1496.647131      | 29 |
| 4  | 727.380723  | 364.194000      | 710.354174     | 355.680725       | 709.370158     | 355.188717       | T    | 2923.265523 | 1462.136399     | 2906.238974    | 1453.623125      | 2905.254958    | 1453.131117      | 28 |
| 5  | 856.423316  | 428.715296      | 839.396767     | 420.202022       | 838.412751     | 419.710014       | E    | 2822.217844 | 1411.612560     | 2805.191295    | 1403.099285      | 2804.207279    | 1402.607277      | 27 |
| 6  | 969.507380  | 485.257328      | 952.480831     | 476.744054       | 951.496815     | 476.252046       | L    | 2693.175251 | 1347.091263     | 2676.148702    | 1338.577989      | 2675.164686    | 1338.085981      | 26 |
| 7  | 1129.538029 | 565.272653      | 1112.511480    | 556.759378       | 1111.527464    | 556.267370       | C    | 2580.091187 | 1290.549231     | 2563.064638    | 1282.035957      | 2562.080622    | 1281.543949      | 25 |
| 8  | 1200.575143 | 600.791210      | 1183.548594    | 592.277935       | 1182.564578    | 591.785927       | A    | 2420.060538 | 1210.533907     | 2403.033989    | 1202.020632      | 2402.049973    | 1201.528624      | 24 |
| 9  | 1257.596607 | 629.301942      | 1240.570058    | 620.788667       | 1239.586042    | 620.296659       | G    | 2349.023424 | 1175.015350     | 2331.996875    | 1166.502075      | 2331.012859    | 1166.010067      | 23 |
| 10 | 1394.655519 | 697.831397      | 1377.628970    | 689.318123       | 1376.644954    | 688.826115       | H    | 2292.001960 | 1146.504618     | 2274.975411    | 1137.991343      | 2273.991395    | 1137.499335      | 22 |
| 11 | 1507.739583 | 754.373429      | 1490.713034    | 745.860155       | 1489.729018    | 745.368147       | L    | 2154.943048 | 1077.975162     | 2137.916499    | 1069.461887      | 2136.932483    | 1068.969879      | 21 |
| 12 | 1578.776697 | 789.891986      | 1561.750148    | 781.378712       | 1560.766132    | 780.886704       | A    | 2041.858984 | 1021.433130     | 2024.832435    | 1012.919855      | 2023.848419    | 1012.427847      | 20 |
| 13 | 1635.798161 | 818.402718      | 1618.771612    | 809.889444       | 1617.787596    | 809.397436       | G    | 1970.821870 | 985.914573      | 1953.795321    | 977.401298       | 1952.811305    | 976.909290       | 19 |
| 14 | 1692.819625 | 846.913450      | 1675.793076    | 838.400176       | 1674.809060    | 837.908168       | G    | 1913.800406 | 957.403841      | 1896.773857    | 948.890566       | 1895.789841    | 948.398558       | 18 |
| 15 | 1793.867304 | 897.437290      | 1776.840755    | 888.924015       | 1775.856739    | 888.432007       | T    | 1856.778942 | 928.893109      | 1839.752393    | 920.379835       | 1838.768377    | 919.887826       | 17 |
| 16 | 1908.894247 | 954.950761      | 1891.867698    | 946.437487       | 1890.883682    | 945.945479       | D    | 1755.731263 | 878.369269      | 1738.704714    | 869.855995       | 1737.720698    | 869.363987       | 16 |
| 17 | 1995.926275 | 998.466775      | 1978.899726    | 989.953501       | 1977.915710    | 989.461493       | S    | 1640.704320 | 820.855798      | 1623.677771    | 812.342523       | 1622.693755    | 811.850515       | 15 |
| 18 | 2155.956924 | 1078.482100     | 2138.930375    | 1069.968825      | 2137.946359    | 1069.476817      | C    | 1553.672292 | 777.339784      | 1536.645743    | 768.826509       | 1535.661727    | 768.334501       | 14 |
| 19 | 2284.015502 | 1142.511389     | 2266.988953    | 1133.998114      | 2266.004937    | 1133.506106      | Q    | 1393.641643 | 697.324459      | 1376.615094    | 688.811185       | 1375.631078    | 688.319177       | 13 |
| 20 | 2341.036966 | 1171.022121     | 2324.010417    | 1162.508846      | 2323.026401    | 1162.016838      | G    | 1265.583065 | 633.295170      | 1248.556516    | 624.781896       | 1247.572500    | 624.289888       | 12 |
| 21 | 2456.063909 | 1228.535592     | 2439.037360    | 1220.022318      | 2438.053344    | 1219.530310      | D    | 1208.561601 | 604.784438      | 1191.535052    | 596.271164       | 1190.551036    | 595.779156       | 11 |
| 22 | 2543.095937 | 1272.051606     | 2526.069388    | 1263.538332      | 2525.085372    | 1263.046324      | S    | 1093.534658 | 547.270967      | 1076.508109    | 538.757692       | 1075.524093    | 538.265684       | 10 |
| 23 | 2600.117401 | 1300.562338     | 2583.090852    | 1292.049064      | 2582.106836    | 1291.557056      | G    | 1006.502630 | 503.754953      | 989.476081     | 495.241678       | 988.492065     | 494.749670       | 9  |
| 24 | 2657.138865 | 1329.073070     | 2640.112316    | 1320.559796      | 2639.128300    | 1320.067788      | G    | 949.481166  | 475.244221      | 932.454617     | 466.730946       | 931.470601     | 466.238938       | 8  |
| 25 | 2754.191629 | 1377.599452     | 2737.165080    | 1369.086178      | 2736.181064    | 1368.594170      | P    | 892.459702  | 446.733489      | 875.433153     | 438.220214       | 874.449137     | 437.728206       | 7  |
| 26 | 2867.275693 | 1434.141484     | 2850.249144    | 1425.628210      | 2849.265128    | 1425.136202      | L    | 795.406938  | 398.207107      | 778.380389     | 389.693832       | 777.396373     | 389.201824       | 6  |
| 27 | 2966.344107 | 1483.675691     | 2949.317558    | 1475.162417      | 2948.333542    | 1474.670409      | V    | 682.322874  | 341.665075      | 665.296325     | 333.151800       | 664.312309     | 332.659792       | 5  |
| 28 | 3126.374756 | 1563.691016     | 3109.348207    | 1555.177741      | 3108.364191    | 1554.685733      | C    | 583.254460  | 292.130868      | 566.227911     | 283.617593       | 565.243895     | 283.125585       | 4  |
| 29 | 3273.443170 | 1637.225223     | 3256.416621    | 1628.711948      | 3255.432605    | 1628.219940      | F    | 423.223811  | 212.115543      | 406.197262     | 203.602269       | 405.213246     | 203.110261       | 3  |
| 30 | 3402.485763 | 1701.746519     | 3385.459214    | 1693.233245      | 3384.475198    | 1692.741237      | E    | 276.155397  | 138.581337      | 259.128848     | 130.068062       | 258.144832     | 129.576054       | 2  |
| 31 |             |                 |                |                  |                |                  | K    | 147.112804  | 74.060040       | 130.086255     | 65.546765        |                |                  | 1  |

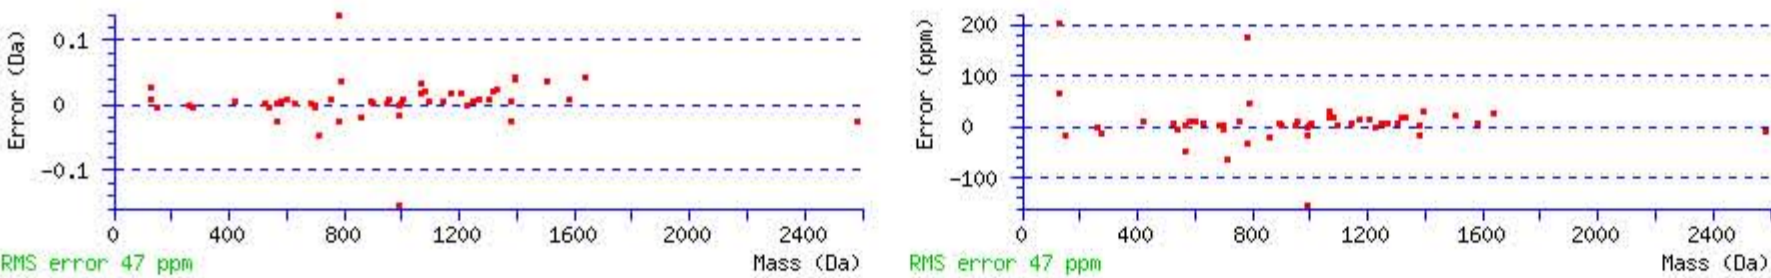

NCBI BLAST search of **VQSTELCAGHLAGGTDSCQGDSGGPLVCFEK**  
(Parameters: blastp, nr protein database, expect=20000, no filter, PAM30)  
Other BLAST [web gateways](#)

All matches to this query

| Score | Mr(calc):   | Delta    | Sequence                                        |
|-------|-------------|----------|-------------------------------------------------|
| 82.8  | 3547.584061 | 0.031675 | <a href="#">VQSTELCAGHLAGGTDSCQGDSGGPLVCFEK</a> |
| 35.8  | 3547.584061 | 0.031675 | <a href="#">VQSTELCAGHLAGGTDSCQGDSGGPLVCFEK</a> |

MATRIX

SCIENCE

Mascot Search Results

Peptide View

MS/MS Fragmentation of **GLGELQELYLK**  
Found in **GP1BA\_HUMAN**, Platelet glycoprotein Ib alpha chain OS=Homo sapiens GN=GP1BA PE=1 SV=1

Match to Query 33318: 1572.881228 from(787.447890,2+) rtinseconds(2567) index(53696)  
Title: Locus:1.1.1.2131.10 File:"2013-07-02 CLN FXIII 180 min 2nd F 4.wiff"  
Data file C:\Program Files (x86)\Matrix Science\Mascot Daemon\mgf\8 FXIII 180 min 2nd\mascot\_daemon\_merge.mgf

Click mouse within plot area to zoom in by factor of two about that point  
Or, 

Plot from

100

 to 

1600

 Da 

Full range

  
Label all possible matches ☐ Label matches used for scoring ☒

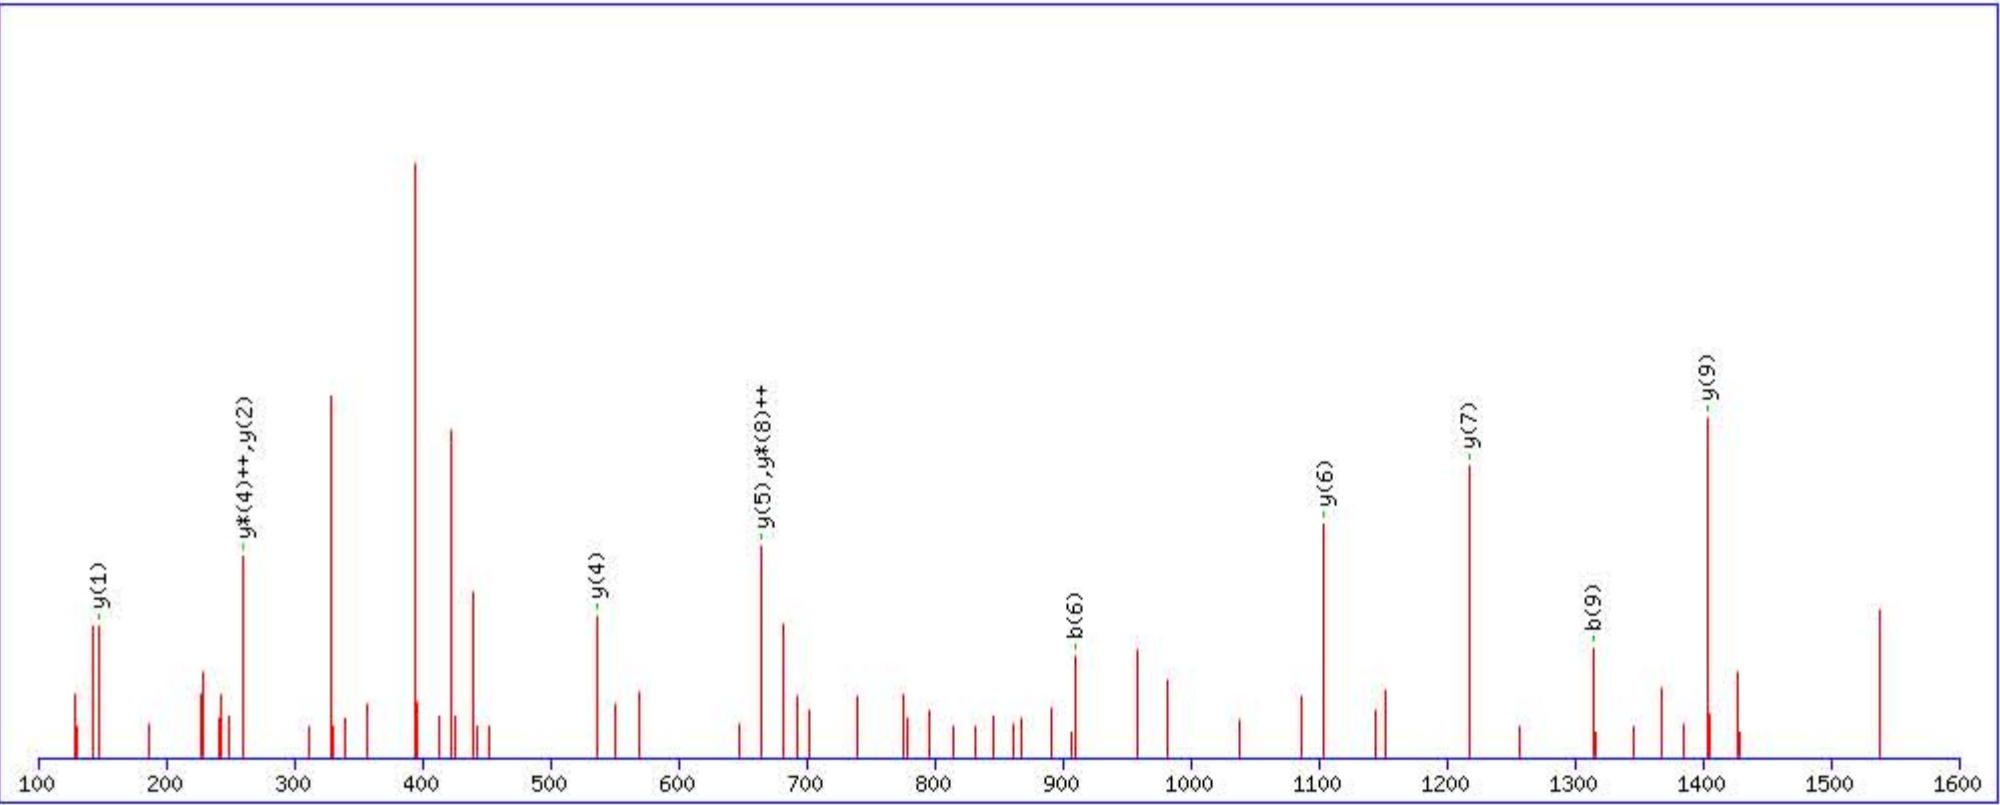

Monoisotopic mass of neutral peptide Mr(calc): 1572.858521  
Fixed modifications: Carbamidomethyl (C) (apply to specified residues or termini only)  
Variable modifications:  
Q6 : Biotin:Thermo-21345 (Q)  
Ions Score: 51 Expect: 0.00012  
Matches : 11/96 fragment ions using 14 most intense peaks [\(help\)](#)

| #  | b           | b <sup>++</sup> | b <sup>*</sup> | b <sup>++</sup> * | b <sup>0</sup> | b <sup>0++</sup> | Seq. | y           | y <sup>++</sup> | y <sup>*</sup> | y <sup>++</sup> * | y <sup>0</sup> | y <sup>0++</sup> | #  |
|----|-------------|-----------------|----------------|-------------------|----------------|------------------|------|-------------|-----------------|----------------|-------------------|----------------|------------------|----|
| 1  | 58.028740   | 29.518008       |                |                   |                |                  | G    |             |                 |                |                   |                |                  | 11 |
| 2  | 171.112804  | 86.060040       |                |                   |                |                  | L    | 1516.844365 | 758.925821      | 1499.817816    | 750.412546        | 1498.833800    | 749.920538       | 10 |
| 3  | 228.134268  | 114.570772      |                |                   |                |                  | G    | 1403.760301 | 702.383789      | 1386.733752    | 693.870514        | 1385.749736    | 693.378506       | 9  |
| 4  | 357.176861  | 179.092068      |                |                   | 339.166296     | 170.086786       | E    | 1346.738837 | 673.873057      | 1329.712288    | 665.359782        | 1328.728272    | 664.867774       | 8  |
| 5  | 470.260925  | 235.634100      |                |                   | 452.250360     | 226.628818       | L    | 1217.696244 | 609.351760      | 1200.669695    | 600.838486        | 1199.685679    | 600.346477       | 7  |
| 6  | 909.486251  | 455.246764      | 892.459702     | 446.733489        | 891.475686     | 446.241481       | Q    | 1104.612180 | 552.809728      | 1087.585631    | 544.296454        | 1086.601615    | 543.804446       | 6  |
| 7  | 1038.528844 | 519.768060      | 1021.502295    | 511.254786        | 1020.518279    | 510.762778       | E    | 665.386854  | 333.197065      | 648.360305     | 324.683791        | 647.376289     | 324.191783       | 5  |
| 8  | 1151.612908 | 576.310092      | 1134.586359    | 567.796818        | 1133.602343    | 567.304810       | L    | 536.344261  | 268.675769      | 519.317712     | 260.162494        |                |                  | 4  |
| 9  | 1314.676237 | 657.841757      | 1297.649688    | 649.328482        | 1296.665672    | 648.836474       | Y    | 423.260197  | 212.133736      | 406.233648     | 203.620462        |                |                  | 3  |
| 10 | 1427.760301 | 714.383789      | 1410.733752    | 705.870514        | 1409.749736    | 705.378506       | L    | 260.196868  | 130.602072      | 243.170319     | 122.088797        |                |                  | 2  |
| 11 |             |                 |                |                   |                |                  | K    | 147.112804  | 74.060040       | 130.086255     | 65.546765         |                |                  | 1  |

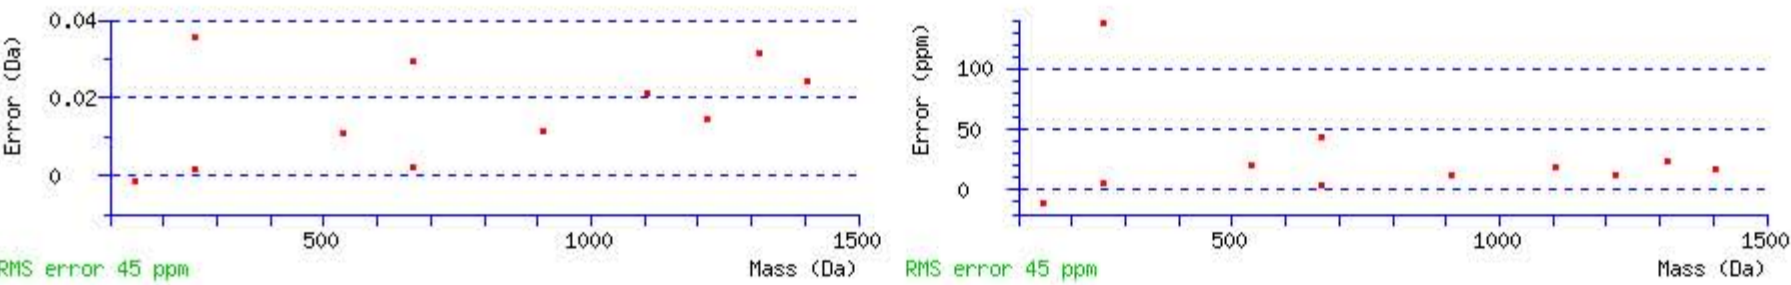

NCBI BLAST search of [GLGELQELYLK](#)  
(Parameters: blastp, nr protein database, expect=20000, no filter, PAM30)  
Other BLAST [web gateways](#)

All matches to this query

| Score | Mr(calc):   | Delta     | Sequence                        |
|-------|-------------|-----------|---------------------------------|
| 51.0  | 1572.858521 | 0.022707  | <a href="#">GLGELQELYLK</a>     |
| 9.2   | 1572.861923 | 0.019305  | <a href="#">QVLEVTSMLVK</a>     |
| 8.2   | 1572.897385 | -0.016157 | <a href="#">TKSIAEELELSILK</a>  |
| 4.4   | 1572.862350 | 0.018878  | <a href="#">QQQAKNFELNLK</a>    |
| 3.7   | 1572.890884 | -0.009656 | <a href="#">LLNLTVRIDIMEK</a>   |
| 2.7   | 1572.890900 | -0.009672 | <a href="#">NISVLGQAGLLTMIK</a> |
| 2.0   | 1572.887527 | -0.006299 | <a href="#">TLTFALRADDPLLK</a>  |
| 1.6   | 1572.869781 | 0.011447  | <a href="#">IQGPQVPGEIK</a>     |
| 1.4   | 1572.887512 | -0.006284 | <a href="#">EFQALIKGGAALDLK</a> |
| 1.0   | 1572.879654 | 0.001574  | <a href="#">GITMLEEIKVPSIK</a>  |

MATRIX

SCIENCE

Mascot Search Results

Peptide View

MS/MS Fragmentation of **TCNHPVPQHGGPFCAGDATR**  
Found in **PROP\_HUMAN**, Properdin OS=Homo sapiens GN=CFP PE=1 SV=2

Match to Query 54008: 2489.124462 from(830.715430,3+) rtinseconds(1500) index(63490)  
Title: Locus:1.1.1.1797.12 File:"2013-07-02 CLN FXIII 180 min 2nd FT.wiff"  
Data file C:\Program Files (x86)\Matrix Science\Mascot Daemon\mgf\8 FXIII 180 min 2nd\mascot\_daemon\_merge.mgf

Click mouse within plot area to zoom in by factor of two about that point  
Or, 

Plot from

0

 to 

2600

 Da 

Full range

  
Label all possible matches ☐ Label matches used for scoring ☒

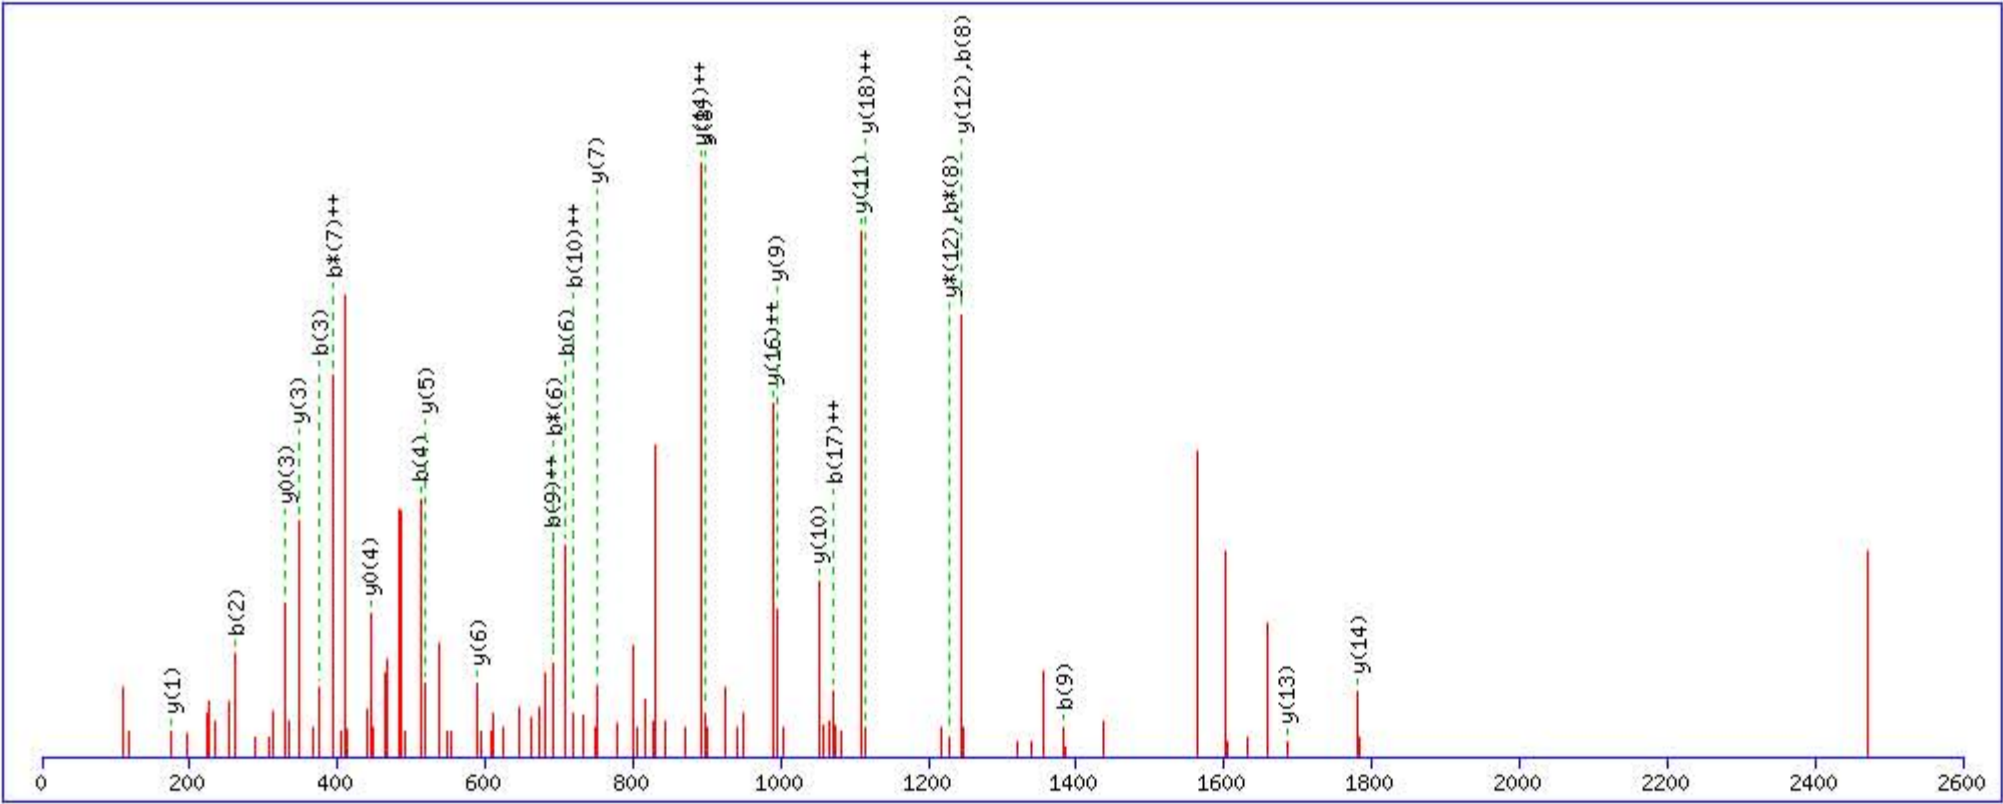

Monoisotopic mass of neutral peptide Mr(calc): 2489.115128  
Fixed modifications: Carbamidomethyl (C) (apply to specified residues or termini only)  
Variable modifications:  
Q8 : Biotin:Thermo-21345 (Q)  
Ions Score: 48 Expect: 0.00015  
Matches : 30/222 fragment ions using 73 most intense peaks [\(help\)](#)

| #  | b           | b <sup>++</sup> | b <sup>*</sup> | b <sup>*++</sup> | b <sup>0</sup> | b <sup>0++</sup> | Seq. | y           | y <sup>++</sup> | y <sup>*</sup> | y <sup>*++</sup> | y <sup>0</sup> | y <sup>0++</sup> | #  |
|----|-------------|-----------------|----------------|------------------|----------------|------------------|------|-------------|-----------------|----------------|------------------|----------------|------------------|----|
| 1  | 102.054955  | 51.531116       |                |                  | 84.044390      | 42.525833        | T    |             |                 |                |                  |                |                  | 20 |
| 2  | 262.085604  | 131.546440      |                |                  | 244.075039     | 122.541158       | C    | 2389.074689 | 1195.040982     | 2372.048140    | 1186.527708      | 2371.064124    | 1186.035700      | 19 |
| 3  | 376.128531  | 188.567904      | 359.101982     | 180.054629       | 358.117966     | 179.562621       | N    | 2229.044040 | 1115.025658     | 2212.017491    | 1106.512383      | 2211.033475    | 1106.020375      | 18 |
| 4  | 513.187443  | 257.097360      | 496.160894     | 248.584085       | 495.176878     | 248.092077       | H    | 2115.001113 | 1058.004194     | 2097.974564    | 1049.490920      | 2096.990548    | 1048.998912      | 17 |
| 5  | 610.240207  | 305.623742      | 593.213658     | 297.110467       | 592.229642     | 296.618459       | P    | 1977.942201 | 989.474739      | 1960.915652    | 980.961464       | 1959.931636    | 980.469456       | 16 |
| 6  | 709.308621  | 355.157949      | 692.282072     | 346.644674       | 691.298056     | 346.152666       | V    | 1880.889437 | 940.948357      | 1863.862888    | 932.435082       | 1862.878872    | 931.943074       | 15 |
| 7  | 806.361385  | 403.684331      | 789.334836     | 395.171056       | 788.350820     | 394.679048       | P    | 1781.821023 | 891.414150      | 1764.794474    | 882.900875       | 1763.810458    | 882.408867       | 14 |
| 8  | 1245.586711 | 623.296994      | 1228.560162    | 614.783719       | 1227.576146    | 614.291711       | Q    | 1684.768259 | 842.887768      | 1667.741710    | 834.374493       | 1666.757694    | 833.882485       | 13 |
| 9  | 1382.645623 | 691.826450      | 1365.619074    | 683.313175       | 1364.635058    | 682.821167       | H    | 1245.542933 | 623.275105      | 1228.516384    | 614.761830       | 1227.532368    | 614.269822       | 12 |
| 10 | 1439.667087 | 720.337182      | 1422.640538    | 711.823907       | 1421.656522    | 711.331899       | G    | 1108.484021 | 554.745649      | 1091.457472    | 546.232374       | 1090.473456    | 545.740366       | 11 |
| 11 | 1496.688551 | 748.847914      | 1479.662002    | 740.334639       | 1478.677986    | 739.842631       | G    | 1051.462557 | 526.234917      | 1034.436008    | 517.721642       | 1033.451992    | 517.229634       | 10 |
| 12 | 1593.741315 | 797.374296      | 1576.714766    | 788.861021       | 1575.730750    | 788.369013       | P    | 994.441093  | 497.724185      | 977.414544     | 489.210910       | 976.430528     | 488.718902       | 9  |
| 13 | 1740.809729 | 870.908503      | 1723.783180    | 862.395228       | 1722.799164    | 861.903220       | F    | 897.388329  | 449.197803      | 880.361780     | 440.684528       | 879.377764     | 440.192520       | 8  |
| 14 | 1900.840378 | 950.923827      | 1883.813829    | 942.410553       | 1882.829813    | 941.918545       | C    | 750.319915  | 375.663596      | 733.293366     | 367.150321       | 732.309350     | 366.658313       | 7  |
| 15 | 1971.877492 | 986.442384      | 1954.850943    | 977.929110       | 1953.866927    | 977.437102       | A    | 590.289266  | 295.648271      | 573.262717     | 287.134997       | 572.278701     | 286.642989       | 6  |
| 16 | 2028.898956 | 1014.953116     | 2011.872407    | 1006.439842      | 2010.888391    | 1005.947834      | G    | 519.252152  | 260.129714      | 502.225603     | 251.616440       | 501.241587     | 251.124432       | 5  |
| 17 | 2143.925899 | 1072.466587     | 2126.899350    | 1063.953313      | 2125.915334    | 1063.461305      | D    | 462.230688  | 231.618982      | 445.204139     | 223.105707       | 444.220123     | 222.613700       | 4  |
| 18 | 2214.963013 | 1107.985144     | 2197.936464    | 1099.471870      | 2196.952448    | 1098.979862      | A    | 347.203745  | 174.105510      | 330.177196     | 165.592236       | 329.193180     | 165.100228       | 3  |
| 19 | 2316.010692 | 1158.508984     | 2298.984143    | 1149.995709      | 2298.000127    | 1149.503701      | T    | 276.166631  | 138.586953      | 259.140082     | 130.073679       | 258.156066     | 129.581671       | 2  |
| 20 |             |                 |                |                  |                |                  | R    | 175.118952  | 88.063114       | 158.092403     | 79.549839        |                |                  | 1  |

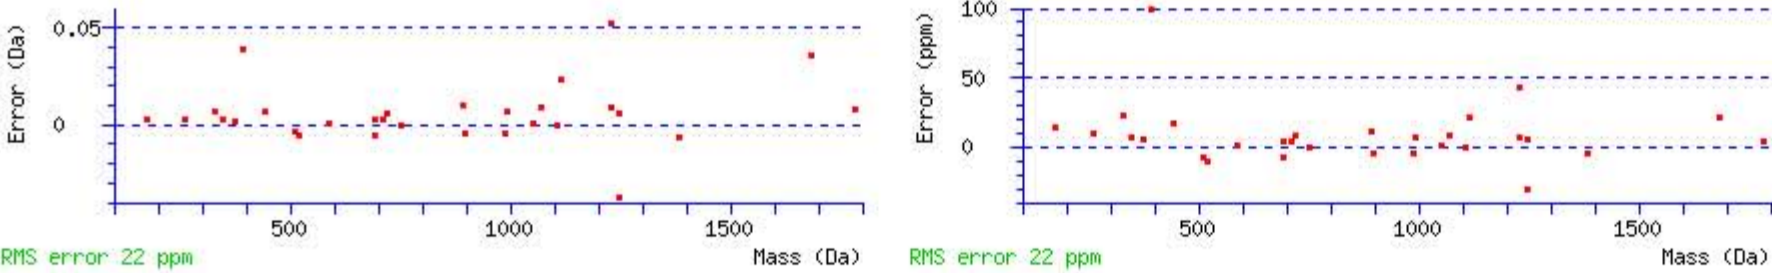

NCBI BLAST search of [TCNHPVPQHGGPFCAGDATR](#)  
(Parameters: blastp, nr protein database, expect=20000, no filter, PAM30)  
Other BLAST [web gateways](#)

All matches to this query

| Score | Mr(calc):   | Delta    | Sequence                             |
|-------|-------------|----------|--------------------------------------|
| 47.5  | 2489.115128 | 0.009334 | <a href="#">TCNHPVPQHGGPFCAGDATR</a> |

MATRIX

SCIENCE

Mascot Search Results

Peptide View

MS/MS Fragmentation of **ECLQTCR**  
Found in **AMBP\_HUMAN**, Protein AMBP OS=Homo sapiens GN=AMBP PE=1 SV=1

Match to Query 22624: 1276.577808 from(639.296180,2+) rtinseconds(1490) index(31008)  
Title: Locus:1.1.1.627.16 File:"2013-07-02 CLN FXIII 180 min 2nd F 3.wiff"  
Data file C:\Program Files (x86)\Matrix Science\Mascot Daemon\mgf\8 FXIII 180 min 2nd\mascot\_daemon\_merge.mgf

Click mouse within plot area to zoom in by factor of two about that point  
Or,   to  Da   
Label all possible matches ☐ Label matches used for scoring ☒

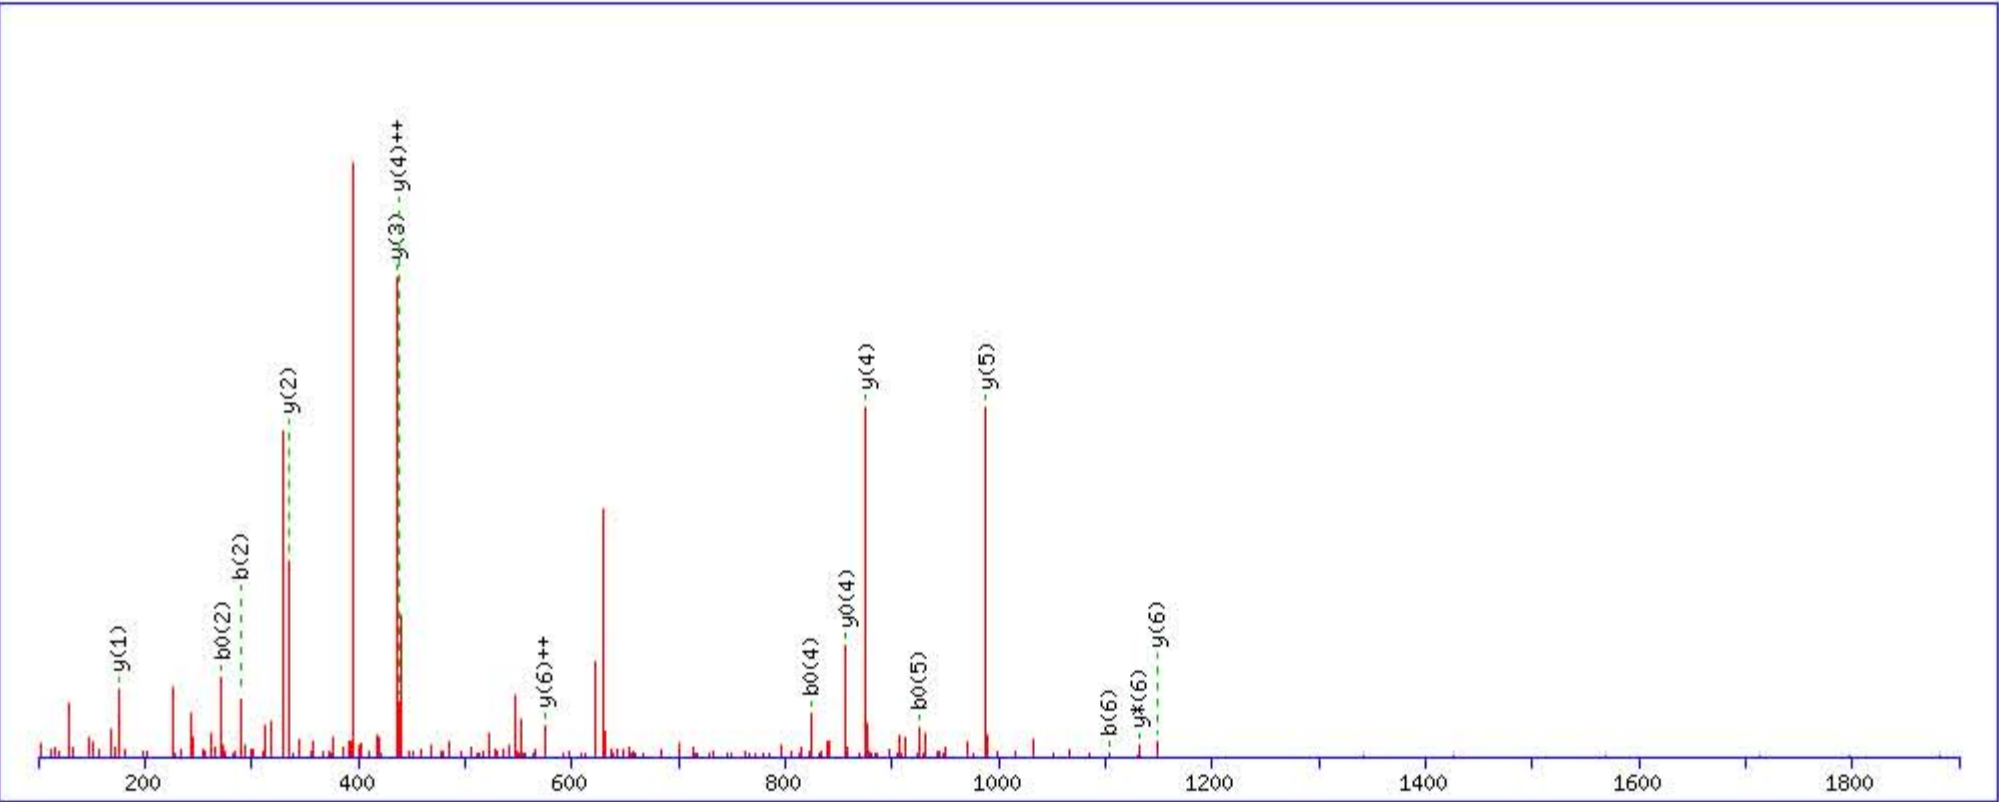

Monoisotopic mass of neutral peptide Mr(calc): 1276.572632  
Fixed modifications: Carbamidomethyl (C) (apply to specified residues or termini only)  
Variable modifications:  
Q4 : Biotin:Thermo-21345 (Q)  
Ions Score: 32 Expect: 0.005  
Matches : 15/62 fragment ions using 33 most intense peaks ([help](#))

| # | b           | b <sup>++</sup> | b <sup>*</sup> | b <sup>++</sup> * | b <sup>0</sup> | b <sup>0++</sup> | Seq. | y           | y <sup>++</sup> | y <sup>*</sup> | y <sup>++</sup> * | y <sup>0</sup> | y <sup>0++</sup> | # |
|---|-------------|-----------------|----------------|-------------------|----------------|------------------|------|-------------|-----------------|----------------|-------------------|----------------|------------------|---|
| 1 | 130.049869  | 65.528572       |                |                   | 112.039304     | 56.523290        | E    |             |                 |                |                   |                |                  | 7 |
| 2 | 290.080518  | 145.543897      |                |                   | 272.069953     | 136.538615       | C    | 1148.537319 | 574.772298      | 1131.510770    | 566.259023        | 1130.526754    | 565.767015       | 6 |
| 3 | 403.164582  | 202.085929      |                |                   | 385.154017     | 193.080647       | L    | 988.506670  | 494.756973      | 971.480121     | 486.243699        | 970.496105     | 485.751691       | 5 |
| 4 | 842.389908  | 421.698592      | 825.363359     | 413.185318        | 824.379343     | 412.693310       | Q    | 875.422606  | 438.214941      | 858.396057     | 429.701667        | 857.412041     | 429.209659       | 4 |
| 5 | 943.437587  | 472.222432      | 926.411038     | 463.709157        | 925.427022     | 463.217149       | T    | 436.197280  | 218.602278      | 419.170731     | 210.089003        | 418.186715     | 209.596995       | 3 |
| 6 | 1103.468236 | 552.237756      | 1086.441687    | 543.724482        | 1085.457671    | 543.232474       | C    | 335.149601  | 168.078438      | 318.123052     | 159.565164        |                |                  | 2 |
| 7 |             |                 |                |                   |                |                  | R    | 175.118952  | 88.063114       | 158.092403     | 79.549839         |                |                  | 1 |

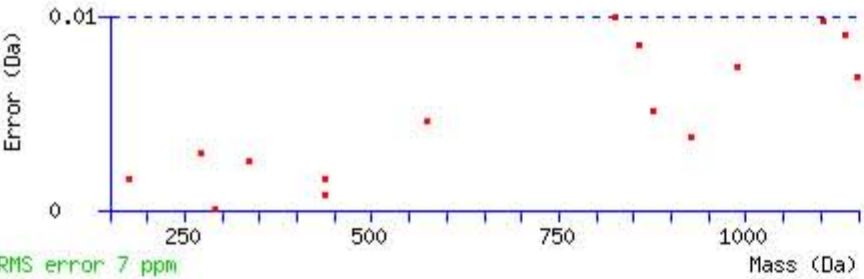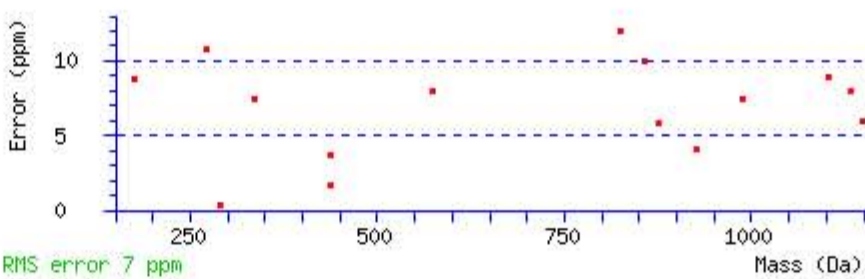

NCBI BLAST search of [ECLQTCR](#)  
(Parameters: blastp, nr protein database, expect=20000, no filter, PAM30)  
Other BLAST [web gateways](#)

All matches to this query

| Score | Mr(calc):   | Delta     | Sequence                     |
|-------|-------------|-----------|------------------------------|
| 31.6  | 1276.572632 | 0.005176  | <a href="#">ECLQTCR</a>      |
| 9.8   | 1276.590393 | -0.012585 | <a href="#">TMHTSVMALDR</a>  |
| 7.9   | 1276.590378 | -0.012570 | <a href="#">MSPSMLTGNSPR</a> |
| 7.3   | 1276.583862 | -0.006054 | <a href="#">KMSLSCHVCR</a>   |
| 6.3   | 1276.569275 | 0.008533  | <a href="#">MPMWAGGVGSPR</a> |
| 6.0   | 1276.579605 | -0.001797 | <a href="#">EEQRSPFNDR</a>   |
| 5.5   | 1276.587006 | -0.009198 | <a href="#">EDGTWAPMRSK</a>  |
| 4.7   | 1276.560516 | 0.017292  | <a href="#">QQVPSEDSMEK</a>  |
| 4.5   | 1276.590393 | -0.012585 | <a href="#">TMHTSVMALDR</a>  |
| 3.4   | 1276.582977 | -0.005169 | <a href="#">EMQLGREDQR</a>   |

M

A

T

R

I

X

S

C

I

E

N

C

E

Mascot Search Results

Peptide View

MS/MS Fragmentation of **GECVPGEQEPEPILIPR**  
Found in **AMBP\_HUMAN**, Protein AMBP OS=Homo sapiens GN=AMBP PE=1 SV=1

Match to Query 49134: 2230.126092 from(744.382640,3+) rtinseconds(2286) index(7238)  
Title: Locus:1.1.1.2073.15 File:"2013-07-02 CLN FXIII 180 min 2nd F 1.wiff"  
Data file C:\Program Files (x86)\Matrix Science\Mascot Daemon\mgf\8 FXIII 180 min 2nd\mascot\_daemon\_merge.mgf

Click mouse within plot area to zoom in by factor of two about that point  
Or,   to  Da   
Label all possible matches ☐ Label matches used for scoring ☒

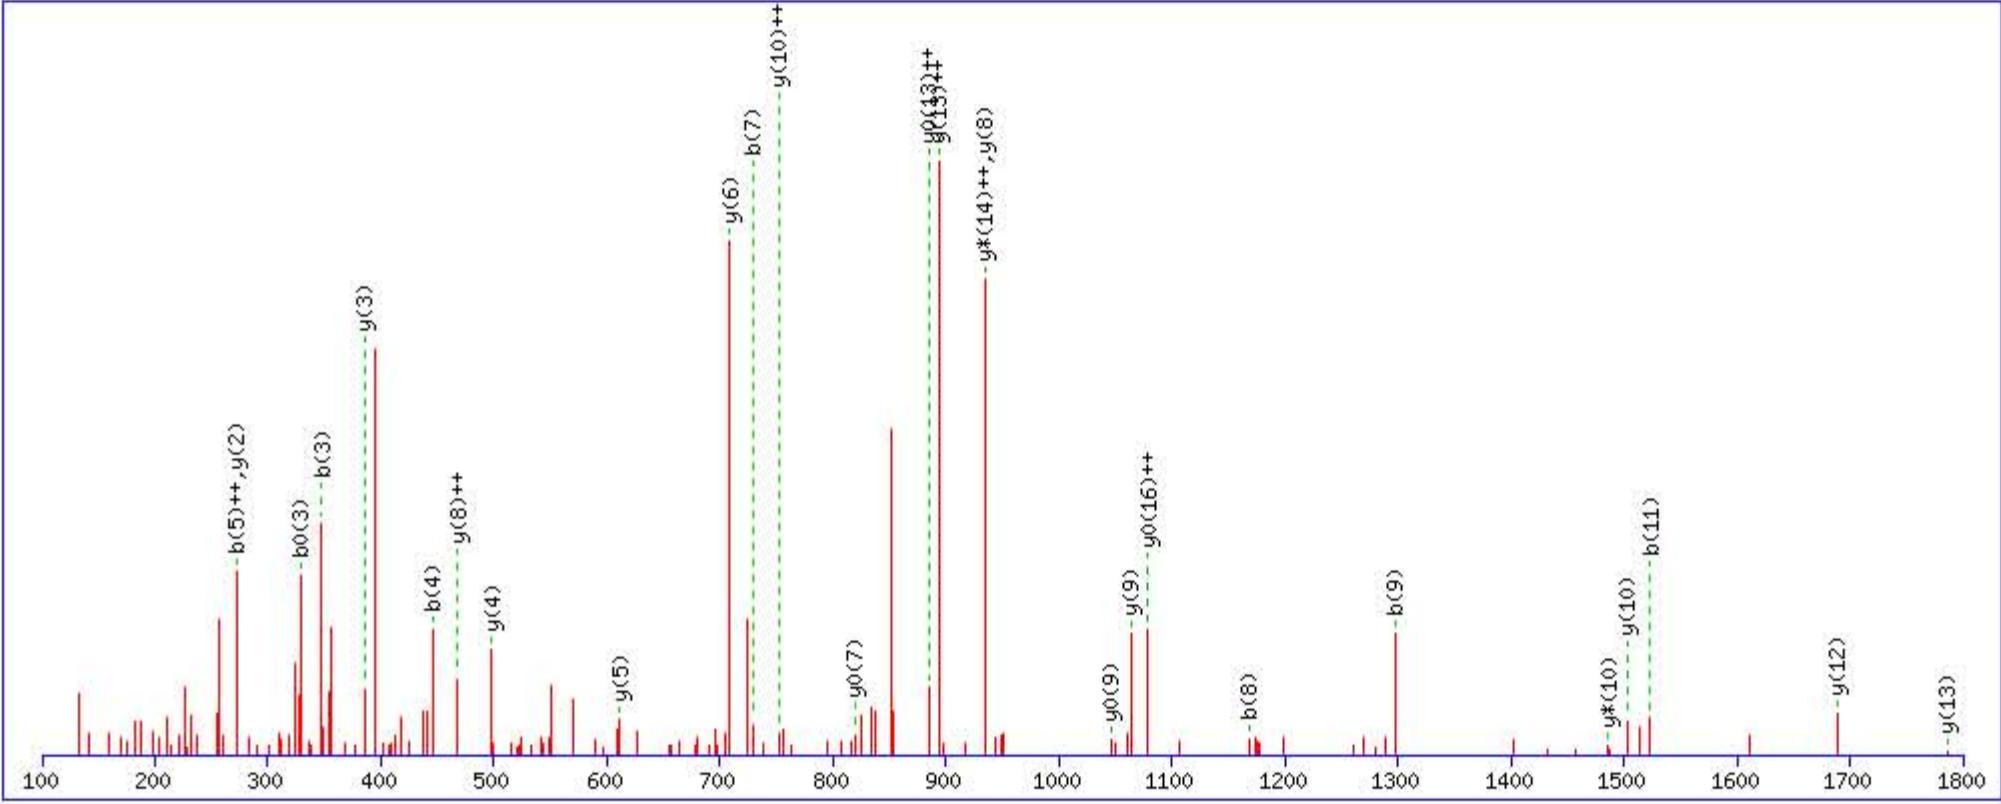

Monoisotopic mass of neutral peptide Mr(calc): 2230.112595  
Fixed modifications: Carbamidomethyl (C) (apply to specified residues or termini only)  
Variable modifications:  
Q8 : Biotin:Thermo-21345 (Q)  
Ions Score: 42 Expect: 0.00013  
Matches : 27/164 fragment ions using 57 most intense peaks [\(help\)](#)

| #  | b           | b <sup>++</sup> | b <sup>*</sup> | b <sup>+++</sup> | b <sup>0</sup> | b <sup>0++</sup> | Seq. | y           | y <sup>++</sup> | y <sup>*</sup> | y <sup>+++</sup> | y <sup>0</sup> | y <sup>0++</sup> | #  |
|----|-------------|-----------------|----------------|------------------|----------------|------------------|------|-------------|-----------------|----------------|------------------|----------------|------------------|----|
| 1  | 58.028740   | 29.518008       |                |                  |                |                  | G    |             |                 |                |                  |                |                  | 17 |
| 2  | 187.071333  | 94.039305       |                |                  | 169.060768     | 85.034022        | E    | 2174.098425 | 1087.552850     | 2157.071876    | 1079.039576      | 2156.087860    | 1078.547568      | 16 |
| 3  | 347.101982  | 174.054629      |                |                  | 329.091417     | 165.049347       | C    | 2045.055832 | 1023.031554     | 2028.029283    | 1014.518279      | 2027.045267    | 1014.026271      | 15 |
| 4  | 446.170396  | 223.588836      |                |                  | 428.159831     | 214.583554       | V    | 1885.025183 | 943.016229      | 1867.998634    | 934.502955       | 1867.014618    | 934.010947       | 14 |
| 5  | 543.223160  | 272.115218      |                |                  | 525.212595     | 263.109936       | P    | 1785.956769 | 893.482022      | 1768.930220    | 884.968748       | 1767.946204    | 884.476740       | 13 |
| 6  | 600.244624  | 300.625950      |                |                  | 582.234059     | 291.620668       | G    | 1688.904005 | 844.955640      | 1671.877456    | 836.442366       | 1670.893440    | 835.950358       | 12 |
| 7  | 729.287217  | 365.147247      |                |                  | 711.276652     | 356.141964       | E    | 1631.882541 | 816.444908      | 1614.855992    | 807.931634       | 1613.871976    | 807.439626       | 11 |
| 8  | 1168.512543 | 584.759910      | 1151.485994    | 576.246635       | 1150.501978    | 575.754627       | Q    | 1502.839948 | 751.923612      | 1485.813399    | 743.410337       | 1484.829383    | 742.918329       | 10 |
| 9  | 1297.555136 | 649.281206      | 1280.528587    | 640.767932       | 1279.544571    | 640.275924       | E    | 1063.614622 | 532.310949      | 1046.588073    | 523.797674       | 1045.604057    | 523.305666       | 9  |
| 10 | 1394.607900 | 697.807588      | 1377.581351    | 689.294314       | 1376.597335    | 688.802306       | P    | 934.572029  | 467.789652      | 917.545480     | 459.276378       | 916.561464     | 458.784370       | 8  |
| 11 | 1523.650493 | 762.328885      | 1506.623944    | 753.815610       | 1505.639928    | 753.323602       | E    | 837.519265  | 419.263270      | 820.492716     | 410.749996       | 819.508700     | 410.257988       | 7  |
| 12 | 1620.703257 | 810.855267      | 1603.676708    | 802.341992       | 1602.692692    | 801.849984       | P    | 708.476672  | 354.741974      | 691.450123     | 346.228699       |                |                  | 6  |
| 13 | 1733.787321 | 867.397299      | 1716.760772    | 858.884024       | 1715.776756    | 858.392016       | I    | 611.423908  | 306.215592      | 594.397359     | 297.702317       |                |                  | 5  |
| 14 | 1846.871385 | 923.939331      | 1829.844836    | 915.426056       | 1828.860820    | 914.934048       | L    | 498.339844  | 249.673560      | 481.313295     | 241.160285       |                |                  | 4  |
| 15 | 1959.955449 | 980.481363      | 1942.928900    | 971.968088       | 1941.944884    | 971.476080       | I    | 385.255780  | 193.131528      | 368.229231     | 184.618253       |                |                  | 3  |
| 16 | 2057.008213 | 1029.007744     | 2039.981664    | 1020.494470      | 2038.997648    | 1020.002462      | P    | 272.171716  | 136.589496      | 255.145167     | 128.076221       |                |                  | 2  |
| 17 |             |                 |                |                  |                |                  | R    | 175.118952  | 88.063114       | 158.092403     | 79.549839        |                |                  | 1  |

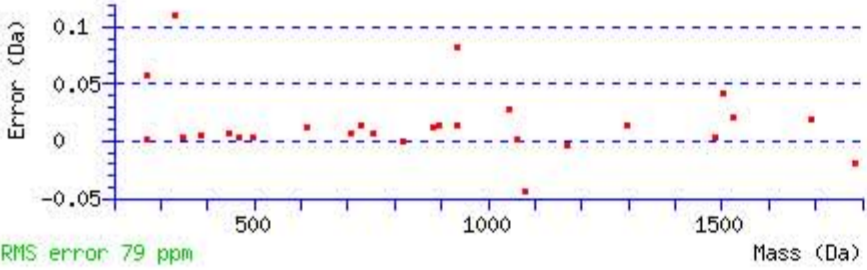

RMS error 79 ppm

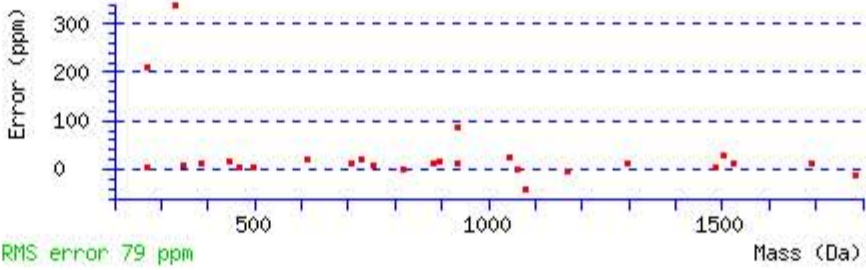

RMS error 79 ppm

NCBI BLAST search of [GECVPGEQEPEPILIPR](#)  
(Parameters: blastp, nr protein database, expect=20000, no filter, PAM30)  
Other BLAST [web gateways](#)

All matches to this query

| Score | Mr(calc):   | Delta    | Sequence                          |
|-------|-------------|----------|-----------------------------------|
| 41.8  | 2230.112595 | 0.013497 | <a href="#">GECVPGEQEPEPILIPR</a> |
| 0.4   | 2230.116409 | 0.009683 | <a href="#">ESQSPSSSASRQKNIWK</a> |

MATRIX

SCIENCE

Mascot Search Results

Peptide View

MS/MS Fragmentation of **GECVPGEQEPEPILIPR**  
Found in **AMBP\_HUMAN**, Protein AMBP OS=Homo sapiens GN=AMBP PE=1 SV=1

Match to Query 49136: 2230.143108 from(1116.078830,2+) rtinseconds(2286) index(7242)  
Title: Locus:1.1.1.2073.19 File:"2013-07-02 CLN FXIII 180 min 2nd F 1.wiff"  
Data file C:\Program Files (x86)\Matrix Science\Mascot Daemon\mgf\8 FXIII 180 min 2nd\mascot\_daemon\_merge.mgf

Click mouse within plot area to zoom in by factor of two about that point  
Or, 

Plot from

0

 to 

2600

 Da 

Full range

  
Label all possible matches ☐ Label matches used for scoring ☒

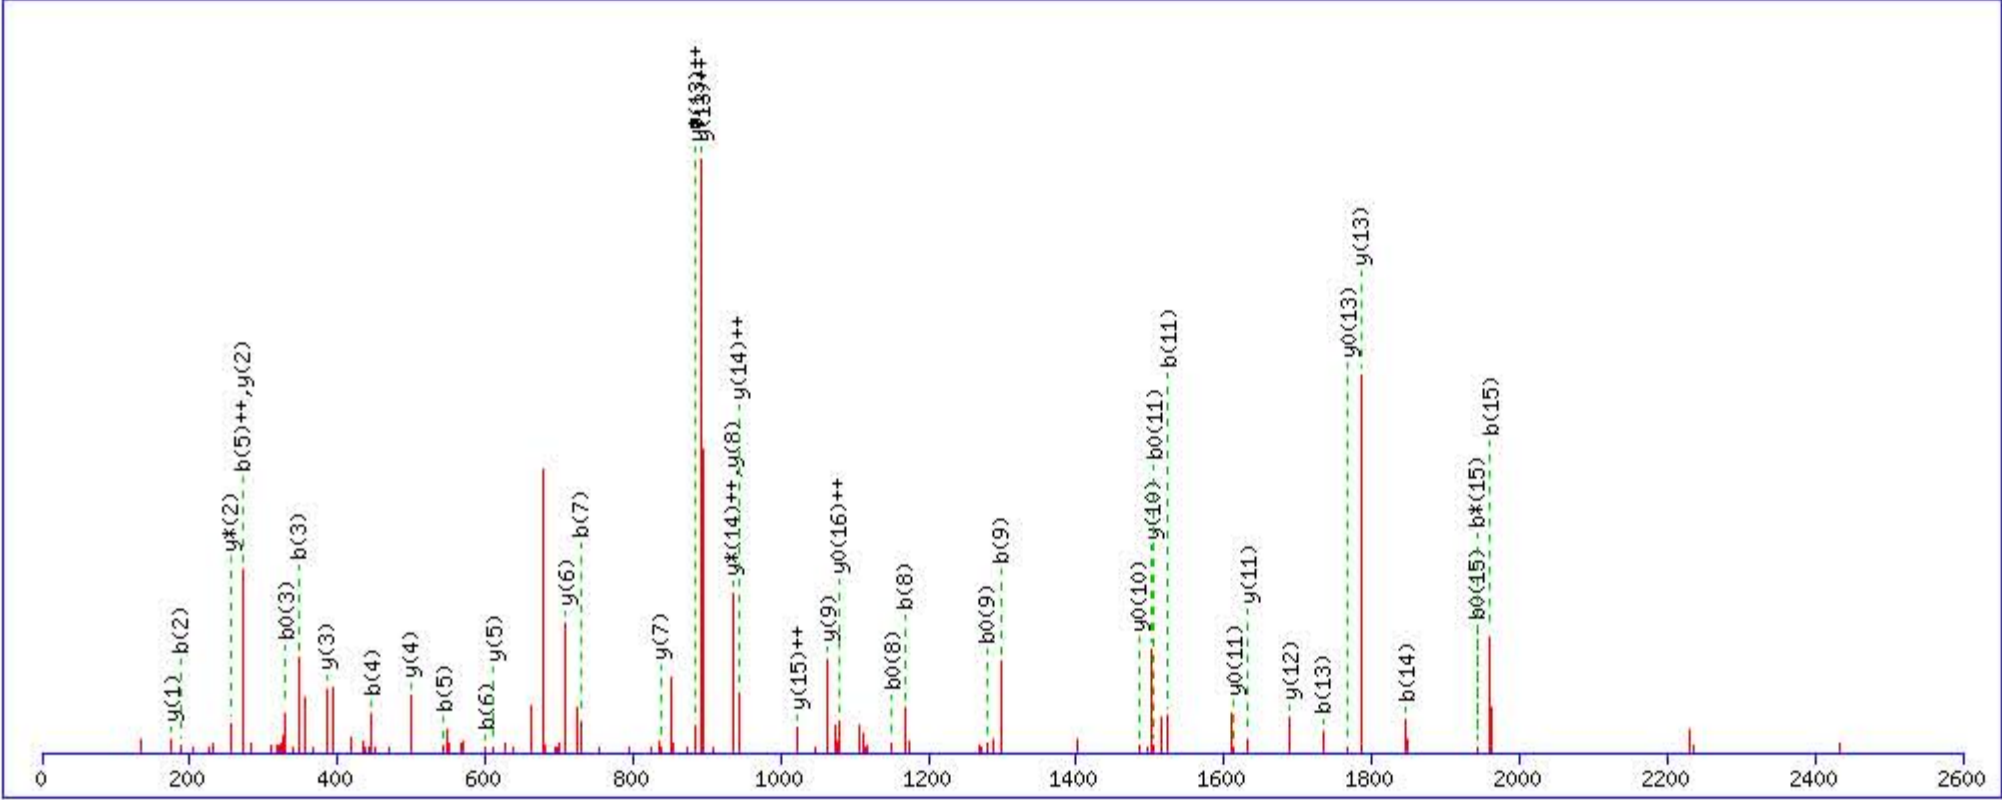

Monoisotopic mass of neutral peptide Mr(calc): 2230.112595  
Fixed modifications: Carbamidomethyl (C) (apply to specified residues or termini only)  
Variable modifications:  
Q8 : Biotin:Thermo-21345 (Q)  
Ions Score: 55 Expect: 8.2e-005  
Matches : 43/164 fragment ions using 105 most intense peaks [\(help\)](#)

| #  | b           | b <sup>++</sup> | b <sup>*</sup> | b <sup>+++</sup> | b <sup>0</sup> | b <sup>0++</sup> | Seq. | y           | y <sup>++</sup> | y <sup>*</sup> | y <sup>+++</sup> | y <sup>0</sup> | y <sup>0++</sup> | #  |
|----|-------------|-----------------|----------------|------------------|----------------|------------------|------|-------------|-----------------|----------------|------------------|----------------|------------------|----|
| 1  | 58.028740   | 29.518008       |                |                  |                |                  | G    |             |                 |                |                  |                |                  | 17 |
| 2  | 187.071333  | 94.039305       |                |                  | 169.060768     | 85.034022        | E    | 2174.098425 | 1087.552850     | 2157.071876    | 1079.039576      | 2156.087860    | 1078.547568      | 16 |
| 3  | 347.101982  | 174.054629      |                |                  | 329.091417     | 165.049347       | C    | 2045.055832 | 1023.031554     | 2028.029283    | 1014.518279      | 2027.045267    | 1014.026271      | 15 |
| 4  | 446.170396  | 223.588836      |                |                  | 428.159831     | 214.583554       | V    | 1885.025183 | 943.016229      | 1867.998634    | 934.502955       | 1867.014618    | 934.010947       | 14 |
| 5  | 543.223160  | 272.115218      |                |                  | 525.212595     | 263.109936       | P    | 1785.956769 | 893.482022      | 1768.930220    | 884.968748       | 1767.946204    | 884.476740       | 13 |
| 6  | 600.244624  | 300.625950      |                |                  | 582.234059     | 291.620668       | G    | 1688.904005 | 844.955640      | 1671.877456    | 836.442366       | 1670.893440    | 835.950358       | 12 |
| 7  | 729.287217  | 365.147247      |                |                  | 711.276652     | 356.141964       | E    | 1631.882541 | 816.444908      | 1614.855992    | 807.931634       | 1613.871976    | 807.439626       | 11 |
| 8  | 1168.512543 | 584.759910      | 1151.485994    | 576.246635       | 1150.501978    | 575.754627       | Q    | 1502.839948 | 751.923612      | 1485.813399    | 743.410337       | 1484.829383    | 742.918329       | 10 |
| 9  | 1297.555136 | 649.281206      | 1280.528587    | 640.767932       | 1279.544571    | 640.275924       | E    | 1063.614622 | 532.310949      | 1046.588073    | 523.797674       | 1045.604057    | 523.305666       | 9  |
| 10 | 1394.607900 | 697.807588      | 1377.581351    | 689.294314       | 1376.597335    | 688.802306       | P    | 934.572029  | 467.789652      | 917.545480     | 459.276378       | 916.561464     | 458.784370       | 8  |
| 11 | 1523.650493 | 762.328885      | 1506.623944    | 753.815610       | 1505.639928    | 753.323602       | E    | 837.519265  | 419.263270      | 820.492716     | 410.749996       | 819.508700     | 410.257988       | 7  |
| 12 | 1620.703257 | 810.855267      | 1603.676708    | 802.341992       | 1602.692692    | 801.849984       | P    | 708.476672  | 354.741974      | 691.450123     | 346.228699       |                |                  | 6  |
| 13 | 1733.787321 | 867.397299      | 1716.760772    | 858.884024       | 1715.776756    | 858.392016       | I    | 611.423908  | 306.215592      | 594.397359     | 297.702317       |                |                  | 5  |
| 14 | 1846.871385 | 923.939331      | 1829.844836    | 915.426056       | 1828.860820    | 914.934048       | L    | 498.339844  | 249.673560      | 481.313295     | 241.160285       |                |                  | 4  |
| 15 | 1959.955449 | 980.481363      | 1942.928900    | 971.968088       | 1941.944884    | 971.476080       | I    | 385.255780  | 193.131528      | 368.229231     | 184.618253       |                |                  | 3  |
| 16 | 2057.008213 | 1029.007744     | 2039.981664    | 1020.494470      | 2038.997648    | 1020.002462      | P    | 272.171716  | 136.589496      | 255.145167     | 128.076221       |                |                  | 2  |
| 17 |             |                 |                |                  |                |                  | R    | 175.118952  | 88.063114       | 158.092403     | 79.549839        |                |                  | 1  |

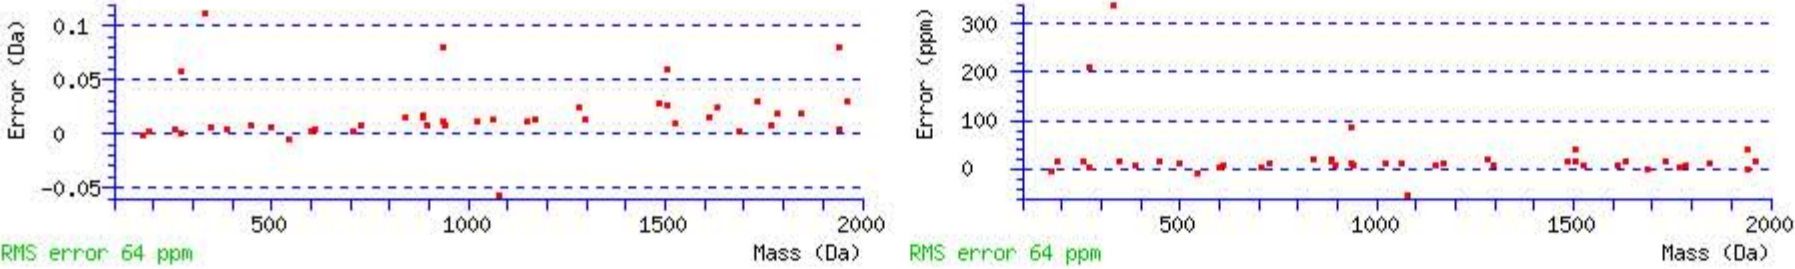

NCBI BLAST search of [GECVPGEQEPEPILIPR](#)  
(Parameters: blastp, nr protein database, expect=20000, no filter, PAM30)  
Other BLAST [web gateways](#)

All matches to this query

| Score | Mr(calc):   | Delta     | Sequence                             |
|-------|-------------|-----------|--------------------------------------|
| 54.9  | 2230.112595 | 0.030513  | <a href="#">GECVPGEQEPEPILIPR</a>    |
| 10.7  | 2230.131714 | 0.011394  | <a href="#">SSTQFHFVFESTRQLPR</a>    |
| 2.8   | 2230.122971 | 0.020137  | <a href="#">QFLGPEGNVDVELIDKSTNR</a> |
| 1.5   | 2230.172104 | -0.028996 | <a href="#">RPPWQICSKFGALPFVAEK</a>  |

M

A

T

R

I

X

S

C

I

E

N

C

E

Mascot Search Results

Peptide View

MS/MS Fragmentation of **KEDSCQLGYSAGPCMGMTSR**  
Found in **AMBP\_HUMAN**, Protein AMBP OS=Homo sapiens GN=AMBP PE=1 SV=1

Match to Query 54951: 2545.125642 from(849.382490,3+) rtinseconds(1888) index(49468)  
Title: Locus:1.1.1.1895.21 File:"2013-07-02 CLN FXIII 180 min 2nd F 4.wiff"  
Data file C:\Program Files (x86)\Matrix Science\Mascot Daemon\mgf\8 FXIII 180 min 2nd\mascot\_daemon\_merge.mgf

Click mouse within plot area to zoom in by factor of two about that point  
Or, 

Plot from

100

 to 

1700

 Da 

Full range

  
Label all possible matches ☐ Label matches used for scoring ☒

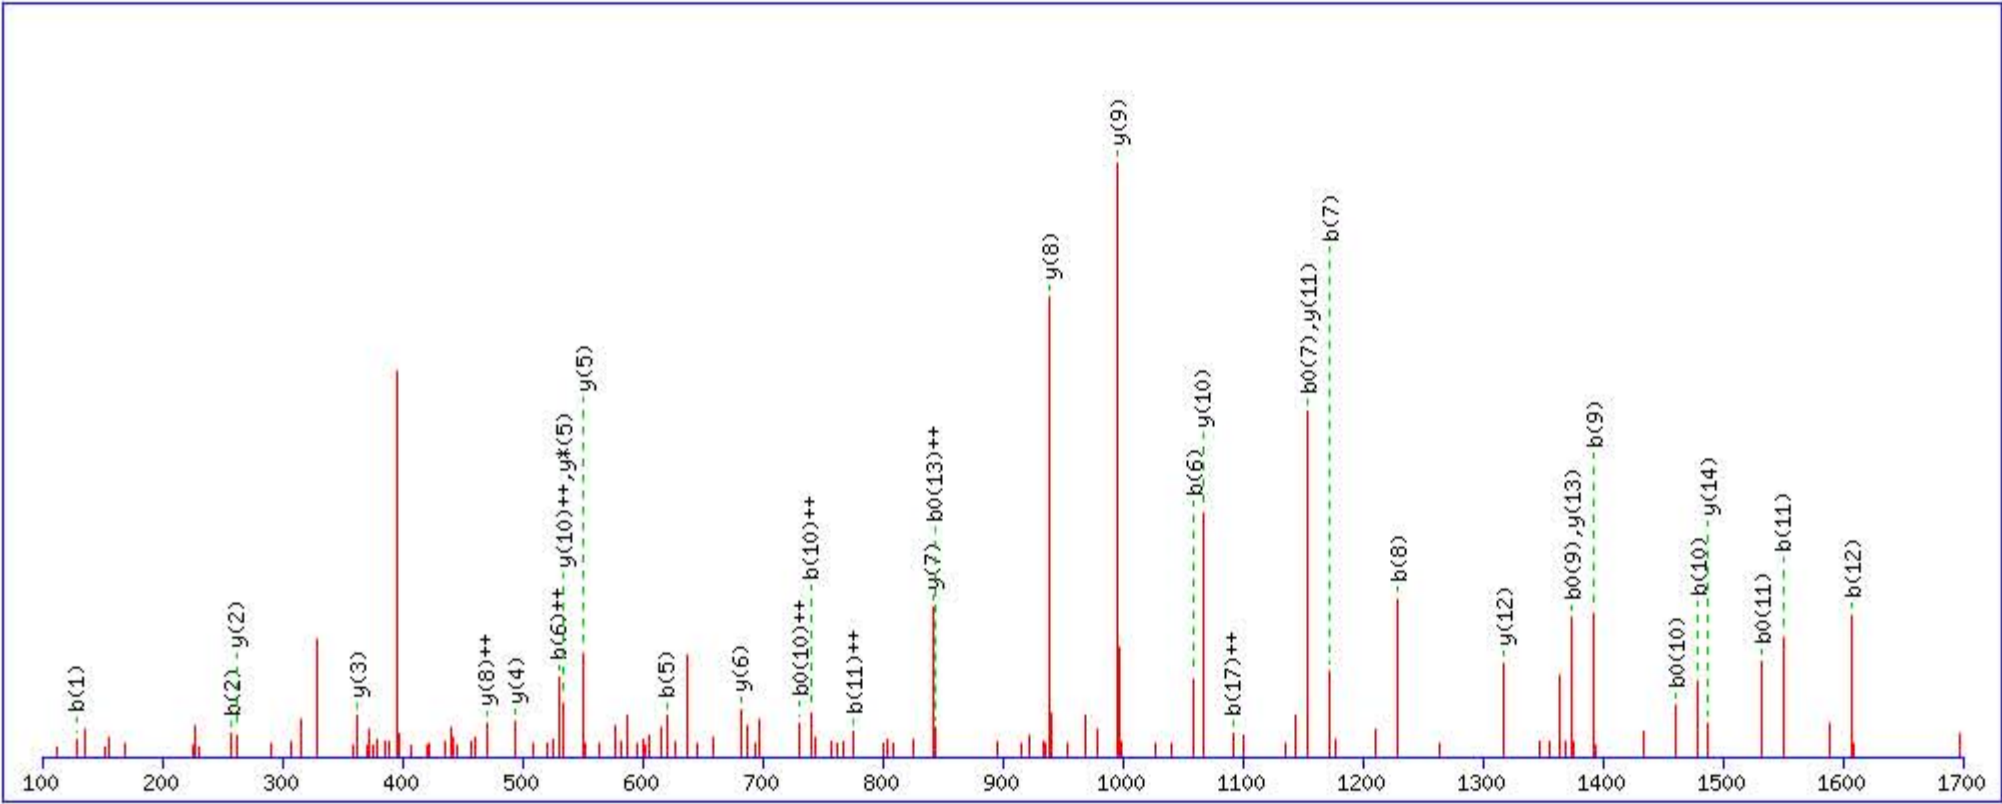

Monoisotopic mass of neutral peptide Mr(calc): 2545.089188  
Fixed modifications: Carbamidomethyl (C) (apply to specified residues or termini only)  
Variable modifications:  
Q6 : Biotin:Thermo-21345 (Q)  
Ions Score: 105 Expect: 1.9e-010  
Matches : 36/224 fragment ions using 45 most intense peaks [\(help\)](#)

| #  | b           | b <sup>++</sup> | b <sup>*</sup> | b <sup>++</sup> * | b <sup>0</sup> | b <sup>0++</sup> | Seq. | y           | y <sup>++</sup> | y <sup>*</sup> | y <sup>++</sup> * | y <sup>0</sup> | y <sup>0++</sup> | #  |
|----|-------------|-----------------|----------------|-------------------|----------------|------------------|------|-------------|-----------------|----------------|-------------------|----------------|------------------|----|
| 1  | 129.102239  | 65.054757       | 112.075690     | 56.541483         |                |                  | K    |             |                 |                |                   |                |                  | 20 |
| 2  | 258.144832  | 129.576054      | 241.118283     | 121.062780        | 240.134267     | 120.570772       | E    | 2418.001508 | 1209.504392     | 2400.974959    | 1200.991117       | 2399.990943    | 1200.499109      | 19 |
| 3  | 373.171775  | 187.089526      | 356.145226     | 178.576251        | 355.161210     | 178.084243       | D    | 2288.958915 | 1144.983095     | 2271.932366    | 1136.469821       | 2270.948350    | 1135.977813      | 18 |
| 4  | 460.203803  | 230.605540      | 443.177254     | 222.092265        | 442.193238     | 221.600257       | S    | 2173.931972 | 1087.469624     | 2156.905423    | 1078.956349       | 2155.921407    | 1078.464341      | 17 |
| 5  | 620.234452  | 310.620864      | 603.207903     | 302.107590        | 602.223887     | 301.615582       | C    | 2086.899944 | 1043.953610     | 2069.873395    | 1035.440335       | 2068.889379    | 1034.948327      | 16 |
| 6  | 1059.459778 | 530.233527      | 1042.433229    | 521.720253        | 1041.449213    | 521.228245       | Q    | 1926.869295 | 963.938286      | 1909.842746    | 955.425011        | 1908.858730    | 954.933003       | 15 |
| 7  | 1172.543842 | 586.775559      | 1155.517293    | 578.262285        | 1154.533277    | 577.770277       | L    | 1487.643969 | 744.325623      | 1470.617420    | 735.812348        | 1469.633404    | 735.320340       | 14 |
| 8  | 1229.565306 | 615.286291      | 1212.538757    | 606.773017        | 1211.554741    | 606.281008       | G    | 1374.559905 | 687.783591      | 1357.533356    | 679.270316        | 1356.549340    | 678.778308       | 13 |
| 9  | 1392.628635 | 696.817956      | 1375.602086    | 688.304681        | 1374.618070    | 687.812673       | Y    | 1317.538441 | 659.272859      | 1300.511892    | 650.759584        | 1299.527876    | 650.267576       | 12 |
| 10 | 1479.660663 | 740.333970      | 1462.634114    | 731.820695        | 1461.650098    | 731.328687       | S    | 1154.475112 | 577.741194      | 1137.448563    | 569.227920        | 1136.464547    | 568.735912       | 11 |
| 11 | 1550.697777 | 775.852527      | 1533.671228    | 767.339252        | 1532.687212    | 766.847244       | A    | 1067.443084 | 534.225180      | 1050.416535    | 525.711906        | 1049.432519    | 525.219898       | 10 |
| 12 | 1607.719241 | 804.363259      | 1590.692692    | 795.849984        | 1589.708676    | 795.357976       | G    | 996.405970  | 498.706623      | 979.379421     | 490.193349        | 978.395405     | 489.701341       | 9  |
| 13 | 1704.772005 | 852.889641      | 1687.745456    | 844.376366        | 1686.761440    | 843.884358       | P    | 939.384506  | 470.195891      | 922.357957     | 461.682617        | 921.373941     | 461.190609       | 8  |
| 14 | 1864.802654 | 932.904965      | 1847.776105    | 924.391691        | 1846.792089    | 923.899683       | C    | 842.331742  | 421.669509      | 825.305193     | 413.156235        | 824.321177     | 412.664227       | 7  |
| 15 | 1995.843139 | 998.425208      | 1978.816590    | 989.911933        | 1977.832574    | 989.419925       | M    | 682.301093  | 341.654185      | 665.274544     | 333.140910        | 664.290528     | 332.648902       | 6  |
| 16 | 2052.864603 | 1026.935939     | 2035.838054    | 1018.422665       | 2034.854038    | 1017.930657      | G    | 551.260608  | 276.133942      | 534.234059     | 267.620668        | 533.250043     | 267.128660       | 5  |
| 17 | 2183.905088 | 1092.456182     | 2166.878539    | 1083.942907       | 2165.894523    | 1083.450899      | M    | 494.239144  | 247.623210      | 477.212595     | 239.109935        | 476.228579     | 238.617927       | 4  |
| 18 | 2284.952767 | 1142.980021     | 2267.926218    | 1134.466747       | 2266.942202    | 1133.974739      | T    | 363.198659  | 182.102967      | 346.172110     | 173.589693        | 345.188094     | 173.097685       | 3  |
| 19 | 2371.984795 | 1186.496035     | 2354.958246    | 1177.982761       | 2353.974230    | 1177.490753      | S    | 262.150980  | 131.579128      | 245.124431     | 123.065854        | 244.140415     | 122.573846       | 2  |
| 20 |             |                 |                |                   |                |                  | R    | 175.118952  | 88.063114       | 158.092403     | 79.549839         |                |                  | 1  |

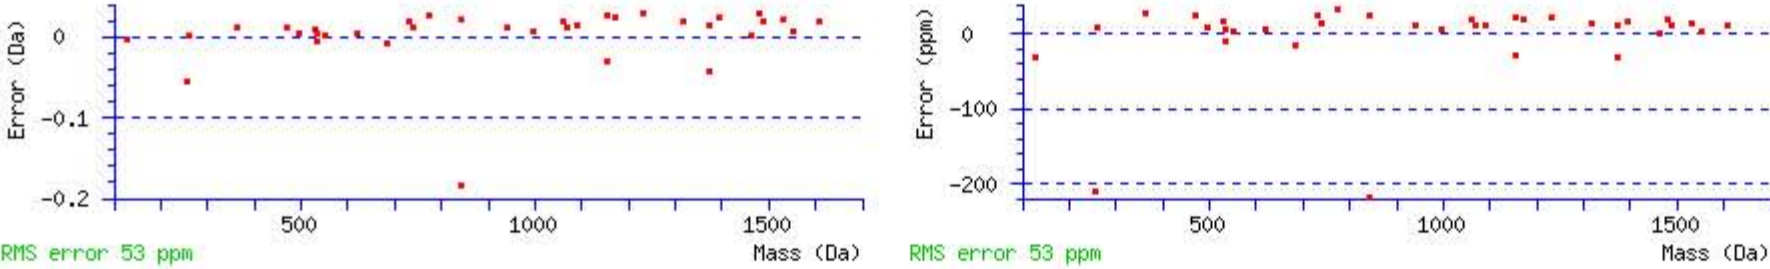

NCBI BLAST search of [KEDSCQLGYSAGPCMGMTSR](#)  
(Parameters: blastp, nr protein database, expect=20000, no filter, PAM30)  
Other BLAST [web gateways](#)

All matches to this query

| Score | Mr(calc):   | Delta    | Sequence                             |
|-------|-------------|----------|--------------------------------------|
| 105.0 | 2545.089188 | 0.036454 | <a href="#">KEDSCQLGYSAGPCMGMTSR</a> |

MATRIX

SCIENCE

Mascot Search Results

Peptide View

MS/MS Fragmentation of **VGALSQLR**  
Found in **MENT\_HUMAN**, Protein MENT OS=Homo sapiens GN=MENT PE=2 SV=1

Match to Query 19078: 1153.669948 from(577.842250,2+) rtinseconds(1943) index(49932)  
Title: Locus:1.1.1.1914.10 File:"2013-07-02 CLN FXIII 180 min 2nd F 4.wiff"  
Data file C:\Program Files (x86)\Matrix Science\Mascot Daemon\mgf\8 FXIII 180 min 2nd\mascot\_daemon\_merge.mgf

Click mouse within plot area to zoom in by factor of two about that point  
Or, 

Plot from

100

 to 

1100

 Da 

Full range

  
Label all possible matches ☐ Label matches used for scoring ☒

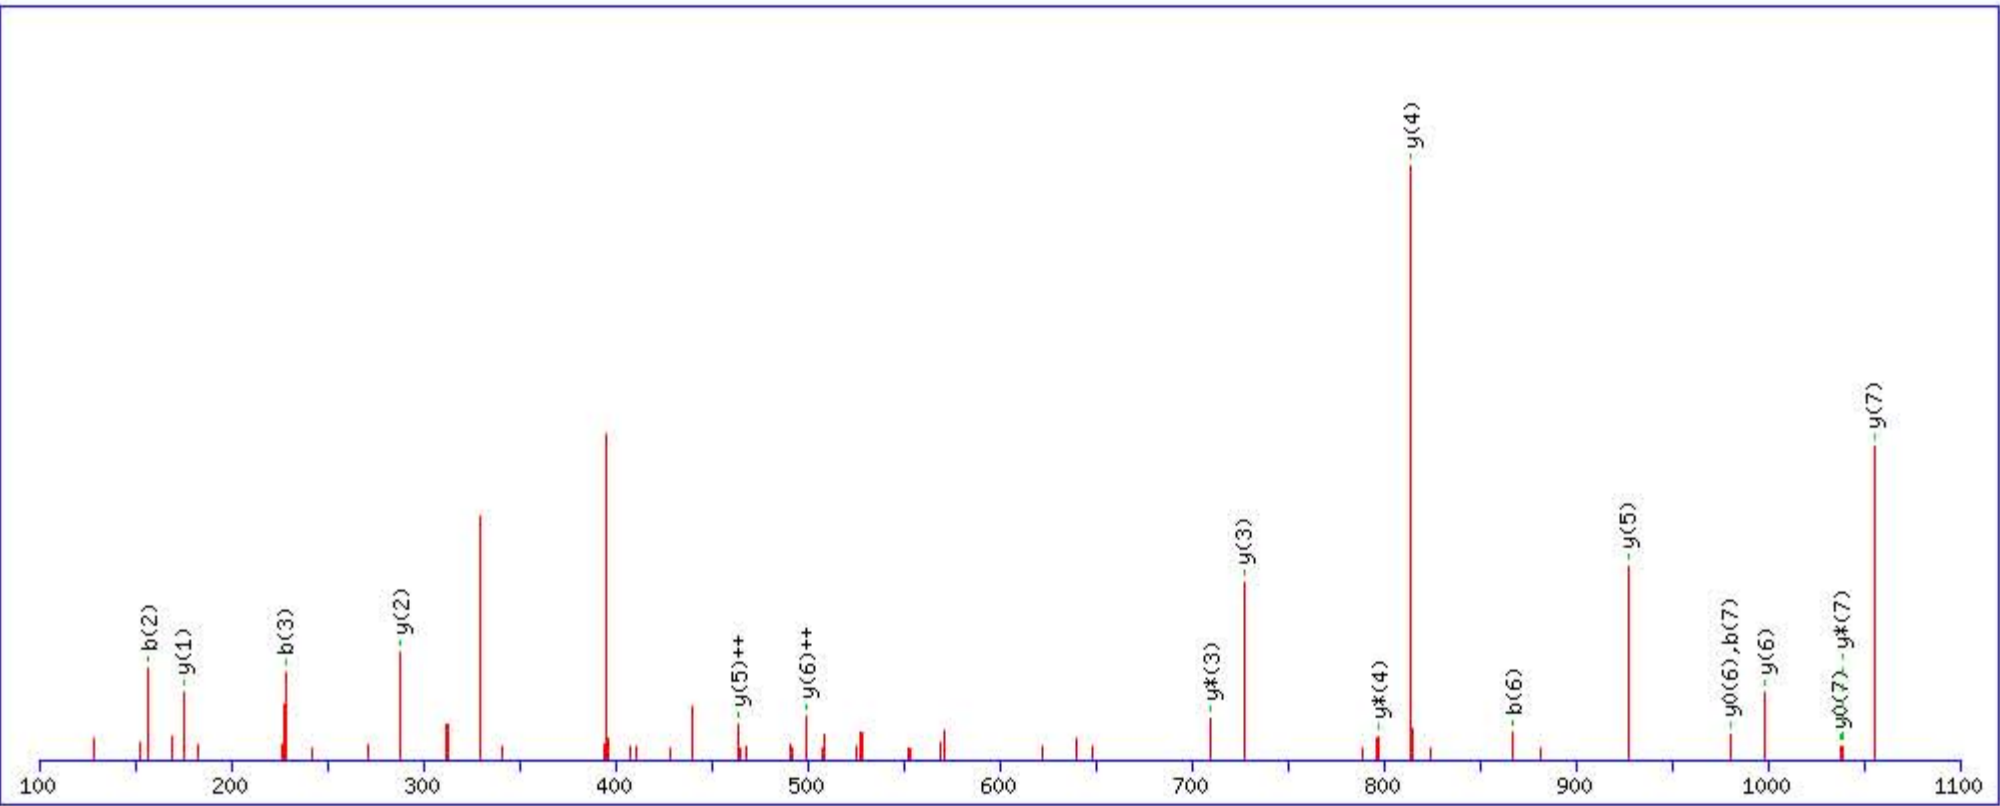

Monoisotopic mass of neutral peptide Mr(calc): 1153.664139  
Fixed modifications: Carbamidomethyl (C) (apply to specified residues or termini only)  
Variable modifications:  
Q6 : Biotin:Thermo-21345 (Q)  
Ions Score: 48 Expect: 0.00021  
Matches : 18/60 fragment ions using 29 most intense peaks (help)

| # | b          | b <sup>++</sup> | b <sup>*</sup> | b <sup>++</sup> | b <sup>0</sup> | b <sup>0++</sup> | Seq. | y           | y <sup>++</sup> | y <sup>*</sup> | y <sup>++</sup> | y <sup>0</sup> | y <sup>0++</sup> | # |
|---|------------|-----------------|----------------|-----------------|----------------|------------------|------|-------------|-----------------|----------------|-----------------|----------------|------------------|---|
| 1 | 100.075690 | 50.541483       |                |                 |                |                  | V    |             |                 |                |                 |                |                  | 8 |
| 2 | 157.097154 | 79.052215       |                |                 |                |                  | G    | 1055.603012 | 528.305144      | 1038.576463    | 519.791870      | 1037.592447    | 519.299862       | 7 |
| 3 | 228.134268 | 114.570772      |                |                 |                |                  | A    | 998.581548  | 499.794412      | 981.554999     | 491.281138      | 980.570983     | 490.789130       | 6 |
| 4 | 341.218332 | 171.112804      |                |                 |                |                  | L    | 927.544434  | 464.275855      | 910.517885     | 455.762581      | 909.533869     | 455.270573       | 5 |
| 5 | 428.250360 | 214.628818      |                |                 | 410.239795     | 205.623535       | S    | 814.460370  | 407.733823      | 797.433821     | 399.220549      | 796.449805     | 398.728541       | 4 |
| 6 | 867.475686 | 434.241481      | 850.449137     | 425.728207      | 849.465121     | 425.236199       | Q    | 727.428342  | 364.217809      | 710.401793     | 355.704535      |                |                  | 3 |
| 7 | 980.559750 | 490.783513      | 963.533201     | 482.270239      | 962.549185     | 481.778231       | L    | 288.203016  | 144.605146      | 271.176467     | 136.091872      |                |                  | 2 |
| 8 |            |                 |                |                 |                |                  | R    | 175.118952  | 88.063114       | 158.092403     | 79.549840       |                |                  | 1 |

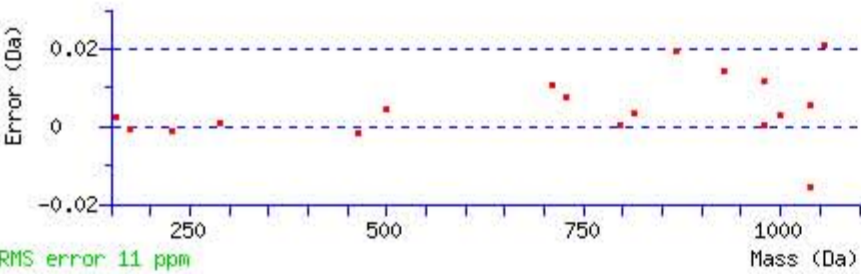

MATRIX

SCIENCE

Mascot Search Results

Peptide View

MS/MS Fragmentation of **RPALNYPVYGETTQVR**  
Found in **PRG4\_HUMAN**, Proteoglycan 4 OS=Homo sapiens GN=PRG4 PE=1 SV=2

Match to Query 47980: 2174.141832 from(725.721220,3+) rtinseconds(1892) index(19534)  
Title: Locus:1.1.1.3041.14 File:"2013-07-02 CLN FXIII 180 min 2nd F 2.wiff"  
Data file C:\Program Files (x86)\Matrix Science\Mascot Daemon\mgf\8 FXIII 180 min 2nd\mascot\_daemon\_merge.mgf

Click mouse within plot area to zoom in by factor of two about that point  
Or, 

Plot from

0

 to 

2800

 Da 

Full range

  
Label all possible matches ☐ Label matches used for scoring ☒

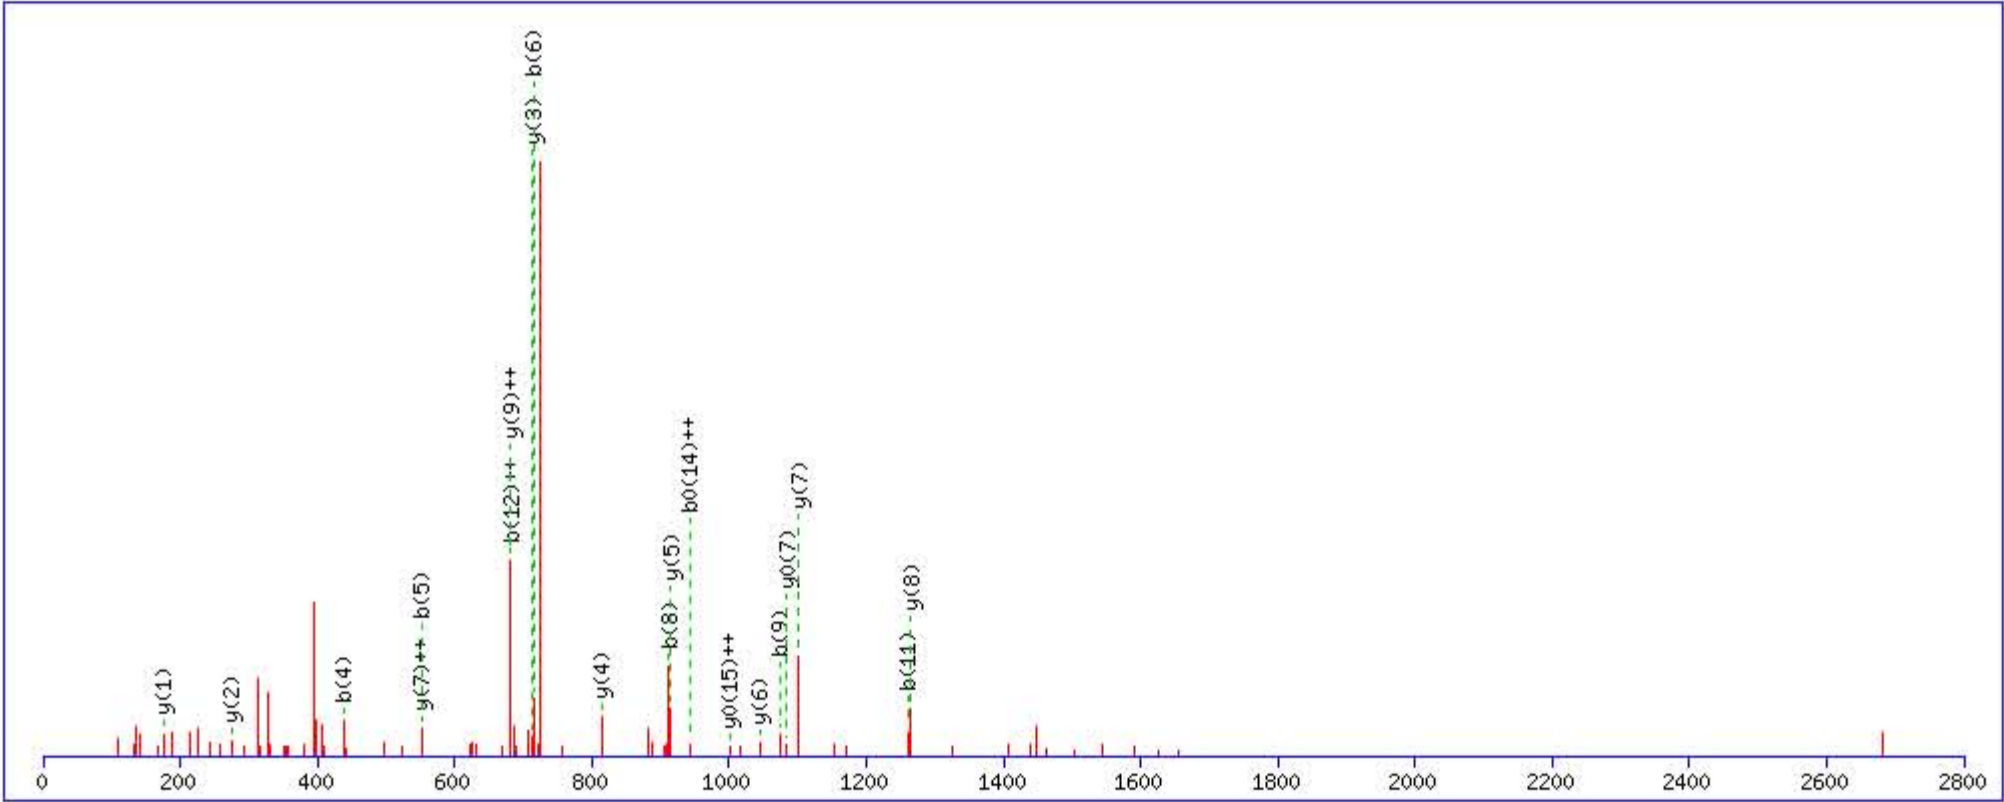

Monoisotopic mass of neutral peptide Mr(calc): 2174.130630  
Fixed modifications: Carbamidomethyl (C) (apply to specified residues or termini only)  
Variable modifications:  
Q14 : Biotin:Thermo-21345 (Q)  
Ions Score: 29 Expect: 0.0019  
Matches : 21/154 fragment ions using 53 most intense peaks [\(help\)](#)

| #  | b           | b <sup>++</sup> | b <sup>*</sup> | b <sup>++</sup> | b <sup>0</sup> | b <sup>0++</sup> | Seq. | y           | y <sup>++</sup> | y <sup>*</sup> | y <sup>++</sup> | y <sup>0</sup> | y <sup>0++</sup> | #  |
|----|-------------|-----------------|----------------|-----------------|----------------|------------------|------|-------------|-----------------|----------------|-----------------|----------------|------------------|----|
| 1  | 157.108387  | 79.057831       | 140.081838     | 70.544557       |                |                  | R    |             |                 |                |                 |                |                  | 16 |
| 2  | 254.161151  | 127.584213      | 237.134602     | 119.070939      |                |                  | P    | 2019.036812 | 1010.022044     | 2002.010263    | 1001.508770     | 2001.026247    | 1001.016762      | 15 |
| 3  | 325.198265  | 163.102770      | 308.171716     | 154.589496      |                |                  | A    | 1921.984048 | 961.495662      | 1904.957499    | 952.982388      | 1903.973483    | 952.490380       | 14 |
| 4  | 438.282329  | 219.644803      | 421.255780     | 211.131528      |                |                  | L    | 1850.946934 | 925.977105      | 1833.920385    | 917.463831      | 1832.936369    | 916.971823       | 13 |
| 5  | 552.325256  | 276.666266      | 535.298707     | 268.152992      |                |                  | N    | 1737.862870 | 869.435073      | 1720.836321    | 860.921799      | 1719.852305    | 860.429791       | 12 |
| 6  | 715.388585  | 358.197931      | 698.362036     | 349.684656      |                |                  | Y    | 1623.819943 | 812.413610      | 1606.793394    | 803.900335      | 1605.809378    | 803.408327       | 11 |
| 7  | 812.441349  | 406.724313      | 795.414800     | 398.211038      |                |                  | P    | 1460.756614 | 730.881945      | 1443.730065    | 722.368671      | 1442.746049    | 721.876663       | 10 |
| 8  | 911.509763  | 456.258520      | 894.483214     | 447.745245      |                |                  | V    | 1363.703850 | 682.355563      | 1346.677301    | 673.842289      | 1345.693285    | 673.350281       | 9  |
| 9  | 1074.573092 | 537.790184      | 1057.546543    | 529.276910      |                |                  | Y    | 1264.635436 | 632.821356      | 1247.608887    | 624.308082      | 1246.624871    | 623.816074       | 8  |
| 10 | 1131.594556 | 566.300916      | 1114.568007    | 557.787642      |                |                  | G    | 1101.572107 | 551.289692      | 1084.545558    | 542.776417      | 1083.561542    | 542.284409       | 7  |
| 11 | 1260.637149 | 630.822212      | 1243.610600    | 622.308938      | 1242.626584    | 621.816930       | E    | 1044.550643 | 522.778960      | 1027.524094    | 514.265685      | 1026.540078    | 513.773677       | 6  |
| 12 | 1361.684828 | 681.346052      | 1344.658279    | 672.832778      | 1343.674263    | 672.340769       | T    | 915.508050  | 458.257663      | 898.481501     | 449.744389      | 897.497485     | 449.252381       | 5  |
| 13 | 1462.732507 | 731.869891      | 1445.705958    | 723.356617      | 1444.721942    | 722.864609       | T    | 814.460371  | 407.733824      | 797.433822     | 399.220549      | 796.449806     | 398.728541       | 4  |
| 14 | 1901.957833 | 951.482555      | 1884.931284    | 942.969280      | 1883.947268    | 942.477272       | Q    | 713.412692  | 357.209984      | 696.386143     | 348.696710      |                |                  | 3  |
| 15 | 2001.026247 | 1001.016762     | 1983.999698    | 992.503487      | 1983.015682    | 992.011479       | V    | 274.187366  | 137.597321      | 257.160817     | 129.084047      |                |                  | 2  |
| 16 |             |                 |                |                 |                |                  | R    | 175.118952  | 88.063114       | 158.092403     | 79.549840       |                |                  | 1  |

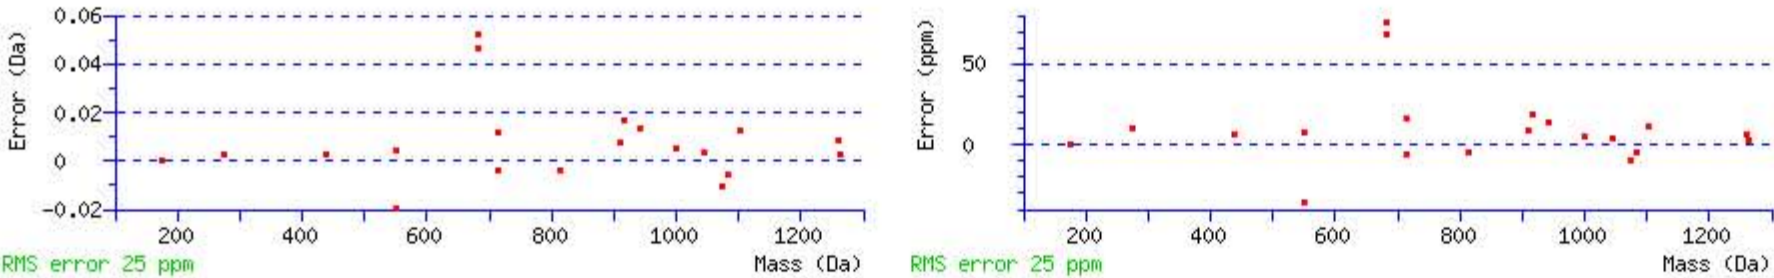

NCBI BLAST search of [RPALNYPVYGETTQVR](#)  
(Parameters: blastp, nr protein database, expect=20000, no filter, PAM30)  
Other BLAST [web gateways](#)

All matches to this query

| Score | Mr(calc):   | Delta     | Sequence                            |
|-------|-------------|-----------|-------------------------------------|
| 29.0  | 2174.130630 | 0.011202  | <a href="#">RPALNYPVYGETTQVR</a>    |
| 0.0   | 2174.144363 | -0.002531 | <a href="#">RETSRLAWTNVASEVQVTK</a> |

MATRIX

SCIENCE

Mascot Search Results

Peptide View

MS/MS Fragmentation of **ETAASLLQAGYK**  
Found in **THRB\_HUMAN**, Prothrombin OS=Homo sapiens GN=F2 PE=1 SV=2

Match to Query 32844: 1561.838148 from(781.926350,2+) rtinseconds(2119) index(51137)  
Title: Locus:1.1.1.1975.15 File:"2013-07-02 CLN FXIII 180 min 2nd F 4.wiff"  
Data file C:\Program Files (x86)\Matrix Science\Mascot Daemon\mgf\8 FXIII 180 min 2nd\mascot\_daemon\_merge.mgf

Click mouse within plot area to zoom in by factor of two about that point  
Or,   to  Da   
Label all possible matches ☐ Label matches used for scoring ☒

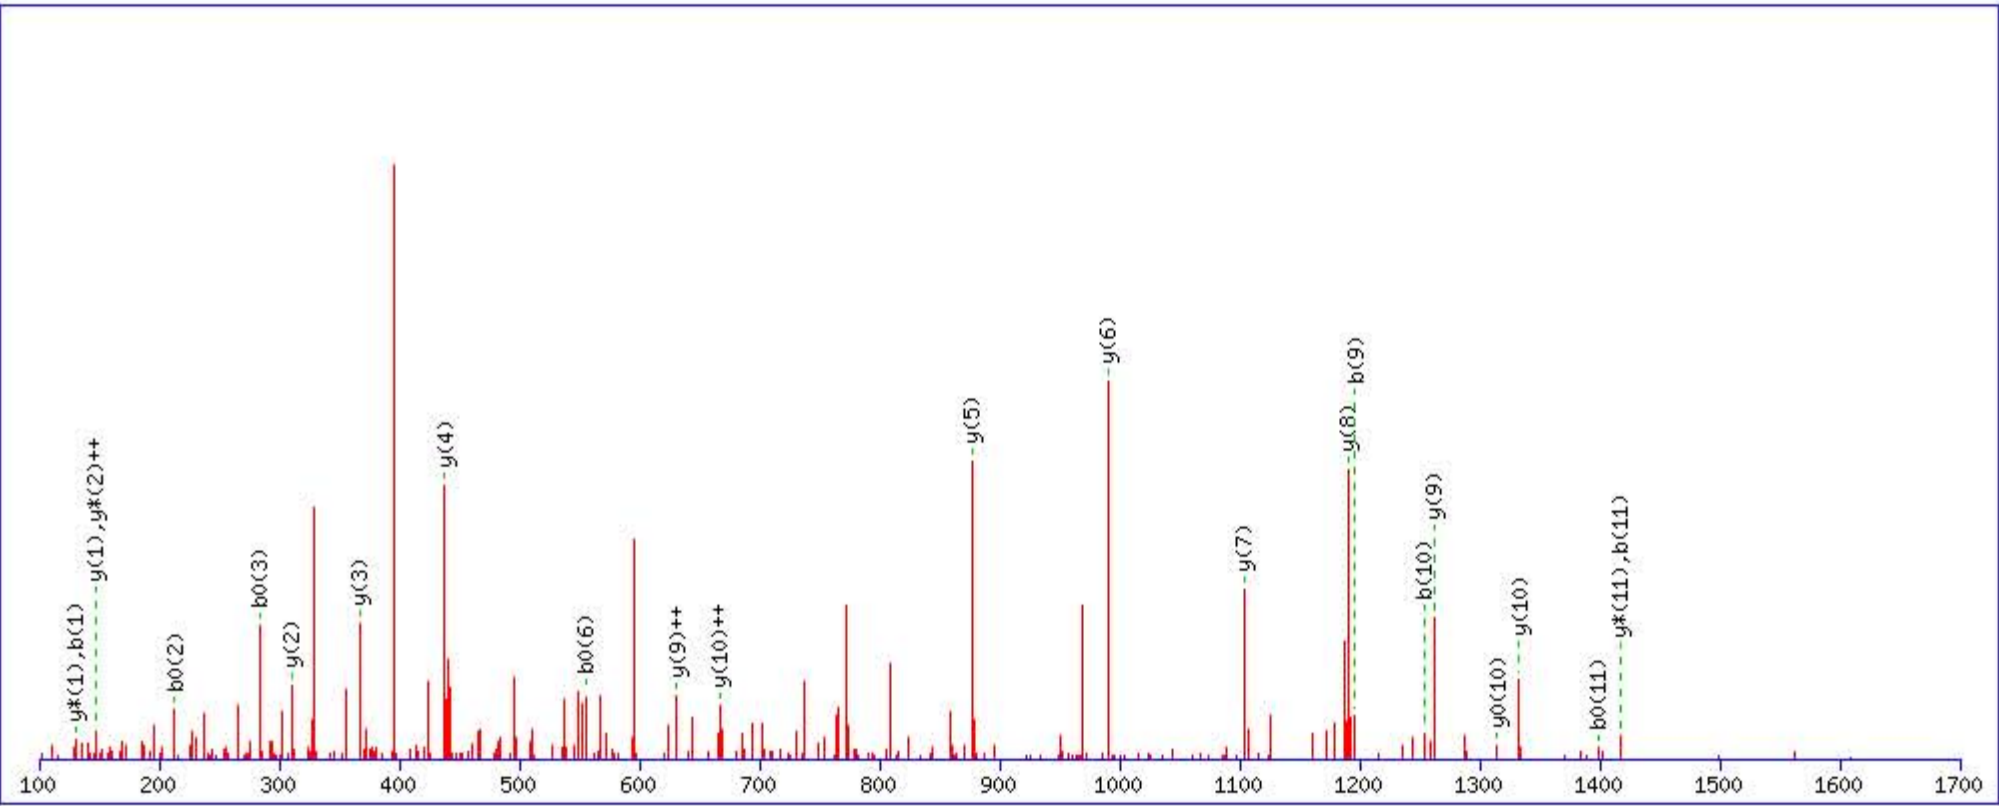

Monoisotopic mass of neutral peptide Mr(calc): 1561.817383  
Fixed modifications: Carbamidomethyl (C) (apply to specified residues or termini only)  
Variable modifications:  
Q8 : Biotin:Thermo-21345 (Q)  
Ions Score: 47 Expect: 6.4e-005  
Matches : 24/104 fragment ions using 57 most intense peaks [\(help\)](#)

| #  | b           | b <sup>++</sup> | b <sup>*</sup> | b <sup>*++</sup> | b <sup>0</sup> | b <sup>0++</sup> | Seq. | y           | y <sup>++</sup> | y <sup>*</sup> | y <sup>*++</sup> | y <sup>0</sup> | y <sup>0++</sup> | #  |
|----|-------------|-----------------|----------------|------------------|----------------|------------------|------|-------------|-----------------|----------------|------------------|----------------|------------------|----|
| 1  | 130.049869  | 65.528572       |                |                  | 112.039304     | 56.523290        | E    |             |                 |                |                  |                |                  | 12 |
| 2  | 231.097548  | 116.052412      |                |                  | 213.086983     | 107.047130       | T    | 1433.782100 | 717.394688      | 1416.755551    | 708.881414       | 1415.771535    | 708.389406       | 11 |
| 3  | 302.134662  | 151.570969      |                |                  | 284.124097     | 142.565687       | A    | 1332.734421 | 666.870848      | 1315.707872    | 658.357574       | 1314.723856    | 657.865566       | 10 |
| 4  | 373.171776  | 187.089526      |                |                  | 355.161211     | 178.084243       | A    | 1261.697307 | 631.352292      | 1244.670758    | 622.839017       | 1243.686742    | 622.347009       | 9  |
| 5  | 460.203804  | 230.605540      |                |                  | 442.193239     | 221.600257       | S    | 1190.660193 | 595.833734      | 1173.633644    | 587.320460       | 1172.649628    | 586.828452       | 8  |
| 6  | 573.287868  | 287.147572      |                |                  | 555.277303     | 278.142290       | L    | 1103.628165 | 552.317721      | 1086.601616    | 543.804446       |                |                  | 7  |
| 7  | 686.371932  | 343.689604      |                |                  | 668.361367     | 334.684322       | L    | 990.544101  | 495.775689      | 973.517552     | 487.262414       |                |                  | 6  |
| 8  | 1125.597258 | 563.302267      | 1108.570709    | 554.788993       | 1107.586693    | 554.296985       | Q    | 877.460037  | 439.233657      | 860.433488     | 430.720382       |                |                  | 5  |
| 9  | 1196.634372 | 598.820824      | 1179.607823    | 590.307550       | 1178.623807    | 589.815541       | A    | 438.234711  | 219.620993      | 421.208162     | 211.107719       |                |                  | 4  |
| 10 | 1253.655836 | 627.331556      | 1236.629287    | 618.818282       | 1235.645271    | 618.326273       | G    | 367.197597  | 184.102436      | 350.171048     | 175.589162       |                |                  | 3  |
| 11 | 1416.719165 | 708.863221      | 1399.692616    | 700.349946       | 1398.708600    | 699.857938       | Y    | 310.176133  | 155.591705      | 293.149584     | 147.078430       |                |                  | 2  |
| 12 |             |                 |                |                  |                |                  | K    | 147.112804  | 74.060040       | 130.086255     | 65.546765        |                |                  | 1  |

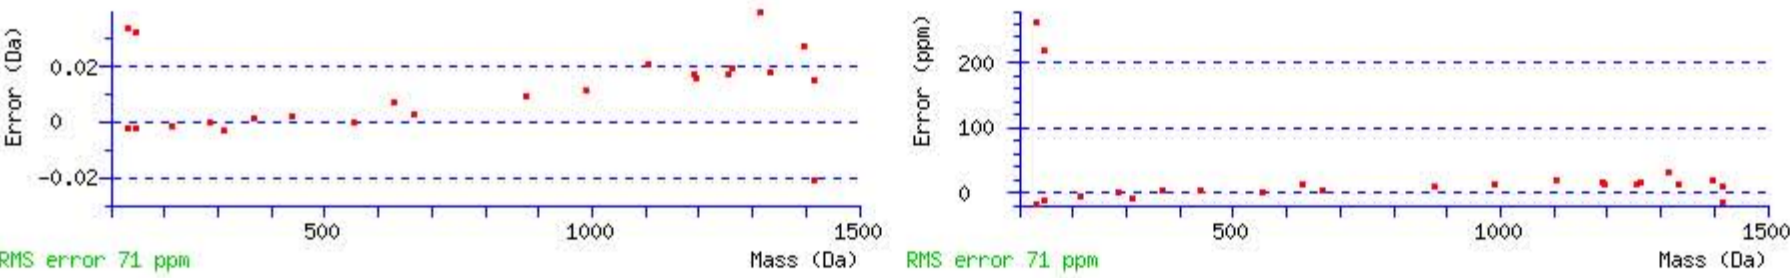

NCBI BLAST search of [ETAASLLQAGYK](#)  
(Parameters: blastp, nr protein database, expect=20000, no filter, PAM30)  
Other BLAST [web gateways](#)

All matches to this query

| Score | Mr(calc):   | Delta    | Sequence                       |
|-------|-------------|----------|--------------------------------|
| 47.0  | 1561.817383 | 0.020765 | <a href="#">ETAASLLQAGYK</a>   |
| 2.3   | 1561.817398 | 0.020750 | <a href="#">VLPEVLEKQCGYK</a>  |
| 2.1   | 1561.821243 | 0.016905 | <a href="#">TEKHPPVSPGRTEK</a> |

MATRIX

SCIENCE

Mascot Search Results

Peptide View

MS/MS Fragmentation of **TATSEYQTFFNPR**  
Found in **THRB\_HUMAN**, Prothrombin OS=Homo sapiens GN=F2 PE=1 SV=2

Match to Query 41727: 1871.904852 from(624.975560,3+) rtinseconds(2262) index(52086)  
Title: Locus:1.1.1.2025.6 File:"2013-07-02 CLN FXIII 180 min 2nd F 4.wiff"  
Data file C:\Program Files (x86)\Matrix Science\Mascot Daemon\mgf\8 FXIII 180 min 2nd\mascot\_daemon\_merge.mgf

Click mouse within plot area to zoom in by factor of two about that point  
Or, 

Plot from

100

 to 

1800

 Da 

Full range

  
Label all possible matches ☐ Label matches used for scoring ☒

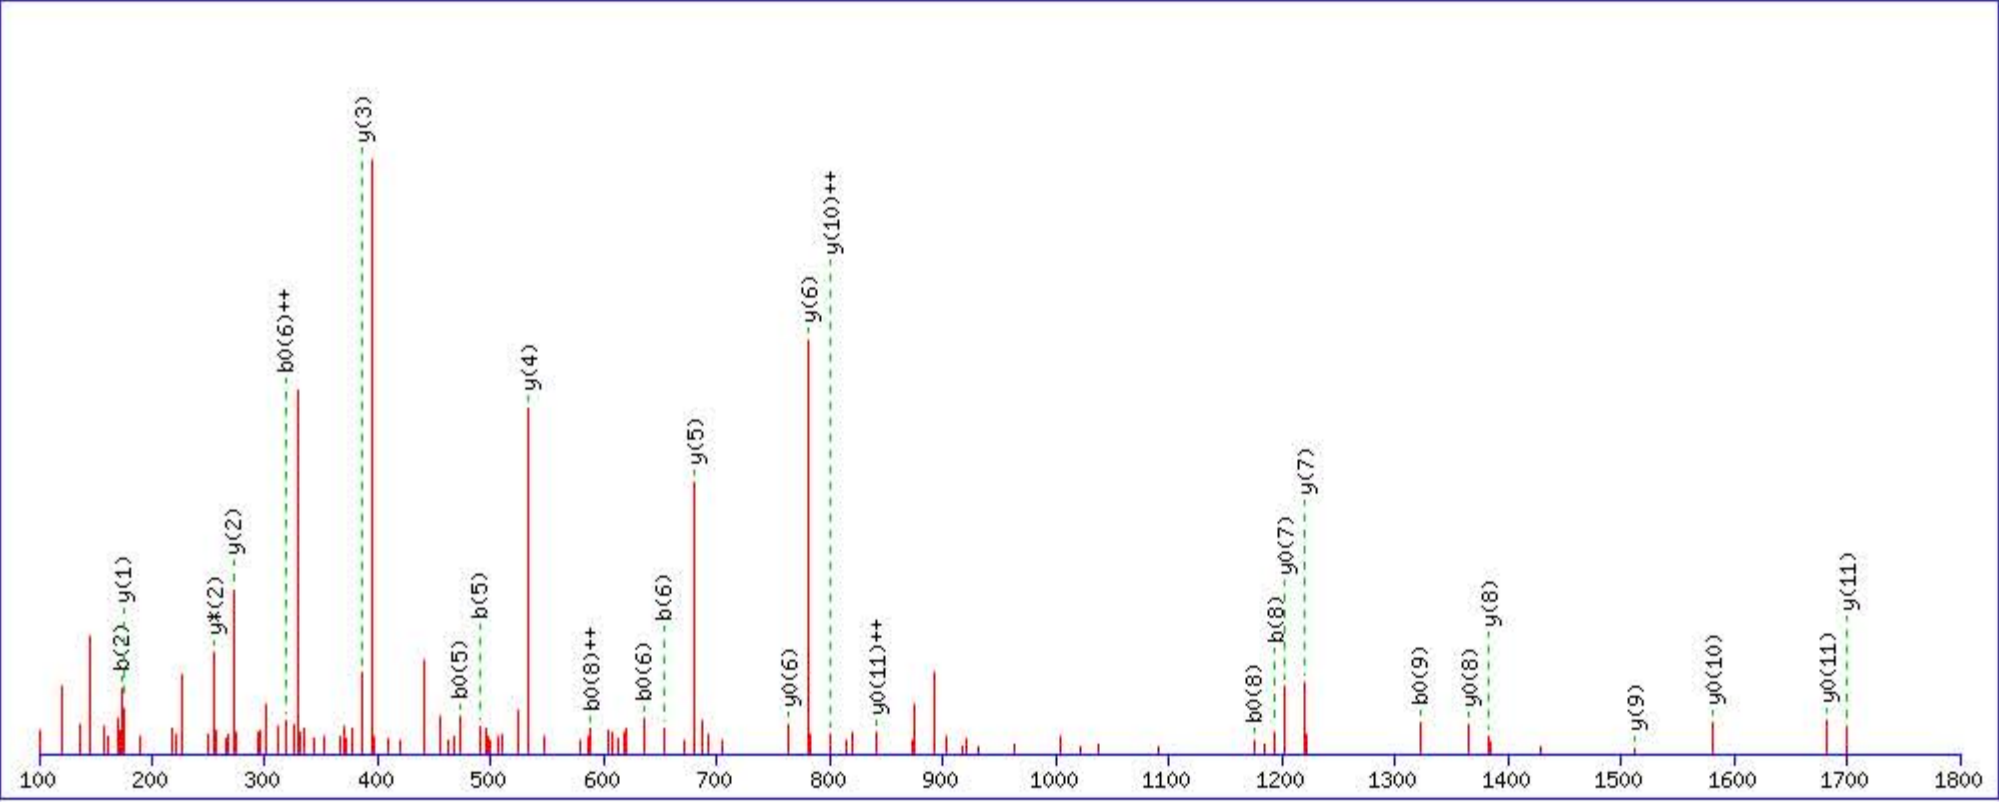

Monoisotopic mass of neutral peptide Mr(calc): 1871.887619  
Fixed modifications: Carbamidomethyl (C) (apply to specified residues or termini only)  
Variable modifications:  
Q7 : Biotin:Thermo-21345 (Q)  
Ions Score: 51 Expect: 0.00017  
Matches : 28/122 fragment ions using 55 most intense peaks [\(help\)](#)

| #  | b           | b <sup>++</sup> | b <sup>*</sup> | b <sup>*++</sup> | b <sup>0</sup> | b <sup>0++</sup> | Seq. | y           | y <sup>++</sup> | y <sup>*</sup> | y <sup>*++</sup> | y <sup>0</sup> | y <sup>0++</sup> | #  |
|----|-------------|-----------------|----------------|------------------|----------------|------------------|------|-------------|-----------------|----------------|------------------|----------------|------------------|----|
| 1  | 102.054955  | 51.531116       |                |                  | 84.044390      | 42.525833        | T    |             |                 |                |                  |                |                  | 13 |
| 2  | 173.092069  | 87.049672       |                |                  | 155.081504     | 78.044390        | A    | 1771.847219 | 886.427248      | 1754.820670    | 877.913973       | 1753.836654    | 877.421965       | 12 |
| 3  | 274.139748  | 137.573512      |                |                  | 256.129183     | 128.568230       | T    | 1700.810105 | 850.908691      | 1683.783556    | 842.395416       | 1682.799540    | 841.903408       | 11 |
| 4  | 361.171776  | 181.089526      |                |                  | 343.161211     | 172.084243       | S    | 1599.762426 | 800.384851      | 1582.735877    | 791.871577       | 1581.751861    | 791.379569       | 10 |
| 5  | 490.214369  | 245.610822      |                |                  | 472.203804     | 236.605540       | E    | 1512.730398 | 756.868837      | 1495.703849    | 748.355563       | 1494.719833    | 747.863555       | 9  |
| 6  | 653.277698  | 327.142487      |                |                  | 635.267133     | 318.137205       | Y    | 1383.687805 | 692.347541      | 1366.661256    | 683.834266       | 1365.677240    | 683.342258       | 8  |
| 7  | 1092.503024 | 546.755150      | 1075.476475    | 538.241876       | 1074.492459    | 537.749868       | Q    | 1220.624476 | 610.815876      | 1203.597927    | 602.302602       | 1202.613911    | 601.810594       | 7  |
| 8  | 1193.550703 | 597.278990      | 1176.524154    | 588.765715       | 1175.540138    | 588.273707       | T    | 781.399150  | 391.203213      | 764.372601     | 382.689939       | 763.388585     | 382.197931       | 6  |
| 9  | 1340.619117 | 670.813197      | 1323.592568    | 662.299922       | 1322.608552    | 661.807914       | F    | 680.351471  | 340.679374      | 663.324922     | 332.166099       |                |                  | 5  |
| 10 | 1487.687531 | 744.347404      | 1470.660982    | 735.834129       | 1469.676966    | 735.342121       | F    | 533.283057  | 267.145167      | 516.256508     | 258.631892       |                |                  | 4  |
| 11 | 1601.730458 | 801.368867      | 1584.703909    | 792.855593       | 1583.719893    | 792.363585       | N    | 386.214643  | 193.610959      | 369.188094     | 185.097685       |                |                  | 3  |
| 12 | 1698.783222 | 849.895249      | 1681.756673    | 841.381975       | 1680.772657    | 840.889967       | P    | 272.171716  | 136.589496      | 255.145167     | 128.076221       |                |                  | 2  |
| 13 |             |                 |                |                  |                |                  | R    | 175.118952  | 88.063114       | 158.092403     | 79.549839        |                |                  | 1  |

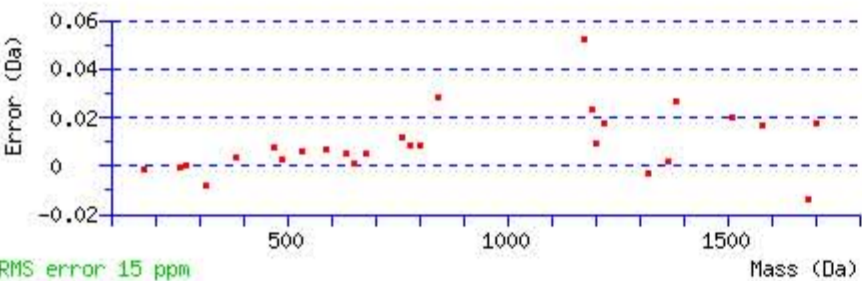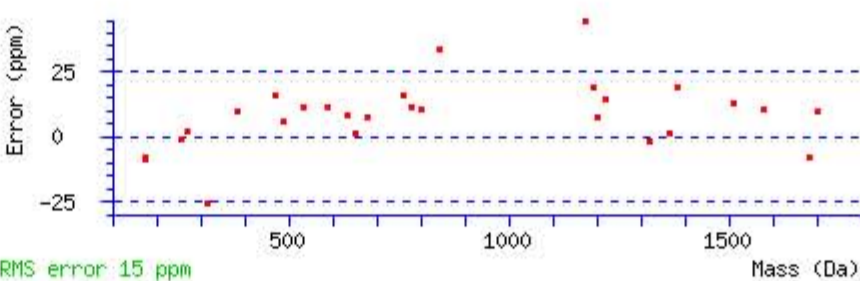

NCBI BLAST search of [TATSEYQTFFNPR](#)  
(Parameters: blastp, nr protein database, expect=20000, no filter, PAM30)  
Other BLAST [web gateways](#)

All matches to this query

| Score | Mr(calc):   | Delta    | Sequence                      |
|-------|-------------|----------|-------------------------------|
| 51.0  | 1871.887619 | 0.017233 | <a href="#">TATSEYQTFFNPR</a> |

MATRIX

SCIENCE

Mascot Search Results

Peptide View

MS/MS Fragmentation of **SPQELLCGASLISDR**  
Found in **THRB\_HUMAN**, Prothrombin OS=Homo sapiens GN=F2 PE=1 SV=2

Match to Query 43223: 1956.003732 from(653.008520,3+) rtinseconds(2472) index(53195)  
Title: Locus:1.1.1.2098.6 File:"2013-07-02 CLN FXIII 180 min 2nd F 4.wiff"  
Data file C:\Program Files (x86)\Matrix Science\Mascot Daemon\mgf\8 FXIII 180 min 2nd\mascot\_daemon\_merge.mgf

Click mouse within plot area to zoom in by factor of two about that point  
Or, 

Plot from

100

 to 

1600

 Da 

Full range

  
Label all possible matches ☐ Label matches used for scoring ☒

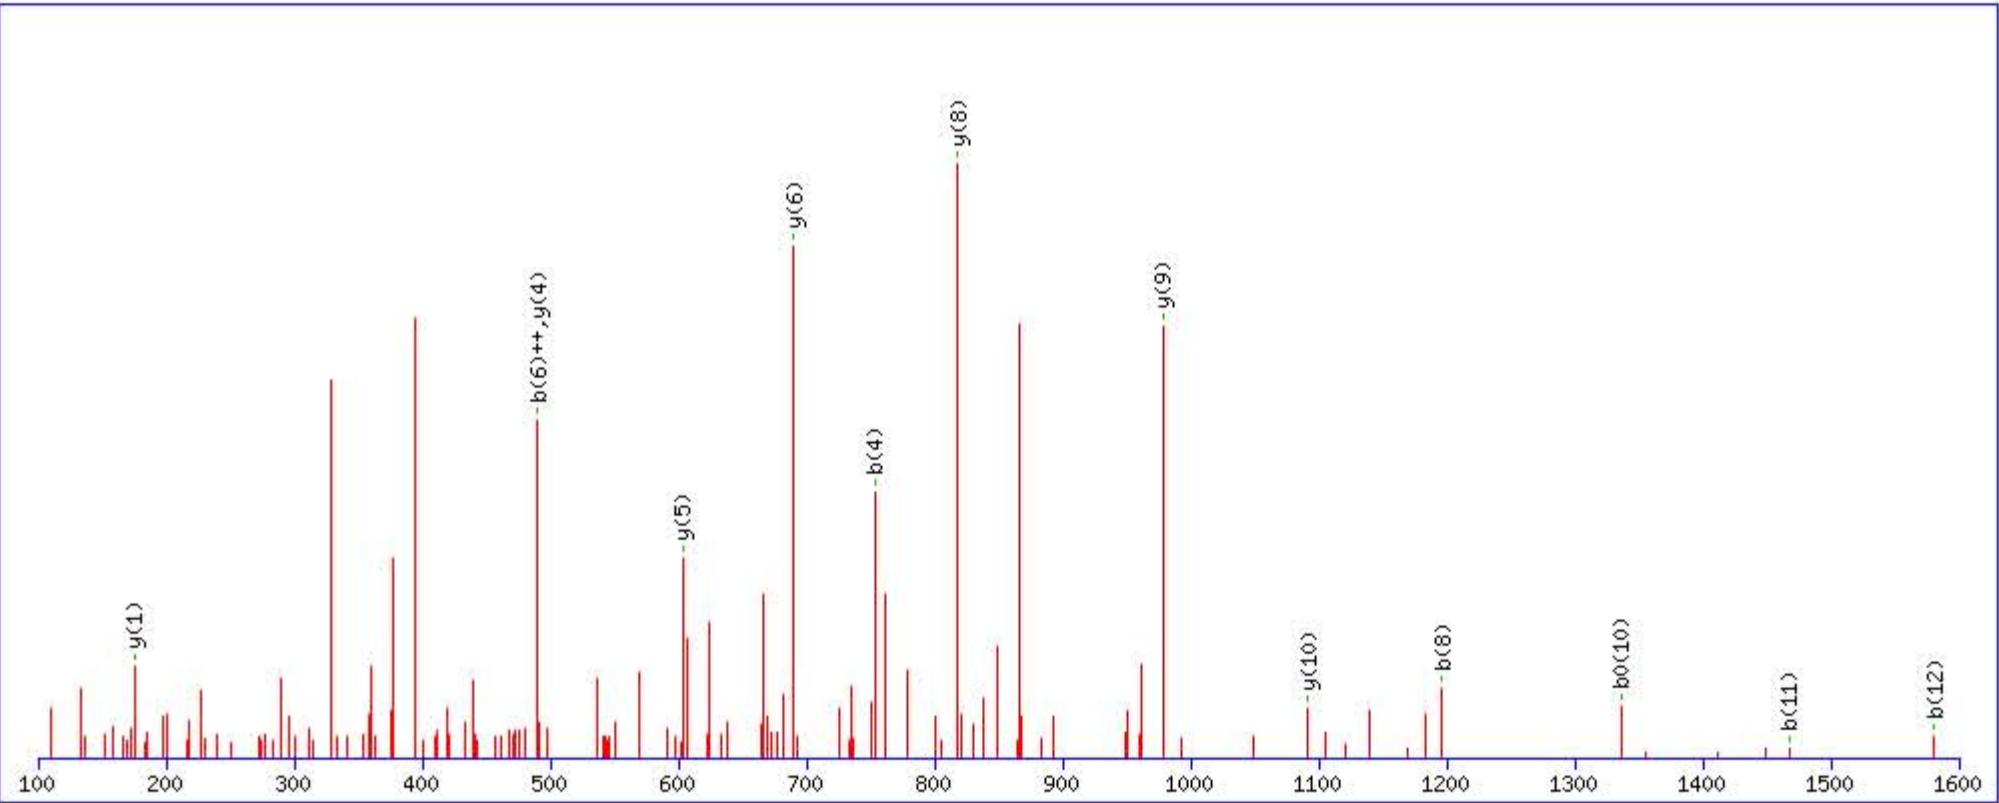

Monoisotopic mass of neutral peptide Mr(calc): 1955.980850  
Fixed modifications: Carbamidomethyl (C) (apply to specified residues or termini only)  
Variable modifications:  
Q3 : Biotin:Thermo-21345 (Q)  
Ions Score: 60 Expect: 9.6e-006  
Matches : 13/162 fragment ions using 14 most intense peaks [\(help\)](#)

| #  | b           | b <sup>++</sup> | b <sup>*</sup> | b <sup>++</sup> * | b <sup>0</sup> | b <sup>0++</sup> | Seq. | y           | y <sup>++</sup> | y <sup>*</sup> | y <sup>++</sup> * | y <sup>0</sup> | y <sup>0++</sup> | #  |
|----|-------------|-----------------|----------------|-------------------|----------------|------------------|------|-------------|-----------------|----------------|-------------------|----------------|------------------|----|
| 1  | 88.039304   | 44.523290       |                |                   | 70.028739      | 35.518008        | S    |             |                 |                |                   |                |                  | 15 |
| 2  | 185.092068  | 93.049672       |                |                   | 167.081503     | 84.044389        | P    | 1869.956117 | 935.481697      | 1852.929568    | 926.968422        | 1851.945552    | 926.476414       | 14 |
| 3  | 624.317394  | 312.662335      | 607.290845     | 304.149061        | 606.306829     | 303.657053       | Q    | 1772.903353 | 886.955314      | 1755.876804    | 878.442040        | 1754.892788    | 877.950032       | 13 |
| 4  | 753.359987  | 377.183632      | 736.333438     | 368.670357        | 735.349422     | 368.178349       | E    | 1333.678027 | 667.342652      | 1316.651478    | 658.829377        | 1315.667462    | 658.337369       | 12 |
| 5  | 866.444051  | 433.725664      | 849.417502     | 425.212389        | 848.433486     | 424.720381       | L    | 1204.635434 | 602.821355      | 1187.608885    | 594.308081        | 1186.624869    | 593.816073       | 11 |
| 6  | 979.528115  | 490.267696      | 962.501566     | 481.754421        | 961.517550     | 481.262413       | L    | 1091.551370 | 546.279323      | 1074.524821    | 537.766049        | 1073.540805    | 537.274040       | 10 |
| 7  | 1139.558764 | 570.283020      | 1122.532215    | 561.769746        | 1121.548199    | 561.277738       | C    | 978.467306  | 489.737291      | 961.440757     | 481.224017        | 960.456741     | 480.732009       | 9  |
| 8  | 1196.580228 | 598.793752      | 1179.553679    | 590.280478        | 1178.569663    | 589.788470       | G    | 818.436657  | 409.721967      | 801.410108     | 401.208692        | 800.426092     | 400.716684       | 8  |
| 9  | 1267.617342 | 634.312309      | 1250.590793    | 625.799035        | 1249.606777    | 625.307027       | A    | 761.415193  | 381.211235      | 744.388644     | 372.697960        | 743.404628     | 372.205952       | 7  |
| 10 | 1354.649370 | 677.828323      | 1337.622821    | 669.315049        | 1336.638805    | 668.823041       | S    | 690.378079  | 345.692678      | 673.351530     | 337.179403        | 672.367514     | 336.687395       | 6  |
| 11 | 1467.733434 | 734.370355      | 1450.706885    | 725.857081        | 1449.722869    | 725.365073       | L    | 603.346051  | 302.176664      | 586.319502     | 293.663389        | 585.335486     | 293.171381       | 5  |
| 12 | 1580.817498 | 790.912387      | 1563.790949    | 782.399113        | 1562.806933    | 781.907104       | I    | 490.261987  | 245.634631      | 473.235438     | 237.121357        | 472.251422     | 236.629349       | 4  |
| 13 | 1667.849526 | 834.428401      | 1650.822977    | 825.915127        | 1649.838961    | 825.423118       | S    | 377.177923  | 189.092600      | 360.151374     | 180.579325        | 359.167358     | 180.087317       | 3  |
| 14 | 1782.876469 | 891.941873      | 1765.849920    | 883.428598        | 1764.865904    | 882.936590       | D    | 290.145895  | 145.576585      | 273.119346     | 137.063311        | 272.135330     | 136.571303       | 2  |
| 15 |             |                 |                |                   |                |                  | R    | 175.118952  | 88.063114       | 158.092403     | 79.549839         |                |                  | 1  |

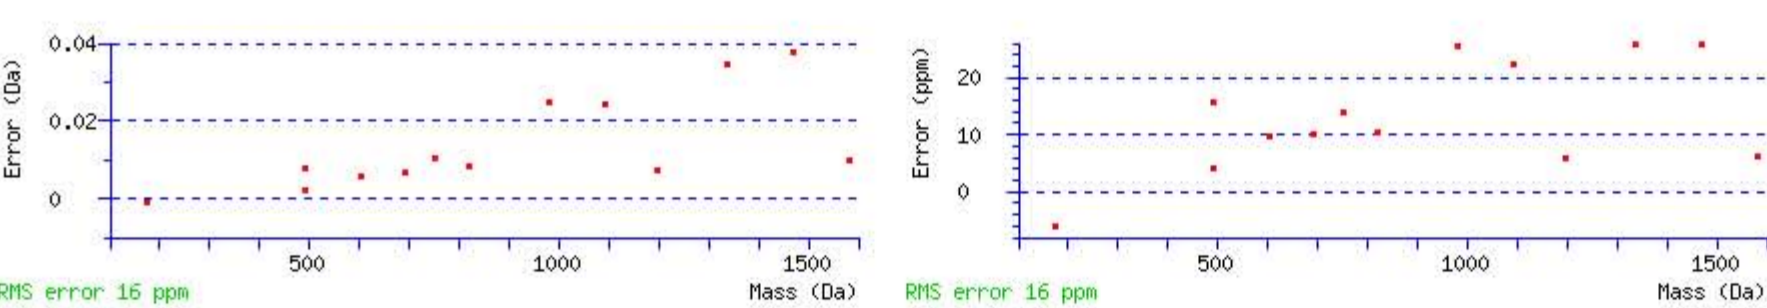

NCBI BLAST search of [SPQELLCGASLISDR](#)  
(Parameters: blastp, nr protein database, expect=20000, no filter, PAM30)  
Other BLAST [web gateways](#)

All matches to this query

| Score | Mr(calc):   | Delta     | Sequence                         |
|-------|-------------|-----------|----------------------------------|
| 60.4  | 1955.980850 | 0.022882  | <a href="#">SPQELLCGASLISDR</a>  |
| 6.4   | 1956.025101 | -0.021369 | <a href="#">YYQVLAIMDFNSTRKR</a> |
| 3.9   | 1955.989594 | 0.014138  | <a href="#">MKMVSQSFTQRF</a>     |
| 1.3   | 1955.989594 | 0.014138  | <a href="#">MKMVSQSFTQRF</a>     |
| 0.5   | 1955.975464 | 0.028268  | <a href="#">QHSLHSAQWFAGAF</a>   |

MATRIX

SCIENCE

Mascot Search Results

Peptide View

MS/MS Fragmentation of **HQDFNSAVQLVENFCR**  
Found in **THRB\_HUMAN**, Prothrombin OS=Homo sapiens GN=F2 PE=1 SV=2

Match to Query 49959: 2274.082628 from(1138.048590,2+) rtinseconds(2448) index(68949)  
Title: Locus:1.1.1.2127.11 File:"2013-07-02 CLN FXIII 180 min 2nd FT.wiff"  
Data file C:\Program Files (x86)\Matrix Science\Mascot Daemon\mgf\8 FXIII 180 min 2nd\mascot\_daemon\_merge.mgf

Click mouse within plot area to zoom in by factor of two about that point  
Or,   to  Da   
Label all possible matches ☐ Label matches used for scoring ☒

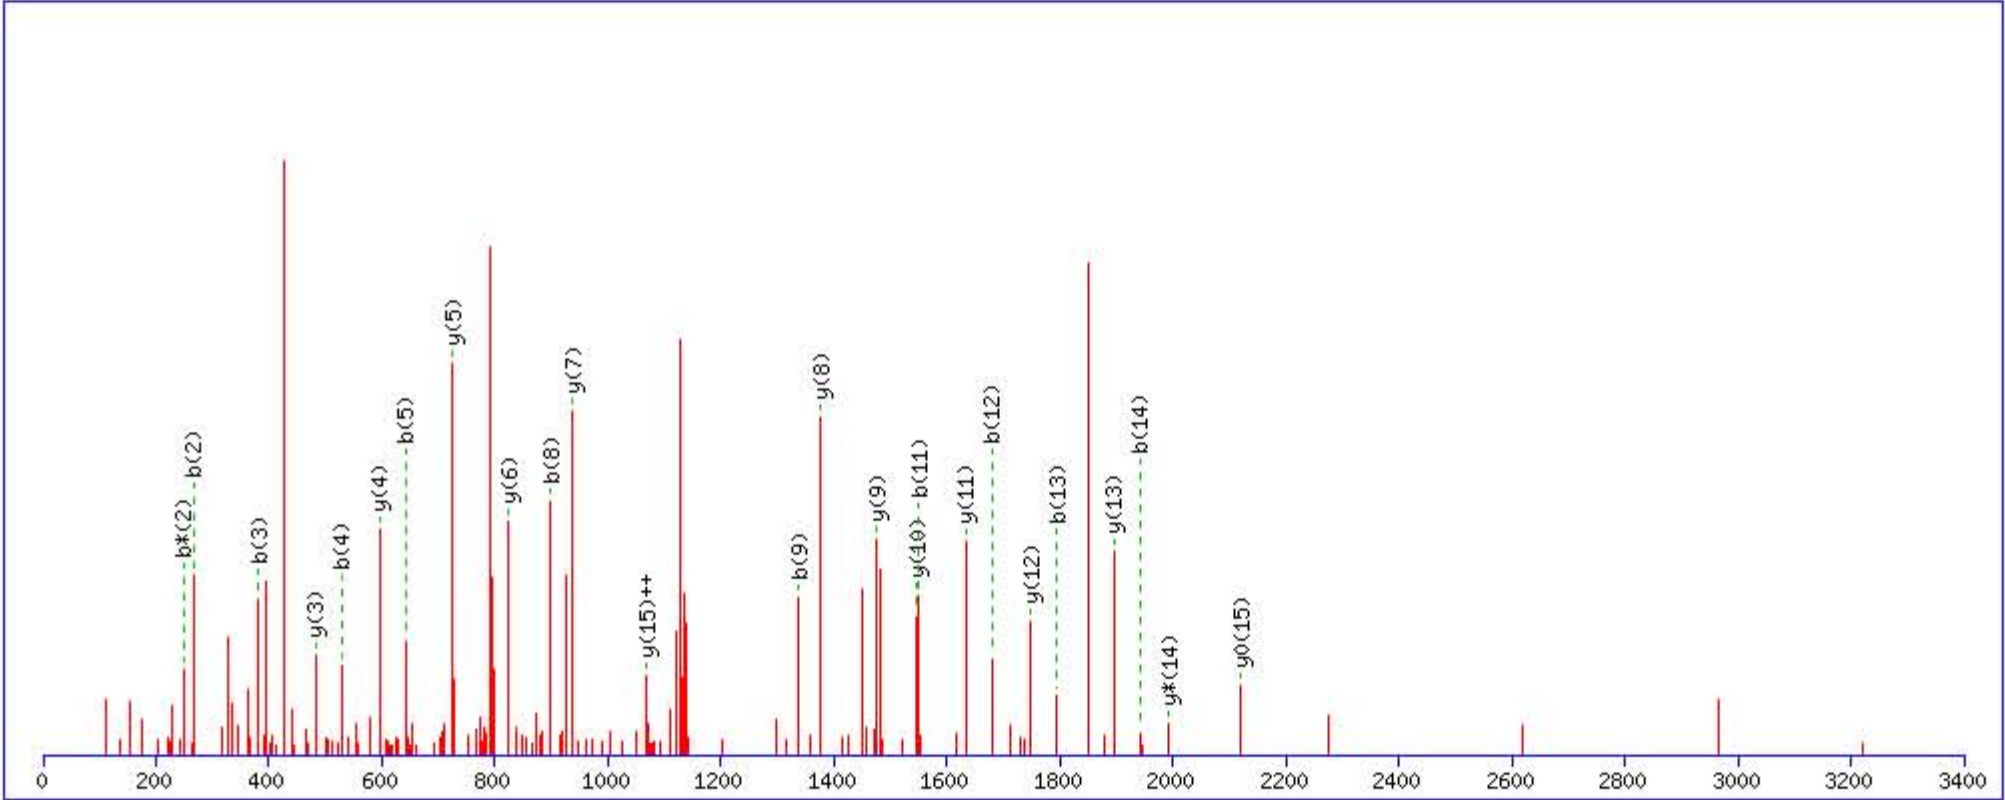

Monoisotopic mass of neutral peptide Mr(calc): 2274.067398  
Fixed modifications: Carbamidomethyl (C) (apply to specified residues or termini only)  
Variable modifications:  
Q9 : Biotin:Thermo-21345 (Q)  
Ions Score: 82 Expect: 2.7e-007  
Matches : 25/166 fragment ions using 38 most intense peaks [\(help\)](#)

| #  | b           | b <sup>++</sup> | b <sup>*</sup> | b <sup>*++</sup> | b <sup>0</sup> | b <sup>0++</sup> | Seq. | y           | y <sup>++</sup> | y <sup>*</sup> | y <sup>*++</sup> | y <sup>0</sup> | y <sup>0++</sup> | #  |
|----|-------------|-----------------|----------------|------------------|----------------|------------------|------|-------------|-----------------|----------------|------------------|----------------|------------------|----|
| 1  | 138.066188  | 69.536732       |                |                  |                |                  | H    |             |                 |                |                  |                |                  | 16 |
| 2  | 266.124766  | 133.566021      | 249.098217     | 125.052746       |                |                  | Q    | 2138.015757 | 1069.511516     | 2120.989208    | 1060.998242      | 2120.005192    | 1060.506234      | 15 |
| 3  | 381.151709  | 191.079492      | 364.125160     | 182.566218       | 363.141144     | 182.074210       | D    | 2009.957179 | 1005.482228     | 1992.930630    | 996.968953       | 1991.946614    | 996.476945       | 14 |
| 4  | 528.220123  | 264.613700      | 511.193574     | 256.100425       | 510.209558     | 255.608417       | F    | 1894.930236 | 947.968756      | 1877.903687    | 939.455482       | 1876.919671    | 938.963474       | 13 |
| 5  | 642.263050  | 321.635163      | 625.236501     | 313.121889       | 624.252485     | 312.629881       | N    | 1747.861822 | 874.434549      | 1730.835273    | 865.921275       | 1729.851257    | 865.429267       | 12 |
| 6  | 729.295078  | 365.151177      | 712.268529     | 356.637903       | 711.284513     | 356.145895       | S    | 1633.818895 | 817.413086      | 1616.792346    | 808.899811       | 1615.808330    | 808.407803       | 11 |
| 7  | 800.332192  | 400.669734      | 783.305643     | 392.156459       | 782.321627     | 391.664451       | A    | 1546.786867 | 773.897072      | 1529.760318    | 765.383797       | 1528.776302    | 764.891789       | 10 |
| 8  | 899.400606  | 450.203941      | 882.374057     | 441.690666       | 881.390041     | 441.198658       | V    | 1475.749753 | 738.378515      | 1458.723204    | 729.865240       | 1457.739188    | 729.373232       | 9  |
| 9  | 1338.625932 | 669.816604      | 1321.599383    | 661.303330       | 1320.615367    | 660.811322       | Q    | 1376.681339 | 688.844308      | 1359.654790    | 680.331033       | 1358.670774    | 679.839025       | 8  |
| 10 | 1451.709996 | 726.358636      | 1434.683447    | 717.845362       | 1433.699431    | 717.353354       | L    | 937.456013  | 469.231645      | 920.429464     | 460.718370       | 919.445448     | 460.226362       | 7  |
| 11 | 1550.778410 | 775.892843      | 1533.751861    | 767.379569       | 1532.767845    | 766.887561       | V    | 824.371949  | 412.689613      | 807.345400     | 404.176338       | 806.361384     | 403.684330       | 6  |
| 12 | 1679.821003 | 840.414140      | 1662.794454    | 831.900865       | 1661.810438    | 831.408857       | E    | 725.303535  | 363.155406      | 708.276986     | 354.642131       | 707.292970     | 354.150123       | 5  |
| 13 | 1793.863930 | 897.435603      | 1776.837381    | 888.922329       | 1775.853365    | 888.430321       | N    | 596.260942  | 298.634109      | 579.234393     | 290.120835       |                |                  | 4  |
| 14 | 1940.932344 | 970.969810      | 1923.905795    | 962.456536       | 1922.921779    | 961.964528       | F    | 482.218015  | 241.612646      | 465.191466     | 233.099371       |                |                  | 3  |
| 15 | 2100.962993 | 1050.985135     | 2083.936444    | 1042.471860      | 2082.952428    | 1041.979852      | C    | 335.149601  | 168.078438      | 318.123052     | 159.565164       |                |                  | 2  |
| 16 |             |                 |                |                  |                |                  | R    | 175.118952  | 88.063114       | 158.092403     | 79.549839        |                |                  | 1  |

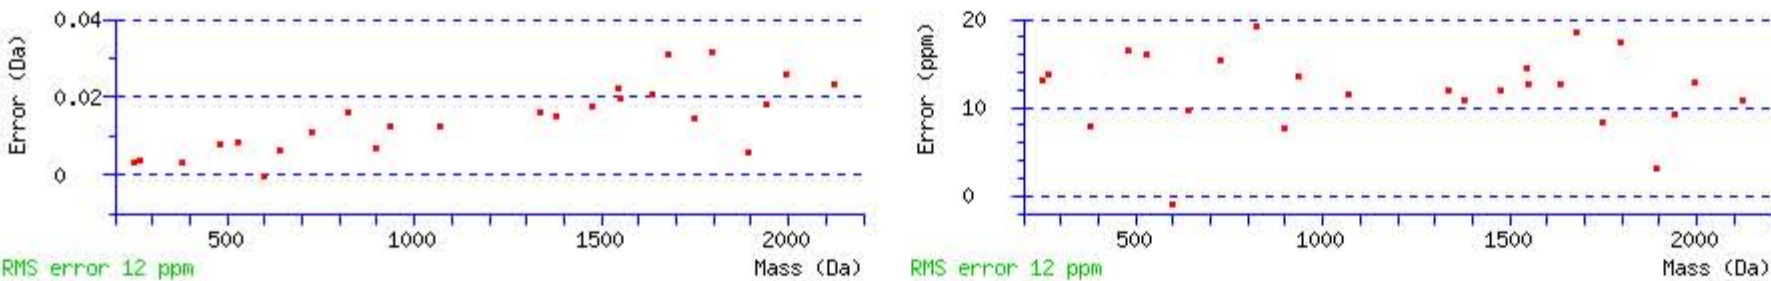

NCBI BLAST search of [HQDFNSAVQLVENFCR](#)  
(Parameters: blastp, nr protein database, expect=20000, no filter, PAM30)  
Other BLAST [web gateways](#)

All matches to this query

| Score | Mr(calc):   | Delta    | Sequence                         |
|-------|-------------|----------|----------------------------------|
| 81.8  | 2274.067398 | 0.015230 | <a href="#">HQDFNSAVQLVENFCR</a> |
| 11.7  | 2274.067398 | 0.015230 | <a href="#">HQDFNSAVQLVENFCR</a> |

MATRIX

SCIENCE

Mascot Search Results

Peptide View

MS/MS Fragmentation of **LAVTTHGLPCLAWASQAQAK**  
Found in **THRB\_HUMAN**, Prothrombin OS=Homo sapiens GN=F2 PE=1 SV=2

Match to Query 50628: 2305.240302 from(769.420710,3+) rtinseconds(2381) index(52753)  
Title: Locus:1.1.1.2066.13 File:"2013-07-02 CLN FXIII 180 min 2nd F 4.wiff"  
Data file C:\Program Files (x86)\Matrix Science\Mascot Daemon\mgf\8 FXIII 180 min 2nd\mascot\_daemon\_merge.mgf

Click mouse within plot area to zoom in by factor of two about that point  
Or,   to  Da   
Label all possible matches ☐ Label matches used for scoring ☒

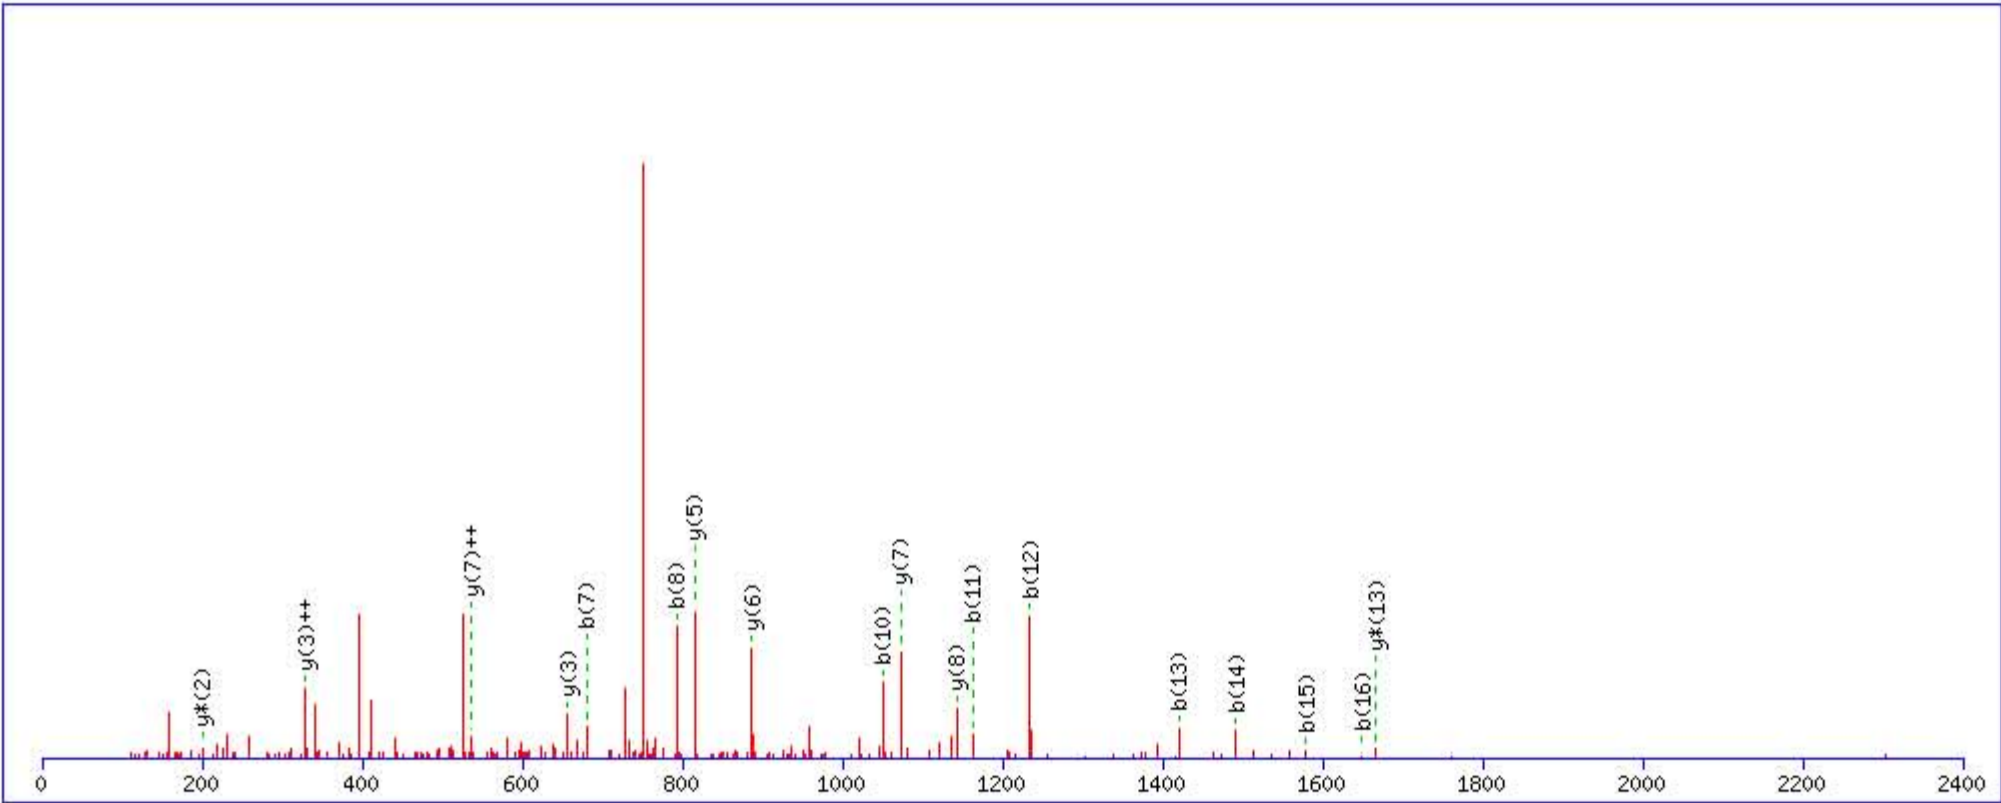

Monoisotopic mass of neutral peptide Mr(calc): 2305.207504  
Fixed modifications: Carbamidomethyl (C) (apply to specified residues or termini only)  
Variable modifications:  
Q17 : Biotin:Thermo-21345 (Q)  
Ions Score: 45 Expect: 0.0006  
Matches : 18/170 fragment ions using 34 most intense peaks [\(help\)](#)

| #  | b           | b <sup>++</sup> | b <sup>*</sup> | b <sup>+++</sup> | b <sup>0</sup> | b <sup>0++</sup> | Seq. | y           | y <sup>++</sup> | y <sup>*</sup> | y <sup>+++</sup> | y <sup>0</sup> | y <sup>0++</sup> | #  |
|----|-------------|-----------------|----------------|------------------|----------------|------------------|------|-------------|-----------------|----------------|------------------|----------------|------------------|----|
| 1  | 114.091340  | 57.549308       |                |                  |                |                  | L    |             |                 |                |                  |                |                  | 19 |
| 2  | 185.128454  | 93.067865       |                |                  |                |                  | A    | 2193.130730 | 1097.069003     | 2176.104181    | 1088.555728      | 2175.120165    | 1088.063720      | 18 |
| 3  | 284.196868  | 142.602072      |                |                  |                |                  | V    | 2122.093616 | 1061.550446     | 2105.067067    | 1053.037171      | 2104.083051    | 1052.545163      | 17 |
| 4  | 385.244547  | 193.125912      |                |                  | 367.233982     | 184.120629       | T    | 2023.025202 | 1012.016239     | 2005.998653    | 1003.502965      | 2005.014637    | 1003.010957      | 16 |
| 5  | 486.292226  | 243.649751      |                |                  | 468.281661     | 234.644469       | T    | 1921.977523 | 961.492400      | 1904.950974    | 952.979125       | 1903.966958    | 952.487117       | 15 |
| 6  | 623.351138  | 312.179207      |                |                  | 605.340573     | 303.173925       | H    | 1820.929844 | 910.968560      | 1803.903295    | 902.455286       | 1802.919279    | 901.963278       | 14 |
| 7  | 680.372602  | 340.689939      |                |                  | 662.362037     | 331.684657       | G    | 1683.870932 | 842.439104      | 1666.844383    | 833.925830       | 1665.860367    | 833.433822       | 13 |
| 8  | 793.456666  | 397.231971      |                |                  | 775.446101     | 388.226689       | L    | 1626.849468 | 813.928372      | 1609.822919    | 805.415098       | 1608.838903    | 804.923090       | 12 |
| 9  | 890.509430  | 445.758353      |                |                  | 872.498865     | 436.753071       | P    | 1513.765404 | 757.386340      | 1496.738855    | 748.873066       | 1495.754839    | 748.381058       | 11 |
| 10 | 1050.540079 | 525.773678      |                |                  | 1032.529514    | 516.768395       | C    | 1416.712640 | 708.859958      | 1399.686091    | 700.346684       | 1398.702075    | 699.854675       | 10 |
| 11 | 1163.624143 | 582.315710      |                |                  | 1145.613578    | 573.310427       | L    | 1256.681991 | 628.844634      | 1239.655442    | 620.331359       | 1238.671426    | 619.839351       | 9  |
| 12 | 1234.661257 | 617.834267      |                |                  | 1216.650692    | 608.828984       | A    | 1143.597927 | 572.302602      | 1126.571378    | 563.789327       | 1125.587362    | 563.297319       | 8  |
| 13 | 1420.740570 | 710.873923      |                |                  | 1402.730005    | 701.868640       | W    | 1072.560813 | 536.784045      | 1055.534264    | 528.270770       | 1054.550248    | 527.778762       | 7  |
| 14 | 1491.777684 | 746.392480      |                |                  | 1473.767119    | 737.387197       | A    | 886.481500  | 443.744388      | 869.454951     | 435.231114       | 868.470935     | 434.739106       | 6  |
| 15 | 1578.809712 | 789.908494      |                |                  | 1560.799147    | 780.903212       | S    | 815.444386  | 408.225831      | 798.417837     | 399.712557       | 797.433821     | 399.220549       | 5  |
| 16 | 1649.846826 | 825.427051      |                |                  | 1631.836261    | 816.421768       | A    | 728.412358  | 364.709817      | 711.385809     | 356.196543       |                |                  | 4  |
| 17 | 2089.072152 | 1045.039714     | 2072.045603    | 1036.526439      | 2071.061587    | 1036.034431      | Q    | 657.375244  | 329.191260      | 640.348695     | 320.677986       |                |                  | 3  |
| 18 | 2160.109266 | 1080.558271     | 2143.082717    | 1072.044996      | 2142.098701    | 1071.552988      | A    | 218.149918  | 109.578597      | 201.123369     | 101.065323       |                |                  | 2  |
| 19 |             |                 |                |                  |                |                  | K    | 147.112804  | 74.060040       | 130.086255     | 65.546765        |                |                  | 1  |

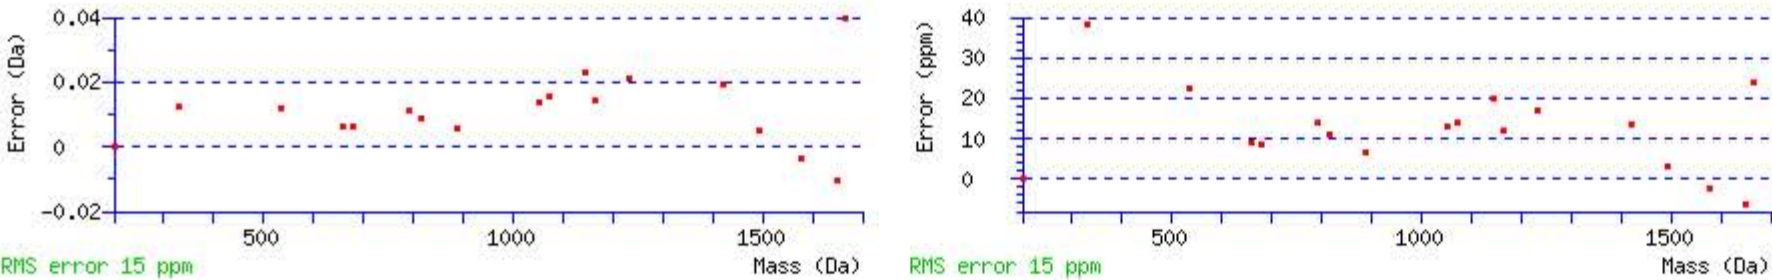

NCBI BLAST search of [LAVTTHGLPCLAWASQAQAK](#)  
(Parameters: blastp, nr protein database, expect=20000, no filter, PAM30)  
Other BLAST [web gateways](#)

All matches to this query

| Score | Mr(calc):   | Delta    | Sequence                             |
|-------|-------------|----------|--------------------------------------|
| 45.3  | 2305.207504 | 0.032798 | <a href="#">LAVTTHGLPCLAWASQAQAK</a> |

MATRIX

SCIENCE

Mascot Search Results

Peptide View

MS/MS Fragmentation of **SEGSSVNLSPPLEQCV****PDR**  
Found in **THRB\_HUMAN**, Prothrombin OS=Homo sapiens GN=F2 PE=1 SV=2

Match to Query 51654: 2381.170092 from(794.730640,3+) rtinseconds(2174) index(51564)  
Title: Locus:1.1.1.1994.13 File:"2013-07-02 CLN FXIII 180 min 2nd F 4.wiff"  
Data file C:\Program Files (x86)\Matrix Science\Mascot Daemon\mgf\8 FXIII 180 min 2nd\mascot\_daemon\_merge.mgf

Click mouse within plot area to zoom in by factor of two about that point  
Or, 

Plot from

0

 to 

2400

 Da 

Full range

  
Label all possible matches ☐ Label matches used for scoring ☒

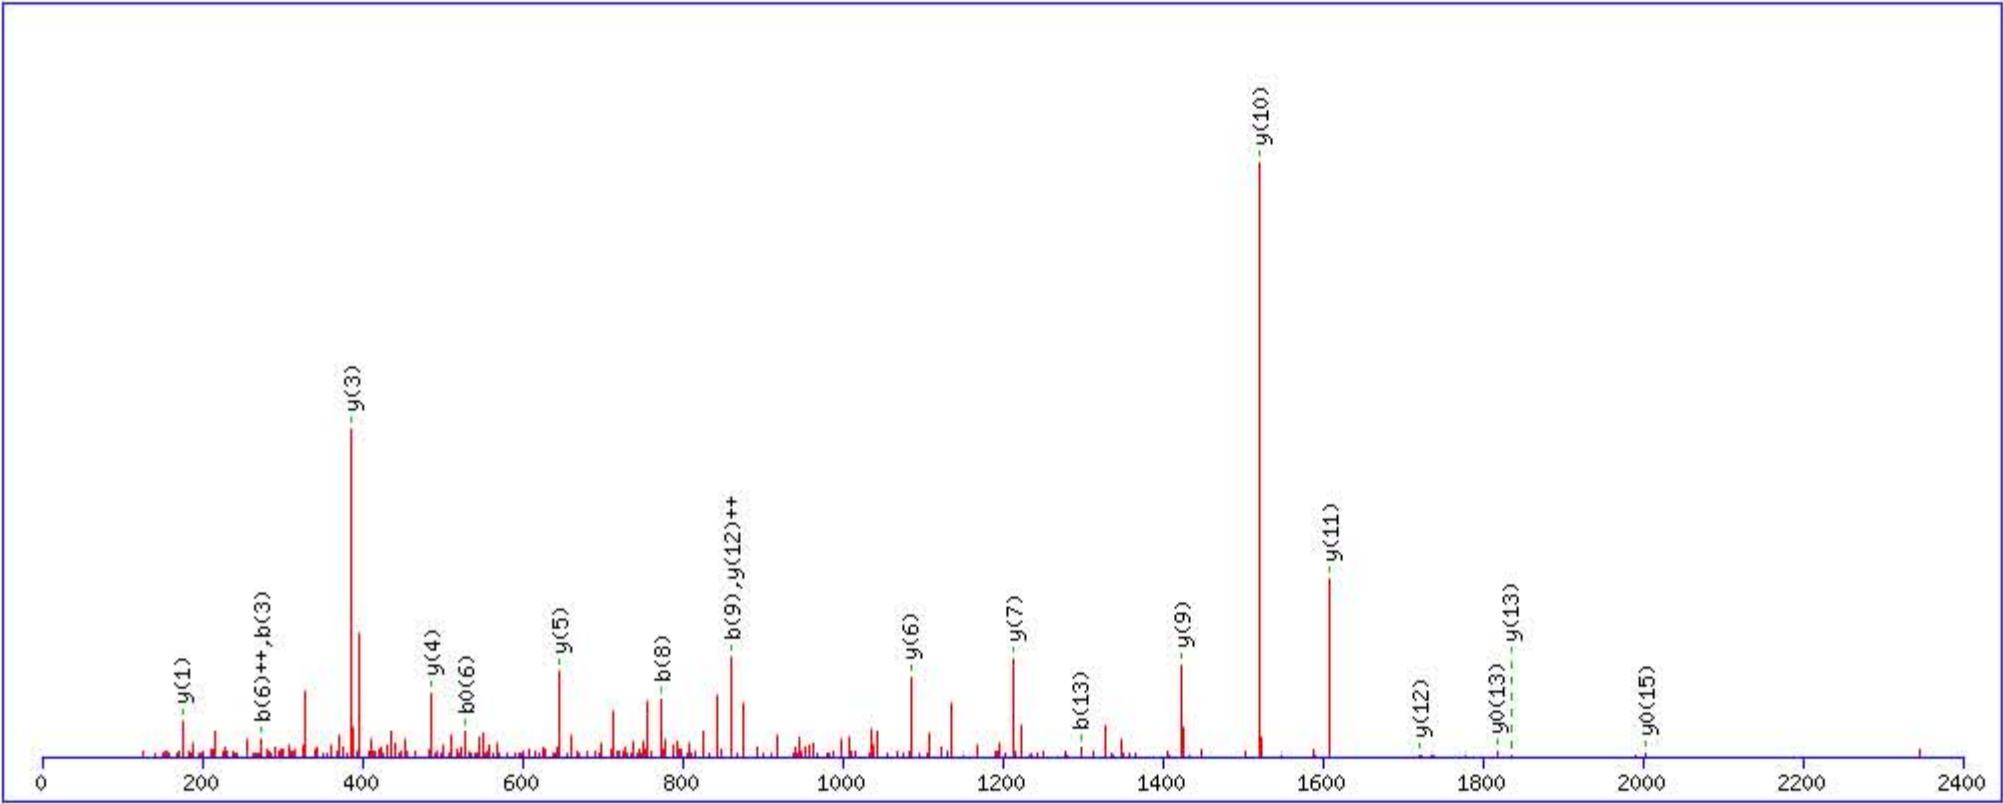

Monoisotopic mass of neutral peptide Mr(calc): 2381.135529  
Fixed modifications: Carbamidomethyl (C) (apply to specified residues or termini only)  
Variable modifications:  
Q14 : Biotin:Thermo-21345 (Q)  
Ions Score: 100 Expect: 1.4e-009  
Matches : 20/202 fragment ions using 20 most intense peaks [\(help\)](#)

| #  | b           | b <sup>++</sup> | b <sup>*</sup> | b <sup>*++</sup> | b <sup>0</sup> | b <sup>0++</sup> | Seq. | y           | y <sup>++</sup> | y <sup>*</sup> | y <sup>*++</sup> | y <sup>0</sup> | y <sup>0++</sup> | #  |
|----|-------------|-----------------|----------------|------------------|----------------|------------------|------|-------------|-----------------|----------------|------------------|----------------|------------------|----|
| 1  | 88.039304   | 44.523290       |                |                  | 70.028739      | 35.518008        | S    |             |                 |                |                  |                |                  | 19 |
| 2  | 217.081897  | 109.044586      |                |                  | 199.071332     | 100.039304       | E    | 2295.110779 | 1148.059027     | 2278.084230    | 1139.545753      | 2277.100214    | 1139.053745      | 18 |
| 3  | 274.103361  | 137.555319      |                |                  | 256.092796     | 128.550036       | G    | 2166.068186 | 1083.537731     | 2149.041637    | 1075.024456      | 2148.057621    | 1074.532448      | 17 |
| 4  | 361.135389  | 181.071332      |                |                  | 343.124824     | 172.066050       | S    | 2109.046722 | 1055.026999     | 2092.020173    | 1046.513724      | 2091.036157    | 1046.021716      | 16 |
| 5  | 448.167417  | 224.587346      |                |                  | 430.156852     | 215.582064       | S    | 2022.014694 | 1011.510985     | 2004.988145    | 1002.997711      | 2004.004129    | 1002.505703      | 15 |
| 6  | 547.235831  | 274.121554      |                |                  | 529.225266     | 265.116271       | V    | 1934.982666 | 967.994971      | 1917.956117    | 959.481697       | 1916.972101    | 958.989689       | 14 |
| 7  | 661.278758  | 331.143017      | 644.252209     | 322.629742       | 643.268193     | 322.137734       | N    | 1835.914252 | 918.460764      | 1818.887703    | 909.947490       | 1817.903687    | 909.455482       | 13 |
| 8  | 774.362822  | 387.685049      | 757.336273     | 379.171774       | 756.352257     | 378.679766       | L    | 1721.871325 | 861.439301      | 1704.844776    | 852.926026       | 1703.860760    | 852.434018       | 12 |
| 9  | 861.394850  | 431.201063      | 844.368301     | 422.687788       | 843.384285     | 422.195780       | S    | 1608.787261 | 804.897269      | 1591.760712    | 796.383994       | 1590.776696    | 795.891986       | 11 |
| 10 | 958.447614  | 479.727445      | 941.421065     | 471.214170       | 940.437049     | 470.722162       | P    | 1521.755233 | 761.381255      | 1504.728684    | 752.867980       | 1503.744668    | 752.375972       | 10 |
| 11 | 1055.500378 | 528.253827      | 1038.473829    | 519.740553       | 1037.489813    | 519.248544       | P    | 1424.702469 | 712.854873      | 1407.675920    | 704.341598       | 1406.691904    | 703.849590       | 9  |
| 12 | 1168.584442 | 584.795859      | 1151.557893    | 576.282584       | 1150.573877    | 575.790576       | L    | 1327.649705 | 664.328491      | 1310.623156    | 655.815216       | 1309.639140    | 655.323208       | 8  |
| 13 | 1297.627035 | 649.317155      | 1280.600486    | 640.803881       | 1279.616470    | 640.311873       | E    | 1214.565641 | 607.786459      | 1197.539092    | 599.273184       | 1196.555076    | 598.781176       | 7  |
| 14 | 1736.852361 | 868.929819      | 1719.825812    | 860.416544       | 1718.841796    | 859.924536       | Q    | 1085.523048 | 543.265162      | 1068.496499    | 534.751888       | 1067.512483    | 534.259880       | 6  |
| 15 | 1896.883010 | 948.945143      | 1879.856461    | 940.431869       | 1878.872445    | 939.939861       | C    | 646.297722  | 323.652499      | 629.271173     | 315.139225       | 628.287157     | 314.647217       | 5  |
| 16 | 1995.951424 | 998.479350      | 1978.924875    | 989.966076       | 1977.940859    | 989.474068       | V    | 486.267073  | 243.637174      | 469.240524     | 235.123900       | 468.256508     | 234.631892       | 4  |
| 17 | 2093.004188 | 1047.005732     | 2075.977639    | 1038.492457      | 2074.993623    | 1038.000449      | P    | 387.198659  | 194.102967      | 370.172110     | 185.589693       | 369.188094     | 185.097685       | 3  |
| 18 | 2208.031131 | 1104.519203     | 2191.004582    | 1096.005929      | 2190.020566    | 1095.513921      | D    | 290.145895  | 145.576585      | 273.119346     | 137.063311       | 272.135330     | 136.571303       | 2  |
| 19 |             |                 |                |                  |                |                  | R    | 175.118952  | 88.063114       | 158.092403     | 79.549839        |                |                  | 1  |

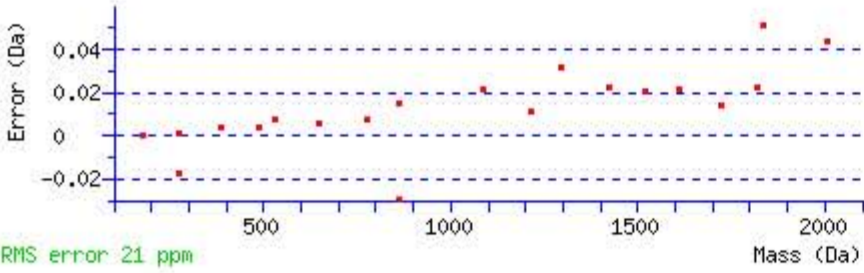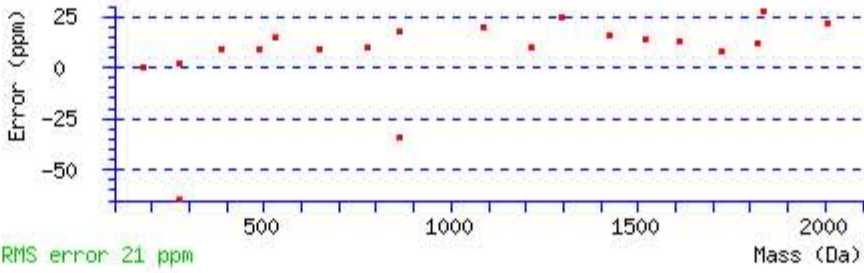

NCBI BLAST search of [SEGSSVNLSPPLEQCV](#)**PDR**  
(Parameters: blastp, nr protein database, expect=20000, no filter, PAM30)  
Other BLAST [web gateways](#)

All matches to this query

| Score | Mr(calc):   | Delta     | Sequence                                       |
|-------|-------------|-----------|------------------------------------------------|
| 100.4 | 2381.135529 | 0.034563  | <a href="#">SEGSSVNLSPPLEQCV</a> <b>PDR</b>    |
| 5.7   | 2381.201736 | -0.031644 | <a href="#">CIDSANLKVHQIEK</a> <b>EMR</b>      |
| 4.3   | 2381.168564 | 0.001528  | <a href="#">GNAVVGYLQCFDLEGESGLV</a> <b>VR</b> |

MATRIX

SCIENCE

Mascot Search Results

Peptide View

MS/MS Fragmentation of **HQDFNSAVQLVENFCR**  
Found in **THRB\_HUMAN**, Prothrombin OS=Homo sapiens GN=F2 PE=1 SV=2

Match to Query 55349: 2585.264856 from(647.323490,4+) rtinseconds(2654) index(54311)  
Title: Locus:1.1.1.2161.7 File:"2013-07-02 CLN FXIII 180 min 2nd F 4.wiff"  
Data file C:\Program Files (x86)\Matrix Science\Mascot Daemon\mgf\8 FXIII 180 min 2nd\mascot\_daemon\_merge.mgf

Click mouse within plot area to zoom in by factor of two about that point

Or, 

Plot from

100

 to 

1500

 Da 

Full range

Label all possible matches ☐ Label matches used for scoring ☒

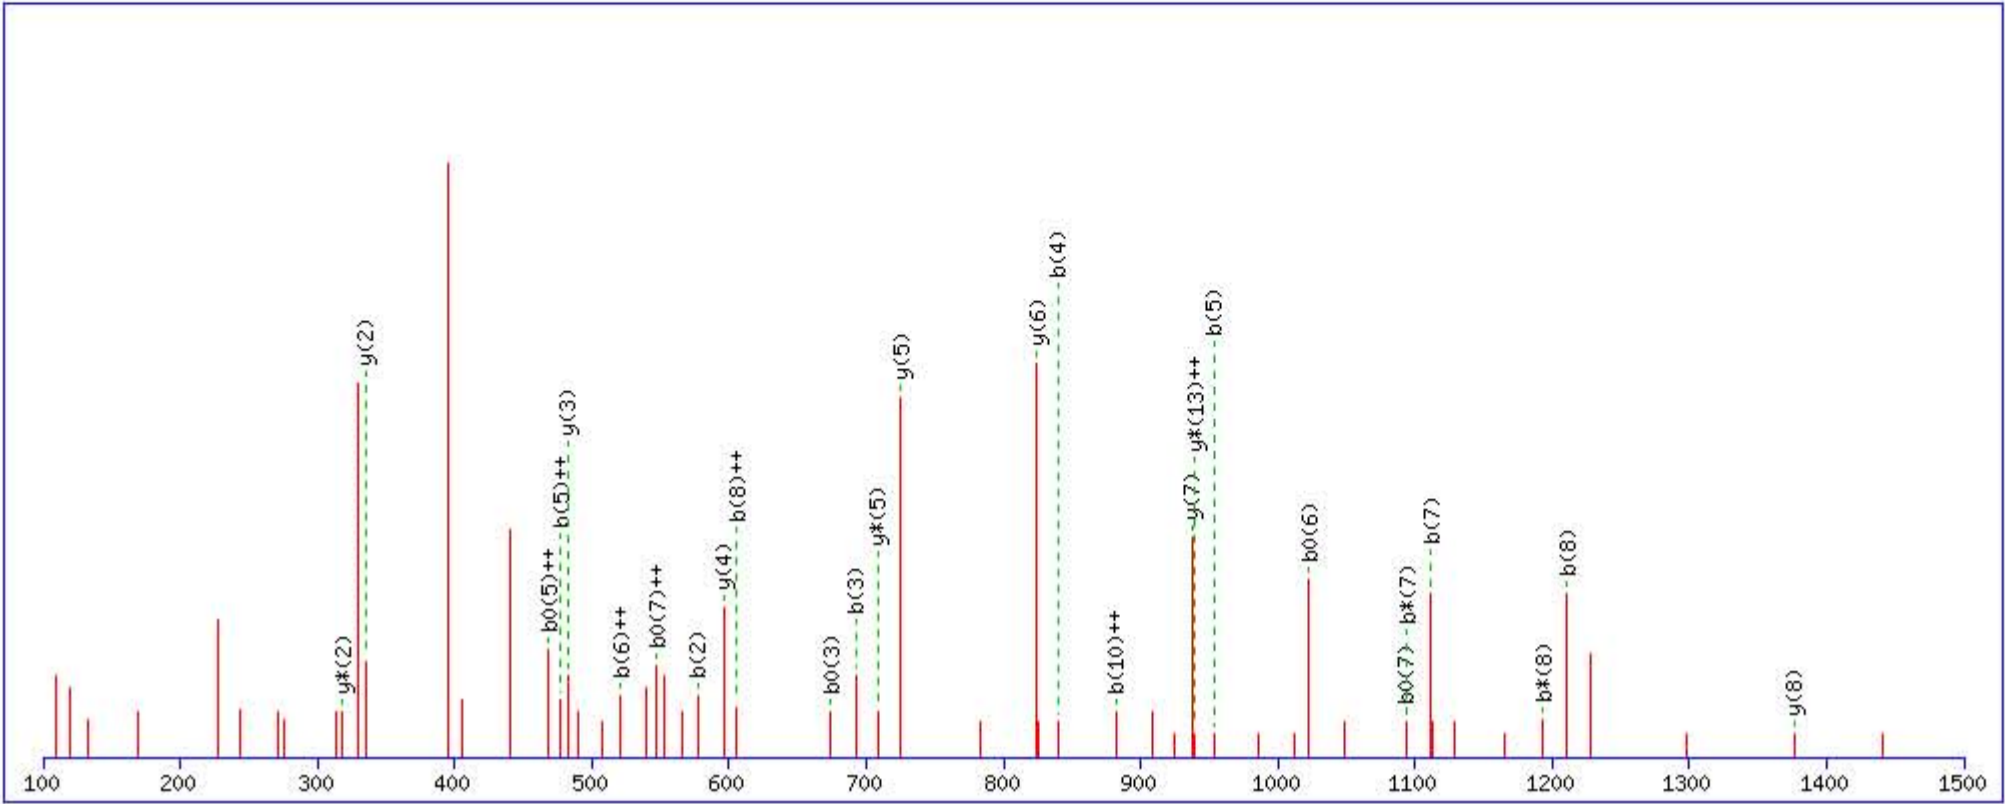

Monoisotopic mass of neutral peptide Mr(calc): 2585.234146  
Fixed modifications: Carbamidomethyl (C) (apply to specified residues or termini only)  
Variable modifications:  
Q2 : Biotin:Thermo-21345 (Q)  
Q9 : Biotin:Thermo-21345 (Q)  
Ions Score: 33 Expect: 0.013  
Matches : 27/166 fragment ions using 57 most intense peaks [\(help\)](#)

| #  | b           | b <sup>++</sup> | b <sup>*</sup> | b <sup>++</sup> * | b <sup>0</sup> | b <sup>0++</sup> | Seq. | y           | y <sup>++</sup> | y <sup>*</sup> | y <sup>++</sup> * | y <sup>0</sup> | y <sup>0++</sup> | #  |
|----|-------------|-----------------|----------------|-------------------|----------------|------------------|------|-------------|-----------------|----------------|-------------------|----------------|------------------|----|
| 1  | 138.066188  | 69.536732       |                |                   |                |                  | H    |             |                 |                |                   |                |                  | 16 |
| 2  | 577.291514  | 289.149395      | 560.264965     | 280.636121        |                |                  | Q    | 2449.182505 | 1225.094890     | 2432.155956    | 1216.581616       | 2431.171940    | 1216.089608      | 15 |
| 3  | 692.318457  | 346.662867      | 675.291908     | 338.149592        | 674.307892     | 337.657584       | D    | 2009.957179 | 1005.482228     | 1992.930630    | 996.968953        | 1991.946614    | 996.476945       | 14 |
| 4  | 839.386871  | 420.197073      | 822.360322     | 411.683799        | 821.376306     | 411.191791       | F    | 1894.930236 | 947.968756      | 1877.903687    | 939.455482        | 1876.919671    | 938.963473       | 13 |
| 5  | 953.429798  | 477.218537      | 936.403249     | 468.705262        | 935.419233     | 468.213254       | N    | 1747.861822 | 874.434549      | 1730.835273    | 865.921275        | 1729.851257    | 865.429267       | 12 |
| 6  | 1040.461826 | 520.734551      | 1023.435277    | 512.221276        | 1022.451261    | 511.729268       | S    | 1633.818895 | 817.413086      | 1616.792346    | 808.899811        | 1615.808330    | 808.407803       | 11 |
| 7  | 1111.498940 | 556.253108      | 1094.472391    | 547.739834        | 1093.488375    | 547.247825       | A    | 1546.786867 | 773.897072      | 1529.760318    | 765.383797        | 1528.776302    | 764.891789       | 10 |
| 8  | 1210.567354 | 605.787315      | 1193.540805    | 597.274041        | 1192.556789    | 596.782033       | V    | 1475.749753 | 738.378515      | 1458.723204    | 729.865240        | 1457.739188    | 729.373232       | 9  |
| 9  | 1649.792680 | 825.399978      | 1632.766131    | 816.886704        | 1631.782115    | 816.394696       | Q    | 1376.681339 | 688.844308      | 1359.654790    | 680.331033        | 1358.670774    | 679.839025       | 8  |
| 10 | 1762.876744 | 881.942010      | 1745.850195    | 873.428736        | 1744.866179    | 872.936728       | L    | 937.456013  | 469.231644      | 920.429464     | 460.718370        | 919.445448     | 460.226362       | 7  |
| 11 | 1861.945158 | 931.476217      | 1844.918609    | 922.962943        | 1843.934593    | 922.470935       | V    | 824.371949  | 412.689612      | 807.345400     | 404.176338        | 806.361384     | 403.684330       | 6  |
| 12 | 1990.987751 | 995.997514      | 1973.961202    | 987.484239        | 1972.977186    | 986.992231       | E    | 725.303535  | 363.155405      | 708.276986     | 354.642131        | 707.292970     | 354.150123       | 5  |
| 13 | 2105.030678 | 1053.018977     | 2088.004129    | 1044.505702       | 2087.020113    | 1044.013694      | N    | 596.260942  | 298.634109      | 579.234393     | 290.120834        |                |                  | 4  |
| 14 | 2252.099092 | 1126.553184     | 2235.072543    | 1118.039909       | 2234.088527    | 1117.547901      | F    | 482.218015  | 241.612645      | 465.191466     | 233.099371        |                |                  | 3  |
| 15 | 2412.129741 | 1206.568508     | 2395.103192    | 1198.055234       | 2394.119176    | 1197.563226      | C    | 335.149601  | 168.078438      | 318.123052     | 159.565164        |                |                  | 2  |
| 16 |             |                 |                |                   |                |                  | R    | 175.118952  | 88.063114       | 158.092403     | 79.549839         |                |                  | 1  |

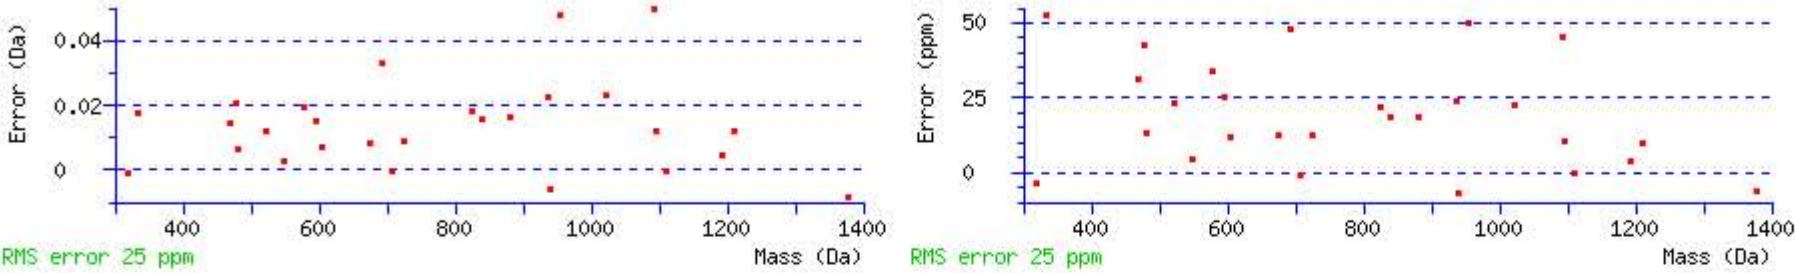

NCBI BLAST search of [HQDFNSAVQLVENFCR](#)  
(Parameters: blastp, nr protein database, expect=20000, no filter, PAM30)  
Other BLAST [web gateways](#)

All matches to this query

| Score | Mr(calc):   | Delta    | Sequence                         |
|-------|-------------|----------|----------------------------------|
| 33.1  | 2585.234146 | 0.030710 | <a href="#">HQDFNSAVQLVENFCR</a> |

M

A

T

R

I

X

S

C

I

E

N

C

E

Mascot Search Results

Peptide View

MS/MS Fragmentation of **RQEC SIPVCGQDQVT VAMTPR**  
Found in **THRB\_HUMAN**, Prothrombin OS=Homo sapiens GN=F2 PE=1 SV=2

Match to Query 56846: 2742.332382 from(915.118070,3+) rtinseconds(1989) index(66365)  
Title: Locus:1.1.1.1967.10 File:"2013-07-02 CLN FXIII 180 min 2nd FT.wiff"  
Data file C:\Program Files (x86)\Matrix Science\Mascot Daemon\mgf\8 FXIII 180 min 2nd\mascot\_daemon\_merge.mgf

Click mouse within plot area to zoom in by factor of two about that point  
Or, 

Plot from

0

 to 

2600

 Da 

Full range

  
Label all possible matches ☐ Label matches used for scoring ☒

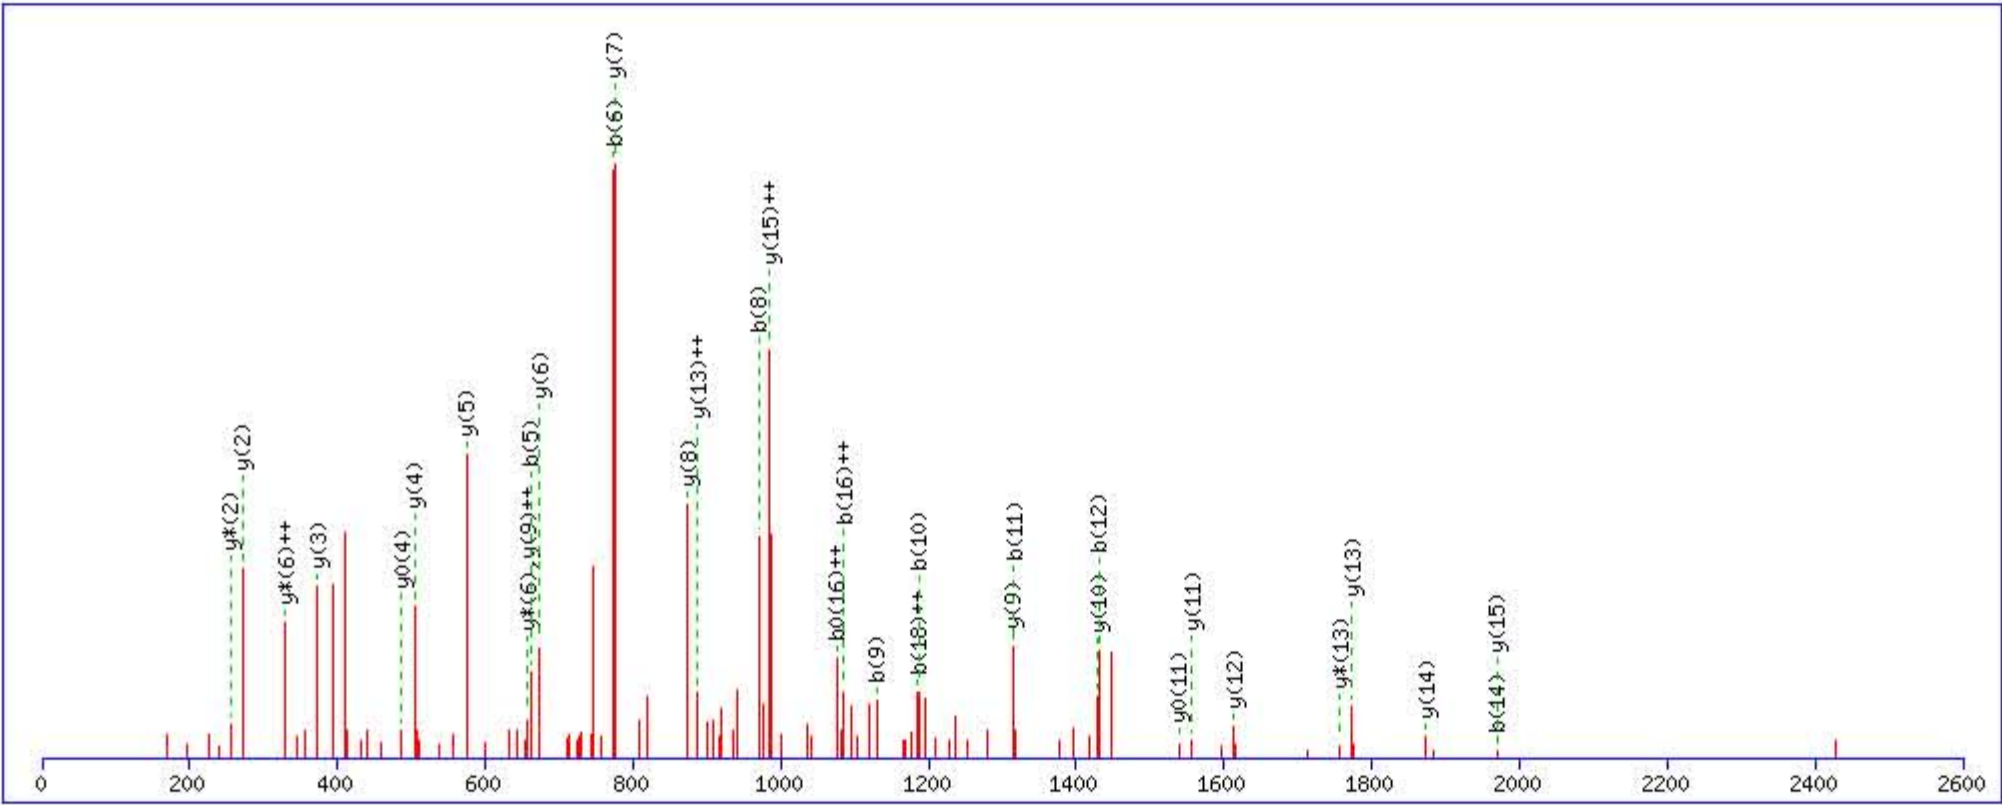

Monoisotopic mass of neutral peptide Mr(calc): 2742.307404  
Fixed modifications: Carbamidomethyl (C) (apply to specified residues or termini only)  
Variable modifications:  
Q13 : Biotin:Thermo-21345 (Q)  
Ions Score: 91 Expect: 3.3e-009  
Matches : 34/232 fragment ions using 53 most intense peaks ([help](#))

| #  | b           | b <sup>++</sup> | b <sup>*</sup> | b <sup>*++</sup> | b <sup>0</sup> | b <sup>0++</sup> | Seq. | y           | y <sup>++</sup> | y <sup>*</sup> | y <sup>*++</sup> | y <sup>0</sup> | y <sup>0++</sup> | #  |
|----|-------------|-----------------|----------------|------------------|----------------|------------------|------|-------------|-----------------|----------------|------------------|----------------|------------------|----|
| 1  | 157.108387  | 79.057831       | 140.081838     | 70.544557        |                |                  | R    |             |                 |                |                  |                |                  | 21 |
| 2  | 285.166965  | 143.087121      | 268.140416     | 134.573846       |                |                  | Q    | 2587.213551 | 1294.110413     | 2570.187002    | 1285.597139      | 2569.202986    | 1285.105131      | 20 |
| 3  | 414.209558  | 207.608417      | 397.183009     | 199.095143       | 396.198993     | 198.603135       | E    | 2459.154973 | 1230.081124     | 2442.128424    | 1221.567850      | 2441.144408    | 1221.075842      | 19 |
| 4  | 574.240207  | 287.623742      | 557.213658     | 279.110467       | 556.229642     | 278.618459       | C    | 2330.112380 | 1165.559828     | 2313.085831    | 1157.046553      | 2312.101815    | 1156.554545      | 18 |
| 5  | 661.272235  | 331.139756      | 644.245686     | 322.626481       | 643.261670     | 322.134473       | S    | 2170.081731 | 1085.544503     | 2153.055182    | 1077.031229      | 2152.071166    | 1076.539221      | 17 |
| 6  | 774.356299  | 387.681788      | 757.329750     | 379.168513       | 756.345734     | 378.676505       | I    | 2083.049703 | 1042.028489     | 2066.023154    | 1033.515215      | 2065.039138    | 1033.023207      | 16 |
| 7  | 871.409063  | 436.208170      | 854.382514     | 427.694895       | 853.398498     | 427.202887       | P    | 1969.965639 | 985.486458      | 1952.939090    | 976.973183       | 1951.955074    | 976.481175       | 15 |
| 8  | 970.477477  | 485.742377      | 953.450928     | 477.229102       | 952.466912     | 476.737094       | V    | 1872.912875 | 936.960076      | 1855.886326    | 928.446801       | 1854.902310    | 927.954793       | 14 |
| 9  | 1130.508126 | 565.757701      | 1113.481577    | 557.244427       | 1112.497561    | 556.752418       | C    | 1773.844461 | 887.425868      | 1756.817912    | 878.912594       | 1755.833896    | 878.420586       | 13 |
| 10 | 1187.529590 | 594.268433      | 1170.503041    | 585.755158       | 1169.519025    | 585.263150       | G    | 1613.813812 | 807.410544      | 1596.787263    | 798.897270       | 1595.803247    | 798.405262       | 12 |
| 11 | 1315.588168 | 658.297722      | 1298.561619    | 649.784448       | 1297.577603    | 649.292440       | Q    | 1556.792348 | 778.899812      | 1539.765799    | 770.386538       | 1538.781783    | 769.894530       | 11 |
| 12 | 1430.615111 | 715.811194      | 1413.588562    | 707.297919       | 1412.604546    | 706.805911       | D    | 1428.733770 | 714.870523      | 1411.707221    | 706.357249       | 1410.723205    | 705.865241       | 10 |
| 13 | 1869.840437 | 935.423857      | 1852.813888    | 926.910582       | 1851.829872    | 926.418574       | Q    | 1313.706827 | 657.357052      | 1296.680278    | 648.843777       | 1295.696262    | 648.351769       | 9  |
| 14 | 1968.908851 | 984.958064      | 1951.882302    | 976.444789       | 1950.898286    | 975.952781       | V    | 874.481501  | 437.744389      | 857.454952     | 429.231114       | 856.470936     | 428.739106       | 8  |
| 15 | 2069.956530 | 1035.481903     | 2052.929981    | 1026.968628      | 2051.945965    | 1026.476620      | T    | 775.413087  | 388.210181      | 758.386538     | 379.696907       | 757.402522     | 379.204899       | 7  |
| 16 | 2169.024944 | 1085.016110     | 2151.998395    | 1076.502835      | 2151.014379    | 1076.010827      | V    | 674.365408  | 337.686342      | 657.338859     | 329.173067       | 656.354843     | 328.681059       | 6  |
| 17 | 2240.062058 | 1120.534667     | 2223.035509    | 1112.021392      | 2222.051493    | 1111.529384      | A    | 575.296994  | 288.152135      | 558.270445     | 279.638861       | 557.286429     | 279.146853       | 5  |
| 18 | 2371.102543 | 1186.054909     | 2354.075994    | 1177.541635      | 2353.091978    | 1177.049627      | M    | 504.259880  | 252.633578      | 487.233331     | 244.120303       | 486.249315     | 243.628295       | 4  |
| 19 | 2472.150222 | 1236.578749     | 2455.123673    | 1228.065474      | 2454.139657    | 1227.573466      | T    | 373.219395  | 187.113335      | 356.192846     | 178.600061       | 355.208830     | 178.108053       | 3  |
| 20 | 2569.202986 | 1285.105131     | 2552.176437    | 1276.591856      | 2551.192421    | 1276.099848      | P    | 272.171716  | 136.589496      | 255.145167     | 128.076221       |                |                  | 2  |
| 21 |             |                 |                |                  |                |                  | R    | 175.118952  | 88.063114       | 158.092403     | 79.549839        |                |                  | 1  |

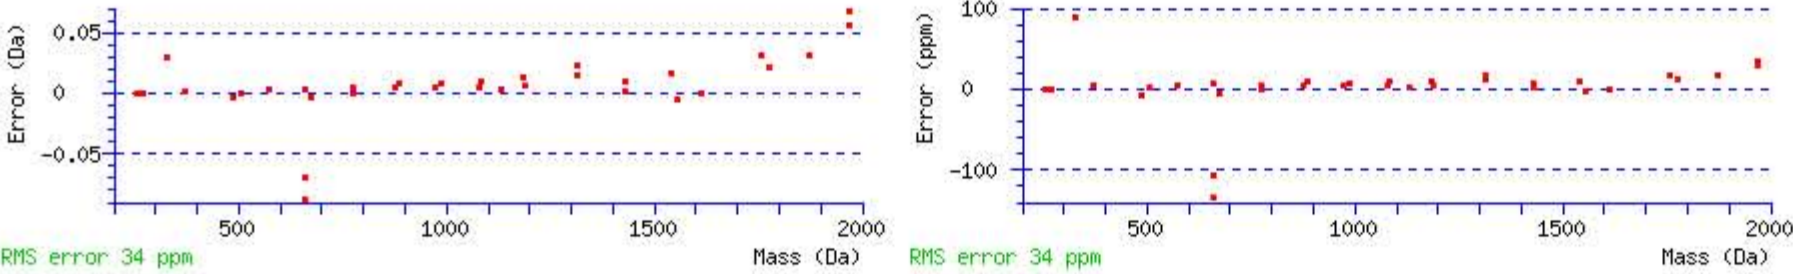

NCBI BLAST search of [RQEC SIPVCGQDQVT VAMTPR](#)  
(Parameters: blastp, nr protein database, expect=20000, no filter, PAM30)  
Other BLAST [web gateways](#)

All matches to this query

| Score | Mr(calc):   | Delta    | Sequence                                 |
|-------|-------------|----------|------------------------------------------|
| 90.6  | 2742.307404 | 0.024978 | <a href="#">RQEC SIPVCGQDQVT VAMTPR</a>  |
| 64.9  | 2742.307404 | 0.024978 | <a href="#">RQEC SIPVCGQDQVT VAMTPR</a>  |
| 13.1  | 2742.307404 | 0.024978 | <a href="#">RQEC SIPVCGQDQVT VAMTPR</a>  |
| 0.1   | 2742.313873 | 0.018509 | <a href="#">MLPSGMASSSQLIPEESGAVGNRR</a> |

MATRIX

SCIENCE

Mascot Search Results

Peptide View

MS/MS Fragmentation of **HQTVPQNTGGK**  
Found in **TRFE\_HUMAN**, Serotransferrin OS=Homo sapiens GN=TF PE=1 SV=3

Match to Query 30419: 1476.749502 from(493.257110,3+) rtinseconds(1179) index(832)  
Title: Locus:1.1.1.1687.7 File:"2013-07-02 CLN FXIII 180 min 2nd F 1.wiff"  
Data file C:\Program Files (x86)\Matrix Science\Mascot Daemon\mgf\8 FXIII 180 min 2nd\mascot\_daemon\_merge.mgf

Click mouse within plot area to zoom in by factor of two about that point  
Or, 

Plot from

100

 to 

1400

 Da 

Full range

  
Label all possible matches ☐ Label matches used for scoring ☒

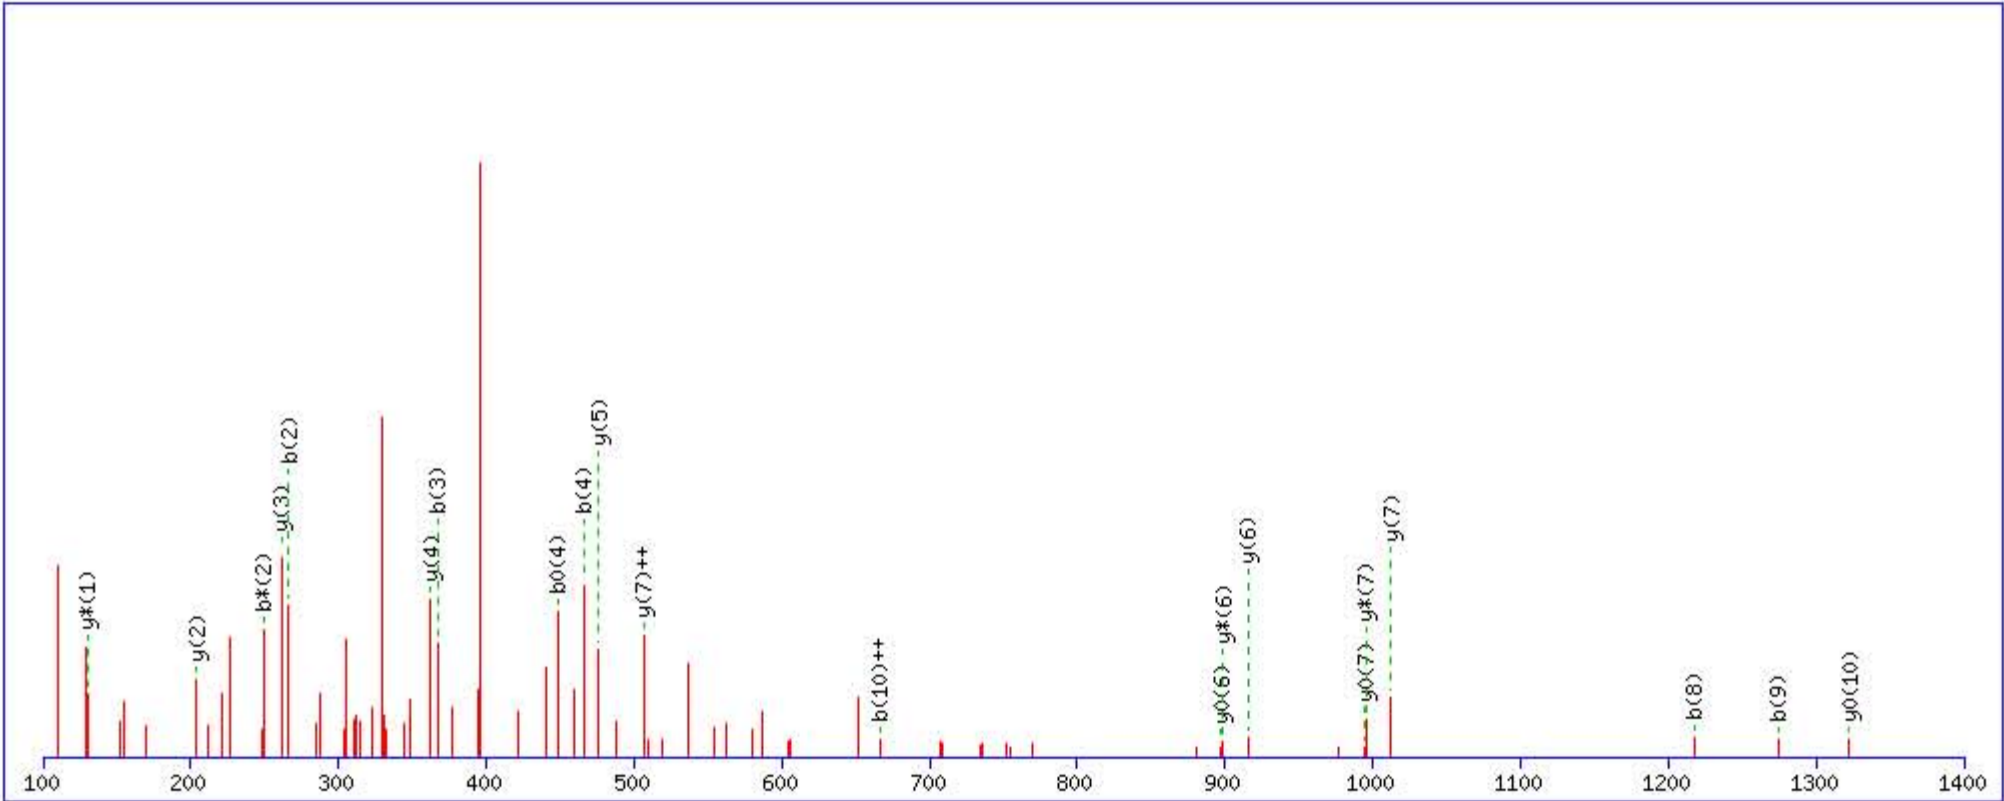

Monoisotopic mass of neutral peptide Mr(calc): 1476.750748  
Fixed modifications: Carbamidomethyl (C) (apply to specified residues or termini only)  
Variable modifications:  
Q6 : Biotin:Thermo-21345 (Q)  
Ions Score: 28 Expect: 0.017  
Matches : 21/108 fragment ions using 39 most intense peaks [\(help\)](#)

| #  | b           | b <sup>++</sup> | b <sup>*</sup> | b <sup>+++</sup> | b <sup>0</sup> | b <sup>0++</sup> | Seq. | y           | y <sup>++</sup> | y <sup>*</sup> | y <sup>+++</sup> | y <sup>0</sup> | y <sup>0++</sup> | #  |
|----|-------------|-----------------|----------------|------------------|----------------|------------------|------|-------------|-----------------|----------------|------------------|----------------|------------------|----|
| 1  | 138.066188  | 69.536732       |                |                  |                |                  | H    |             |                 |                |                  |                |                  | 11 |
| 2  | 266.124766  | 133.566021      | 249.098217     | 125.052746       |                |                  | Q    | 1340.699099 | 670.853187      | 1323.672550    | 662.339913       | 1322.688534    | 661.847905       | 10 |
| 3  | 367.172445  | 184.089860      | 350.145896     | 175.576586       | 349.161880     | 175.084578       | T    | 1212.640521 | 606.823899      | 1195.613972    | 598.310624       | 1194.629956    | 597.818616       | 9  |
| 4  | 466.240859  | 233.624068      | 449.214310     | 225.110793       | 448.230294     | 224.618785       | V    | 1111.592842 | 556.300059      | 1094.566293    | 547.786784       | 1093.582277    | 547.294776       | 8  |
| 5  | 563.293623  | 282.150450      | 546.267074     | 273.637175       | 545.283058     | 273.145167       | P    | 1012.524428 | 506.765852      | 995.497879     | 498.252577       | 994.513863     | 497.760569       | 7  |
| 6  | 1002.518949 | 501.763113      | 985.492400     | 493.249838       | 984.508384     | 492.757830       | Q    | 915.471664  | 458.239470      | 898.445115     | 449.726195       | 897.461099     | 449.234187       | 6  |
| 7  | 1116.561876 | 558.784576      | 1099.535327    | 550.271302       | 1098.551311    | 549.779293       | N    | 476.246338  | 238.626807      | 459.219789     | 230.113532       | 458.235773     | 229.621524       | 5  |
| 8  | 1217.609555 | 609.308416      | 1200.583006    | 600.795141       | 1199.598990    | 600.303133       | T    | 362.203411  | 181.605343      | 345.176862     | 173.092069       | 344.192846     | 172.600061       | 4  |
| 9  | 1274.631019 | 637.819147      | 1257.604470    | 629.305873       | 1256.620454    | 628.813865       | G    | 261.155732  | 131.081504      | 244.129183     | 122.568229       |                |                  | 3  |
| 10 | 1331.652483 | 666.329879      | 1314.625934    | 657.816605       | 1313.641918    | 657.324597       | G    | 204.134268  | 102.570772      | 187.107719     | 94.057497        |                |                  | 2  |
| 11 |             |                 |                |                  |                |                  | K    | 147.112804  | 74.060040       | 130.086255     | 65.546765        |                |                  | 1  |

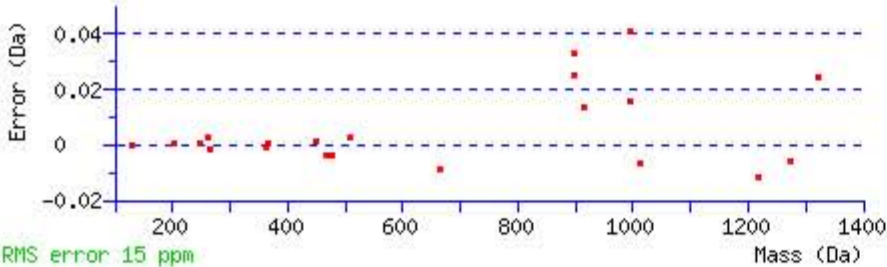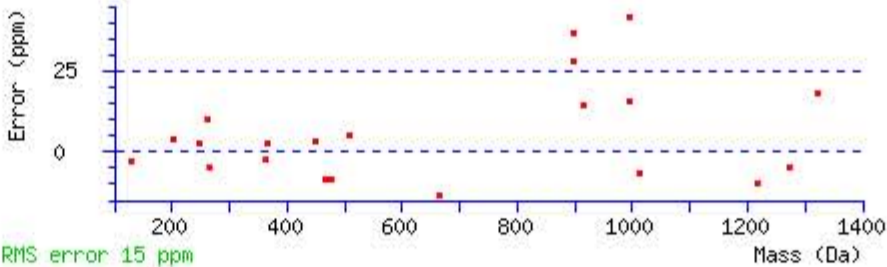

NCBI BLAST search of [HQTVPQNTGGK](#)  
(Parameters: blastp, nr protein database, expect=20000, no filter, PAM30)  
Other BLAST [web gateways](#)

All matches to this query

| Score | Mr(calc):   | Delta     | Sequence                     |
|-------|-------------|-----------|------------------------------|
| 28.4  | 1476.750748 | -0.001246 | <a href="#">HQTVPQNTGGK</a>  |
| 9.6   | 1476.736115 | 0.013387  | <a href="#">HQEALIGQSFGK</a> |
| 2.1   | 1476.750748 | -0.001246 | <a href="#">HQTVPQNTGGK</a>  |

MATRIX

SCIENCE

Mascot Search Results

Peptide View

MS/MS Fragmentation of **KDSGFQMNQLR**  
Found in **TRFE\_HUMAN**, Serotransferrin OS=Homo sapiens GN=TF PE=1 SV=3

Match to Query 36470: 1633.814148 from(817.914350,2+) rtinseconds(1810) index(65218)  
Title: Locus:1.1.1.1905.15 File:"2013-07-02 CLN FXIII 180 min 2nd FT.wiff"  
Data file C:\Program Files (x86)\Matrix Science\Mascot Daemon\mgf\8 FXIII 180 min 2nd\mascot\_daemon\_merge.mgf

Click mouse within plot area to zoom in by factor of two about that point  
Or, 

Plot from

100

 to 

1700

 Da 

Full range

  
Label all possible matches ☐ Label matches used for scoring ☒

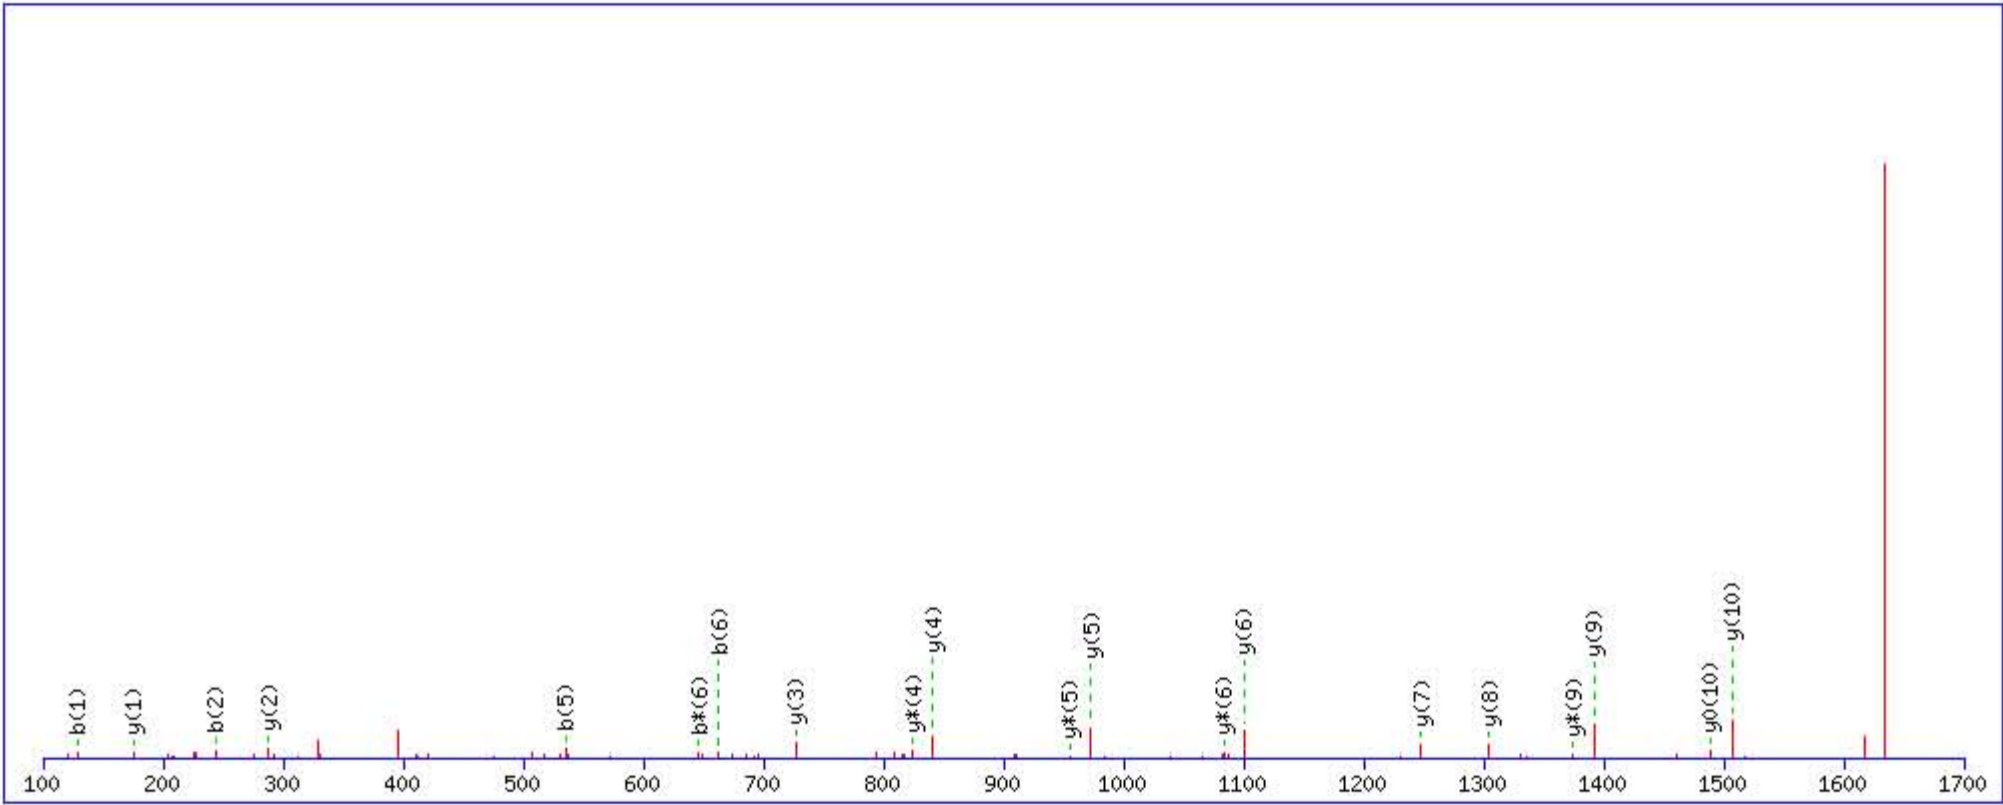

Monoisotopic mass of neutral peptide Mr(calc): 1633.806854  
Fixed modifications: Carbamidomethyl (C) (apply to specified residues or termini only)  
Variable modifications:  
Q9 : Biotin:Thermo-21345 (Q)  
Ions Score: 90 Expect: 2.2e-008  
Matches : 20/102 fragment ions using 27 most intense peaks [\(help\)](#)

| #  | b           | b <sup>++</sup> | b <sup>*</sup> | b <sup>+++</sup> | b <sup>0</sup> | b <sup>0++</sup> | Seq. | y           | y <sup>++</sup> | y <sup>*</sup> | y <sup>+++</sup> | y <sup>0</sup> | y <sup>0++</sup> | #  |
|----|-------------|-----------------|----------------|------------------|----------------|------------------|------|-------------|-----------------|----------------|------------------|----------------|------------------|----|
| 1  | 129.102239  | 65.054757       | 112.075690     | 56.541483        |                |                  | K    |             |                 |                |                  |                |                  | 11 |
| 2  | 244.129182  | 122.568229      | 227.102633     | 114.054955       | 226.118617     | 113.562947       | D    | 1506.719181 | 753.863228      | 1489.692632    | 745.349954       | 1488.708616    | 744.857946       | 10 |
| 3  | 331.161210  | 166.084243      | 314.134661     | 157.570969       | 313.150645     | 157.078961       | S    | 1391.692238 | 696.349757      | 1374.665689    | 687.836482       | 1373.681673    | 687.344474       | 9  |
| 4  | 388.182674  | 194.594975      | 371.156125     | 186.081701       | 370.172109     | 185.589693       | G    | 1304.660210 | 652.833743      | 1287.633661    | 644.320468       |                |                  | 8  |
| 5  | 535.251088  | 268.129182      | 518.224539     | 259.615908       | 517.240523     | 259.123900       | F    | 1247.638746 | 624.323011      | 1230.612197    | 615.809736       |                |                  | 7  |
| 6  | 663.309666  | 332.158471      | 646.283117     | 323.645197       | 645.299101     | 323.153189       | Q    | 1100.570332 | 550.788804      | 1083.543783    | 542.275530       |                |                  | 6  |
| 7  | 794.350151  | 397.678714      | 777.323602     | 389.165439       | 776.339586     | 388.673431       | M    | 972.511754  | 486.759515      | 955.485205     | 478.246240       |                |                  | 5  |
| 8  | 908.393078  | 454.700177      | 891.366529     | 446.186903       | 890.382513     | 445.694895       | N    | 841.471269  | 421.239272      | 824.444720     | 412.725998       |                |                  | 4  |
| 9  | 1347.618404 | 674.312840      | 1330.591855    | 665.799566       | 1329.607839    | 665.307558       | Q    | 727.428342  | 364.217809      | 710.401793     | 355.704534       |                |                  | 3  |
| 10 | 1460.702468 | 730.854872      | 1443.675919    | 722.341598       | 1442.691903    | 721.849589       | L    | 288.203016  | 144.605146      | 271.176467     | 136.091871       |                |                  | 2  |
| 11 |             |                 |                |                  |                |                  | R    | 175.118952  | 88.063114       | 158.092403     | 79.549839        |                |                  | 1  |

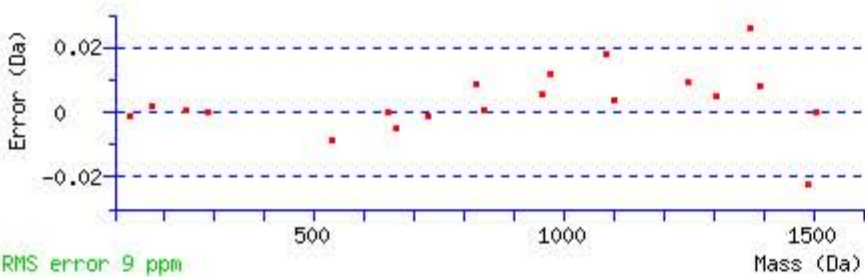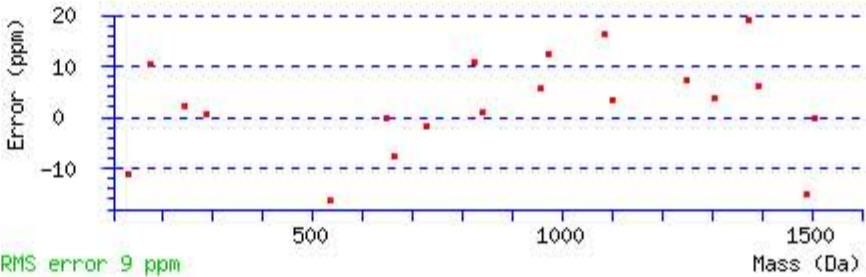

NCBI BLAST search of [KDSGFQMNQLR](#)  
(Parameters: blastp, nr protein database, expect=20000, no filter, PAM30)  
Other BLAST [web gateways](#)

All matches to this query

| Score | Mr(calc):   | Delta     | Sequence                          |
|-------|-------------|-----------|-----------------------------------|
| 90.1  | 1633.806854 | 0.007294  | <a href="#">KDSGFQMNQLR</a>       |
| 39.1  | 1633.806854 | 0.007294  | <a href="#">KDSGFQMNQLR</a>       |
| 15.1  | 1633.799454 | 0.014694  | <a href="#">DANSFKSRDQR</a>       |
| 13.2  | 1633.834518 | -0.020370 | <a href="#">KADIGVAMGIAGSDVSK</a> |
| 12.3  | 1633.798096 | 0.016052  | <a href="#">QDQEKDNMIEKLK</a>     |
| 10.7  | 1633.795609 | 0.018539  | <a href="#">KFMEDEQQLR</a>        |
| 9.9   | 1633.832016 | -0.017868 | <a href="#">MSIFTPTNQIR</a>       |
| 7.9   | 1633.809998 | 0.004150  | <a href="#">KQYDSFTYRAEVK</a>     |
| 7.2   | 1633.822128 | -0.007980 | <a href="#">QFMKGQVSWGR</a>       |
| 7.1   | 1633.817184 | -0.003036 | <a href="#">HLHEGAKSASAEELR</a>   |

MATRIX

SCIENCE

Mascot Search Results

Peptide View

MS/MS Fragmentation of **KDSGFQMNQLR**  
Found in **TRFE\_HUMAN**, Serotransferrin OS=Homo sapiens GN=TF PE=1 SV=3

Match to Query 36471: 1633.814788 from(817.914670,2+) rtinseconds(1747) index(64864)  
Title: Locus:1.1.1.1883.14 File:"2013-07-02 CLN FXIII 180 min 2nd FT.wiff"  
Data file C:\Program Files (x86)\Matrix Science\Mascot Daemon\mgf\8 FXIII 180 min 2nd\mascot\_daemon\_merge.mgf

Click mouse within plot area to zoom in by factor of two about that point  
Or, 

Plot from

0

 to 

3000

 Da 

Full range

  
Label all possible matches ☐ Label matches used for scoring ☒

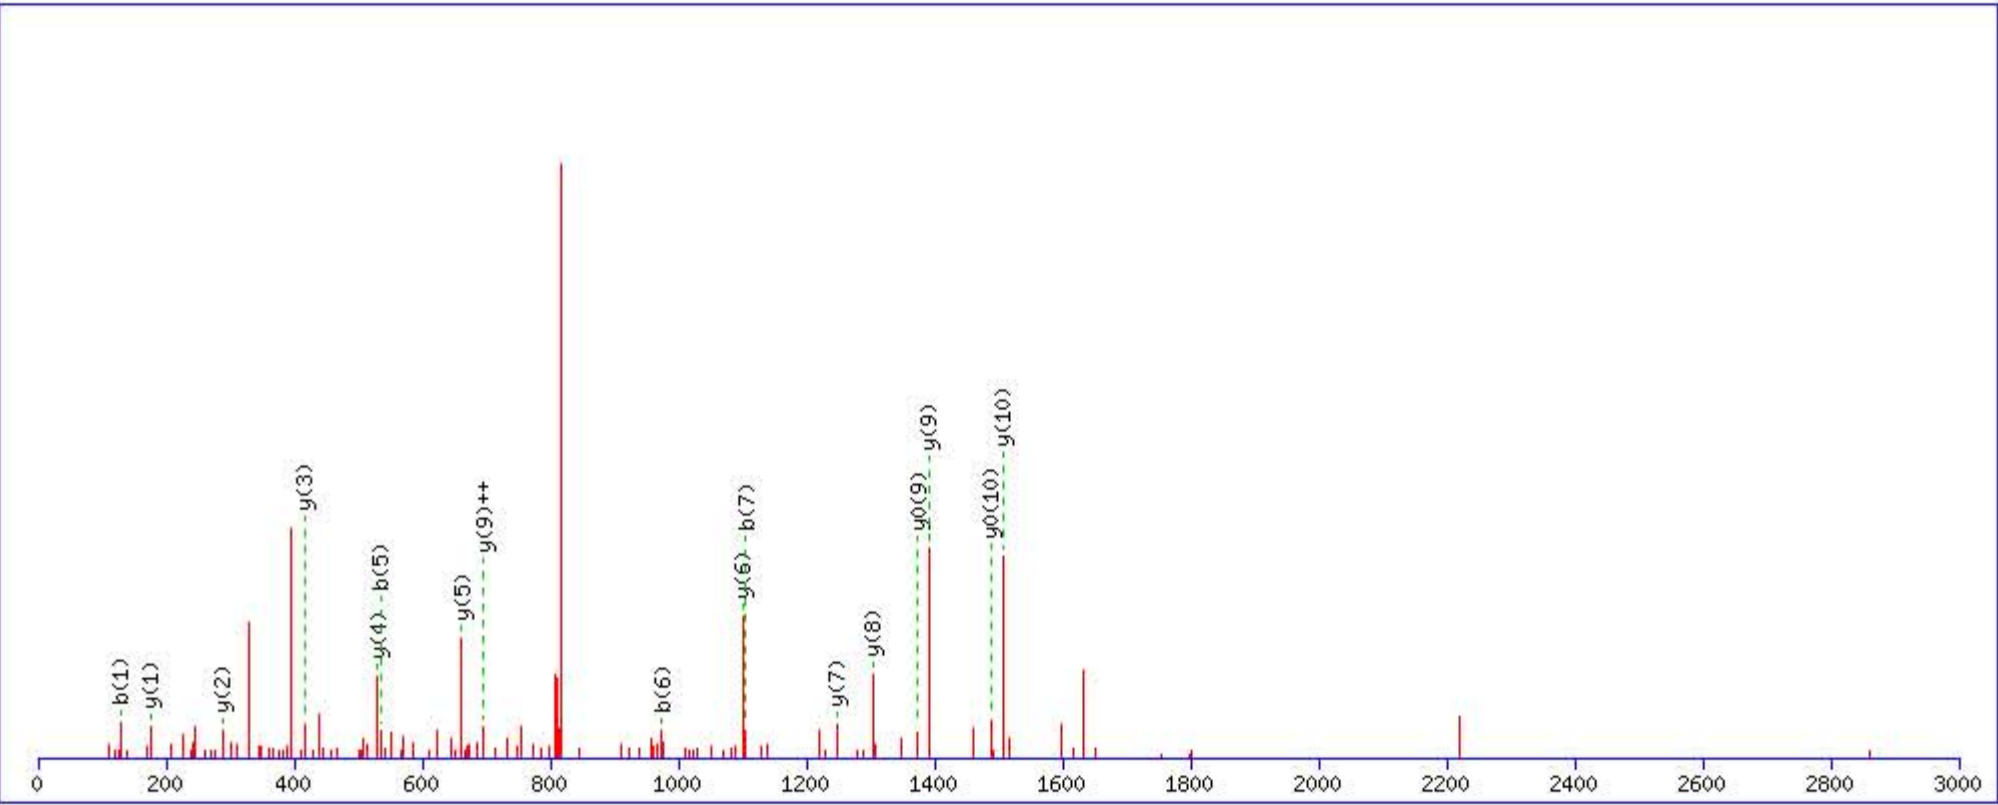

Monoisotopic mass of neutral peptide Mr(calc): 1633.806854  
Fixed modifications: Carbamidomethyl (C) (apply to specified residues or termini only)  
Variable modifications:  
Q6 : Biotin:Thermo-21345 (Q)  
Ions Score: 71 Expect: 6.6e-007  
Matches : 17/102 fragment ions using 31 most intense peaks ([help](#))

| #  | b           | b <sup>++</sup> | b <sup>*</sup> | b <sup>++</sup> * | b <sup>0</sup> | b <sup>0++</sup> | Seq. | y           | y <sup>++</sup> | y <sup>*</sup> | y <sup>++</sup> * | y <sup>0</sup> | y <sup>0++</sup> | #  |
|----|-------------|-----------------|----------------|-------------------|----------------|------------------|------|-------------|-----------------|----------------|-------------------|----------------|------------------|----|
| 1  | 129.102239  | 65.054757       | 112.075690     | 56.541483         |                |                  | K    |             |                 |                |                   |                |                  | 11 |
| 2  | 244.129182  | 122.568229      | 227.102633     | 114.054955        | 226.118617     | 113.562947       | D    | 1506.719181 | 753.863228      | 1489.692632    | 745.349954        | 1488.708616    | 744.857946       | 10 |
| 3  | 331.161210  | 166.084243      | 314.134661     | 157.570969        | 313.150645     | 157.078961       | S    | 1391.692238 | 696.349757      | 1374.665689    | 687.836482        | 1373.681673    | 687.344474       | 9  |
| 4  | 388.182674  | 194.594975      | 371.156125     | 186.081701        | 370.172109     | 185.589693       | G    | 1304.660210 | 652.833743      | 1287.633661    | 644.320468        |                |                  | 8  |
| 5  | 535.251088  | 268.129182      | 518.224539     | 259.615908        | 517.240523     | 259.123900       | F    | 1247.638746 | 624.323011      | 1230.612197    | 615.809736        |                |                  | 7  |
| 6  | 974.476414  | 487.741845      | 957.449865     | 479.228571        | 956.465849     | 478.736563       | Q    | 1100.570332 | 550.788804      | 1083.543783    | 542.275530        |                |                  | 6  |
| 7  | 1105.516899 | 553.262088      | 1088.490350    | 544.748813        | 1087.506334    | 544.256805       | M    | 661.345006  | 331.176141      | 644.318457     | 322.662866        |                |                  | 5  |
| 8  | 1219.559826 | 610.283551      | 1202.533277    | 601.770277        | 1201.549261    | 601.278268       | N    | 530.304521  | 265.655899      | 513.277972     | 257.142624        |                |                  | 4  |
| 9  | 1347.618404 | 674.312840      | 1330.591855    | 665.799566        | 1329.607839    | 665.307558       | Q    | 416.261594  | 208.634435      | 399.235045     | 200.121160        |                |                  | 3  |
| 10 | 1460.702468 | 730.854872      | 1443.675919    | 722.341598        | 1442.691903    | 721.849589       | L    | 288.203016  | 144.605146      | 271.176467     | 136.091871        |                |                  | 2  |
| 11 |             |                 |                |                   |                |                  | R    | 175.118952  | 88.063114       | 158.092403     | 79.549839         |                |                  | 1  |

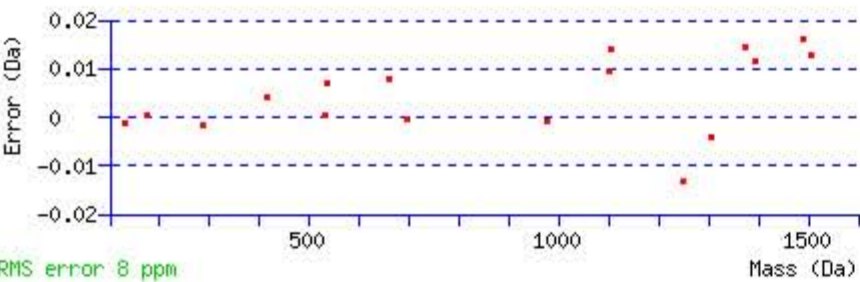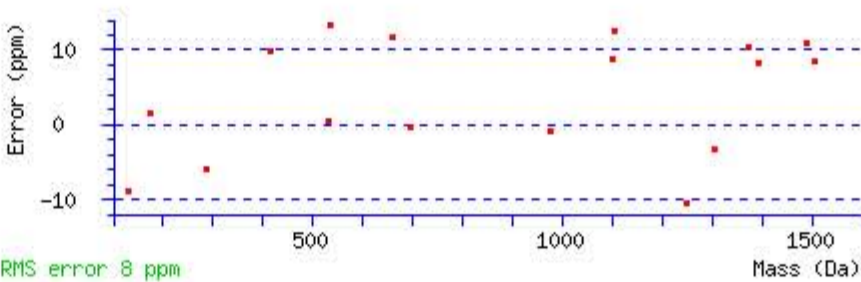

NCBI BLAST search of [KDSGFQMNQLR](#)  
(Parameters: blastp, nr protein database, expect=20000, no filter, PAM30)  
Other BLAST [web gateways](#)

All matches to this query

| Score | Mr(calc):   | Delta     | Sequence                         |
|-------|-------------|-----------|----------------------------------|
| 71.0  | 1633.806854 | 0.007934  | <a href="#">KDSGFQMNQLR</a>      |
| 30.9  | 1633.806854 | 0.007934  | <a href="#">KDSGFQMNQLR</a>      |
| 4.8   | 1633.798096 | 0.016692  | <a href="#">QDQEKDNMIEKLK</a>    |
| 4.3   | 1633.824615 | -0.009827 | <a href="#">AGGAFLMAGQVAEQLR</a> |
| 3.1   | 1633.835129 | -0.020341 | <a href="#">YSLSPSKSYKYSPK</a>   |
| 2.9   | 1633.803482 | 0.011306  | <a href="#">QLFERDWSSR</a>       |
| 2.7   | 1633.795609 | 0.019179  | <a href="#">KFMEDEQQLR</a>       |
| 2.3   | 1633.809998 | 0.004790  | <a href="#">KQYDSFTYRAEVK</a>    |
| 2.2   | 1633.832443 | -0.017655 | <a href="#">NRYINILAYDHSR</a>    |
| 1.5   | 1633.805954 | 0.008834  | <a href="#">LFREENDINESIR</a>    |

MATRIX

SCIENCE

Mascot Search Results

Peptide View

MS/MS Fragmentation of **HQTVPQNTGGK**  
Found in **TRFE\_HUMAN**, Serotransferrin OS=Homo sapiens GN=TF PE=1 SV=3

Match to Query 39985: 1787.916462 from(596.979430,3+) rtinseconds(1568) index(63938)  
Title: Locus:1.1.1.1821.10 File:"2013-07-02 CLN FXIII 180 min 2nd FT.wiff"  
Data file C:\Program Files (x86)\Matrix Science\Mascot Daemon\mgf\8 FXIII 180 min 2nd\mascot\_daemon\_merge.mgf

Click mouse within plot area to zoom in by factor of two about that point  
Or, 

Plot from

100

 to 

1800

 Da 

Full range

  
Label all possible matches ☐ Label matches used for scoring ☒

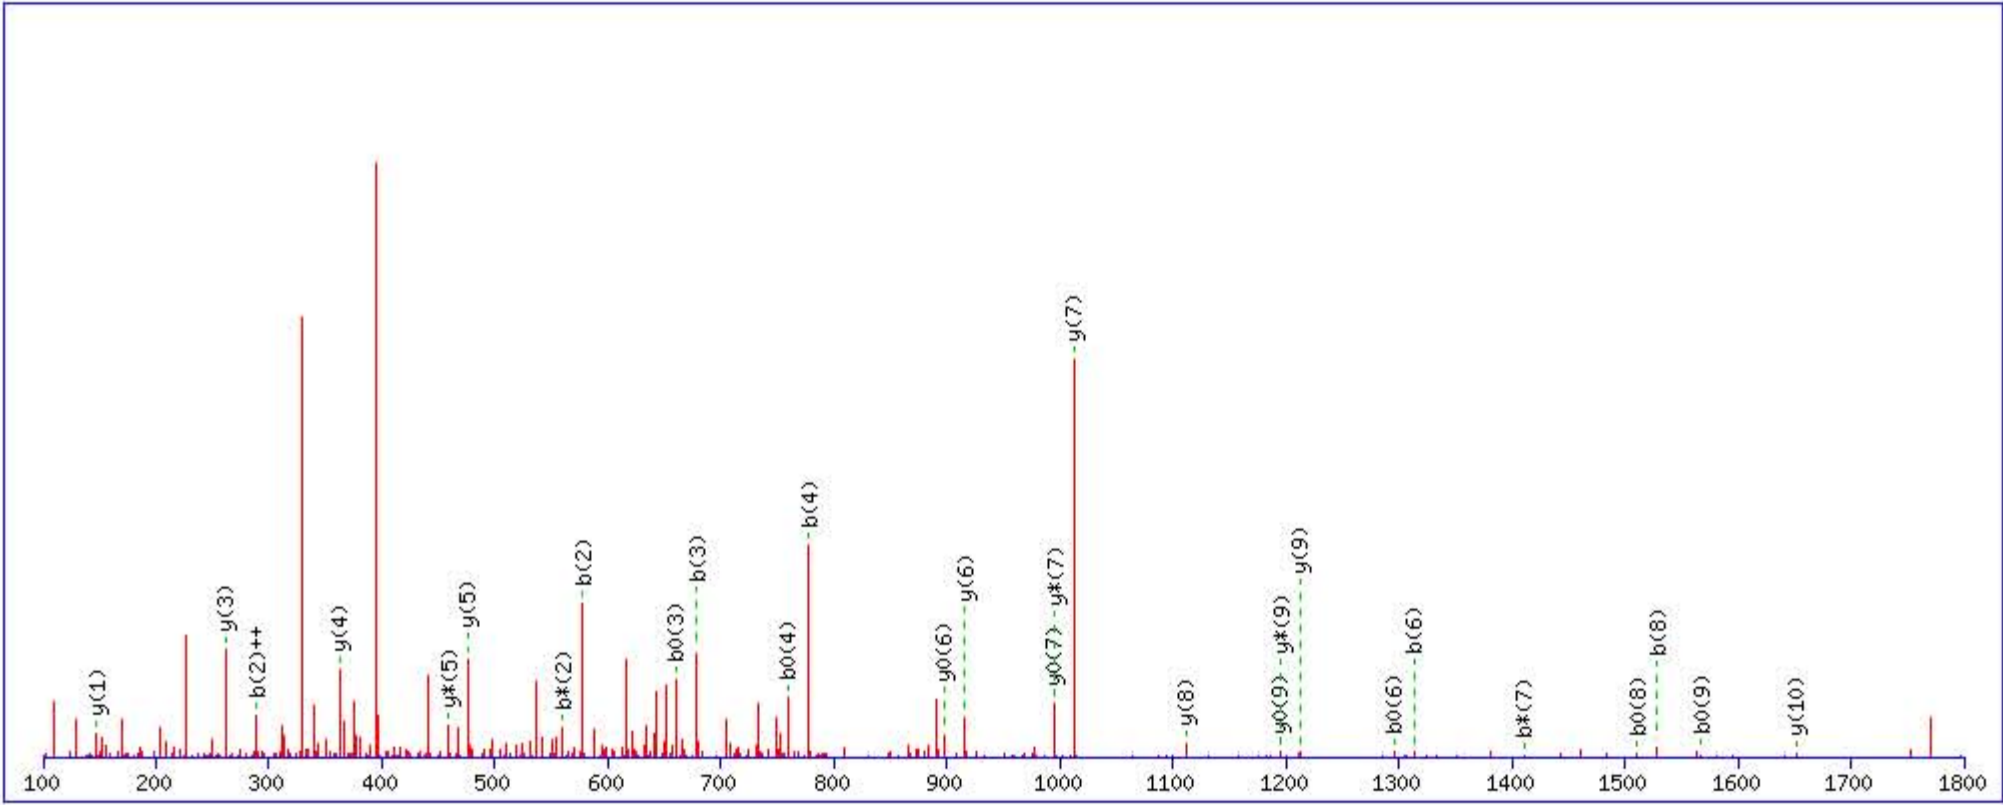

Monoisotopic mass of neutral peptide Mr(calc): 1787.917496  
Fixed modifications: Carbamidomethyl (C) (apply to specified residues or termini only)  
Variable modifications:  
Q2 : Biotin:Thermo-21345 (Q)  
Q6 : Biotin:Thermo-21345 (Q)  
Ions Score: 37 Expect: 0.00049  
Matches : 28/108 fragment ions using 64 most intense peaks [\(help\)](#)

| #  | b           | b <sup>++</sup> | b <sup>*</sup> | b <sup>*++</sup> | b <sup>0</sup> | b <sup>0++</sup> | Seq. | y           | y <sup>++</sup> | y <sup>*</sup> | y <sup>*++</sup> | y <sup>0</sup> | y <sup>0++</sup> | #  |
|----|-------------|-----------------|----------------|------------------|----------------|------------------|------|-------------|-----------------|----------------|------------------|----------------|------------------|----|
| 1  | 138.066188  | 69.536732       |                |                  |                |                  | H    |             |                 |                |                  |                |                  | 11 |
| 2  | 577.291514  | 289.149395      | 560.264965     | 280.636121       |                |                  | Q    | 1651.865847 | 826.436562      | 1634.839298    | 817.923287       | 1633.855282    | 817.431279       | 10 |
| 3  | 678.339193  | 339.673235      | 661.312644     | 331.159960       | 660.328628     | 330.667952       | T    | 1212.640521 | 606.823899      | 1195.613972    | 598.310624       | 1194.629956    | 597.818616       | 9  |
| 4  | 777.407607  | 389.207442      | 760.381058     | 380.694167       | 759.397042     | 380.202159       | V    | 1111.592842 | 556.300059      | 1094.566293    | 547.786785       | 1093.582277    | 547.294777       | 8  |
| 5  | 874.460371  | 437.733824      | 857.433822     | 429.220549       | 856.449806     | 428.728541       | P    | 1012.524428 | 506.765852      | 995.497879     | 498.252578       | 994.513863     | 497.760570       | 7  |
| 6  | 1313.685697 | 657.346487      | 1296.659148    | 648.833212       | 1295.675132    | 648.341204       | Q    | 915.471664  | 458.239470      | 898.445115     | 449.726196       | 897.461099     | 449.234188       | 6  |
| 7  | 1427.728624 | 714.367950      | 1410.702075    | 705.854676       | 1409.718059    | 705.362668       | N    | 476.246338  | 238.626807      | 459.219789     | 230.113532       | 458.235773     | 229.621524       | 5  |
| 8  | 1528.776303 | 764.891790      | 1511.749754    | 756.378515       | 1510.765738    | 755.886507       | T    | 362.203411  | 181.605343      | 345.176862     | 173.092069       | 344.192846     | 172.600061       | 4  |
| 9  | 1585.797767 | 793.402522      | 1568.771218    | 784.889247       | 1567.787202    | 784.397239       | G    | 261.155732  | 131.081504      | 244.129183     | 122.568229       |                |                  | 3  |
| 10 | 1642.819231 | 821.913254      | 1625.792682    | 813.399979       | 1624.808666    | 812.907971       | G    | 204.134268  | 102.570772      | 187.107719     | 94.057497        |                |                  | 2  |
| 11 |             |                 |                |                  |                |                  | K    | 147.112804  | 74.060040       | 130.086255     | 65.546765        |                |                  | 1  |

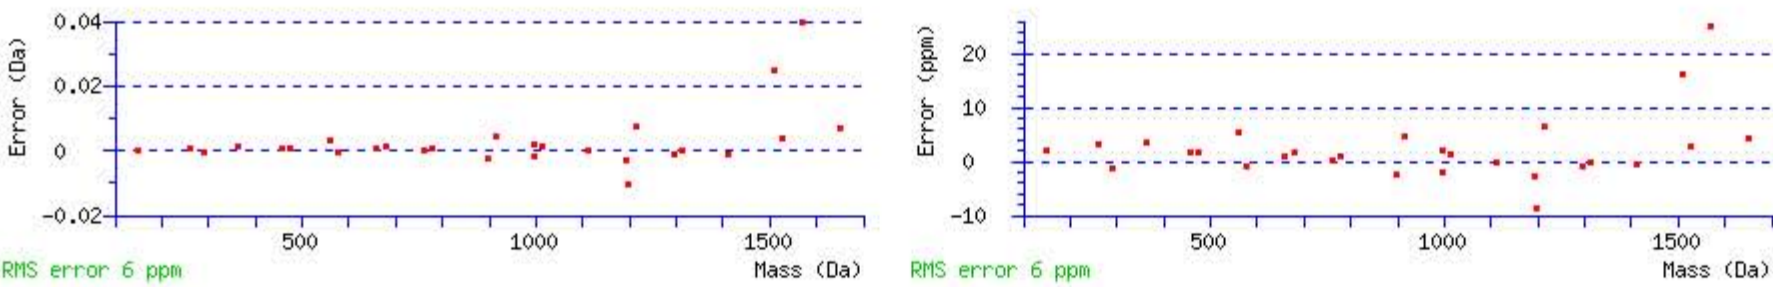

NCBI BLAST search of [HQTVPQNTGGK](#)  
(Parameters: blastp, nr protein database, expect=20000, no filter, PAM30)  
Other BLAST [web gateways](#)

All matches to this query

| Score | Mr(calc):   | Delta     | Sequence                        |
|-------|-------------|-----------|---------------------------------|
| 36.9  | 1787.917496 | -0.001034 | <a href="#">HQTVPQNTGGK</a>     |
| 1.6   | 1787.943115 | -0.026653 | <a href="#">TPVNDGKYHVVRFTR</a> |

MATRIX

SCIENCE

Mascot Search Results

Peptide View

MS/MS Fragmentation of **SKEFQLFSSPHGK**  
Found in **TRFE\_HUMAN**, Serotransferrin OS=Homo sapiens GN=TF PE=1 SV=3

Match to Query 40284: 1801.919128 from(901.966840,2+) rtinseconds(1779) index(65072)  
Title: Locus:1.1.1.1894.14 File:"2013-07-02 CLN FXIII 180 min 2nd FT.wiff"  
Data file C:\Program Files (x86)\Matrix Science\Mascot Daemon\mgf\8 FXIII 180 min 2nd\mascot\_daemon\_merge.mgf

Click mouse within plot area to zoom in by factor of two about that point  
Or,   to  Da   
Label all possible matches ☐ Label matches used for scoring ☒

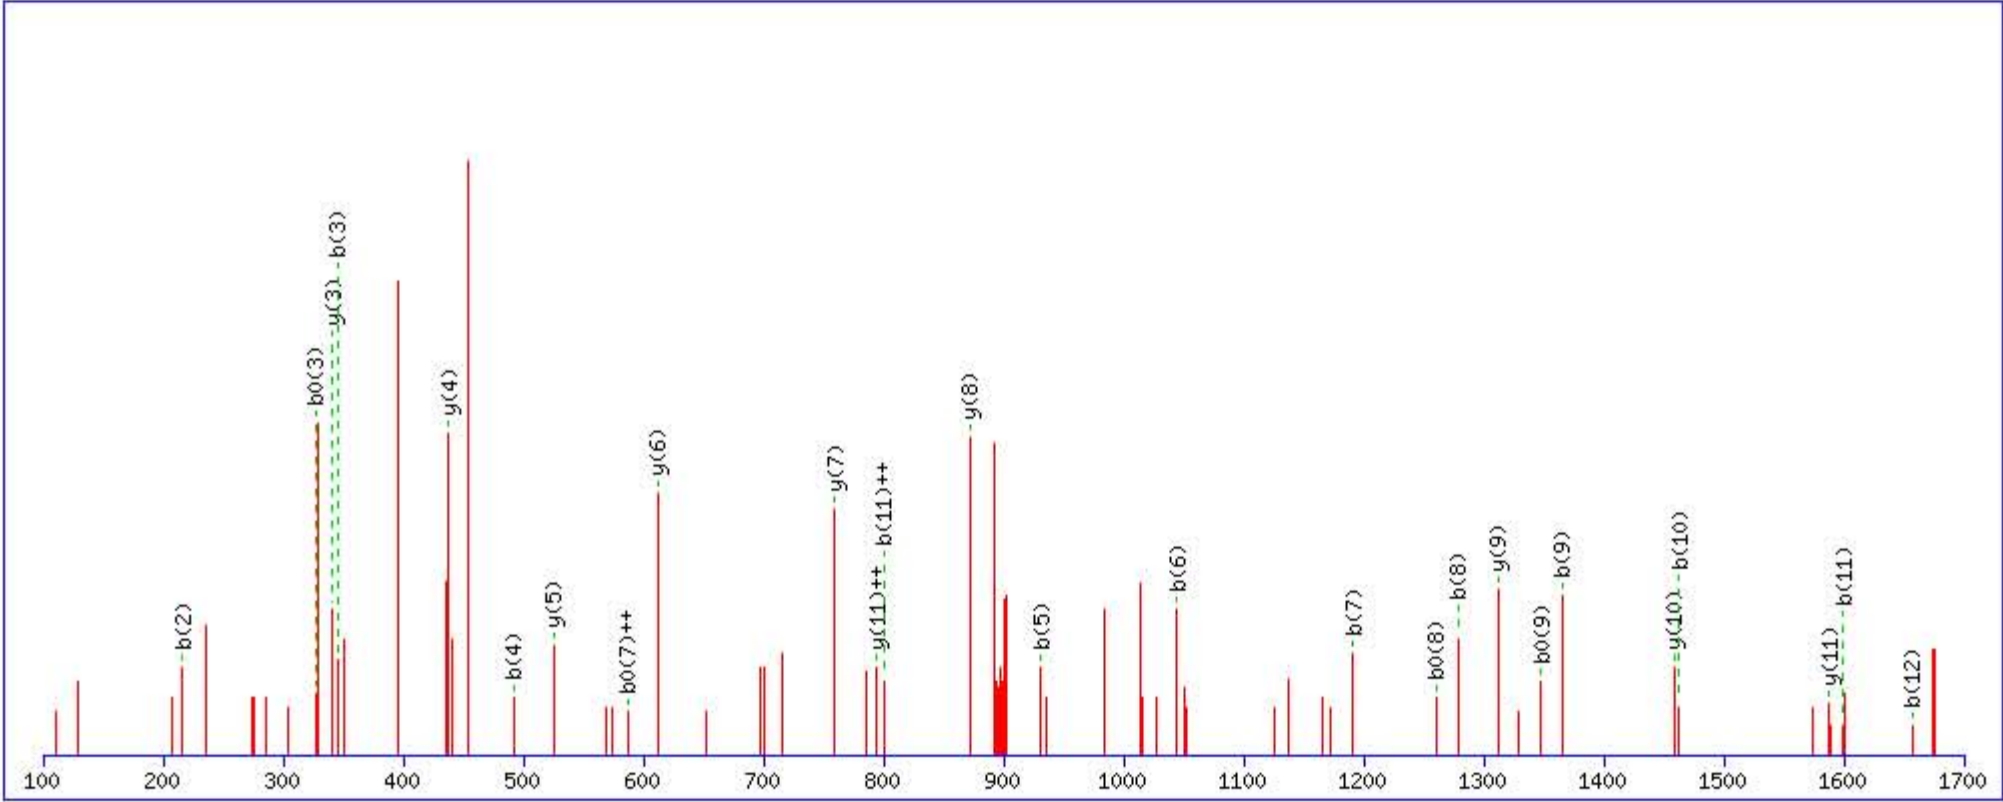

Monoisotopic mass of neutral peptide Mr(calc): 1801.918518  
Fixed modifications: Carbamidomethyl (C) (apply to specified residues or termini only)  
Variable modifications:  
Q5 : Biotin:Thermo-21345 (Q)  
Ions Score: 44 Expect: 0.00028  
Matches : 26/134 fragment ions using 71 most intense peaks [\(help\)](#)

| #  | b           | b <sup>++</sup> | b <sup>*</sup> | b <sup>++</sup> * | b <sup>0</sup> | b <sup>0++</sup> | Seq. | y           | y <sup>++</sup> | y <sup>*</sup> | y <sup>++</sup> * | y <sup>0</sup> | y <sup>0++</sup> | #  |
|----|-------------|-----------------|----------------|-------------------|----------------|------------------|------|-------------|-----------------|----------------|-------------------|----------------|------------------|----|
| 1  | 88.039304   | 44.523290       |                |                   | 70.028739      | 35.518008        | S    |             |                 |                |                   |                |                  | 13 |
| 2  | 216.134267  | 108.570771      | 199.107718     | 100.057497        | 198.123702     | 99.565489        | K    | 1715.893774 | 858.450525      | 1698.867225    | 849.937251        | 1697.883209    | 849.445243       | 12 |
| 3  | 345.176860  | 173.092068      | 328.150311     | 164.578793        | 327.166295     | 164.086785       | E    | 1587.798811 | 794.403044      | 1570.772262    | 785.889769        | 1569.788246    | 785.397761       | 11 |
| 4  | 492.245274  | 246.626275      | 475.218725     | 238.113000        | 474.234709     | 237.620992       | F    | 1458.756218 | 729.881747      | 1441.729669    | 721.368473        | 1440.745653    | 720.876465       | 10 |
| 5  | 931.470600  | 466.238938      | 914.444051     | 457.725664        | 913.460035     | 457.233656       | Q    | 1311.687804 | 656.347540      | 1294.661255    | 647.834266        | 1293.677239    | 647.342258       | 9  |
| 6  | 1044.554664 | 522.780970      | 1027.528115    | 514.267696        | 1026.544099    | 513.775688       | L    | 872.462478  | 436.734877      | 855.435929     | 428.221603        | 854.451913     | 427.729595       | 8  |
| 7  | 1191.623078 | 596.315177      | 1174.596529    | 587.801903        | 1173.612513    | 587.309895       | F    | 759.378414  | 380.192845      | 742.351865     | 371.679571        | 741.367849     | 371.187563       | 7  |
| 8  | 1278.655106 | 639.831191      | 1261.628557    | 631.317917        | 1260.644541    | 630.825909       | S    | 612.310000  | 306.658638      | 595.283451     | 298.145364        | 594.299435     | 297.653356       | 6  |
| 9  | 1365.687134 | 683.347205      | 1348.660585    | 674.833931        | 1347.676569    | 674.341923       | S    | 525.277972  | 263.142624      | 508.251423     | 254.629350        | 507.267407     | 254.137342       | 5  |
| 10 | 1462.739898 | 731.873587      | 1445.713349    | 723.360313        | 1444.729333    | 722.868305       | P    | 438.245944  | 219.626610      | 421.219395     | 211.113335        |                |                  | 4  |
| 11 | 1599.798810 | 800.403043      | 1582.772261    | 791.889769        | 1581.788245    | 791.397761       | H    | 341.193180  | 171.100228      | 324.166631     | 162.586953        |                |                  | 3  |
| 12 | 1656.820274 | 828.913775      | 1639.793725    | 820.400501        | 1638.809709    | 819.908493       | G    | 204.134268  | 102.570772      | 187.107719     | 94.057497         |                |                  | 2  |
| 13 |             |                 |                |                   |                |                  | K    | 147.112804  | 74.060040       | 130.086255     | 65.546765         |                |                  | 1  |

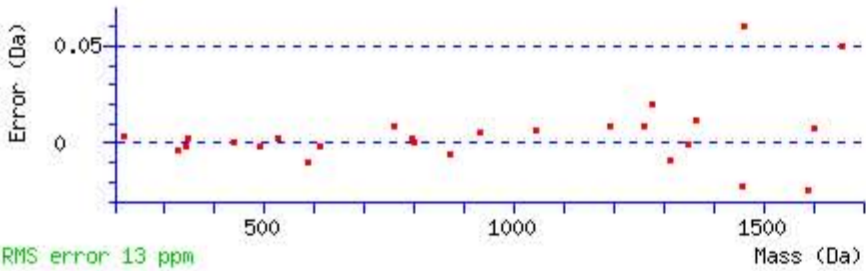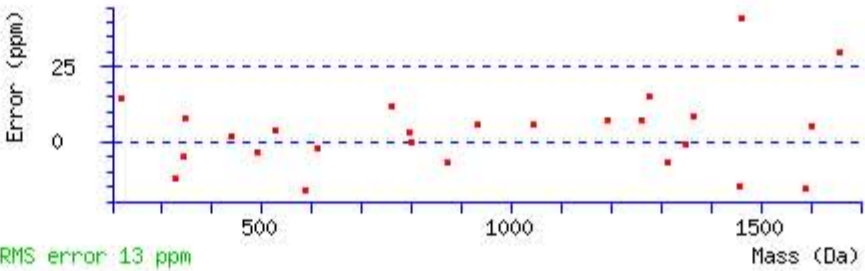

NCBI BLAST search of [SKEFQLFSSPHGK](#)  
(Parameters: blastp, nr protein database, expect=20000, no filter, PAM30)  
Other BLAST [web gateways](#)

All matches to this query

| Score | Mr(calc):   | Delta     | Sequence                         |
|-------|-------------|-----------|----------------------------------|
| 44.4  | 1801.918518 | 0.000610  | <a href="#">SKEFQLFSSPHGK</a>    |
| 6.5   | 1801.928421 | -0.009293 | <a href="#">KFMTLDPVSQDALPPK</a> |

MATRIX

SCIENCE

Mascot Search Results

Peptide View

MS/MS Fragmentation of **EDPQTFYYAVAVVK**  
Found in **TRFE\_HUMAN**, Serotransferrin OS=Homo sapiens GN=TF PE=1 SV=3

Match to Query 42933: 1940.003128 from(971.008840,2+) rtinseconds(2563) index(69598)  
Title: Locus:1.1.1.2168.15 File:"2013-07-02 CLN FXIII 180 min 2nd FT.wiff"  
Data file C:\Program Files (x86)\Matrix Science\Mascot Daemon\mgf\8 FXIII 180 min 2nd\mascot\_daemon\_merge.mgf

Click mouse within plot area to zoom in by factor of two about that point  
Or, 

Plot from

0

 to 

2600

 Da 

Full range

  
Label all possible matches ☐ Label matches used for scoring ☒

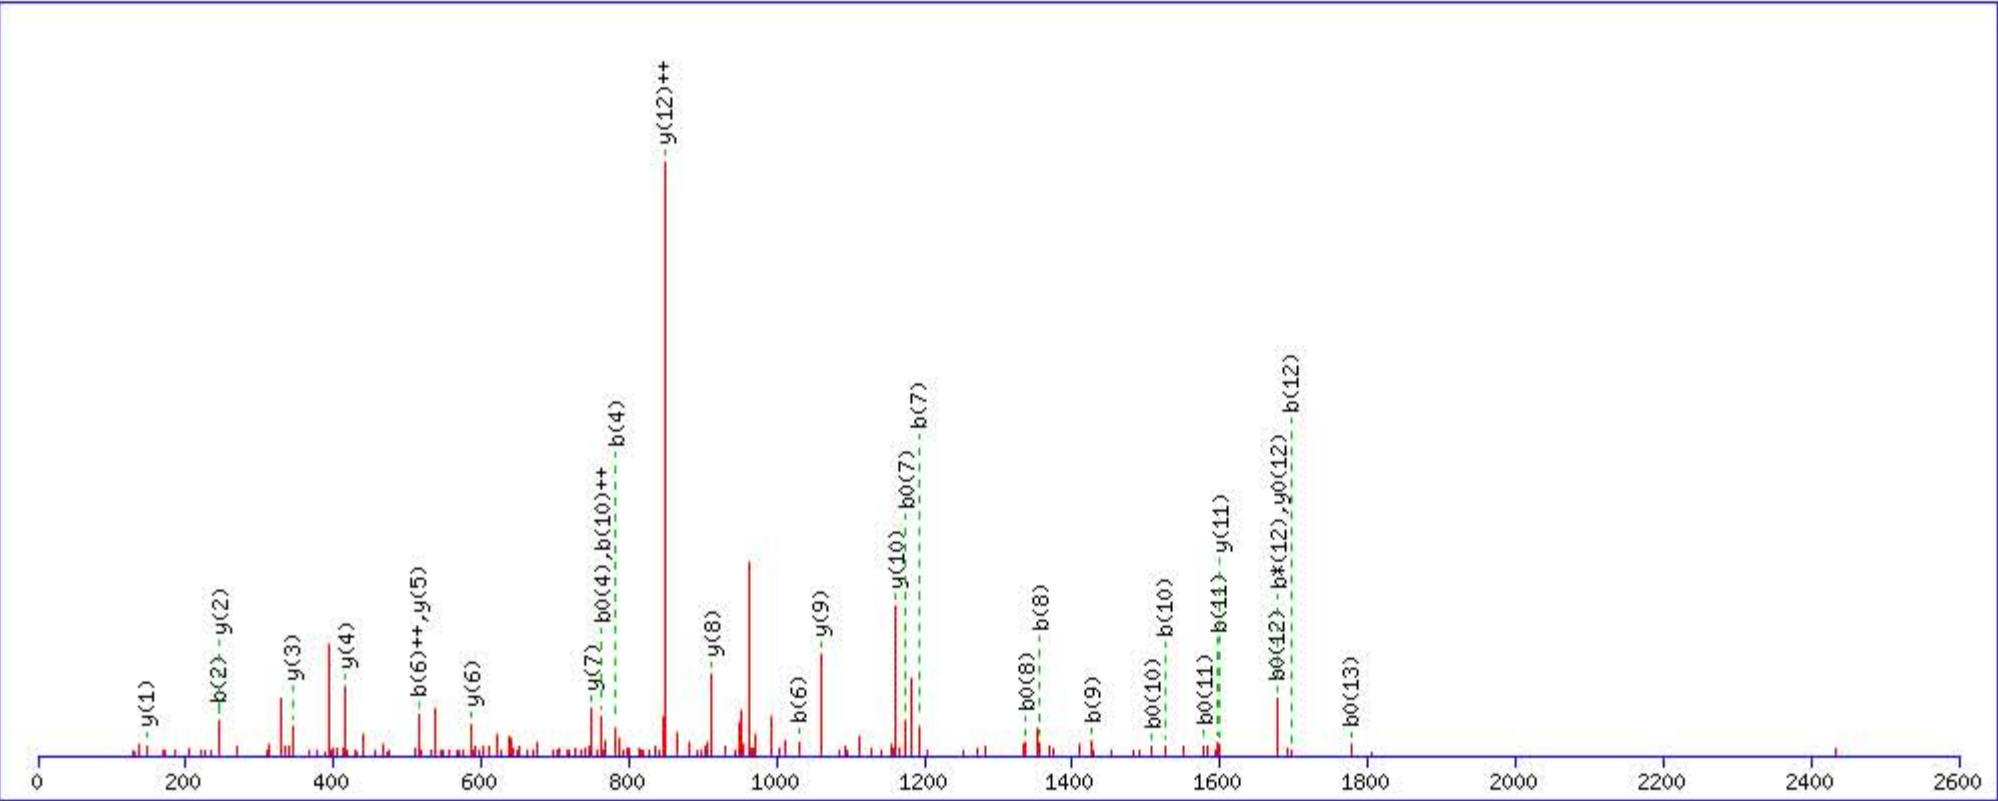

Monoisotopic mass of neutral peptide Mr(calc): 1939.975372  
Fixed modifications: Carbamidomethyl (C) (apply to specified residues or termini only)  
Variable modifications:  
Q4 : Biotin:Thermo-21345 (Q)  
Ions Score: 56 Expect: 1.2e-005  
Matches : 32/132 fragment ions using 65 most intense peaks [\(help\)](#)

| #  | b           | b <sup>++</sup> | b <sup>*</sup> | b <sup>#+</sup> | b <sup>0</sup> | b <sup>0++</sup> | Seq. | y           | y <sup>++</sup> | y <sup>*</sup> | y <sup>#+</sup> | y <sup>0</sup> | y <sup>0++</sup> | #  |
|----|-------------|-----------------|----------------|-----------------|----------------|------------------|------|-------------|-----------------|----------------|-----------------|----------------|------------------|----|
| 1  | 130.049869  | 65.528572       |                |                 | 112.039304     | 56.523290        | E    |             |                 |                |                 |                |                  | 14 |
| 2  | 245.076812  | 123.042044      |                |                 | 227.066247     | 114.036762       | D    | 1811.940058 | 906.473667      | 1794.913509    | 897.960393      | 1793.929493    | 897.468385       | 13 |
| 3  | 342.129576  | 171.568426      |                |                 | 324.119011     | 162.563144       | P    | 1696.913115 | 848.960196      | 1679.886566    | 840.446921      | 1678.902550    | 839.954913       | 12 |
| 4  | 781.354902  | 391.181089      | 764.328353     | 382.667815      | 763.344337     | 382.175807       | Q    | 1599.860351 | 800.433814      | 1582.833802    | 791.920539      | 1581.849786    | 791.428531       | 11 |
| 5  | 882.402581  | 441.704929      | 865.376032     | 433.191654      | 864.392016     | 432.699646       | T    | 1160.635025 | 580.821151      | 1143.608476    | 572.307876      | 1142.624460    | 571.815868       | 10 |
| 6  | 1029.470995 | 515.239136      | 1012.444446    | 506.725861      | 1011.460430    | 506.233853       | F    | 1059.587346 | 530.297311      | 1042.560797    | 521.784037      |                |                  | 9  |
| 7  | 1192.534324 | 596.770800      | 1175.507775    | 588.257526      | 1174.523759    | 587.765518       | Y    | 912.518932  | 456.763104      | 895.492383     | 448.249830      |                |                  | 8  |
| 8  | 1355.597653 | 678.302465      | 1338.571104    | 669.789190      | 1337.587088    | 669.297182       | Y    | 749.455603  | 375.231440      | 732.429054     | 366.718165      |                |                  | 7  |
| 9  | 1426.634767 | 713.821022      | 1409.608218    | 705.307747      | 1408.624202    | 704.815739       | A    | 586.392274  | 293.699775      | 569.365725     | 285.186501      |                |                  | 6  |
| 10 | 1525.703181 | 763.355229      | 1508.676632    | 754.841954      | 1507.692616    | 754.349946       | V    | 515.355160  | 258.181218      | 498.328611     | 249.667944      |                |                  | 5  |
| 11 | 1596.740295 | 798.873786      | 1579.713746    | 790.360511      | 1578.729730    | 789.868503       | A    | 416.286746  | 208.647011      | 399.260197     | 200.133737      |                |                  | 4  |
| 12 | 1695.808709 | 848.407993      | 1678.782160    | 839.894718      | 1677.798144    | 839.402710       | V    | 345.249632  | 173.128454      | 328.223083     | 164.615180      |                |                  | 3  |
| 13 | 1794.877123 | 897.942200      | 1777.850574    | 889.428925      | 1776.866558    | 888.936917       | V    | 246.181218  | 123.594247      | 229.154669     | 115.080973      |                |                  | 2  |
| 14 |             |                 |                |                 |                |                  | K    | 147.112804  | 74.060040       | 130.086255     | 65.546765       |                |                  | 1  |

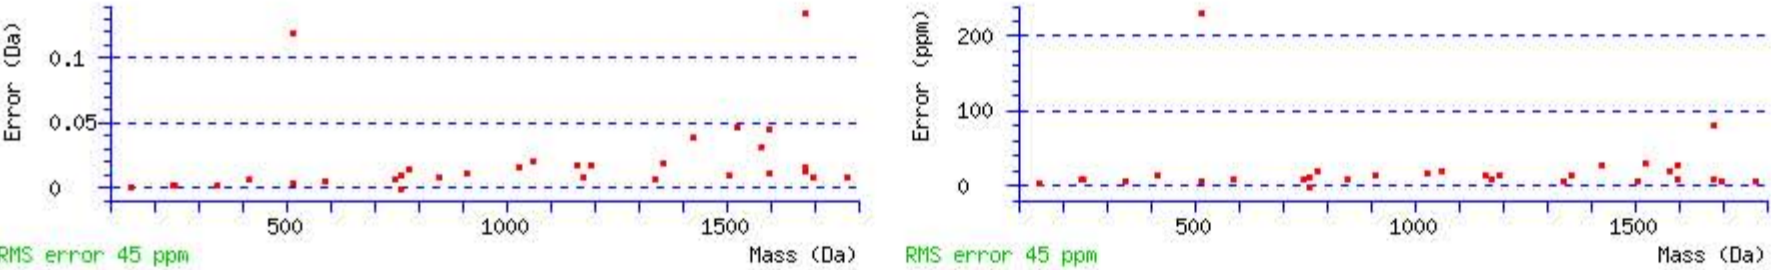

NCBI BLAST search of [EDPQTFYYAVAVVK](#)  
(Parameters: blastp, nr protein database, expect=20000, no filter, PAM30)  
Other BLAST [web gateways](#)

All matches to this query

| Score | Mr(calc):   | Delta    | Sequence                            |
|-------|-------------|----------|-------------------------------------|
| 55.8  | 1939.975372 | 0.027756 | <a href="#">EDPQTFYYAVAVVK</a>      |
| 3.4   | 1939.993851 | 0.009277 | <a href="#">VSGVTPQHMVGATPFAVAR</a> |
| 2.8   | 1939.982605 | 0.020523 | <a href="#">SVVGIDLGFAQSCYVAVAR</a> |

MATRIX

SCIENCE

Mascot Search Results

Peptide View

MS/MS Fragmentation of **KDSGFQMNQLR**  
Found in **TRFE\_HUMAN**, Serotransferrin OS=Homo sapiens GN=TF PE=1 SV=3

Match to Query 43002: 1944.980022 from(649.333950,3+) rtinseconds(2080) index(66884)  
Title: Locus:1.1.1.1999.10 File:"2013-07-02 CLN FXIII 180 min 2nd FT.wiff"  
Data file C:\Program Files (x86)\Matrix Science\Mascot Daemon\mgf\8 FXIII 180 min 2nd\mascot\_daemon\_merge.mgf

Click mouse within plot area to zoom in by factor of two about that point  
Or, 

Plot from

100

 to 

1800

 Da 

Full range

  
Label all possible matches ☐ Label matches used for scoring ☒

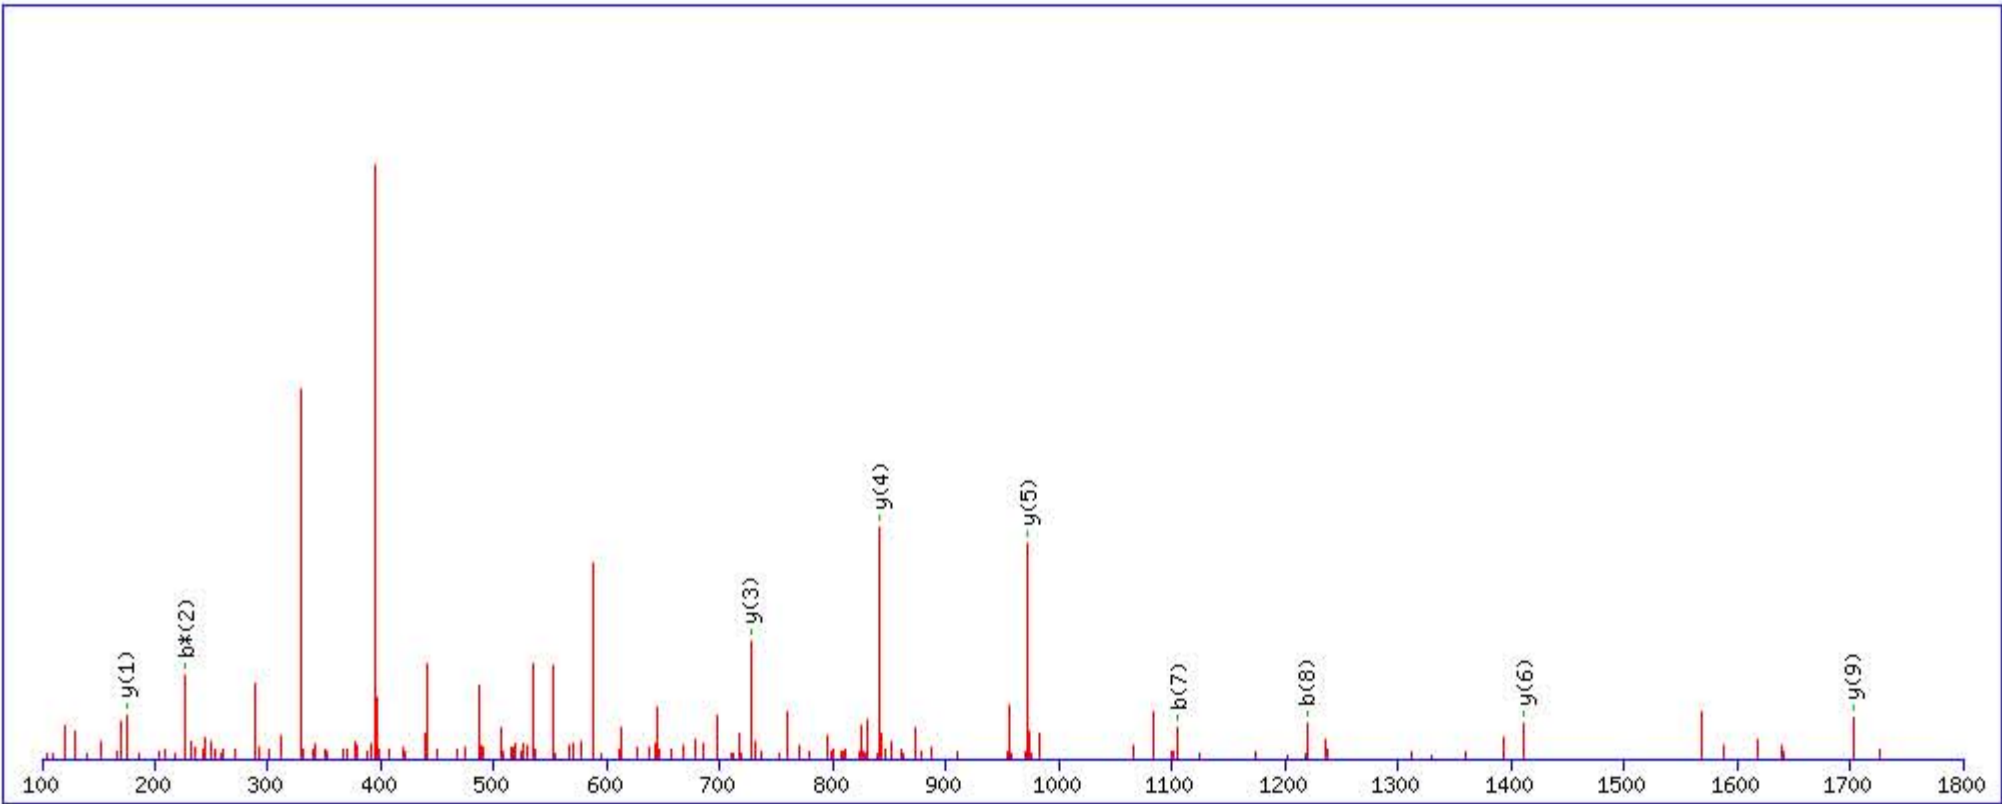

Monoisotopic mass of neutral peptide Mr(calc): 1944.973602  
Fixed modifications: Carbamidomethyl (C) (apply to specified residues or termini only)  
Variable modifications:  
Q6 : Biotin:Thermo-21345 (Q)  
Q9 : Biotin:Thermo-21345 (Q)  
Ions Score: 28 Expect: 0.048  
Matches : 9/102 fragment ions using 17 most intense peaks [\(help\)](#)

| #  | b           | b <sup>++</sup> | b <sup>*</sup> | b <sup>*++</sup> | b <sup>0</sup> | b <sup>0++</sup> | Seq. | y           | y <sup>++</sup> | y <sup>*</sup> | y <sup>*++</sup> | y <sup>0</sup> | y <sup>0++</sup> | #  |
|----|-------------|-----------------|----------------|------------------|----------------|------------------|------|-------------|-----------------|----------------|------------------|----------------|------------------|----|
| 1  | 129.102239  | 65.054757       | 112.075690     | 56.541483        |                |                  | K    |             |                 |                |                  |                |                  | 11 |
| 2  | 244.129182  | 122.568229      | 227.102633     | 114.054955       | 226.118617     | 113.562947       | D    | 1817.885929 | 909.446603      | 1800.859380    | 900.933328       | 1799.875364    | 900.441320       | 10 |
| 3  | 331.161210  | 166.084243      | 314.134661     | 157.570969       | 313.150645     | 157.078961       | S    | 1702.858986 | 851.933131      | 1685.832437    | 843.419857       | 1684.848421    | 842.927848       | 9  |
| 4  | 388.182674  | 194.594975      | 371.156125     | 186.081701       | 370.172109     | 185.589693       | G    | 1615.826958 | 808.417117      | 1598.800409    | 799.903843       |                |                  | 8  |
| 5  | 535.251088  | 268.129182      | 518.224539     | 259.615908       | 517.240523     | 259.123900       | F    | 1558.805494 | 779.906385      | 1541.778945    | 771.393111       |                |                  | 7  |
| 6  | 974.476414  | 487.741845      | 957.449865     | 479.228571       | 956.465849     | 478.736563       | Q    | 1411.737080 | 706.372178      | 1394.710531    | 697.858904       |                |                  | 6  |
| 7  | 1105.516899 | 553.262088      | 1088.490350    | 544.748813       | 1087.506334    | 544.256805       | M    | 972.511754  | 486.759515      | 955.485205     | 478.246241       |                |                  | 5  |
| 8  | 1219.559826 | 610.283551      | 1202.533277    | 601.770277       | 1201.549261    | 601.278268       | N    | 841.471269  | 421.239273      | 824.444720     | 412.725998       |                |                  | 4  |
| 9  | 1658.785152 | 829.896214      | 1641.758603    | 821.382940       | 1640.774587    | 820.890932       | Q    | 727.428342  | 364.217809      | 710.401793     | 355.704535       |                |                  | 3  |
| 10 | 1771.869216 | 886.438246      | 1754.842667    | 877.924972       | 1753.858651    | 877.432964       | L    | 288.203016  | 144.605146      | 271.176467     | 136.091871       |                |                  | 2  |
| 11 |             |                 |                |                  |                |                  | R    | 175.118952  | 88.063114       | 158.092403     | 79.549839        |                |                  | 1  |

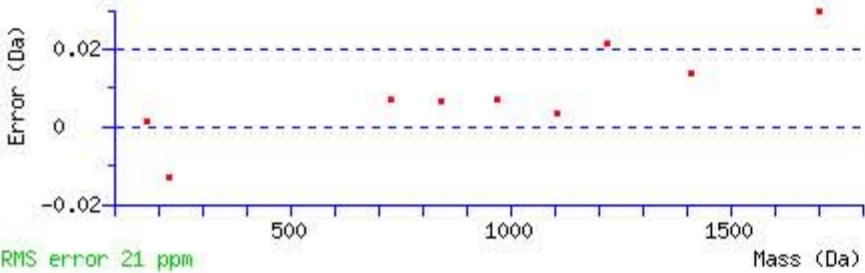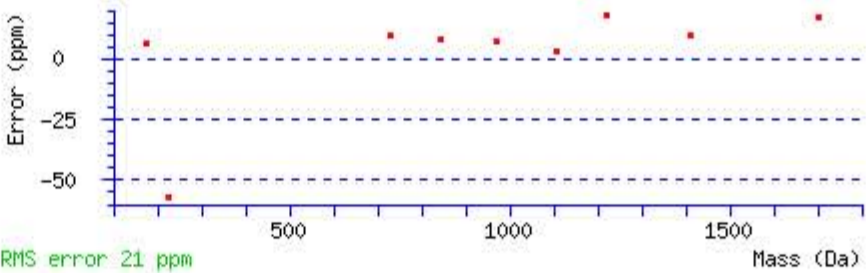

NCBI BLAST search of [KDSGFQMNQLR](#)  
(Parameters: blastp, nr protein database, expect=20000, no filter, PAM30)  
Other BLAST [web gateways](#)

All matches to this query

| Score | Mr(calc):   | Delta    | Sequence                    |
|-------|-------------|----------|-----------------------------|
| 27.5  | 1944.973602 | 0.006420 | <a href="#">KDSGFQMNQLR</a> |

MATRIX

SCIENCE

Mascot Search Results

Peptide View

MS/MS Fragmentation of **ADRDQYELLCLDNTR**  
Found in **TRFE\_HUMAN**, Serotransferrin OS=Homo sapiens GN=TF PE=1 SV=3

Match to Query 48320: 2192.050542 from(731.690790,3+) rtinseconds(2203) index(67647)  
Title: Locus:1.1.1.2042.14 File:"2013-07-02 CLN FXIII 180 min 2nd FT.wiff"  
Data file C:\Program Files (x86)\Matrix Science\Mascot Daemon\mgf\8 FXIII 180 min 2nd\mascot\_daemon\_merge.mgf

Click mouse within plot area to zoom in by factor of two about that point  
Or, 

Plot from

100

 to 

1700

 Da 

Full range

  
Label all possible matches ☐ Label matches used for scoring ☒

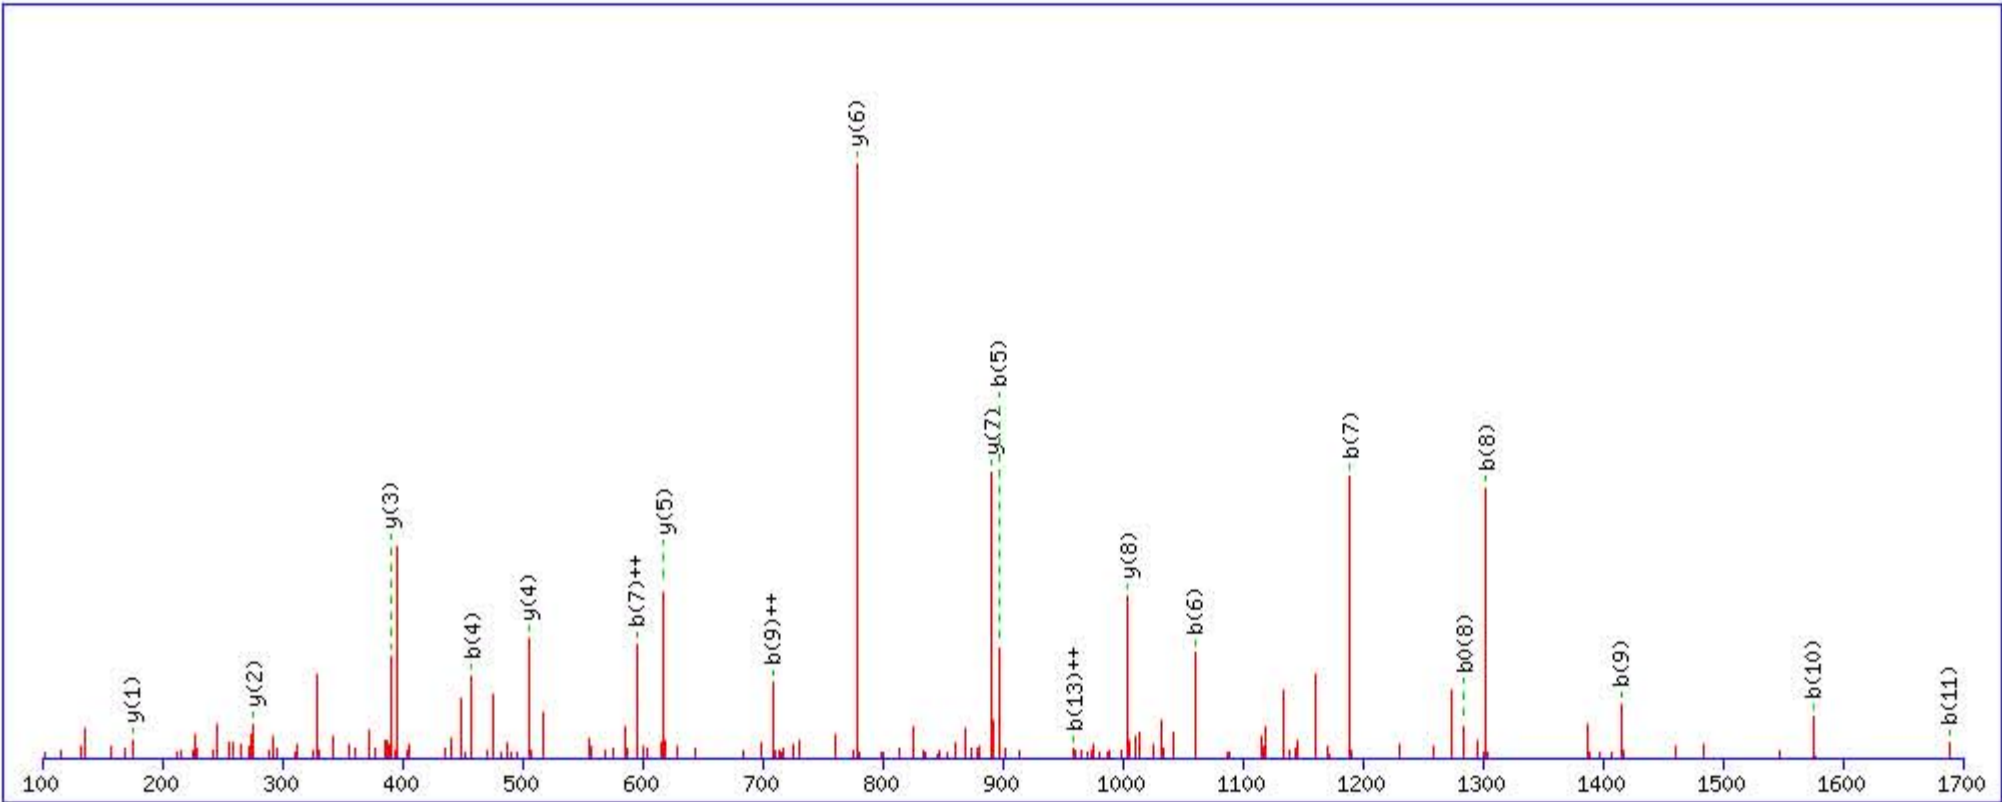

Monoisotopic mass of neutral peptide Mr(calc): 2192.035400  
Fixed modifications: Carbamidomethyl (C) (apply to specified residues or termini only)  
Variable modifications:  
Q5 : Biotin:Thermo-21345 (Q)  
Ions Score: 60 Expect: 2e-005  
Matches : 20/160 fragment ions using 31 most intense peaks [\(help\)](#)

| #  | b           | b <sup>++</sup> | b <sup>*</sup> | b <sup>*++</sup> | b <sup>0</sup> | b <sup>0++</sup> | Seq. | y           | y <sup>++</sup> | y <sup>*</sup> | y <sup>*++</sup> | y <sup>0</sup> | y <sup>0++</sup> | #  |
|----|-------------|-----------------|----------------|------------------|----------------|------------------|------|-------------|-----------------|----------------|------------------|----------------|------------------|----|
| 1  | 72.044390   | 36.525833       |                |                  |                |                  | A    |             |                 |                |                  |                |                  | 15 |
| 2  | 187.071333  | 94.039304       |                |                  | 169.060768     | 85.034022        | D    | 2122.005587 | 1061.506431     | 2104.979038    | 1052.993157      | 2103.995022    | 1052.501149      | 14 |
| 3  | 343.172444  | 172.089860      | 326.145895     | 163.576585       | 325.161879     | 163.084577       | R    | 2006.978644 | 1003.992960     | 1989.952095    | 995.479685       | 1988.968079    | 994.987677       | 13 |
| 4  | 458.199387  | 229.603332      | 441.172838     | 221.090057       | 440.188822     | 220.598049       | D    | 1850.877533 | 925.942404      | 1833.850984    | 917.429130       | 1832.866968    | 916.937122       | 12 |
| 5  | 897.424713  | 449.215995      | 880.398164     | 440.702720       | 879.414148     | 440.210712       | Q    | 1735.850590 | 868.428933      | 1718.824041    | 859.915658       | 1717.840025    | 859.423650       | 11 |
| 6  | 1060.488042 | 530.747659      | 1043.461493    | 522.234385       | 1042.477477    | 521.742376       | Y    | 1296.625264 | 648.816270      | 1279.598715    | 640.302995       | 1278.614699    | 639.810987       | 10 |
| 7  | 1189.530635 | 595.268955      | 1172.504086    | 586.755681       | 1171.520070    | 586.263673       | E    | 1133.561935 | 567.284605      | 1116.535386    | 558.771331       | 1115.551370    | 558.279323       | 9  |
| 8  | 1302.614699 | 651.810987      | 1285.588150    | 643.297713       | 1284.604134    | 642.805705       | L    | 1004.519342 | 502.763309      | 987.492793     | 494.250034       | 986.508777     | 493.758026       | 8  |
| 9  | 1415.698763 | 708.353019      | 1398.672214    | 699.839745       | 1397.688198    | 699.347737       | L    | 891.435278  | 446.221277      | 874.408729     | 437.708002       | 873.424713     | 437.215994       | 7  |
| 10 | 1575.729412 | 788.368344      | 1558.702863    | 779.855069       | 1557.718847    | 779.363061       | C    | 778.351214  | 389.679245      | 761.324665     | 381.165971       | 760.340649     | 380.673963       | 6  |
| 11 | 1688.813476 | 844.910376      | 1671.786927    | 836.397101       | 1670.802911    | 835.905093       | L    | 618.320565  | 309.663921      | 601.294016     | 301.150646       | 600.310000     | 300.658638       | 5  |
| 12 | 1803.840419 | 902.423847      | 1786.813870    | 893.910573       | 1785.829854    | 893.418565       | D    | 505.236501  | 253.121888      | 488.209952     | 244.608614       | 487.225936     | 244.116606       | 4  |
| 13 | 1917.883346 | 959.445311      | 1900.856797    | 950.932036       | 1899.872781    | 950.440028       | N    | 390.209558  | 195.608417      | 373.183009     | 187.095142       | 372.198993     | 186.603134       | 3  |
| 14 | 2018.931025 | 1009.969150     | 2001.904476    | 1001.455876      | 2000.920460    | 1000.963868      | T    | 276.166631  | 138.586953      | 259.140082     | 130.073679       | 258.156066     | 129.581671       | 2  |
| 15 |             |                 |                |                  |                |                  | R    | 175.118952  | 88.063114       | 158.092403     | 79.549839        |                |                  | 1  |

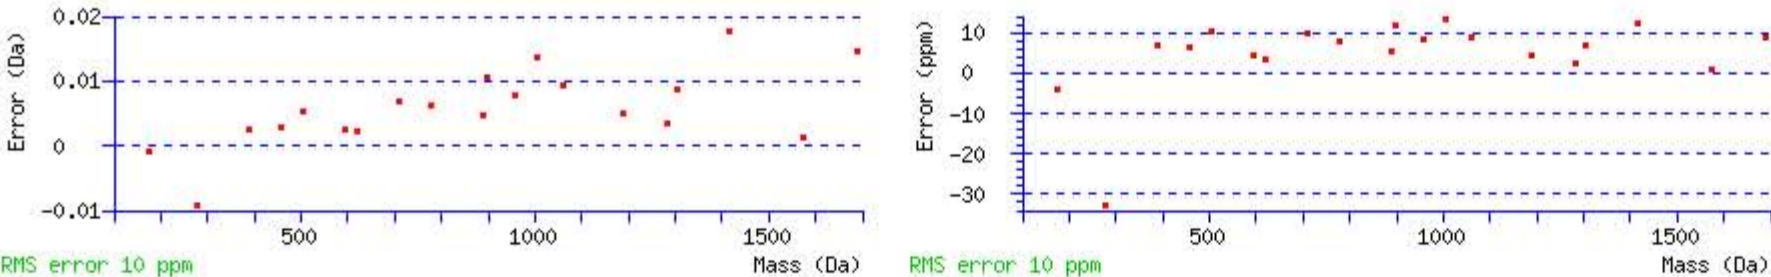

NCBI BLAST search of [ADRDQYELLCLDNTR](#)  
(Parameters: blastp, nr protein database, expect=20000, no filter, PAM30)  
Other BLAST [web gateways](#)

All matches to this query

| Score | Mr(calc):   | Delta    | Sequence                        |
|-------|-------------|----------|---------------------------------|
| 60.2  | 2192.035400 | 0.015142 | <a href="#">ADRDQYELLCLDNTR</a> |

M

A

T

R

I

X

S

C

I

E

N

C

E

Mascot Search Results

Peptide View

MS/MS Fragmentation of **EDLIWELLNQAQEHFGK**  
Found in **TRFE\_HUMAN**, Serotransferrin OS=Homo sapiens GN=TF PE=1 SV=3

Match to Query 51635: 2380.216752 from(794.412860,3+) rtinseconds(3295) index(74082)  
Title: Locus:1.1.1.2417.9 File:"2013-07-02 CLN FXIII 180 min 2nd FT.wiff"  
Data file C:\Program Files (x86)\Matrix Science\Mascot Daemon\mgf\8 FXIII 180 min 2nd\mascot\_daemon\_merge.mgf

Click mouse within plot area to zoom in by factor of two about that point  
Or, 

Plot from

100

 to 

1800

 Da 

Full range

  
Label all possible matches ☐ Label matches used for scoring ☒

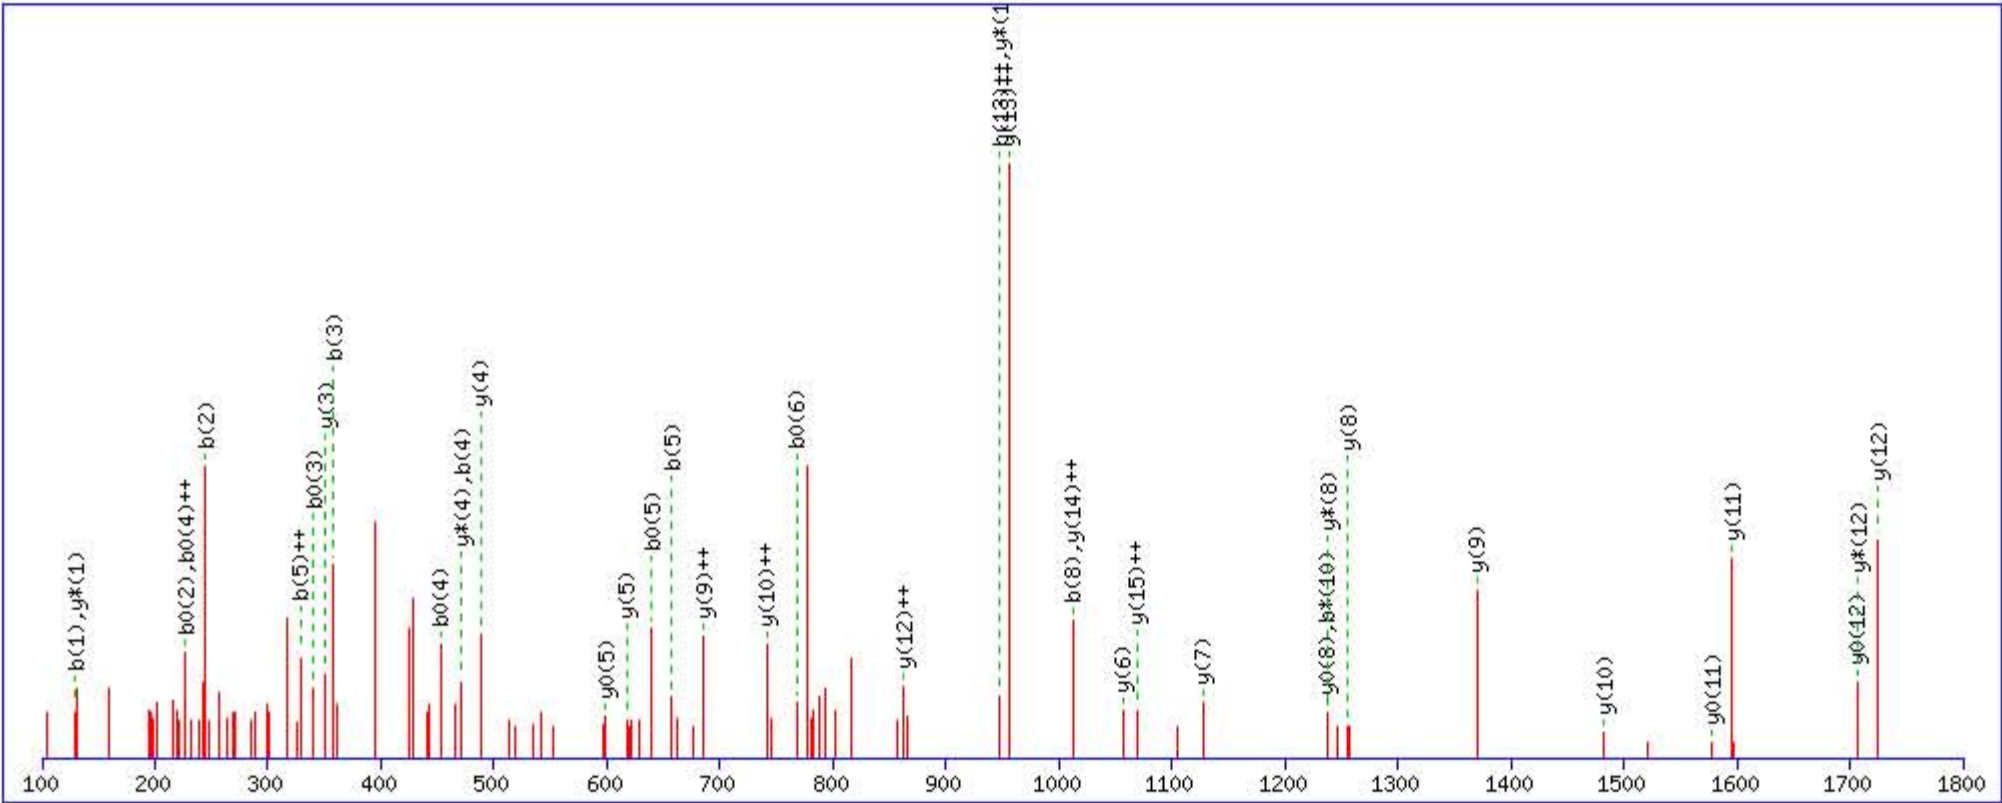

MATRIX

SCIENCE

Mascot Search Results

Peptide View

MS/MS Fragmentation of **SMGGKEDLIWELLNQAQEHFGK**  
Found in **TRFE\_HUMAN**, Serotransferrin OS=Homo sapiens GN=TF PE=1 SV=3

Match to Query 58590: 2856.433902 from(953.151910,3+) rtinseconds(2951) index(72569)  
Title: Locus:1.1.1.2300.19 File:"2013-07-02 CLN FXIII 180 min 2nd FT.wiff"  
Data file C:\Program Files (x86)\Matrix Science\Mascot Daemon\mgf\8 FXIII 180 min 2nd\mascot\_daemon\_merge.mgf

Click mouse within plot area to zoom in by factor of two about that point  
Or, 

Plot from

100

 to 

2000

 Da 

Full range

  
Label all possible matches ☐ Label matches used for scoring ☒

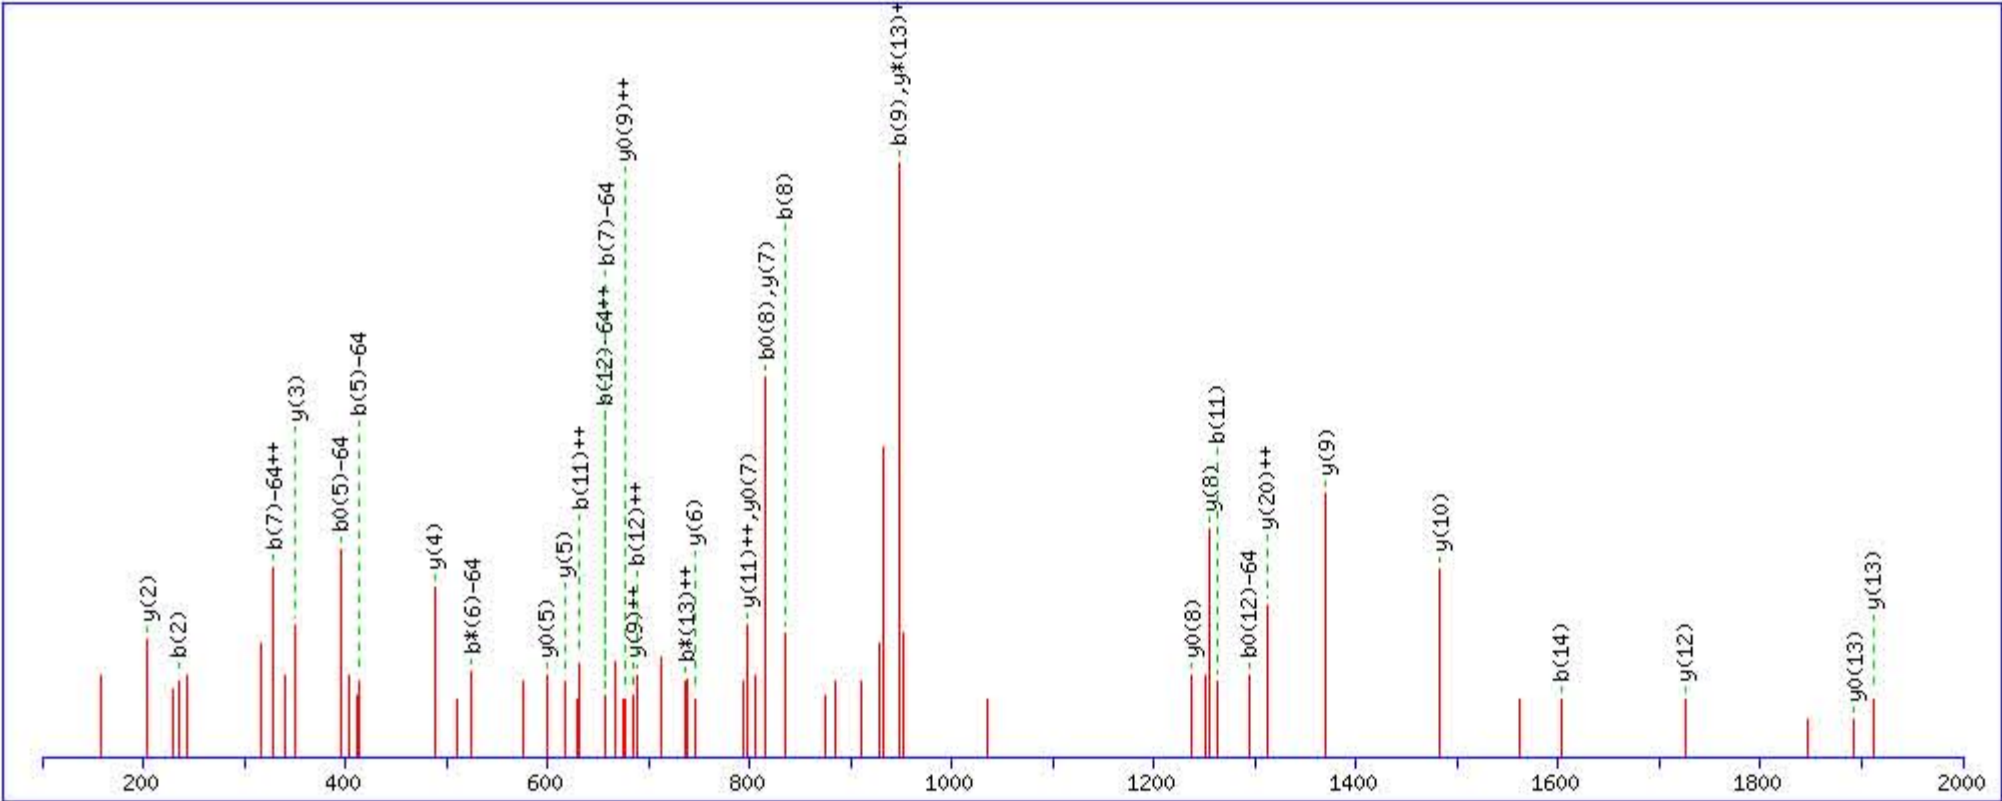

Monoisotopic mass of neutral peptide Mr(calc): 2856.393845  
Fixed modifications: Carbamidomethyl (C) (apply to specified residues or termini only)  
Variable modifications:  
M2 : Oxidation (M), with neutral losses 0.000000 (shown in table), 63.998285  
Q15 : Biotin:Thermo-21345 (Q)  
Ions Score: 48 Expect: 0.00049  
Matches : 36/356 fragment ions using 61 most intense peaks [\(help\)](#)

| #  | b           | b <sup>++</sup> | b <sup>*</sup> | b <sup>*++</sup> | b <sup>0</sup> | b <sup>0++</sup> | Seq. | y           | y <sup>++</sup> | y <sup>*</sup> | y <sup>*++</sup> | y <sup>0</sup> | y <sup>0++</sup> | #  |
|----|-------------|-----------------|----------------|------------------|----------------|------------------|------|-------------|-----------------|----------------|------------------|----------------|------------------|----|
| 1  | 88.039304   | 44.523290       |                |                  | 70.028739      | 35.518008        | S    |             |                 |                |                  |                |                  | 22 |
| 2  | 235.074704  | 118.040990      |                |                  | 217.064139     | 109.035707       | M    | 2770.369121 | 1385.688198     | 2753.342572    | 1377.174924      | 2752.358556    | 1376.682916      | 21 |
| 3  | 292.096168  | 146.551722      |                |                  | 274.085603     | 137.546439       | G    | 2623.333721 | 1312.170498     | 2606.307172    | 1303.657224      | 2605.323156    | 1303.165216      | 20 |
| 4  | 349.117632  | 175.062454      |                |                  | 331.107067     | 166.057171       | G    | 2566.312257 | 1283.659766     | 2549.285708    | 1275.146492      | 2548.301692    | 1274.654484      | 19 |
| 5  | 477.212595  | 239.109935      | 460.186046     | 230.596661       | 459.202030     | 230.104653       | K    | 2509.290793 | 1255.149034     | 2492.264244    | 1246.635760      | 2491.280228    | 1246.143752      | 18 |
| 6  | 606.255188  | 303.631232      | 589.228639     | 295.117958       | 588.244623     | 294.625950       | E    | 2381.195830 | 1191.101553     | 2364.169281    | 1182.588278      | 2363.185265    | 1182.096270      | 17 |
| 7  | 721.282131  | 361.144704      | 704.255582     | 352.631429       | 703.271566     | 352.139421       | D    | 2252.153237 | 1126.580256     | 2235.126688    | 1118.066982      | 2234.142672    | 1117.574974      | 16 |
| 8  | 834.366195  | 417.686736      | 817.339646     | 409.173461       | 816.355630     | 408.681453       | L    | 2137.126294 | 1069.066785     | 2120.099745    | 1060.553510      | 2119.115729    | 1060.061502      | 15 |
| 9  | 947.450259  | 474.228768      | 930.423710     | 465.715493       | 929.439694     | 465.223485       | I    | 2024.042230 | 1012.524753     | 2007.015681    | 1004.011479      | 2006.031665    | 1003.519471      | 14 |
| 10 | 1133.529572 | 567.268424      | 1116.503023    | 558.755150       | 1115.519007    | 558.263142       | W    | 1910.958166 | 955.982721      | 1893.931617    | 947.469447       | 1892.947601    | 946.977439       | 13 |
| 11 | 1262.572165 | 631.789721      | 1245.545616    | 623.276446       | 1244.561600    | 622.784438       | E    | 1724.878853 | 862.943065      | 1707.852304    | 854.429790       | 1706.868288    | 853.937782       | 12 |
| 12 | 1375.656229 | 688.331753      | 1358.629680    | 679.818478       | 1357.645664    | 679.326470       | L    | 1595.836260 | 798.421768      | 1578.809711    | 789.908494       | 1577.825695    | 789.416486       | 11 |
| 13 | 1488.740293 | 744.873785      | 1471.713744    | 736.360510       | 1470.729728    | 735.868502       | L    | 1482.752196 | 741.879736      | 1465.725647    | 733.366462       | 1464.741631    | 732.874454       | 10 |
| 14 | 1602.783220 | 801.895248      | 1585.756671    | 793.381974       | 1584.772655    | 792.889966       | N    | 1369.668132 | 685.337704      | 1352.641583    | 676.824430       | 1351.657567    | 676.332422       | 9  |
| 15 | 2042.008546 | 1021.507911     | 2024.981997    | 1012.994637      | 2023.997981    | 1012.502629      | Q    | 1255.625205 | 628.316241      | 1238.598656    | 619.802966       | 1237.614640    | 619.310958       | 8  |
| 16 | 2113.045660 | 1057.026468     | 2096.019111    | 1048.513193      | 2095.035095    | 1048.021186      | A    | 816.399879  | 408.703578      | 799.373330     | 400.190303       | 798.389314     | 399.698295       | 7  |
| 17 | 2241.104238 | 1121.055757     | 2224.077689    | 1112.542483      | 2223.093673    | 1112.050475      | Q    | 745.362765  | 373.185021      | 728.336216     | 364.671746       | 727.352200     | 364.179738       | 6  |
| 18 | 2370.146831 | 1185.577054     | 2353.120282    | 1177.063779      | 2352.136266    | 1176.571771      | E    | 617.304187  | 309.155732      | 600.277638     | 300.642457       | 599.293622     | 300.150449       | 5  |
| 19 | 2507.205743 | 1254.106510     | 2490.179194    | 1245.593235      | 2489.195178    | 1245.101227      | H    | 488.261594  | 244.634435      | 471.235045     | 236.121160       |                |                  | 4  |
| 20 | 2654.274157 | 1327.640717     | 2637.247608    | 1319.127442      | 2636.263592    | 1318.635434      | F    | 351.202682  | 176.104979      | 334.176133     | 167.591704       |                |                  | 3  |
| 21 | 2711.295621 | 1356.151449     | 2694.269072    | 1347.638174      | 2693.285056    | 1347.146166      | G    | 204.134268  | 102.570772      | 187.107719     | 94.057497        |                |                  | 2  |
| 22 |             |                 |                |                  |                |                  | K    | 147.112804  | 74.060040       | 130.086255     | 65.546765        |                |                  | 1  |

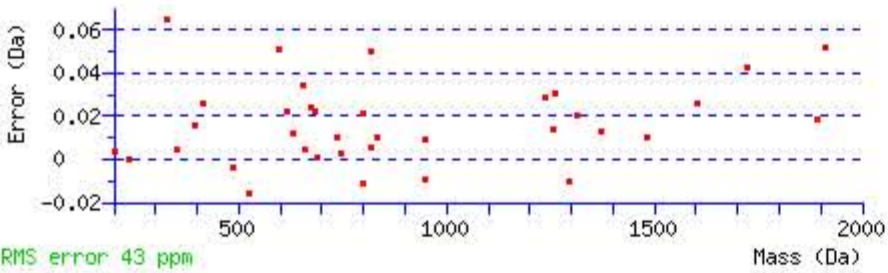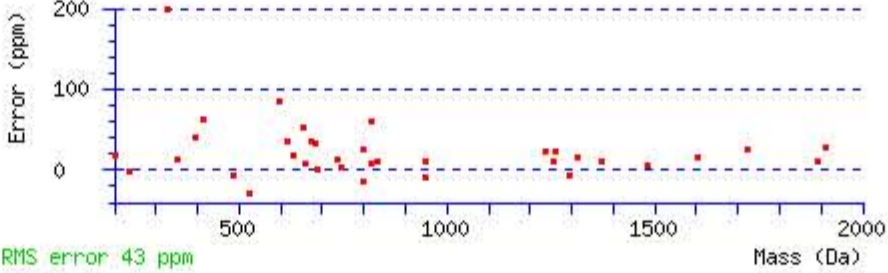

NCBI BLAST search of [SMGGKEDLIWELLNQAQEHFGK](#)  
(Parameters: blastp, nr protein database, expect=20000, no filter, PAM30)  
Other BLAST [web gateways](#)

All matches to this query

| Score | Mr(calc):   | Delta    | Sequence                               |
|-------|-------------|----------|----------------------------------------|
| 47.7  | 2856.393845 | 0.040057 | <a href="#">SMGGKEDLIWELLNQAQEHFGK</a> |
| 37.6  | 2856.393845 | 0.040057 | <a href="#">SMGGKEDLIWELLNQAQEHFGK</a> |

MATRIX

SCIENCE

Mascot Search Results

Peptide View

MS/MS Fragmentation of **KPVDEYKDCHLAQVPSHTVVAR**  
Found in **TRFE\_HUMAN**, Serotransferrin OS=Homo sapiens GN=TF PE=1 SV=3

Match to Query 58643: 2859.453120 from(572.897900,5+) rtinseconds(1491) index(63449)  
Title: Locus:1.1.1.1794.6 File:"2013-07-02 CLN FXIII 180 min 2nd FT.wiff"  
Data file C:\Program Files (x86)\Matrix Science\Mascot Daemon\mgf\8 FXIII 180 min 2nd\mascot\_daemon\_merge.mgf

Click mouse within plot area to zoom in by factor of two about that point  
Or, 

Plot from

100

 to 

1700

 Da 

Full range

  
Label all possible matches ☐ Label matches used for scoring ☒

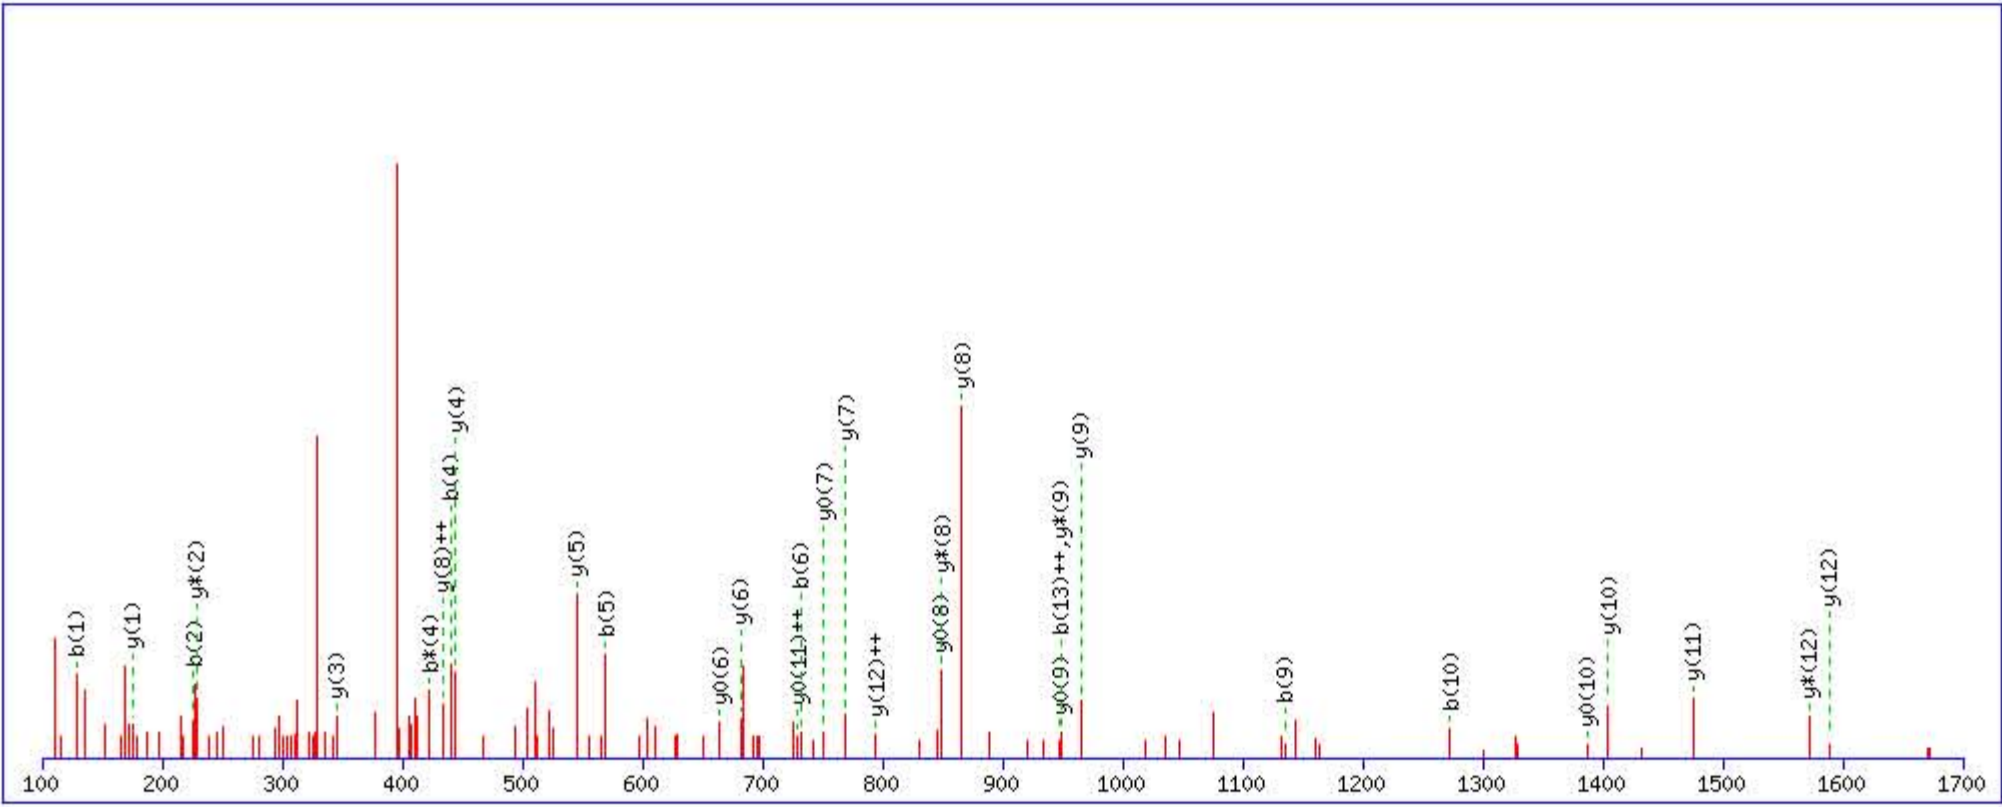

Monoisotopic mass of neutral peptide Mr(calc): 2859.452393  
Fixed modifications: Carbamidomethyl (C) (apply to specified residues or termini only)  
Variable modifications:  
Q13 : Biotin:Thermo-21345 (Q)  
Ions Score: 48 Expect: 0.0005  
Matches : 32/238 fragment ions using 76 most intense peaks [\(help\)](#)

| #  | b           | b <sup>++</sup> | b <sup>*</sup> | b <sup>*++</sup> | b <sup>0</sup> | b <sup>0++</sup> | Seq. | y           | y <sup>++</sup> | y <sup>*</sup> | y <sup>*++</sup> | y <sup>0</sup> | y <sup>0++</sup> | #  |
|----|-------------|-----------------|----------------|------------------|----------------|------------------|------|-------------|-----------------|----------------|------------------|----------------|------------------|----|
| 1  | 129.102239  | 65.054757       | 112.075690     | 56.541483        |                |                  | K    |             |                 |                |                  |                |                  | 22 |
| 2  | 226.155003  | 113.581139      | 209.128454     | 105.067865       |                |                  | P    | 2732.364705 | 1366.685990     | 2715.338156    | 1358.172716      | 2714.354140    | 1357.680708      | 21 |
| 3  | 325.223417  | 163.115346      | 308.196868     | 154.602072       |                |                  | V    | 2635.311941 | 1318.159608     | 2618.285392    | 1309.646334      | 2617.301376    | 1309.154326      | 20 |
| 4  | 440.250360  | 220.628818      | 423.223811     | 212.115544       | 422.239795     | 211.623536       | D    | 2536.243527 | 1268.625401     | 2519.216978    | 1260.112127      | 2518.232962    | 1259.620119      | 19 |
| 5  | 569.292953  | 285.150115      | 552.266404     | 276.636840       | 551.282388     | 276.144832       | E    | 2421.216584 | 1211.111930     | 2404.190035    | 1202.598655      | 2403.206019    | 1202.106647      | 18 |
| 6  | 732.356282  | 366.681779      | 715.329733     | 358.168505       | 714.345717     | 357.676497       | Y    | 2292.173991 | 1146.590633     | 2275.147442    | 1138.077359      | 2274.163426    | 1137.585351      | 17 |
| 7  | 860.451245  | 430.729261      | 843.424696     | 422.215986       | 842.440680     | 421.723978       | K    | 2129.110662 | 1065.058969     | 2112.084113    | 1056.545694      | 2111.100097    | 1056.053686      | 16 |
| 8  | 975.478188  | 488.242732      | 958.451639     | 479.729458       | 957.467623     | 479.237450       | D    | 2001.015699 | 1001.011487     | 1983.989150    | 992.498213       | 1983.005134    | 992.006205       | 15 |
| 9  | 1135.508837 | 568.258057      | 1118.482288    | 559.744782       | 1117.498272    | 559.252774       | C    | 1885.988756 | 943.498016      | 1868.962207    | 934.984741       | 1867.978191    | 934.492733       | 14 |
| 10 | 1272.567749 | 636.787513      | 1255.541200    | 628.274238       | 1254.557184    | 627.782230       | H    | 1725.958107 | 863.482691      | 1708.931558    | 854.969417       | 1707.947542    | 854.477409       | 13 |
| 11 | 1385.651813 | 693.329545      | 1368.625264    | 684.816270       | 1367.641248    | 684.324262       | L    | 1588.899195 | 794.953235      | 1571.872646    | 786.439961       | 1570.888630    | 785.947953       | 12 |
| 12 | 1456.688927 | 728.848101      | 1439.662378    | 720.334827       | 1438.678362    | 719.842819       | A    | 1475.815131 | 738.411203      | 1458.788582    | 729.897929       | 1457.804566    | 729.405921       | 11 |
| 13 | 1895.914253 | 948.460765      | 1878.887704    | 939.947490       | 1877.903688    | 939.455482       | Q    | 1404.778017 | 702.892646      | 1387.751468    | 694.379372       | 1386.767452    | 693.887364       | 10 |
| 14 | 1994.982667 | 997.994972      | 1977.956118    | 989.481697       | 1976.972102    | 988.989689       | V    | 965.552691  | 483.279983      | 948.526142     | 474.766709       | 947.542126     | 474.274701       | 9  |
| 15 | 2092.035431 | 1046.521353     | 2075.008882    | 1038.008079      | 2074.024866    | 1037.516071      | P    | 866.484277  | 433.745776      | 849.457728     | 425.232502       | 848.473712     | 424.740494       | 8  |
| 16 | 2179.067459 | 1090.037367     | 2162.040910    | 1081.524093      | 2161.056894    | 1081.032085      | S    | 769.431513  | 385.219394      | 752.404964     | 376.706120       | 751.420948     | 376.214112       | 7  |
| 17 | 2316.126371 | 1158.566823     | 2299.099822    | 1150.053549      | 2298.115806    | 1149.561541      | H    | 682.399485  | 341.703380      | 665.372936     | 333.190106       | 664.388920     | 332.698098       | 6  |
| 18 | 2417.174050 | 1209.090663     | 2400.147501    | 1200.577388      | 2399.163485    | 1200.085380      | T    | 545.340573  | 273.173924      | 528.314024     | 264.660650       | 527.330008     | 264.168642       | 5  |
| 19 | 2516.242464 | 1258.624870     | 2499.215915    | 1250.111595      | 2498.231899    | 1249.619587      | V    | 444.292894  | 222.650085      | 427.266345     | 214.136810       |                |                  | 4  |
| 20 | 2615.310878 | 1308.159077     | 2598.284329    | 1299.645802      | 2597.300313    | 1299.153794      | V    | 345.224480  | 173.115878      | 328.197931     | 164.602603       |                |                  | 3  |
| 21 | 2686.347992 | 1343.677634     | 2669.321443    | 1335.164359      | 2668.337427    | 1334.672351      | A    | 246.156066  | 123.581671      | 229.129517     | 115.068397       |                |                  | 2  |
| 22 |             |                 |                |                  |                |                  | R    | 175.118952  | 88.063114       | 158.092403     | 79.549839        |                |                  | 1  |

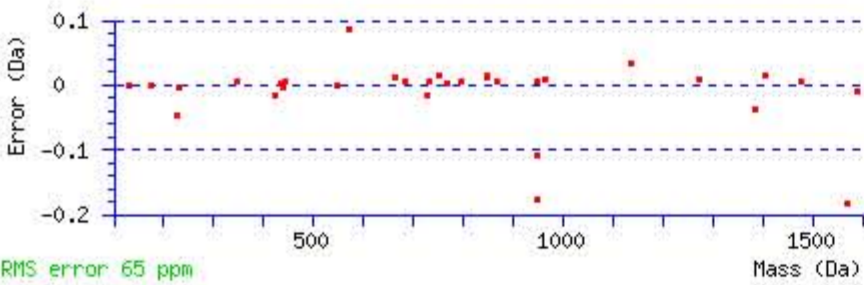

NCBI BLAST search of [KPVDEYKDCHLAQVPSHTVVAR](#)  
(Parameters: blastp, nr protein database, expect=20000, no filter, PAM30)  
Other BLAST [web gateways](#)

All matches to this query

| Score | Mr(calc):   | Delta    | Sequence                               |
|-------|-------------|----------|----------------------------------------|
| 47.7  | 2859.452393 | 0.000727 | <a href="#">KPVDEYKDCHLAQVPSHTVVAR</a> |

MATRIX

SCIENCE

Mascot Search Results

Peptide View

MS/MS Fragmentation of **FQNALLVR**  
Found in **ALBU\_HUMAN**, Serum albumin OS=Homo sapiens GN=ALB PE=1 SV=2

Match to Query 22473: 1270.729008 from(636.371780,2+) rtinseconds(2090) index(20782)  
Title: Locus:1.1.1.3110.6 File:"2013-07-02 CLN FXIII 180 min 2nd F 2.wiff"  
Data file C:\Program Files (x86)\Matrix Science\Mascot Daemon\mgf\8 FXIII 180 min 2nd\mascot\_daemon\_merge.mgf

Click mouse within plot area to zoom in by factor of two about that point  
Or, 

Plot from

100

 to 

1800

 Da 

Full range

  
Label all possible matches ☐ Label matches used for scoring ☒

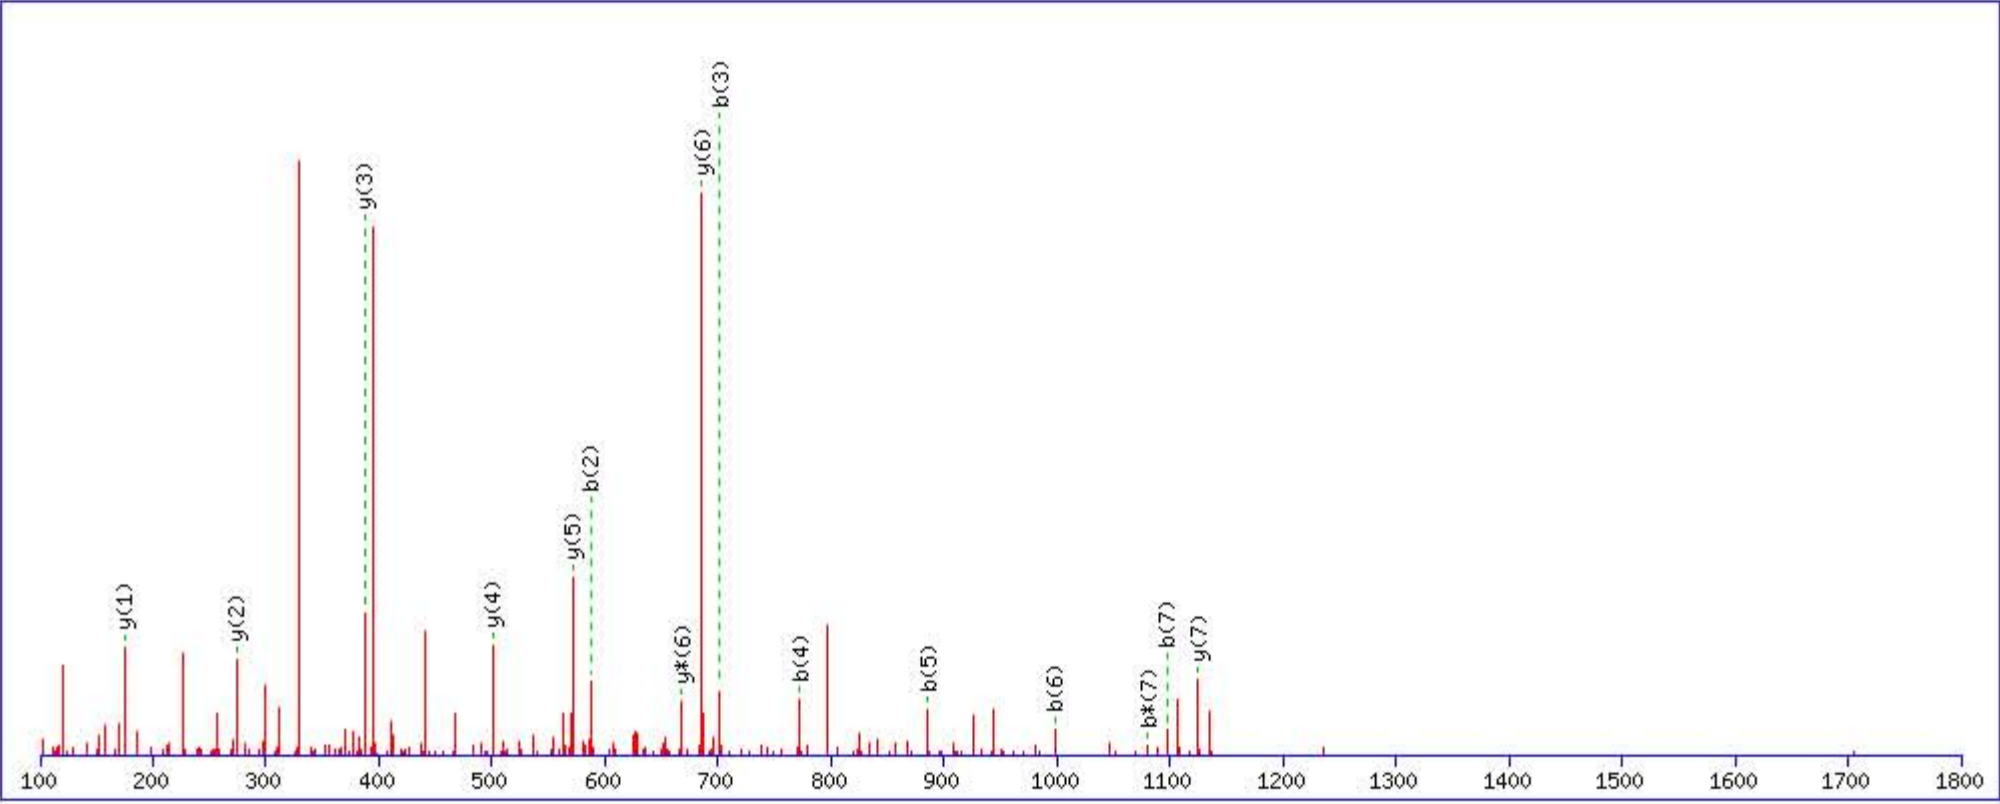

Monoisotopic mass of neutral peptide Mr(calc): 1270.721985  
Fixed modifications: Carbamidomethyl (C) (apply to specified residues or termini only)  
Variable modifications:  
Q2 : Biotin:Thermo-21345 (Q)  
Ions Score: 35 Expect: 0.0043  
Matches : 15/54 fragment ions using 34 most intense peaks [\(help\)](#)

| # | b           | b <sup>++</sup> | b <sup>*</sup> | b <sup>+++</sup> | Seq. | y           | y <sup>++</sup> | y <sup>*</sup> | y <sup>+++</sup> | # |
|---|-------------|-----------------|----------------|------------------|------|-------------|-----------------|----------------|------------------|---|
| 1 | 148.075690  | 74.541483       |                |                  | F    |             |                 |                |                  | 8 |
| 2 | 587.301016  | 294.154146      | 570.274467     | 285.640872       | Q    | 1124.660861 | 562.834068      | 1107.634312    | 554.320794       | 7 |
| 3 | 701.343943  | 351.175610      | 684.317394     | 342.662335       | N    | 685.435535  | 343.221406      | 668.408986     | 334.708131       | 6 |
| 4 | 772.381057  | 386.694166      | 755.354508     | 378.180892       | A    | 571.392608  | 286.199942      | 554.366059     | 277.686668       | 5 |
| 5 | 885.465121  | 443.236199      | 868.438572     | 434.722924       | L    | 500.355494  | 250.681385      | 483.328945     | 242.168110       | 4 |
| 6 | 998.549185  | 499.778231      | 981.522636     | 491.264956       | L    | 387.271430  | 194.139353      | 370.244881     | 185.626078       | 3 |
| 7 | 1097.617599 | 549.312437      | 1080.591050    | 540.799163       | V    | 274.187366  | 137.597321      | 257.160817     | 129.084046       | 2 |
| 8 |             |                 |                |                  | R    | 175.118952  | 88.063114       | 158.092403     | 79.549839        | 1 |

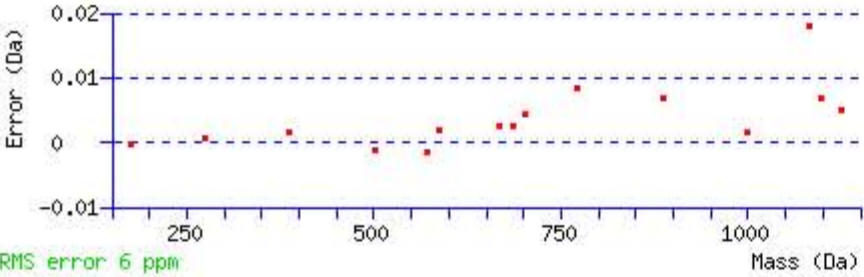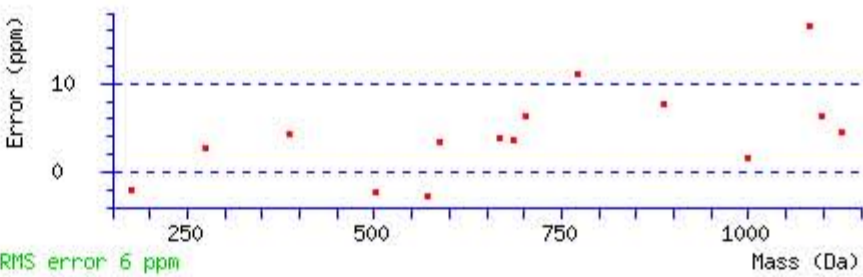

NCBI BLAST search of [FQNALLVR](#)  
(Parameters: blastp, nr protein database, expect=20000, no filter, PAM30)  
Other BLAST [web gateways](#)

All matches to this query

| Score | Mr(calc):   | Delta     | Sequence                     |
|-------|-------------|-----------|------------------------------|
| 35.3  | 1270.721985 | 0.007023  | <a href="#">FQNALLVR</a>     |
| 13.1  | 1270.735687 | -0.006679 | <a href="#">KEAELRSGIIR</a>  |
| 8.8   | 1270.733215 | -0.004207 | <a href="#">MFHIRAVILR</a>   |
| 7.8   | 1270.722000 | 0.007008  | <a href="#">FQIAQVVR</a>     |
| 6.8   | 1270.733215 | -0.004207 | <a href="#">FQRQILR</a>      |
| 3.8   | 1270.717957 | 0.011051  | <a href="#">QLSRTLRSR</a>    |
| 3.2   | 1270.739761 | -0.010753 | <a href="#">QVVNIPSFIVR</a>  |
| 3.2   | 1270.735733 | -0.006725 | <a href="#">EILGRGVSSVVR</a> |
| 2.7   | 1270.725357 | 0.003651  | <a href="#">QKVMAIVR</a>     |
| 1.6   | 1270.710541 | 0.018467  | <a href="#">AVNSKAEVARAR</a> |

MATRIX

SCIENCE

Mascot Search Results

Peptide View

MS/MS Fragmentation of **LVAASQAALGL**  
Found in **ALBU\_HUMAN**, Serum albumin OS=Homo sapiens GN=ALB PE=1 SV=2

Match to Query 23735: 1323.772348 from(662.893450,2+) rtinseconds(2524) index(23331)  
Title: Locus:1.1.1.3261.6 File:"2013-07-02 CLN FXIII 180 min 2nd F 2.wiff"  
Data file C:\Program Files (x86)\Matrix Science\Mascot Daemon\mgf\8 FXIII 180 min 2nd\mascot\_daemon\_merge.mgf

Click mouse within plot area to zoom in by factor of two about that point  
Or, 

Plot from

100

 to 

1400

 Da 

Full range

  
Label all possible matches ☐ Label matches used for scoring ☒

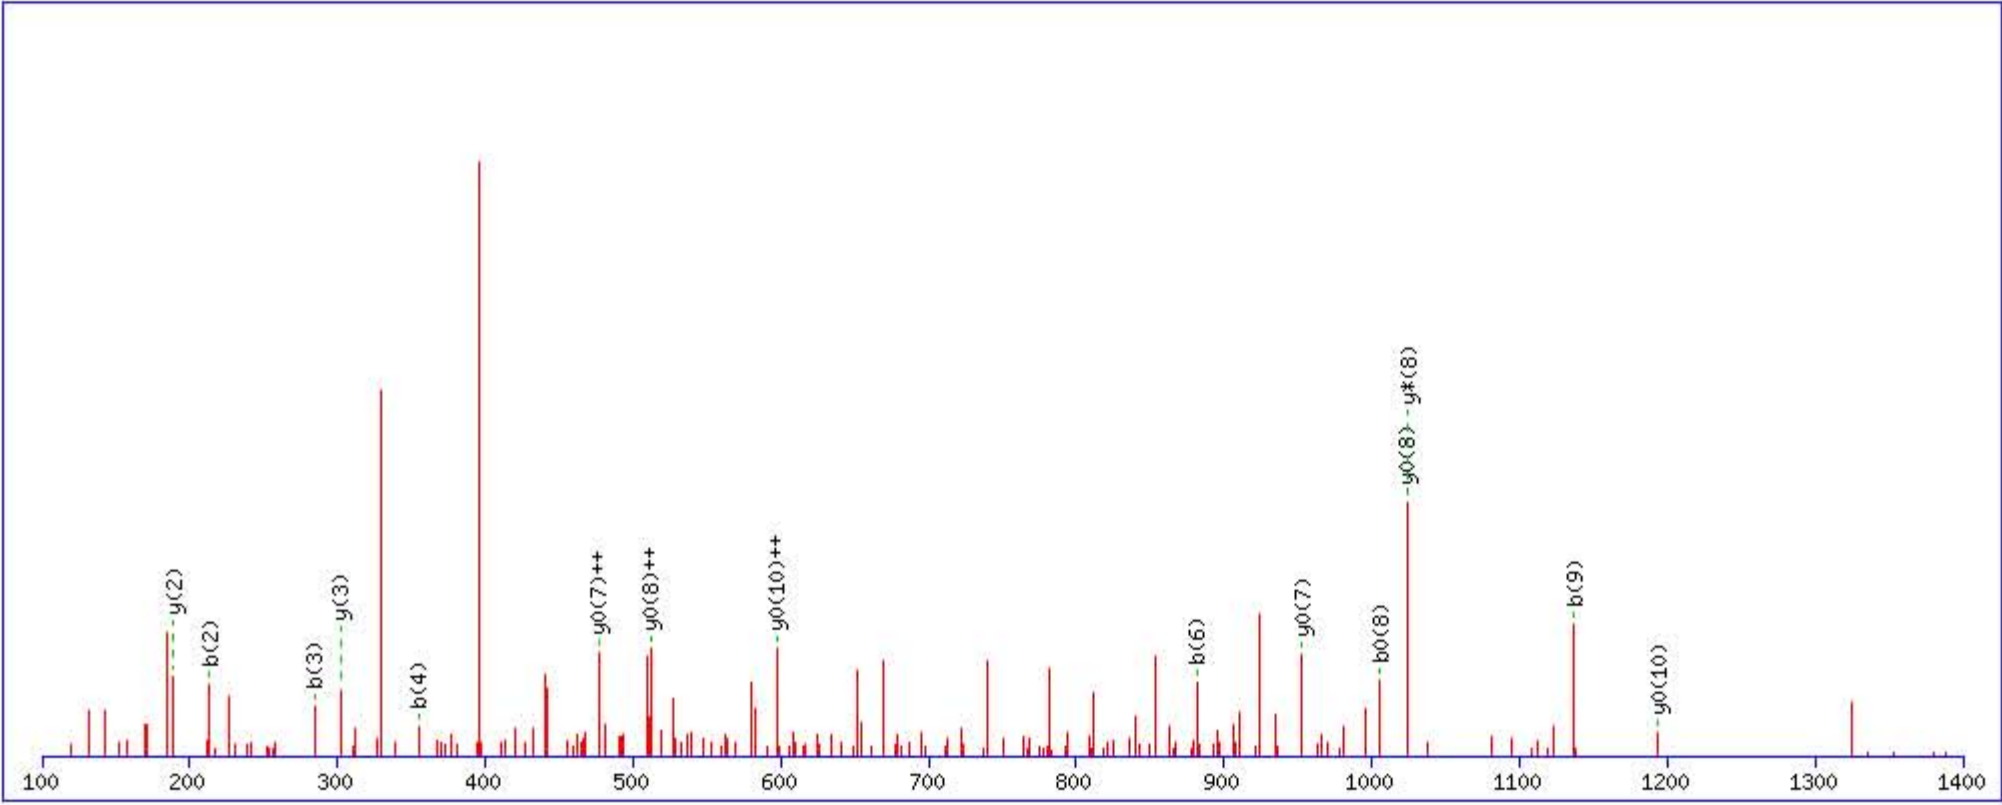

Monoisotopic mass of neutral peptide **Mr(calc):** 1323.758423  
Fixed modifications: Carbamidomethyl (C) (apply to specified residues or termini only)  
Variable modifications:  
Q6 : Biotin:Thermo-21345 (Q)  
Ions Score: 45 Expect: 0.00022  
Matches : 21/80 fragment ions using 33 most intense peaks ([help](#))

| #  | b           | b <sup>++</sup> | b <sup>+</sup> | b <sup>+++</sup> | b <sup>0</sup> | b <sup>0++</sup> | Seq. | y           | y <sup>++</sup> | y <sup>+</sup> | y <sup>+++</sup> | y <sup>0</sup> | y <sup>0++</sup> | #  |
|----|-------------|-----------------|----------------|------------------|----------------|------------------|------|-------------|-----------------|----------------|------------------|----------------|------------------|----|
| 1  | 114.091340  | 57.549308       |                |                  |                |                  | L    |             |                 |                |                  |                |                  | 11 |
| 2  | 213.159754  | 107.083515      |                |                  |                |                  | V    | 1211.681657 | 606.344466      | 1194.655108    | 597.831192       | 1193.671092    | 597.339184       | 10 |
| 3  | 284.196868  | 142.602072      |                |                  |                |                  | A    | 1112.613243 | 556.810259      | 1095.586694    | 548.296985       | 1094.602678    | 547.804977       | 9  |
| 4  | 355.233982  | 178.120629      |                |                  |                |                  | A    | 1041.576129 | 521.291702      | 1024.549580    | 512.778428       | 1023.565564    | 512.286420       | 8  |
| 5  | 442.266010  | 221.636643      |                |                  | 424.255445     | 212.631361       | S    | 970.539015  | 485.773145      | 953.512466     | 477.259871       | 952.528450     | 476.767863       | 7  |
| 6  | 881.491336  | 441.249306      | 864.464787     | 432.736032       | 863.480771     | 432.244024       | Q    | 883.506987  | 442.257131      | 866.480438     | 433.743857       |                |                  | 6  |
| 7  | 952.528450  | 476.767863      | 935.501901     | 468.254589       | 934.517885     | 467.762581       | A    | 444.281661  | 222.644468      |                |                  |                |                  | 5  |
| 8  | 1023.565564 | 512.286420      | 1006.539015    | 503.773146       | 1005.554999    | 503.281138       | A    | 373.244547  | 187.125911      |                |                  |                |                  | 4  |
| 9  | 1136.649628 | 568.828452      | 1119.623079    | 560.315178       | 1118.639063    | 559.823169       | L    | 302.207433  | 151.607354      |                |                  |                |                  | 3  |
| 10 | 1193.671092 | 597.339184      | 1176.644543    | 588.825909       | 1175.660527    | 588.333901       | G    | 189.123369  | 95.065322       |                |                  |                |                  | 2  |
| 11 |             |                 |                |                  |                |                  | L    | 132.101905  | 66.554590       |                |                  |                |                  | 1  |

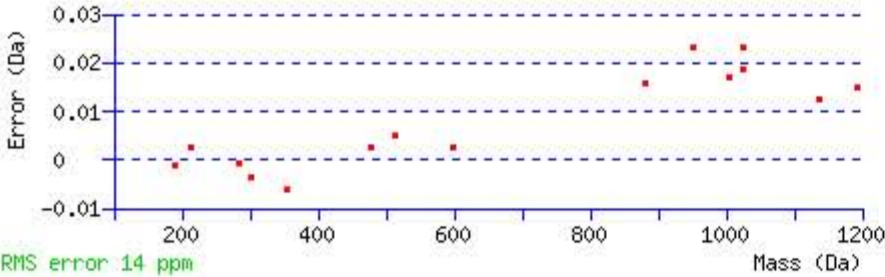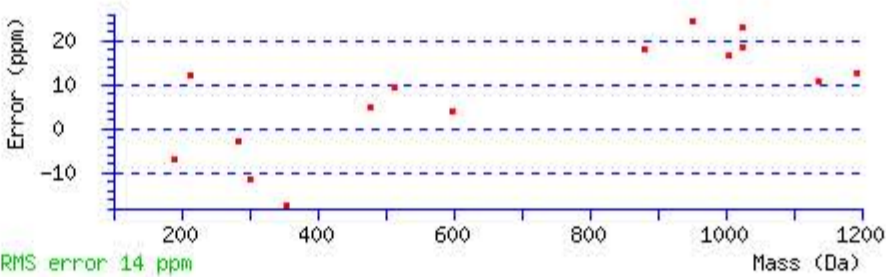

NCBI **BLAST** search of **LVAASQAALGL**  
(Parameters: blastp, nr protein database, expect=20000, no filter, PAM30)  
Other BLAST [web gateways](#)

All matches to this query

| Score | Mr(calc):   | Delta     | Sequence                      |
|-------|-------------|-----------|-------------------------------|
| 44.7  | 1323.758423 | 0.013925  | <a href="#">LVAASQAALGL</a>   |
| 5.7   | 1323.780899 | -0.008551 | <a href="#">MLGV PANRIVVR</a> |

MATRIX

SCIENCE

Mascot Search Results

Peptide View

MS/MS Fragmentation of **AAFTECCQAADK**  
Found in **ALBU\_HUMAN**, Serum albumin OS=Homo sapiens GN=ALB PE=1 SV=2

Match to Query 37579: 1681.731328 from(841.872940,2+) rtinseconds(1593) index(17561)  
Title: Locus:1.1.1.2937.13 File:"2013-07-02 CLN FXIII 180 min 2nd F 2.wiff"  
Data file C:\Program Files (x86)\Matrix Science\Mascot Daemon\mgf\8 FXIII 180 min 2nd\mascot\_daemon\_merge.mgf

Click mouse within plot area to zoom in by factor of two about that point  
Or, 

Plot from

0

 to 

3000

 Da 

Full range

  
Label all possible matches ☐ Label matches used for scoring ☒

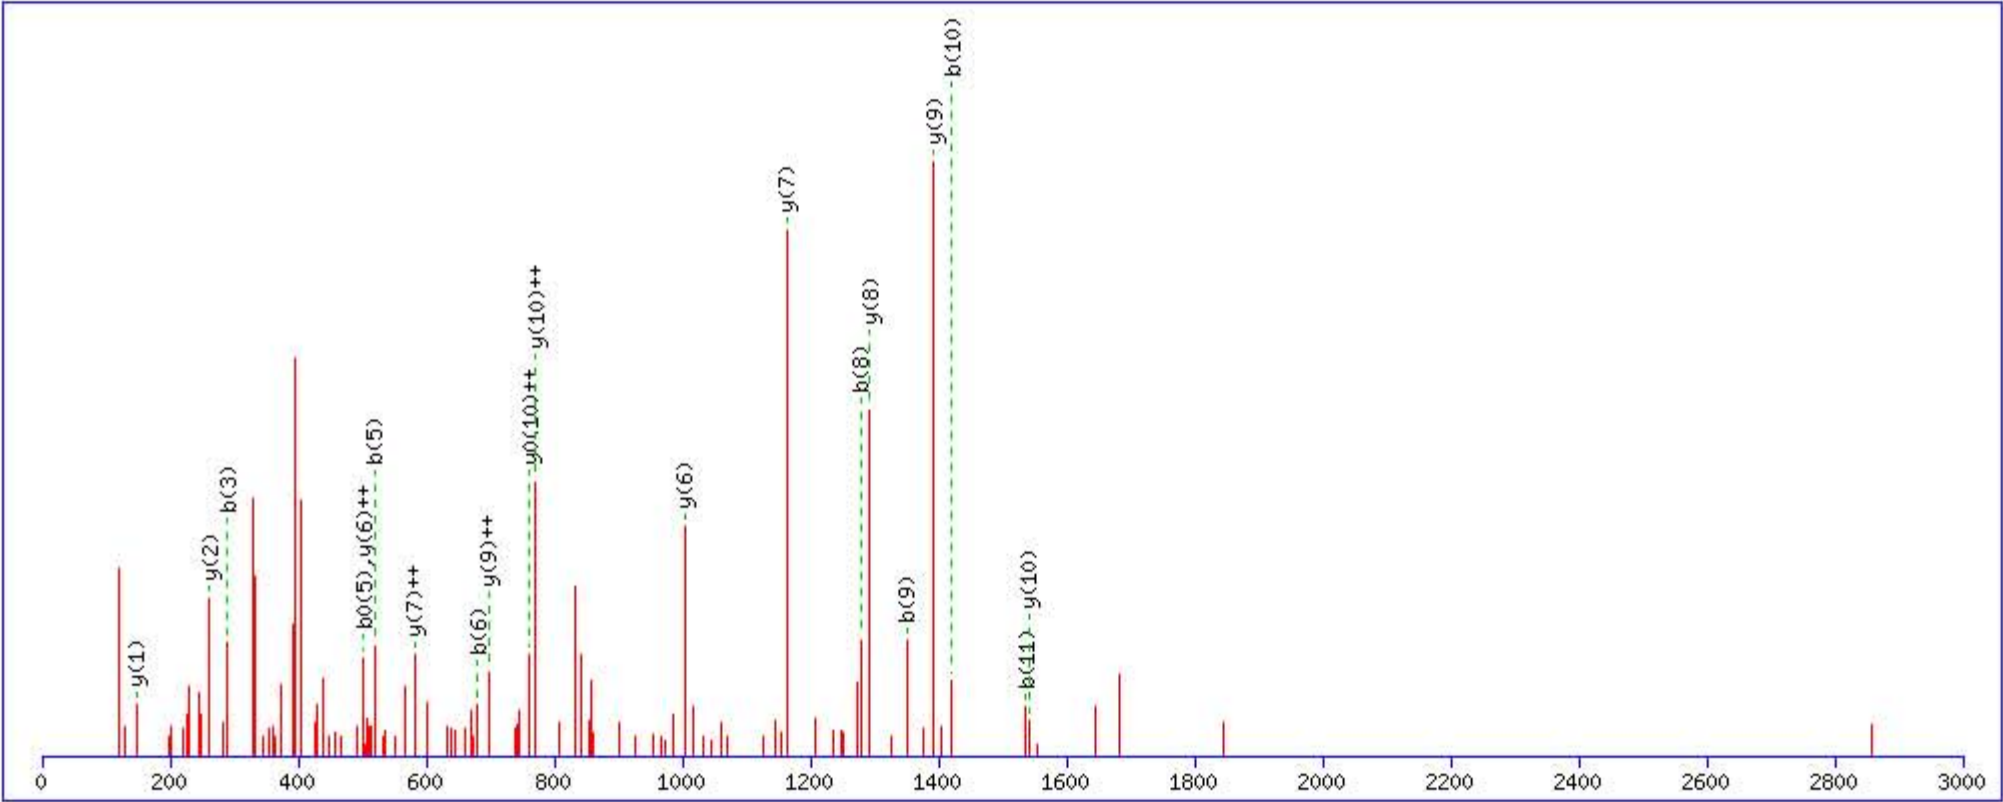

Monoisotopic mass of neutral peptide Mr(calc): 1681.726227  
Fixed modifications: Carbamidomethyl (C) (apply to specified residues or termini only)  
Variable modifications:  
Q8 : Biotin:Thermo-21345 (Q)  
Ions Score: 53 Expect: 2.6e-005  
Matches : 20/110 fragment ions using 30 most intense peaks [\(help\)](#)

| #  | b           | b <sup>++</sup> | b <sup>+</sup> | b <sup>++</sup> | b <sup>0</sup> | b <sup>0++</sup> | Seq. | y           | y <sup>++</sup> | y <sup>+</sup> | y <sup>++</sup> | y <sup>0</sup> | y <sup>0++</sup> | #  |
|----|-------------|-----------------|----------------|-----------------|----------------|------------------|------|-------------|-----------------|----------------|-----------------|----------------|------------------|----|
| 1  | 72.044390   | 36.525833       |                |                 |                |                  | A    |             |                 |                |                 |                |                  | 12 |
| 2  | 143.081504  | 72.044390       |                |                 |                |                  | A    | 1611.696399 | 806.351838      | 1594.669850    | 797.838563      | 1593.685834    | 797.346555       | 11 |
| 3  | 290.149918  | 145.578597      |                |                 |                |                  | F    | 1540.659285 | 770.833281      | 1523.632736    | 762.320006      | 1522.648720    | 761.827998       | 10 |
| 4  | 391.197597  | 196.102437      |                |                 | 373.187032     | 187.097154       | T    | 1393.590871 | 697.299074      | 1376.564322    | 688.785799      | 1375.580306    | 688.293791       | 9  |
| 5  | 520.240190  | 260.623733      |                |                 | 502.229625     | 251.618451       | E    | 1292.543192 | 646.775234      | 1275.516643    | 638.261960      | 1274.532627    | 637.769952       | 8  |
| 6  | 680.270839  | 340.639058      |                |                 | 662.260274     | 331.633775       | C    | 1163.500599 | 582.253938      | 1146.474050    | 573.740663      | 1145.490034    | 573.248655       | 7  |
| 7  | 840.301488  | 420.654382      |                |                 | 822.290923     | 411.649100       | C    | 1003.469950 | 502.238613      | 986.443401     | 493.725339      | 985.459385     | 493.233331       | 6  |
| 8  | 1279.526814 | 640.267045      | 1262.500265    | 631.753771      | 1261.516249    | 631.261763       | Q    | 843.439301  | 422.223289      | 826.412752     | 413.710014      | 825.428736     | 413.218006       | 5  |
| 9  | 1350.563928 | 675.785602      | 1333.537379    | 667.272328      | 1332.553363    | 666.780320       | A    | 404.213975  | 202.610626      | 387.187426     | 194.097351      | 386.203410     | 193.605343       | 4  |
| 10 | 1421.601042 | 711.304159      | 1404.574493    | 702.790885      | 1403.590477    | 702.298877       | A    | 333.176861  | 167.092069      | 316.150312     | 158.578794      | 315.166296     | 158.086786       | 3  |
| 11 | 1536.627985 | 768.817631      | 1519.601436    | 760.304356      | 1518.617420    | 759.812348       | D    | 262.139747  | 131.573512      | 245.113198     | 123.060237      | 244.129182     | 122.568229       | 2  |
| 12 |             |                 |                |                 |                |                  | K    | 147.112804  | 74.060040       | 130.086255     | 65.546765       |                |                  | 1  |

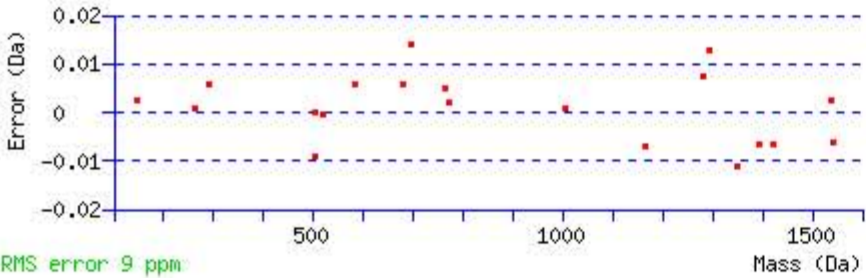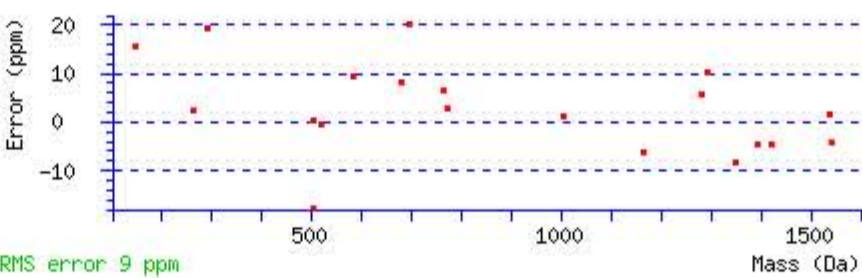

NCBI BLAST search of [AAFTECCQAADK](#)  
(Parameters: blastp, nr protein database, expect=20000, no filter, PAM30)  
Other BLAST [web gateways](#)

All matches to this query

| Score | Mr(calc):   | Delta    | Sequence                     |
|-------|-------------|----------|------------------------------|
| 53.1  | 1681.726227 | 0.005101 | <a href="#">AAFTECCQAADK</a> |

*MATRIX*  
*SCIENCE*

# Mascot Search Results

Peptide View

MS/MS Fragmentation of **YICENQDSISSK**  
Found in **ALBU\_HUMAN**, Serum albumin OS=Homo sapiens GN=ALB PE=1 SV=2

Match to Query 39179: 1753.803828 from(877.909190,2+) rtinseconds(1657) index(17915)  
Title: Locus:1.1.1.2959.11 File:"2013-07-02 CLN FXIII 180 min 2nd F 2.wiff"  
Data file C:\Program Files (x86)\Matrix Science\Mascot Daemon\mgf\8 FXIII 180 min 2nd\mascot\_daemon\_merge.mgf

Click mouse within plot area to zoom in by factor of two about that point  
Or, Plot from  to  Da   
Label all possible matches ☐ Label matches used for scoring ☒

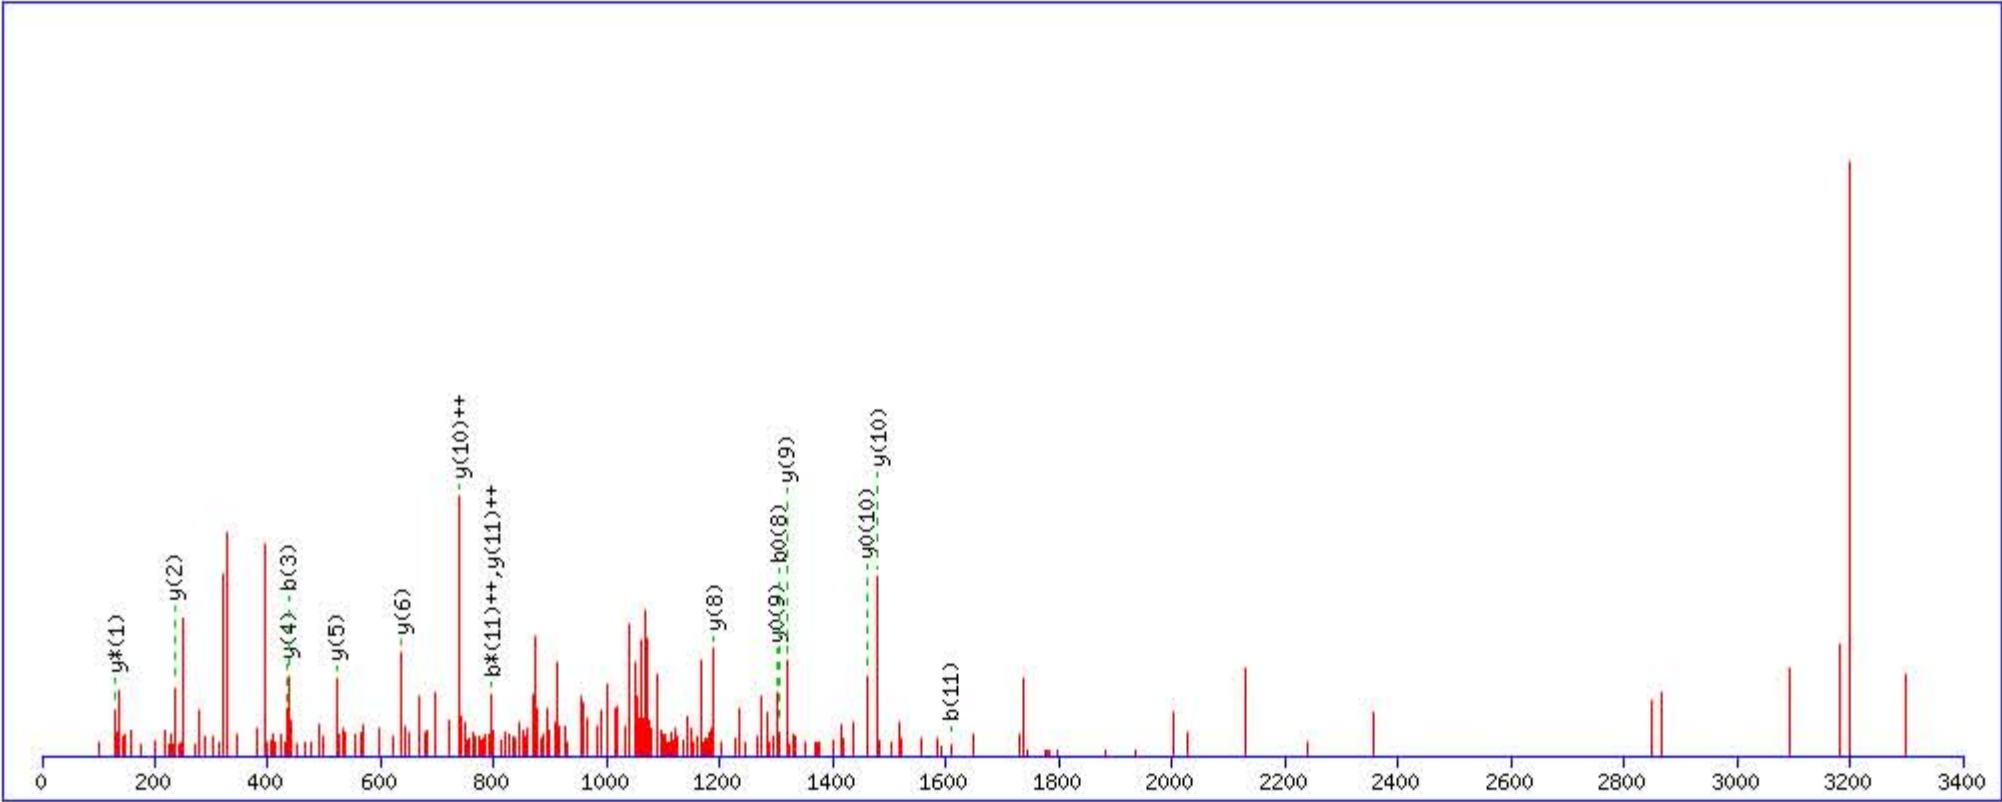

Monoisotopic mass of neutral peptide Mr(calc): 1753.801483  
Fixed modifications: Carbamidomethyl (C) (apply to specified residues or termini only)  
Variable modifications:  
Q6 : Biotin:Thermo-21345 (Q)  
Ions Score: 30 Expect: 0.012  
Matches : 16/116 fragment ions using 34 most intense peaks ([help](#))

| #  | b           | b <sup>++</sup> | b <sup>+</sup> | b <sup>++</sup> | b <sup>0</sup> | b <sup>0++</sup> | Seq. | y           | y <sup>++</sup> | y <sup>+</sup> | y <sup>++</sup> | y <sup>0</sup> | y <sup>0++</sup> | #  |
|----|-------------|-----------------|----------------|-----------------|----------------|------------------|------|-------------|-----------------|----------------|-----------------|----------------|------------------|----|
| 1  | 164.070605  | 82.538940       |                |                 |                |                  | Y    |             |                 |                |                 |                |                  | 12 |
| 2  | 277.154669  | 139.080973      |                |                 |                |                  | I    | 1591.745454 | 796.376365      | 1574.718905    | 787.863091      | 1573.734889    | 787.371083       | 11 |
| 3  | 437.185318  | 219.096297      |                |                 |                |                  | C    | 1478.661390 | 739.834333      | 1461.634841    | 731.321059      | 1460.650825    | 730.829051       | 10 |
| 4  | 566.227911  | 283.617594      |                |                 | 548.217346     | 274.612311       | E    | 1318.630741 | 659.819009      | 1301.604192    | 651.305734      | 1300.620176    | 650.813726       | 9  |
| 5  | 680.270838  | 340.639057      | 663.244289     | 332.125783      | 662.260273     | 331.633775       | N    | 1189.588148 | 595.297712      | 1172.561599    | 586.784438      | 1171.577583    | 586.292430       | 8  |
| 6  | 1119.496164 | 560.251720      | 1102.469615    | 551.738446      | 1101.485599    | 551.246437       | Q    | 1075.545221 | 538.276249      | 1058.518672    | 529.762974      | 1057.534656    | 529.270966       | 7  |
| 7  | 1234.523107 | 617.765192      | 1217.496558    | 609.251917      | 1216.512542    | 608.759909       | D    | 636.319895  | 318.663586      | 619.293346     | 310.150311      | 618.309330     | 309.658303       | 6  |
| 8  | 1321.555135 | 661.281206      | 1304.528586    | 652.767931      | 1303.544570    | 652.275923       | S    | 521.292952  | 261.150114      | 504.266403     | 252.636840      | 503.282387     | 252.144832       | 5  |
| 9  | 1434.639199 | 717.823238      | 1417.612650    | 709.309963      | 1416.628634    | 708.817955       | I    | 434.260924  | 217.634100      | 417.234375     | 209.120826      | 416.250359     | 208.628818       | 4  |
| 10 | 1521.671227 | 761.339252      | 1504.644678    | 752.825977      | 1503.660662    | 752.333969       | S    | 321.176860  | 161.092068      | 304.150311     | 152.578794      | 303.166295     | 152.086786       | 3  |
| 11 | 1608.703255 | 804.855266      | 1591.676706    | 796.341991      | 1590.692690    | 795.849983       | S    | 234.144832  | 117.576054      | 217.118283     | 109.062780      | 216.134267     | 108.570772       | 2  |
| 12 |             |                 |                |                 |                |                  | K    | 147.112804  | 74.060040       | 130.086255     | 65.546765       |                |                  | 1  |

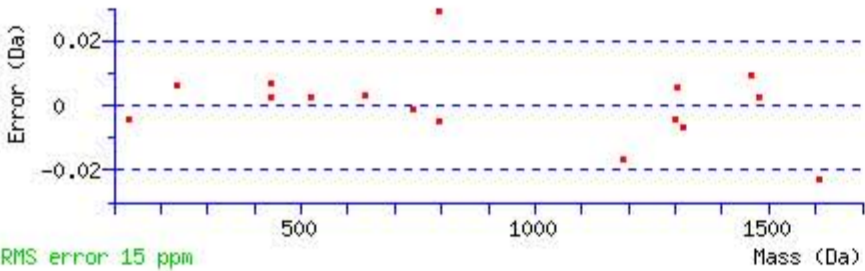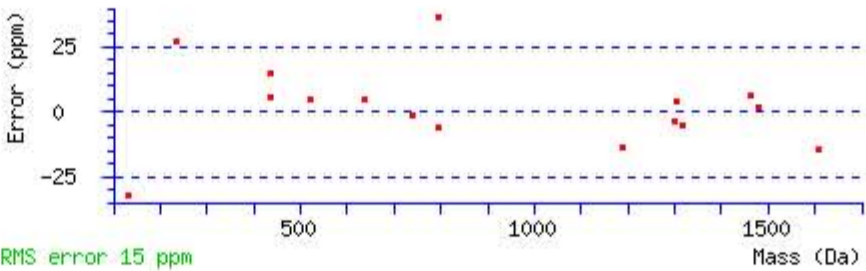

NCBI BLAST search of [YICENQDSISSK](#)  
(Parameters: blastp, nr protein database, expect=20000, no filter, PAM30)  
Other BLAST [web gateways](#)

All matches to this query

| Score | Mr(calc):   | Delta    | Sequence                     |
|-------|-------------|----------|------------------------------|
| 29.8  | 1753.801483 | 0.002345 | <a href="#">YICENQDSISSK</a> |

MATRIX

SCIENCE

Mascot Search Results

Peptide View

MS/MS Fragmentation of **KVPQVSTPTLVEVSR**  
Found in **ALBU\_HUMAN**, Serum albumin OS=Homo sapiens GN=ALB PE=1 SV=2

Match to Query 43099: 1950.105972 from(651.042600,3+) rtinseconds(1919) index(65863)  
Title: Locus:1.1.1.1943.18 File:"2013-07-02 CLN FXIII 180 min 2nd FT.wiff"  
Data file C:\Program Files (x86)\Matrix Science\Mascot Daemon\mgf\8 FXIII 180 min 2nd\mascot\_daemon\_merge.mgf

Click mouse within plot area to zoom in by factor of two about that point  
Or,   to  Da   
Label all possible matches ☐ Label matches used for scoring ☒

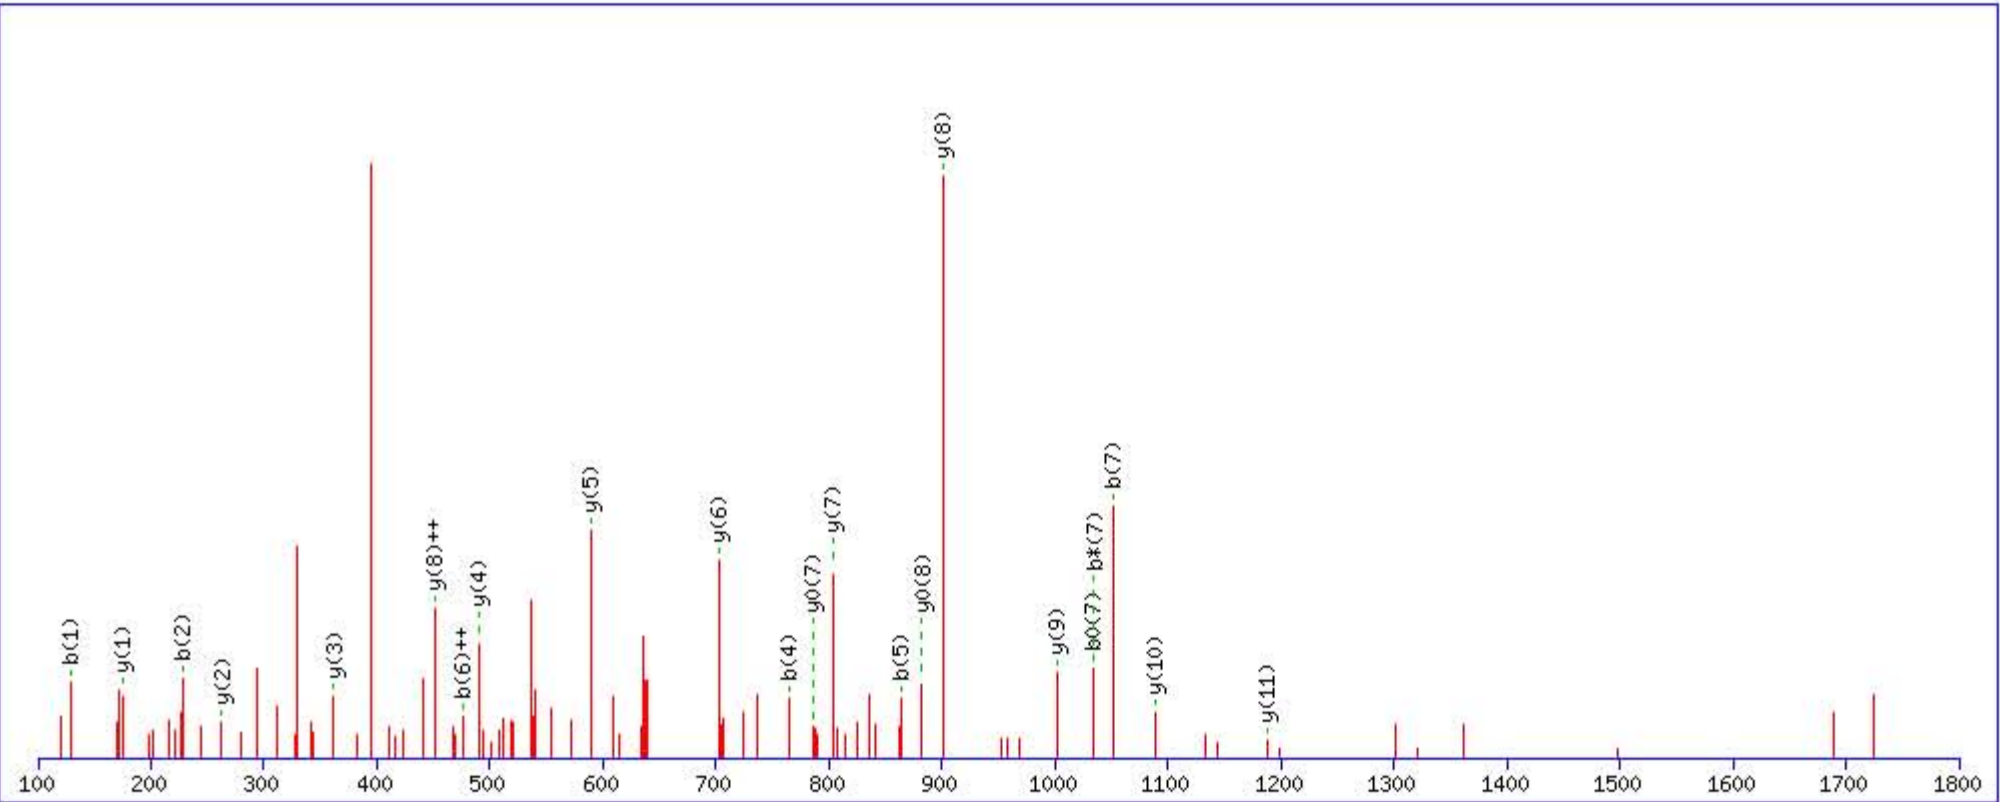

Monoisotopic mass of neutral peptide Mr(calc): 1950.097229  
Fixed modifications: Carbamidomethyl (C) (apply to specified residues or termini only)  
Variable modifications:  
Q4 : Biotin:Thermo-21345 (Q)  
Ions Score: 43 Expect: 0.0005  
Matches : 22/156 fragment ions using 61 most intense peaks [\(help\)](#)

| #  | b           | b <sup>++</sup> | b <sup>+</sup> | b <sup>+++</sup> | b <sup>0</sup> | b <sup>0++</sup> | Seq. | y           | y <sup>++</sup> | y <sup>+</sup> | y <sup>+++</sup> | y <sup>0</sup> | y <sup>0++</sup> | #  |
|----|-------------|-----------------|----------------|------------------|----------------|------------------|------|-------------|-----------------|----------------|------------------|----------------|------------------|----|
| 1  | 129.102239  | 65.054757       | 112.075690     | 56.541483        |                |                  | K    |             |                 |                |                  |                |                  | 15 |
| 2  | 228.170653  | 114.588965      | 211.144104     | 106.075690       |                |                  | V    | 1823.009533 | 912.008404      | 1805.982984    | 903.495130       | 1804.998968    | 903.003122       | 14 |
| 3  | 325.223417  | 163.115346      | 308.196868     | 154.602072       |                |                  | P    | 1723.941119 | 862.474197      | 1706.914570    | 853.960923       | 1705.930554    | 853.468915       | 13 |
| 4  | 764.448743  | 382.728010      | 747.422194     | 374.214735       |                |                  | Q    | 1626.888355 | 813.947815      | 1609.861806    | 805.434541       | 1608.877790    | 804.942533       | 12 |
| 5  | 863.517157  | 432.262217      | 846.490608     | 423.748942       |                |                  | V    | 1187.663029 | 594.335153      | 1170.636480    | 585.821878       | 1169.652464    | 585.329870       | 11 |
| 6  | 950.549185  | 475.778231      | 933.522636     | 467.264956       | 932.538620     | 466.772948       | S    | 1088.594615 | 544.800946      | 1071.568066    | 536.287671       | 1070.584050    | 535.795663       | 10 |
| 7  | 1051.596864 | 526.302070      | 1034.570315    | 517.788795       | 1033.586299    | 517.296787       | T    | 1001.562587 | 501.284932      | 984.536038     | 492.771657       | 983.552022     | 492.279649       | 9  |
| 8  | 1148.649628 | 574.828452      | 1131.623079    | 566.315178       | 1130.639063    | 565.823169       | P    | 900.514908  | 450.761092      | 883.488359     | 442.247818       | 882.504343     | 441.755810       | 8  |
| 9  | 1249.697307 | 625.352291      | 1232.670758    | 616.839017       | 1231.686742    | 616.347009       | T    | 803.462144  | 402.234710      | 786.435595     | 393.721436       | 785.451579     | 393.229428       | 7  |
| 10 | 1362.781371 | 681.894323      | 1345.754822    | 673.381049       | 1344.770806    | 672.889041       | L    | 702.414465  | 351.710871      | 685.387916     | 343.197596       | 684.403900     | 342.705588       | 6  |
| 11 | 1461.849785 | 731.428530      | 1444.823236    | 722.915256       | 1443.839220    | 722.423248       | V    | 589.330401  | 295.168839      | 572.303852     | 286.655564       | 571.319836     | 286.163556       | 5  |
| 12 | 1590.892378 | 795.949827      | 1573.865829    | 787.436552       | 1572.881813    | 786.944544       | E    | 490.261987  | 245.634631      | 473.235438     | 237.121357       | 472.251422     | 236.629349       | 4  |
| 13 | 1689.960792 | 845.484034      | 1672.934243    | 836.970759       | 1671.950227    | 836.478751       | V    | 361.219394  | 181.113335      | 344.192845     | 172.600061       | 343.208829     | 172.108053       | 3  |
| 14 | 1776.992820 | 889.000048      | 1759.966271    | 880.486774       | 1758.982255    | 879.994765       | S    | 262.150980  | 131.579128      | 245.124431     | 123.065854       | 244.140415     | 122.573846       | 2  |
| 15 |             |                 |                |                  |                |                  | R    | 175.118952  | 88.063114       | 158.092403     | 79.549839        |                |                  | 1  |

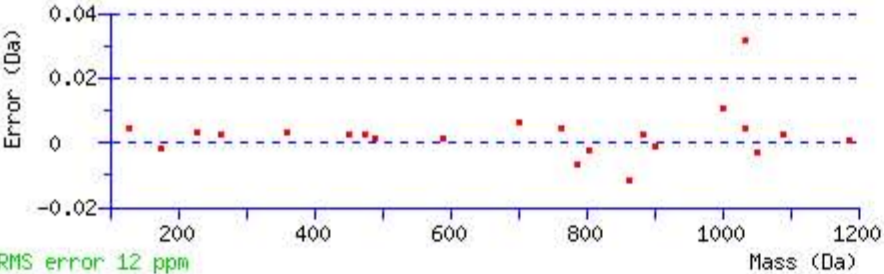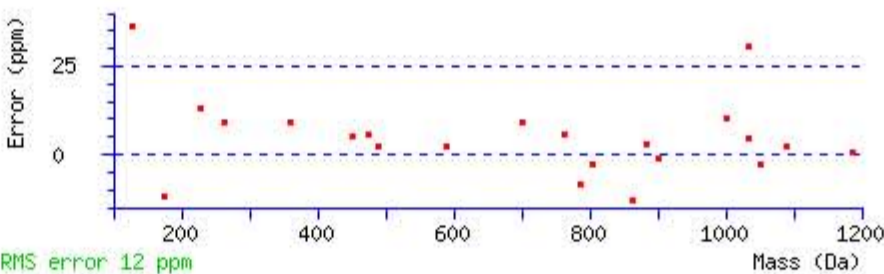

NCBI BLAST search of [KVPQVSTPTLVEVSR](#)  
(Parameters: blastp, nr protein database, expect=20000, no filter, PAM30)  
Other BLAST [web gateways](#)

All matches to this query

| Score | Mr(calc):   | Delta    | Sequence                        |
|-------|-------------|----------|---------------------------------|
| 43.0  | 1950.097229 | 0.008743 | <a href="#">KVPQVSTPTLVEVSR</a> |

MATRIX

SCIENCE

Mascot Search Results

Peptide View

MS/MS Fragmentation of **QNCELFEQLGEYK**  
Found in **ALBU\_HUMAN**, Serum albumin OS=Homo sapiens GN=ALB PE=1 SV=2

Match to Query 43526: 1967.927742 from(656.983190,3+) rtinseconds(2391) index(7801)  
Title: Locus:1.1.1.2110.8 File:"2013-07-02 CLN FXIII 180 min 2nd F 1.wiff"  
Data file C:\Program Files (x86)\Matrix Science\Mascot Daemon\mgf\8 FXIII 180 min 2nd\mascot\_daemon\_merge.mgf

Click mouse within plot area to zoom in by factor of two about that point  
Or, 

Plot from

100

 to 

2000

 Da

Full range

Label all possible matches ☐ Label matches used for scoring ☒

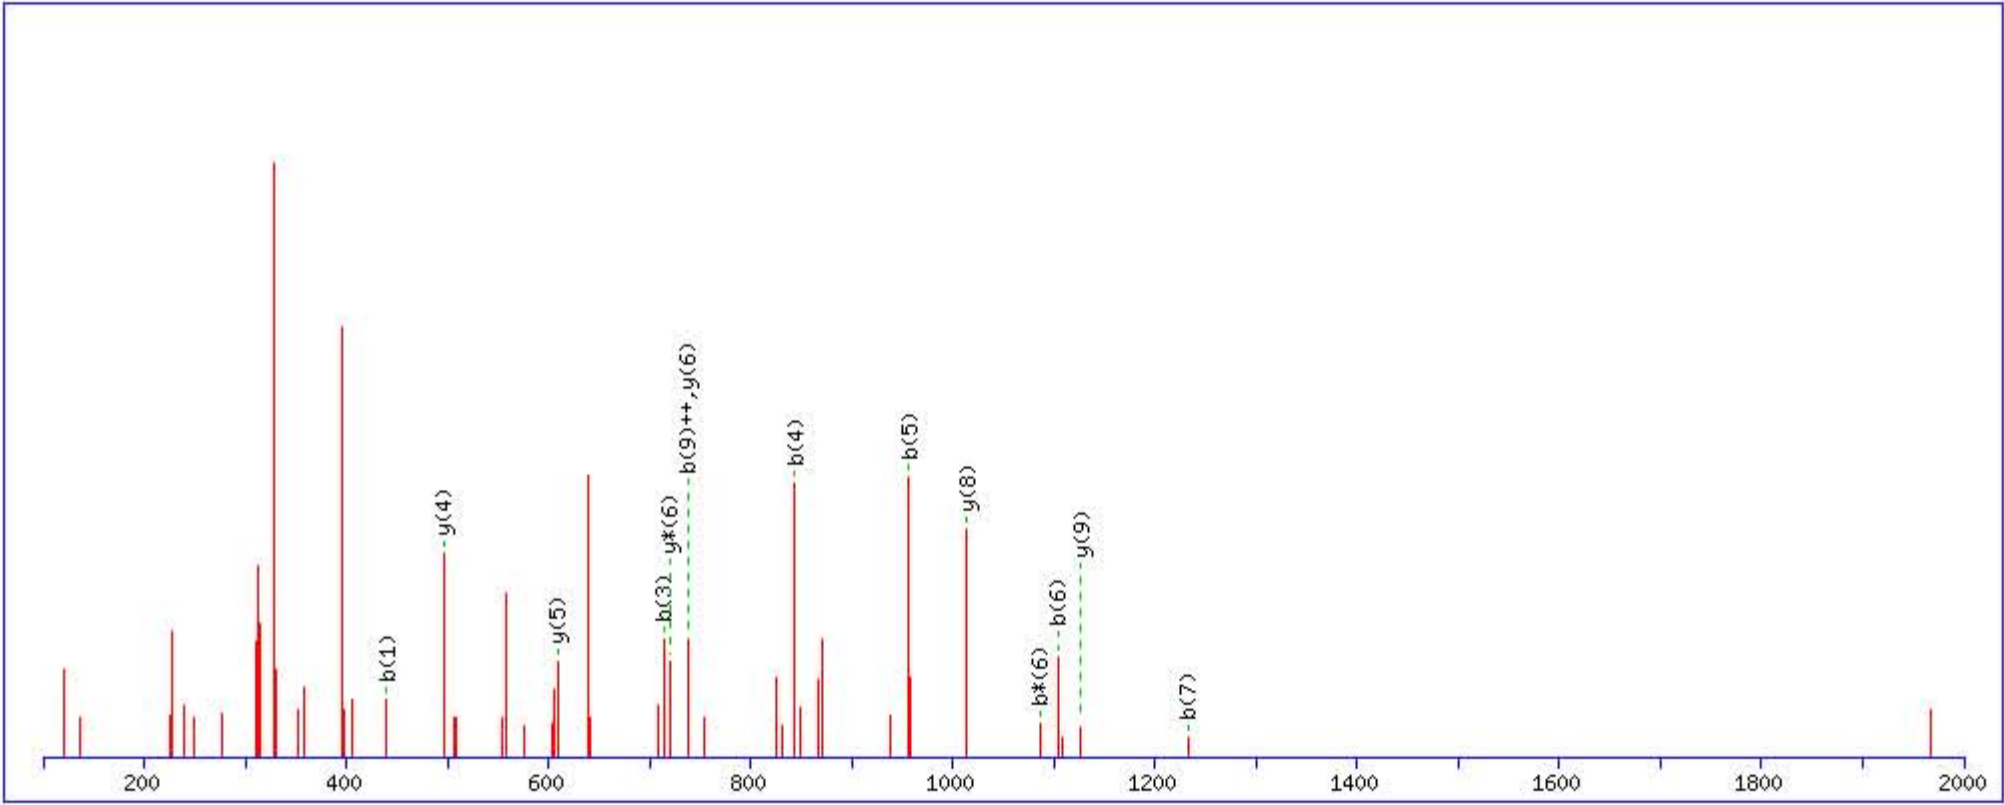

Monoisotopic mass of neutral peptide Mr(calc): 1967.912094  
Fixed modifications: Carbamidomethyl (C) (apply to specified residues or termini only)  
Variable modifications:  
Q1 : Biotin:Thermo-21345 (Q)  
Ions Score: 33 Expect: 0.0084  
Matches : 14/134 fragment ions using 23 most intense peaks [\(help\)](#)

| #  | b                  | b <sup>++</sup>   | b <sup>*</sup>     | b <sup>+++</sup> | b <sup>0</sup> | b <sup>0++</sup> | Seq.     | y                  | y <sup>++</sup> | y <sup>*</sup>    | y <sup>+++</sup> | y <sup>0</sup> | y <sup>0++</sup> | #         |
|----|--------------------|-------------------|--------------------|------------------|----------------|------------------|----------|--------------------|-----------------|-------------------|------------------|----------------|------------------|-----------|
| 1  | <b>440.232602</b>  | 220.619939        | 423.206053         | 212.106664       |                |                  | <b>Q</b> |                    |                 |                   |                  |                |                  | <b>13</b> |
| 2  | 554.275529         | 277.641403        | 537.248980         | 269.128128       |                |                  | <b>N</b> | 1529.694072        | 765.350674      | 1512.667523       | 756.837400       | 1511.683507    | 756.345392       | <b>12</b> |
| 3  | <b>714.306178</b>  | 357.656727        | 697.279629         | 349.143453       |                |                  | <b>C</b> | 1415.651145        | 708.329211      | 1398.624596       | 699.815936       | 1397.640580    | 699.323928       | <b>11</b> |
| 4  | <b>843.348771</b>  | 422.178024        | 826.322222         | 413.664749       | 825.338206     | 413.172741       | <b>E</b> | 1255.620496        | 628.313886      | 1238.593947       | 619.800612       | 1237.609931    | 619.308604       | <b>10</b> |
| 5  | <b>956.432835</b>  | 478.720056        | 939.406286         | 470.206781       | 938.422270     | 469.714773       | <b>L</b> | <b>1126.577903</b> | 563.792590      | 1109.551354       | 555.279315       | 1108.567338    | 554.787307       | <b>9</b>  |
| 6  | <b>1103.501249</b> | 552.254263        | <b>1086.474700</b> | 543.740988       | 1085.490684    | 543.248980       | <b>F</b> | <b>1013.493839</b> | 507.250558      | 996.467290        | 498.737283       | 995.483274     | 498.245275       | <b>8</b>  |
| 7  | <b>1232.543842</b> | 616.775559        | 1215.517293        | 608.262285       | 1214.533277    | 607.770277       | <b>E</b> | 866.425425         | 433.716351      | 849.398876        | 425.203076       | 848.414860     | 424.711068       | <b>7</b>  |
| 8  | 1360.602420        | 680.804848        | 1343.575871        | 672.291574       | 1342.591855    | 671.799566       | <b>Q</b> | <b>737.382832</b>  | 369.195054      | <b>720.356283</b> | 360.681780       | 719.372267     | 360.189772       | <b>6</b>  |
| 9  | 1473.686484        | <b>737.346880</b> | 1456.659935        | 728.833606       | 1455.675919    | 728.341598       | <b>L</b> | <b>609.324254</b>  | 305.165765      | 592.297705        | 296.652490       | 591.313689     | 296.160482       | <b>5</b>  |
| 10 | 1530.707948        | 765.857612        | 1513.681399        | 757.344338       | 1512.697383    | 756.852330       | <b>G</b> | <b>496.240190</b>  | 248.623733      | 479.213641        | 240.110458       | 478.229625     | 239.618450       | <b>4</b>  |
| 11 | 1659.750541        | 830.378909        | 1642.723992        | 821.865634       | 1641.739976    | 821.373626       | <b>E</b> | 439.218726         | 220.113001      | 422.192177        | 211.599726       | 421.208161     | 211.107718       | <b>3</b>  |
| 12 | 1822.813870        | 911.910573        | 1805.787321        | 903.397299       | 1804.803305    | 902.905291       | <b>Y</b> | 310.176133         | 155.591705      | 293.149584        | 147.078430       |                |                  | <b>2</b>  |
| 13 |                    |                   |                    |                  |                |                  | <b>K</b> | 147.112804         | 74.060040       | 130.086255        | 65.546765        |                |                  | <b>1</b>  |

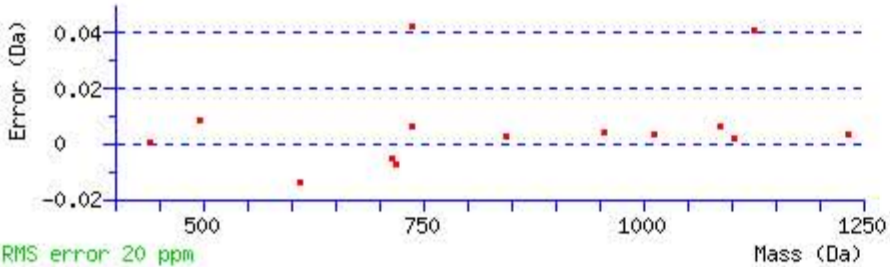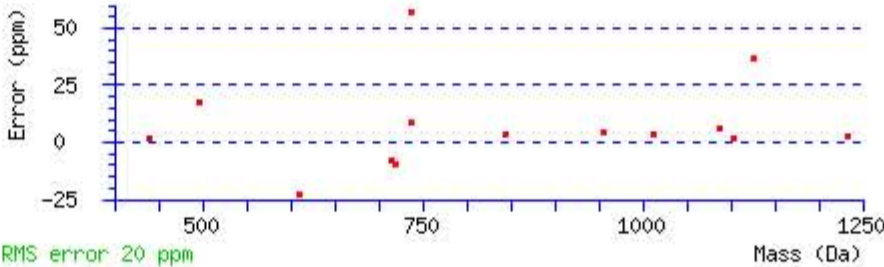

NCBI **BLAST** search of **QNCELFEQLGEYK**  
(Parameters: blastp, nr protein database, expect=20000, no filter, PAM30)  
Other BLAST [web gateways](#)

All matches to this query

| Score | Mr(calc):   | Delta    | Sequence                      |
|-------|-------------|----------|-------------------------------|
| 33.1  | 1967.912094 | 0.015648 | <a href="#">QNCELFEQLGEYK</a> |

MATRIX

SCIENCE

Mascot Search Results

Peptide View

MS/MS Fragmentation of **VFDEFKPLVEEPQNLIK**  
Found in **ALBU\_HUMAN**, Serum albumin OS=Homo sapiens GN=ALB PE=1 SV=2

Match to Query 51396: 2355.288072 from(786.103300,3+) rtinseconds(2620) index(23807)  
Title: Locus:1.1.1.3294.18 File:"2013-07-02 CLN FXIII 180 min 2nd F 2.wiff"  
Data file C:\Program Files (x86)\Matrix Science\Mascot Daemon\mgf\8 FXIII 180 min 2nd\mascot\_daemon\_merge.mgf

Click mouse within plot area to zoom in by factor of two about that point  
Or,   to  Da   
Label all possible matches ☐ Label matches used for scoring ☒

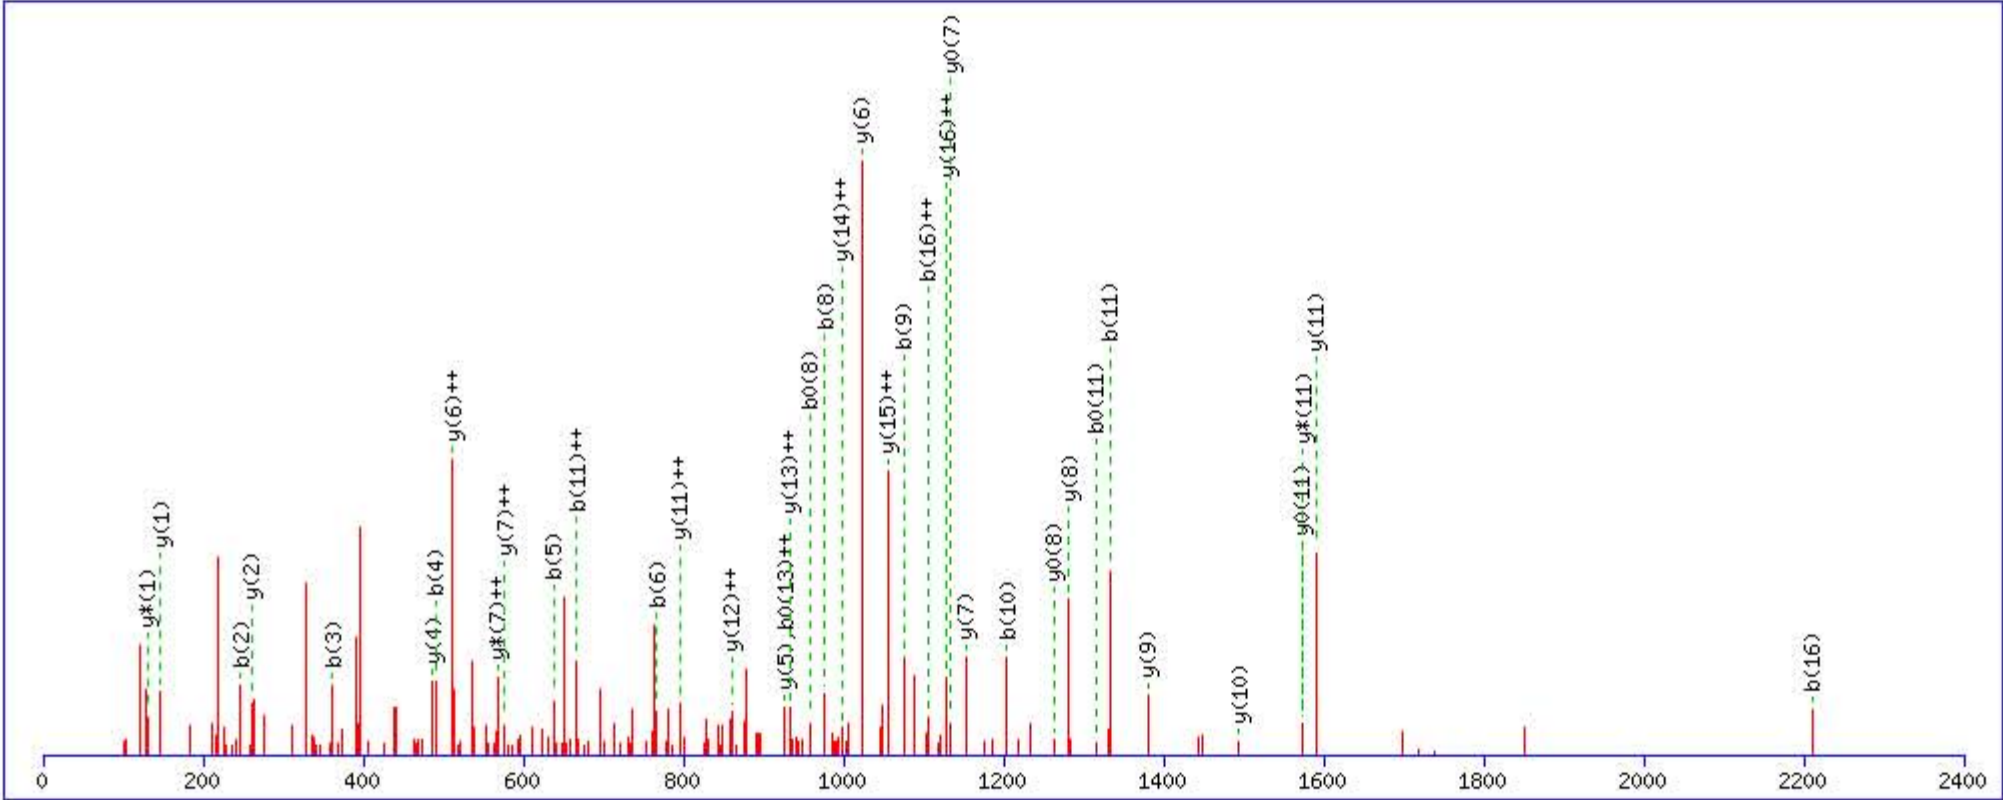

Monoisotopic mass of neutral peptide Mr(calc): 2355.254822  
Fixed modifications: Carbamidomethyl (C) (apply to specified residues or termini only)  
Variable modifications:  
Q13 : Biotin:Thermo-21345 (Q)  
Ions Score: 52 Expect: 9e-005  
Matches : 39/166 fragment ions using 77 most intense peaks [\(help\)](#)

| #  | b           | b <sup>++</sup> | b <sup>*</sup> | b <sup>+++</sup> | b <sup>0</sup> | b <sup>0++</sup> | Seq. | y           | y <sup>++</sup> | y <sup>*</sup> | y <sup>+++</sup> | y <sup>0</sup> | y <sup>0++</sup> | #  |
|----|-------------|-----------------|----------------|------------------|----------------|------------------|------|-------------|-----------------|----------------|------------------|----------------|------------------|----|
| 1  | 100.075690  | 50.541483       |                |                  |                |                  | V    |             |                 |                |                  |                |                  | 17 |
| 2  | 247.144104  | 124.075690      |                |                  |                |                  | F    | 2257.193704 | 1129.100490     | 2240.167155    | 1120.587216      | 2239.183139    | 1120.095208      | 16 |
| 3  | 362.171047  | 181.589161      |                |                  | 344.160482     | 172.583879       | D    | 2110.125290 | 1055.566283     | 2093.098741    | 1047.053008      | 2092.114725    | 1046.561000      | 15 |
| 4  | 491.213640  | 246.110458      |                |                  | 473.203075     | 237.105176       | E    | 1995.098347 | 998.052812      | 1978.071798    | 989.539537       | 1977.087782    | 989.047529       | 14 |
| 5  | 638.282054  | 319.644665      |                |                  | 620.271489     | 310.639383       | F    | 1866.055754 | 933.531515      | 1849.029205    | 925.018241       | 1848.045189    | 924.526233       | 13 |
| 6  | 766.377017  | 383.692147      | 749.350468     | 375.178872       | 748.366452     | 374.686864       | K    | 1718.987340 | 859.997308      | 1701.960791    | 851.484034       | 1700.976775    | 850.992026       | 12 |
| 7  | 863.429781  | 432.218529      | 846.403232     | 423.705254       | 845.419216     | 423.213246       | P    | 1590.892377 | 795.949827      | 1573.865828    | 787.436552       | 1572.881812    | 786.944544       | 11 |
| 8  | 976.513845  | 488.760561      | 959.487296     | 480.247286       | 958.503280     | 479.755278       | L    | 1493.839613 | 747.423445      | 1476.813064    | 738.910170       | 1475.829048    | 738.418162       | 10 |
| 9  | 1075.582259 | 538.294768      | 1058.555710    | 529.781493       | 1057.571694    | 529.289485       | V    | 1380.755549 | 690.881413      | 1363.729000    | 682.368138       | 1362.744984    | 681.876130       | 9  |
| 10 | 1204.624852 | 602.816064      | 1187.598303    | 594.302790       | 1186.614287    | 593.810782       | E    | 1281.687135 | 641.347206      | 1264.660586    | 632.833931       | 1263.676570    | 632.341923       | 8  |
| 11 | 1333.667445 | 667.337361      | 1316.640896    | 658.824086       | 1315.656880    | 658.332078       | E    | 1152.644542 | 576.825909      | 1135.617993    | 568.312635       | 1134.633977    | 567.820627       | 7  |
| 12 | 1430.720209 | 715.863743      | 1413.693660    | 707.350468       | 1412.709644    | 706.858460       | P    | 1023.601949 | 512.304613      | 1006.575400    | 503.791338       |                |                  | 6  |
| 13 | 1869.945535 | 935.476406      | 1852.918986    | 926.963131       | 1851.934970    | 926.471123       | Q    | 926.549185  | 463.778231      | 909.522636     | 455.264956       |                |                  | 5  |
| 14 | 1983.988462 | 992.497869      | 1966.961913    | 983.984595       | 1965.977897    | 983.492587       | N    | 487.323859  | 244.165568      | 470.297310     | 235.652293       |                |                  | 4  |
| 15 | 2097.072526 | 1049.039901     | 2080.045977    | 1040.526627      | 2079.061961    | 1040.034619      | L    | 373.280932  | 187.144104      | 356.254383     | 178.630830       |                |                  | 3  |
| 16 | 2210.156590 | 1105.581933     | 2193.130041    | 1097.068659      | 2192.146025    | 1096.576651      | I    | 260.196868  | 130.602072      | 243.170319     | 122.088798       |                |                  | 2  |
| 17 |             |                 |                |                  |                |                  | K    | 147.112804  | 74.060040       | 130.086255     | 65.546765        |                |                  | 1  |

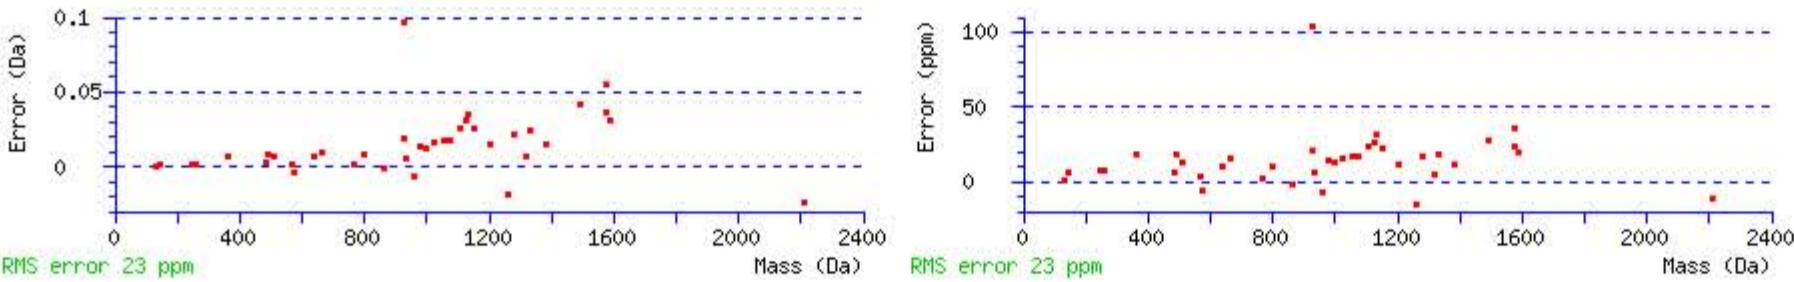

NCBI BLAST search of [VFDEFKPLVEEPQNLIK](#)  
(Parameters: blastp, nr protein database, expect=20000, no filter, PAM30)  
Other BLAST [web gateways](#)

All matches to this query

| Score | Mr(calc):   | Delta    | Sequence                          |
|-------|-------------|----------|-----------------------------------|
| 52.5  | 2355.254822 | 0.033250 | <a href="#">VFDEFKPLVEEPQNLIK</a> |

MATRIX

SCIENCE

Mascot Search Results

Peptide View

MS/MS Fragmentation of **RMPCAEDYLSVVLNQLCVLHEK**  
Found in **ALBU\_HUMAN**, Serum albumin OS=Homo sapiens GN=ALB PE=1 SV=2

Match to Query 60016: 2984.507656 from(747.134190,4+) rtinseconds(3089) index(26559)  
Title: Locus:1.1.1.3455.11 File:"2013-07-02 CLN FXIII 180 min 2nd F 2.wiff"  
Data file C:\Program Files (x86)\Matrix Science\Mascot Daemon\mgf\8 FXIII 180 min 2nd\mascot\_daemon\_merge.mgf

Click mouse within plot area to zoom in by factor of two about that point  
Or, 

Plot from

100

 to 

1900

 Da 

Full range

  
Label all possible matches ☐ Label matches used for scoring ☒

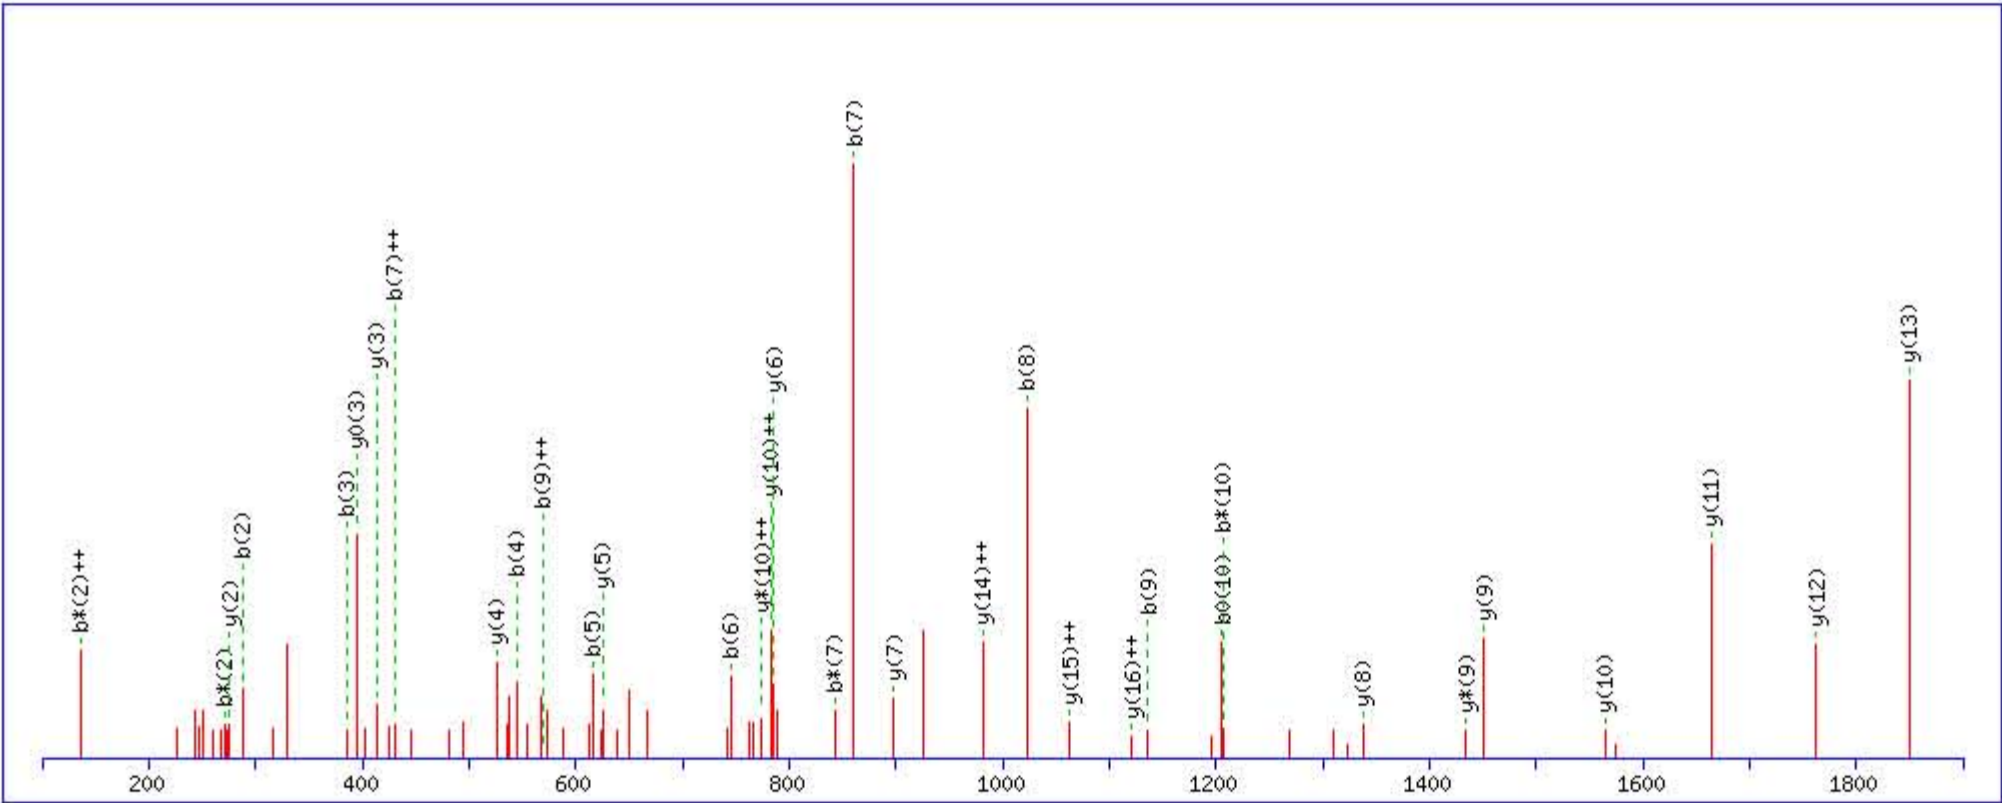

Monoisotopic mass of neutral peptide Mr(calc): 2984.474426  
Fixed modifications: Carbamidomethyl (C) (apply to specified residues or termini only)  
Variable modifications:  
Q15 : Biotin:Thermo-21345 (Q)  
Ions Score: 80 Expect: 3.5e-008  
Matches : 34/240 fragment ions using 60 most intense peaks [\(help\)](#)

| #  | b           | b <sup>++</sup> | b <sup>*</sup> | b <sup>*++</sup> | b <sup>0</sup> | b <sup>0++</sup> | Seq. | y           | y <sup>++</sup> | y <sup>*</sup> | y <sup>*++</sup> | y <sup>0</sup> | y <sup>0++</sup> | #  |
|----|-------------|-----------------|----------------|------------------|----------------|------------------|------|-------------|-----------------|----------------|------------------|----------------|------------------|----|
| 1  | 157.108387  | 79.057831       | 140.081838     | 70.544557        |                |                  | R    |             |                 |                |                  |                |                  | 22 |
| 2  | 288.148872  | 144.578074      | 271.122323     | 136.064799       |                |                  | M    | 2829.380614 | 1415.193945     | 2812.354065    | 1406.680670      | 2811.370049    | 1406.188662      | 21 |
| 3  | 385.201636  | 193.104456      | 368.175087     | 184.591181       |                |                  | P    | 2698.340129 | 1349.673702     | 2681.313580    | 1341.160428      | 2680.329564    | 1340.668420      | 20 |
| 4  | 545.232285  | 273.119781      | 528.205736     | 264.606506       |                |                  | C    | 2601.287365 | 1301.147320     | 2584.260816    | 1292.634046      | 2583.276800    | 1292.142038      | 19 |
| 5  | 616.269399  | 308.638338      | 599.242850     | 300.125063       |                |                  | A    | 2441.256716 | 1221.131996     | 2424.230167    | 1212.618721      | 2423.246151    | 1212.126713      | 18 |
| 6  | 745.311992  | 373.159634      | 728.285443     | 364.646360       | 727.301427     | 364.154352       | E    | 2370.219602 | 1185.613439     | 2353.193053    | 1177.100164      | 2352.209037    | 1176.608156      | 17 |
| 7  | 860.338935  | 430.673106      | 843.312386     | 422.159831       | 842.328370     | 421.667823       | D    | 2241.177009 | 1121.092142     | 2224.150460    | 1112.578868      | 2223.166444    | 1112.086860      | 16 |
| 8  | 1023.402264 | 512.204770      | 1006.375715    | 503.691496       | 1005.391699    | 503.199488       | Y    | 2126.150066 | 1063.578671     | 2109.123517    | 1055.065396      | 2108.139501    | 1054.573388      | 15 |
| 9  | 1136.486328 | 568.746802      | 1119.459779    | 560.233528       | 1118.475763    | 559.741519       | L    | 1963.086737 | 982.047007      | 1946.060188    | 973.533732       | 1945.076172    | 973.041724       | 14 |
| 10 | 1223.518356 | 612.262816      | 1206.491807    | 603.749542       | 1205.507791    | 603.257534       | S    | 1850.002673 | 925.504975      | 1832.976124    | 916.991700       | 1831.992108    | 916.499692       | 13 |
| 11 | 1322.586770 | 661.797023      | 1305.560221    | 653.283749       | 1304.576205    | 652.791741       | V    | 1762.970645 | 881.988961      | 1745.944096    | 873.475686       | 1744.960080    | 872.983678       | 12 |
| 12 | 1421.655184 | 711.331230      | 1404.628635    | 702.817956       | 1403.644619    | 702.325948       | V    | 1663.902231 | 832.454754      | 1646.875682    | 823.941479       | 1645.891666    | 823.449471       | 11 |
| 13 | 1534.739248 | 767.873262      | 1517.712699    | 759.359988       | 1516.728683    | 758.867980       | L    | 1564.833817 | 782.920547      | 1547.807268    | 774.407272       | 1546.823252    | 773.915264       | 10 |
| 14 | 1648.782175 | 824.894726      | 1631.755626    | 816.381451       | 1630.771610    | 815.889443       | N    | 1451.749753 | 726.378515      | 1434.723204    | 717.865240       | 1433.739188    | 717.373232       | 9  |
| 15 | 2088.007501 | 1044.507388     | 2070.980952    | 1035.994114      | 2069.996936    | 1035.502106      | Q    | 1337.706826 | 669.357051      | 1320.680277    | 660.843777       | 1319.696261    | 660.351769       | 8  |
| 16 | 2201.091565 | 1101.049421     | 2184.065016    | 1092.536146      | 2183.081000    | 1092.044138      | L    | 898.481500  | 449.744388      | 881.454951     | 441.231114       | 880.470935     | 440.739106       | 7  |
| 17 | 2361.122214 | 1181.064745     | 2344.095665    | 1172.551470      | 2343.111649    | 1172.059462      | C    | 785.397436  | 393.202356      | 768.370887     | 384.689081       | 767.386871     | 384.197073       | 6  |
| 18 | 2460.190628 | 1230.598952     | 2443.164079    | 1222.085677      | 2442.180063    | 1221.593669      | V    | 625.366787  | 313.187032      | 608.340238     | 304.673757       | 607.356222     | 304.181749       | 5  |
| 19 | 2573.274692 | 1287.140984     | 2556.248143    | 1278.627709      | 2555.264127    | 1278.135701      | L    | 526.298373  | 263.652825      | 509.271824     | 255.139550       | 508.287808     | 254.647542       | 4  |
| 20 | 2710.333604 | 1355.670440     | 2693.307055    | 1347.157165      | 2692.323039    | 1346.665157      | H    | 413.214309  | 207.110793      | 396.187760     | 198.597518       | 395.203744     | 198.105510       | 3  |
| 21 | 2839.376197 | 1420.191736     | 2822.349648    | 1411.678462      | 2821.365632    | 1411.186454      | E    | 276.155397  | 138.581337      | 259.128848     | 130.068062       | 258.144832     | 129.576054       | 2  |
| 22 |             |                 |                |                  |                |                  | K    | 147.112804  | 74.060040       | 130.086255     | 65.546765        |                |                  | 1  |

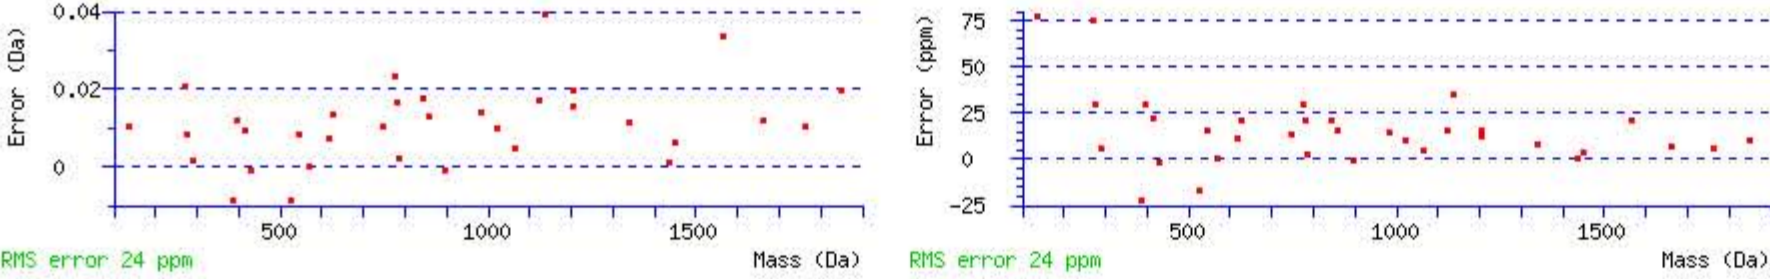

NCBI BLAST search of [RMPCAEDYLSVVLNQLCVLHEK](#)  
(Parameters: blastp, nr protein database, expect=20000, no filter, PAM30)  
Other BLAST [web gateways](#)

All matches to this query

| Score | Mr(calc):   | Delta    | Sequence                                   |
|-------|-------------|----------|--------------------------------------------|
| 80.0  | 2984.474426 | 0.033230 | <a href="#">RMPCAEDYLSVVLNQLCVLHEK</a>     |
| 0.5   | 2984.466171 | 0.041485 | <a href="#">QQMNGLTSLDASTVYGSSPALERQLR</a> |

MATRIX

SCIENCE

Mascot Search Results

Peptide View

MS/MS Fragmentation of **IQNILTEEPK**  
Found in **PON1\_HUMAN**, Serum paraoxonase/arylesterase 1 OS=Homo sapiens GN=PON1 PE=1 SV=3

Match to Query 30953: 1494.831908 from(748.423230,2+) rtinseconds(2033) index(50540)  
Title: Locus:1.1.1.1945.8 File:"2013-07-02 CLN FXIII 180 min 2nd F 4.wiff"  
Data file C:\Program Files (x86)\Matrix Science\Mascot Daemon\mgf\8 FXIII 180 min 2nd\mascot\_daemon\_merge.mgf

Click mouse within plot area to zoom in by factor of two about that point  
Or,   to  Da   
Label all possible matches ☐ Label matches used for scoring ☒

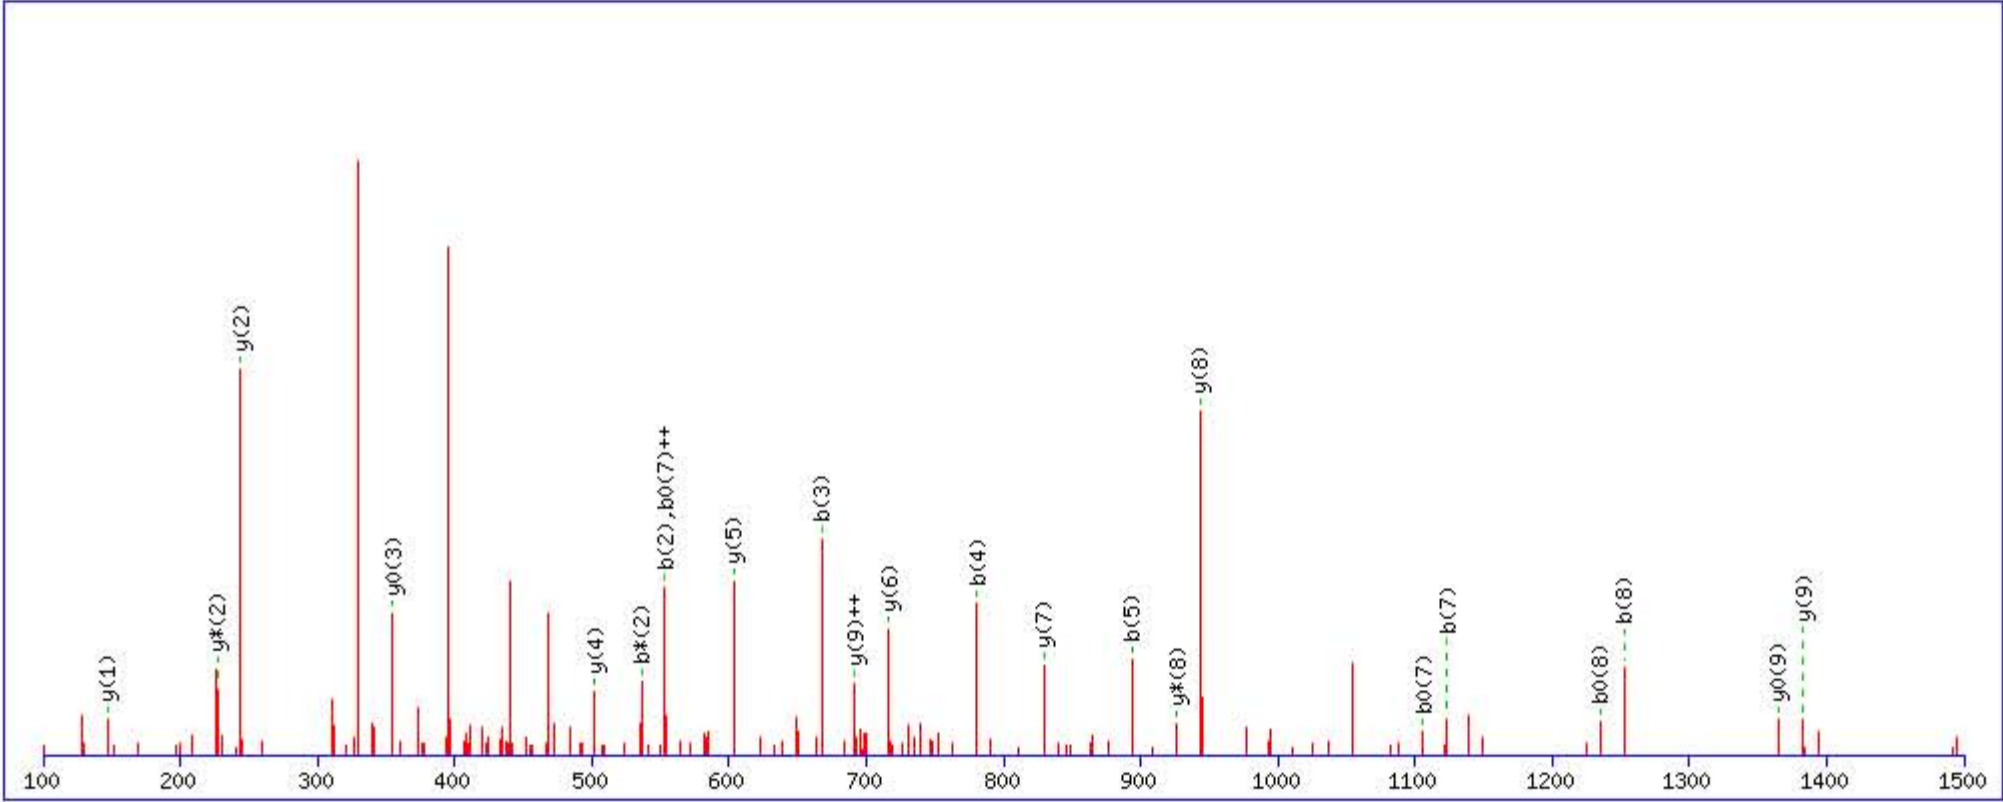

Monoisotopic mass of neutral peptide Mr(calc): 1494.811569  
Fixed modifications: Carbamidomethyl (C) (apply to specified residues or termini only)  
Variable modifications:  
Q2 : Biotin:Thermo-21345 (Q)  
Ions Score: 45 Expect: 0.0003  
Matches : 23/92 fragment ions using 40 most intense peaks [\(help\)](#)

| #  | b           | b <sup>++</sup> | b <sup>*</sup> | b <sup>*++</sup> | b <sup>0</sup> | b <sup>0++</sup> | Seq. | y           | y <sup>++</sup> | y <sup>*</sup> | y <sup>*++</sup> | y <sup>0</sup> | y <sup>0++</sup> | #  |
|----|-------------|-----------------|----------------|------------------|----------------|------------------|------|-------------|-----------------|----------------|------------------|----------------|------------------|----|
| 1  | 114.091340  | 57.549308       |                |                  |                |                  | I    |             |                 |                |                  |                |                  | 10 |
| 2  | 553.316666  | 277.161971      | 536.290117     | 268.648697       |                |                  | Q    | 1382.734814 | 691.871045      | 1365.708265    | 683.357771       | 1364.724249    | 682.865763       | 9  |
| 3  | 667.359593  | 334.183435      | 650.333044     | 325.670160       |                |                  | N    | 943.509488  | 472.258382      | 926.482939     | 463.745108       | 925.498923     | 463.253100       | 8  |
| 4  | 780.443657  | 390.725467      | 763.417108     | 382.212192       |                |                  | I    | 829.466561  | 415.236919      | 812.440012     | 406.723644       | 811.455996     | 406.231636       | 7  |
| 5  | 893.527721  | 447.267499      | 876.501172     | 438.754224       |                |                  | L    | 716.382497  | 358.694887      | 699.355948     | 350.181612       | 698.371932     | 349.689604       | 6  |
| 6  | 994.575400  | 497.791338      | 977.548851     | 489.278064       | 976.564835     | 488.786056       | T    | 603.298433  | 302.152855      | 586.271884     | 293.639580       | 585.287868     | 293.147572       | 5  |
| 7  | 1123.617993 | 562.312635      | 1106.591444    | 553.799360       | 1105.607428    | 553.307352       | E    | 502.250754  | 251.629015      | 485.224205     | 243.115741       | 484.240189     | 242.623733       | 4  |
| 8  | 1252.660586 | 626.833931      | 1235.634037    | 618.320657       | 1234.650021    | 617.828649       | E    | 373.208161  | 187.107719      | 356.181612     | 178.594444       | 355.197596     | 178.102436       | 3  |
| 9  | 1349.713350 | 675.360313      | 1332.686801    | 666.847039       | 1331.702785    | 666.355031       | P    | 244.165568  | 122.586422      | 227.139019     | 114.073148       |                |                  | 2  |
| 10 |             |                 |                |                  |                |                  | K    | 147.112804  | 74.060040       | 130.086255     | 65.546765        |                |                  | 1  |

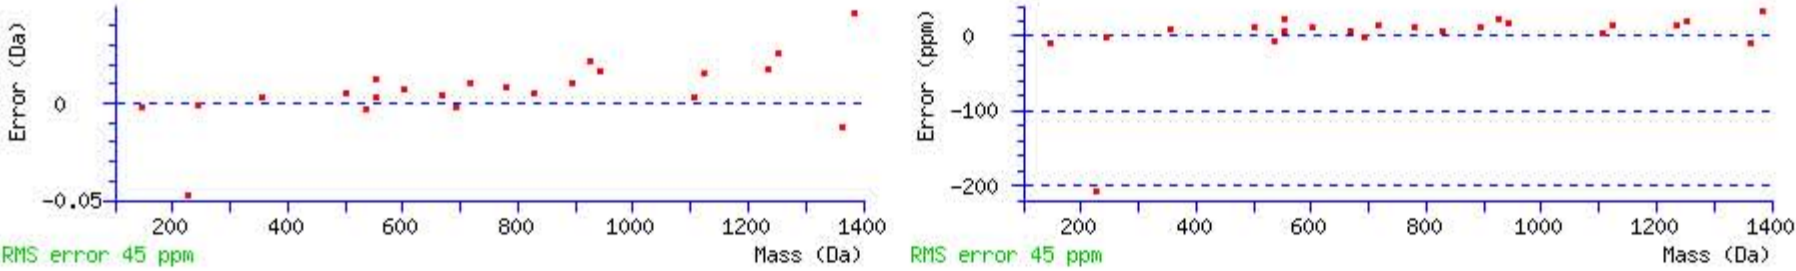

NCBI BLAST search of [IQNILTEEPK](#)  
(Parameters: blastp, nr protein database, expect=20000, no filter, PAM30)  
Other BLAST [web gateways](#)

All matches to this query

| Score | Mr(calc):   | Delta     | Sequence                       |
|-------|-------------|-----------|--------------------------------|
| 45.0  | 1494.811569 | 0.020339  | <a href="#">IQNILTEEPK</a>     |
| 7.0   | 1494.815430 | 0.016478  | <a href="#">KGSTKDSGHLQIPK</a> |
| 6.3   | 1494.834030 | -0.002122 | <a href="#">QLLRALEEGR</a>     |
| 3.9   | 1494.822815 | 0.009093  | <a href="#">IIFRTSELMTLR</a>   |
| 2.8   | 1494.834030 | -0.002122 | <a href="#">QLNAIRDNIK</a>     |

MATRIX

SCIENCE

Mascot Search Results

Peptide View

MS/MS Fragmentation of **AKLIALTLLGMGLALFRNHQSSYQTR**  
Found in **PON1\_HUMAN**, Serum paraoxonase/arylesterase 1 OS=Homo sapiens GN=PON1 PE=1 SV=3

Match to Query 61746: 3212.808020 from(643.568880,5+) rtinseconds(3212) index(58478)  
Title: Locus:1.1.1.2350.3 File:"2013-07-02 CLN FXIII 180 min 2nd F 4.wiff"  
Data file C:\Program Files (x86)\Matrix Science\Mascot Daemon\mgf\8 FXIII 180 min 2nd\mascot\_daemon\_merge.mgf

Click mouse within plot area to zoom in by factor of two about that point  
Or, 

Plot from

0

 to 

2400

 Da 

Full range

  
Label all possible matches ☐ Label matches used for scoring ☒

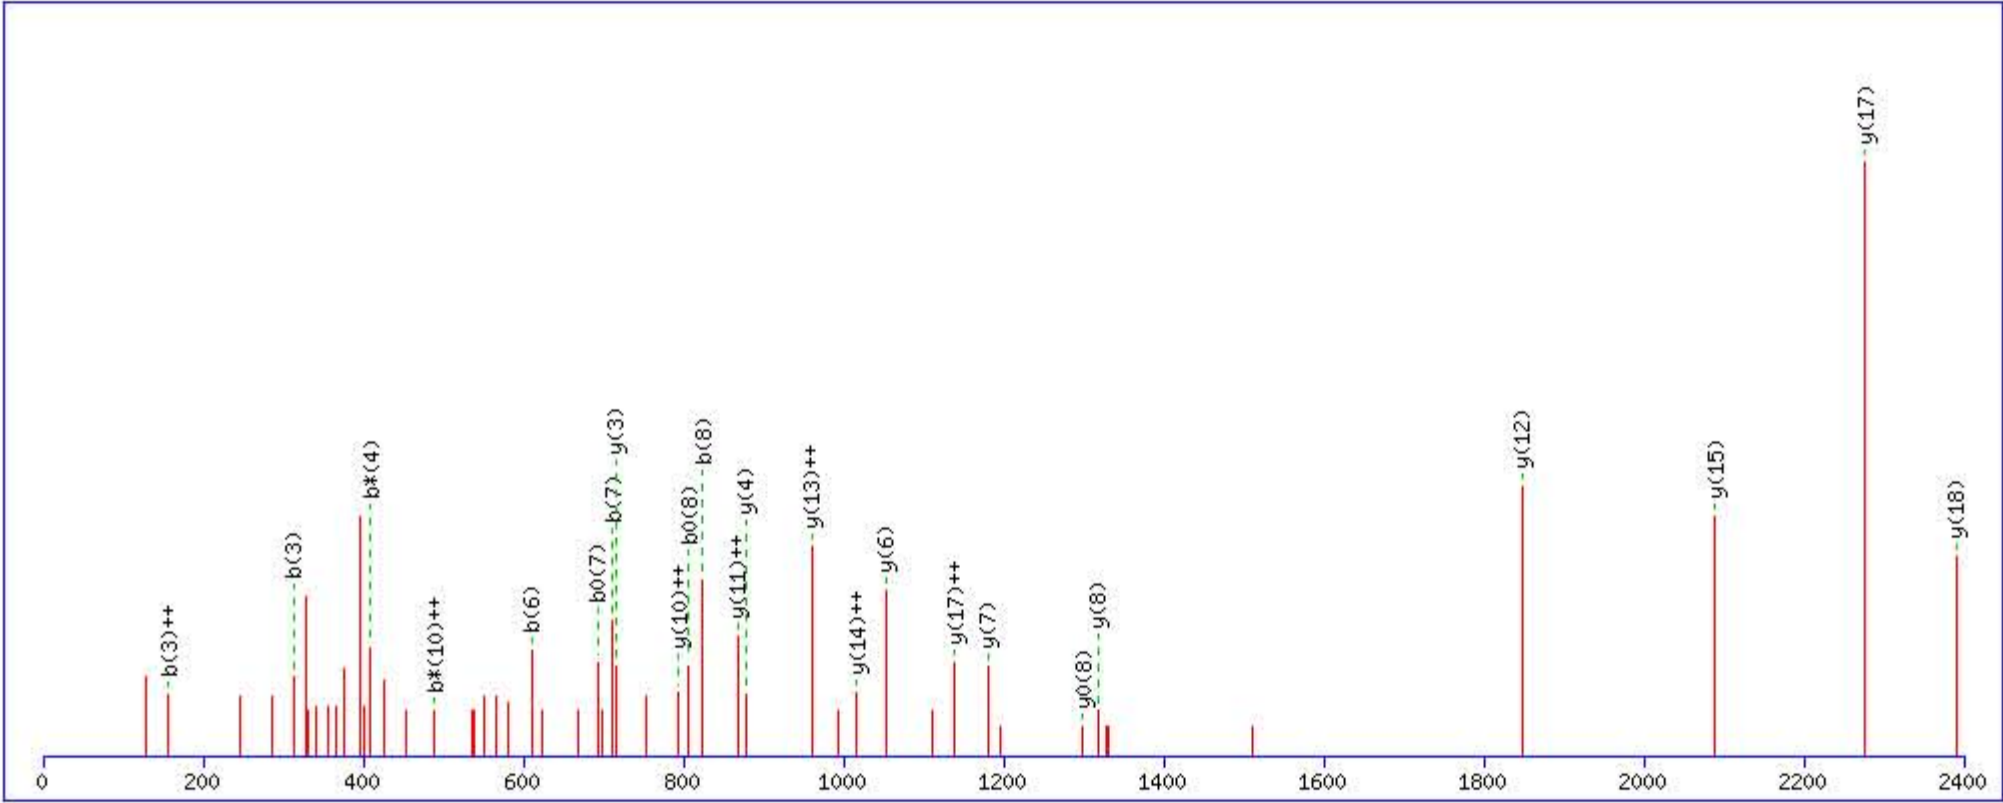

Monoisotopic mass of neutral peptide Mr(calc): 3212.767807  
Fixed modifications: Carbamidomethyl (C) (apply to specified residues or termini only)  
Variable modifications:  
Q24 : Biotin:Thermo-21345 (Q)  
Ions Score: 47 Expect: 9.9e-005  
Matches : 24/284 fragment ions using 40 most intense peaks [\(help\)](#)

| #  | b           | b <sup>++</sup> | b <sup>*</sup> | b <sup>++</sup> | b <sup>0</sup> | b <sup>0++</sup> | Seq. | y           | y <sup>++</sup> | y <sup>*</sup> | y <sup>++</sup> | y <sup>0</sup> | y <sup>0++</sup> | #  |
|----|-------------|-----------------|----------------|-----------------|----------------|------------------|------|-------------|-----------------|----------------|-----------------|----------------|------------------|----|
| 1  | 72.044390   | 36.525833       |                |                 |                |                  | A    |             |                 |                |                 |                |                  | 26 |
| 2  | 200.139353  | 100.573315      | 183.112804     | 92.060040       |                |                  | K    | 3142.738015 | 1571.872645     | 3125.711466    | 1563.359371     | 3124.727450    | 1562.867363      | 25 |
| 3  | 313.223417  | 157.115346      | 296.196868     | 148.602072      |                |                  | L    | 3014.643052 | 1507.825164     | 2997.616503    | 1499.311889     | 2996.632487    | 1498.819881      | 24 |
| 4  | 426.307481  | 213.657378      | 409.280932     | 205.144104      |                |                  | I    | 2901.558988 | 1451.283132     | 2884.532439    | 1442.769857     | 2883.548423    | 1442.277849      | 23 |
| 5  | 497.344595  | 249.175935      | 480.318046     | 240.662661      |                |                  | A    | 2788.474924 | 1394.741100     | 2771.448375    | 1386.227825     | 2770.464359    | 1385.735817      | 22 |
| 6  | 610.428659  | 305.717968      | 593.402110     | 297.204693      |                |                  | L    | 2717.437810 | 1359.222543     | 2700.411261    | 1350.709268     | 2699.427245    | 1350.217260      | 21 |
| 7  | 711.476338  | 356.241807      | 694.449789     | 347.728533      | 693.465773     | 347.236525       | T    | 2604.353746 | 1302.680511     | 2587.327197    | 1294.167236     | 2586.343181    | 1293.675228      | 20 |
| 8  | 824.560402  | 412.783839      | 807.533853     | 404.270565      | 806.549837     | 403.778557       | L    | 2503.306067 | 1252.156671     | 2486.279518    | 1243.643397     | 2485.295502    | 1243.151389      | 19 |
| 9  | 937.644466  | 469.325871      | 920.617917     | 460.812597      | 919.633901     | 460.320589       | L    | 2390.222003 | 1195.614639     | 2373.195454    | 1187.101365     | 2372.211438    | 1186.609357      | 18 |
| 10 | 994.665930  | 497.836603      | 977.639381     | 489.323329      | 976.655365     | 488.831321       | G    | 2277.137939 | 1139.072607     | 2260.111390    | 1130.559333     | 2259.127374    | 1130.067325      | 17 |
| 11 | 1125.706415 | 563.356846      | 1108.679866    | 554.843571      | 1107.695850    | 554.351563       | M    | 2220.116475 | 1110.561875     | 2203.089926    | 1102.048601     | 2202.105910    | 1101.556593      | 16 |
| 12 | 1182.727879 | 591.867578      | 1165.701330    | 583.354303      | 1164.717314    | 582.862295       | G    | 2089.075990 | 1045.041633     | 2072.049441    | 1036.528358     | 2071.065425    | 1036.036350      | 15 |
| 13 | 1295.811943 | 648.409609      | 1278.785394    | 639.896335      | 1277.801378    | 639.404327       | L    | 2032.054526 | 1016.530901     | 2015.027977    | 1008.017627     | 2014.043961    | 1007.525619      | 14 |
| 14 | 1366.849057 | 683.928166      | 1349.822508    | 675.414892      | 1348.838492    | 674.922884       | A    | 1918.970462 | 959.988869      | 1901.943913    | 951.475595      | 1900.959897    | 950.983587       | 13 |
| 15 | 1479.933121 | 740.470198      | 1462.906572    | 731.956924      | 1461.922556    | 731.464916       | L    | 1847.933348 | 924.470312      | 1830.906799    | 915.957038      | 1829.922783    | 915.465030       | 12 |
| 16 | 1627.001535 | 814.004405      | 1609.974986    | 805.491131      | 1608.990970    | 804.999123       | F    | 1734.849284 | 867.928280      | 1717.822735    | 859.415006      | 1716.838719    | 858.922998       | 11 |
| 17 | 1783.102646 | 892.054961      | 1766.076097    | 883.541686      | 1765.092081    | 883.049678       | R    | 1587.780870 | 794.394073      | 1570.754321    | 785.880799      | 1569.770305    | 785.388791       | 10 |
| 18 | 1897.145573 | 949.076424      | 1880.119024    | 940.563150      | 1879.135008    | 940.071142       | N    | 1431.679759 | 716.343518      | 1414.653210    | 707.830243      | 1413.669194    | 707.338235       | 9  |
| 19 | 2034.204485 | 1017.605880     | 2017.177936    | 1009.092606     | 2016.193920    | 1008.600598      | H    | 1317.636832 | 659.322054      | 1300.610283    | 650.808780      | 1299.626267    | 650.316772       | 8  |
| 20 | 2162.263063 | 1081.635169     | 2145.236514    | 1073.121895     | 2144.252498    | 1072.629887      | Q    | 1180.577920 | 590.792598      | 1163.551371    | 582.279324      | 1162.567355    | 581.787316       | 7  |
| 21 | 2249.295091 | 1125.151183     | 2232.268542    | 1116.637909     | 2231.284526    | 1116.145901      | S    | 1052.519342 | 526.763309      | 1035.492793    | 518.250035      | 1034.508777    | 517.758027       | 6  |
| 22 | 2336.327119 | 1168.667197     | 2319.300570    | 1160.153923     | 2318.316554    | 1159.661915      | S    | 965.487314  | 483.247295      | 948.460765     | 474.734021      | 947.476749     | 474.242013       | 5  |
| 23 | 2499.390448 | 1250.198862     | 2482.363899    | 1241.685587     | 2481.379883    | 1241.193579      | Y    | 878.455286  | 439.731281      | 861.428737     | 431.218007      | 860.444721     | 430.725999       | 4  |
| 24 | 2938.615774 | 1469.811525     | 2921.589225    | 1461.298250     | 2920.605209    | 1460.806242      | Q    | 715.391957  | 358.199617      | 698.365408     | 349.686342      | 697.381392     | 349.194334       | 3  |
| 25 | 3039.663453 | 1520.335364     | 3022.636904    | 1511.822090     | 3021.652888    | 1511.330082      | T    | 276.166631  | 138.586953      | 259.140082     | 130.073679      | 258.156066     | 129.581671       | 2  |
| 26 |             |                 |                |                 |                |                  | R    | 175.118952  | 88.063114       | 158.092403     | 79.549839       |                |                  | 1  |

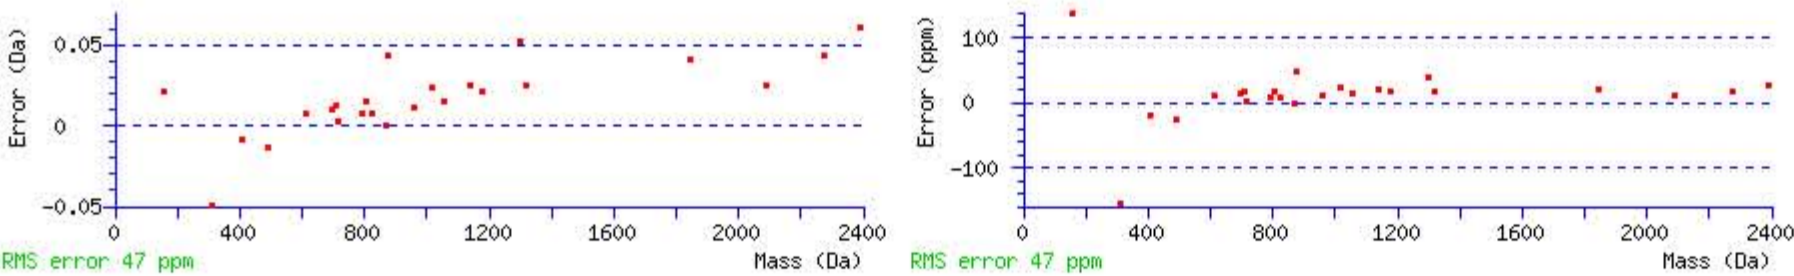

NCBI BLAST search of [AKLIALTLLGMGLALFRNHQSSYQTR](#)  
(Parameters: blastp, nr protein database, expect=20000, no filter, PAM30)  
Other BLAST [web gateways](#)

All matches to this query

| Score | Mr(calc):   | Delta    | Sequence                                   |
|-------|-------------|----------|--------------------------------------------|
| 46.6  | 3212.767807 | 0.040213 | <a href="#">AKLIALTLLGMGLALFRNHQSSYQTR</a> |
| 34.3  | 3212.767807 | 0.040213 | <a href="#">AKLIALTLLGMGLALFRNHQSSYQTR</a> |

MATRIX

SCIENCE

Mascot Search Results

Peptide View

MS/MS Fragmentation of **QAEISASAPTSLR**  
Found in **SHBG\_HUMAN**, Sex hormone-binding globulin OS=Homo sapiens GN=SHBG PE=1 SV=2

Match to Query 36698: 1640.866728 from(821.440640,2+) rtinseconds(1850) index(4577)  
Title: Locus:1.1.1.1921.12 File:"2013-07-02 CLN FXIII 180 min 2nd F 1.wiff"  
Data file C:\Program Files (x86)\Matrix Science\Mascot Daemon\mgf\8 FXIII 180 min 2nd\mascot\_daemon\_merge.mgf

Click mouse within plot area to zoom in by factor of two about that point  
Or,   to  Da   
Label all possible matches ☐ Label matches used for scoring ☒

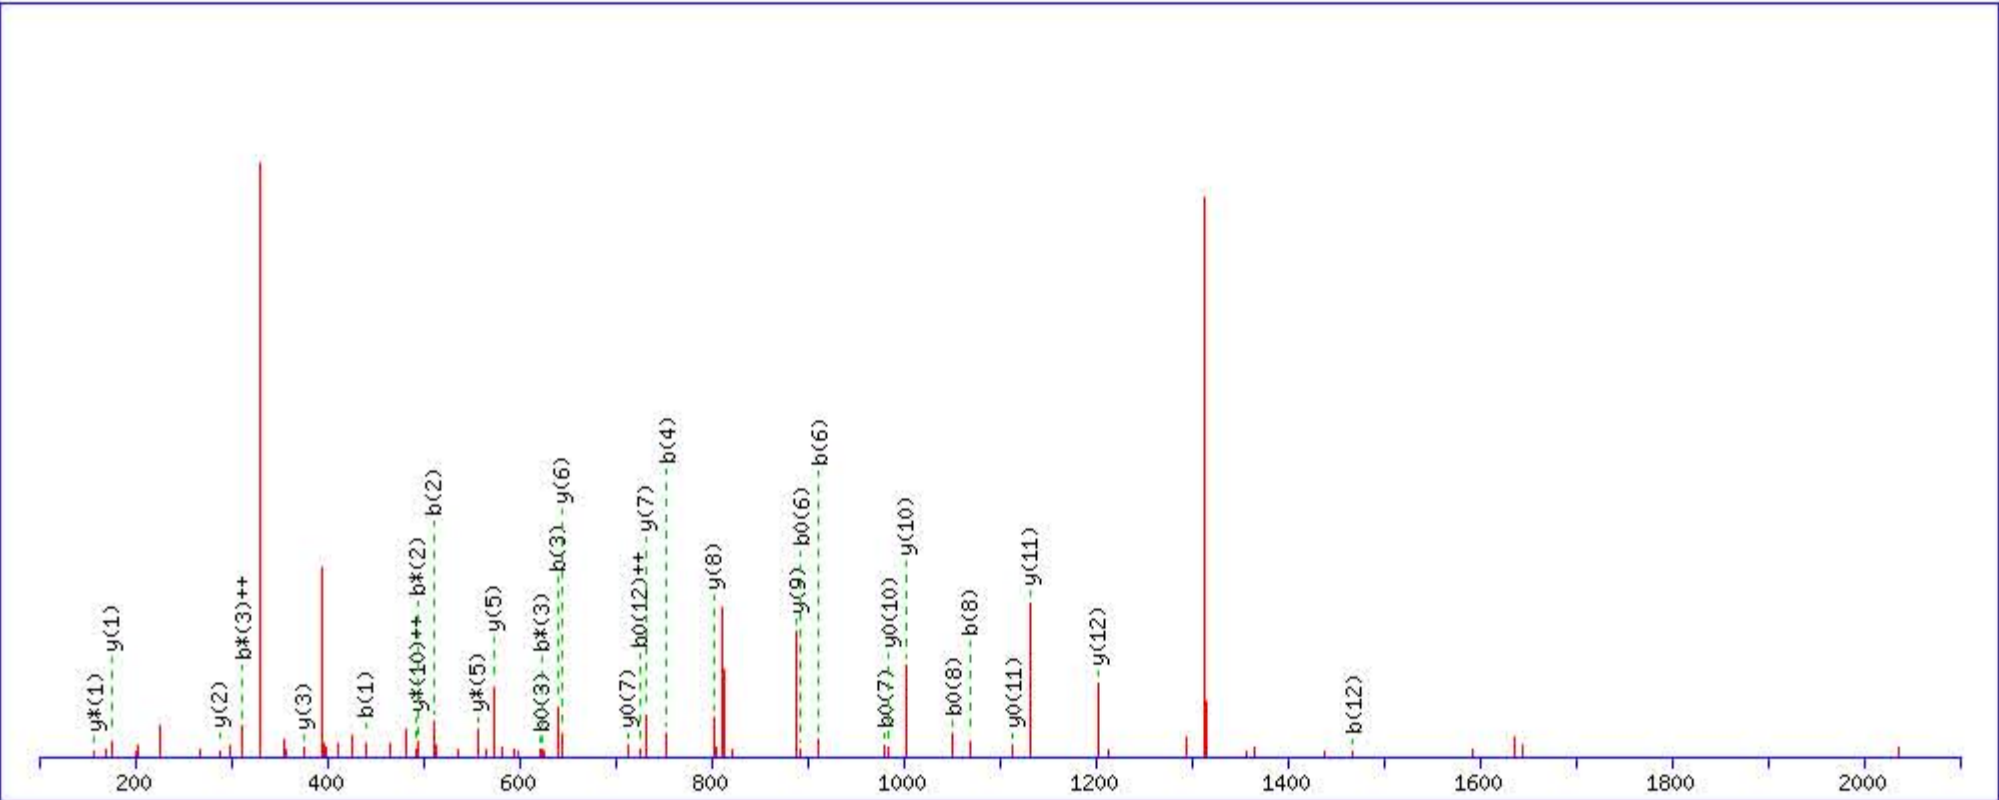

Monoisotopic mass of neutral peptide Mr(calc): 1640.855560  
Fixed modifications: Carbamidomethyl (C) (apply to specified residues or termini only)  
Variable modifications:  
Q1 : Biotin:Thermo-21345 (Q)  
Ions Score: 58 Expect: 1.2e-005  
Matches : 32/136 fragment ions using 74 most intense peaks [\(help\)](#)

| #  | b           | b <sup>++</sup> | b <sup>*</sup> | b <sup>+++</sup> | b <sup>0</sup> | b <sup>0++</sup> | Seq. | y           | y <sup>++</sup> | y <sup>*</sup> | y <sup>+++</sup> | y <sup>0</sup> | y <sup>0++</sup> | #  |
|----|-------------|-----------------|----------------|------------------|----------------|------------------|------|-------------|-----------------|----------------|------------------|----------------|------------------|----|
| 1  | 440.232602  | 220.619939      | 423.206053     | 212.106664       |                |                  | Q    |             |                 |                |                  |                |                  | 13 |
| 2  | 511.269716  | 256.138496      | 494.243167     | 247.625221       |                |                  | A    | 1202.637542 | 601.822409      | 1185.610993    | 593.309135       | 1184.626977    | 592.817126       | 12 |
| 3  | 640.312309  | 320.659793      | 623.285760     | 312.146518       | 622.301744     | 311.654510       | E    | 1131.600428 | 566.303852      | 1114.573879    | 557.790578       | 1113.589863    | 557.298569       | 11 |
| 4  | 753.396373  | 377.201825      | 736.369824     | 368.688550       | 735.385808     | 368.196542       | I    | 1002.557835 | 501.782556      | 985.531286     | 493.269281       | 984.547270     | 492.777273       | 10 |
| 5  | 840.428401  | 420.717839      | 823.401852     | 412.204564       | 822.417836     | 411.712556       | S    | 889.473771  | 445.240523      | 872.447222     | 436.727249       | 871.463206     | 436.235241       | 9  |
| 6  | 911.465515  | 456.236396      | 894.438966     | 447.723121       | 893.454950     | 447.231113       | A    | 802.441743  | 401.724510      | 785.415194     | 393.211235       | 784.431178     | 392.719227       | 8  |
| 7  | 998.497543  | 499.752410      | 981.470994     | 491.239135       | 980.486978     | 490.747127       | S    | 731.404629  | 366.205953      | 714.378080     | 357.692678       | 713.394064     | 357.200670       | 7  |
| 8  | 1069.534657 | 535.270966      | 1052.508108    | 526.757692       | 1051.524092    | 526.265684       | A    | 644.372601  | 322.689939      | 627.346052     | 314.176664       | 626.362036     | 313.684656       | 6  |
| 9  | 1166.587421 | 583.797349      | 1149.560872    | 575.284074       | 1148.576856    | 574.792066       | P    | 573.335487  | 287.171382      | 556.308938     | 278.658107       | 555.324922     | 278.166099       | 5  |
| 10 | 1267.635100 | 634.321188      | 1250.608551    | 625.807914       | 1249.624535    | 625.315905       | T    | 476.282723  | 238.644999      | 459.256174     | 230.131725       | 458.272158     | 229.639717       | 4  |
| 11 | 1354.667128 | 677.837202      | 1337.640579    | 669.323928       | 1336.656563    | 668.831920       | S    | 375.235044  | 188.121160      | 358.208495     | 179.607885       | 357.224479     | 179.115877       | 3  |
| 12 | 1467.751192 | 734.379234      | 1450.724643    | 725.865960       | 1449.740627    | 725.373951       | L    | 288.203016  | 144.605146      | 271.176467     | 136.091871       |                |                  | 2  |
| 13 |             |                 |                |                  |                |                  | R    | 175.118952  | 88.063114       | 158.092403     | 79.549839        |                |                  | 1  |

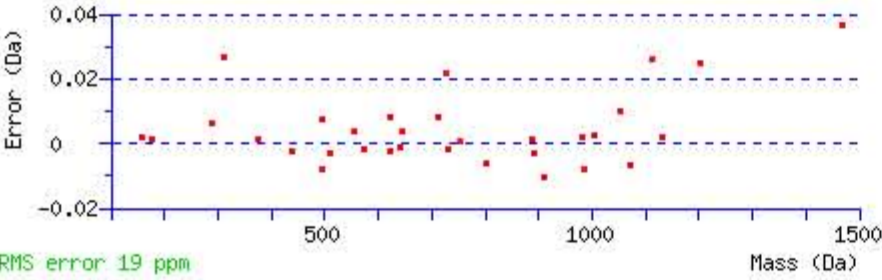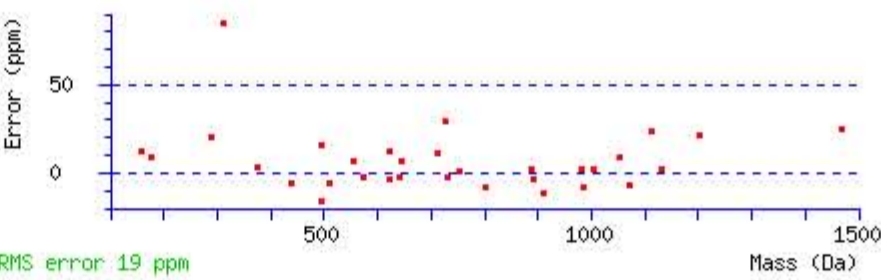

NCBI BLAST search of [QAEISASAPTSLR](#)  
(Parameters: blastp, nr protein database, expect=20000, no filter, PAM30)  
Other BLAST [web gateways](#)

All matches to this query

| Score | Mr(calc):   | Delta     | Sequence                        |
|-------|-------------|-----------|---------------------------------|
| 57.9  | 1640.855560 | 0.011168  | <a href="#">QAEISASAPTSLR</a>   |
| 5.0   | 1640.885422 | -0.018694 | <a href="#">LLKKDLCNTHLMR</a>   |
| 3.6   | 1640.855530 | 0.011198  | <a href="#">QAKLEKEEAER</a>     |
| 3.4   | 1640.884521 | -0.017793 | <a href="#">EAQKKPAESQKIER</a>  |
| 1.8   | 1640.849030 | 0.017698  | <a href="#">AQEMEAAVGRLR</a>    |
| 1.7   | 1640.849045 | 0.017683  | <a href="#">QADICVREIAR</a>     |
| 1.4   | 1640.848175 | 0.018553  | <a href="#">LLAQPDDSEQTLRR</a>  |
| 1.0   | 1640.884537 | -0.017809 | <a href="#">KSSLLAALDEERPGR</a> |
| 0.8   | 1640.852219 | 0.014509  | <a href="#">VTQHFAKETQDPLK</a>  |
| 0.6   | 1640.849045 | 0.017683  | <a href="#">GDRIAQLICER</a>     |

MATRIX

SCIENCE

Mascot Search Results

Peptide View

MS/MS Fragmentation of **KGHQLQLDYFGACK**  
Found in **SPRL1\_HUMAN**, SPARC-like protein 1 OS=Homo sapiens GN=SPARCL1 PE=1 SV=2

Match to Query 43671: 1974.996012 from(659.339280,3+) rtinseconds(1949) index(49982)  
Title: Locus:1.1.1.1916.15 File:"2013-07-02 CLN FXIII 180 min 2nd F 4.wiff"  
Data file C:\Program Files (x86)\Matrix Science\Mascot Daemon\mgf\8 FXIII 180 min 2nd\mascot\_daemon\_merge.mgf

Click mouse within plot area to zoom in by factor of two about that point  
Or, 

Plot from

100

 to 

1500

 Da 

Full range

  
Label all possible matches ☐ Label matches used for scoring ☒

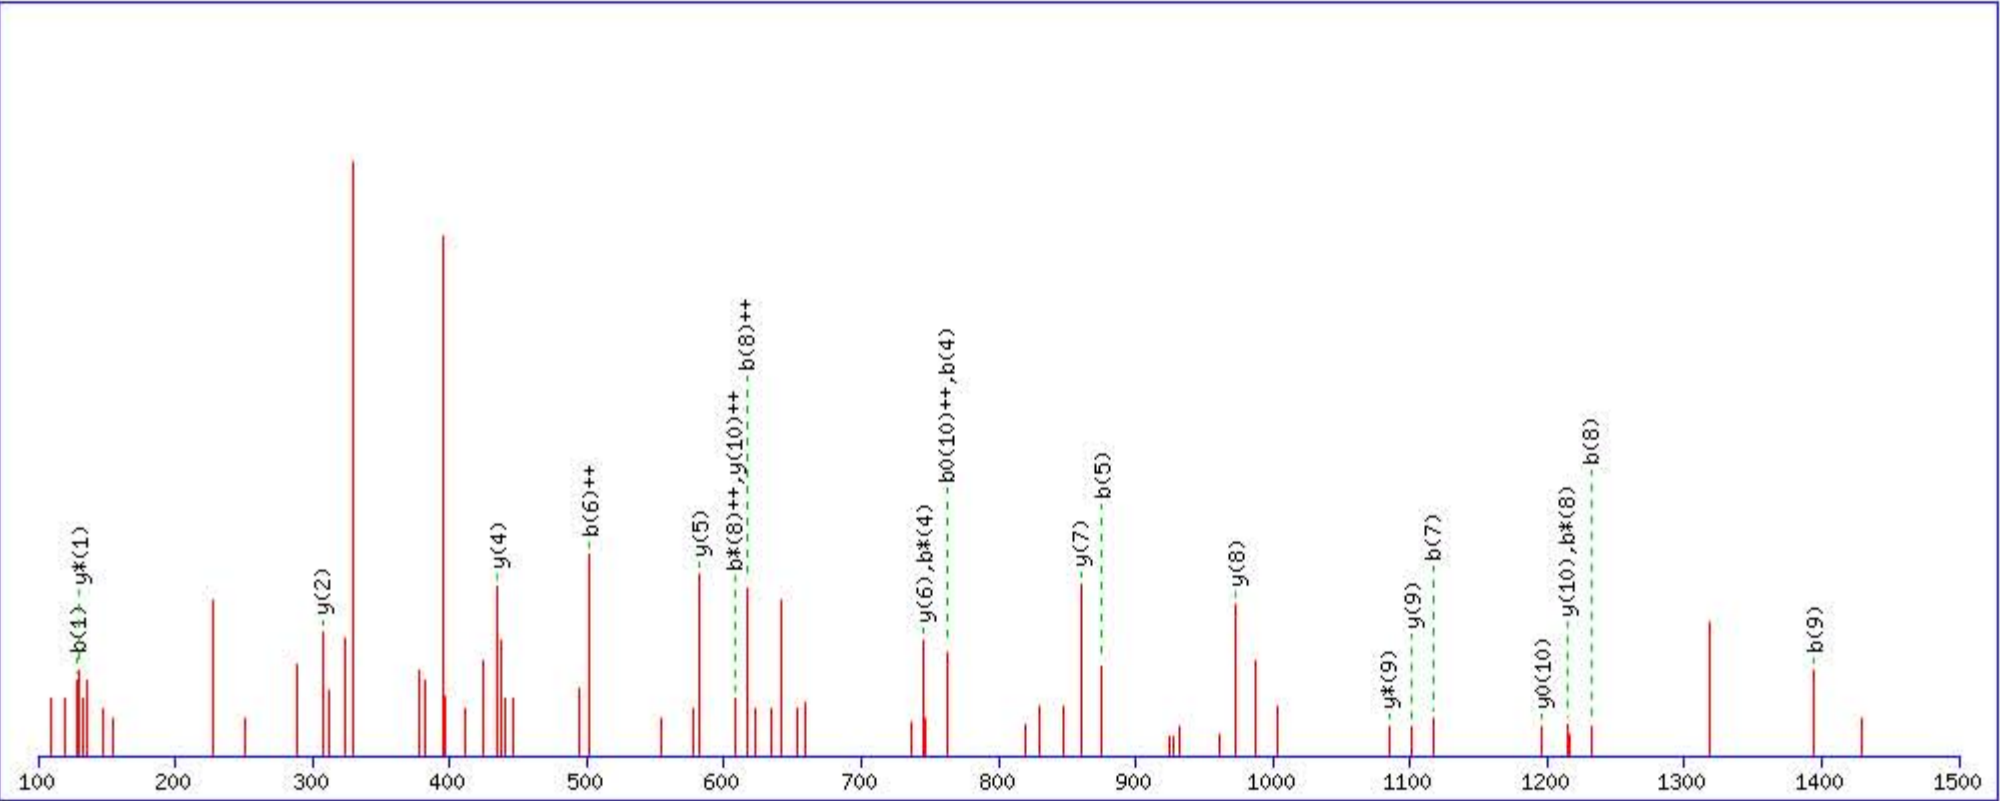

Monoisotopic mass of neutral peptide Mr(calc): 1974.980804  
Fixed modifications: Carbamidomethyl (C) (apply to specified residues or termini only)  
Variable modifications:  
Q4 : Biotin:Thermo-21345 (Q)  
Ions Score: 54 Expect: 2.4e-005  
Matches : 24/130 fragment ions using 27 most intense peaks [\(help\)](#)

| #  | b           | b <sup>++</sup> | b <sup>*</sup> | b <sup>++</sup> * | b <sup>0</sup> | b <sup>0++</sup> | Seq. | y           | y <sup>++</sup> | y <sup>*</sup> | y <sup>++</sup> * | y <sup>0</sup> | y <sup>0++</sup> | #  |
|----|-------------|-----------------|----------------|-------------------|----------------|------------------|------|-------------|-----------------|----------------|-------------------|----------------|------------------|----|
| 1  | 129.102239  | 65.054757       | 112.075690     | 56.541483         |                |                  | K    |             |                 |                |                   |                |                  | 14 |
| 2  | 186.123703  | 93.565489       | 169.097154     | 85.052215         |                |                  | G    | 1847.893125 | 924.450201      | 1830.866576    | 915.936926        | 1829.882560    | 915.444918       | 13 |
| 3  | 323.182615  | 162.094945      | 306.156066     | 153.581671        |                |                  | H    | 1790.871661 | 895.939469      | 1773.845112    | 887.426194        | 1772.861096    | 886.934186       | 12 |
| 4  | 762.407941  | 381.707609      | 745.381392     | 373.194334        |                |                  | Q    | 1653.812749 | 827.410013      | 1636.786200    | 818.896738        | 1635.802184    | 818.404730       | 11 |
| 5  | 875.492005  | 438.249641      | 858.465456     | 429.736366        |                |                  | L    | 1214.587423 | 607.797350      | 1197.560874    | 599.284075        | 1196.576858    | 598.792067       | 10 |
| 6  | 1003.550583 | 502.278930      | 986.524034     | 493.765655        |                |                  | Q    | 1101.503359 | 551.255318      | 1084.476810    | 542.742043        | 1083.492794    | 542.250035       | 9  |
| 7  | 1116.634647 | 558.820962      | 1099.608098    | 550.307687        |                |                  | L    | 973.444781  | 487.226029      | 956.418232     | 478.712754        | 955.434216     | 478.220746       | 8  |
| 8  | 1231.661590 | 616.334433      | 1214.635041    | 607.821159        | 1213.651025    | 607.329151       | D    | 860.360717  | 430.683997      | 843.334168     | 422.170722        | 842.350152     | 421.678714       | 7  |
| 9  | 1394.724919 | 697.866098      | 1377.698370    | 689.352823        | 1376.714354    | 688.860815       | Y    | 745.333774  | 373.170525      | 728.307225     | 364.657251        |                |                  | 6  |
| 10 | 1541.793333 | 771.400305      | 1524.766784    | 762.887030        | 1523.782768    | 762.395022       | F    | 582.270445  | 291.638861      | 565.243896     | 283.125586        |                |                  | 5  |
| 11 | 1598.814797 | 799.911037      | 1581.788248    | 791.397762        | 1580.804232    | 790.905754       | G    | 435.202031  | 218.104653      | 418.175482     | 209.591379        |                |                  | 4  |
| 12 | 1669.851911 | 835.429594      | 1652.825362    | 826.916319        | 1651.841346    | 826.424311       | A    | 378.180567  | 189.593921      | 361.154018     | 181.080647        |                |                  | 3  |
| 13 | 1829.882560 | 915.444918      | 1812.856011    | 906.931644        | 1811.871995    | 906.439636       | C    | 307.143453  | 154.075365      | 290.116904     | 145.562090        |                |                  | 2  |
| 14 |             |                 |                |                   |                |                  | K    | 147.112804  | 74.060040       | 130.086255     | 65.546765         |                |                  | 1  |

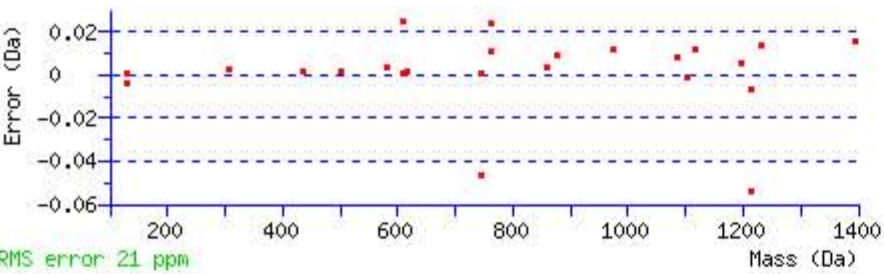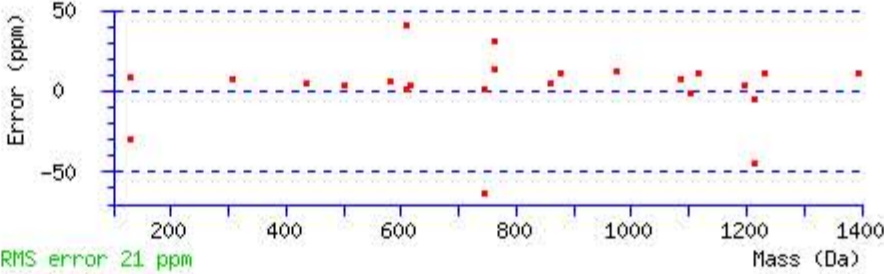

NCBI BLAST search of [KGHQLQLDYFGACK](#)  
(Parameters: blastp, nr protein database, expect=20000, no filter, PAM30)  
Other BLAST [web gateways](#)

All matches to this query

| Score | Mr(calc):   | Delta    | Sequence                         |
|-------|-------------|----------|----------------------------------|
| 54.3  | 1974.980804 | 0.015208 | <a href="#">KGHQLQLDYFGACK</a>   |
| 27.9  | 1974.980804 | 0.015208 | <a href="#">KGHQLQLDYFGACK</a>   |
| 4.9   | 1974.966888 | 0.029124 | <a href="#">HMHIHISTVNHAFKCK</a> |

MATRIX

SCIENCE

Mascot Search Results

Peptide View

MS/MS Fragmentation of **LDTLAQEVALLK**  
Found in **TETN\_HUMAN**, Tetranectin OS=Homo sapiens GN=CLEC3B PE=1 SV=3

Match to Query 35714: 1623.943448 from(812.979000,2+) rtinseconds(2581) index(8653)  
Title: Locus:1.1.1.2176.6 File:"2013-07-02 CLN FXIII 180 min 2nd F 1.wiff"  
Data file C:\Program Files (x86)\Matrix Science\Mascot Daemon\mgf\8 FXIII 180 min 2nd\mascot\_daemon\_merge.mgf

Click mouse within plot area to zoom in by factor of two about that point

Or,   to  Da

Label all possible matches ☐ Label matches used for scoring ☒

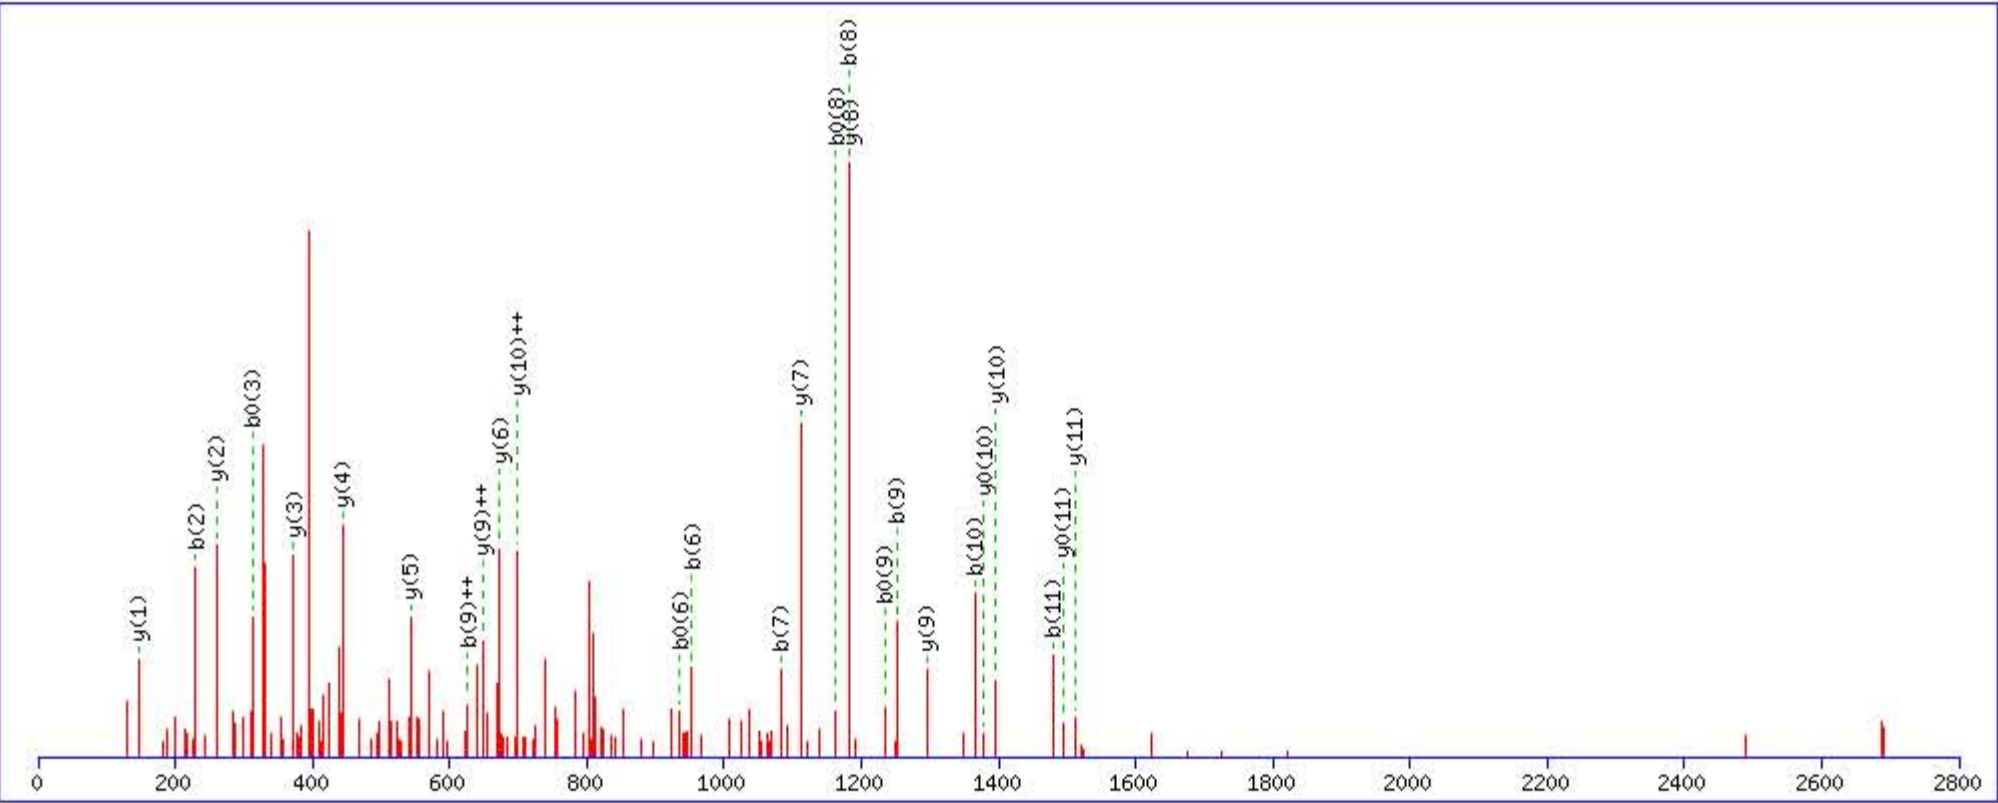

Monoisotopic mass of neutral peptide Mr(calc): 1623.926941  
Fixed modifications: Carbamidomethyl (C) (apply to specified residues or termini only)  
Variable modifications:  
Q6 : Biotin:Thermo-21345 (Q)  
Ions Score: 80 Expect: 7.4e-008  
Matches : 27/110 fragment ions using 43 most intense peaks [\(help\)](#)

| #  | b           | b <sup>++</sup> | b <sup>*</sup> | b <sup>+++</sup> | b <sup>0</sup> | b <sup>0++</sup> | Seq. | y           | y <sup>++</sup> | y <sup>*</sup> | y <sup>+++</sup> | y <sup>0</sup> | y <sup>0++</sup> | #  |
|----|-------------|-----------------|----------------|------------------|----------------|------------------|------|-------------|-----------------|----------------|------------------|----------------|------------------|----|
| 1  | 114.091340  | 57.549308       |                |                  |                |                  | L    |             |                 |                |                  |                |                  | 12 |
| 2  | 229.118283  | 115.062779      |                |                  | 211.107718     | 106.057497       | D    | 1511.850179 | 756.428728      | 1494.823630    | 747.915453       | 1493.839614    | 747.423445       | 11 |
| 3  | 330.165962  | 165.586619      |                |                  | 312.155397     | 156.581336       | T    | 1396.823236 | 698.915256      | 1379.796687    | 690.401982       | 1378.812671    | 689.909973       | 10 |
| 4  | 443.250026  | 222.128651      |                |                  | 425.239461     | 213.123369       | L    | 1295.775557 | 648.391416      | 1278.749008    | 639.878142       | 1277.764992    | 639.386134       | 9  |
| 5  | 514.287140  | 257.647208      |                |                  | 496.276575     | 248.641926       | A    | 1182.691493 | 591.849385      | 1165.664944    | 583.336110       | 1164.680928    | 582.844102       | 8  |
| 6  | 953.512466  | 477.259871      | 936.485917     | 468.746597       | 935.501901     | 468.254589       | Q    | 1111.654379 | 556.330827      | 1094.627830    | 547.817553       | 1093.643814    | 547.325545       | 7  |
| 7  | 1082.555059 | 541.781168      | 1065.528510    | 533.267893       | 1064.544494    | 532.775885       | E    | 672.429053  | 336.718165      | 655.402504     | 328.204890       | 654.418488     | 327.712882       | 6  |
| 8  | 1181.623473 | 591.315375      | 1164.596924    | 582.802100       | 1163.612908    | 582.310092       | V    | 543.386460  | 272.196868      | 526.359911     | 263.683593       |                |                  | 5  |
| 9  | 1252.660587 | 626.833932      | 1235.634038    | 618.320657       | 1234.650022    | 617.828649       | A    | 444.318046  | 222.662661      | 427.291497     | 214.149386       |                |                  | 4  |
| 10 | 1365.744651 | 683.375964      | 1348.718102    | 674.862689       | 1347.734086    | 674.370681       | L    | 373.280932  | 187.144104      | 356.254383     | 178.630829       |                |                  | 3  |
| 11 | 1478.828715 | 739.917995      | 1461.802166    | 731.404721       | 1460.818150    | 730.912713       | L    | 260.196868  | 130.602072      | 243.170319     | 122.088797       |                |                  | 2  |
| 12 |             |                 |                |                  |                |                  | K    | 147.112804  | 74.060040       | 130.086255     | 65.546765        |                |                  | 1  |

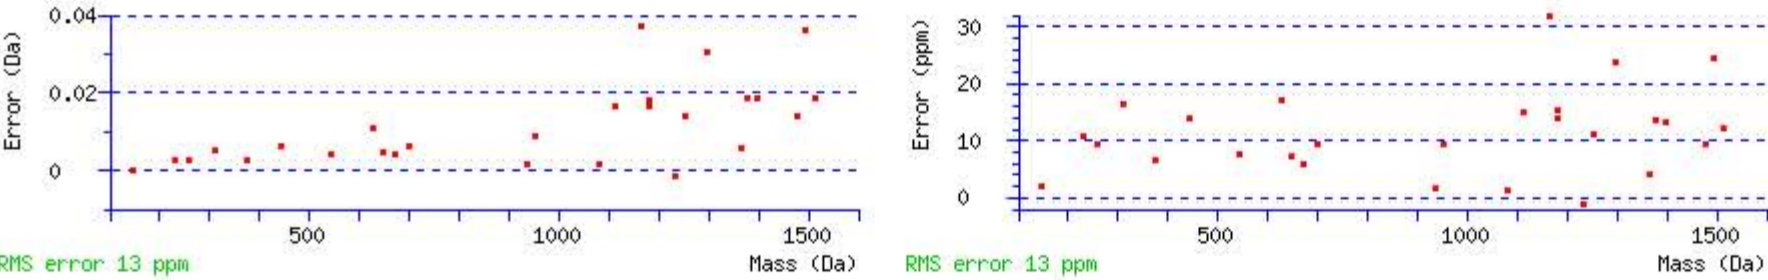

NCBI BLAST search of [LDTLAQEVALLK](#)  
(Parameters: blastp, nr protein database, expect=20000, no filter, PAM30)  
Other BLAST [web gateways](#)

All matches to this query

| Score | Mr(calc):   | Delta     | Sequence                         |
|-------|-------------|-----------|----------------------------------|
| 80.0  | 1623.926941 | 0.016507  | <a href="#">LDTLAQEVALLK</a>     |
| 6.3   | 1623.926956 | 0.016492  | <a href="#">KTLVSMPPPLPGLDLK</a> |
| 4.3   | 1623.944702 | -0.001254 | <a href="#">EVELIIQVTPKDIK</a>   |
| 3.7   | 1623.957260 | -0.013812 | <a href="#">IFRPKHTRISELK</a>    |
| 2.8   | 1623.942001 | 0.001447  | <a href="#">ESKPGGLPRRSSIIK</a>  |
| 2.8   | 1623.934799 | 0.008649  | <a href="#">FIQKFSQASSKILK</a>   |
| 2.8   | 1623.928284 | 0.015164  | <a href="#">LCHAAFLPSVRLLK</a>   |
| 2.8   | 1623.942200 | 0.001248  | <a href="#">LLPVQENFLLK</a>      |
| 2.5   | 1623.919556 | 0.023892  | <a href="#">EVSPEPIVSTVARLK</a>  |
| 2.3   | 1623.919540 | 0.023908  | <a href="#">KLSLGTAEPQVKEPK</a>  |

Peptide View

MS/MS Fragmentation of **EQQALQTVCLK**  
Found in **TETN\_HUMAN**, Tetranectin OS=Homo sapiens GN=CLEC3B PE=1 SV=3

Match to Query 36292: 1627.857608 from(814.936080,2+) rtinseconds(1966) index(5474)  
Title: Locus:1.1.1.1961.10 File:"2013-07-02 CLN FXIII 180 min 2nd F 1.wiff"  
Data file C:\Program Files (x86)\Matrix Science\Mascot Daemon\mgf\8 FXIII 180 min 2nd\mascot\_daemon\_merge.mgf

Click mouse within plot area to zoom in by factor of two about that point

Or, 

Plot from

100

 to 

1800

 Da 

Full range

Label all possible matches ☐ Label matches used for scoring ☒

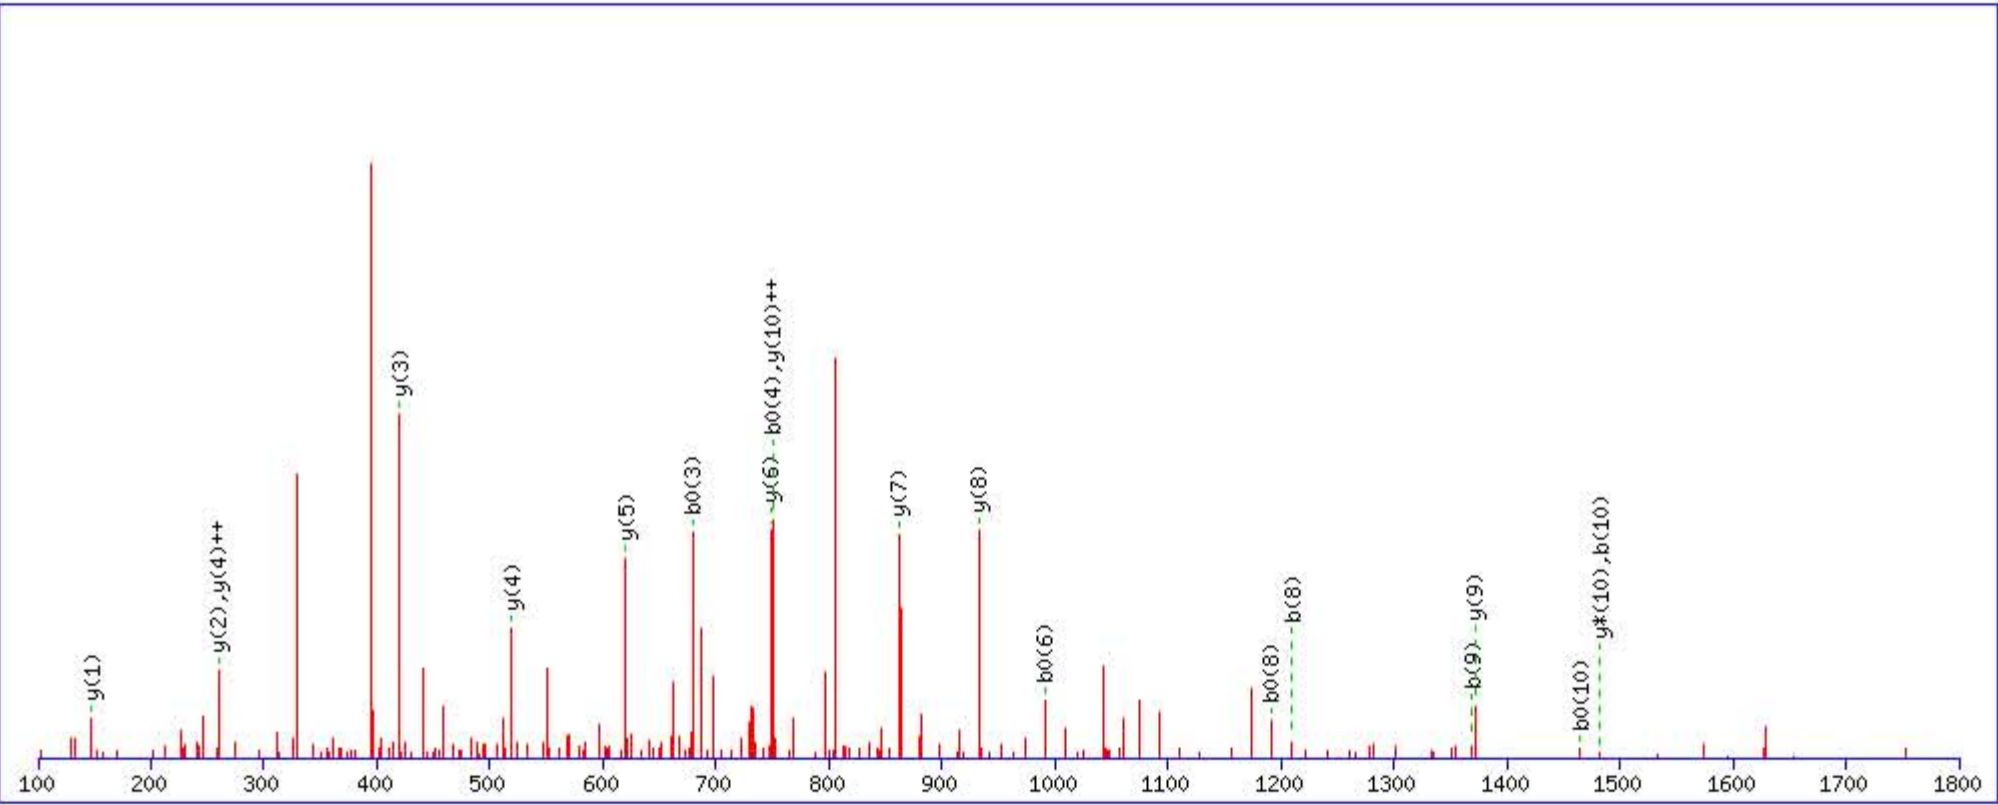

Monoisotopic mass of neutral peptide Mr(calc): 1627.842575  
Fixed modifications: Carbamidomethyl (C) (apply to specified residues or termini only)  
Variable modifications:  
Q3 : Biotin:Thermo-21345 (Q)  
Ions Score: 60 Expect: 9.1e-006  
Matches : 20/110 fragment ions using 30 most intense peaks [\(help\)](#)

| #  | b           | b <sup>++</sup> | b <sup>*</sup> | b <sup>++</sup> * | b <sup>0</sup> | b <sup>0++</sup> | Seq. | y           | y <sup>++</sup> | y <sup>*</sup> | y <sup>++</sup> * | y <sup>0</sup> | y <sup>0++</sup> | #  |
|----|-------------|-----------------|----------------|-------------------|----------------|------------------|------|-------------|-----------------|----------------|-------------------|----------------|------------------|----|
| 1  | 130.049869  | 65.528572       |                |                   | 112.039304     | 56.523290        | E    |             |                 |                |                   |                |                  | 11 |
| 2  | 258.108447  | 129.557862      | 241.081898     | 121.044587        | 240.097882     | 120.552579       | Q    | 1499.807270 | 750.407273      | 1482.780721    | 741.893999        | 1481.796705    | 741.401991       | 10 |
| 3  | 697.333773  | 349.170525      | 680.307224     | 340.657250        | 679.323208     | 340.165242       | Q    | 1371.748692 | 686.377984      | 1354.722143    | 677.864710        | 1353.738127    | 677.372702       | 9  |
| 4  | 768.370887  | 384.689082      | 751.344338     | 376.175807        | 750.360322     | 375.683799       | A    | 932.523366  | 466.765321      | 915.496817     | 458.252047        | 914.512801     | 457.760039       | 8  |
| 5  | 881.454951  | 441.231114      | 864.428402     | 432.717839        | 863.444386     | 432.225831       | L    | 861.486252  | 431.246764      | 844.459703     | 422.733490        | 843.475687     | 422.241482       | 7  |
| 6  | 1009.513529 | 505.260403      | 992.486980     | 496.747128        | 991.502964     | 496.255120       | Q    | 748.402188  | 374.704732      | 731.375639     | 366.191458        | 730.391623     | 365.699450       | 6  |
| 7  | 1110.561208 | 555.784242      | 1093.534659    | 547.270968        | 1092.550643    | 546.778960       | T    | 620.343610  | 310.675443      | 603.317061     | 302.162169        | 602.333045     | 301.670161       | 5  |
| 8  | 1209.629622 | 605.318449      | 1192.603073    | 596.805175        | 1191.619057    | 596.313167       | V    | 519.295931  | 260.151604      | 502.269382     | 251.638329        |                |                  | 4  |
| 9  | 1369.660271 | 685.333774      | 1352.633722    | 676.820499        | 1351.649706    | 676.328491       | C    | 420.227517  | 210.617396      | 403.200968     | 202.104122        |                |                  | 3  |
| 10 | 1482.744335 | 741.875806      | 1465.717786    | 733.362531        | 1464.733770    | 732.870523       | L    | 260.196868  | 130.602072      | 243.170319     | 122.088797        |                |                  | 2  |
| 11 |             |                 |                |                   |                |                  | K    | 147.112804  | 74.060040       | 130.086255     | 65.546765         |                |                  | 1  |

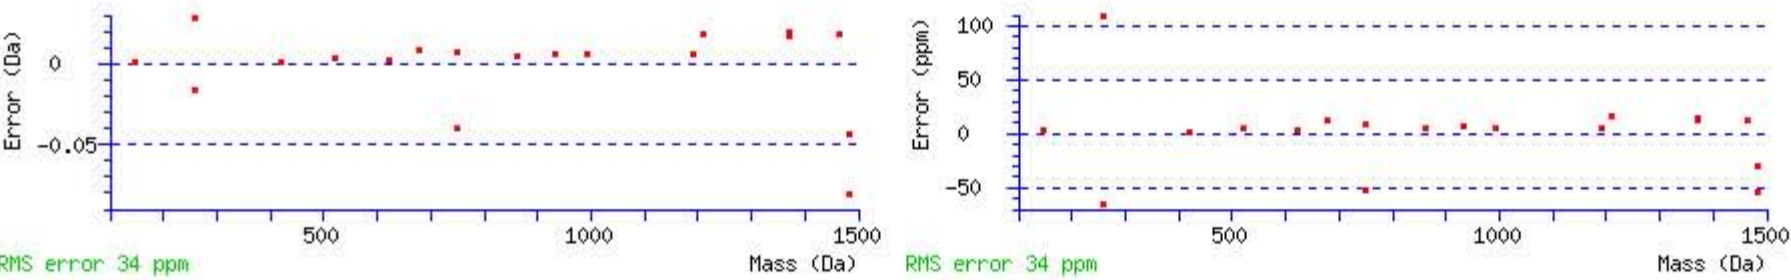

NCBI BLAST search of [EQQALQTVCLK](#)  
(Parameters: blastp, nr protein database, expect=20000, no filter, PAM30)  
Other BLAST [web gateways](#)

All matches to this query

| Score | Mr(calc):   | Delta     | Sequence                      |
|-------|-------------|-----------|-------------------------------|
| 59.8  | 1627.842575 | 0.015033  | <a href="#">EQQALQTVCLK</a>   |
| 51.5  | 1627.842575 | 0.015033  | <a href="#">EQQALQTVCLK</a>   |
| 25.0  | 1627.842575 | 0.015033  | <a href="#">EQQALQTVCLK</a>   |
| 5.7   | 1627.835159 | 0.022449  | <a href="#">EQVQASREDKK</a>   |
| 5.1   | 1627.845688 | 0.011920  | <a href="#">KKEFSLEEIYTNK</a> |
| 5.0   | 1627.835159 | 0.022449  | <a href="#">EQVQASREDKK</a>   |
| 5.0   | 1627.853775 | 0.003833  | <a href="#">QEKMQQLREK</a>    |
| 4.5   | 1627.875580 | -0.017972 | <a href="#">KPKDL DFAQQK</a>  |
| 4.4   | 1627.835159 | 0.022449  | <a href="#">QRPEAKTSGSEK</a>  |
| 4.2   | 1627.875580 | -0.017972 | <a href="#">KPKDL DFAQQK</a>  |

MATRIX

SCIENCE

Mascot Search Results

Peptide View

MS/MS Fragmentation of **ETIEQEK**  
Found in **TYB10\_HUMAN**, Thymosin beta-10 OS=Homo sapiens GN=TMSB10 PE=1 SV=2

Match to Query 20217: 1186.589968 from(594.302260,2+) rtinseconds(1423) index(62974)  
Title: Locus:1.1.1.1770.17 File:"2013-07-02 CLN FXIII 180 min 2nd FT.wiff"  
Data file C:\Program Files (x86)\Matrix Science\Mascot Daemon\mgf\8 FXIII 180 min 2nd\mascot\_daemon\_merge.mgf

Click mouse within plot area to zoom in by factor of two about that point  
Or,   to  Da   
Label all possible matches ☐ Label matches used for scoring ☒

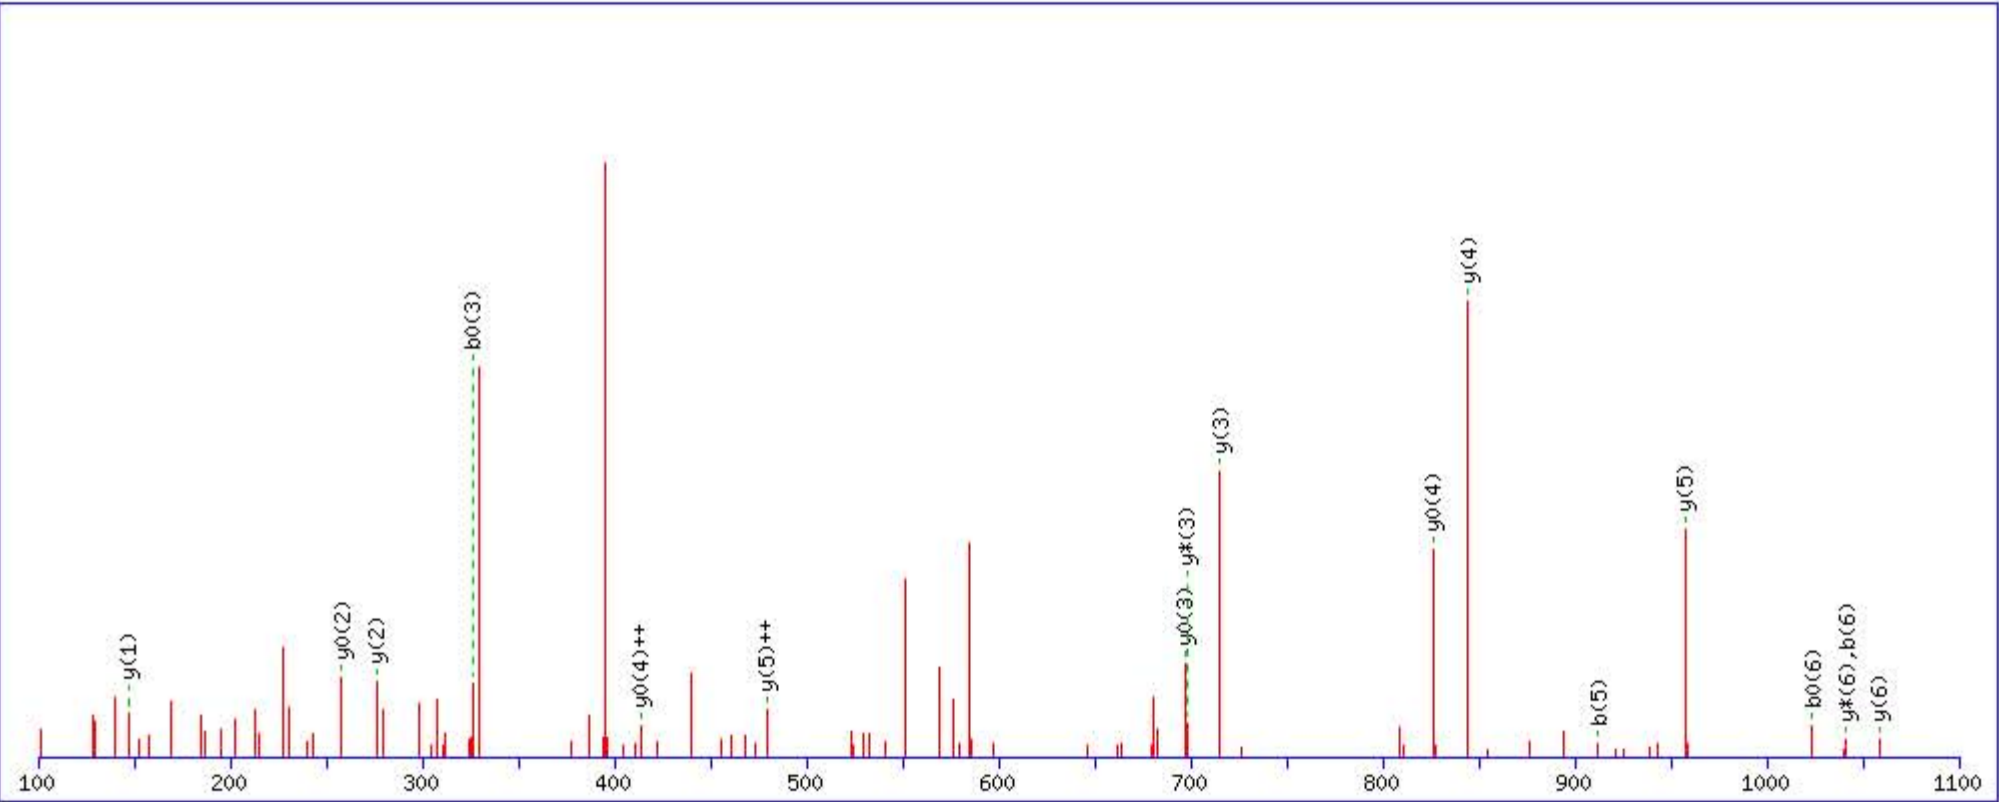

Monoisotopic mass of neutral peptide Mr(calc): 1186.590347  
Fixed modifications: Carbamidomethyl (C) (apply to specified residues or termini only)  
Variable modifications:  
Q5 : Biotin:Thermo-21345 (Q)  
Ions Score: 33 Expect: 0.0068  
Matches : 17/62 fragment ions using 29 most intense peaks ([help](#))

| # | b           | b <sup>++</sup> | b <sup>*</sup> | b <sup>++</sup> * | b <sup>0</sup> | b <sup>0++</sup> | Seq. | y           | y <sup>++</sup> | y <sup>*</sup> | y <sup>++</sup> * | y <sup>0</sup> | y <sup>0++</sup> | # |
|---|-------------|-----------------|----------------|-------------------|----------------|------------------|------|-------------|-----------------|----------------|-------------------|----------------|------------------|---|
| 1 | 130.049869  | 65.528572       |                |                   | 112.039304     | 56.523290        | E    |             |                 |                |                   |                |                  | 7 |
| 2 | 231.097548  | 116.052412      |                |                   | 213.086983     | 107.047130       | T    | 1058.555059 | 529.781168      | 1041.528510    | 521.267893        | 1040.544494    | 520.775885       | 6 |
| 3 | 344.181612  | 172.594444      |                |                   | 326.171047     | 163.589162       | I    | 957.507380  | 479.257328      | 940.480831     | 470.744054        | 939.496815     | 470.252046       | 5 |
| 4 | 473.224205  | 237.115741      |                |                   | 455.213640     | 228.110458       | E    | 844.423316  | 422.715296      | 827.396767     | 414.202022        | 826.412751     | 413.710014       | 4 |
| 5 | 912.449531  | 456.728404      | 895.422982     | 448.215129        | 894.438966     | 447.723121       | Q    | 715.380723  | 358.194000      | 698.354174     | 349.680725        | 697.370158     | 349.188717       | 3 |
| 6 | 1041.492124 | 521.249700      | 1024.465575    | 512.736426        | 1023.481559    | 512.244418       | E    | 276.155397  | 138.581336      | 259.128848     | 130.068062        | 258.144832     | 129.576054       | 2 |
| 7 |             |                 |                |                   |                |                  | K    | 147.112804  | 74.060040       | 130.086255     | 65.546765         |                |                  | 1 |

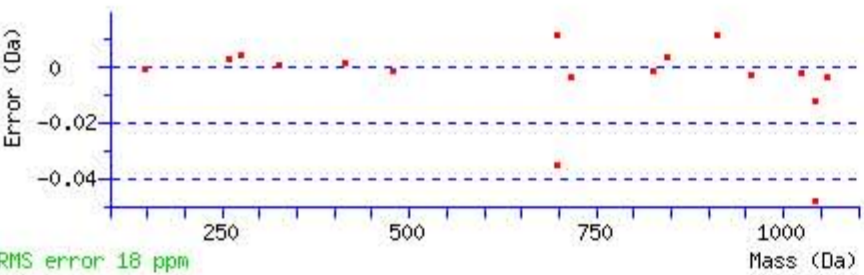

NCBI BLAST search of [ETIEQEK](#)  
(Parameters: blastp, nr protein database, expect=20000, no filter, PAM30)  
Other BLAST [web gateways](#)

All matches to this query

| Score | Mr(calc):   | Delta     | Sequence                   |
|-------|-------------|-----------|----------------------------|
| 33.3  | 1186.590347 | -0.000379 | <a href="#">ETIEQEK</a>    |
| 9.6   | 1186.572586 | 0.017382  | <a href="#">KEMMKETFK</a>  |
| 8.8   | 1186.591721 | -0.001753 | <a href="#">KTVGFHSHMK</a> |
| 8.7   | 1186.572586 | 0.017382  | <a href="#">KEMMKETFK</a>  |
| 6.8   | 1186.601578 | -0.011610 | <a href="#">QEQQESK</a>    |
| 5.9   | 1186.572617 | 0.017351  | <a href="#">MDVFMKGLSK</a> |
| 5.5   | 1186.590347 | -0.000379 | <a href="#">QEEELTK</a>    |
| 5.2   | 1186.605392 | -0.015424 | <a href="#">KEAEQEAARR</a> |
| 4.7   | 1186.601578 | -0.011610 | <a href="#">TNEKQEK</a>    |
| 2.6   | 1186.601578 | -0.011610 | <a href="#">EEKQNTK</a>    |

MATRIX

SCIENCE

Mascot Search Results

Peptide View

MS/MS Fragmentation of **SPYQLVLQHSR**  
Found in **BGH3\_HUMAN**, Transforming growth factor-beta-induced protein ig-h3 OS=Homo sapiens GN=TGFB1 PE=1 SV=1

Match to Query 36597: 1637.876022 from(546.965950,3+) rtinseconds(1889) index(19507)  
Title: Locus:1.1.1.3040.12 File:"2013-07-02 CLN FXIII 180 min 2nd F 2.wiff"  
Data file C:\Program Files (x86)\Matrix Science\Mascot Daemon\mgf\8 FXIII 180 min 2nd\mascot\_daemon\_merge.mgf

Click mouse within plot area to zoom in by factor of two about that point  
Or, 

Plot from

100

 to 

1600

 Da 

Full range

  
Label all possible matches ☐ Label matches used for scoring ☒

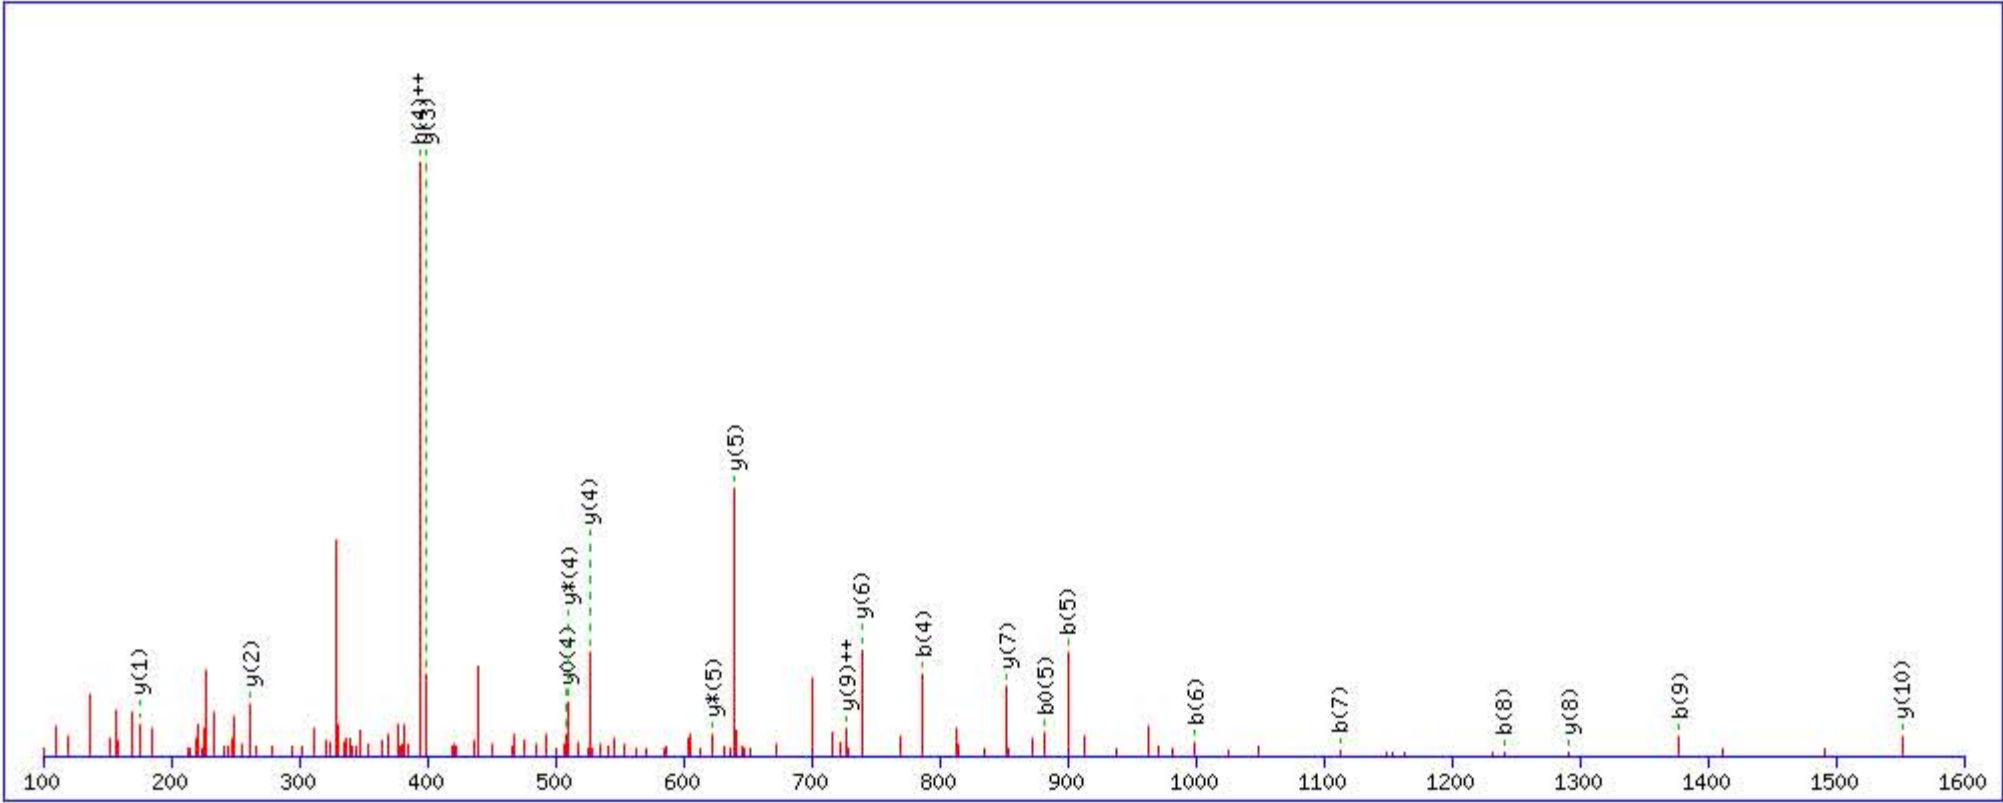

Monoisotopic mass of neutral peptide Mr(calc): 1637.871170  
Fixed modifications: Carbamidomethyl (C) (apply to specified residues or termini only)  
Variable modifications:  
Q4 : Biotin:Thermo-21345 (Q)  
Ions Score: 38 Expect: 0.00041  
Matches : 21/112 fragment ions using 50 most intense peaks [\(help\)](#)

| #  | b           | b <sup>++</sup> | b <sup>+</sup> | b <sup>+++</sup> | b <sup>0</sup> | b <sup>0++</sup> | Seq. | y           | y <sup>++</sup> | y <sup>+</sup> | y <sup>+++</sup> | y <sup>0</sup> | y <sup>0++</sup> | #  |
|----|-------------|-----------------|----------------|------------------|----------------|------------------|------|-------------|-----------------|----------------|------------------|----------------|------------------|----|
| 1  | 88.039304   | 44.523290       |                |                  | 70.028739      | 35.518008        | S    |             |                 |                |                  |                |                  | 11 |
| 2  | 185.092068  | 93.049672       |                |                  | 167.081503     | 84.044389        | P    | 1551.846431 | 776.426853      | 1534.819882    | 767.913579       | 1533.835866    | 767.421571       | 10 |
| 3  | 348.155397  | 174.581336      |                |                  | 330.144832     | 165.576054       | Y    | 1454.793667 | 727.900471      | 1437.767118    | 719.387197       | 1436.783102    | 718.895189       | 9  |
| 4  | 787.380723  | 394.194000      | 770.354174     | 385.680725       | 769.370158     | 385.188717       | Q    | 1291.730338 | 646.368807      | 1274.703789    | 637.855532       | 1273.719773    | 637.363524       | 8  |
| 5  | 900.464787  | 450.736032      | 883.438238     | 442.222757       | 882.454222     | 441.730749       | L    | 852.505012  | 426.756144      | 835.478463     | 418.242869       | 834.494447     | 417.750861       | 7  |
| 6  | 999.533201  | 500.270239      | 982.506652     | 491.756964       | 981.522636     | 491.264956       | V    | 739.420948  | 370.214112      | 722.394399     | 361.700837       | 721.410383     | 361.208829       | 6  |
| 7  | 1112.617265 | 556.812270      | 1095.590716    | 548.298996       | 1094.606700    | 547.806988       | L    | 640.352534  | 320.679905      | 623.325985     | 312.166630       | 622.341969     | 311.674622       | 5  |
| 8  | 1240.675843 | 620.841559      | 1223.649294    | 612.328285       | 1222.665278    | 611.836277       | Q    | 527.268470  | 264.137873      | 510.241921     | 255.624598       | 509.257905     | 255.132590       | 4  |
| 9  | 1377.734755 | 689.371015      | 1360.708206    | 680.857741       | 1359.724190    | 680.365733       | H    | 399.209892  | 200.108584      | 382.183343     | 191.595309       | 381.199327     | 191.103301       | 3  |
| 10 | 1464.766783 | 732.887029      | 1447.740234    | 724.373755       | 1446.756218    | 723.881747       | S    | 262.150980  | 131.579128      | 245.124431     | 123.065854       | 244.140415     | 122.573846       | 2  |
| 11 |             |                 |                |                  |                |                  | R    | 175.118952  | 88.063114       | 158.092403     | 79.549839        |                |                  | 1  |

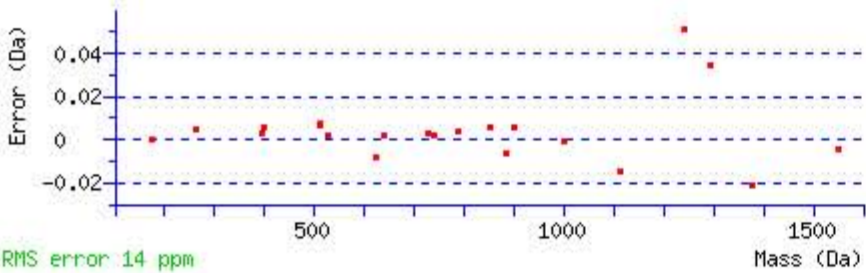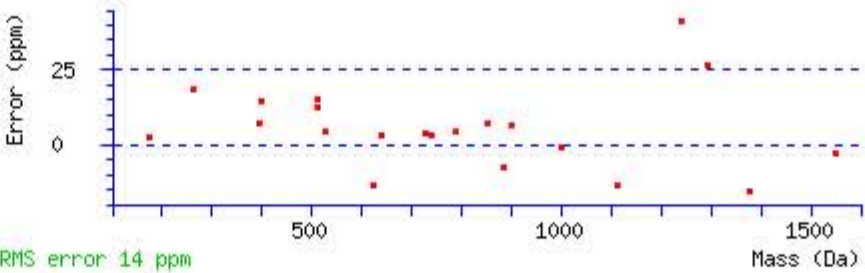

NCBI BLAST search of [SPYQLVLQHSR](#)  
(Parameters: blastp, nr protein database, expect=20000, no filter, PAM30)  
Other BLAST [web gateways](#)

All matches to this query

| Score | Mr(calc):   | Delta    | Sequence                       |
|-------|-------------|----------|--------------------------------|
| 38.0  | 1637.871170 | 0.004852 | <a href="#">SPYQLVLQHSR</a>    |
| 1.9   | 1637.855911 | 0.020111 | <a href="#">RTAYSGVPMILSSR</a> |

MATRIX

SCIENCE

Mascot Search Results

Peptide View

MS/MS Fragmentation of **NLHDLDVSDNQLER**  
Found in **VASN\_HUMAN**, Vasorin OS=Homo sapiens GN=VASN PE=1 SV=1

Match to Query 43703: 1977.964422 from(660.328750,3+) rtinseconds(1945) index(5341)  
Title: Locus:1.1.1.1954.19 File:"2013-07-02 CLN FXIII 180 min 2nd F 1.wiff"  
Data file C:\Program Files (x86)\Matrix Science\Mascot Daemon\mgf\8 FXIII 180 min 2nd\mascot\_daemon\_merge.mgf

Click mouse within plot area to zoom in by factor of two about that point  
Or,   to  Da   
Label all possible matches ☐ Label matches used for scoring ☒

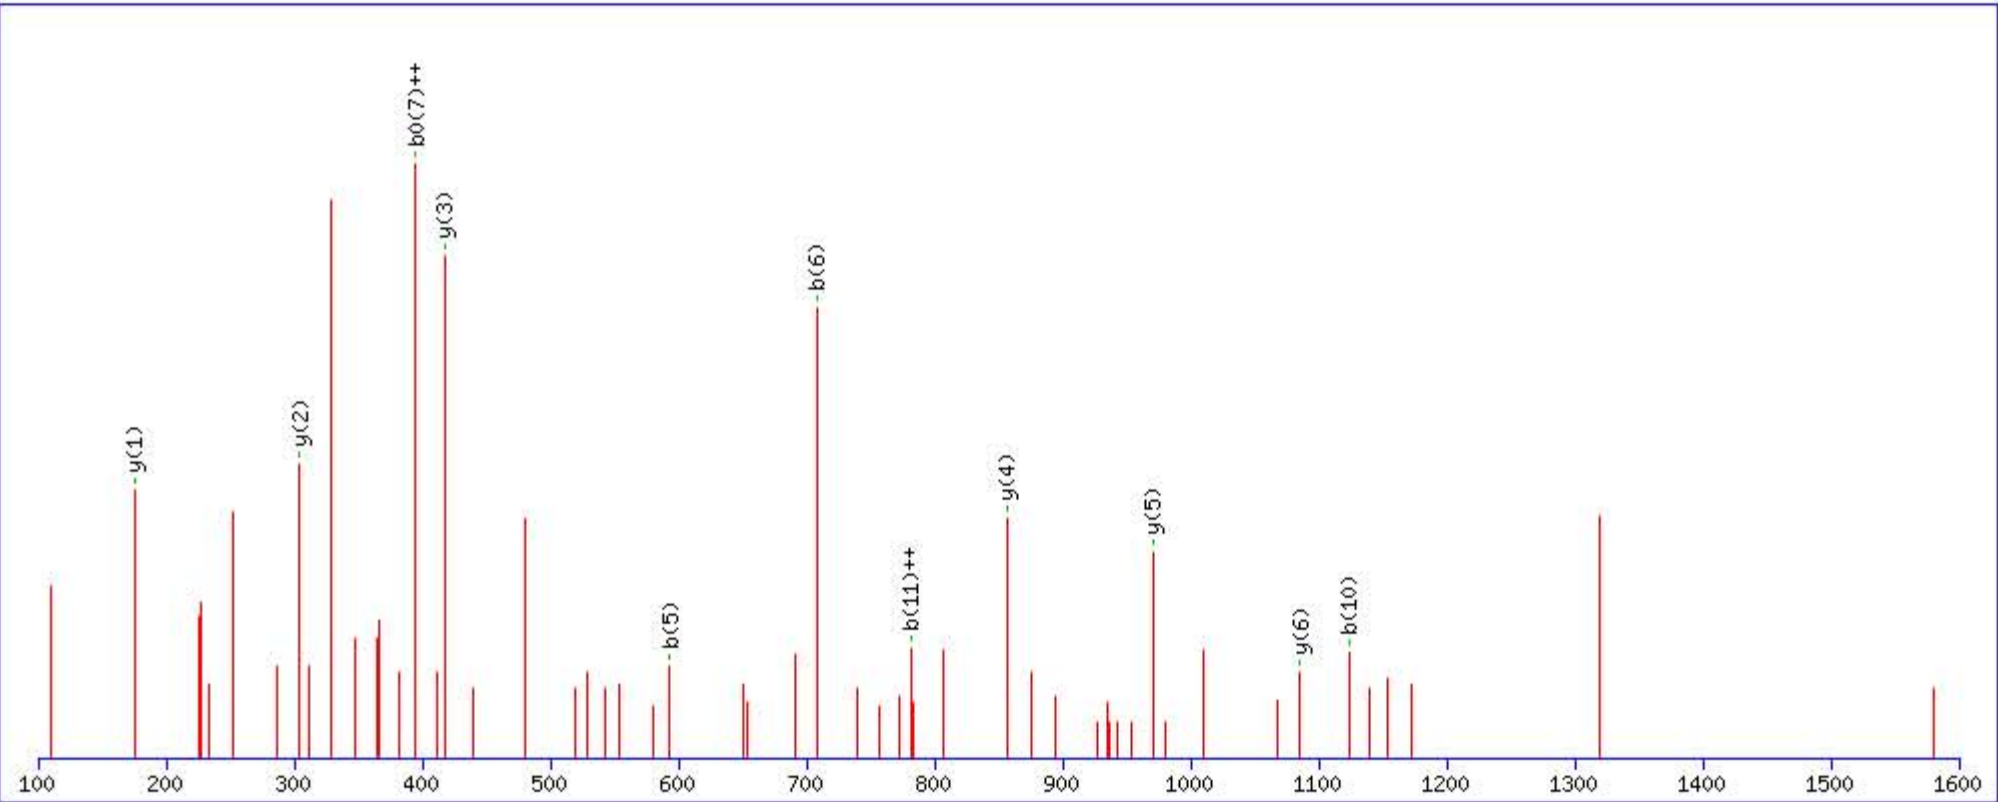

Monoisotopic mass of neutral peptide Mr(calc): 1977.957809  
Fixed modifications: Carbamidomethyl (C) (apply to specified residues or termini only)  
Variable modifications:  
Q11 : Biotin:Thermo-21345 (Q)  
Ions Score: 45 Expect: 6.7e-005  
Matches : 11/148 fragment ions using 13 most intense peaks [\(help\)](#)

| #  | b           | b <sup>++</sup> | b <sup>*</sup> | b <sup>*++</sup> | b <sup>0</sup> | b <sup>0++</sup> | Seq. | y           | y <sup>++</sup> | y <sup>*</sup> | y <sup>*++</sup> | y <sup>0</sup> | y <sup>0++</sup> | #  |
|----|-------------|-----------------|----------------|------------------|----------------|------------------|------|-------------|-----------------|----------------|------------------|----------------|------------------|----|
| 1  | 115.050203  | 58.028740       | 98.023654      | 49.515465        |                |                  | N    |             |                 |                |                  |                |                  | 14 |
| 2  | 228.134267  | 114.570771      | 211.107718     | 106.057497       |                |                  | L    | 1864.922173 | 932.964724      | 1847.895624    | 924.451450       | 1846.911608    | 923.959442       | 13 |
| 3  | 365.193179  | 183.100227      | 348.166630     | 174.586953       |                |                  | H    | 1751.838109 | 876.422692      | 1734.811560    | 867.909418       | 1733.827544    | 867.417410       | 12 |
| 4  | 480.220122  | 240.613699      | 463.193573     | 232.100425       | 462.209557     | 231.608417       | D    | 1614.779197 | 807.893236      | 1597.752648    | 799.379962       | 1596.768632    | 798.887954       | 11 |
| 5  | 593.304186  | 297.155731      | 576.277637     | 288.642457       | 575.293621     | 288.150449       | L    | 1499.752254 | 750.379765      | 1482.725705    | 741.866490       | 1481.741689    | 741.374482       | 10 |
| 6  | 708.331129  | 354.669203      | 691.304580     | 346.155928       | 690.320564     | 345.663920       | D    | 1386.668190 | 693.837733      | 1369.641641    | 685.324458       | 1368.657625    | 684.832450       | 9  |
| 7  | 807.399543  | 404.203410      | 790.372994     | 395.690135       | 789.388978     | 395.198127       | V    | 1271.641247 | 636.324261      | 1254.614698    | 627.810987       | 1253.630682    | 627.318979       | 8  |
| 8  | 894.431571  | 447.719424      | 877.405022     | 439.206149       | 876.421006     | 438.714141       | S    | 1172.572833 | 586.790054      | 1155.546284    | 578.276780       | 1154.562268    | 577.784772       | 7  |
| 9  | 1009.458514 | 505.232895      | 992.431965     | 496.719620       | 991.447949     | 496.227612       | D    | 1085.540805 | 543.274040      | 1068.514256    | 534.760766       | 1067.530240    | 534.268758       | 6  |
| 10 | 1123.501441 | 562.254358      | 1106.474892    | 553.741084       | 1105.490876    | 553.249076       | N    | 970.513862  | 485.760569      | 953.487313     | 477.247294       | 952.503297     | 476.755286       | 5  |
| 11 | 1562.726767 | 781.867021      | 1545.700218    | 773.353747       | 1544.716202    | 772.861739       | Q    | 856.470935  | 428.739105      | 839.444386     | 420.225831       | 838.460370     | 419.733823       | 4  |
| 12 | 1675.810831 | 838.409053      | 1658.784282    | 829.895779       | 1657.800266    | 829.403771       | L    | 417.245609  | 209.126442      | 400.219060     | 200.613168       | 399.235044     | 200.121160       | 3  |
| 13 | 1804.853424 | 902.930350      | 1787.826875    | 894.417075       | 1786.842859    | 893.925067       | E    | 304.161545  | 152.584410      | 287.134996     | 144.071136       | 286.150980     | 143.579128       | 2  |
| 14 |             |                 |                |                  |                |                  | R    | 175.118952  | 88.063114       | 158.092403     | 79.549839        |                |                  | 1  |

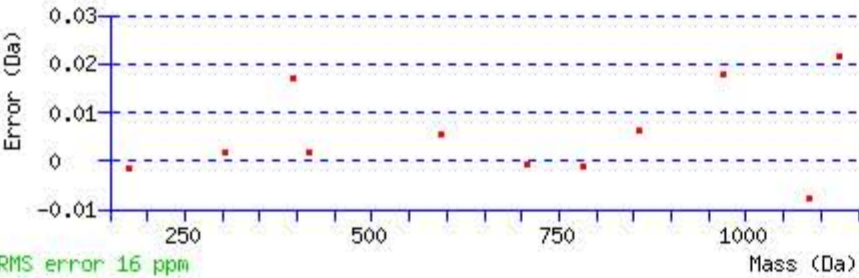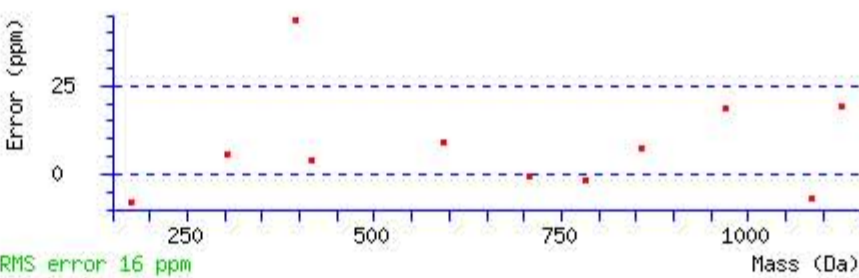

NCBI BLAST search of **NLHDLDVSDNQLER**  
(Parameters: blastp, nr protein database, expect=20000, no filter, PAM30)  
Other BLAST [web gateways](#)

All matches to this query

| Score | Mr(calc):   | Delta     | Sequence                           |
|-------|-------------|-----------|------------------------------------|
| 45.2  | 1977.957809 | 0.006613  | <a href="#">NLHDLDVSDNQLER</a>     |
| 0.7   | 1977.979813 | -0.015391 | <a href="#">TMPRTVPGSTMKMGSLER</a> |

MATRIX

SCIENCE

Mascot Search Results

Peptide View

MS/MS Fragmentation of **LAGLGLQQLDEGLFSR**  
Found in **VASN\_HUMAN**, Vasin OS=Homo sapiens GN=VASN PE=1 SV=1

Match to Query 45190: 2027.105622 from(676.709150,3+) rtinseconds(2815) index(9965)  
Title: Locus:1.1.1.2257.12 File:"2013-07-02 CLN FXIII 180 min 2nd F 1.wiff"  
Data file C:\Program Files (x86)\Matrix Science\Mascot Daemon\mgf\8 FXIII 180 min 2nd\mascot\_daemon\_merge.mgf

Click mouse within plot area to zoom in by factor of two about that point  
Or, 

Plot from

100

 to 

1300

 Da 

Full range

  
Label all possible matches ☐ Label matches used for scoring ☒

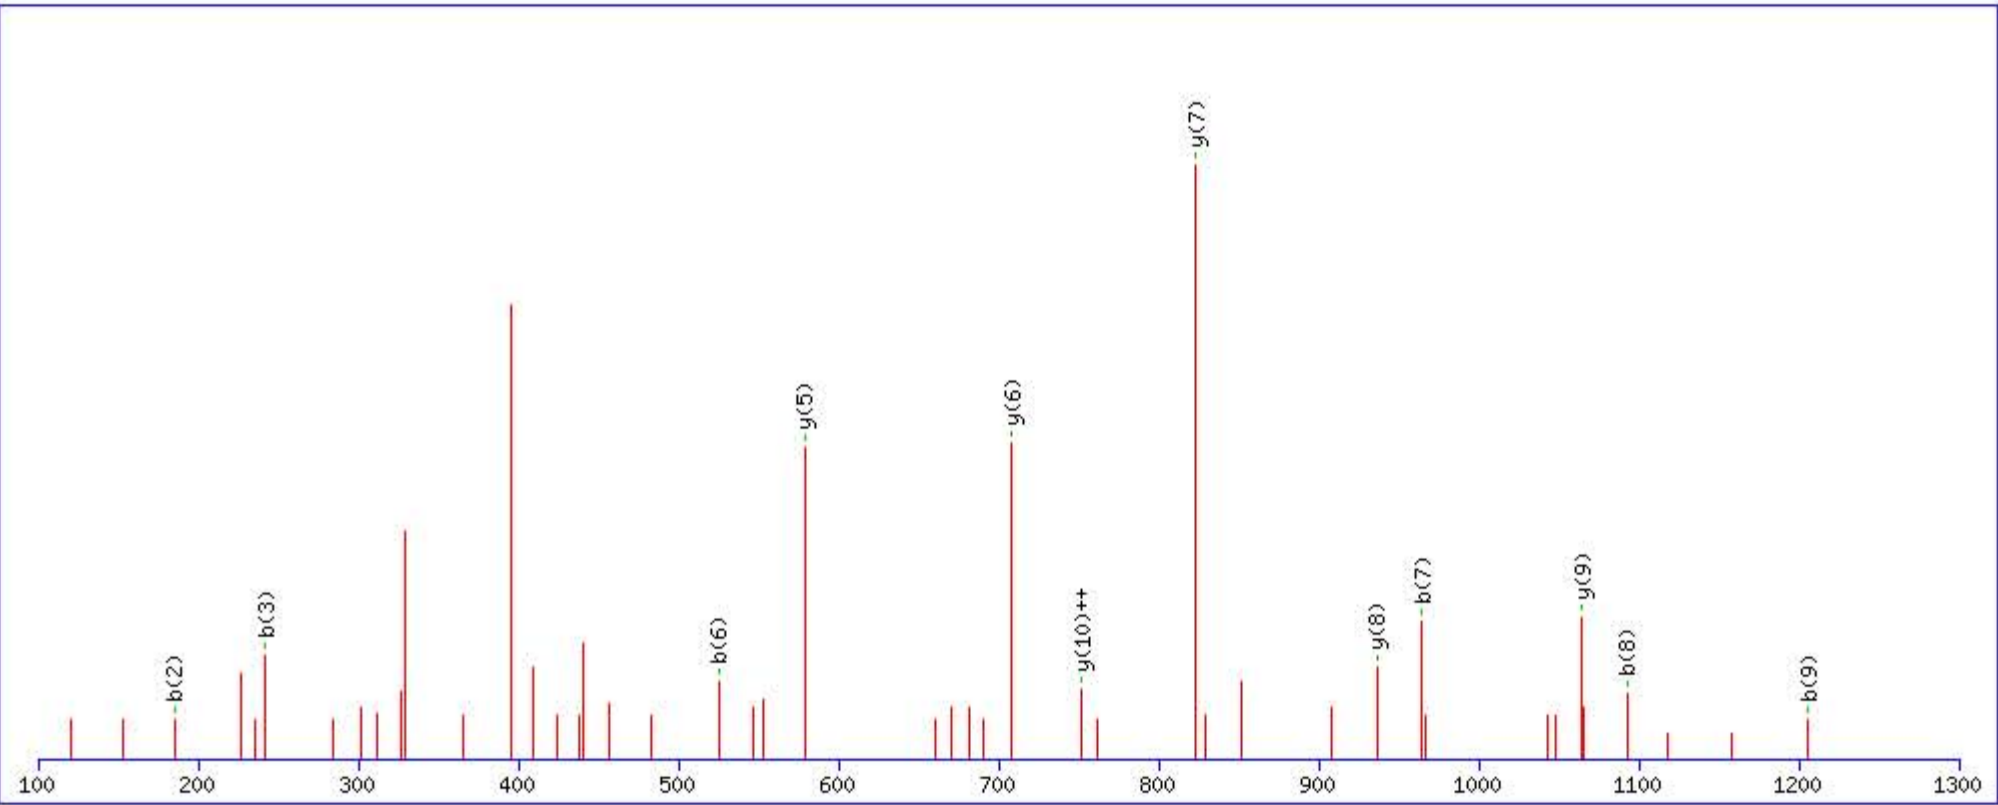

Monoisotopic mass of neutral peptide Mr(calc): 2027.087372  
Fixed modifications: Carbamidomethyl (C) (apply to specified residues or termini only)  
Variable modifications:  
Q7 : Biotin:Thermo-21345 (Q)  
Ions Score: 32 Expect: 0.011  
Matches : 12/148 fragment ions using 22 most intense peaks [\(help\)](#)

| #  | b           | b <sup>++</sup> | b <sup>*</sup> | b <sup>*++</sup> | b <sup>0</sup> | b <sup>0++</sup> | Seq. | y           | y <sup>++</sup> | y <sup>*</sup> | y <sup>*++</sup> | y <sup>0</sup> | y <sup>0++</sup> | #  |
|----|-------------|-----------------|----------------|------------------|----------------|------------------|------|-------------|-----------------|----------------|------------------|----------------|------------------|----|
| 1  | 114.091340  | 57.549308       |                |                  |                |                  | L    |             |                 |                |                  |                |                  | 16 |
| 2  | 185.128454  | 93.067865       |                |                  |                |                  | A    | 1915.010596 | 958.008936      | 1897.984047    | 949.495662       | 1897.000031    | 949.003654       | 15 |
| 3  | 242.149918  | 121.578597      |                |                  |                |                  | G    | 1843.973482 | 922.490379      | 1826.946933    | 913.977105       | 1825.962917    | 913.485097       | 14 |
| 4  | 355.233982  | 178.120629      |                |                  |                |                  | L    | 1786.952018 | 893.979647      | 1769.925469    | 885.466373       | 1768.941453    | 884.974364       | 13 |
| 5  | 412.255446  | 206.631361      |                |                  |                |                  | G    | 1673.867954 | 837.437615      | 1656.841405    | 828.924341       | 1655.857389    | 828.432333       | 12 |
| 6  | 525.339510  | 263.173393      |                |                  |                |                  | L    | 1616.846490 | 808.926883      | 1599.819941    | 800.413609       | 1598.835925    | 799.921601       | 11 |
| 7  | 964.564836  | 482.786056      | 947.538287     | 474.272782       |                |                  | Q    | 1503.762426 | 752.384851      | 1486.735877    | 743.871577       | 1485.751861    | 743.379569       | 10 |
| 8  | 1092.623414 | 546.815345      | 1075.596865    | 538.302071       |                |                  | Q    | 1064.537100 | 532.772188      | 1047.510551    | 524.258914       | 1046.526535    | 523.766906       | 9  |
| 9  | 1205.707478 | 603.357377      | 1188.680929    | 594.844102       |                |                  | L    | 936.478522  | 468.742899      | 919.451973     | 460.229625       | 918.467957     | 459.737617       | 8  |
| 10 | 1320.734421 | 660.870848      | 1303.707872    | 652.357574       | 1302.723856    | 651.865566       | D    | 823.394458  | 412.200867      | 806.367909     | 403.687593       | 805.383893     | 403.195585       | 7  |
| 11 | 1449.777014 | 725.392145      | 1432.750465    | 716.878871       | 1431.766449    | 716.386863       | E    | 708.367515  | 354.687396      | 691.340966     | 346.174121       | 690.356950     | 345.682113       | 6  |
| 12 | 1506.798478 | 753.902877      | 1489.771929    | 745.389603       | 1488.787913    | 744.897594       | G    | 579.324922  | 290.166099      | 562.298373     | 281.652825       | 561.314357     | 281.160817       | 5  |
| 13 | 1619.882542 | 810.444909      | 1602.855993    | 801.931634       | 1601.871977    | 801.439626       | L    | 522.303458  | 261.655367      | 505.276909     | 253.142093       | 504.292893     | 252.650085       | 4  |
| 14 | 1766.950956 | 883.979116      | 1749.924407    | 875.465842       | 1748.940391    | 874.973833       | F    | 409.219394  | 205.113335      | 392.192845     | 196.600061       | 391.208829     | 196.108053       | 3  |
| 15 | 1853.982984 | 927.495130      | 1836.956435    | 918.981856       | 1835.972419    | 918.489848       | S    | 262.150980  | 131.579128      | 245.124431     | 123.065854       | 244.140415     | 122.573846       | 2  |
| 16 |             |                 |                |                  |                |                  | R    | 175.118952  | 88.063114       | 158.092403     | 79.549839        |                |                  | 1  |

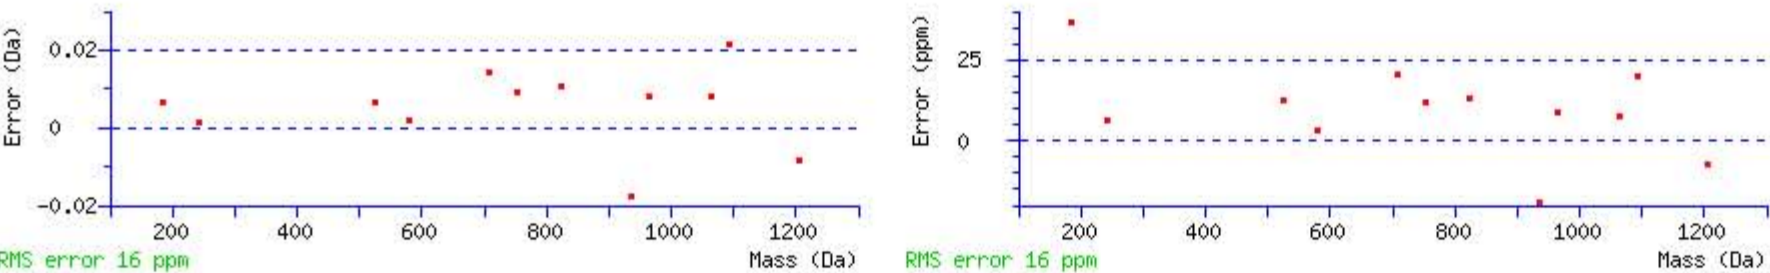

NCBI BLAST search of [LAGLGLQQLDEGLFSR](#)  
(Parameters: blastp, nr protein database, expect=20000, no filter, PAM30)  
Other BLAST [web gateways](#)

All matches to this query

| Score | Mr(calc):   | Delta    | Sequence                         |
|-------|-------------|----------|----------------------------------|
| 32.2  | 2027.087372 | 0.018250 | <a href="#">LAGLGLQQLDEGLFSR</a> |
| 20.4  | 2027.087372 | 0.018250 | <a href="#">LAGLGLQQLDEGLFSR</a> |

***{MATRIX}***  
***{SCIENCE}*** Mascot Search Results

Peptide View

MS/MS Fragmentation of **FEDCCQEK**  
Found in **VTDB\_HUMAN**, Vitamin D-binding protein OS=Homo sapiens GN=GC PE=1 SV=1

Match to Query 28850: 1425.571328 from(713.792940,2+) rtinseconds(1447) index(16546)  
Title: Locus:1.1.1.2886.12 File:"2013-07-02 CLN FXIII 180 min 2nd F 2.wiff"  
Data file C:\Program Files (x86)\Matrix Science\Mascot Daemon\mgf\8 FXIII 180 min 2nd\mascot\_daemon\_merge.mgf

Click mouse within plot area to zoom in by factor of two about that point  
Or,   to  Da   
Label all possible matches ☐ Label matches used for scoring ☒

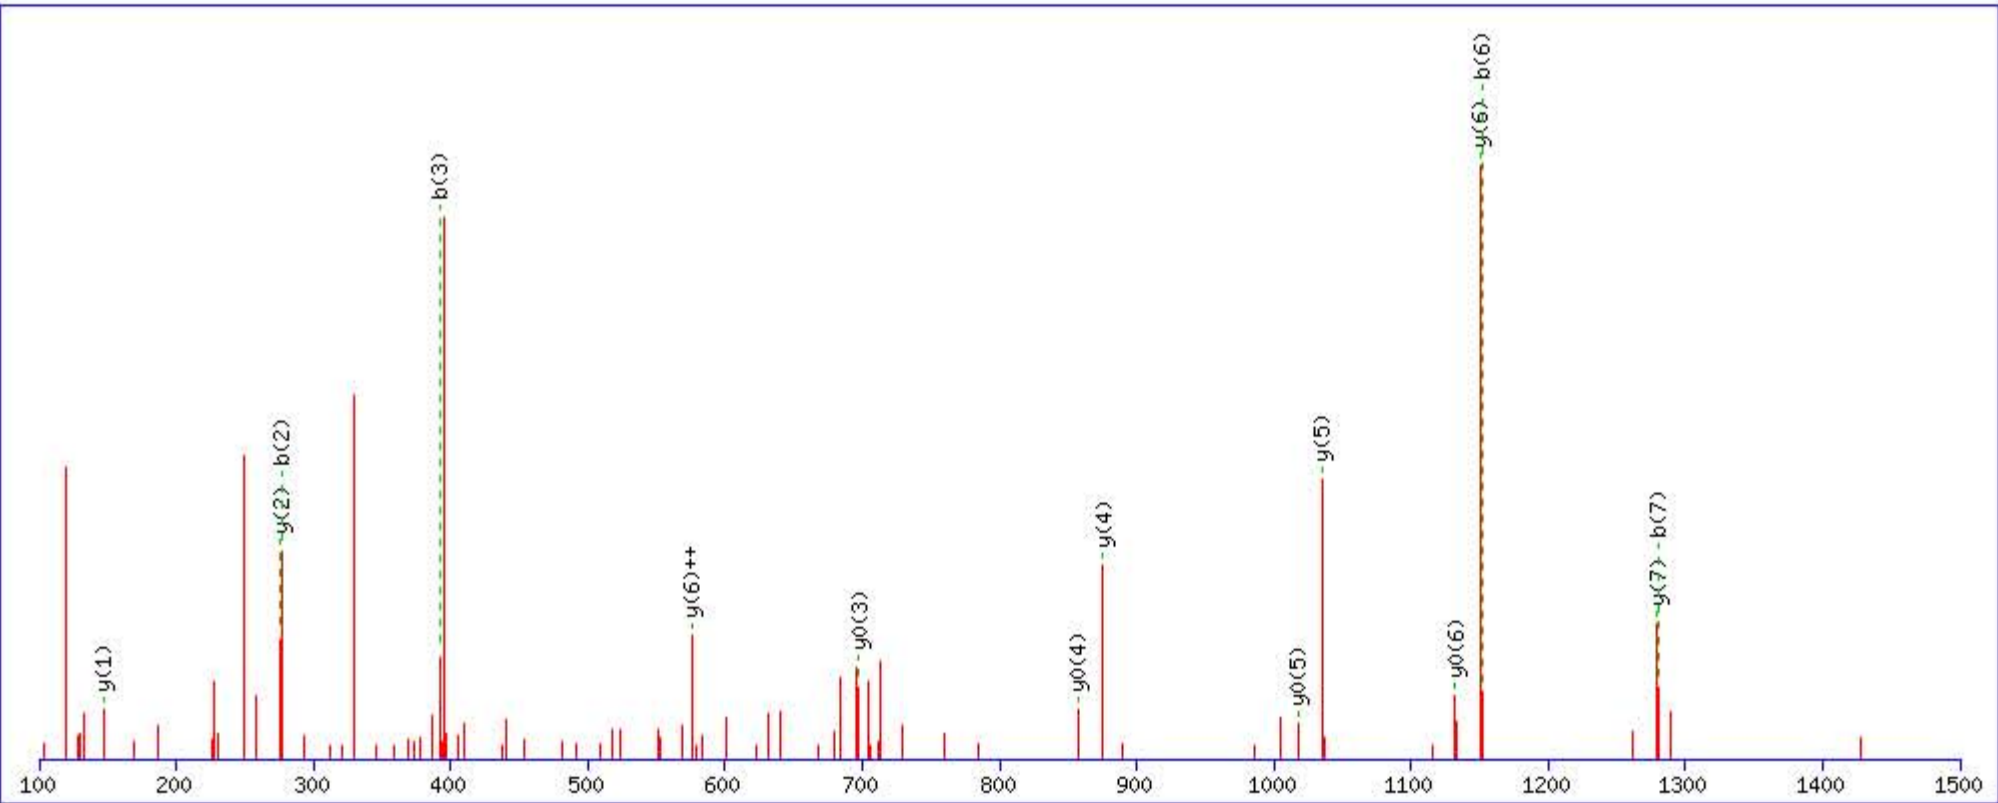

Monoisotopic mass of neutral peptide Mr(calc): 1425.572693  
Fixed modifications: Carbamidomethyl (C) (apply to specified residues or termini only)  
Variable modifications:  
Q6 : Biotin:Thermo-21345 (Q)  
Ions Score: 26 Expect: 0.0023  
Matches : 15/70 fragment ions using 34 most intense peaks [\(help\)](#)

| # | b           | b <sup>++</sup> | b <sup>*</sup> | b <sup>++</sup> * | b <sup>0</sup> | b <sup>0++</sup> | Seq. | y           | y <sup>++</sup> | y <sup>*</sup> | y <sup>++</sup> * | y <sup>0</sup> | y <sup>0++</sup> | # |
|---|-------------|-----------------|----------------|-------------------|----------------|------------------|------|-------------|-----------------|----------------|-------------------|----------------|------------------|---|
| 1 | 148.075690  | 74.541483       |                |                   |                |                  | F    |             |                 |                |                   |                |                  | 8 |
| 2 | 277.118283  | 139.062779      |                |                   | 259.107718     | 130.057497       | E    | 1279.511557 | 640.259417      | 1262.485008    | 631.746142        | 1261.500992    | 631.254134       | 7 |
| 3 | 392.145226  | 196.576251      |                |                   | 374.134661     | 187.570968       | D    | 1150.468964 | 575.738120      | 1133.442415    | 567.224846        | 1132.458399    | 566.732838       | 6 |
| 4 | 552.175875  | 276.591576      |                |                   | 534.165310     | 267.586293       | C    | 1035.442021 | 518.224649      | 1018.415472    | 509.711374        | 1017.431456    | 509.219366       | 5 |
| 5 | 712.206524  | 356.606900      |                |                   | 694.195959     | 347.601618       | C    | 875.411372  | 438.209324      | 858.384823     | 429.696050        | 857.400807     | 429.204042       | 4 |
| 6 | 1151.431850 | 576.219563      | 1134.405301    | 567.706289        | 1133.421285    | 567.214281       | Q    | 715.380723  | 358.194000      | 698.354174     | 349.680725        | 697.370158     | 349.188717       | 3 |
| 7 | 1280.474443 | 640.740860      | 1263.447894    | 632.227585        | 1262.463878    | 631.735577       | E    | 276.155397  | 138.581337      | 259.128848     | 130.068062        | 258.144832     | 129.576054       | 2 |
| 8 |             |                 |                |                   |                |                  | K    | 147.112804  | 74.060040       | 130.086255     | 65.546765         |                |                  | 1 |

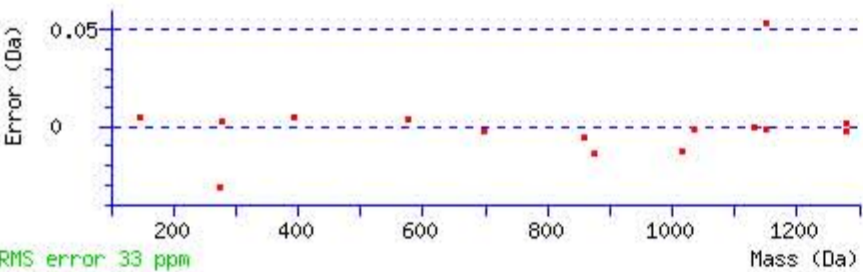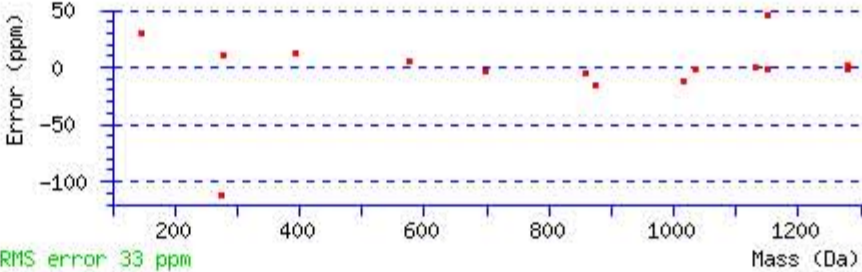

NCBI BLAST search of [FEDCCQEK](#)  
(Parameters: blastp, nr protein database, expect=20000, no filter, PAM30)  
Other BLAST [web gateways](#)

All matches to this query

| Score | Mr(calc):   | Delta     | Sequence                 |
|-------|-------------|-----------|--------------------------|
| 26.4  | 1425.572693 | -0.001365 | <a href="#">FEDCCQEK</a> |

MATRIX

SCIENCE

Mascot Search Results

Peptide View

MS/MS Fragmentation of **VCSQYAAYGEK**  
Found in **VTDB\_HUMAN**, Vitamin D-binding protein OS=Homo sapiens GN=GC PE=1 SV=1

Match to Query 34006: 1585.730508 from(793.872530,2+) rtinseconds(1610) index(64145)  
Title: Locus:1.1.1.1835.8 File:"2013-07-02 CLN FXIII 180 min 2nd FT.wiff"  
Data file C:\Program Files (x86)\Matrix Science\Mascot Daemon\mgf\8 FXIII 180 min 2nd\mascot\_daemon\_merge.mgf

Click mouse within plot area to zoom in by factor of two about that point  
Or,   to  Da   
Label all possible matches ☐ Label matches used for scoring ☒

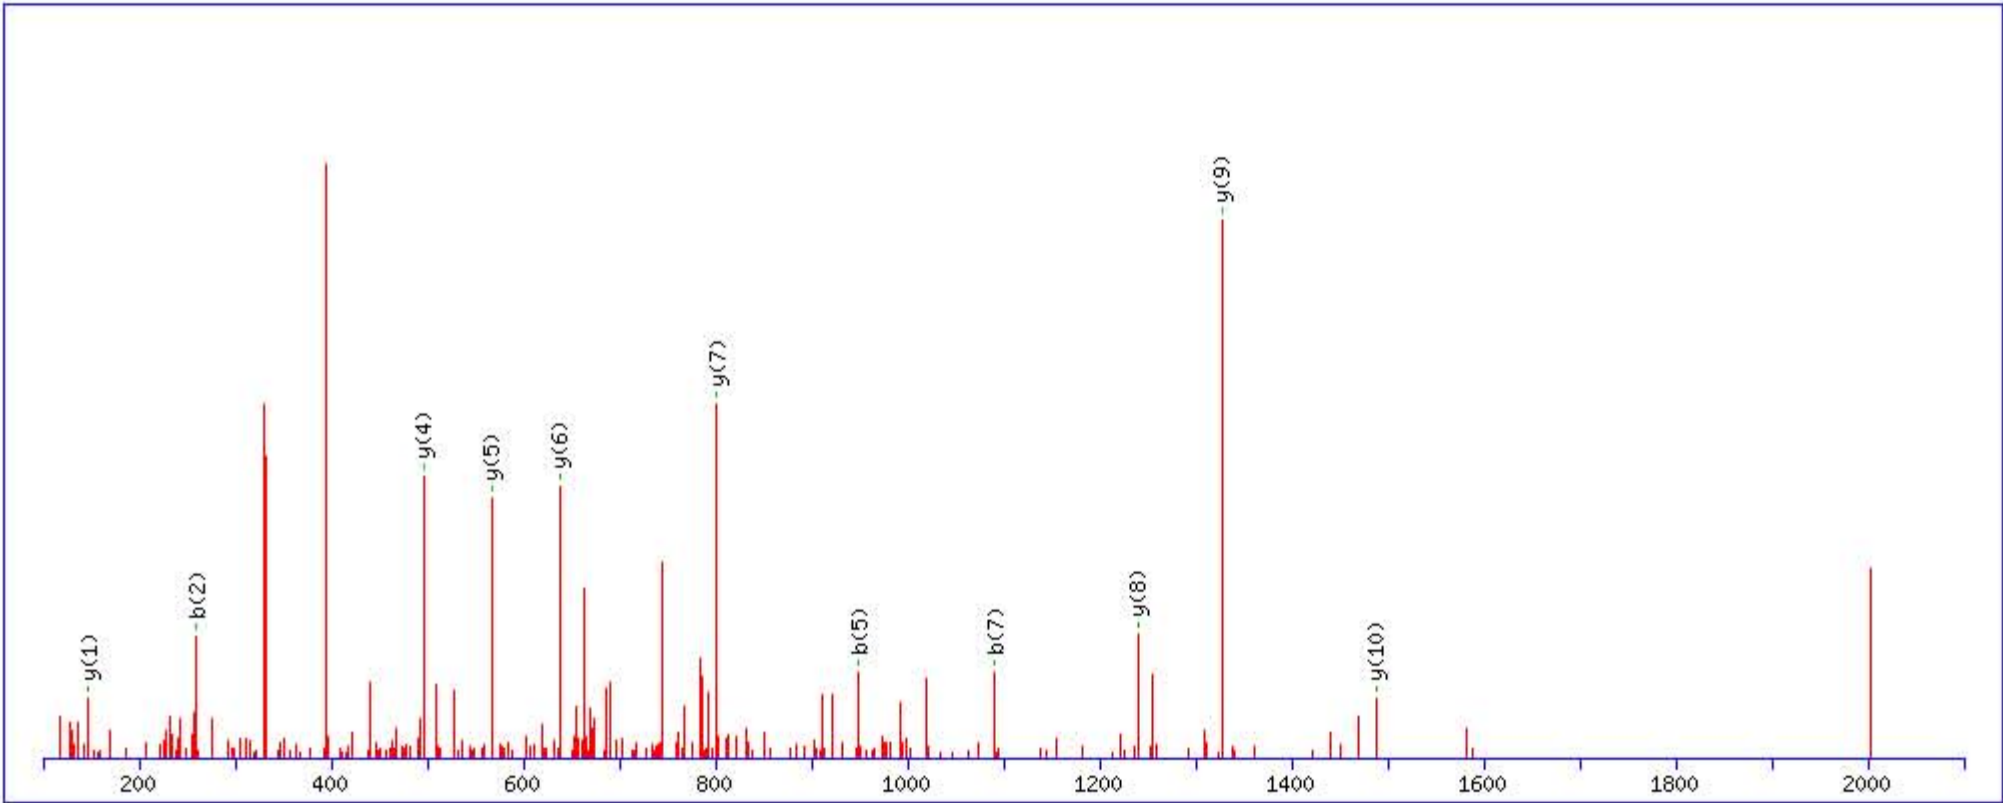

Monoisotopic mass of neutral peptide Mr(calc): 1585.726868  
Fixed modifications: Carbamidomethyl (C) (apply to specified residues or termini only)  
Variable modifications:  
Q4 : Biotin:Thermo-21345 (Q)  
Ions Score: 63 Expect: 5.4e-006  
Matches : 11/108 fragment ions using 15 most intense peaks ([help](#))

| #  | b           | b <sup>++</sup> | b <sup>*</sup> | b <sup>*++</sup> | b <sup>0</sup> | b <sup>0++</sup> | Seq. | y           | y <sup>++</sup> | y <sup>*</sup> | y <sup>*++</sup> | y <sup>0</sup> | y <sup>0++</sup> | #  |
|----|-------------|-----------------|----------------|------------------|----------------|------------------|------|-------------|-----------------|----------------|------------------|----------------|------------------|----|
| 1  | 100.075690  | 50.541483       |                |                  |                |                  | V    |             |                 |                |                  |                |                  | 11 |
| 2  | 260.106339  | 130.556807      |                |                  |                |                  | C    | 1487.665750 | 744.336513      | 1470.639201    | 735.823239       | 1469.655185    | 735.331231       | 10 |
| 3  | 347.138367  | 174.072821      |                |                  | 329.127802     | 165.067539       | S    | 1327.635101 | 664.321189      | 1310.608552    | 655.807914       | 1309.624536    | 655.315906       | 9  |
| 4  | 786.363693  | 393.685485      | 769.337144     | 385.172210       | 768.353128     | 384.680202       | Q    | 1240.603073 | 620.805175      | 1223.576524    | 612.291900       | 1222.592508    | 611.799892       | 8  |
| 5  | 949.427022  | 475.217149      | 932.400473     | 466.703875       | 931.416457     | 466.211867       | Y    | 801.377747  | 401.192512      | 784.351198     | 392.679237       | 783.367182     | 392.187229       | 7  |
| 6  | 1020.464136 | 510.735706      | 1003.437587    | 502.222432       | 1002.453571    | 501.730424       | A    | 638.314418  | 319.660847      | 621.287869     | 311.147573       | 620.303853     | 310.655565       | 6  |
| 7  | 1091.501250 | 546.254263      | 1074.474701    | 537.740989       | 1073.490685    | 537.248981       | A    | 567.277304  | 284.142290      | 550.250755     | 275.629016       | 549.266739     | 275.137008       | 5  |
| 8  | 1254.564579 | 627.785928      | 1237.538030    | 619.272653       | 1236.554014    | 618.780645       | Y    | 496.240190  | 248.623733      | 479.213641     | 240.110459       | 478.229625     | 239.618451       | 4  |
| 9  | 1311.586043 | 656.296660      | 1294.559494    | 647.783385       | 1293.575478    | 647.291377       | G    | 333.176861  | 167.092069      | 316.150312     | 158.578794       | 315.166296     | 158.086786       | 3  |
| 10 | 1440.628636 | 720.817956      | 1423.602087    | 712.304682       | 1422.618071    | 711.812674       | E    | 276.155397  | 138.581337      | 259.128848     | 130.068062       | 258.144832     | 129.576054       | 2  |
| 11 |             |                 |                |                  |                |                  | K    | 147.112804  | 74.060040       | 130.086255     | 65.546765        |                |                  | 1  |

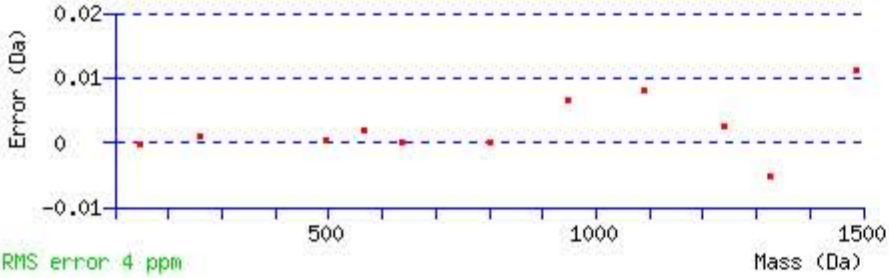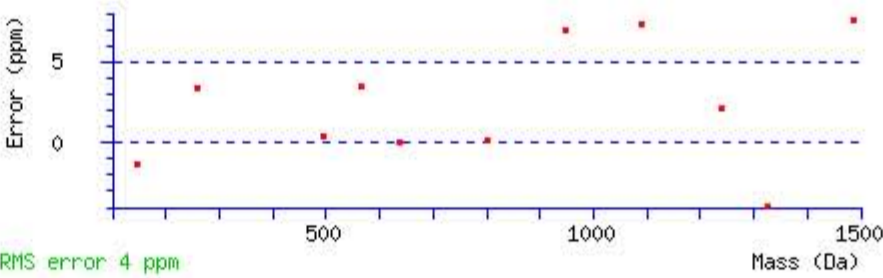

NCBI BLAST search of [VCSQYAAYGEK](#)  
(Parameters: blastp, nr protein database, expect=20000, no filter, PAM30)  
Other BLAST [web gateways](#)

All matches to this query

| Score | Mr(calc):   | Delta     | Sequence                        |
|-------|-------------|-----------|---------------------------------|
| 62.8  | 1585.726868 | 0.003640  | <a href="#">VCSQYAAYGEK</a>     |
| 18.8  | 1585.744614 | -0.014106 | <a href="#">MSVNYAAGLSPYADK</a> |
| 2.1   | 1585.729370 | 0.001138  | <a href="#">LEDYLTSCASNSVK</a>  |

MATRIX

SCIENCE

Mascot Search Results

Peptide View

MS/MS Fragmentation of **KFPSGTFEQVSQLVK**  
Found in **VTDB\_HUMAN**, Vitamin D-binding protein OS=Homo sapiens GN=GC PE=1 SV=1

Match to Query 44825: 2005.080822 from(669.367550,3+) rtinseconds(2223) index(67752)  
Title: Locus:1.1.1.2049.13 File:"2013-07-02 CLN FXIII 180 min 2nd FT.wiff"  
Data file C:\Program Files (x86)\Matrix Science\Mascot Daemon\mgf\8 FXIII 180 min 2nd\mascot\_daemon\_merge.mgf

Click mouse within plot area to zoom in by factor of two about that point  
Or,   to  Da   
Label all possible matches ☐ Label matches used for scoring ☒

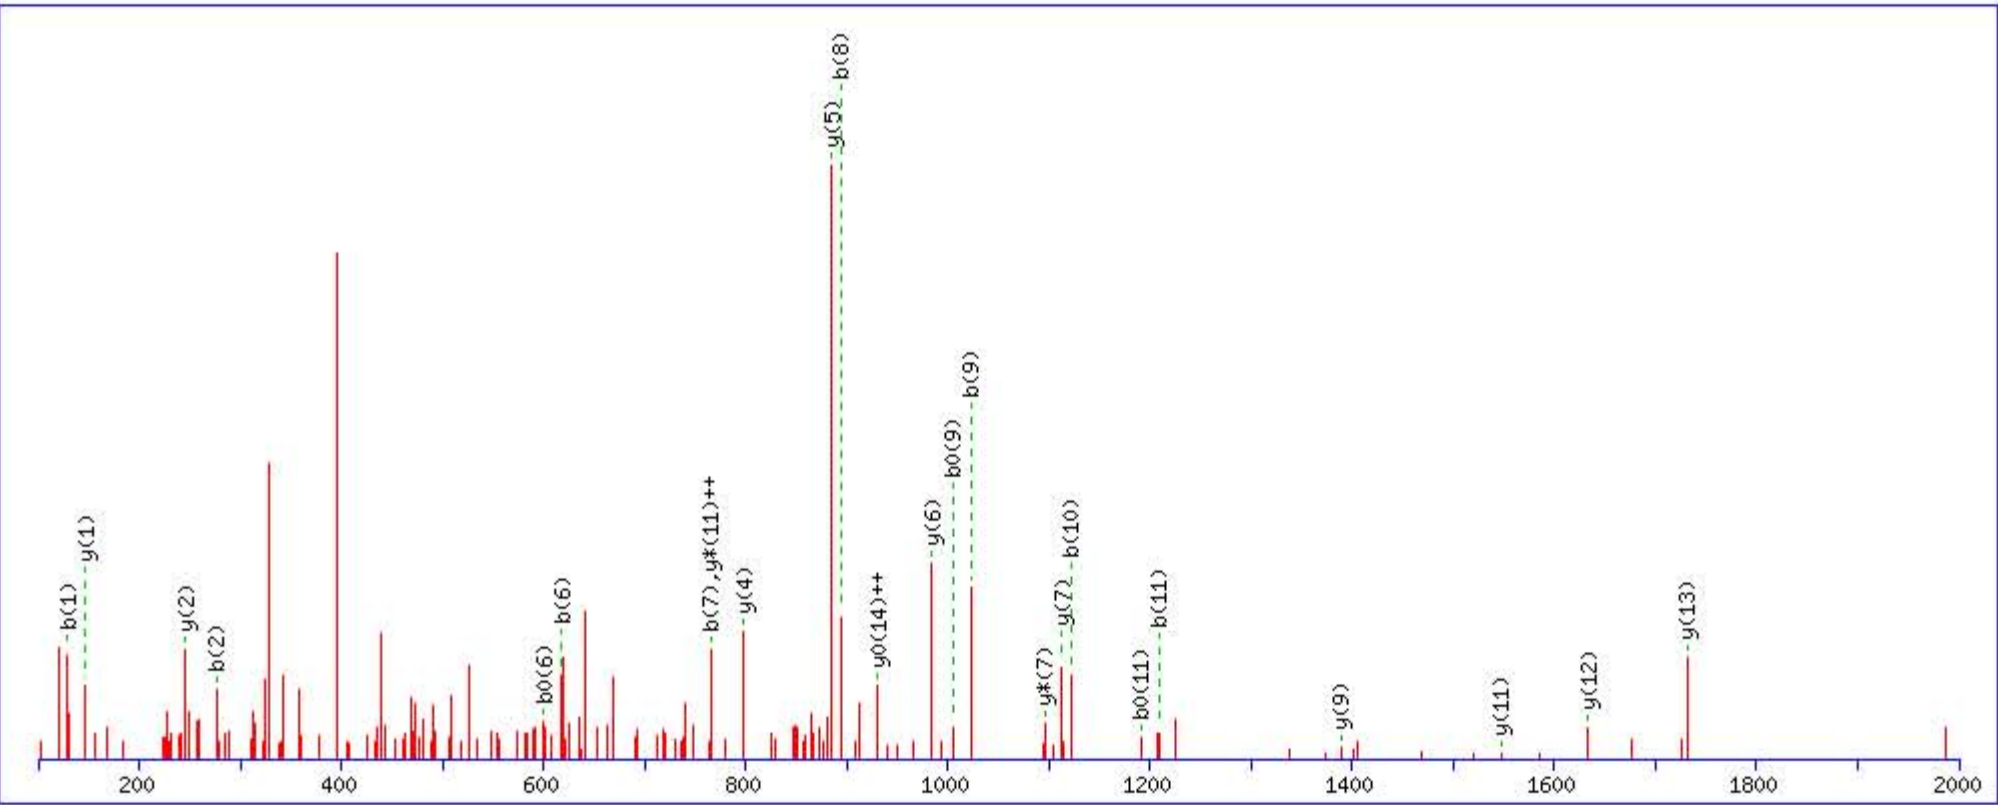

Monoisotopic mass of neutral peptide Mr(calc): 2005.070679  
Fixed modifications: Carbamidomethyl (C) (apply to specified residues or termini only)  
Variable modifications:  
Q12 : Biotin:Thermo-21345 (Q)  
Ions Score: 50 Expect: 2.5e-005  
Matches : 25/154 fragment ions using 50 most intense peaks [\(help\)](#)

| #  | b           | b <sup>++</sup> | b <sup>*</sup> | b <sup>*++</sup> | b <sup>0</sup> | b <sup>0++</sup> | Seq. | y           | y <sup>++</sup> | y <sup>*</sup> | y <sup>*++</sup> | y <sup>0</sup> | y <sup>0++</sup> | #  |
|----|-------------|-----------------|----------------|------------------|----------------|------------------|------|-------------|-----------------|----------------|------------------|----------------|------------------|----|
| 1  | 129.102239  | 65.054757       | 112.075690     | 56.541483        |                |                  | K    |             |                 |                |                  |                |                  | 15 |
| 2  | 276.170653  | 138.588964      | 259.144104     | 130.075690       |                |                  | F    | 1877.982984 | 939.495130      | 1860.956435    | 930.981856       | 1859.972419    | 930.489848       | 14 |
| 3  | 373.223417  | 187.115346      | 356.196868     | 178.602072       |                |                  | P    | 1730.914570 | 865.960923      | 1713.888021    | 857.447649       | 1712.904005    | 856.955641       | 13 |
| 4  | 460.255445  | 230.631360      | 443.228896     | 222.118086       | 442.244880     | 221.626078       | S    | 1633.861806 | 817.434541      | 1616.835257    | 808.921267       | 1615.851241    | 808.429259       | 12 |
| 5  | 517.276909  | 259.142093      | 500.250360     | 250.628818       | 499.266344     | 250.136810       | G    | 1546.829778 | 773.918527      | 1529.803229    | 765.405253       | 1528.819213    | 764.913245       | 11 |
| 6  | 618.324588  | 309.665932      | 601.298039     | 301.152658       | 600.314023     | 300.660650       | T    | 1489.808314 | 745.407795      | 1472.781765    | 736.894521       | 1471.797749    | 736.402513       | 10 |
| 7  | 765.393002  | 383.200139      | 748.366453     | 374.686865       | 747.382437     | 374.194857       | F    | 1388.760635 | 694.883956      | 1371.734086    | 686.370681       | 1370.750070    | 685.878673       | 9  |
| 8  | 894.435595  | 447.721436      | 877.409046     | 439.208161       | 876.425030     | 438.716153       | E    | 1241.692221 | 621.349749      | 1224.665672    | 612.836474       | 1223.681656    | 612.344466       | 8  |
| 9  | 1022.494173 | 511.750725      | 1005.467624    | 503.237450       | 1004.483608    | 502.745442       | Q    | 1112.649628 | 556.828452      | 1095.623079    | 548.315178       | 1094.639063    | 547.823170       | 7  |
| 10 | 1121.562587 | 561.284932      | 1104.536038    | 552.771657       | 1103.552022    | 552.279649       | V    | 984.591050  | 492.799163      | 967.564501     | 484.285889       | 966.580485     | 483.793881       | 6  |
| 11 | 1208.594615 | 604.800946      | 1191.568066    | 596.287671       | 1190.584050    | 595.795663       | S    | 885.522636  | 443.264956      | 868.496087     | 434.751682       | 867.512071     | 434.259674       | 5  |
| 12 | 1647.819941 | 824.413609      | 1630.793392    | 815.900334       | 1629.809376    | 815.408326       | Q    | 798.490608  | 399.748942      | 781.464059     | 391.235668       |                |                  | 4  |
| 13 | 1760.904005 | 880.955641      | 1743.877456    | 872.442366       | 1742.893440    | 871.950358       | L    | 359.265282  | 180.136279      | 342.238733     | 171.623004       |                |                  | 3  |
| 14 | 1859.972419 | 930.489848      | 1842.945870    | 921.976573       | 1841.961854    | 921.484565       | V    | 246.181218  | 123.594247      | 229.154669     | 115.080973       |                |                  | 2  |
| 15 |             |                 |                |                  |                |                  | K    | 147.112804  | 74.060040       | 130.086255     | 65.546765        |                |                  | 1  |

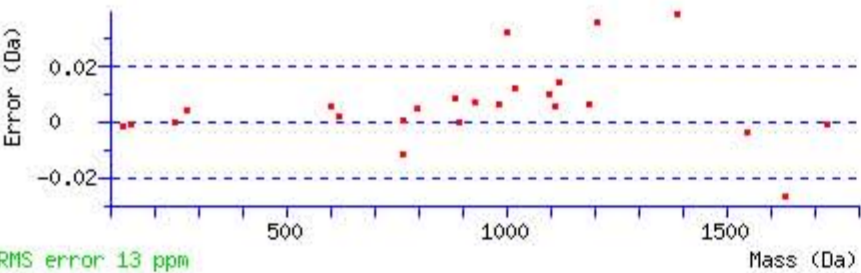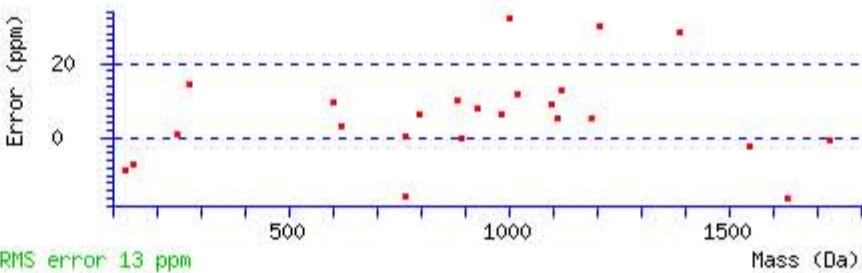

NCBI BLAST search of [KFPSGTFEQVSQLVK](#)  
(Parameters: blastp, nr protein database, expect=20000, no filter, PAM30)  
Other BLAST [web gateways](#)

All matches to this query

| Score | Mr(calc):   | Delta    | Sequence                        |
|-------|-------------|----------|---------------------------------|
| 50.0  | 2005.070679 | 0.010143 | <a href="#">KFPSGTFEQVSQLVK</a> |
| 22.6  | 2005.070679 | 0.010143 | <a href="#">KFPSGTFEQVSQLVK</a> |
| 0.9   | 2005.079193 | 0.001629 | <a href="#">RATWLHQALREGTR</a>  |

Match to Query 44830: 2005.084332 from(669.368720,3+) rtinseconds(2362) index(68507)  
Title: Locus:1.1.1.2097.20 File:"2013-07-02 CLN FXIII 180 min 2nd FT.wiff"  
Data file C:\Program Files (x86)\Matrix Science\Mascot Daemon\mgf\8 FXIII 180 min 2nd\mascot\_daemon\_merge.mgf

| #  | b           | b <sup>++</sup> | b <sup>*</sup> | b <sup>++</sup> * | b <sup>0</sup> | b <sup>0++</sup> | Seq. | y           | y <sup>++</sup> | y <sup>*</sup> | y <sup>++</sup> * | y <sup>0</sup> | y <sup>0++</sup> | #  |
|----|-------------|-----------------|----------------|-------------------|----------------|------------------|------|-------------|-----------------|----------------|-------------------|----------------|------------------|----|
| 1  | 129.102239  | 65.054757       | 112.075690     | 56.541483         |                |                  | K    |             |                 |                |                   |                |                  | 15 |
| 2  | 276.170653  | 138.588964      | 259.144104     | 130.075690        |                |                  | F    | 1877.982984 | 939.495130      | 1860.956435    | 930.981856        | 1859.972419    | 930.489848       | 14 |
| 3  | 373.223417  | 187.115346      | 356.196868     | 178.602072        |                |                  | P    | 1730.914570 | 865.960923      | 1713.888021    | 857.447649        | 1712.904005    | 856.955641       | 13 |
| 4  | 460.255445  | 230.631360      | 443.228896     | 222.118086        | 442.244880     | 221.626078       | S    | 1633.861806 | 817.434541      | 1616.835257    | 808.921267        | 1615.851241    | 808.429259       | 12 |
| 5  | 517.276909  | 259.142093      | 500.250360     | 250.628818        | 499.266344     | 250.136810       | G    | 1546.829778 | 773.918527      | 1529.803229    | 765.405253        | 1528.819213    | 764.913245       | 11 |
| 6  | 618.324588  | 309.665932      | 601.298039     | 301.152658        | 600.314023     | 300.660650       | T    | 1489.808314 | 745.407795      | 1472.781765    | 736.894521        | 1471.797749    | 736.402513       | 10 |
| 7  | 765.393002  | 383.200139      | 748.366453     | 374.686865        | 747.382437     | 374.194857       | F    | 1388.760635 | 694.883955      | 1371.734086    | 686.370681        | 1370.750070    | 685.878673       | 9  |
| 8  | 894.435595  | 447.721436      | 877.409046     | 439.208161        | 876.425030     | 438.716153       | E    | 1241.692221 | 621.349749      | 1224.665672    | 612.836474        | 1223.681656    | 612.344466       | 8  |
| 9  | 1333.660921 | 667.334098      | 1316.634372    | 658.820824        | 1315.650356    | 658.328816       | Q    | 1112.649628 | 556.828452      | 1095.623079    | 548.315178        | 1094.639063    | 547.823169       | 7  |
| 10 | 1432.729335 | 716.868306      | 1415.702786    | 708.355031        | 1414.718770    | 707.863023       | V    | 673.424302  | 337.215789      | 656.397753     | 328.702515        | 655.413737     | 328.210507       | 6  |
| 11 | 1519.761363 | 760.384320      | 1502.734814    | 751.871045        | 1501.750798    | 751.379037       | S    | 574.355888  | 287.681582      | 557.329339     | 279.168308        | 556.345323     | 278.676300       | 5  |
| 12 | 1647.819941 | 824.413609      | 1630.793392    | 815.900334        | 1629.809376    | 815.408326       | Q    | 487.323860  | 244.165568      | 470.297311     | 235.652293        |                |                  | 4  |
| 13 | 1760.904005 | 880.955640      | 1743.877456    | 872.442366        | 1742.893440    | 871.950358       | L    | 359.265282  | 180.136279      | 342.238733     | 171.623004        |                |                  | 3  |
| 14 | 1859.972419 | 930.489848      | 1842.945870    | 921.976573        | 1841.961854    | 921.484565       | V    | 246.181218  | 123.594247      | 229.154669     | 115.080973        |                |                  | 2  |
| 15 |             |                 |                |                   |                |                  | K    | 147.112804  | 74.060040       | 130.086255     | 65.546765         |                |                  | 1  |

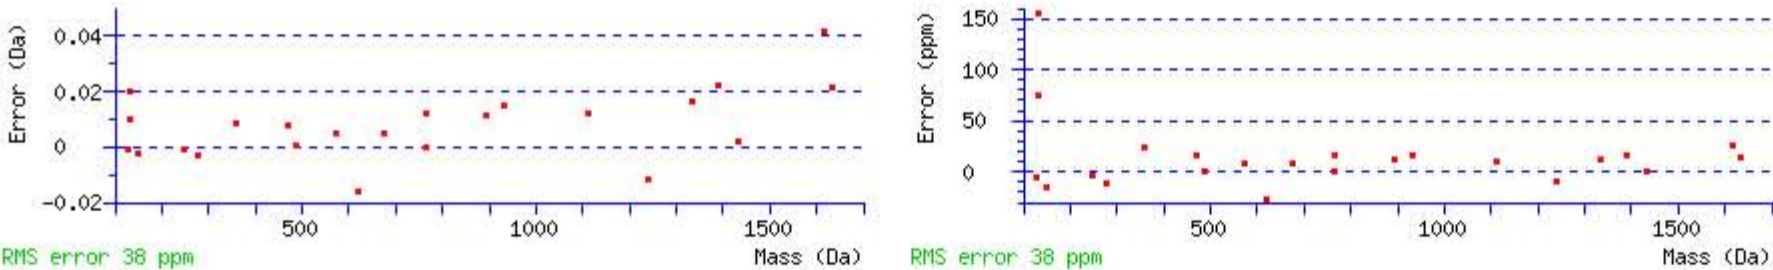

### All matches to this query

| Score | Mr(calc):   | Delta    | Sequence                        |
|-------|-------------|----------|---------------------------------|
| 33.4  | 2005.070679 | 0.013653 | <a href="#">KFPSGTFEQVSQLVK</a> |
| 9.1   | 2005.070679 | 0.013653 | <a href="#">KFPSGTFEQVSQLVK</a> |

MATRIX

SCIENCE

Mascot Search Results

Peptide View

MS/MS Fragmentation of **GQELCADYSENTFTEYK**  
Found in **VTDB\_HUMAN**, Vitamin D-binding protein OS=Homo sapiens GN=GC PE=1 SV=1

Match to Query 51493: 2365.043412 from(789.355080,3+) rtinseconds(2158) index(67400)  
Title: Locus:1.1.1.2026.23 File:"2013-07-02 CLN FXIII 180 min 2nd FT.wiff"  
Data file C:\Program Files (x86)\Matrix Science\Mascot Daemon\mgf\8 FXIII 180 min 2nd\mascot\_daemon\_merge.mgf

Click mouse within plot area to zoom in by factor of two about that point  
Or, 

Plot from

100

 to 

1700

 Da 

Full range

  
Label all possible matches ☐ Label matches used for scoring ☒

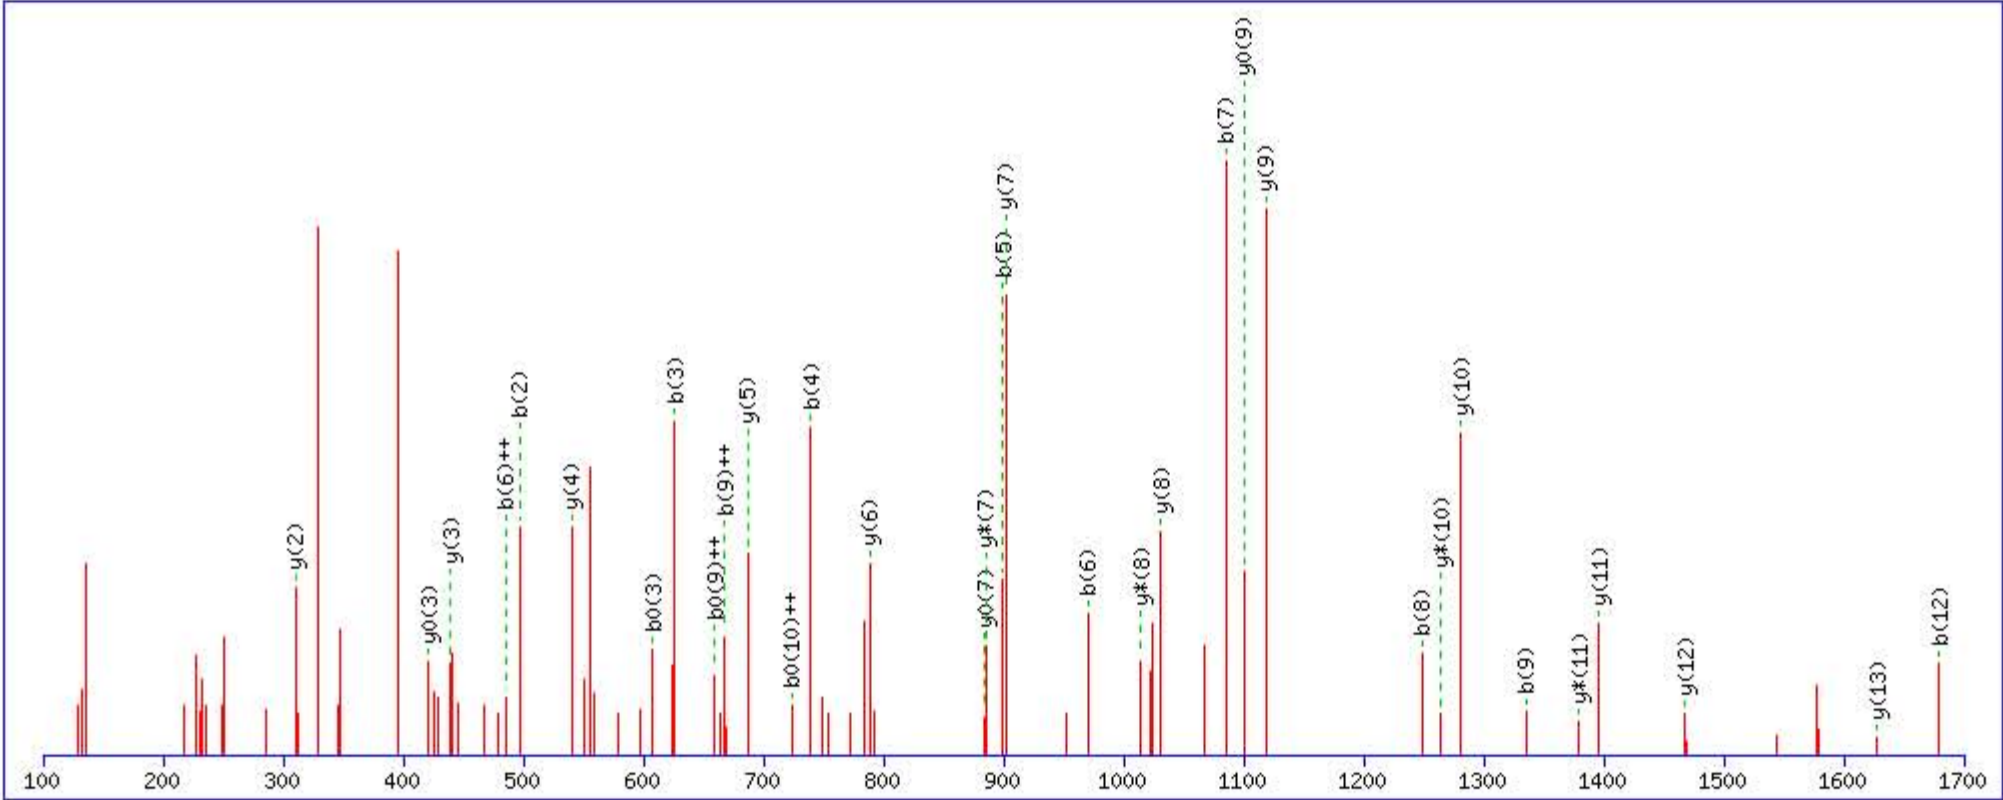

Monoisotopic mass of neutral peptide Mr(calc): 2365.024231  
Fixed modifications: Carbamidomethyl (C) (apply to specified residues or termini only)  
Variable modifications:  
Q2 : Biotin:Thermo-21345 (Q)  
Ions Score: 74 Expect: 2e-007  
Matches : 33/182 fragment ions using 53 most intense peaks [\(help\)](#)

| #  | b           | b <sup>++</sup> | b <sup>*</sup> | b <sup>+++</sup> | b <sup>0</sup> | b <sup>0++</sup> | Seq. | y           | y <sup>++</sup> | y <sup>*</sup> | y <sup>+++</sup> | y <sup>0</sup> | y <sup>0++</sup> | #  |
|----|-------------|-----------------|----------------|------------------|----------------|------------------|------|-------------|-----------------|----------------|------------------|----------------|------------------|----|
| 1  | 58.028740   | 29.518008       |                |                  |                |                  | G    |             |                 |                |                  |                |                  | 17 |
| 2  | 497.254066  | 249.130671      | 480.227517     | 240.617397       |                |                  | Q    | 2309.010064 | 1155.008670     | 2291.983515    | 1146.495395      | 2290.999499    | 1146.003387      | 16 |
| 3  | 626.296659  | 313.651968      | 609.270110     | 305.138693       | 608.286094     | 304.646685       | E    | 1869.784738 | 935.396007      | 1852.758189    | 926.882733       | 1851.774173    | 926.390725       | 15 |
| 4  | 739.380723  | 370.194000      | 722.354174     | 361.680725       | 721.370158     | 361.188717       | L    | 1740.742145 | 870.874711      | 1723.715596    | 862.361436       | 1722.731580    | 861.869428       | 14 |
| 5  | 899.411372  | 450.209324      | 882.384823     | 441.696050       | 881.400807     | 441.204042       | C    | 1627.658081 | 814.332679      | 1610.631532    | 805.819404       | 1609.647516    | 805.327396       | 13 |
| 6  | 970.448486  | 485.727881      | 953.421937     | 477.214607       | 952.437921     | 476.722599       | A    | 1467.627432 | 734.317354      | 1450.600883    | 725.804080       | 1449.616867    | 725.312072       | 12 |
| 7  | 1085.475429 | 543.241353      | 1068.448880    | 534.728078       | 1067.464864    | 534.236070       | D    | 1396.590318 | 698.798797      | 1379.563769    | 690.285523       | 1378.579753    | 689.793515       | 11 |
| 8  | 1248.538758 | 624.773017      | 1231.512209    | 616.259743       | 1230.528193    | 615.767735       | Y    | 1281.563375 | 641.285326      | 1264.536826    | 632.772051       | 1263.552810    | 632.280043       | 10 |
| 9  | 1335.570786 | 668.289031      | 1318.544237    | 659.775757       | 1317.560221    | 659.283749       | S    | 1118.500046 | 559.753661      | 1101.473497    | 551.240387       | 1100.489481    | 550.748379       | 9  |
| 10 | 1464.613379 | 732.810328      | 1447.586830    | 724.297053       | 1446.602814    | 723.805045       | E    | 1031.468018 | 516.237647      | 1014.441469    | 507.724373       | 1013.457453    | 507.232365       | 8  |
| 11 | 1578.656306 | 789.831791      | 1561.629757    | 781.318517       | 1560.645741    | 780.826509       | N    | 902.425425  | 451.716351      | 885.398876     | 443.203076       | 884.414860     | 442.711068       | 7  |
| 12 | 1679.703985 | 840.355631      | 1662.677436    | 831.842356       | 1661.693420    | 831.350348       | T    | 788.382498  | 394.694887      | 771.355949     | 386.181613       | 770.371933     | 385.689605       | 6  |
| 13 | 1826.772399 | 913.889838      | 1809.745850    | 905.376563       | 1808.761834    | 904.884555       | F    | 687.334819  | 344.171048      | 670.308270     | 335.657773       | 669.324254     | 335.165765       | 5  |
| 14 | 1927.820078 | 964.413677      | 1910.793529    | 955.900403       | 1909.809513    | 955.408395       | T    | 540.266405  | 270.636841      | 523.239856     | 262.123566       | 522.255840     | 261.631558       | 4  |
| 15 | 2056.862671 | 1028.934973     | 2039.836122    | 1020.421699      | 2038.852106    | 1019.929691      | E    | 439.218726  | 220.113001      | 422.192177     | 211.599726       | 421.208161     | 211.107718       | 3  |
| 16 | 2219.926000 | 1110.466638     | 2202.899451    | 1101.953363      | 2201.915435    | 1101.461355      | Y    | 310.176133  | 155.591705      | 293.149584     | 147.078430       |                |                  | 2  |
| 17 |             |                 |                |                  |                |                  | K    | 147.112804  | 74.060040       | 130.086255     | 65.546765        |                |                  | 1  |

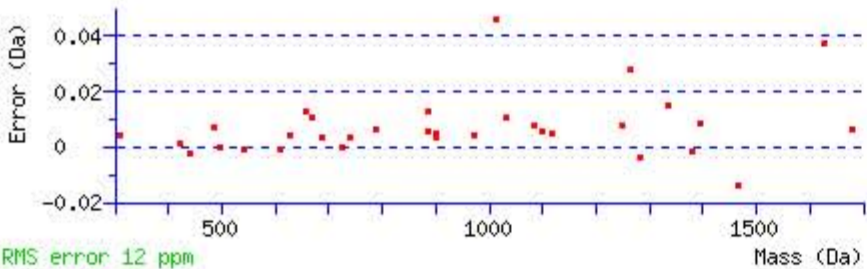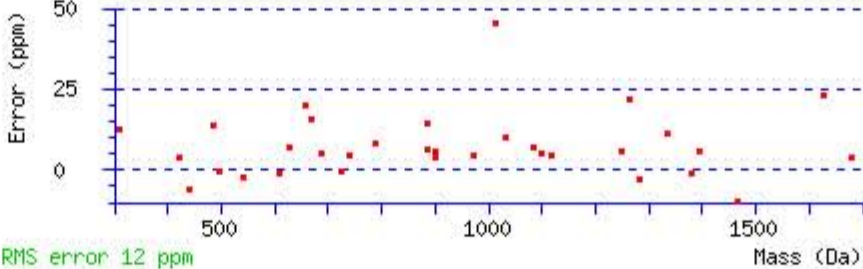

NCBI BLAST search of [GQELCADYSENTFTEYK](#)  
(Parameters: blastp, nr protein database, expect=20000, no filter, PAM30)  
Other BLAST [web gateways](#)

All matches to this query

| Score | Mr(calc):   | Delta    | Sequence                          |
|-------|-------------|----------|-----------------------------------|
| 74.4  | 2365.024231 | 0.019181 | <a href="#">GQELCADYSENTFTEYK</a> |

Peptide View

MS/MS Fragmentation of **HQPQEFPTYVEPTNDEICEAFR**  
Found in **VTDB\_HUMAN**, Vitamin D-binding protein OS=Homo sapiens GN=GC PE=1 SV=1

Match to Query 60238: 3017.405622 from(1006.809150,3+) rtinseconds(2354) index(68441)  
Title: Locus:1.1.1.2094.26 File:"2013-07-02 CLN FXIII 180 min 2nd FT.wiff"  
Data file C:\Program Files (x86)\Matrix Science\Mascot Daemon\mgf\8 FXIII 180 min 2nd\mascot\_daemon\_merge.mgf

Click mouse within plot area to zoom in by factor of two about that point  
Or, 

Plot from

100

 to 

2000

 Da 

Full range

  
Label all possible matches ☐ Label matches used for scoring ☒

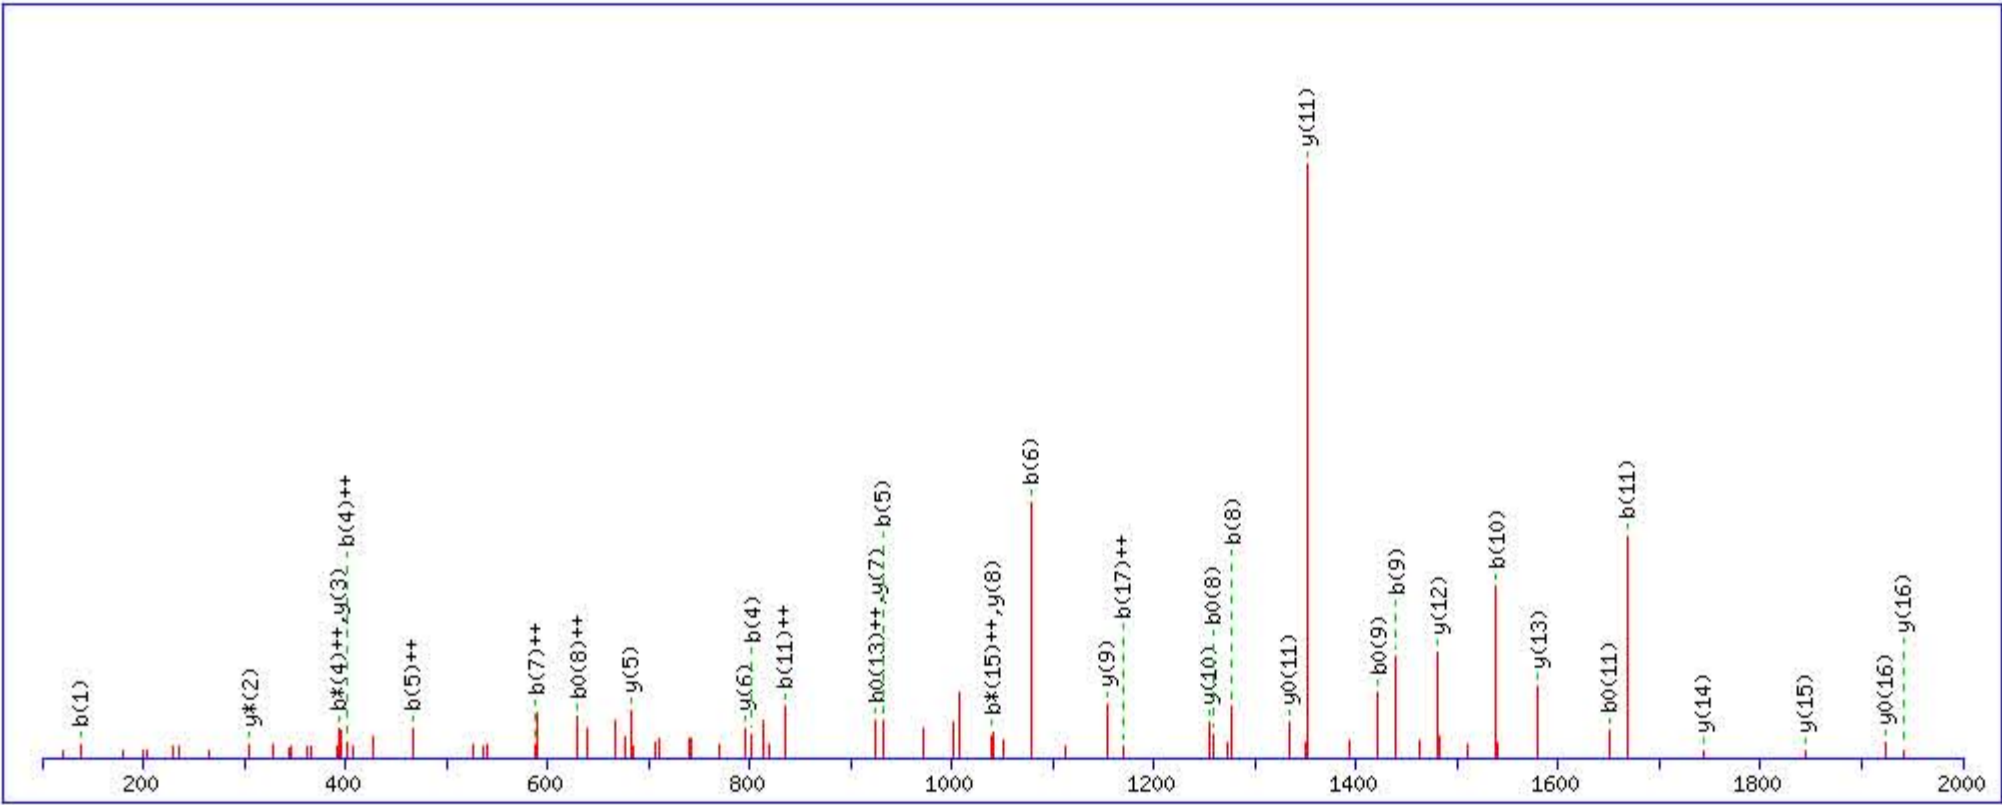

Monoisotopic mass of neutral peptide Mr(calc): 3017.368774  
Fixed modifications: Carbamidomethyl (C) (apply to specified residues or termini only)  
Variable modifications:  
Q4 : Biotin:Thermo-21345 (Q)  
Ions Score: 82 Expect: 2.5e-008  
Matches : 36/236 fragment ions using 50 most intense peaks [\(help\)](#)

| #  | b           | b <sup>++</sup> | b <sup>*</sup> | b <sup>*++</sup> | b <sup>0</sup> | b <sup>0++</sup> | Seq. | y           | y <sup>++</sup> | y <sup>*</sup> | y <sup>*++</sup> | y <sup>0</sup> | y <sup>0++</sup> | #  |
|----|-------------|-----------------|----------------|------------------|----------------|------------------|------|-------------|-----------------|----------------|------------------|----------------|------------------|----|
| 1  | 138.066188  | 69.536732       |                |                  |                |                  | H    |             |                 |                |                  |                |                  | 22 |
| 2  | 266.124766  | 133.566021      | 249.098217     | 125.052746       |                |                  | Q    | 2881.317146 | 1441.162211     | 2864.290597    | 1432.648936      | 2863.306581    | 1432.156928      | 21 |
| 3  | 363.177530  | 182.092403      | 346.150981     | 173.579129       |                |                  | P    | 2753.258568 | 1377.132922     | 2736.232019    | 1368.619647      | 2735.248003    | 1368.127639      | 20 |
| 4  | 802.402856  | 401.705066      | 785.376307     | 393.191792       |                |                  | Q    | 2656.205804 | 1328.606540     | 2639.179255    | 1320.093265      | 2638.195239    | 1319.601257      | 19 |
| 5  | 931.445449  | 466.226363      | 914.418900     | 457.713088       | 913.434884     | 457.221080       | E    | 2216.980478 | 1108.993877     | 2199.953929    | 1100.480602      | 2198.969913    | 1099.988594      | 18 |
| 6  | 1078.513863 | 539.760570      | 1061.487314    | 531.247295       | 1060.503298    | 530.755287       | F    | 2087.937885 | 1044.472580     | 2070.911336    | 1035.959306      | 2069.927320    | 1035.467298      | 17 |
| 7  | 1175.566627 | 588.286952      | 1158.540078    | 579.773677       | 1157.556062    | 579.281669       | P    | 1940.869471 | 970.938374      | 1923.842922    | 962.425099       | 1922.858906    | 961.933091       | 16 |
| 8  | 1276.614306 | 638.810791      | 1259.587757    | 630.297517       | 1258.603741    | 629.805509       | T    | 1843.816707 | 922.411992      | 1826.790158    | 913.898717       | 1825.806142    | 913.406709       | 15 |
| 9  | 1439.677635 | 720.342456      | 1422.651086    | 711.829181       | 1421.667070    | 711.337173       | Y    | 1742.769028 | 871.888152      | 1725.742479    | 863.374878       | 1724.758463    | 862.882870       | 14 |
| 10 | 1538.746049 | 769.876663      | 1521.719500    | 761.363388       | 1520.735484    | 760.871380       | V    | 1579.705699 | 790.356488      | 1562.679150    | 781.843213       | 1561.695134    | 781.351205       | 13 |
| 11 | 1667.788642 | 834.397959      | 1650.762093    | 825.884685       | 1649.778077    | 825.392677       | E    | 1480.637285 | 740.822281      | 1463.610736    | 732.309006       | 1462.626720    | 731.816998       | 12 |
| 12 | 1764.841406 | 882.924341      | 1747.814857    | 874.411067       | 1746.830841    | 873.919059       | P    | 1351.594692 | 676.300984      | 1334.568143    | 667.787710       | 1333.584127    | 667.295702       | 11 |
| 13 | 1865.889085 | 933.448181      | 1848.862536    | 924.934906       | 1847.878520    | 924.442898       | T    | 1254.541928 | 627.774602      | 1237.515379    | 619.261328       | 1236.531363    | 618.769320       | 10 |
| 14 | 1979.932012 | 990.469644      | 1962.905463    | 981.956370       | 1961.921447    | 981.464362       | N    | 1153.494249 | 577.250763      | 1136.467700    | 568.737488       | 1135.483684    | 568.245480       | 9  |
| 15 | 2094.958955 | 1047.983115     | 2077.932406    | 1039.469841      | 2076.948390    | 1038.977833      | D    | 1039.451322 | 520.229299      | 1022.424773    | 511.716025       | 1021.440757    | 511.224017       | 8  |
| 16 | 2224.001548 | 1112.504412     | 2206.974999    | 1103.991137      | 2205.990983    | 1103.499130      | E    | 924.424379  | 462.715828      | 907.397830     | 454.202553       | 906.413814     | 453.710545       | 7  |
| 17 | 2337.085612 | 1169.046444     | 2320.059063    | 1160.533170      | 2319.075047    | 1160.041162      | I    | 795.381786  | 398.194531      | 778.355237     | 389.681257       | 777.371221     | 389.189249       | 6  |
| 18 | 2497.116261 | 1249.061769     | 2480.089712    | 1240.548494      | 2479.105696    | 1240.056486      | C    | 682.297722  | 341.652499      | 665.271173     | 333.139225       | 664.287157     | 332.647217       | 5  |
| 19 | 2626.158854 | 1313.583065     | 2609.132305    | 1305.069791      | 2608.148289    | 1304.577783      | E    | 522.267073  | 261.637175      | 505.240524     | 253.123900       | 504.256508     | 252.631892       | 4  |
| 20 | 2697.195968 | 1349.101622     | 2680.169419    | 1340.588348      | 2679.185403    | 1340.096340      | A    | 393.224480  | 197.115878      | 376.197931     | 188.602603       |                |                  | 3  |
| 21 | 2844.264382 | 1422.635829     | 2827.237833    | 1414.122555      | 2826.253817    | 1413.630547      | F    | 322.187366  | 161.597321      | 305.160817     | 153.084046       |                |                  | 2  |
| 22 |             |                 |                |                  |                |                  | R    | 175.118952  | 88.063114       | 158.092403     | 79.549839        |                |                  | 1  |

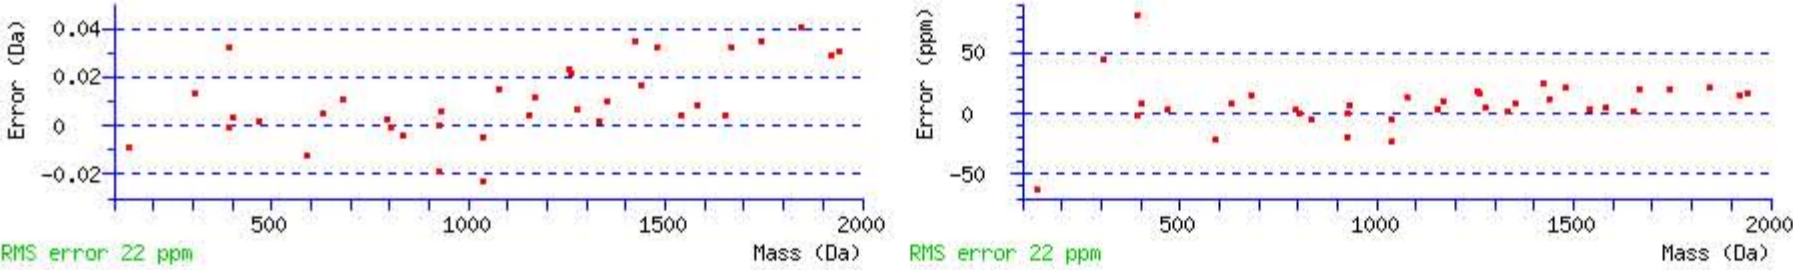

NCBI BLAST search of [HQPQEFPTYVEPTNDEICEAFR](#)  
(Parameters: blastp, nr protein database, expect=20000, no filter, PAM30)  
Other BLAST [web gateways](#)

All matches to this query

| Score | Mr(calc):   | Delta     | Sequence                                    |
|-------|-------------|-----------|---------------------------------------------|
| 81.8  | 3017.368774 | 0.036848  | <a href="#">HQPQEFPTYVEPTNDEICEAFR</a>      |
| 81.8  | 3017.368774 | 0.036848  | <a href="#">HQPQEFPTYVEPTNDEICEAFR</a>      |
| 0.8   | 3017.420258 | -0.014636 | <a href="#">VGWARPGCRPDVELGADDQAFVFEGNR</a> |

MATRIX

SCIENCE

Mascot Search Results

Peptide View

MS/MS Fragmentation of **LGDDLLQCHPAVK**  
Found in **PROC\_HUMAN**, Vitamin K-dependent protein C OS=Homo sapiens GN=PROC PE=1 SV=1

Match to Query 39789: 1775.916372 from(592.979400,3+) rtinseconds(1951) index(50002)  
Title: Locus:1.1.1.1917.10 File:"2013-07-02 CLN FXIII 180 min 2nd F 4.wiff"  
Data file C:\Program Files (x86)\Matrix Science\Mascot Daemon\mgf\8 FXIII 180 min 2nd\mascot\_daemon\_merge.mgf

Click mouse within plot area to zoom in by factor of two about that point  
Or, 

Plot from

100

 to 

1700

 Da 

Full range

  
Label all possible matches ☐ Label matches used for scoring ☒

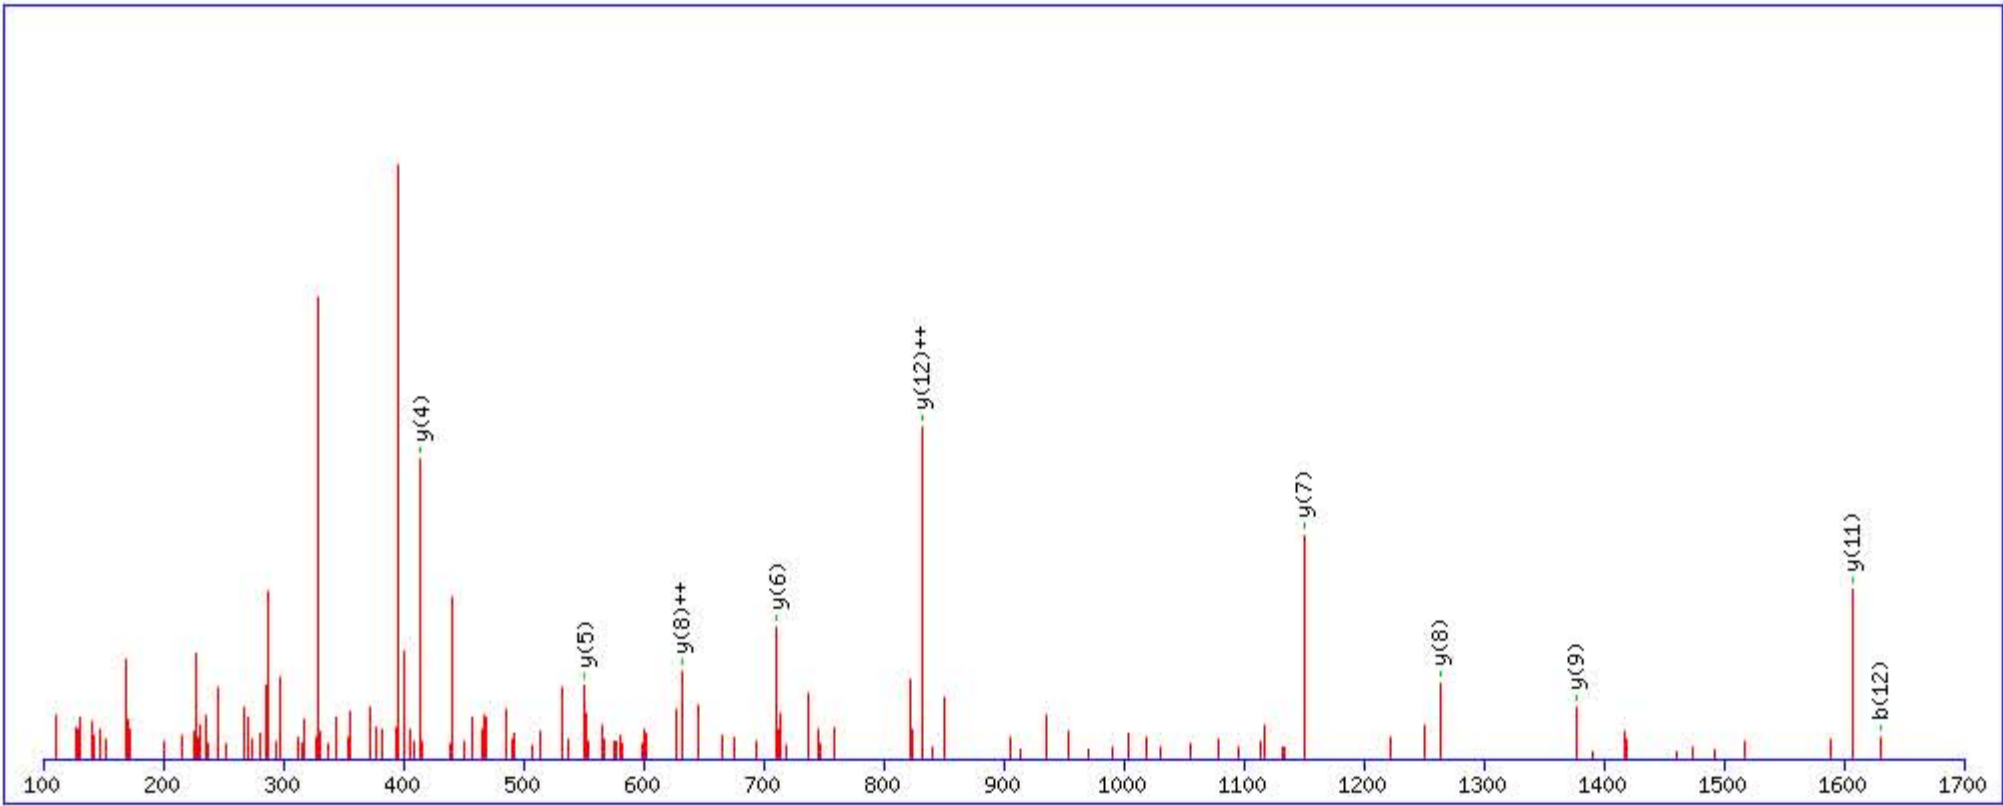

Monoisotopic mass of neutral peptide Mr(calc): 1775.906250  
Fixed modifications: Carbamidomethyl (C) (apply to specified residues or termini only)  
Variable modifications:  
Q7 : Biotin:Thermo-21345 (Q)  
Ions Score: 41 Expect: 0.00021  
Matches : 10/110 fragment ions using 16 most intense peaks [\(help\)](#)

| #  | b           | b <sup>++</sup> | b <sup>*</sup> | b <sup>*++</sup> | b <sup>0</sup> | b <sup>0++</sup> | Seq. | y           | y <sup>++</sup> | y <sup>*</sup> | y <sup>*++</sup> | y <sup>0</sup> | y <sup>0++</sup> | #  |
|----|-------------|-----------------|----------------|------------------|----------------|------------------|------|-------------|-----------------|----------------|------------------|----------------|------------------|----|
| 1  | 114.091340  | 57.549308       |                |                  |                |                  | L    |             |                 |                |                  |                |                  | 13 |
| 2  | 171.112804  | 86.060040       |                |                  |                |                  | G    | 1663.829461 | 832.418369      | 1646.802912    | 823.905094       | 1645.818896    | 823.413086       | 12 |
| 3  | 286.139747  | 143.573512      |                |                  | 268.129182     | 134.568229       | D    | 1606.807997 | 803.907637      | 1589.781448    | 795.394362       | 1588.797432    | 794.902354       | 11 |
| 4  | 401.166690  | 201.086983      |                |                  | 383.156125     | 192.081701       | D    | 1491.781054 | 746.394165      | 1474.754505    | 737.880891       | 1473.770489    | 737.388883       | 10 |
| 5  | 514.250754  | 257.629015      |                |                  | 496.240189     | 248.623733       | L    | 1376.754111 | 688.880694      | 1359.727562    | 680.367419       |                |                  | 9  |
| 6  | 627.334818  | 314.171047      |                |                  | 609.324253     | 305.165765       | L    | 1263.670047 | 632.338662      | 1246.643498    | 623.825387       |                |                  | 8  |
| 7  | 1066.560144 | 533.783710      | 1049.533595    | 525.270436       | 1048.549579    | 524.778428       | Q    | 1150.585983 | 575.796630      | 1133.559434    | 567.283355       |                |                  | 7  |
| 8  | 1226.590793 | 613.799035      | 1209.564244    | 605.285760       | 1208.580228    | 604.793752       | C    | 711.360657  | 356.183967      | 694.334108     | 347.670692       |                |                  | 6  |
| 9  | 1363.649705 | 682.328491      | 1346.623156    | 673.815216       | 1345.639140    | 673.323208       | H    | 551.330008  | 276.168642      | 534.303459     | 267.655368       |                |                  | 5  |
| 10 | 1460.702469 | 730.854873      | 1443.675920    | 722.341598       | 1442.691904    | 721.849590       | P    | 414.271096  | 207.639186      | 397.244547     | 199.125912       |                |                  | 4  |
| 11 | 1531.739583 | 766.373430      | 1514.713034    | 757.860155       | 1513.729018    | 757.368147       | A    | 317.218332  | 159.112804      | 300.191783     | 150.599530       |                |                  | 3  |
| 12 | 1630.807997 | 815.907637      | 1613.781448    | 807.394362       | 1612.797432    | 806.902354       | V    | 246.181218  | 123.594247      | 229.154669     | 115.080973       |                |                  | 2  |
| 13 |             |                 |                |                  |                |                  | K    | 147.112804  | 74.060040       | 130.086255     | 65.546765        |                |                  | 1  |

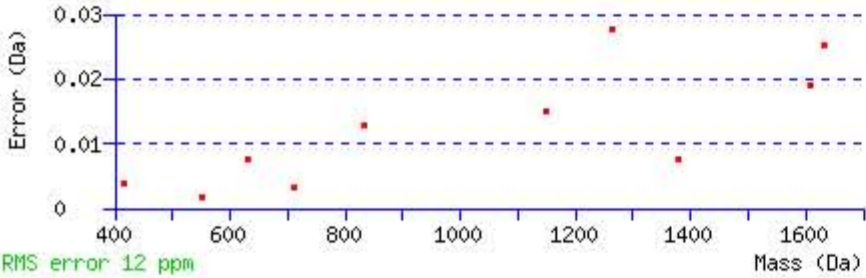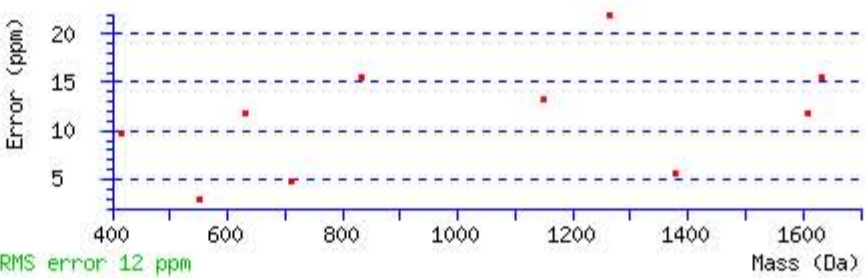

NCBI BLAST search of [LGDDLLQCHPAVK](#)  
(Parameters: blastp, nr protein database, expect=20000, no filter, PAM30)  
Other BLAST [web gateways](#)

All matches to this query

| Score | Mr(calc):   | Delta     | Sequence                       |
|-------|-------------|-----------|--------------------------------|
| 40.8  | 1775.906250 | 0.010122  | <a href="#">LGDDLLQCHPAVK</a>  |
| 1.5   | 1775.935852 | -0.019480 | <a href="#">KRSPYNYLQVAYFK</a> |

M

A

T

R

I

X

S

C

I

E

N

C

E

Mascot Search Results

Peptide View

MS/MS Fragmentation of **ELNQAGQETLVTGWGYHSSR**  
Found in **PROC\_HUMAN**, Vitamin K-dependent protein C OS=Homo sapiens GN=PROC PE=1 SV=1

Match to Query 54917: 2543.247696 from(636.819200,4+) rtinseconds(2159) index(51452)  
Title: Locus:1.1.1.1989.8 File:"2013-07-02 CLN FXIII 180 min 2nd F 4.wiff"  
Data file C:\Program Files (x86)\Matrix Science\Mascot Daemon\mgf\8 FXIII 180 min 2nd\mascot\_daemon\_merge.mgf

Click mouse within plot area to zoom in by factor of two about that point  
Or,   to  Da   
Label all possible matches ☐ Label matches used for scoring ☒

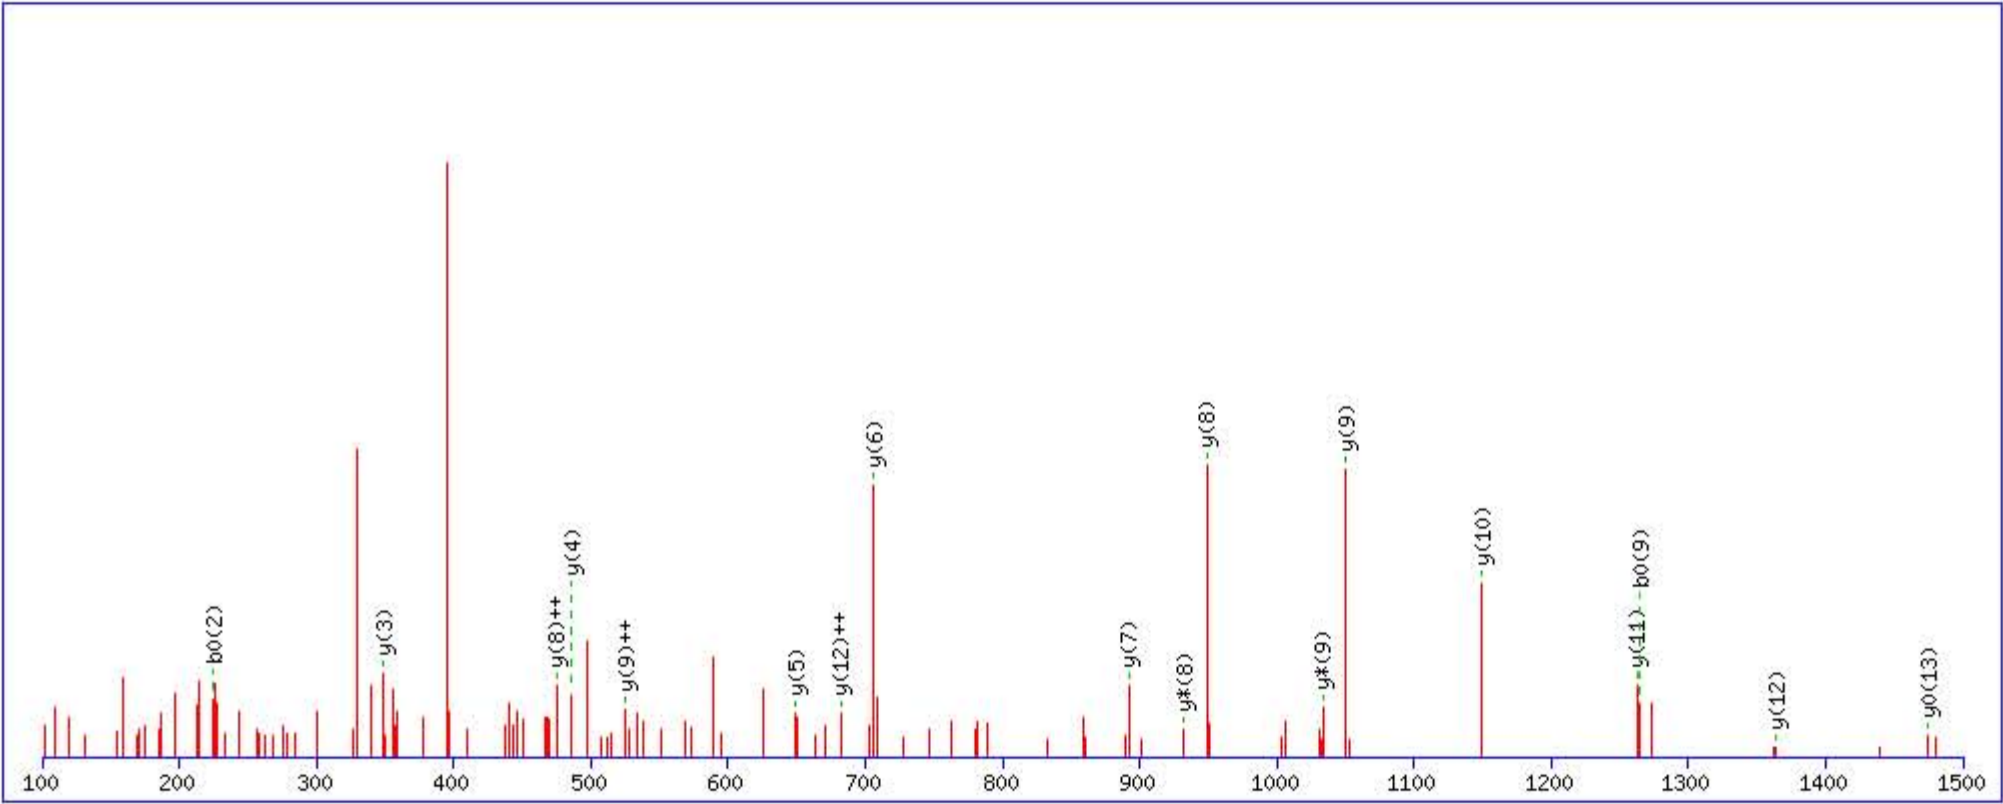

Monoisotopic mass of neutral peptide Mr(calc): 2543.222702  
Fixed modifications: Carbamidomethyl (C) (apply to specified residues or termini only)  
Variable modifications:  
Q7 : Biotin:Thermo-21345 (Q)  
Ions Score: 44 Expect: 0.0012  
Matches : 18/222 fragment ions using 39 most intense peaks [\(help\)](#)

| #  | b           | b <sup>++</sup> | b <sup>*</sup> | b <sup>*++</sup> | b <sup>0</sup> | b <sup>0++</sup> | Seq. | y           | y <sup>++</sup> | y <sup>*</sup> | y <sup>*++</sup> | y <sup>0</sup> | y <sup>0++</sup> | #  |
|----|-------------|-----------------|----------------|------------------|----------------|------------------|------|-------------|-----------------|----------------|------------------|----------------|------------------|----|
| 1  | 130.049869  | 65.528572       |                |                  | 112.039304     | 56.523290        | E    |             |                 |                |                  |                |                  | 20 |
| 2  | 243.133933  | 122.070605      |                |                  | 225.123368     | 113.065322       | L    | 2415.187392 | 1208.097334     | 2398.160843    | 1199.584059      | 2397.176827    | 1199.092051      | 19 |
| 3  | 357.176860  | 179.092068      | 340.150311     | 170.578794       | 339.166295     | 170.086786       | N    | 2302.103328 | 1151.555302     | 2285.076779    | 1143.042027      | 2284.092763    | 1142.550019      | 18 |
| 4  | 485.235438  | 243.121357      | 468.208889     | 234.608083       | 467.224873     | 234.116075       | Q    | 2188.060401 | 1094.533838     | 2171.033852    | 1086.020564      | 2170.049836    | 1085.528556      | 17 |
| 5  | 556.272552  | 278.639914      | 539.246003     | 270.126640       | 538.261987     | 269.634632       | A    | 2060.001823 | 1030.504549     | 2042.975274    | 1021.991275      | 2041.991258    | 1021.499267      | 16 |
| 6  | 613.294016  | 307.150646      | 596.267467     | 298.637372       | 595.283451     | 298.145364       | G    | 1988.964709 | 994.985993      | 1971.938160    | 986.472718       | 1970.954144    | 985.980710       | 15 |
| 7  | 1052.519342 | 526.763309      | 1035.492793    | 518.250035       | 1034.508777    | 517.758027       | Q    | 1931.943245 | 966.475261      | 1914.916696    | 957.961986       | 1913.932680    | 957.469978       | 14 |
| 8  | 1181.561935 | 591.284606      | 1164.535386    | 582.771331       | 1163.551370    | 582.279323       | E    | 1492.717919 | 746.862597      | 1475.691370    | 738.349323       | 1474.707354    | 737.857315       | 13 |
| 9  | 1282.609614 | 641.808445      | 1265.583065    | 633.295171       | 1264.599049    | 632.803163       | T    | 1363.675326 | 682.341301      | 1346.648777    | 673.828026       | 1345.664761    | 673.336018       | 12 |
| 10 | 1395.693678 | 698.350477      | 1378.667129    | 689.837203       | 1377.683113    | 689.345195       | L    | 1262.627647 | 631.817461      | 1245.601098    | 623.304187       | 1244.617082    | 622.812179       | 11 |
| 11 | 1494.762092 | 747.884684      | 1477.735543    | 739.371410       | 1476.751527    | 738.879402       | V    | 1149.543583 | 575.275429      | 1132.517034    | 566.762155       | 1131.533018    | 566.270147       | 10 |
| 12 | 1595.809771 | 798.408524      | 1578.783222    | 789.895249       | 1577.799206    | 789.403241       | T    | 1050.475169 | 525.741222      | 1033.448620    | 517.227948       | 1032.464604    | 516.735940       | 9  |
| 13 | 1652.831235 | 826.919256      | 1635.804686    | 818.405981       | 1634.820670    | 817.913973       | G    | 949.427490  | 475.217383      | 932.400941     | 466.704108       | 931.416925     | 466.212100       | 8  |
| 14 | 1838.910548 | 919.958912      | 1821.883999    | 911.445638       | 1820.899983    | 910.953630       | W    | 892.406026  | 446.706651      | 875.379477     | 438.193376       | 874.395461     | 437.701368       | 7  |
| 15 | 1895.932012 | 948.469644      | 1878.905463    | 939.956370       | 1877.921447    | 939.464362       | G    | 706.326713  | 353.666994      | 689.300164     | 345.153720       | 688.316148     | 344.661712       | 6  |
| 16 | 2058.995341 | 1030.001308     | 2041.968792    | 1021.488034      | 2040.984776    | 1020.996026      | Y    | 649.305249  | 325.156263      | 632.278700     | 316.642988       | 631.294684     | 316.150980       | 5  |
| 17 | 2196.054253 | 1098.530764     | 2179.027704    | 1090.017490      | 2178.043688    | 1089.525482      | H    | 486.241920  | 243.624598      | 469.215371     | 235.111324       | 468.231355     | 234.619316       | 4  |
| 18 | 2283.086281 | 1142.046778     | 2266.059732    | 1133.533504      | 2265.075716    | 1133.041496      | S    | 349.183008  | 175.095142      | 332.156459     | 166.581868       | 331.172443     | 166.089860       | 3  |
| 19 | 2370.118309 | 1185.562792     | 2353.091760    | 1177.049518      | 2352.107744    | 1176.557510      | S    | 262.150980  | 131.579128      | 245.124431     | 123.065854       | 244.140415     | 122.573846       | 2  |
| 20 |             |                 |                |                  |                |                  | R    | 175.118952  | 88.063114       | 158.092403     | 79.549839        |                |                  | 1  |

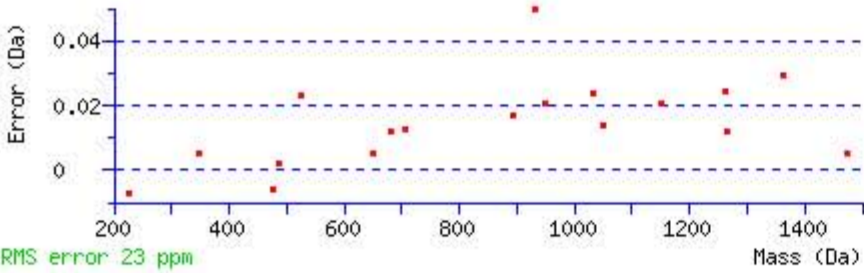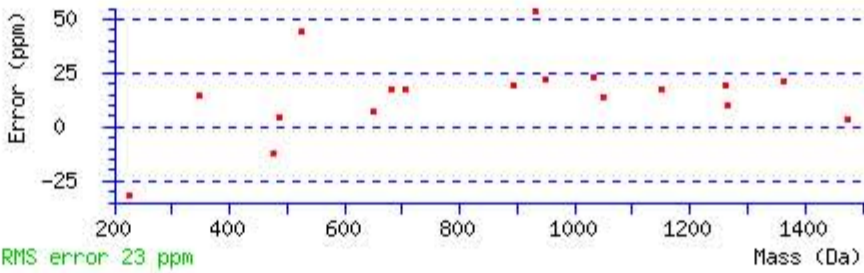

NCBI BLAST search of [ELNQAGQETLVTGWGYHSSR](#)  
(Parameters: blastp, nr protein database, expect=20000, no filter, PAM30)  
Other BLAST [web gateways](#)

All matches to this query

| Score | Mr(calc):   | Delta    | Sequence                             |
|-------|-------------|----------|--------------------------------------|
| 43.7  | 2543.222702 | 0.024994 | <a href="#">ELNQAGQETLVTGWGYHSSR</a> |
| 43.7  | 2543.222702 | 0.024994 | <a href="#">ELNQAGQETLVTGWGYHSSR</a> |

MATRIX

SCIENCE

Mascot Search Results

Peptide View

MS/MS Fragmentation of **QLAVLDK**  
Found in **PROS\_HUMAN**, Vitamin K-dependent protein S OS=Homo sapiens GN=PROS1 PE=1 SV=1

Match to Query 16192: 1096.636108 from(549.325330,2+) rtinseconds(1975) index(50198)  
Title: Locus:1.1.1.1925.6 File:"2013-07-02 CLN FXIII 180 min 2nd F 4.wiff"  
Data file C:\Program Files (x86)\Matrix Science\Mascot Daemon\mgf\8 FXIII 180 min 2nd\mascot\_daemon\_merge.mgf

Click mouse within plot area to zoom in by factor of two about that point  
Or, 

Plot from

100

 to 

1200

 Da 

Full range

  
Label all possible matches ☐ Label matches used for scoring ☒

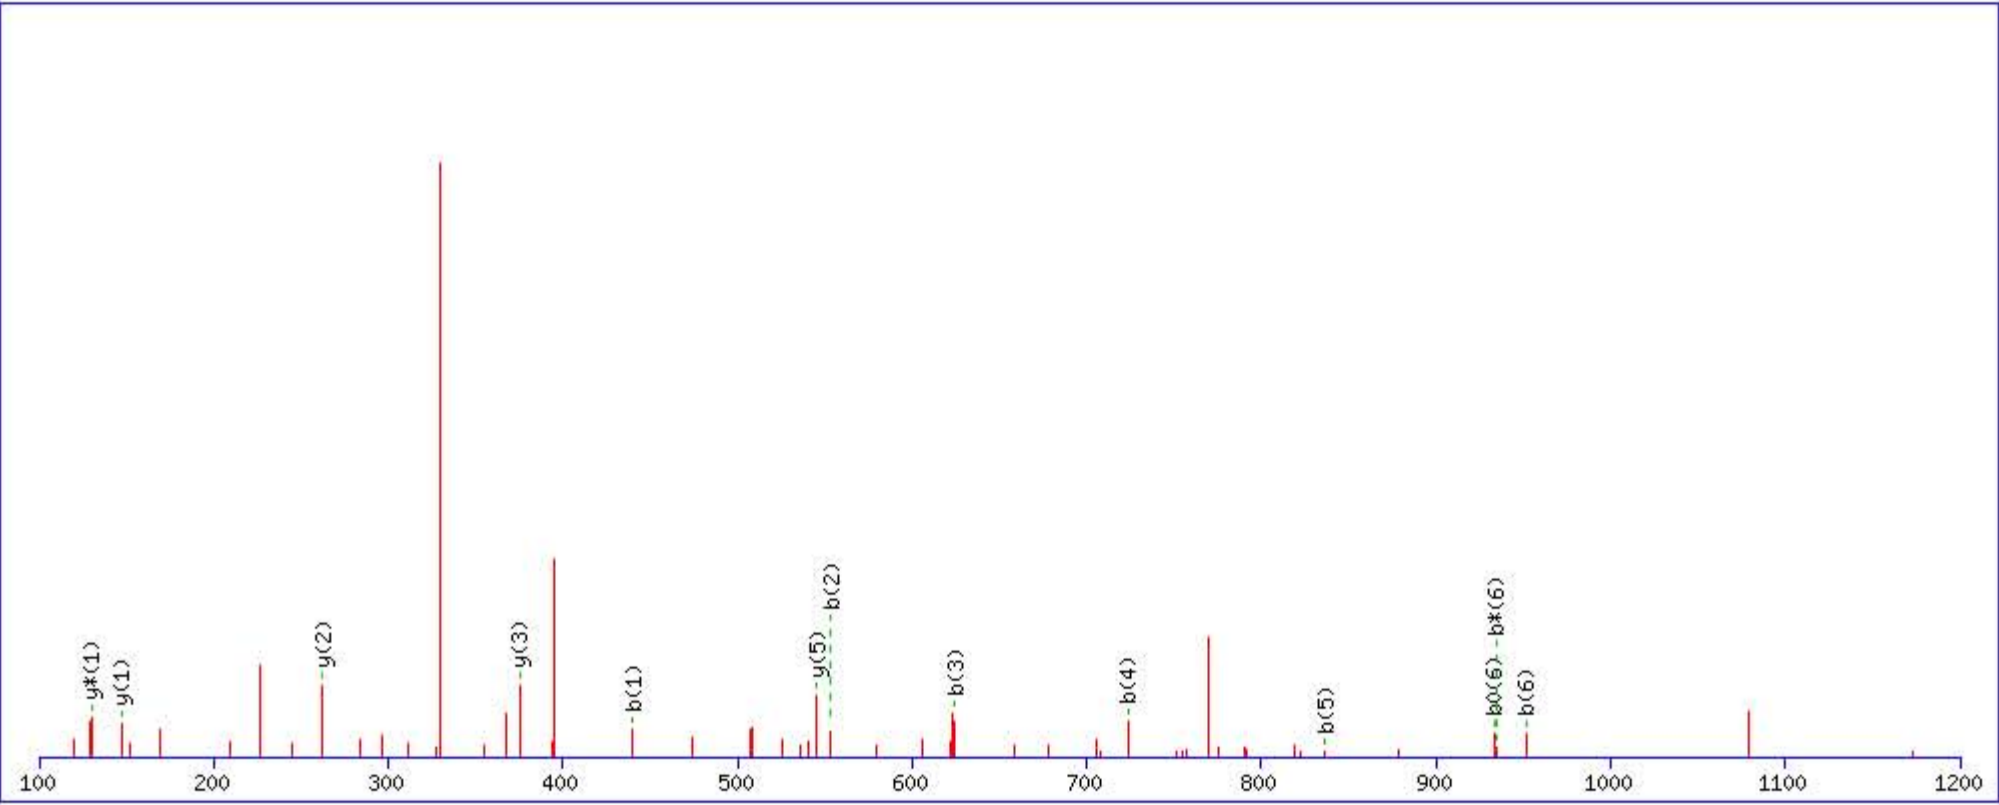

Monoisotopic mass of neutral peptide Mr(calc): 1096.631439  
Fixed modifications: Carbamidomethyl (C) (apply to specified residues or termini only)  
Variable modifications:  
Q1 : Biotin:Thermo-21345 (Q)  
Ions Score: 31 Expect: 0.013  
Matches : 13/60 fragment ions using 28 most intense peaks [\(help\)](#)

| # | b          | b <sup>++</sup> | b <sup>*</sup> | b <sup>*++</sup> | b <sup>0</sup> | b <sup>0++</sup> | Seq. | y          | y <sup>++</sup> | y <sup>*</sup> | y <sup>*++</sup> | y <sup>0</sup> | y <sup>0++</sup> | # |
|---|------------|-----------------|----------------|------------------|----------------|------------------|------|------------|-----------------|----------------|------------------|----------------|------------------|---|
| 1 | 440.232602 | 220.619939      | 423.206053     | 212.106664       |                |                  | Q    |            |                 |                |                  |                |                  | 7 |
| 2 | 553.316666 | 277.161971      | 536.290117     | 268.648697       |                |                  | L    | 658.413403 | 329.710340      | 641.386854     | 321.197065       | 640.402838     | 320.705057       | 6 |
| 3 | 624.353780 | 312.680528      | 607.327231     | 304.167254       |                |                  | A    | 545.329339 | 273.168308      | 528.302790     | 264.655033       | 527.318774     | 264.163025       | 5 |
| 4 | 723.422194 | 362.214735      | 706.395645     | 353.701461       |                |                  | V    | 474.292225 | 237.649750      | 457.265676     | 229.136476       | 456.281660     | 228.644468       | 4 |
| 5 | 836.506258 | 418.756767      | 819.479709     | 410.243493       |                |                  | L    | 375.223811 | 188.115543      | 358.197262     | 179.602269       | 357.213246     | 179.110261       | 3 |
| 6 | 951.533201 | 476.270239      | 934.506652     | 467.756964       | 933.522636     | 467.264956       | D    | 262.139747 | 131.573511      | 245.113198     | 123.060237       | 244.129182     | 122.568229       | 2 |
| 7 |            |                 |                |                  |                |                  | K    | 147.112804 | 74.060040       | 130.086255     | 65.546765        |                |                  | 1 |

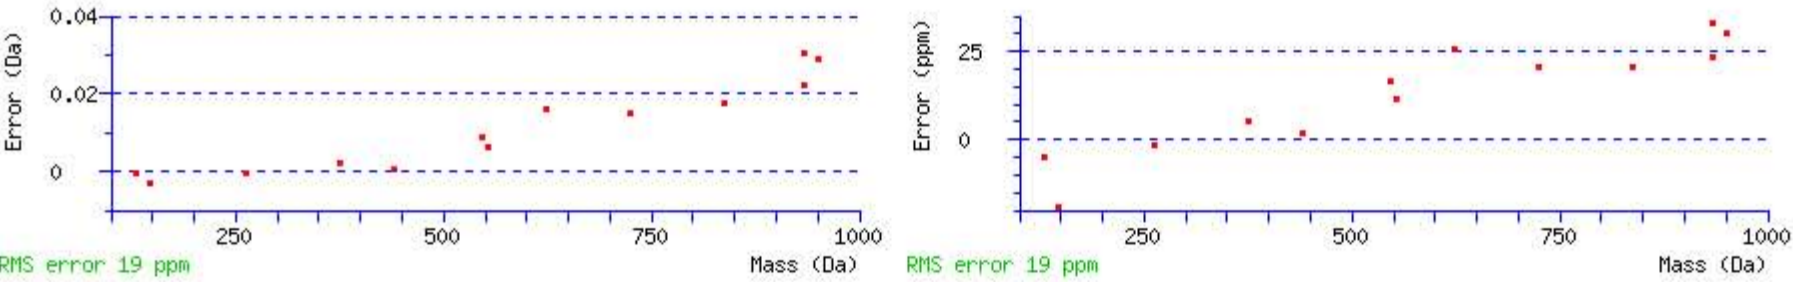

NCBI **BLAST** search of [QLAVLDK](#)  
(Parameters: blastp, nr protein database, expect=20000, no filter, PAM30)  
Other BLAST [web gateways](#)

All matches to this query

| Score | Mr(calc):   | Delta     | Sequence                   |
|-------|-------------|-----------|----------------------------|
| 30.6  | 1096.631439 | 0.004669  | <a href="#">QLAVLDK</a>    |
| 18.3  | 1096.624054 | 0.012054  | <a href="#">KPVDSVPLSR</a> |
| 8.3   | 1096.624023 | 0.012085  | <a href="#">IPRENLLDK</a>  |
| 7.9   | 1096.642654 | -0.006546 | <a href="#">QLLREK</a>     |
| 7.8   | 1096.639297 | -0.003189 | <a href="#">AHVSPLFKAK</a> |
| 6.1   | 1096.628067 | 0.008041  | <a href="#">YIFVSLLSR</a>  |
| 4.9   | 1096.631439 | 0.004669  | <a href="#">GILQLDK</a>    |
| 2.8   | 1096.631439 | 0.004669  | <a href="#">QIDVAIK</a>    |
| 2.8   | 1096.642654 | -0.006546 | <a href="#">NITMHLCLK</a>  |
| 1.2   | 1096.631439 | 0.004669  | <a href="#">QIEGLVK</a>    |

MATRIX

SCIENCE

Mascot Search Results

Peptide View

MS/MS Fragmentation of **QSTNAYPDLR**  
Found in **PROS\_HUMAN**, Vitamin K-dependent protein S OS=Homo sapiens GN=PROS1 PE=1 SV=1

Match to Query 30342: 1474.737428 from(738.375990,2+) rtinseconds(1771) index(32742)  
Title: Locus:1.1.1.725.18 File:"2013-07-02 CLN FXIII 180 min 2nd F 3.wiff"  
Data file C:\Program Files (x86)\Matrix Science\Mascot Daemon\mgf\8 FXIII 180 min 2nd\mascot\_daemon\_merge.mgf

Click mouse within plot area to zoom in by factor of two about that point  
Or, 

Plot from

100

 to 

1500

 Da 

Full range

  
Label all possible matches ☐ Label matches used for scoring ☒

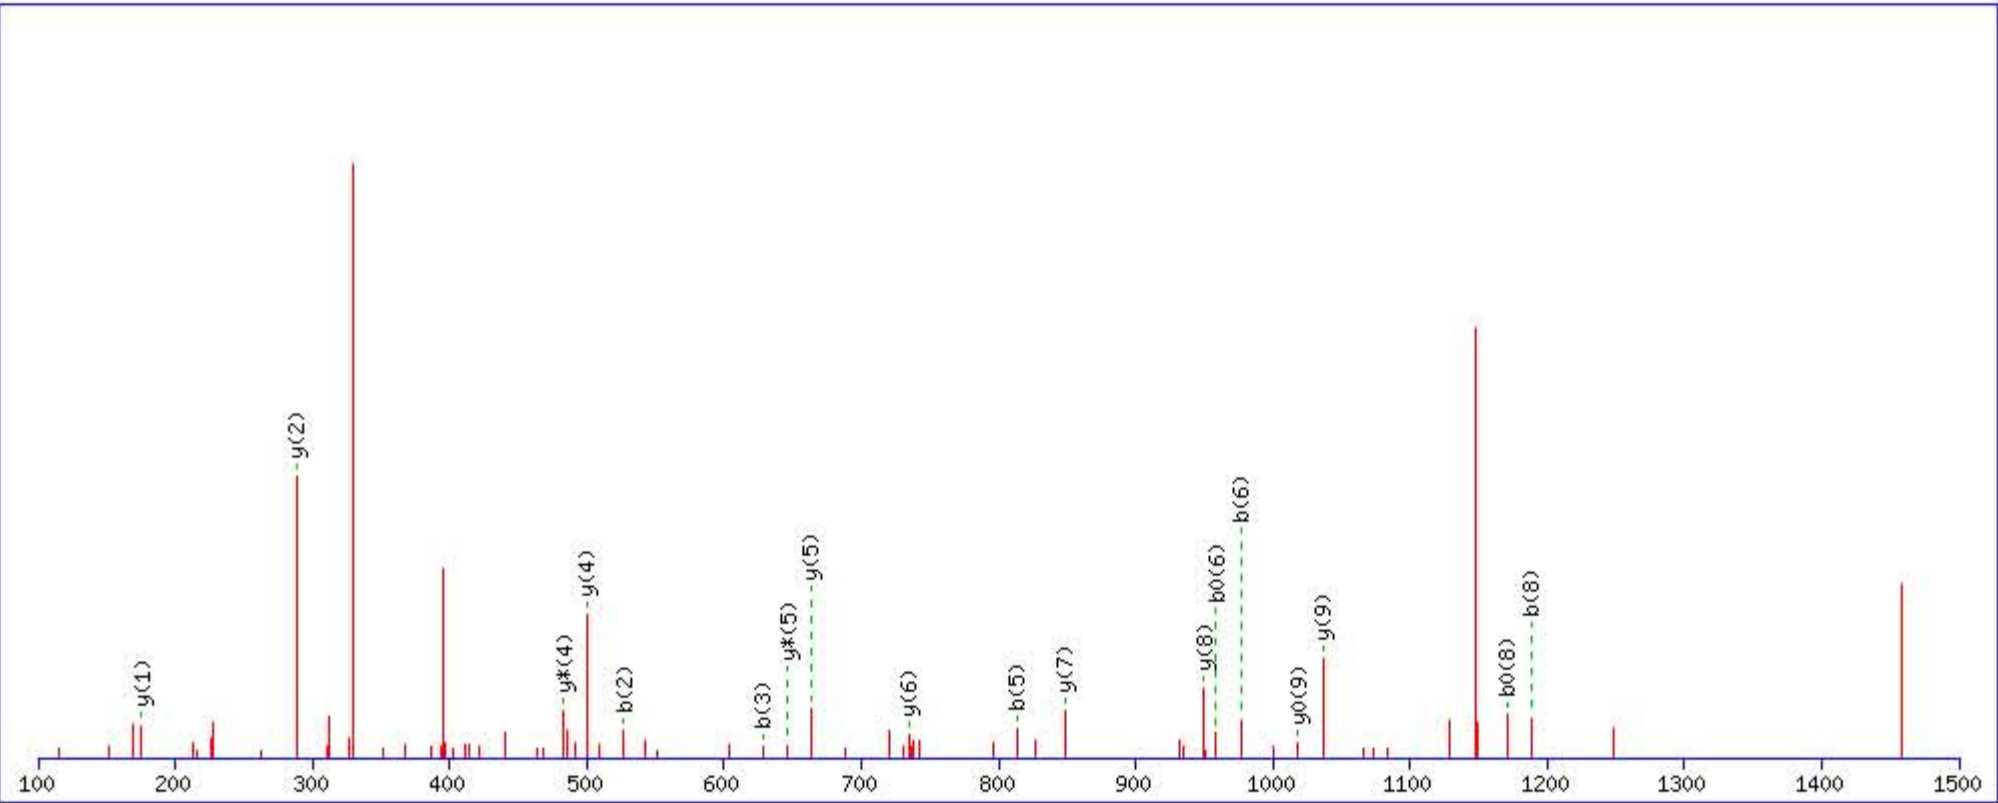

Monoisotopic mass of neutral peptide Mr(calc): 1474.723831  
Fixed modifications: Carbamidomethyl (C) (apply to specified residues or termini only)  
Variable modifications:  
Q1 : Biotin:Thermo-21345 (Q)  
Ions Score: 48 Expect: 0.00063  
Matches : 18/102 fragment ions using 34 most intense peaks [\(help\)](#)

| #  | b           | b <sup>++</sup> | b <sup>*</sup> | b <sup>*++</sup> | b <sup>0</sup> | b <sup>0++</sup> | Seq. | y           | y <sup>++</sup> | y <sup>*</sup> | y <sup>*++</sup> | y <sup>0</sup> | y <sup>0++</sup> | #  |
|----|-------------|-----------------|----------------|------------------|----------------|------------------|------|-------------|-----------------|----------------|------------------|----------------|------------------|----|
| 1  | 440.232602  | 220.619939      | 423.206053     | 212.106664       |                |                  | Q    |             |                 |                |                  |                |                  | 10 |
| 2  | 527.264630  | 264.135953      | 510.238081     | 255.622679       | 509.254065     | 255.130671       | S    | 1036.505800 | 518.756538      | 1019.479251    | 510.243263       | 1018.495235    | 509.751255       | 9  |
| 3  | 628.312309  | 314.659793      | 611.285760     | 306.146518       | 610.301744     | 305.654510       | T    | 949.473772  | 475.240524      | 932.447223     | 466.727249       | 931.463207     | 466.235241       | 8  |
| 4  | 742.355236  | 371.681256      | 725.328687     | 363.167982       | 724.344671     | 362.675974       | N    | 848.426093  | 424.716684      | 831.399544     | 416.203410       | 830.415528     | 415.711402       | 7  |
| 5  | 813.392350  | 407.199813      | 796.365801     | 398.686538       | 795.381785     | 398.194530       | A    | 734.383166  | 367.695221      | 717.356617     | 359.181946       | 716.372601     | 358.689938       | 6  |
| 6  | 976.455679  | 488.731477      | 959.429130     | 480.218203       | 958.445114     | 479.726195       | Y    | 663.346052  | 332.176664      | 646.319503     | 323.663389       | 645.335487     | 323.171382       | 5  |
| 7  | 1073.508443 | 537.257860      | 1056.481894    | 528.744585       | 1055.497878    | 528.252577       | P    | 500.282723  | 250.644999      | 483.256174     | 242.131725       | 482.272158     | 241.639717       | 4  |
| 8  | 1188.535386 | 594.771331      | 1171.508837    | 586.258057       | 1170.524821    | 585.766049       | D    | 403.229959  | 202.118617      | 386.203410     | 193.605343       | 385.219394     | 193.113335       | 3  |
| 9  | 1301.619450 | 651.313363      | 1284.592901    | 642.800089       | 1283.608885    | 642.308080       | L    | 288.203016  | 144.605146      | 271.176467     | 136.091871       |                |                  | 2  |
| 10 |             |                 |                |                  |                |                  | R    | 175.118952  | 88.063114       | 158.092403     | 79.549839        |                |                  | 1  |

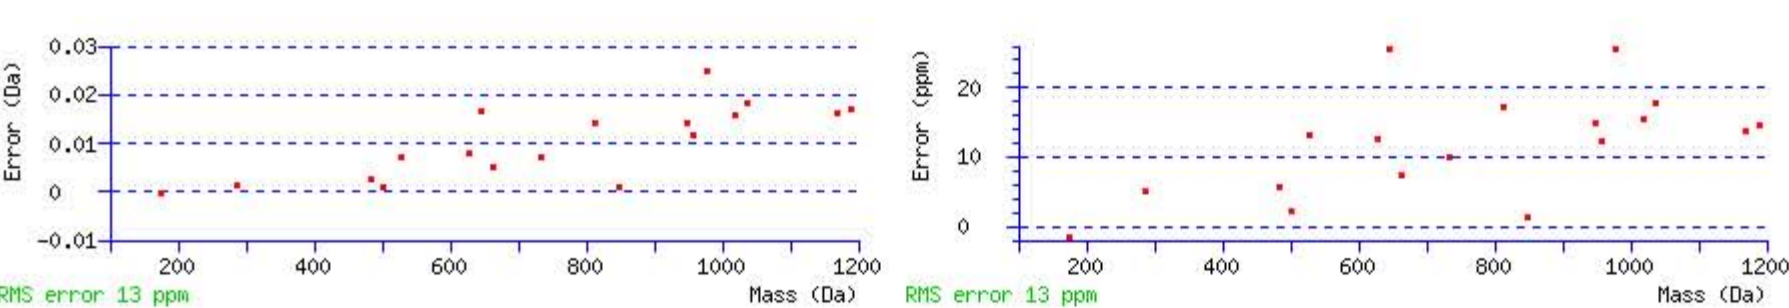

NCBI BLAST search of [QSTNAYPDLR](#)  
(Parameters: blastp, nr protein database, expect=20000, no filter, PAM30)  
Other BLAST [web gateways](#)

All matches to this query

| Score | Mr(calc):   | Delta     | Sequence                      |
|-------|-------------|-----------|-------------------------------|
| 48.5  | 1474.723831 | 0.013597  | <a href="#">QSTNAYPDLR</a>    |
| 13.4  | 1474.721161 | 0.016267  | <a href="#">QSTHGERGHR</a>    |
| 12.8  | 1474.744934 | -0.007506 | <a href="#">LSKEELIQNMDR</a>  |
| 8.6   | 1474.748779 | -0.011351 | <a href="#">LQSESTNNGKNKR</a> |
| 8.2   | 1474.745605 | -0.008177 | <a href="#">EPWEELFSIGLR</a>  |
| 6.0   | 1474.741592 | -0.004164 | <a href="#">SSLEHGSDVYLLR</a> |
| 4.3   | 1474.735092 | 0.002336  | <a href="#">SFCVLSQLTQHR</a>  |
| 1.8   | 1474.726303 | 0.011125  | <a href="#">VQTEKEEKEEAR</a>  |
| 1.1   | 1474.757721 | -0.020293 | <a href="#">YQMLAFVHR</a>     |
| 1.0   | 1474.757523 | -0.020095 | <a href="#">MGLQARRWASGSR</a> |

MATRIX

SCIENCE

Mascot Search Results

Peptide View

MS/MS Fragmentation of **SFQTGLFTAAR**  
Found in **PROS\_HUMAN**, Vitamin K-dependent protein S OS=Homo sapiens GN=PROS1 PE=1 SV=1

Match to Query 31490: 1508.800388 from(755.407470,2+) rtinseconds(2303) index(52295)  
Title: Locus:1.1.1.2039.10 File:"2013-07-02 CLN FXIII 180 min 2nd F 4.wiff"  
Data file C:\Program Files (x86)\Matrix Science\Mascot Daemon\mgf\8 FXIII 180 min 2nd\mascot\_daemon\_merge.mgf

Click mouse within plot area to zoom in by factor of two about that point  
Or, 

Plot from

0

 to 

2800

 Da 

Full range

  
Label all possible matches ☐ Label matches used for scoring ☒

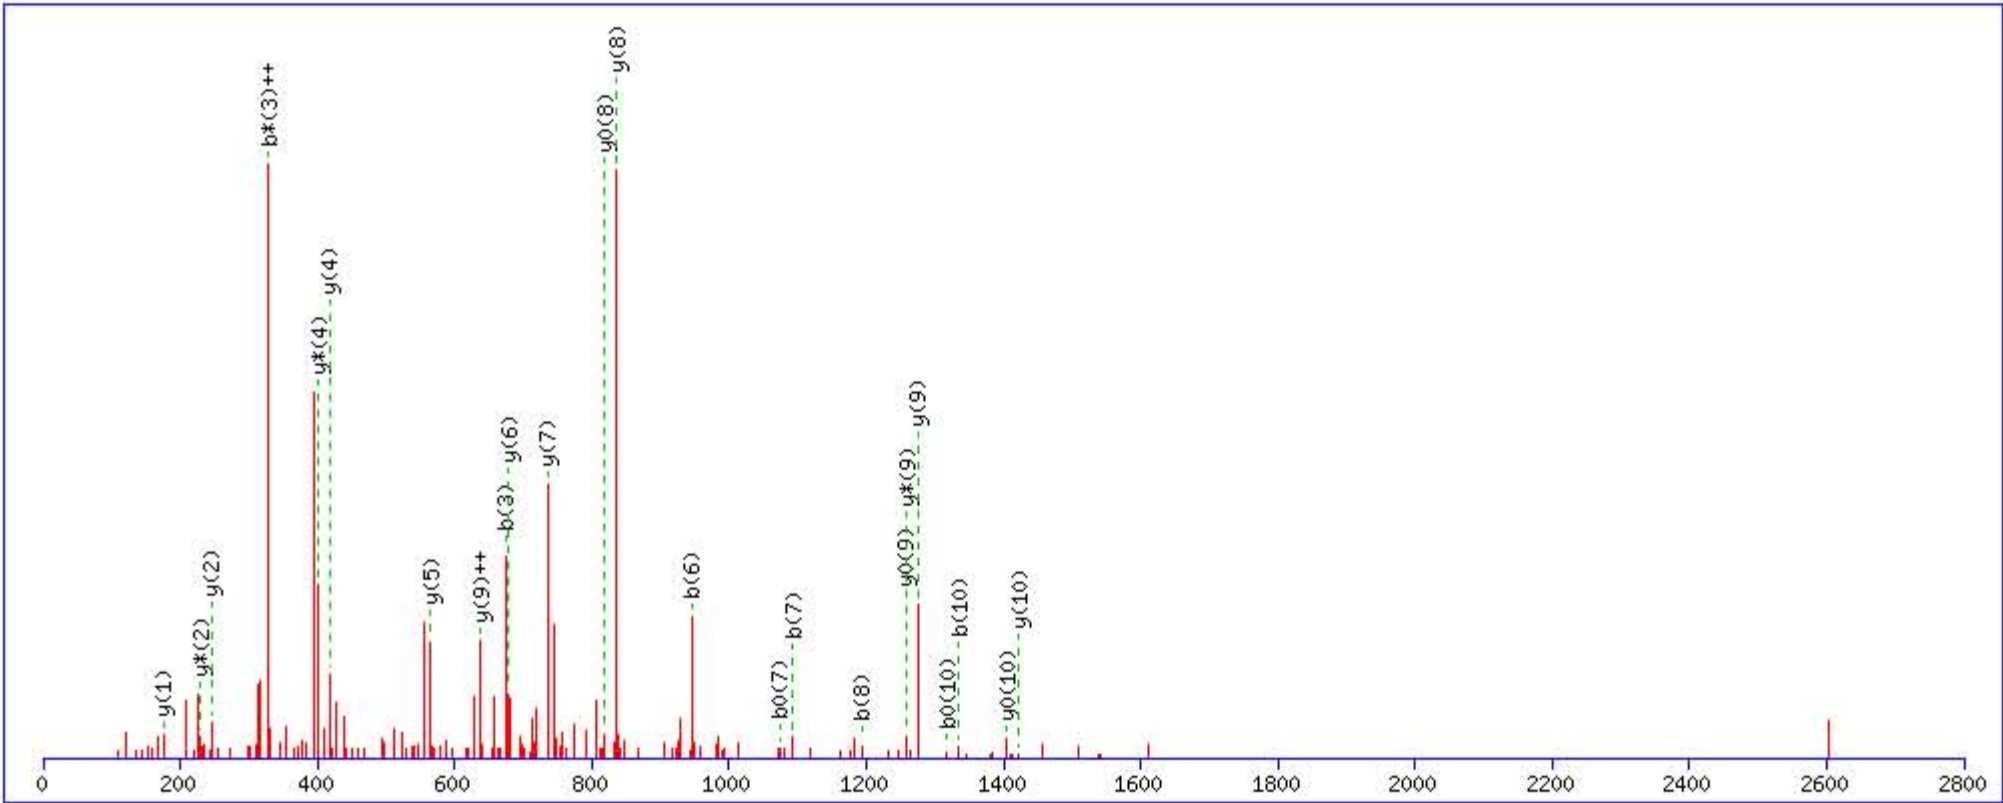

Monoisotopic mass of neutral peptide Mr(calc): 1508.780975  
Fixed modifications: Carbamidomethyl (C) (apply to specified residues or termini only)  
Variable modifications:  
Q3 : Biotin:Thermo-21345 (Q)  
Ions Score: 58 Expect: 1.9e-005  
Matches : 24/110 fragment ions using 42 most intense peaks [\(help\)](#)

| #  | b           | b <sup>++</sup> | b <sup>*</sup> | b <sup>*++</sup> | b <sup>0</sup> | b <sup>0++</sup> | Seq. | y           | y <sup>++</sup> | y <sup>*</sup> | y <sup>*++</sup> | y <sup>0</sup> | y <sup>0++</sup> | #  |
|----|-------------|-----------------|----------------|------------------|----------------|------------------|------|-------------|-----------------|----------------|------------------|----------------|------------------|----|
| 1  | 88.039304   | 44.523290       |                |                  | 70.028739      | 35.518008        | S    |             |                 |                |                  |                |                  | 11 |
| 2  | 235.107718  | 118.057497      |                |                  | 217.097153     | 109.052214       | F    | 1422.756220 | 711.881748      | 1405.729671    | 703.368474       | 1404.745655    | 702.876465       | 10 |
| 3  | 674.333044  | 337.670160      | 657.306495     | 329.156885       | 656.322479     | 328.664877       | Q    | 1275.687806 | 638.347541      | 1258.661257    | 629.834267       | 1257.677241    | 629.342259       | 9  |
| 4  | 775.380723  | 388.194000      | 758.354174     | 379.680725       | 757.370158     | 379.188717       | T    | 836.462480  | 418.734878      | 819.435931     | 410.221604       | 818.451915     | 409.729596       | 8  |
| 5  | 832.402187  | 416.704732      | 815.375638     | 408.191457       | 814.391622     | 407.699449       | G    | 735.414801  | 368.211039      | 718.388252     | 359.697764       | 717.404236     | 359.205756       | 7  |
| 6  | 945.486251  | 473.246764      | 928.459702     | 464.733489       | 927.475686     | 464.241481       | L    | 678.393337  | 339.700307      | 661.366788     | 331.187032       | 660.382772     | 330.695024       | 6  |
| 7  | 1092.554665 | 546.780971      | 1075.528116    | 538.267696       | 1074.544100    | 537.775688       | F    | 565.309273  | 283.158275      | 548.282724     | 274.645000       | 547.298708     | 274.152992       | 5  |
| 8  | 1193.602344 | 597.304810      | 1176.575795    | 588.791536       | 1175.591779    | 588.299528       | T    | 418.240859  | 209.624067      | 401.214310     | 201.110793       | 400.230294     | 200.618785       | 4  |
| 9  | 1264.639458 | 632.823367      | 1247.612909    | 624.310093       | 1246.628893    | 623.818085       | A    | 317.193180  | 159.100228      | 300.166631     | 150.586953       |                |                  | 3  |
| 10 | 1335.676572 | 668.341924      | 1318.650023    | 659.828650       | 1317.666007    | 659.336642       | A    | 246.156066  | 123.581671      | 229.129517     | 115.068396       |                |                  | 2  |
| 11 |             |                 |                |                  |                |                  | R    | 175.118952  | 88.063114       | 158.092403     | 79.549839        |                |                  | 1  |

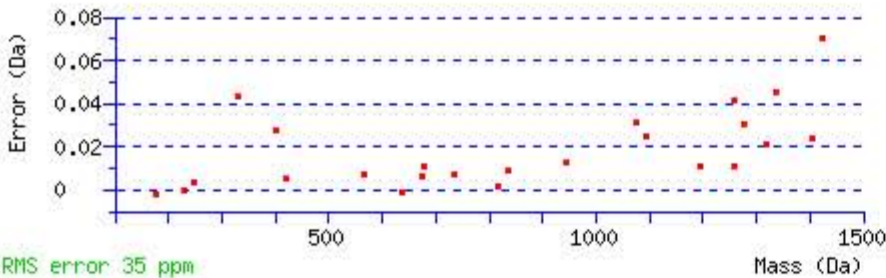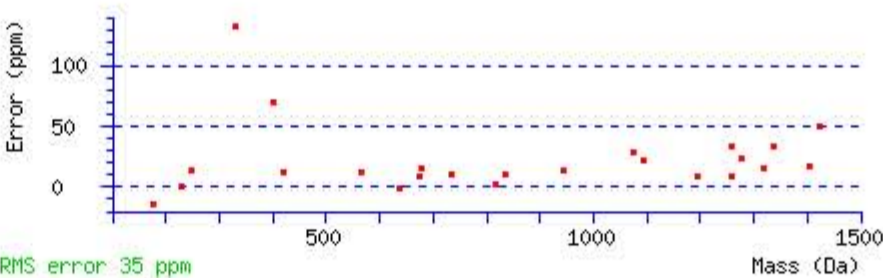

NCBI BLAST search of [SFQTGLFTAAR](#)  
(Parameters: blastp, nr protein database, expect=20000, no filter, PAM30)  
Other BLAST [web gateways](#)

All matches to this query

| Score | Mr(calc):   | Delta     | Sequence                       |
|-------|-------------|-----------|--------------------------------|
| 57.9  | 1508.780975 | 0.019413  | <a href="#">SFQTGLFTAAR</a>    |
| 7.3   | 1508.798721 | 0.001667  | <a href="#">SSYGVAAPVDFLRK</a> |
| 2.7   | 1508.805939 | -0.005551 | <a href="#">SSPEHTTILRGGVR</a> |

MATRIX

SCIENCE

Mascot Search Results

Peptide View

MS/MS Fragmentation of **IETISHEDLQR**  
Found in **PROS\_HUMAN**, Vitamin K-dependent protein S OS=Homo sapiens GN=PROS1 PE=1 SV=1

Match to Query 36910: 1650.843342 from(551.288390,3+) rtinseconds(1644) index(47956)  
Title: Locus:1.1.1.1810.7 File:"2013-07-02 CLN FXIII 180 min 2nd F 4.wiff"  
Data file C:\Program Files (x86)\Matrix Science\Mascot Daemon\mgf\8 FXIII 180 min 2nd\mascot\_daemon\_merge.mgf

Click mouse within plot area to zoom in by factor of two about that point  
Or, 

Plot from

100

to

1900

Da

Full range

Label all possible matches ☐Label matches used for scoring ☒

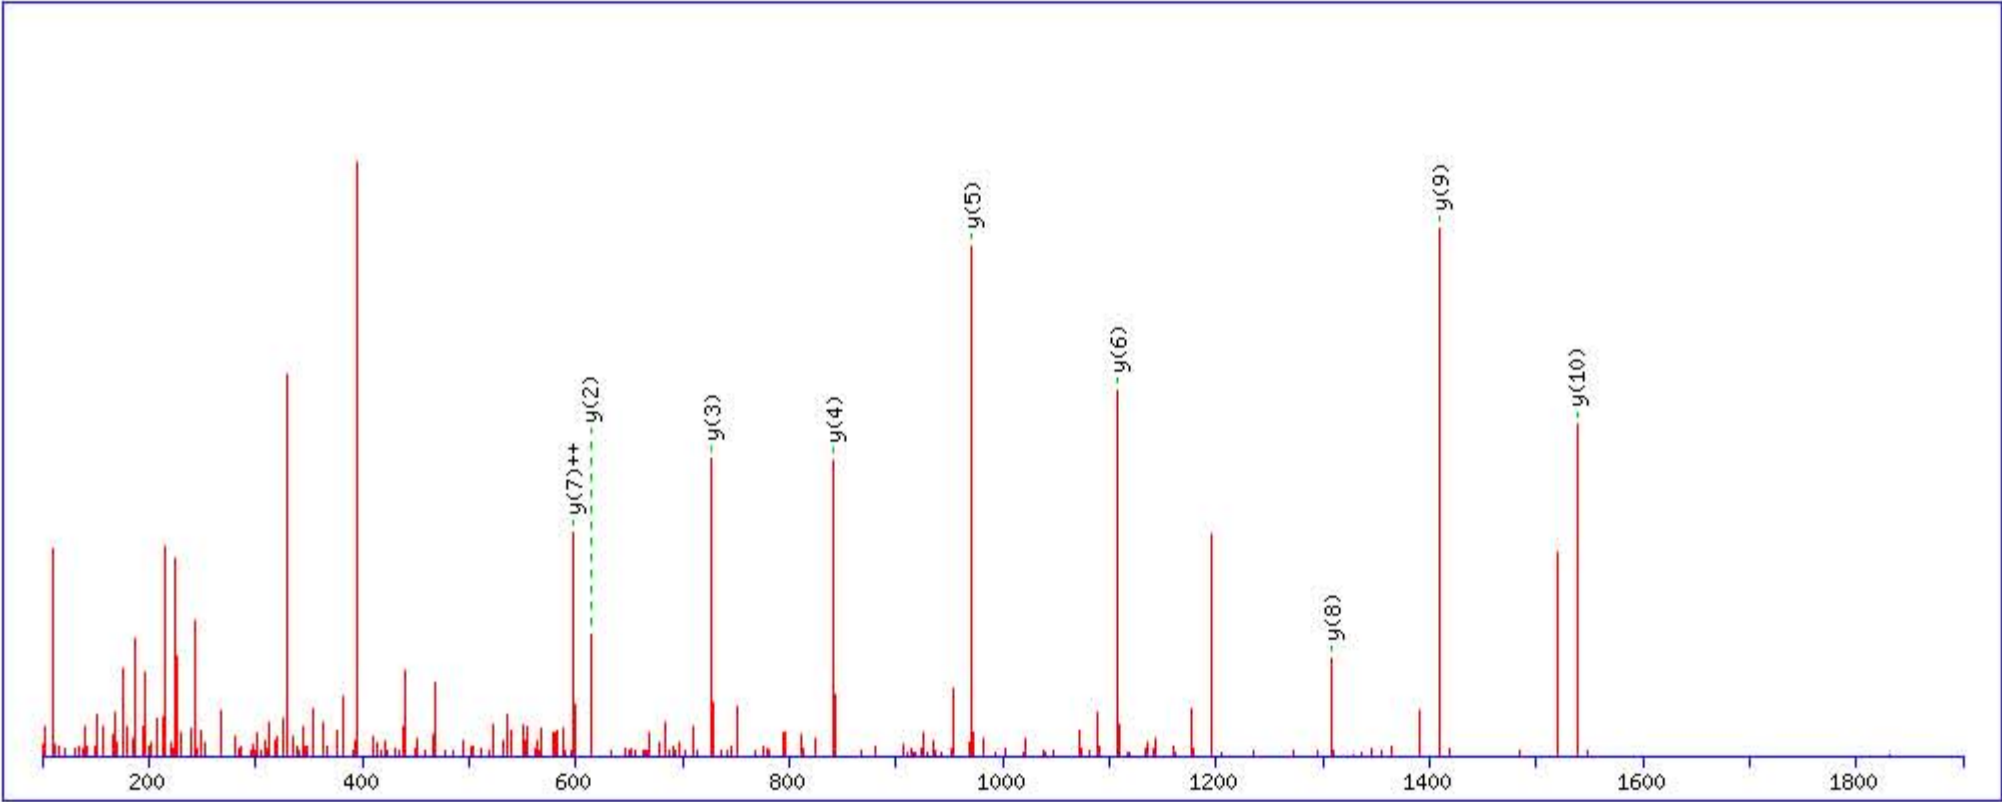

Monoisotopic mass of neutral peptide Mr(calc): 1650.839920  
Fixed modifications: Carbamidomethyl (C) (apply to specified residues or termini only)  
Variable modifications:  
Q10 : Biotin:Thermo-21345 (Q)  
Ions Score: 53 Expect: 1.8e-005  
Matches : 9/94 fragment ions using 15 most intense peaks [\(help\)](#)

| #  | b           | b <sup>++</sup> | b <sup>+</sup> | b <sup>++</sup> * | b <sup>0</sup> | b <sup>0++</sup> | Seq. | y           | y <sup>++</sup> | y <sup>+</sup> | y <sup>++</sup> * | y <sup>0</sup> | y <sup>0++</sup> | #  |
|----|-------------|-----------------|----------------|-------------------|----------------|------------------|------|-------------|-----------------|----------------|-------------------|----------------|------------------|----|
| 1  | 114.091340  | 57.549308       |                |                   |                |                  | I    |             |                 |                |                   |                |                  | 11 |
| 2  | 243.133933  | 122.070605      |                |                   | 225.123368     | 113.065322       | E    | 1538.763154 | 769.885215      | 1521.736605    | 761.371941        | 1520.752589    | 760.879933       | 10 |
| 3  | 344.181612  | 172.594444      |                |                   | 326.171047     | 163.589162       | T    | 1409.720561 | 705.363919      | 1392.694012    | 696.850644        | 1391.709996    | 696.358636       | 9  |
| 4  | 457.265676  | 229.136476      |                |                   | 439.255111     | 220.131194       | I    | 1308.672882 | 654.840079      | 1291.646333    | 646.326805        | 1290.662317    | 645.834797       | 8  |
| 5  | 544.297704  | 272.652490      |                |                   | 526.287139     | 263.647208       | S    | 1195.588818 | 598.298047      | 1178.562269    | 589.784773        | 1177.578253    | 589.292764       | 7  |
| 6  | 681.356616  | 341.181946      |                |                   | 663.346051     | 332.176664       | H    | 1108.556790 | 554.782033      | 1091.530241    | 546.268759        | 1090.546225    | 545.776751       | 6  |
| 7  | 810.399209  | 405.703243      |                |                   | 792.388644     | 396.697960       | E    | 971.497878  | 486.252577      | 954.471329     | 477.739303        | 953.487313     | 477.247295       | 5  |
| 8  | 925.426152  | 463.216714      |                |                   | 907.415587     | 454.211432       | D    | 842.455285  | 421.731281      | 825.428736     | 413.218006        | 824.444720     | 412.725998       | 4  |
| 9  | 1038.510216 | 519.758746      |                |                   | 1020.499651    | 510.753463       | L    | 727.428342  | 364.217809      | 710.401793     | 355.704535        |                |                  | 3  |
| 10 | 1477.735542 | 739.371409      | 1460.708993    | 730.858135        | 1459.724977    | 730.366127       | Q    | 614.344278  | 307.675777      | 597.317729     | 299.162503        |                |                  | 2  |
| 11 |             |                 |                |                   |                |                  | R    | 175.118952  | 88.063114       | 158.092403     | 79.549839         |                |                  | 1  |

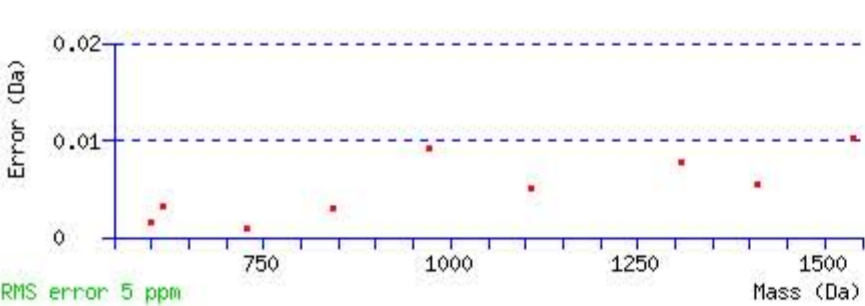

RMS error 5 ppm

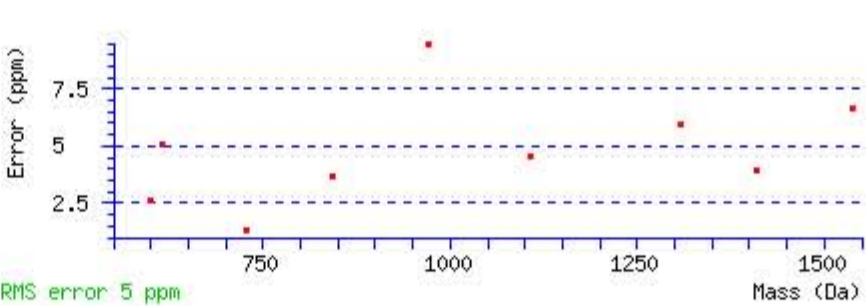

RMS error 5 ppm

NCBI BLAST search of [IETISHEDLQR](#)  
(Parameters: blastp, nr protein database, expect=20000, no filter, PAM30)  
Other BLAST [web gateways](#)

All matches to this query

| Score | Mr(calc):   | Delta     | Sequence                                       |
|-------|-------------|-----------|------------------------------------------------|
| 52.8  | 1650.839920 | 0.003422  | <a href="#">IETISHEDLQR</a>                    |
| 2.3   | 1650.855881 | -0.012539 | <a href="#">MQRTGGGAPR</a> <a href="#">PGR</a> |

MATRIX

SCIENCE

Mascot Search Results

Peptide View

MS/MS Fragmentation of **IQALSLCSDQQSHLEFR**  
Found in **PROS\_HUMAN**, Vitamin K-dependent protein S OS=Homo sapiens GN=PROS1 PE=1 SV=1

Match to Query 51247: 2342.167136 from(586.549060,4+) rtinseconds(2171) index(51540)  
Title: Locus:1.1.1.1993.9 File:"2013-07-02 CLN FXIII 180 min 2nd F 4.wiff"  
Data file C:\Program Files (x86)\Matrix Science\Mascot Daemon\mgf\8 FXIII 180 min 2nd\mascot\_daemon\_merge.mgf

Click mouse within plot area to zoom in by factor of two about that point  
Or, 

Plot from

100

 to 

2000

 Da 

Full range

  
Label all possible matches ☐ Label matches used for scoring ☒

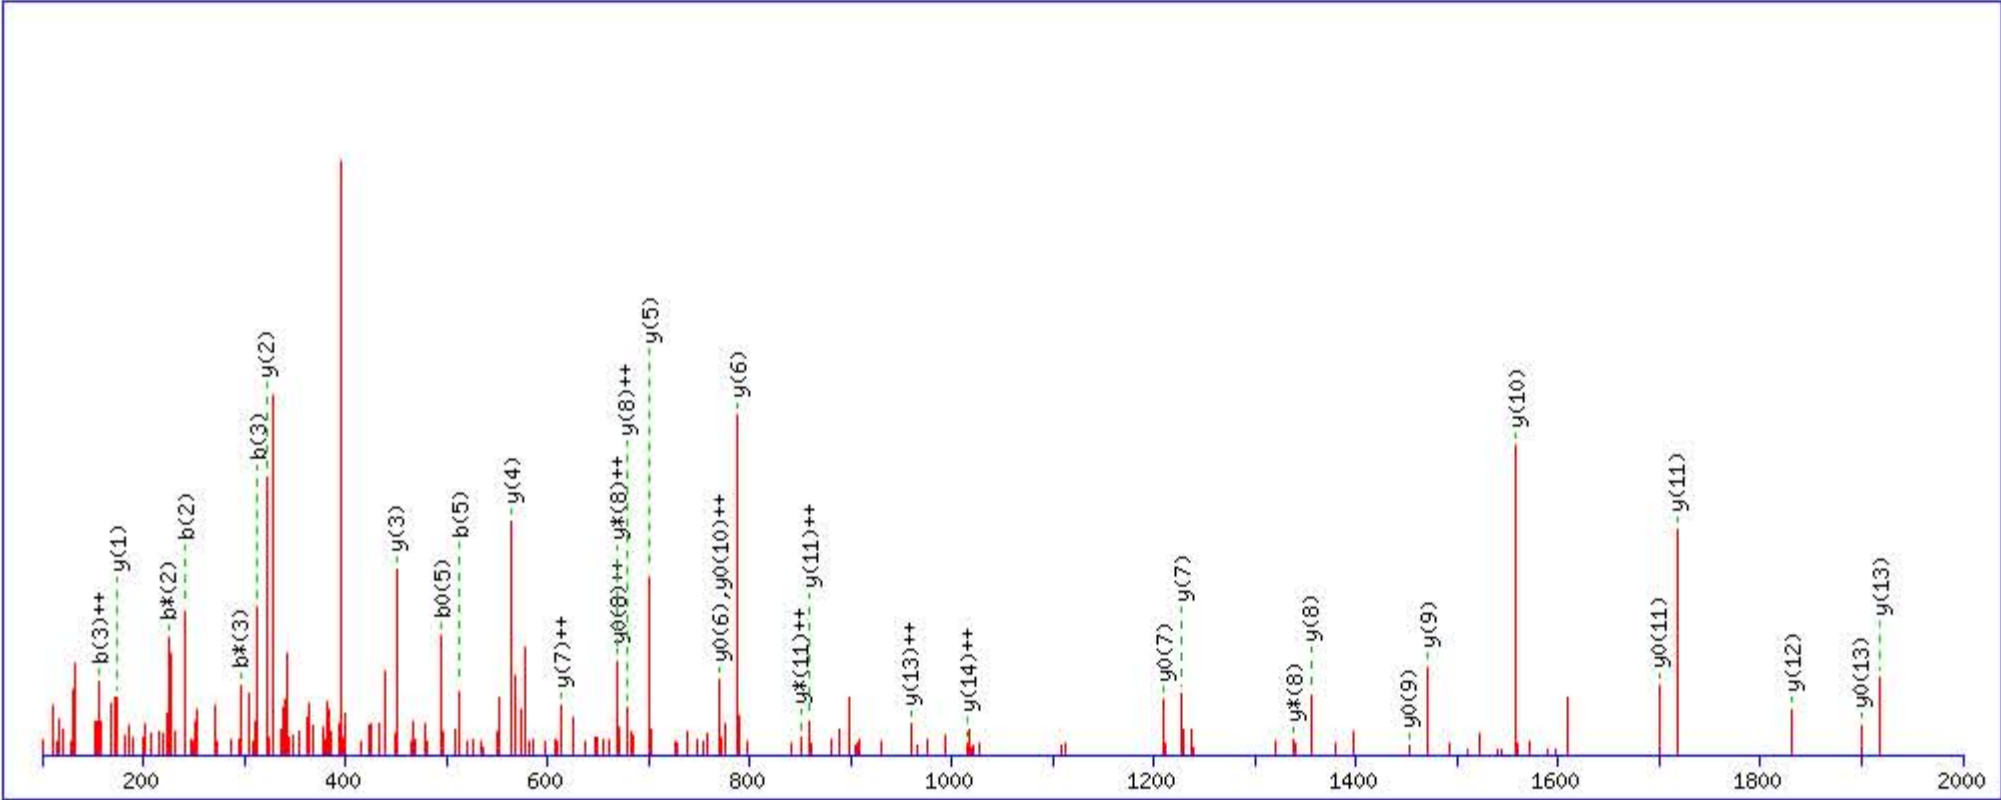

Monoisotopic mass of neutral peptide Mr(calc): 2342.151108  
Fixed modifications: Carbamidomethyl (C) (apply to specified residues or termini only)  
Variable modifications:  
Q11 : Biotin:Thermo-21345 (Q)  
Ions Score: 70 Expect: 3.5e-006  
Matches : 35/178 fragment ions using 65 most intense peaks [\(help\)](#)

| #  | b           | b <sup>++</sup> | b <sup>*</sup> | b <sup>+++</sup> | b <sup>0</sup> | b <sup>0++</sup> | Seq. | y           | y <sup>++</sup> | y <sup>*</sup> | y <sup>+++</sup> | y <sup>0</sup> | y <sup>0++</sup> | #  |
|----|-------------|-----------------|----------------|------------------|----------------|------------------|------|-------------|-----------------|----------------|------------------|----------------|------------------|----|
| 1  | 114.091340  | 57.549308       |                |                  |                |                  | I    |             |                 |                |                  |                |                  | 17 |
| 2  | 242.149918  | 121.578597      | 225.123369     | 113.065323       |                |                  | Q    | 2230.074335 | 1115.540805     | 2213.047786    | 1107.027531      | 2212.063770    | 1106.535523      | 16 |
| 3  | 313.187032  | 157.097154      | 296.160483     | 148.583879       |                |                  | A    | 2102.015757 | 1051.511516     | 2084.989208    | 1042.998242      | 2084.005192    | 1042.506234      | 15 |
| 4  | 426.271096  | 213.639186      | 409.244547     | 205.125912       |                |                  | L    | 2030.978643 | 1015.992959     | 2013.952094    | 1007.479685      | 2012.968078    | 1006.987677      | 14 |
| 5  | 513.303124  | 257.155200      | 496.276575     | 248.641926       | 495.292559     | 248.149918       | S    | 1917.894579 | 959.450927      | 1900.868030    | 950.937653       | 1899.884014    | 950.445645       | 13 |
| 6  | 626.387188  | 313.697232      | 609.360639     | 305.183958       | 608.376623     | 304.691950       | L    | 1830.862551 | 915.934913      | 1813.836002    | 907.421639       | 1812.851986    | 906.929631       | 12 |
| 7  | 786.417837  | 393.712557      | 769.391288     | 385.199282       | 768.407272     | 384.707274       | C    | 1717.778487 | 859.392881      | 1700.751938    | 850.879607       | 1699.767922    | 850.387599       | 11 |
| 8  | 873.449865  | 437.228571      | 856.423316     | 428.715296       | 855.439300     | 428.223288       | S    | 1557.747838 | 779.377557      | 1540.721289    | 770.864282       | 1539.737273    | 770.372274       | 10 |
| 9  | 988.476808  | 494.742042      | 971.450259     | 486.228768       | 970.466243     | 485.736760       | D    | 1470.715810 | 735.861543      | 1453.689261    | 727.348268       | 1452.705245    | 726.856260       | 9  |
| 10 | 1116.535386 | 558.771331      | 1099.508837    | 550.258057       | 1098.524821    | 549.766049       | Q    | 1355.688867 | 678.348071      | 1338.662318    | 669.834797       | 1337.678302    | 669.342789       | 8  |
| 11 | 1555.760712 | 778.383994      | 1538.734163    | 769.870720       | 1537.750147    | 769.378712       | Q    | 1227.630289 | 614.318782      | 1210.603740    | 605.805508       | 1209.619724    | 605.313500       | 7  |
| 12 | 1642.792740 | 821.900008      | 1625.766191    | 813.386734       | 1624.782175    | 812.894726       | S    | 788.404963  | 394.706119      | 771.378414     | 386.192845       | 770.394398     | 385.700837       | 6  |
| 13 | 1779.851652 | 890.429464      | 1762.825103    | 881.916190       | 1761.841087    | 881.424182       | H    | 701.372935  | 351.190105      | 684.346386     | 342.676831       | 683.362370     | 342.184823       | 5  |
| 14 | 1892.935716 | 946.971496      | 1875.909167    | 938.458222       | 1874.925151    | 937.966213       | L    | 564.314023  | 282.660649      | 547.287474     | 274.147375       | 546.303458     | 273.655367       | 4  |
| 15 | 2021.978309 | 1011.492793     | 2004.951760    | 1002.979518      | 2003.967744    | 1002.487510      | E    | 451.229959  | 226.118617      | 434.203410     | 217.605343       | 433.219394     | 217.113335       | 3  |
| 16 | 2169.046723 | 1085.026999     | 2152.020174    | 1076.513725      | 2151.036158    | 1076.021717      | F    | 322.187366  | 161.597321      | 305.160817     | 153.084046       |                |                  | 2  |
| 17 |             |                 |                |                  |                |                  | R    | 175.118952  | 88.063114       | 158.092403     | 79.549839        |                |                  | 1  |

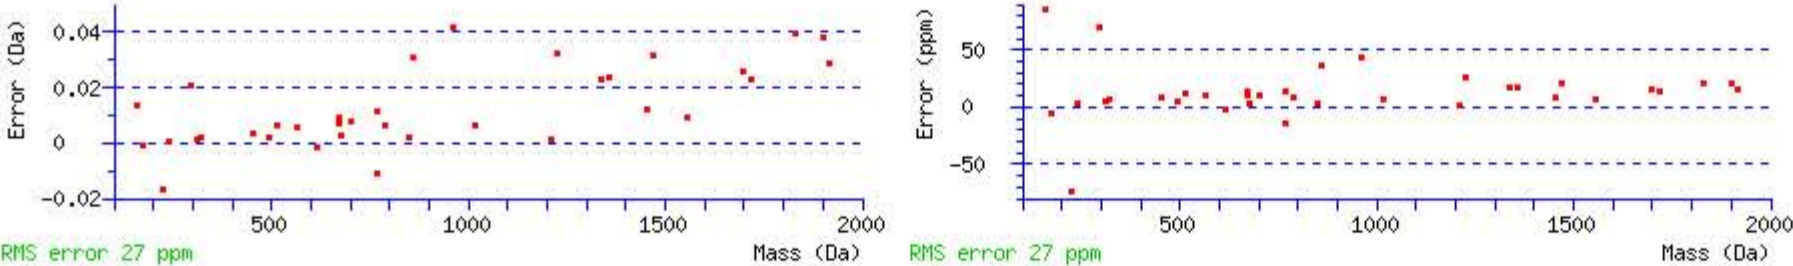

NCBI BLAST search of [IQALSLCSDQQSHLEFR](#)  
(Parameters: blastp, nr protein database, expect=20000, no filter, PAM30)  
Other BLAST [web gateways](#)

All matches to this query

| Score | Mr(calc):   | Delta    | Sequence                          |
|-------|-------------|----------|-----------------------------------|
| 69.5  | 2342.151108 | 0.016028 | <a href="#">IQALSLCSDQQSHLEFR</a> |
| 57.6  | 2342.151108 | 0.016028 | <a href="#">IQALSLCSDQQSHLEFR</a> |

MATRIX

SCIENCE

Mascot Search Results

Peptide View

MS/MS Fragmentation of **IQALSLCSDQQSHLEFR**  
Found in **PROS\_HUMAN**, Vitamin K-dependent protein S OS=Homo sapiens GN=PROS1 PE=1 SV=1

Match to Query 51249: 2342.183682 from(781.735170,3+) rtinseconds(2180) index(51602)  
Title: Locus:1.1.1.1996.11 File:"2013-07-02 CLN FXIII 180 min 2nd F 4.wiff"  
Data file C:\Program Files (x86)\Matrix Science\Mascot Daemon\mgf\8 FXIII 180 min 2nd\mascot\_daemon\_merge.mgf

Click mouse within plot area to zoom in by factor of two about that point  
Or,   to  Da   
Label all possible matches ☐ Label matches used for scoring ☒

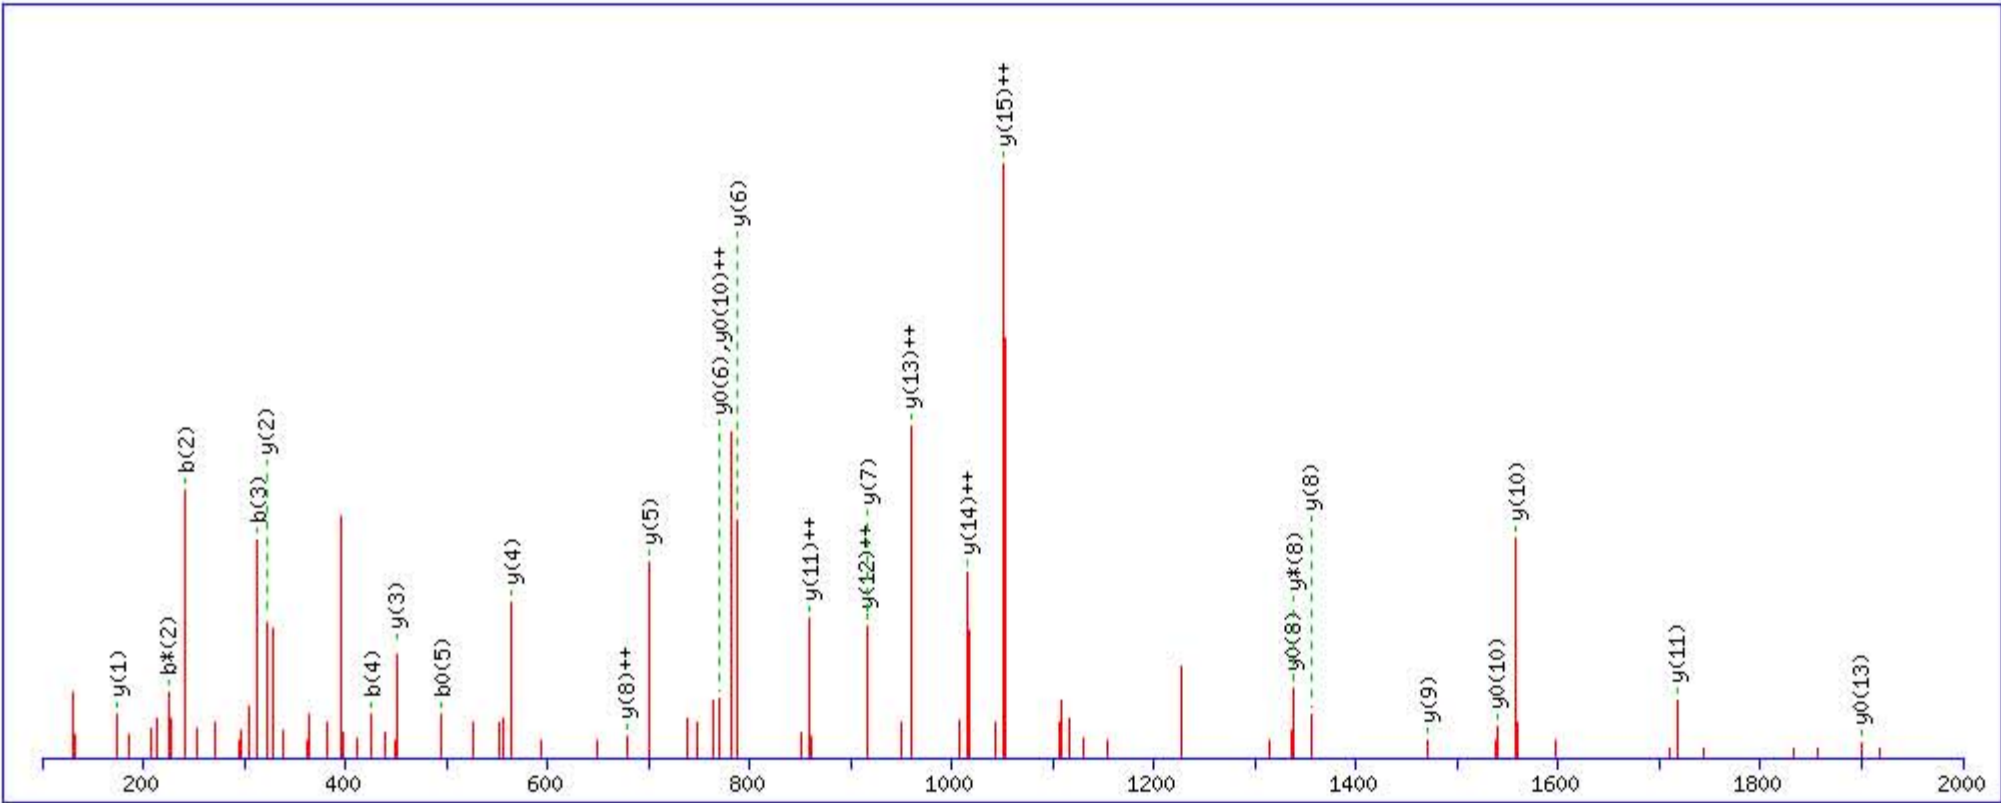

Monoisotopic mass of neutral peptide Mr(calc): 2342.151108  
Fixed modifications: Carbamidomethyl (C) (apply to specified residues or termini only)  
Variable modifications:  
Q10 : Biotin:Thermo-21345 (Q)  
Ions Score: 69 Expect: 3.7e-006  
Matches : 28/178 fragment ions using 46 most intense peaks [\(help\)](#)

| #  | b           | b <sup>++</sup> | b <sup>+</sup> | b <sup>+++</sup> | b <sup>0</sup> | b <sup>0++</sup> | Seq. | y           | y <sup>++</sup> | y <sup>+</sup> | y <sup>+++</sup> | y <sup>0</sup> | y <sup>0++</sup> | #  |
|----|-------------|-----------------|----------------|------------------|----------------|------------------|------|-------------|-----------------|----------------|------------------|----------------|------------------|----|
| 1  | 114.091340  | 57.549308       |                |                  |                |                  | I    |             |                 |                |                  |                |                  | 17 |
| 2  | 242.149918  | 121.578597      | 225.123369     | 113.065323       |                |                  | Q    | 2230.074335 | 1115.540805     | 2213.047786    | 1107.027531      | 2212.063770    | 1106.535523      | 16 |
| 3  | 313.187032  | 157.097154      | 296.160483     | 148.583879       |                |                  | A    | 2102.015757 | 1051.511516     | 2084.989208    | 1042.998242      | 2084.005192    | 1042.506234      | 15 |
| 4  | 426.271096  | 213.639186      | 409.244547     | 205.125912       |                |                  | L    | 2030.978643 | 1015.992959     | 2013.952094    | 1007.479685      | 2012.968078    | 1006.987677      | 14 |
| 5  | 513.303124  | 257.155200      | 496.276575     | 248.641926       | 495.292559     | 248.149918       | S    | 1917.894579 | 959.450927      | 1900.868030    | 950.937653       | 1899.884014    | 950.445645       | 13 |
| 6  | 626.387188  | 313.697232      | 609.360639     | 305.183958       | 608.376623     | 304.691950       | L    | 1830.862551 | 915.934913      | 1813.836002    | 907.421639       | 1812.851986    | 906.929631       | 12 |
| 7  | 786.417837  | 393.712557      | 769.391288     | 385.199282       | 768.407272     | 384.707274       | C    | 1717.778487 | 859.392881      | 1700.751938    | 850.879607       | 1699.767922    | 850.387599       | 11 |
| 8  | 873.449865  | 437.228571      | 856.423316     | 428.715296       | 855.439300     | 428.223288       | S    | 1557.747838 | 779.377557      | 1540.721289    | 770.864282       | 1539.737273    | 770.372274       | 10 |
| 9  | 988.476808  | 494.742042      | 971.450259     | 486.228768       | 970.466243     | 485.736760       | D    | 1470.715810 | 735.861543      | 1453.689261    | 727.348268       | 1452.705245    | 726.856260       | 9  |
| 10 | 1427.702134 | 714.354705      | 1410.675585    | 705.841431       | 1409.691569    | 705.349422       | Q    | 1355.688867 | 678.348071      | 1338.662318    | 669.834797       | 1337.678302    | 669.342789       | 8  |
| 11 | 1555.760712 | 778.383994      | 1538.734163    | 769.870720       | 1537.750147    | 769.378712       | Q    | 916.463541  | 458.735408      | 899.436992     | 450.222134       | 898.452976     | 449.730126       | 7  |
| 12 | 1642.792740 | 821.900008      | 1625.766191    | 813.386734       | 1624.782175    | 812.894726       | S    | 788.404963  | 394.706119      | 771.378414     | 386.192845       | 770.394398     | 385.700837       | 6  |
| 13 | 1779.851652 | 890.429464      | 1762.825103    | 881.916190       | 1761.841087    | 881.424182       | H    | 701.372935  | 351.190105      | 684.346386     | 342.676831       | 683.362370     | 342.184823       | 5  |
| 14 | 1892.935716 | 946.971496      | 1875.909167    | 938.458222       | 1874.925151    | 937.966213       | L    | 564.314023  | 282.660649      | 547.287474     | 274.147375       | 546.303458     | 273.655367       | 4  |
| 15 | 2021.978309 | 1011.492793     | 2004.951760    | 1002.979518      | 2003.967744    | 1002.487510      | E    | 451.229959  | 226.118617      | 434.203410     | 217.605343       | 433.219394     | 217.113335       | 3  |
| 16 | 2169.046723 | 1085.026999     | 2152.020174    | 1076.513725      | 2151.036158    | 1076.021717      | F    | 322.187366  | 161.597321      | 305.160817     | 153.084046       |                |                  | 2  |
| 17 |             |                 |                |                  |                |                  | R    | 175.118952  | 88.063114       | 158.092403     | 79.549839        |                |                  | 1  |

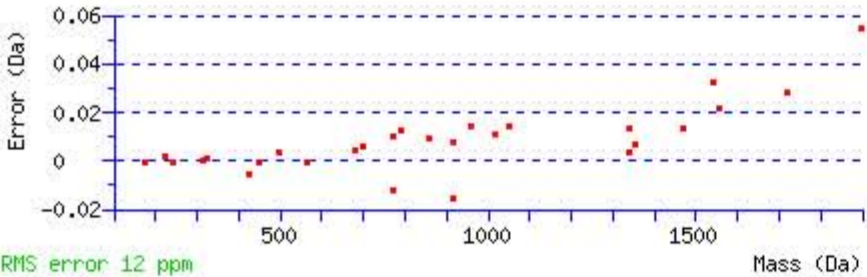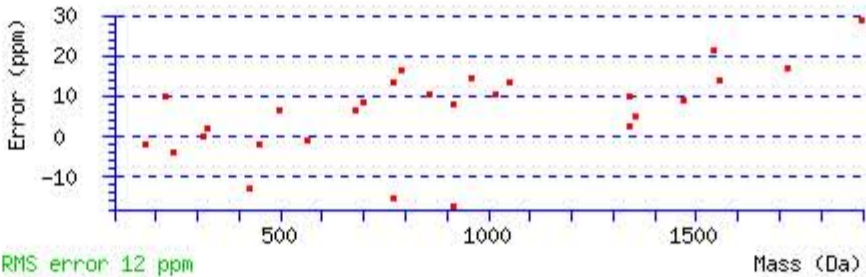

NCBI BLAST search of [IQALSLCSDQQSHLEFR](#)  
(Parameters: blastp, nr protein database, expect=20000, no filter, PAM30)  
Other BLAST [web gateways](#)

All matches to this query

| Score | Mr(calc):   | Delta    | Sequence                          |
|-------|-------------|----------|-----------------------------------|
| 69.0  | 2342.151108 | 0.032574 | <a href="#">IQALSLCSDQQSHLEFR</a> |
| 69.0  | 2342.151108 | 0.032574 | <a href="#">IQALSLCSDQQSHLEFR</a> |
| 3.4   | 2342.151108 | 0.032574 | <a href="#">IQALSLCSDQQSHLEFR</a> |

MATRIX

SCIENCE

Mascot Search Results

Peptide View

MS/MS Fragmentation of **APDLQDLPWQVK**  
Found in **PROZ\_HUMAN**, Vitamin K-dependent protein Z OS=Homo sapiens GN=PROZ PE=1 SV=2

Match to Query 38405: 1719.912042 from(574.311290,3+) rtinseconds(2544) index(53586)  
Title: Locus:1.1.1.2123.4 File:"2013-07-02 CLN FXIII 180 min 2nd F 4.wiff"  
Data file C:\Program Files (x86)\Matrix Science\Mascot Daemon\mgf\8 FXIII 180 min 2nd\mascot\_daemon\_merge.mgf

Click mouse within plot area to zoom in by factor of two about that point  
Or,   to  Da   
Label all possible matches ☐ Label matches used for scoring ☒

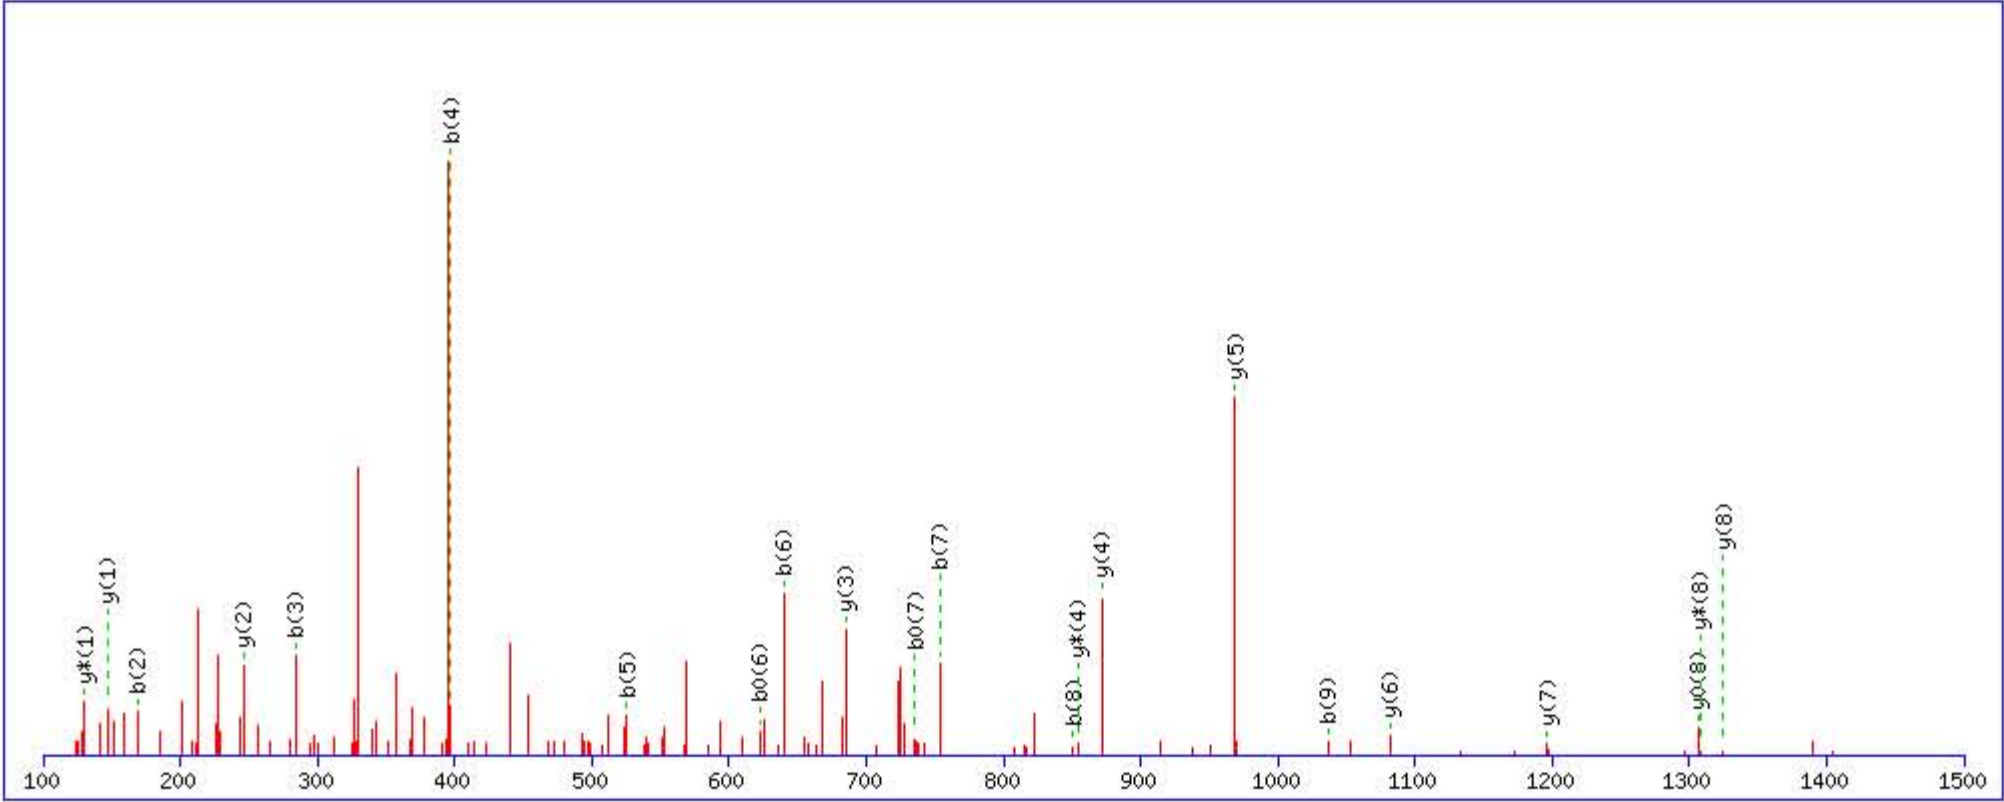

Monoisotopic mass of neutral peptide Mr(calc): 1719.901810  
Fixed modifications: Carbamidomethyl (C) (apply to specified residues or termini only)  
Variable modifications:  
Q10 : Biotin:Thermo-21345 (Q)  
Ions Score: 32 Expect: 0.0051  
Matches : 22/108 fragment ions using 58 most intense peaks [\(help\)](#)

| #  | b           | b <sup>++</sup> | b <sup>*</sup> | b <sup>+++</sup> | b <sup>0</sup> | b <sup>0++</sup> | Seq. | y           | y <sup>++</sup> | y <sup>*</sup> | y <sup>+++</sup> | y <sup>0</sup> | y <sup>0++</sup> | #  |
|----|-------------|-----------------|----------------|------------------|----------------|------------------|------|-------------|-----------------|----------------|------------------|----------------|------------------|----|
| 1  | 72.044390   | 36.525833       |                |                  |                |                  | A    |             |                 |                |                  |                |                  | 12 |
| 2  | 169.097154  | 85.052215       |                |                  |                |                  | P    | 1649.871977 | 825.439627      | 1632.845428    | 816.926352       | 1631.861412    | 816.434344       | 11 |
| 3  | 284.124097  | 142.565687      |                |                  | 266.113532     | 133.560404       | D    | 1552.819213 | 776.913245      | 1535.792664    | 768.399970       | 1534.808648    | 767.907962       | 10 |
| 4  | 397.208161  | 199.107719      |                |                  | 379.197596     | 190.102436       | L    | 1437.792270 | 719.399773      | 1420.765721    | 710.886499       | 1419.781705    | 710.394491       | 9  |
| 5  | 525.266739  | 263.137008      | 508.240190     | 254.623733       | 507.256174     | 254.131725       | Q    | 1324.708206 | 662.857741      | 1307.681657    | 654.344467       | 1306.697641    | 653.852459       | 8  |
| 6  | 640.293682  | 320.650479      | 623.267133     | 312.137205       | 622.283117     | 311.645197       | D    | 1196.649628 | 598.828452      | 1179.623079    | 590.315178       | 1178.639063    | 589.823170       | 7  |
| 7  | 753.377746  | 377.192511      | 736.351197     | 368.679237       | 735.367181     | 368.187229       | L    | 1081.622685 | 541.314981      | 1064.596136    | 532.801706       |                |                  | 6  |
| 8  | 850.430510  | 425.718893      | 833.403961     | 417.205619       | 832.419945     | 416.713611       | P    | 968.538621  | 484.772949      | 951.512072     | 476.259674       |                |                  | 5  |
| 9  | 1036.509823 | 518.758550      | 1019.483274    | 510.245275       | 1018.499258    | 509.753267       | W    | 871.485857  | 436.246567      | 854.459308     | 427.733292       |                |                  | 4  |
| 10 | 1475.735149 | 738.371213      | 1458.708600    | 729.857938       | 1457.724584    | 729.365930       | Q    | 685.406544  | 343.206910      | 668.379995     | 334.693636       |                |                  | 3  |
| 11 | 1574.803563 | 787.905420      | 1557.777014    | 779.392145       | 1556.792998    | 778.900137       | V    | 246.181218  | 123.594247      | 229.154669     | 115.080973       |                |                  | 2  |
| 12 |             |                 |                |                  |                |                  | K    | 147.112804  | 74.060040       | 130.086255     | 65.546765        |                |                  | 1  |

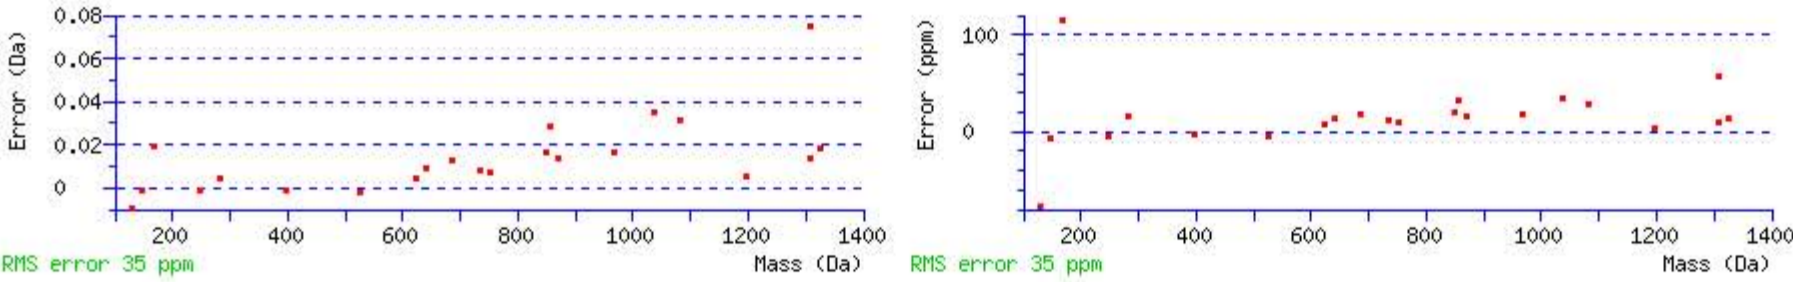

NCBI BLAST search of [APDLQDLPWQVK](#)  
(Parameters: blastp, nr protein database, expect=20000, no filter, PAM30)  
Other BLAST [web gateways](#)

All matches to this query

| Score | Mr(calc):   | Delta    | Sequence                         |
|-------|-------------|----------|----------------------------------|
| 32.4  | 1719.901810 | 0.010232 | <a href="#">APDLQDLPWQVK</a>     |
| 7.7   | 1719.907715 | 0.004327 | <a href="#">VLGVVMTTGTDVKDAK</a> |
| 3.8   | 1719.897766 | 0.014276 | <a href="#">LVHNKPPTMKPEGEK</a>  |

MATRIX

SCIENCE

Mascot Search Results

Peptide View

MS/MS Fragmentation of **QCVPHDQCACGVLTSEK**  
Found in **PROZ\_HUMAN**, Vitamin K-dependent protein Z OS=Homo sapiens GN=PROZ PE=1 SV=2

Match to Query 50527: 2299.042722 from(767.354850,3+) rtinseconds(1636) index(47898)  
Title: Locus:1.1.1.1807.23 File:"2013-07-02 CLN FXIII 180 min 2nd F 4.wiff"  
Data file C:\Program Files (x86)\Matrix Science\Mascot Daemon\mgf\8 FXIII 180 min 2nd\mascot\_daemon\_merge.mgf

Click mouse within plot area to zoom in by factor of two about that point  
Or, 

Plot from

0

 to 

2400

 Da 

Full range

  
Label all possible matches ☐ Label matches used for scoring ☒

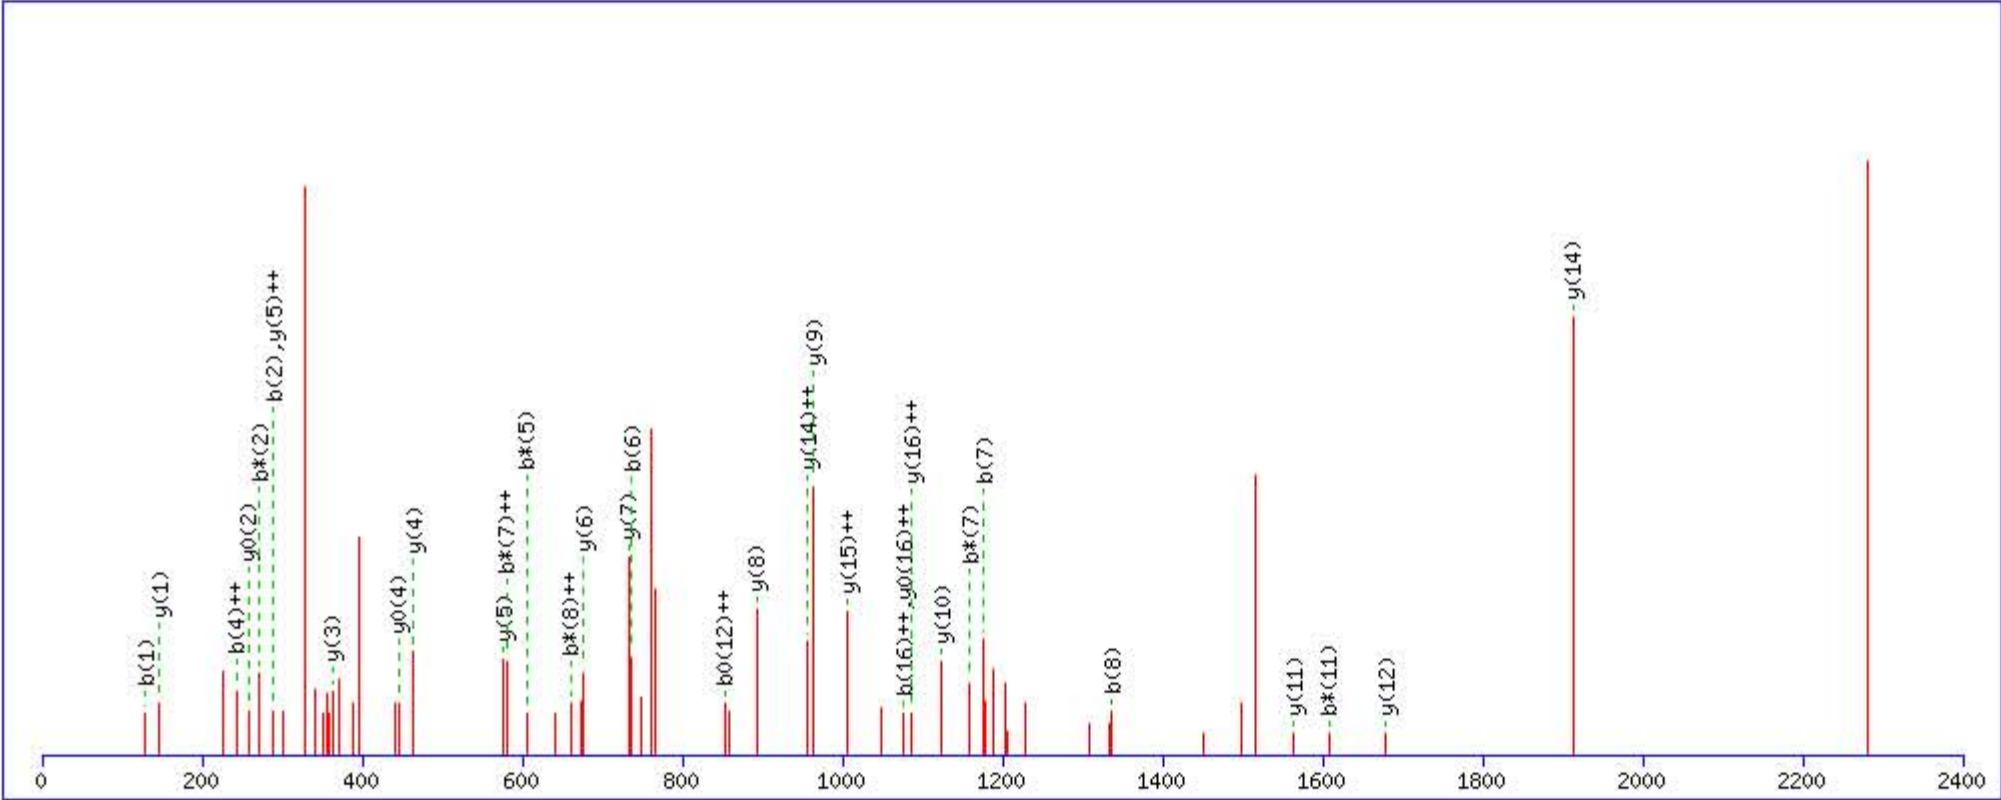

Monoisotopic mass of neutral peptide Mr(calc): 2299.021790  
Fixed modifications: Carbamidomethyl (C) (apply to specified residues or termini only)  
Variable modifications:  
Q7 : Biotin:Thermo-21345 (Q)  
Ions Score: 71 Expect: 8.6e-007  
Matches : 33/180 fragment ions using 55 most intense peaks [\(help\)](#)

| #  | b           | b <sup>++</sup> | b <sup>*</sup> | b <sup>+++</sup> | b <sup>0</sup> | b <sup>0++</sup> | Seq. | y           | y <sup>++</sup> | y <sup>*</sup> | y <sup>+++</sup> | y <sup>0</sup> | y <sup>0++</sup> | #  |
|----|-------------|-----------------|----------------|------------------|----------------|------------------|------|-------------|-----------------|----------------|------------------|----------------|------------------|----|
| 1  | 129.065854  | 65.036565       | 112.039305     | 56.523291        |                |                  | Q    |             |                 |                |                  |                |                  | 17 |
| 2  | 289.096503  | 145.051890      | 272.069954     | 136.538615       |                |                  | C    | 2171.970466 | 1086.488871     | 2154.943917    | 1077.975596      | 2153.959901    | 1077.483588      | 16 |
| 3  | 388.164917  | 194.586097      | 371.138368     | 186.072822       |                |                  | V    | 2011.939817 | 1006.473547     | 1994.913268    | 997.960272       | 1993.929252    | 997.468264       | 15 |
| 4  | 485.217681  | 243.112479      | 468.191132     | 234.599204       |                |                  | P    | 1912.871403 | 956.939340      | 1895.844854    | 948.426065       | 1894.860838    | 947.934057       | 14 |
| 5  | 622.276593  | 311.641935      | 605.250044     | 303.128660       |                |                  | H    | 1815.818639 | 908.412958      | 1798.792090    | 899.899683       | 1797.808074    | 899.407675       | 13 |
| 6  | 737.303536  | 369.155406      | 720.276987     | 360.642132       | 719.292971     | 360.150124       | D    | 1678.759727 | 839.883502      | 1661.733178    | 831.370227       | 1660.749162    | 830.878219       | 12 |
| 7  | 1176.528862 | 588.768069      | 1159.502313    | 580.254795       | 1158.518297    | 579.762786       | Q    | 1563.732784 | 782.370030      | 1546.706235    | 773.856756       | 1545.722219    | 773.364748       | 11 |
| 8  | 1336.559511 | 668.783393      | 1319.532962    | 660.270119       | 1318.548946    | 659.778111       | C    | 1124.507458 | 562.757367      | 1107.480909    | 554.244093       | 1106.496893    | 553.752085       | 10 |
| 9  | 1407.596625 | 704.301950      | 1390.570076    | 695.788676       | 1389.586060    | 695.296668       | A    | 964.476809  | 482.742043      | 947.450260     | 474.228768       | 946.466244     | 473.736760       | 9  |
| 10 | 1567.627274 | 784.317275      | 1550.600725    | 775.804001       | 1549.616709    | 775.311992       | C    | 893.439695  | 447.223486      | 876.413146     | 438.710211       | 875.429130     | 438.218203       | 8  |
| 11 | 1624.648738 | 812.828007      | 1607.622189    | 804.314732       | 1606.638173    | 803.822724       | G    | 733.409046  | 367.208161      | 716.382497     | 358.694887       | 715.398481     | 358.202879       | 7  |
| 12 | 1723.717152 | 862.362214      | 1706.690603    | 853.848940       | 1705.706587    | 853.356931       | V    | 676.387582  | 338.697429      | 659.361033     | 330.184155       | 658.377017     | 329.692147       | 6  |
| 13 | 1836.801216 | 918.904246      | 1819.774667    | 910.390971       | 1818.790651    | 909.898963       | L    | 577.319168  | 289.163222      | 560.292619     | 280.649948       | 559.308603     | 280.157940       | 5  |
| 14 | 1937.848895 | 969.428085      | 1920.822346    | 960.914811       | 1919.838330    | 960.422803       | T    | 464.235104  | 232.621190      | 447.208555     | 224.107916       | 446.224539     | 223.615908       | 4  |
| 15 | 2024.880923 | 1012.944100     | 2007.854374    | 1004.430825      | 2006.870358    | 1003.938817      | S    | 363.187425  | 182.097351      | 346.160876     | 173.584076       | 345.176860     | 173.092068       | 3  |
| 16 | 2153.923516 | 1077.465396     | 2136.896967    | 1068.952121      | 2135.912951    | 1068.460113      | E    | 276.155397  | 138.581337      | 259.128848     | 130.068062       | 258.144832     | 129.576054       | 2  |
| 17 |             |                 |                |                  |                |                  | K    | 147.112804  | 74.060040       | 130.086255     | 65.546765        |                |                  | 1  |

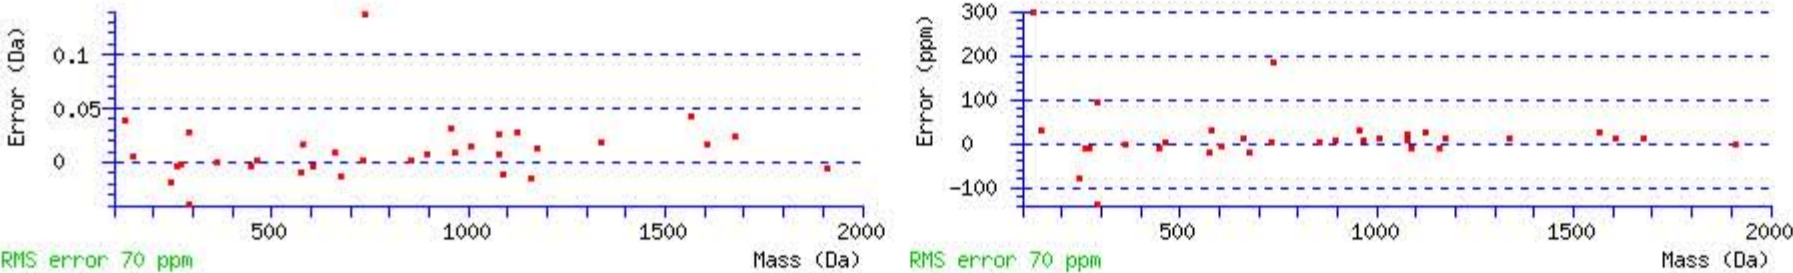

NCBI BLAST search of [QCVPHDQCACGVLTSEK](#)  
(Parameters: blastp, nr protein database, expect=20000, no filter, PAM30)  
Other BLAST [web gateways](#)

All matches to this query

| Score | Mr(calc):   | Delta    | Sequence                          |
|-------|-------------|----------|-----------------------------------|
| 71.4  | 2299.021790 | 0.020932 | <a href="#">QCVPHDQCACGVLTSEK</a> |
| 35.8  | 2299.021790 | 0.020932 | <a href="#">QCVPHDQCACGVLTSEK</a> |

M

A

T

R

I

X

S

C

I

E

N

C

E

Mascot Search Results

Peptide View

MS/MS Fragmentation of **QCVPHDQCACGVLTSEK**  
Found in **PROZ\_HUMAN**, Vitamin K-dependent protein Z OS=Homo sapiens GN=PROZ PE=1 SV=2

Match to Query 55595: 2610.218172 from(871.080000,3+) rtinseconds(1923) index(49765)  
Title: Locus:1.1.1.1907.18 File:"2013-07-02 CLN FXIII 180 min 2nd F 4.wiff"  
Data file C:\Program Files (x86)\Matrix Science\Mascot Daemon\mgf\8 FXIII 180 min 2nd\mascot\_daemon\_merge.mgf

Click mouse within plot area to zoom in by factor of two about that point  
Or,   to  Da

Label all possible matches ☐ Label matches used for scoring ☒

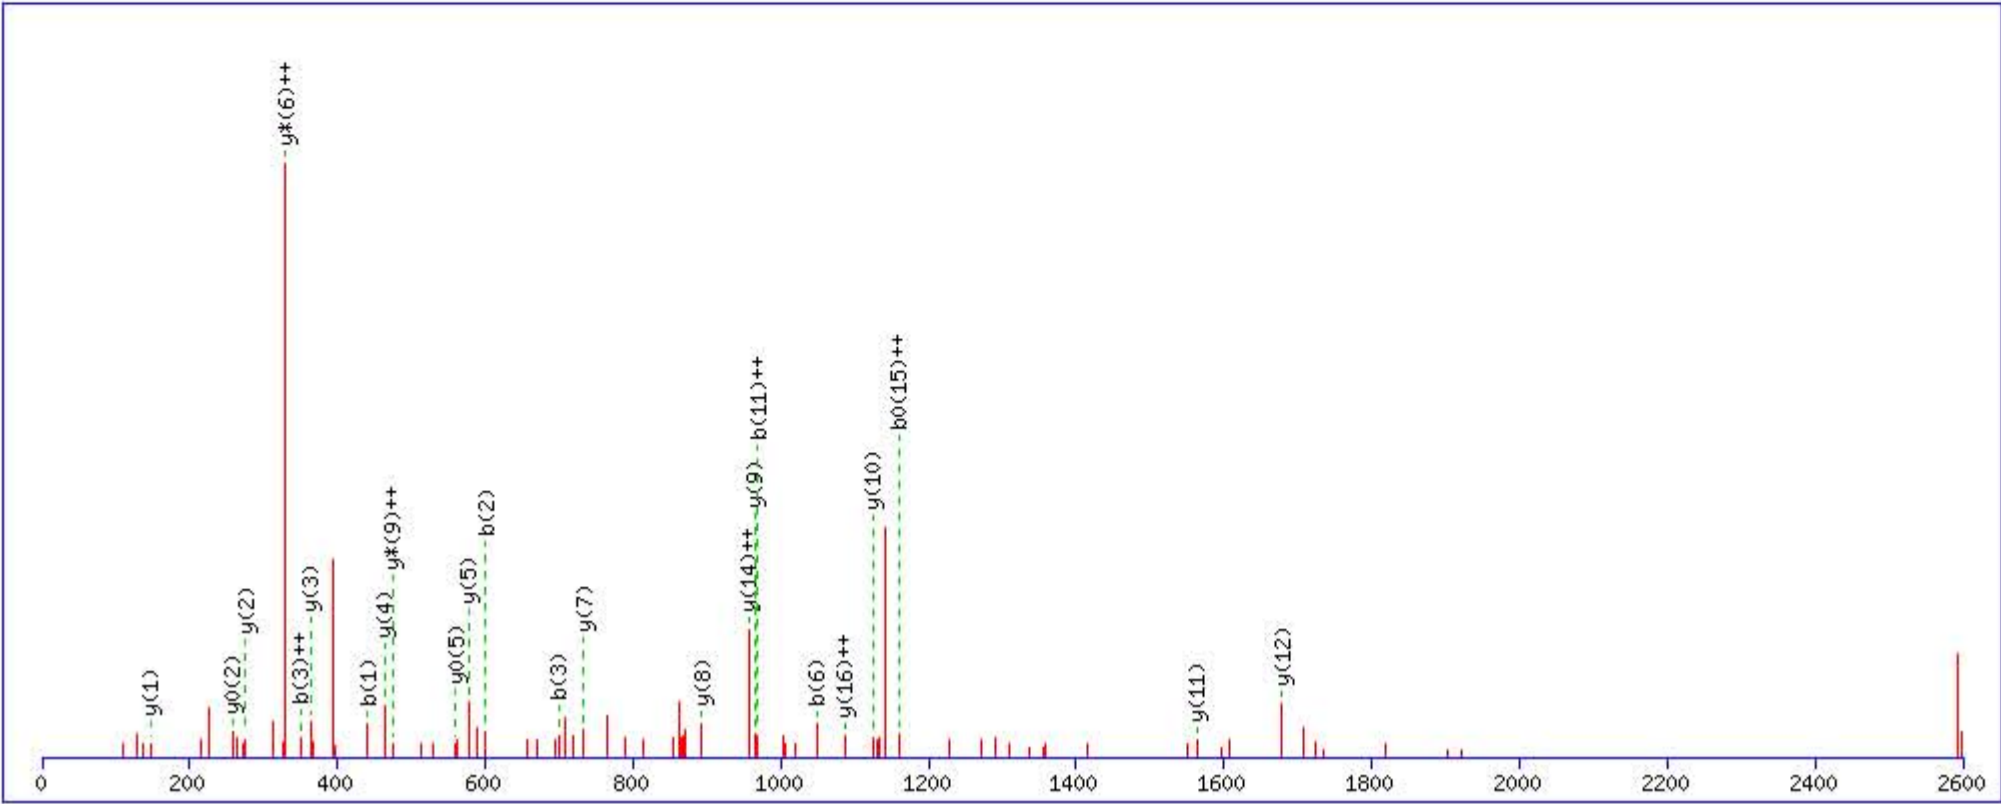

Monoisotopic mass of neutral peptide Mr(calc): 2610.188538  
Fixed modifications: Carbamidomethyl (C) (apply to specified residues or termini only)  
Variable modifications:  
Q1 : Biotin:Thermo-21345 (Q)  
Q7 : Biotin:Thermo-21345 (Q)  
Ions Score: 30 Expect: 0.019  
Matches : 24/180 fragment ions using 78 most intense peaks [\(help\)](#)

| #  | b           | b <sup>++</sup> | b <sup>*</sup> | b <sup>+++</sup> | b <sup>0</sup> | b <sup>0++</sup> | Seq. | y           | y <sup>++</sup> | y <sup>*</sup> | y <sup>+++</sup> | y <sup>0</sup> | y <sup>0++</sup> | #  |
|----|-------------|-----------------|----------------|------------------|----------------|------------------|------|-------------|-----------------|----------------|------------------|----------------|------------------|----|
| 1  | 440.232602  | 220.619939      | 423.206053     | 212.106664       |                |                  | Q    |             |                 |                |                  |                |                  | 17 |
| 2  | 600.263251  | 300.635264      | 583.236702     | 292.121989       |                |                  | C    | 2171.970466 | 1086.488871     | 2154.943917    | 1077.975596      | 2153.959901    | 1077.483588      | 16 |
| 3  | 699.331665  | 350.169471      | 682.305116     | 341.656196       |                |                  | V    | 2011.939817 | 1006.473547     | 1994.913268    | 997.960272       | 1993.929252    | 997.468264       | 15 |
| 4  | 796.384429  | 398.695853      | 779.357880     | 390.182578       |                |                  | P    | 1912.871403 | 956.939340      | 1895.844854    | 948.426065       | 1894.860838    | 947.934057       | 14 |
| 5  | 933.443341  | 467.225309      | 916.416792     | 458.712034       |                |                  | H    | 1815.818639 | 908.412958      | 1798.792090    | 899.899683       | 1797.808074    | 899.407675       | 13 |
| 6  | 1048.470284 | 524.738780      | 1031.443735    | 516.225506       | 1030.459719    | 515.733498       | D    | 1678.759727 | 839.883502      | 1661.733178    | 831.370227       | 1660.749162    | 830.878219       | 12 |
| 7  | 1487.695610 | 744.351443      | 1470.669061    | 735.838169       | 1469.685045    | 735.346161       | Q    | 1563.732784 | 782.370030      | 1546.706235    | 773.856756       | 1545.722219    | 773.364748       | 11 |
| 8  | 1647.726259 | 824.366768      | 1630.699710    | 815.853493       | 1629.715694    | 815.361485       | C    | 1124.507458 | 562.757367      | 1107.480909    | 554.244093       | 1106.496893    | 553.752085       | 10 |
| 9  | 1718.763373 | 859.885325      | 1701.736824    | 851.372050       | 1700.752808    | 850.880042       | A    | 964.476809  | 482.742043      | 947.450260     | 474.228768       | 946.466244     | 473.736760       | 9  |
| 10 | 1878.794022 | 939.900649      | 1861.767473    | 931.387375       | 1860.783457    | 930.895367       | C    | 893.439695  | 447.223486      | 876.413146     | 438.710211       | 875.429130     | 438.218203       | 8  |
| 11 | 1935.815486 | 968.411381      | 1918.788937    | 959.898107       | 1917.804921    | 959.406098       | G    | 733.409046  | 367.208161      | 716.382497     | 358.694887       | 715.398481     | 358.202879       | 7  |
| 12 | 2034.883900 | 1017.945588     | 2017.857351    | 1009.432314      | 2016.873335    | 1008.940306      | V    | 676.387582  | 338.697429      | 659.361033     | 330.184155       | 658.377017     | 329.692147       | 6  |
| 13 | 2147.967964 | 1074.487620     | 2130.941415    | 1065.974345      | 2129.957399    | 1065.482337      | L    | 577.319168  | 289.163222      | 560.292619     | 280.649948       | 559.308603     | 280.157940       | 5  |
| 14 | 2249.015643 | 1125.011459     | 2231.989094    | 1116.498185      | 2231.005078    | 1116.006177      | T    | 464.235104  | 232.621190      | 447.208555     | 224.107915       | 446.224539     | 223.615907       | 4  |
| 15 | 2336.047671 | 1168.527473     | 2319.021122    | 1160.014199      | 2318.037106    | 1159.522191      | S    | 363.187425  | 182.097351      | 346.160876     | 173.584076       | 345.176860     | 173.092068       | 3  |
| 16 | 2465.090264 | 1233.048770     | 2448.063715    | 1224.535495      | 2447.079699    | 1224.043487      | E    | 276.155397  | 138.581337      | 259.128848     | 130.068062       | 258.144832     | 129.576054       | 2  |
| 17 |             |                 |                |                  |                |                  | K    | 147.112804  | 74.060040       | 130.086255     | 65.546765        |                |                  | 1  |

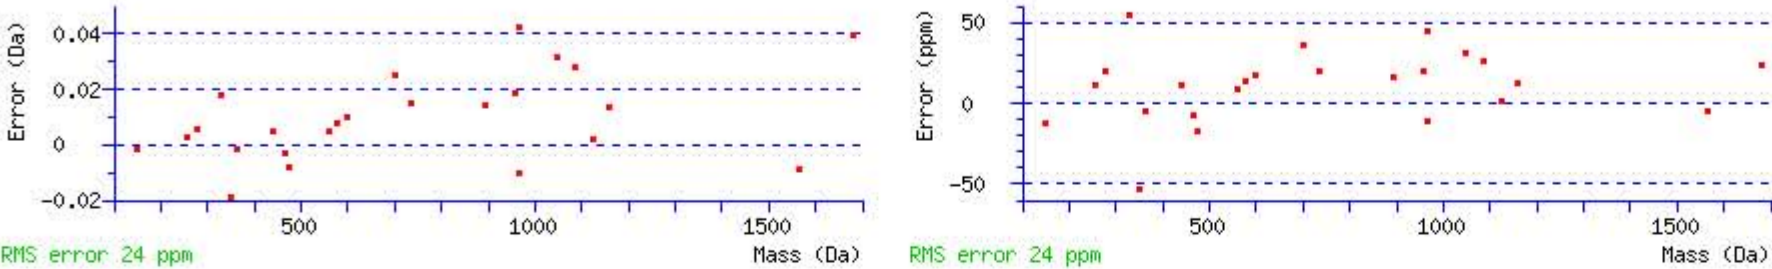

NCBI BLAST search of [QCVPHDQCACGVLTSEK](#)  
(Parameters: blastp, nr protein database, expect=20000, no filter, PAM30)  
Other BLAST [web gateways](#)

All matches to this query

| Score | Mr(calc):   | Delta    | Sequence                          |
|-------|-------------|----------|-----------------------------------|
| 29.6  | 2610.188538 | 0.029634 | <a href="#">QCVPHDQCACGVLTSEK</a> |

MATRIX

SCIENCE

Mascot Search Results

Peptide View

MS/MS Fragmentation of **QPQFISR**  
Found in **VTNC\_HUMAN**, Vitronectin OS=Homo sapiens GN=VTN PE=1 SV=1

Match to Query 20206: 1185.638728 from(593.826640,2+) rtinseconds(1761) index(48714)  
Title: Locus:1.1.1.1851.5 File:"2013-07-02 CLN FXIII 180 min 2nd F 4.wiff"  
Data file C:\Program Files (x86)\Matrix Science\Mascot Daemon\mgf\8 FXIII 180 min 2nd\mascot\_daemon\_merge.mgf

Click mouse within plot area to zoom in by factor of two about that point  
Or,   to  Da   
Label all possible matches ☐ Label matches used for scoring ☒

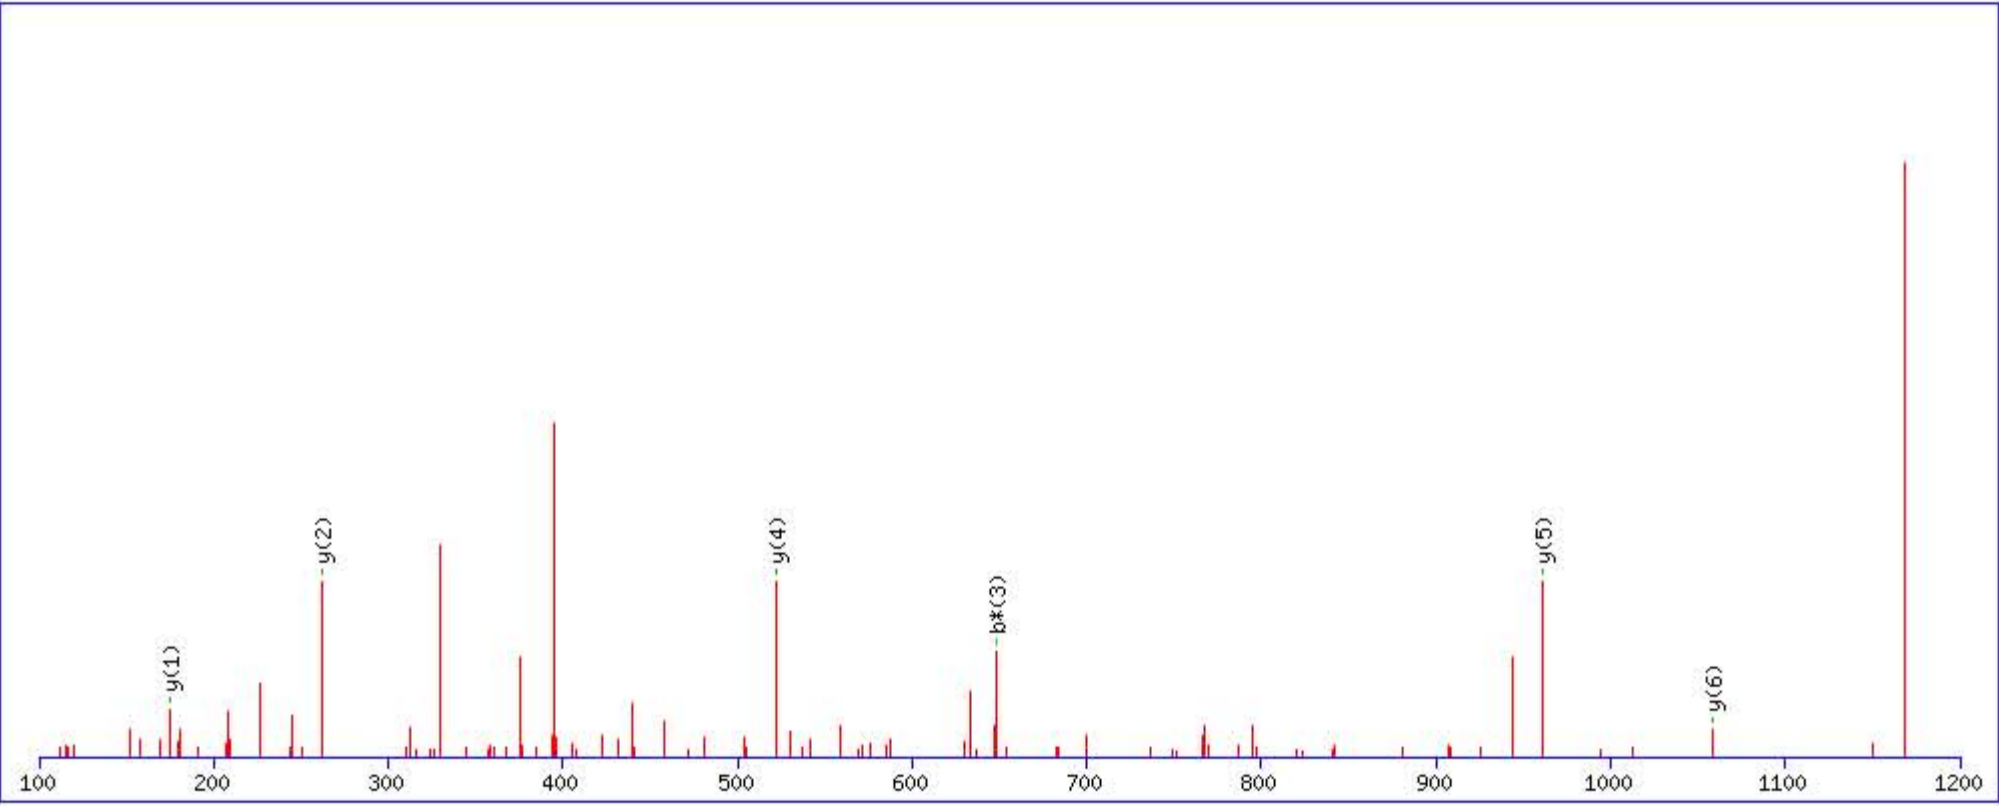

Monoisotopic mass of neutral peptide Mr(calc): 1185.632843  
Fixed modifications: Carbamidomethyl (C) (apply to specified residues or termini only)  
Variable modifications:  
Q3 : Biotin:Thermo-21345 (Q)  
Ions Score: 31 Expect: 0.02  
Matches : 6/60 fragment ions using 11 most intense peaks ([help](#))

| # | b           | b <sup>++</sup> | b <sup>*</sup> | b <sup>*++</sup> | b <sup>0</sup> | b <sup>0++</sup> | Seq. | y           | y <sup>++</sup> | y <sup>*</sup> | y <sup>*++</sup> | y <sup>0</sup> | y <sup>0++</sup> | # |
|---|-------------|-----------------|----------------|------------------|----------------|------------------|------|-------------|-----------------|----------------|------------------|----------------|------------------|---|
| 1 | 129.065854  | 65.036565       | 112.039305     | 56.523291        |                |                  | Q    |             |                 |                |                  |                |                  | 7 |
| 2 | 226.118618  | 113.562947      | 209.092069     | 105.049673       |                |                  | P    | 1058.581548 | 529.794412      | 1041.554999    | 521.281138       | 1040.570983    | 520.789129       | 6 |
| 3 | 665.343944  | 333.175610      | 648.317395     | 324.662336       |                |                  | Q    | 961.528784  | 481.268030      | 944.502235     | 472.754755       | 943.518219     | 472.262747       | 5 |
| 4 | 812.412358  | 406.709817      | 795.385809     | 398.196543       |                |                  | F    | 522.303458  | 261.655367      | 505.276909     | 253.142092       | 504.292893     | 252.650084       | 4 |
| 5 | 925.496422  | 463.251849      | 908.469873     | 454.738575       |                |                  | I    | 375.235044  | 188.121160      | 358.208495     | 179.607885       | 357.224479     | 179.115877       | 3 |
| 6 | 1012.528450 | 506.767863      | 995.501901     | 498.254589       | 994.517885     | 497.762581       | S    | 262.150980  | 131.579128      | 245.124431     | 123.065853       | 244.140415     | 122.573845       | 2 |
| 7 |             |                 |                |                  |                |                  | R    | 175.118952  | 88.063114       | 158.092403     | 79.549839        |                |                  | 1 |

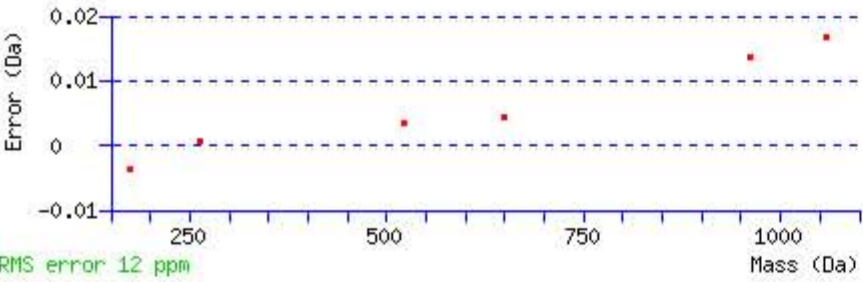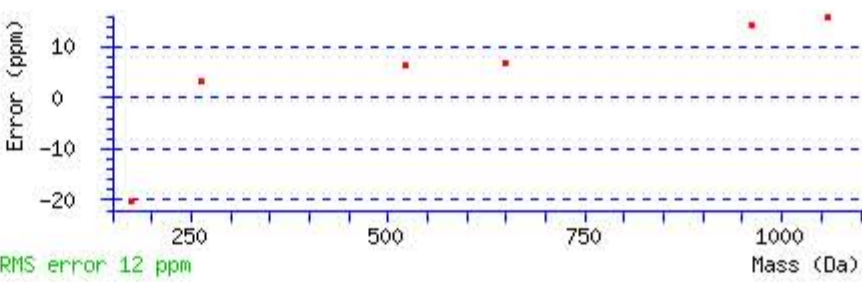

NCBI BLAST search of [QPQFISR](#)  
(Parameters: blastp, nr protein database, expect=20000, no filter, PAM30)  
Other BLAST [web gateways](#)

All matches to this query

| Score | Mr(calc):   | Delta     | Sequence                     |
|-------|-------------|-----------|------------------------------|
| 30.9  | 1185.632843 | 0.005885  | <a href="#">QPQFISR</a>      |
| 18.4  | 1185.646561 | -0.007833 | <a href="#">KPIDSLRDSR</a>   |
| 12.9  | 1185.632843 | 0.005885  | <a href="#">QPQFISR</a>      |
| 11.8  | 1185.653961 | -0.015233 | <a href="#">LSGALPLCLSR</a>  |
| 8.4   | 1185.650604 | -0.011876 | <a href="#">KPV TENVPFR</a>  |
| 6.6   | 1185.636200 | 0.002528  | <a href="#">QIAAVMSR</a>     |
| 5.6   | 1185.653961 | -0.015233 | <a href="#">ILTASQSR</a>     |
| 5.4   | 1185.646561 | -0.007833 | <a href="#">APSAKKPSTGSR</a> |
| 4.5   | 1185.653976 | -0.015248 | <a href="#">TQITLGSR</a>     |
| 4.2   | 1185.628799 | 0.009929  | <a href="#">SGKMAPKPQSR</a>  |

MATRIX

SCIENCE

Mascot Search Results

Peptide View

MS/MS Fragmentation of **GQYCYELDEK**  
Found in **VTNC\_HUMAN**, Vitronectin OS=Homo sapiens GN=VTN PE=1 SV=1

Match to Query 35238: 1614.726548 from(808.370550,2+) rtinseconds(1883) index(33331)  
Title: Locus:1.1.1.764.20 File:"2013-07-02 CLN FXIII 180 min 2nd F 3.wiff"  
Data file C:\Program Files (x86)\Matrix Science\Mascot Daemon\mgf\8 FXIII 180 min 2nd\mascot\_daemon\_merge.mgf

Click mouse within plot area to zoom in by factor of two about that point  
Or, 

Plot from

100

 to 

1800

 Da 

Full range

  
Label all possible matches ☐ Label matches used for scoring ☒

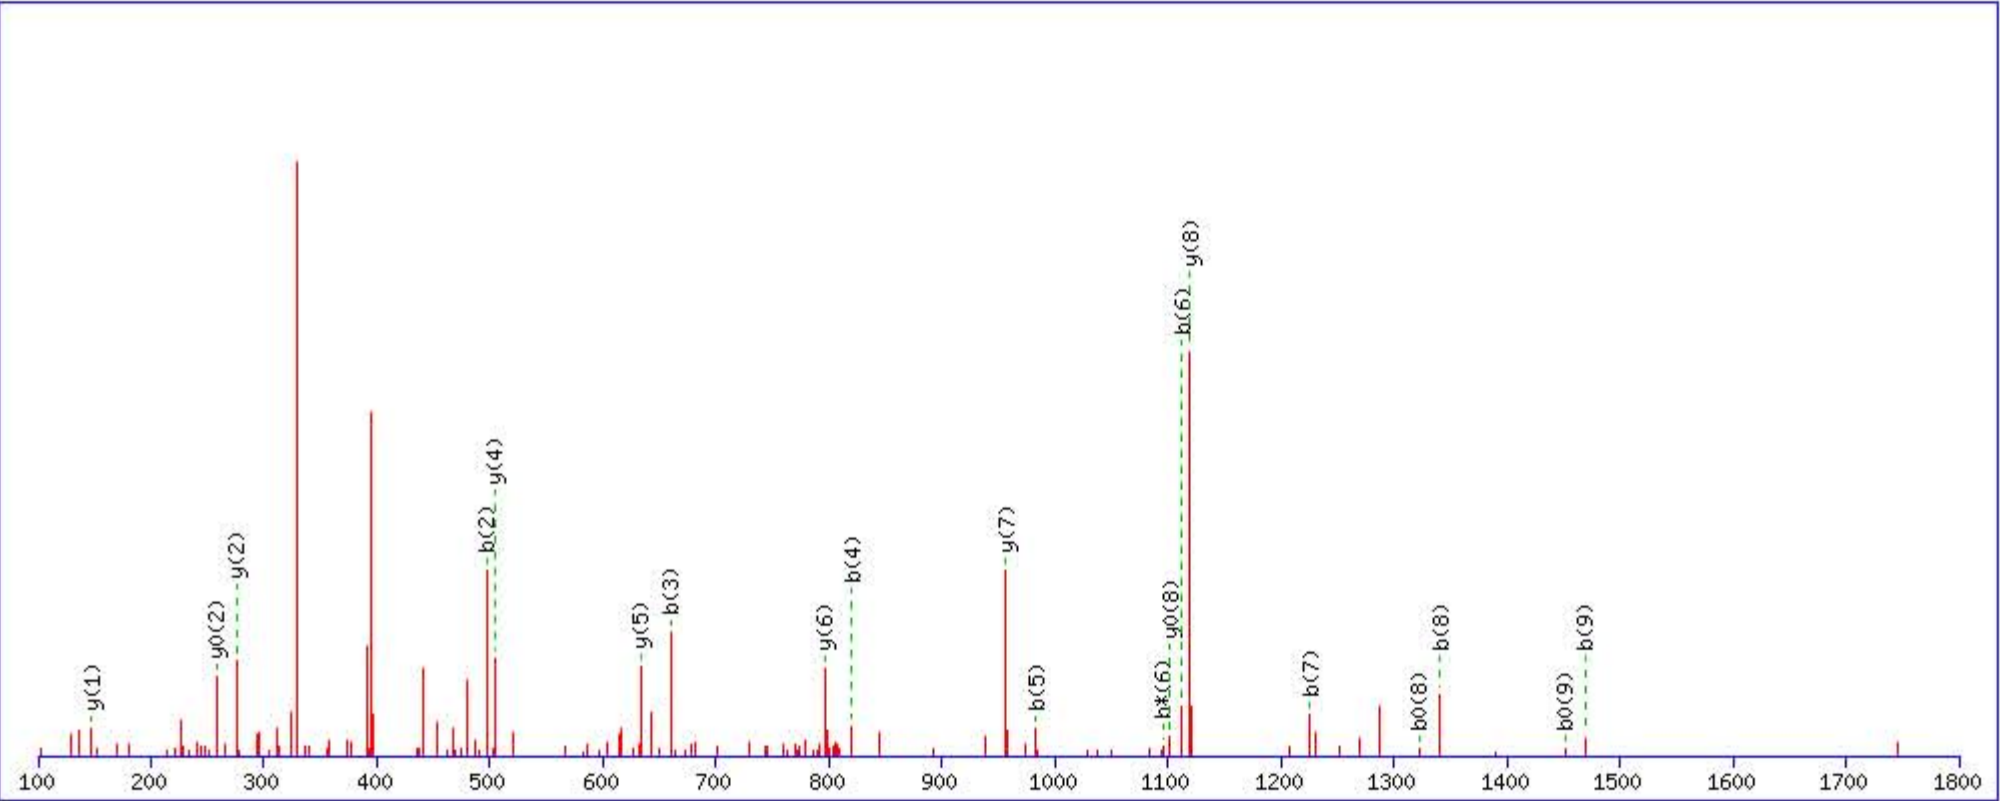

Monoisotopic mass of neutral peptide Mr(calc): 1614.705795  
Fixed modifications: Carbamidomethyl (C) (apply to specified residues or termini only)  
Variable modifications:  
Q2 : Biotin:Thermo-21345 (Q)  
Ions Score: 59 Expect: 8.1e-006  
Matches : 20/94 fragment ions using 28 most intense peaks [\(help\)](#)

| #  | b           | b <sup>++</sup> | b <sup>*</sup> | b <sup>++</sup> * | b <sup>0</sup> | b <sup>0++</sup> | Seq. | y           | y <sup>++</sup> | y <sup>*</sup> | y <sup>++</sup> * | y <sup>0</sup> | y <sup>0++</sup> | #  |
|----|-------------|-----------------|----------------|-------------------|----------------|------------------|------|-------------|-----------------|----------------|-------------------|----------------|------------------|----|
| 1  | 58.028740   | 29.518008       |                |                   |                |                  | G    |             |                 |                |                   |                |                  | 10 |
| 2  | 497.254066  | 249.130671      | 480.227517     | 240.617397        |                |                  | Q    | 1558.691630 | 779.849453      | 1541.665081    | 771.336179        | 1540.681065    | 770.844171       | 9  |
| 3  | 660.317395  | 330.662336      | 643.290846     | 322.149061        |                |                  | Y    | 1119.466304 | 560.236790      | 1102.439755    | 551.723516        | 1101.455739    | 551.231508       | 8  |
| 4  | 820.348044  | 410.677660      | 803.321495     | 402.164386        |                |                  | C    | 956.402975  | 478.705126      | 939.376426     | 470.191851        | 938.392410     | 469.699843       | 7  |
| 5  | 983.411373  | 492.209325      | 966.384824     | 483.696050        |                |                  | Y    | 796.372326  | 398.689801      | 779.345777     | 390.176527        | 778.361761     | 389.684519       | 6  |
| 6  | 1112.453966 | 556.730621      | 1095.427417    | 548.217347        | 1094.443401    | 547.725339       | E    | 633.308997  | 317.158137      | 616.282448     | 308.644862        | 615.298432     | 308.152854       | 5  |
| 7  | 1225.538030 | 613.272653      | 1208.511481    | 604.759379        | 1207.527465    | 604.267371       | L    | 504.266404  | 252.636840      | 487.239855     | 244.123566        | 486.255839     | 243.631558       | 4  |
| 8  | 1340.564973 | 670.786125      | 1323.538424    | 662.272850        | 1322.554408    | 661.780842       | D    | 391.182340  | 196.094808      | 374.155791     | 187.581534        | 373.171775     | 187.089526       | 3  |
| 9  | 1469.607566 | 735.307421      | 1452.581017    | 726.794147        | 1451.597001    | 726.302139       | E    | 276.155397  | 138.581337      | 259.128848     | 130.068062        | 258.144832     | 129.576054       | 2  |
| 10 |             |                 |                |                   |                |                  | K    | 147.112804  | 74.060040       | 130.086255     | 65.546765         |                |                  | 1  |

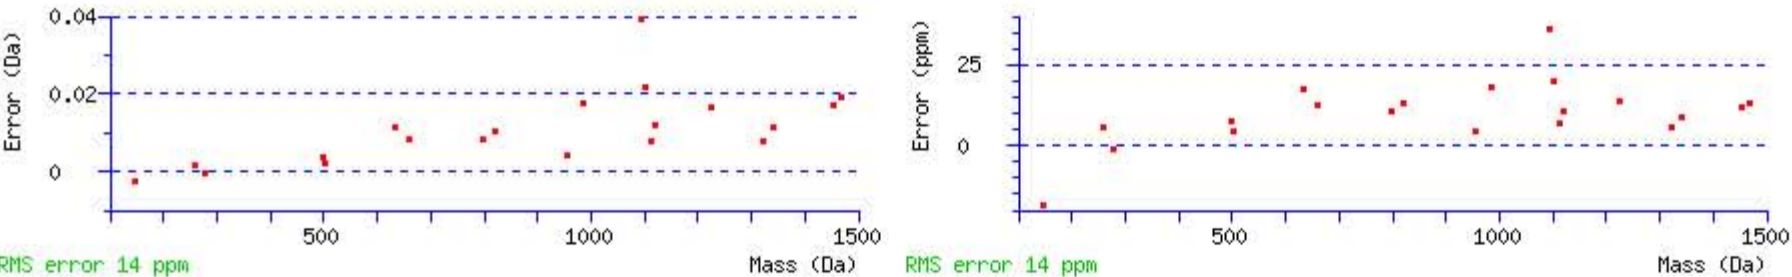

NCBI BLAST search of [GQYCYELDEK](#)  
(Parameters: blastp, nr protein database, expect=20000, no filter, PAM30)  
Other BLAST [web gateways](#)

All matches to this query

| Score | Mr(calc):   | Delta     | Sequence                         |
|-------|-------------|-----------|----------------------------------|
| 58.9  | 1614.705795 | 0.020753  | <a href="#">GQYCYELDEK</a>       |
| 12.4  | 1614.748520 | -0.021972 | <a href="#">TRAPAEEGAEGPSDTK</a> |
| 7.2   | 1614.717010 | 0.009538  | <a href="#">EYFRMELMHAEK</a>     |
| 2.0   | 1614.748535 | -0.021987 | <a href="#">VDNSSLTGESEPQPR</a>  |
| 1.7   | 1614.719528 | 0.007020  | <a href="#">KDMYNDTLNGSTEK</a>   |
| 1.1   | 1614.738129 | -0.011581 | <a href="#">EKAKADAECYTAMK</a>   |
| 0.5   | 1614.702667 | 0.023881  | <a href="#">LWCCTGNSIMVMK</a>    |

MATRIX

SCIENCE

Mascot Search Results

Peptide View

MS/MS Fragmentation of **DWHGVPGQVDAAMAGR**  
Found in **VTNC\_HUMAN**, Vitronectin OS=Homo sapiens GN=VTN PE=1 SV=1

Match to Query 43693: 1976.955702 from(659.992510,3+) rtinseconds(2159) index(51454)  
Title: Locus:1.1.1.1989.10 File:"2013-07-02 CLN FXIII 180 min 2nd F 4.wiff"  
Data file C:\Program Files (x86)\Matrix Science\Mascot Daemon\mgf\8 FXIII 180 min 2nd\mascot\_daemon\_merge.mgf

Click mouse within plot area to zoom in by factor of two about that point  
Or, 

Plot from

100

 to 

1600

 Da 

Full range

  
Label all possible matches ☐ Label matches used for scoring ☒

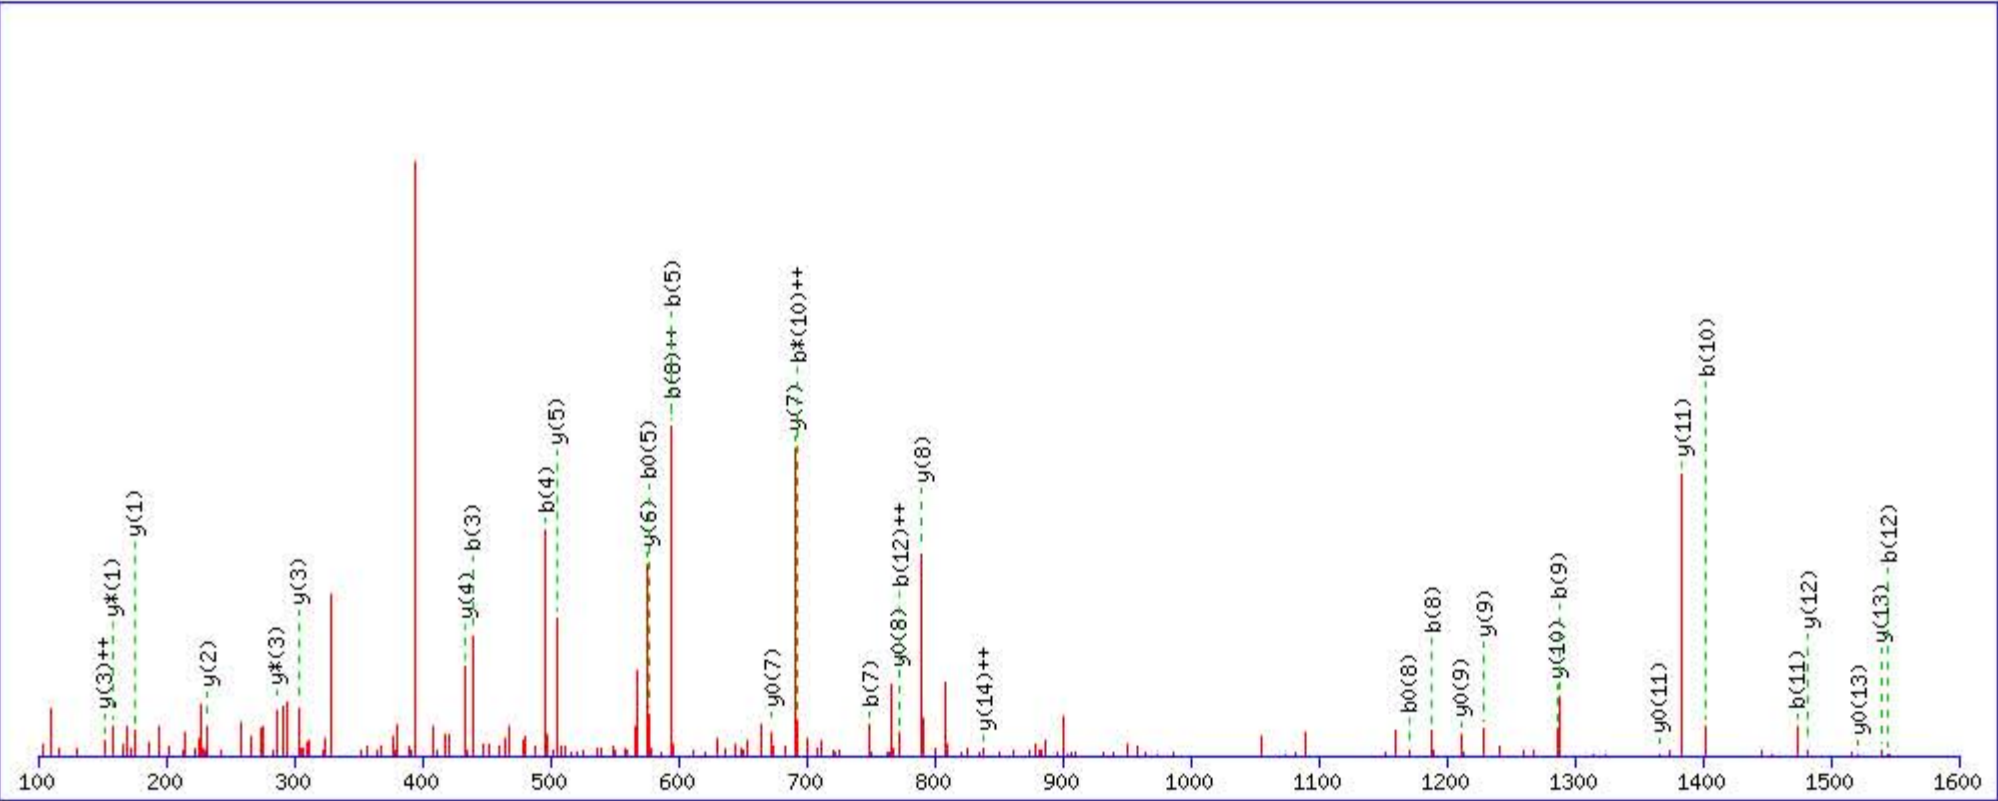

Monoisotopic mass of neutral peptide Mr(calc): 1976.934937  
Fixed modifications: Carbamidomethyl (C) (apply to specified residues or termini only)  
Variable modifications:  
Q8 : Biotin:Thermo-21345 (Q)  
Ions Score: 58 Expect: 4.2e-006  
Matches : 36/154 fragment ions using 95 most intense peaks [\(help\)](#)

| #  | b           | b <sup>++</sup> | b <sup>*</sup> | b <sup>*++</sup> | b <sup>0</sup> | b <sup>0++</sup> | Seq. | y           | y <sup>++</sup> | y <sup>*</sup> | y <sup>*++</sup> | y <sup>0</sup> | y <sup>0++</sup> | #  |
|----|-------------|-----------------|----------------|------------------|----------------|------------------|------|-------------|-----------------|----------------|------------------|----------------|------------------|----|
| 1  | 116.034219  | 58.520748       |                |                  | 98.023654      | 49.515465        | D    |             |                 |                |                  |                |                  | 16 |
| 2  | 302.113532  | 151.560404      |                |                  | 284.102967     | 142.555122       | W    | 1862.915257 | 931.961266      | 1845.888708    | 923.447992       | 1844.904692    | 922.955984       | 15 |
| 3  | 439.172444  | 220.089860      |                |                  | 421.161879     | 211.084577       | H    | 1676.835944 | 838.921610      | 1659.809395    | 830.408336       | 1658.825379    | 829.916327       | 14 |
| 4  | 496.193908  | 248.600592      |                |                  | 478.183343     | 239.595309       | G    | 1539.777032 | 770.392154      | 1522.750483    | 761.878880       | 1521.766467    | 761.386871       | 13 |
| 5  | 595.262322  | 298.134799      |                |                  | 577.251757     | 289.129517       | V    | 1482.755568 | 741.881422      | 1465.729019    | 733.368148       | 1464.745003    | 732.876140       | 12 |
| 6  | 692.315086  | 346.661181      |                |                  | 674.304521     | 337.655899       | P    | 1383.687154 | 692.347215      | 1366.660605    | 683.833941       | 1365.676589    | 683.341932       | 11 |
| 7  | 749.336550  | 375.171913      |                |                  | 731.325985     | 366.166631       | G    | 1286.634390 | 643.820833      | 1269.607841    | 635.307559       | 1268.623825    | 634.815550       | 10 |
| 8  | 1188.561876 | 594.784576      | 1171.535327    | 586.271302       | 1170.551311    | 585.779293       | Q    | 1229.612926 | 615.310101      | 1212.586377    | 606.796827       | 1211.602361    | 606.304819       | 9  |
| 9  | 1287.630290 | 644.318783      | 1270.603741    | 635.805509       | 1269.619725    | 635.313501       | V    | 790.387600  | 395.697438      | 773.361051     | 387.184164       | 772.377035     | 386.692156       | 8  |
| 10 | 1402.657233 | 701.832255      | 1385.630684    | 693.318980       | 1384.646668    | 692.826972       | D    | 691.319186  | 346.163231      | 674.292637     | 337.649956       | 673.308621     | 337.157948       | 7  |
| 11 | 1473.694347 | 737.350812      | 1456.667798    | 728.837537       | 1455.683782    | 728.345529       | A    | 576.292243  | 288.649759      | 559.265694     | 280.136485       |                |                  | 6  |
| 12 | 1544.731461 | 772.869369      | 1527.704912    | 764.356094       | 1526.720896    | 763.864086       | A    | 505.255129  | 253.131202      | 488.228580     | 244.617928       |                |                  | 5  |
| 13 | 1675.771946 | 838.389611      | 1658.745397    | 829.876337       | 1657.761381    | 829.384329       | M    | 434.218015  | 217.612645      | 417.191466     | 209.099371       |                |                  | 4  |
| 14 | 1746.809060 | 873.908168      | 1729.782511    | 865.394894       | 1728.798495    | 864.902886       | A    | 303.177530  | 152.092403      | 286.150981     | 143.579128       |                |                  | 3  |
| 15 | 1803.830524 | 902.418900      | 1786.803975    | 893.905626       | 1785.819959    | 893.413617       | G    | 232.140416  | 116.573846      | 215.113867     | 108.060571       |                |                  | 2  |
| 16 |             |                 |                |                  |                |                  | R    | 175.118952  | 88.063114       | 158.092403     | 79.549839        |                |                  | 1  |

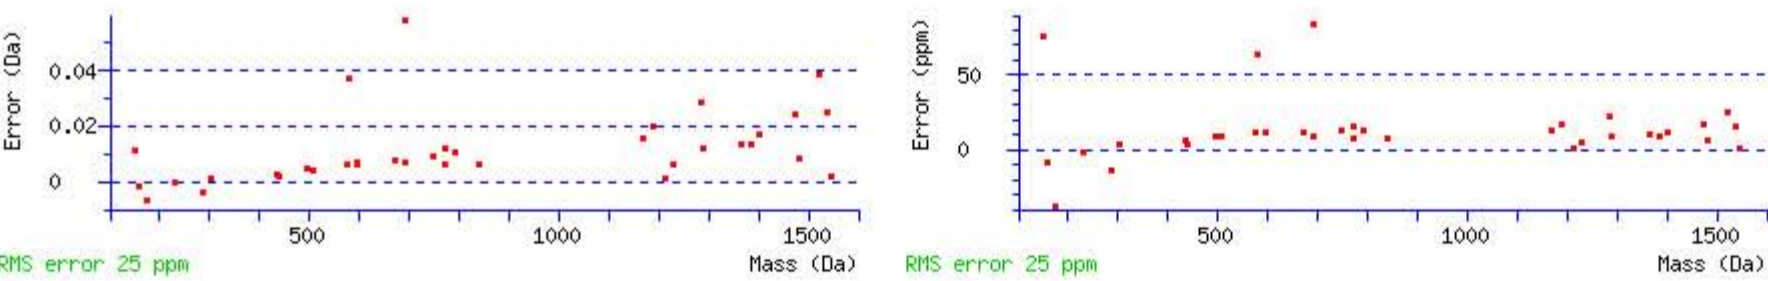

NCBI **BLAST** search of [DWHGVPGQVDAAMAGR](#)  
(Parameters: blastp, nr protein database, expect=20000, no filter, PAM30)  
Other BLAST [web gateways](#)

All matches to this query

| Score | Mr(calc):   | Delta     | Sequence                          |
|-------|-------------|-----------|-----------------------------------|
| 58.0  | 1976.934937 | 0.020765  | <a href="#">DWHGVPGQVDAAMAGR</a>  |
| 0.8   | 1976.959854 | -0.004152 | <a href="#">HLTSRHQEAEMAQNAVR</a> |

MATRIX

SCIENCE

Mascot Search Results

Peptide View

MS/MS Fragmentation of **SIAQYWLGC PAPGHL**  
Found in **VTNC\_HUMAN**, Vitronectin OS=Homo sapiens GN=VTN PE=1 SV=1

Match to Query 43753: 1979.995962 from(661.005930,3+) rtinseconds(2648) index(54278)  
Title: Locus:1.1.1.2159.6 File:"2013-07-02 CLN FXIII 180 min 2nd F 4.wiff"  
Data file C:\Program Files (x86)\Matrix Science\Mascot Daemon\mgf\8 FXIII 180 min 2nd\mascot\_daemon\_merge.mgf

Click mouse within plot area to zoom in by factor of two about that point  
Or, 

Plot from

100

 to 

1400

 Da 

Full range

  
Label all possible matches ☐ Label matches used for scoring ☒

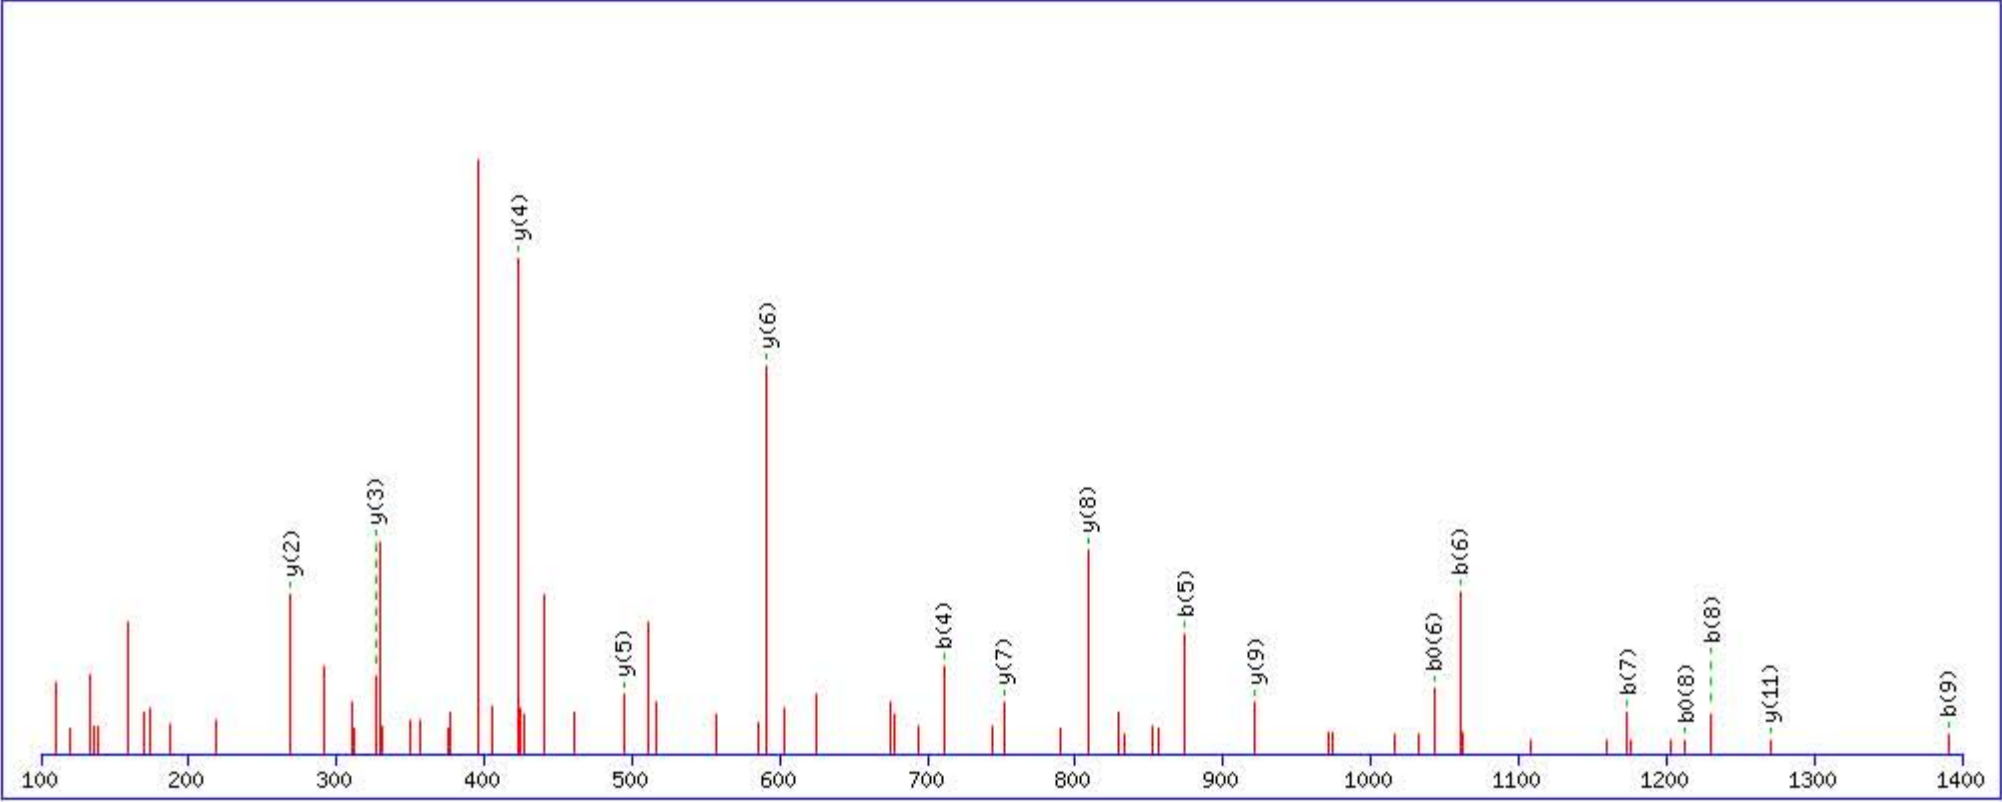

Monoisotopic mass of neutral peptide Mr(calc): 1979.974991  
Fixed modifications: Carbamidomethyl (C) (apply to specified residues or termini only)  
Variable modifications:  
Q4 : Biotin:Thermo-21345 (Q)  
Ions Score: 46 Expect: 0.00071  
Matches : 17/112 fragment ions using 37 most intense peaks [\(help\)](#)

| #  | b           | b <sup>++</sup> | b <sup>+</sup> | b <sup>++</sup> | b <sup>0</sup> | b <sup>0++</sup> | Seq. | y           | y <sup>++</sup> | y <sup>+</sup> | y <sup>++</sup> | #  |
|----|-------------|-----------------|----------------|-----------------|----------------|------------------|------|-------------|-----------------|----------------|-----------------|----|
| 1  | 88.039304   | 44.523290       |                |                 | 70.028739      | 35.518008        | S    |             |                 |                |                 | 15 |
| 2  | 201.123368  | 101.065322      |                |                 | 183.112803     | 92.060039        | I    | 1893.950246 | 947.478761      | 1876.923697    | 938.965486      | 14 |
| 3  | 272.160482  | 136.583879      |                |                 | 254.149917     | 127.578596       | A    | 1780.866182 | 890.936729      | 1763.839633    | 882.423454      | 13 |
| 4  | 711.385808  | 356.196542      | 694.359259     | 347.683268      | 693.375243     | 347.191260       | Q    | 1709.829068 | 855.418172      | 1692.802519    | 846.904897      | 12 |
| 5  | 874.449137  | 437.728207      | 857.422588     | 429.214932      | 856.438572     | 428.722924       | Y    | 1270.603742 | 635.805509      |                |                 | 11 |
| 6  | 1060.528450 | 530.767863      | 1043.501901    | 522.254589      | 1042.517885    | 521.762581       | W    | 1107.540413 | 554.273844      |                |                 | 10 |
| 7  | 1173.612514 | 587.309895      | 1156.585965    | 578.796621      | 1155.601949    | 578.304612       | L    | 921.461100  | 461.234188      |                |                 | 9  |
| 8  | 1230.633978 | 615.820627      | 1213.607429    | 607.307352      | 1212.623413    | 606.815344       | G    | 808.377036  | 404.692156      |                |                 | 8  |
| 9  | 1390.664627 | 695.835951      | 1373.638078    | 687.322677      | 1372.654062    | 686.830669       | C    | 751.355572  | 376.181424      |                |                 | 7  |
| 10 | 1487.717391 | 744.362333      | 1470.690842    | 735.849059      | 1469.706826    | 735.357051       | P    | 591.324923  | 296.166099      |                |                 | 6  |
| 11 | 1558.754505 | 779.880890      | 1541.727956    | 771.367616      | 1540.743940    | 770.875608       | A    | 494.272159  | 247.639717      |                |                 | 5  |
| 12 | 1655.807269 | 828.407272      | 1638.780720    | 819.893998      | 1637.796704    | 819.401990       | P    | 423.235045  | 212.121160      |                |                 | 4  |
| 13 | 1712.828733 | 856.918004      | 1695.802184    | 848.404730      | 1694.818168    | 847.912722       | G    | 326.182281  | 163.594778      |                |                 | 3  |
| 14 | 1849.887645 | 925.447460      | 1832.861096    | 916.934186      | 1831.877080    | 916.442178       | H    | 269.160817  | 135.084046      |                |                 | 2  |
| 15 |             |                 |                |                 |                |                  | L    | 132.101905  | 66.554590       |                |                 | 1  |

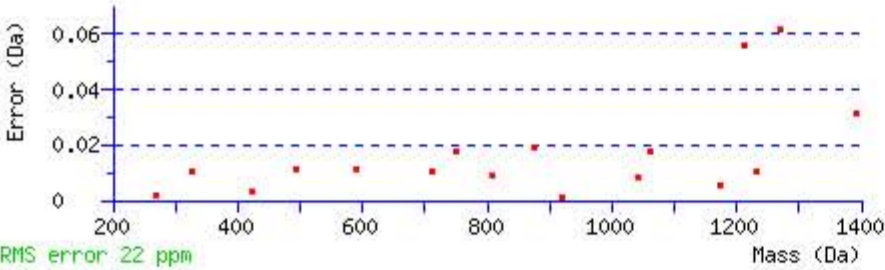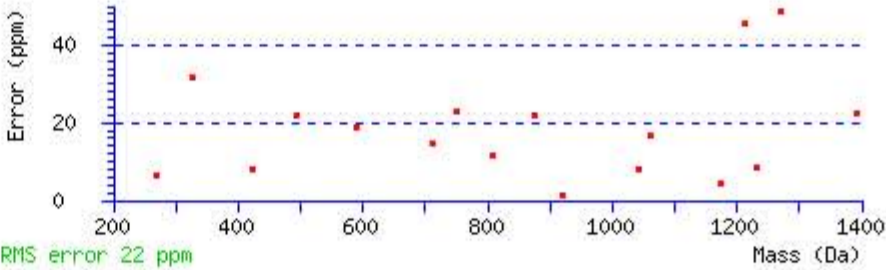

NCBI BLAST search of [SIAQYWLGC PAPGHL](#)  
(Parameters: blastp, nr protein database, expect=20000, no filter, PAM30)  
Other BLAST [web gateways](#)

All matches to this query

| Score | Mr(calc):   | Delta    | Sequence                         |
|-------|-------------|----------|----------------------------------|
| 45.9  | 1979.974991 | 0.020971 | <a href="#">SIAQYWLGC PAPGHL</a> |

MATRIX

SCIENCE

Mascot Search Results

Peptide View

MS/MS Fragmentation of **CQCDELCSYYQSCCTDYTAECKPQVTR**  
Found in **VTNC\_HUMAN**, Vitronectin OS=Homo sapiens GN=VTN PE=1 SV=1

Match to Query 67565: 3792.558470 from(759.518970,5+) rtinseconds(1950) index(49989)  
Title: Locus:1.1.1.1916.22 File:"2013-07-02 CLN FXIII 180 min 2nd F 4.wiff"  
Data file C:\Program Files (x86)\Matrix Science\Mascot Daemon\mgf\8 FXIII 180 min 2nd\mascot\_daemon\_merge.mgf

Click mouse within plot area to zoom in by factor of two about that point

Or, 

Plot from

0

 to 

2400

 Da 

Full range

Label all possible matches ☐ Label matches used for scoring ☒

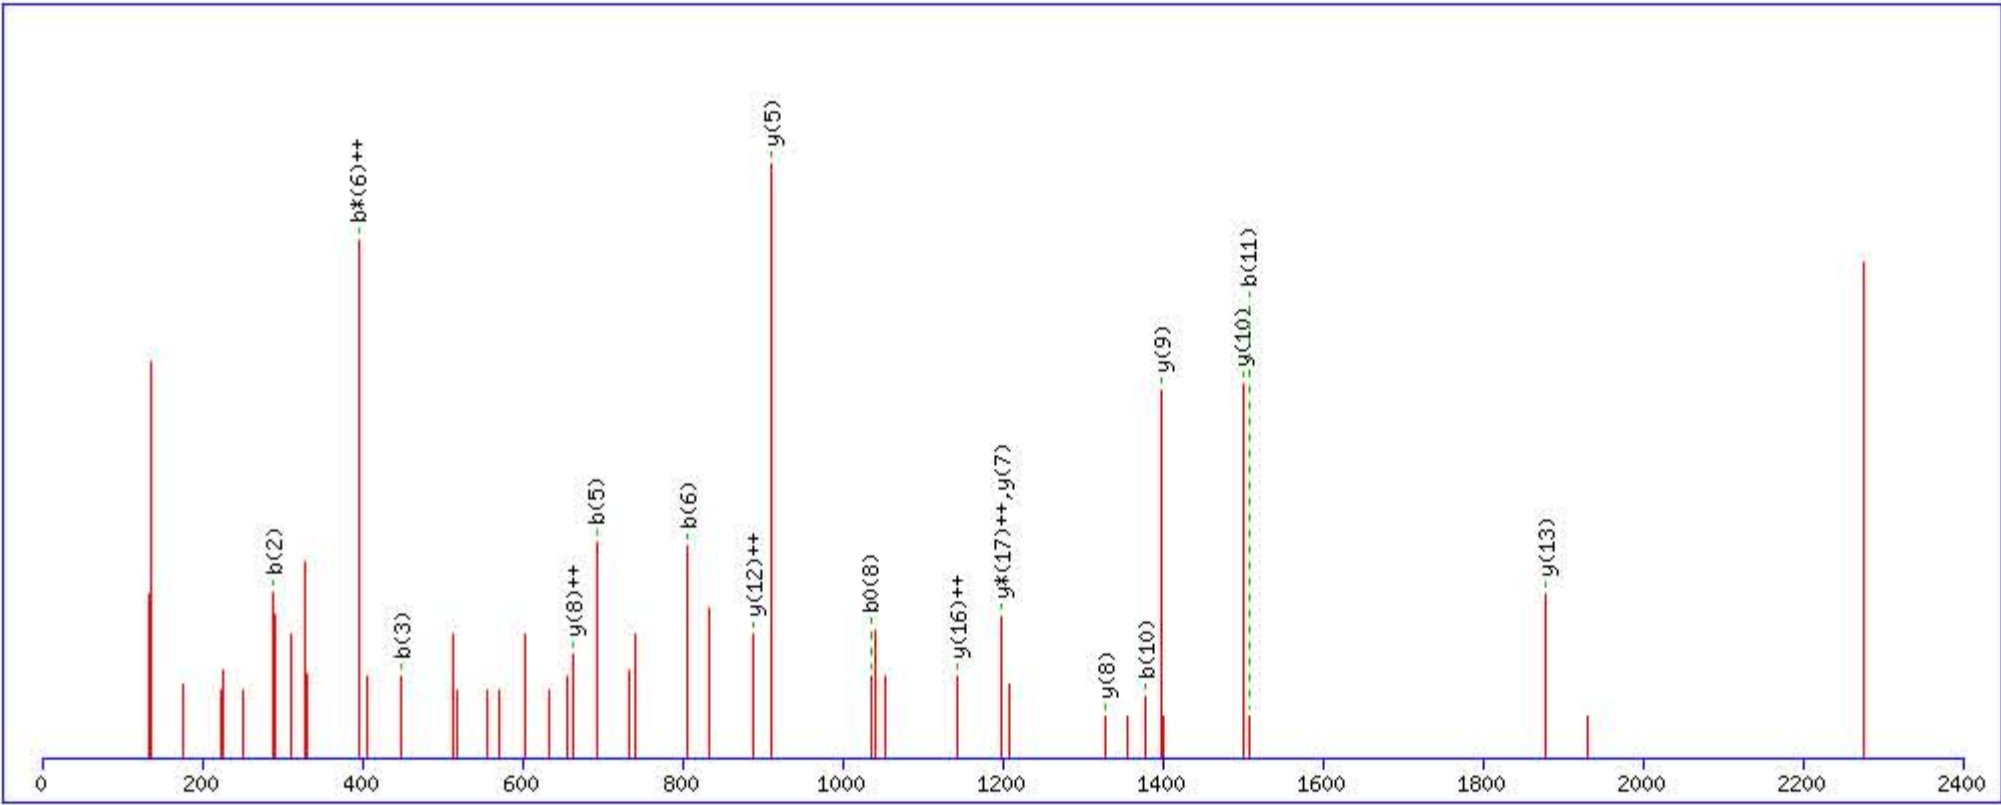

Monoisotopic mass of neutral peptide Mr(calc): 3792.511536  
Fixed modifications: Carbamidomethyl (C) (apply to specified residues or termini only)  
Variable modifications:  
Q24 : Biotin:Thermo-21345 (Q)  
Ions Score: 40 Expect: 0.00011  
Matches : 18/302 fragment ions using 28 most intense peaks [\(help\)](#)

| #  | b           | b <sup>++</sup> | b <sup>*</sup> | b <sup>++</sup> | b <sup>0</sup> | b <sup>0++</sup> | Seq. | y           | y <sup>++</sup> | y <sup>*</sup> | y <sup>++</sup> | y <sup>0</sup> | y <sup>0++</sup> | #  |
|----|-------------|-----------------|----------------|-----------------|----------------|------------------|------|-------------|-----------------|----------------|-----------------|----------------|------------------|----|
| 1  | 161.037925  | 81.022600       |                |                 |                |                  | C    |             |                 |                |                 |                |                  | 27 |
| 2  | 289.096503  | 145.051890      | 272.069954     | 136.538615      |                |                  | Q    | 3633.488150 | 1817.247713     | 3616.461601    | 1808.734438     | 3615.477585    | 1808.242431      | 26 |
| 3  | 449.127152  | 225.067214      | 432.100603     | 216.553940      |                |                  | C    | 3505.429572 | 1753.218424     | 3488.403023    | 1744.705149     | 3487.419007    | 1744.213141      | 25 |
| 4  | 564.154095  | 282.580686      | 547.127546     | 274.067411      | 546.143530     | 273.575403       | D    | 3345.398923 | 1673.203099     | 3328.372374    | 1664.689825     | 3327.388358    | 1664.197817      | 24 |
| 5  | 693.196688  | 347.101982      | 676.170139     | 338.588708      | 675.186123     | 338.096700       | E    | 3230.371980 | 1615.689628     | 3213.345431    | 1607.176353     | 3212.361415    | 1606.684345      | 23 |
| 6  | 806.280752  | 403.644014      | 789.254203     | 395.130740      | 788.270187     | 394.638732       | L    | 3101.329387 | 1551.168331     | 3084.302838    | 1542.655057     | 3083.318822    | 1542.163049      | 22 |
| 7  | 966.311401  | 483.659339      | 949.284852     | 475.146064      | 948.300836     | 474.654056       | C    | 2988.245323 | 1494.626299     | 2971.218774    | 1486.113025     | 2970.234758    | 1485.621017      | 21 |
| 8  | 1053.343429 | 527.175353      | 1036.316880    | 518.662078      | 1035.332864    | 518.170070       | S    | 2828.214674 | 1414.610975     | 2811.188125    | 1406.097700     | 2810.204109    | 1405.605692      | 20 |
| 9  | 1216.406758 | 608.707017      | 1199.380209    | 600.193743      | 1198.396193    | 599.701735       | Y    | 2741.182646 | 1371.094961     | 2724.156097    | 1362.581686     | 2723.172081    | 1362.089678      | 19 |
| 10 | 1379.470087 | 690.238682      | 1362.443538    | 681.725407      | 1361.459522    | 681.233399       | Y    | 2578.119317 | 1289.563296     | 2561.092768    | 1281.050022     | 2560.108752    | 1280.558014      | 18 |
| 11 | 1507.528665 | 754.267971      | 1490.502116    | 745.754696      | 1489.518100    | 745.262688       | Q    | 2415.055988 | 1208.031632     | 2398.029439    | 1199.518357     | 2397.045423    | 1199.026349      | 17 |
| 12 | 1594.560693 | 797.783985      | 1577.534144    | 789.270710      | 1576.550128    | 788.778702       | S    | 2286.997410 | 1144.002343     | 2269.970861    | 1135.489068     | 2268.986845    | 1134.997060      | 16 |
| 13 | 1754.591342 | 877.799309      | 1737.564793    | 869.286035      | 1736.580777    | 868.794027       | C    | 2199.965382 | 1100.486329     | 2182.938833    | 1091.973054     | 2181.954817    | 1091.481046      | 15 |
| 14 | 1914.621991 | 957.814634      | 1897.595442    | 949.301359      | 1896.611426    | 948.809351       | C    | 2039.934733 | 1020.471005     | 2022.908184    | 1011.957730     | 2021.924168    | 1011.465722      | 14 |
| 15 | 2015.669670 | 1008.338473     | 1998.643121    | 999.825199      | 1997.659105    | 999.333191       | T    | 1879.904084 | 940.455680      | 1862.877535    | 931.942406      | 1861.893519    | 931.450398       | 13 |
| 16 | 2130.696613 | 1065.851945     | 2113.670064    | 1057.338670     | 2112.686048    | 1056.846662      | D    | 1778.856405 | 889.931841      | 1761.829856    | 881.418566      | 1760.845840    | 880.926558       | 12 |
| 17 | 2293.759942 | 1147.383609     | 2276.733393    | 1138.870335     | 2275.749377    | 1138.378327      | Y    | 1663.829462 | 832.418369      | 1646.802913    | 823.905095      | 1645.818897    | 823.413086       | 11 |
| 18 | 2394.807621 | 1197.907449     | 2377.781072    | 1189.394174     | 2376.797056    | 1188.902166      | T    | 1500.766133 | 750.886704      | 1483.739584    | 742.373430      | 1482.755568    | 741.881422       | 10 |
| 19 | 2465.844735 | 1233.426006     | 2448.818186    | 1224.912731     | 2447.834170    | 1224.420723      | A    | 1399.718454 | 700.362865      | 1382.691905    | 691.849591      | 1381.707889    | 691.357583       | 9  |
| 20 | 2594.887328 | 1297.947302     | 2577.860779    | 1289.434028     | 2576.876763    | 1288.942020      | E    | 1328.681340 | 664.844308      | 1311.654791    | 656.331033      | 1310.670775    | 655.839025       | 8  |
| 21 | 2754.917977 | 1377.962627     | 2737.891428    | 1369.449352     | 2736.907412    | 1368.957344      | C    | 1199.638747 | 600.323011      | 1182.612198    | 591.809737      | 1181.628182    | 591.317729       | 7  |
| 22 | 2883.012940 | 1442.010108     | 2865.986391    | 1433.496834     | 2865.002375    | 1433.004826      | K    | 1039.608098 | 520.307687      | 1022.581549    | 511.794412      | 1021.597533    | 511.302404       | 6  |
| 23 | 2980.065704 | 1490.536490     | 2963.039155    | 1482.023216     | 2962.055139    | 1481.531208      | P    | 911.513135  | 456.260205      | 894.486586     | 447.746931      | 893.502570     | 447.254923       | 5  |
| 24 | 3419.291030 | 1710.149153     | 3402.264481    | 1701.635879     | 3401.280465    | 1701.143871      | Q    | 814.460371  | 407.733823      | 797.433822     | 399.220549      | 796.449806     | 398.728541       | 4  |
| 25 | 3518.359444 | 1759.683360     | 3501.332895    | 1751.170086     | 3500.348879    | 1750.678078      | V    | 375.235045  | 188.121160      | 358.208496     | 179.607886      | 357.224480     | 179.115878       | 3  |
| 26 | 3619.407123 | 1810.207200     | 3602.380574    | 1801.693925     | 3601.396558    | 1801.201917      | T    | 276.166631  | 138.586953      | 259.140082     | 130.073679      | 258.156066     | 129.581671       | 2  |
| 27 |             |                 |                |                 |                |                  | R    | 175.118952  | 88.063114       | 158.092403     | 79.549839       |                |                  | 1  |

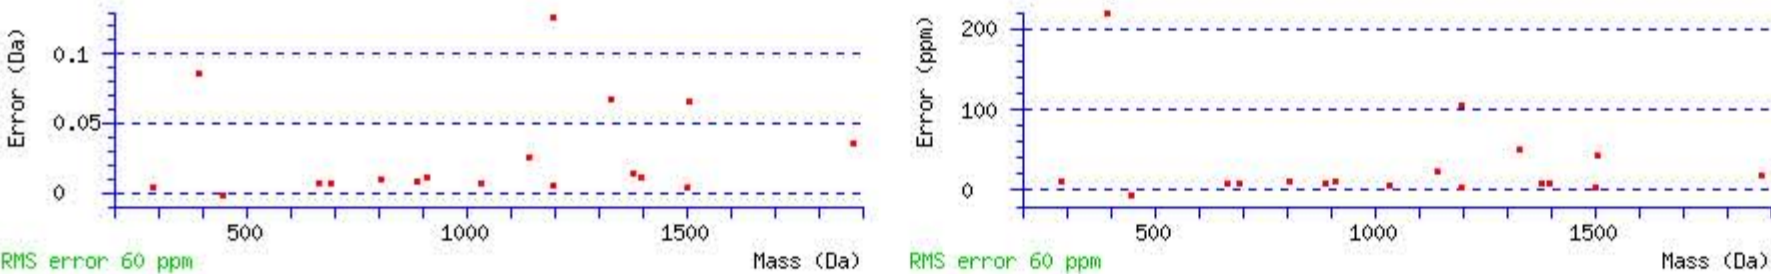

NCBI BLAST search of [CQCDELCSYYQSCCTDYTAECKPQVTR](#)  
(Parameters: blastp, nr protein database, expect=20000, no filter, PAM30)  
Other BLAST [web gateways](#)

All matches to this query

| Score | Mr(calc):   | Delta    | Sequence                                    |
|-------|-------------|----------|---------------------------------------------|
| 39.7  | 3792.511536 | 0.046934 | <a href="#">CQCDELCSYYQSCCTDYTAECKPQVTR</a> |
| 5.6   | 3792.511536 | 0.046934 | <a href="#">CQCDELCSYYQSCCTDYTAECKPQVTR</a> |

MATRIX

SCIENCE

Mascot Search Results

Peptide View

MS/MS Fragmentation of **GGQIMTLK**  
Found in **VWF\_HUMAN**, von Willebrand factor OS=Homo sapiens GN=VWF PE=1 SV=4

Match to Query 19146: 1157.637348 from(579.825950,2+) rtinseconds(1922) index(49756)  
Title: Locus:1.1.1.1907.9 File:"2013-07-02 CLN FXIII 180 min 2nd F 4.wiff"  
Data file C:\Program Files (x86)\Matrix Science\Mascot Daemon\mgf\8 FXIII 180 min 2nd\mascot\_daemon\_merge.mgf

Click mouse within plot area to zoom in by factor of two about that point  
Or, 

Plot from

100

 to 

1100

 Da 

Full range

  
Label all possible matches ☐ Label matches used for scoring ☒

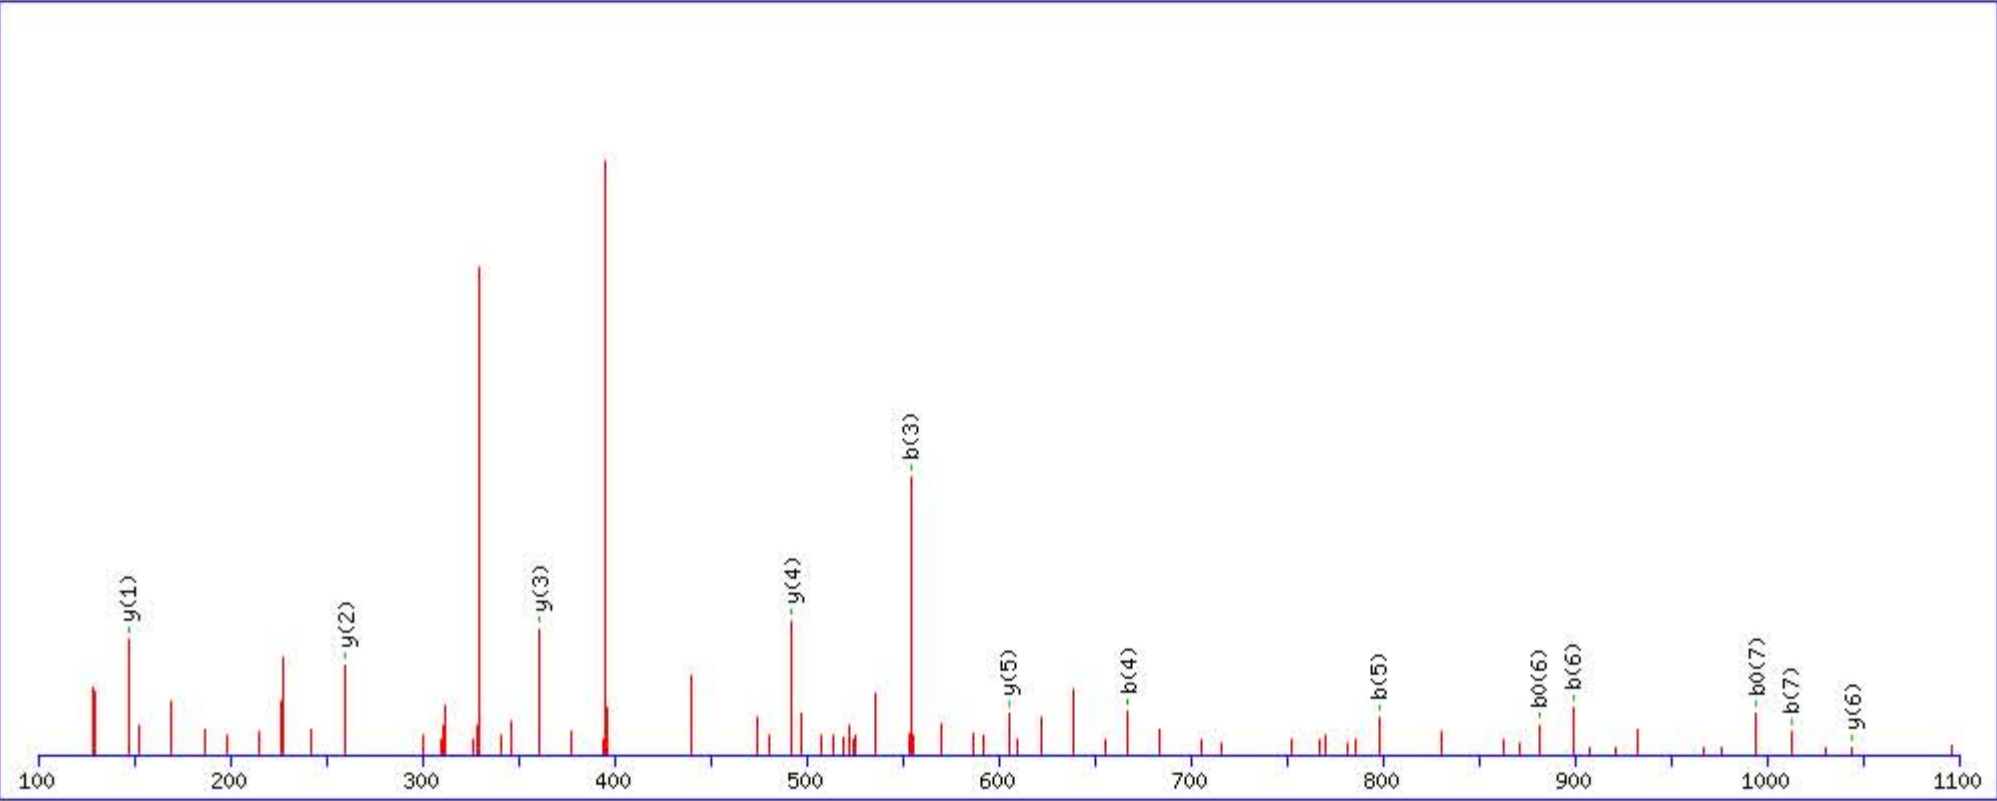

Monoisotopic mass of neutral peptide Mr(calc): 1157.630066  
Fixed modifications: Carbamidomethyl (C) (apply to specified residues or termini only)  
Variable modifications:  
Q3 : Biotin:Thermo-21345 (Q)  
Ions Score: 26 Expect: 0.046  
Matches : 13/66 fragment ions using 30 most intense peaks [\(help\)](#)

| # | b           | b <sup>++</sup> | b <sup>*</sup> | b <sup>*++</sup> | b <sup>0</sup> | b <sup>0++</sup> | Seq. | y           | y <sup>++</sup> | y <sup>*</sup> | y <sup>*++</sup> | y <sup>0</sup> | y <sup>0++</sup> | # |
|---|-------------|-----------------|----------------|------------------|----------------|------------------|------|-------------|-----------------|----------------|------------------|----------------|------------------|---|
| 1 | 58.028740   | 29.518008       |                |                  |                |                  | G    |             |                 |                |                  |                |                  | 8 |
| 2 | 115.050204  | 58.028740       |                |                  |                |                  | G    | 1101.615886 | 551.311581      | 1084.589337    | 542.798307       | 1083.605321    | 542.306299       | 7 |
| 3 | 554.275530  | 277.641403      | 537.248981     | 269.128129       |                |                  | Q    | 1044.594422 | 522.800849      | 1027.567873    | 514.287575       | 1026.583857    | 513.795567       | 6 |
| 4 | 667.359594  | 334.183435      | 650.333045     | 325.670161       |                |                  | I    | 605.369096  | 303.188186      | 588.342547     | 294.674912       | 587.358531     | 294.182904       | 5 |
| 5 | 798.400079  | 399.703678      | 781.373530     | 391.190403       |                |                  | M    | 492.285032  | 246.646154      | 475.258483     | 238.132880       | 474.274467     | 237.640872       | 4 |
| 6 | 899.447758  | 450.227517      | 882.421209     | 441.714243       | 881.437193     | 441.222235       | T    | 361.244547  | 181.125912      | 344.217998     | 172.612637       | 343.233982     | 172.120629       | 3 |
| 7 | 1012.531822 | 506.769549      | 995.505273     | 498.256275       | 994.521257     | 497.764267       | L    | 260.196868  | 130.602072      | 243.170319     | 122.088798       |                |                  | 2 |
| 8 |             |                 |                |                  |                |                  | K    | 147.112804  | 74.060040       | 130.086255     | 65.546765        |                |                  | 1 |

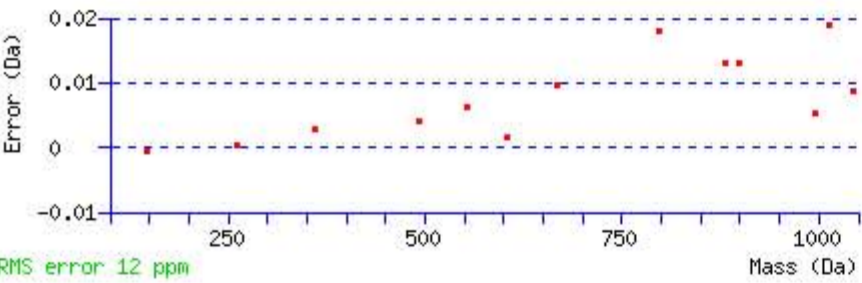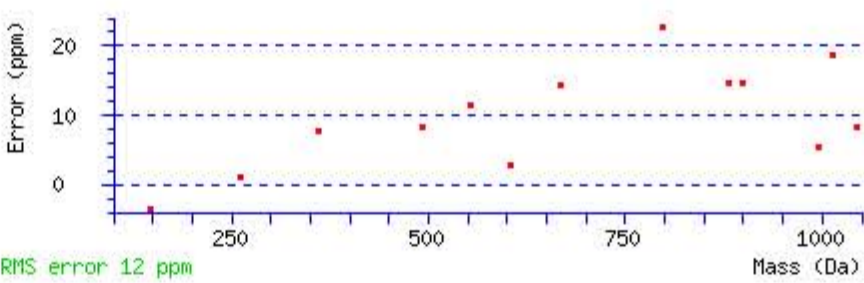

NCBI BLAST search of [GGQIMTLK](#)  
(Parameters: blastp, nr protein database, expect=20000, no filter, PAM30)  
Other BLAST [web gateways](#)

All matches to this query

| Score | Mr(calc):   | Delta     | Sequence                     |
|-------|-------------|-----------|------------------------------|
| 26.4  | 1157.630066 | 0.007282  | <a href="#">GGQIMTLK</a>     |
| 11.4  | 1157.630051 | 0.007297  | <a href="#">QLSQMLK</a>      |
| 11.0  | 1157.636566 | 0.000782  | <a href="#">LLAIMPDELK</a>   |
| 10.6  | 1157.647827 | -0.010479 | <a href="#">ALVGGTAPMTIK</a> |
| 8.4   | 1157.640411 | -0.003063 | <a href="#">AQQLSSGNLK</a>   |
| 6.6   | 1157.630081 | 0.007267  | <a href="#">CVTLVQK</a>      |
| 6.4   | 1157.640411 | -0.003063 | <a href="#">SPGKNSSIQLK</a>  |
| 5.6   | 1157.630051 | 0.007297  | <a href="#">QAGAMLLK</a>     |
| 3.5   | 1157.636566 | 0.000782  | <a href="#">ILVEEMAPLK</a>   |
| 2.8   | 1157.633209 | 0.004139  | <a href="#">LLDPEPSFLK</a>   |

MATRIX

SCIENCE

Mascot Search Results

Peptide View

MS/MS Fragmentation of **VSSQCADTR**  
Found in **VWF\_HUMAN**, von Willebrand factor OS=Homo sapiens GN=VWF PE=1 SV=4

Match to Query 23939: 1333.619708 from(667.817130,2+) rtinseconds(1285) index(29830)  
Title: Locus:1.1.1.555.17 File:"2013-07-02 CLN FXIII 180 min 2nd F 3.wiff"  
Data file C:\Program Files (x86)\Matrix Science\Mascot Daemon\mgf\8 FXIII 180 min 2nd\mascot\_daemon\_merge.mgf

Click mouse within plot area to zoom in by factor of two about that point  
Or, 

Plot from

100

 to 

1300

 Da 

Full range

  
Label all possible matches ☐ Label matches used for scoring ☒

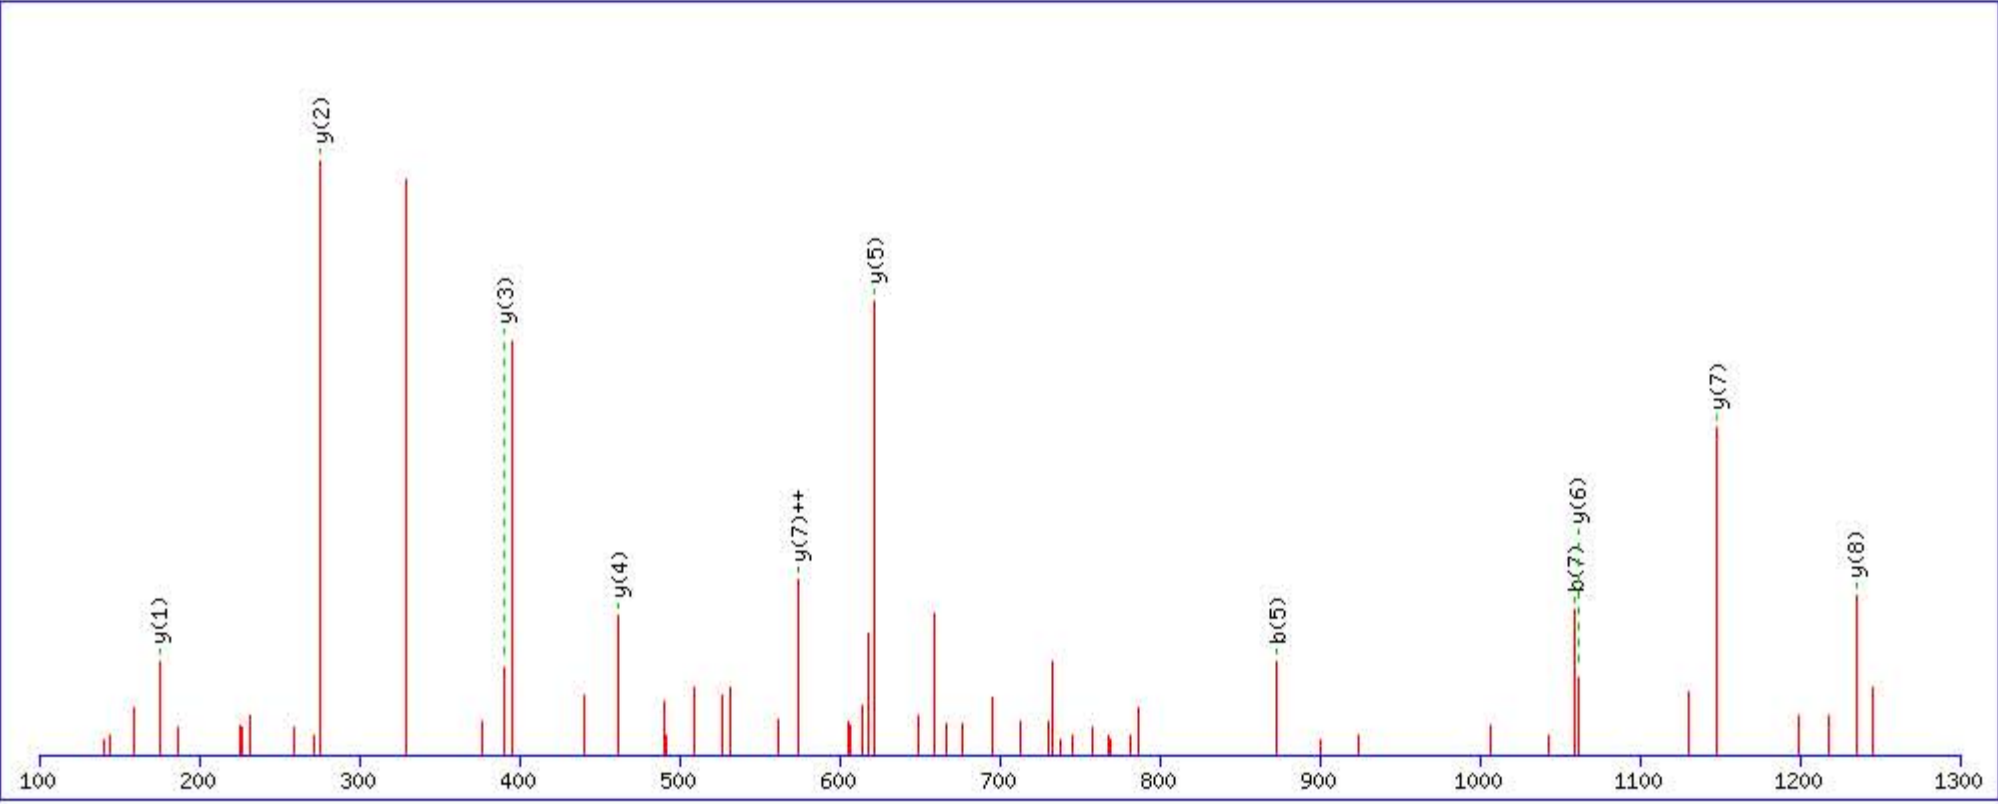

Monoisotopic mass of neutral peptide Mr(calc): 1333.611862  
Fixed modifications: Carbamidomethyl (C) (apply to specified residues or termini only)  
Variable modifications:  
Q4 : Biotin:Thermo-21345 (Q)  
Ions Score: 51 Expect: 4.9e-005  
Matches : 11/86 fragment ions using 22 most intense peaks (help)

| # | b           | b <sup>++</sup> | b <sup>+</sup> | b <sup>+++</sup> | b <sup>0</sup> | b <sup>0++</sup> | Seq. | y           | y <sup>++</sup> | y <sup>+</sup> | y <sup>+++</sup> | y <sup>0</sup> | y <sup>0++</sup> | # |
|---|-------------|-----------------|----------------|------------------|----------------|------------------|------|-------------|-----------------|----------------|------------------|----------------|------------------|---|
| 1 | 100.075690  | 50.541483       |                |                  |                |                  | V    |             |                 |                |                  |                |                  | 9 |
| 2 | 187.107718  | 94.057497       |                |                  | 169.097153     | 85.052214        | S    | 1235.550719 | 618.278998      | 1218.524170    | 609.765723       | 1217.540154    | 609.273715       | 8 |
| 3 | 274.139746  | 137.573511      |                |                  | 256.129181     | 128.568229       | S    | 1148.518691 | 574.762984      | 1131.492142    | 566.249709       | 1130.508126    | 565.757701       | 7 |
| 4 | 713.365072  | 357.186174      | 696.338523     | 348.672900       | 695.354507     | 348.180892       | Q    | 1061.486663 | 531.246970      | 1044.460114    | 522.733695       | 1043.476098    | 522.241687       | 6 |
| 5 | 873.395721  | 437.201499      | 856.369172     | 428.688224       | 855.385156     | 428.196216       | C    | 622.261337  | 311.634307      | 605.234788     | 303.121032       | 604.250772     | 302.629024       | 5 |
| 6 | 944.432835  | 472.720056      | 927.406286     | 464.206781       | 926.422270     | 463.714773       | A    | 462.230688  | 231.618982      | 445.204139     | 223.105707       | 444.220123     | 222.613700       | 4 |
| 7 | 1059.459778 | 530.233527      | 1042.433229    | 521.720253       | 1041.449213    | 521.228245       | D    | 391.193574  | 196.100425      | 374.167025     | 187.587151       | 373.183009     | 187.095143       | 3 |
| 8 | 1160.507457 | 580.757367      | 1143.480908    | 572.244092       | 1142.496892    | 571.752084       | T    | 276.166631  | 138.586953      | 259.140082     | 130.073679       | 258.156066     | 129.581671       | 2 |
| 9 |             |                 |                |                  |                |                  | R    | 175.118952  | 88.063114       | 158.092403     | 79.549839        |                |                  | 1 |

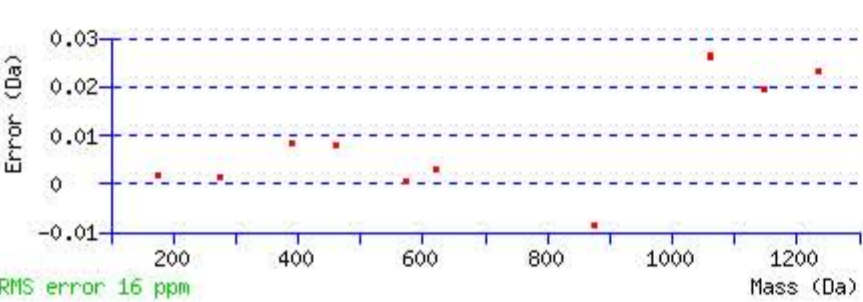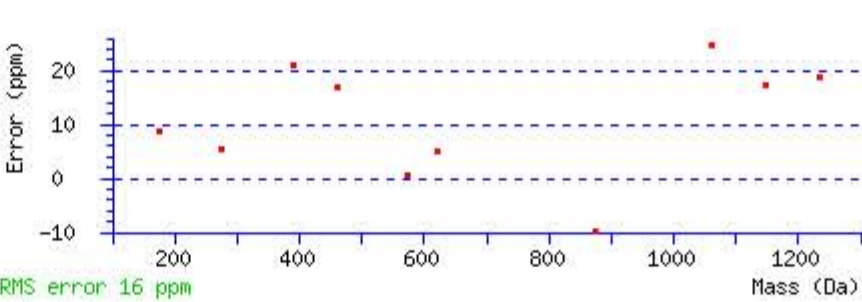

NCBI BLAST search of [VSSQCADTR](#)  
(Parameters: blastp, nr protein database, expect=20000, no filter, PAM30)  
Other BLAST [web gateways](#)

All matches to this query

| Score | Mr(calc):   | Delta     | Sequence                     |
|-------|-------------|-----------|------------------------------|
| 51.3  | 1333.611862 | 0.007846  | <a href="#">VSSQCADTR</a>    |
| 5.0   | 1333.633606 | -0.013898 | <a href="#">LIYNTHMADEK</a>  |
| 3.6   | 1333.607117 | 0.012591  | <a href="#">GEIEIESDAPMK</a> |
| 0.9   | 1333.626221 | -0.006513 | <a href="#">GNEIEPNFSATR</a> |

MATRIX

SCIENCE

Mascot Search Results

Peptide View

MS/MS Fragmentation of **VKEEVFIQQR**  
Found in **VWF\_HUMAN**, von Willebrand factor OS=Homo sapiens GN=VWF PE=1 SV=4

Match to Query 34026: 1585.863822 from(529.628550,3+) rtinseconds(1787) index(32842)  
Title: Locus:1.1.1.731.6 File:"2013-07-02 CLN FXIII 180 min 2nd F 3.wiff"  
Data file C:\Program Files (x86)\Matrix Science\Mascot Daemon\mgf\8 FXIII 180 min 2nd\mascot\_daemon\_merge.mgf

Click mouse within plot area to zoom in by factor of two about that point  
Or,   to  Da   
Label all possible matches ☐ Label matches used for scoring ☒

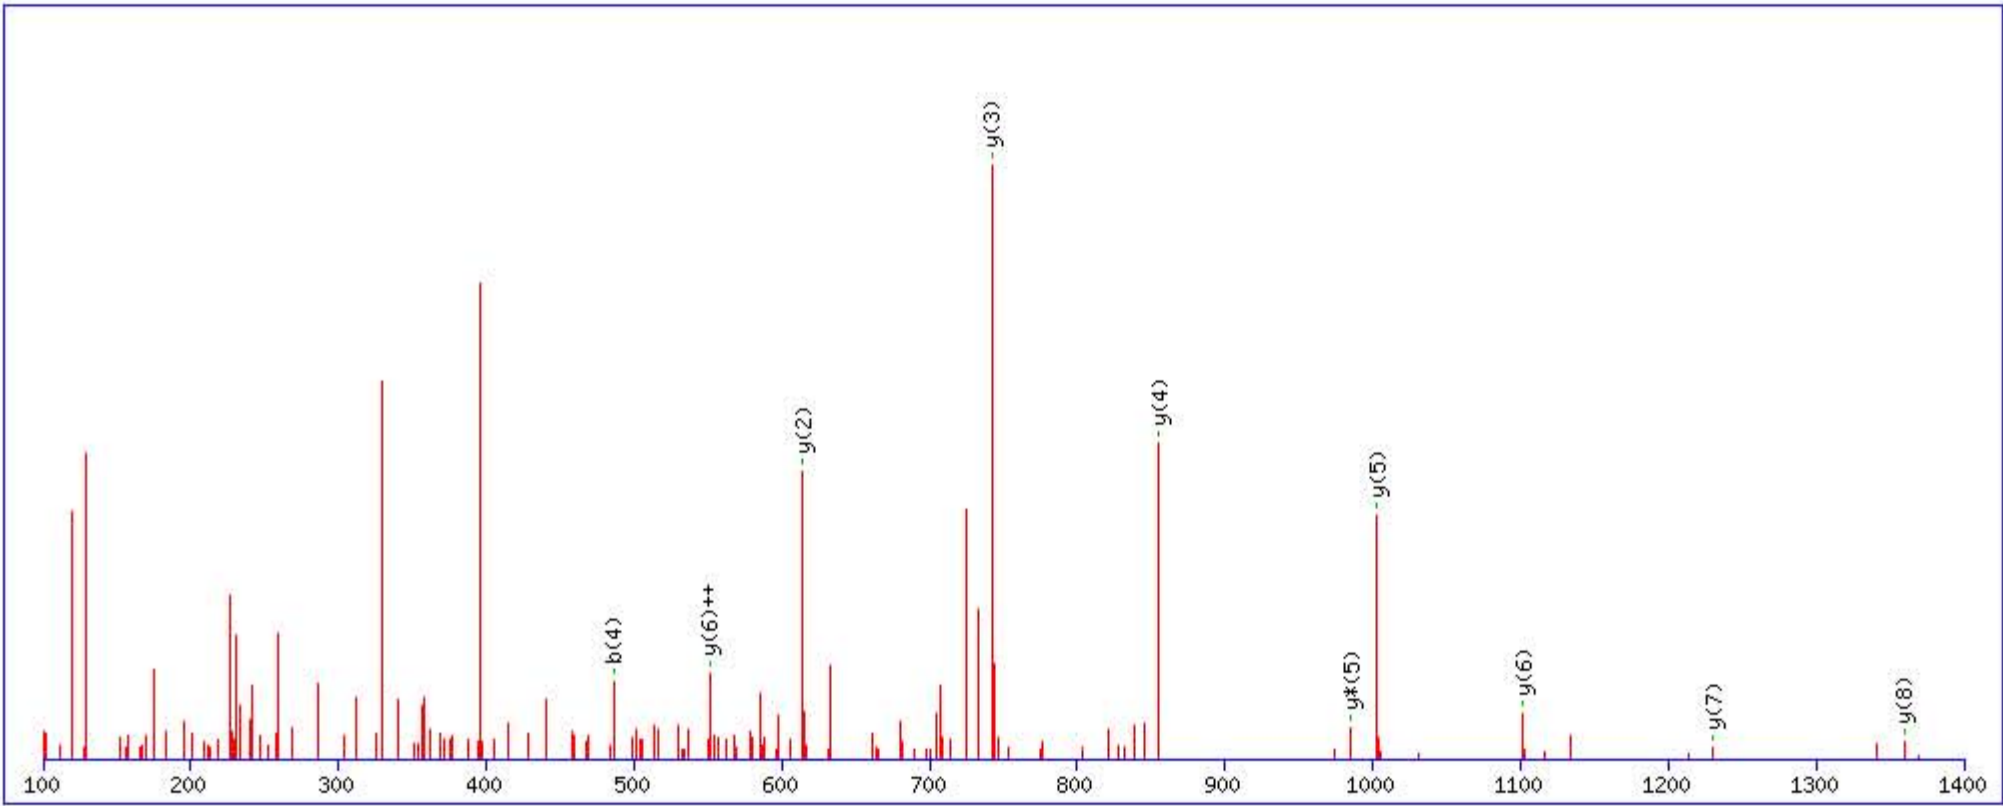

Monoisotopic mass of neutral peptide Mr(calc): 1585.865021  
Fixed modifications: Carbamidomethyl (C) (apply to specified residues or termini only)  
Variable modifications:  
Q9 : Biotin:Thermo-21345 (Q)  
Ions Score: 53 Expect: 5.9e-005  
Matches : 10/90 fragment ions using 13 most intense peaks [\(help\)](#)

| #  | b           | b <sup>++</sup> | b <sup>*</sup> | b <sup>*++</sup> | b <sup>0</sup> | b <sup>0++</sup> | Seq. | y           | y <sup>++</sup> | y <sup>*</sup> | y <sup>*++</sup> | y <sup>0</sup> | y <sup>0++</sup> | #  |
|----|-------------|-----------------|----------------|------------------|----------------|------------------|------|-------------|-----------------|----------------|------------------|----------------|------------------|----|
| 1  | 100.075690  | 50.541483       |                |                  |                |                  | V    |             |                 |                |                  |                |                  | 10 |
| 2  | 228.170653  | 114.588965      | 211.144104     | 106.075690       |                |                  | K    | 1487.803897 | 744.405587      | 1470.777348    | 735.892312       | 1469.793332    | 735.400304       | 9  |
| 3  | 357.213246  | 179.110261      | 340.186697     | 170.596987       | 339.202681     | 170.104979       | E    | 1359.708934 | 680.358105      | 1342.682385    | 671.844831       | 1341.698369    | 671.352823       | 8  |
| 4  | 486.255839  | 243.631558      | 469.229290     | 235.118283       | 468.245274     | 234.626275       | E    | 1230.666341 | 615.836809      | 1213.639792    | 607.323534       | 1212.655776    | 606.831526       | 7  |
| 5  | 585.324253  | 293.165765      | 568.297704     | 284.652490       | 567.313688     | 284.160482       | V    | 1101.623748 | 551.315512      | 1084.597199    | 542.802238       |                |                  | 6  |
| 6  | 732.392667  | 366.699972      | 715.366118     | 358.186697       | 714.382102     | 357.694689       | F    | 1002.555334 | 501.781305      | 985.528785     | 493.268031       |                |                  | 5  |
| 7  | 845.476731  | 423.242004      | 828.450182     | 414.728729       | 827.466166     | 414.236721       | I    | 855.486920  | 428.247098      | 838.460371     | 419.733824       |                |                  | 4  |
| 8  | 973.535309  | 487.271293      | 956.508760     | 478.758018       | 955.524744     | 478.266010       | Q    | 742.402856  | 371.705066      | 725.376307     | 363.191792       |                |                  | 3  |
| 9  | 1412.760635 | 706.883956      | 1395.734086    | 698.370681       | 1394.750070    | 697.878673       | Q    | 614.344278  | 307.675777      | 597.317729     | 299.162503       |                |                  | 2  |
| 10 |             |                 |                |                  |                |                  | R    | 175.118952  | 88.063114       | 158.092403     | 79.549839        |                |                  | 1  |

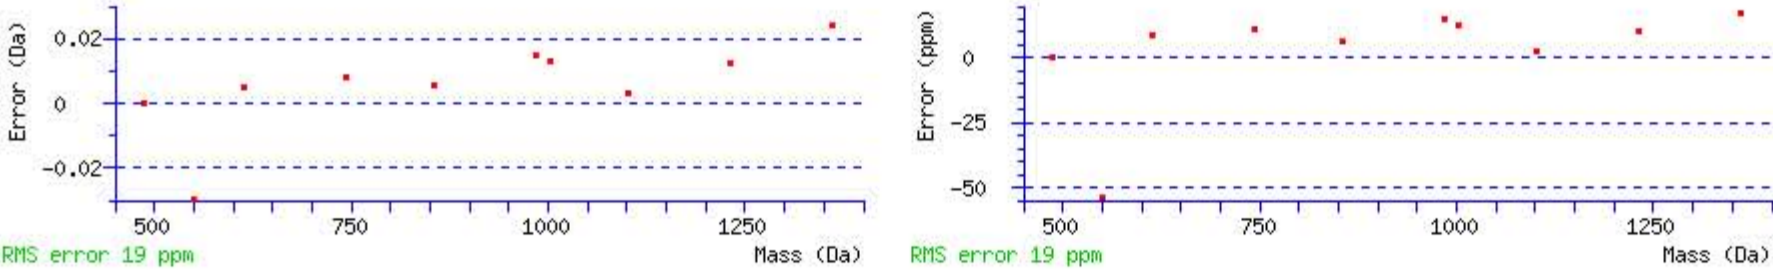

NCBI BLAST search of [VKEEVFIQQR](#)  
(Parameters: blastp, nr protein database, expect=20000, no filter, PAM30)  
Other BLAST [web gateways](#)

All matches to this query

| Score | Mr(calc):   | Delta     | Sequence                       |
|-------|-------------|-----------|--------------------------------|
| 53.4  | 1585.865021 | -0.001199 | <a href="#">VKEEVFIQQR</a>     |
| 38.5  | 1585.865021 | -0.001199 | <a href="#">VKEEVFIQQR</a>     |
| 7.8   | 1585.842392 | 0.021430  | <a href="#">EIQTTTGNQQVLVR</a> |
| 4.0   | 1585.857605 | 0.006217  | <a href="#">QEEVAGIRAKFPNK</a> |
| 0.0   | 1585.842361 | 0.021461  | <a href="#">QSVLVKSNEEGIQR</a> |

MATRIX

SCIENCE

Mascot Search Results

Peptide View

MS/MS Fragmentation of **QHSDPCALNPR**  
Found in **VWF\_HUMAN**, von Willebrand factor OS=Homo sapiens GN=VWF PE=1 SV=4

Match to Query 34822: 1604.759022 from(535.926950,3+) rtinseconds(1444) index(30658)  
Title: Locus:1.1.1.611.9 File:"2013-07-02 CLN FXIII 180 min 2nd F 3.wiff"  
Data file C:\Program Files (x86)\Matrix Science\Mascot Daemon\mgf\8 FXIII 180 min 2nd\mascot\_daemon\_merge.mgf

Click mouse within plot area to zoom in by factor of two about that point  
Or, 

Plot from

100

 to 

1300

 Da 

Full range

  
Label all possible matches ☐ Label matches used for scoring ☒

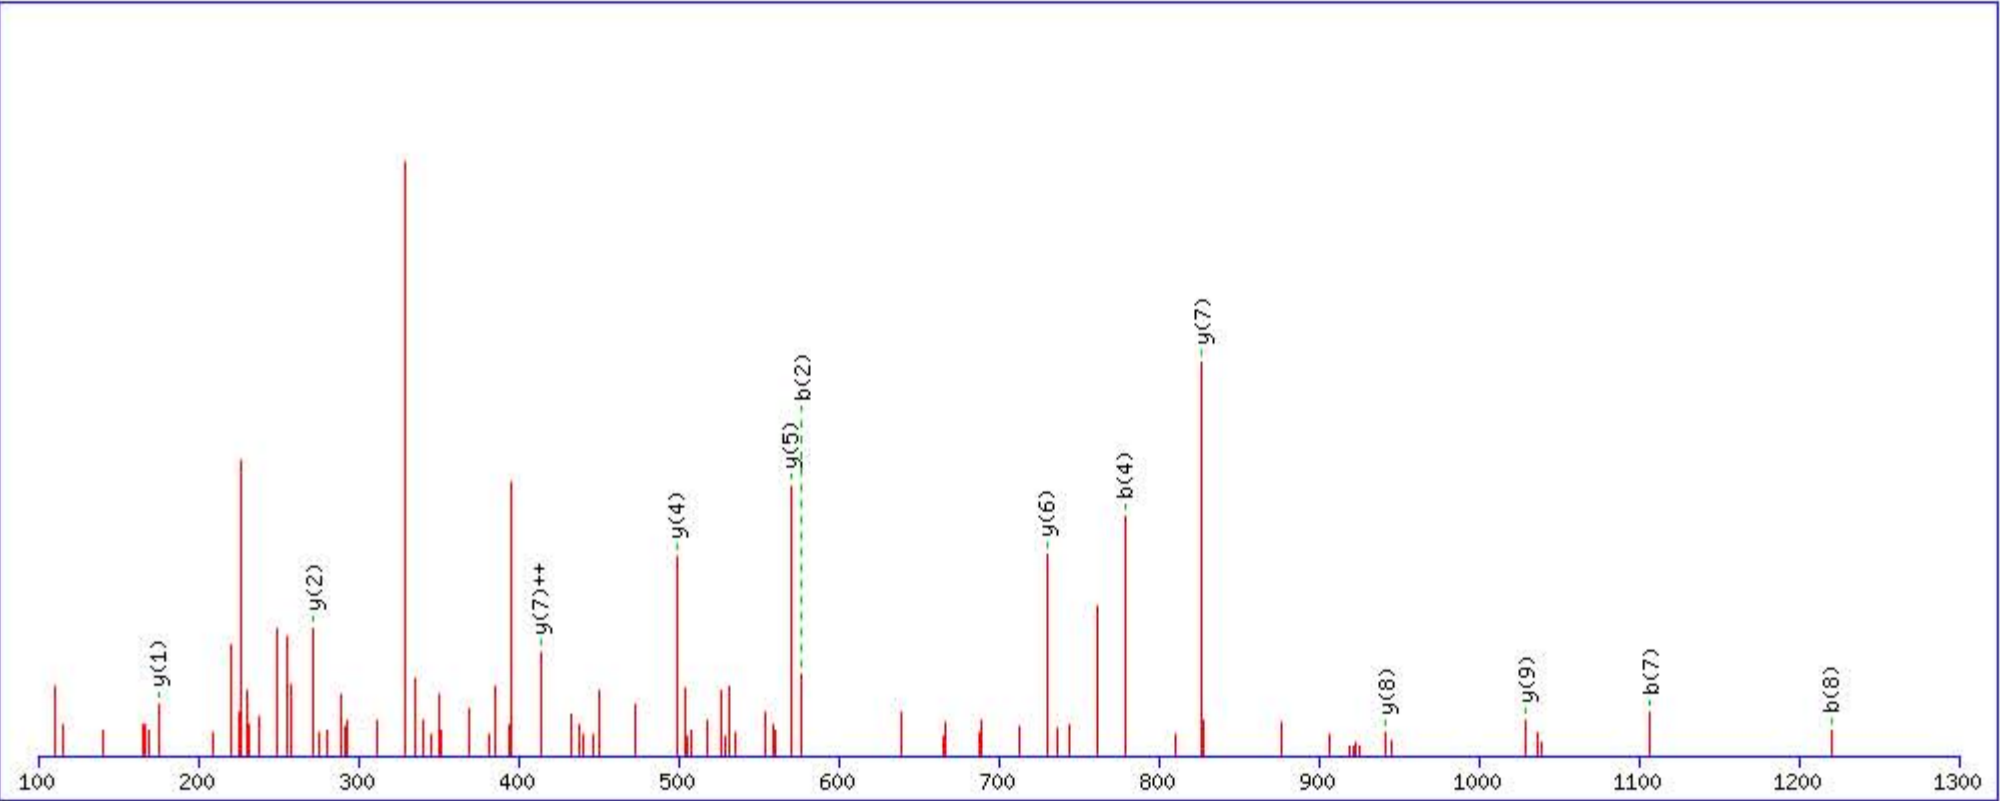

Monoisotopic mass of neutral peptide Mr(calc): 1604.755157  
Fixed modifications: Carbamidomethyl (C) (apply to specified residues or termini only)  
Variable modifications:  
Q1 : Biotin:Thermo-21345 (Q)  
Ions Score: 51 Expect: 0.00013  
Matches : 13/102 fragment ions using 21 most intense peaks [\(help\)](#)

| #  | b           | b <sup>++</sup> | b <sup>*</sup> | b <sup>++</sup> * | b <sup>0</sup> | b <sup>0++</sup> | Seq. | y           | y <sup>++</sup> | y <sup>*</sup> | y <sup>++</sup> * | y <sup>0</sup> | y <sup>0++</sup> | #  |
|----|-------------|-----------------|----------------|-------------------|----------------|------------------|------|-------------|-----------------|----------------|-------------------|----------------|------------------|----|
| 1  | 440.232602  | 220.619939      | 423.206053     | 212.106664        |                |                  | Q    |             |                 |                |                   |                |                  | 11 |
| 2  | 577.291514  | 289.149395      | 560.264965     | 280.636121        |                |                  | H    | 1166.537117 | 583.772196      | 1149.510568    | 575.258922        | 1148.526552    | 574.766914       | 10 |
| 3  | 664.323542  | 332.665409      | 647.296993     | 324.152134        | 646.312977     | 323.660126       | S    | 1029.478205 | 515.242740      | 1012.451656    | 506.729466        | 1011.467640    | 506.237458       | 9  |
| 4  | 779.350485  | 390.178880      | 762.323936     | 381.665606        | 761.339920     | 381.173598       | D    | 942.446177  | 471.726726      | 925.419628     | 463.213452        | 924.435612     | 462.721444       | 8  |
| 5  | 876.403249  | 438.705263      | 859.376700     | 430.191988        | 858.392684     | 429.699980       | P    | 827.419234  | 414.213255      | 810.392685     | 405.699980        |                |                  | 7  |
| 6  | 1036.433898 | 518.720587      | 1019.407349    | 510.207313        | 1018.423333    | 509.715305       | C    | 730.366470  | 365.686873      | 713.339921     | 357.173598        |                |                  | 6  |
| 7  | 1107.471012 | 554.239144      | 1090.444463    | 545.725870        | 1089.460447    | 545.233861       | A    | 570.335821  | 285.671548      | 553.309272     | 277.158274        |                |                  | 5  |
| 8  | 1220.555076 | 610.781176      | 1203.528527    | 602.267901        | 1202.544511    | 601.775893       | L    | 499.298707  | 250.152991      | 482.272158     | 241.639717        |                |                  | 4  |
| 9  | 1334.598003 | 667.802639      | 1317.571454    | 659.289365        | 1316.587438    | 658.797357       | N    | 386.214643  | 193.610959      | 369.188094     | 185.097685        |                |                  | 3  |
| 10 | 1431.650767 | 716.329021      | 1414.624218    | 707.815747        | 1413.640202    | 707.323739       | P    | 272.171716  | 136.589496      | 255.145167     | 128.076221        |                |                  | 2  |
| 11 |             |                 |                |                   |                |                  | R    | 175.118952  | 88.063114       | 158.092403     | 79.549839         |                |                  | 1  |

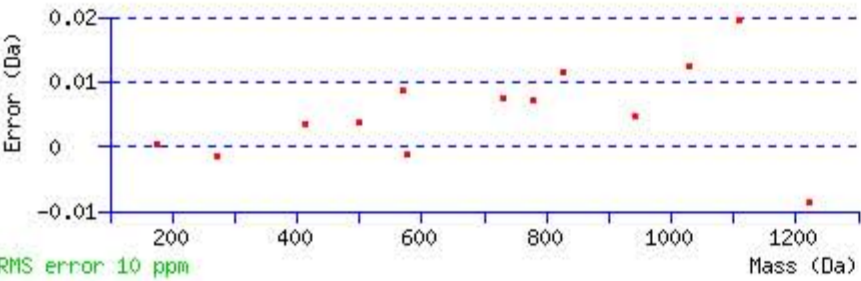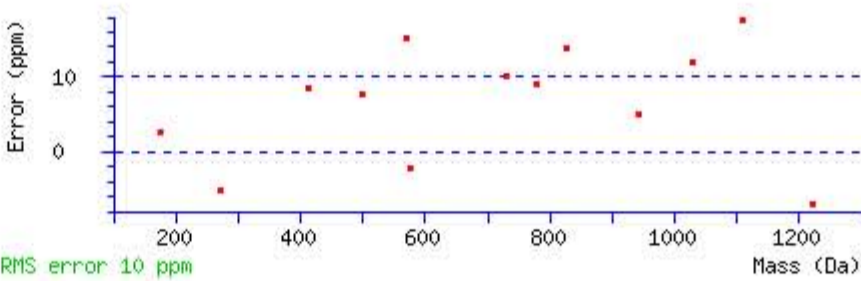

NCBI BLAST search of **QHSDPCALNPR**  
(Parameters: blastp, nr protein database, expect=20000, no filter, PAM30)  
Other BLAST [web gateways](#)

All matches to this query

| Score | Mr(calc):   | Delta     | Sequence                          |
|-------|-------------|-----------|-----------------------------------|
| 50.9  | 1604.755157 | 0.003865  | <a href="#">QHSDPCALNPR</a>       |
| 12.3  | 1604.782806 | -0.023784 | <a href="#">QEQINTMTQDLR</a>      |
| 3.5   | 1604.736725 | 0.022297  | <a href="#">EGMGWSYLVCLK</a>      |
| 1.2   | 1604.747726 | 0.011296  | <a href="#">IHNEERSYKCNR</a>      |
| 0.8   | 1604.769043 | -0.010021 | <a href="#">KEIMYYQQALMR</a>      |
| 0.7   | 1604.754288 | 0.004734  | <a href="#">GPSPASSSSSSPPAHPR</a> |

MATRIX

SCIENCE

Mascot Search Results

Peptide View

MS/MS Fragmentation of **ILTSDVFQDCNK**  
Found in **VWF\_HUMAN**, von Willebrand factor OS=Homo sapiens GN=VWF PE=1 SV=4

Match to Query 39090: 1749.850272 from(584.290700,3+) rtinseconds(2147) index(51351)  
Title: Locus:1.1.1.1985.7 File:"2013-07-02 CLN FXIII 180 min 2nd F 4.wiff"  
Data file C:\Program Files (x86)\Matrix Science\Mascot Daemon\mgf\8 FXIII 180 min 2nd\mascot\_daemon\_merge.mgf

Click mouse within plot area to zoom in by factor of two about that point  
Or, 

Plot from

100

 to 

1700

 Da 

Full range

  
Label all possible matches ☐ Label matches used for scoring ☒

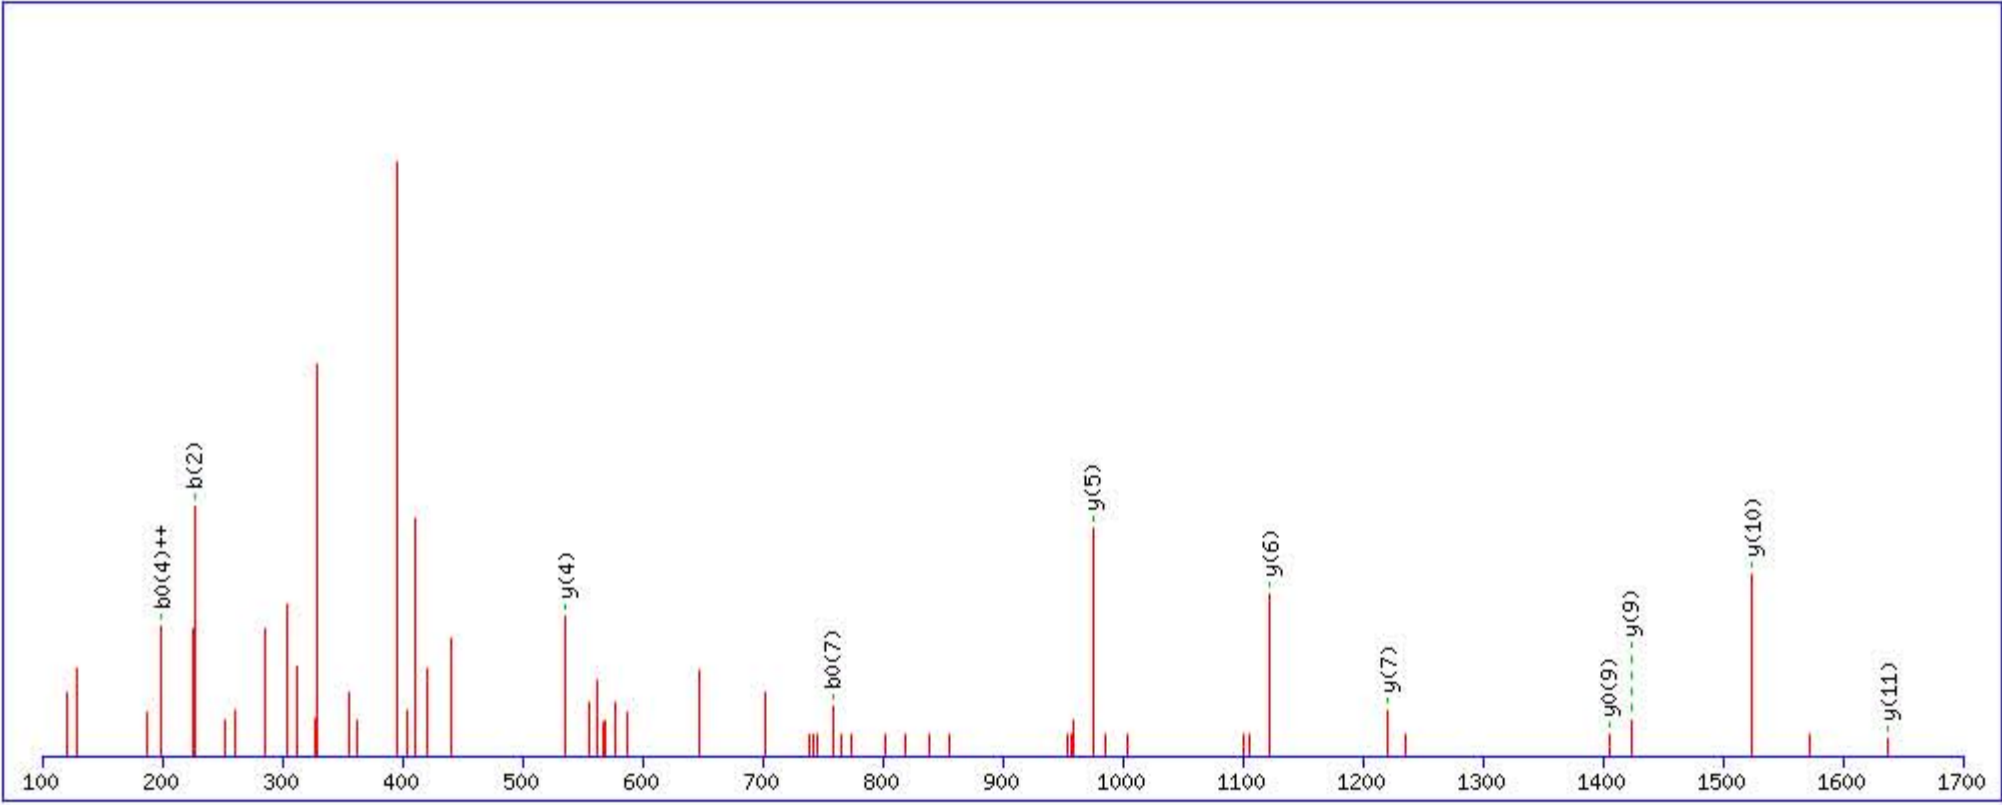

Monoisotopic mass of neutral peptide **Mr(calc):** 1749.842987  
Fixed modifications: Carbamidomethyl (C) (apply to specified residues or termini only)  
Variable modifications:  
Q8 : Biotin:Thermo-21345 (Q)  
Ions Score: 39 Expect: 0.0029  
Matches : 11/108 fragment ions using 16 most intense peaks [\(help\)](#)

| #  | b           | b <sup>++</sup> | b <sup>+</sup> | b <sup>++</sup> * | b <sup>0</sup> | b <sup>0++</sup> | Seq. | y           | y <sup>++</sup> | y <sup>+</sup> | y <sup>++</sup> * | y <sup>0</sup> | y <sup>0++</sup> | #  |
|----|-------------|-----------------|----------------|-------------------|----------------|------------------|------|-------------|-----------------|----------------|-------------------|----------------|------------------|----|
| 1  | 114.091340  | 57.549308       |                |                   |                |                  | I    |             |                 |                |                   |                |                  | 12 |
| 2  | 227.175404  | 114.091340      |                |                   |                |                  | L    | 1637.766191 | 819.386734      | 1620.739642    | 810.873459        | 1619.755626    | 810.381451       | 11 |
| 3  | 328.223083  | 164.615179      |                |                   | 310.212518     | 155.609897       | T    | 1524.682127 | 762.844702      | 1507.655578    | 754.331427        | 1506.671562    | 753.839419       | 10 |
| 4  | 415.255111  | 208.131193      |                |                   | 397.244546     | 199.125911       | S    | 1423.634448 | 712.320862      | 1406.607899    | 703.807588        | 1405.623883    | 703.315580       | 9  |
| 5  | 530.282054  | 265.644665      |                |                   | 512.271489     | 256.639383       | D    | 1336.602420 | 668.804848      | 1319.575871    | 660.291574        | 1318.591855    | 659.799565       | 8  |
| 6  | 629.350468  | 315.178872      |                |                   | 611.339903     | 306.173589       | V    | 1221.575477 | 611.291377      | 1204.548928    | 602.778102        | 1203.564912    | 602.286094       | 7  |
| 7  | 776.418882  | 388.713079      |                |                   | 758.408317     | 379.707796       | F    | 1122.507063 | 561.757170      | 1105.480514    | 553.243895        | 1104.496498    | 552.751887       | 6  |
| 8  | 1215.644208 | 608.325742      | 1198.617659    | 599.812468        | 1197.633643    | 599.320459       | Q    | 975.438649  | 488.222963      | 958.412100     | 479.709688        | 957.428084     | 479.217680       | 5  |
| 9  | 1330.671151 | 665.839214      | 1313.644602    | 657.325939        | 1312.660586    | 656.833931       | D    | 536.213323  | 268.610300      | 519.186774     | 260.097025        | 518.202758     | 259.605017       | 4  |
| 10 | 1490.701800 | 745.854538      | 1473.675251    | 737.341264        | 1472.691235    | 736.849256       | C    | 421.186380  | 211.096828      | 404.159831     | 202.583553        |                |                  | 3  |
| 11 | 1604.744727 | 802.876002      | 1587.718178    | 794.362727        | 1586.734162    | 793.870719       | N    | 261.155731  | 131.081503      | 244.129182     | 122.568229        |                |                  | 2  |
| 12 |             |                 |                |                   |                |                  | K    | 147.112804  | 74.060040       | 130.086255     | 65.546765         |                |                  | 1  |

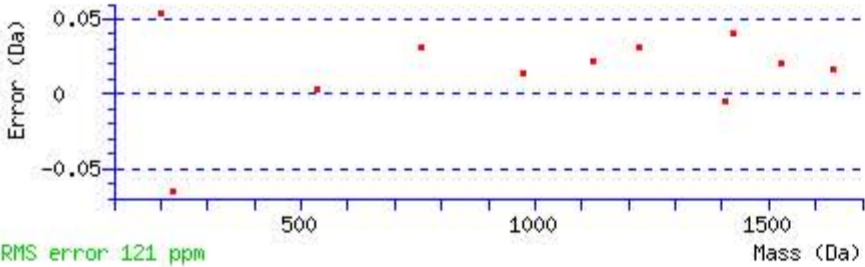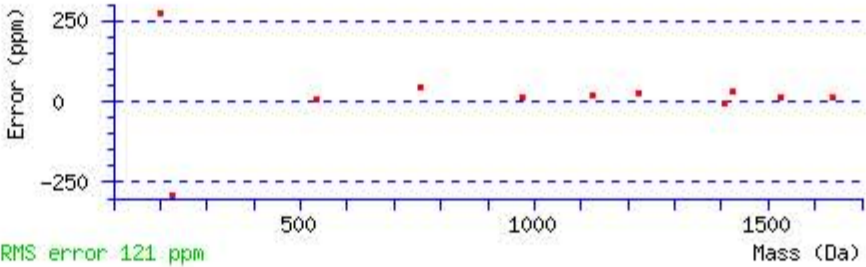

NCBI BLAST search of [ILTSDVFQDCNK](#)  
(Parameters: blastp, nr protein database, expect=20000, no filter, PAM30)  
Other BLAST [web gateways](#)

All matches to this query

| Score | Mr(calc):   | Delta    | Sequence                     |
|-------|-------------|----------|------------------------------|
| 38.5  | 1749.842987 | 0.007285 | <a href="#">ILTSDVFQDCNK</a> |
